# Supplementary material for: Optimization of Experimental Parameters in Data-Independent Mass Spectrometry Significantly Increases Depth and Reproducibility of Results
Source: PubMed Central journal article supplement (PMC5724188; doi:10.1074/mcp.ra117.000314), 2017-10-25

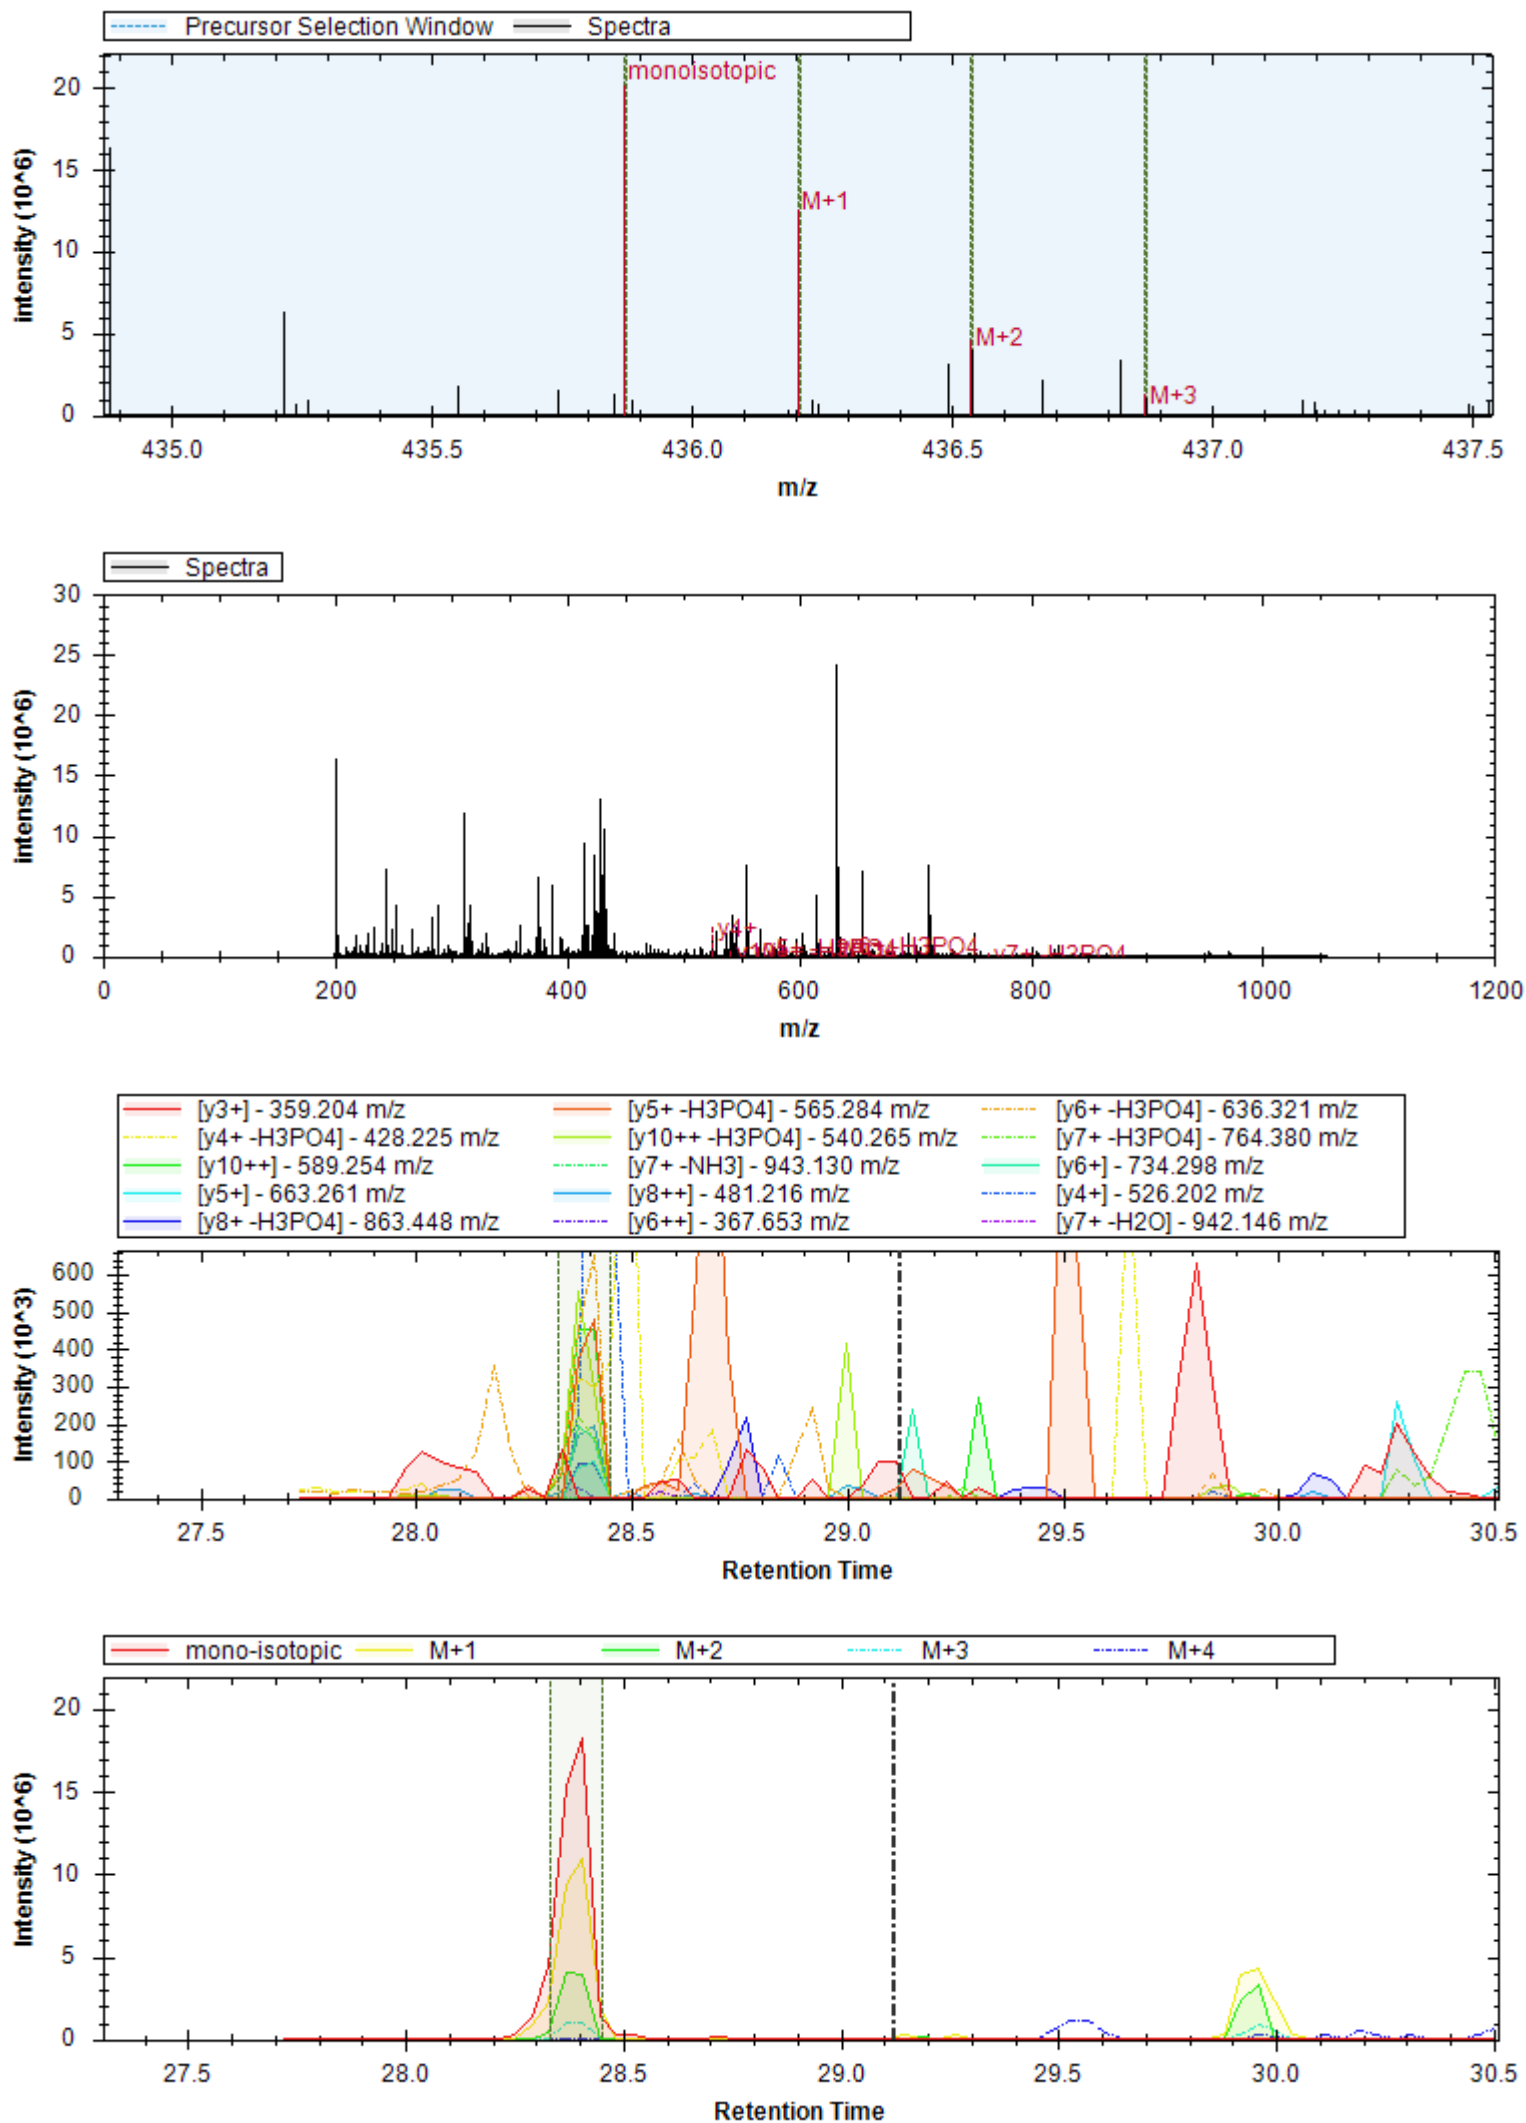

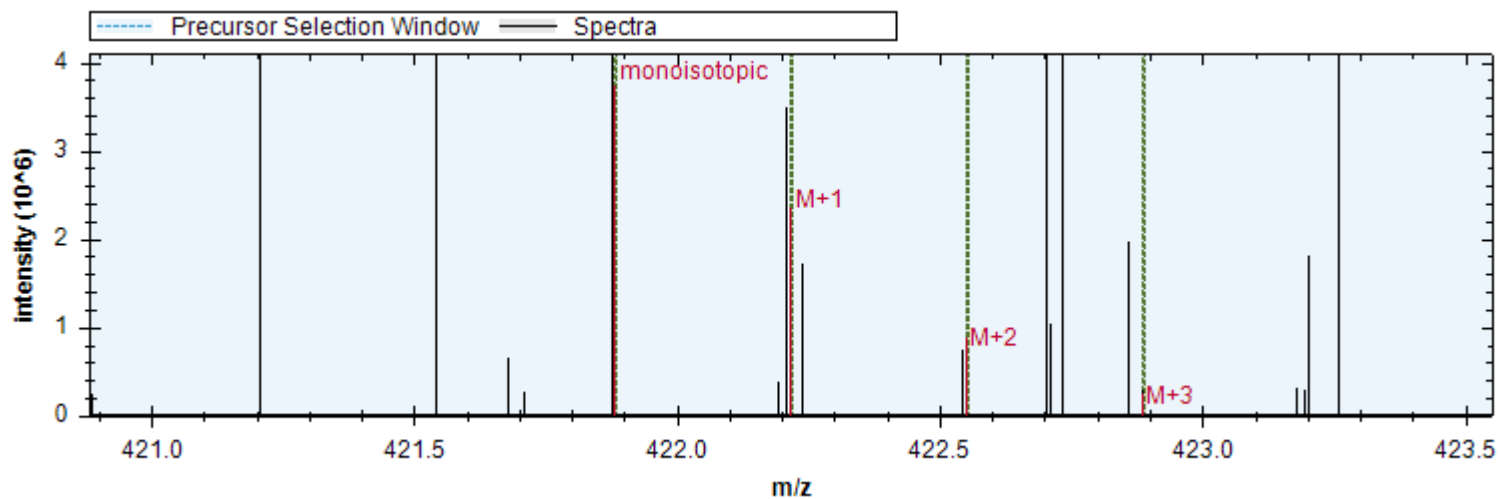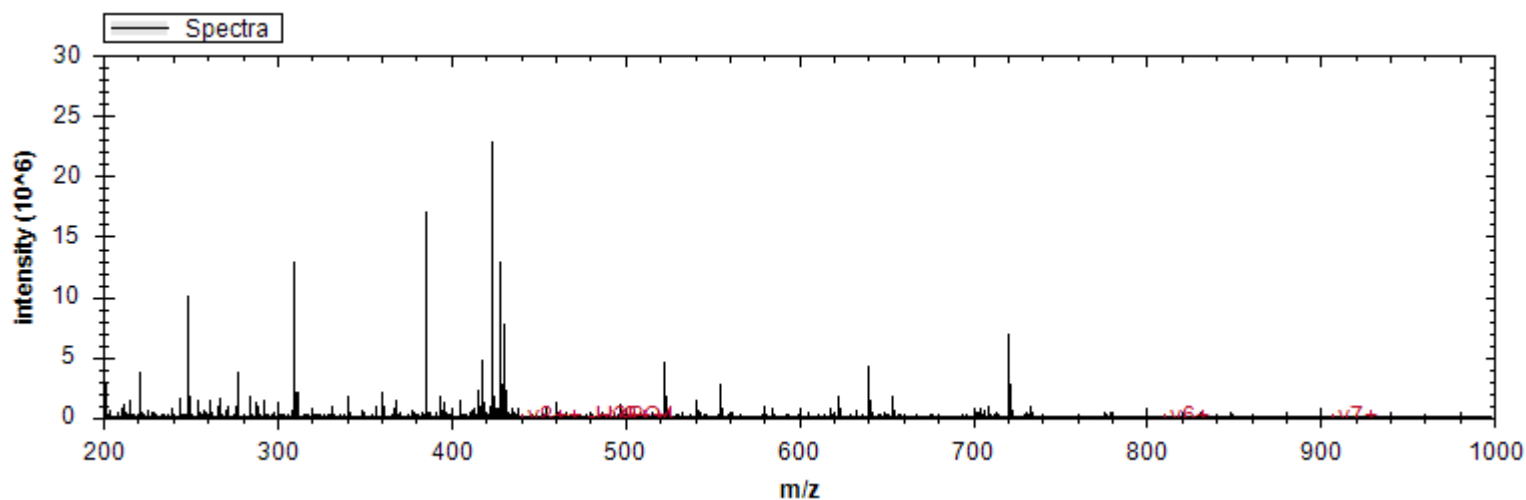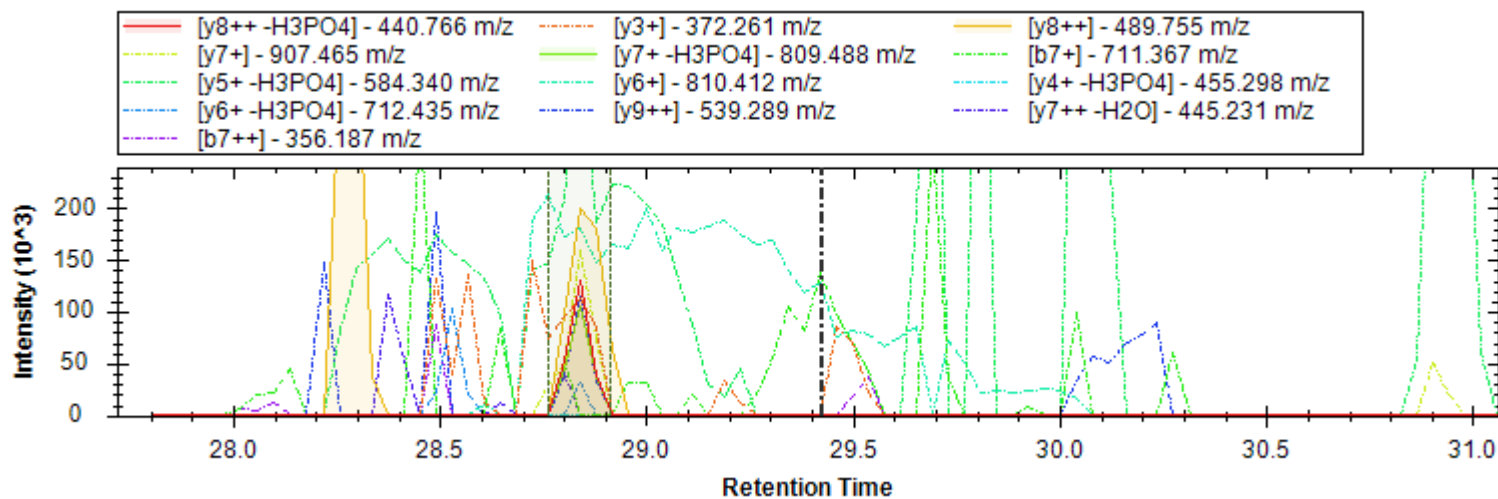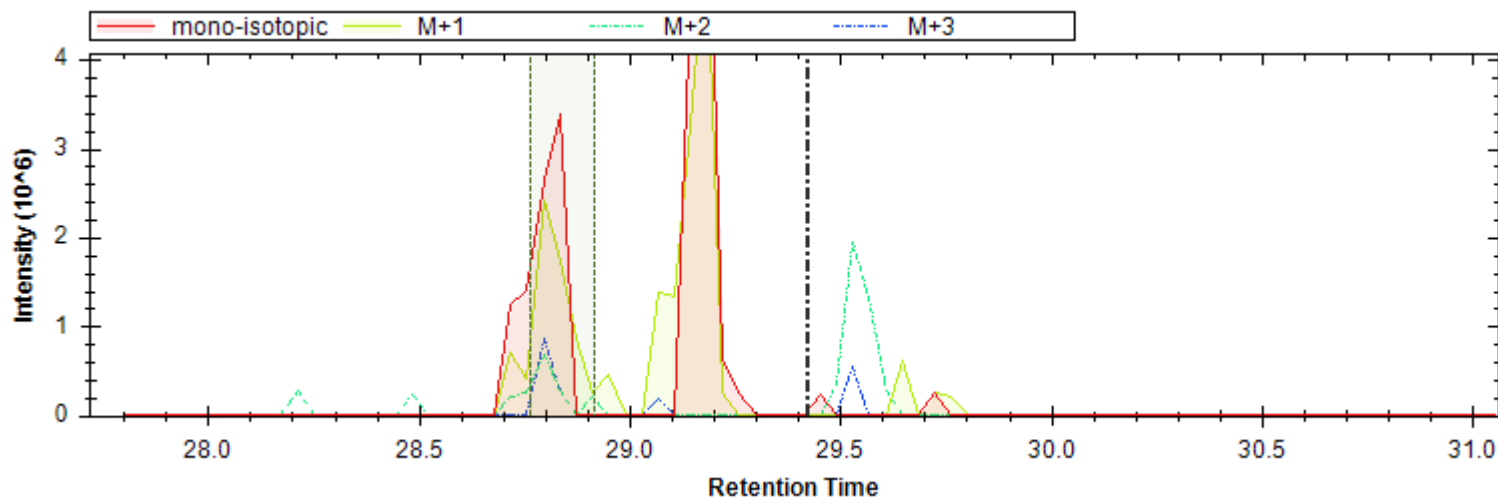

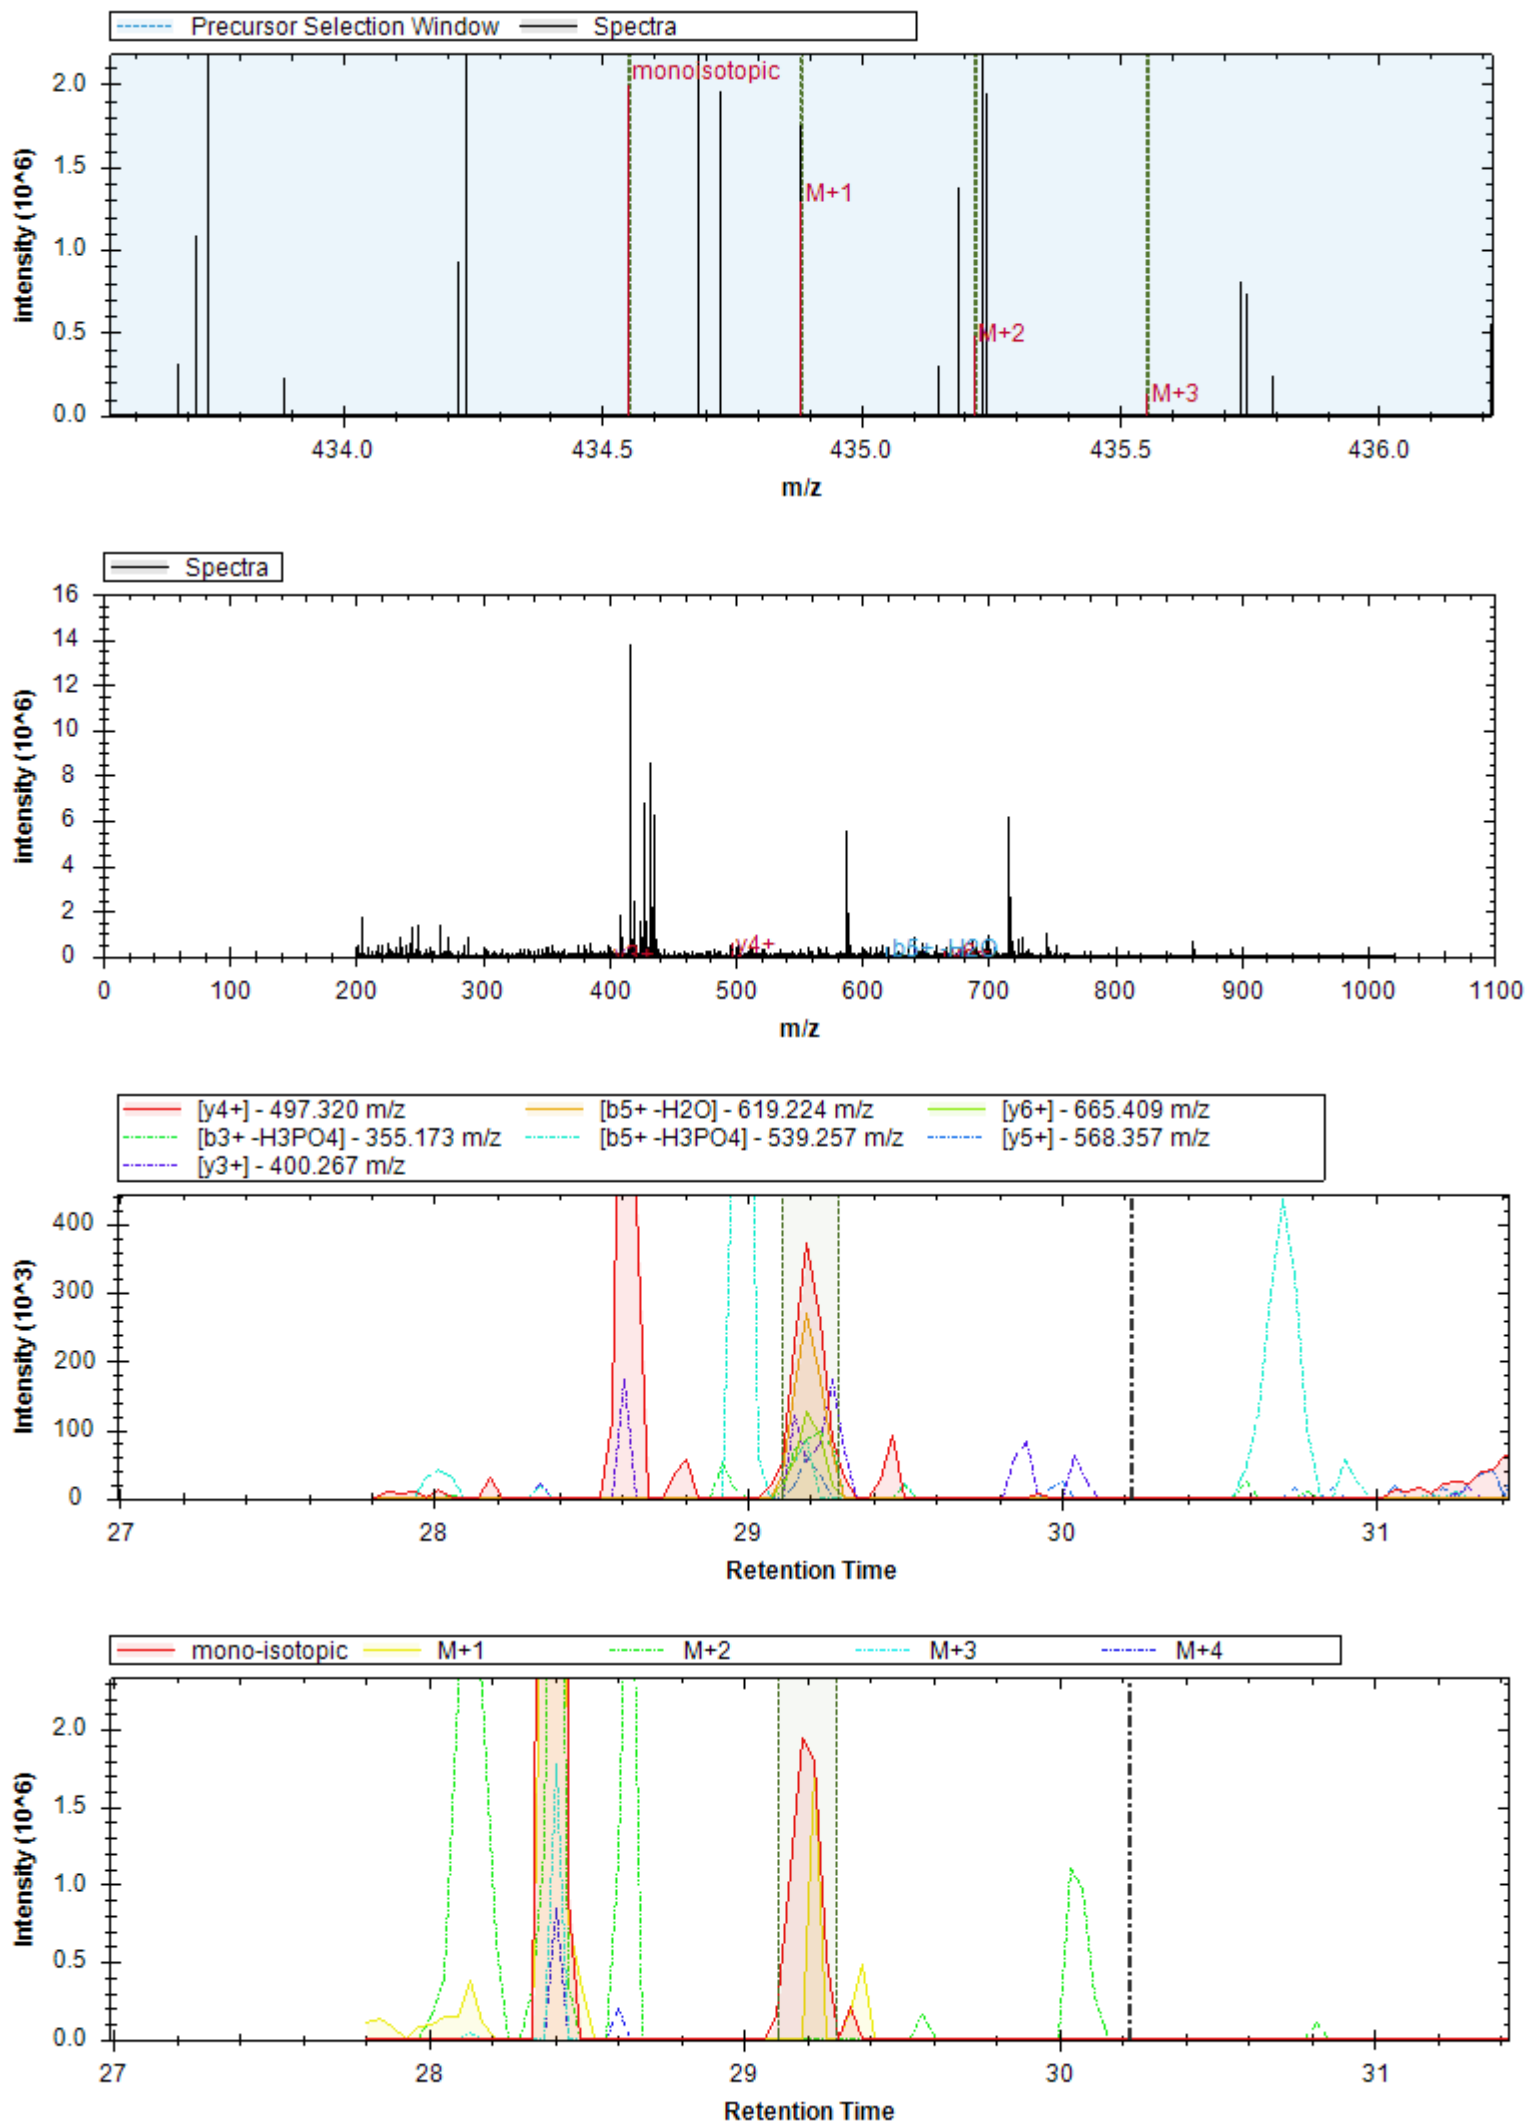

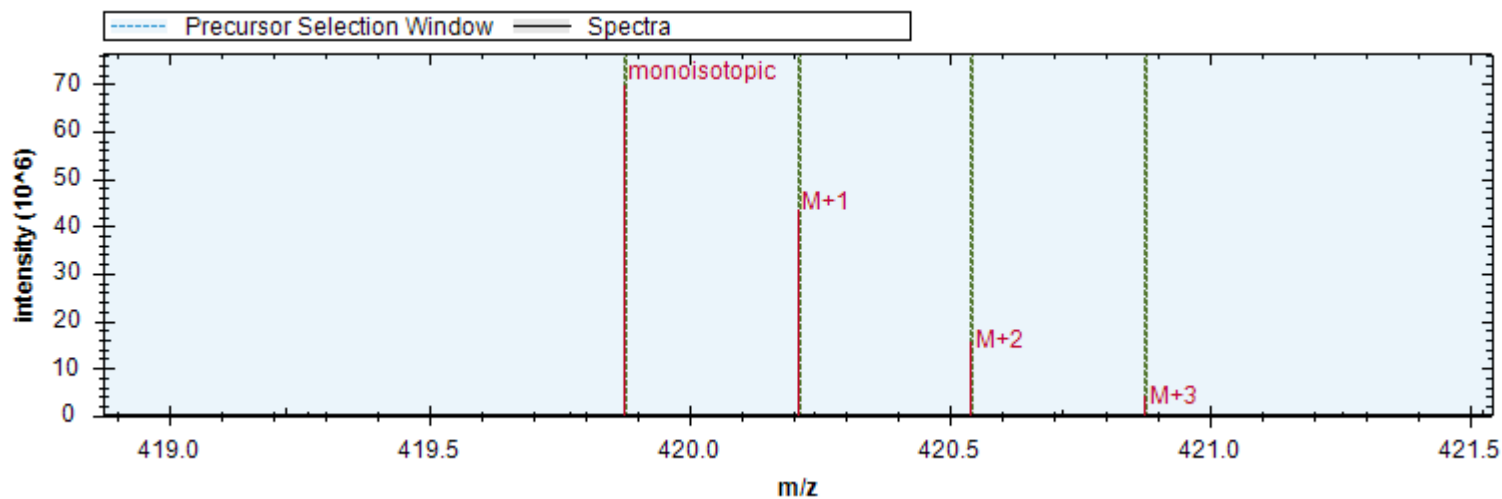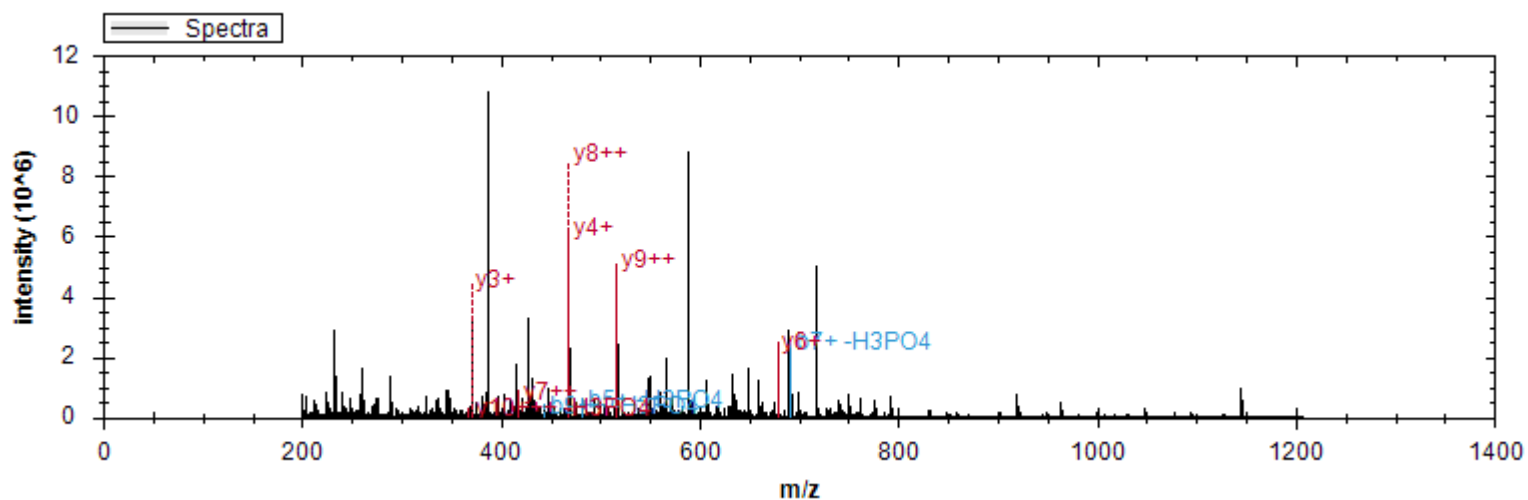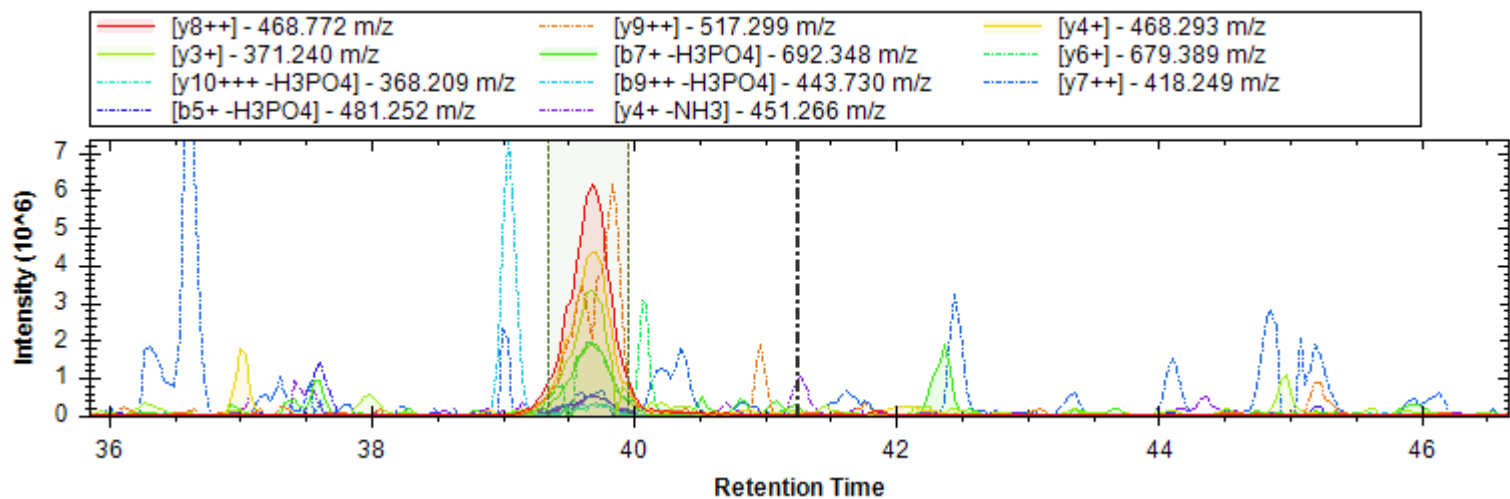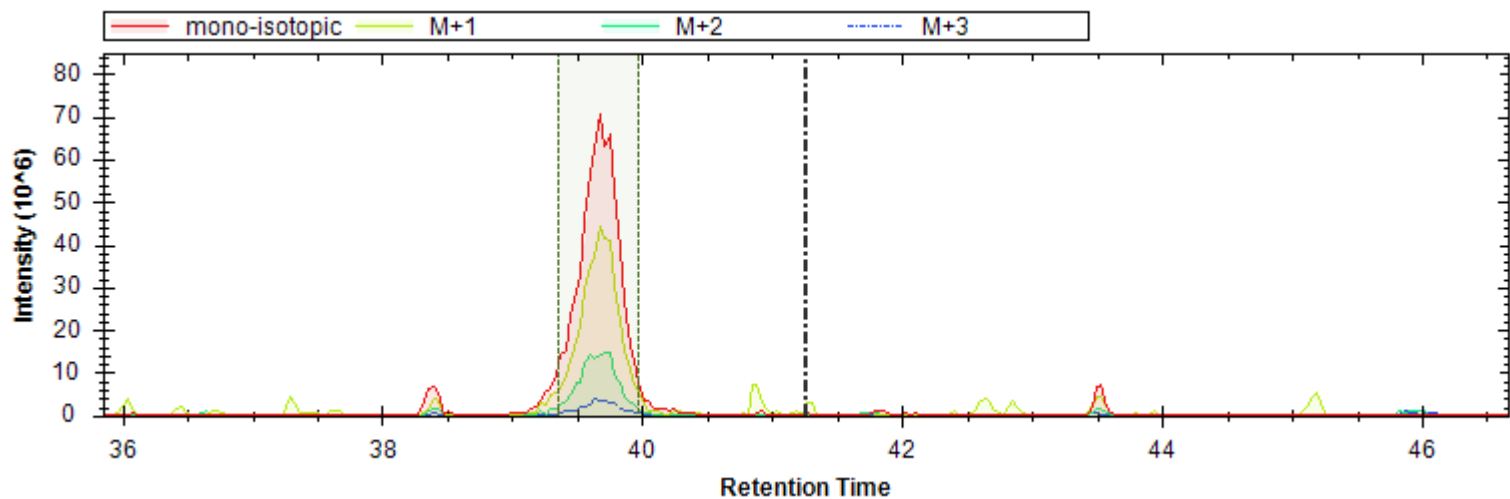

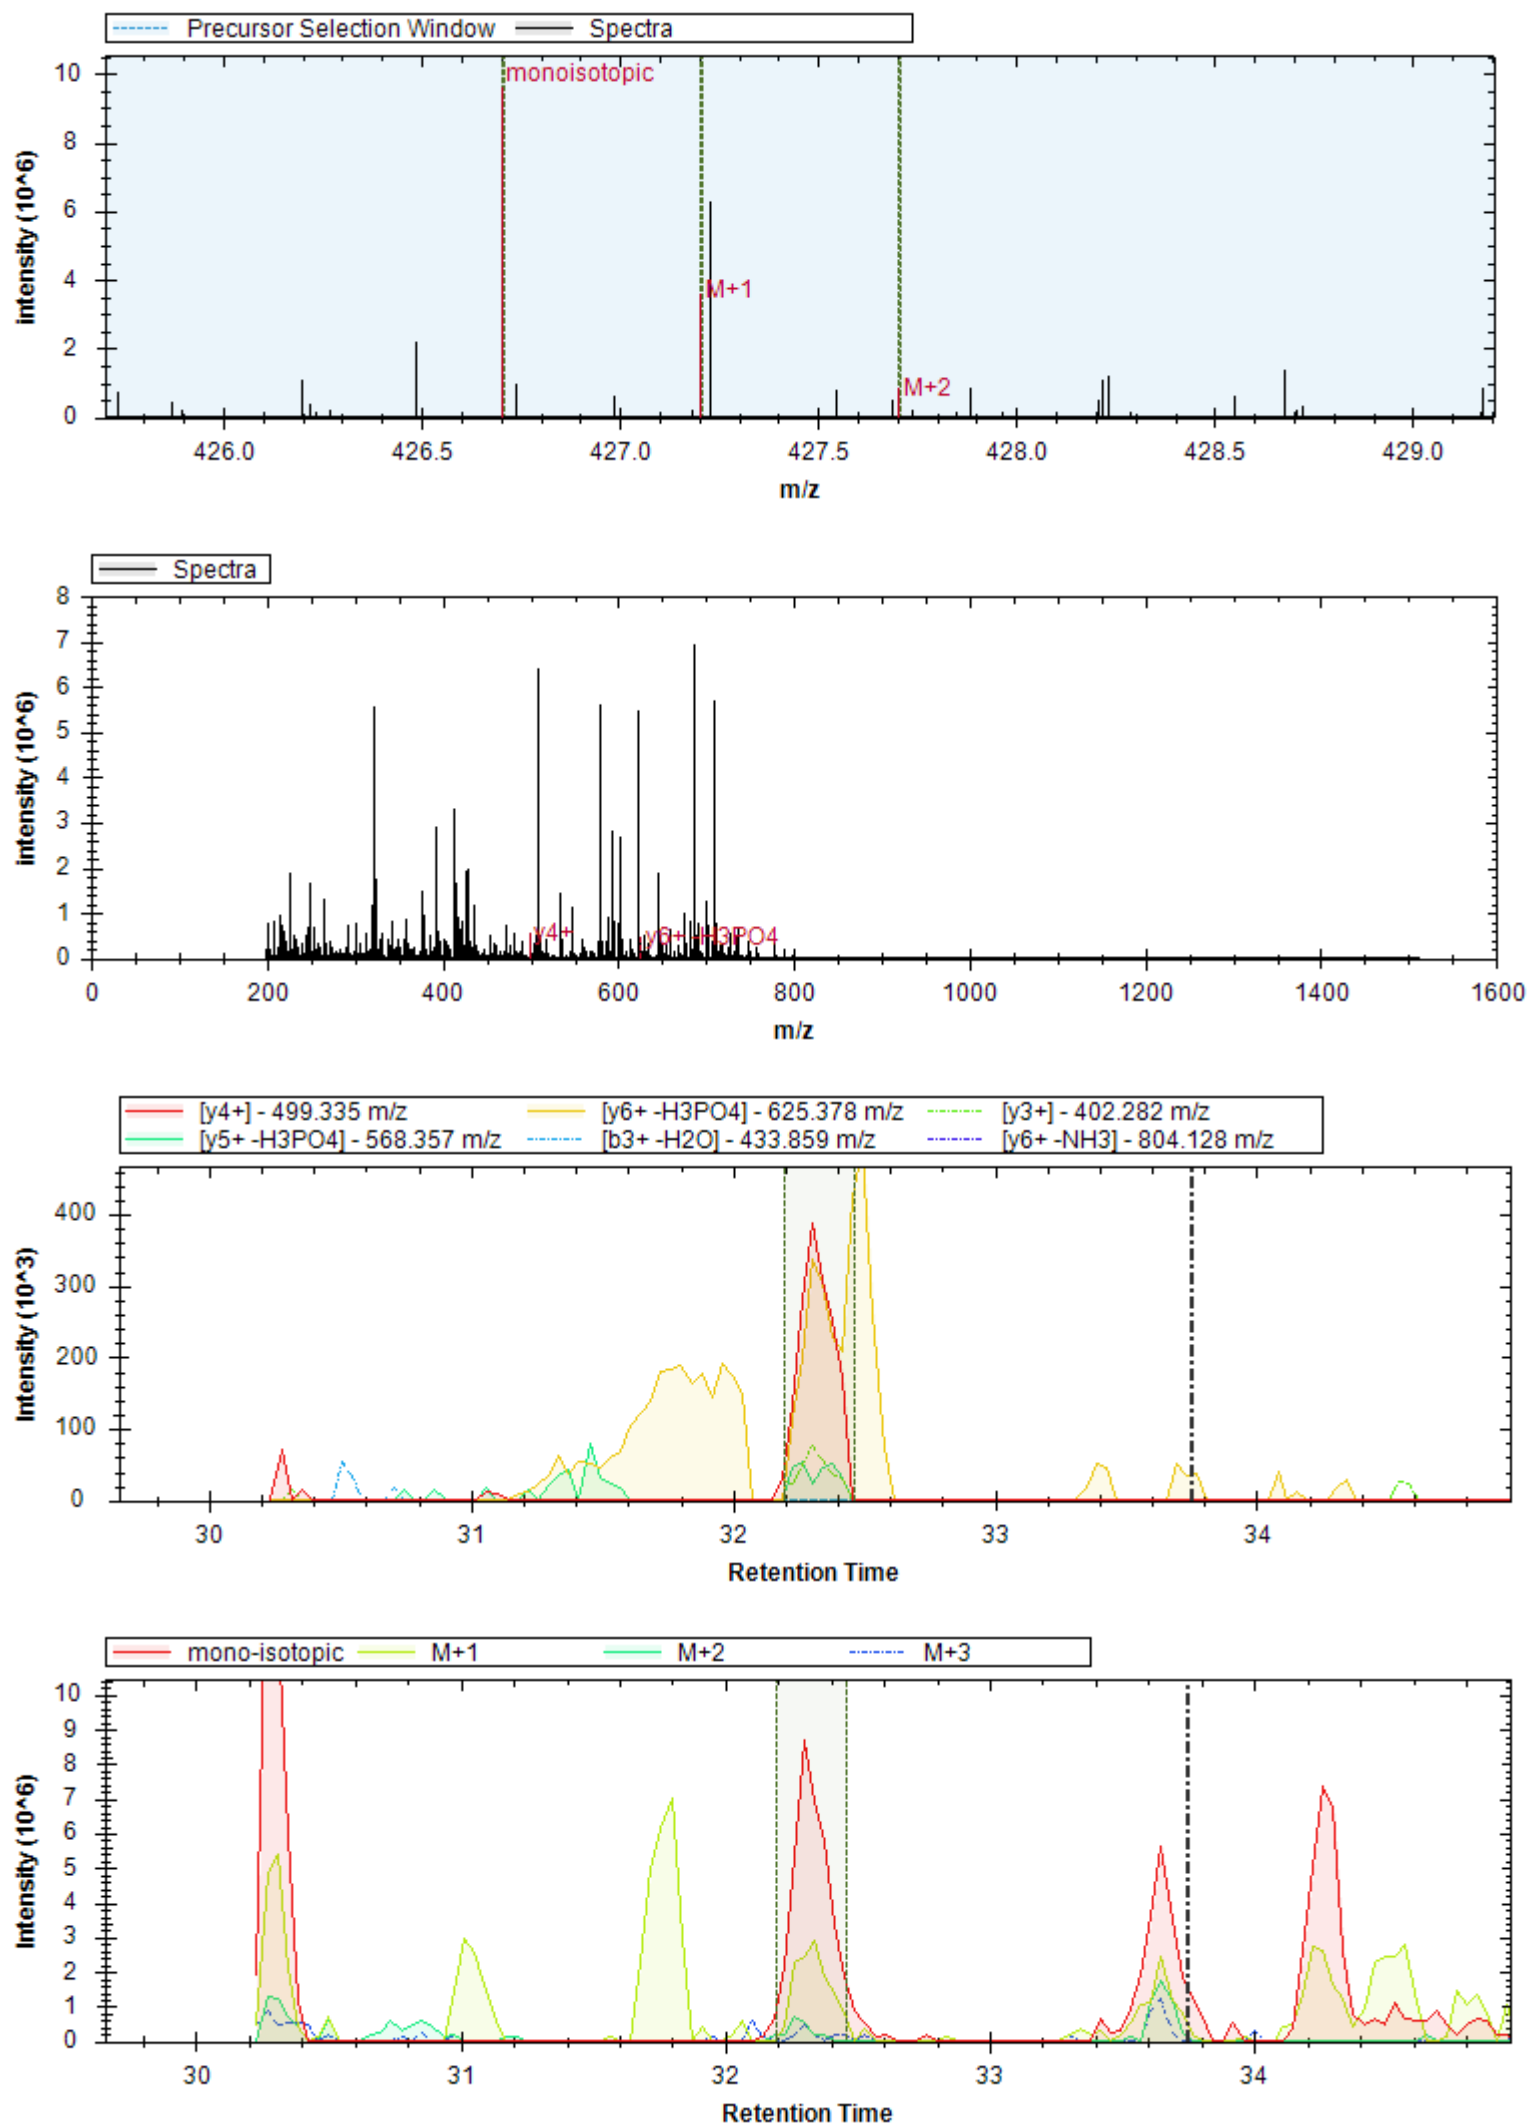

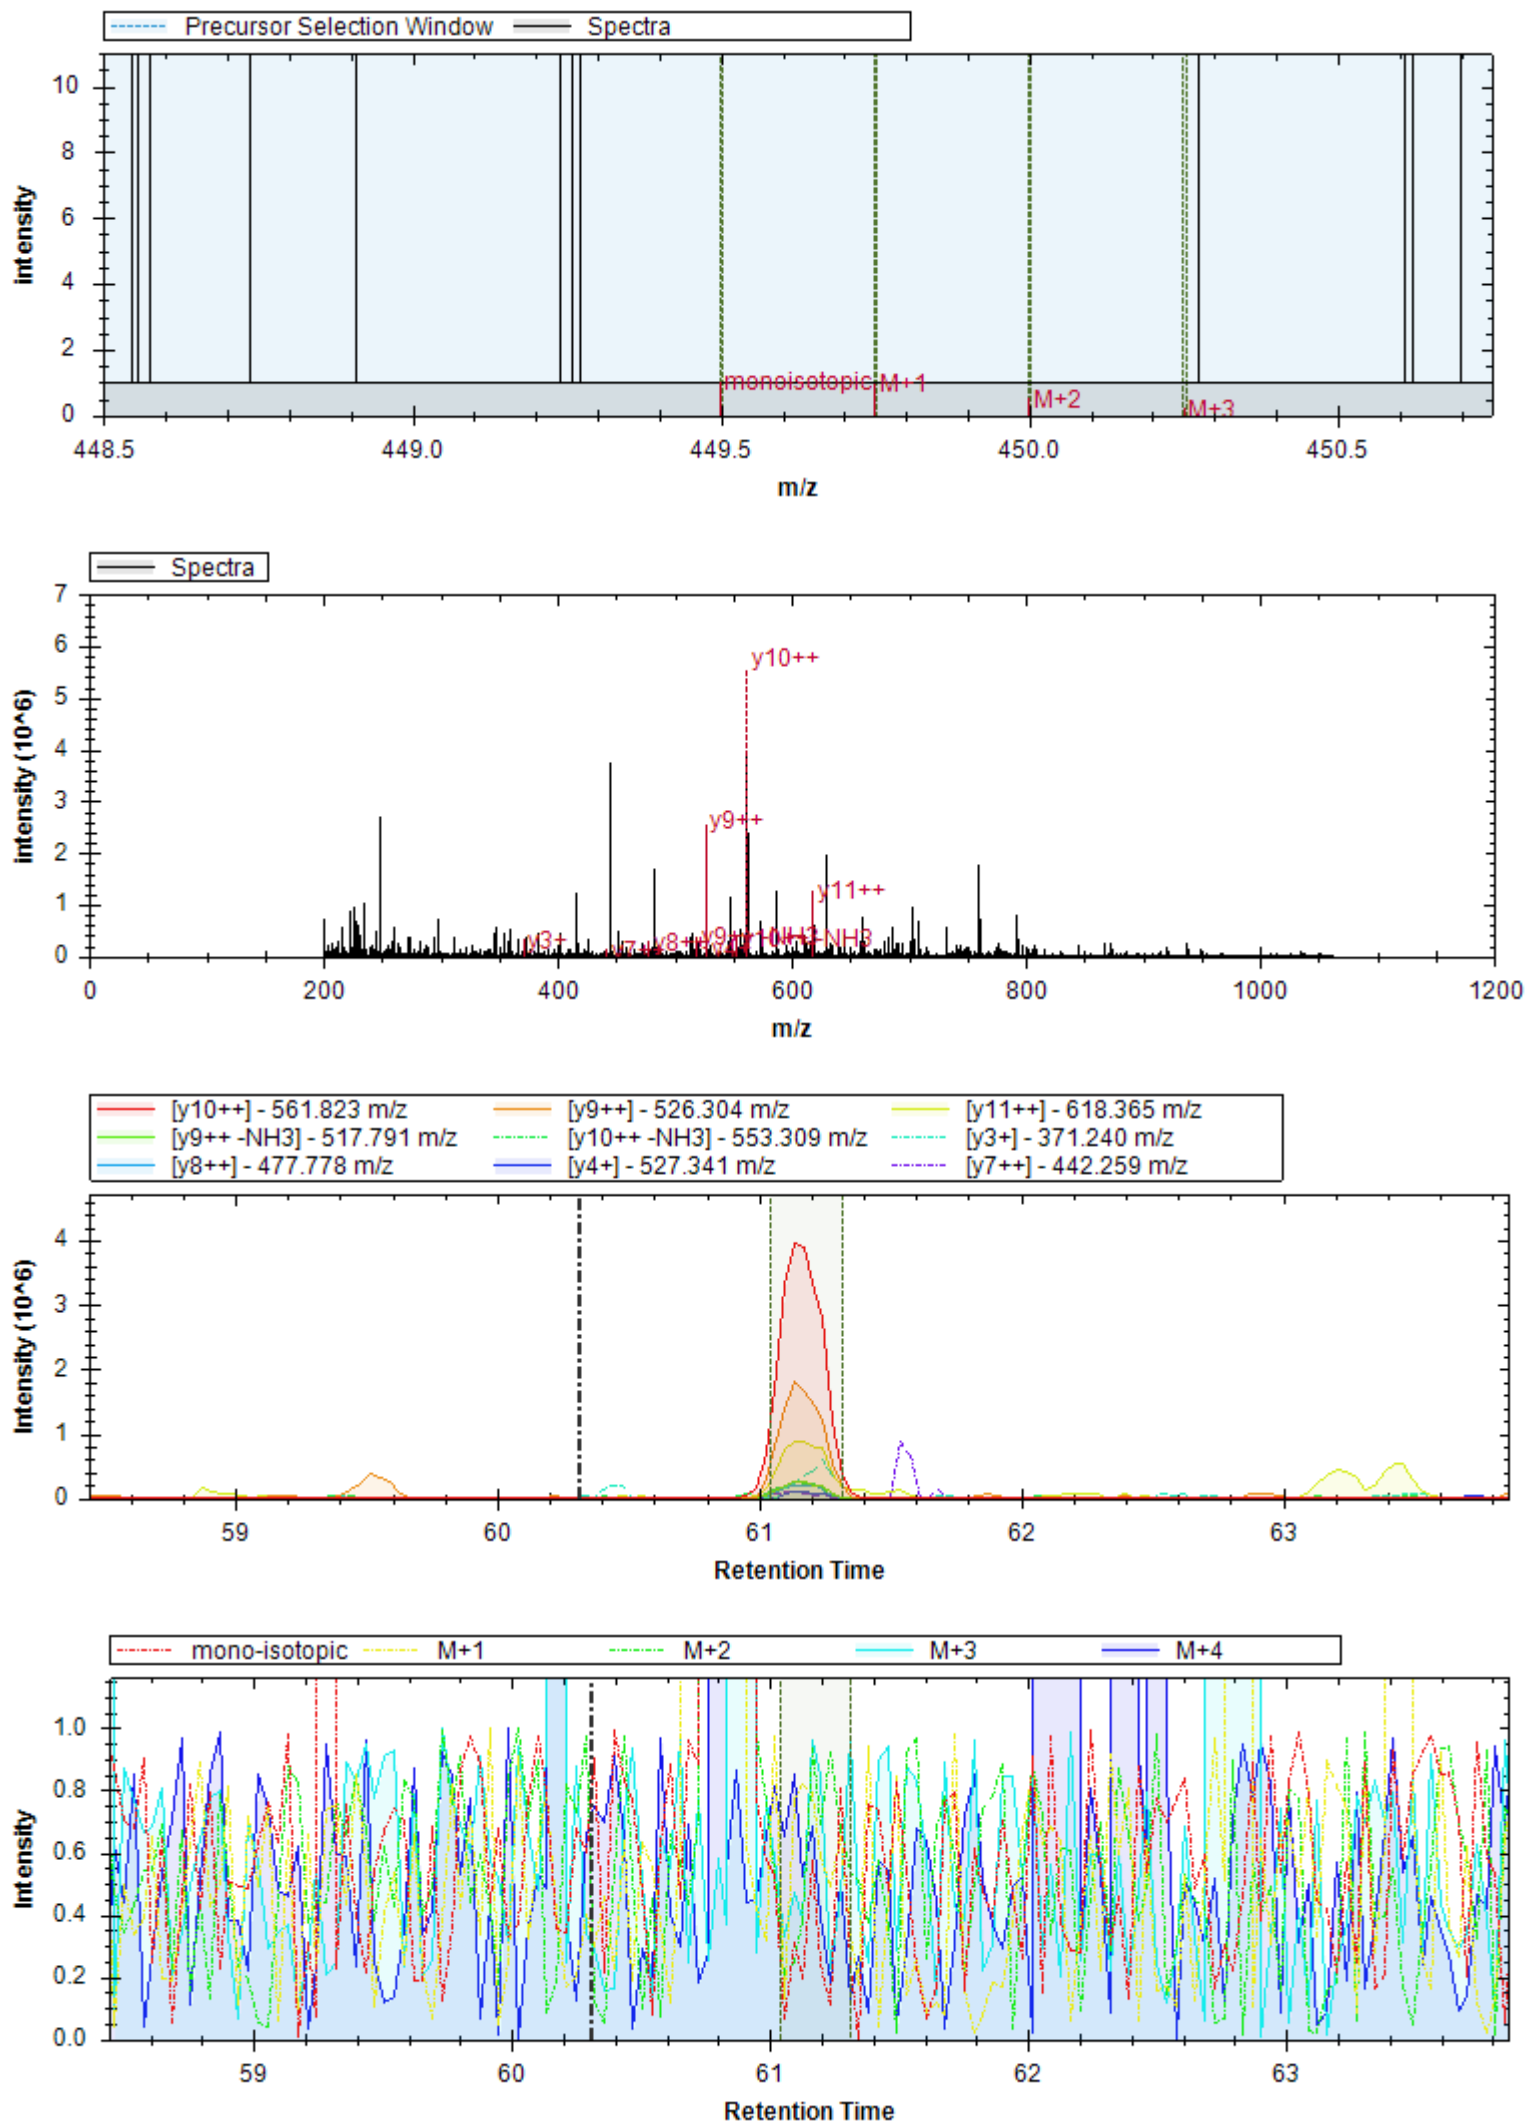

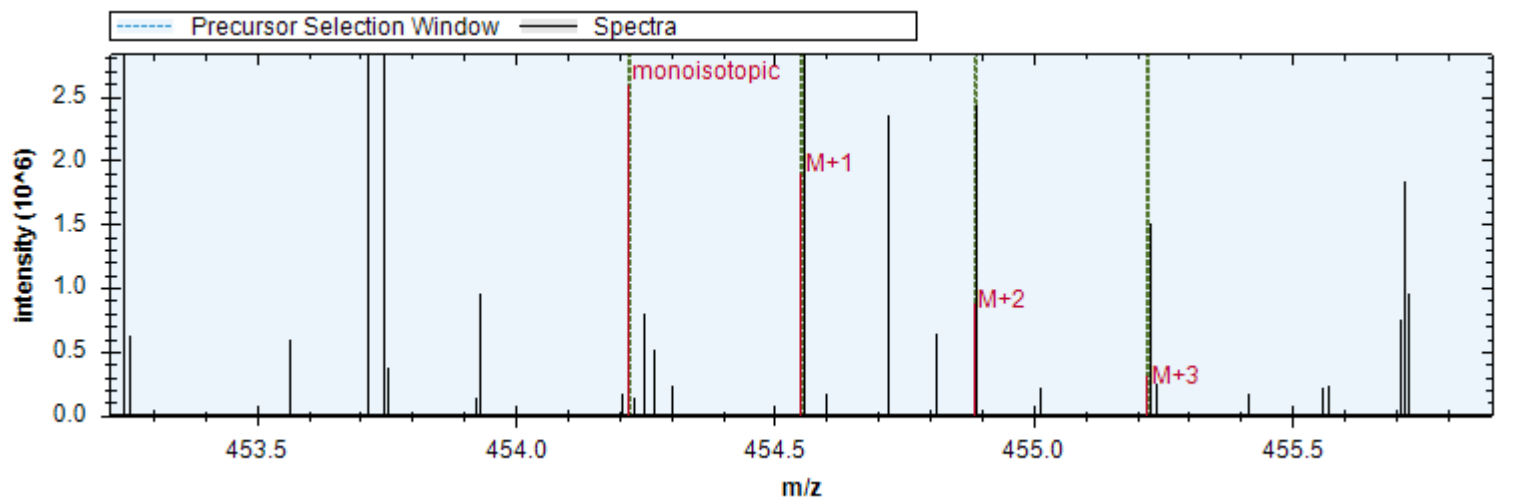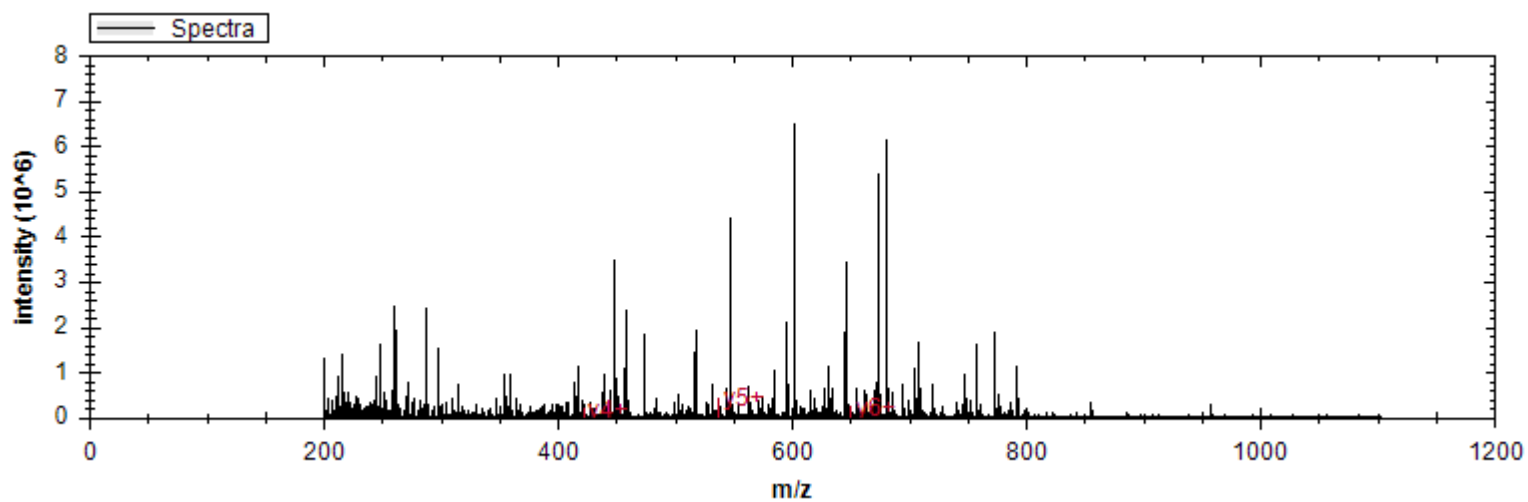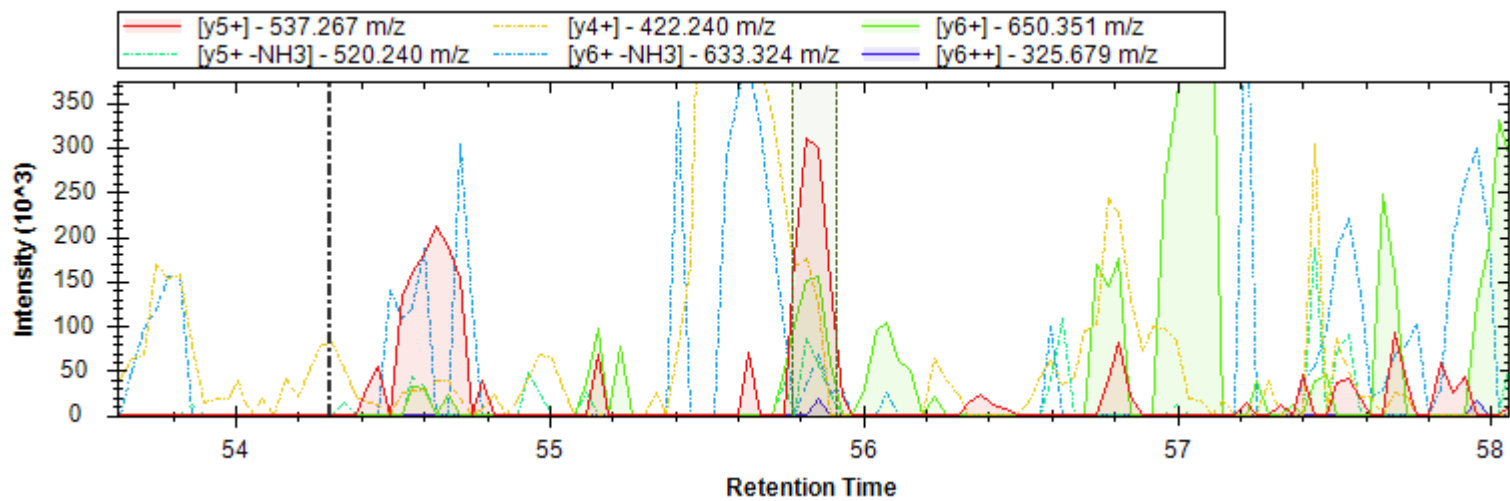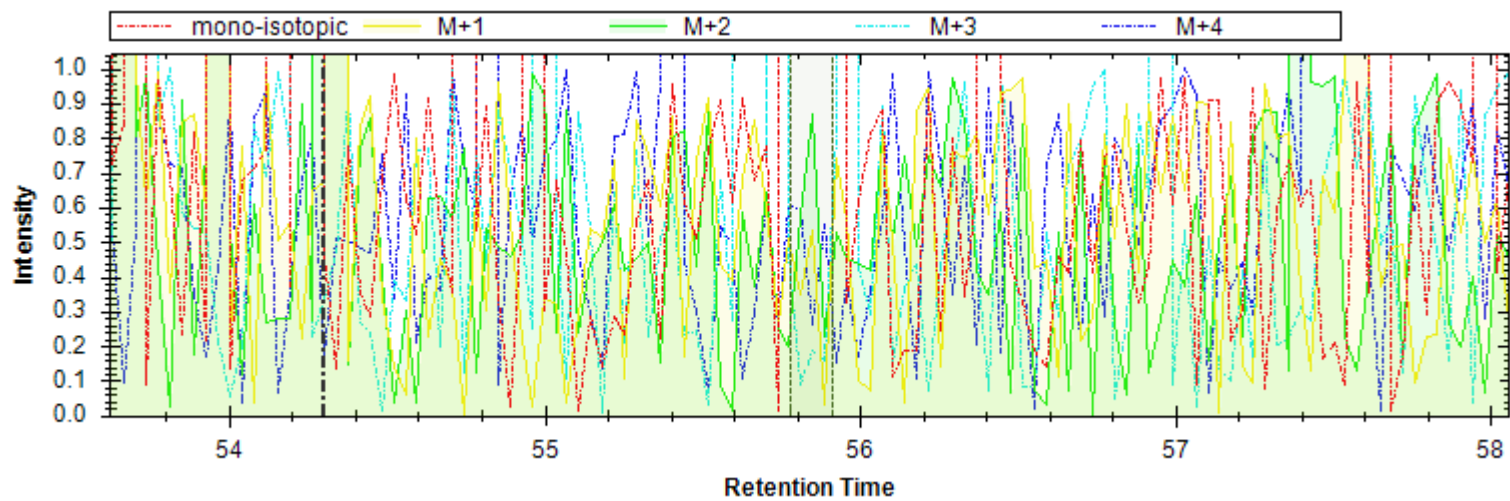

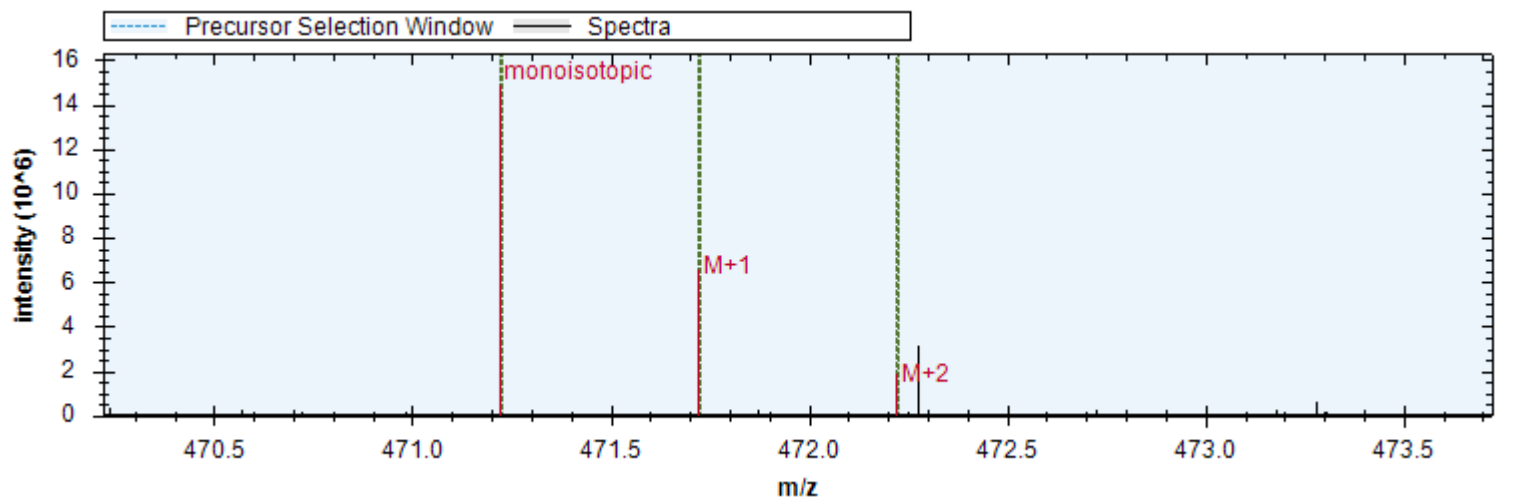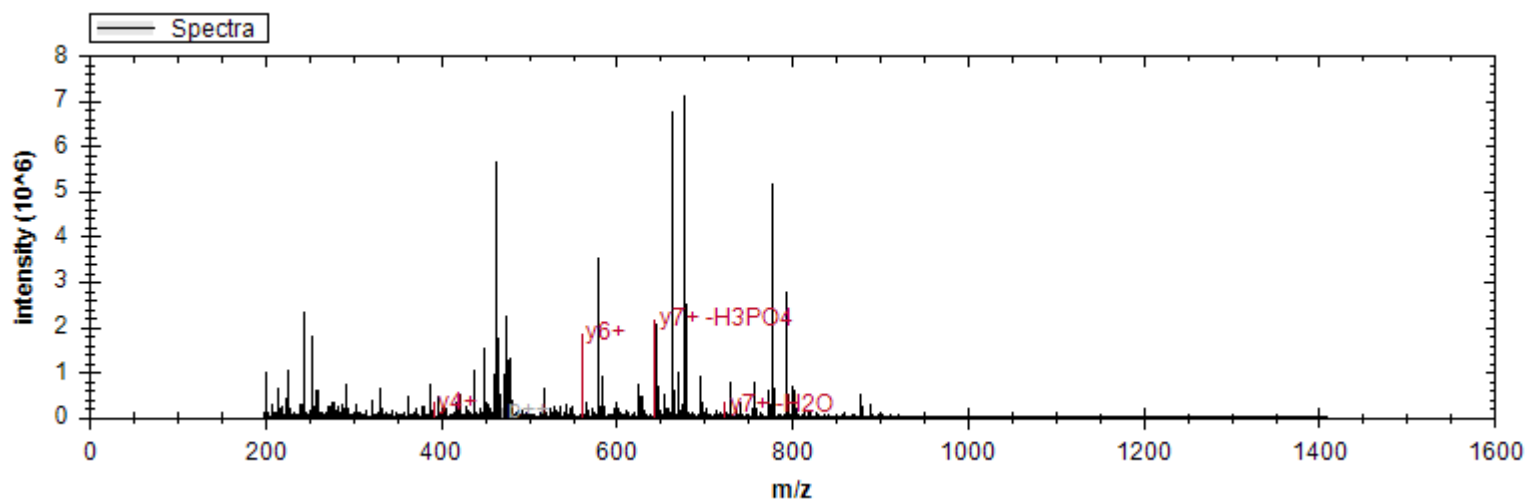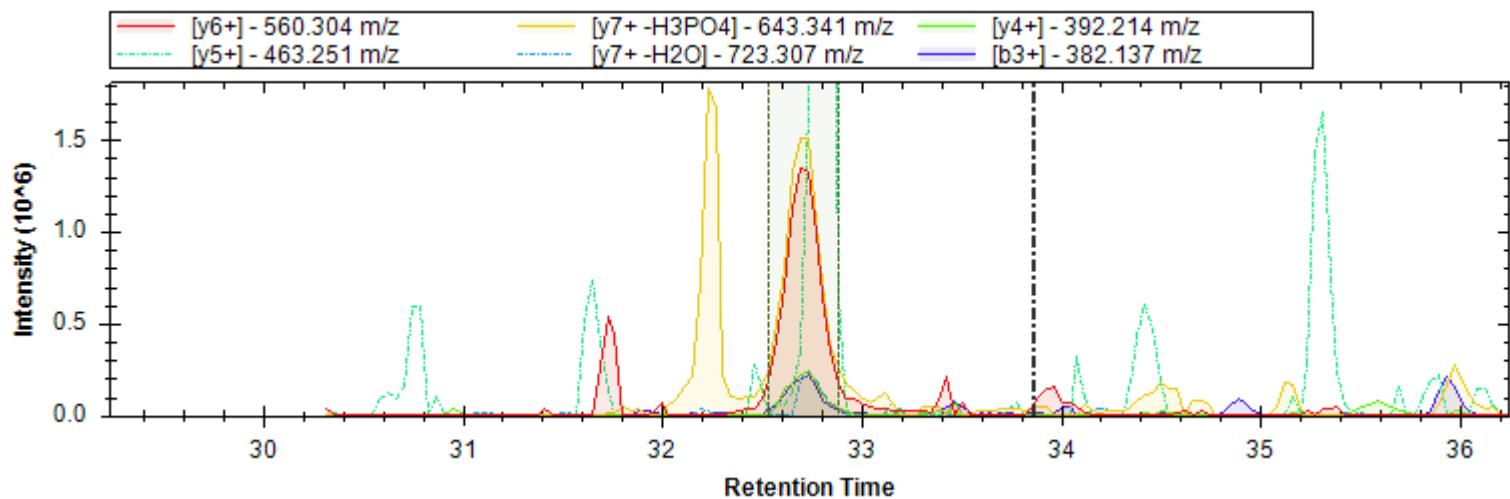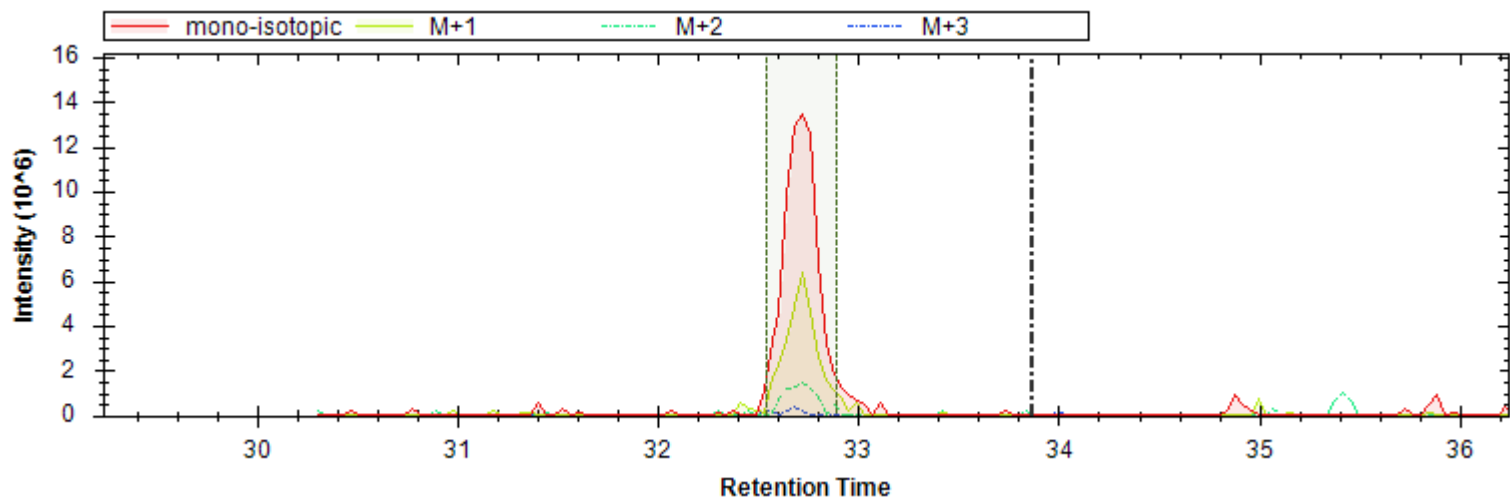



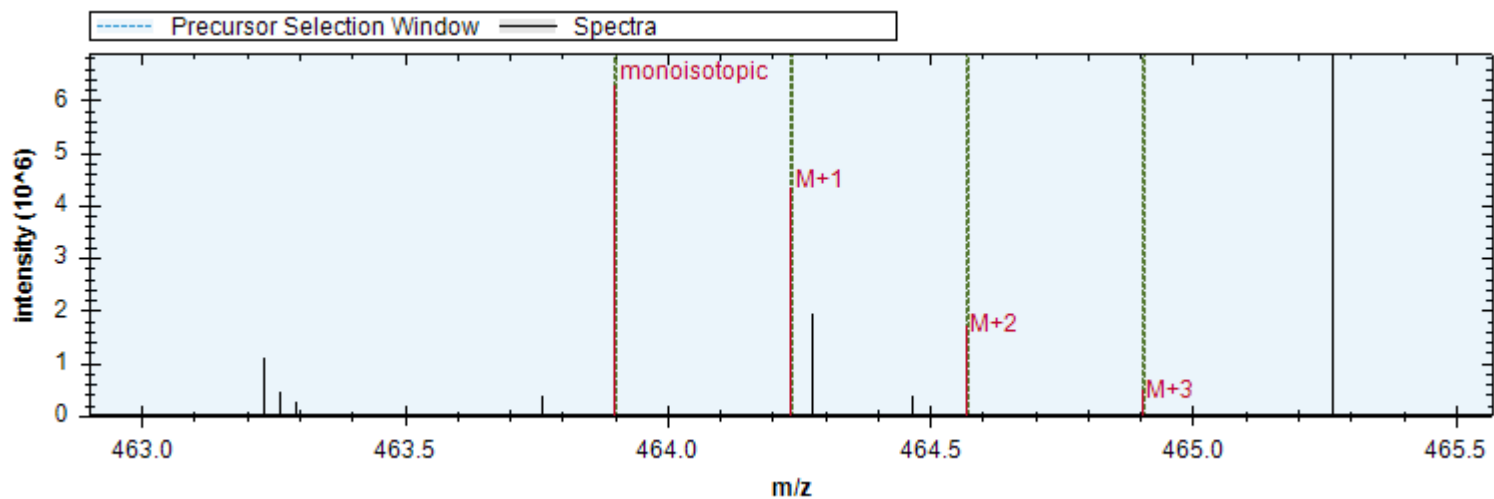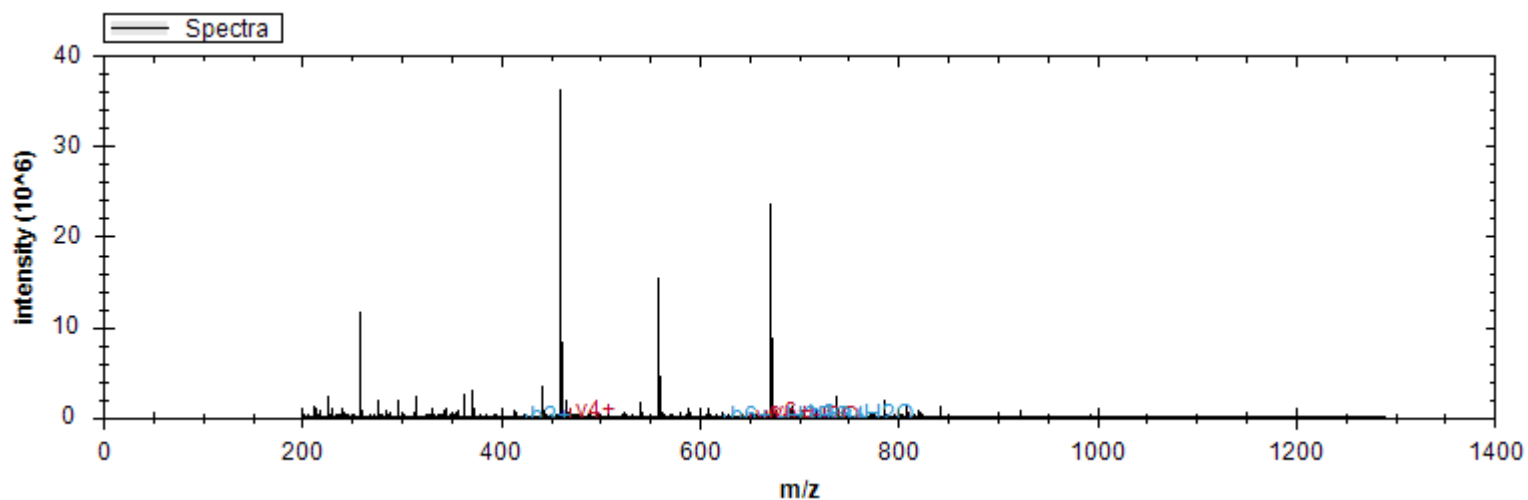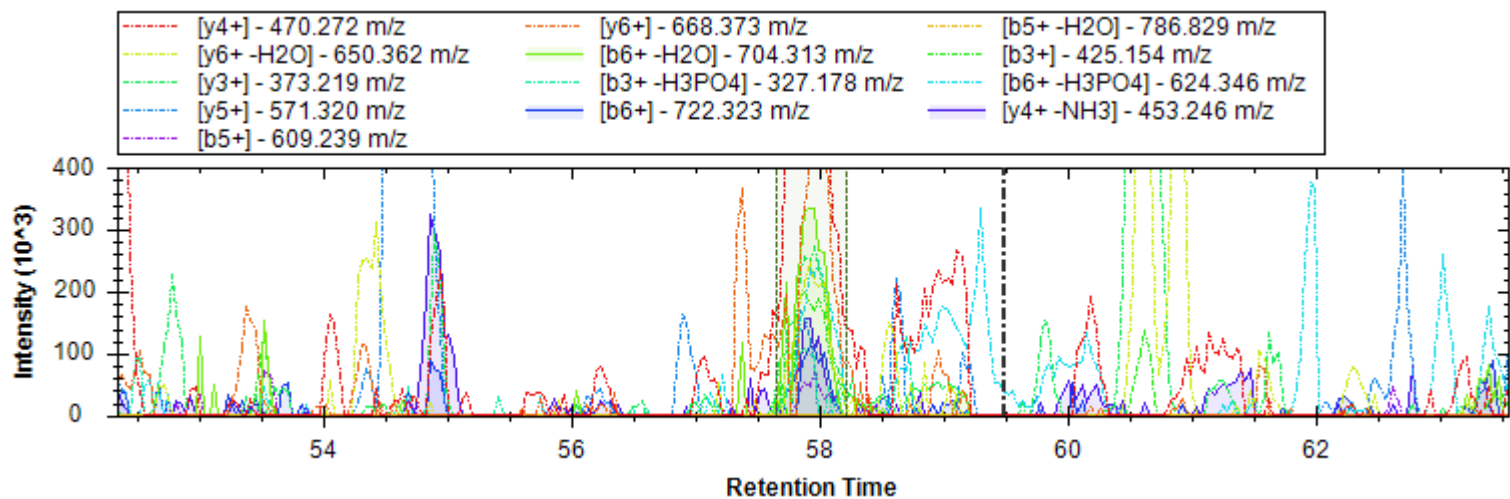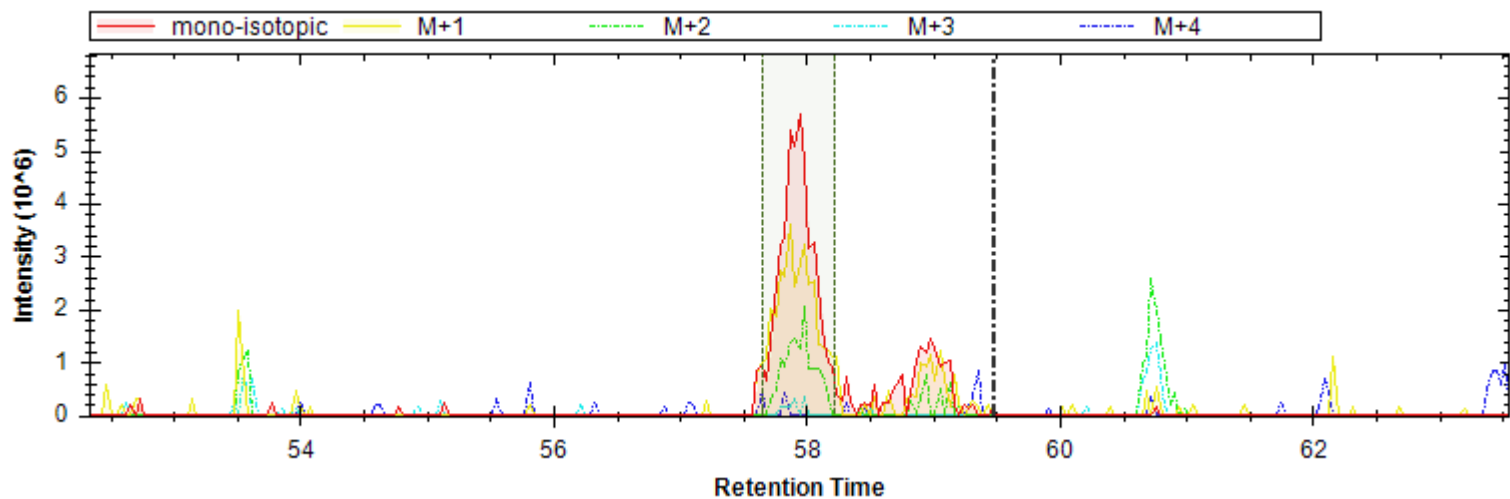

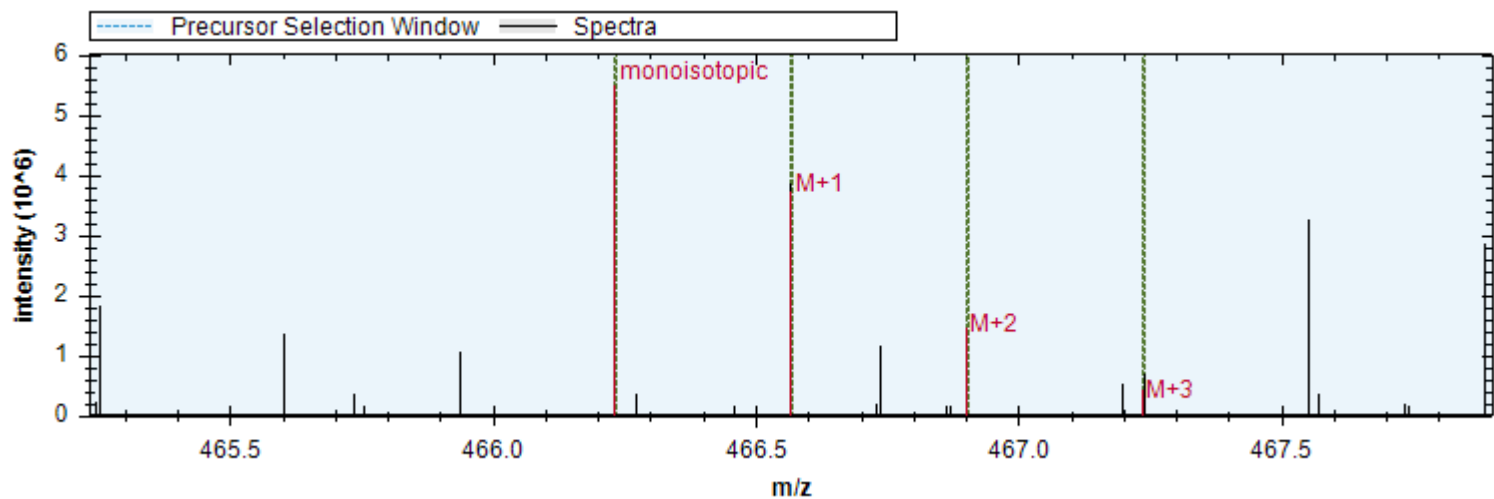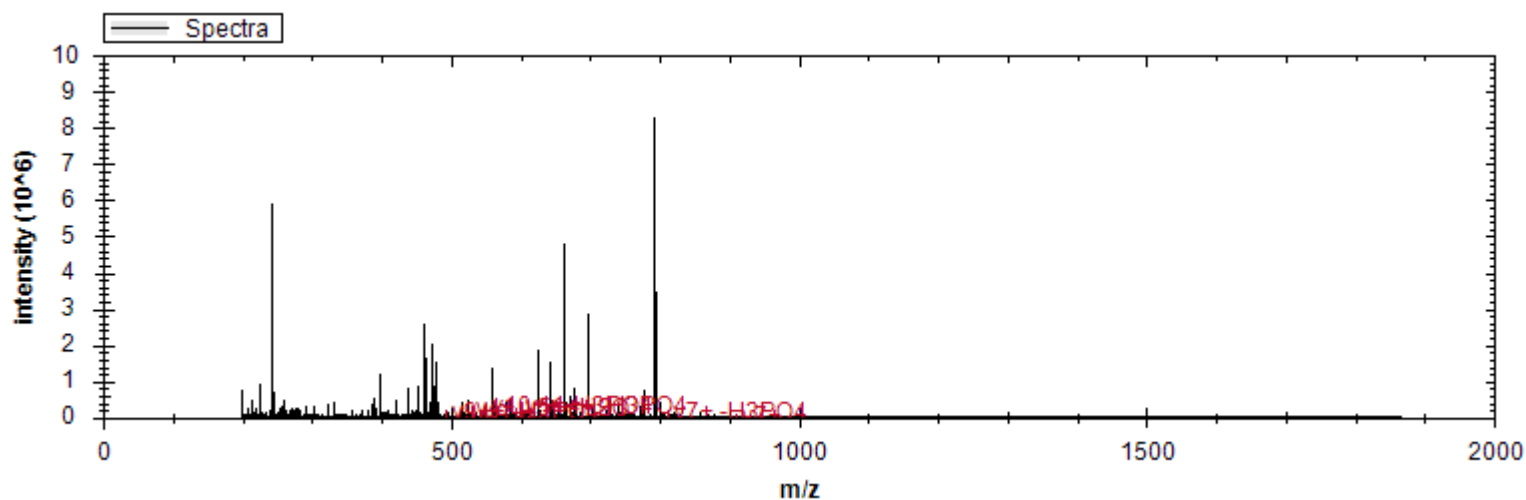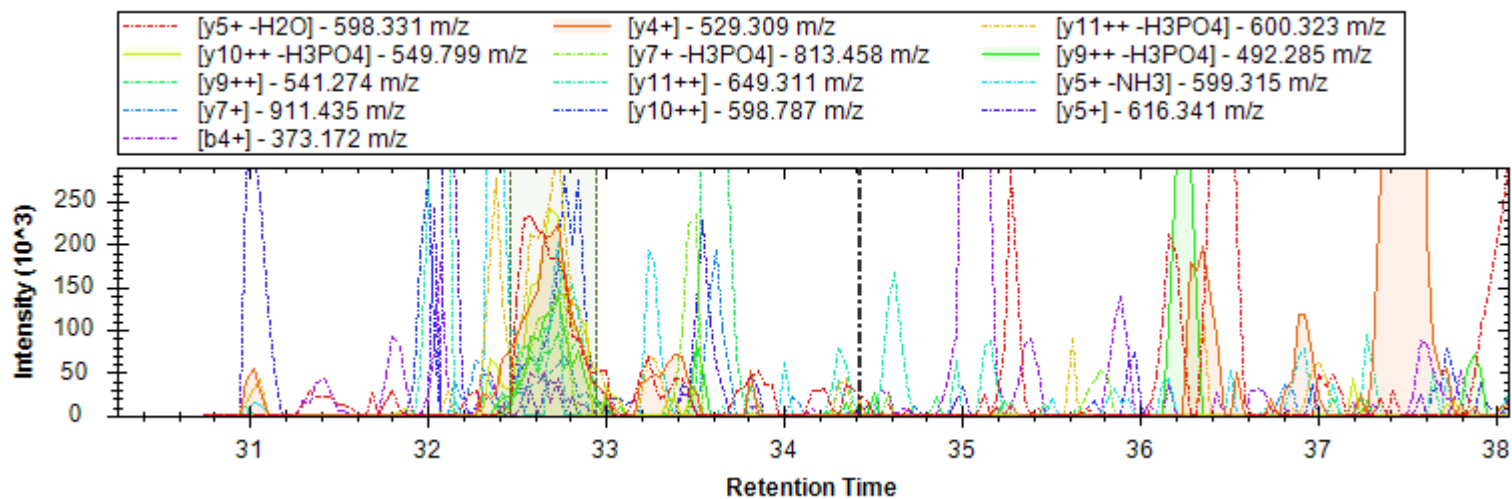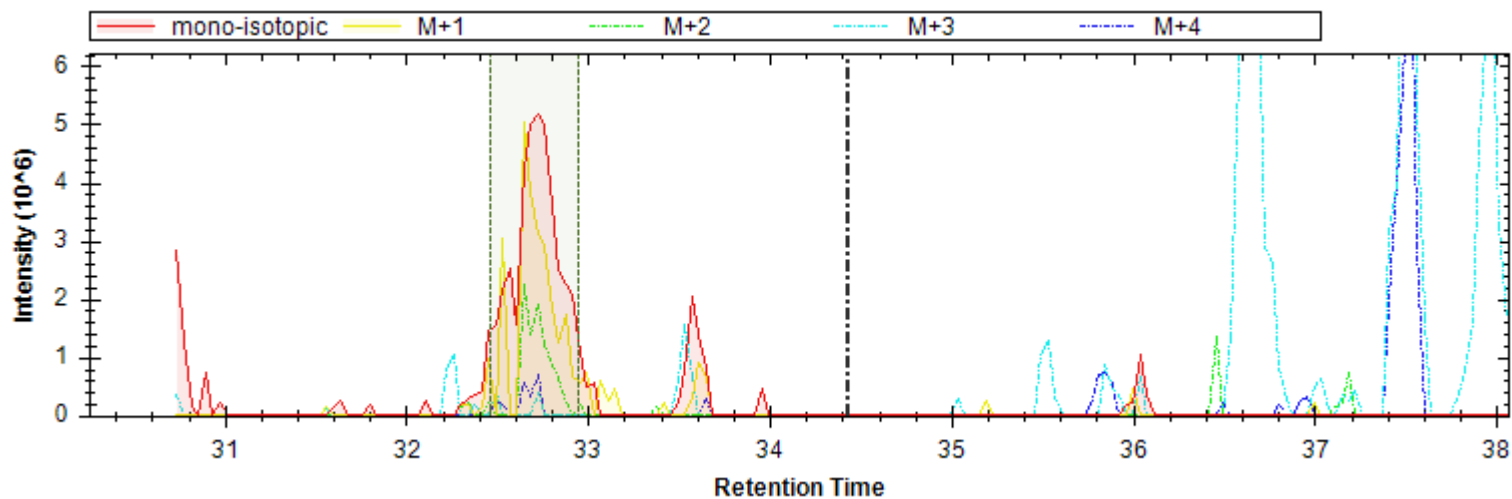

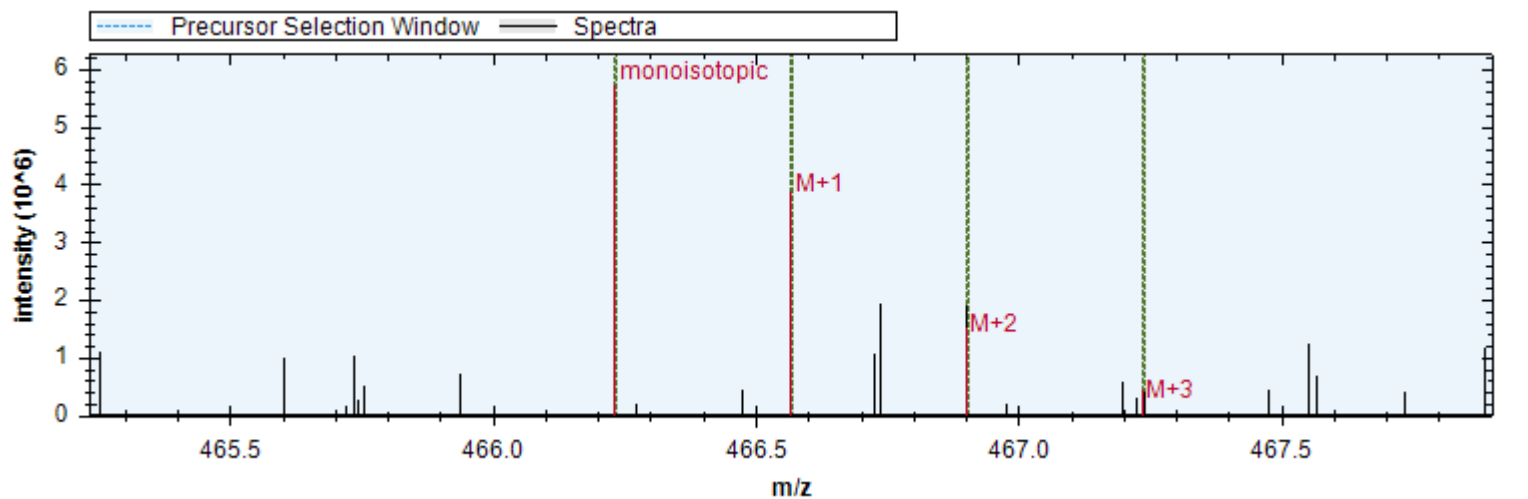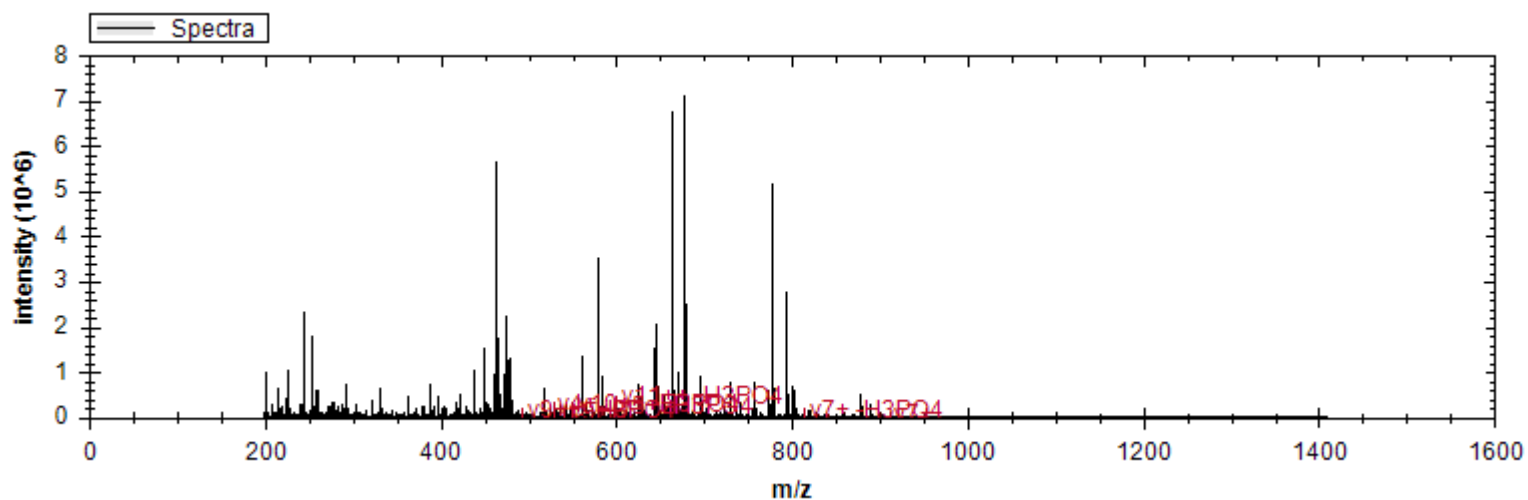

- |                              |                            |                              |
|------------------------------|----------------------------|------------------------------|
| [y5+ -H3PO4] - 598.331 m/z   | [y4+] - 529.309 m/z        | [y11++ -H3PO4] - 600.323 m/z |
| [y10++ -H3PO4] - 549.799 m/z | [y7+ -H3PO4] - 813.458 m/z | [y9++ -H3PO4] - 492.285 m/z  |
| [y9++] - 541.274 m/z         | [y11++] - 649.311 m/z      | [y10++] - 598.787 m/z        |
| [y7+] - 911.435 m/z          | [y6+ -H3PO4] - 726.426 m/z | [y5+] - 696.308 m/z          |
| [y7+ -NH3] - 992.208 m/z     | [b4+] - 373.172 m/z        | [y4+ -H2O] - 511.299 m/z     |

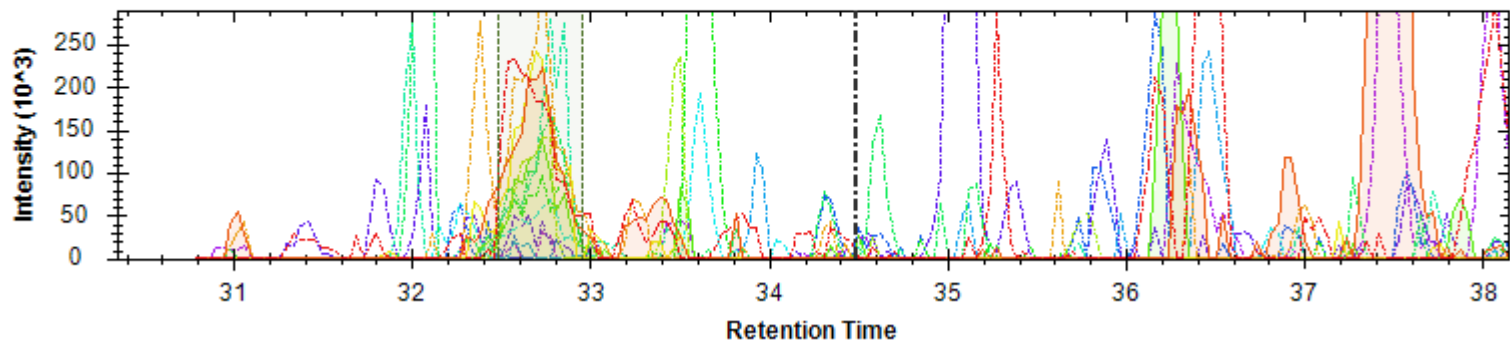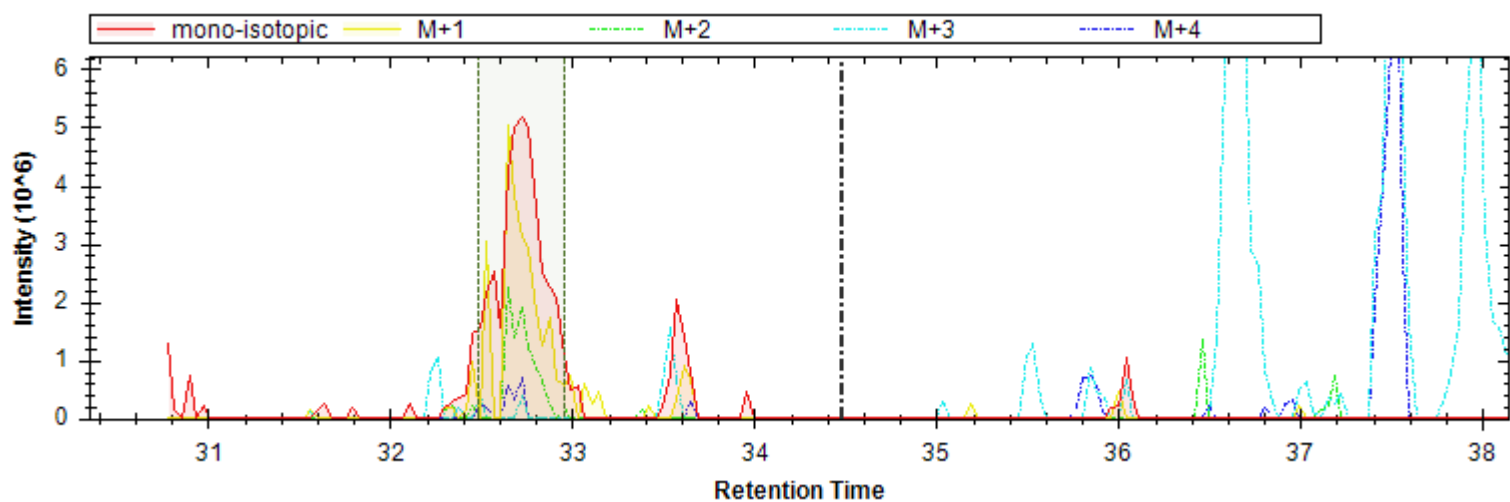

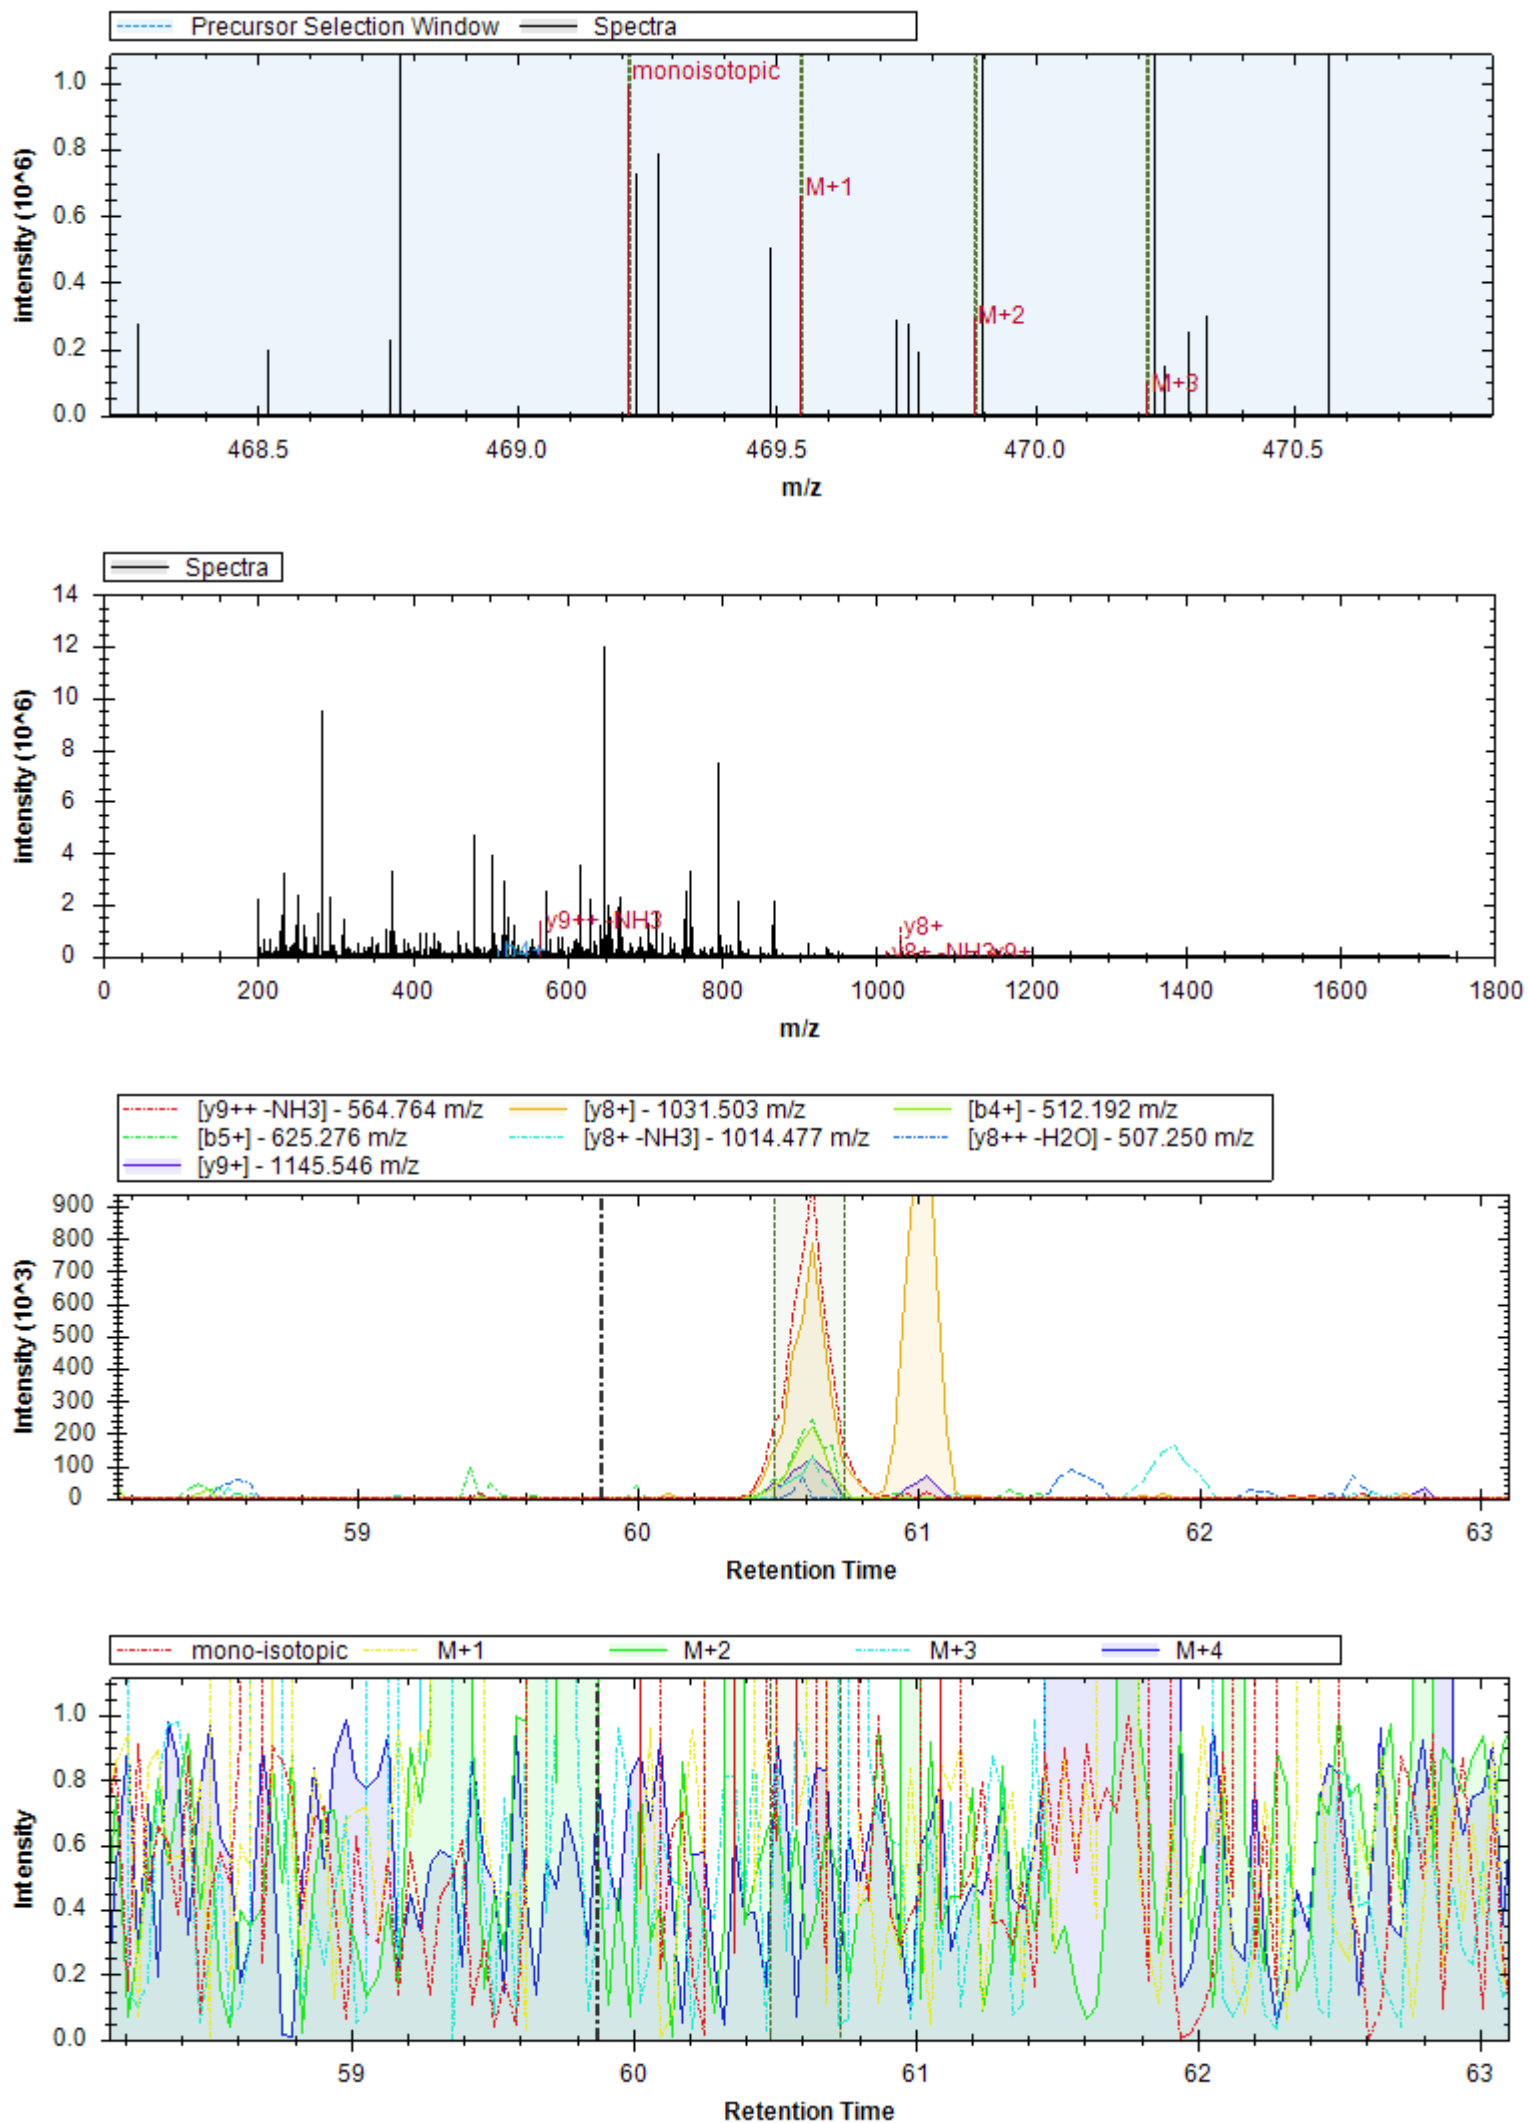

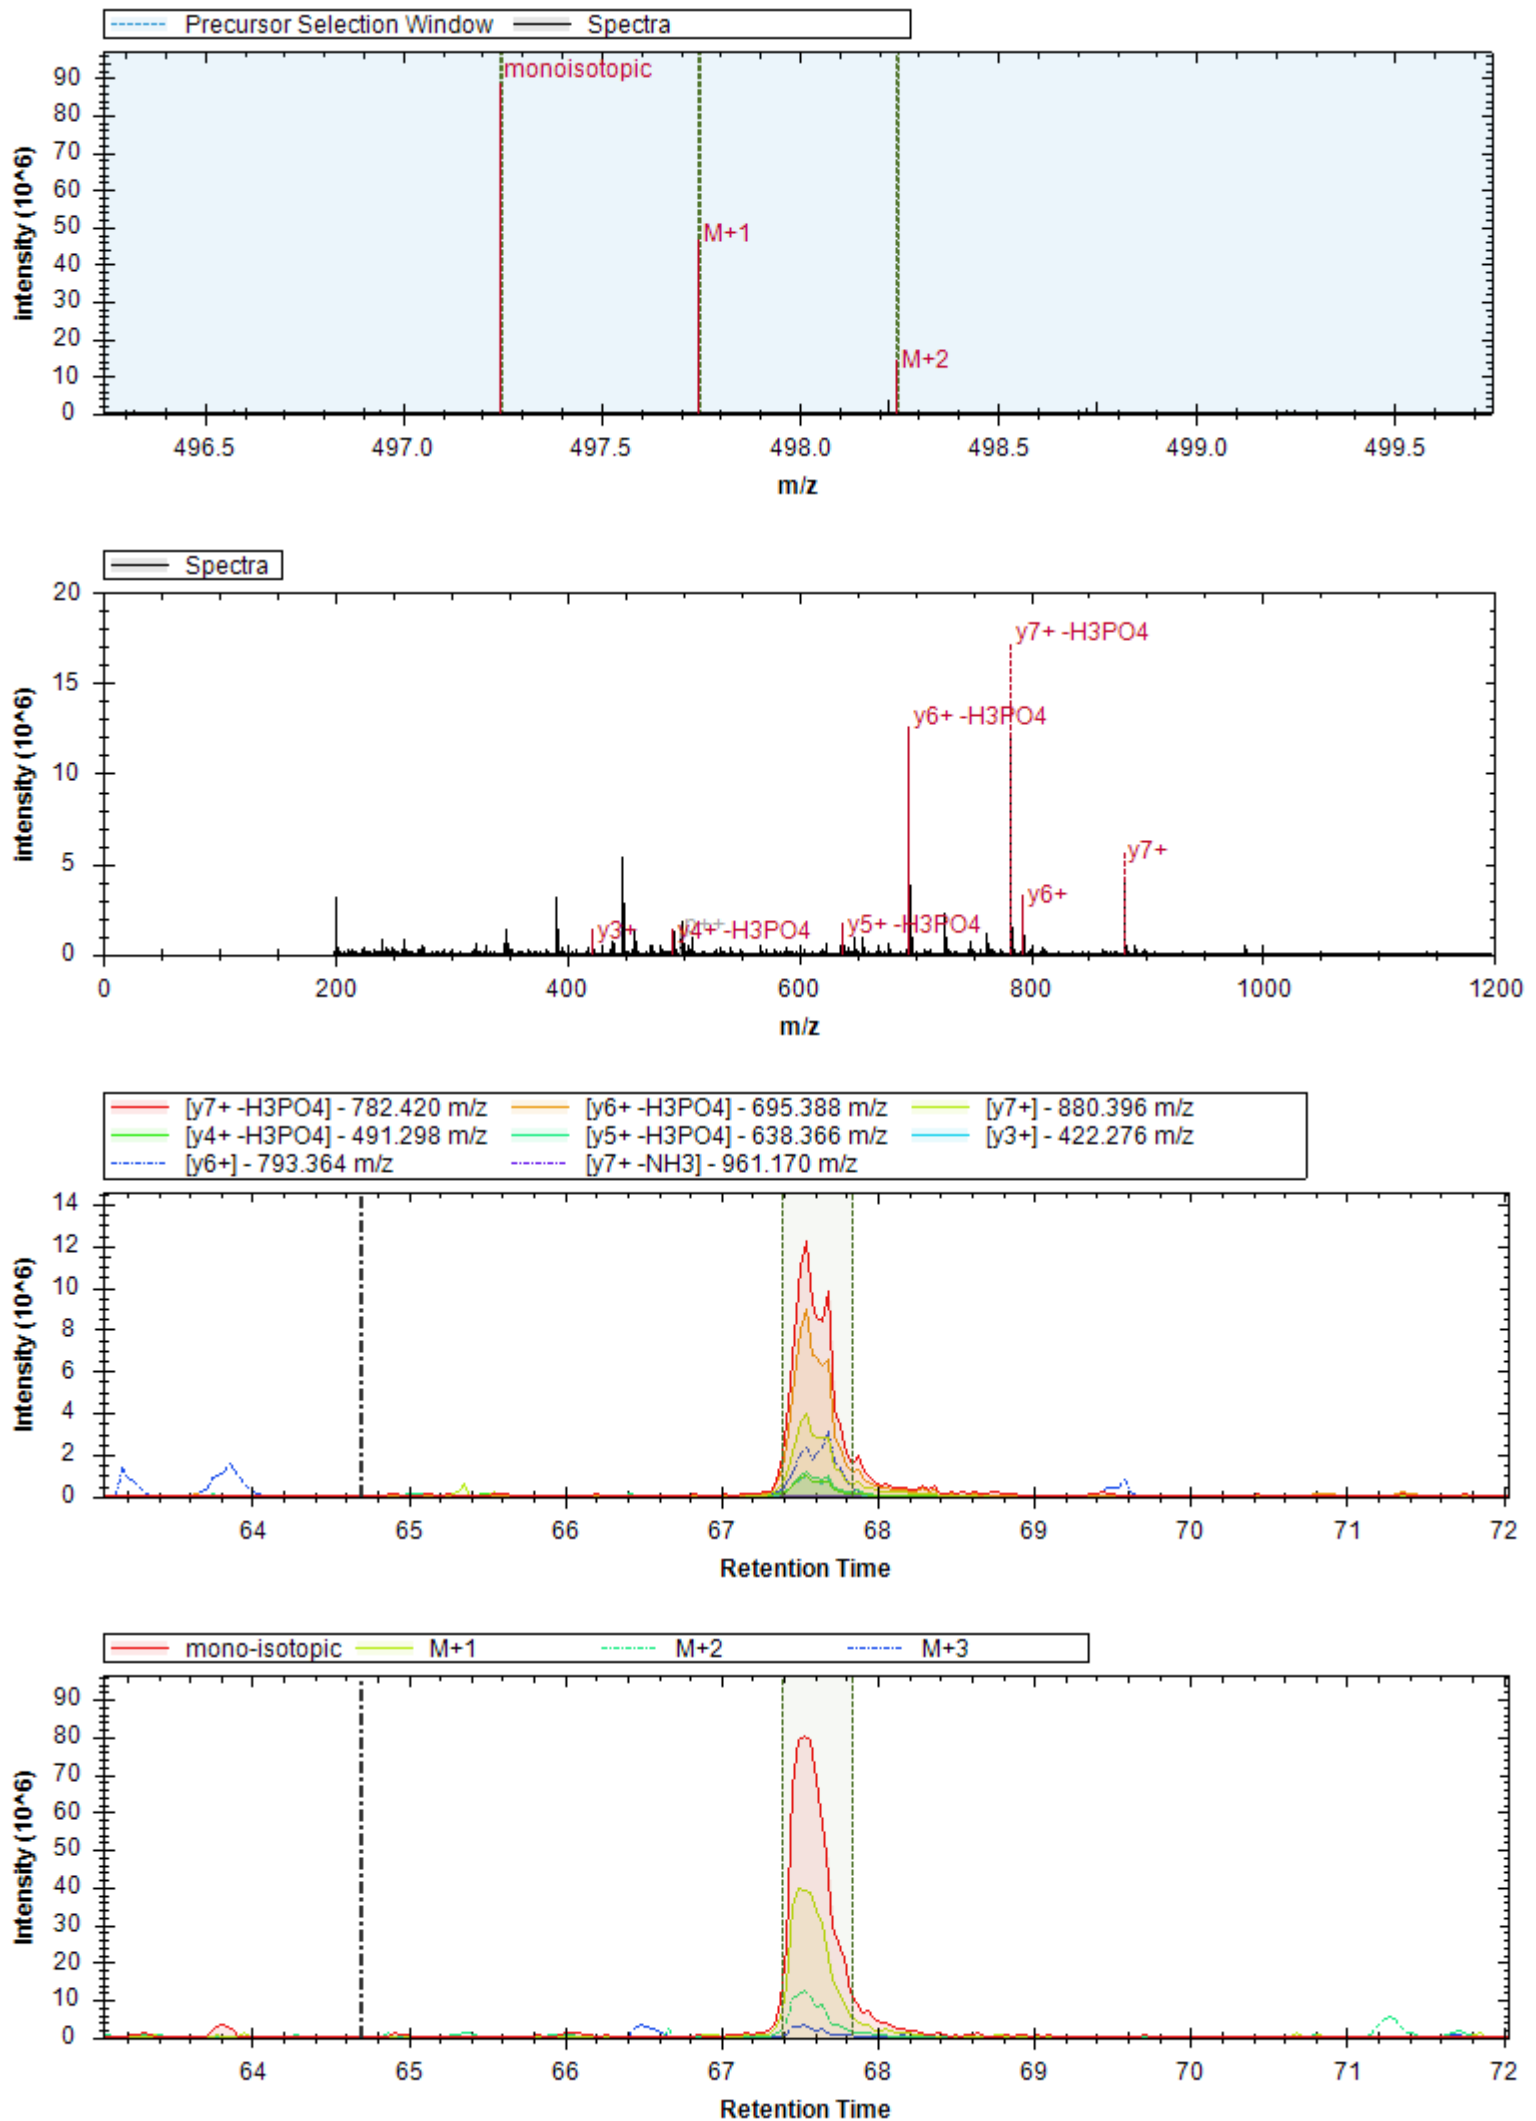

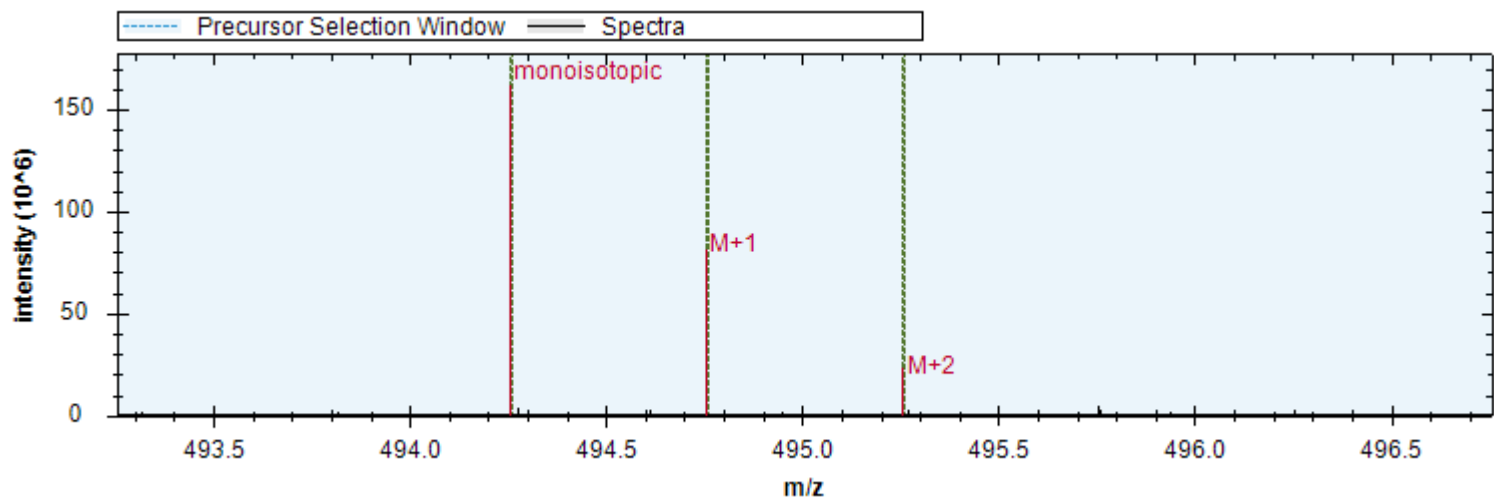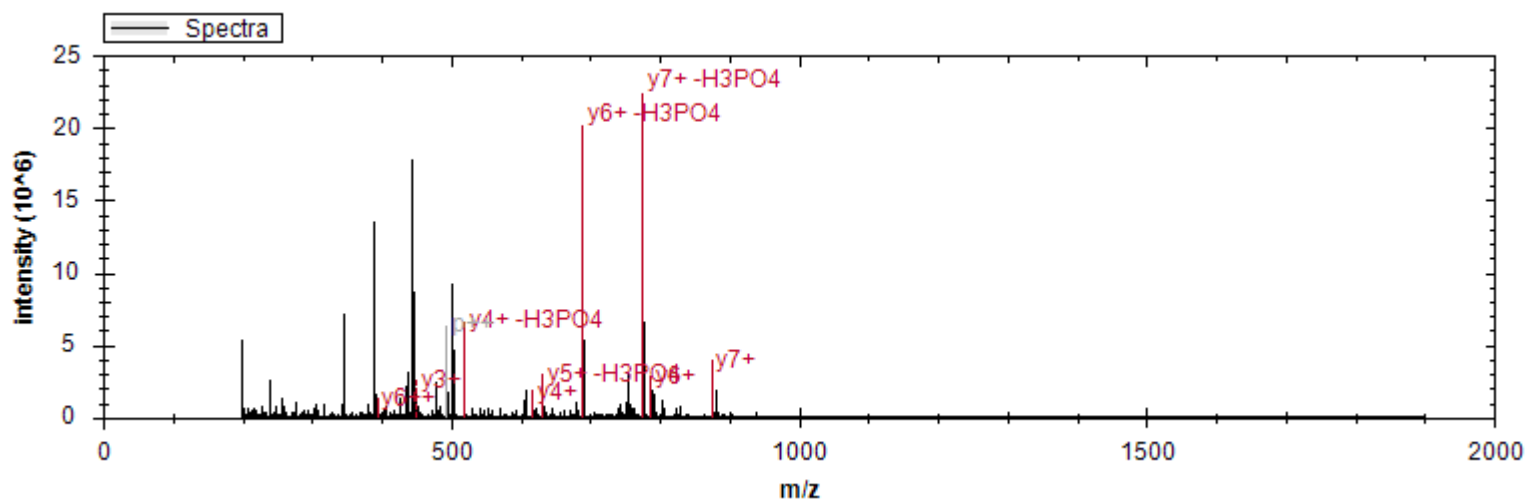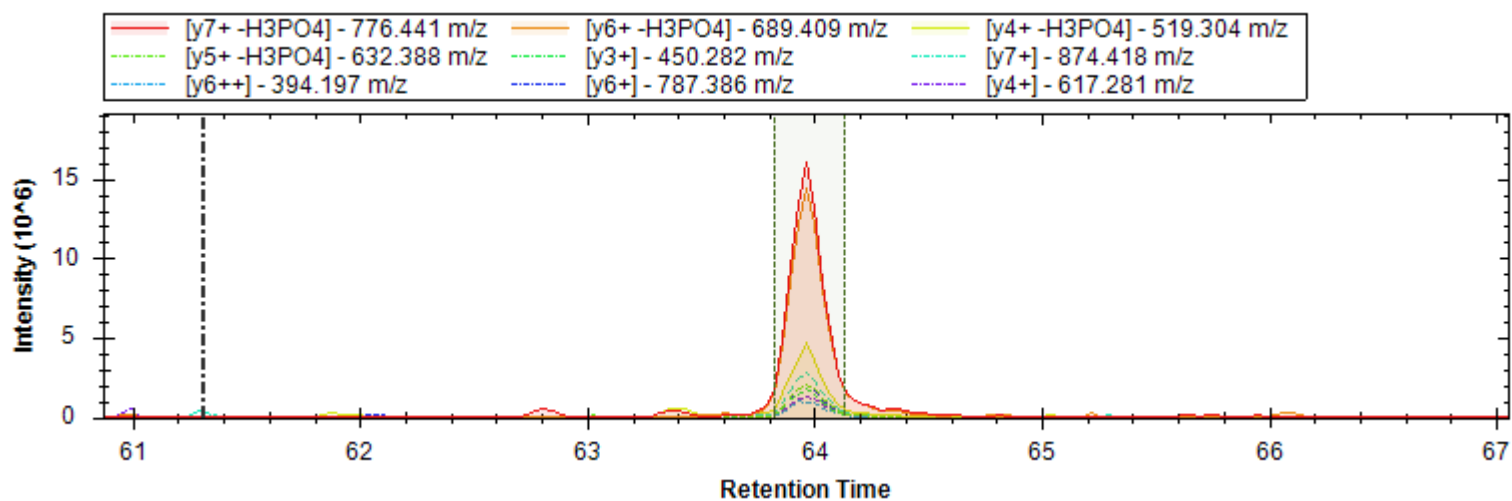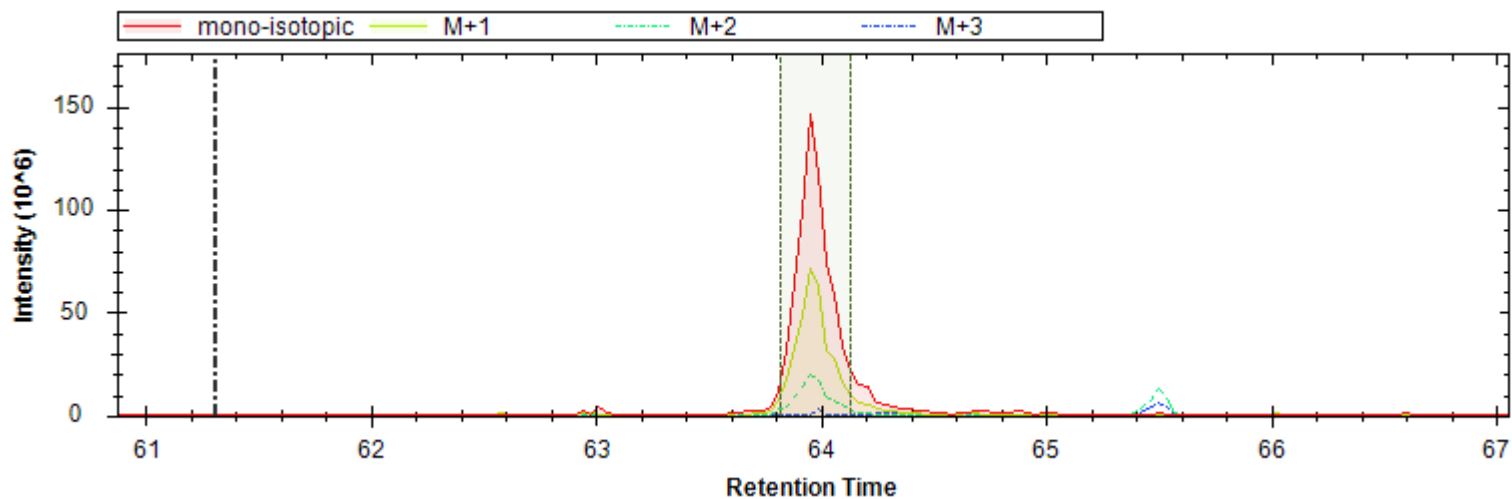

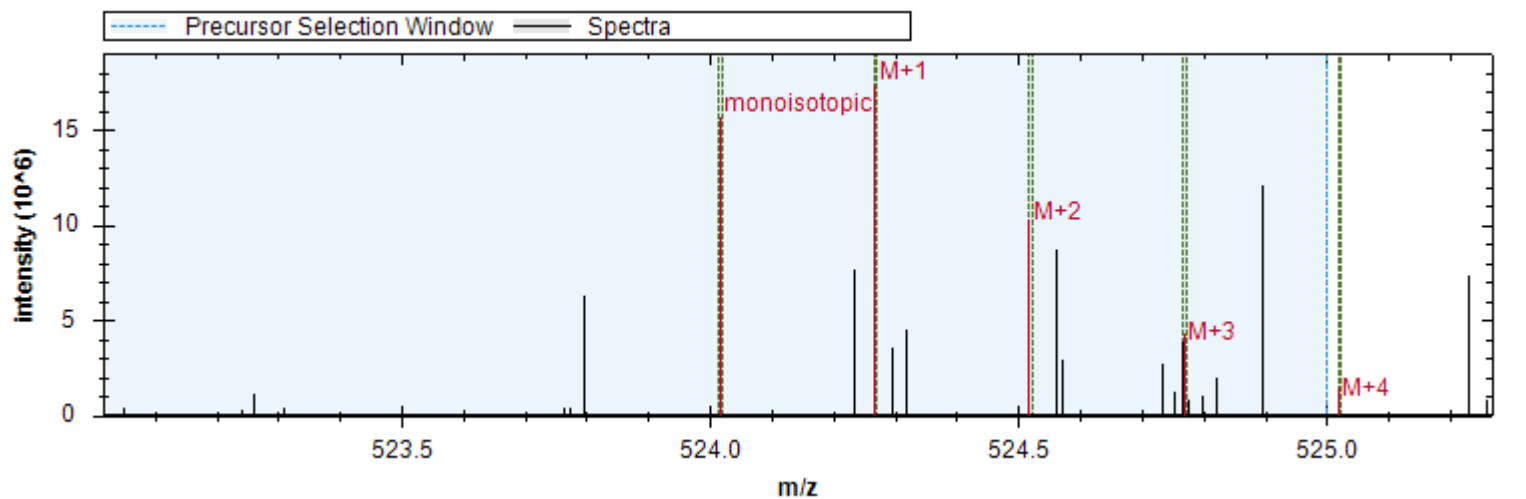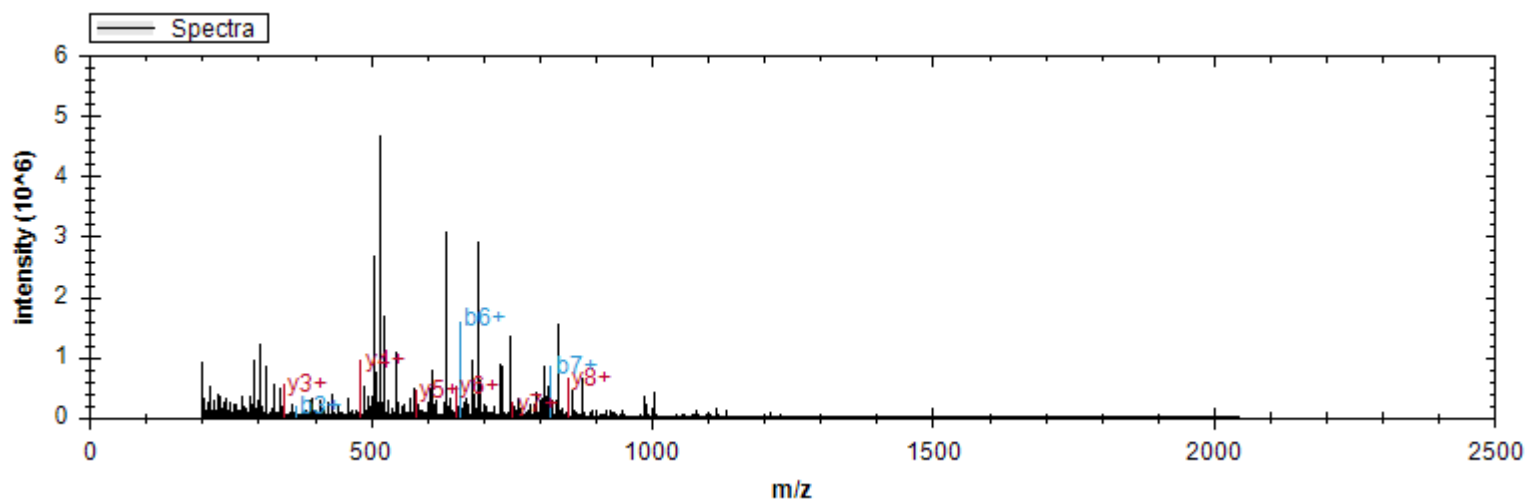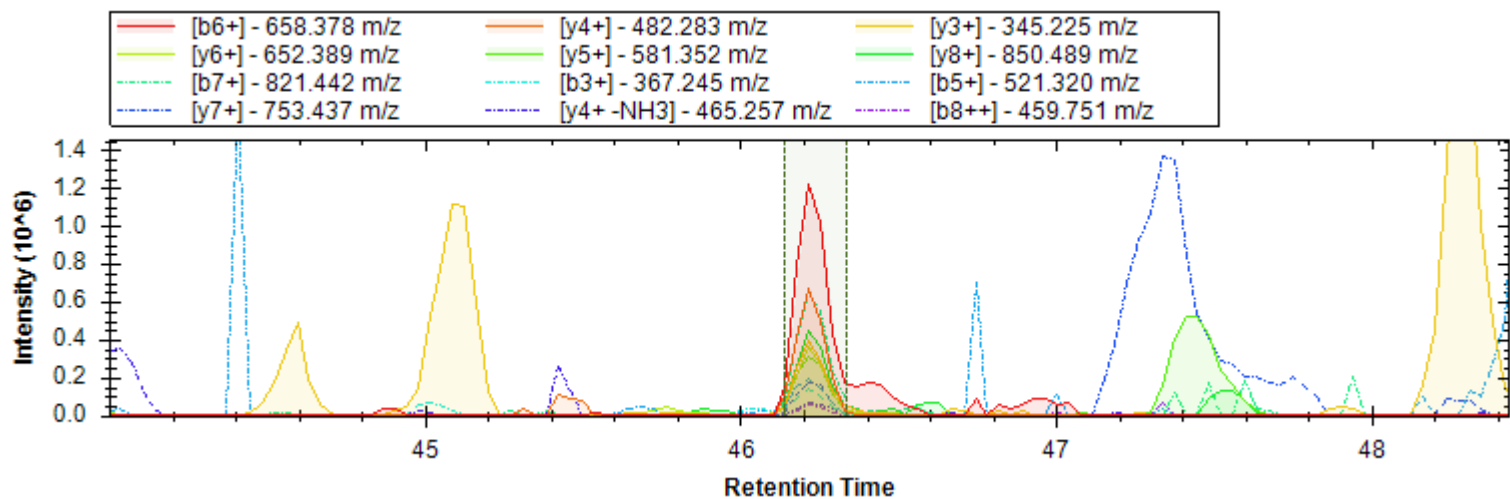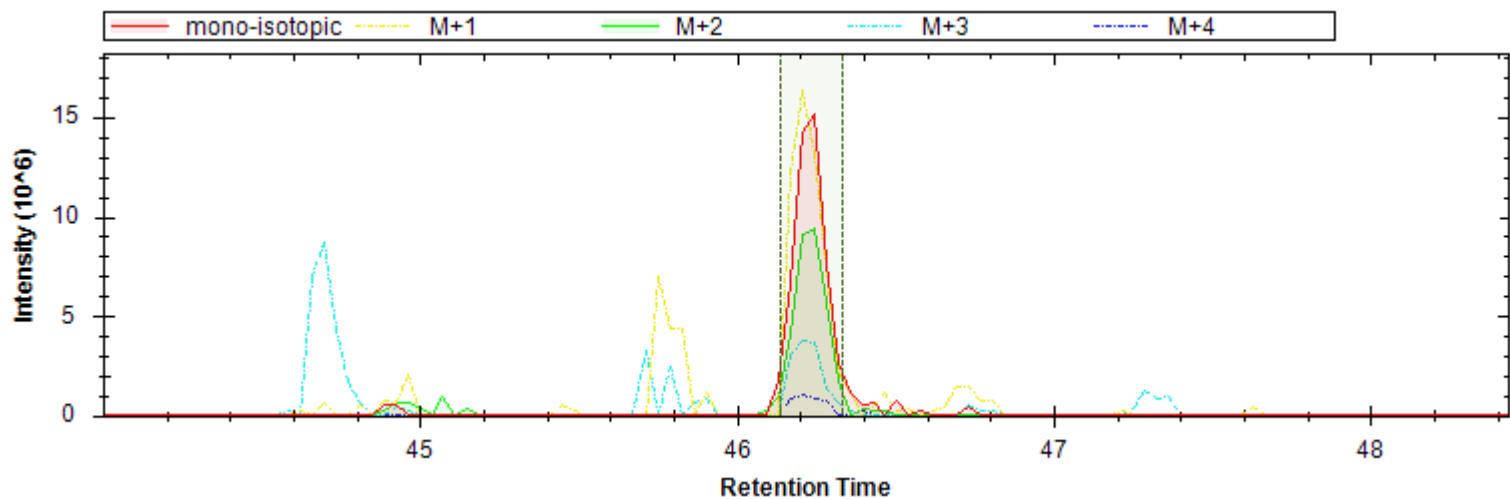

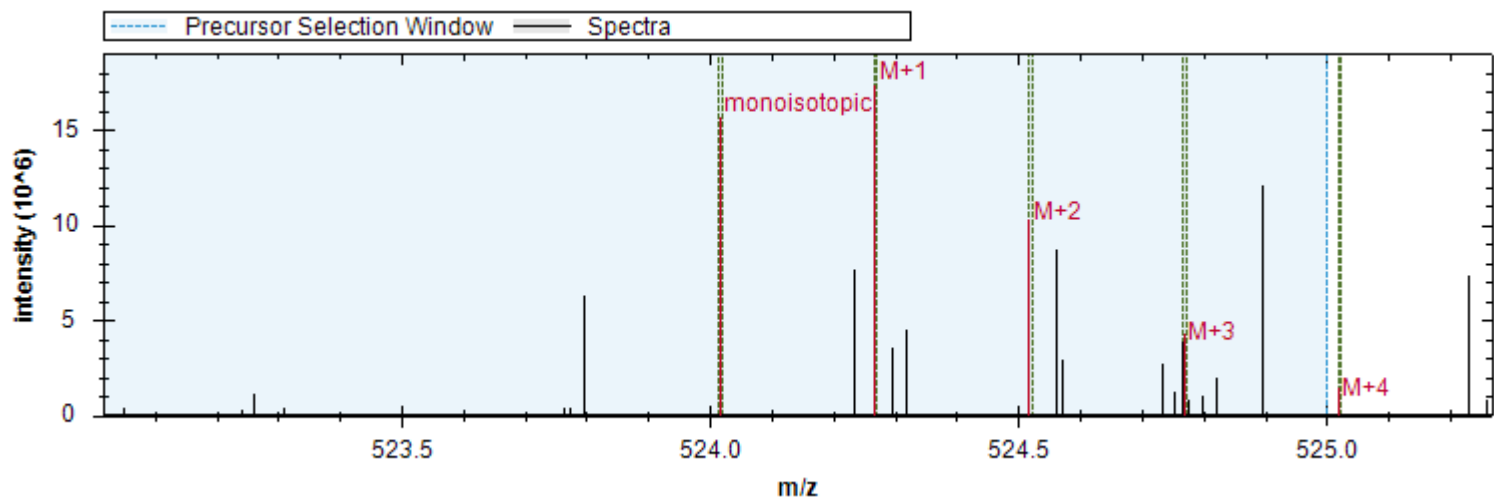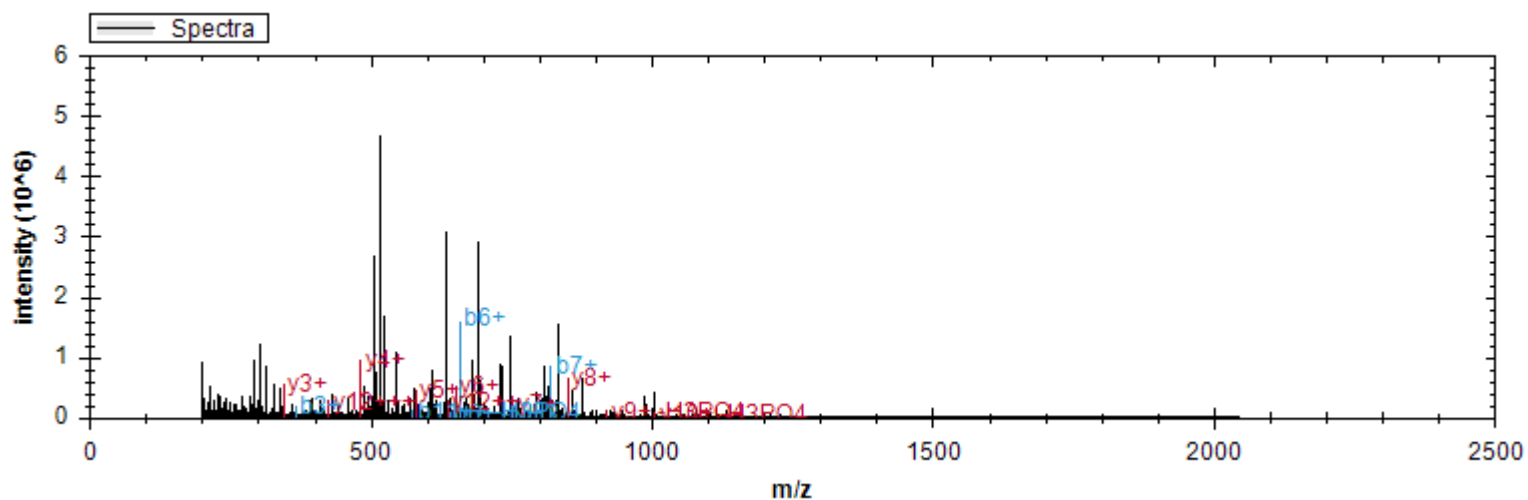

|                               |                            |                            |
|-------------------------------|----------------------------|----------------------------|
| [b6+] - 658.378 m/z           | [y4+] - 482.283 m/z        | [y3+] - 345.225 m/z        |
| [b7+] - 821.442 m/z           | [y8+] - 850.489 m/z        | [y6+] - 652.389 m/z        |
| [y5+] - 581.352 m/z           | [b5+] - 521.320 m/z        | [y12+++] - 424.875 m/z     |
| [y7+] - 753.437 m/z           | [b9+] - 989.532 m/z        | [b3+] - 367.245 m/z        |
| [b8+++] - 459.751 m/z         | [y11+ -H2O] - 1255.346 m/z | [b6+ -NH3] - 641.352 m/z   |
| [b11+++ -H3PO4] - 573.296 m/z | [y12+++] - 636.809 m/z     | [y9+ -H3PO4] - 919.511 m/z |
| [y10+ -H3PO4] - 1006.543 m/z  | [y4+ -NH3] - 465.257 m/z   |                            |

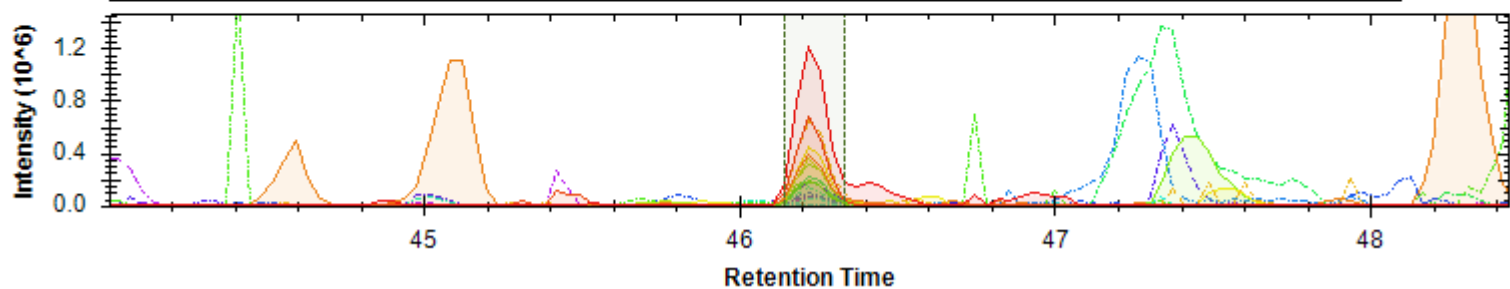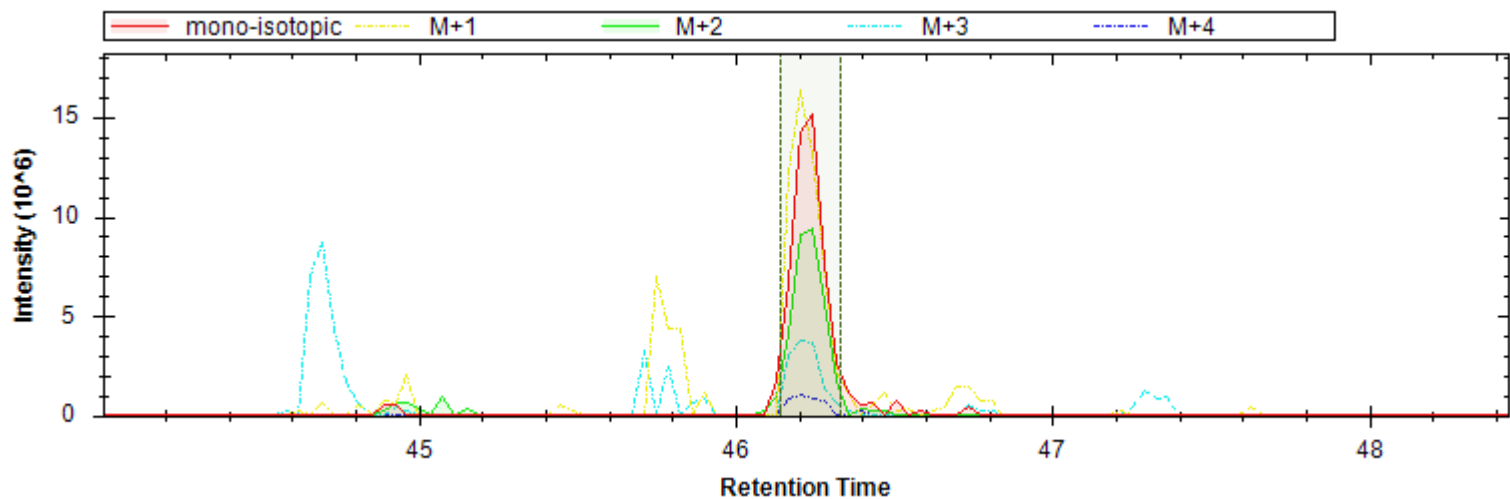



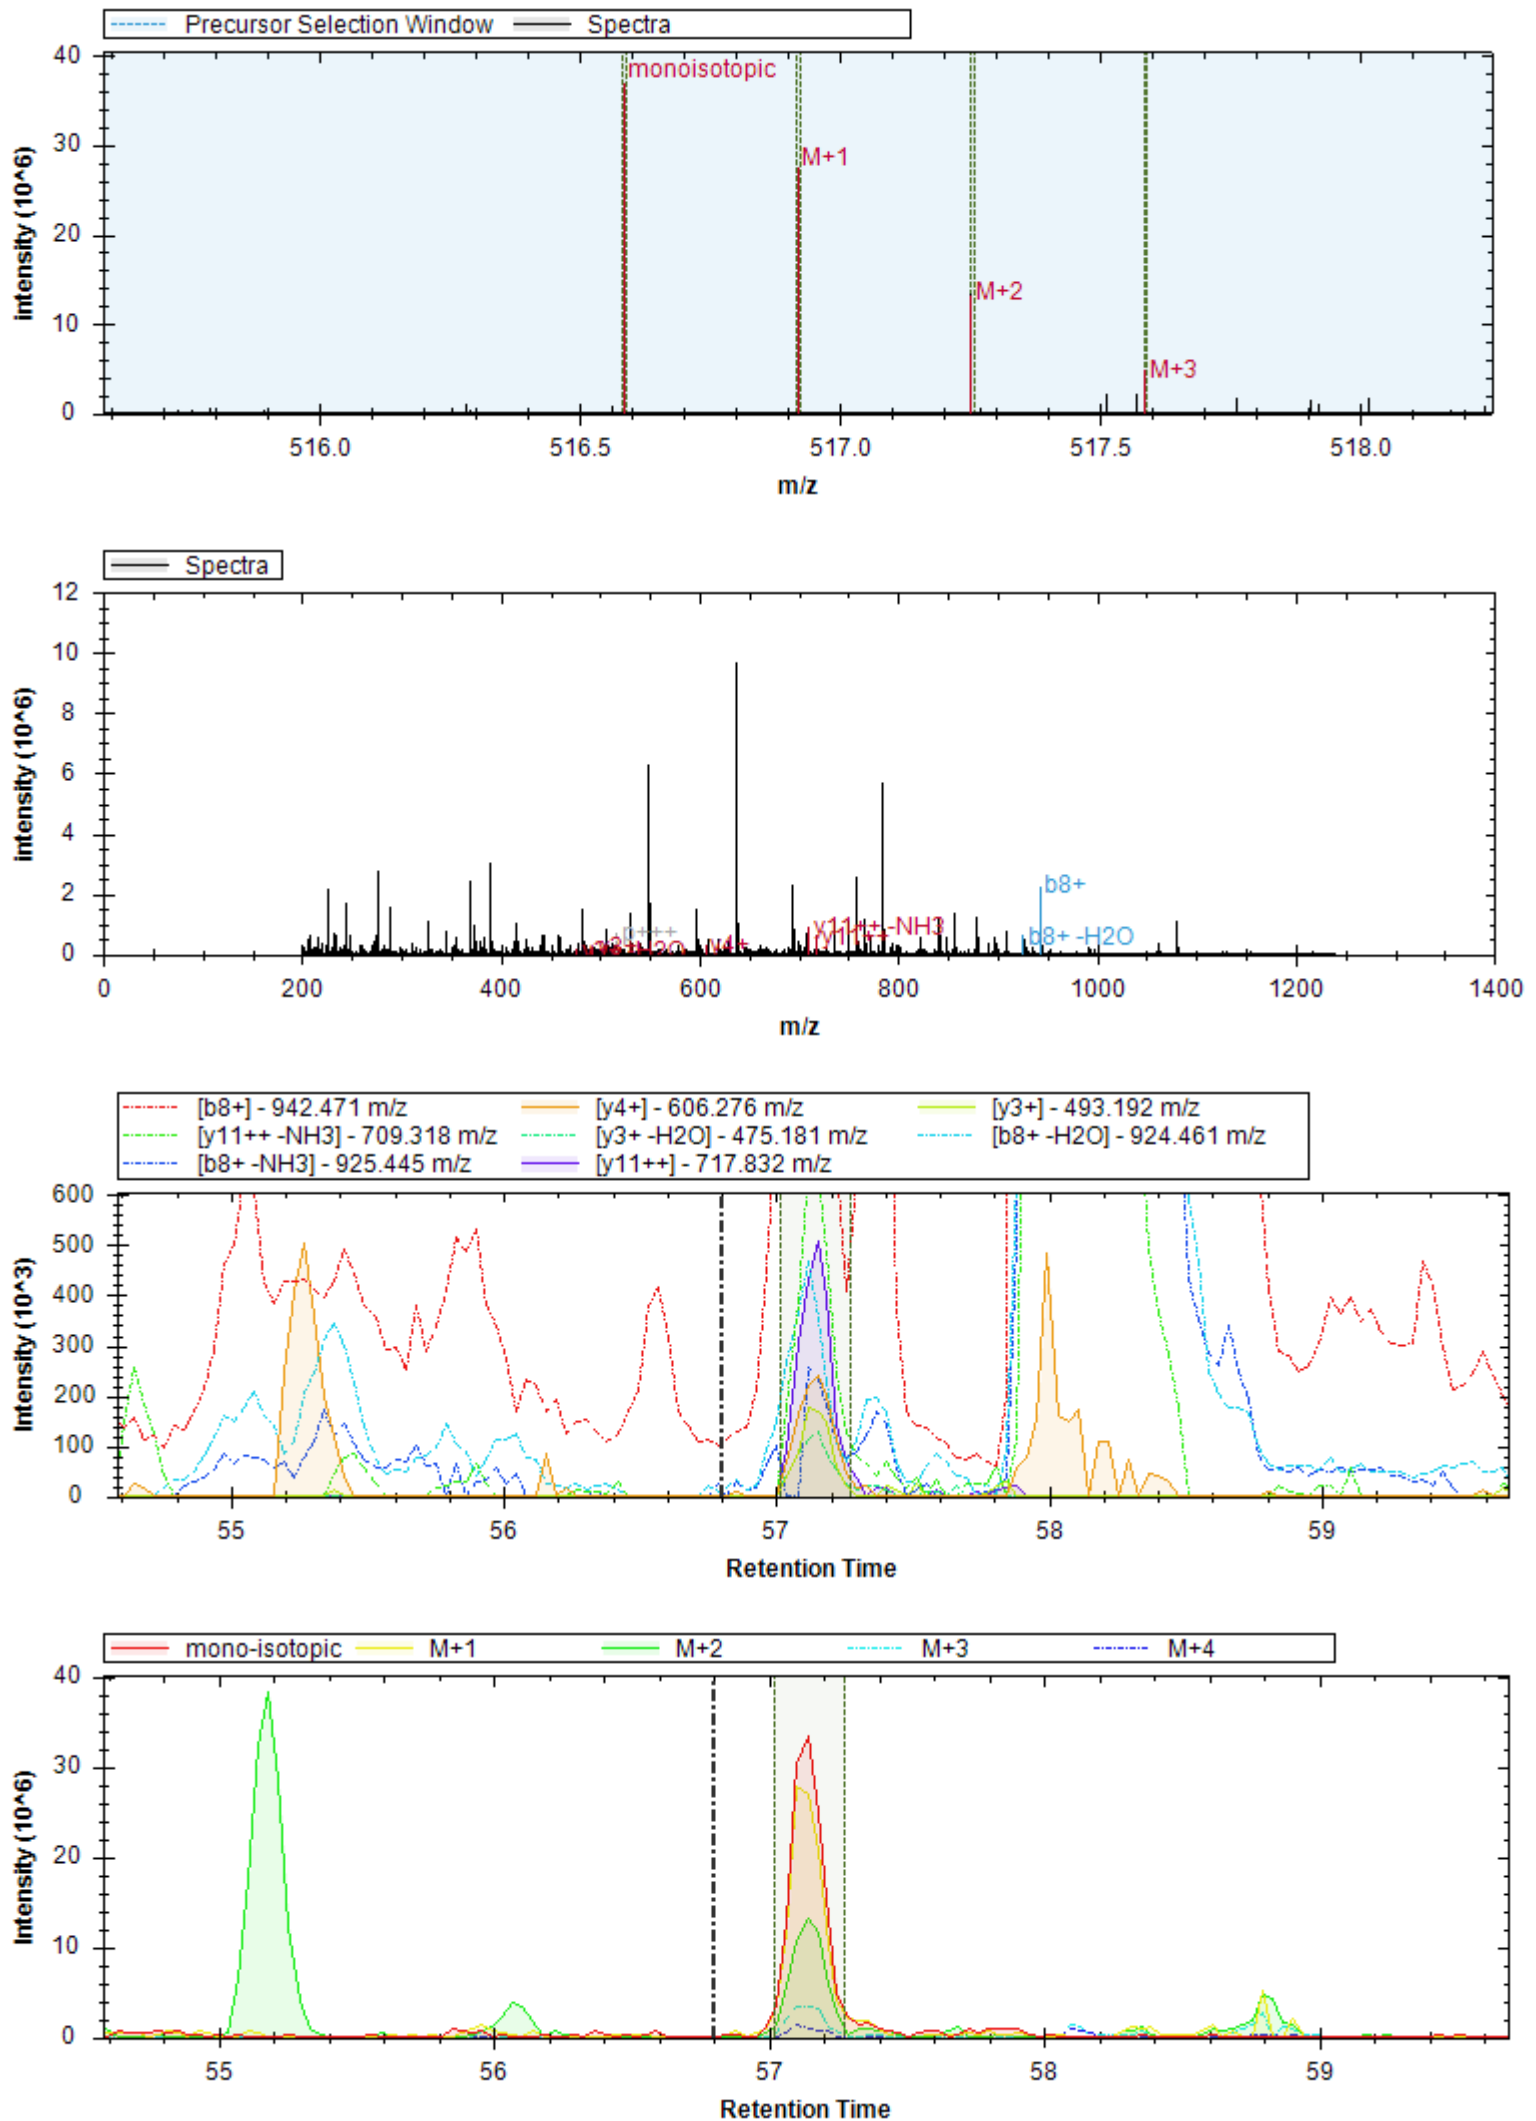

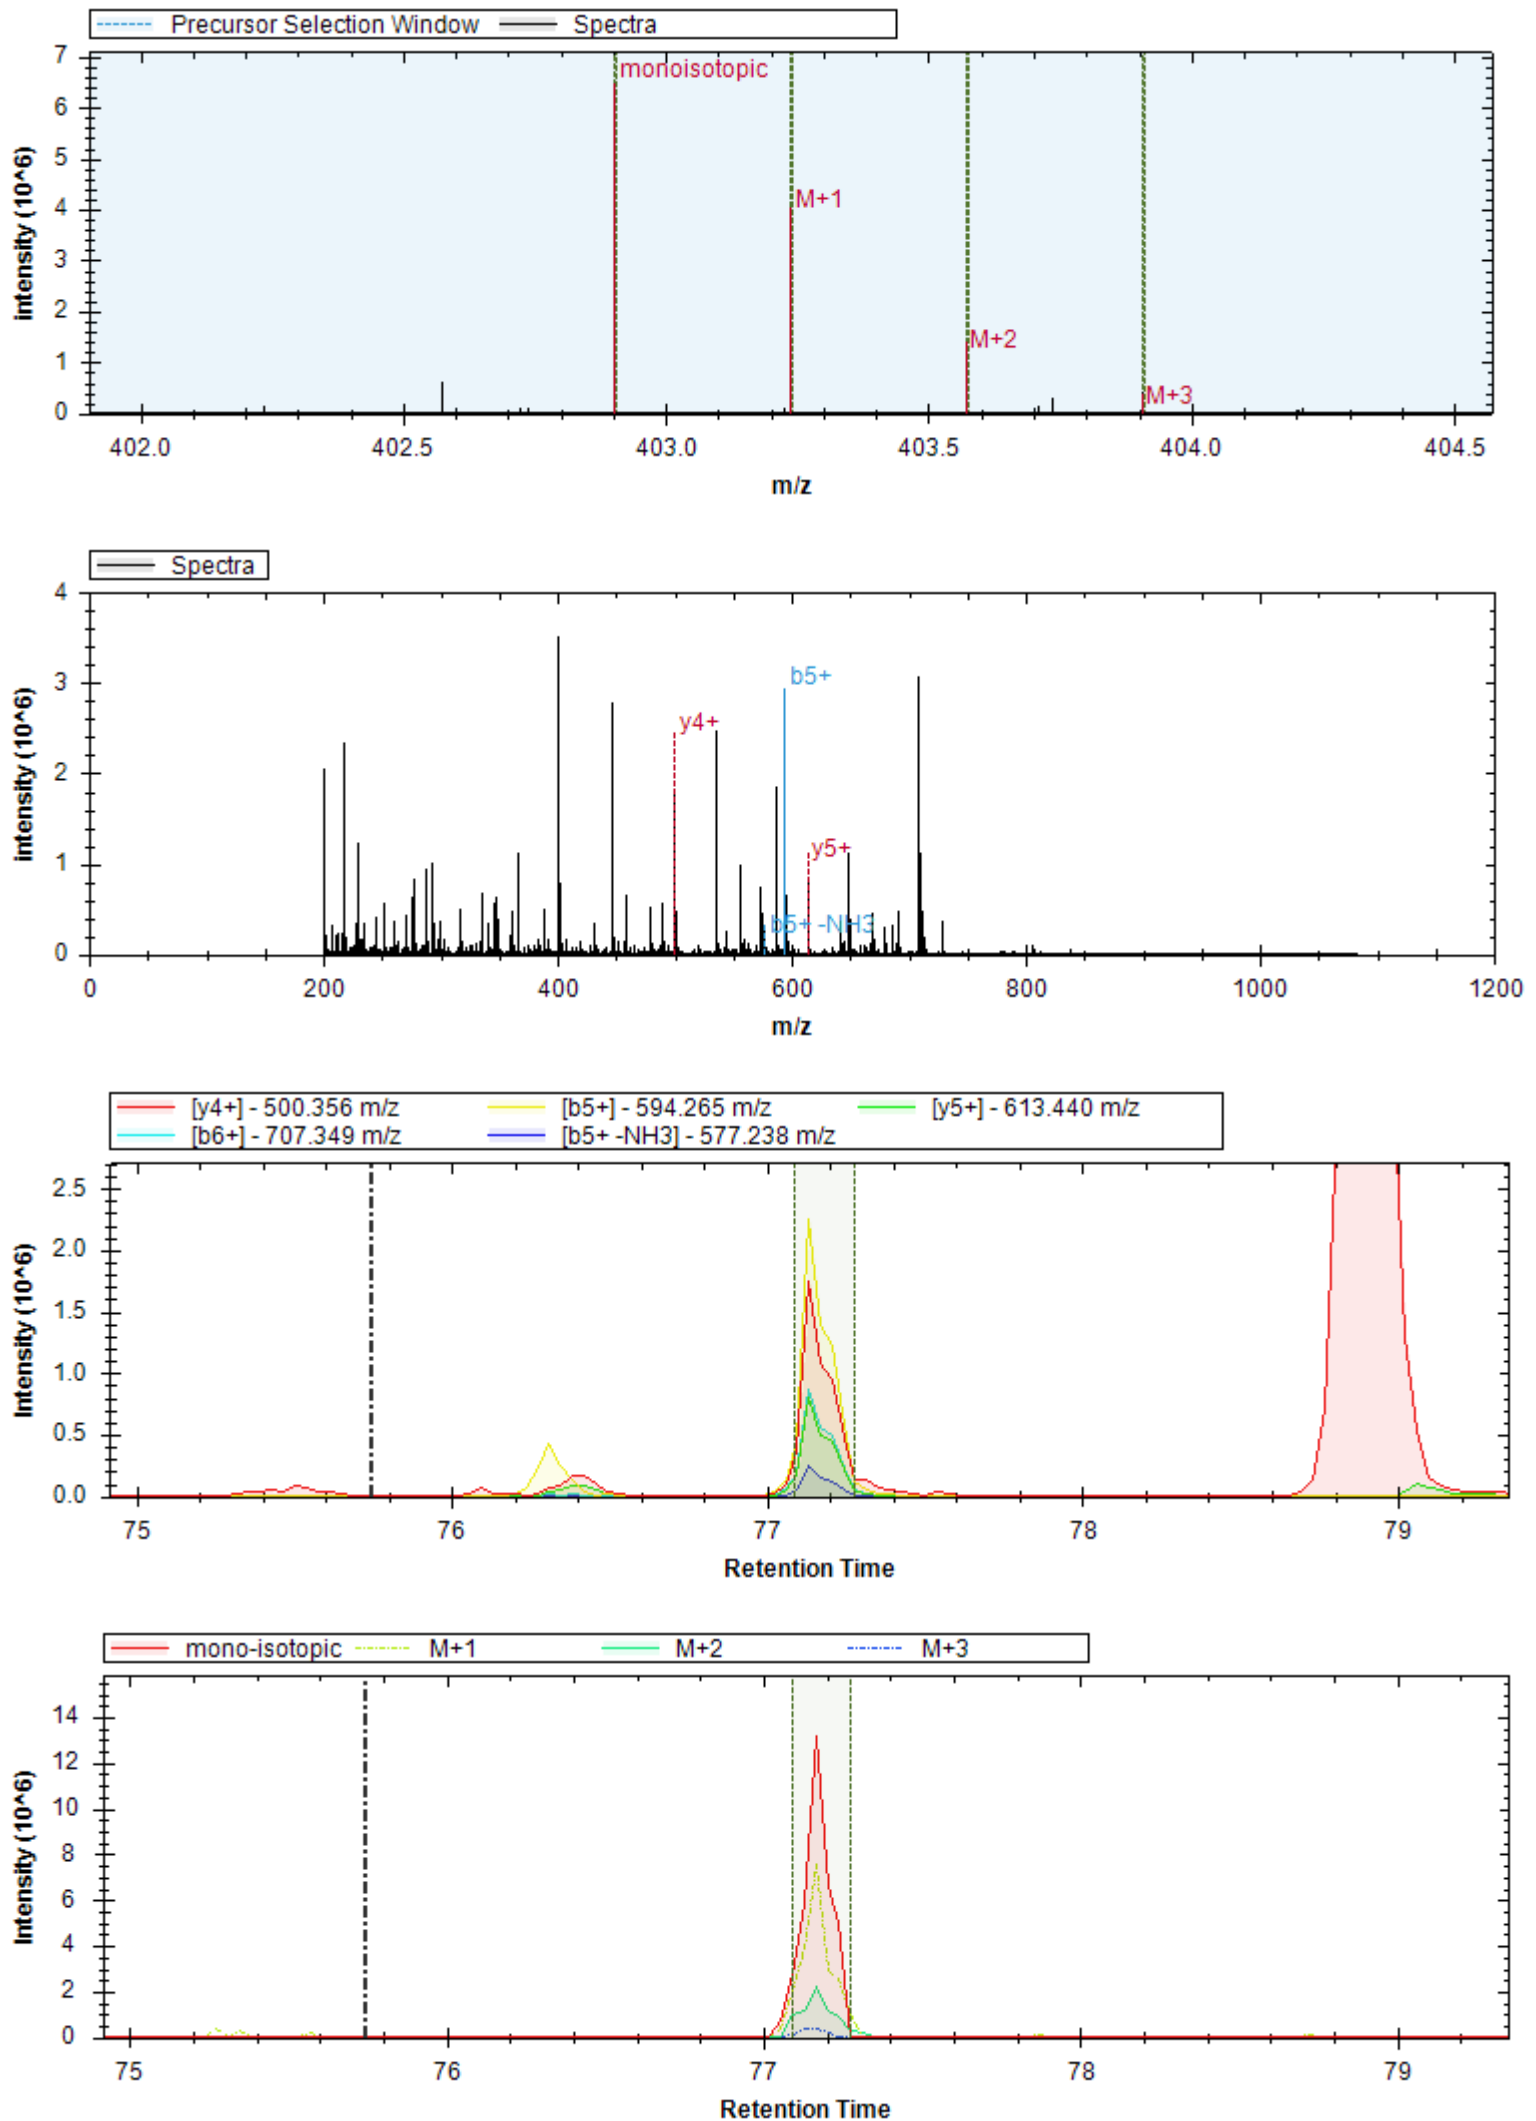

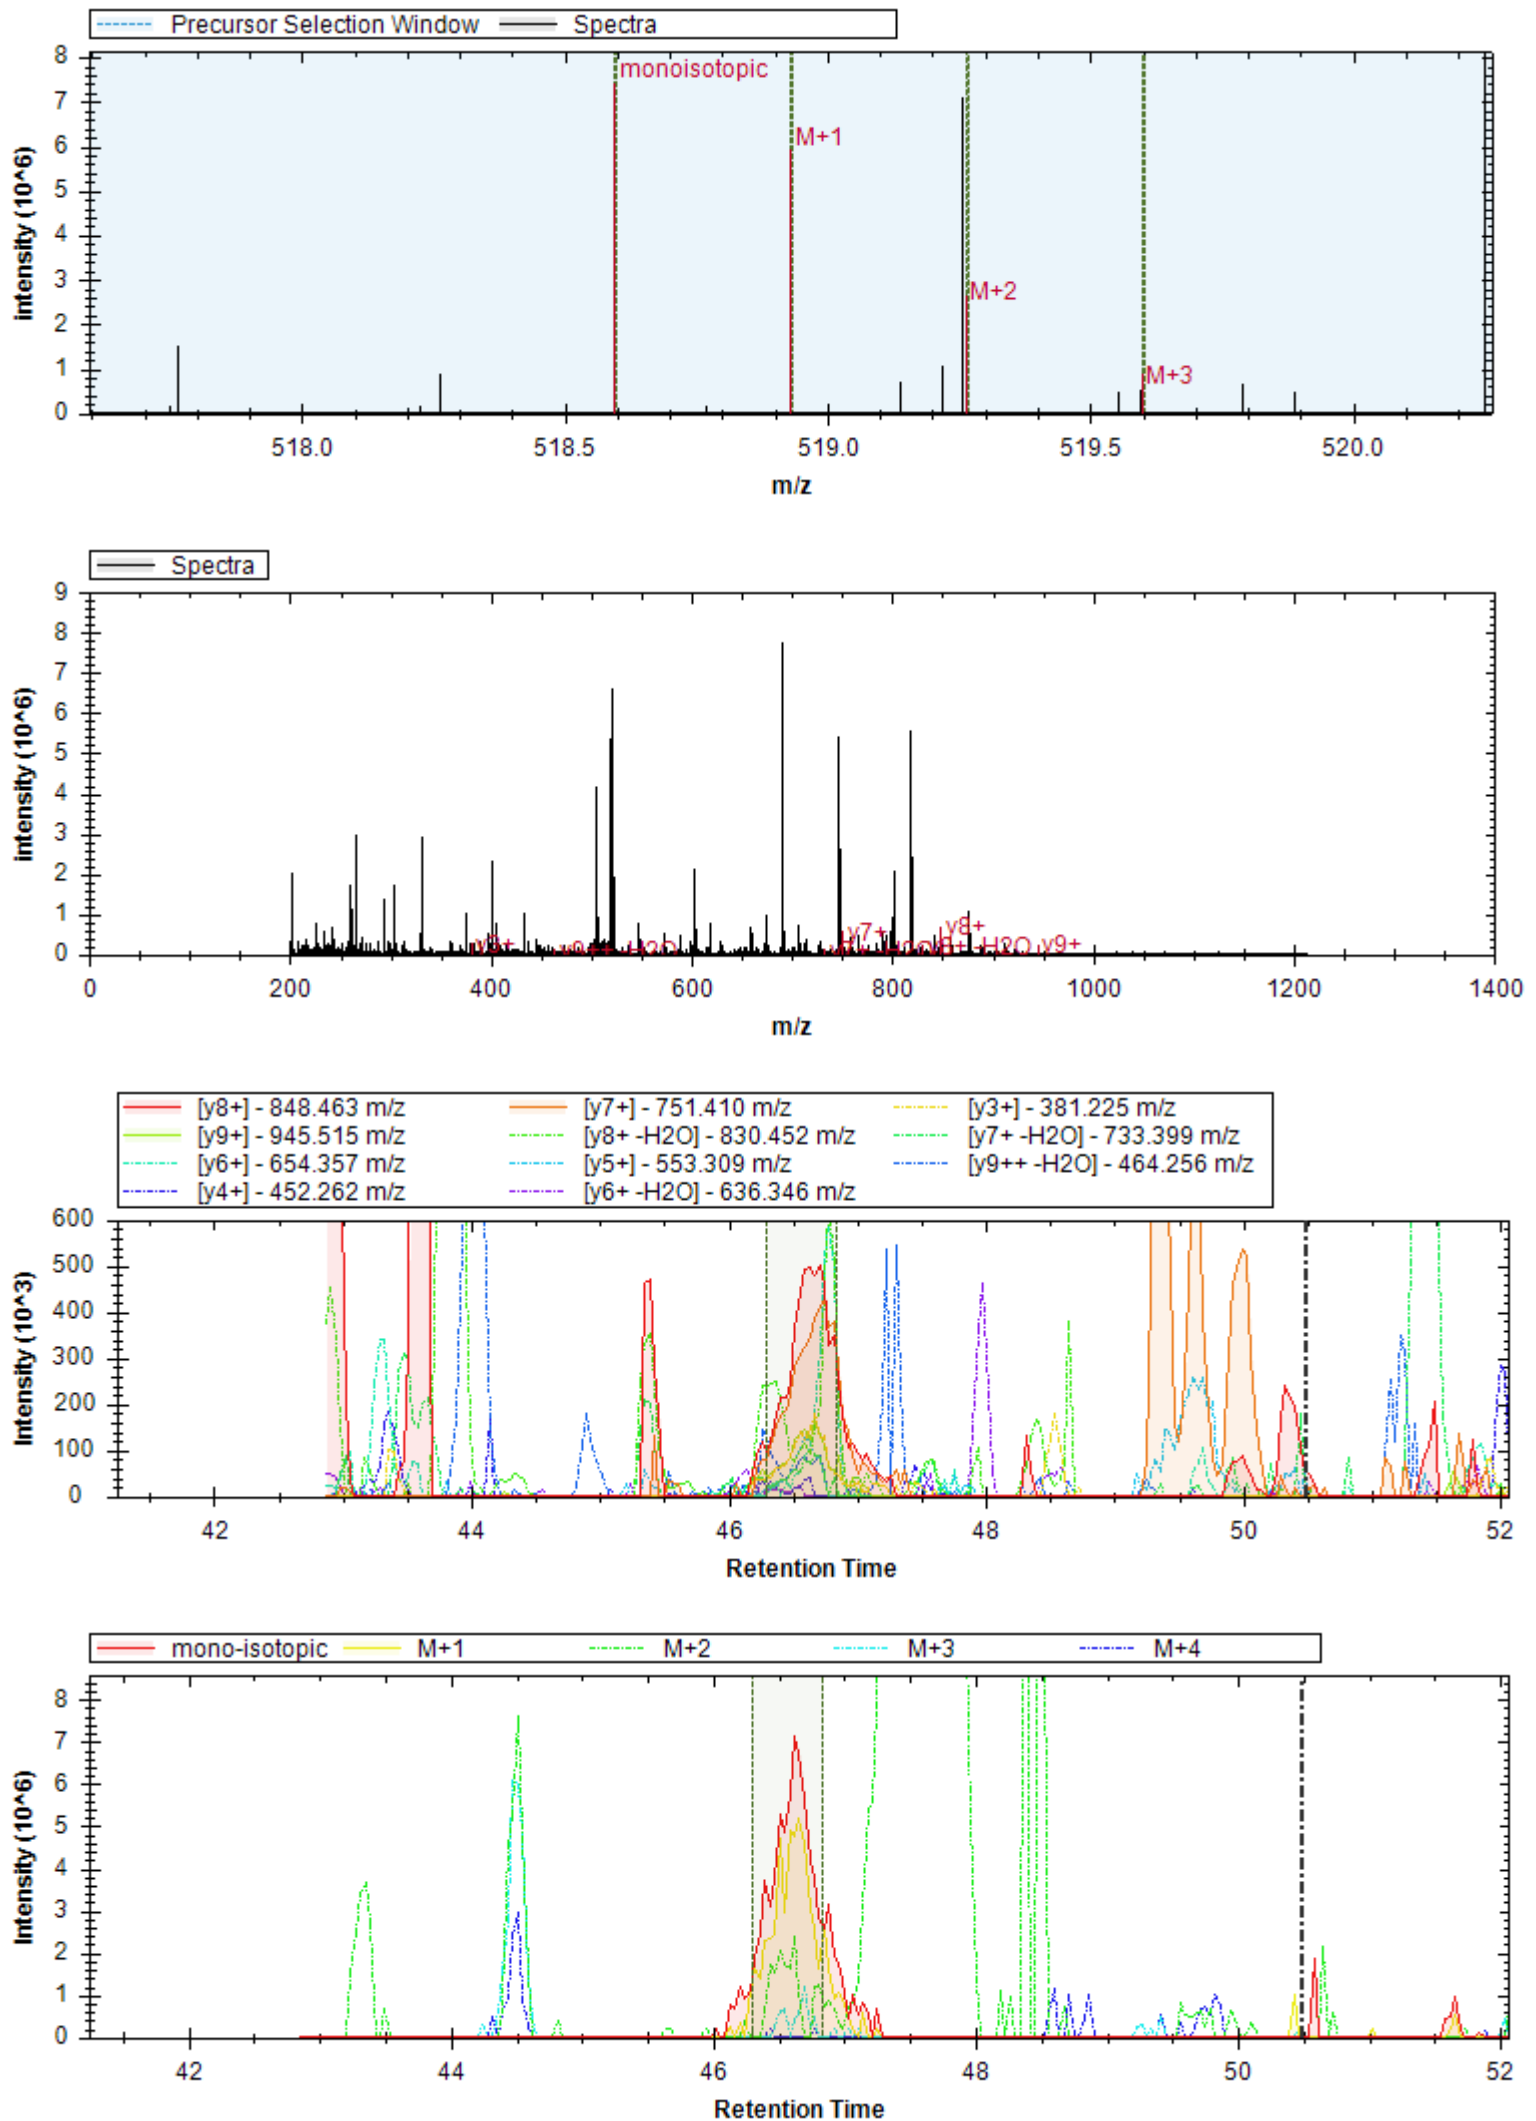

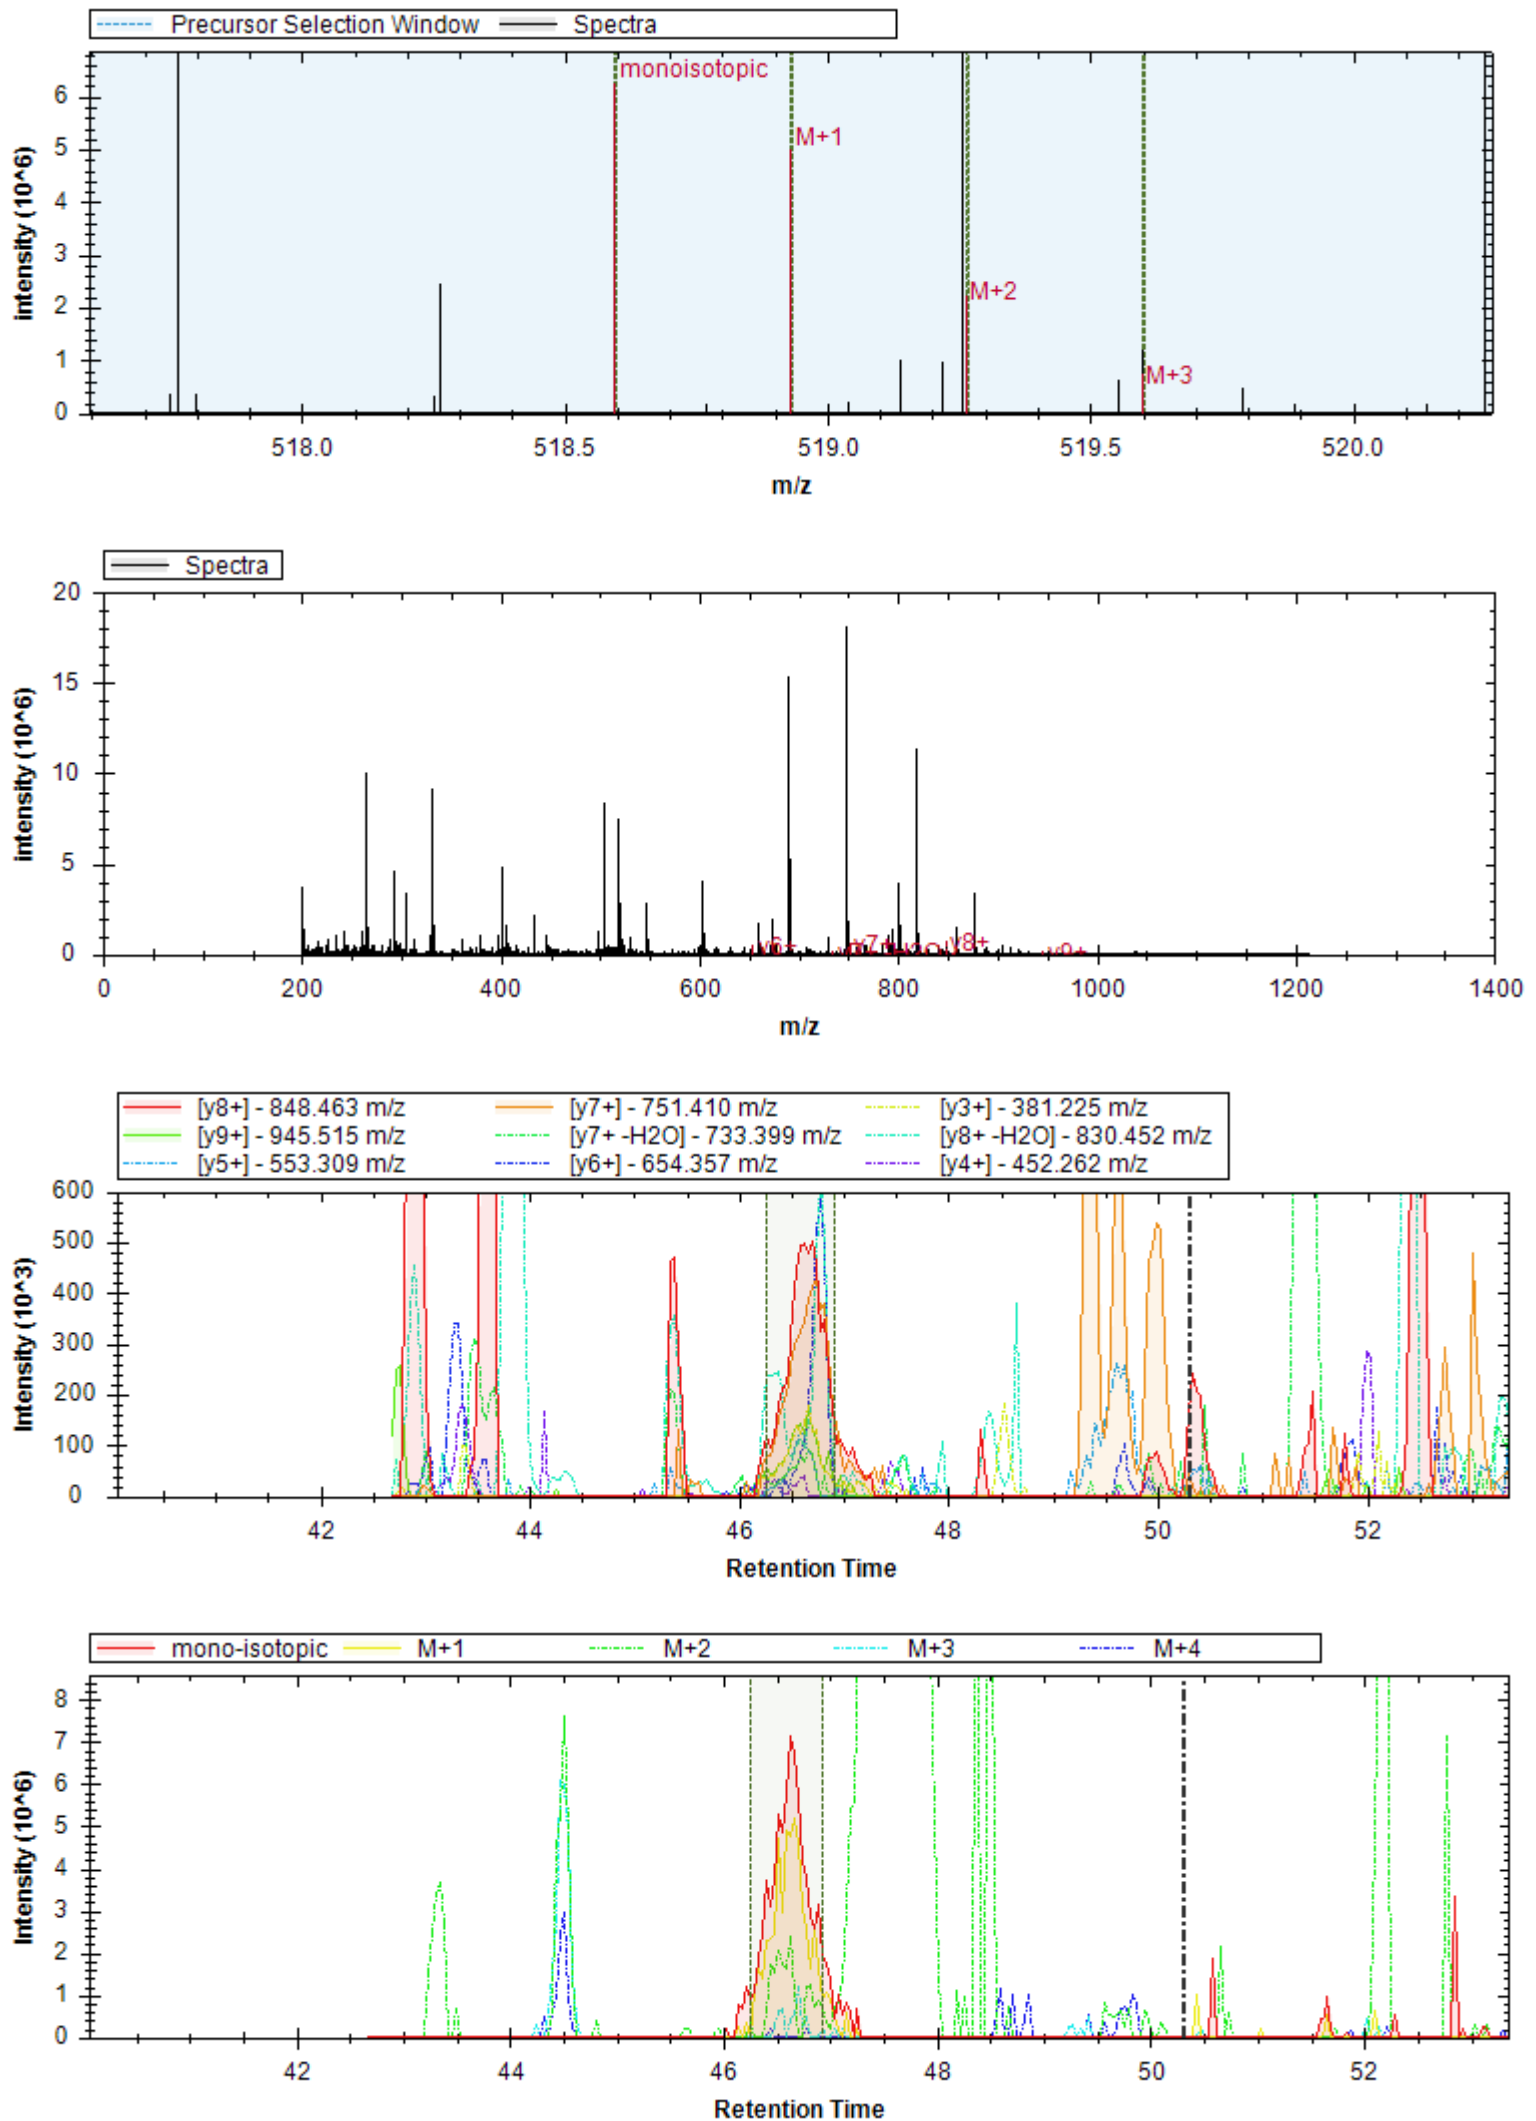

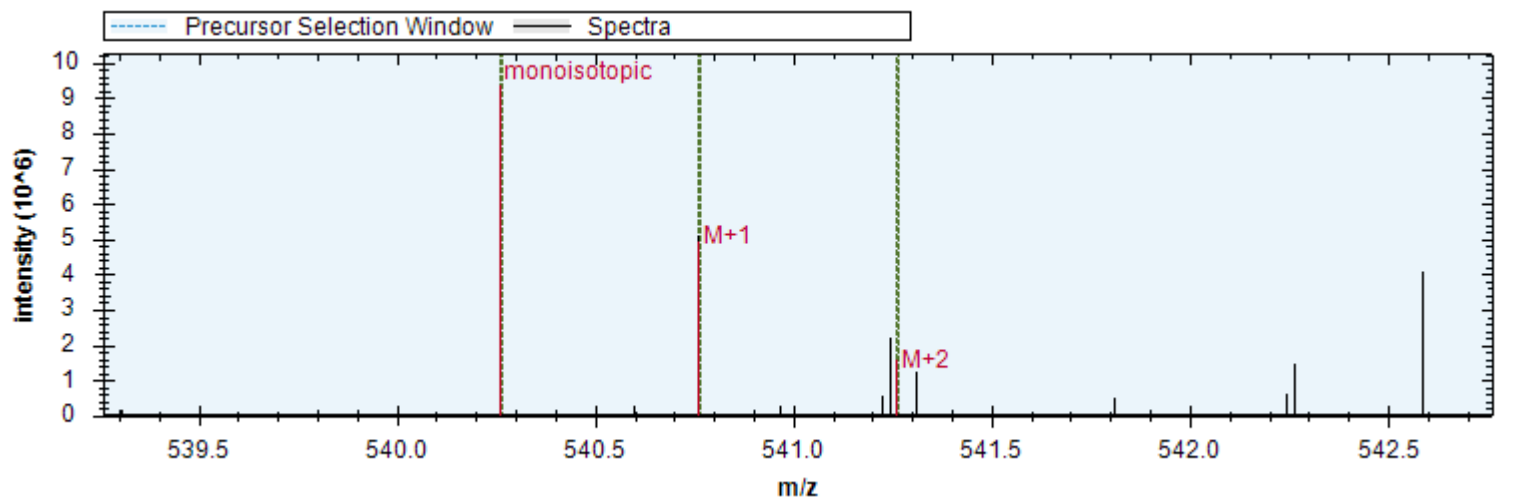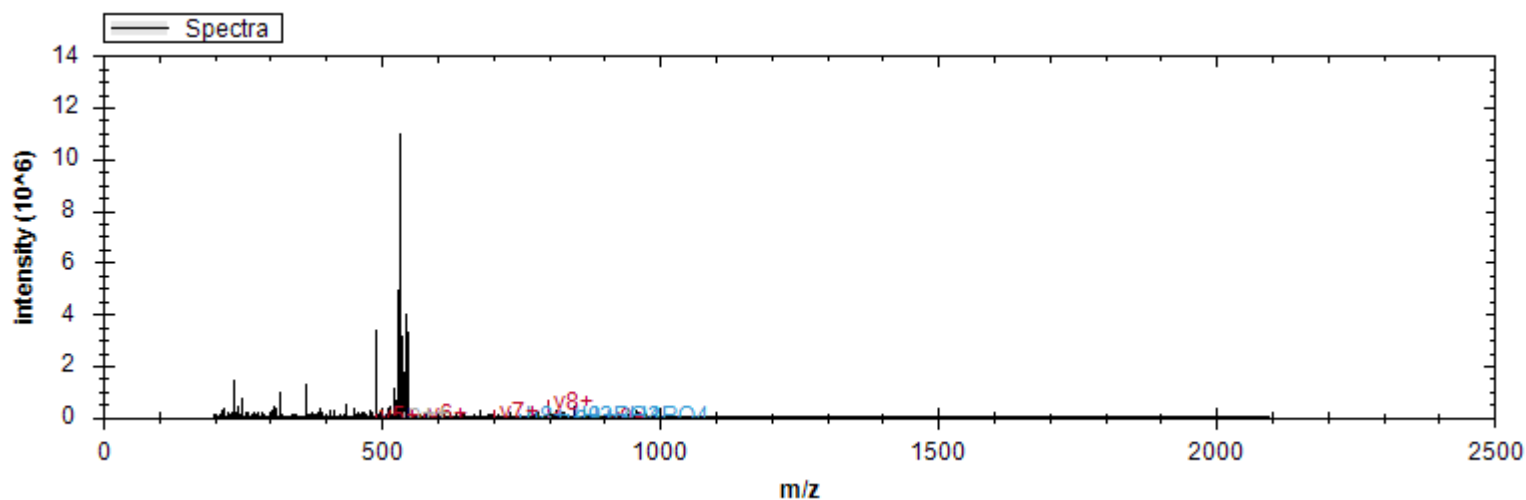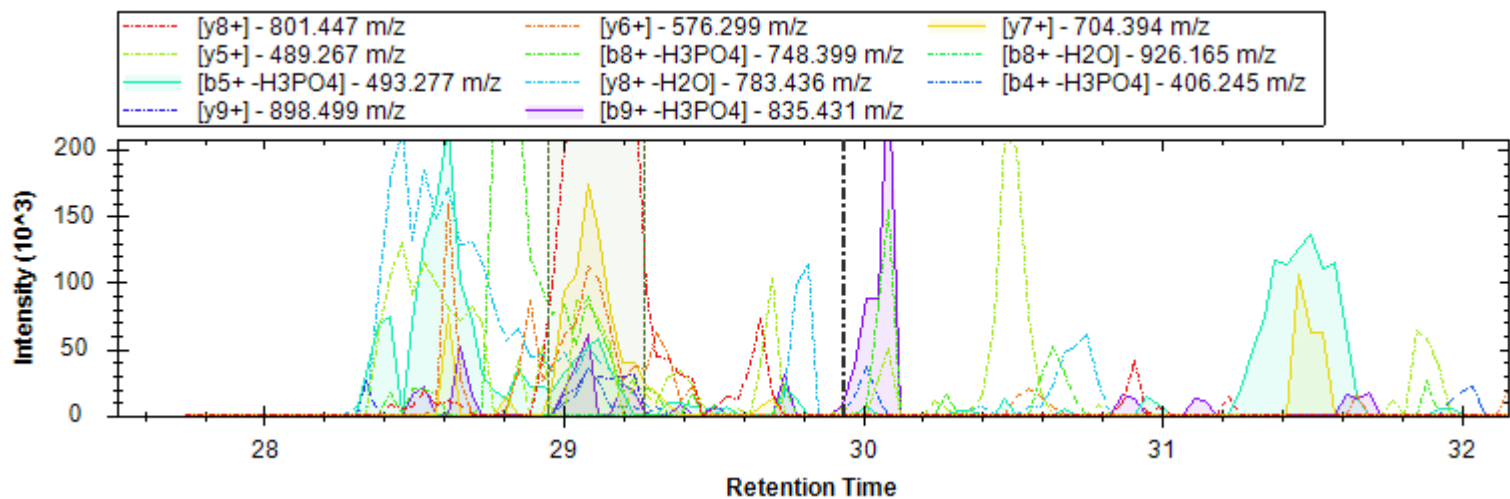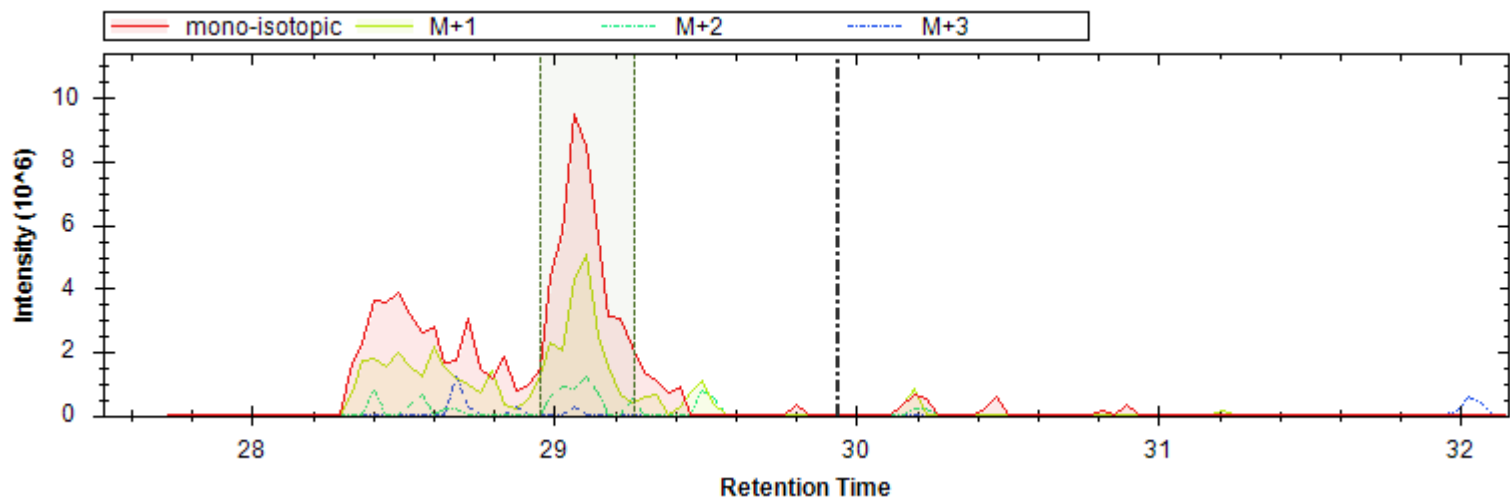

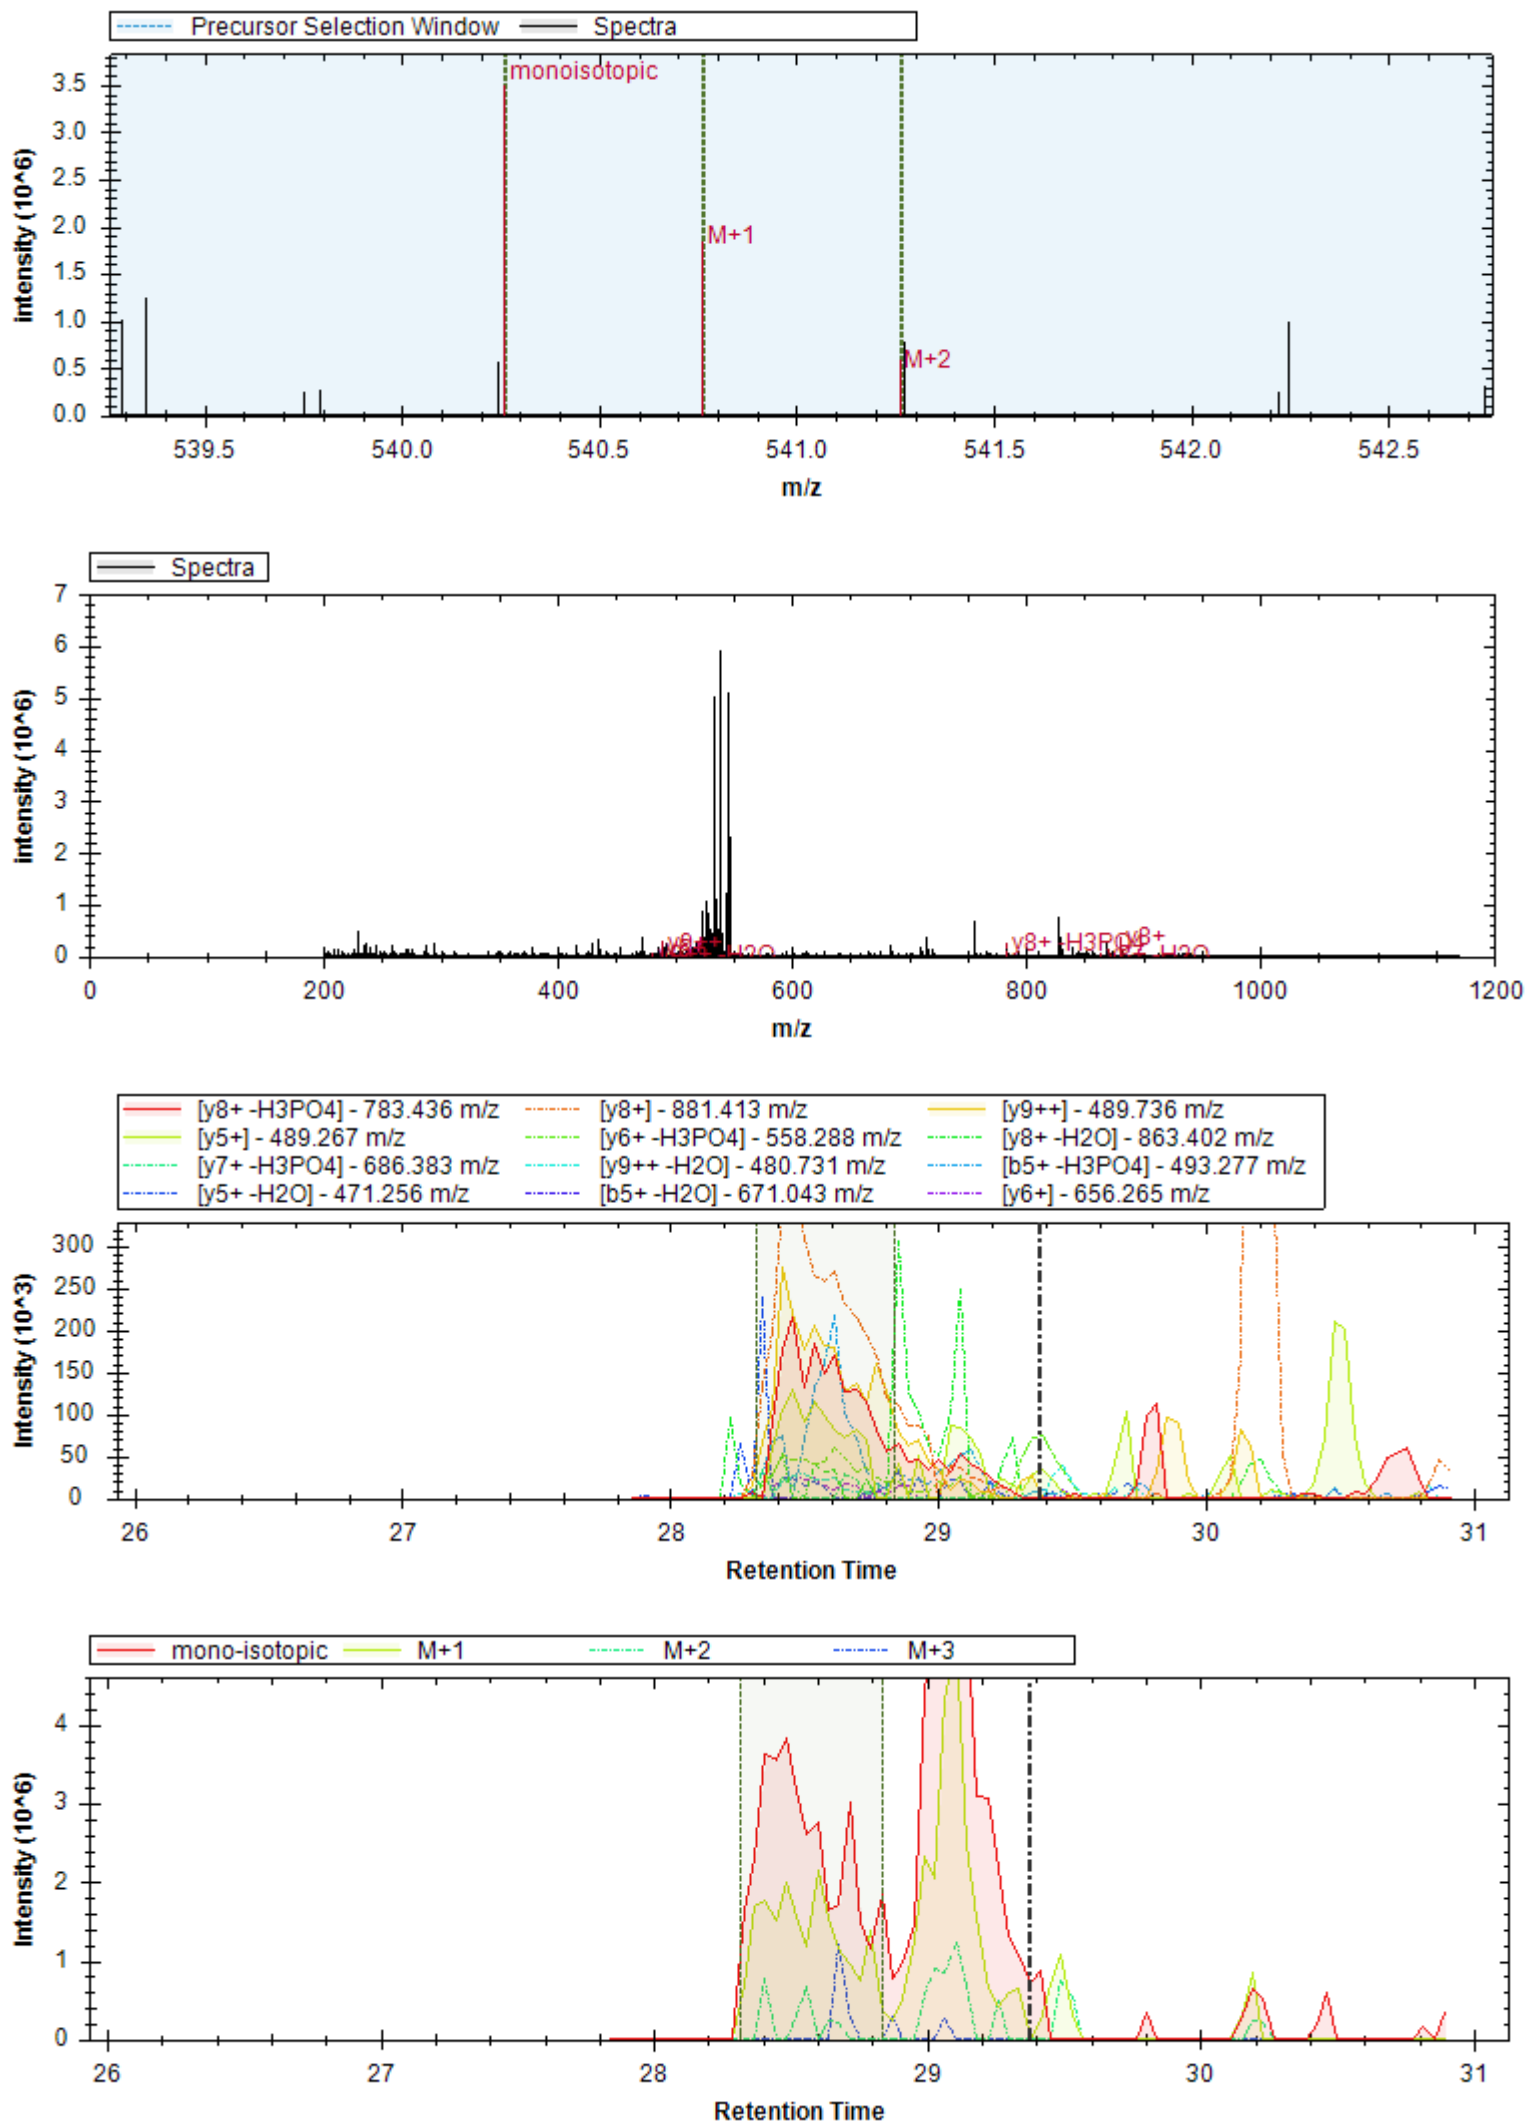

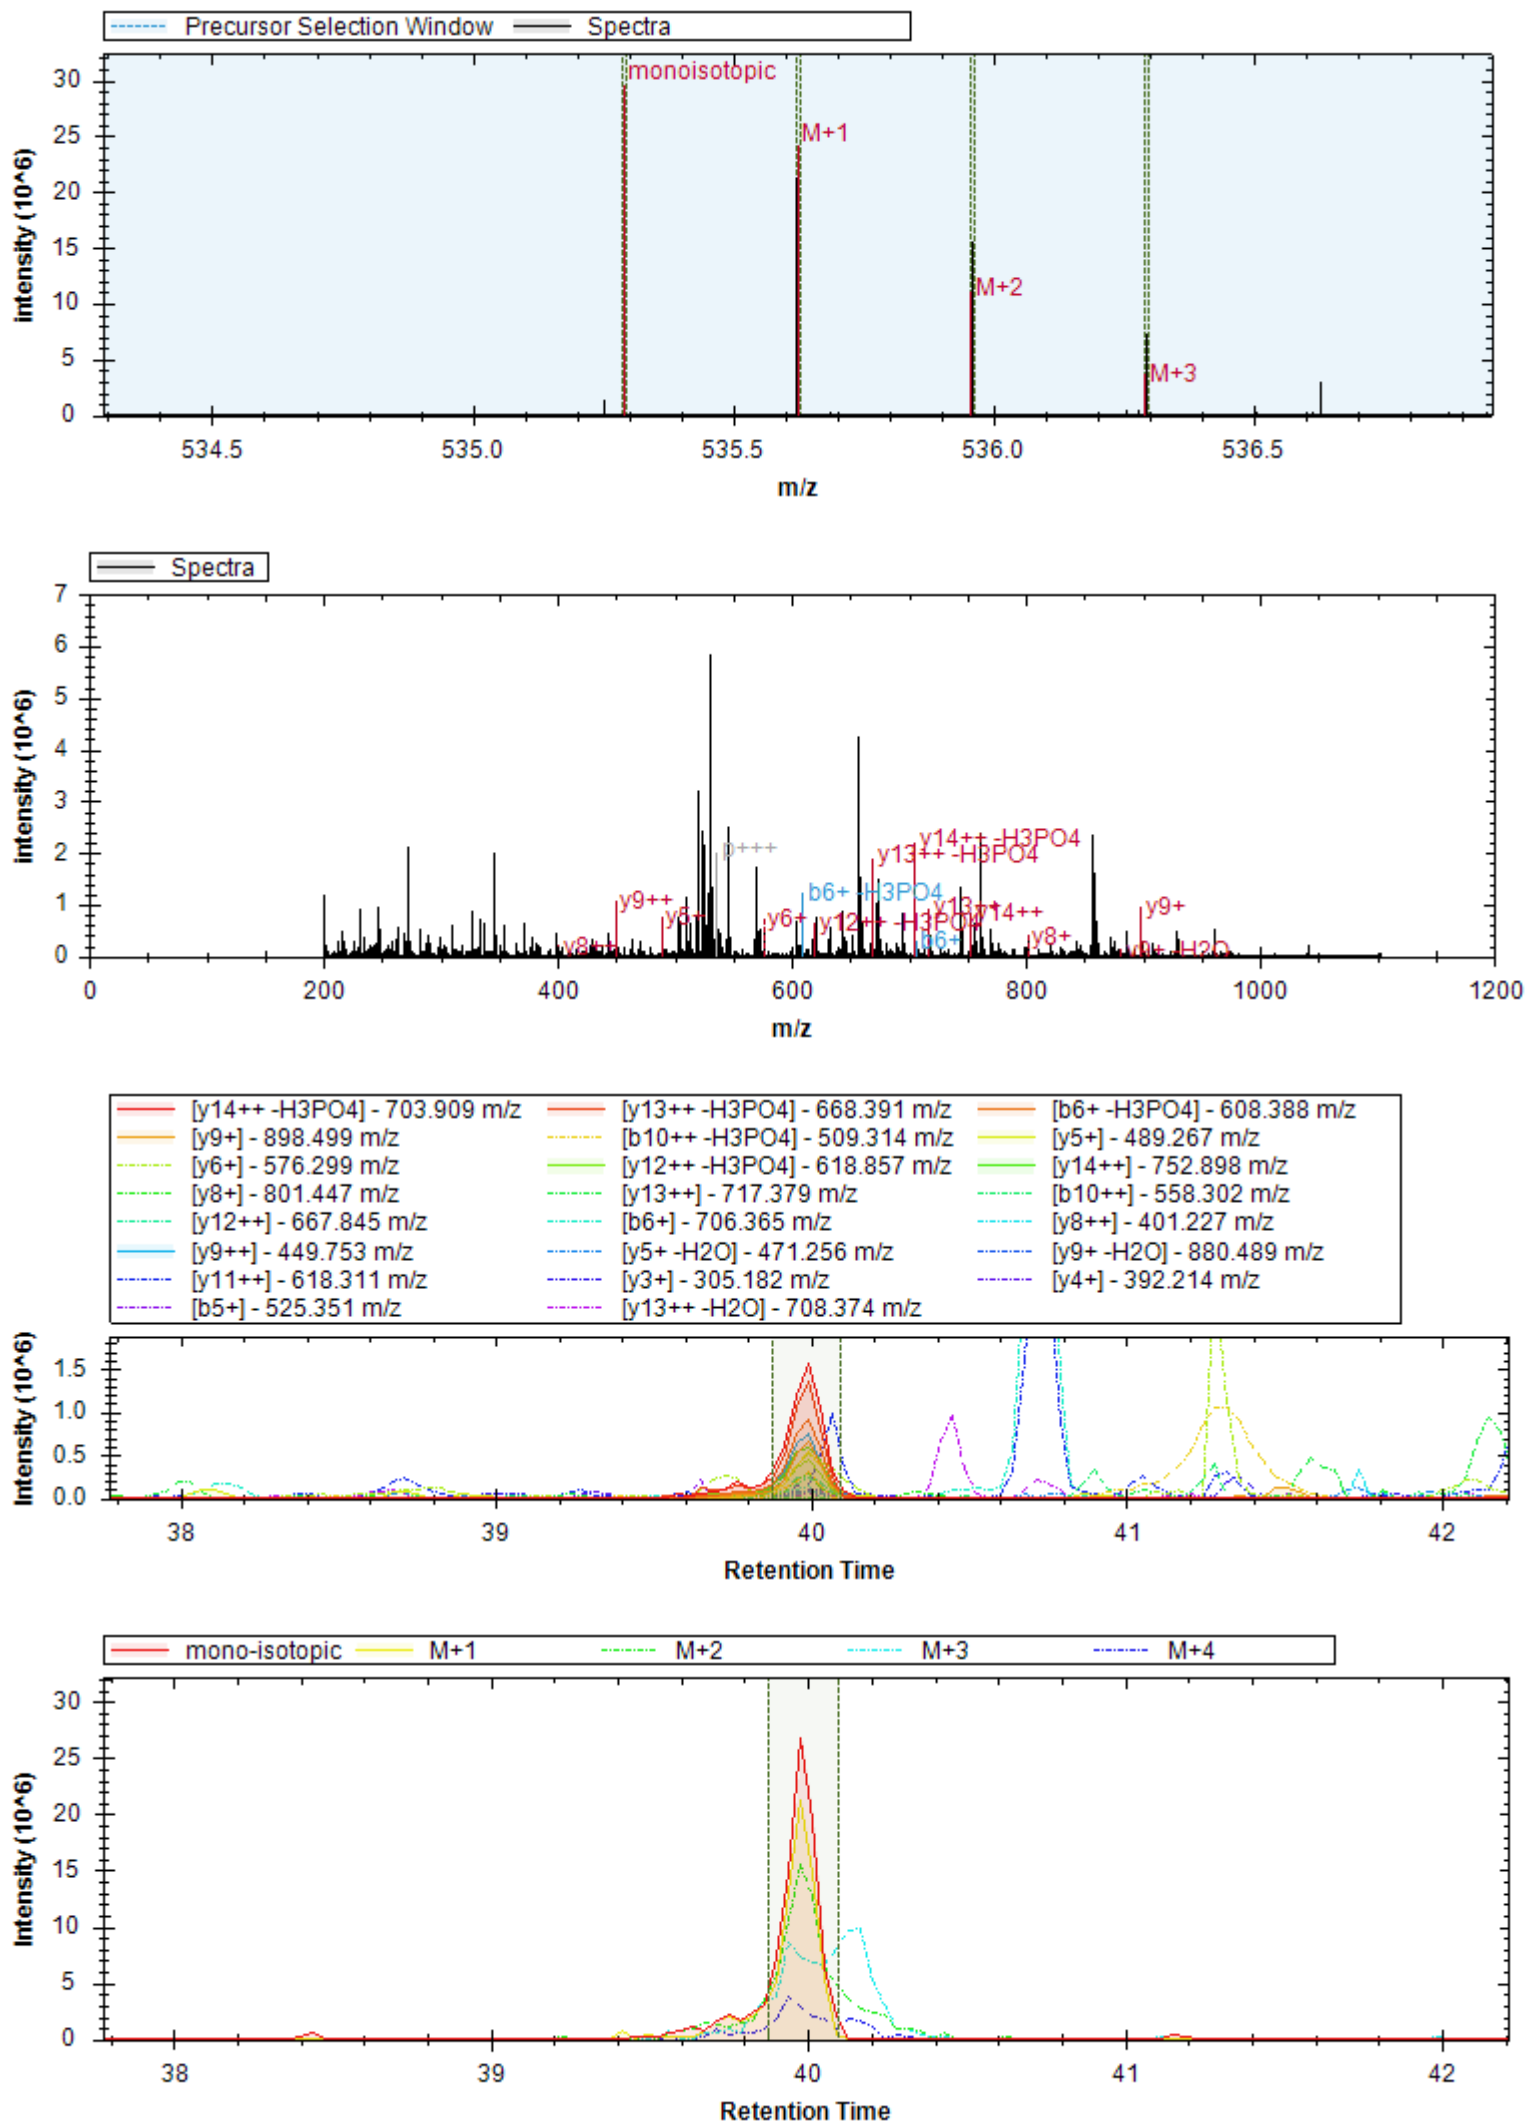

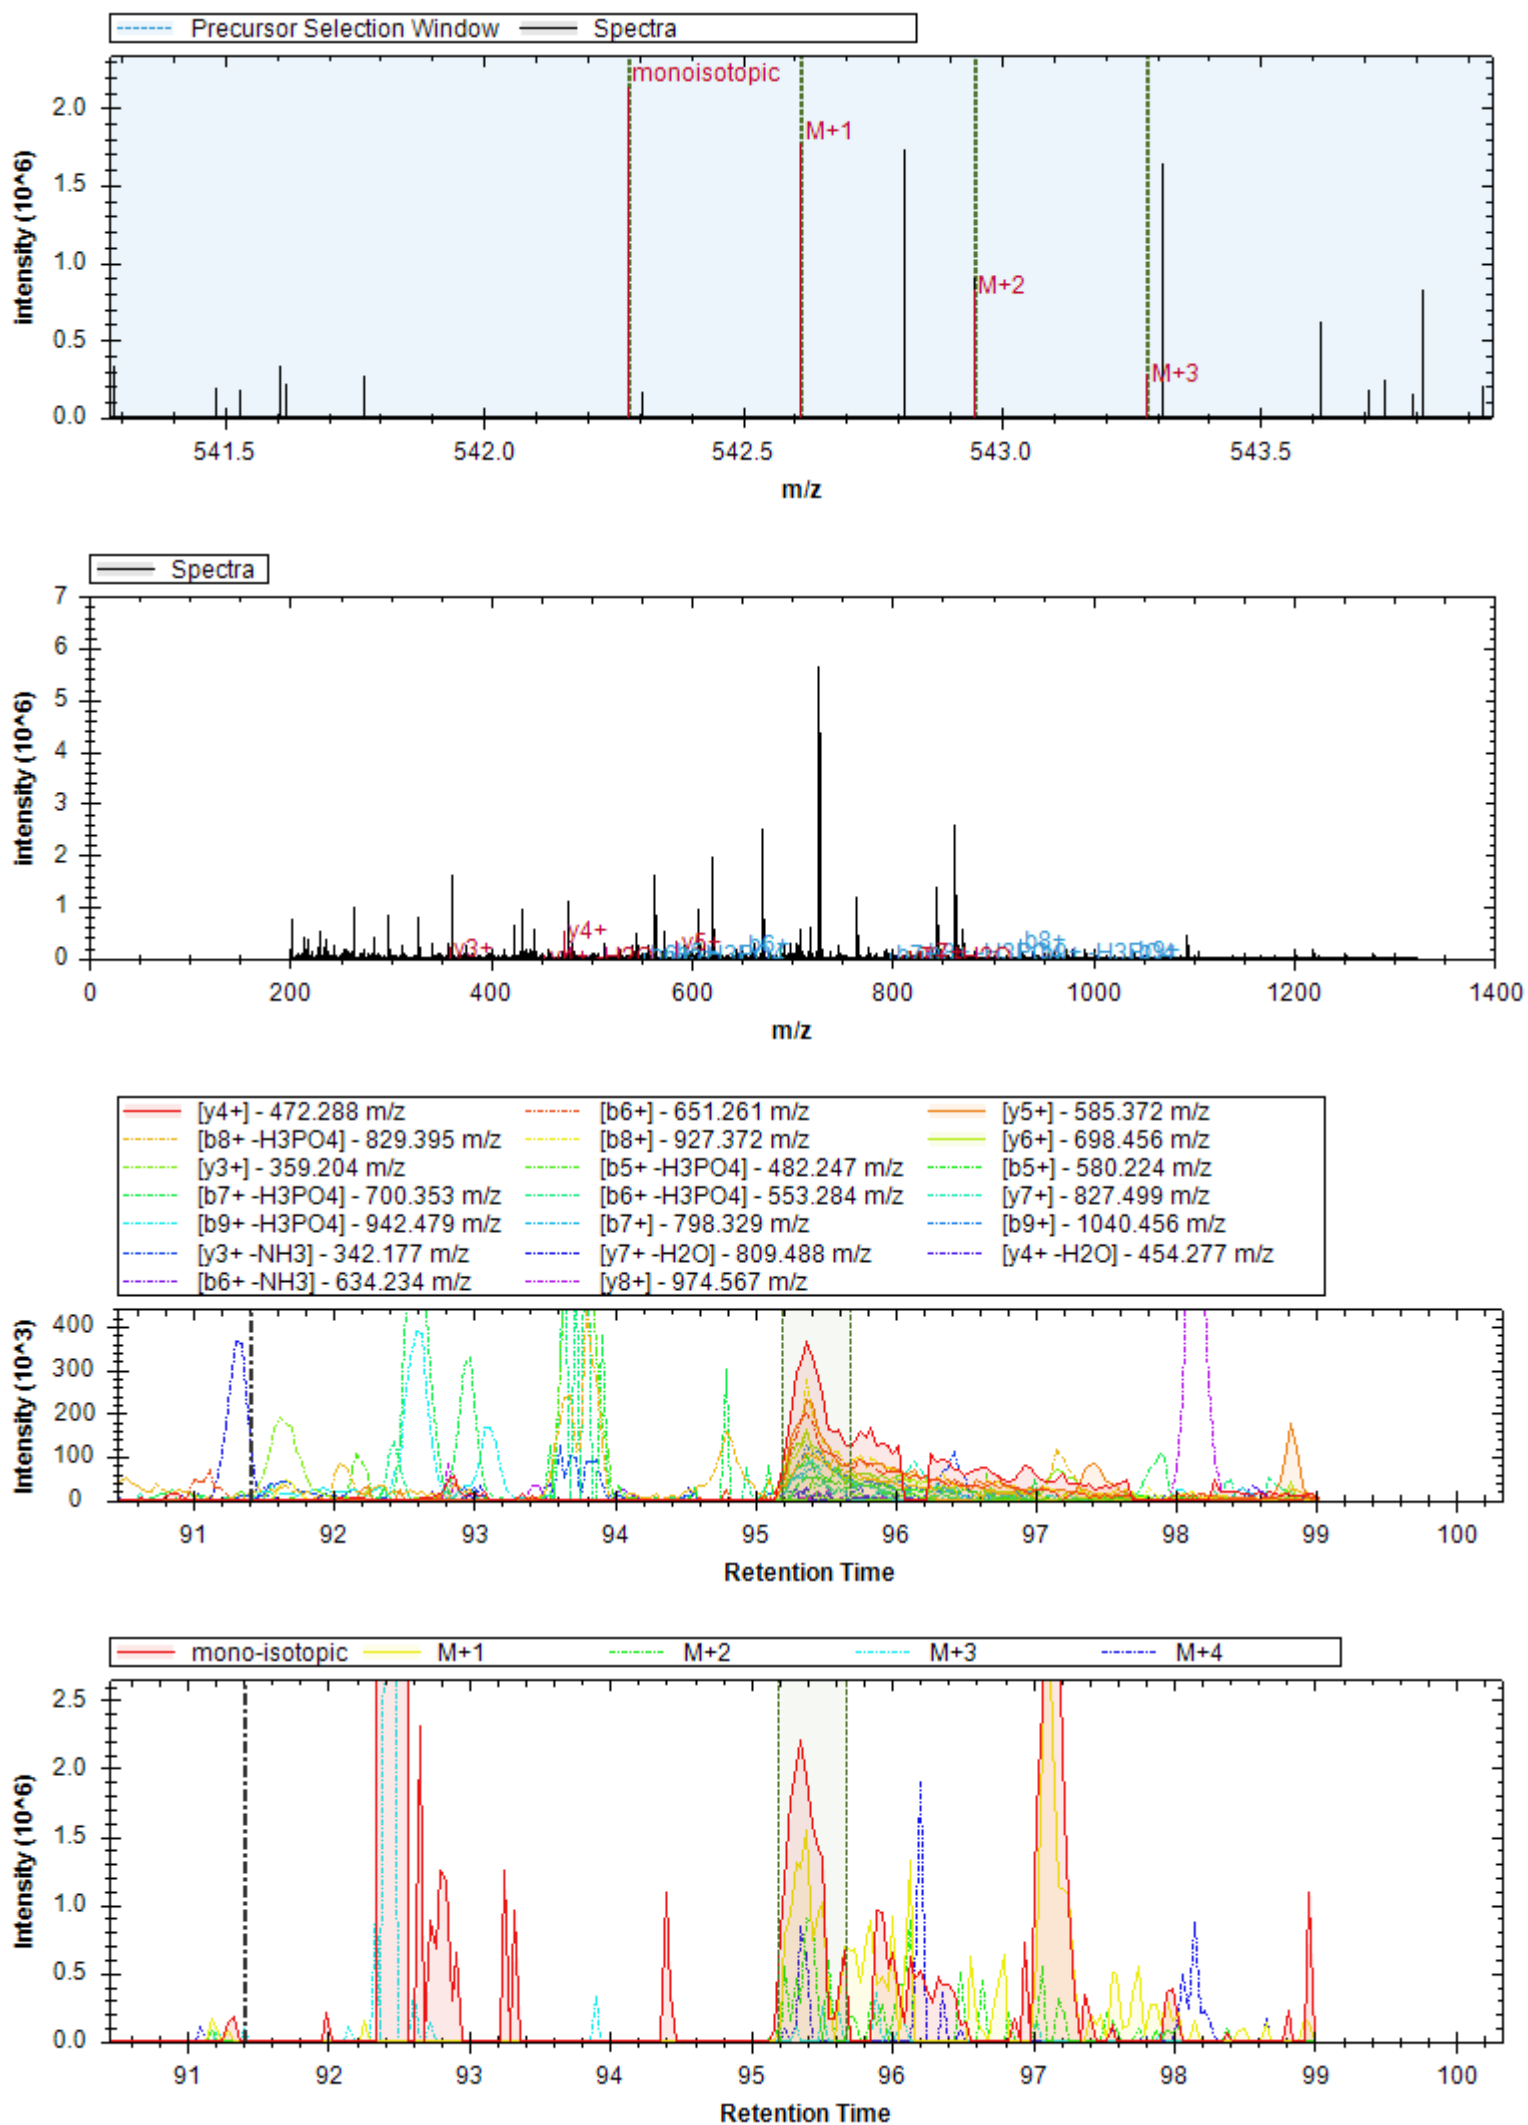



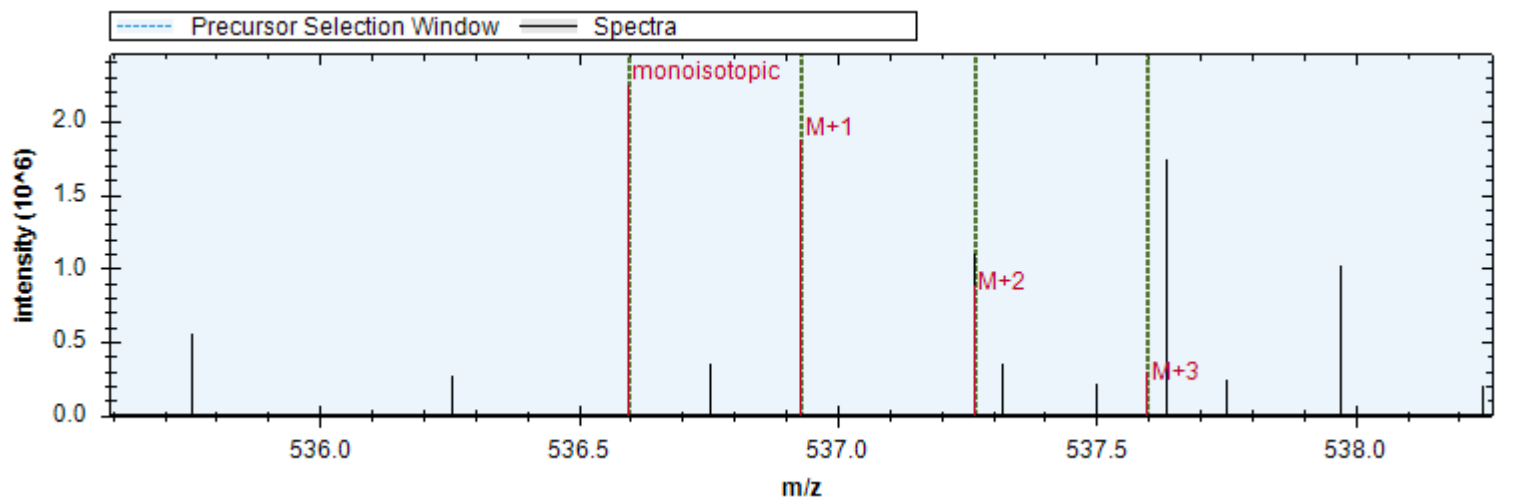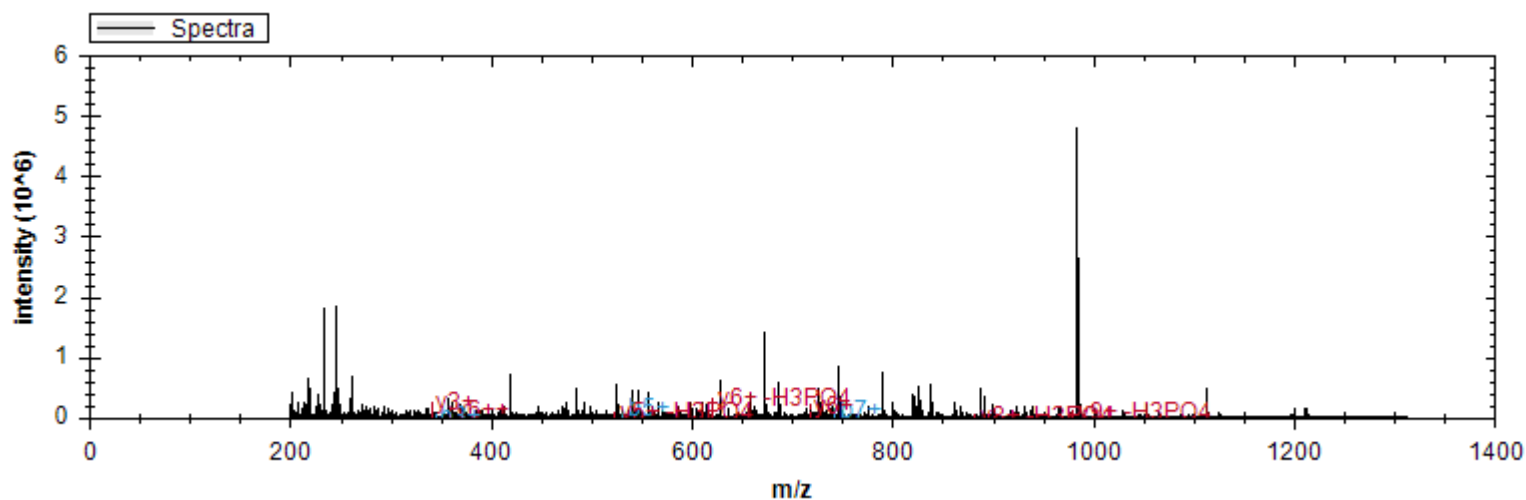

|                            |                            |                          |
|----------------------------|----------------------------|--------------------------|
| [y6+ -H3PO4] - 620.377 m/z | [y3+] - 341.218 m/z        | [b5+] - 531.277 m/z      |
| [y6++] - 359.680 m/z       | [y5+ -H3PO4] - 523.324 m/z | [y6+] - 718.354 m/z      |
| [y4+ -H3PO4] - 410.240 m/z | [b7+] - 743.357 m/z        | [b5+ -H2O] - 513.267 m/z |
| [y7+ -H3PO4] - 767.445 m/z | [y9++] - 539.255 m/z       | [b3+] - 345.177 m/z      |
| [y7++] - 433.215 m/z       | [y8+ -H3PO4] - 882.472 m/z | [b4+] - 432.209 m/z      |
| [y4+] - 508.217 m/z        | [b3+ -H2O] - 327.166 m/z   | [b8+] - 890.425 m/z      |
| [b4+ -H2O] - 414.198 m/z   | [b7+ -H2O] - 725.346 m/z   | [y7+] - 865.422 m/z      |
| [y9+ -H3PO4] - 979.525 m/z |                            |                          |

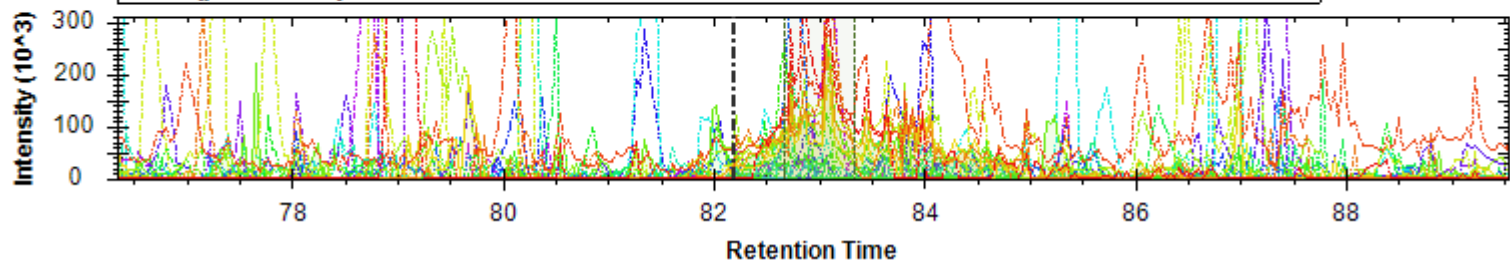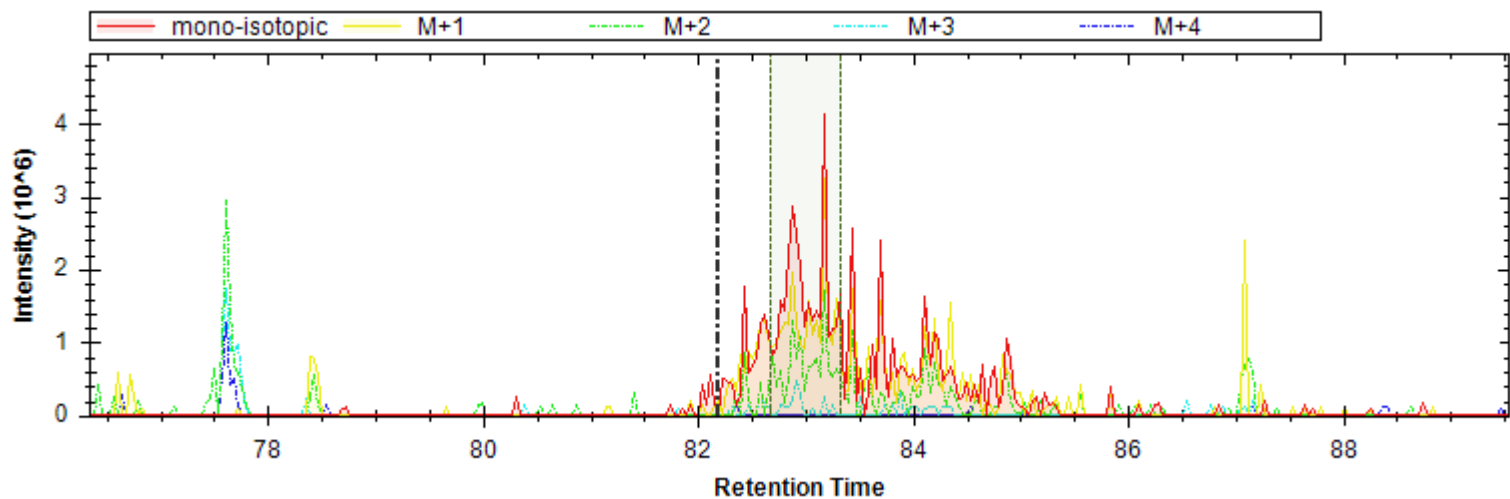

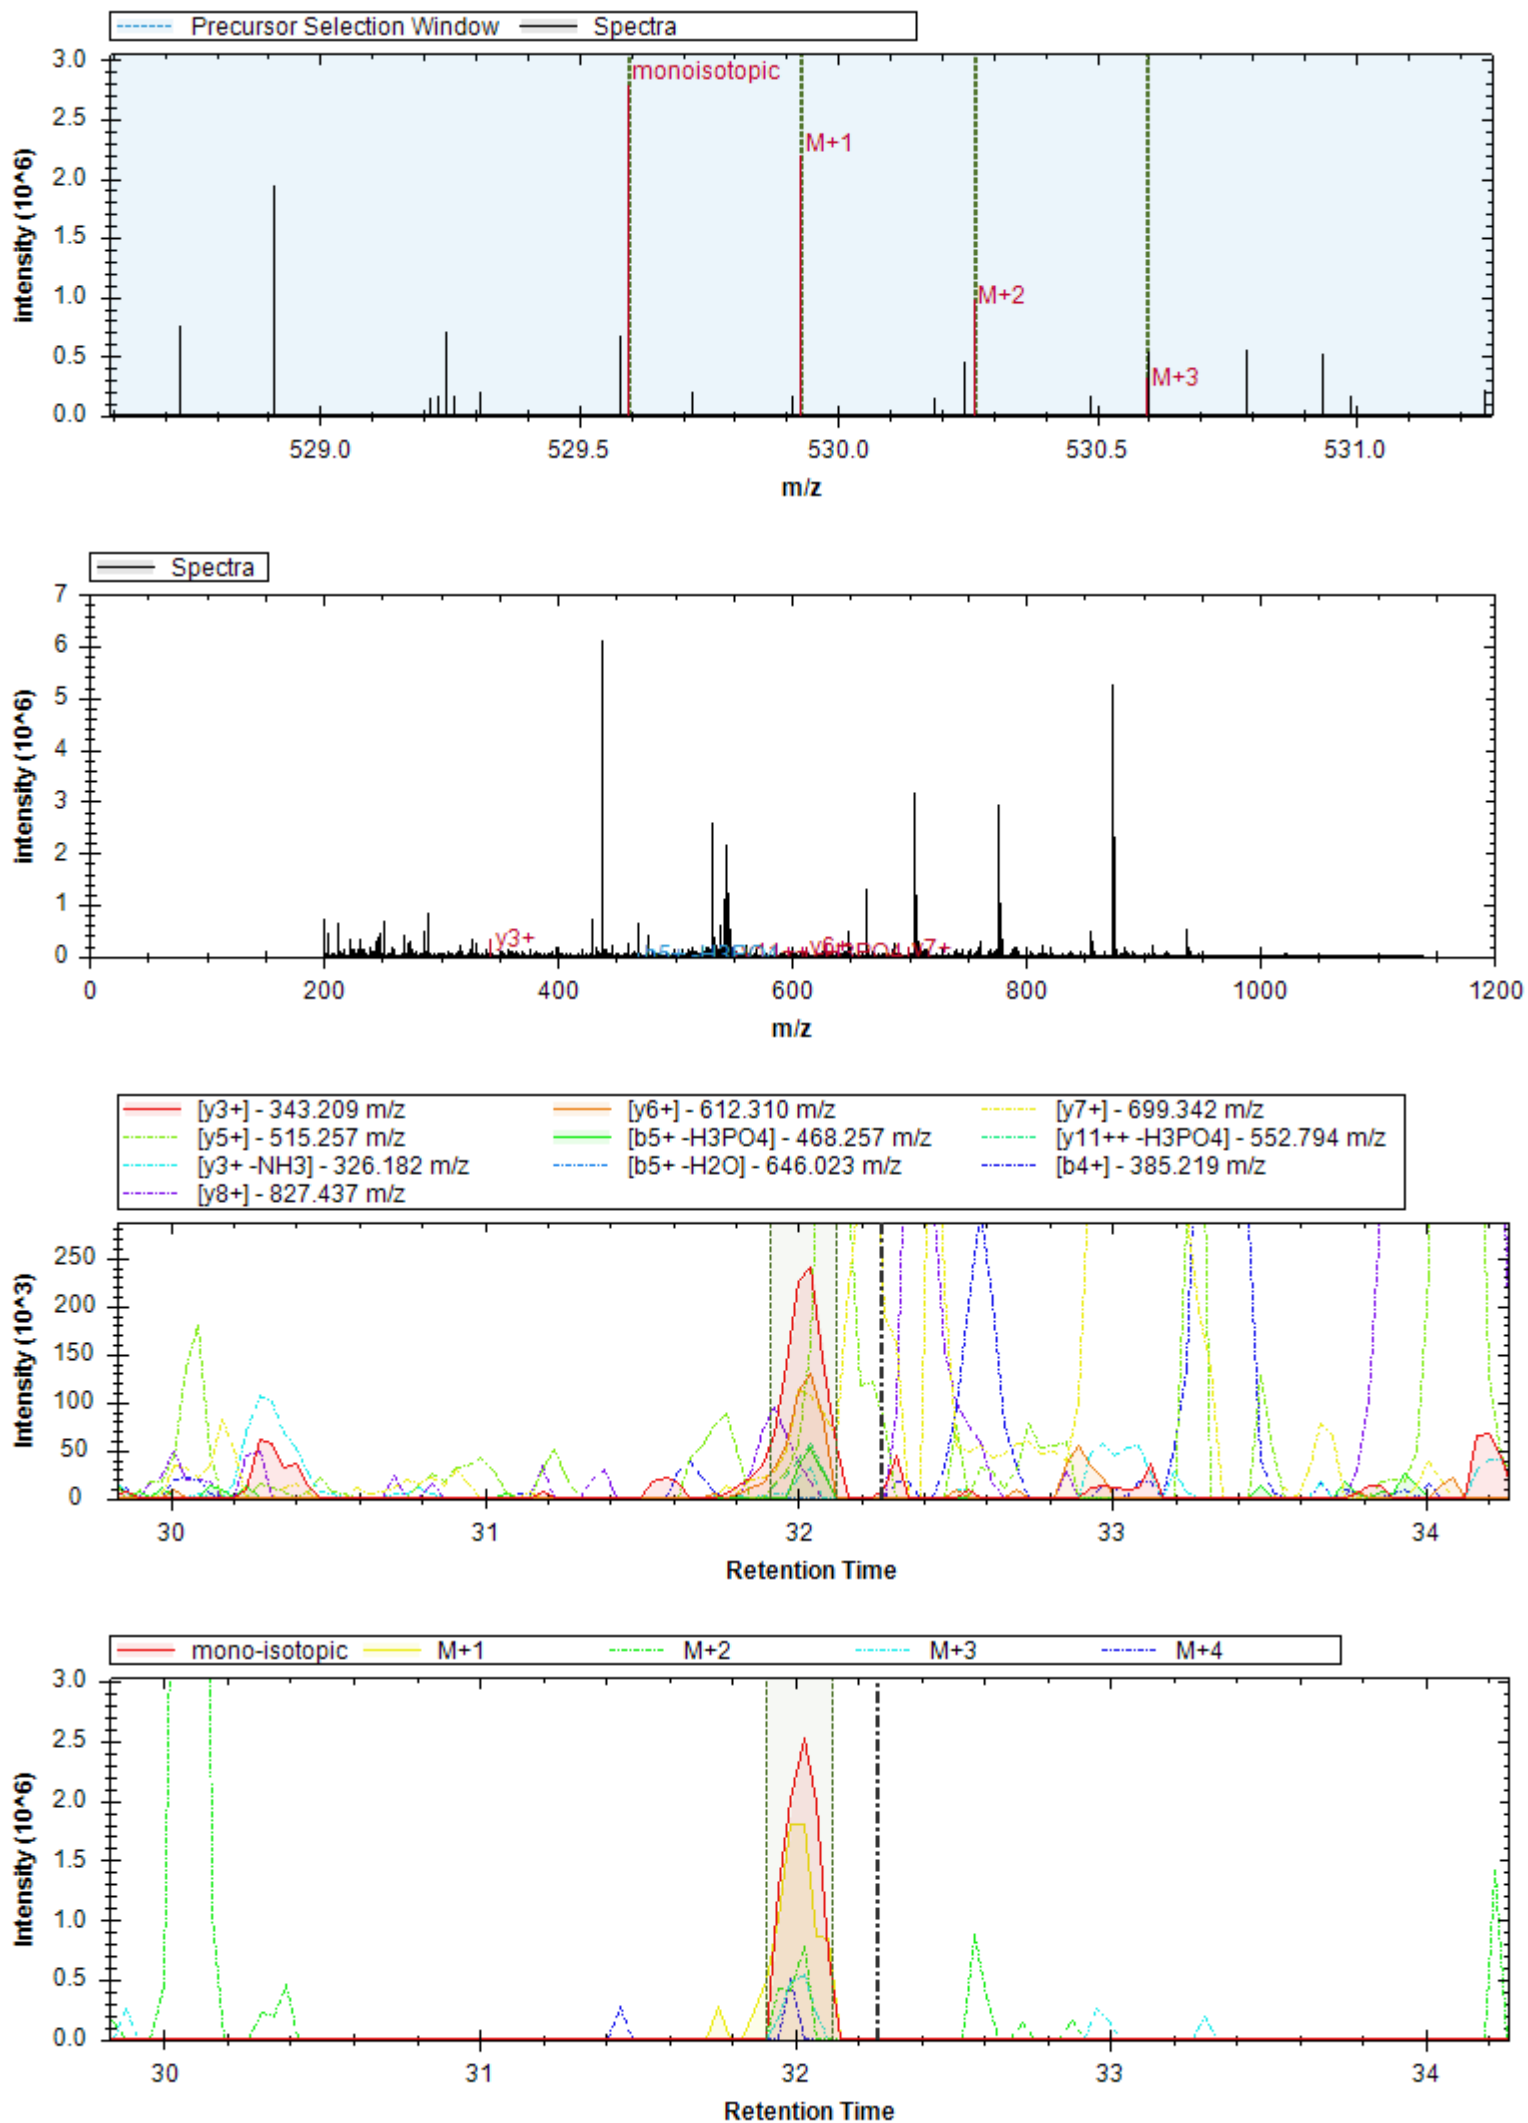

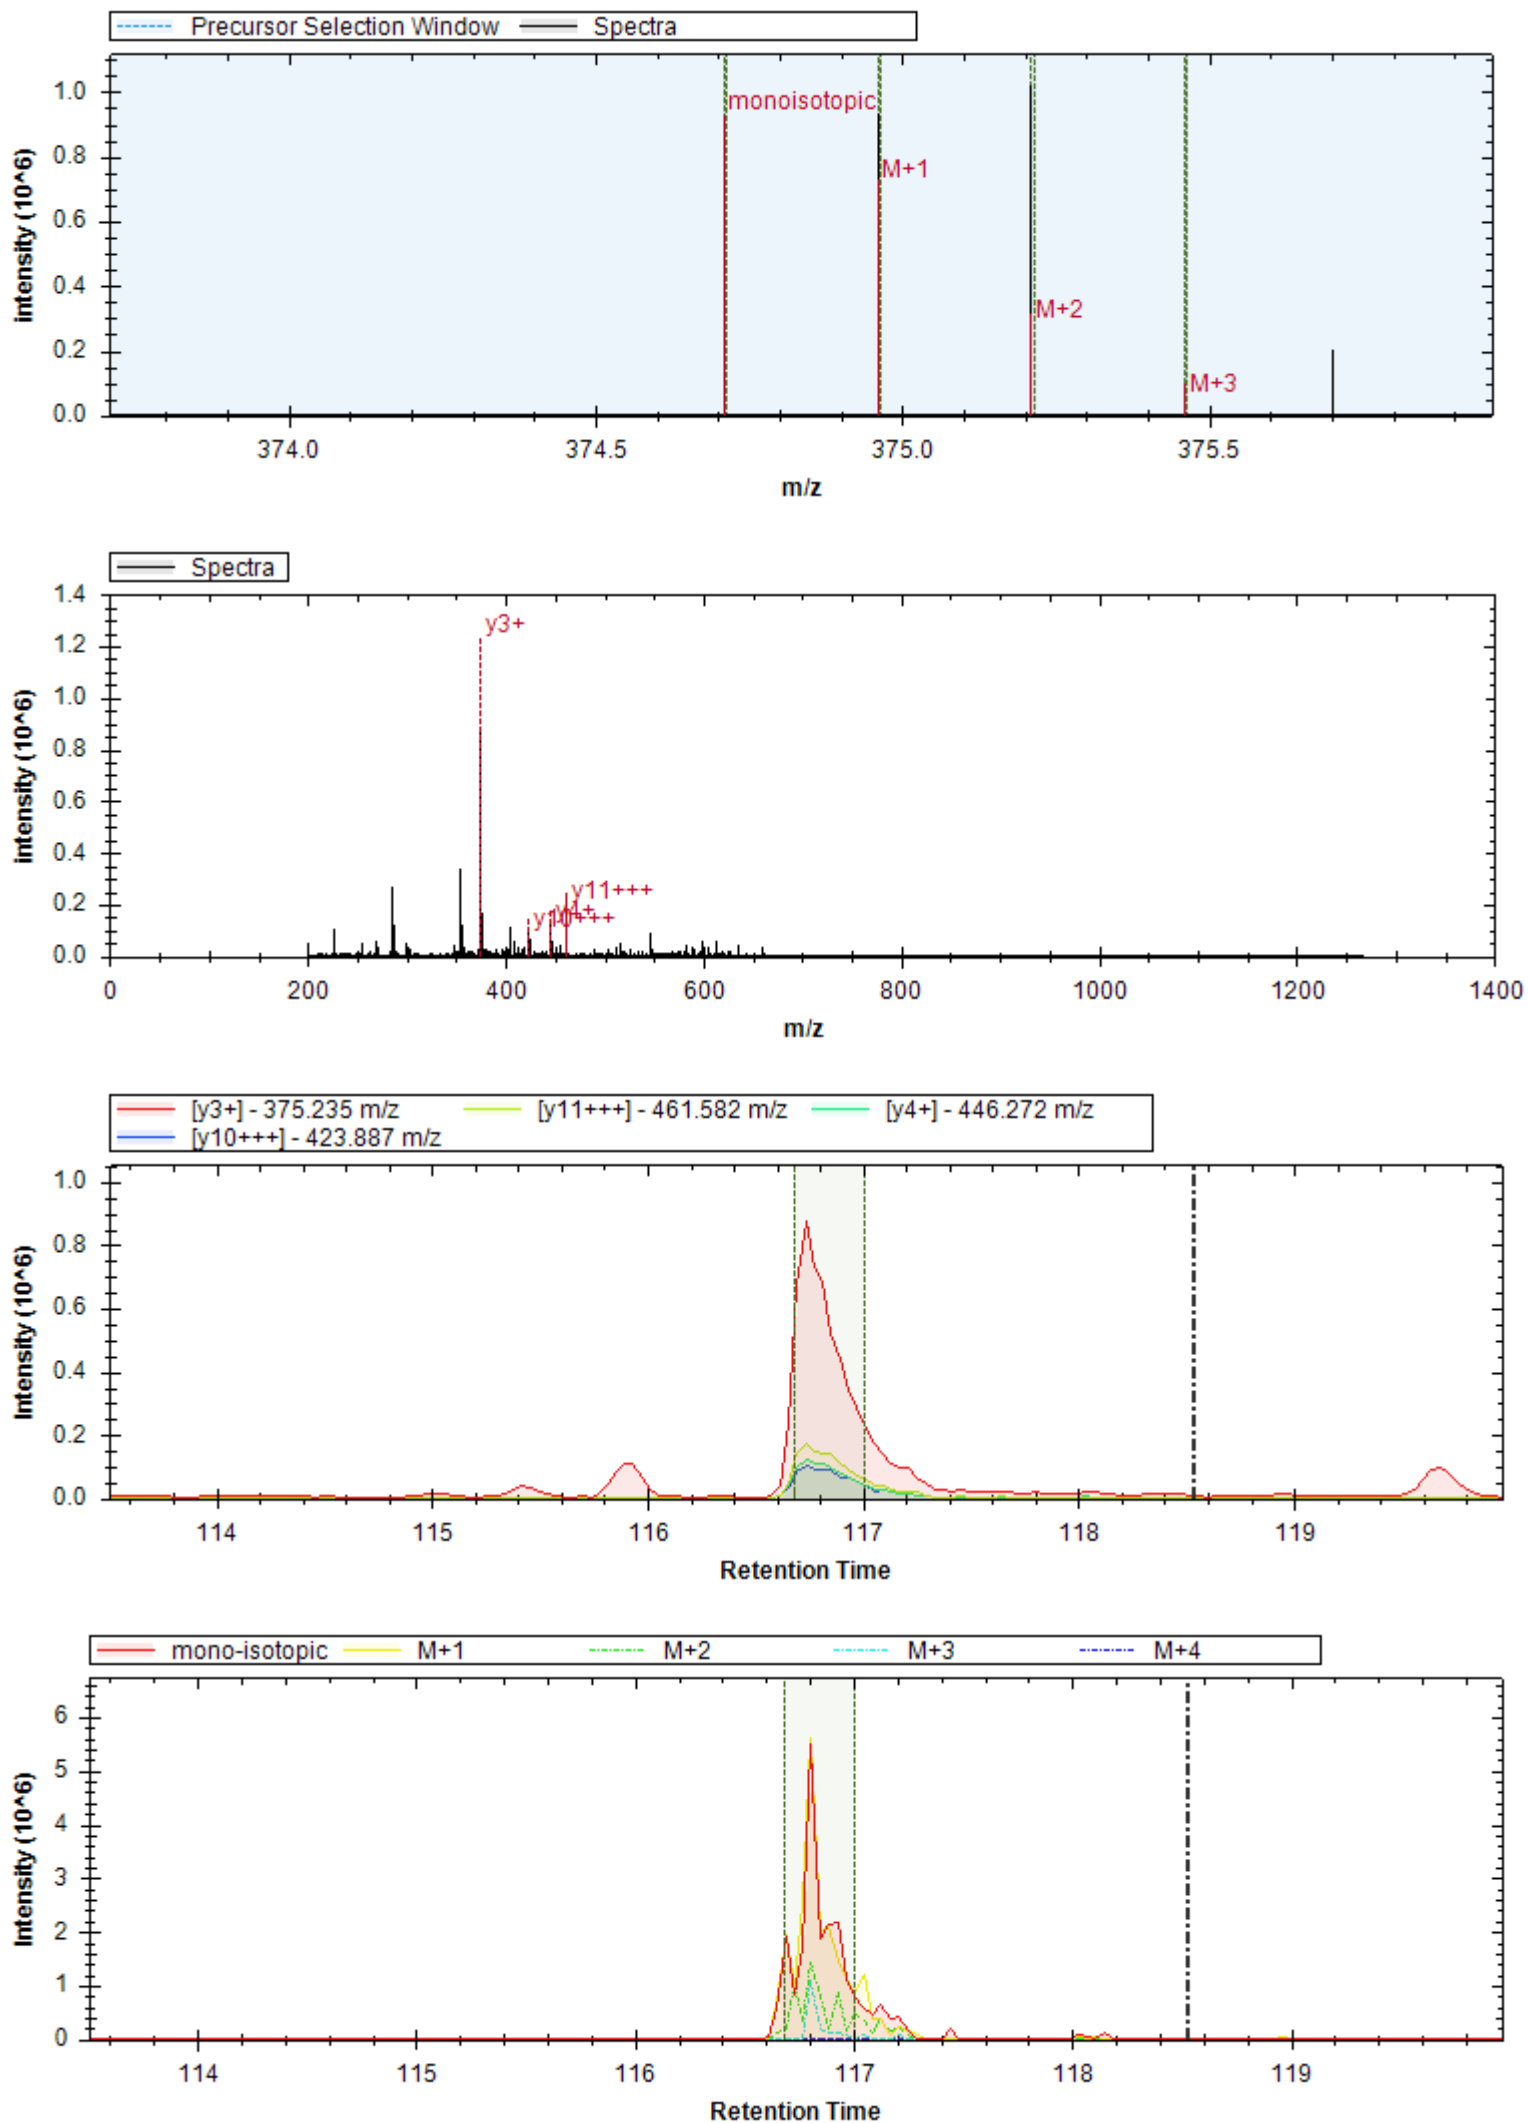

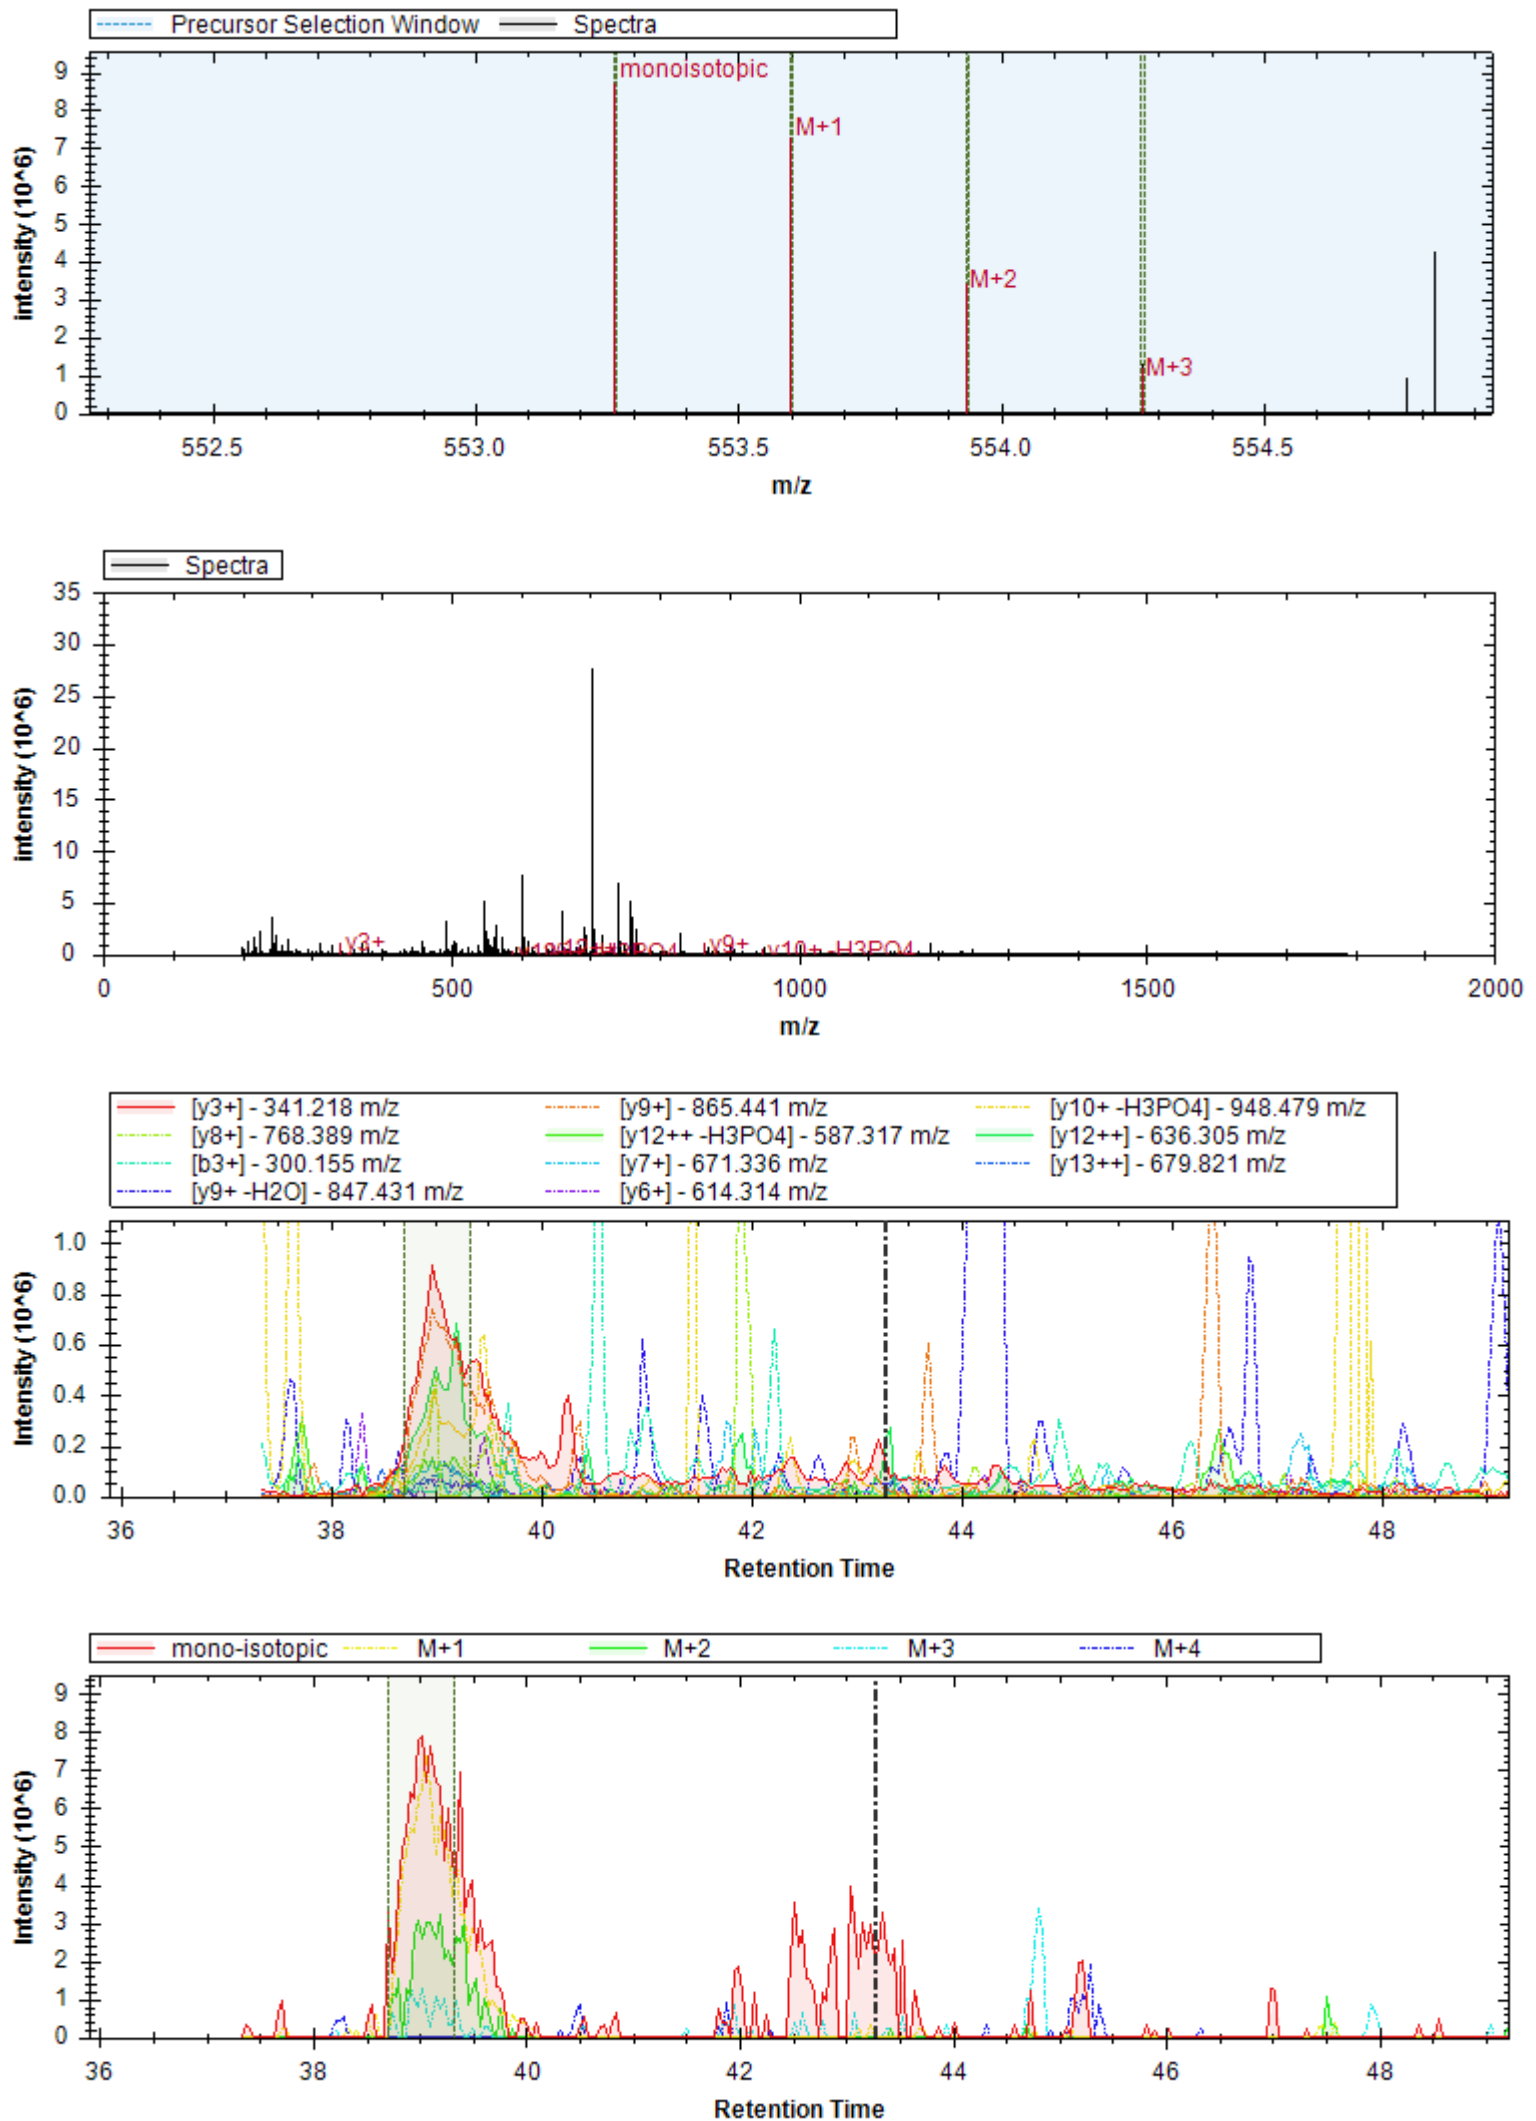

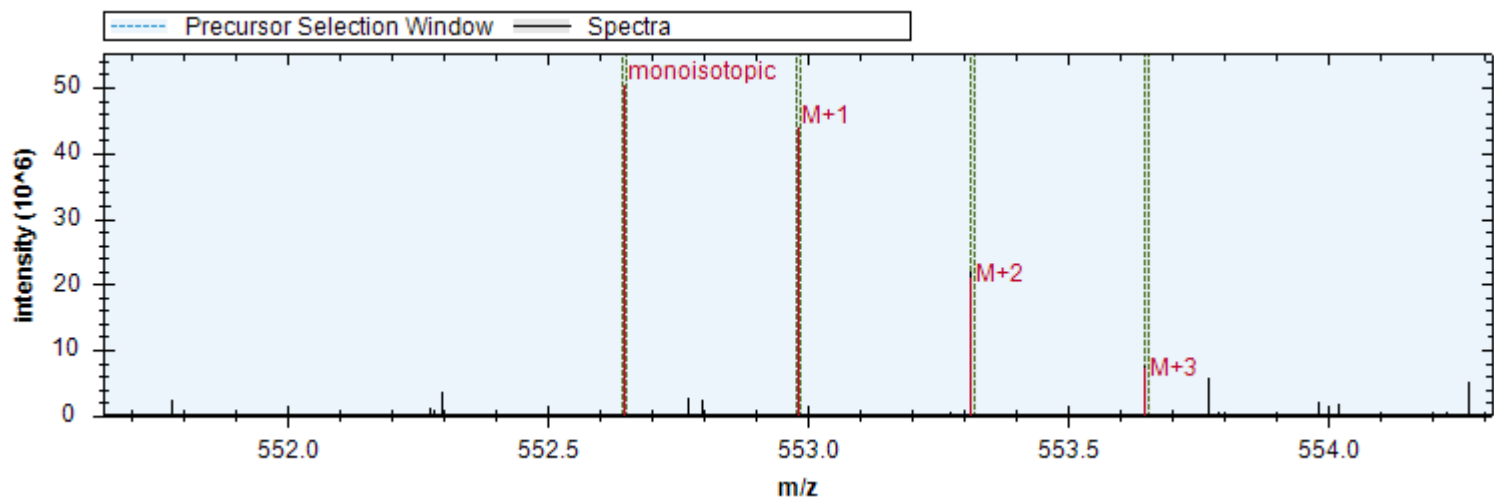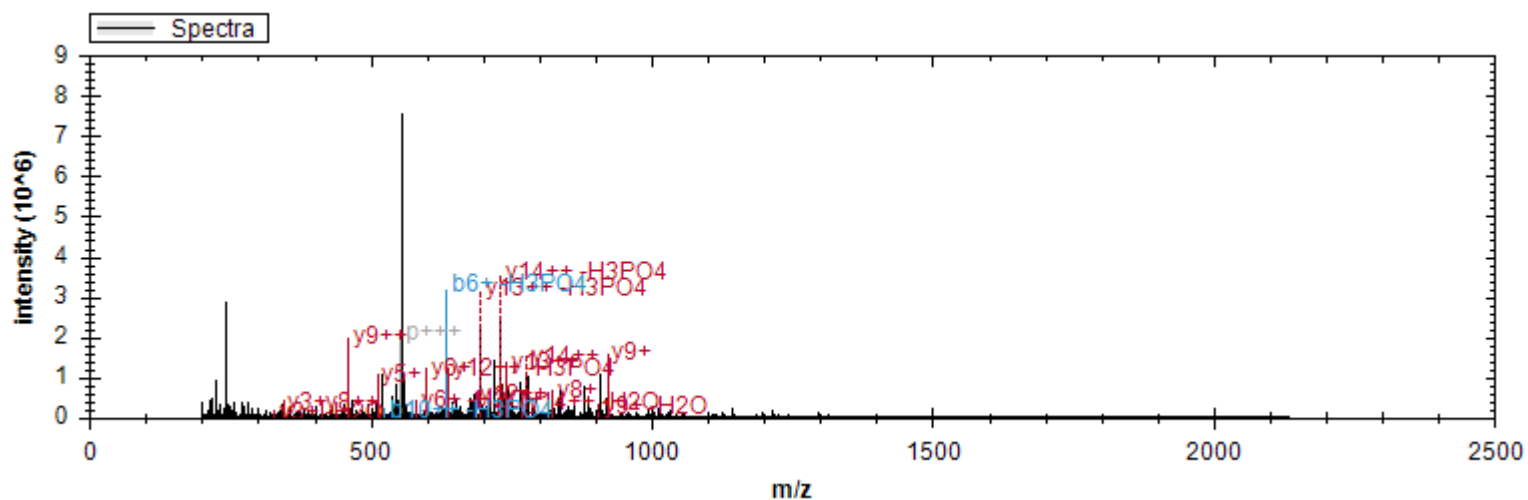

- |                              |                              |                              |
|------------------------------|------------------------------|------------------------------|
| [b6+ -H3PO4] - 636.419 m/z   | [y14++ -H3PO4] - 729.943 m/z | [y13++ -H3PO4] - 694.425 m/z |
| [y9++] - 461.772 m/z         | [y9+] - 922.536 m/z          | [y5+] - 513.303 m/z          |
| [y12++ -H3PO4] - 637.883 m/z | [y6+] - 600.335 m/z          | [y10++] - 552.278 m/z        |
| [y14++] - 778.932 m/z        | [y13+] - 743.413 m/z         | [b6+] - 734.396 m/z          |
| [y8+] - 825.483 m/z          | [y6+ -H2O] - 582.325 m/z     | [y3+] - 345.213 m/z          |
| [y9+ -H2O] - 904.525 m/z     | [y5+ -H2O] - 495.293 m/z     | [y7+] - 728.430 m/z          |
| [y12++] - 686.871 m/z        | [y14++ -H2O] - 769.926 m/z   | [y3+ -H2O] - 327.203 m/z     |
| [y8++] - 413.245 m/z         | [b10++] - 572.318 m/z        | [b10++ -H3PO4] - 523.330 m/z |

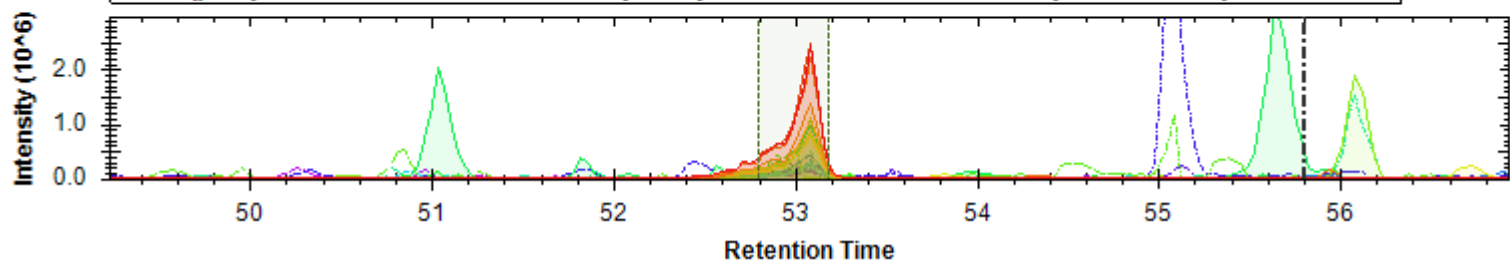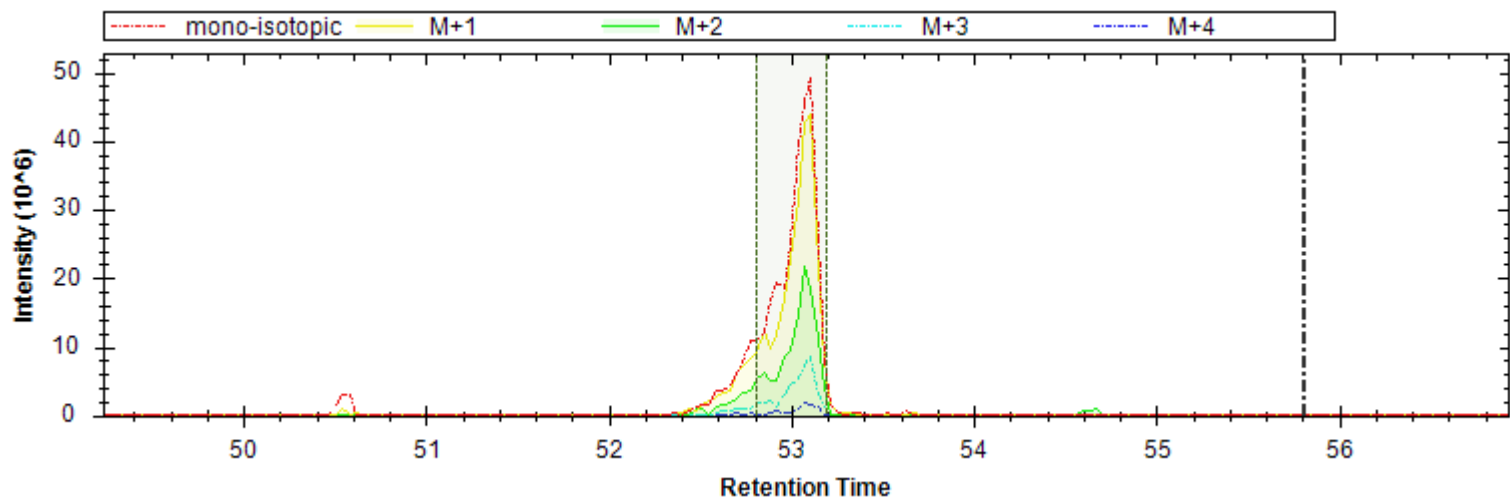

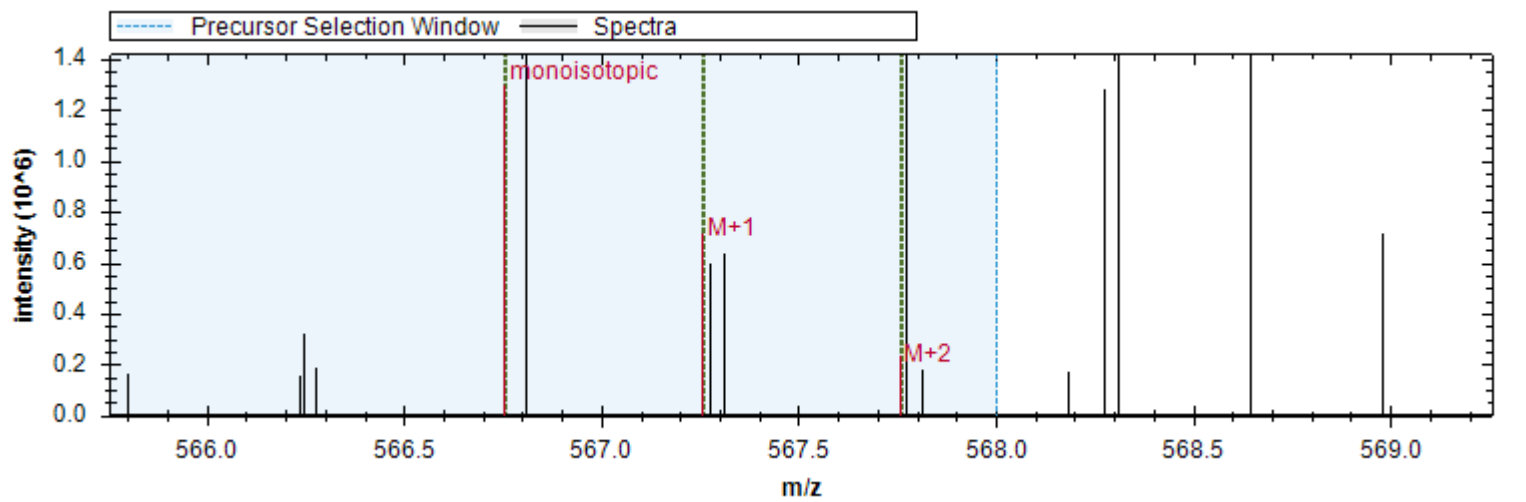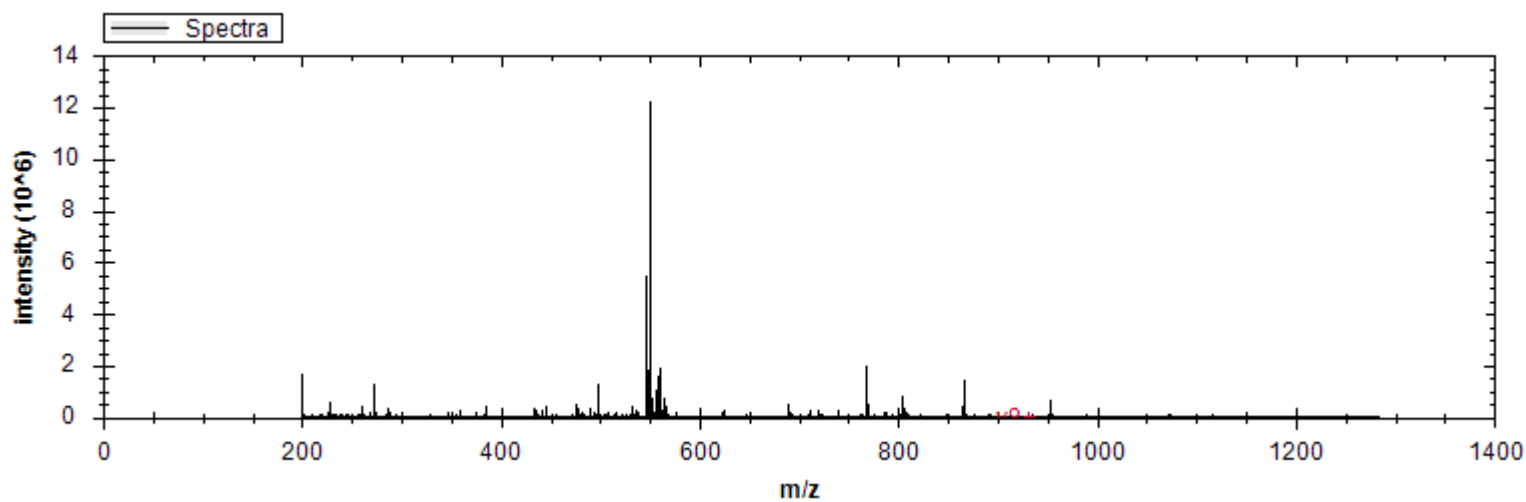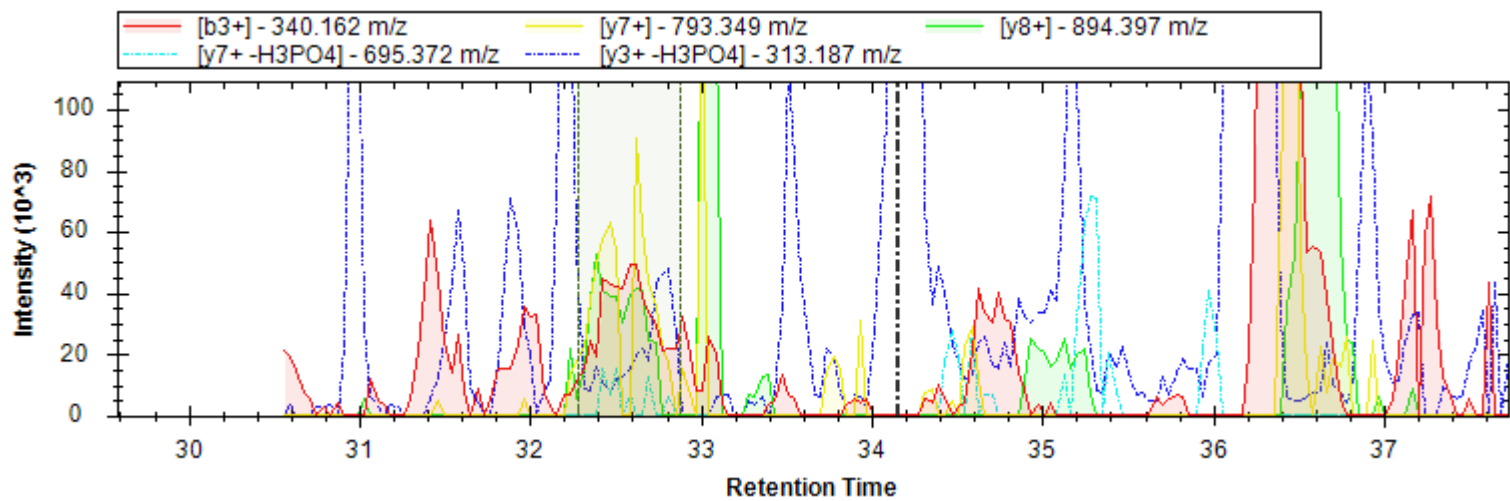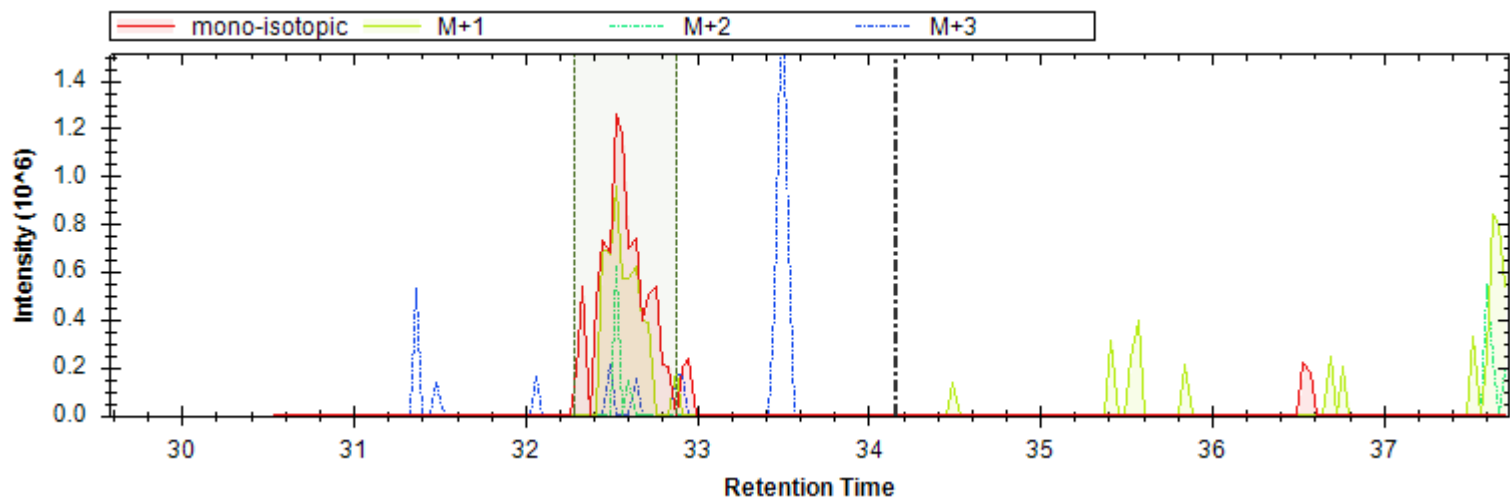

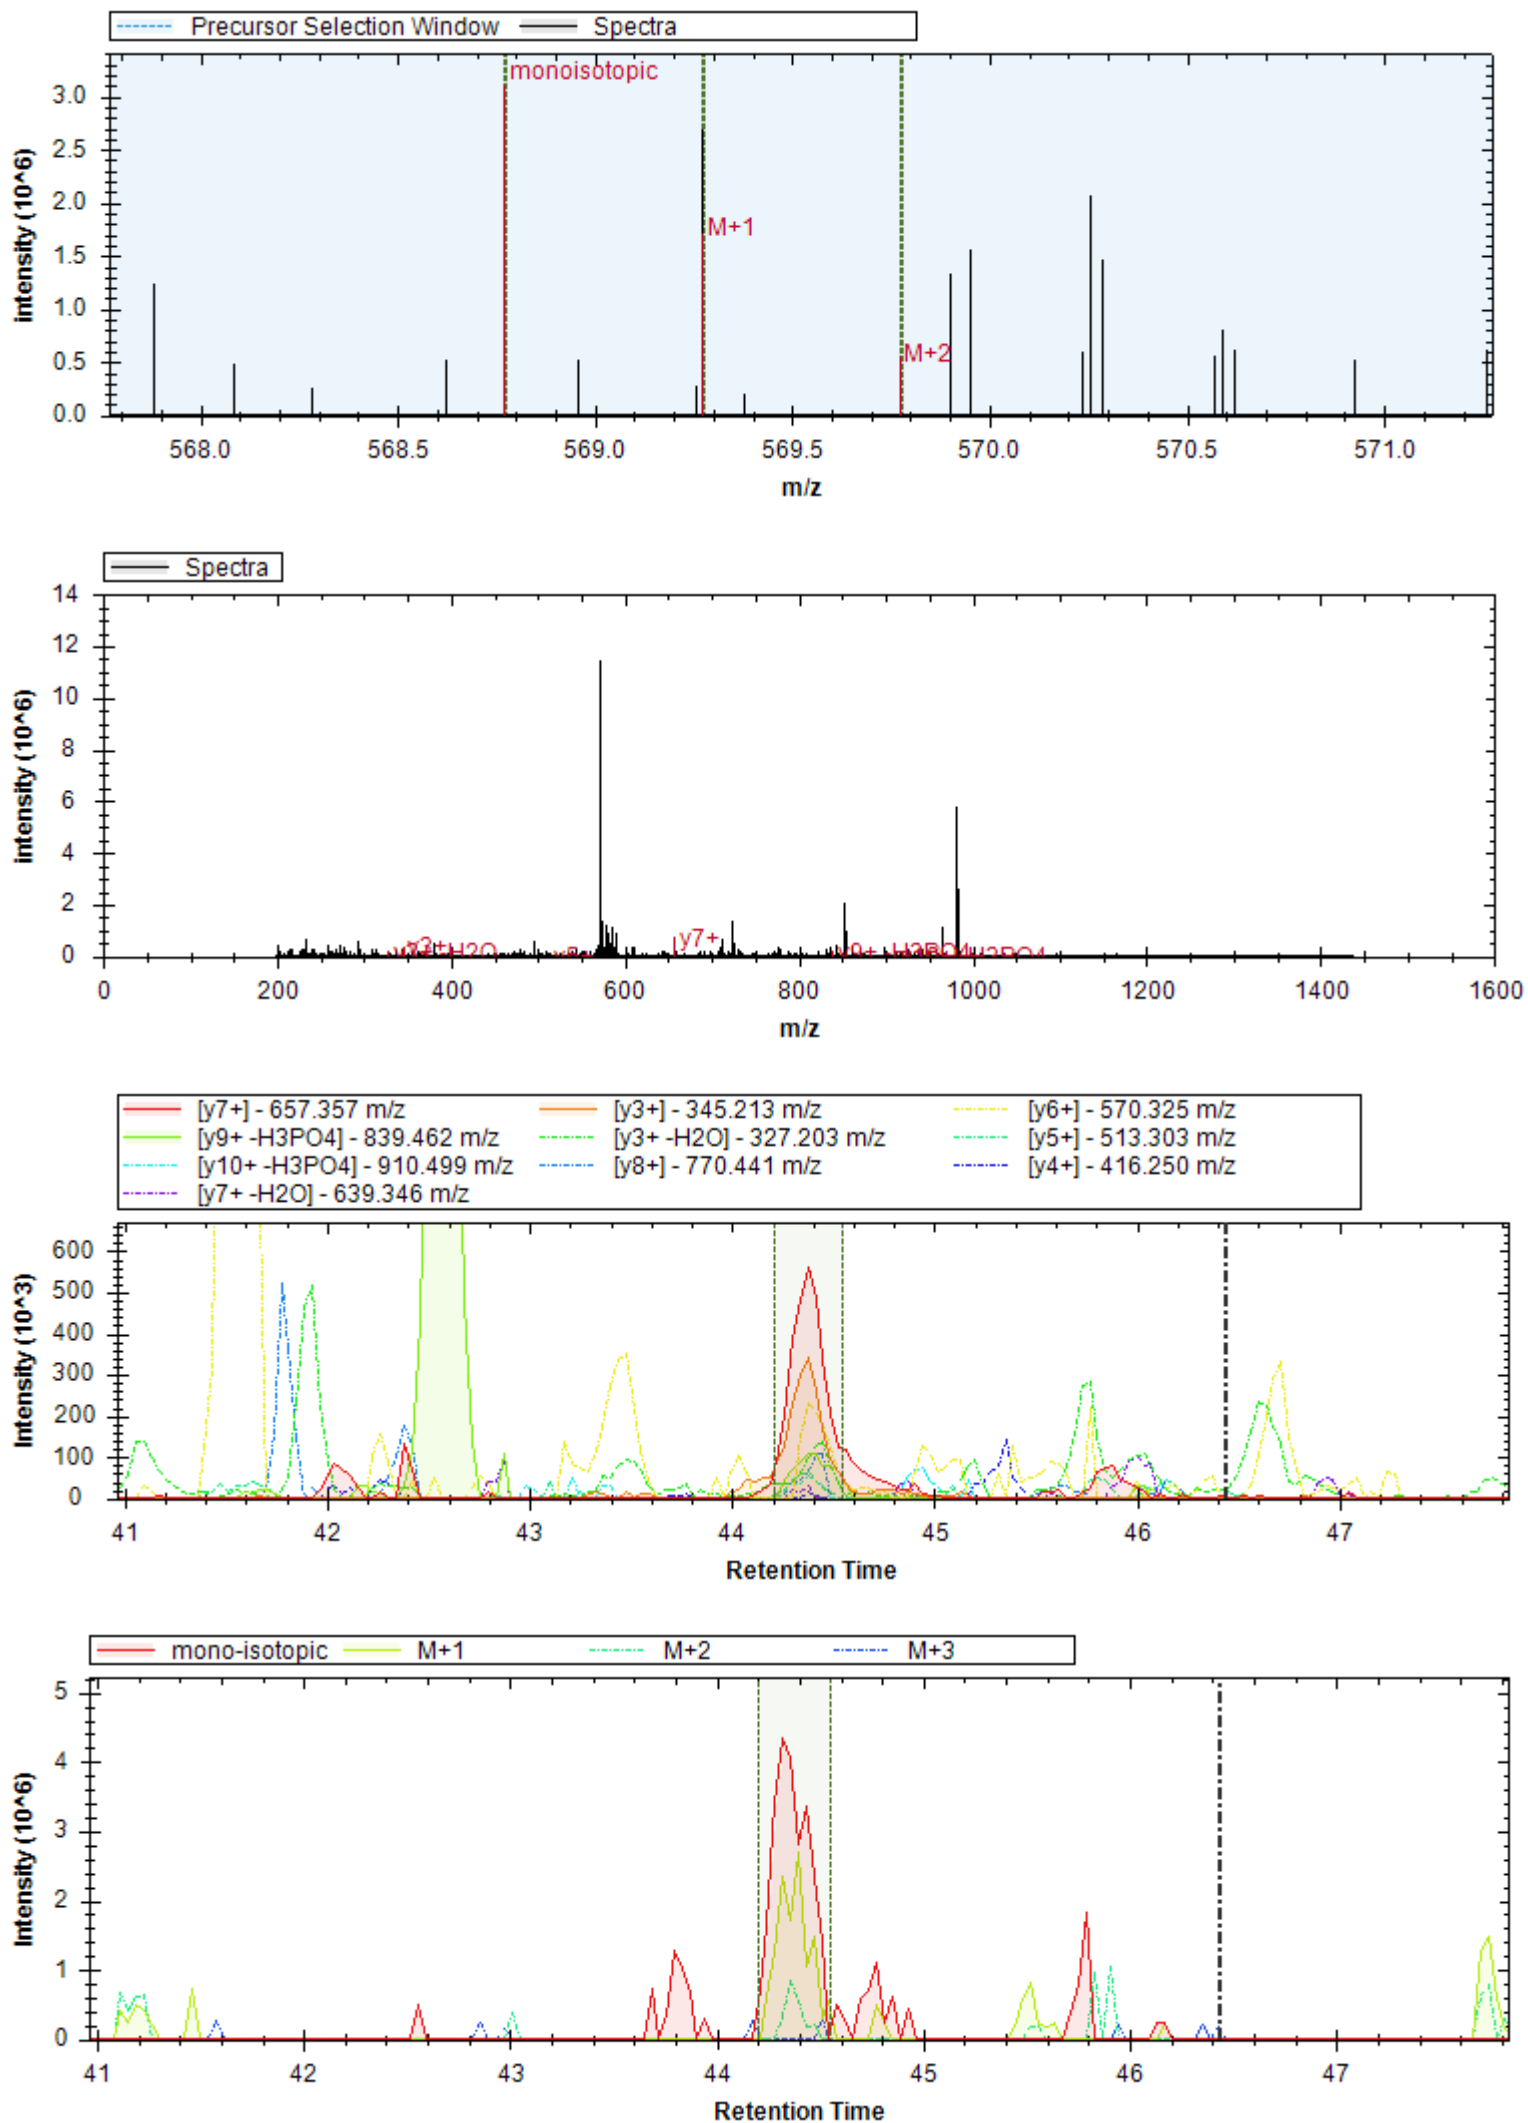

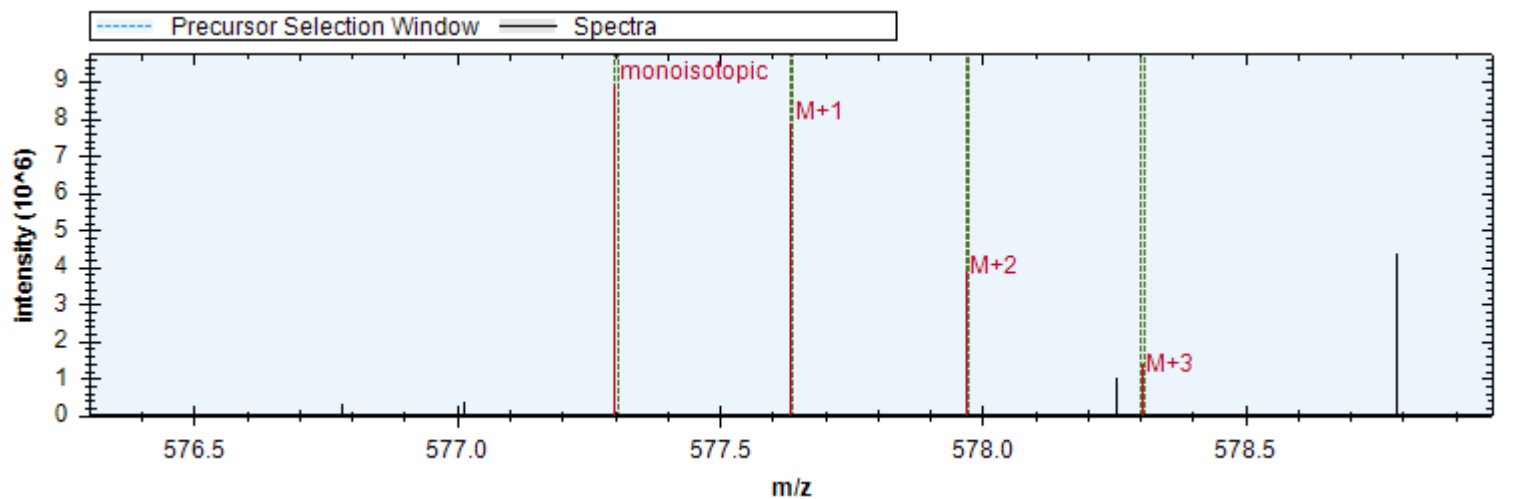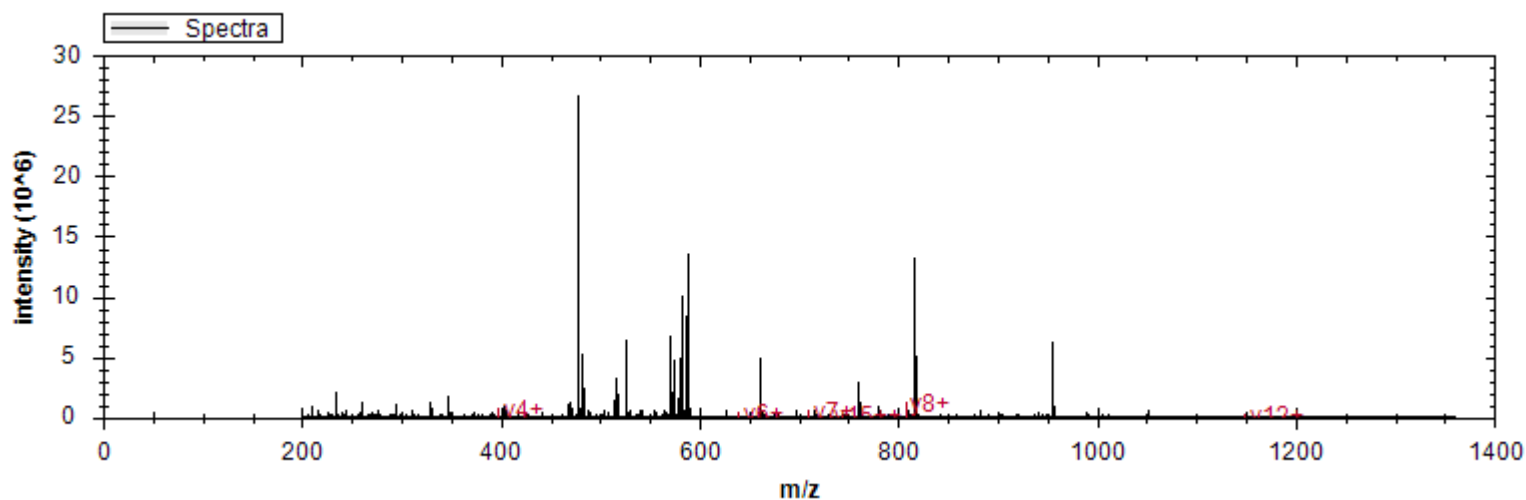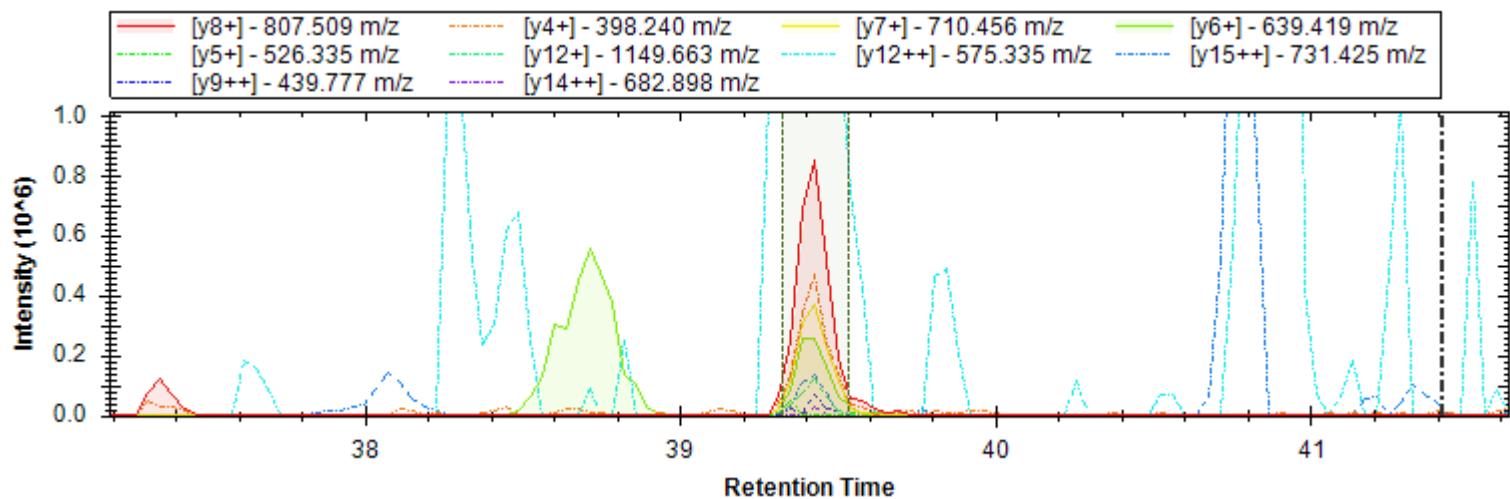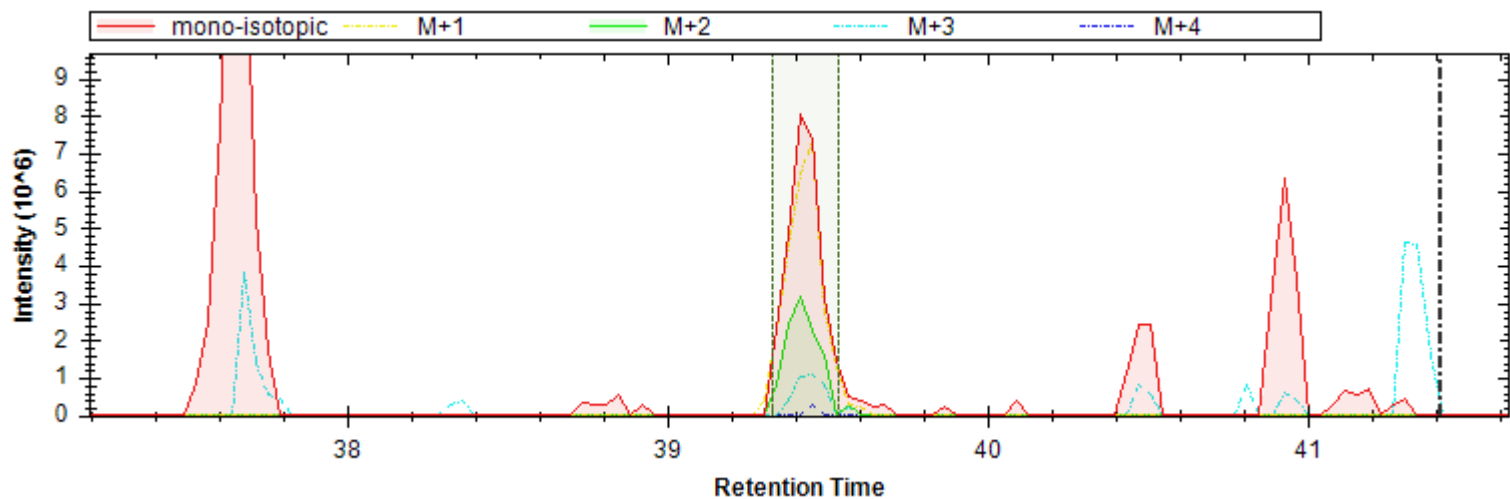



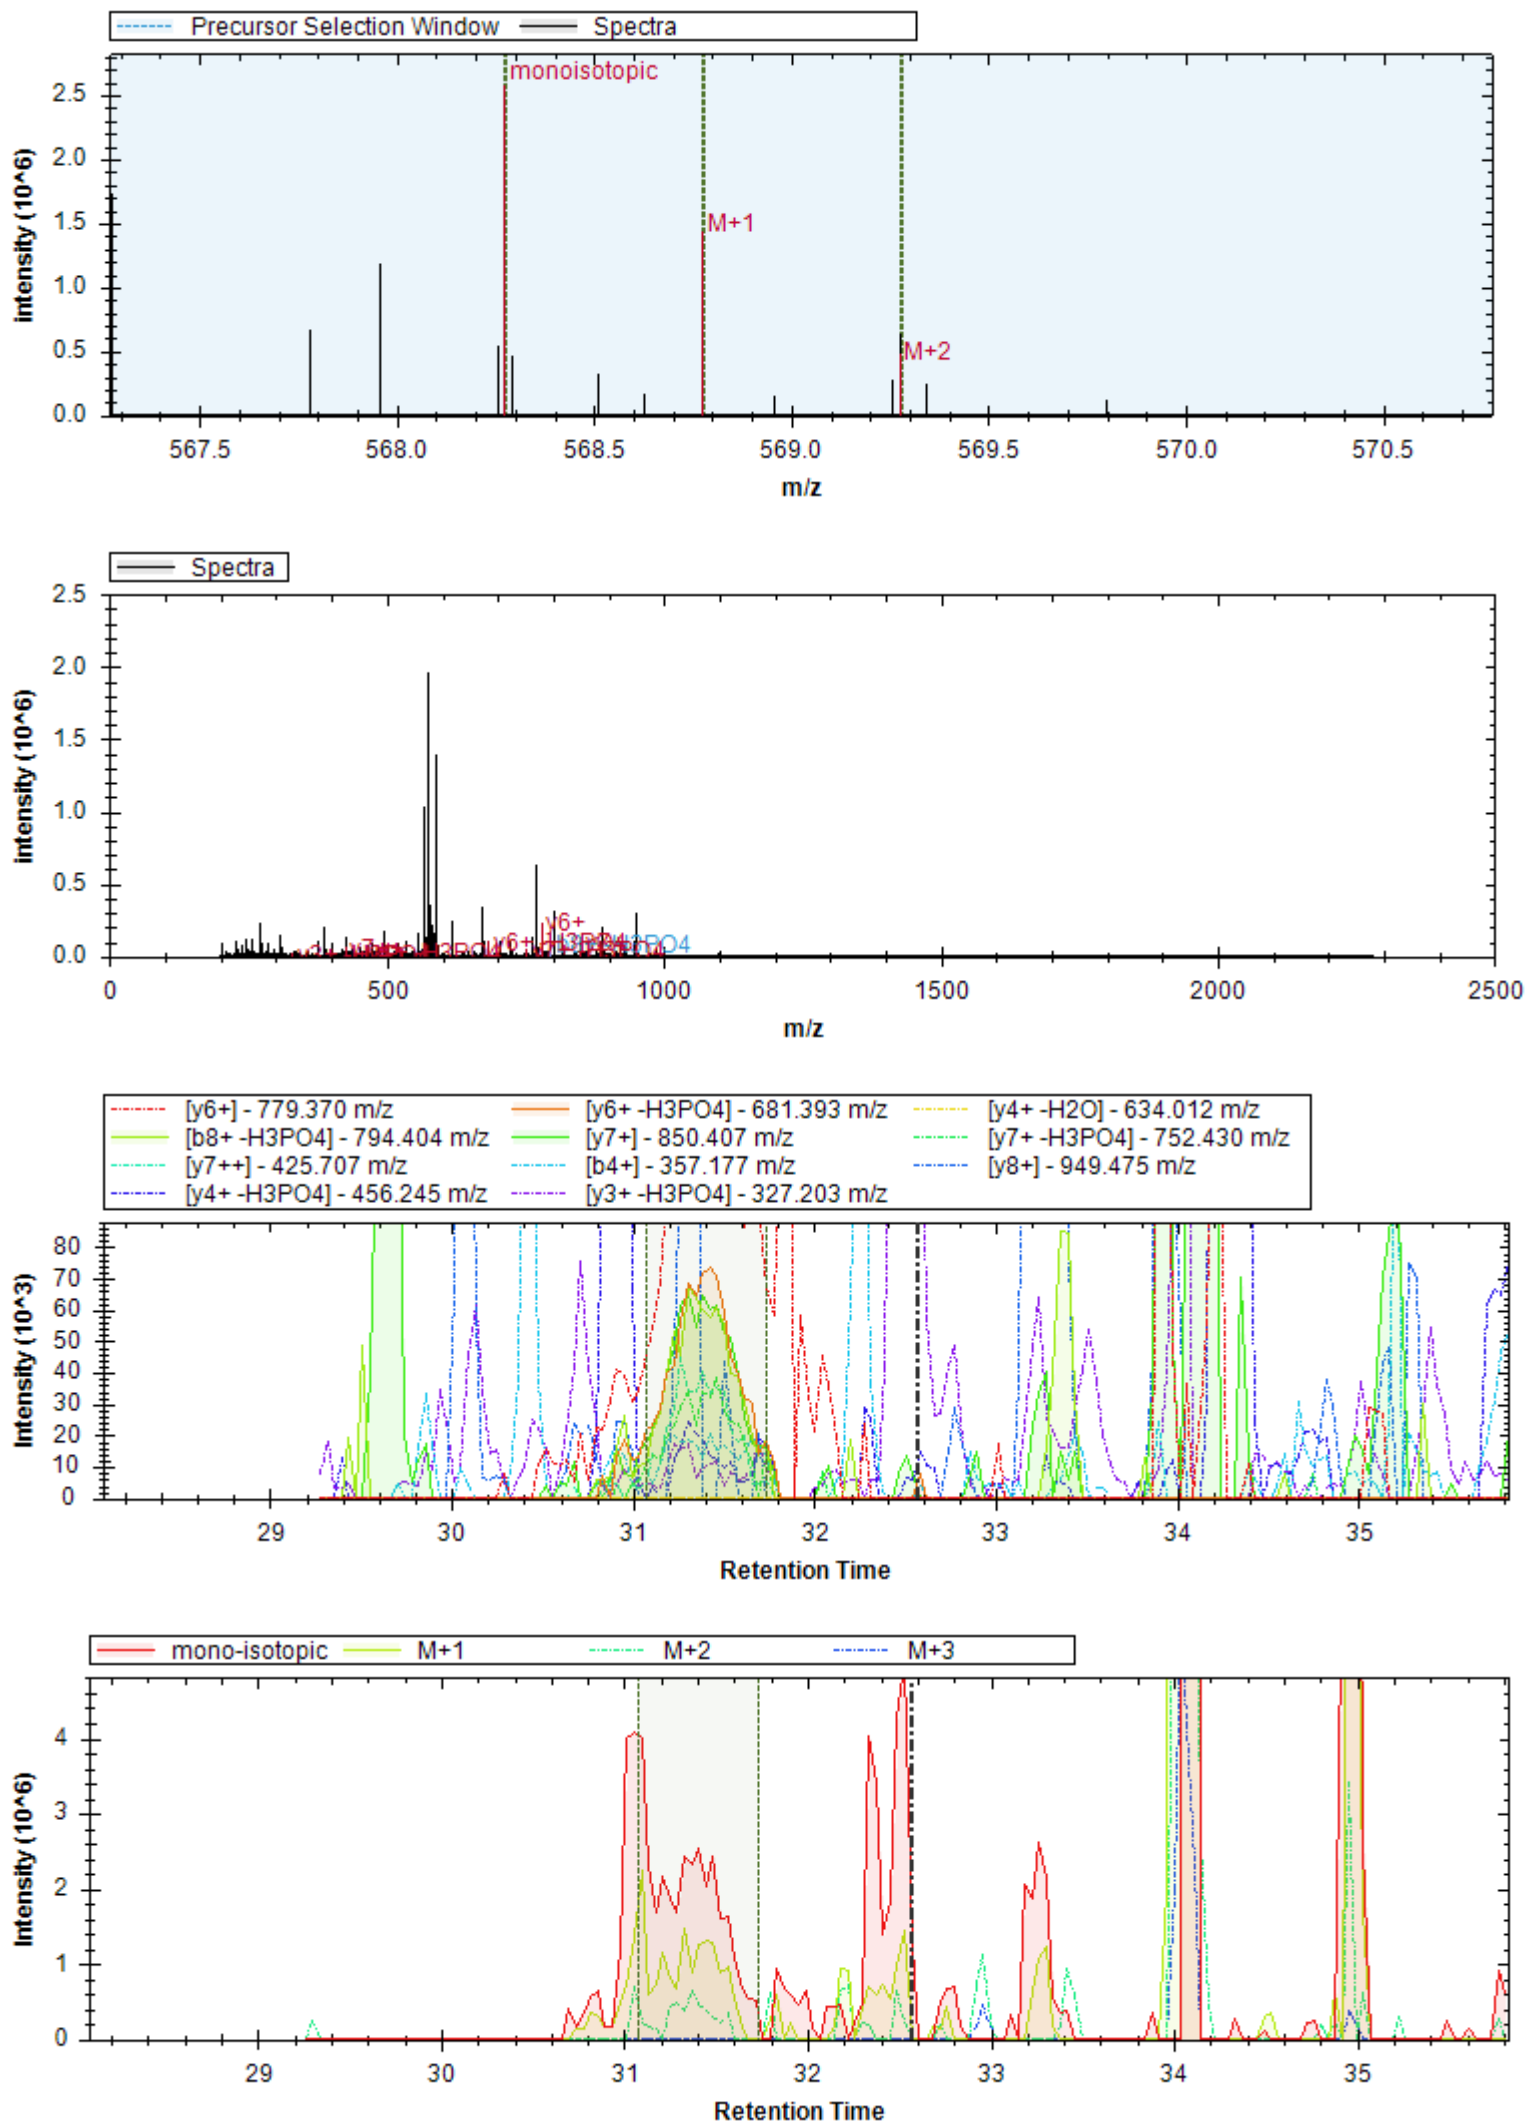

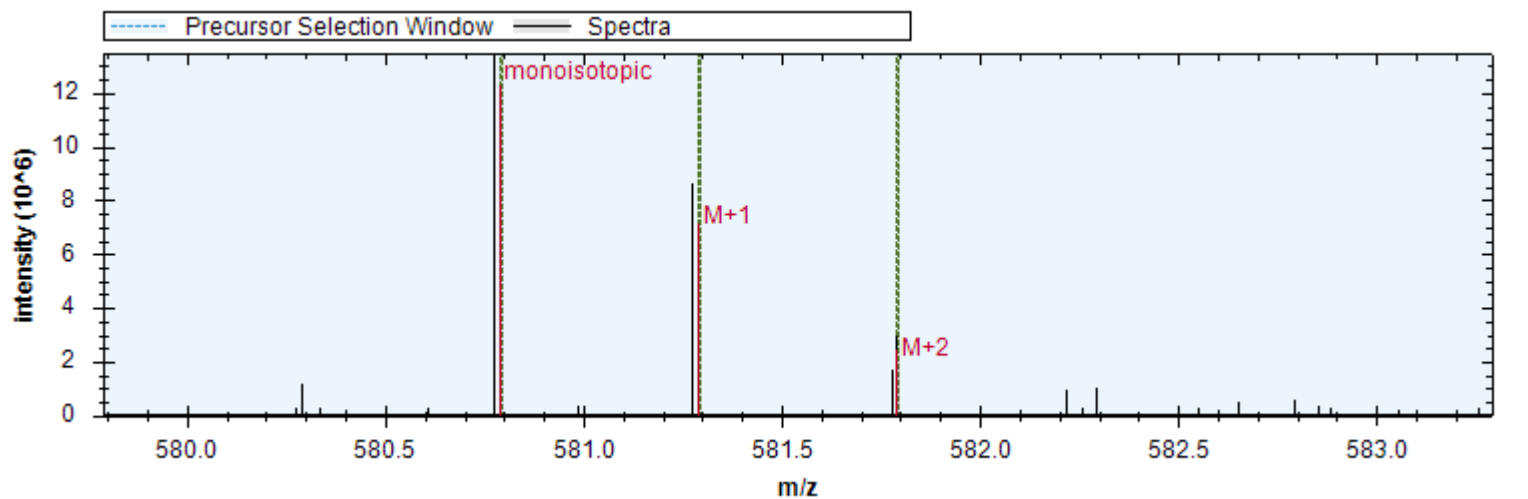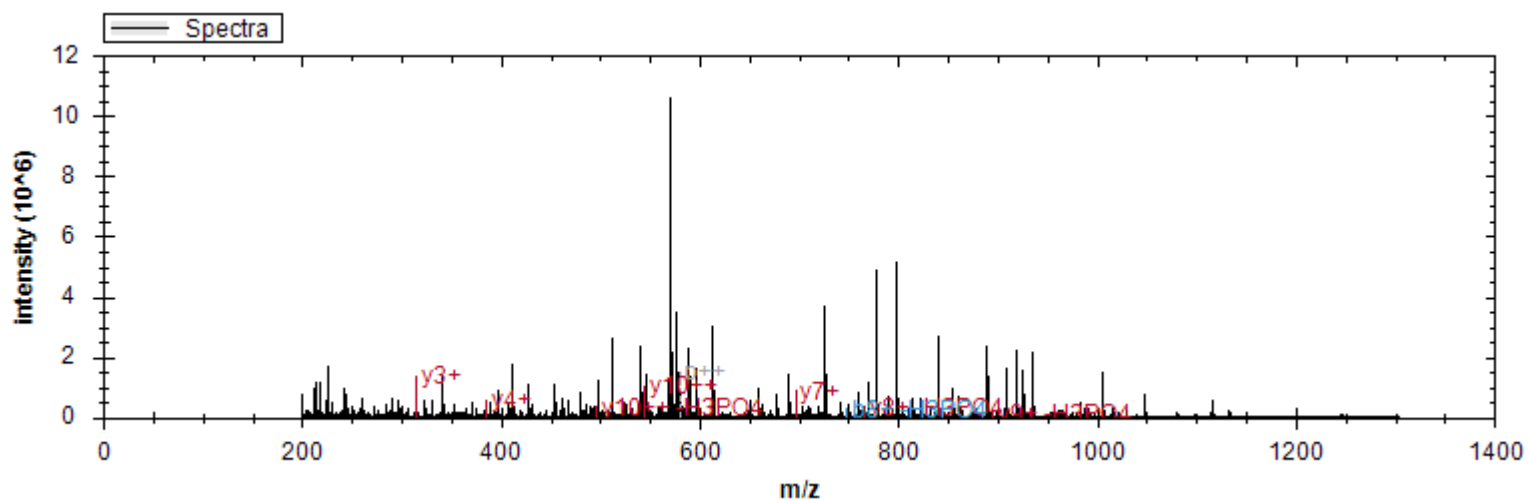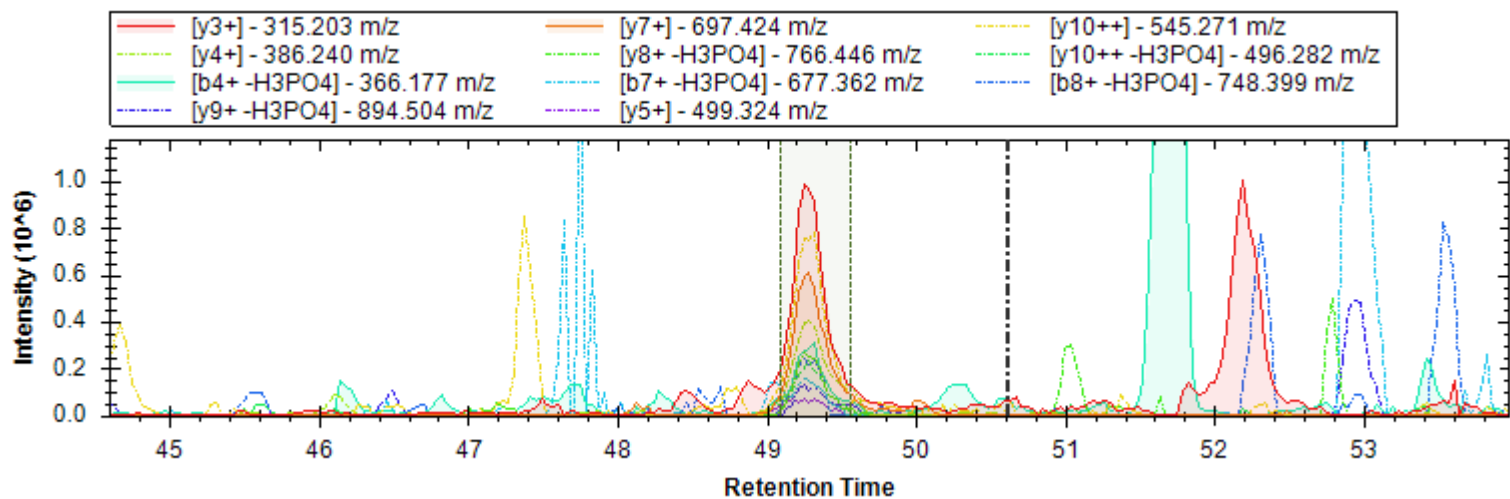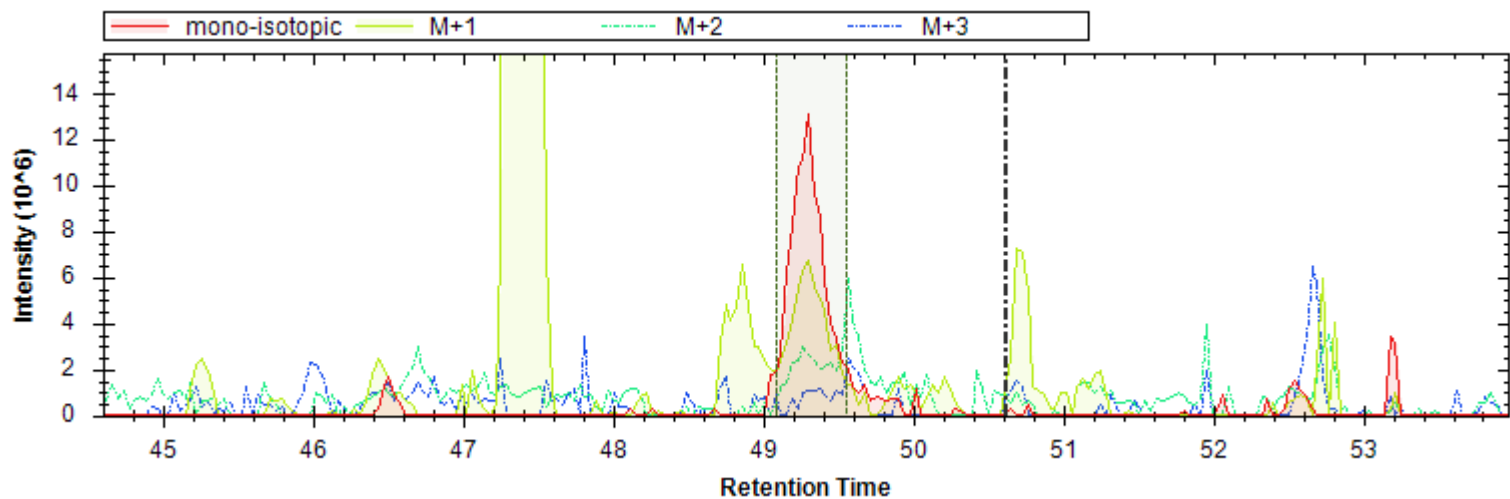

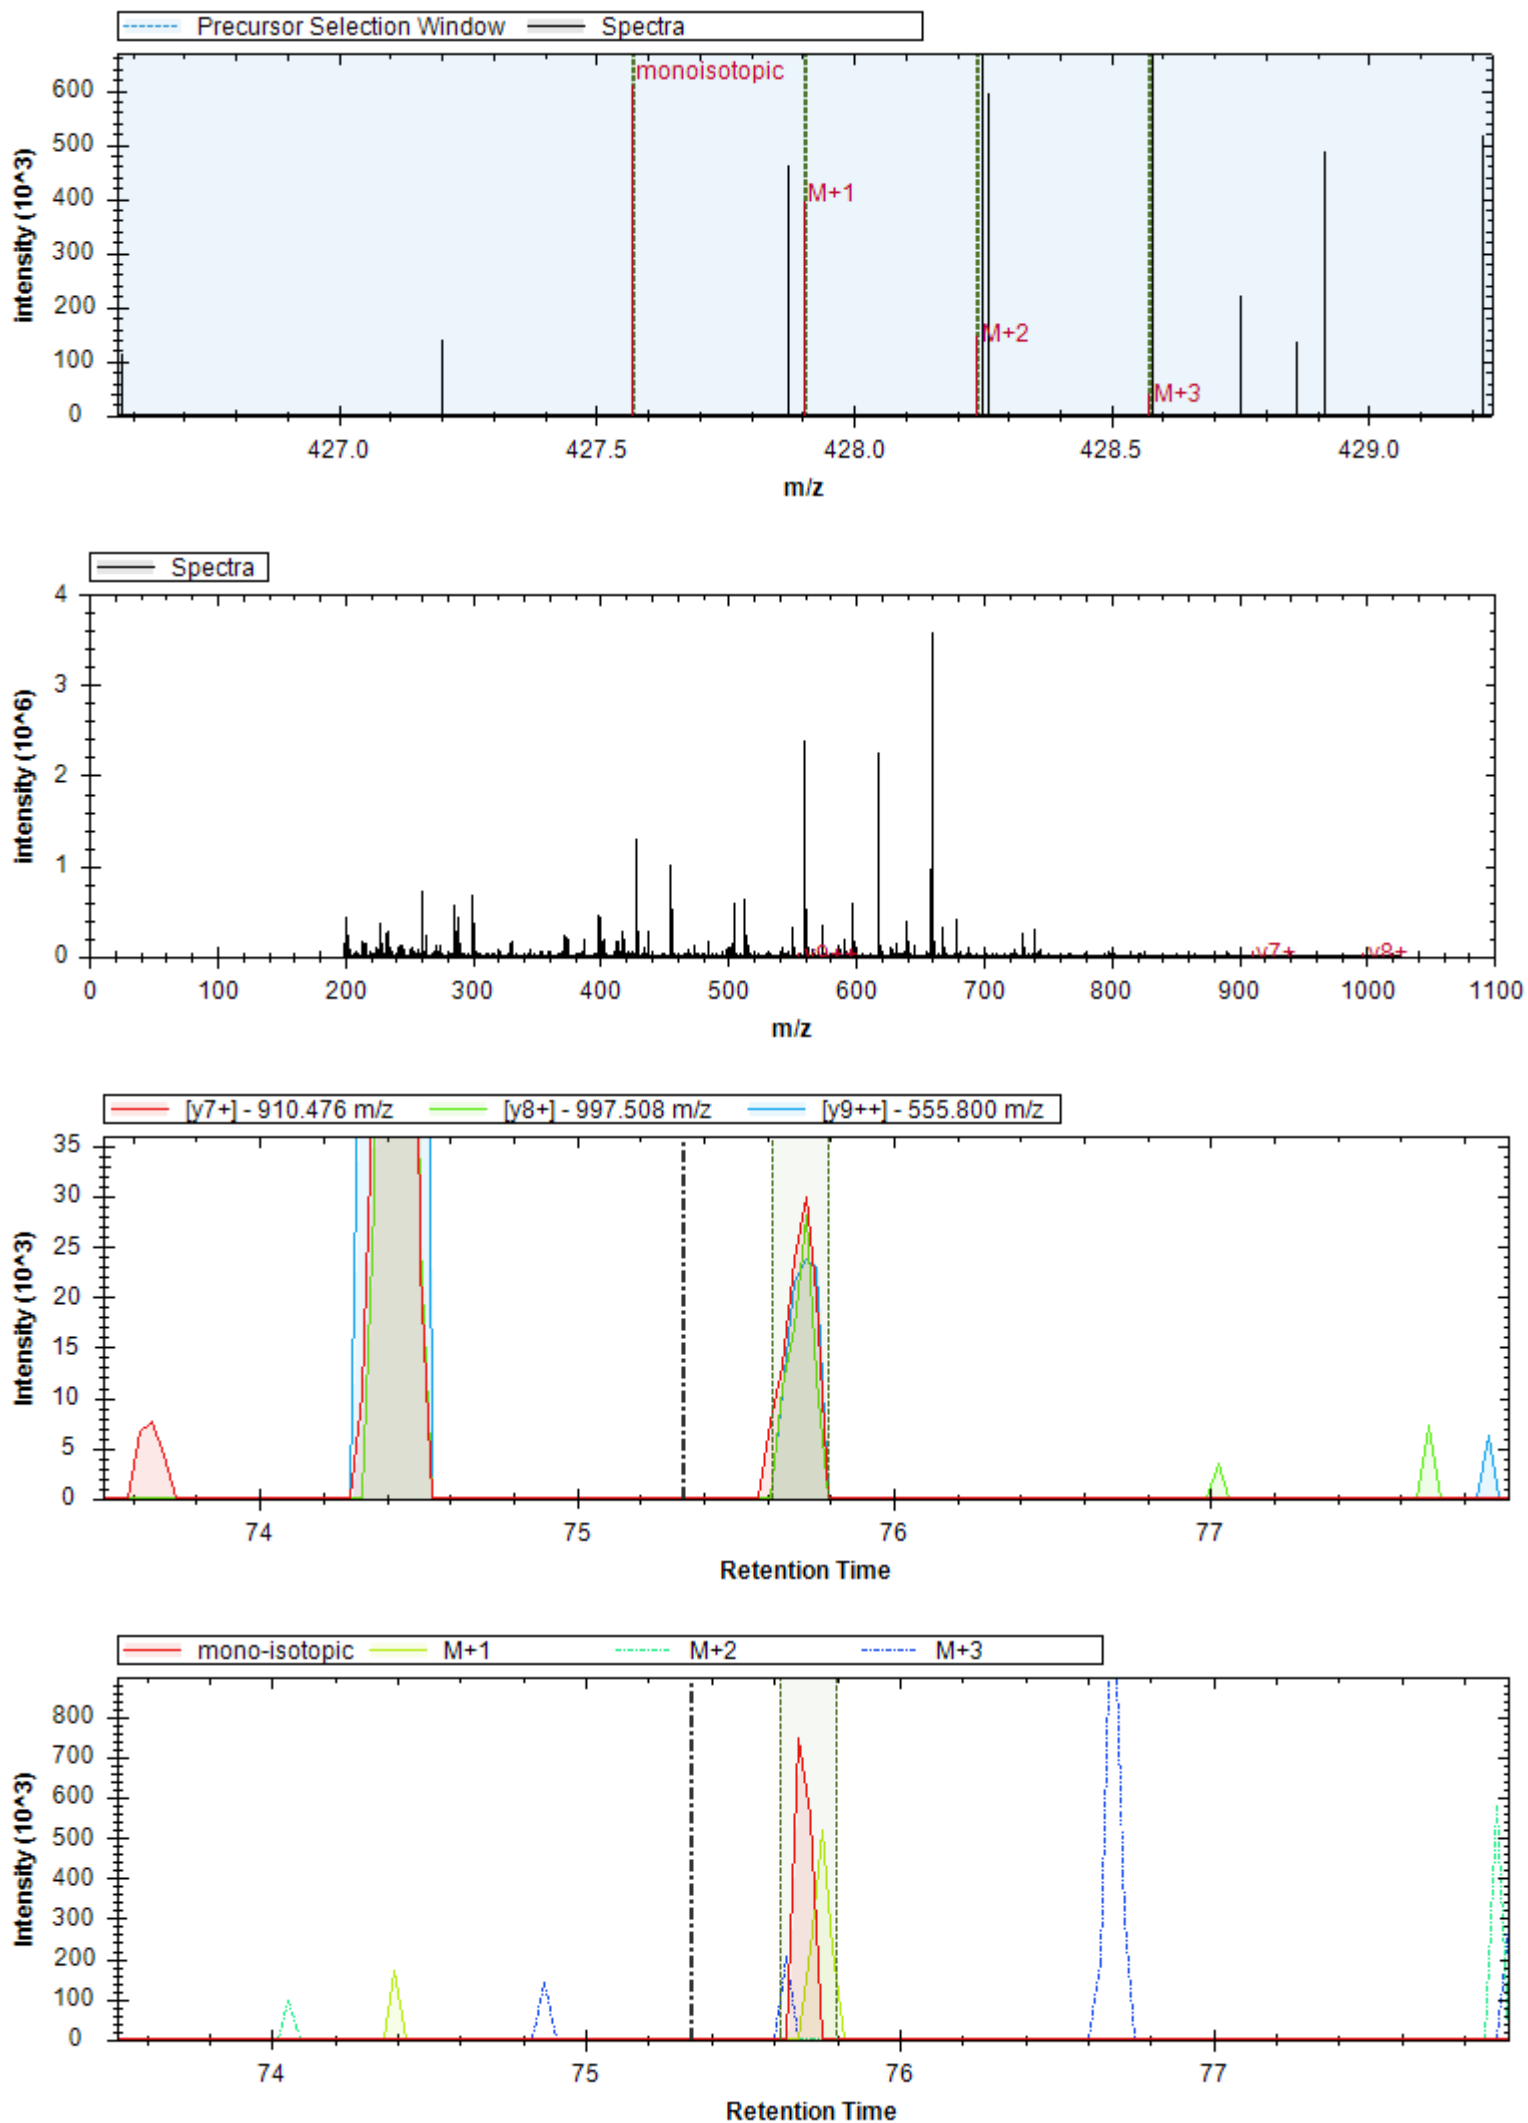

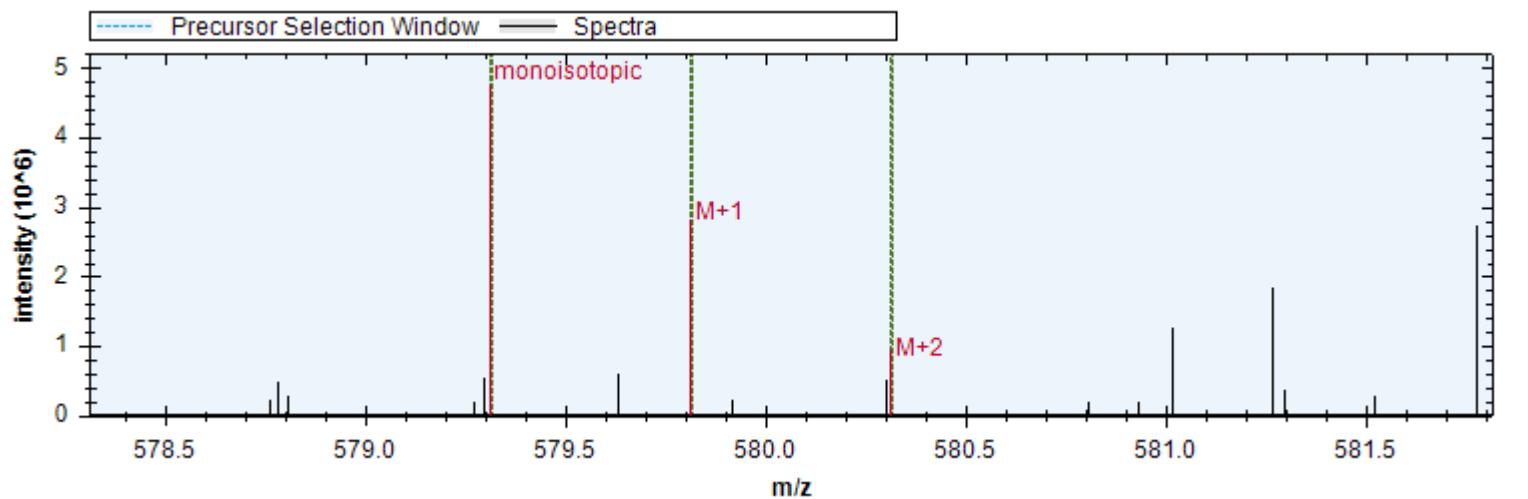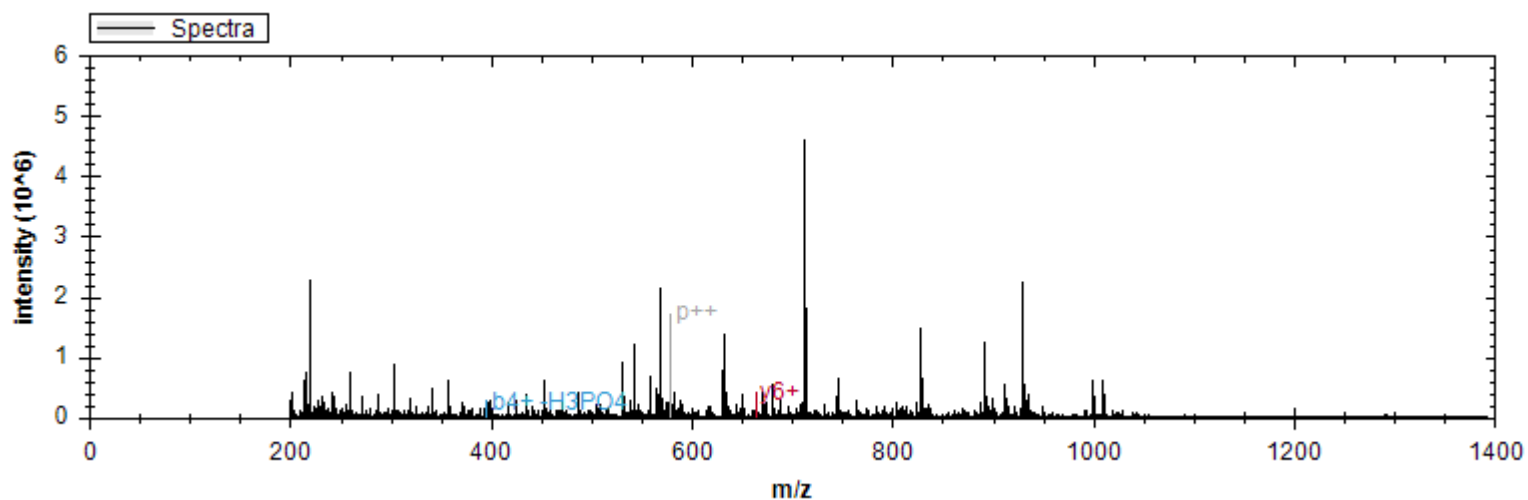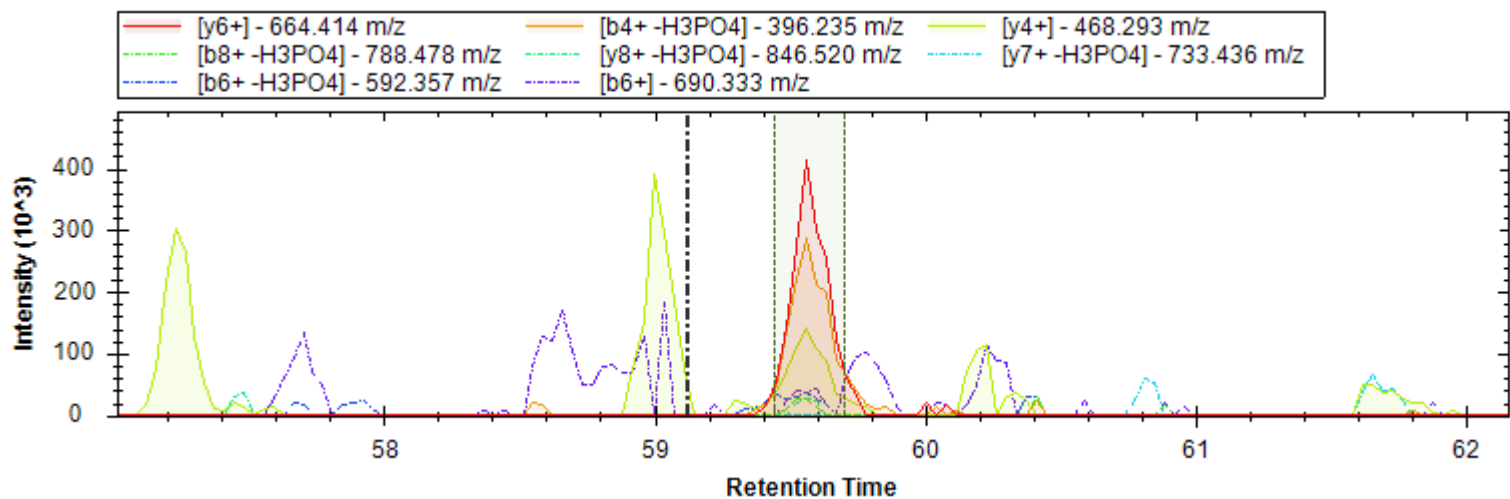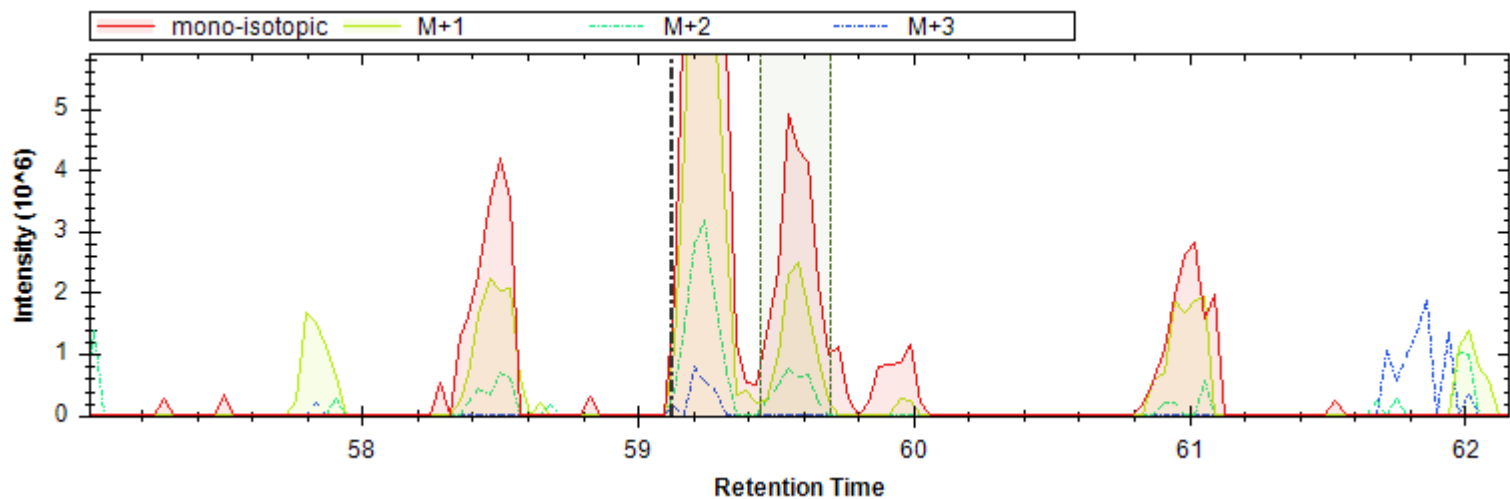

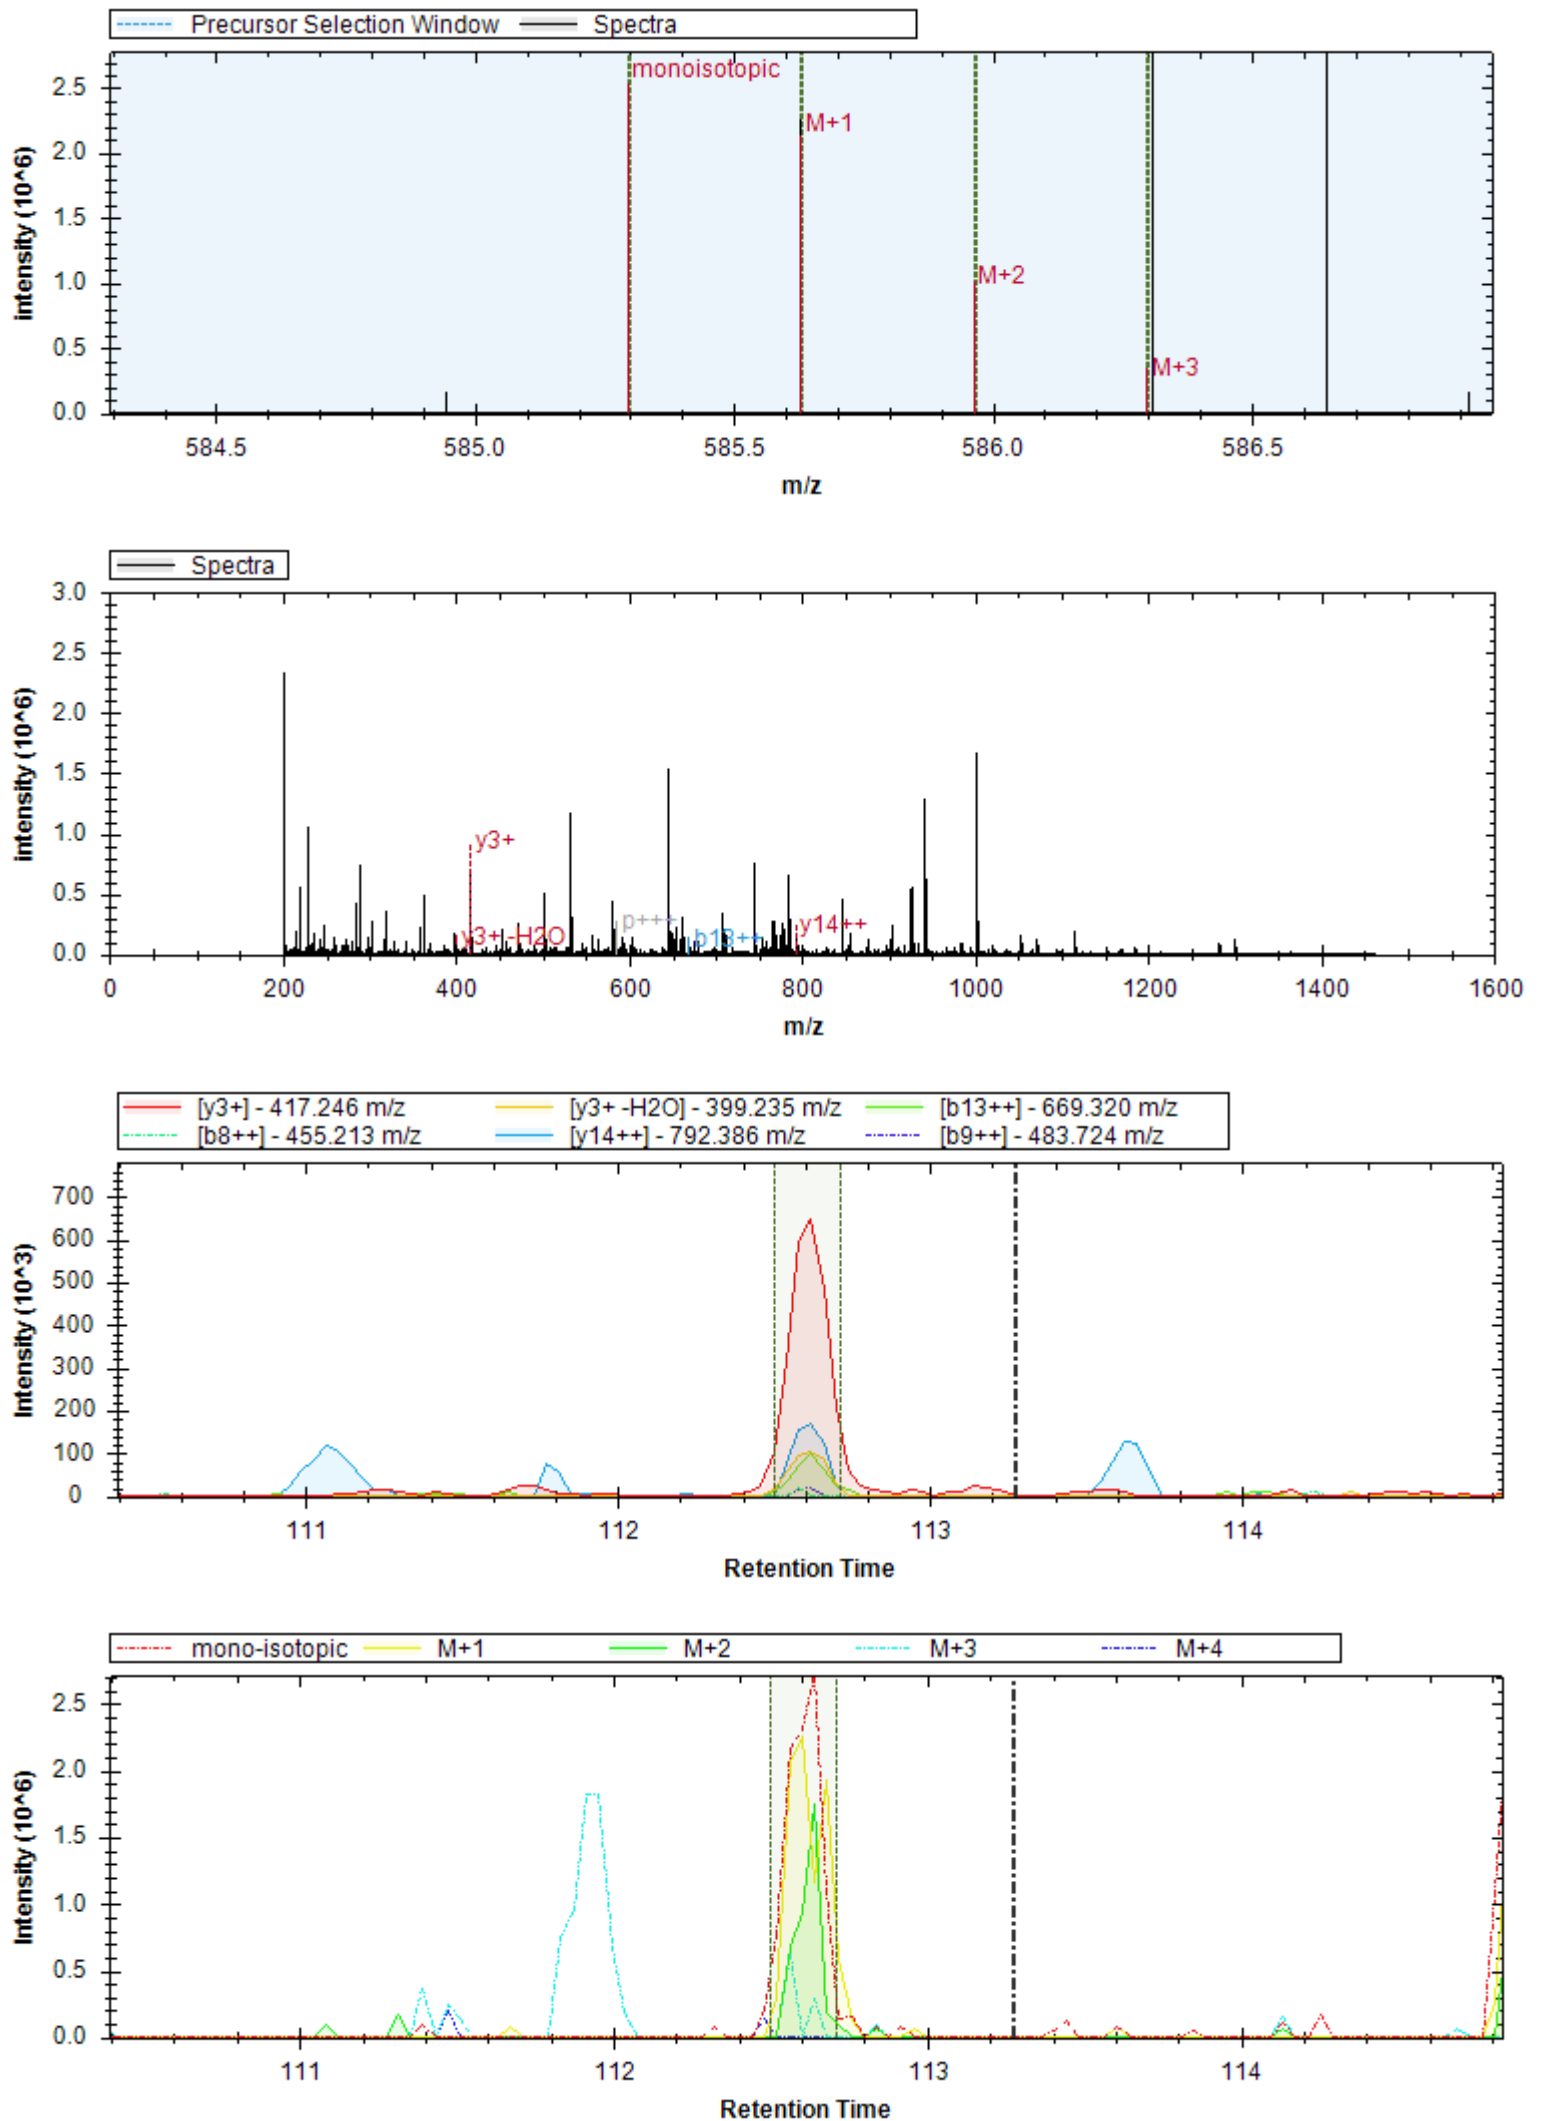

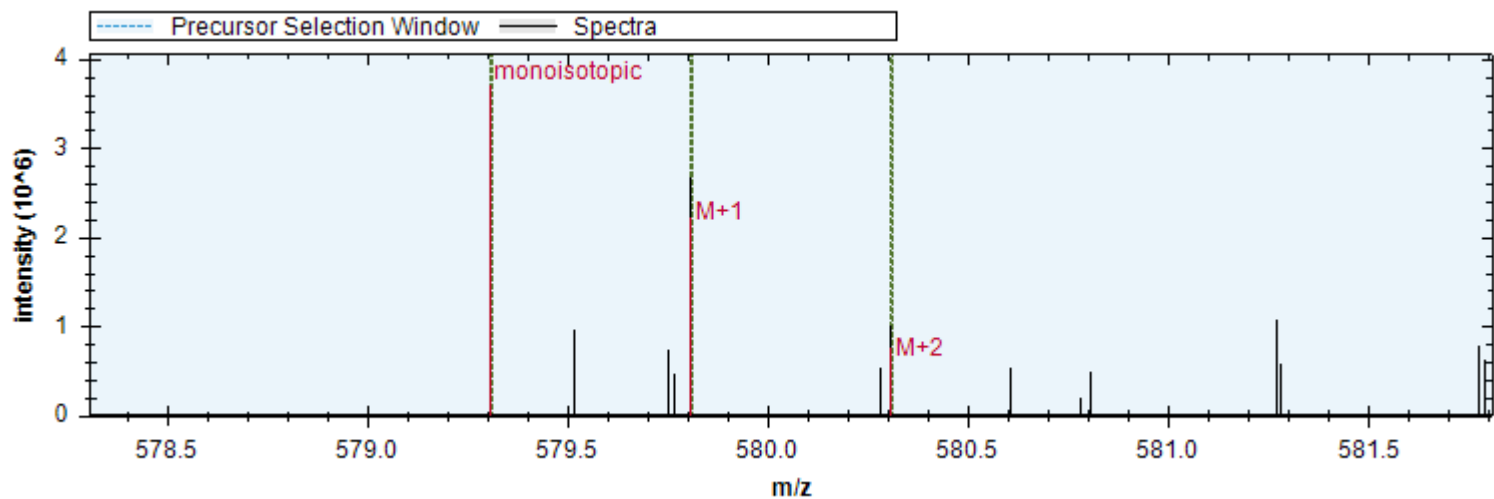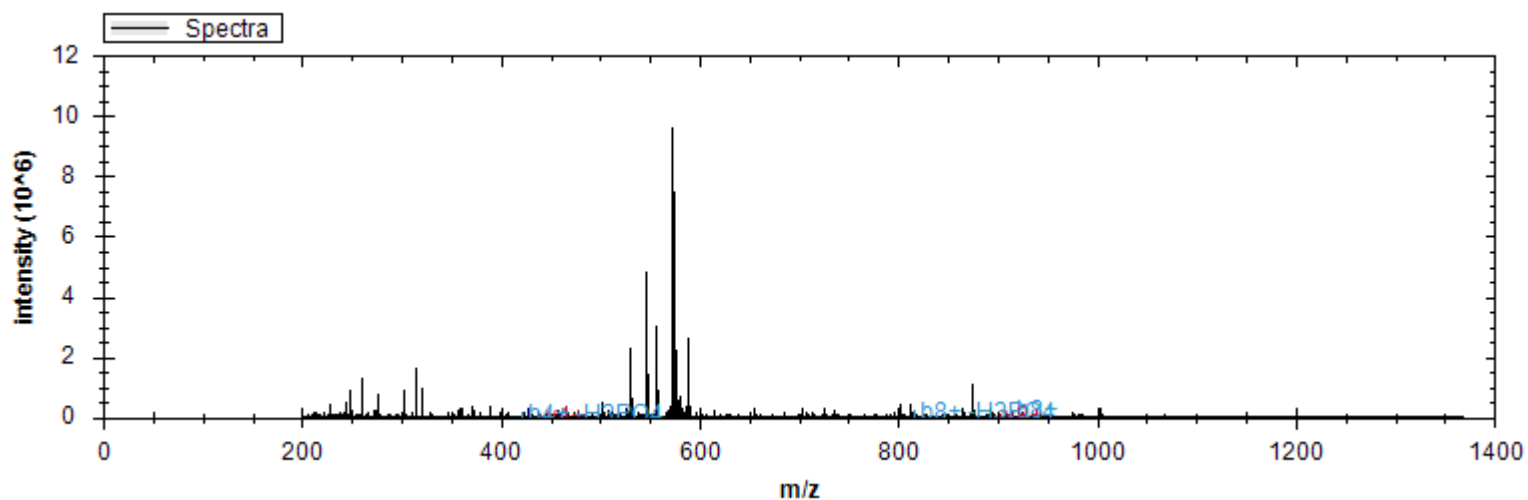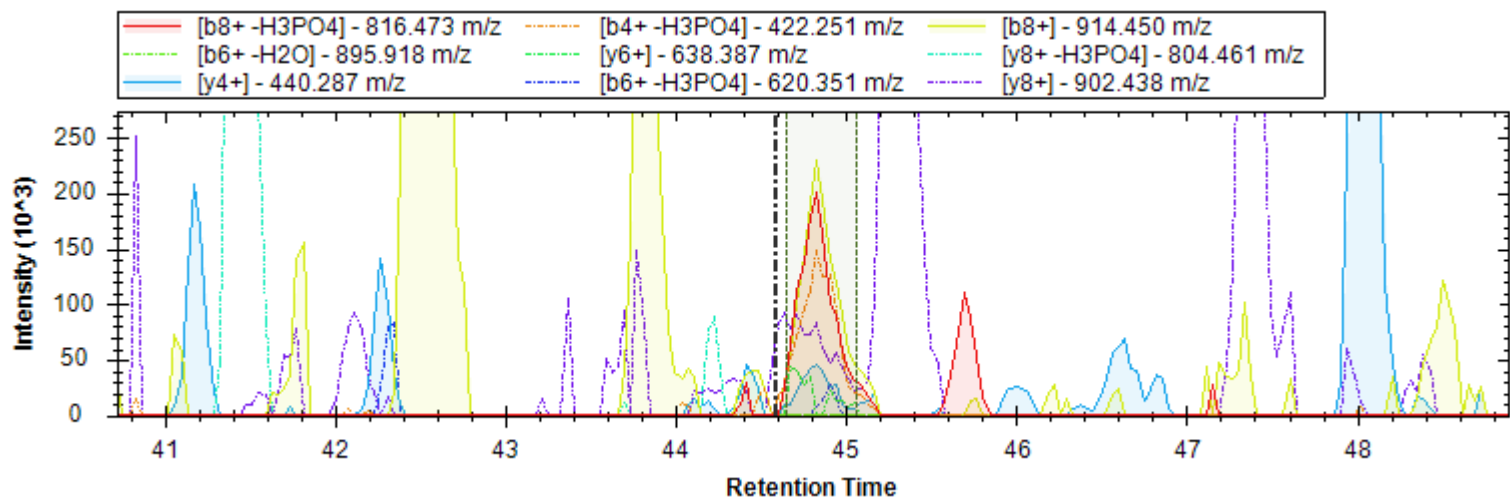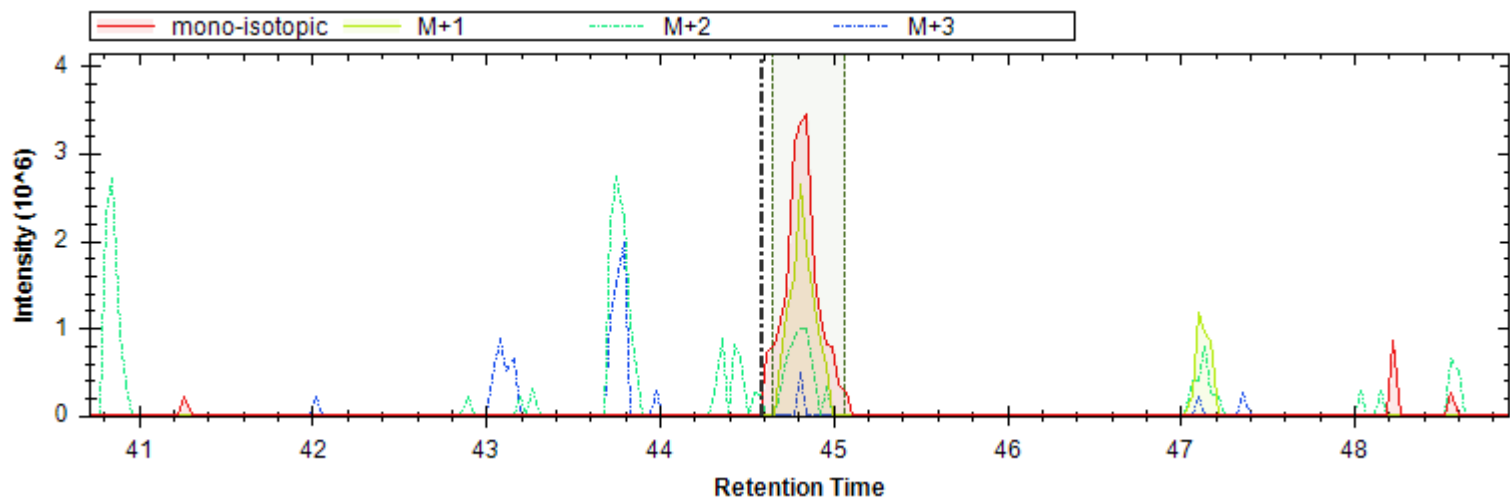

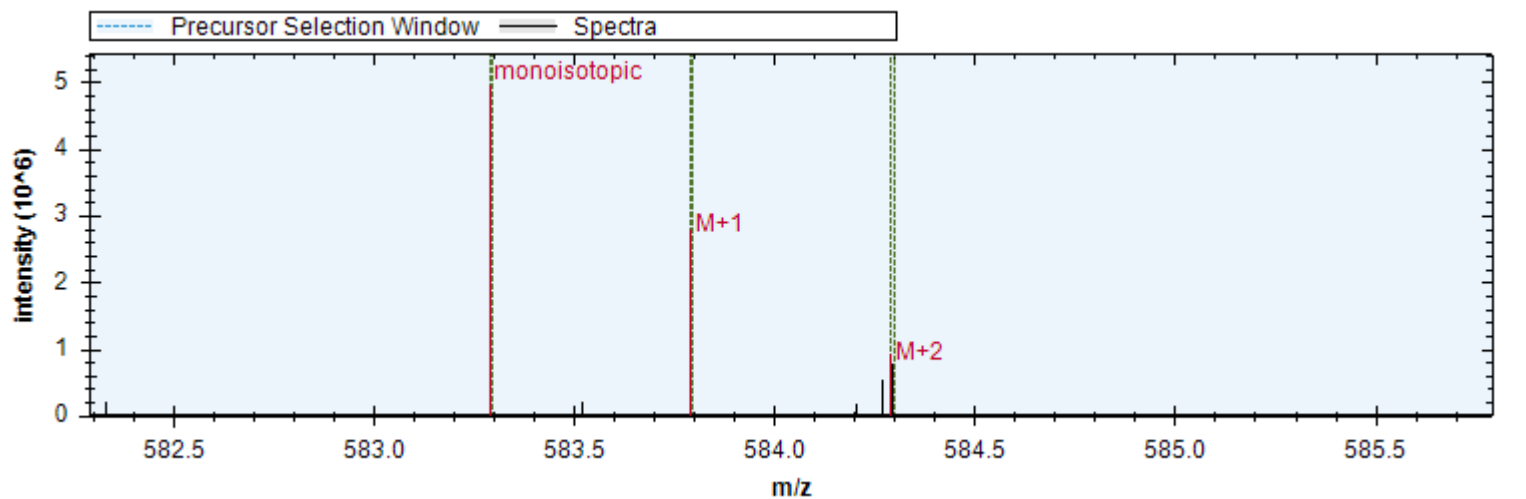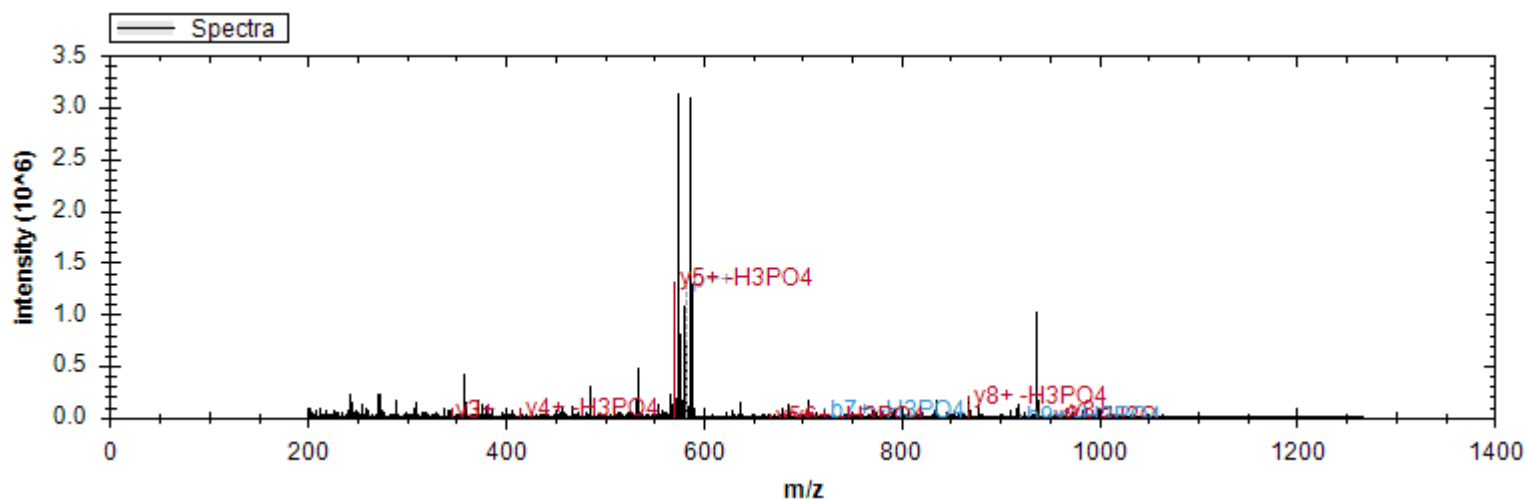

|                             |                            |                            |
|-----------------------------|----------------------------|----------------------------|
| [y8+ -H3PO4] - 868.500 m/z  | [b7+ -H3PO4] - 723.390 m/z | [y3+] - 345.213 m/z        |
| [y8+] - 966.477 m/z         | [y6+ -H3PO4] - 683.420 m/z | [y5+ -H3PO4] - 570.336 m/z |
| [y9++ -H3PO4] - 498.783 m/z | [b4+] - 385.183 m/z        | [b6+] - 654.368 m/z        |
| [y5+] - 668.313 m/z         | [b9+ -H3PO4] - 921.490 m/z | [y8+ -H2O] - 948.466 m/z   |
| [y7+ -H3PO4] - 811.479 m/z  | [b9+ -NH3] - 1100.240 m/z  | [y4+ -H3PO4] - 414.235 m/z |

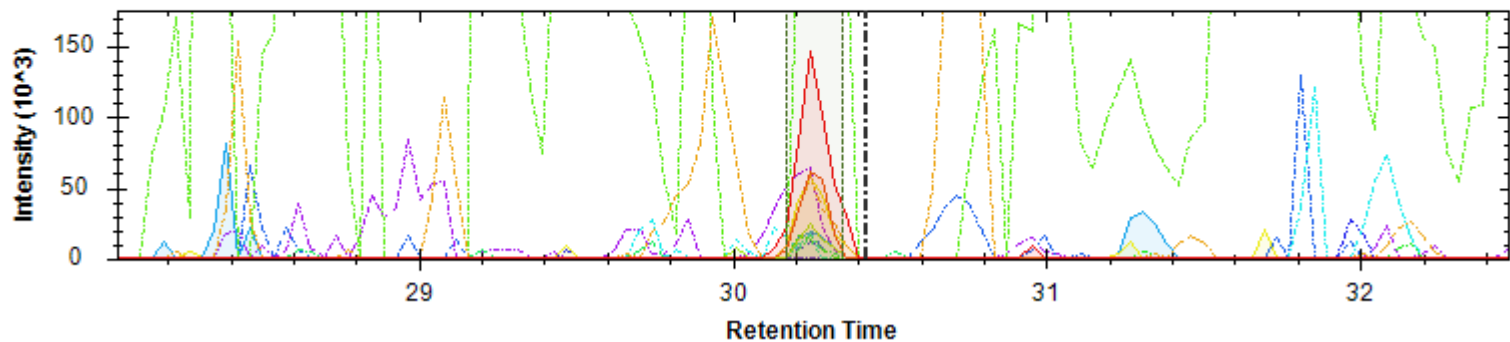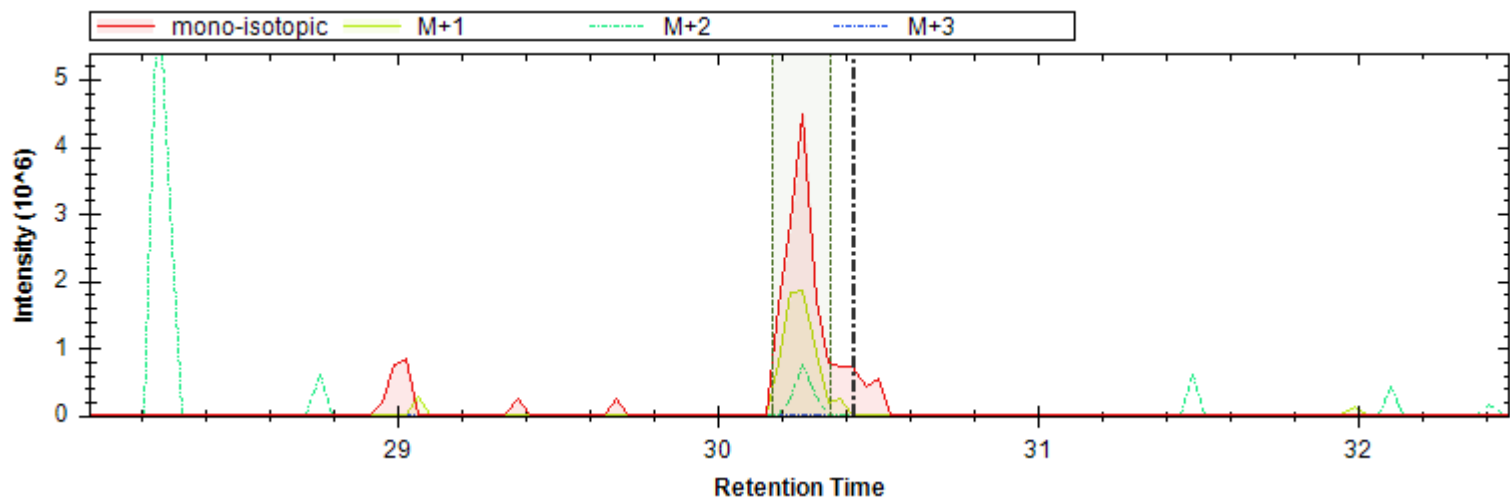

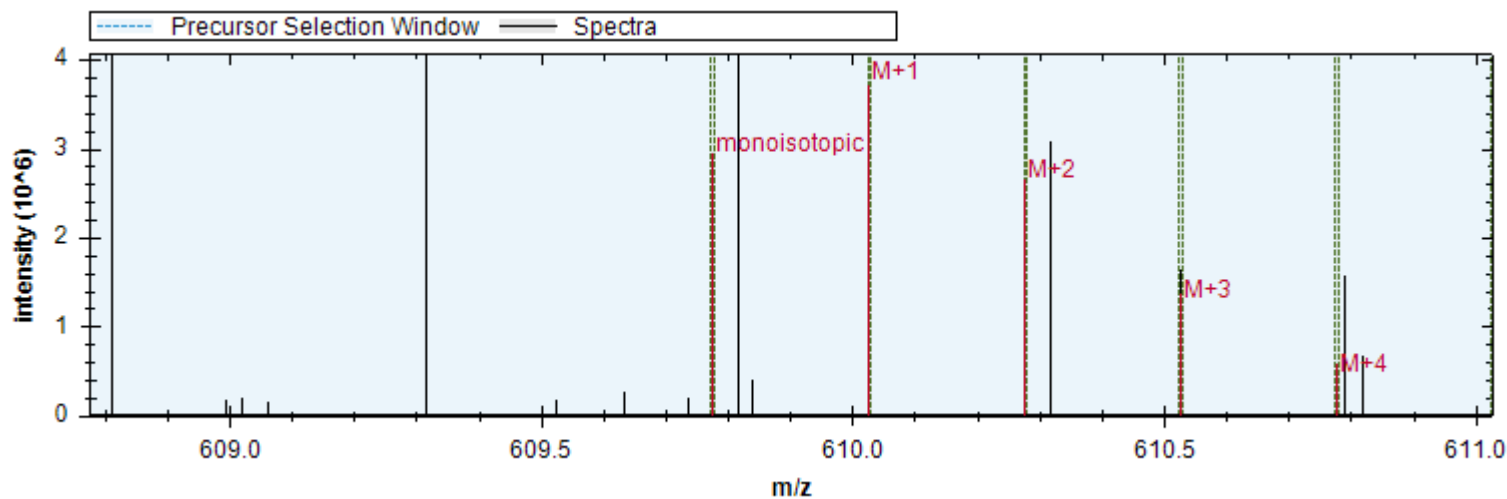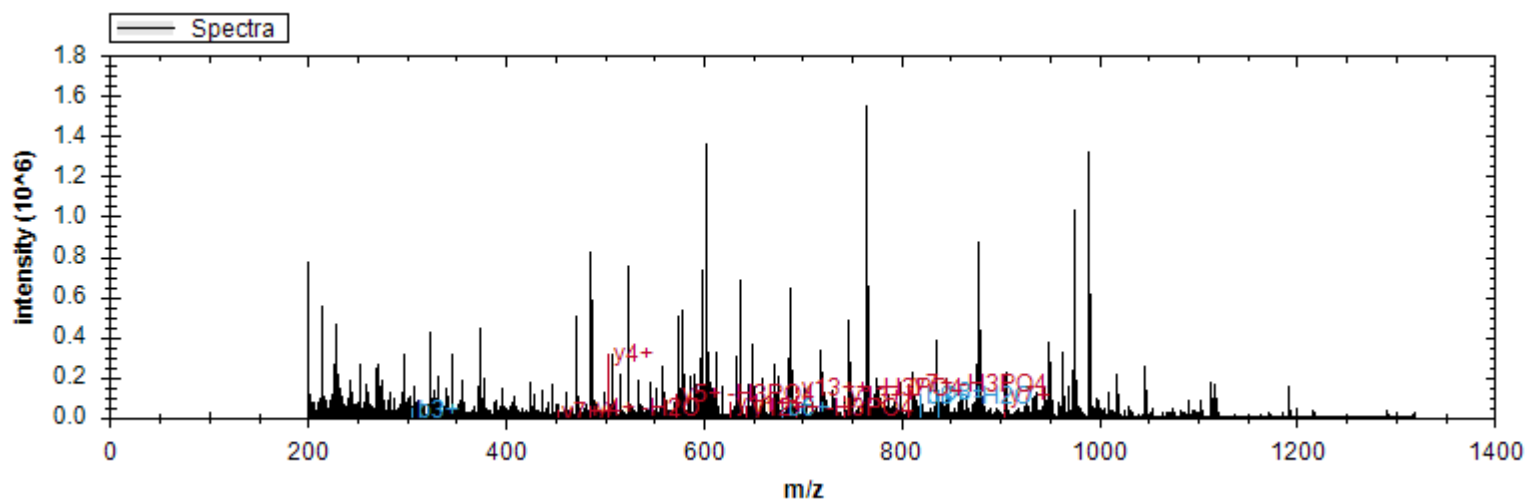

|                              |                              |                              |
|------------------------------|------------------------------|------------------------------|
| [y7+ -H3PO4] - 807.382 m/z   | [y13++ -H3PO4] - 694.325 m/z | [b8+ -H2O] - 820.374 m/z     |
| [y4+] - 504.249 m/z          | [b8+] - 838.384 m/z          | [y7+] - 905.359 m/z          |
| [y11++ -H3PO4] - 579.280 m/z | [y5+ -H3PO4] - 573.270 m/z   | [y12++ -H3PO4] - 643.801 m/z |
| [y11++] - 628.268 m/z        | [y13++] - 743.313 m/z        | [b7+] - 751.352 m/z          |
| [b9++] - 476.238 m/z         | [y6+ -H3PO4] - 710.329 m/z   | [b6+ -H2O] - 662.305 m/z     |
| [y12++] - 692.789 m/z        | [b9+ -H2O] - 933.458 m/z     | [b7+ -H2O] - 733.342 m/z     |
| [b6+] - 680.315 m/z          | [y5+ -NH3] - 752.020 m/z     | [y4+ -H2O] - 486.238 m/z     |
| [b5+] - 593.283 m/z          | [y7++] - 453.183 m/z         | [b3+] - 306.156 m/z          |
| [y10++] - 592.750 m/z        |                              |                              |

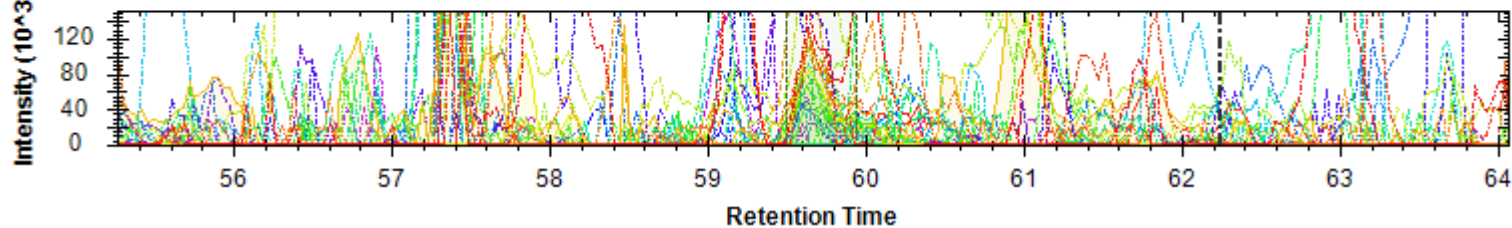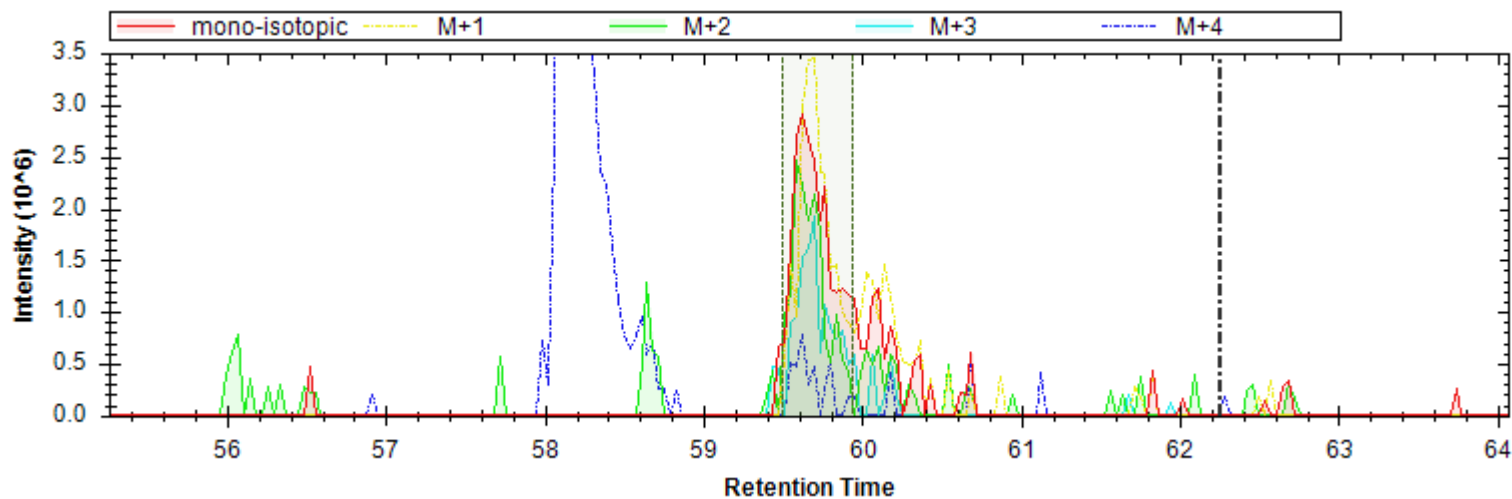



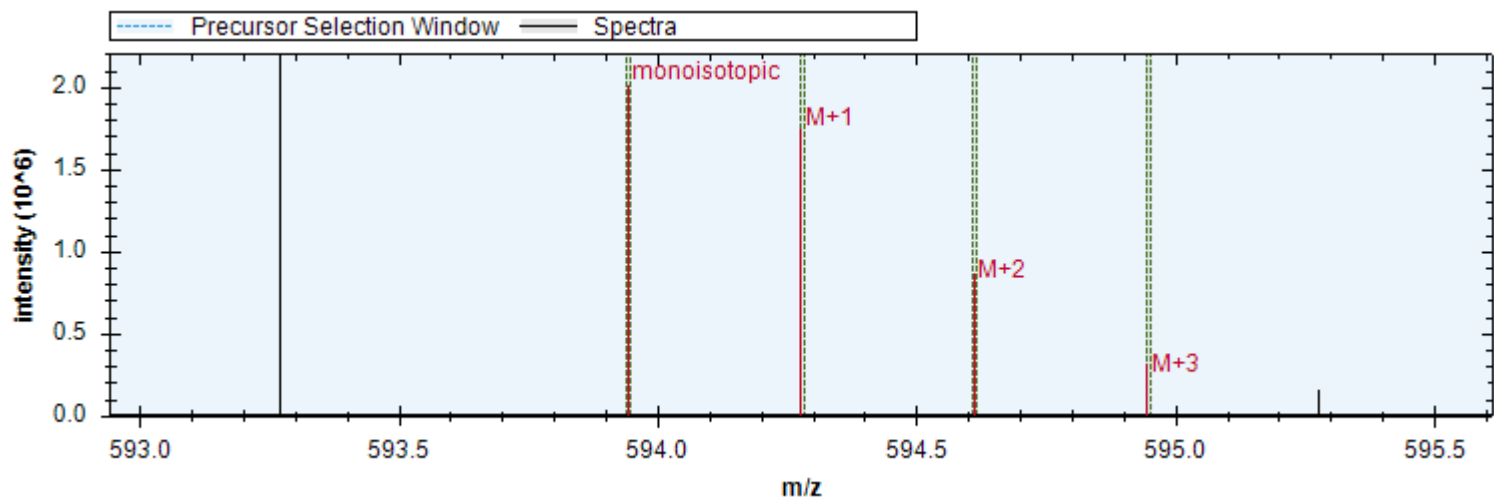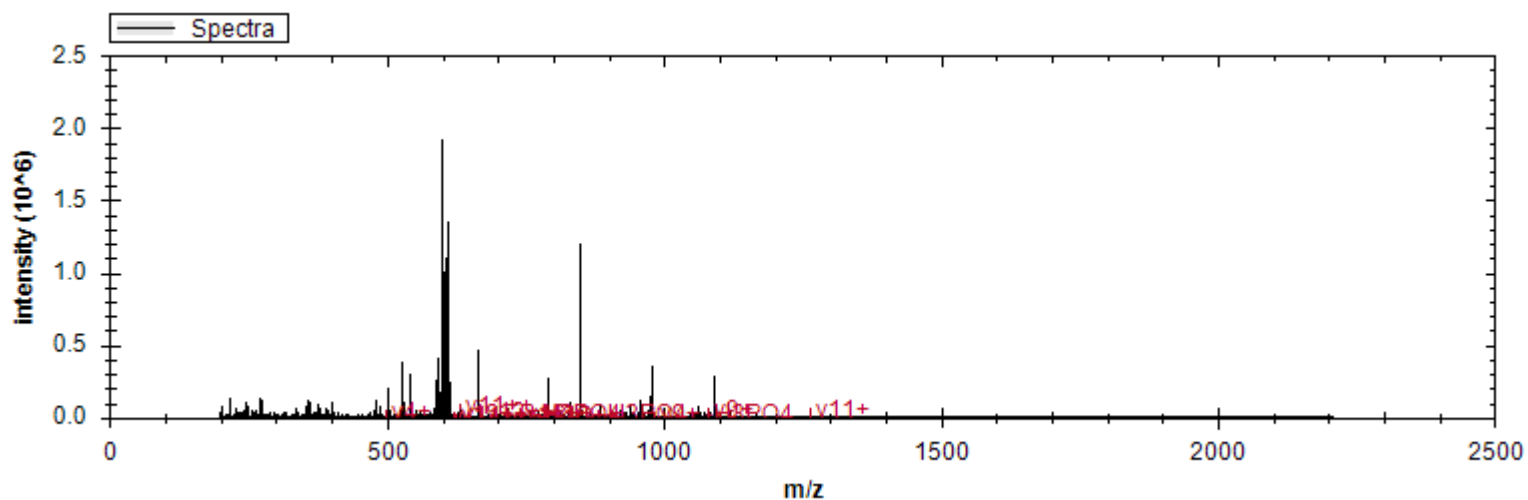

- |                              |                              |                              |
|------------------------------|------------------------------|------------------------------|
| [y9+] - 1081.529 m/z         | [y11++] - 633.311 m/z        | [y4+] - 500.356 m/z          |
| [y11+] - 1265.614 m/z        | [y12++ -H3PO4] - 619.841 m/z | [y11+ -H3PO4] - 1167.637 m/z |
| [b4+ -H2O] - 355.125 m/z     | [y9+ -H3PO4] - 983.552 m/z   | [b3+] - 316.114 m/z          |
| [y15++ -H3PO4] - 741.383 m/z | [y10+ -H3PO4] - 1070.584 m/z | [y12++] - 668.829 m/z        |
| [y7+] - 897.444 m/z          | [y11++ -H2O] - 624.305 m/z   | [y15++] - 790.372 m/z        |
| [y14++ -H3PO4] - 683.870 m/z | [b6+] - 515.210 m/z          |                              |

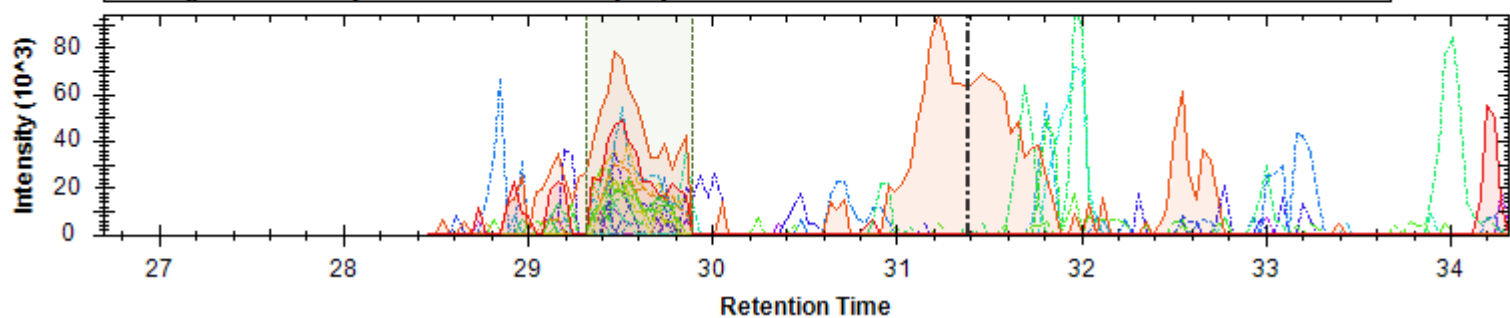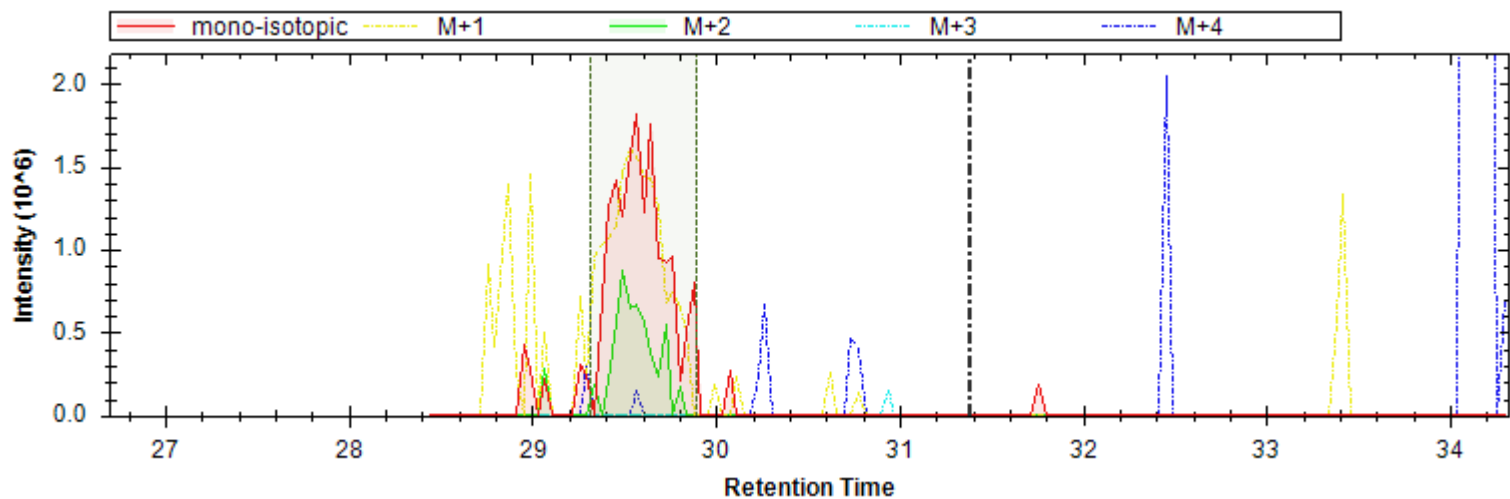

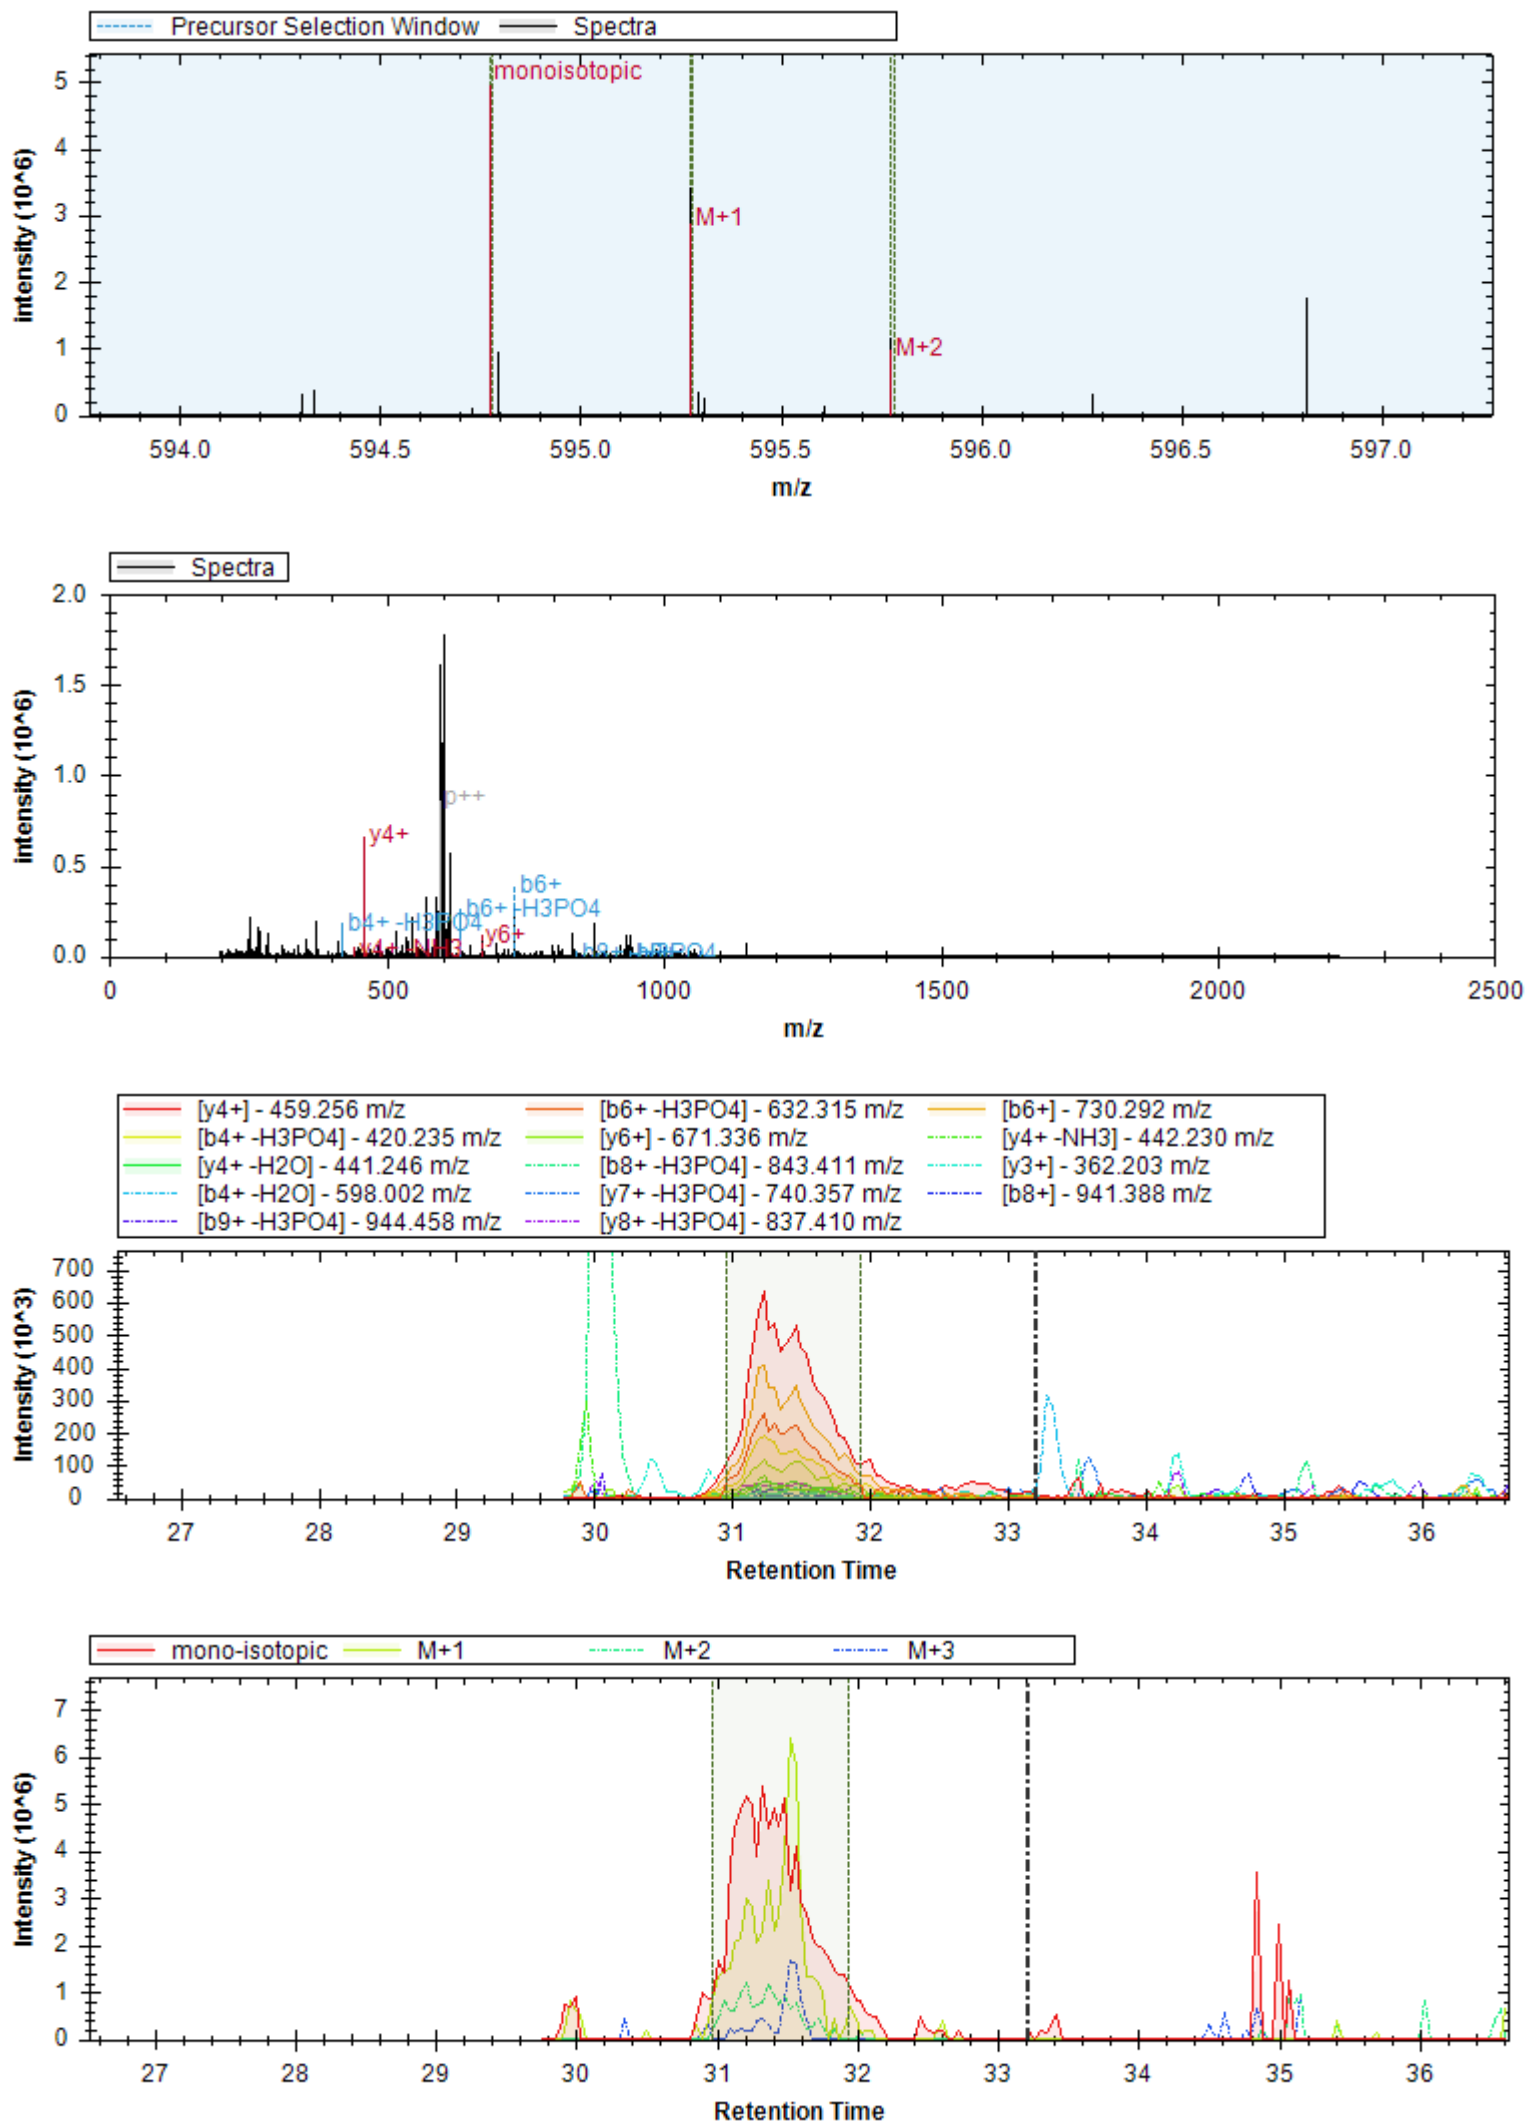

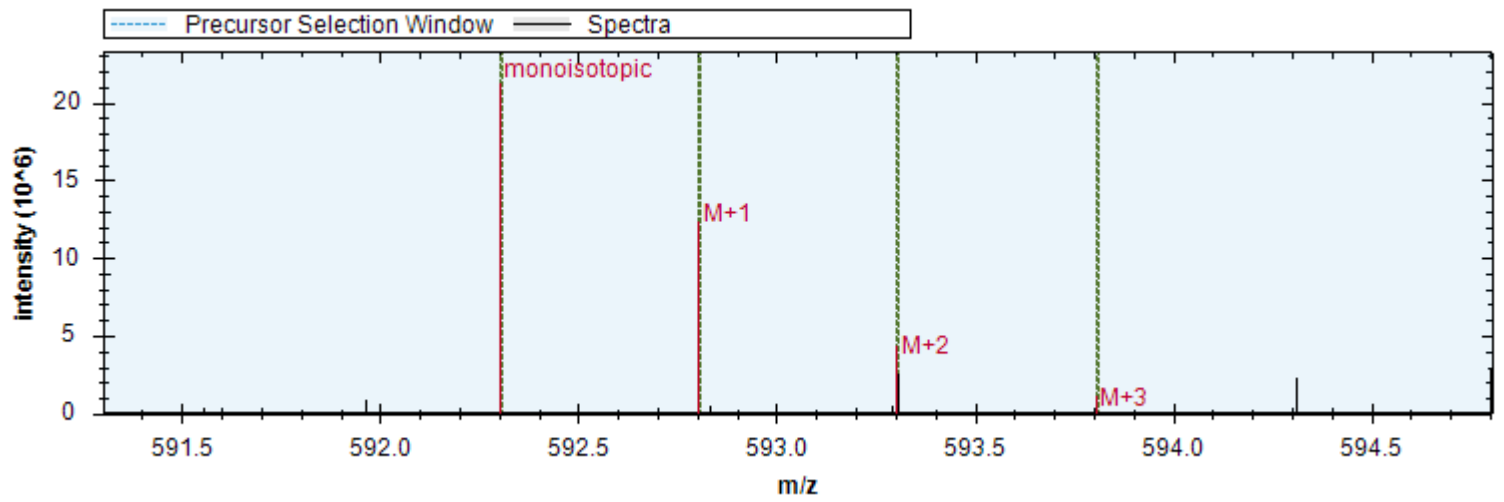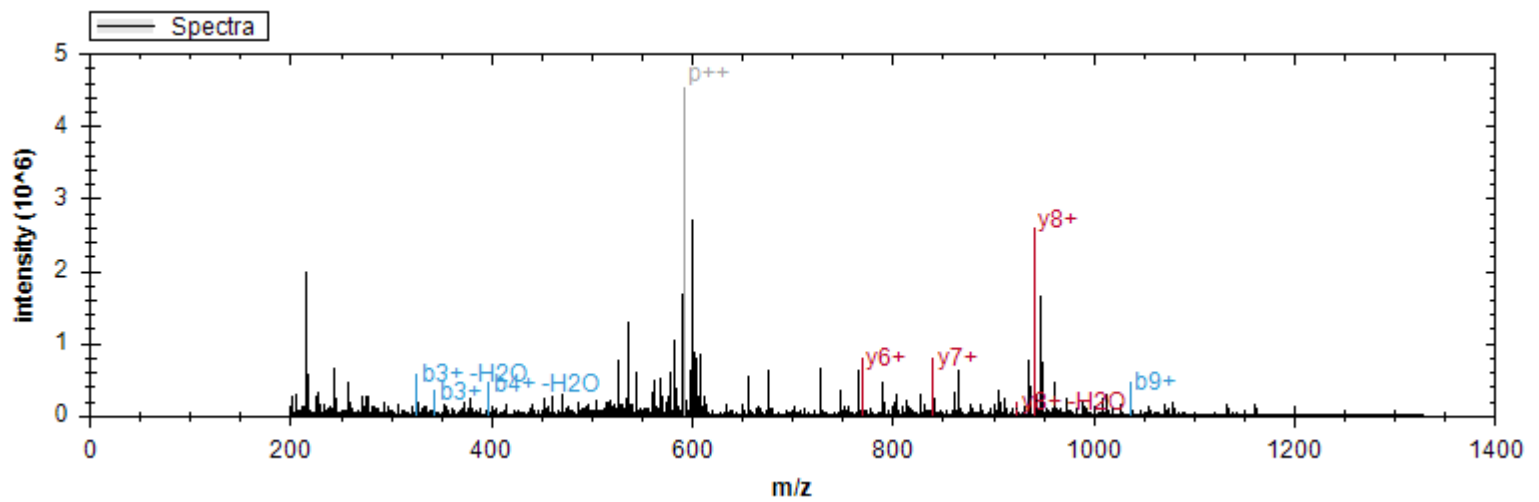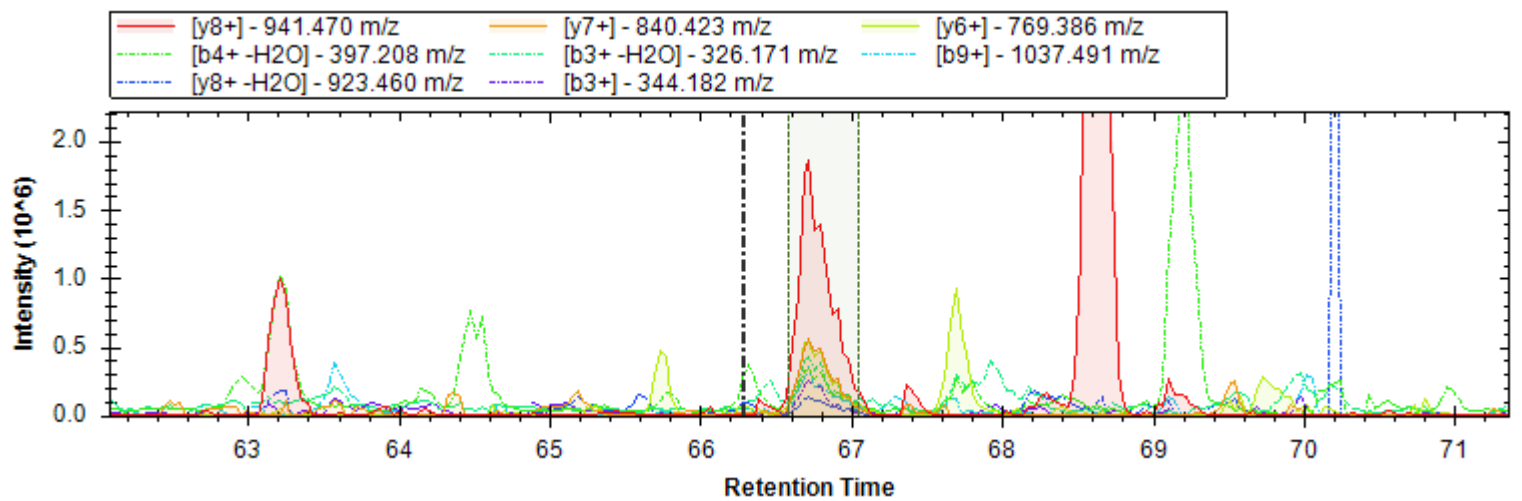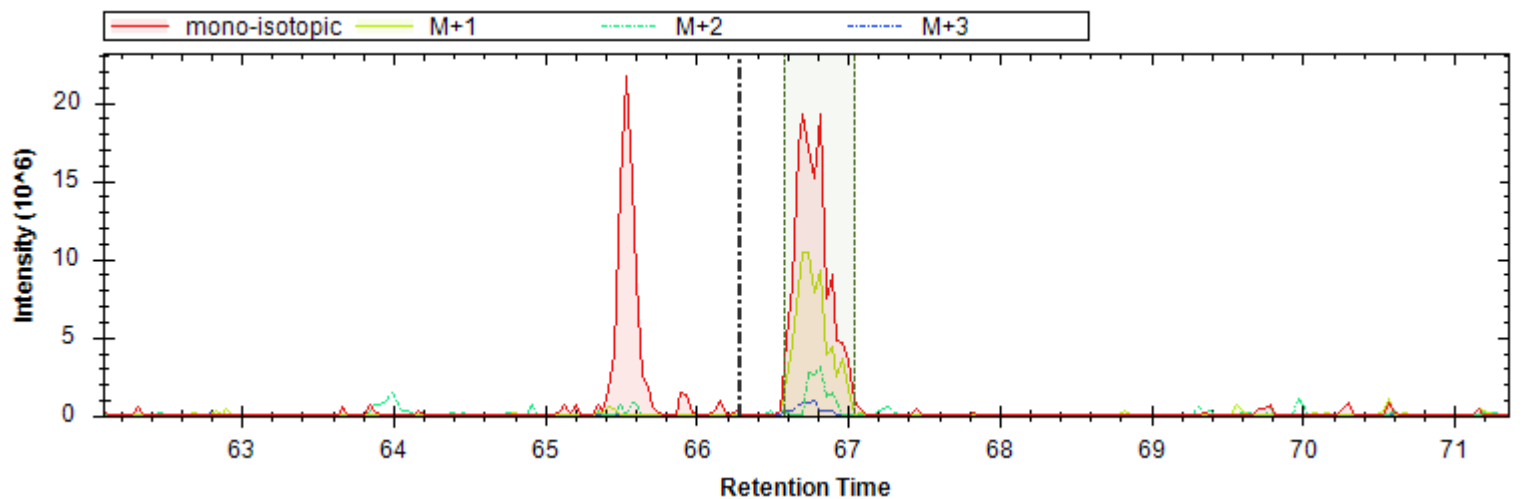

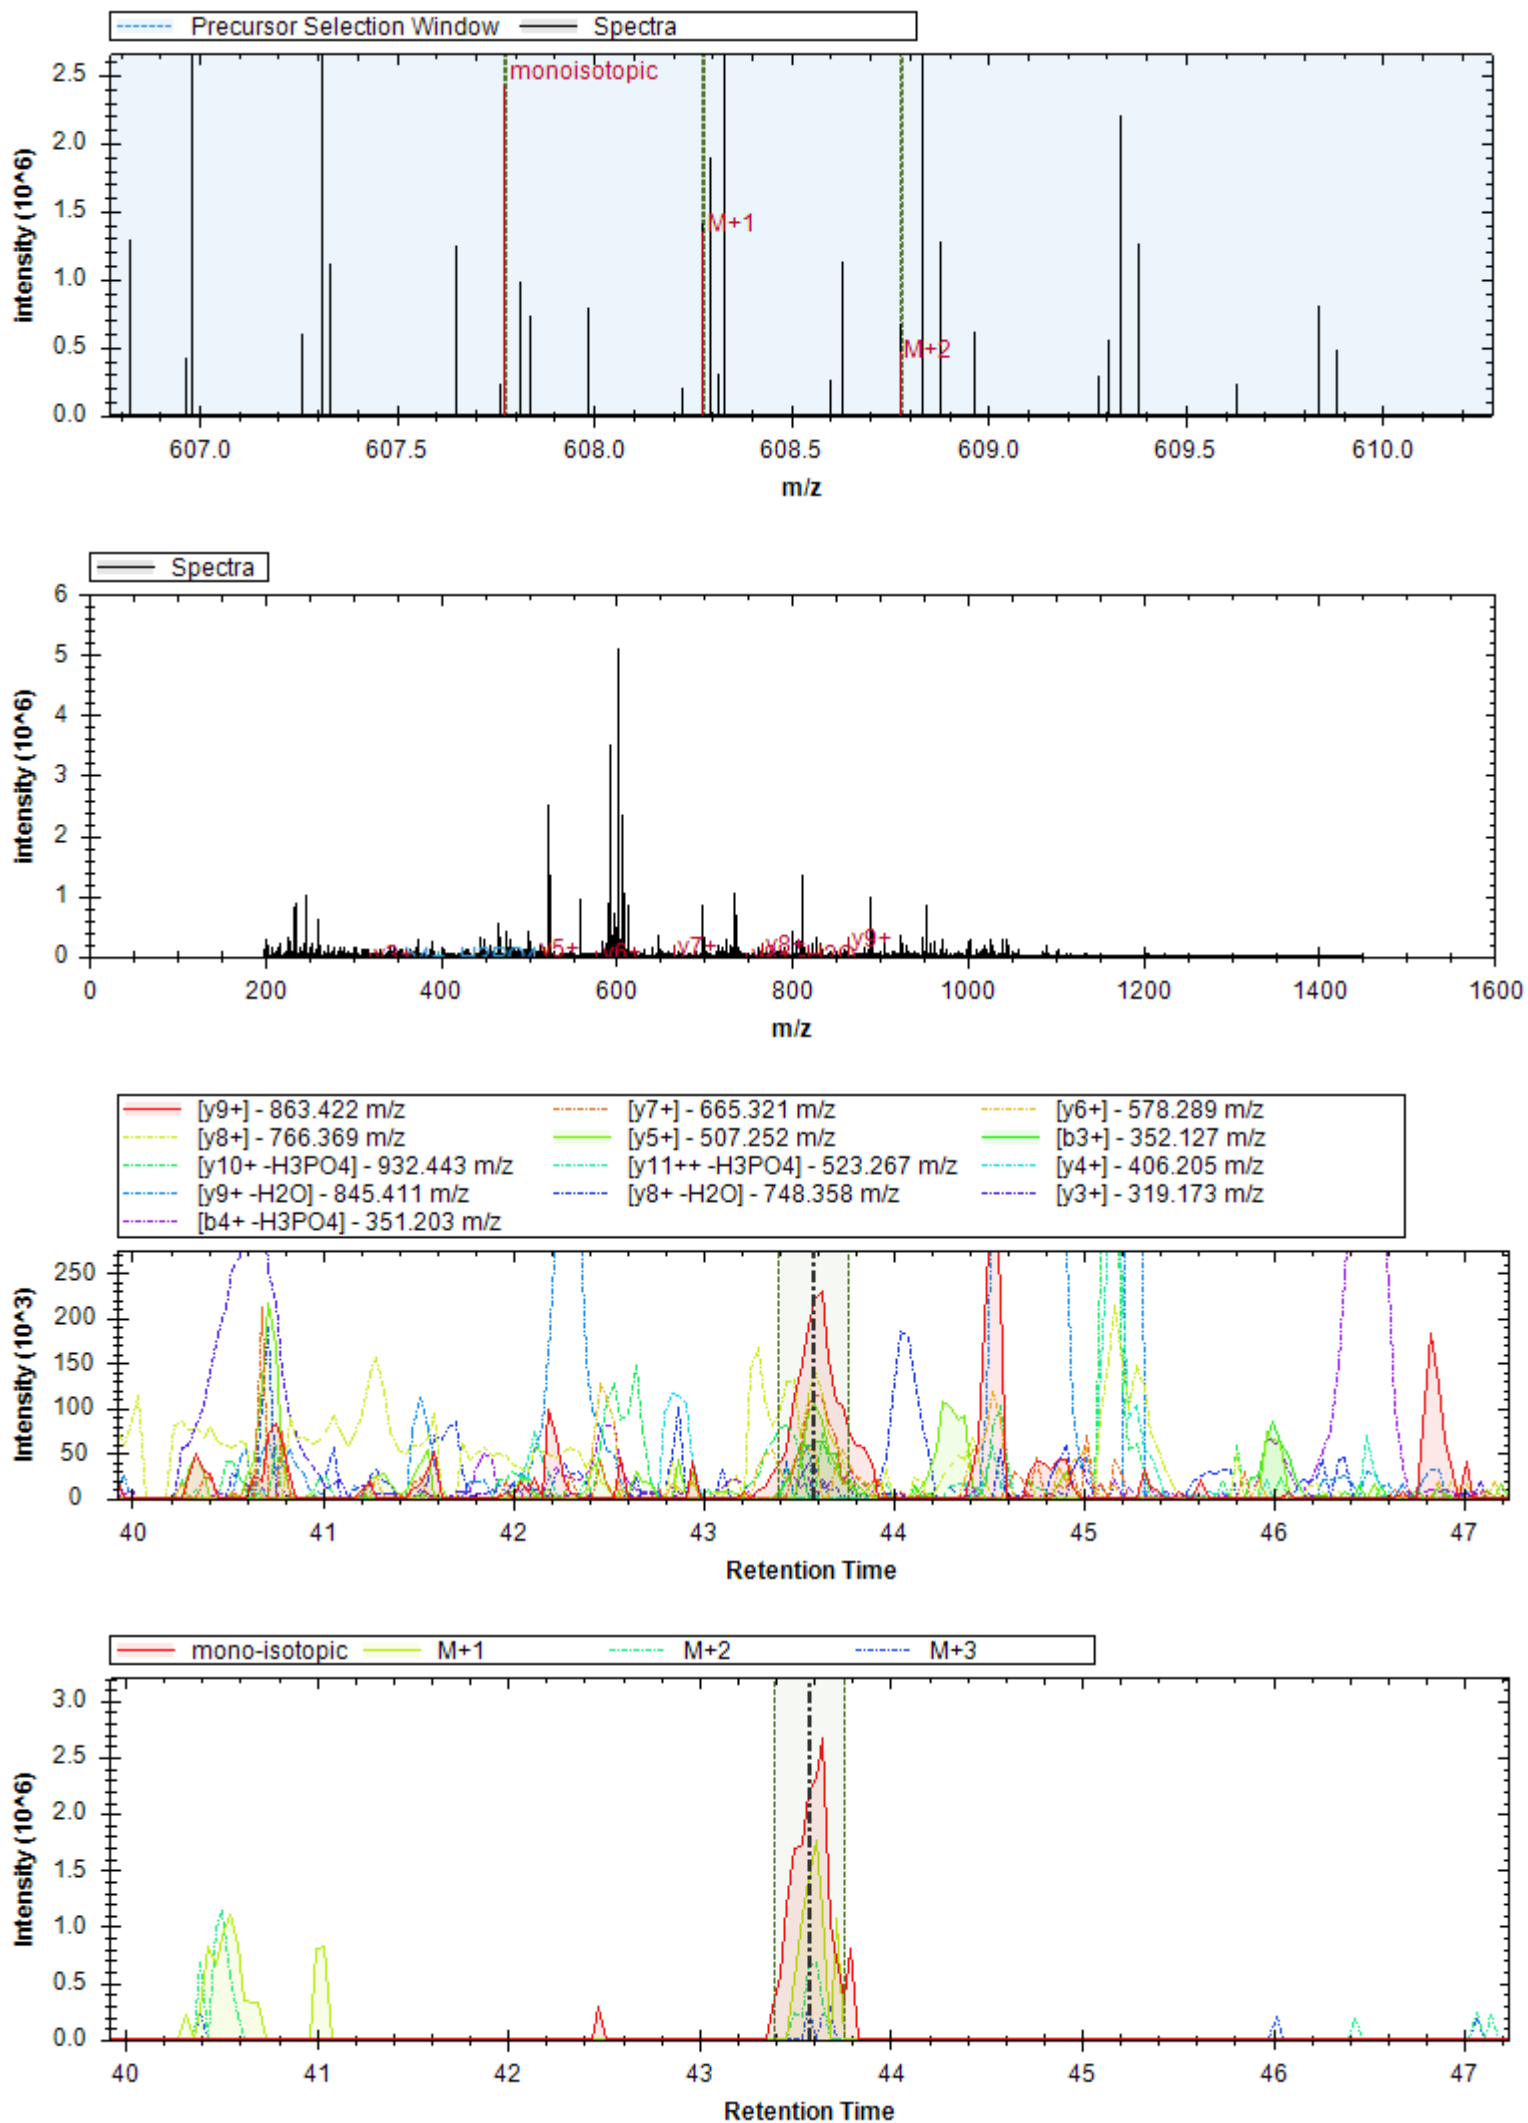

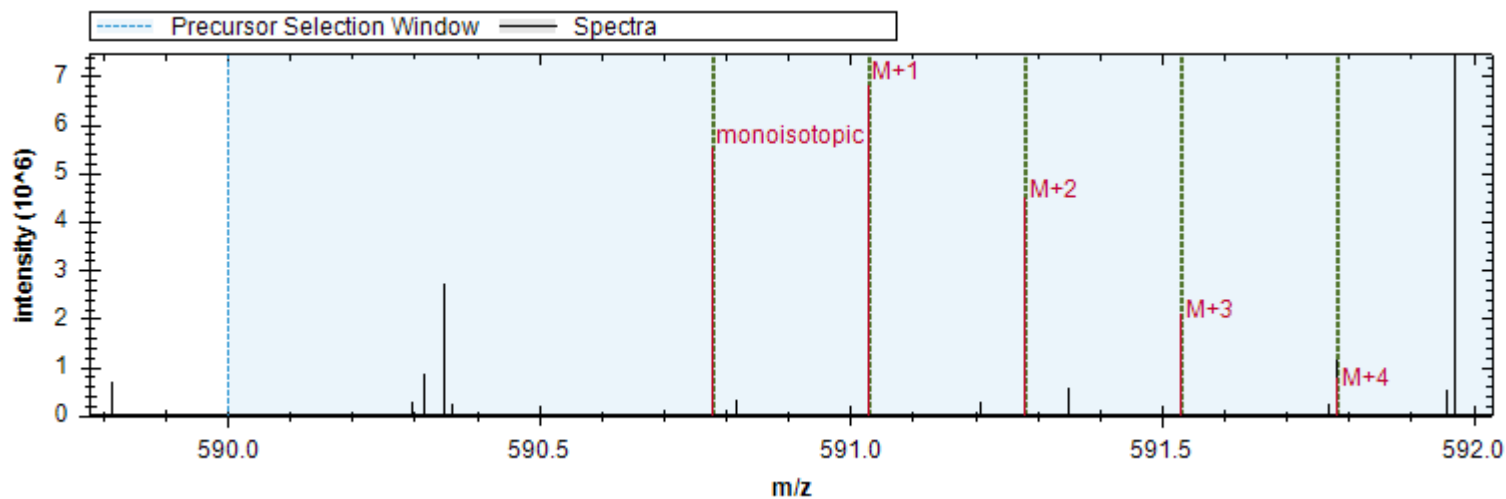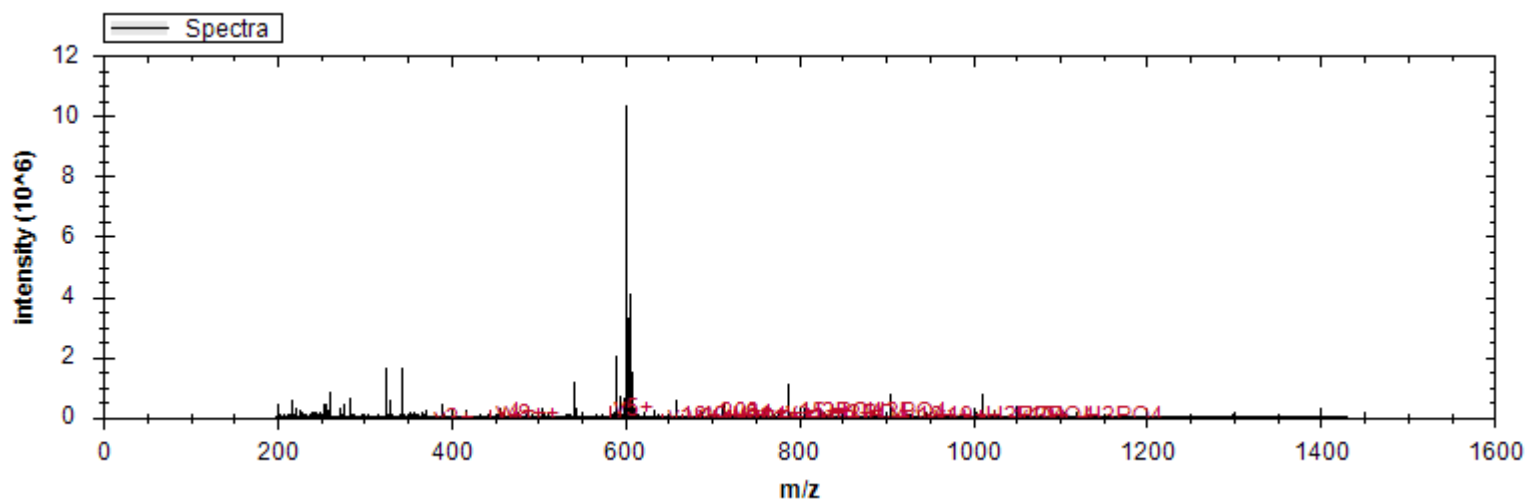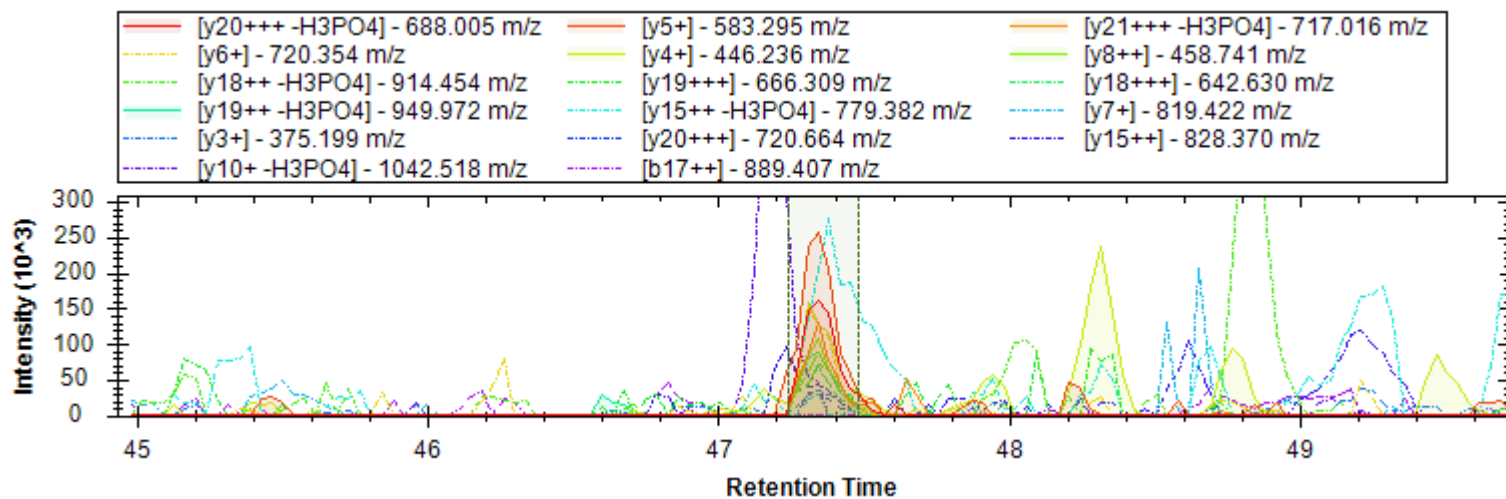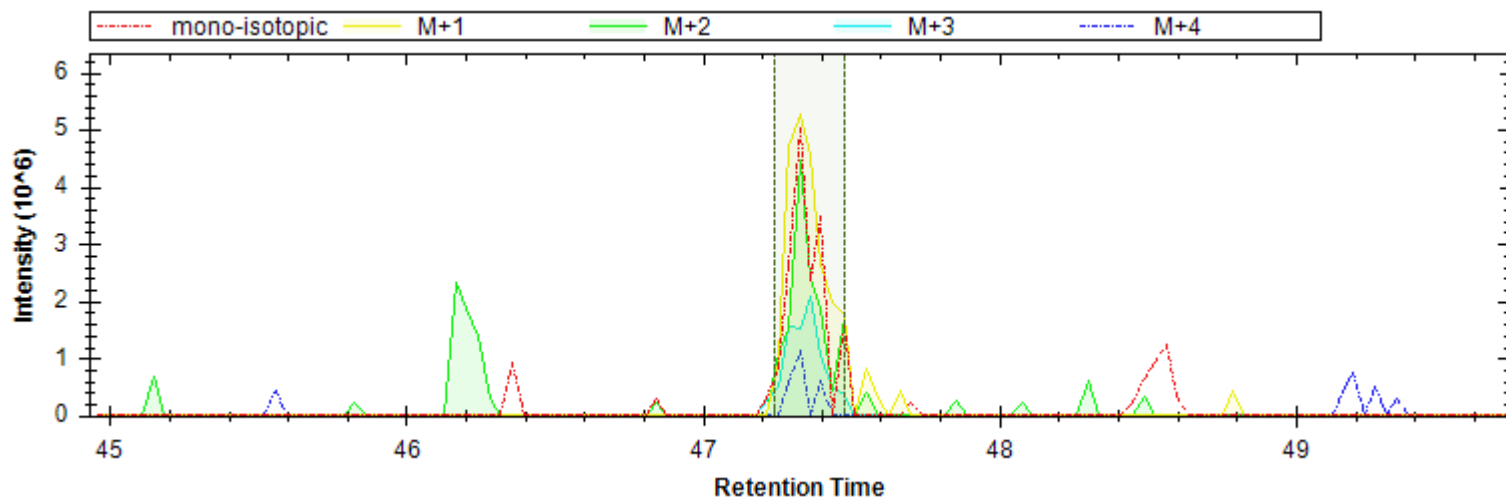

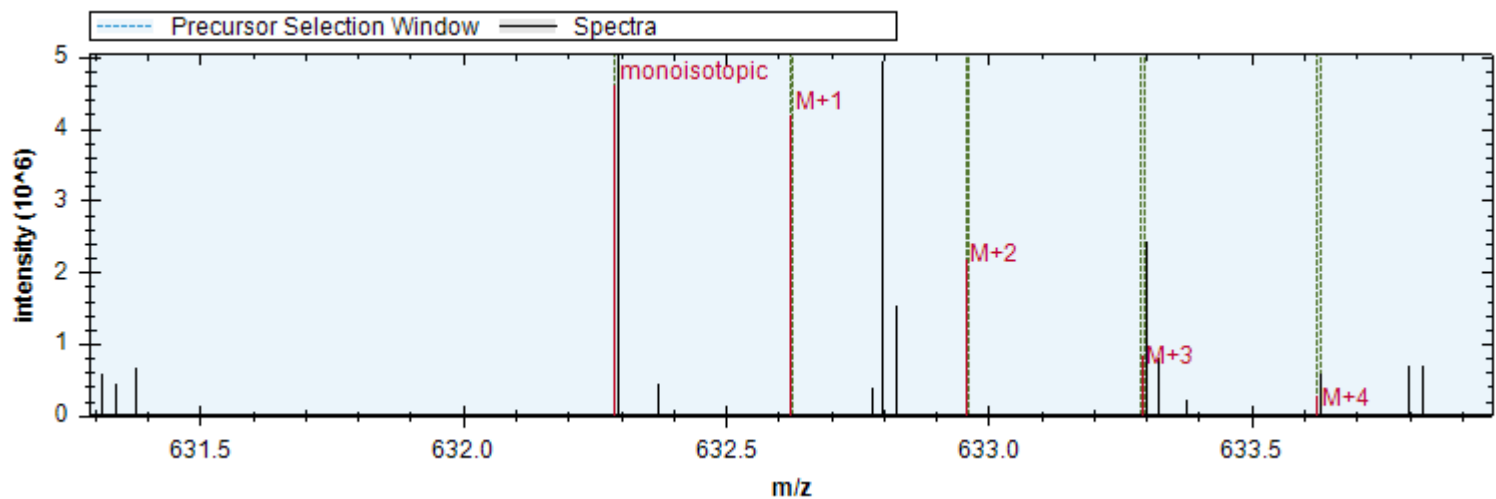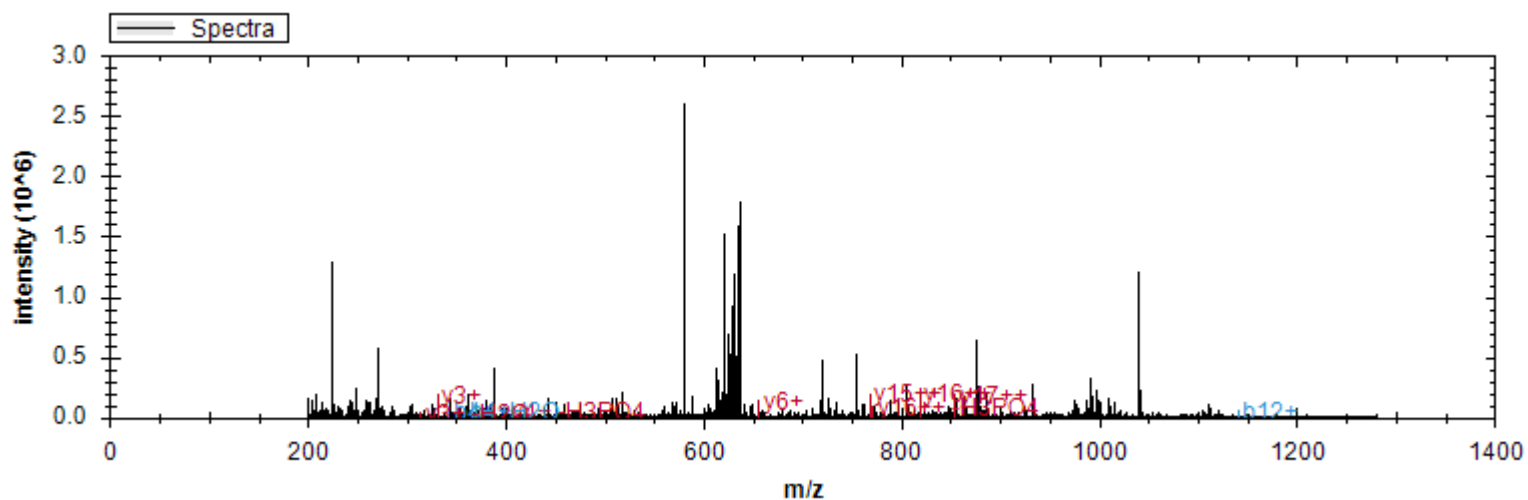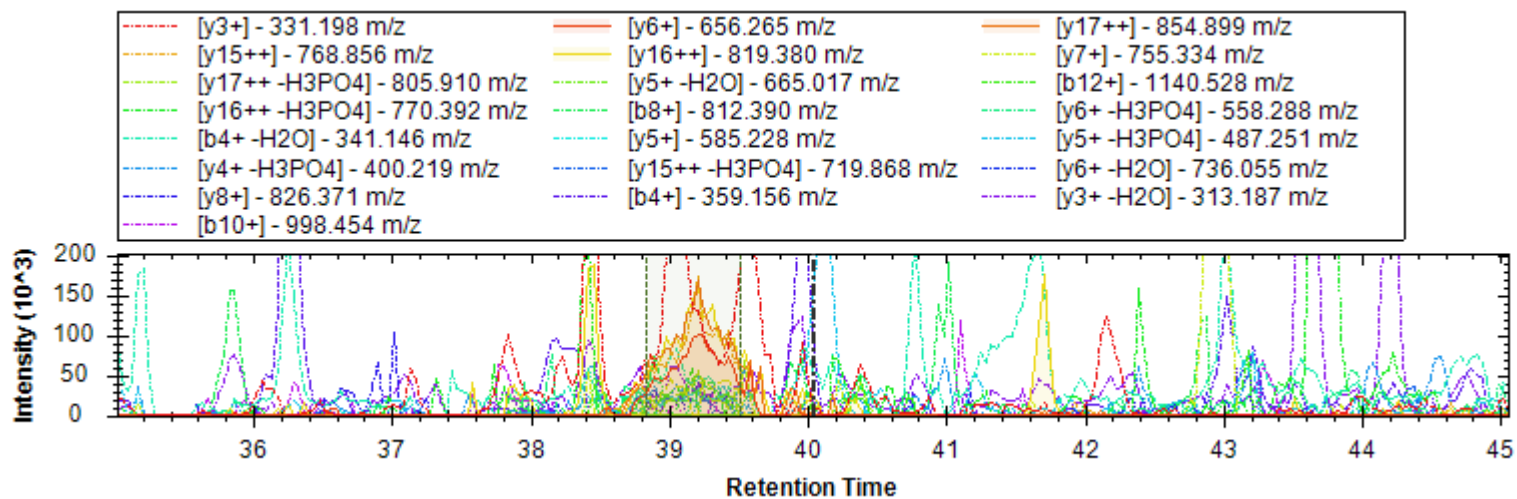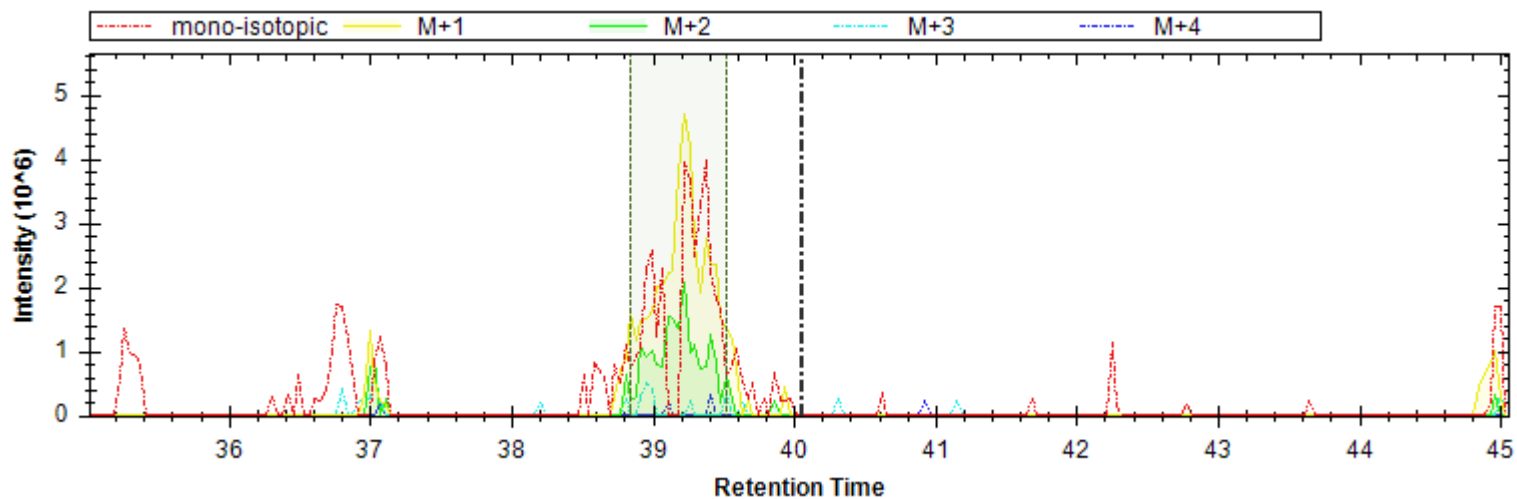

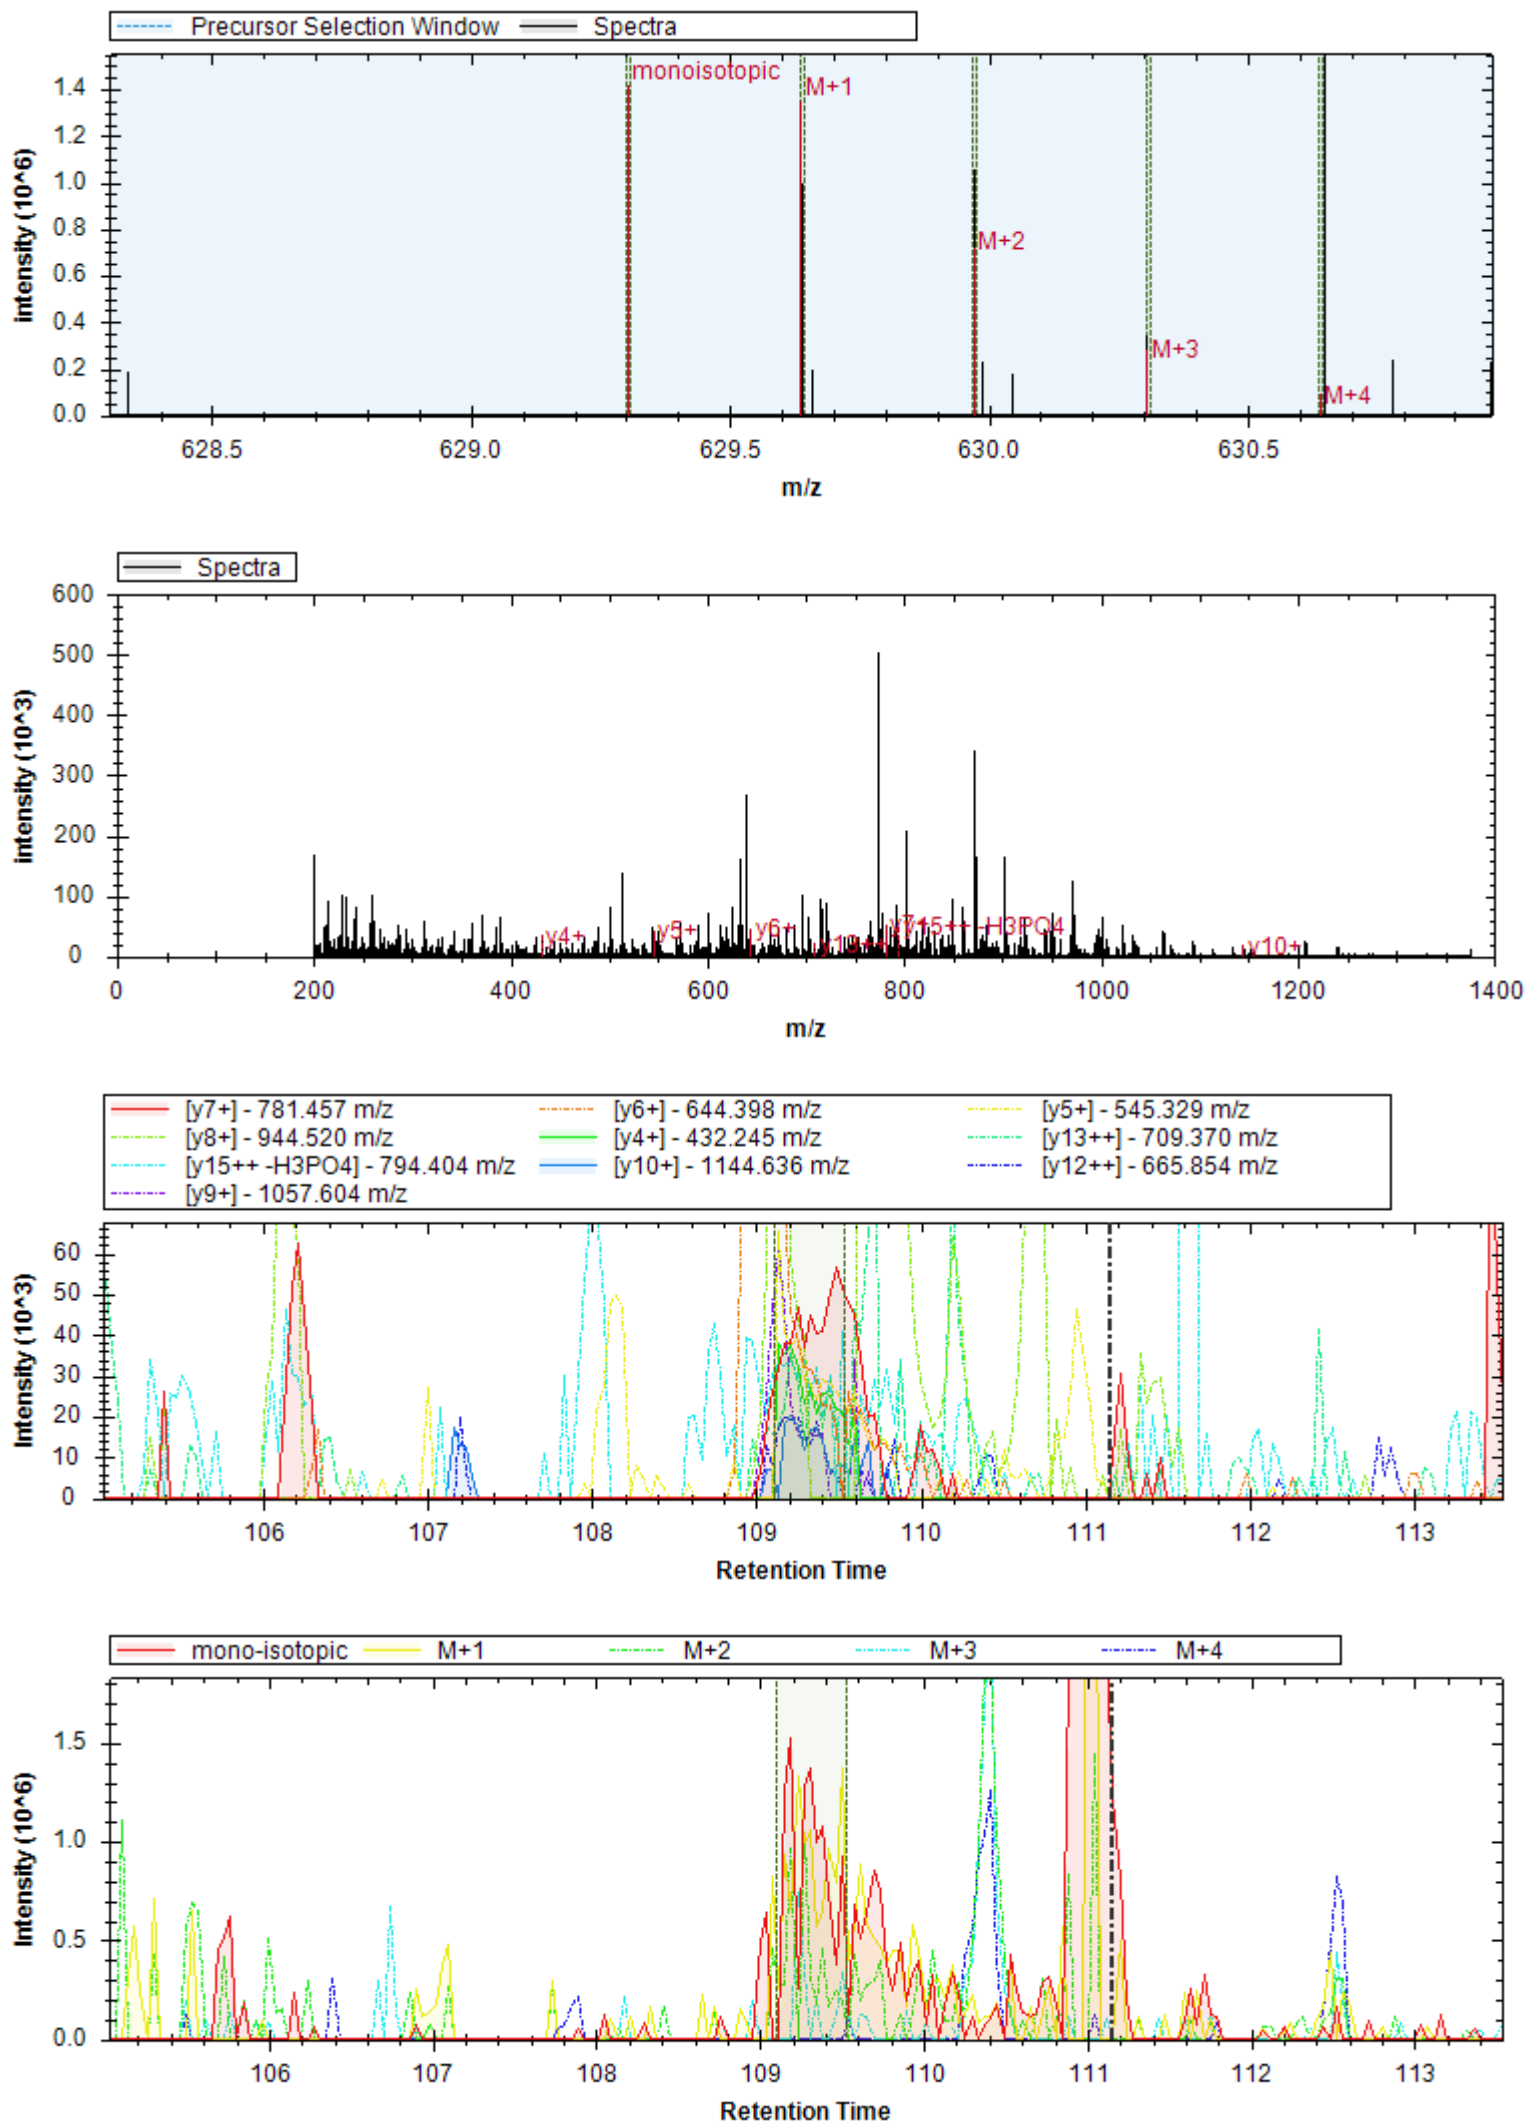

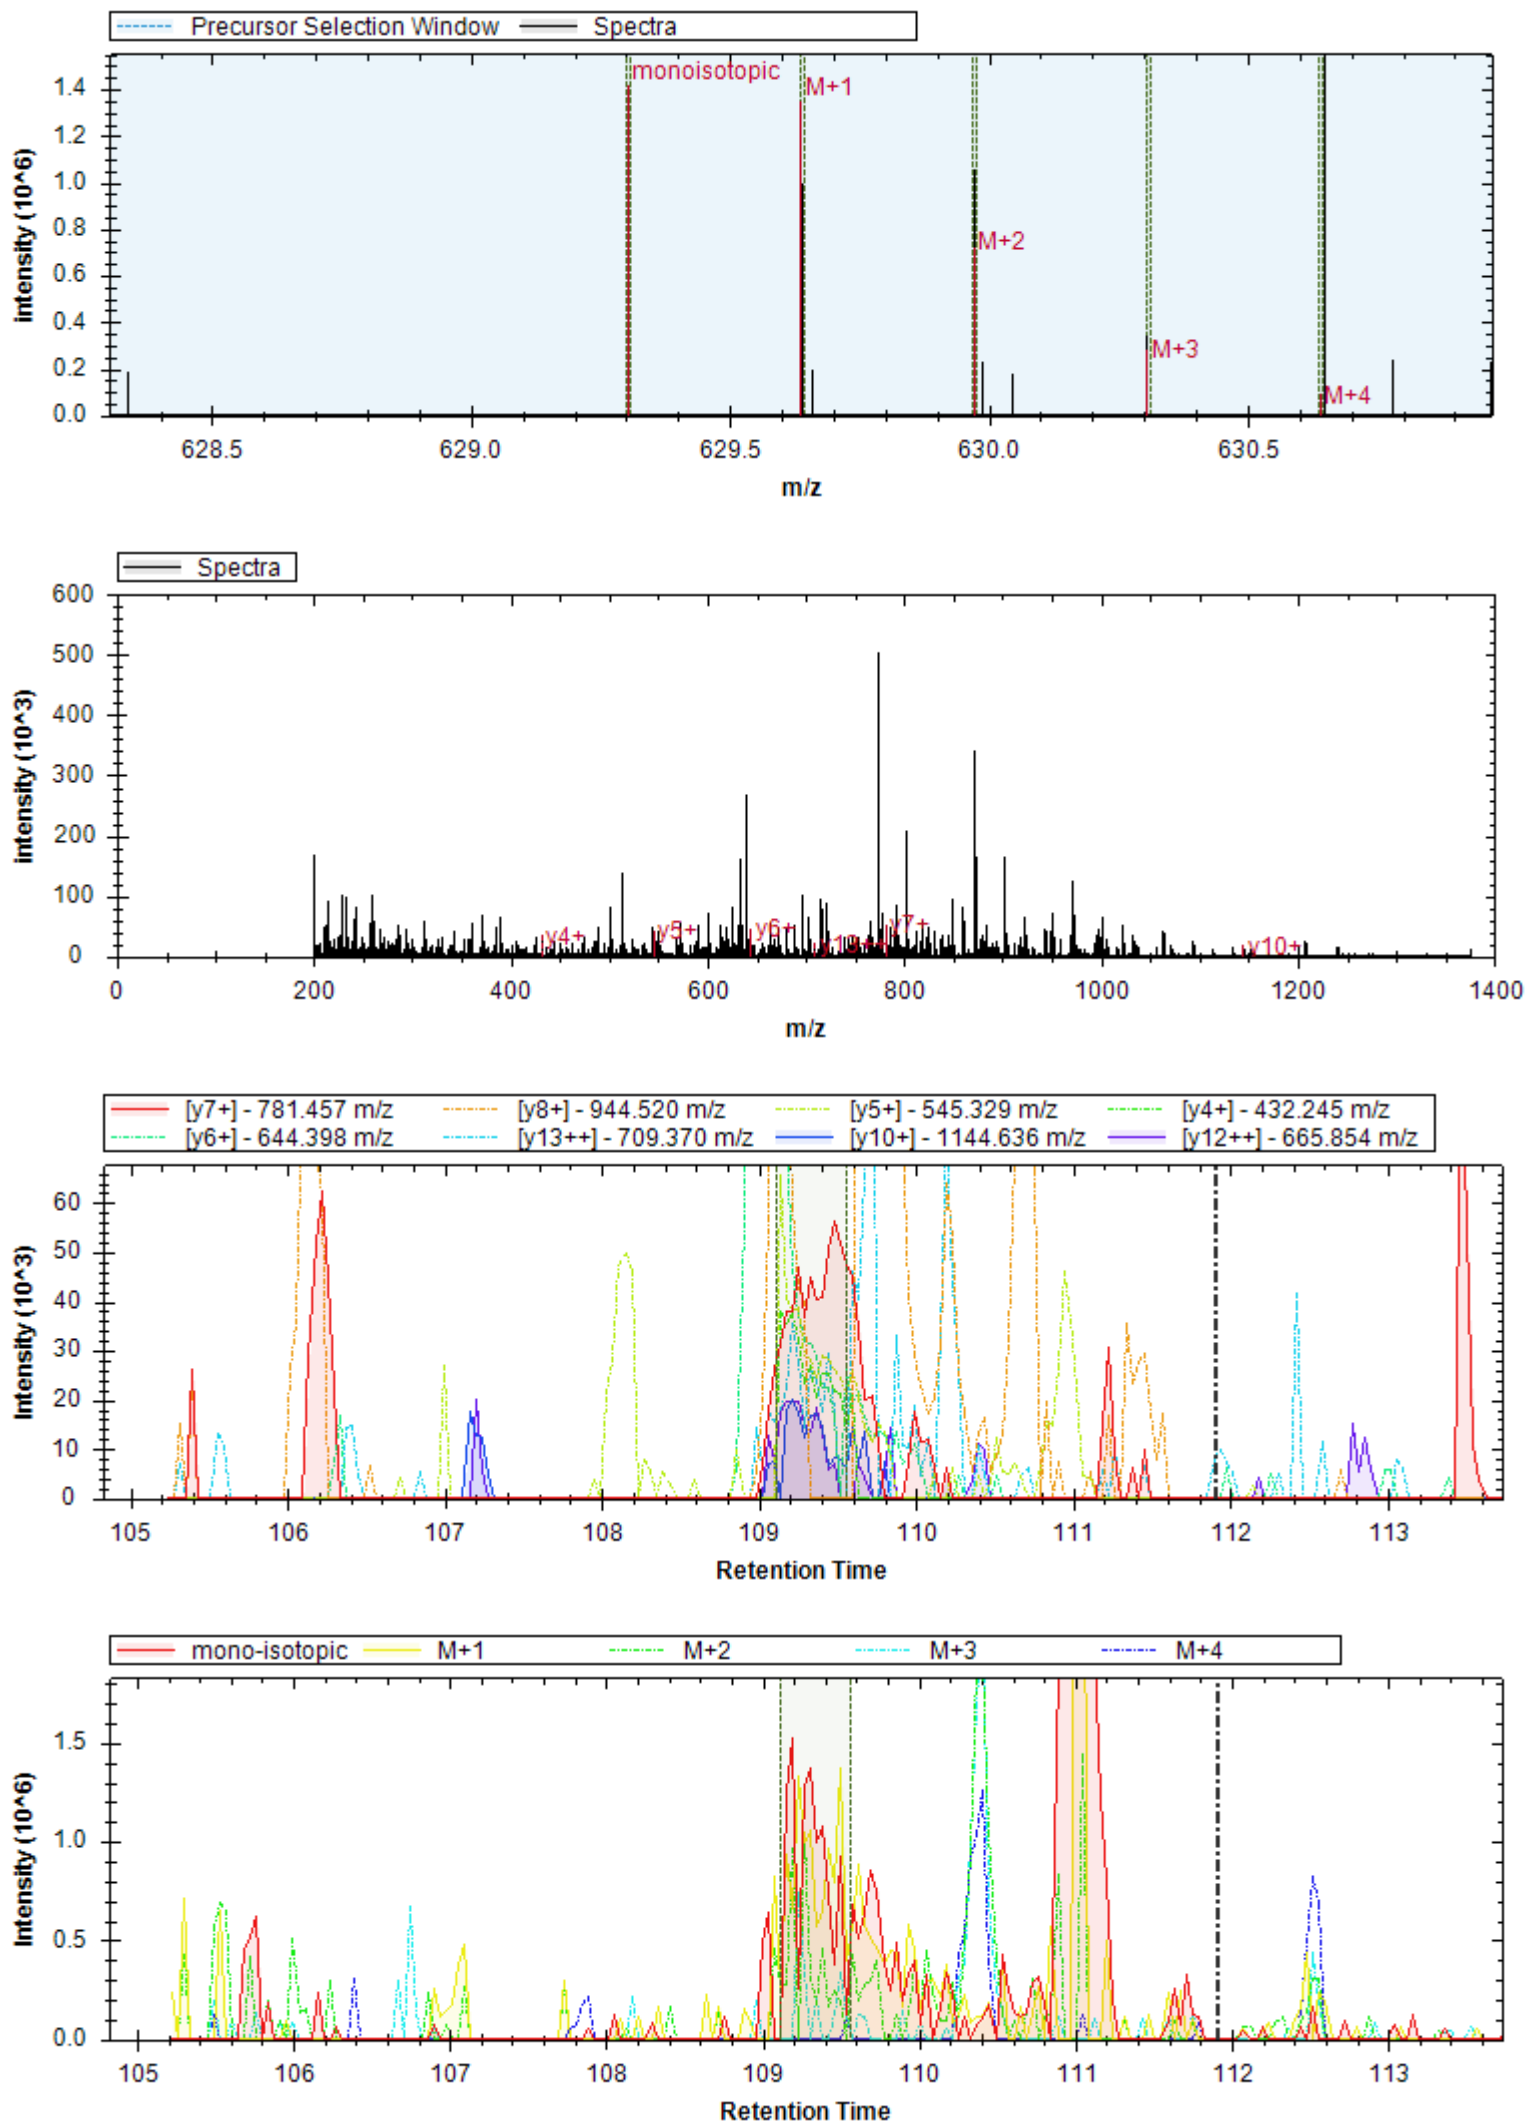



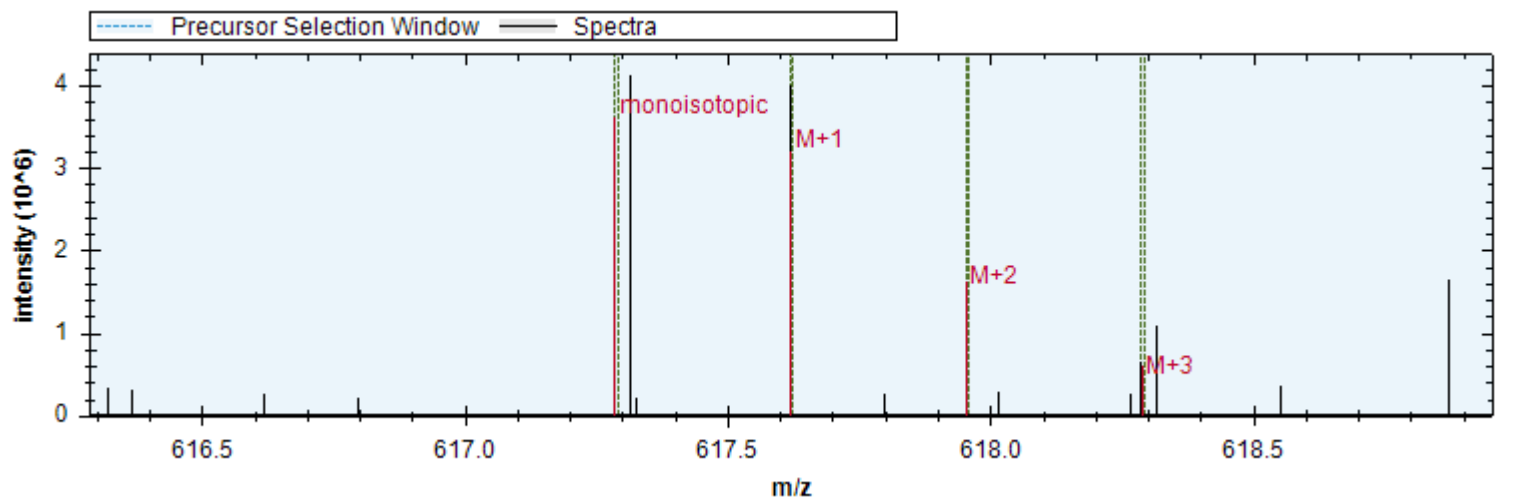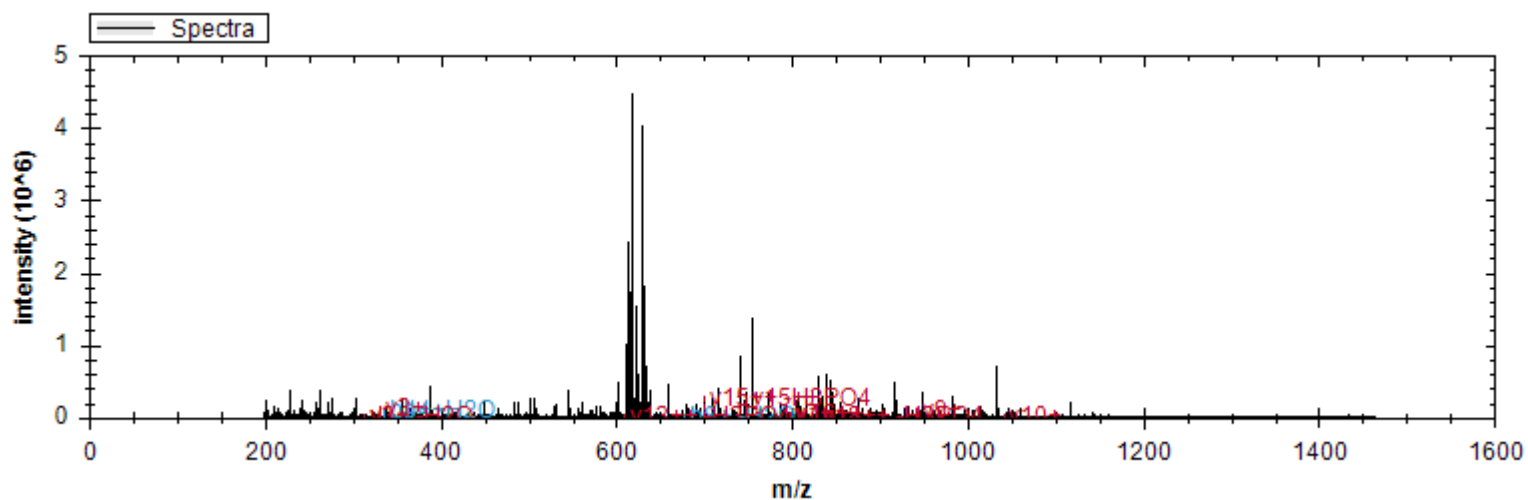

- |                              |                            |                              |
|------------------------------|----------------------------|------------------------------|
| [y15++ -H3PO4] - 700.350 m/z | [y9+ -H3PO4] - 844.427 m/z | [y15++] - 749.338 m/z        |
| [b4+ -H2O] - 335.171 m/z     | [y3+] - 331.198 m/z        | [b9+] - 809.379 m/z          |
| [b4+] - 353.182 m/z          | [y9+] - 942.404 m/z        | [y18++ -H3PO4] - 827.911 m/z |
| [b9+ -NH3] - 792.352 m/z     | [y15++ -H2O] - 740.333 m/z | [y13++] - 657.296 m/z        |
| [y13++ -H3PO4] - 608.307 m/z | [y8+ -H3PO4] - 787.406 m/z | [y9+ -H2O] - 924.394 m/z     |
| [y18++] - 876.899 m/z        | [y10+] - 1041.472 m/z      | [b8+ -H2O] - 677.325 m/z     |
| [y16++] - 799.862 m/z        | [y6+ -H3PO4] - 613.342 m/z | [y8+] - 885.383 m/z          |
| [y9++] - 471.706 m/z         | [y3+ -H2O] - 313.187 m/z   | [b9+ -H2O] - 791.368 m/z     |
| [y7+] - 798.351 m/z          |                            |                              |

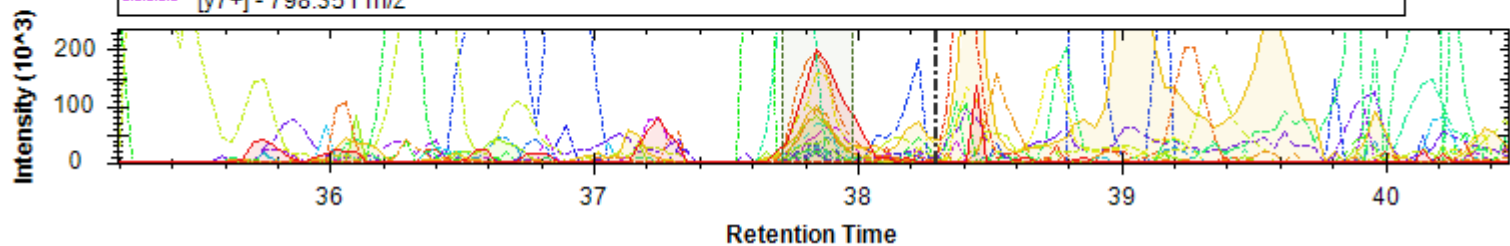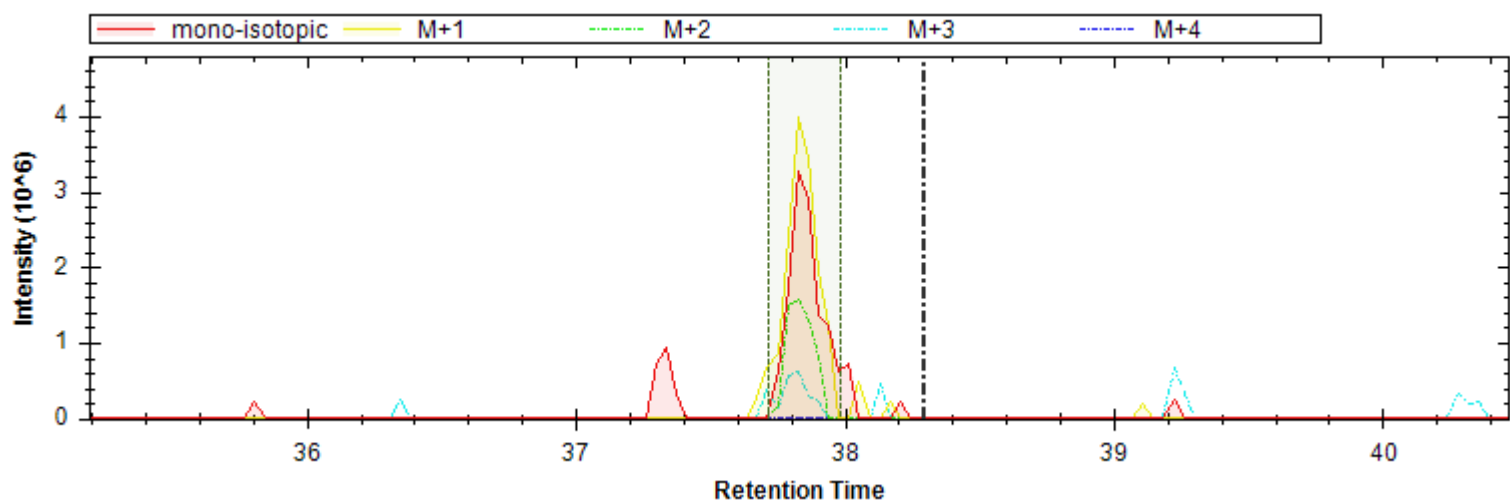

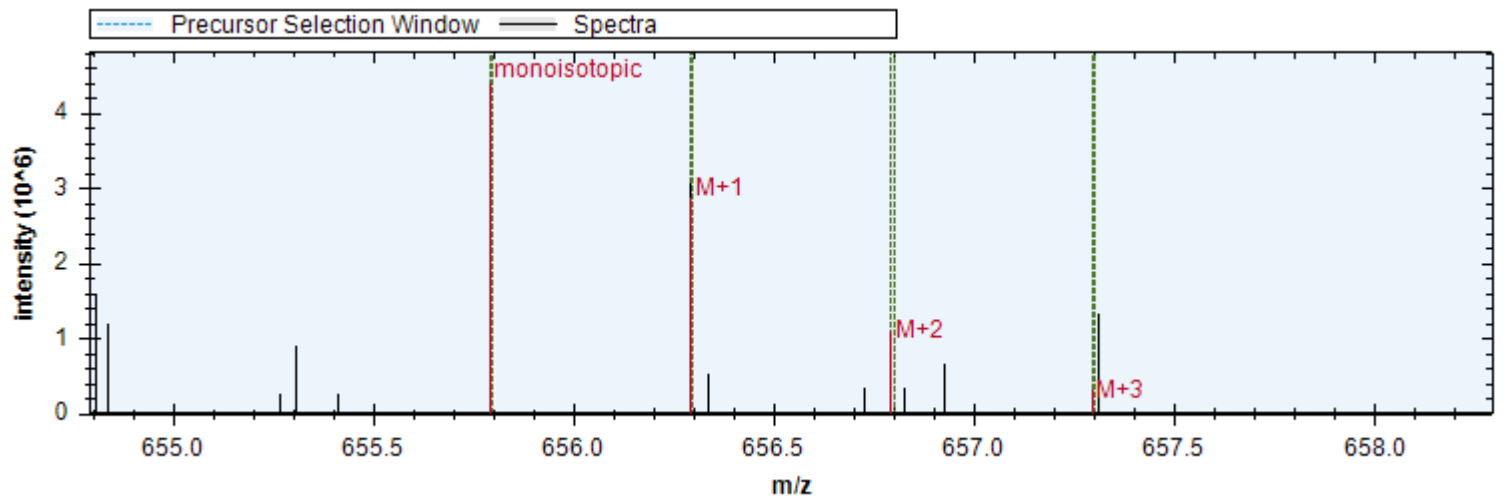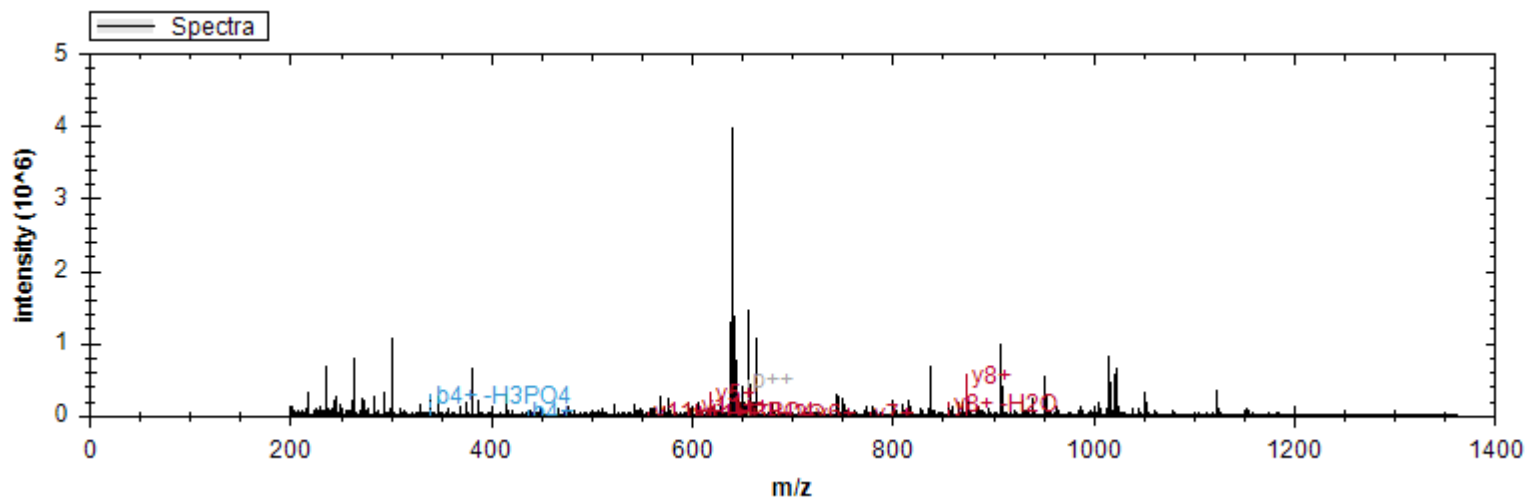

- |                              |                              |                            |
|------------------------------|------------------------------|----------------------------|
| [y8+] - 874.442 m/z          | [b4+ -H3PO4] - 339.166 m/z   | [y5+] - 619.320 m/z        |
| [y10+ -H3PO4] - 1014.500 m/z | [y11++ -H3PO4] - 556.280 m/z | [y8+ -H2O] - 856.431 m/z   |
| [y7+] - 777.389 m/z          | [y9+ -H2O] - 1135.245 m/z    | [b7+ -H2O] - 772.055 m/z   |
| [y9+ -H3PO4] - 957.479 m/z   | [y6+] - 720.368 m/z          | [y11++ -H2O] - 596.263 m/z |
| [b4+] - 437.143 m/z          | [y10+] - 1112.477 m/z        | [y11+] - 605.269 m/z       |

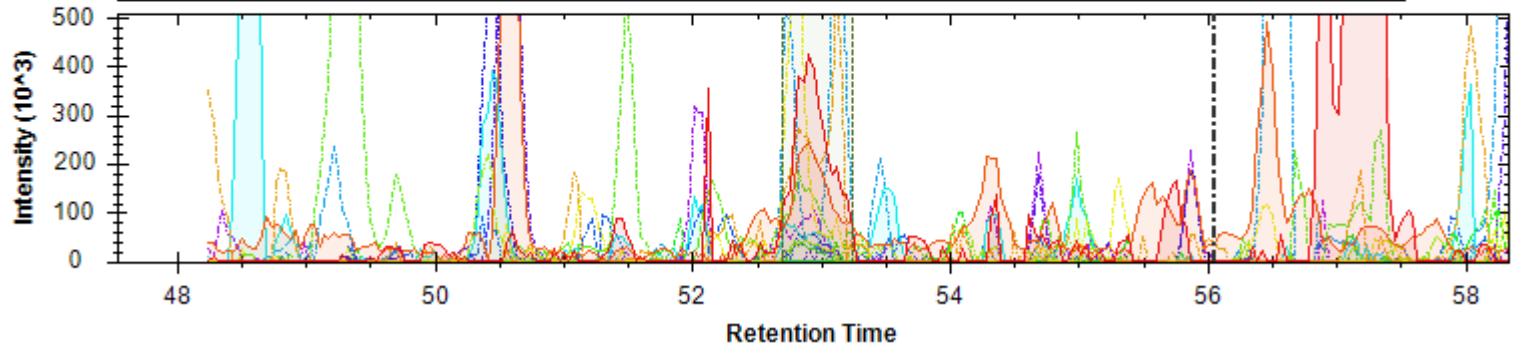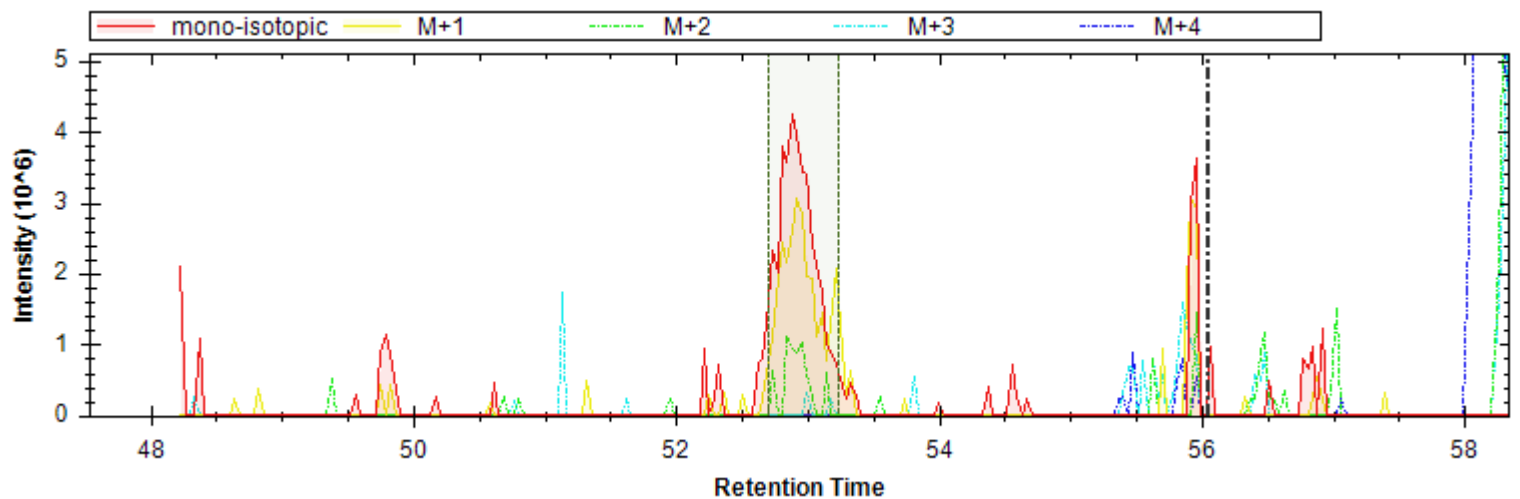

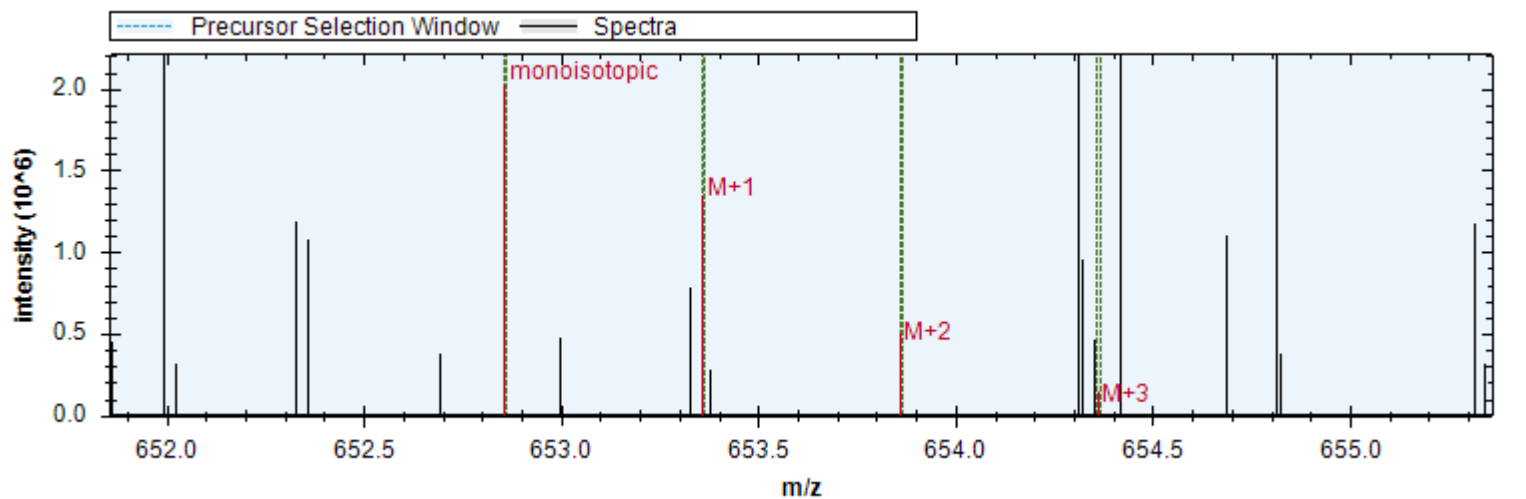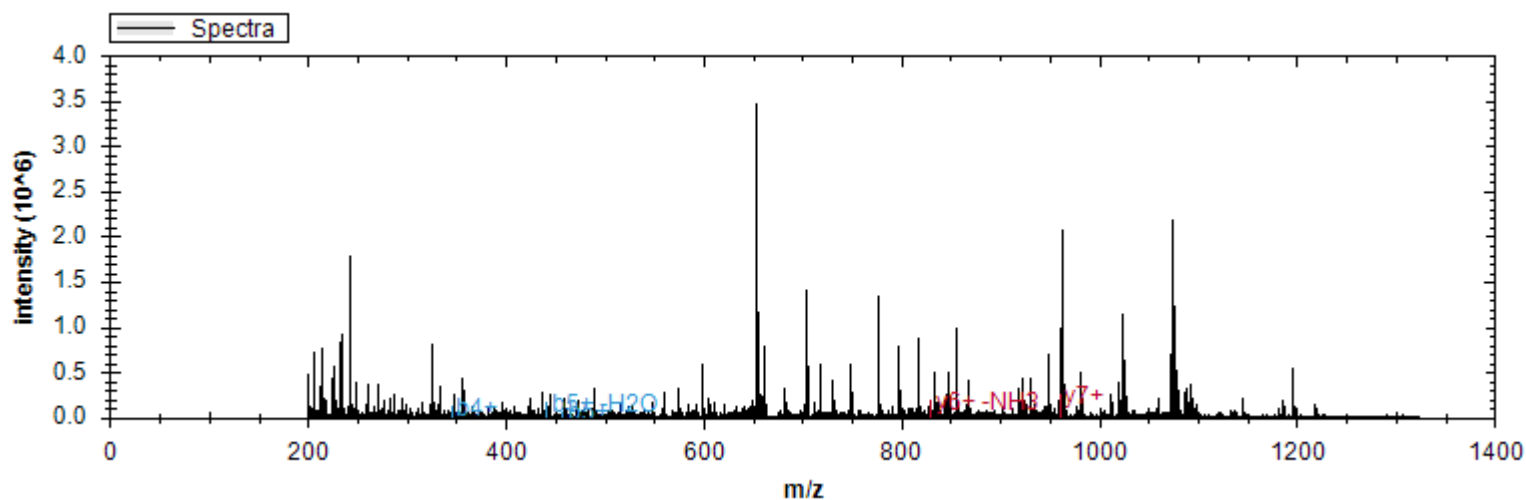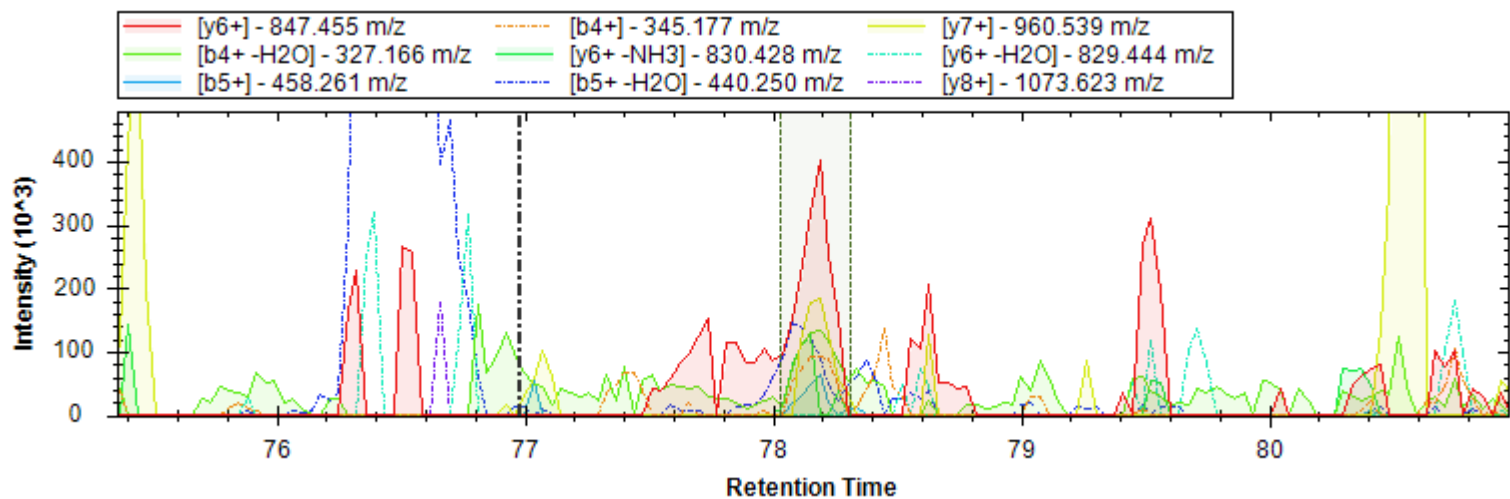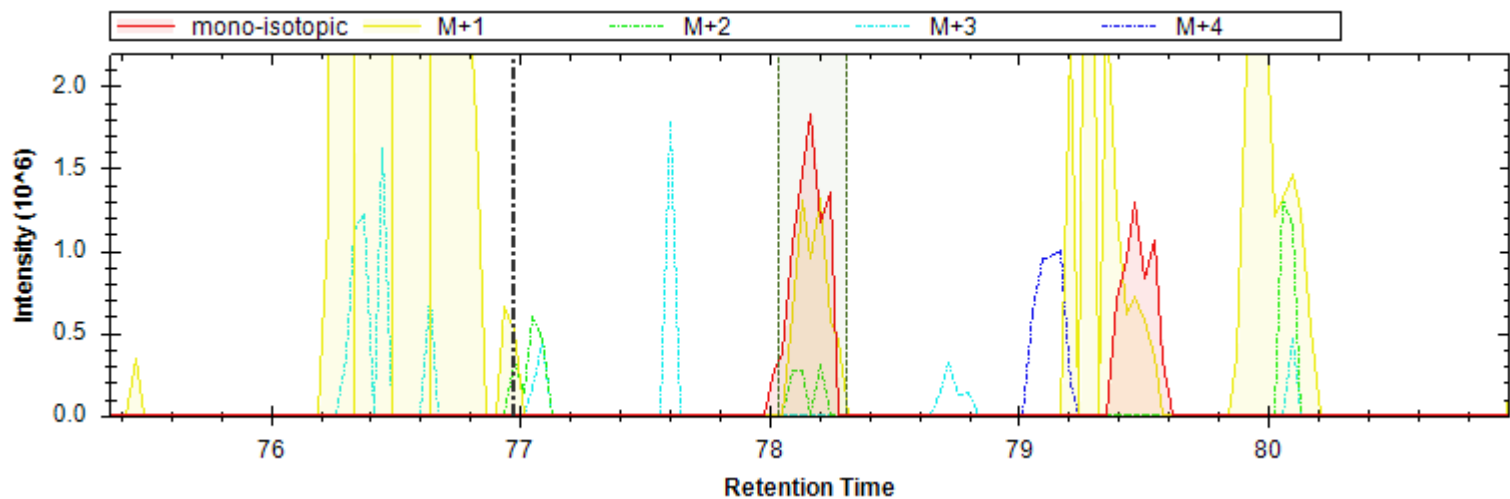

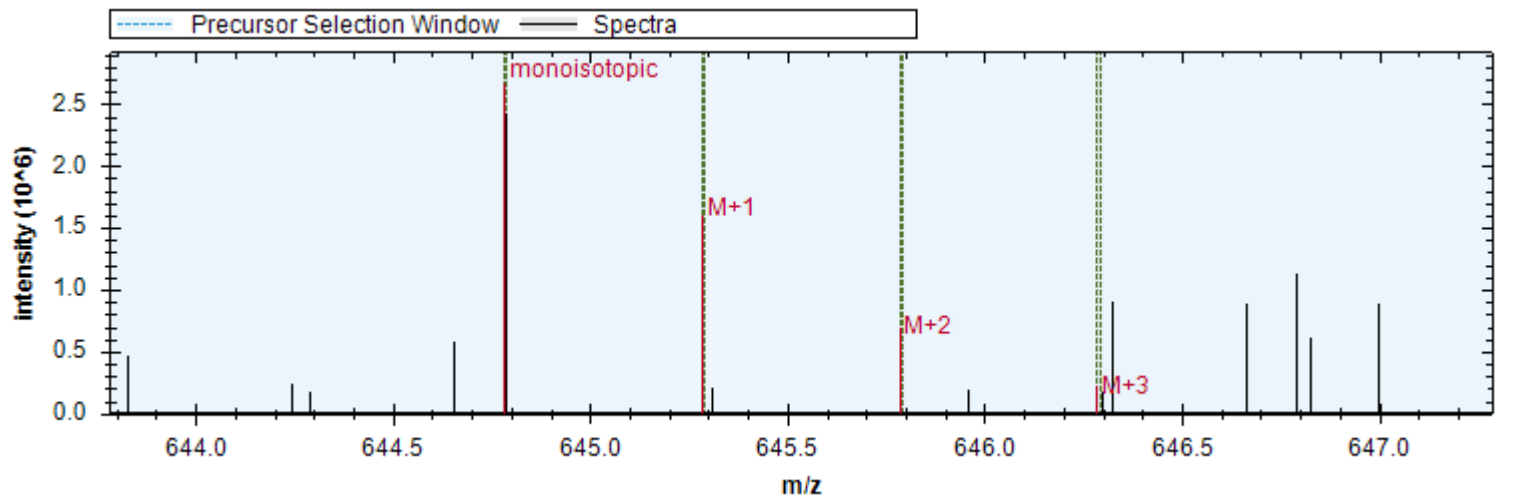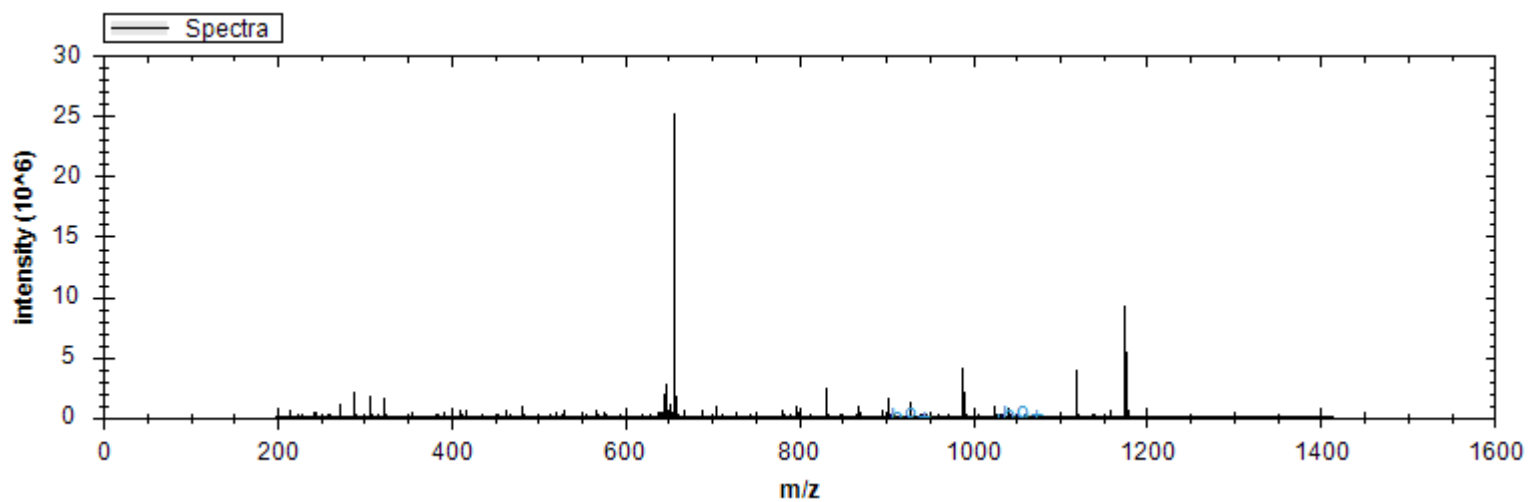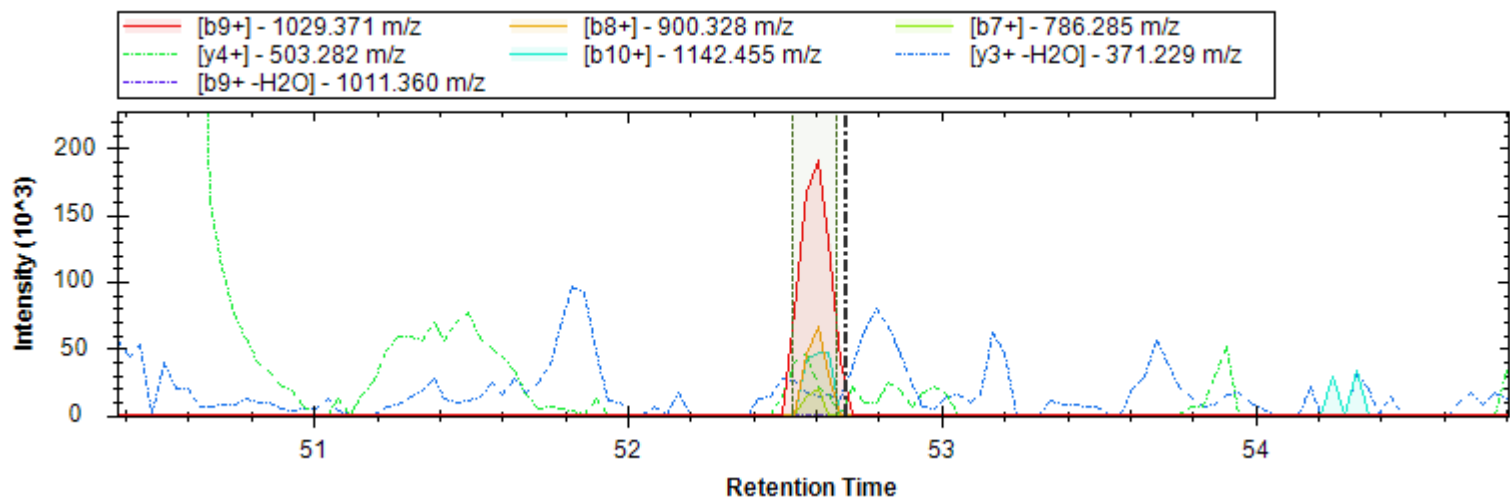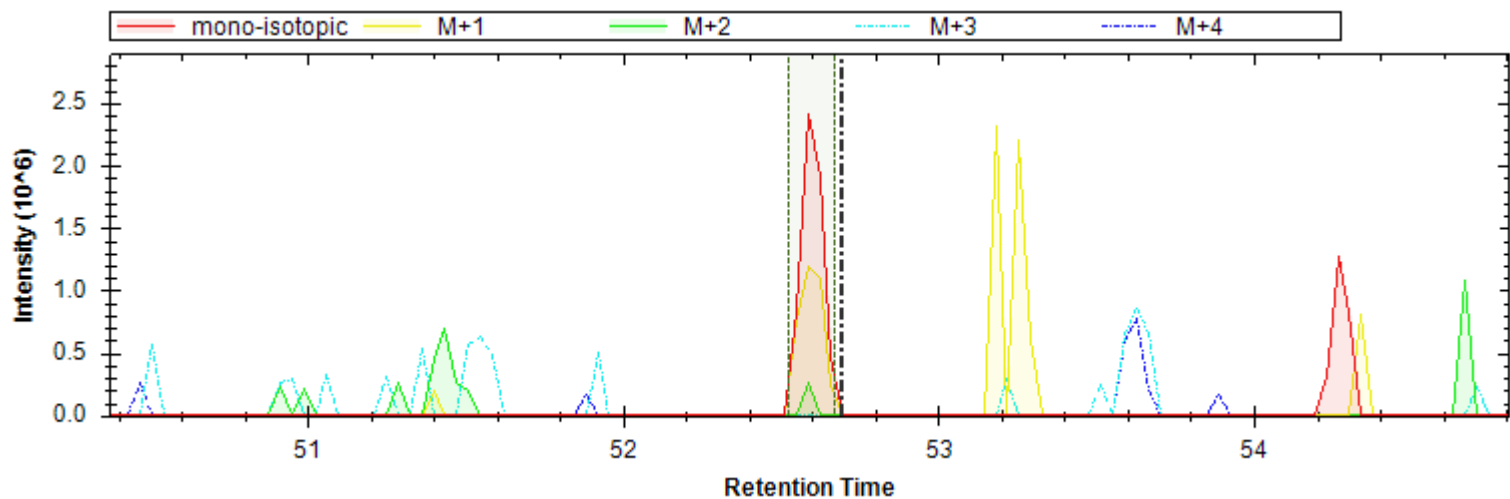

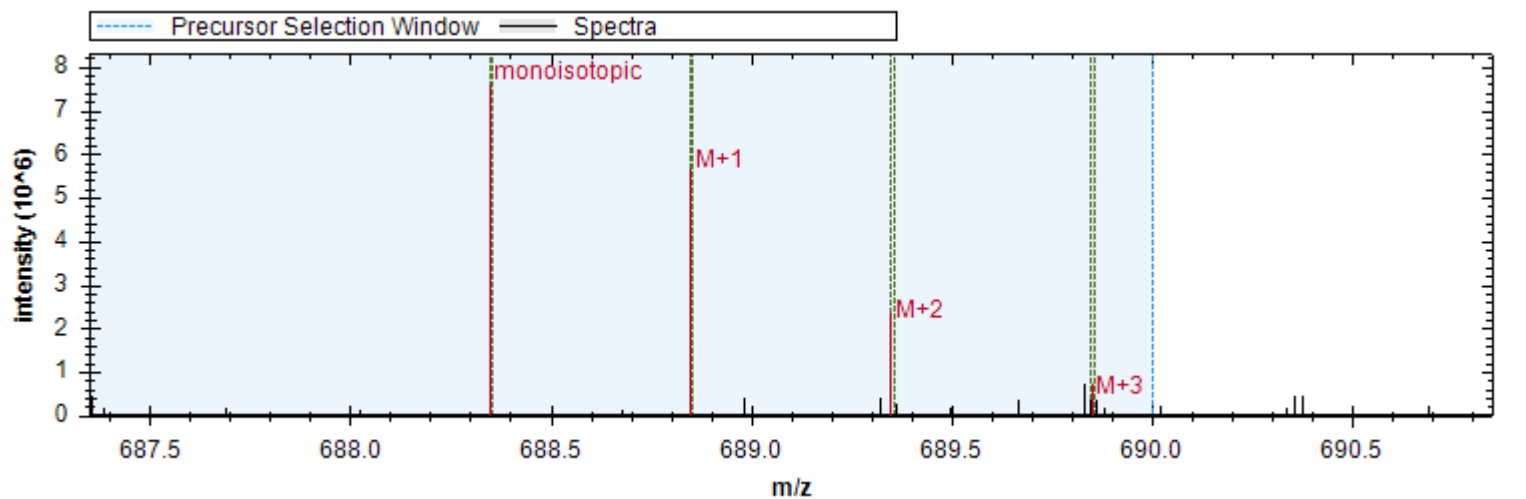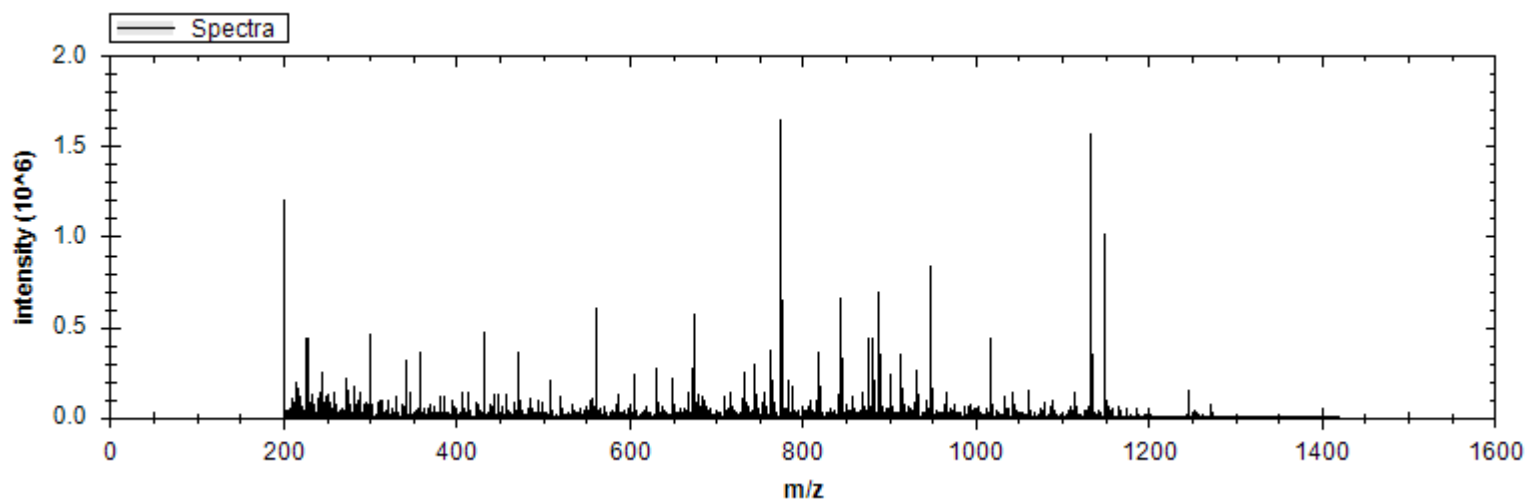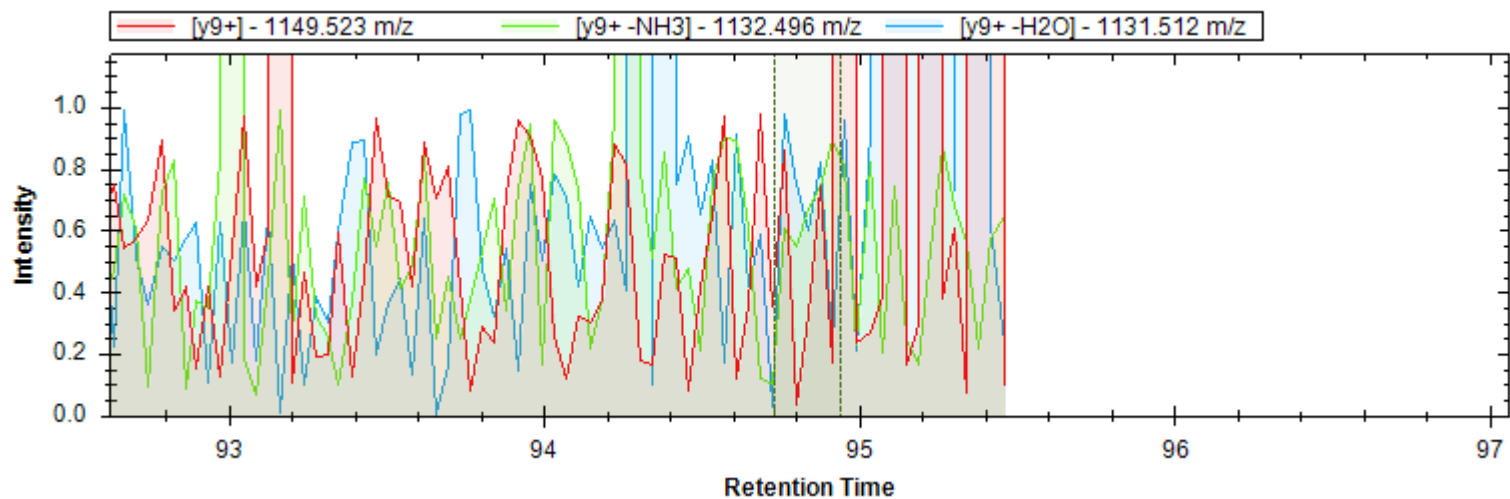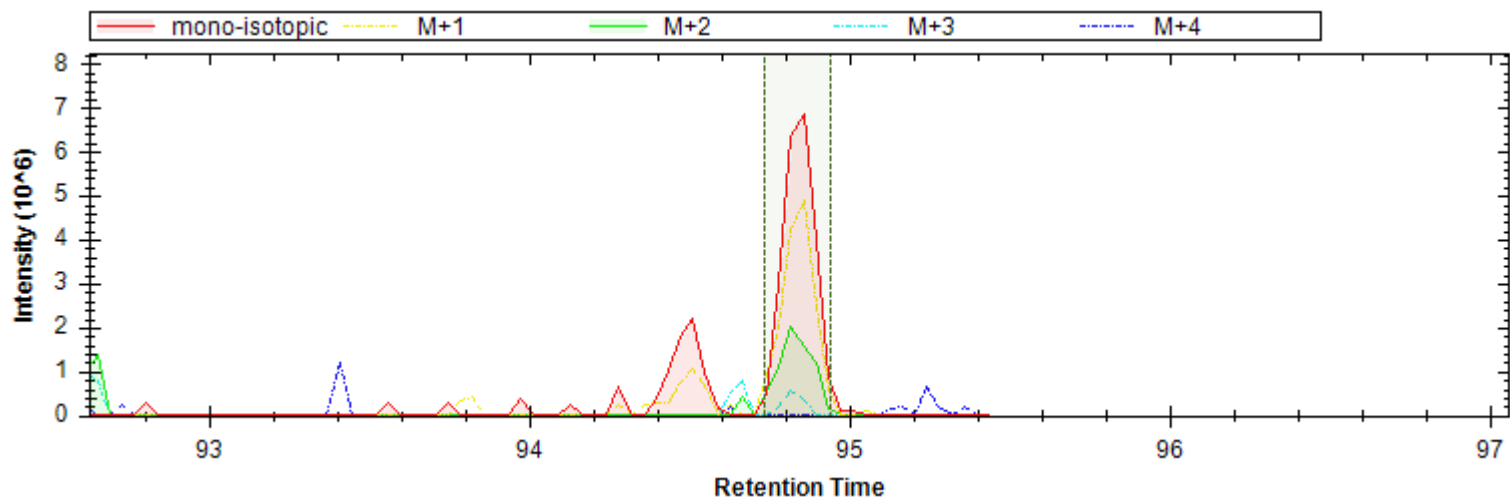

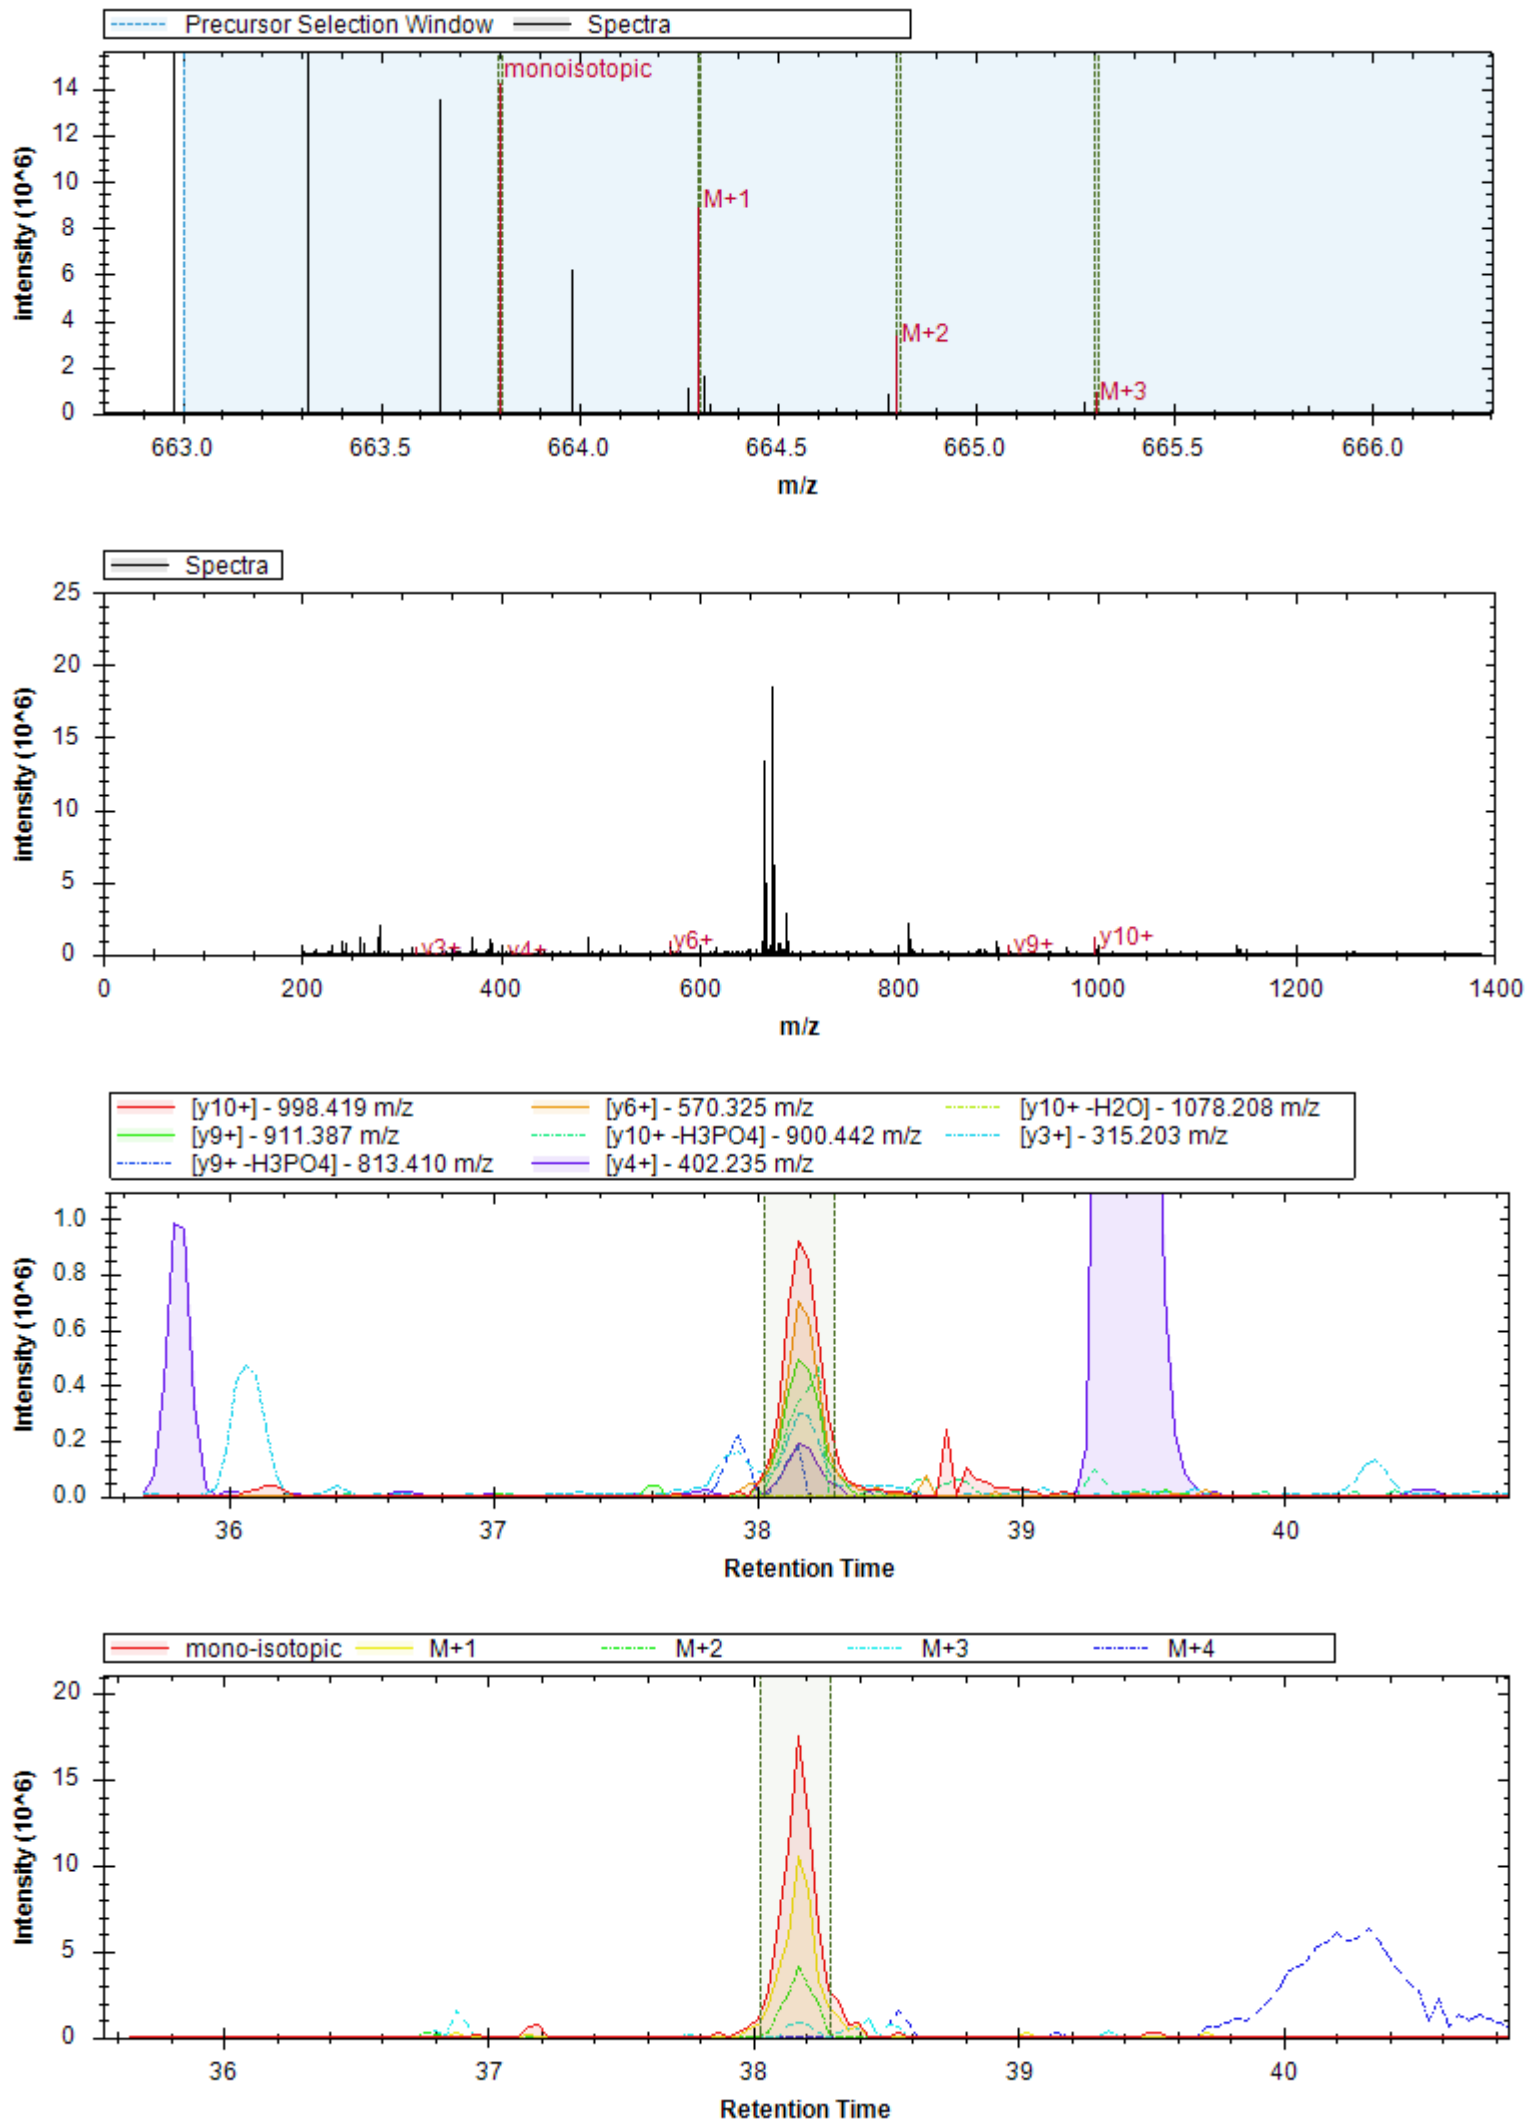

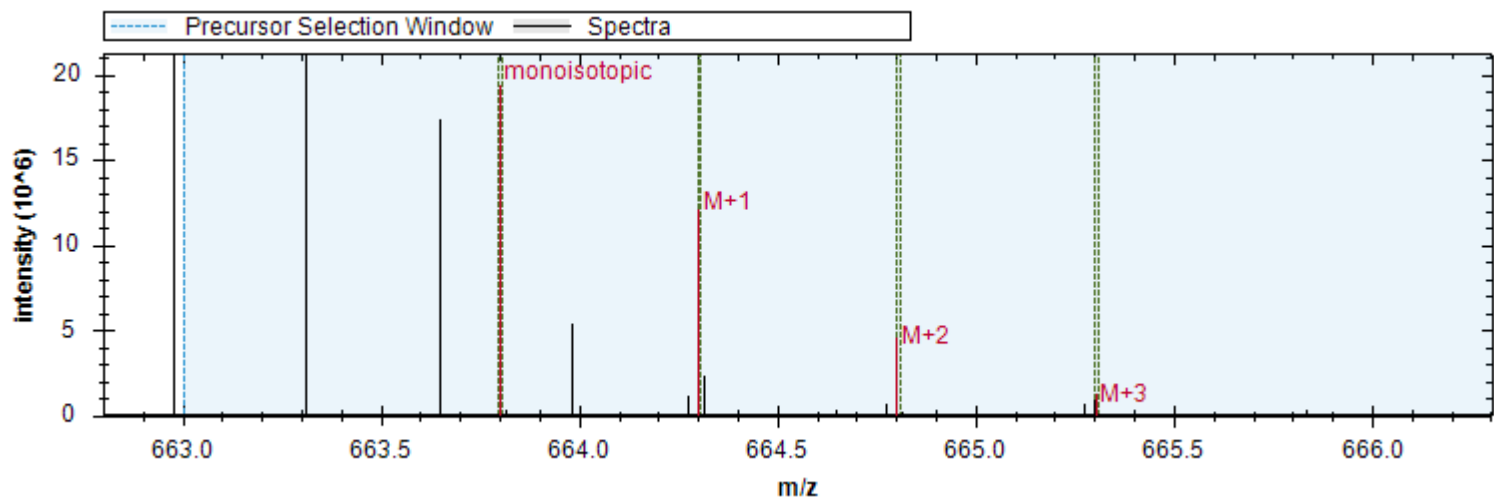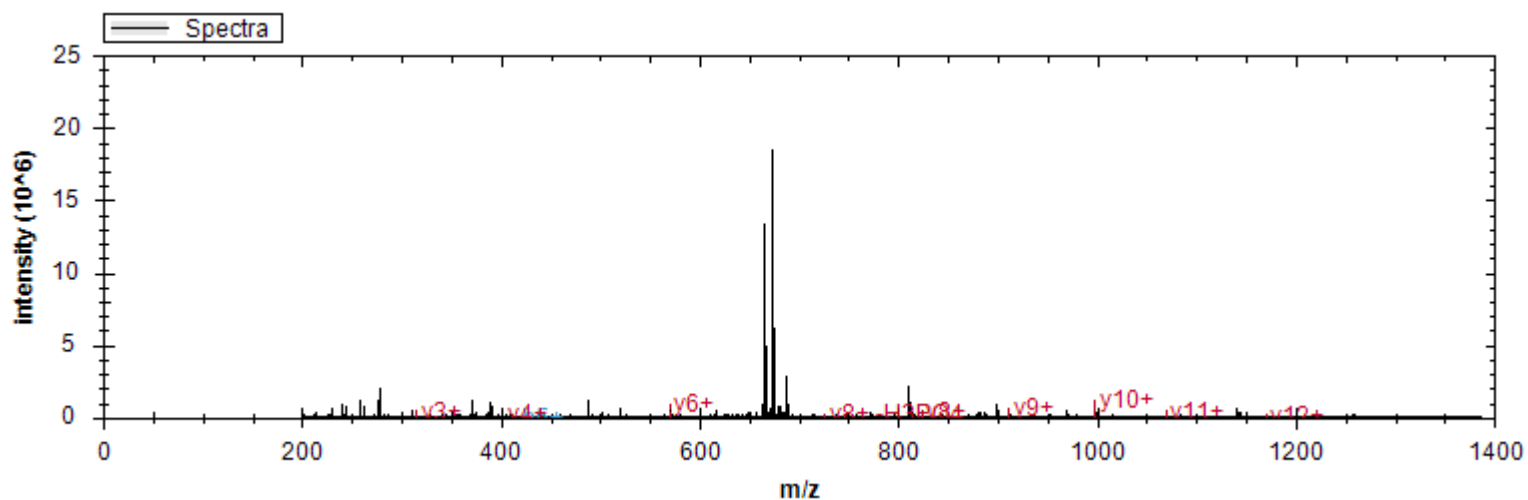

- |                            |                             |                             |
|----------------------------|-----------------------------|-----------------------------|
| [y10+] - 998.419 m/z       | [y6+] - 570.325 m/z         | [y10+ -H3PO4] - 900.442 m/z |
| [y9+] - 911.387 m/z        | [y11+ -H2O] - 1149.246 m/z  | [y3+] - 315.203 m/z         |
| [y8+ -H3PO4] - 726.378 m/z | [y11+] - 1069.456 m/z       | [y8+] - 824.355 m/z         |
| [y4+] - 402.235 m/z        | [y9+ -H3PO4] - 813.410 m/z  | [y8+ -H2O] - 904.144 m/z    |
| [y10+ -H2O] - 1078.208 m/z | [y11+ -H3PO4] - 971.479 m/z | [b5+] - 416.214 m/z         |
| [y10+ -NH3] - 981.393 m/z  | [y12+] - 1170.504 m/z       | [y9+ -H2O] - 893.377 m/z    |

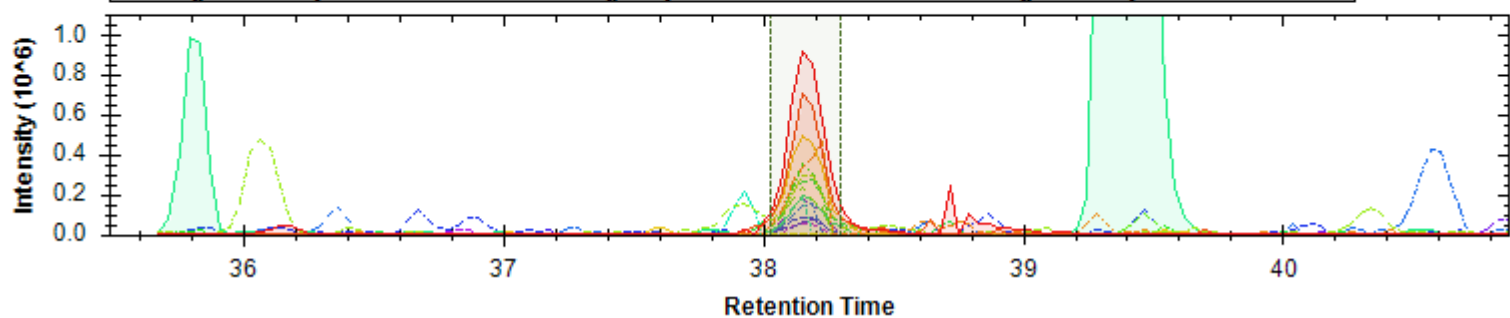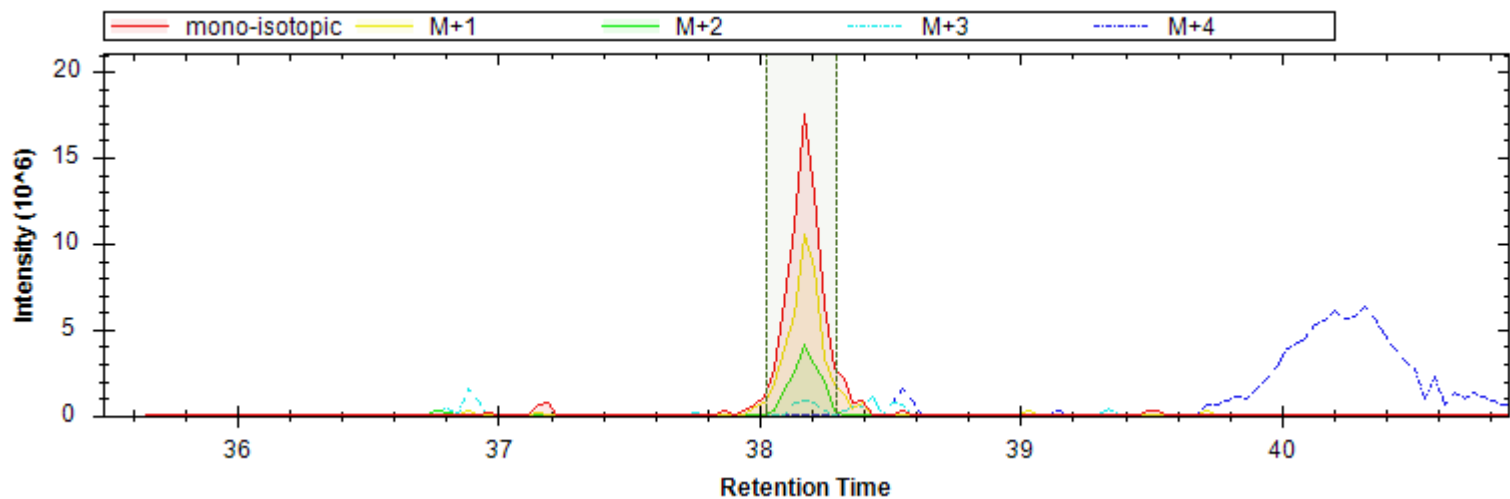

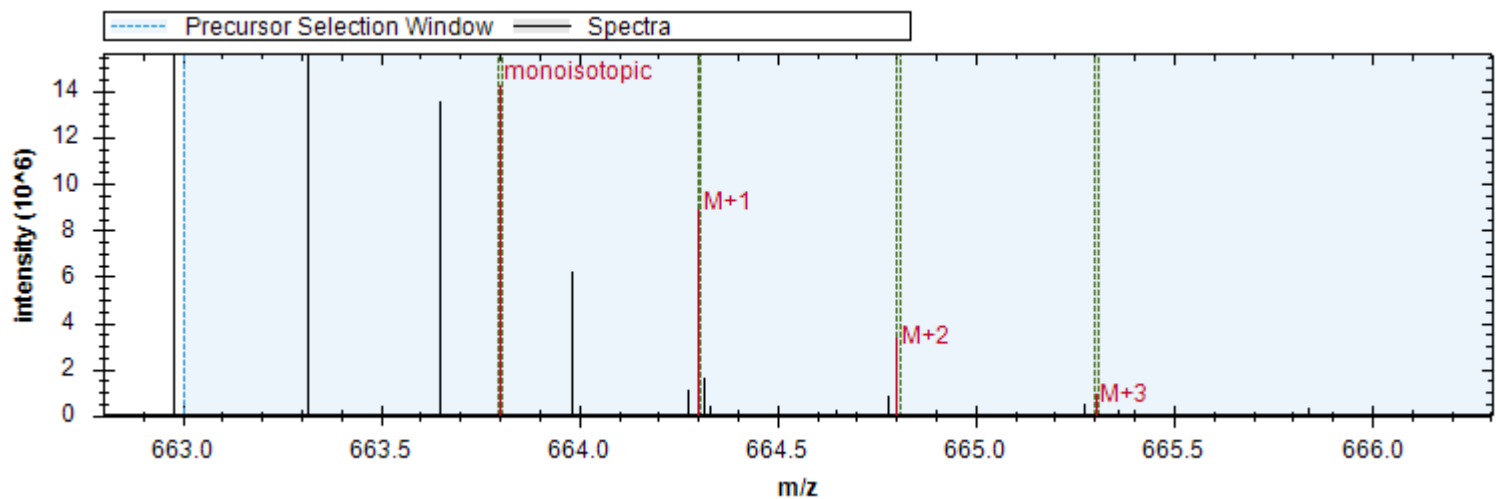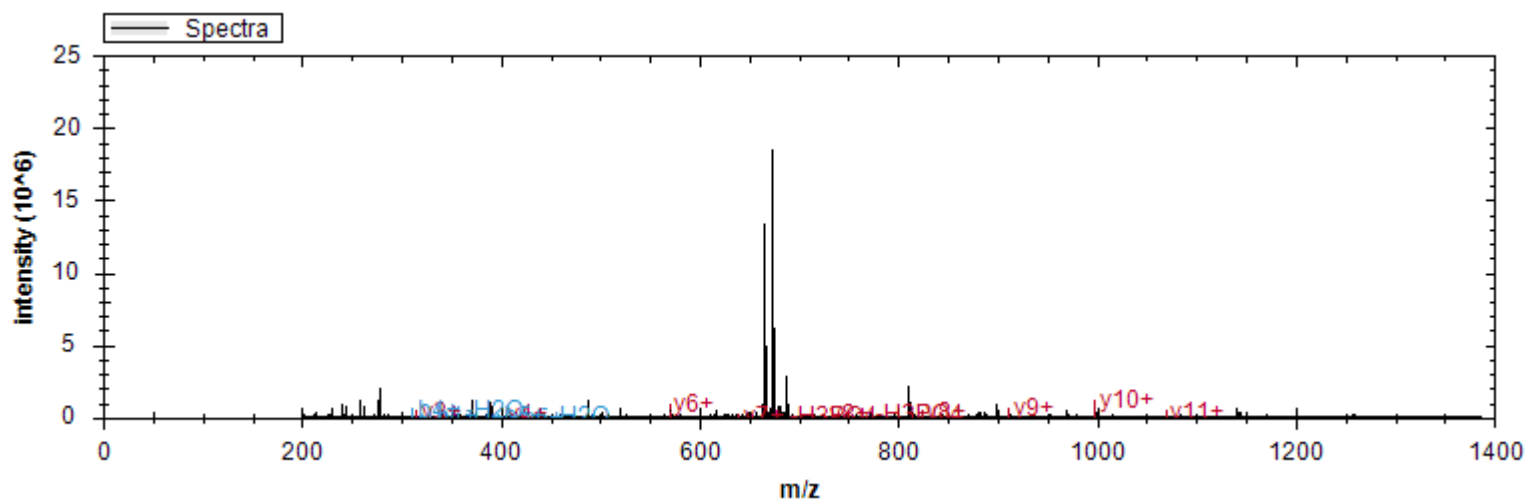

- |                             |                             |                            |
|-----------------------------|-----------------------------|----------------------------|
| [y6+] - 570.325 m/z         | [y10+] - 998.419 m/z        | [b4+ -H2O] - 311.171 m/z   |
| [y4+ -H2O] - 384.224 m/z    | [y10+ -H3PO4] - 900.442 m/z | [y9+] - 911.387 m/z        |
| [y3+] - 315.203 m/z         | [y8+ -H3PO4] - 726.378 m/z  | [y4+] - 402.235 m/z        |
| [y8+] - 824.355 m/z         | [b4+] - 329.182 m/z         | [b5+] - 416.214 m/z        |
| [y11+ -H3PO4] - 971.479 m/z | [b5+ -H2O] - 398.203 m/z    | [y11+] - 1069.456 m/z      |
| [y8+ -H2O] - 904.144 m/z    | [y9+ -H3PO4] - 813.410 m/z  | [y7+ -H3PO4] - 639.346 m/z |
| [y11+ -H2O] - 1247.046 m/z  | [y9+ -H2O] - 991.177 m/z    |                            |

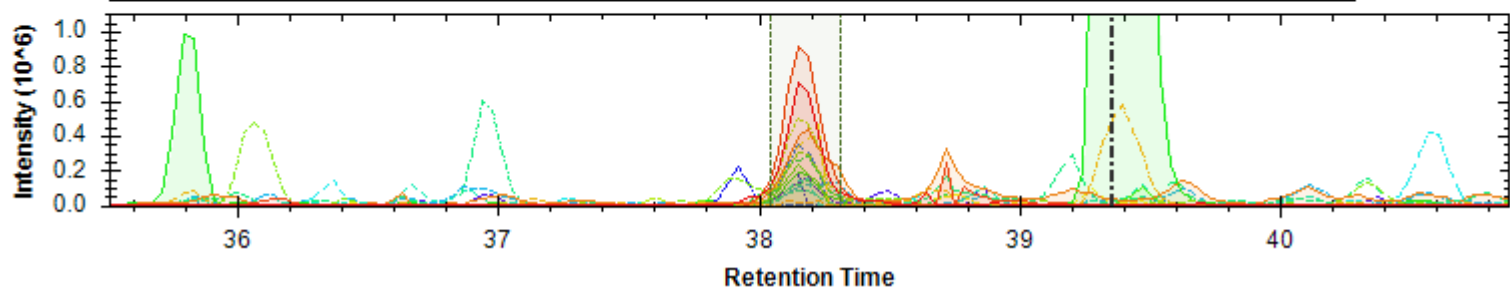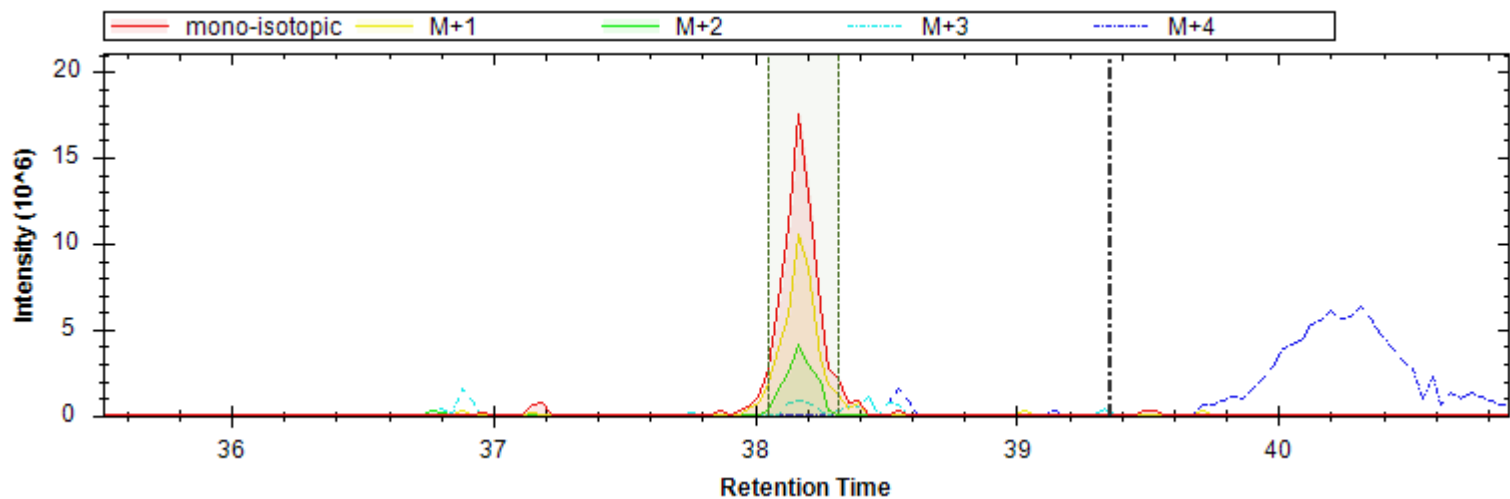



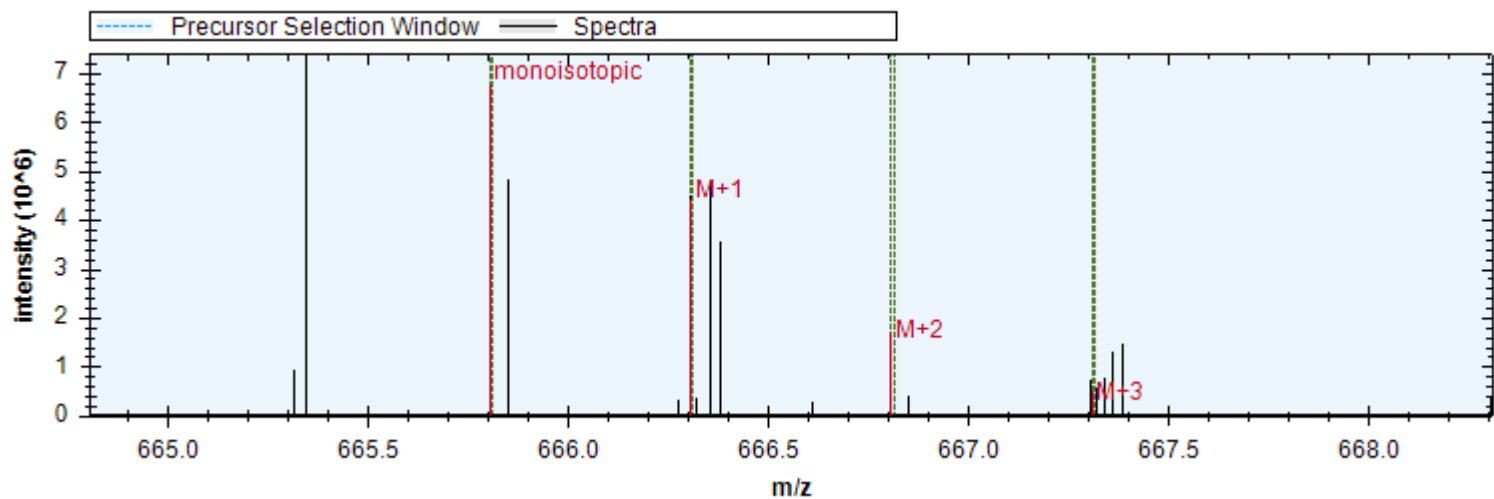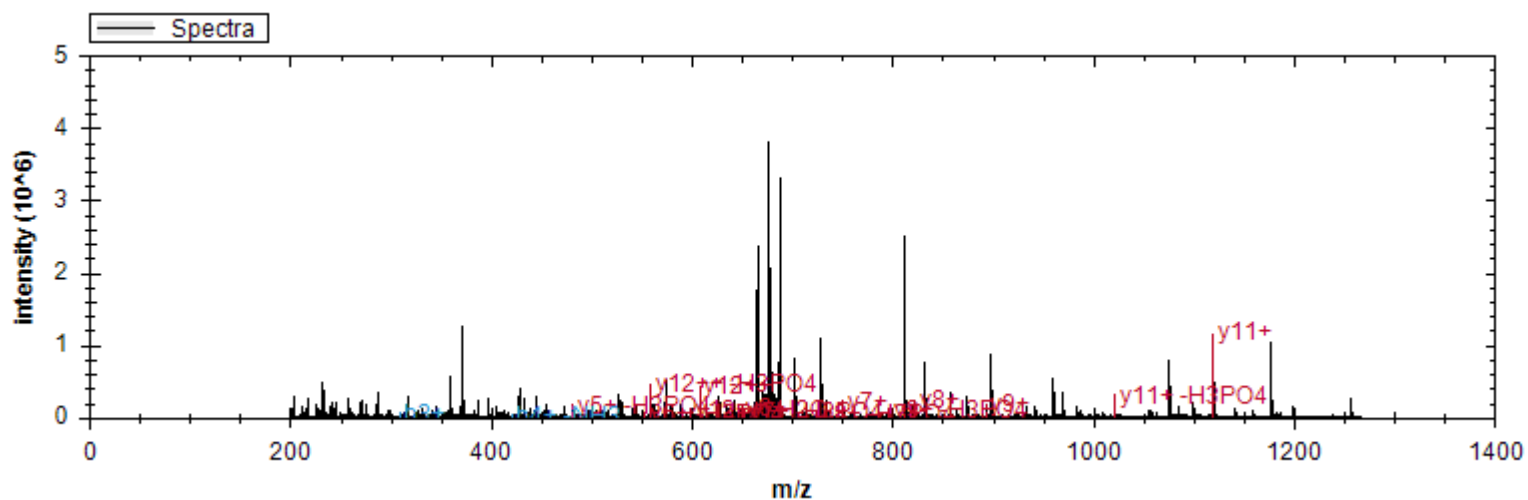

- |                              |                              |                             |
|------------------------------|------------------------------|-----------------------------|
| [y12++ -H3PO4] - 559.796 m/z | [y11+ -H3PO4] - 1021.531 m/z | [y11+] - 1119.508 m/z       |
| [y12++] - 608.784 m/z        | [y5+] - 579.254 m/z          | [y5+ -H3PO4] - 481.277 m/z  |
| [y9+] - 893.413 m/z          | [y9+ -H3PO4] - 795.436 m/z   | [y12++ -H2O] - 599.779 m/z  |
| [y7+] - 751.339 m/z          | [y8+] - 822.376 m/z          | [y6+] - 650.291 m/z         |
| [y8+ -H3PO4] - 724.399 m/z   | [y7+ -H3PO4] - 653.362 m/z   | [y10+ -H3PO4] - 924.479 m/z |
| [b5+ -NH3] - 492.209 m/z     | [y6+ -H3PO4] - 552.314 m/z   | [b3+] - 309.156 m/z         |
| [y9+ -H2O] - 875.402 m/z     | [y11+ -H2O] - 1199.298 m/z   | [b5+] - 509.235 m/z         |
| [y3+ -H3PO4] - 313.187 m/z   | [b4+ -NH3] - 421.172 m/z     |                             |

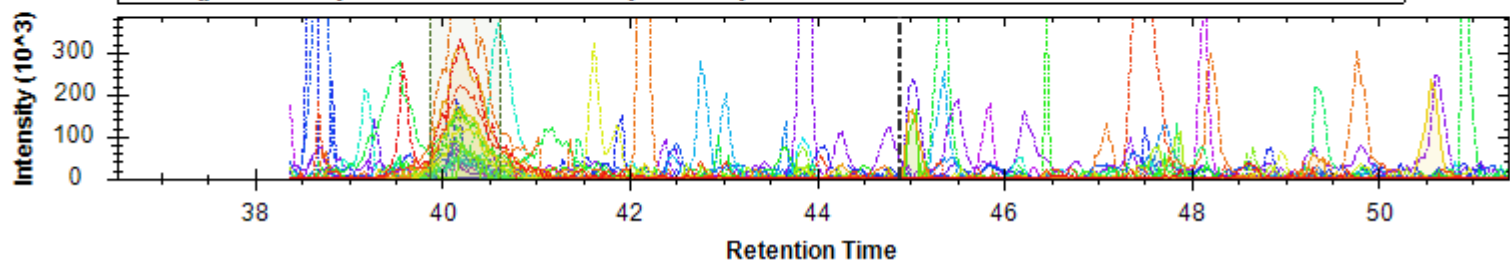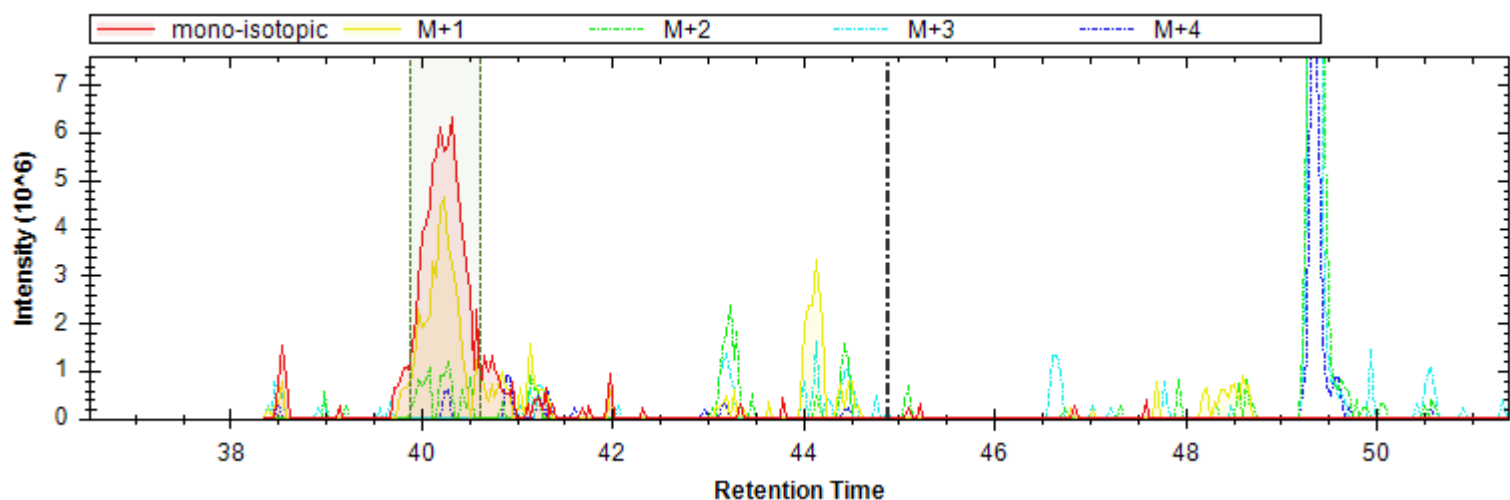



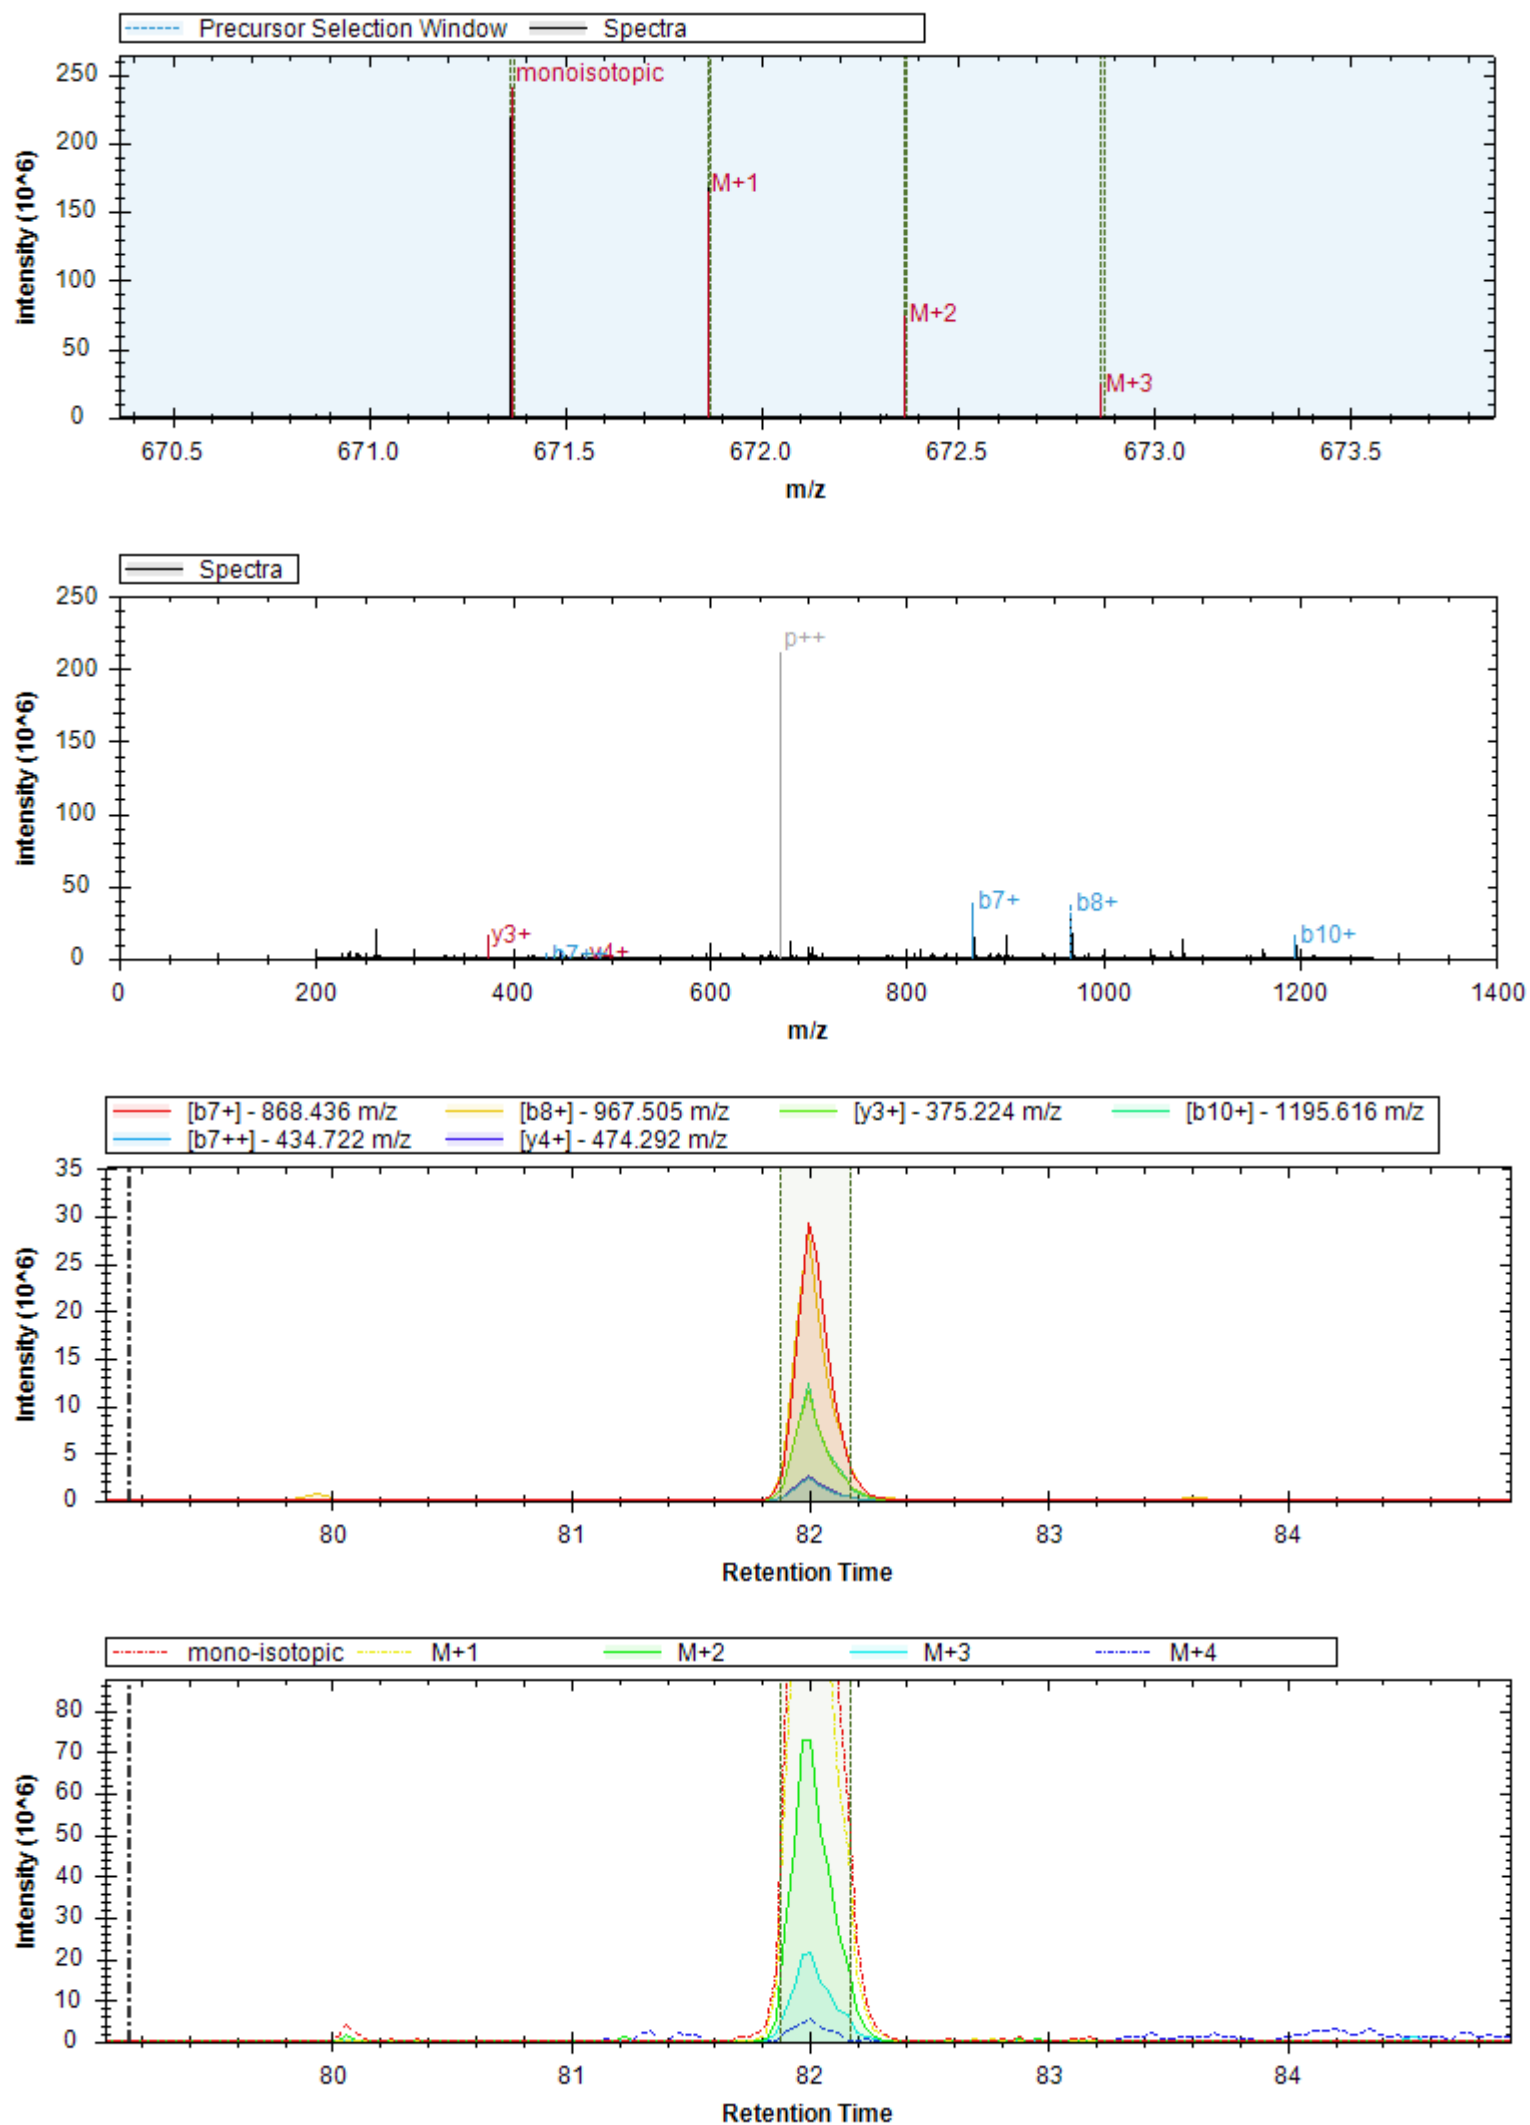

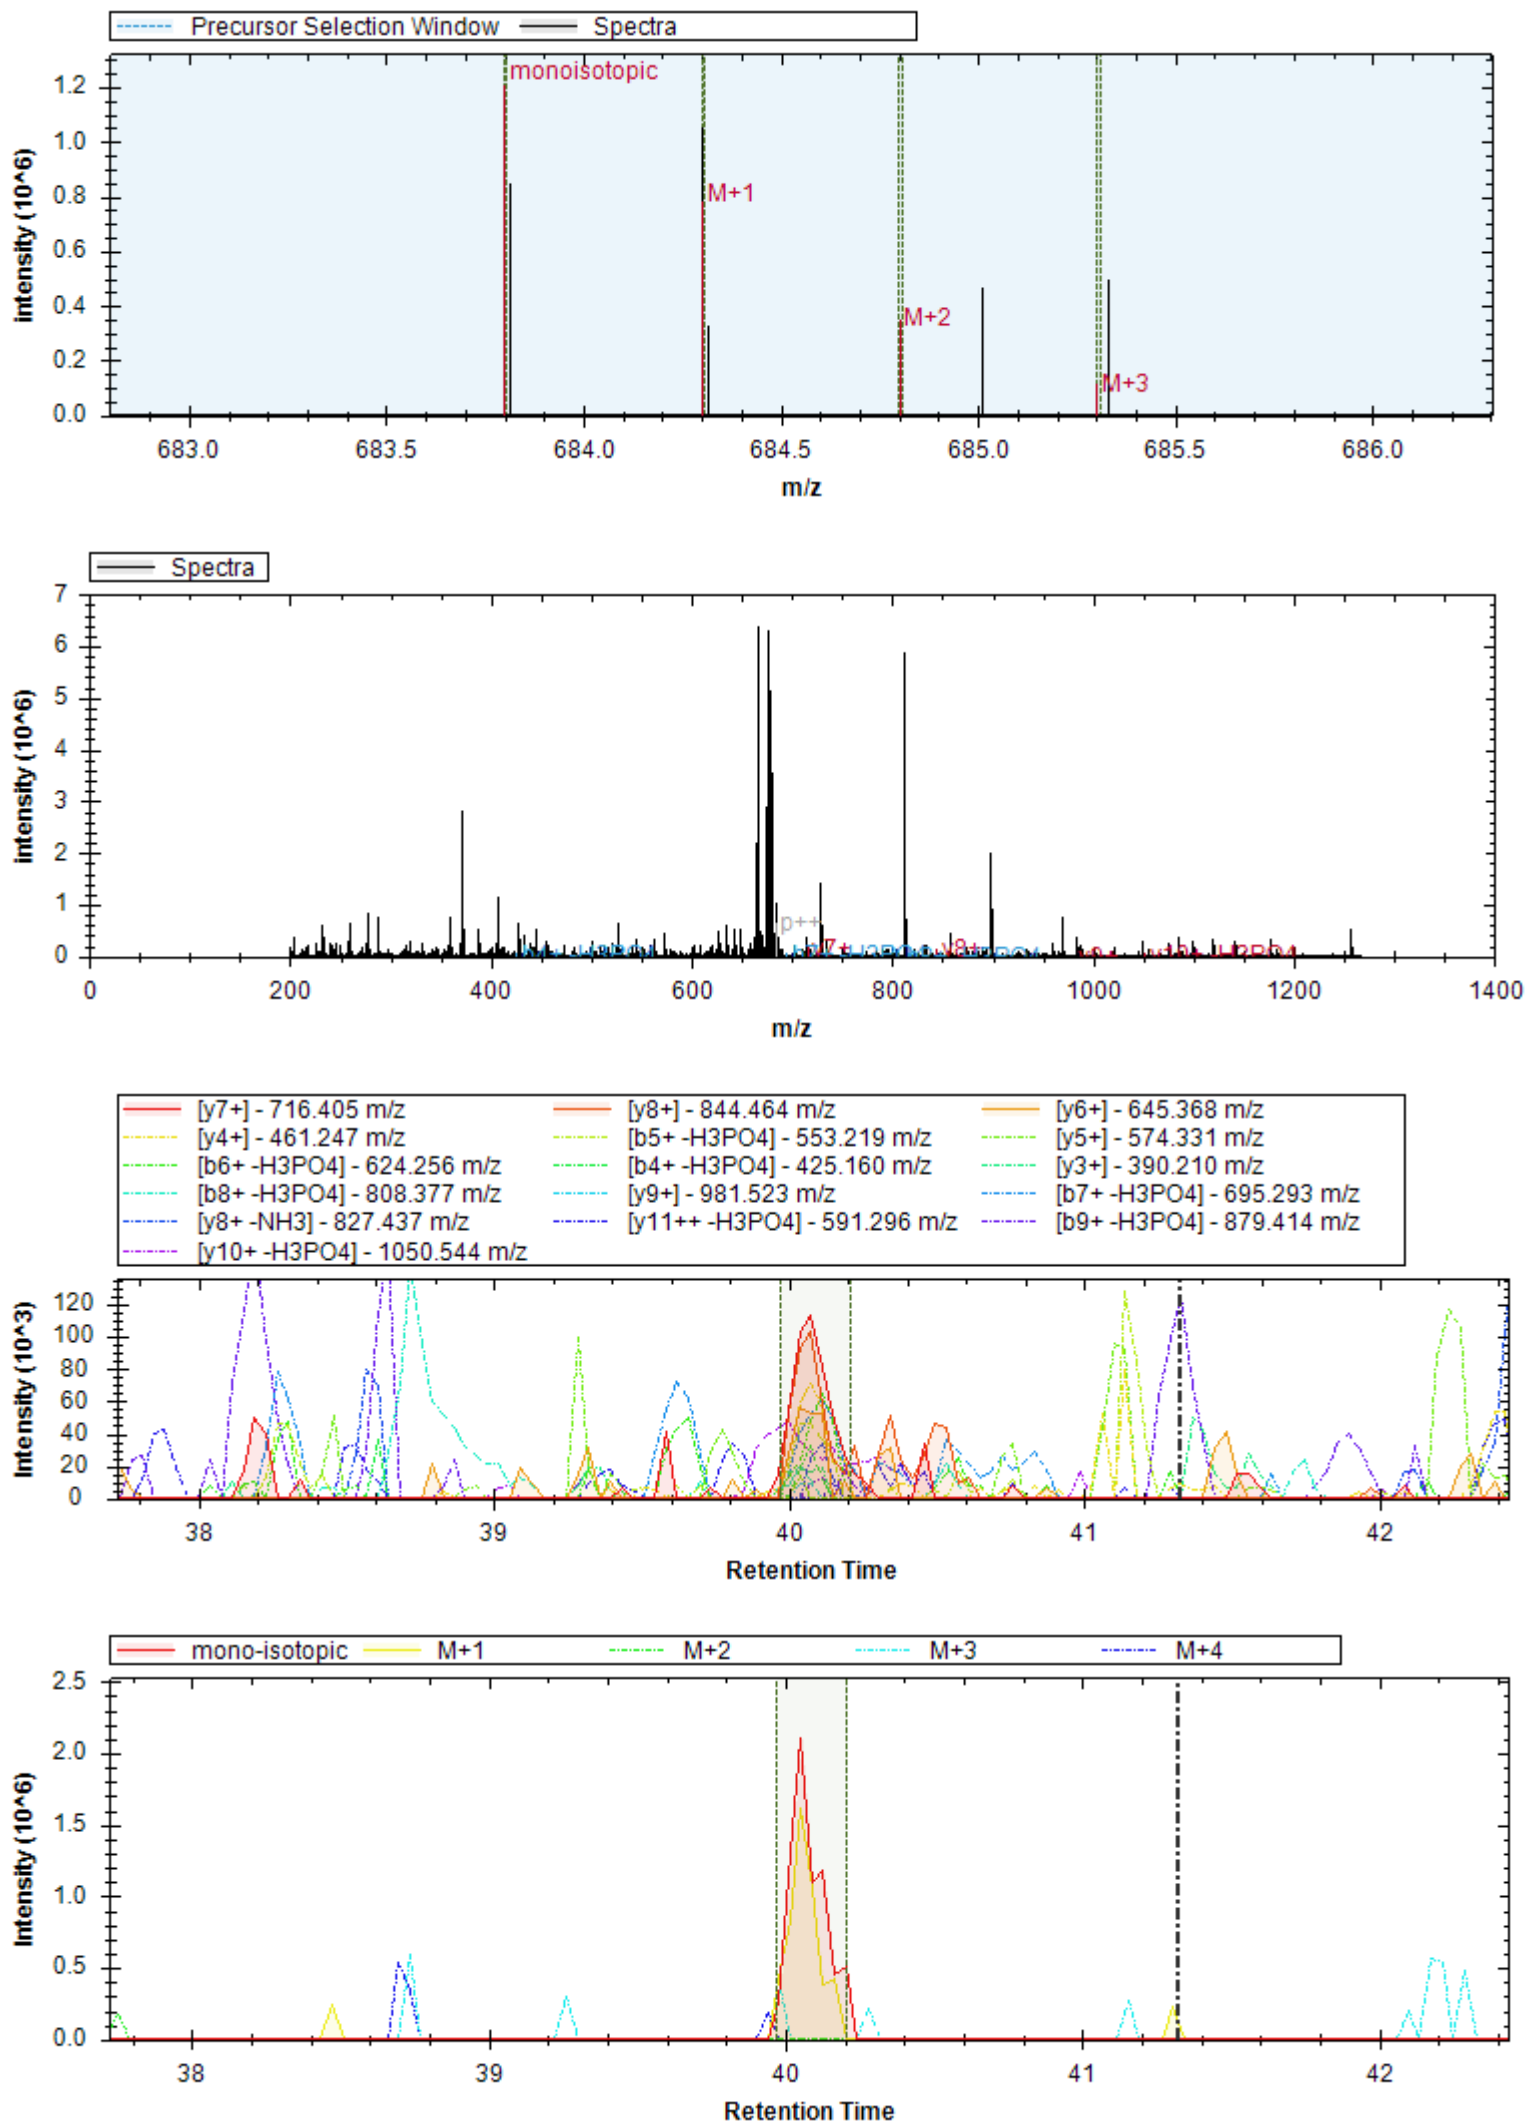

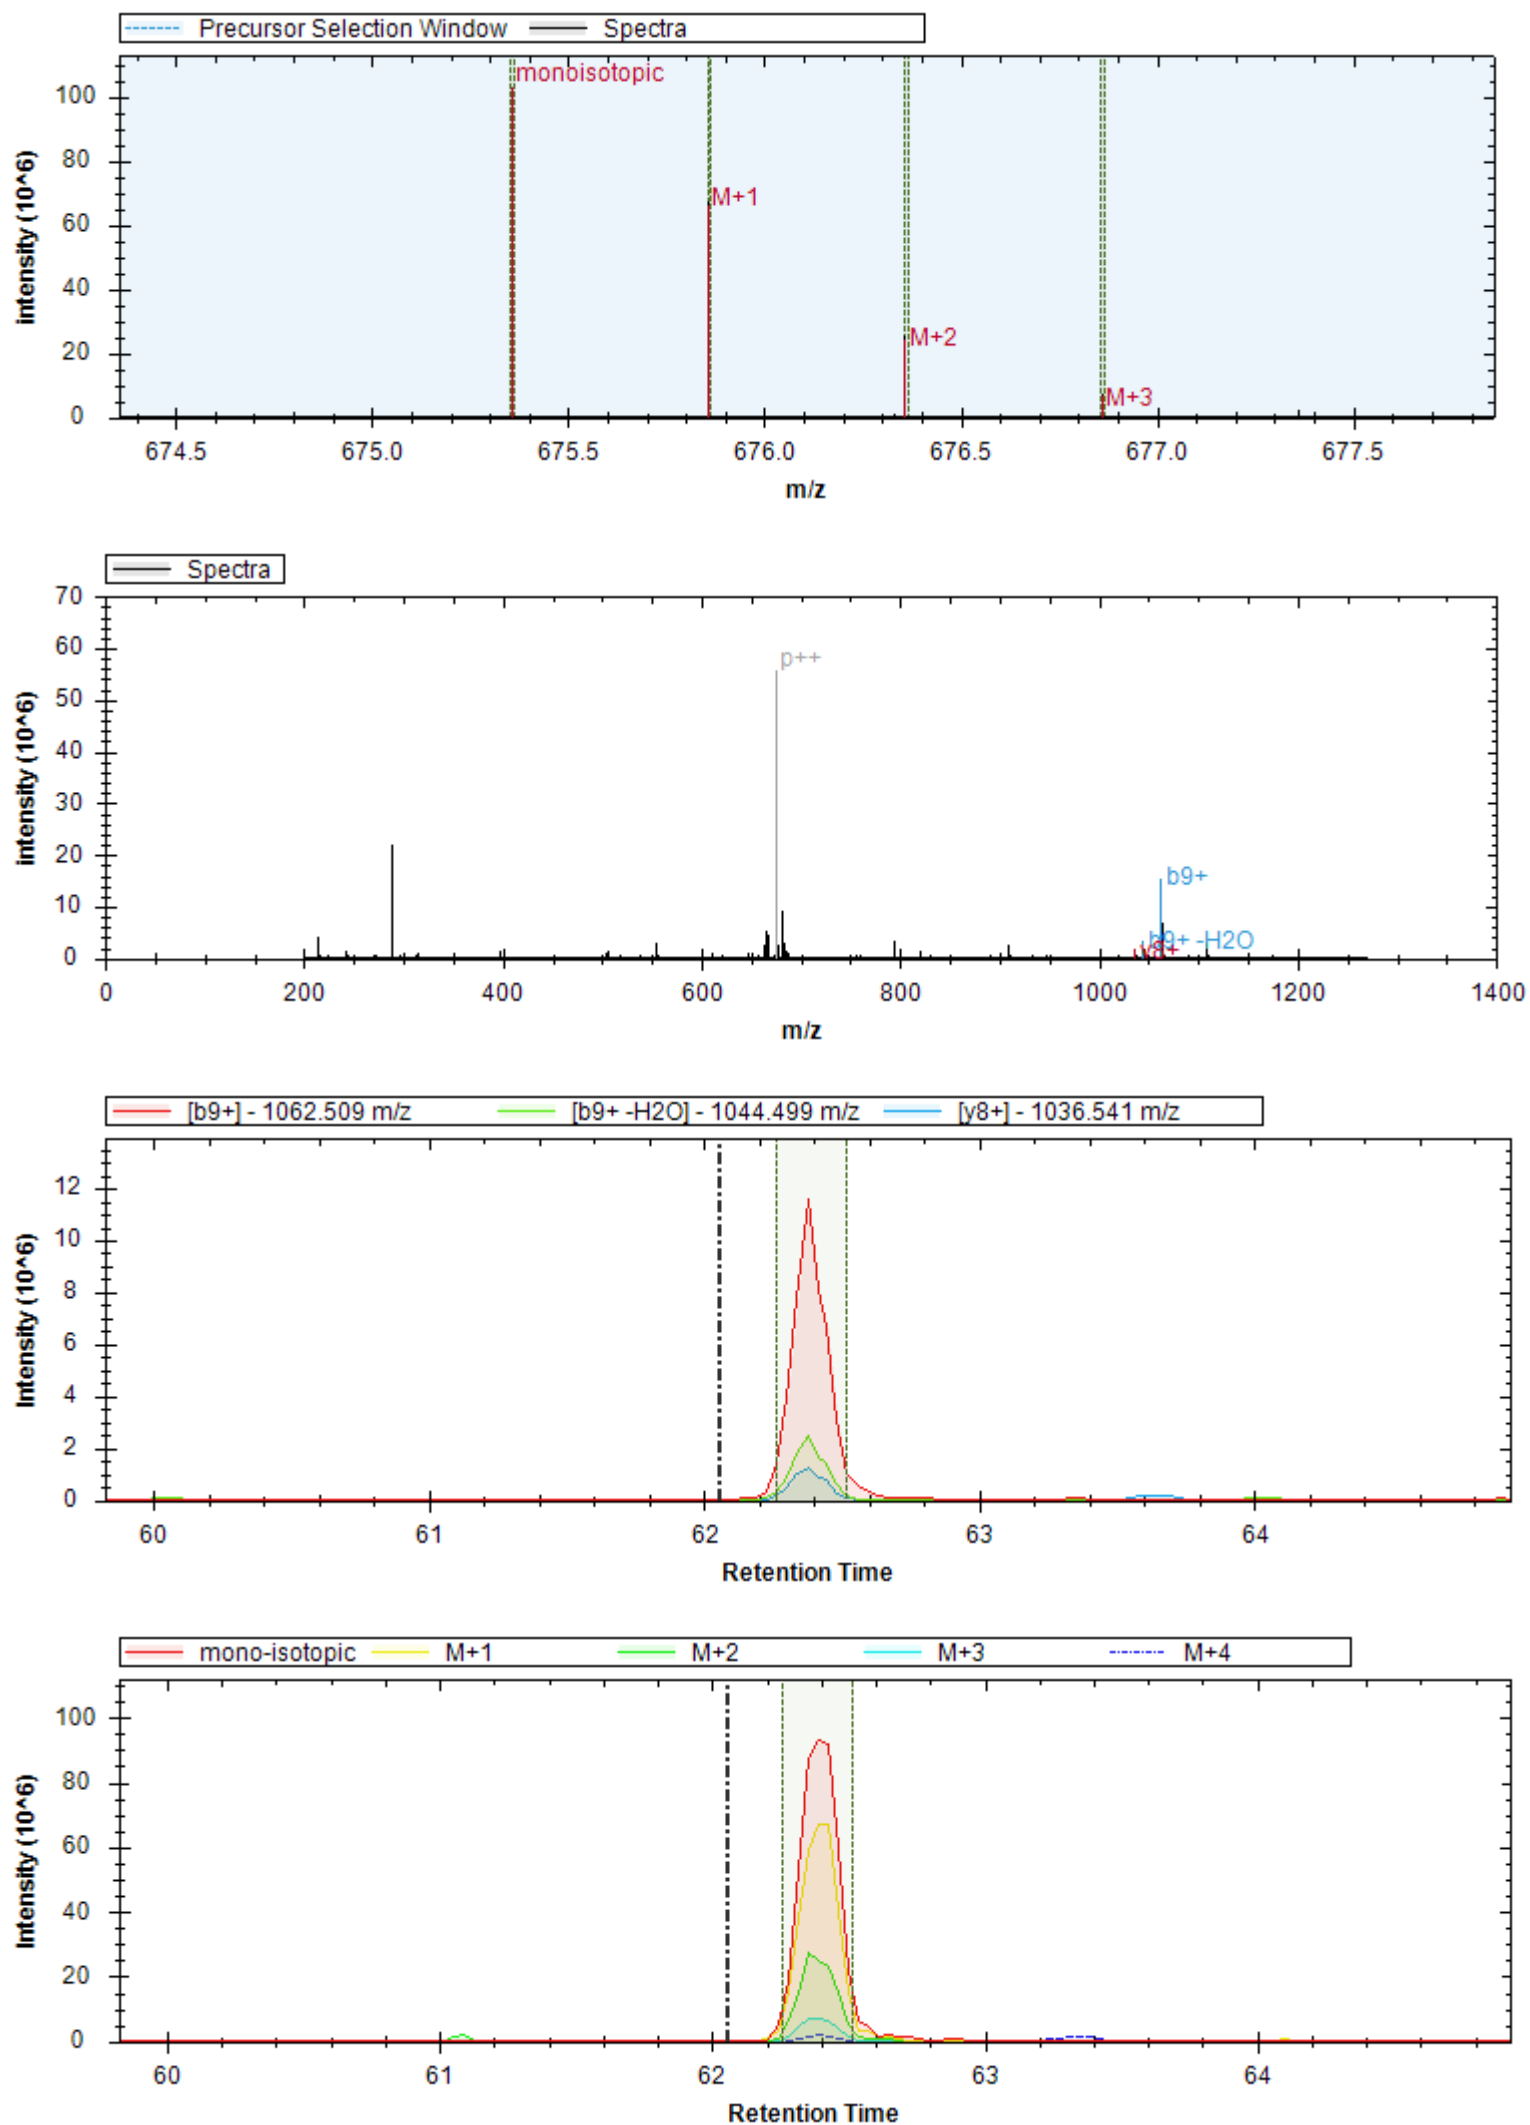

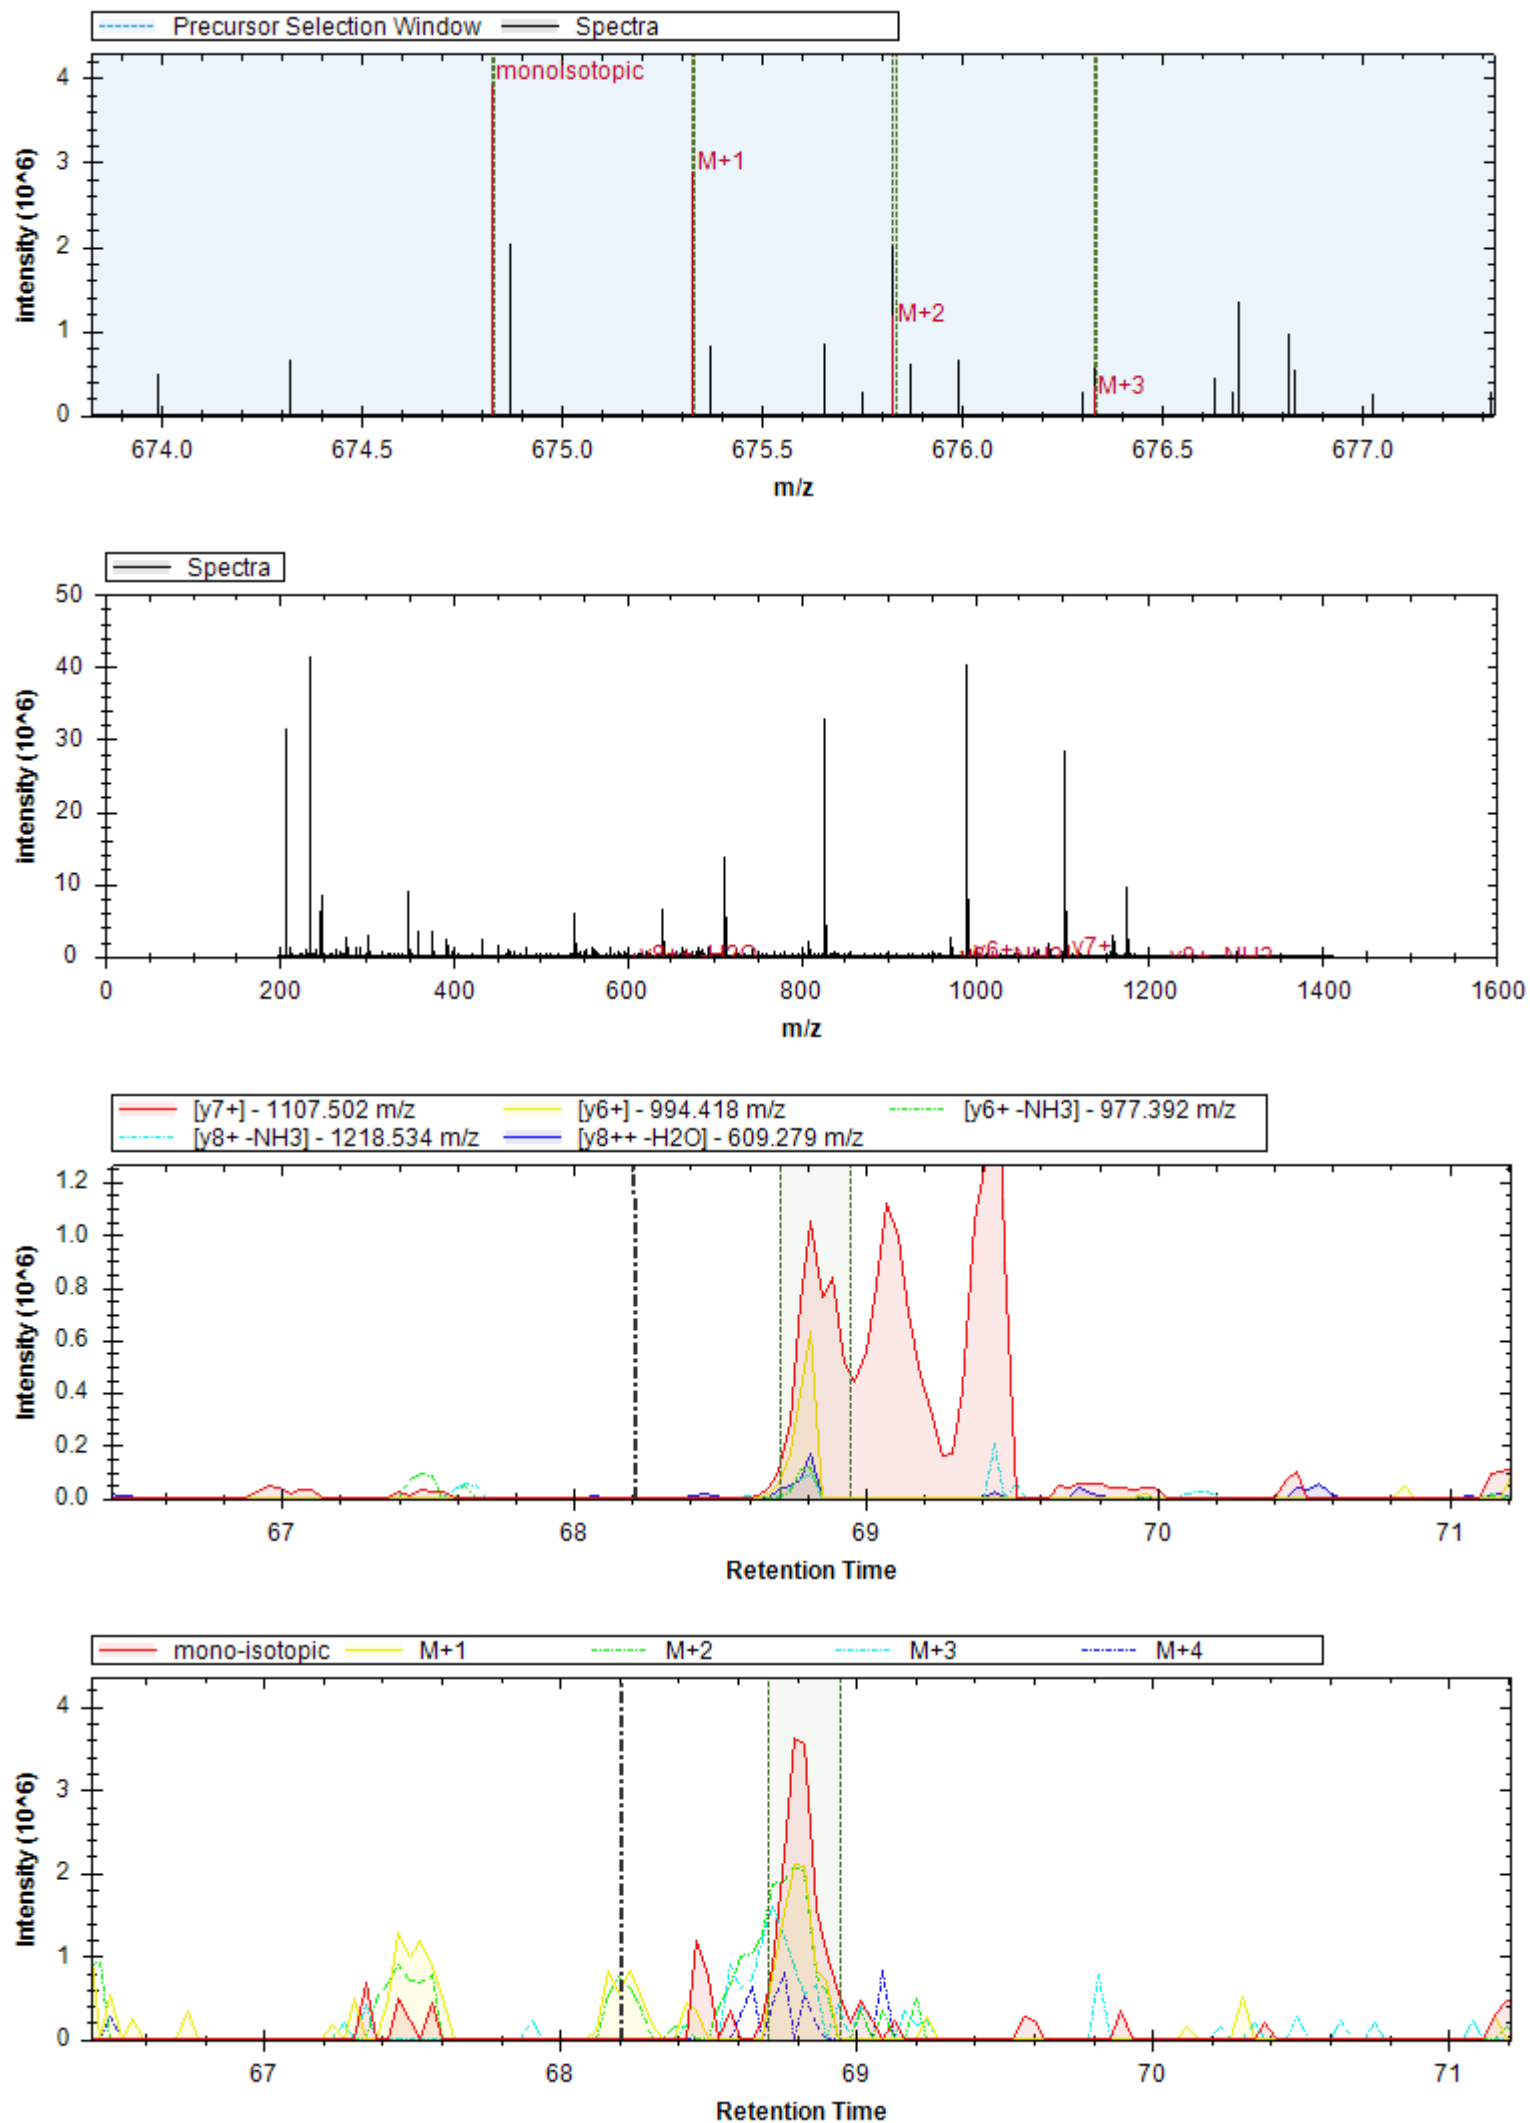

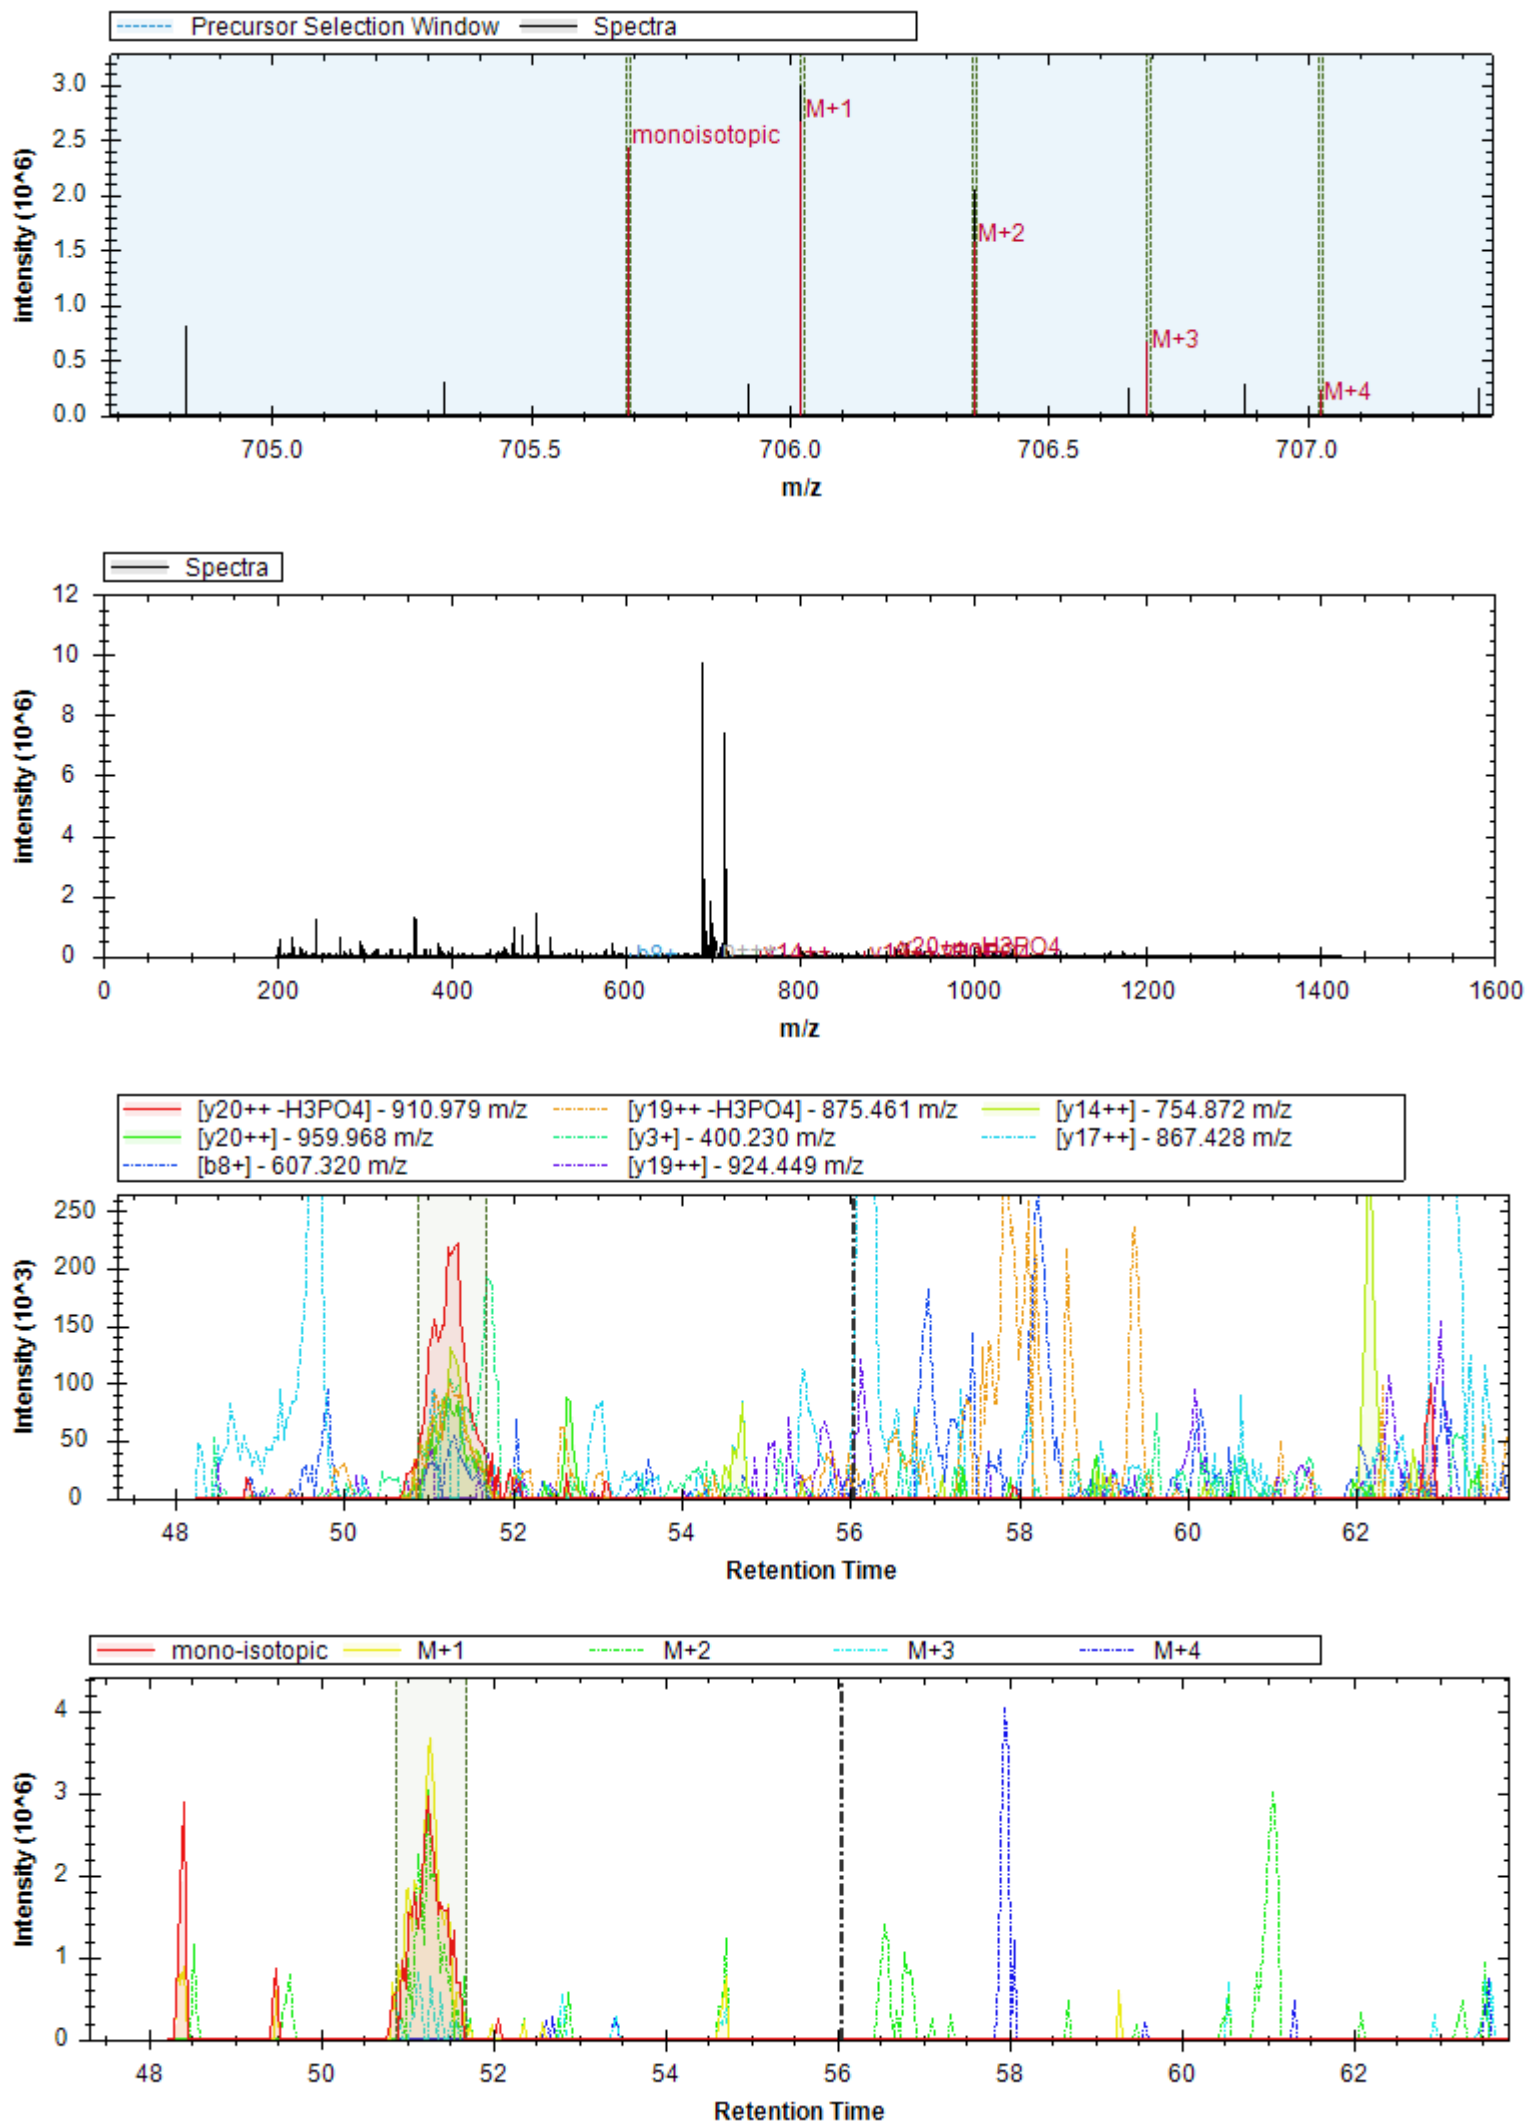

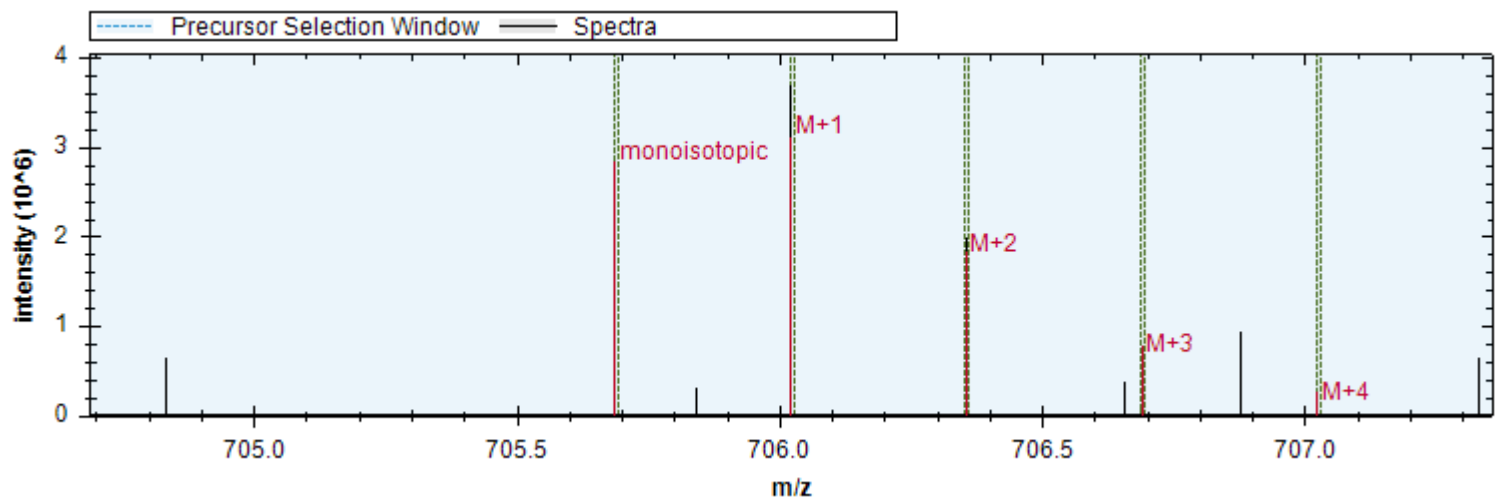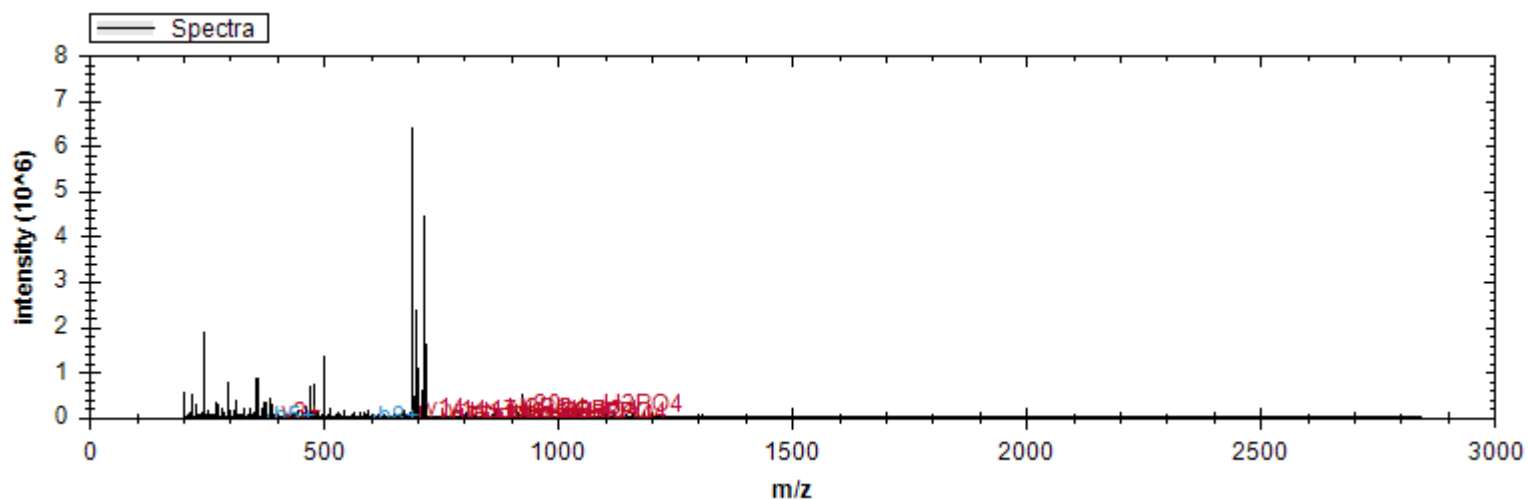

- |                              |                              |                              |
|------------------------------|------------------------------|------------------------------|
| [y20++ -H3PO4] - 910.979 m/z | [y14++ -H3PO4] - 705.884 m/z | [y17++ -H3PO4] - 818.439 m/z |
| [y19++ -H3PO4] - 875.461 m/z | [y3+] - 400.230 m/z          | [y14++] - 754.872 m/z        |
| [y20++] - 959.968 m/z        | [y18++ -H3PO4] - 846.950 m/z | [y17++] - 867.428 m/z        |
| [b8+] - 607.320 m/z          | [y19++] - 924.449 m/z        | [y16++ -H3PO4] - 769.913 m/z |
| [b5+] - 382.209 m/z          | [y15++ -H3PO4] - 741.402 m/z | [b19++ -H3PO4] - 809.429 m/z |
| [y14++ -H2O] - 745.867 m/z   | [b4+] - 325.187 m/z          | [b19++] - 858.417 m/z        |
| [y18++] - 895.939 m/z        | [y9+ -H3PO4] - 918.479 m/z   |                              |

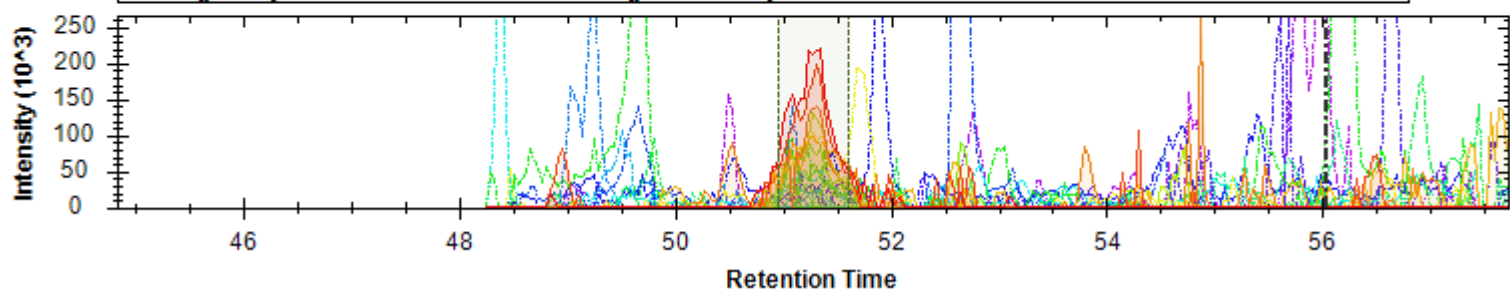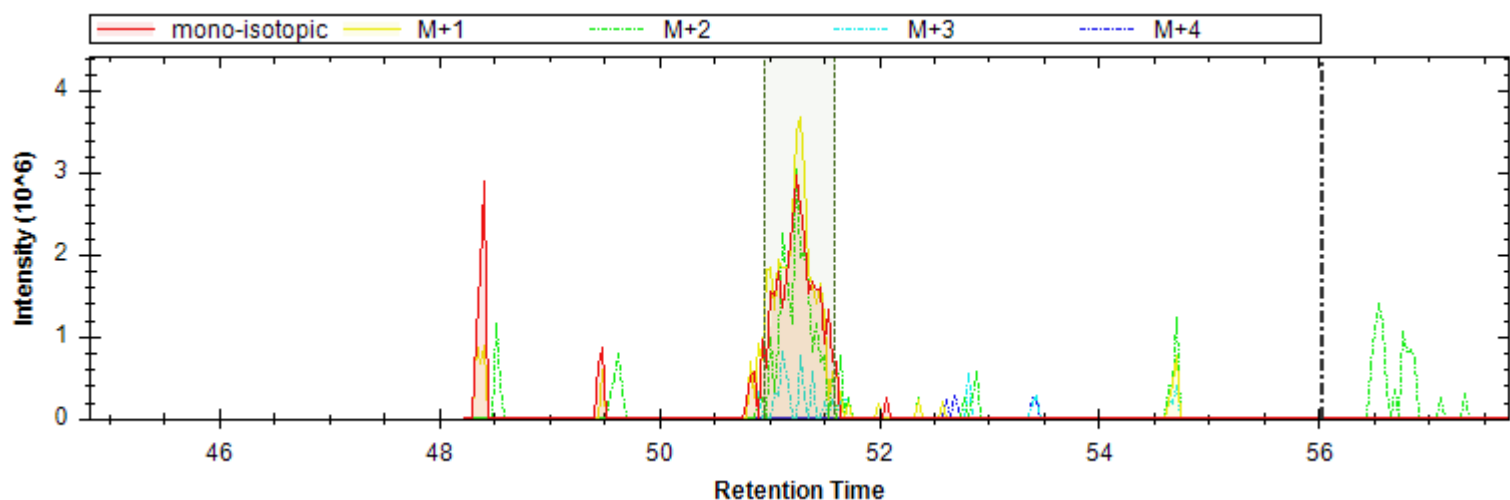



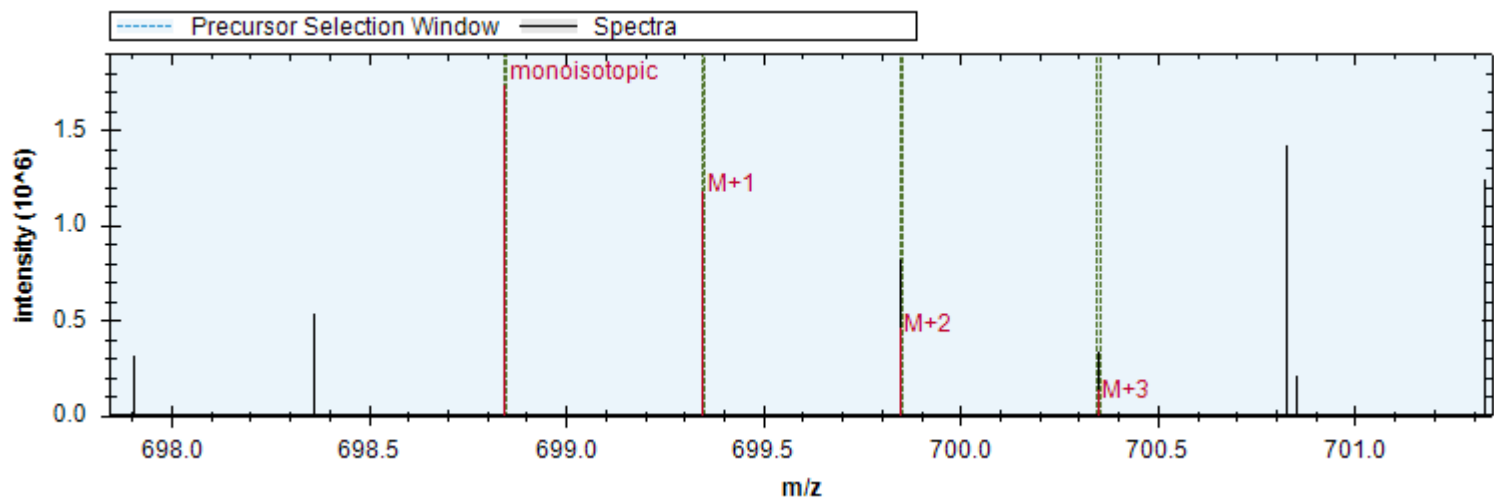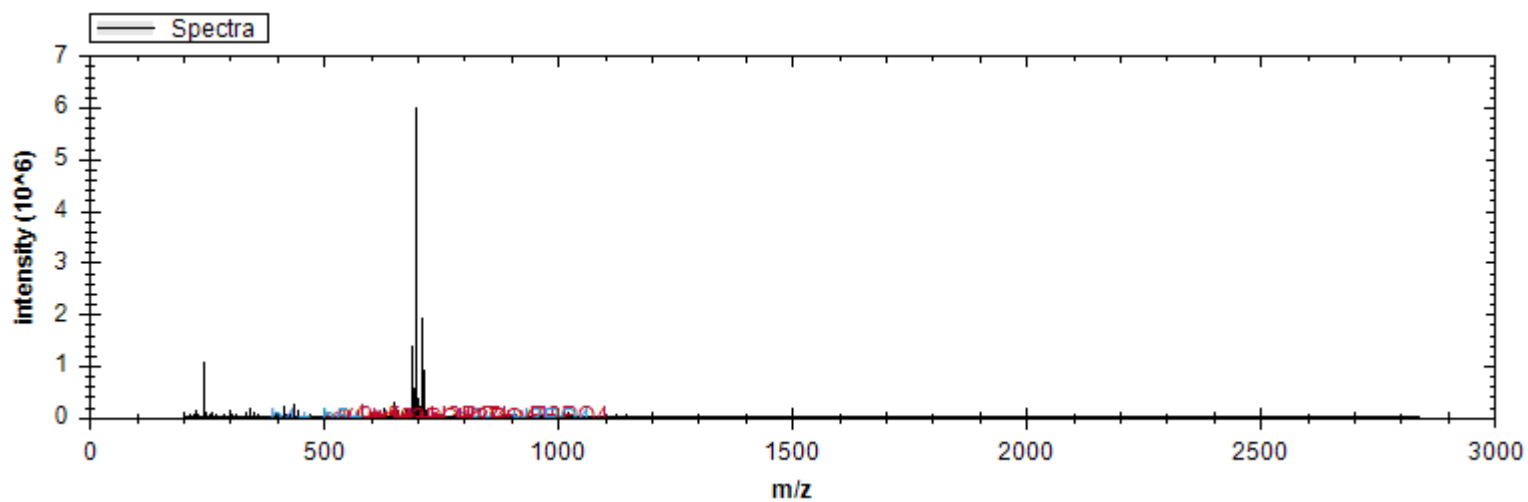

|                              |                            |                             |
|------------------------------|----------------------------|-----------------------------|
| [y4+] - 529.309 m/z          | [y7+ -H3PO4] - 813.458 m/z | [y5+ -H3PO4] - 598.331 m/z  |
| [y11++ -H3PO4] - 600.323 m/z | [y7+] - 911.435 m/z        | [b4+] - 373.172 m/z         |
| [b8+ -H3PO4] - 770.404 m/z   | [y9++] - 541.274 m/z       | [y11++] - 649.311 m/z       |
| [y10+ -H3PO4] - 1098.590 m/z | [y6+ -H3PO4] - 726.426 m/z | [y10++] - 598.787 m/z       |
| [b5+] - 486.256 m/z          | [y5+] - 696.308 m/z        | [y9++ -H3PO4] - 492.285 m/z |

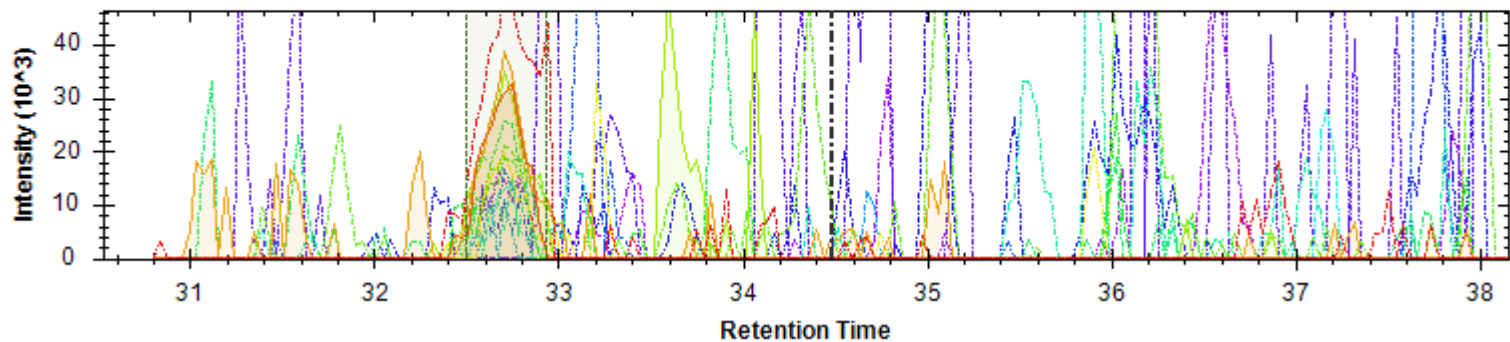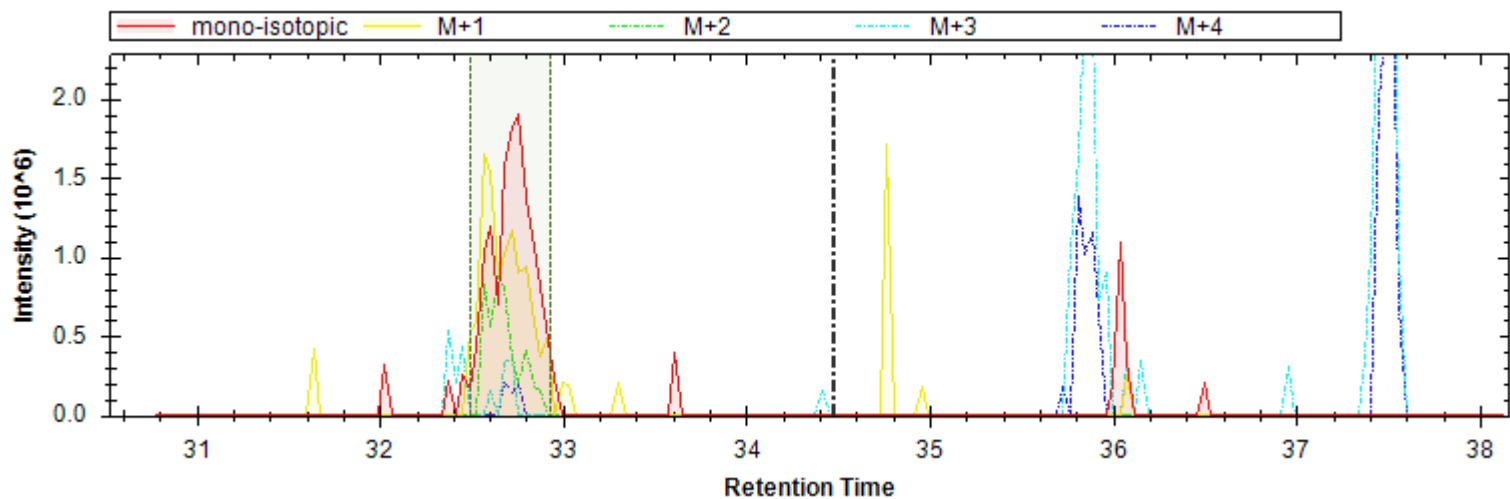

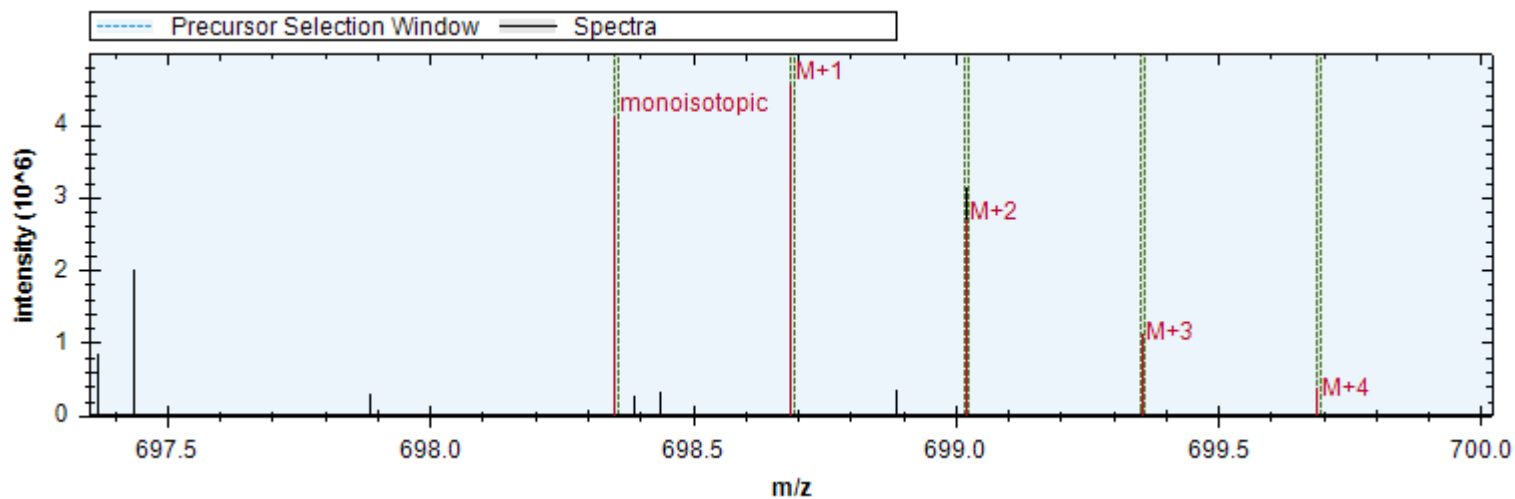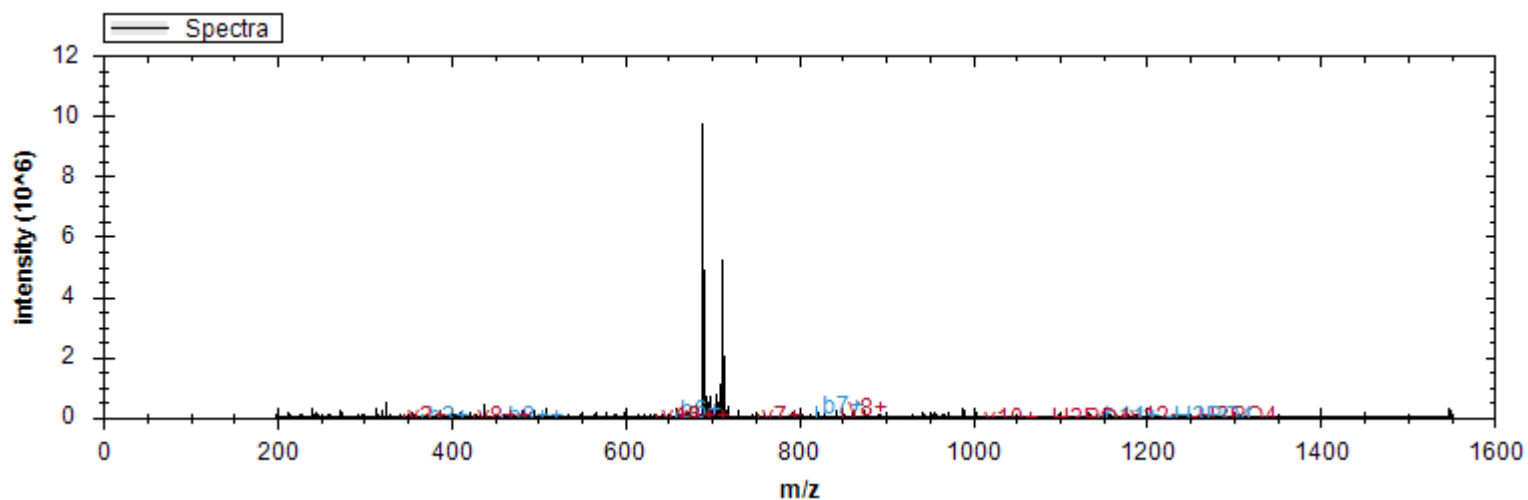

- |                              |                              |                      |
|------------------------------|------------------------------|----------------------|
| [b7+] - 821.442 m/z          | [y10+ -H2O] - 1184.309 m/z   | [b6+] - 658.378 m/z  |
| [y8+] - 850.489 m/z          | [b9+] - 989.532 m/z          | [b8++] - 459.751 m/z |
| [y4+] - 482.283 m/z          | [y12+ -H2O] - 1352.399 m/z   | [b3+] - 367.245 m/z  |
| [y6+] - 652.389 m/z          | [y12+ -H3PO4] - 1174.633 m/z | [y7+] - 753.437 m/z  |
| [y12++] - 636.809 m/z        | [b17++] - 910.436 m/z        | [y8++] - 425.748 m/z |
| [b11+ -H3PO4] - 1145.585 m/z | [y10+ -H3PO4] - 1006.543 m/z | [y3+] - 345.225 m/z  |
| [y5+] - 581.352 m/z          | [y13++] - 718.340 m/z        |                      |

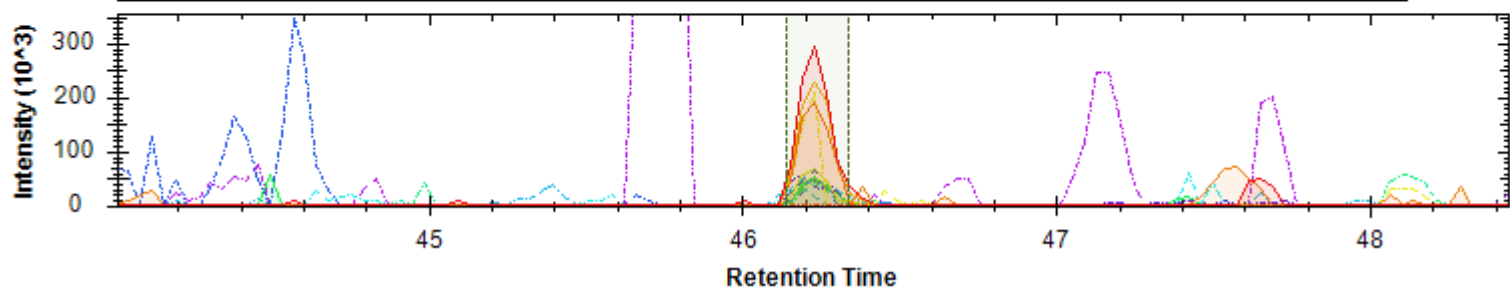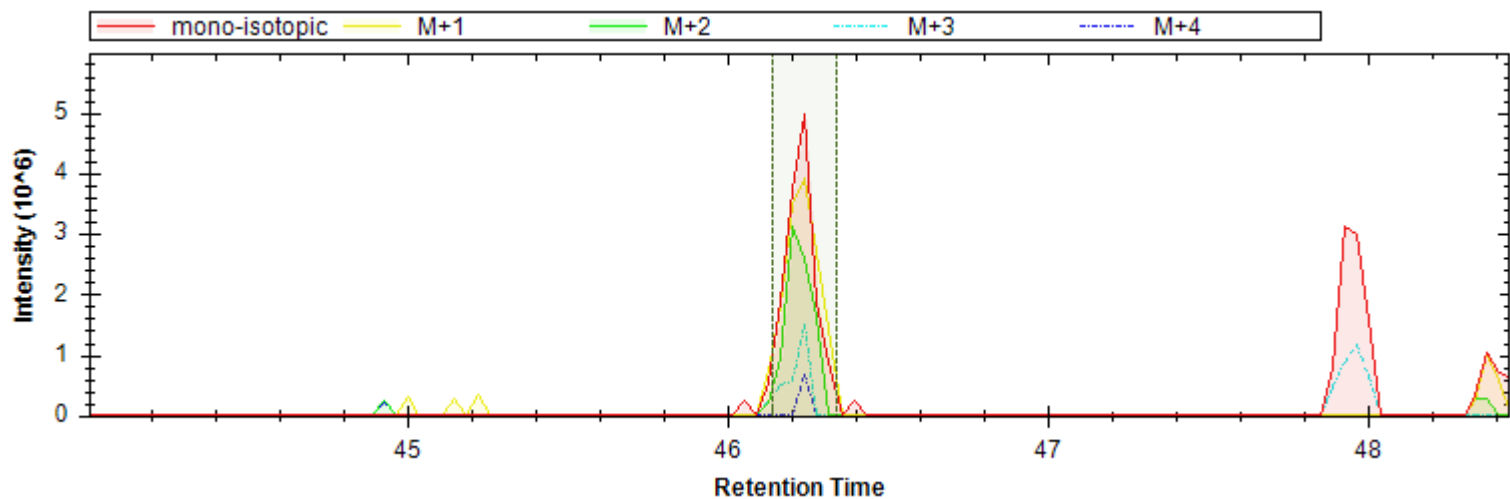

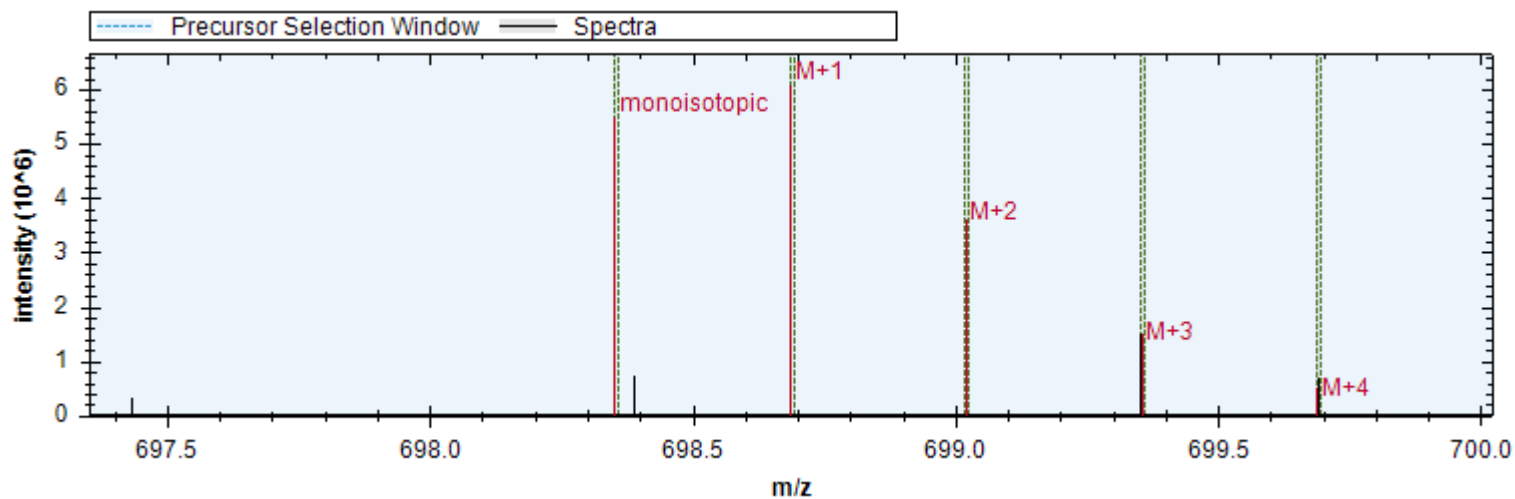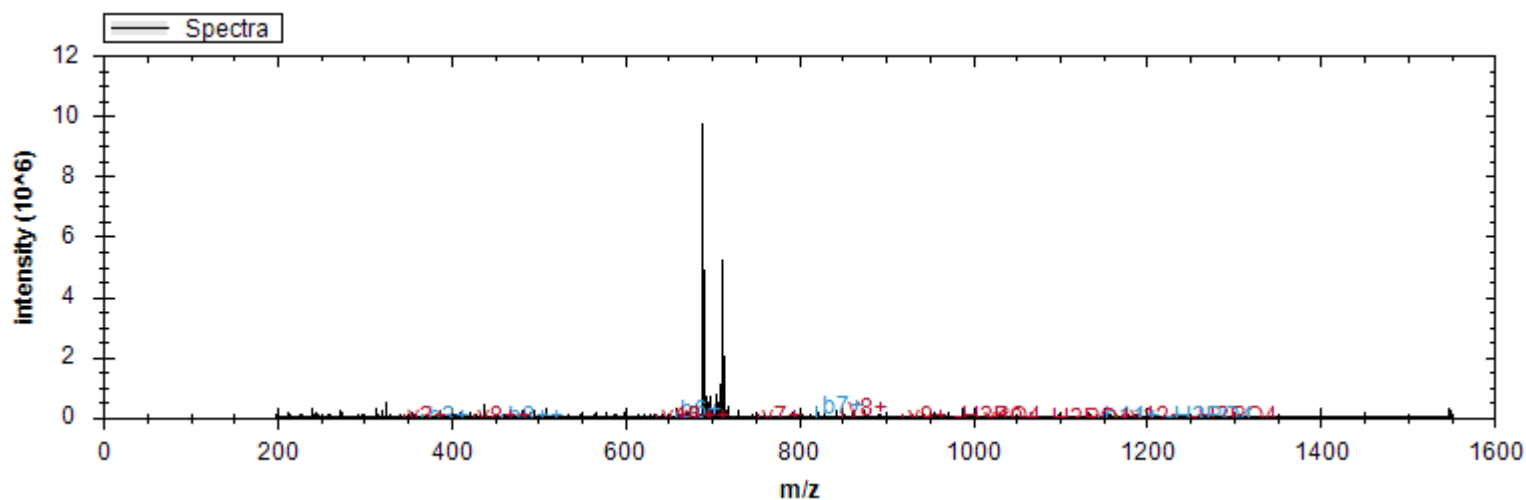

- |                              |                              |                              |
|------------------------------|------------------------------|------------------------------|
| [b7+] - 821.442 m/z          | [y8+] - 850.489 m/z          | [b6+] - 658.378 m/z          |
| [b9+] - 989.532 m/z          | [y4+] - 482.283 m/z          | [b8++] - 459.751 m/z         |
| [y11+ -H2O] - 1255.346 m/z   | [y6+] - 652.389 m/z          | [b3+] - 367.245 m/z          |
| [y5+] - 581.352 m/z          | [y9+ -H3PO4] - 919.511 m/z   | [y7+] - 753.437 m/z          |
| [y10+ -H3PO4] - 1006.543 m/z | [b11+ -H3PO4] - 1145.585 m/z | [y12+ -H3PO4] - 1174.633 m/z |
| [y3+] - 345.225 m/z          | [y12++] - 636.809 m/z        | [y8++] - 425.748 m/z         |
| [y11+ -H3PO4] - 1077.580 m/z |                              |                              |

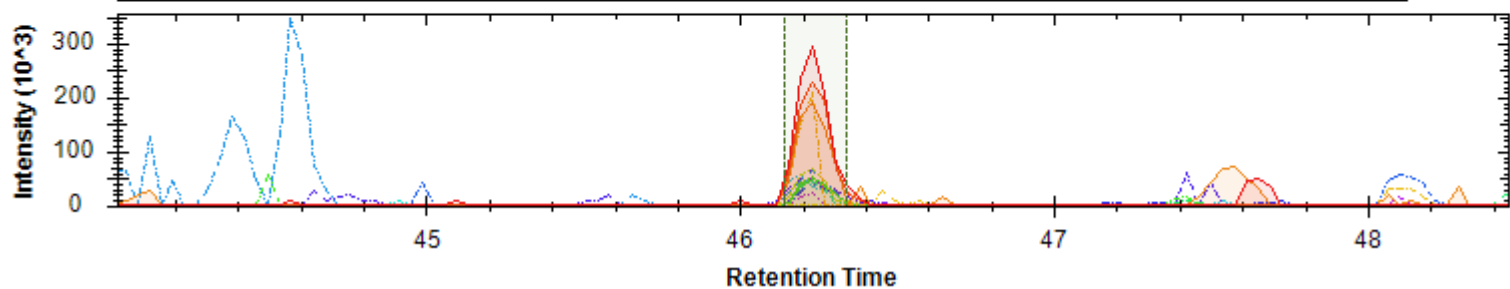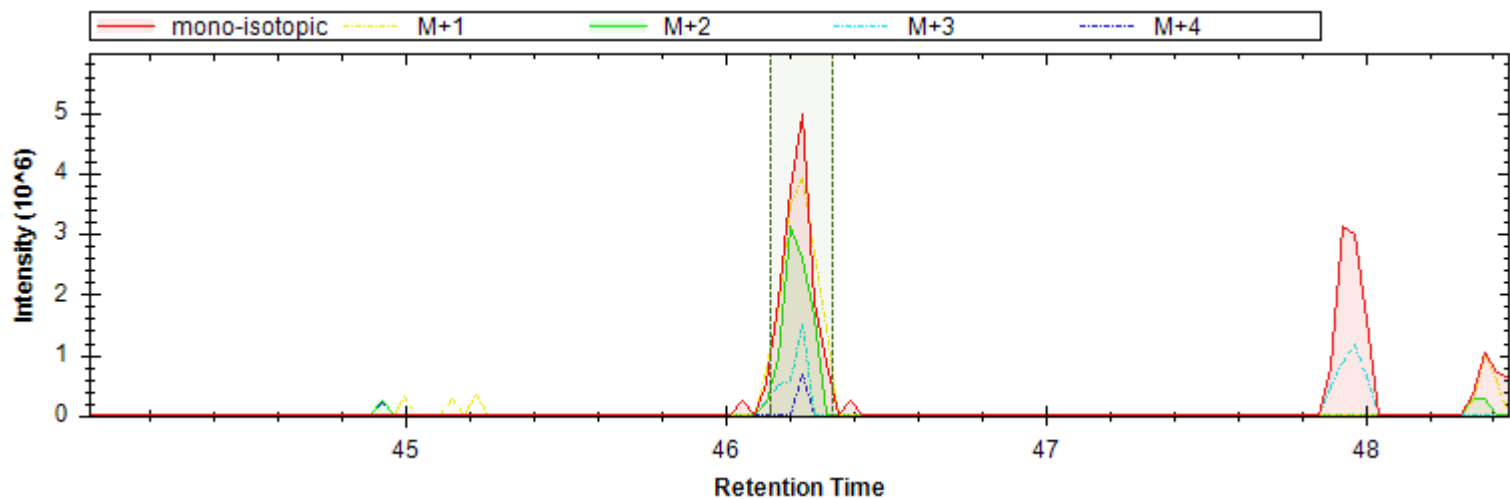

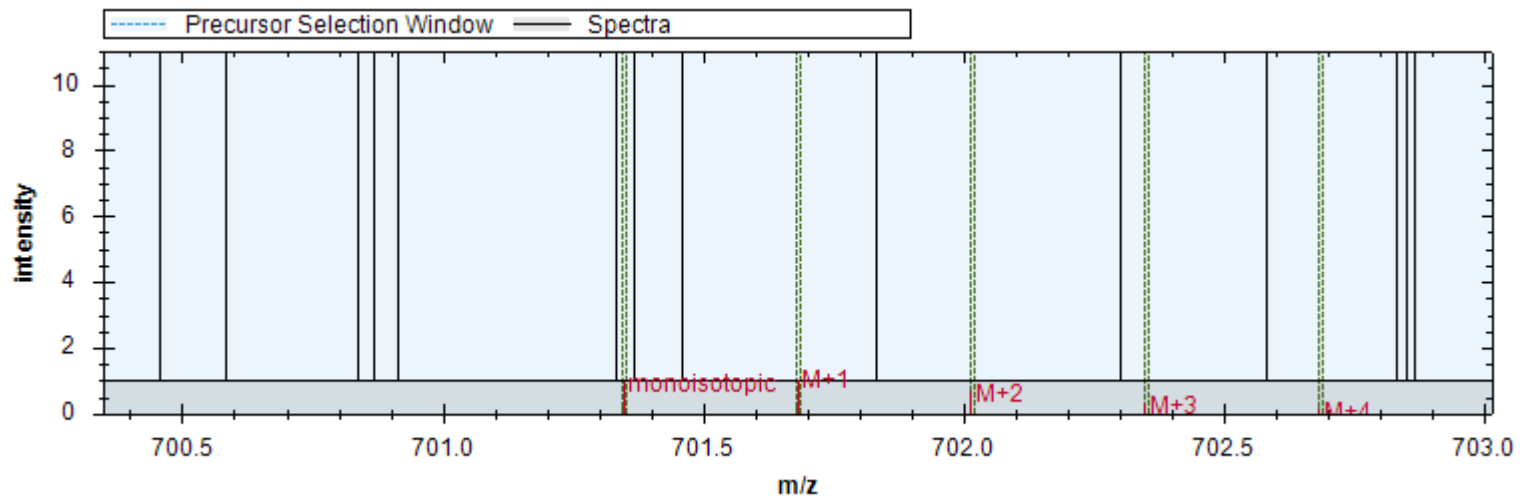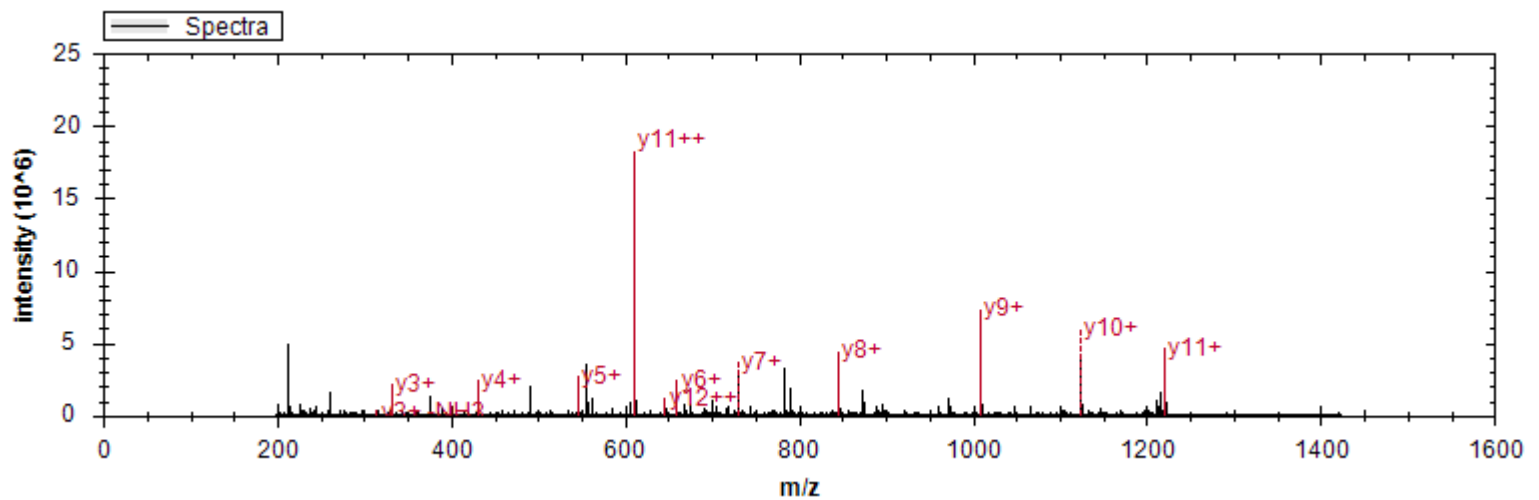

|                          |                       |                       |
|--------------------------|-----------------------|-----------------------|
| [y9+] - 1008.500 m/z     | [y11++] - 610.793 m/z | [y10+] - 1123.527 m/z |
| [y8+] - 845.436 m/z      | [y7+] - 730.409 m/z   | [y11+] - 1220.579 m/z |
| [y4+] - 431.261 m/z      | [y5+] - 546.288 m/z   | [y3+] - 332.193 m/z   |
| [y6+] - 659.372 m/z      | [y12++] - 646.312 m/z | [y13++] - 702.854 m/z |
| [y3+ -NH3] - 315.166 m/z |                       |                       |

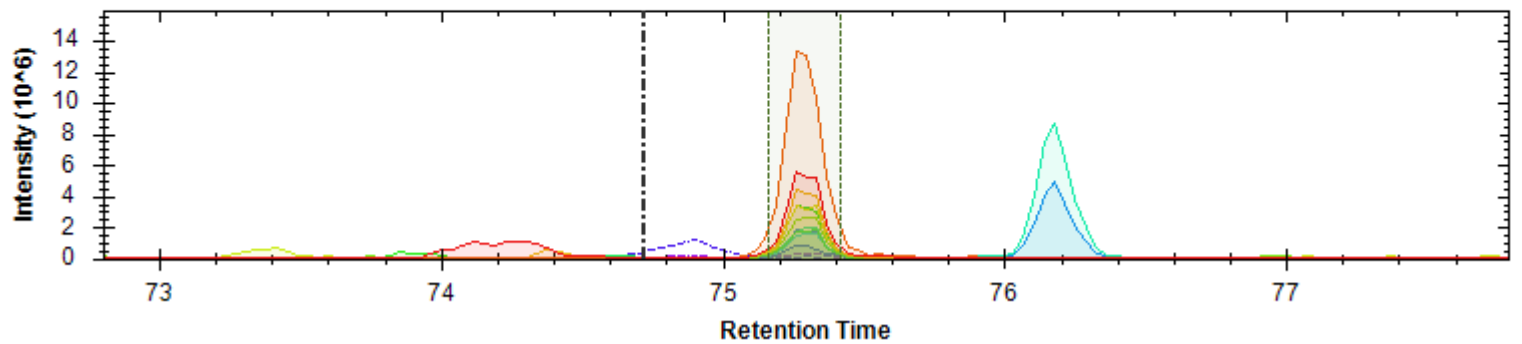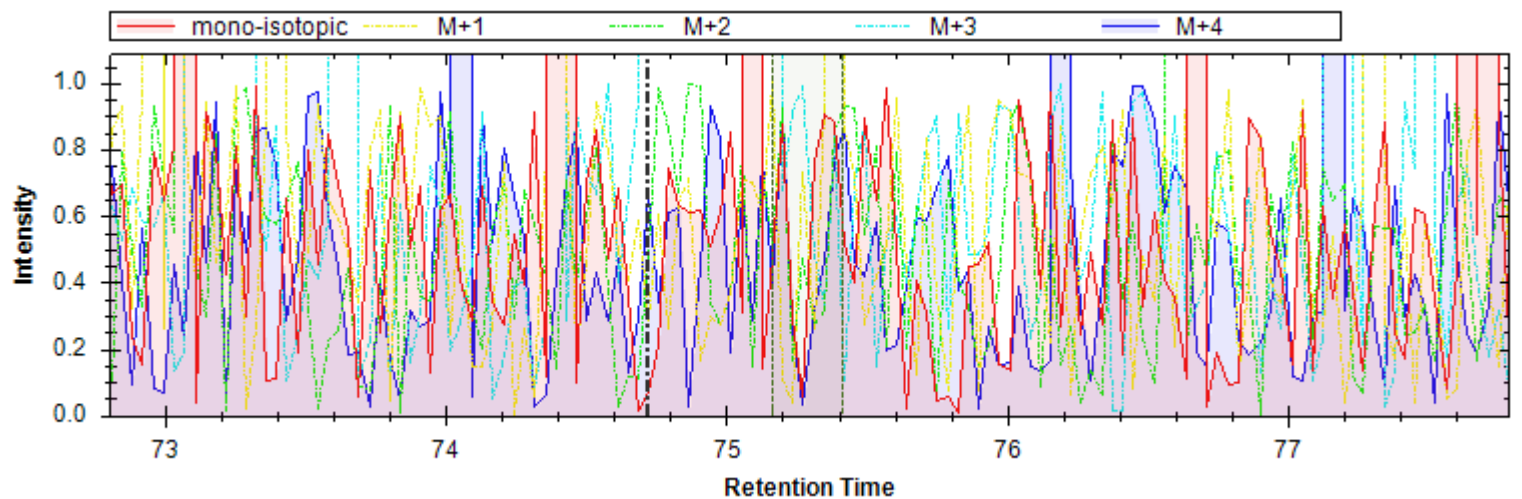

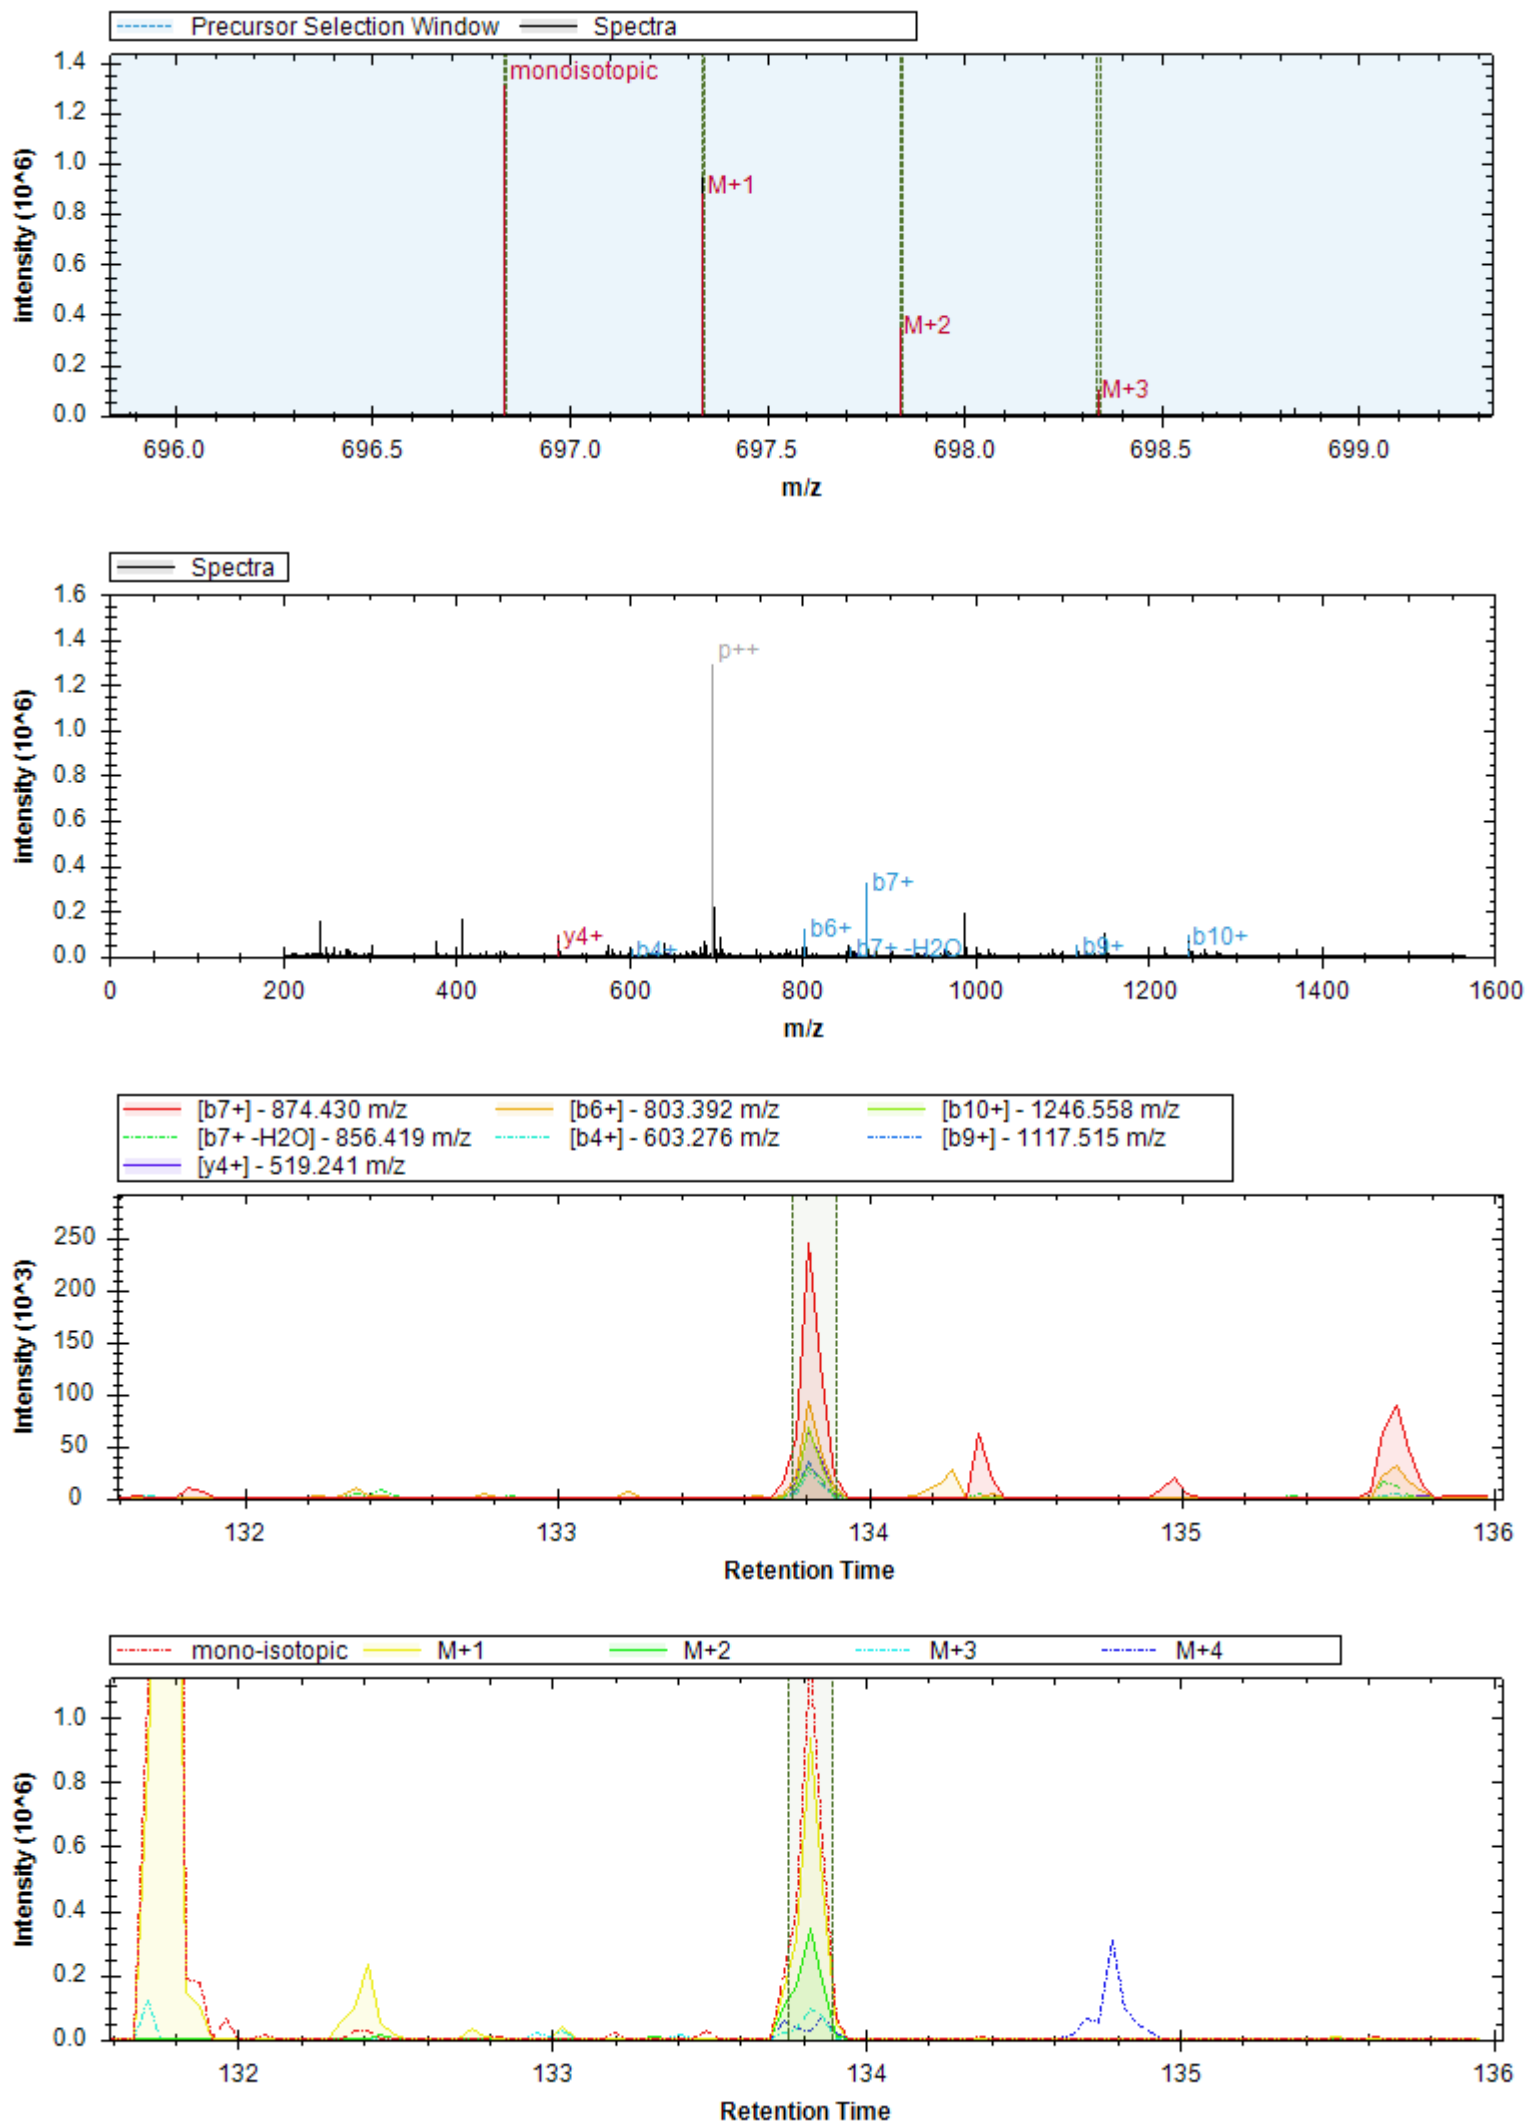

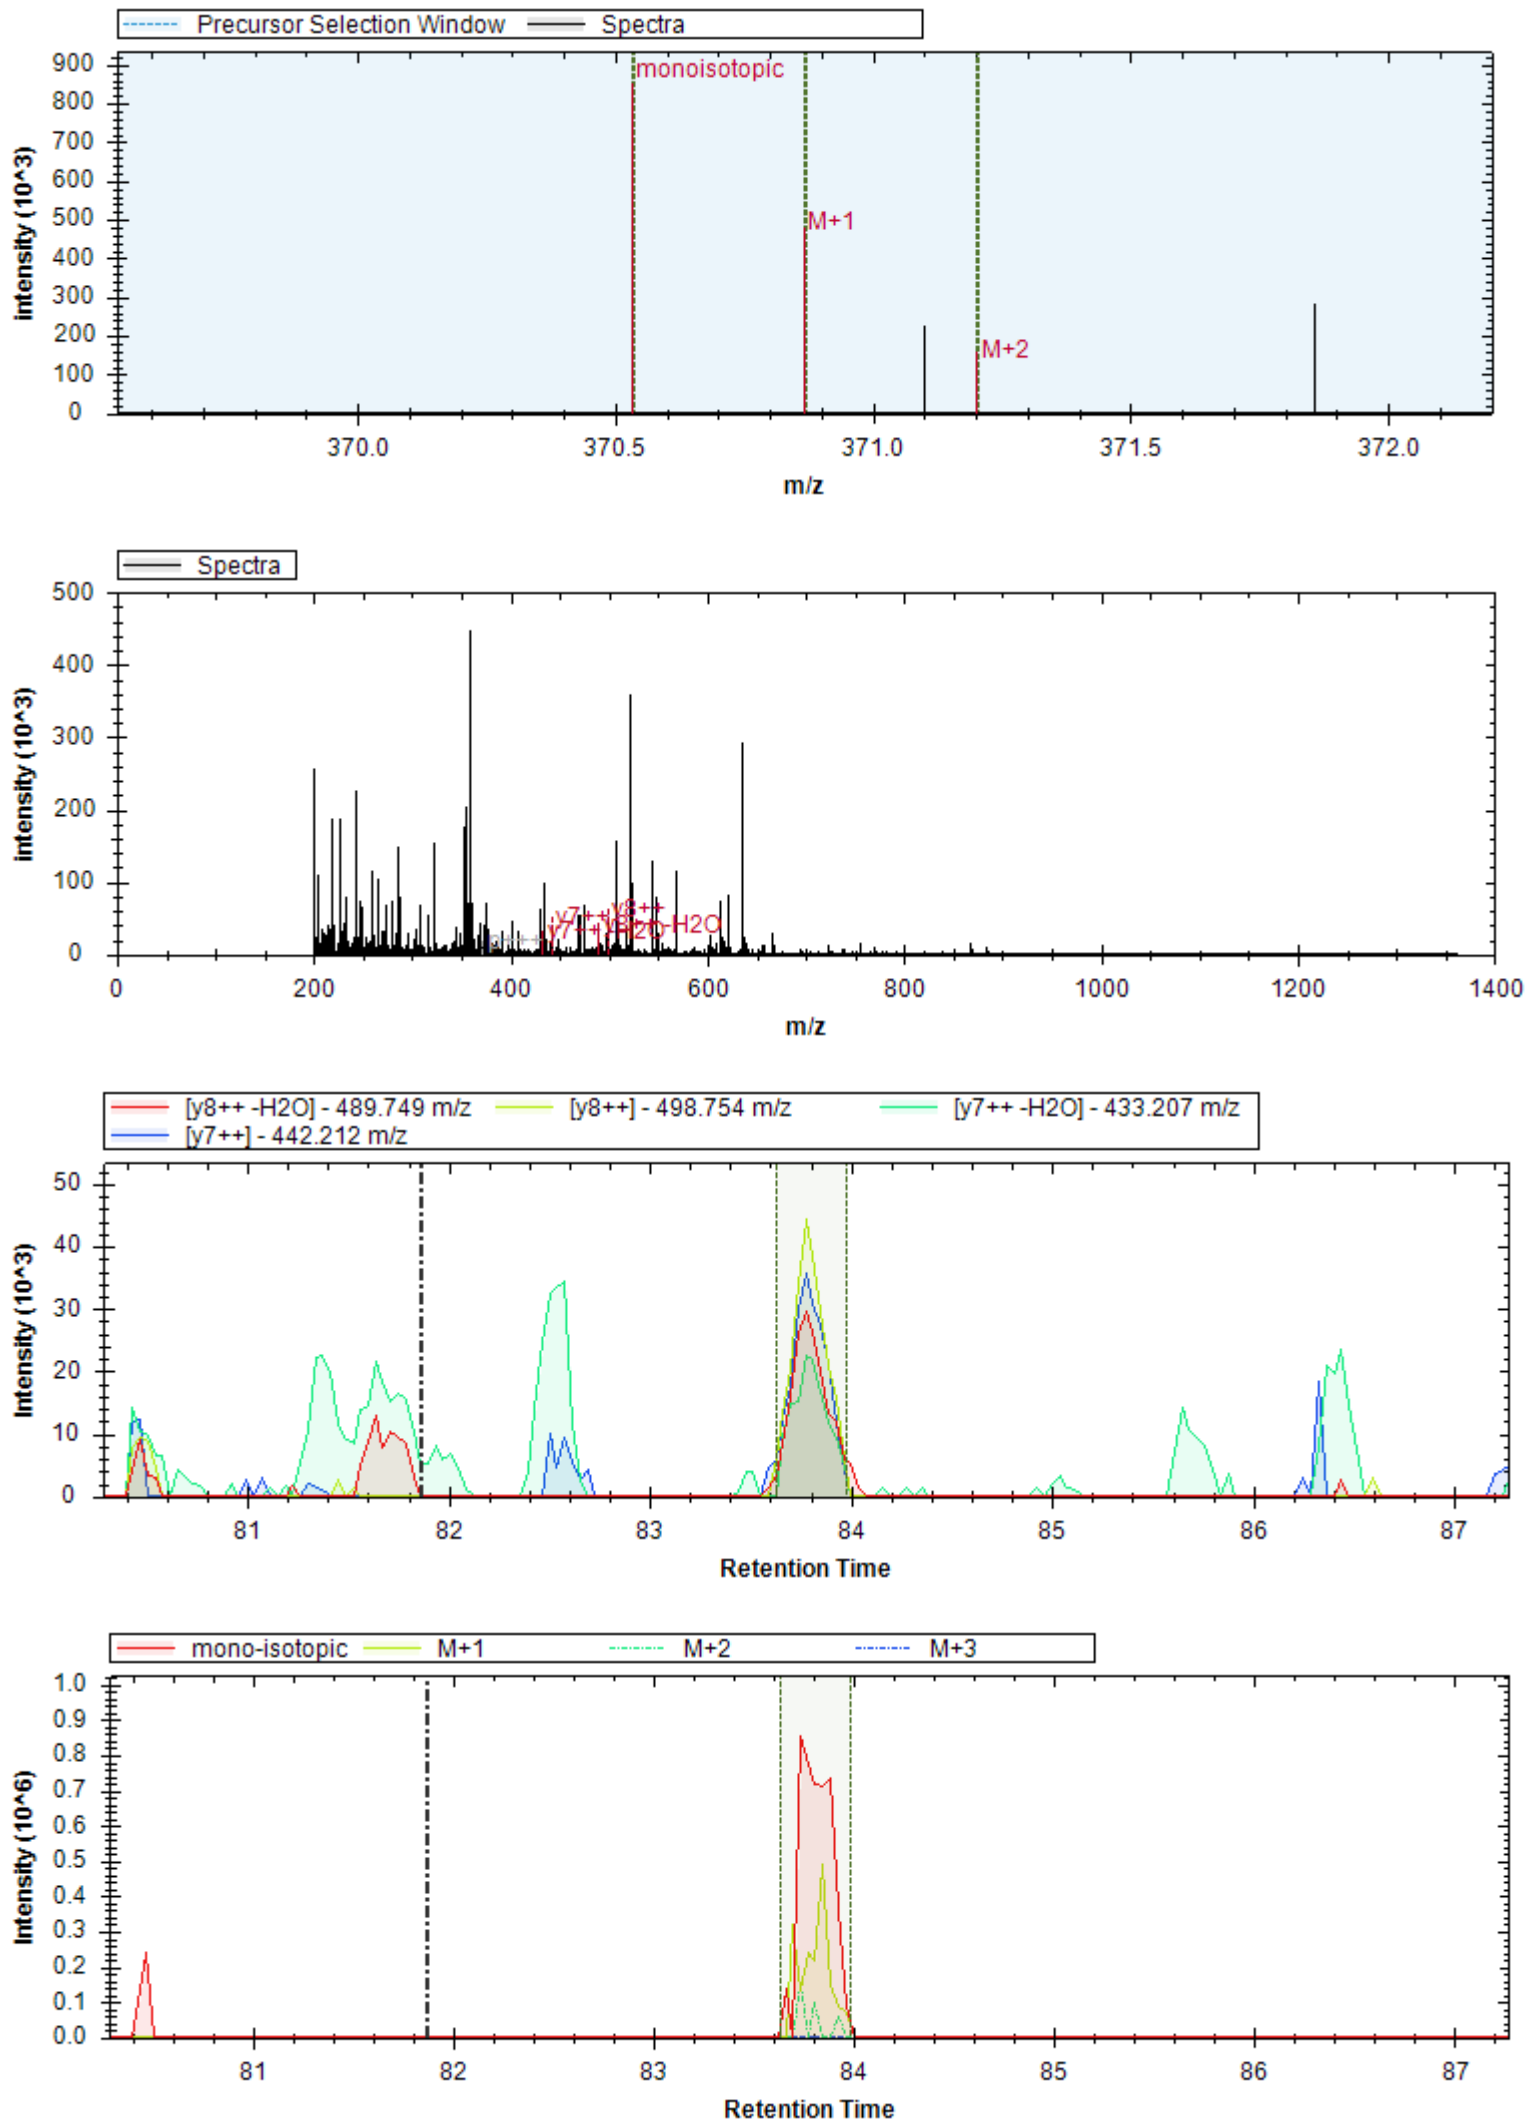

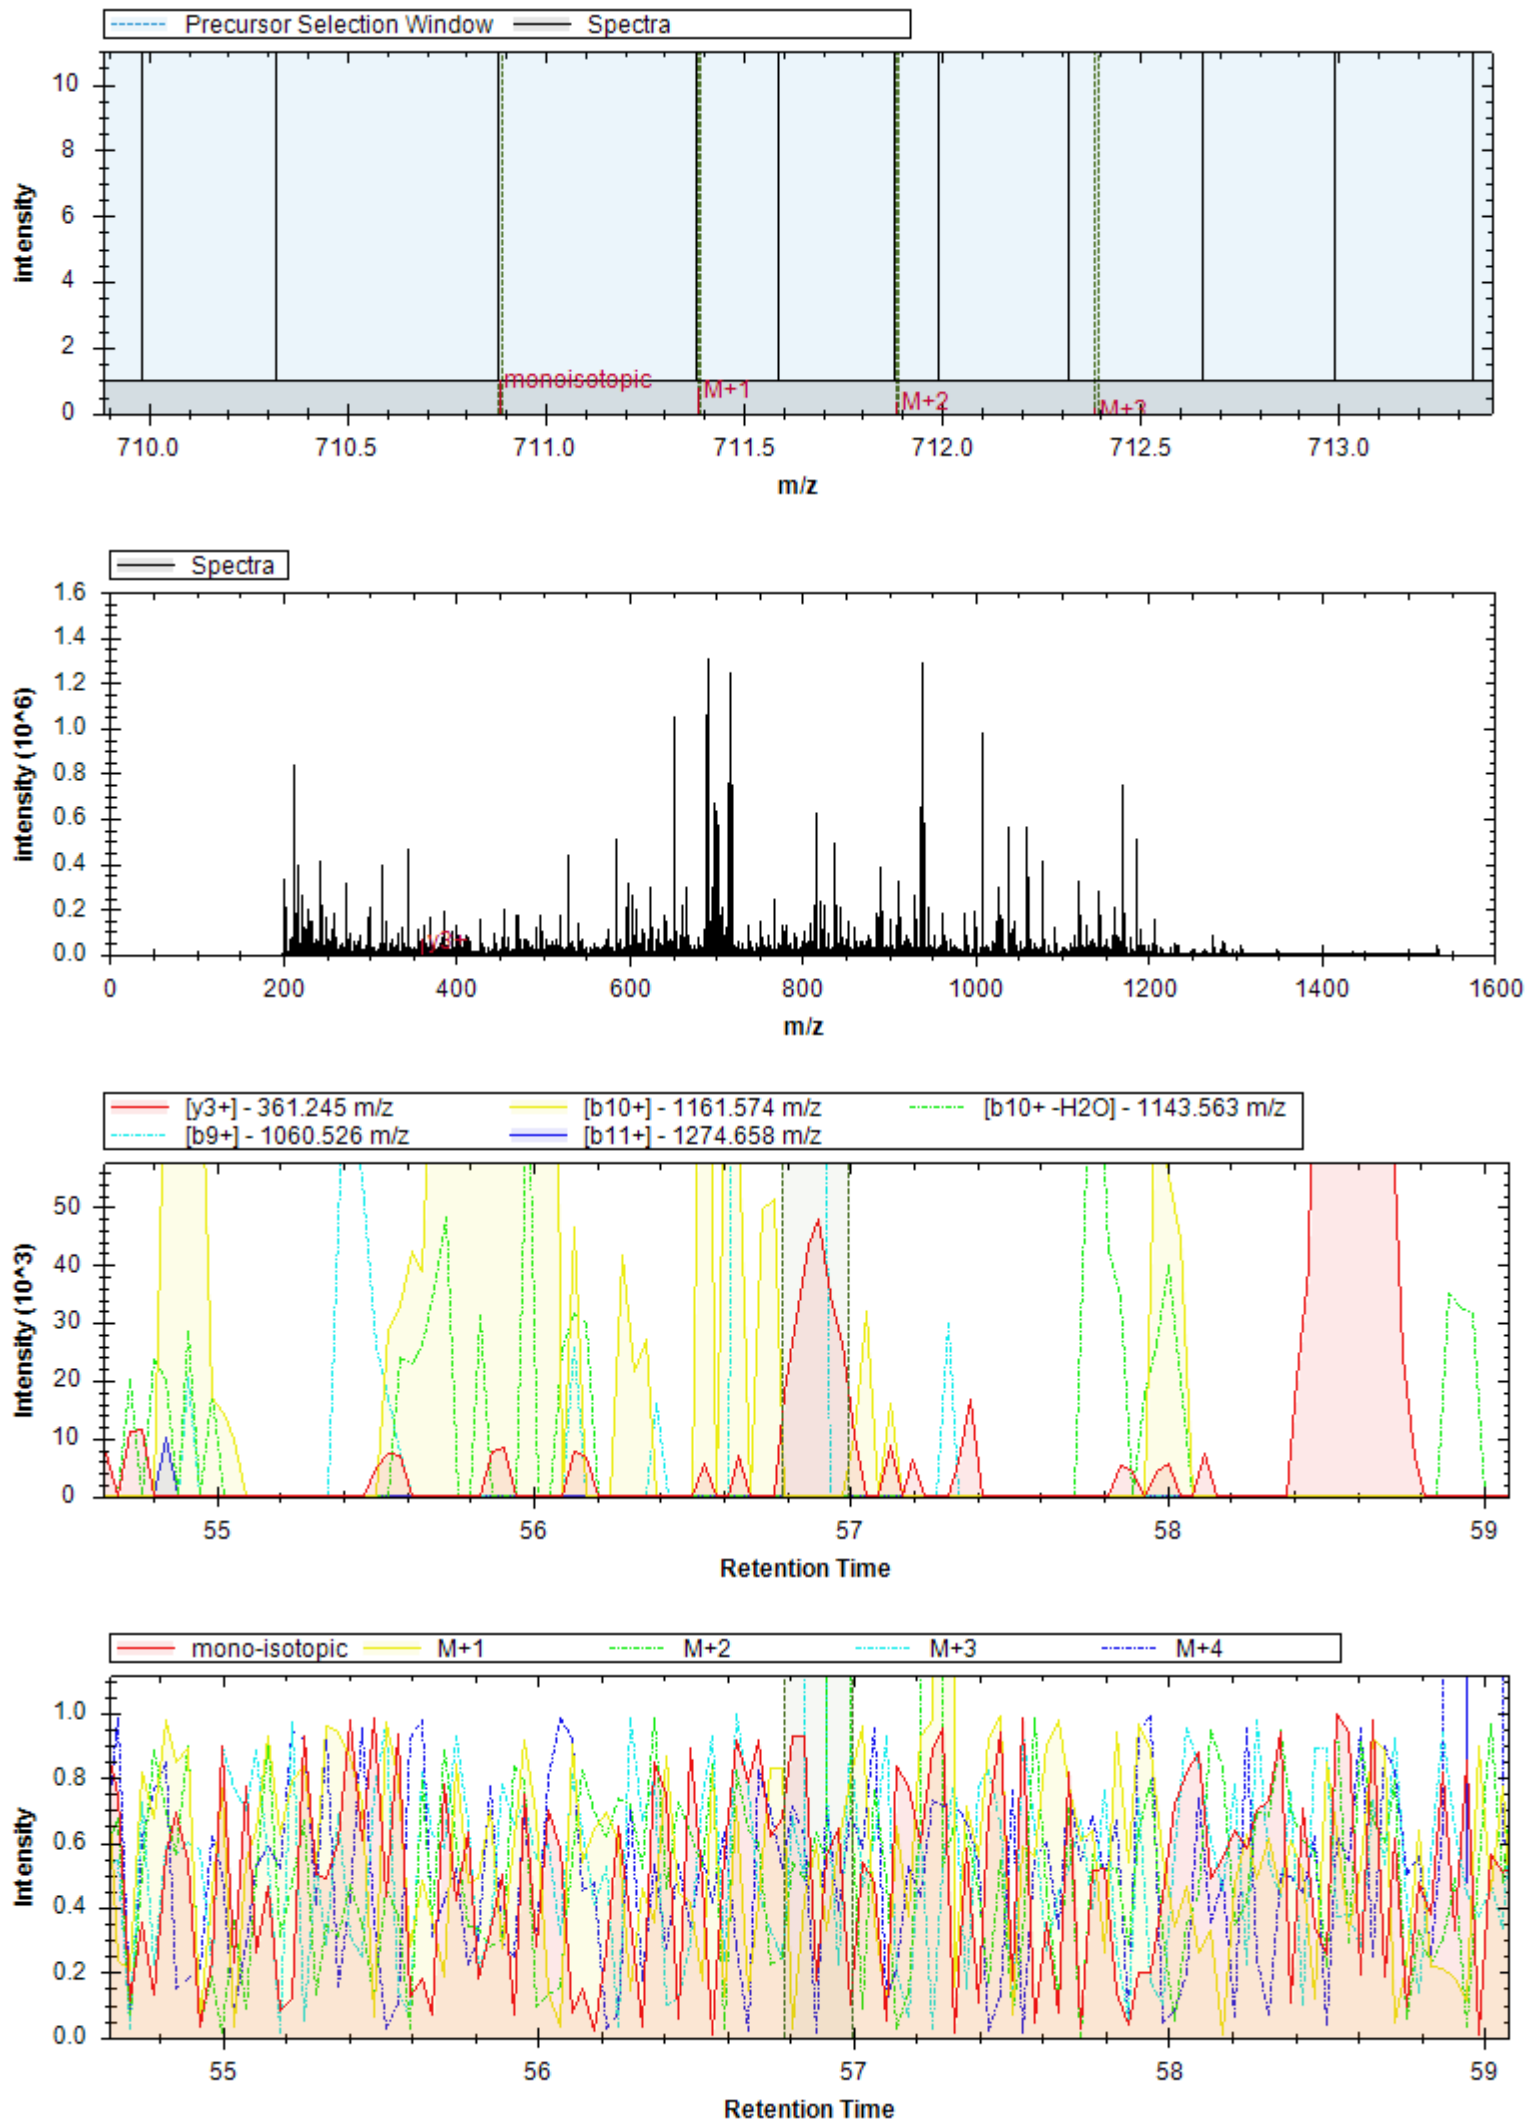

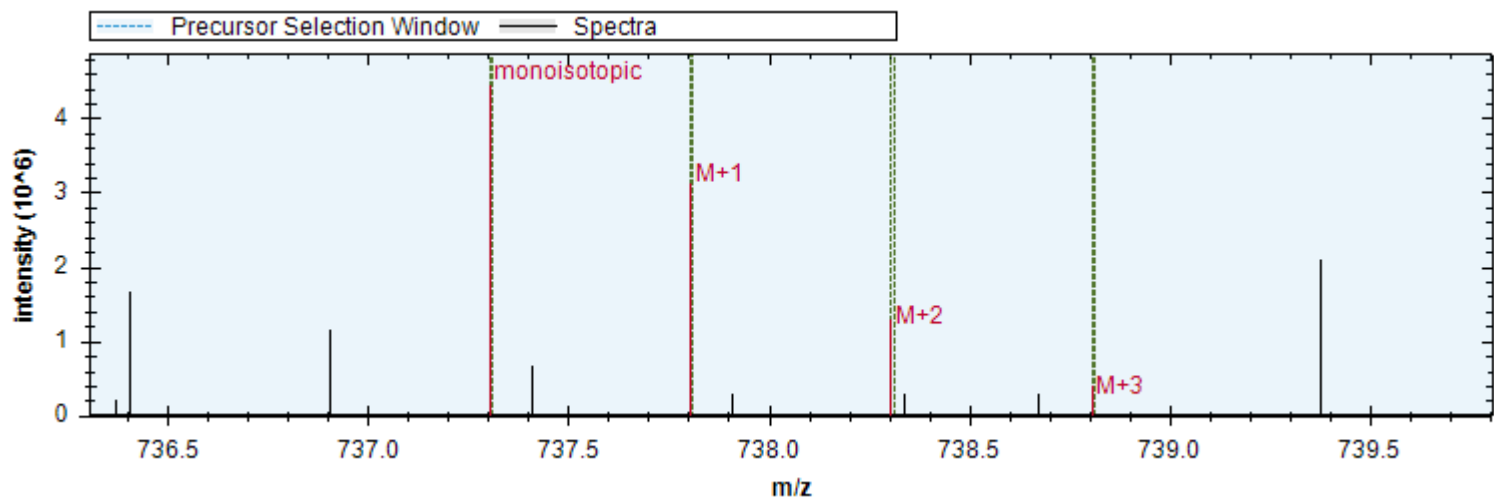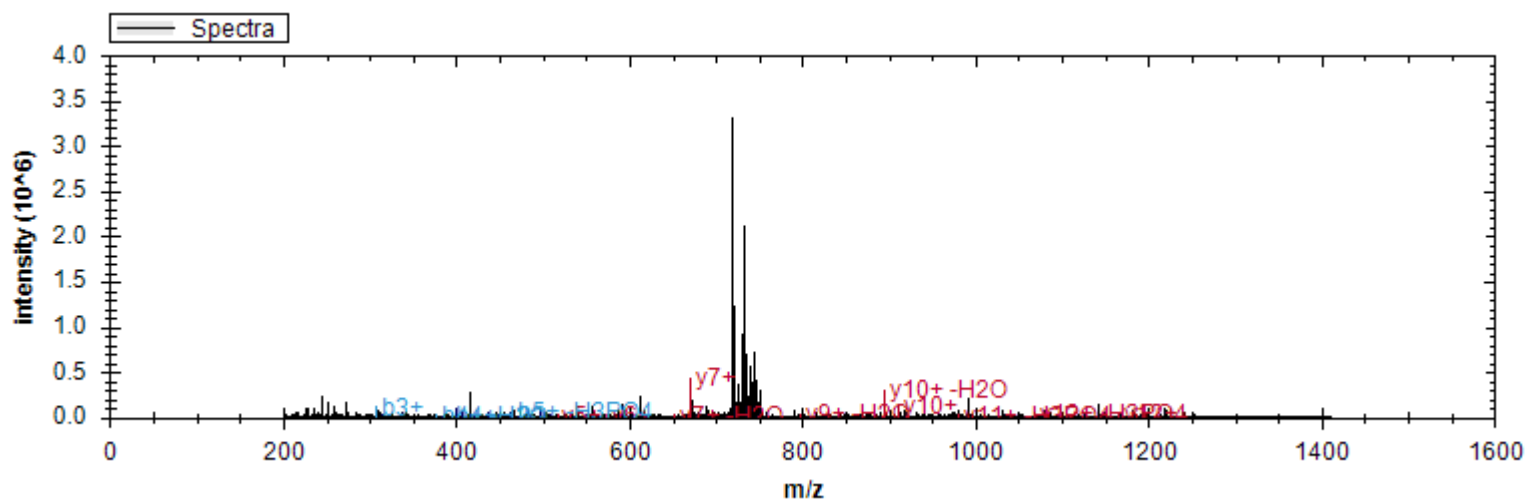

- |                              |                          |                             |
|------------------------------|--------------------------|-----------------------------|
| [y7+] - 671.347 m/z          | [y4+] - 416.225 m/z      | [y10+ -H2O] - 894.443 m/z   |
| [y10+] - 912.453 m/z         | [b3+] - 308.124 m/z      | [y11+ -H3PO4] - 981.475 m/z |
| [y12+ -H3PO4] - 1068.507 m/z | [y9+ -H2O] - 797.390 m/z | [b5+ -H3PO4] - 464.178 m/z  |
| [b5+ -H2O] - 641.944 m/z     | [b4+ -H2O] - 377.146 m/z | [y5+] - 517.273 m/z         |
| [y7+ -H2O] - 653.337 m/z     | [b8+ -H2O] - 883.050 m/z | [y6+] - 574.294 m/z         |
| [y8+ -H2O] - 740.369 m/z     | [y4+ -NH3] - 399.199 m/z | [y12+] - 1166.484 m/z       |
| [b4+] - 395.156 m/z          |                          |                             |

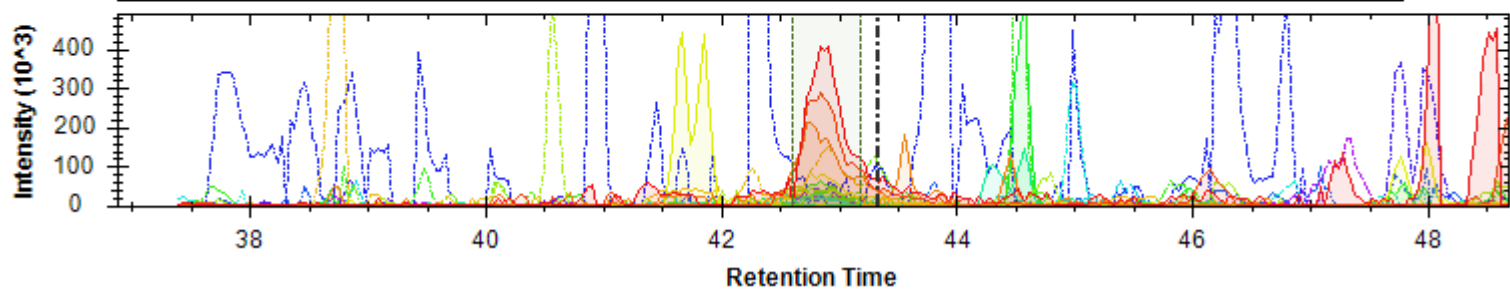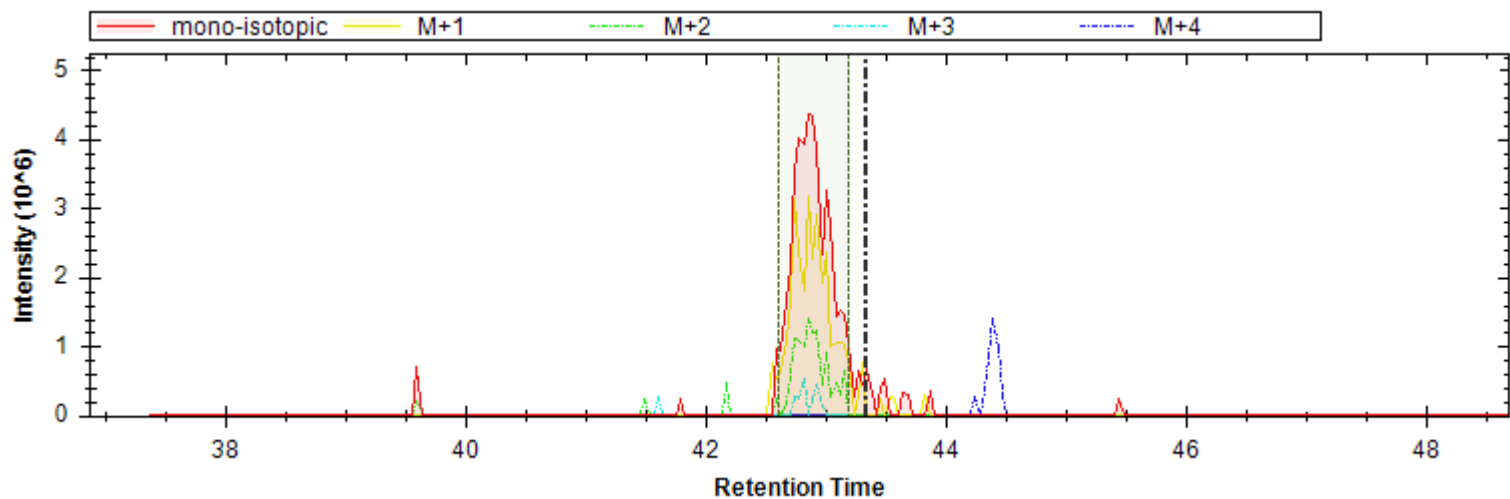



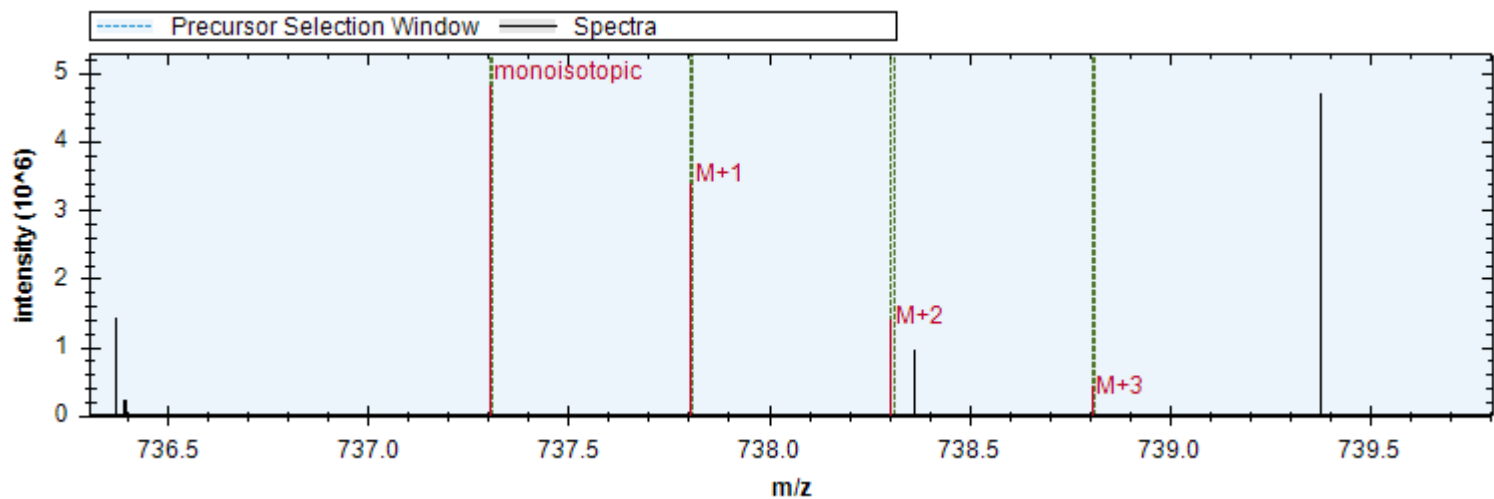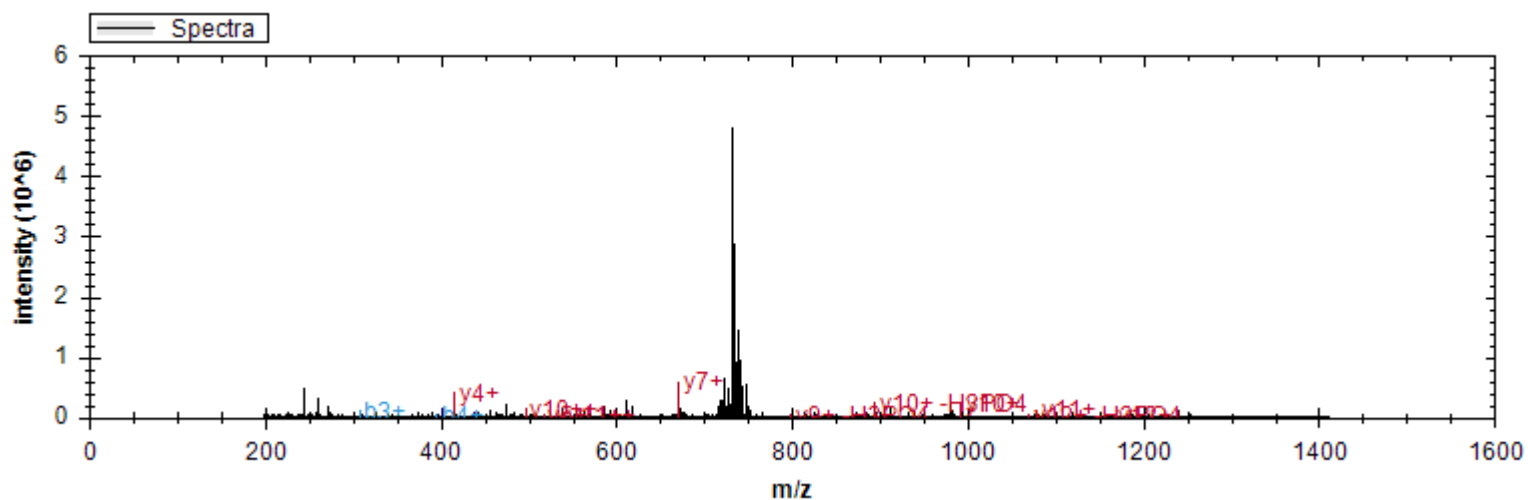

- |                             |                              |                            |
|-----------------------------|------------------------------|----------------------------|
| [y7+] - 671.347 m/z         | [y10+ -H3PO4] - 894.443 m/z  | [y4+] - 416.225 m/z        |
| [y10+] - 992.420 m/z        | [y10++] - 496.714 m/z        | [b3+] - 308.124 m/z        |
| [y11+ -H3PO4] - 981.475 m/z | [y12+ -H3PO4] - 1068.507 m/z | [y9+ -H3PO4] - 797.390 m/z |
| [y11++] - 540.230 m/z       | [y11+] - 1079.452 m/z        | [y7+ -H2O] - 653.337 m/z   |
| [y8+ -H3PO4] - 740.369 m/z  | [y12+] - 1166.484 m/z        | [y10+ -H2O] - 1072.209 m/z |
| [b4+ -H2O] - 377.146 m/z    | [y5+] - 517.273 m/z          | [y10+ -NH3] - 975.393 m/z  |
| [b4+] - 395.156 m/z         |                              |                            |

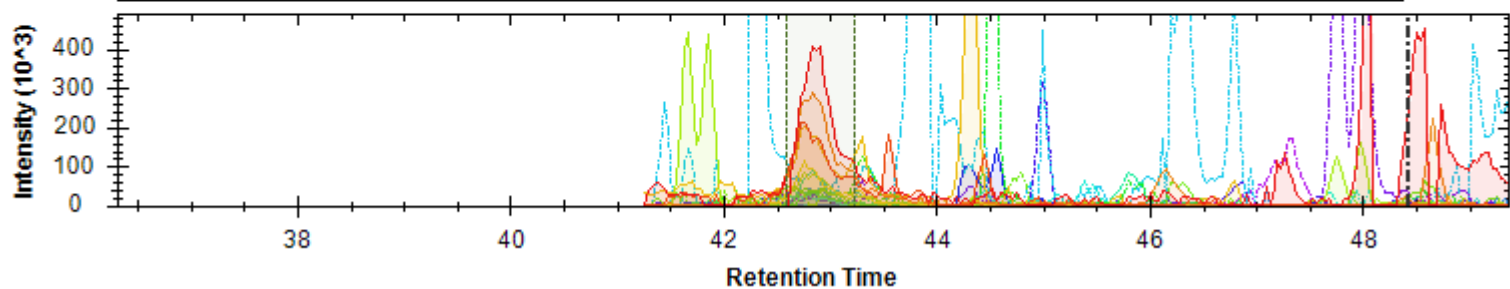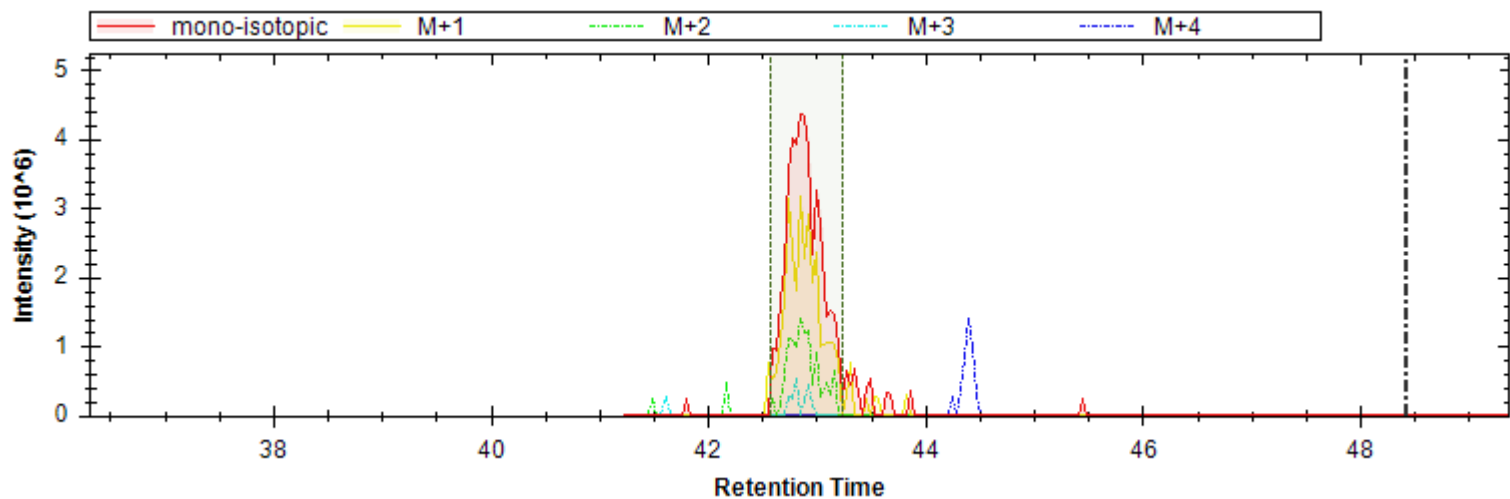

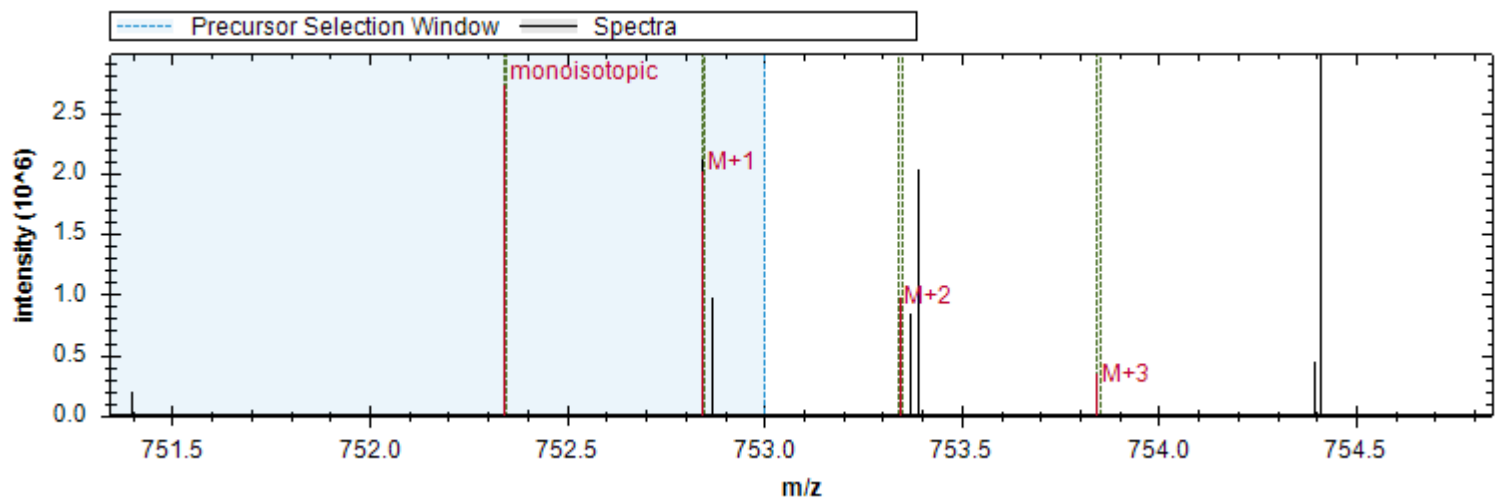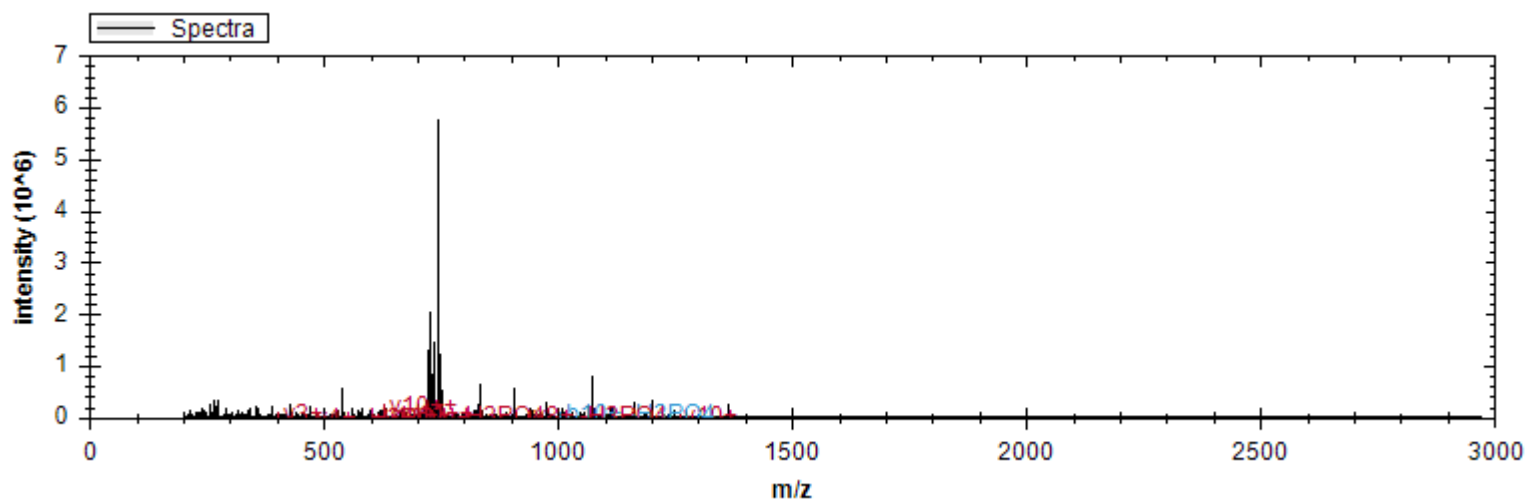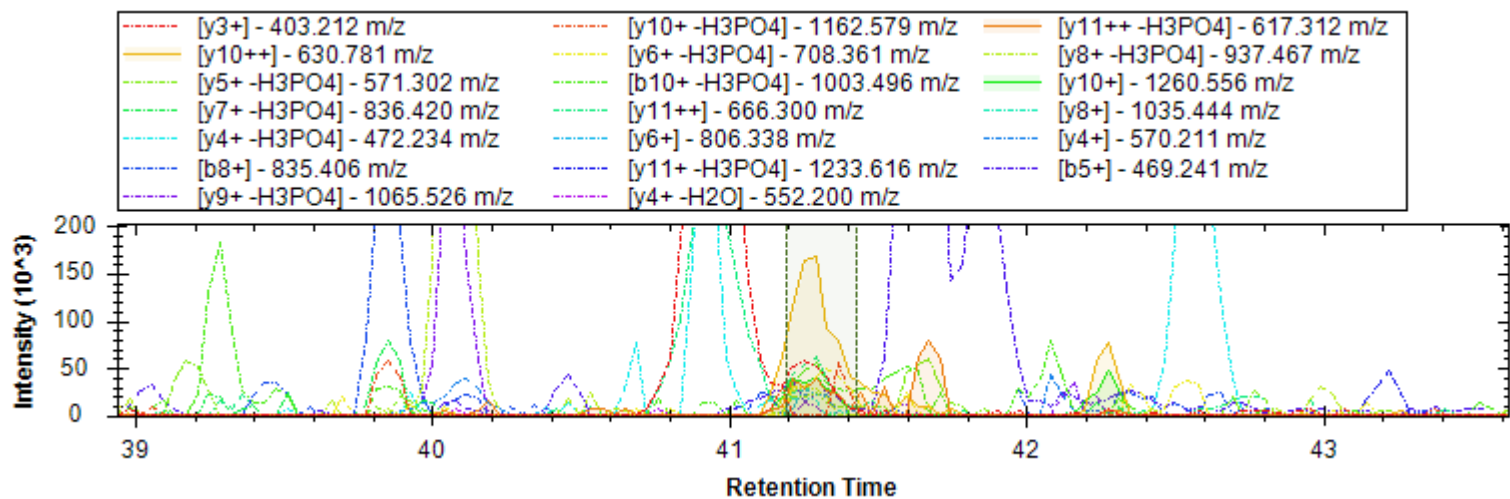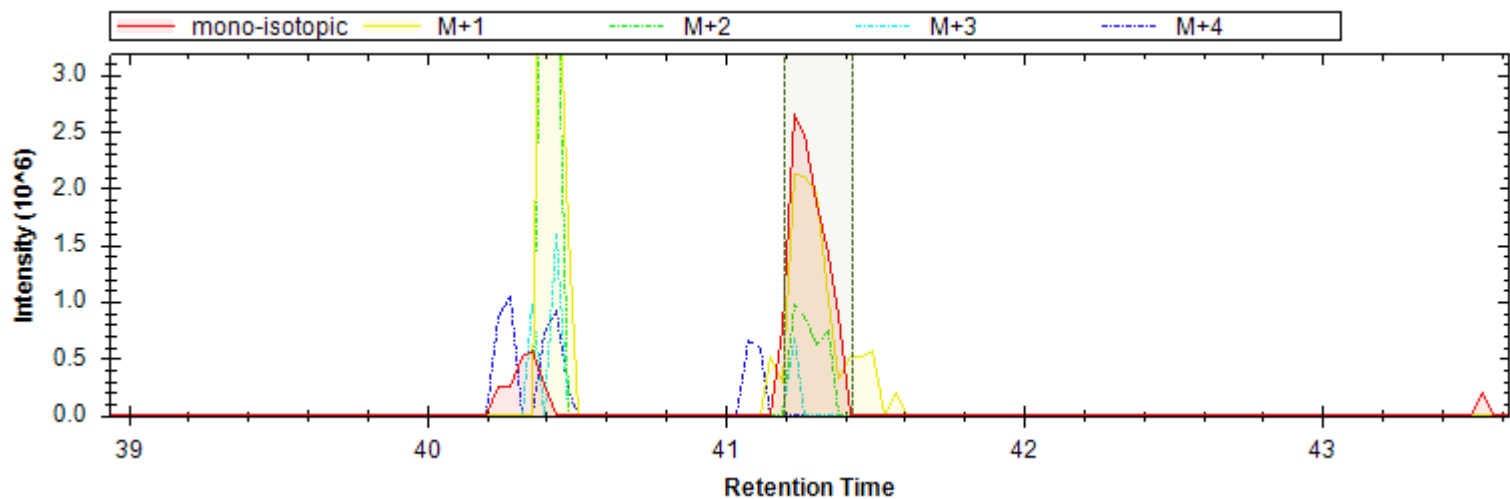

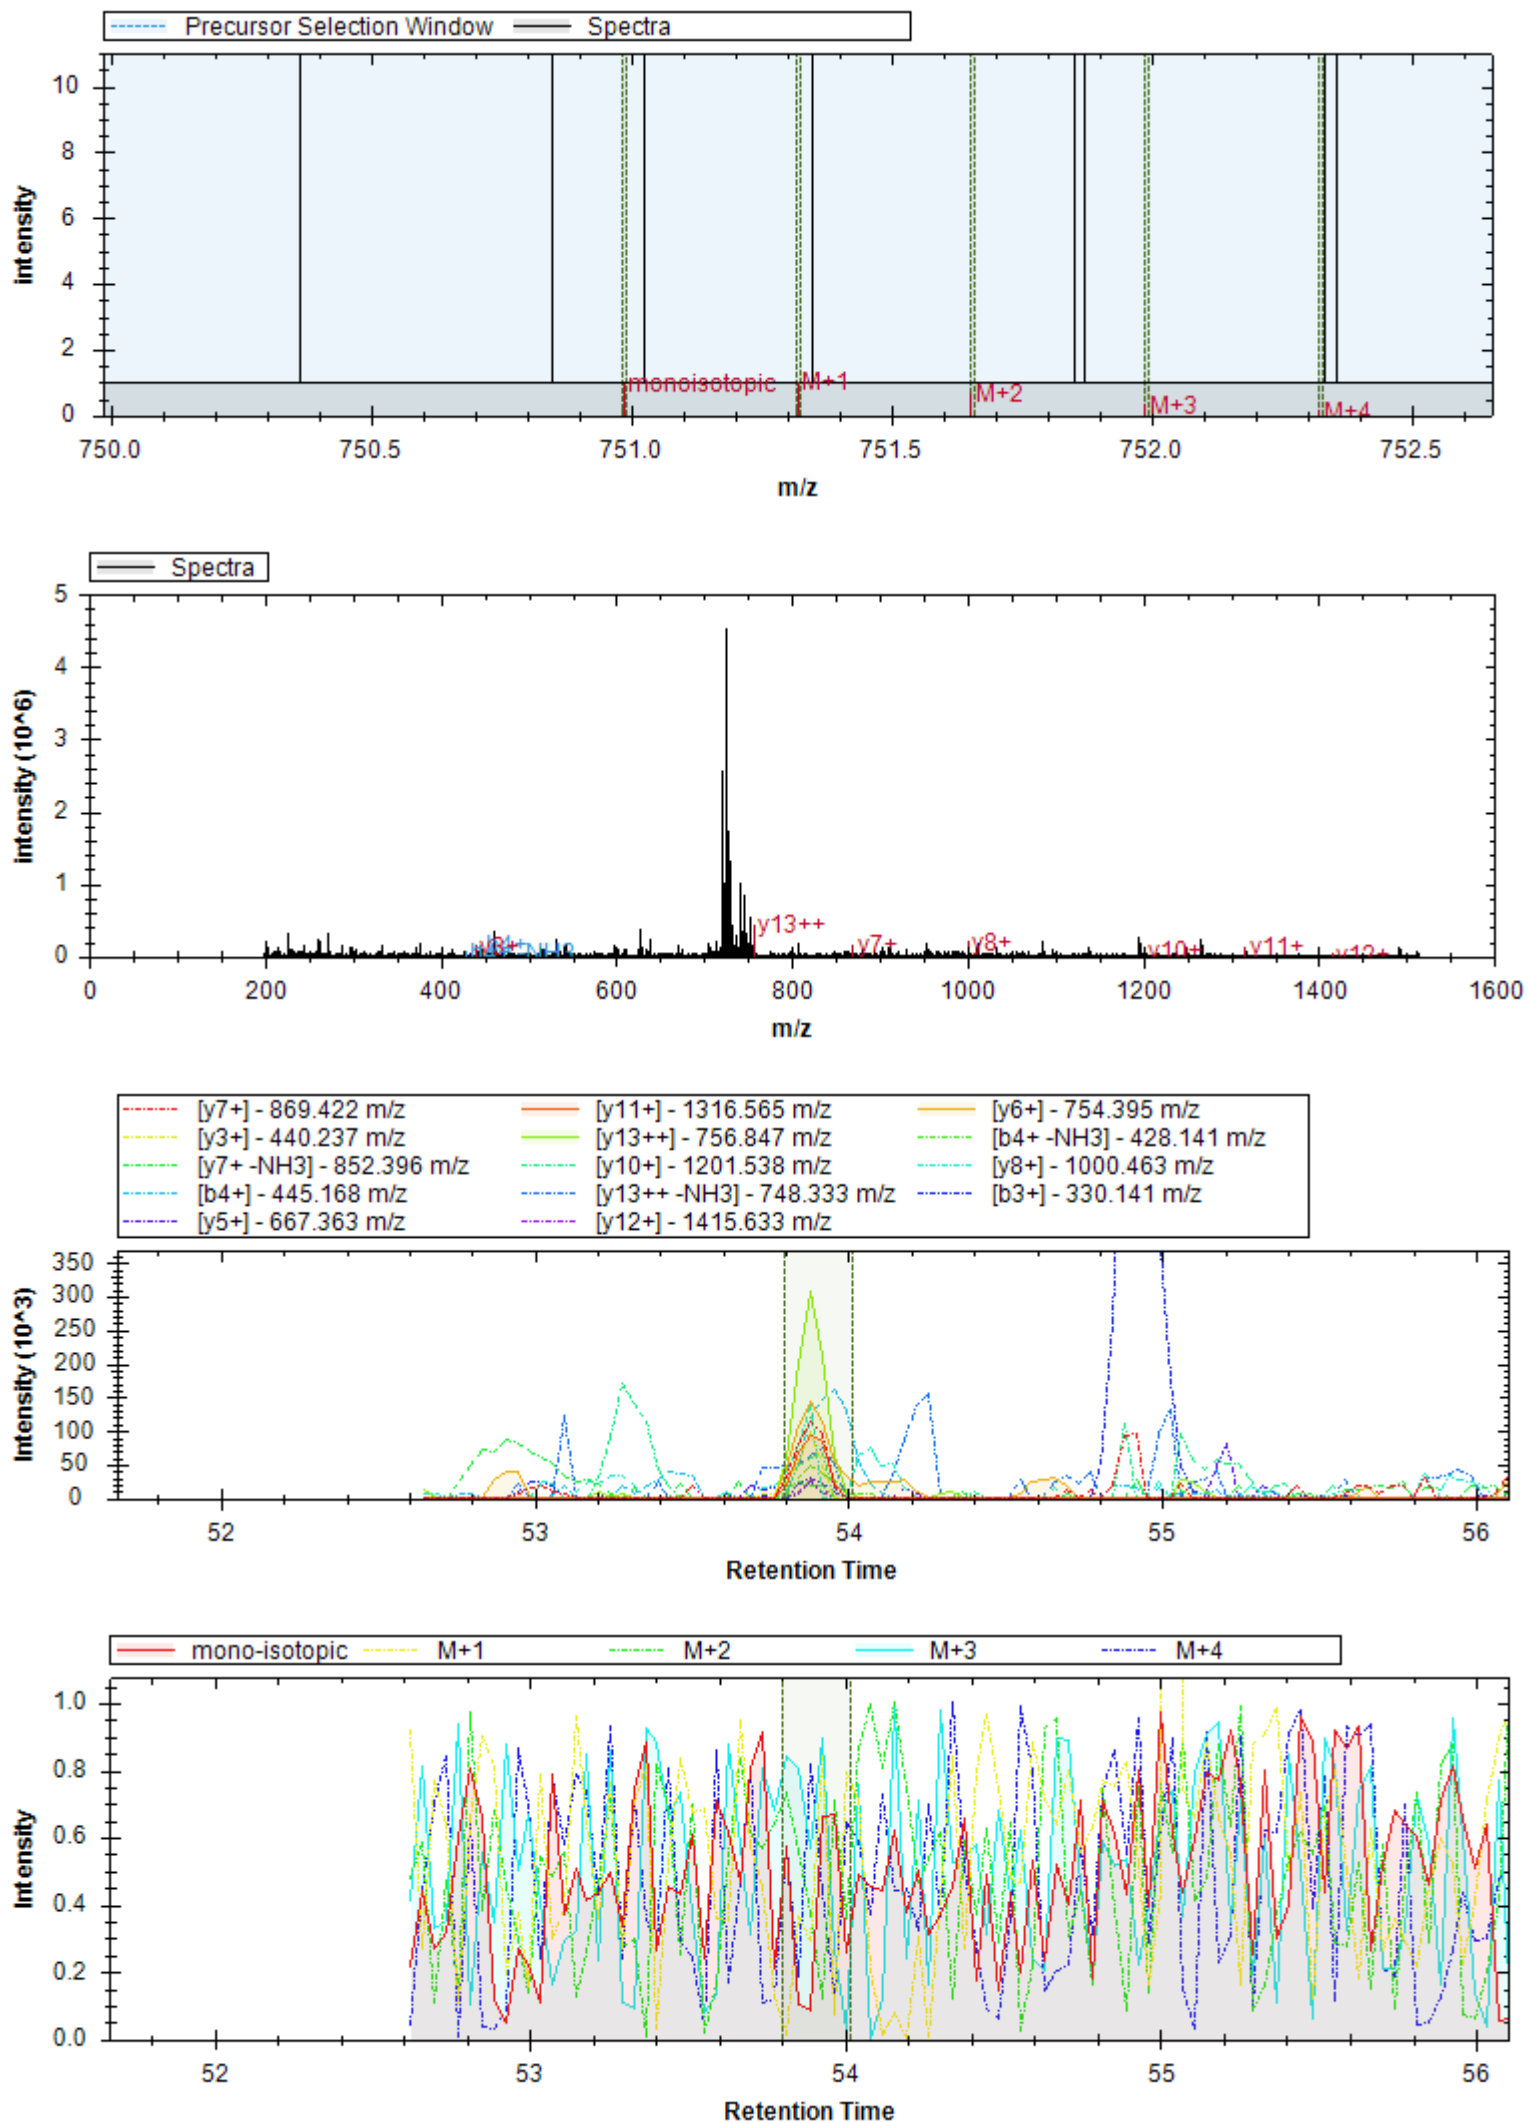

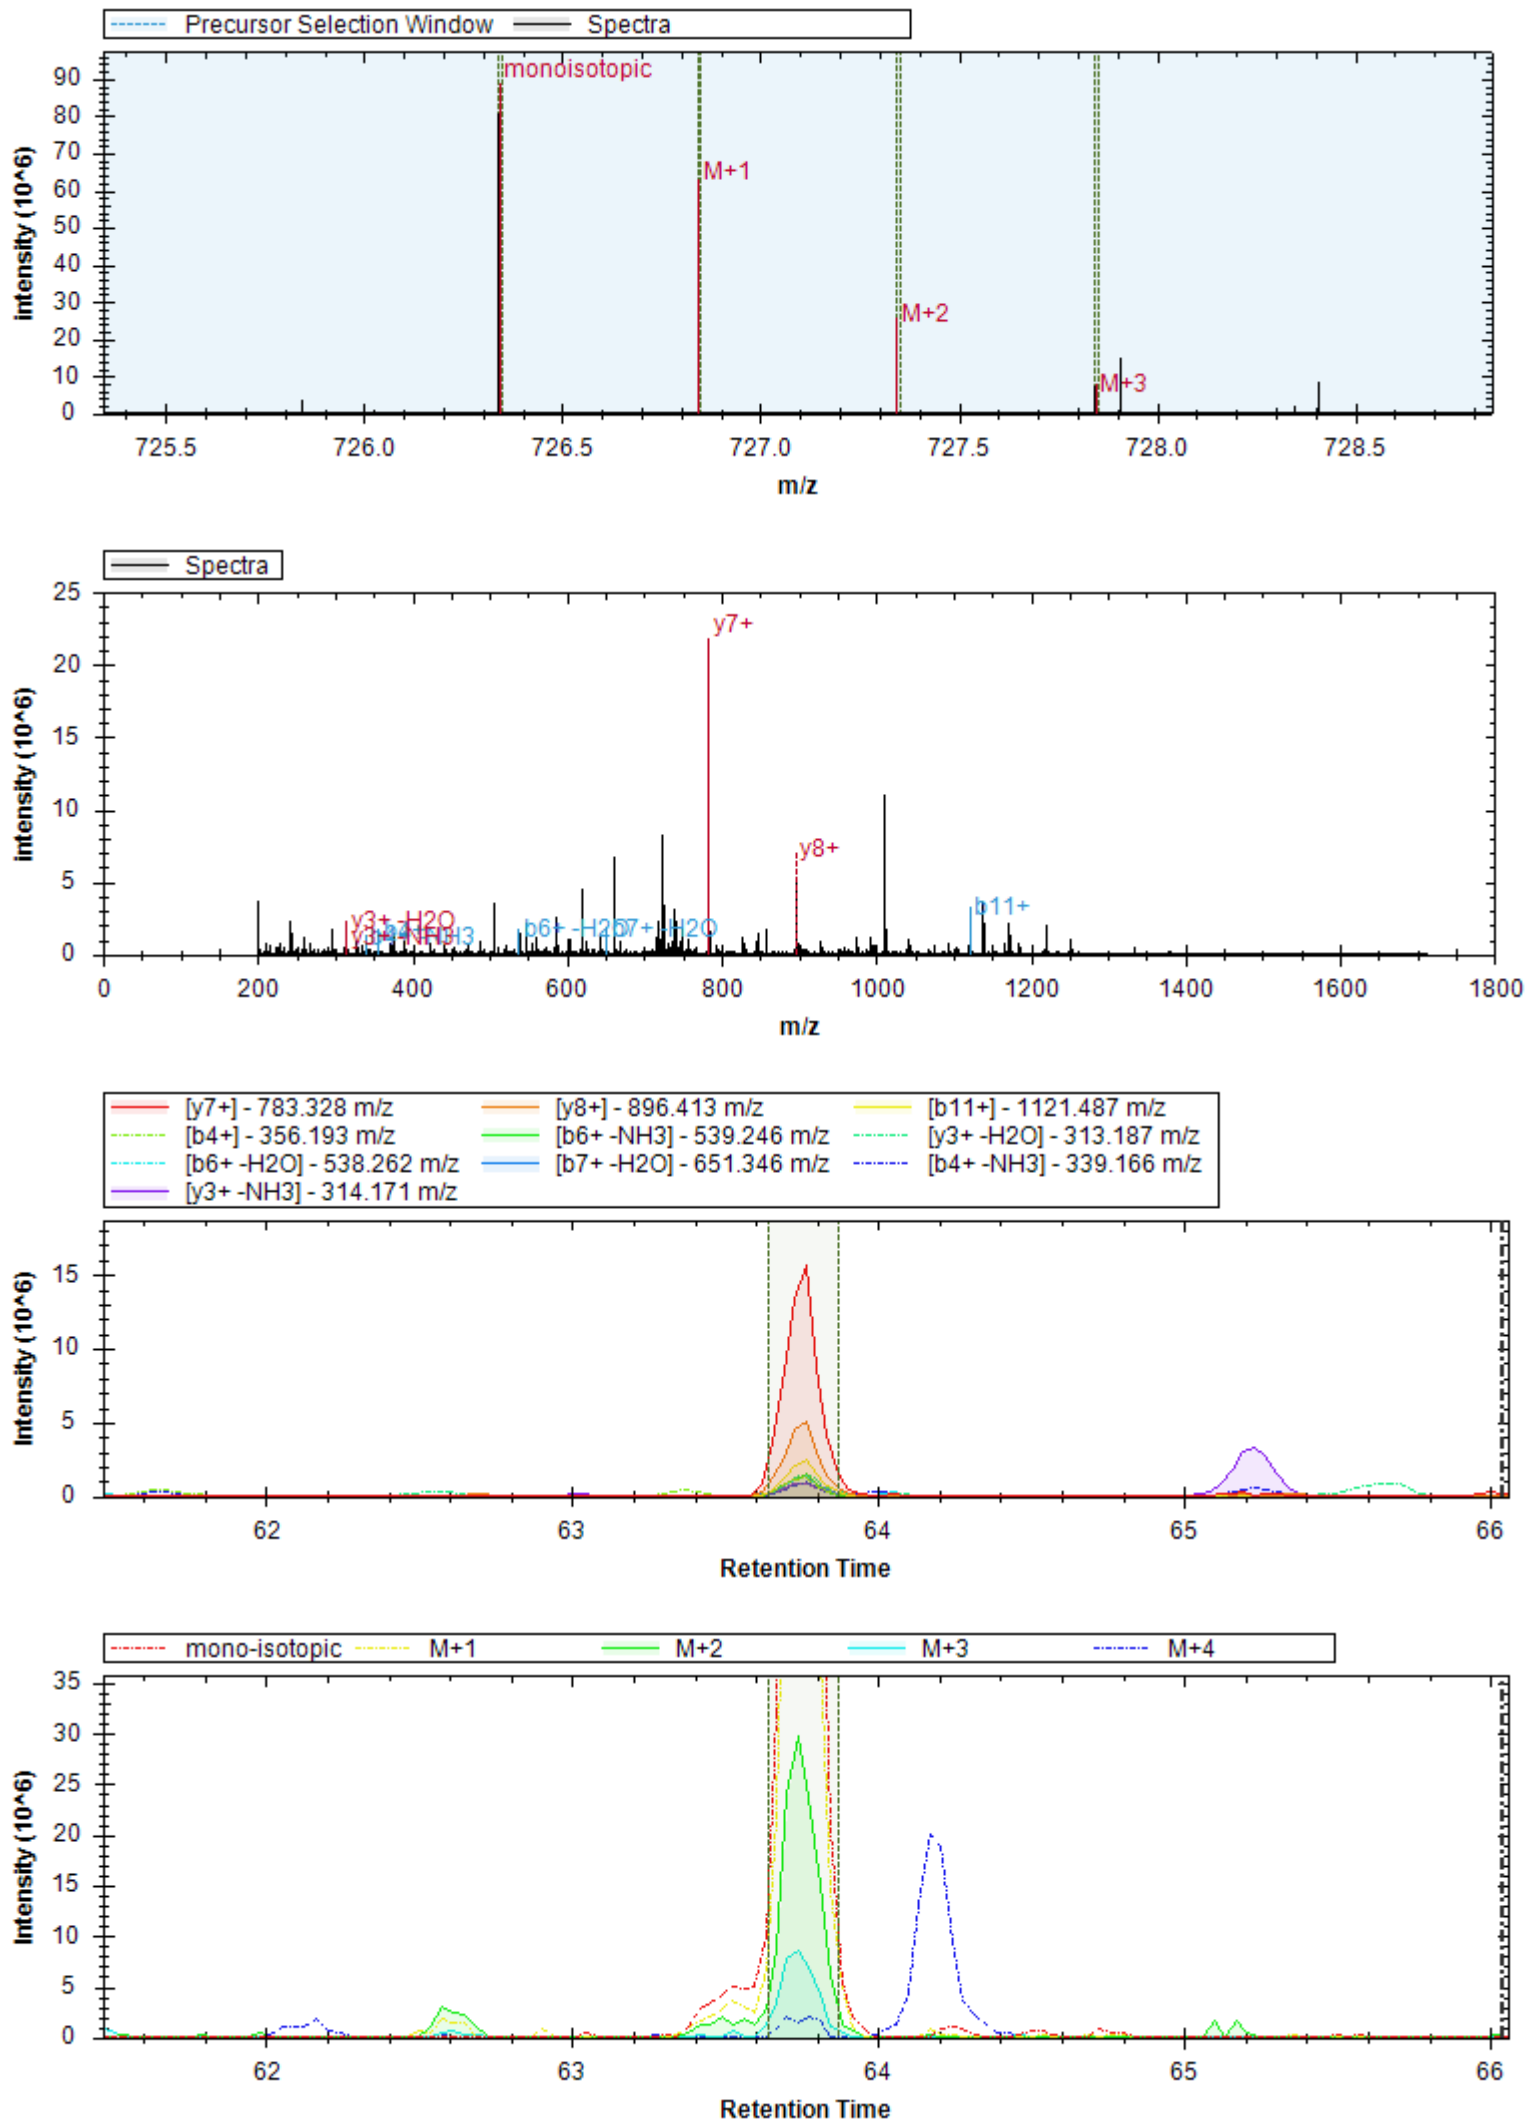

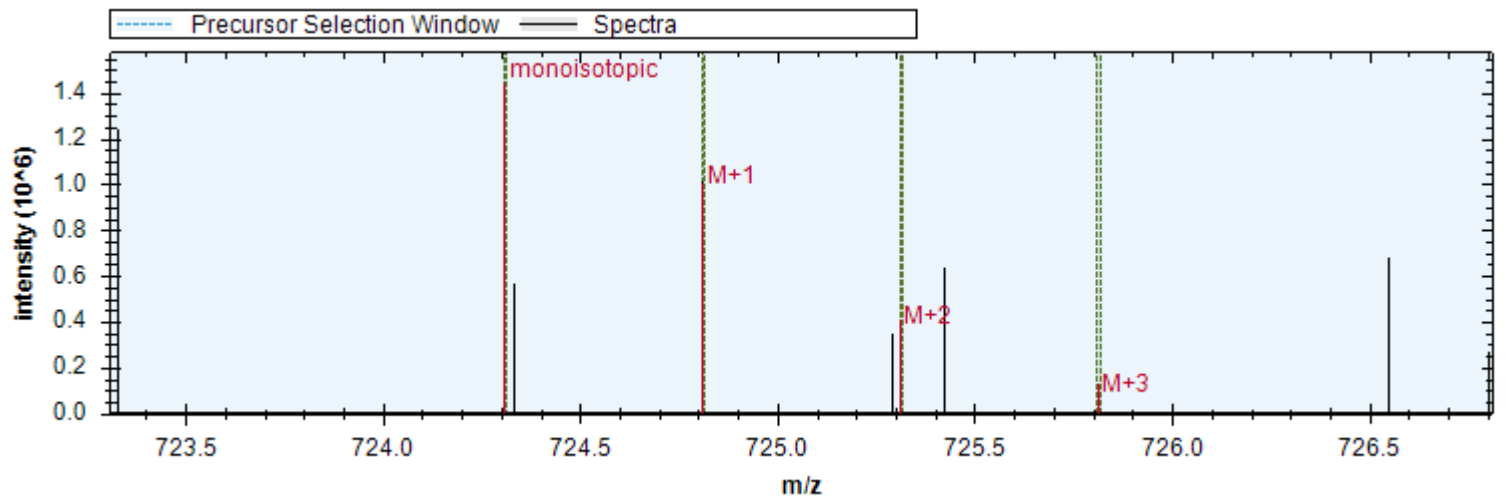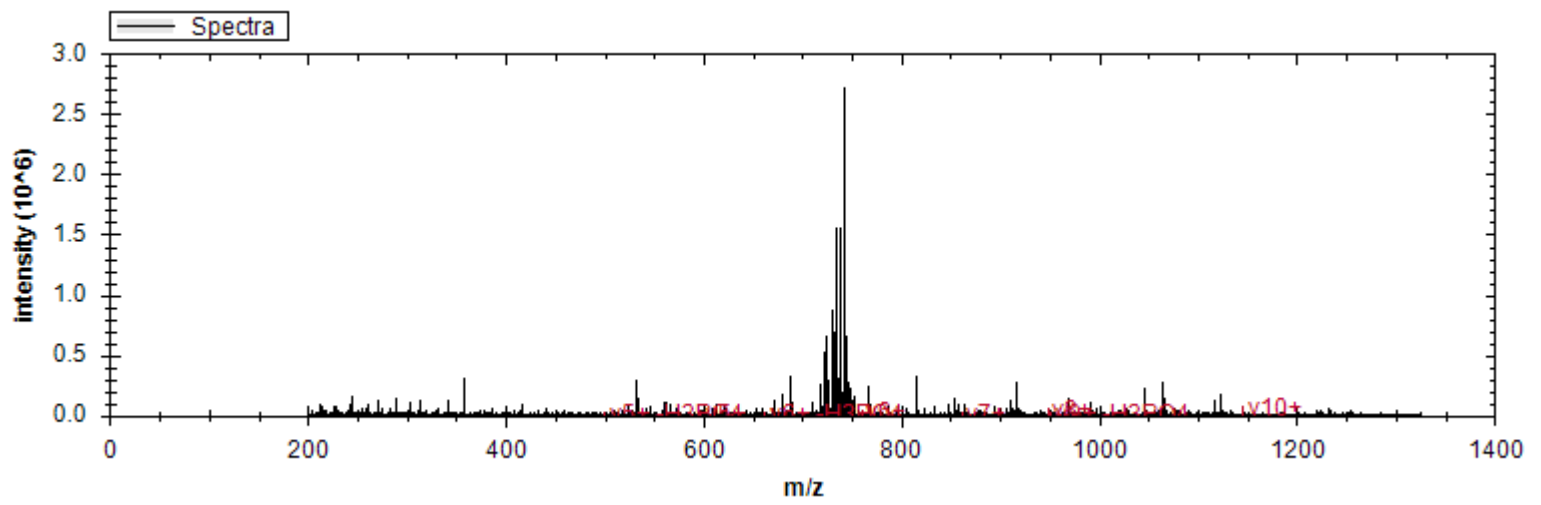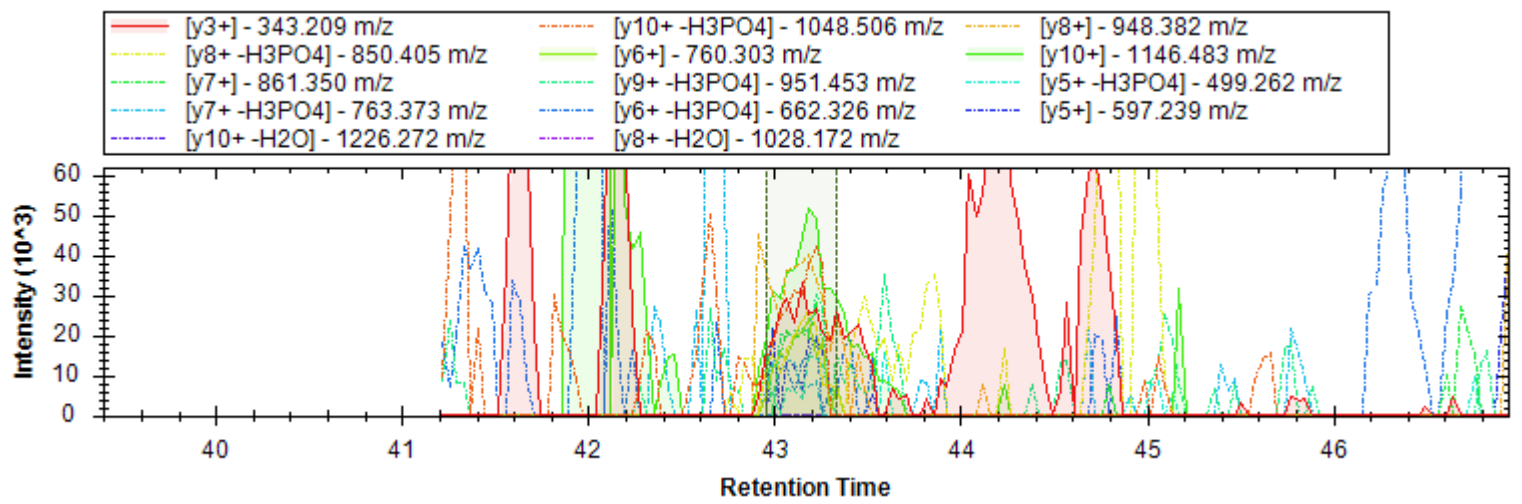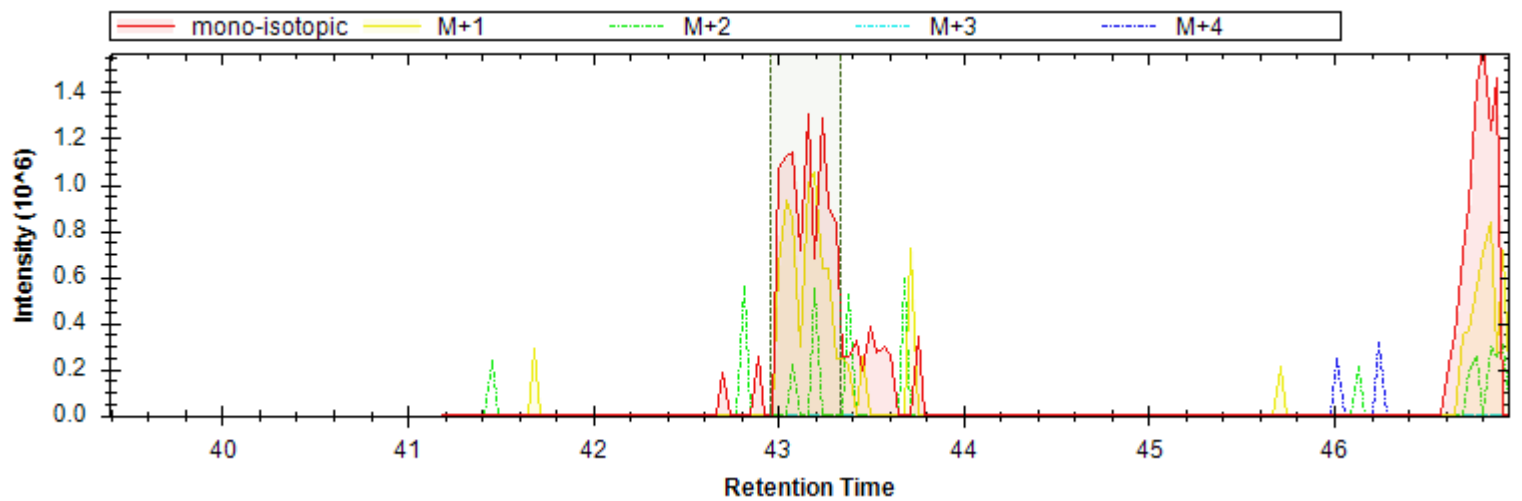

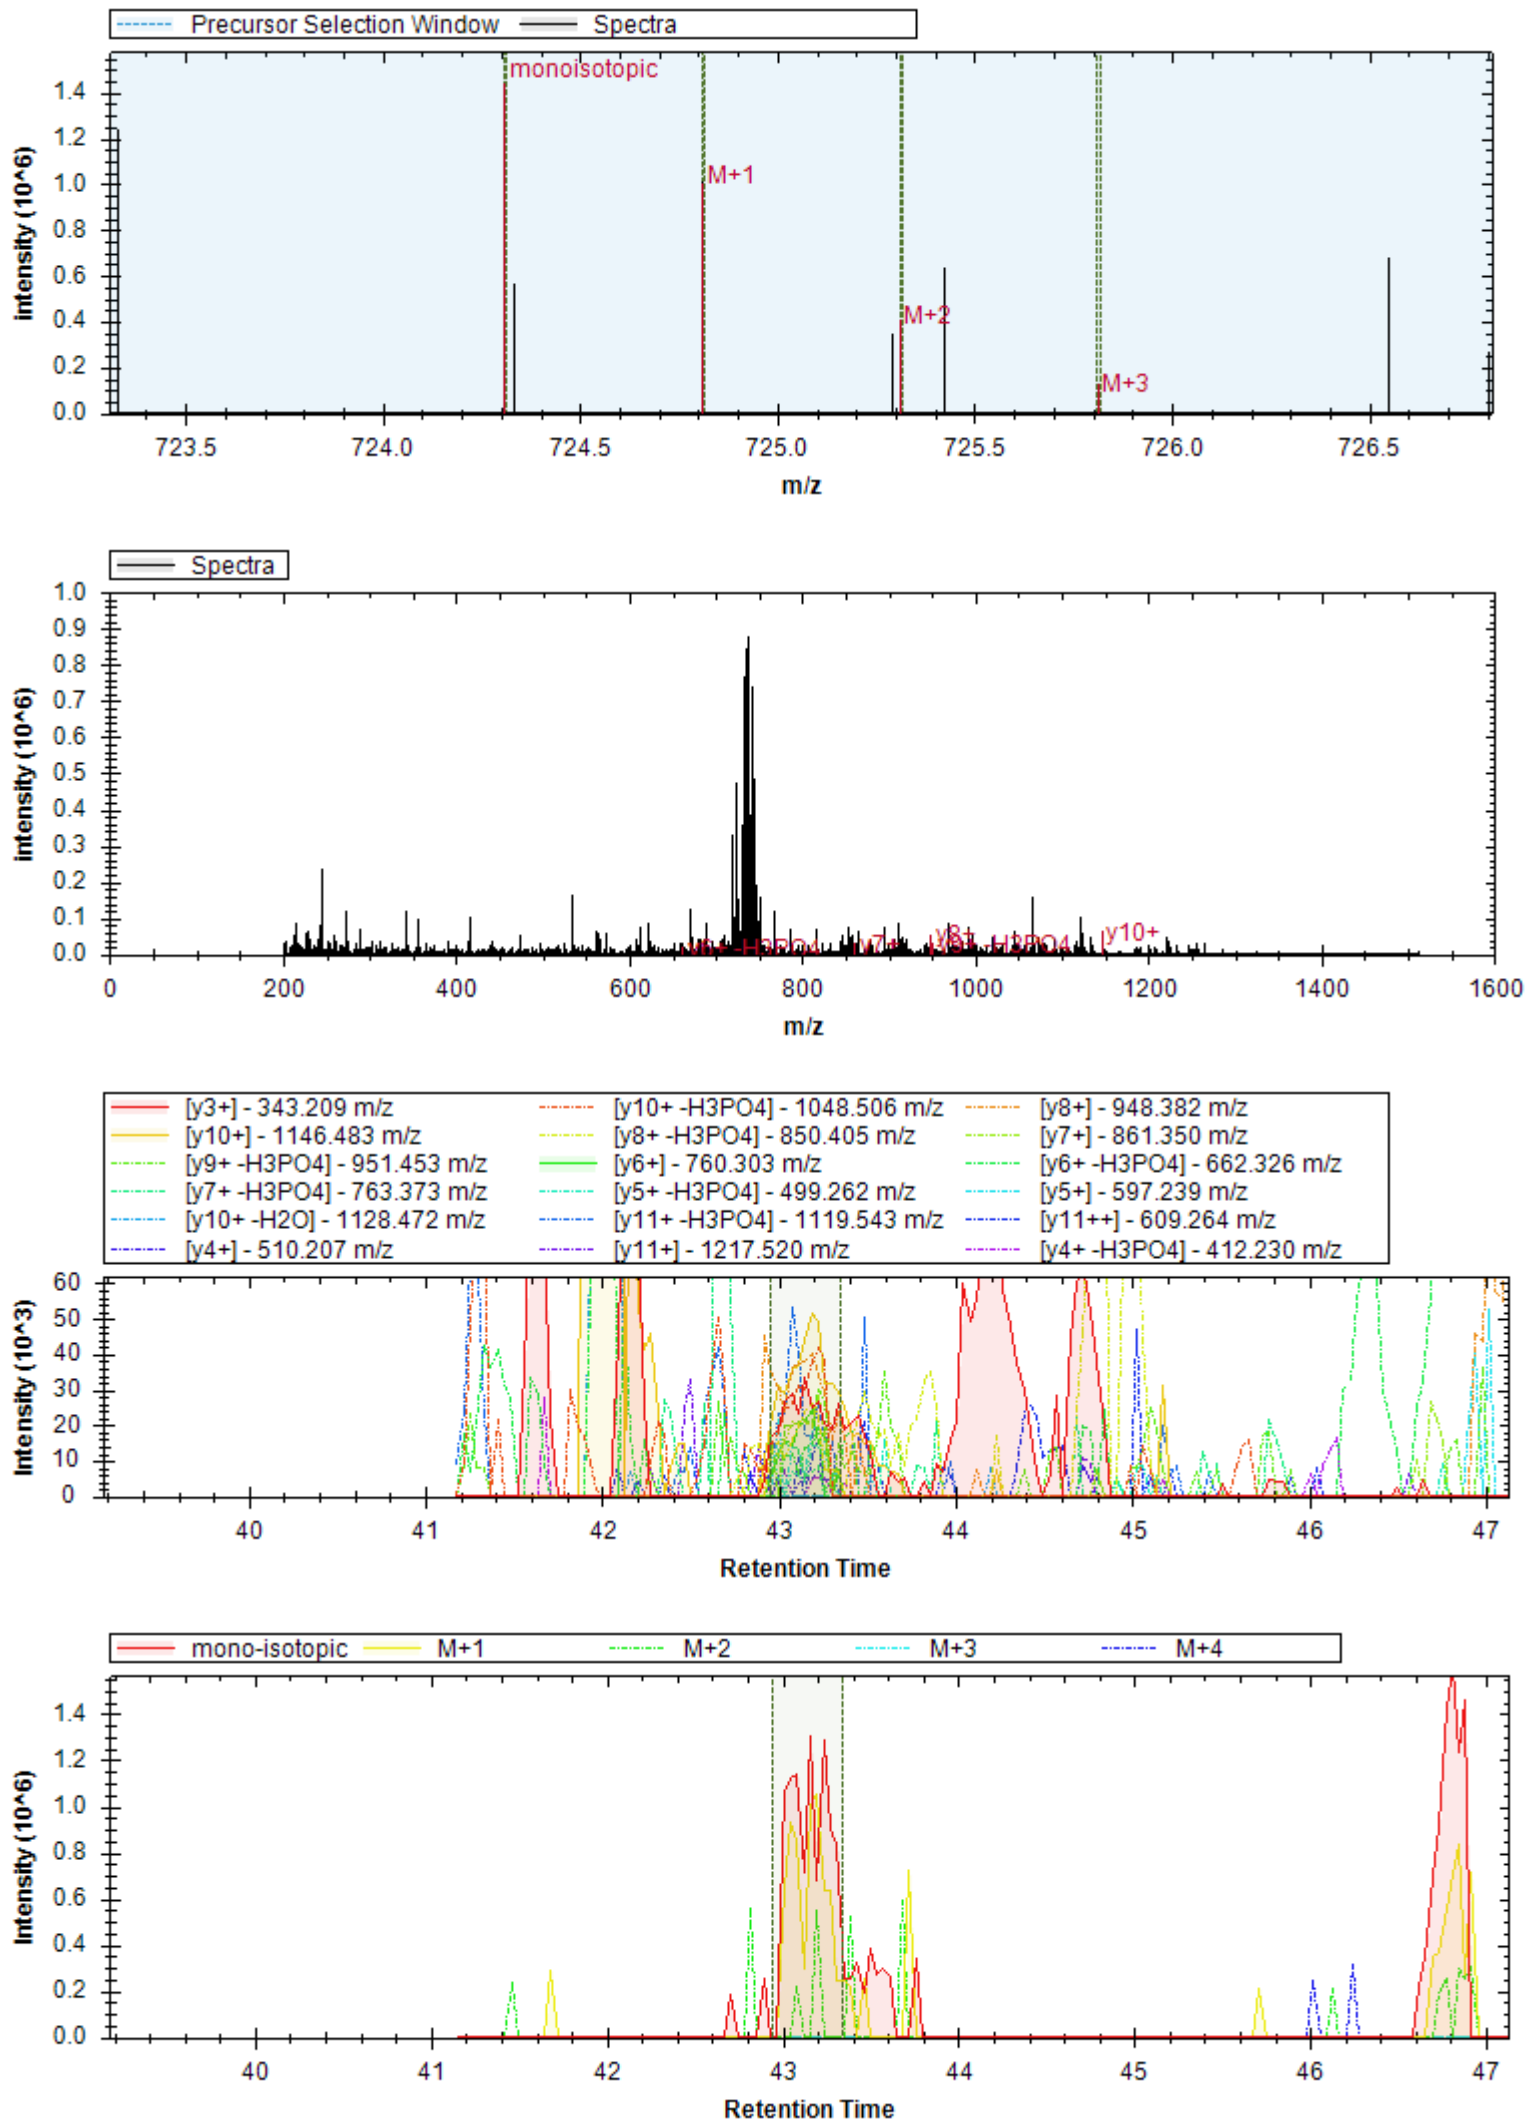

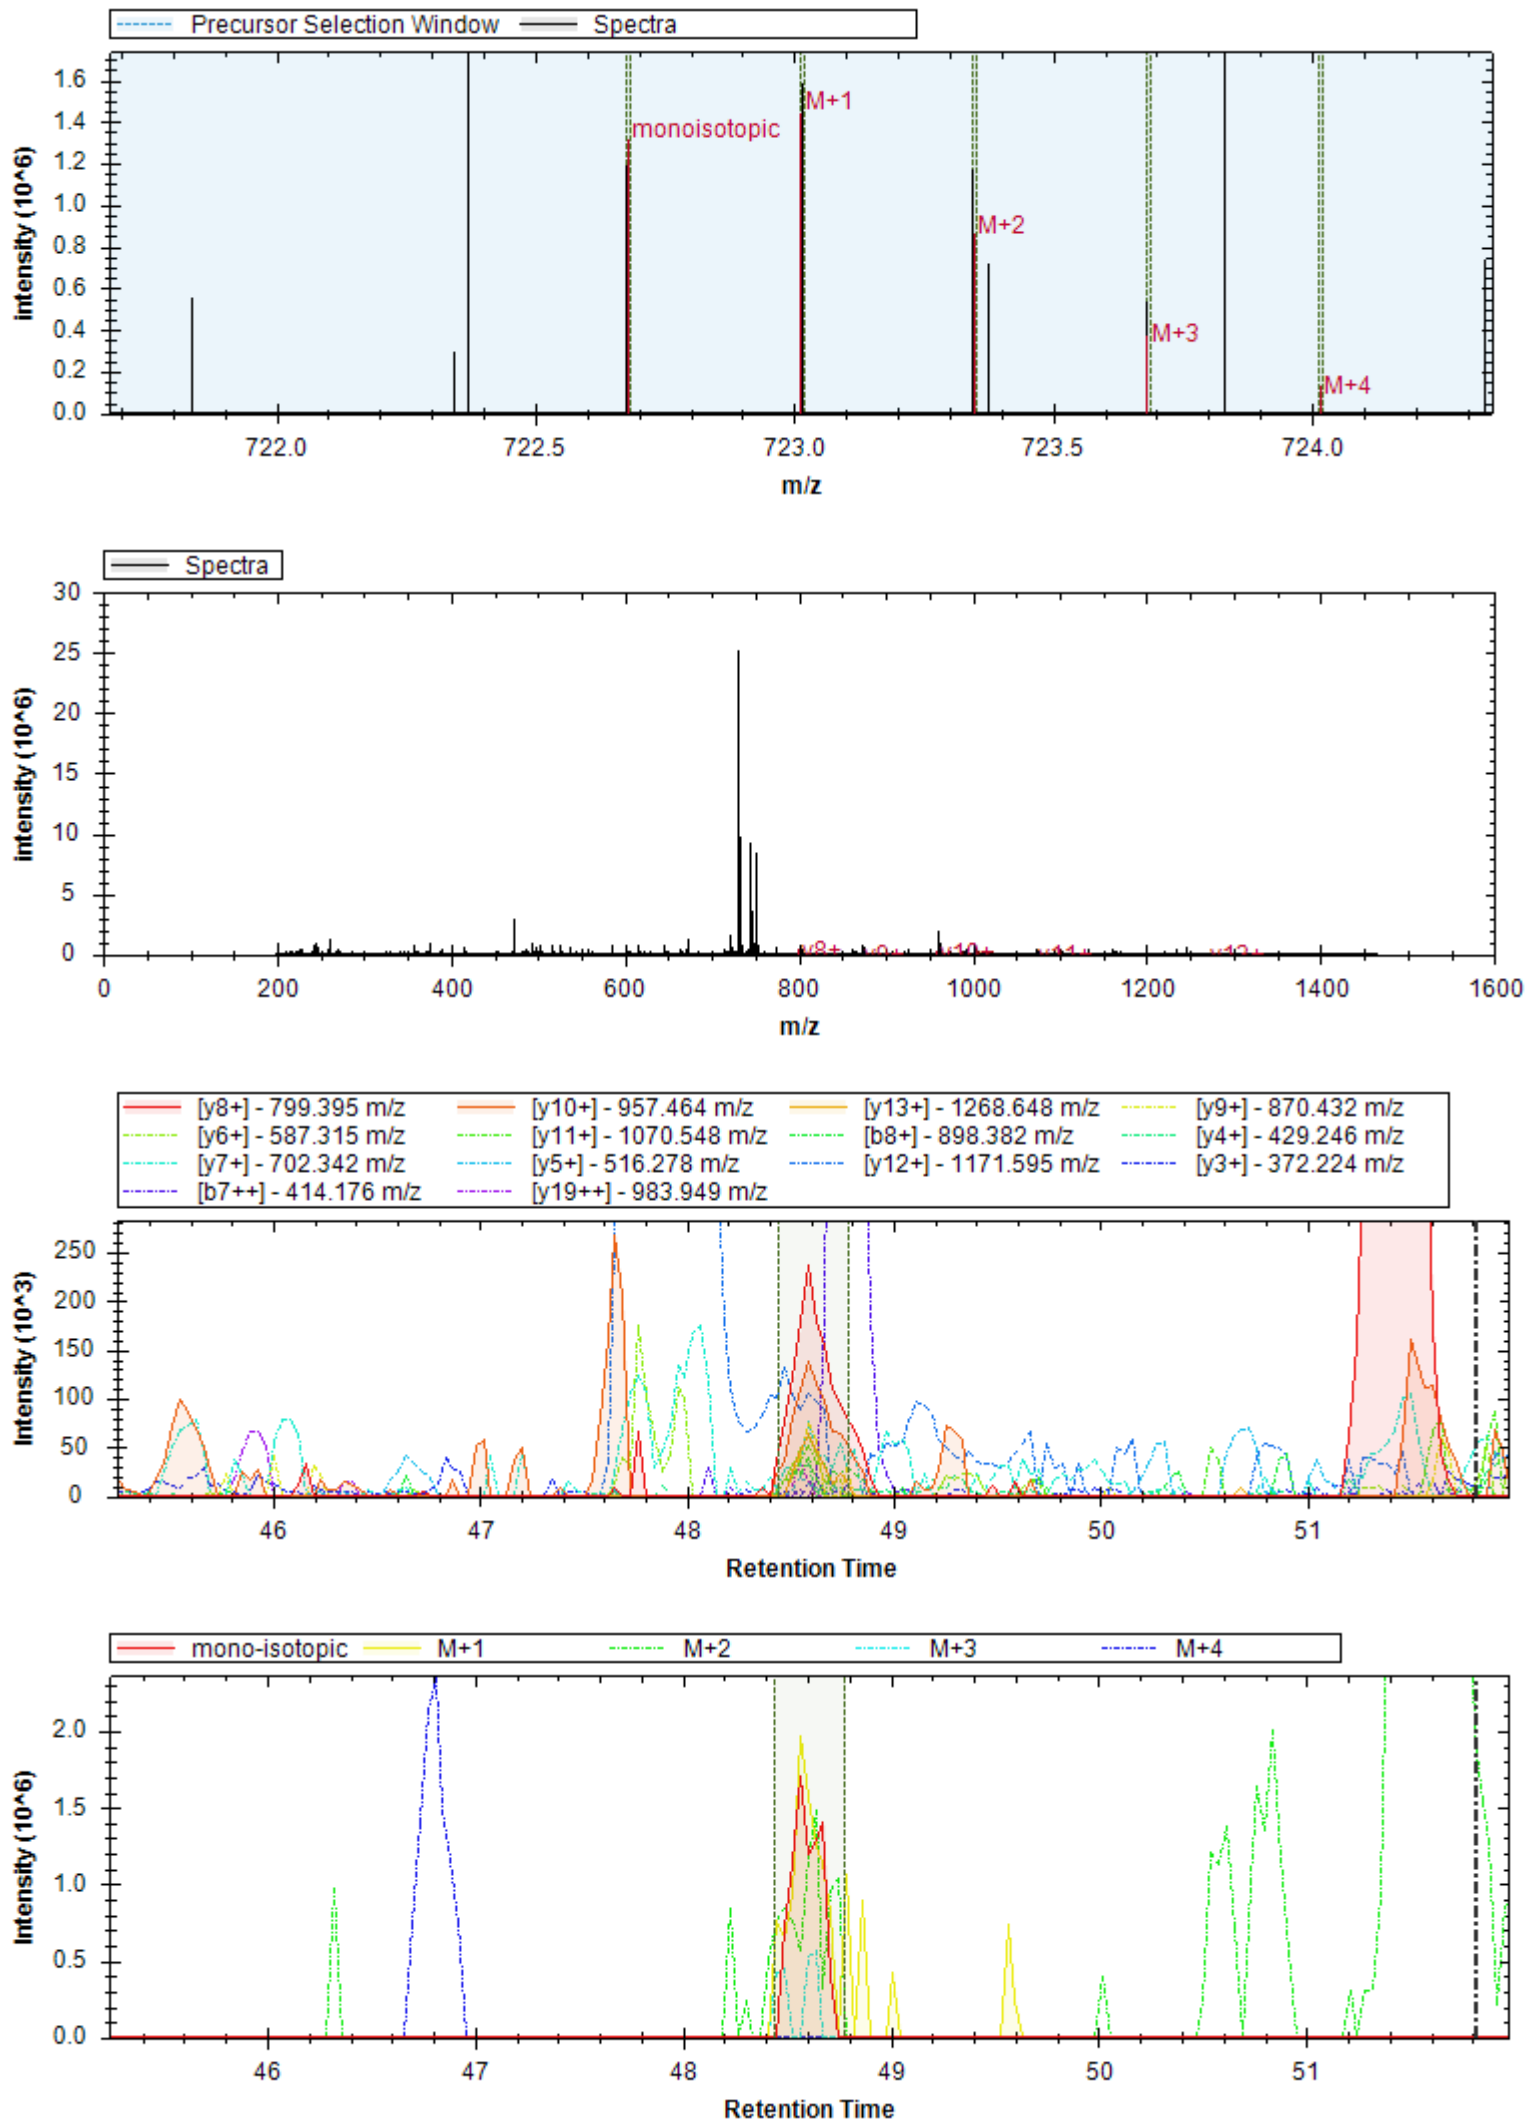

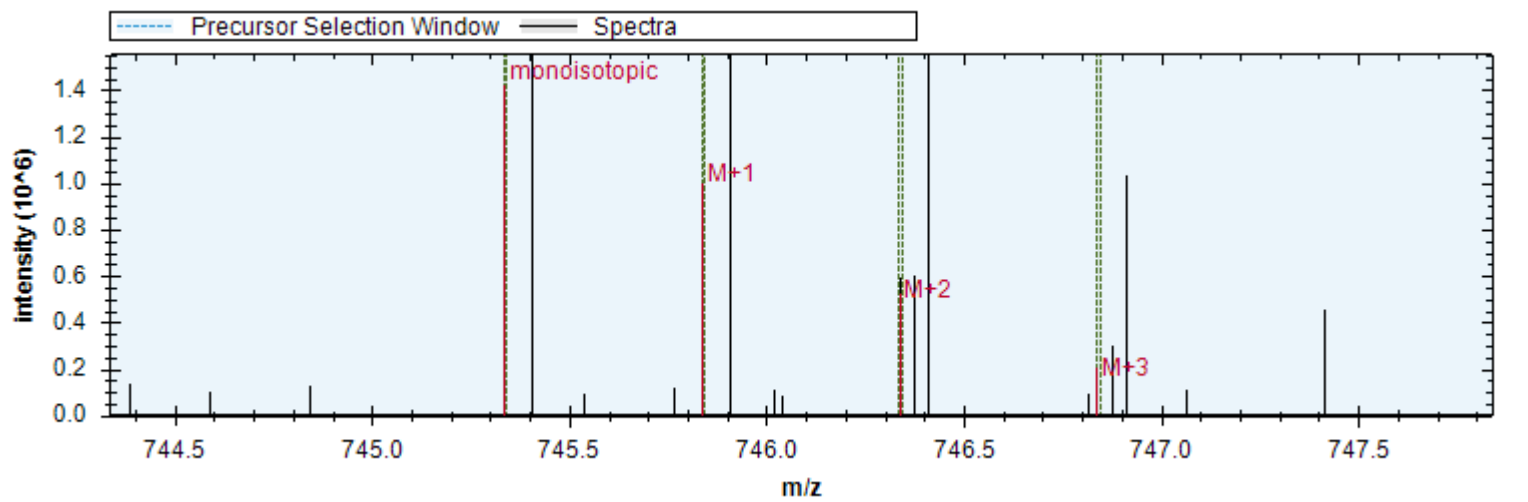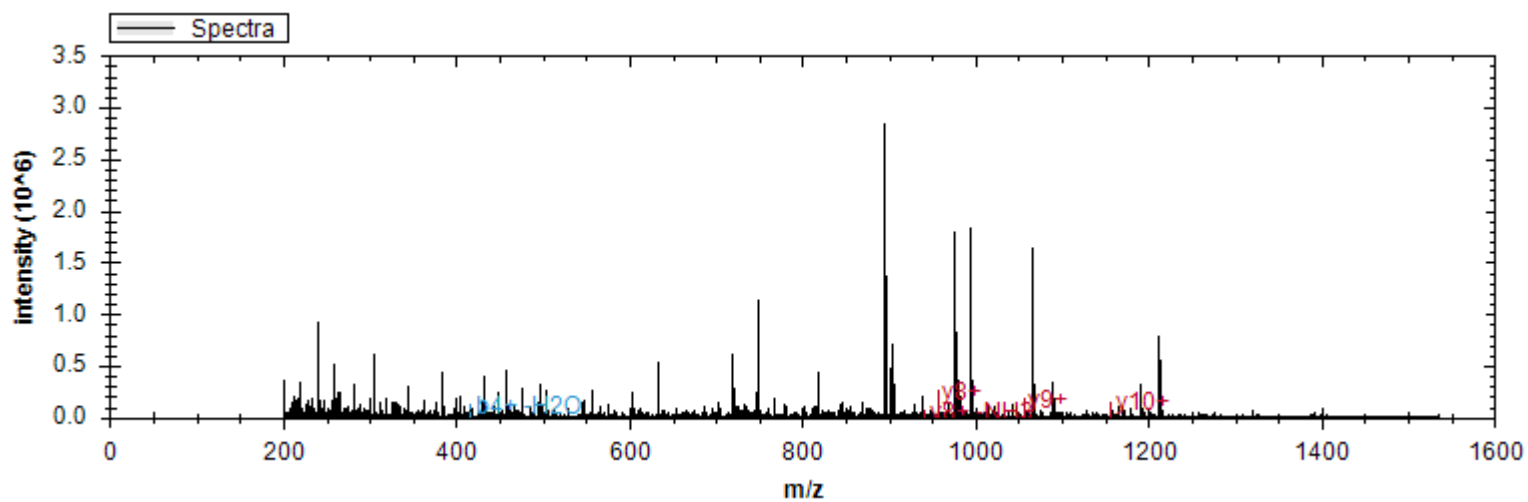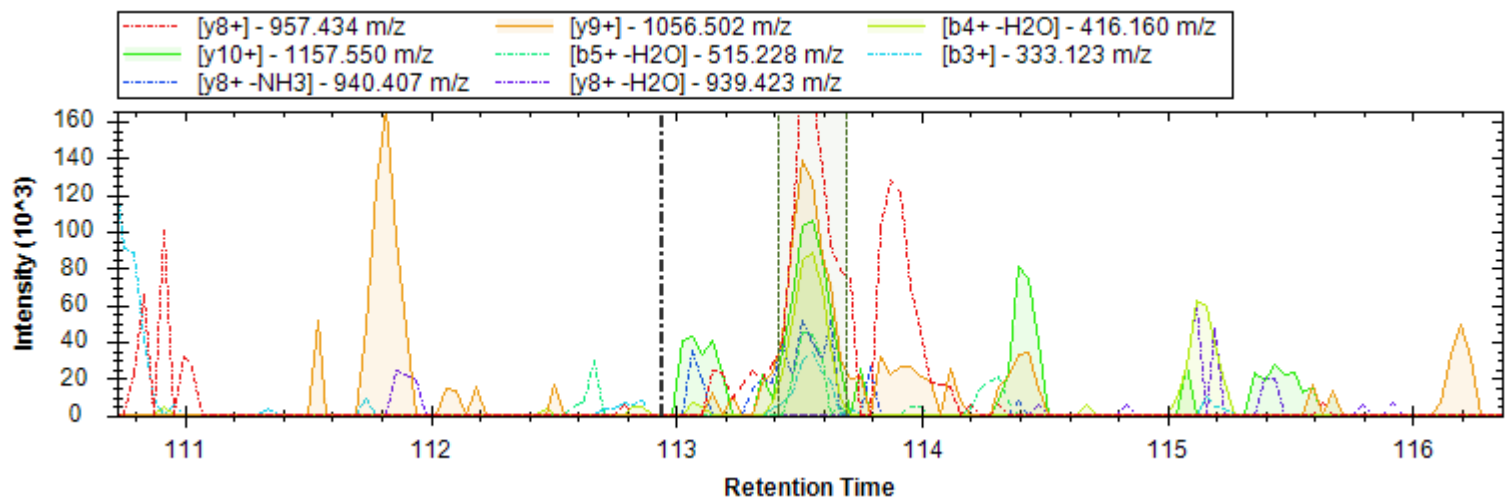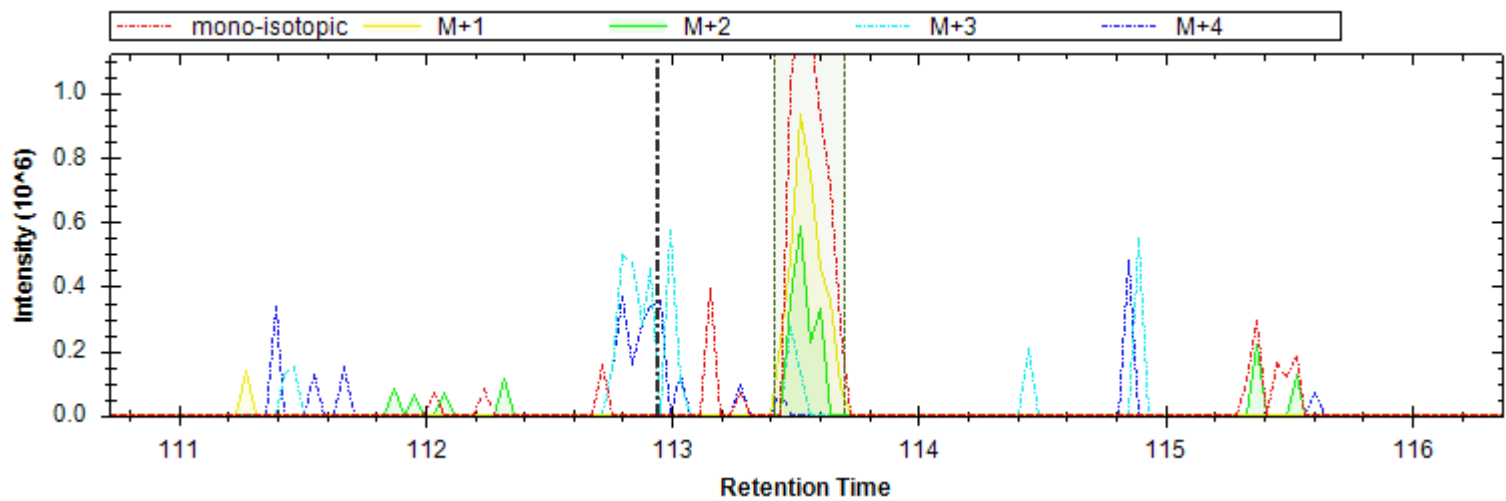



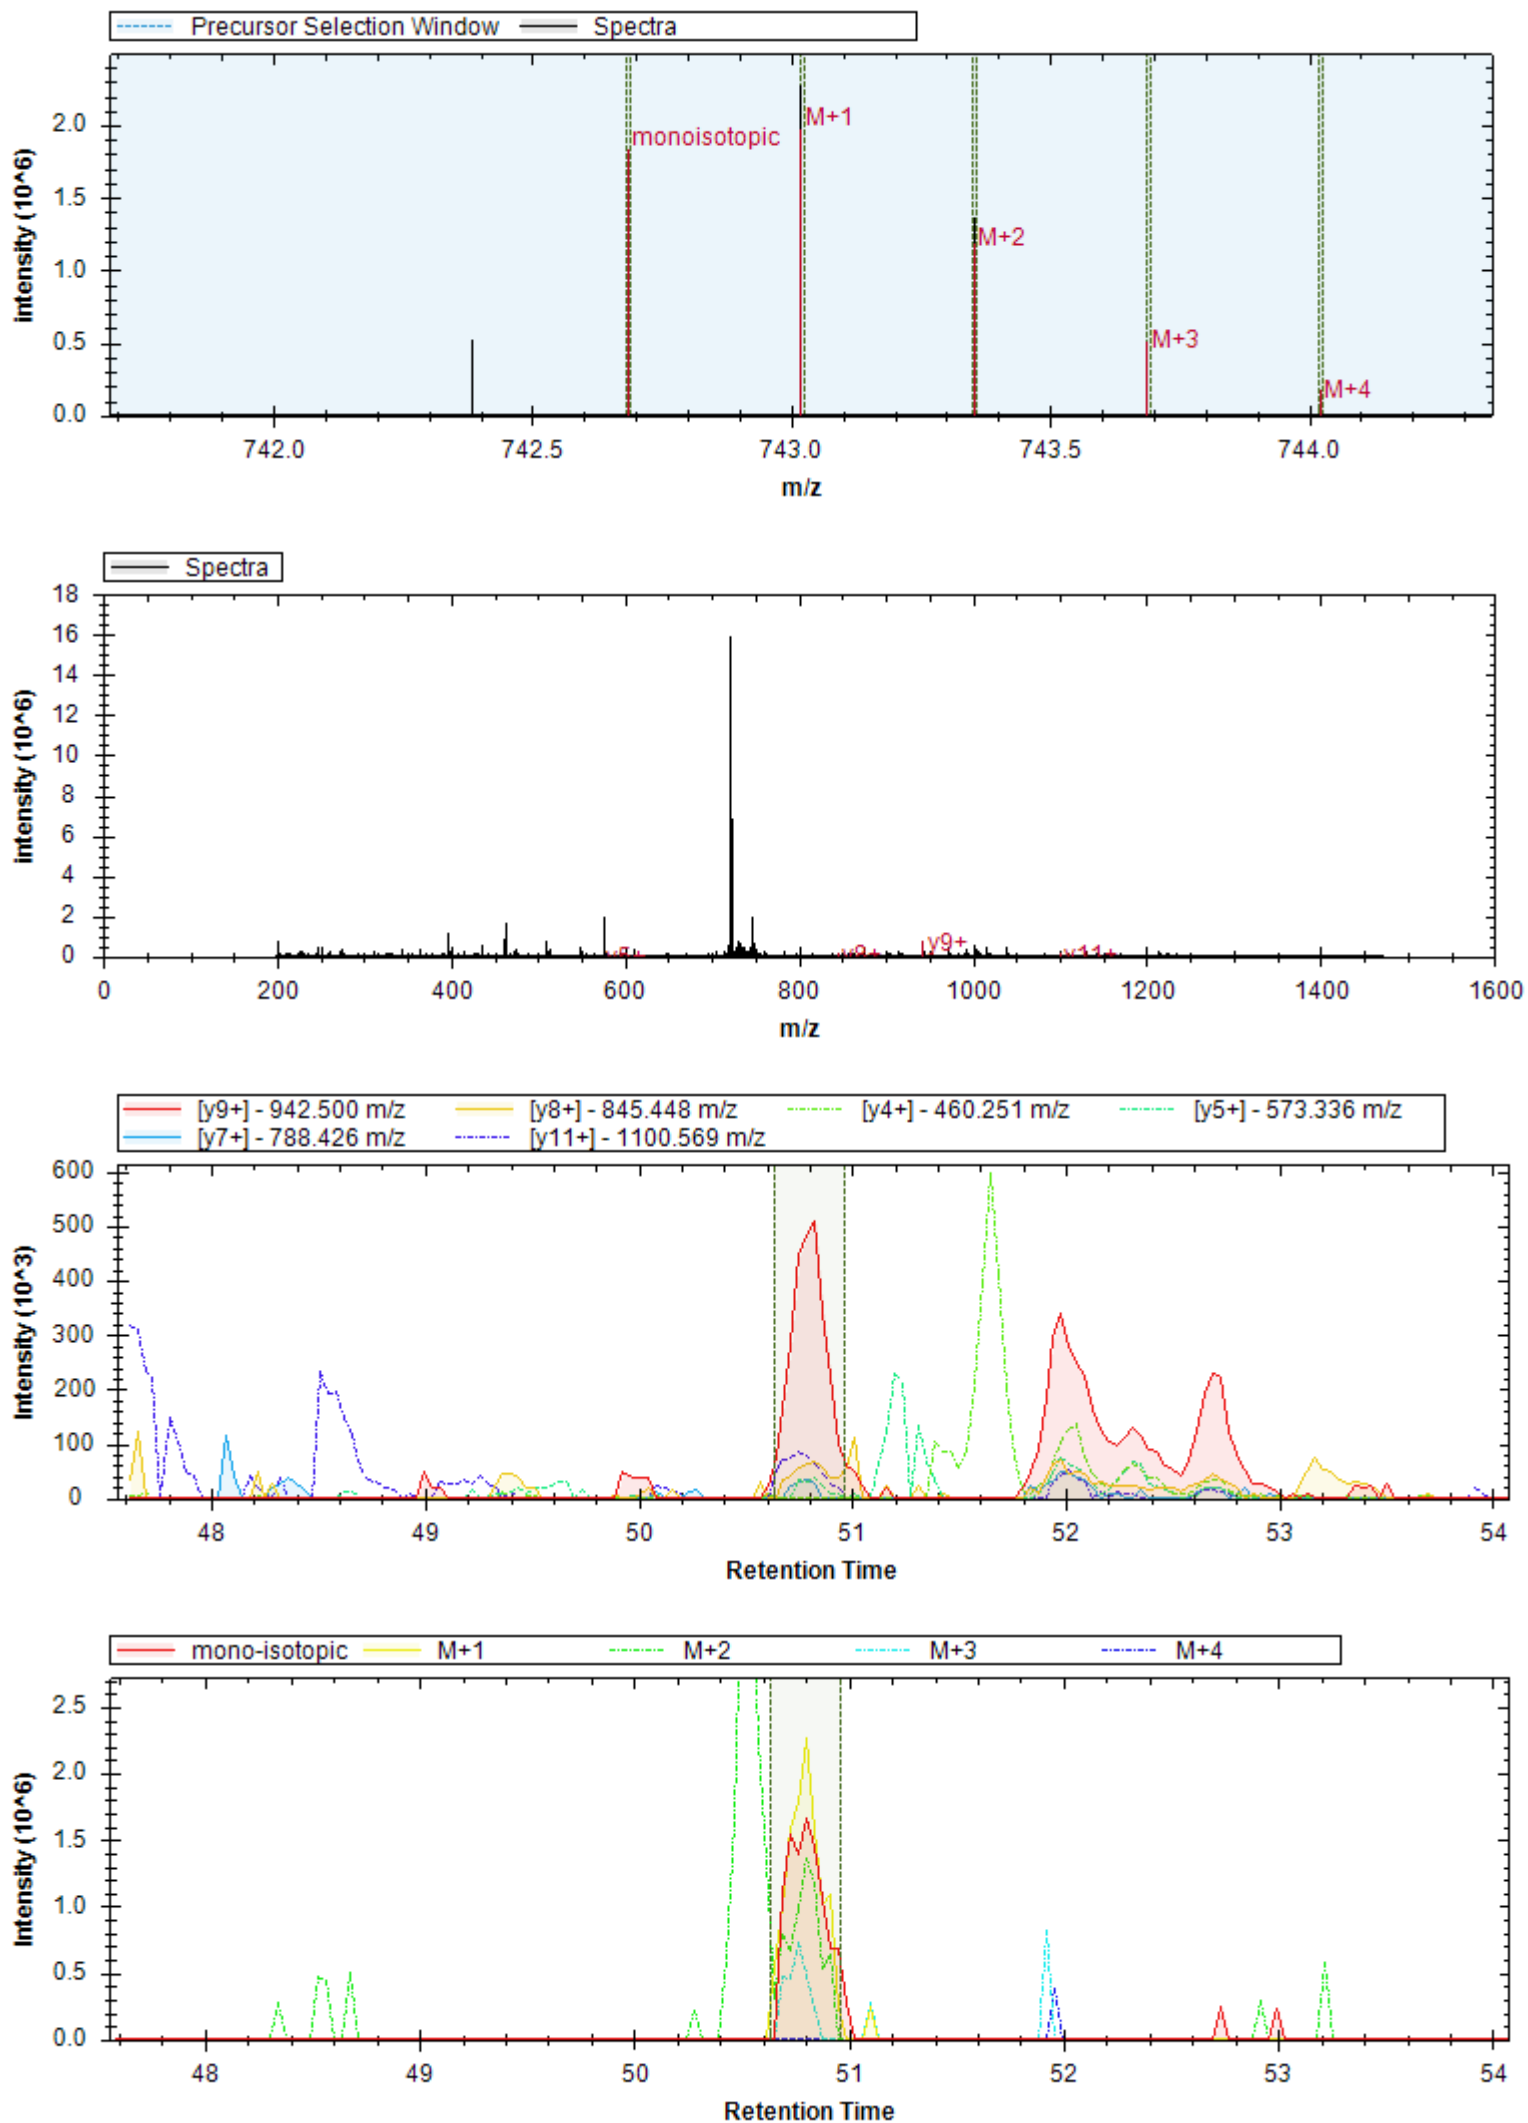

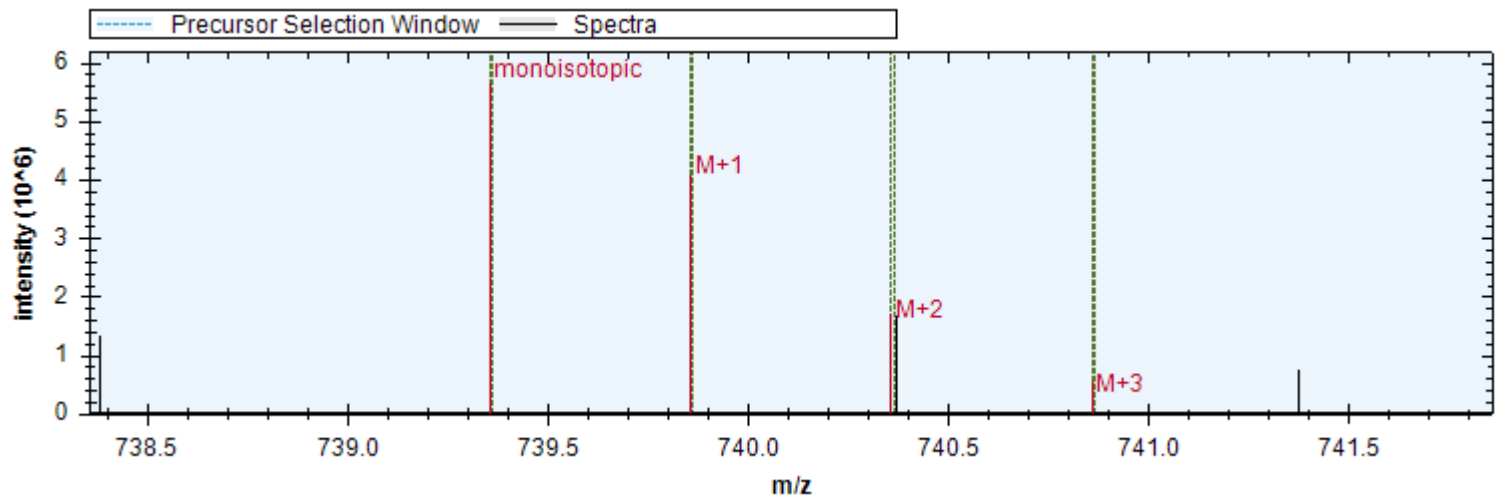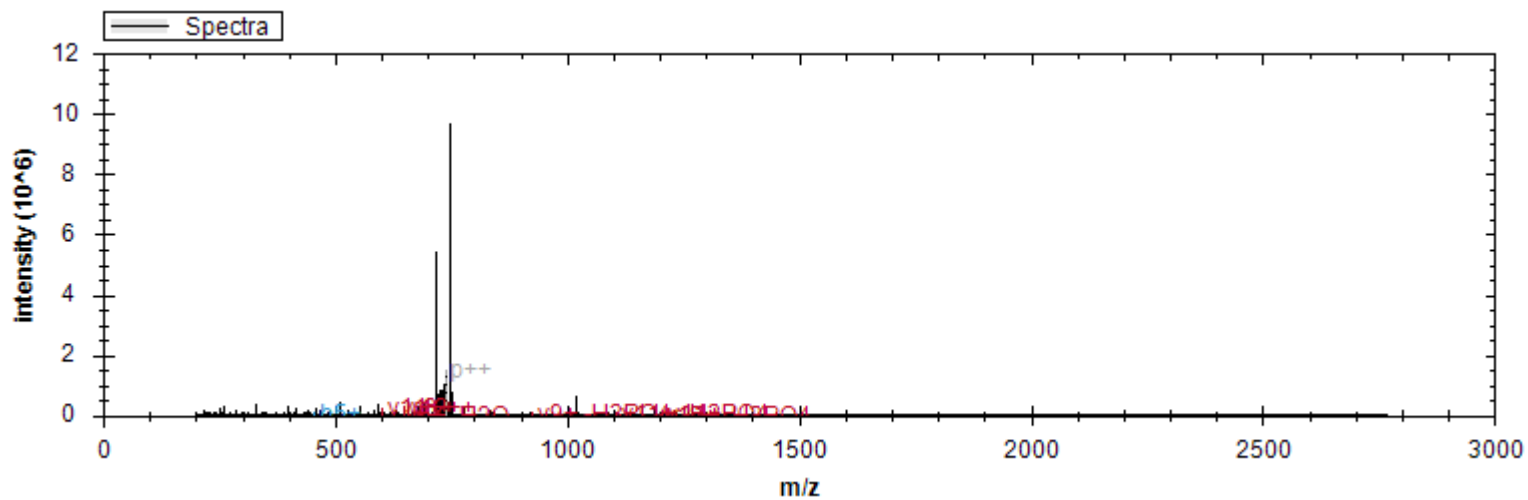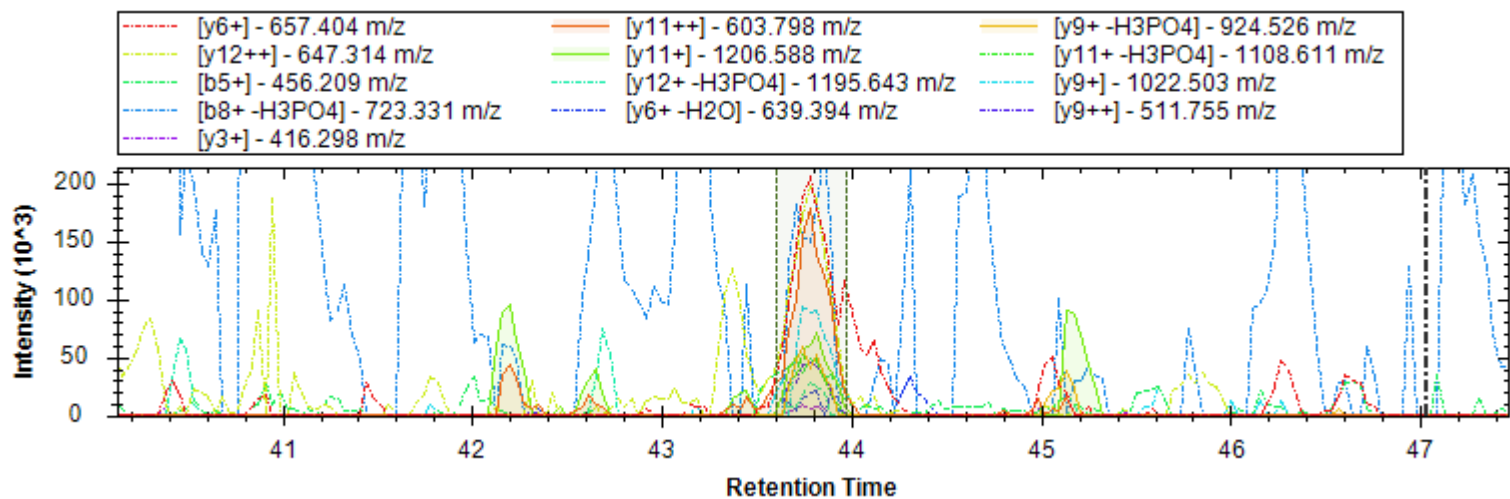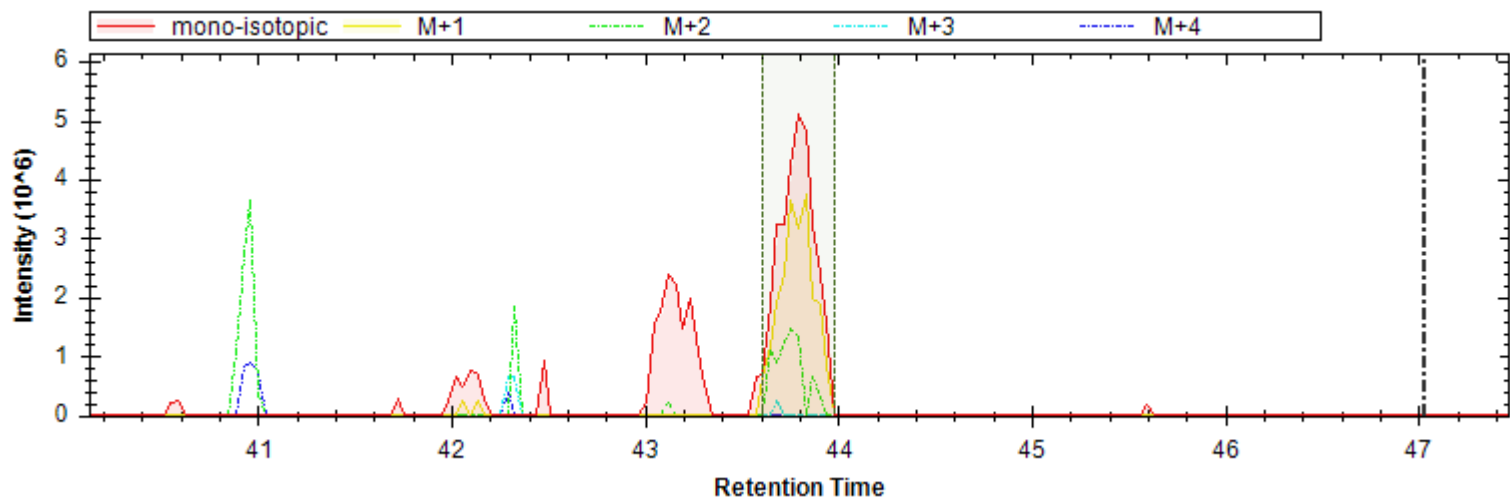

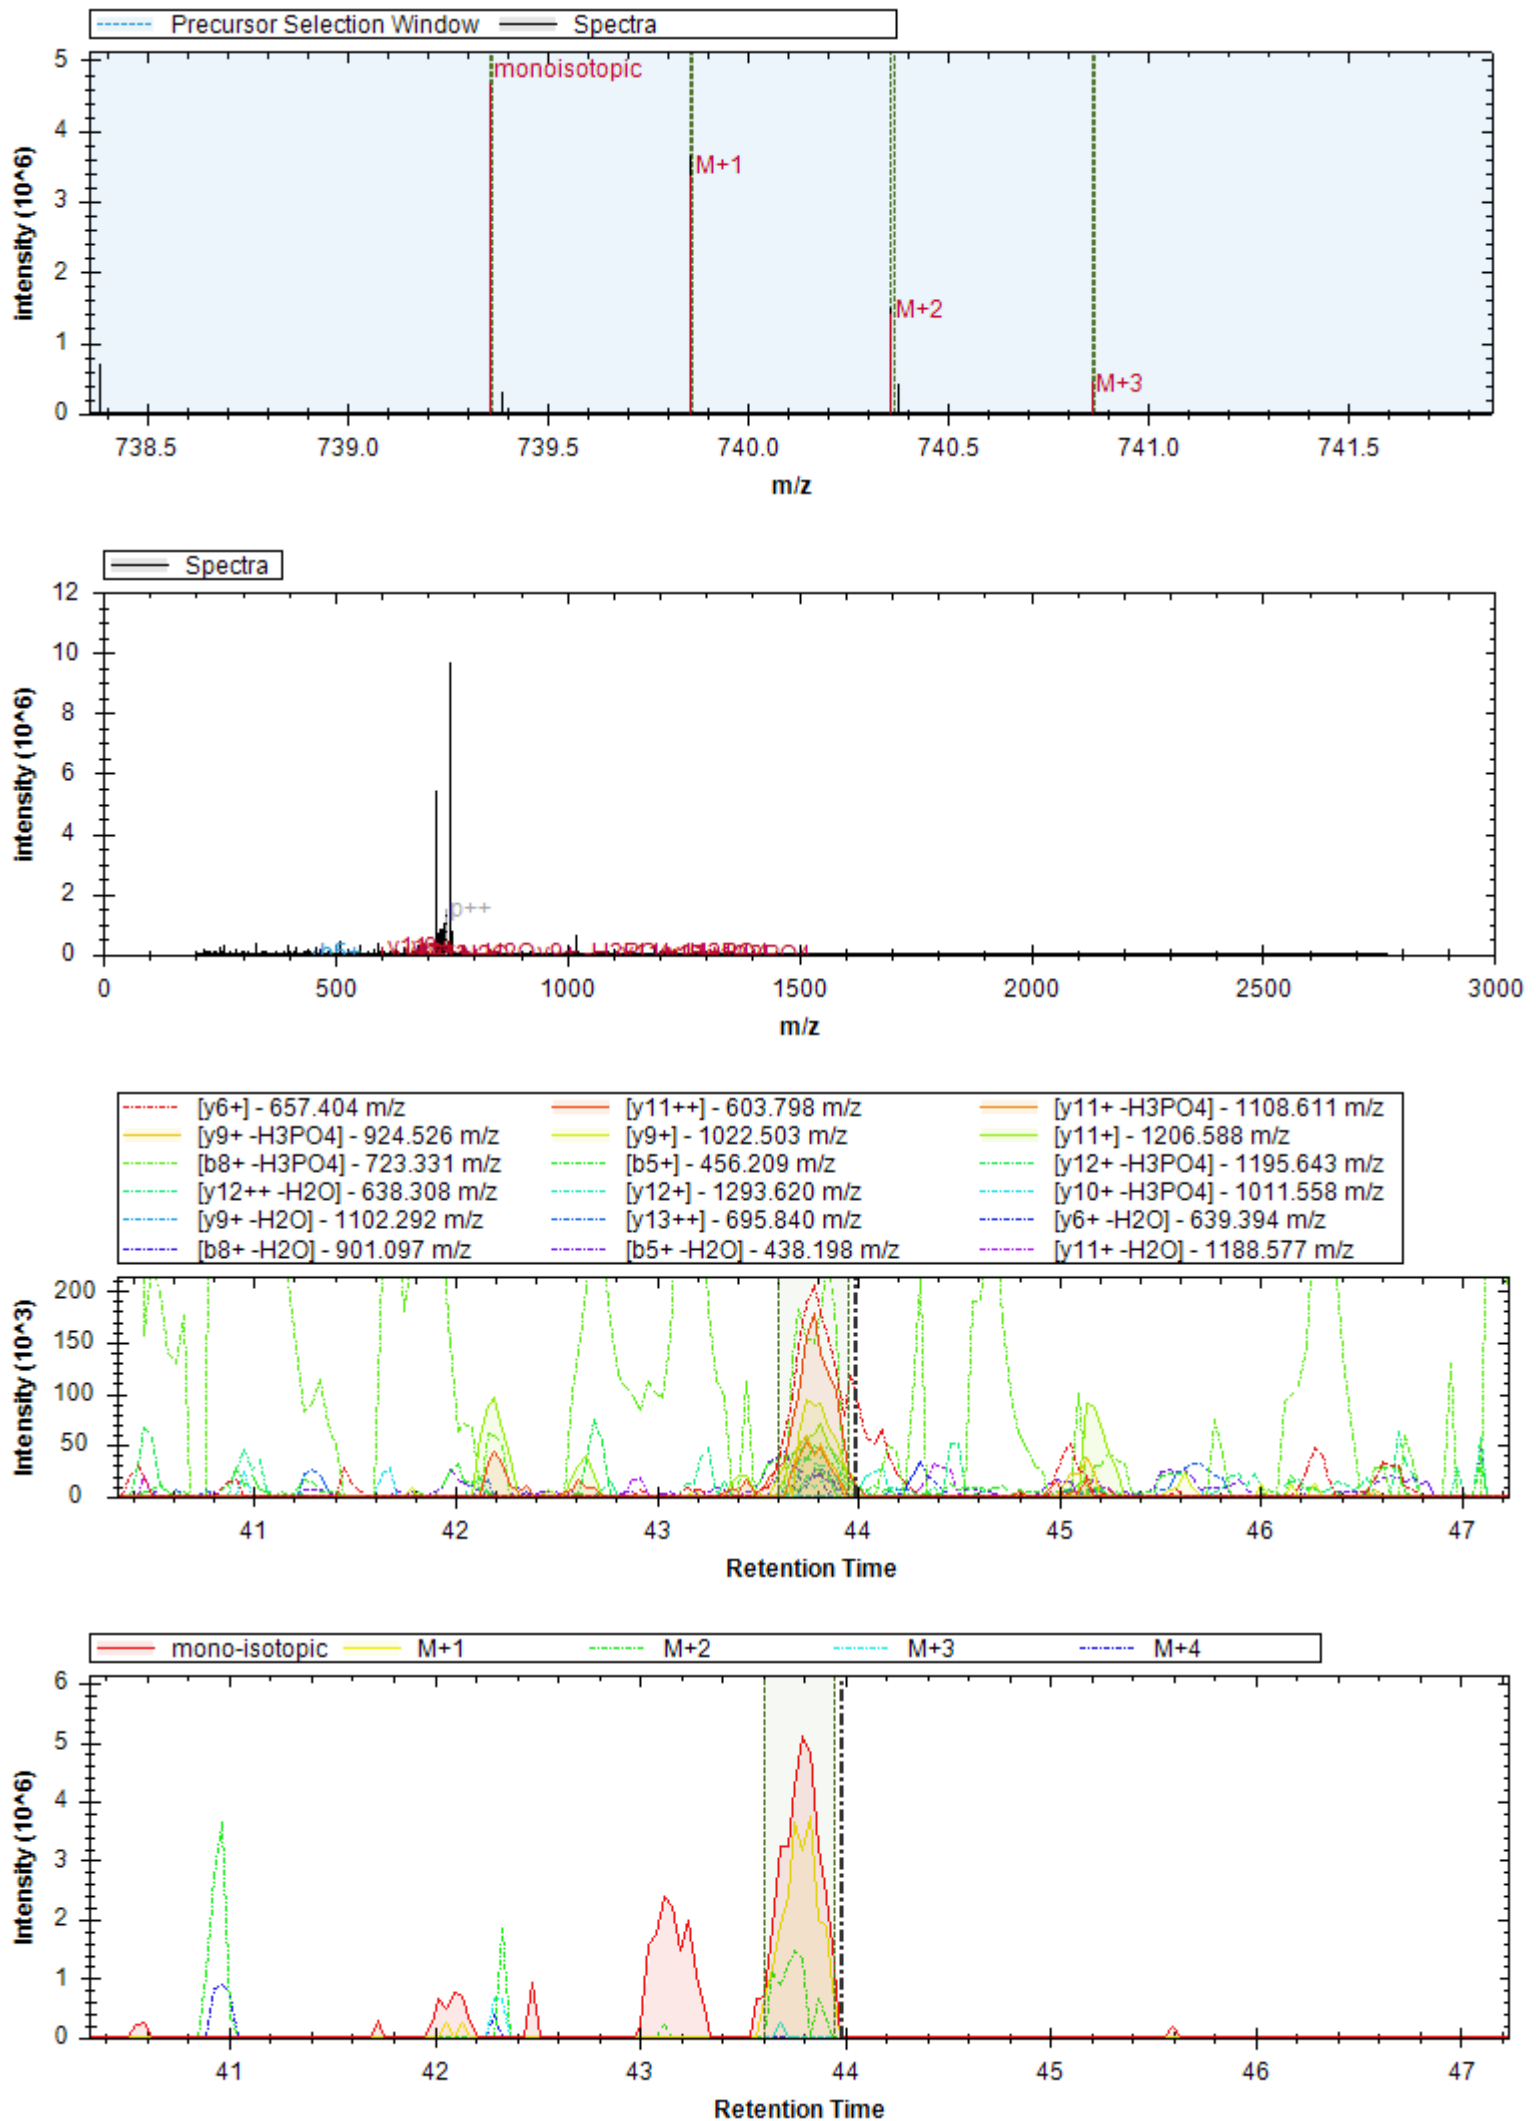

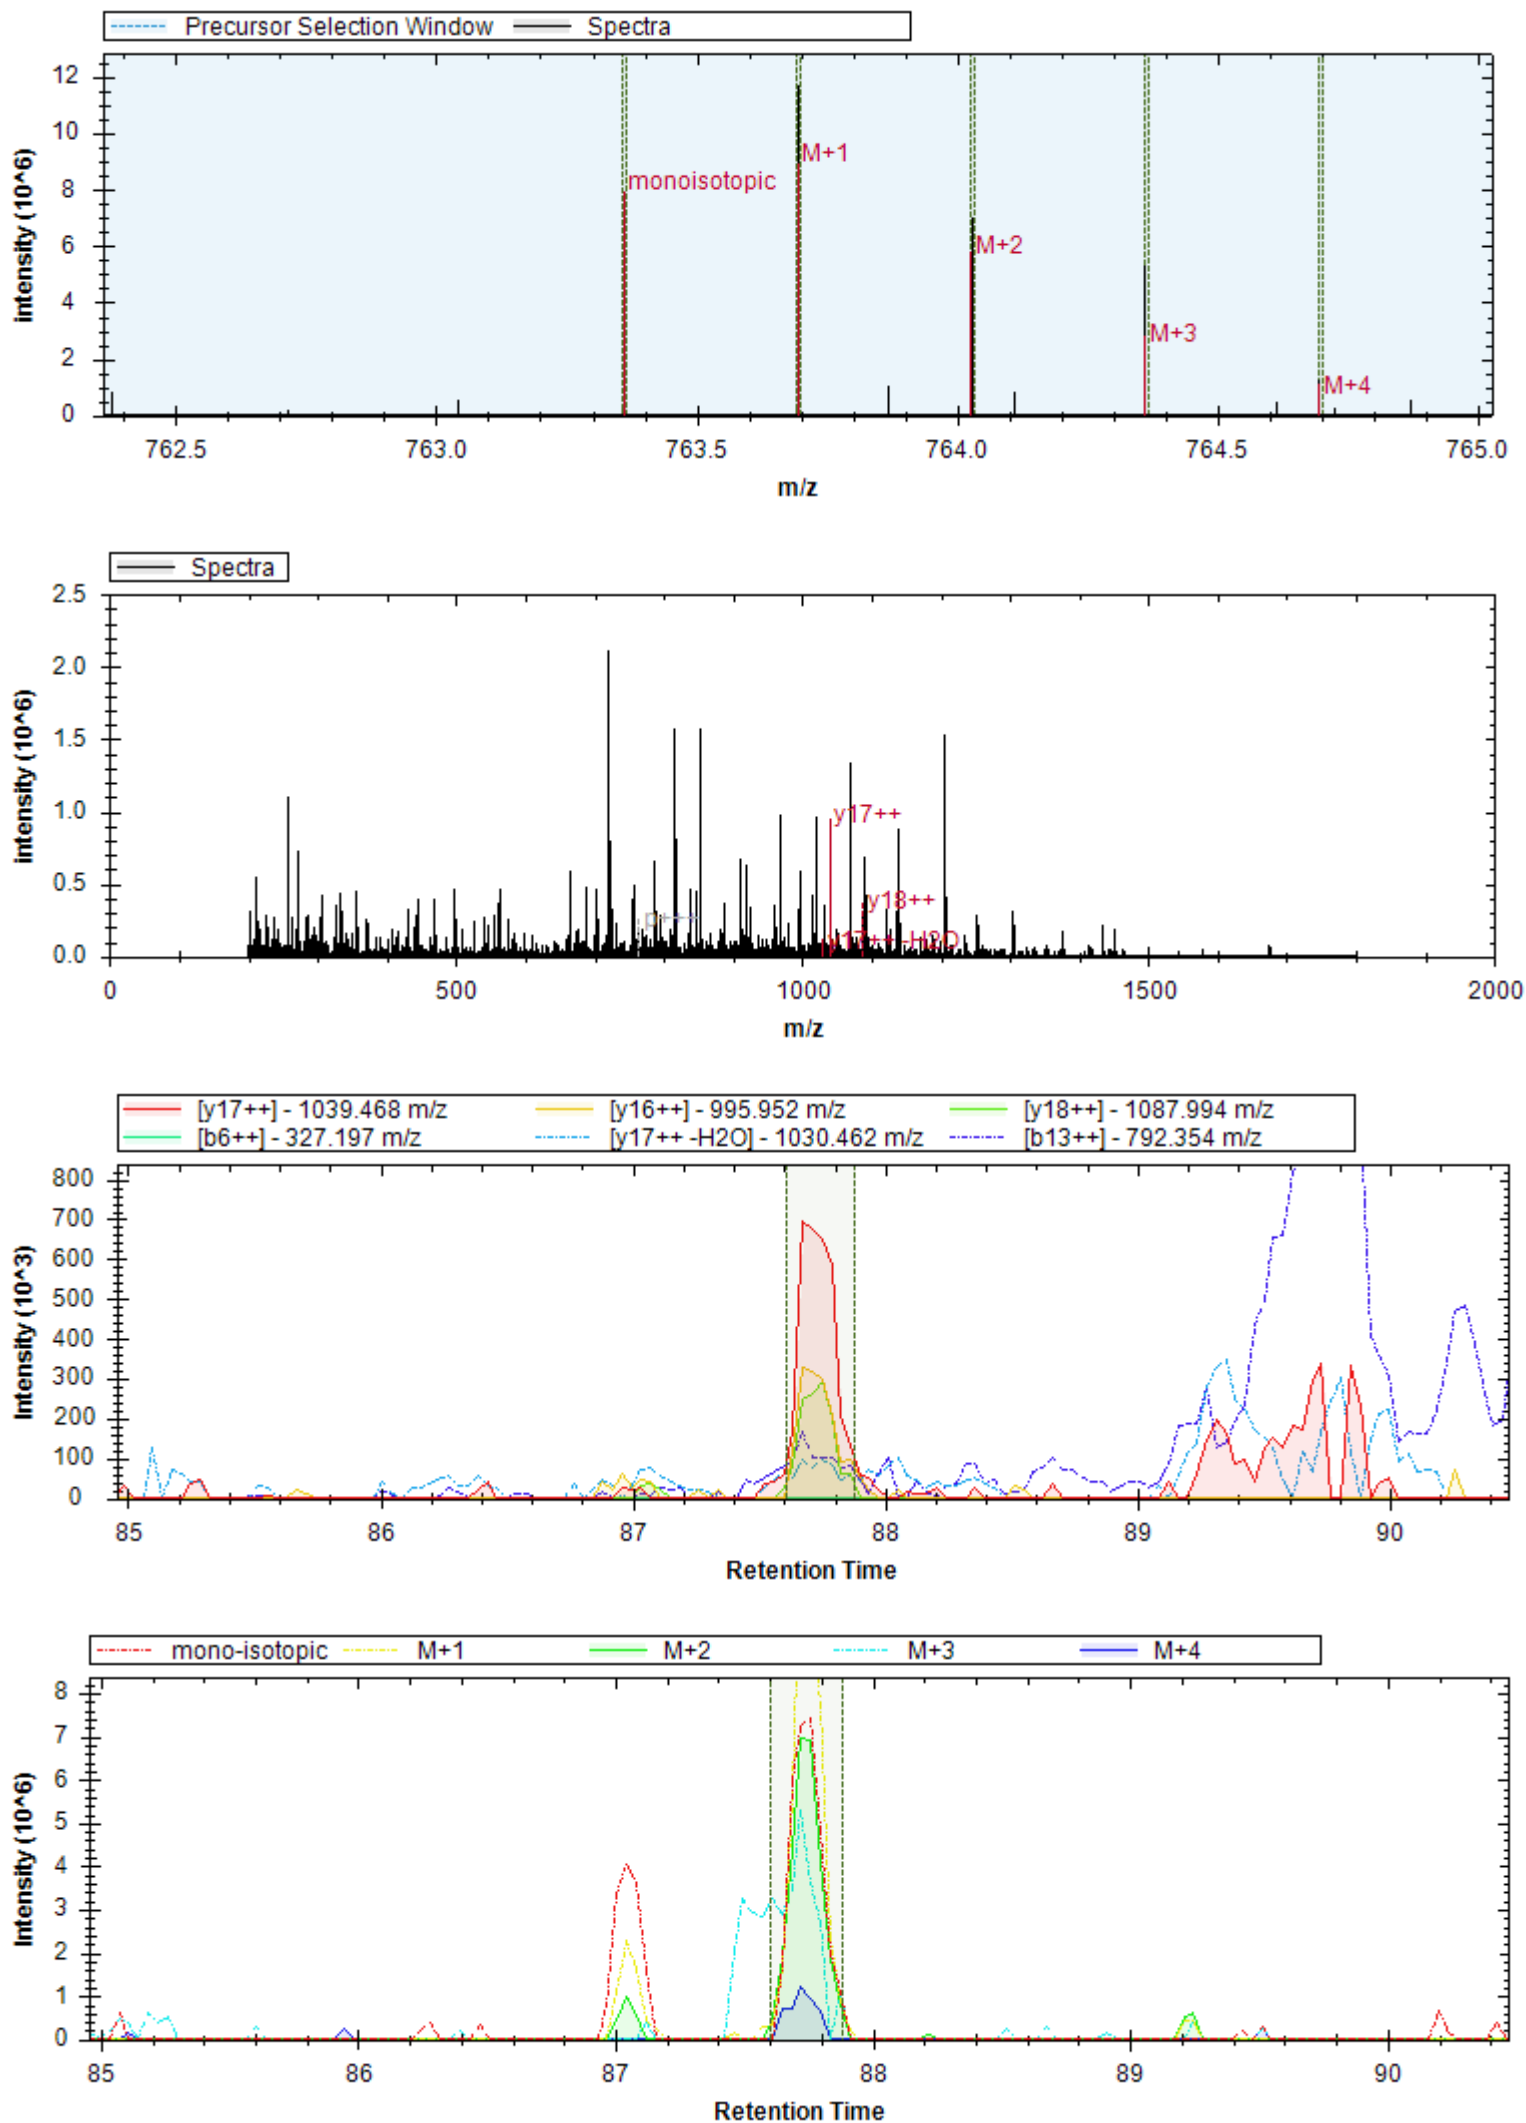

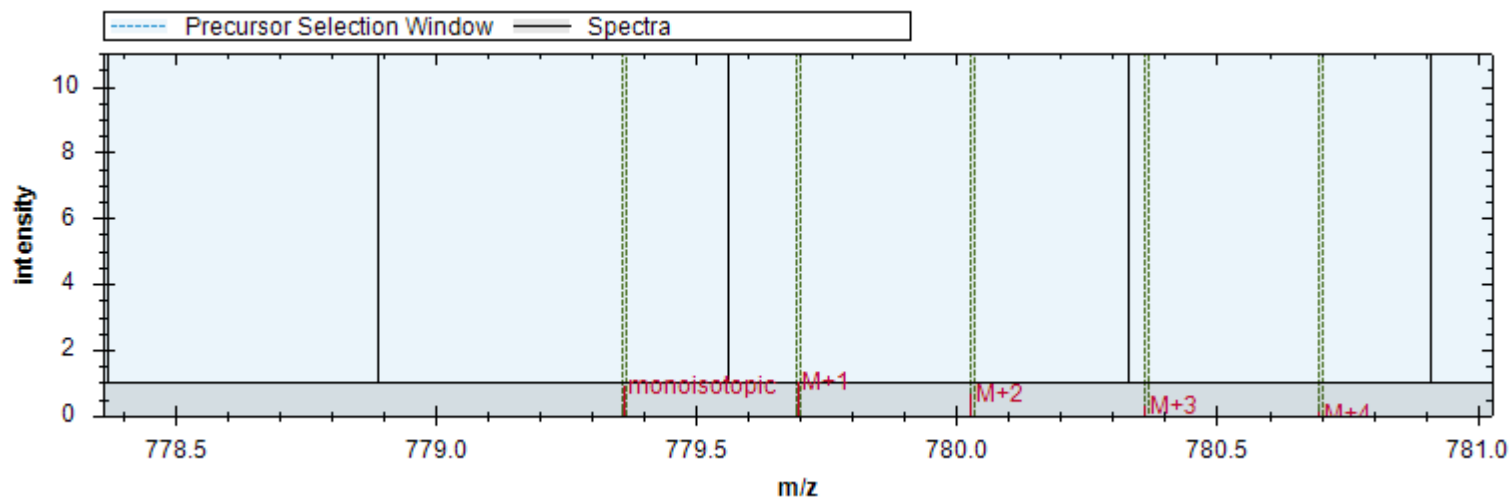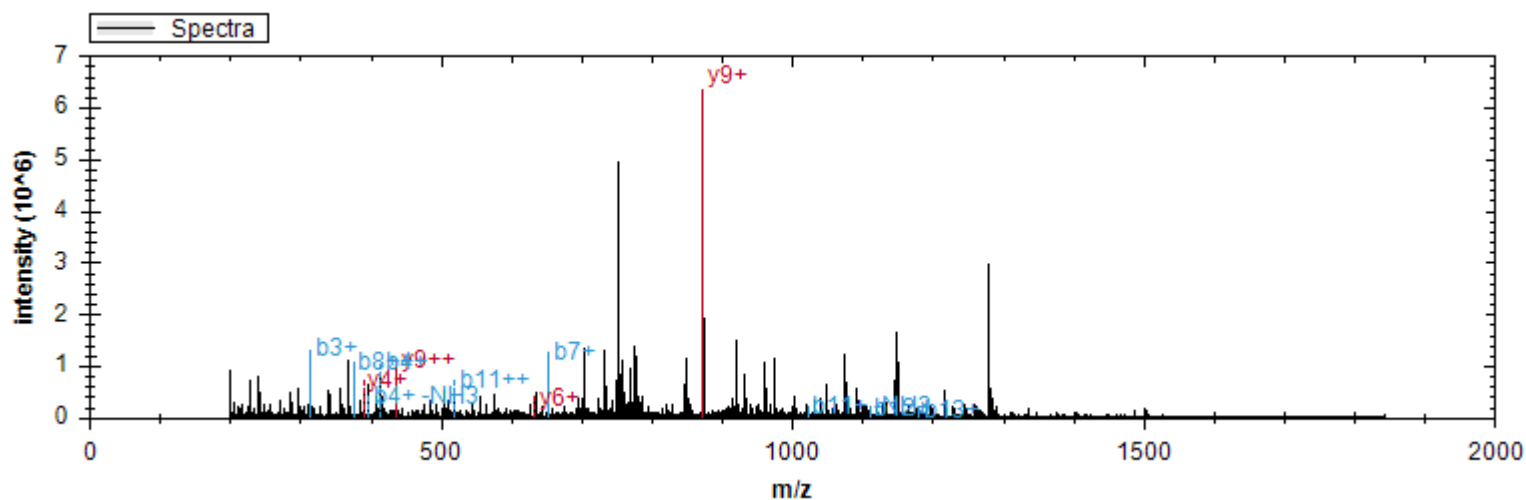

|                          |                          |                            |
|--------------------------|--------------------------|----------------------------|
| [y9+] - 873.431 m/z      | [b7+] - 653.325 m/z      | [b11+] - 1039.505 m/z      |
| [b3+] - 315.130 m/z      | [b8+] - 376.701 m/z      | [y7+] - 705.341 m/z        |
| [b4+] - 414.198 m/z      | [b11+] - 520.256 m/z     | [b7+ -H2O] - 635.315 m/z   |
| [b8+] - 752.394 m/z      | [b4+ -H2O] - 396.188 m/z | [y8+] - 776.379 m/z        |
| [y4+] - 390.235 m/z      | [y11+] - 1155.493 m/z    | [y9+] - 437.219 m/z        |
| [b12+] - 1110.543 m/z    | [y6+] - 634.304 m/z      | [b7+ -NH3] - 636.299 m/z   |
| [y12+] - 1226.530 m/z    | [b5+] - 511.251 m/z      | [b11+ -NH3] - 1022.479 m/z |
| [b4+ -NH3] - 397.172 m/z | [b13+] - 1181.580 m/z    | [b8+ -NH3] - 735.367 m/z   |
| [y5+] - 505.262 m/z      |                          |                            |

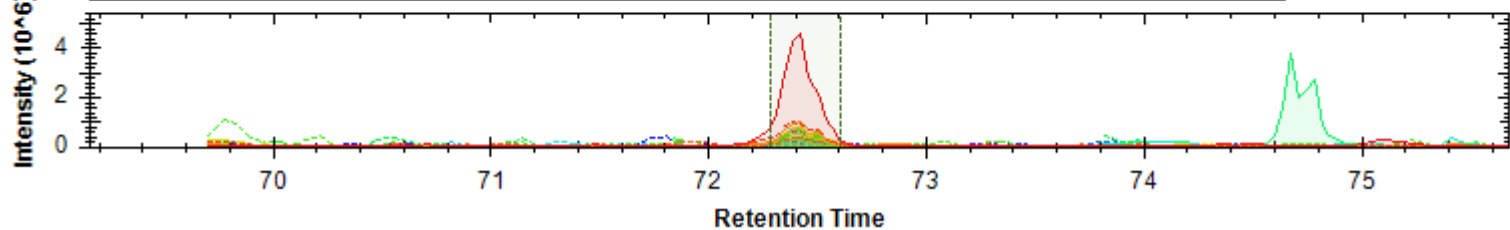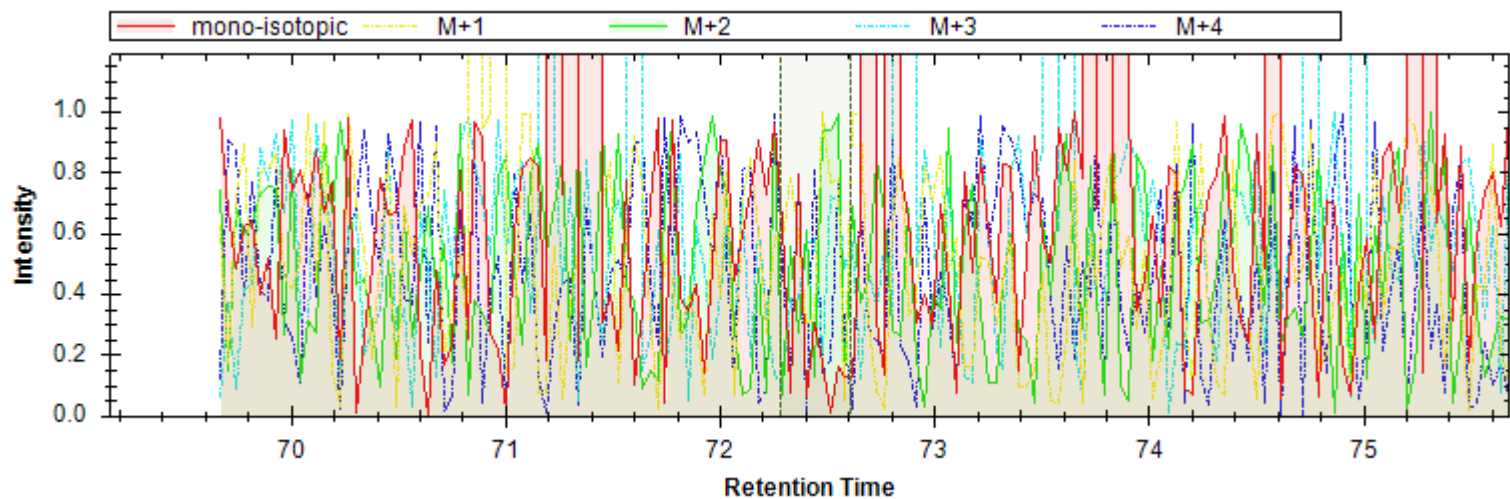

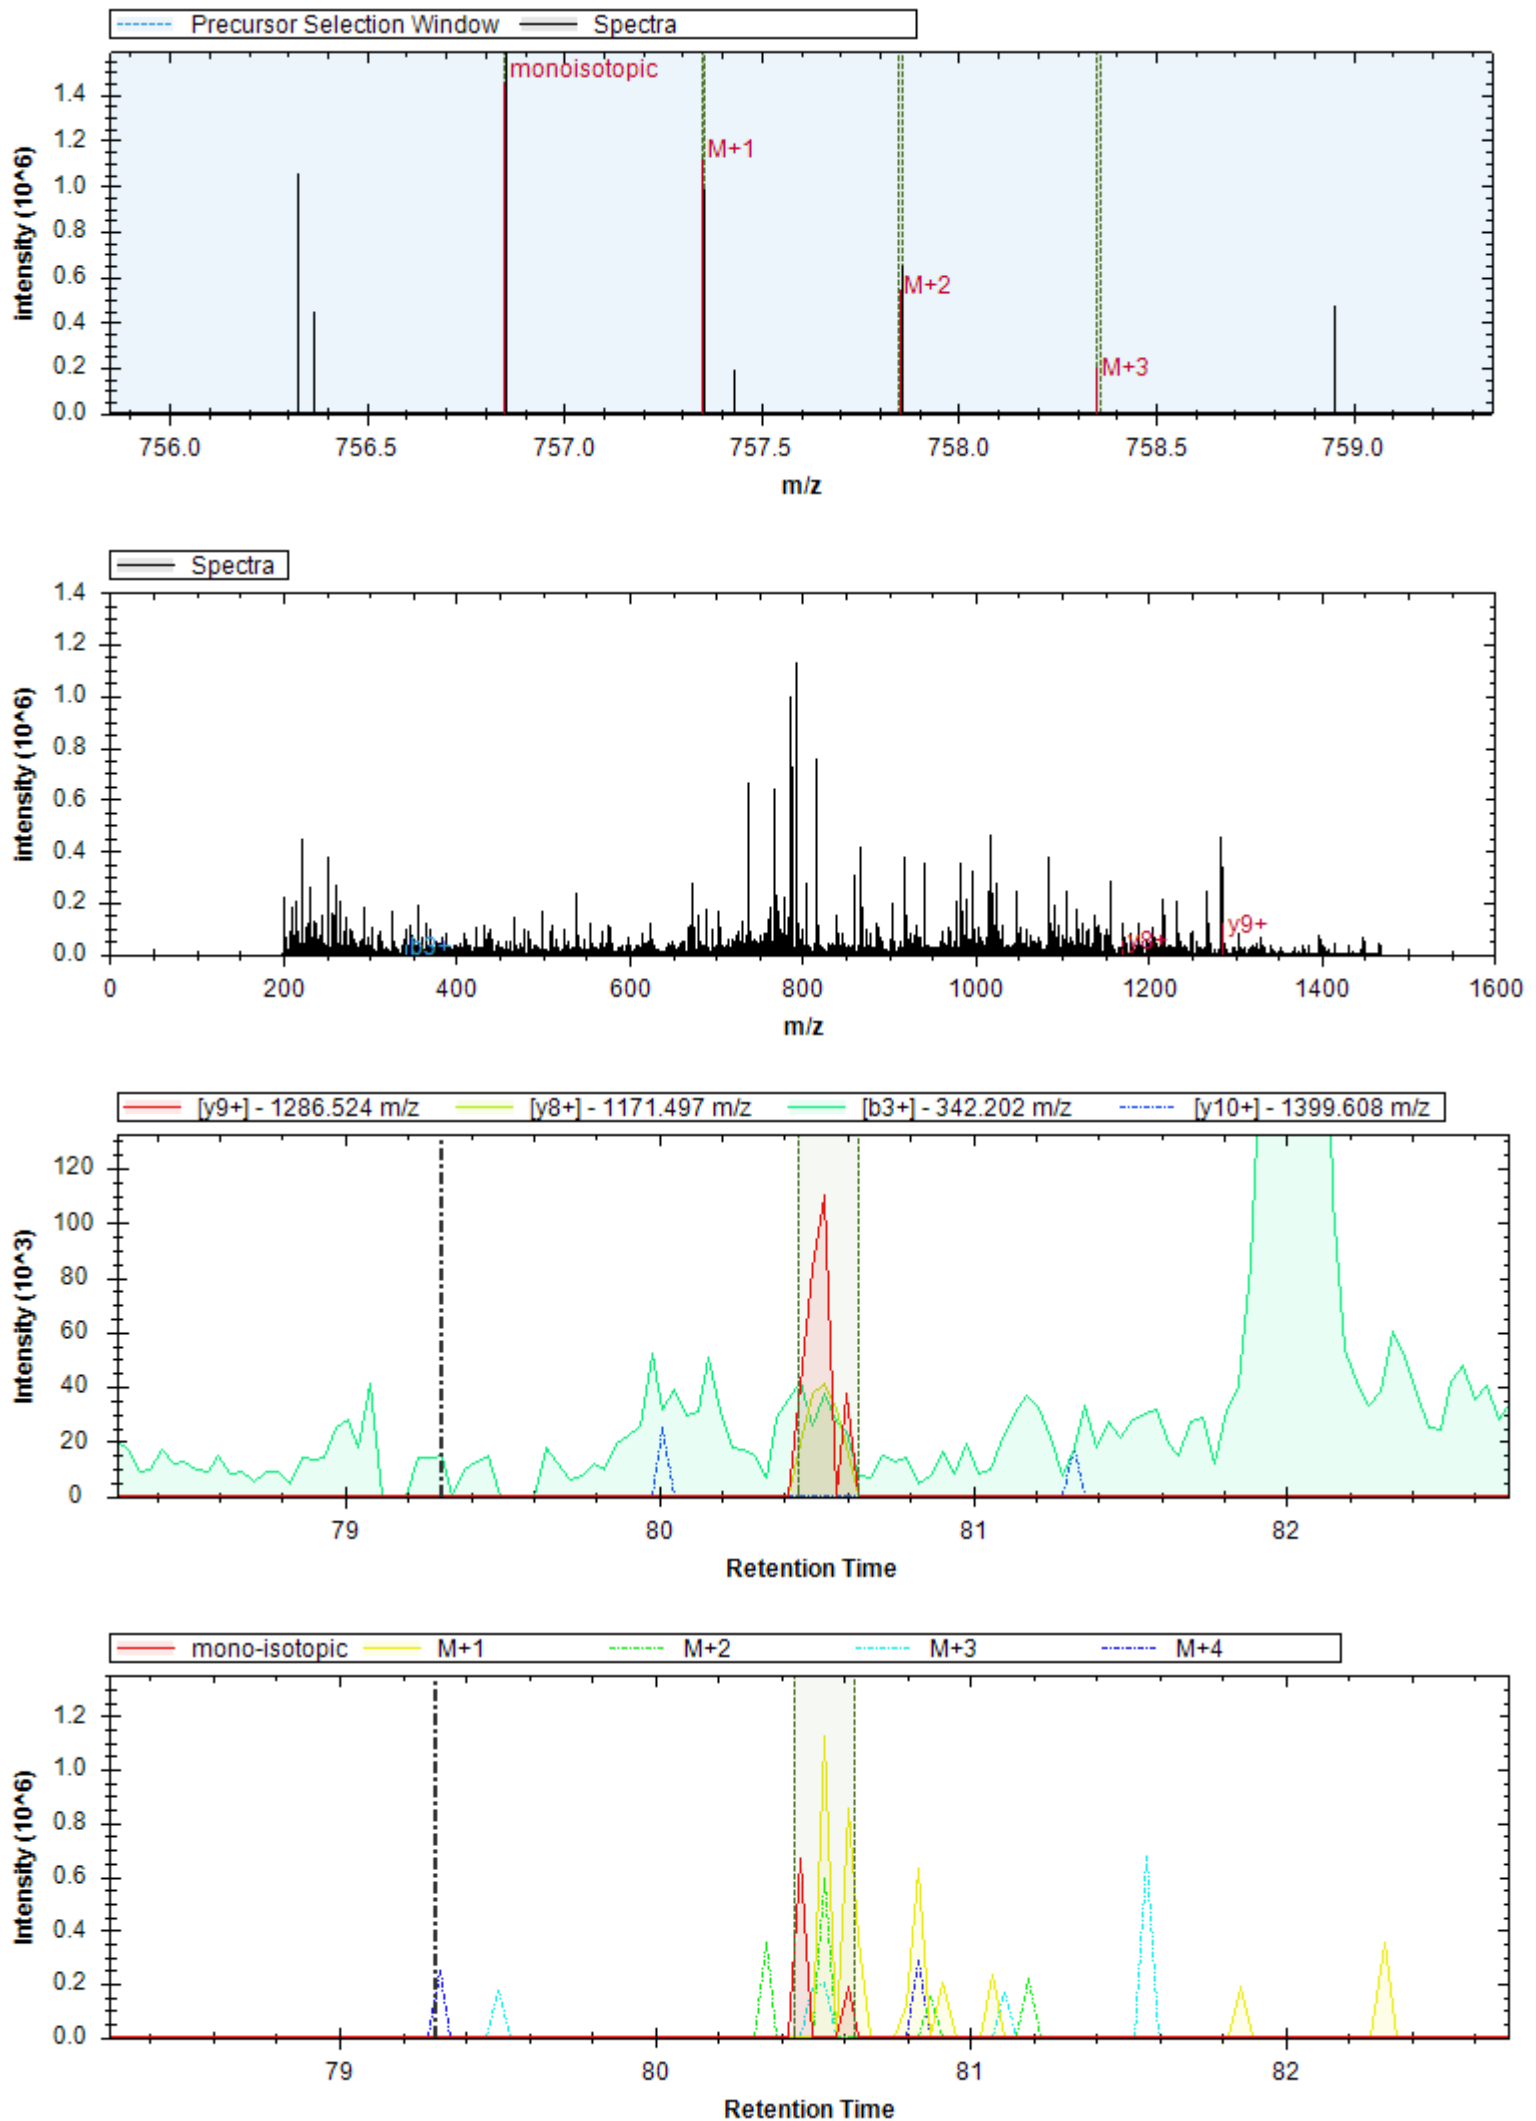

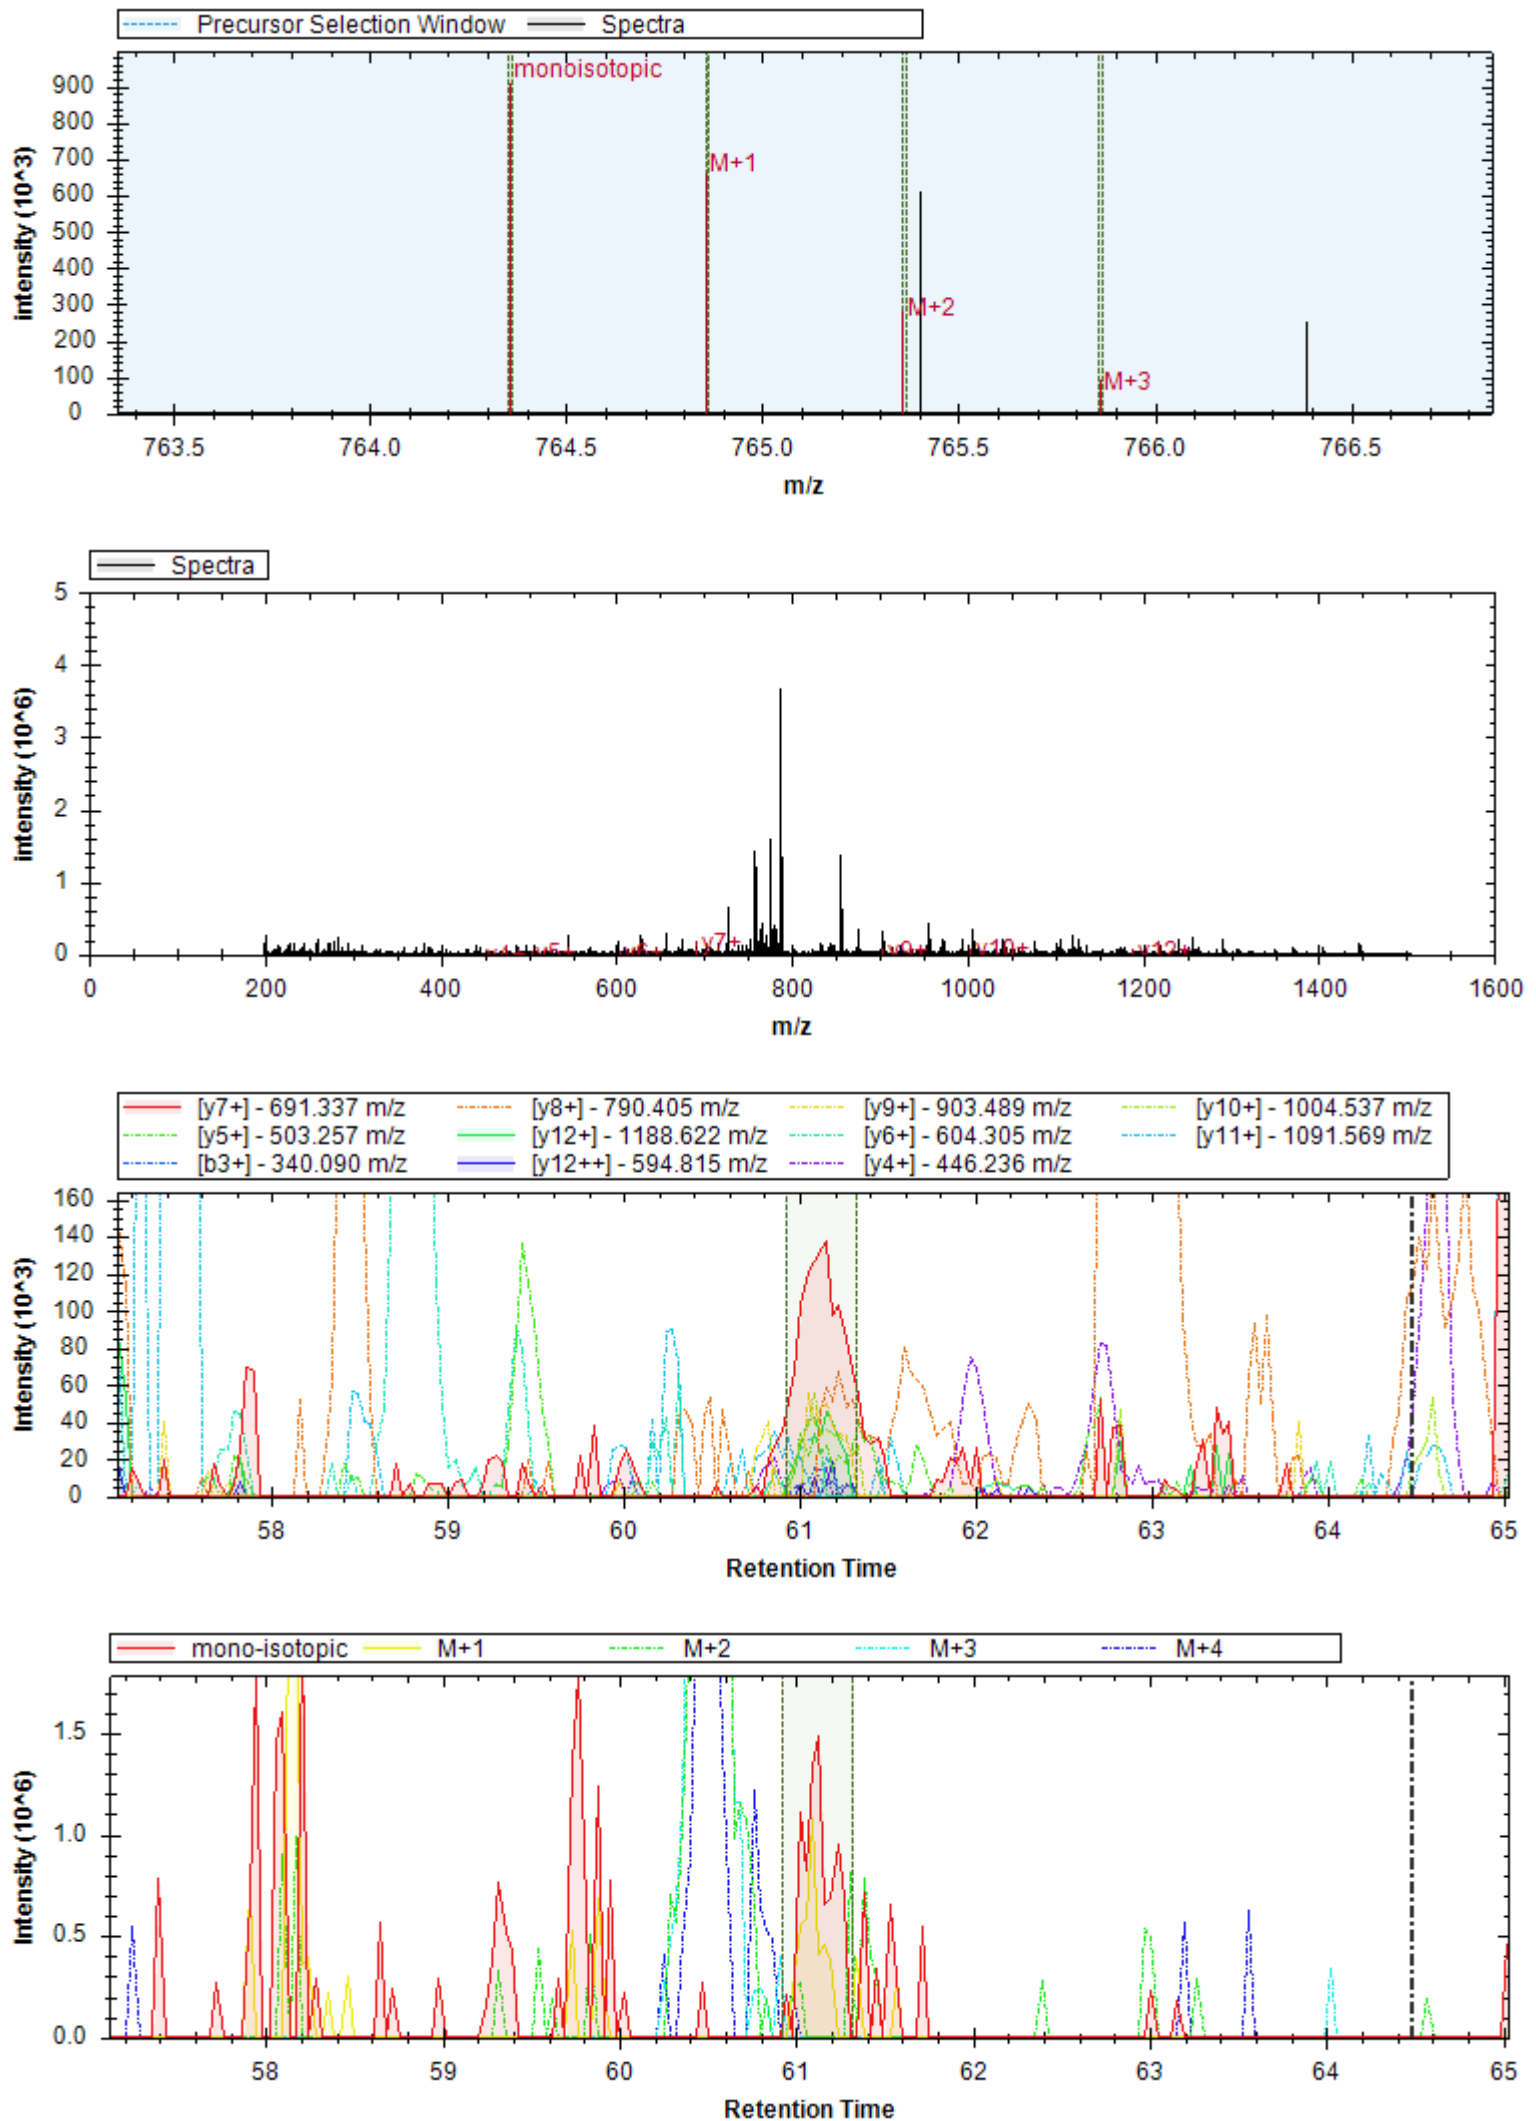

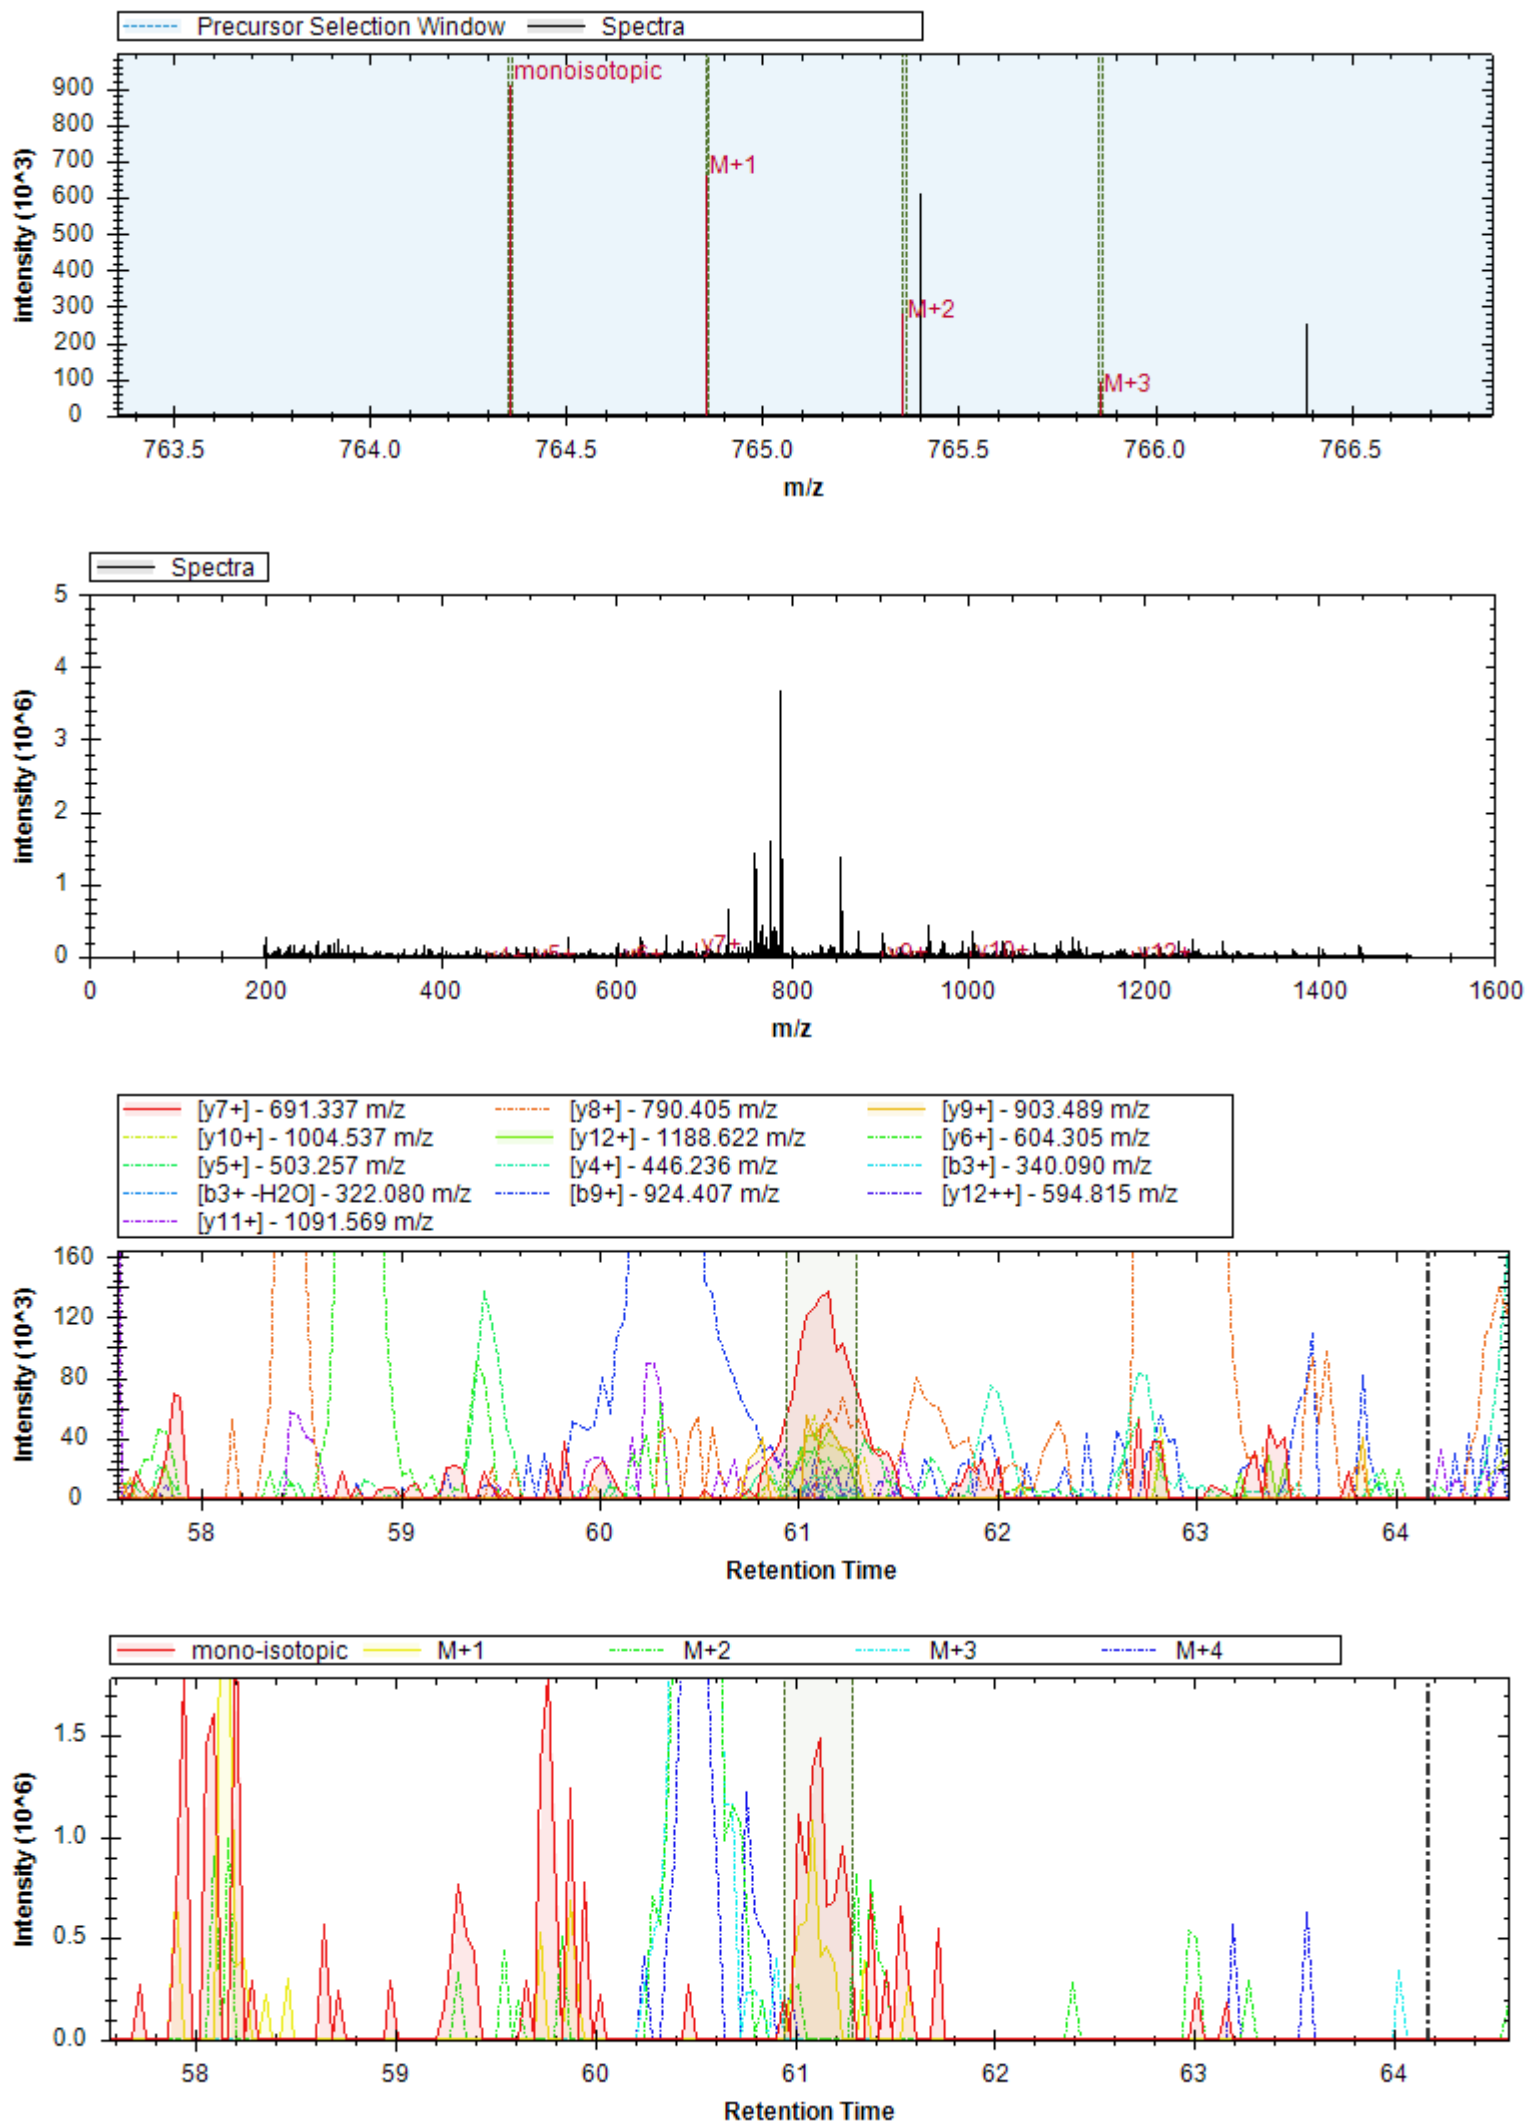



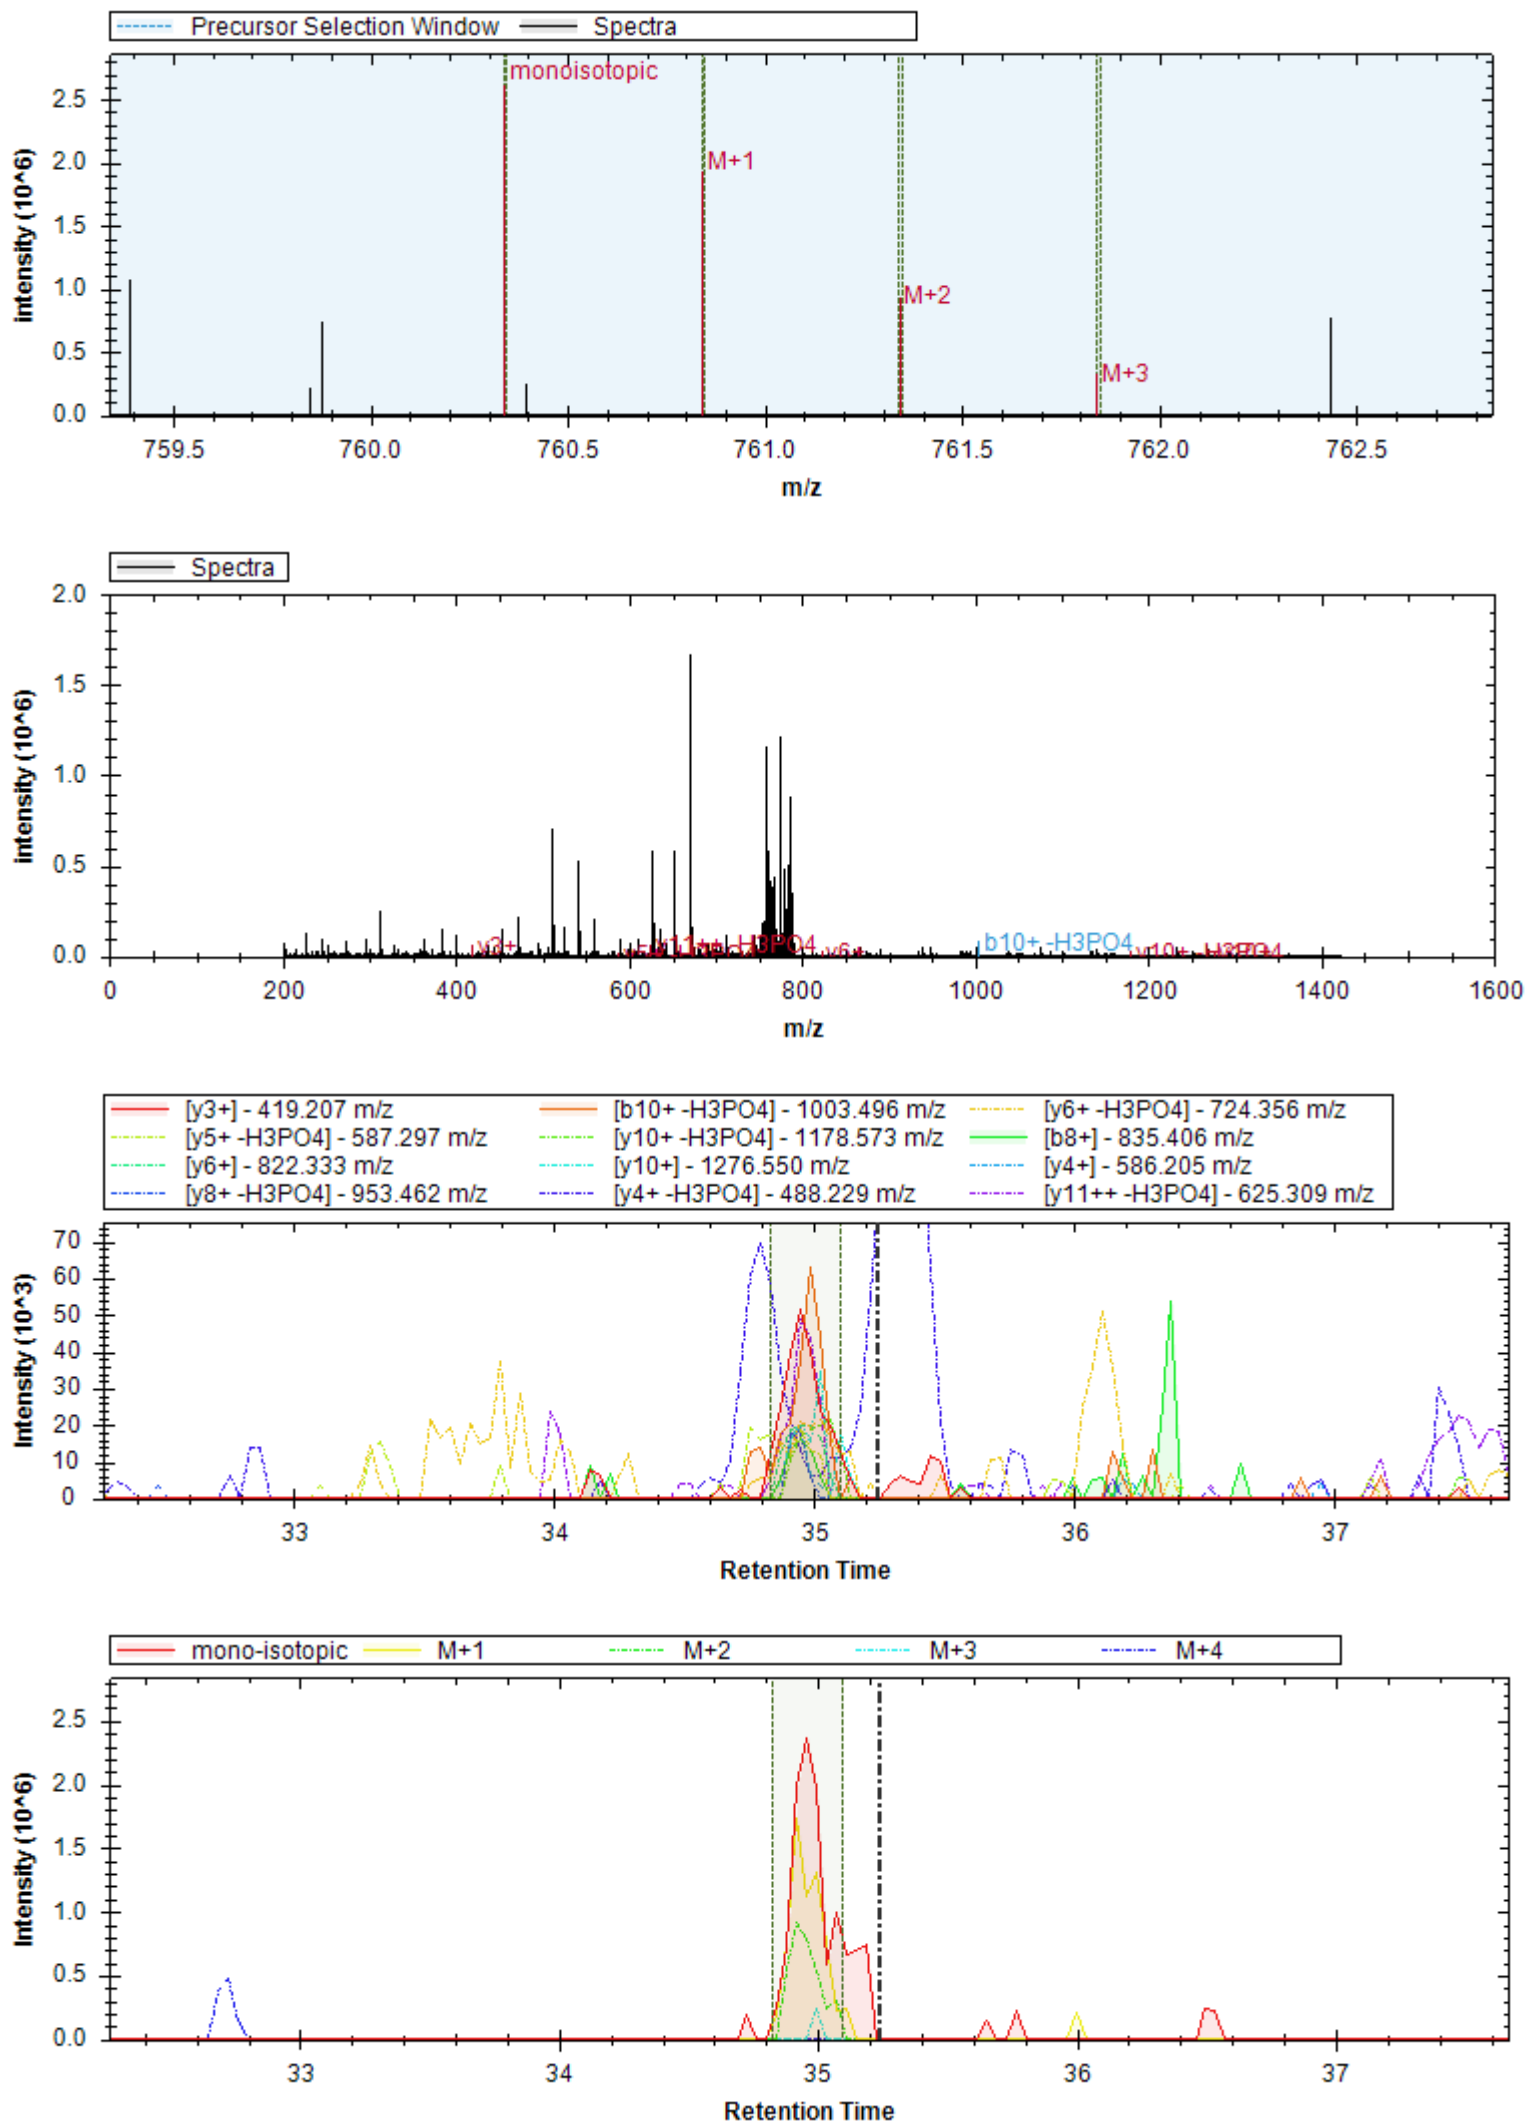

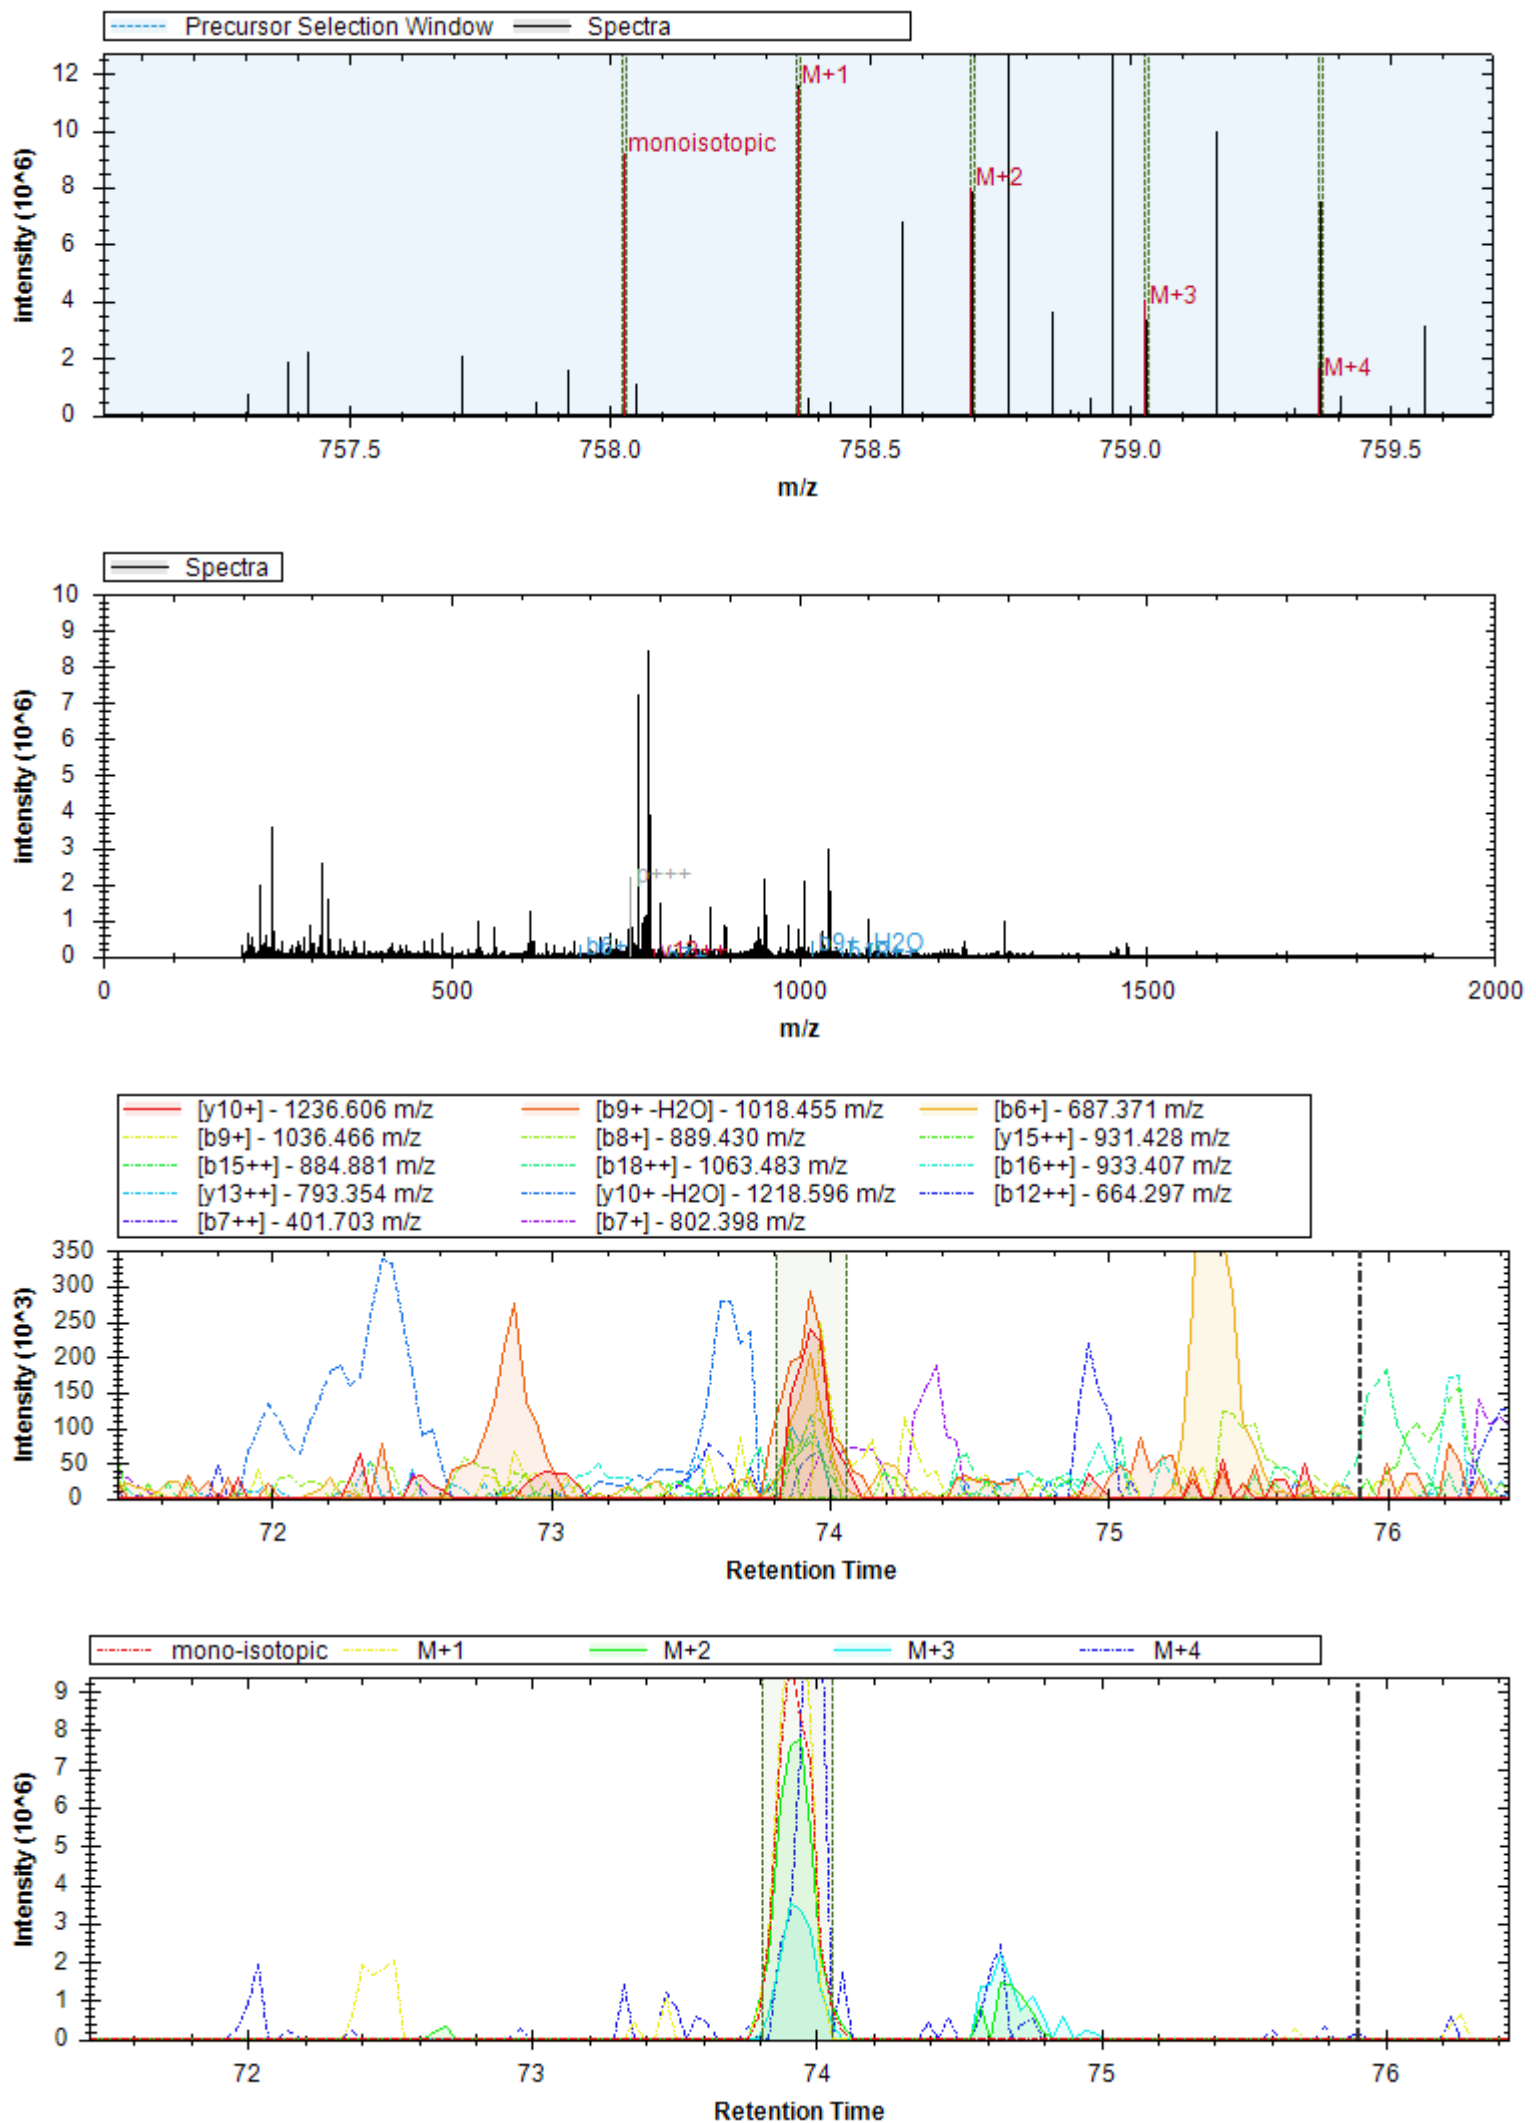

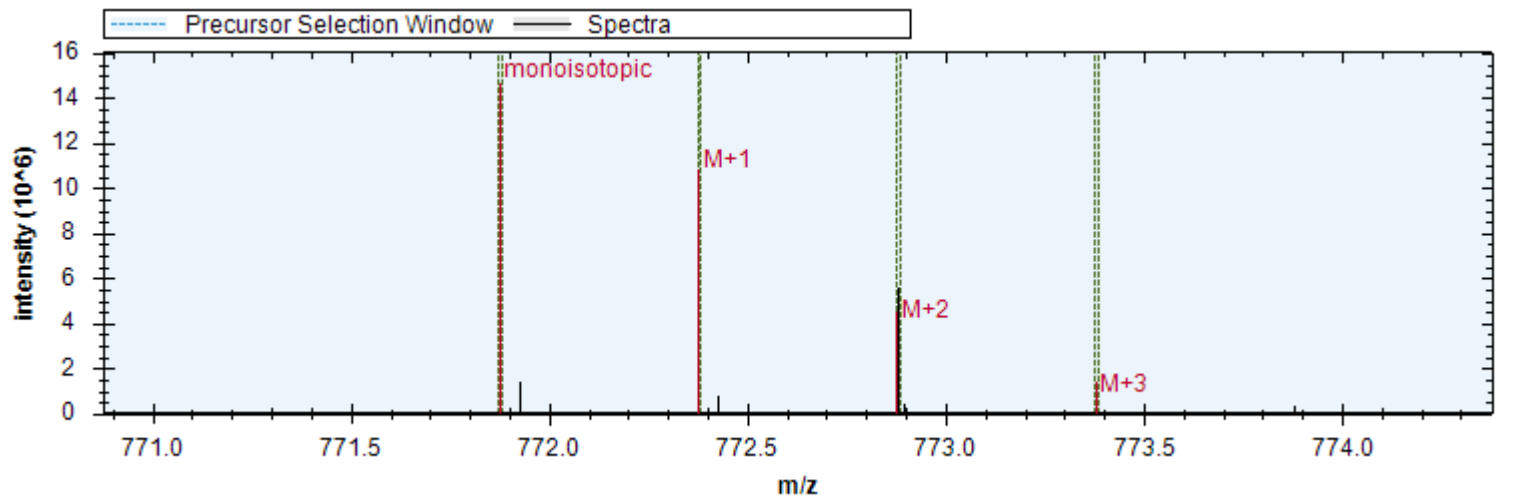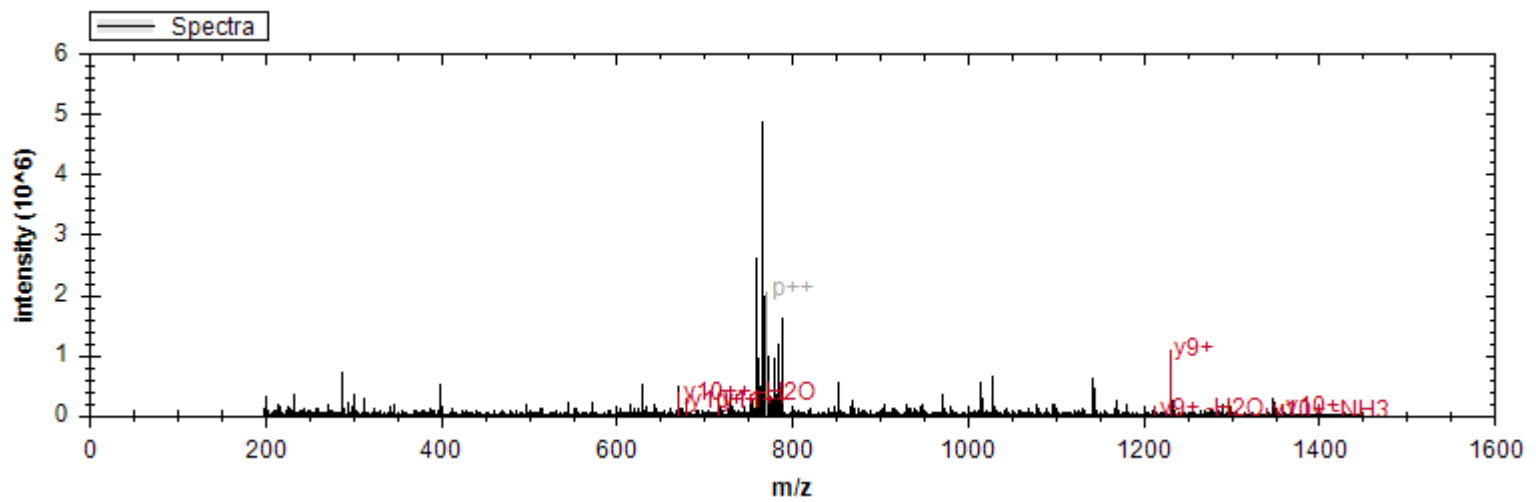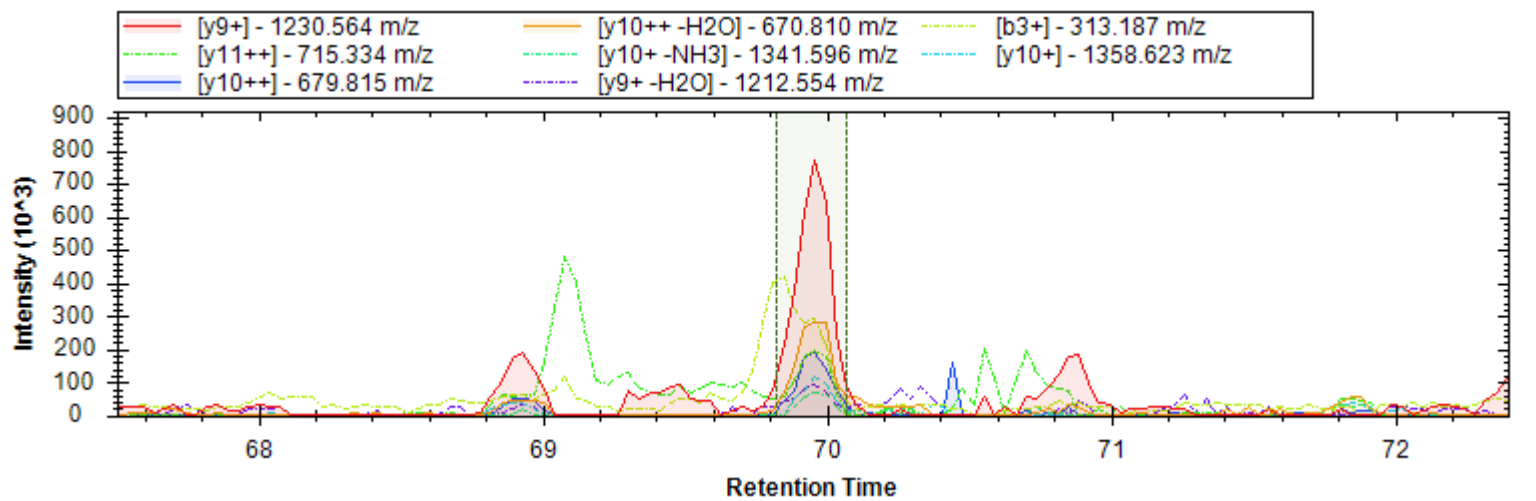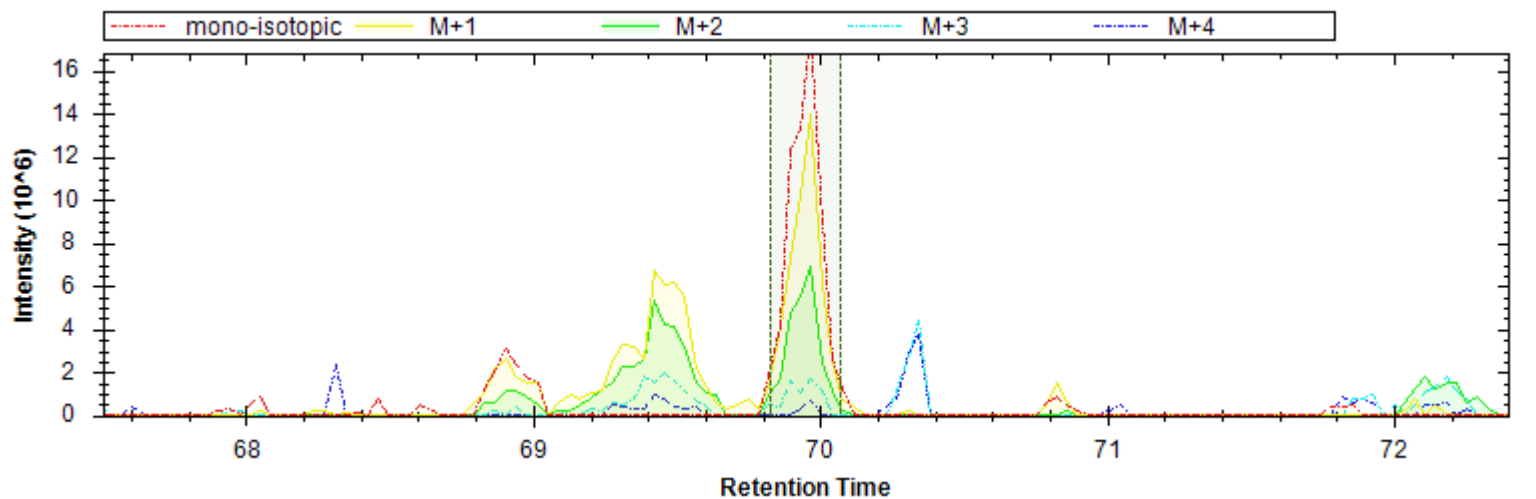

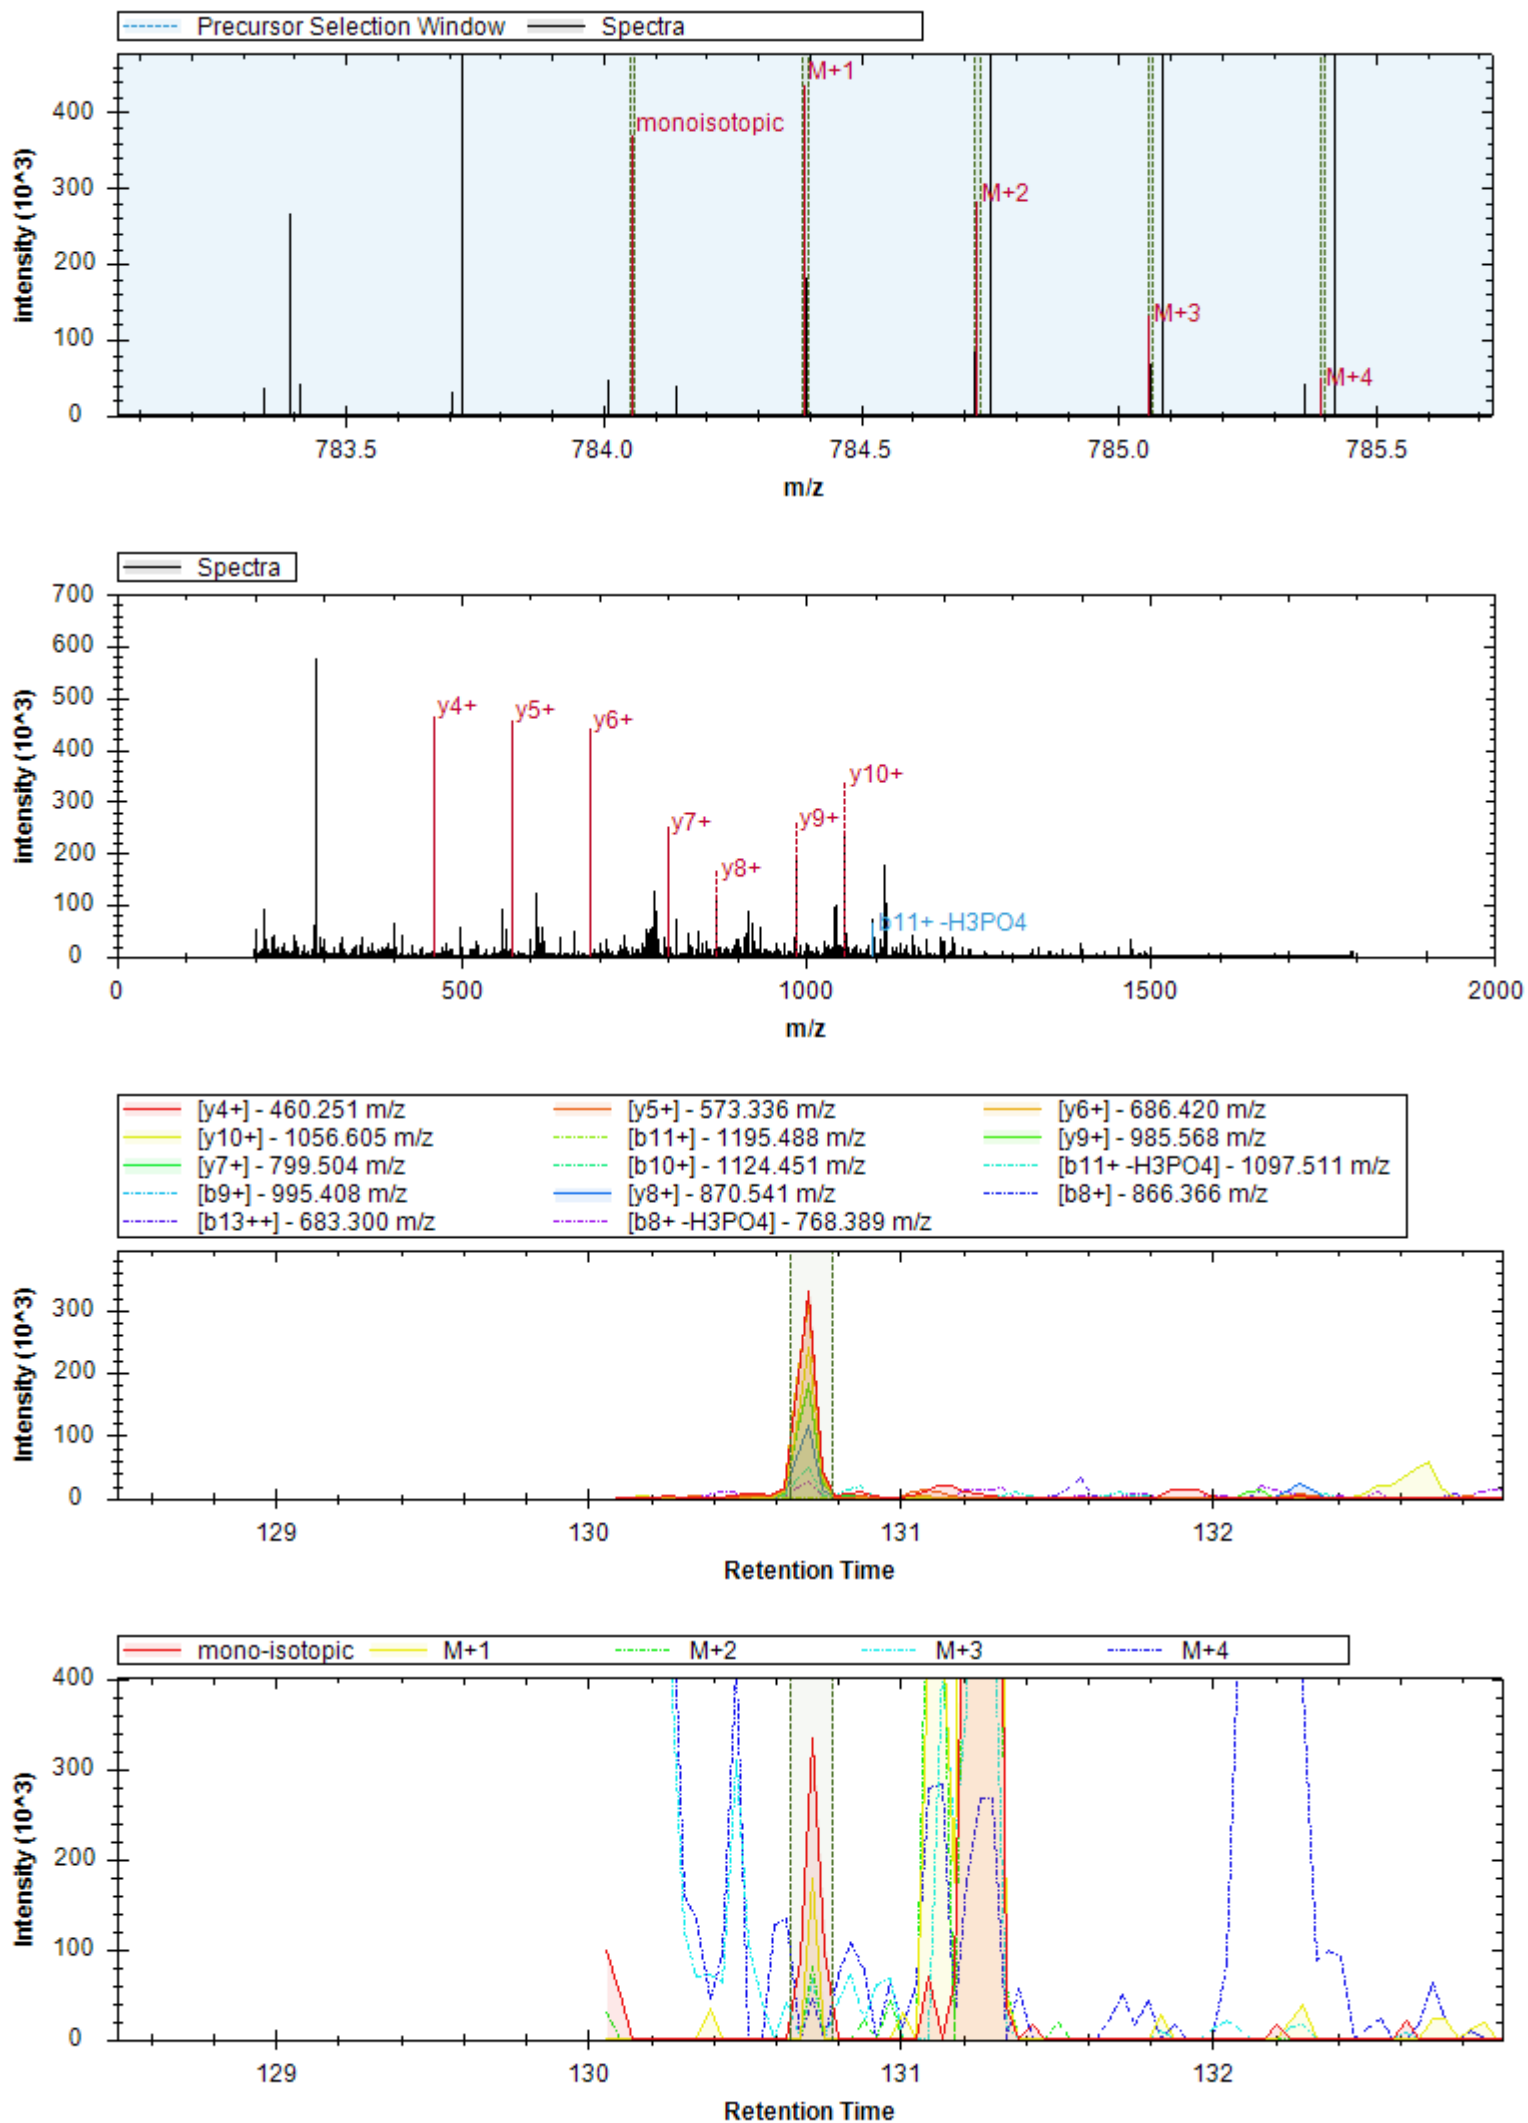

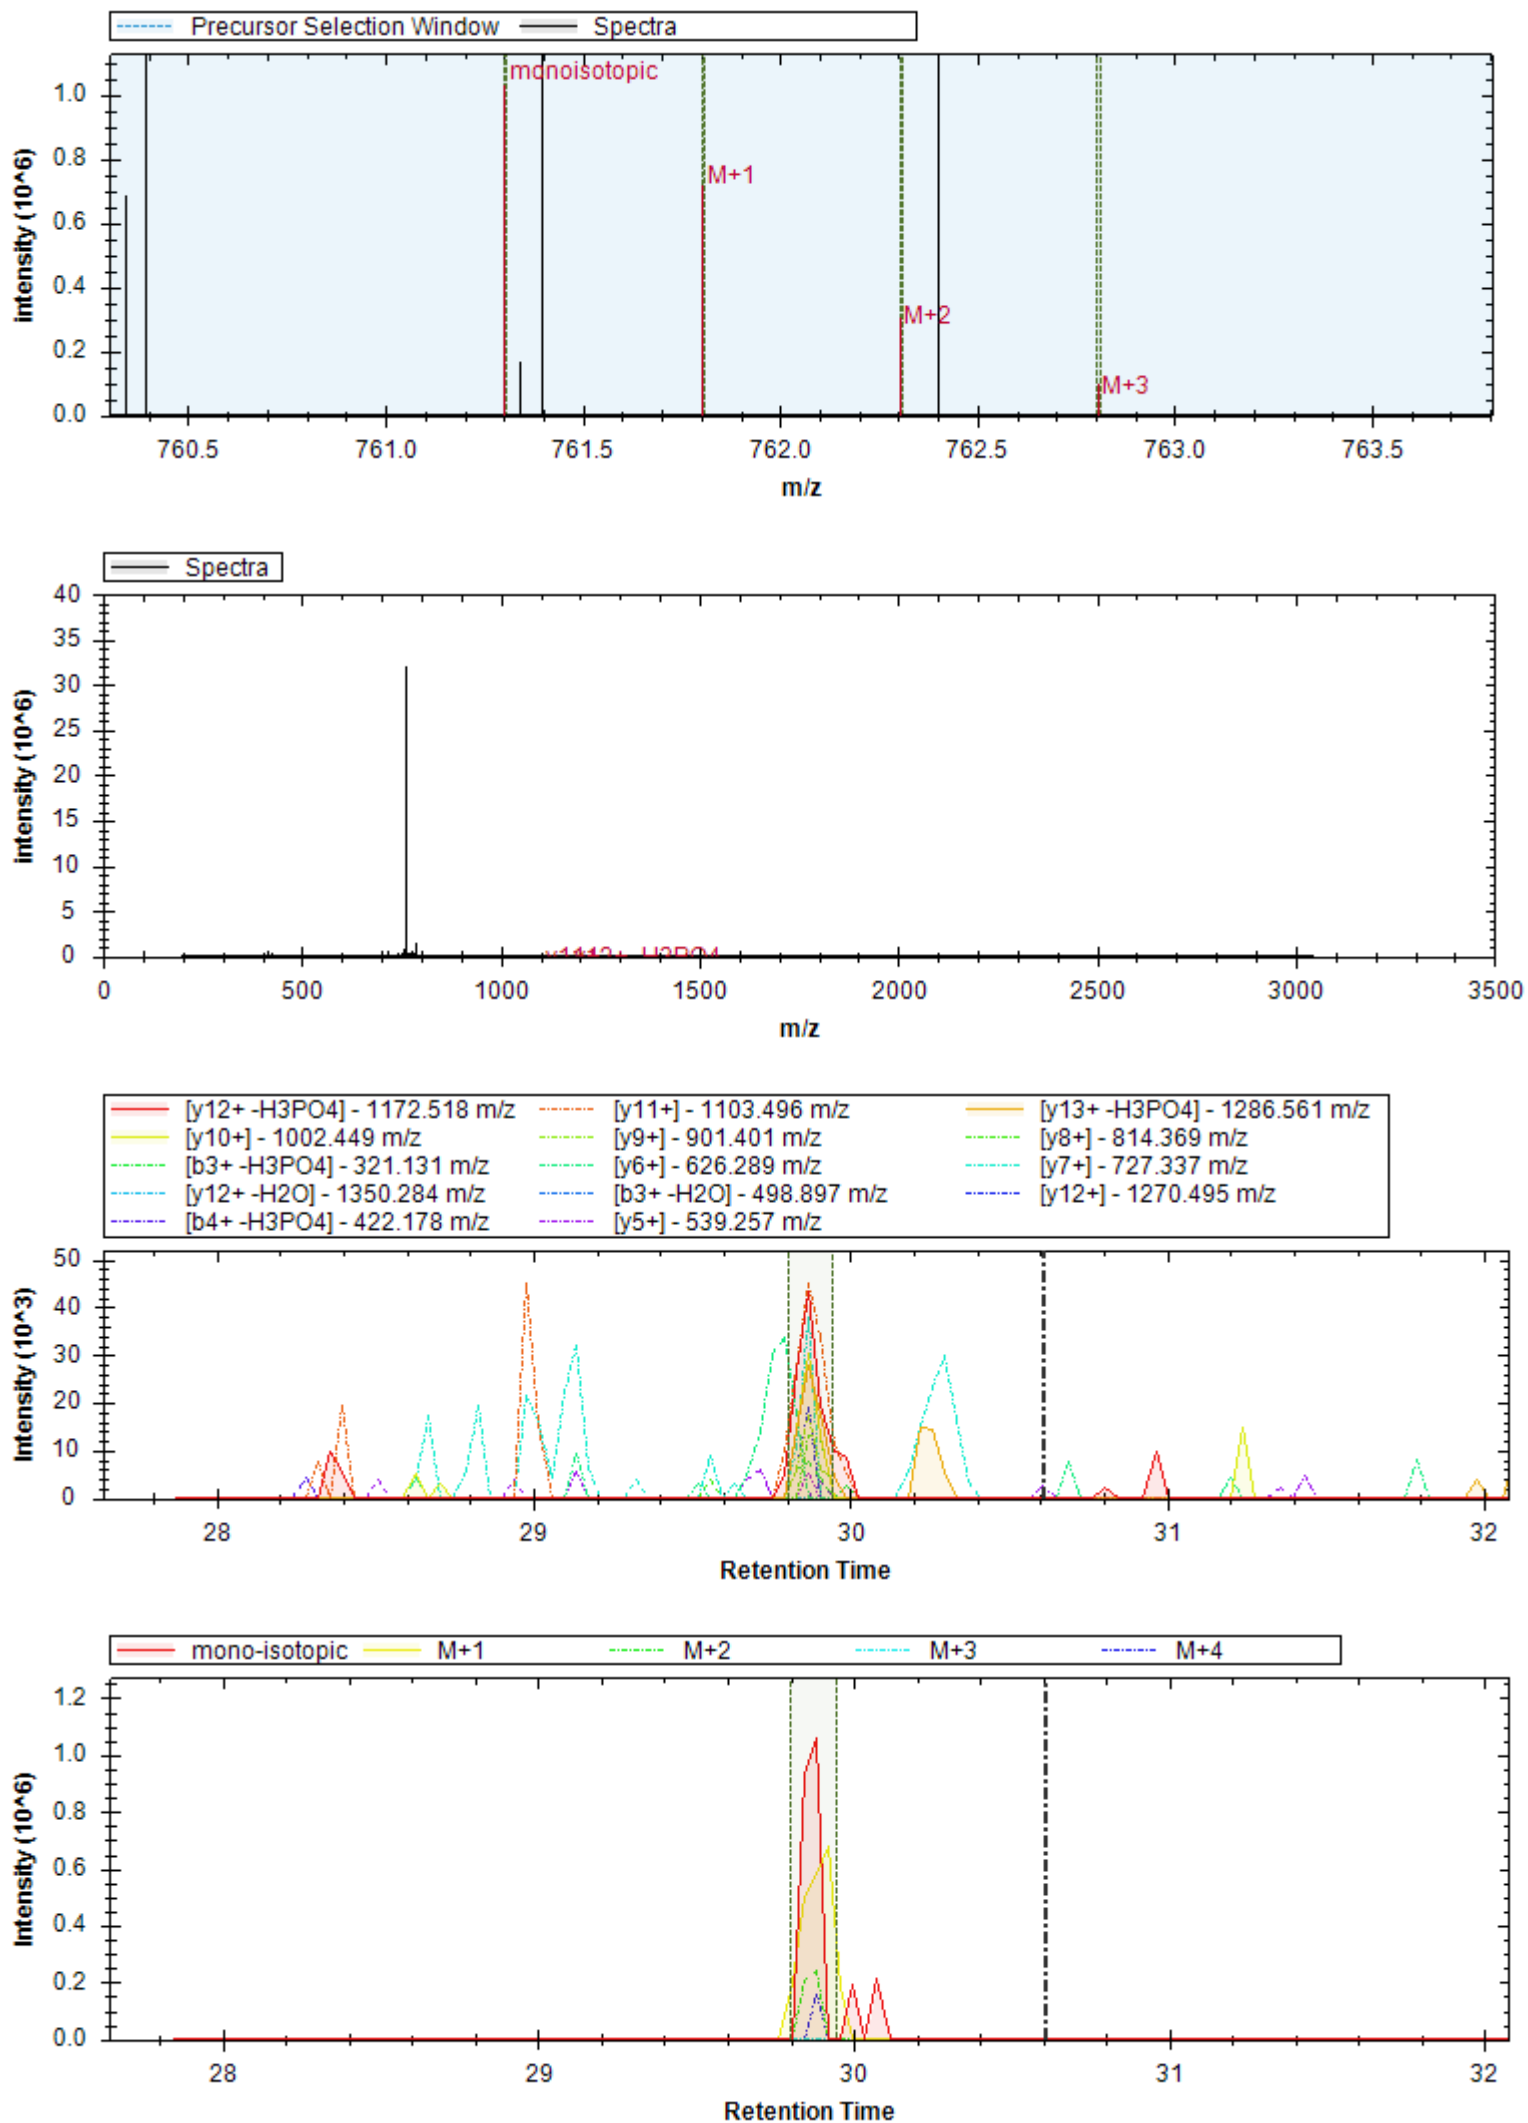

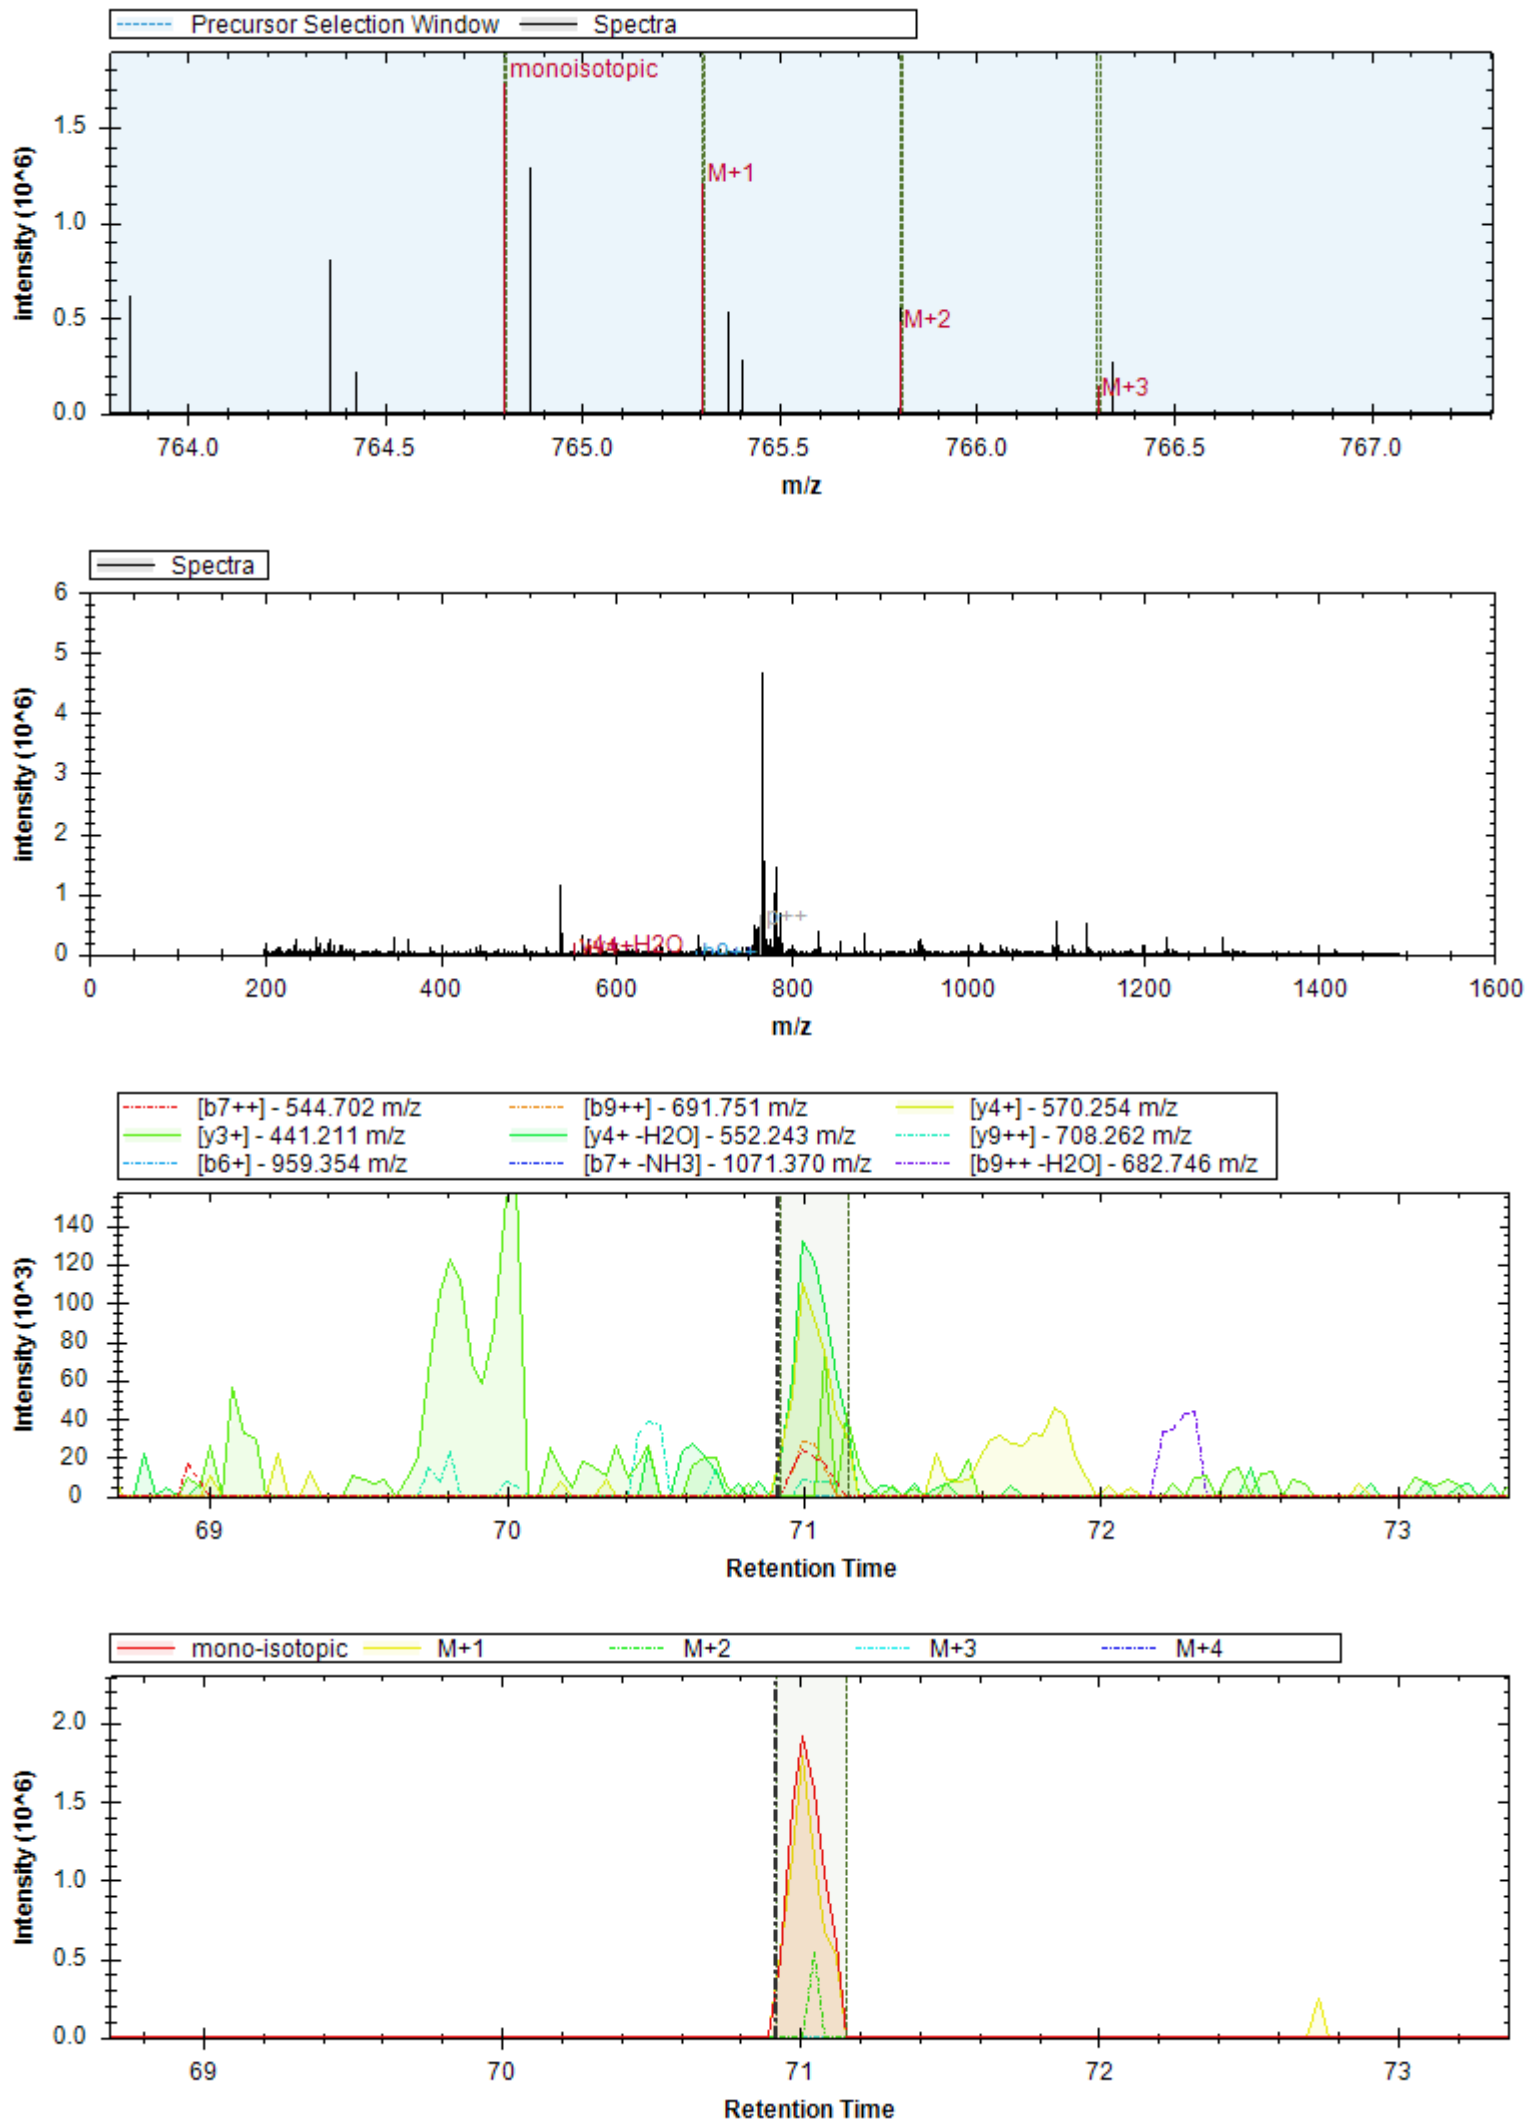

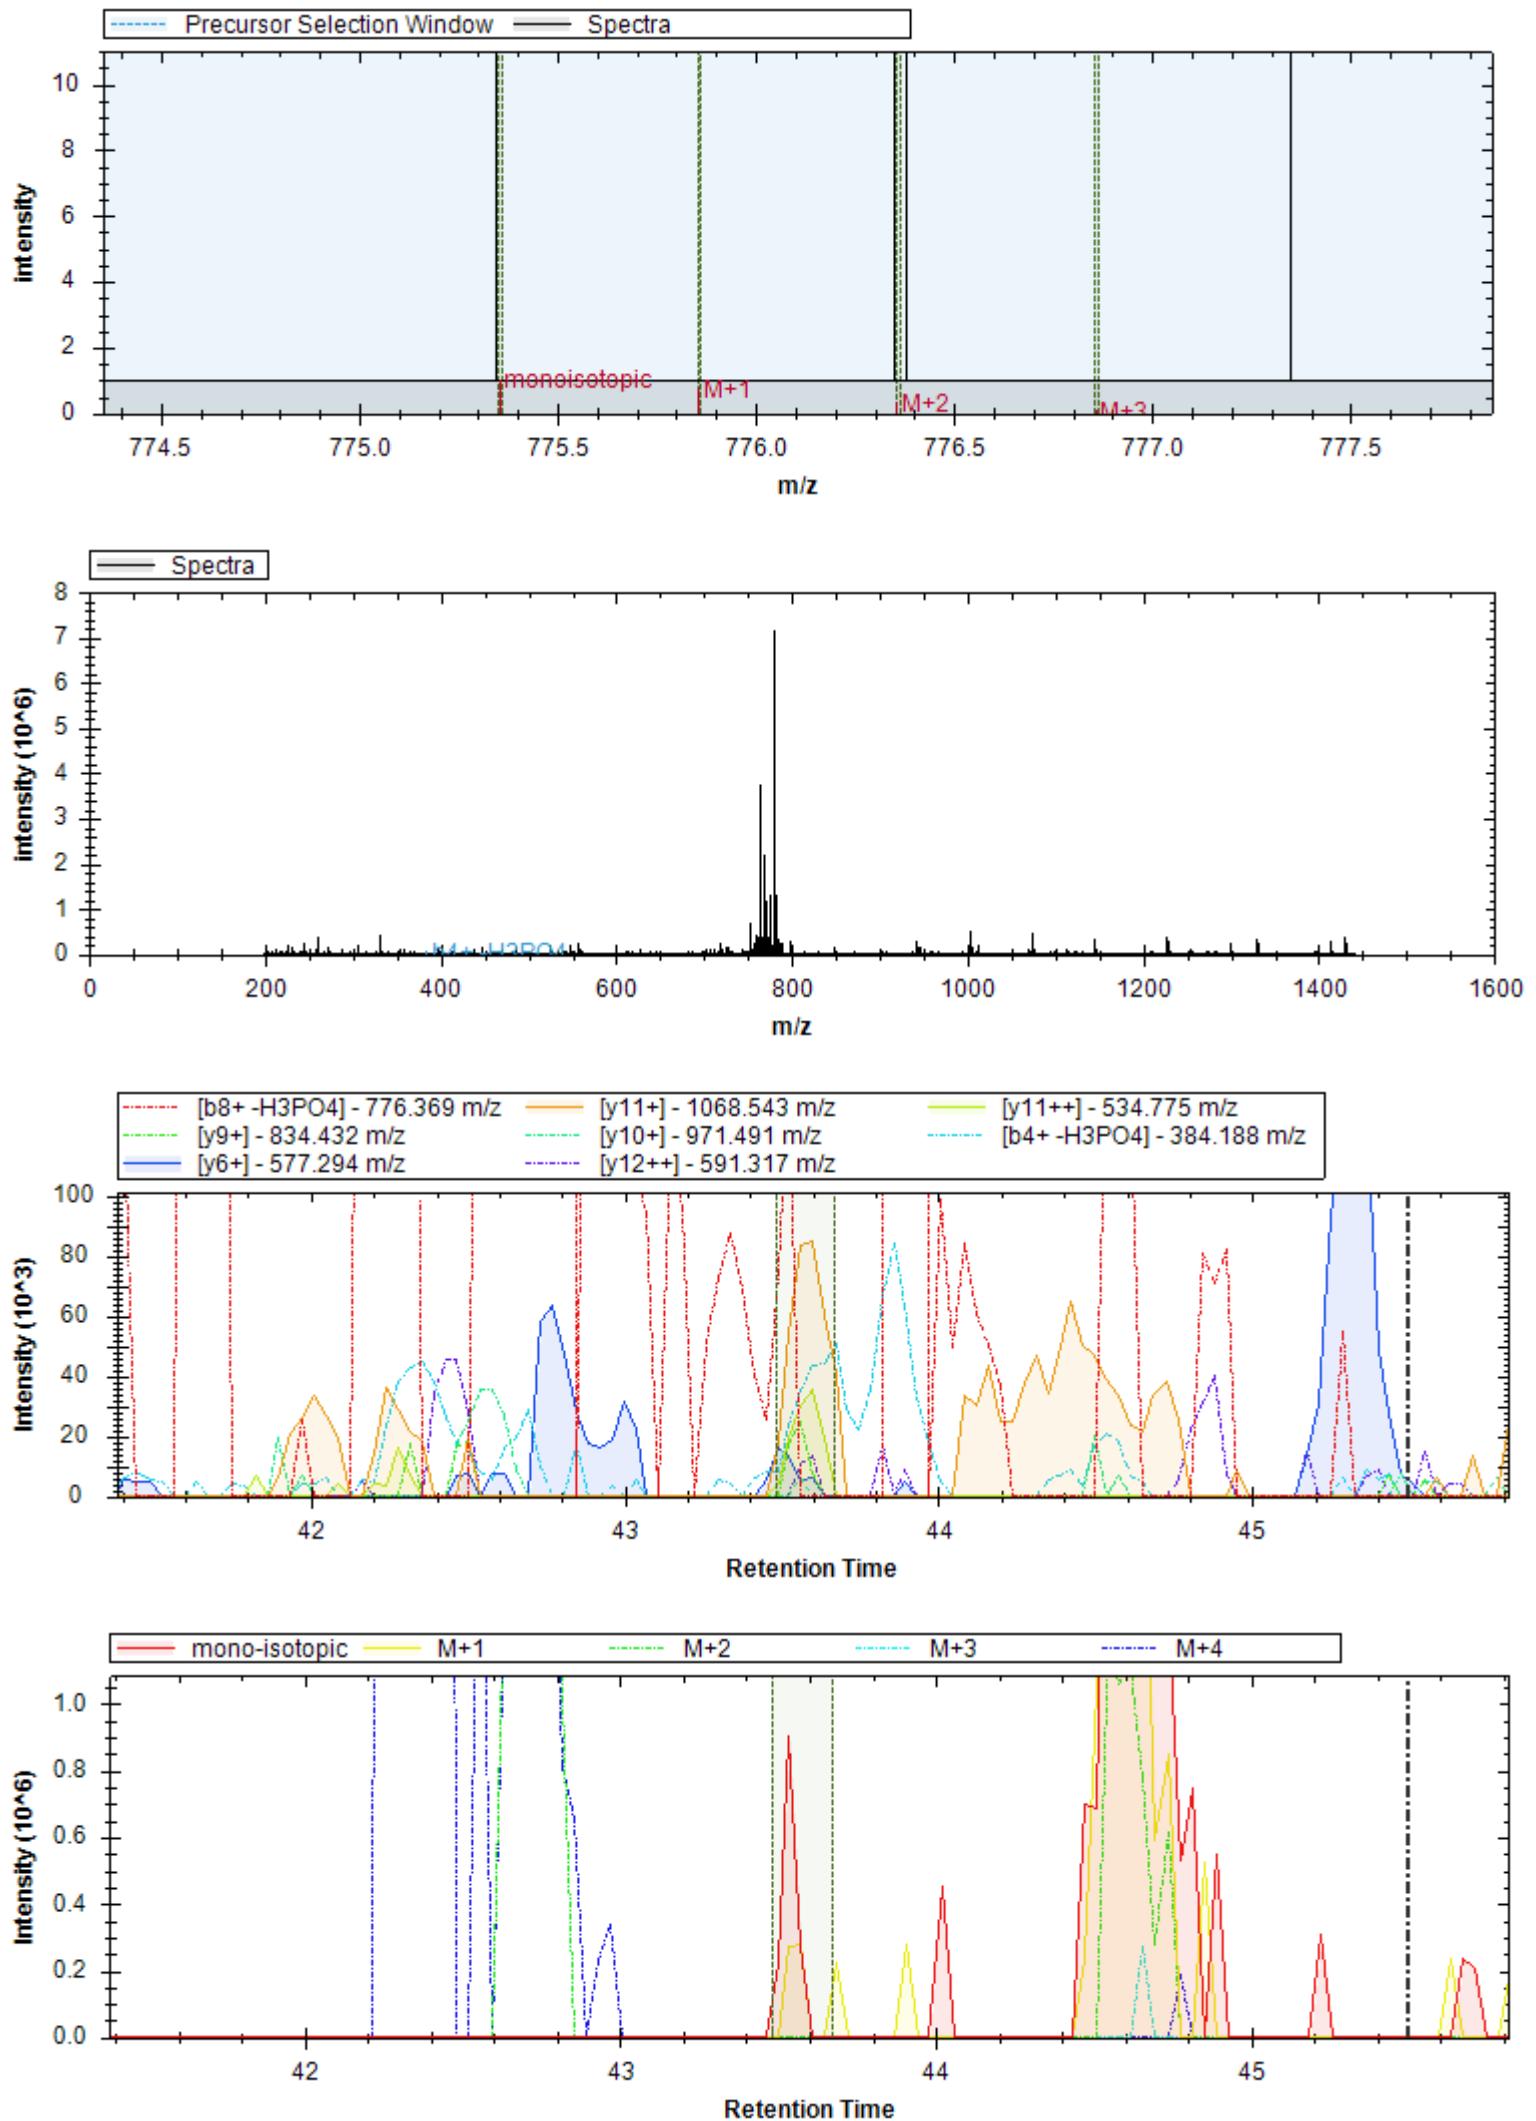

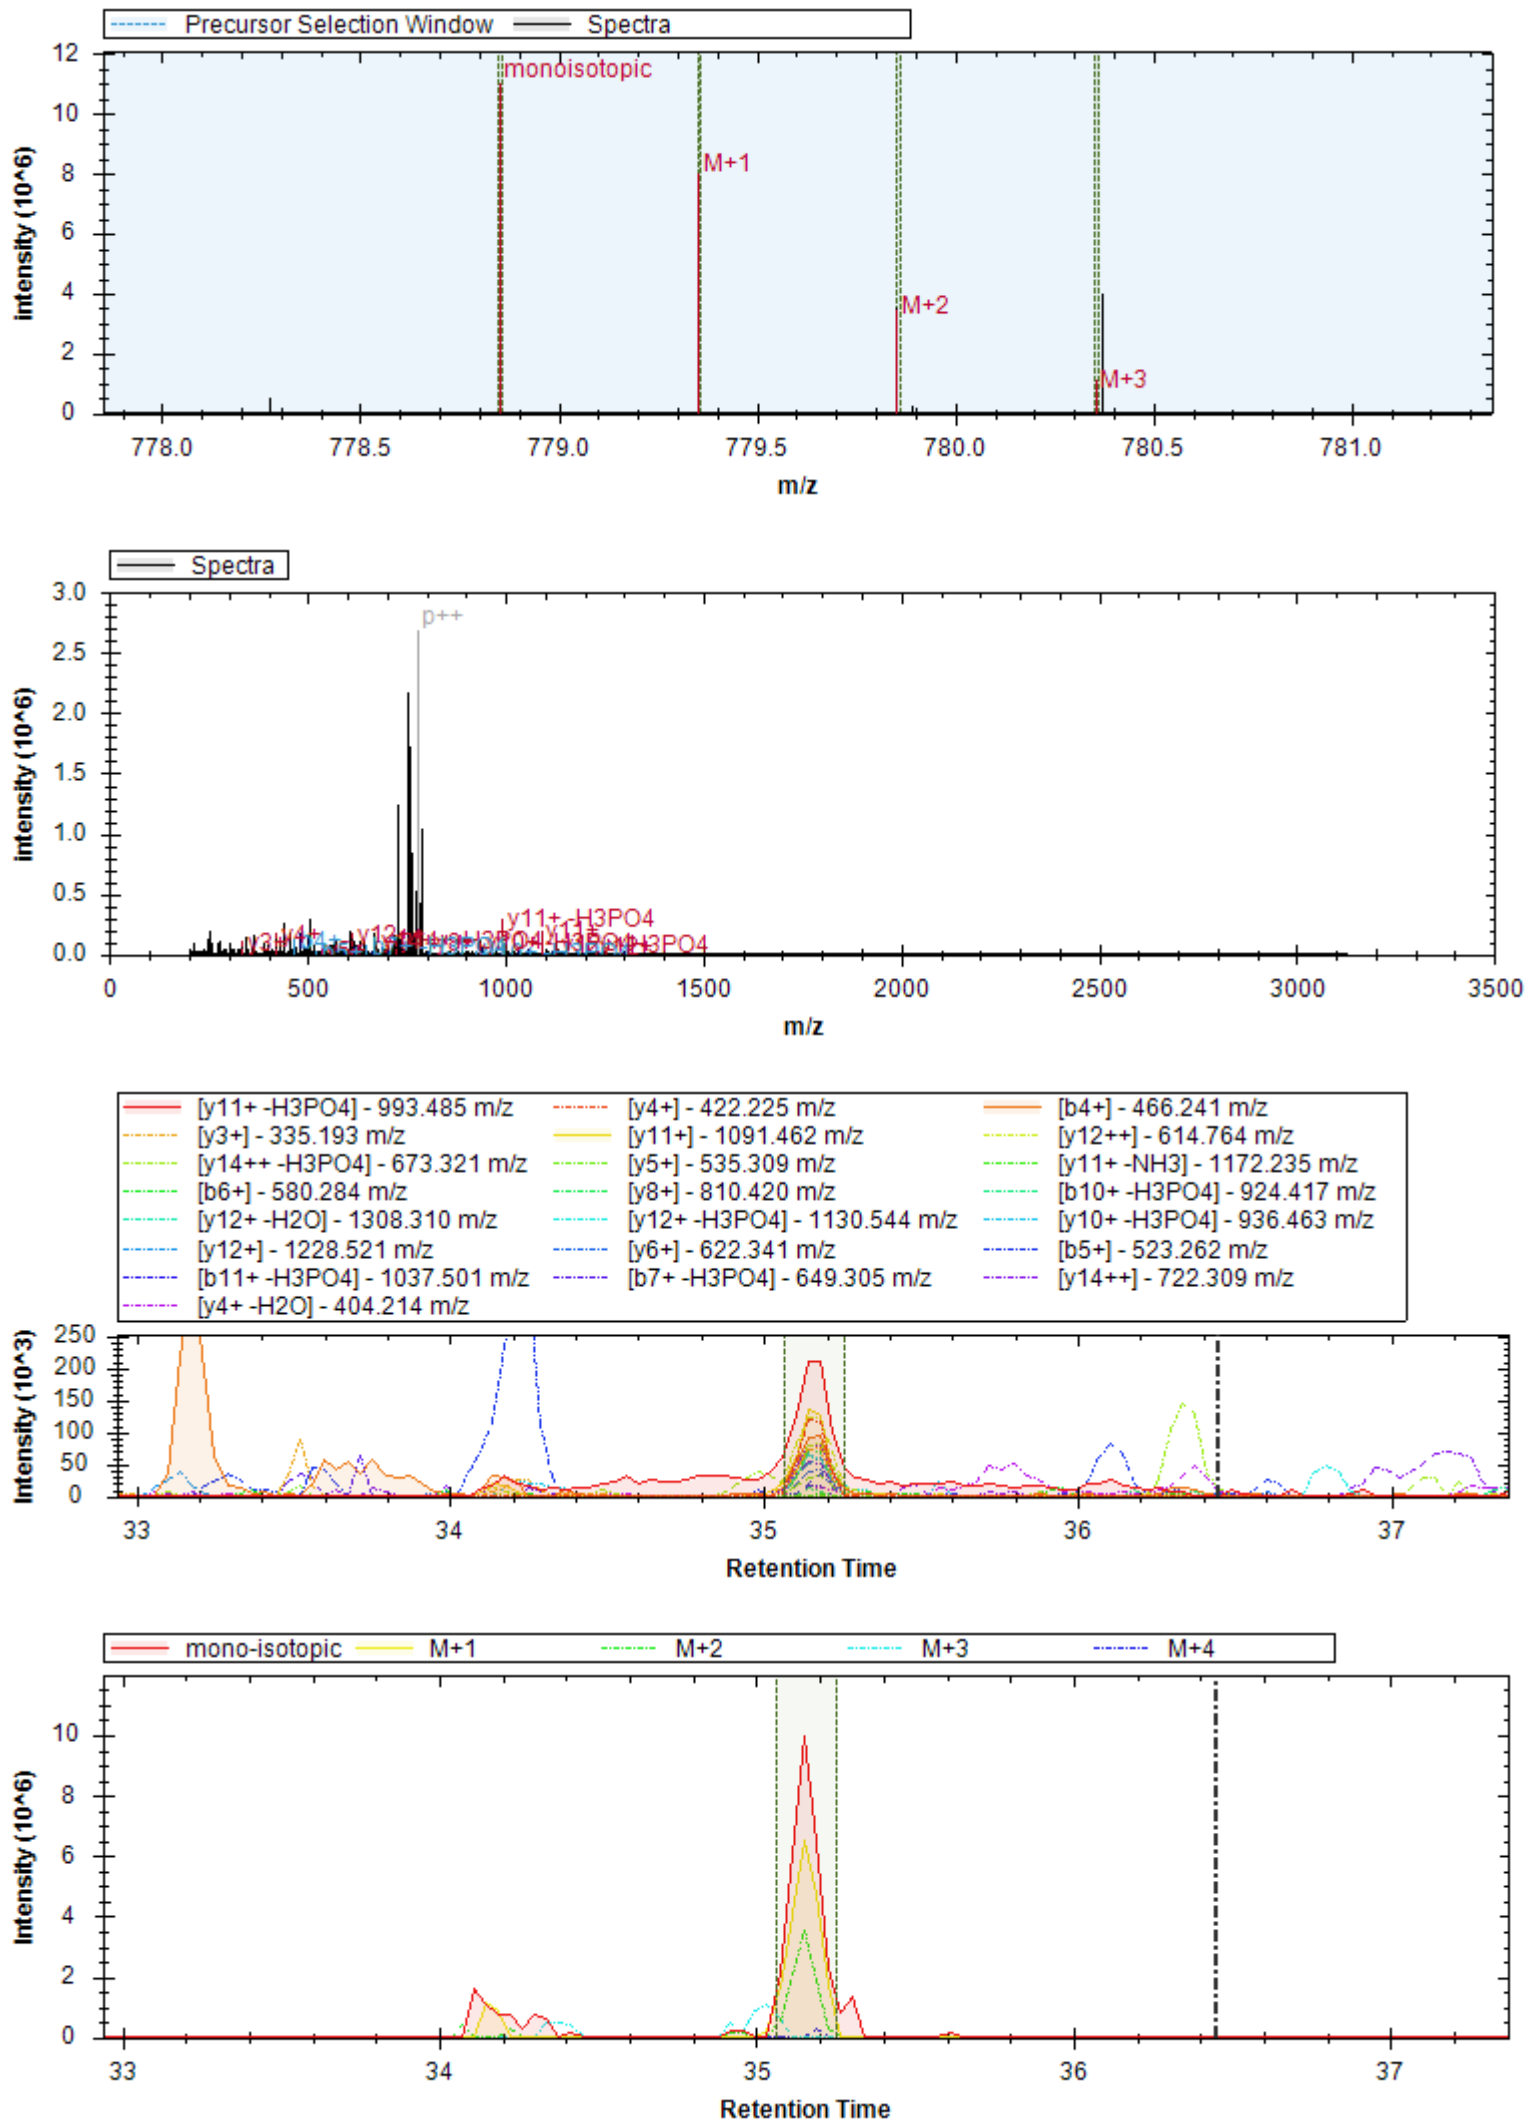



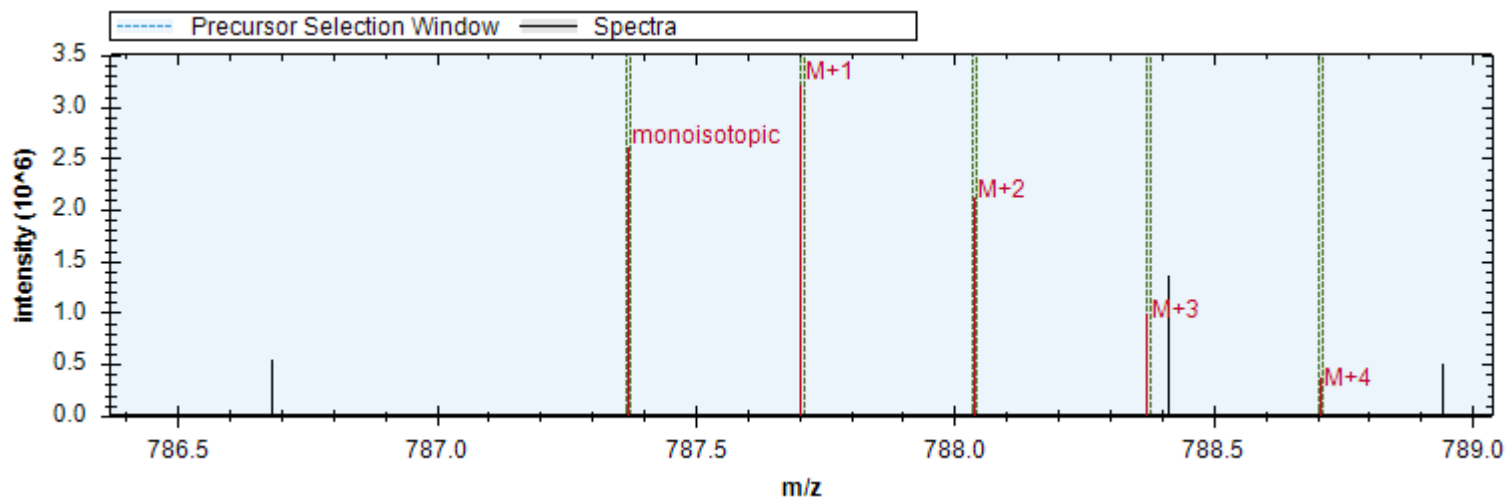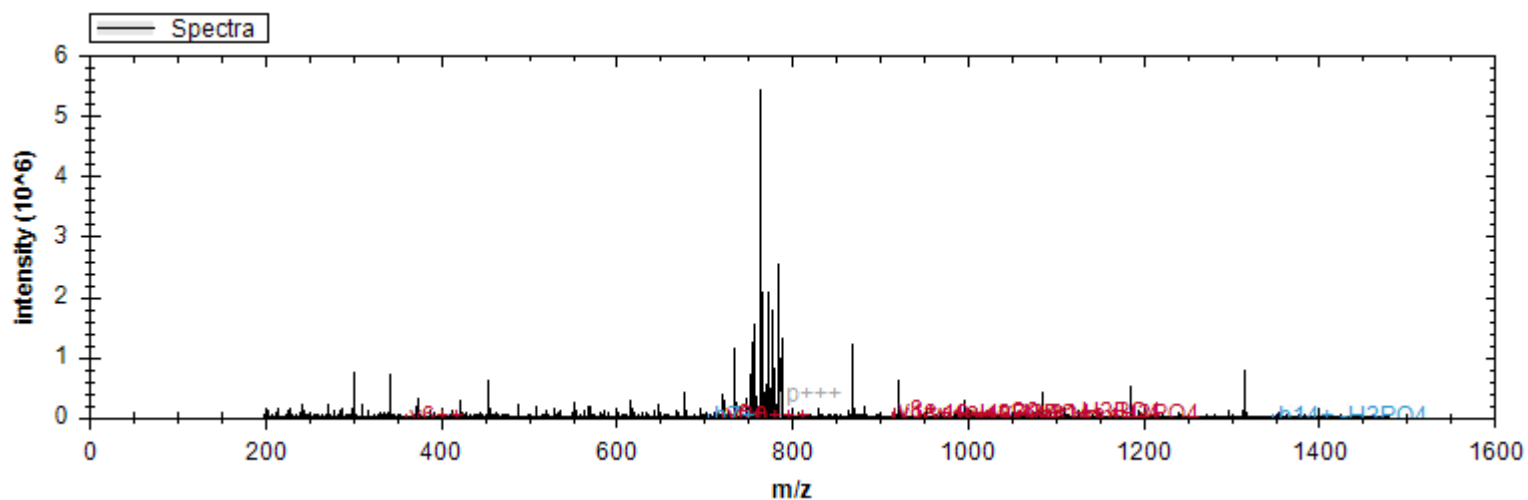

|                              |                               |                               |
|------------------------------|-------------------------------|-------------------------------|
| [y18++ -H3PO4] - 914.454 m/z | [y19++ -H3PO4] - 949.972 m/z  | [y20++ -H3PO4] - 1031.504 m/z |
| [y5+] - 583.295 m/z          | [y21++ -H3PO4] - 1075.020 m/z | [b3+ -H2O] - 346.176 m/z      |
| [b14+ -H3PO4] - 1346.649 m/z | [y6+] - 720.354 m/z           | [y4+] - 446.236 m/z           |
| [b3+] - 364.187 m/z          | [y8+] - 916.475 m/z           | [y6++] - 360.681 m/z          |
| [b7+] - 705.368 m/z          | [y3+] - 375.199 m/z           | [y20++] - 1080.492 m/z        |
| [y17++ -H3PO4] - 885.943 m/z | [y10+ -H3PO4] - 1042.518 m/z  | [b11+] - 1149.569 m/z         |
| [y18++] - 963.442 m/z        | [b12+] - 1220.606 m/z         | [y19++] - 998.961 m/z         |
| [y7+] - 819.422 m/z          | [y21++] - 1124.008 m/z        | [y20+++] - 720.664 m/z        |
| [b13+] - 1277.627 m/z        |                               |                               |

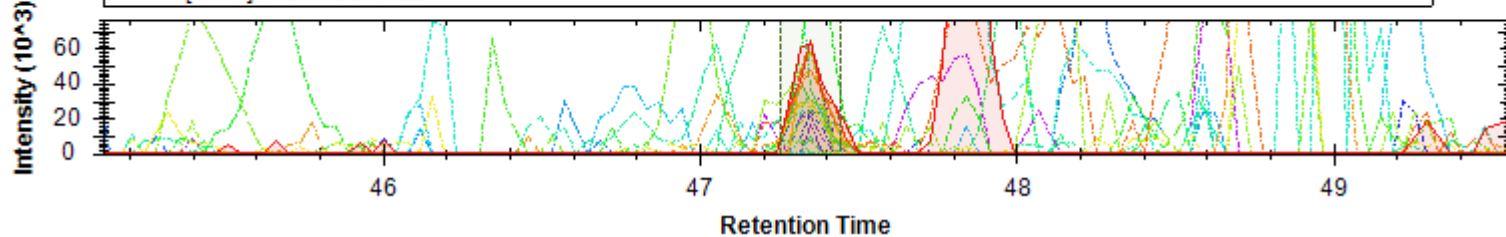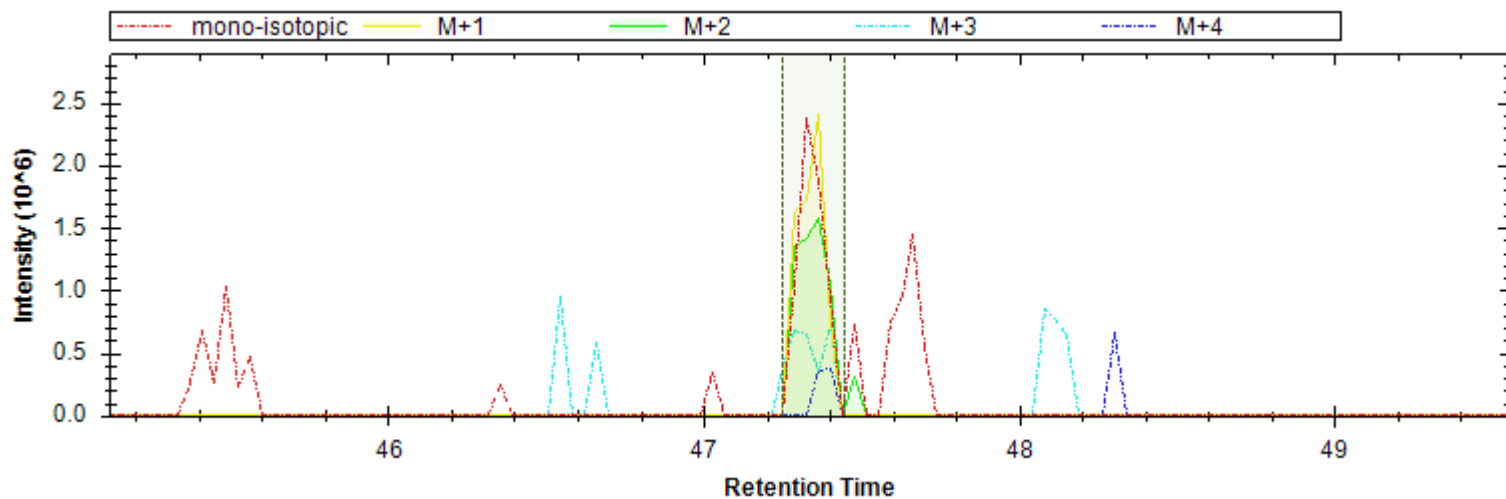

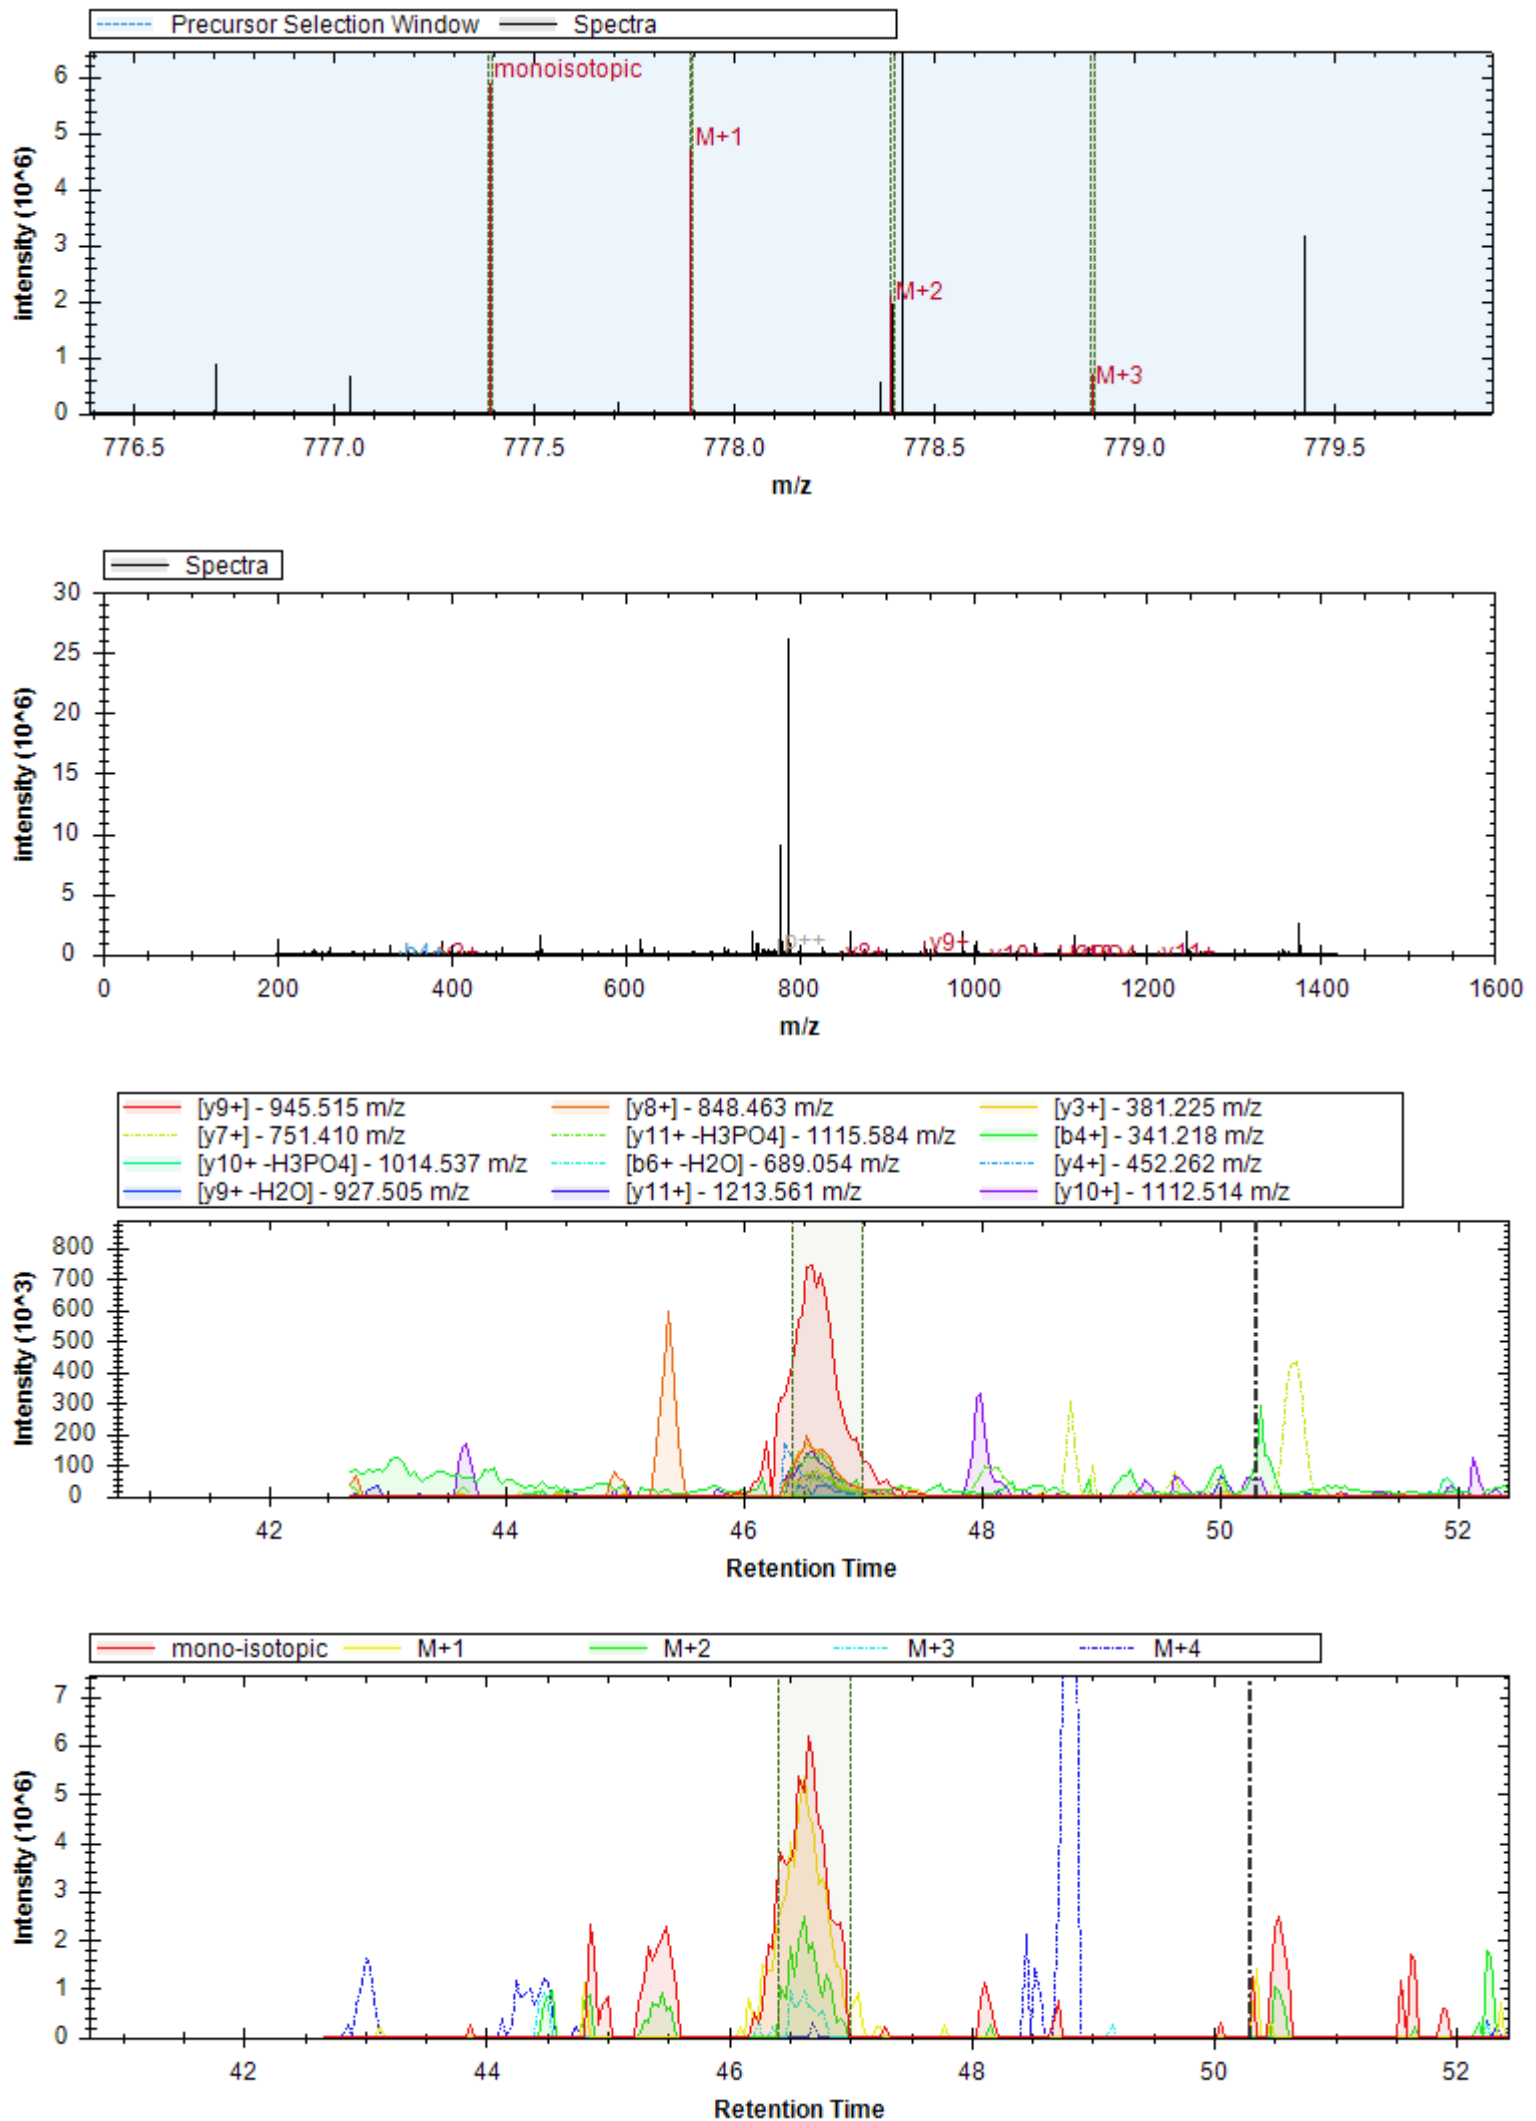

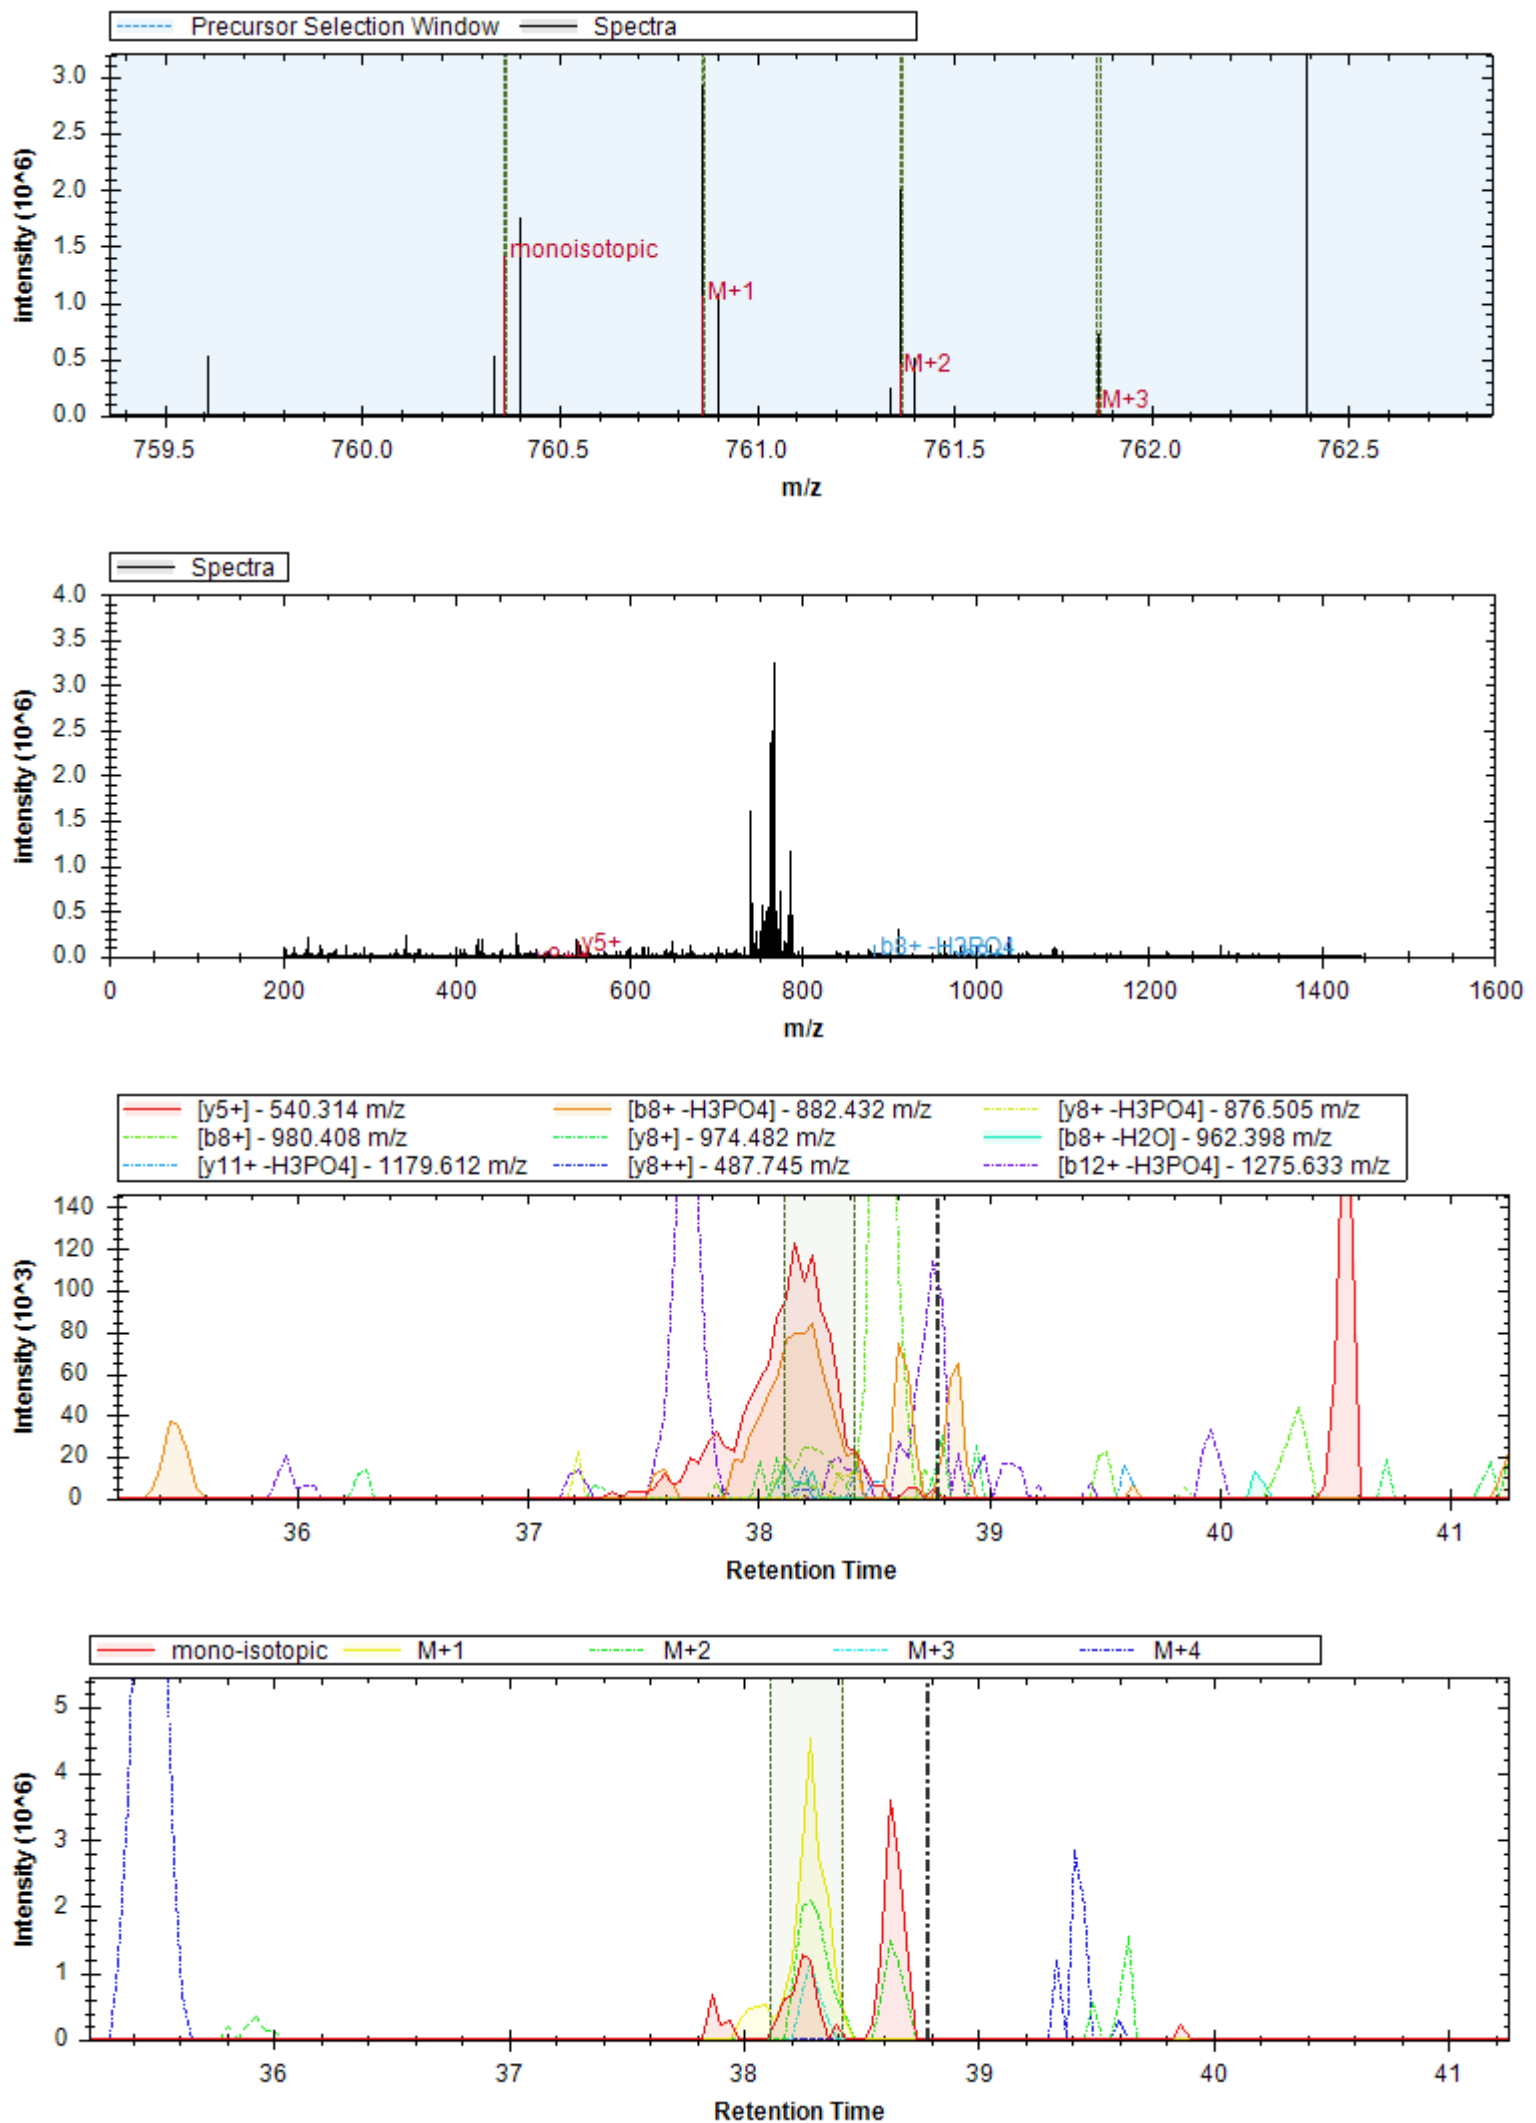

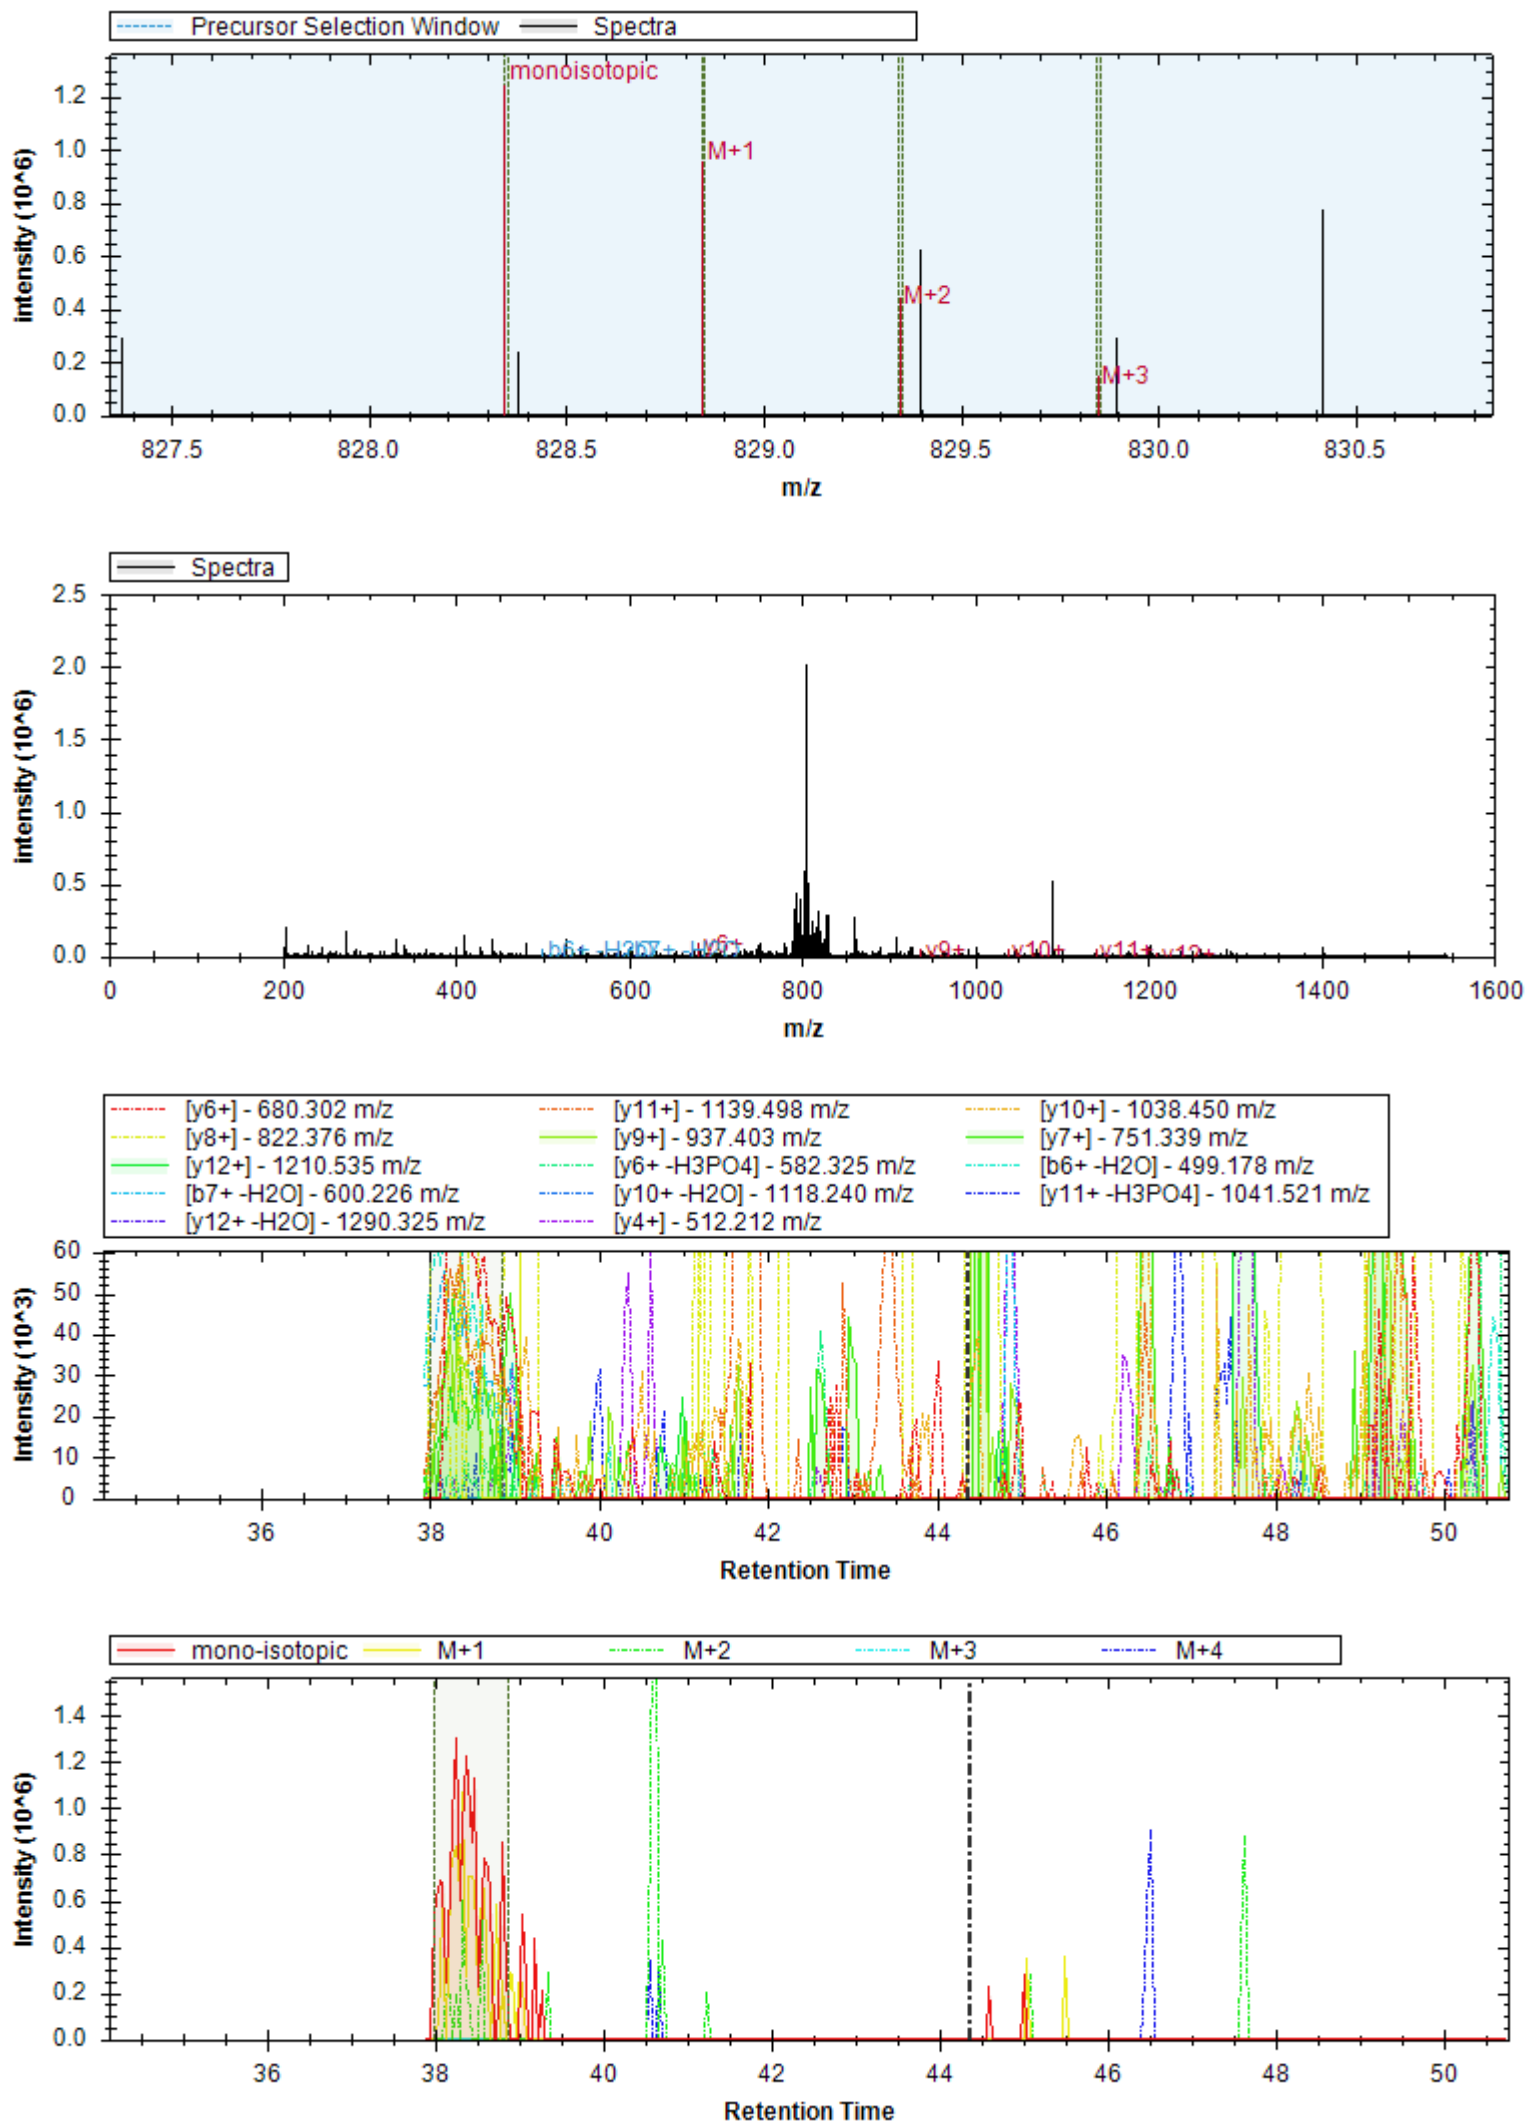

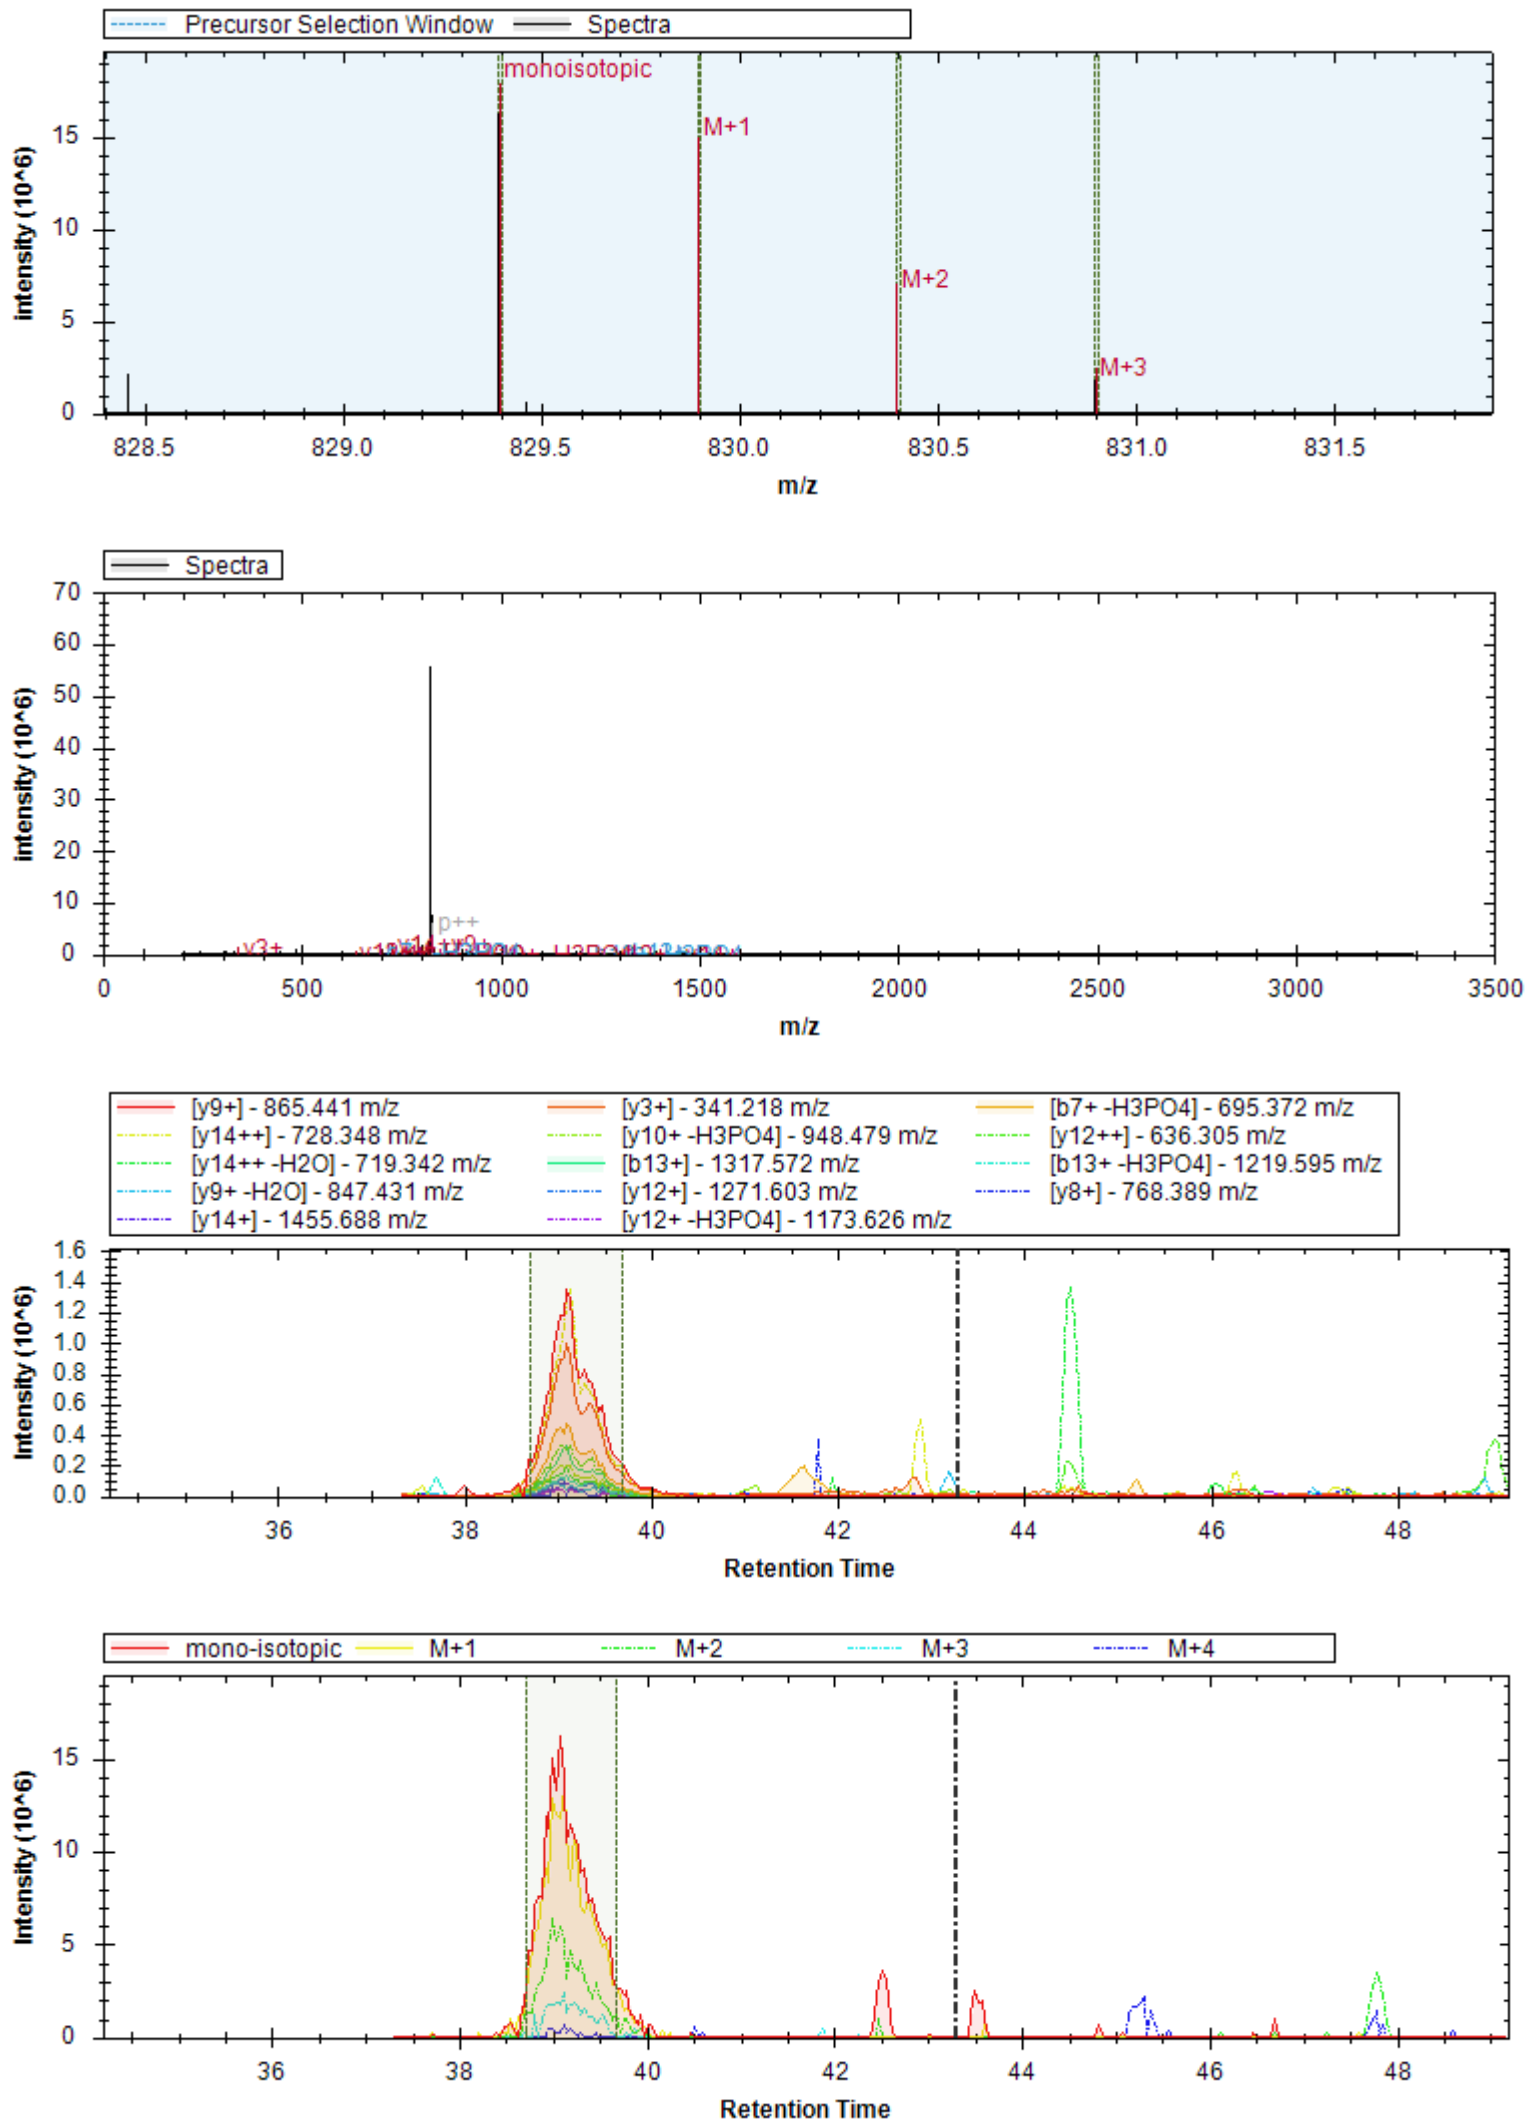

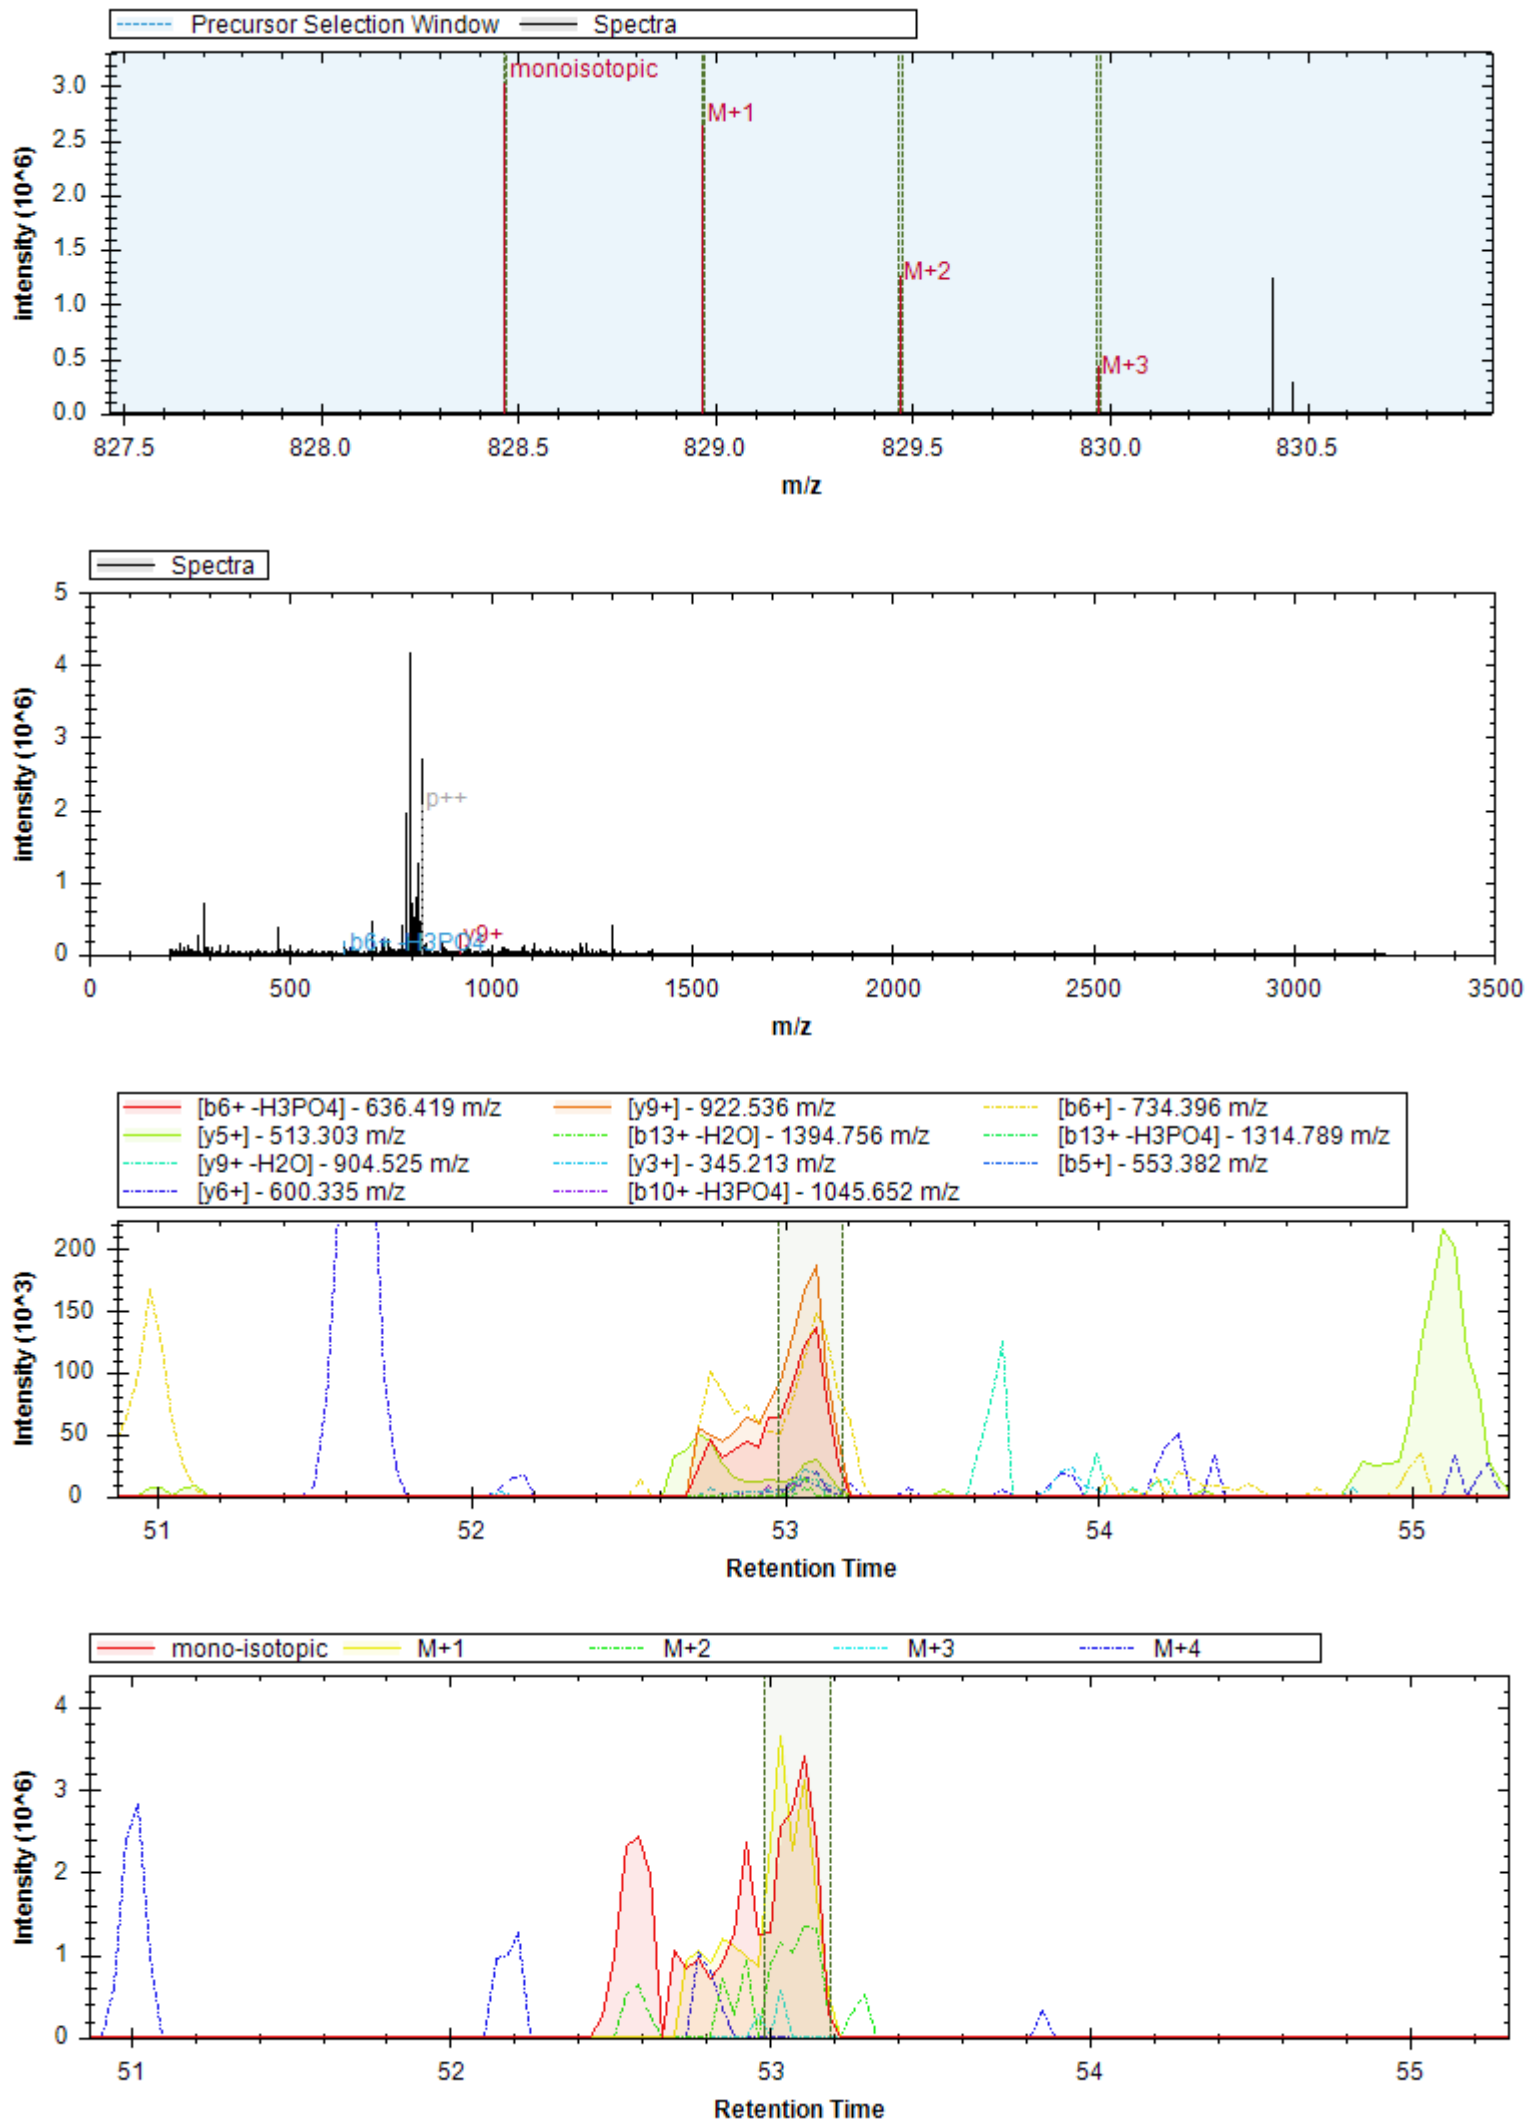

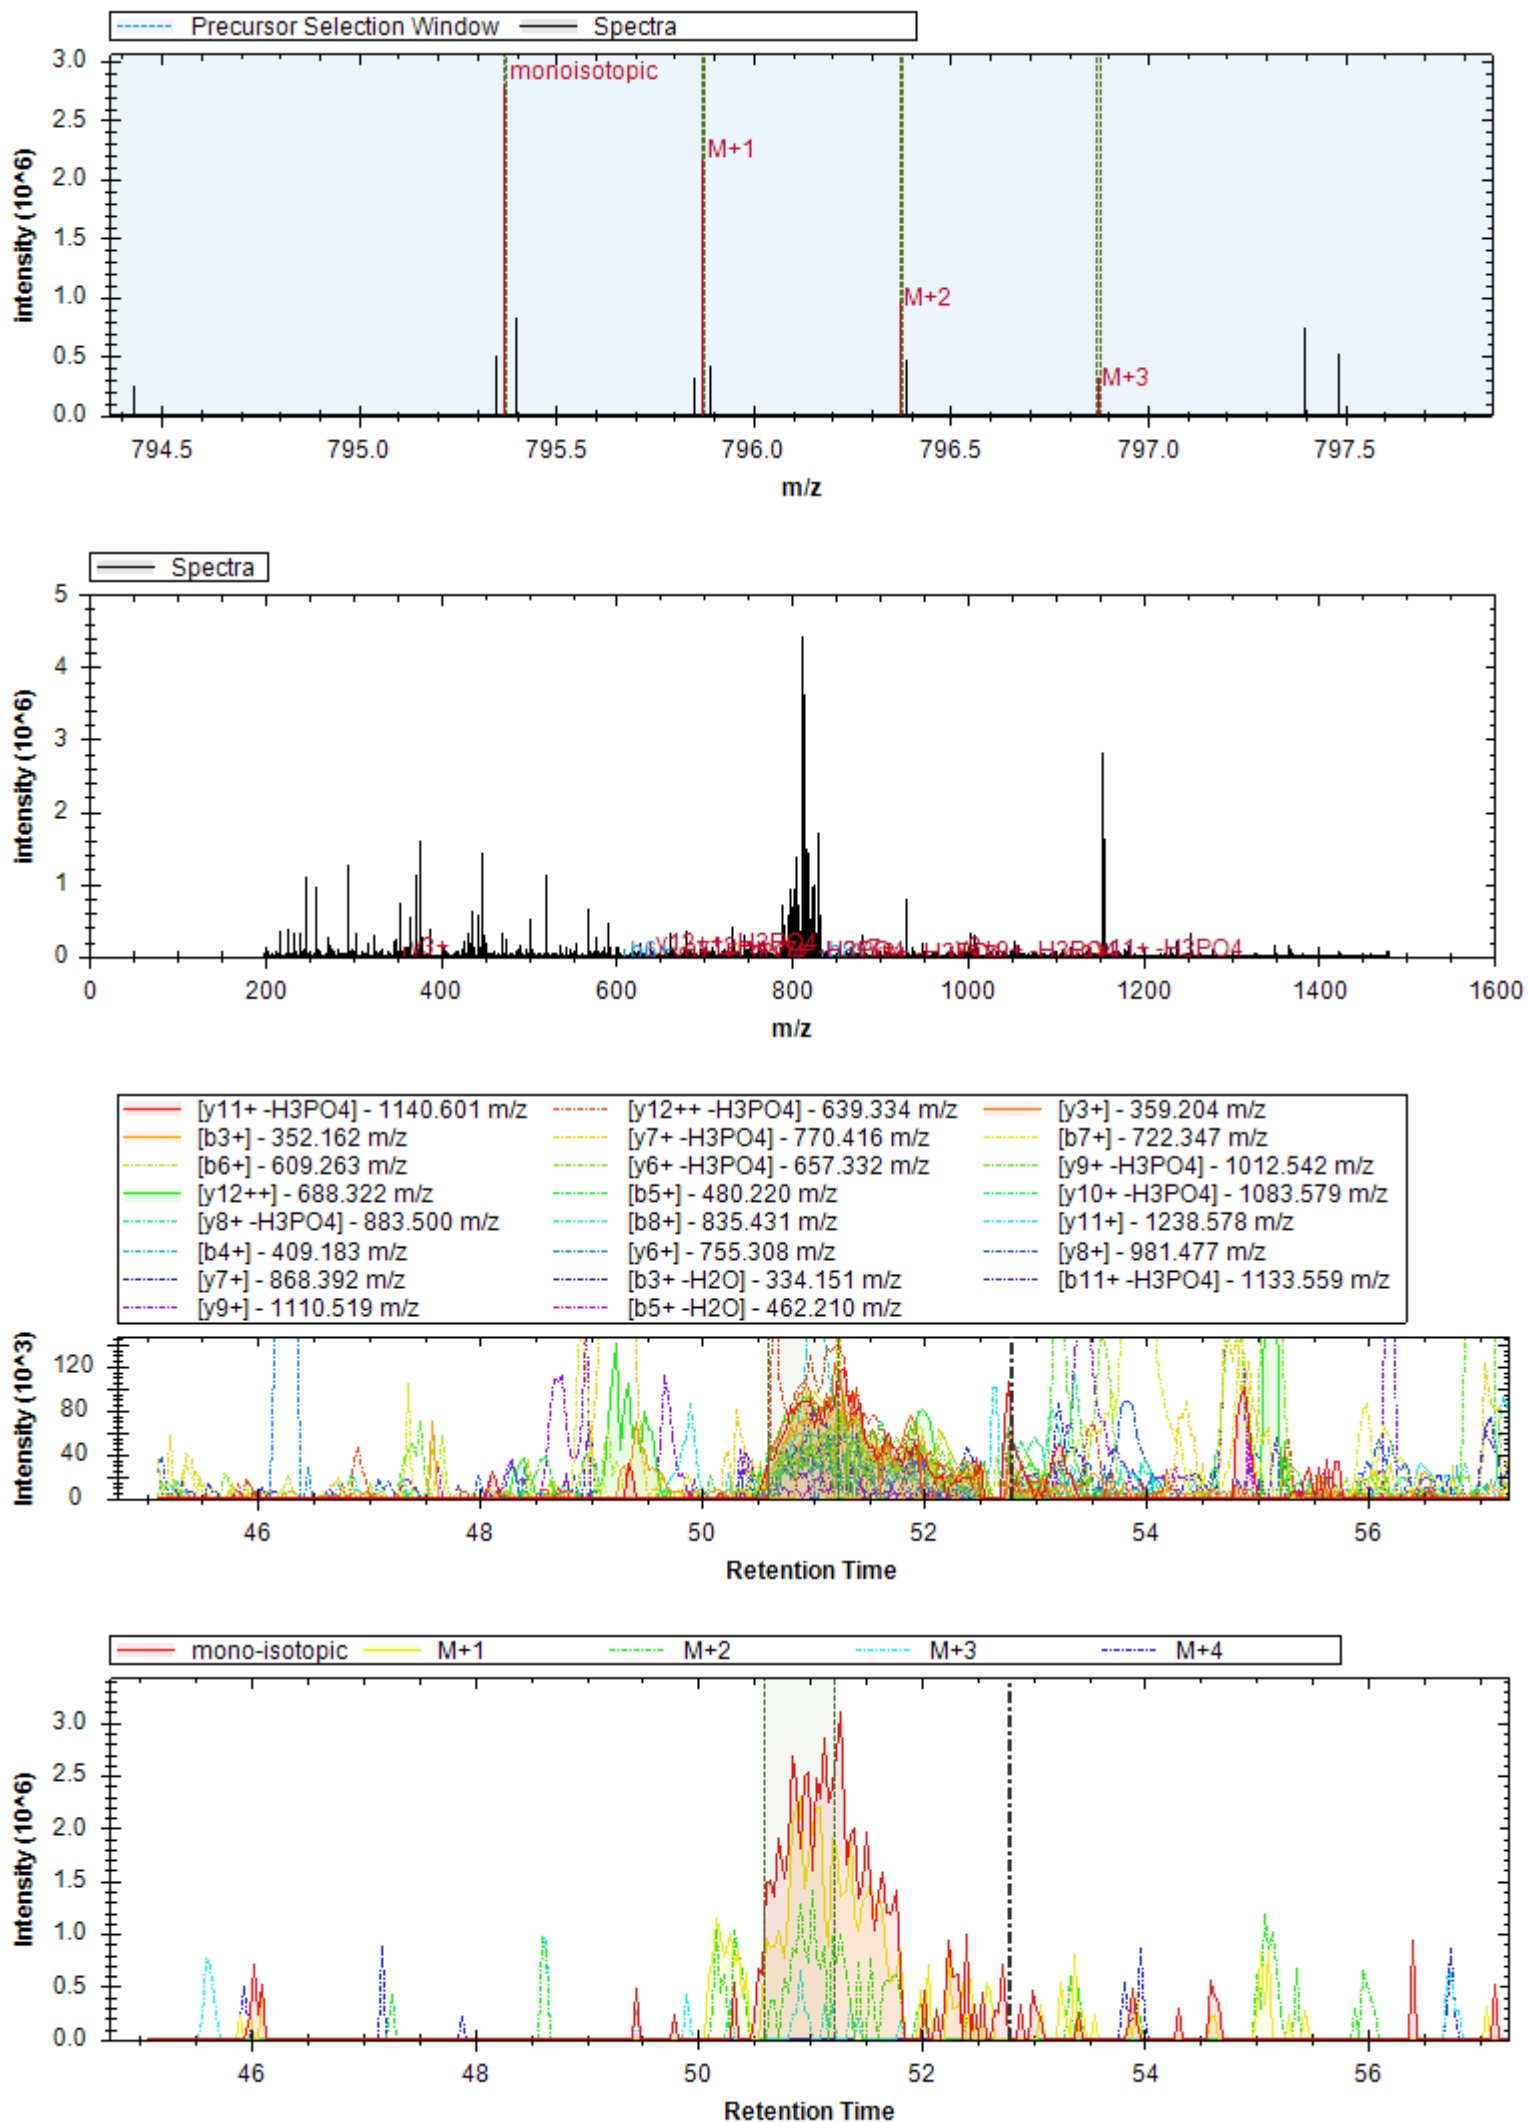

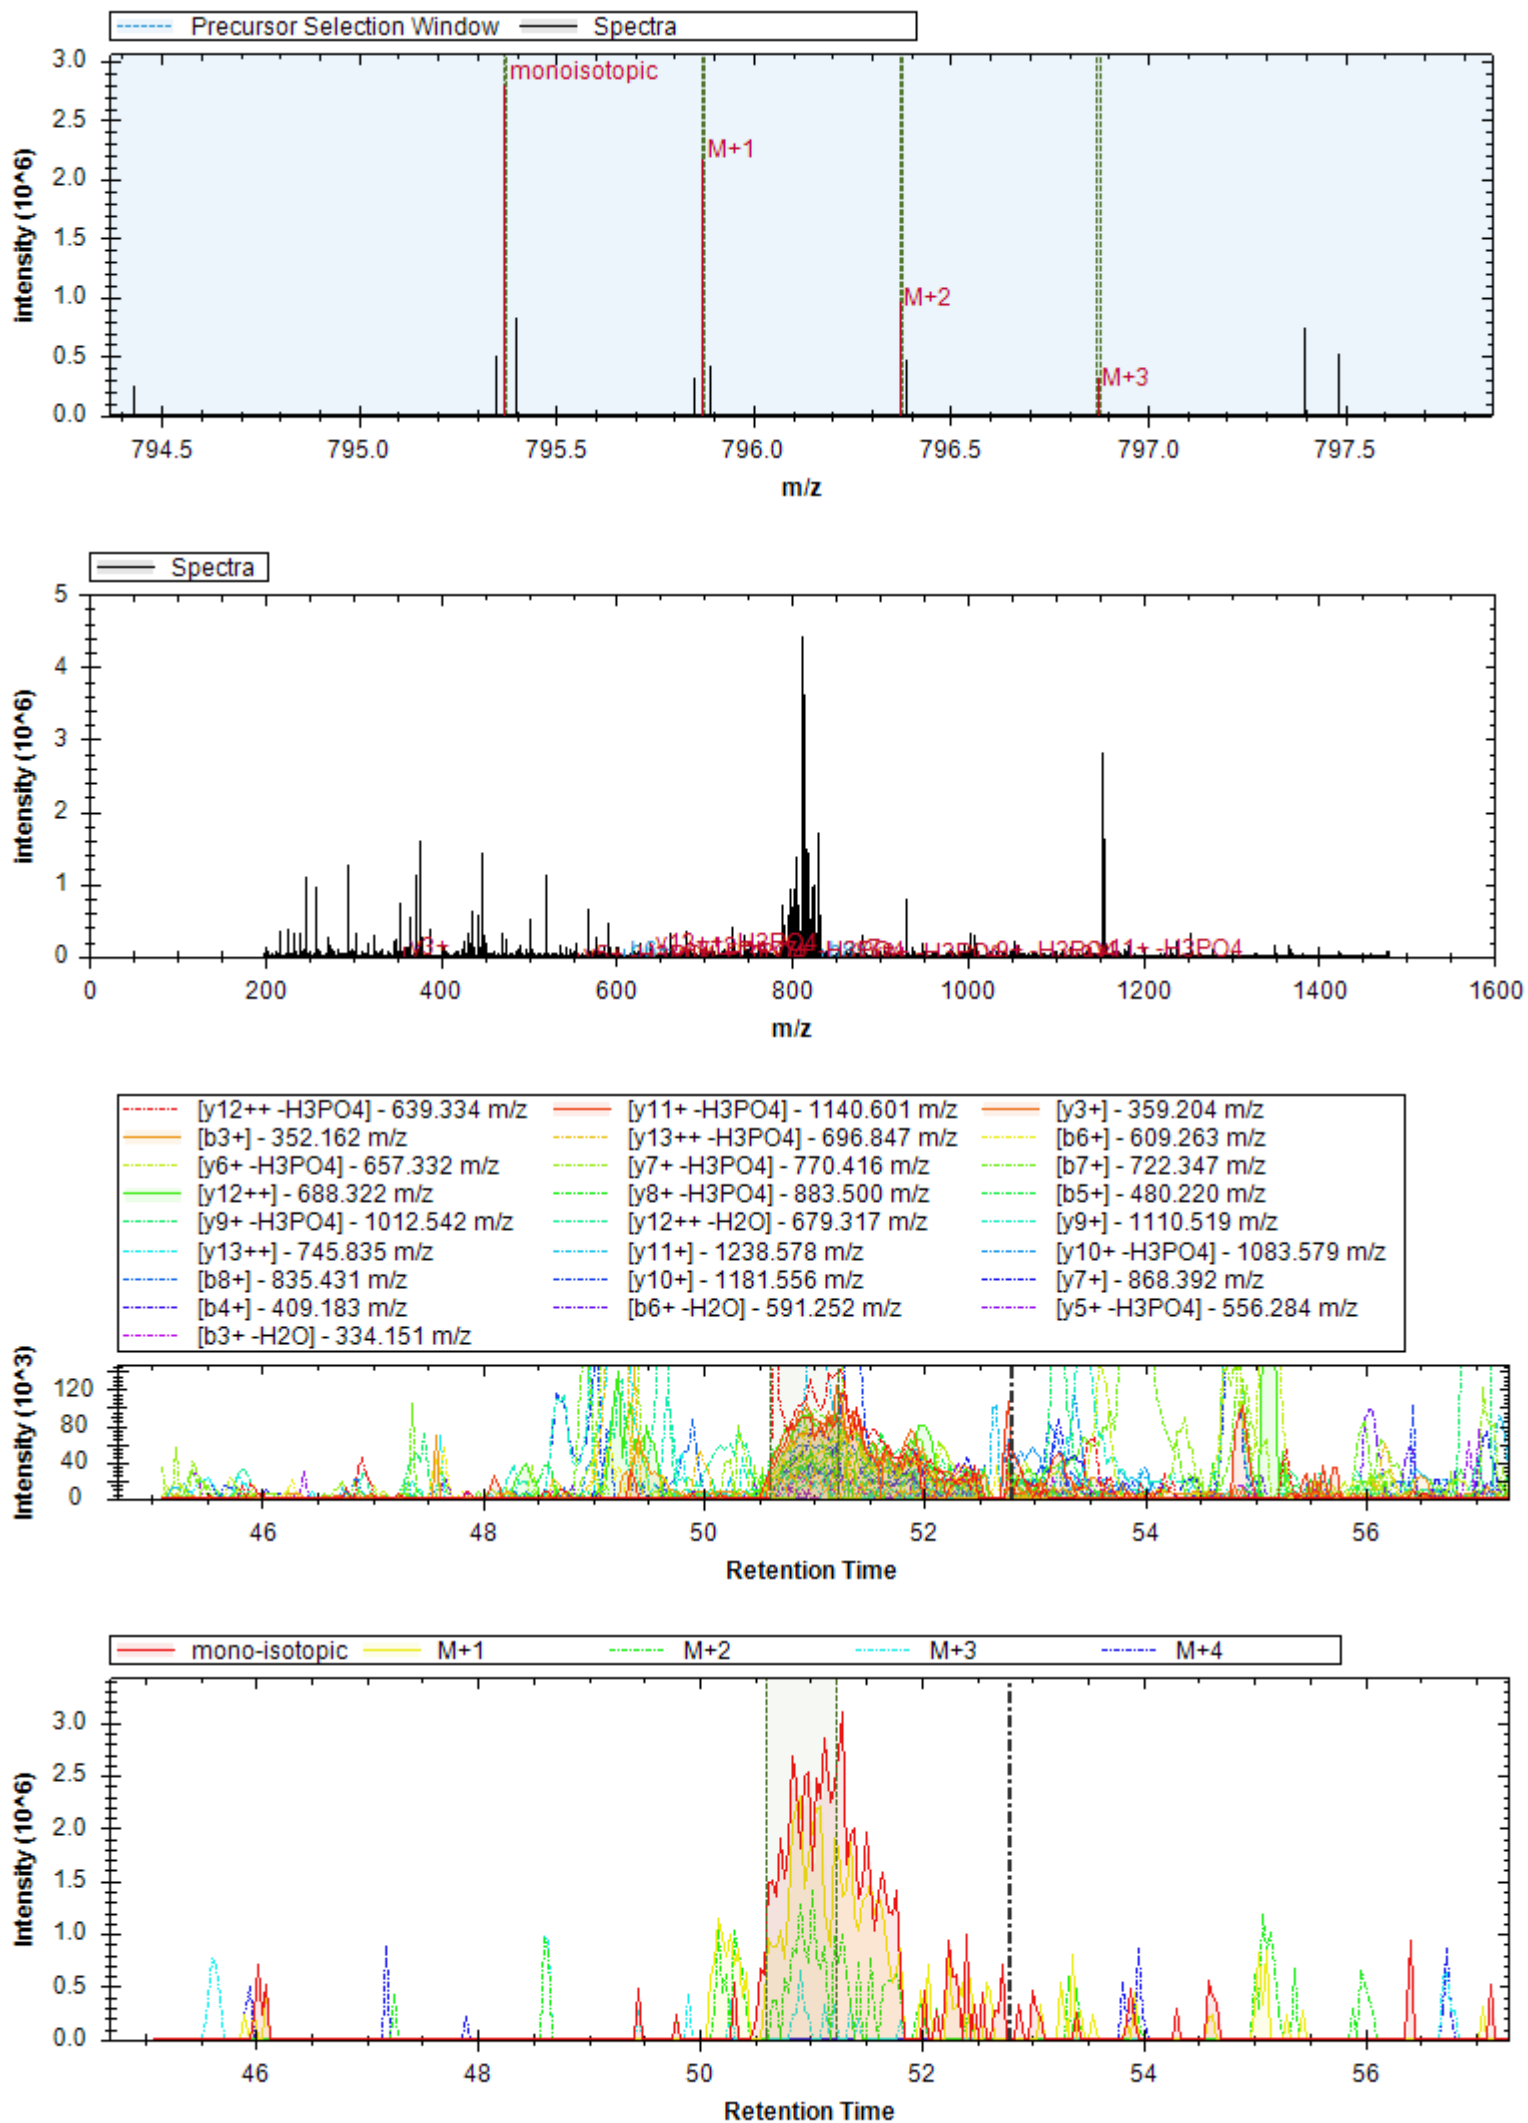



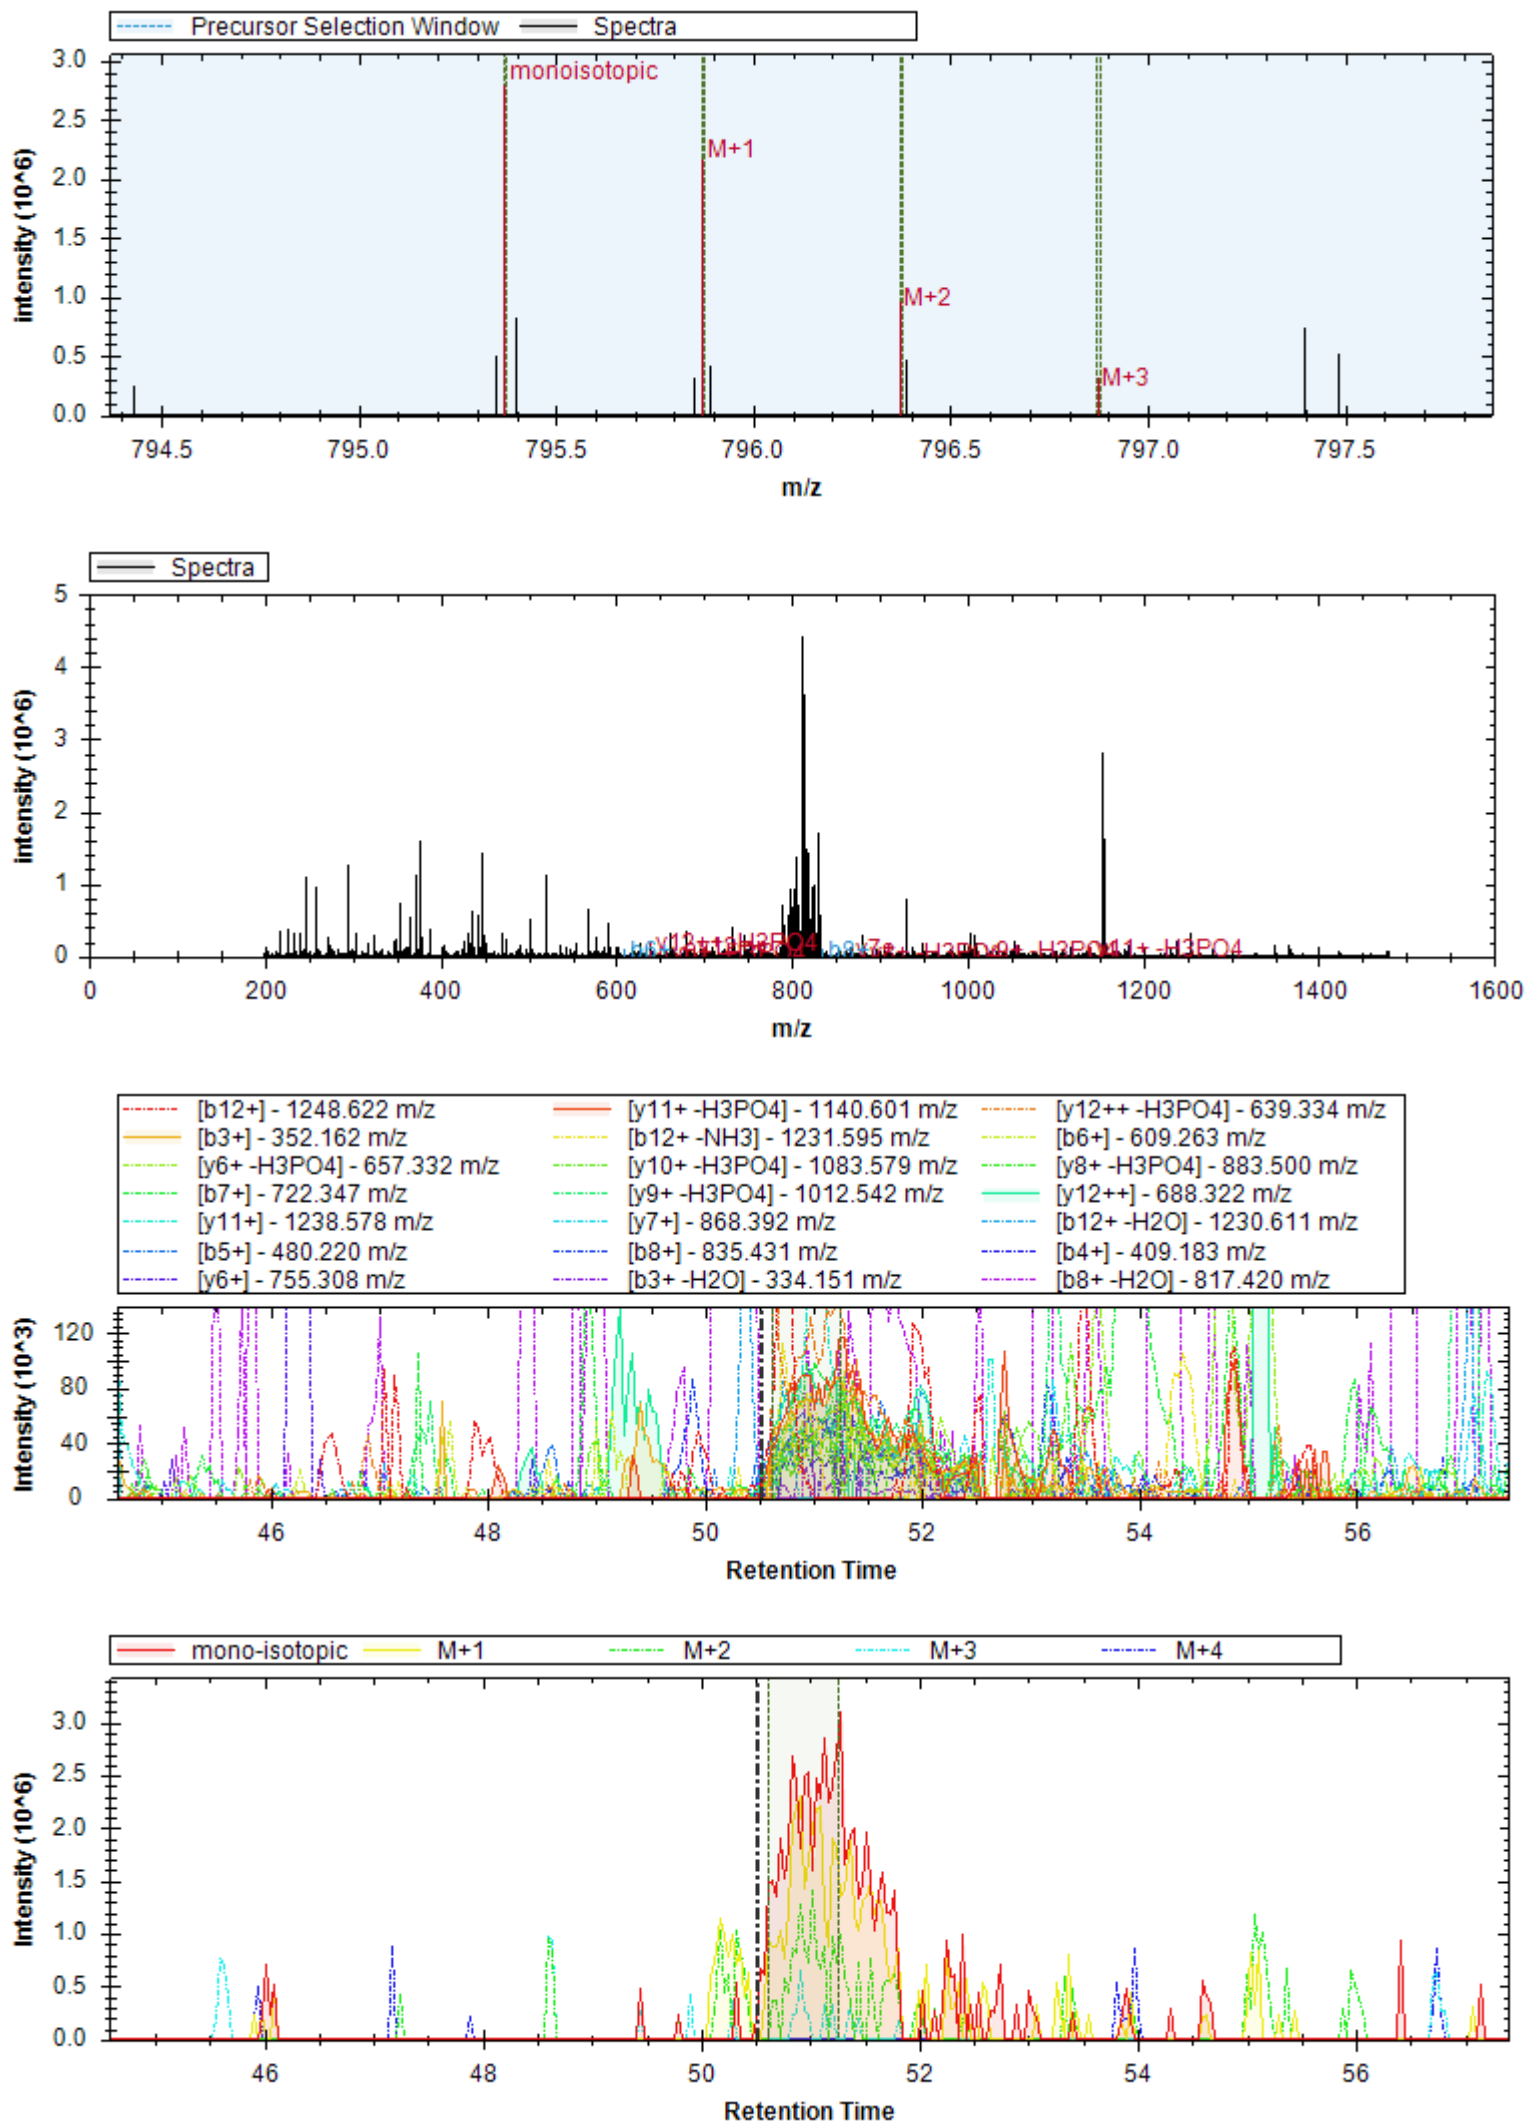

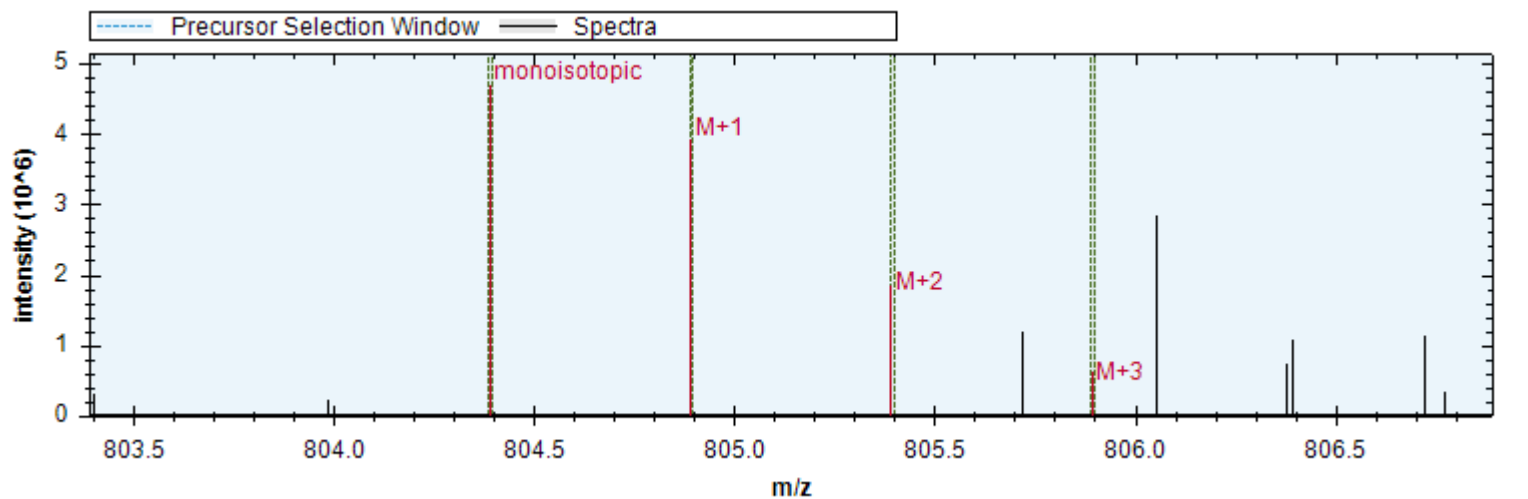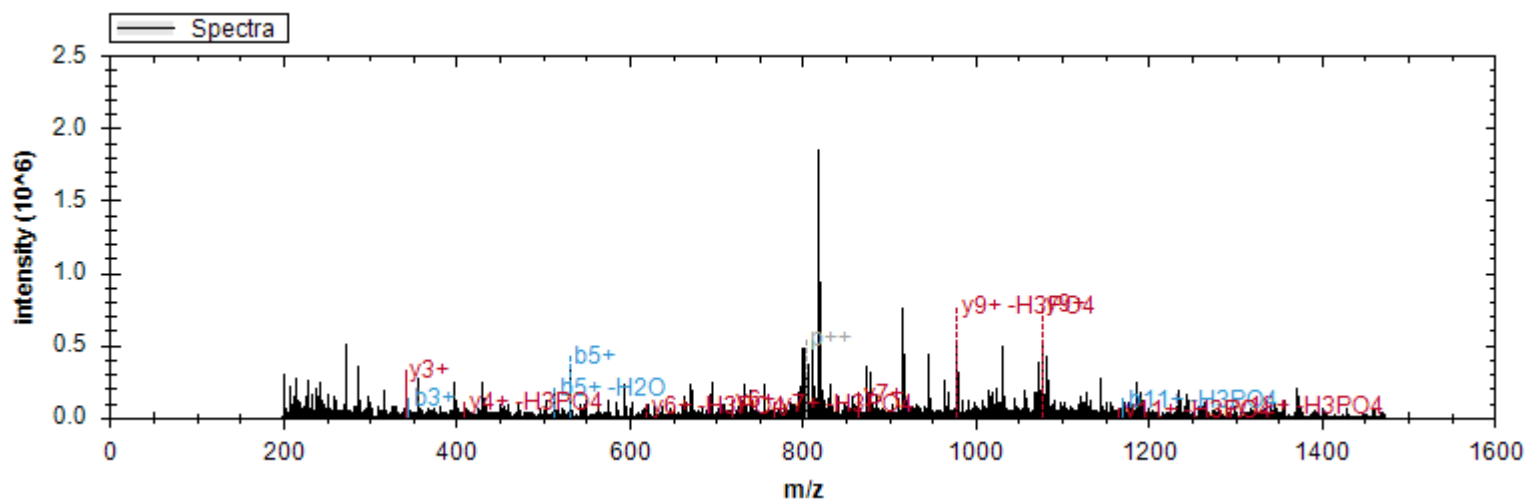

|                                            |                                            |                                        |
|--------------------------------------------|--------------------------------------------|----------------------------------------|
| [ $y_9+$ - $H_3PO_4$ ] - 979.525 $m/z$     | [ $y_9+$ ] - 1077.502 $m/z$                | [ $b_5+$ ] - 531.277 $m/z$             |
| [ $y_3+$ ] - 341.218 $m/z$                 | [ $b_5+$ - $H_2O$ ] - 513.267 $m/z$        | [ $y_7+$ - $H_3PO_4$ ] - 767.445 $m/z$ |
| [ $y_6+$ - $H_3PO_4$ ] - 620.377 $m/z$     | [ $b_3+$ ] - 345.177 $m/z$                 | [ $y_7+$ ] - 865.422 $m/z$             |
| [ $y_{12+}$ - $H_3PO_4$ ] - 1294.668 $m/z$ | [ $y_{11+}$ - $H_3PO_4$ ] - 1165.625 $m/z$ | [ $y_6+$ ] - 718.354 $m/z$             |
| [ $b_3+$ - $H_2O$ ] - 327.166 $m/z$        | [ $b_4+$ ] - 432.209 $m/z$                 | [ $y_4+$ - $H_3PO_4$ ] - 410.240 $m/z$ |
| [ $y_8+$ - $H_2O$ ] - 1060.238 $m/z$       | [ $b_{11+}$ - $H_3PO_4$ ] - 1169.584 $m/z$ |                                        |

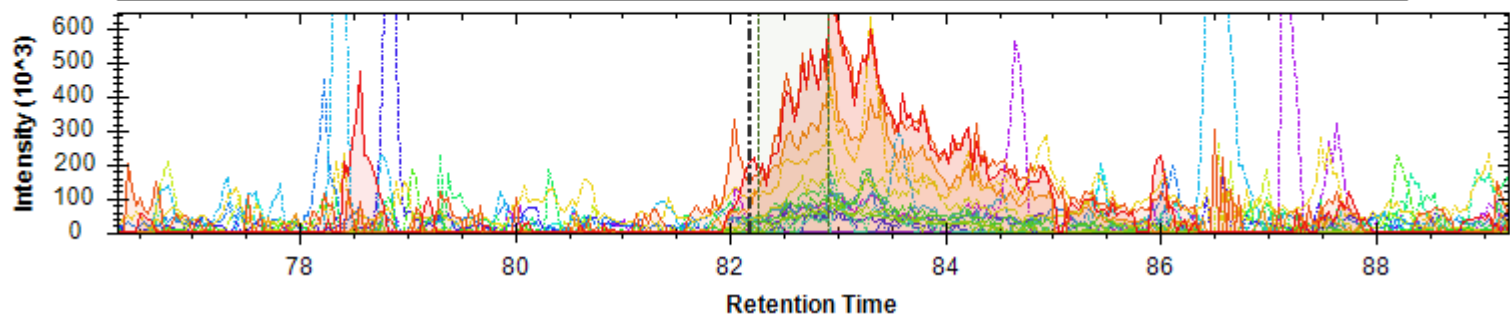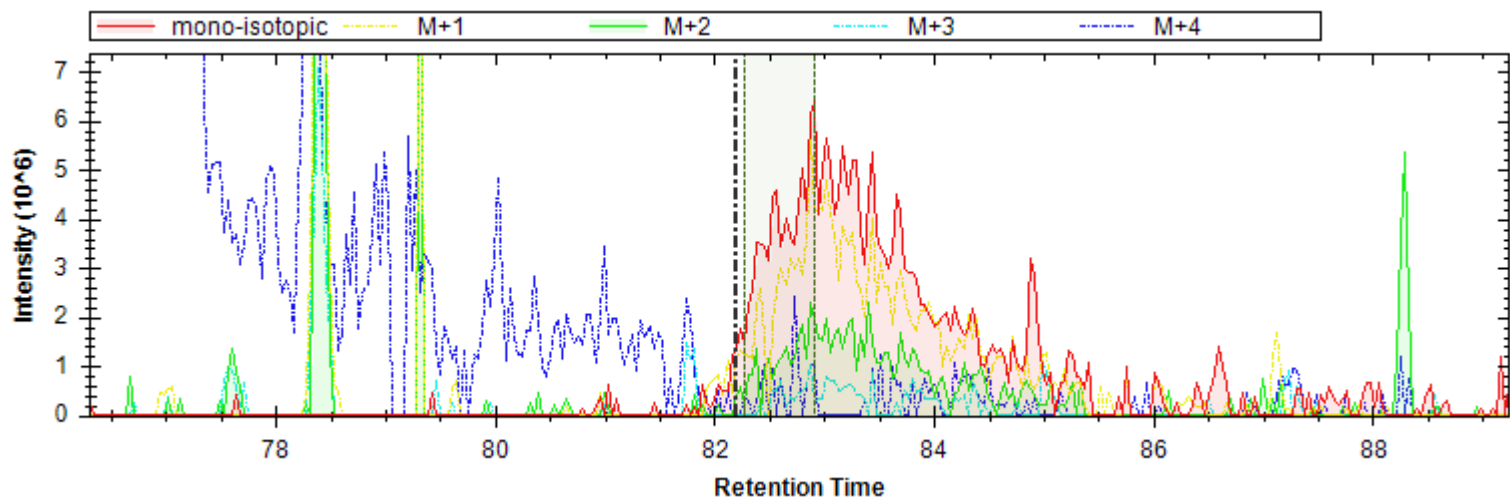

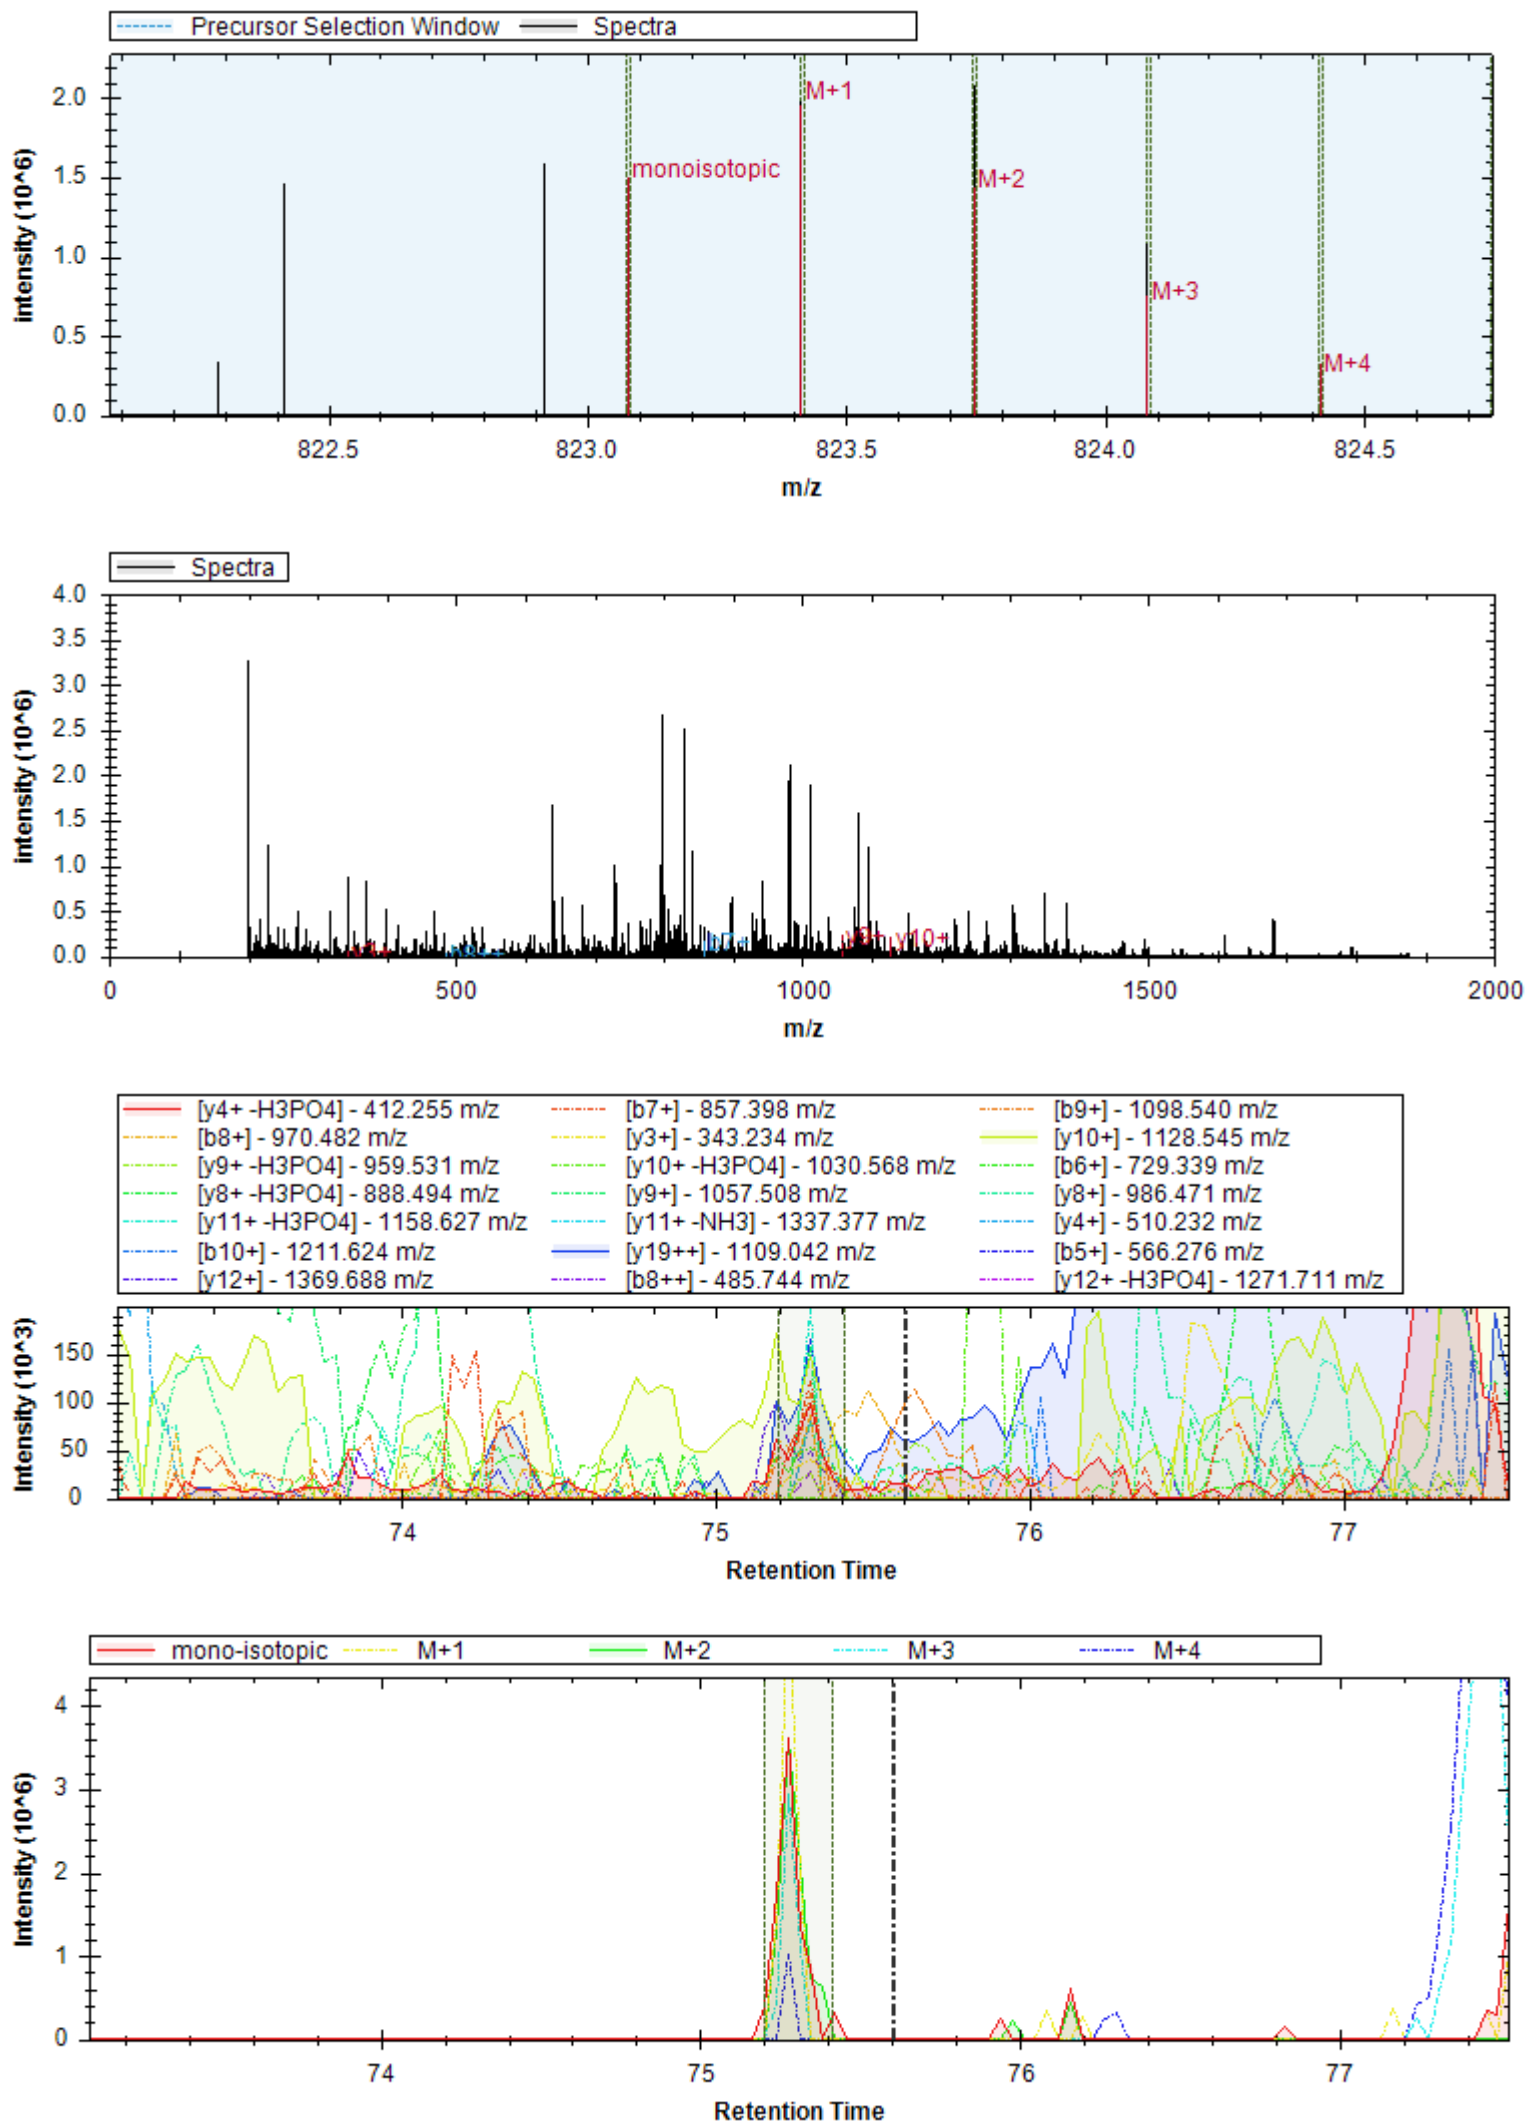

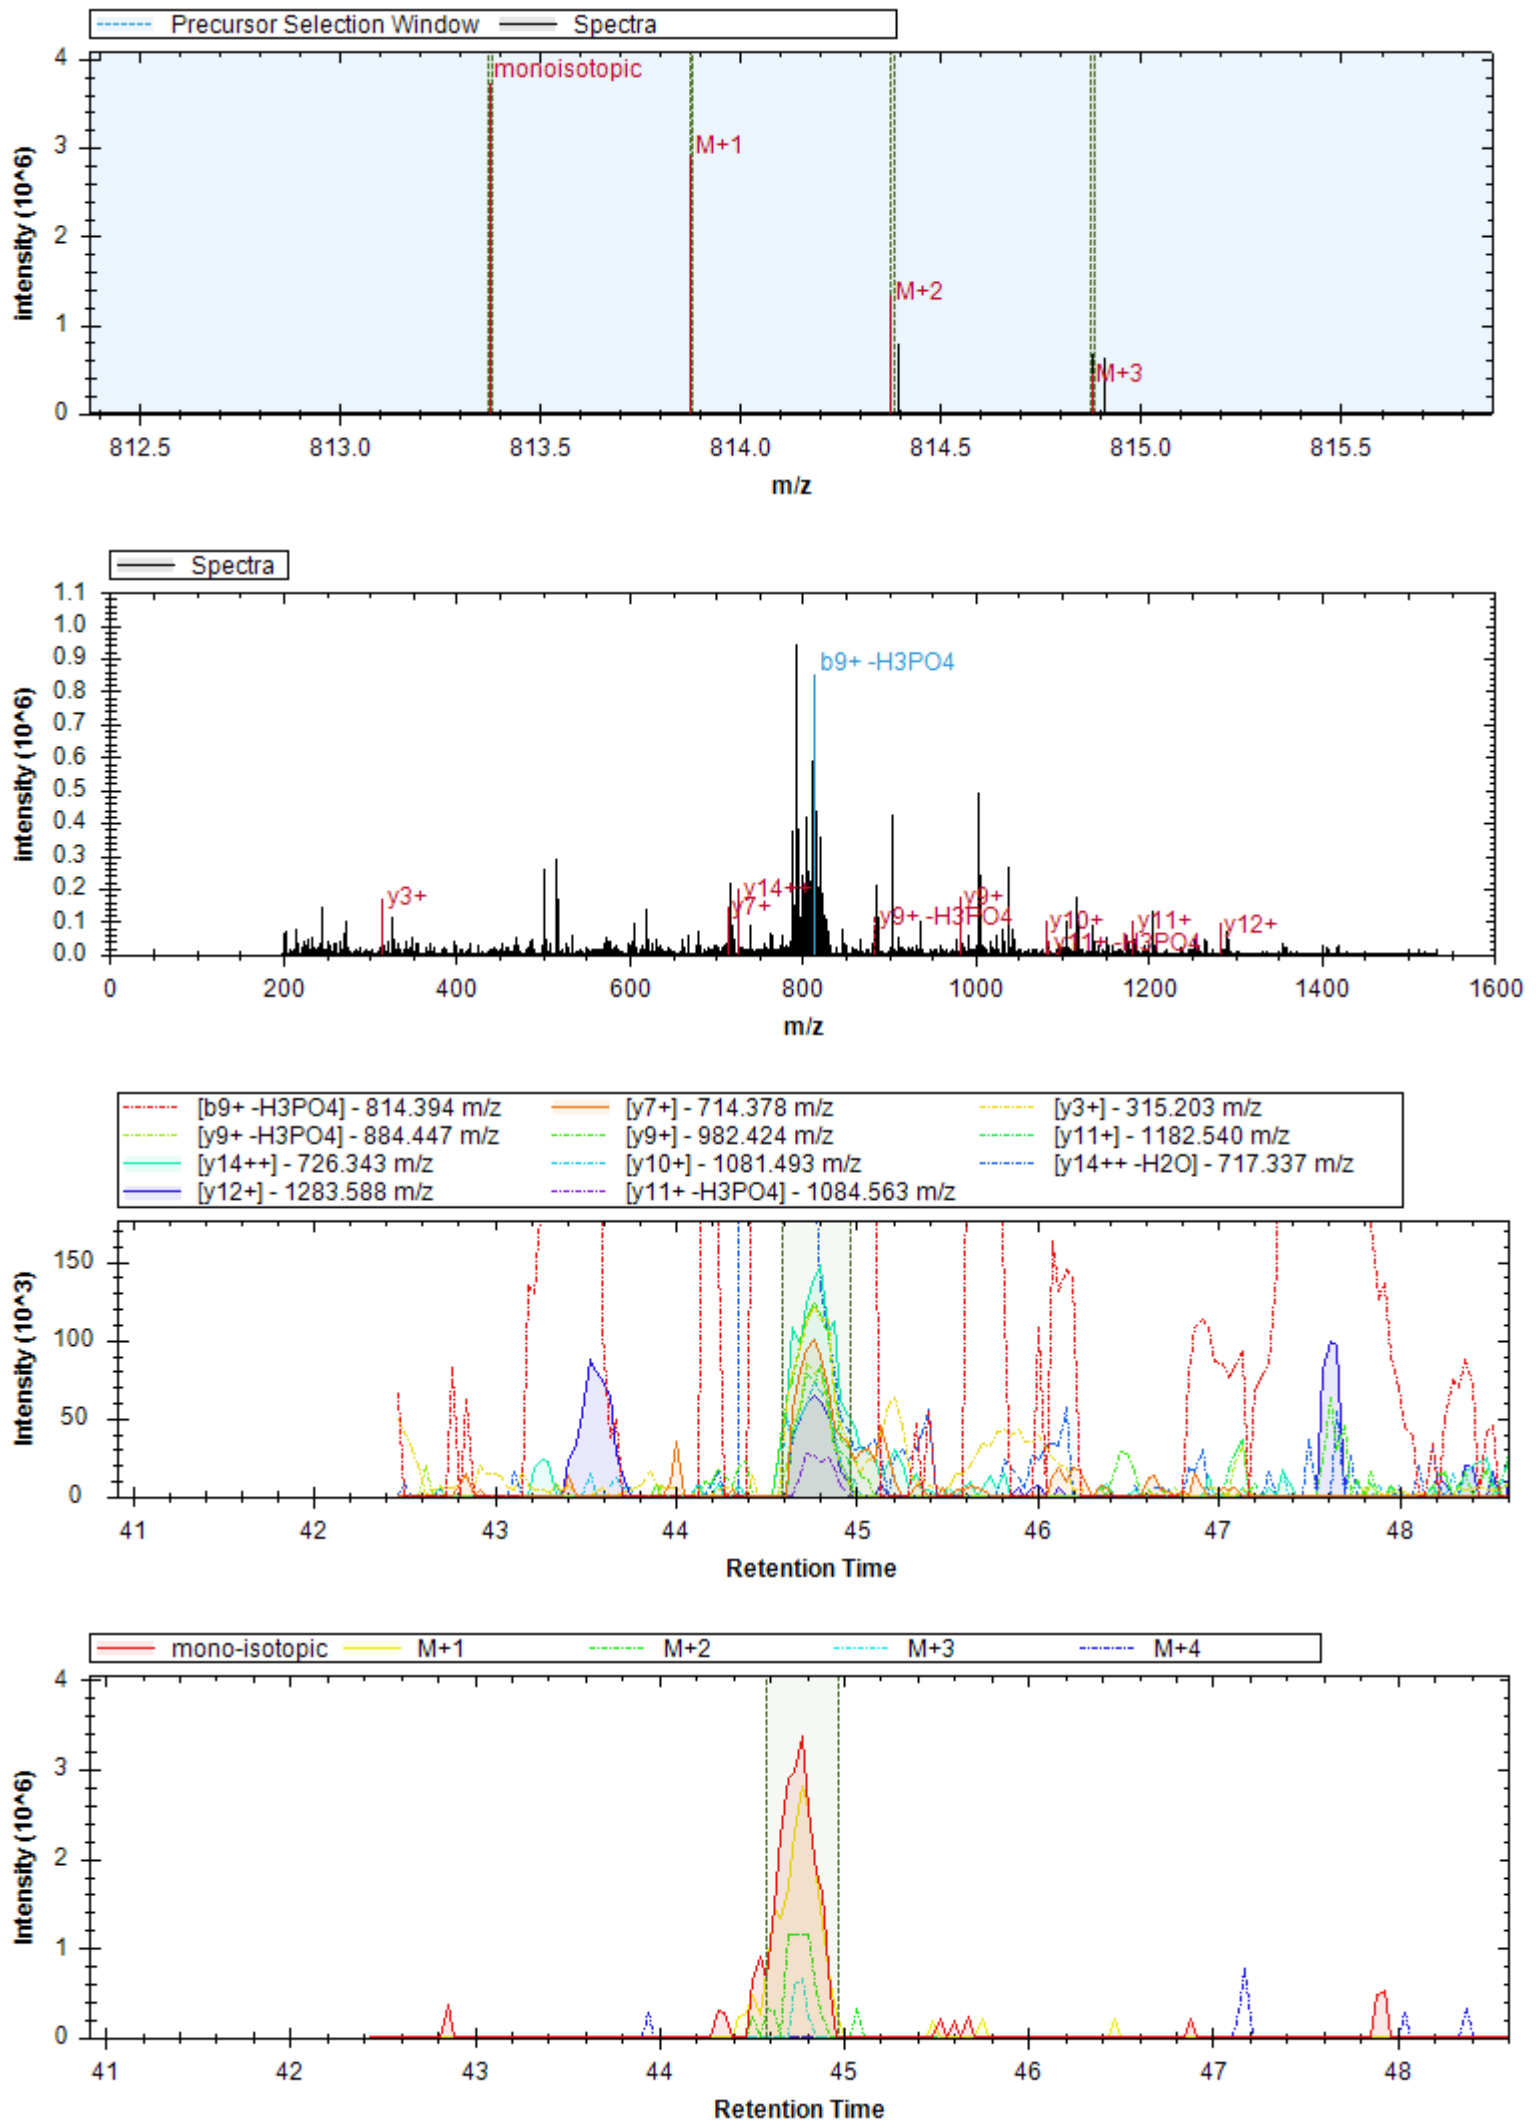

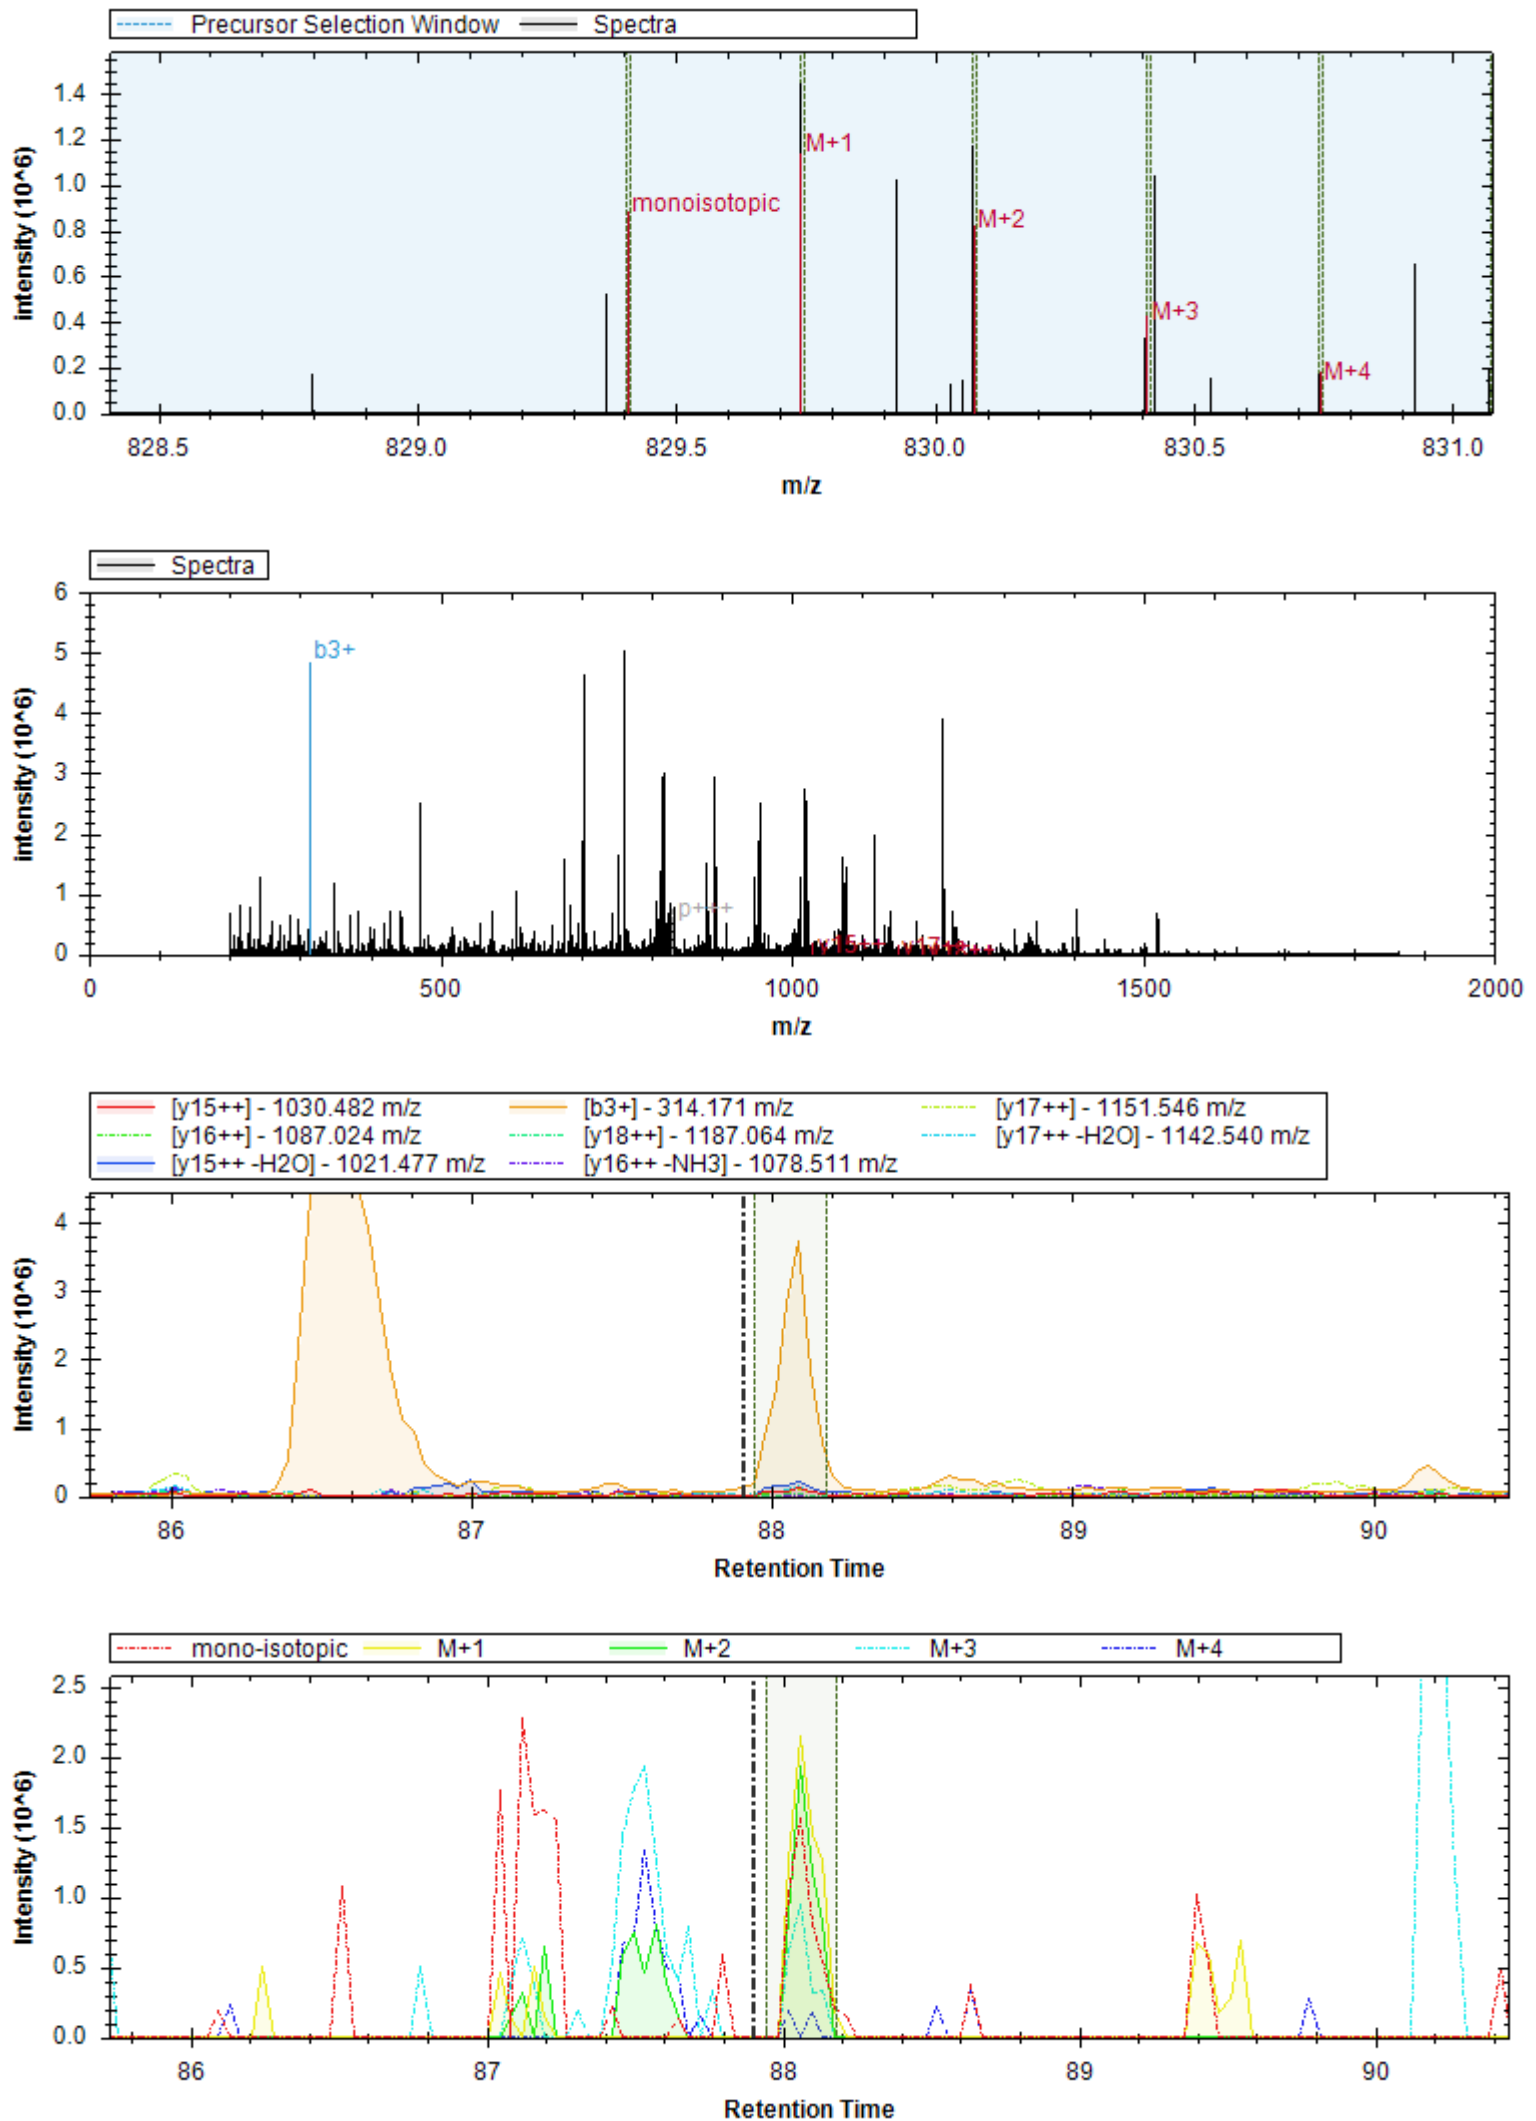

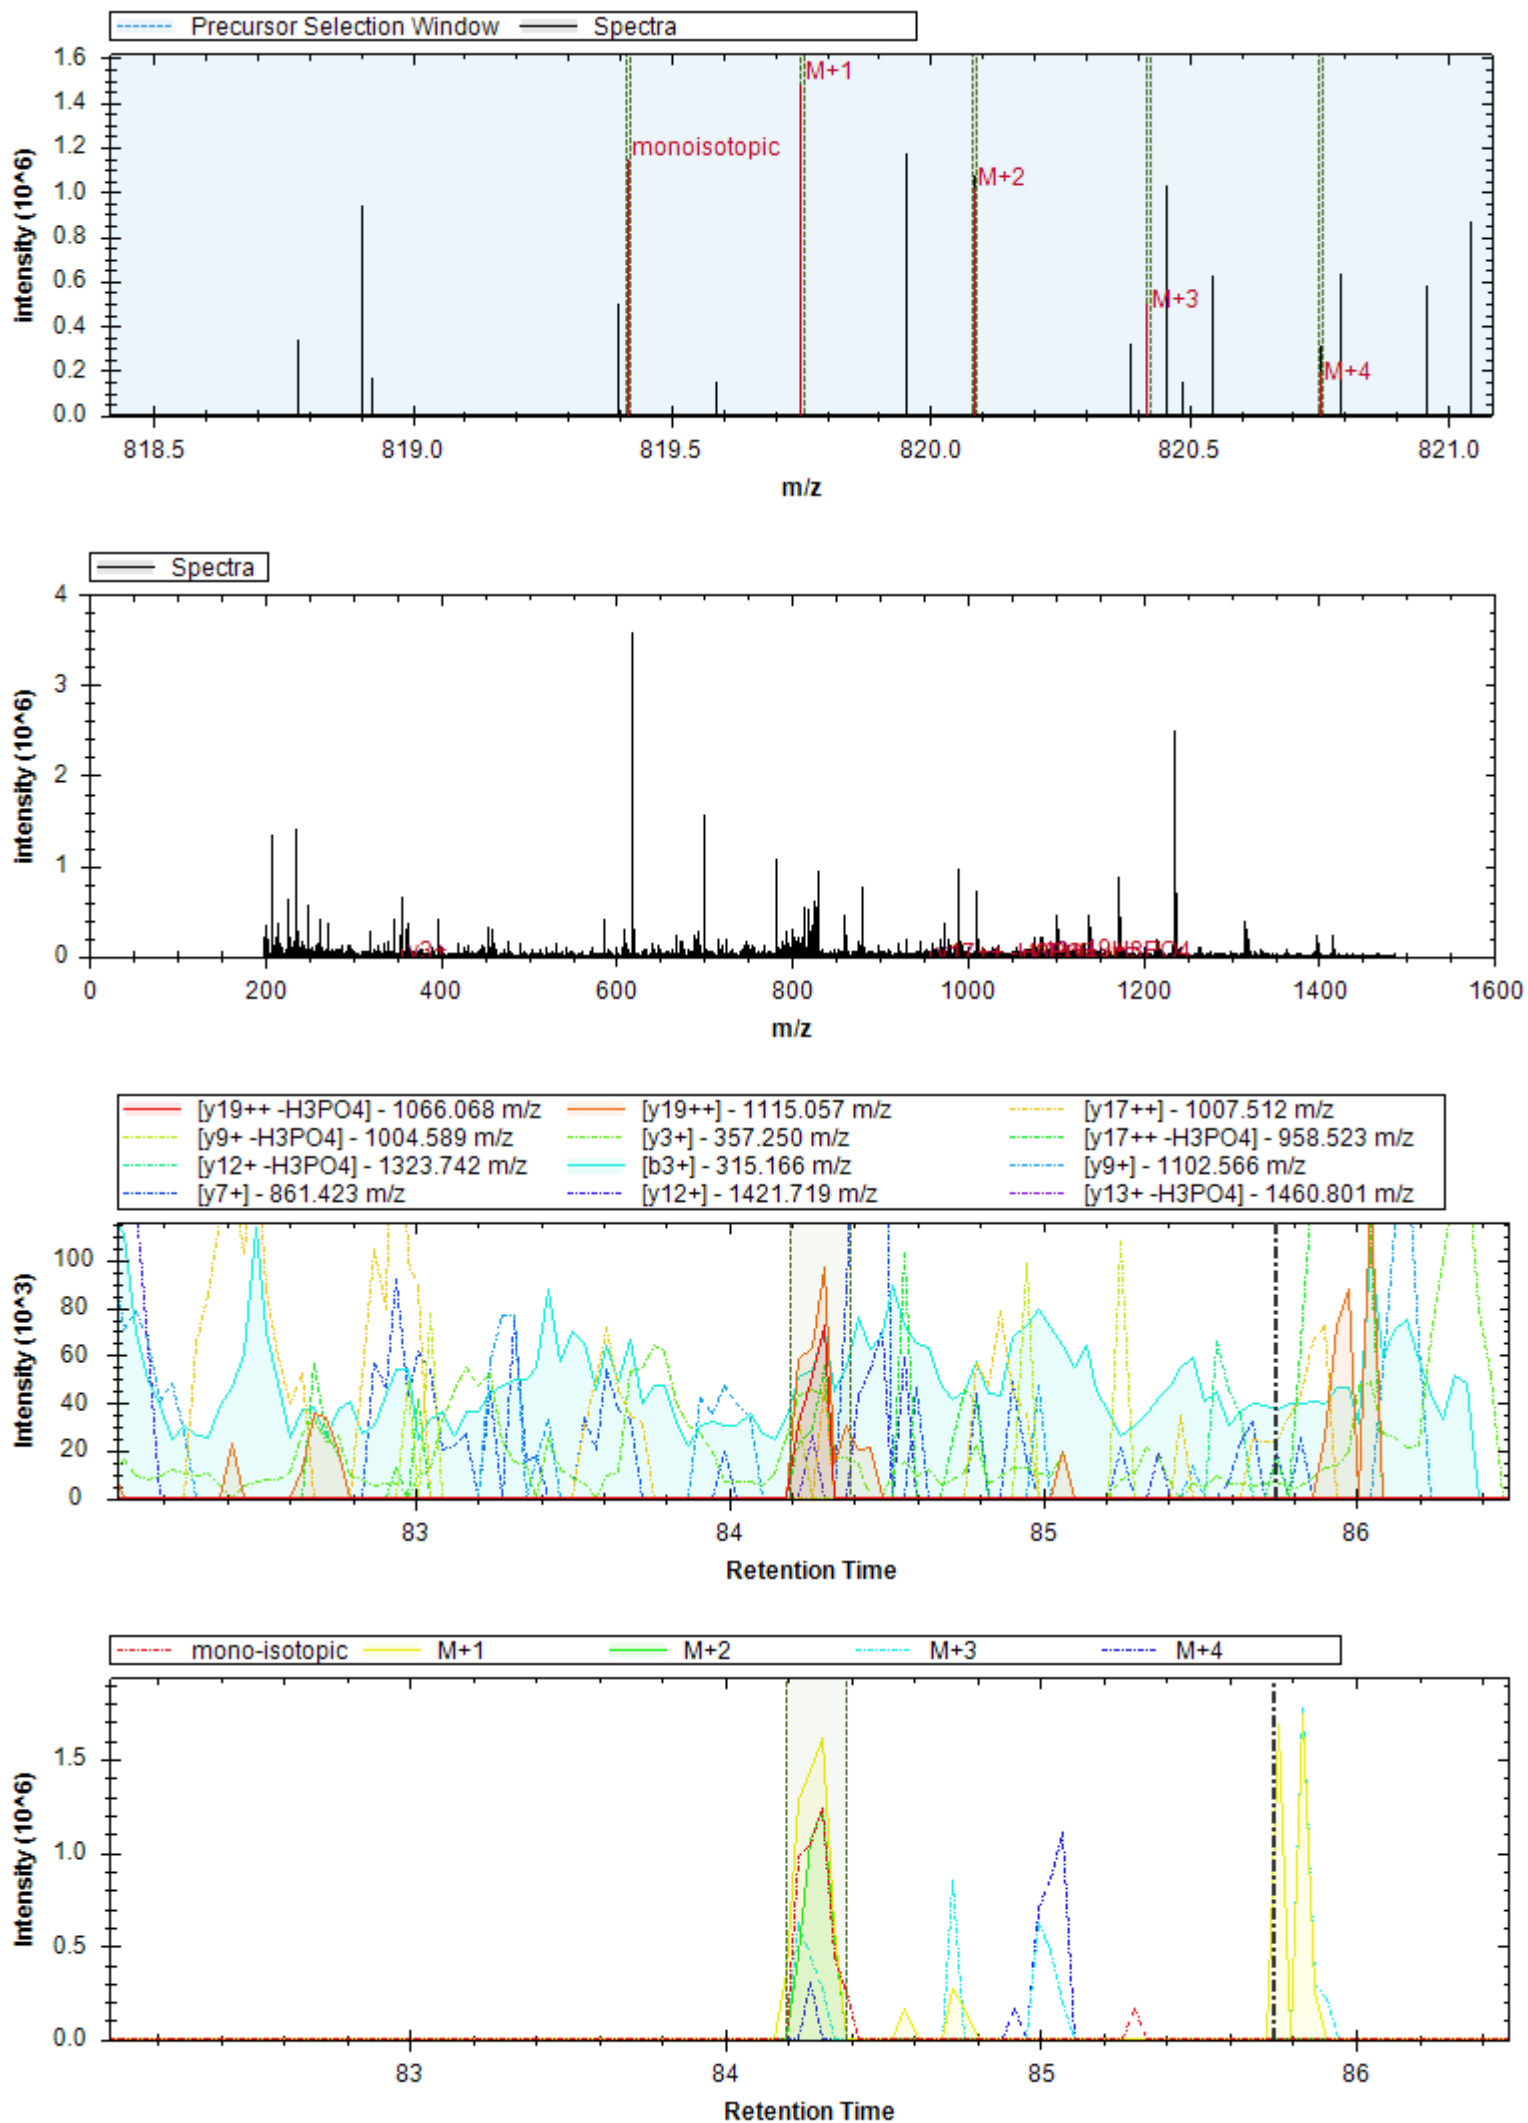

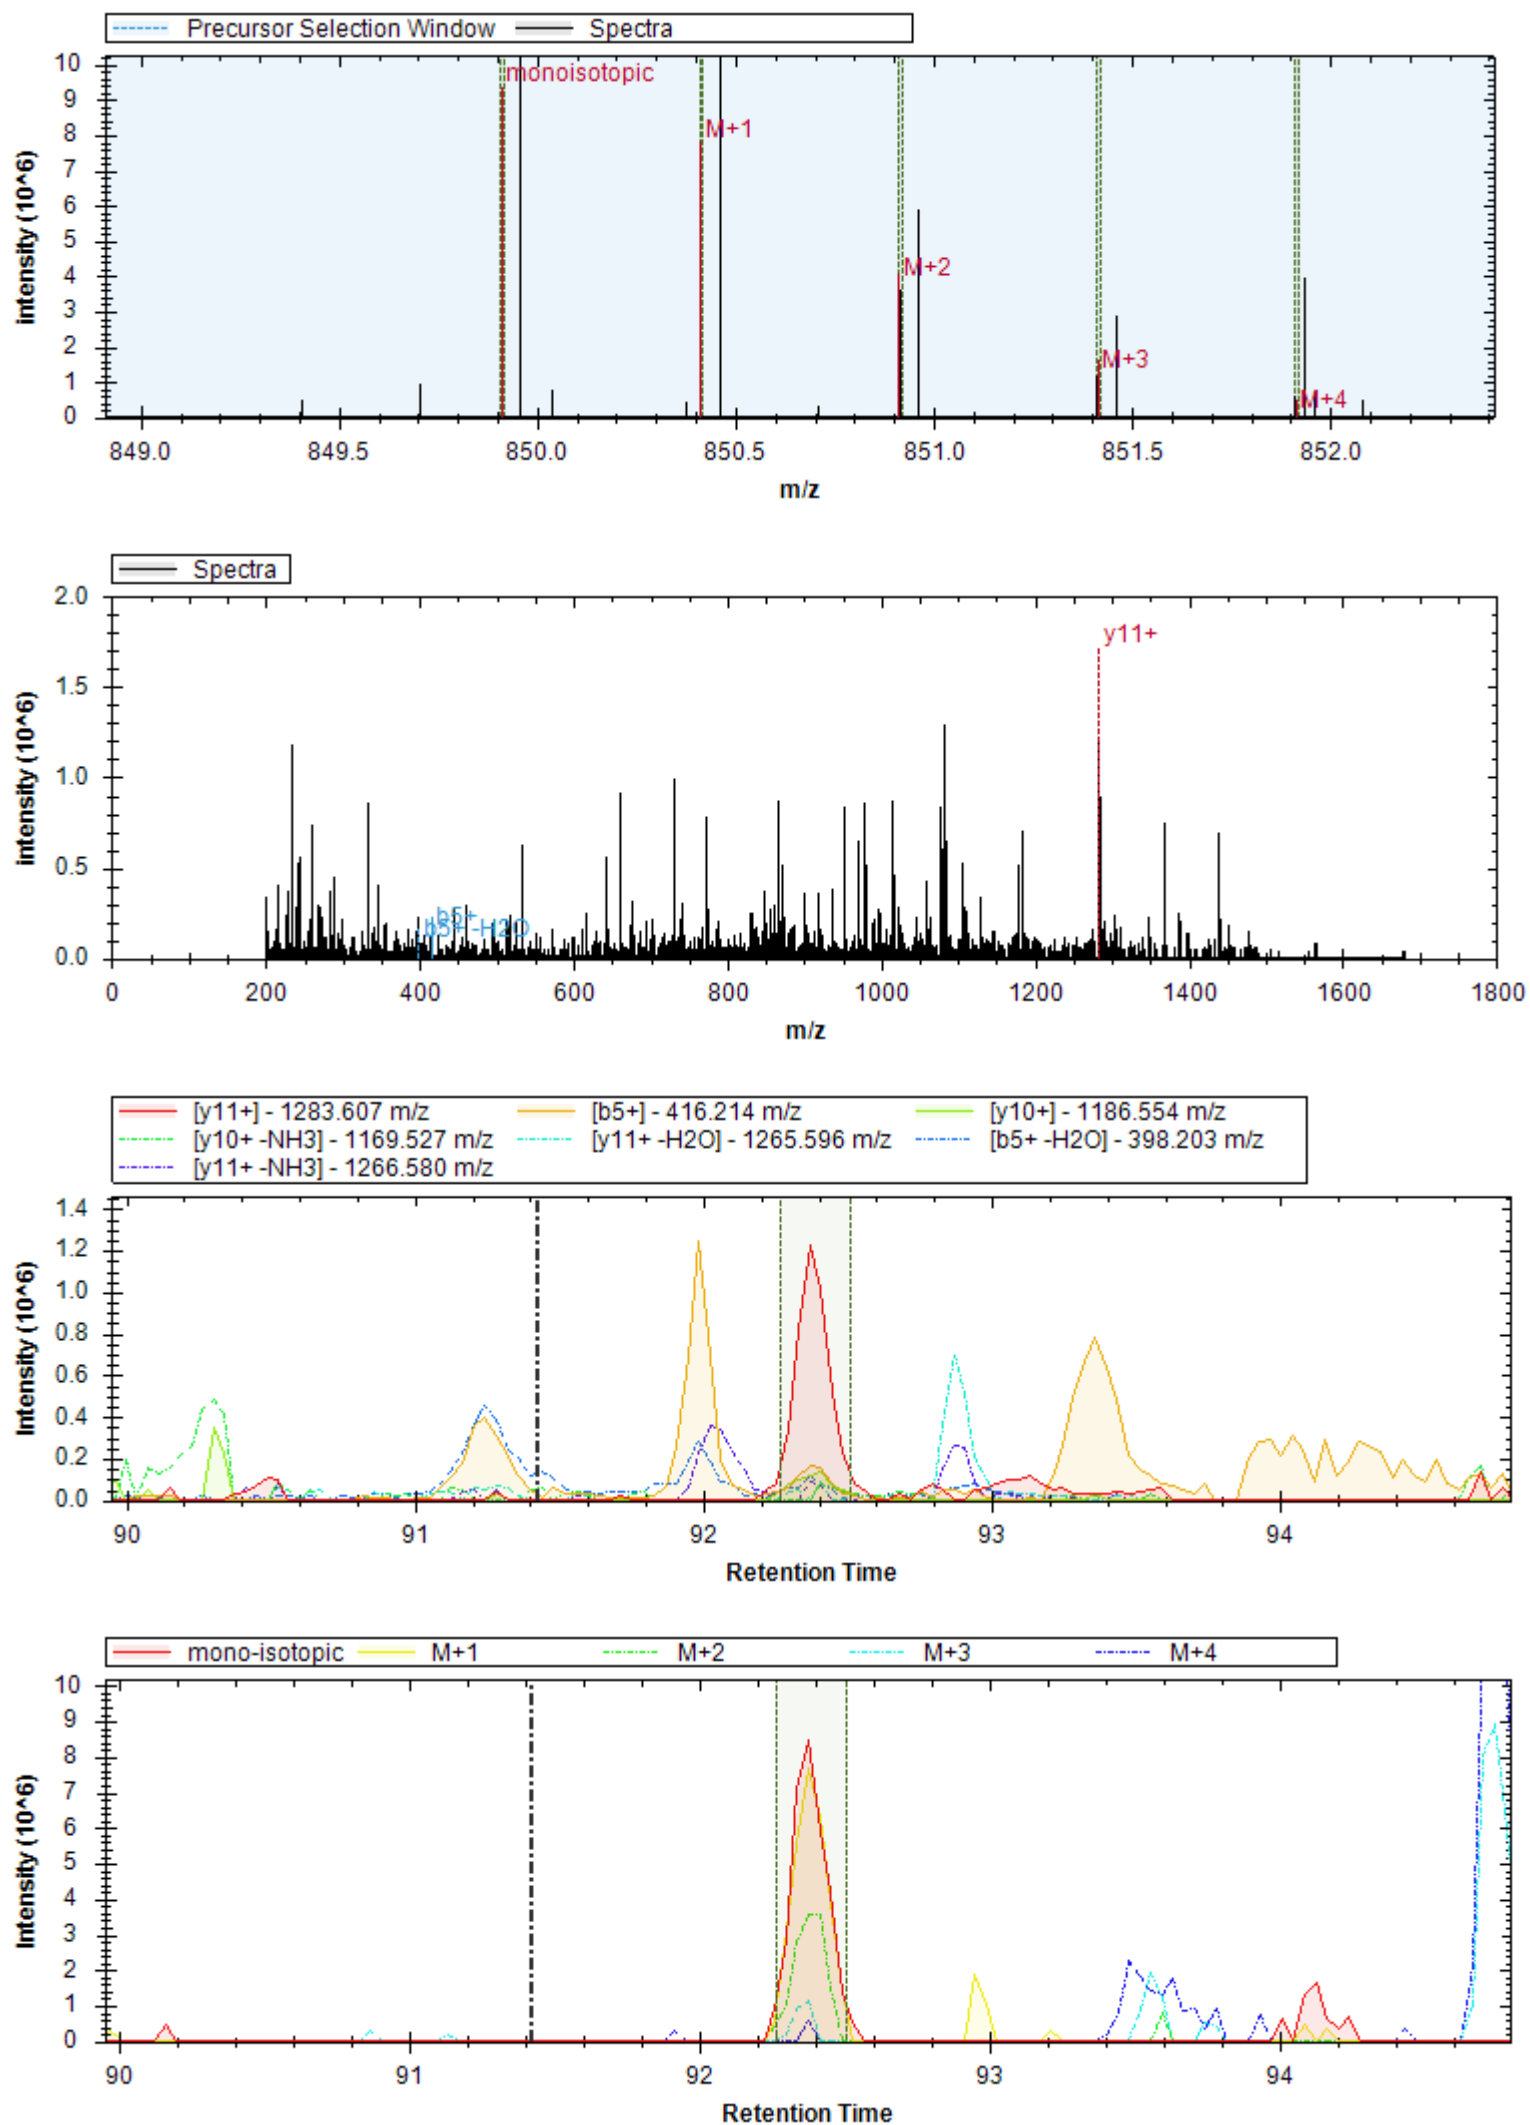

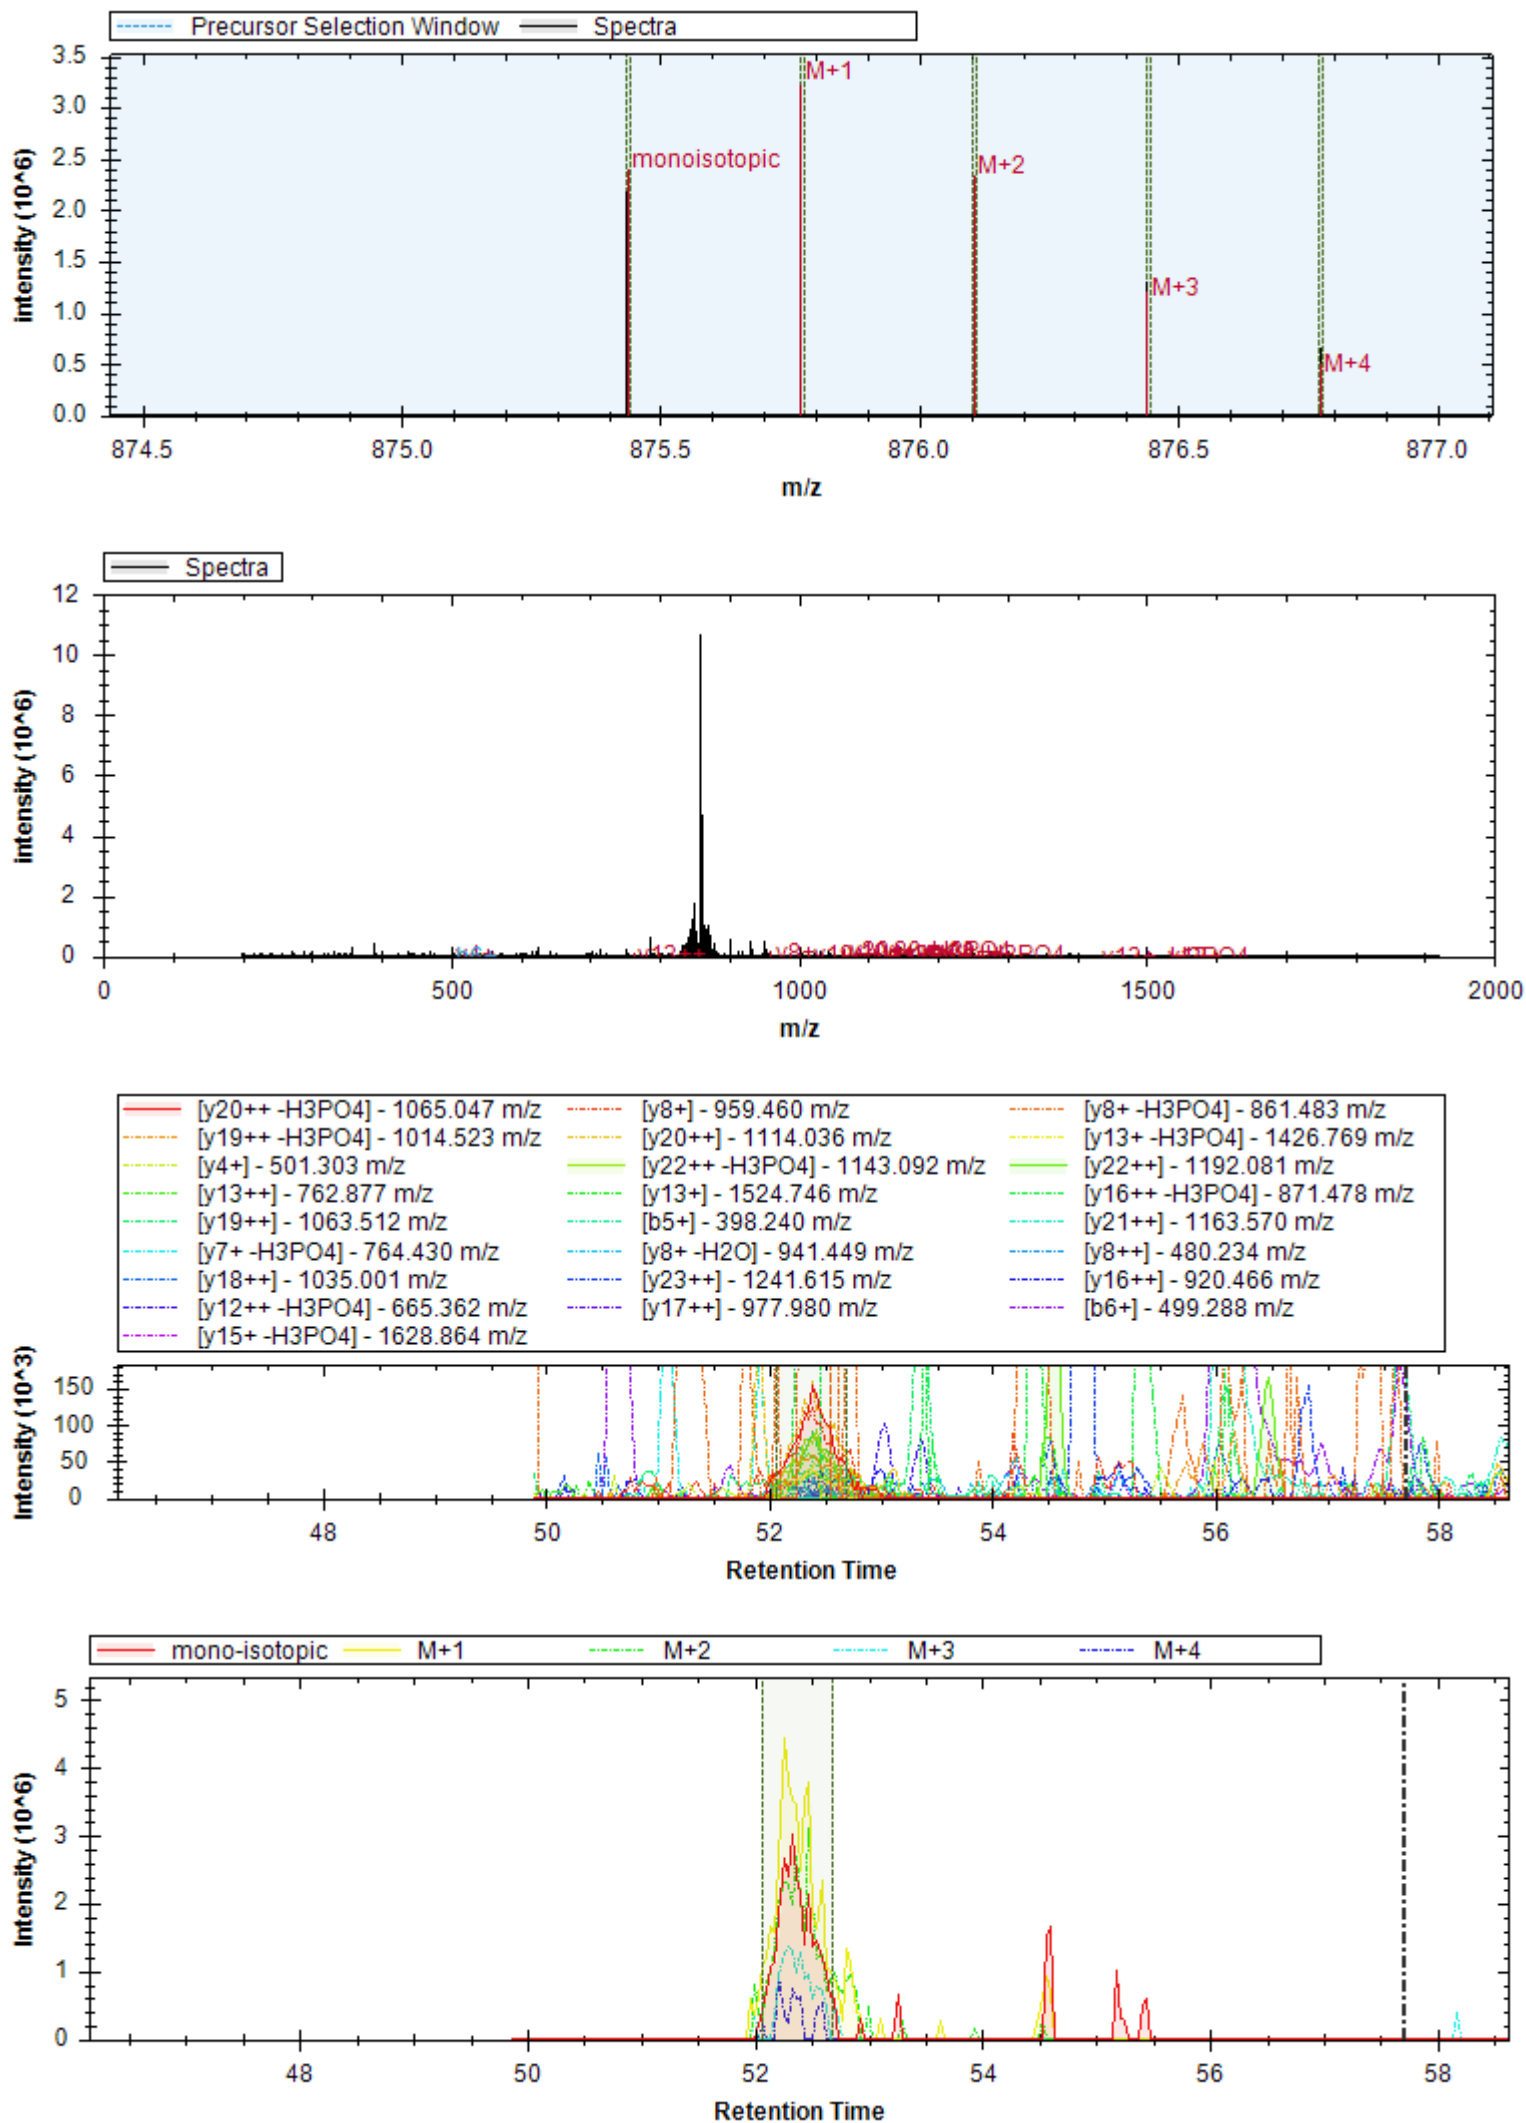



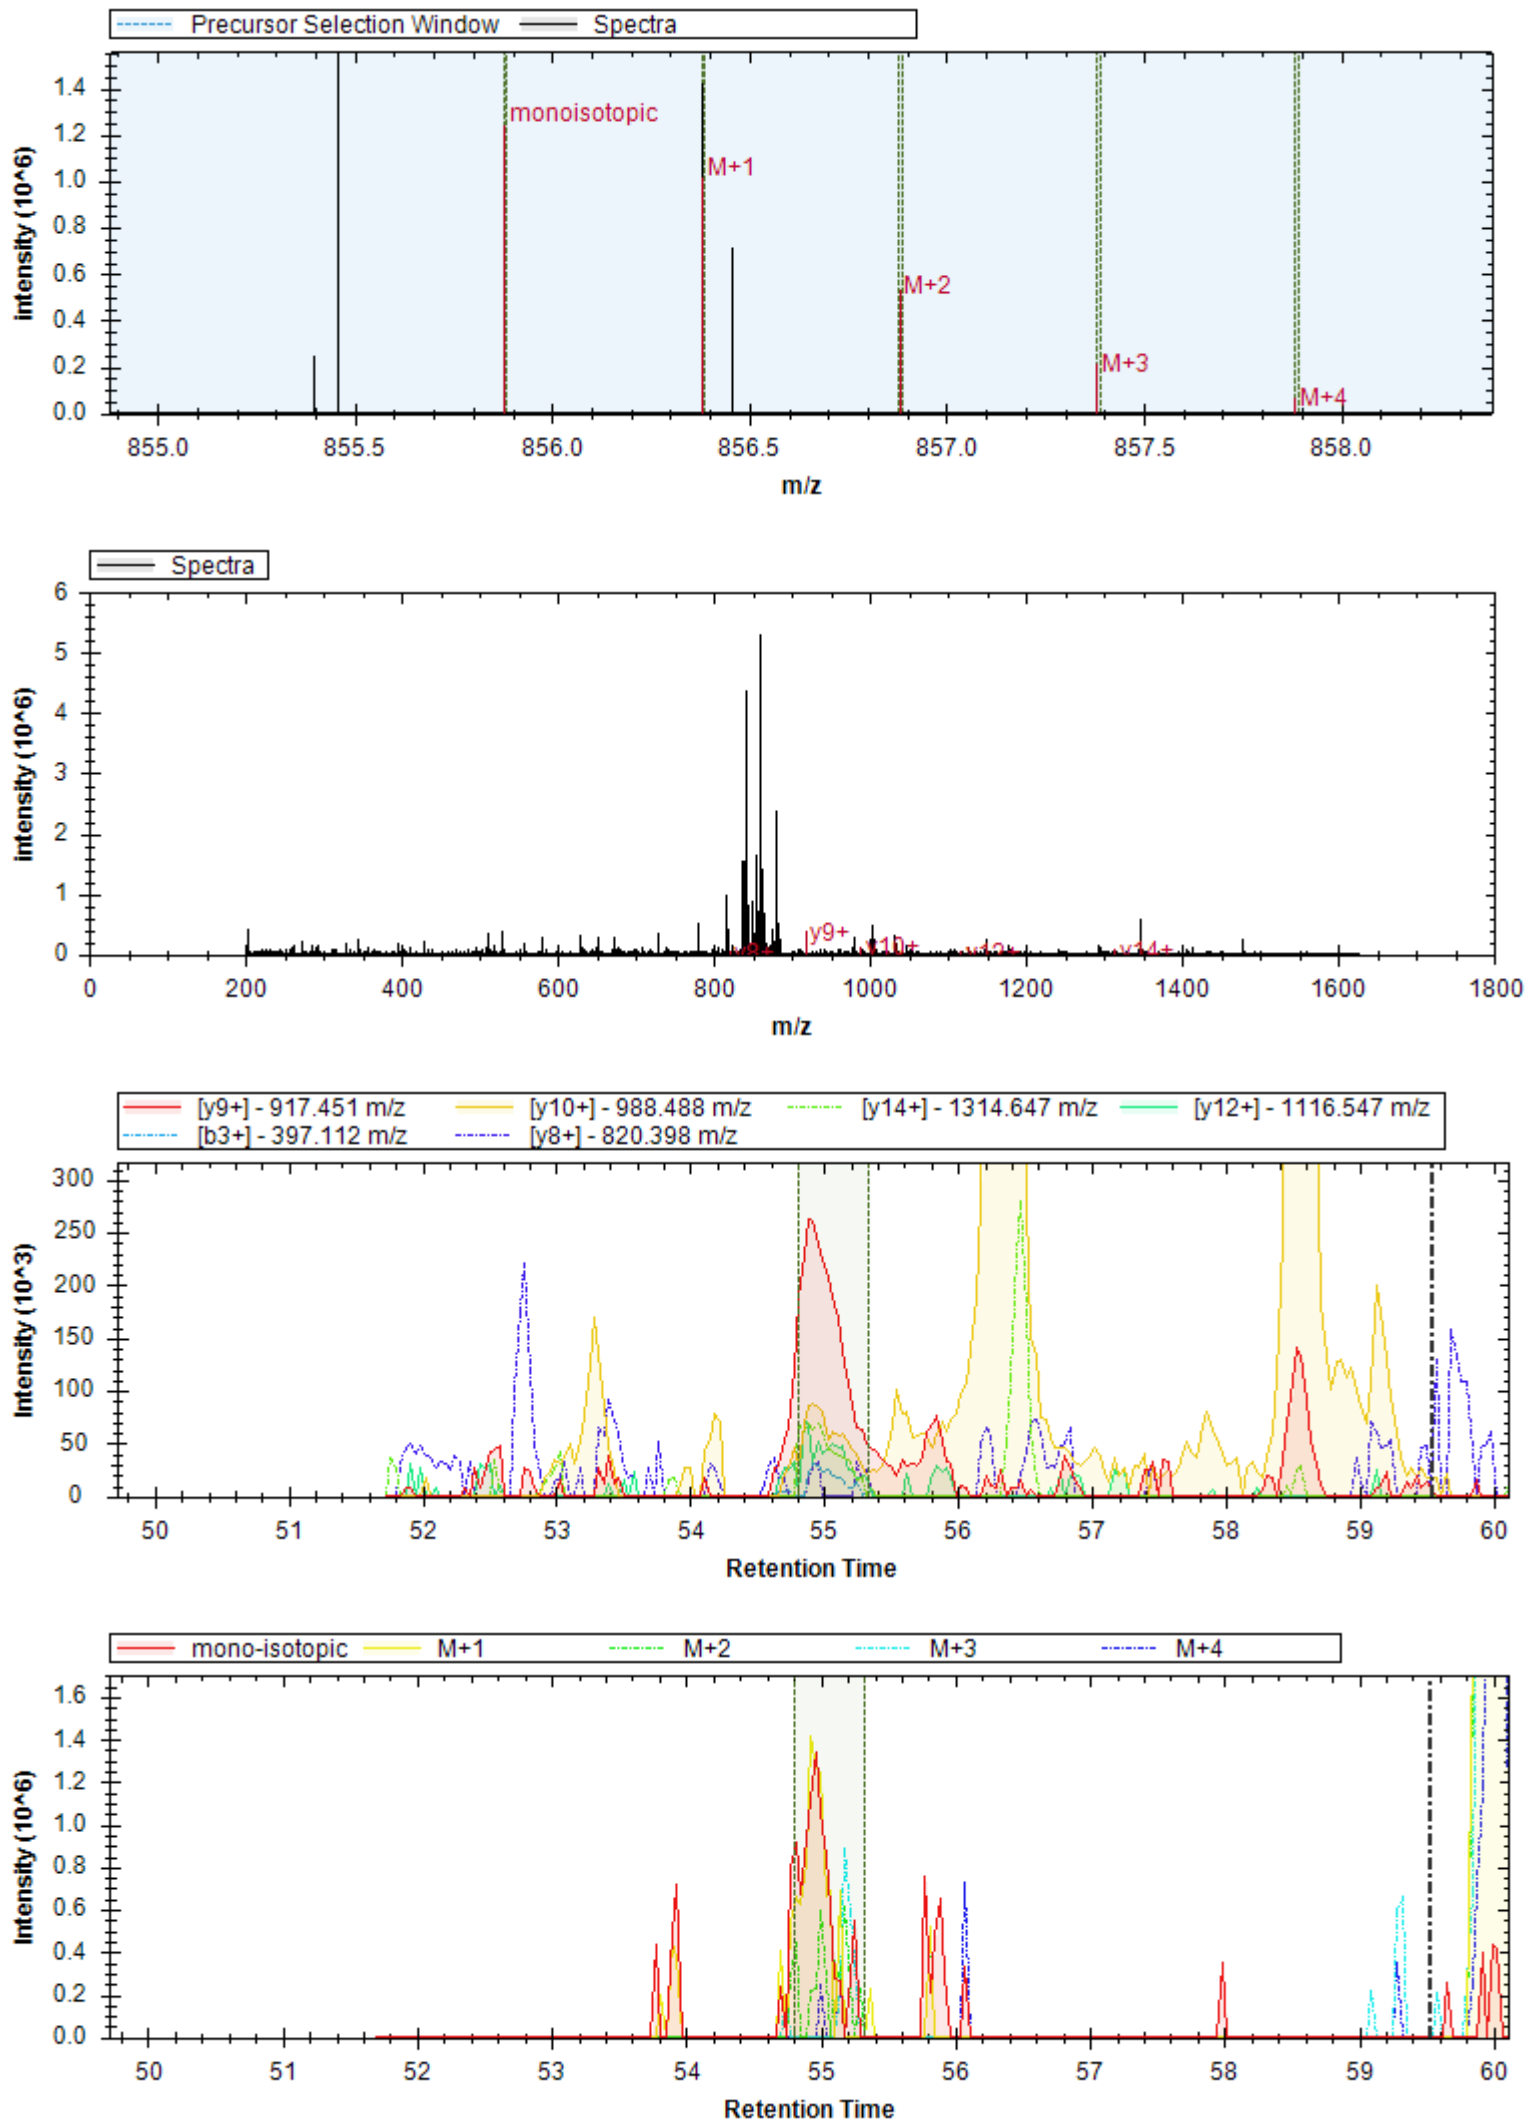

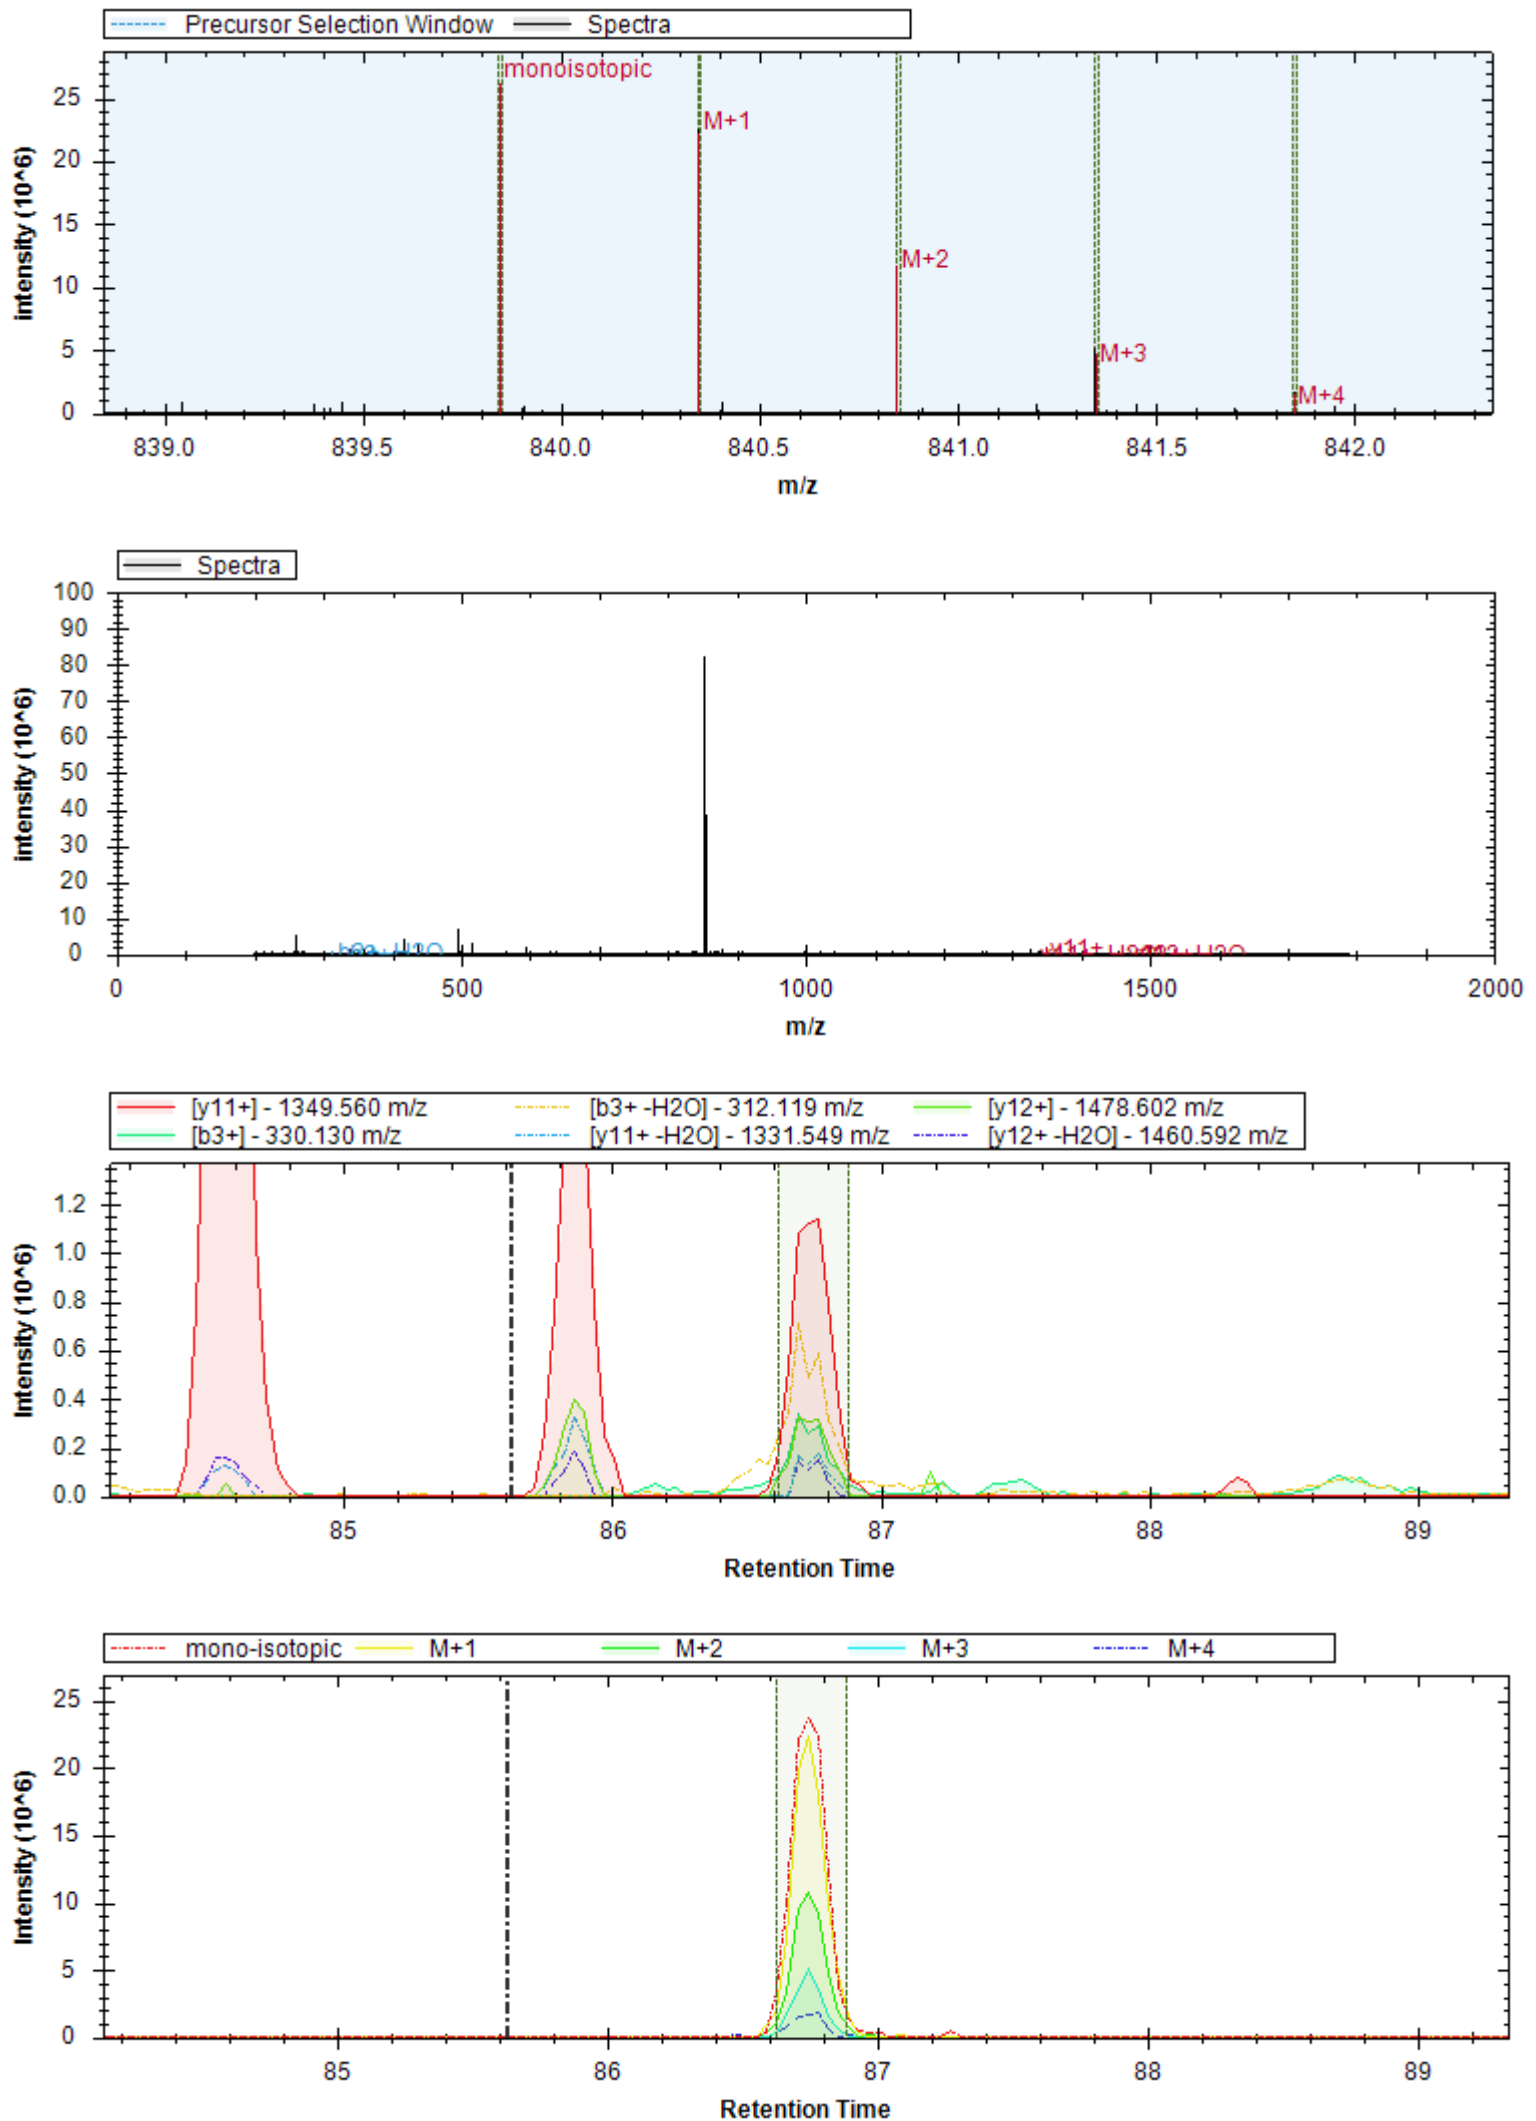

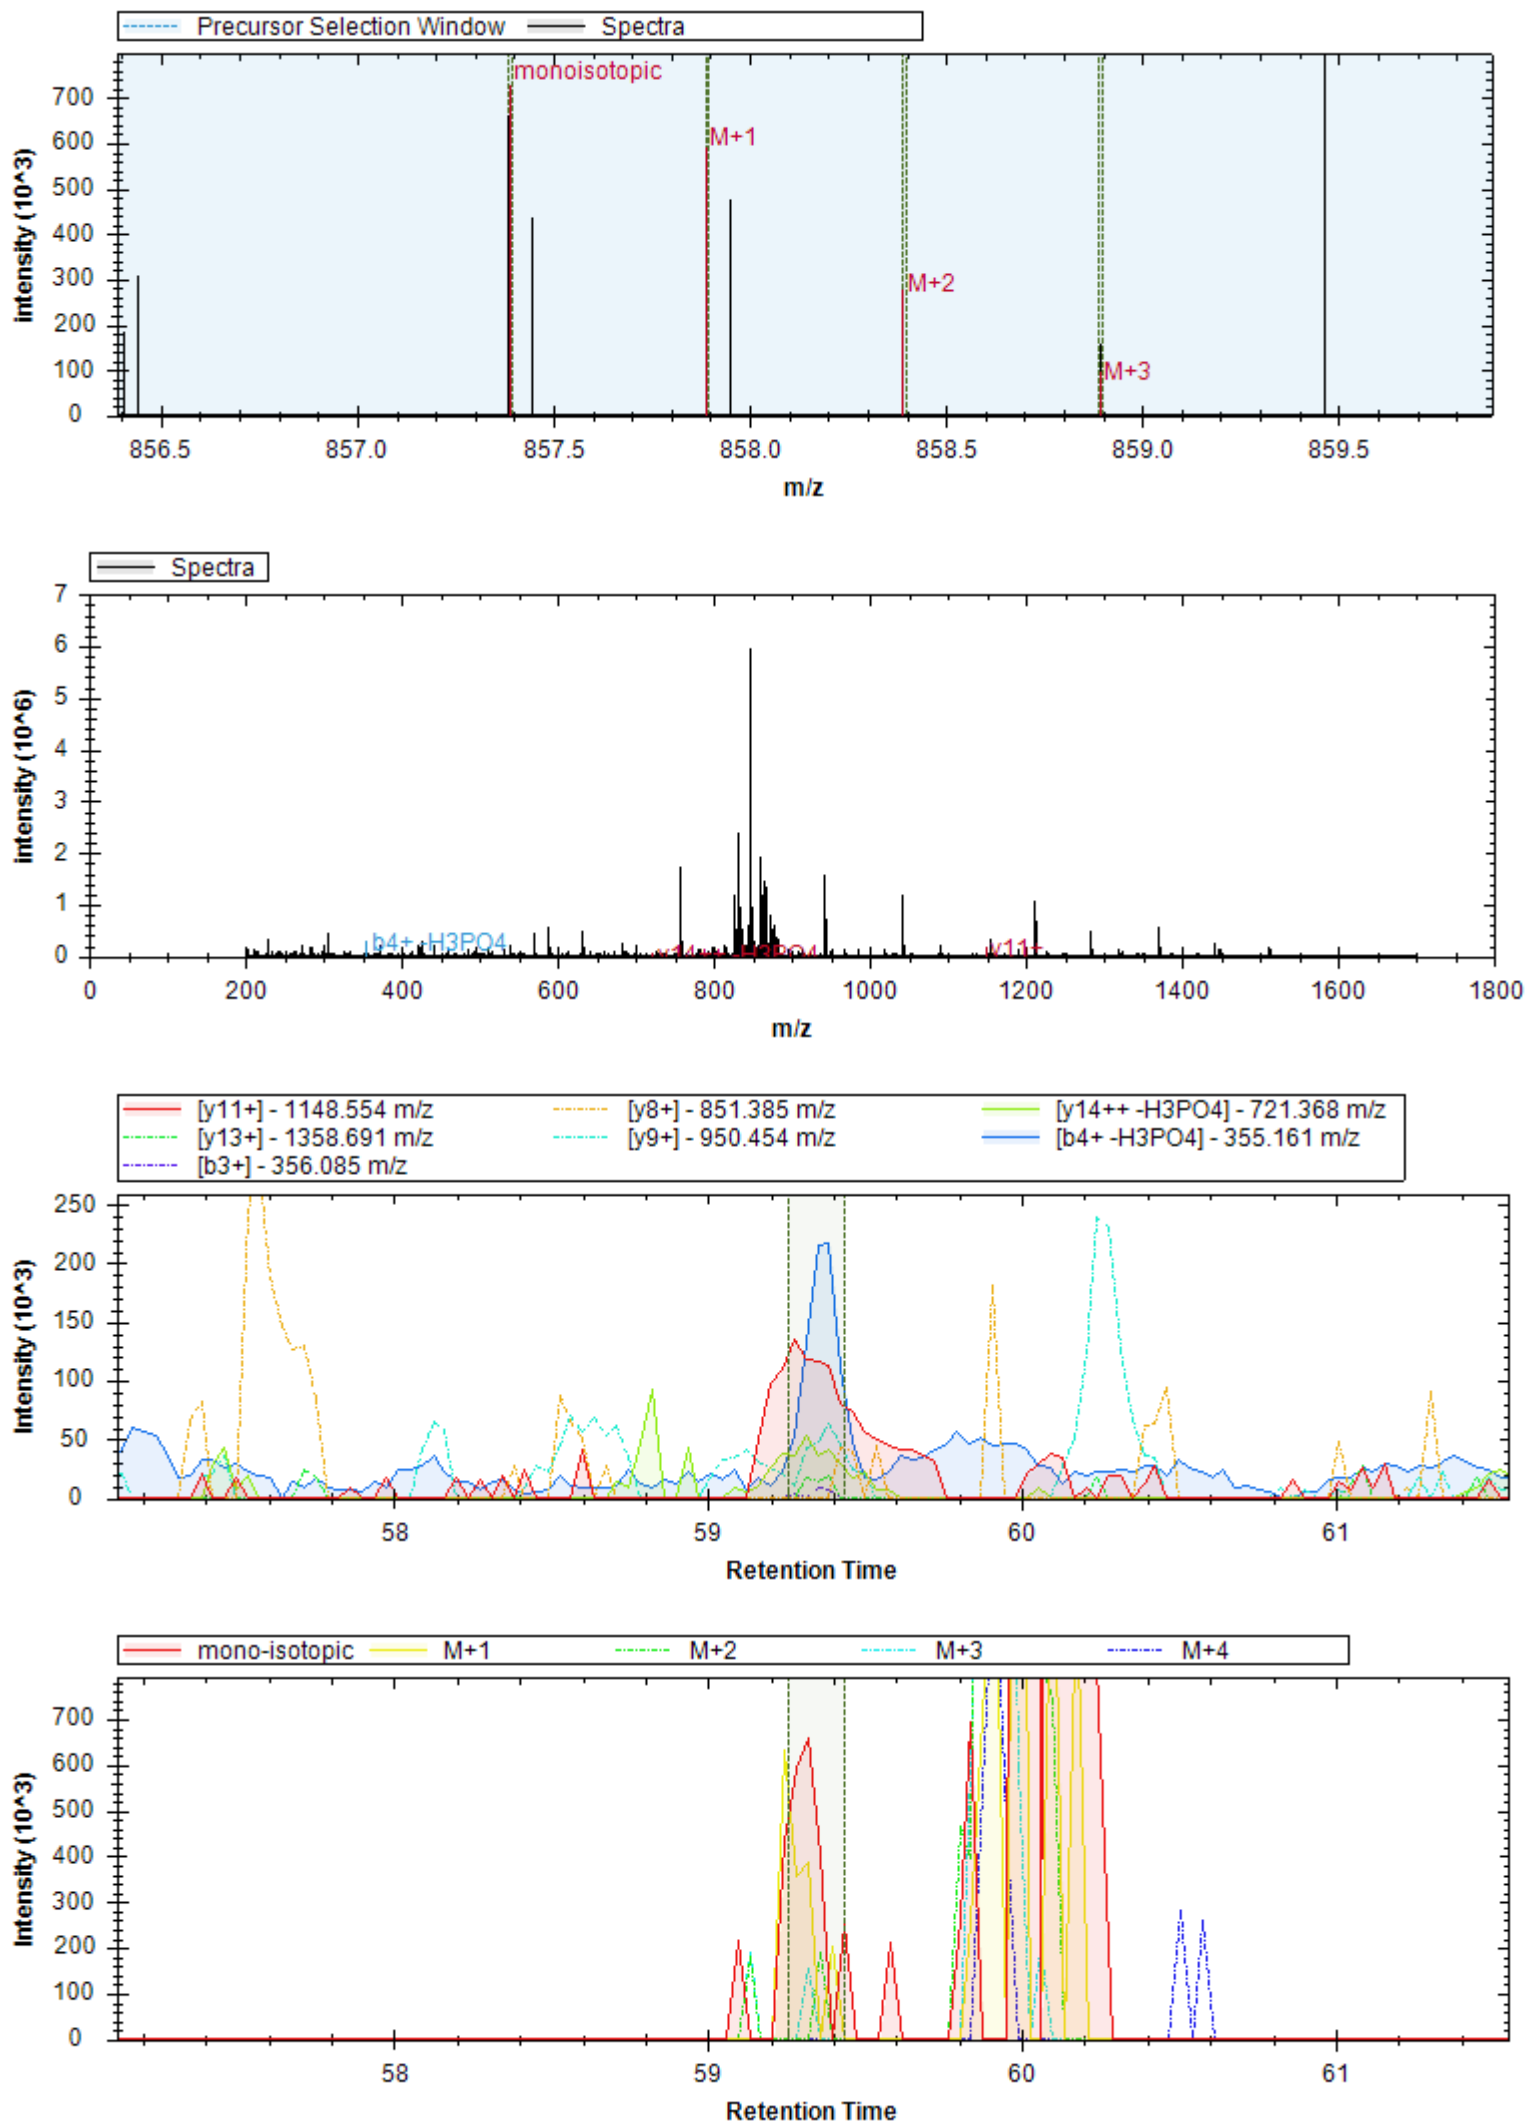

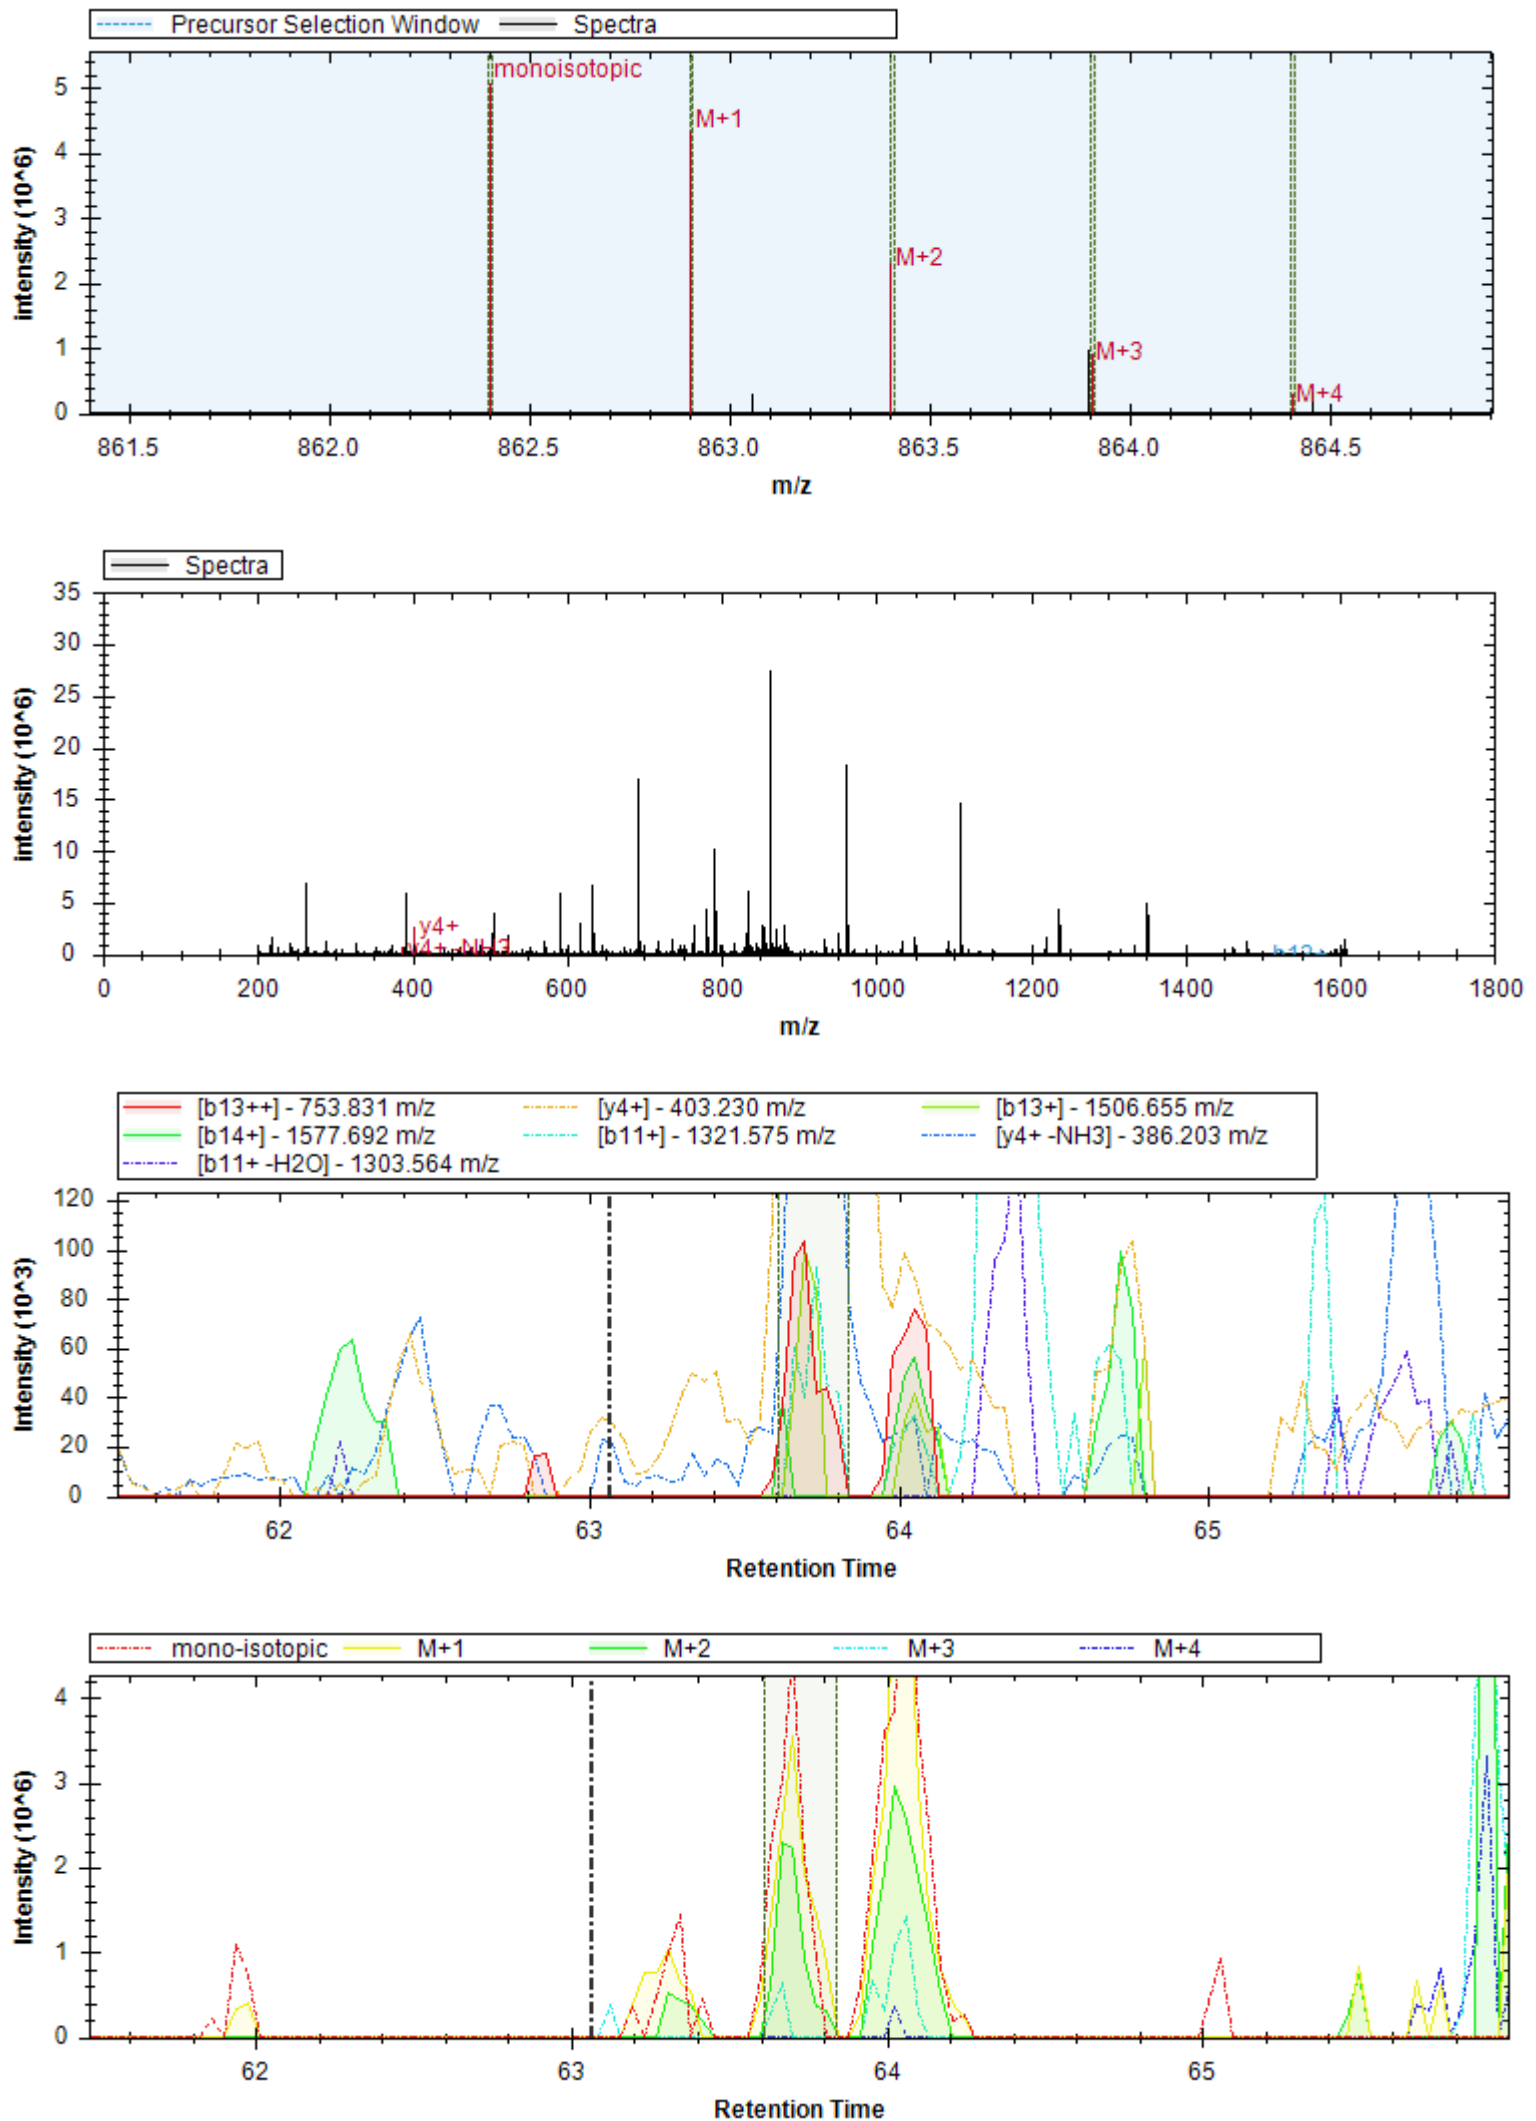

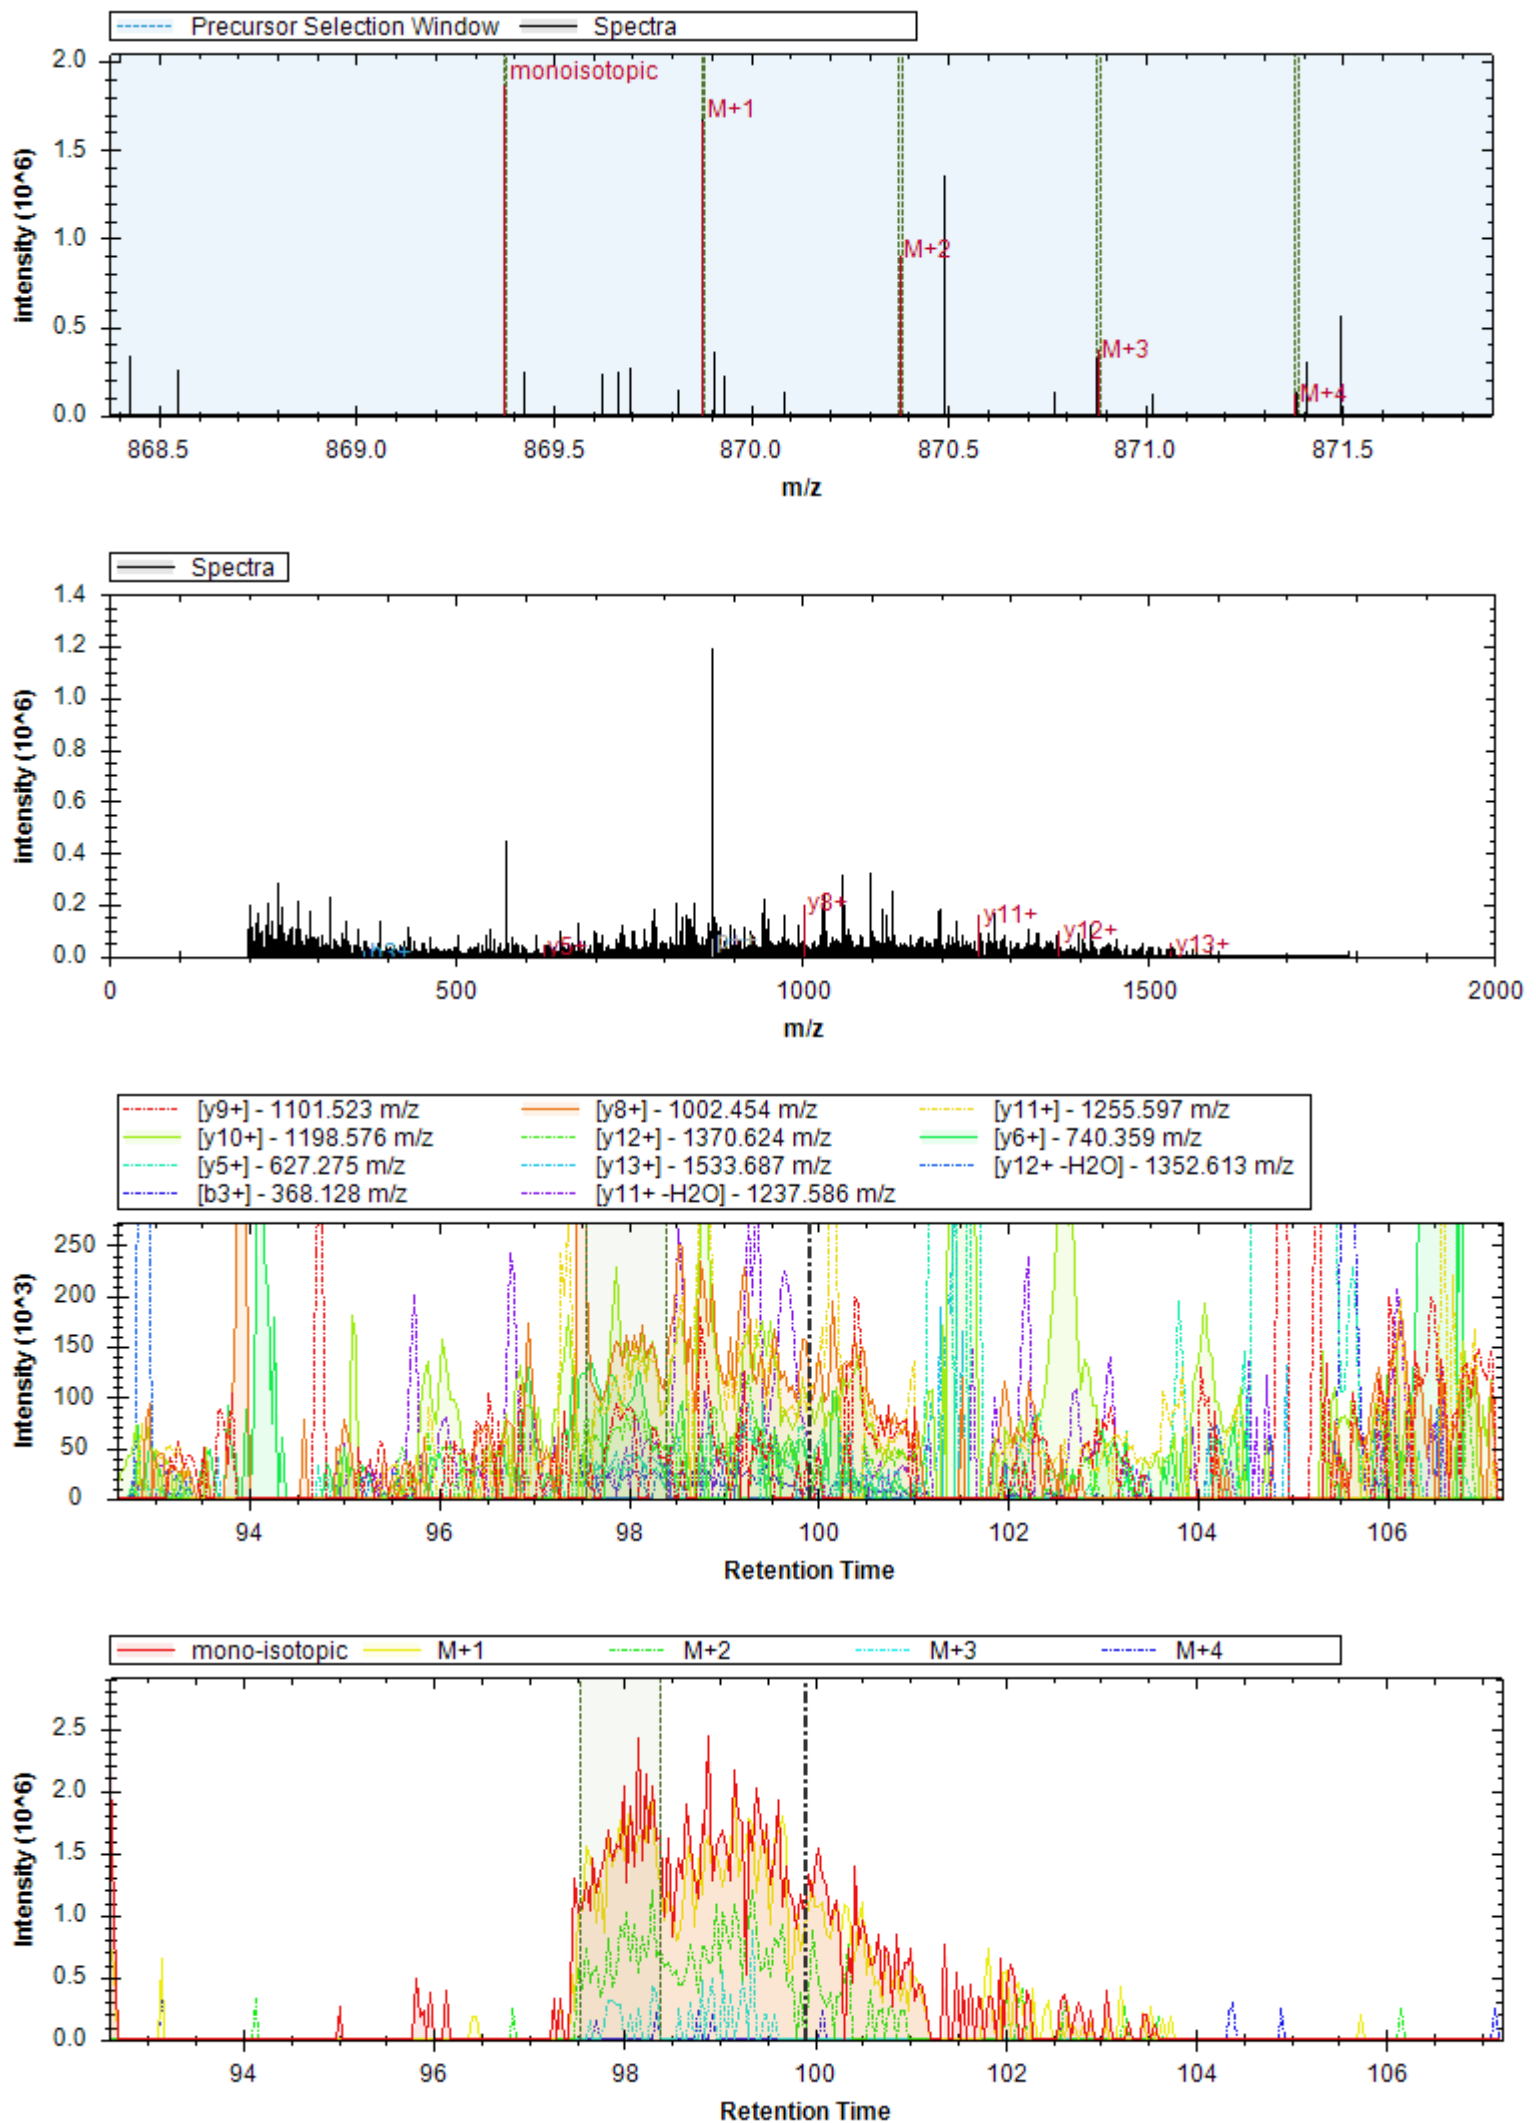

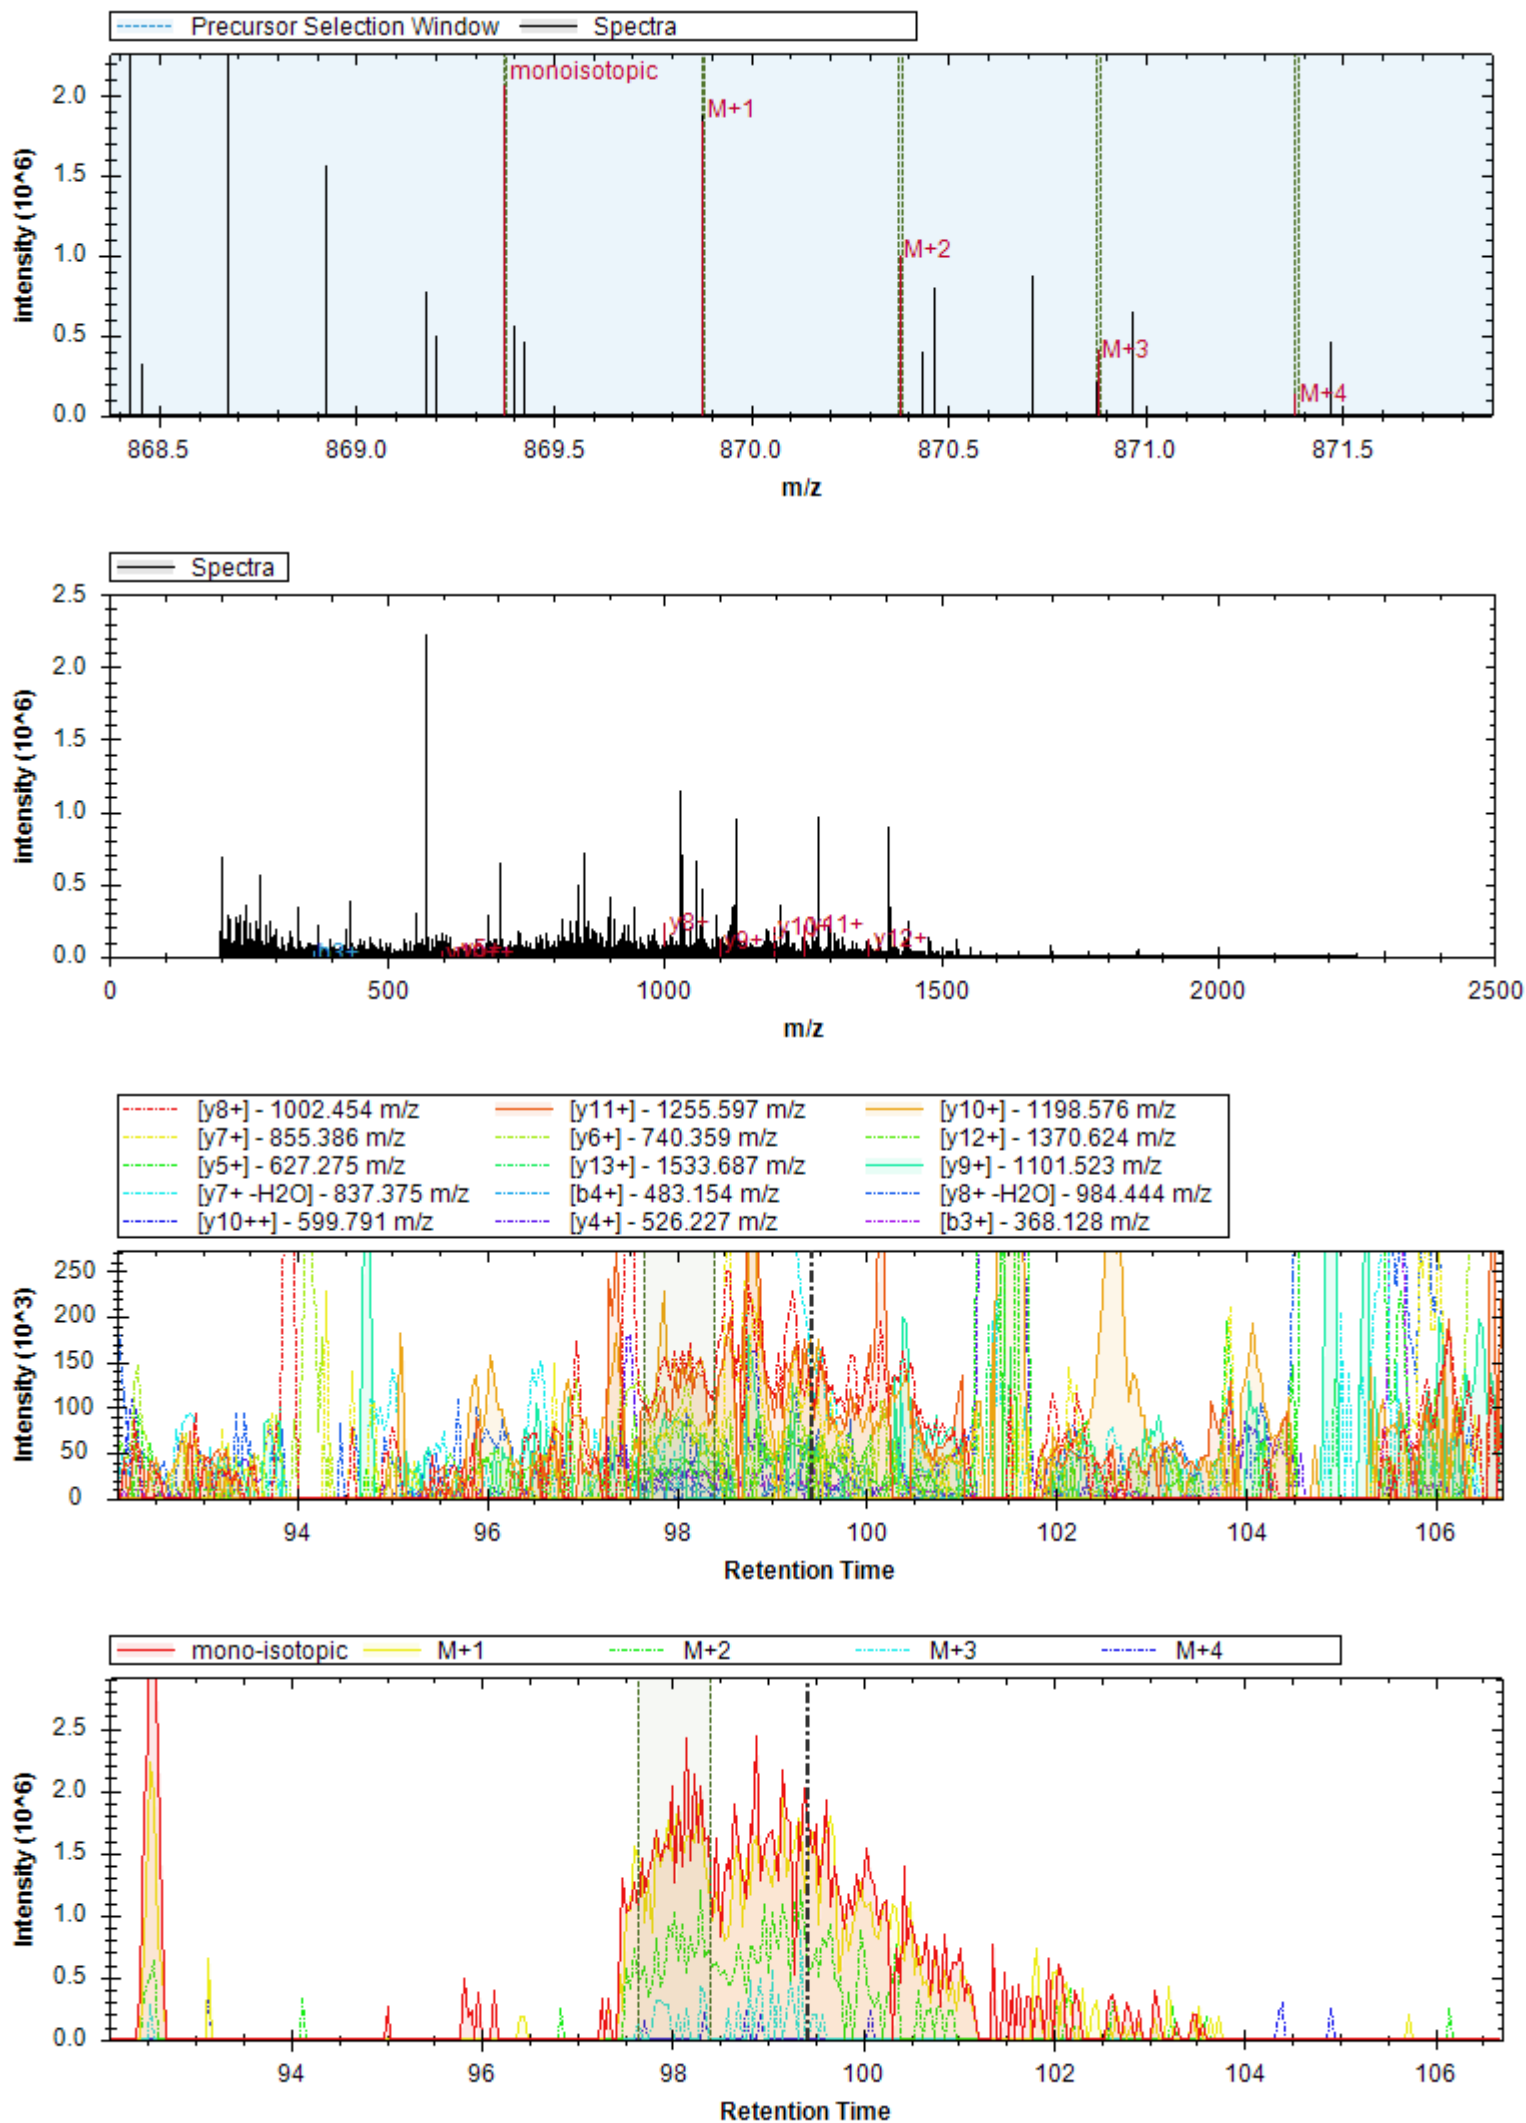

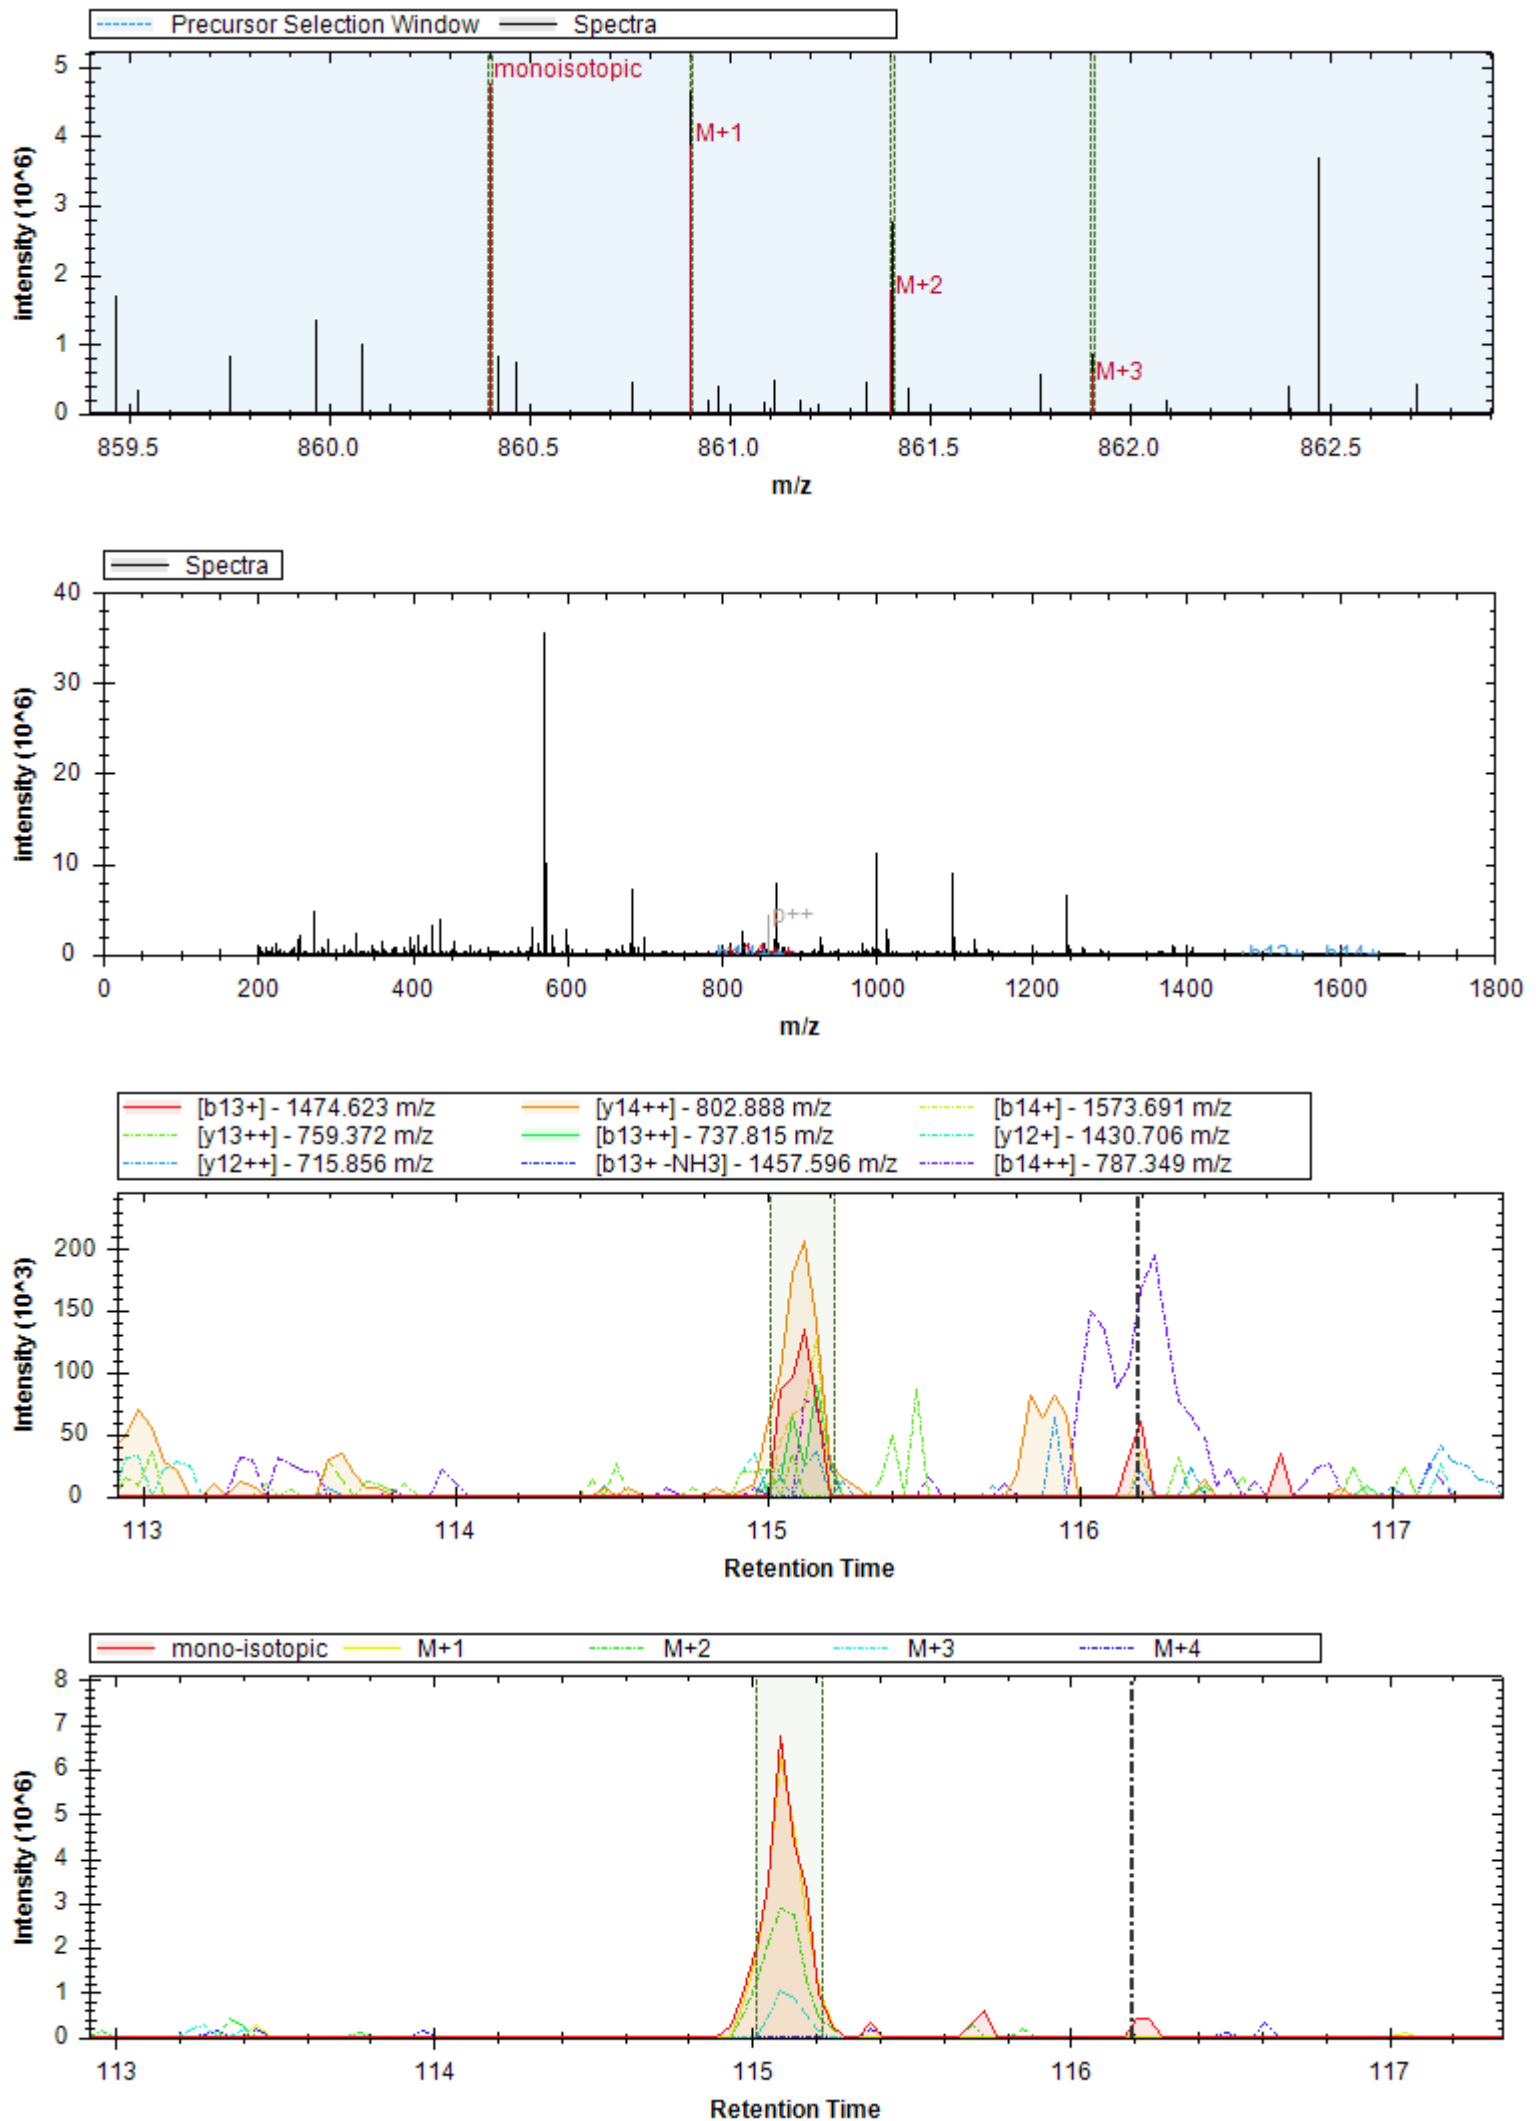

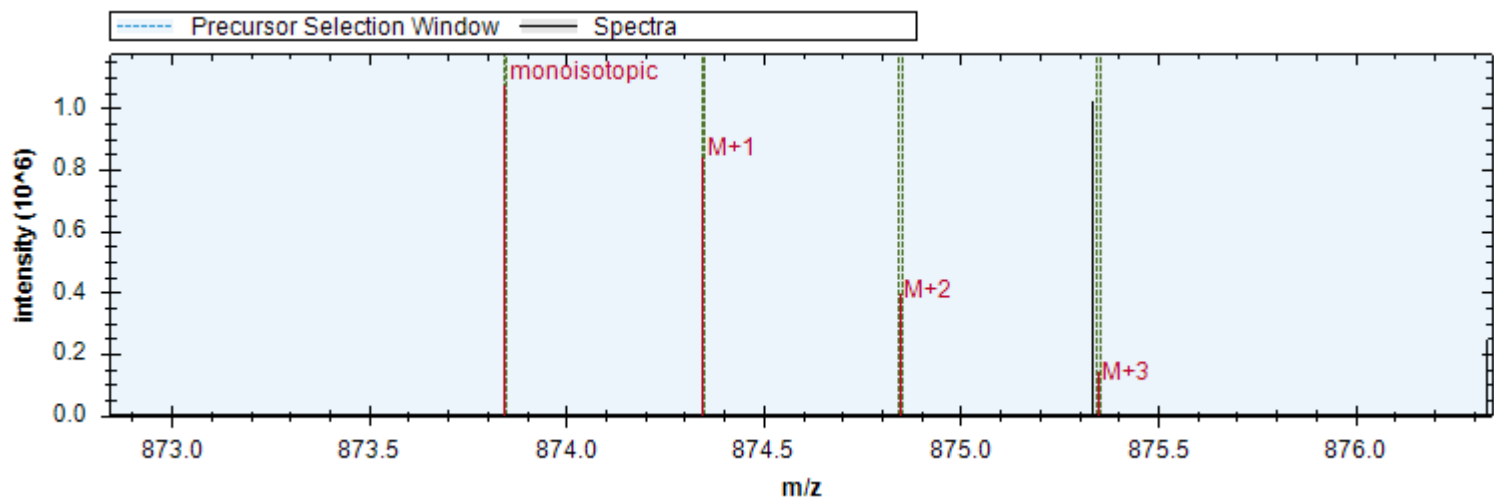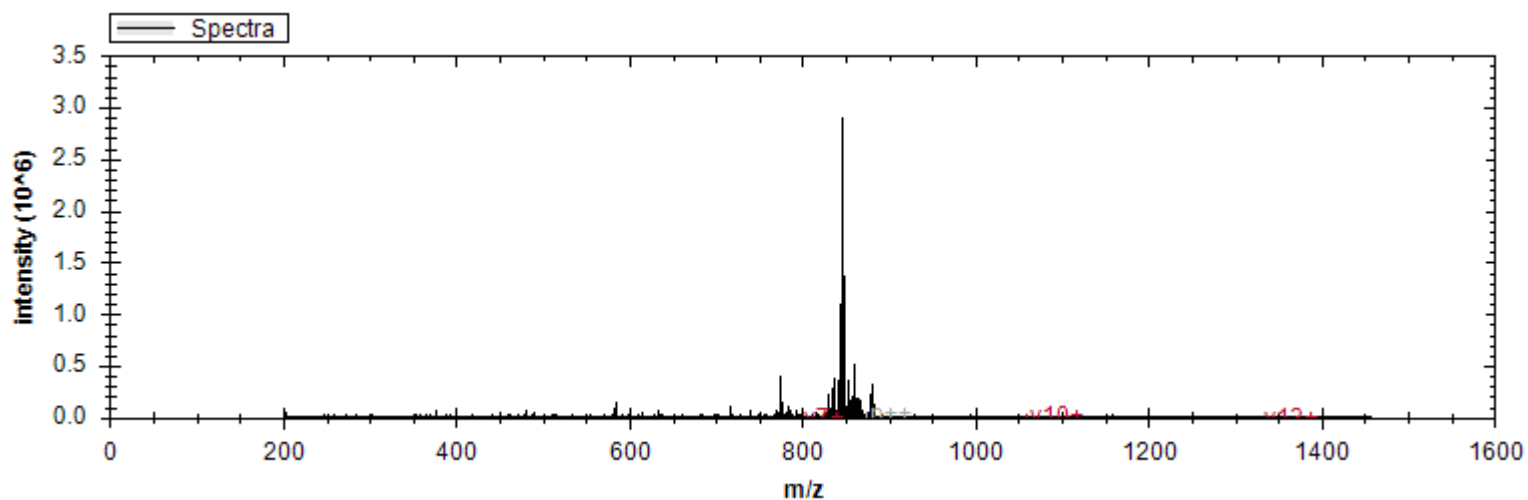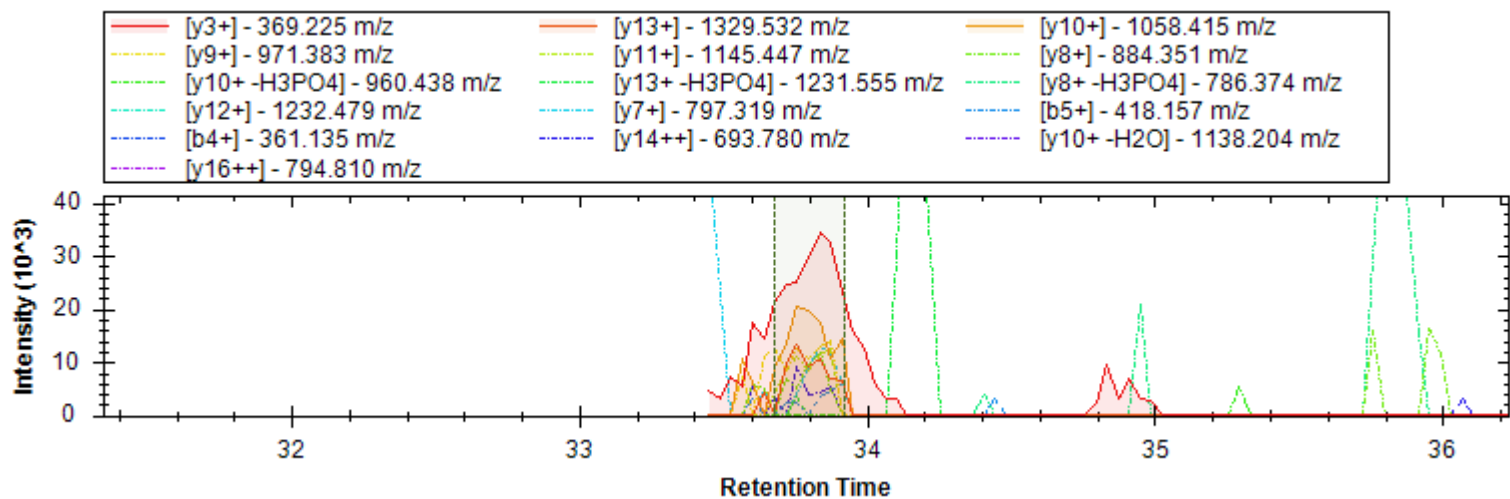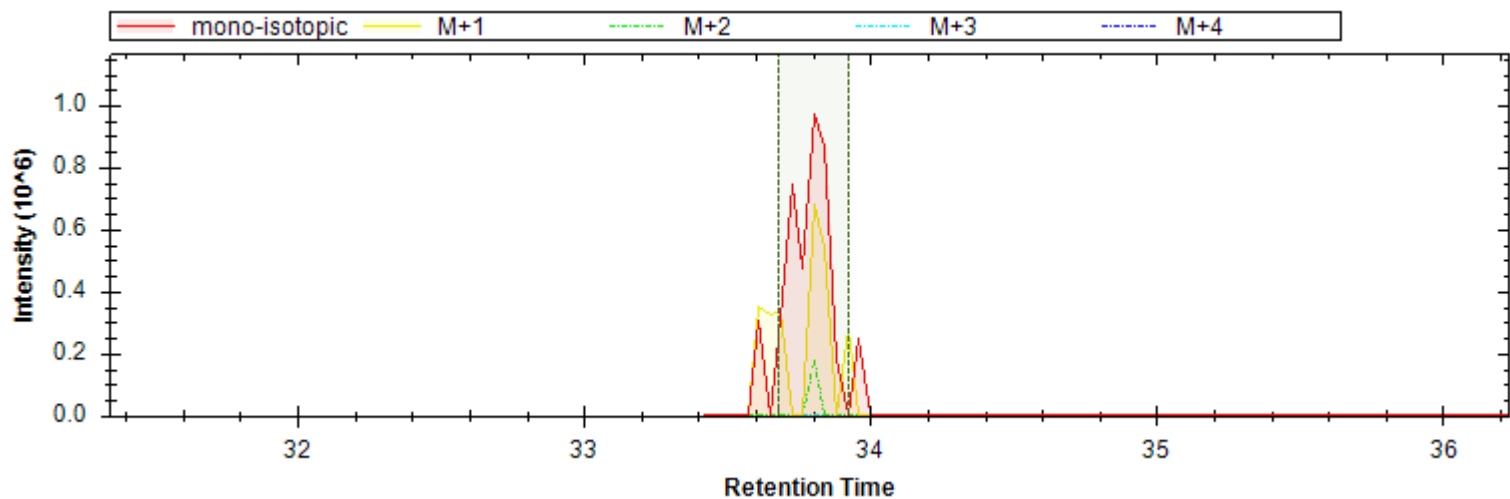



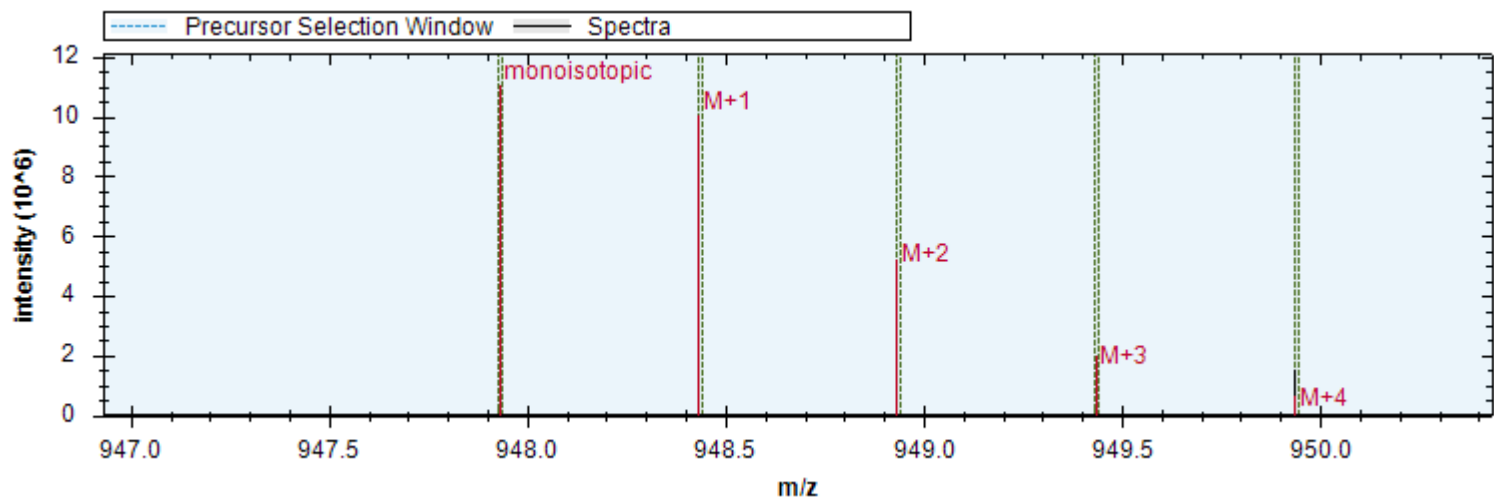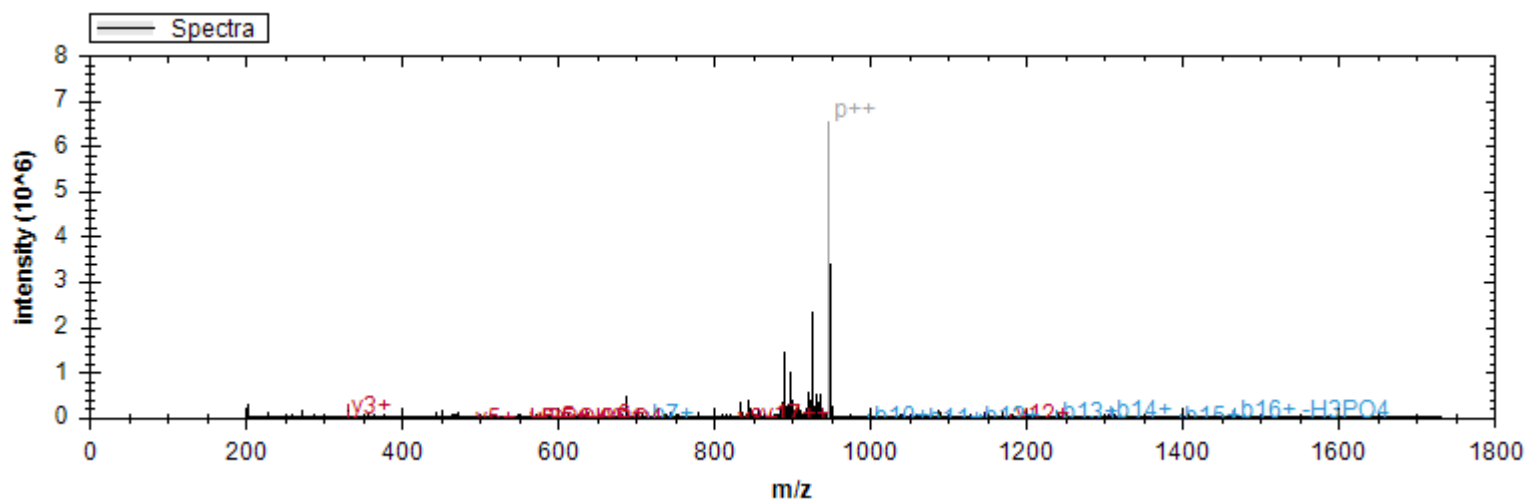

- |                            |                            |                              |
|----------------------------|----------------------------|------------------------------|
| [b14+] - 1310.634 m/z      | [y3+] - 331.198 m/z        | [b16+ -H3PO4] - 1466.687 m/z |
| [b13+] - 1239.596 m/z      | [b7+] - 715.337 m/z        | [b12+] - 1140.528 m/z        |
| [y6+] - 656.265 m/z        | [b15+] - 1397.666 m/z      | [y12+ -H2O] - 1260.314 m/z   |
| [b10+] - 998.454 m/z       | [y12+] - 1180.525 m/z      | [y4+] - 498.196 m/z          |
| [y17++] - 854.899 m/z      | [b16+ -H2O] - 1644.453 m/z | [b11+] - 1069.491 m/z        |
| [y4+ -H3PO4] - 400.219 m/z | [b15+ -H2O] - 1379.655 m/z | [y5+ -H3PO4] - 487.251 m/z   |
| [y9+] - 897.408 m/z        | [y4+ -NH3] - 578.969 m/z   | [y3+ -H2O] - 313.187 m/z     |
| [y5+] - 585.228 m/z        | [y6+ -H3PO4] - 558.288 m/z | [b16+ -NH3] - 1645.437 m/z   |
| [y8+] - 826.371 m/z        |                            |                              |

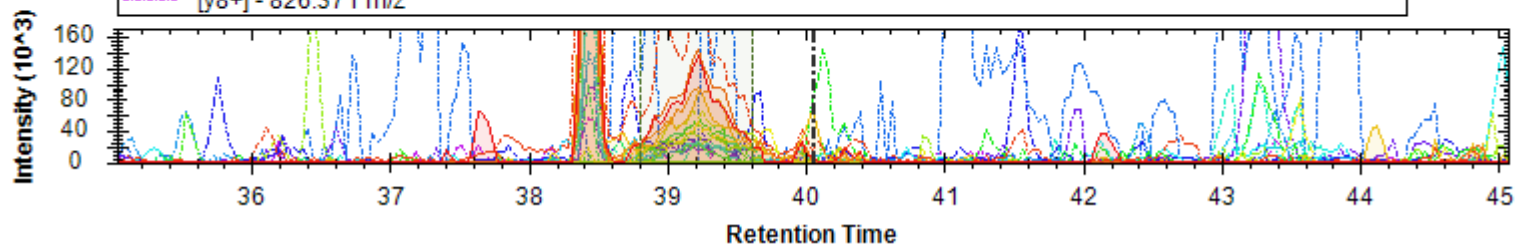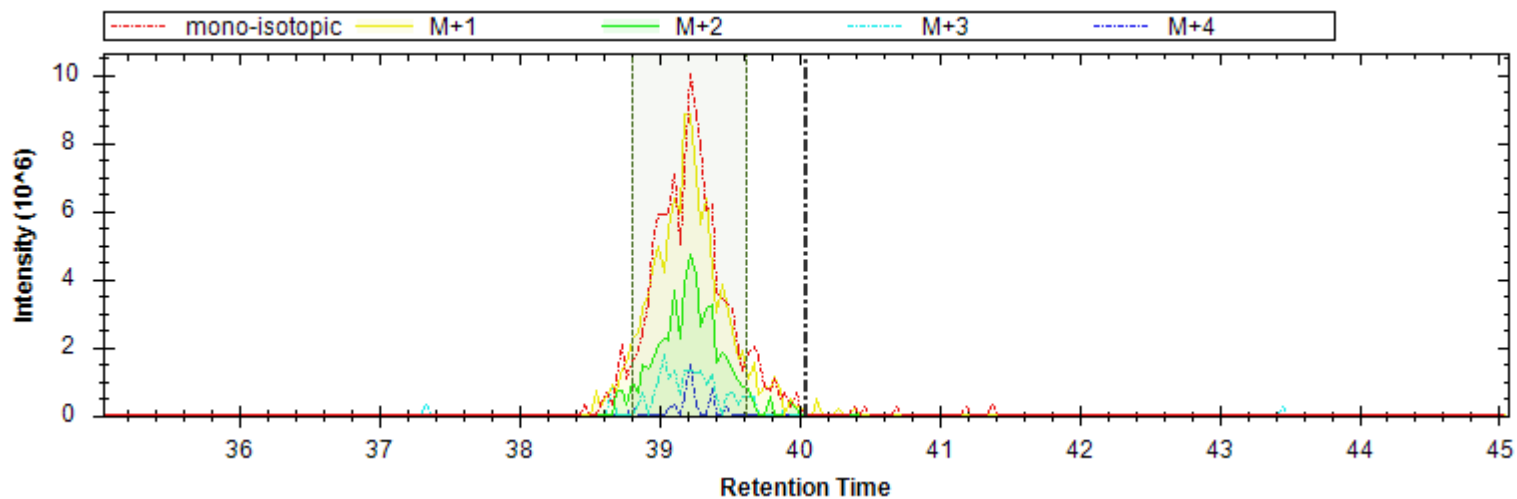

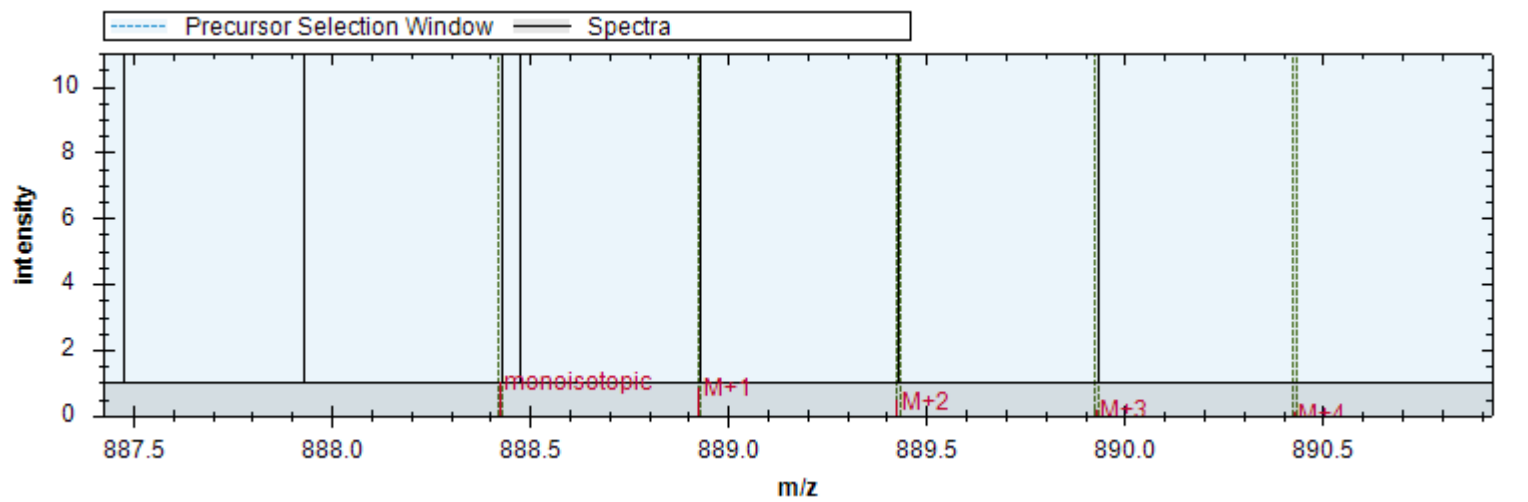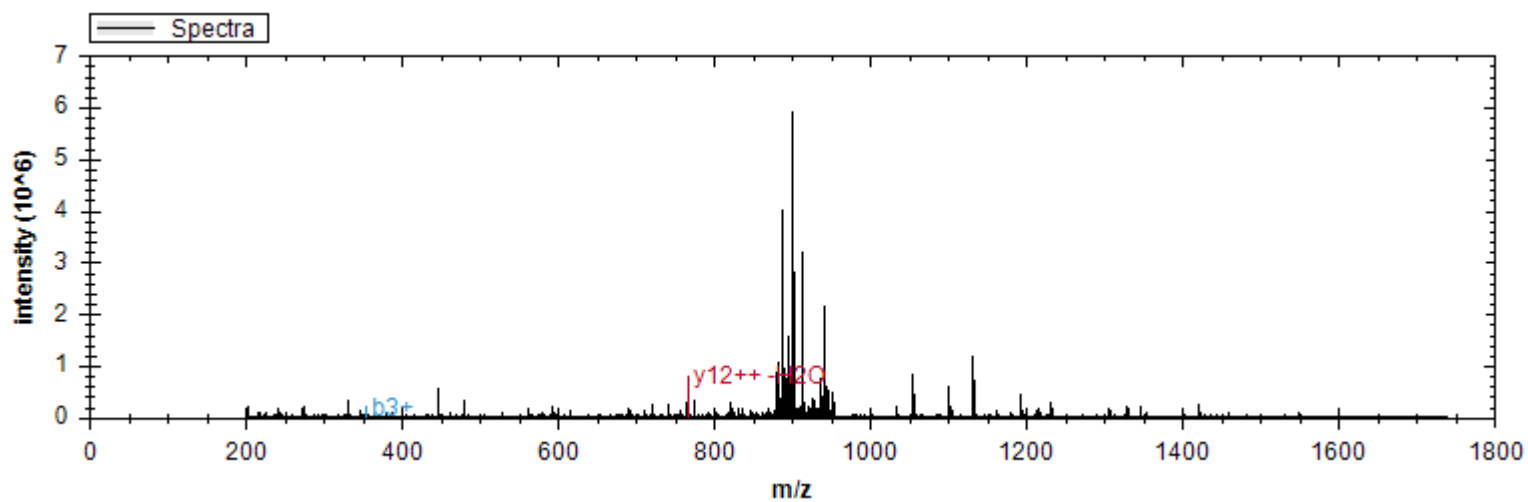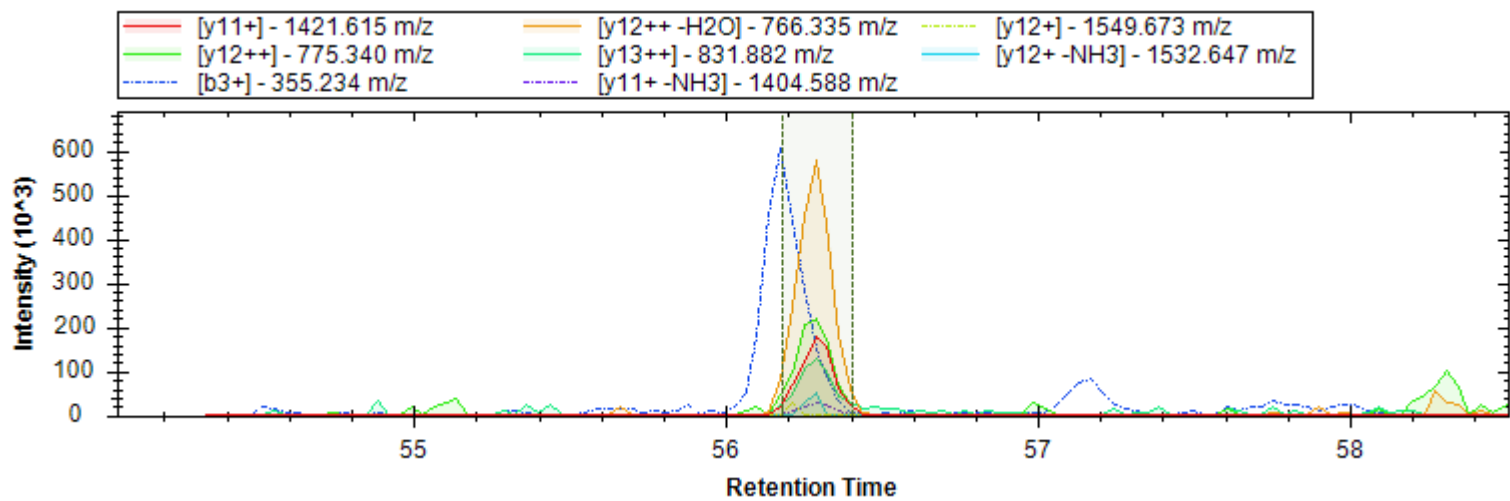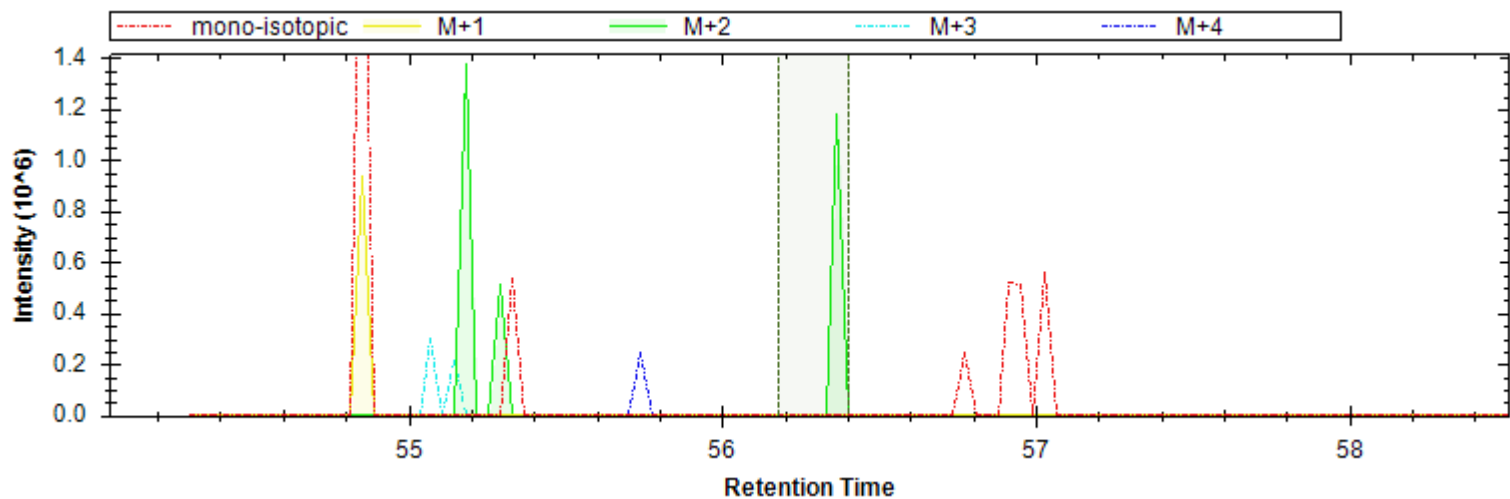



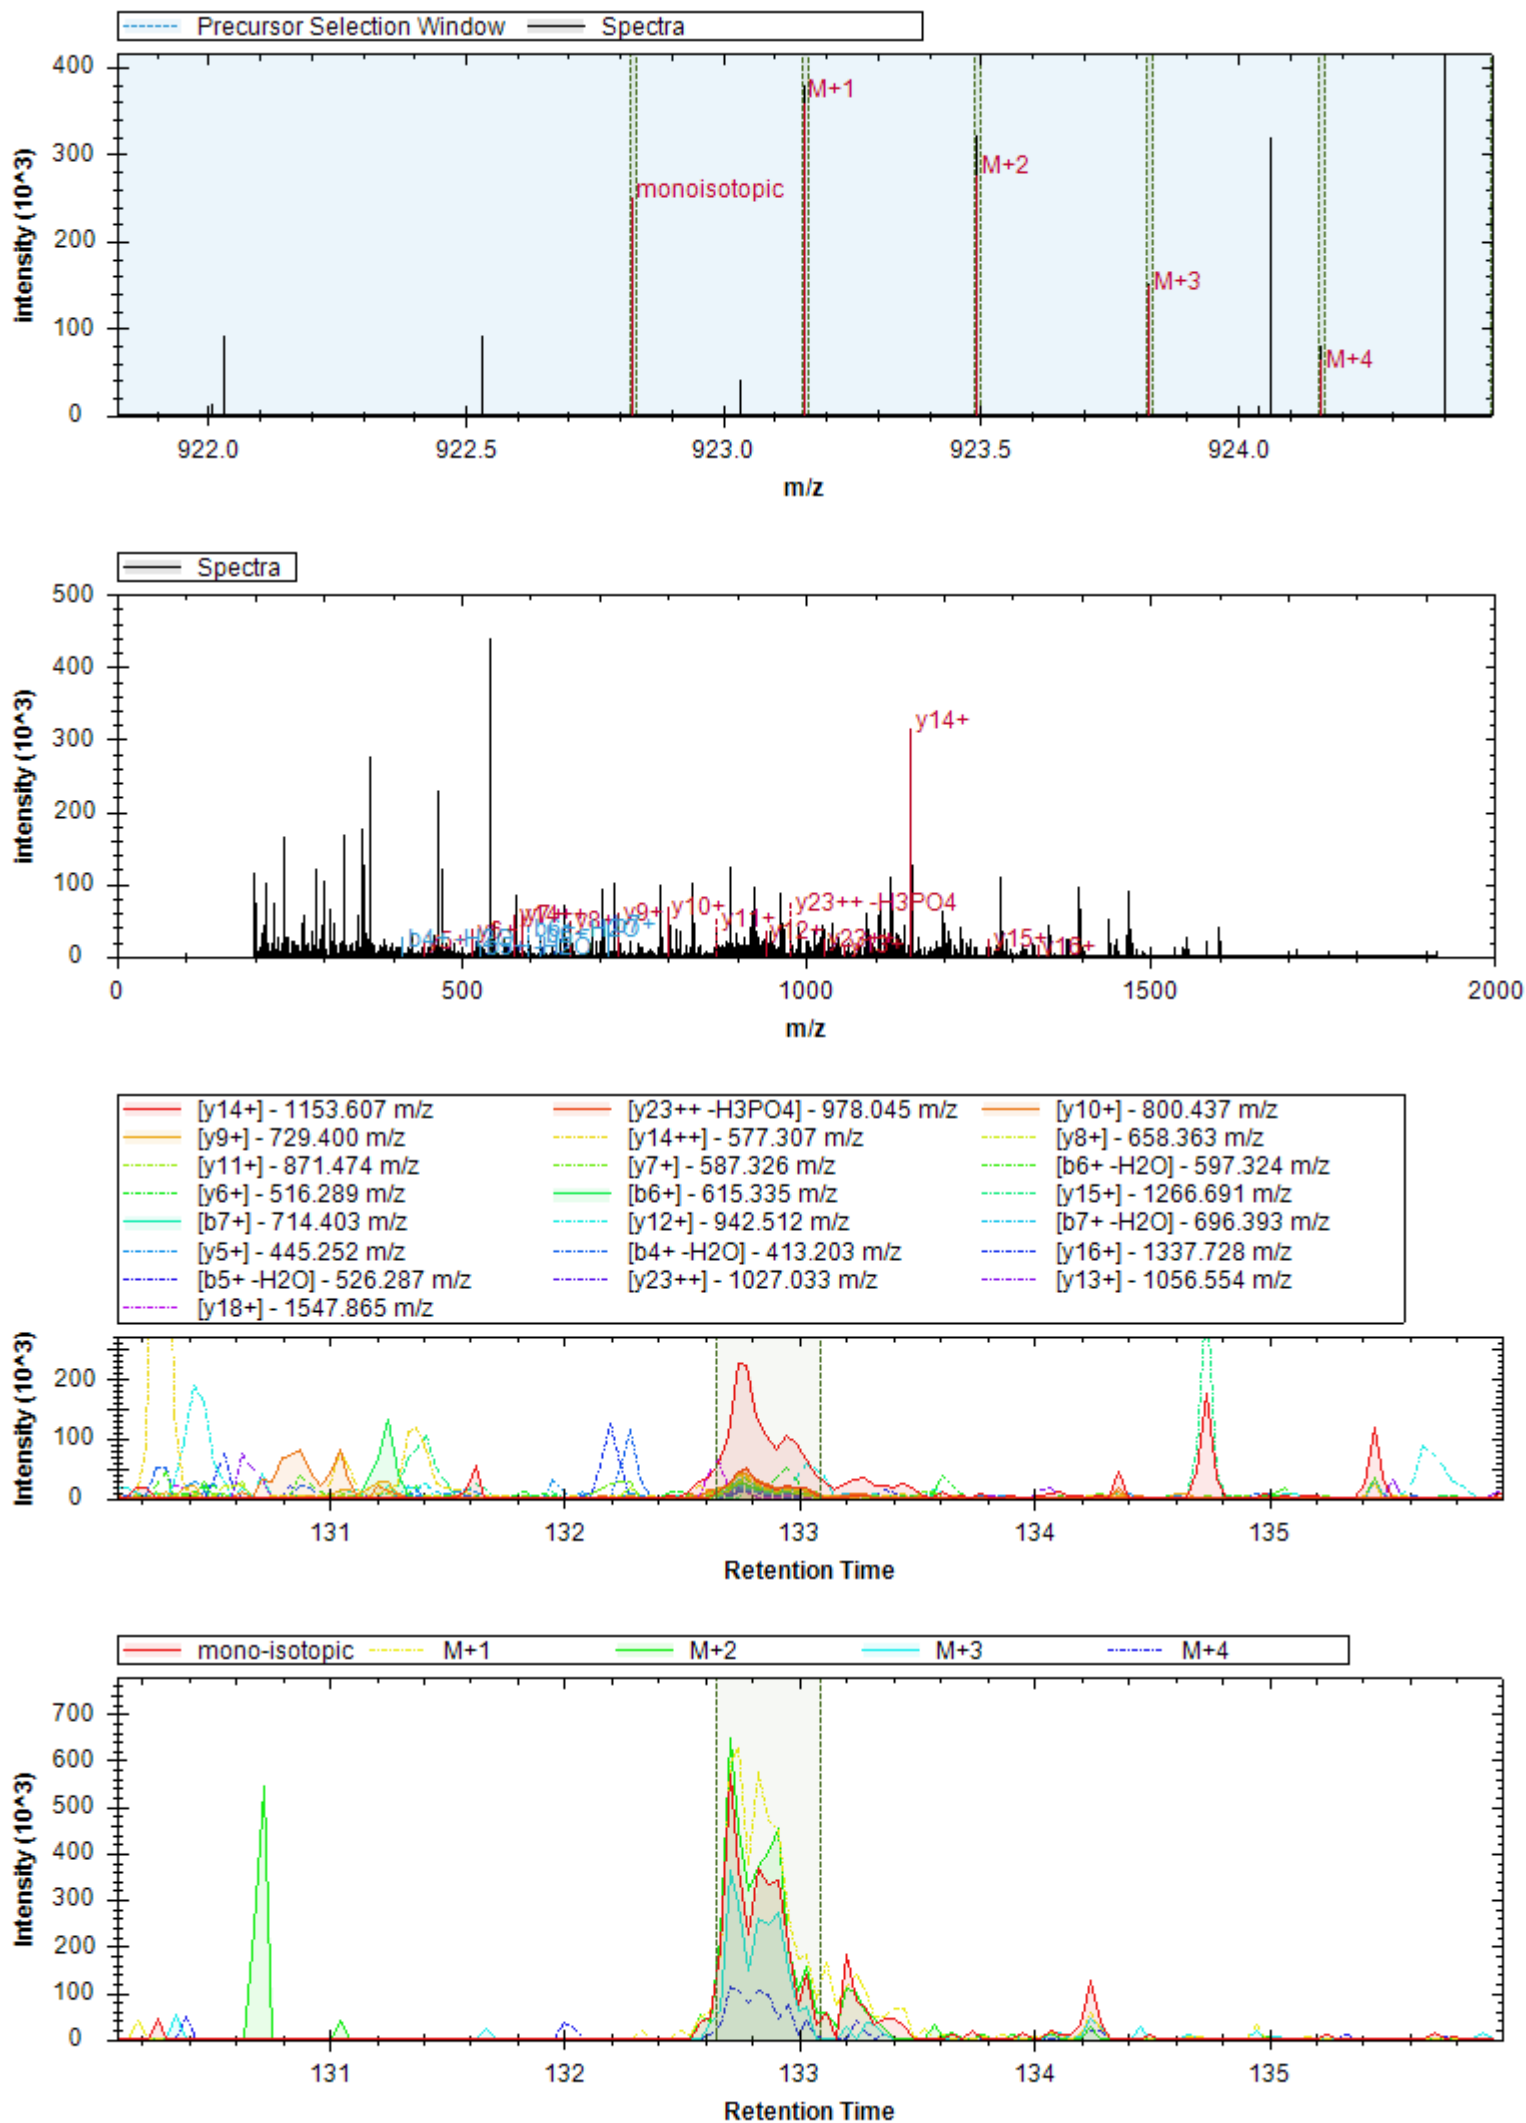

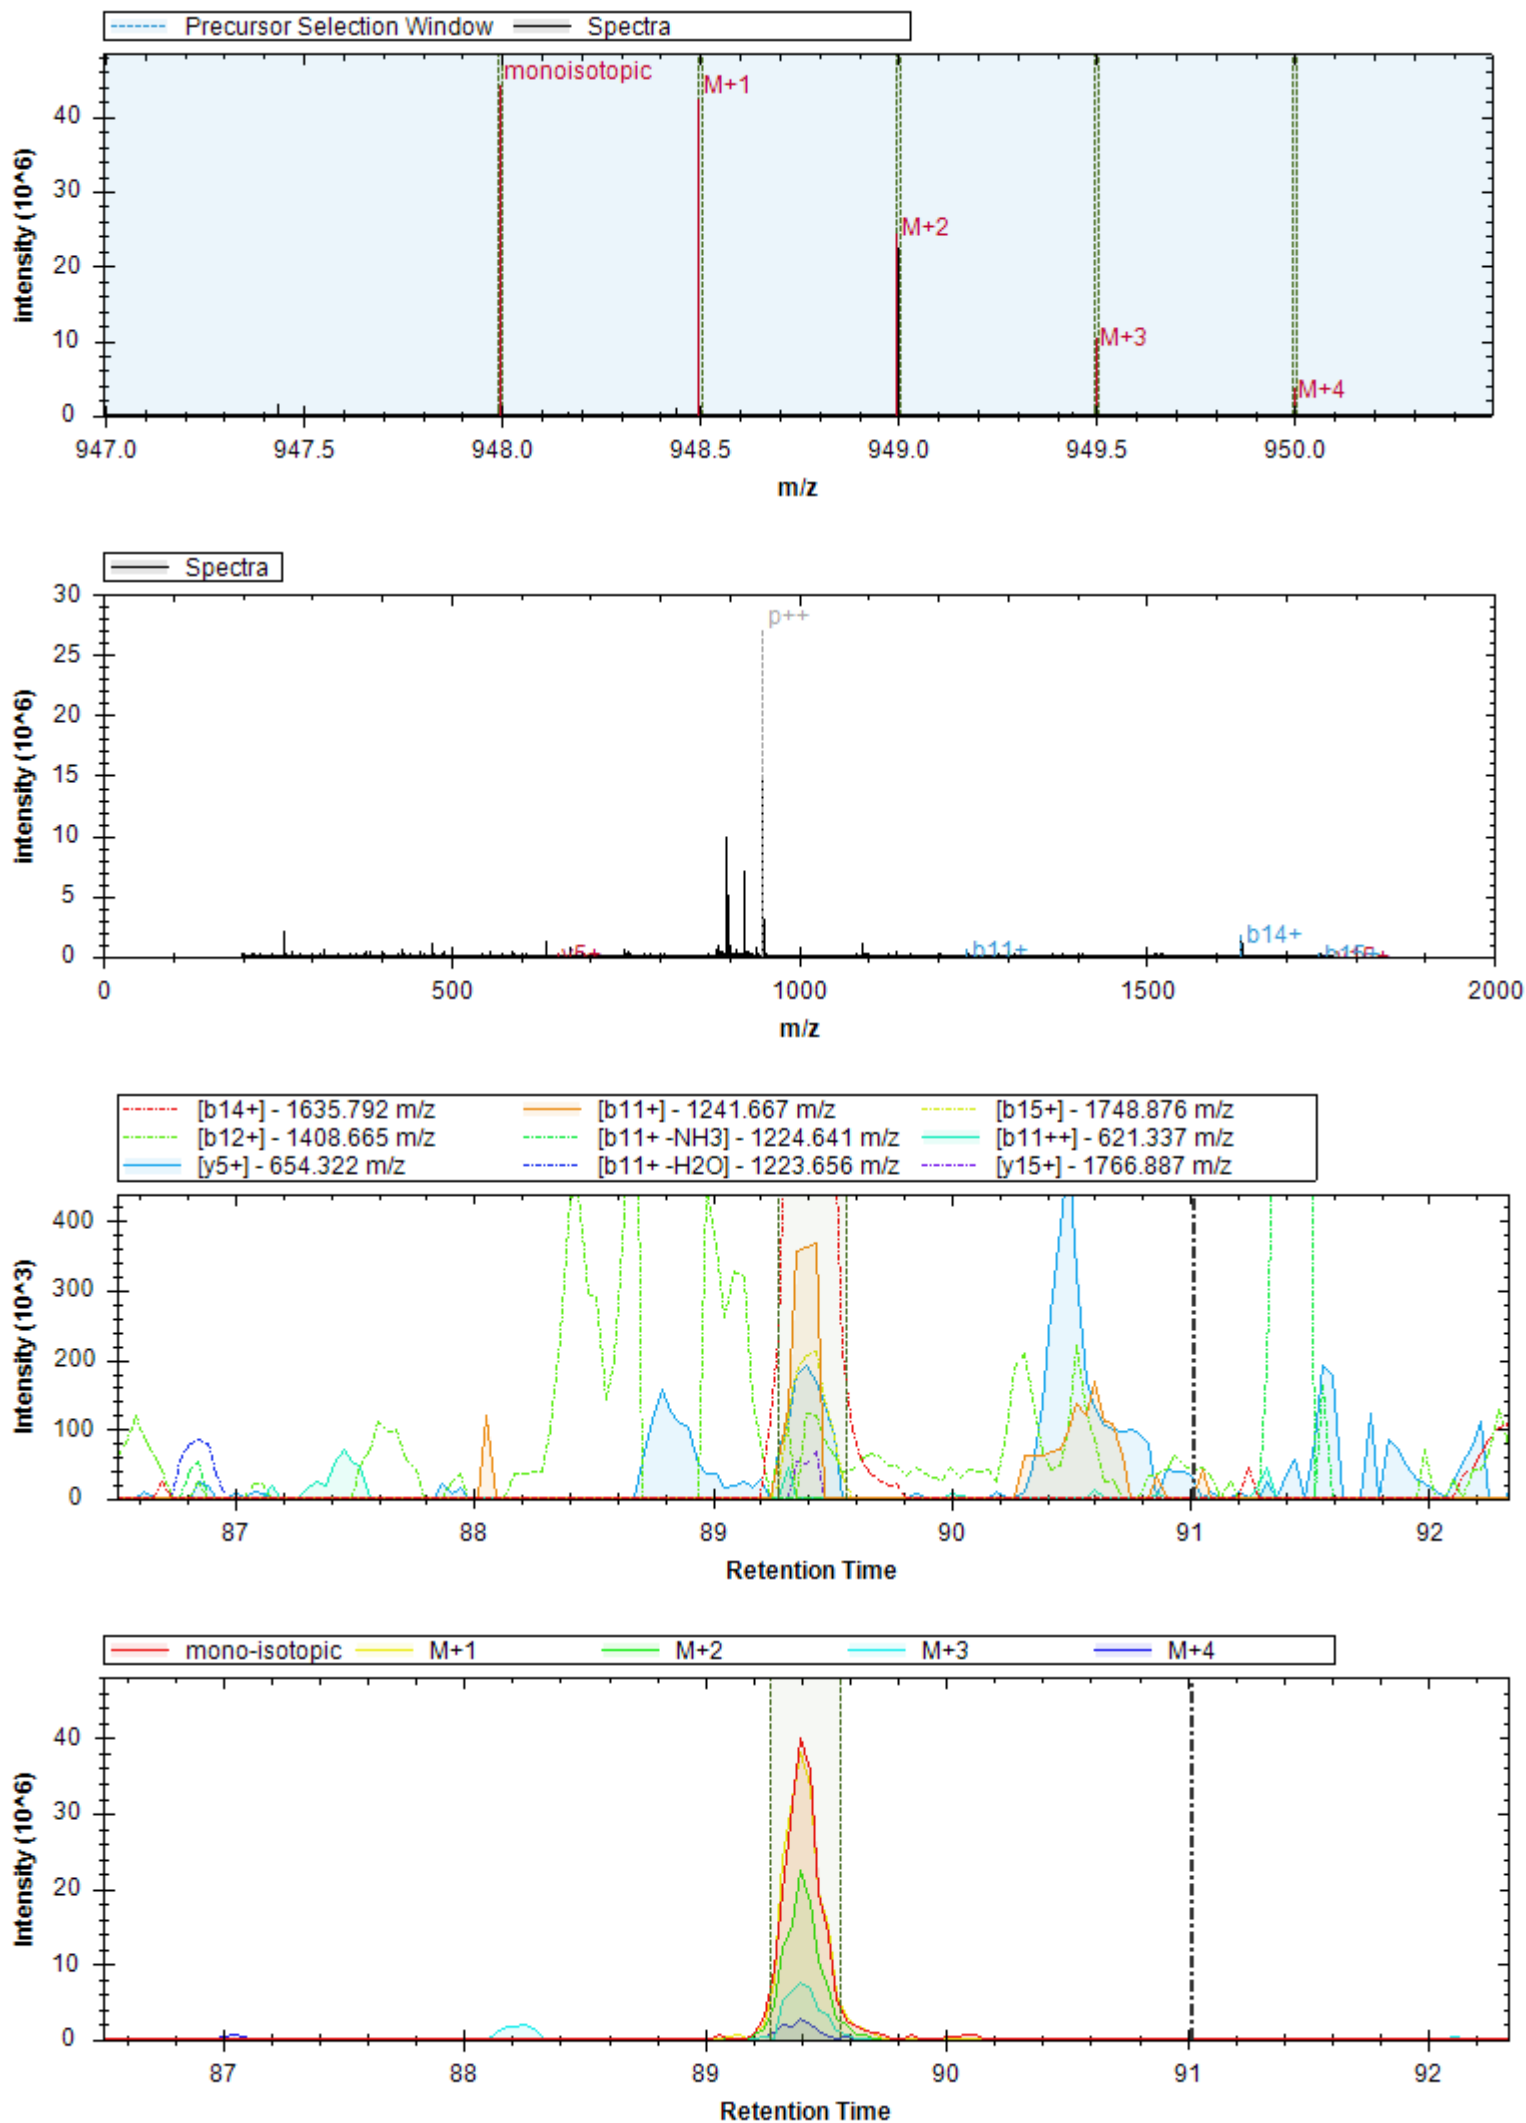

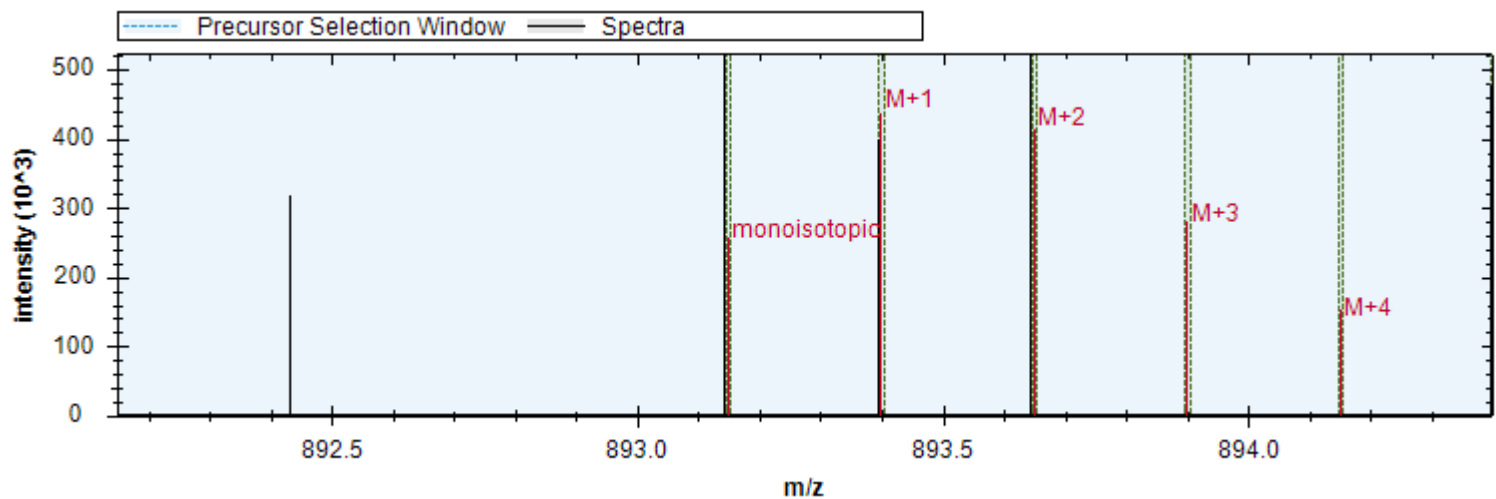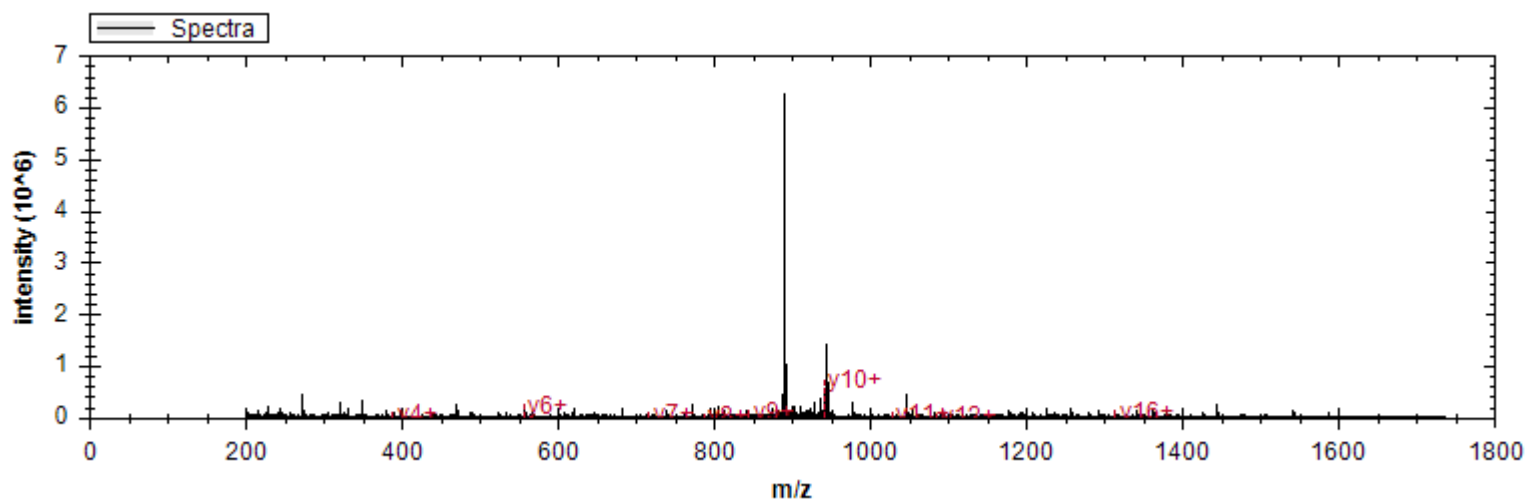

|                             |                        |                        |
|-----------------------------|------------------------|------------------------|
| [y10+] - 941.487 m/z        | [y6+] - 556.345 m/z    | [b23++] - 1072.437 m/z |
| [y9+] - 844.435 m/z         | [y16+] - 1313.627 m/z  | [y11+] - 1028.519 m/z  |
| [y7+] - 716.376 m/z         | [b20++] - 944.876 m/z  | [b30++] - 1315.048 m/z |
| [y12+] - 1085.541 m/z       | [y15+] - 1256.605 m/z  | [y14+] - 1199.584 m/z  |
| [b23++ -H2O] - 1063.432 m/z | [y13+] - 1142.562 m/z  | [b22++] - 1036.918 m/z |
| [b24++] - 1128.979 m/z      | [y8+] - 787.413 m/z    | [b25++] - 1157.490 m/z |
| [y4+] - 388.255 m/z         | [b29++] - 1271.532 m/z |                        |

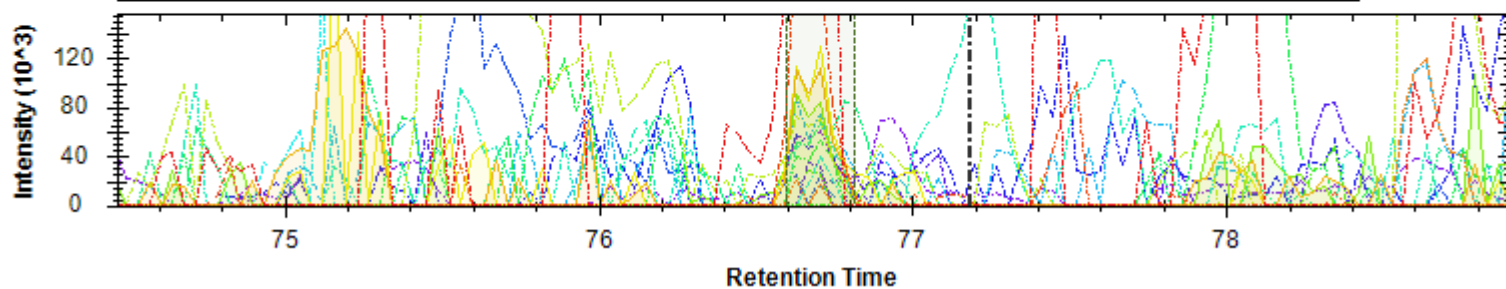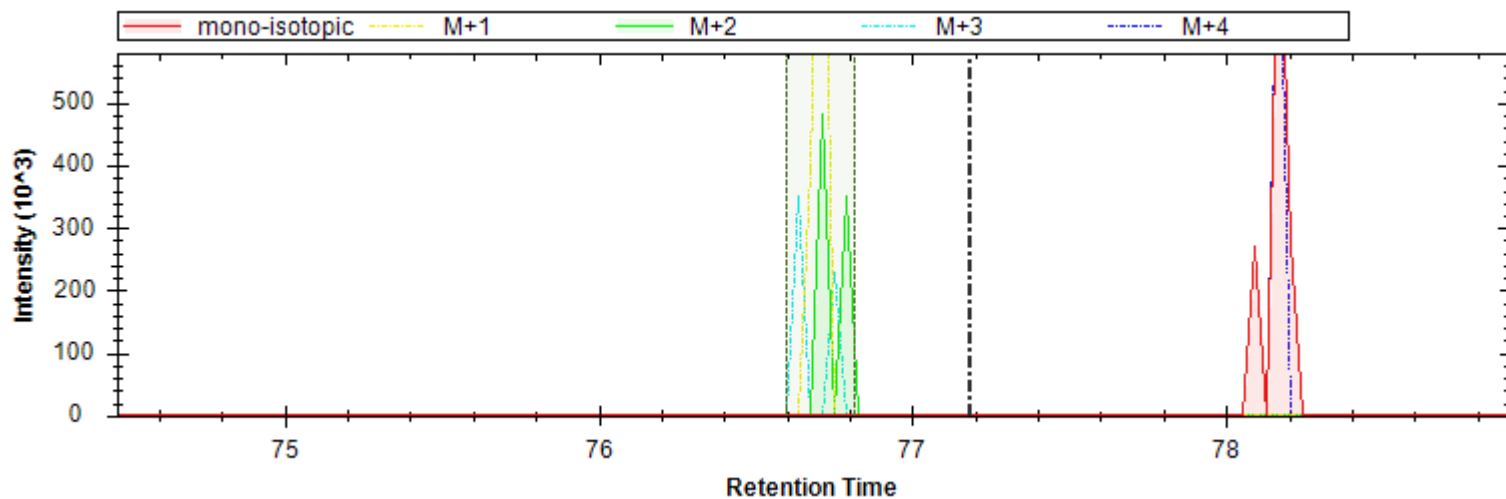

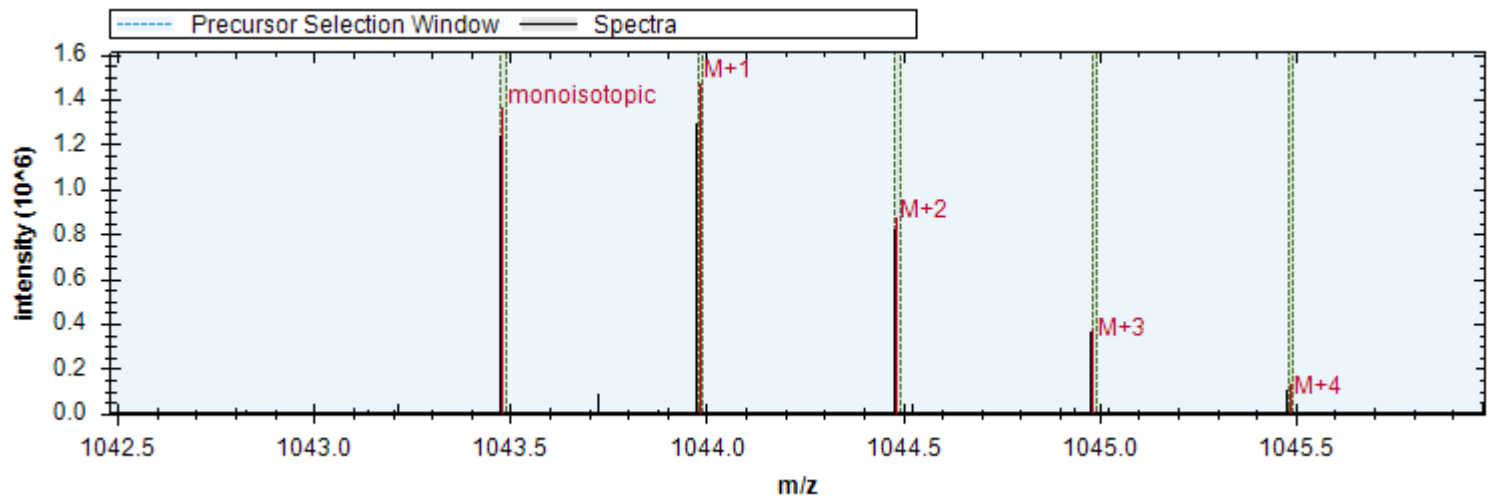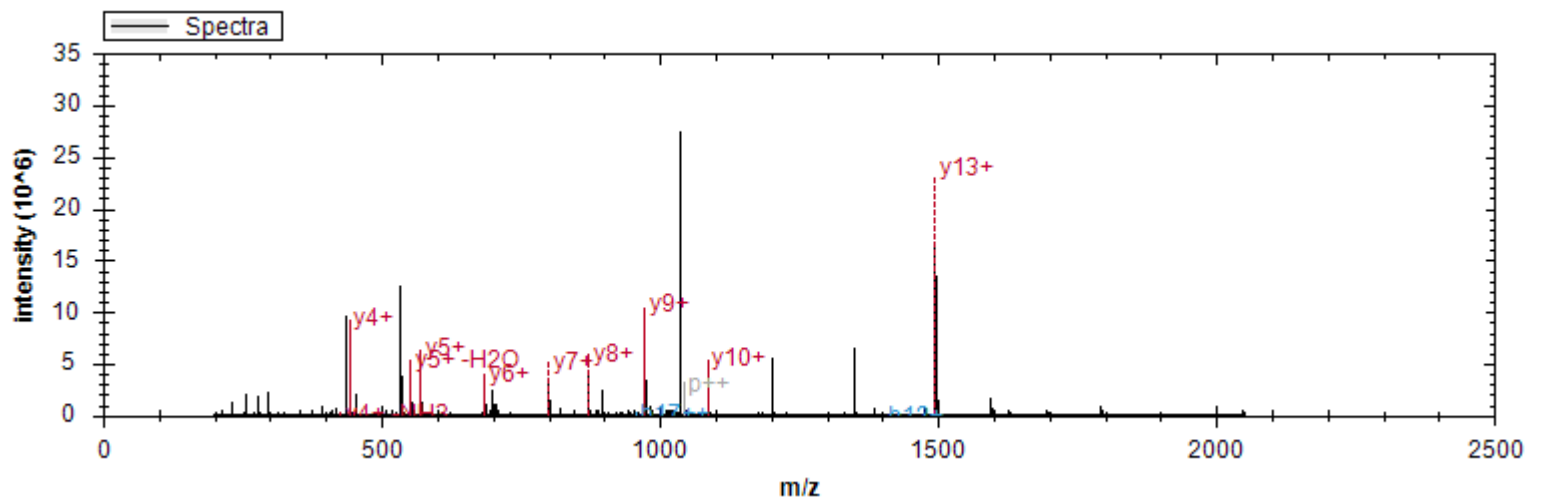

|                          |                       |                            |
|--------------------------|-----------------------|----------------------------|
| [y5+] - 571.320 m/z      | [y4+] - 442.277 m/z   | [y6+] - 686.347 m/z        |
| [b13+] - 1515.640 m/z    | [b8+] - 1000.418 m/z  | [y10+] - 1086.543 m/z      |
| [b12+] - 1400.613 m/z    | [y13+] - 1495.706 m/z | [b14+] - 1644.683 m/z      |
| [y5+ -H2O] - 553.309 m/z | [y9+] - 973.459 m/z   | [y8+] - 872.411 m/z        |
| [b17++] - 956.424 m/z    | [y7+] - 801.374 m/z   | [y10+ -NH3] - 1069.516 m/z |
| [y4+ -NH3] - 425.251 m/z |                       |                            |

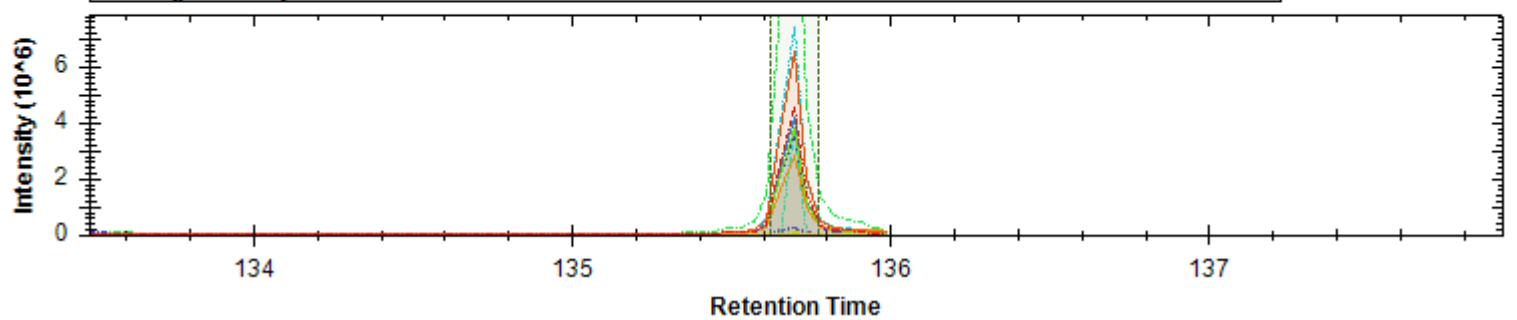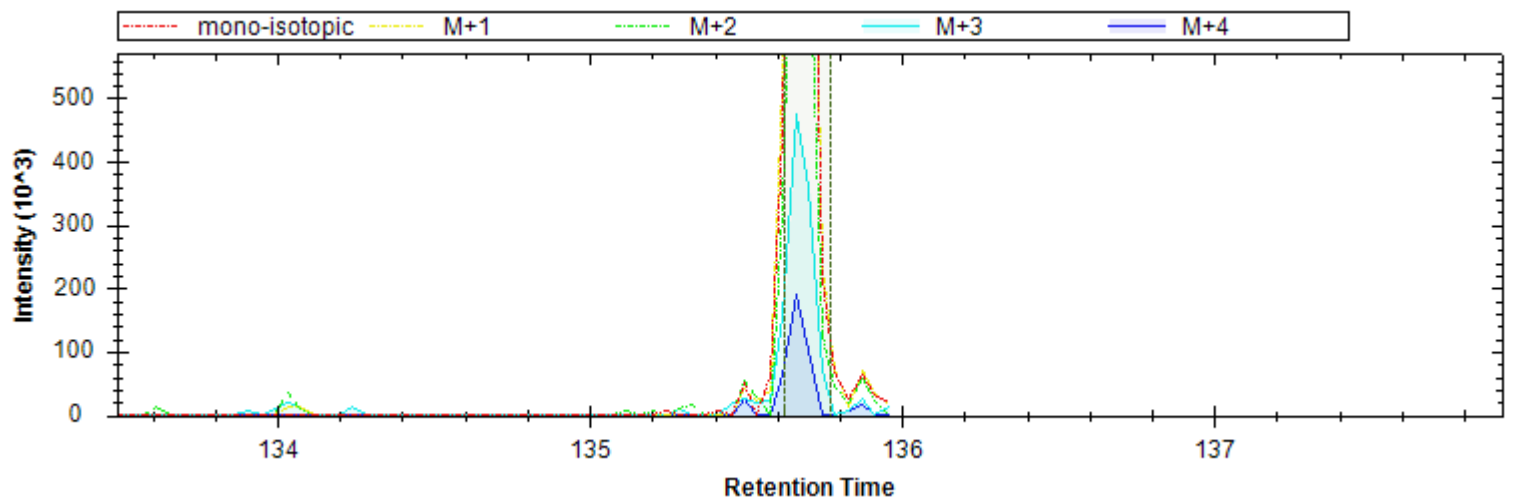

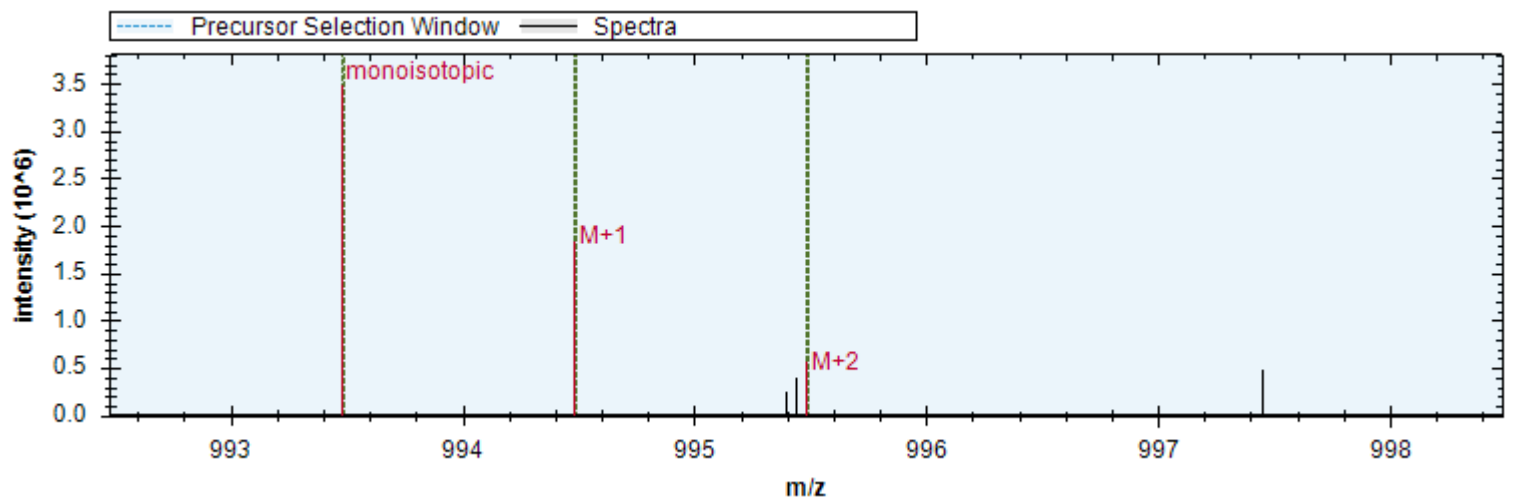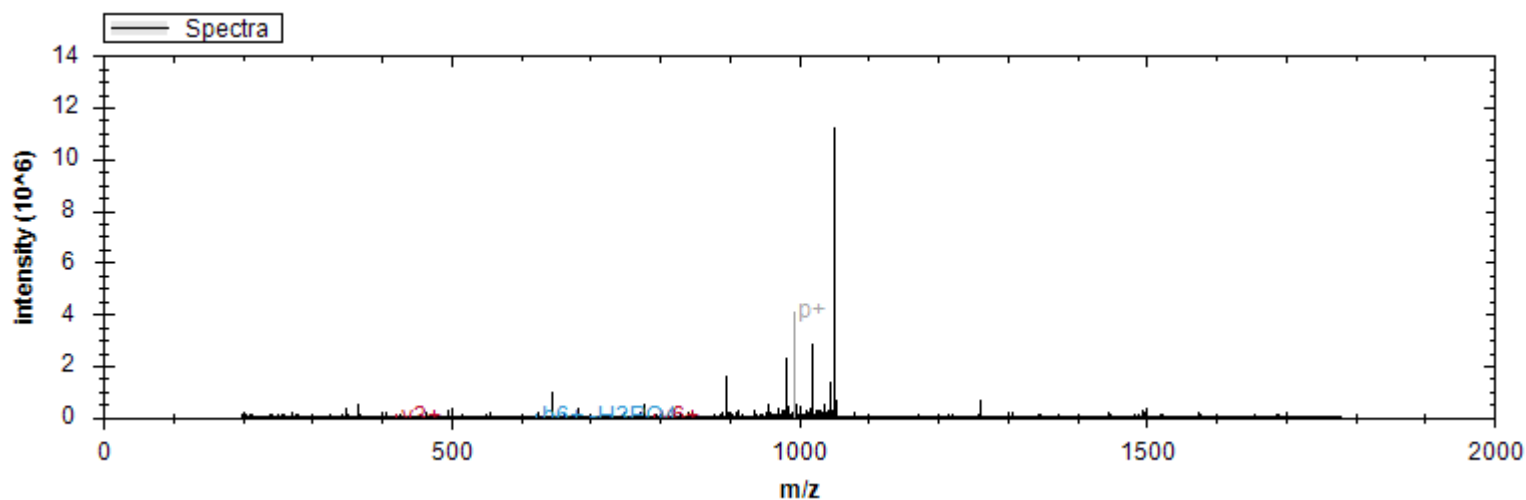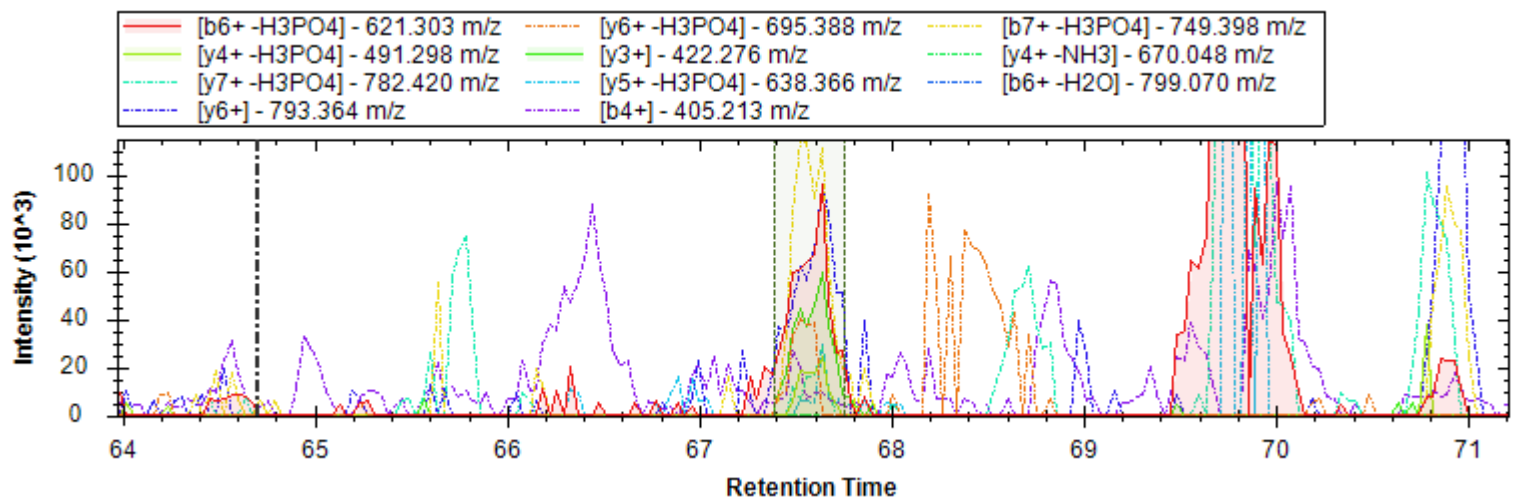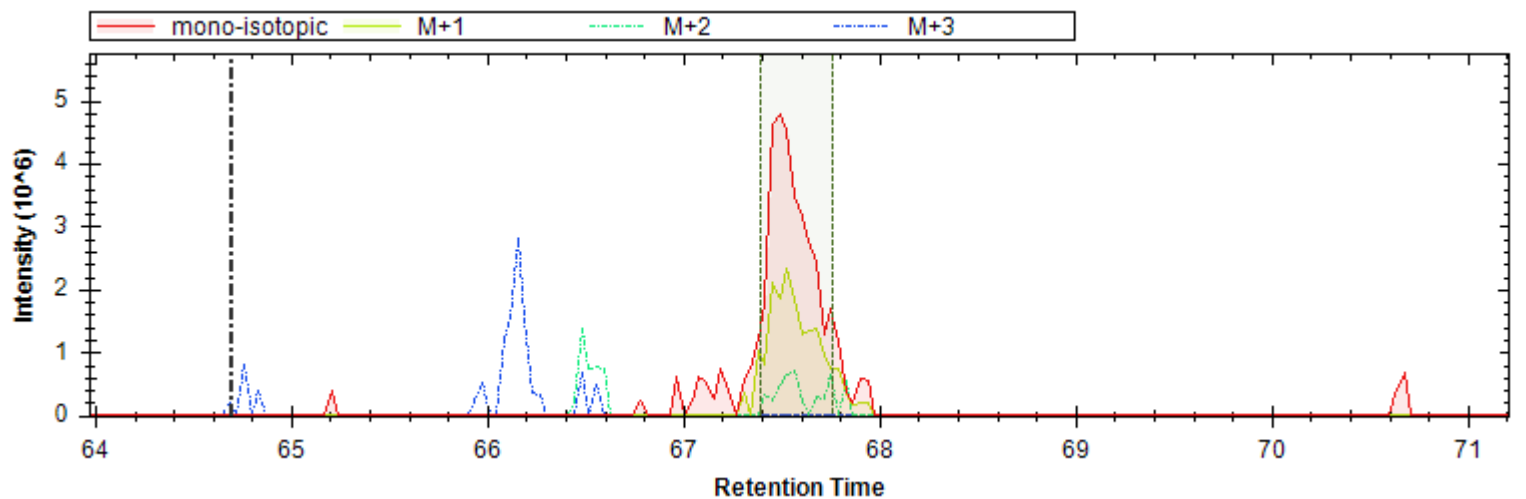



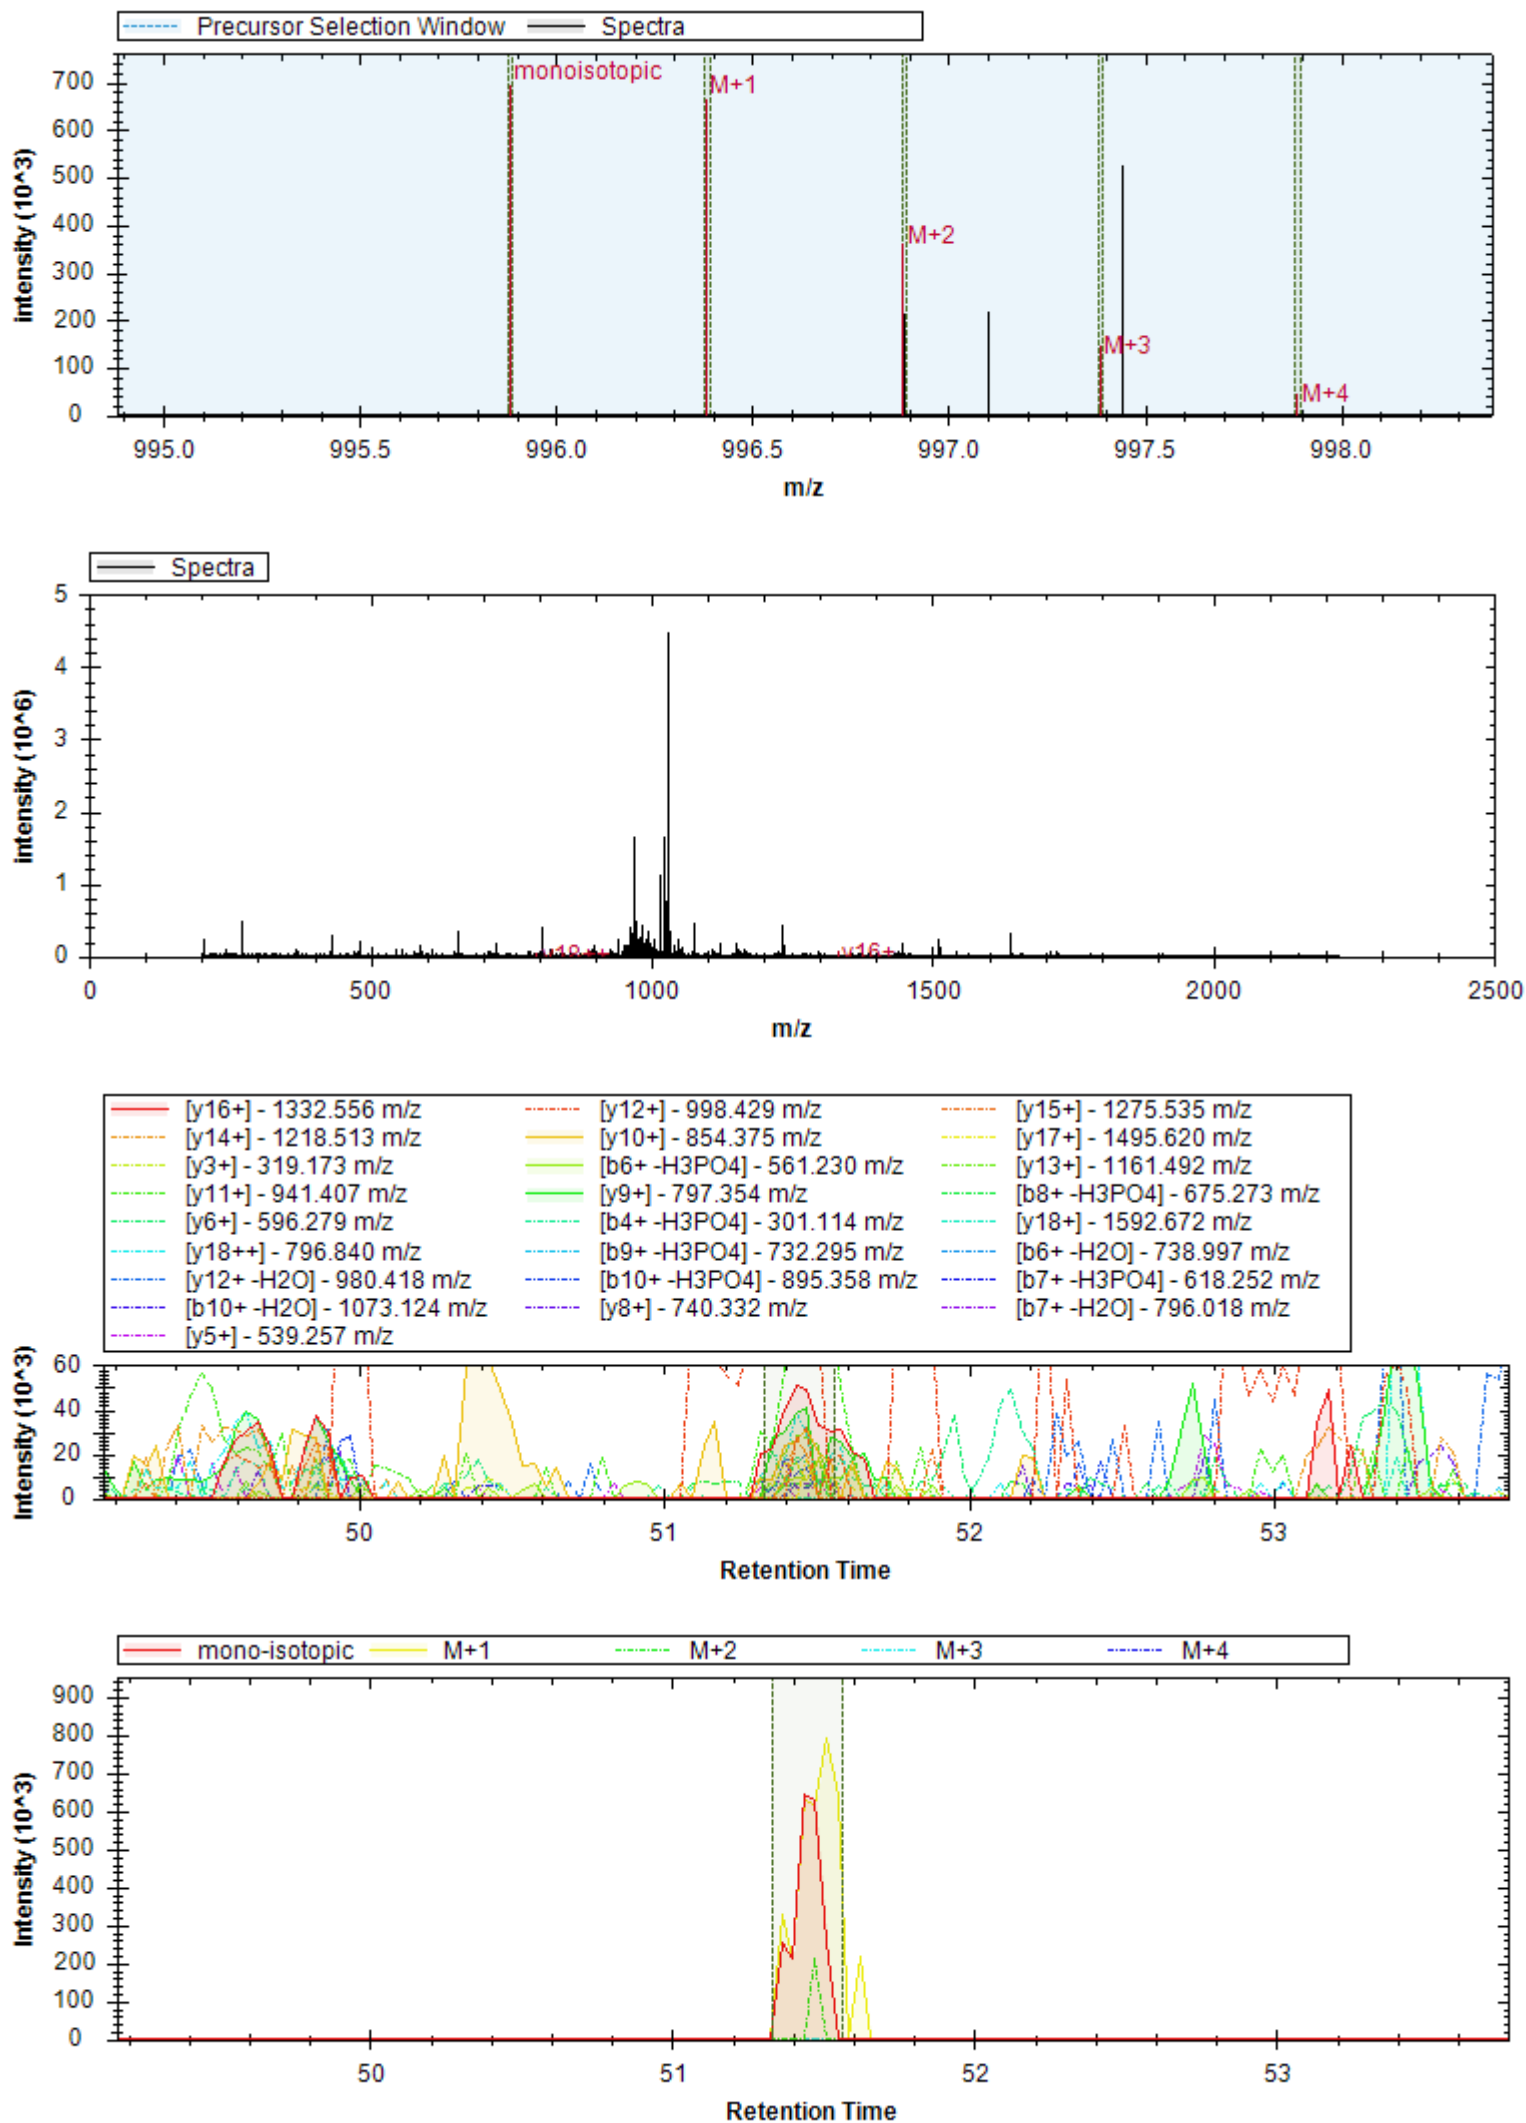

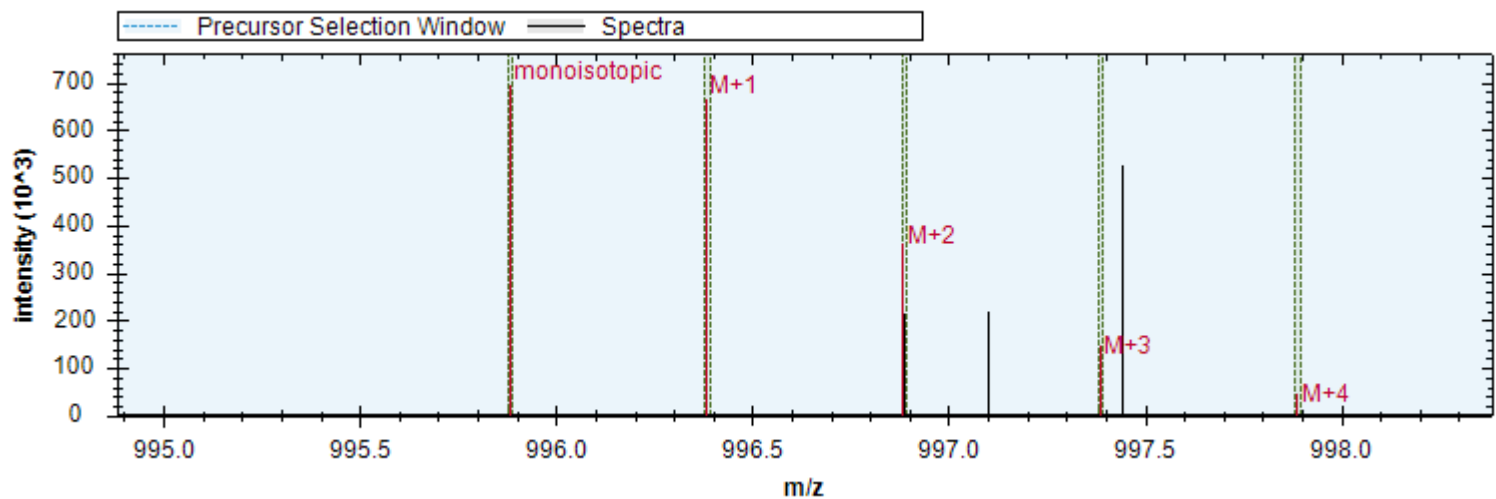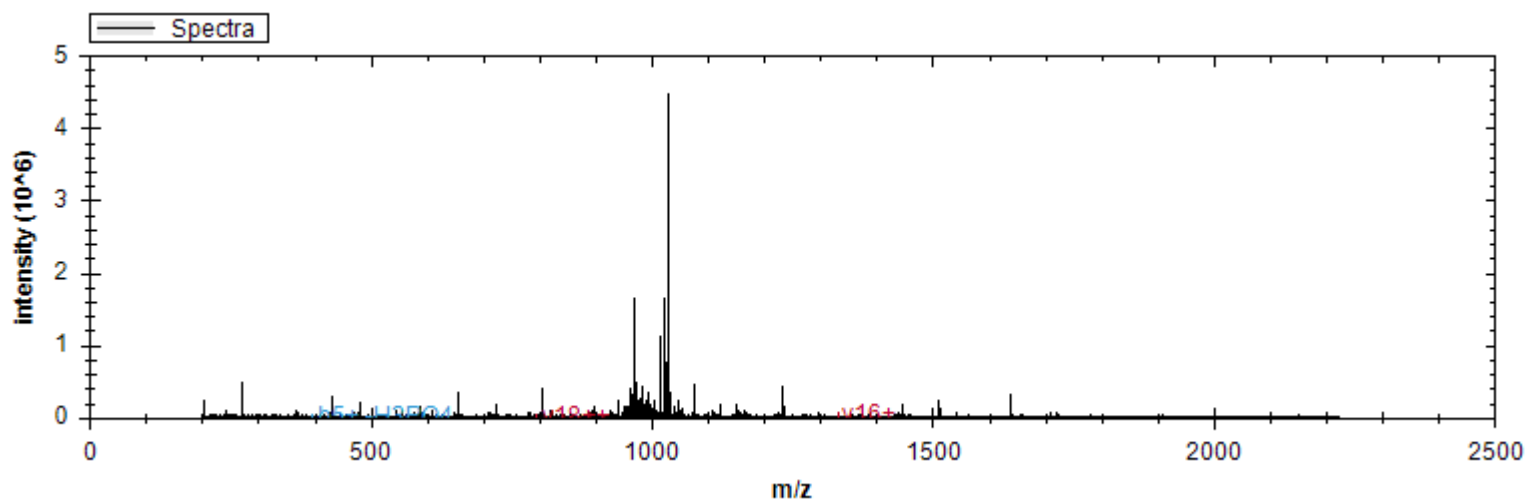

|                             |                            |                              |
|-----------------------------|----------------------------|------------------------------|
| [y16+] - 1332.556 m/z       | [y12+] - 998.429 m/z       | [y9+] - 797.354 m/z          |
| [y15+] - 1275.535 m/z       | [y10+] - 854.375 m/z       | [y14+] - 1218.513 m/z        |
| [y13+] - 1161.492 m/z       | [y18++] - 796.840 m/z      | [y11+] - 941.407 m/z         |
| [b6+ -H3PO4] - 561.230 m/z  | [y17+] - 1495.620 m/z      | [y20++ -H3PO4] - 859.861 m/z |
| [b4+ -H3PO4] - 301.114 m/z  | [y3+] - 319.173 m/z        | [y18+] - 1592.672 m/z        |
| [y6+] - 596.279 m/z         | [b7+ -H3PO4] - 618.252 m/z | [y8+] - 740.332 m/z          |
| [b6+ -H2O] - 738.997 m/z    | [b5+ -H3PO4] - 398.167 m/z | [b9+ -H3PO4] - 732.295 m/z   |
| [b10+ -H3PO4] - 895.358 m/z | [y7+] - 683.311 m/z        | [b8+ -H3PO4] - 675.273 m/z   |
| [y12+ -NH3] - 981.402 m/z   |                            |                              |

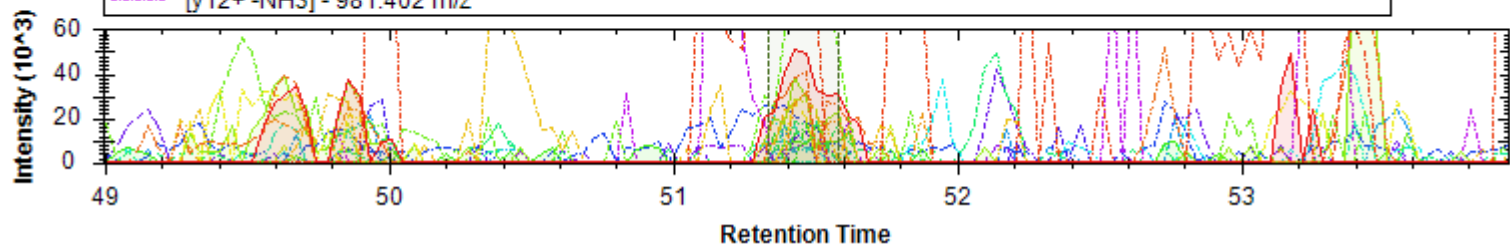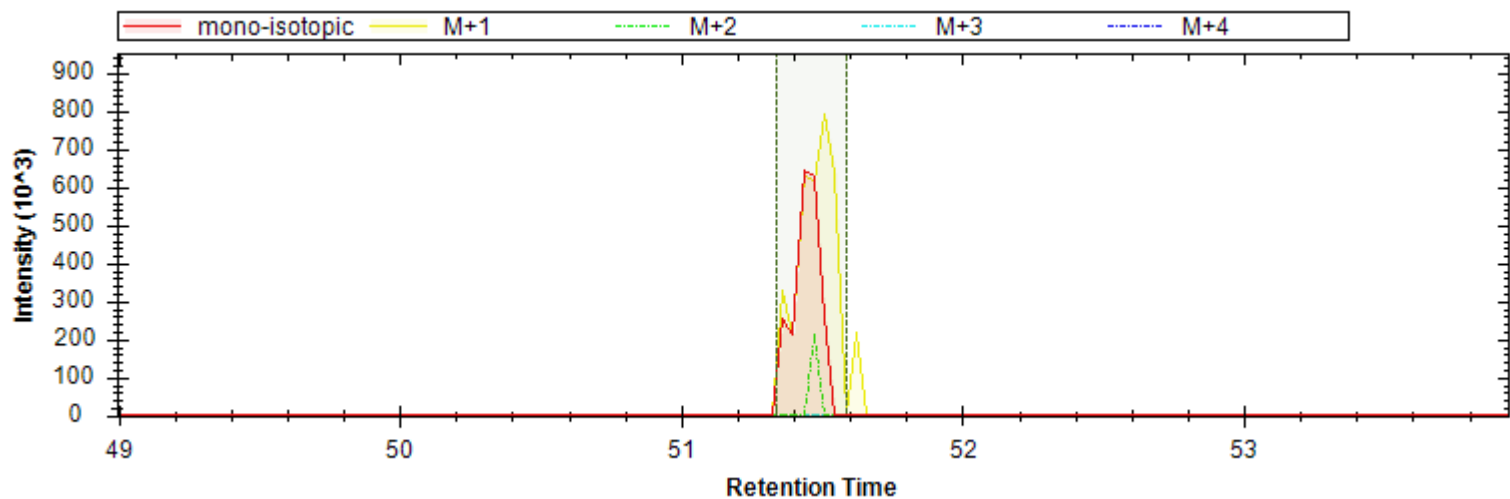

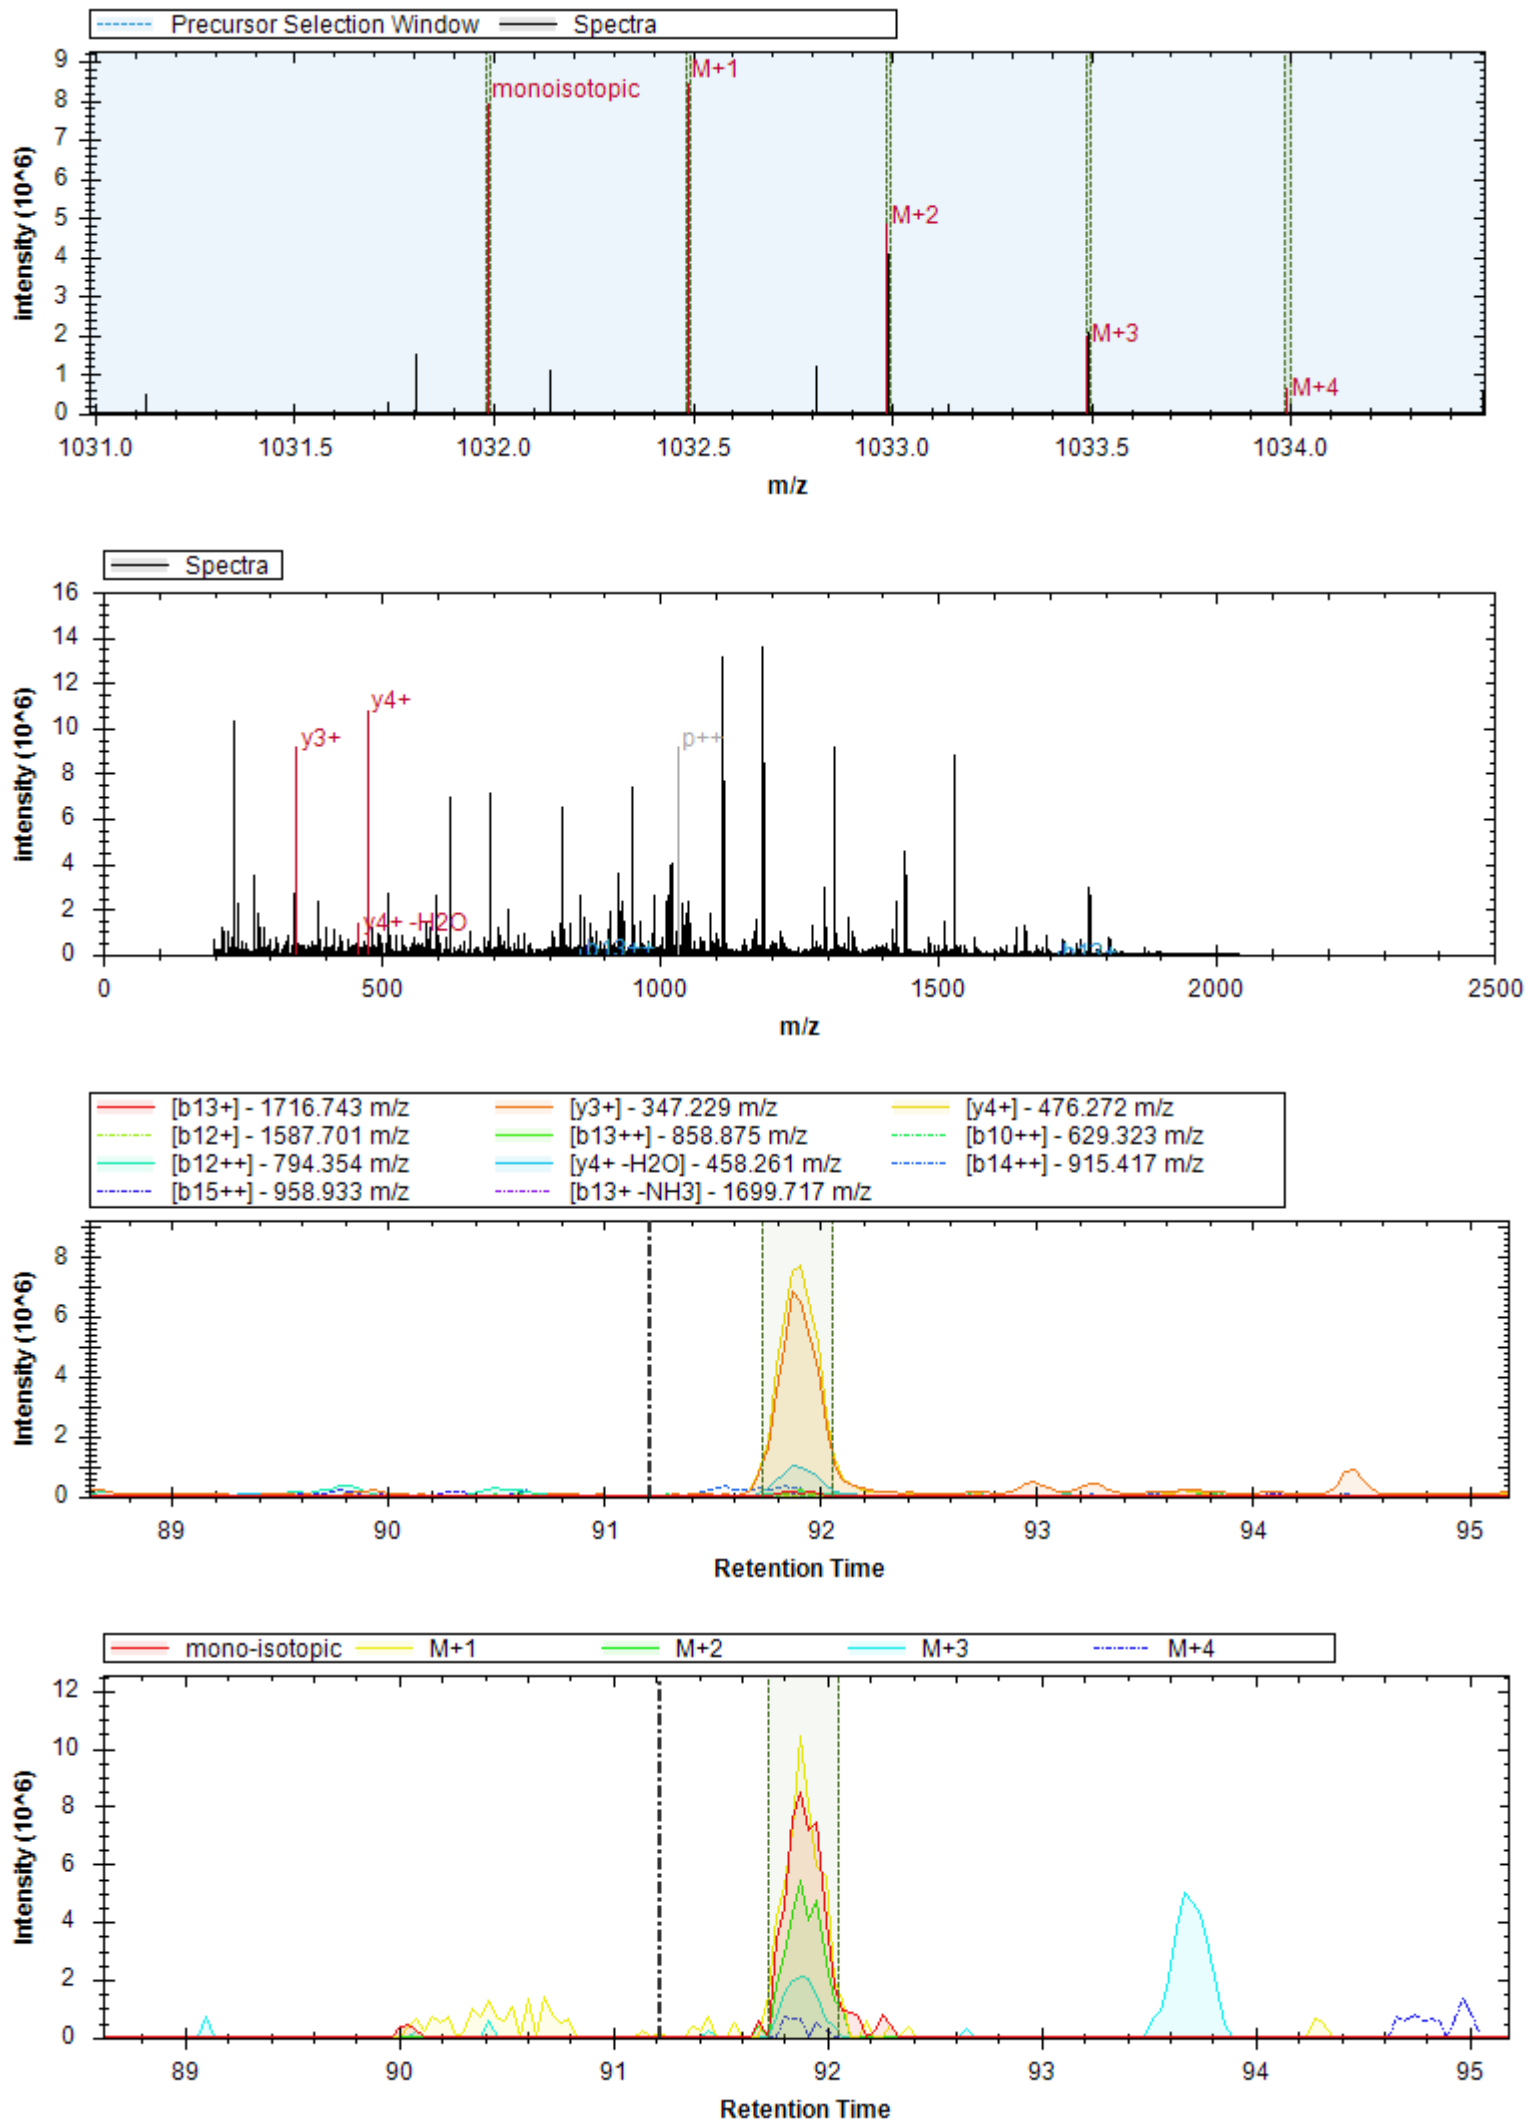

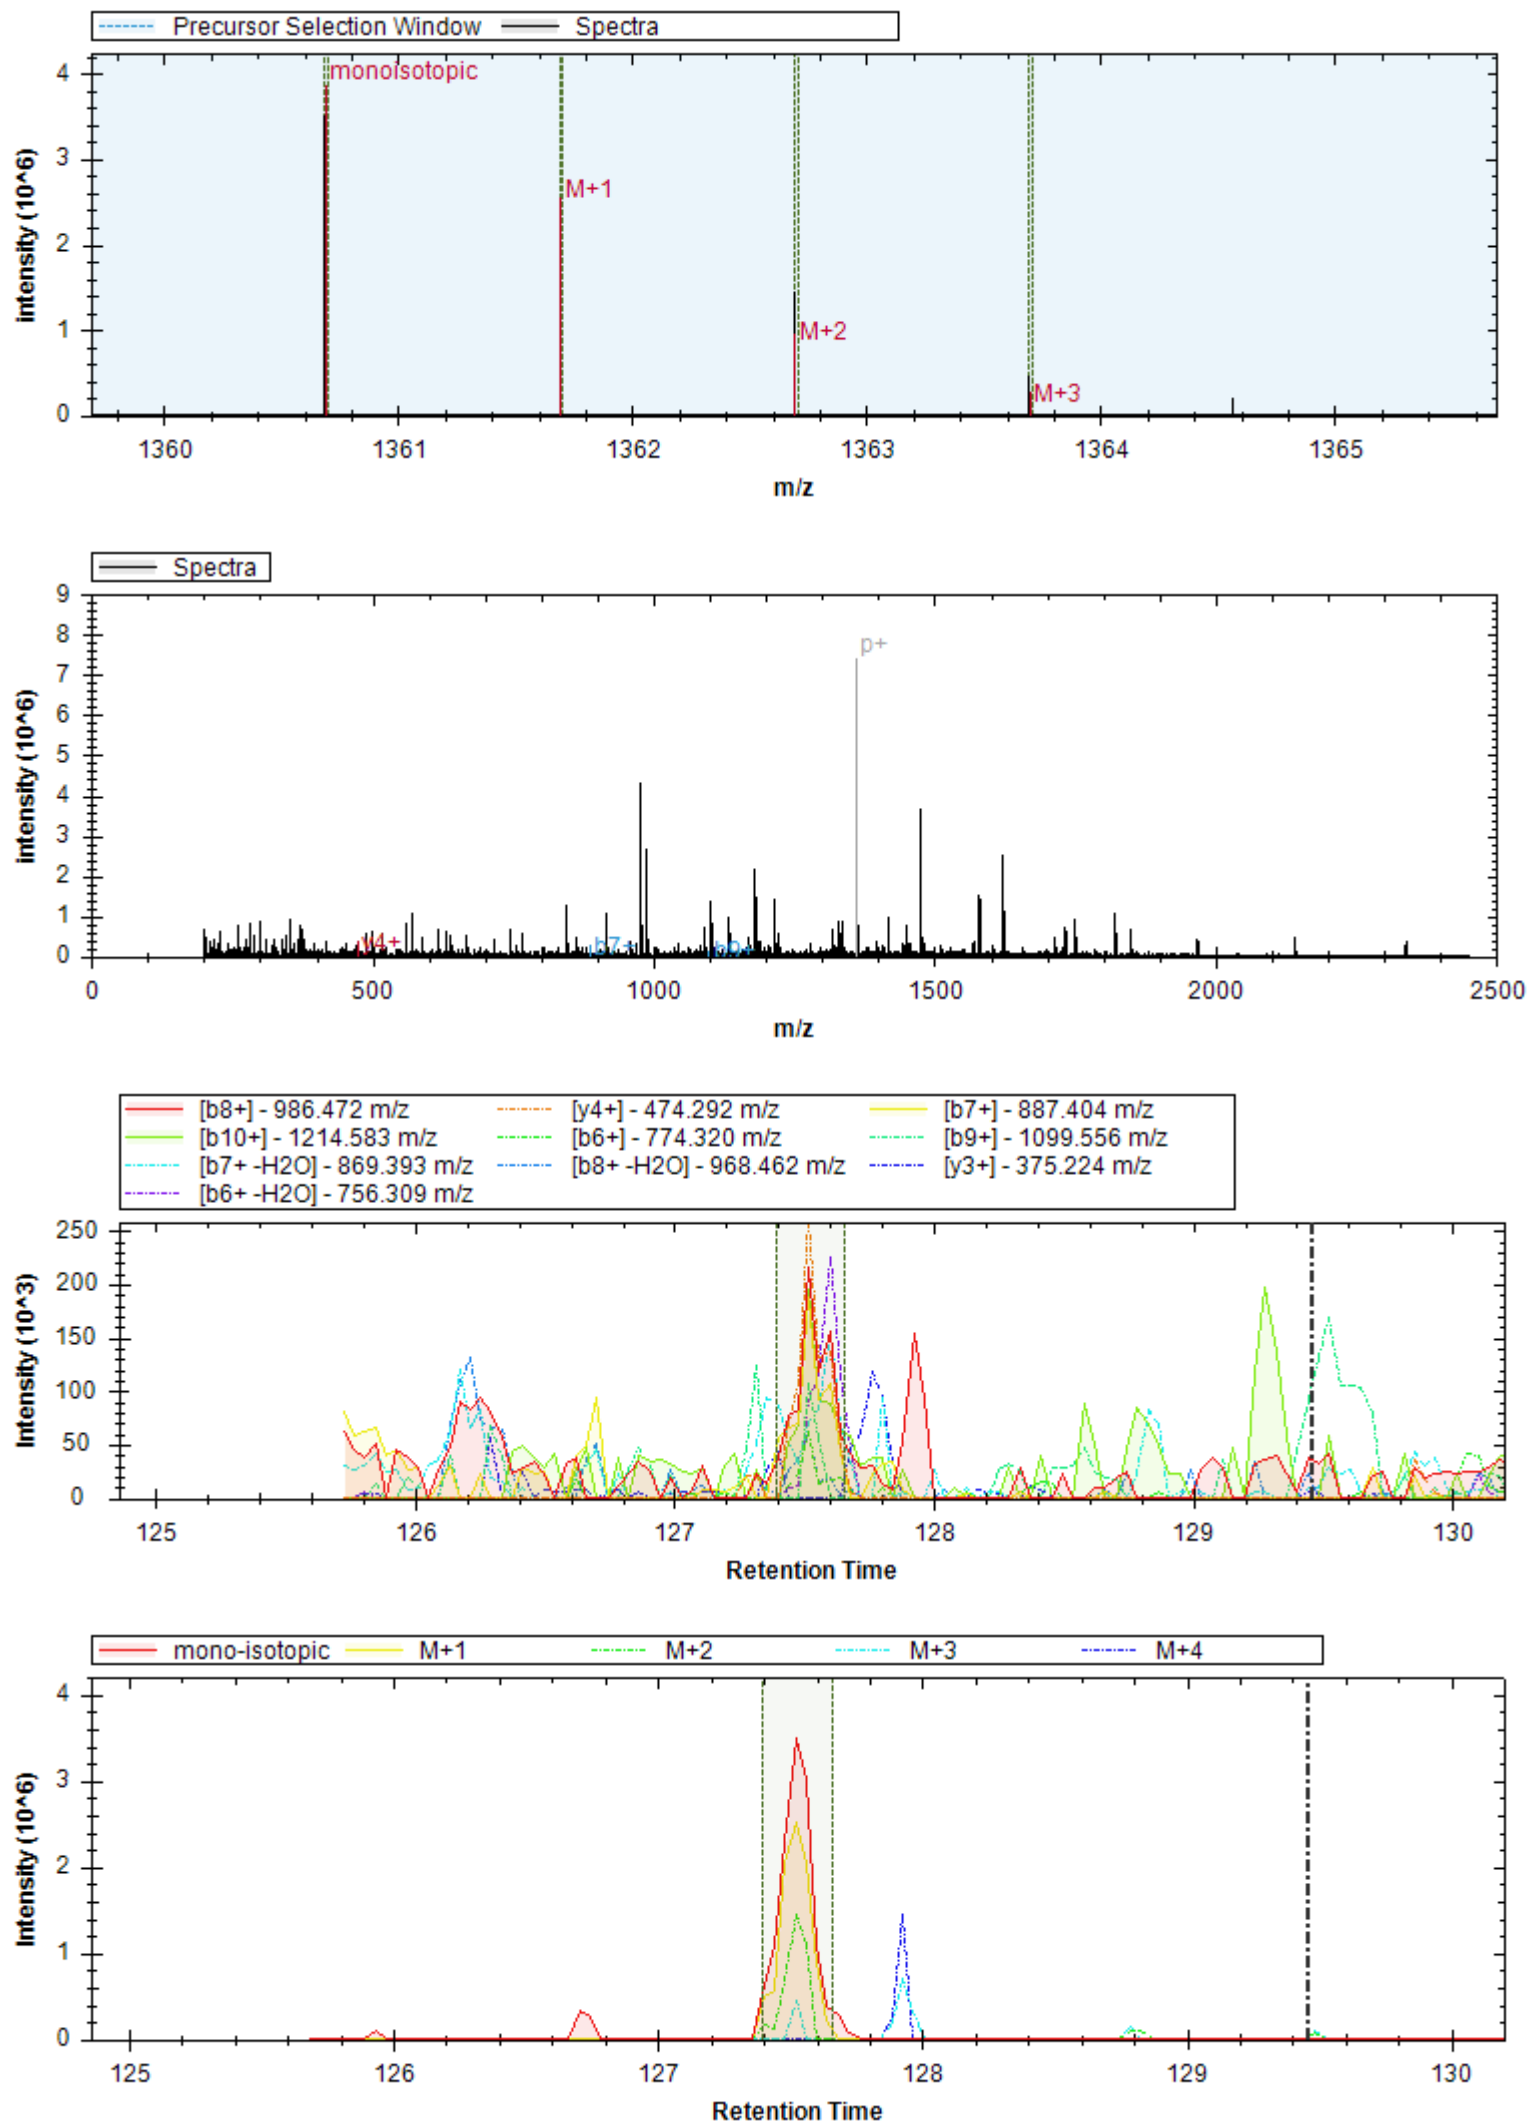

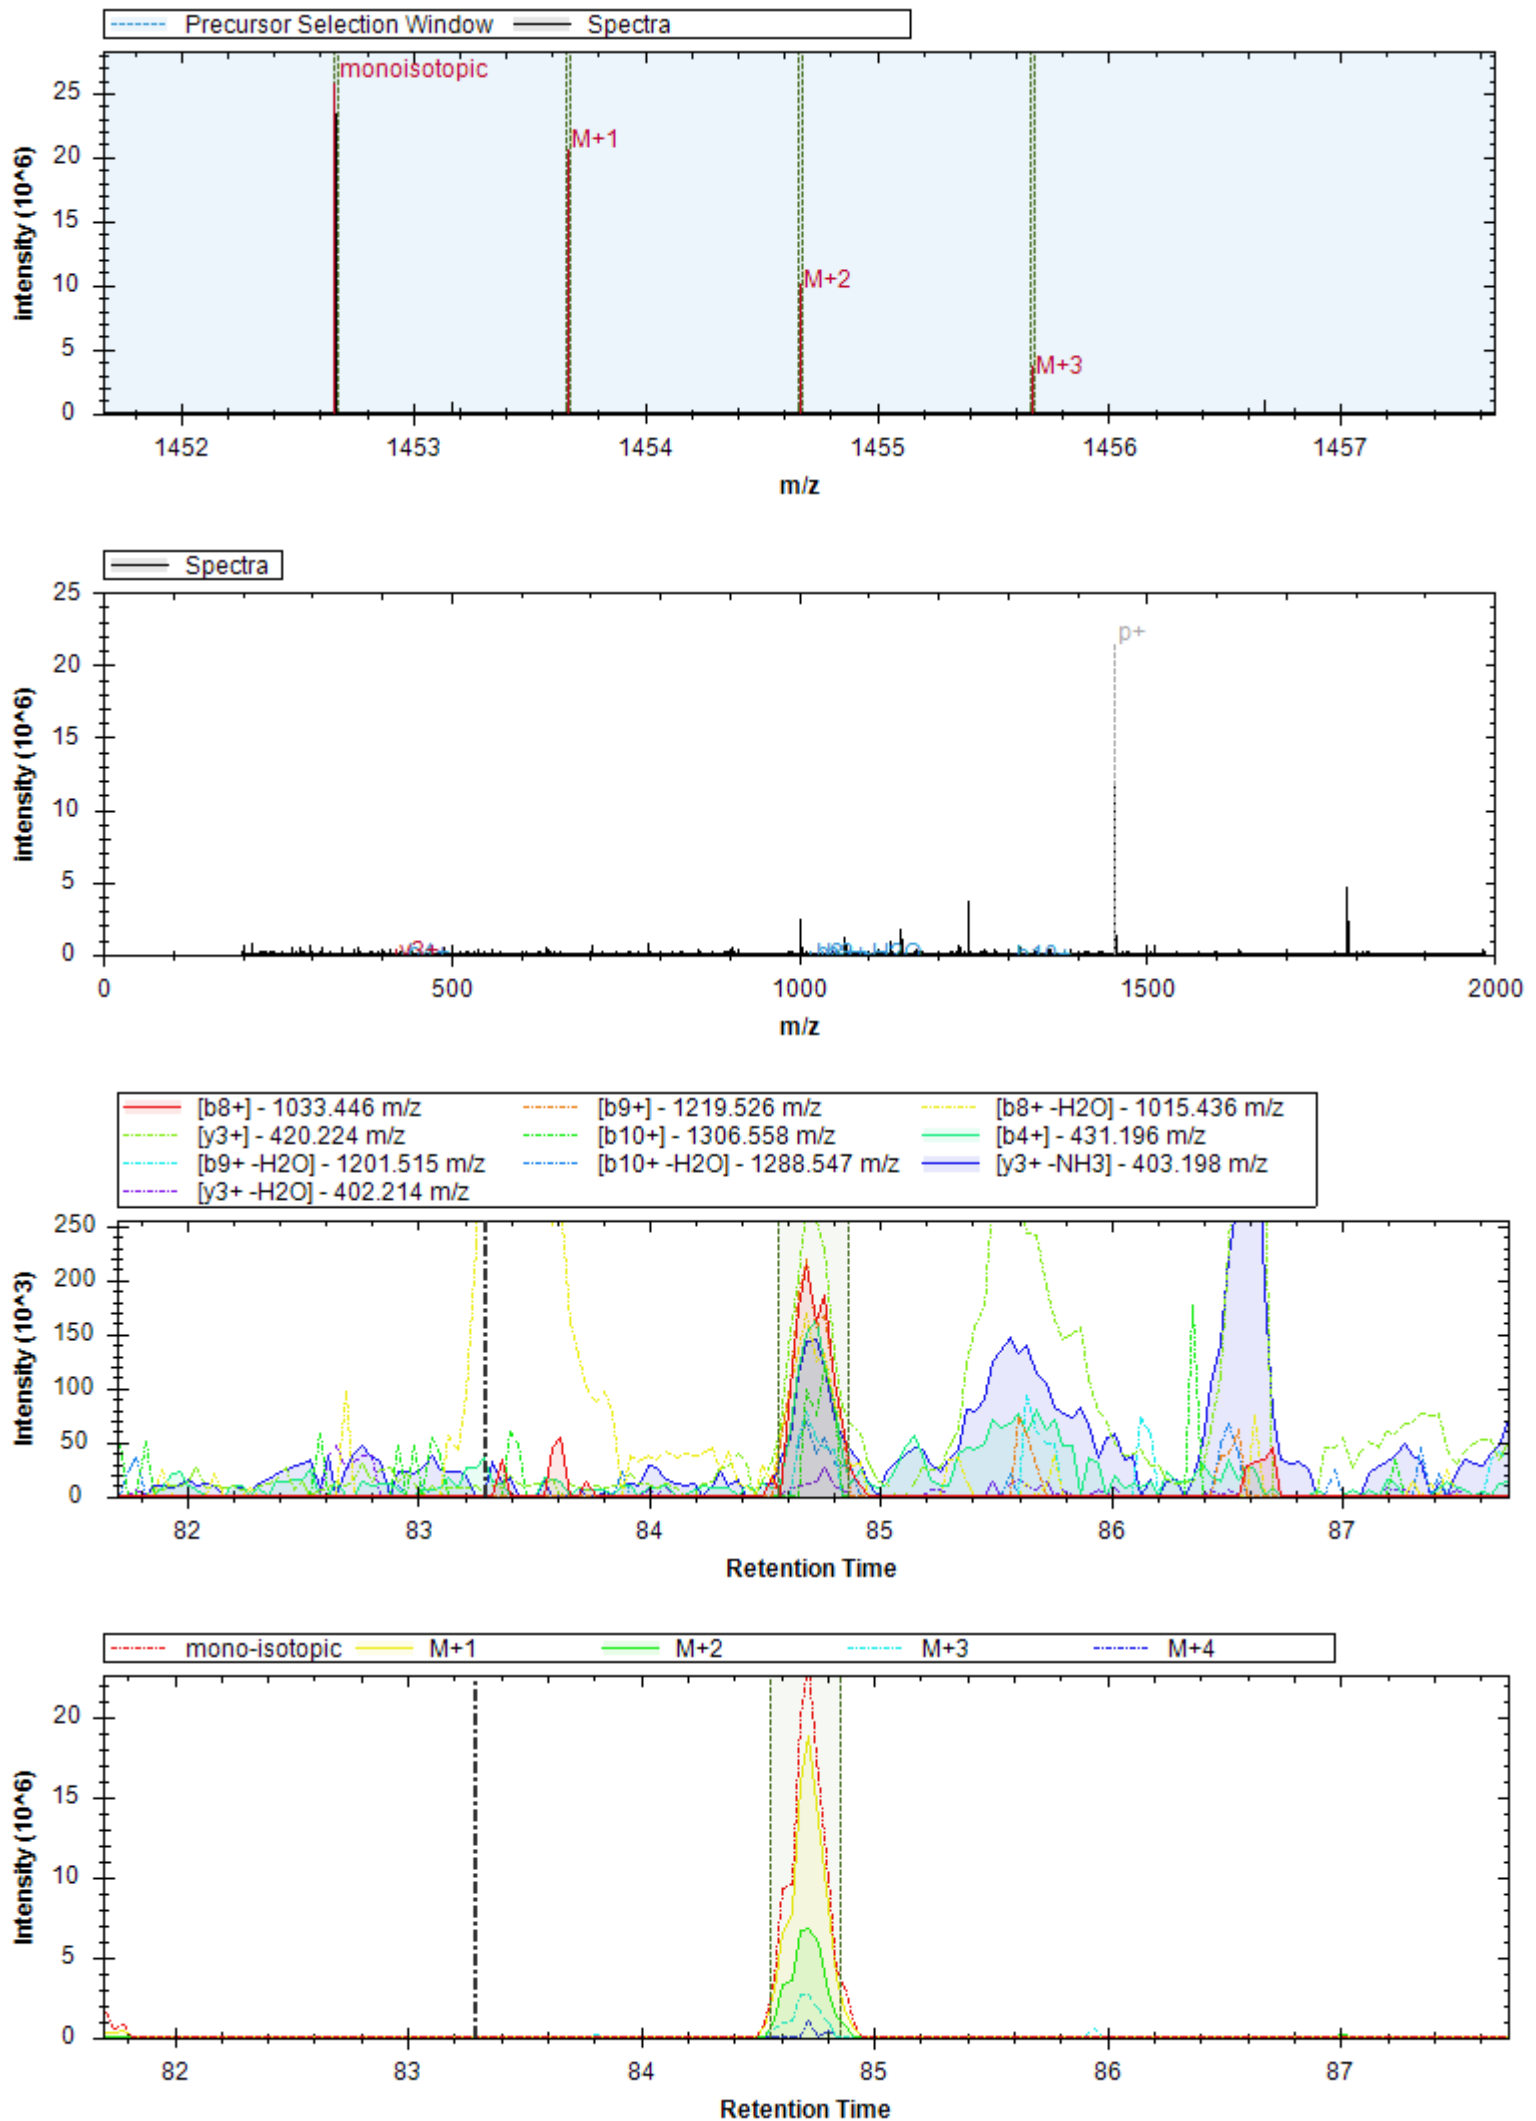

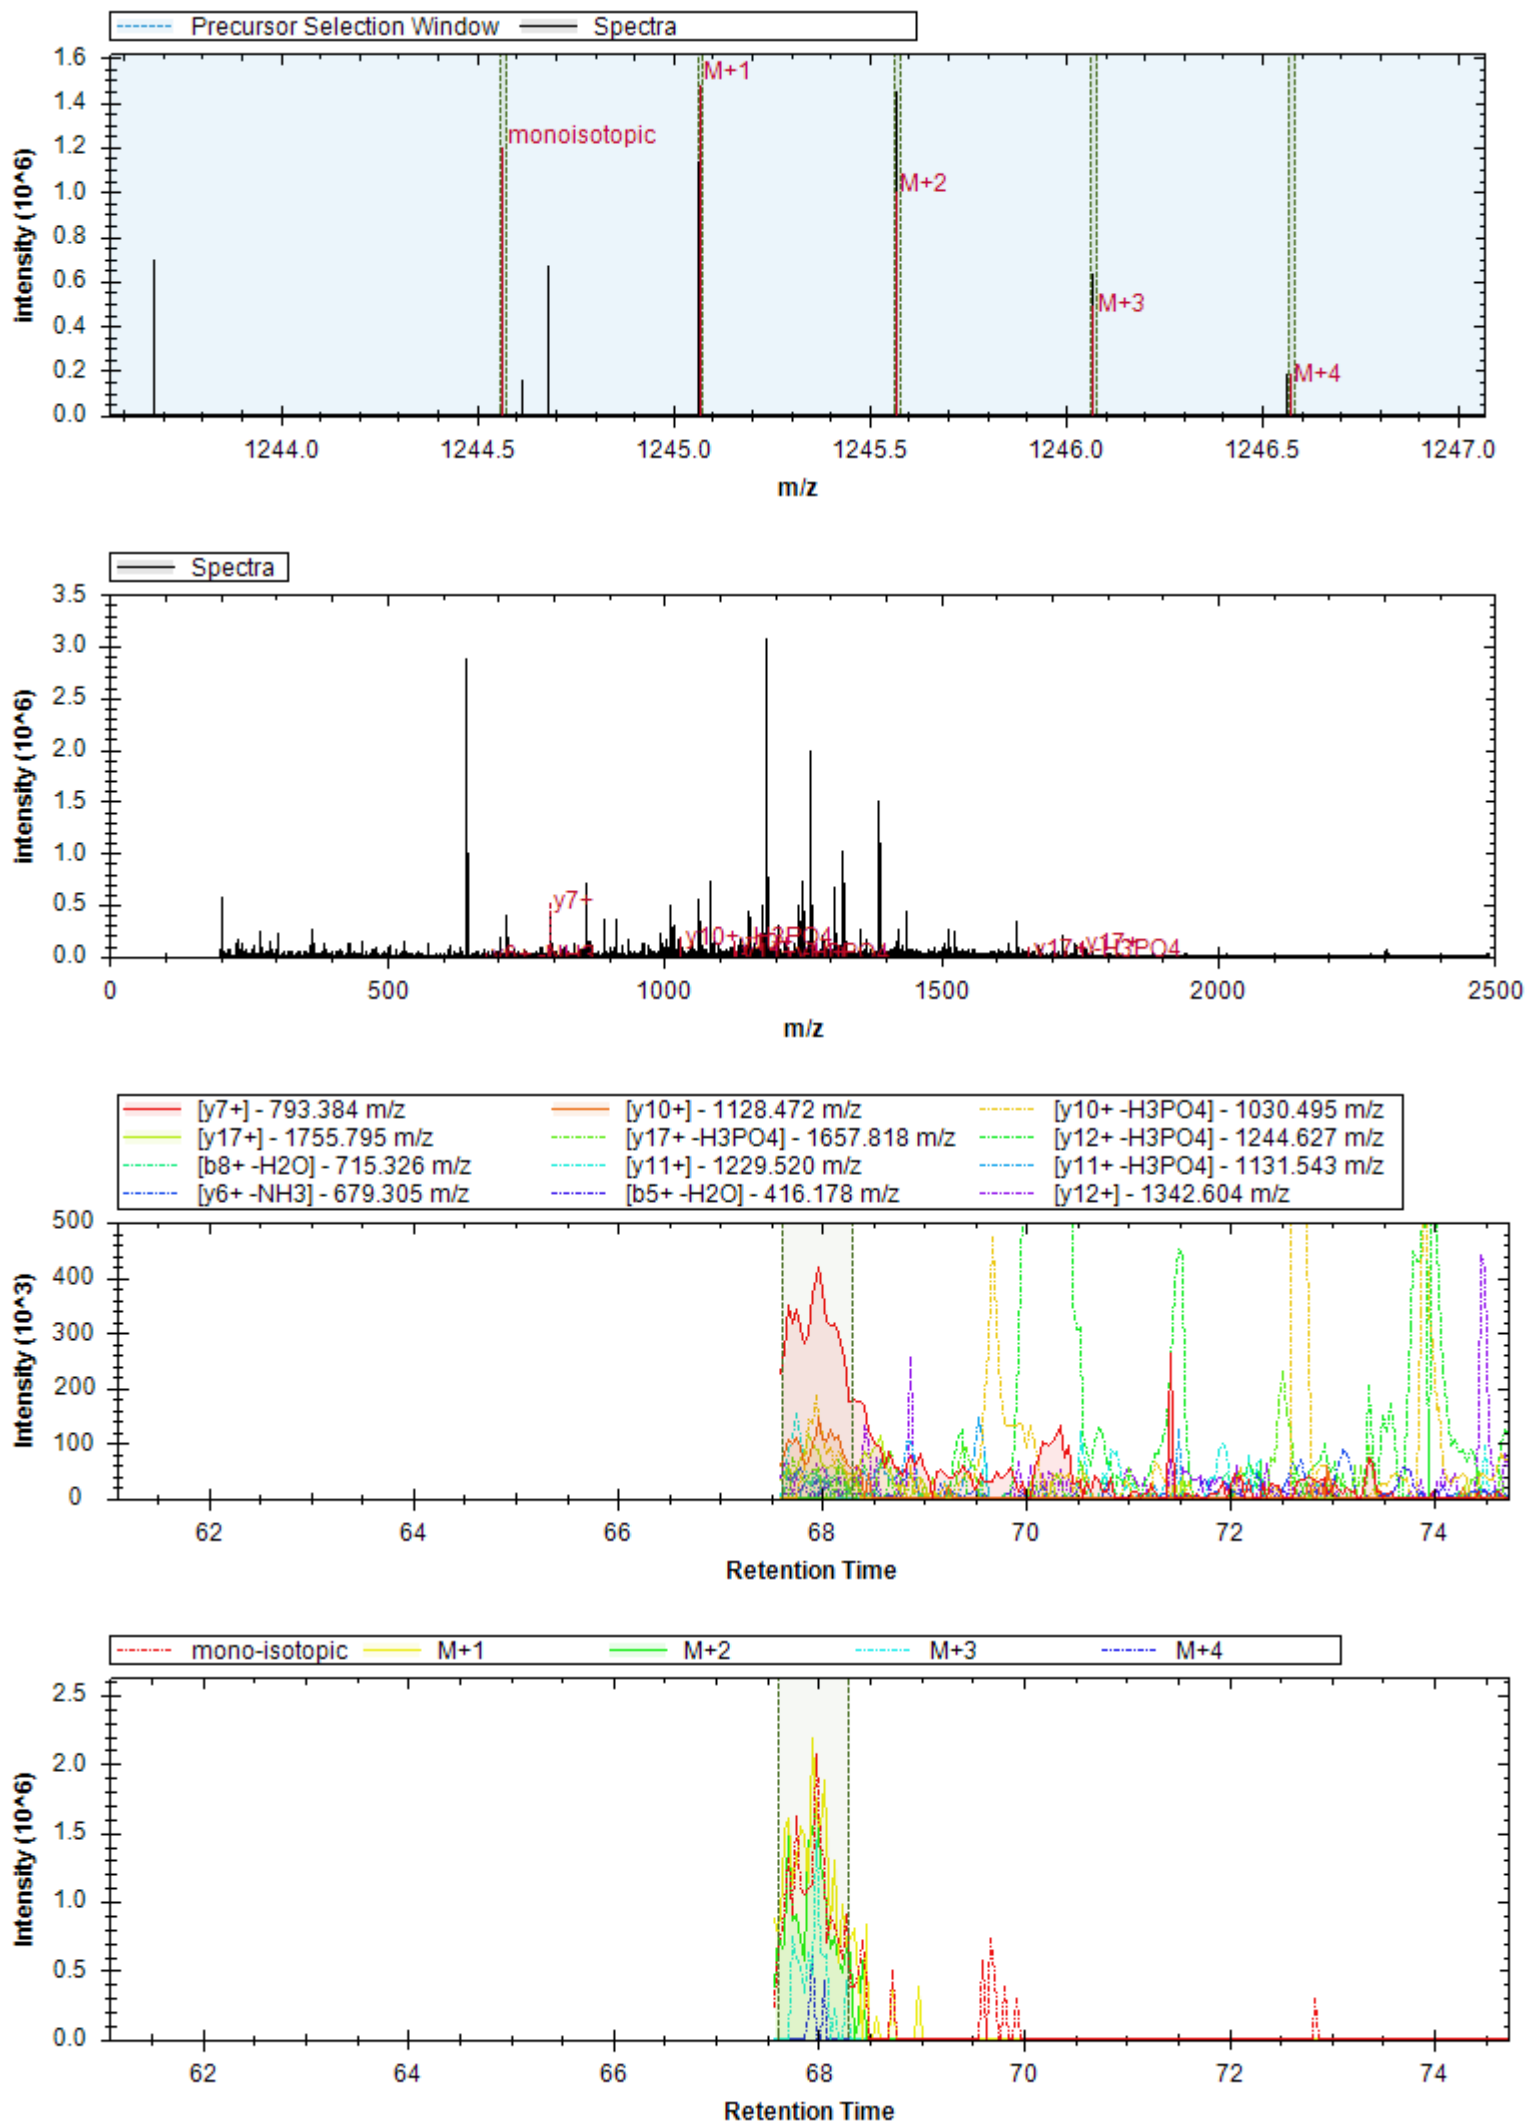

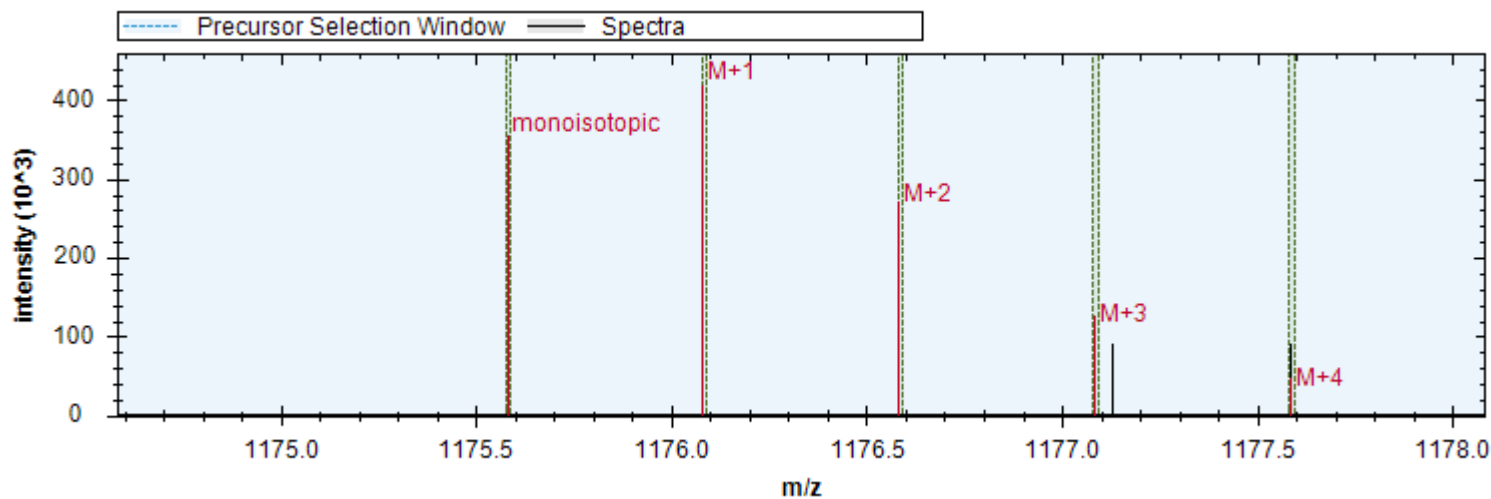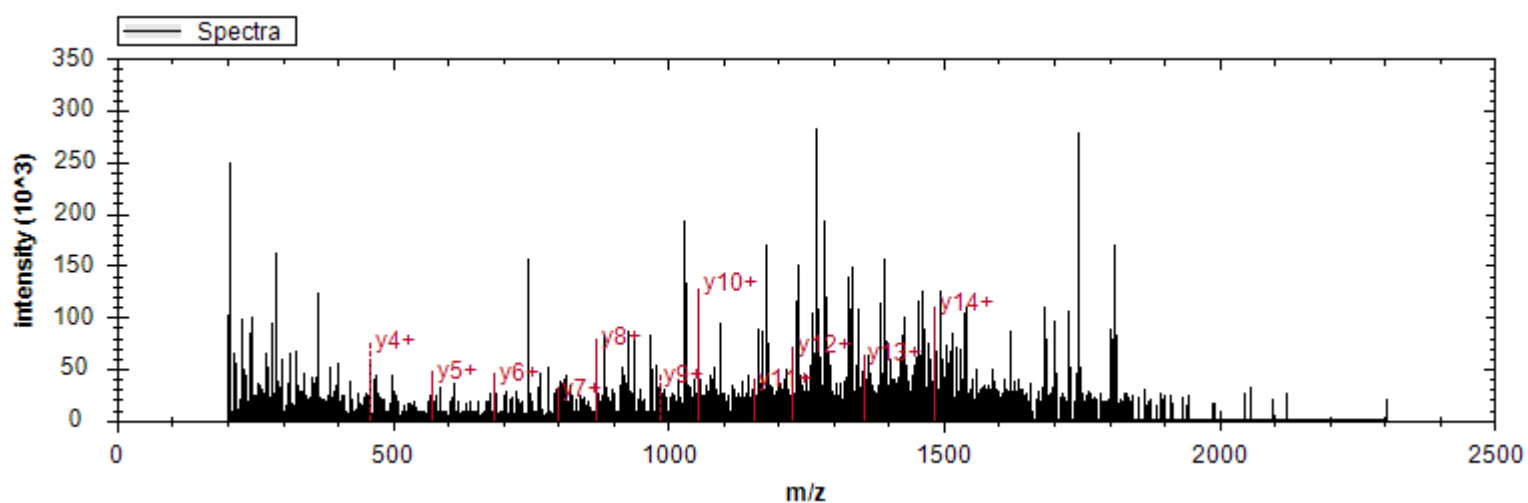

|                       |                       |                       |                       |
|-----------------------|-----------------------|-----------------------|-----------------------|
| [y10+] - 1056.605 m/z | [y12+] - 1226.710 m/z | [y14+] - 1484.796 m/z | [y11+] - 1155.673 m/z |
| [y4+] - 460.251 m/z   | [y5+] - 573.336 m/z   | [y9+] - 985.568 m/z   | [y13+] - 1355.753 m/z |
| [y6+] - 686.420 m/z   | [y8+] - 870.541 m/z   | [y7+] - 799.504 m/z   | [b7+] - 767.297 m/z   |
| [b3+] - 327.203 m/z   |                       |                       |                       |

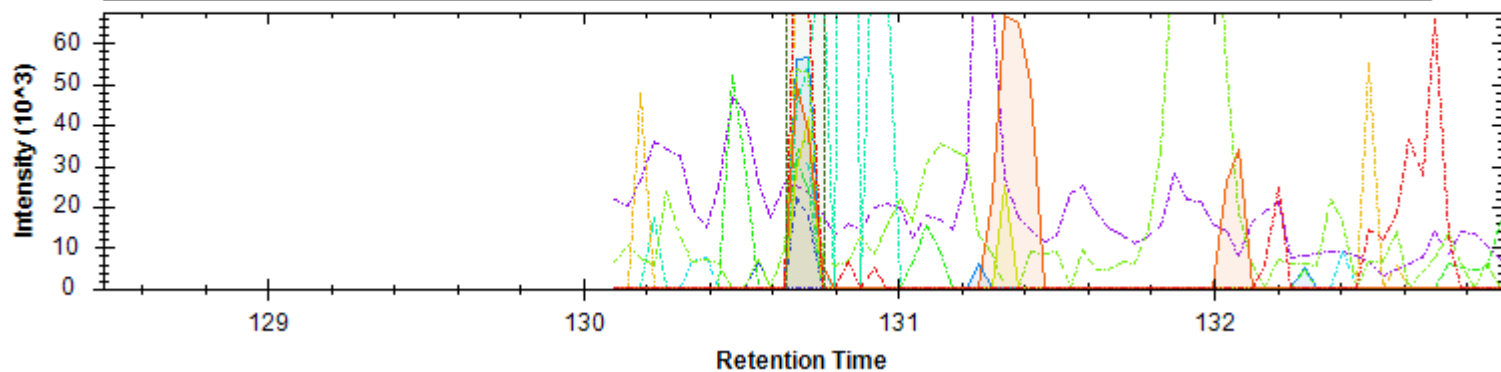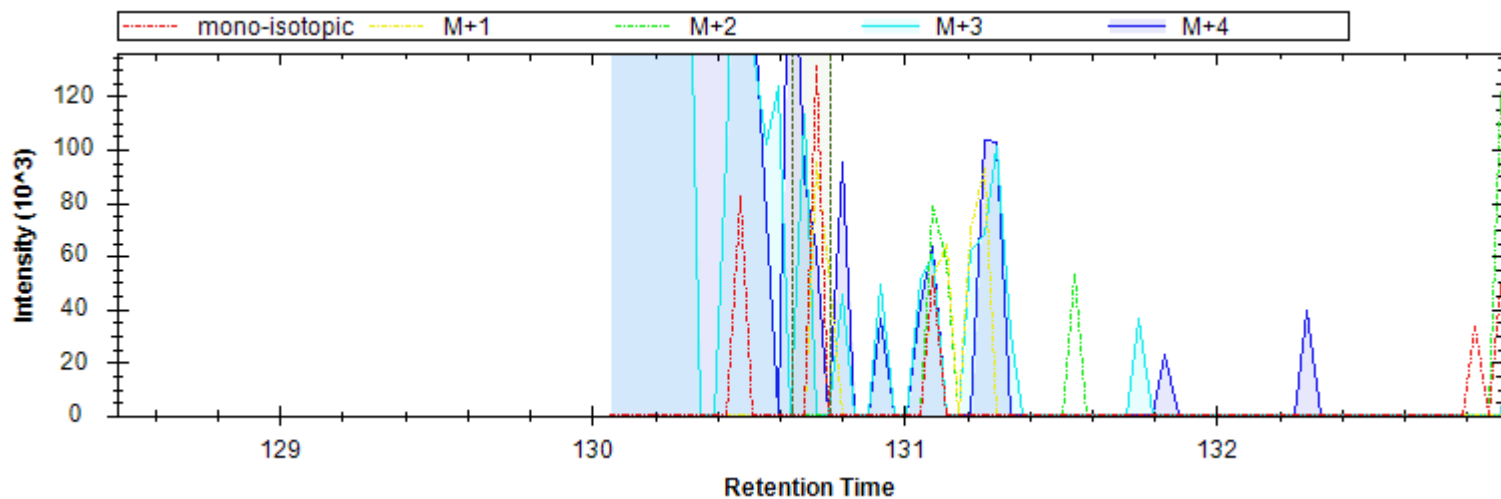

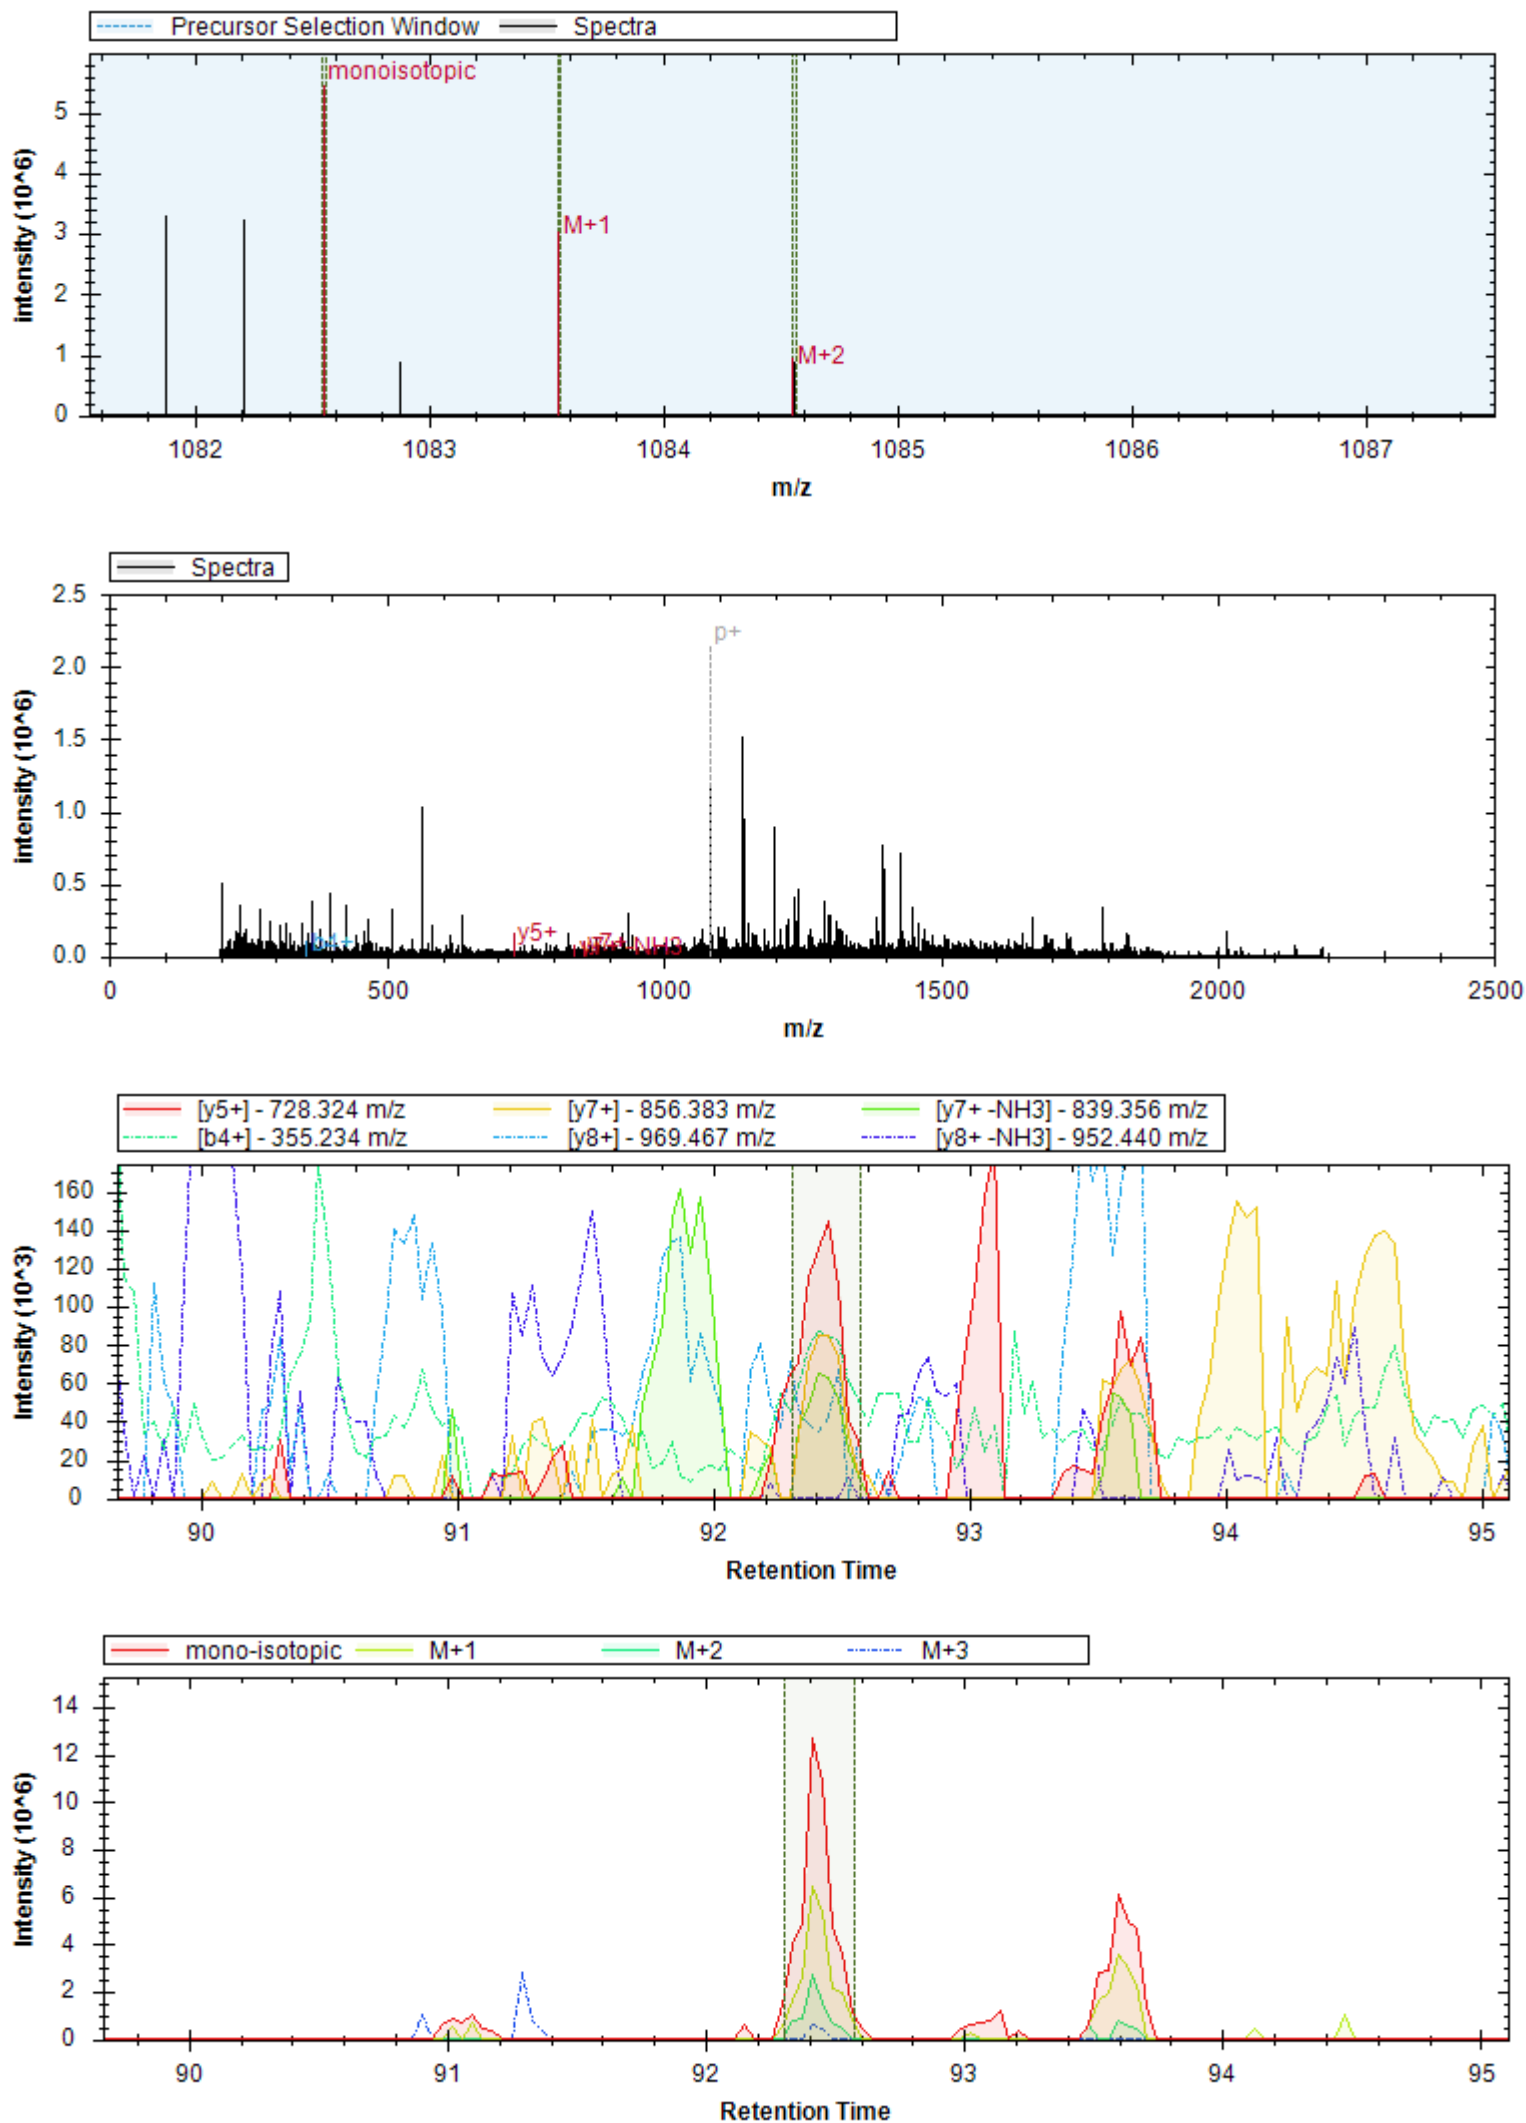



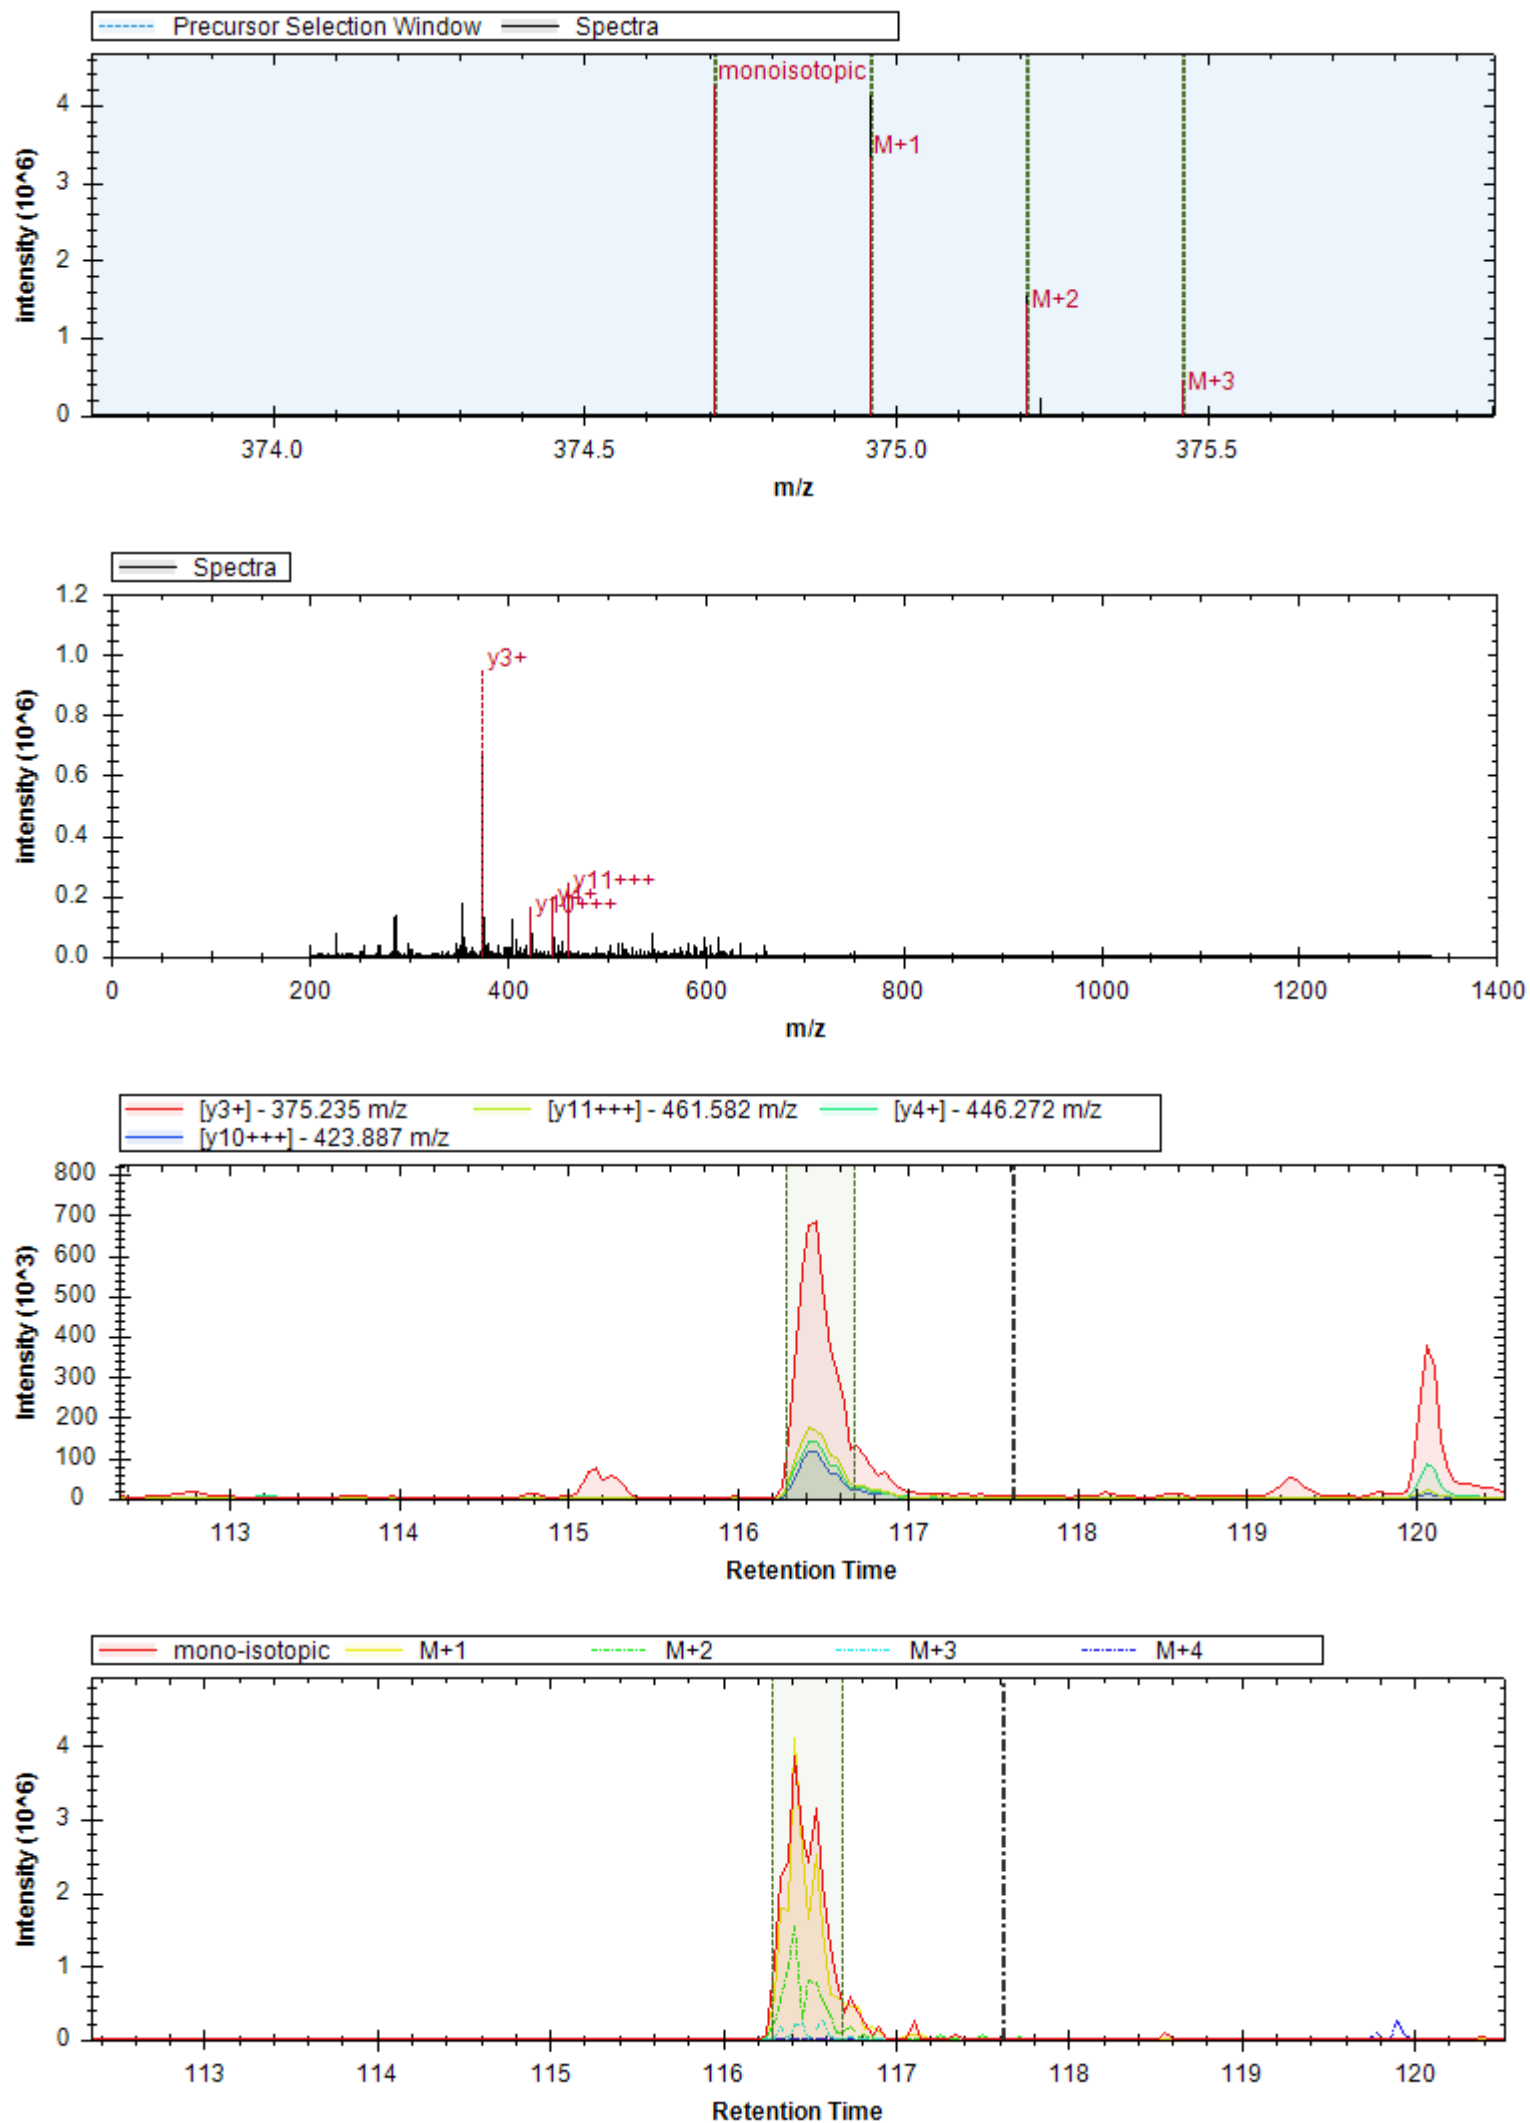

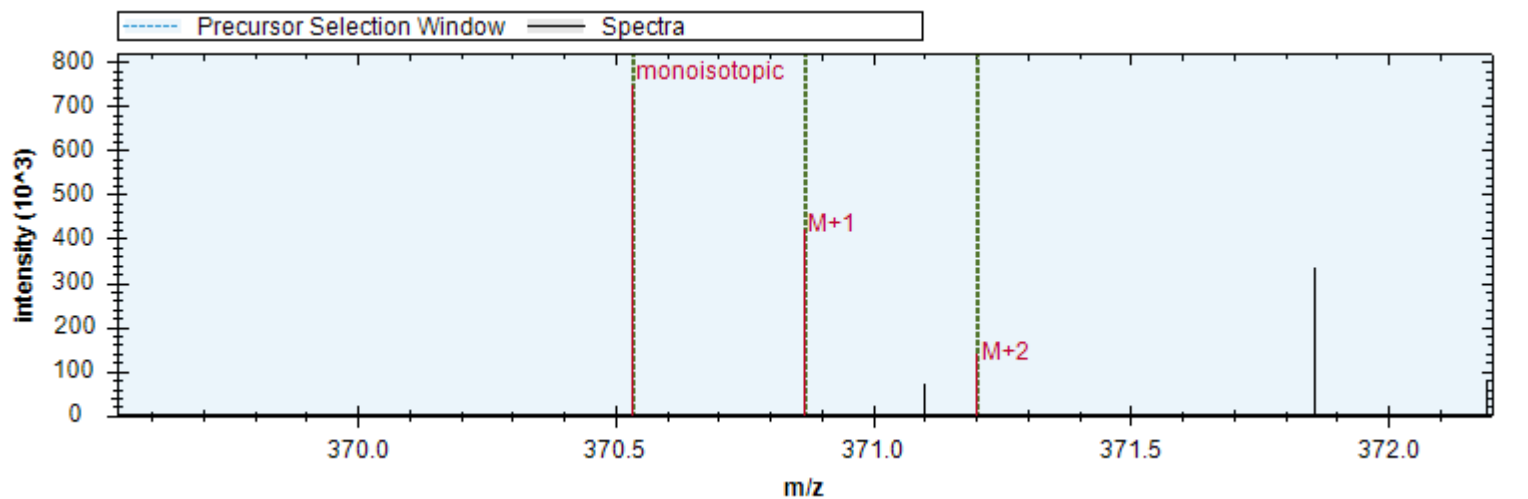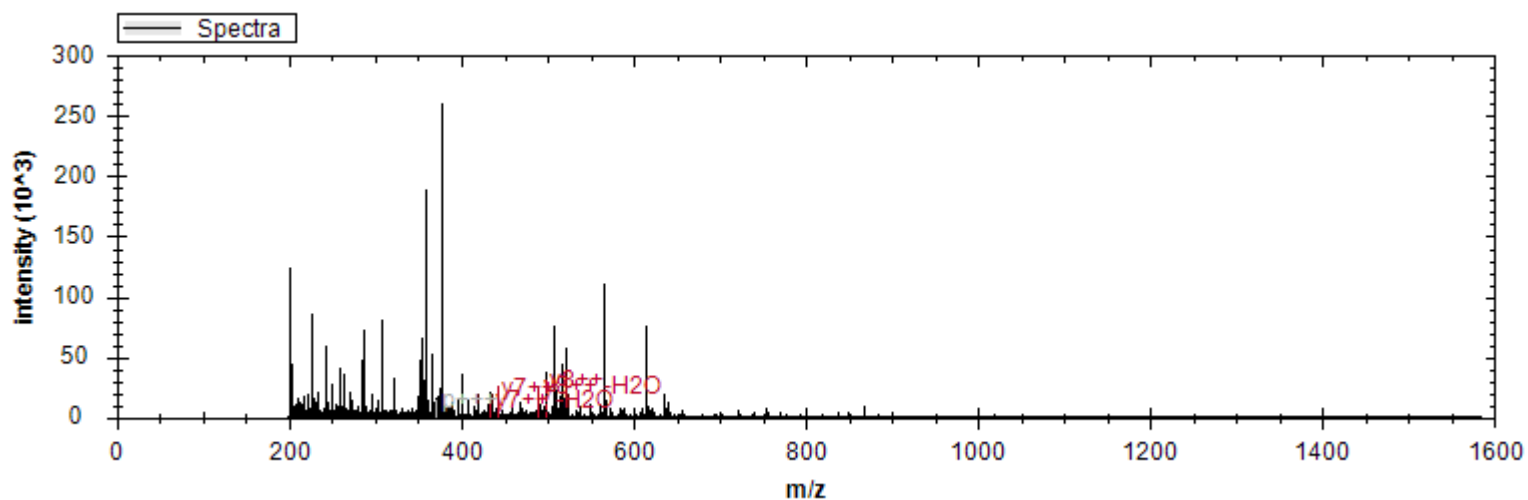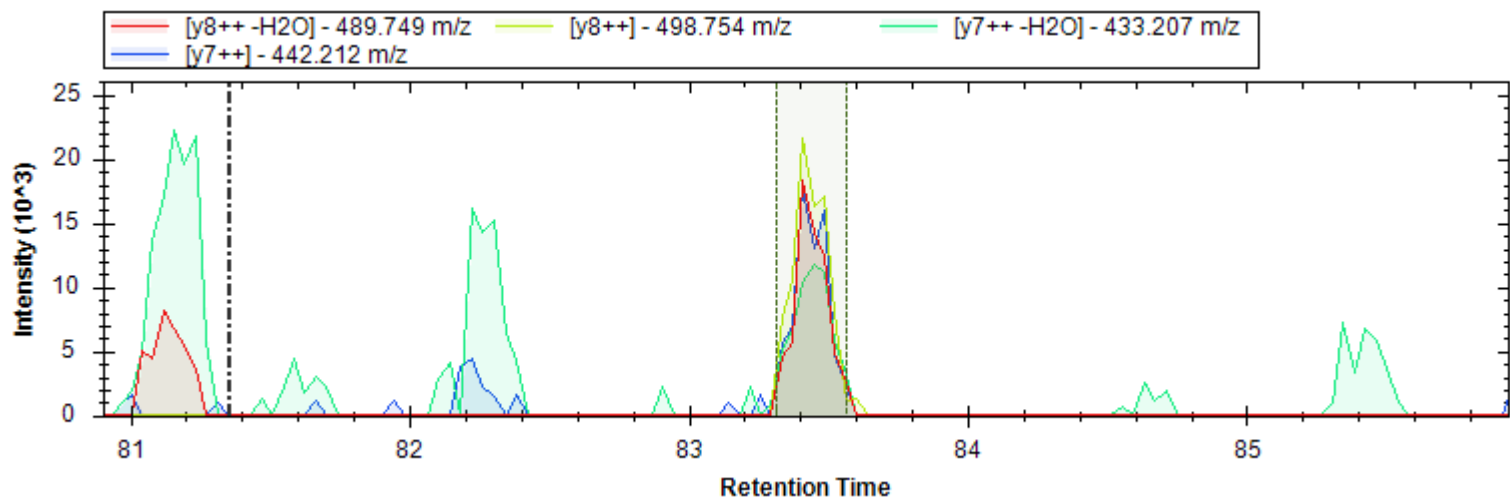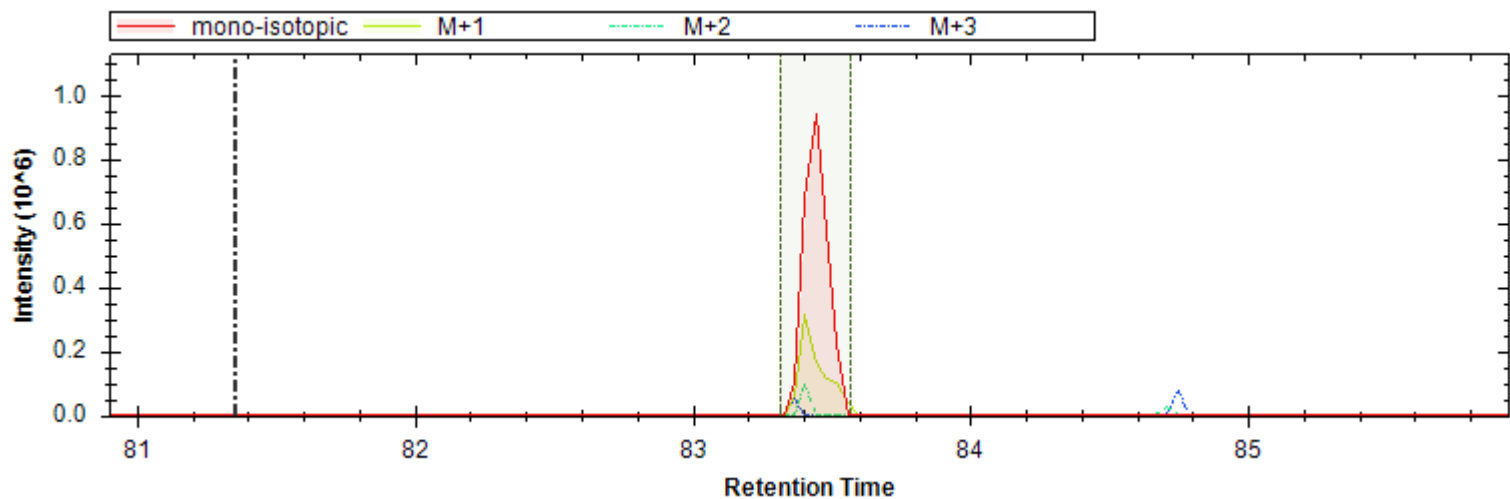

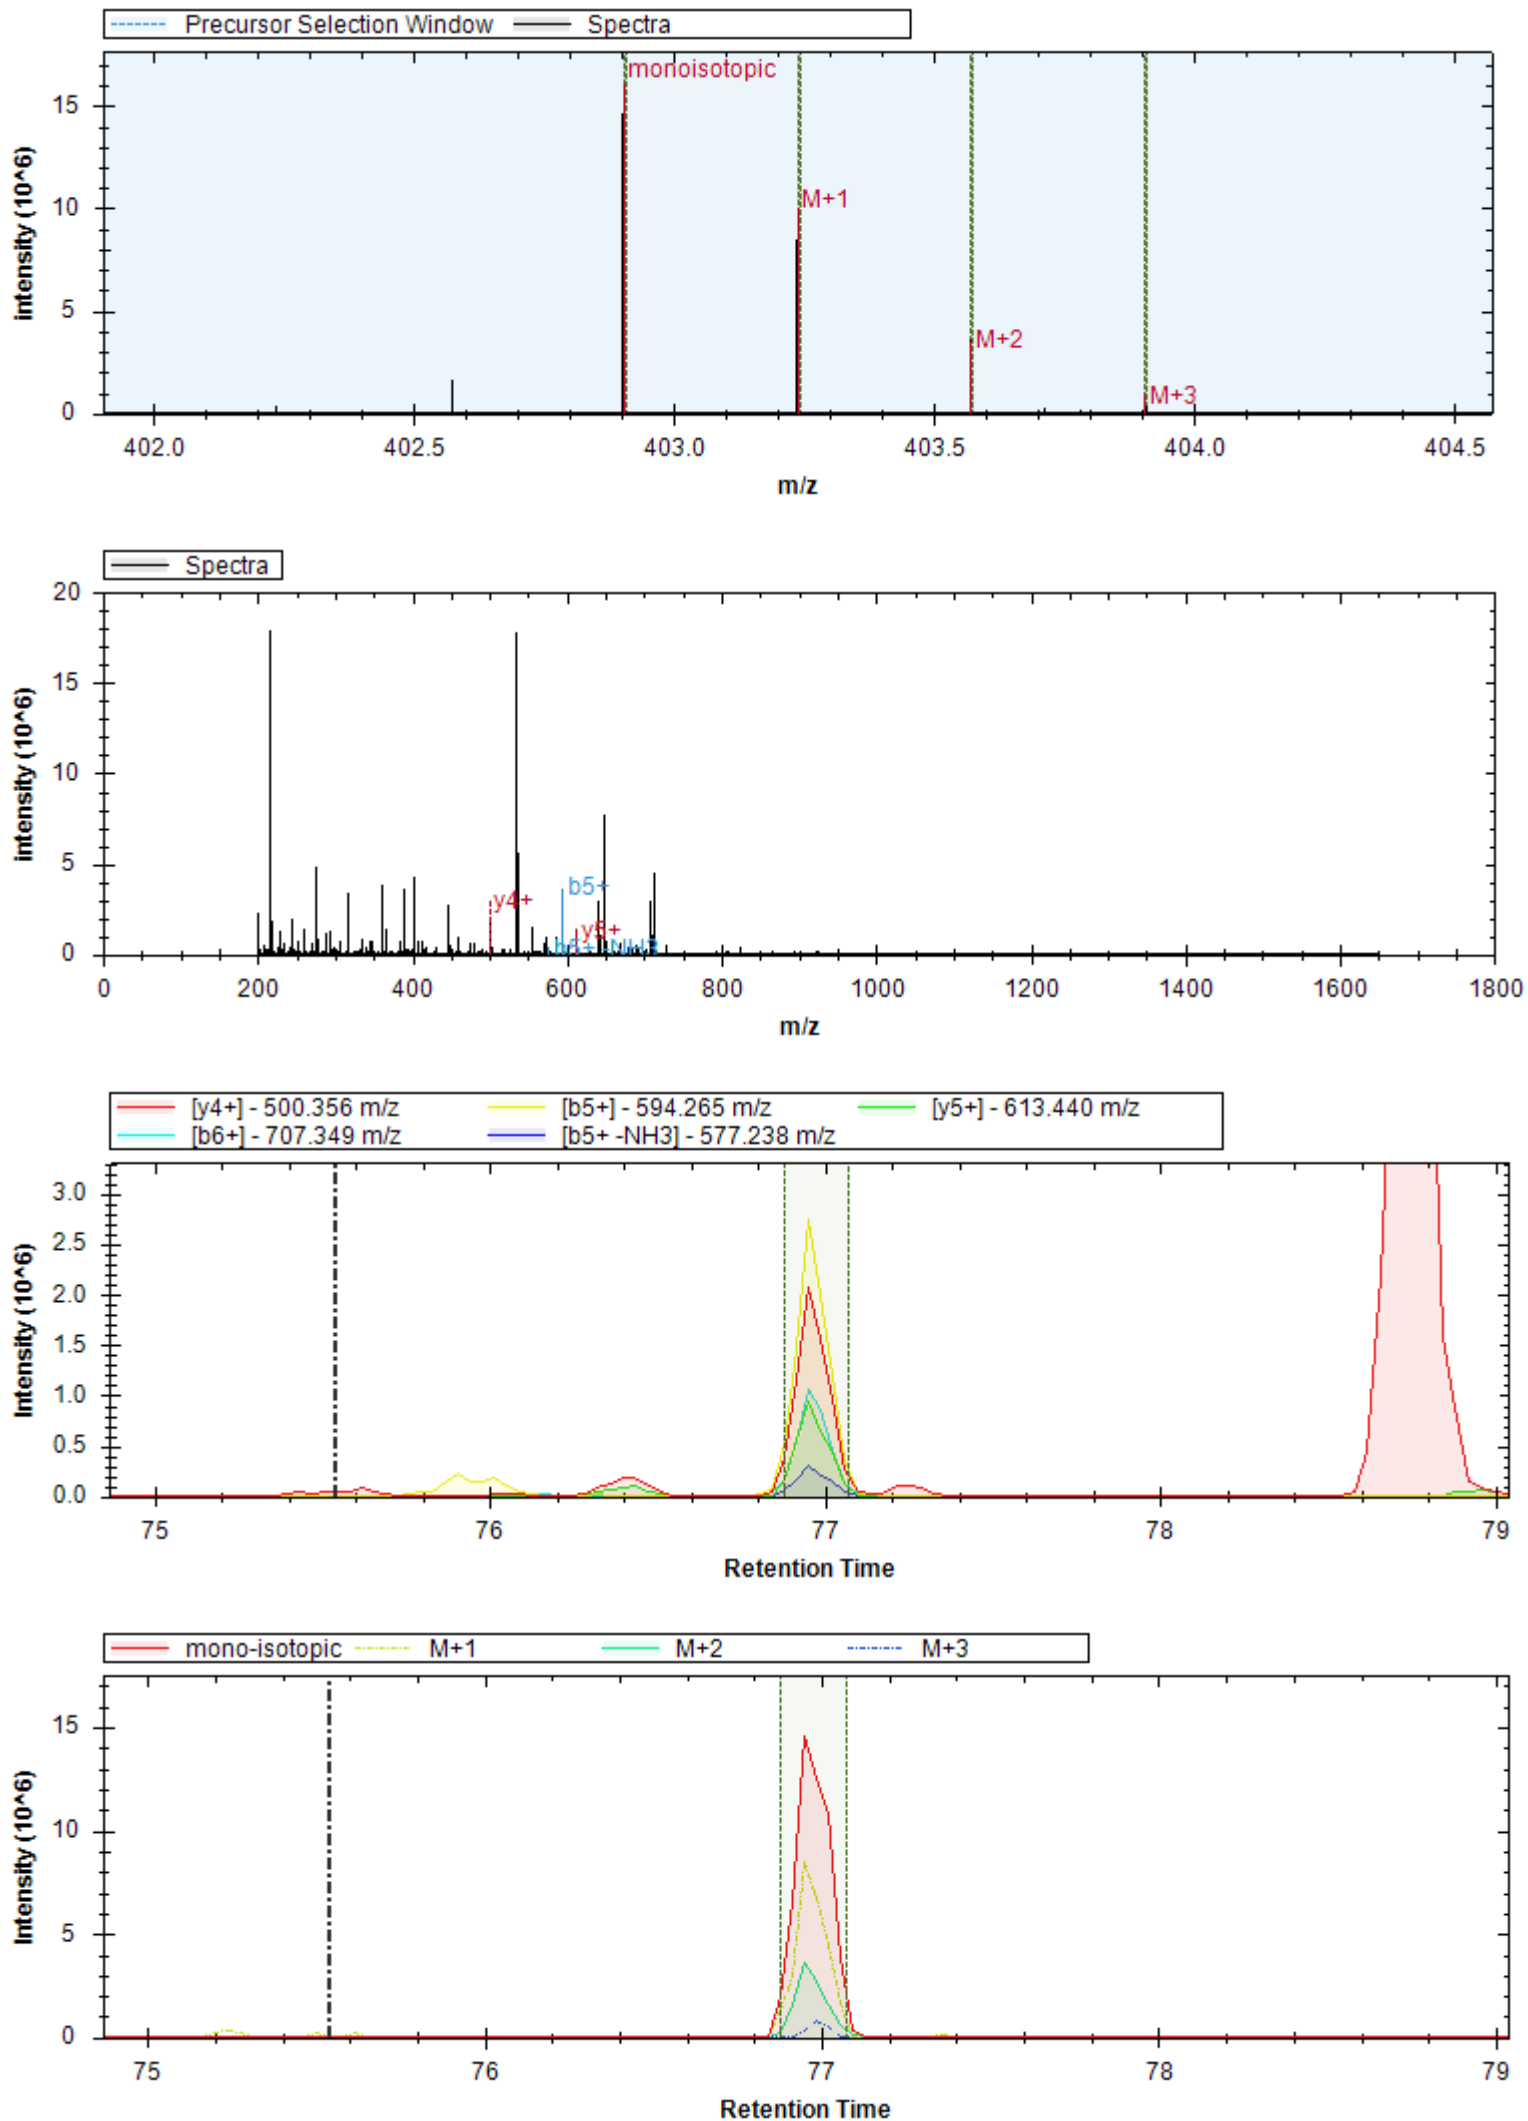

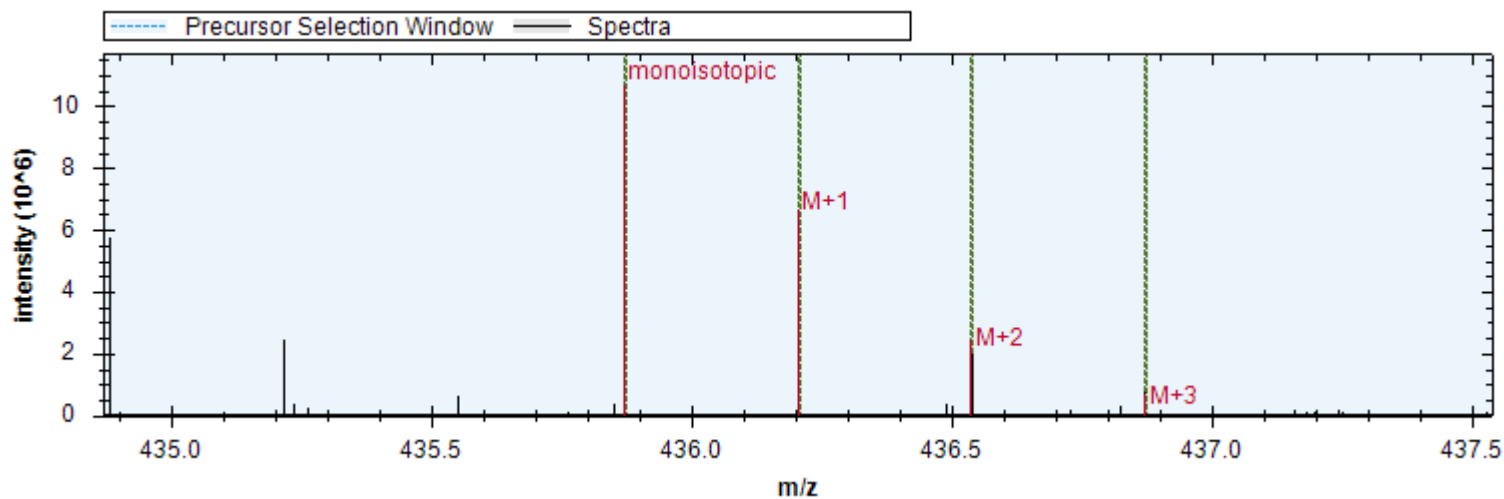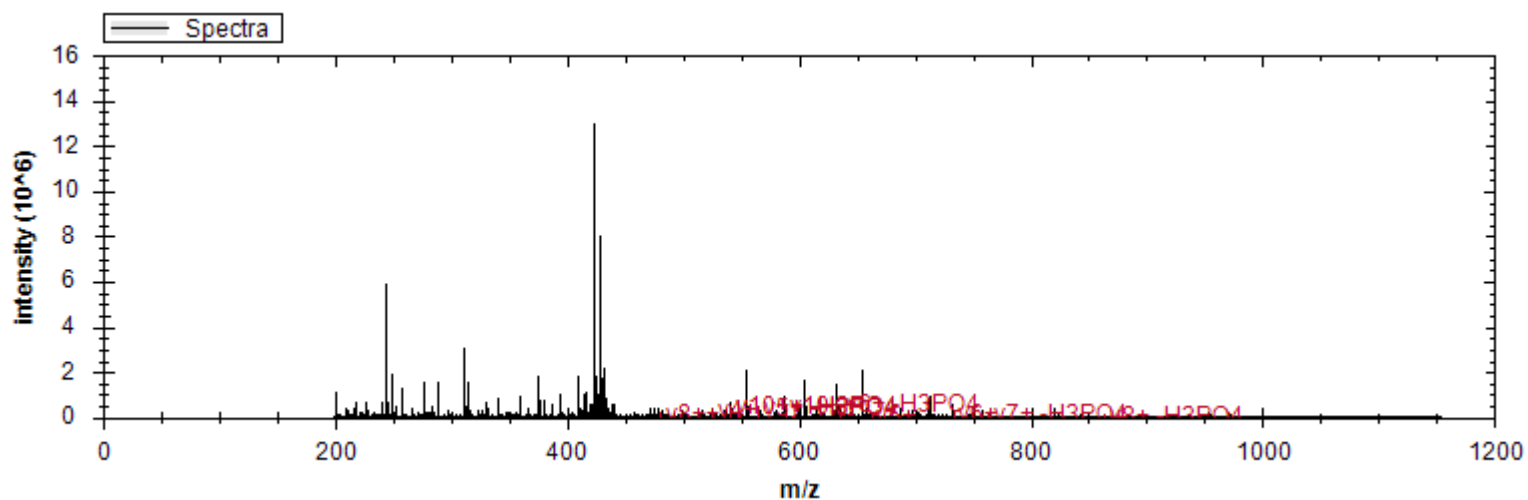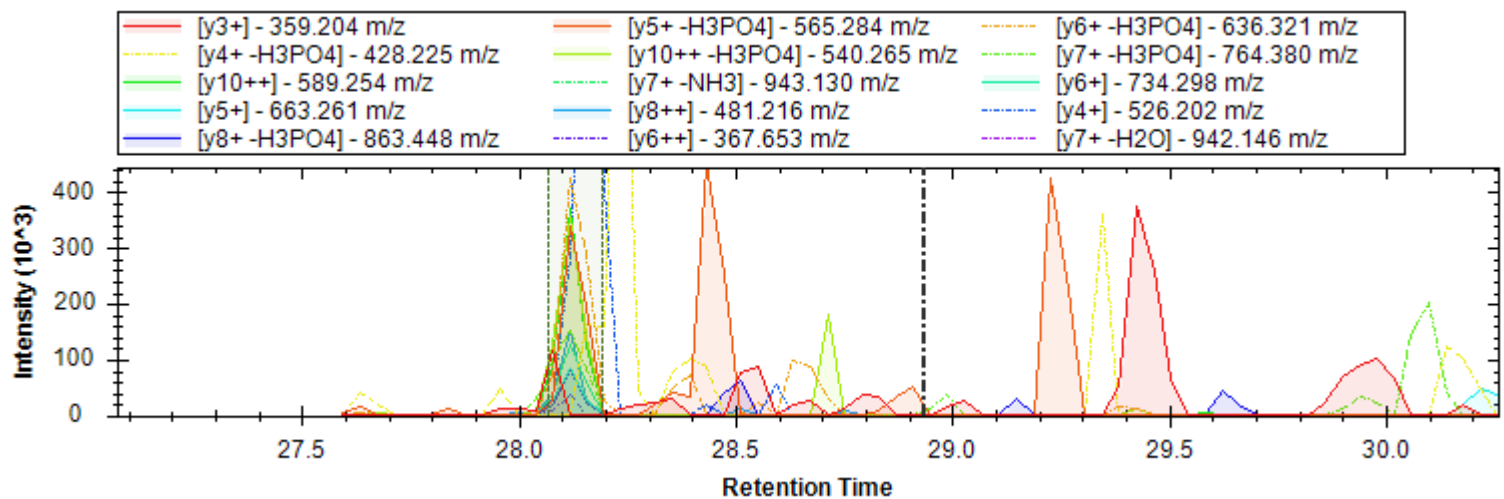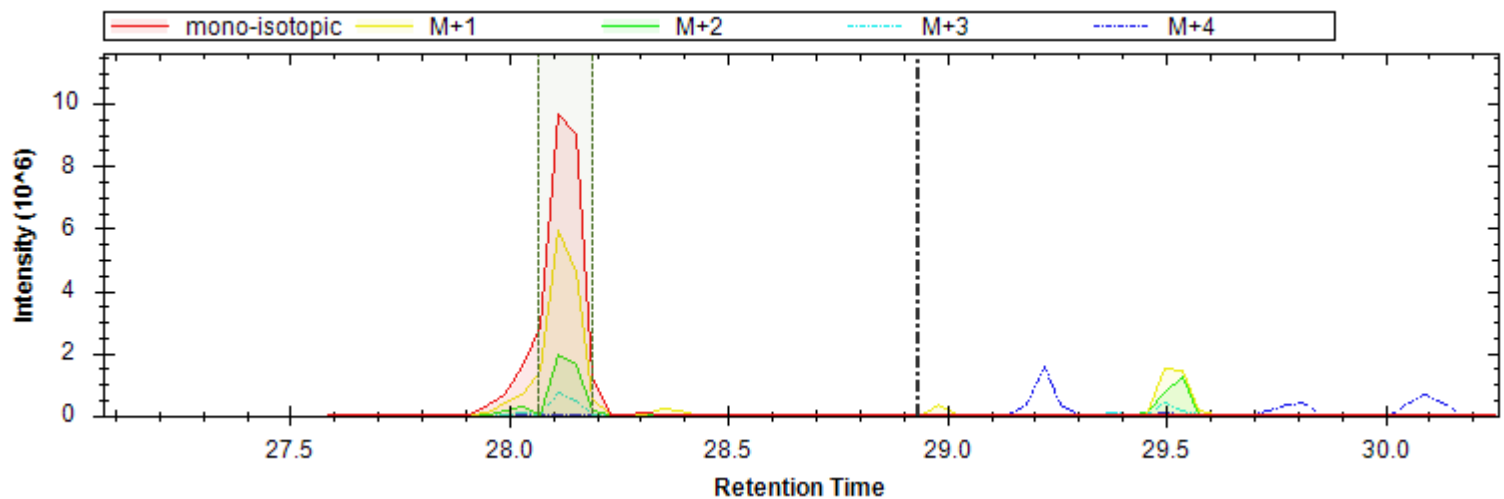

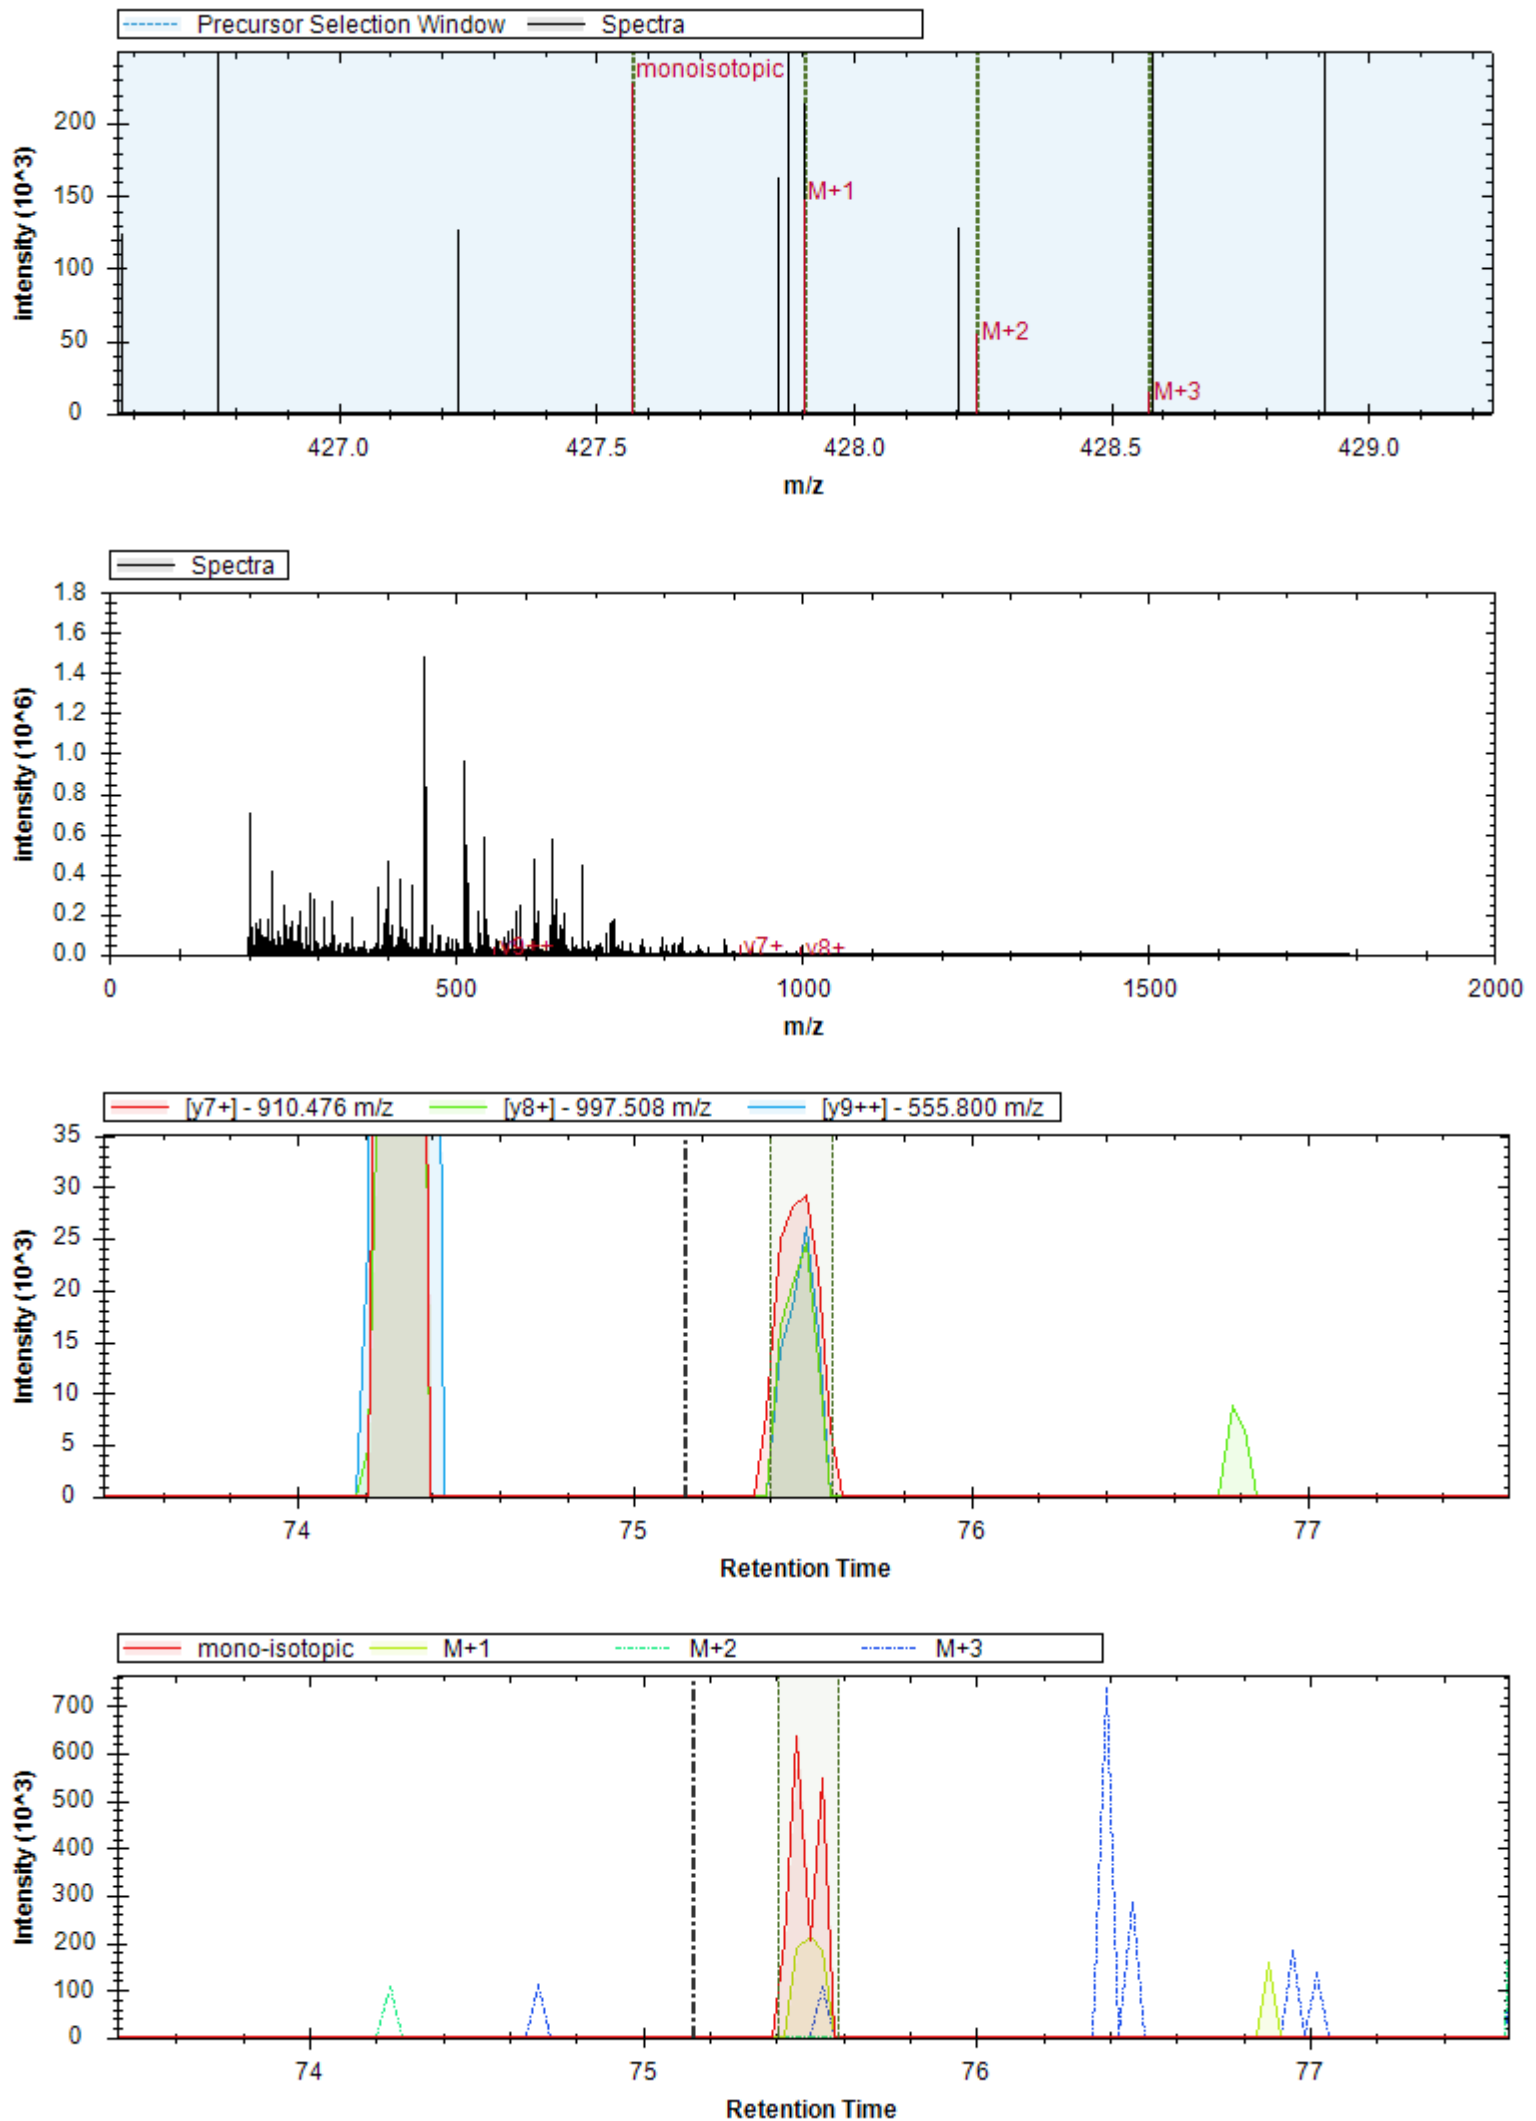

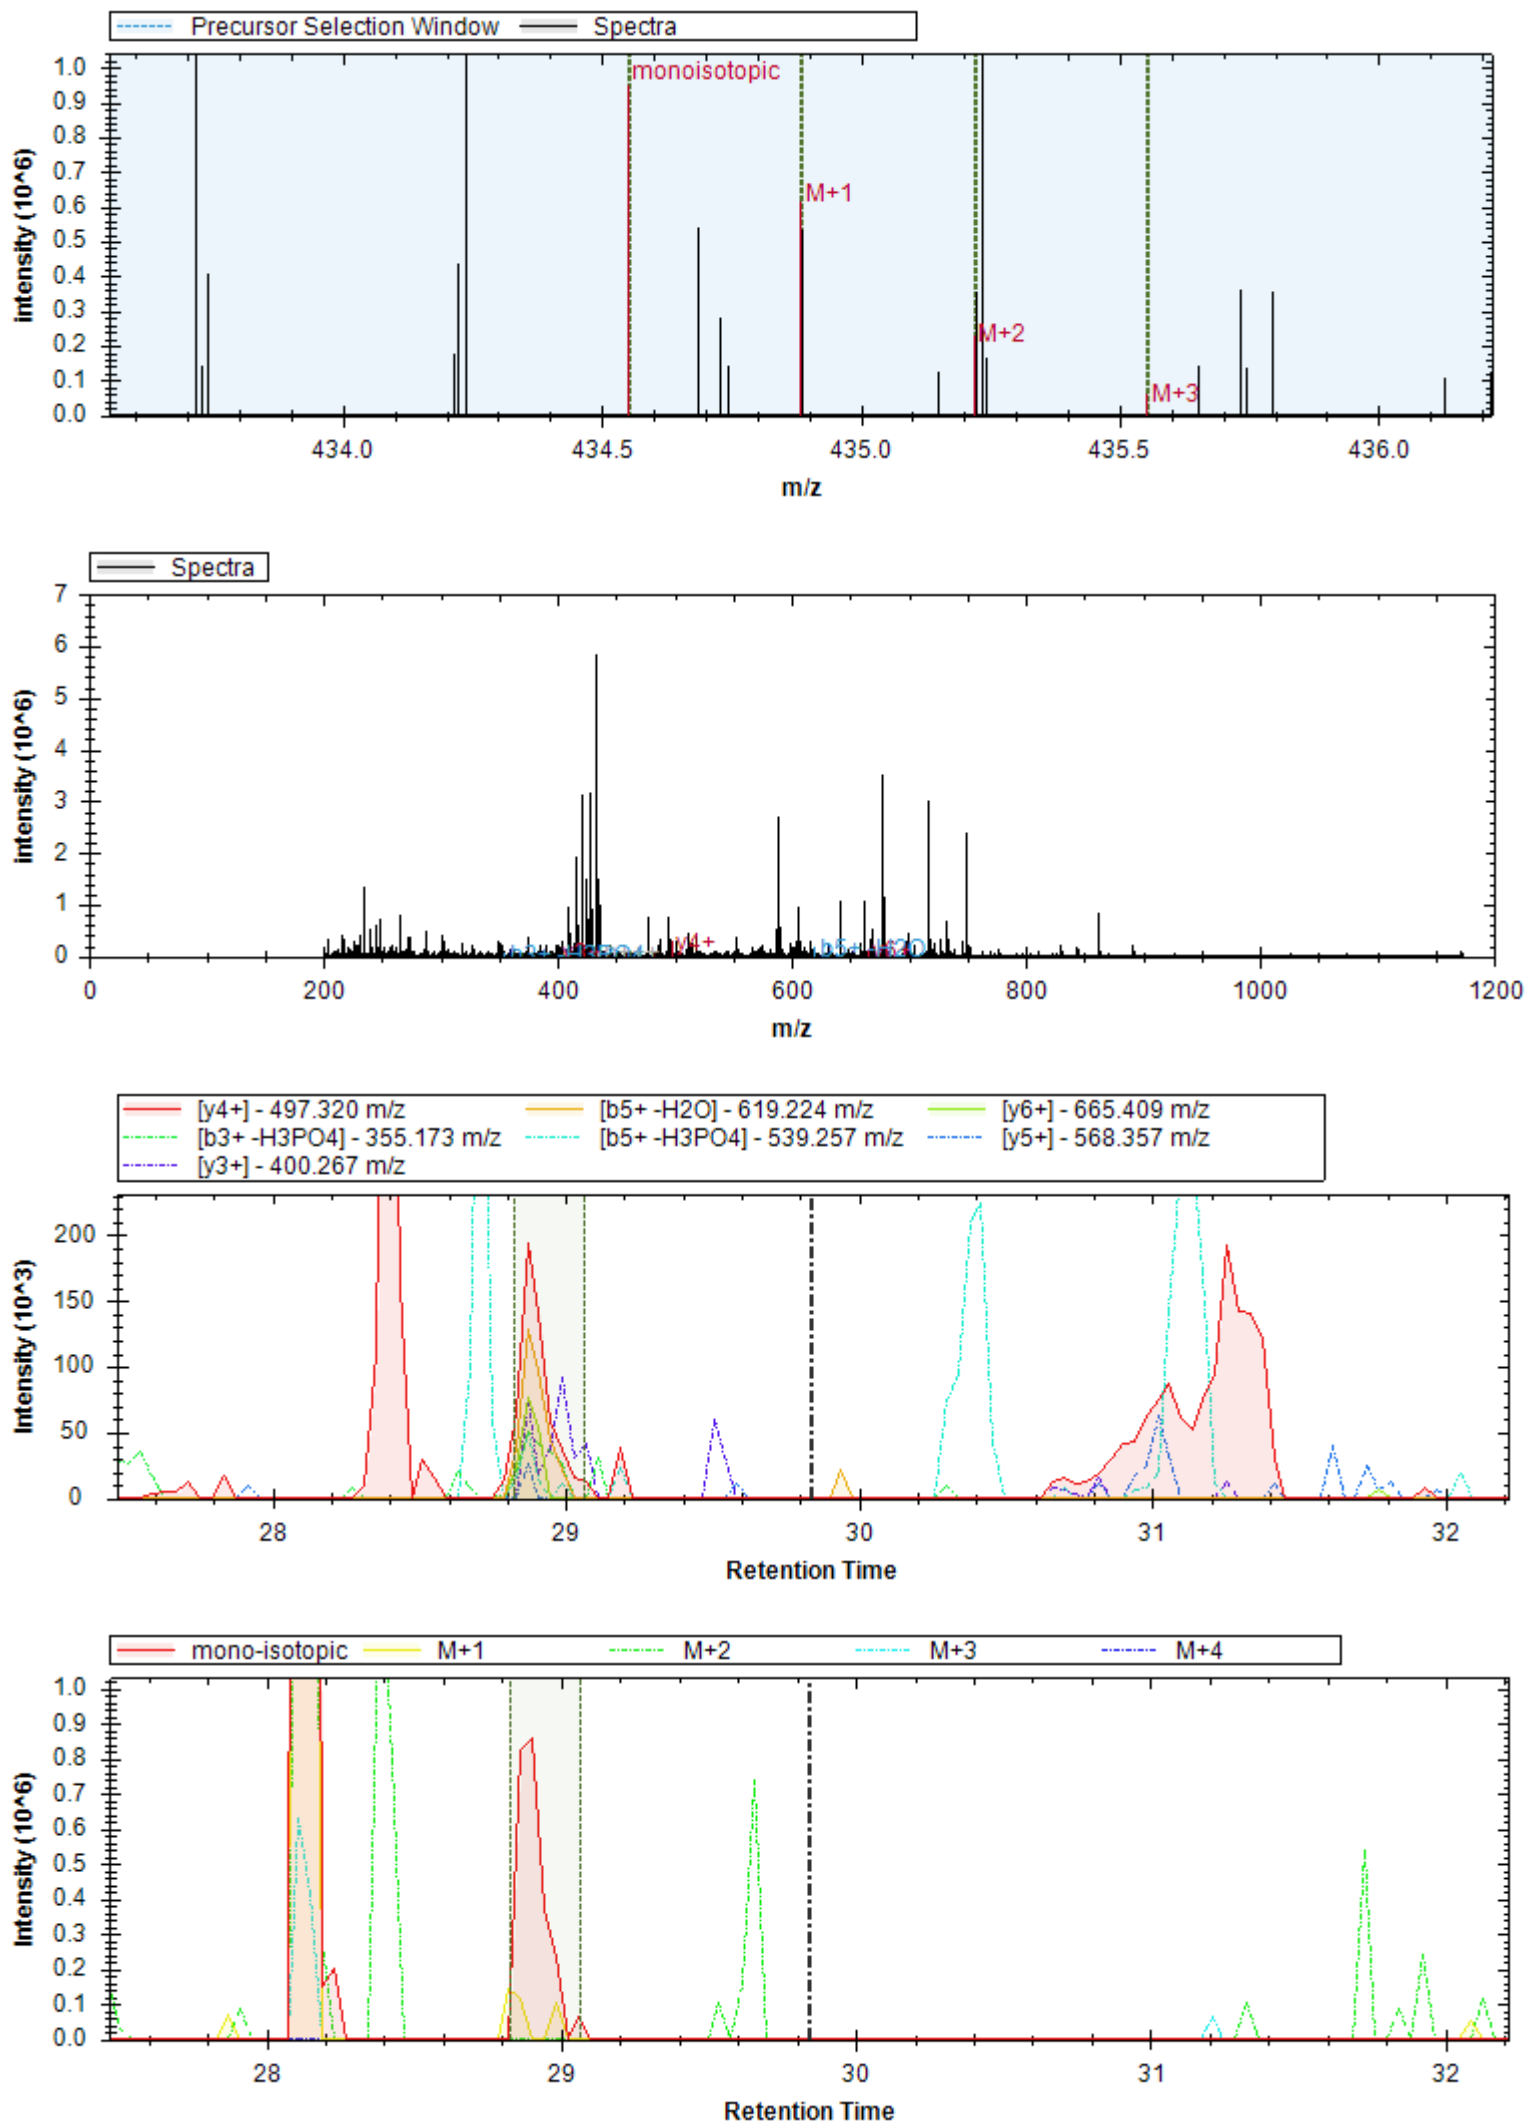

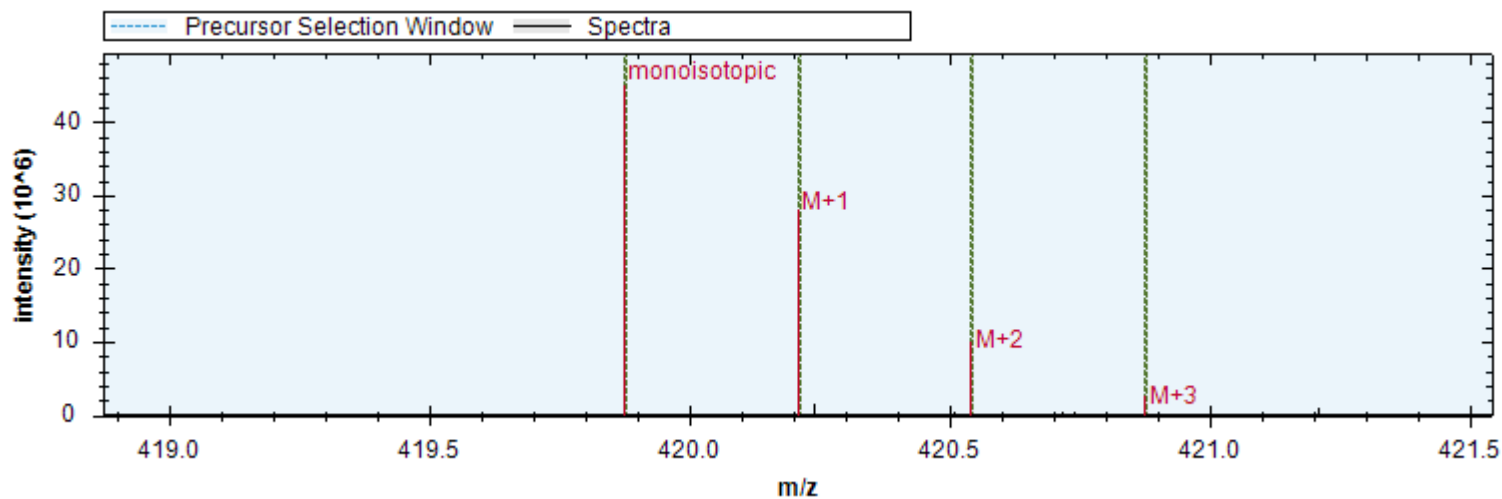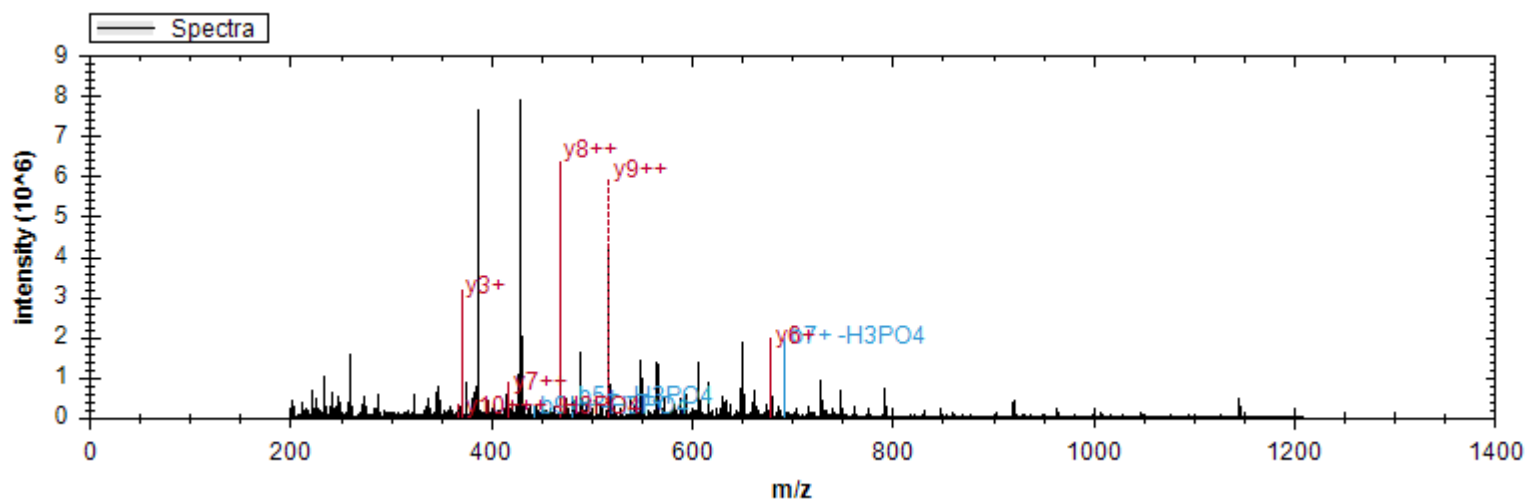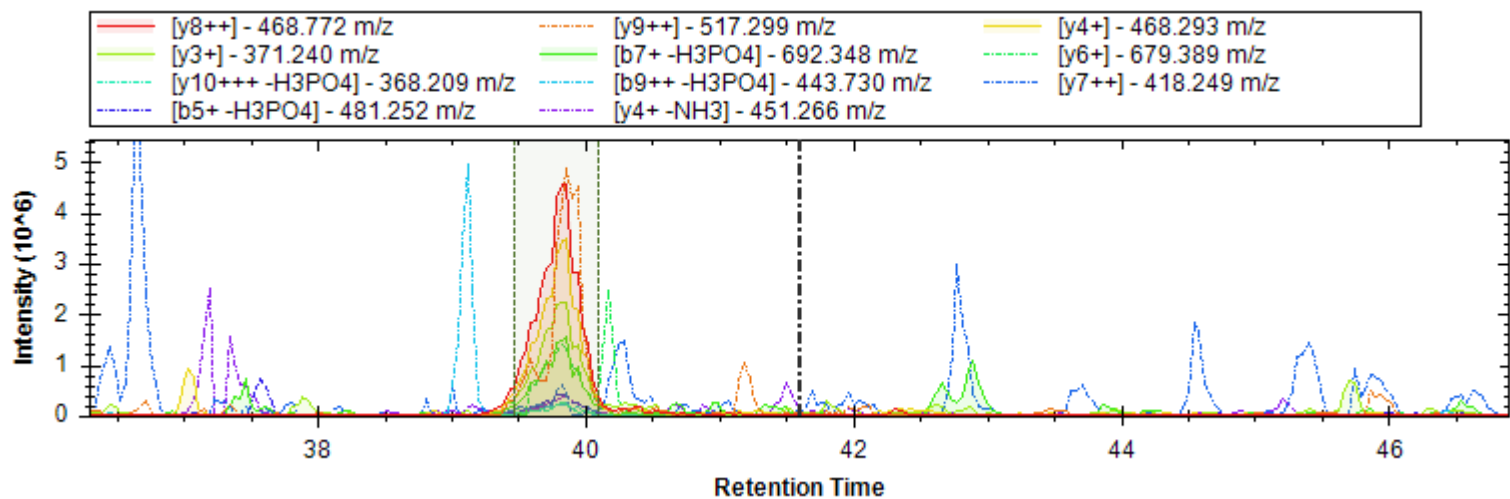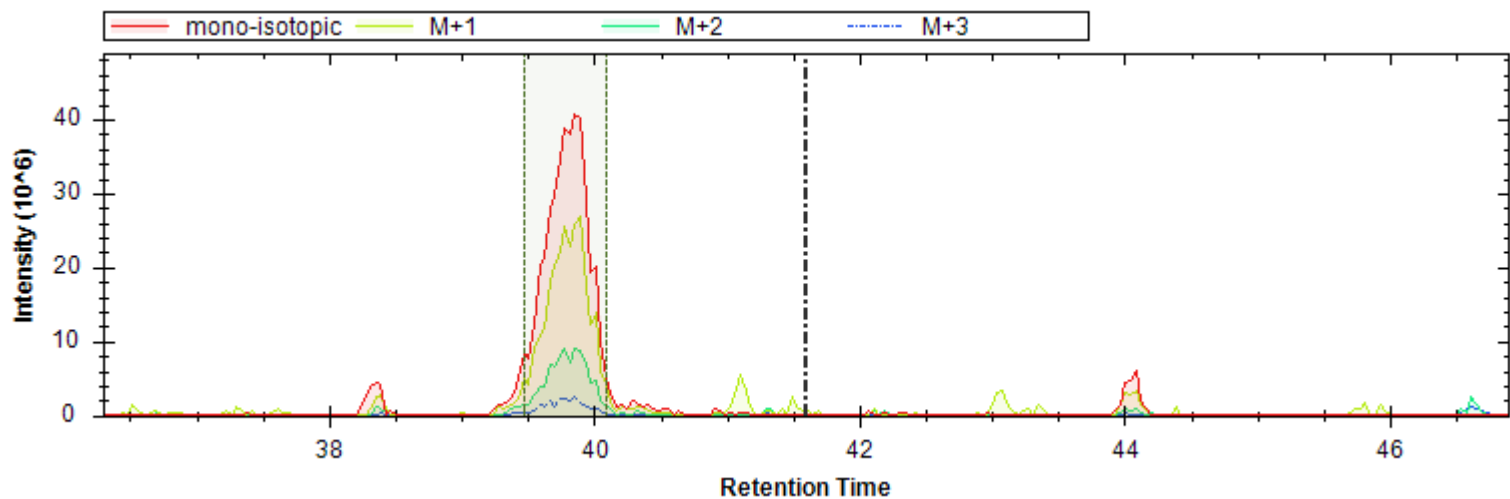

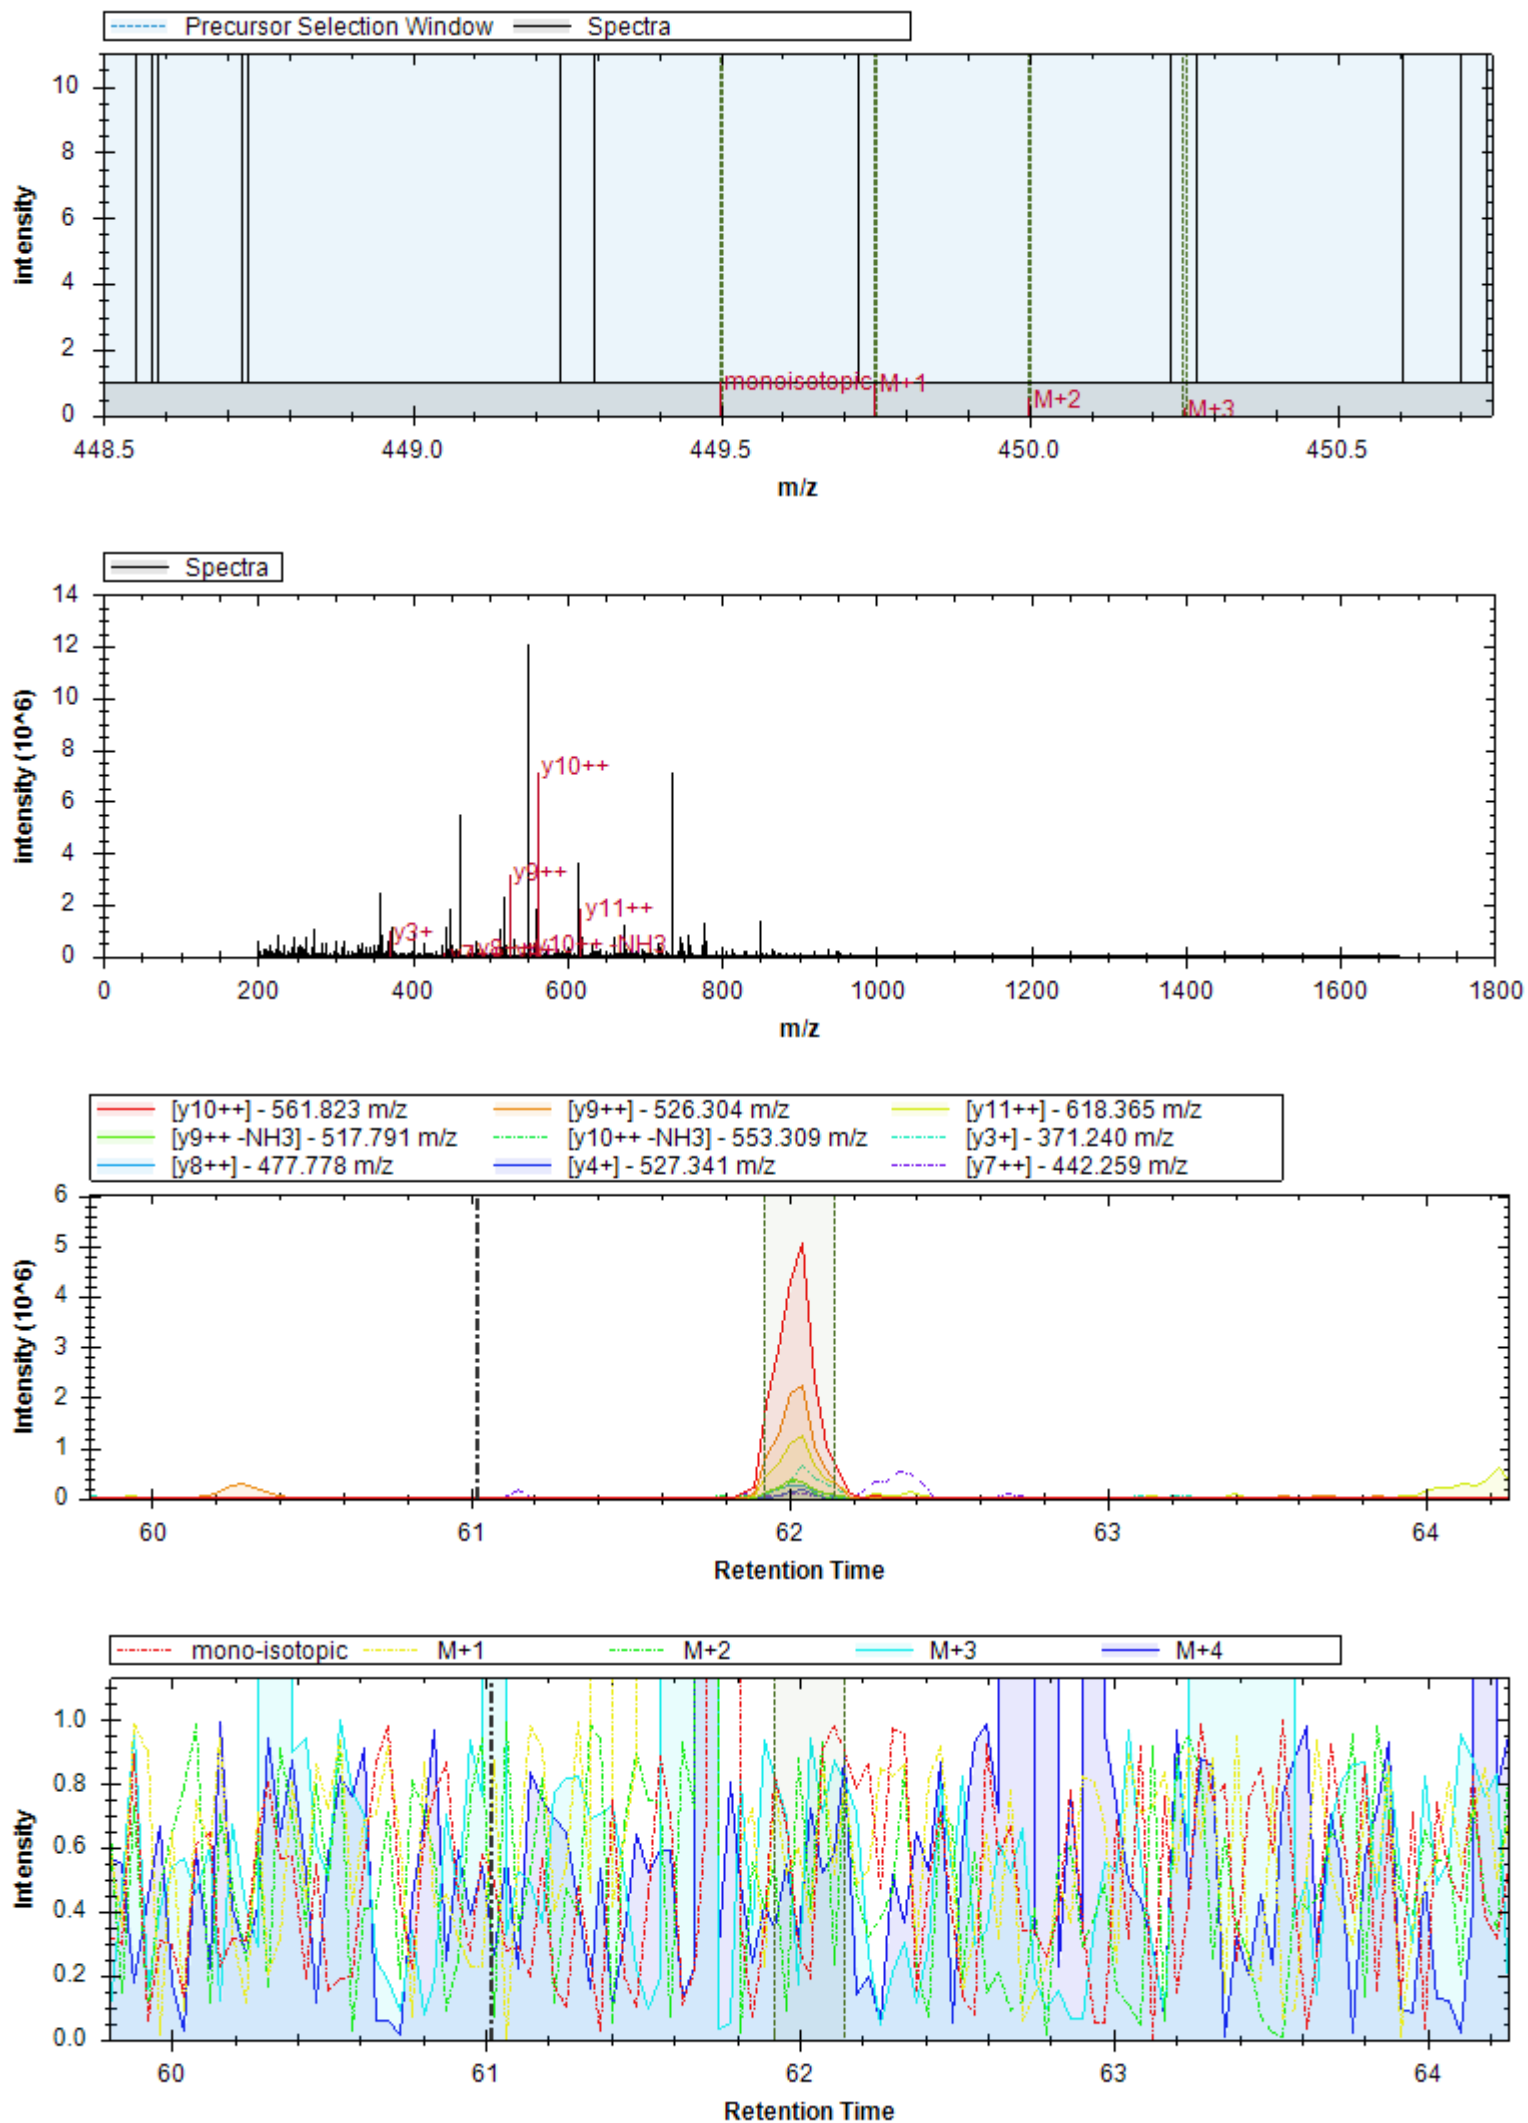



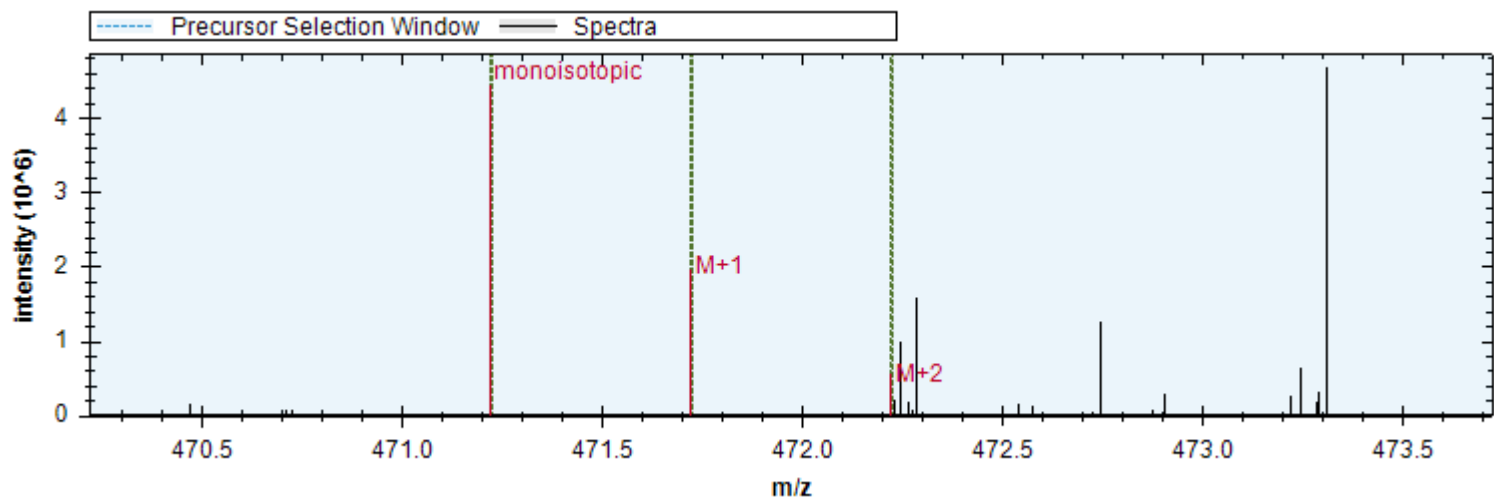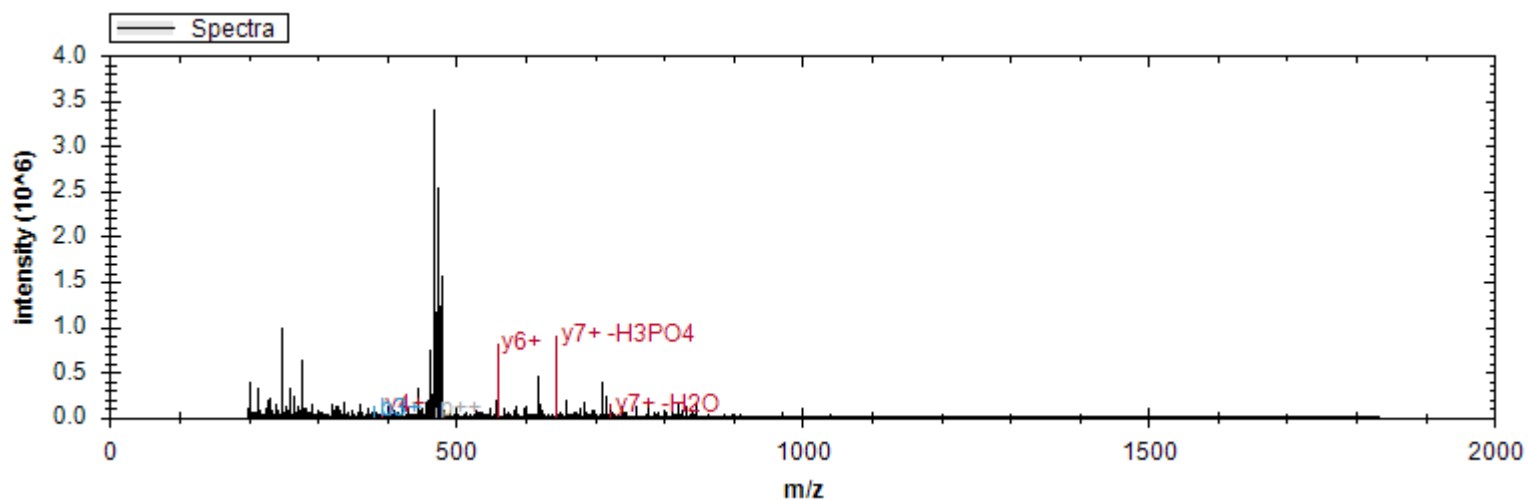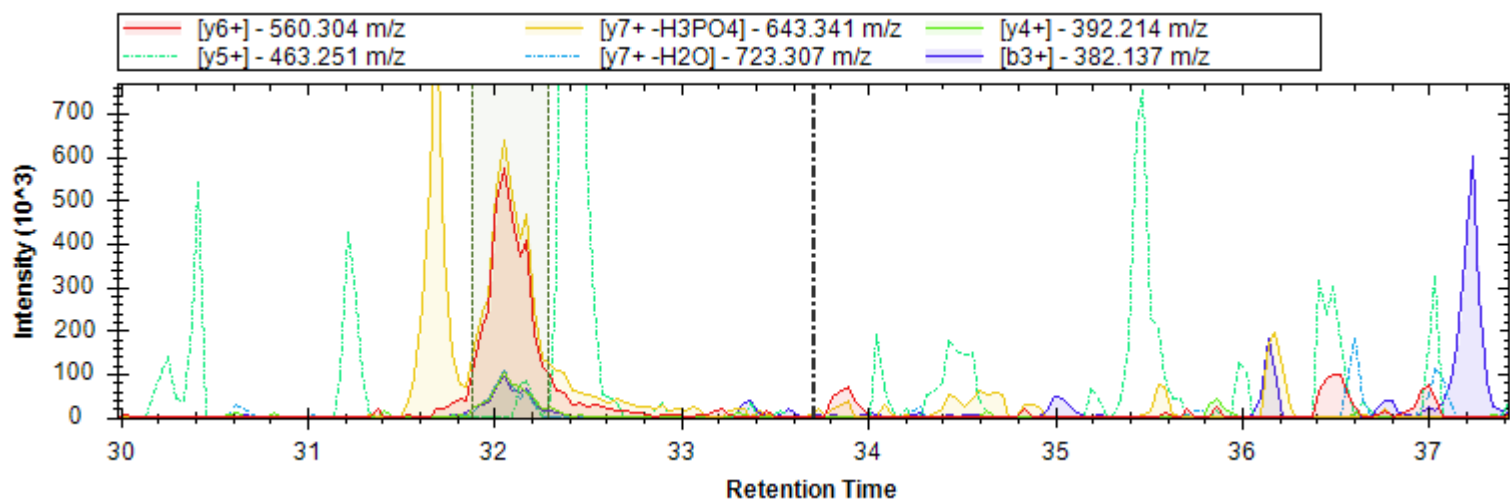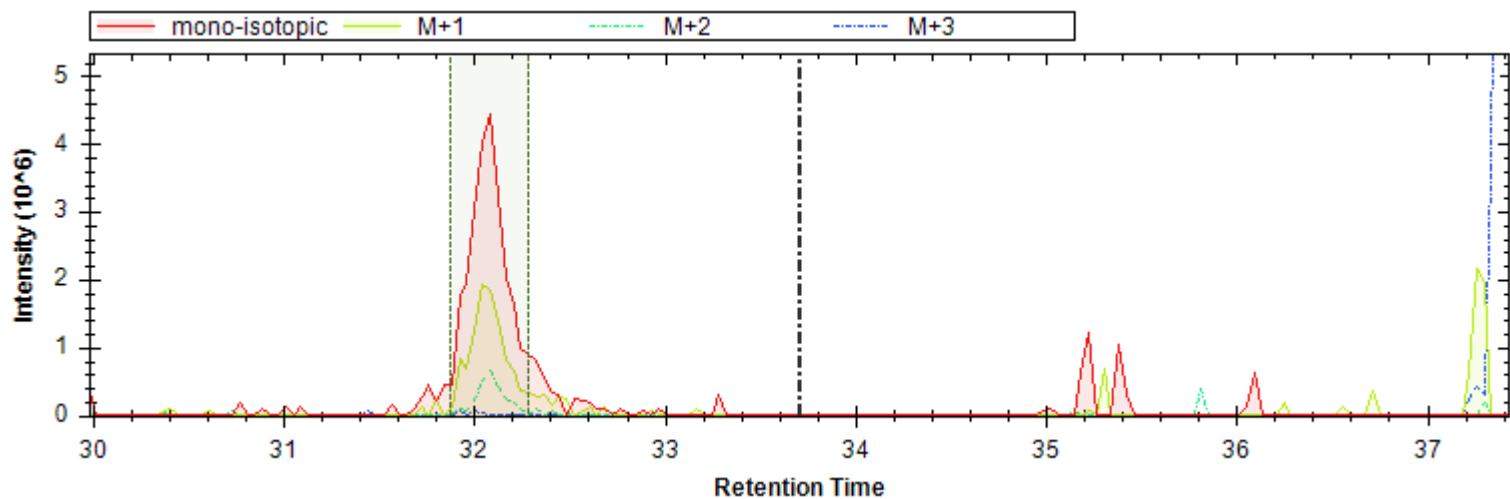

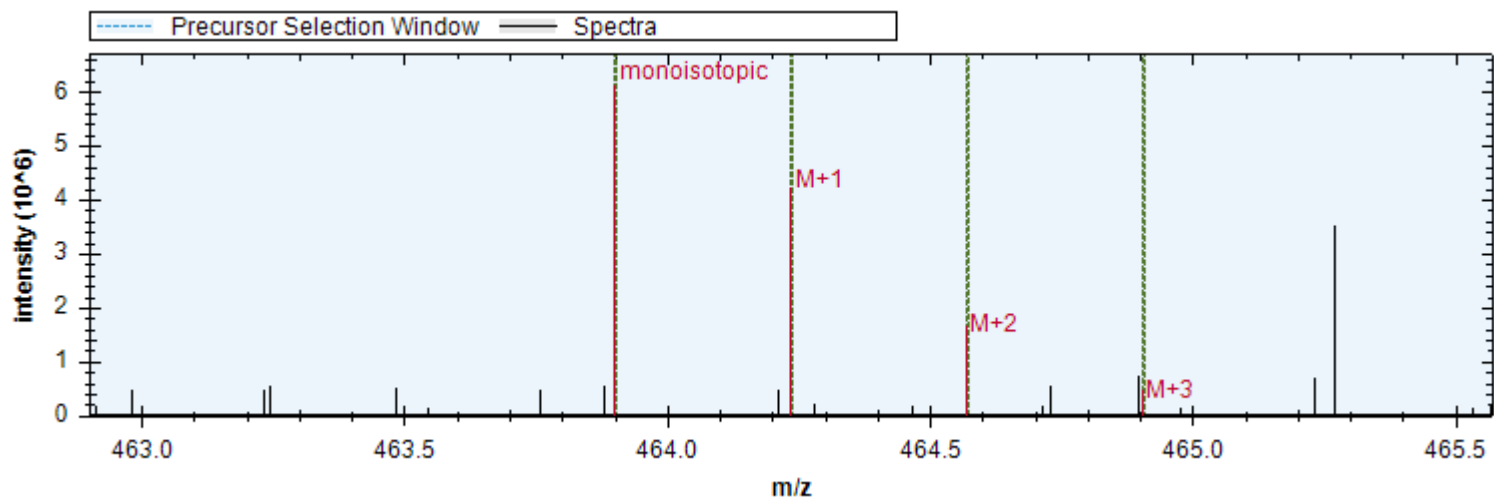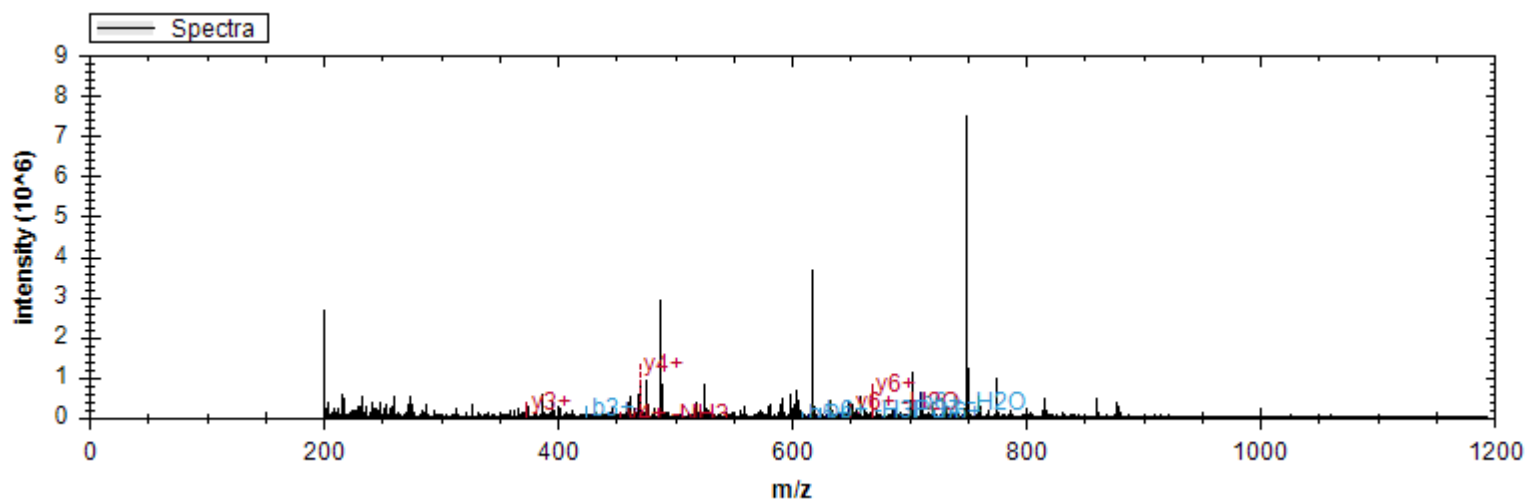

- |                          |                            |                            |
|--------------------------|----------------------------|----------------------------|
| [y4+] - 470.272 m/z      | [y6+] - 668.373 m/z        | [b5+ -H2O] - 786.829 m/z   |
| [y6+ -H2O] - 650.362 m/z | [b6+ -H2O] - 704.313 m/z   | [b3+] - 425.154 m/z        |
| [y3+] - 373.219 m/z      | [b3+ -H3PO4] - 327.178 m/z | [b6+ -H3PO4] - 624.346 m/z |
| [y5+] - 571.320 m/z      | [b6+] - 722.323 m/z        | [y4+ -NH3] - 453.246 m/z   |
| [b5+] - 609.239 m/z      |                            |                            |

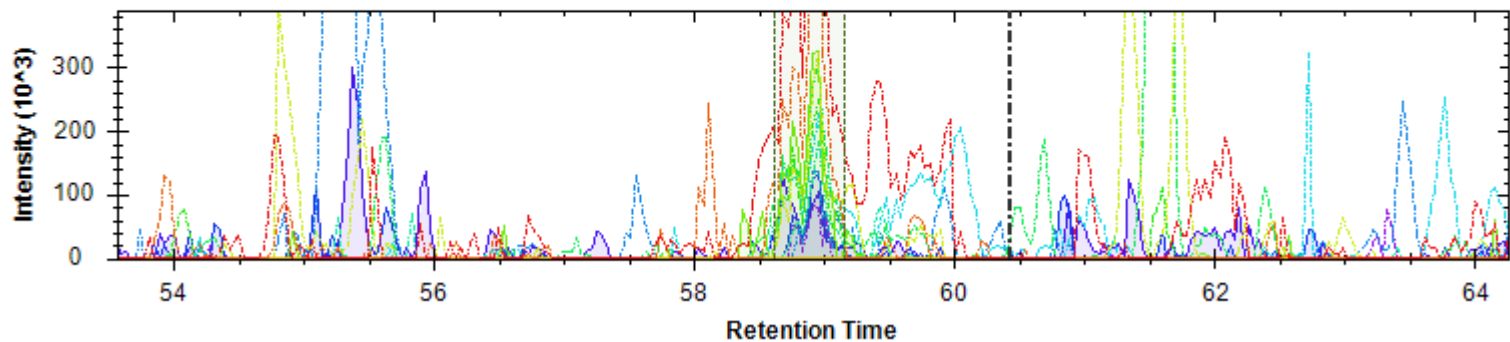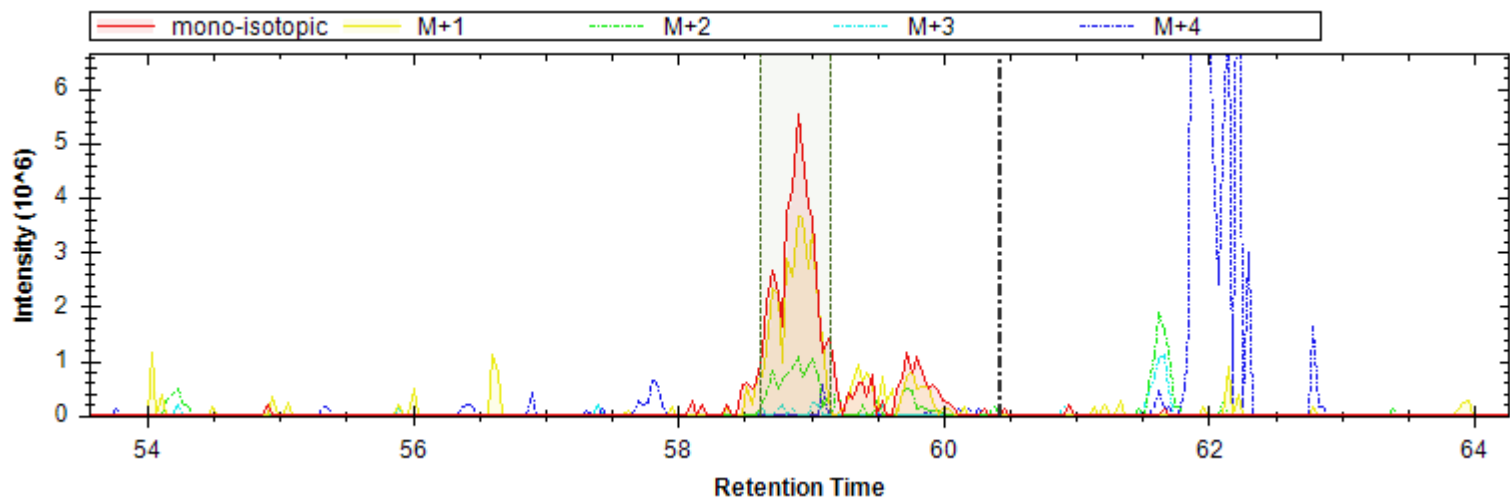

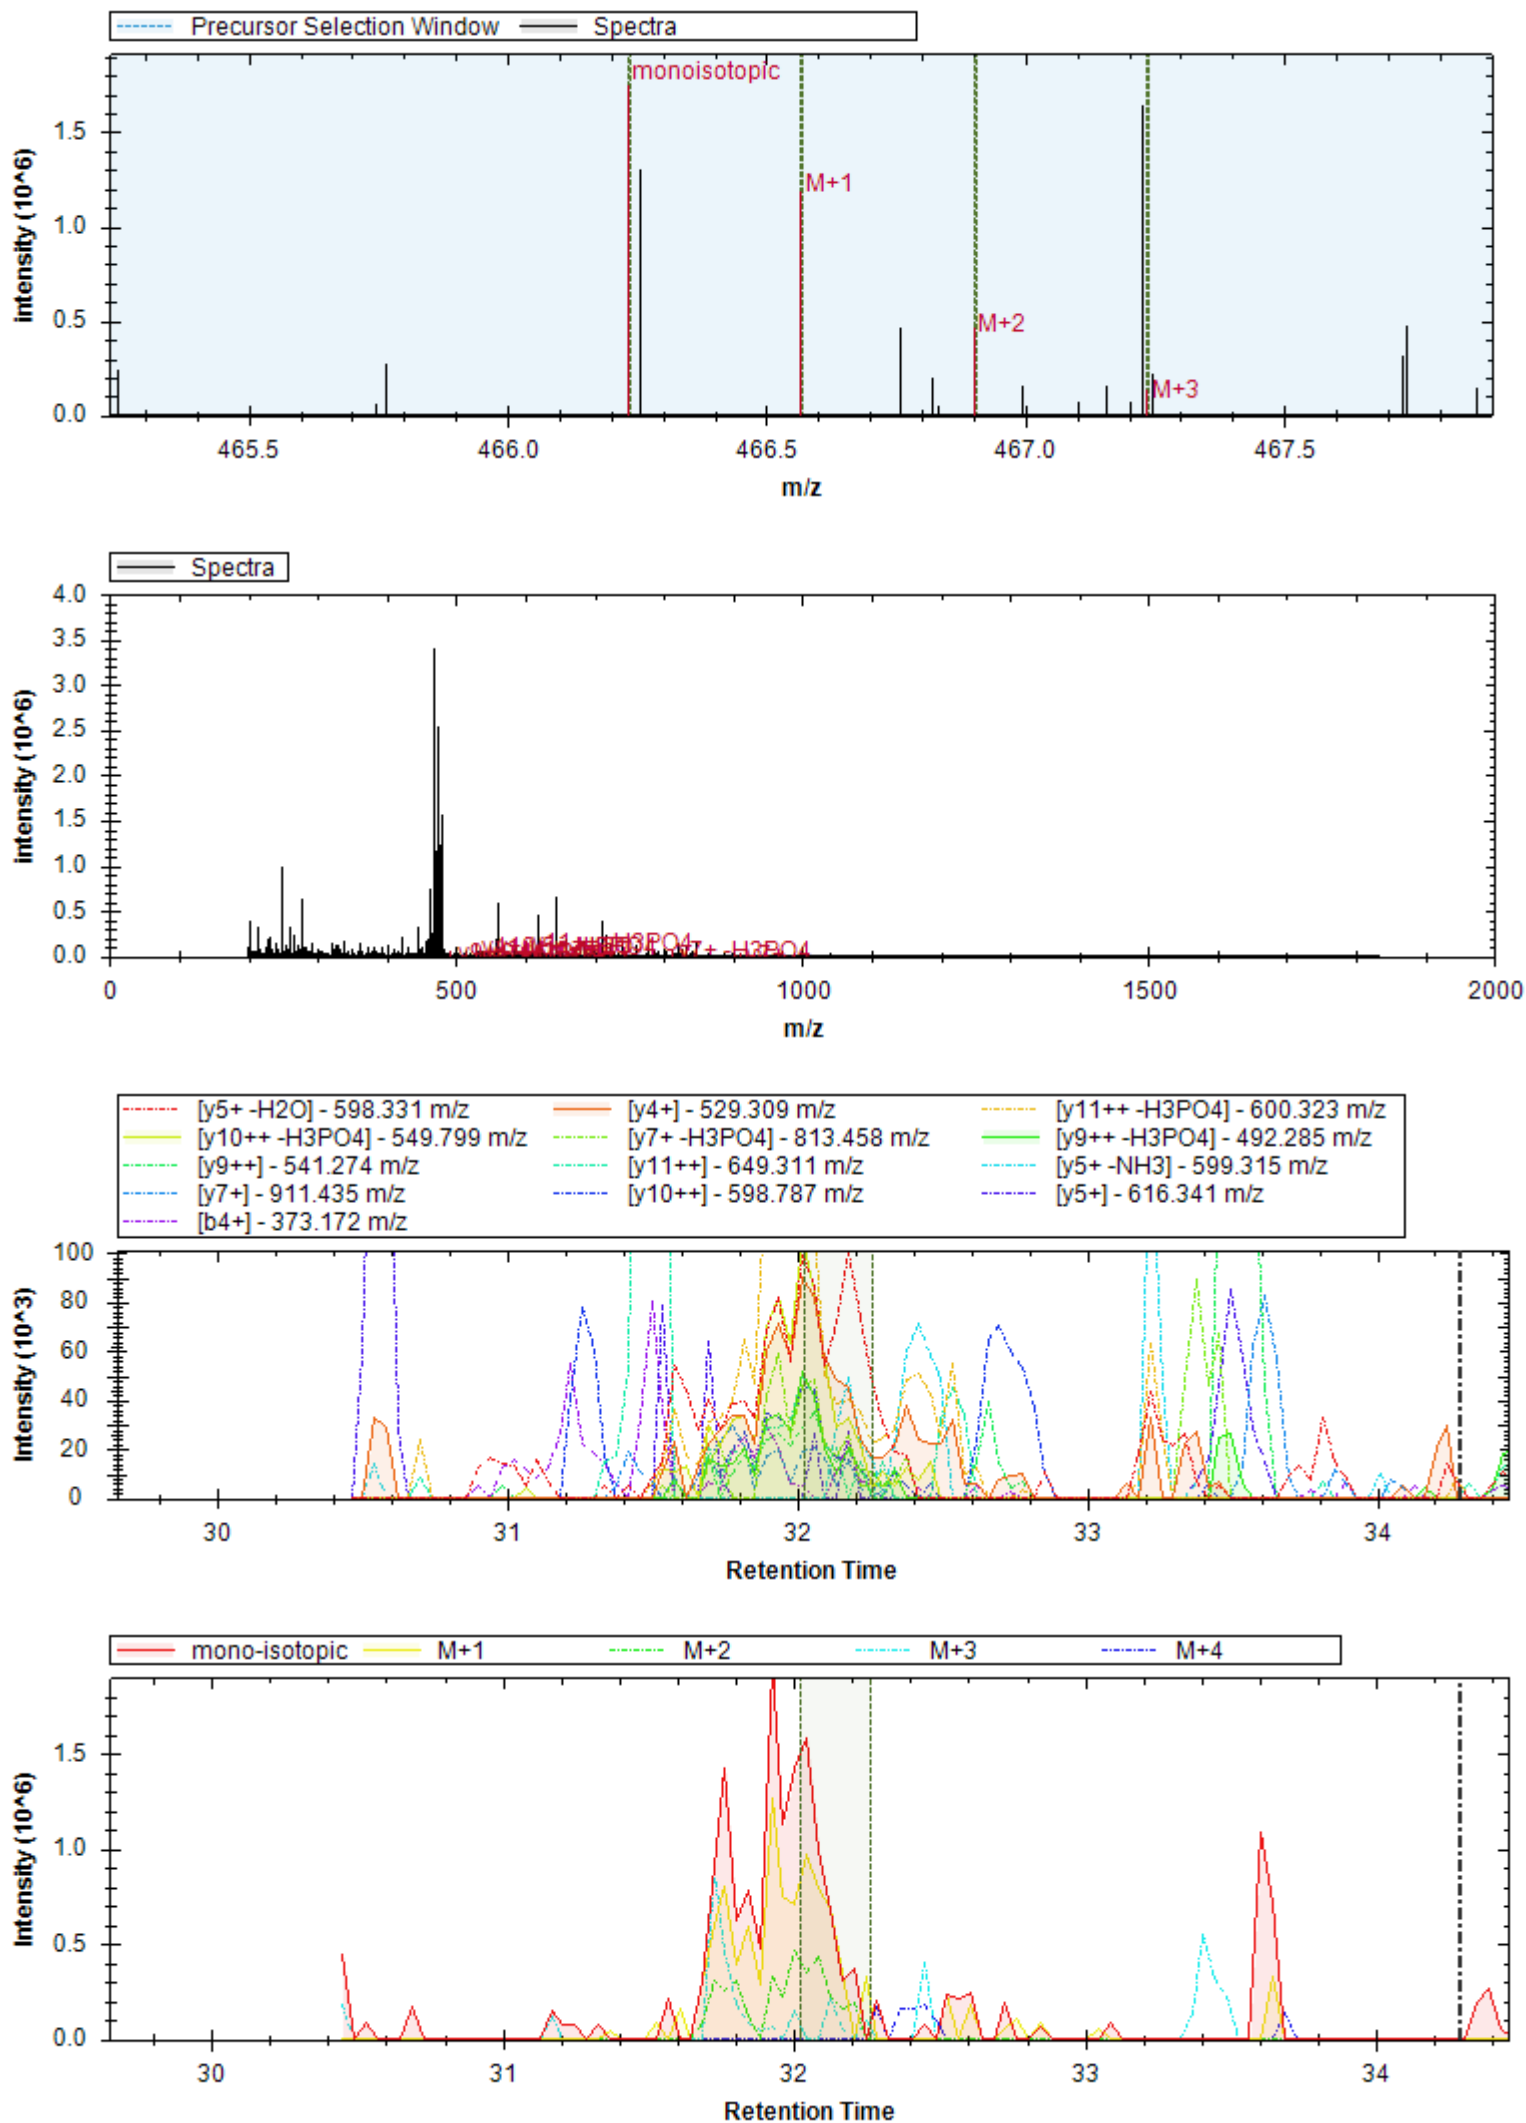

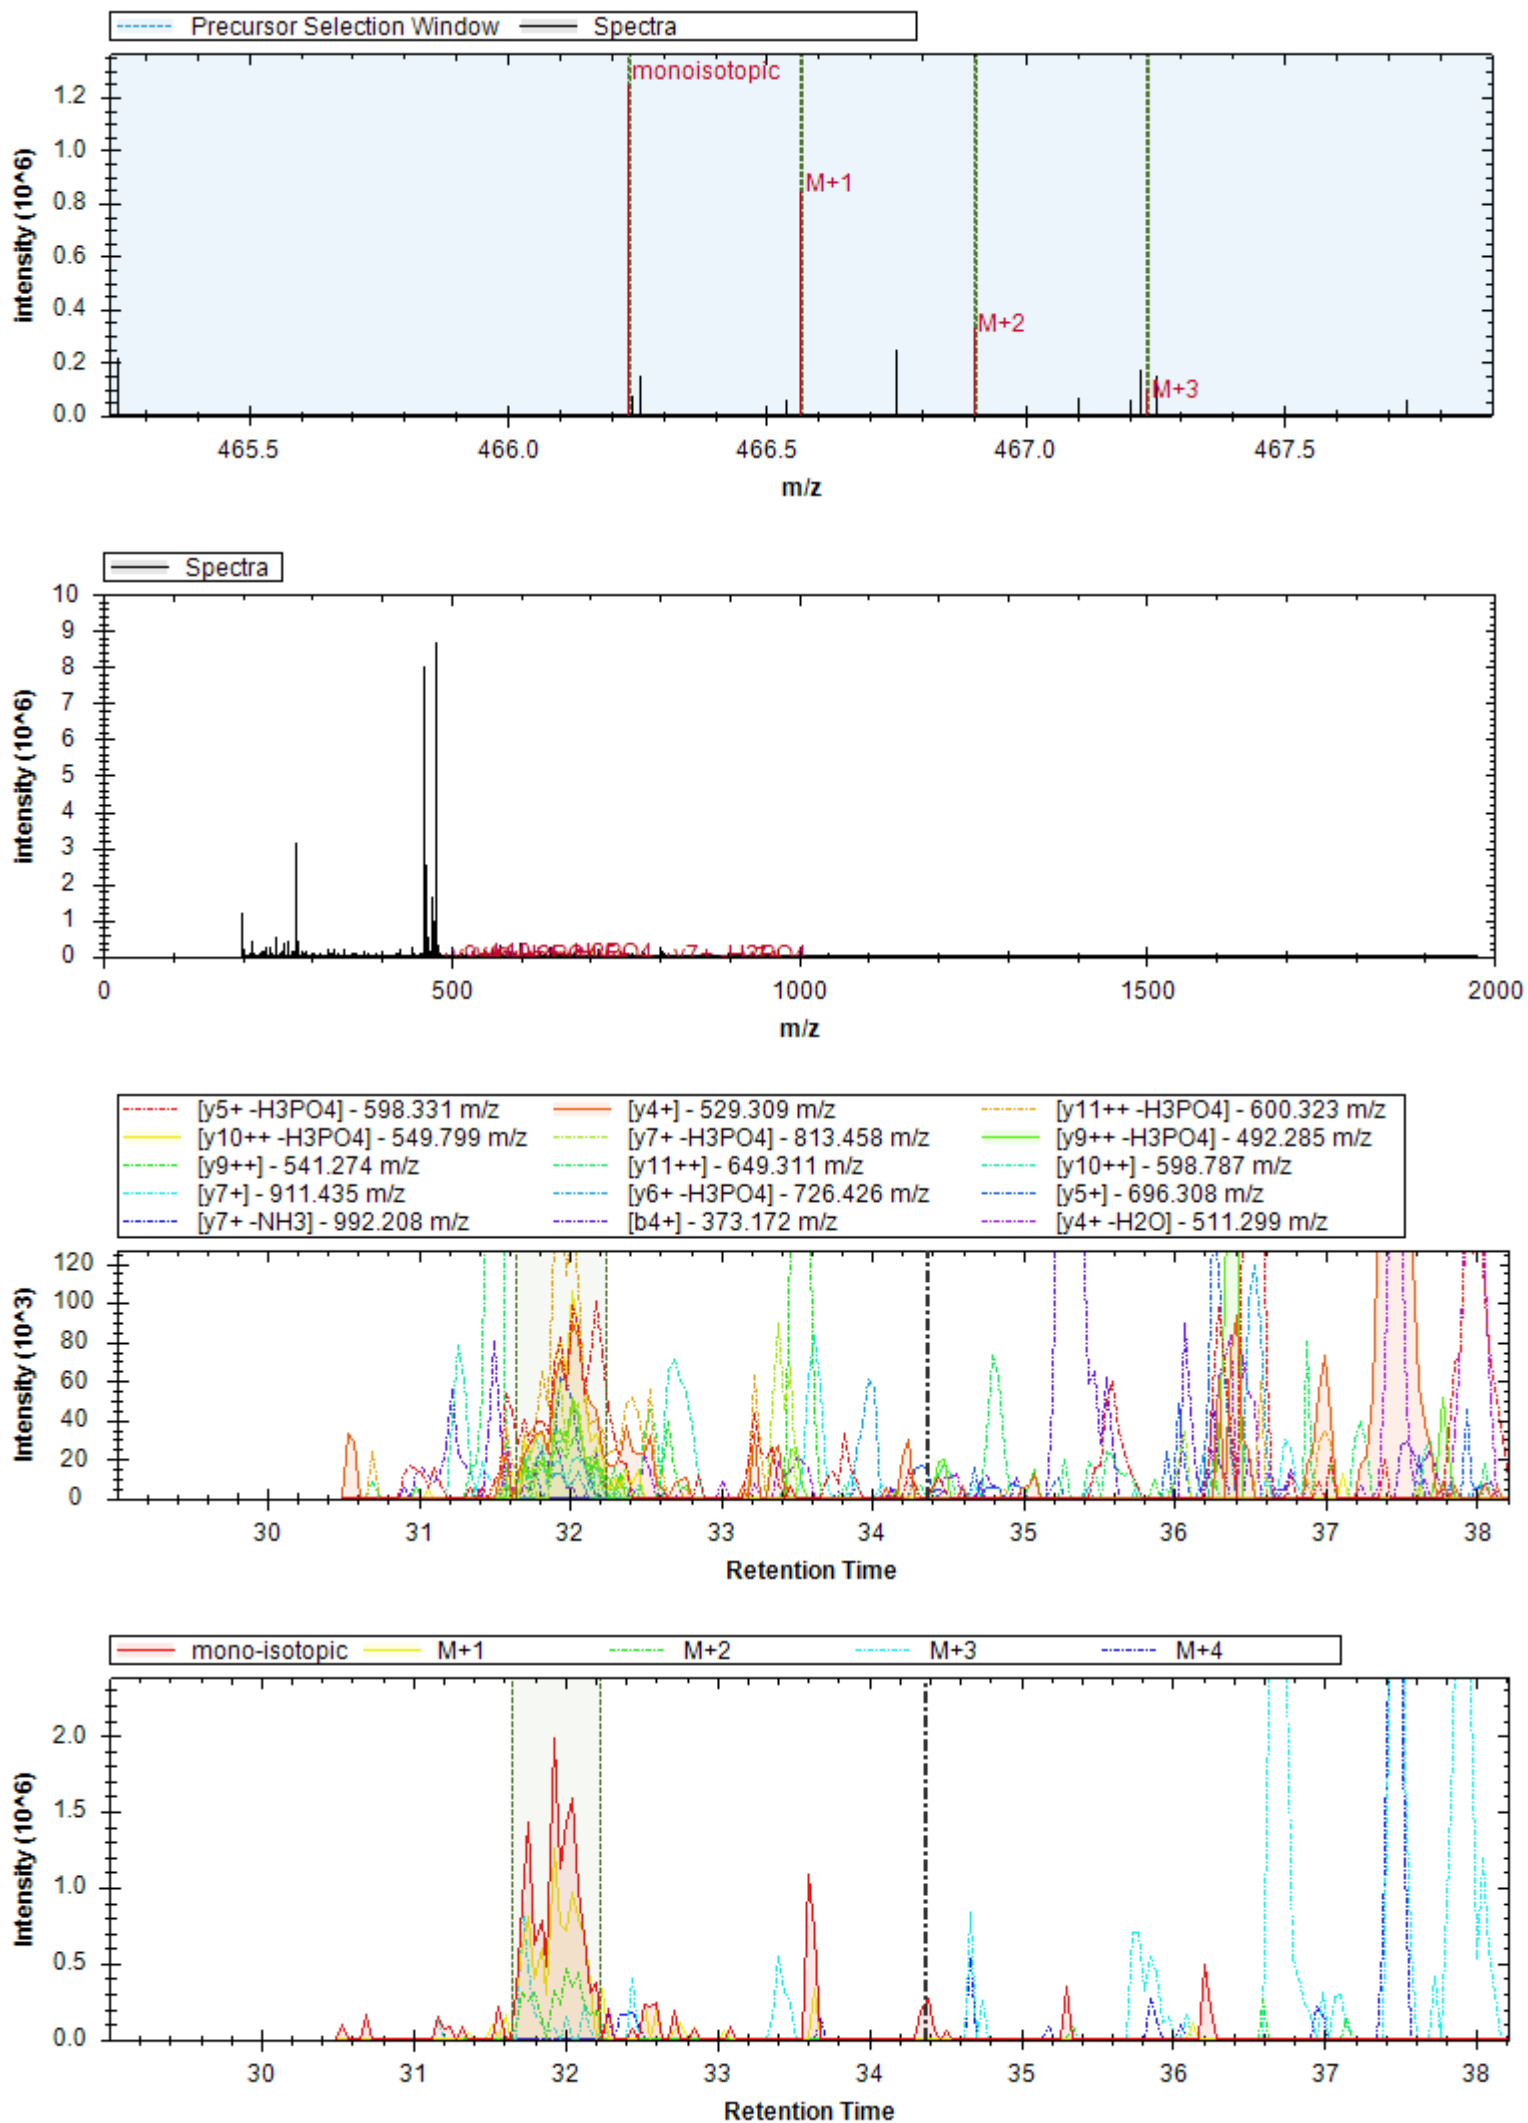

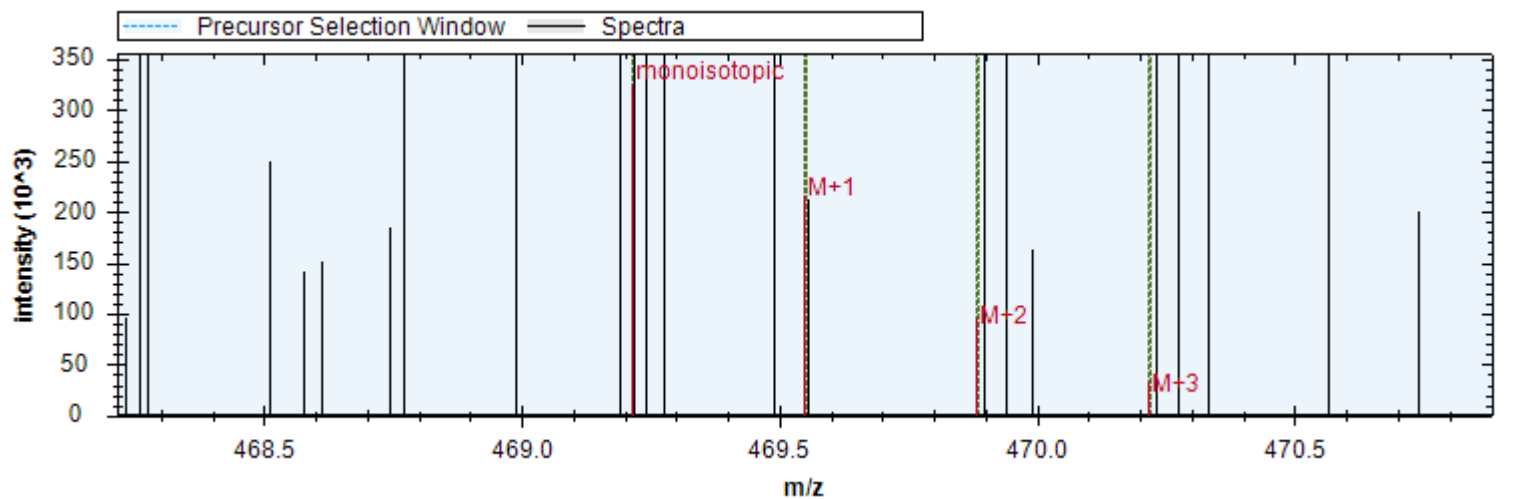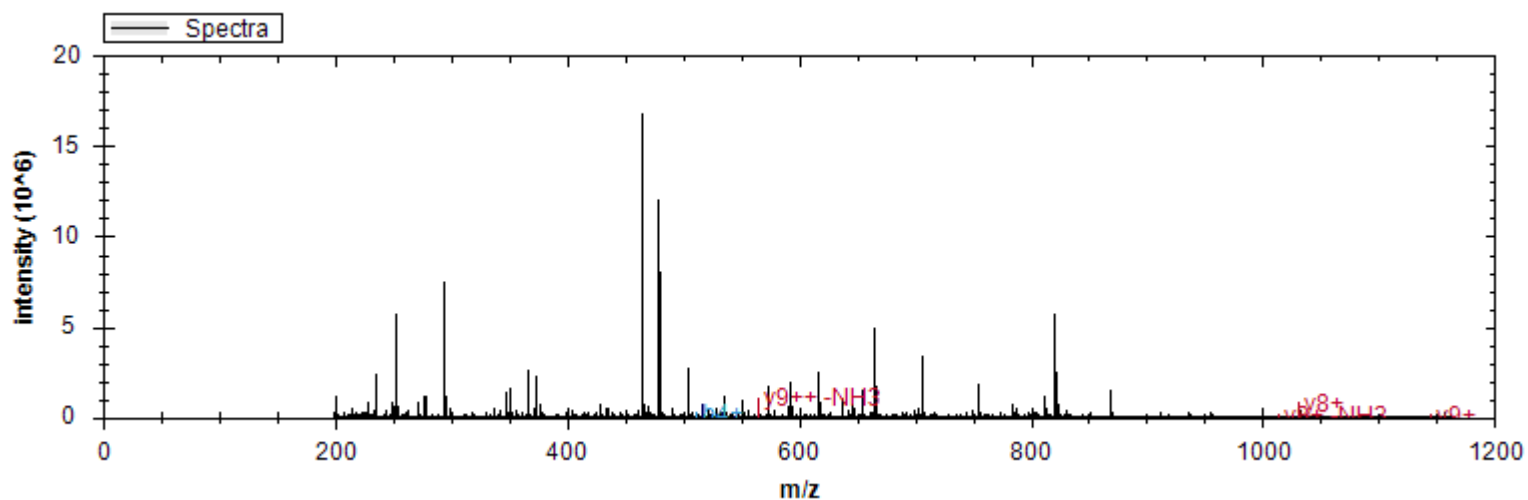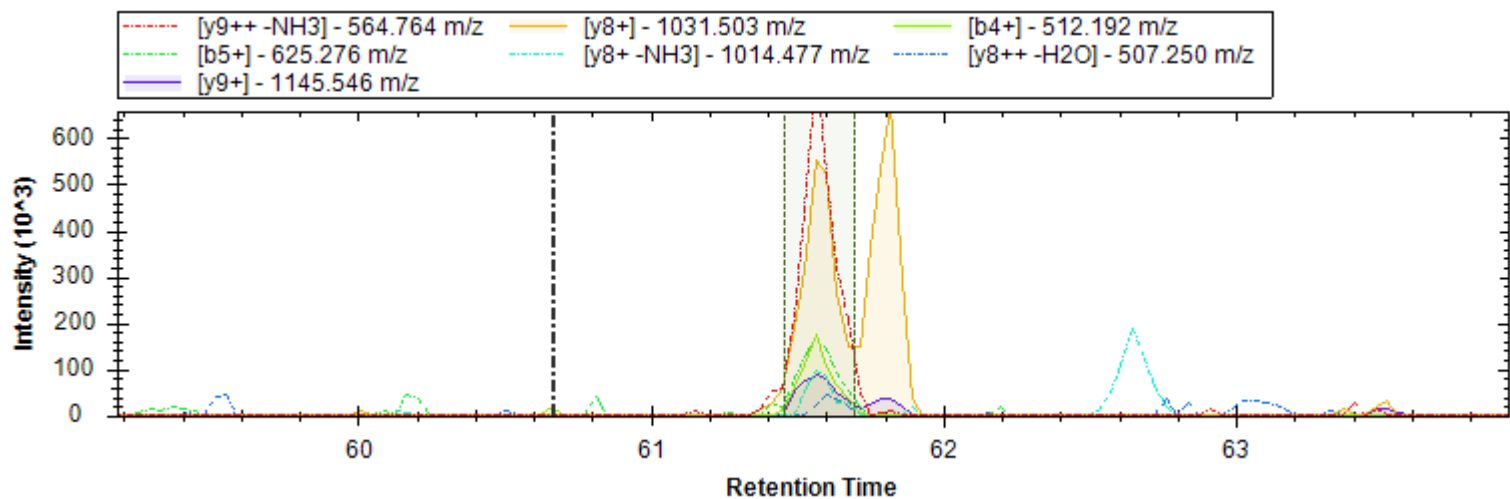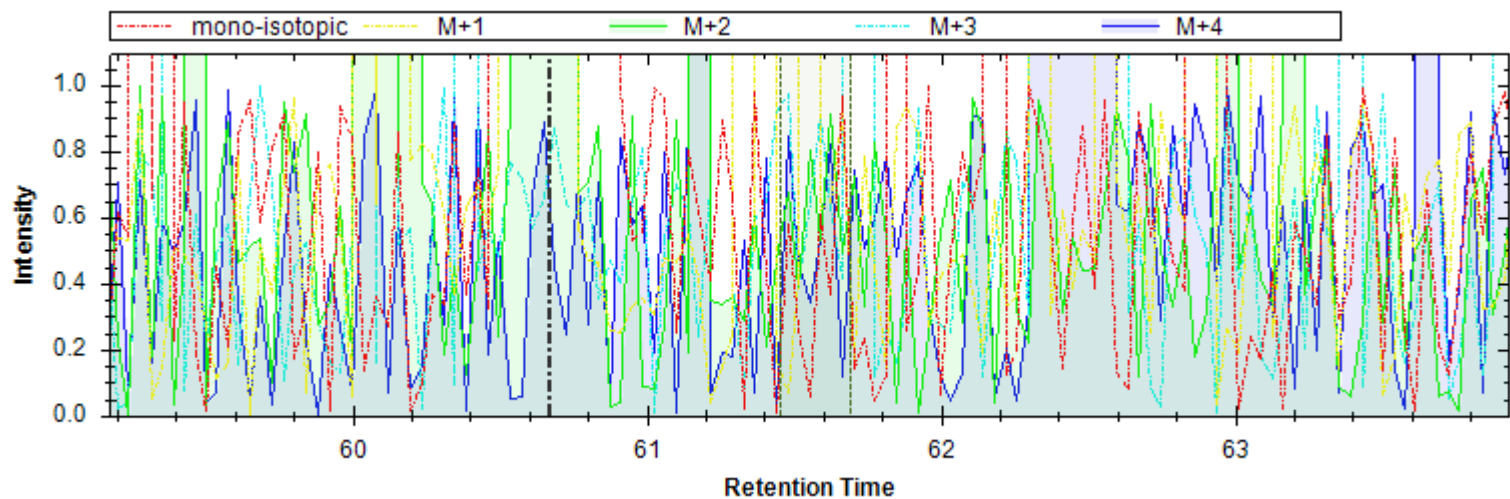

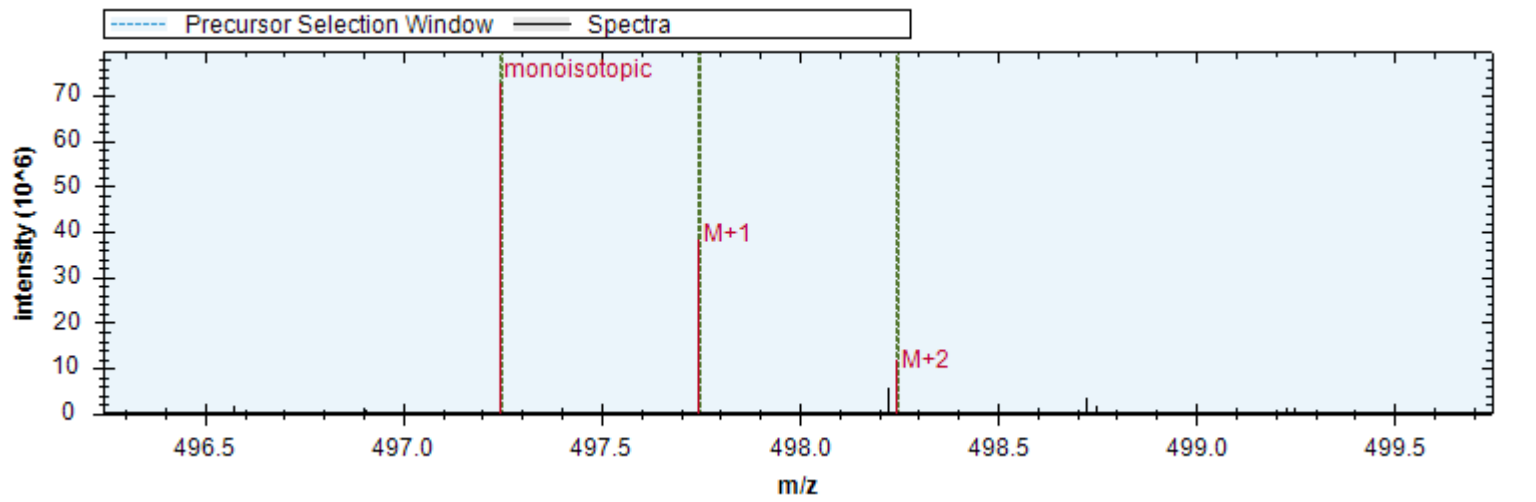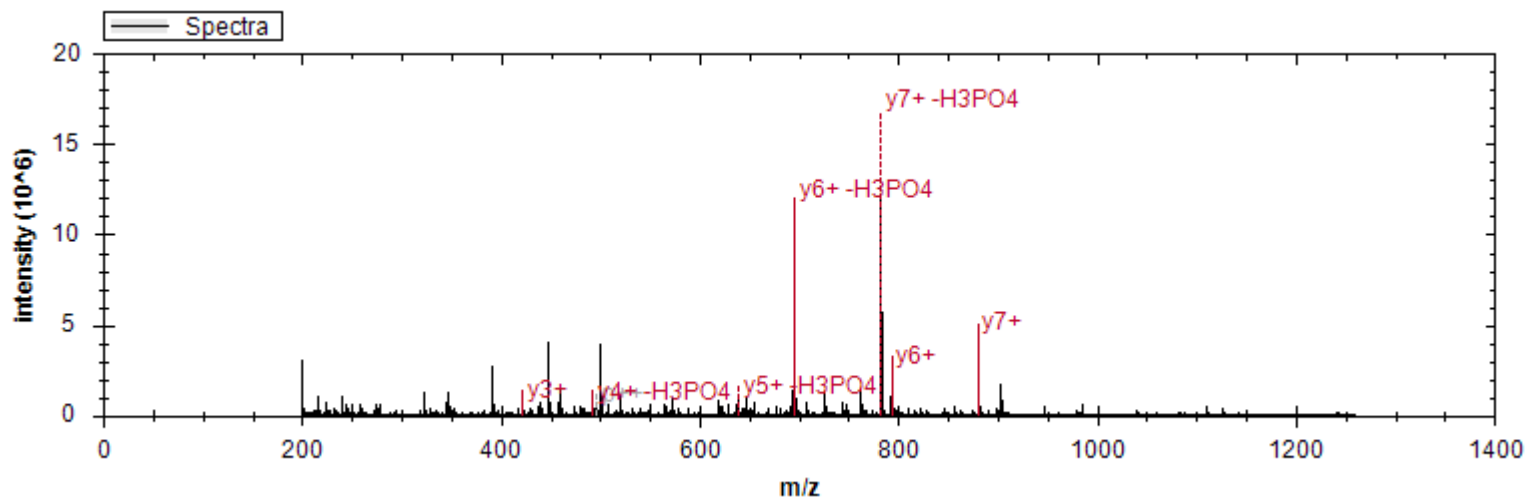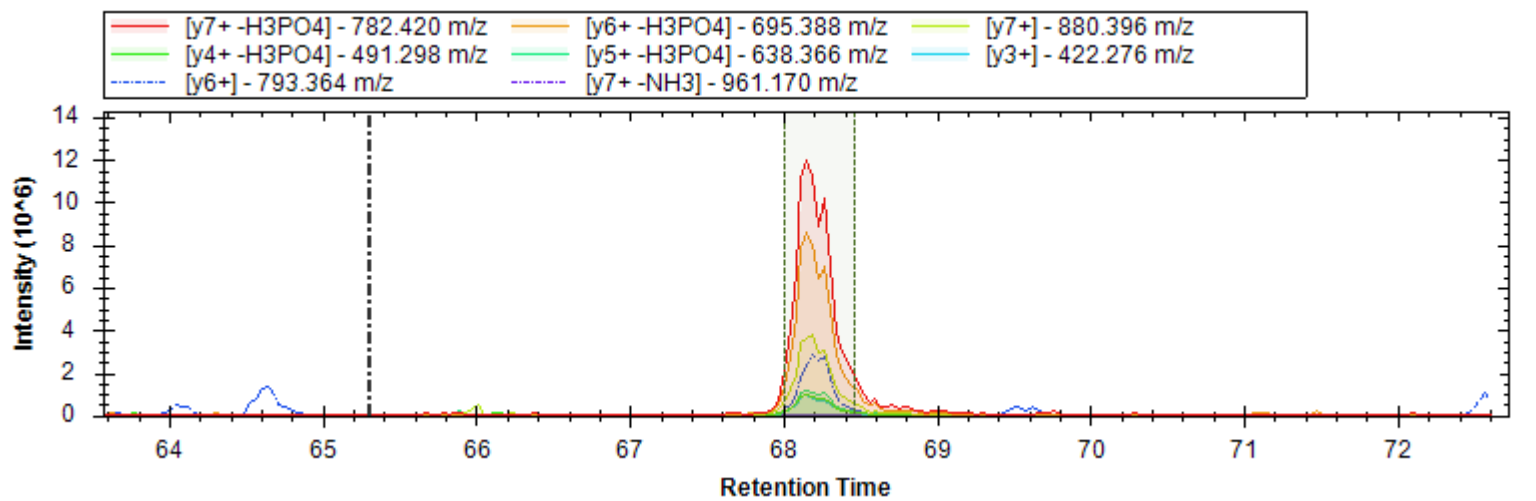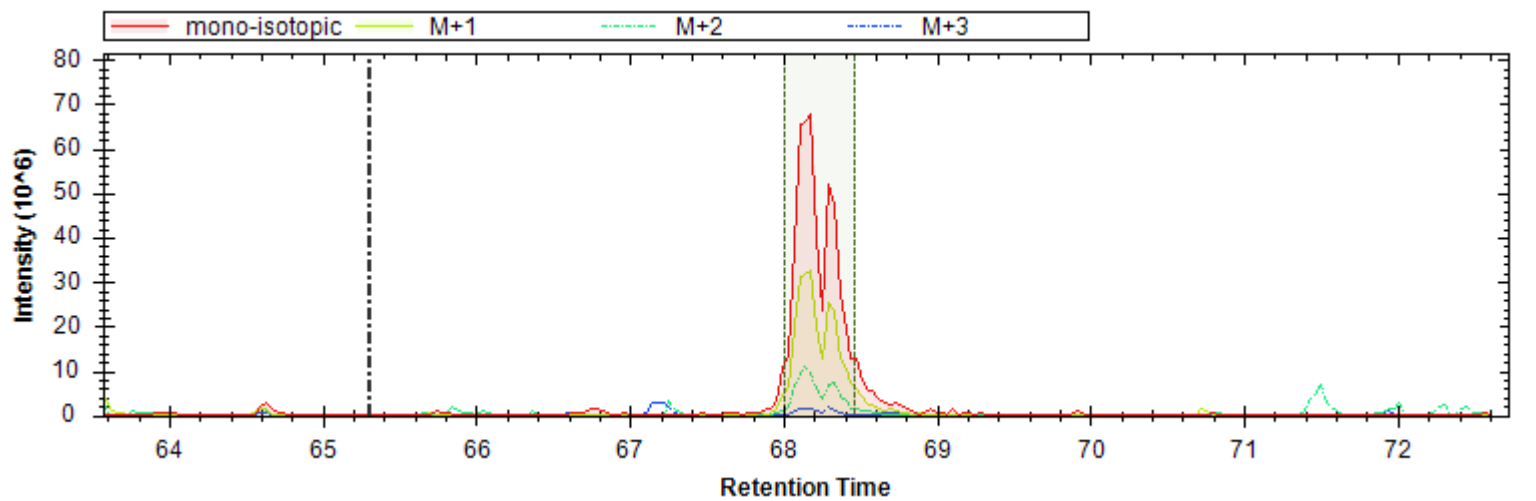

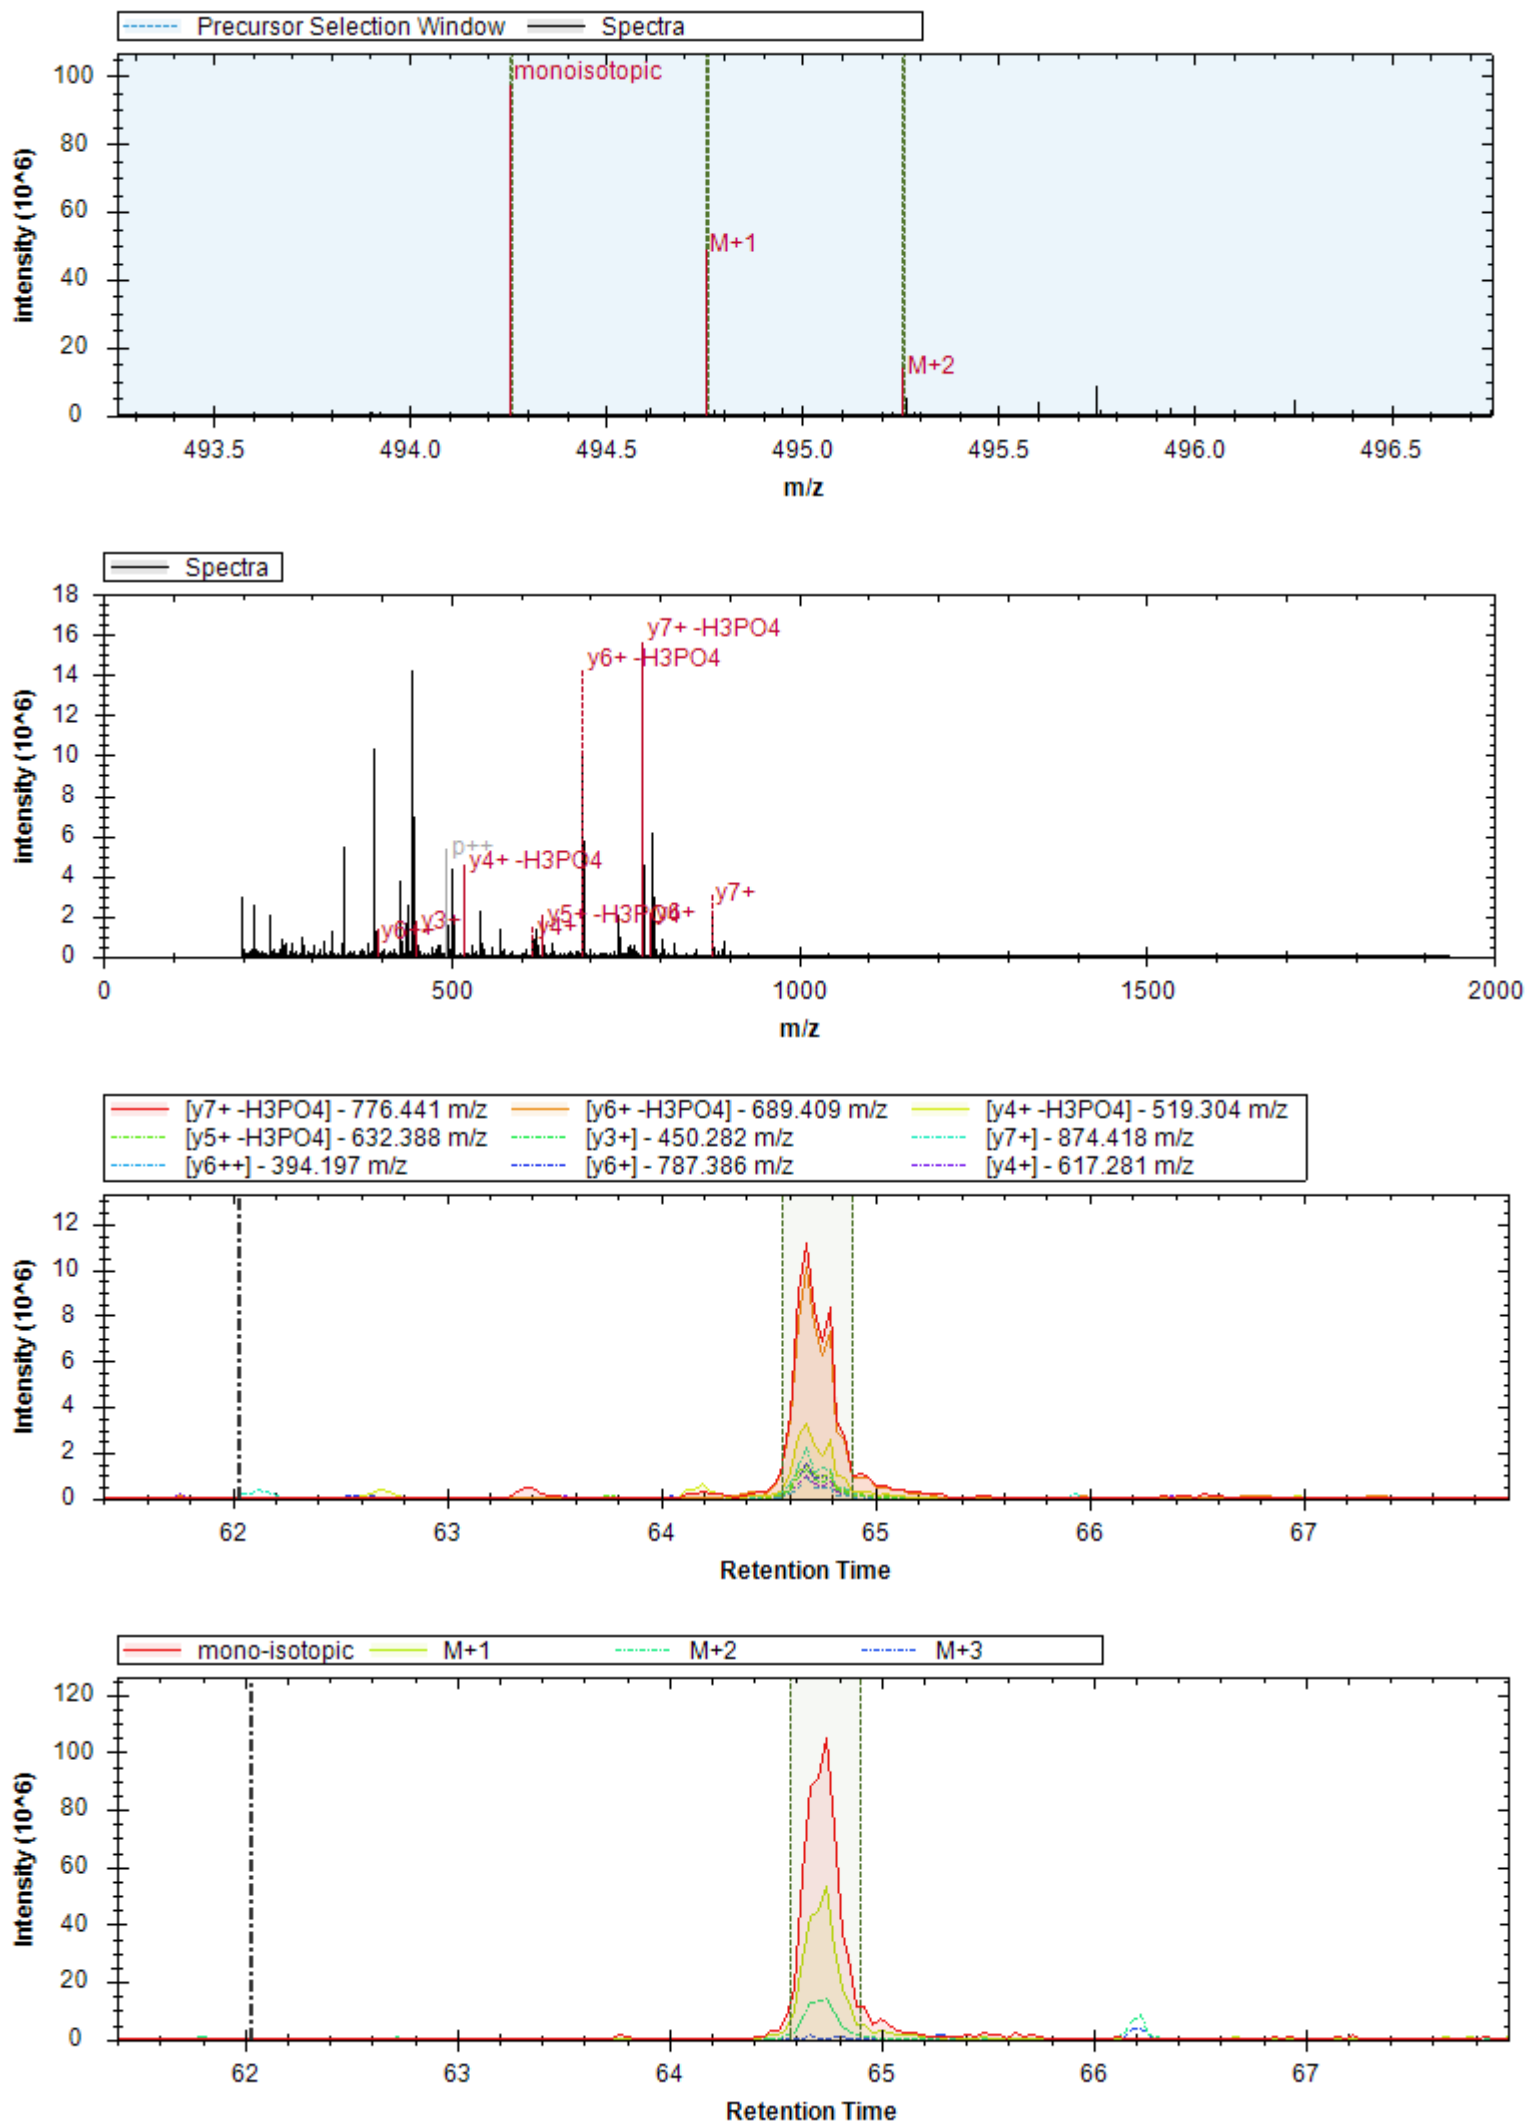

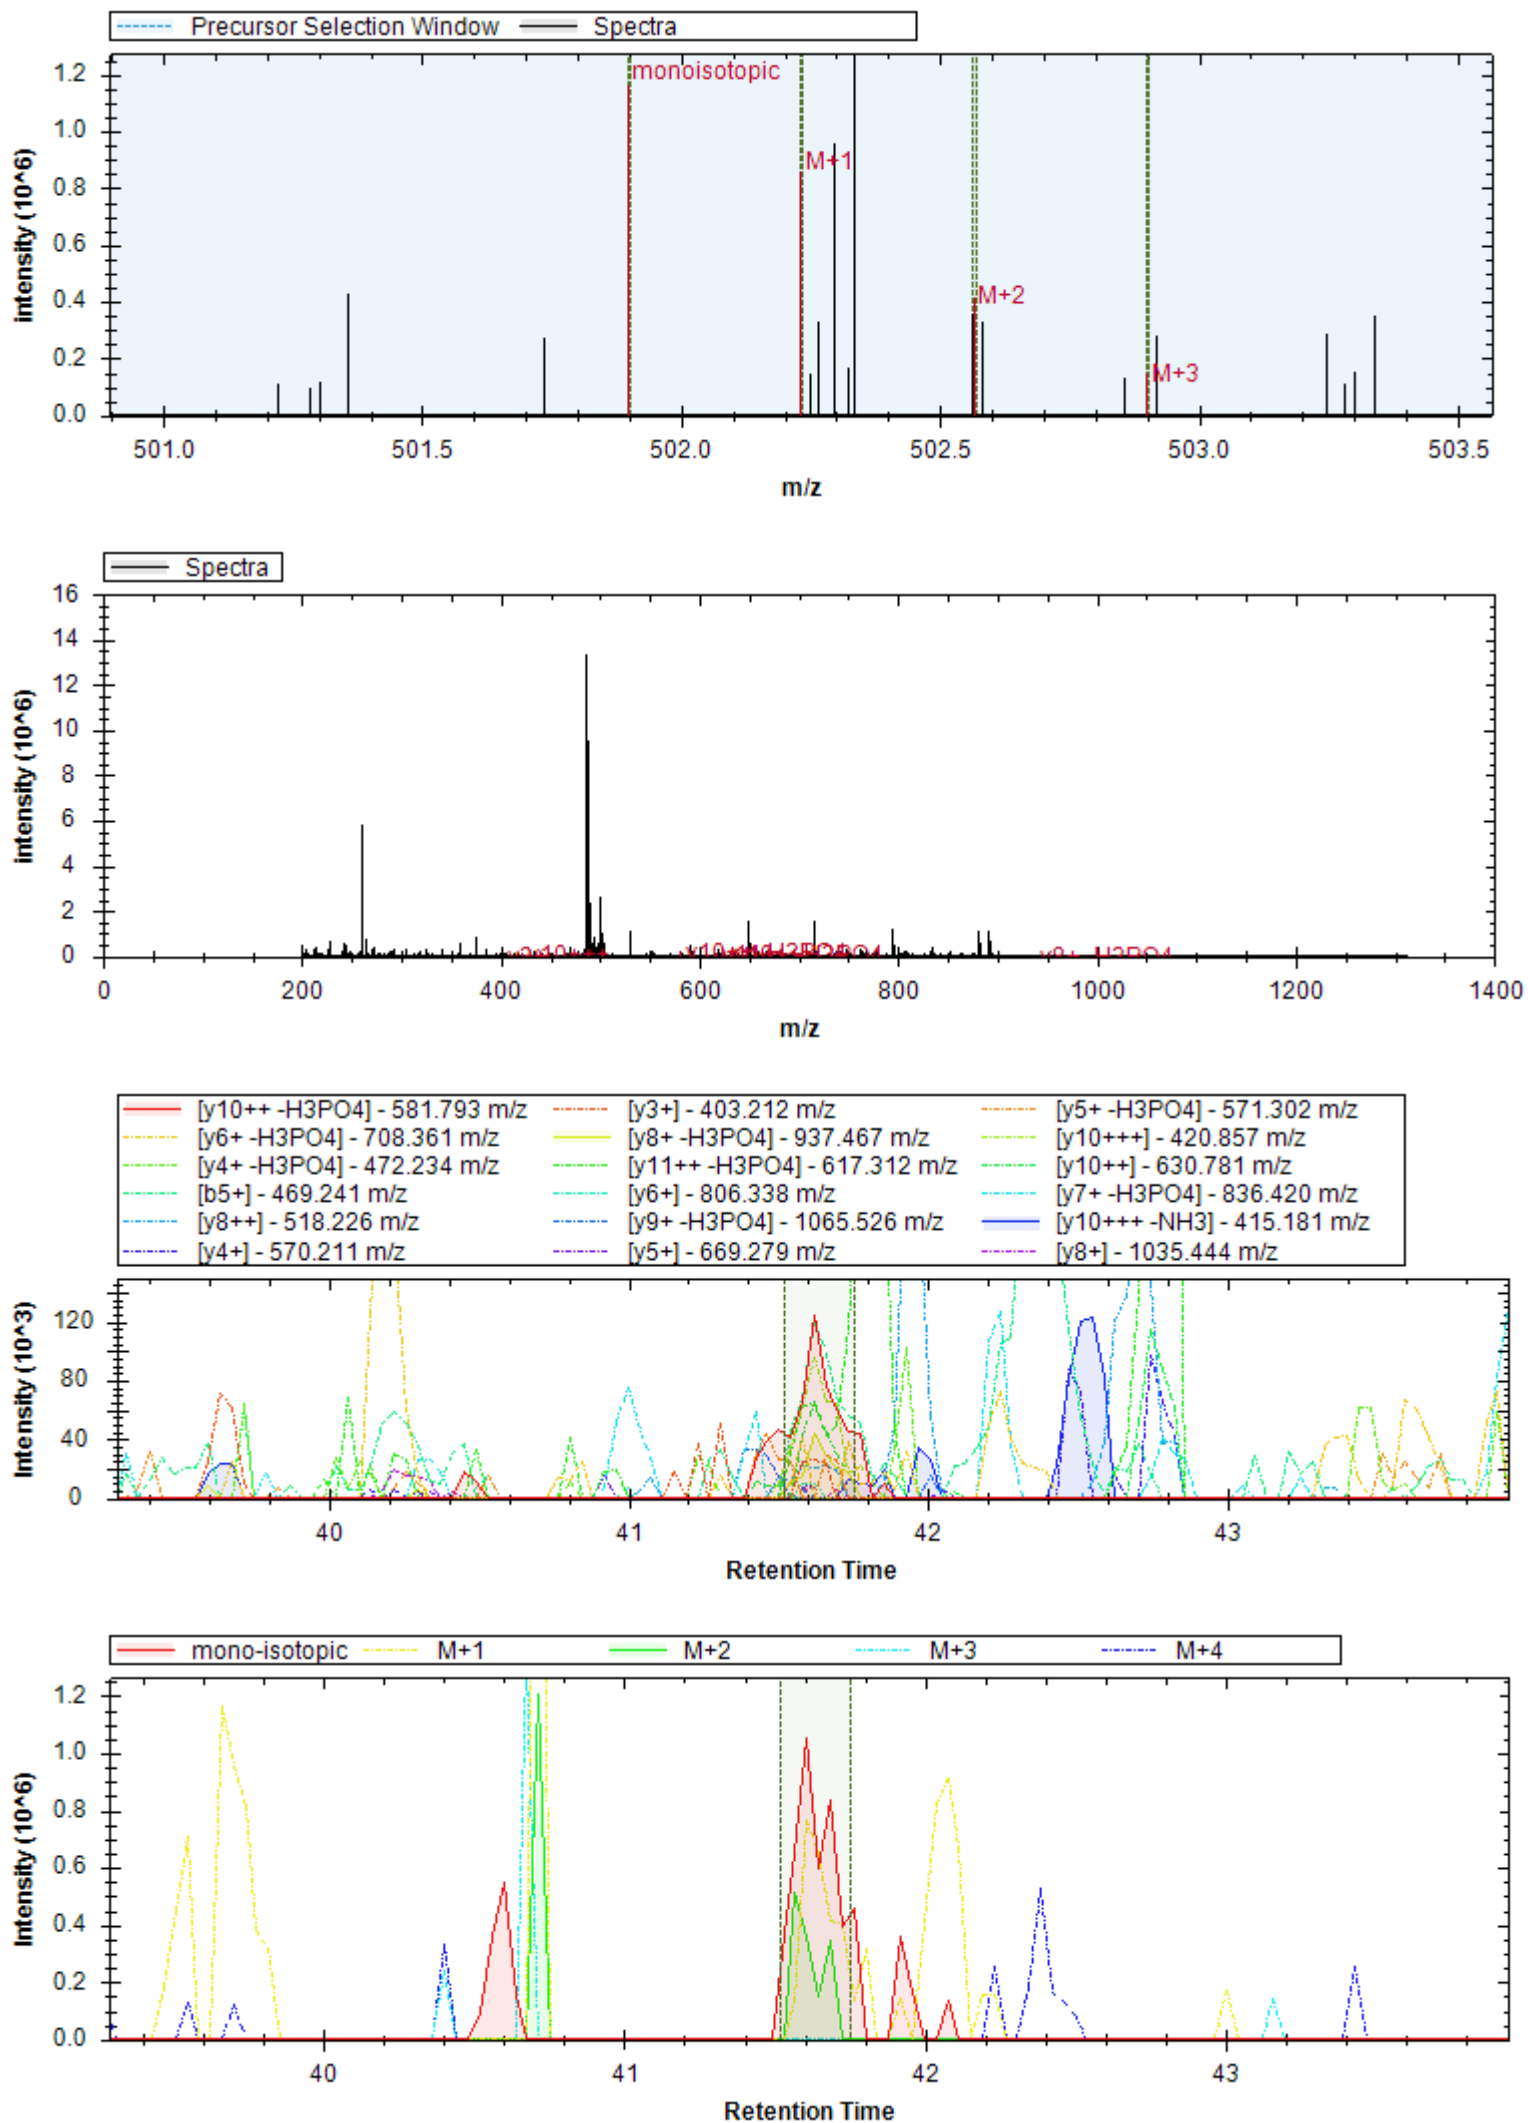



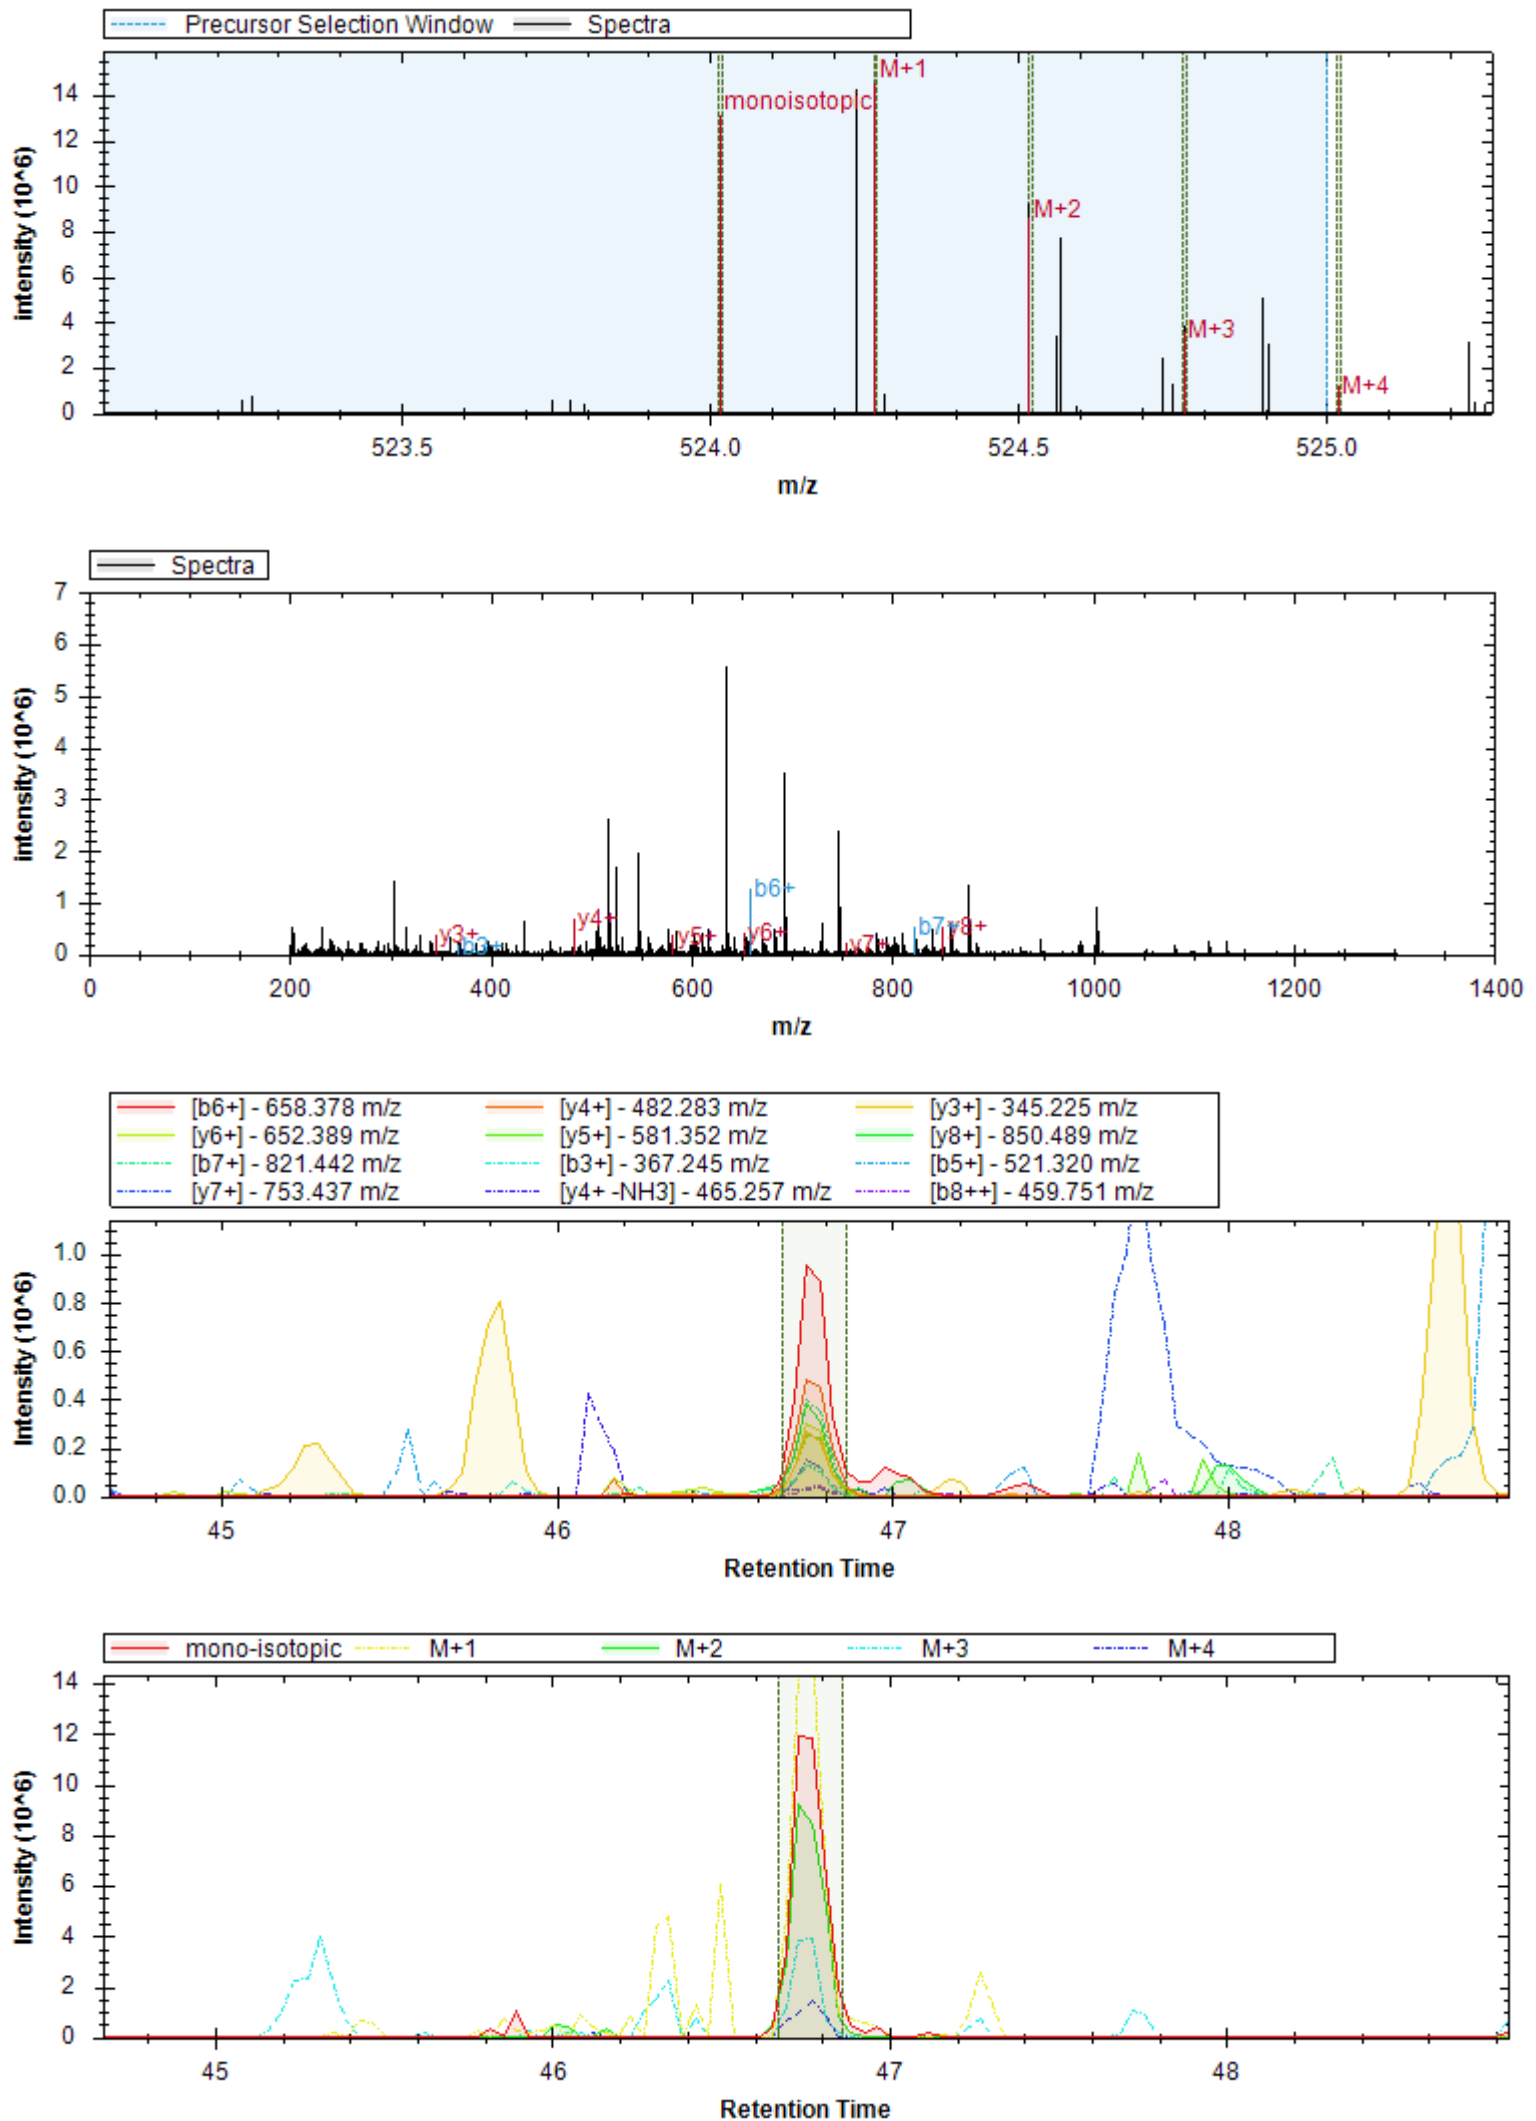



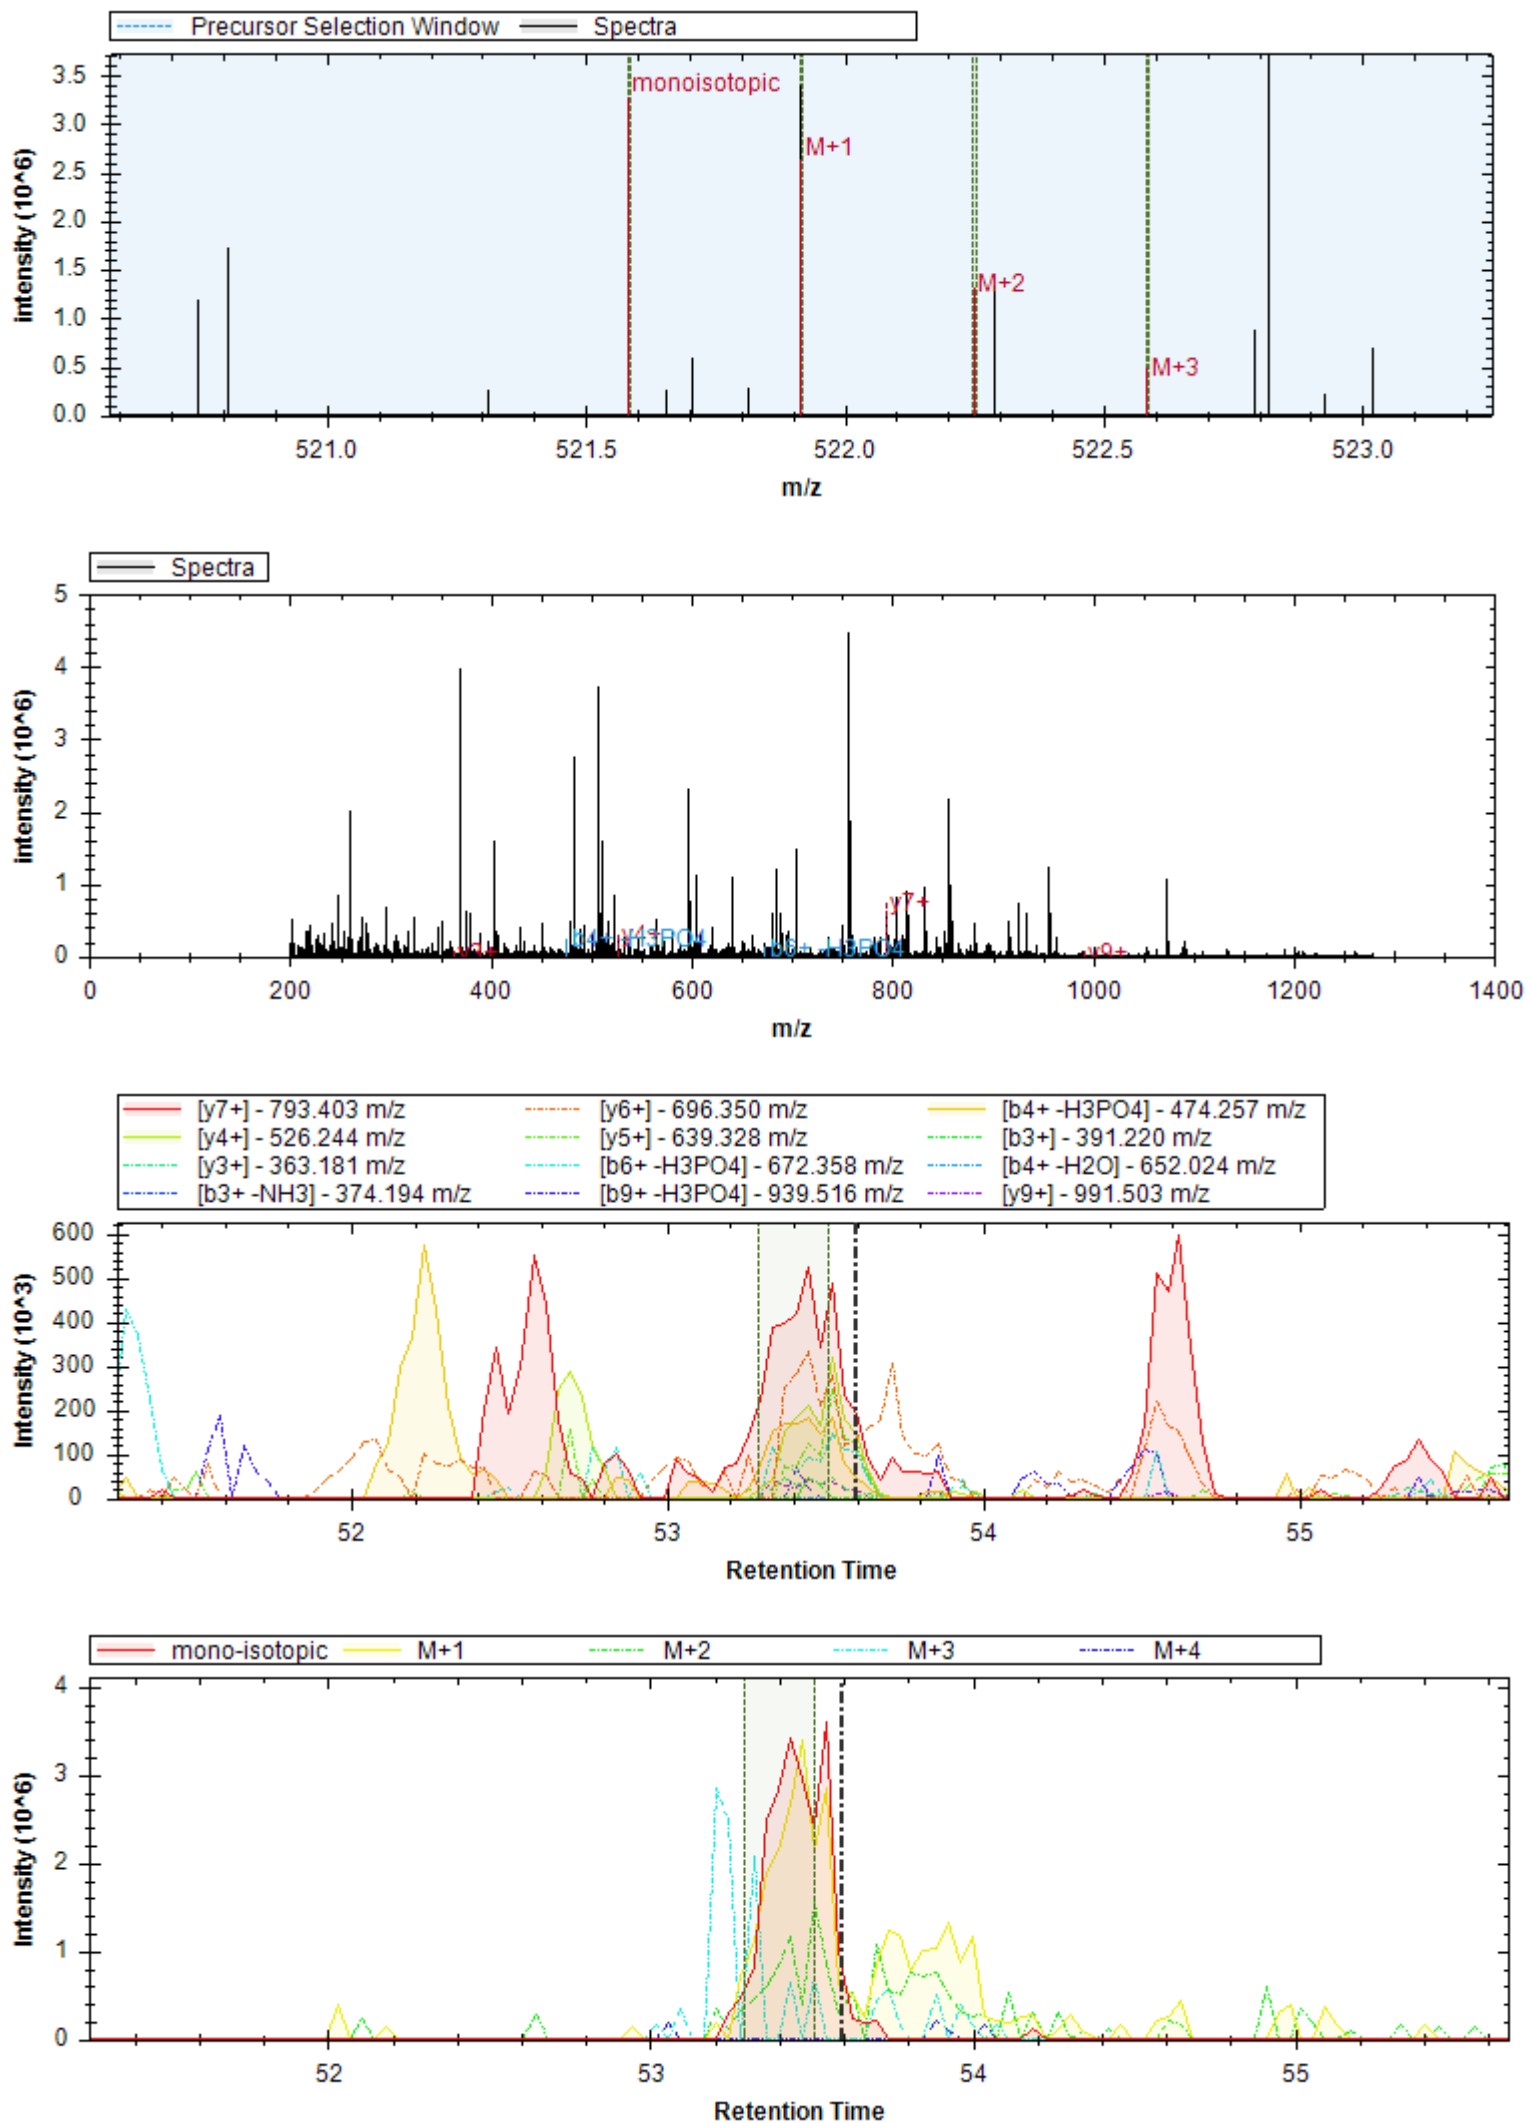

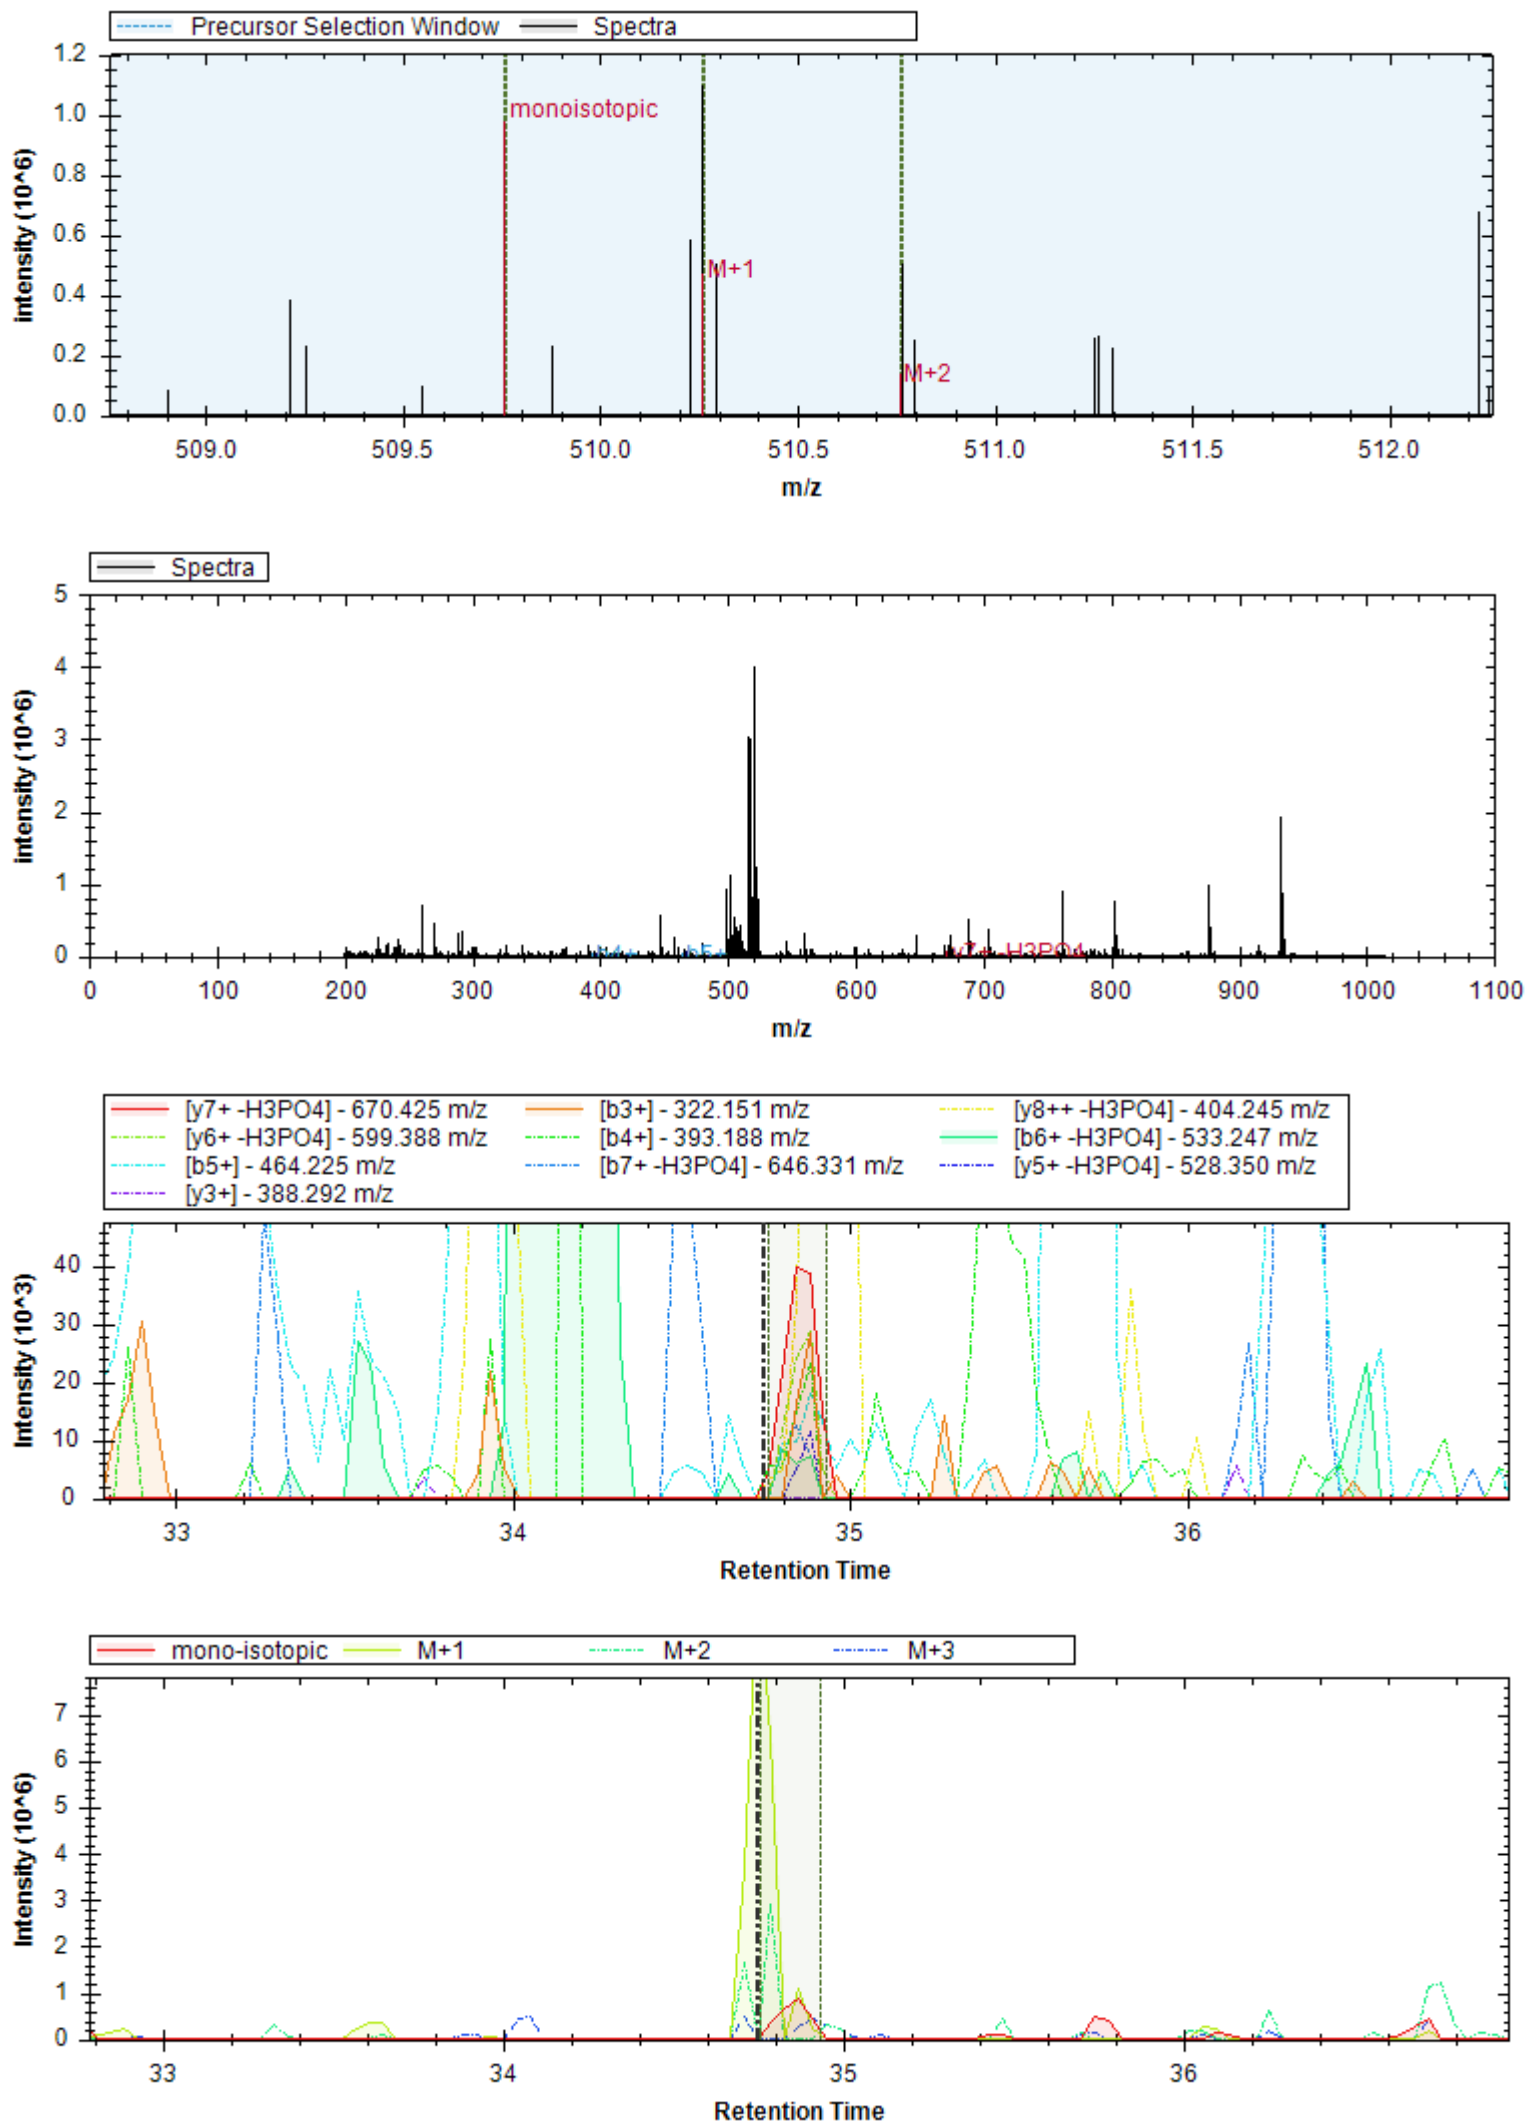

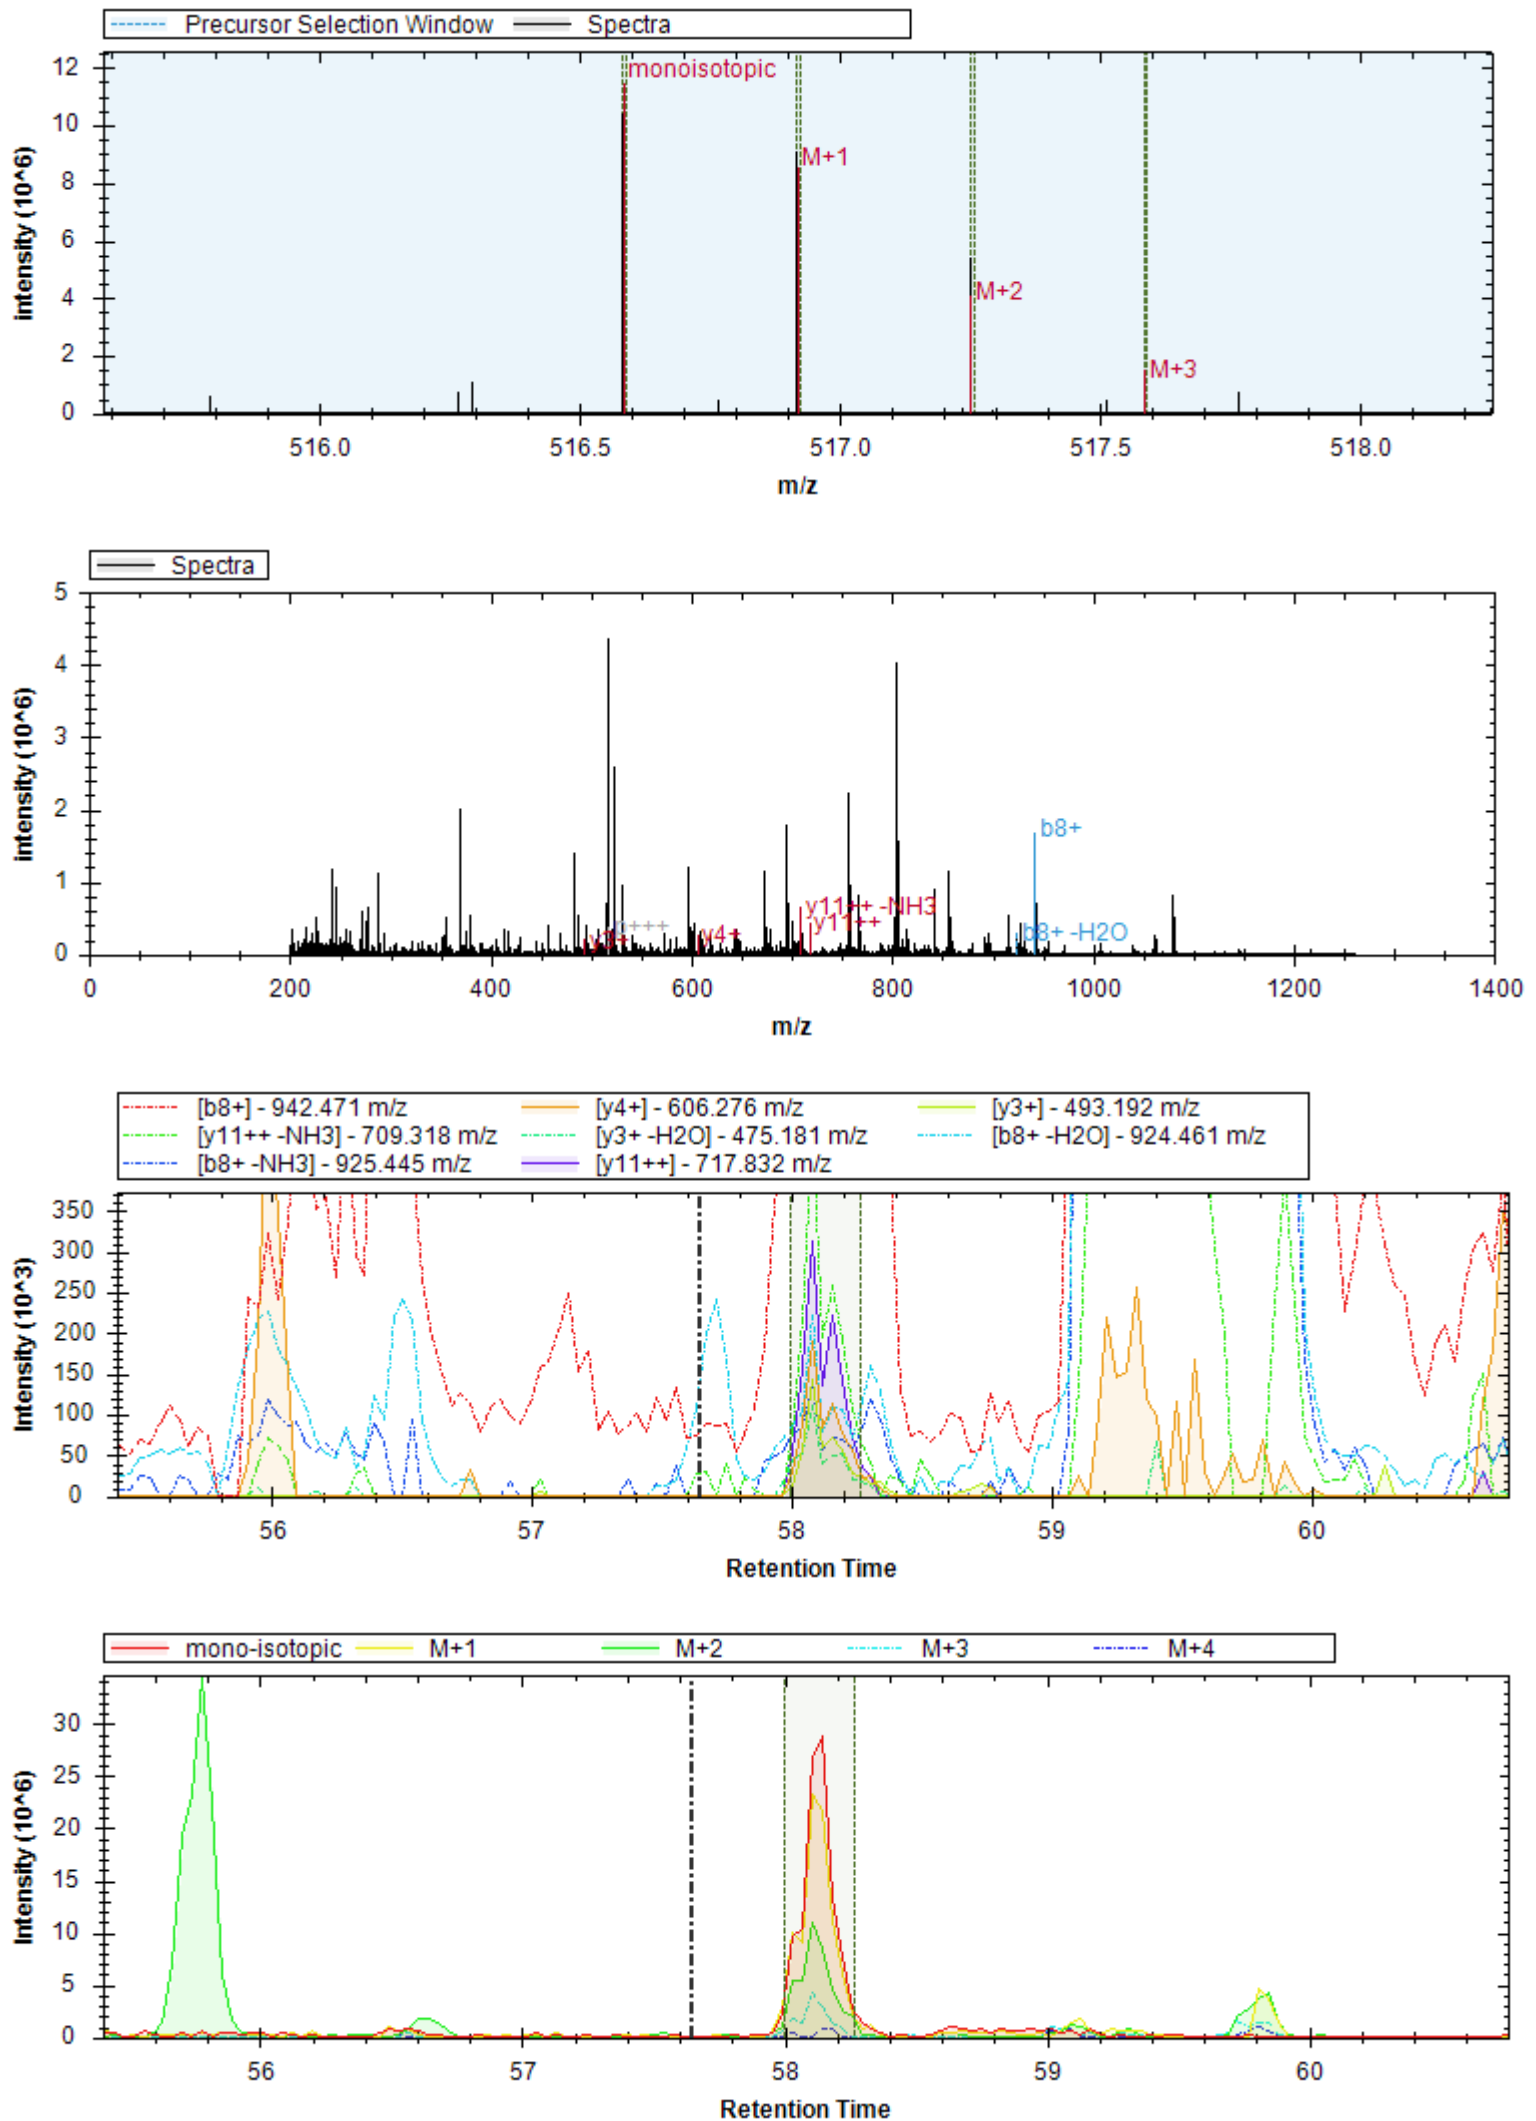

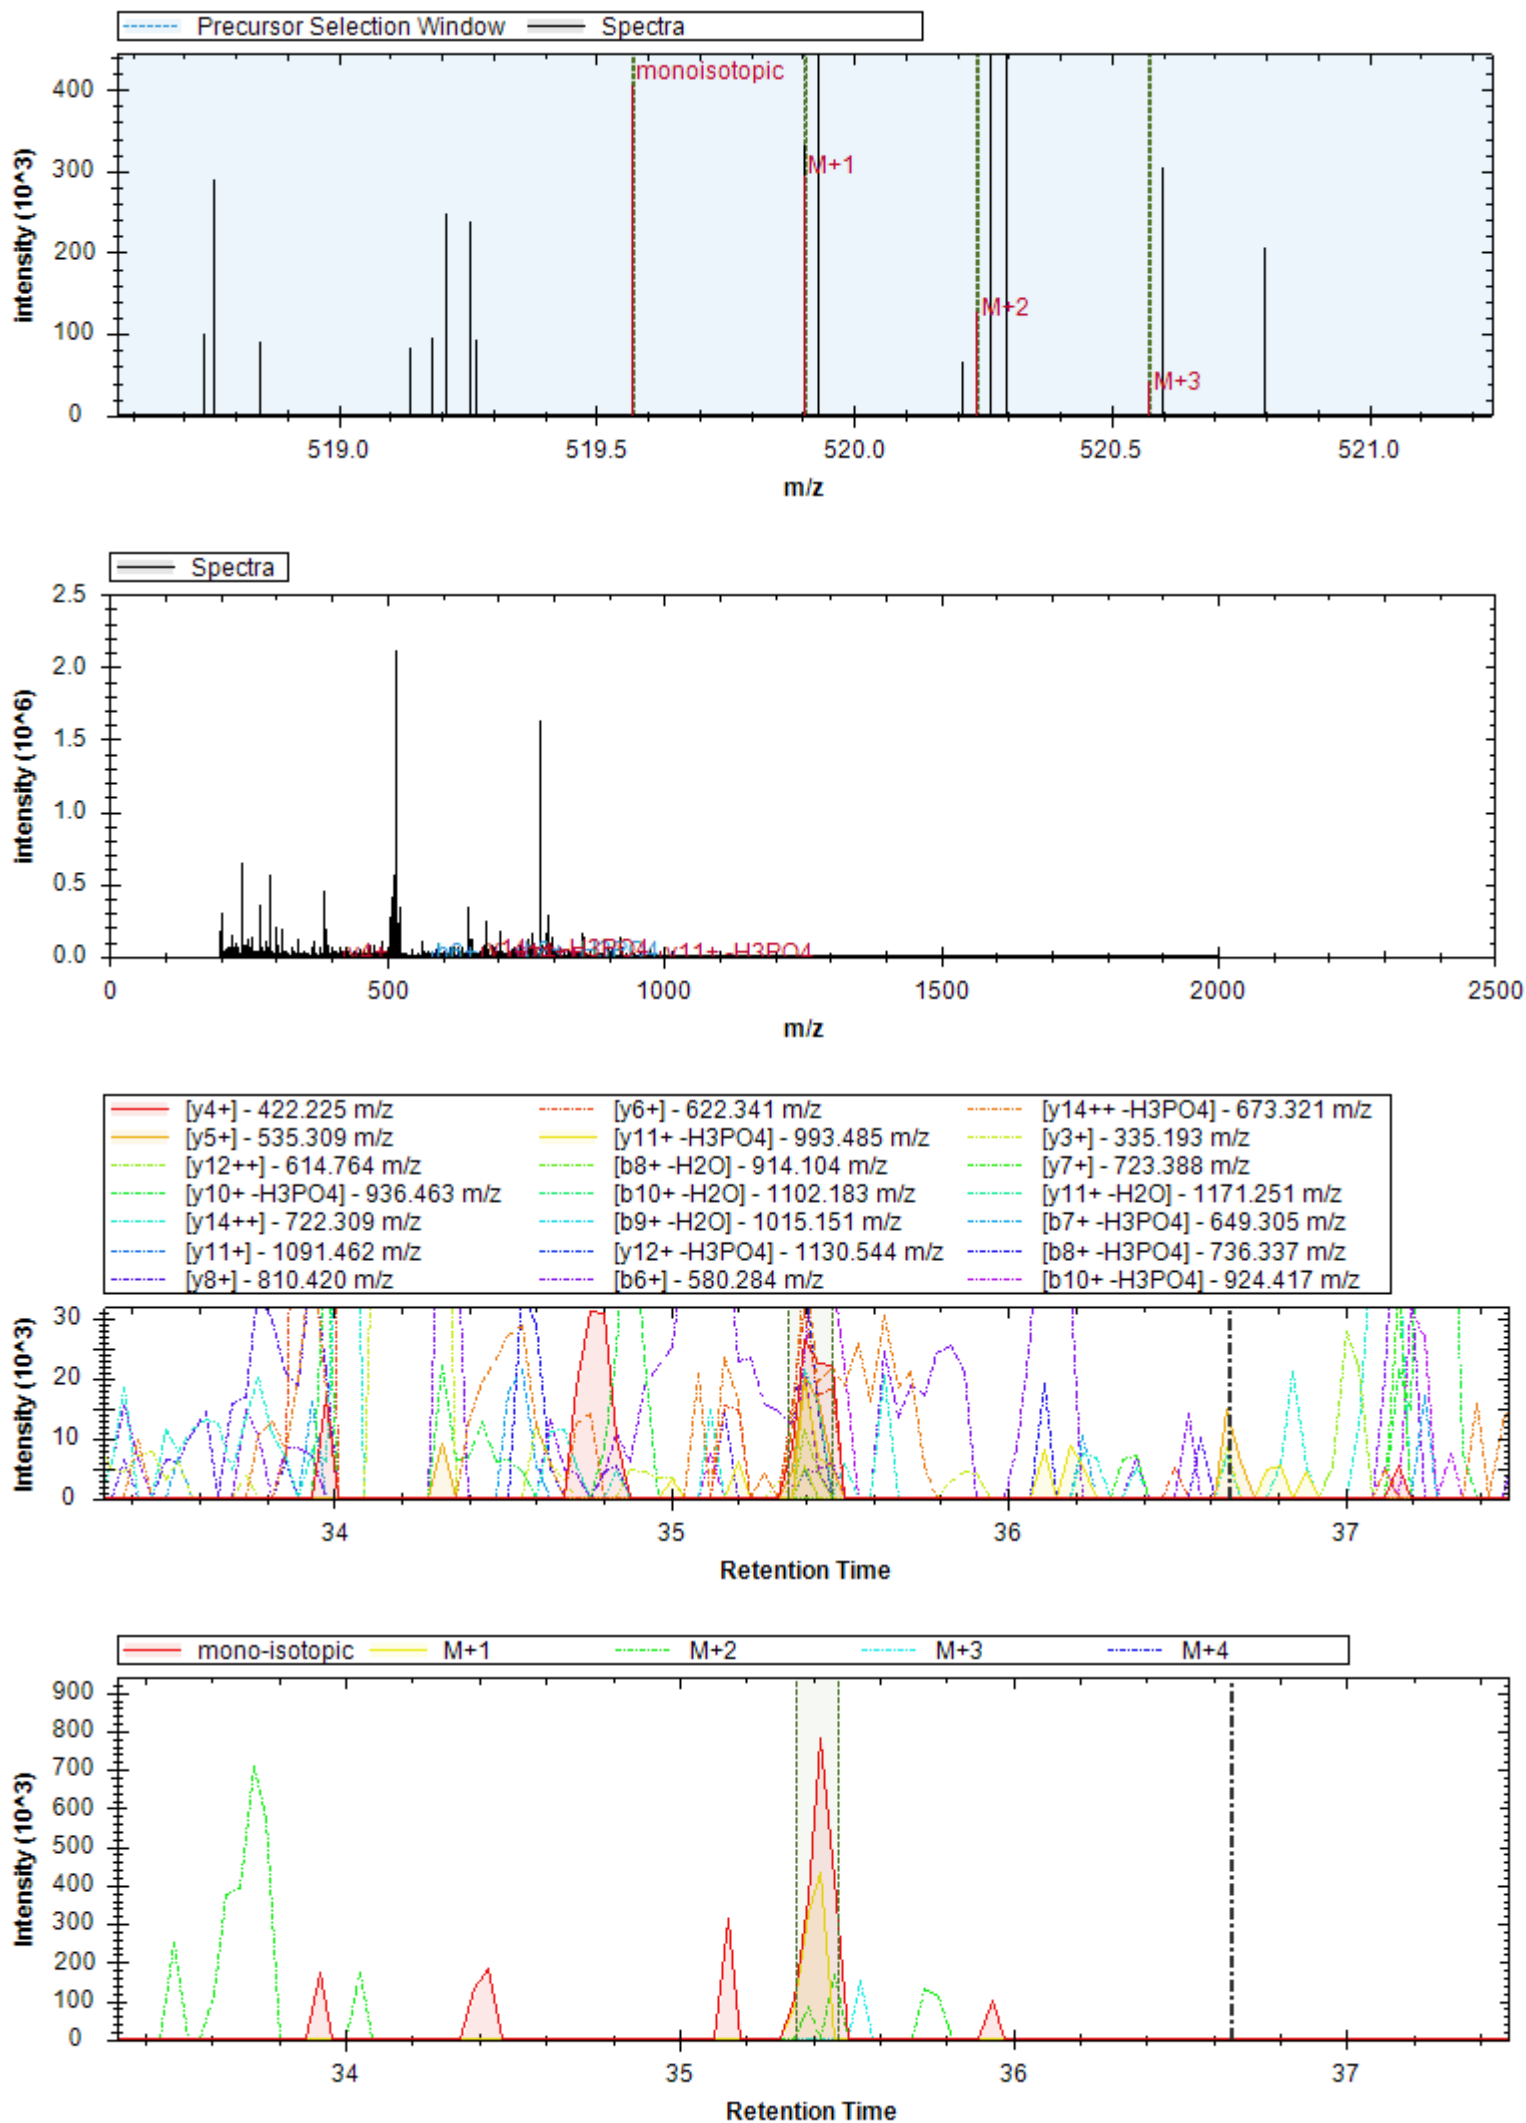

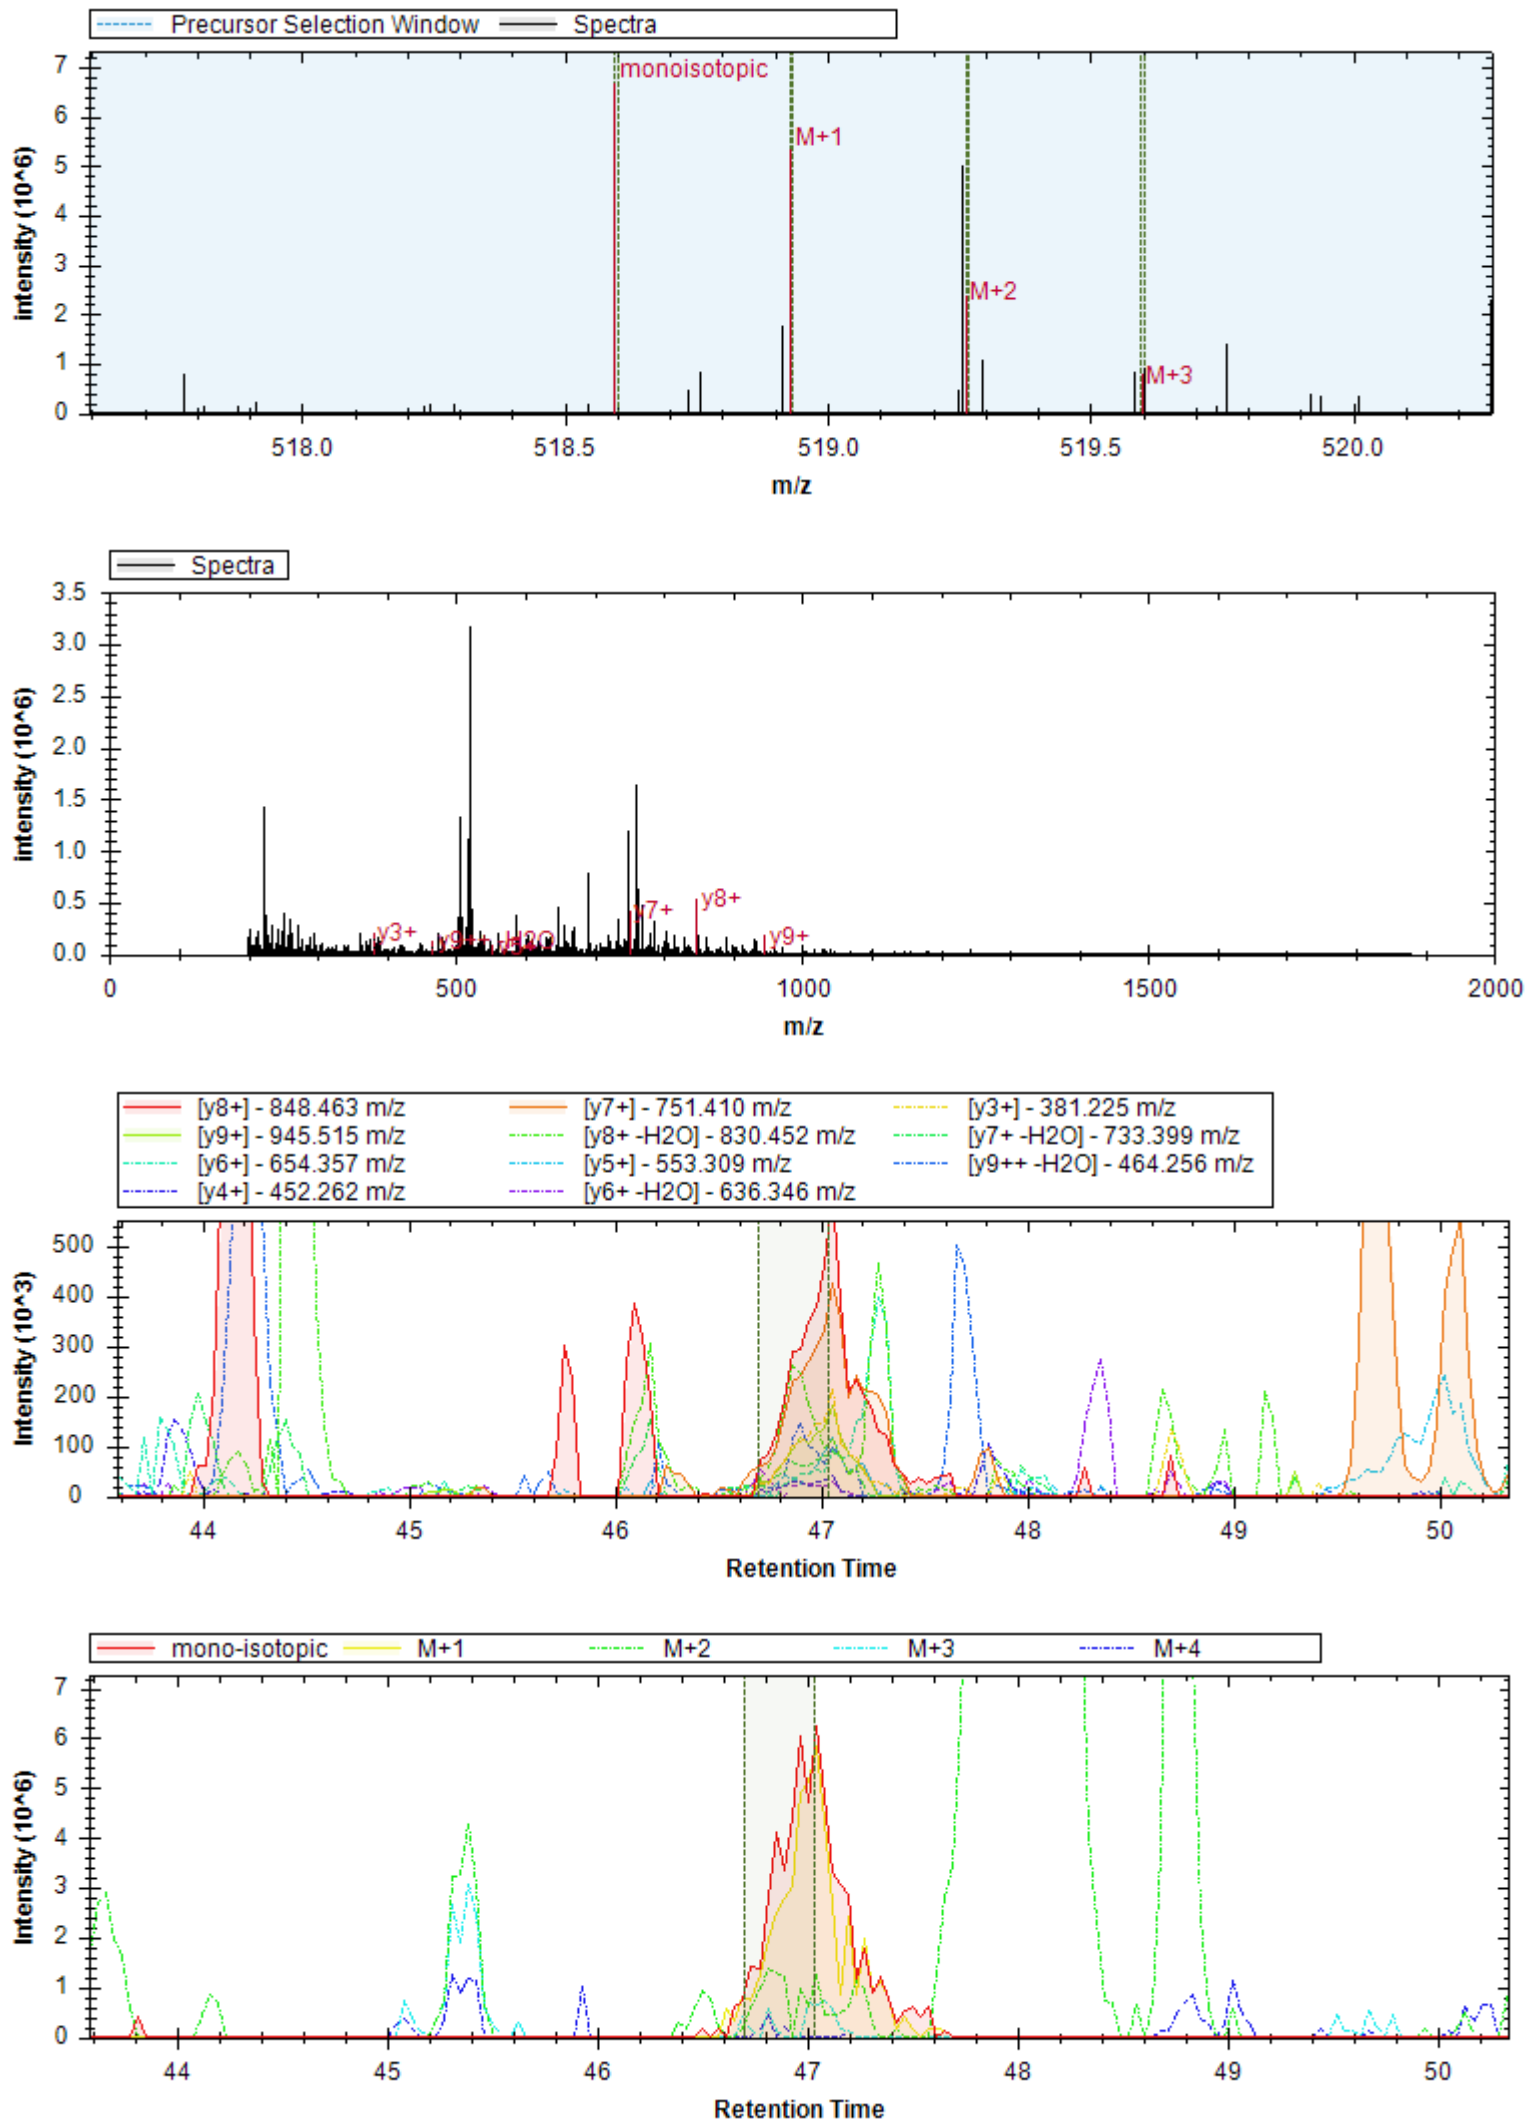

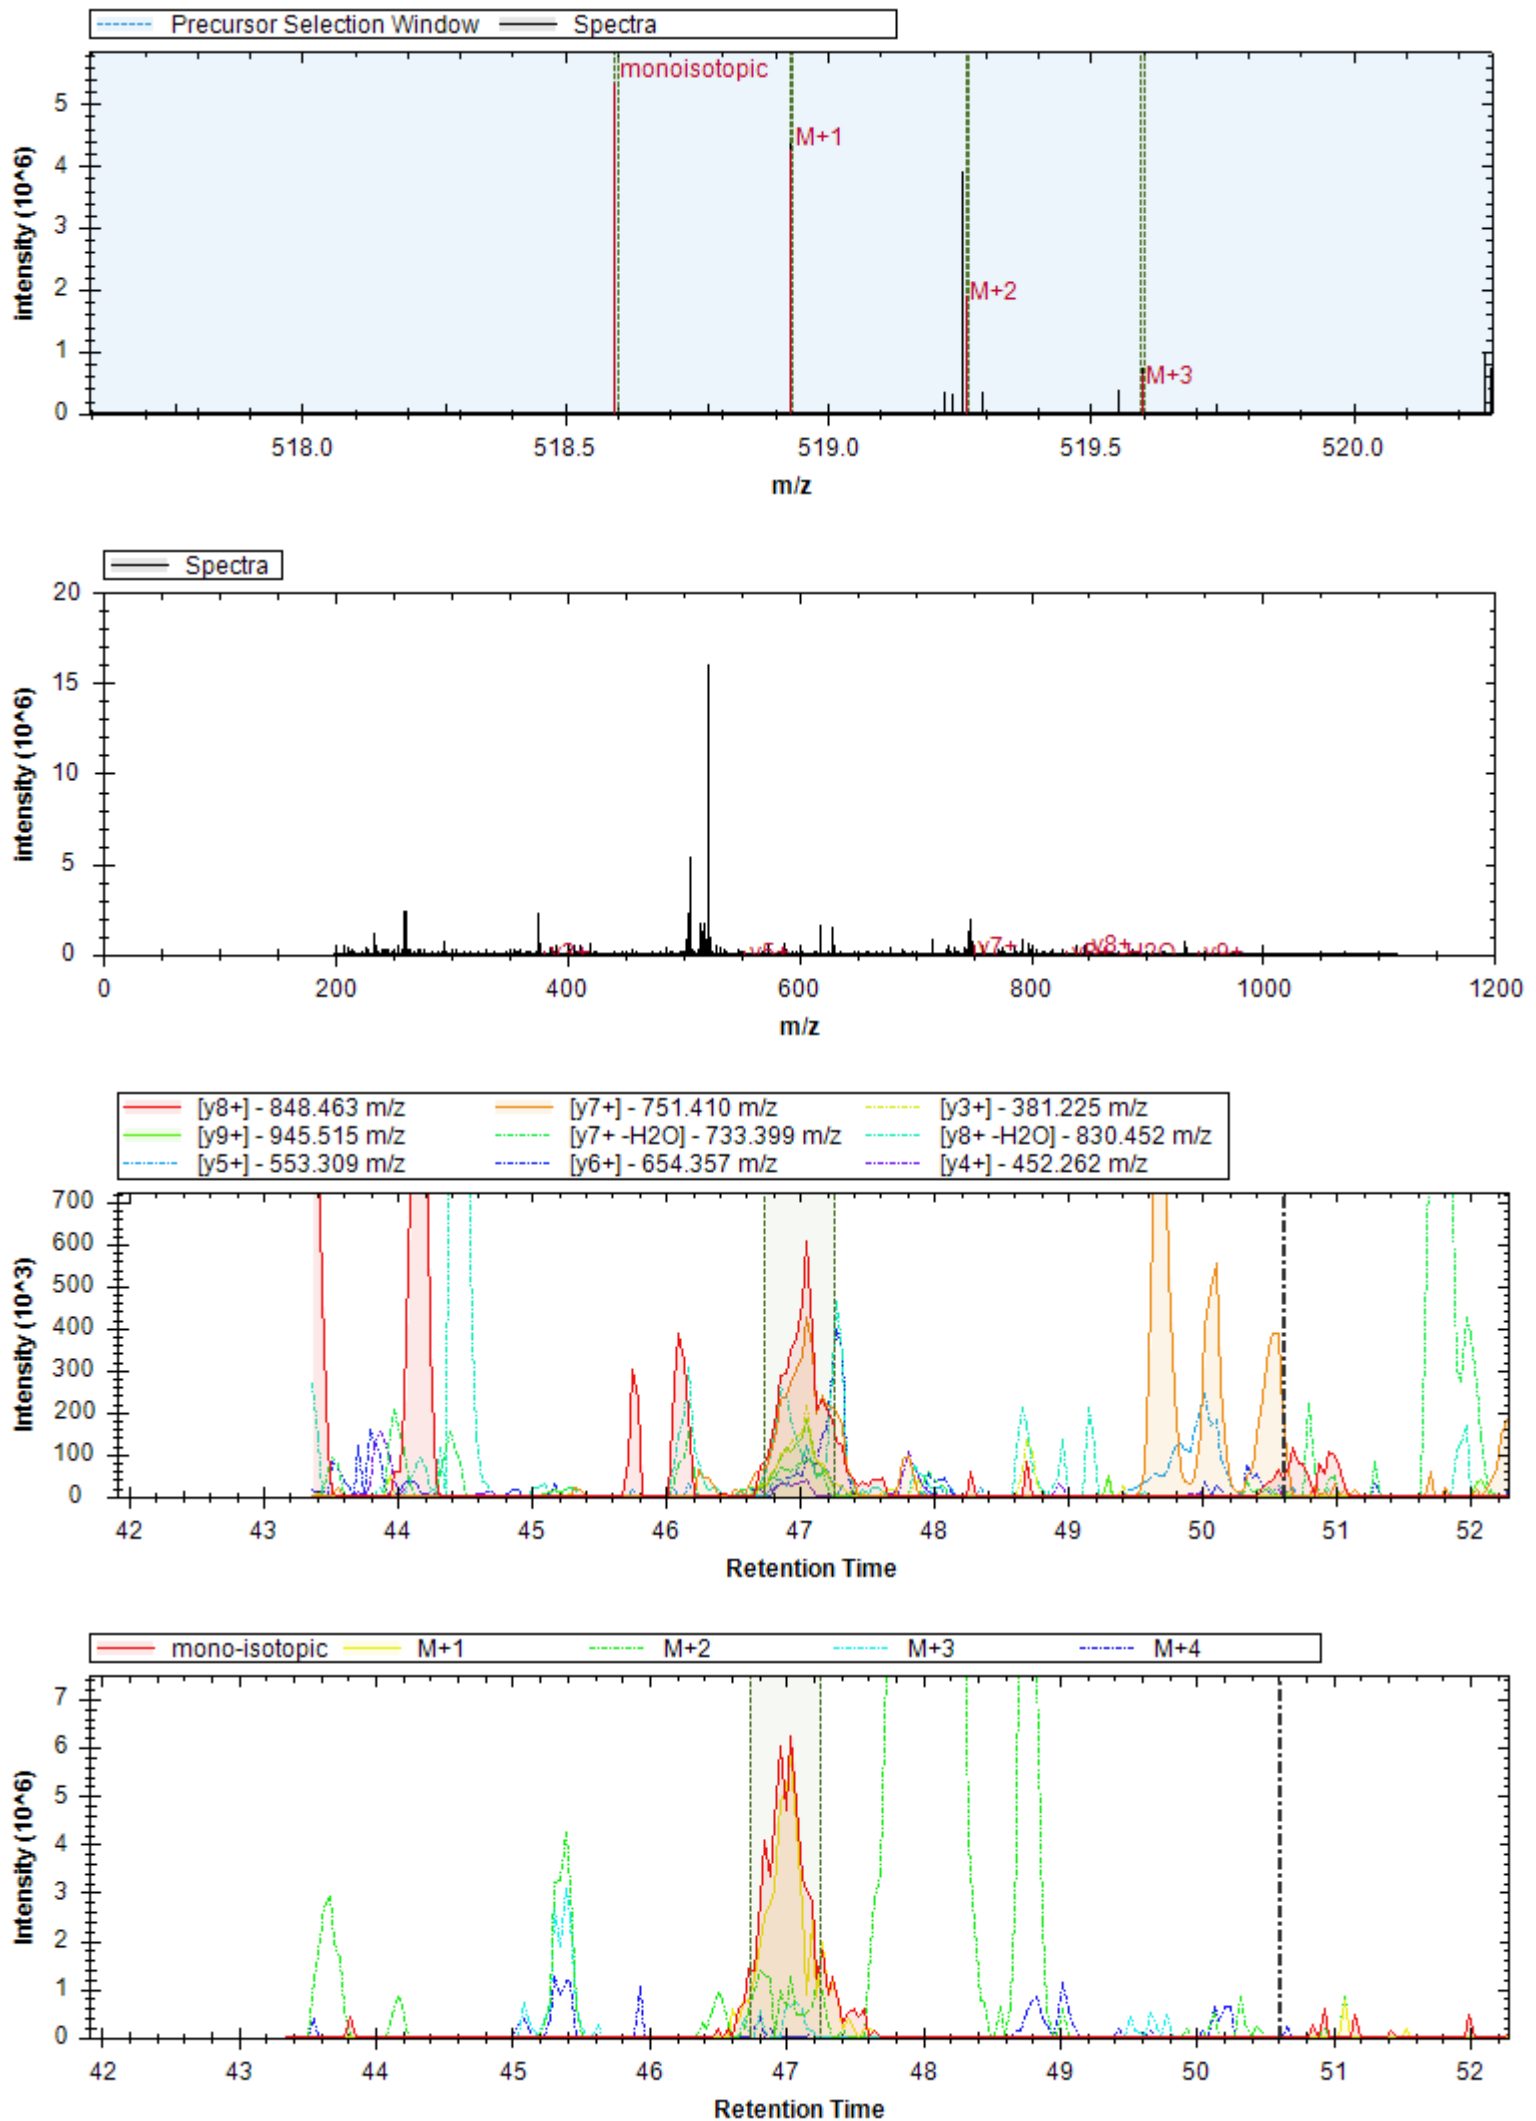



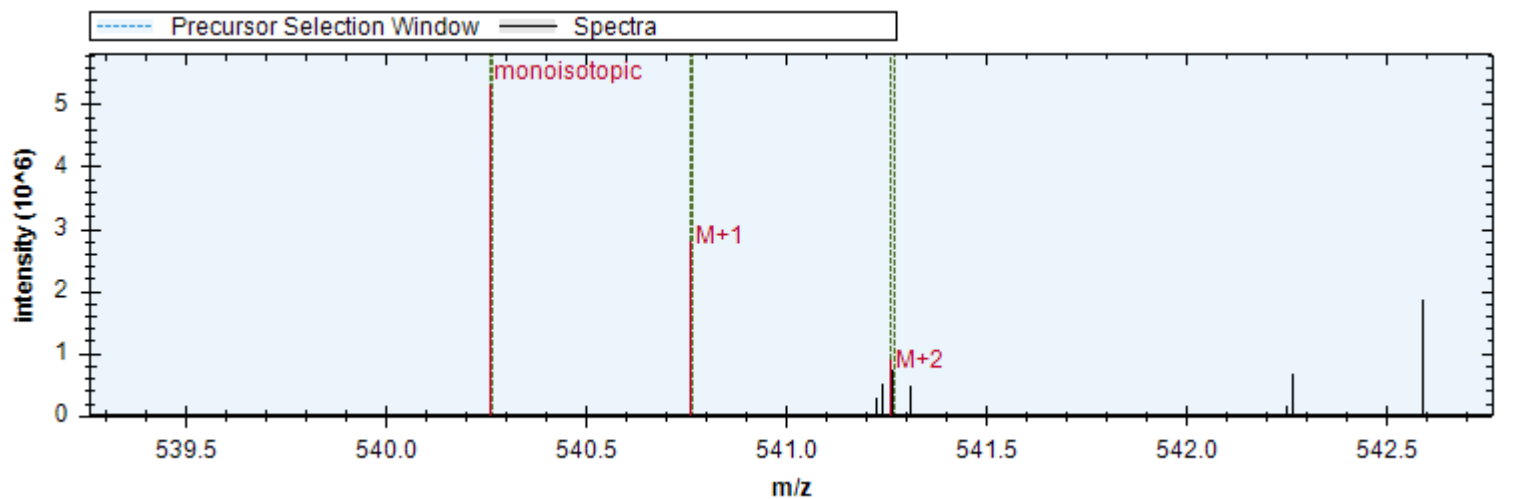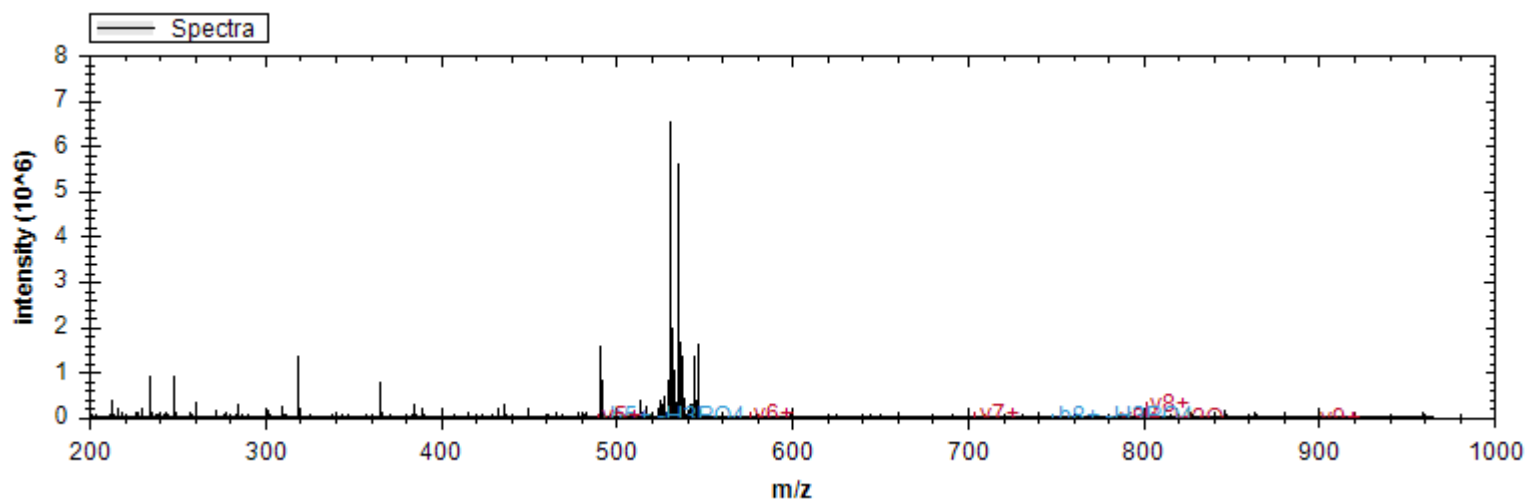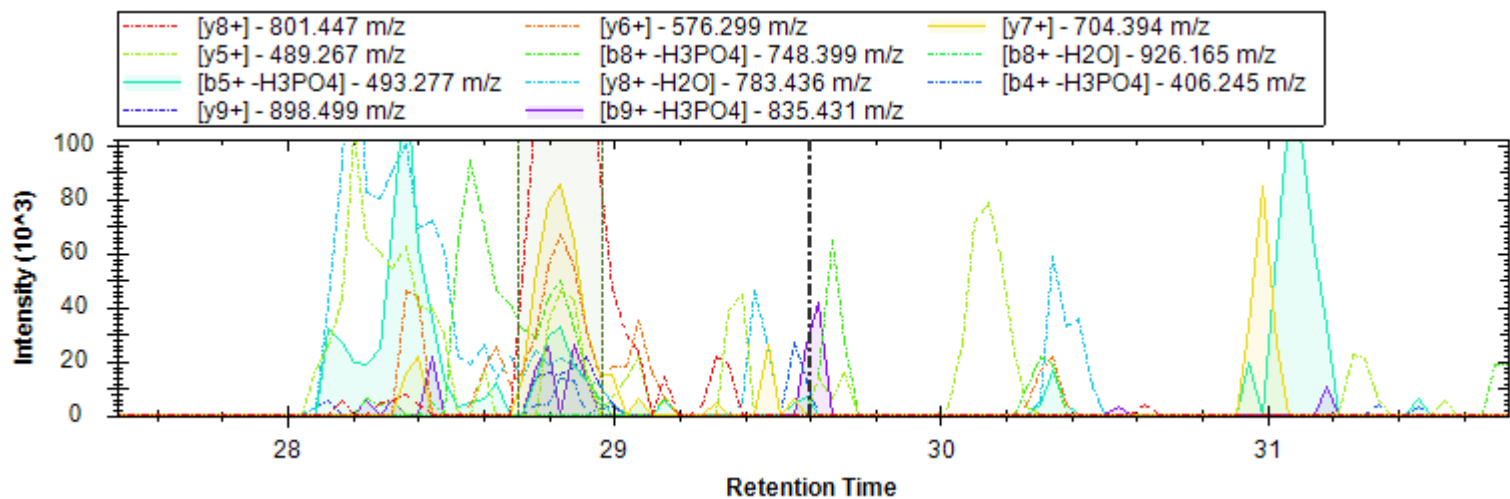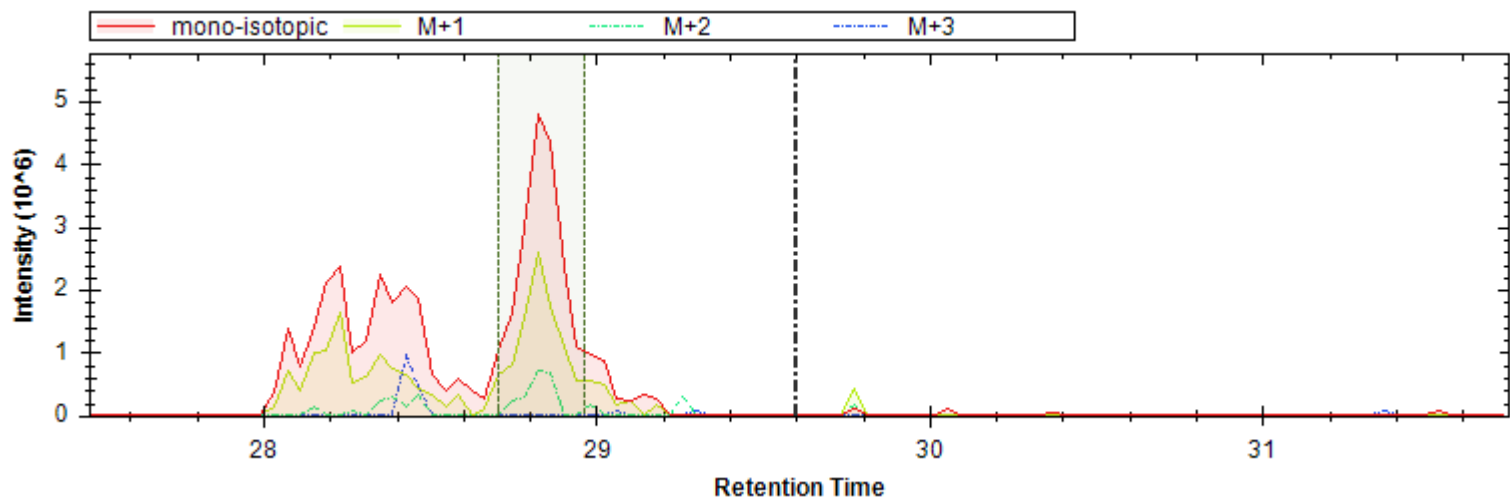

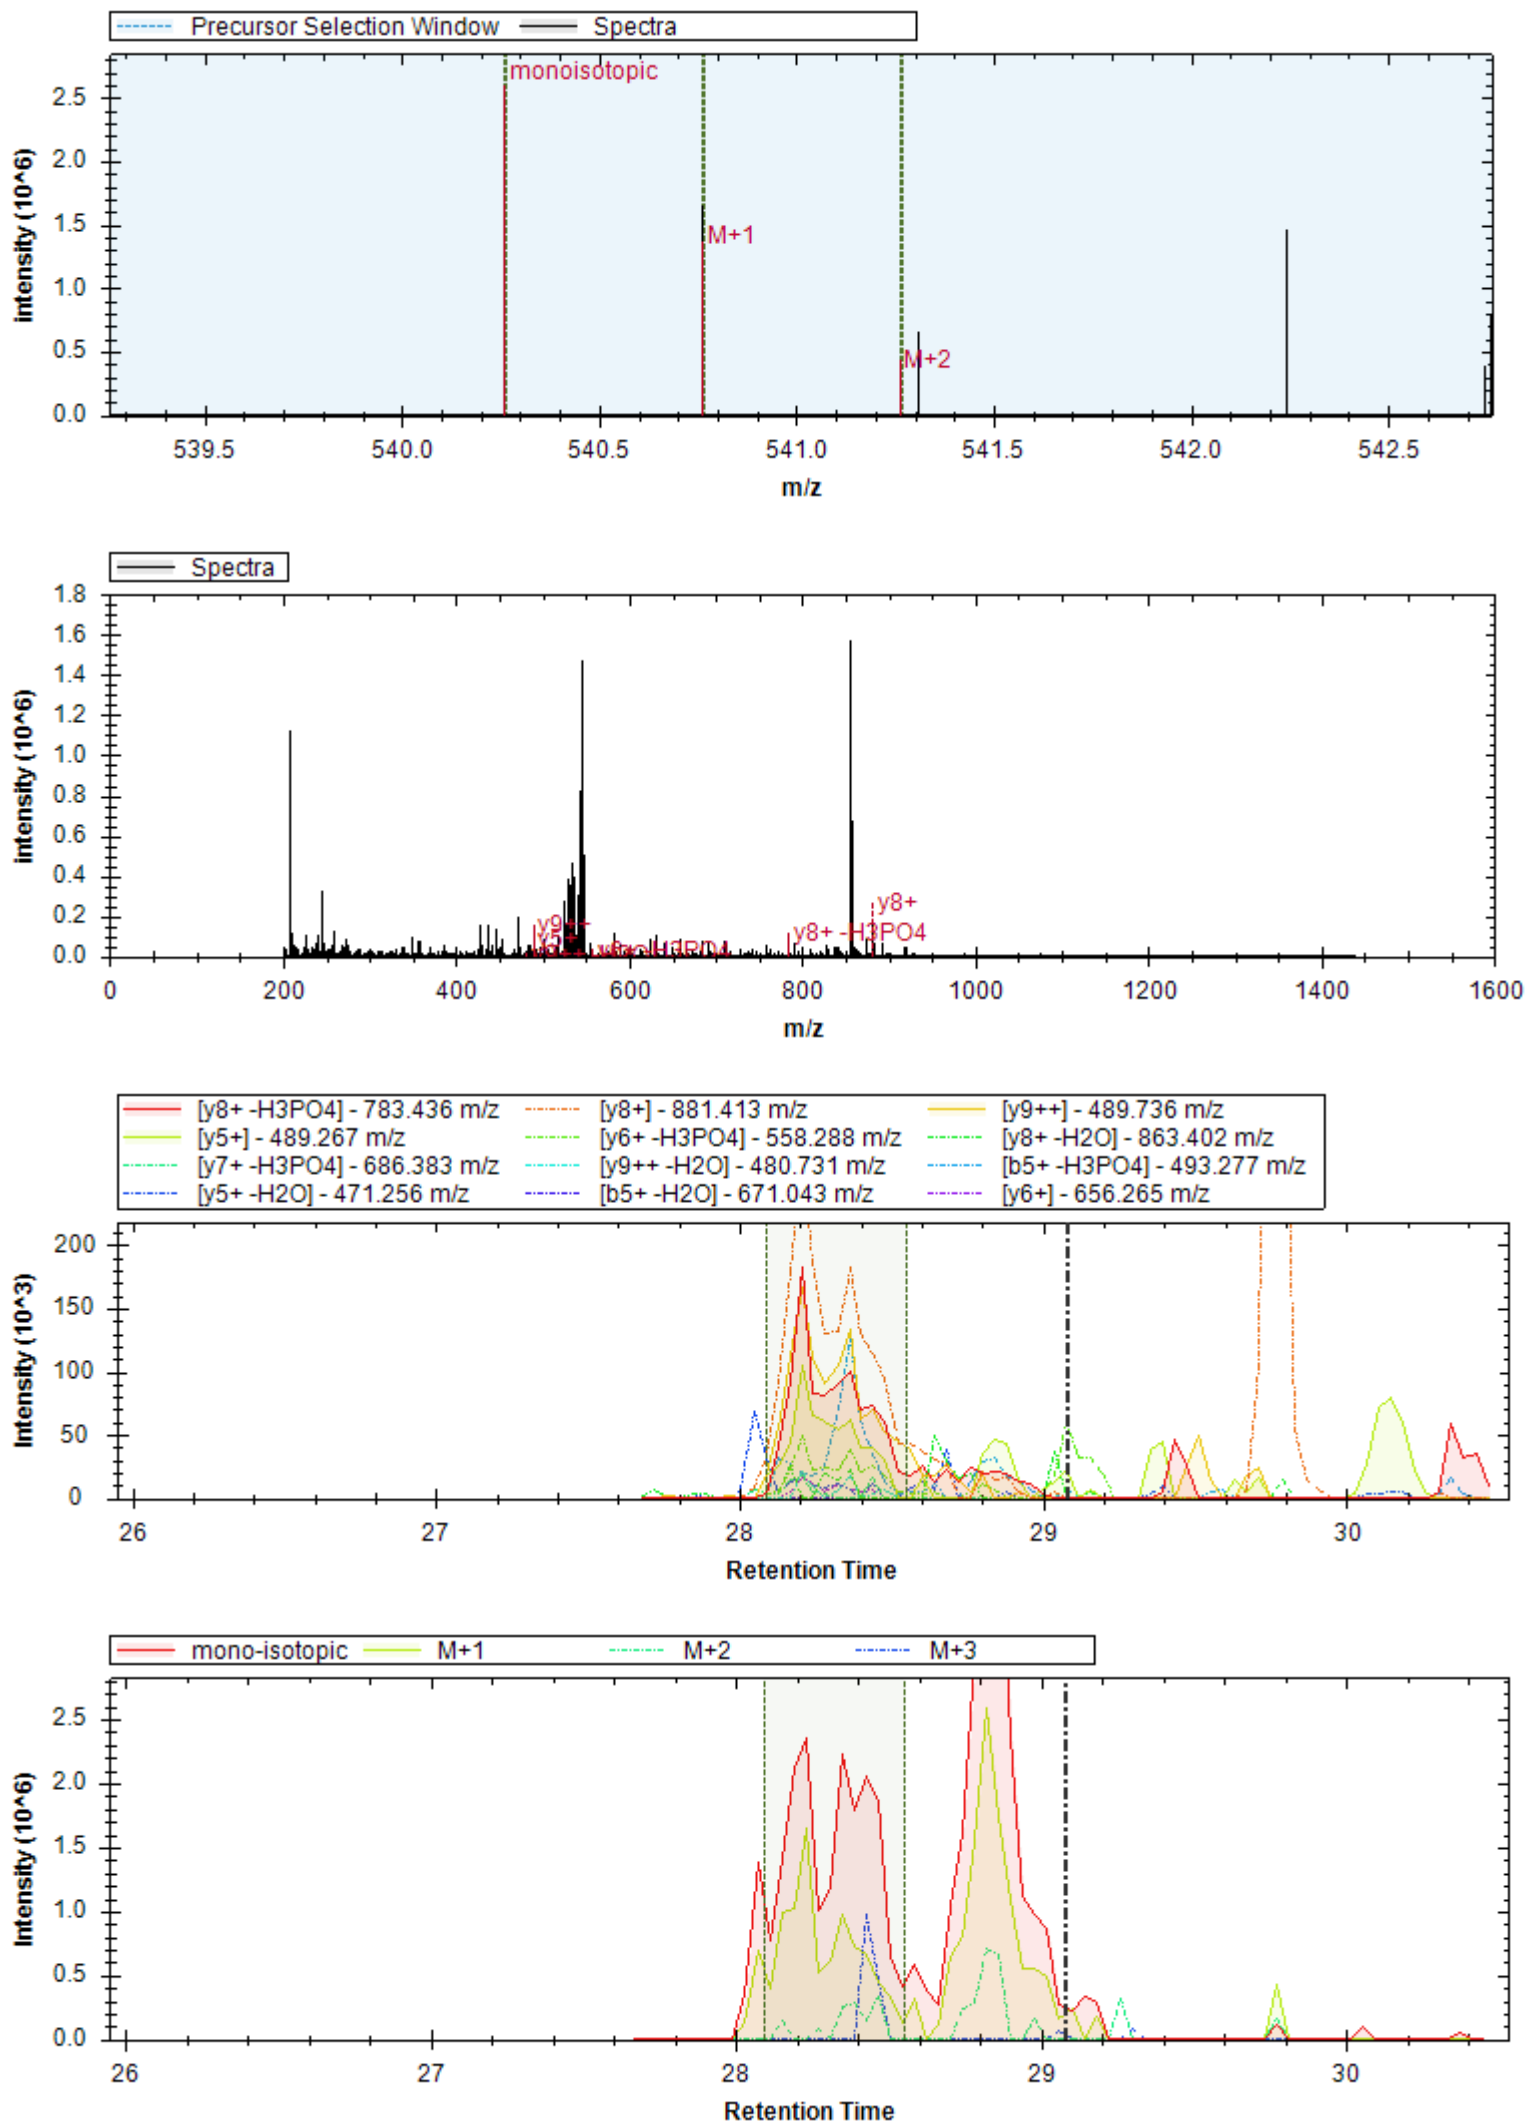

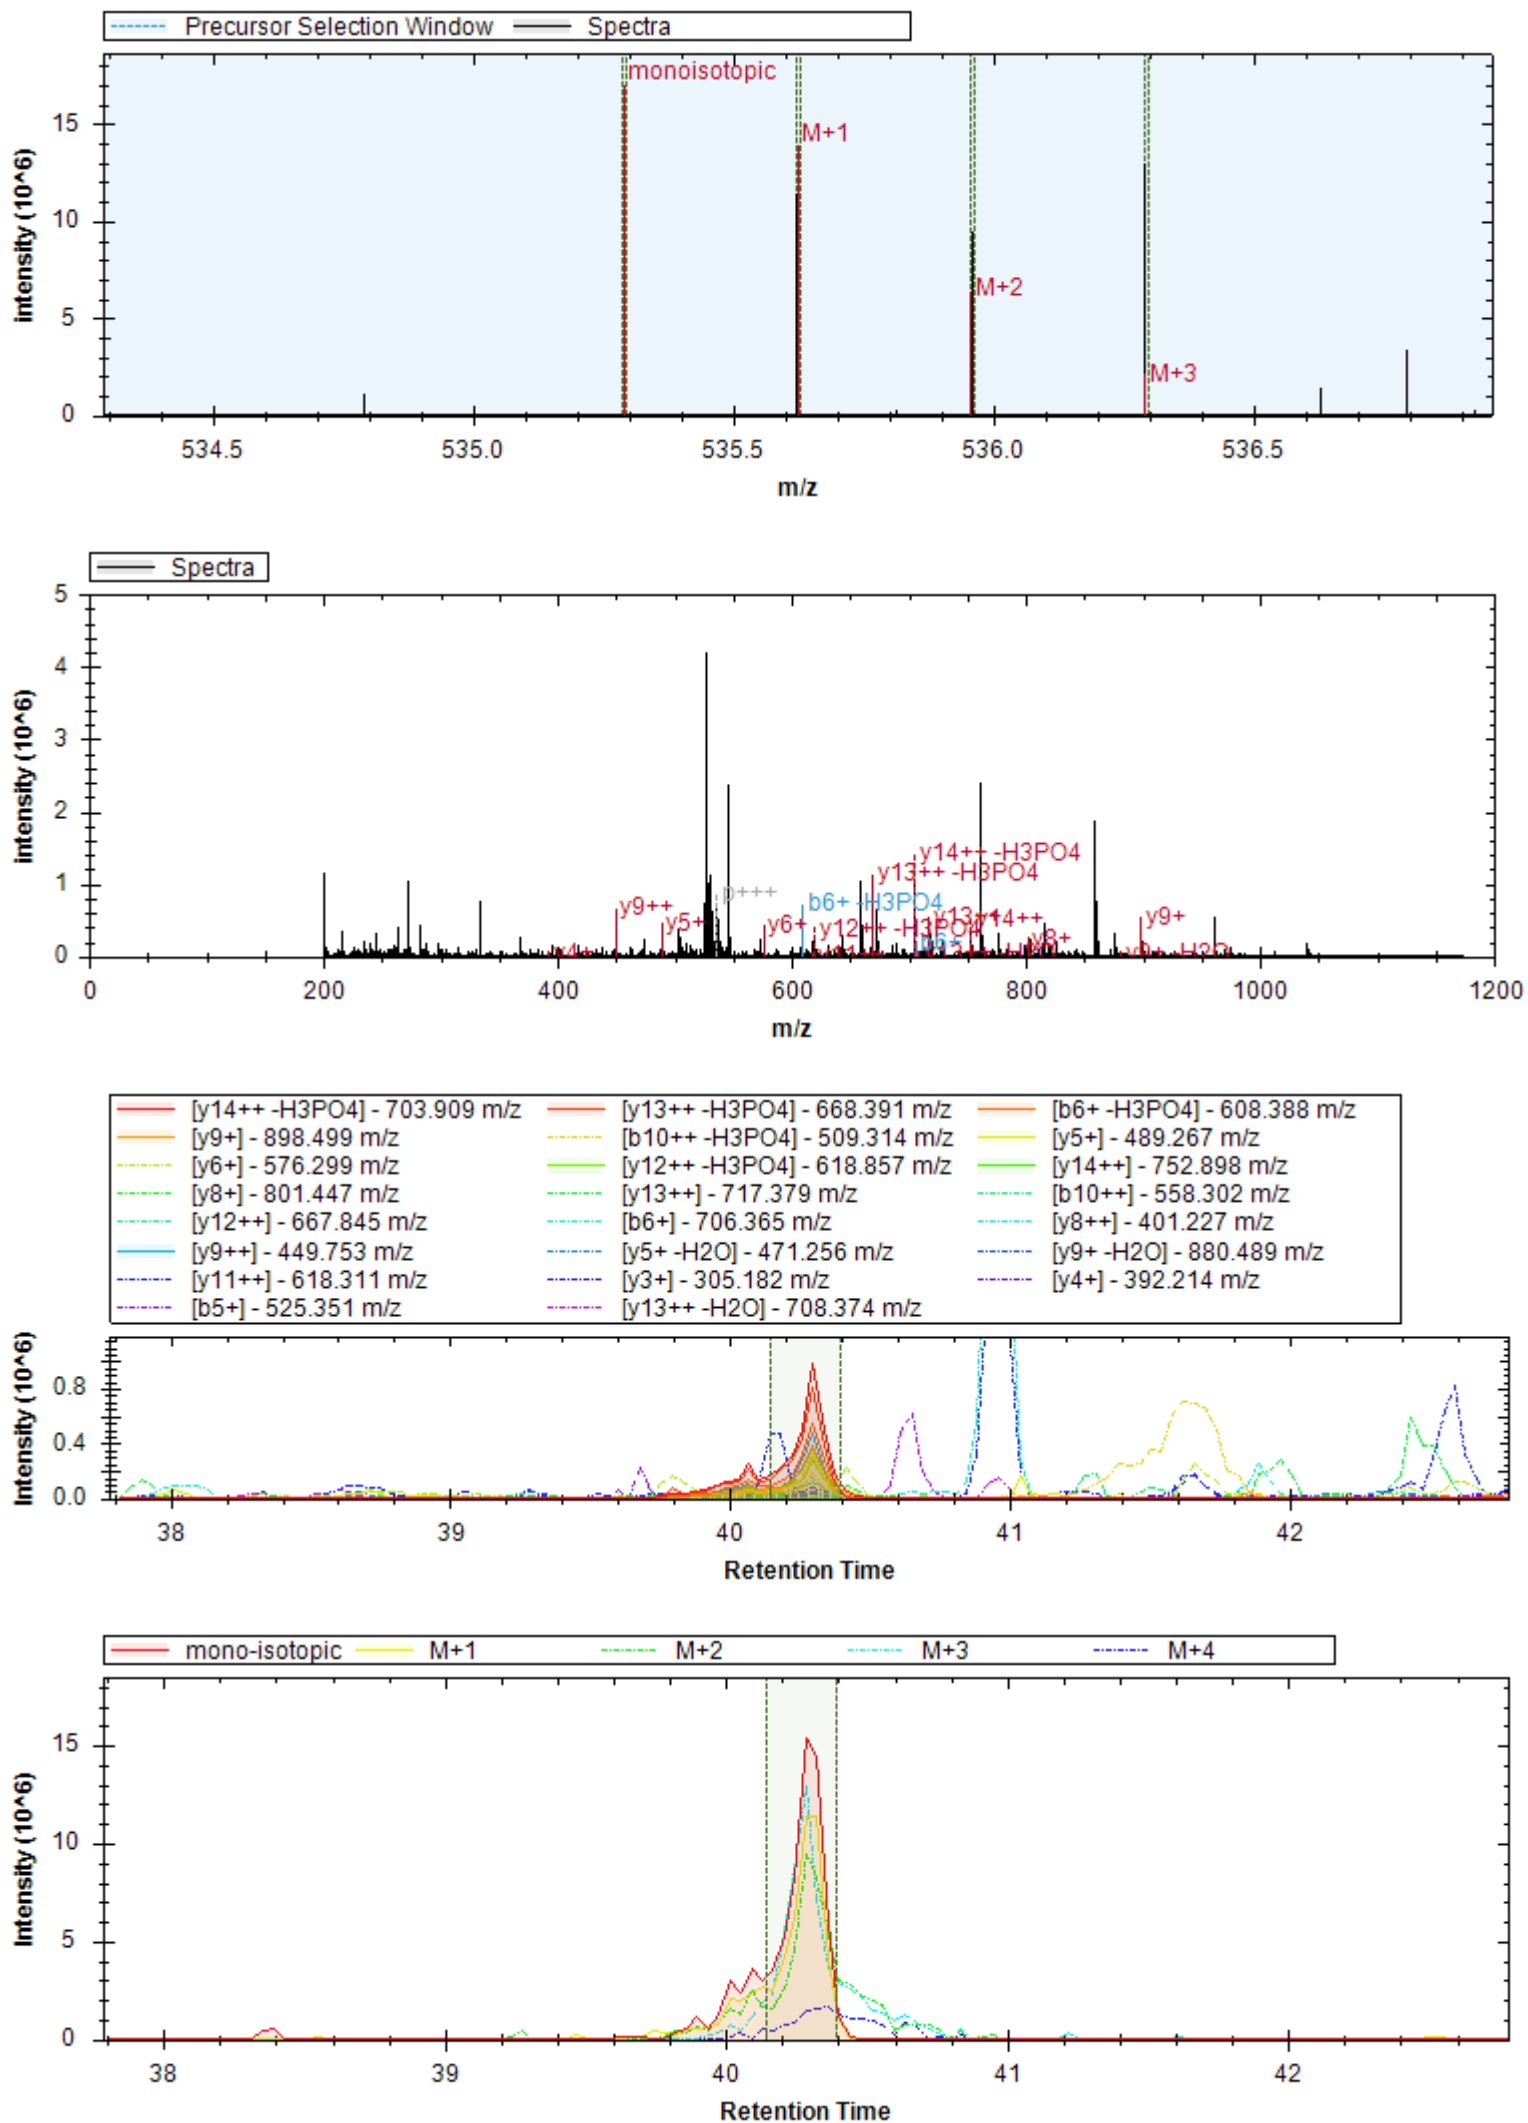

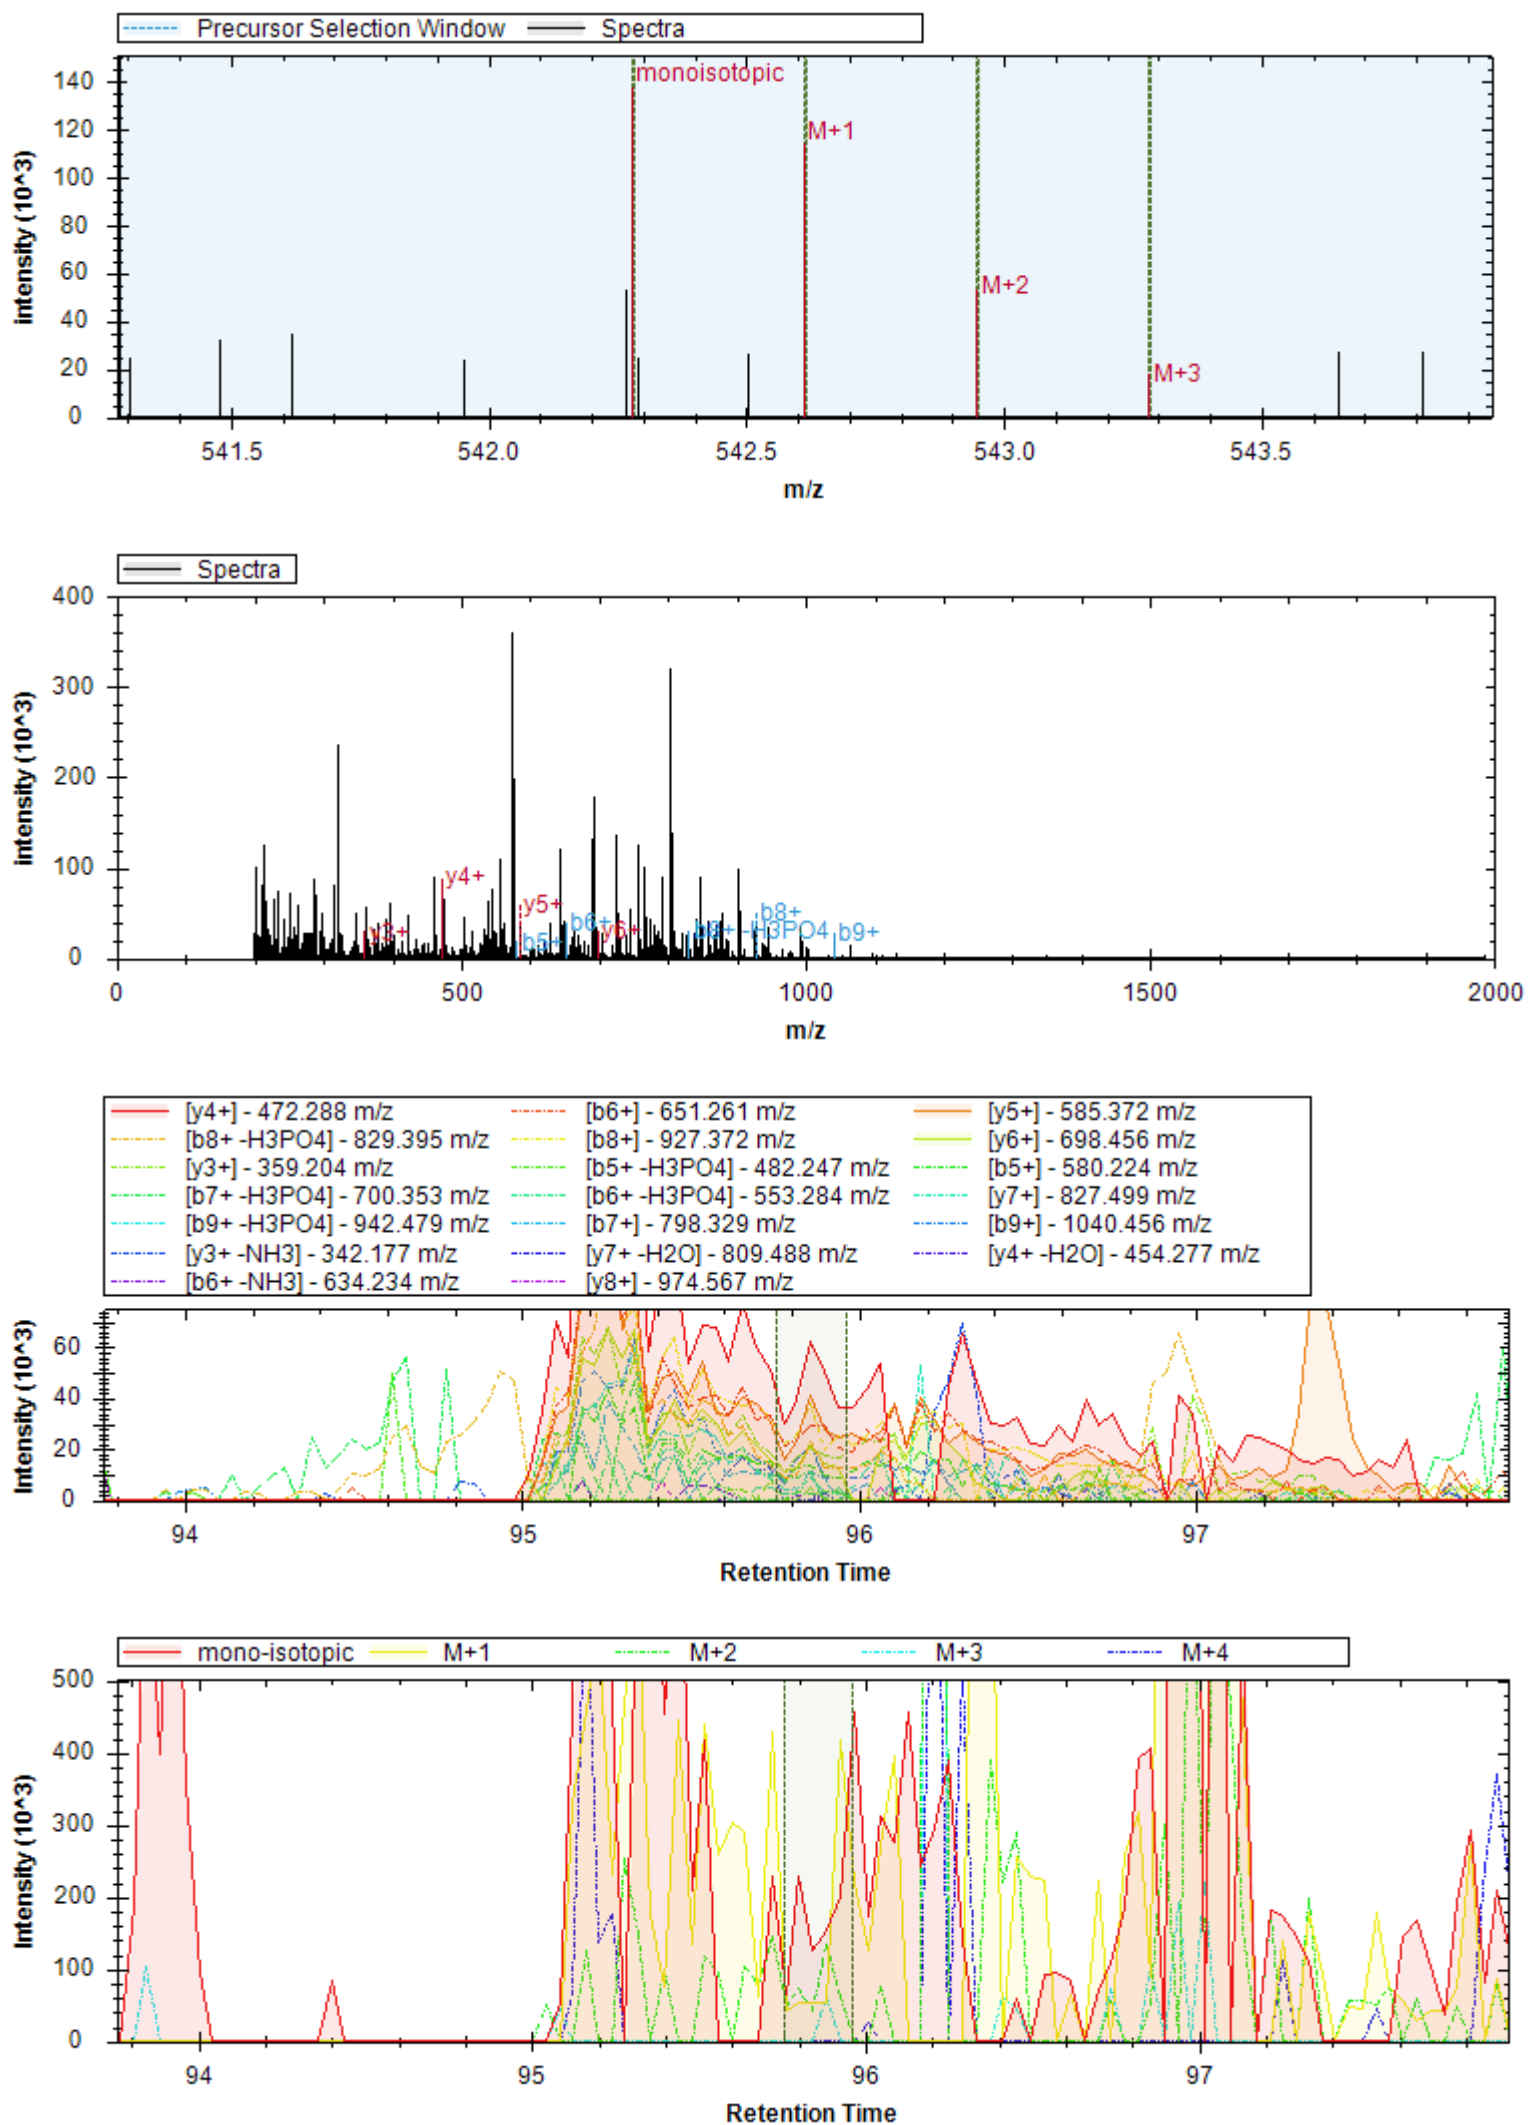

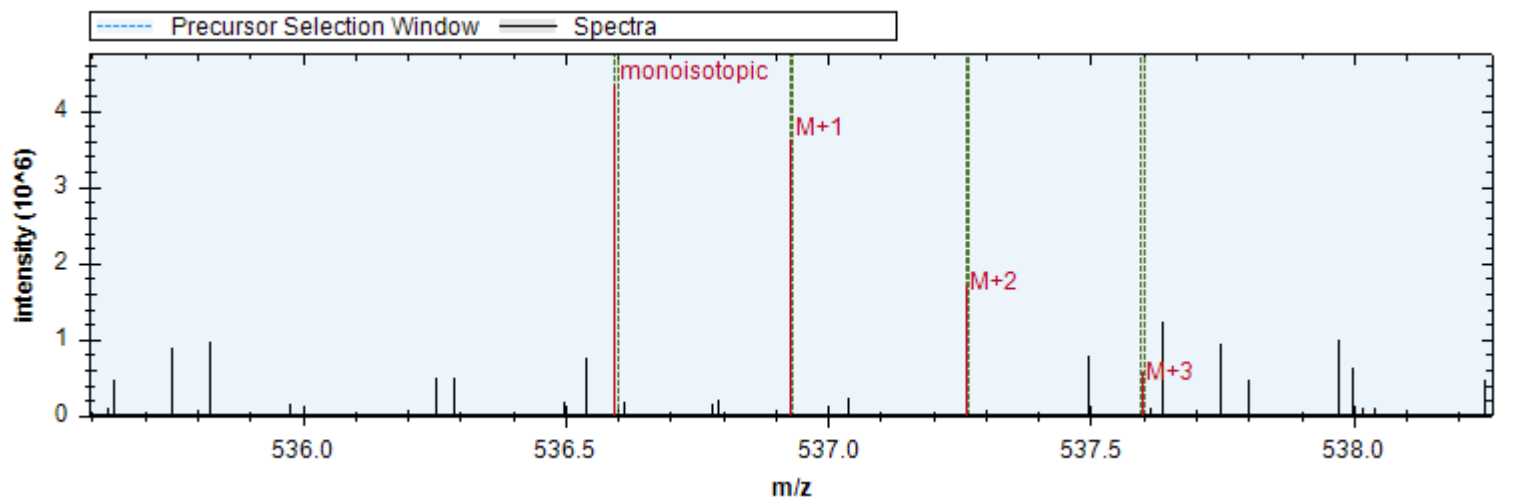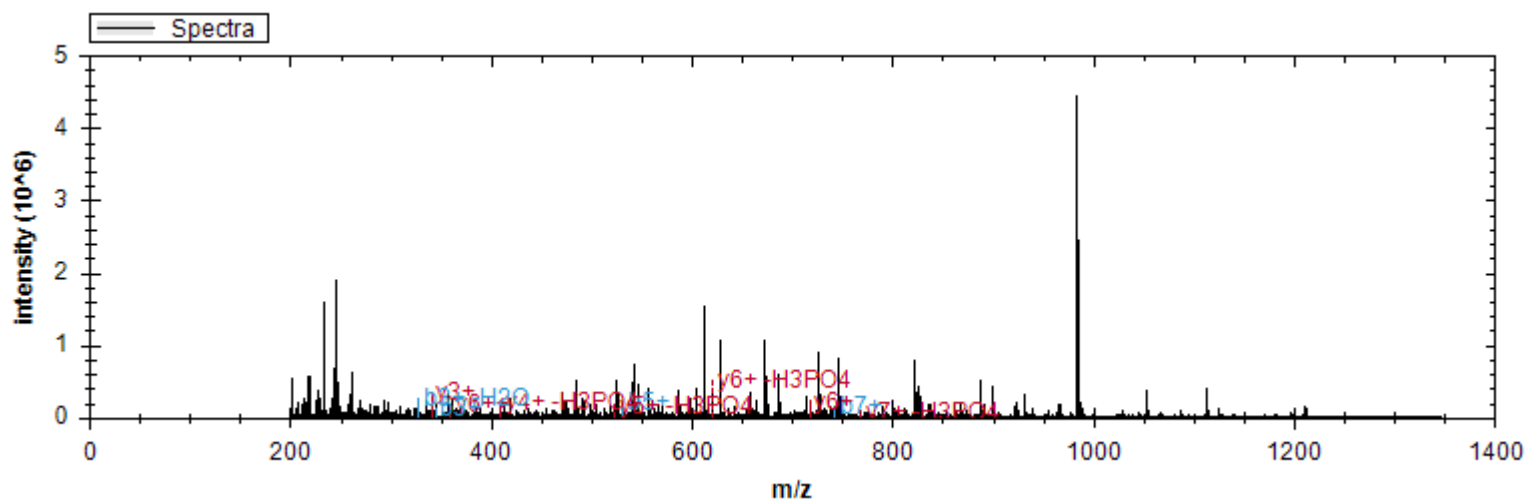

- |                            |                            |                          |
|----------------------------|----------------------------|--------------------------|
| [y6+ -H3PO4] - 620.377 m/z | [y3+] - 341.218 m/z        | [b5+] - 531.277 m/z      |
| [y6++] - 359.680 m/z       | [y5+ -H3PO4] - 523.324 m/z | [y6+] - 718.354 m/z      |
| [y4+ -H3PO4] - 410.240 m/z | [b7+] - 743.357 m/z        | [b5+ -H2O] - 513.267 m/z |
| [y7+ -H3PO4] - 767.445 m/z | [y9++] - 539.255 m/z       | [b3+] - 345.177 m/z      |
| [y7++] - 433.215 m/z       | [y8+ -H3PO4] - 882.472 m/z | [b4+] - 432.209 m/z      |
| [y4+] - 508.217 m/z        | [b3+ -H2O] - 327.166 m/z   | [b8+] - 890.425 m/z      |
| [b4+ -H2O] - 414.198 m/z   | [b7+ -H2O] - 725.346 m/z   | [y7+] - 865.422 m/z      |
| [y9+ -H3PO4] - 979.525 m/z |                            |                          |

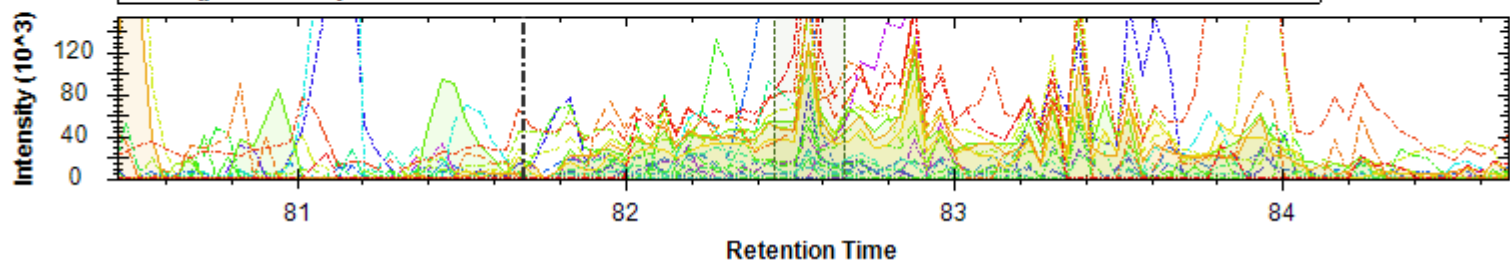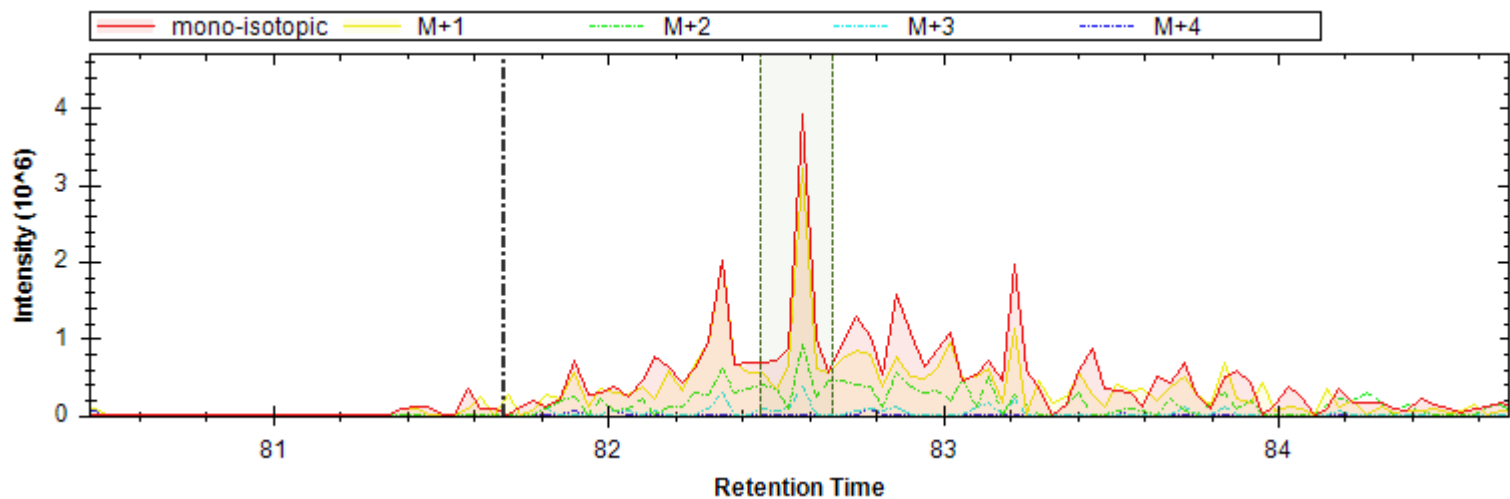

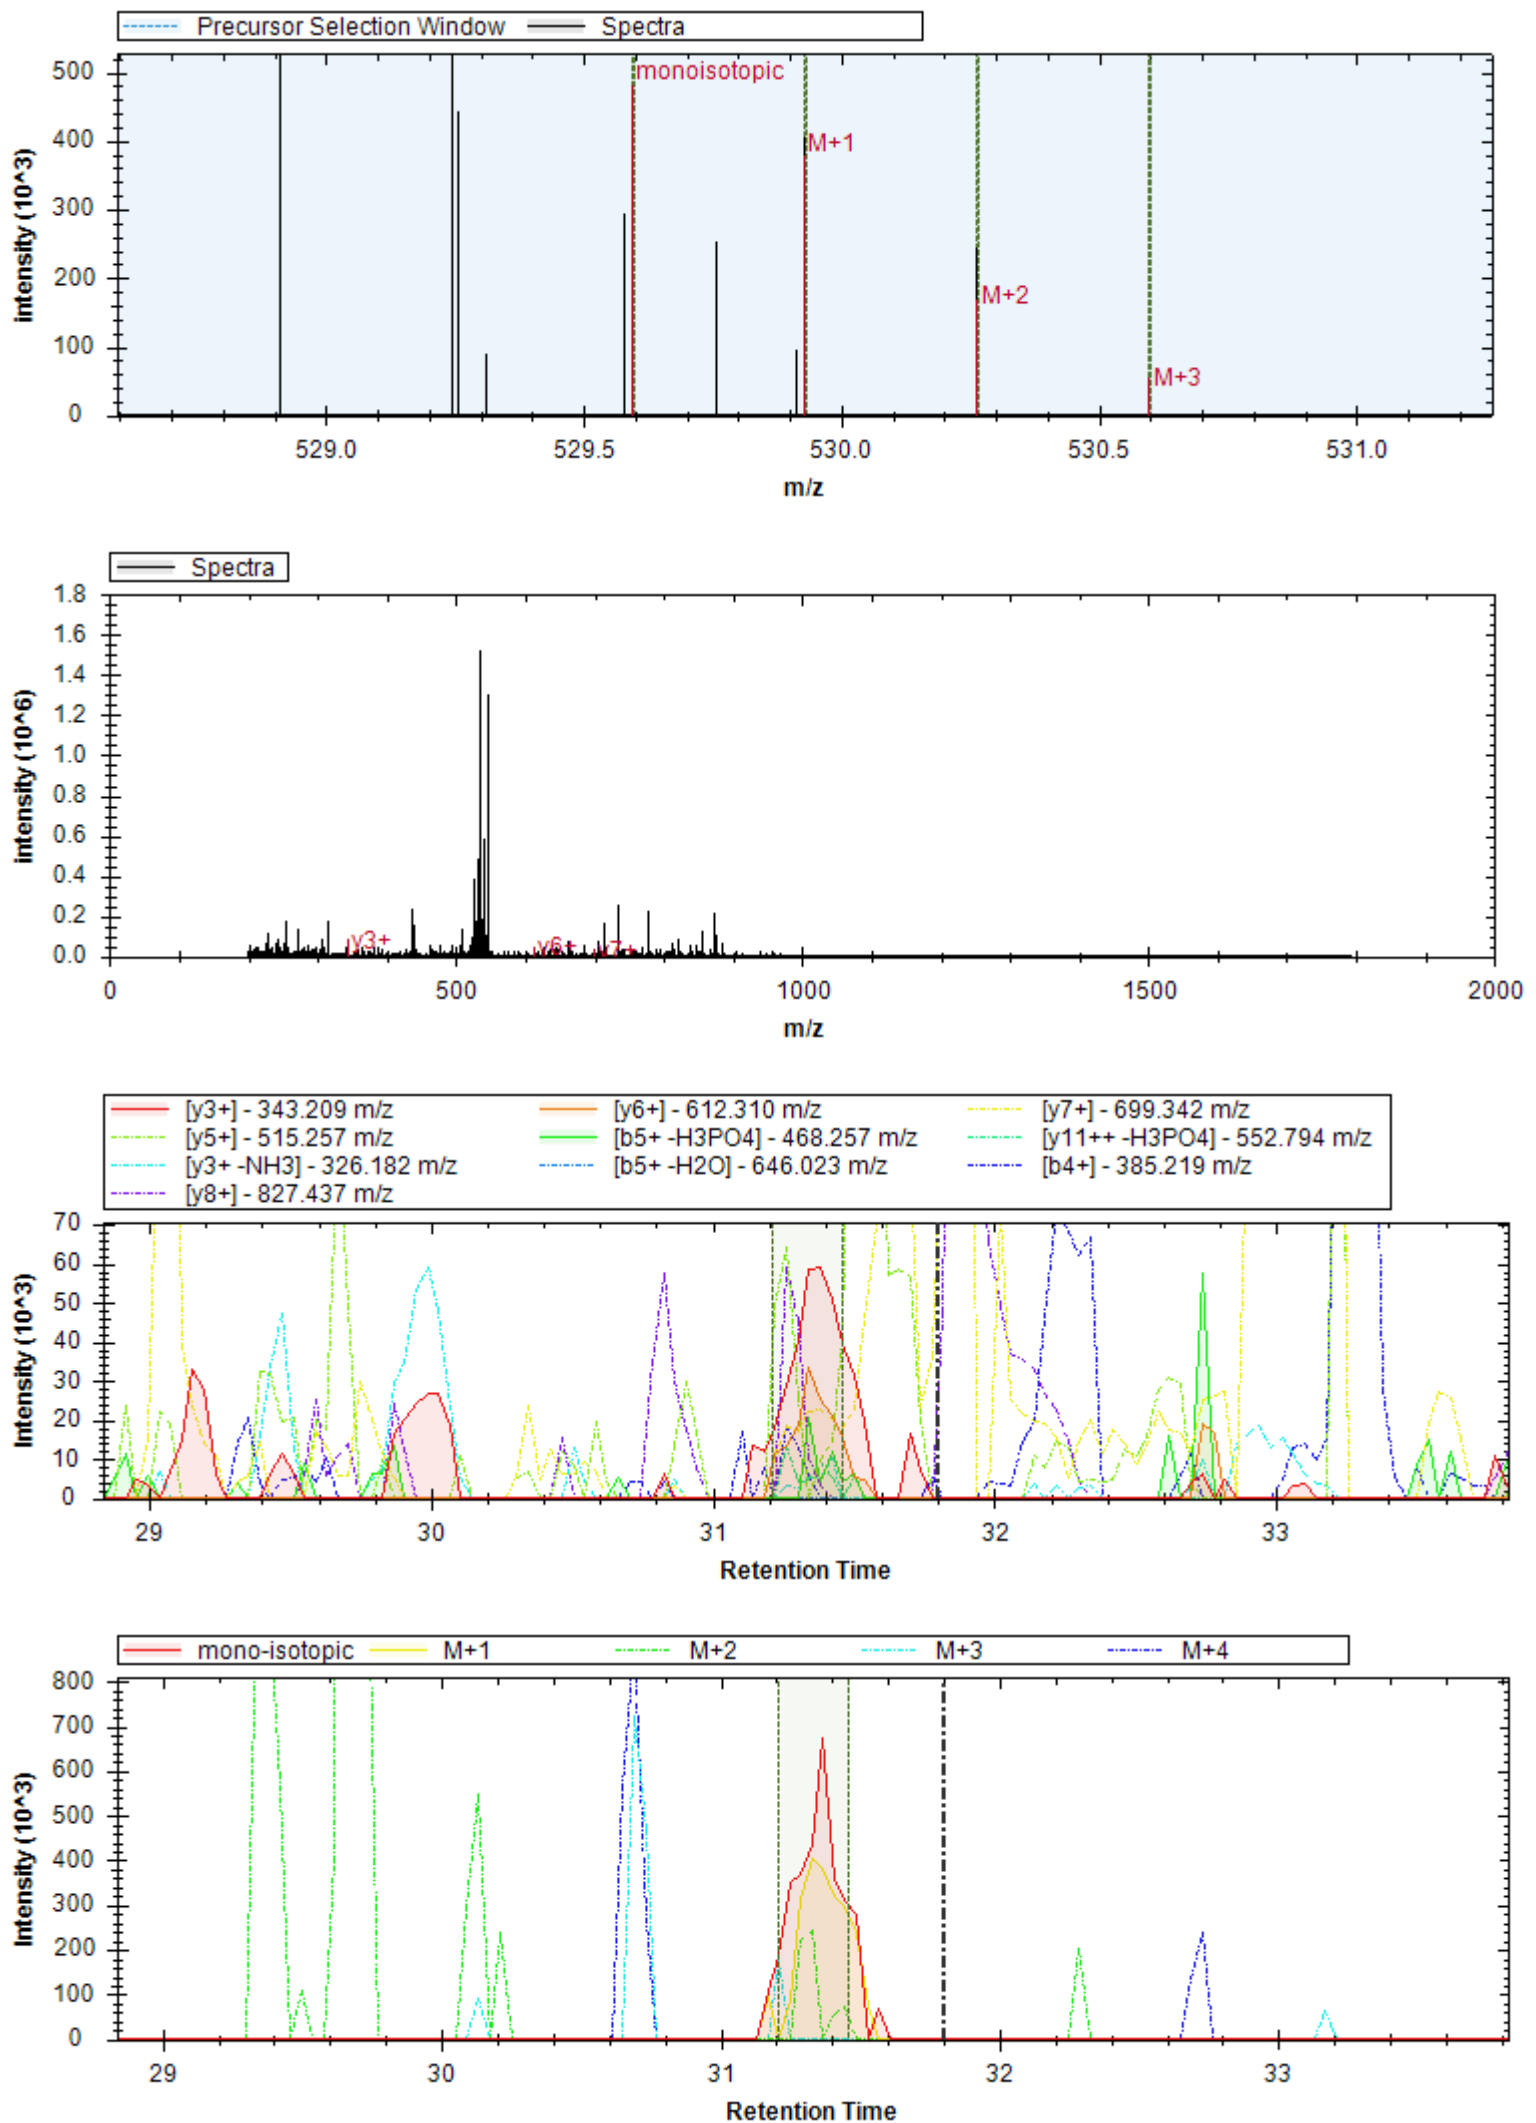

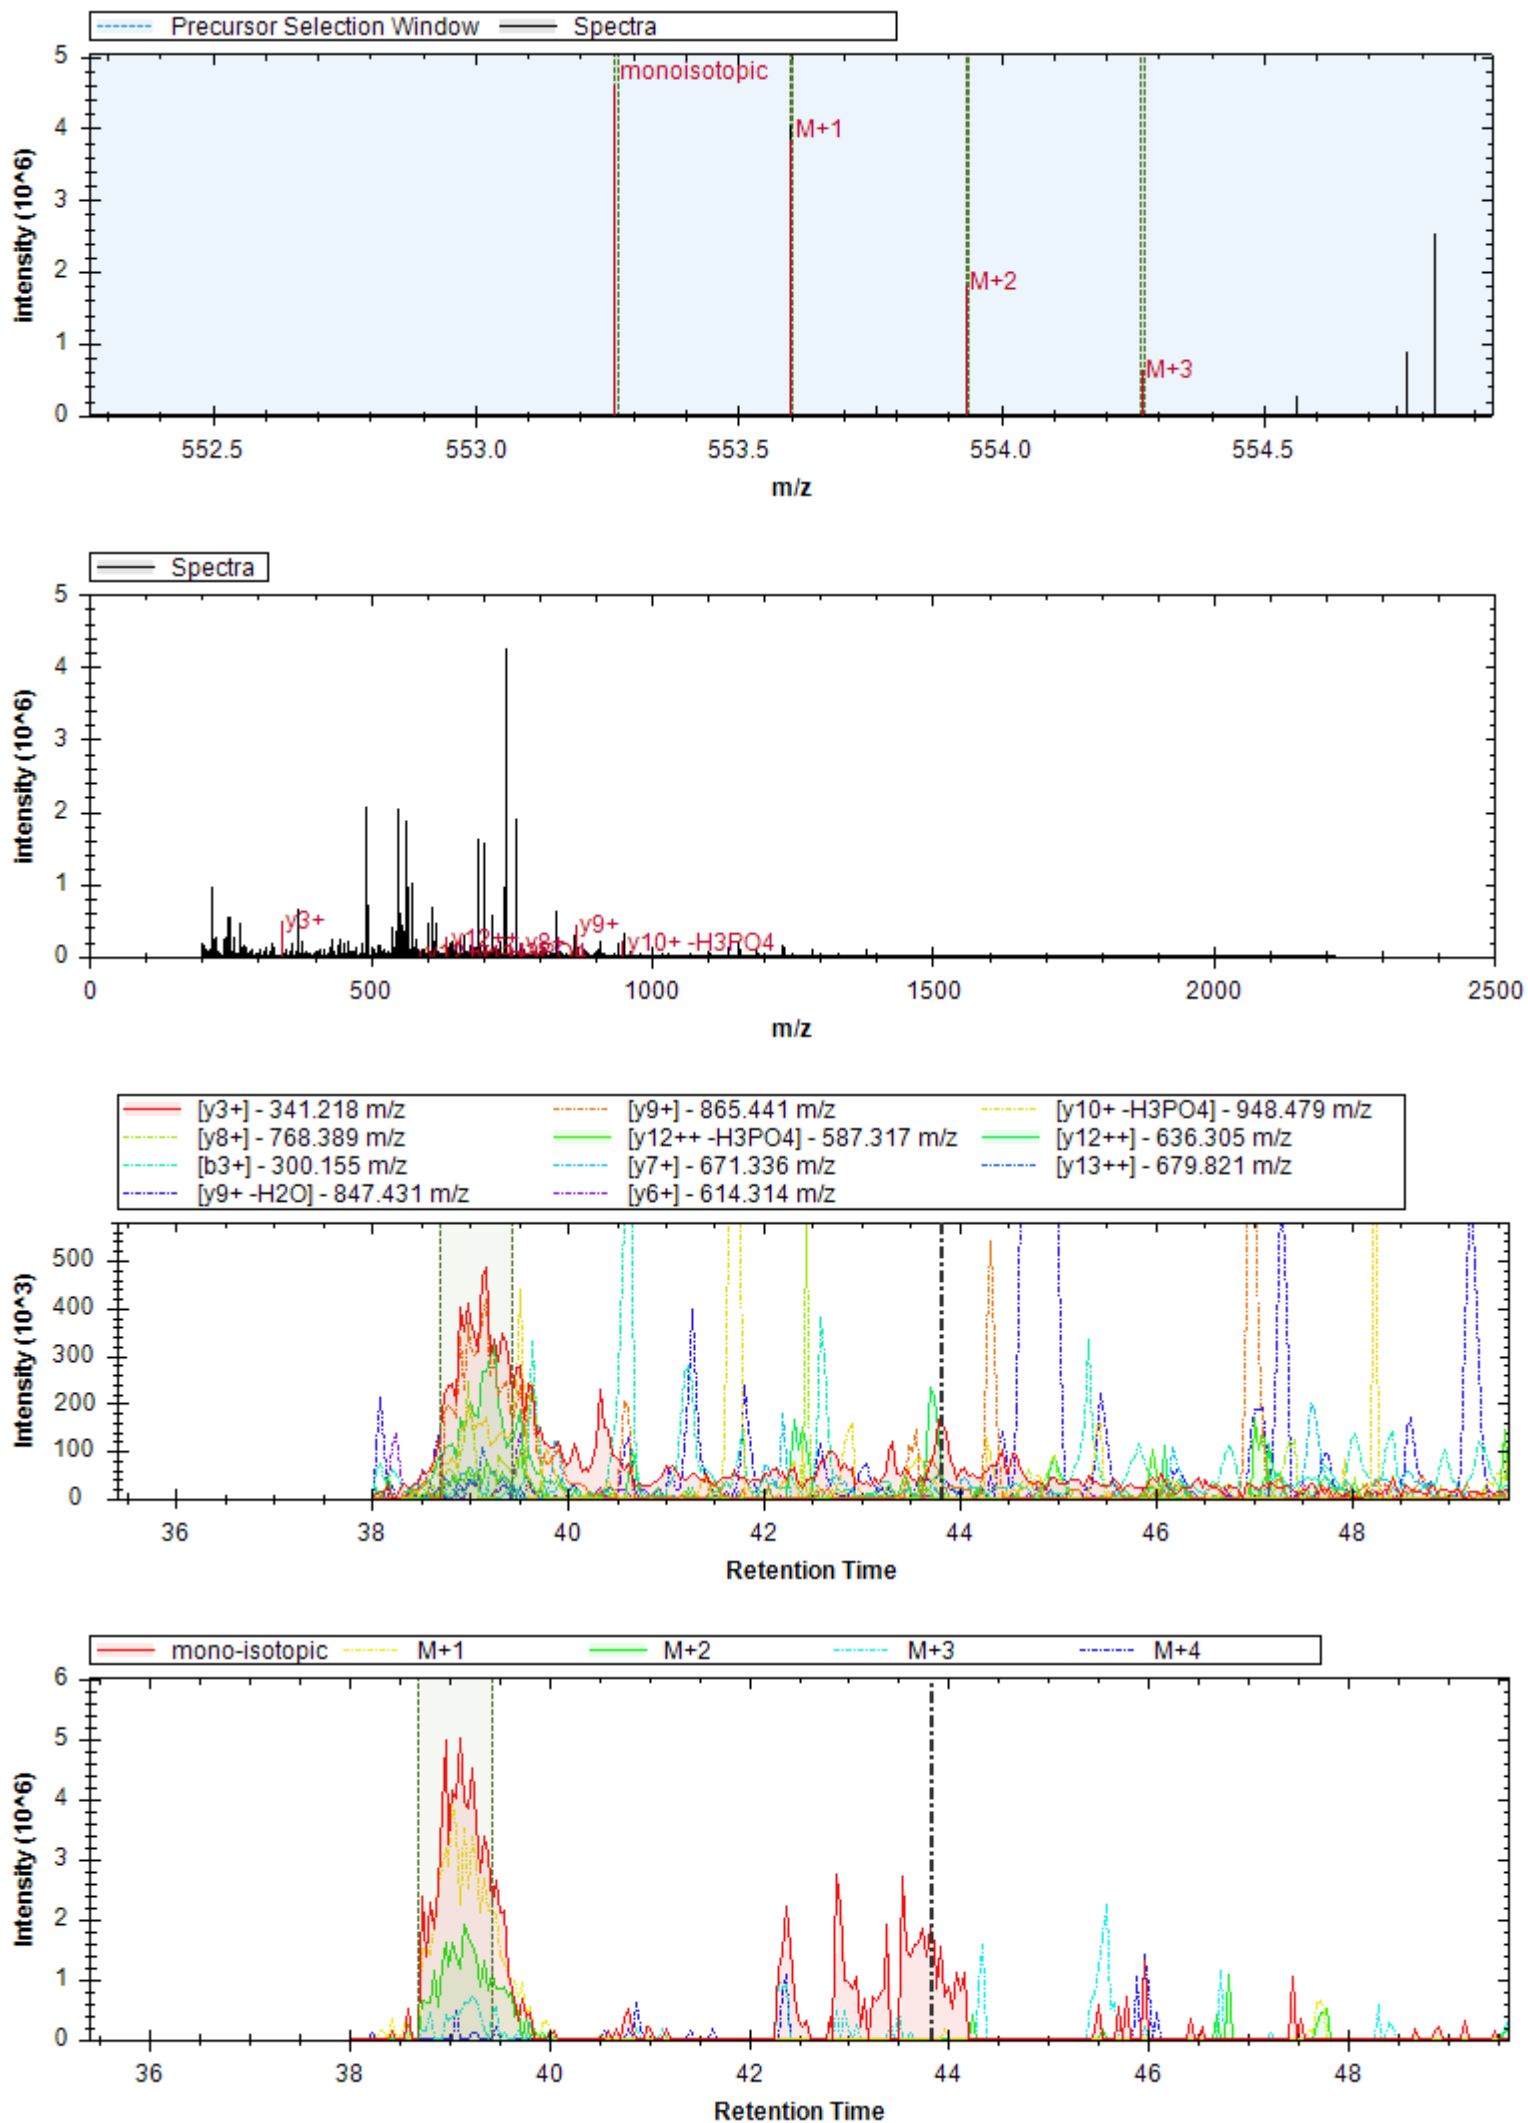





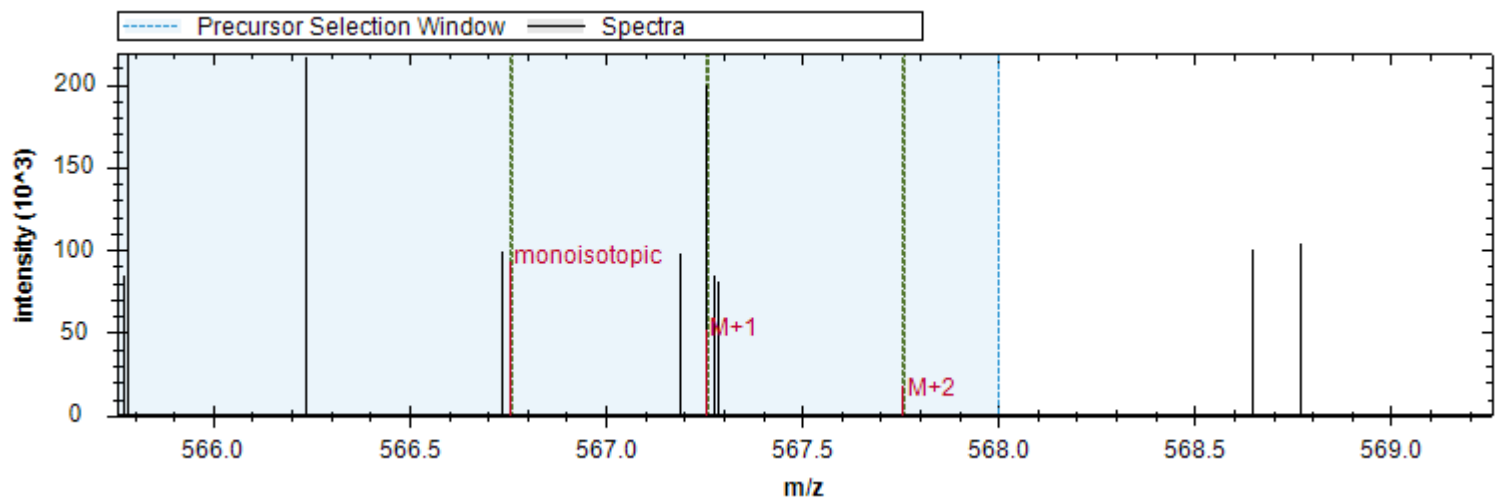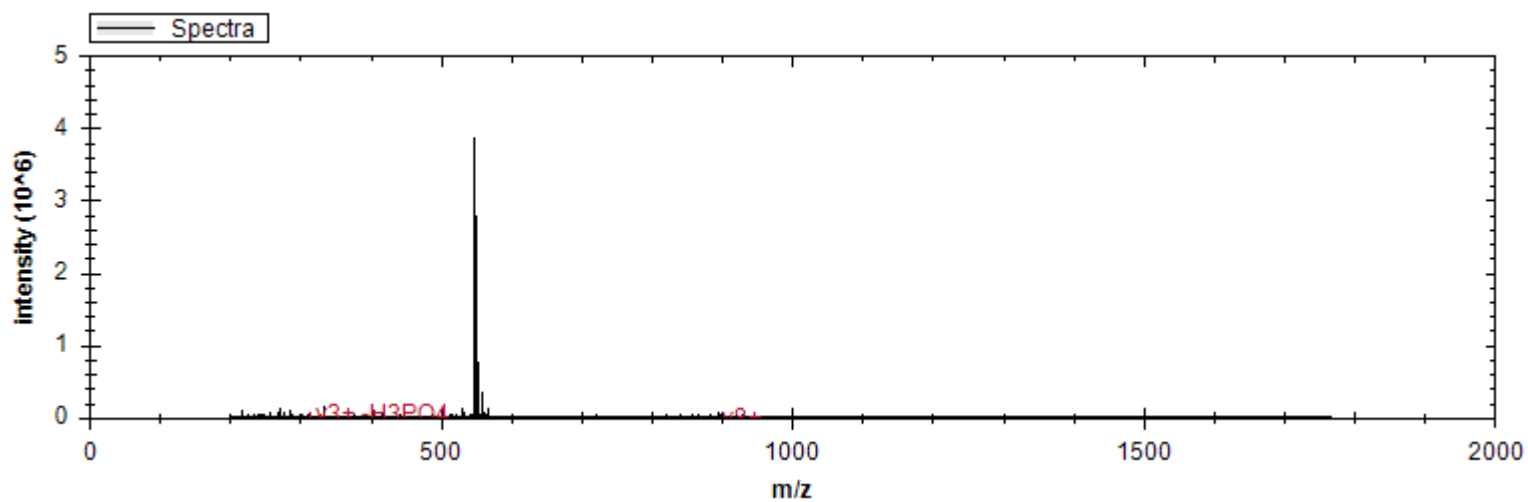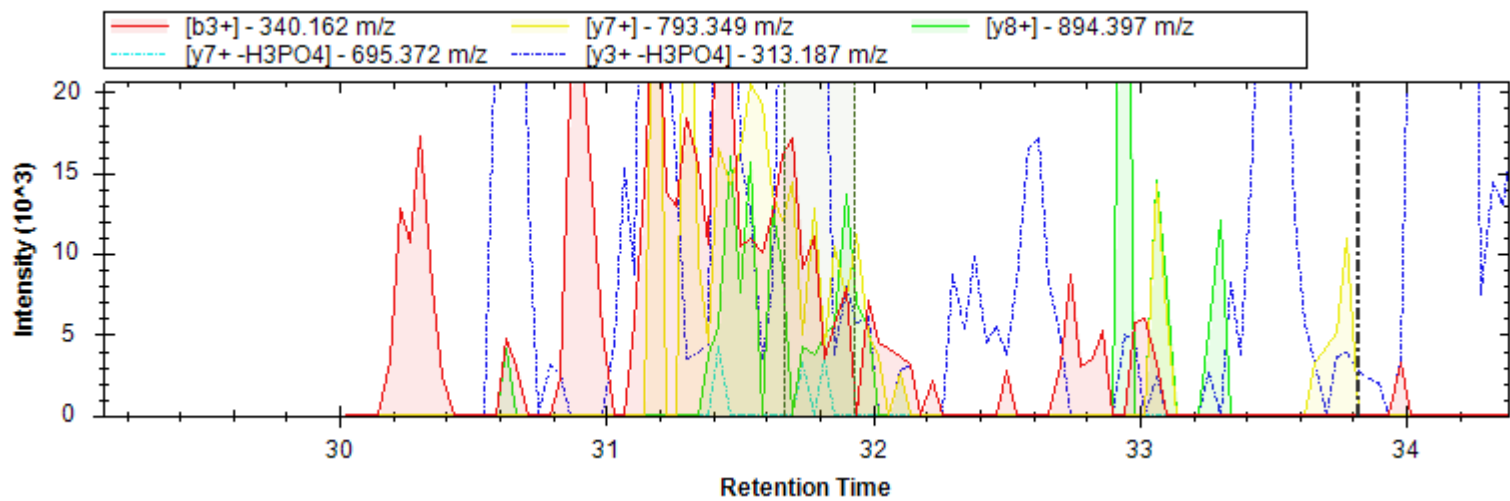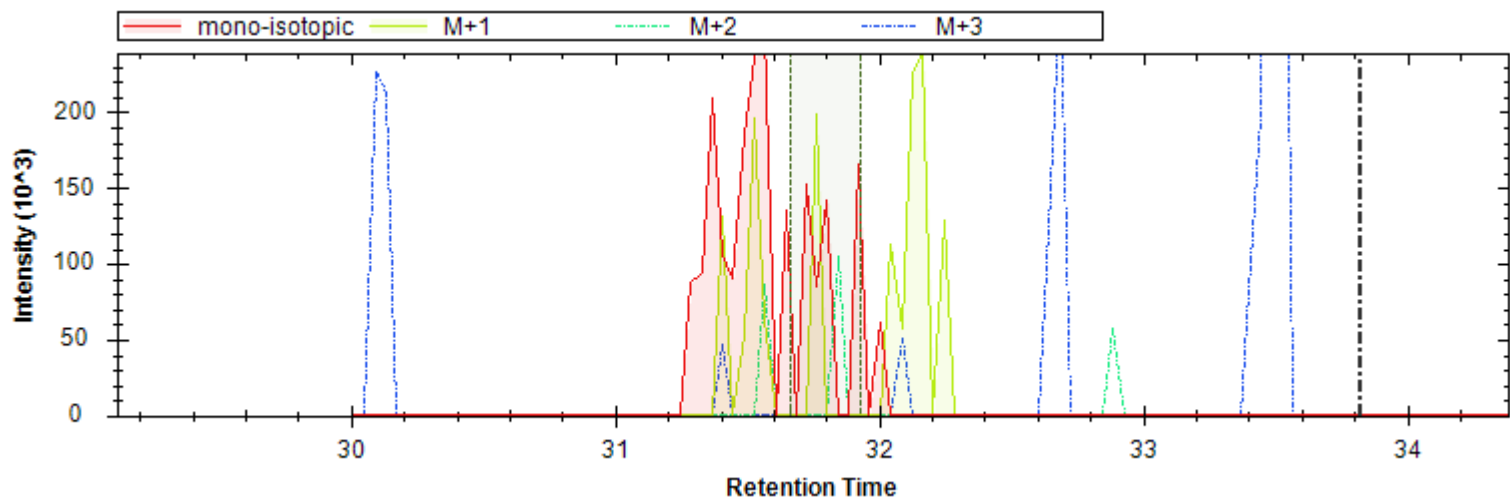

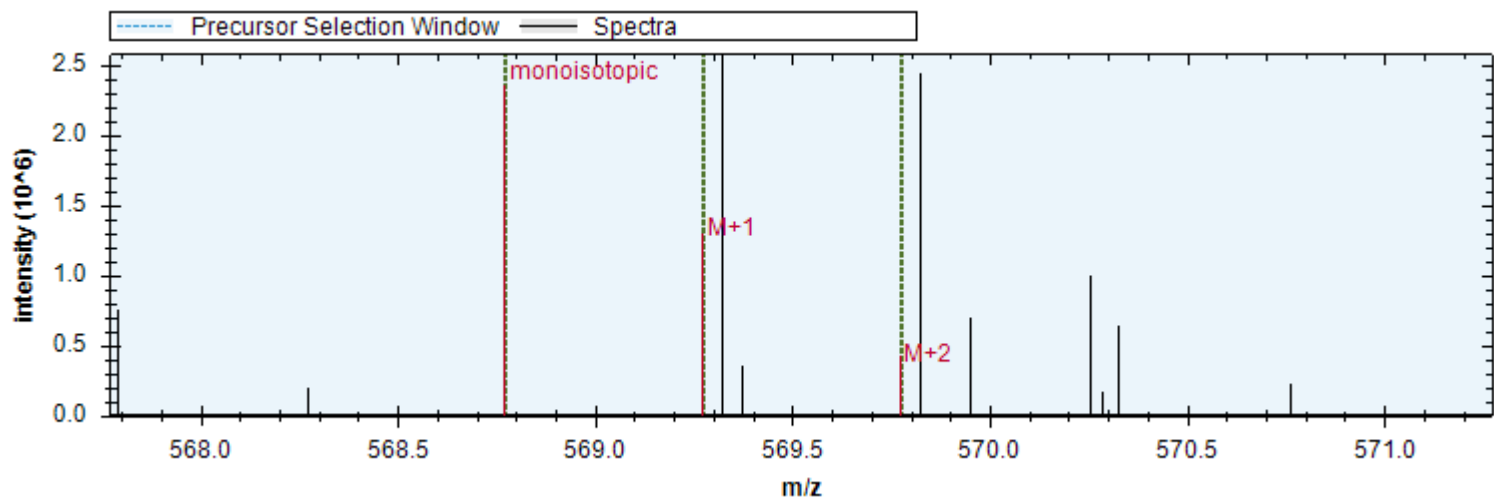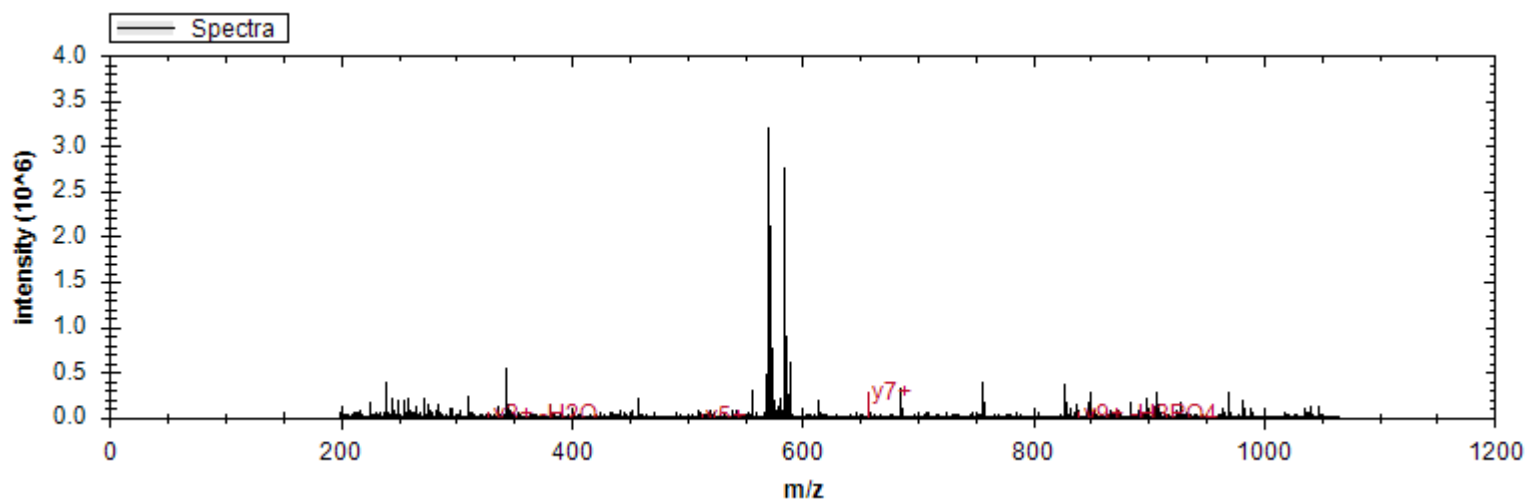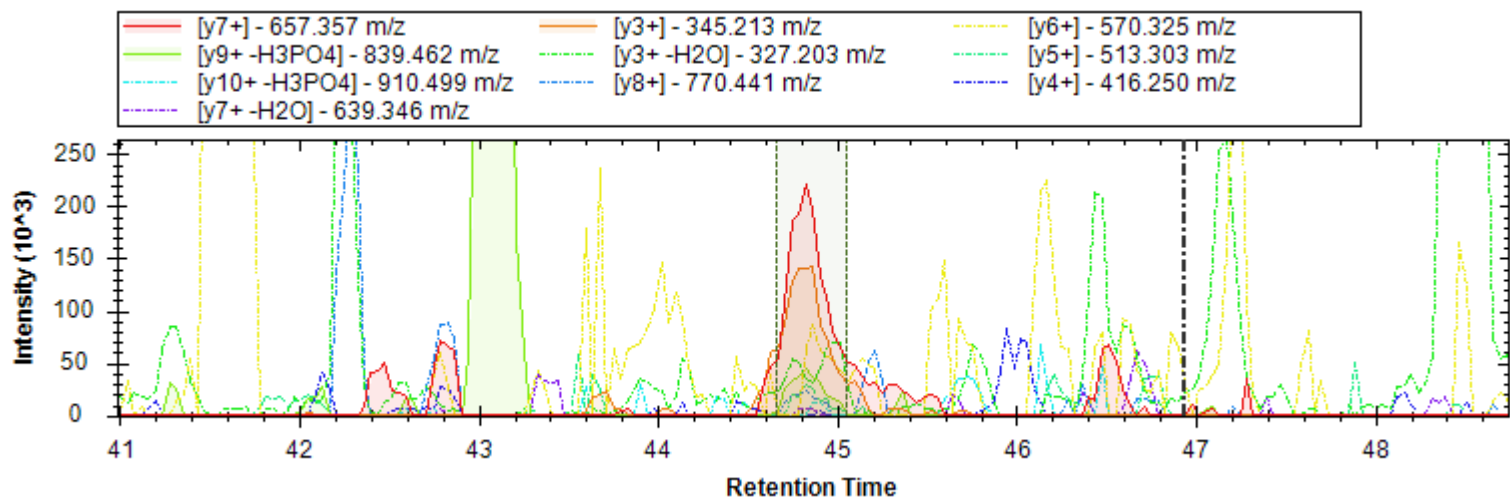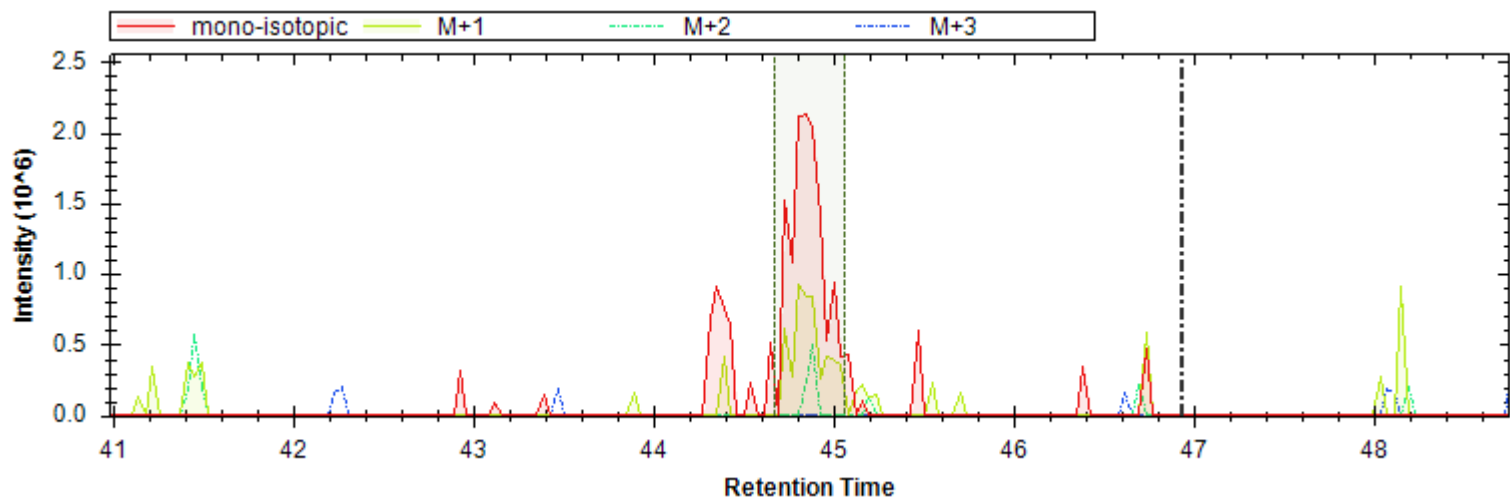

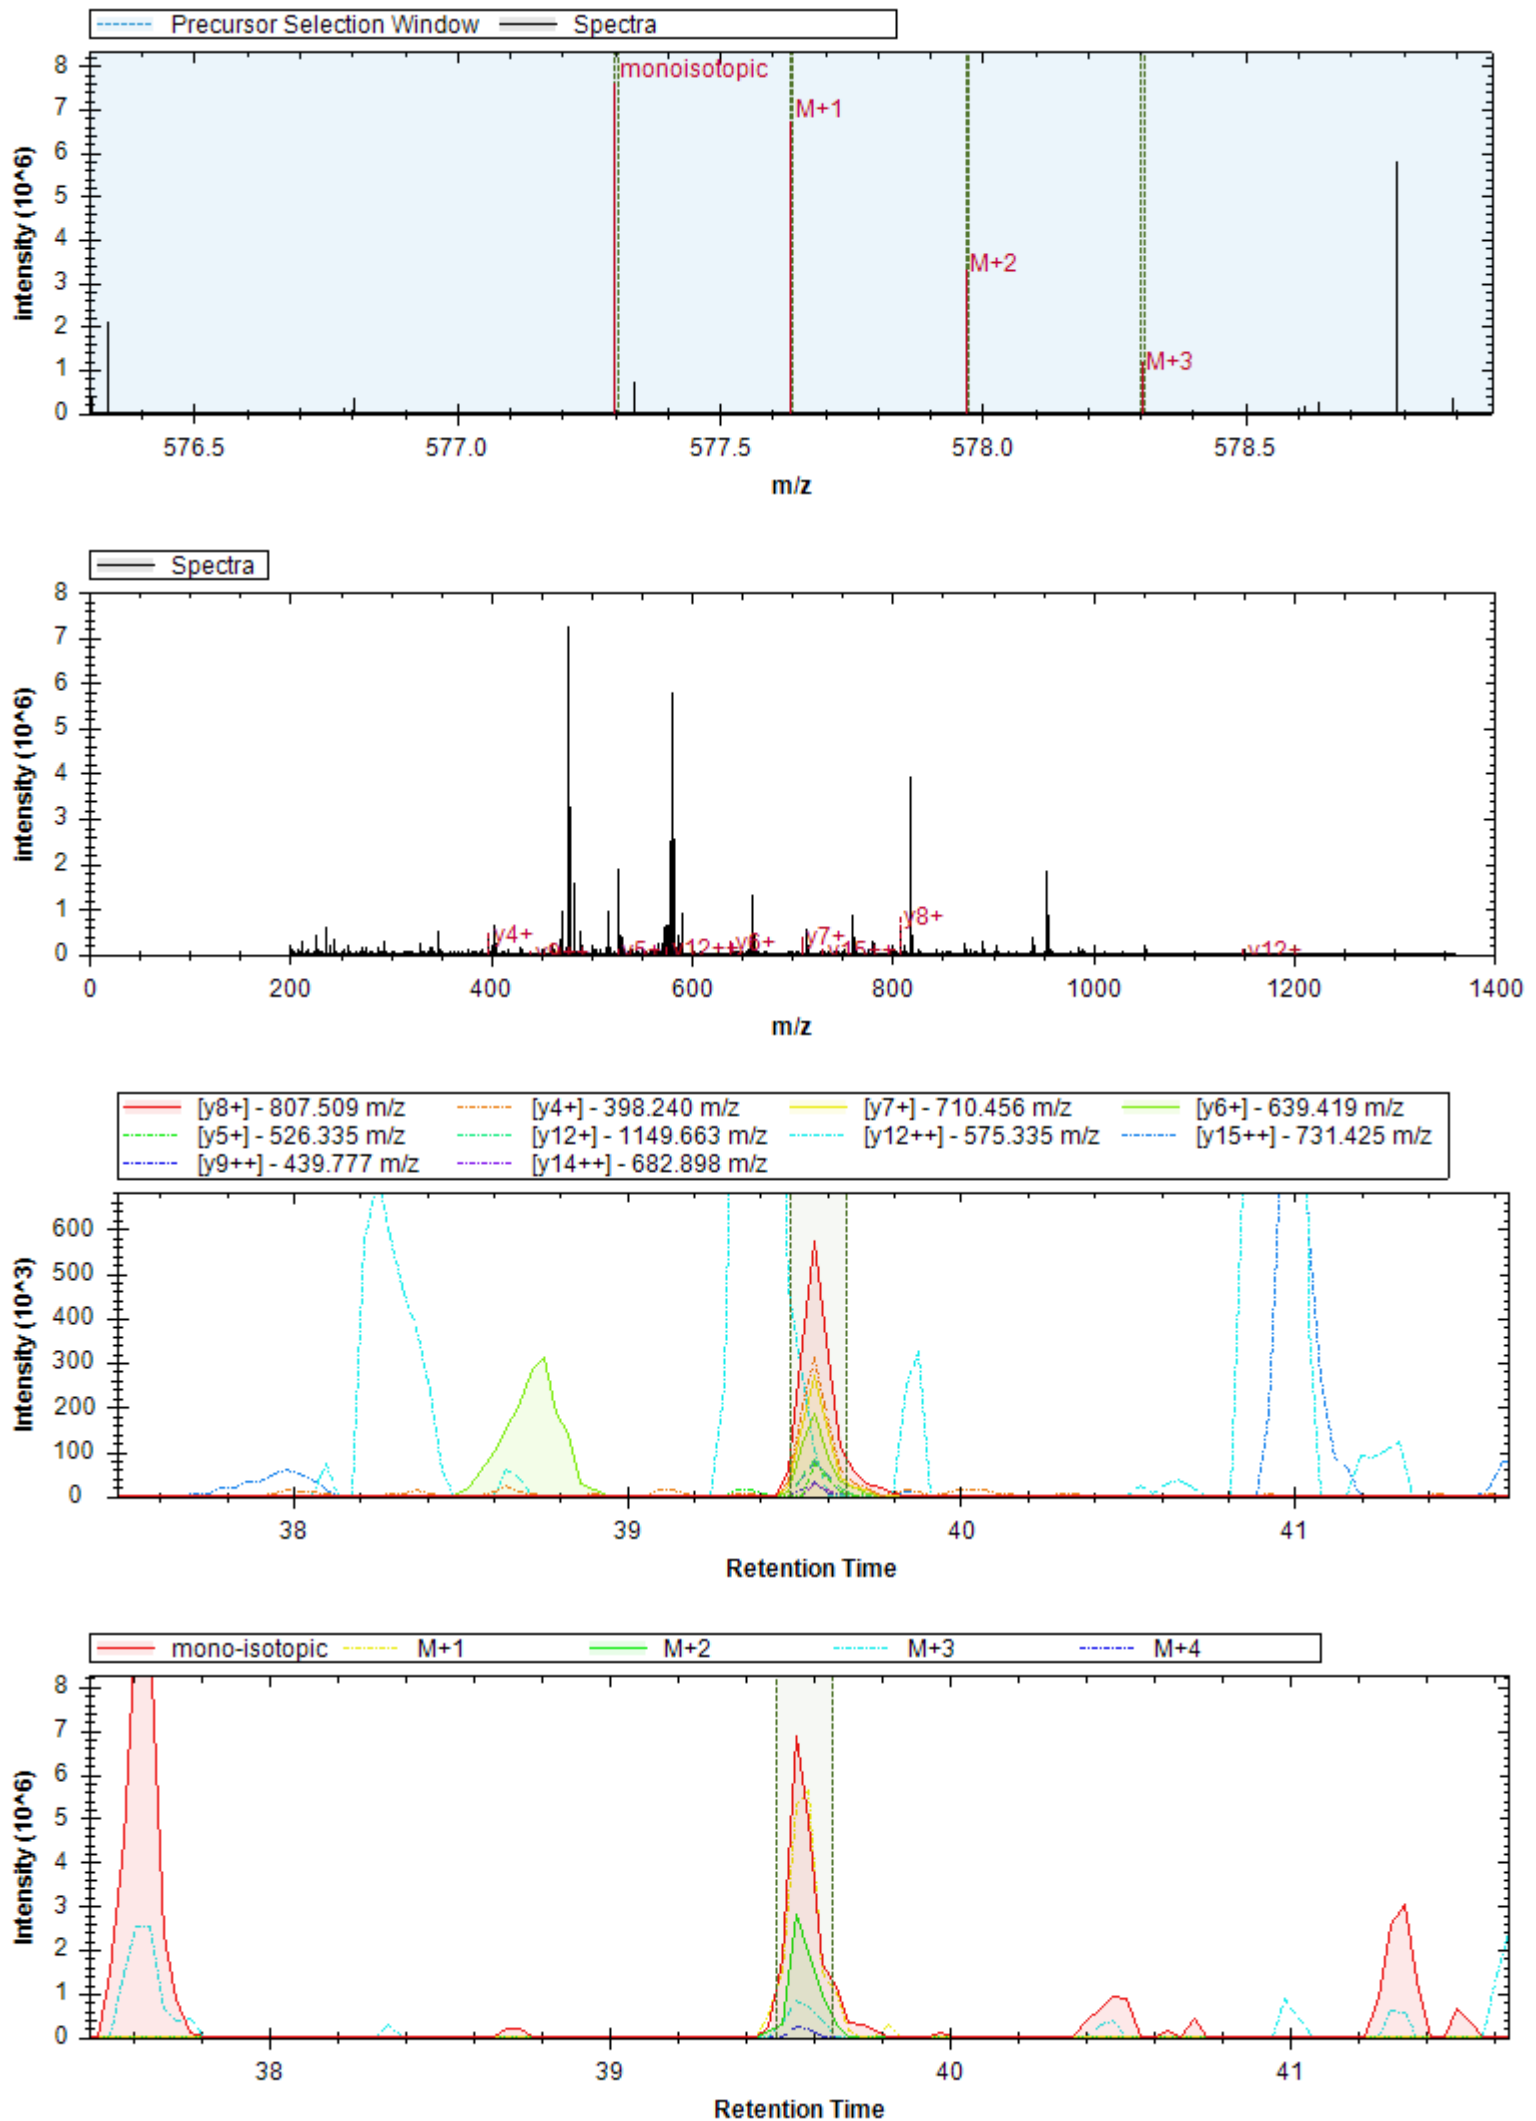

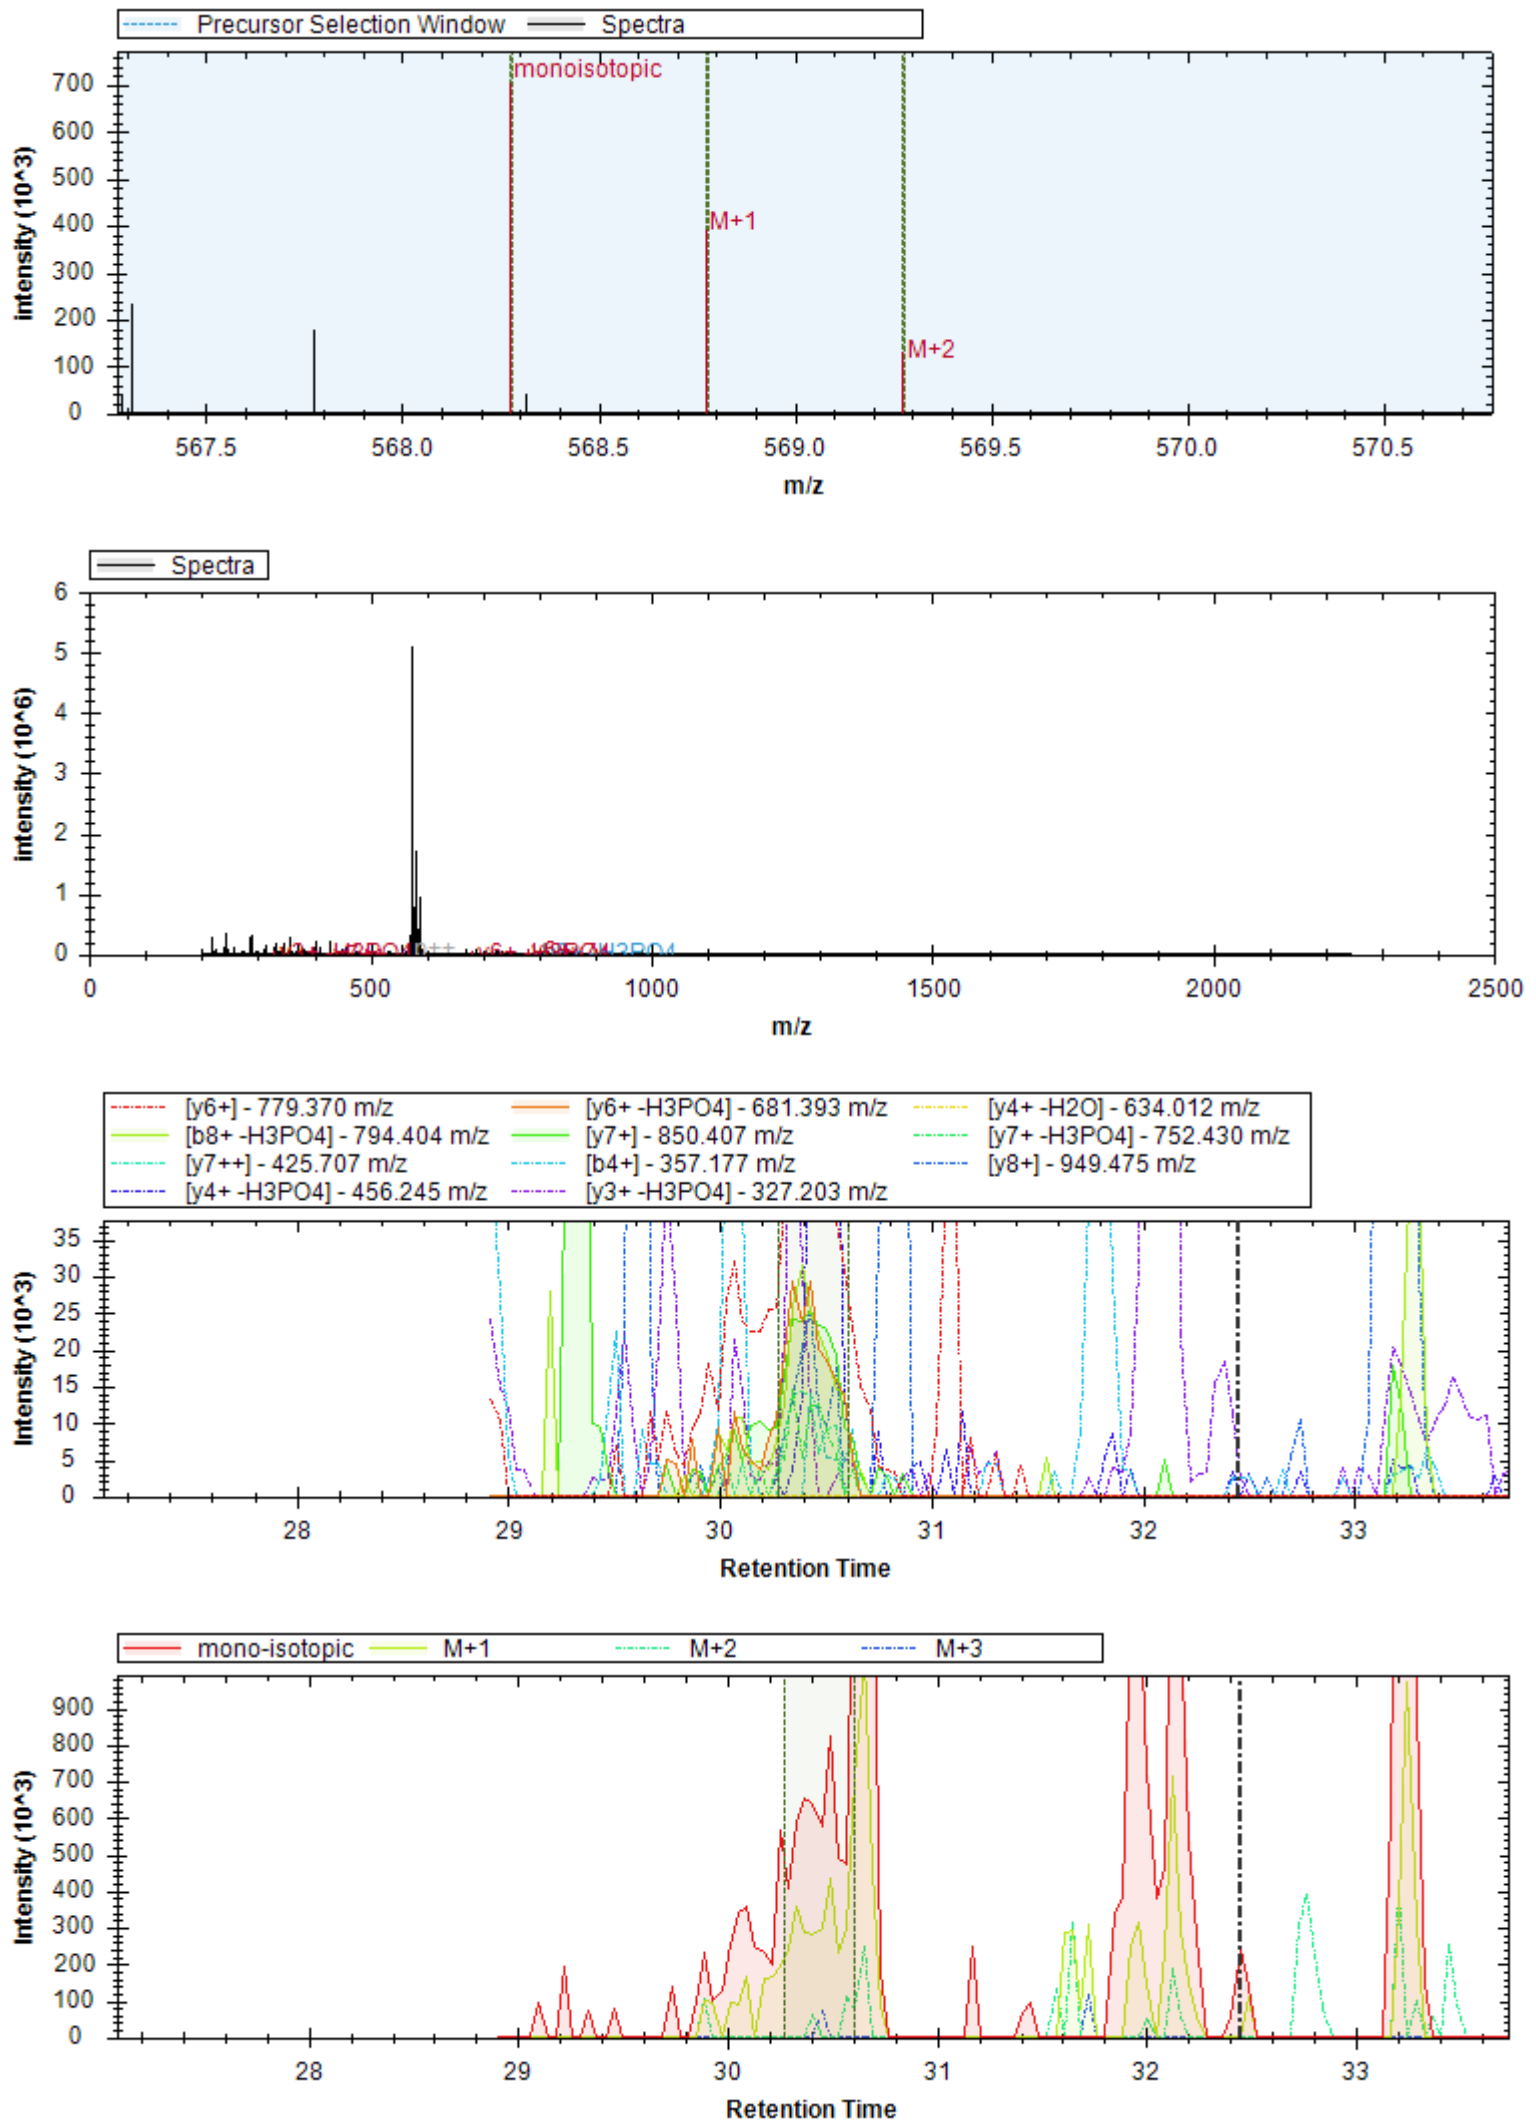

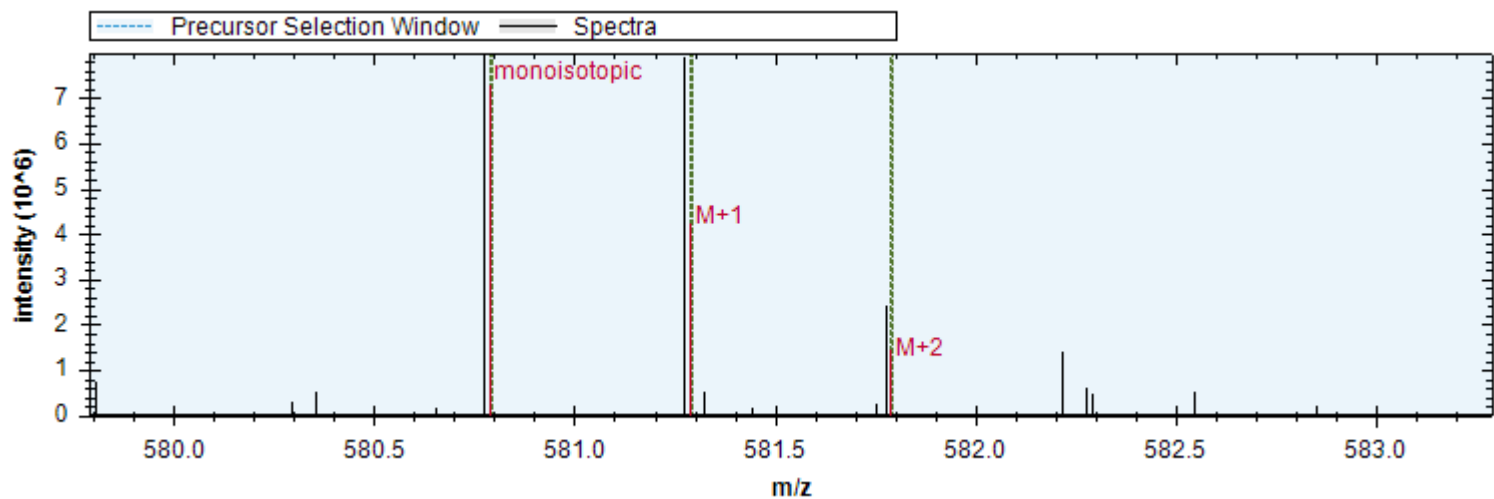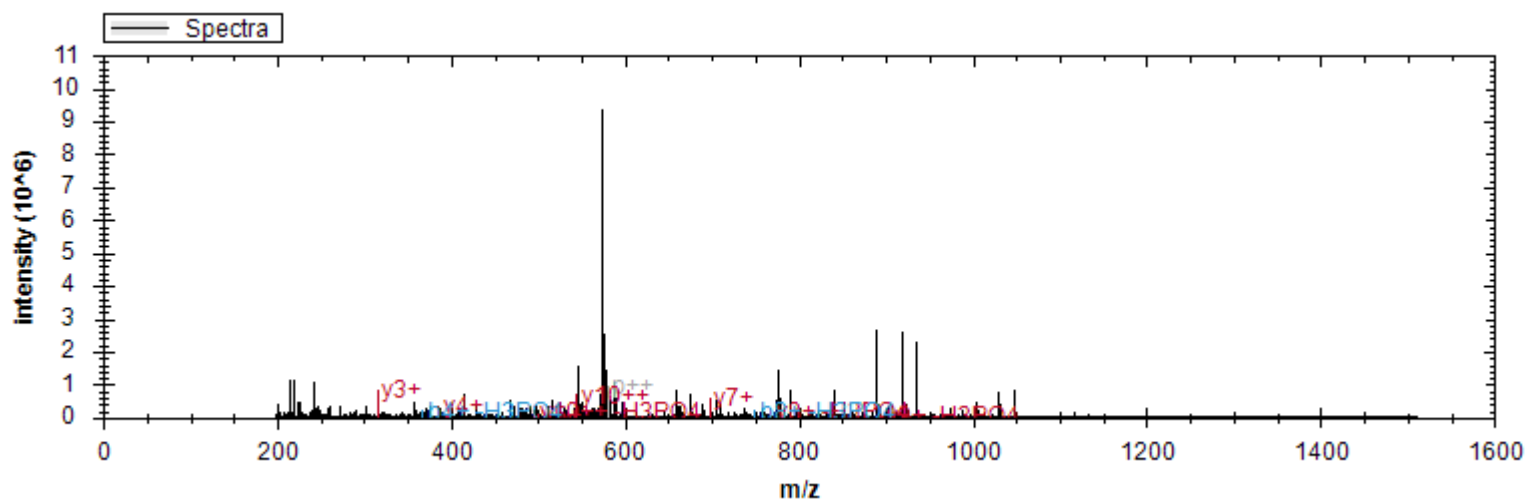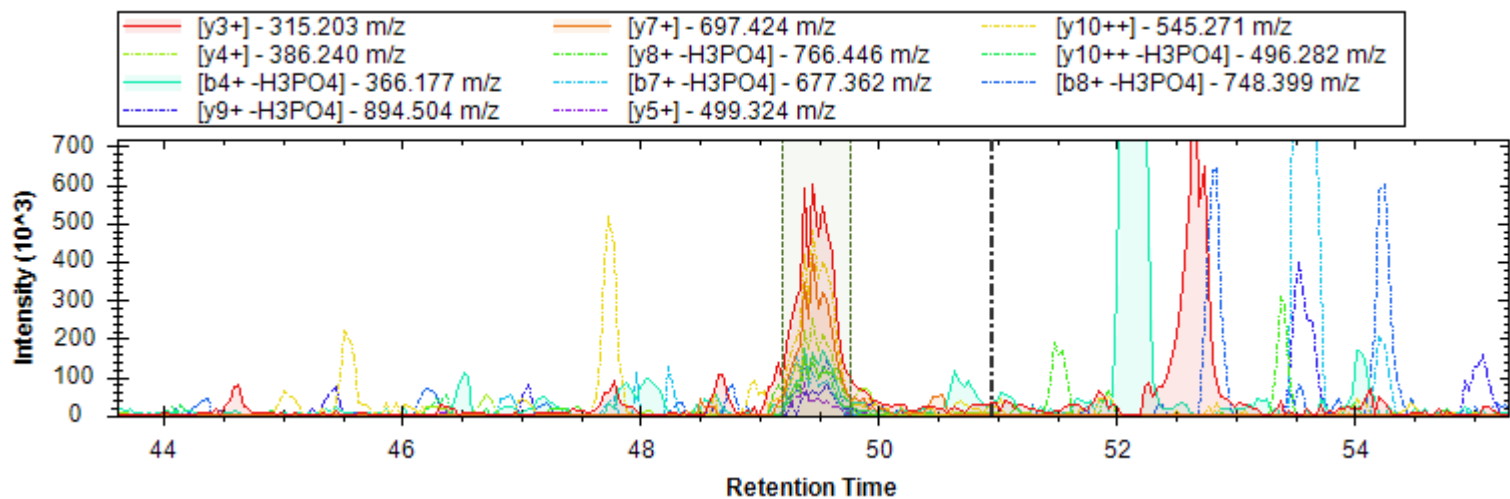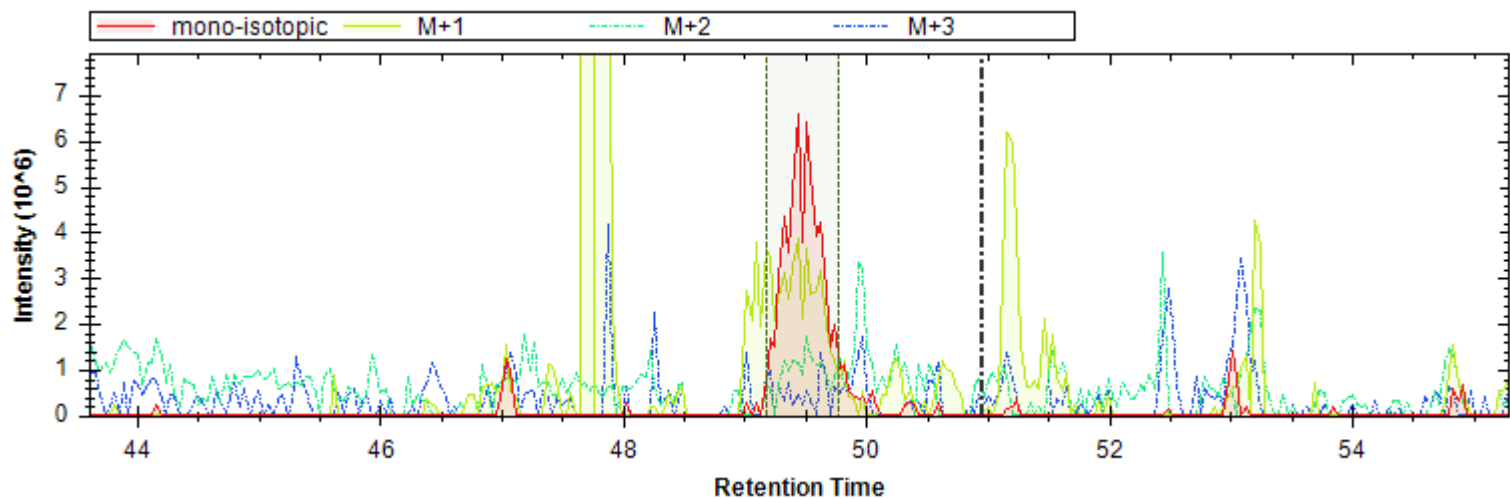

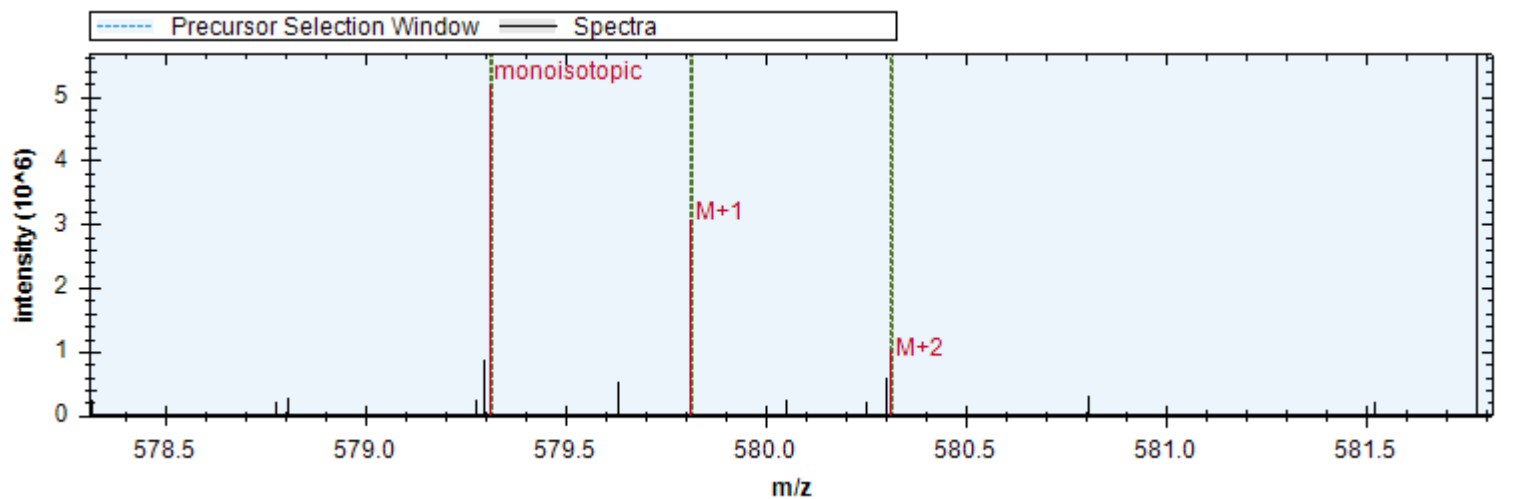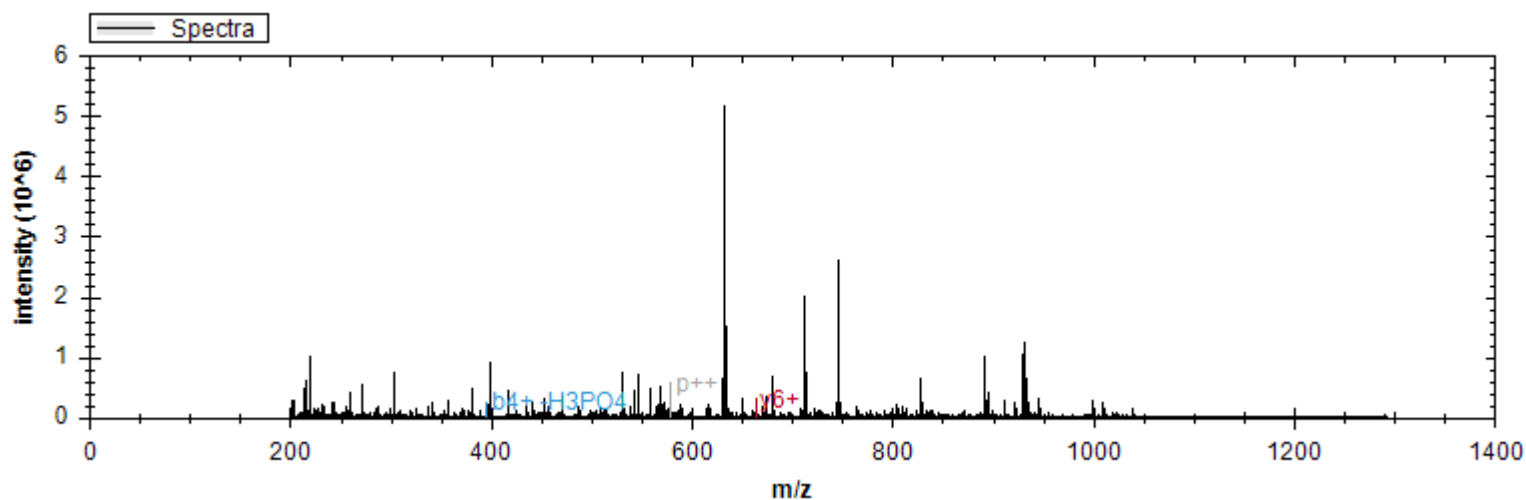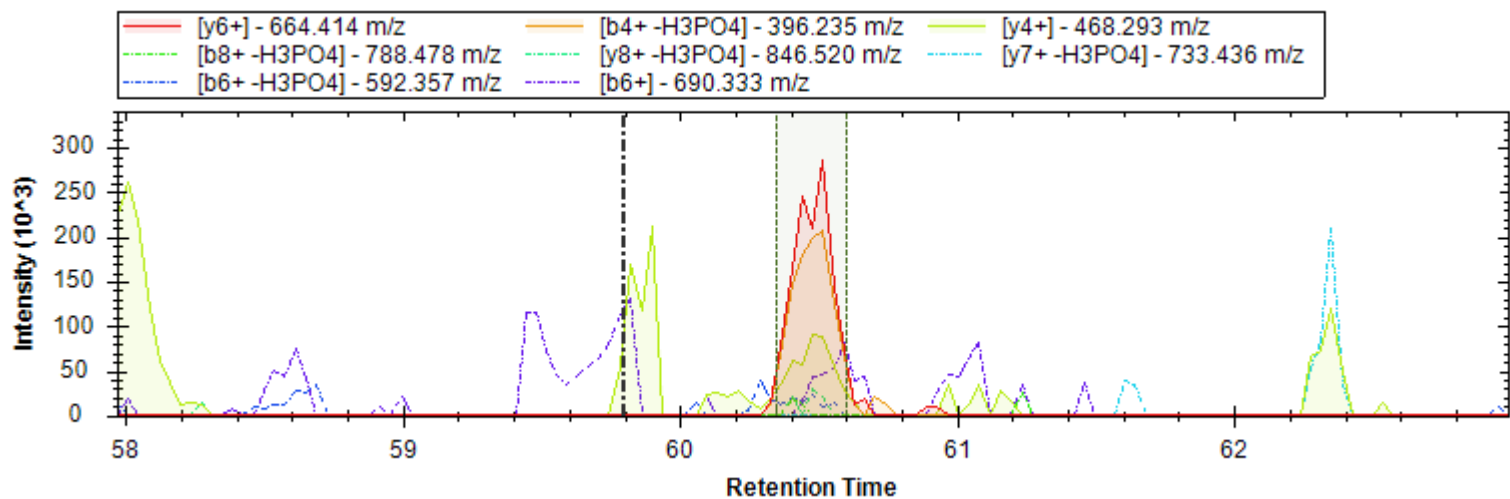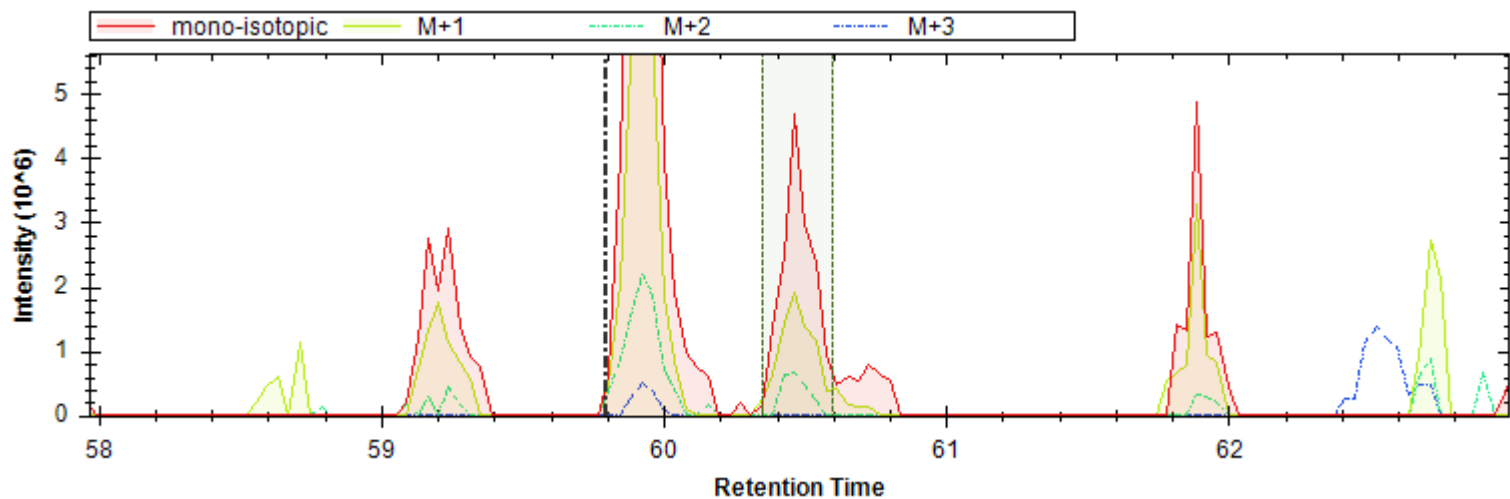

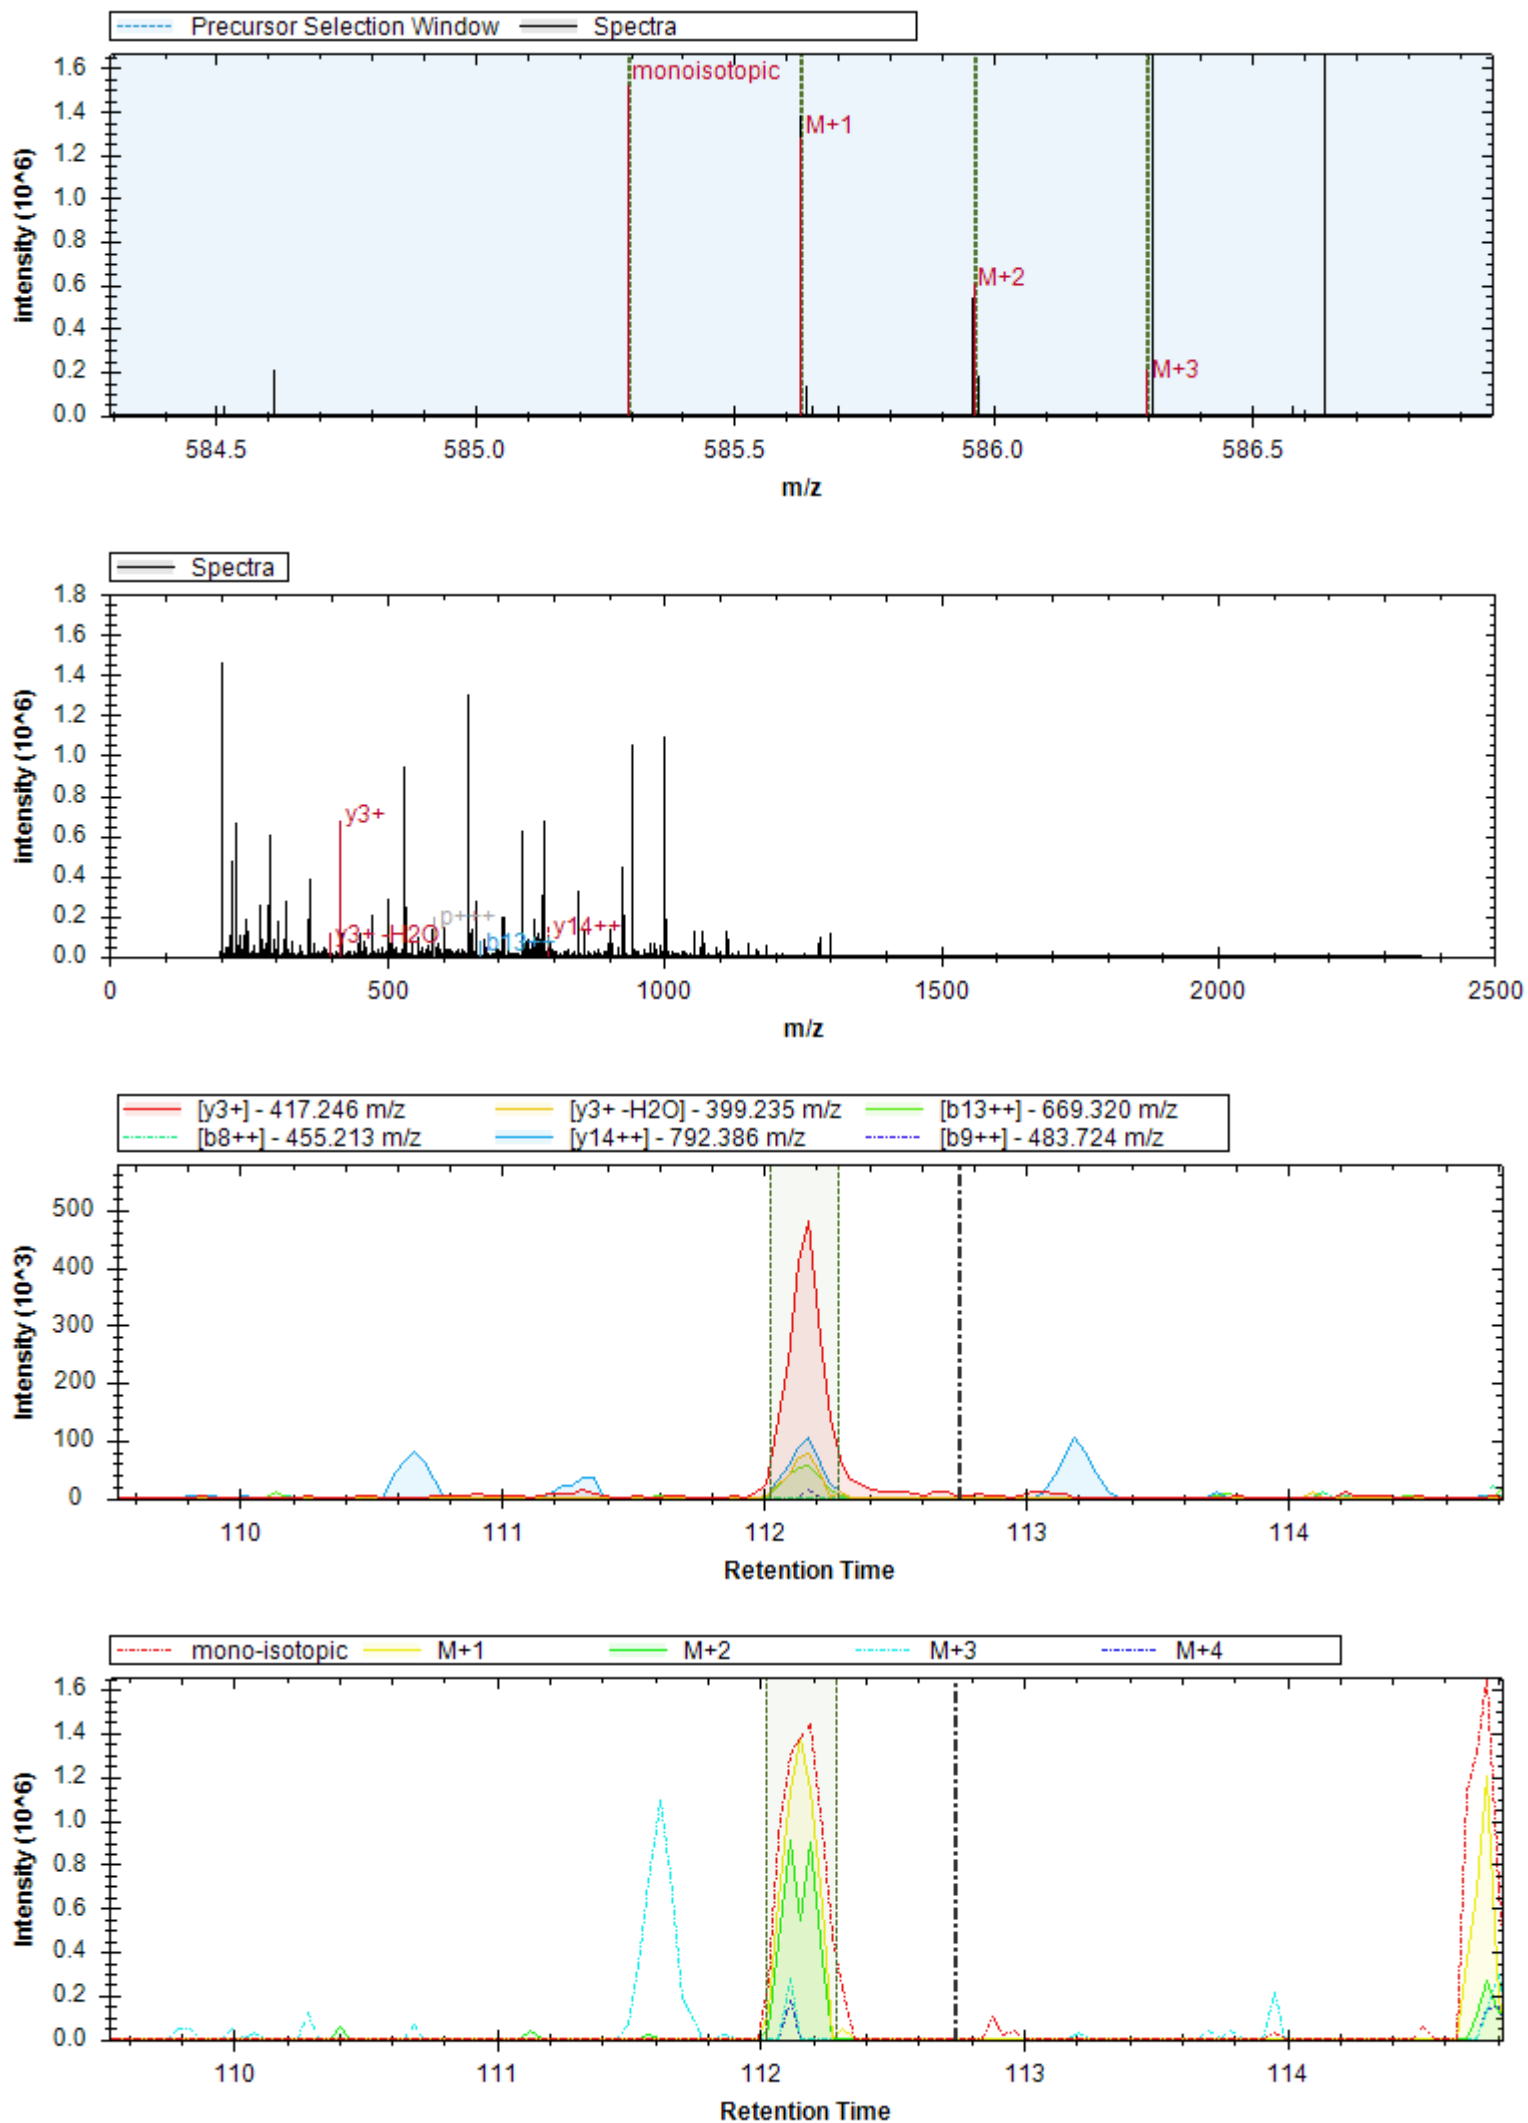

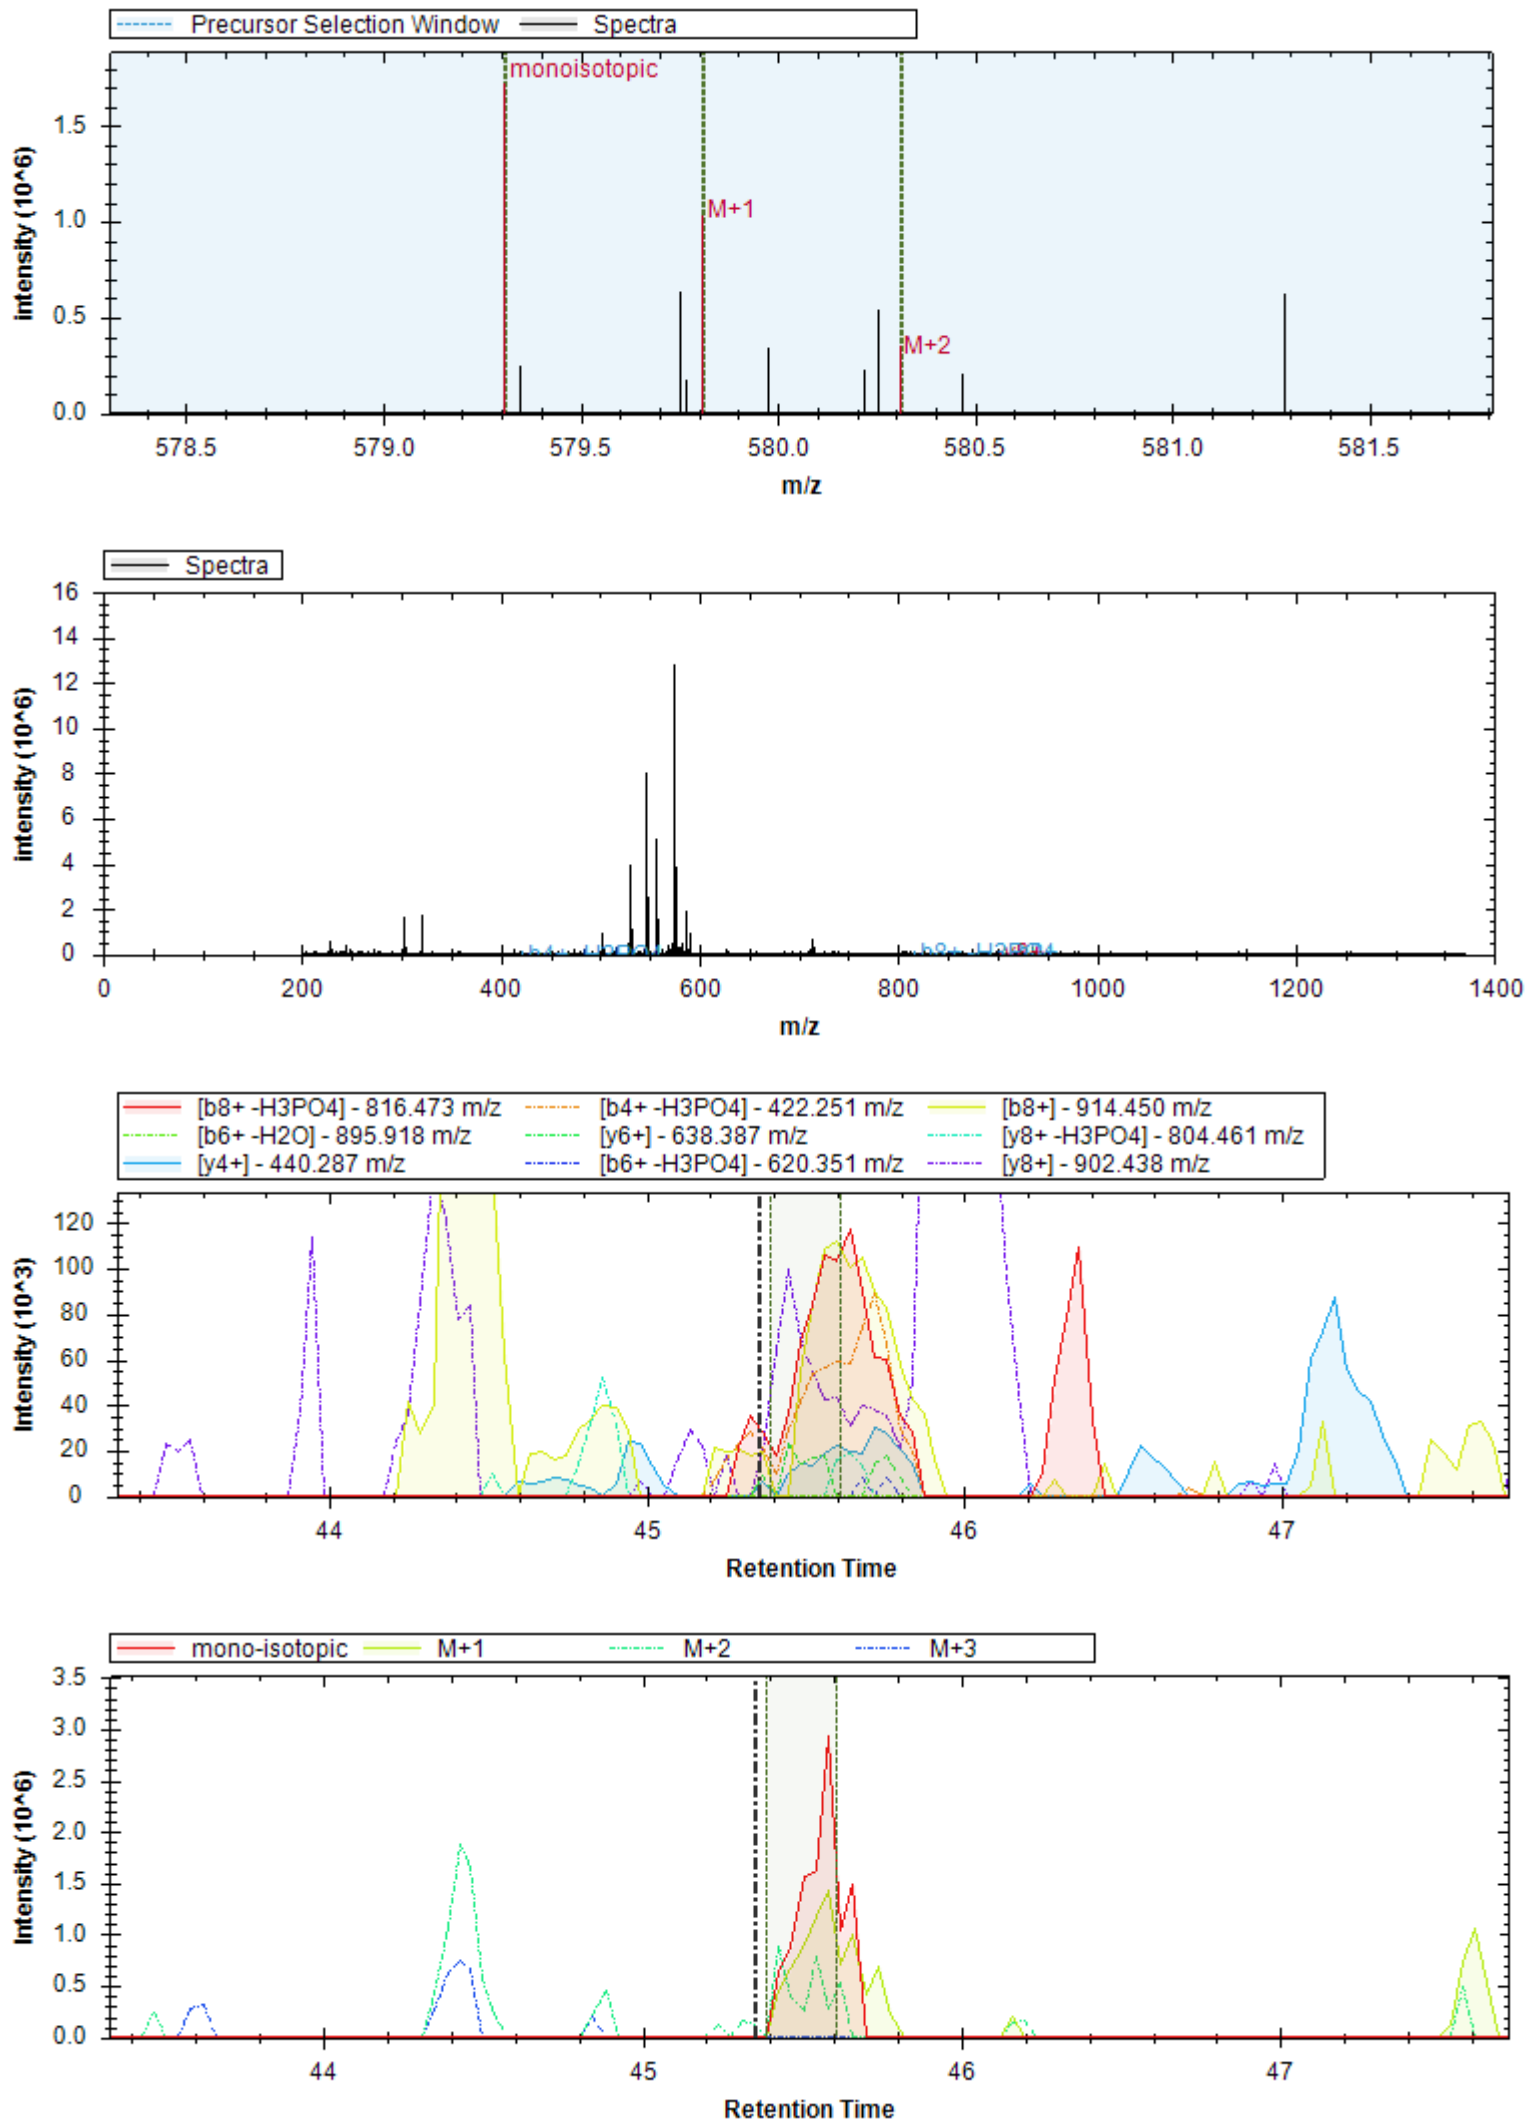



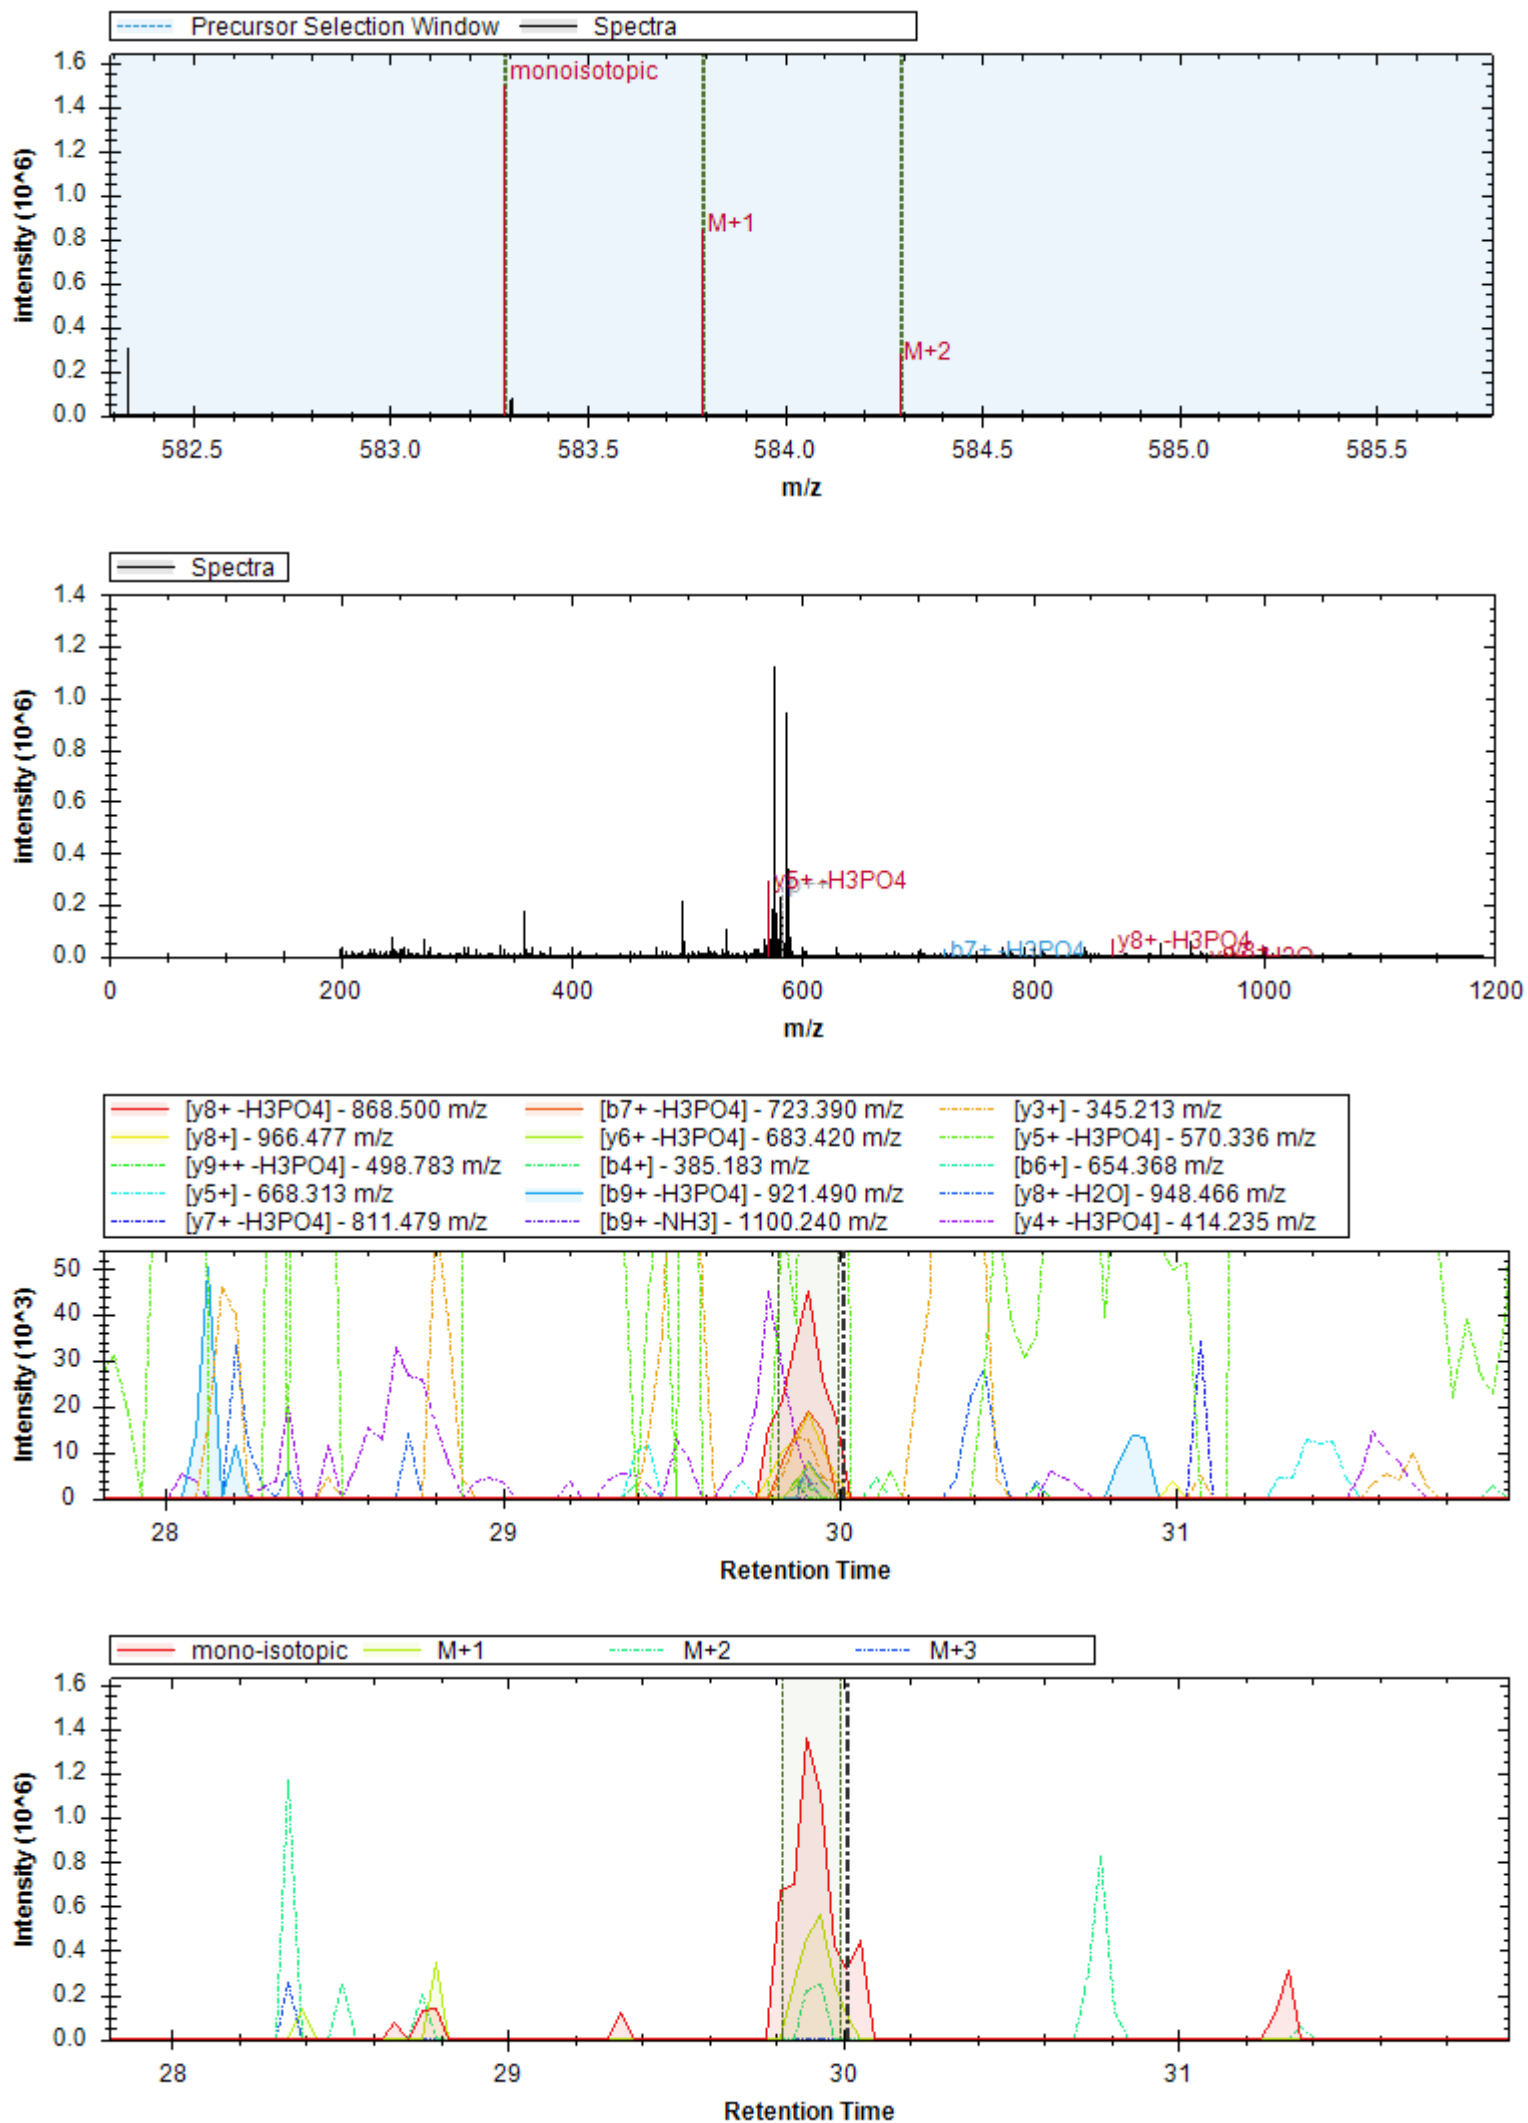

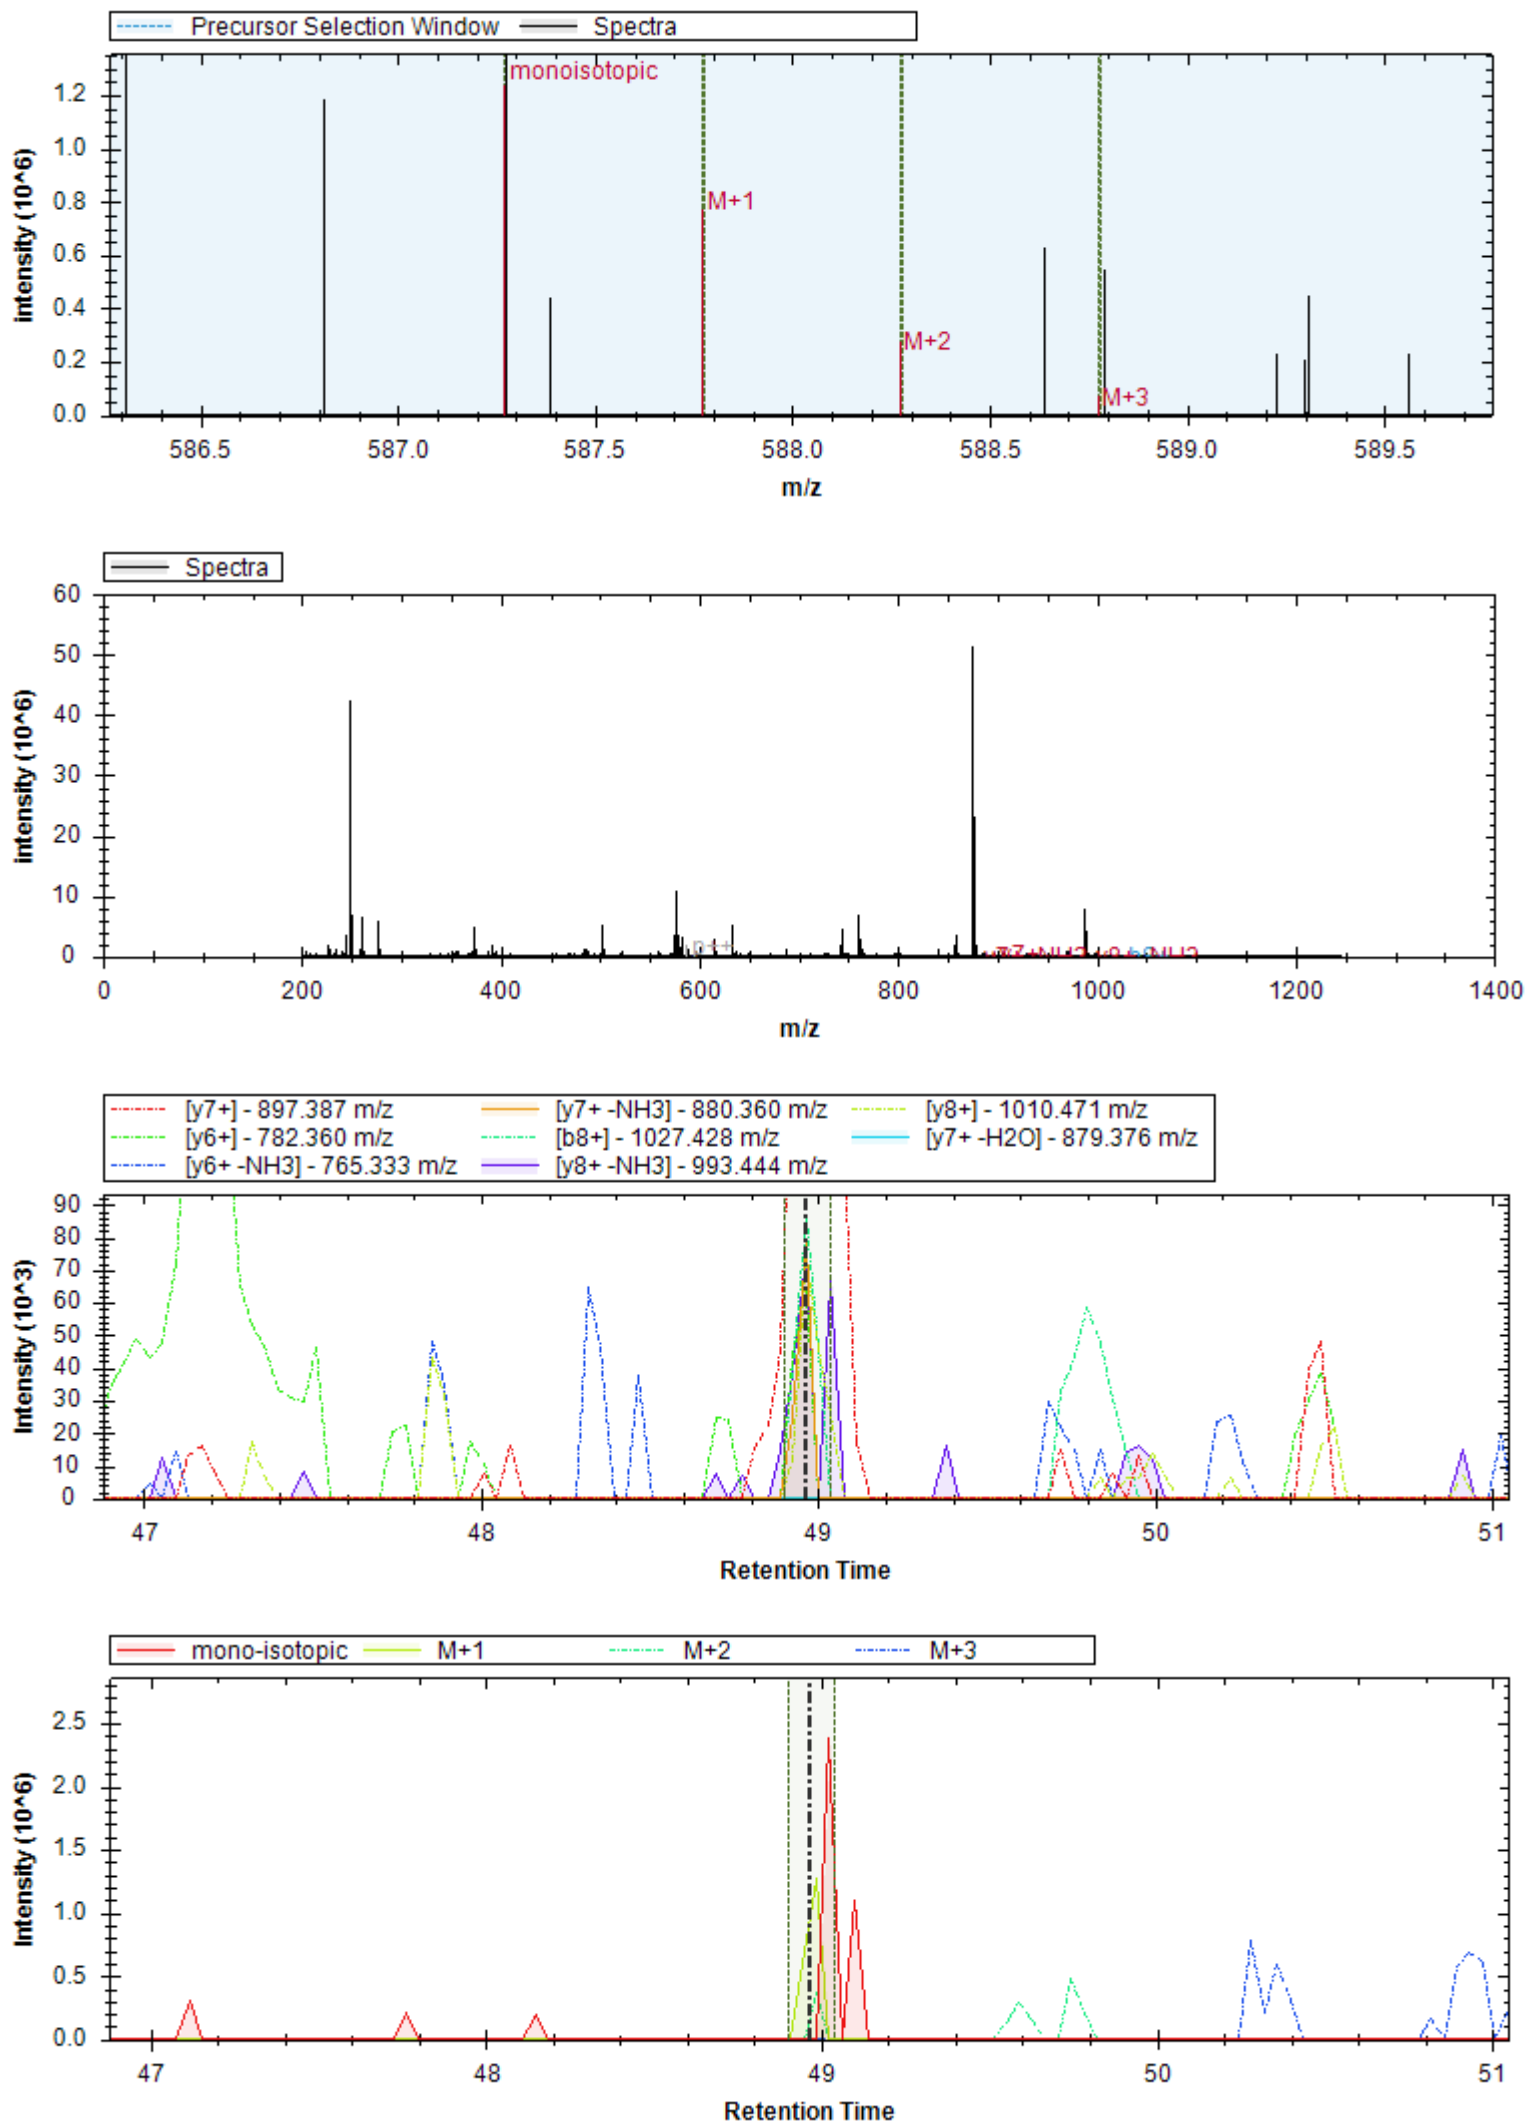

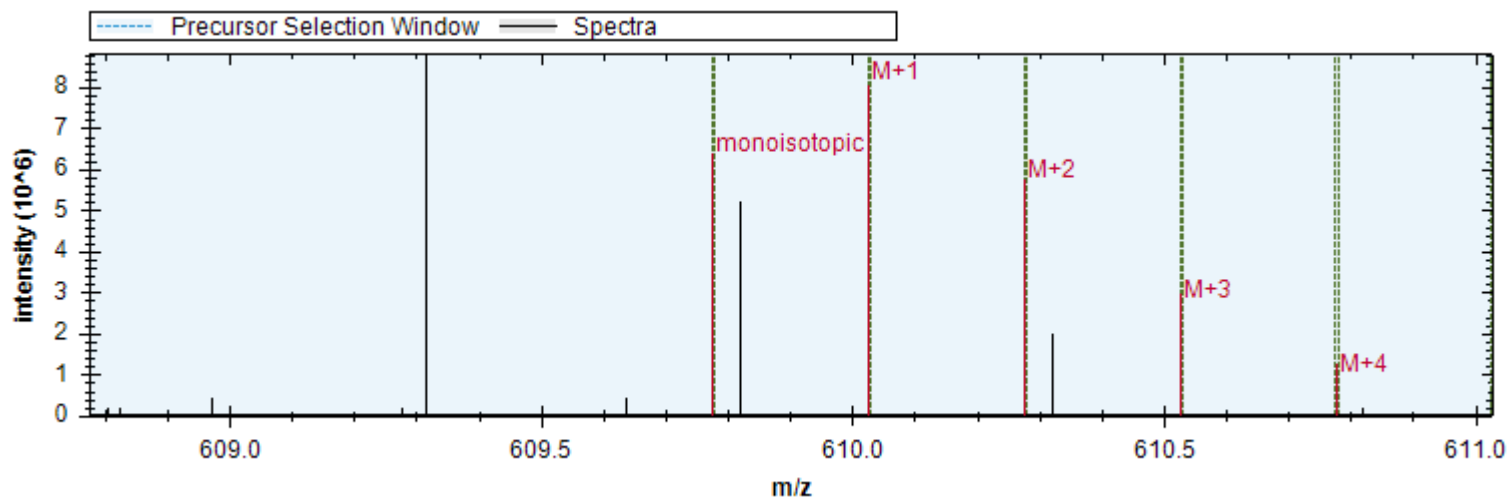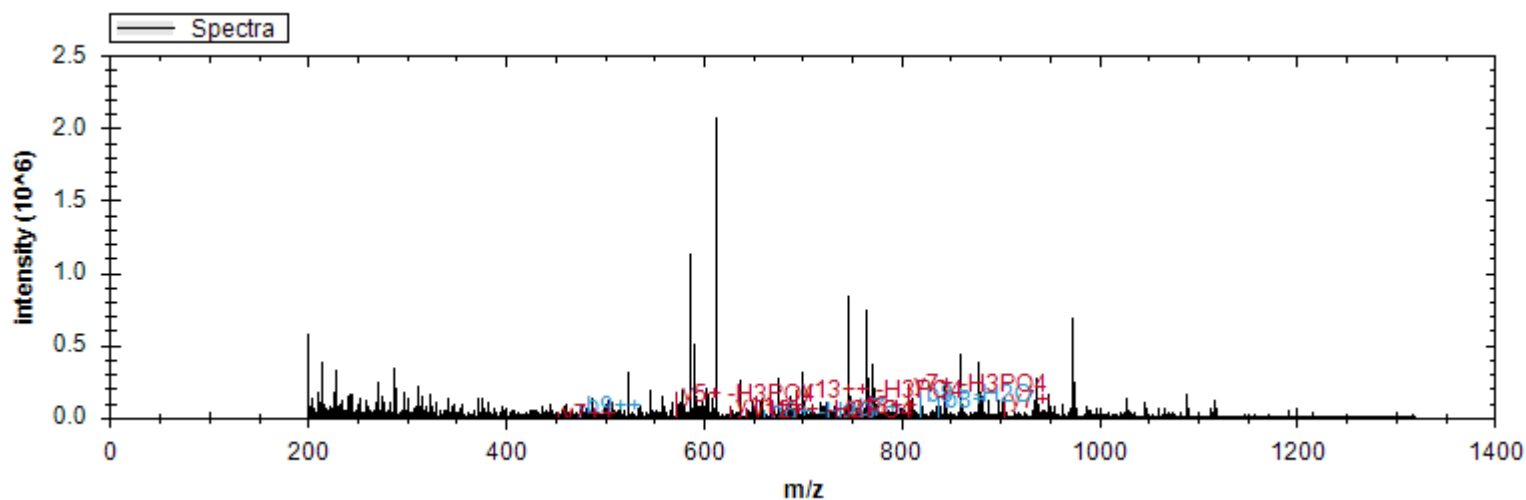

- |                              |                              |                              |
|------------------------------|------------------------------|------------------------------|
| [y7+ -H3PO4] - 807.382 m/z   | [y13++ -H3PO4] - 694.325 m/z | [b8+ -H2O] - 820.374 m/z     |
| [y4+] - 504.249 m/z          | [b8+] - 838.384 m/z          | [y7+] - 905.359 m/z          |
| [y11++ -H3PO4] - 579.280 m/z | [y5+ -H3PO4] - 573.270 m/z   | [y12++ -H3PO4] - 643.801 m/z |
| [y11++] - 628.268 m/z        | [y13++] - 743.313 m/z        | [b7+] - 751.352 m/z          |
| [b9++] - 476.238 m/z         | [y6+ -H3PO4] - 710.329 m/z   | [b6+ -H2O] - 662.305 m/z     |
| [y12++] - 692.789 m/z        | [b9+ -H2O] - 933.458 m/z     | [b7+ -H2O] - 733.342 m/z     |
| [b6+] - 680.315 m/z          | [y5+ -NH3] - 752.020 m/z     | [y4+ -H2O] - 486.238 m/z     |
| [b5+] - 593.283 m/z          | [y7++] - 453.183 m/z         | [b3+] - 306.156 m/z          |
| [y10++] - 592.750 m/z        |                              |                              |

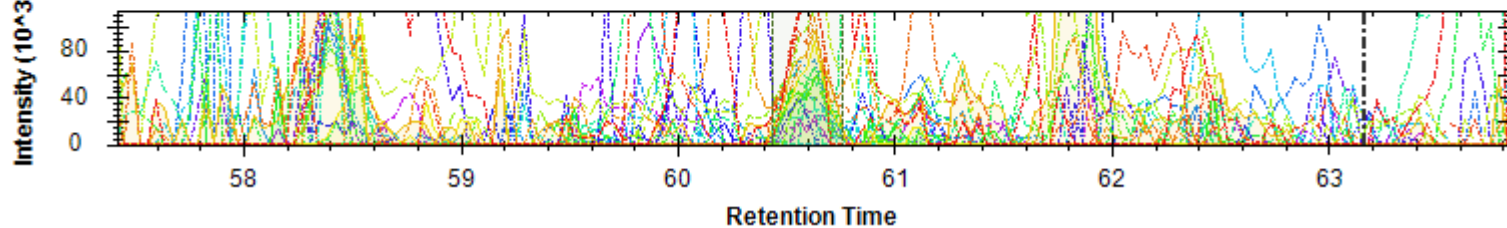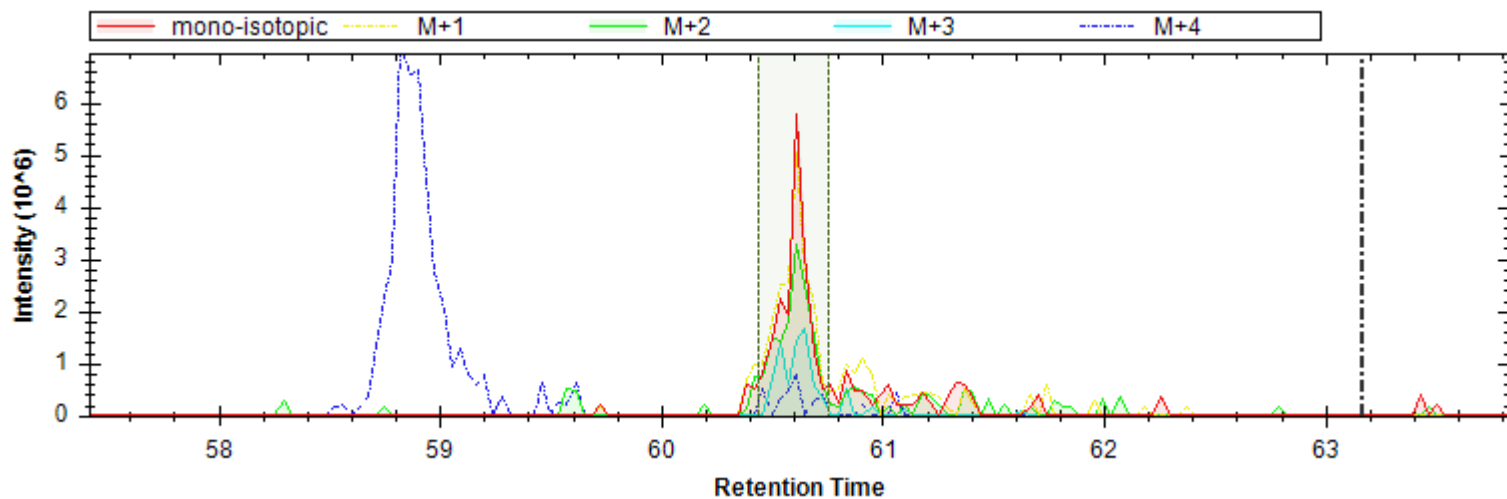

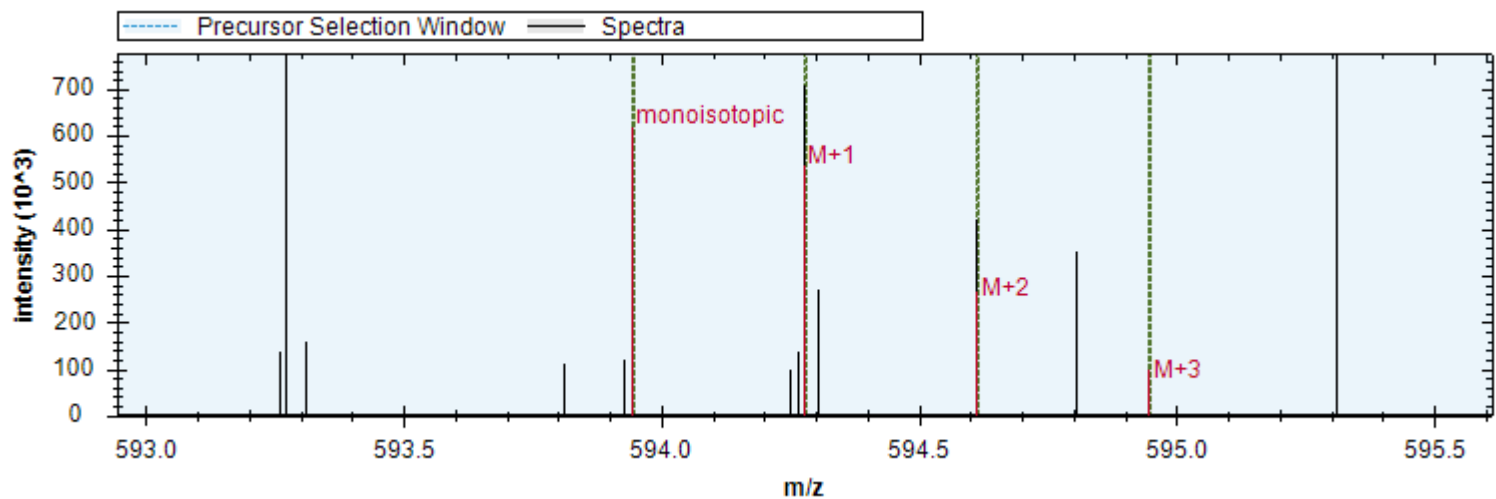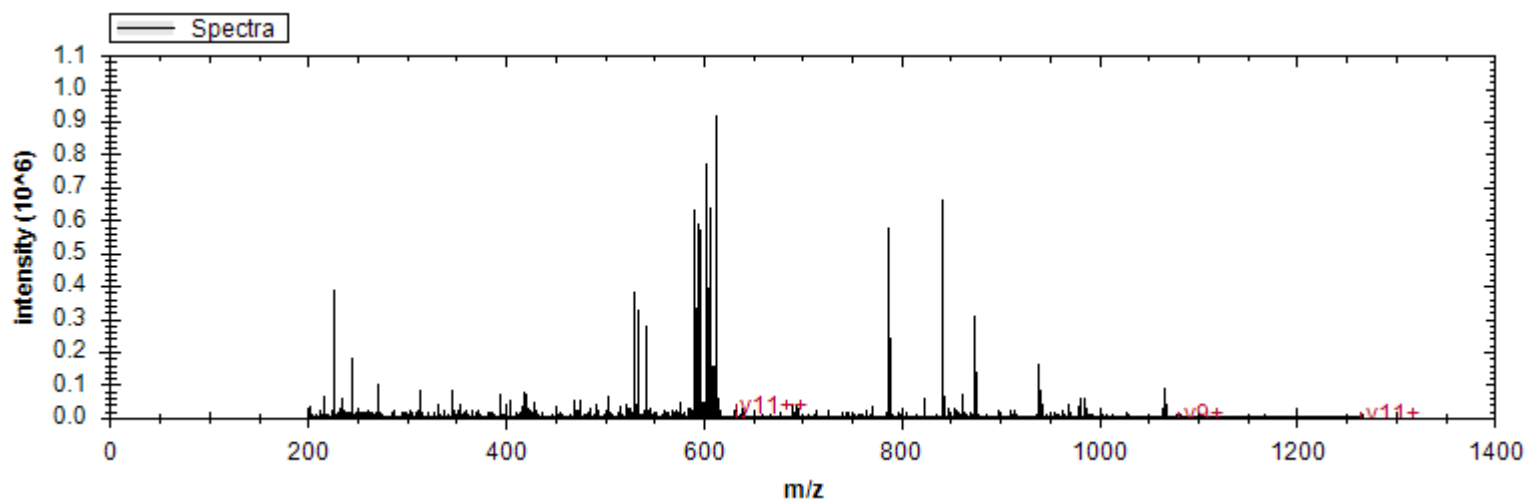

- |                              |                              |                              |
|------------------------------|------------------------------|------------------------------|
| [y9+] - 1081.529 m/z         | [y11++] - 633.311 m/z        | [y4+] - 500.356 m/z          |
| [y11+] - 1265.614 m/z        | [y12++ -H3PO4] - 619.841 m/z | [y11+ -H3PO4] - 1167.637 m/z |
| [b4+ -H2O] - 355.125 m/z     | [y9+ -H3PO4] - 983.552 m/z   | [b3+] - 316.114 m/z          |
| [y15++ -H3PO4] - 741.383 m/z | [y10+ -H3PO4] - 1070.584 m/z | [y12++] - 668.829 m/z        |
| [y7+] - 897.444 m/z          | [y11++ -H2O] - 624.305 m/z   | [y15++] - 790.372 m/z        |
| [y14++ -H3PO4] - 683.870 m/z | [b6+] - 515.210 m/z          |                              |

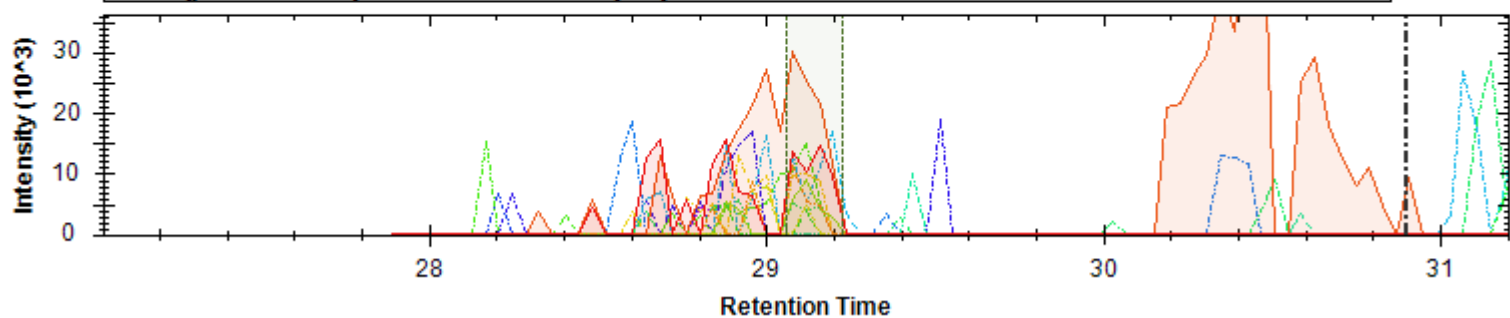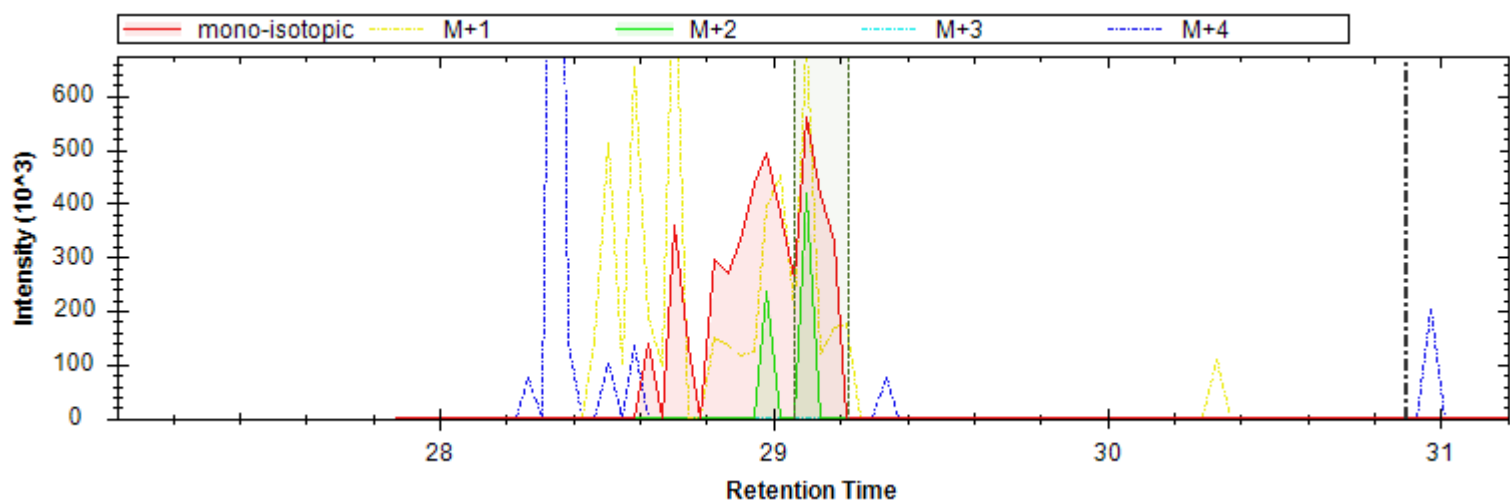

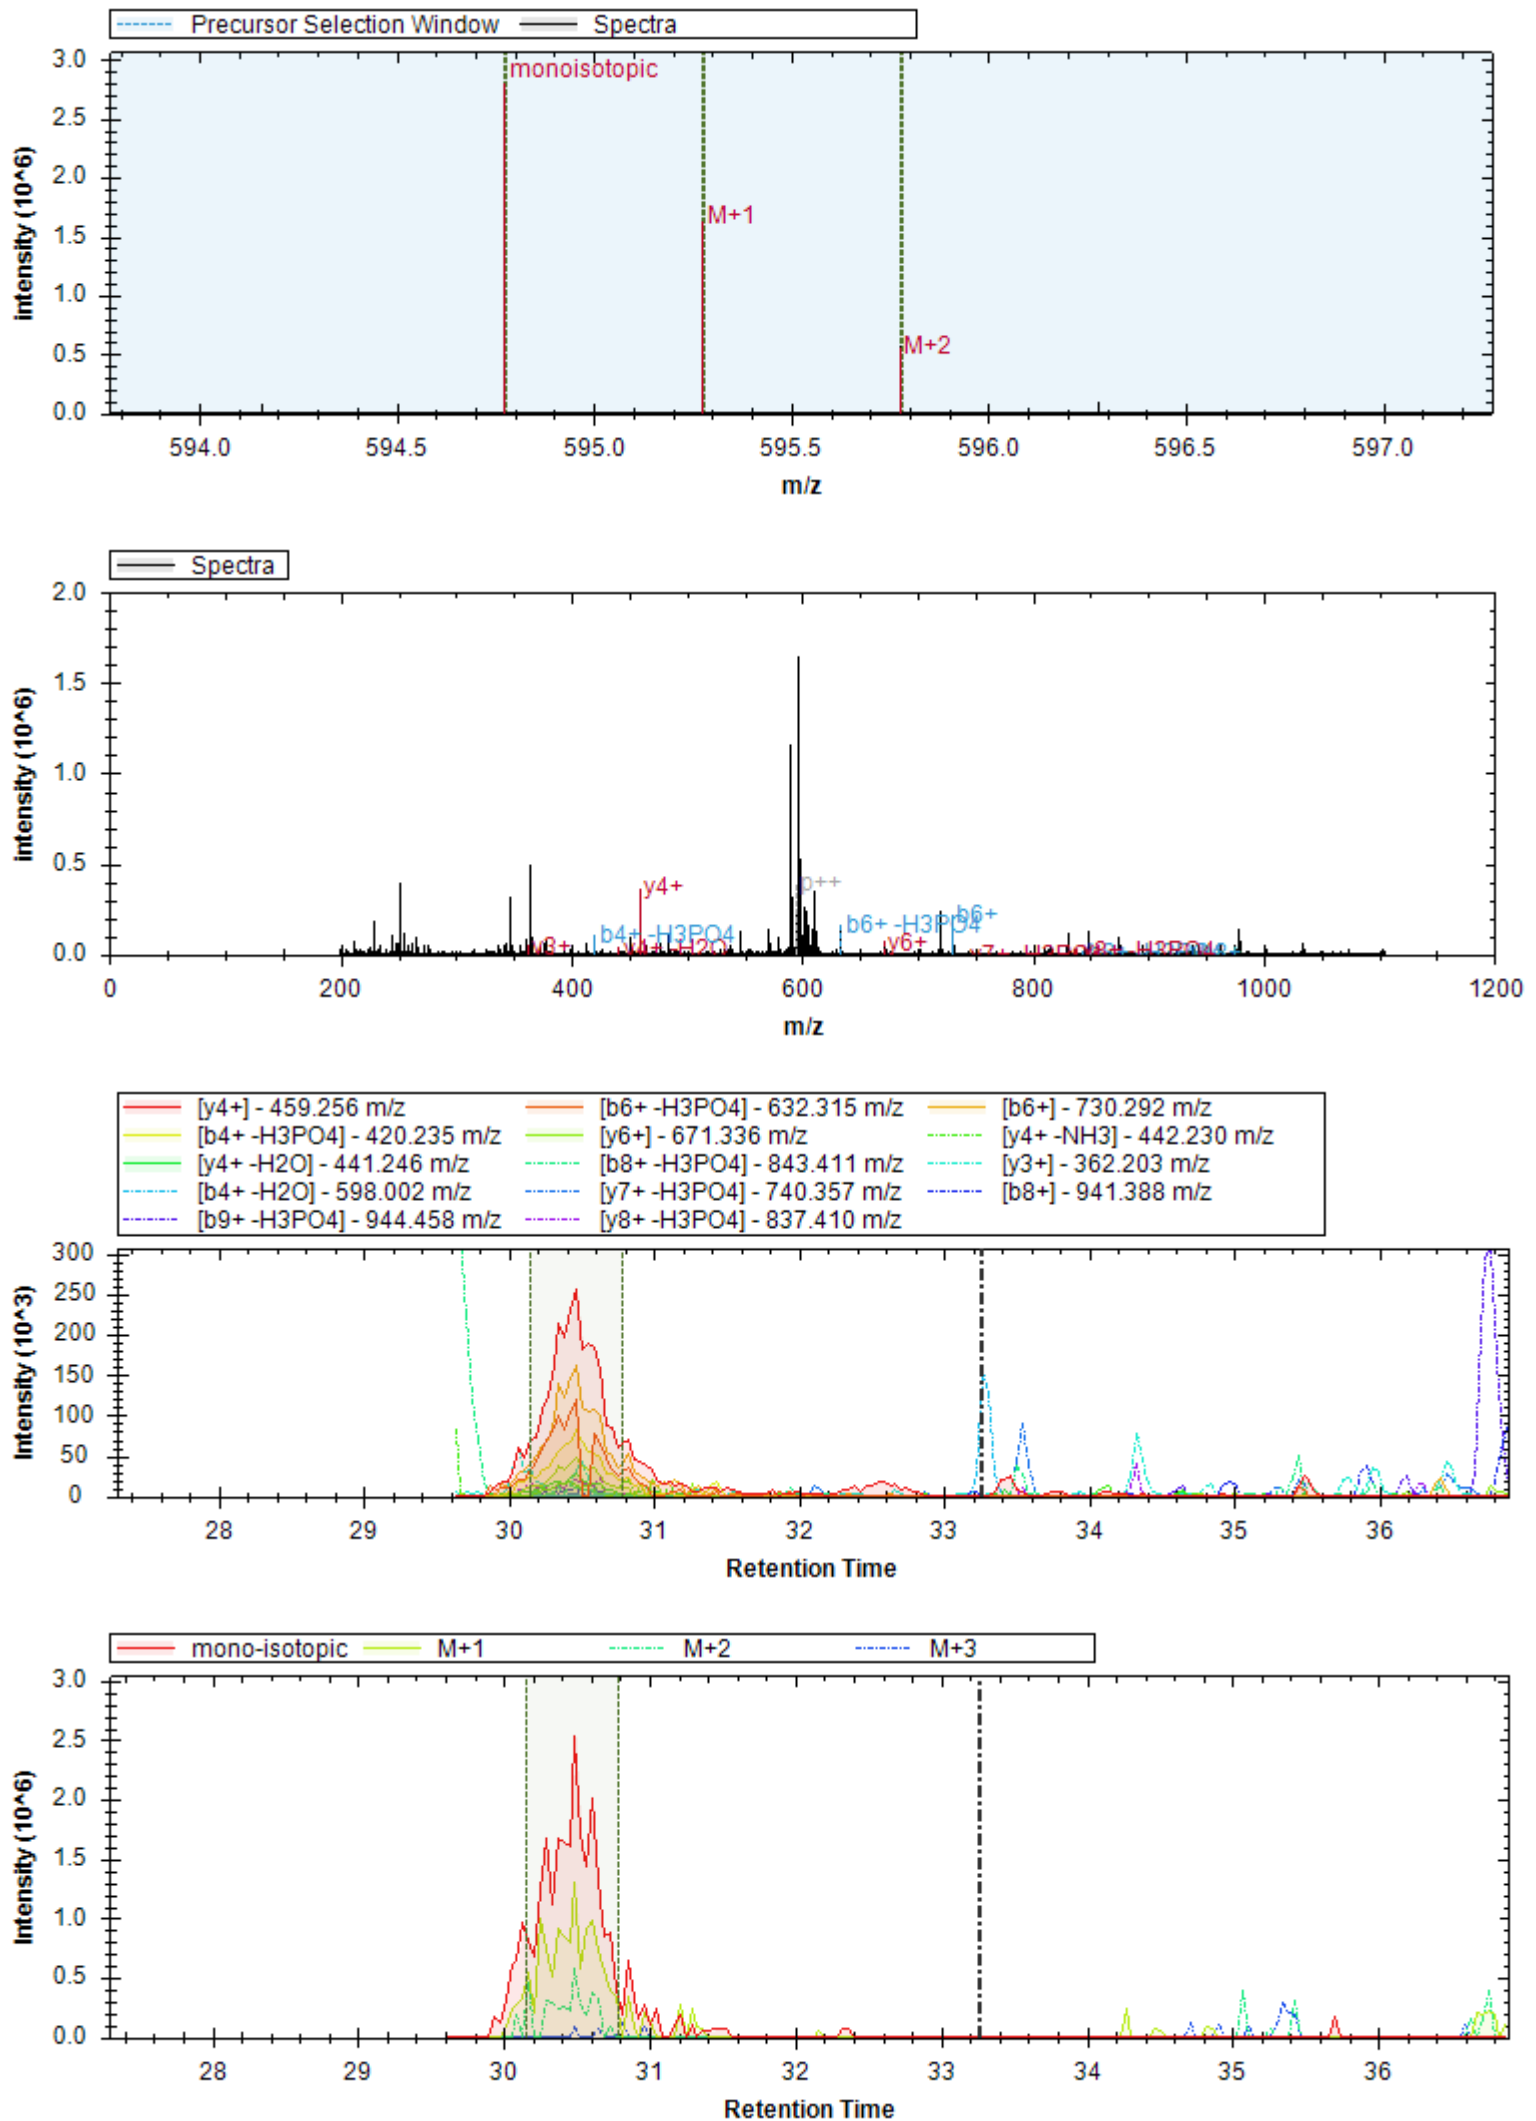

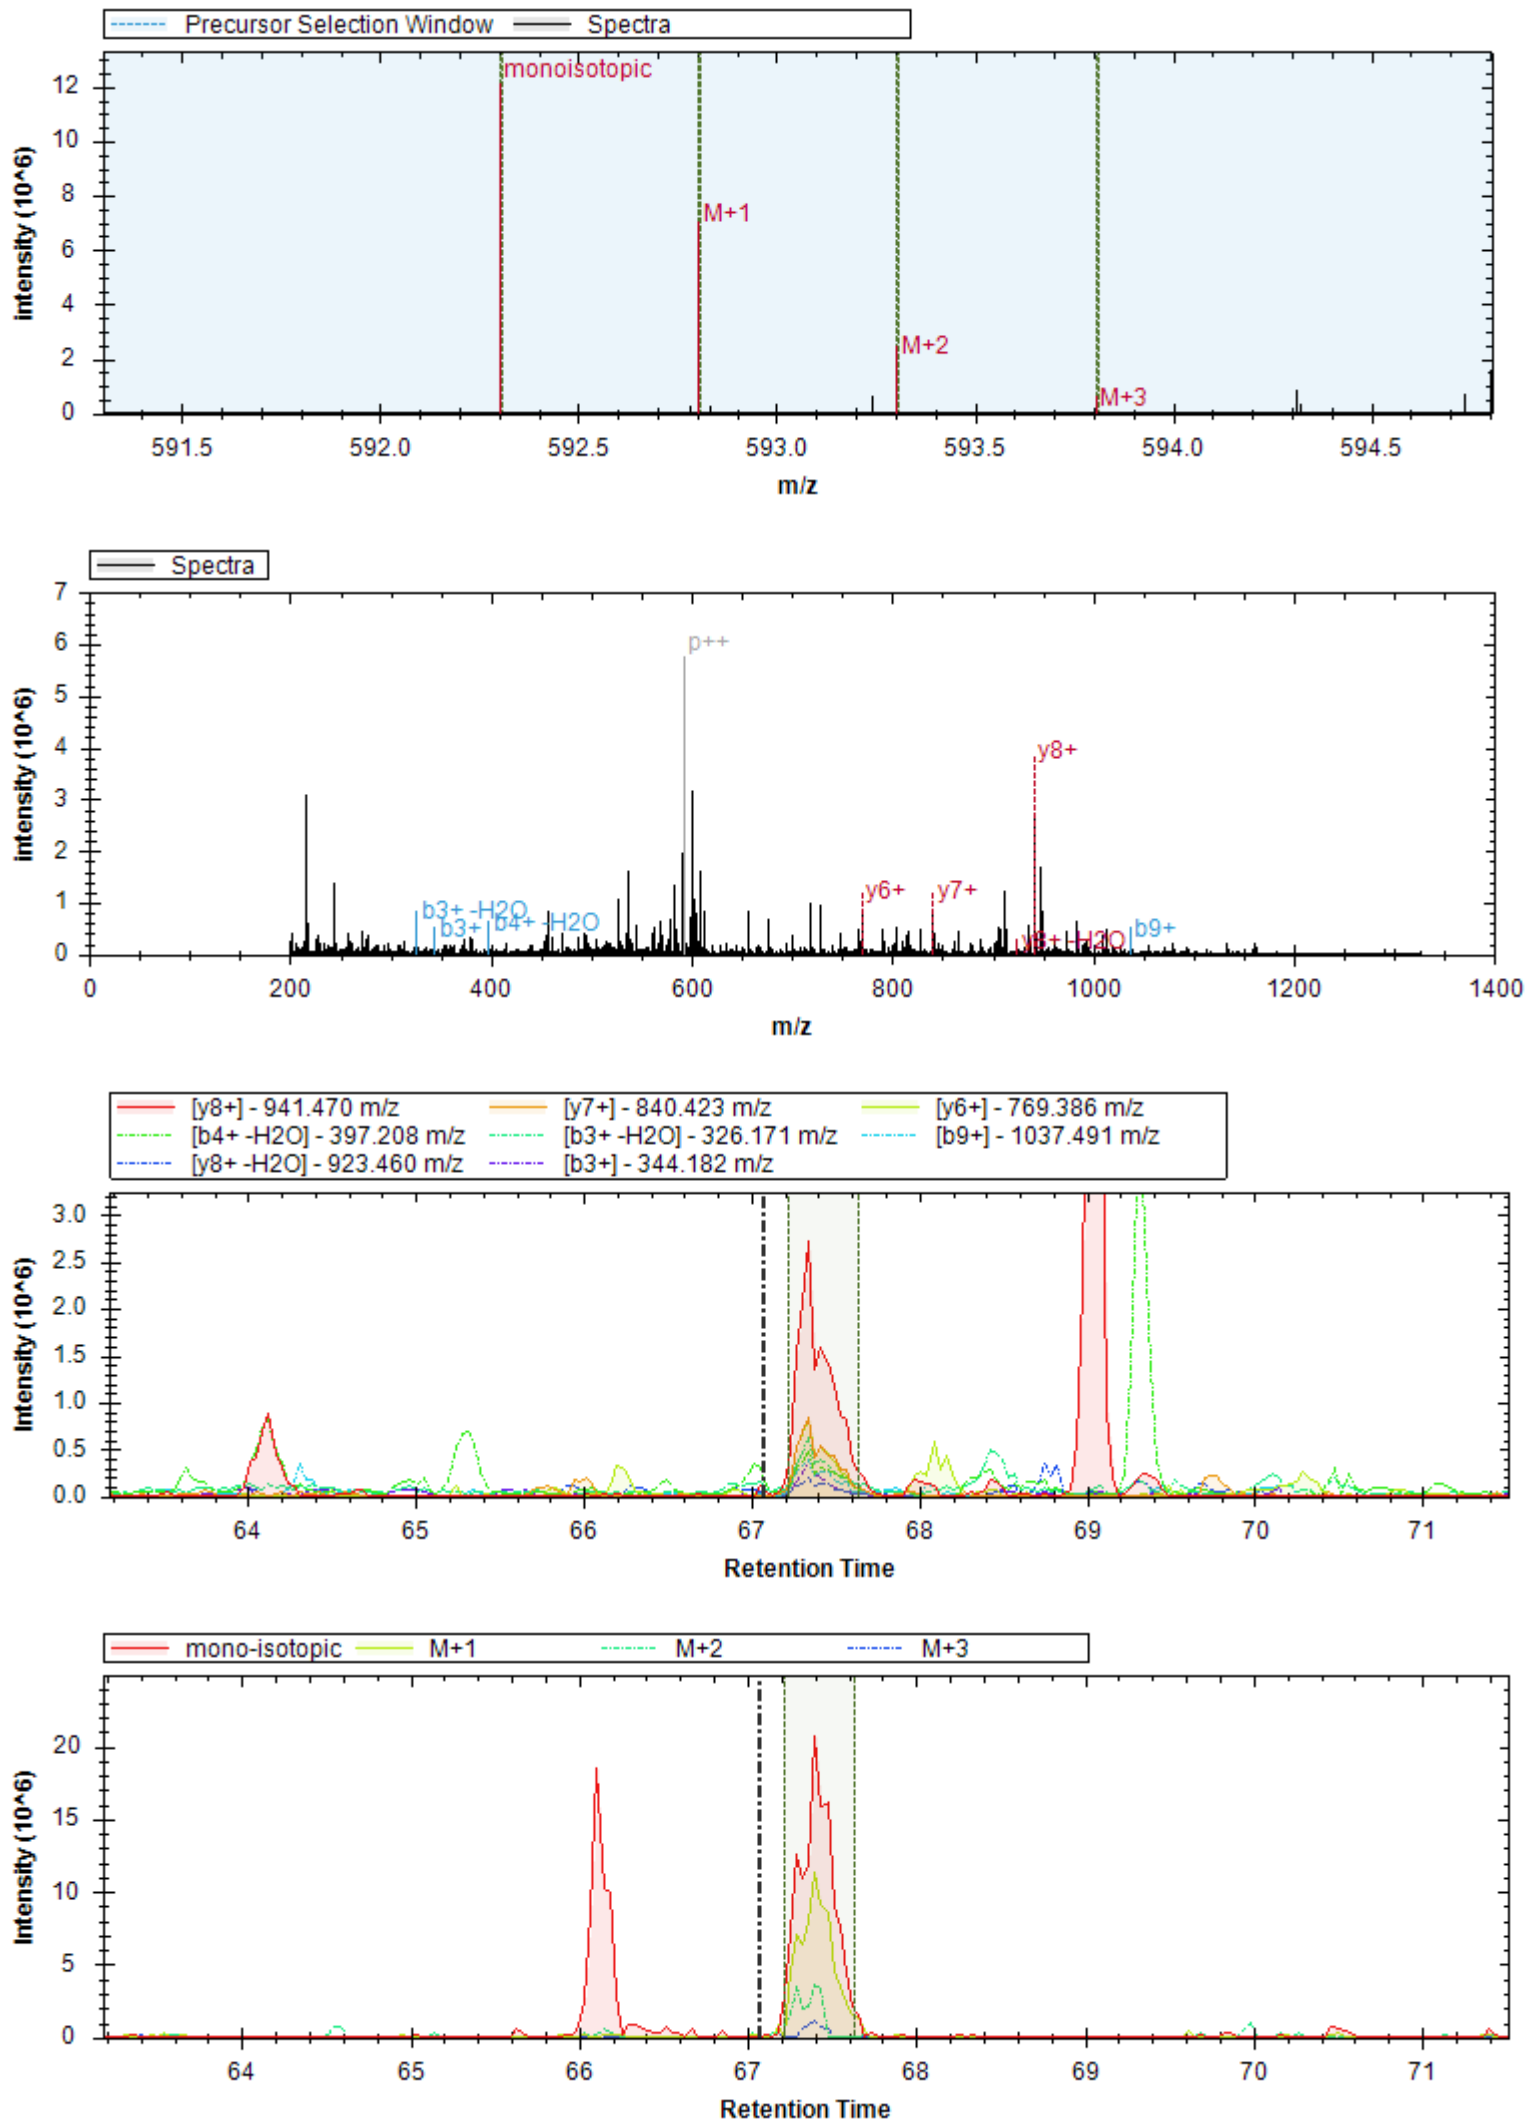

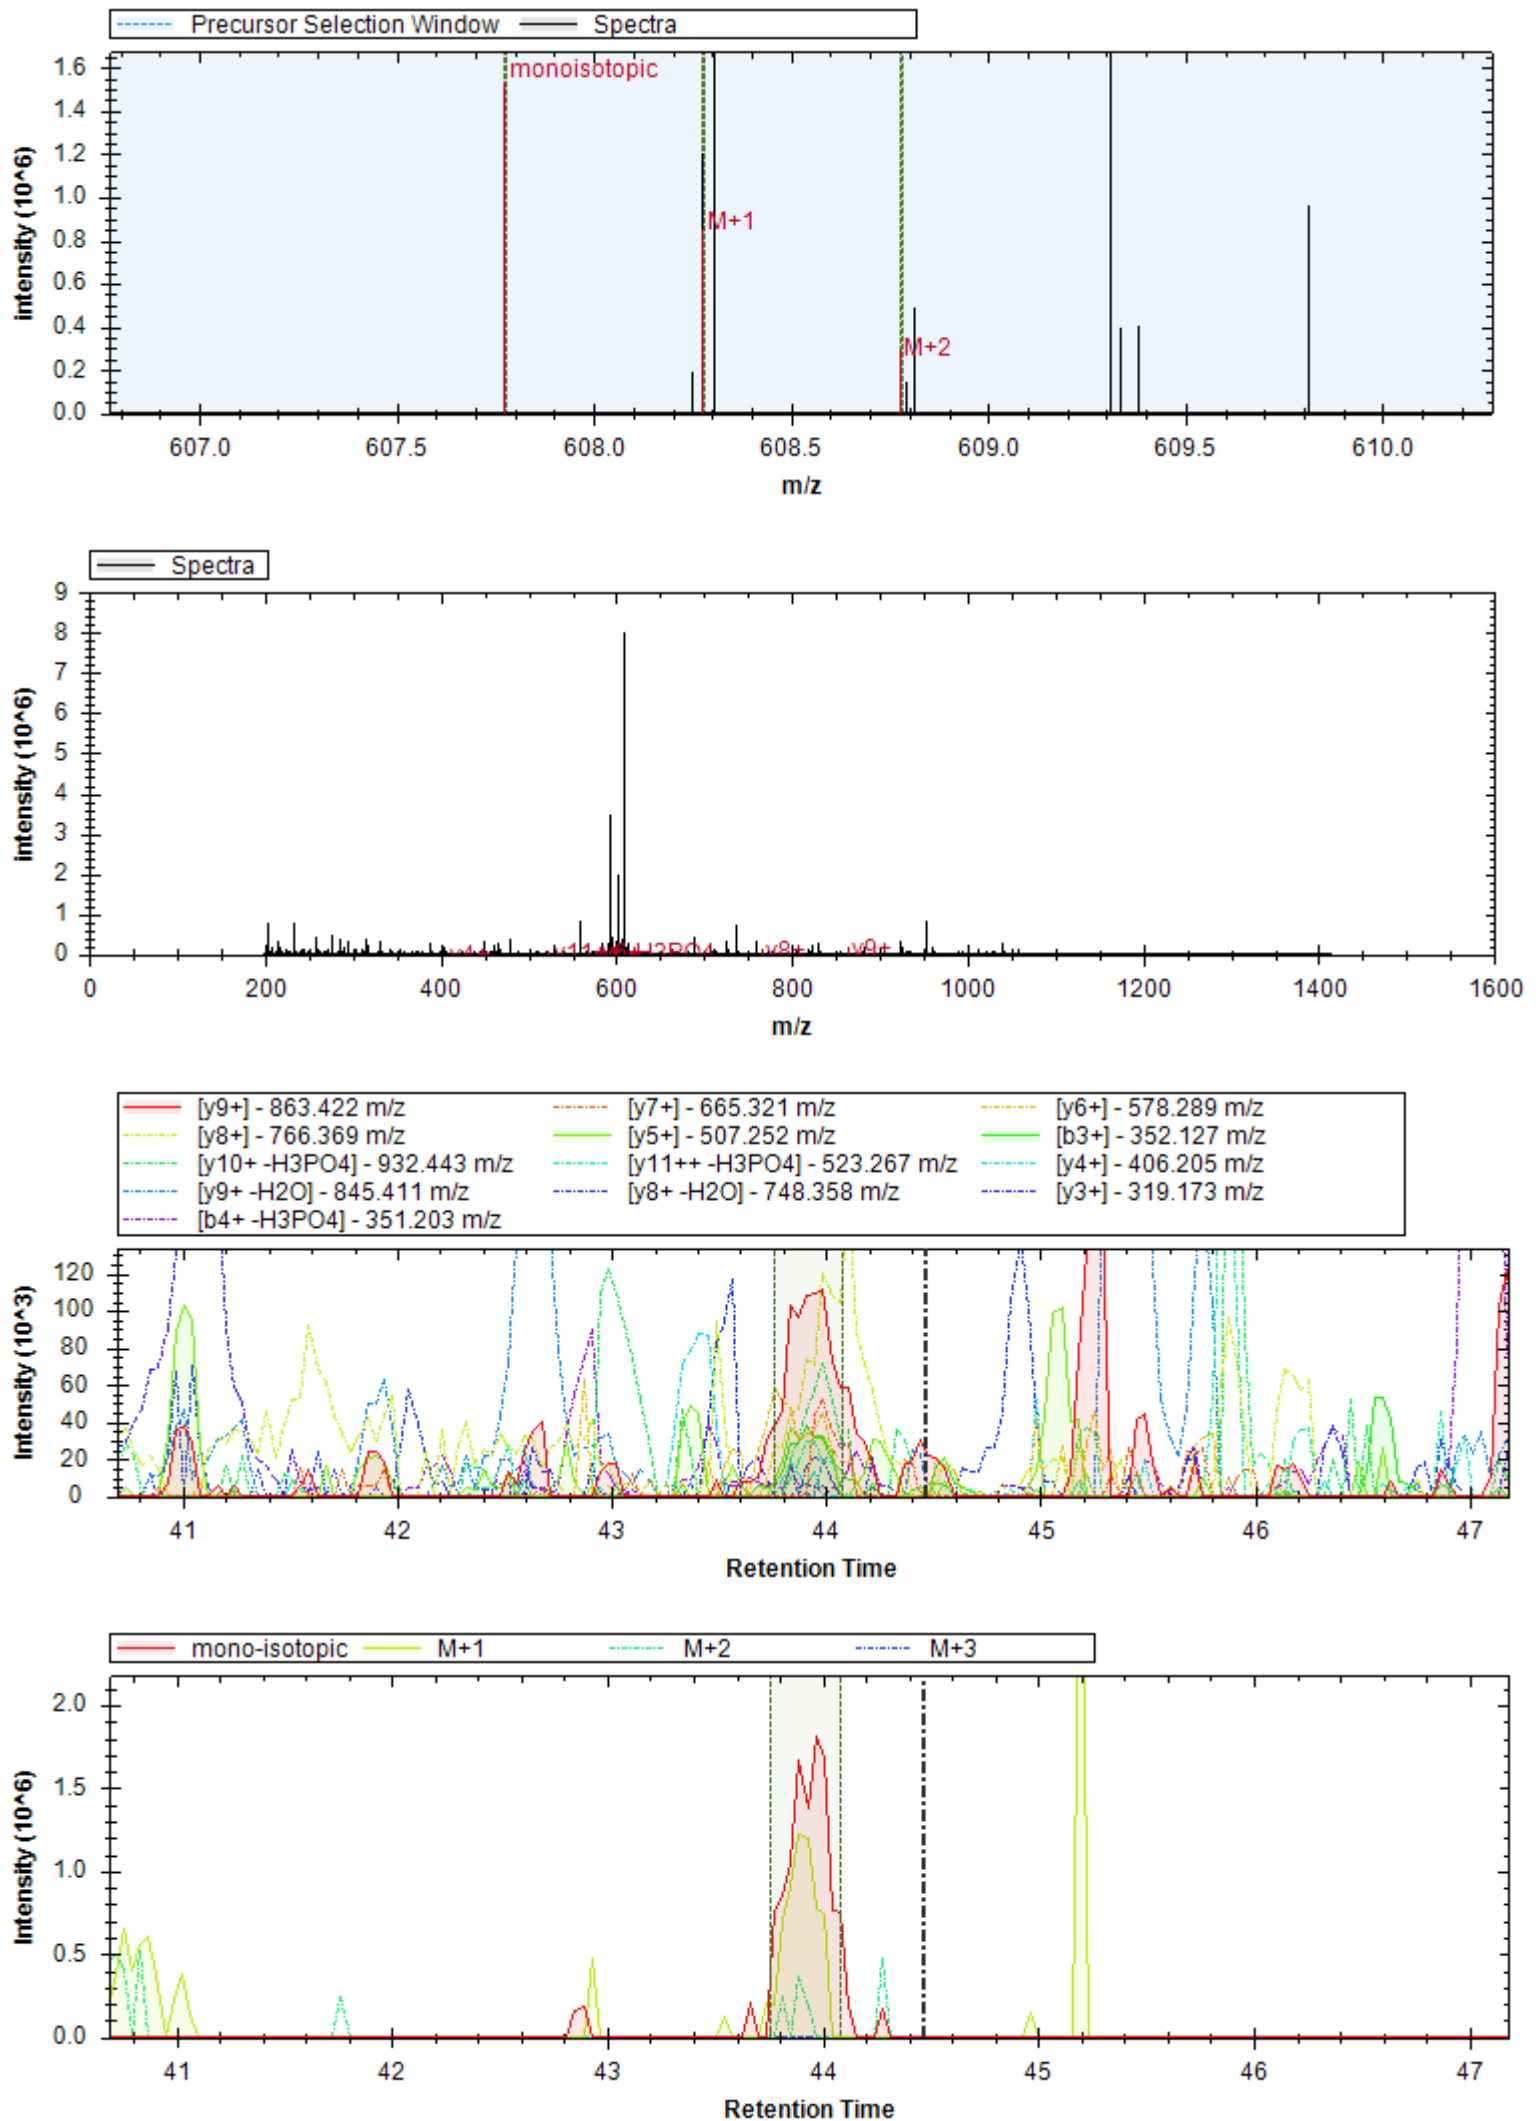

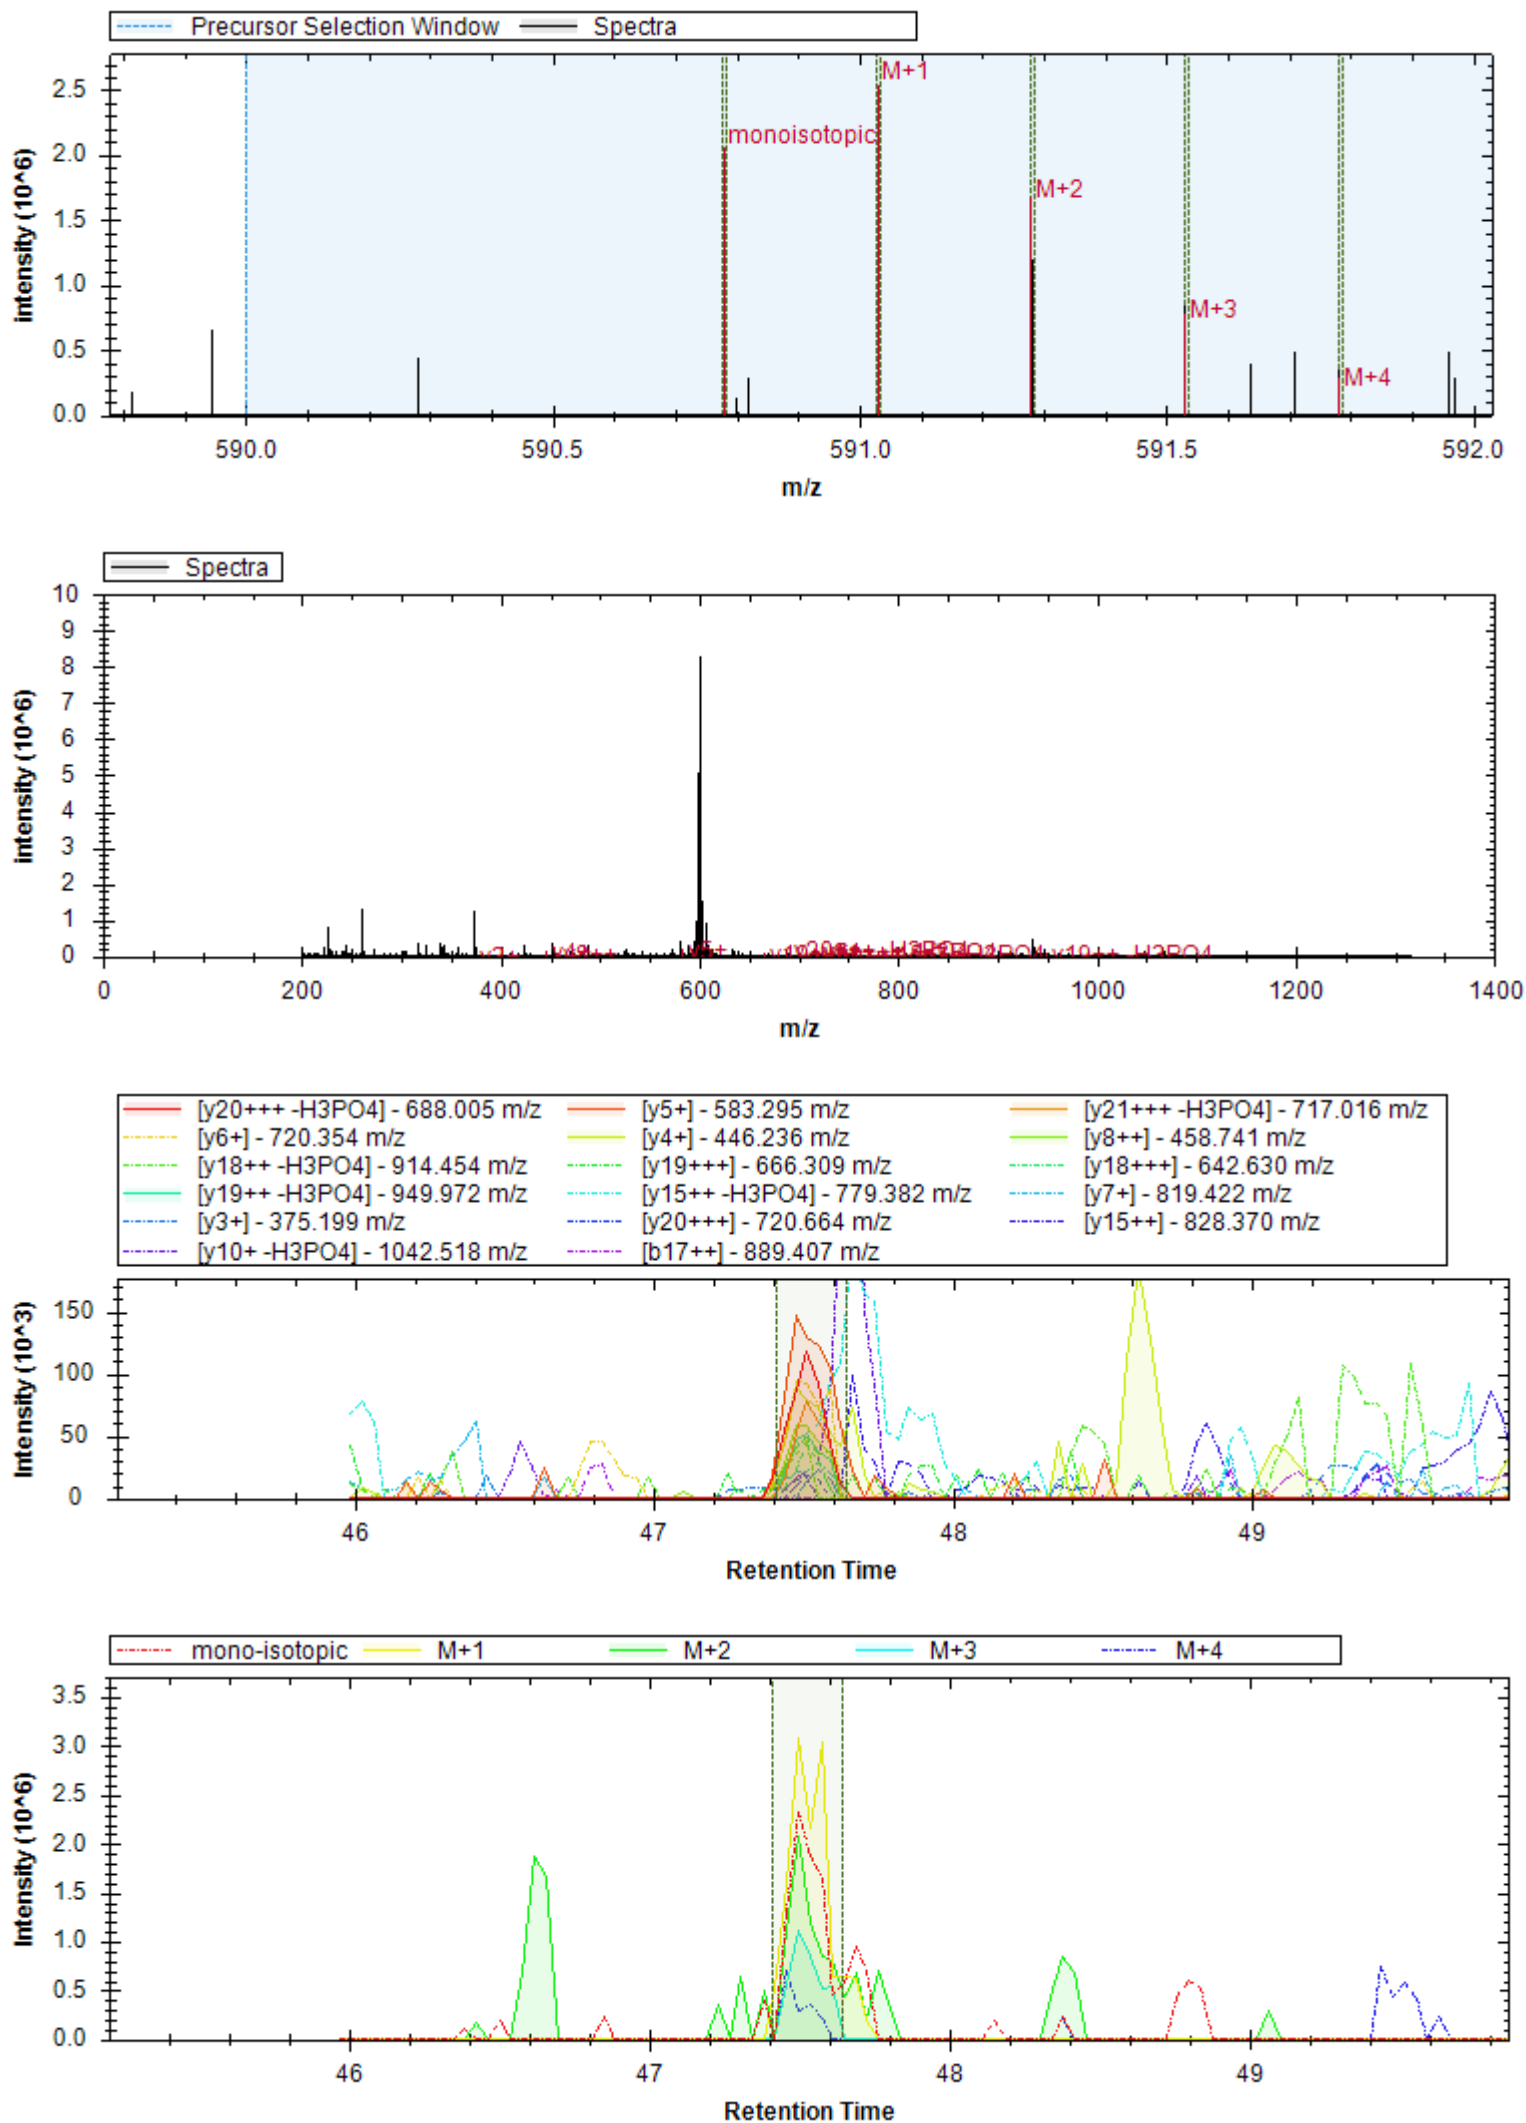



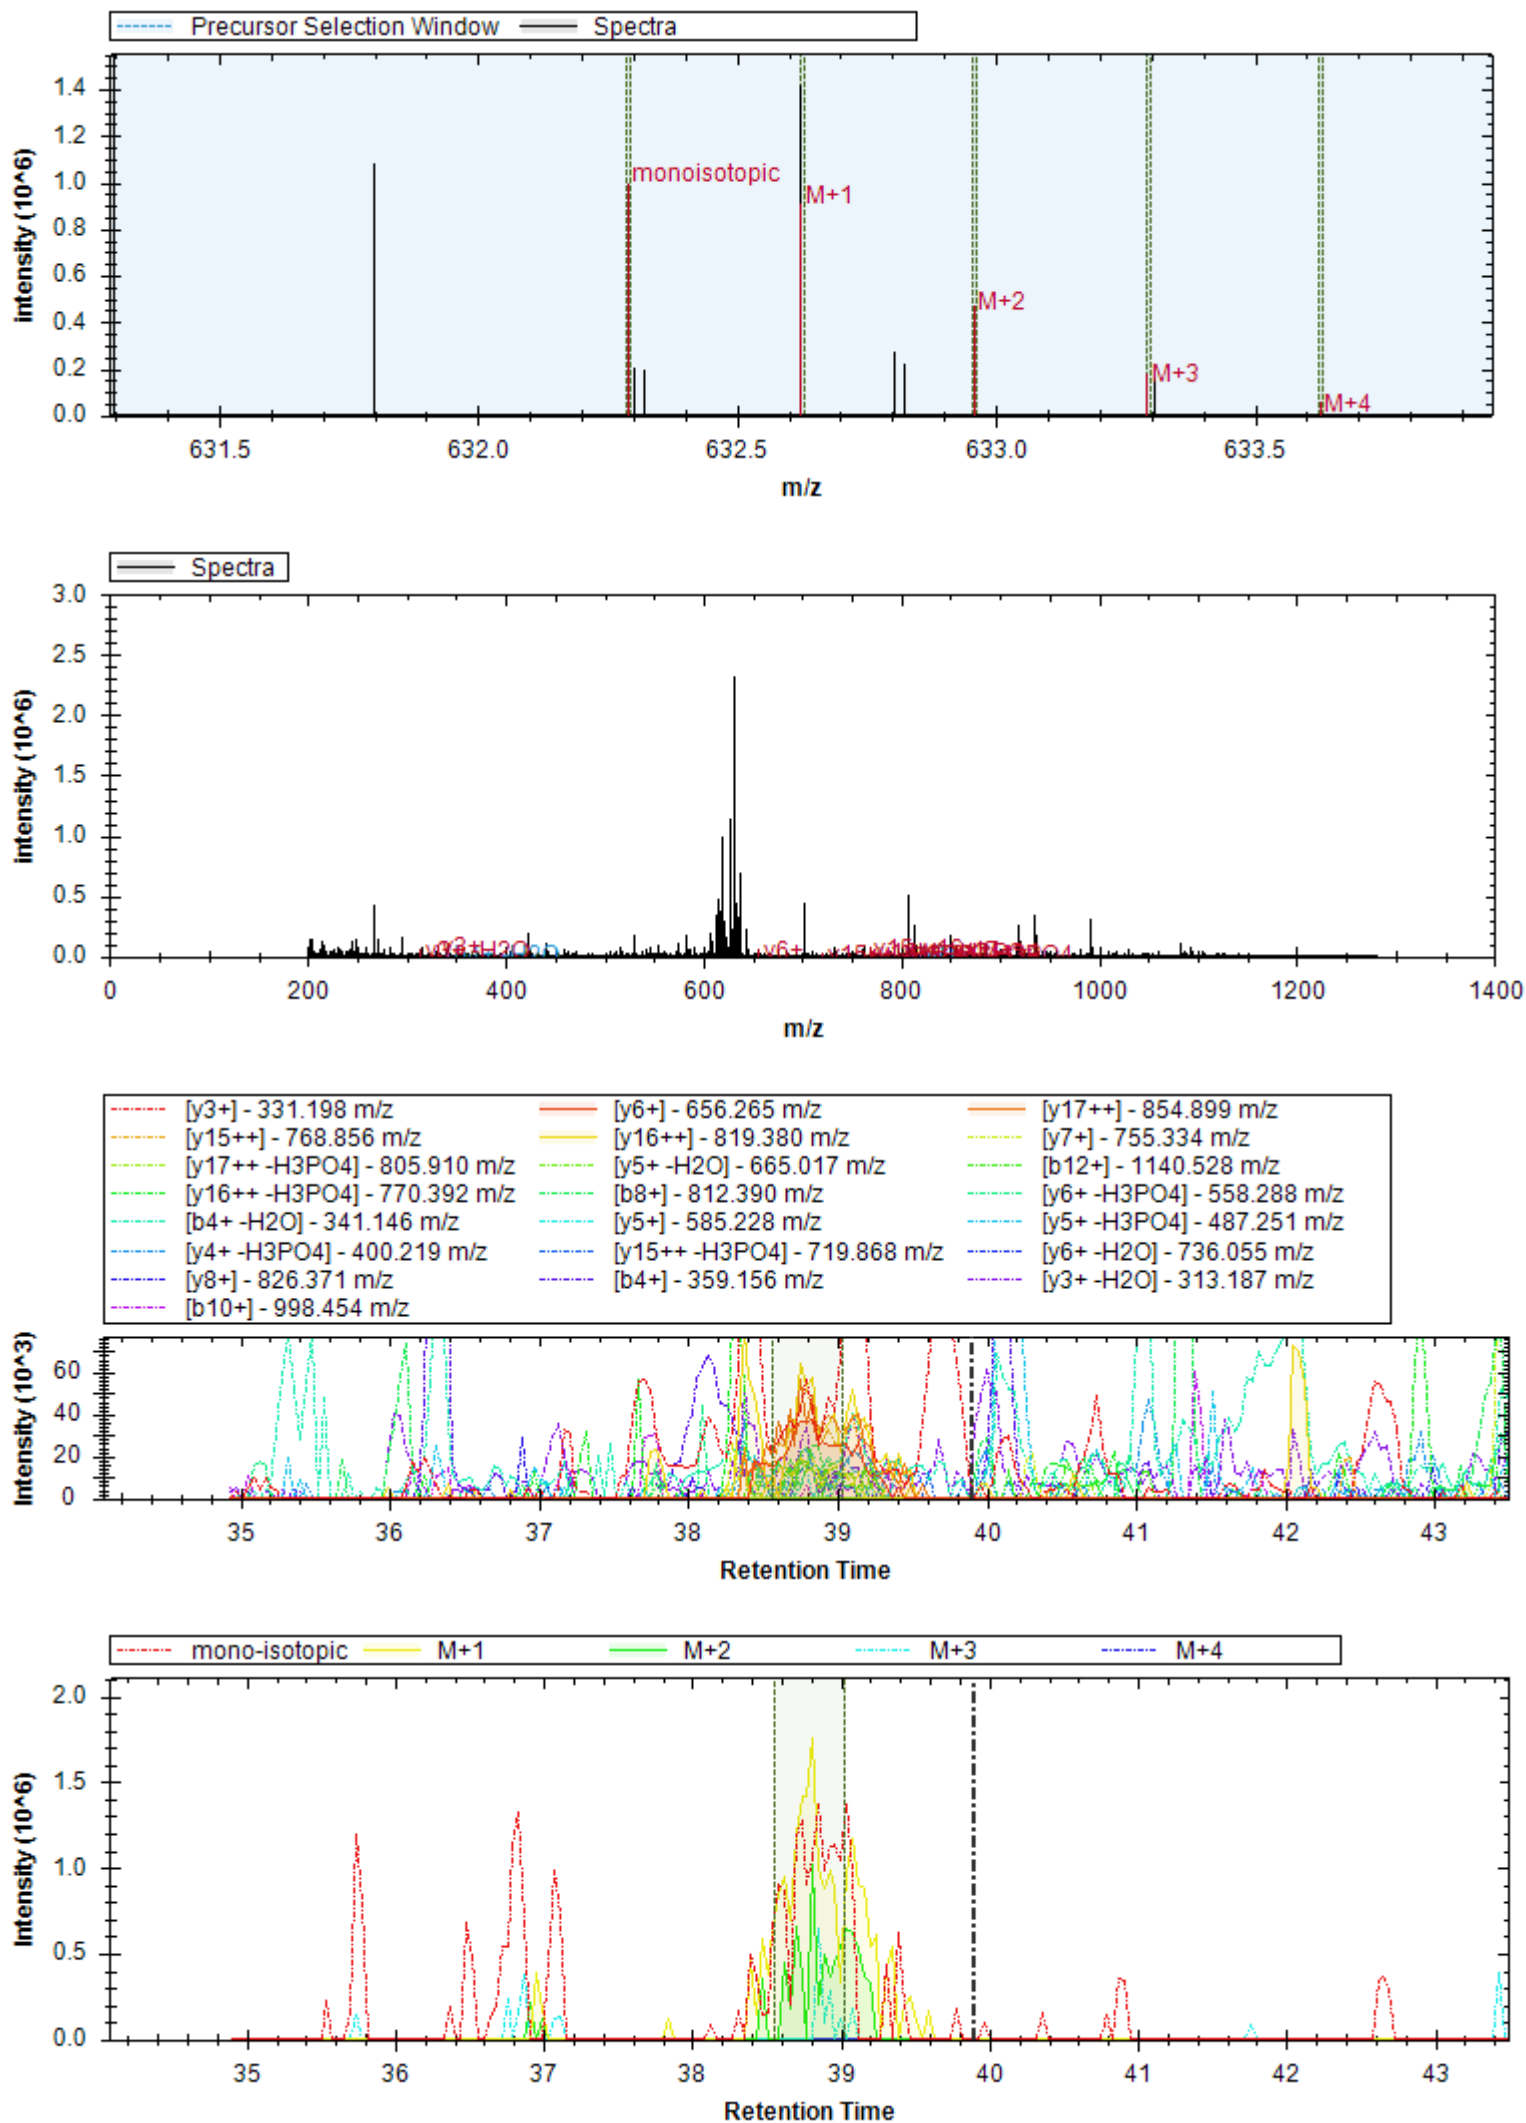

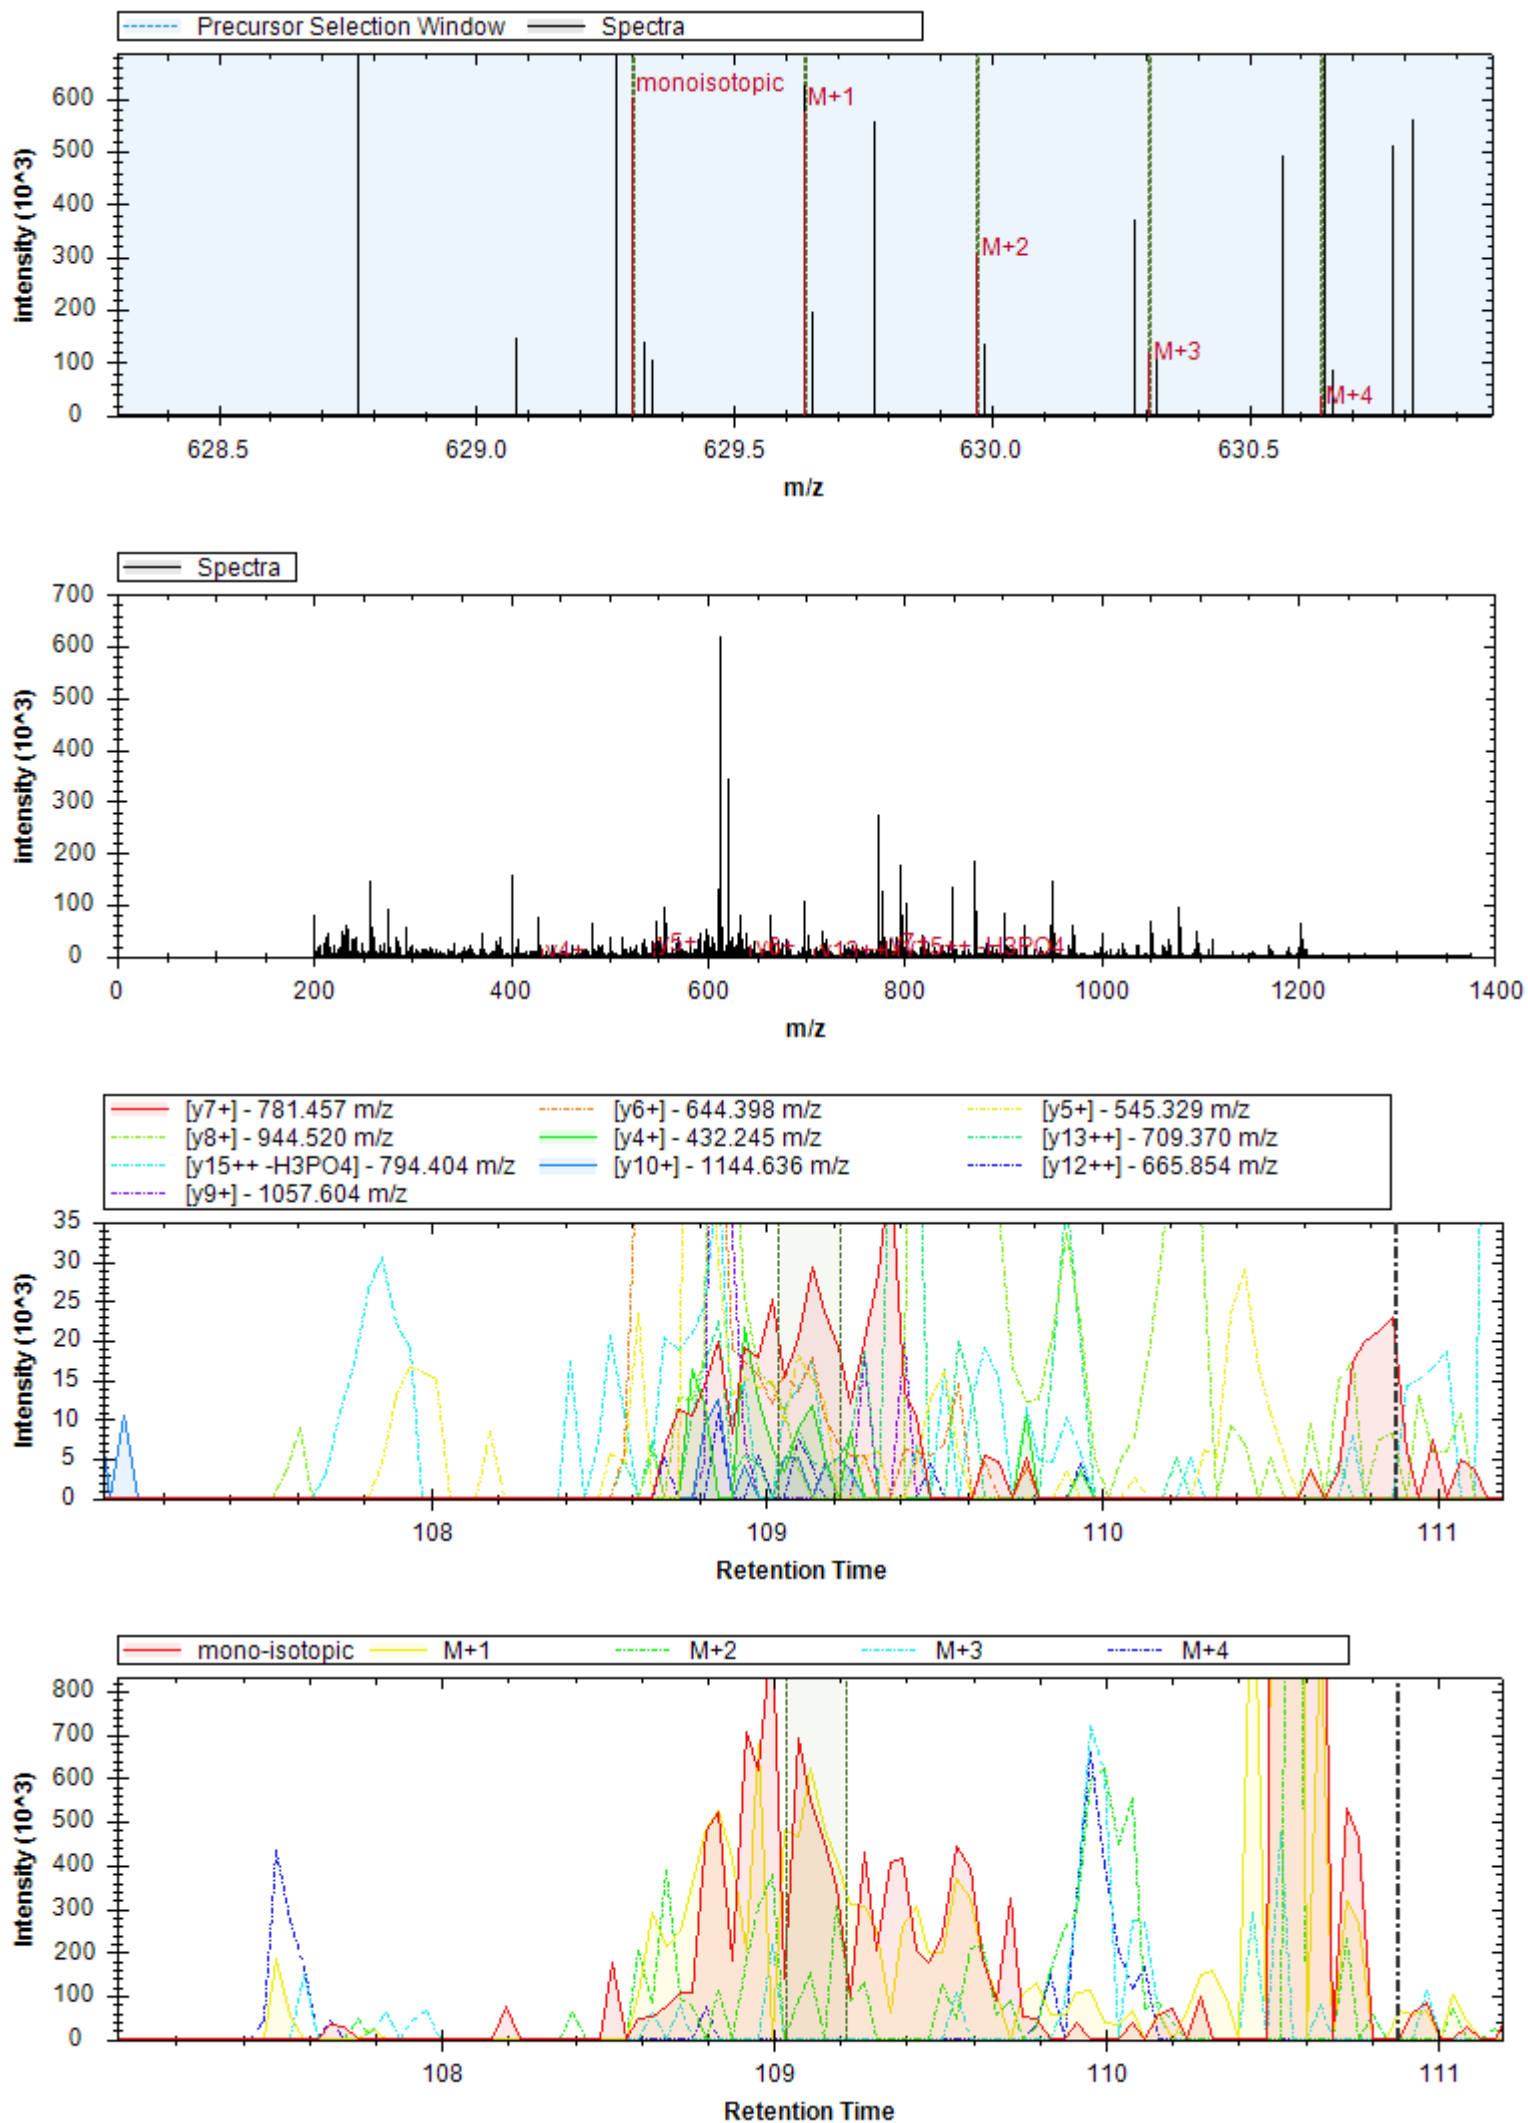

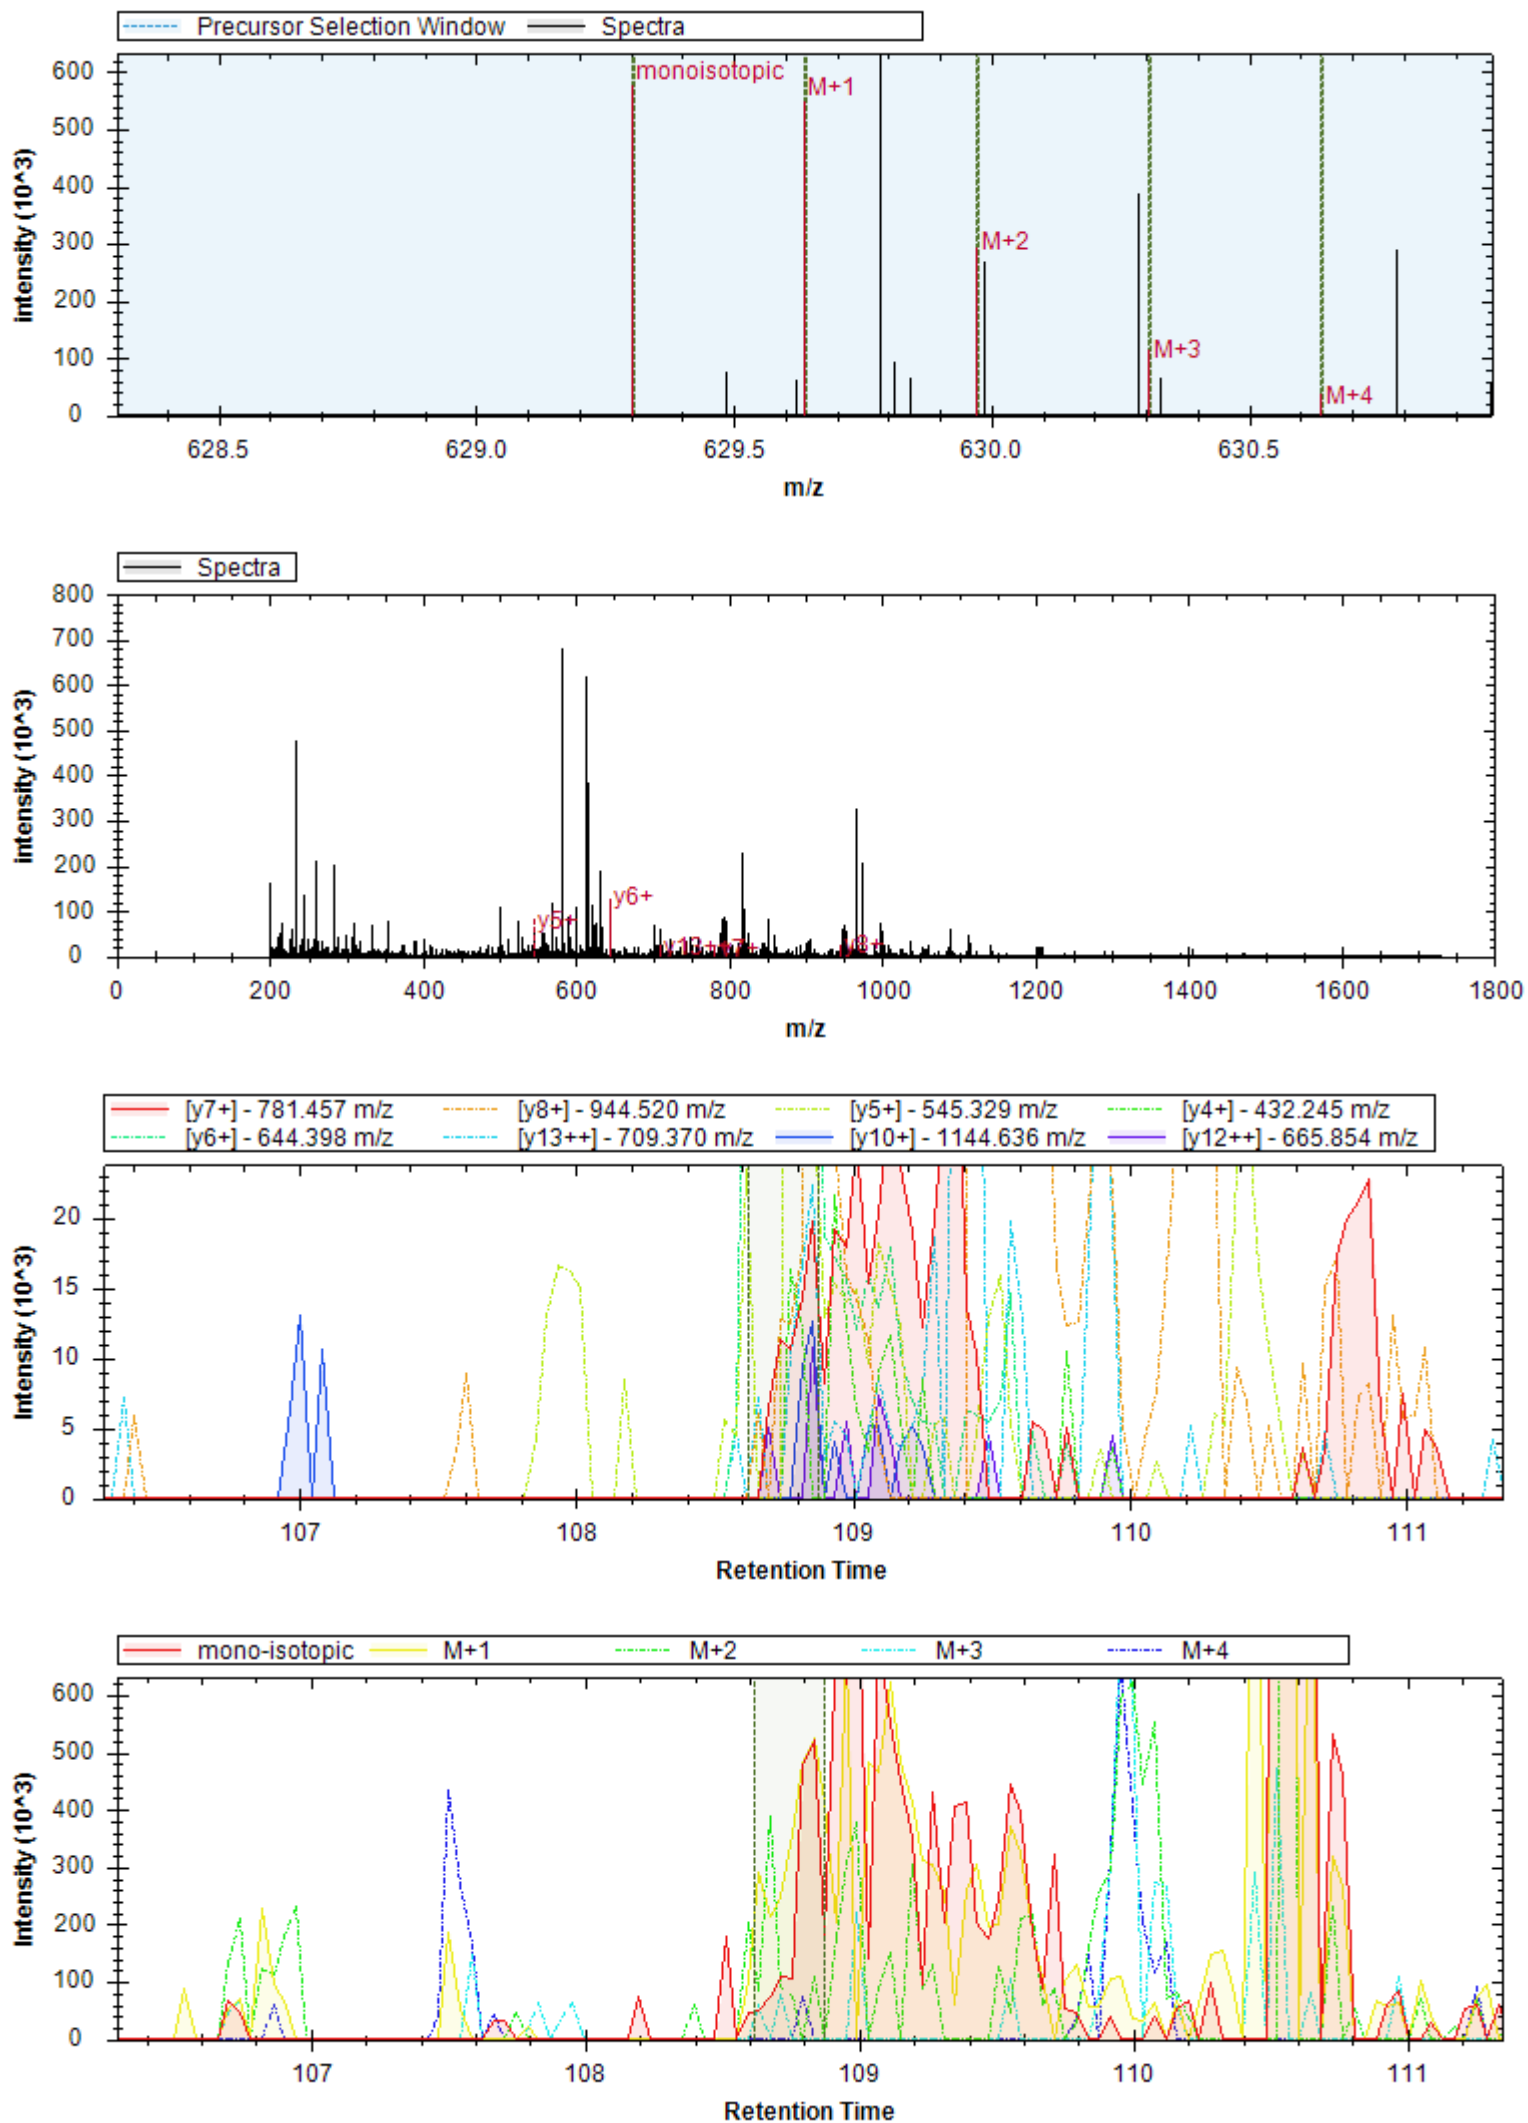

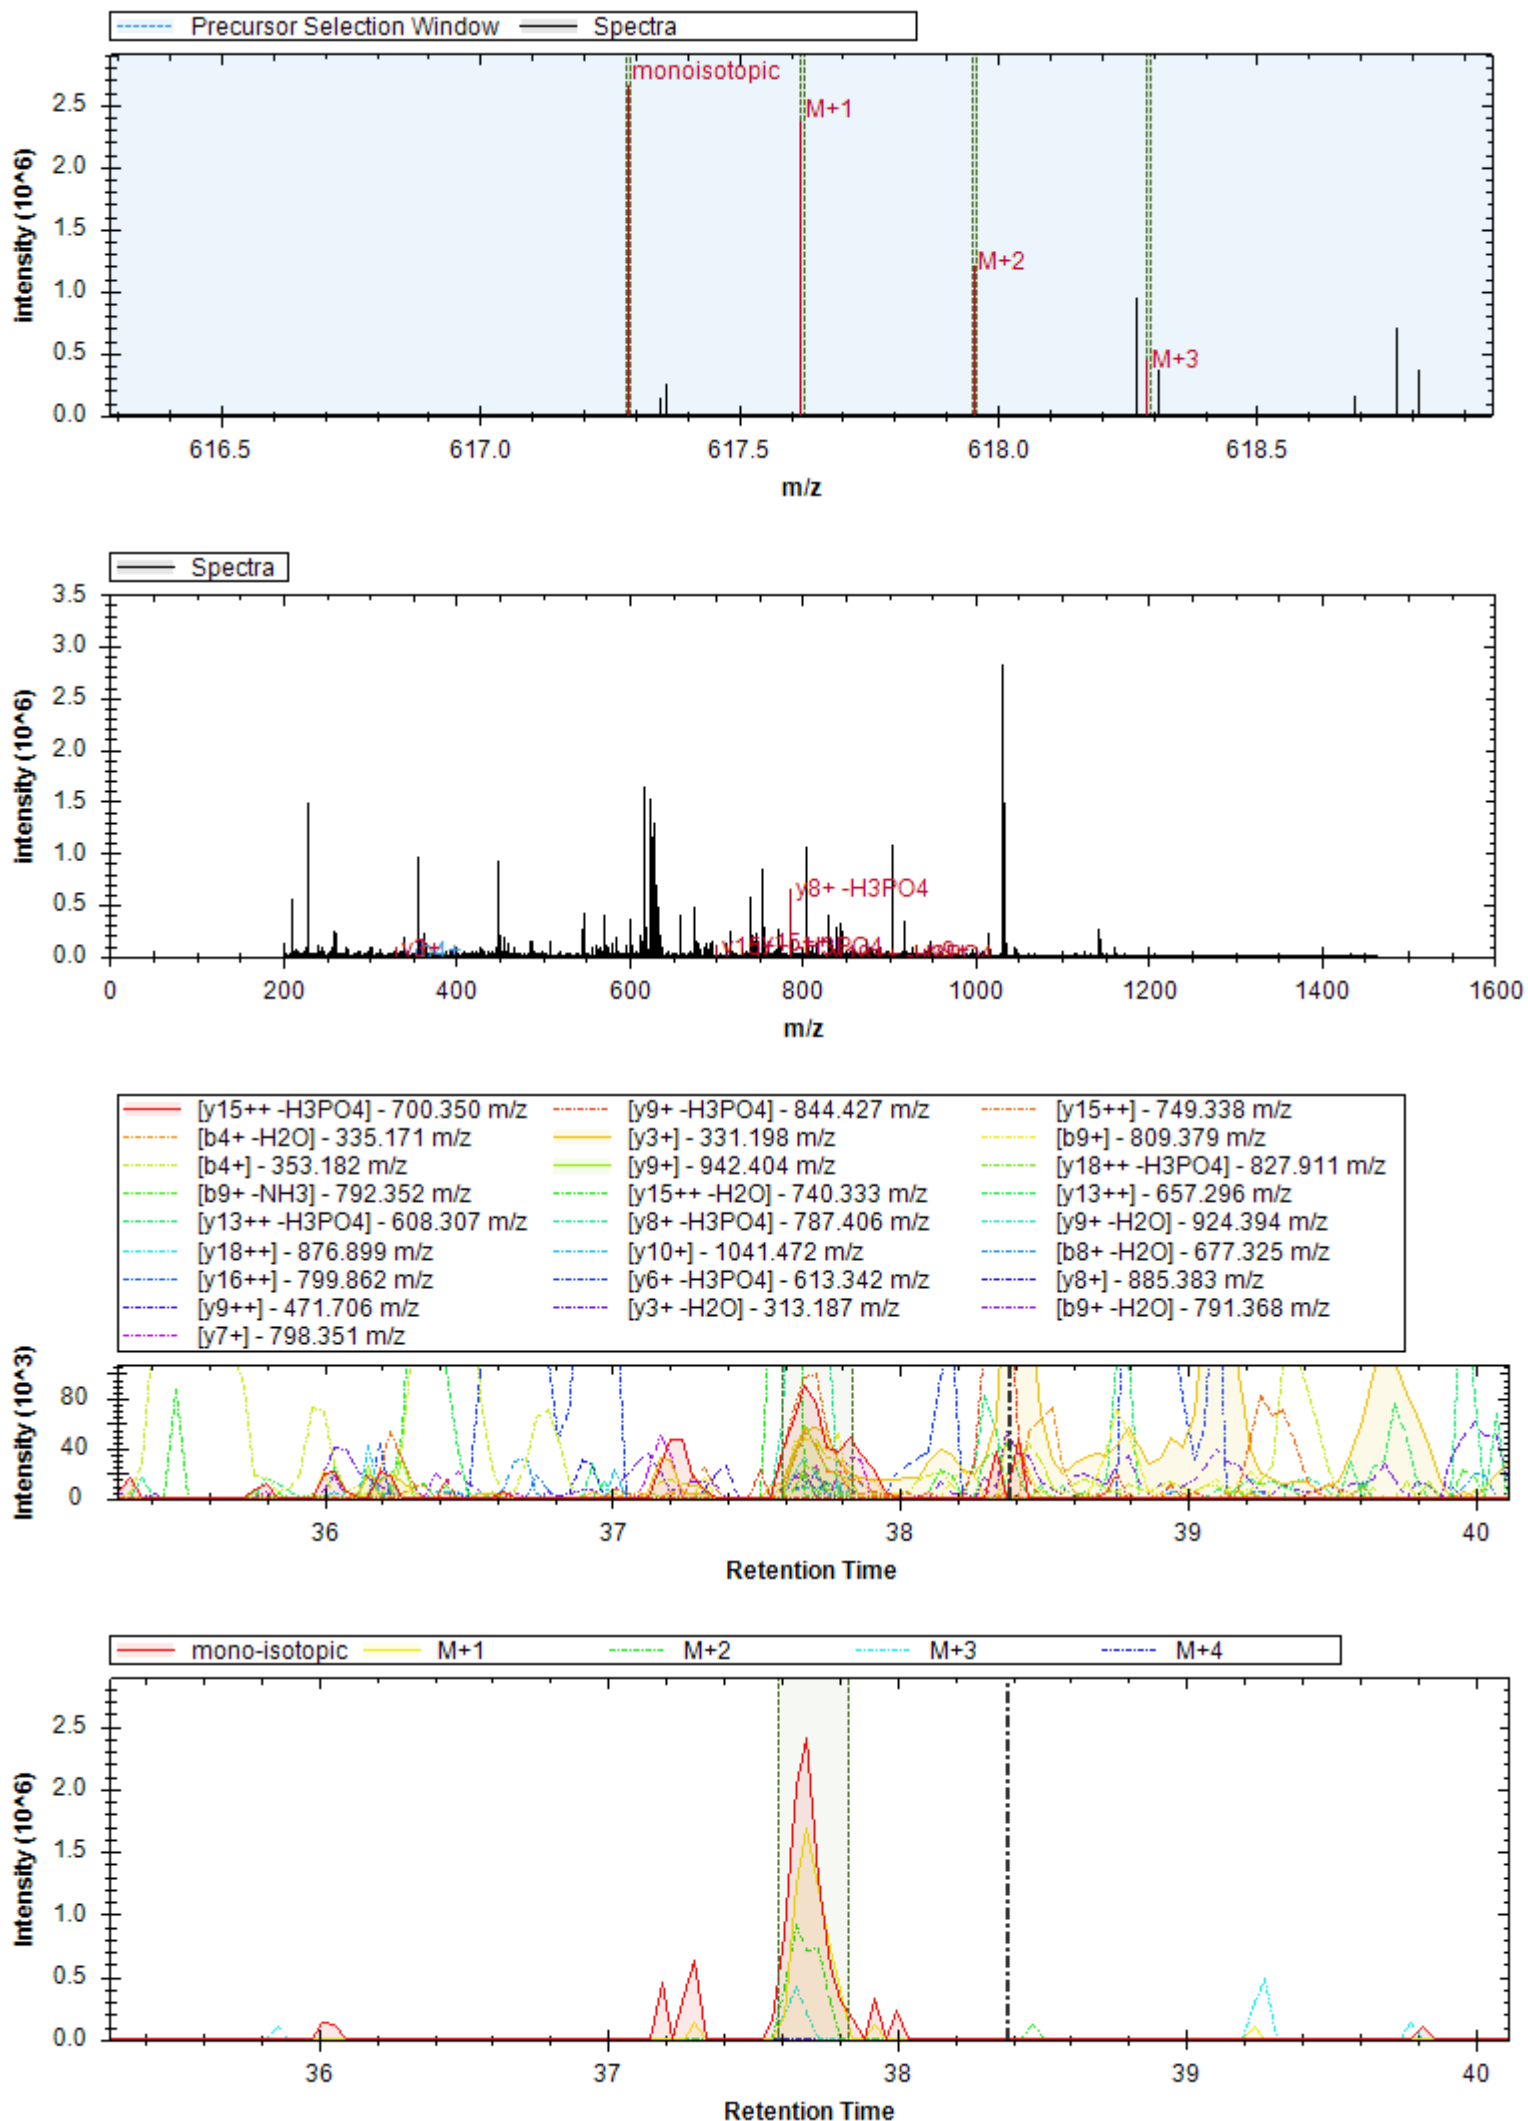

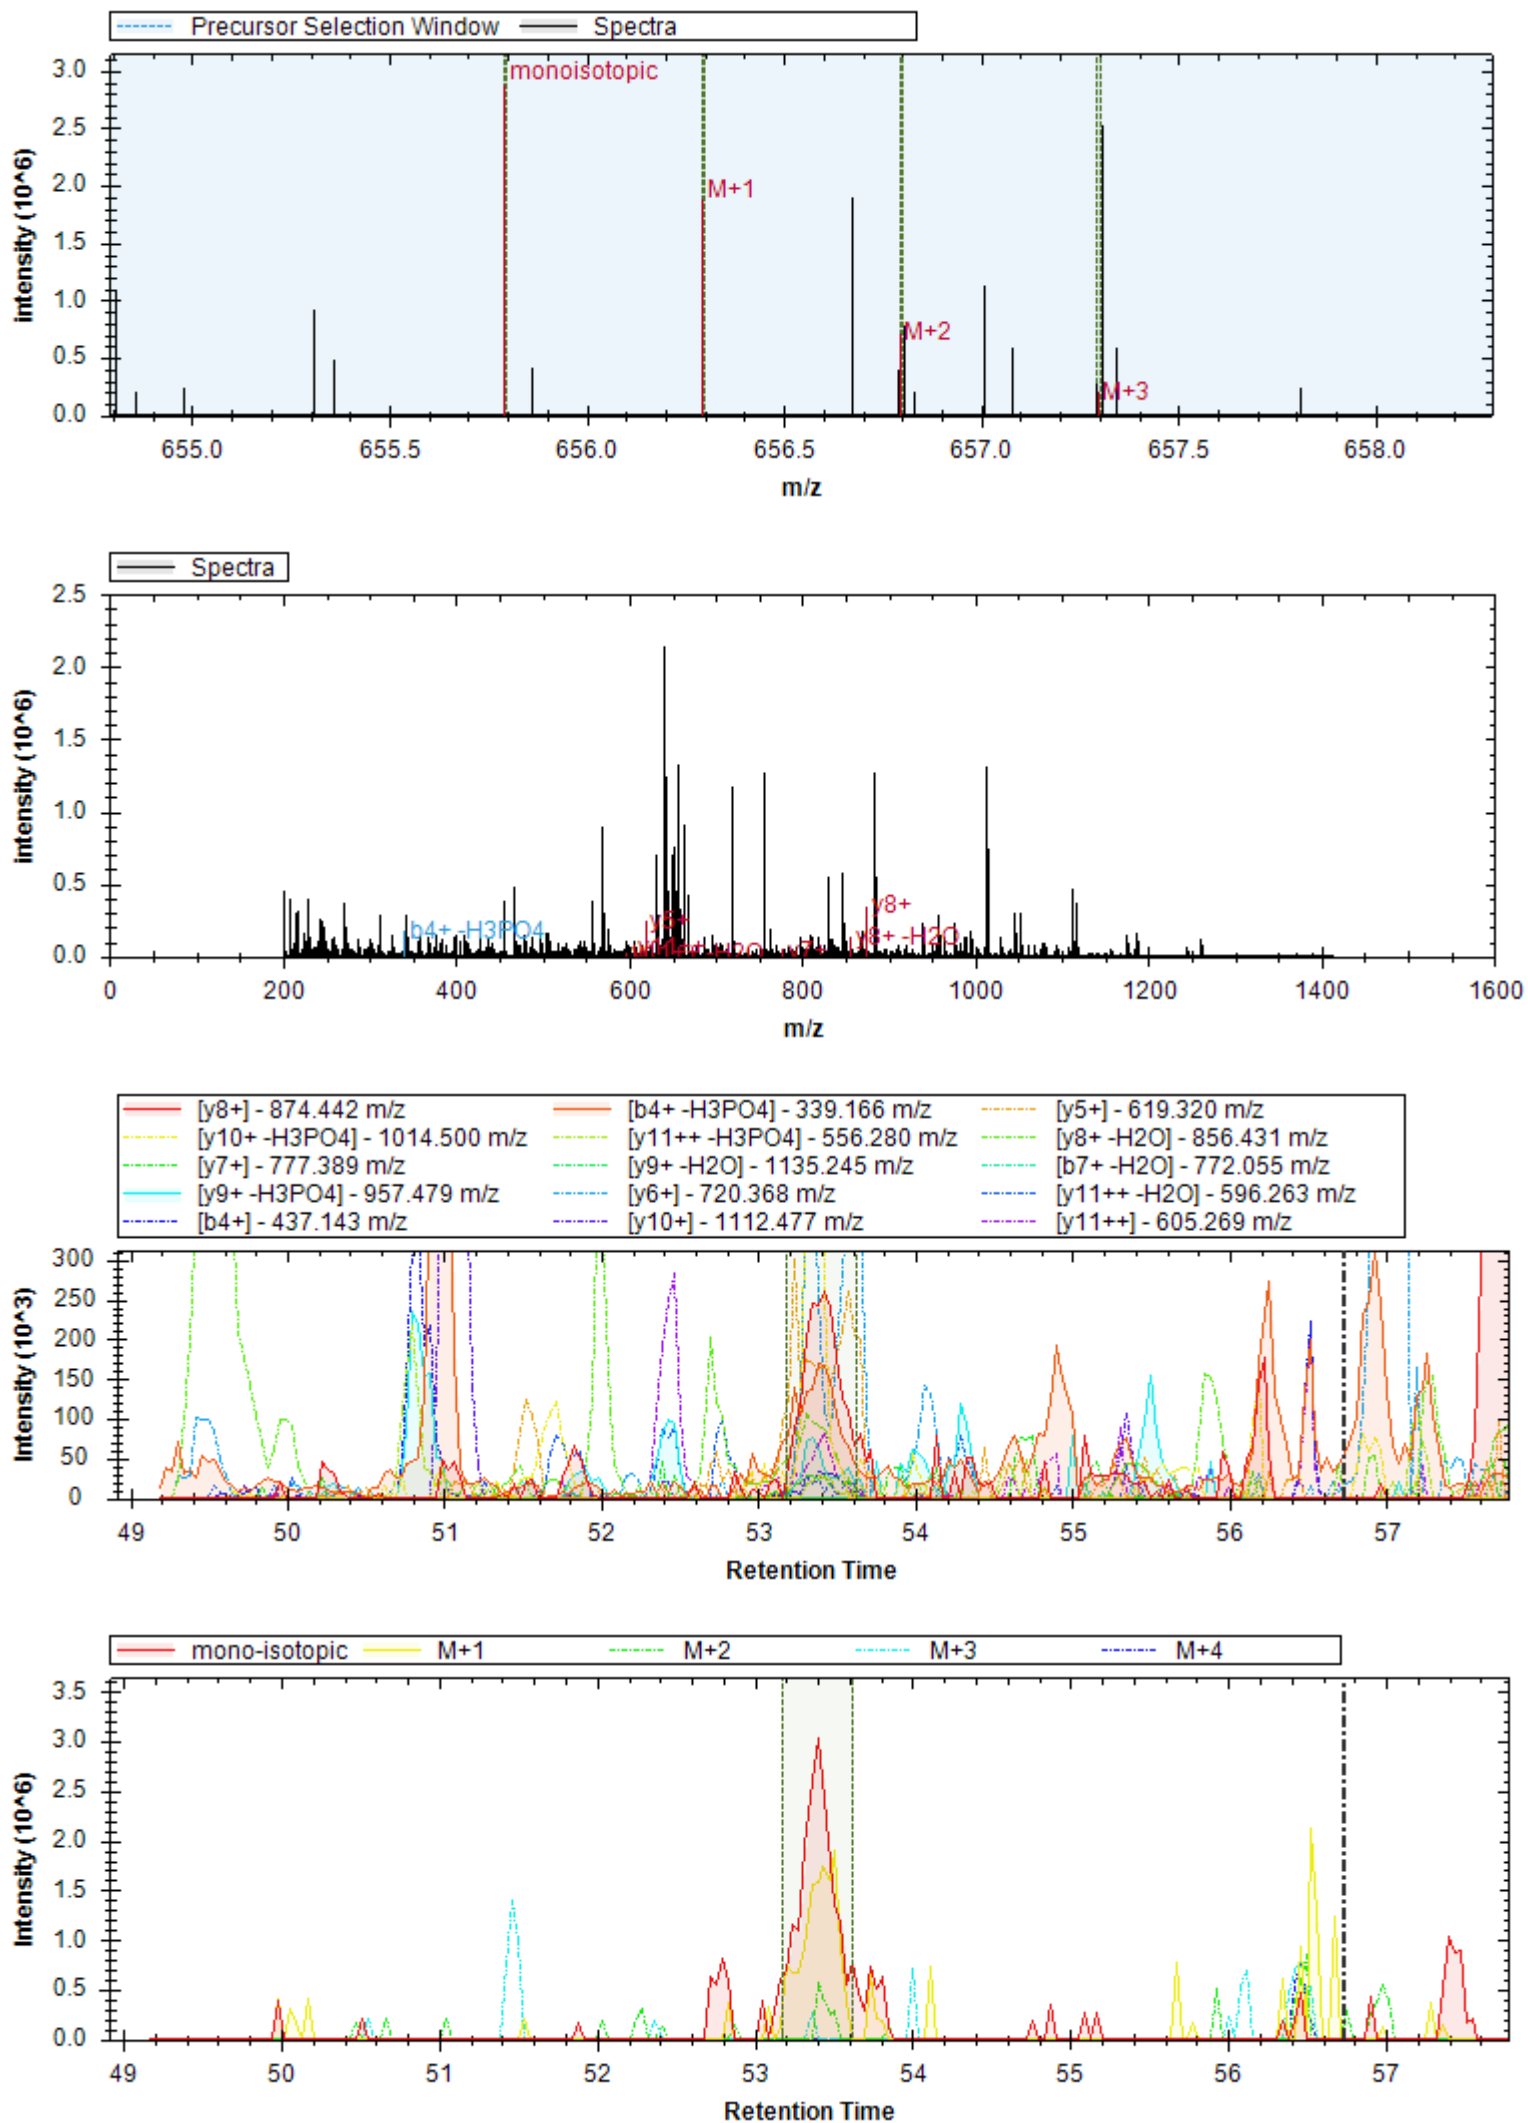

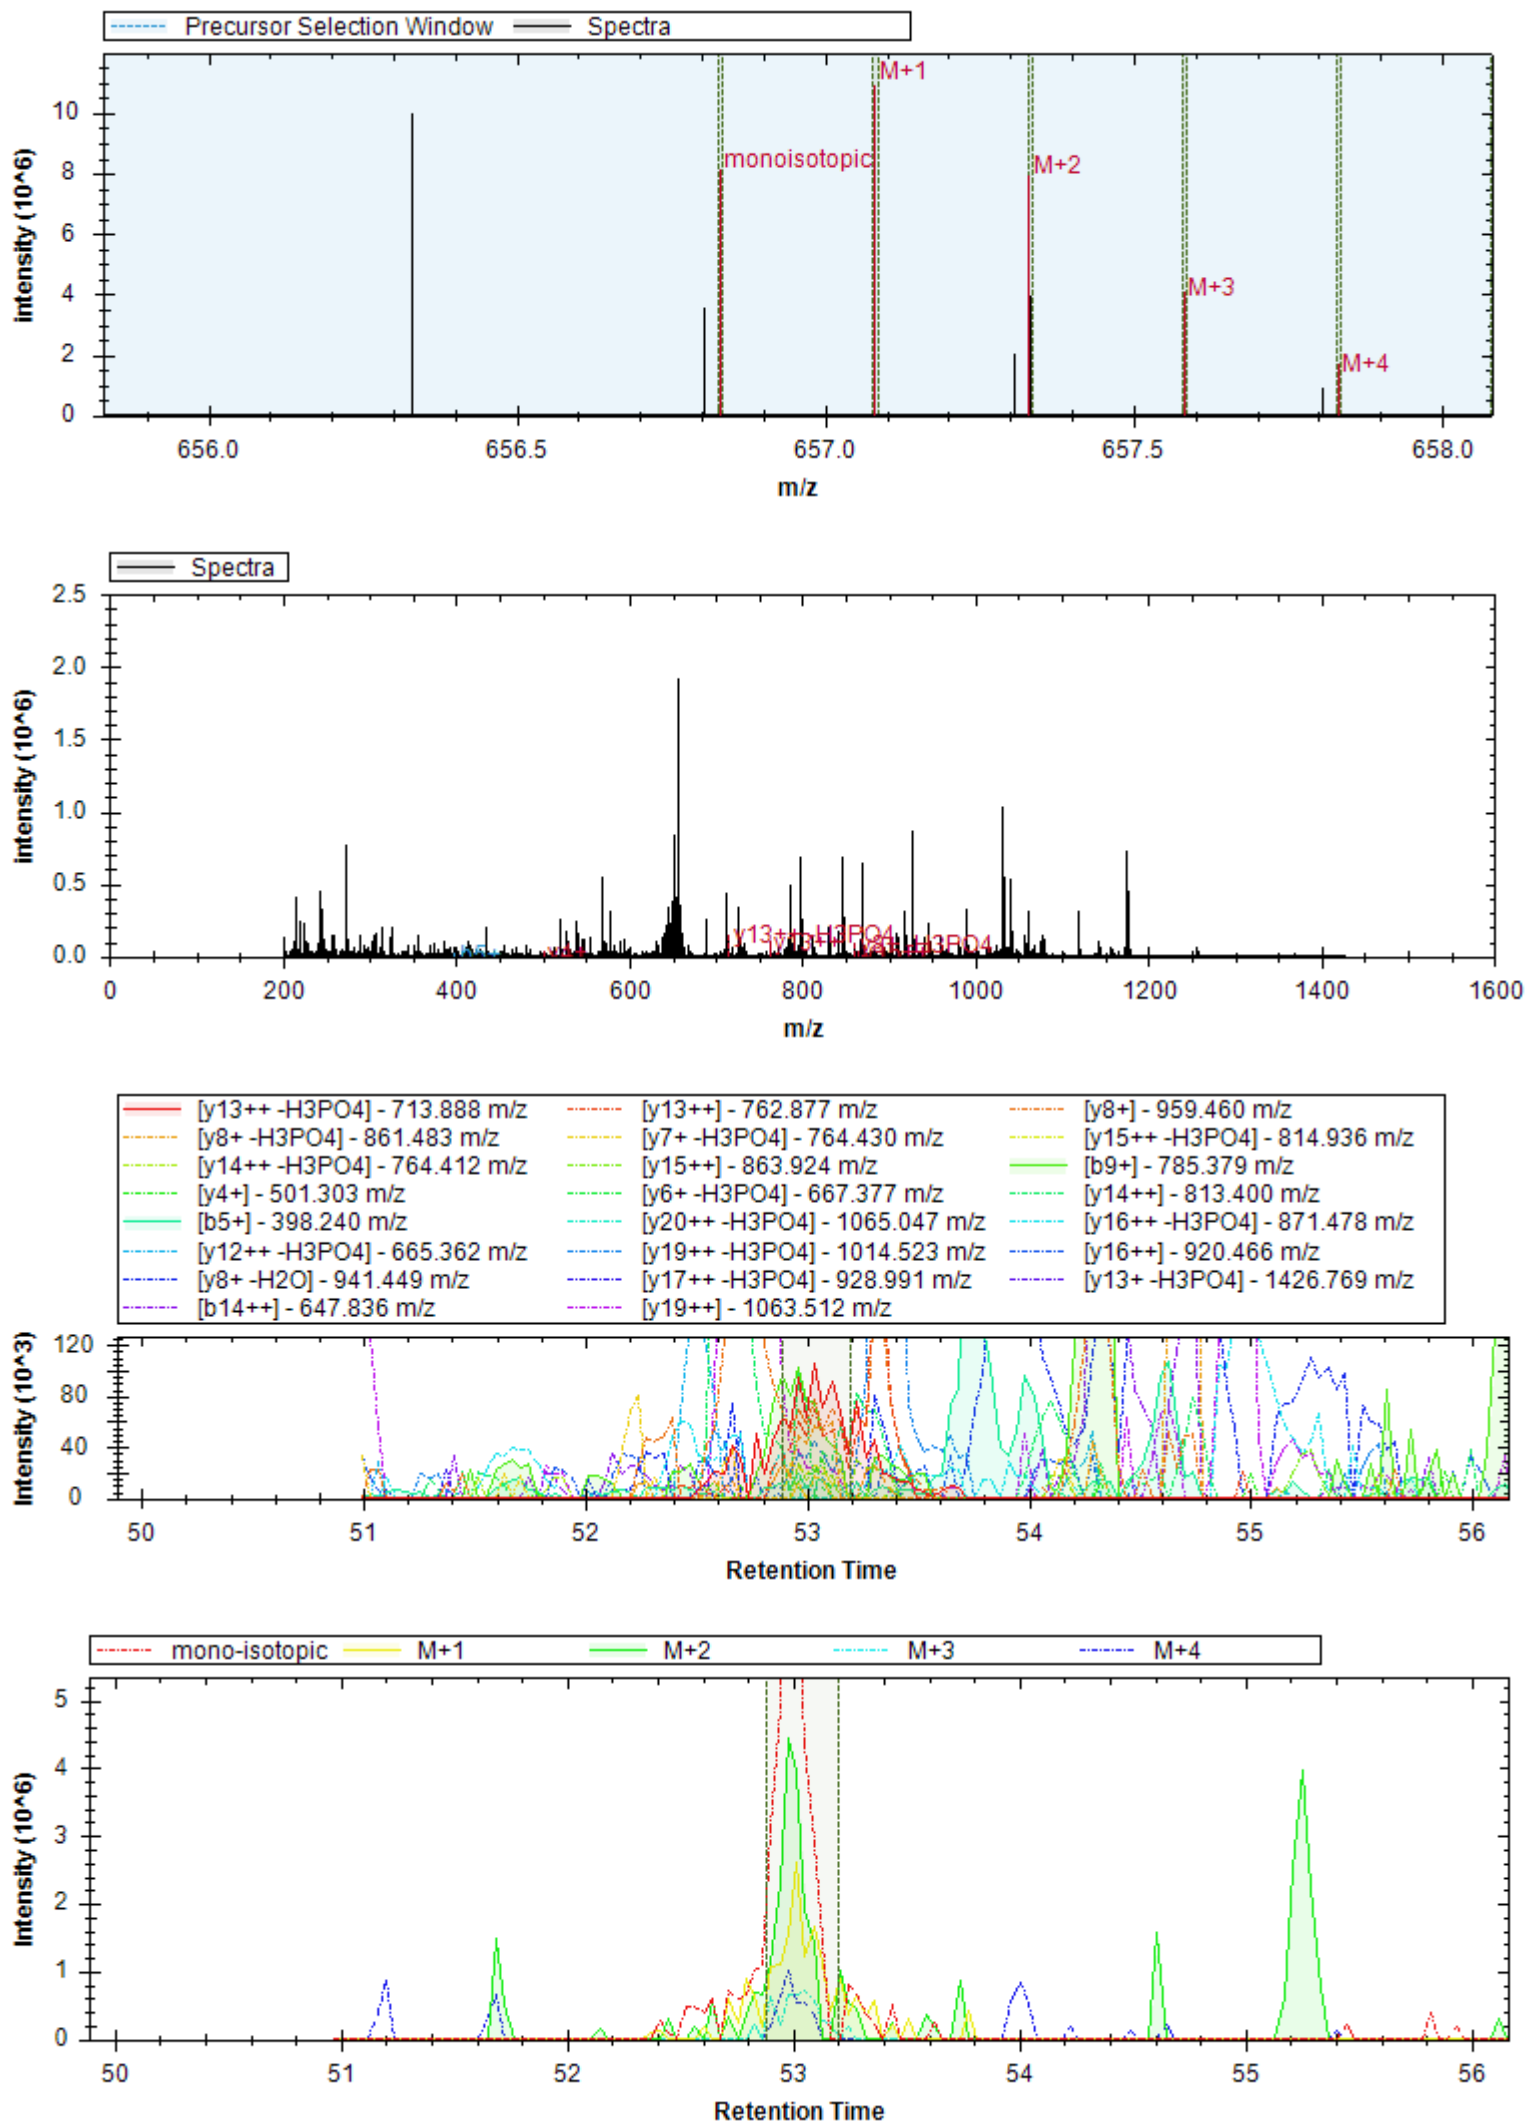

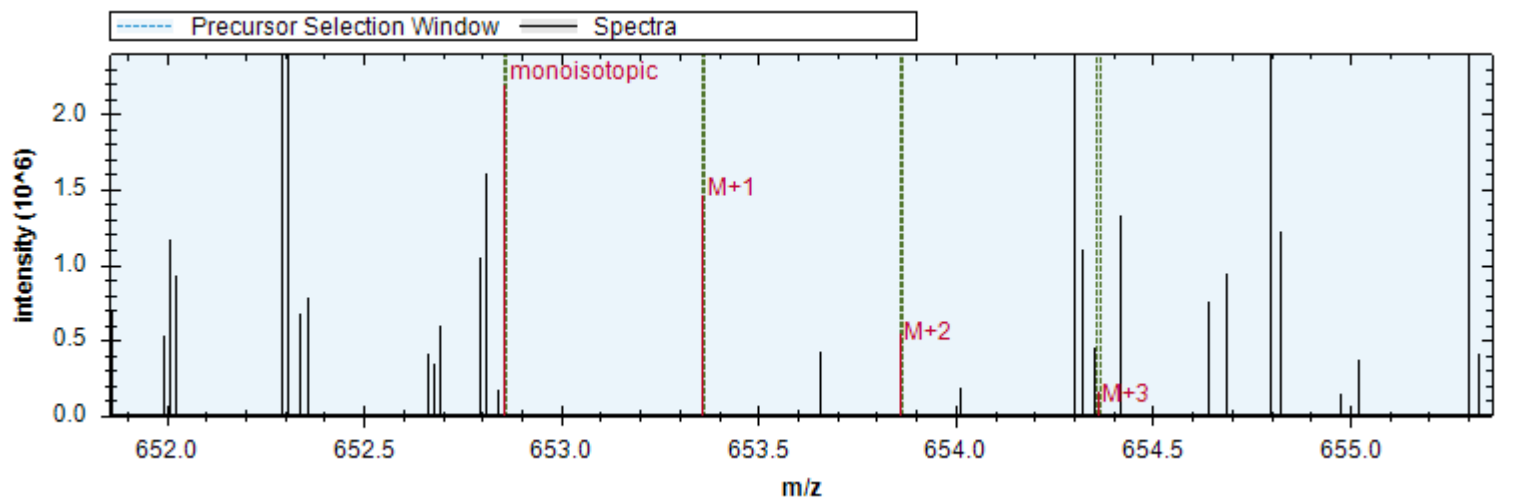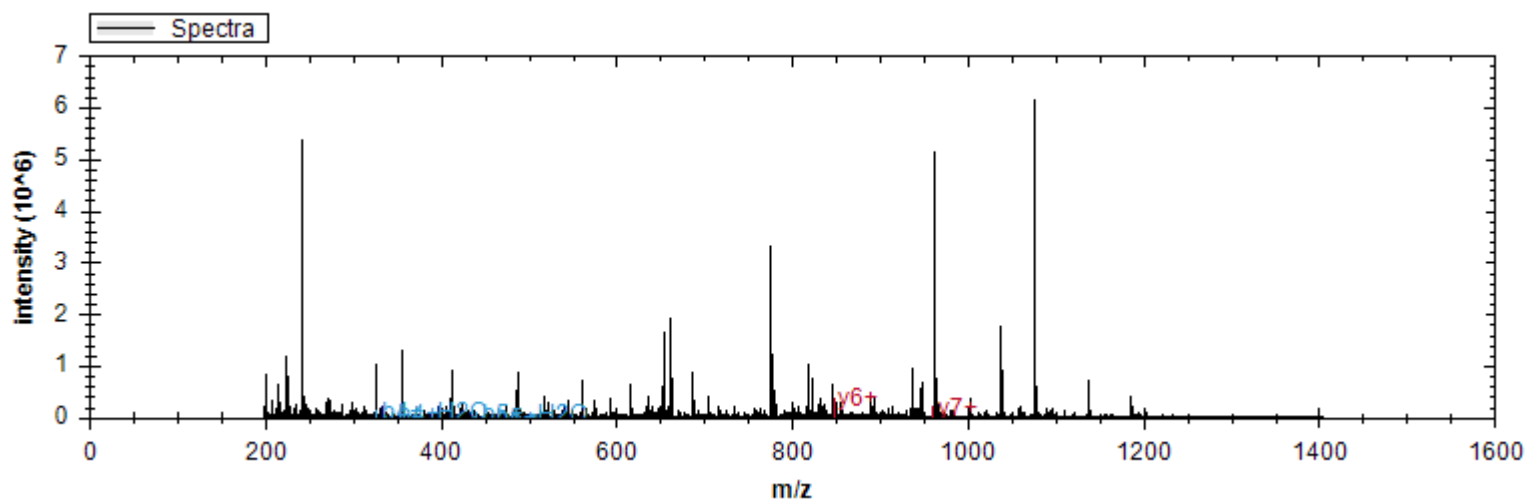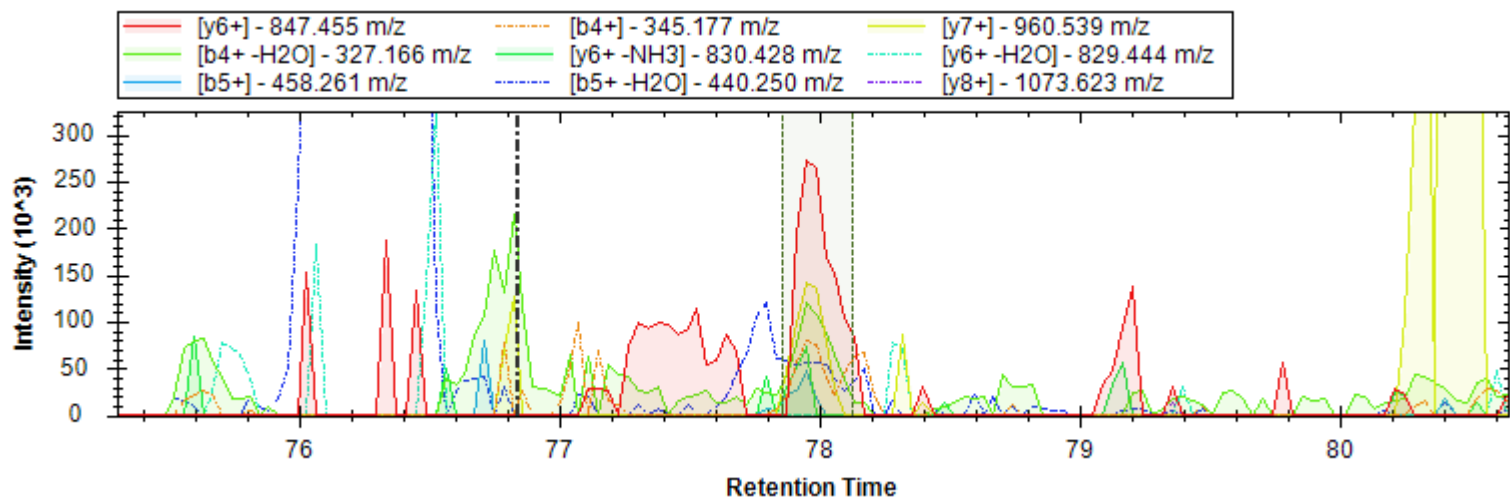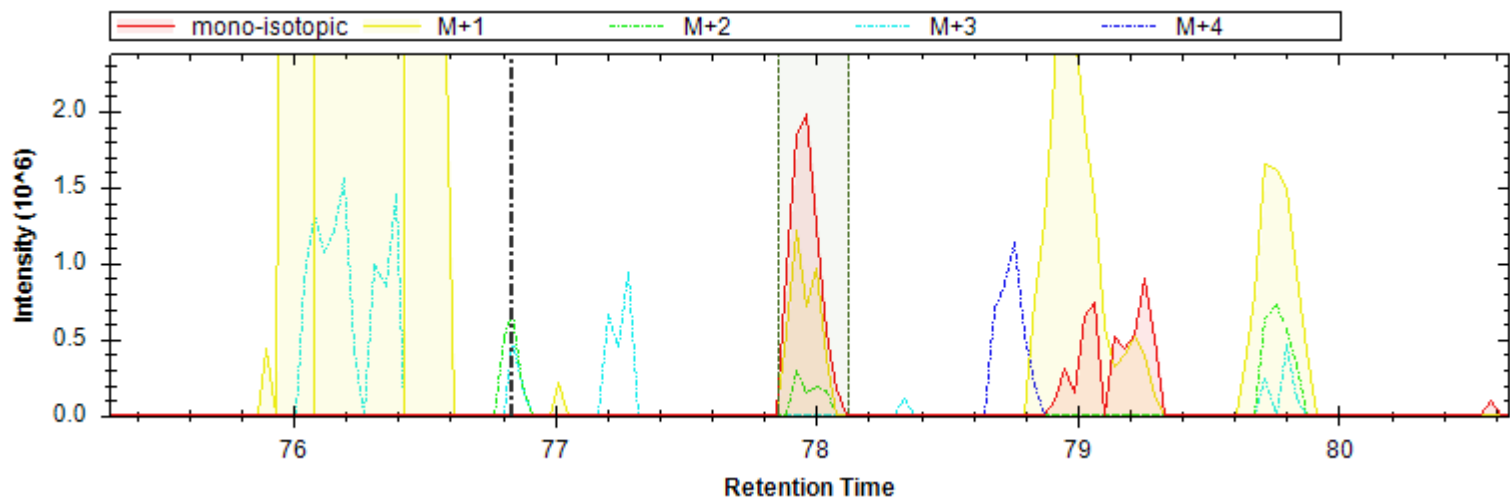

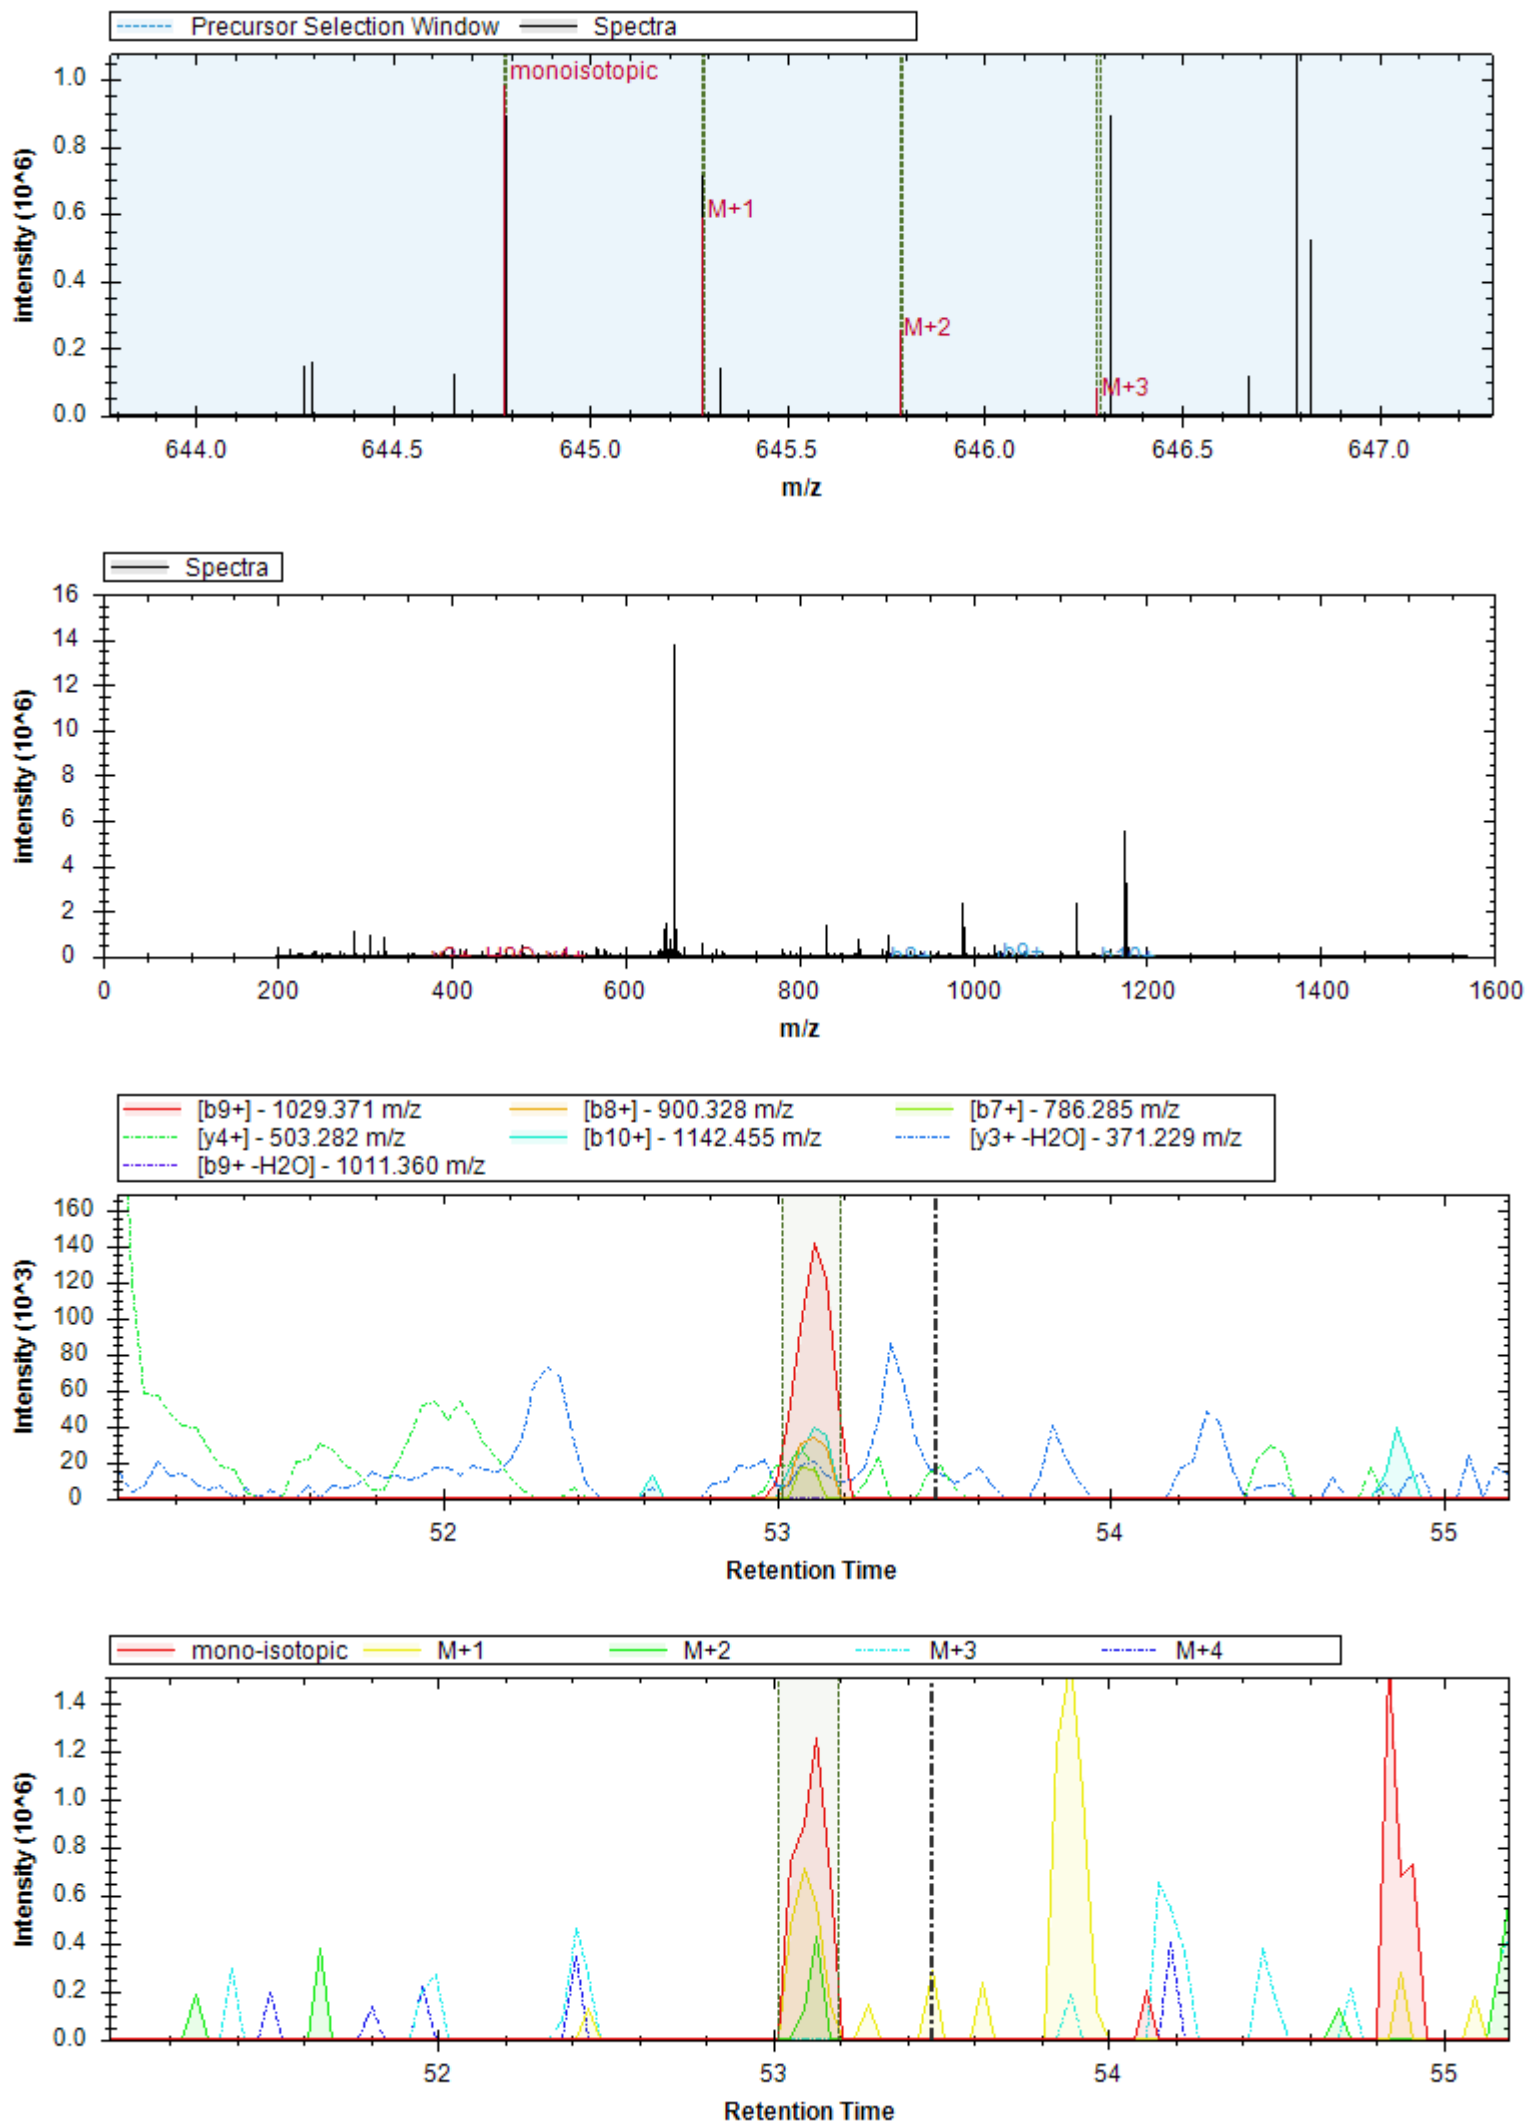



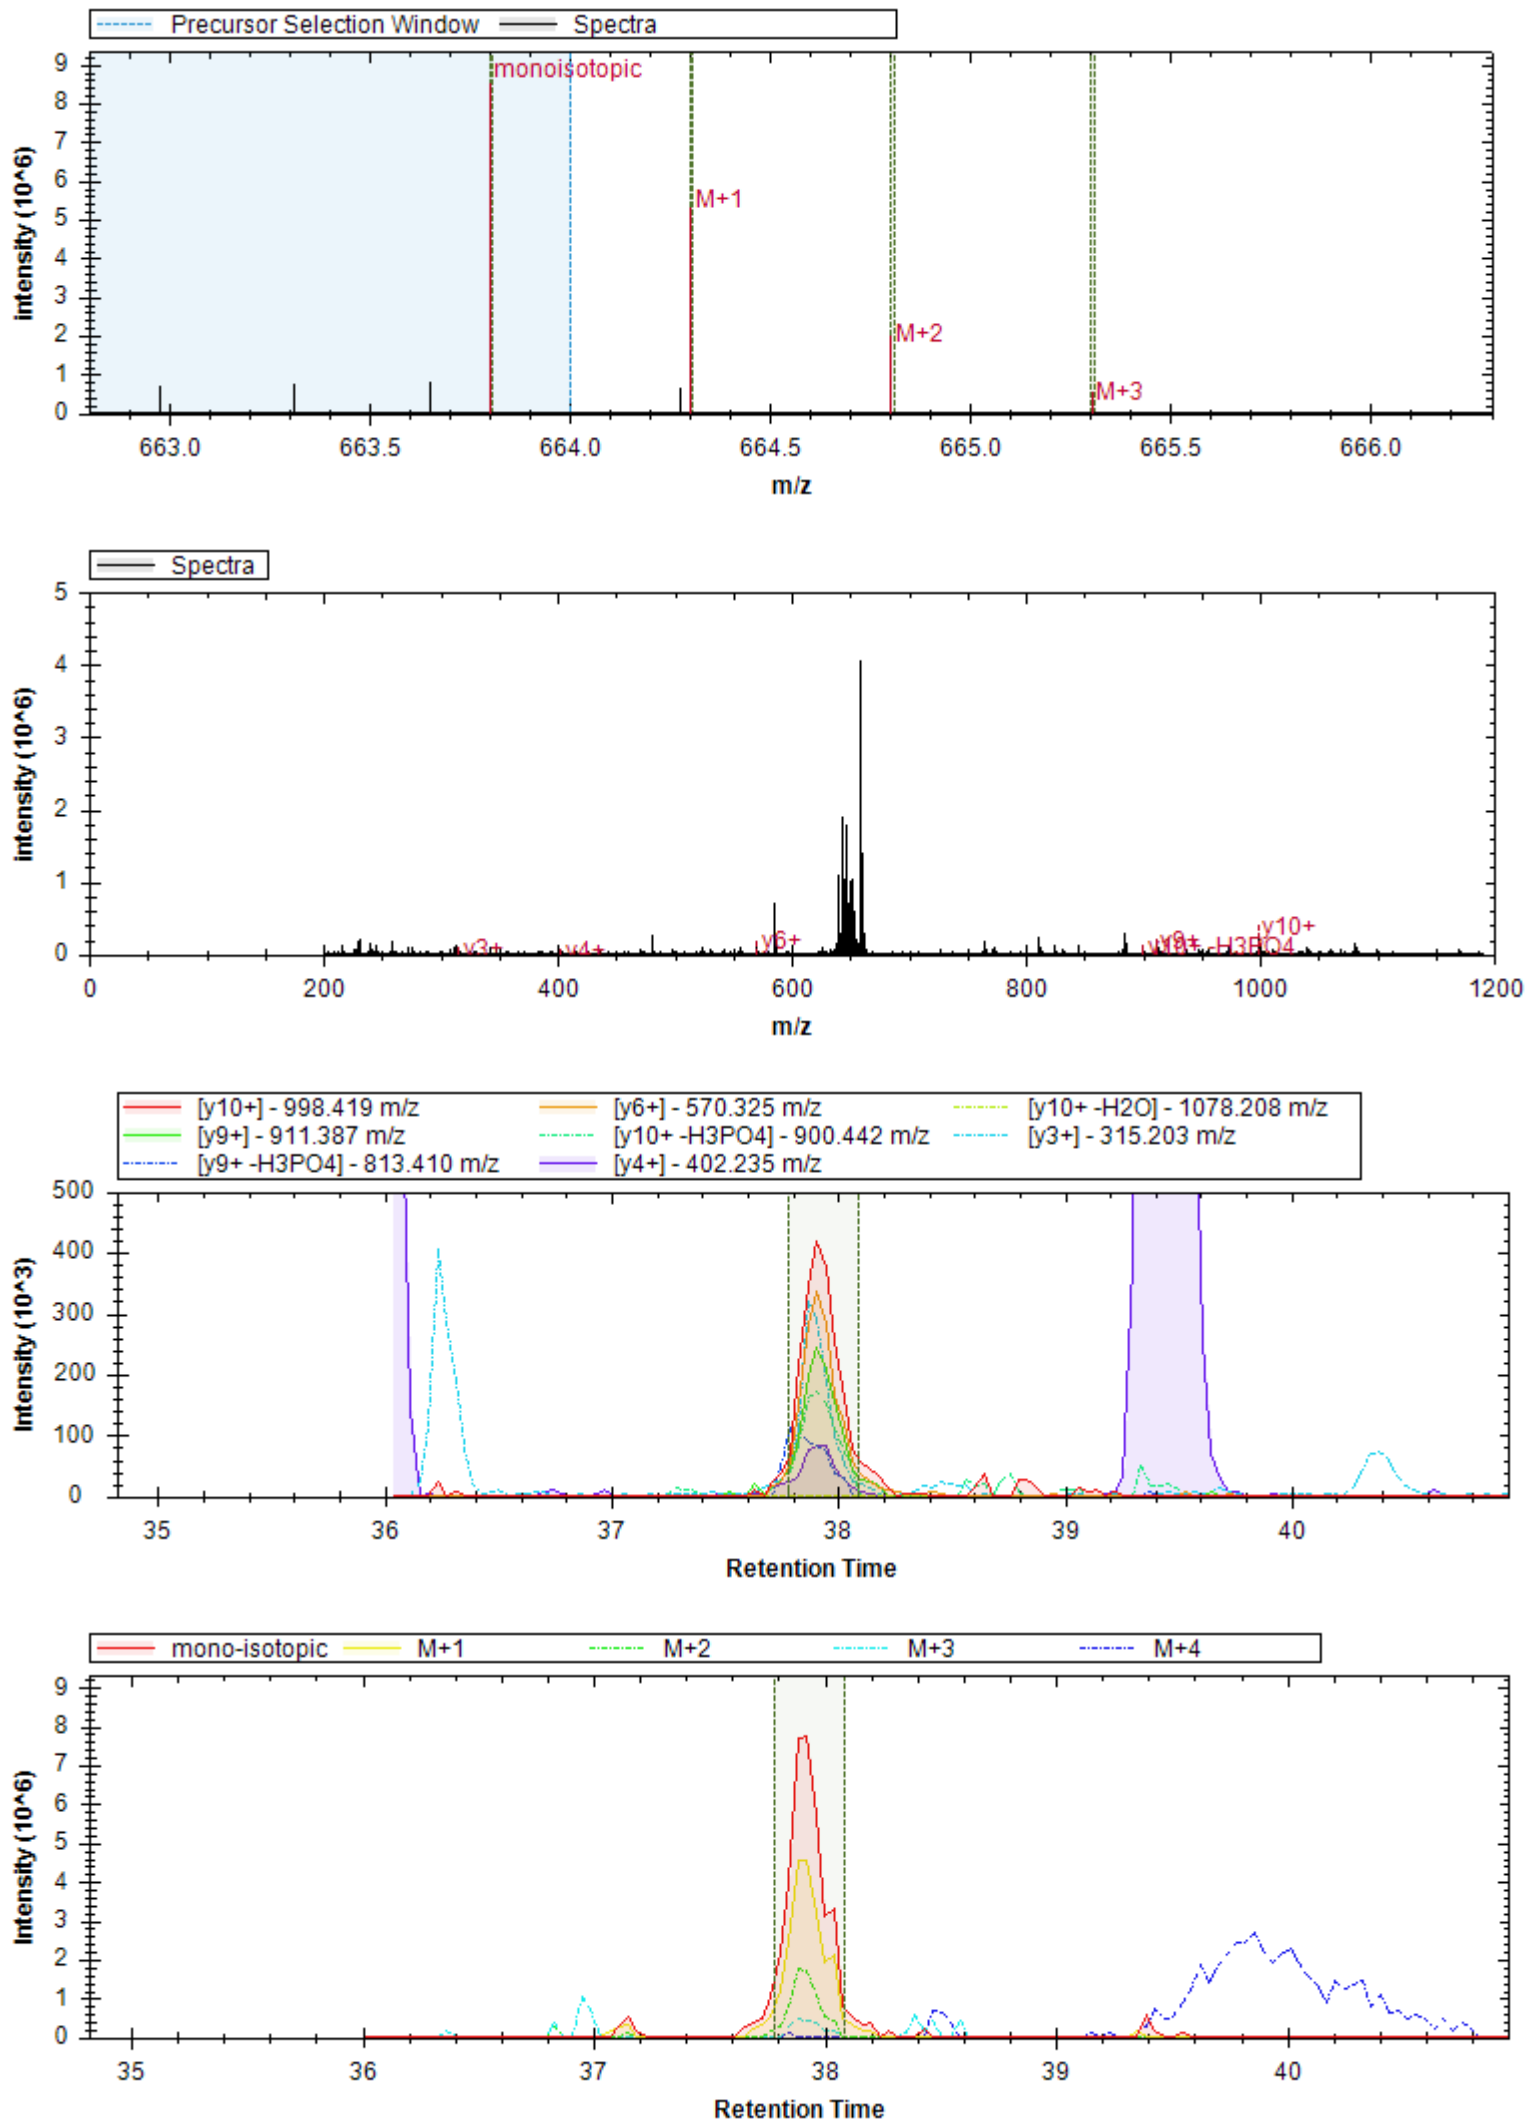

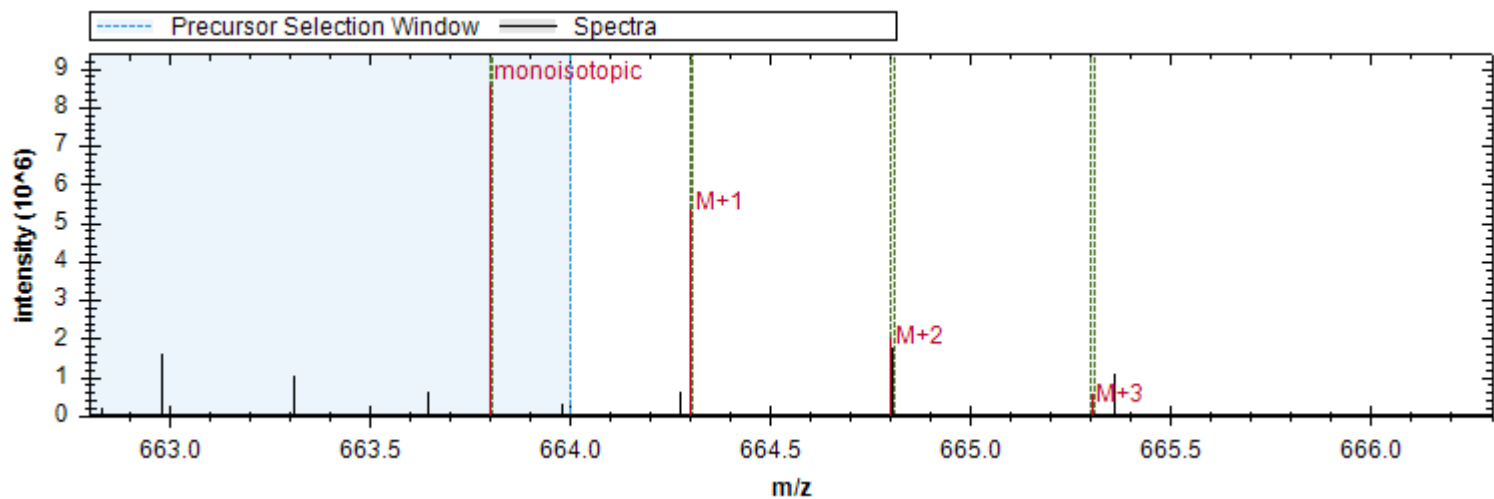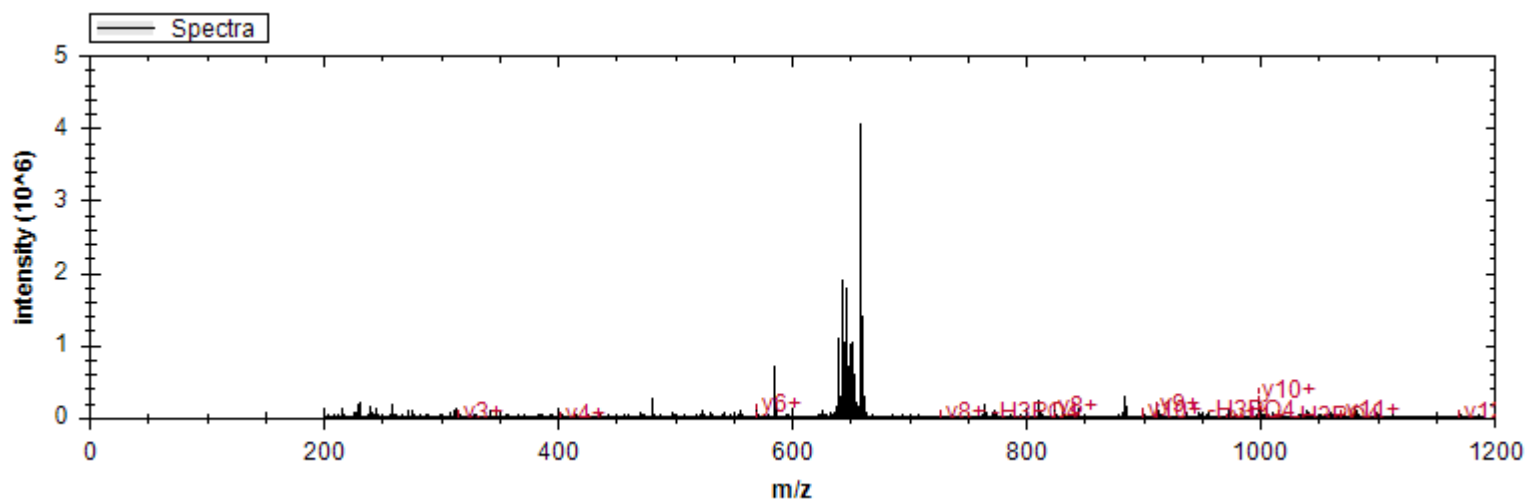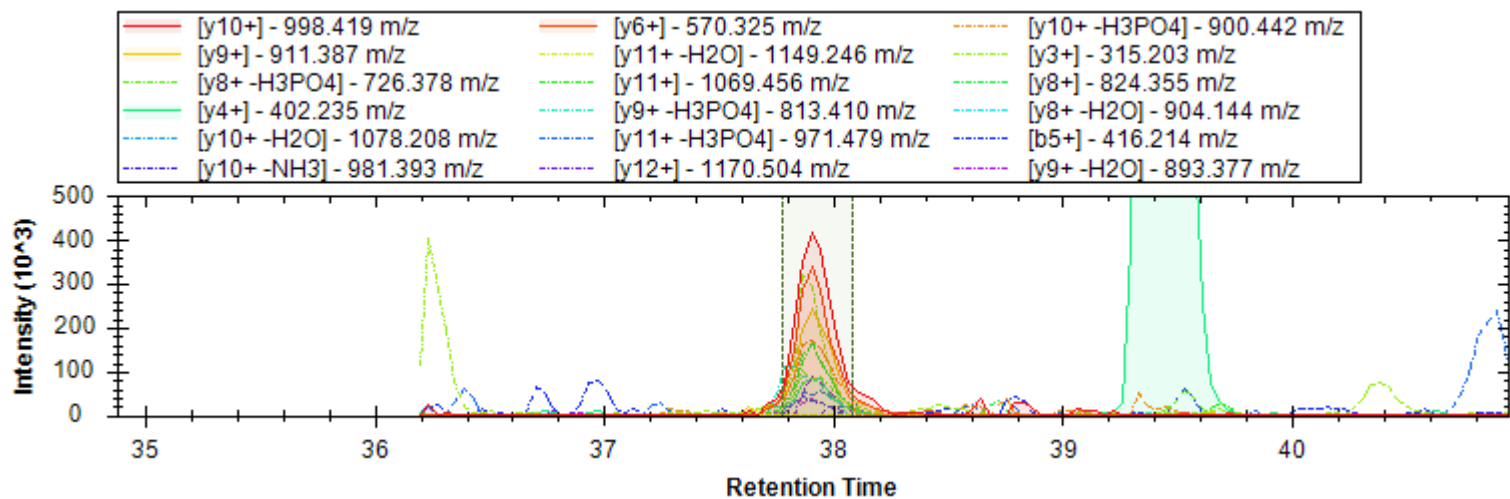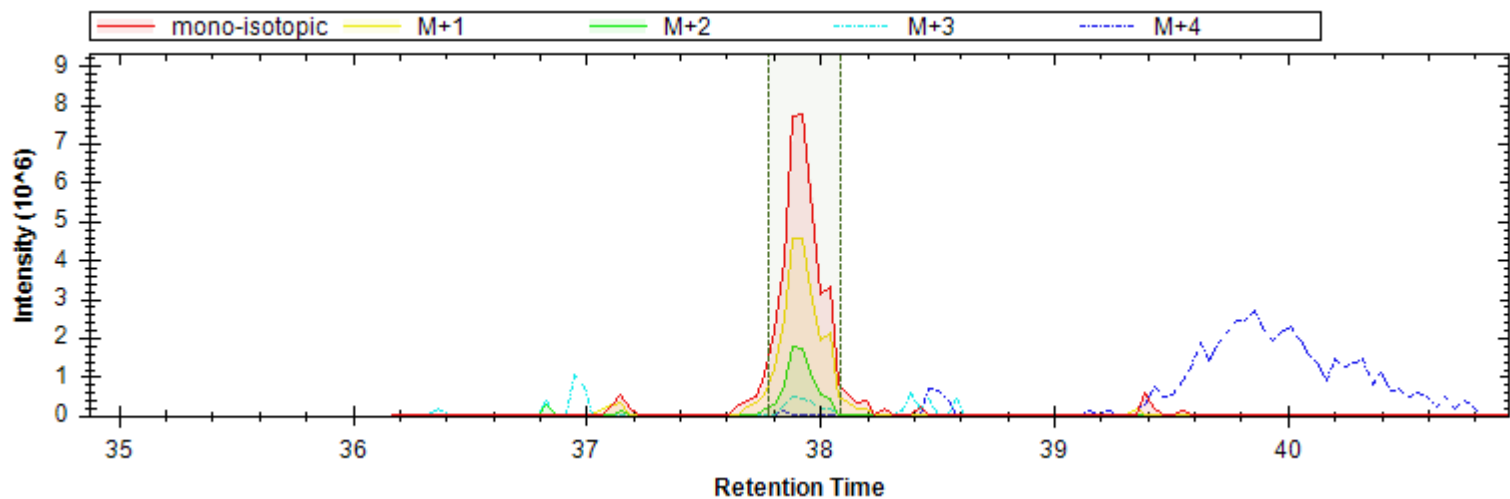

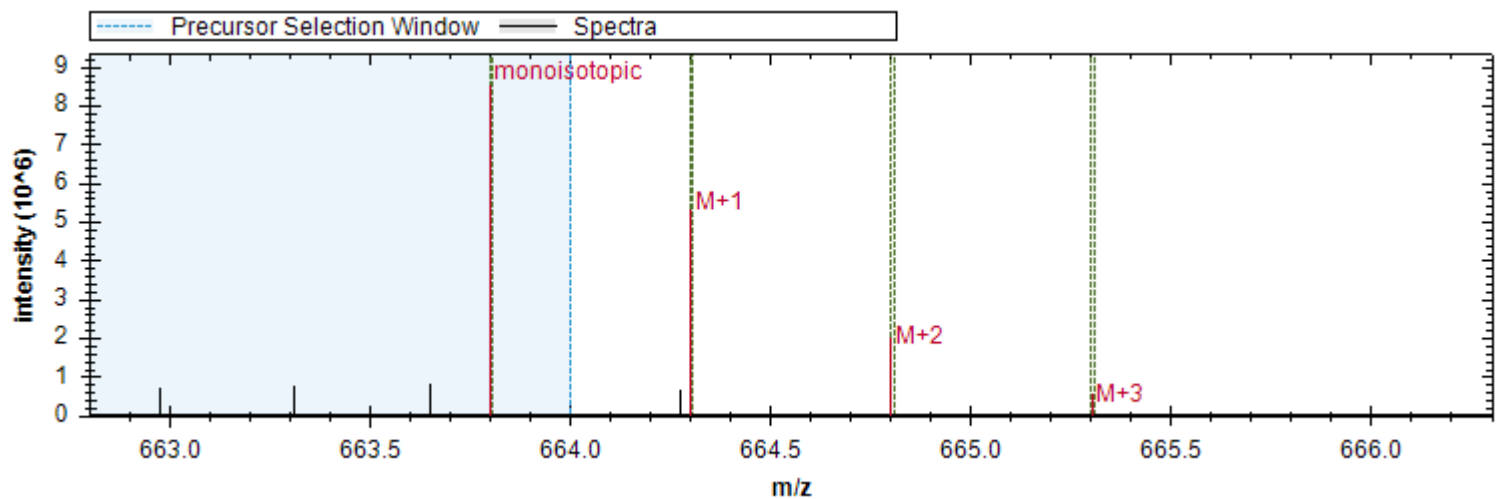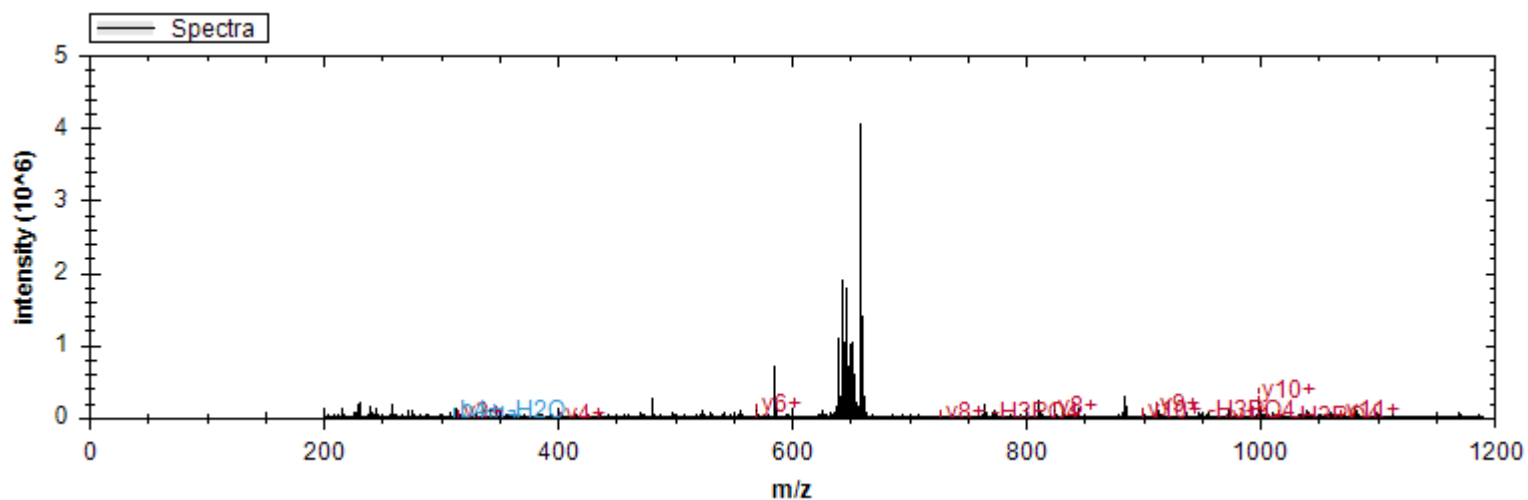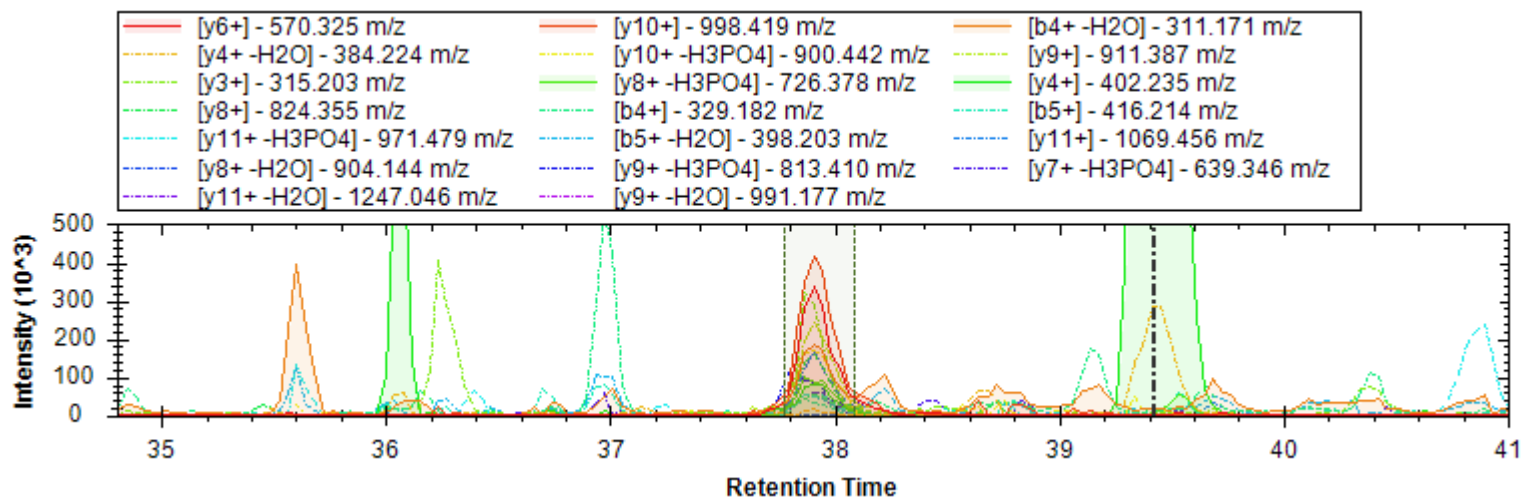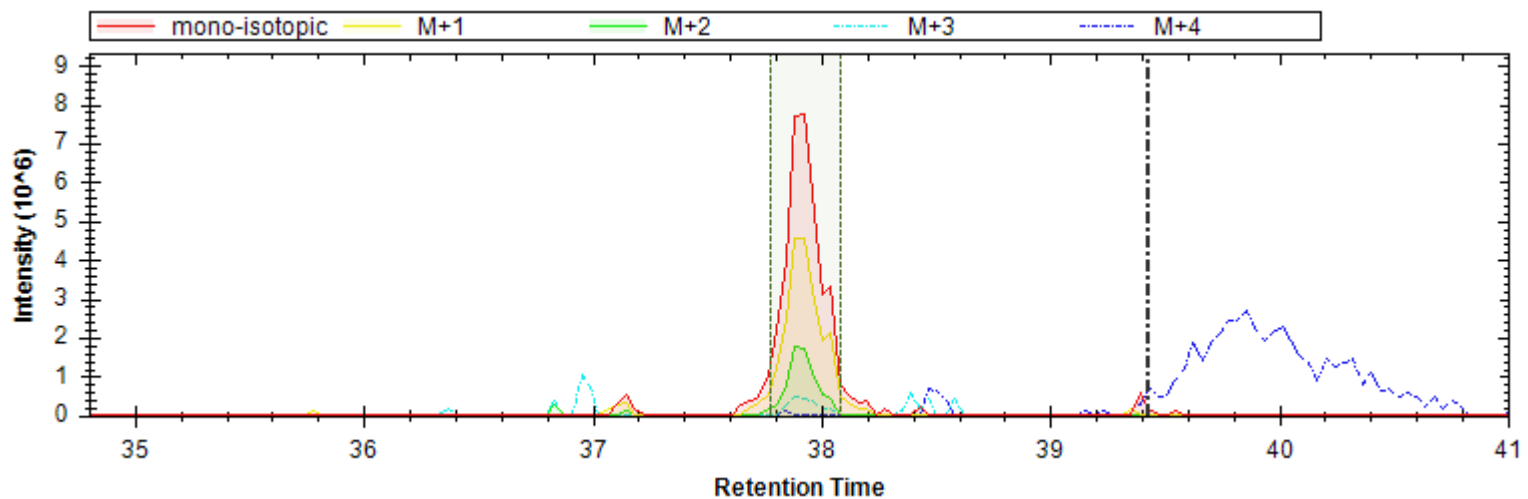

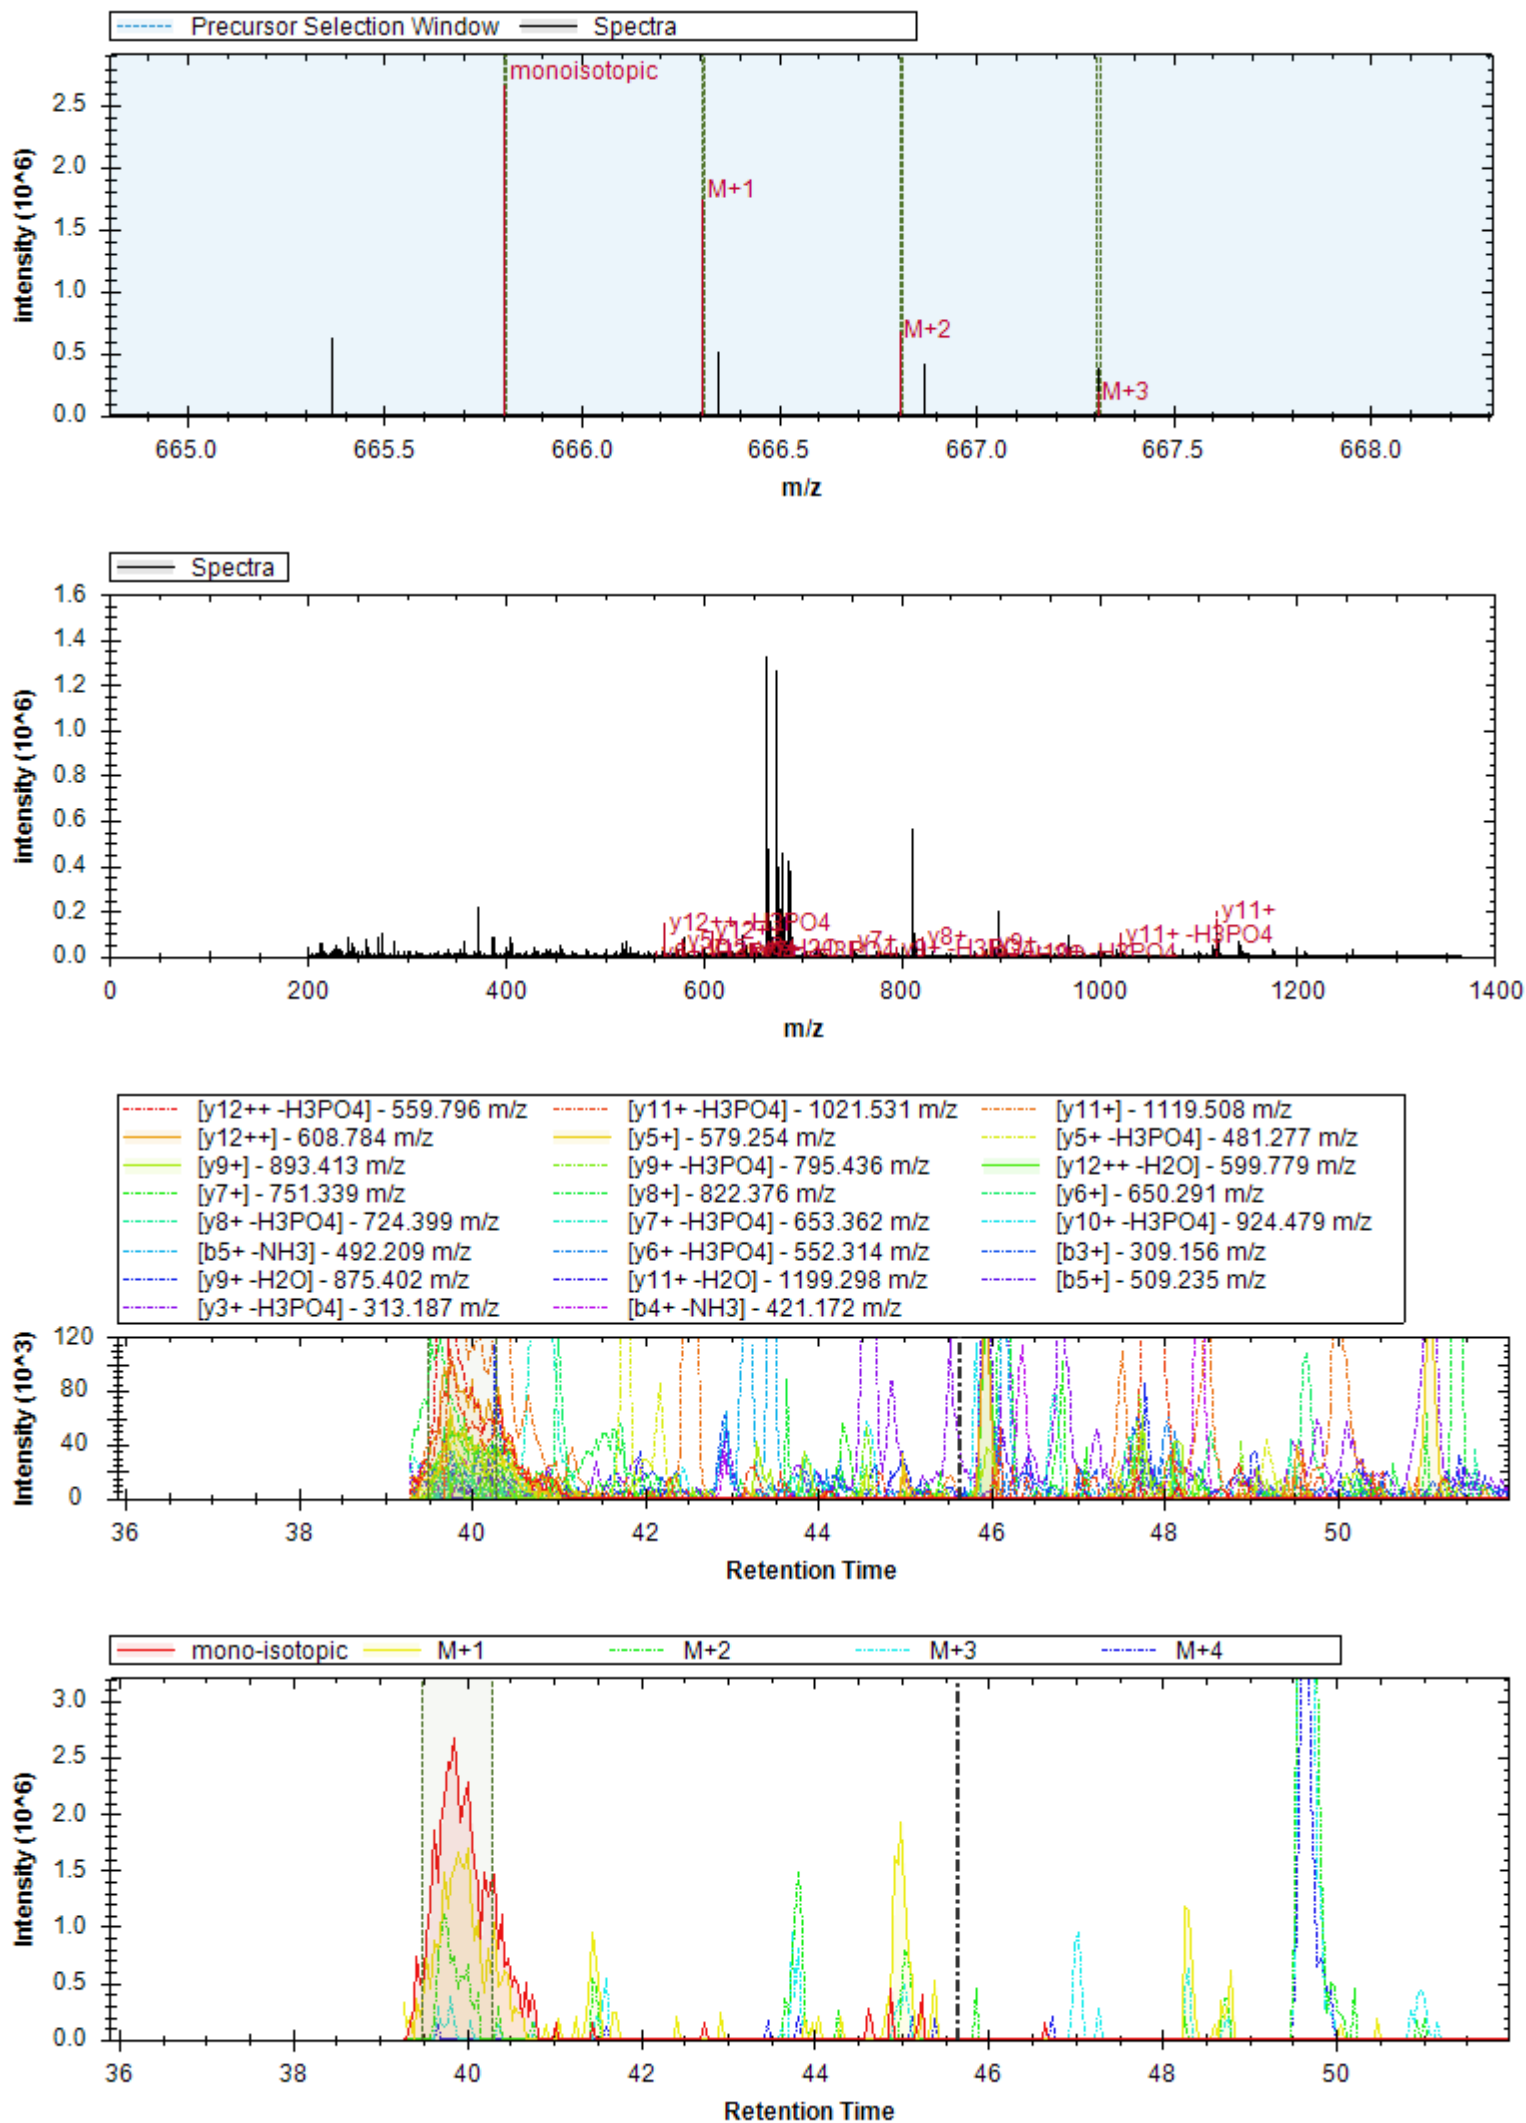

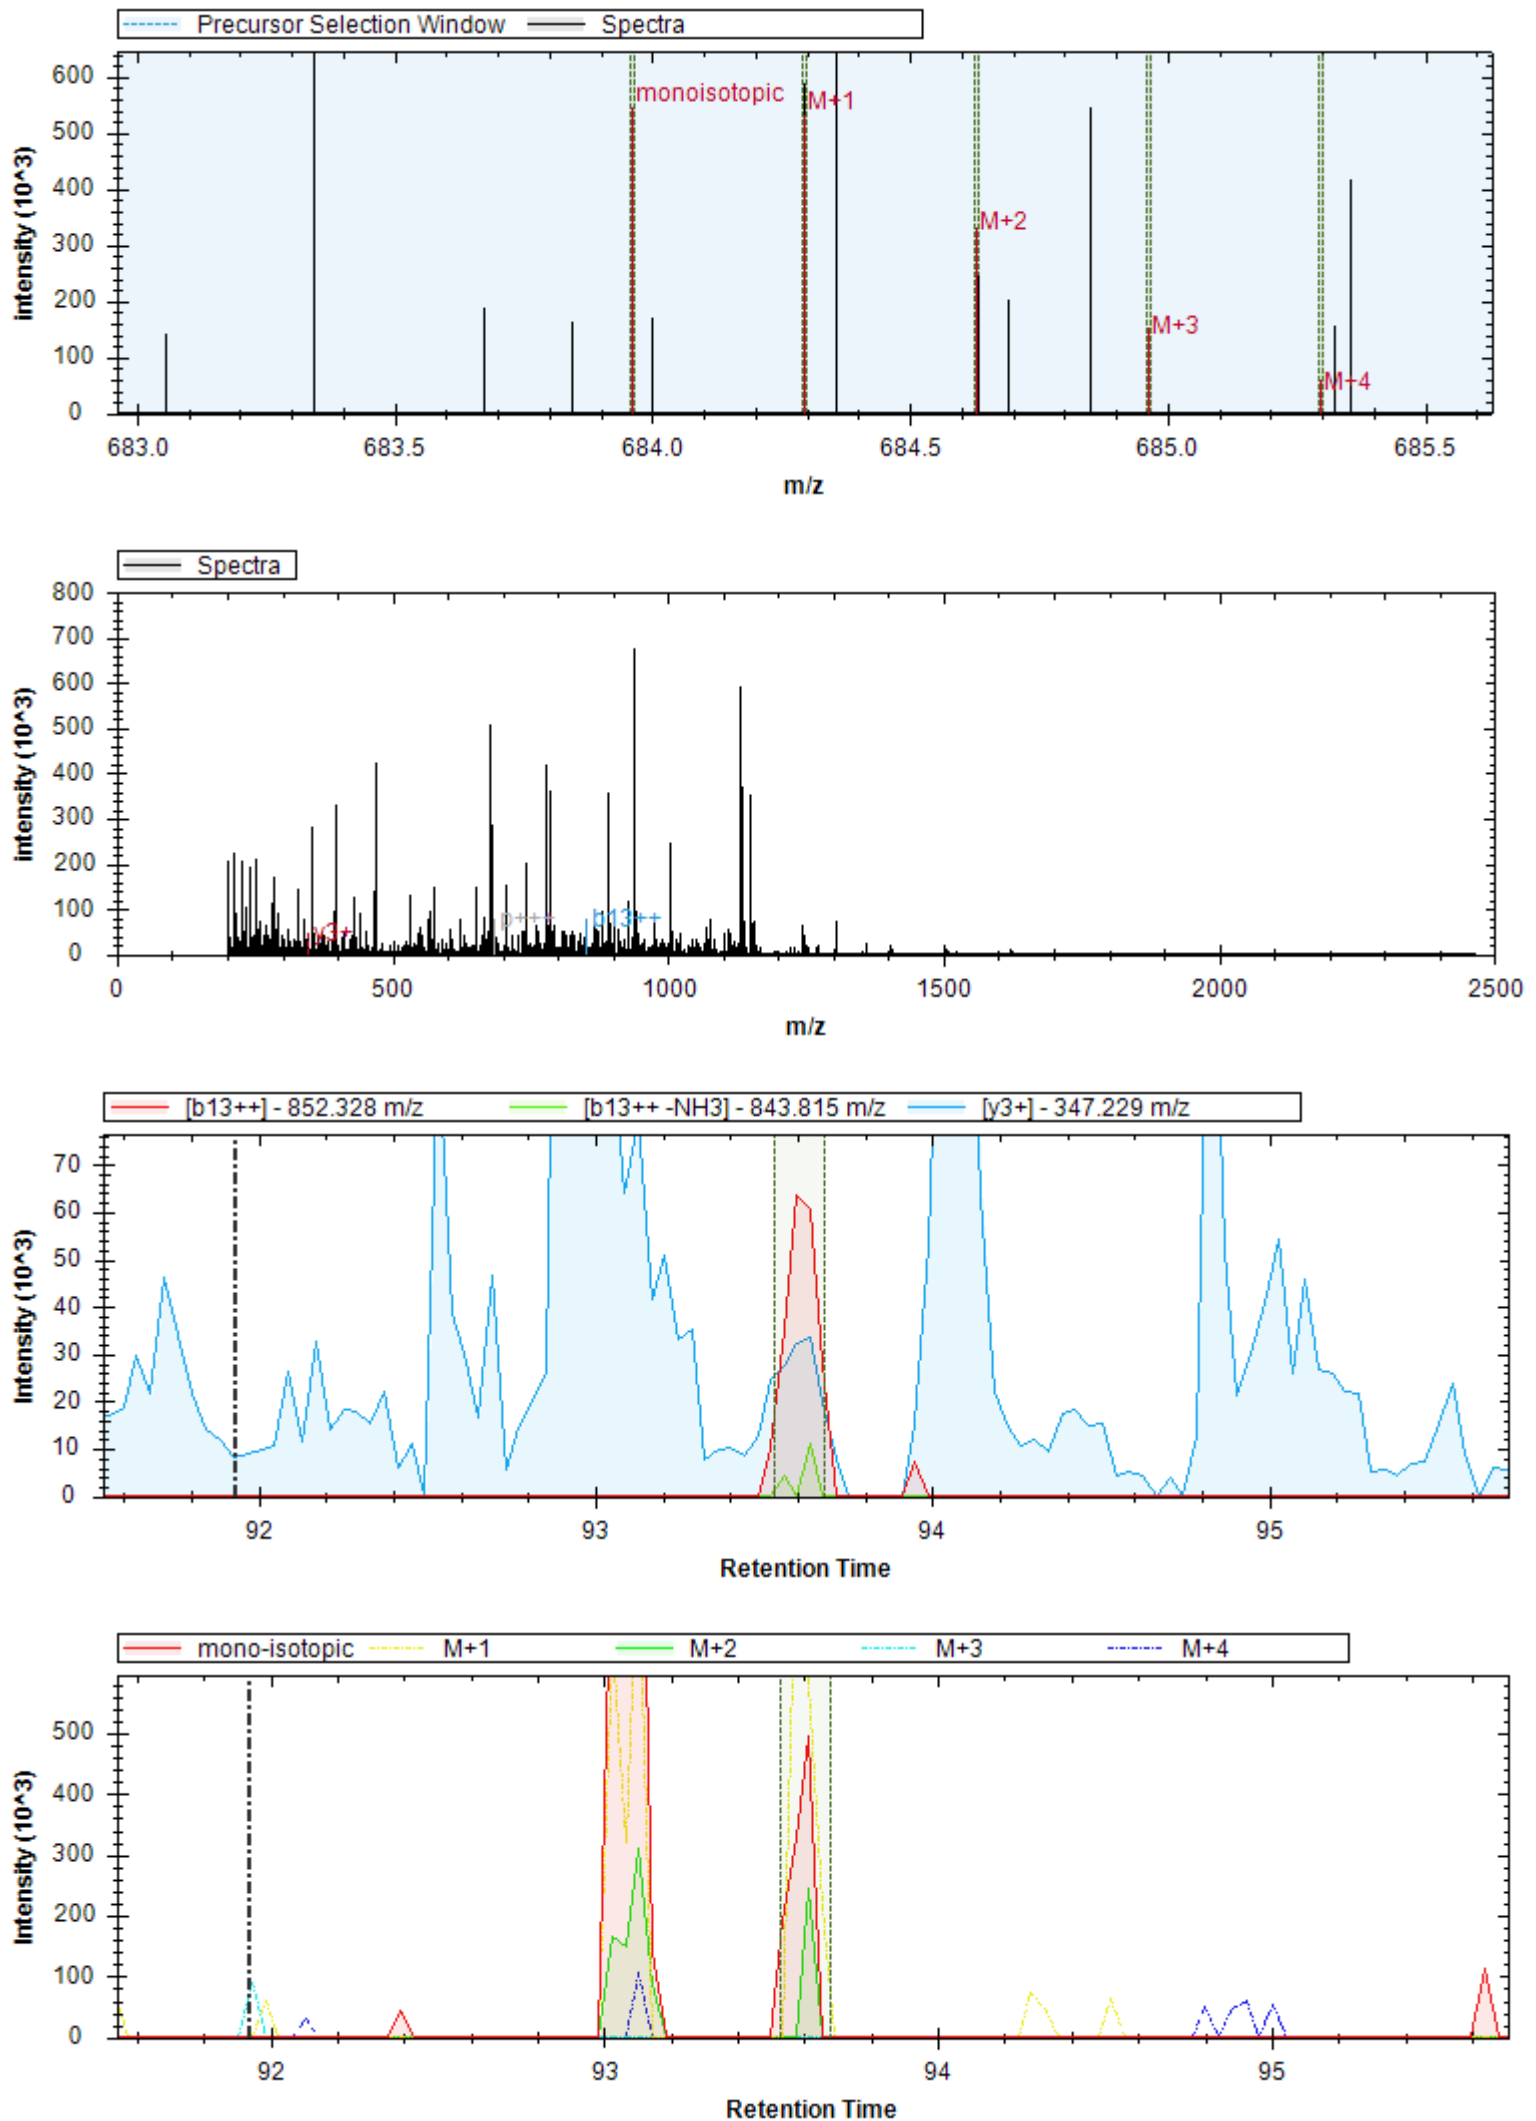

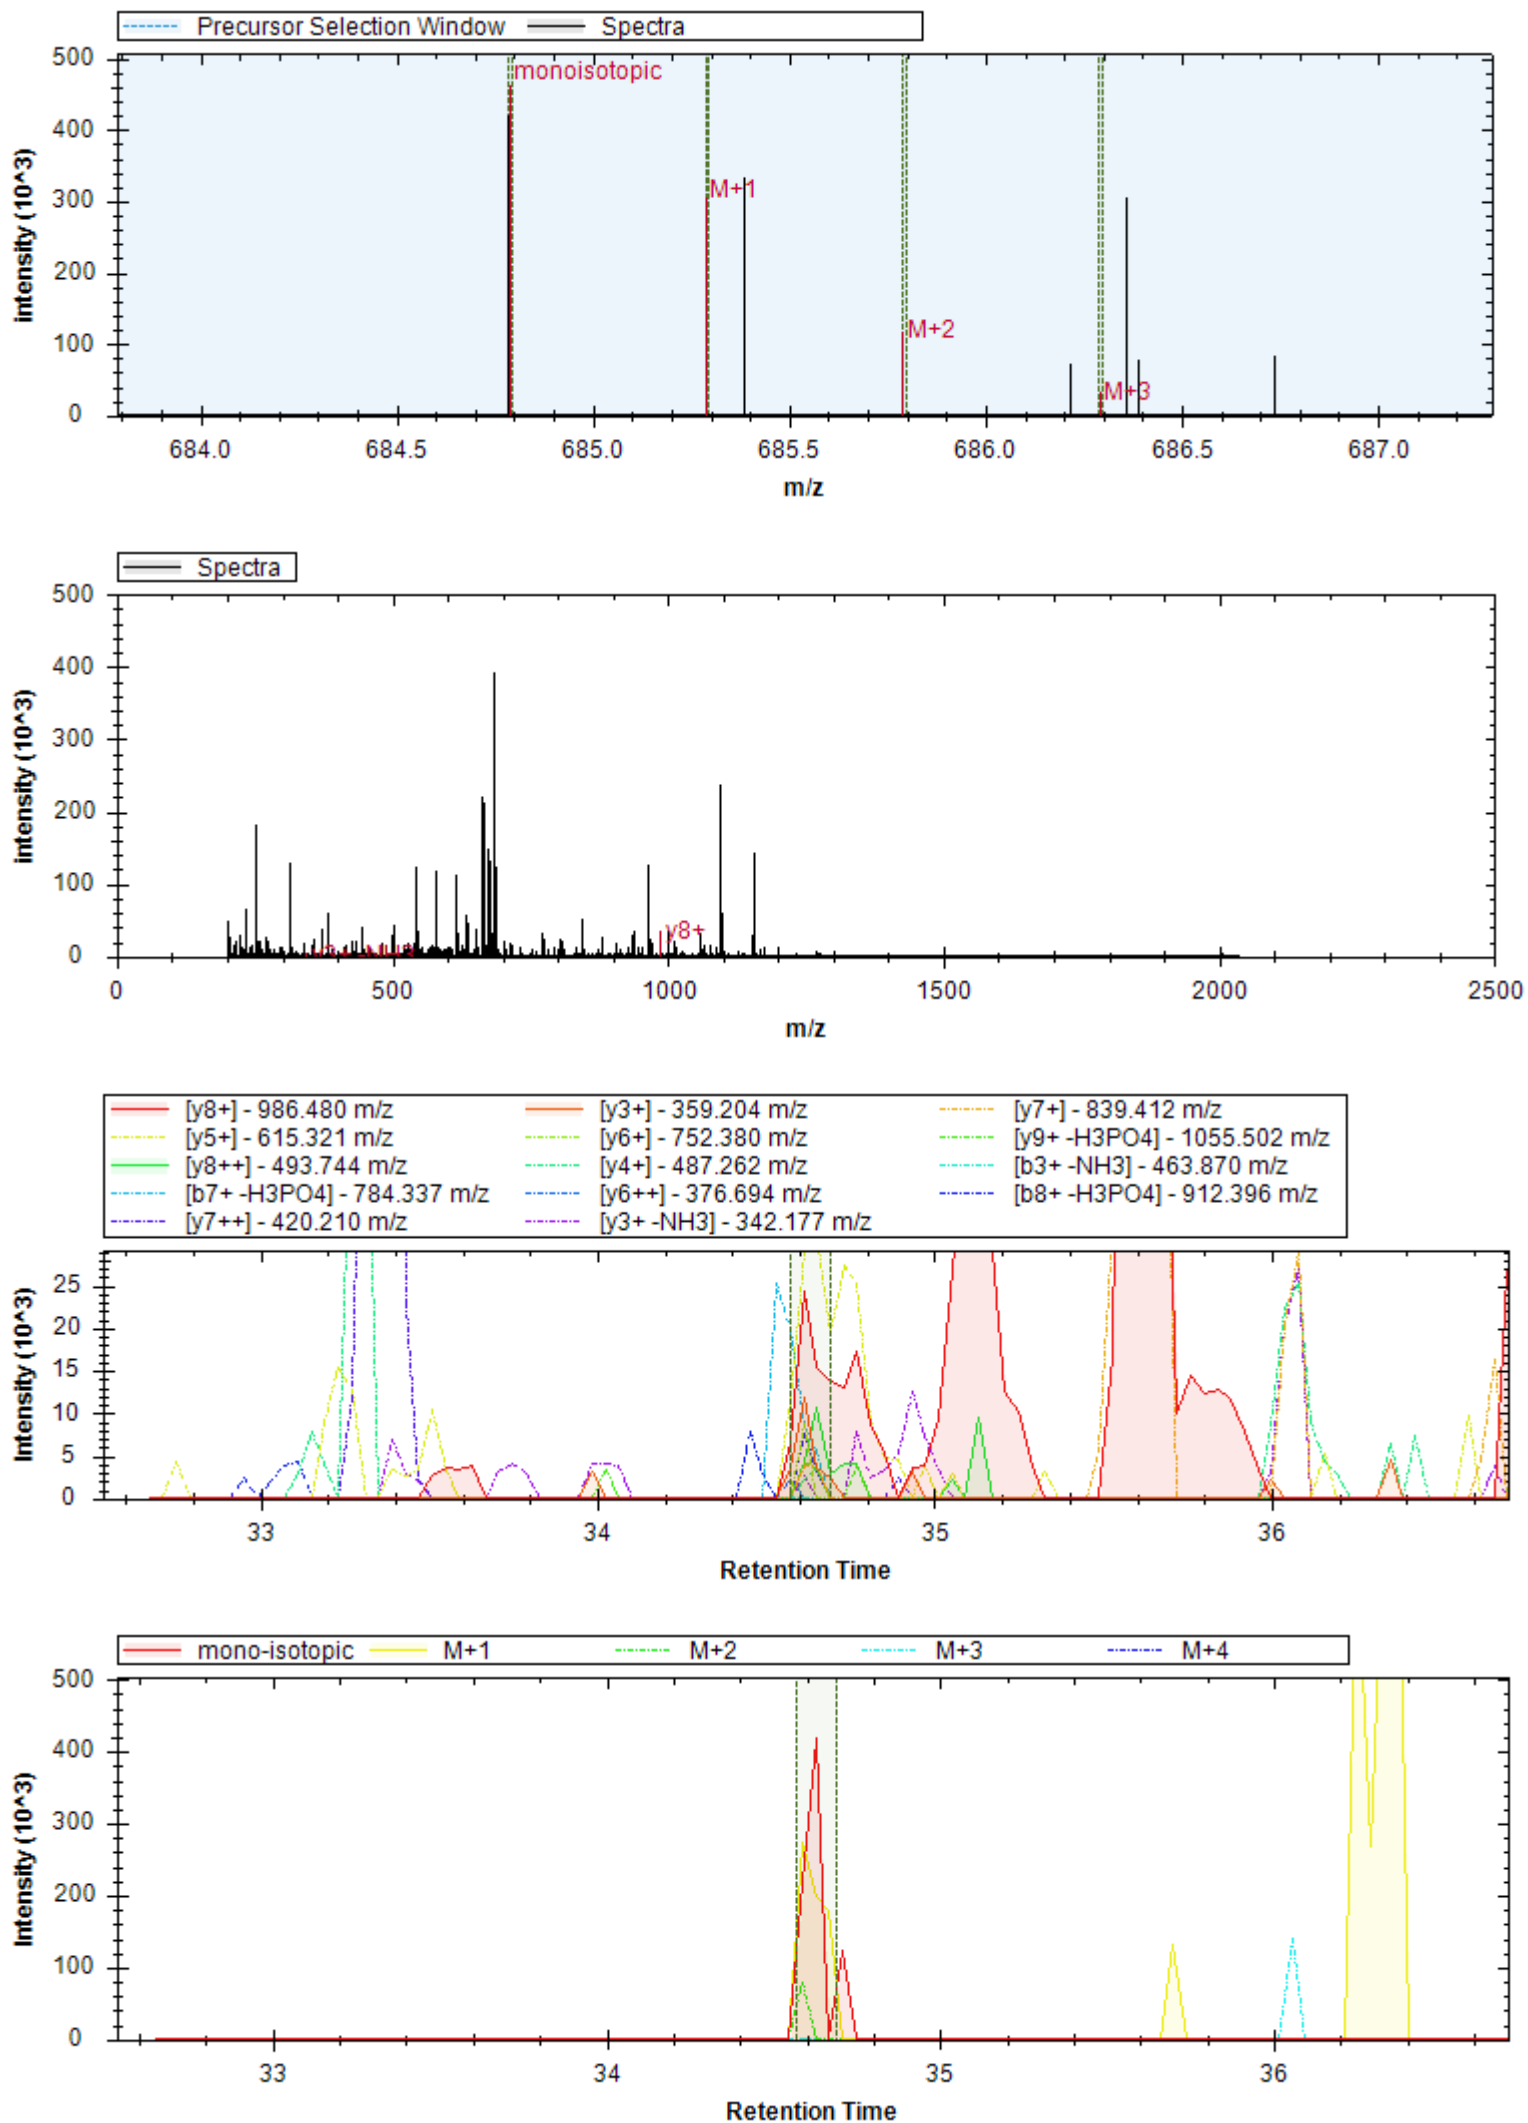

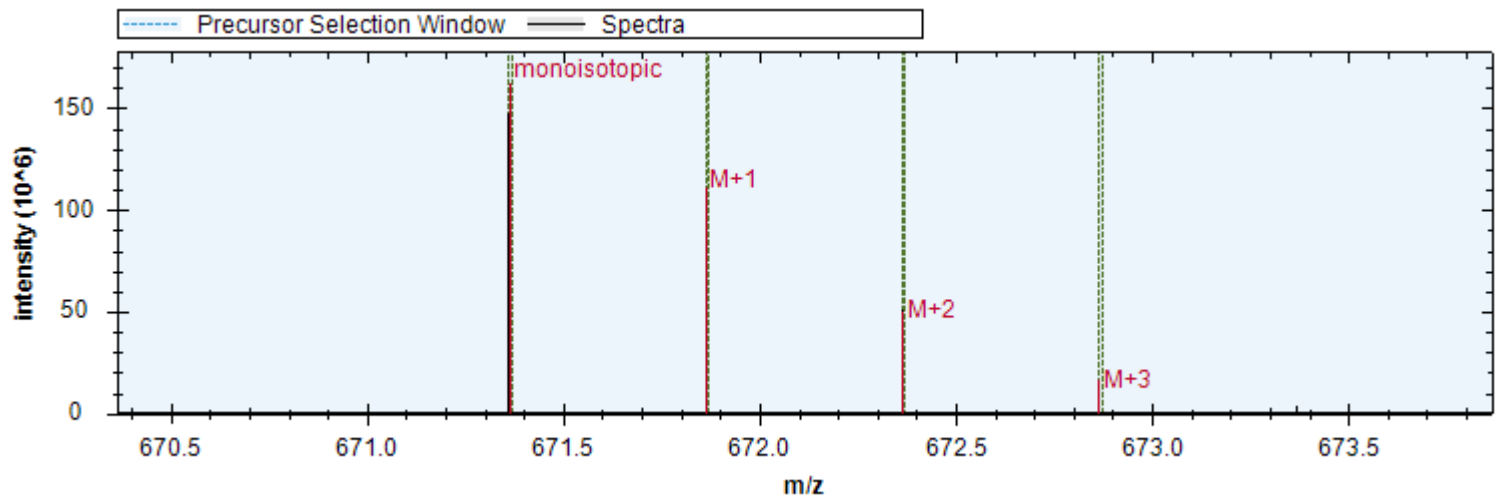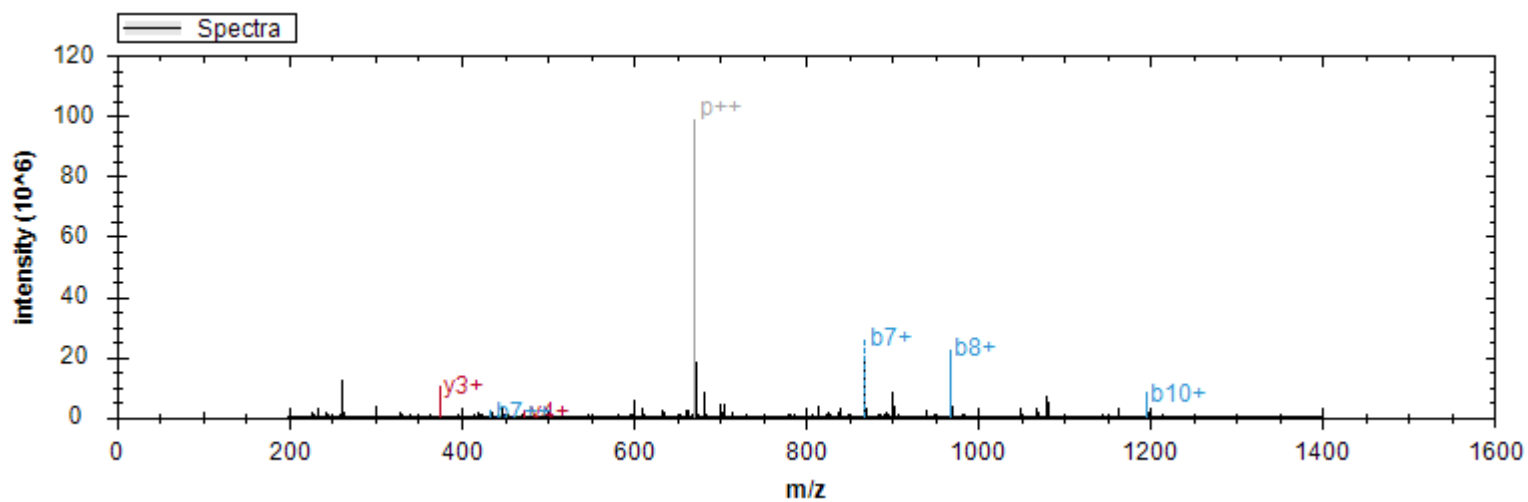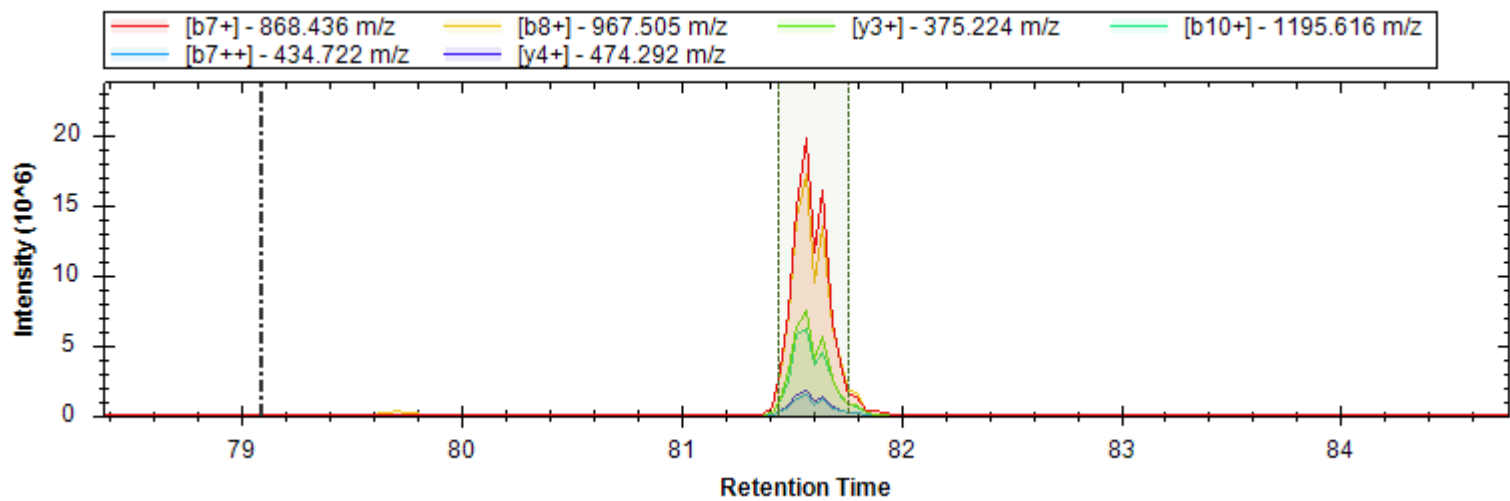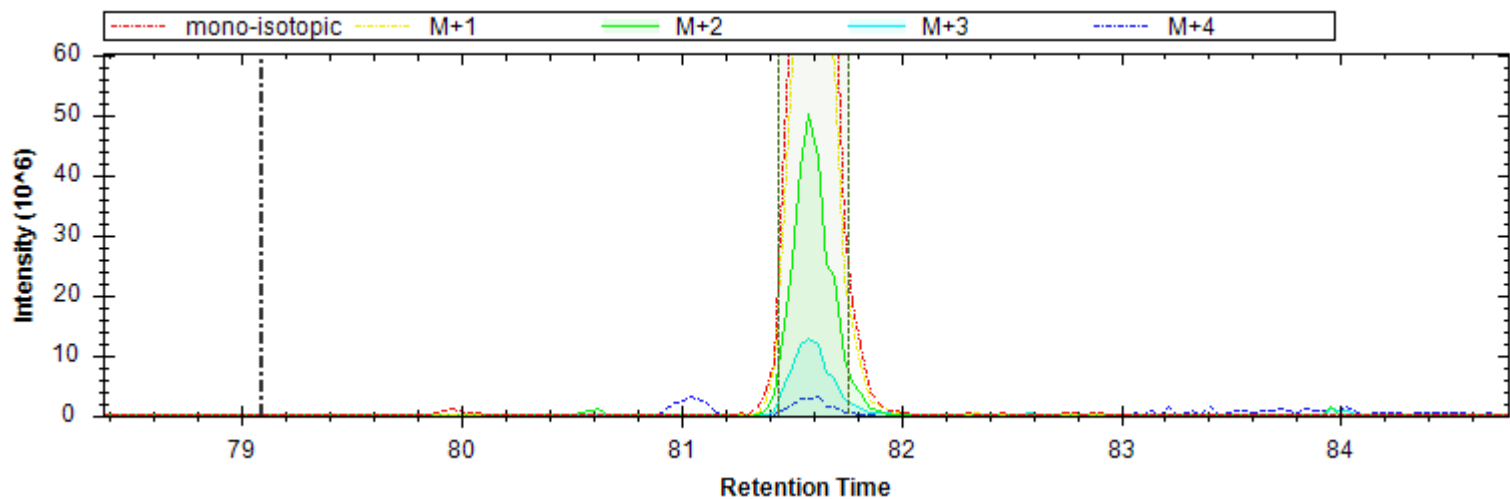

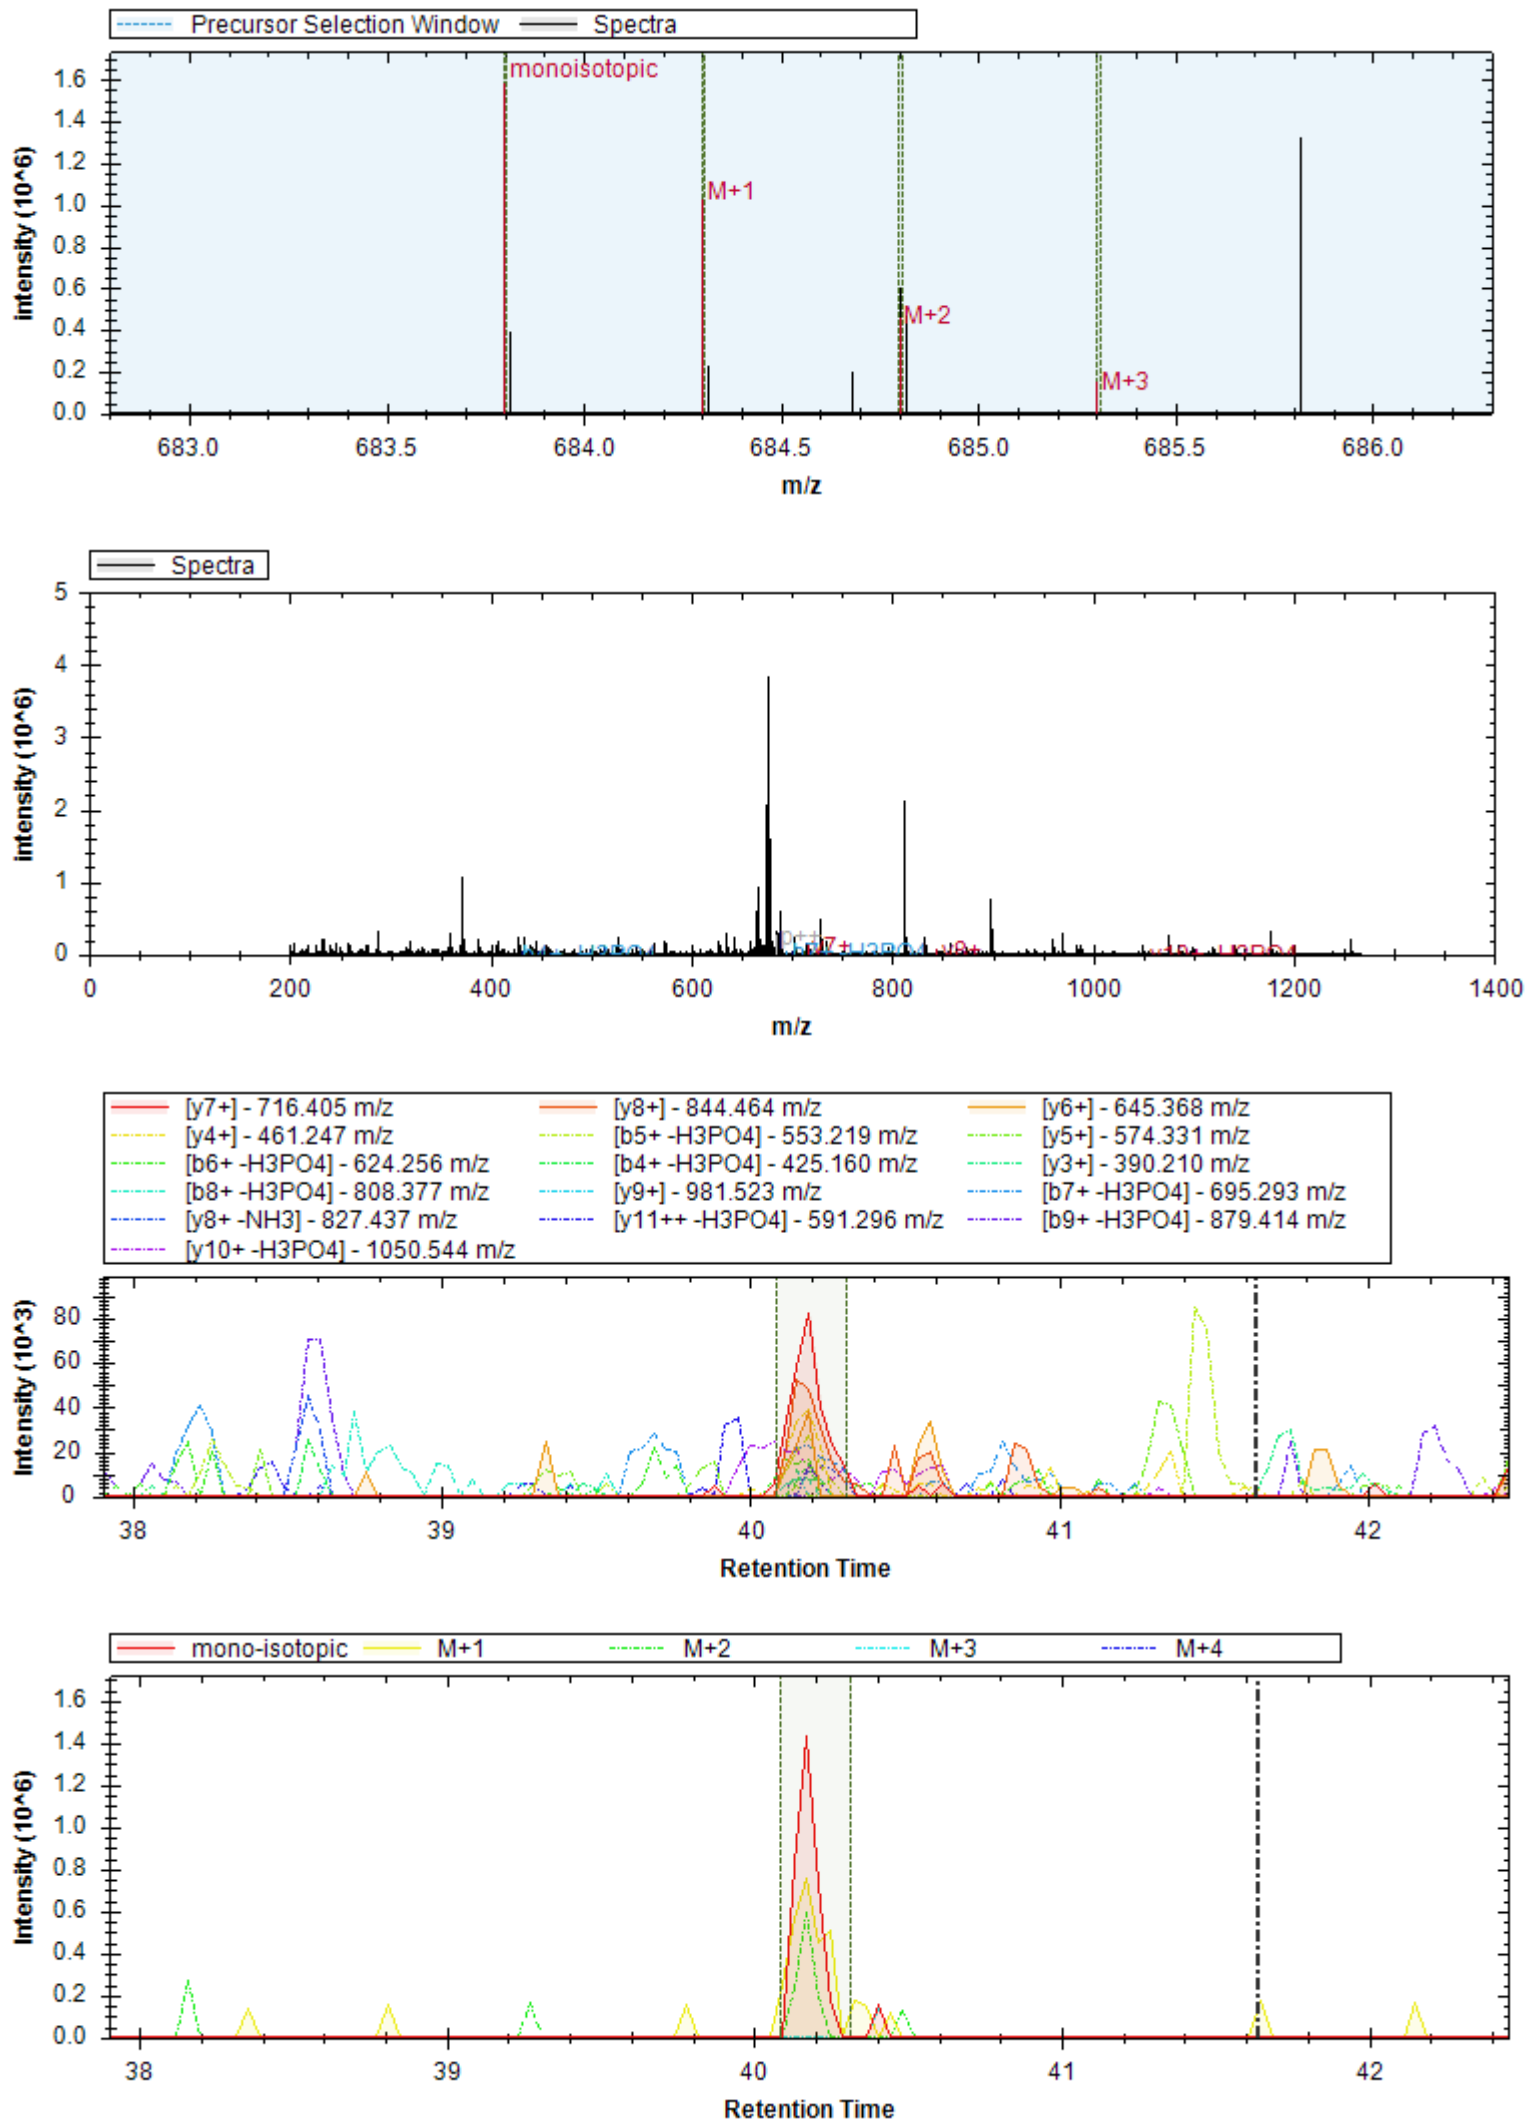



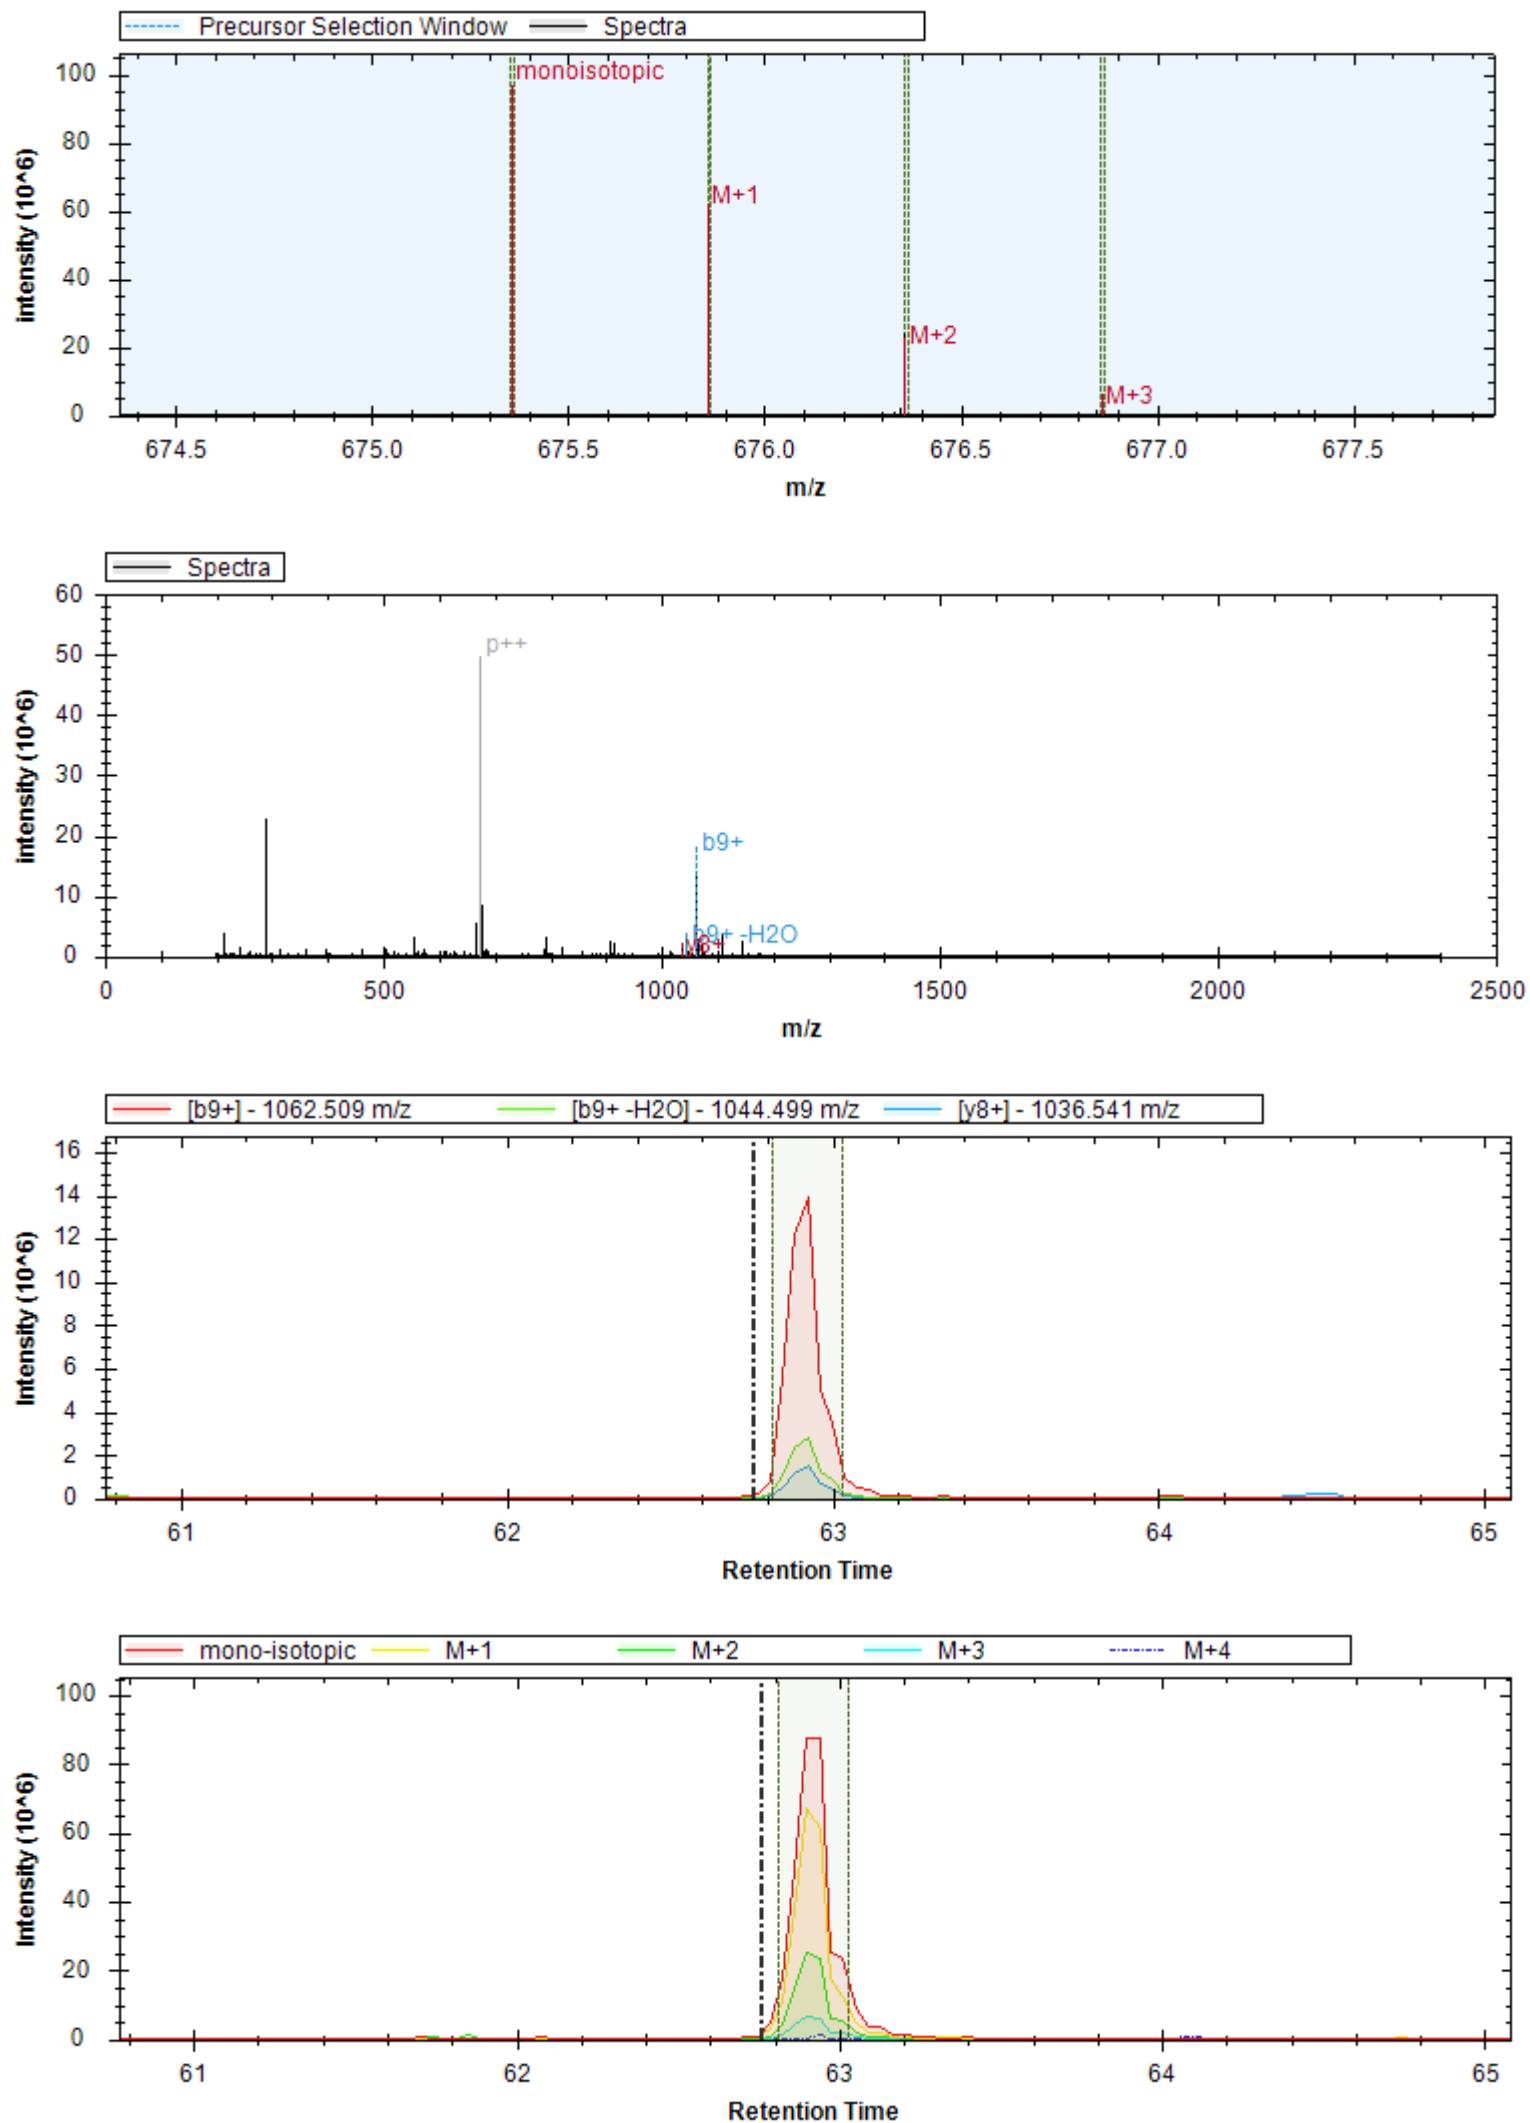

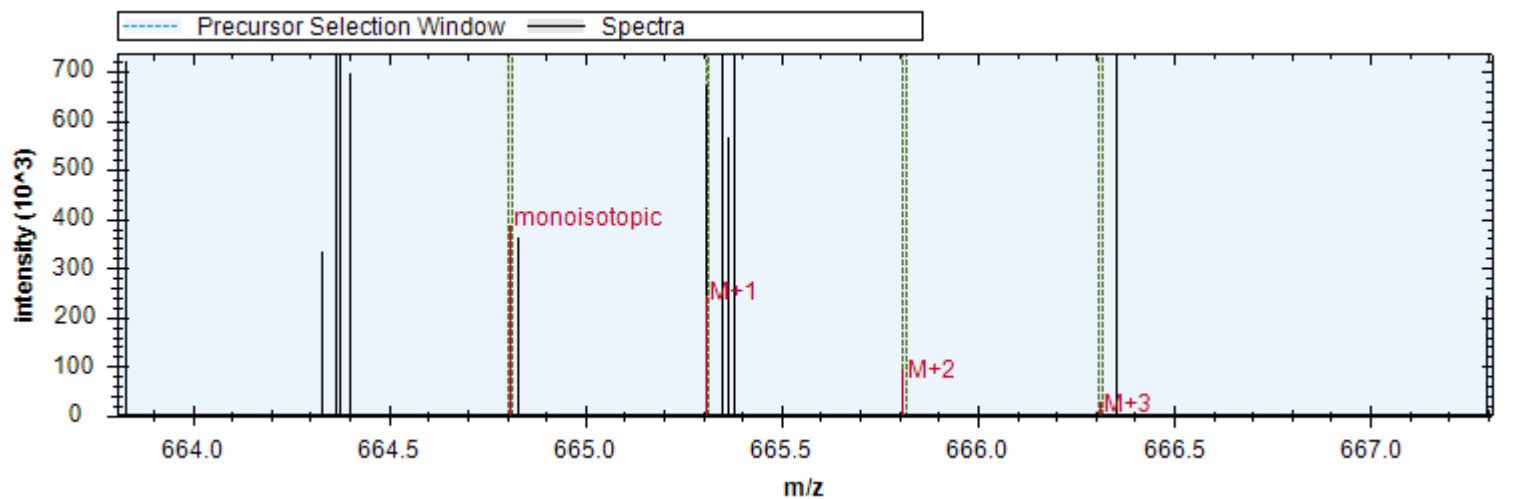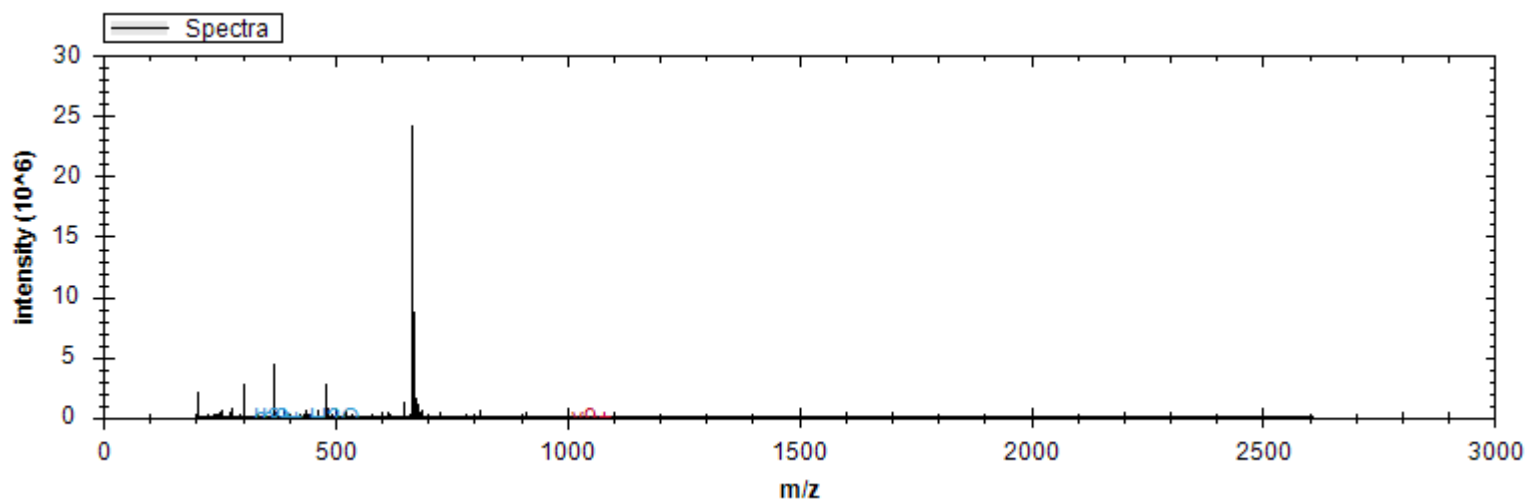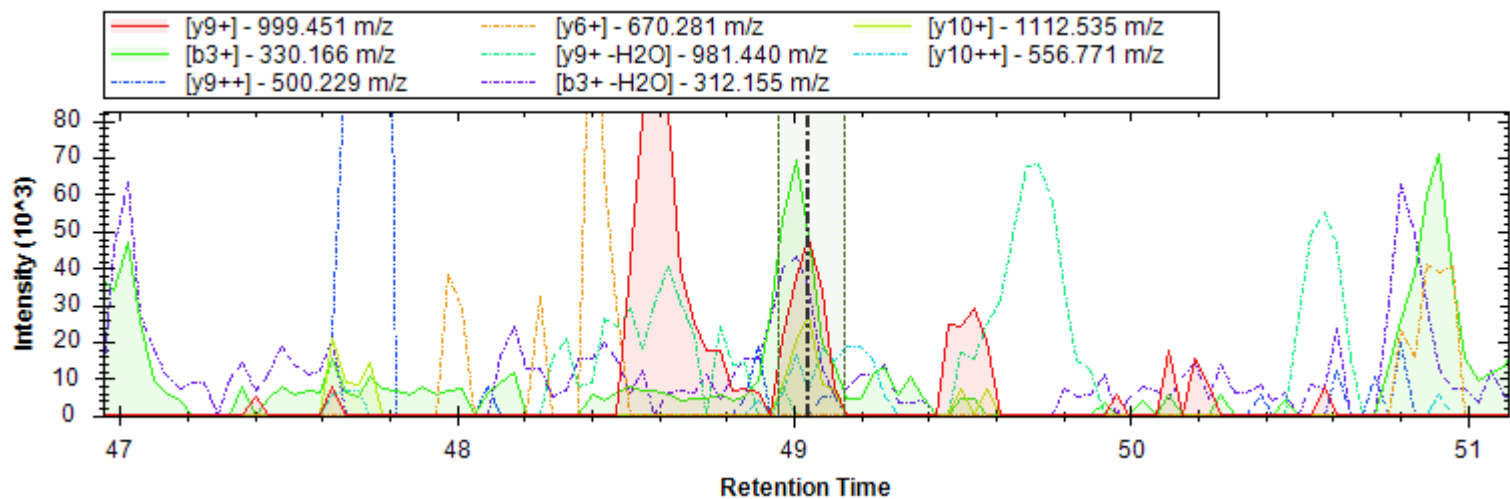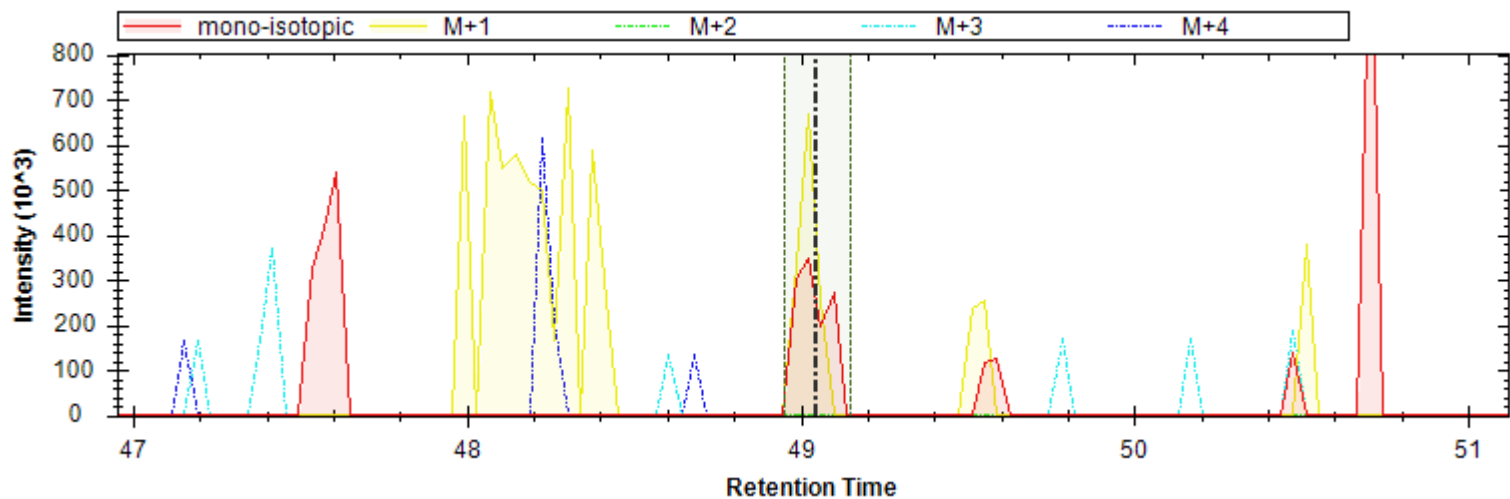

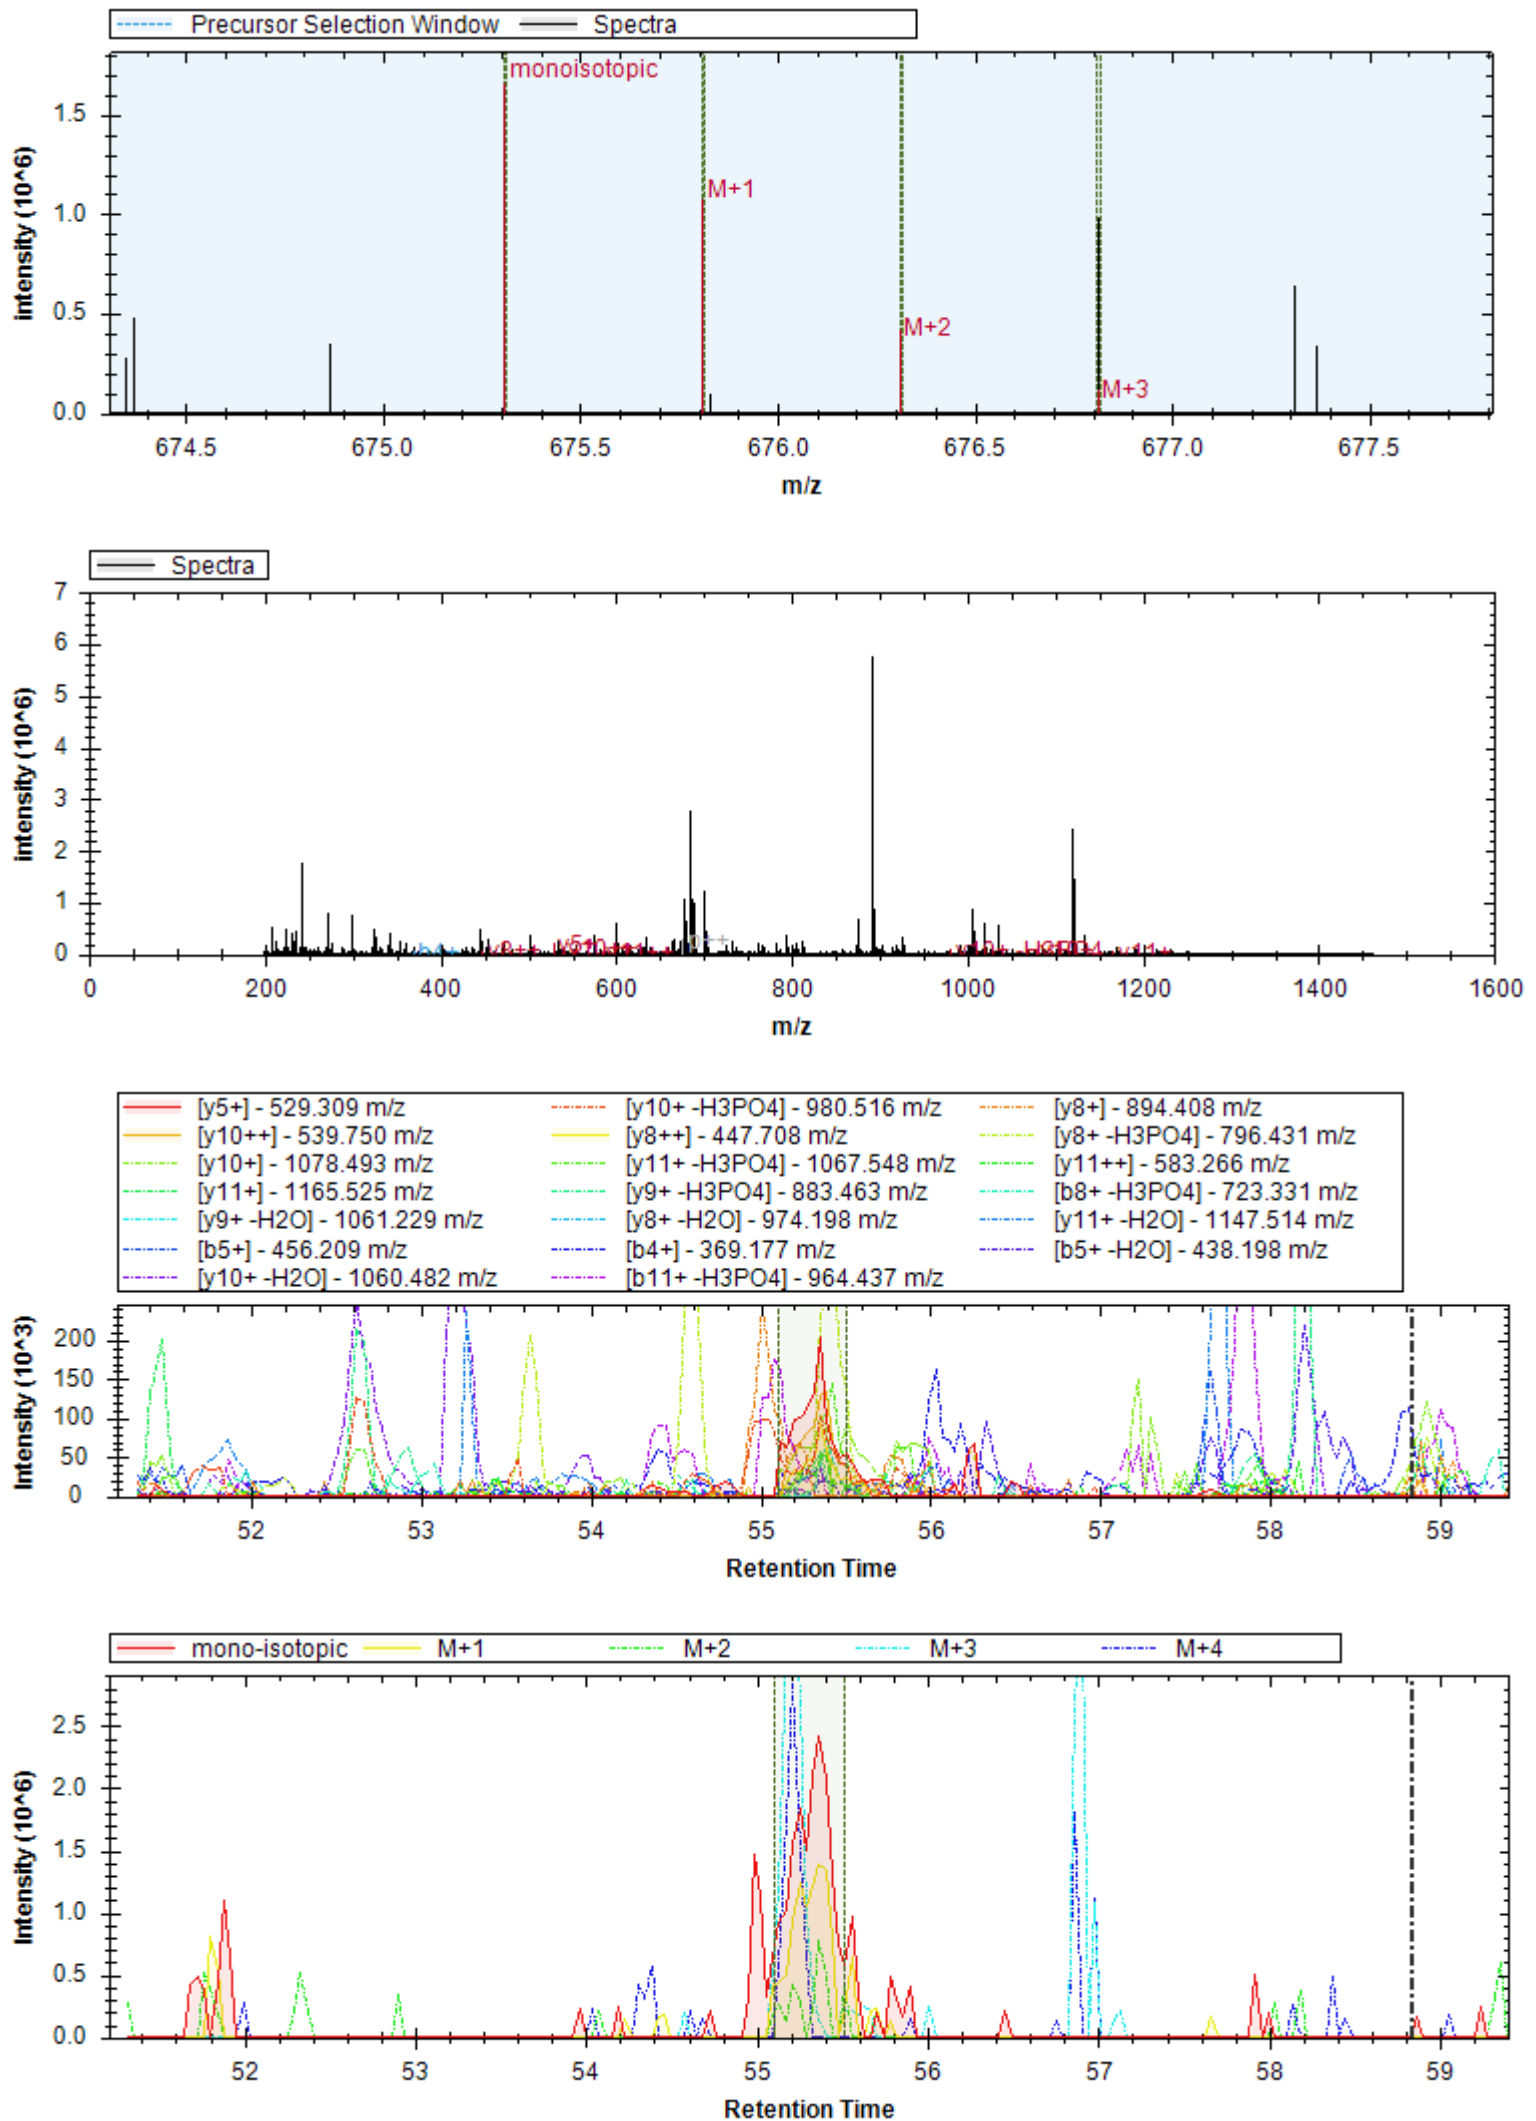

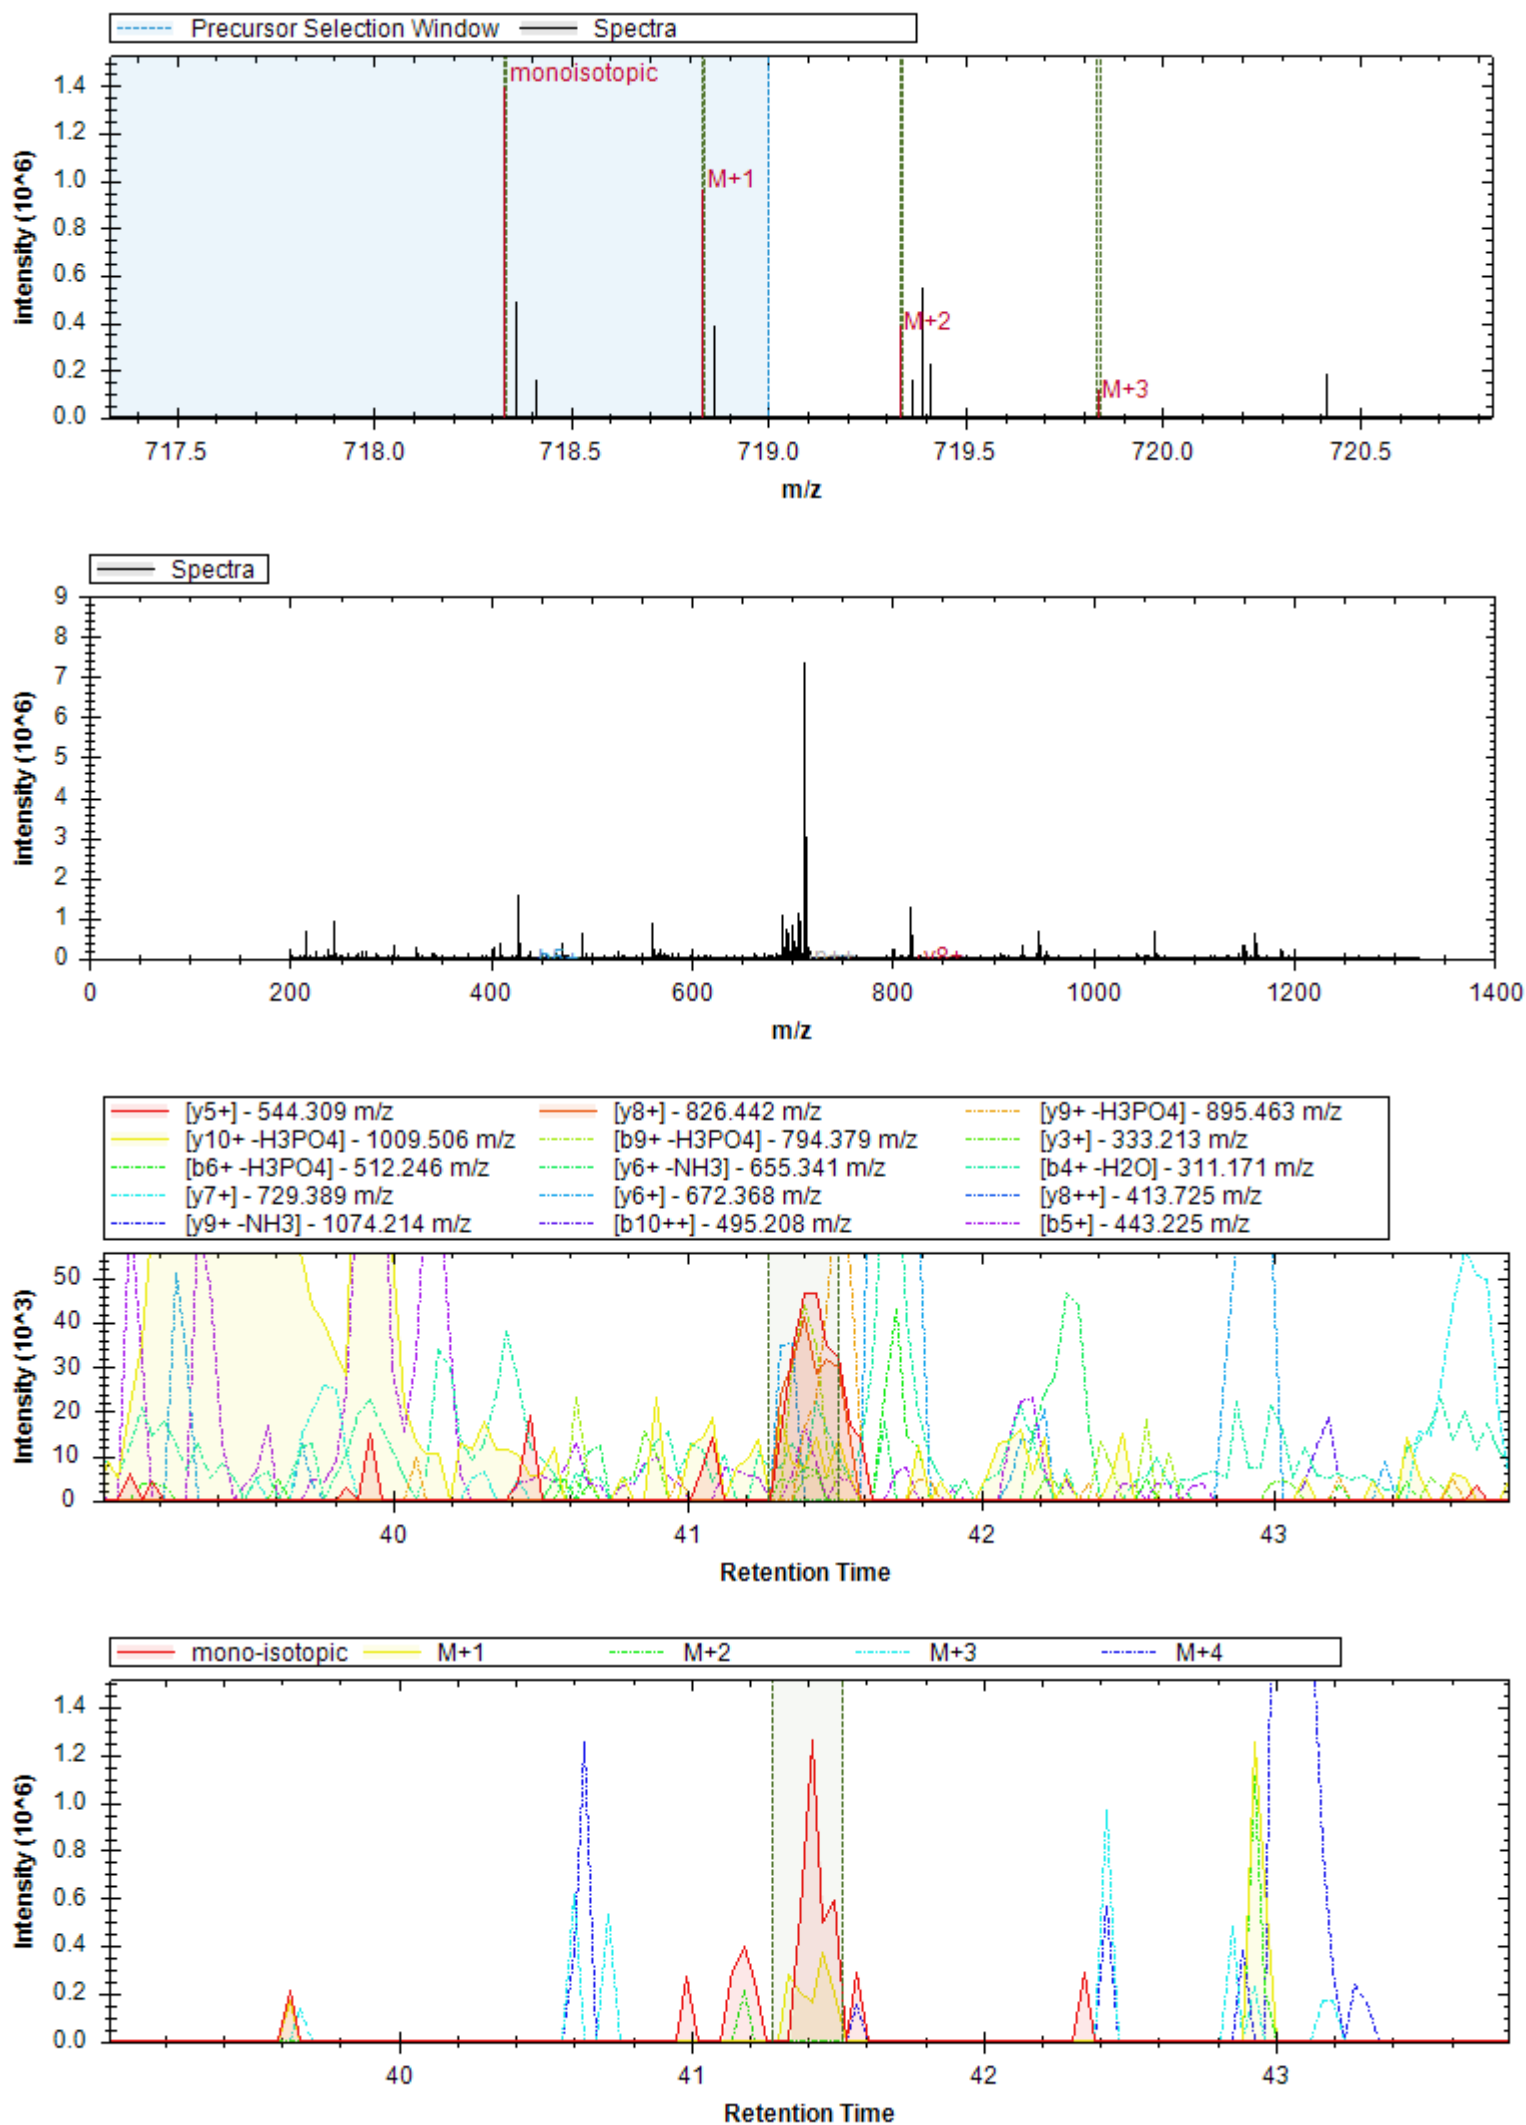

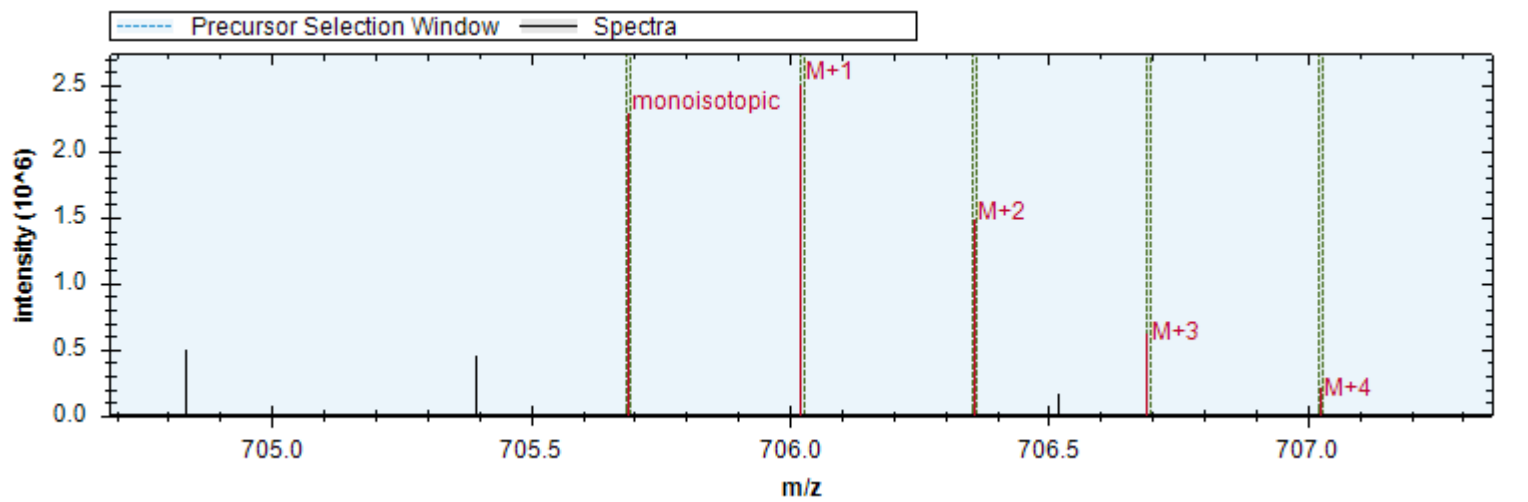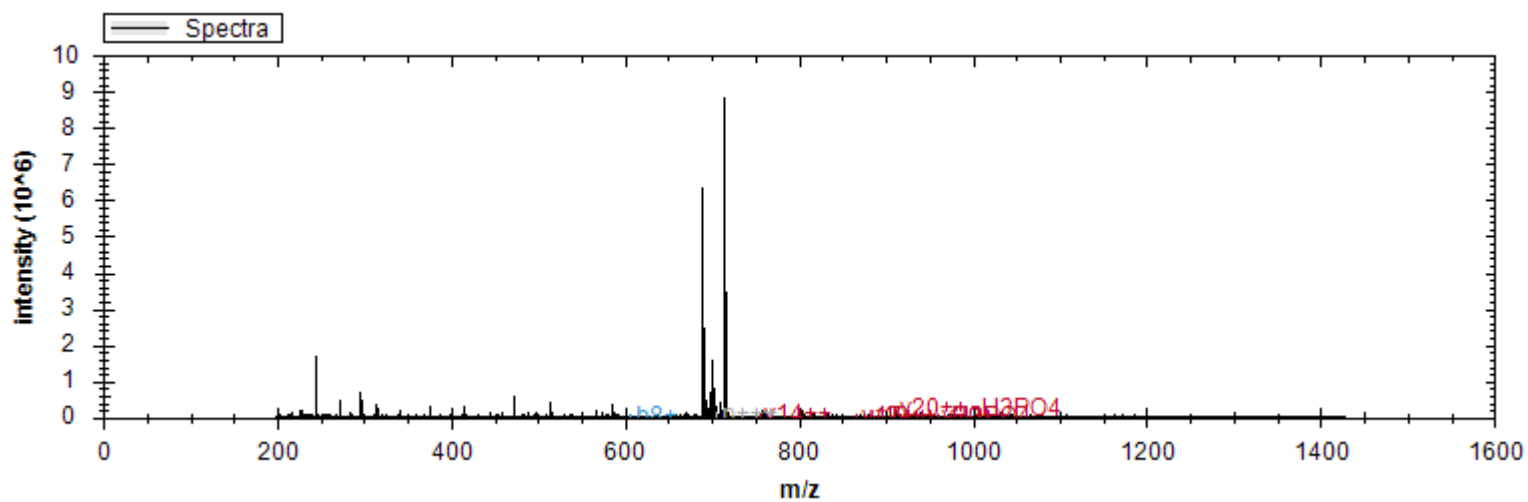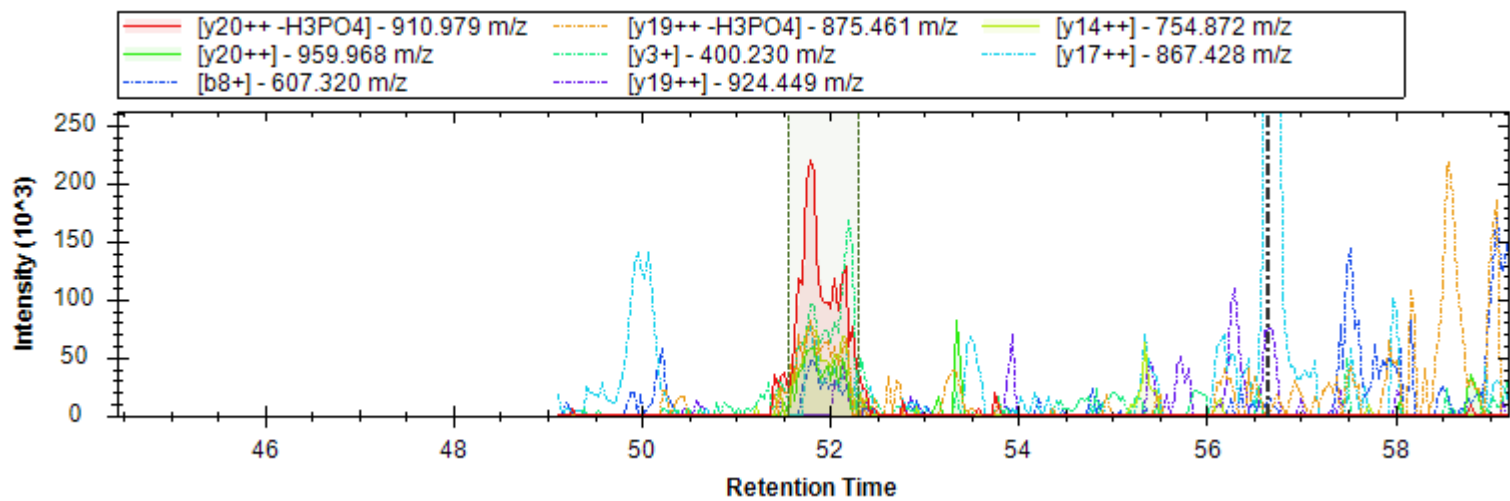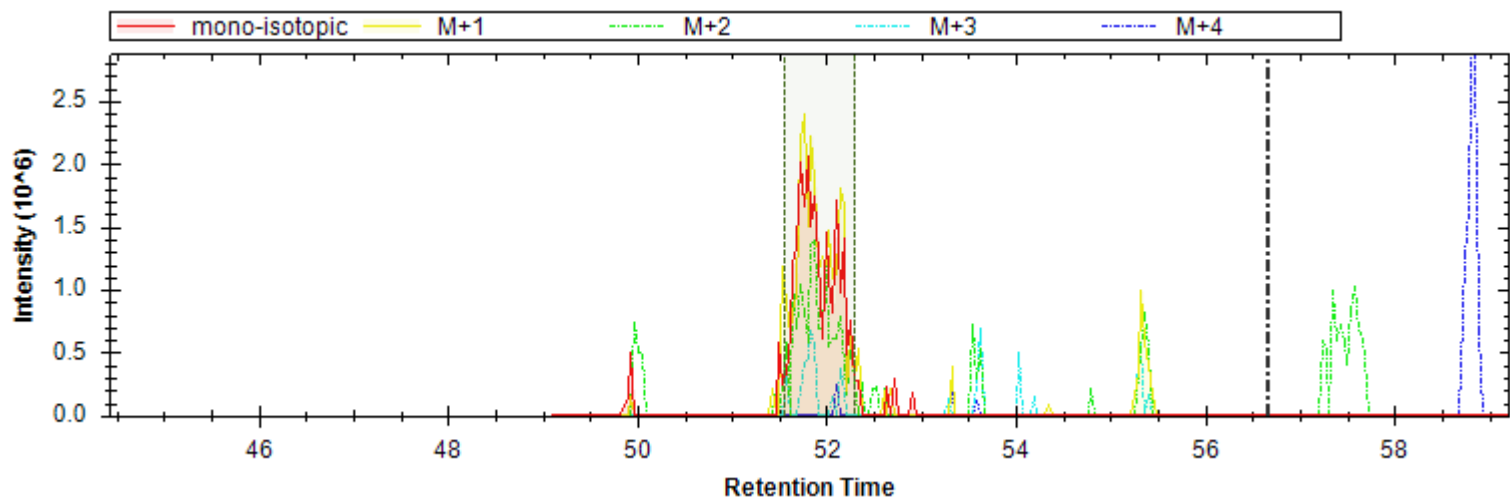

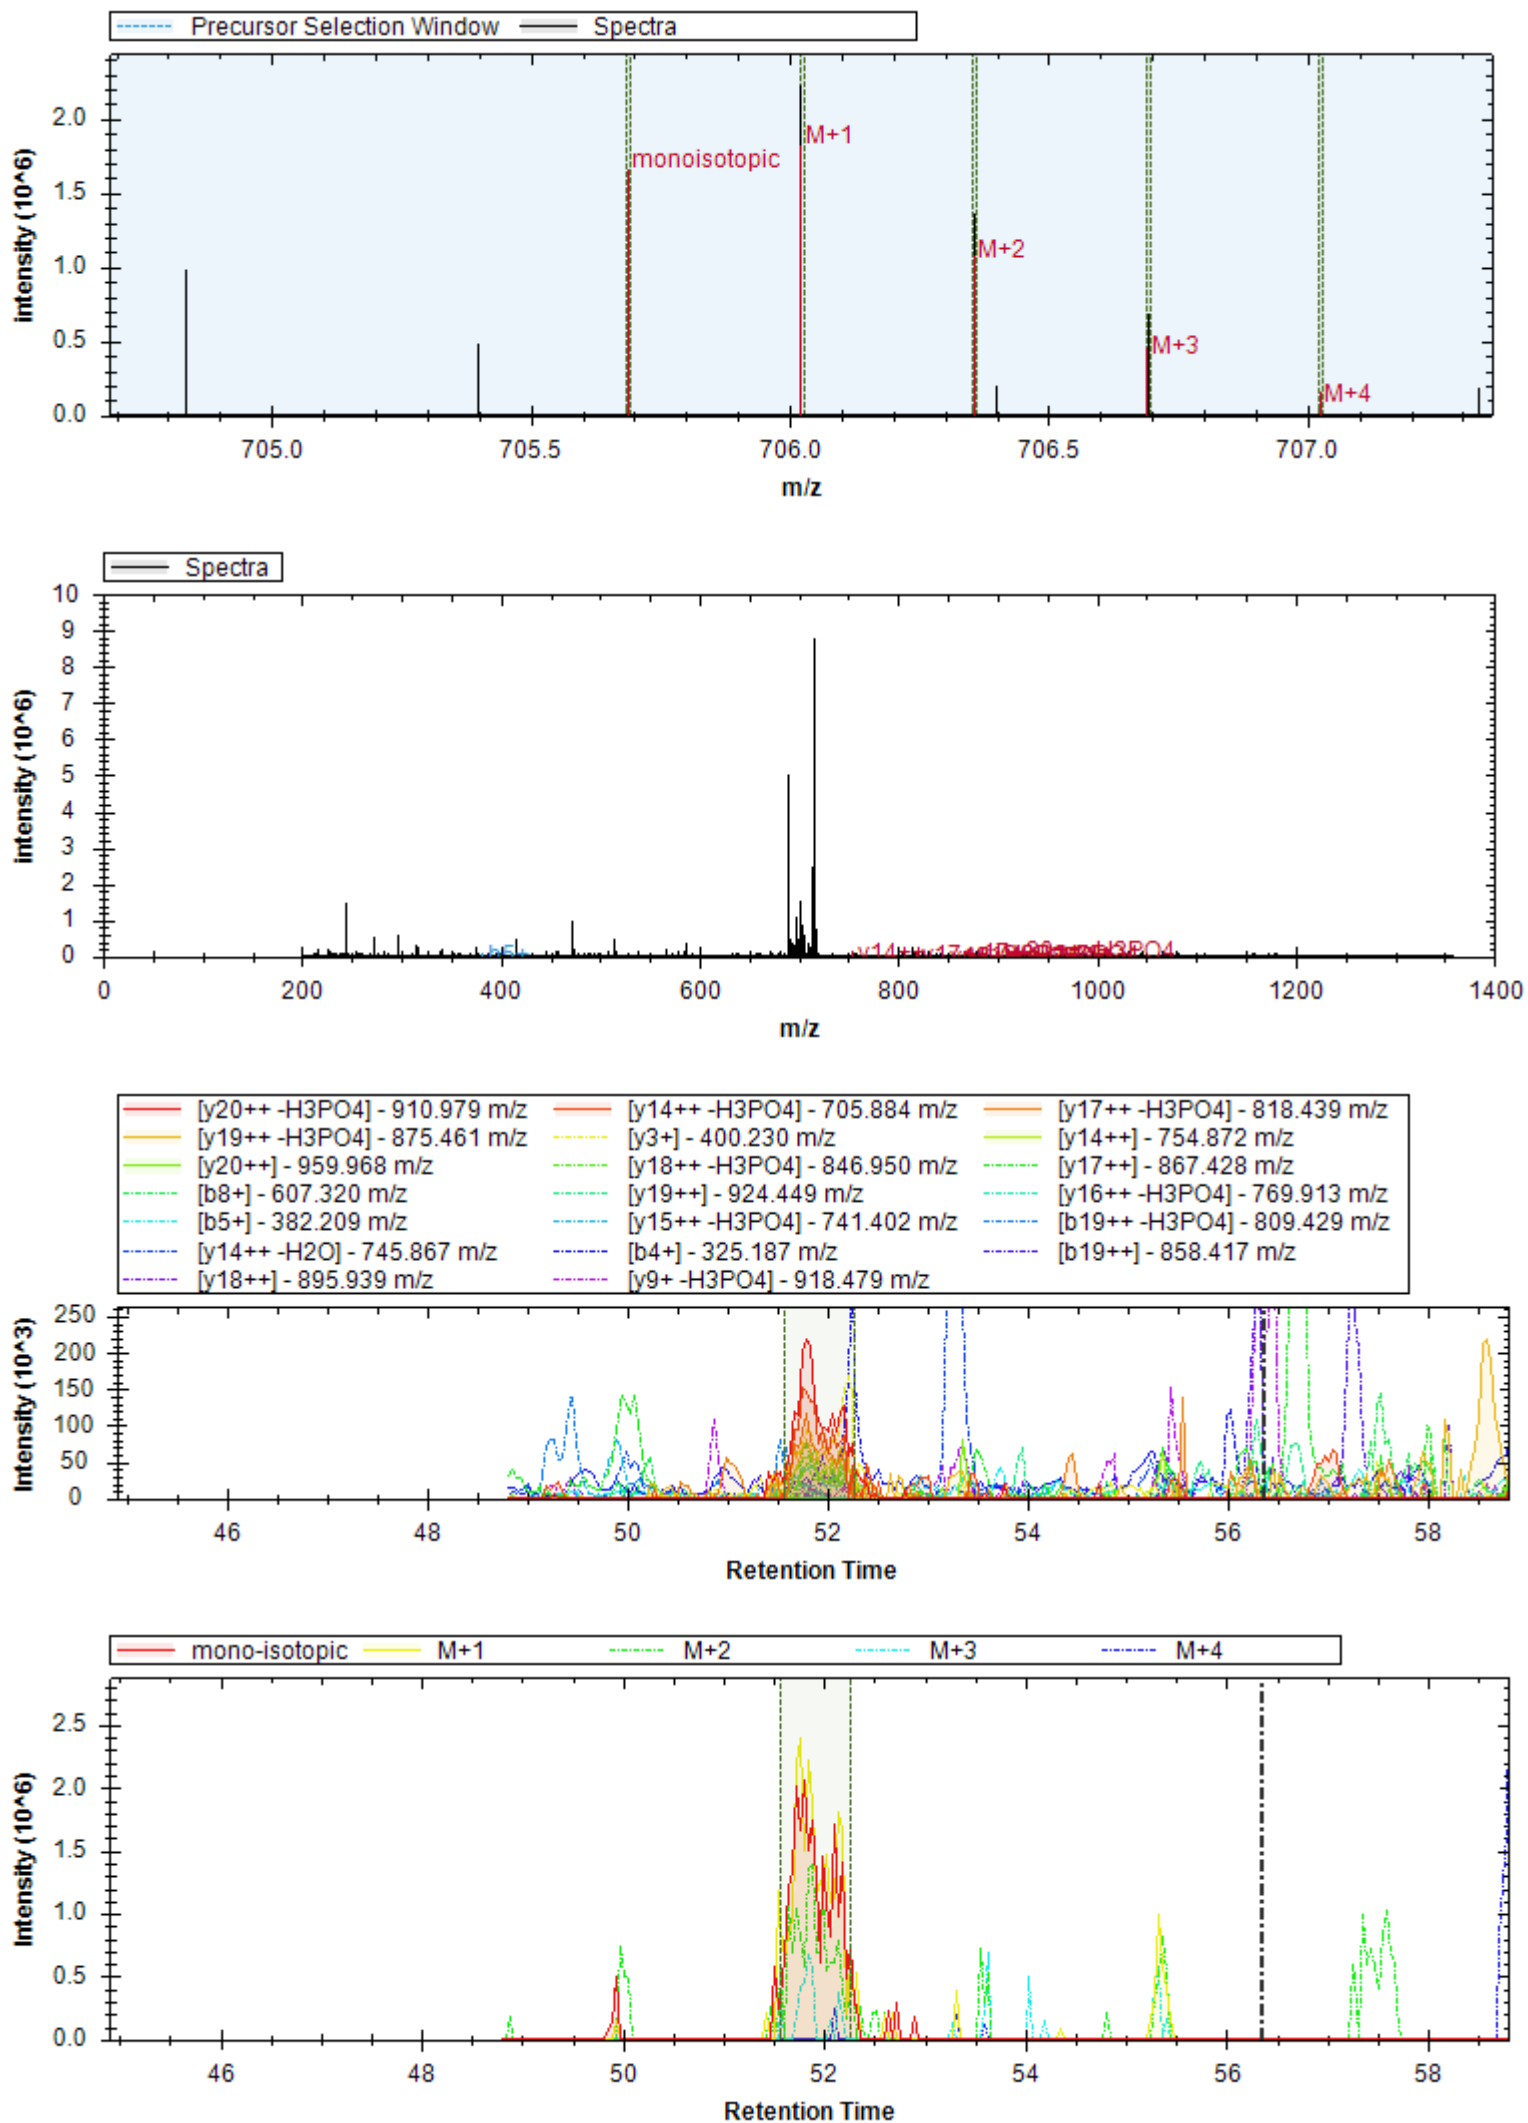

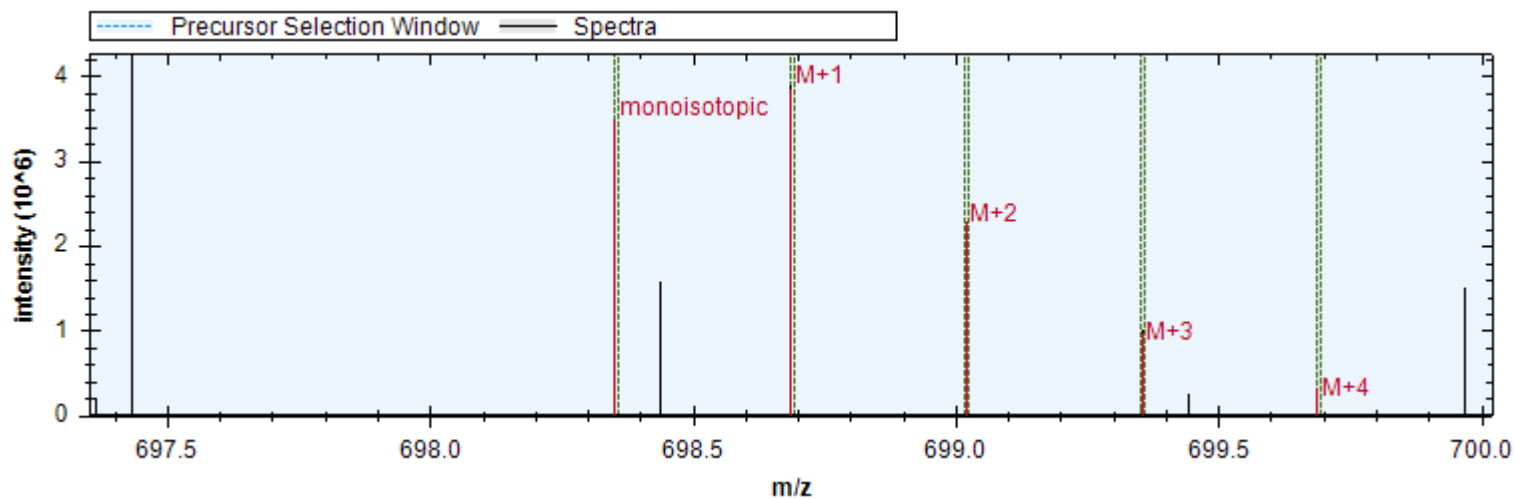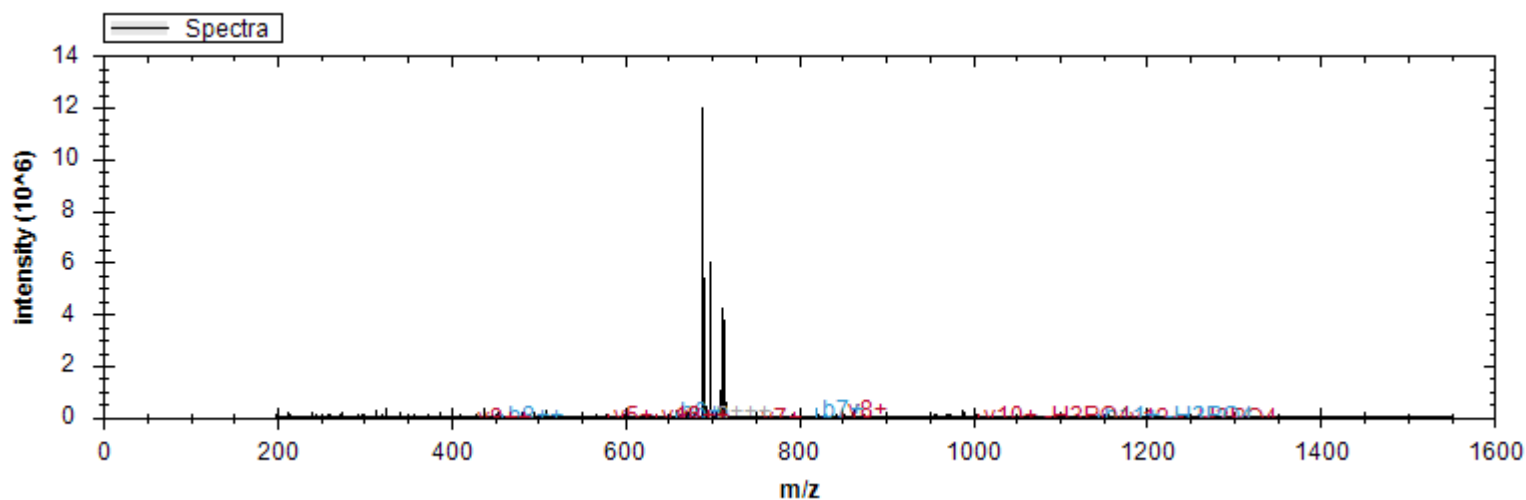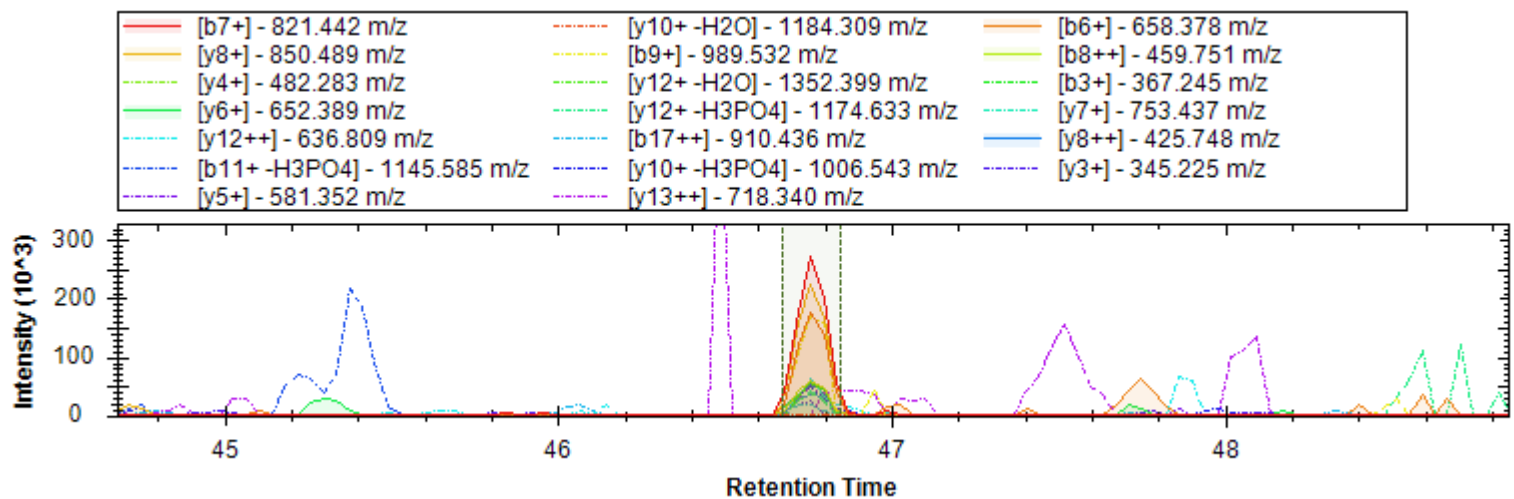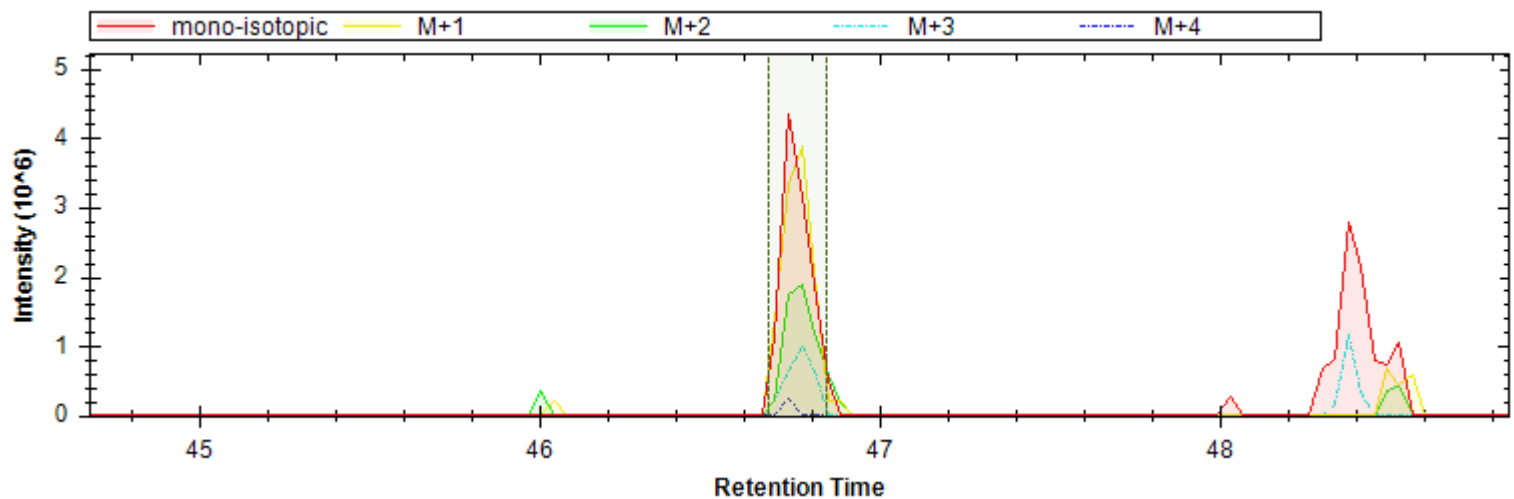

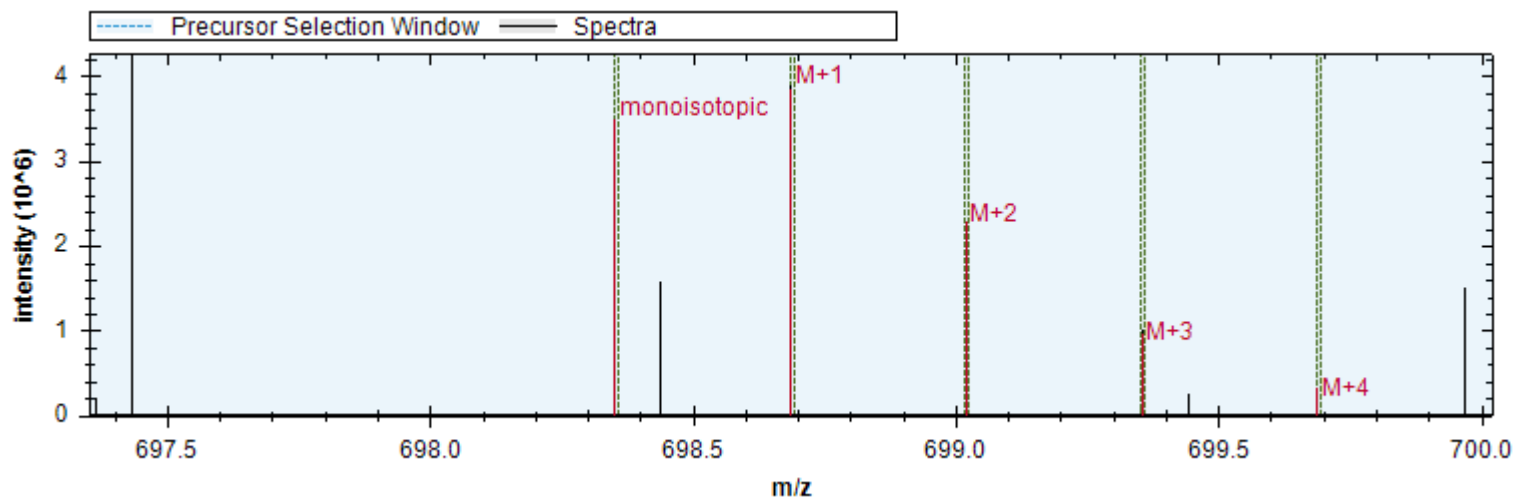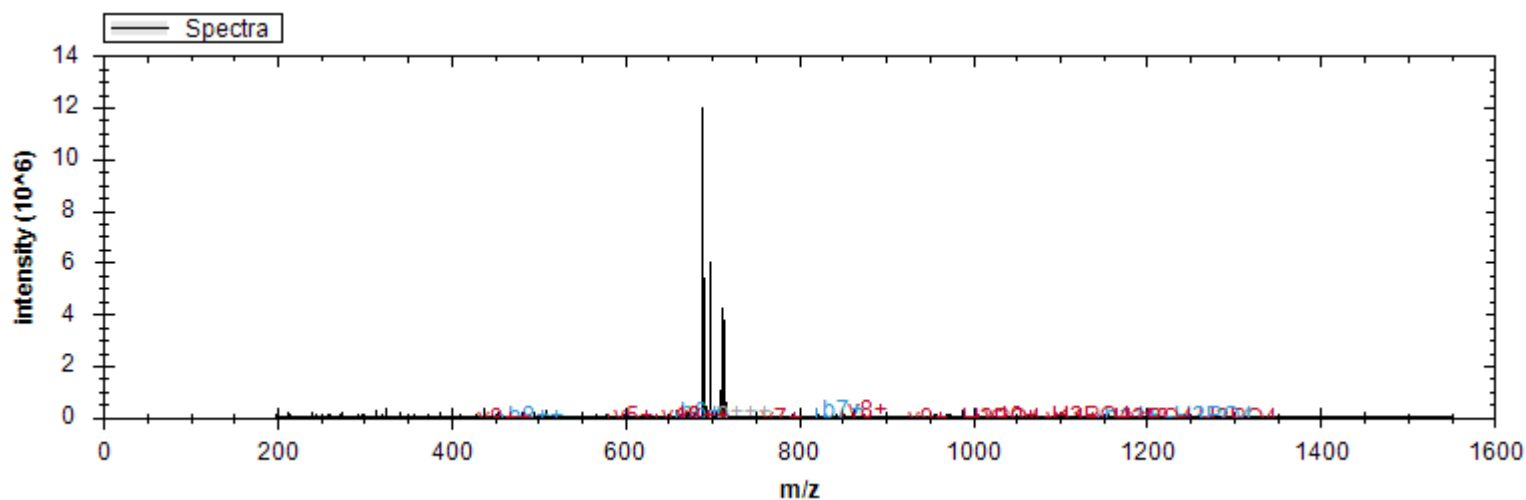

- |                              |                              |                              |
|------------------------------|------------------------------|------------------------------|
| [b7+] - 821.442 m/z          | [y8+] - 850.489 m/z          | [b6+] - 658.378 m/z          |
| [b9+] - 989.532 m/z          | [y4+] - 482.283 m/z          | [b8++] - 459.751 m/z         |
| [y11+ -H2O] - 1255.346 m/z   | [y6+] - 652.389 m/z          | [b3+] - 367.245 m/z          |
| [y5+] - 581.352 m/z          | [y9+ -H3PO4] - 919.511 m/z   | [y7+] - 753.437 m/z          |
| [y10+ -H3PO4] - 1006.543 m/z | [b11+ -H3PO4] - 1145.585 m/z | [y12+ -H3PO4] - 1174.633 m/z |
| [y3+] - 345.225 m/z          | [y12++] - 636.809 m/z        | [y8++] - 425.748 m/z         |
| [y11+ -H3PO4] - 1077.580 m/z |                              |                              |

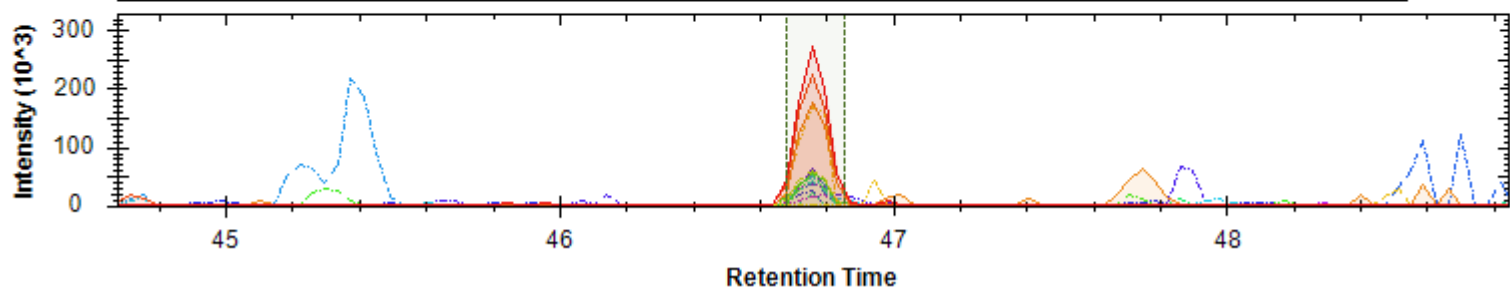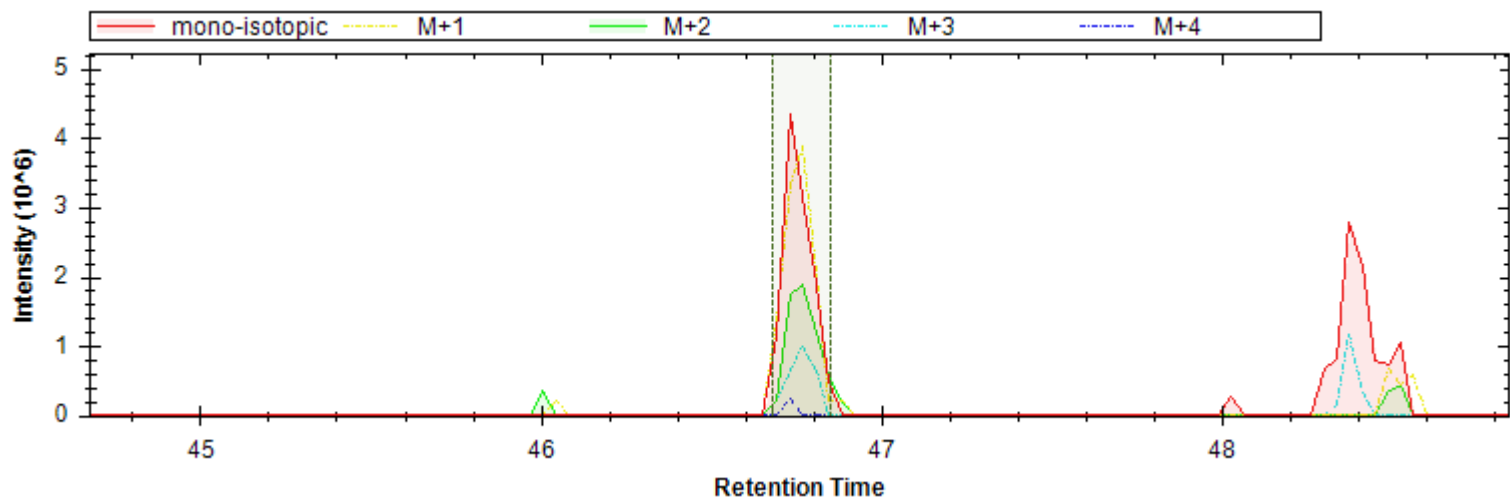



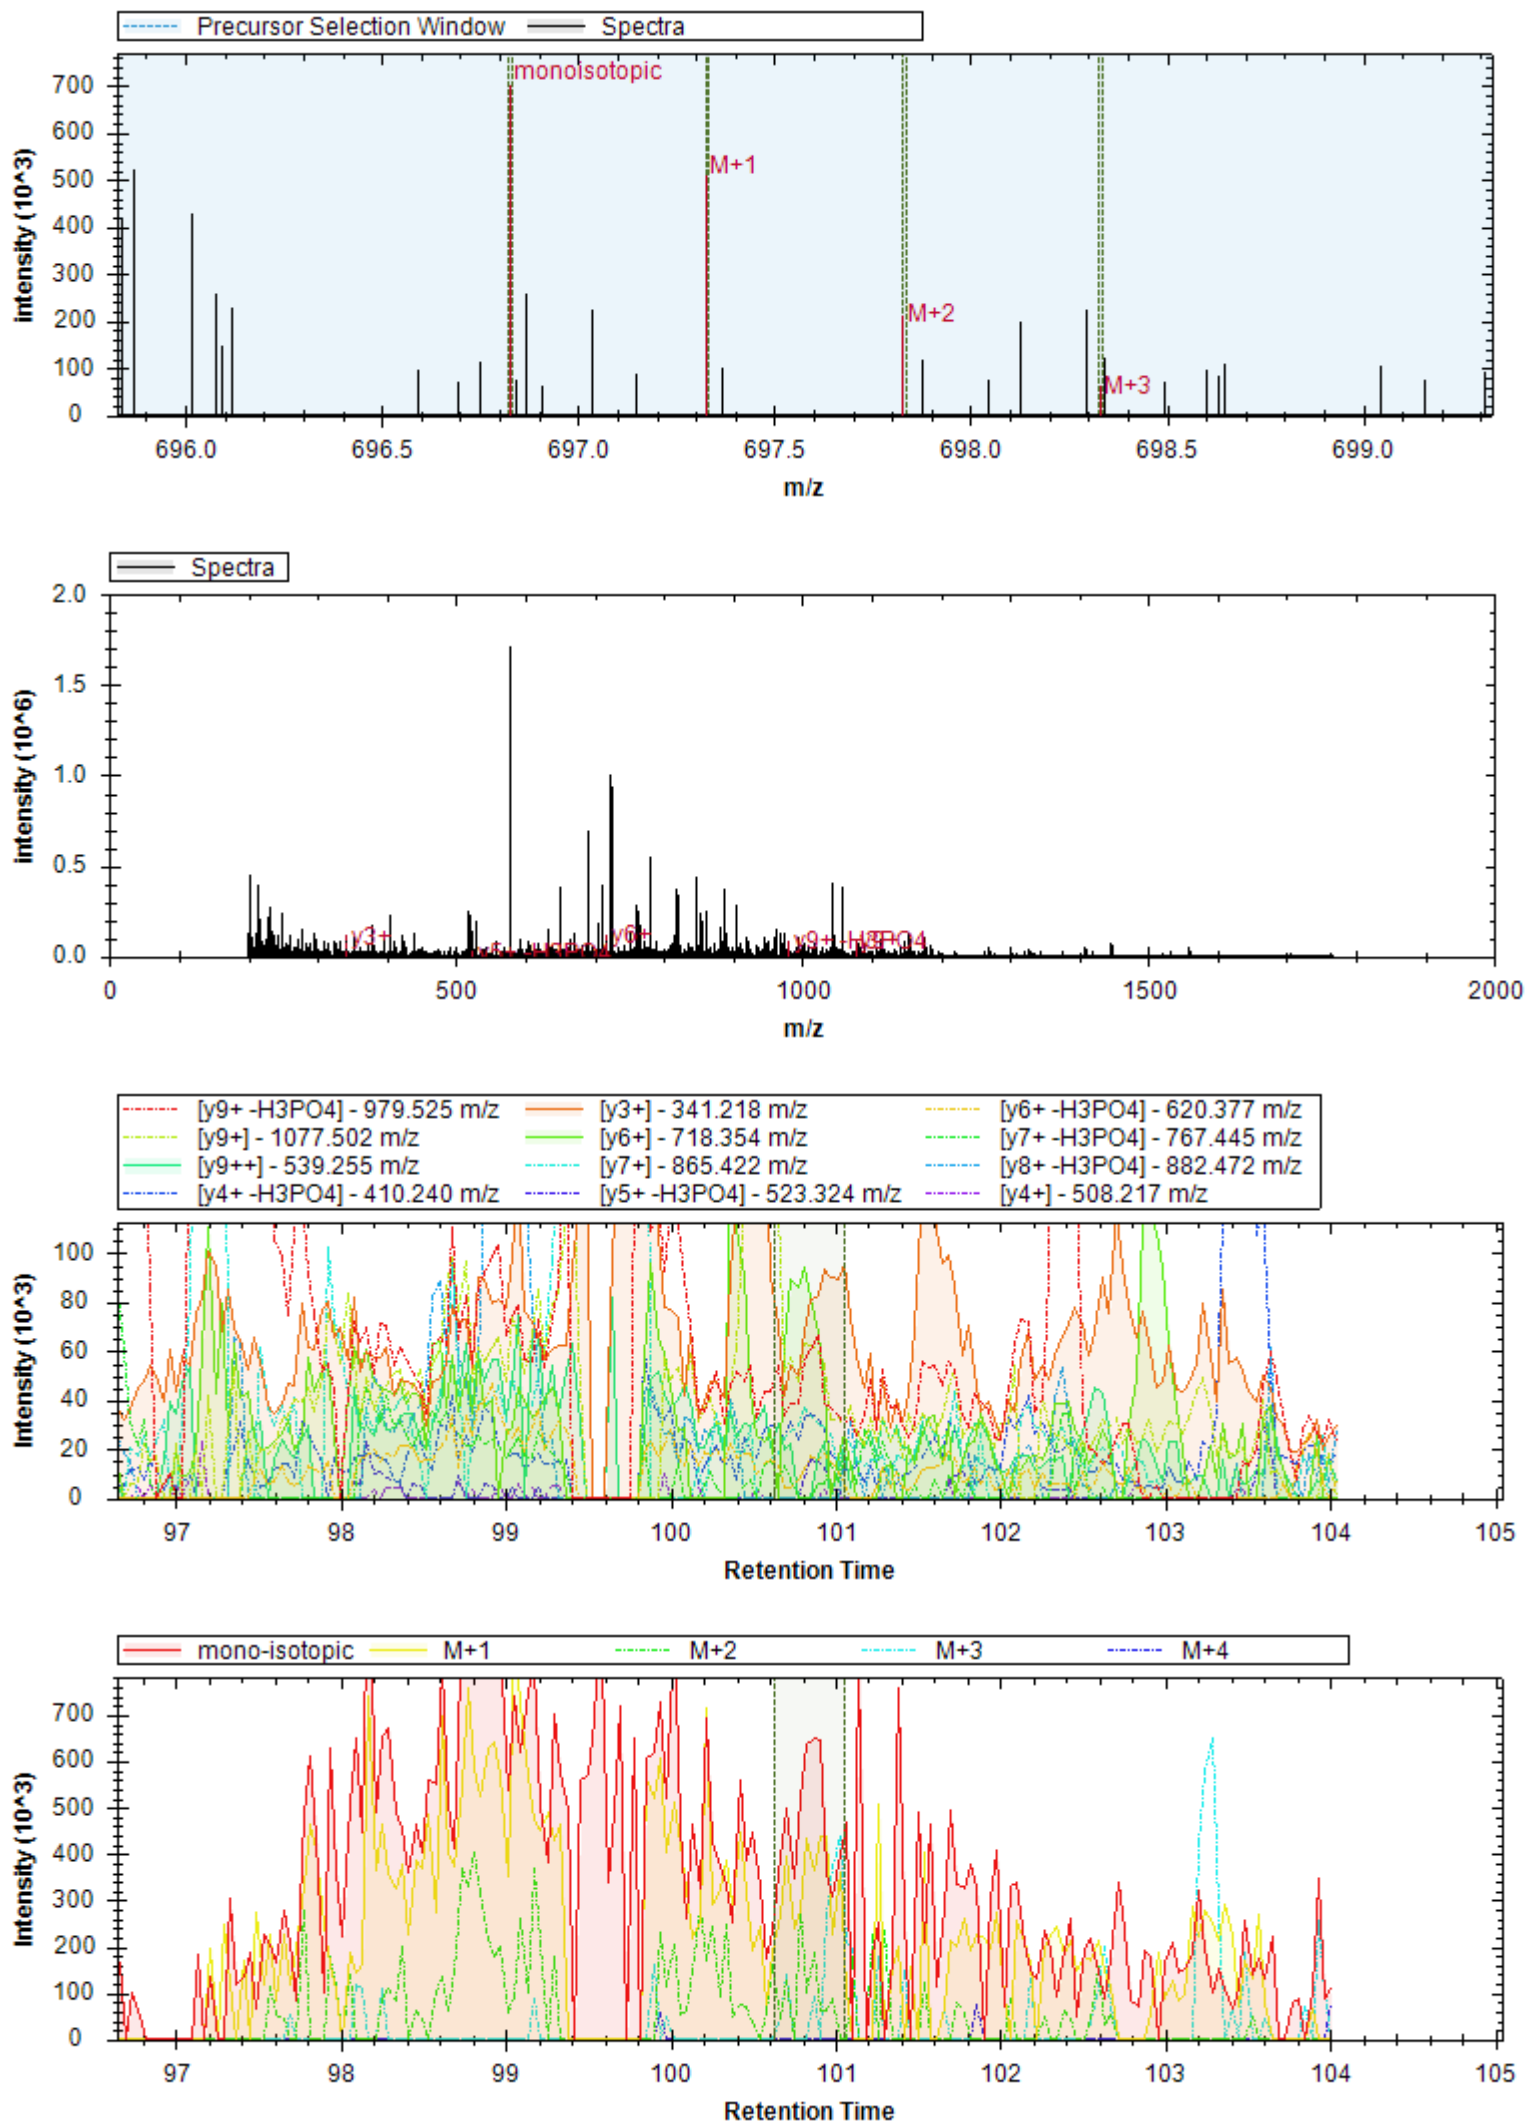

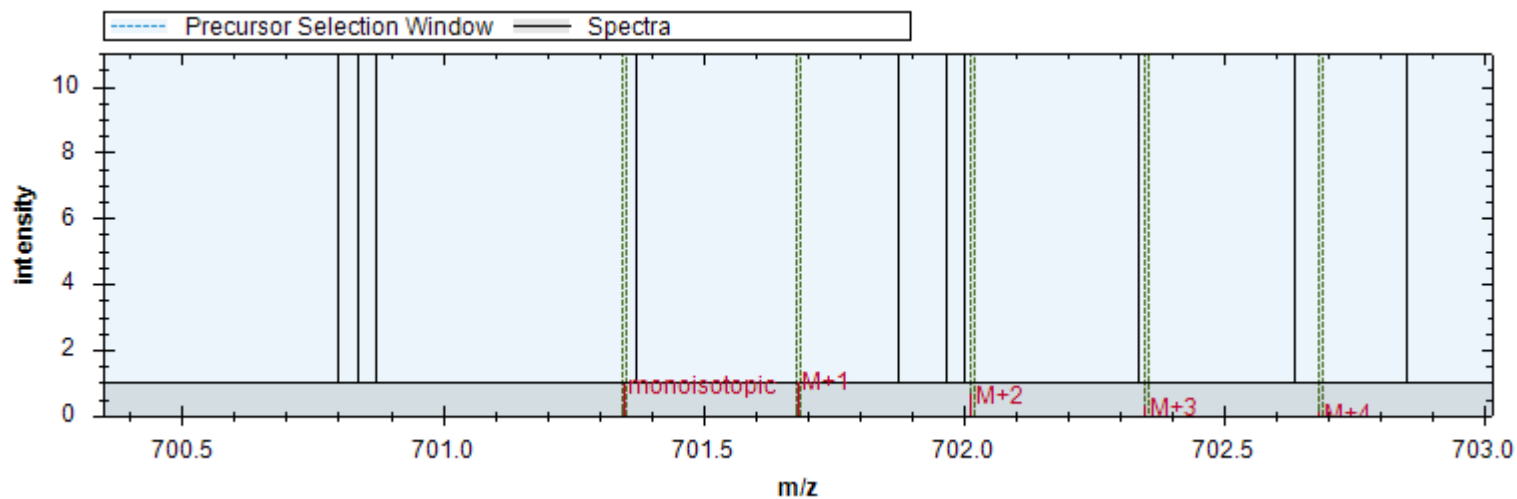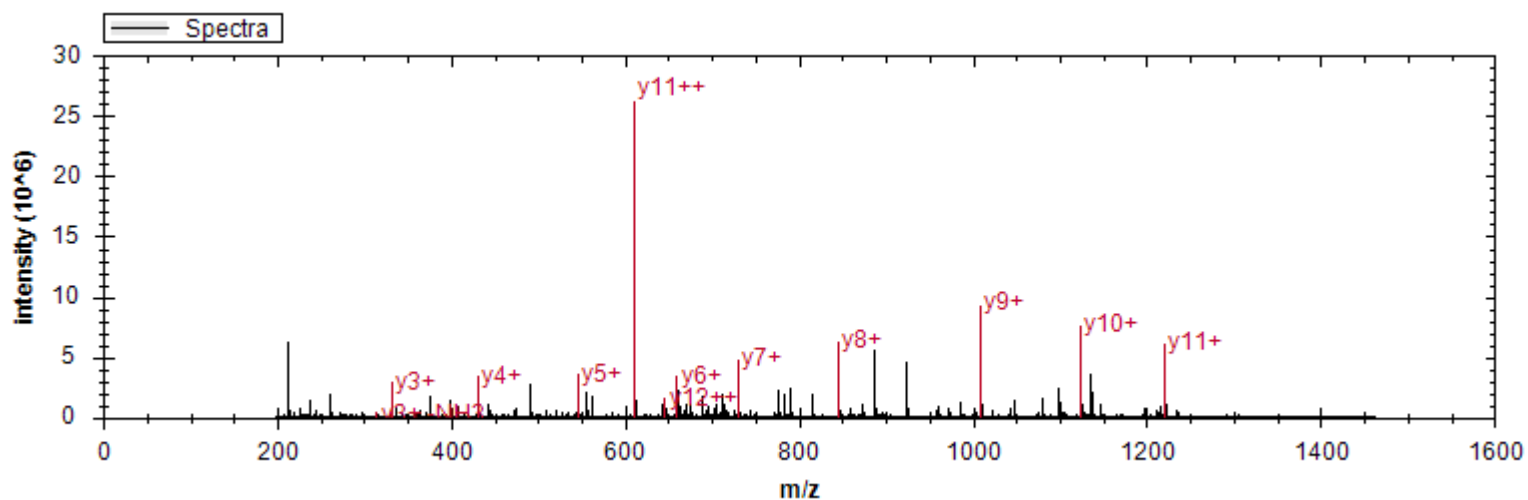

|                          |                       |                       |
|--------------------------|-----------------------|-----------------------|
| [y9+] - 1008.500 m/z     | [y11++] - 610.793 m/z | [y10+] - 1123.527 m/z |
| [y8+] - 845.436 m/z      | [y7+] - 730.409 m/z   | [y11+] - 1220.579 m/z |
| [y4+] - 431.261 m/z      | [y5+] - 546.288 m/z   | [y3+] - 332.193 m/z   |
| [y6+] - 659.372 m/z      | [y12++] - 646.312 m/z | [y13++] - 702.854 m/z |
| [y3+ -NH3] - 315.166 m/z |                       |                       |

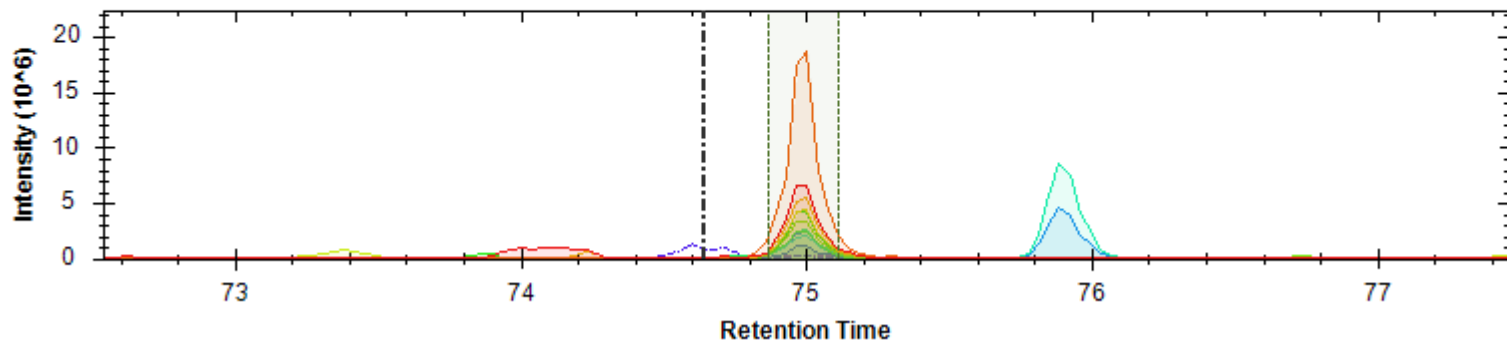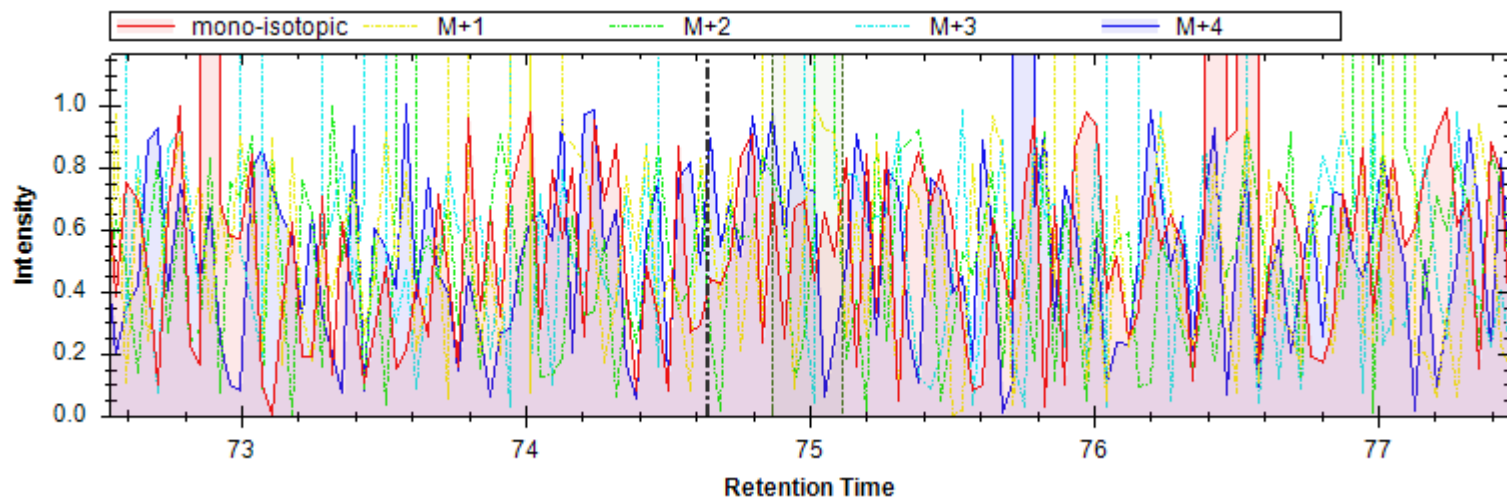

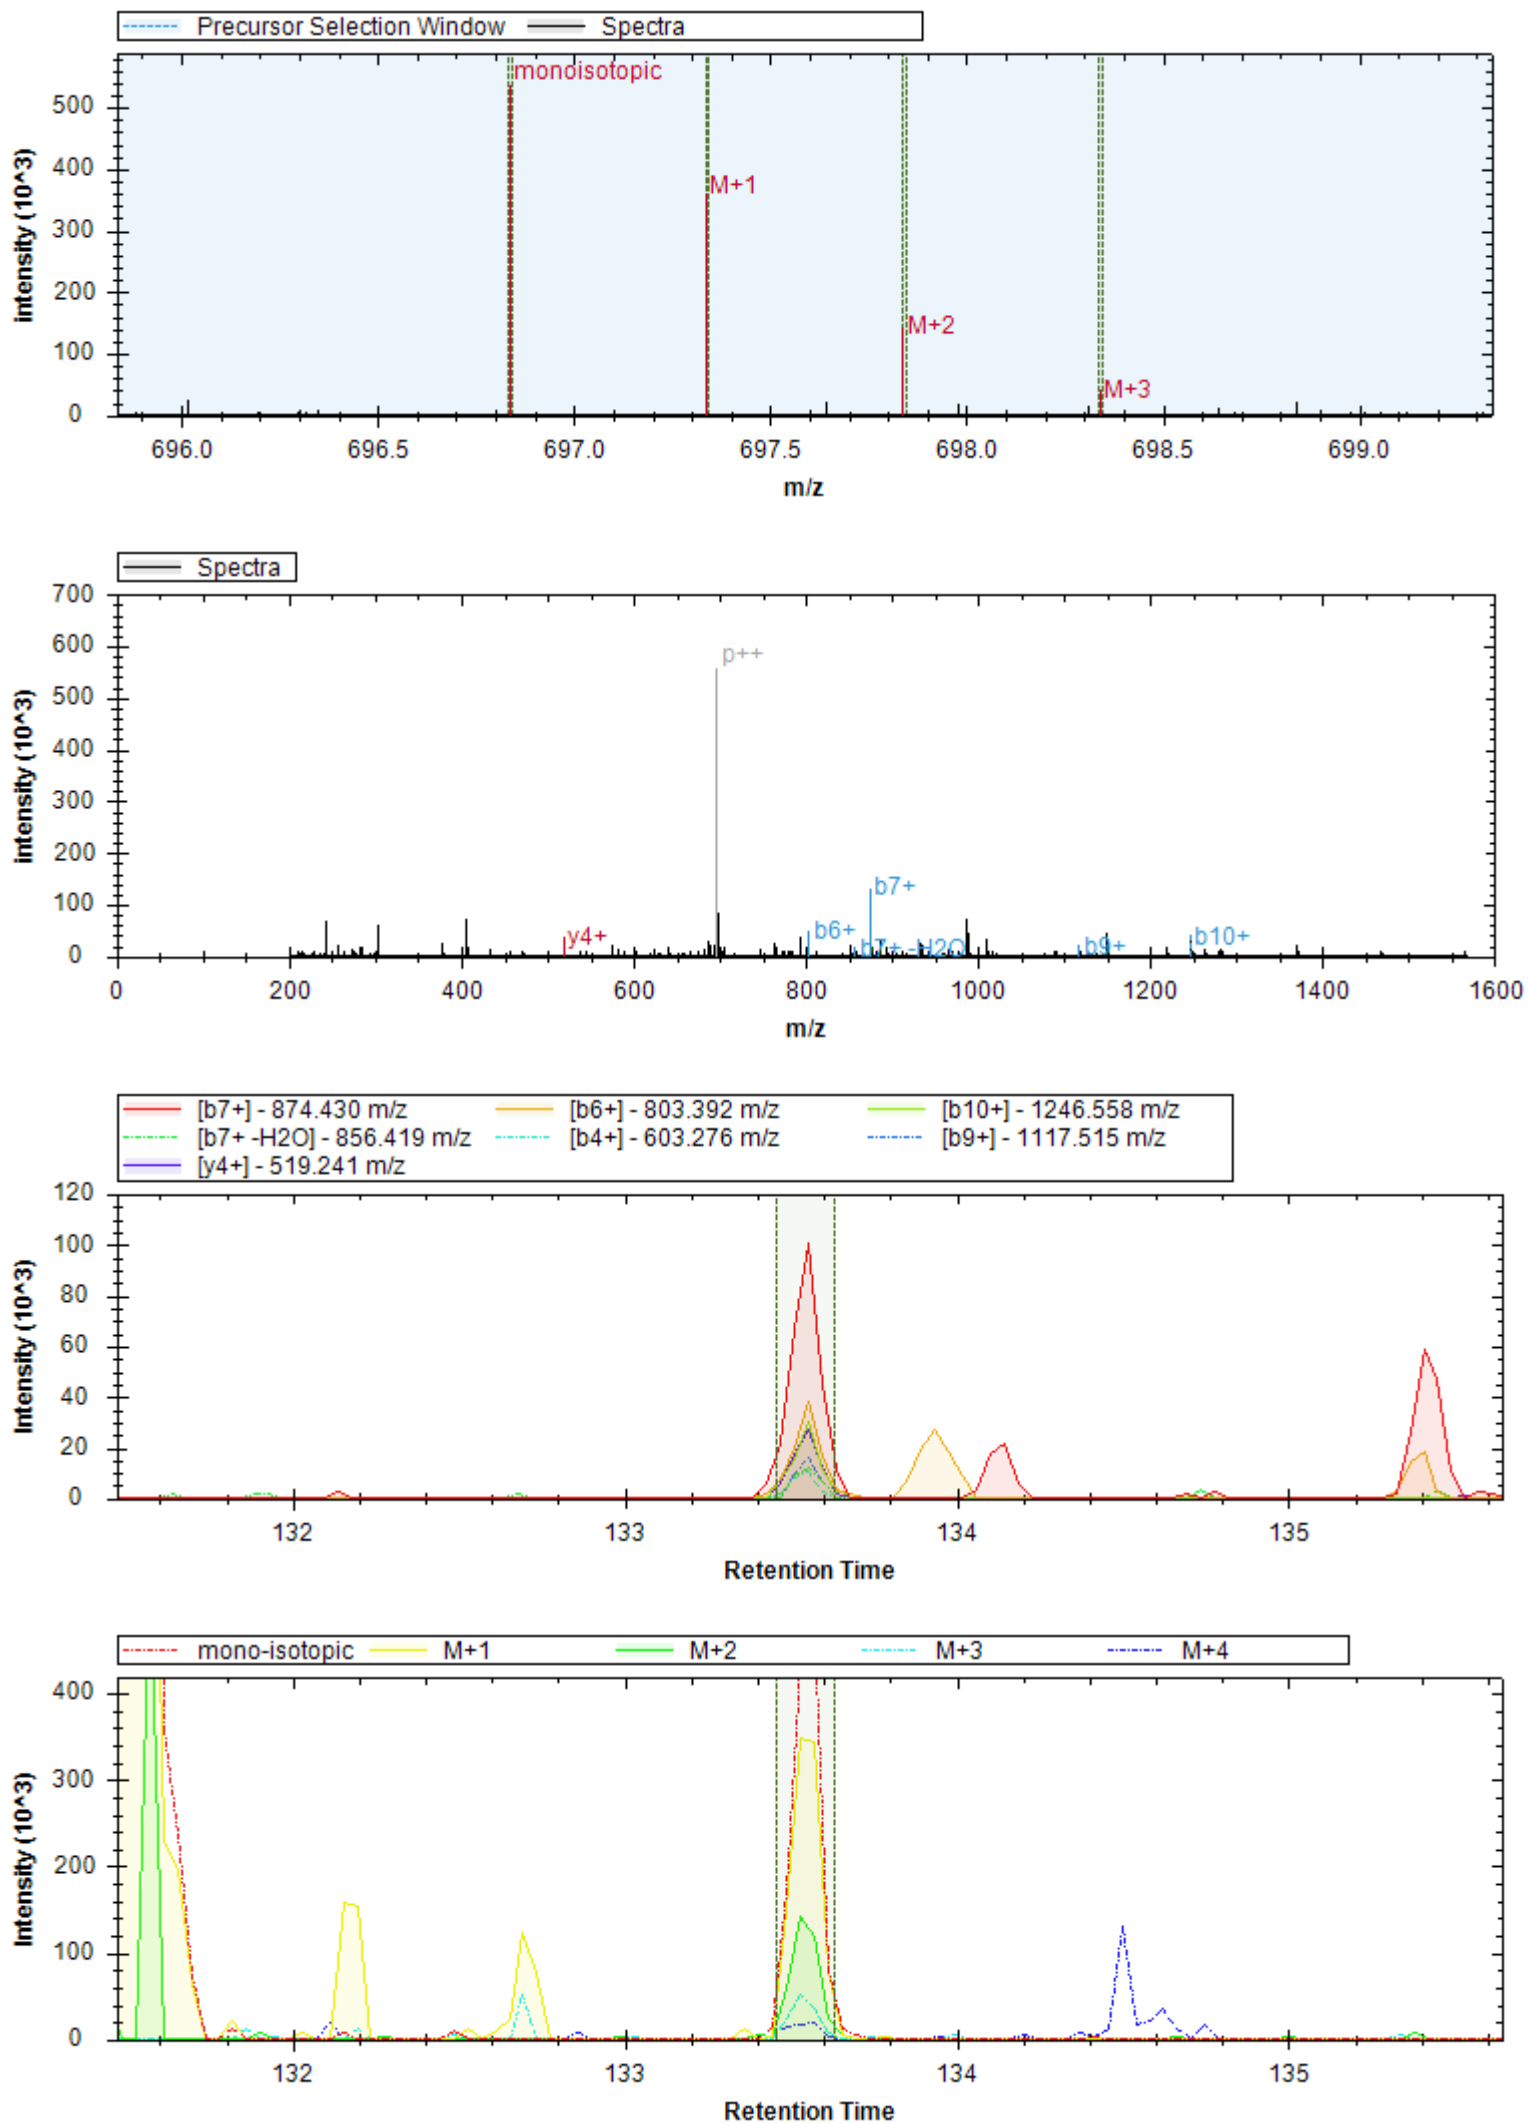

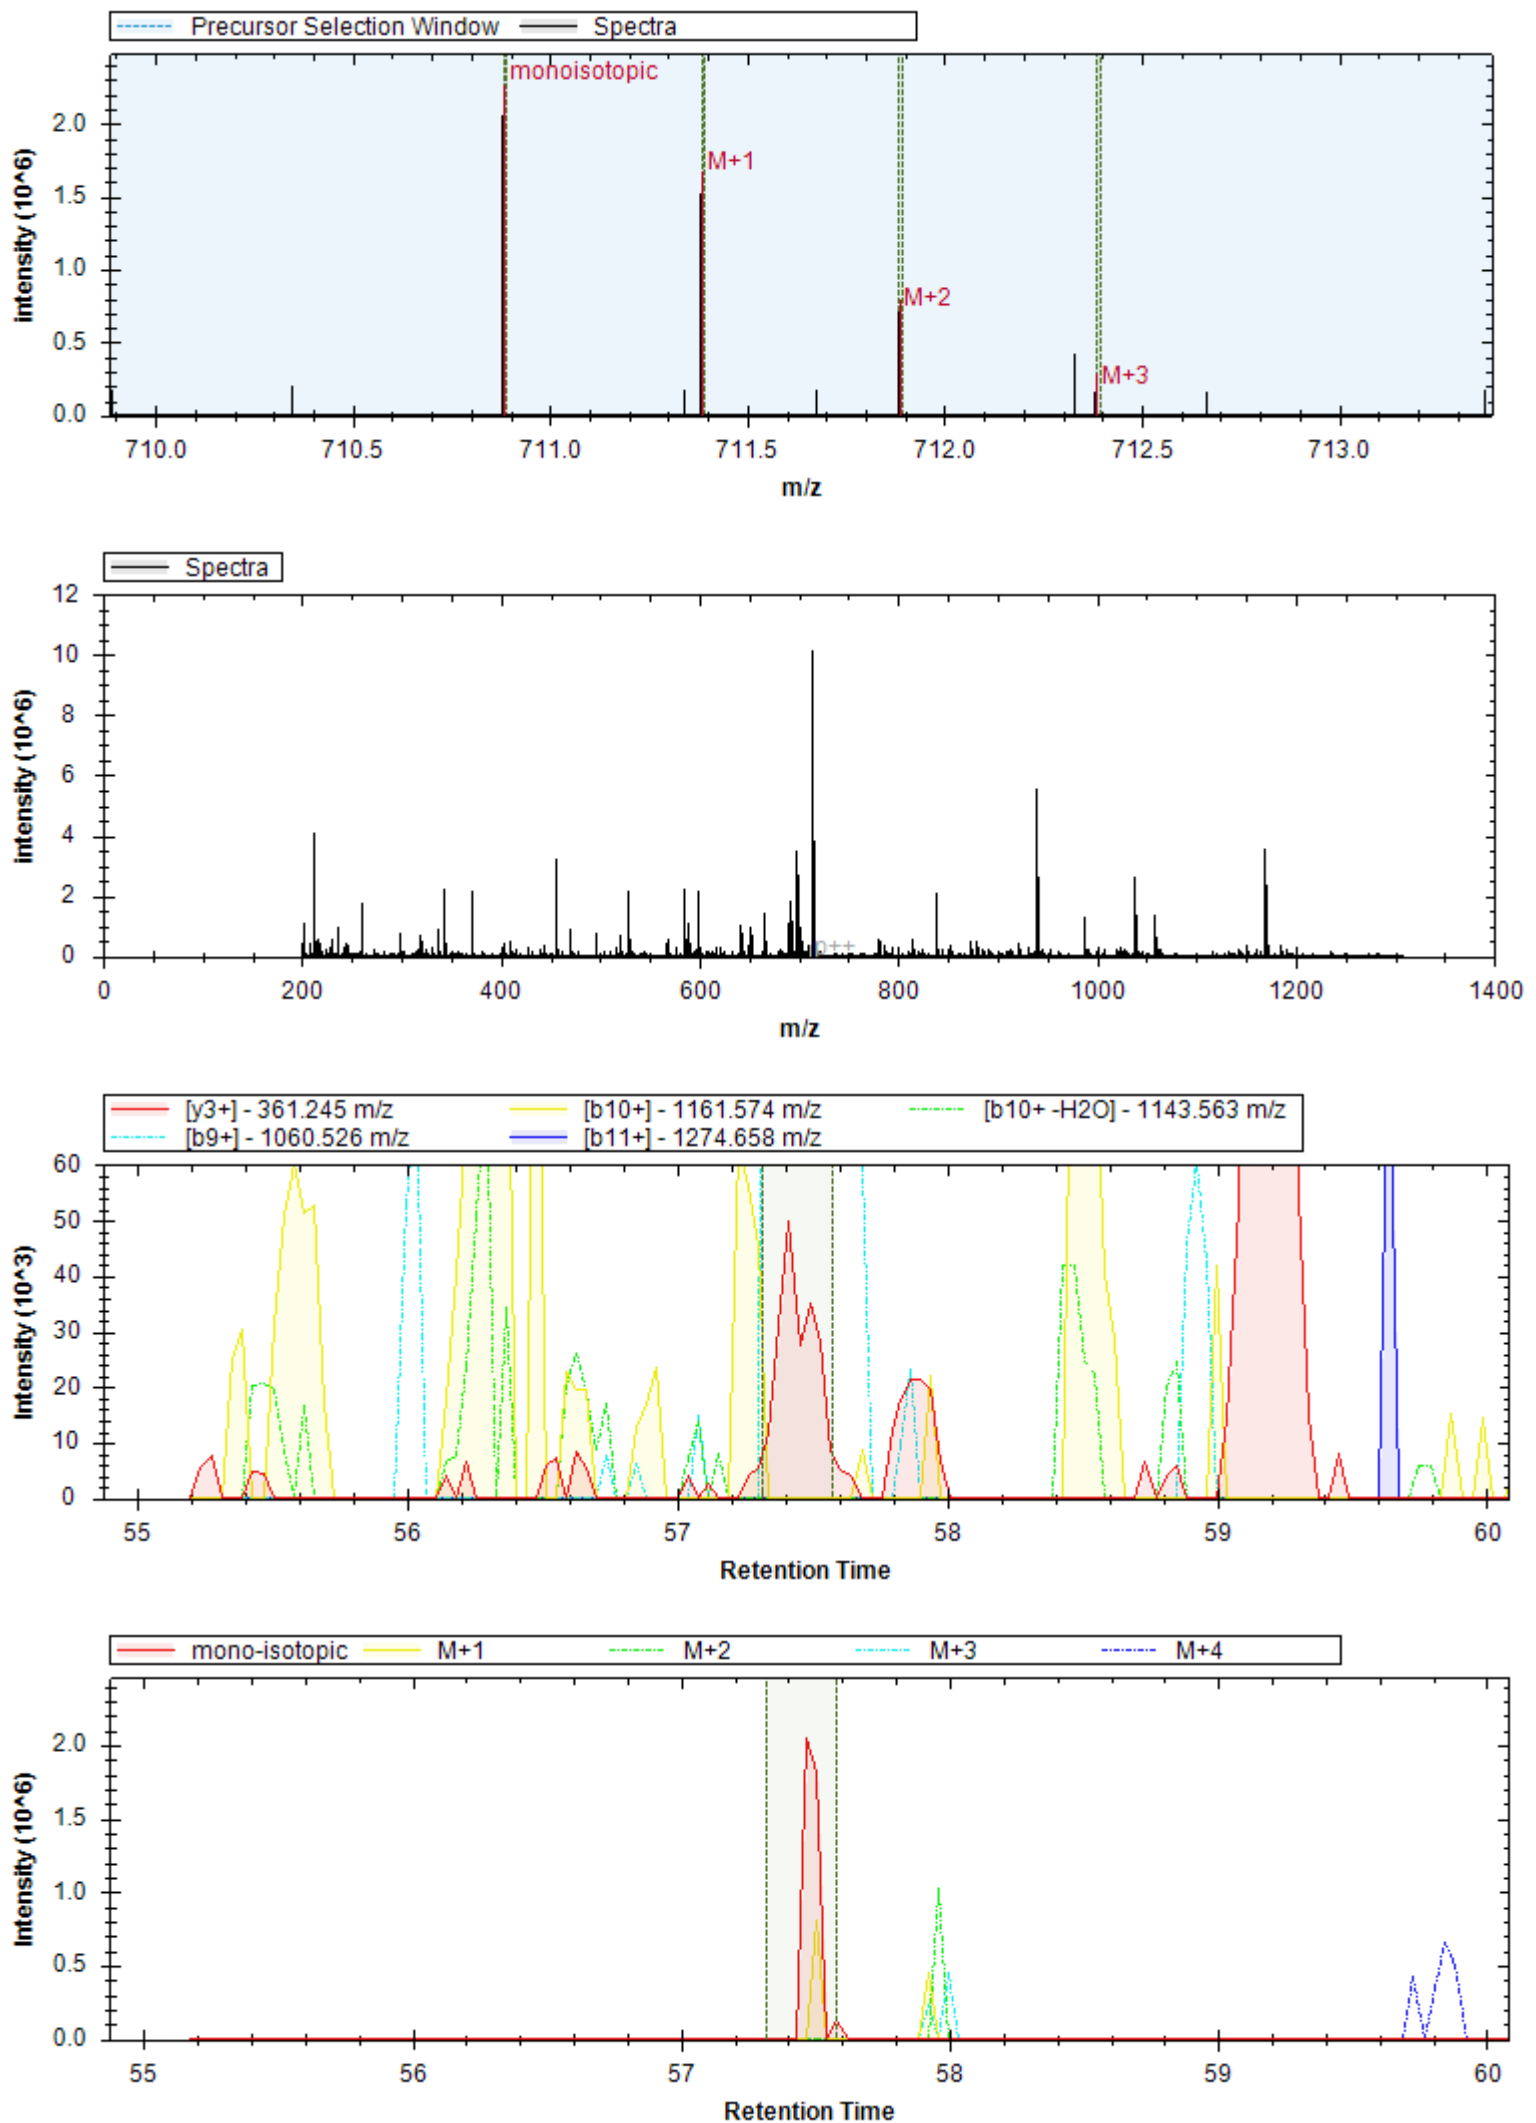

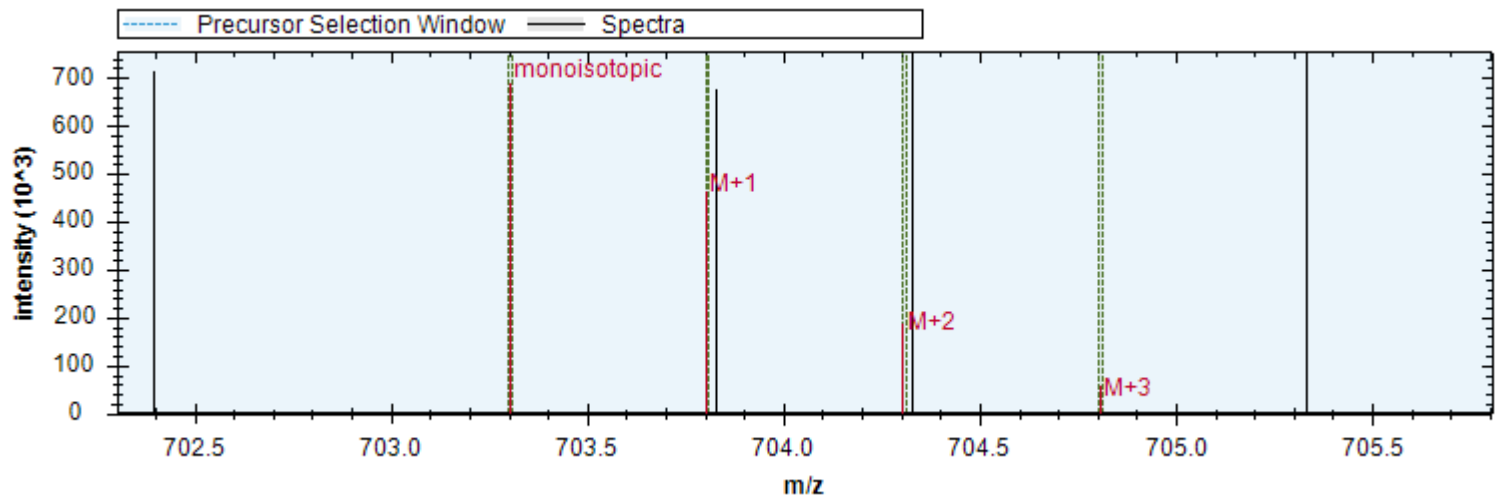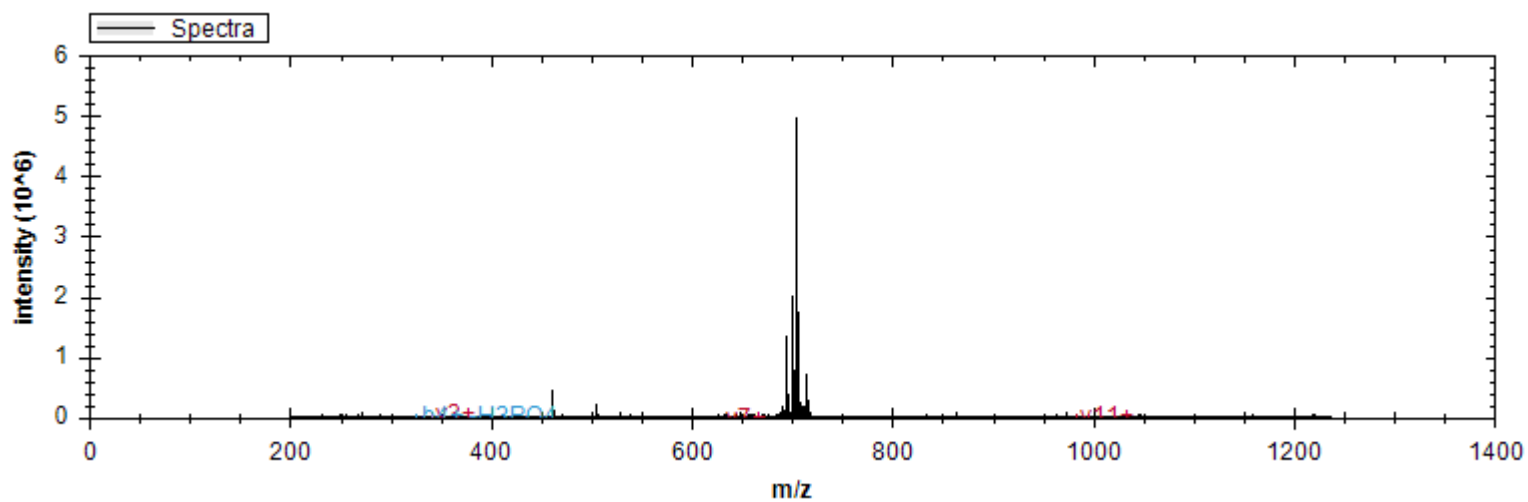

- |                              |                              |                             |
|------------------------------|------------------------------|-----------------------------|
| [y11+] - 983.479 m/z         | [b4+ -H3PO4] - 325.151 m/z   | [y3+] - 341.218 m/z         |
| [y9+] - 815.389 m/z          | [y14++] - 659.787 m/z        | [y7+] - 629.325 m/z         |
| [y13+ -H3PO4] - 1123.538 m/z | [y10+] - 886.427 m/z         | [b12+ -H3PO4] - 967.412 m/z |
| [y12++ -H3PO4] - 533.762 m/z | [y11+ -H2O] - 965.469 m/z    | [y11++] - 492.243 m/z       |
| [y12+ -H3PO4] - 1066.516 m/z | [y14++ -H3PO4] - 610.799 m/z | [b4+] - 423.128 m/z         |
| [b8+ -H3PO4] - 679.305 m/z   |                              |                             |

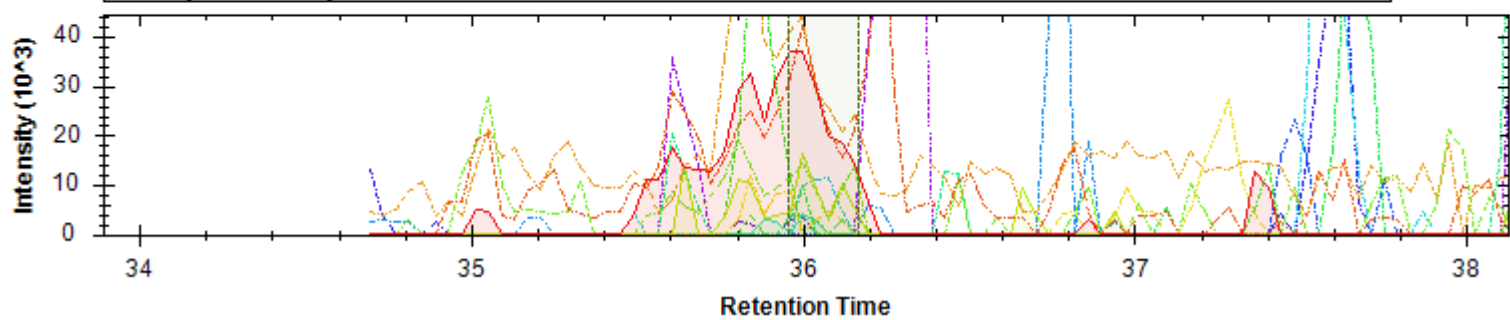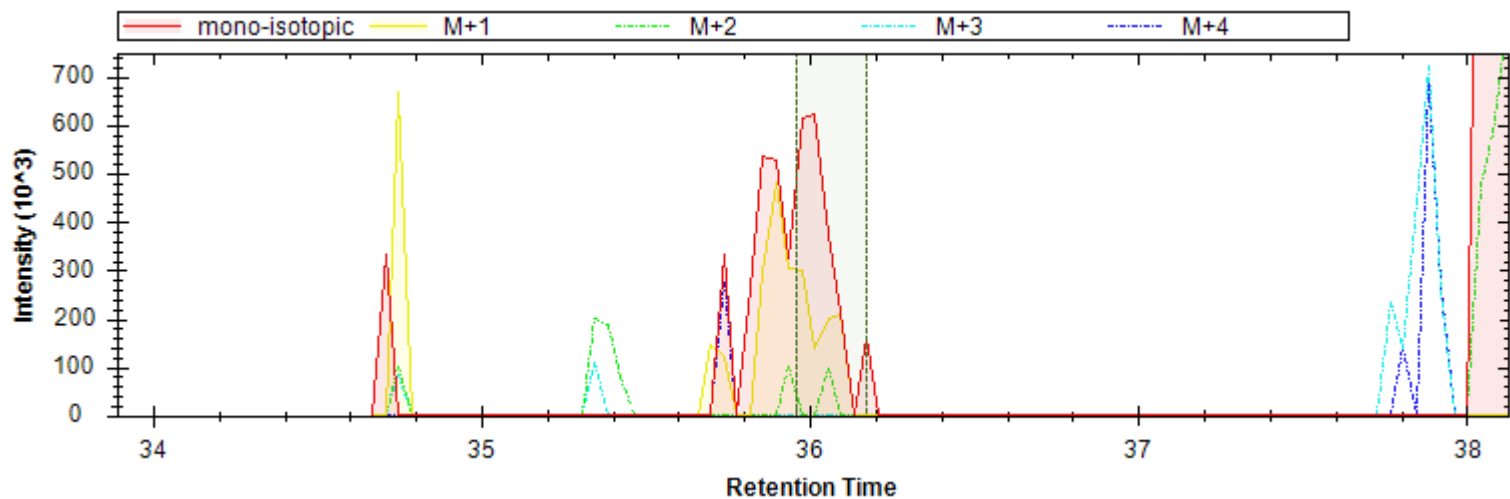

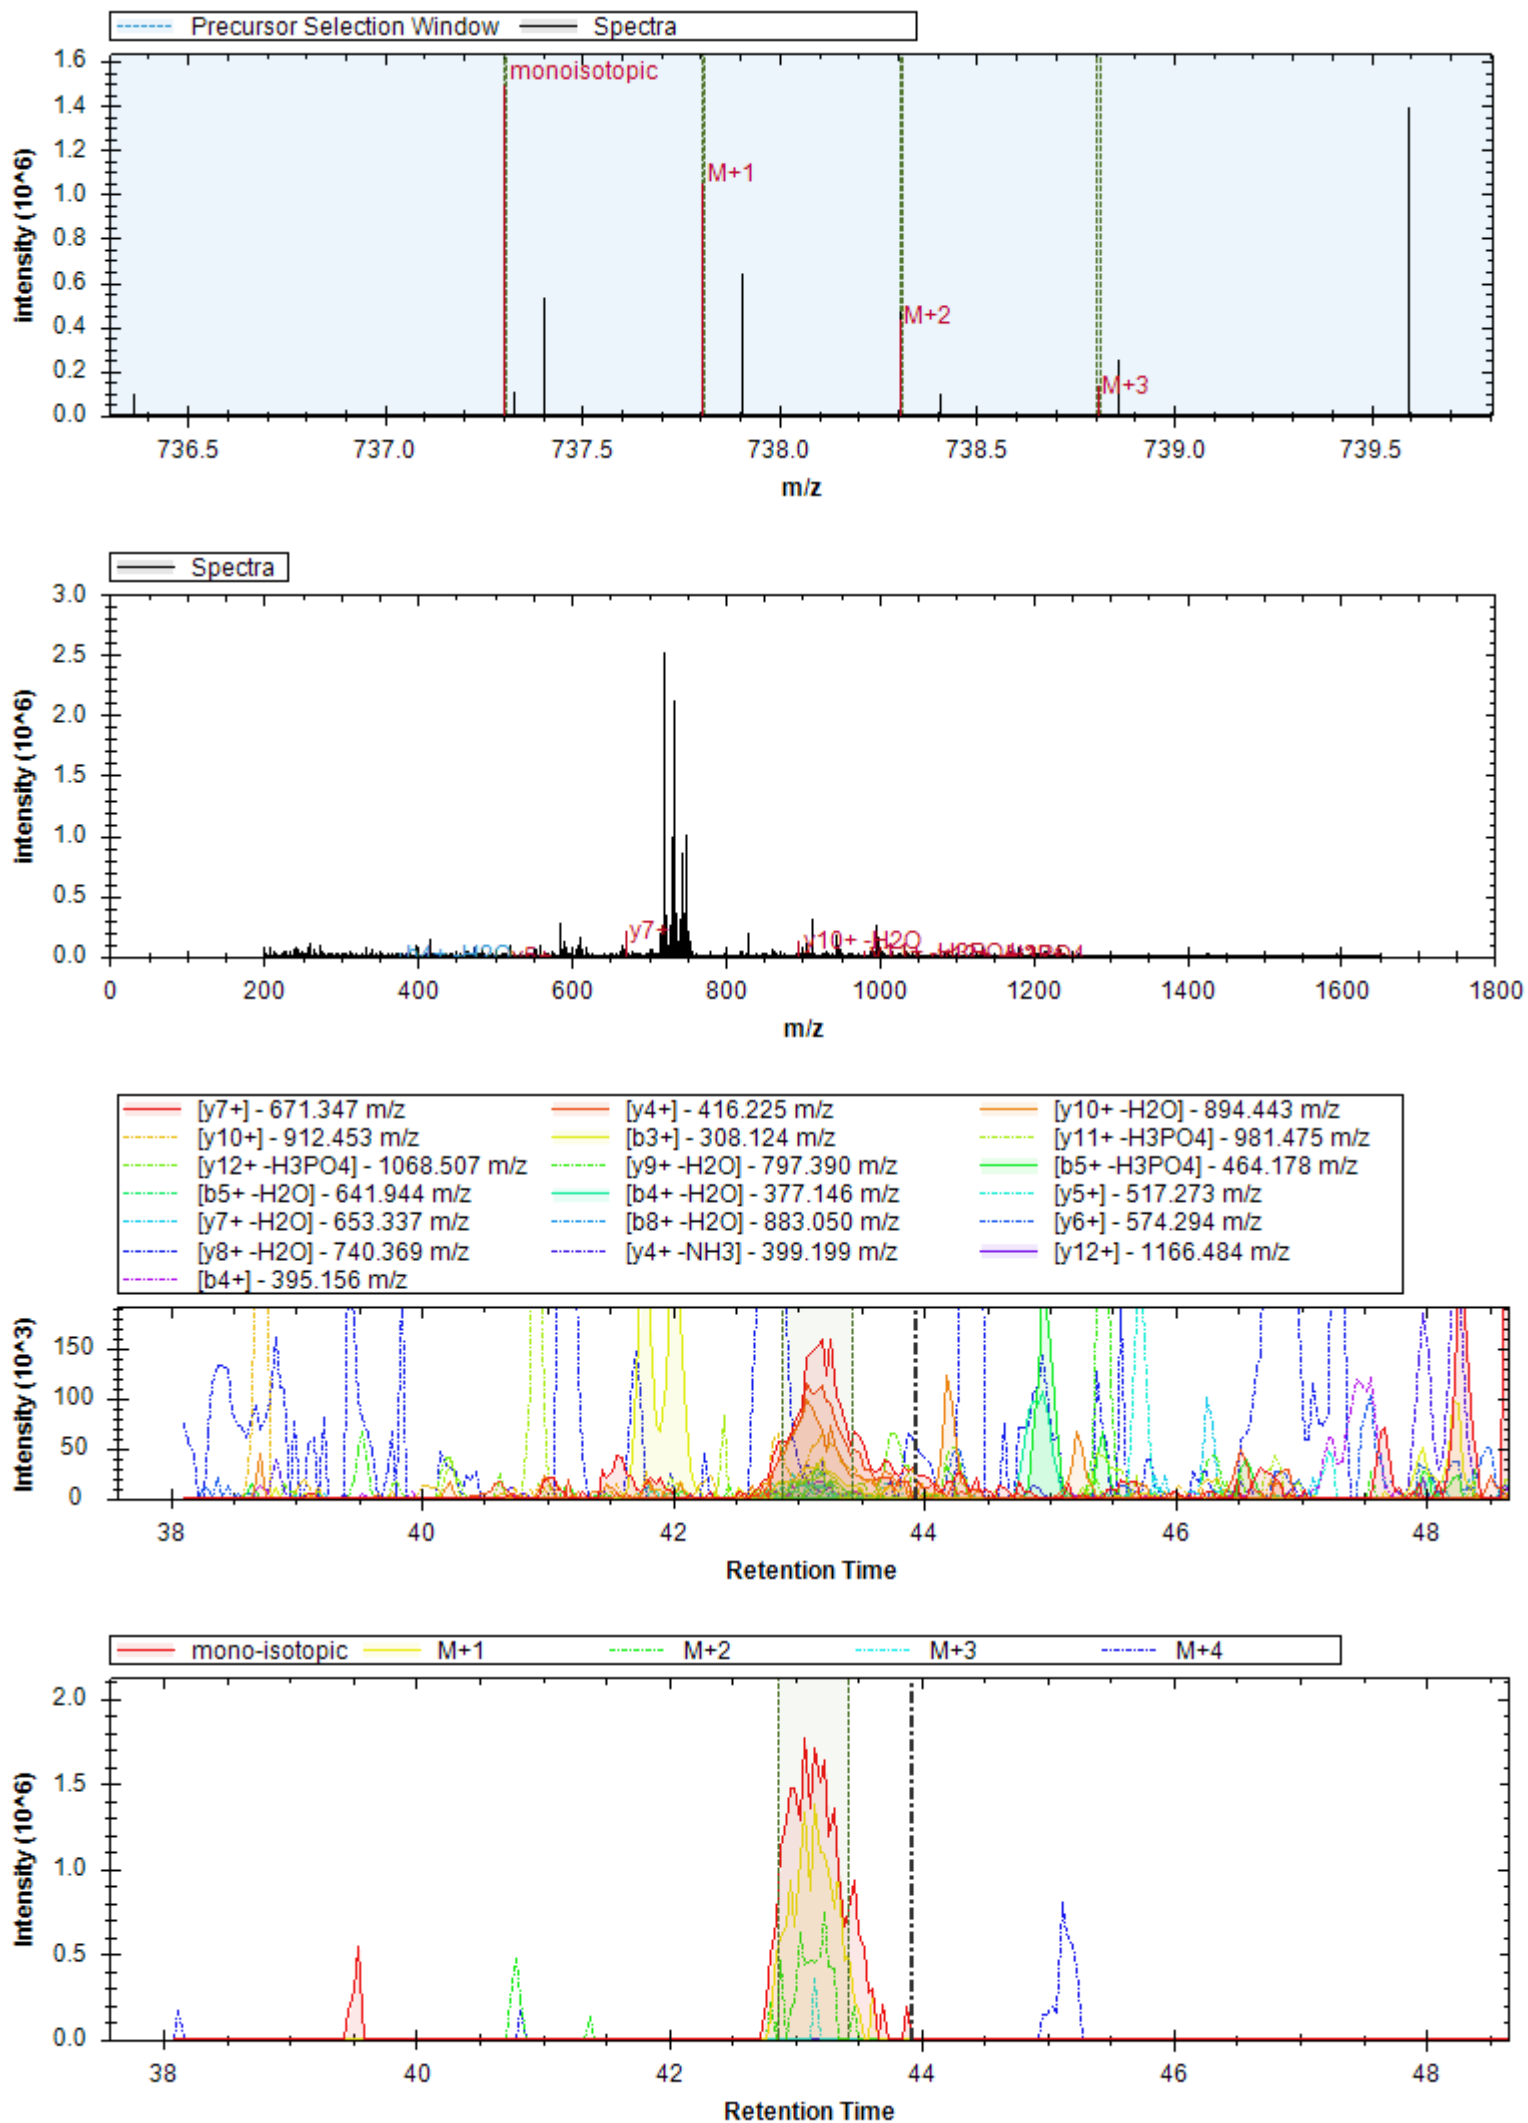

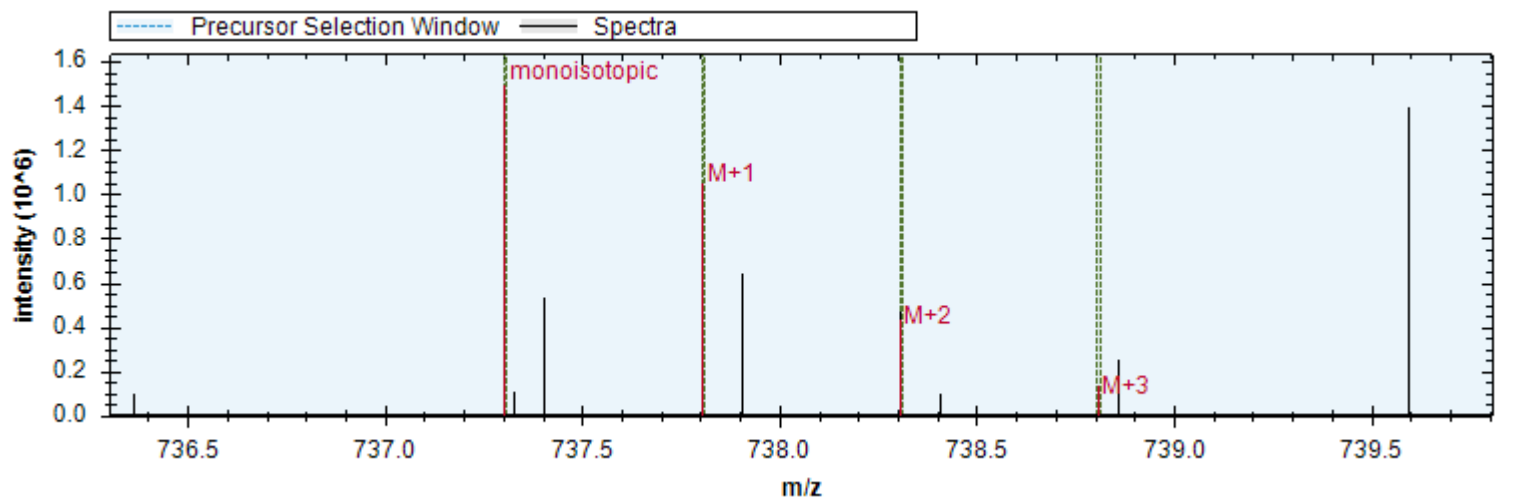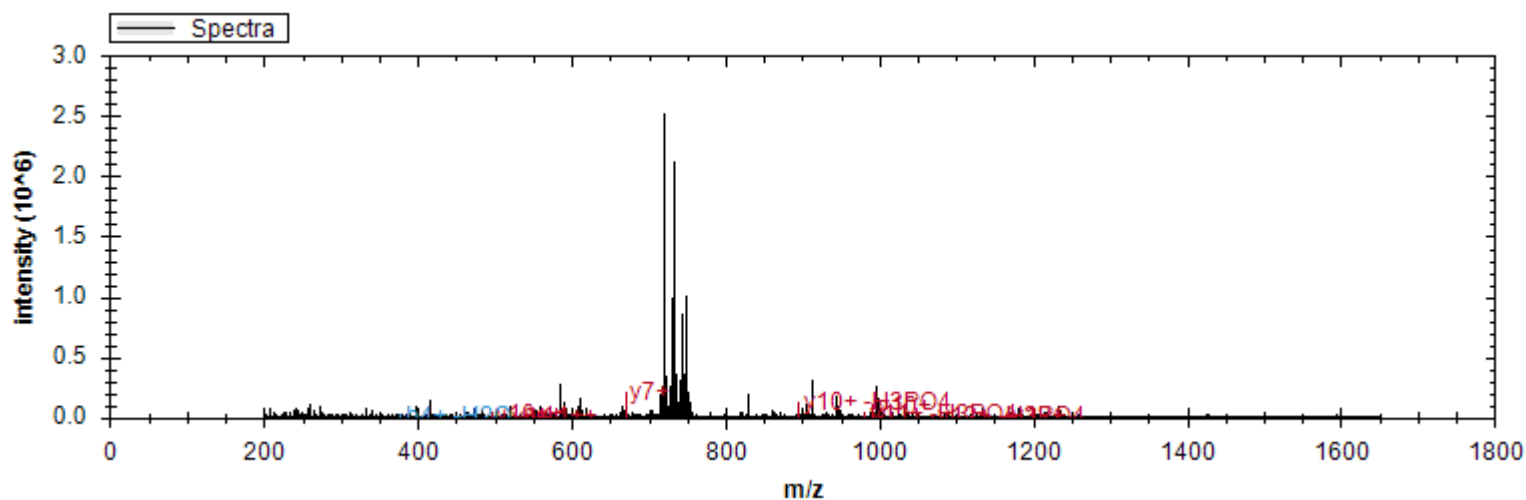

- |                             |                              |                            |
|-----------------------------|------------------------------|----------------------------|
| [y7+] - 671.347 m/z         | [y10+ -H3PO4] - 894.443 m/z  | [y4+] - 416.225 m/z        |
| [y10+] - 992.420 m/z        | [y10++] - 496.714 m/z        | [b3+] - 308.124 m/z        |
| [y11+ -H3PO4] - 981.475 m/z | [y12+ -H3PO4] - 1068.507 m/z | [y9+ -H3PO4] - 797.390 m/z |
| [y11++] - 540.230 m/z       | [y11+] - 1079.452 m/z        | [y7+ -H2O] - 653.337 m/z   |
| [y8+ -H3PO4] - 740.369 m/z  | [y12+] - 1166.484 m/z        | [y10+ -H2O] - 1072.209 m/z |
| [b4+ -H2O] - 377.146 m/z    | [y5+] - 517.273 m/z          | [y10+ -NH3] - 975.393 m/z  |
| [b4+] - 395.156 m/z         |                              |                            |

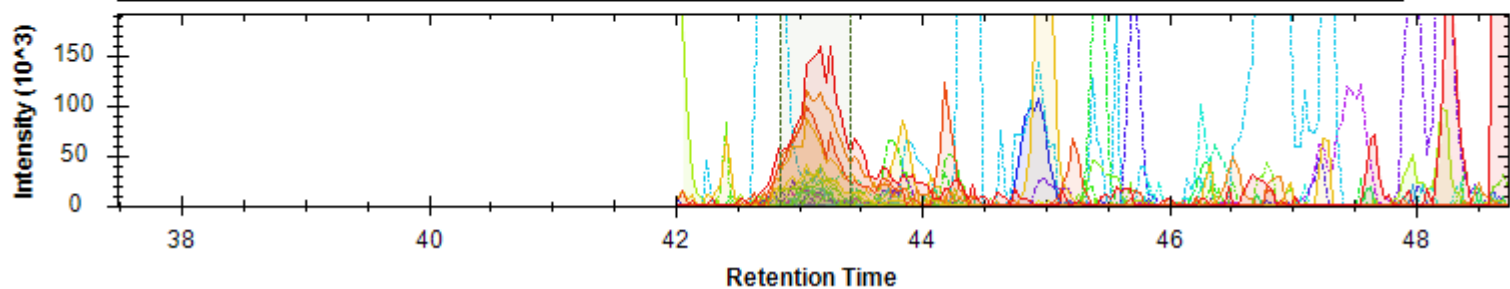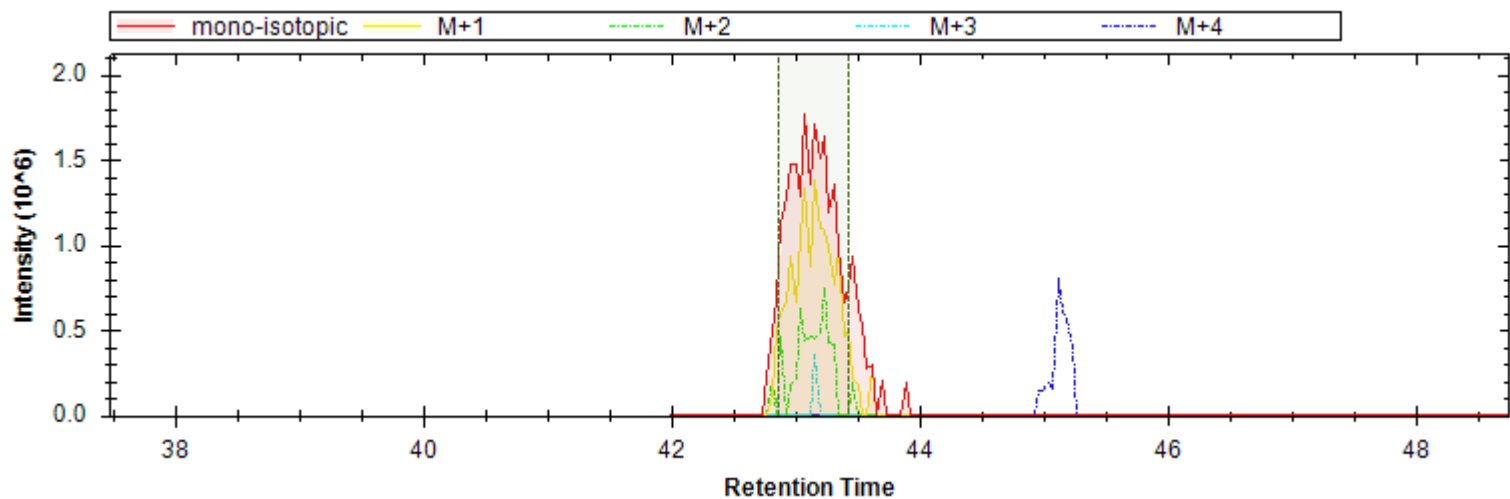

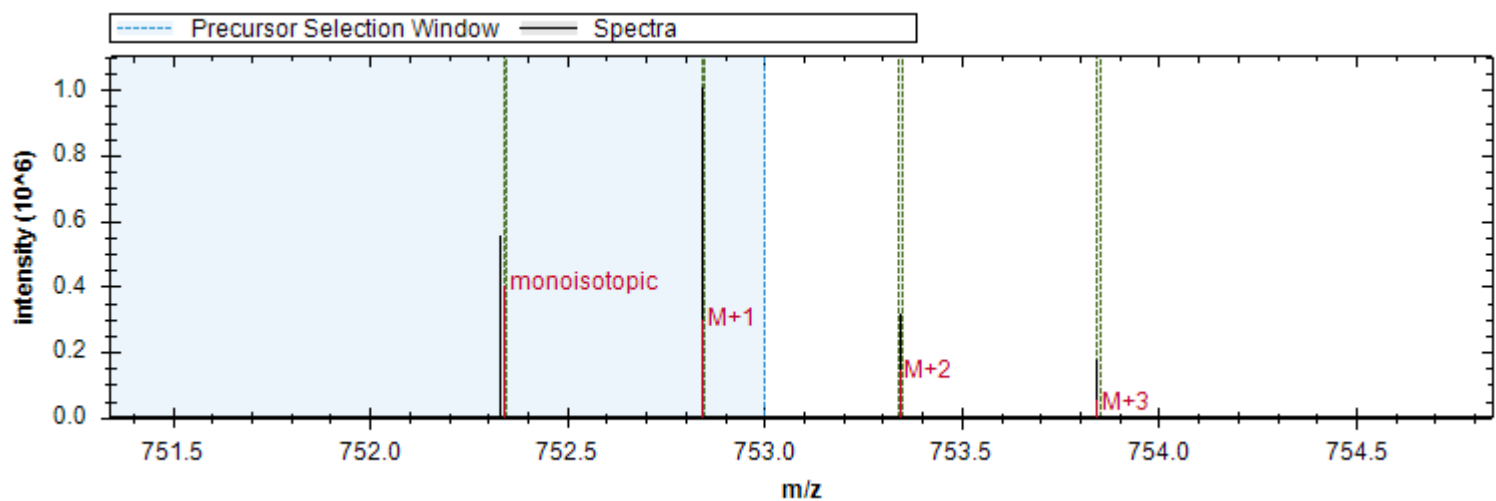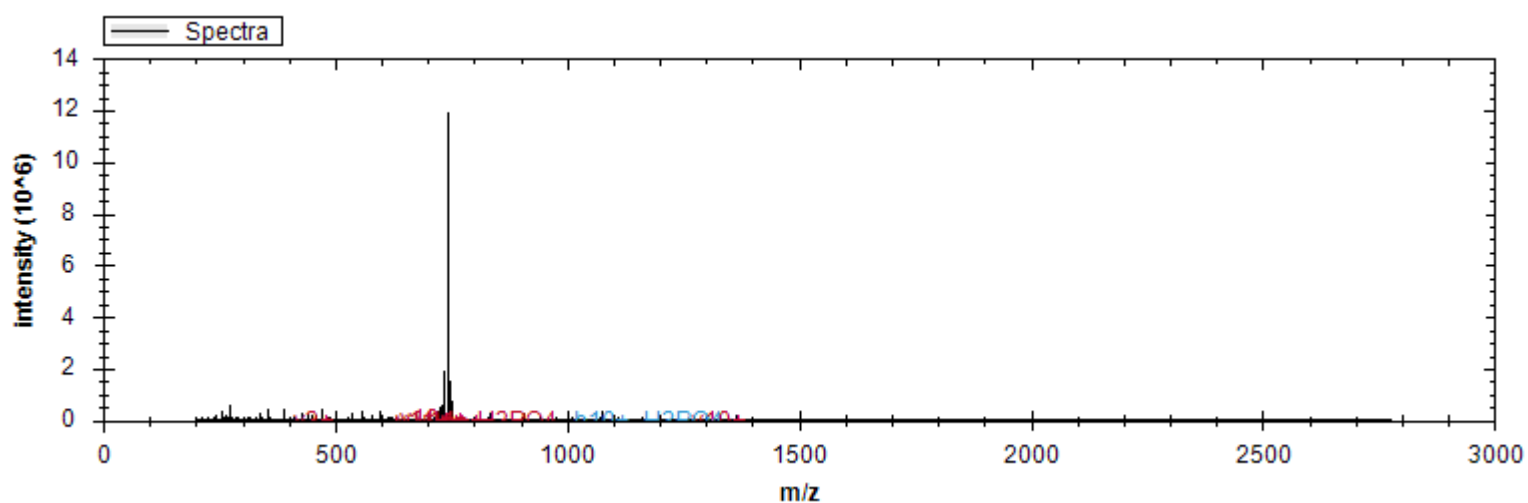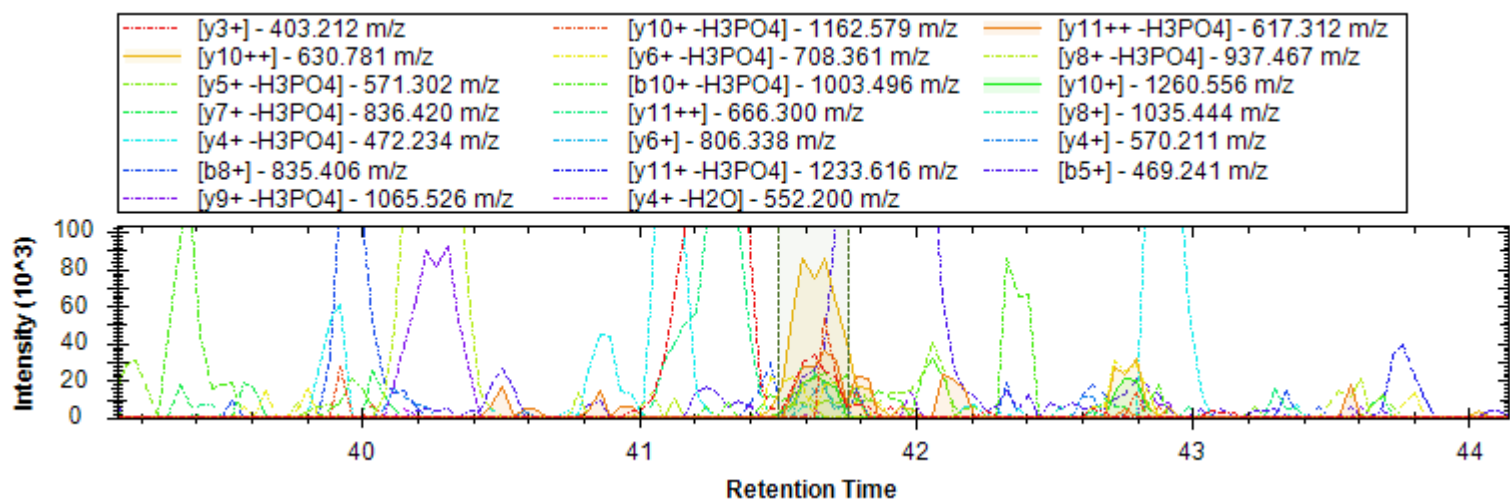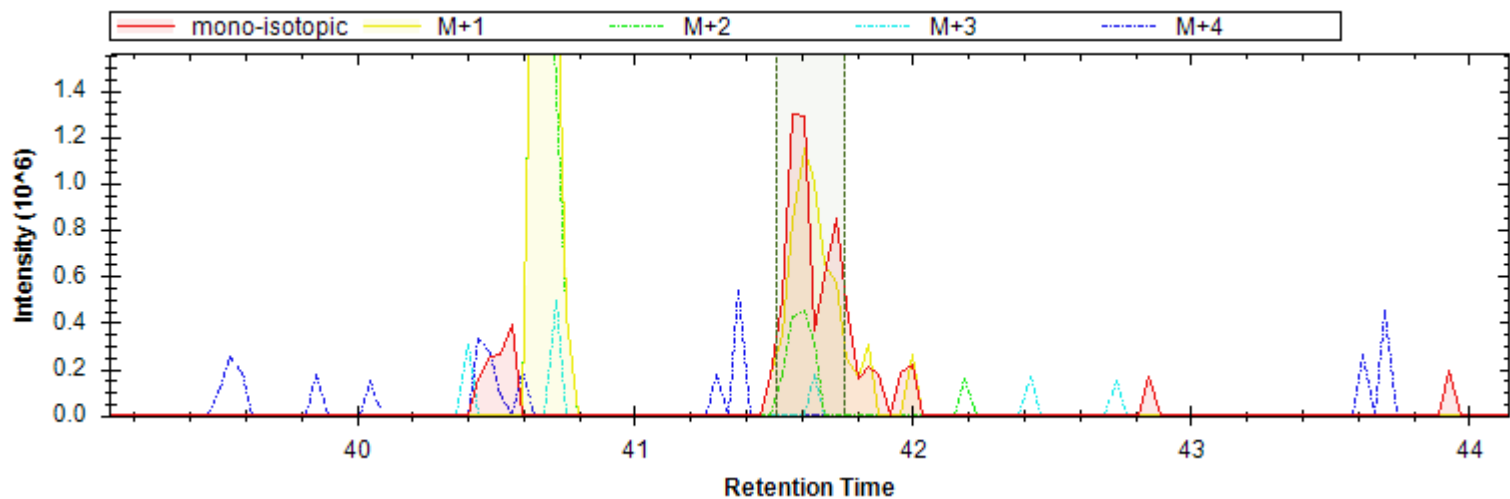



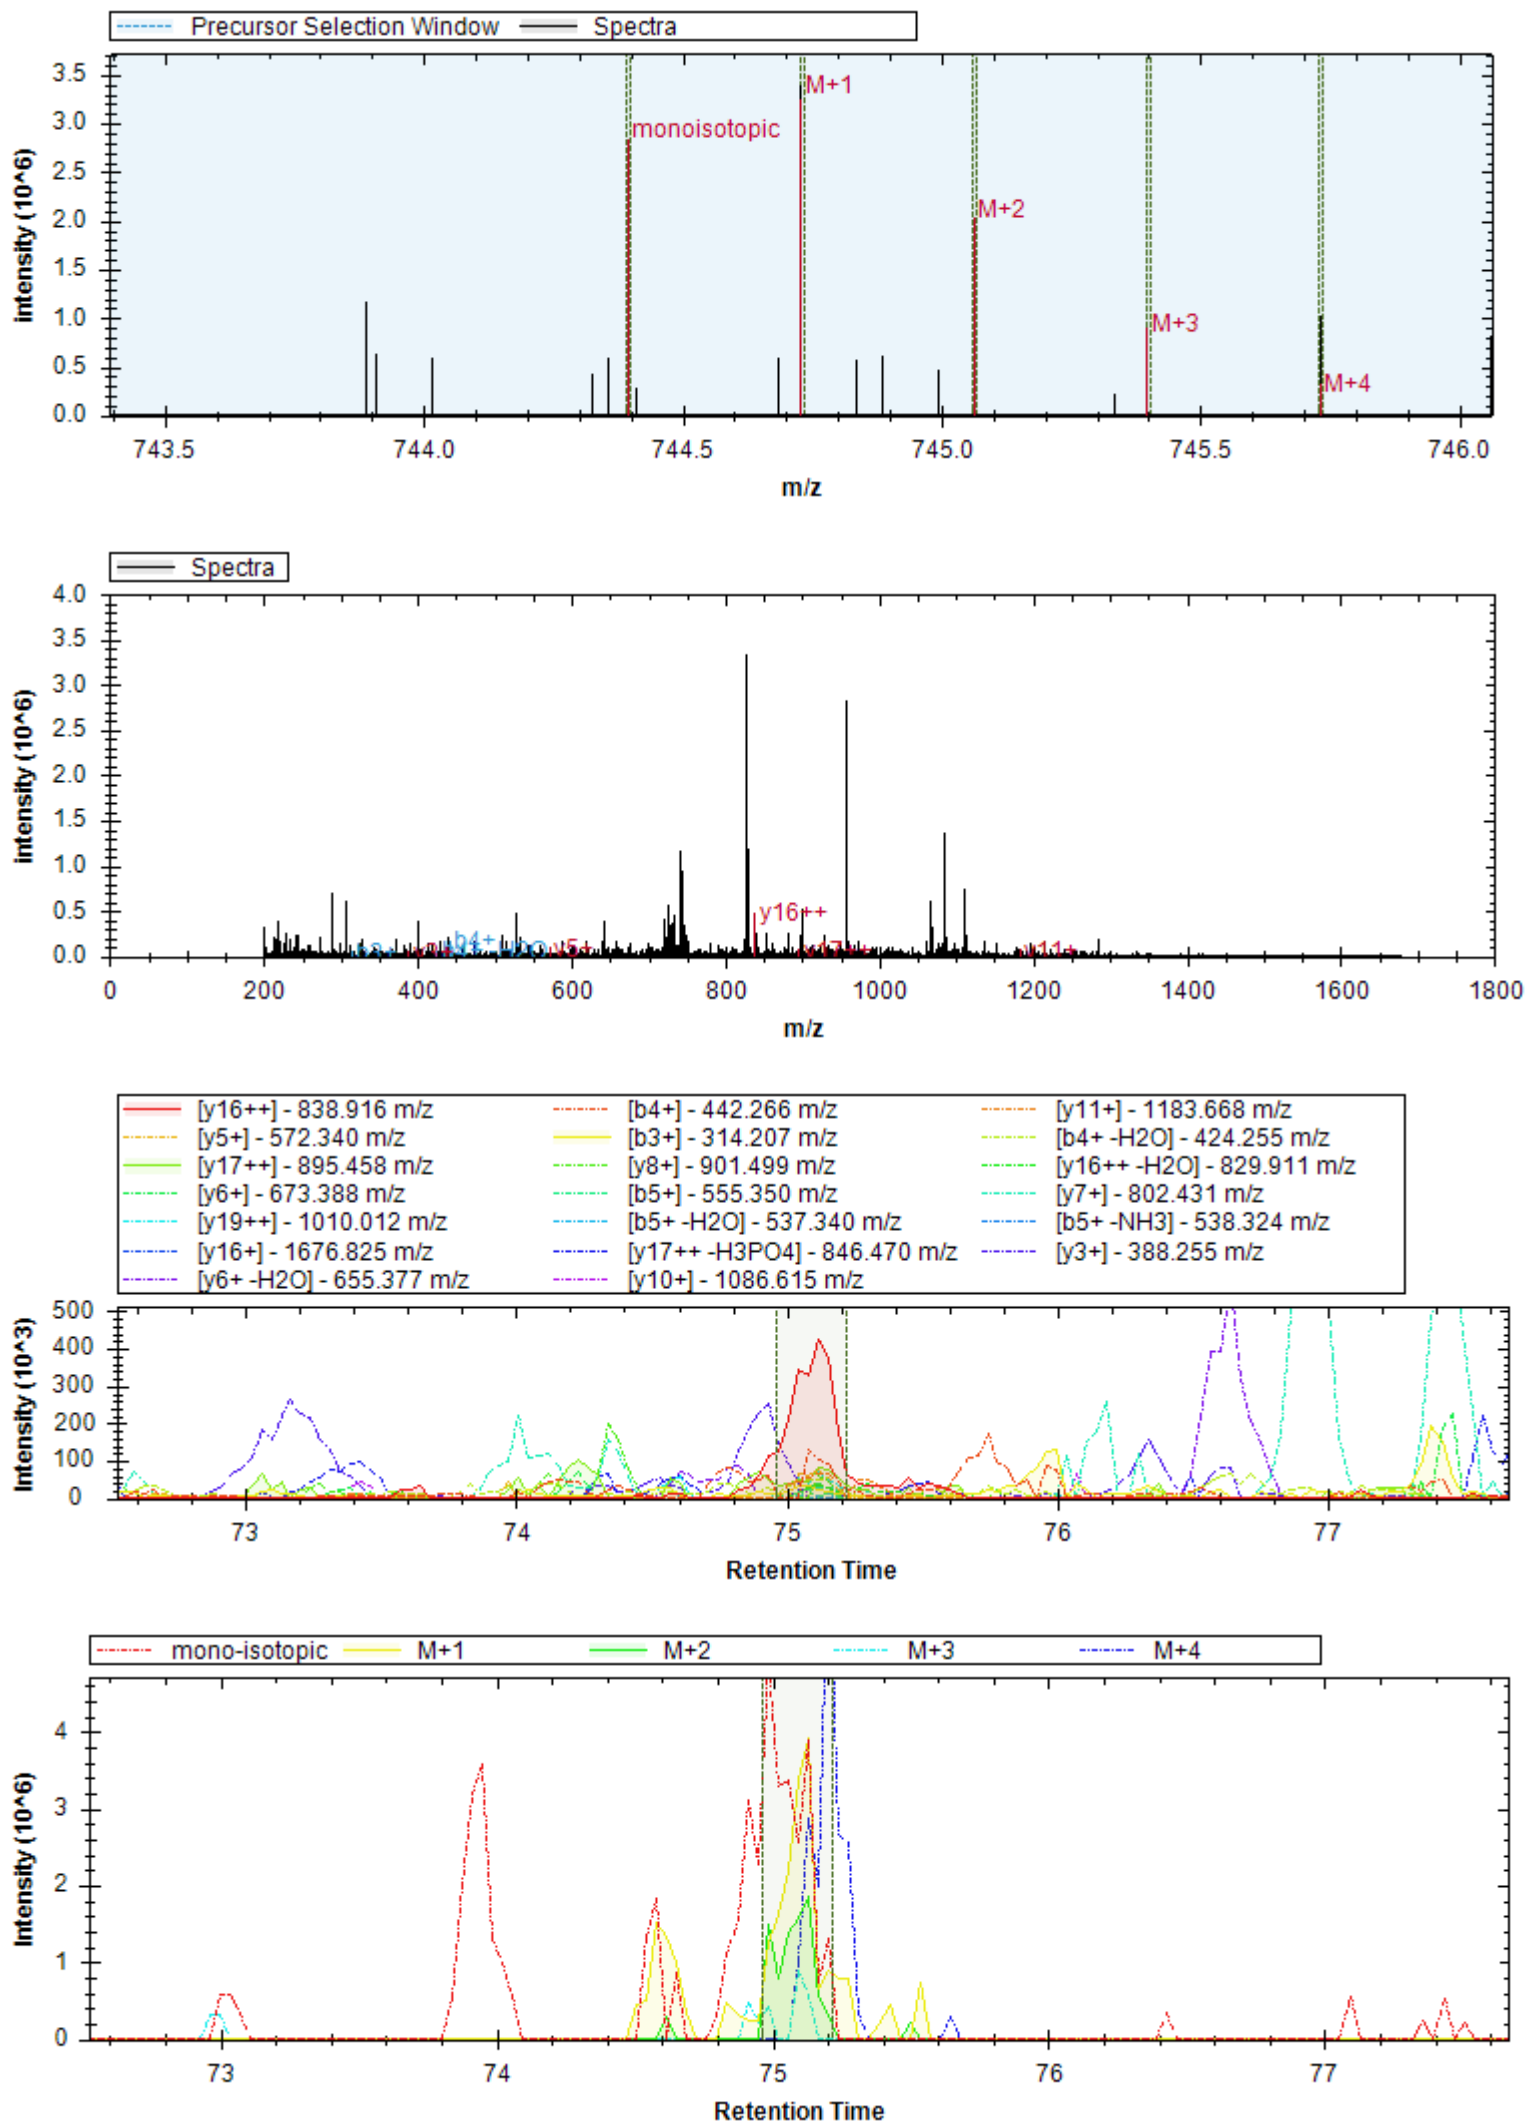

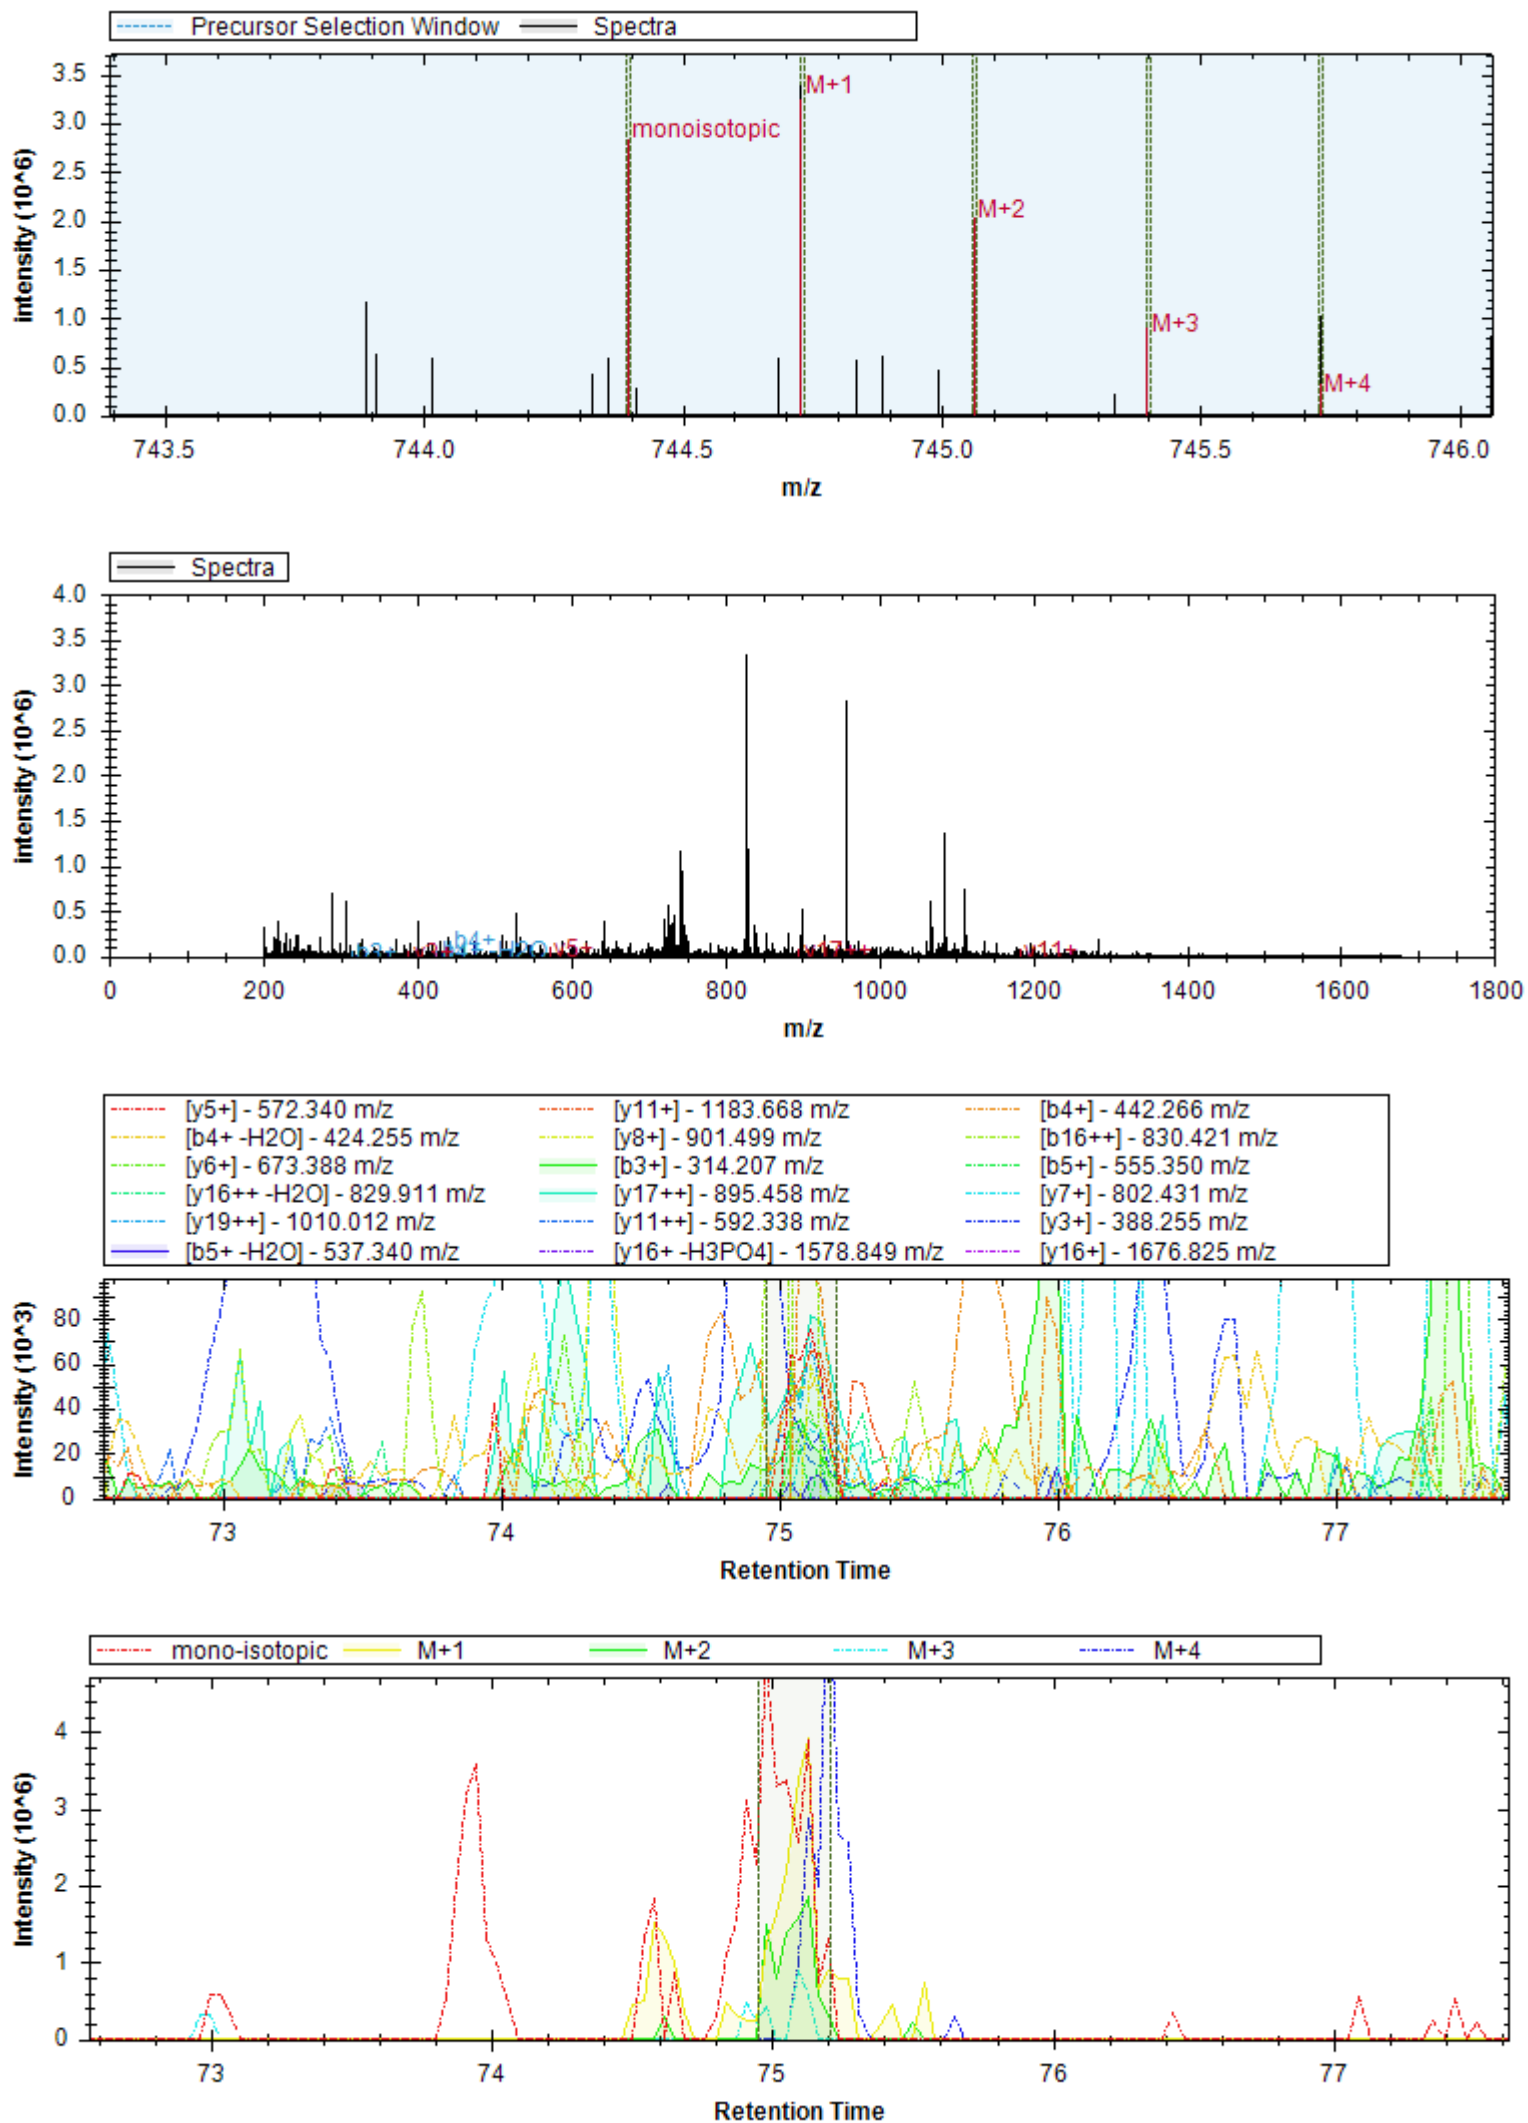

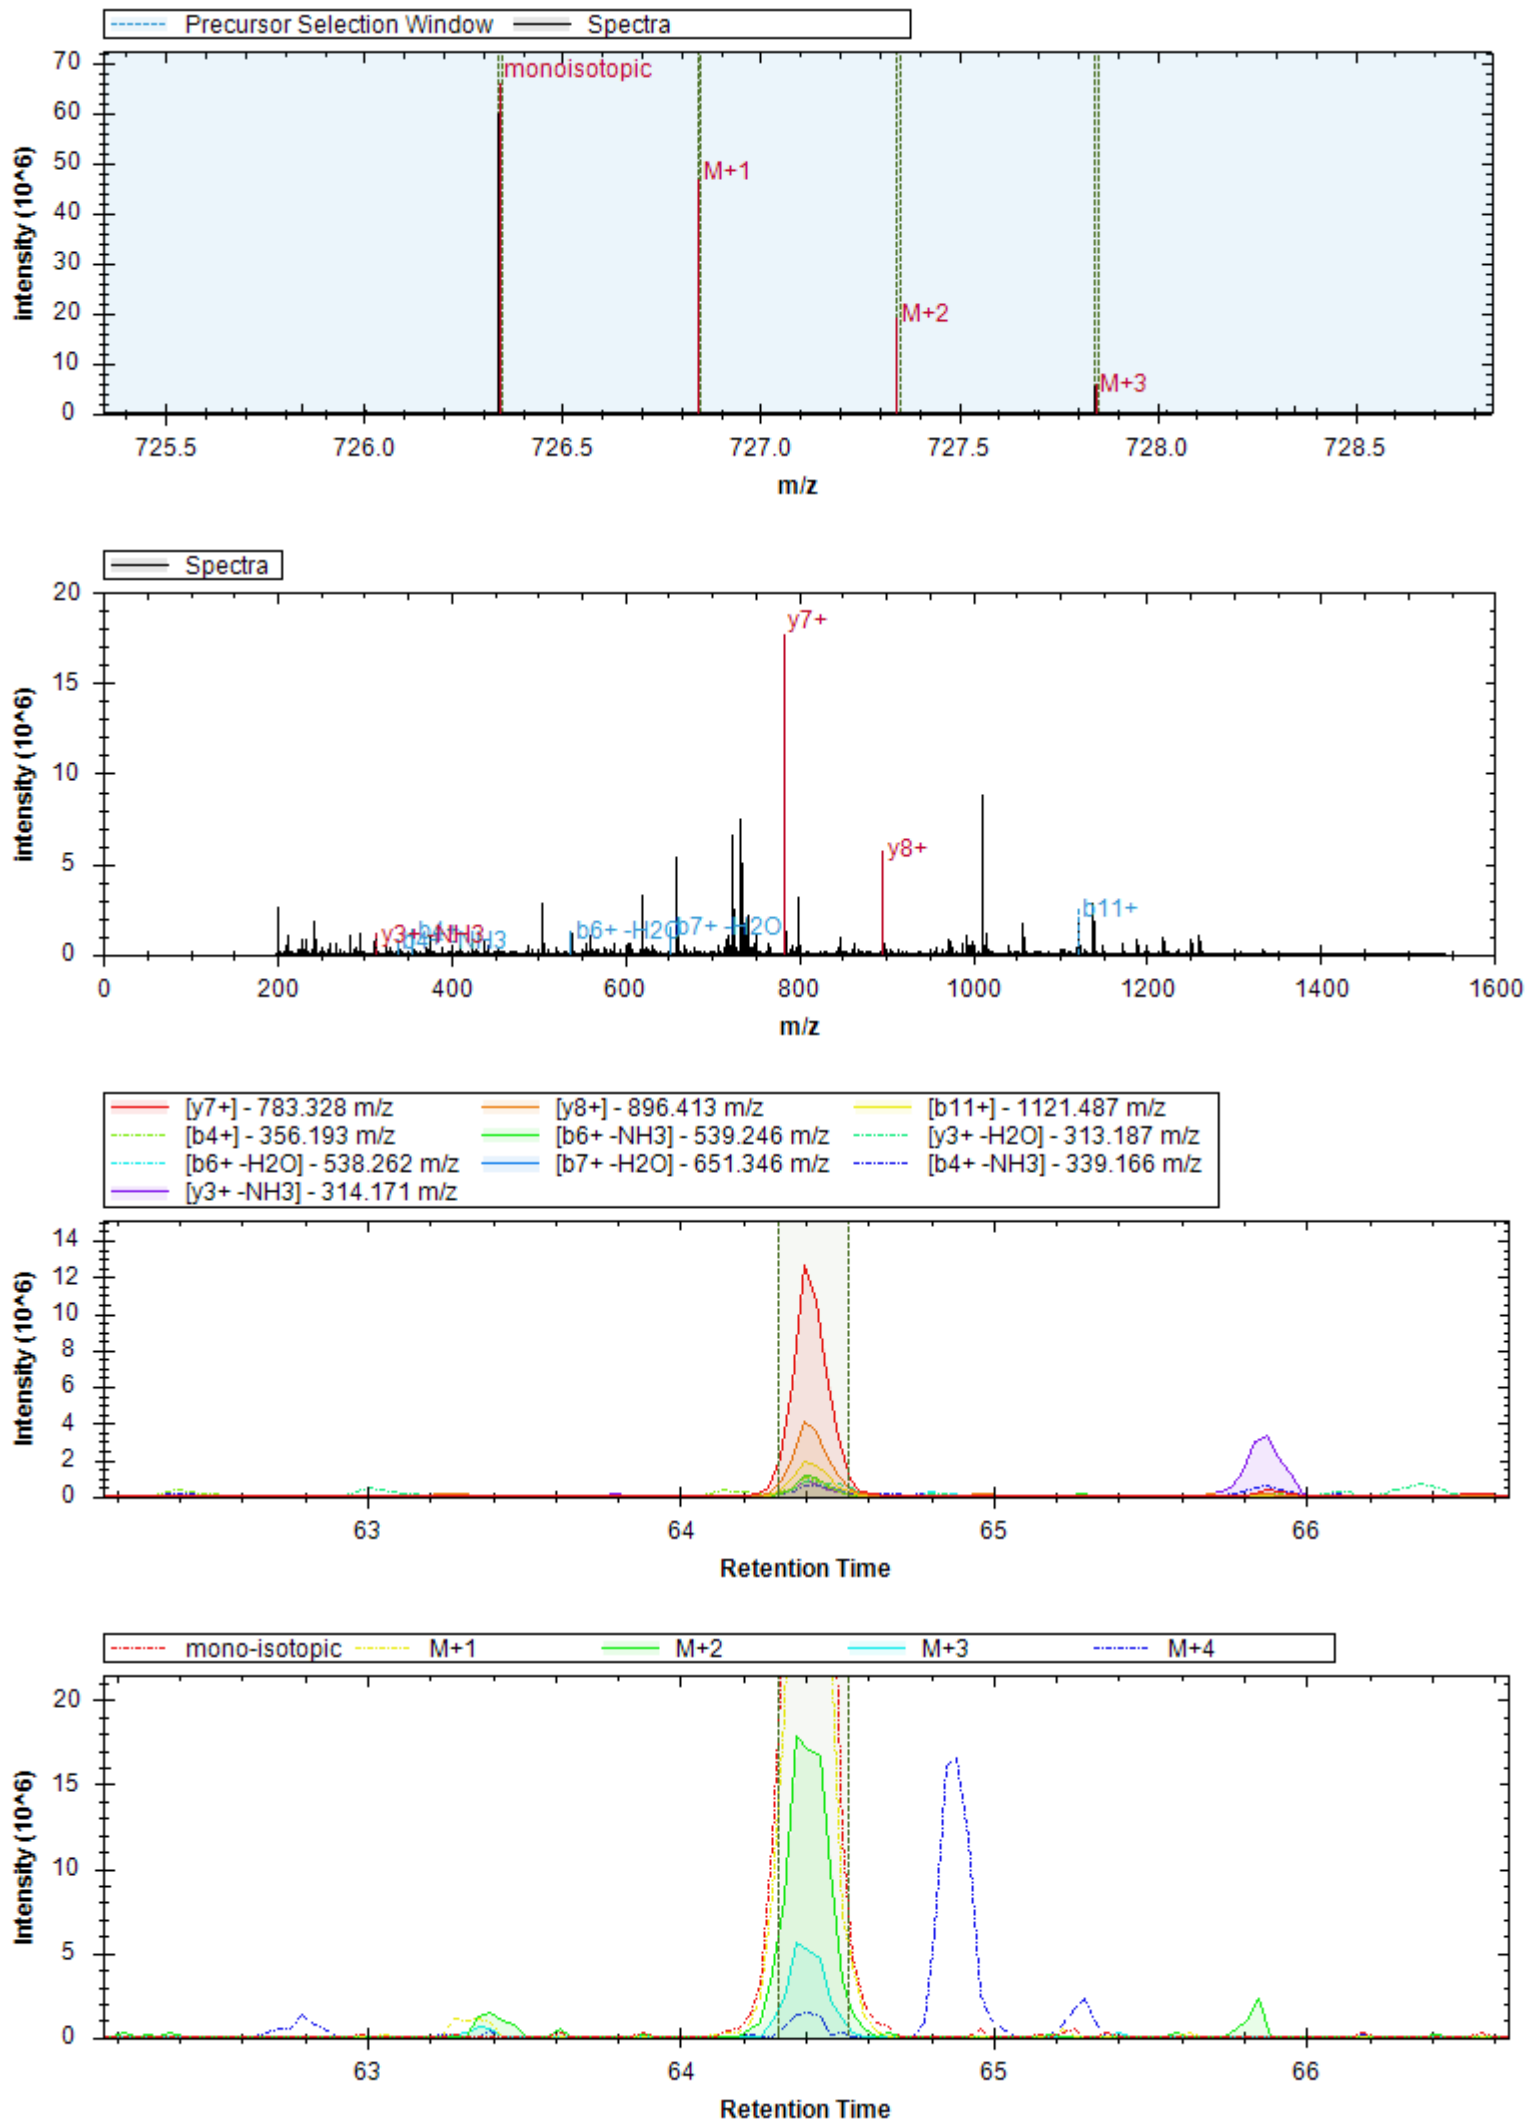

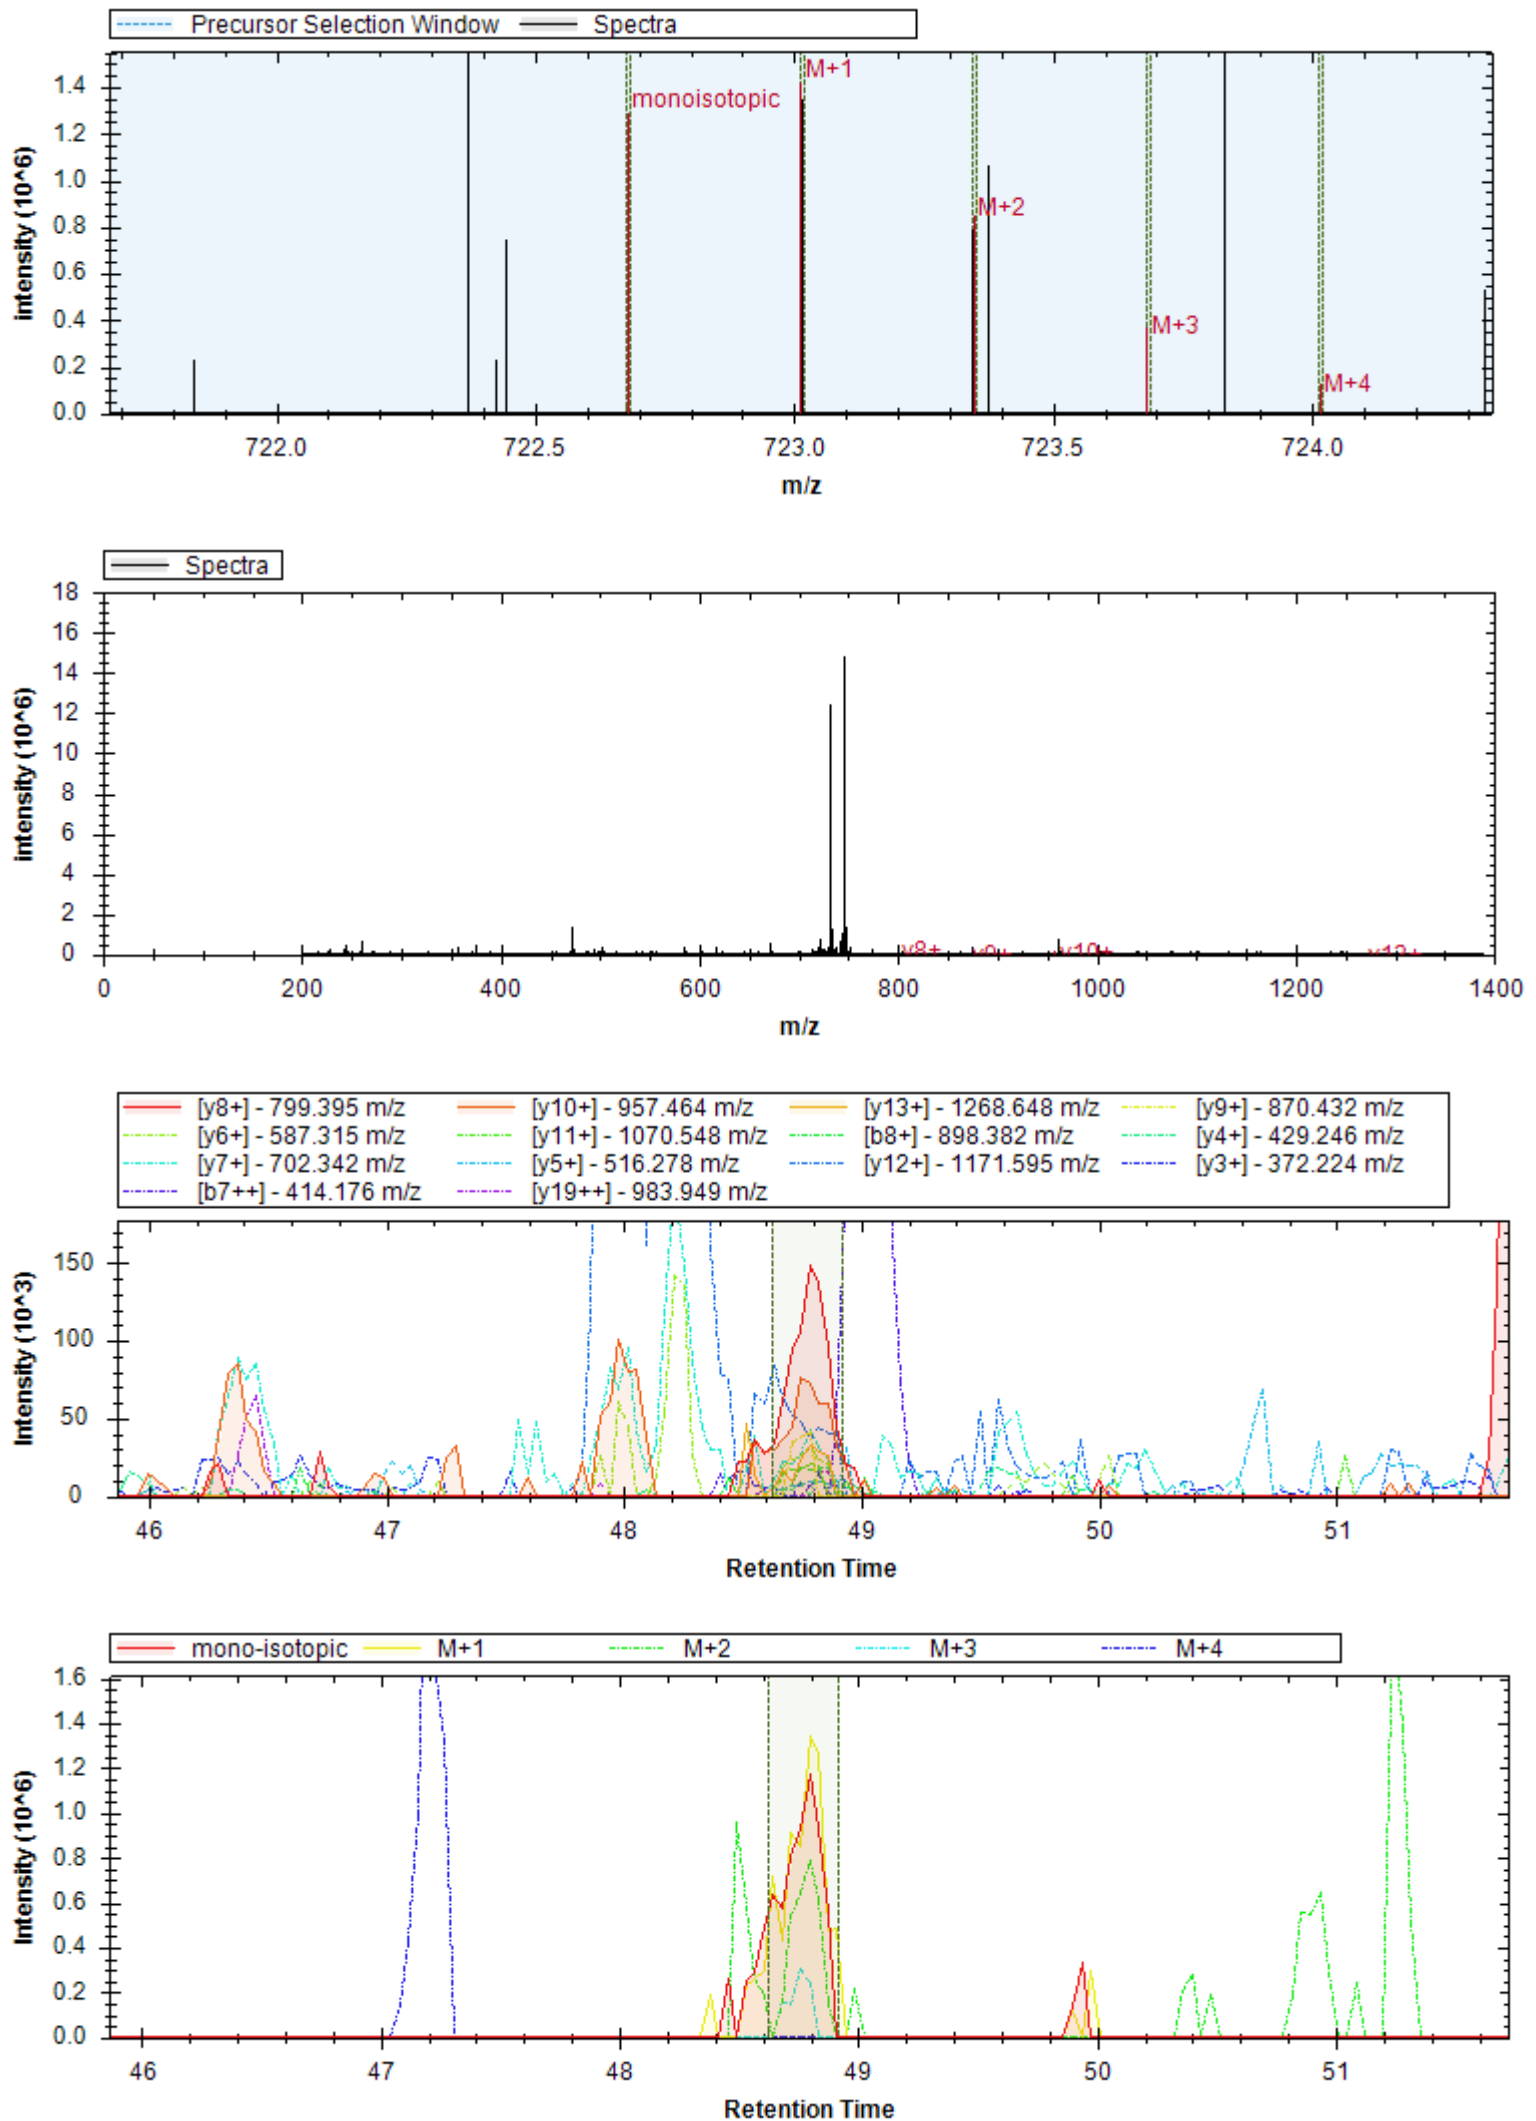

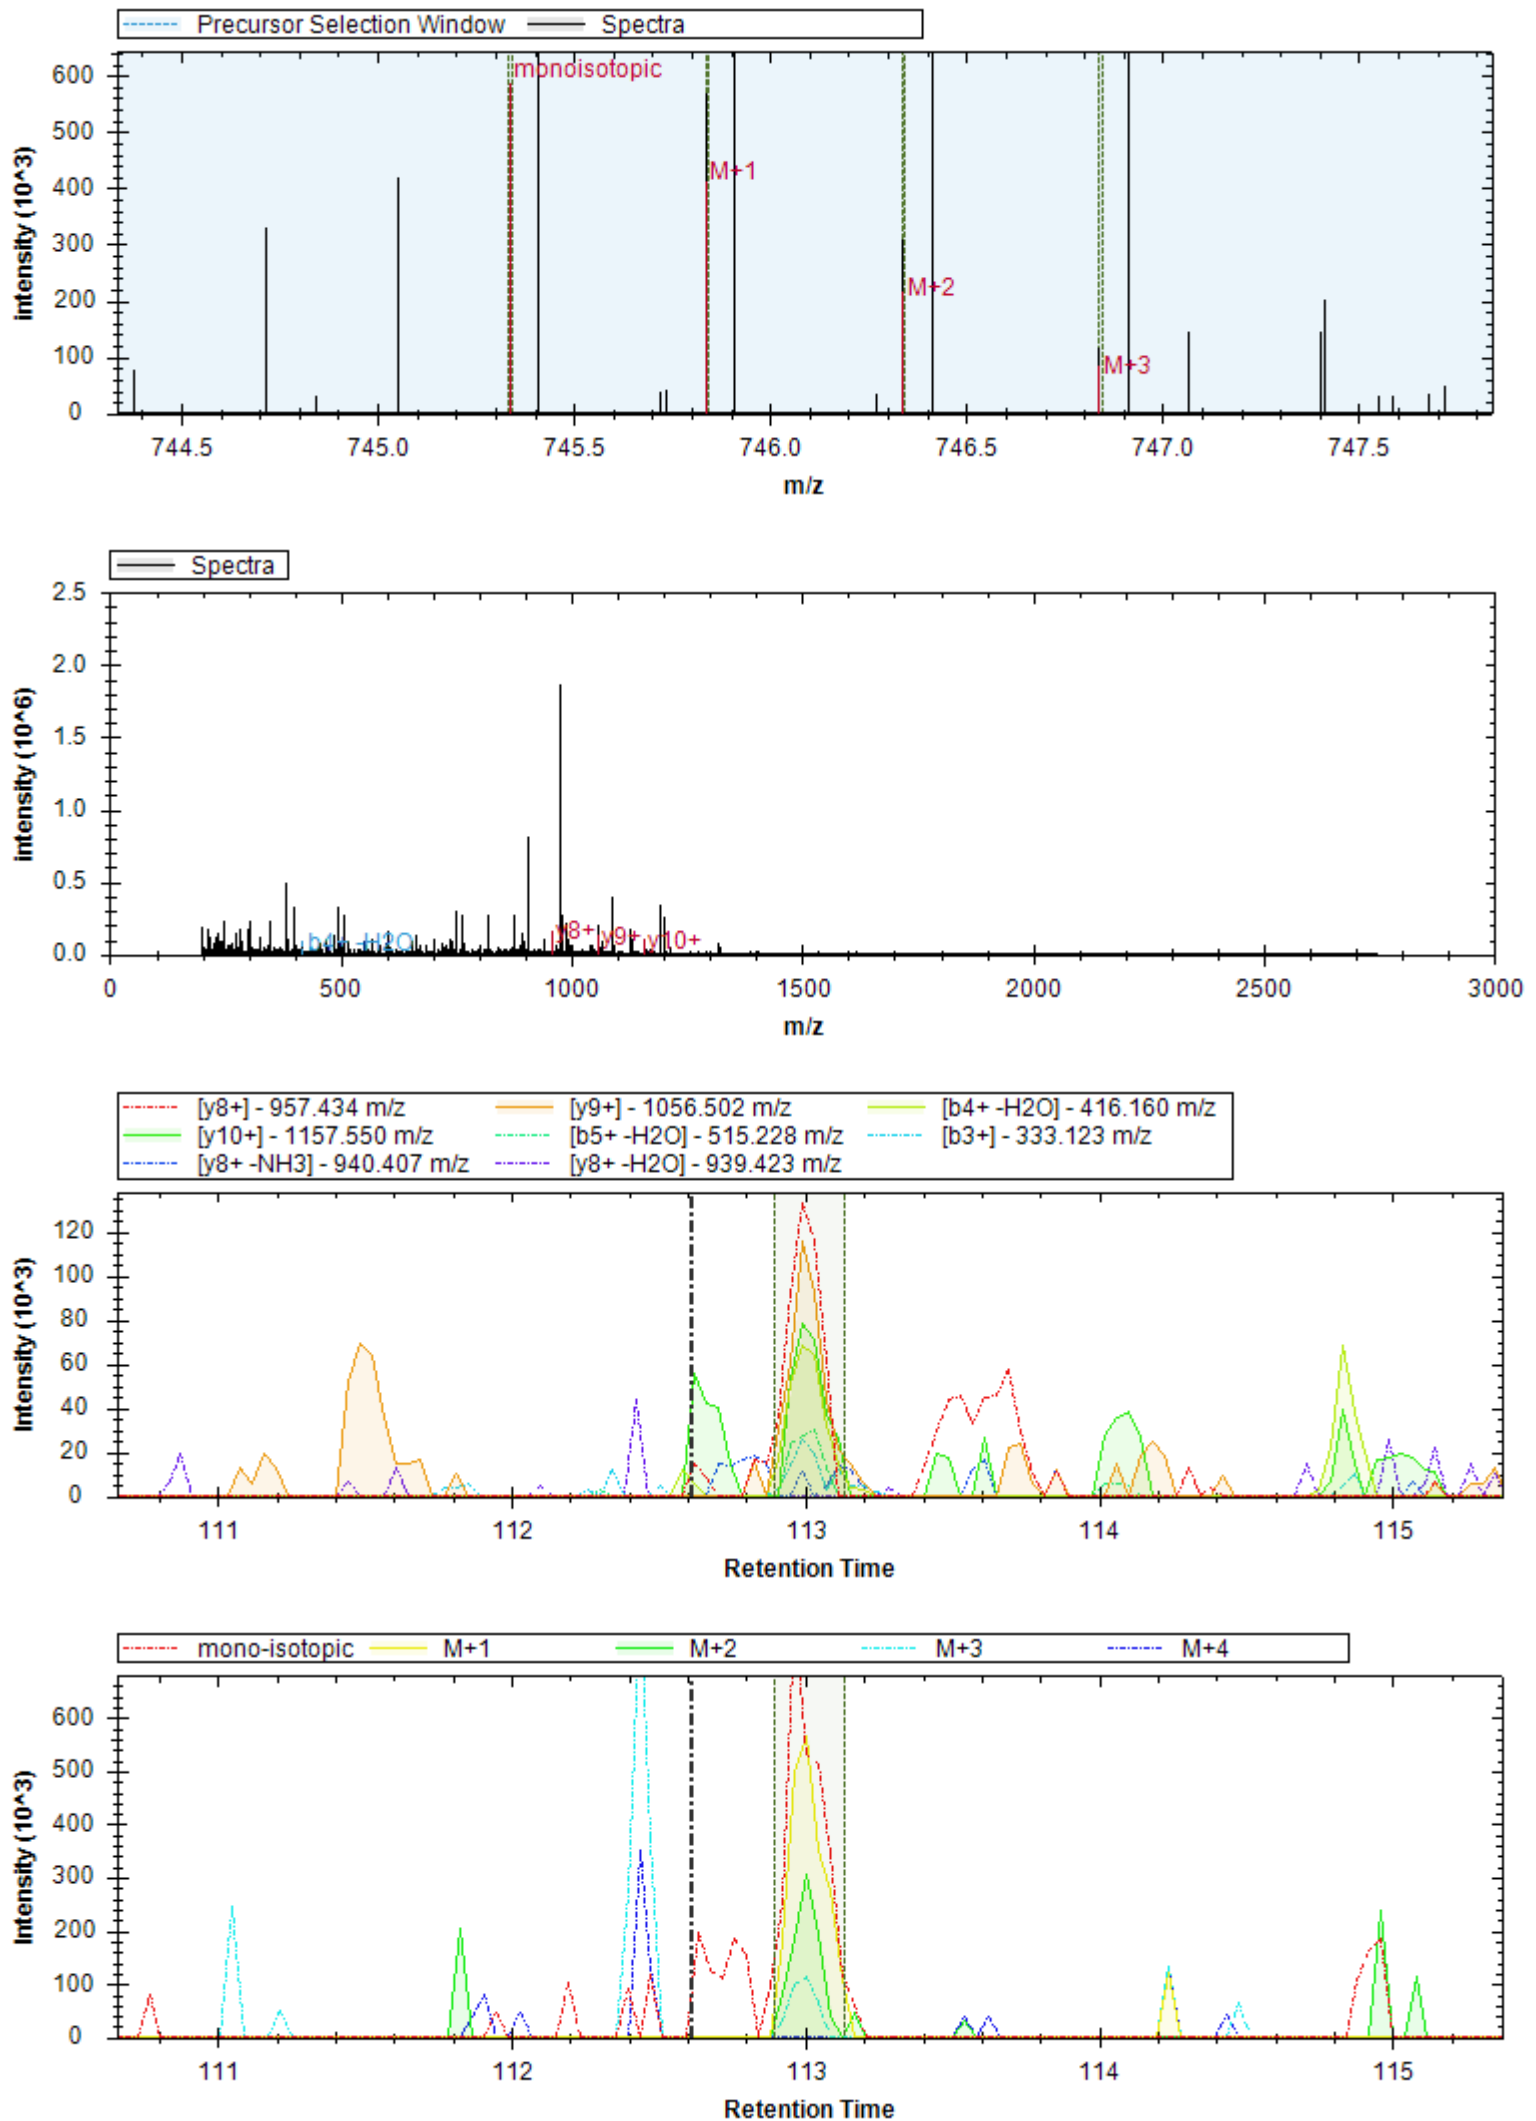

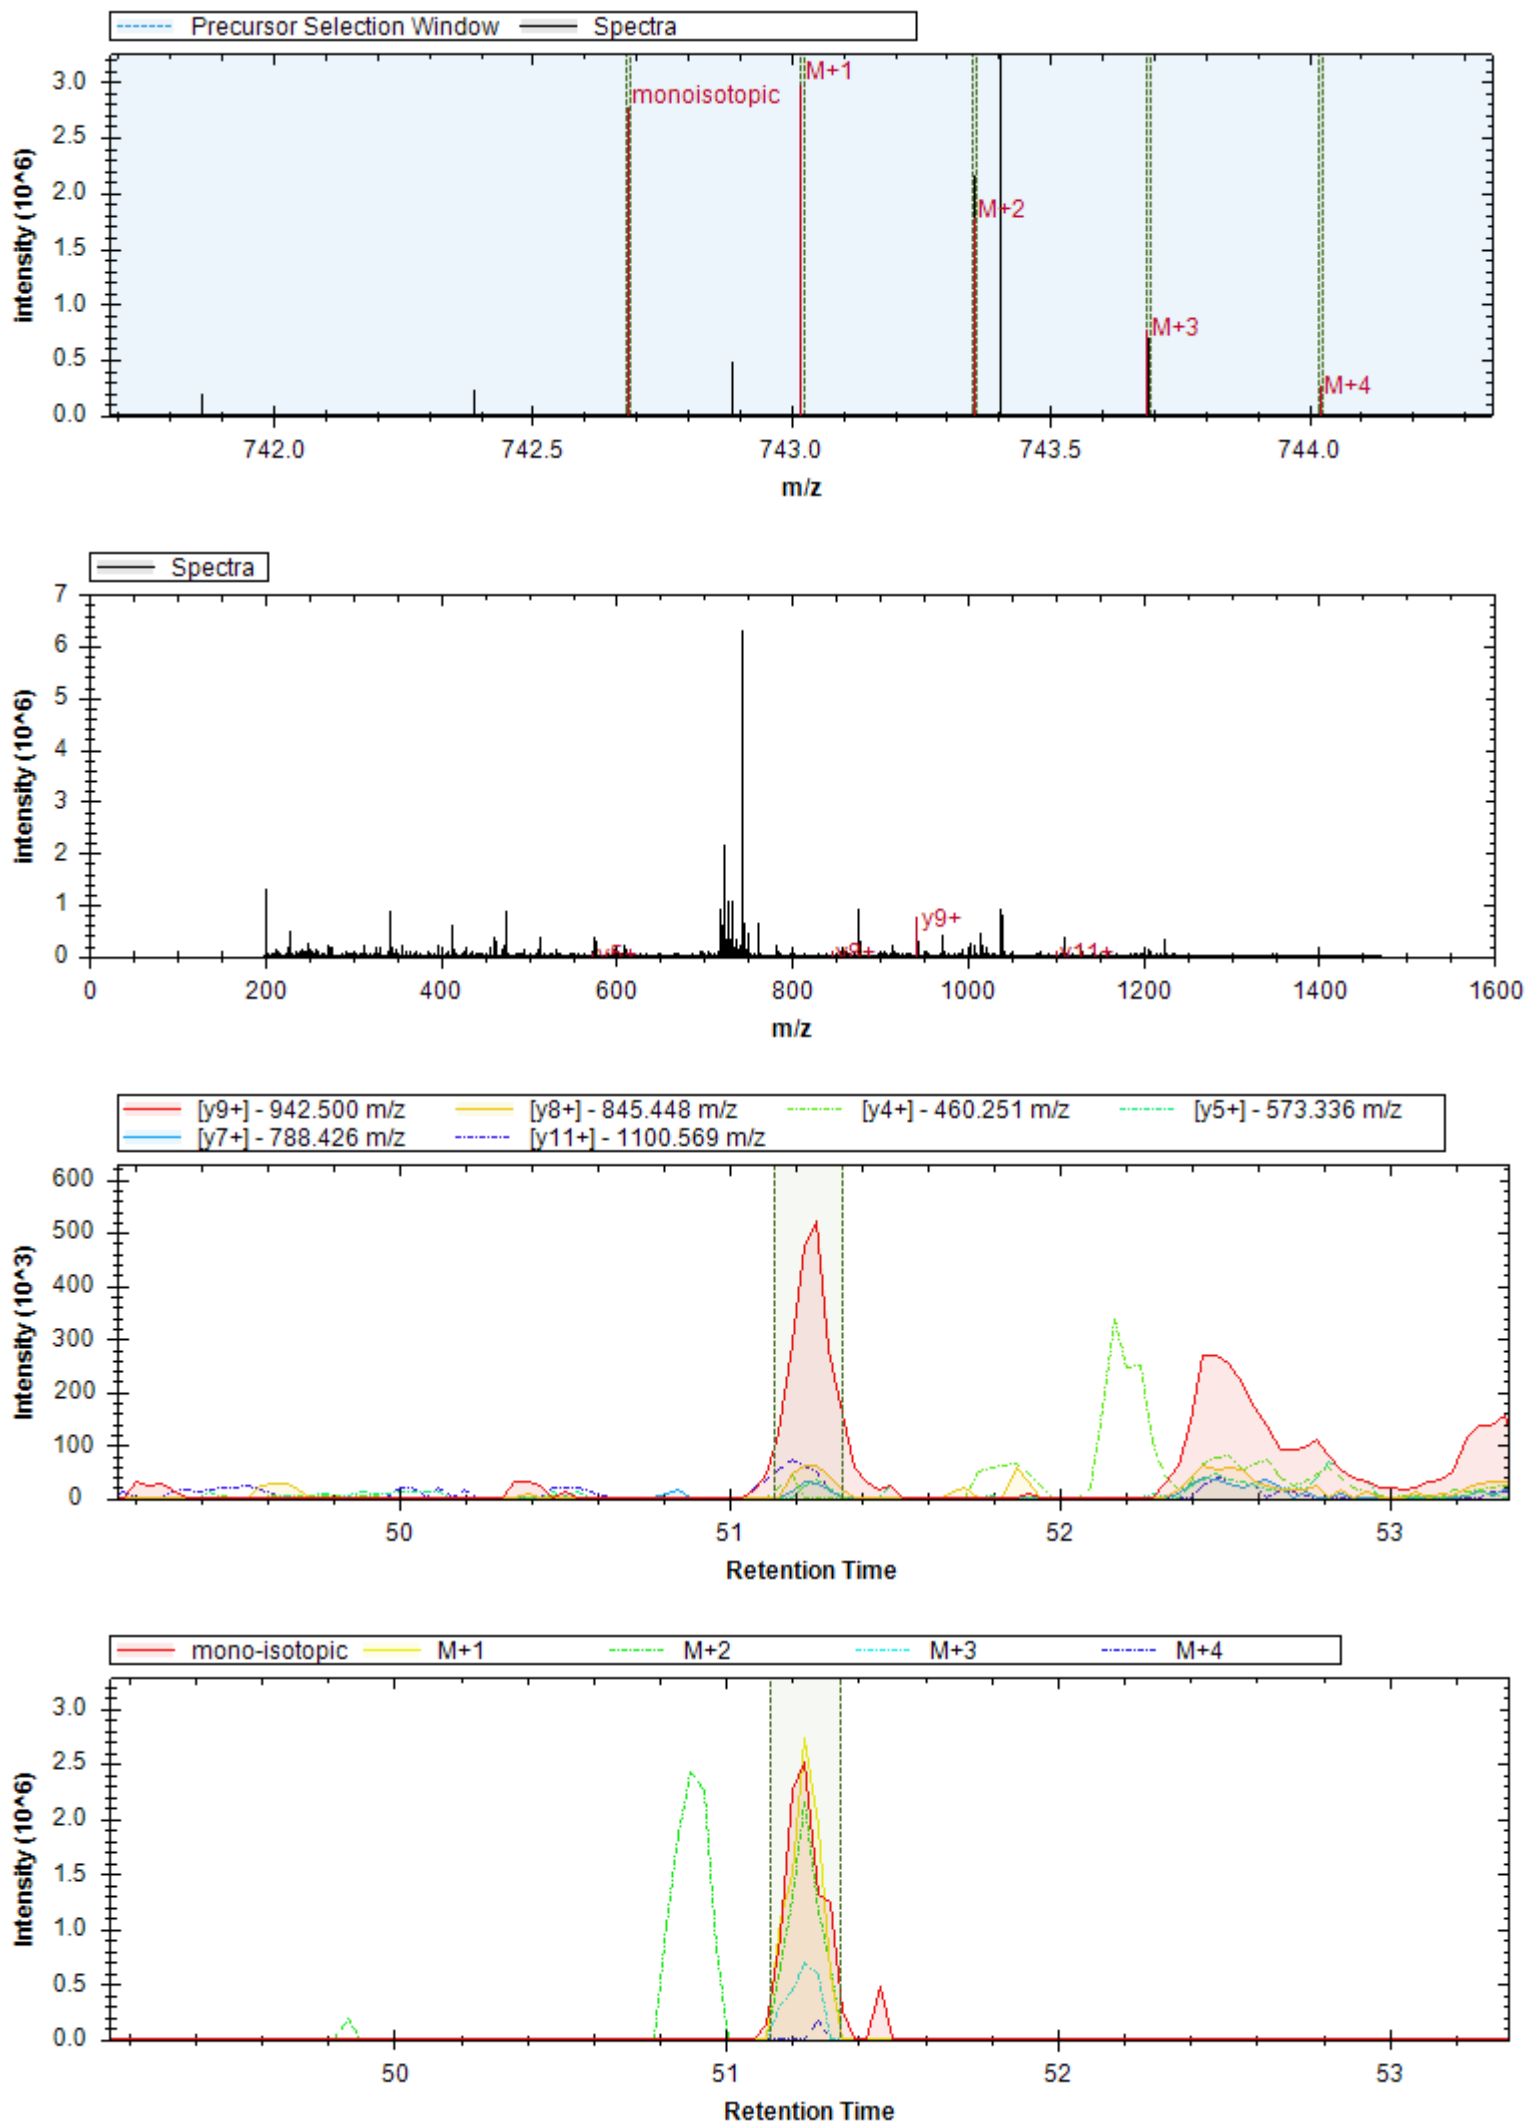

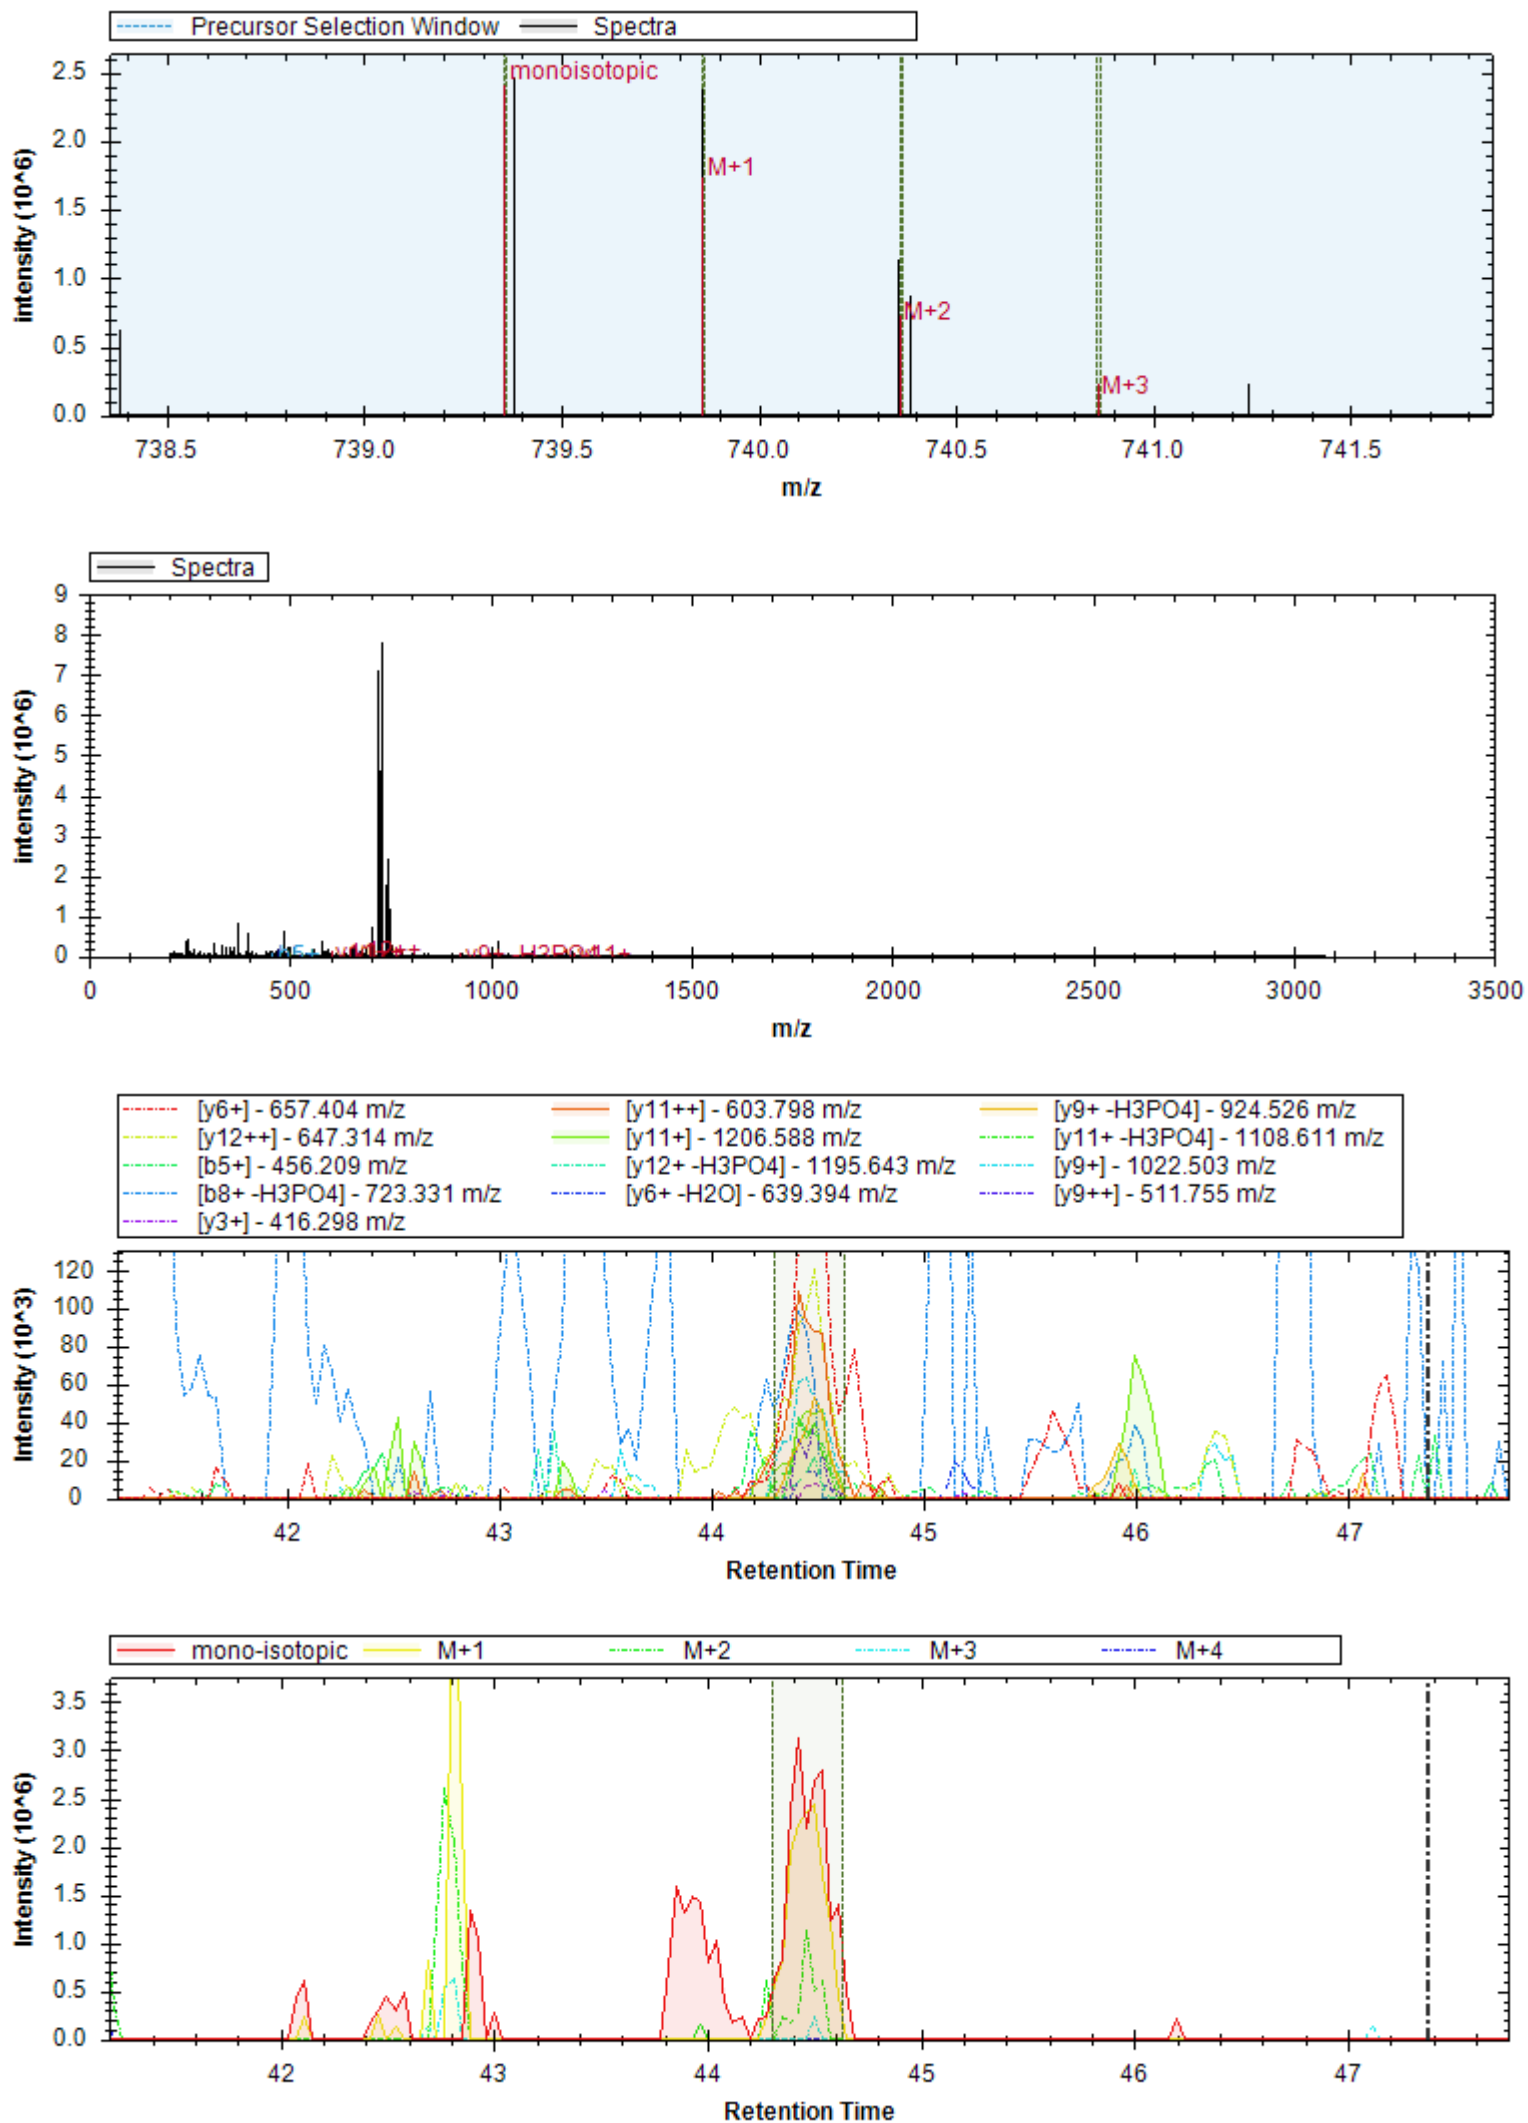

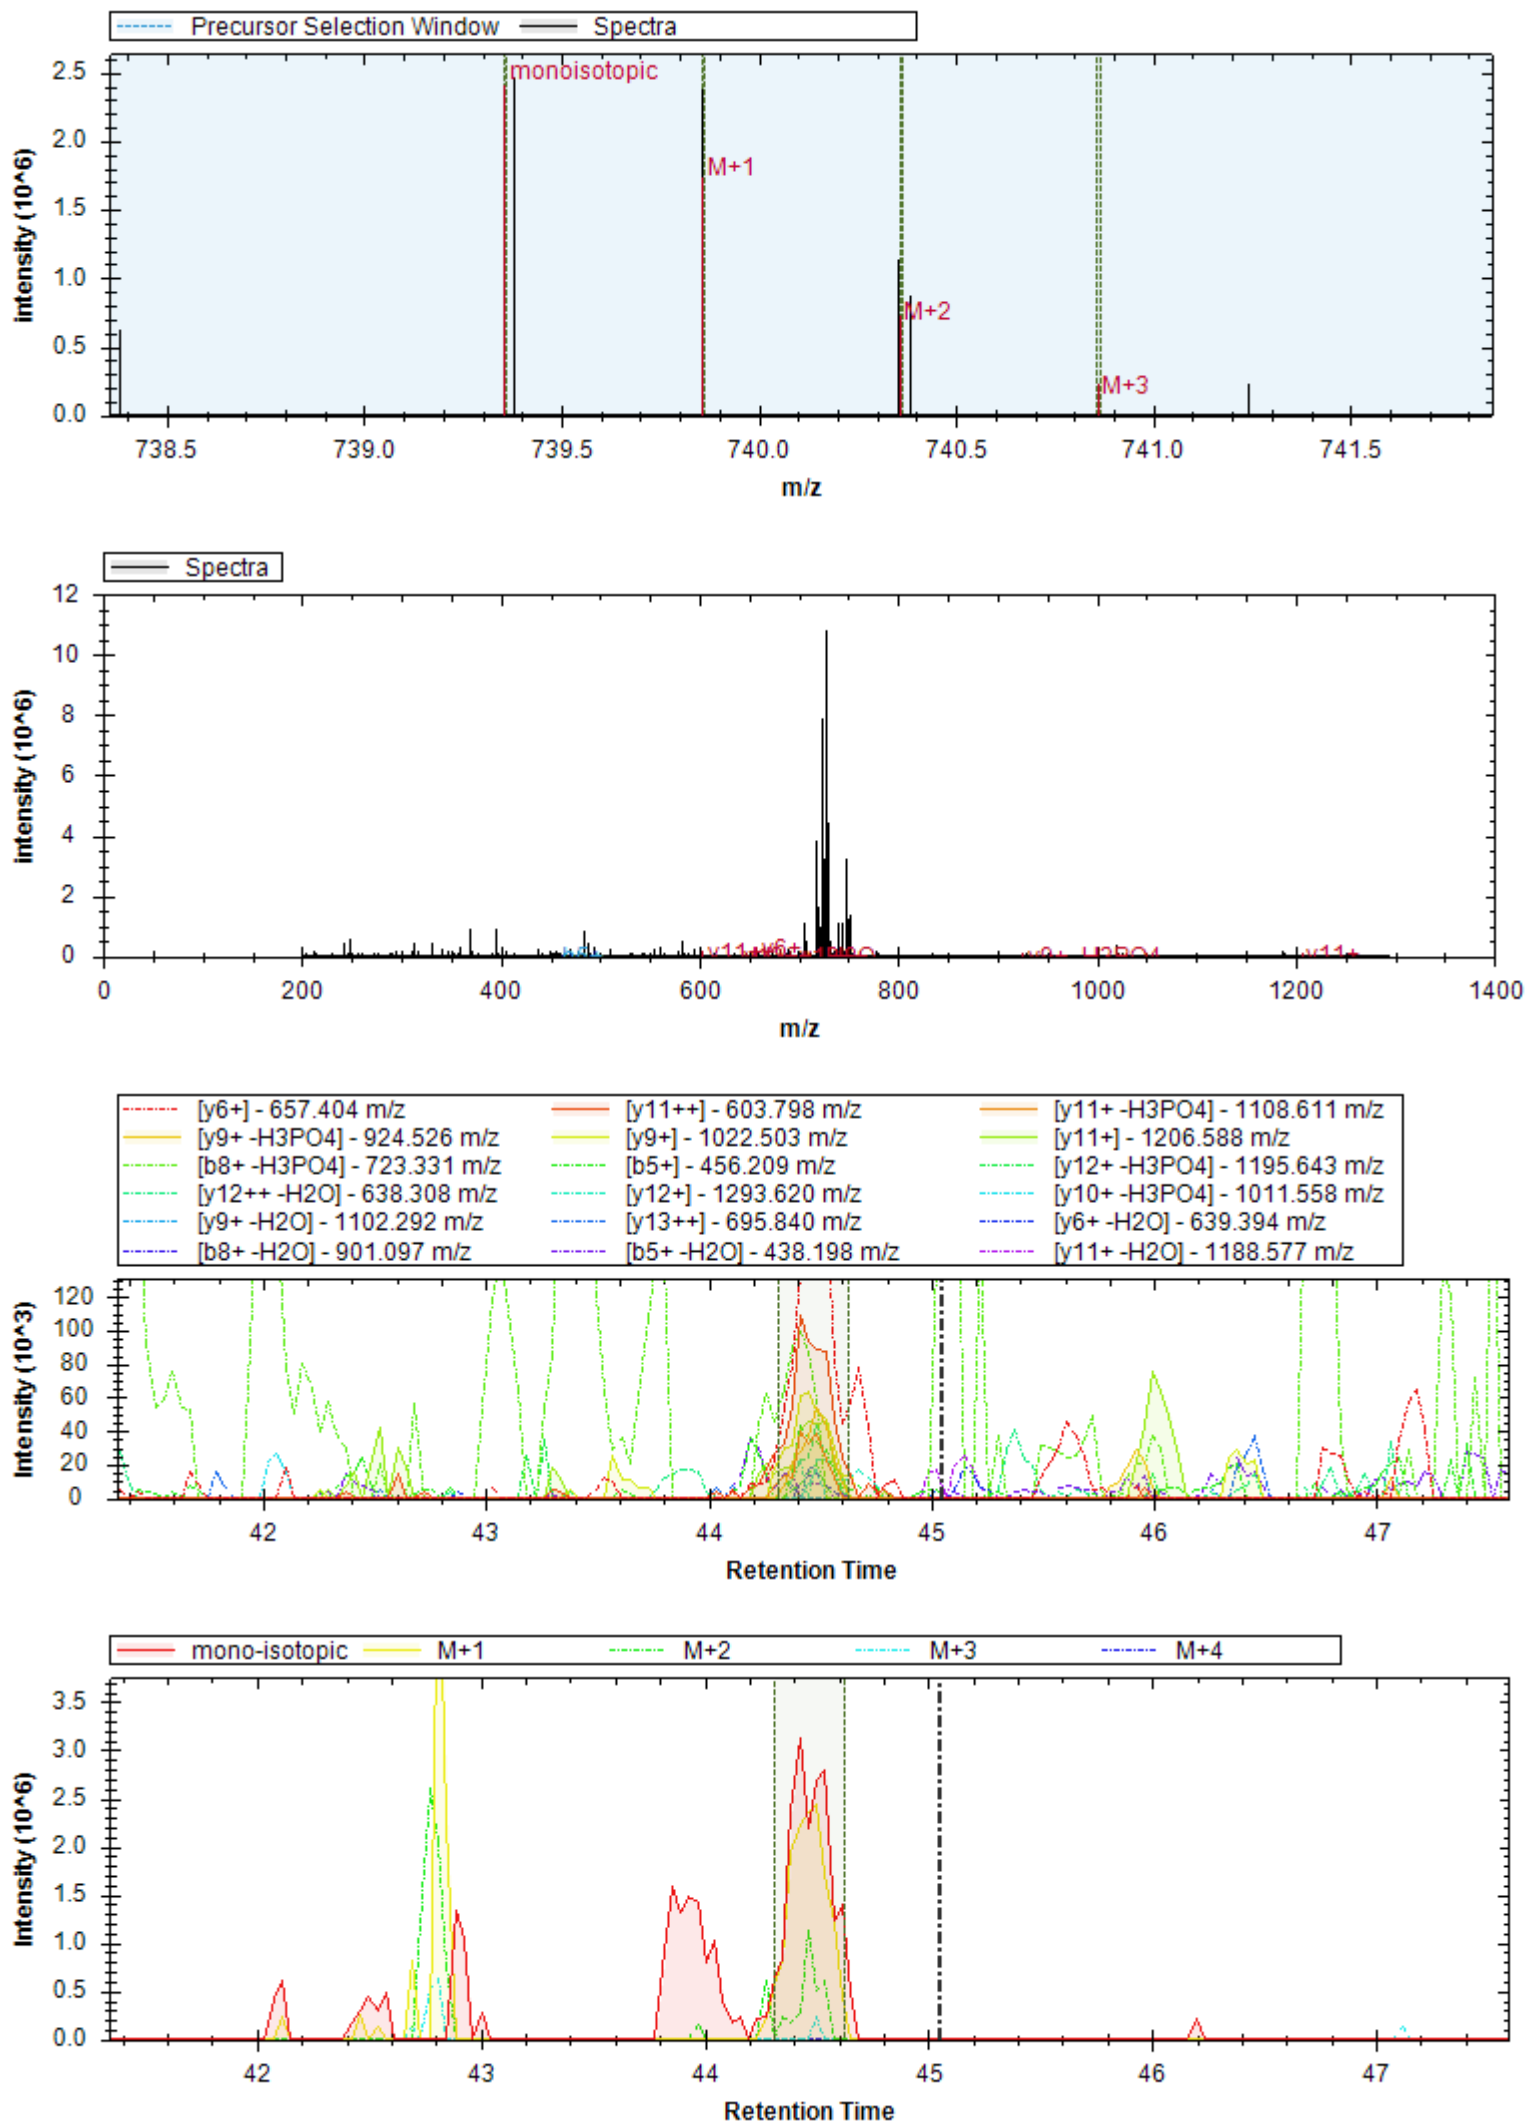



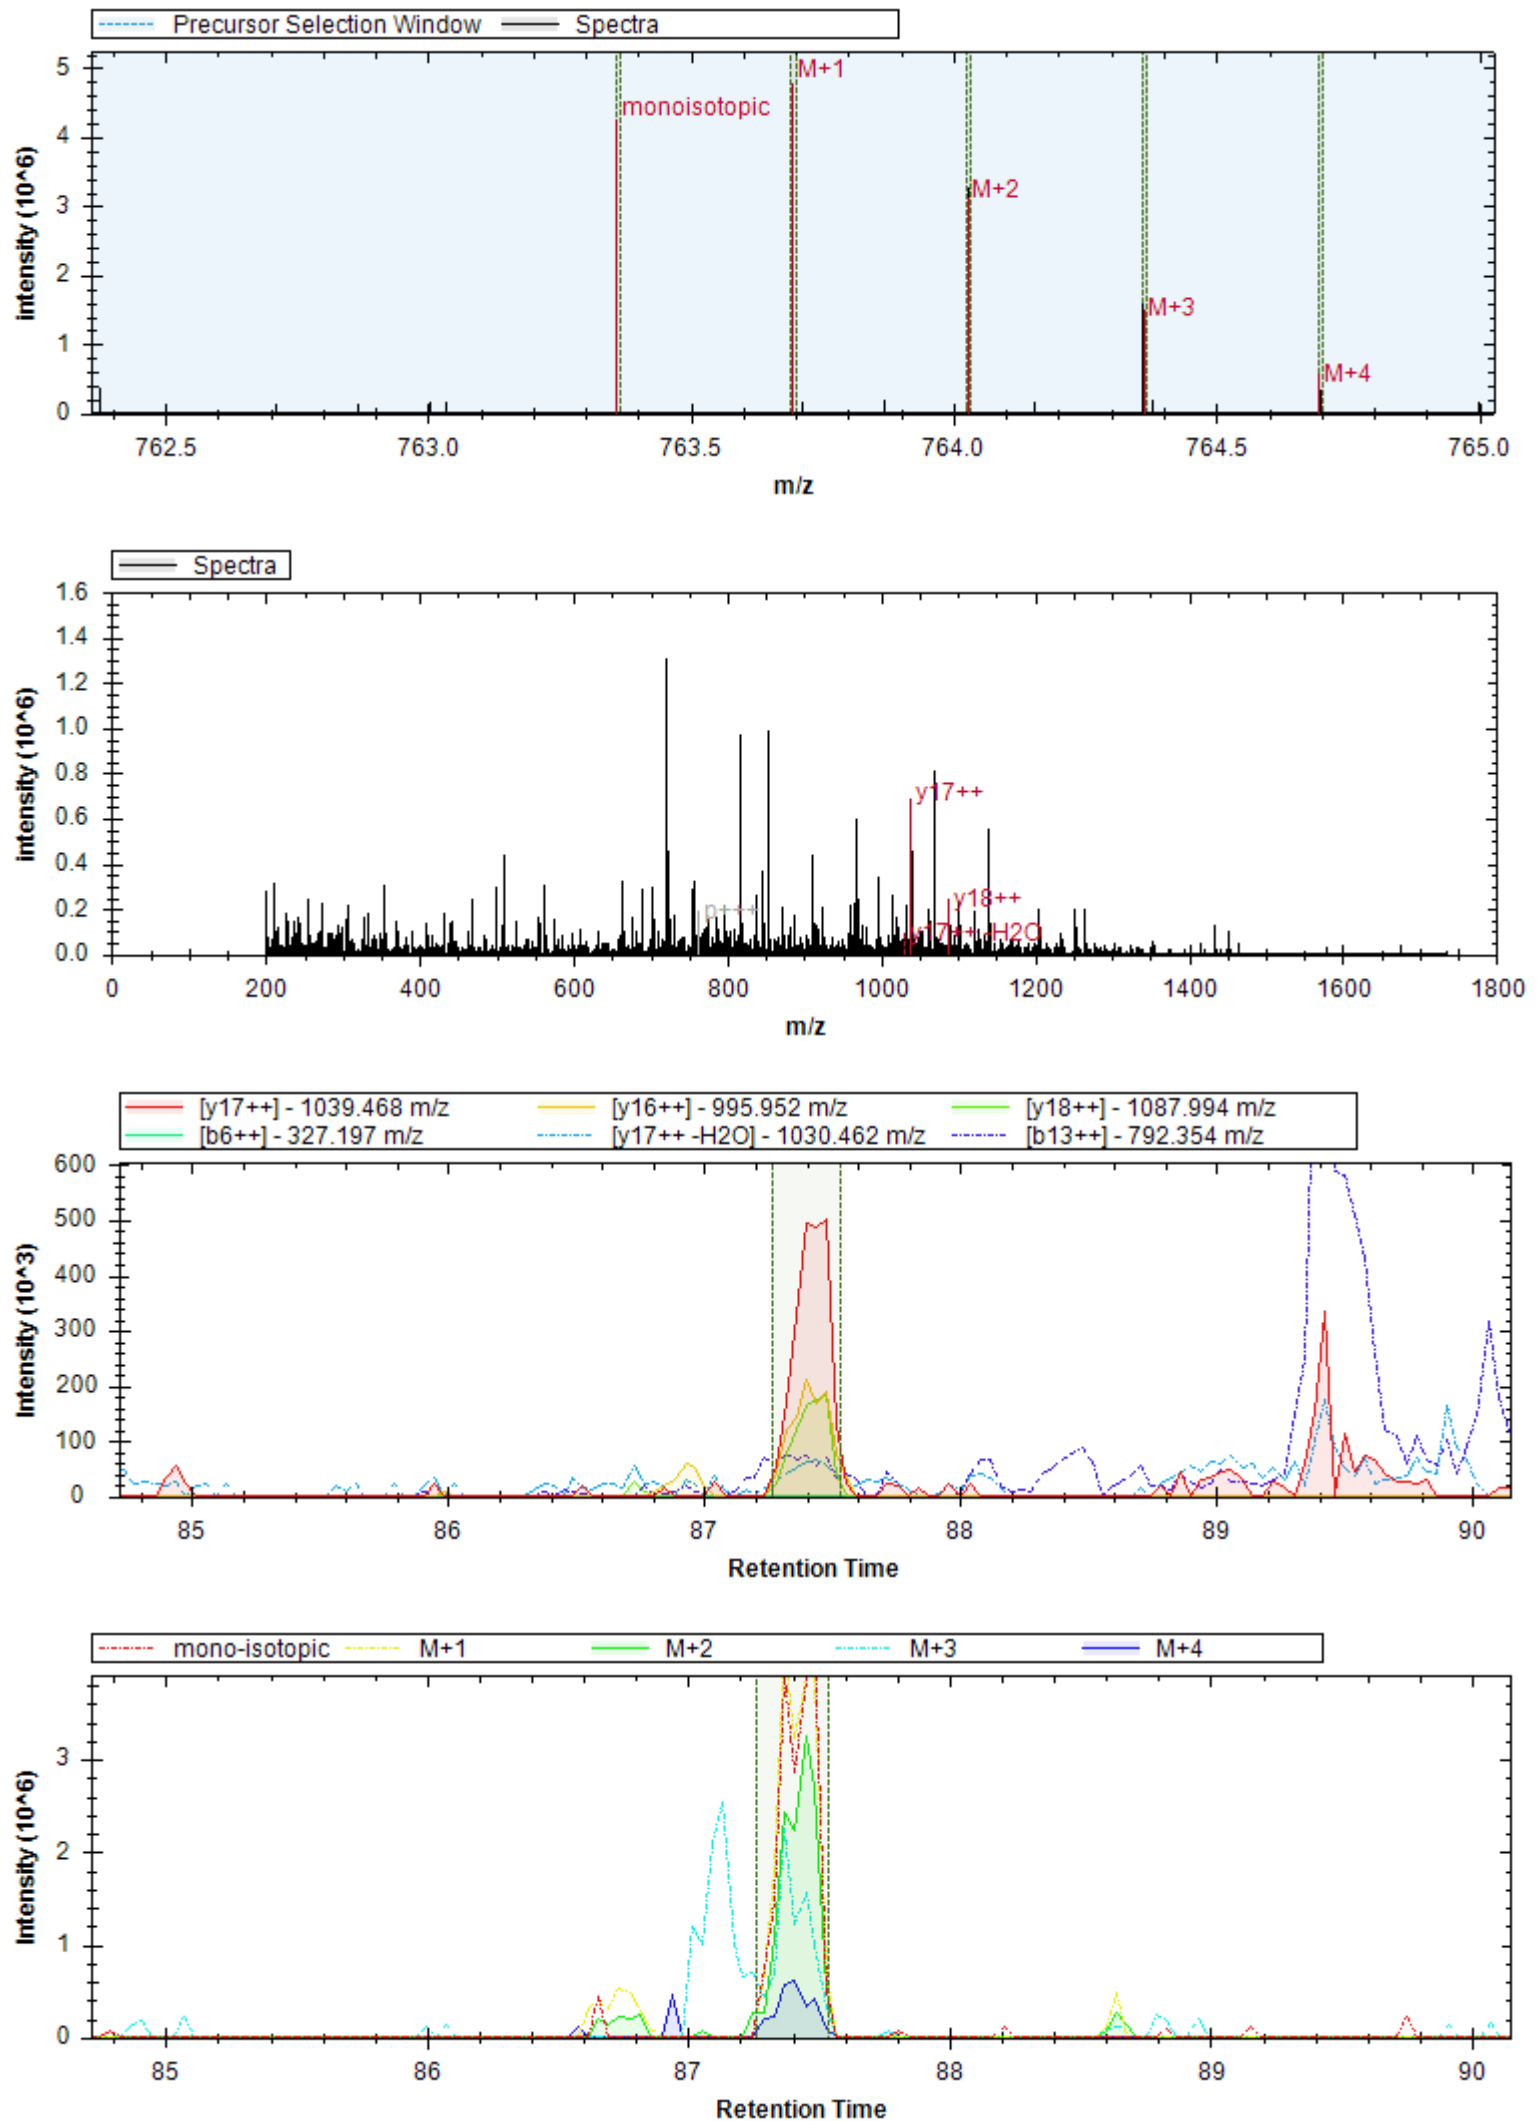

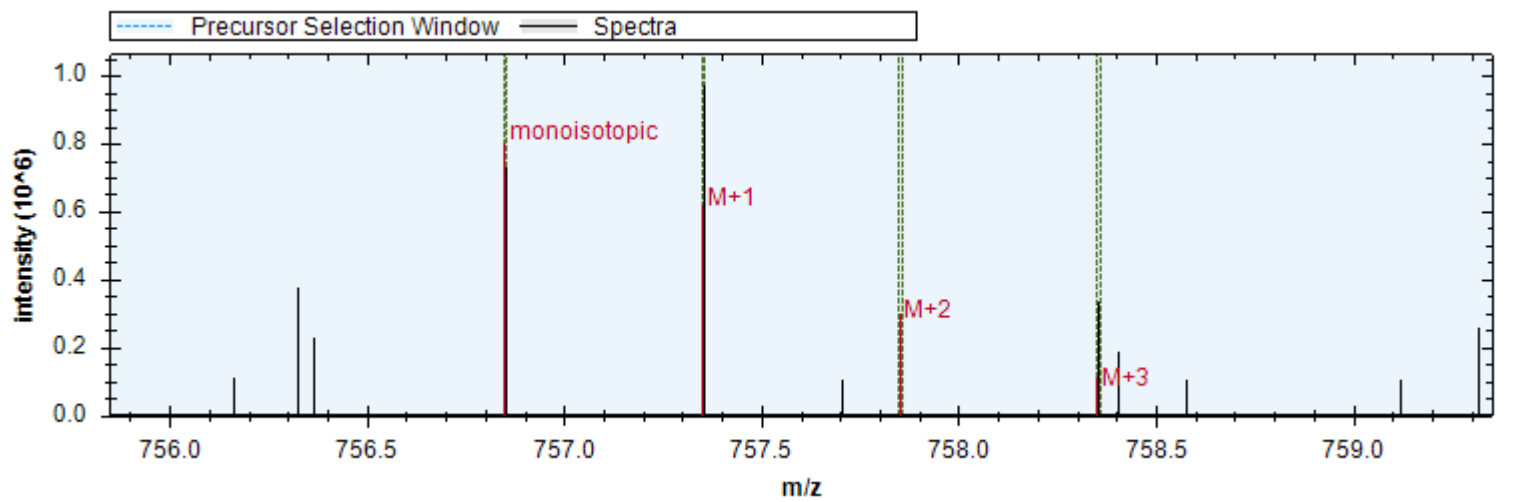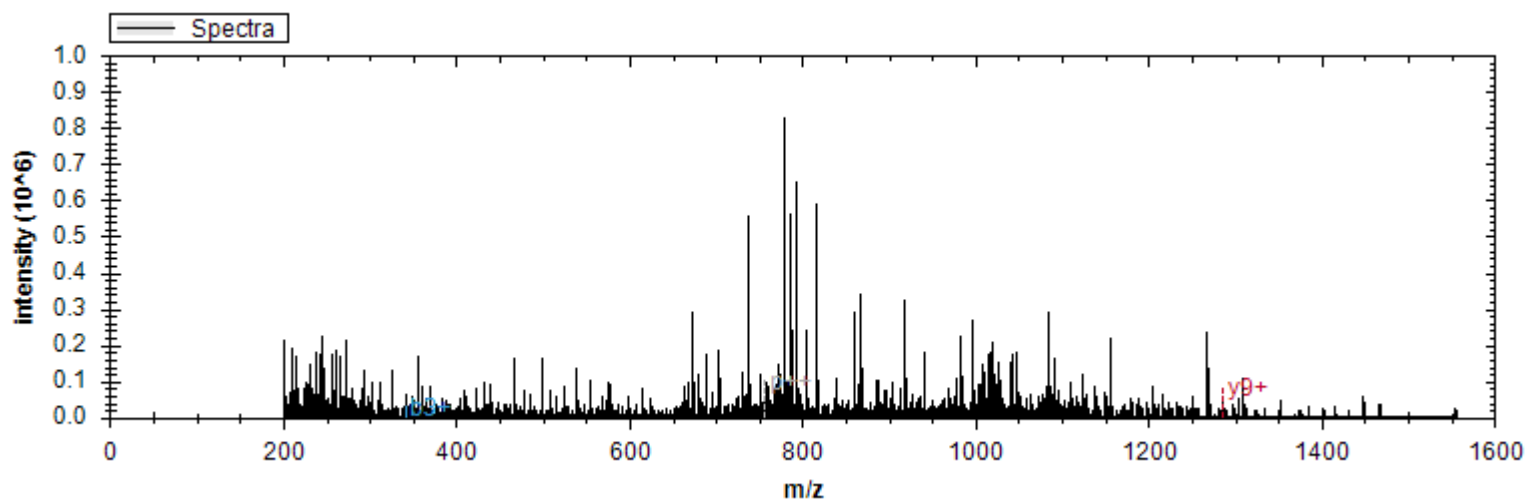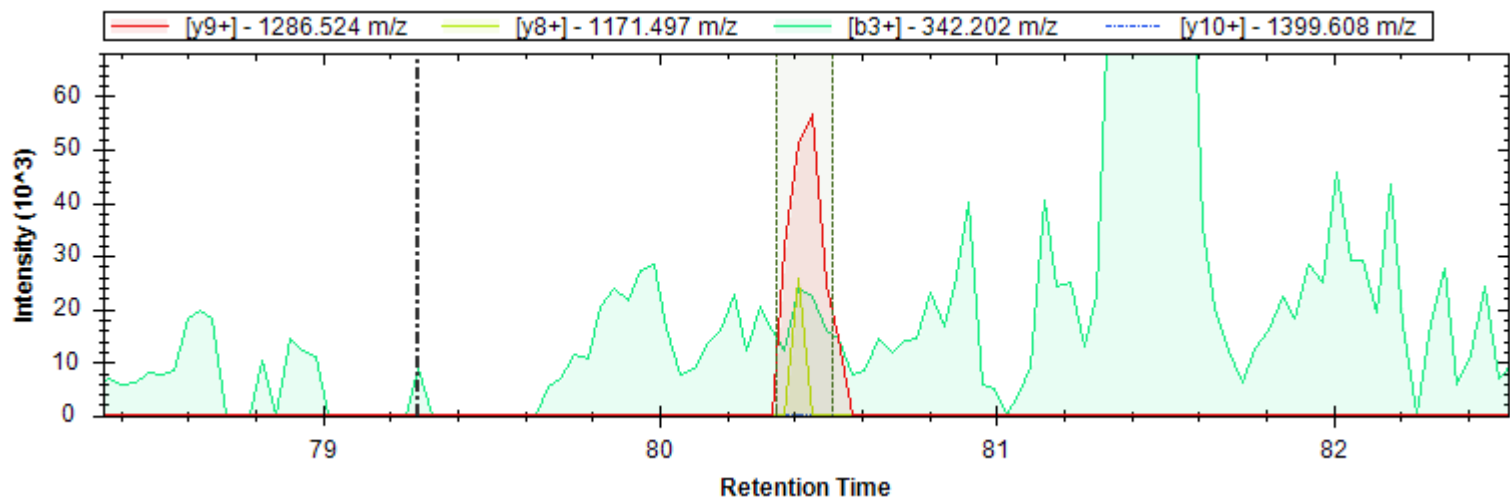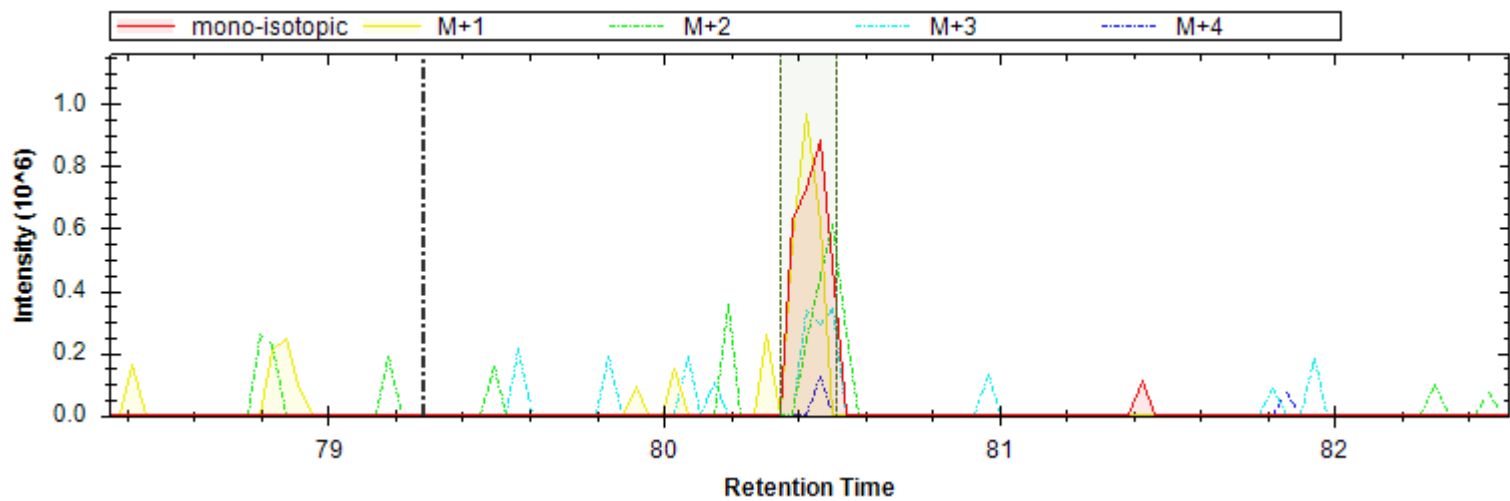

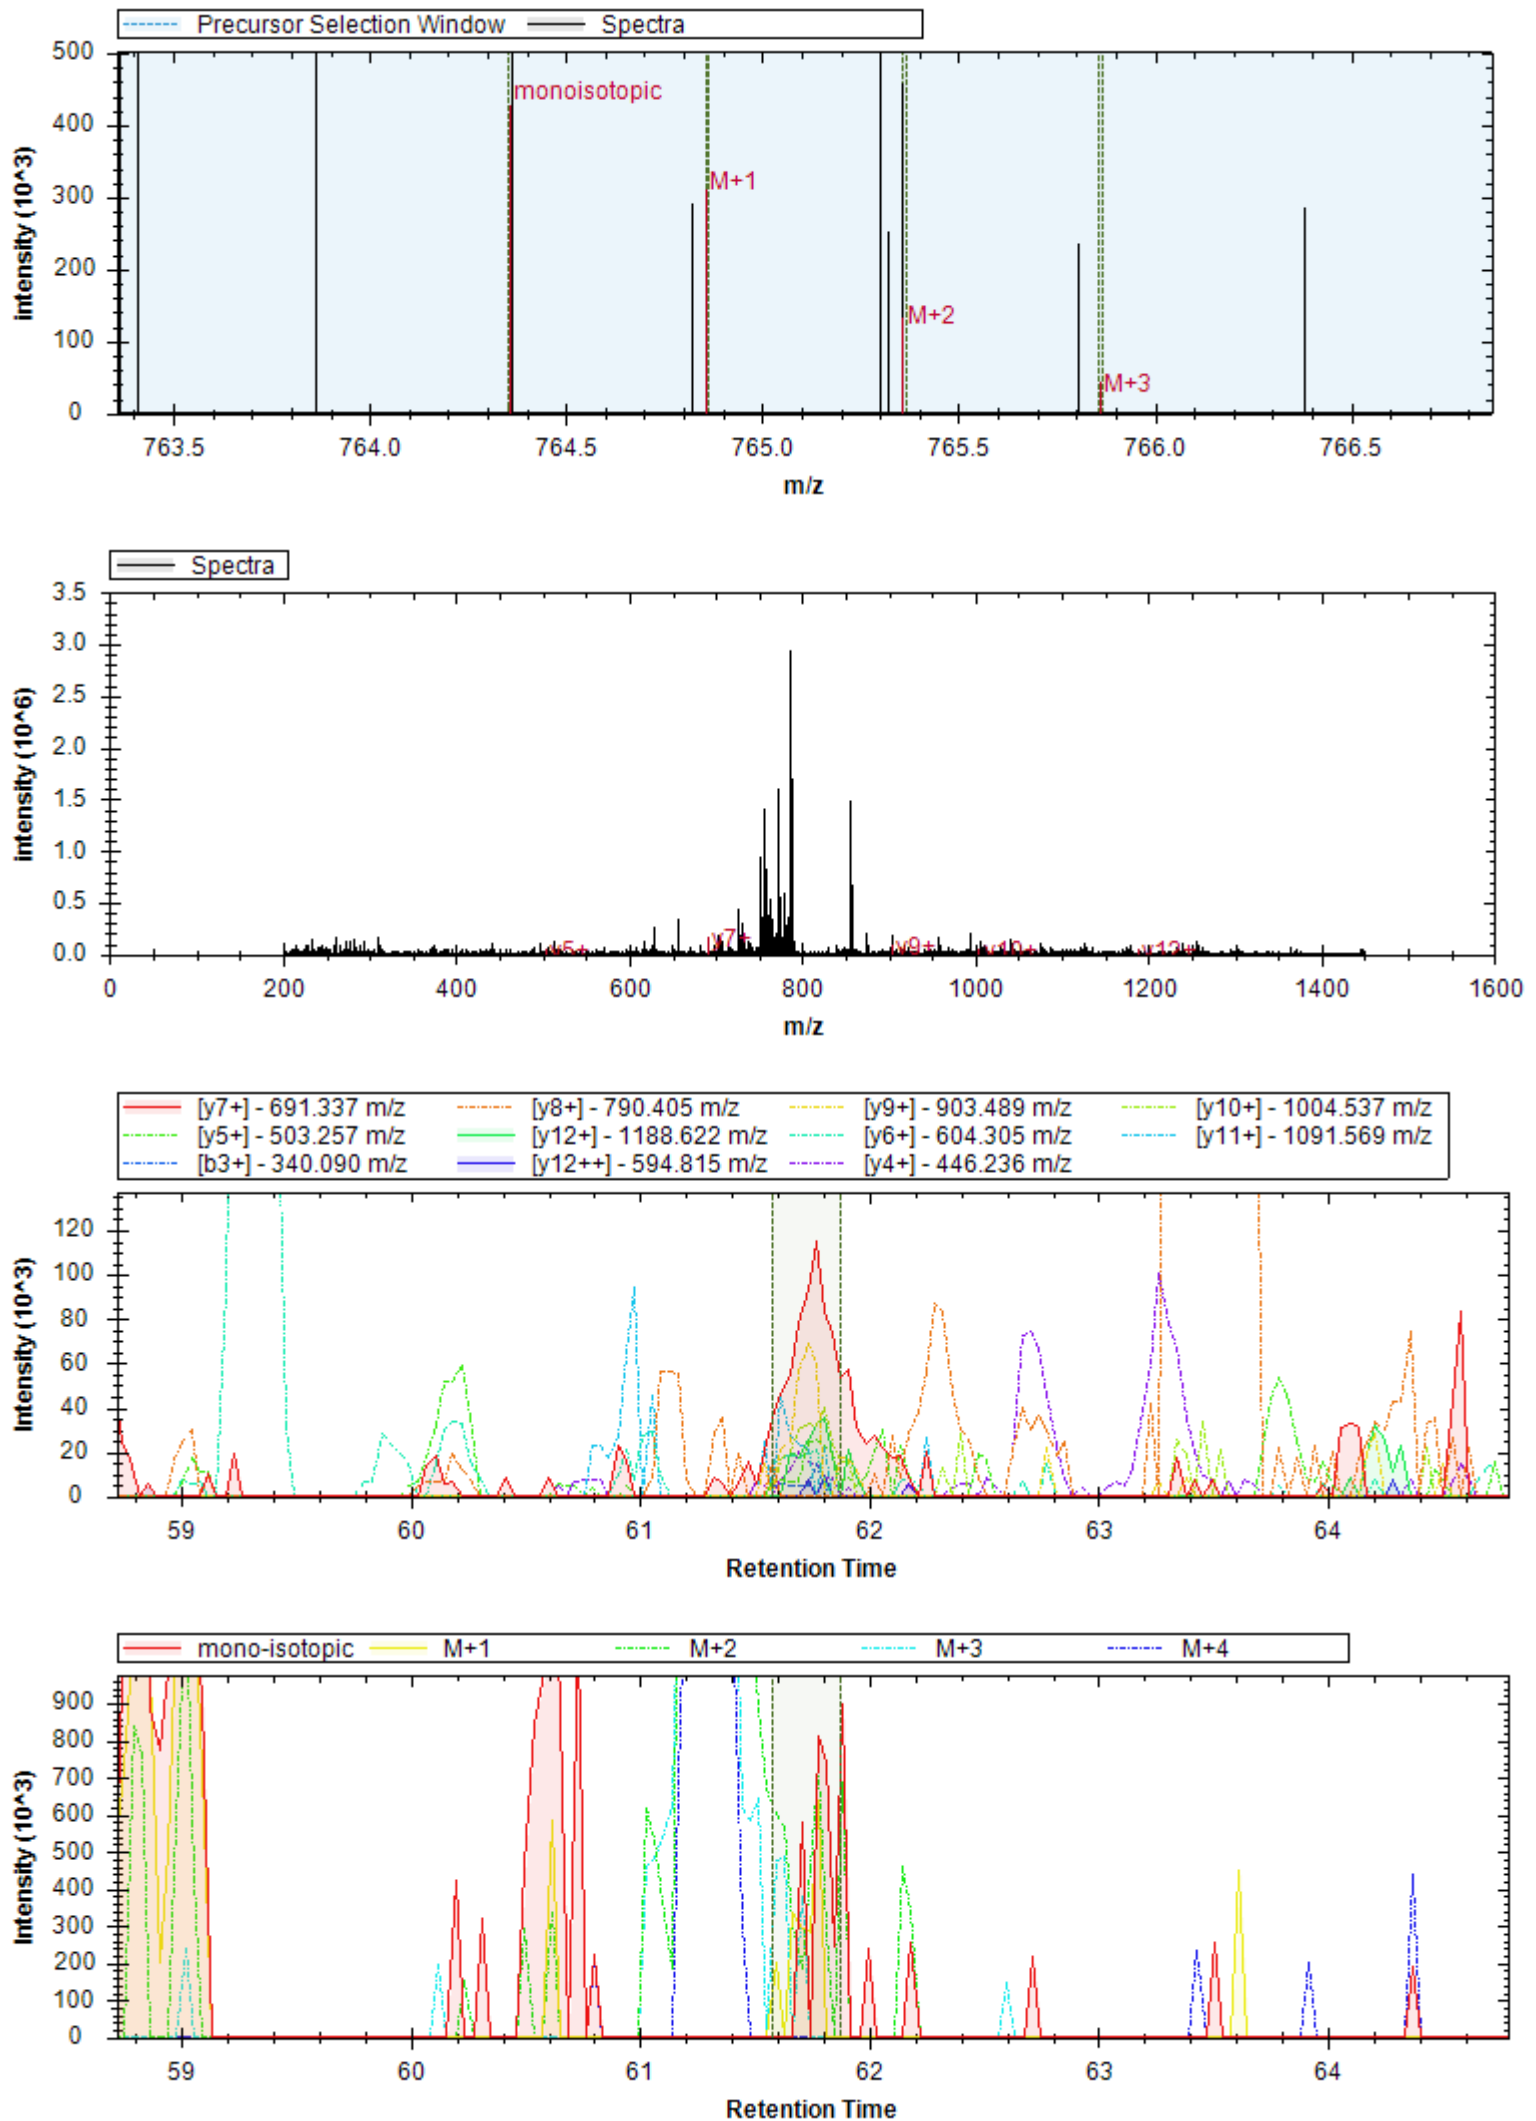

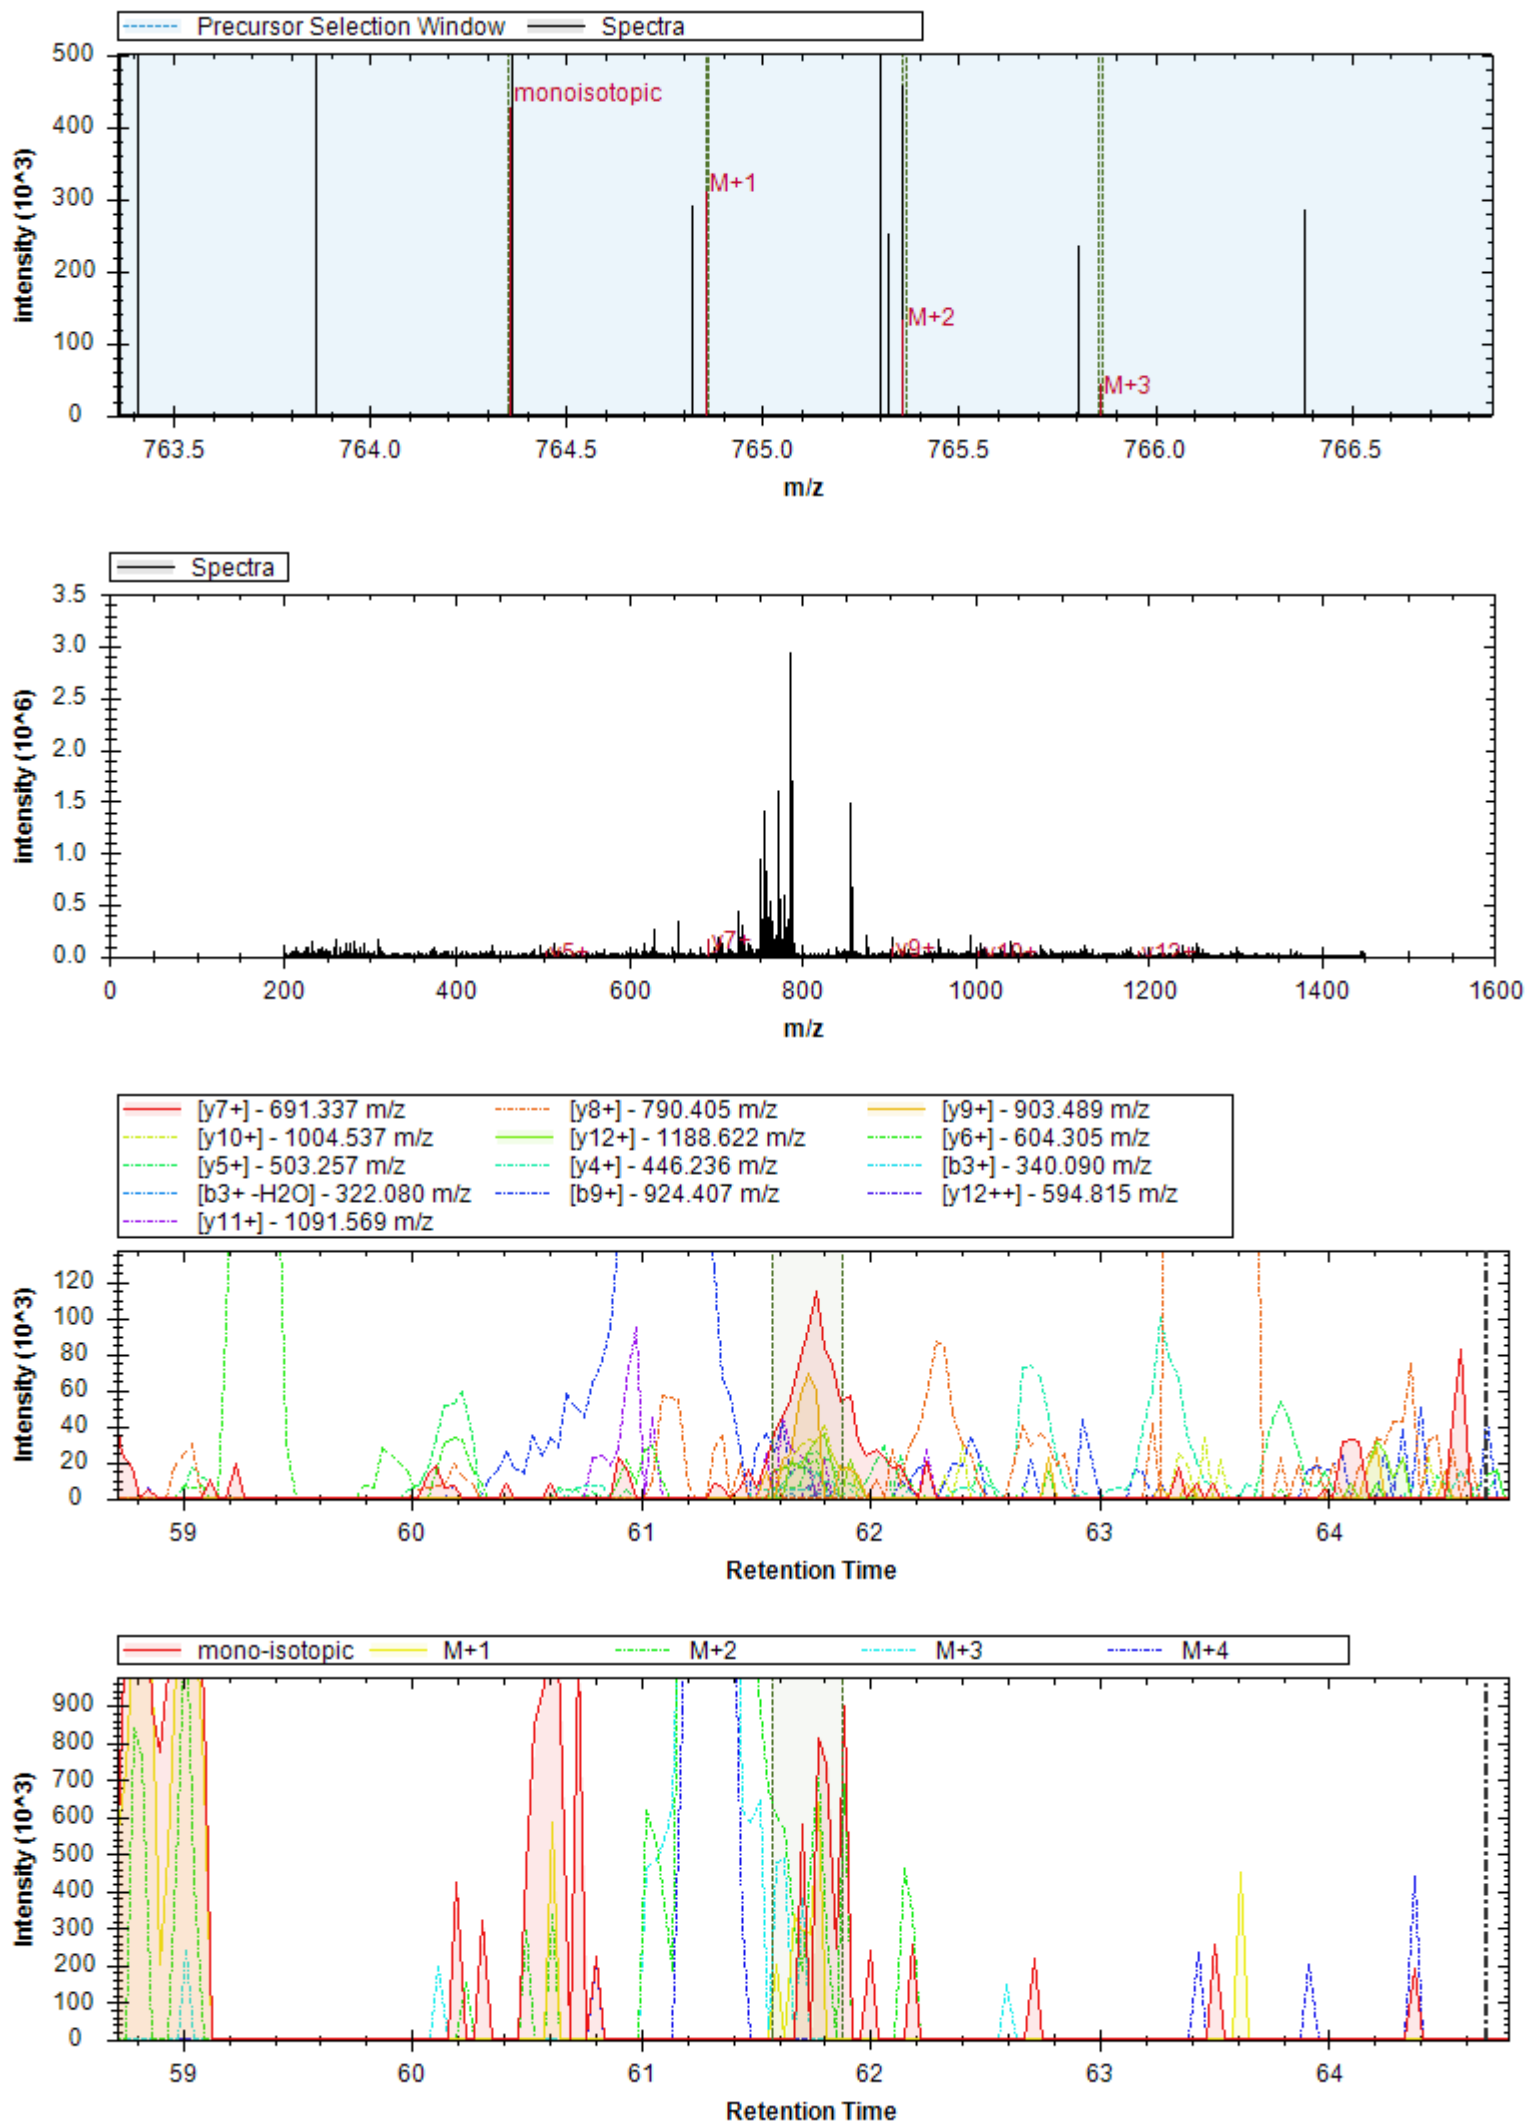

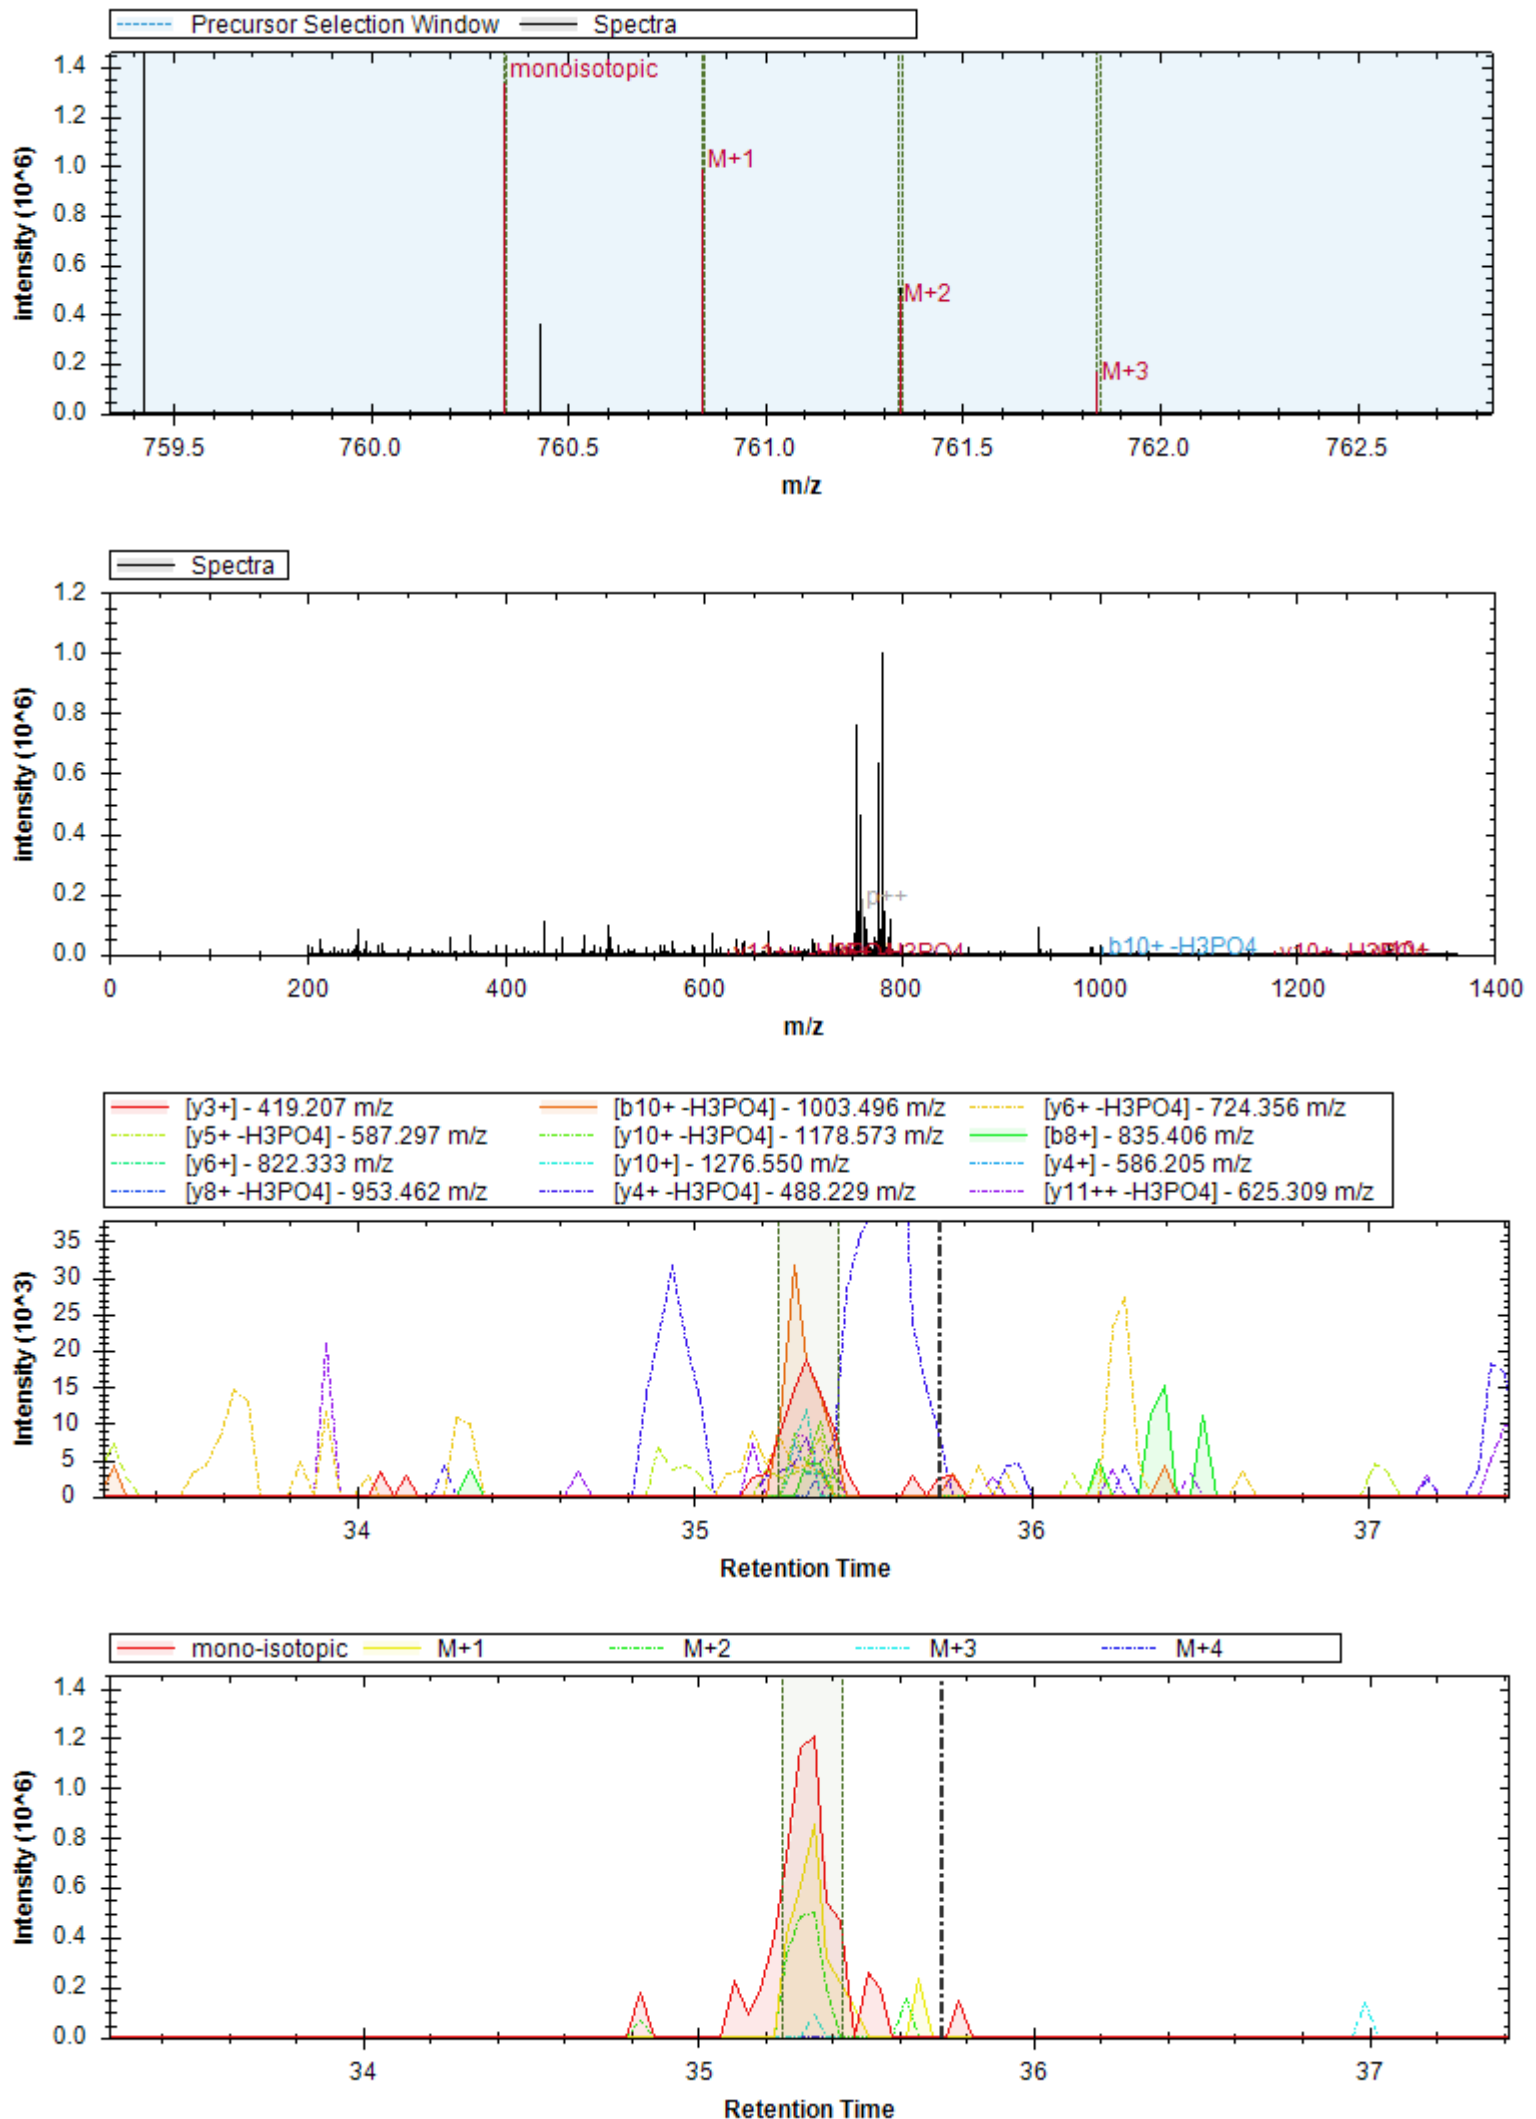

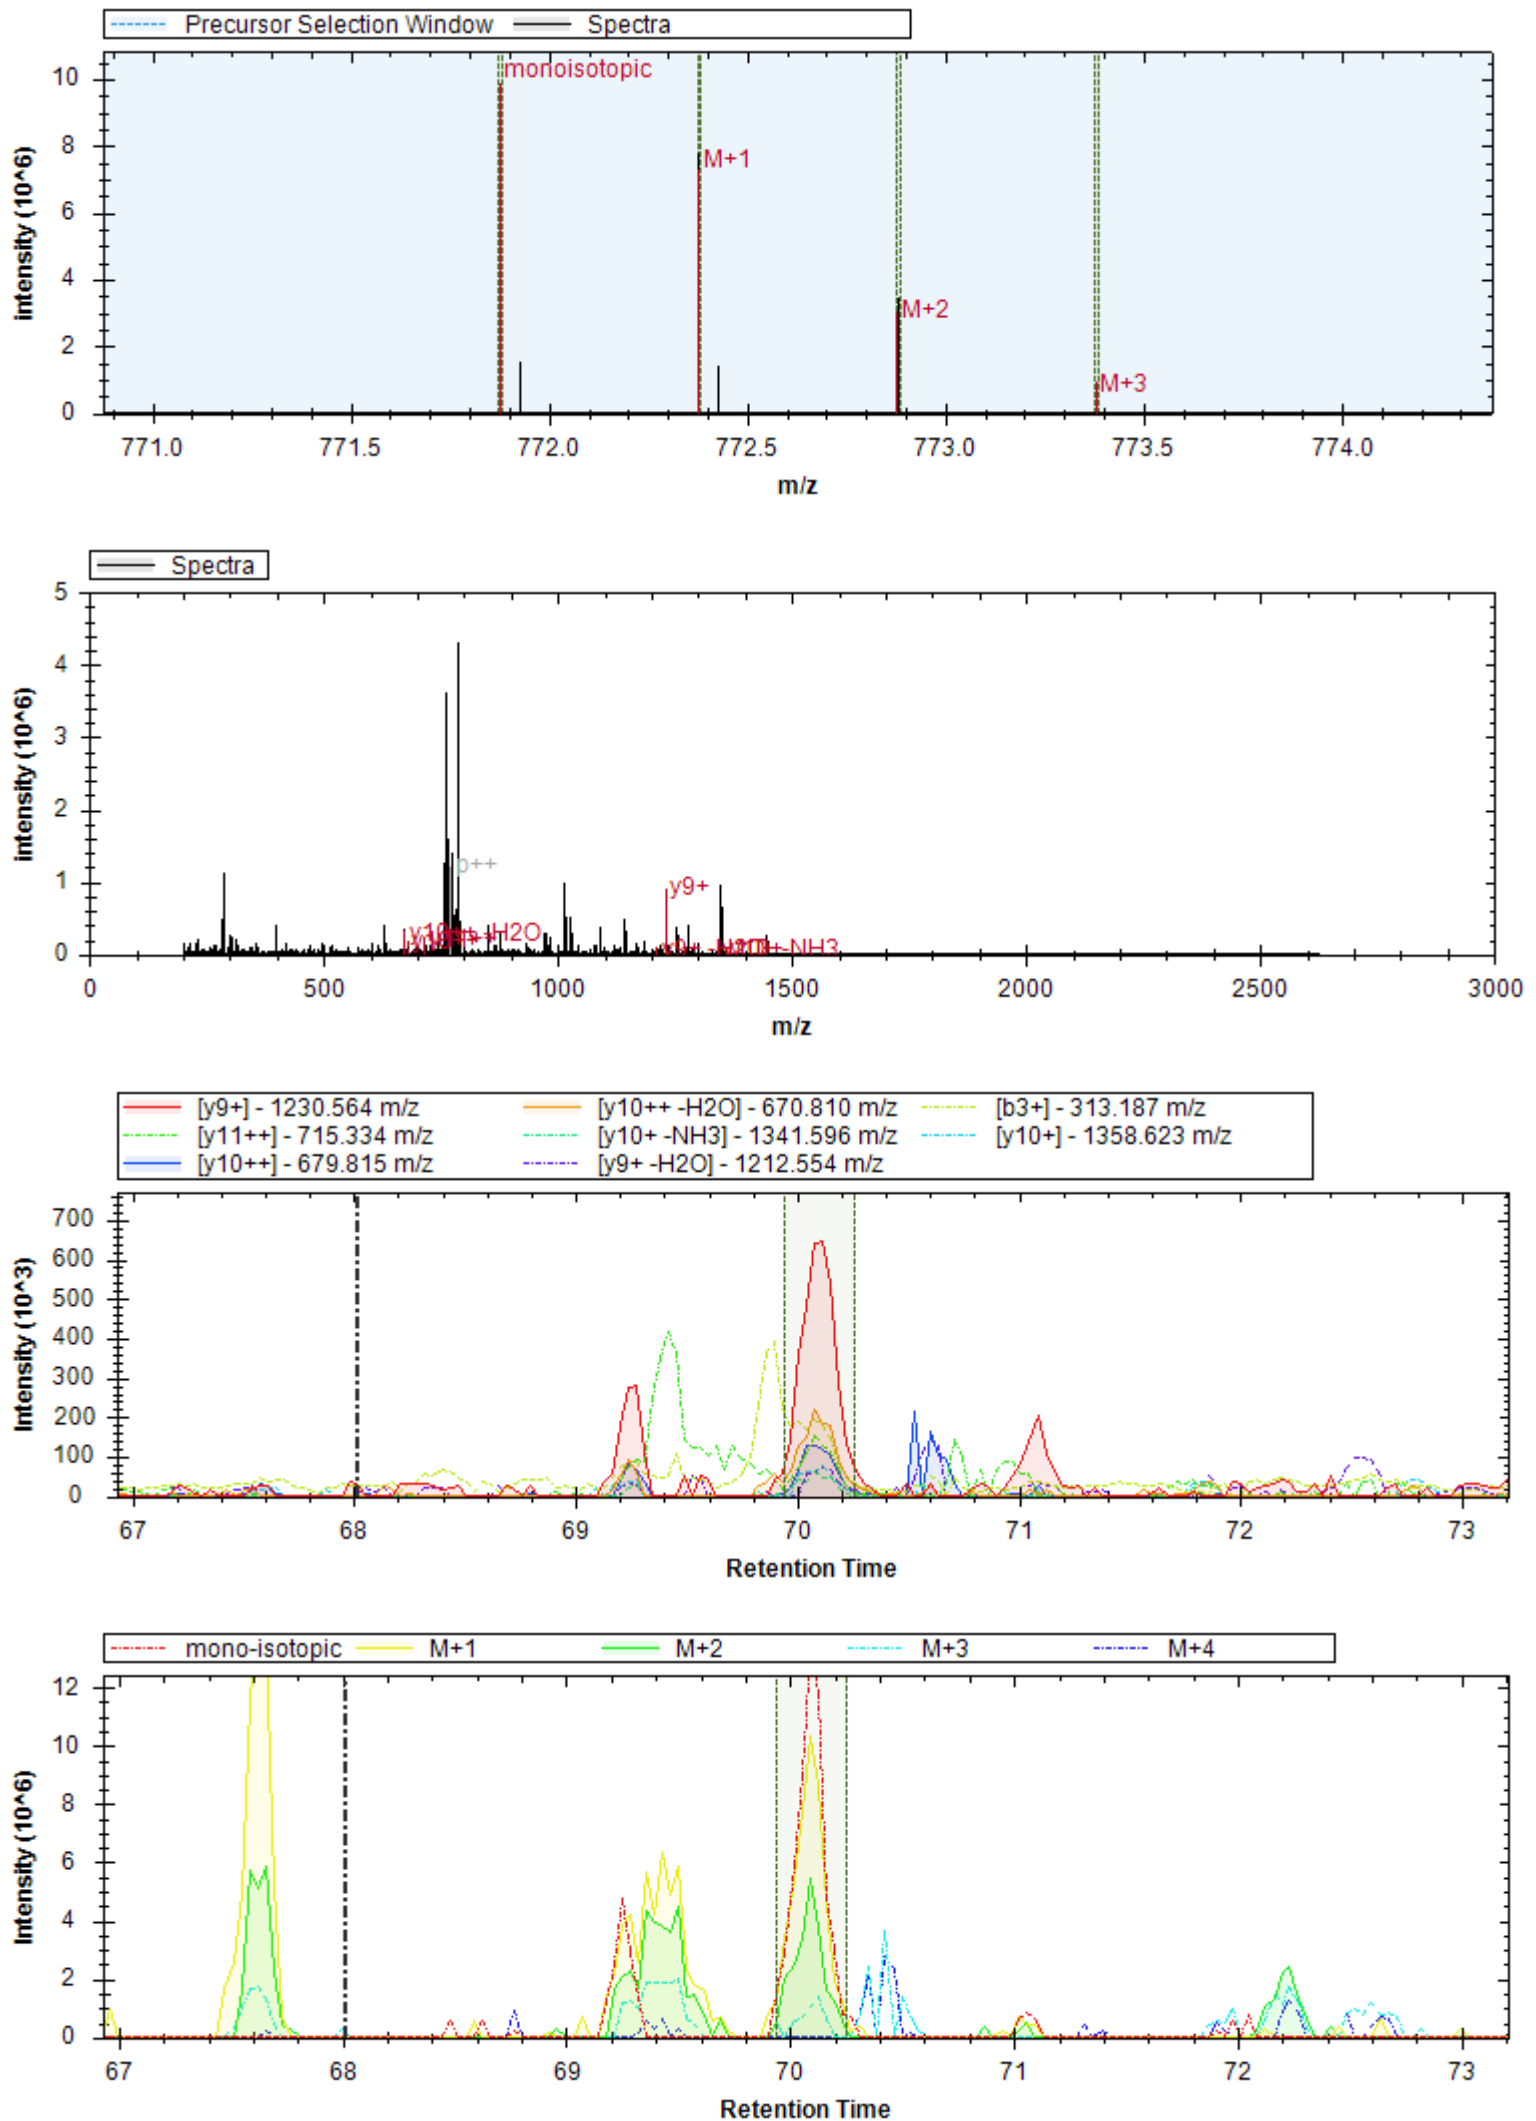

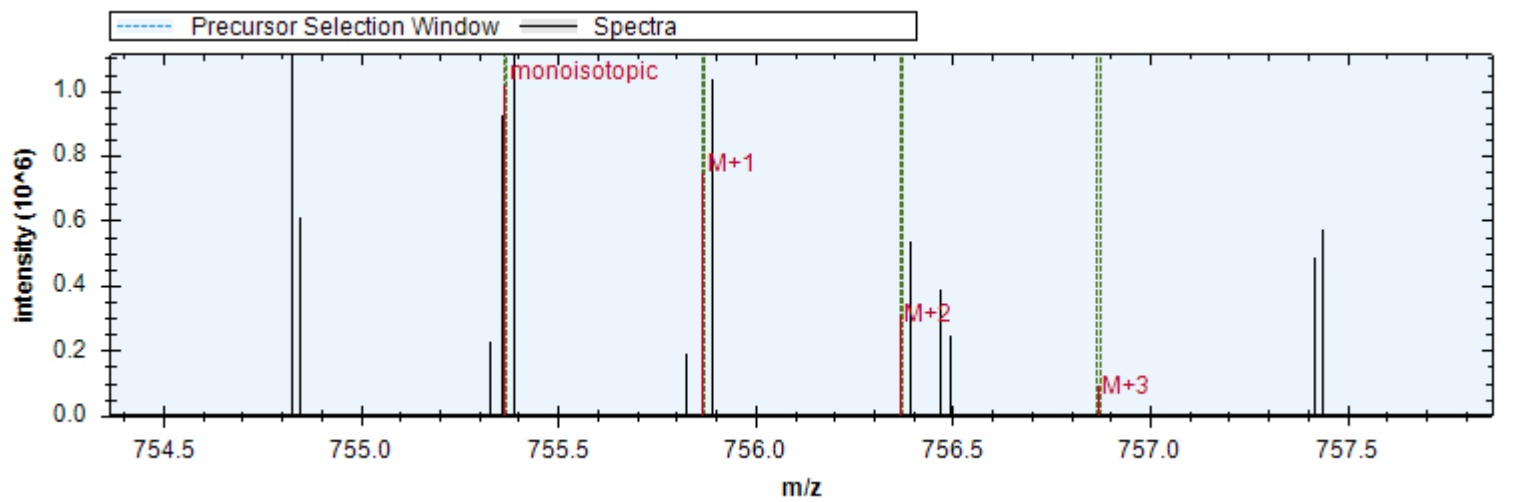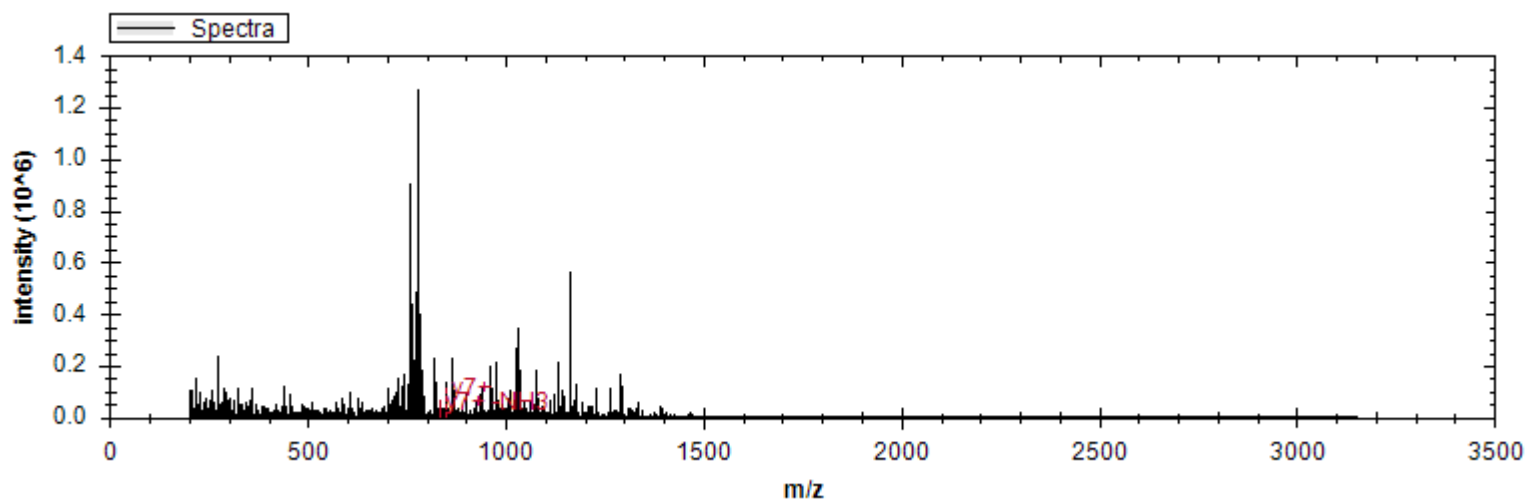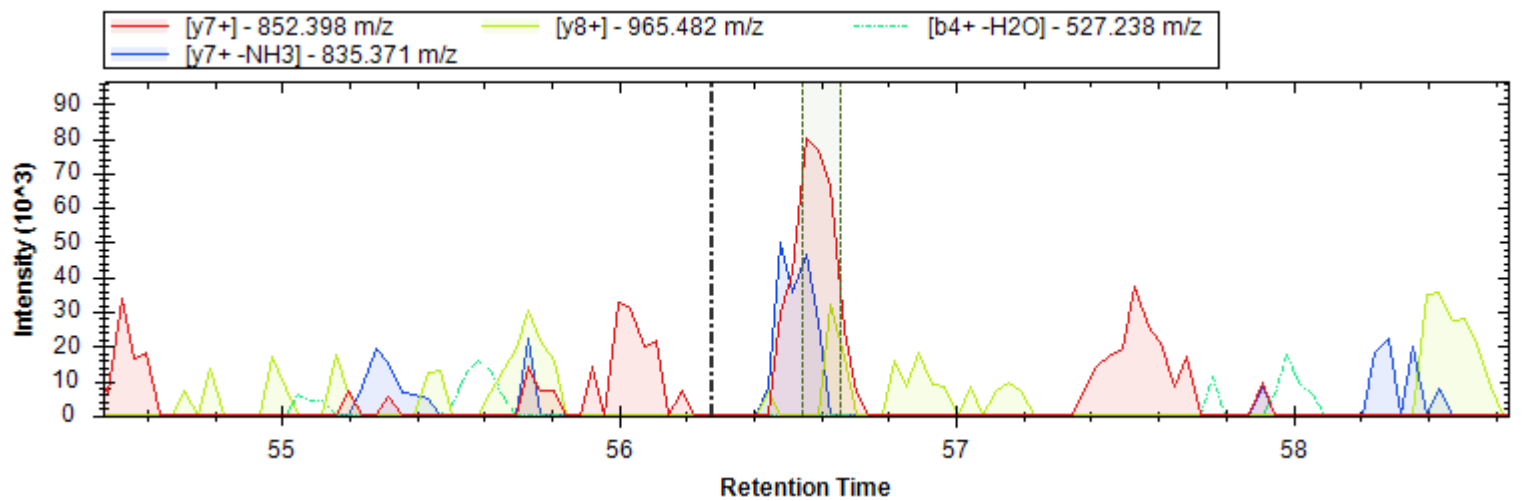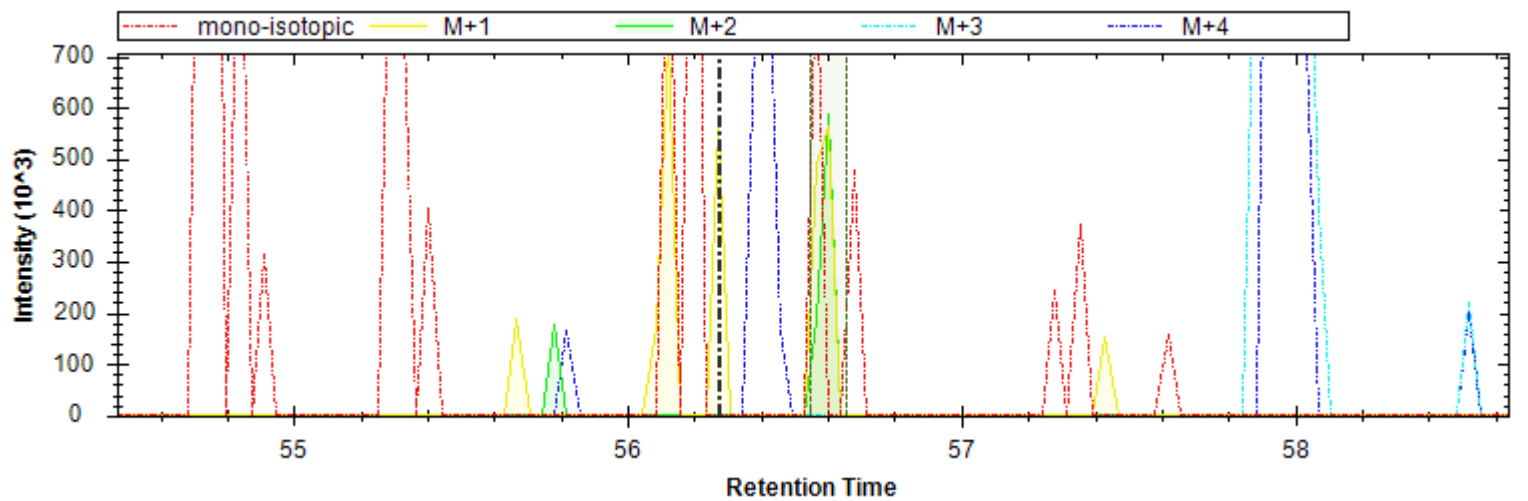

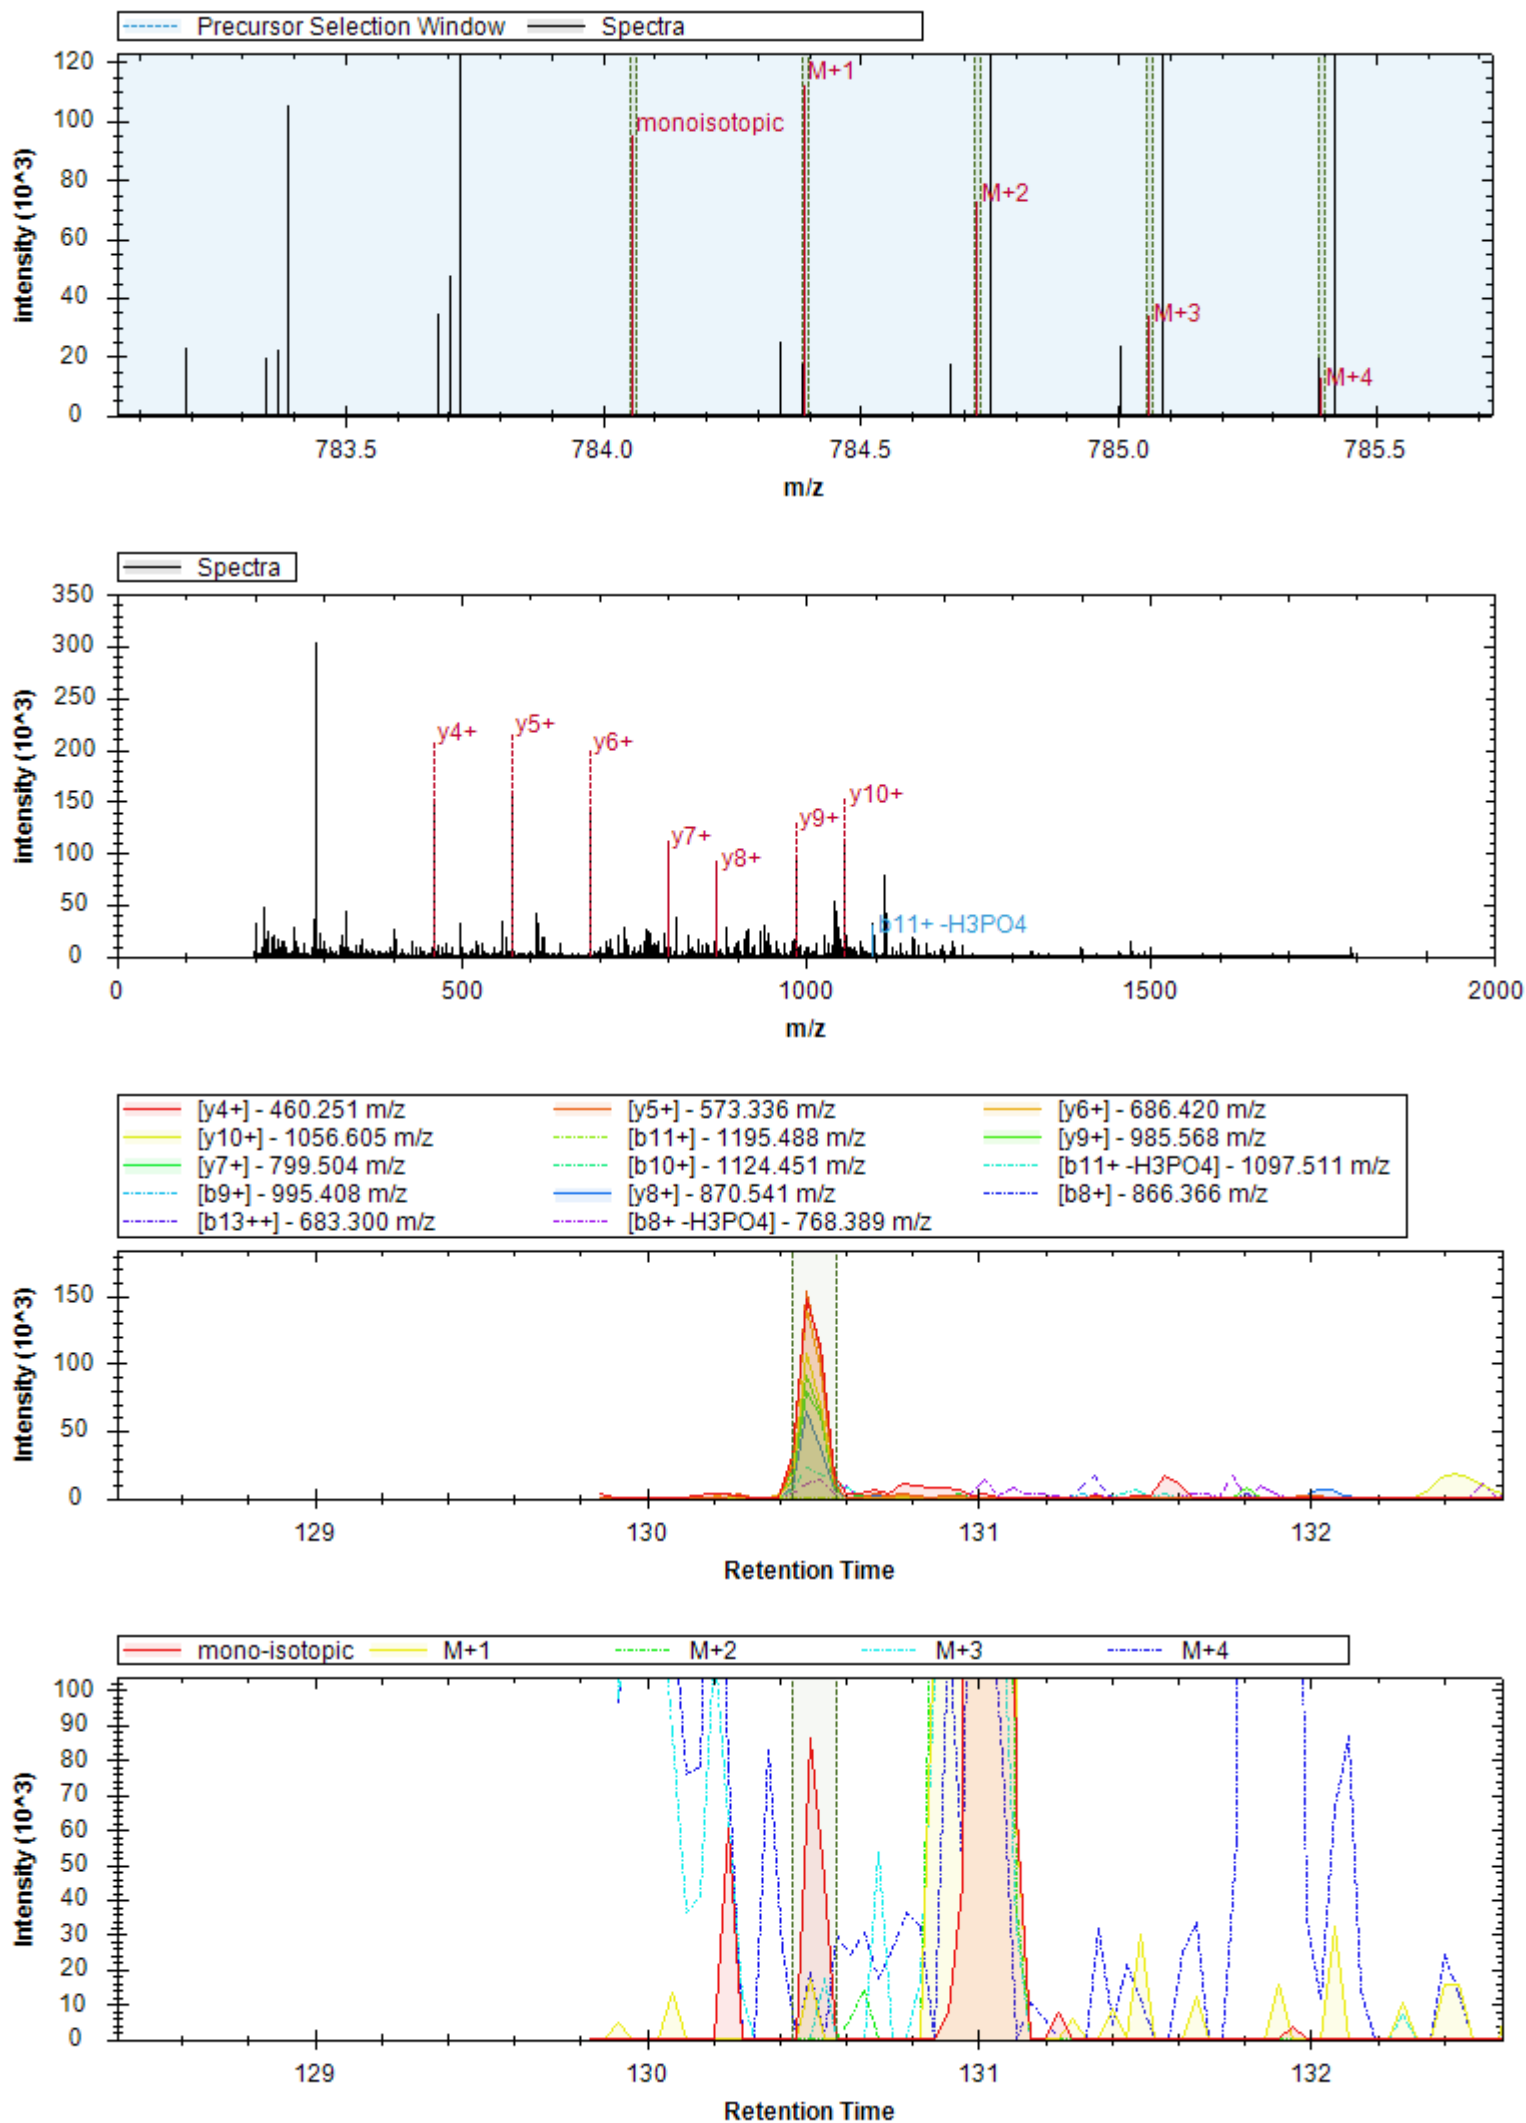



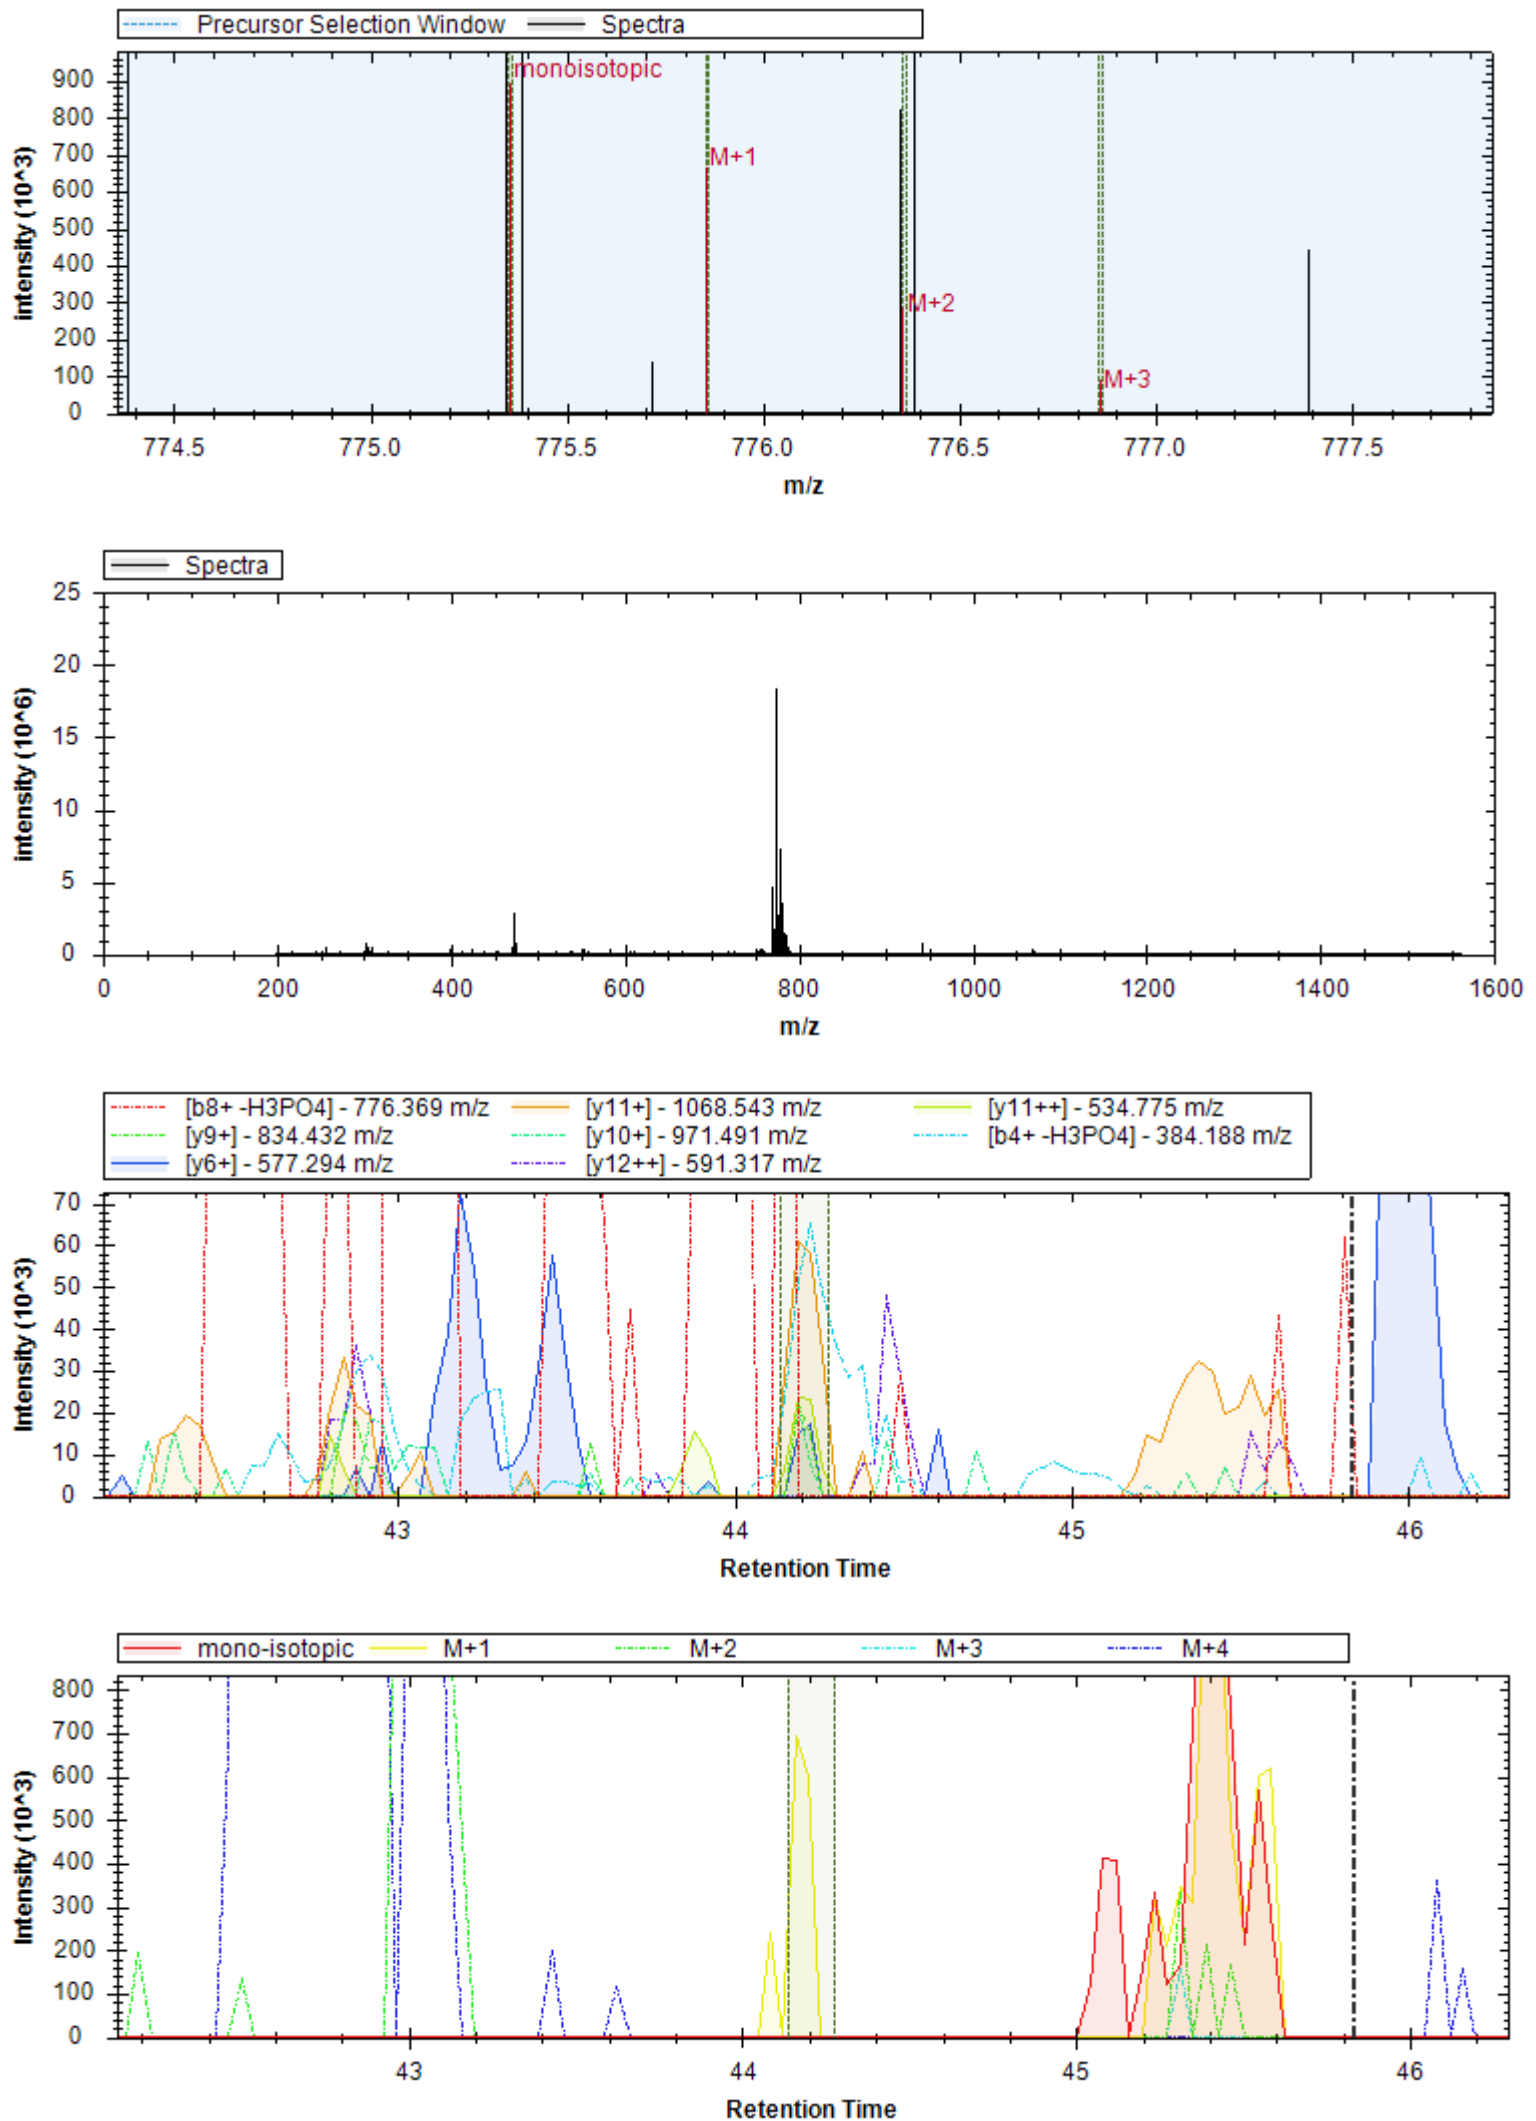

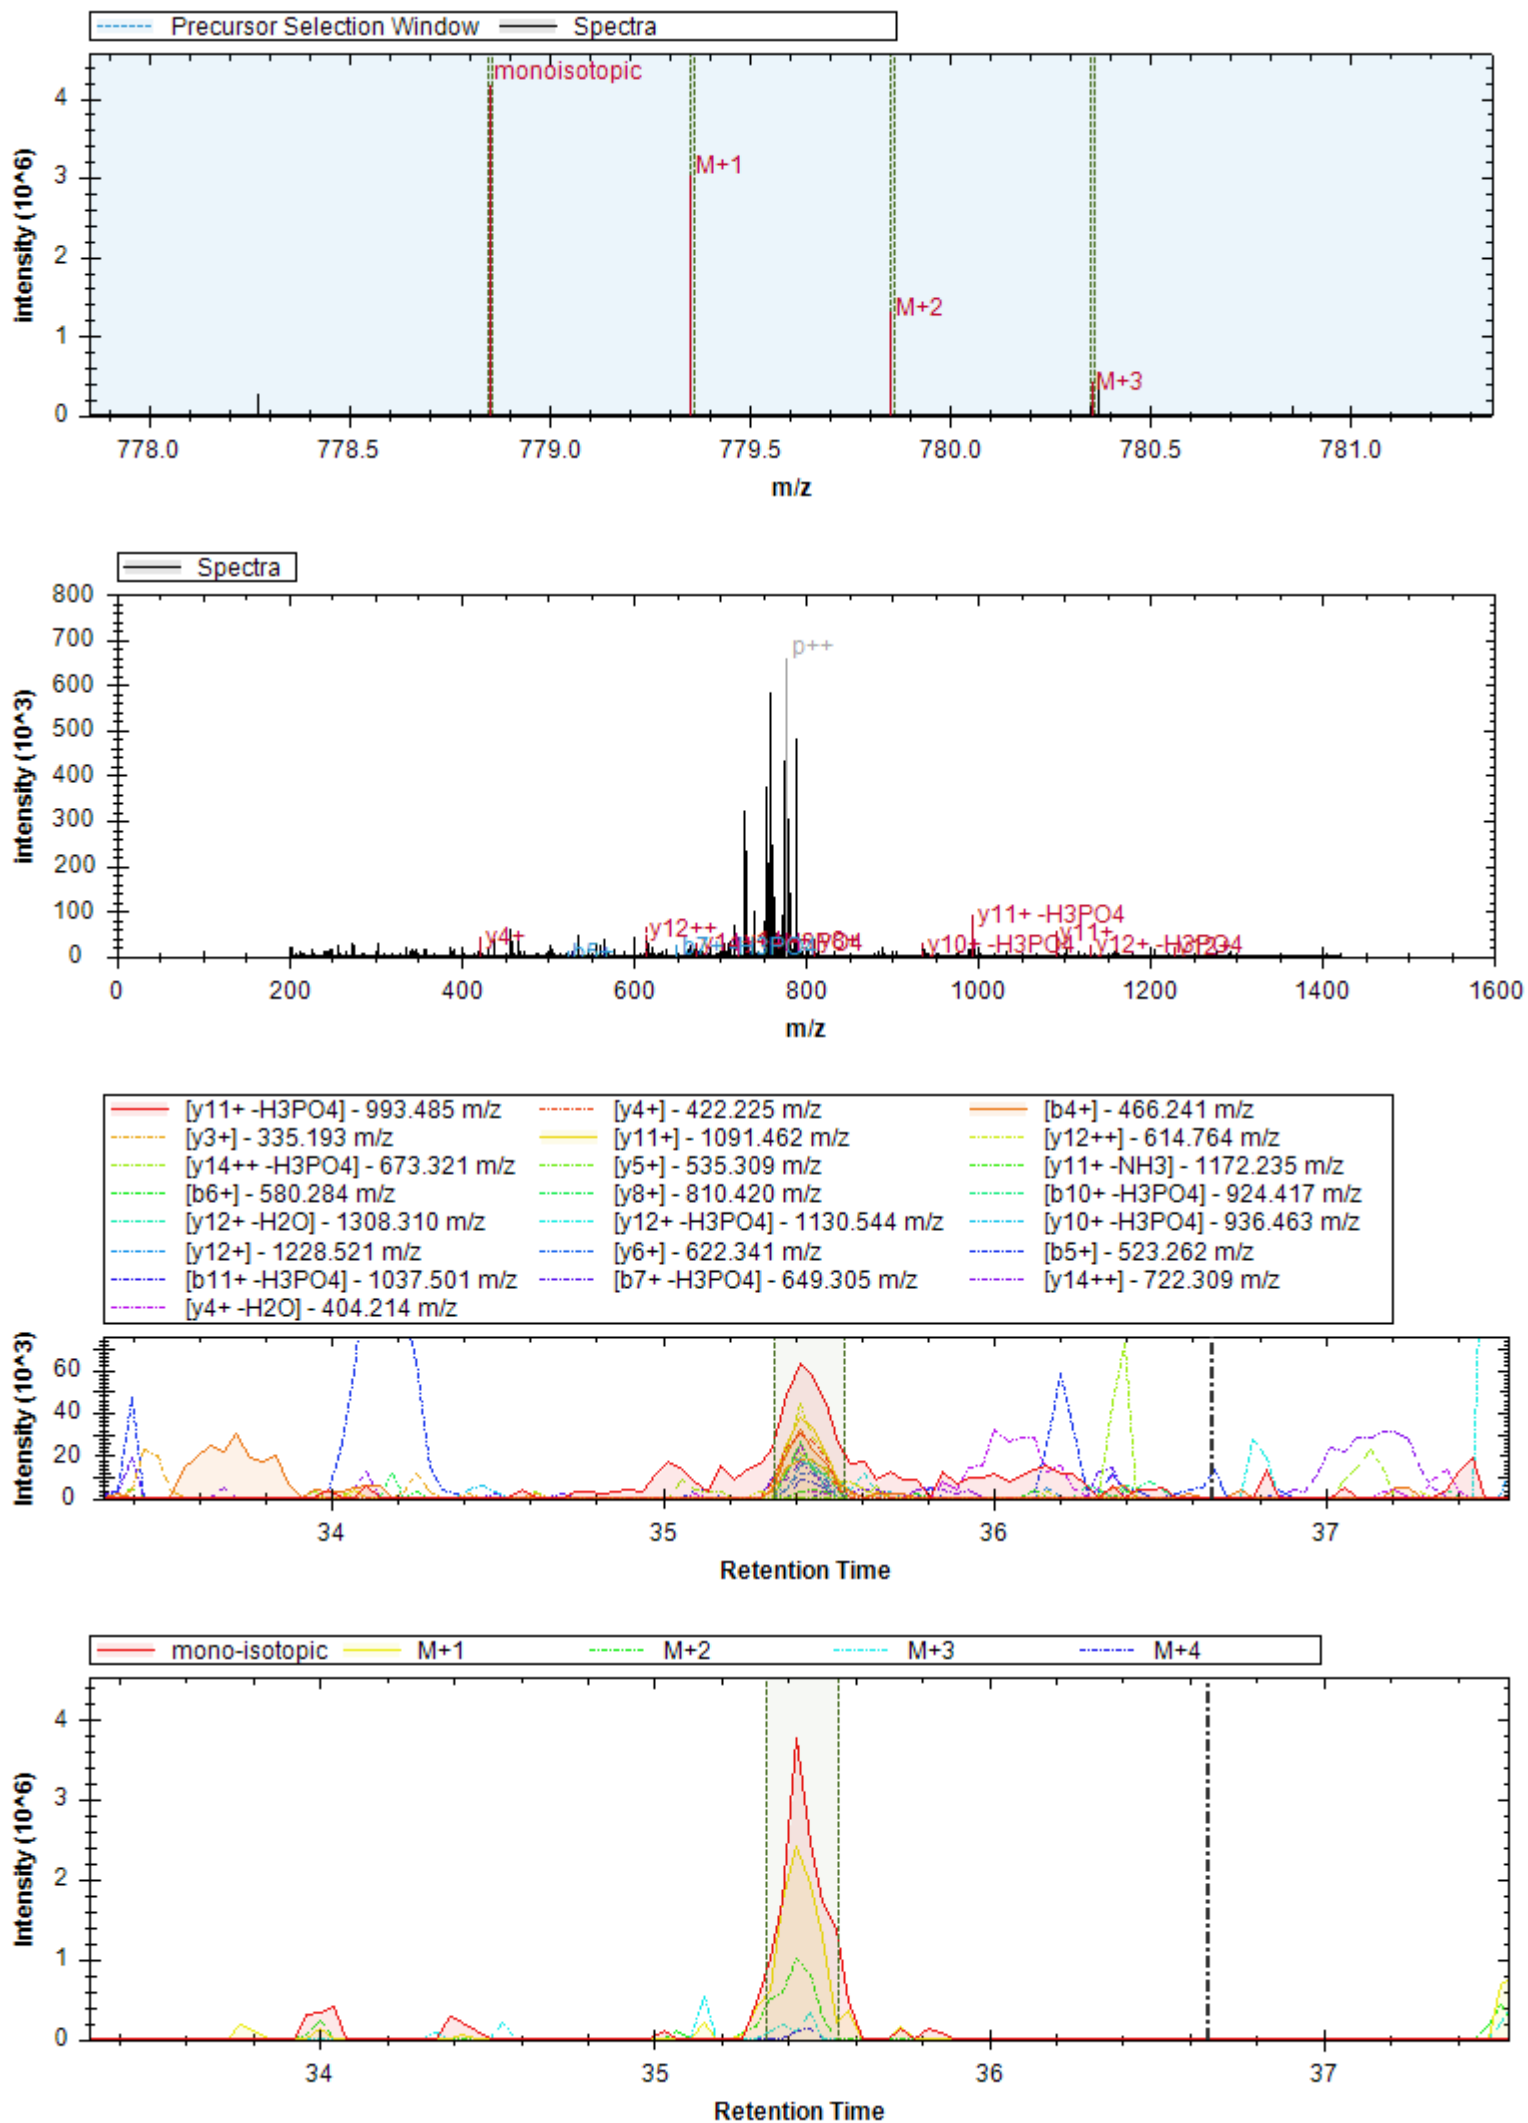

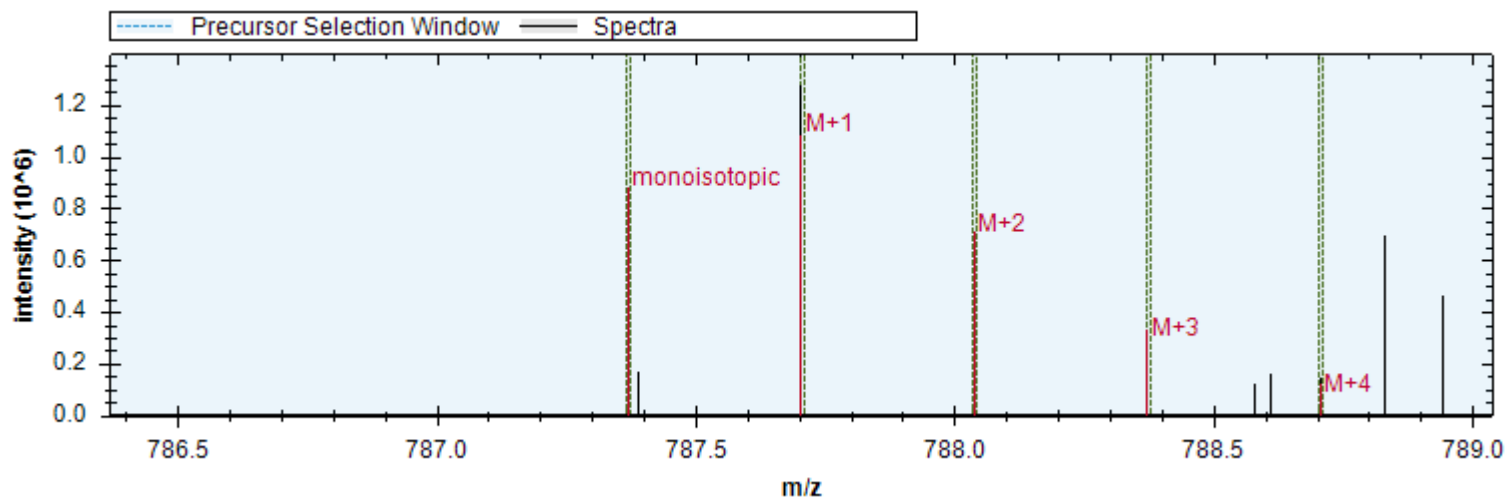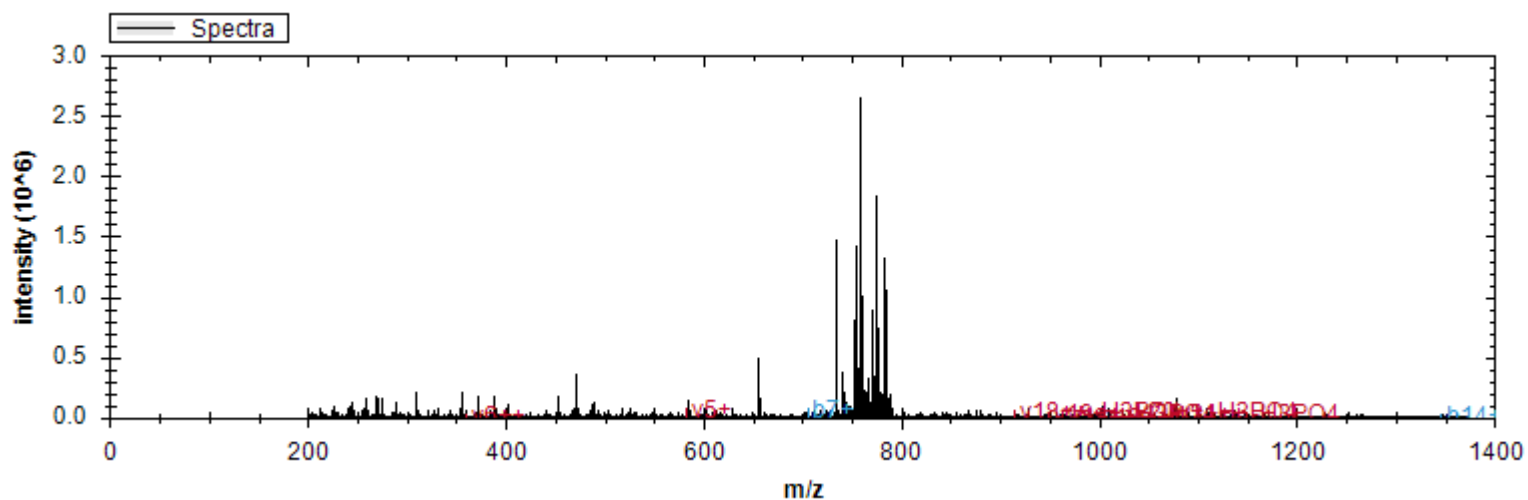

|                              |                               |                               |
|------------------------------|-------------------------------|-------------------------------|
| [y18++ -H3PO4] - 914.454 m/z | [y19++ -H3PO4] - 949.972 m/z  | [y20++ -H3PO4] - 1031.504 m/z |
| [y5+] - 583.295 m/z          | [y21++ -H3PO4] - 1075.020 m/z | [b3+ -H2O] - 346.176 m/z      |
| [b14+ -H3PO4] - 1346.649 m/z | [y6+] - 720.354 m/z           | [y4+] - 446.236 m/z           |
| [b3+] - 364.187 m/z          | [y8+] - 916.475 m/z           | [y6++] - 360.681 m/z          |
| [b7+] - 705.368 m/z          | [y3+] - 375.199 m/z           | [y20++] - 1080.492 m/z        |
| [y17++ -H3PO4] - 885.943 m/z | [y10+ -H3PO4] - 1042.518 m/z  | [b11+] - 1149.569 m/z         |
| [y18++] - 963.442 m/z        | [b12+] - 1220.606 m/z         | [y19++] - 998.961 m/z         |
| [y7+] - 819.422 m/z          | [y21++] - 1124.008 m/z        | [y20+++] - 720.664 m/z        |
| [b13+] - 1277.627 m/z        |                               |                               |

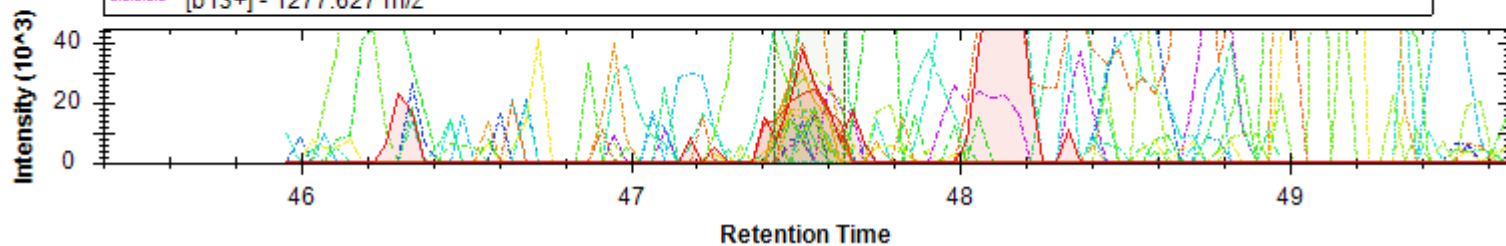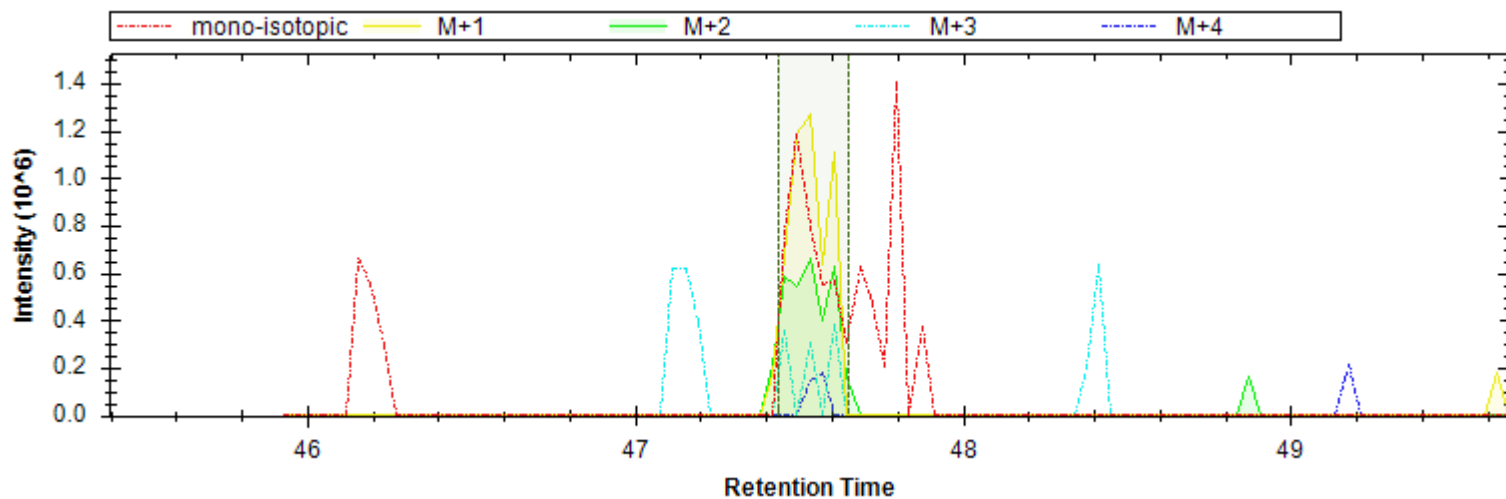

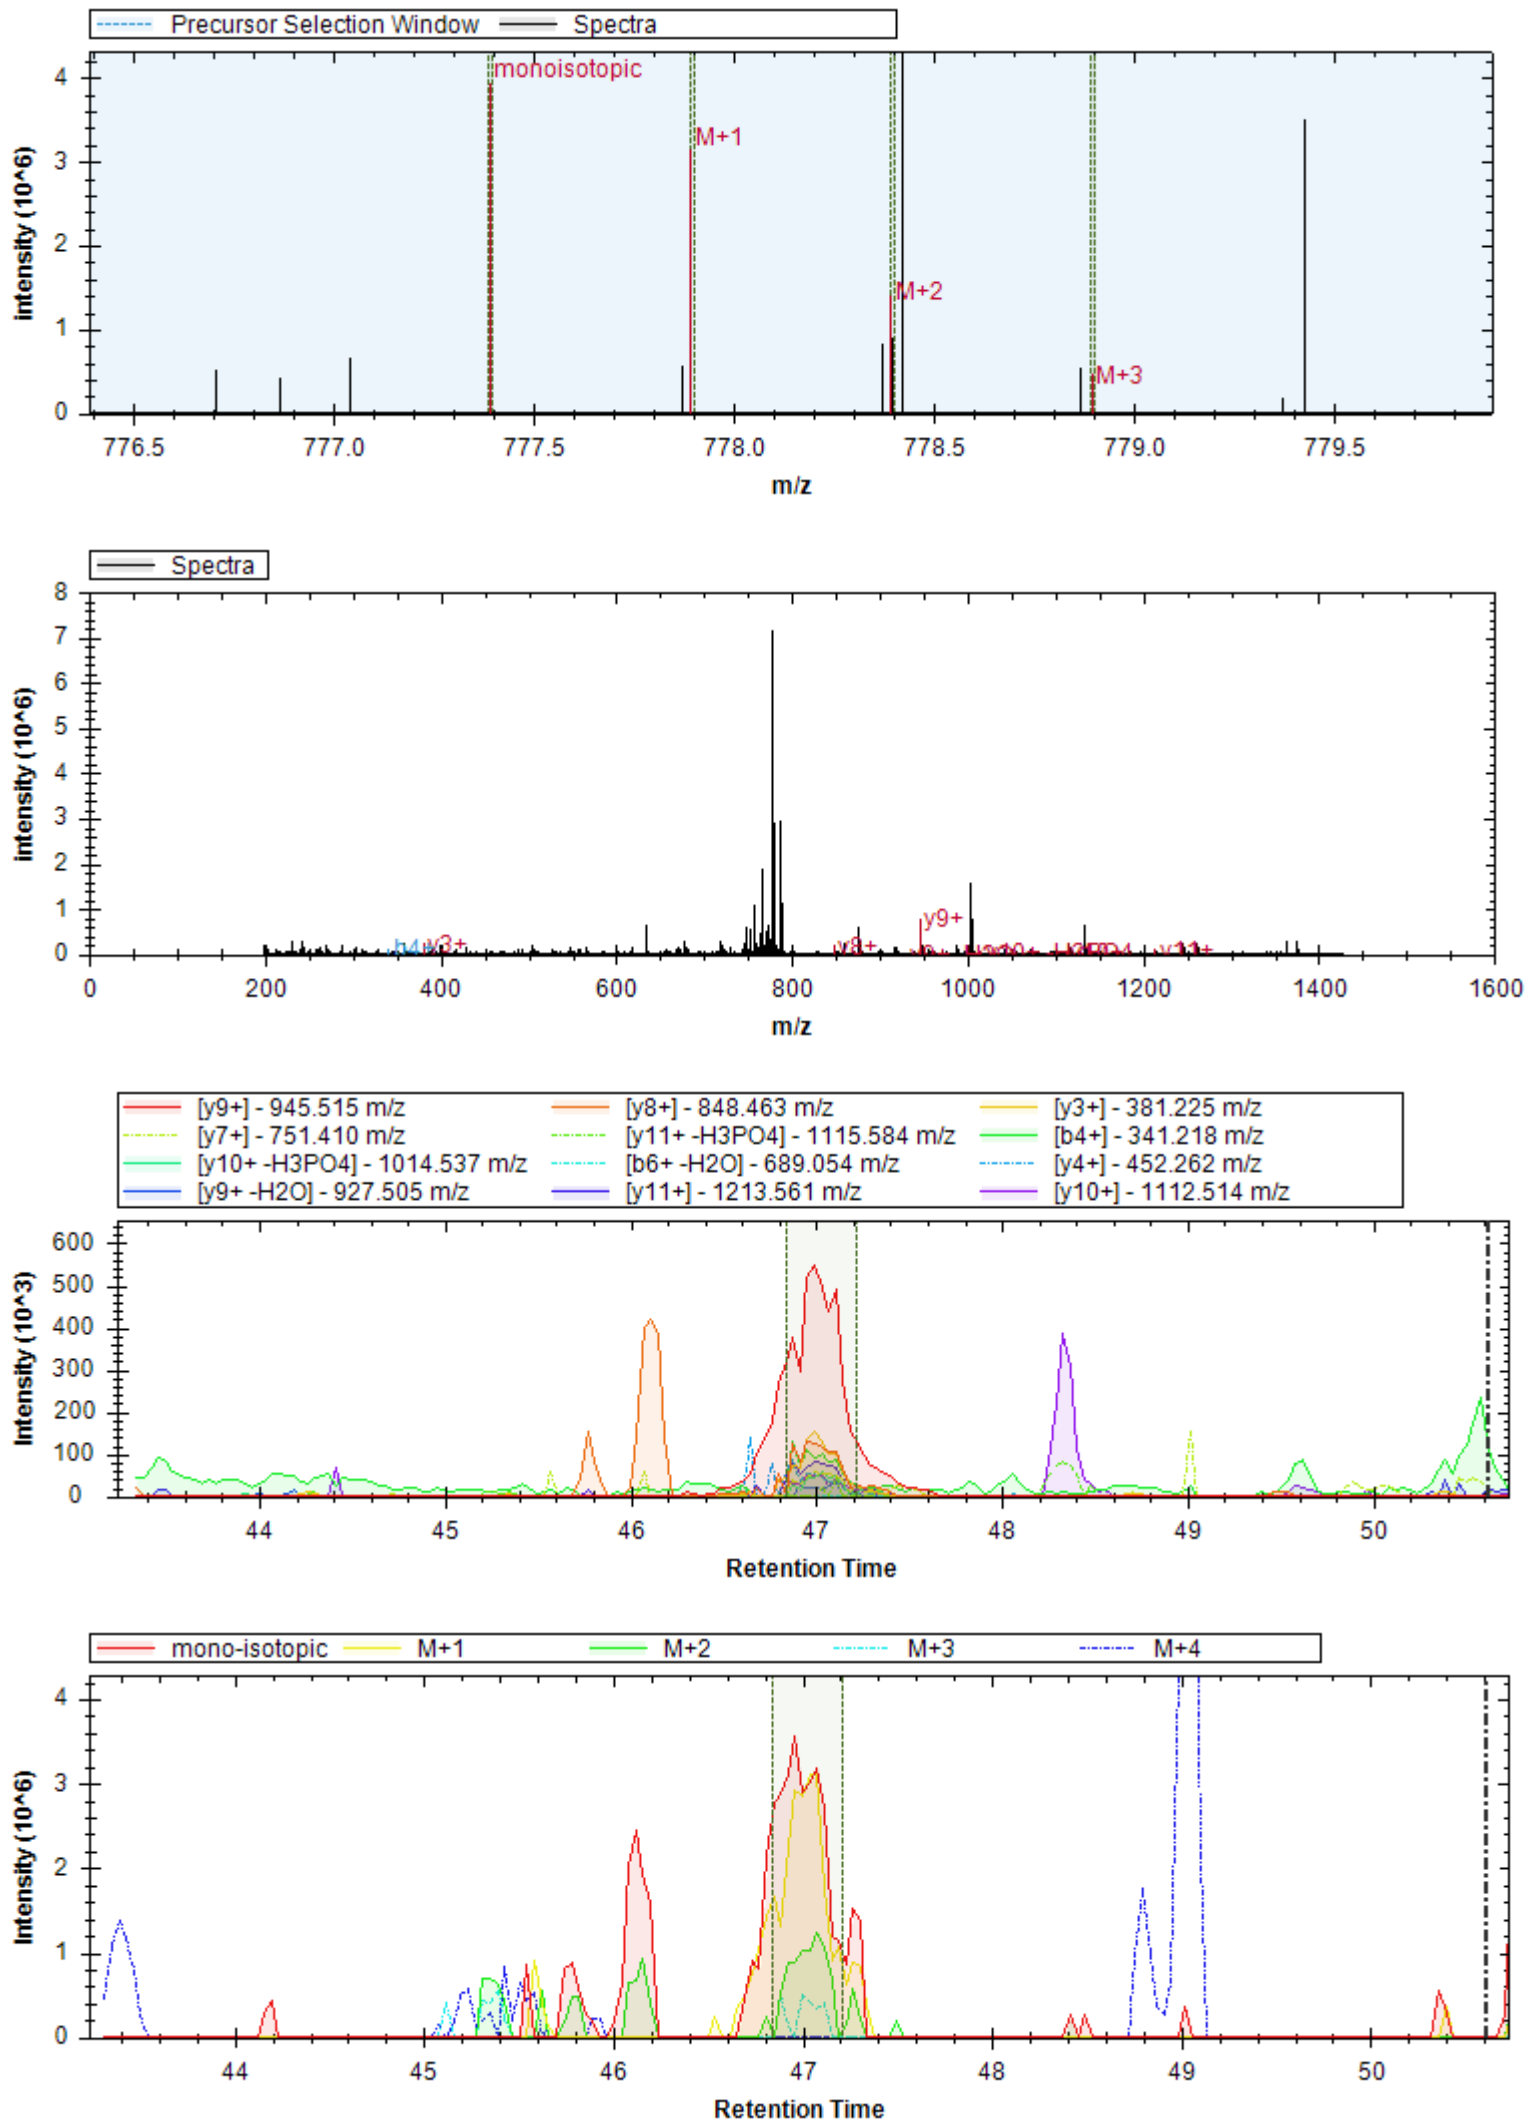

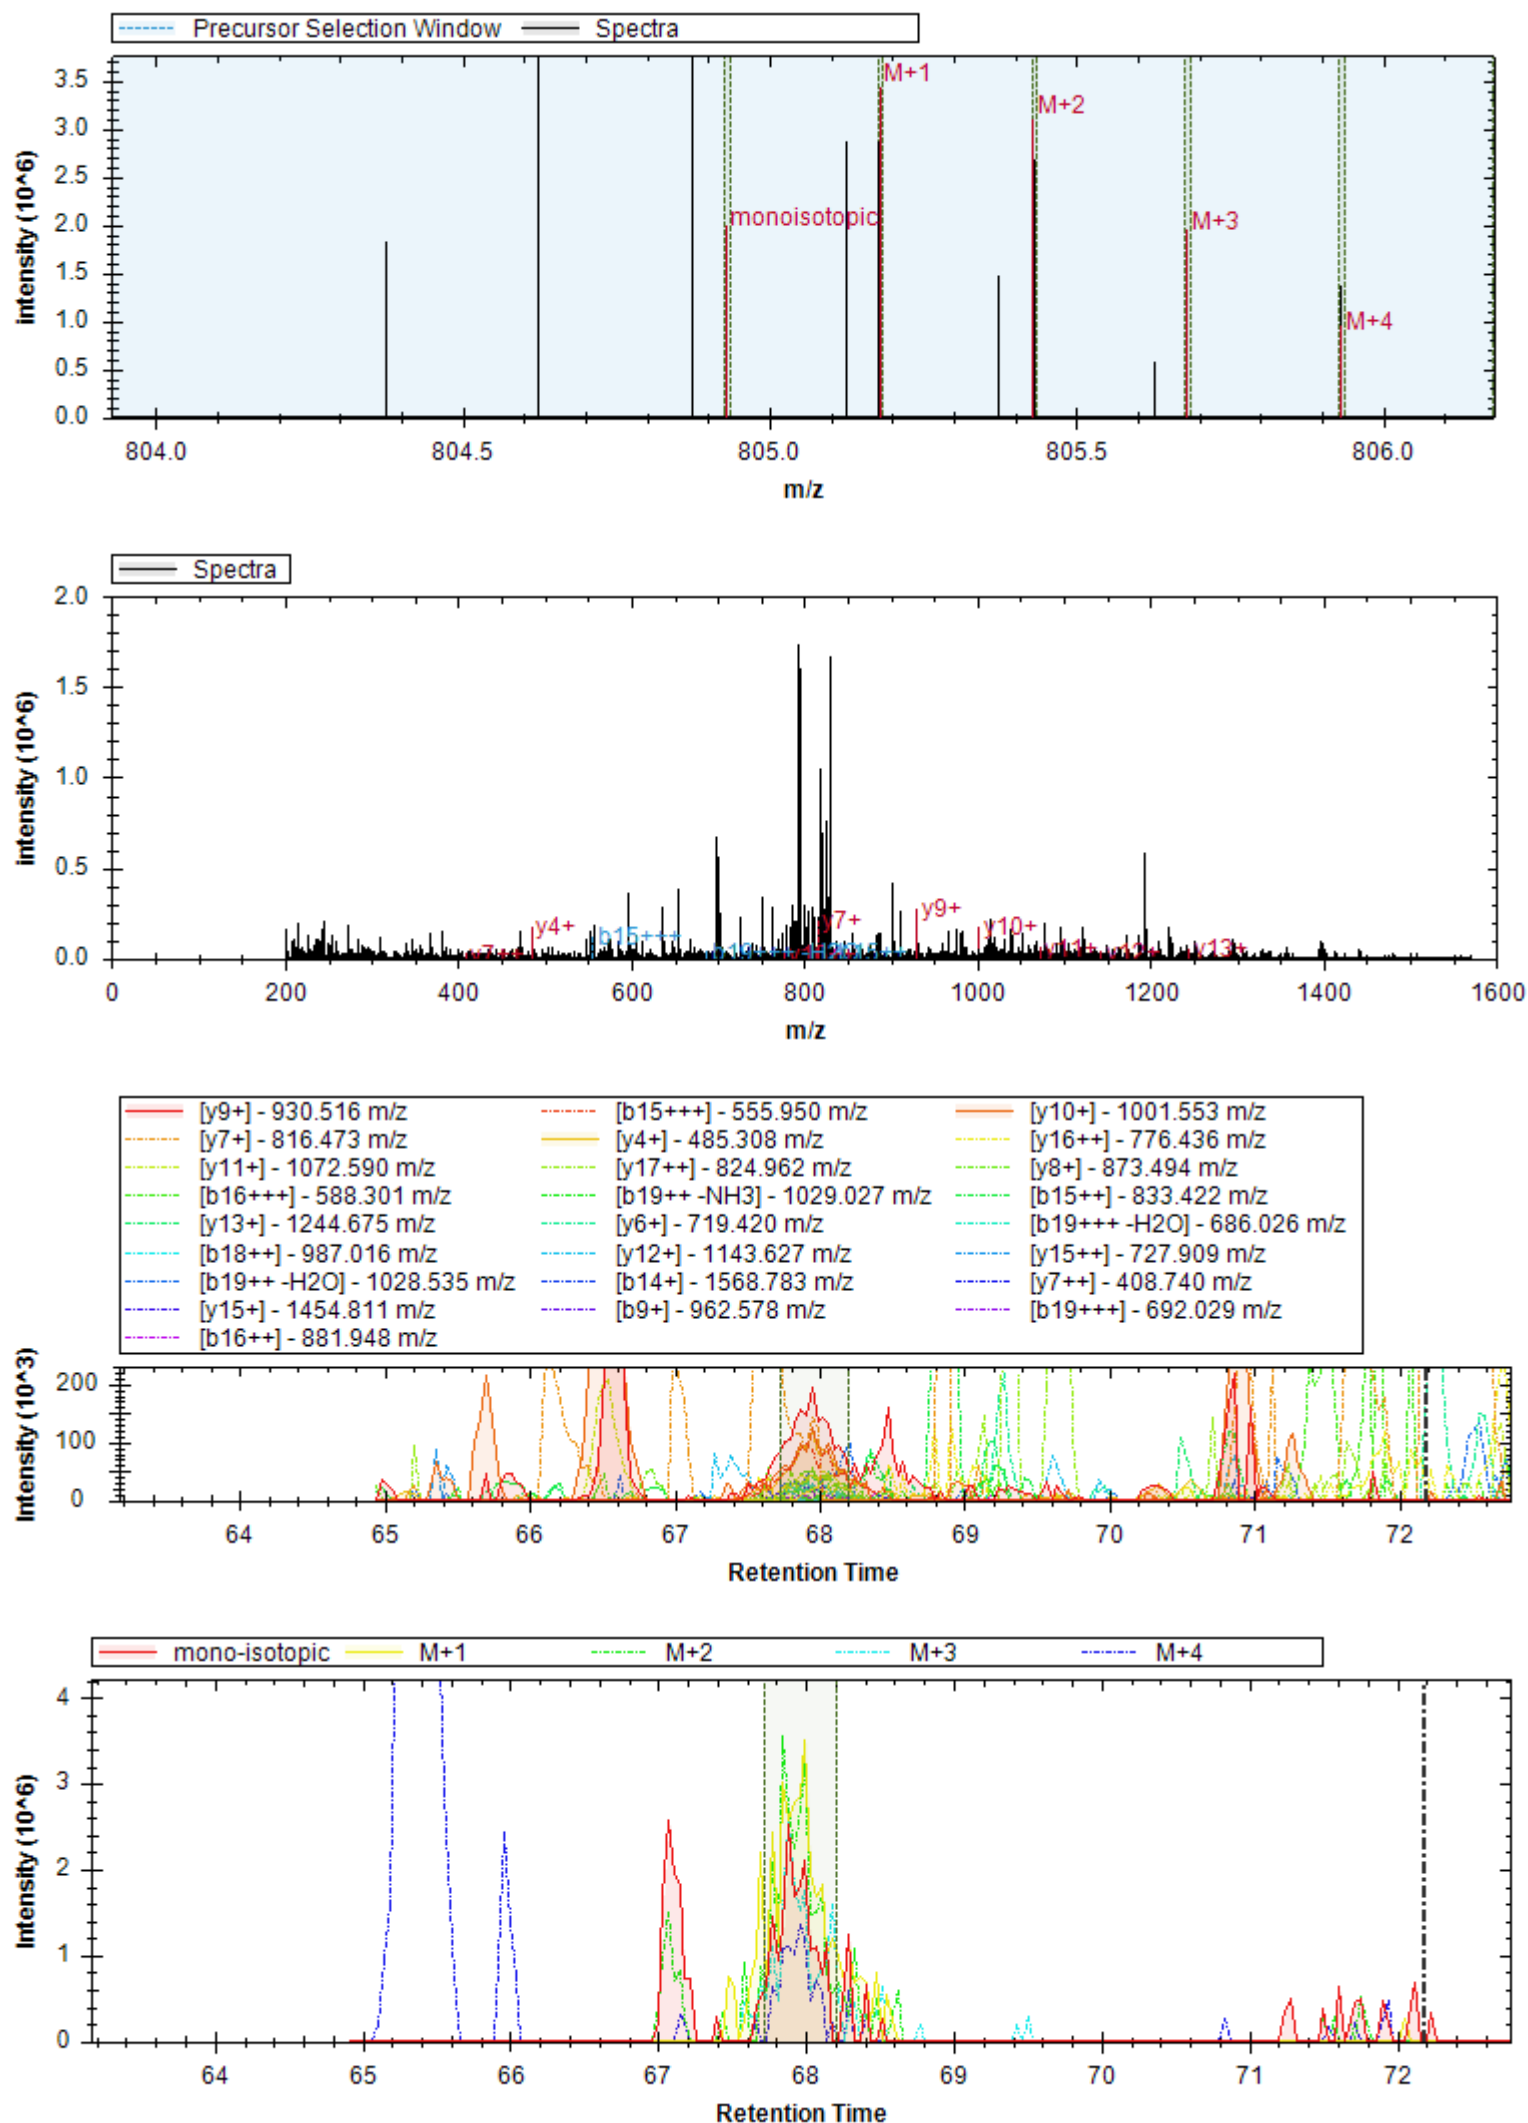

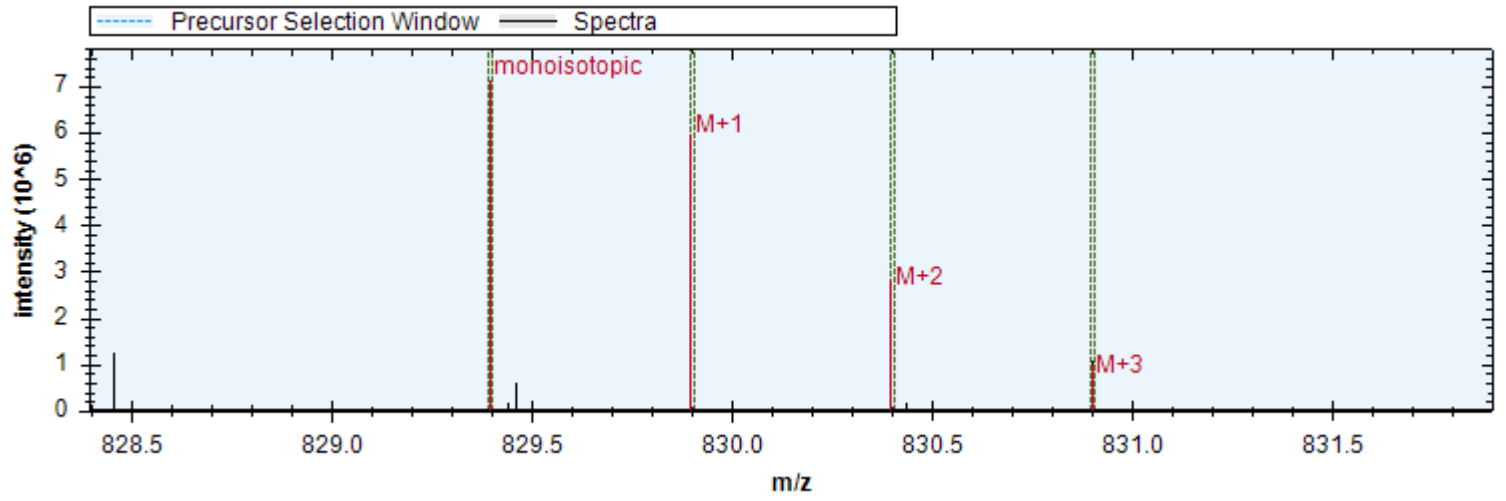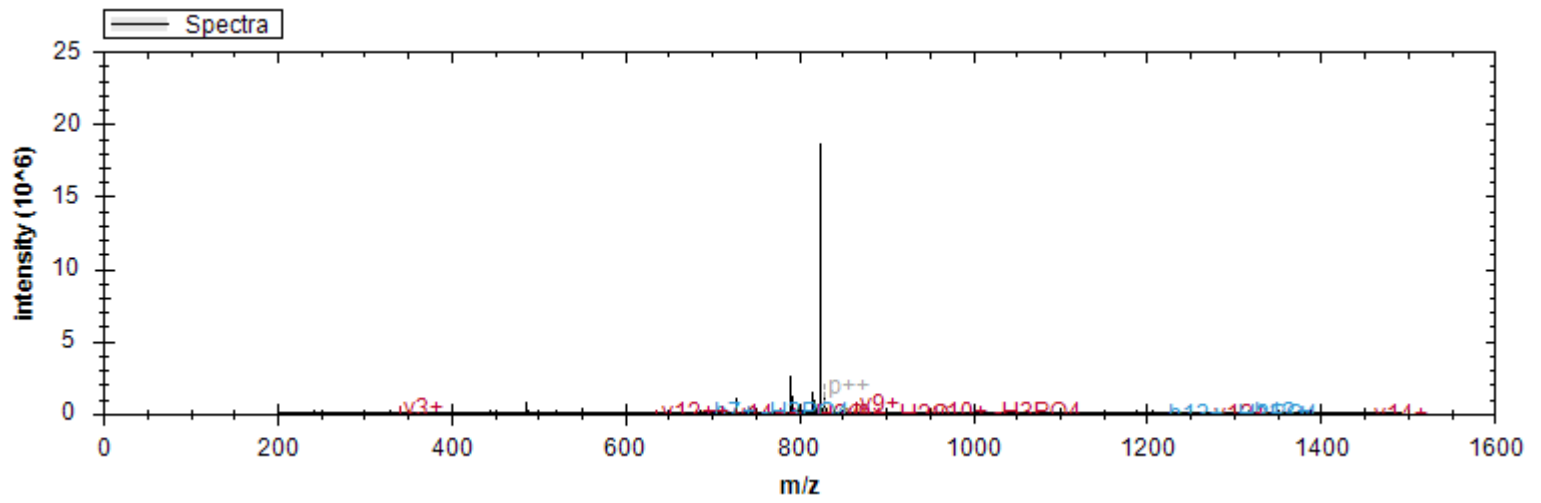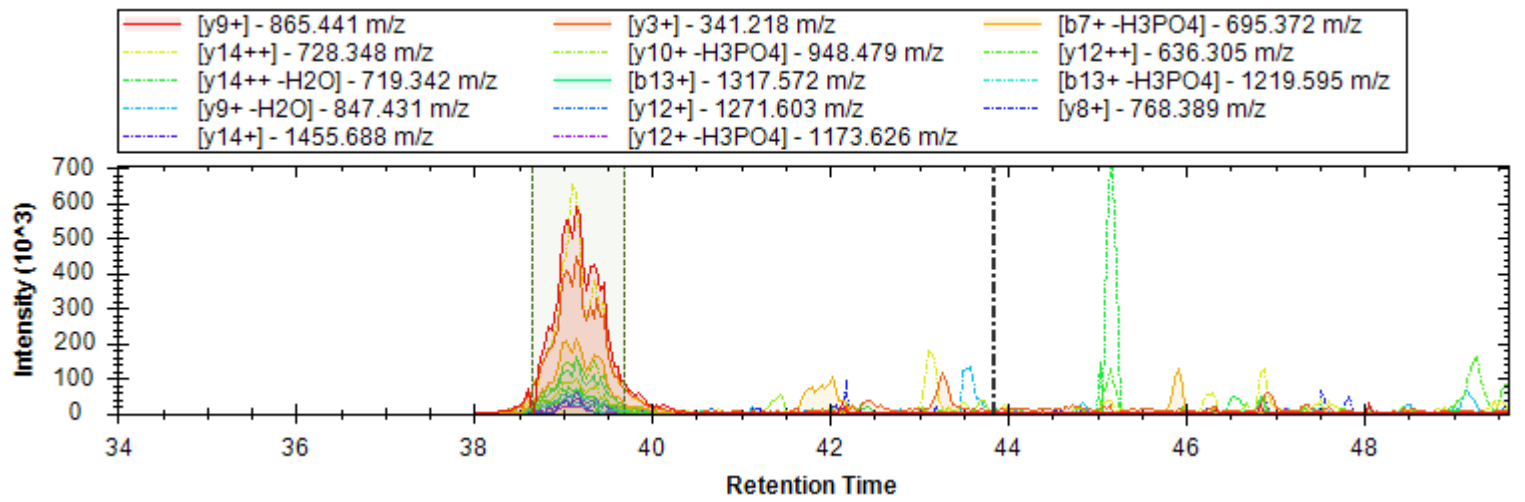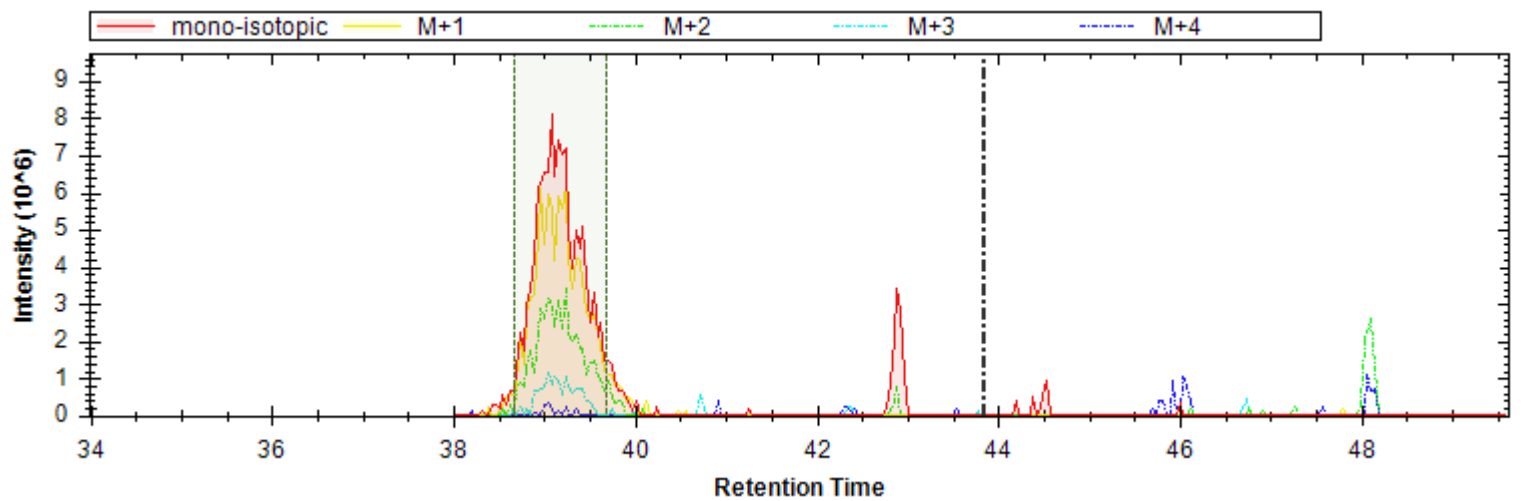

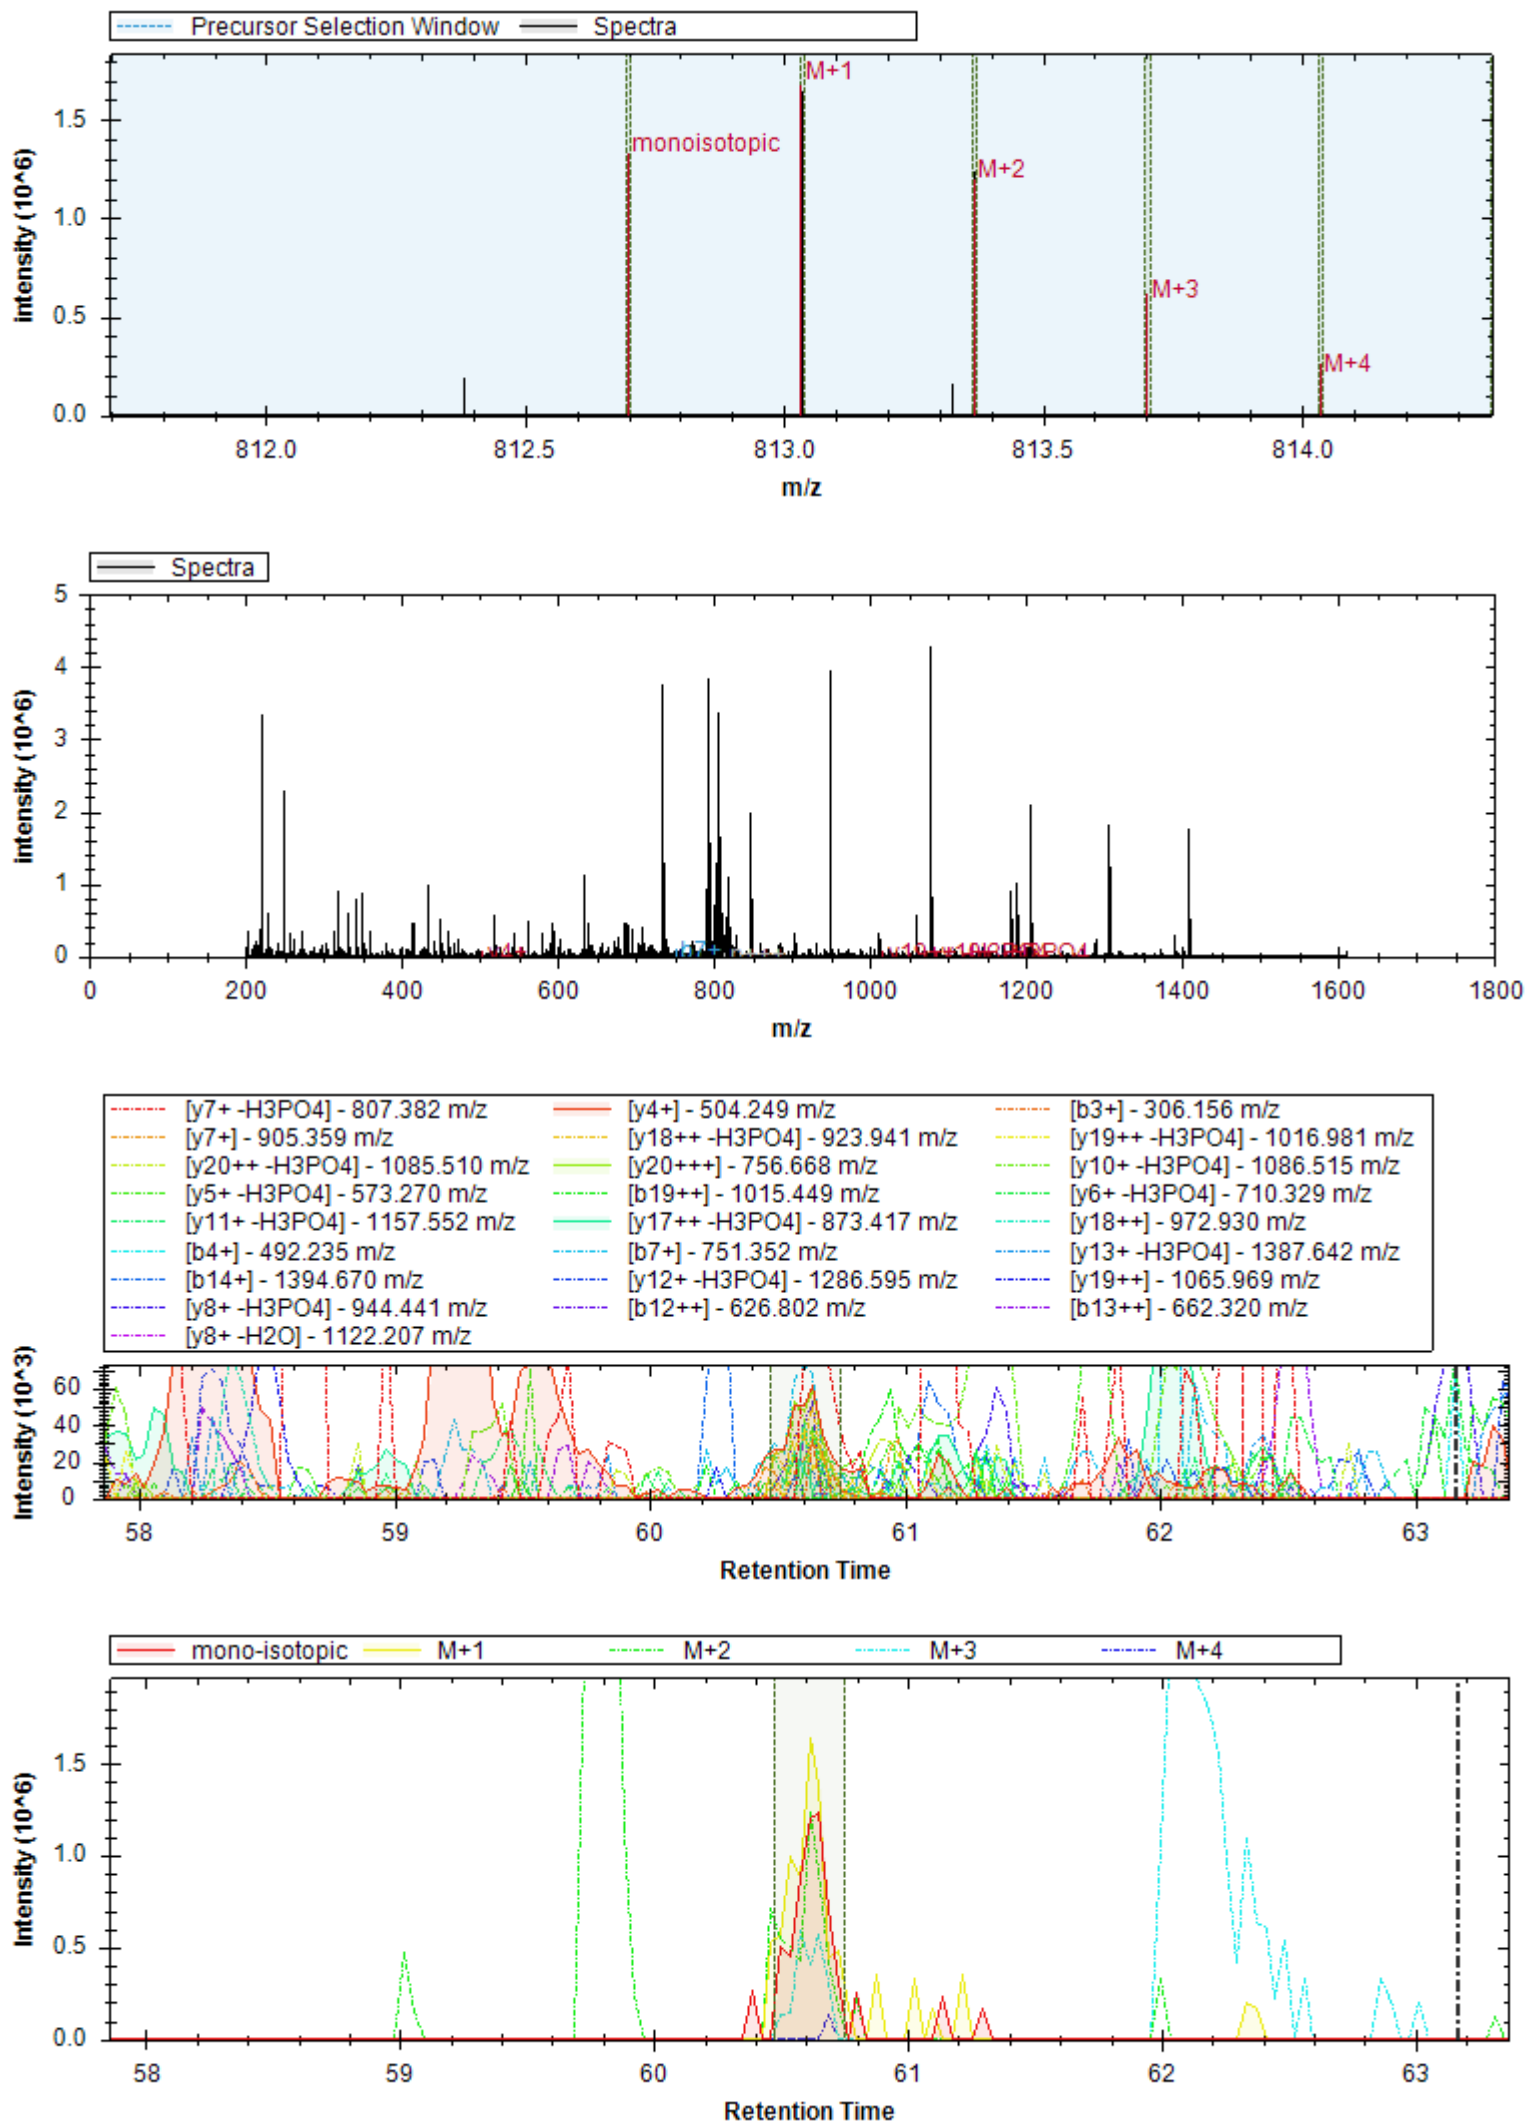

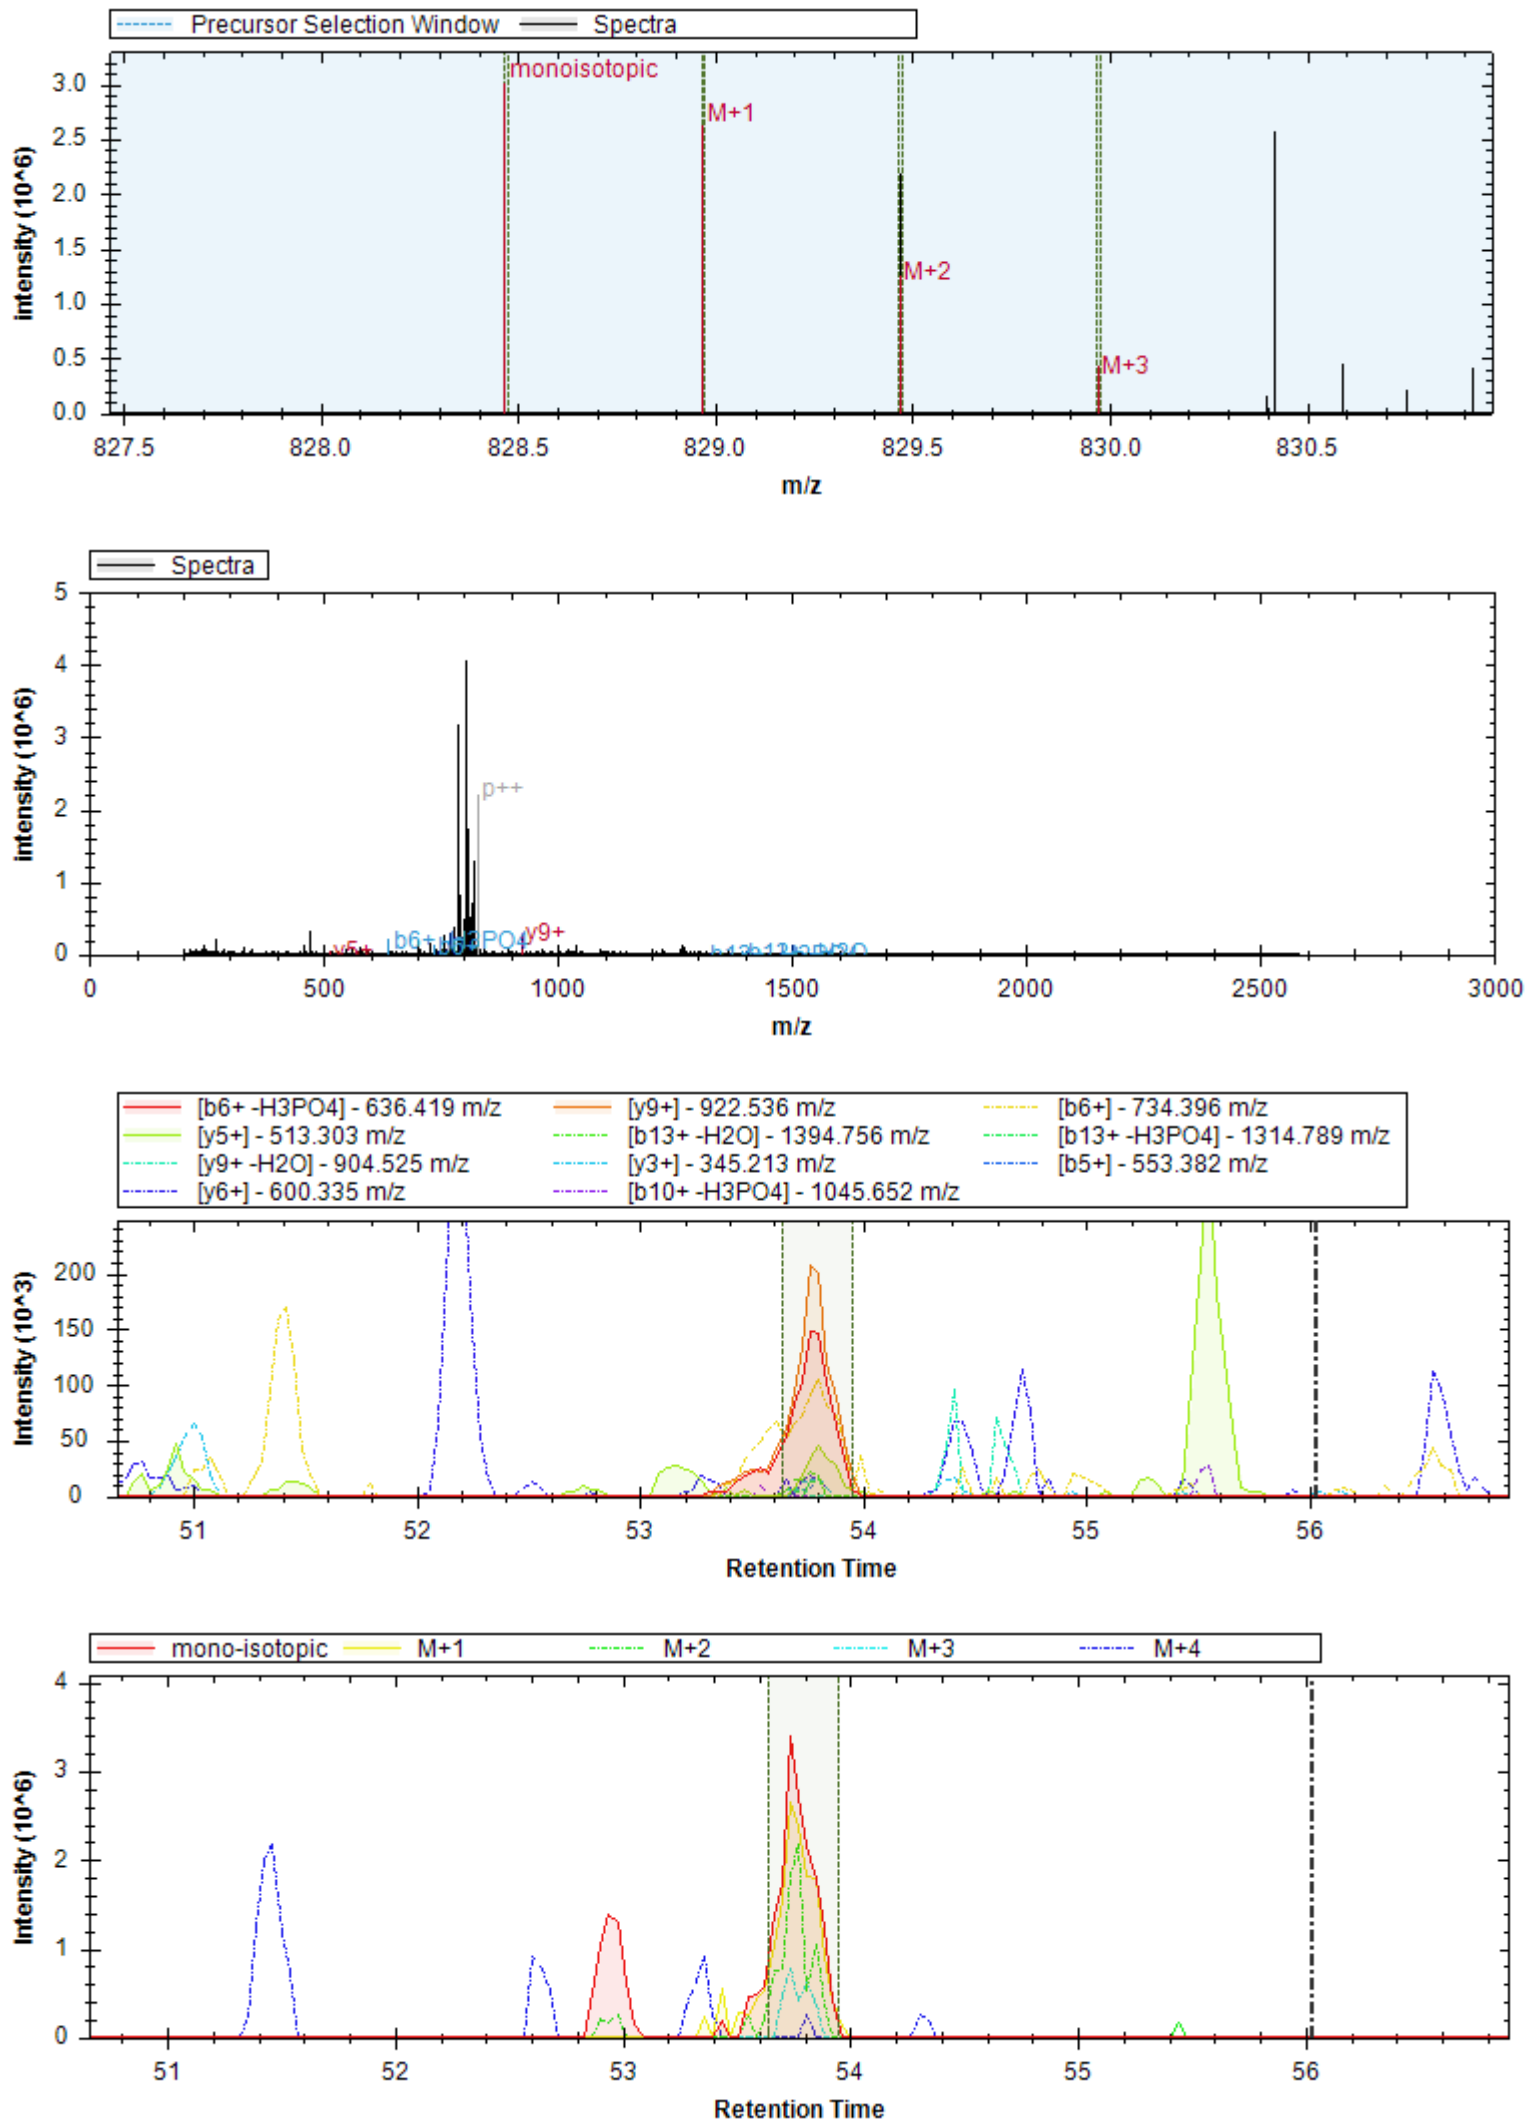



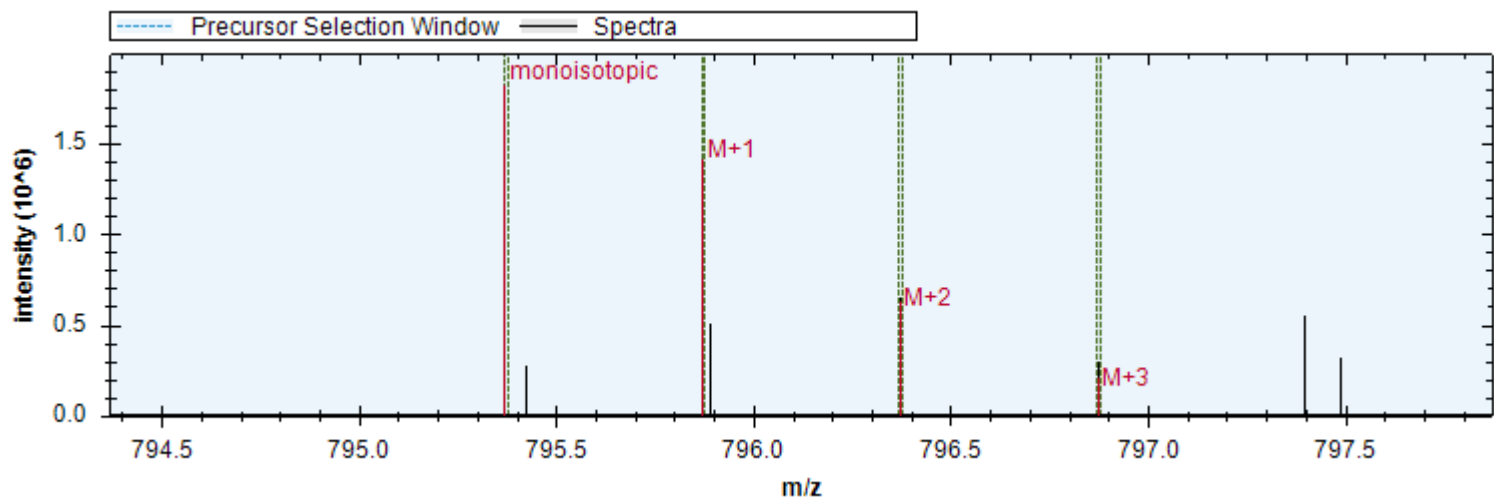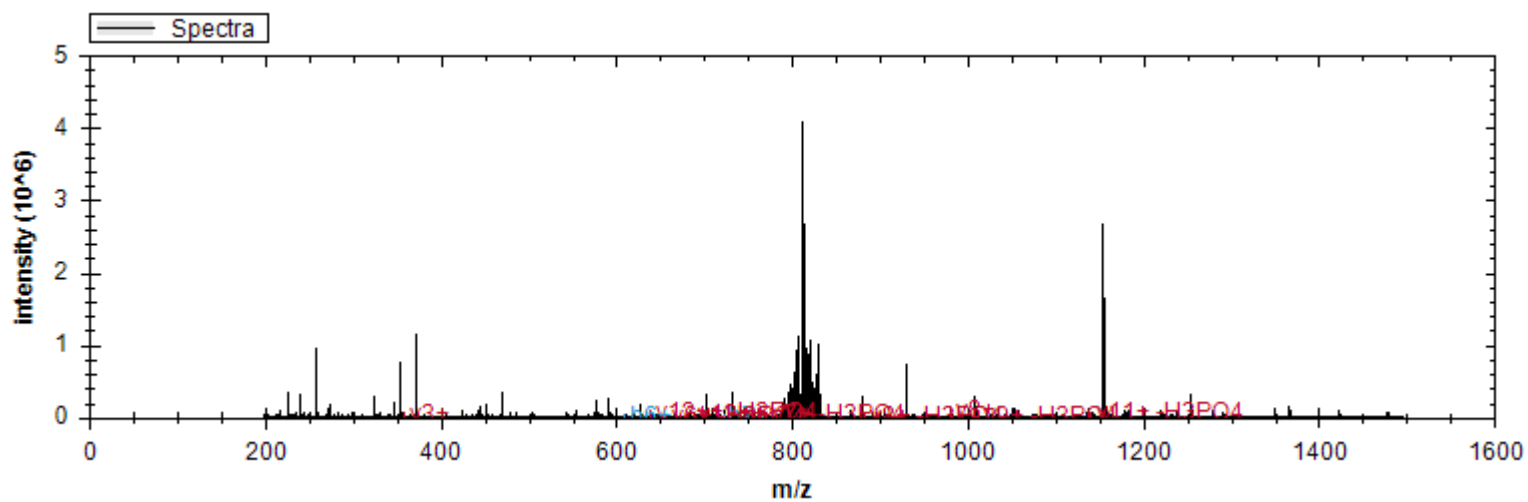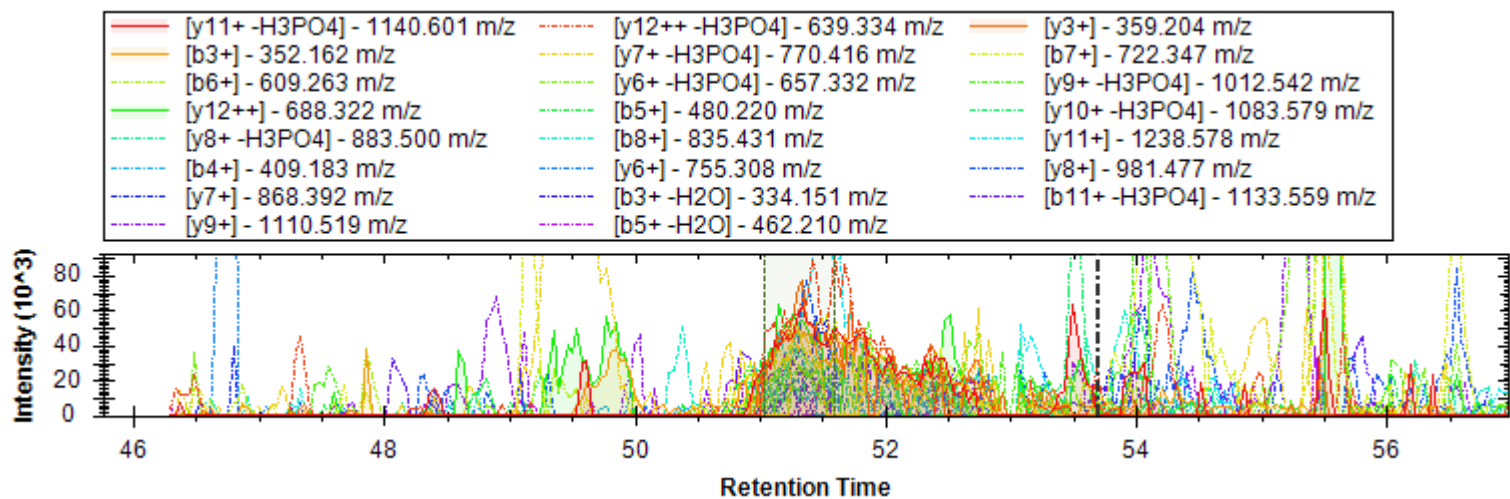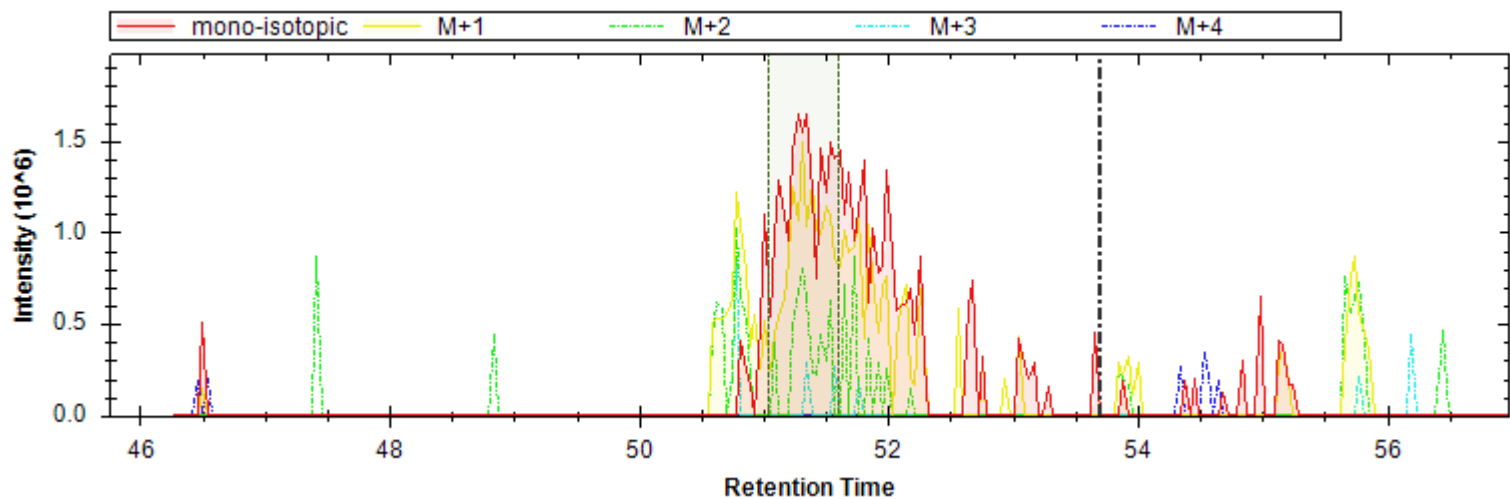

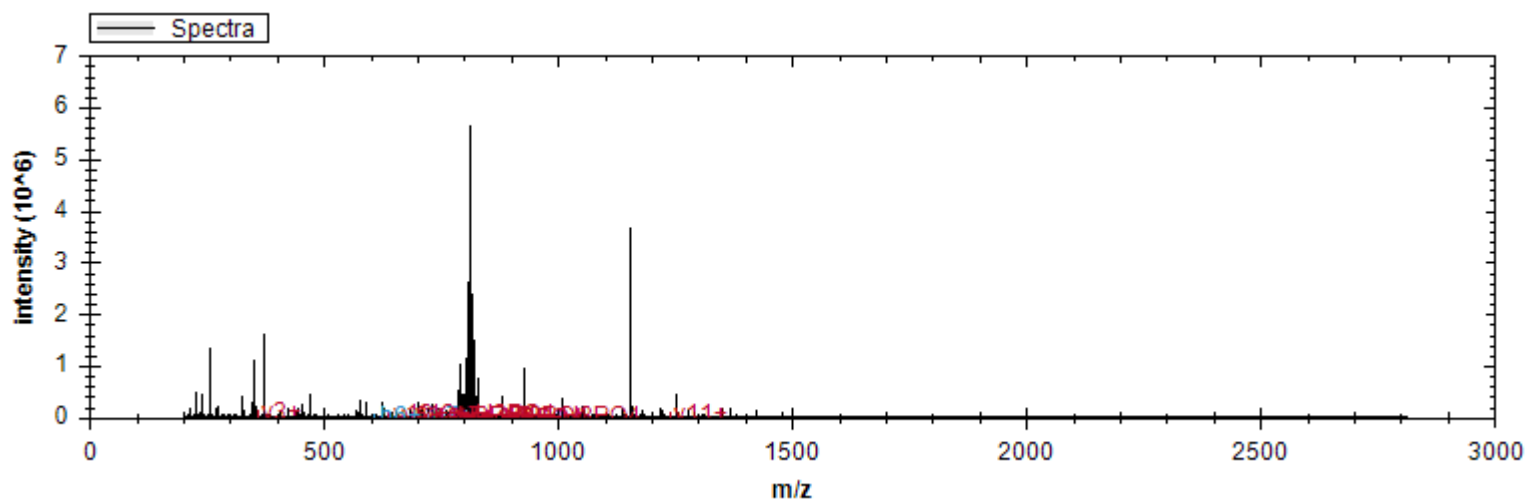

|                              |                              |                              |
|------------------------------|------------------------------|------------------------------|
| [y12++ -H3PO4] - 639.334 m/z | [y11+ -H3PO4] - 1140.601 m/z | [y3+] - 359.204 m/z          |
| [b3+] - 352.162 m/z          | [y13++ -H3PO4] - 696.847 m/z | [b6+] - 609.263 m/z          |
| [y6+ -H3PO4] - 657.332 m/z   | [y7+ -H3PO4] - 770.416 m/z   | [b7+] - 722.347 m/z          |
| [y12++] - 688.322 m/z        | [y8+ -H3PO4] - 883.500 m/z   | [b5+] - 480.220 m/z          |
| [y9+ -H3PO4] - 1012.542 m/z  | [y12++ -H2O] - 679.317 m/z   | [y9+] - 1110.519 m/z         |
| [y13++] - 745.835 m/z        | [y11+] - 1238.578 m/z        | [y10+ -H3PO4] - 1083.579 m/z |
| [b8+] - 835.431 m/z          | [y10+] - 1181.556 m/z        | [y7+] - 868.392 m/z          |
| [b4+] - 409.183 m/z          | [b6+ -H2O] - 591.252 m/z     | [y5+ -H3PO4] - 556.284 m/z   |
| [b3+ -H2O] - 334.151 m/z     |                              |                              |

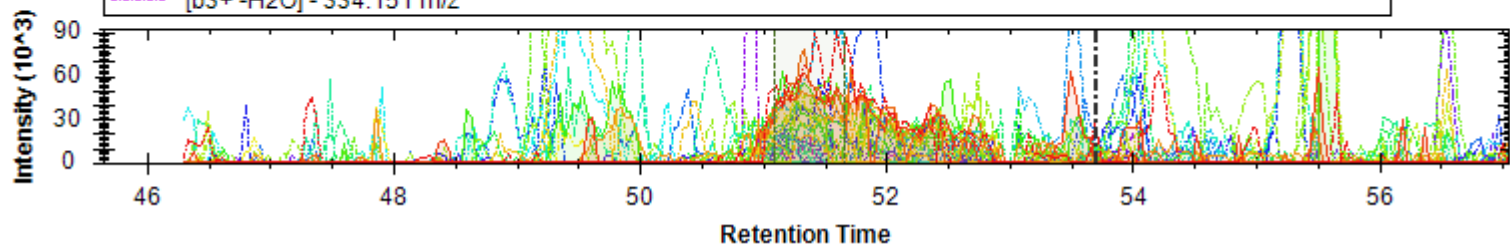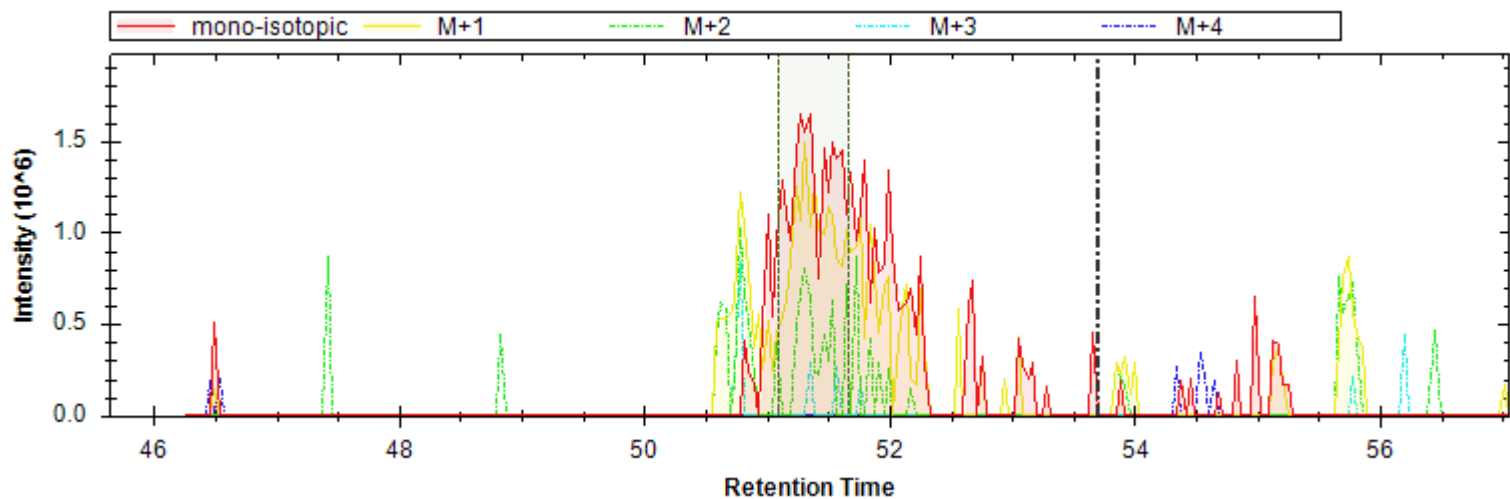

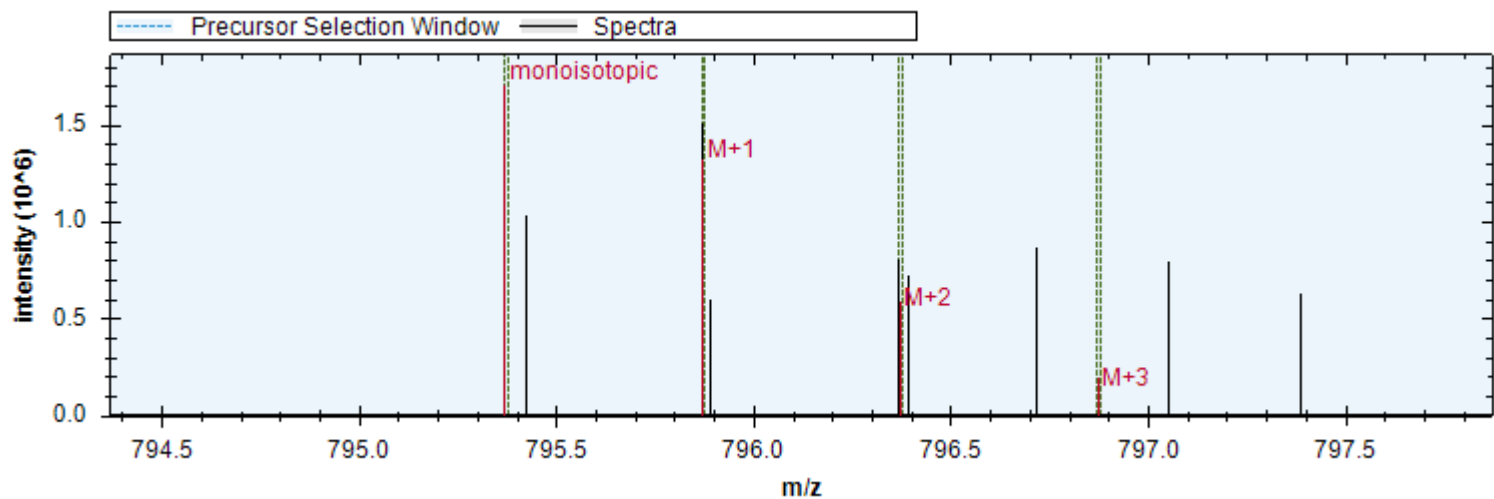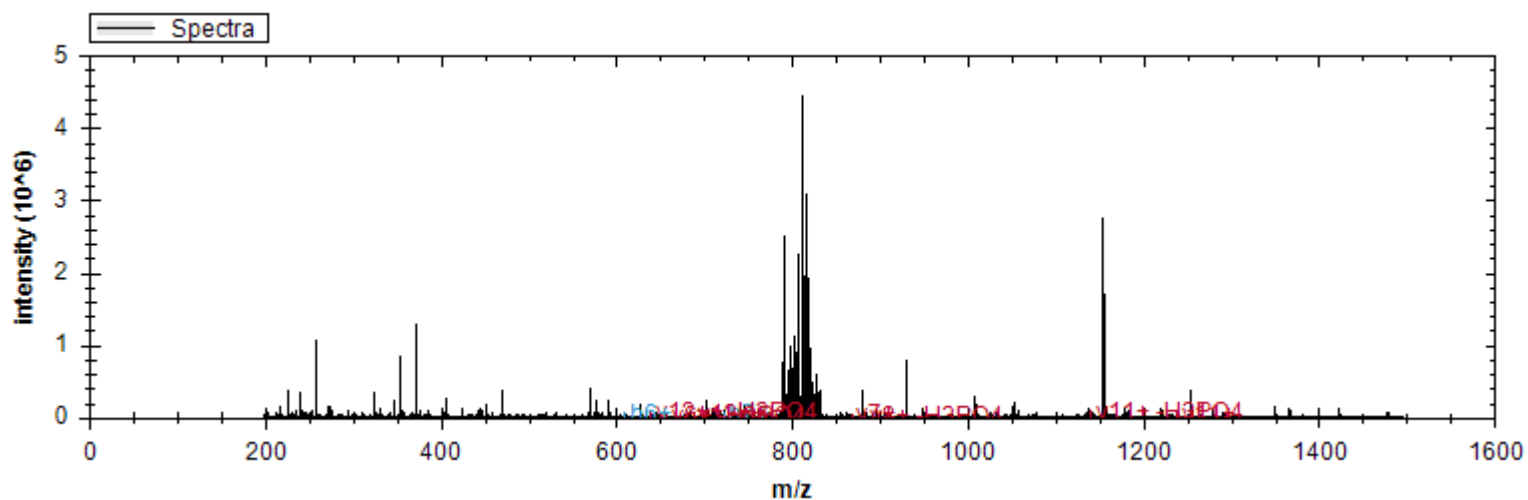

|                            |                              |                              |
|----------------------------|------------------------------|------------------------------|
| [b12+] - 1248.622 m/z      | [y11+ -H3PO4] - 1140.601 m/z | [y12++ -H3PO4] - 639.334 m/z |
| [b3+] - 352.162 m/z        | [b12+ -NH3] - 1231.595 m/z   | [b6+] - 609.263 m/z          |
| [y6+ -H3PO4] - 657.332 m/z | [y10+ -H3PO4] - 1083.579 m/z | [y8+ -H3PO4] - 883.500 m/z   |
| [b7+] - 722.347 m/z        | [y9+ -H3PO4] - 1012.542 m/z  | [y12++] - 688.322 m/z        |
| [y11+] - 1238.578 m/z      | [y7+] - 868.392 m/z          | [b12+ -H2O] - 1230.611 m/z   |
| [b5+] - 480.220 m/z        | [b8+] - 835.431 m/z          | [b4+] - 409.183 m/z          |
| [y6+] - 755.308 m/z        | [b3+ -H2O] - 334.151 m/z     | [b8+ -H2O] - 817.420 m/z     |

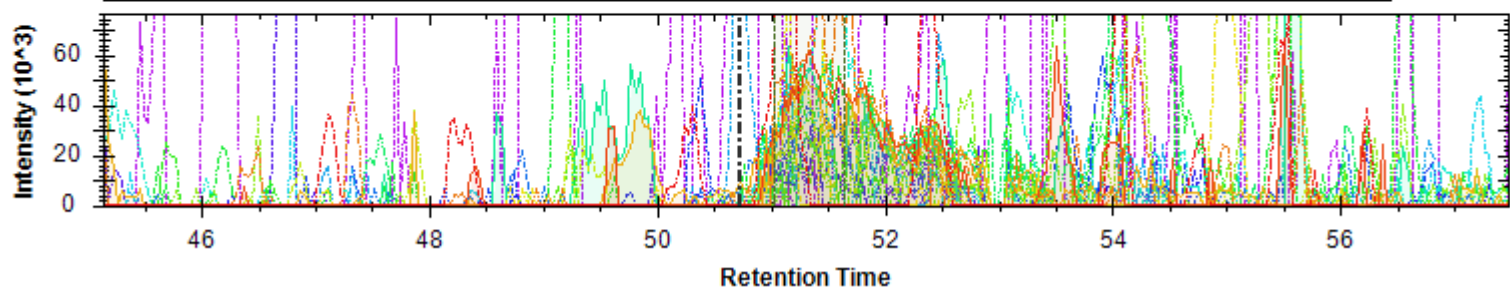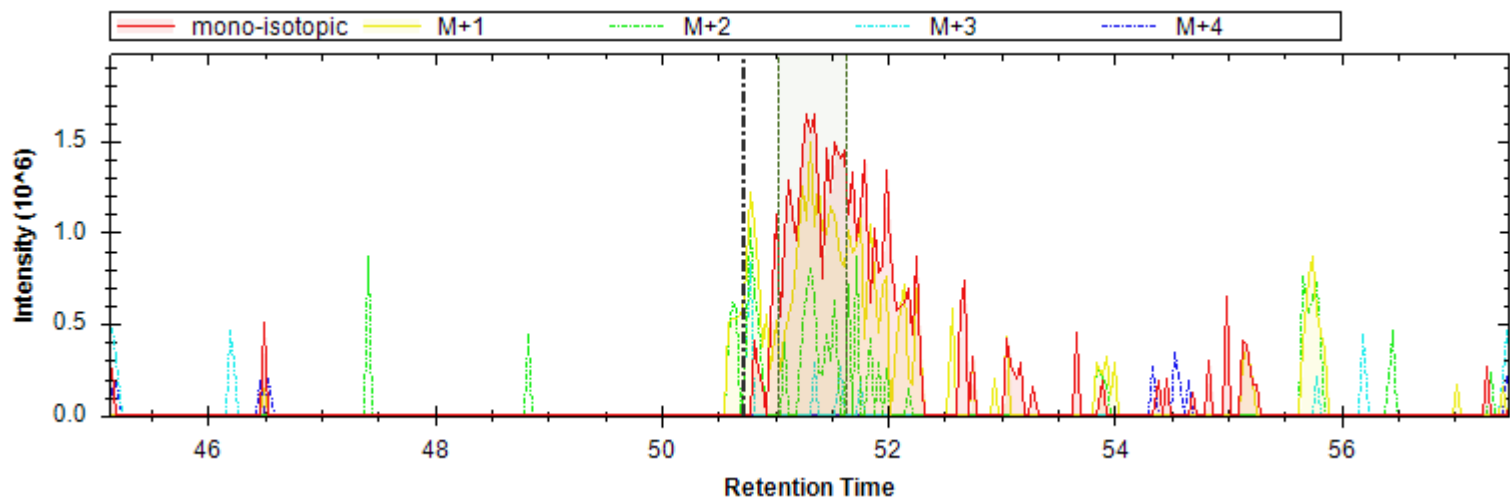

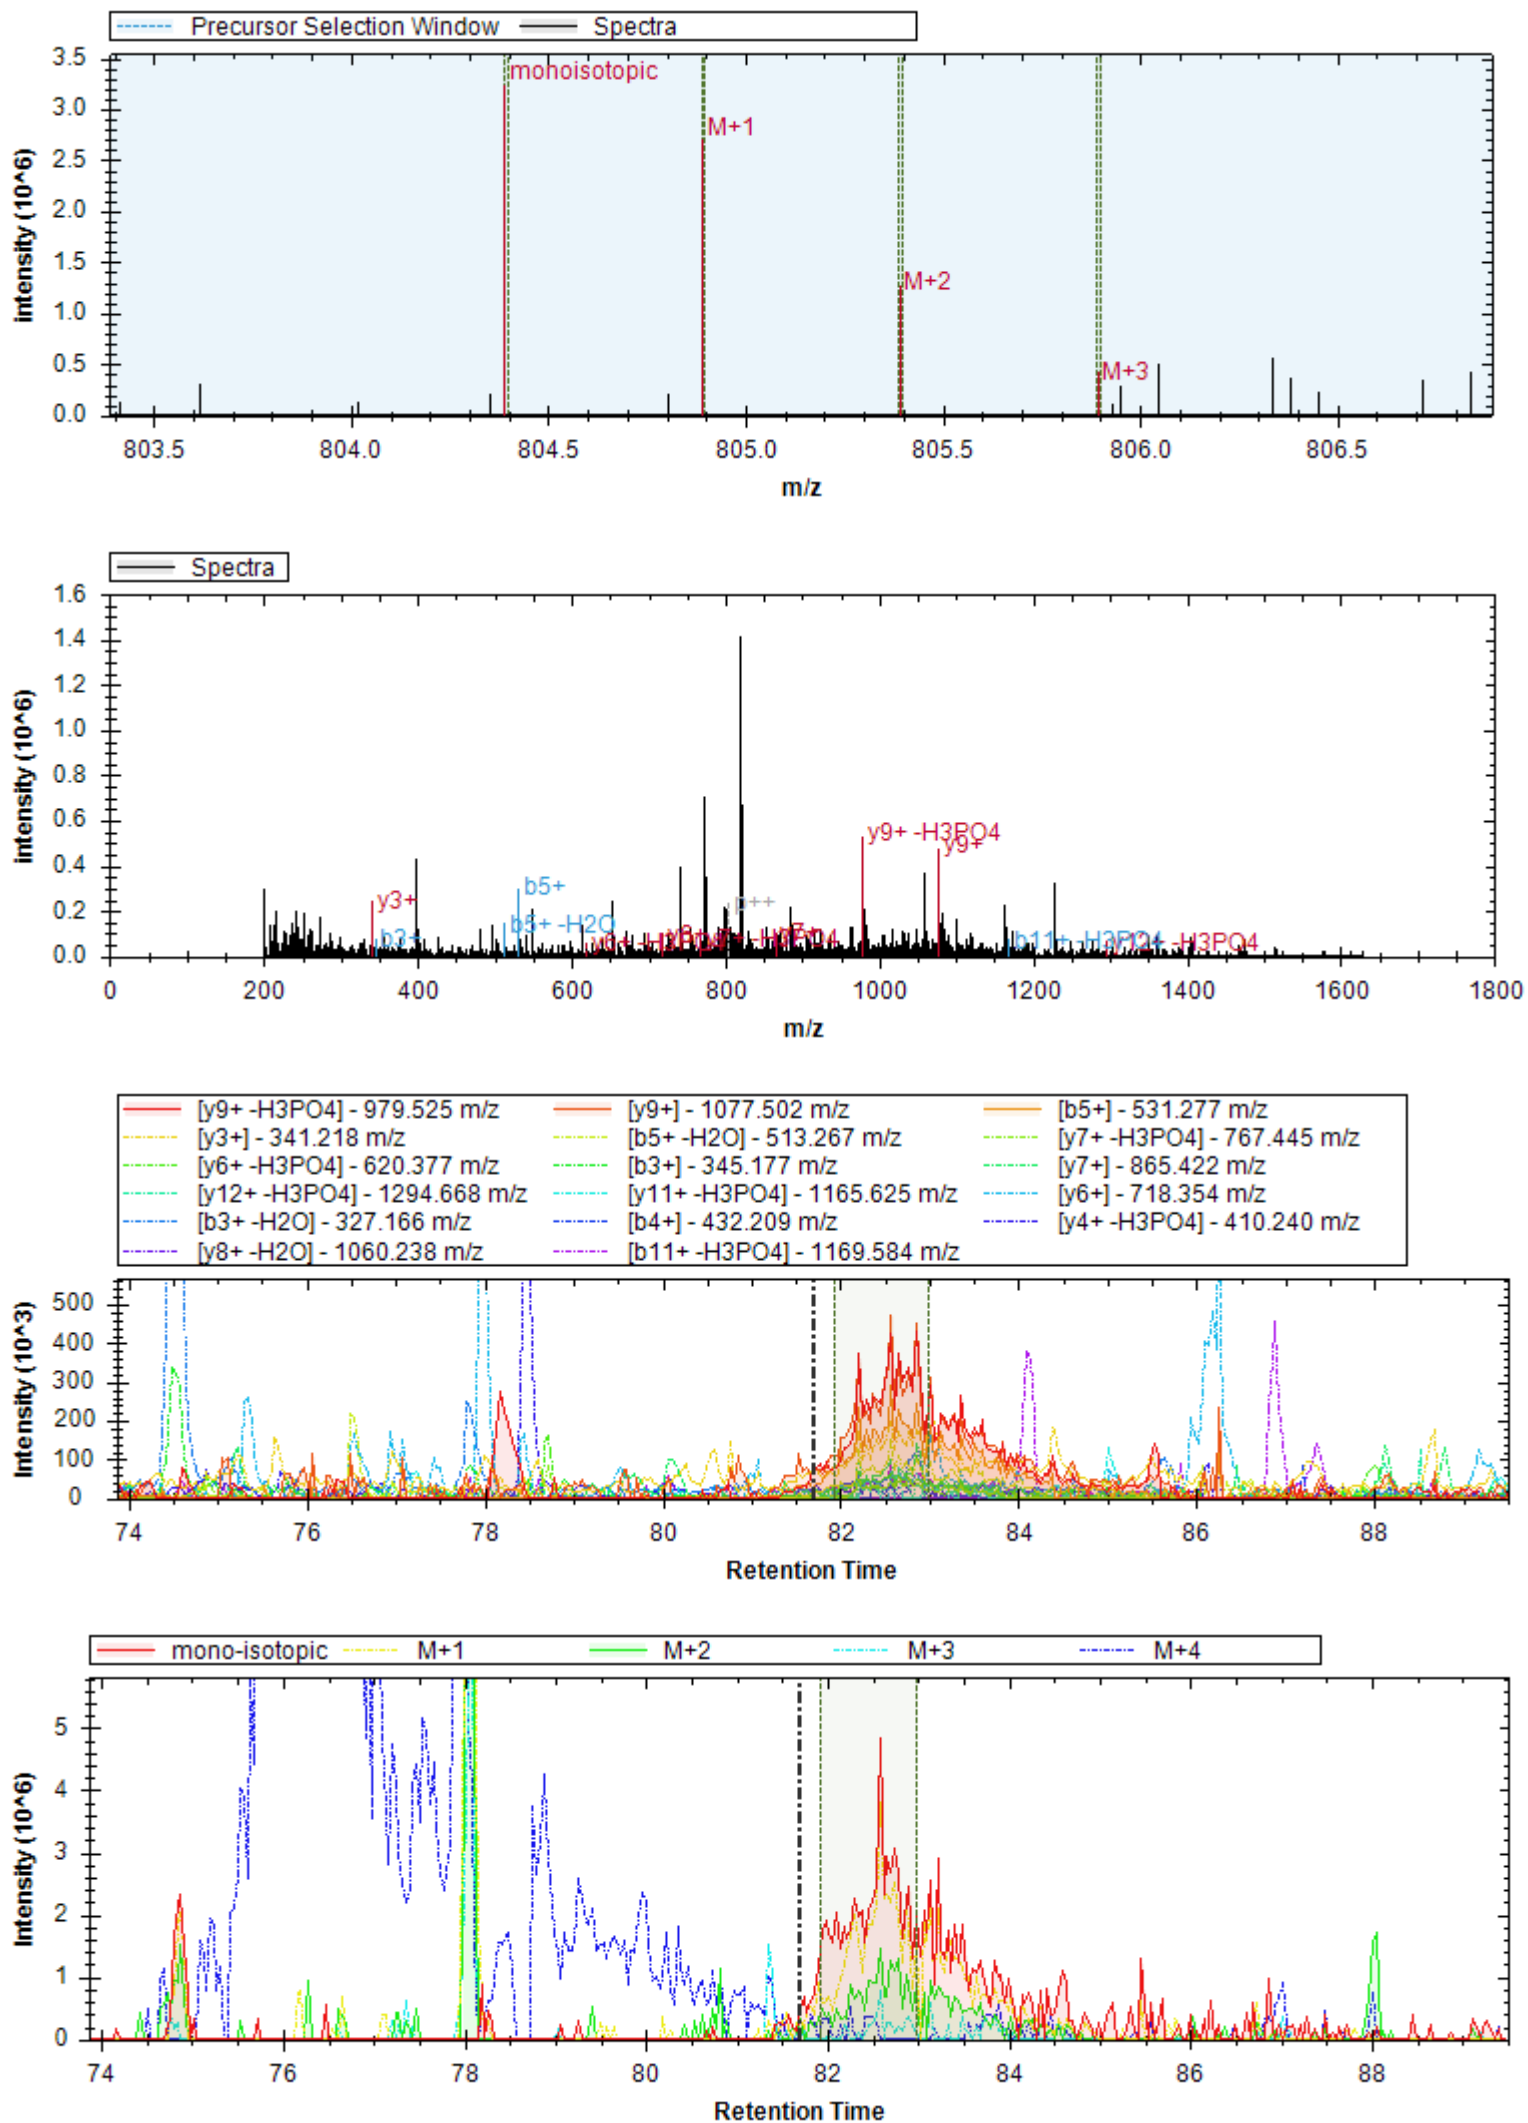

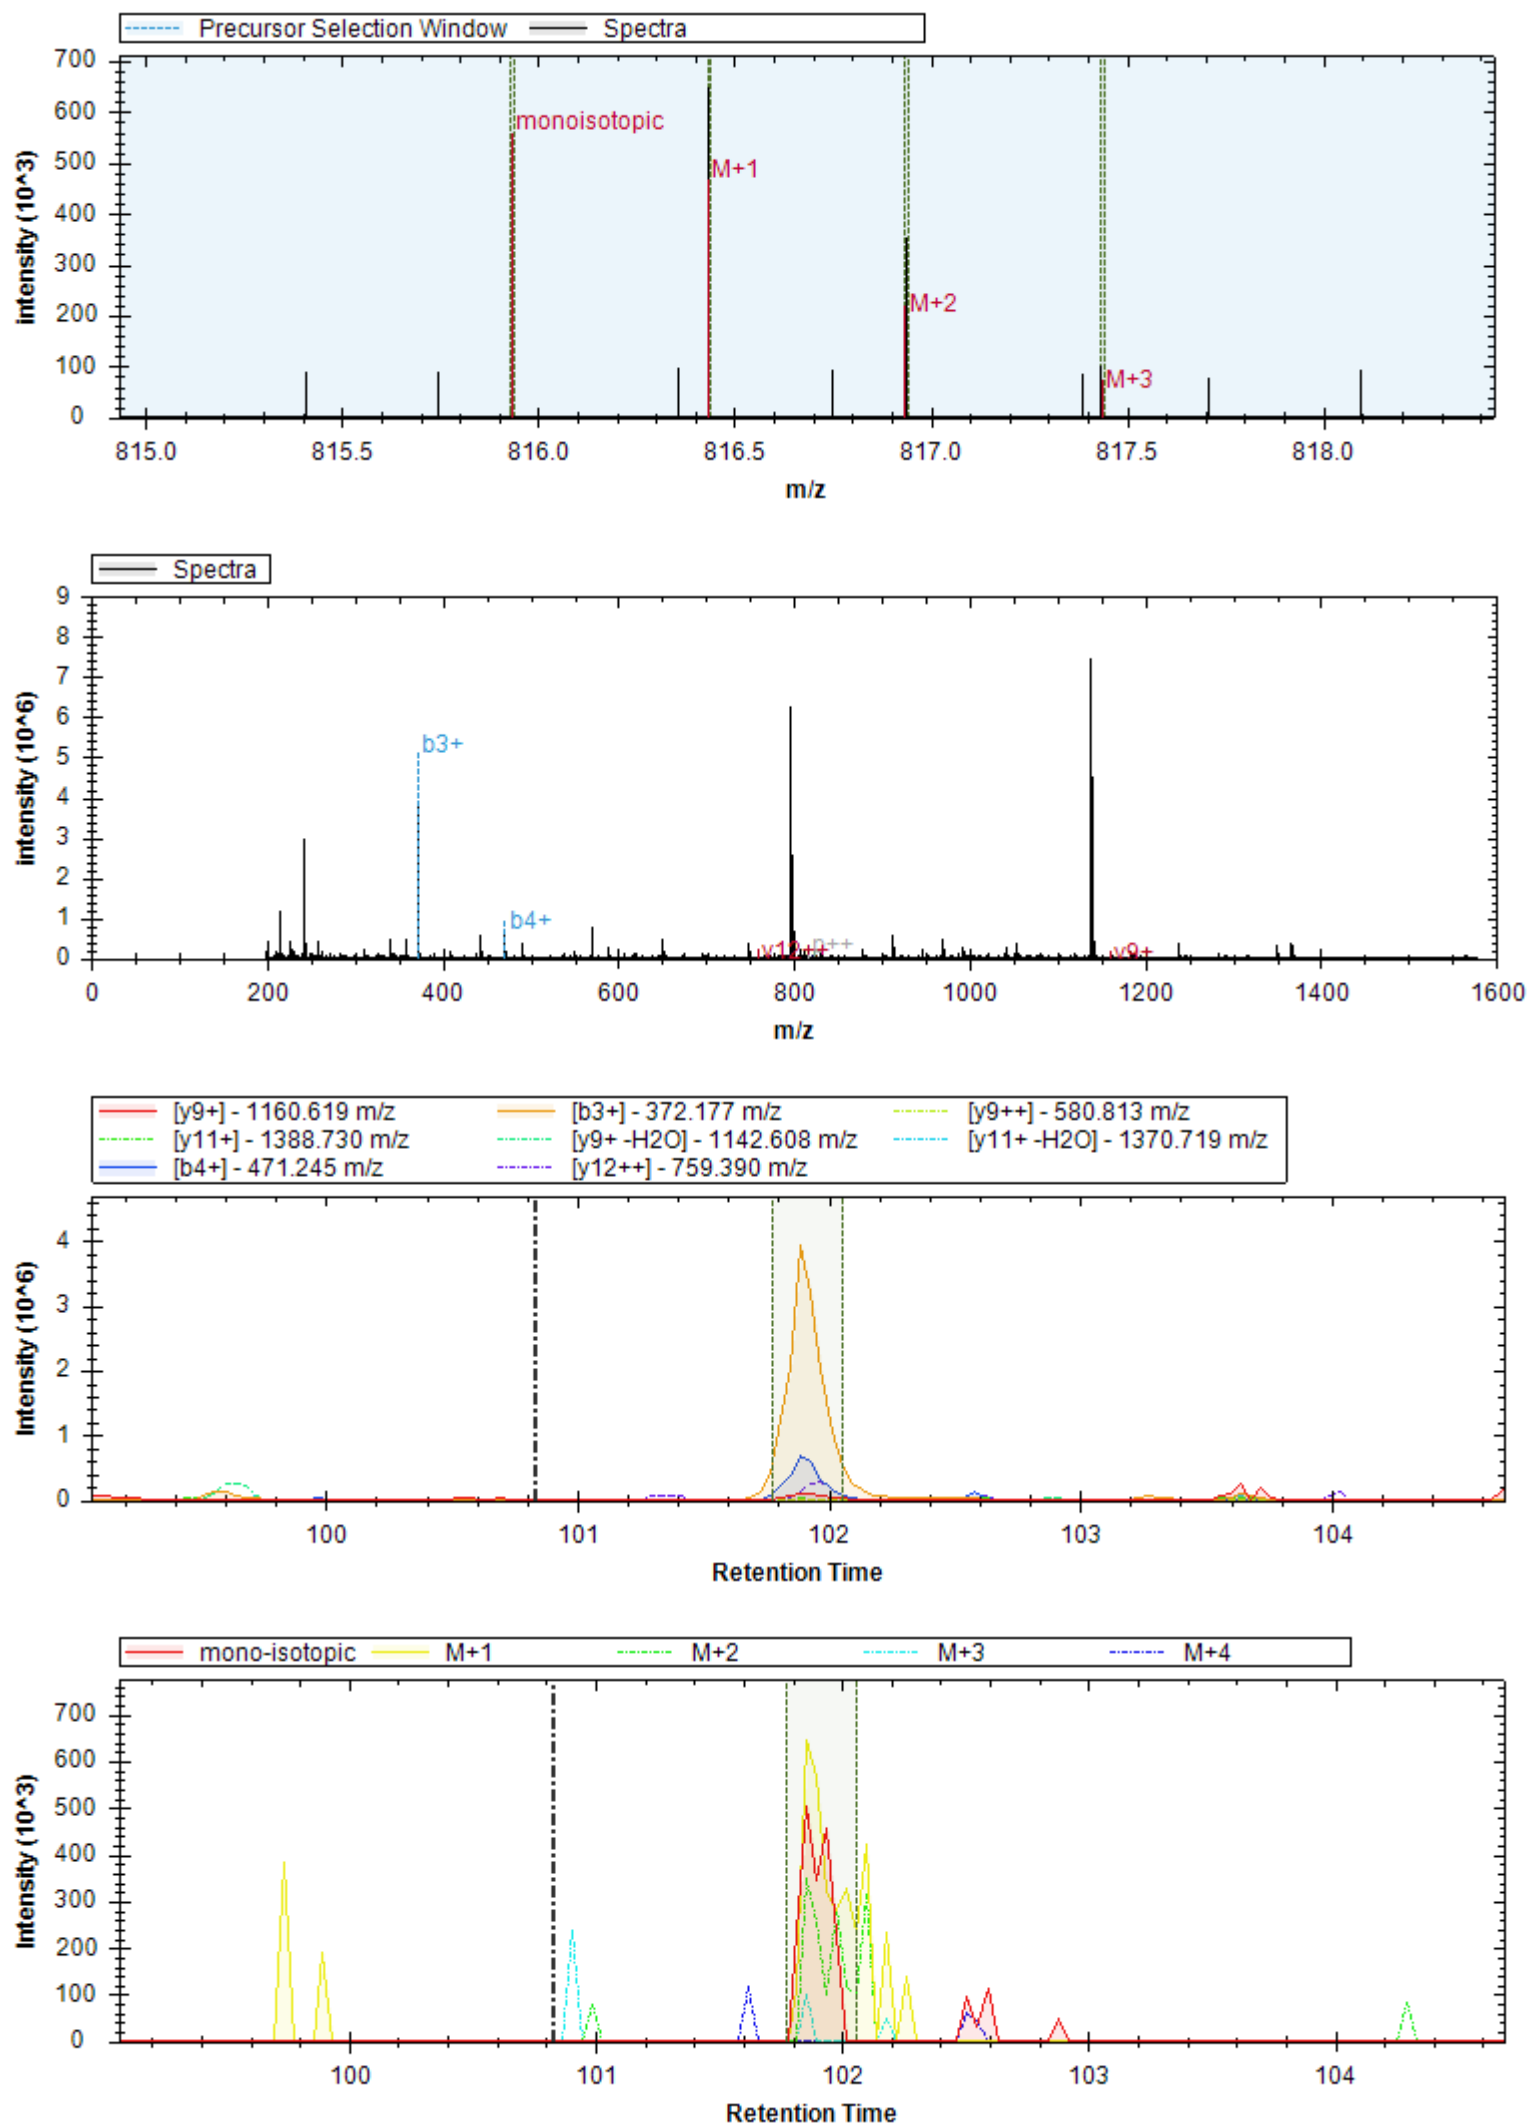

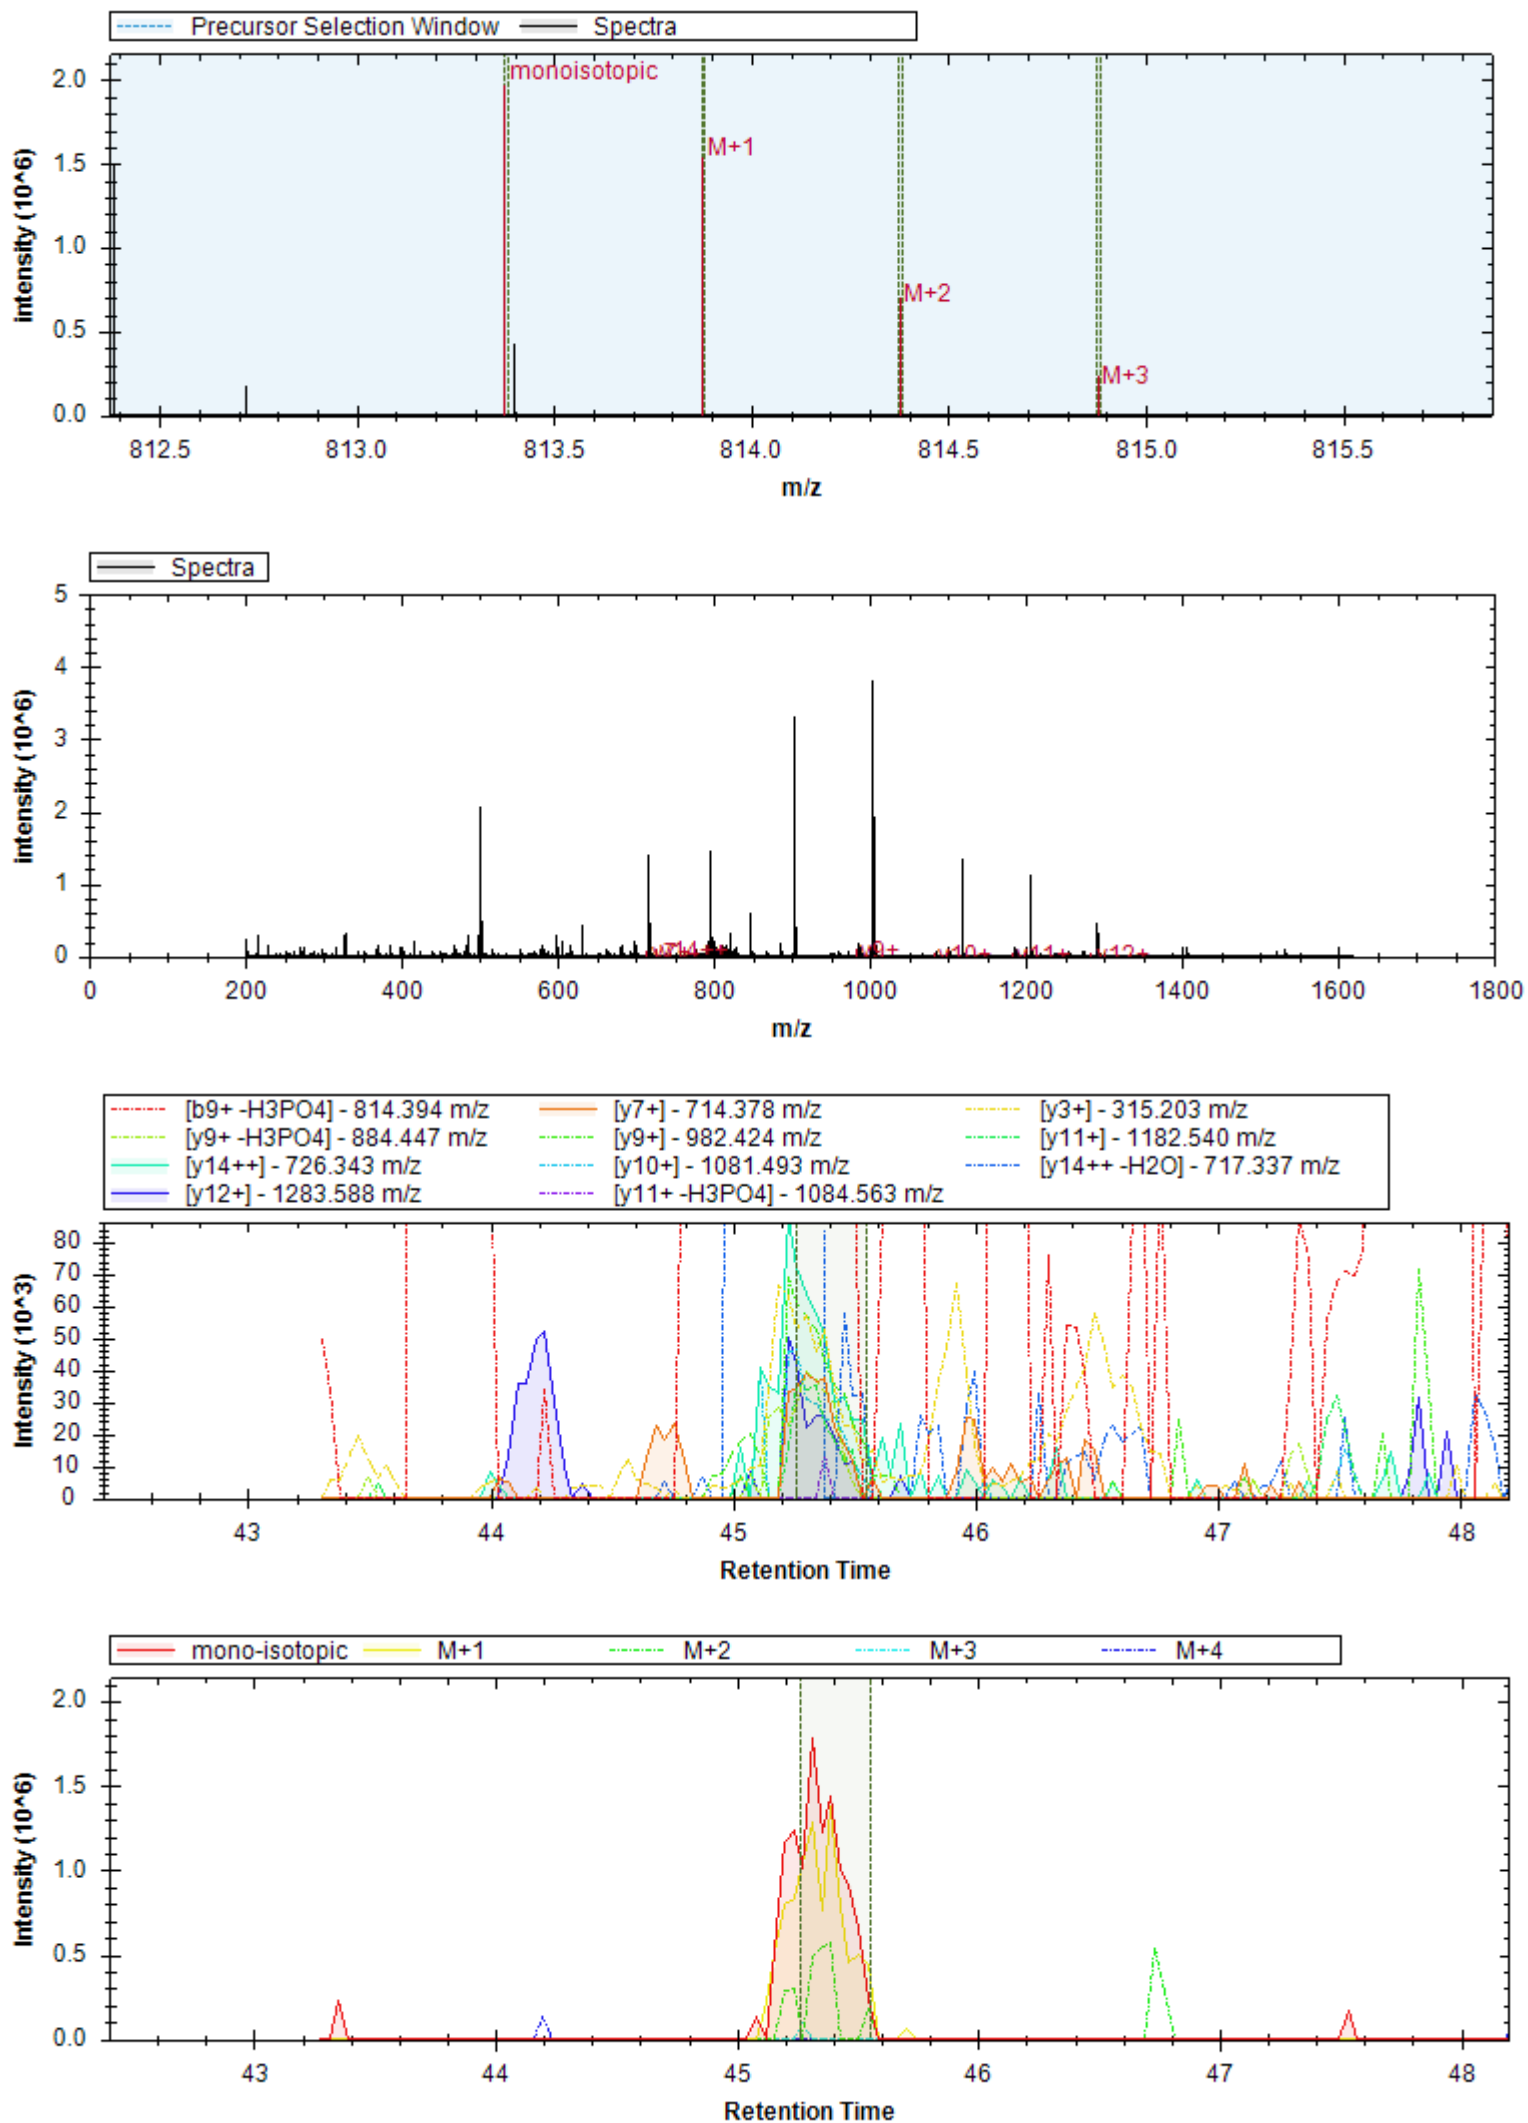

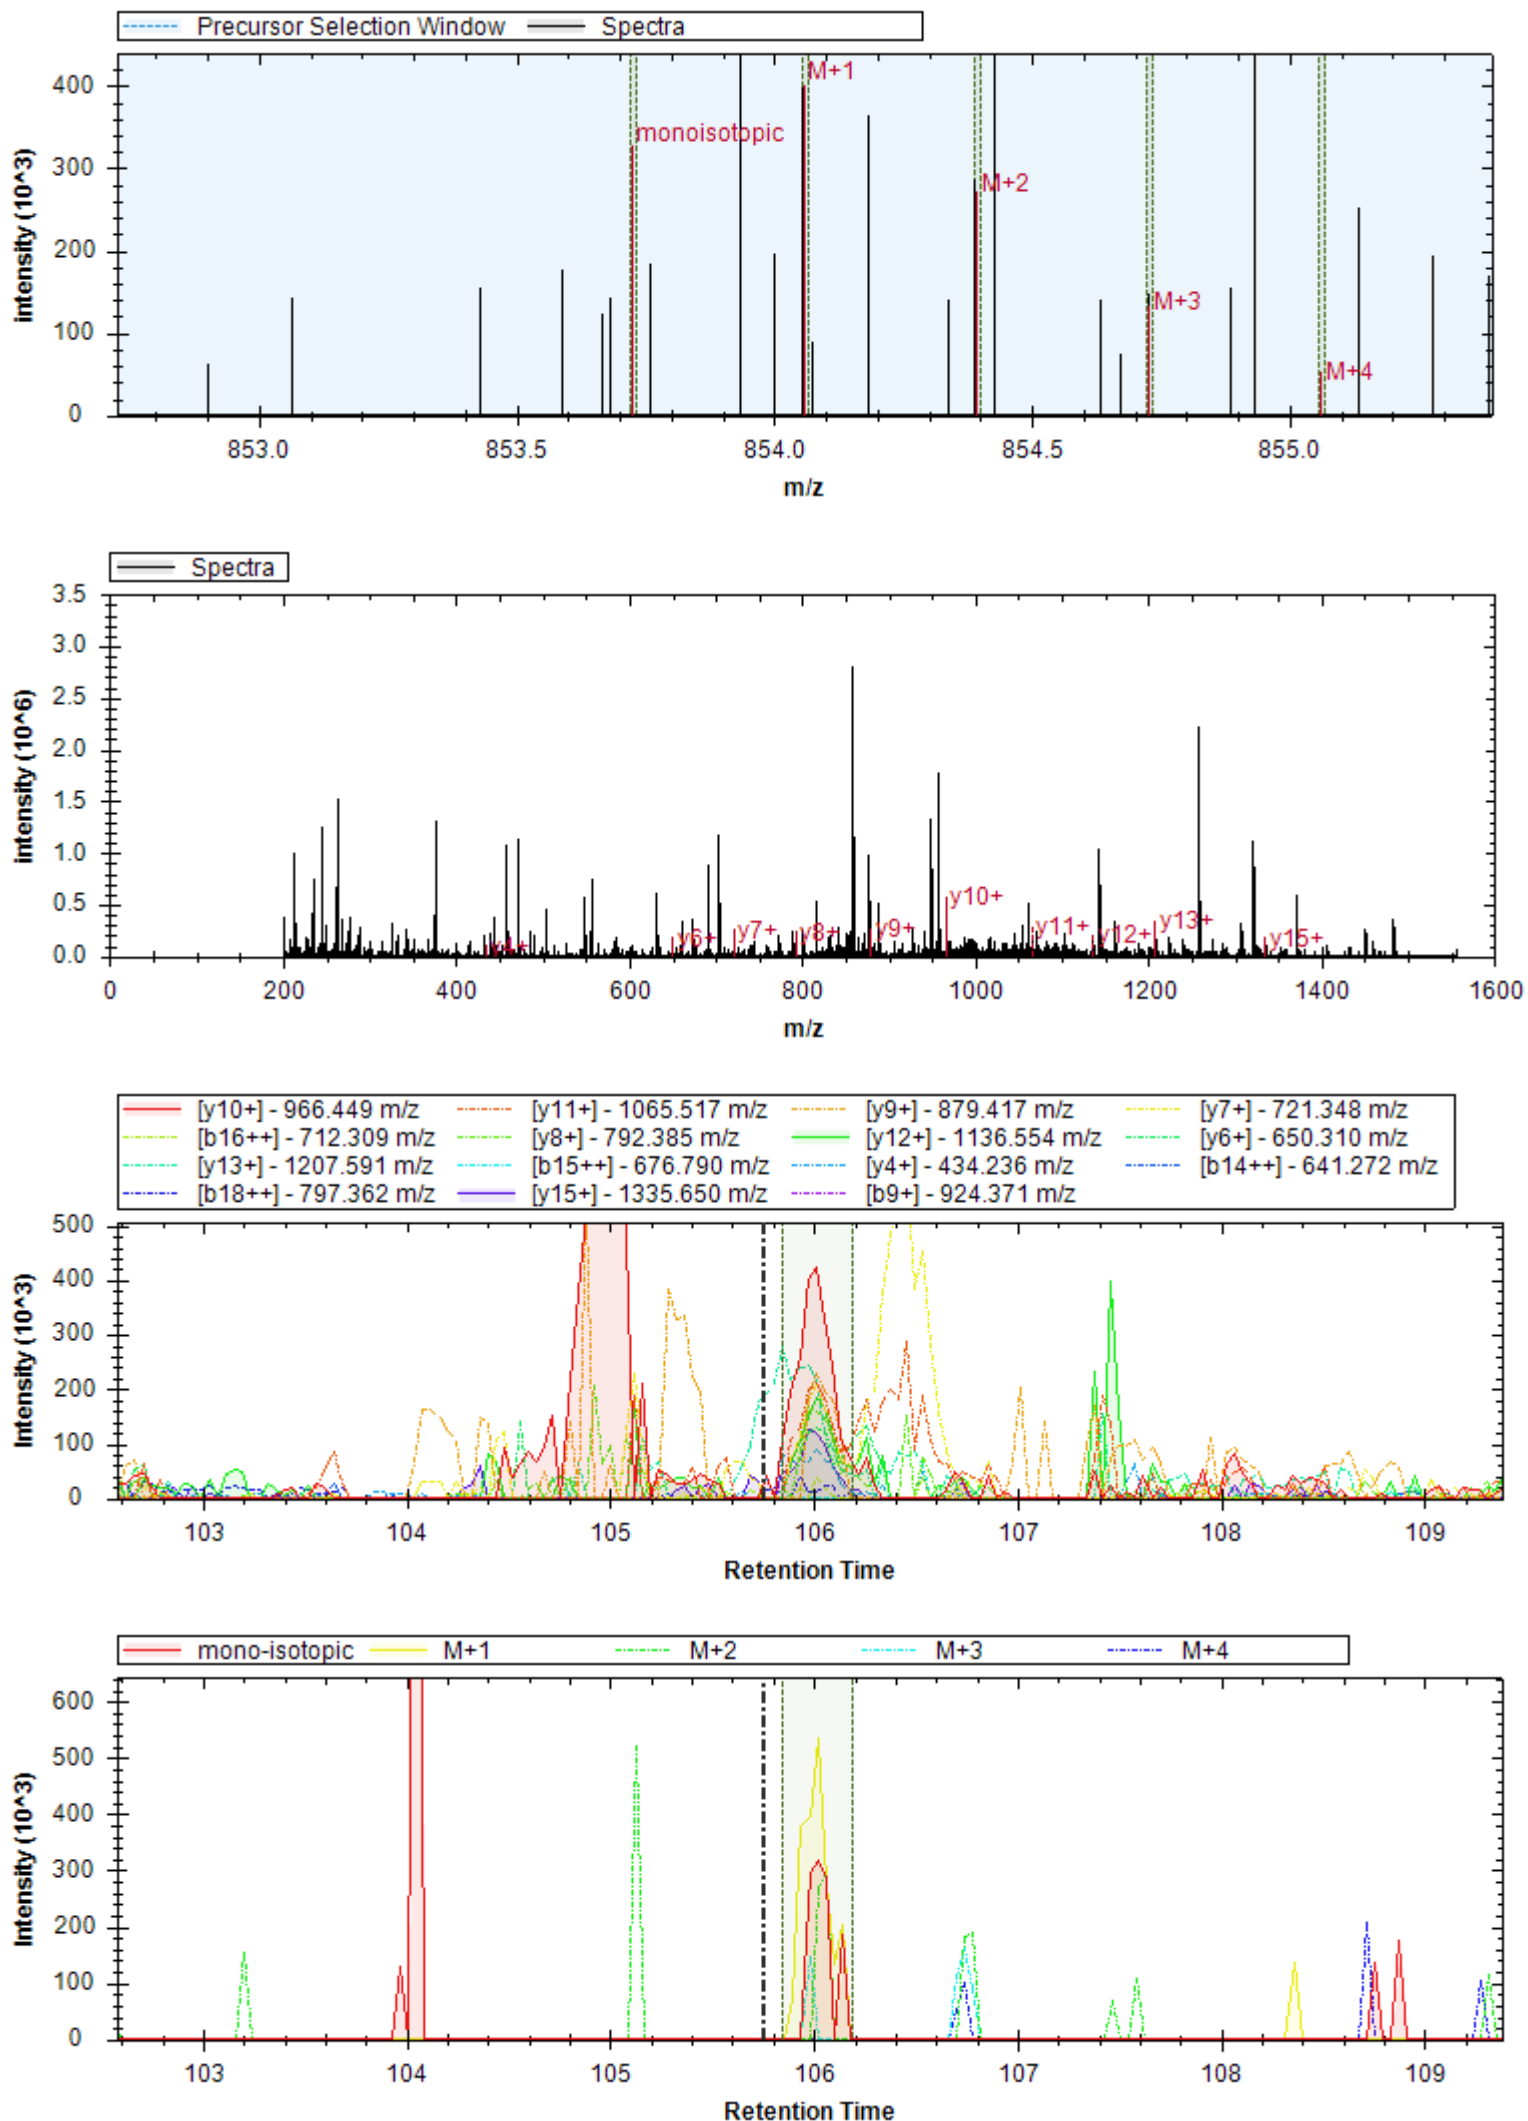

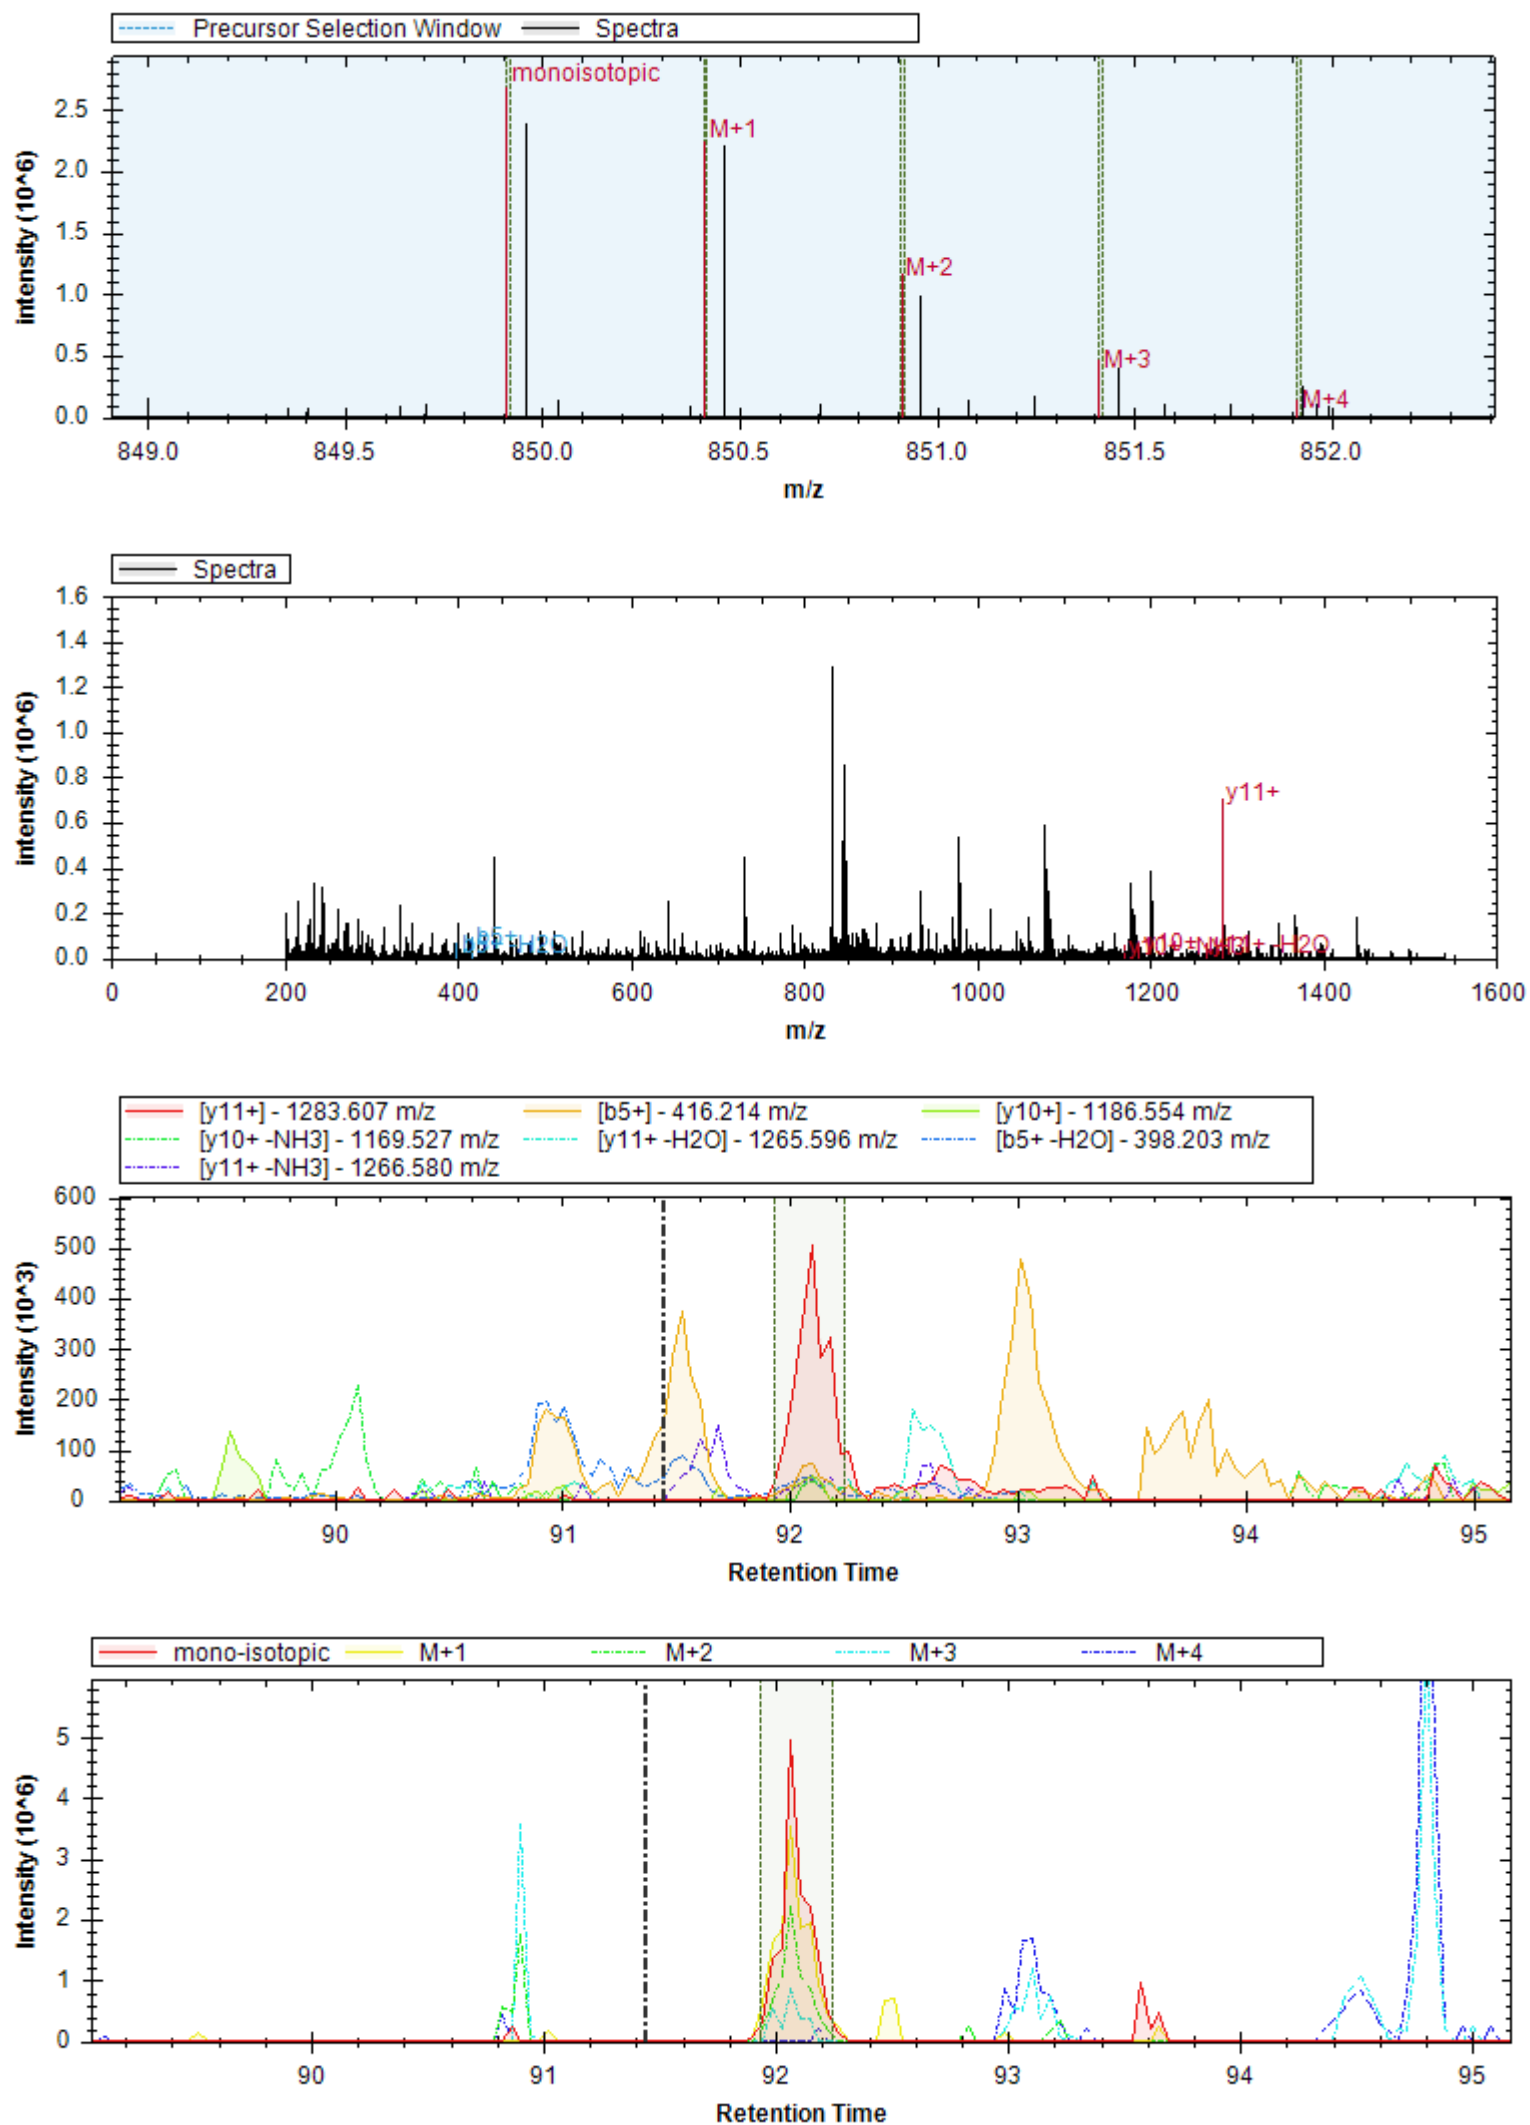



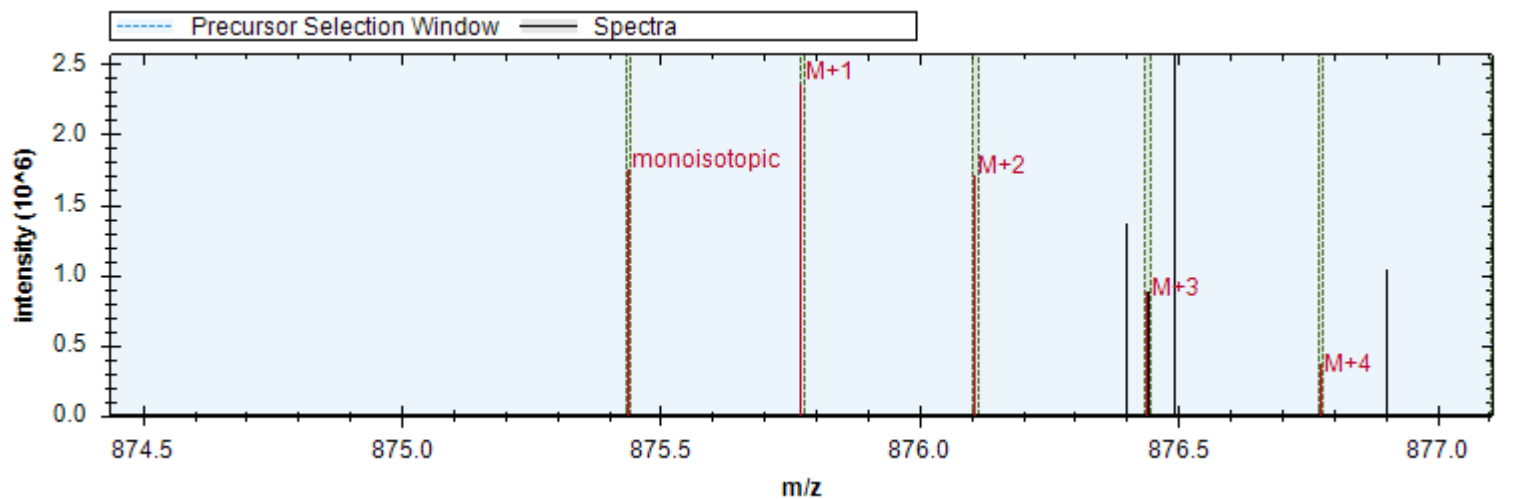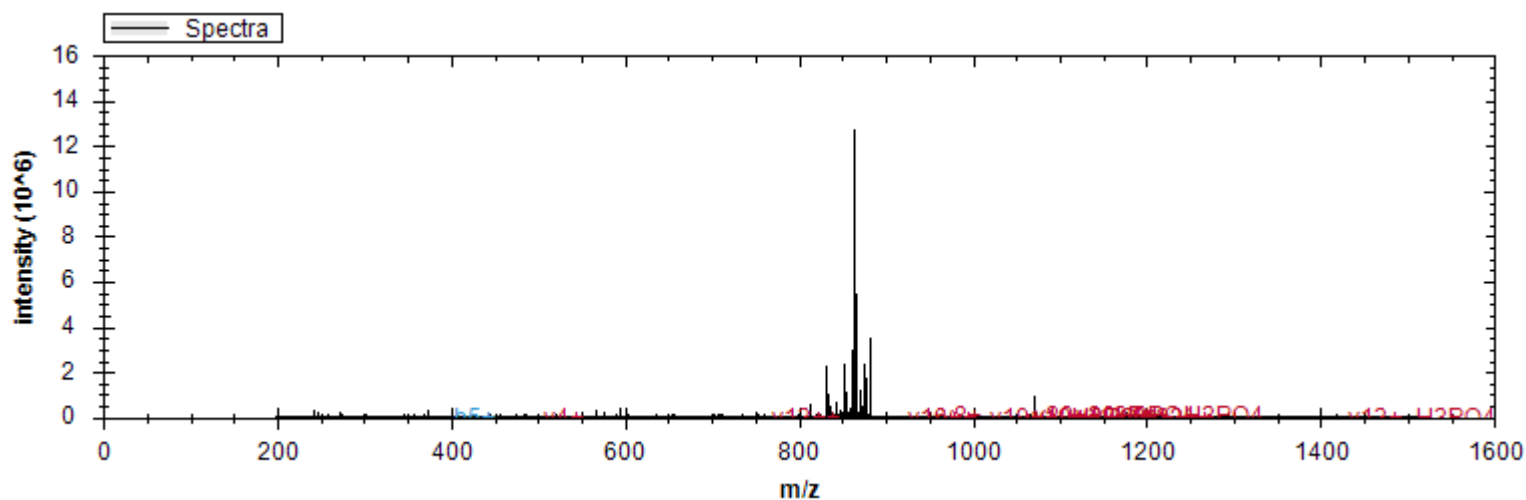

- |                               |                               |                              |
|-------------------------------|-------------------------------|------------------------------|
| [y20++ -H3PO4] - 1065.047 m/z | [y8+] - 959.460 m/z           | [y8+ -H3PO4] - 861.483 m/z   |
| [y19++ -H3PO4] - 1014.523 m/z | [y20++] - 1114.036 m/z        | [y13+ -H3PO4] - 1426.769 m/z |
| [y4+] - 501.303 m/z           | [y22++ -H3PO4] - 1143.092 m/z | [y22++] - 1192.081 m/z       |
| [y13++] - 762.877 m/z         | [y13+] - 1524.746 m/z         | [y16++ -H3PO4] - 871.478 m/z |
| [y19++] - 1063.512 m/z        | [b5+] - 398.240 m/z           | [y21++] - 1163.570 m/z       |
| [y7+ -H3PO4] - 764.430 m/z    | [y8+ -H2O] - 941.449 m/z      | [y8++] - 480.234 m/z         |
| [y18++] - 1035.001 m/z        | [y23++] - 1241.615 m/z        | [y16++] - 920.466 m/z        |
| [y12++ -H3PO4] - 665.362 m/z  | [y17++] - 977.980 m/z         | [b6+] - 499.288 m/z          |
| [y15+ -H3PO4] - 1628.864 m/z  |                               |                              |

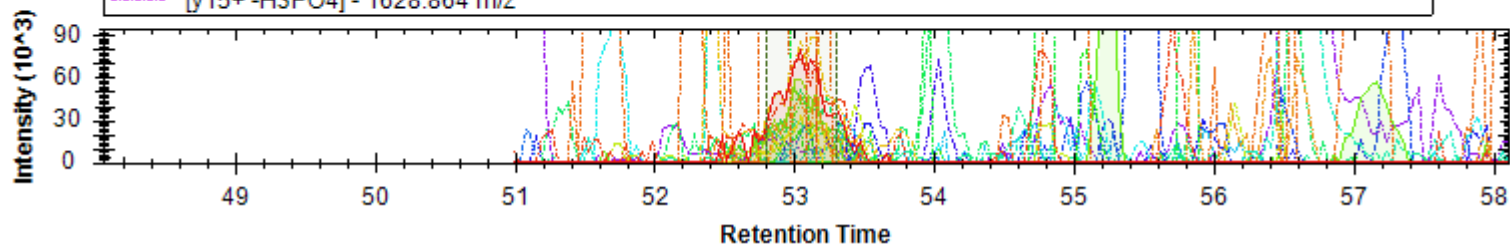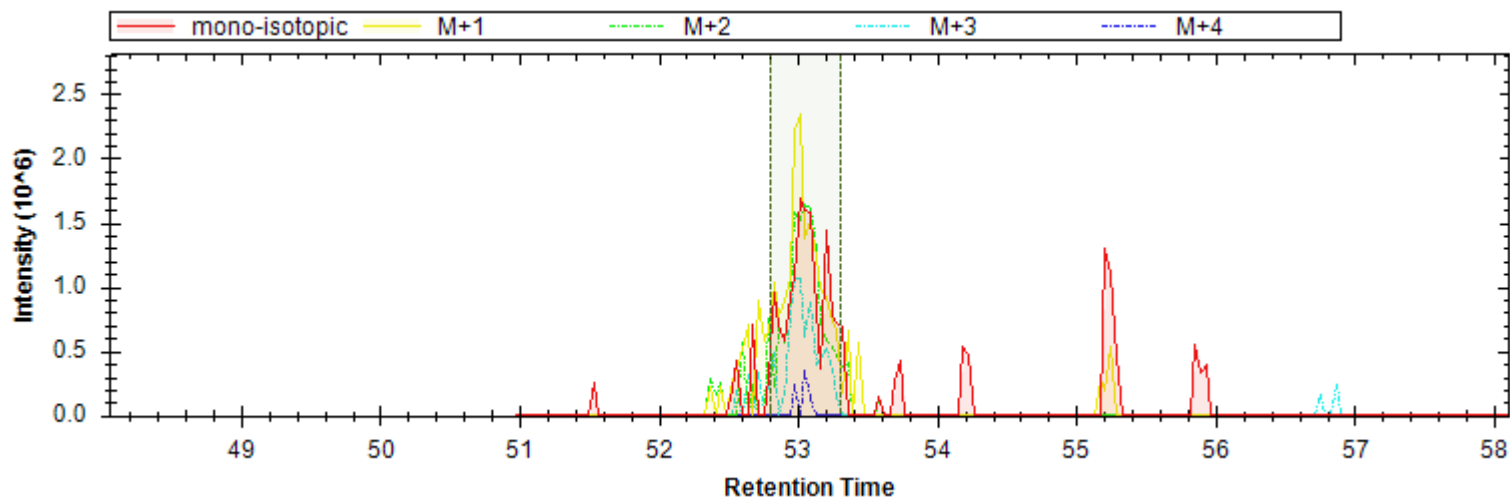

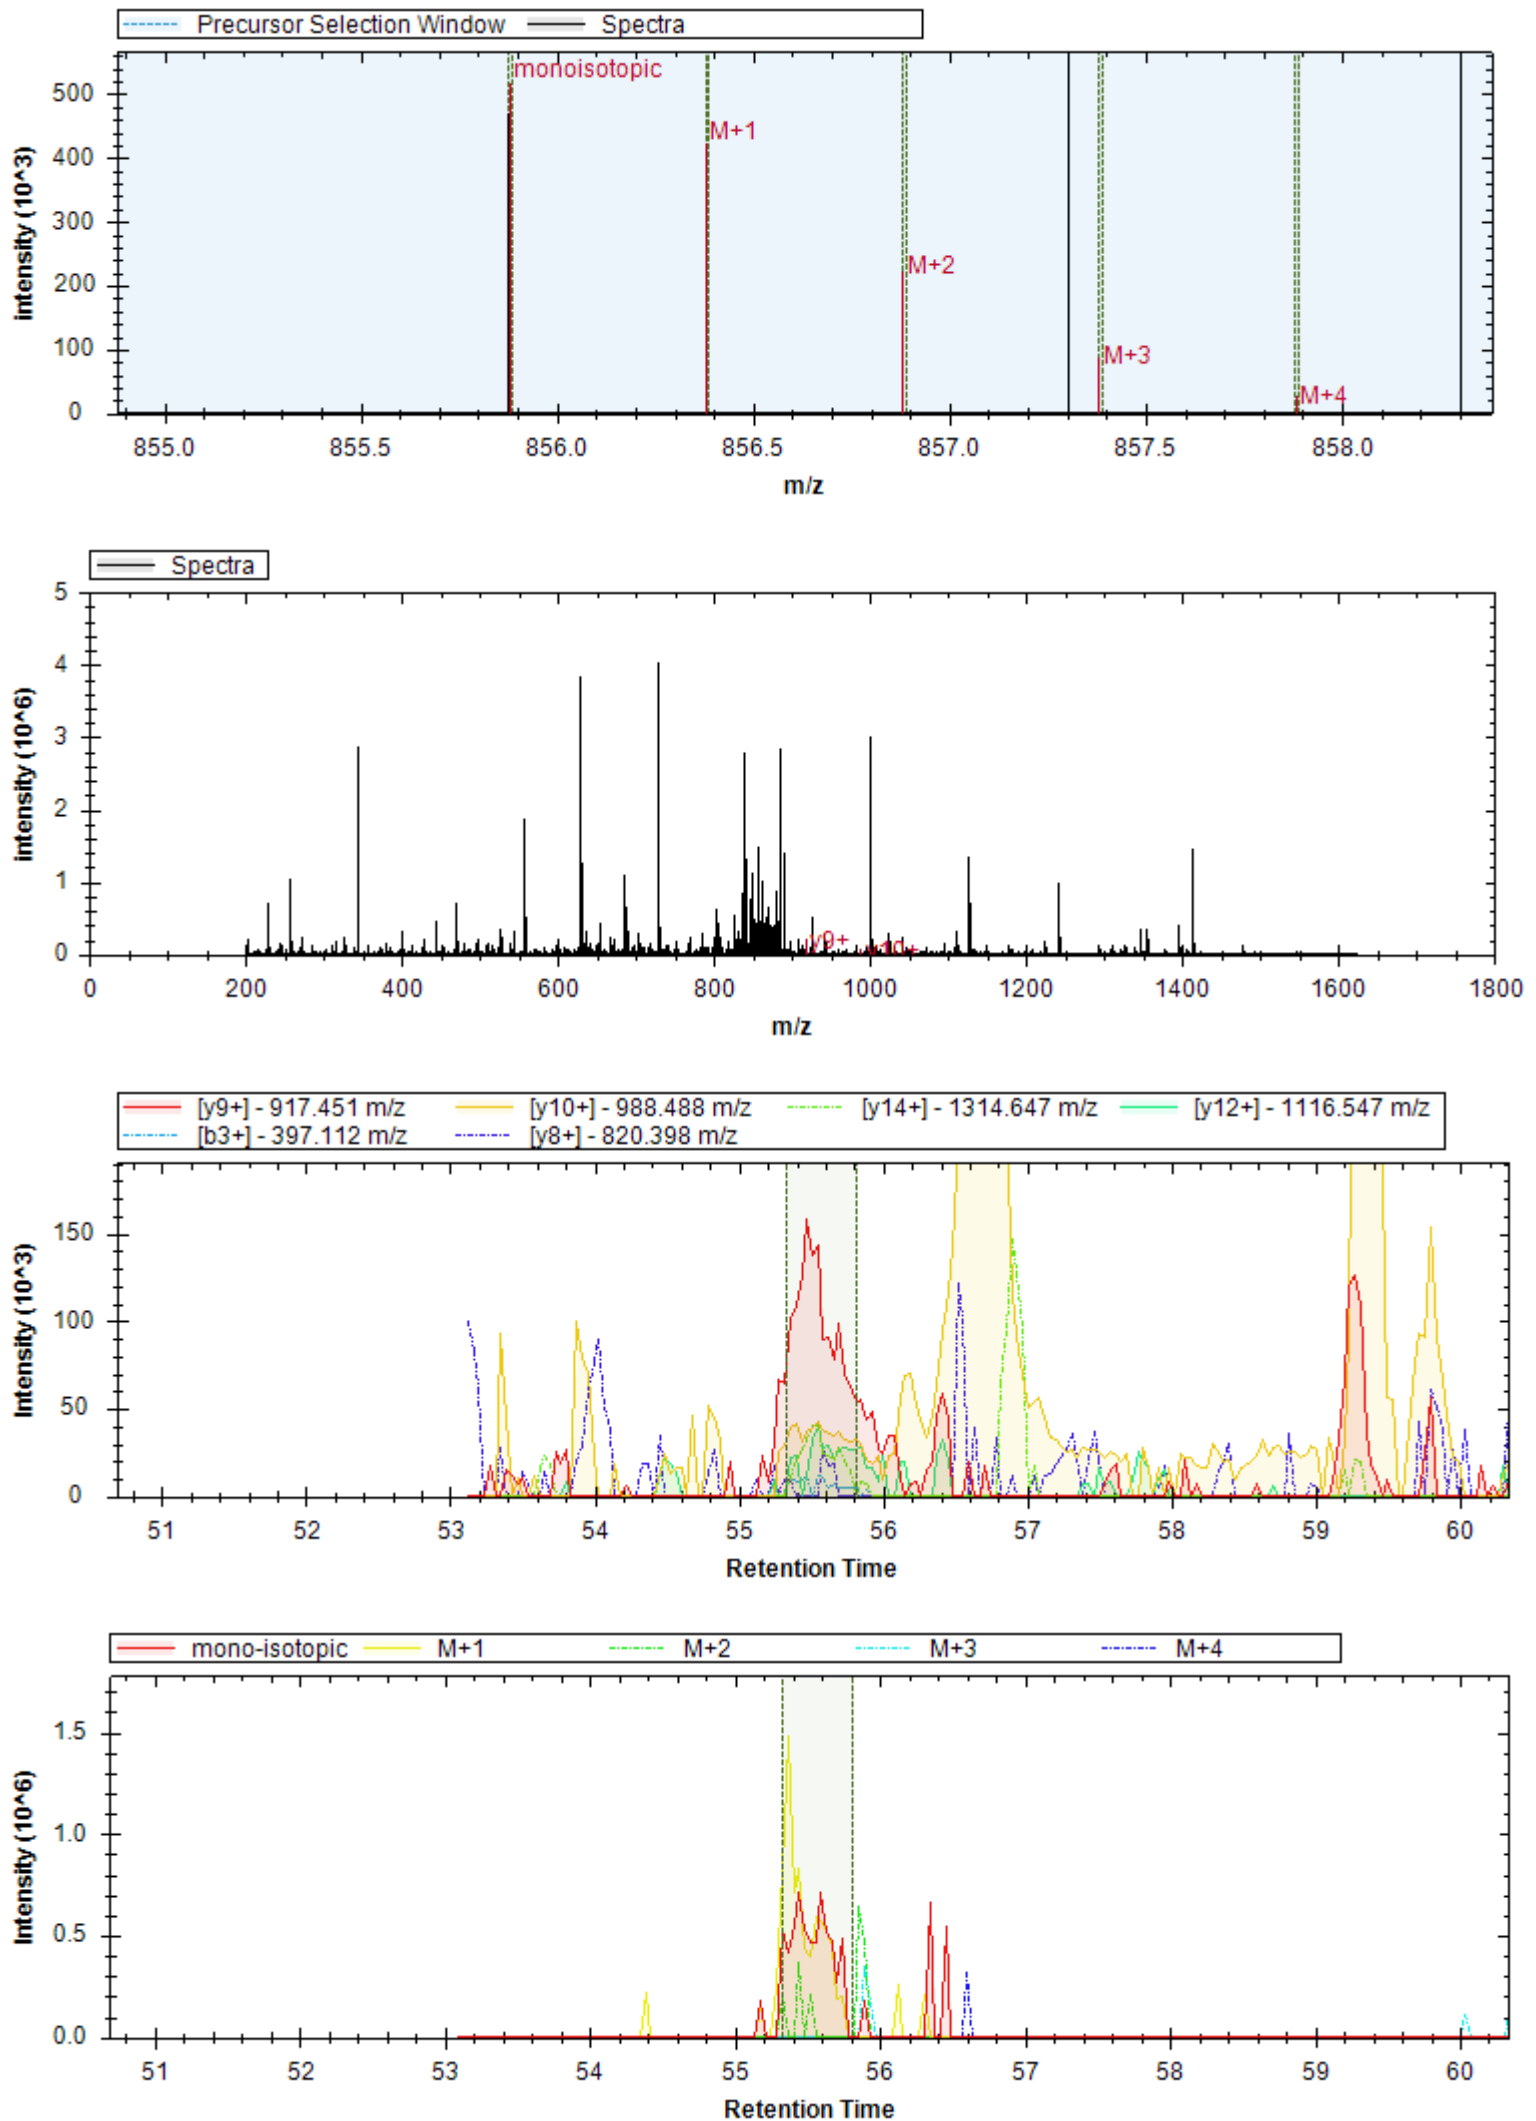

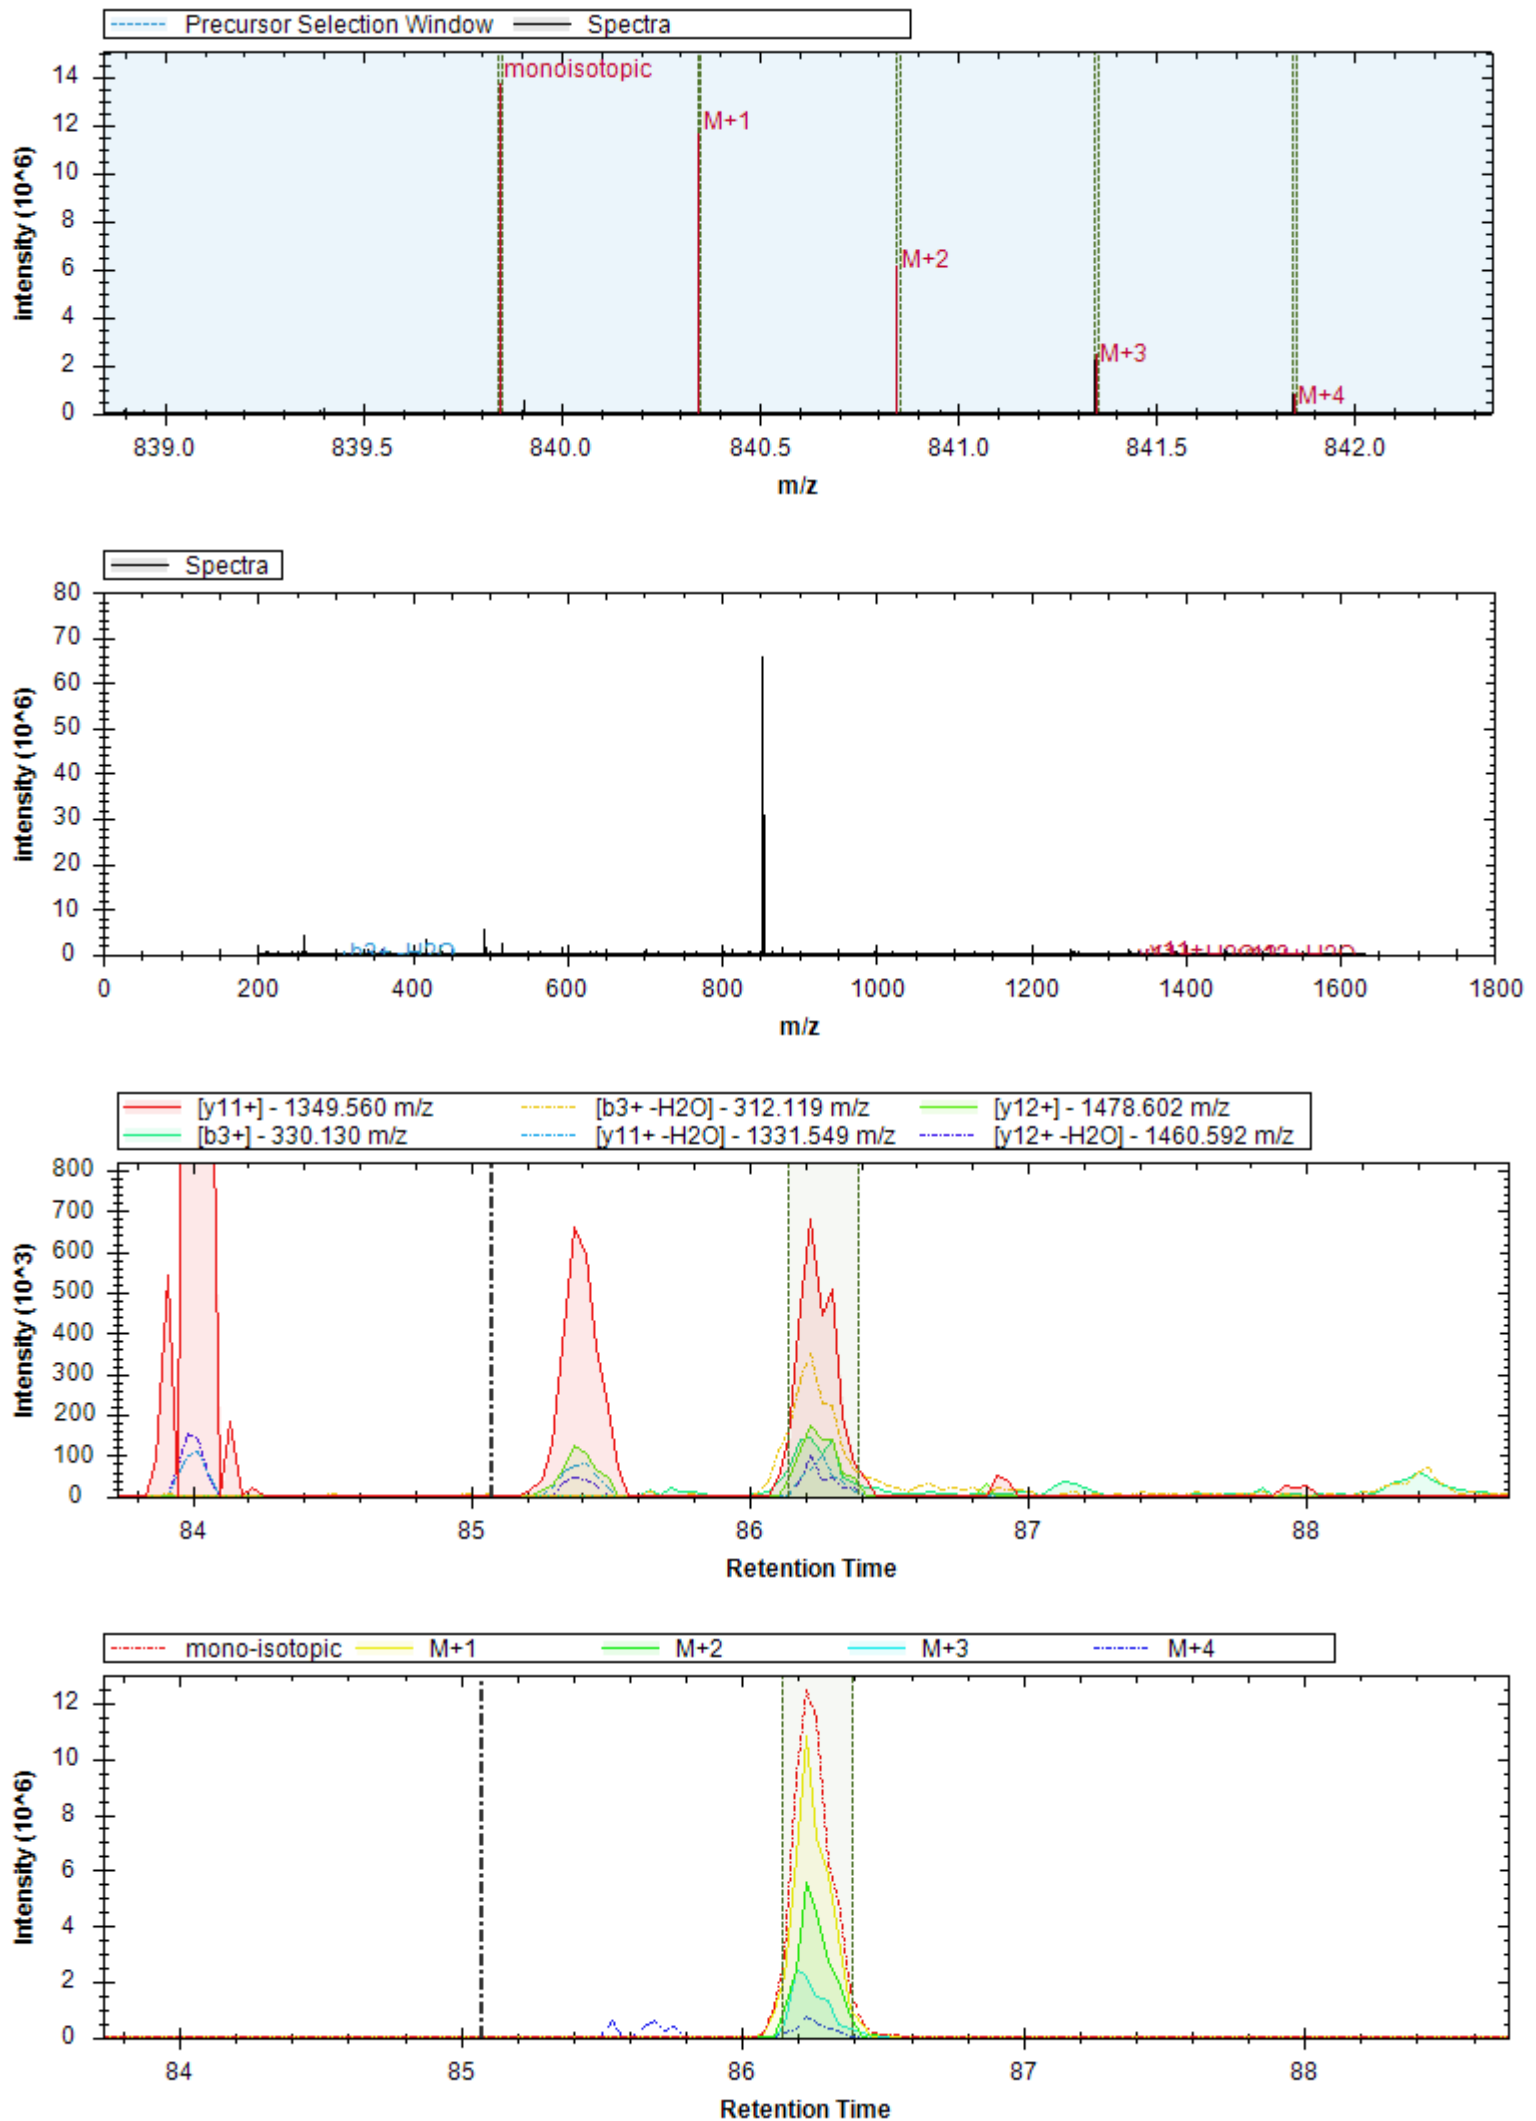

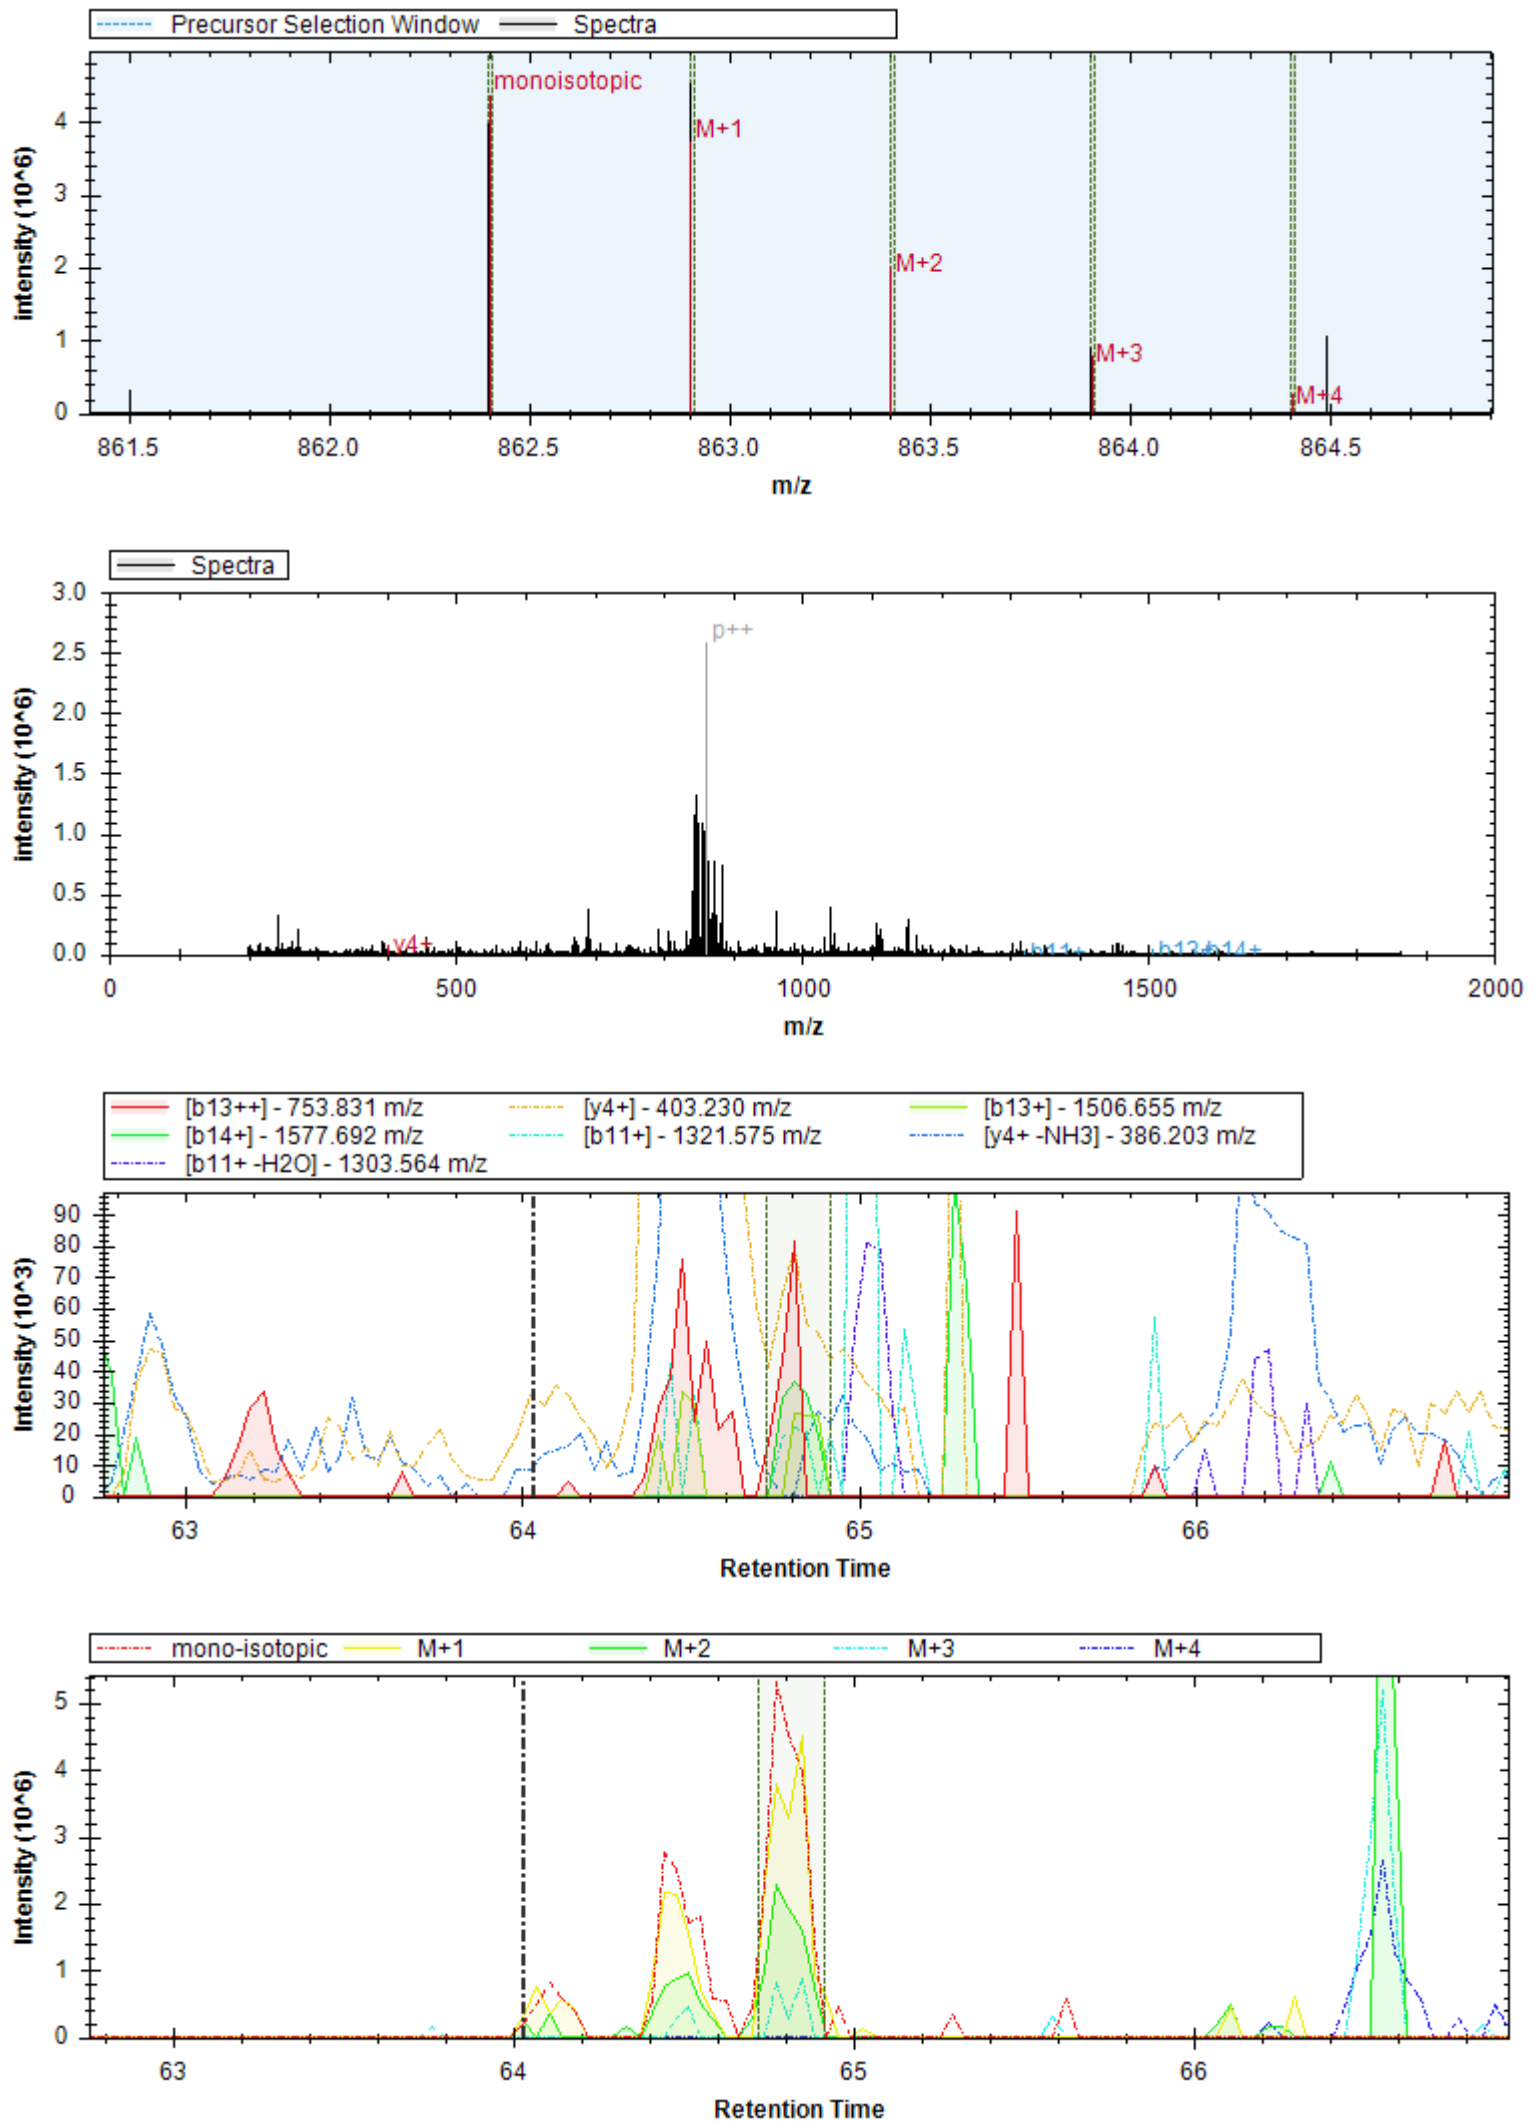

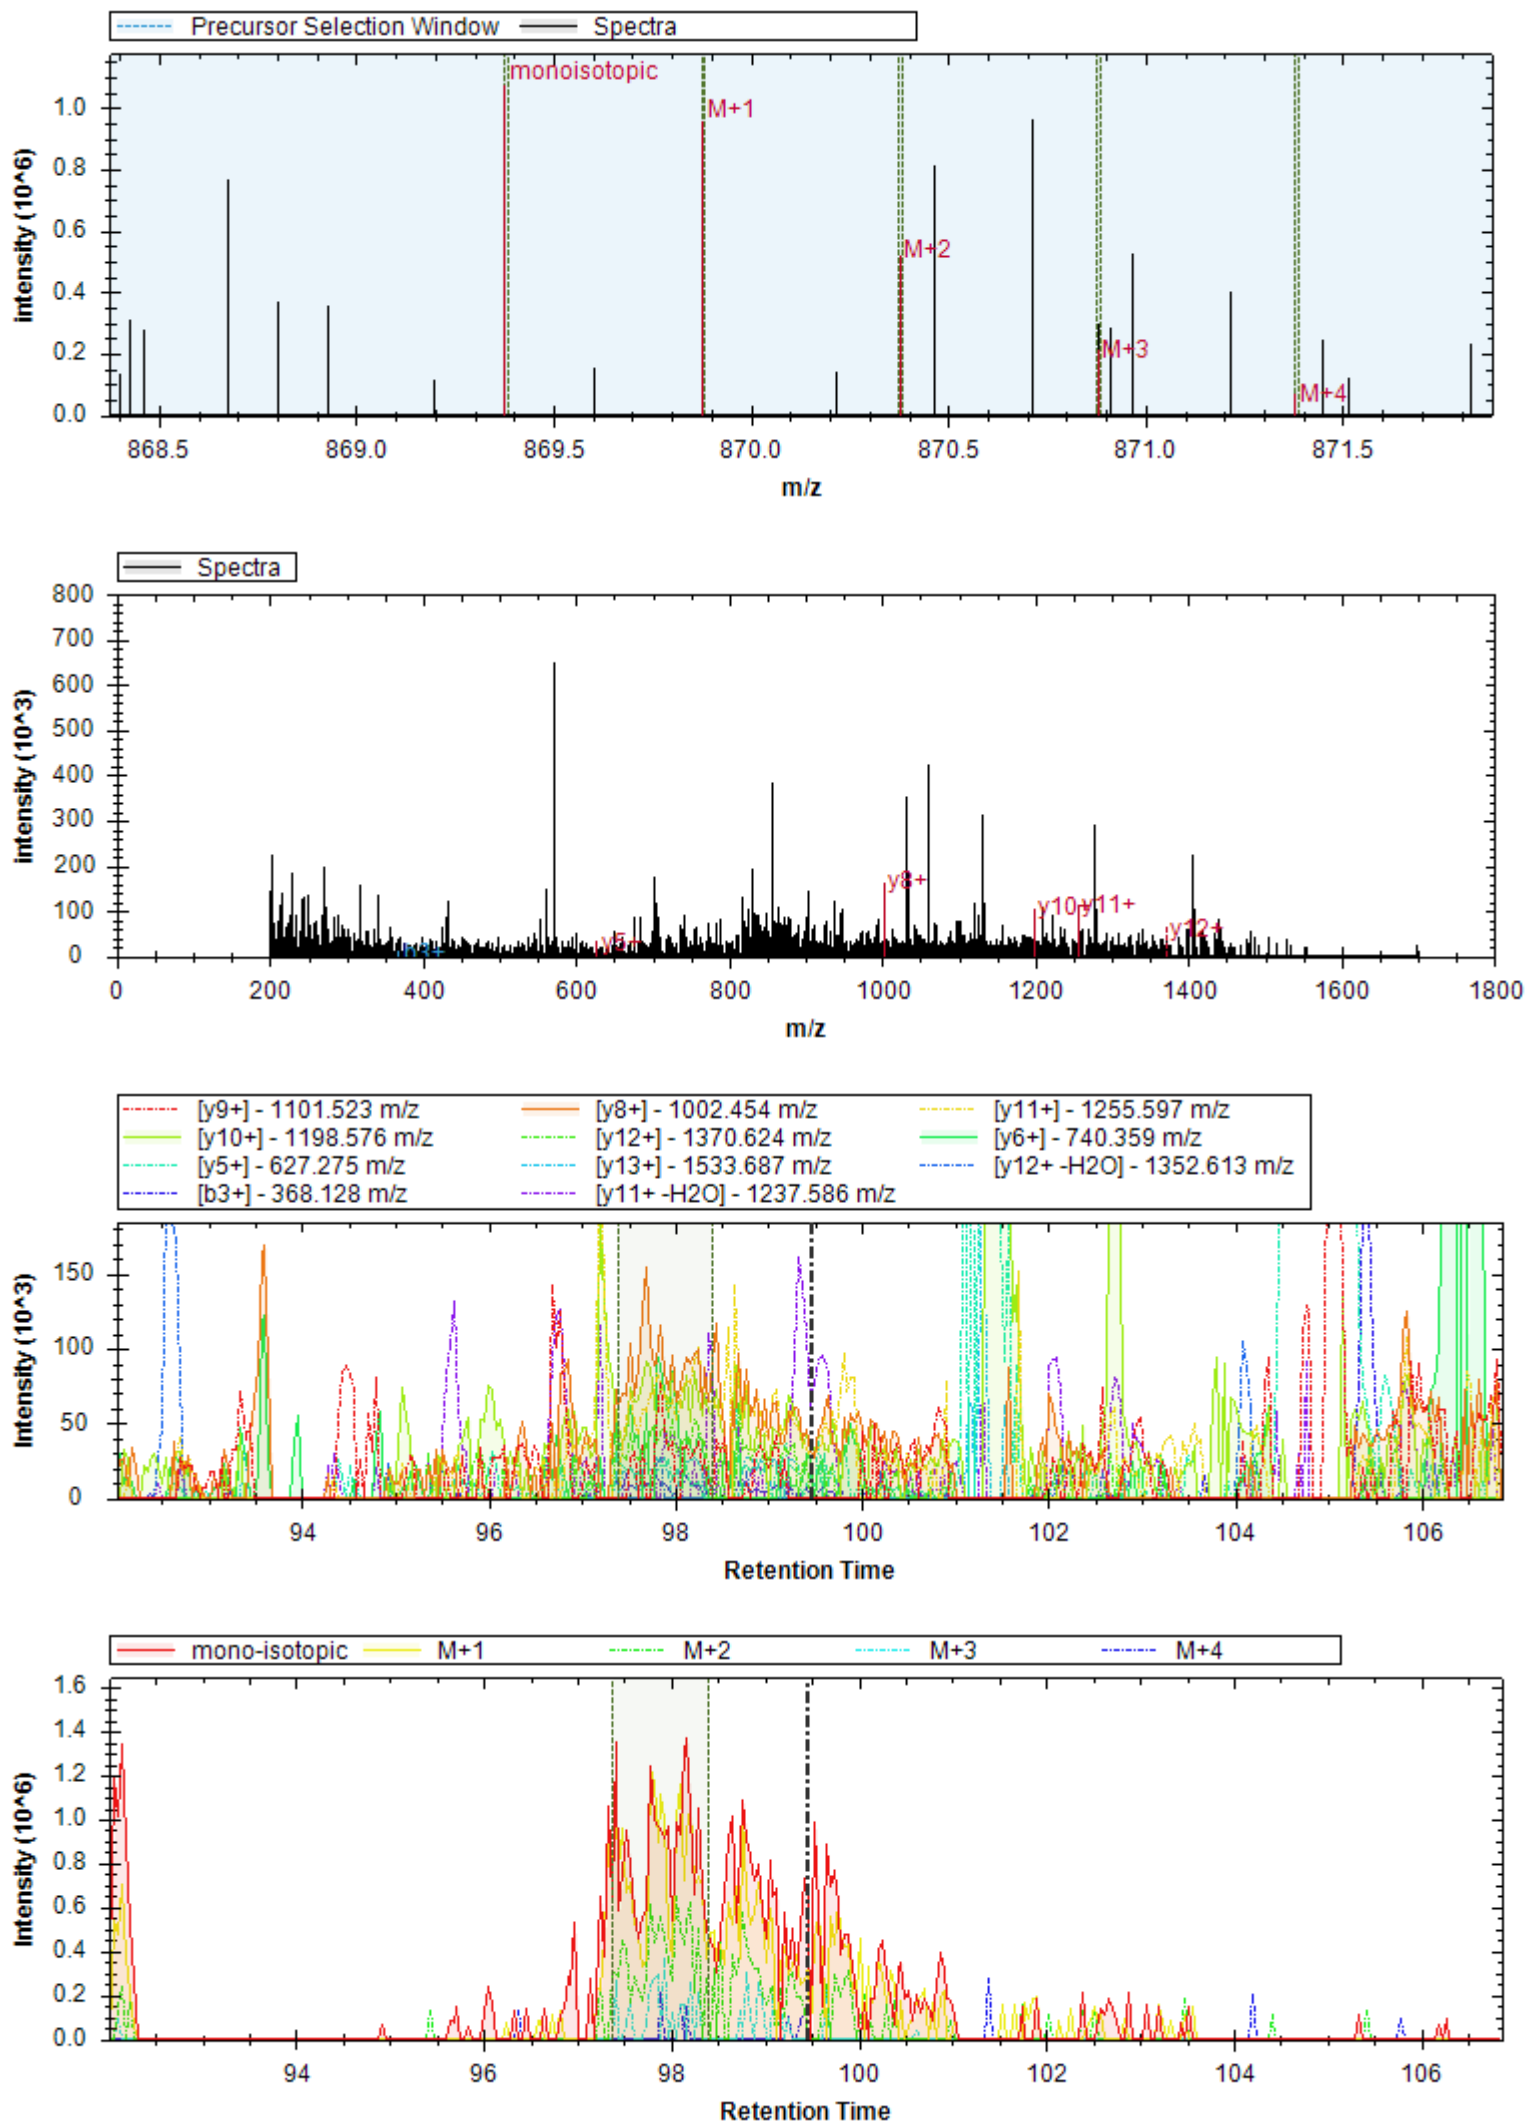

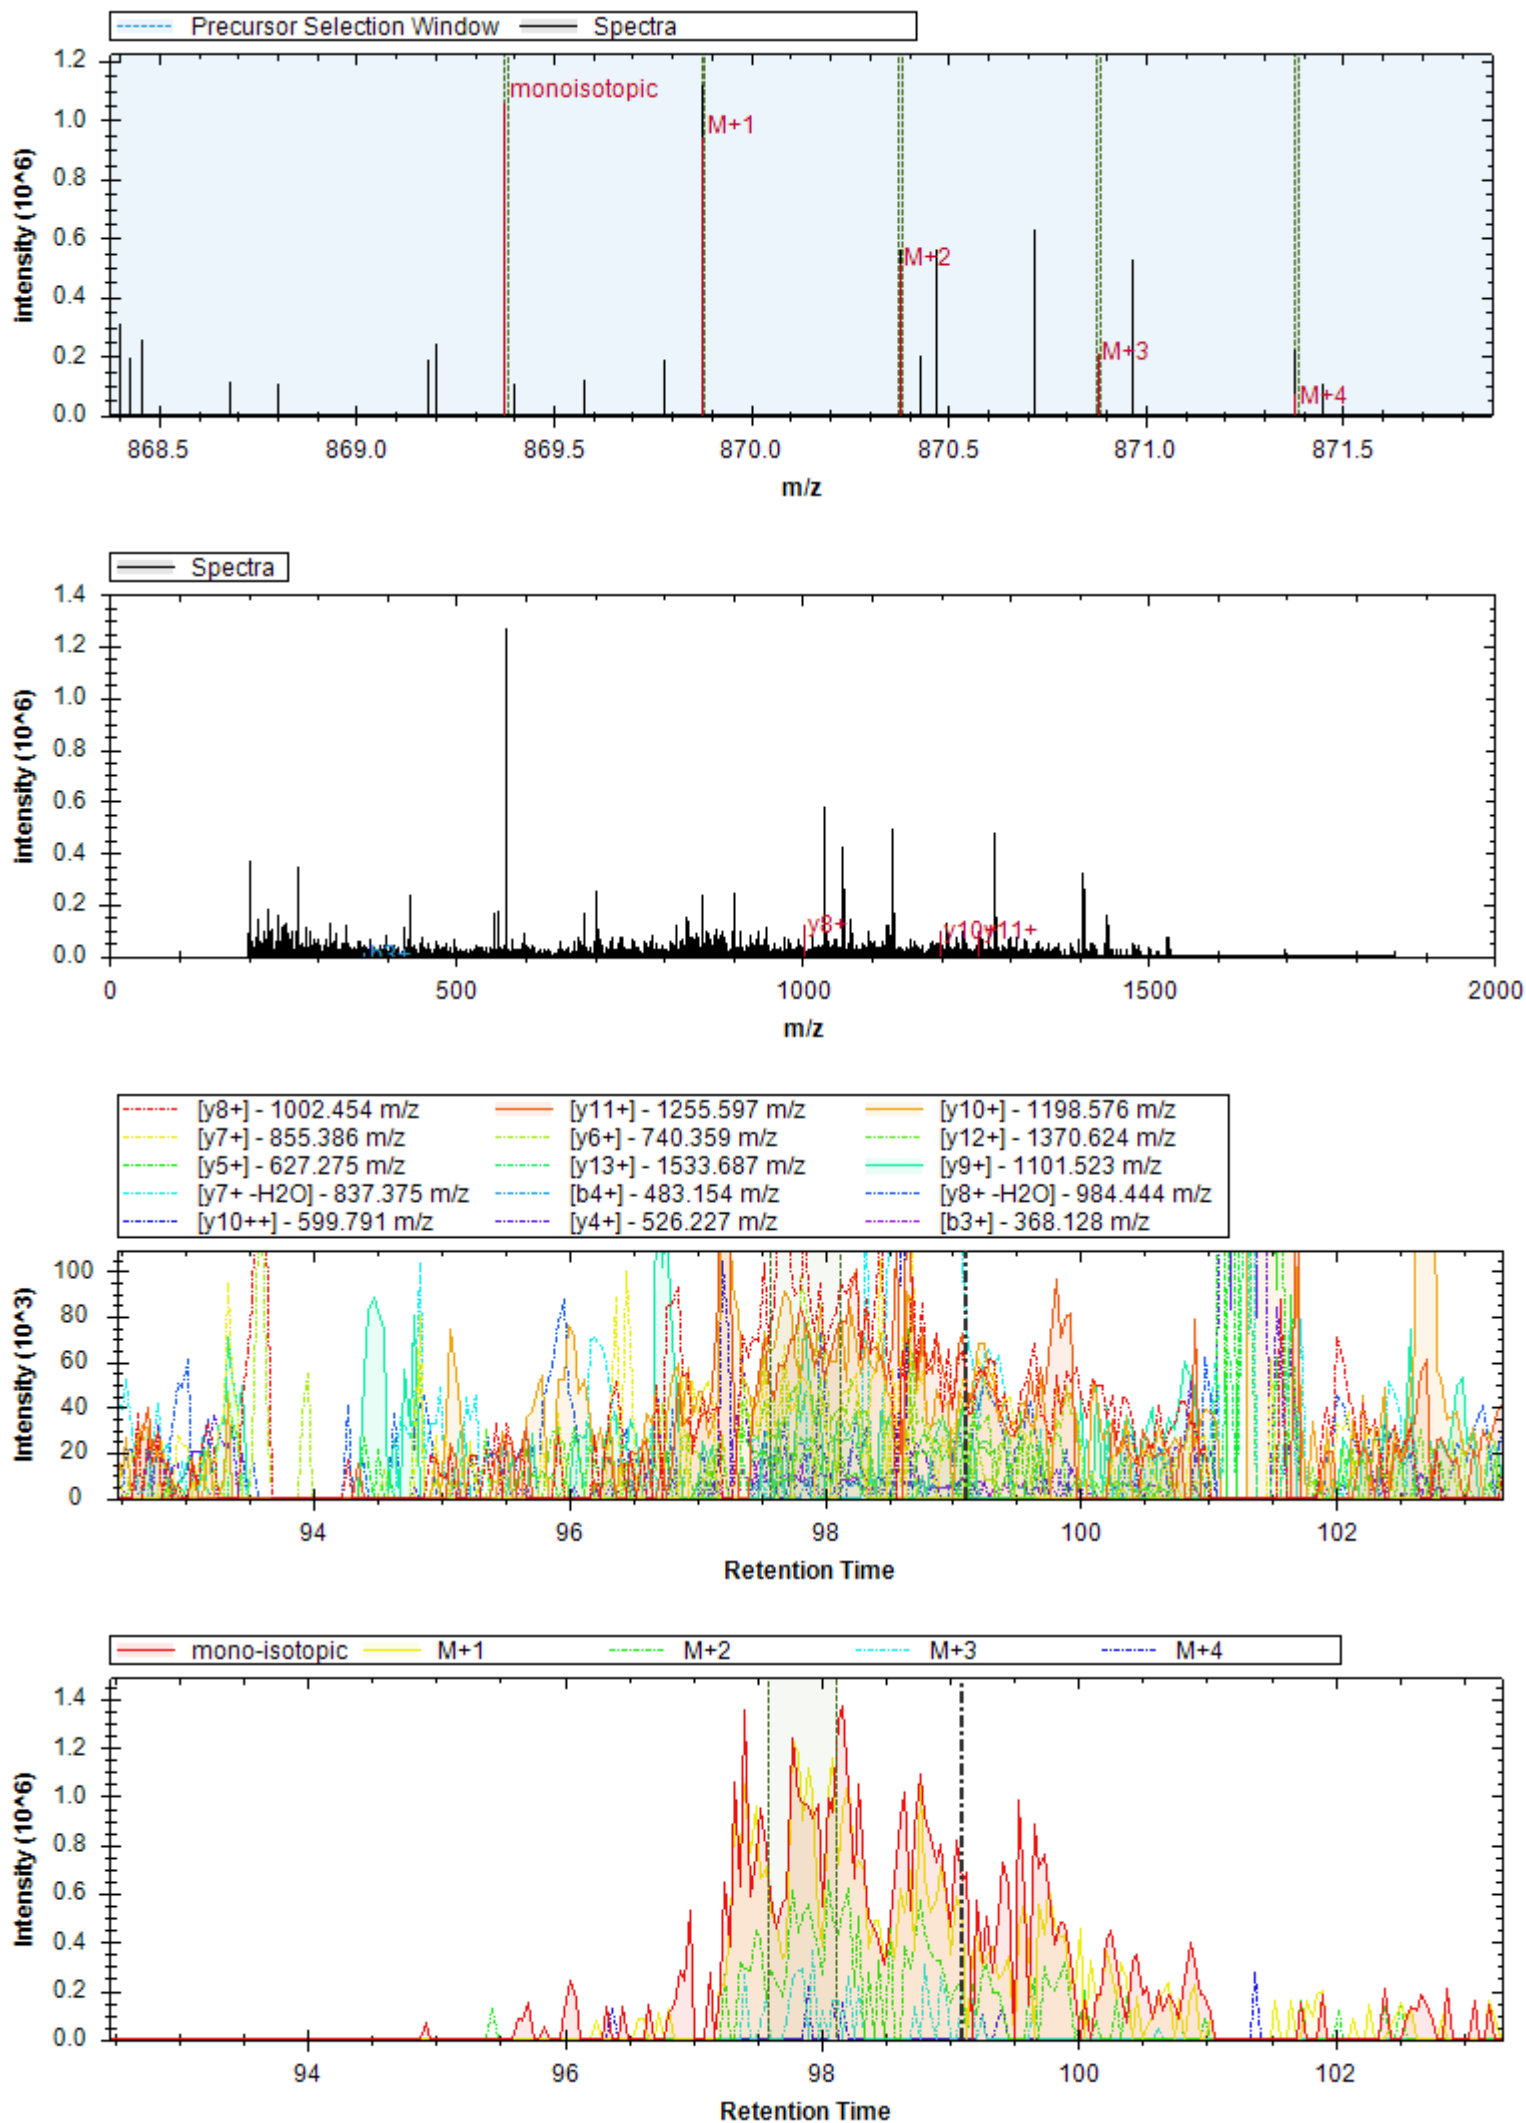

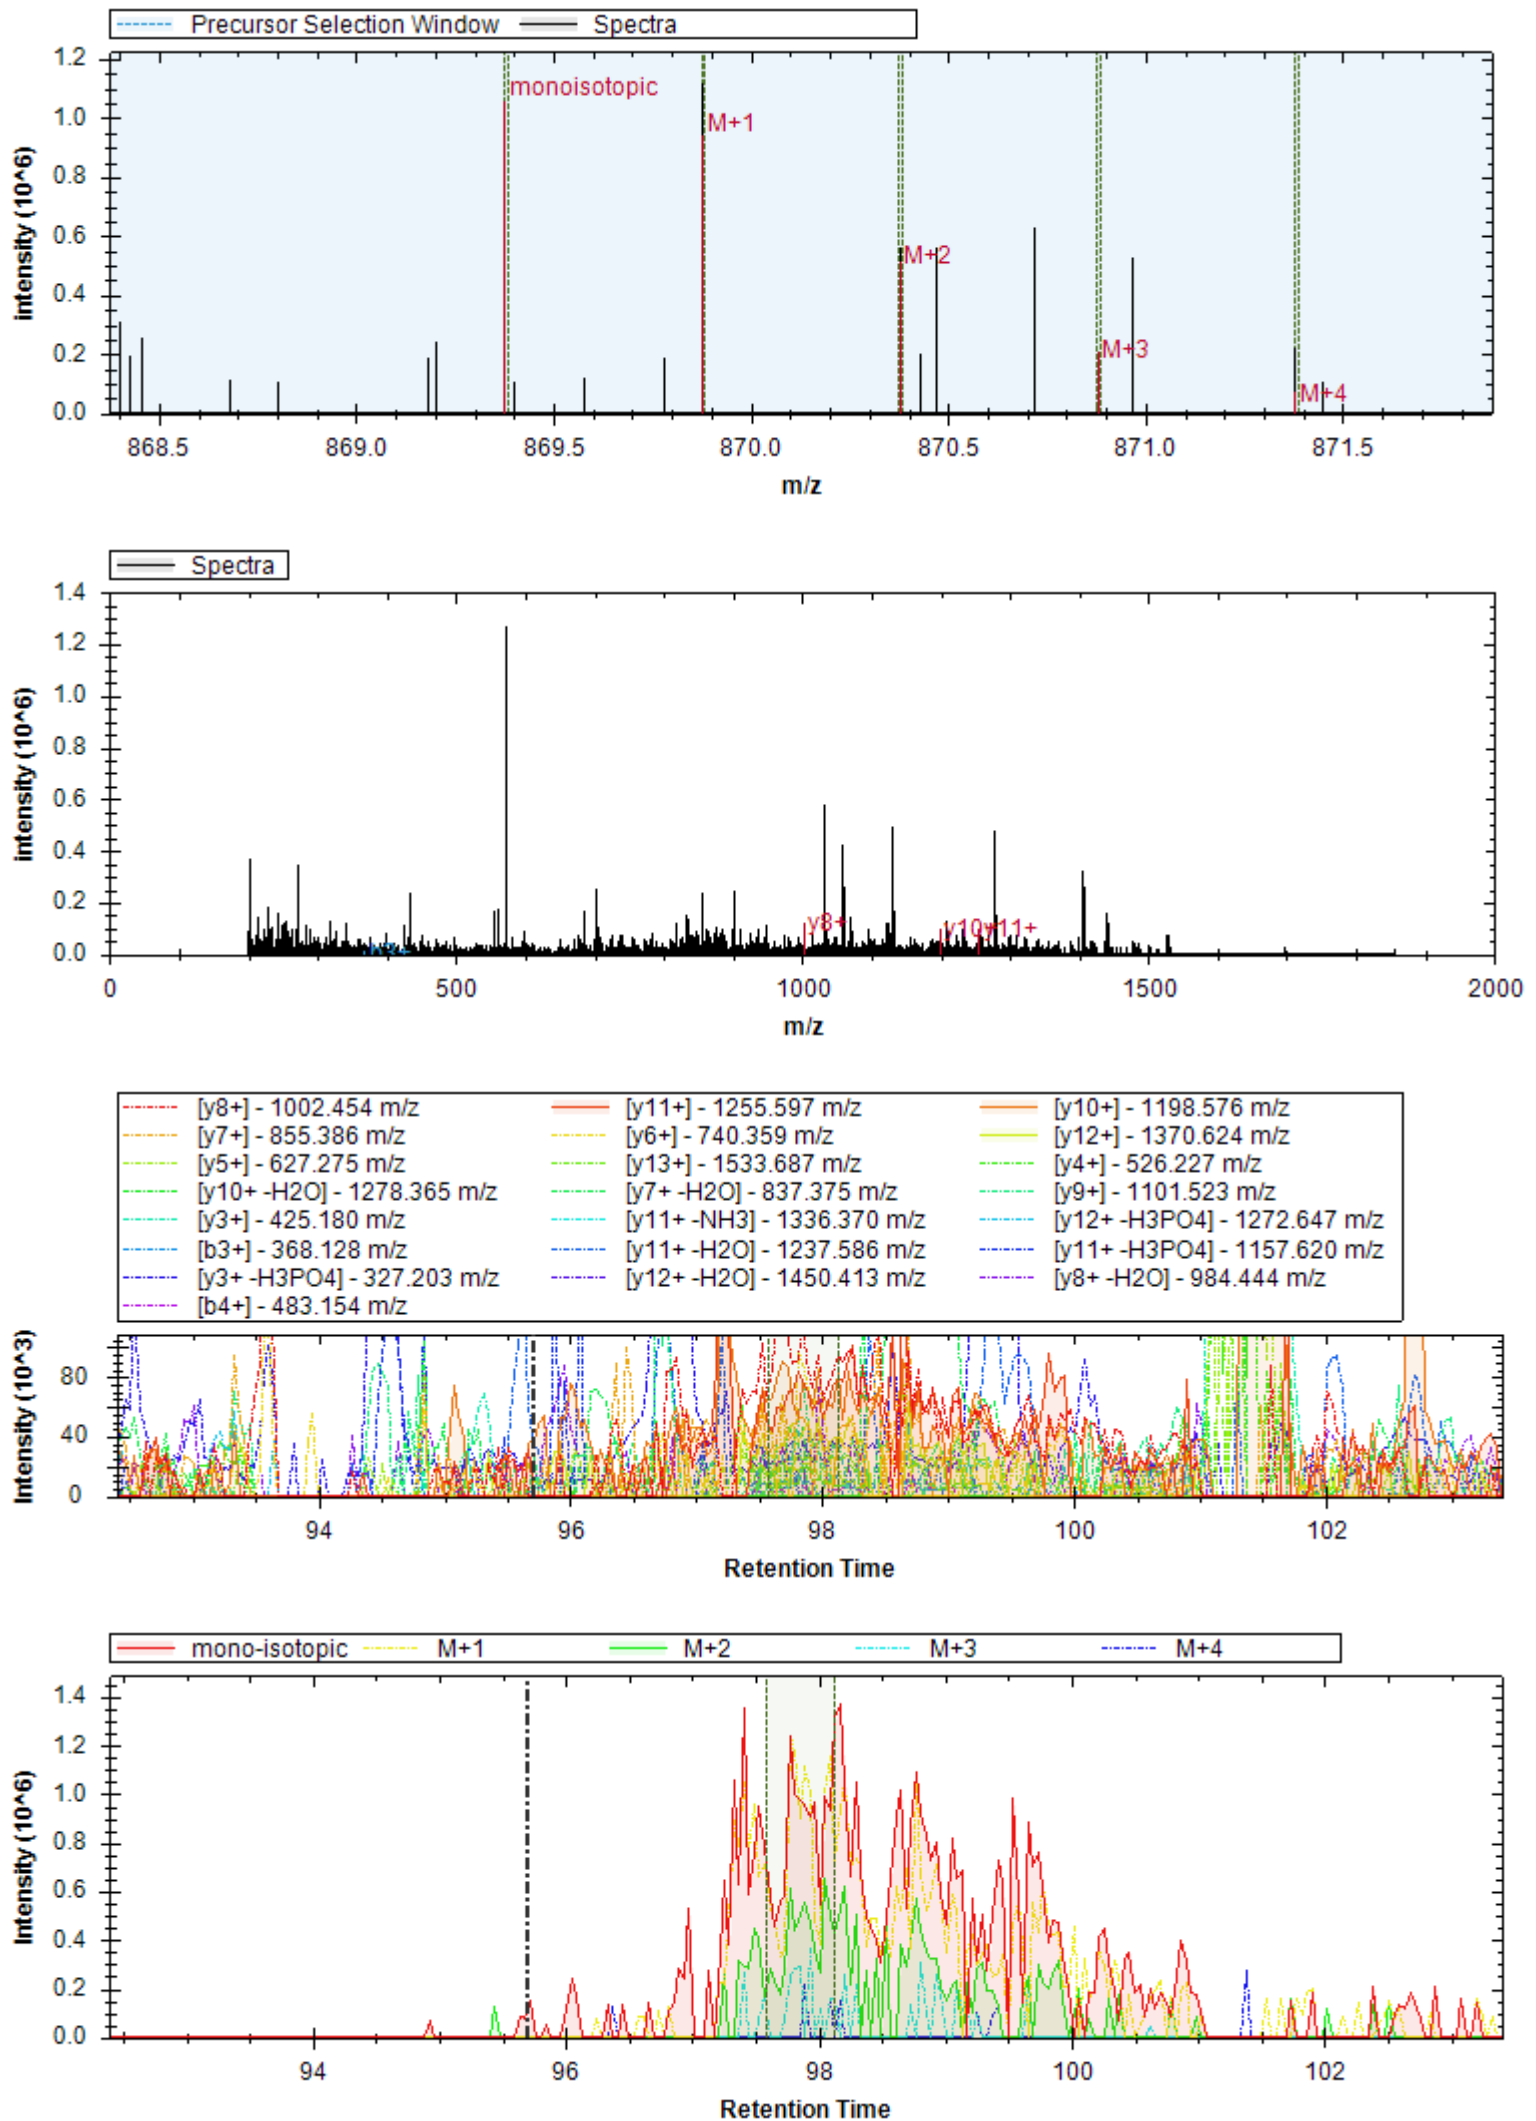

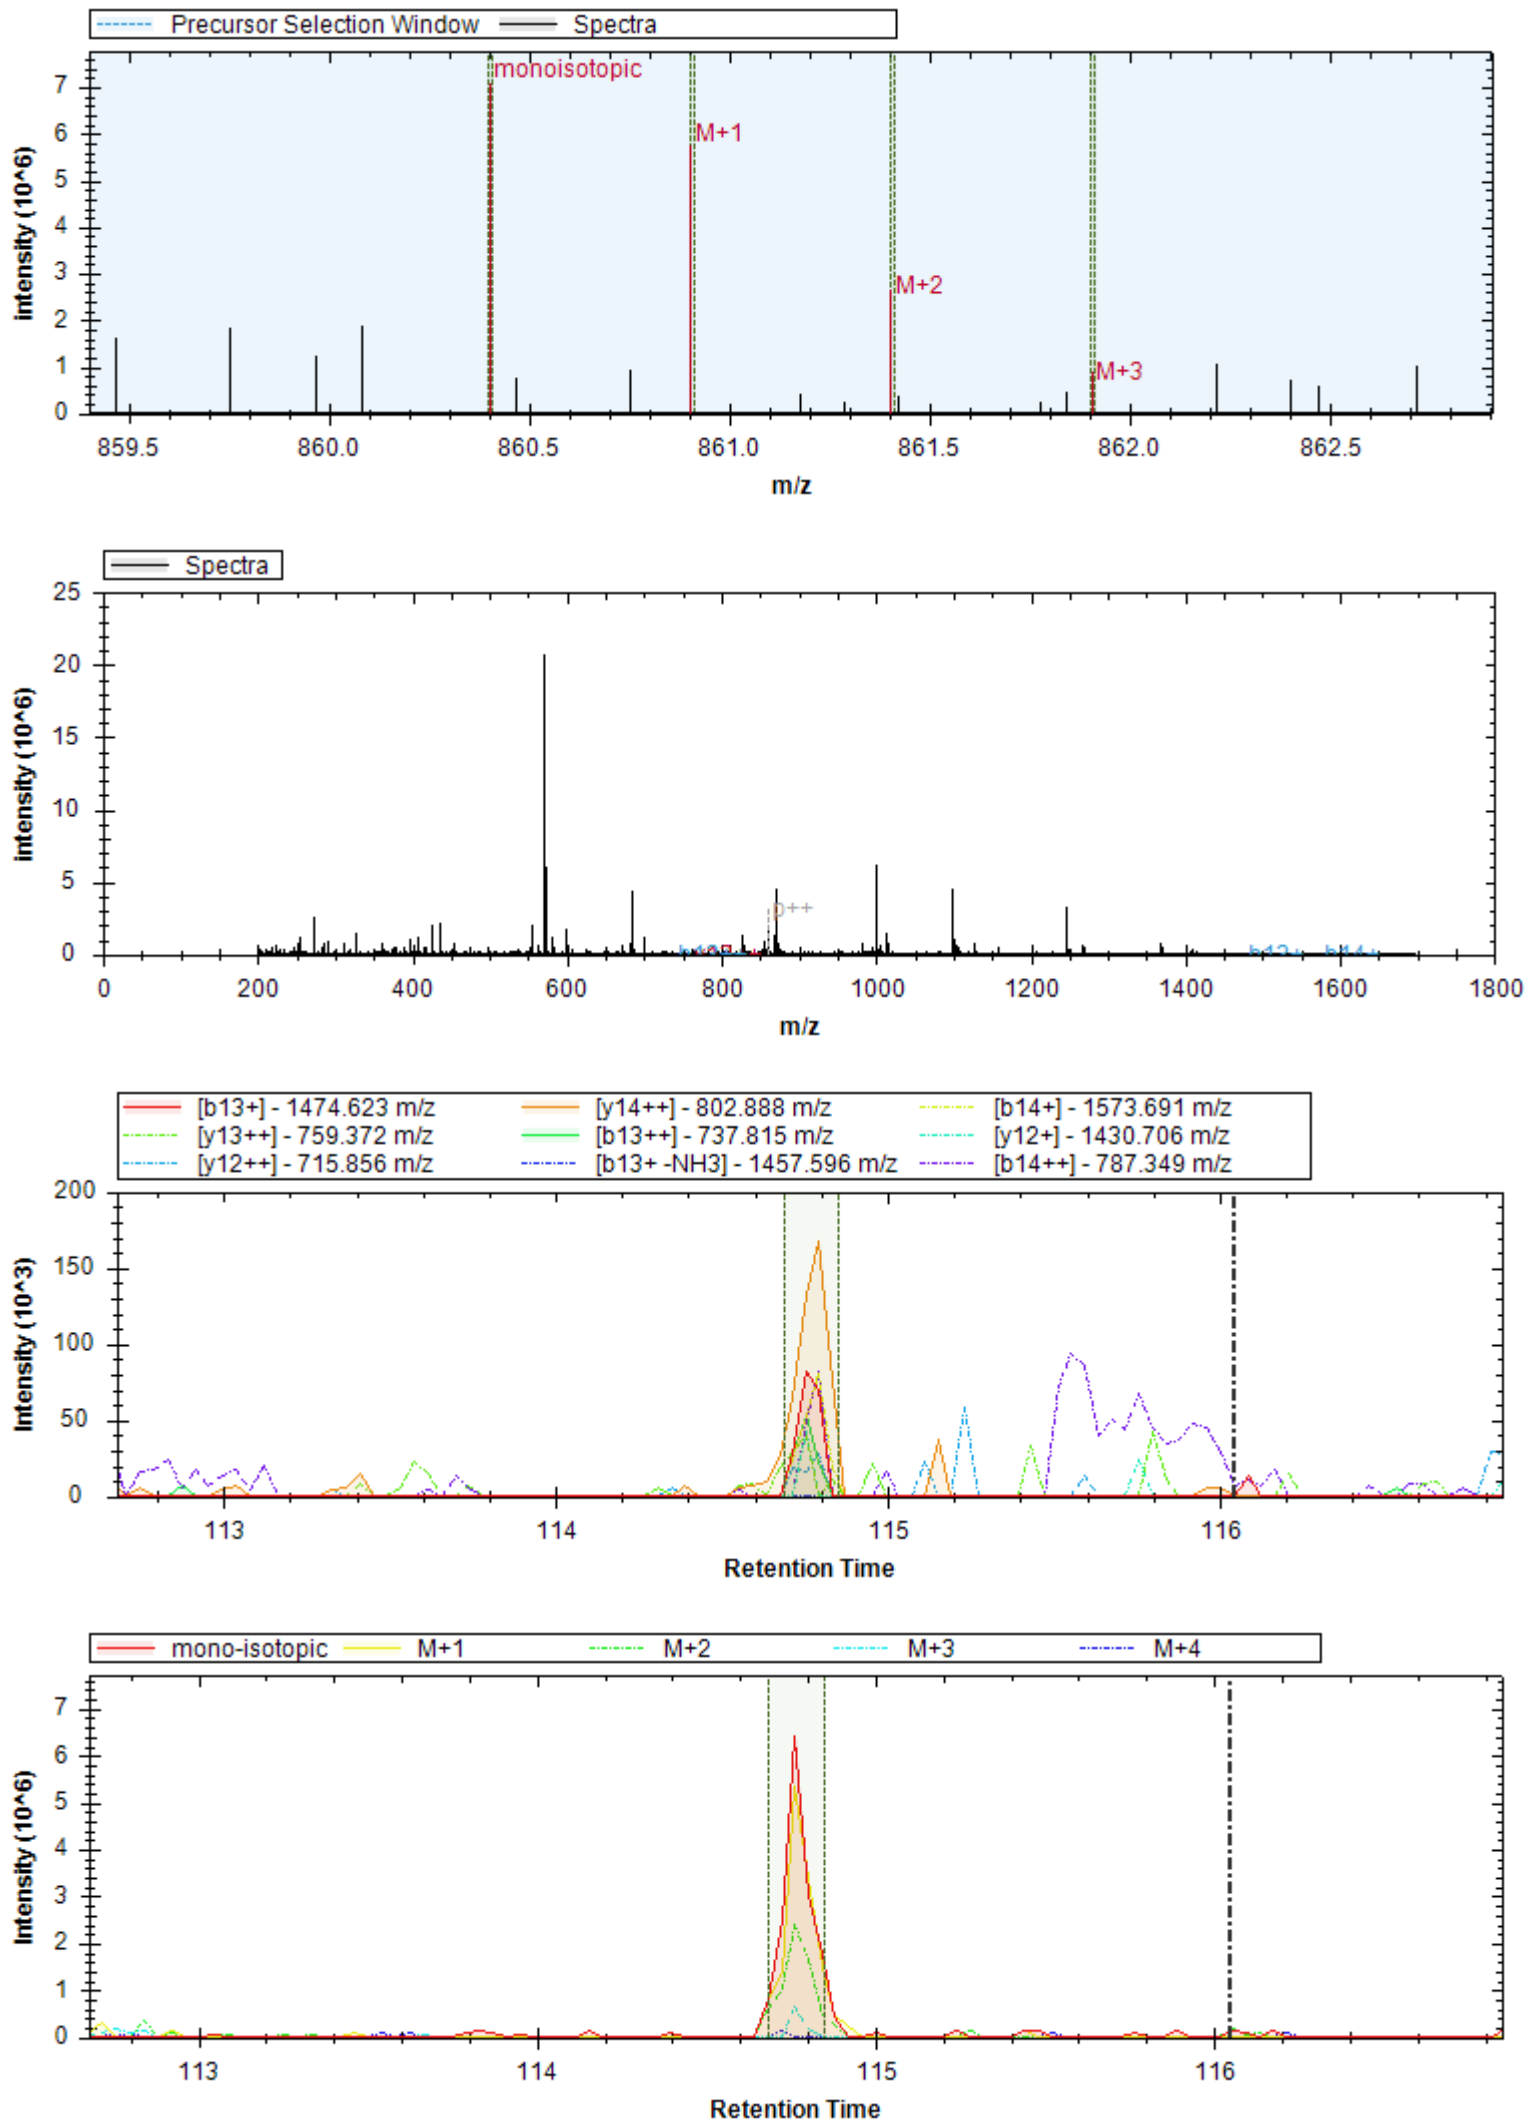



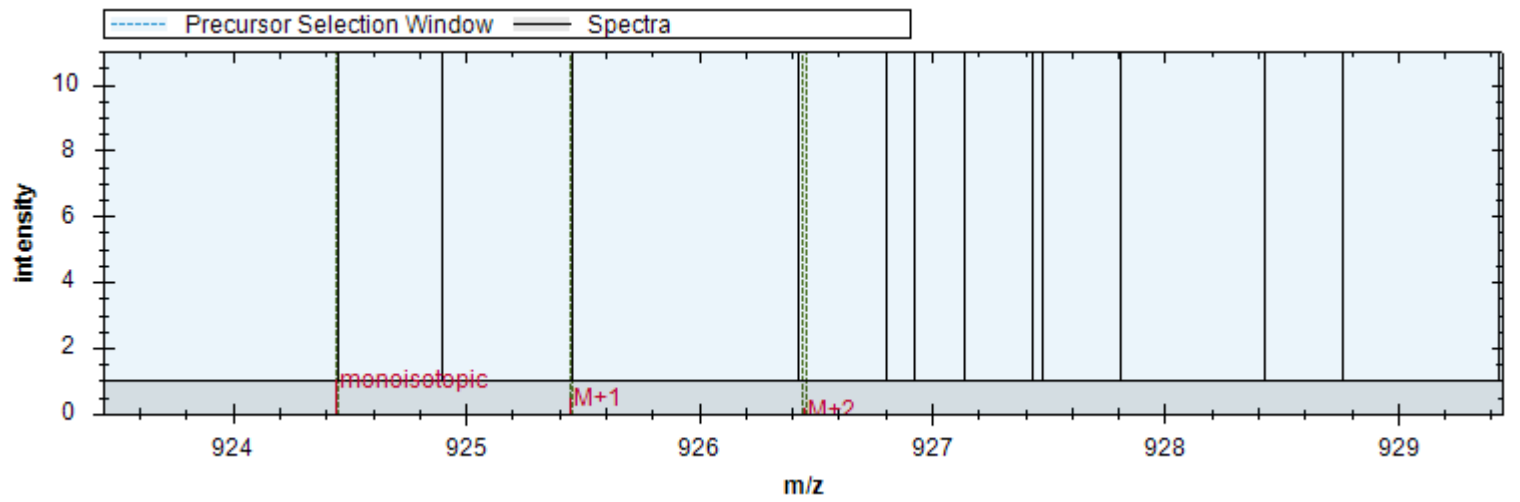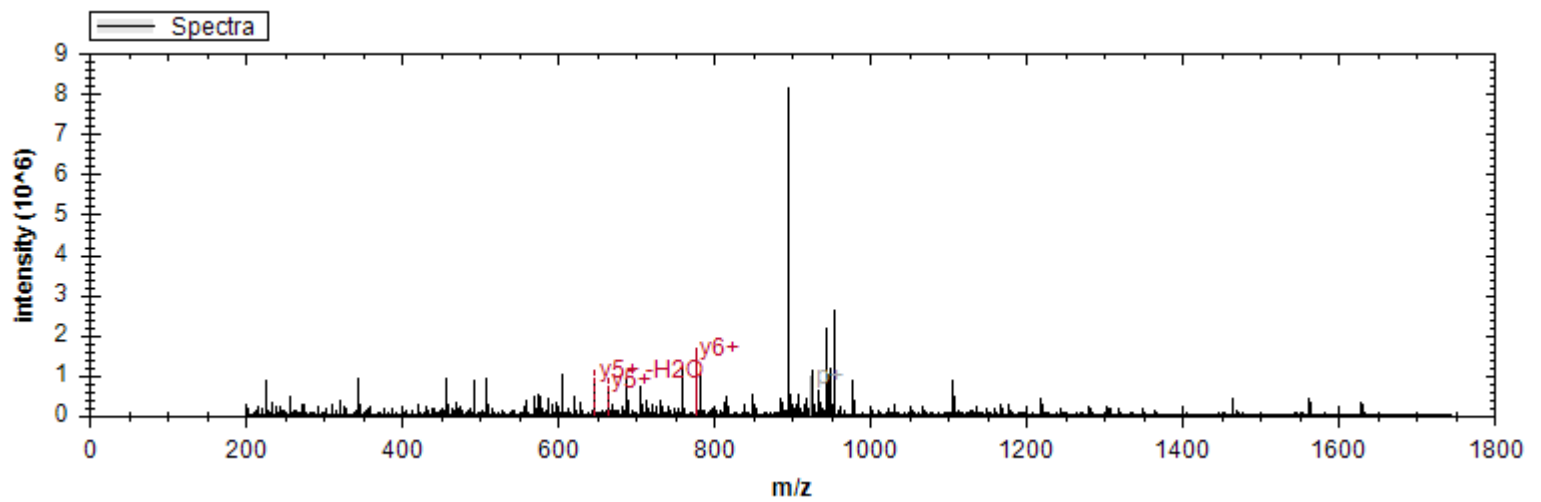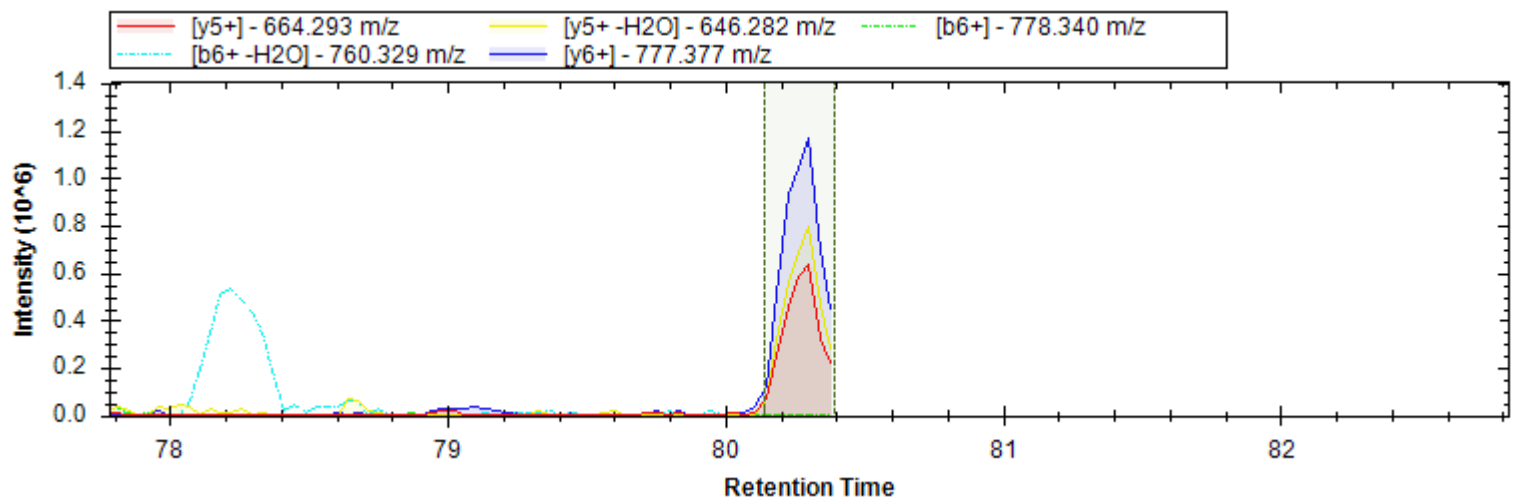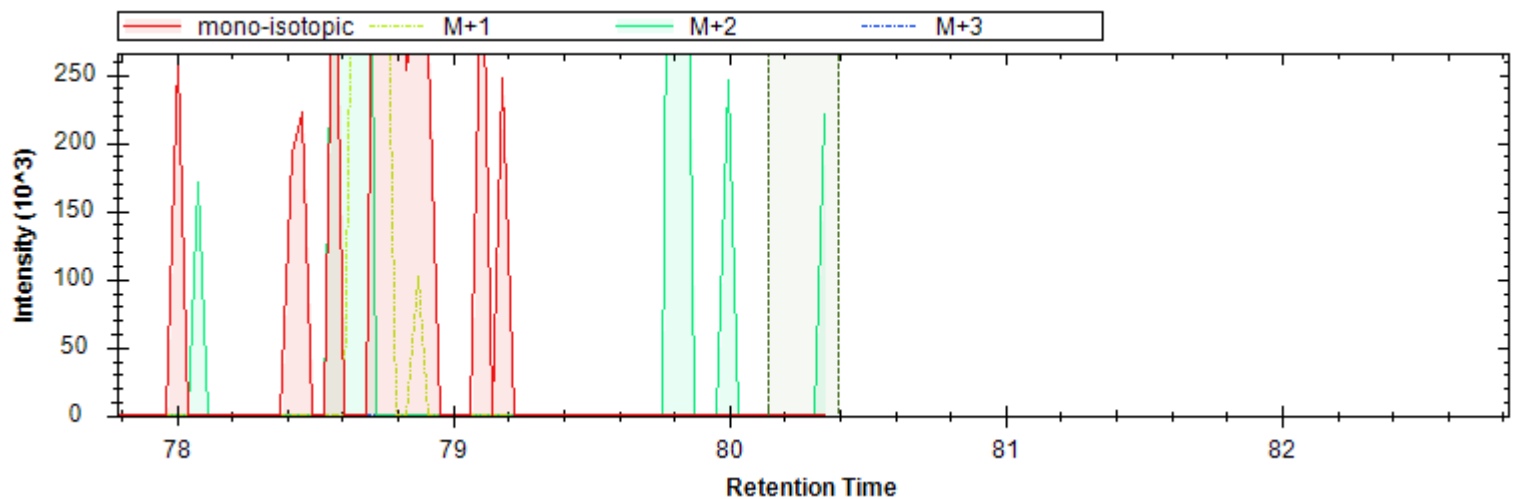

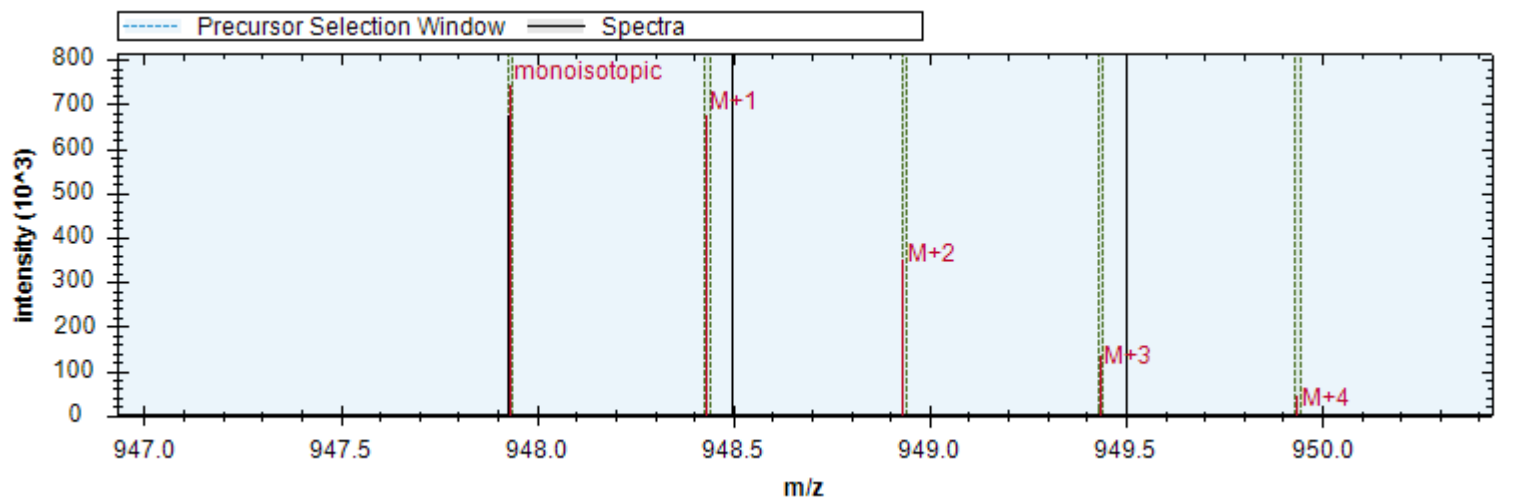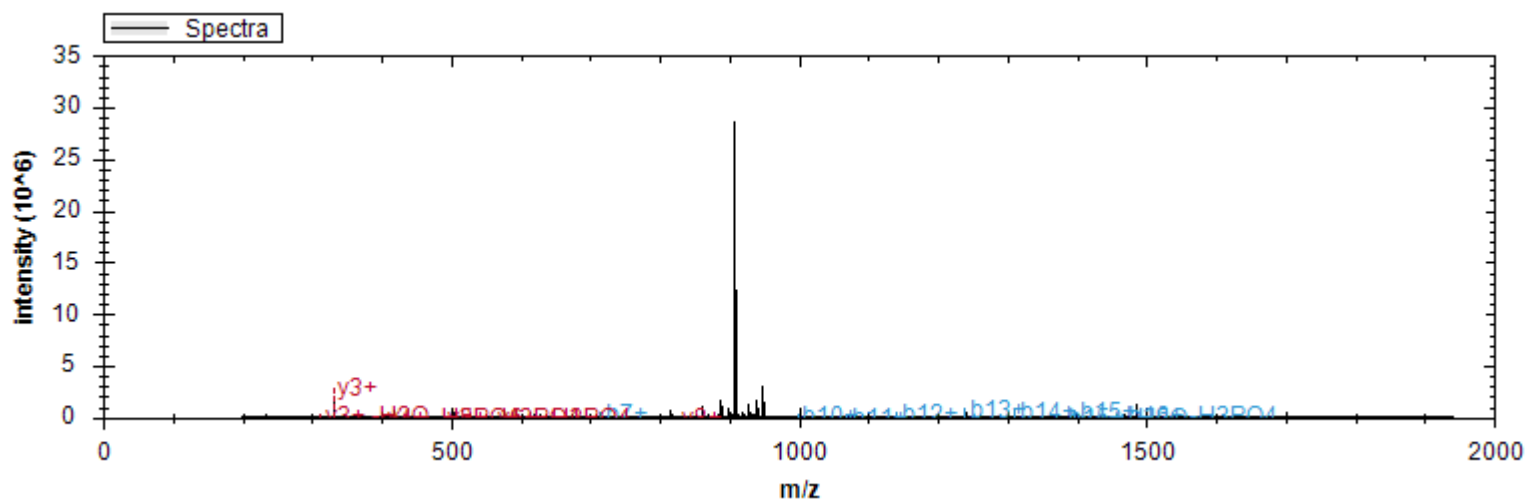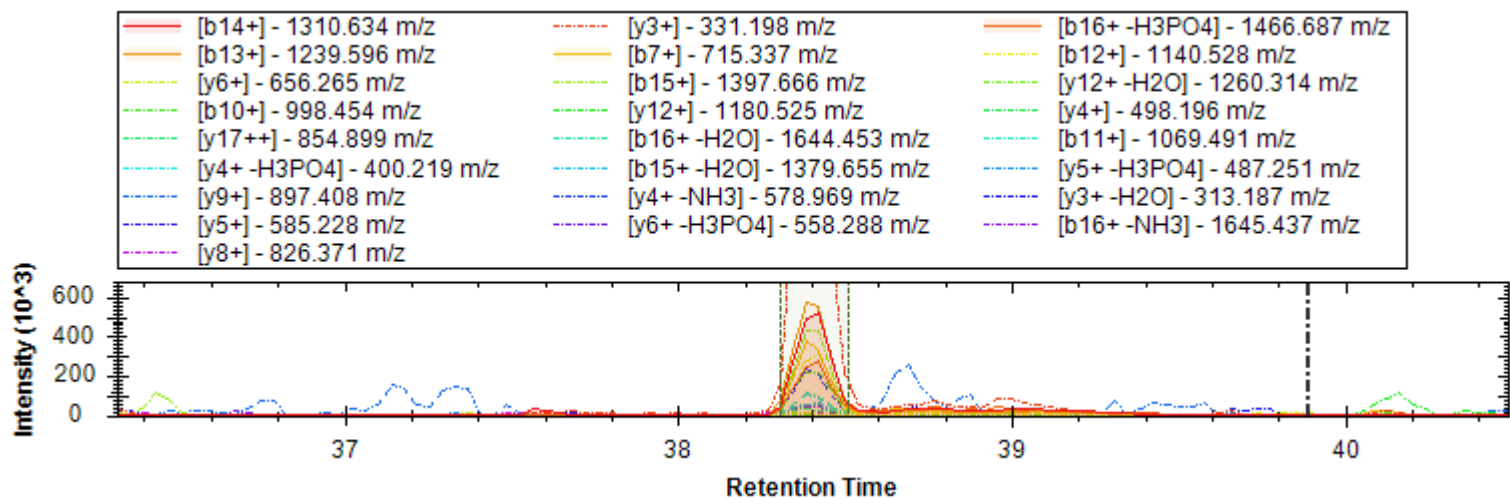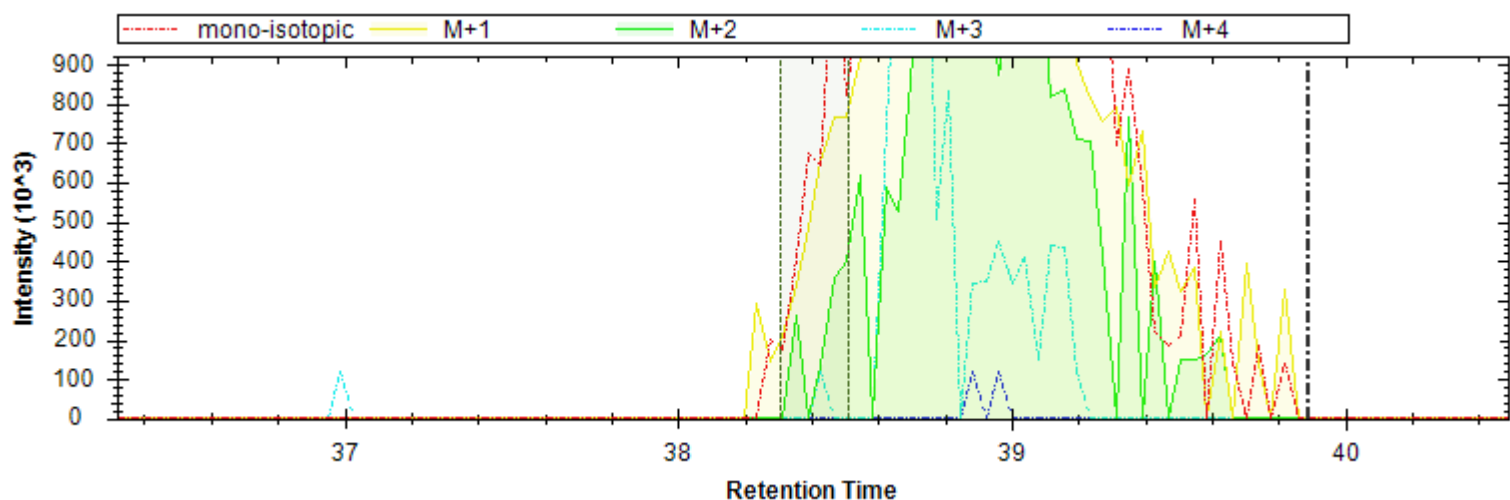

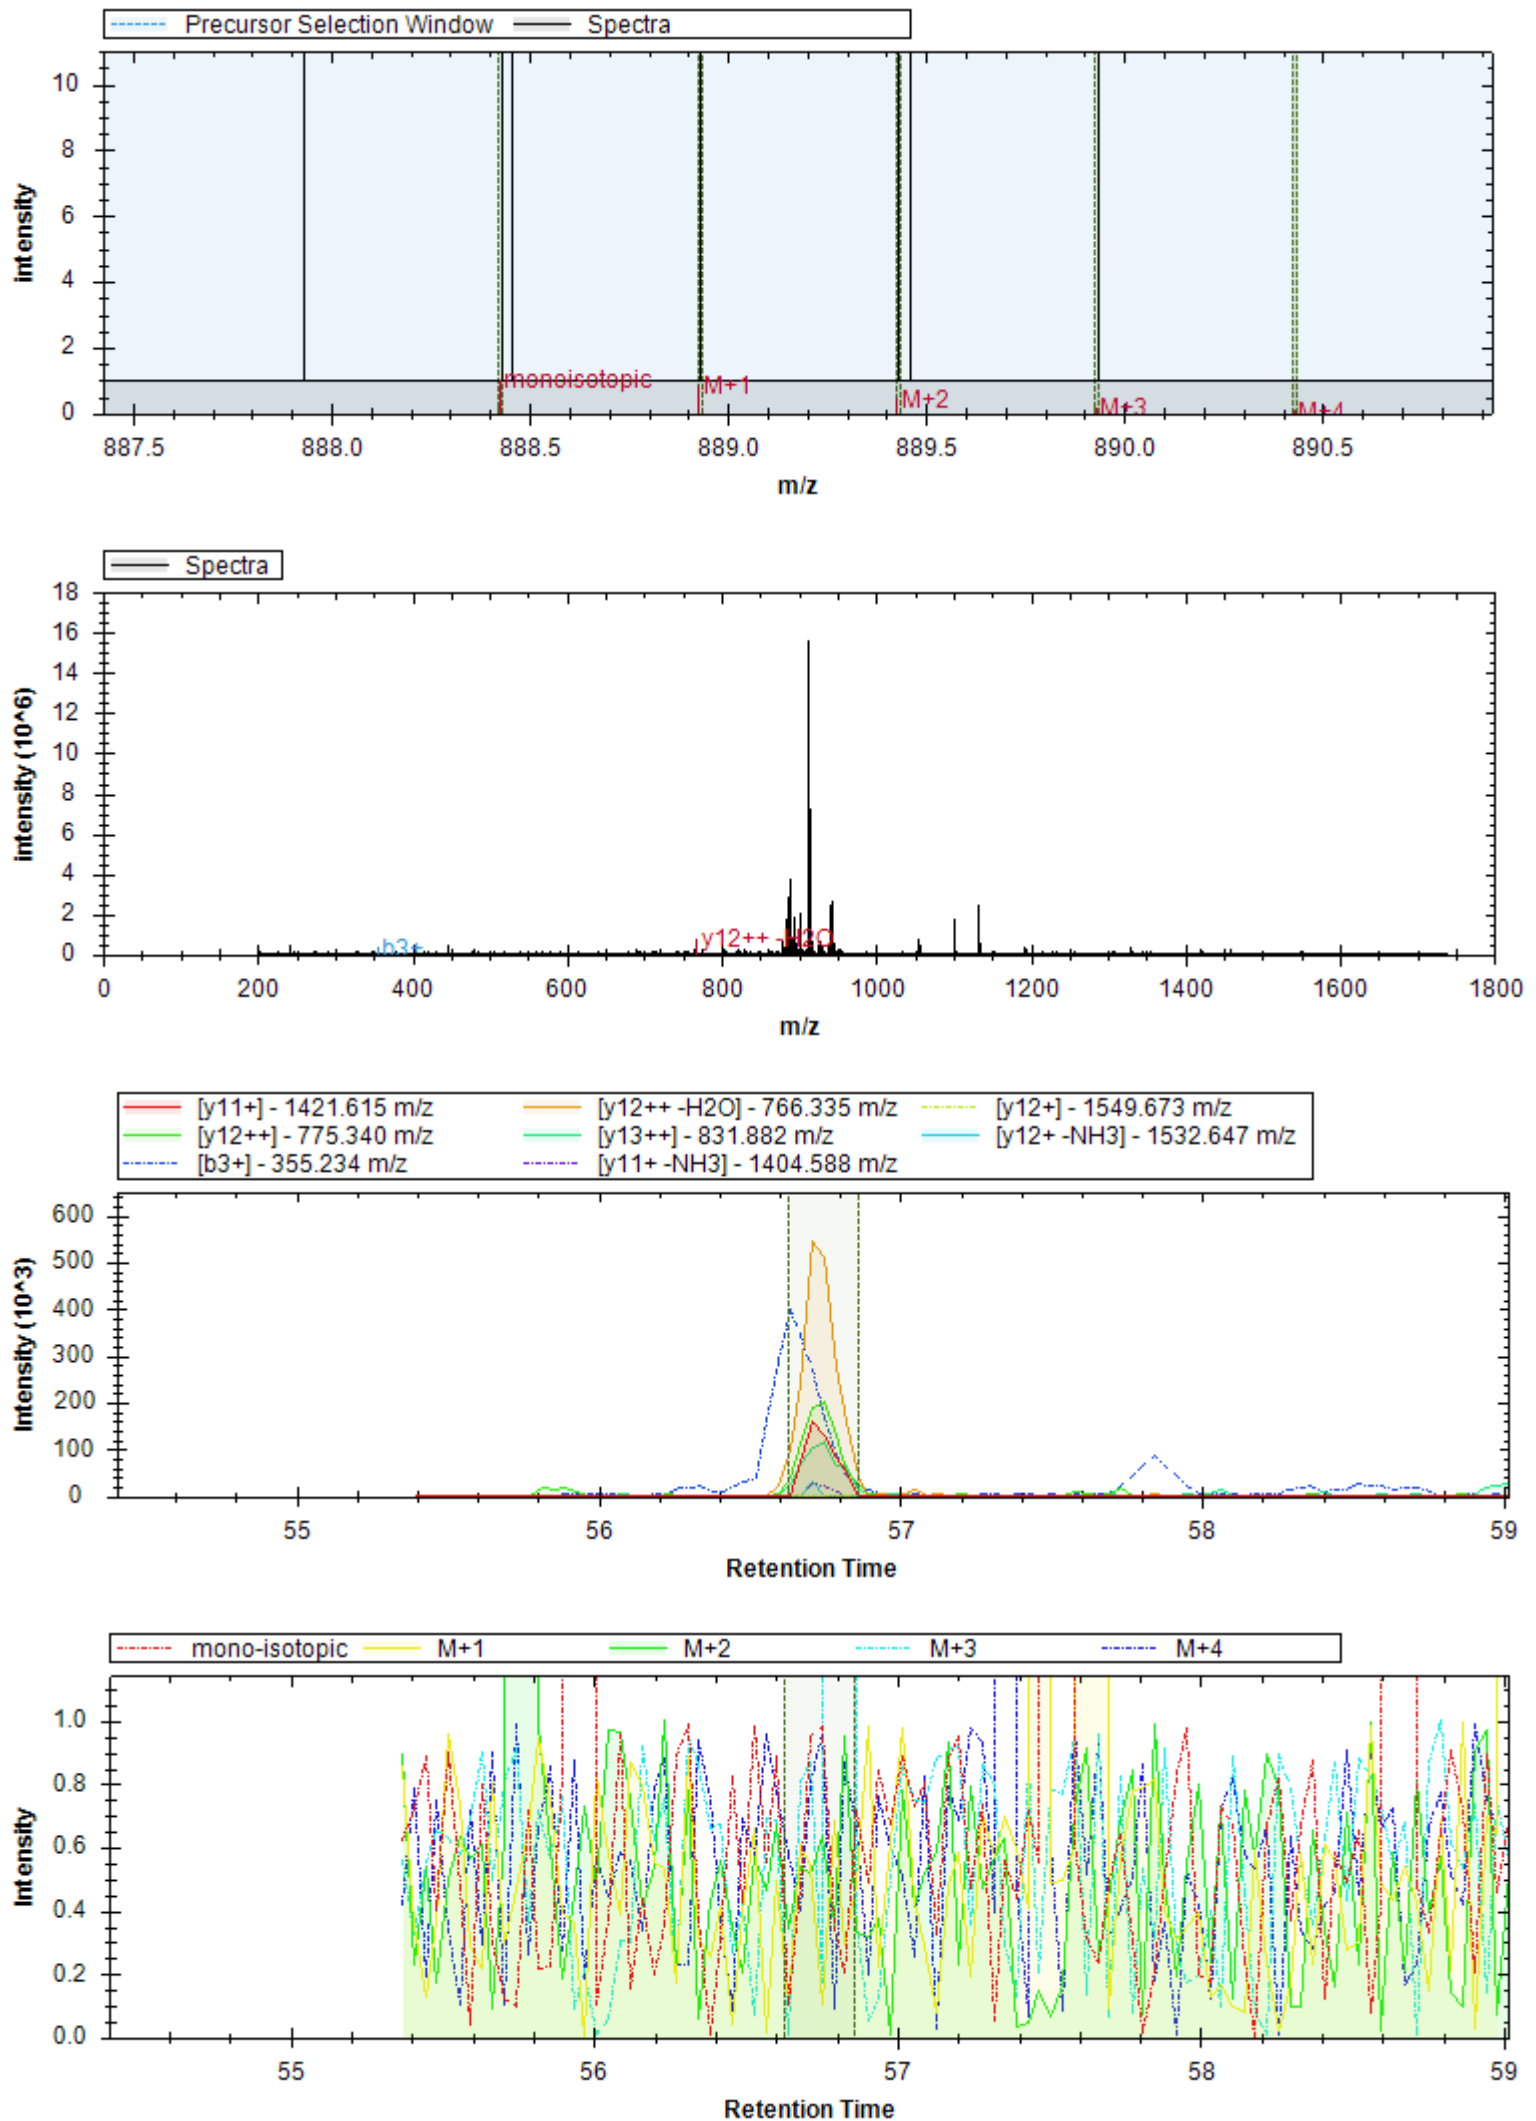

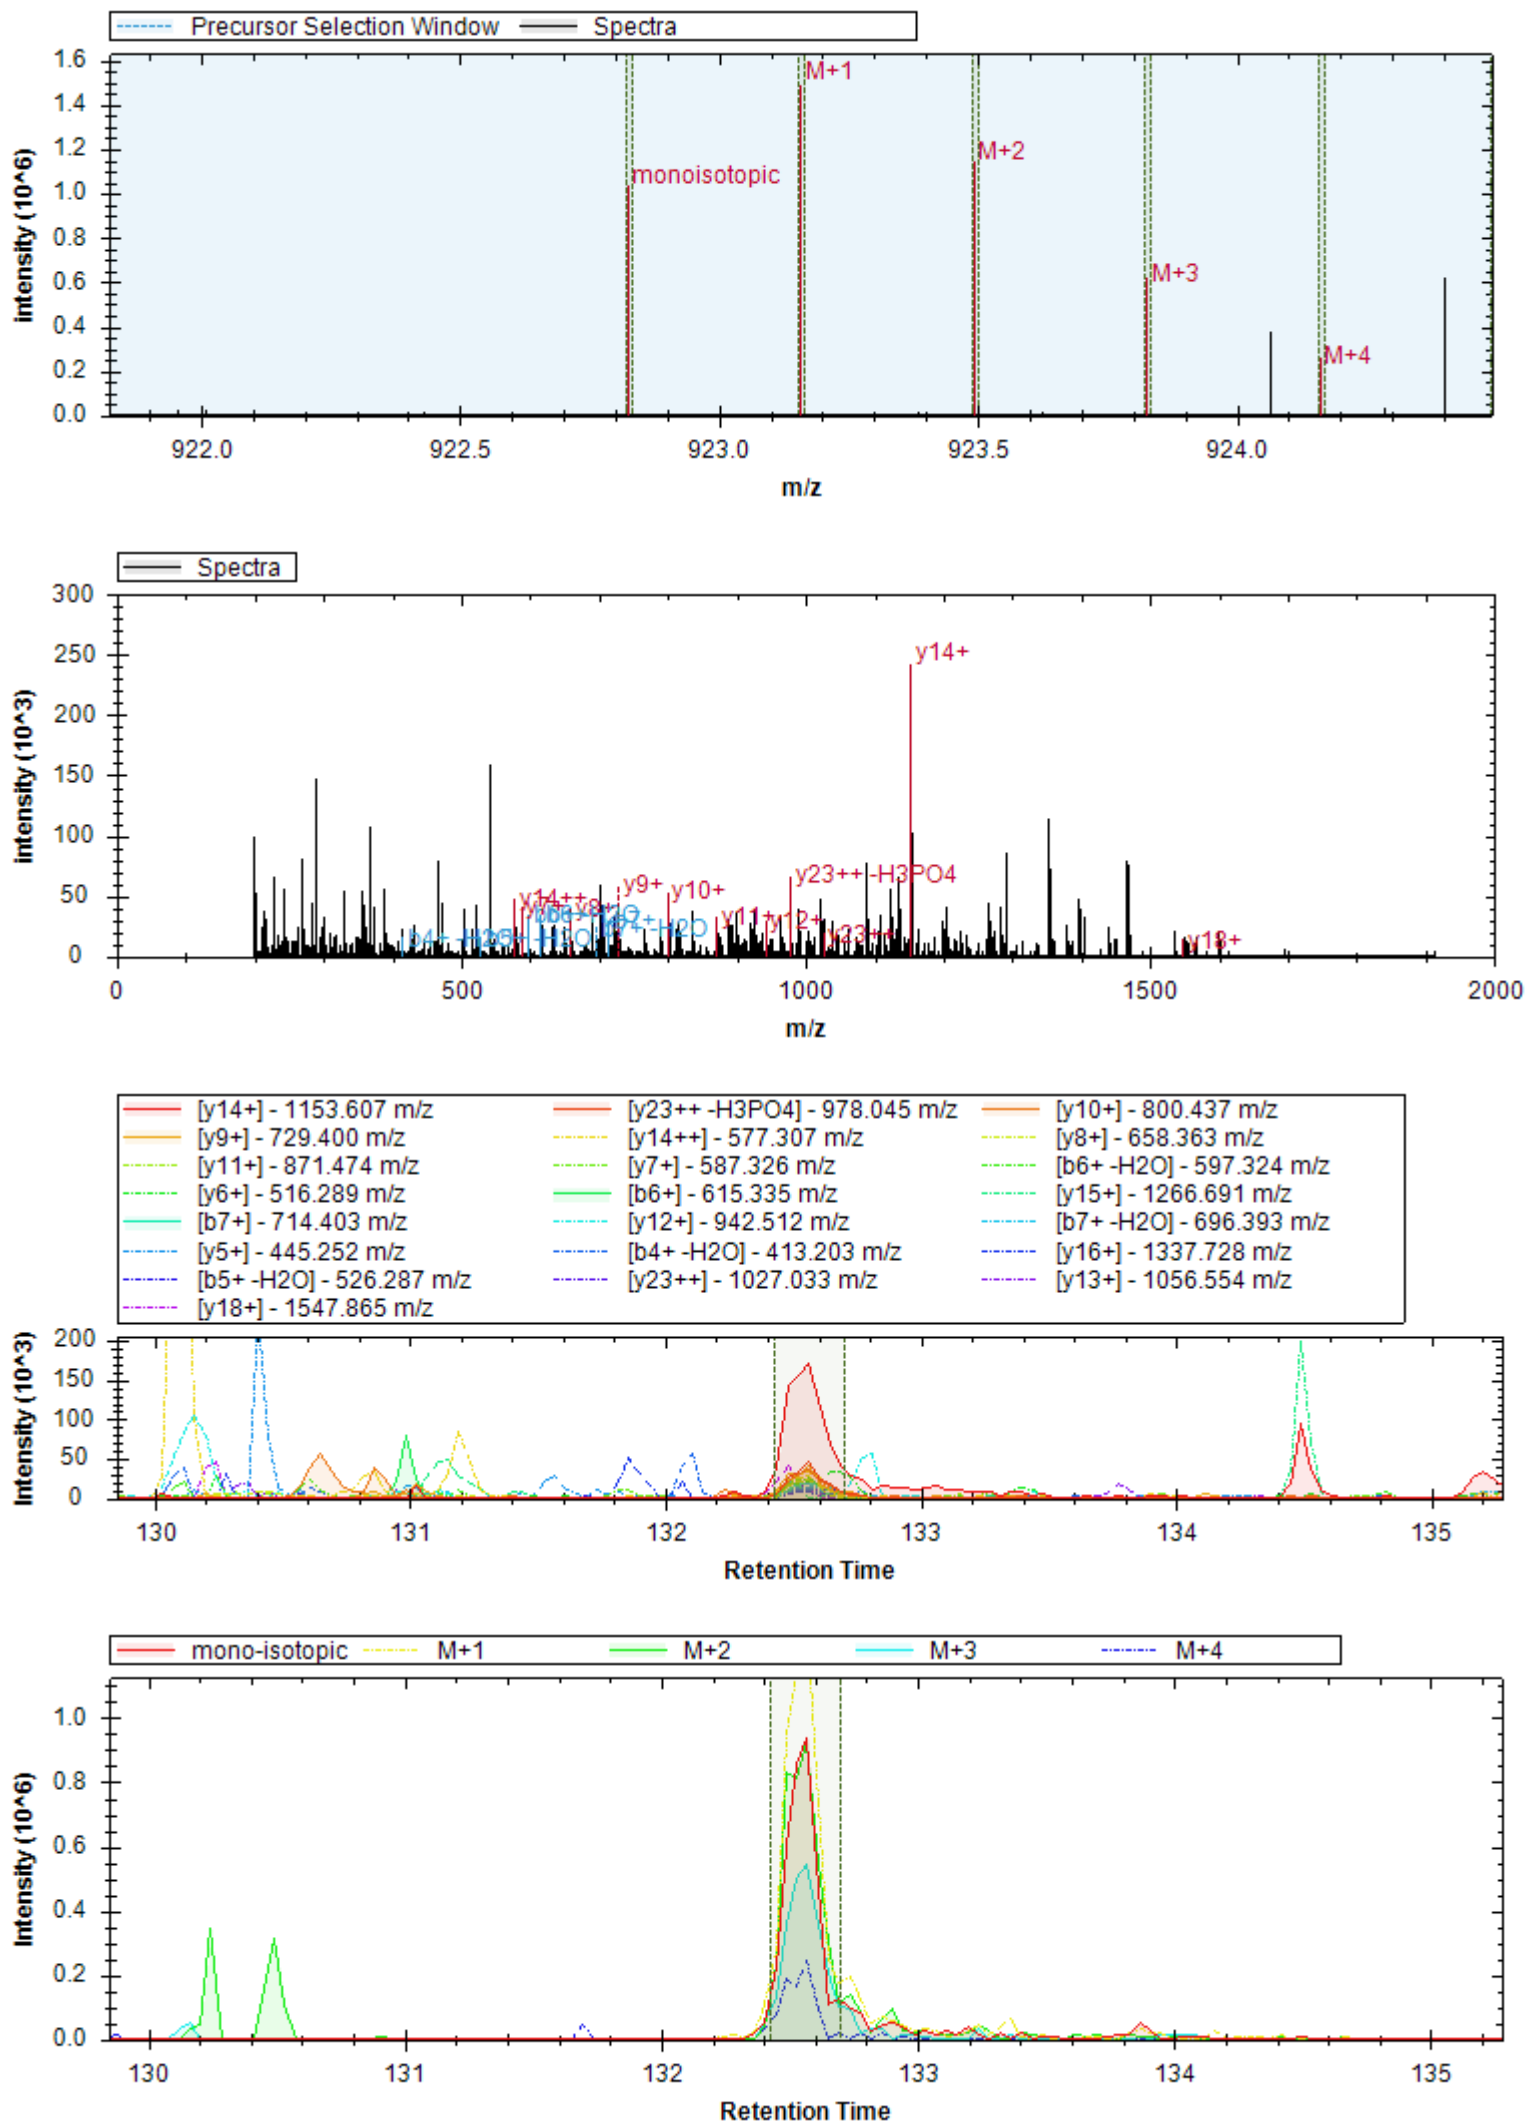

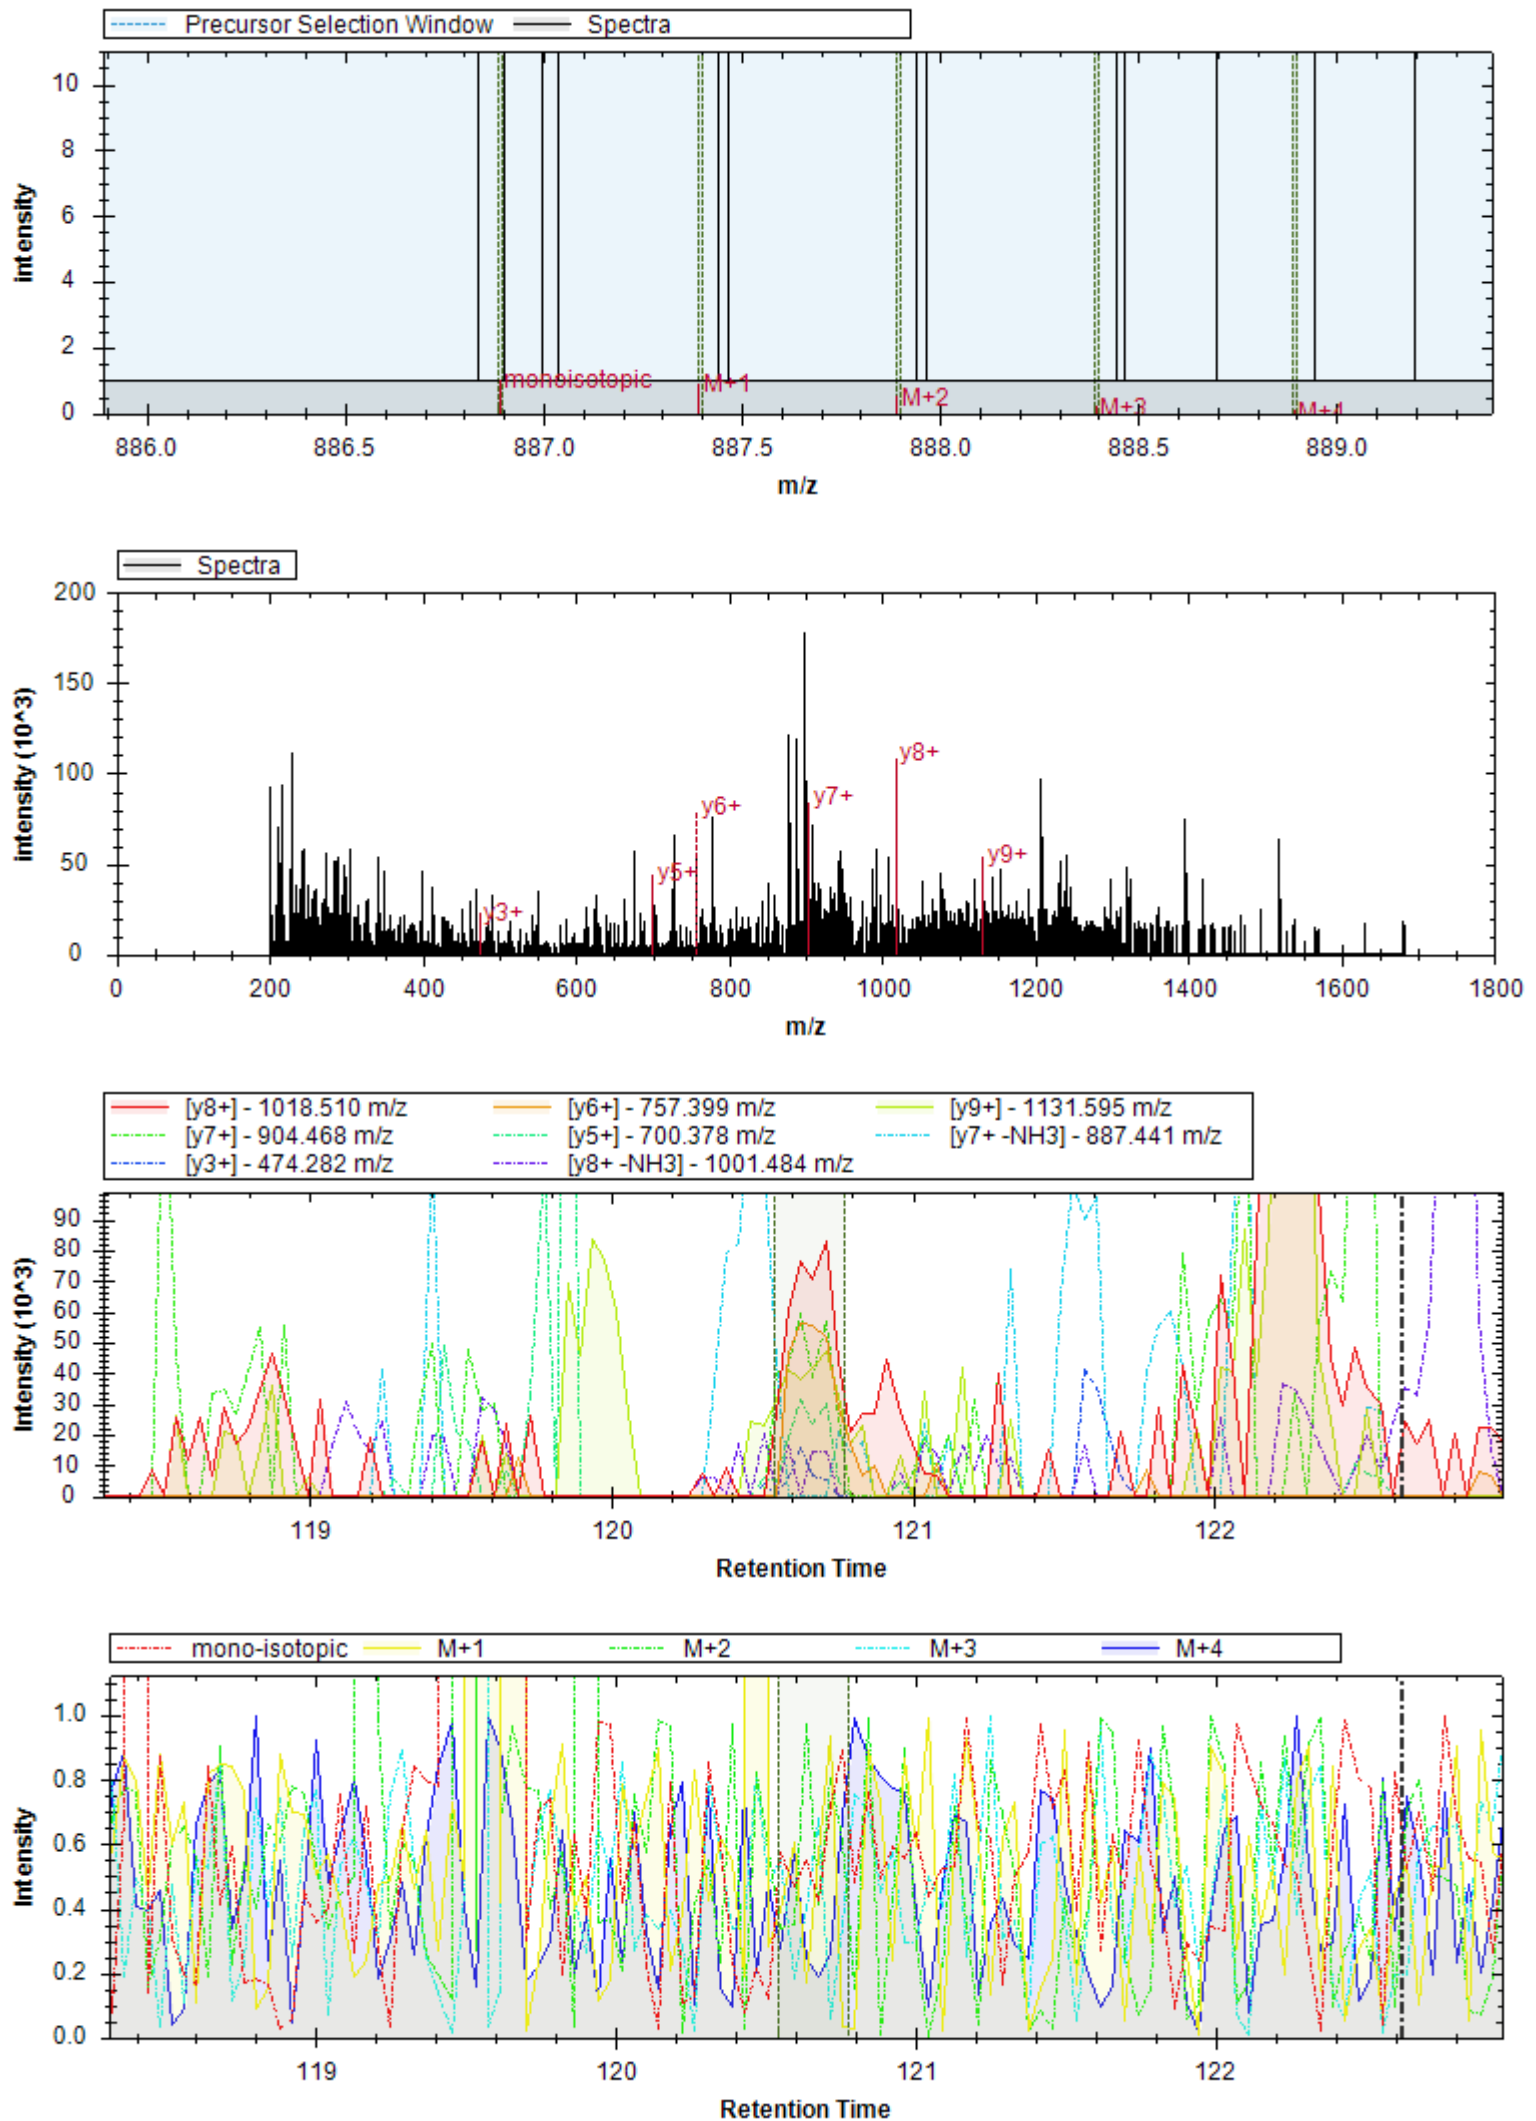

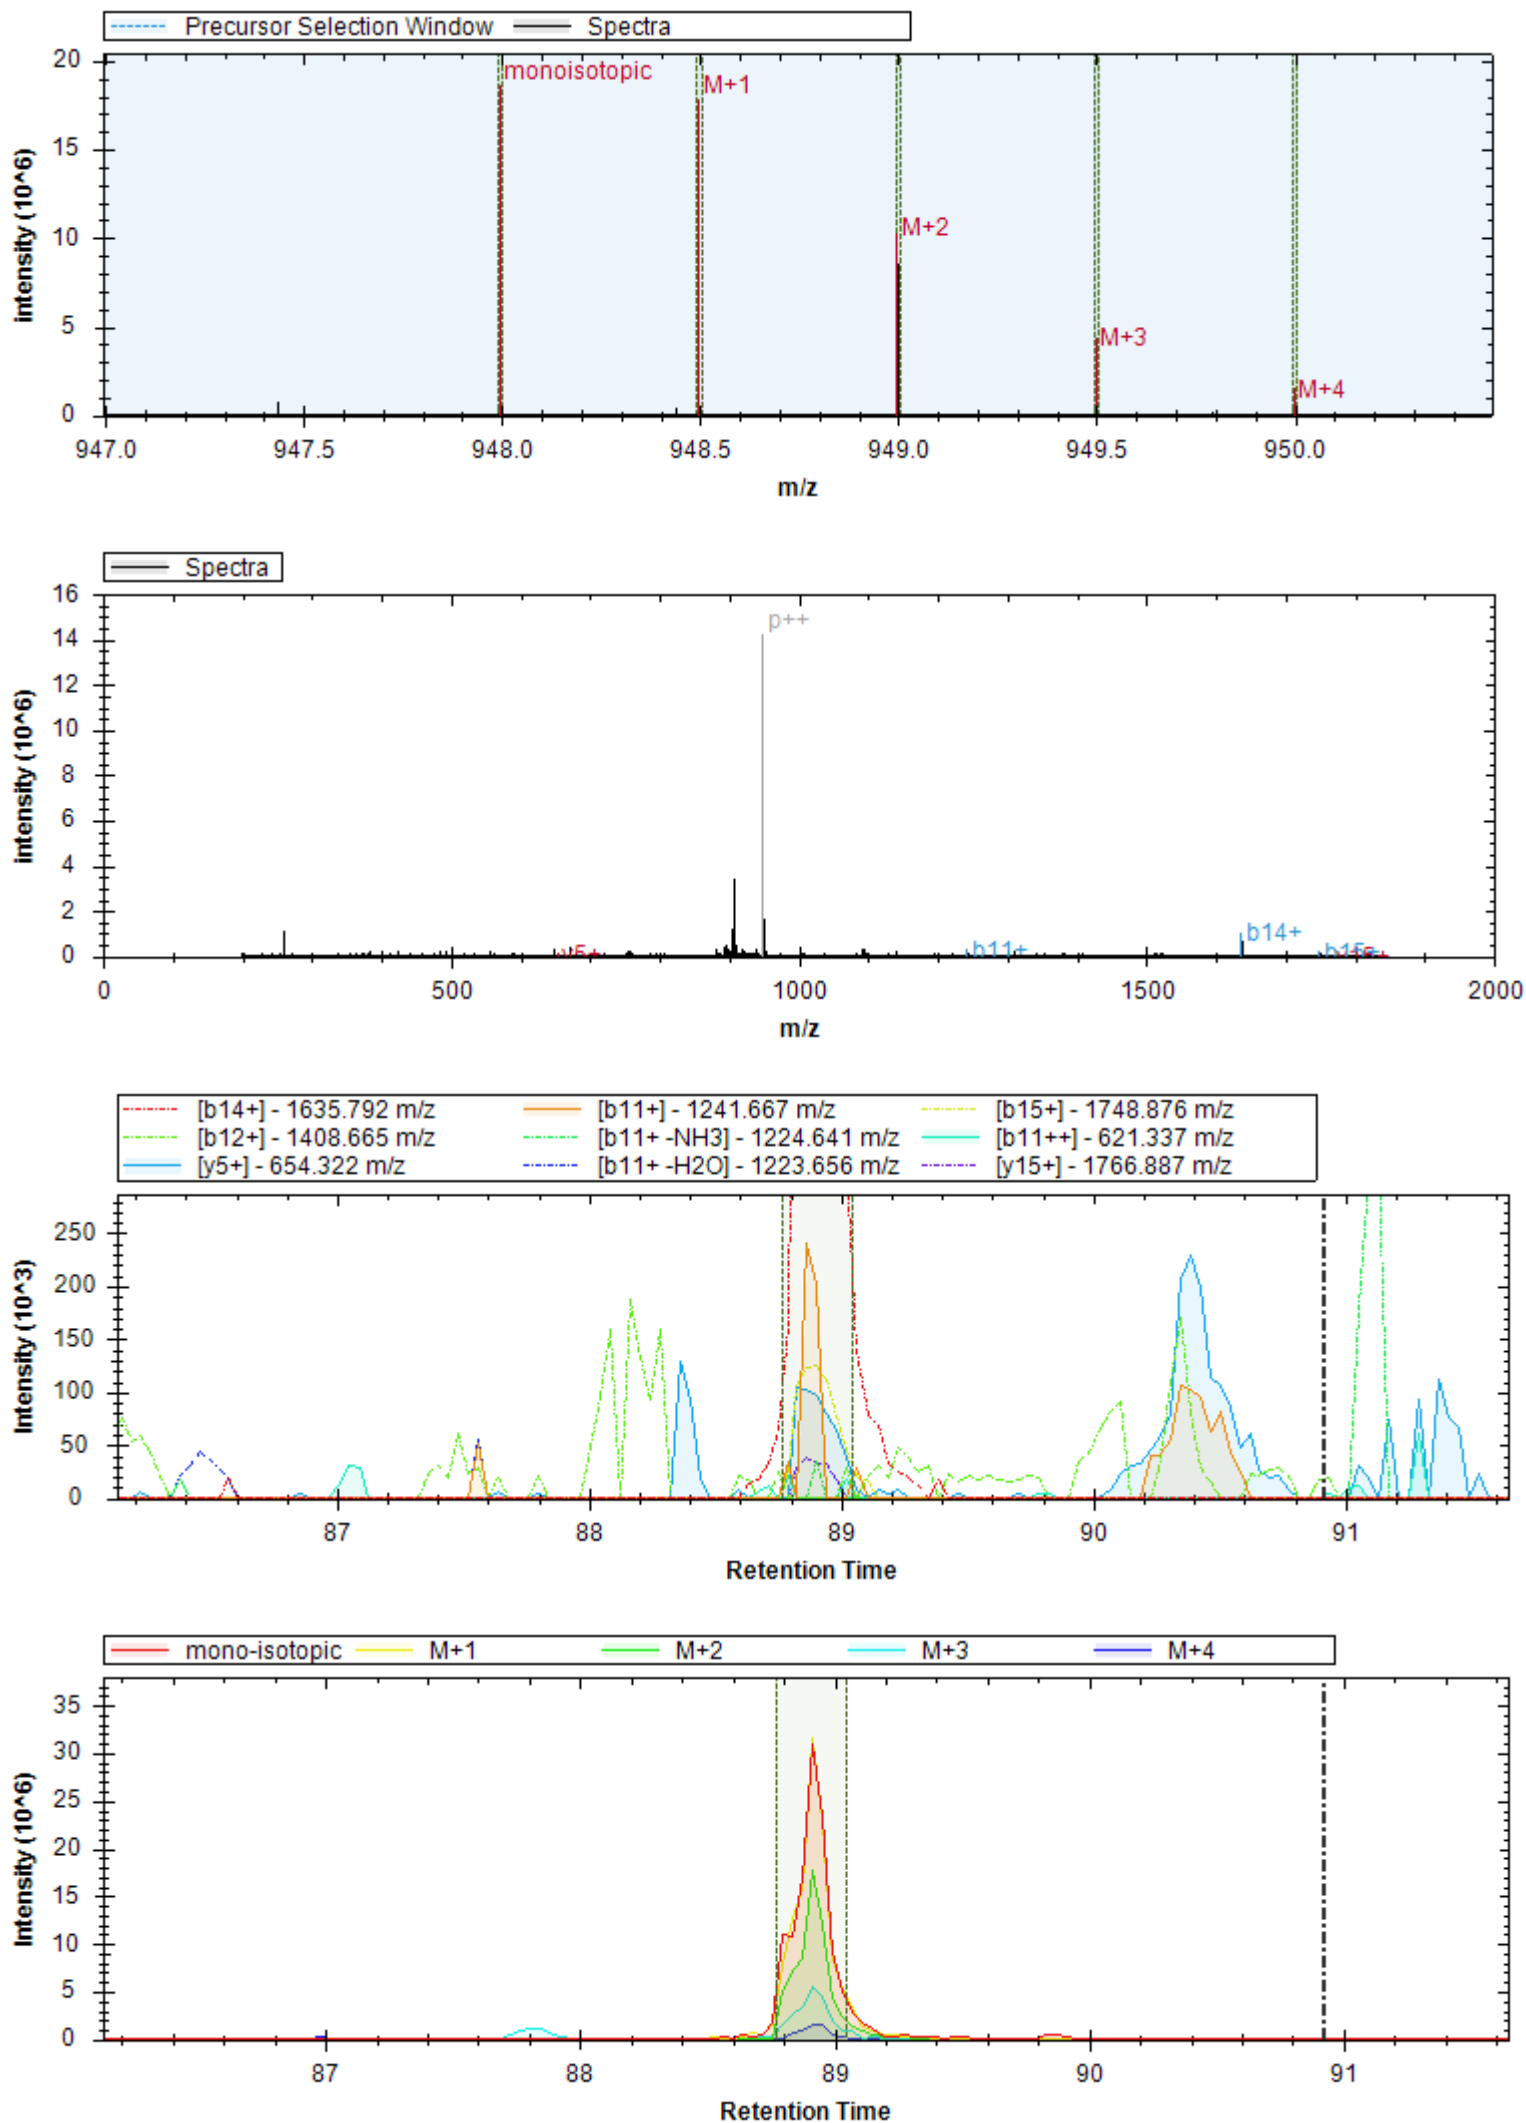

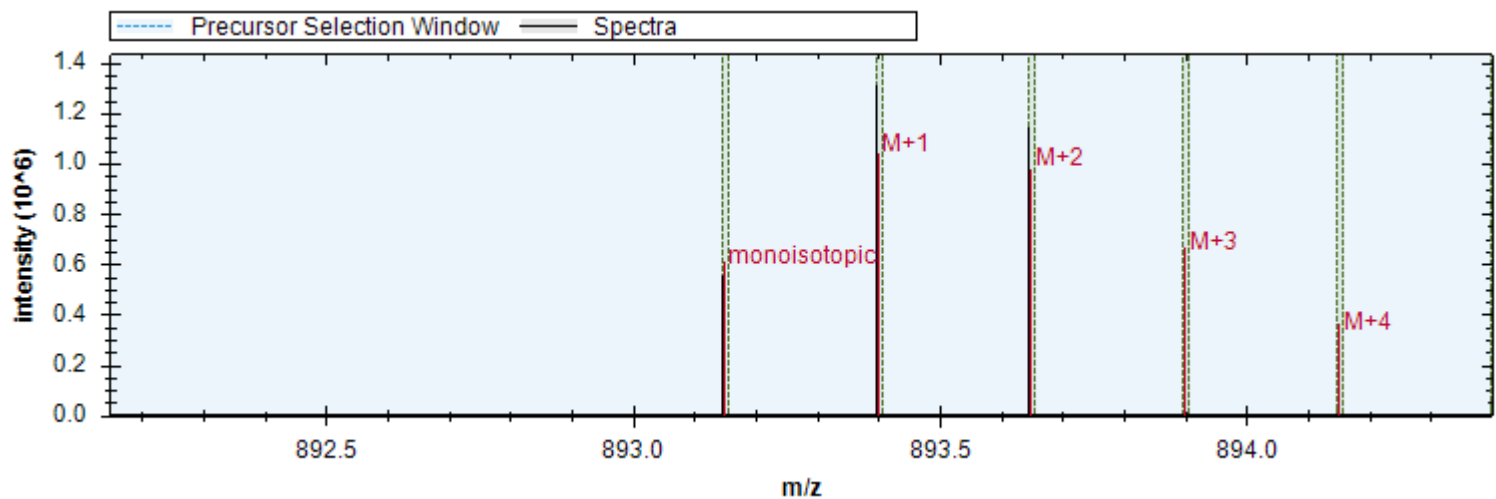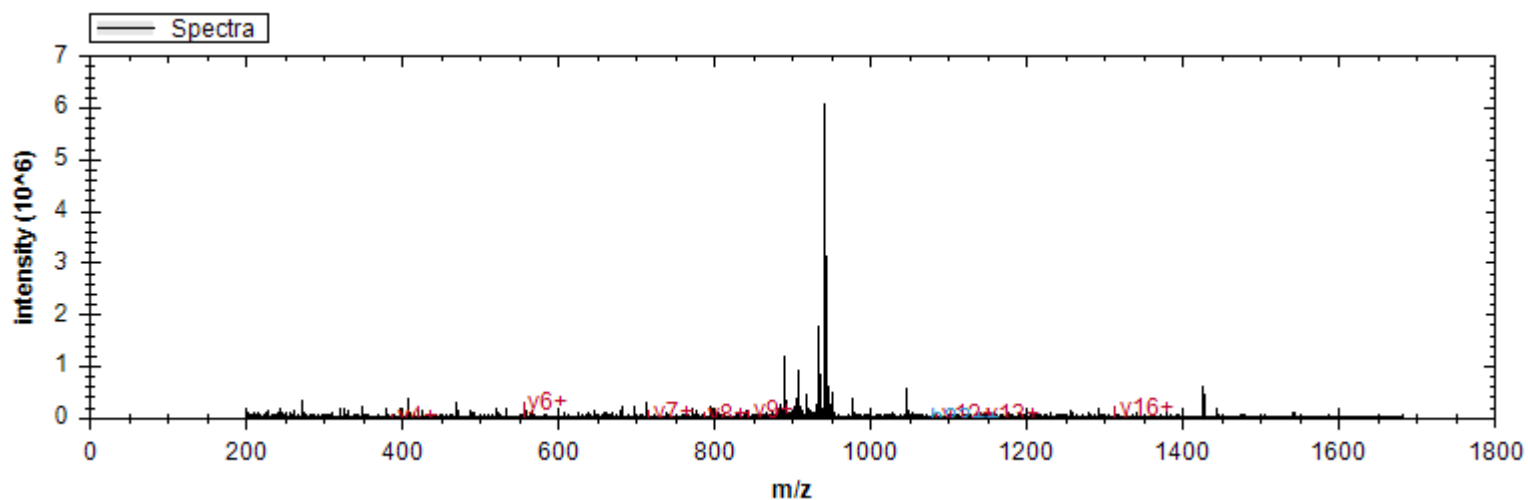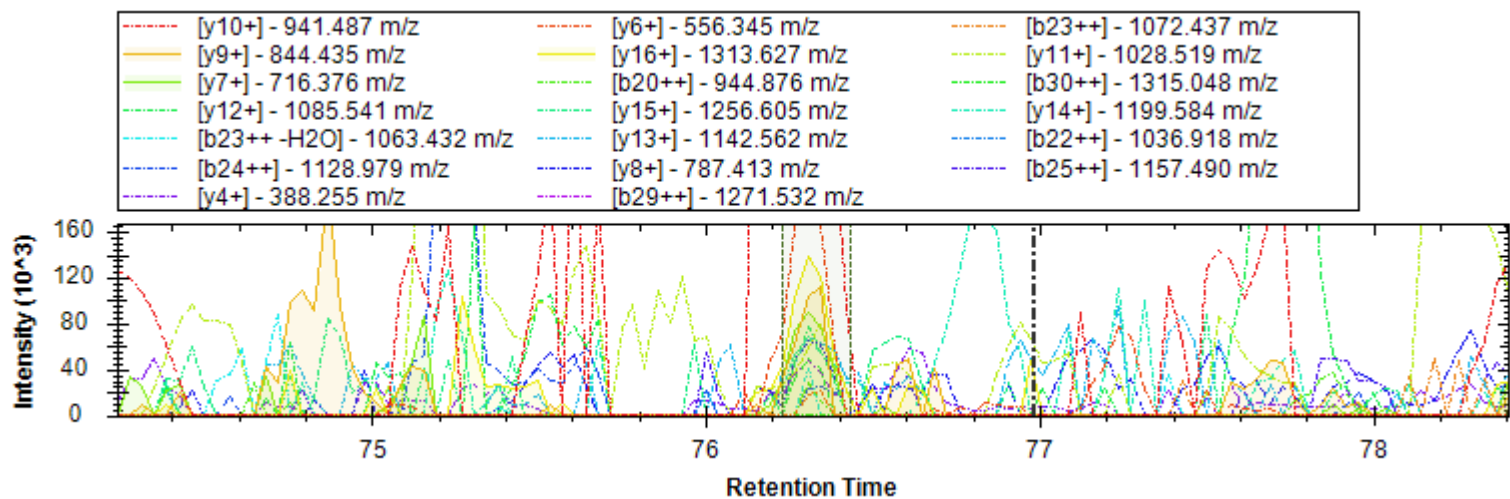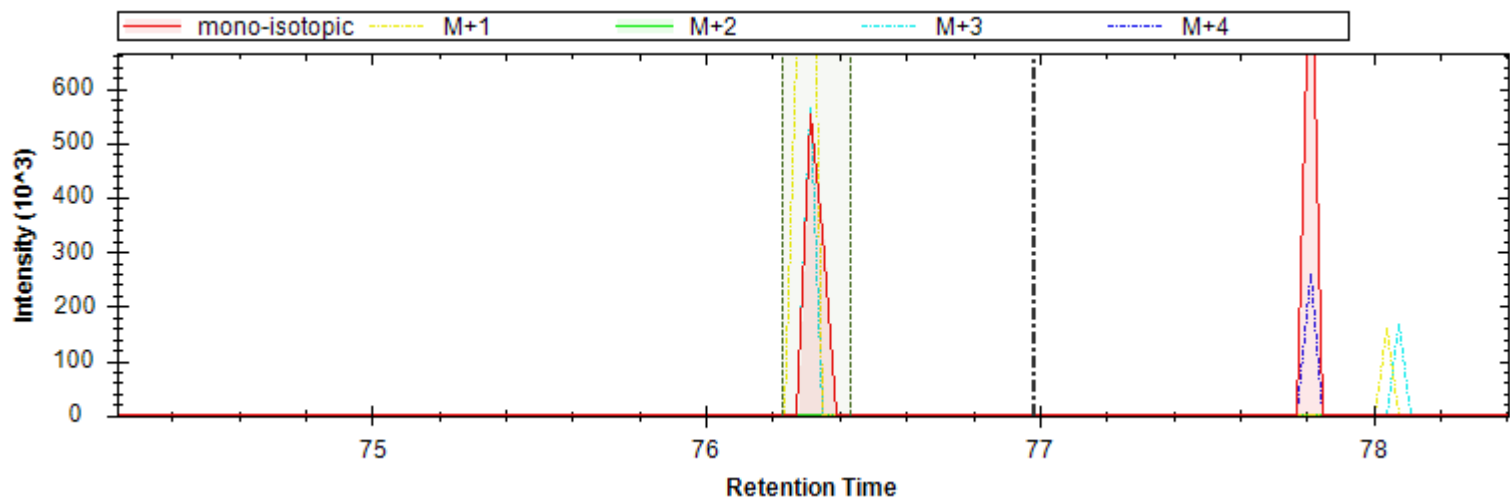

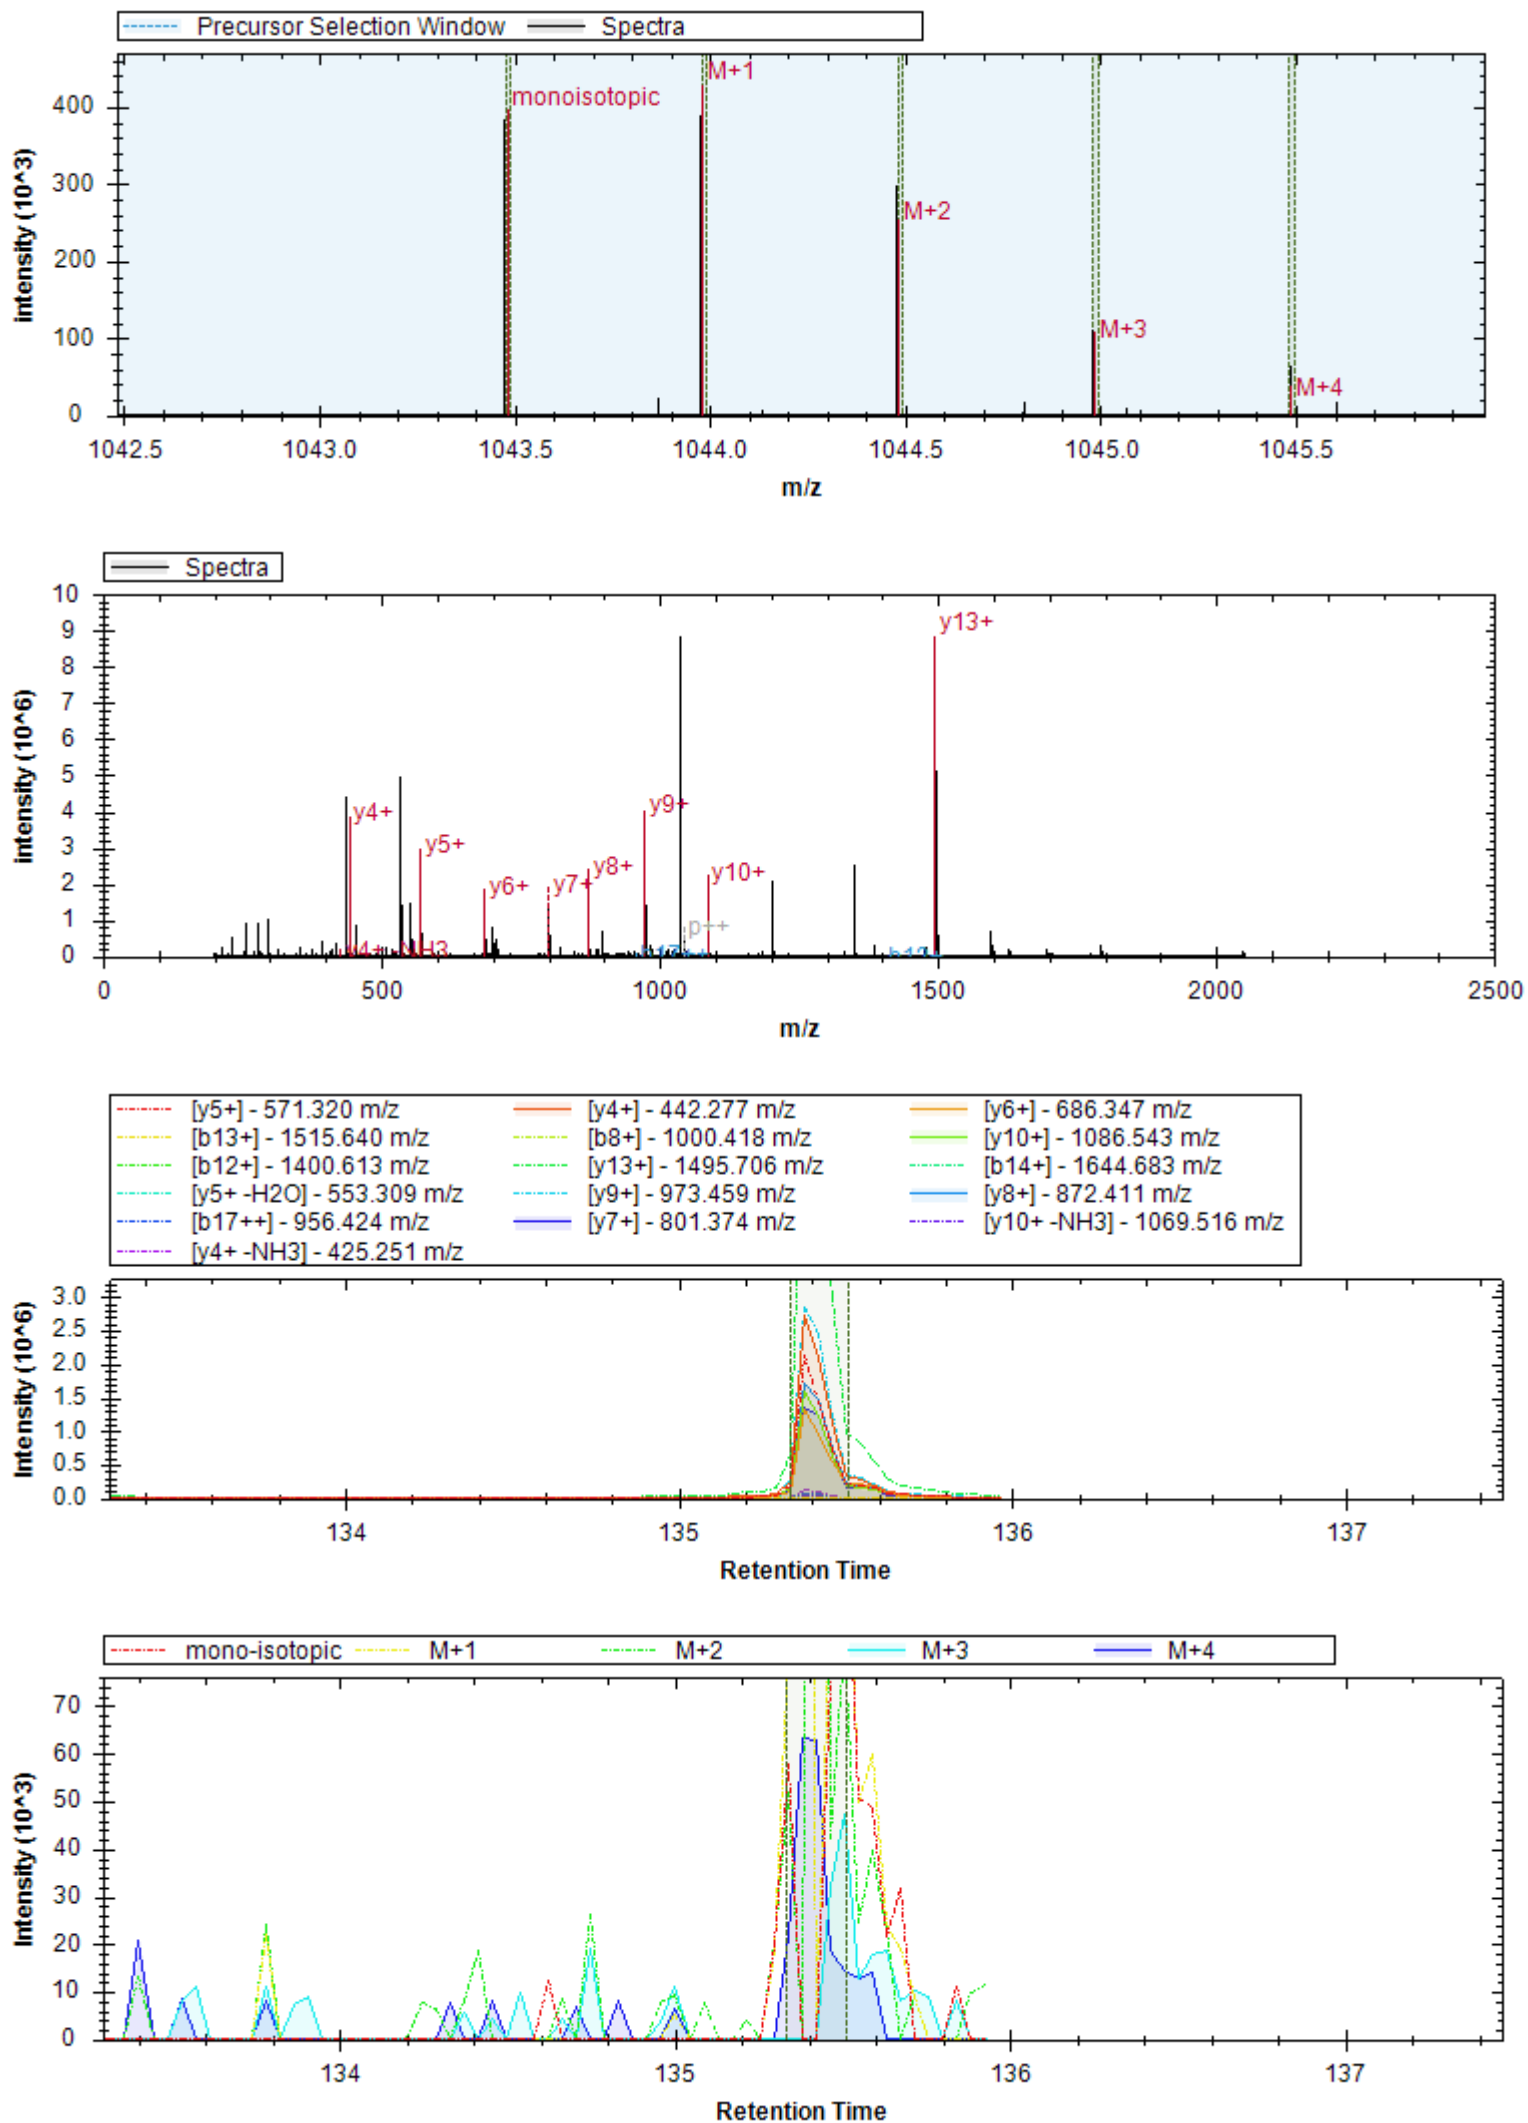



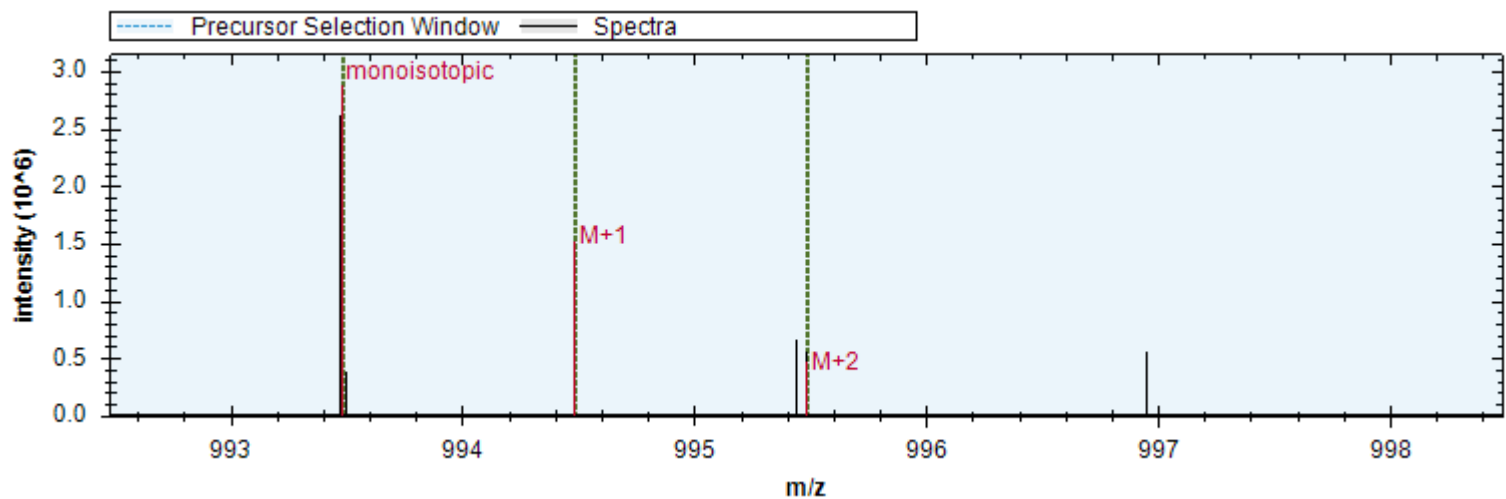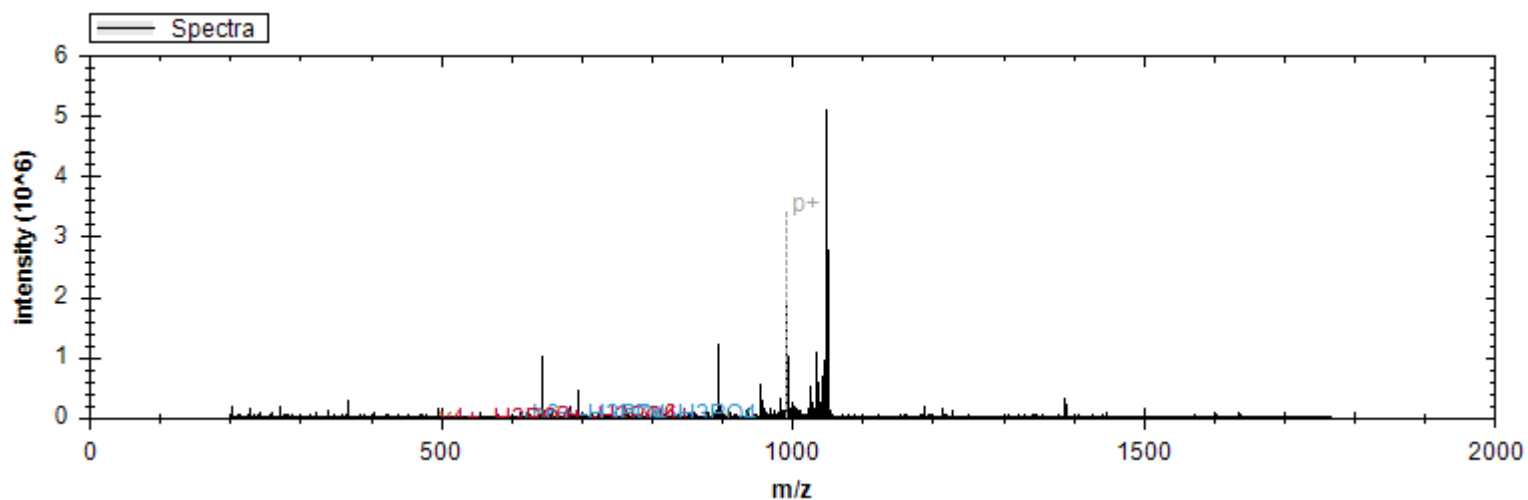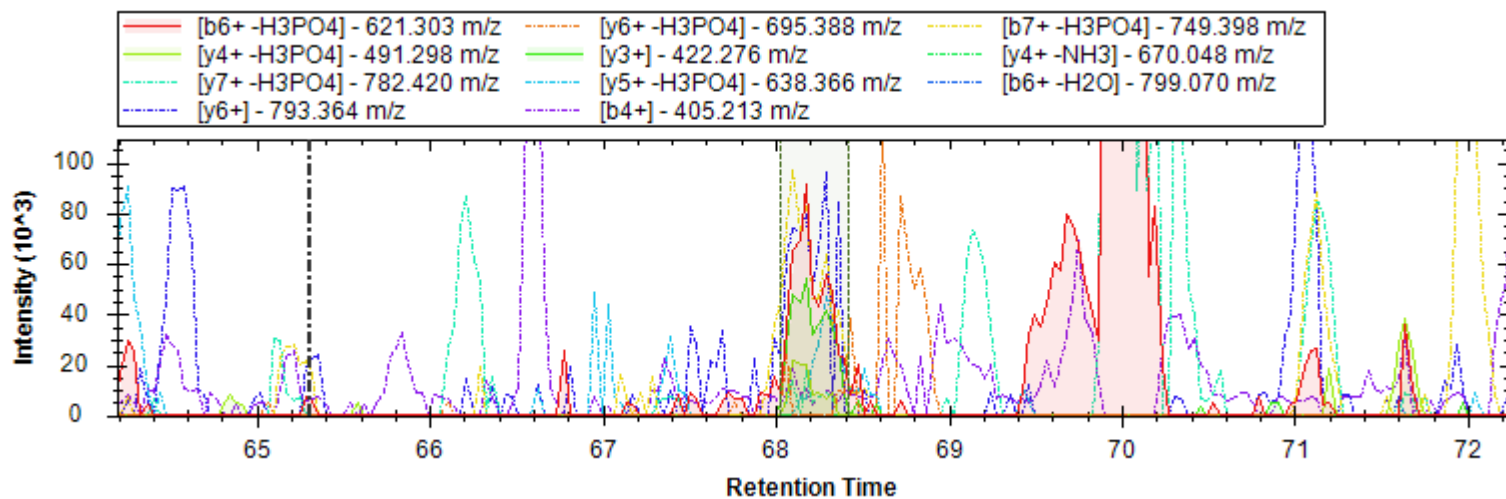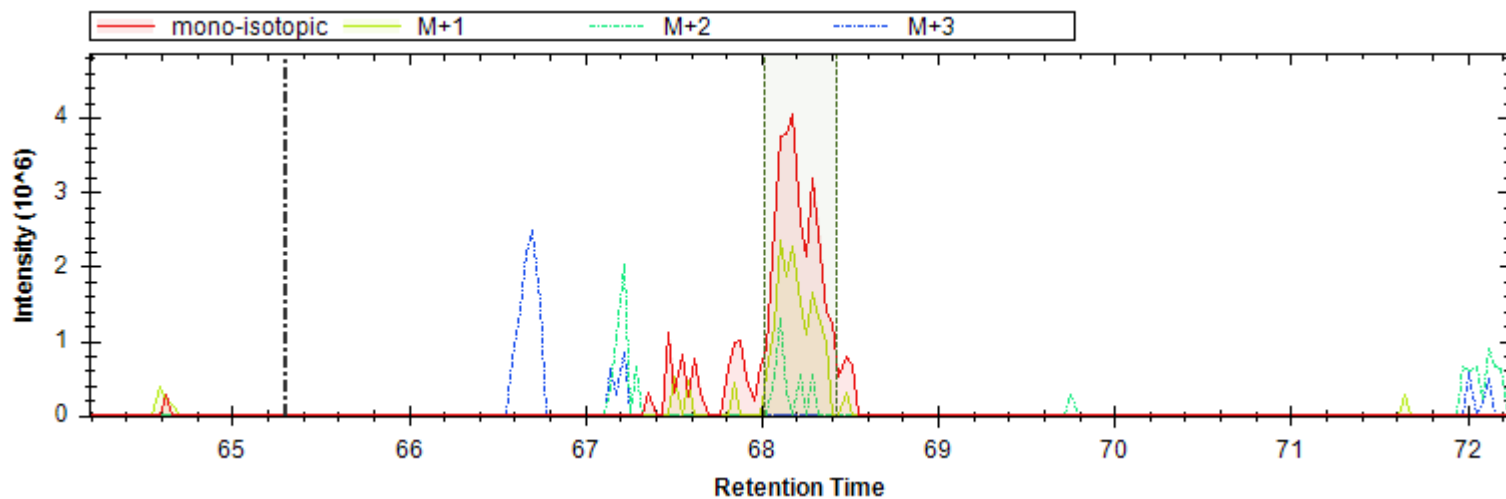

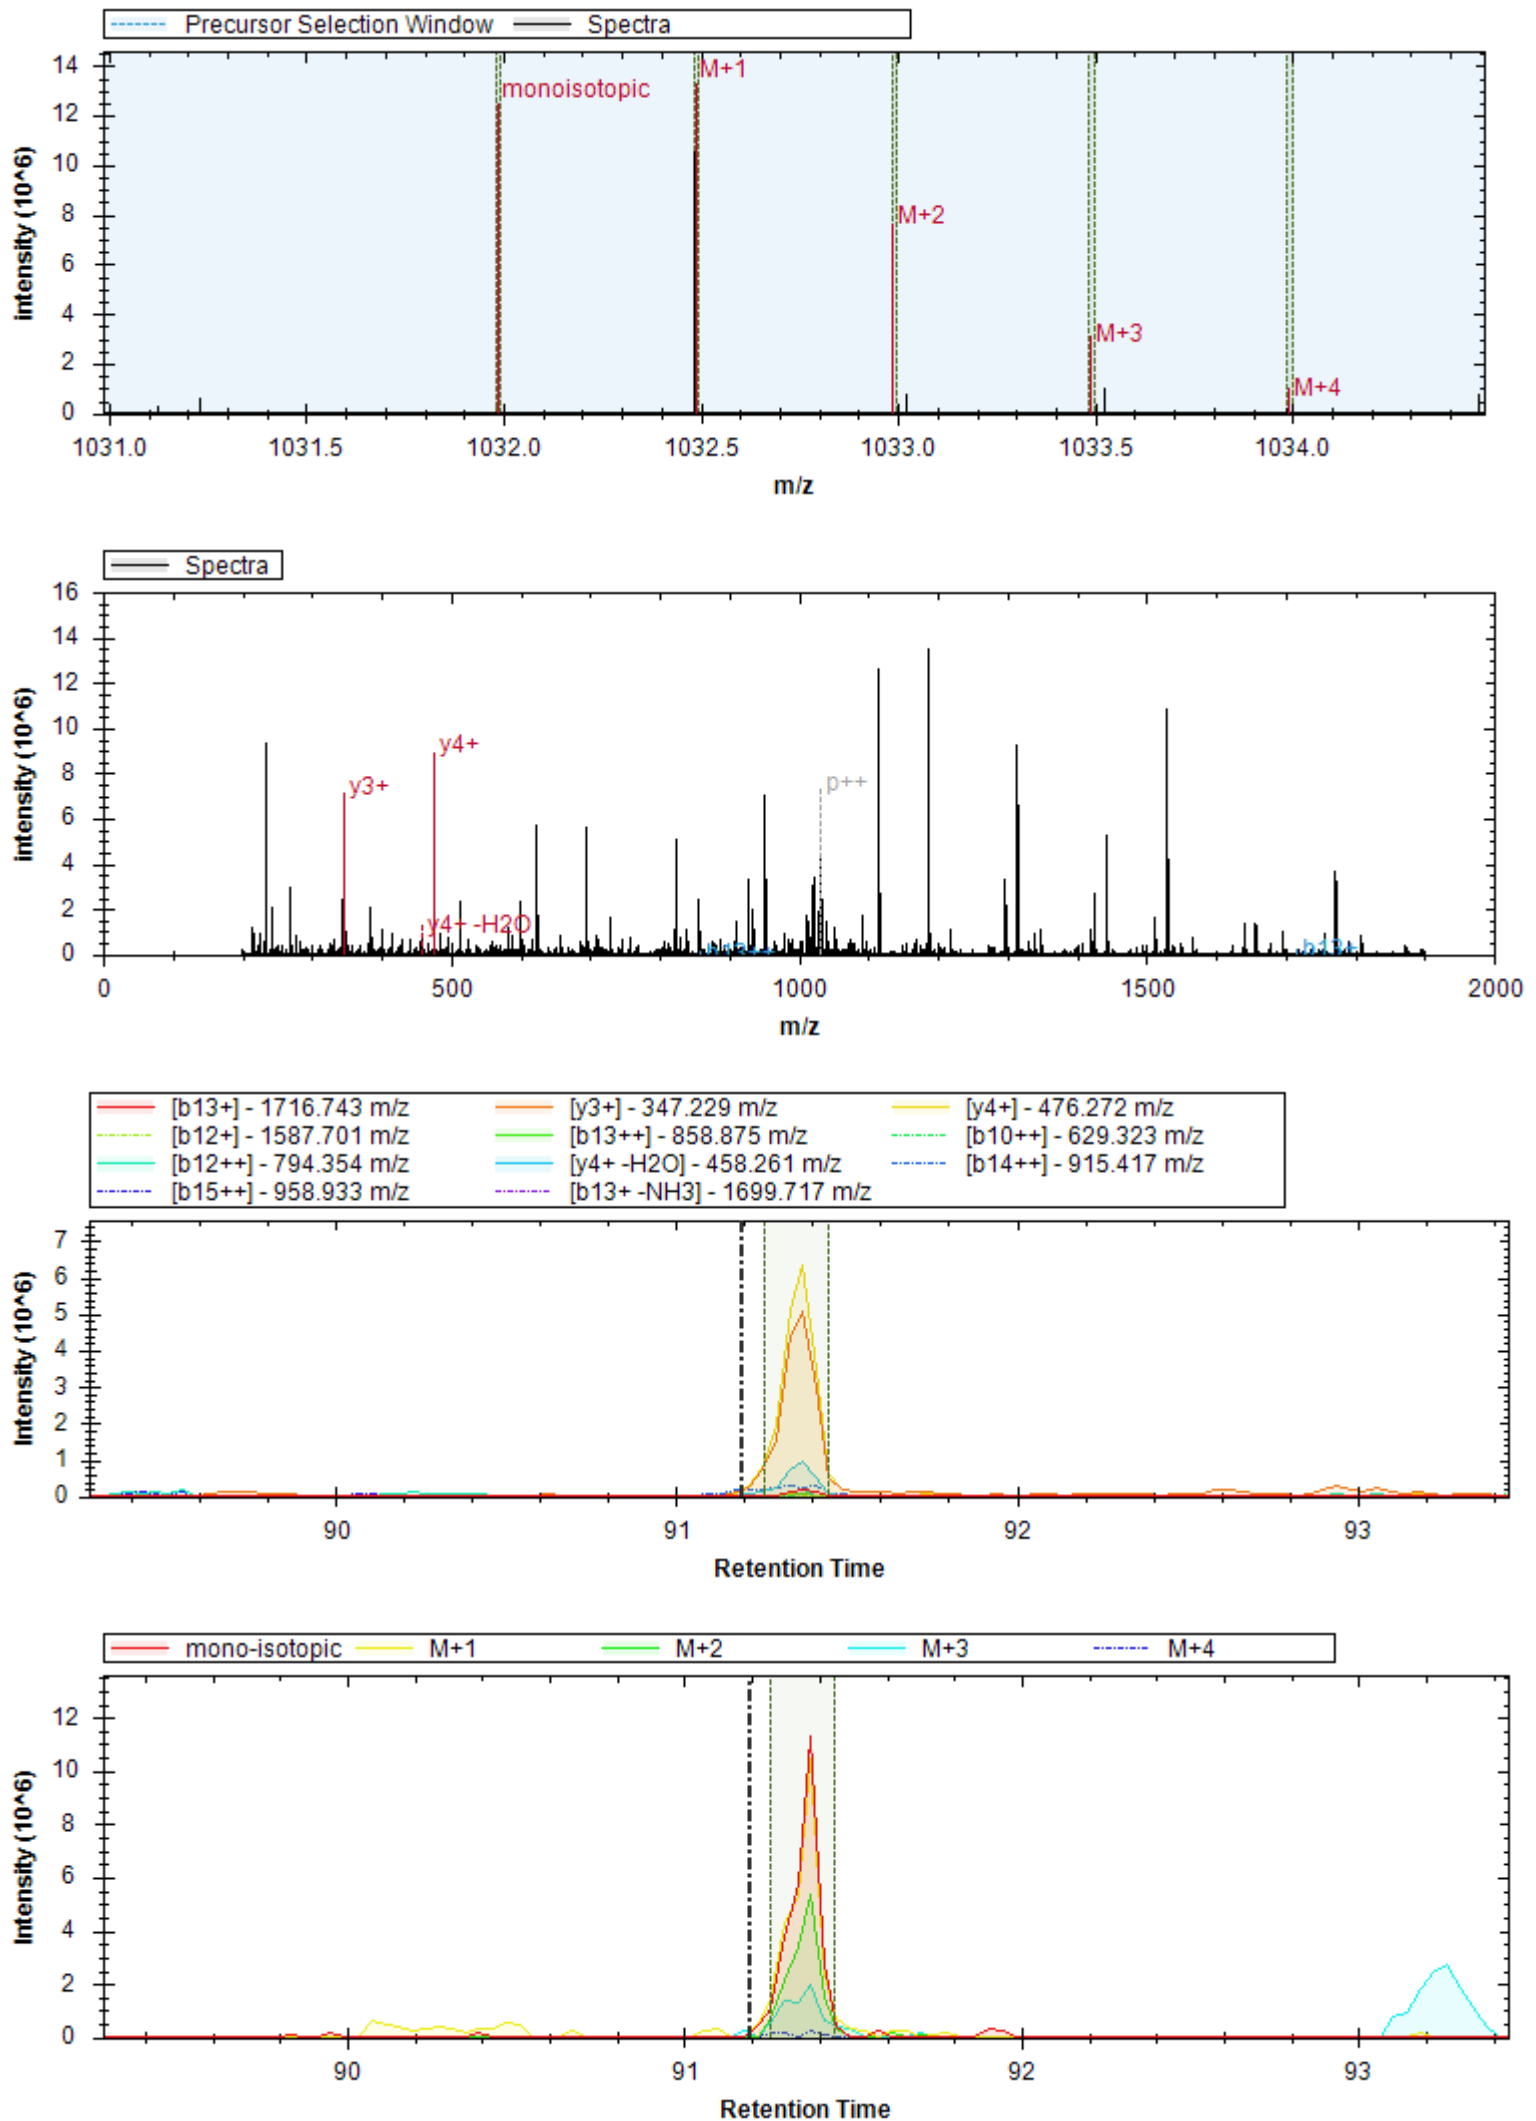

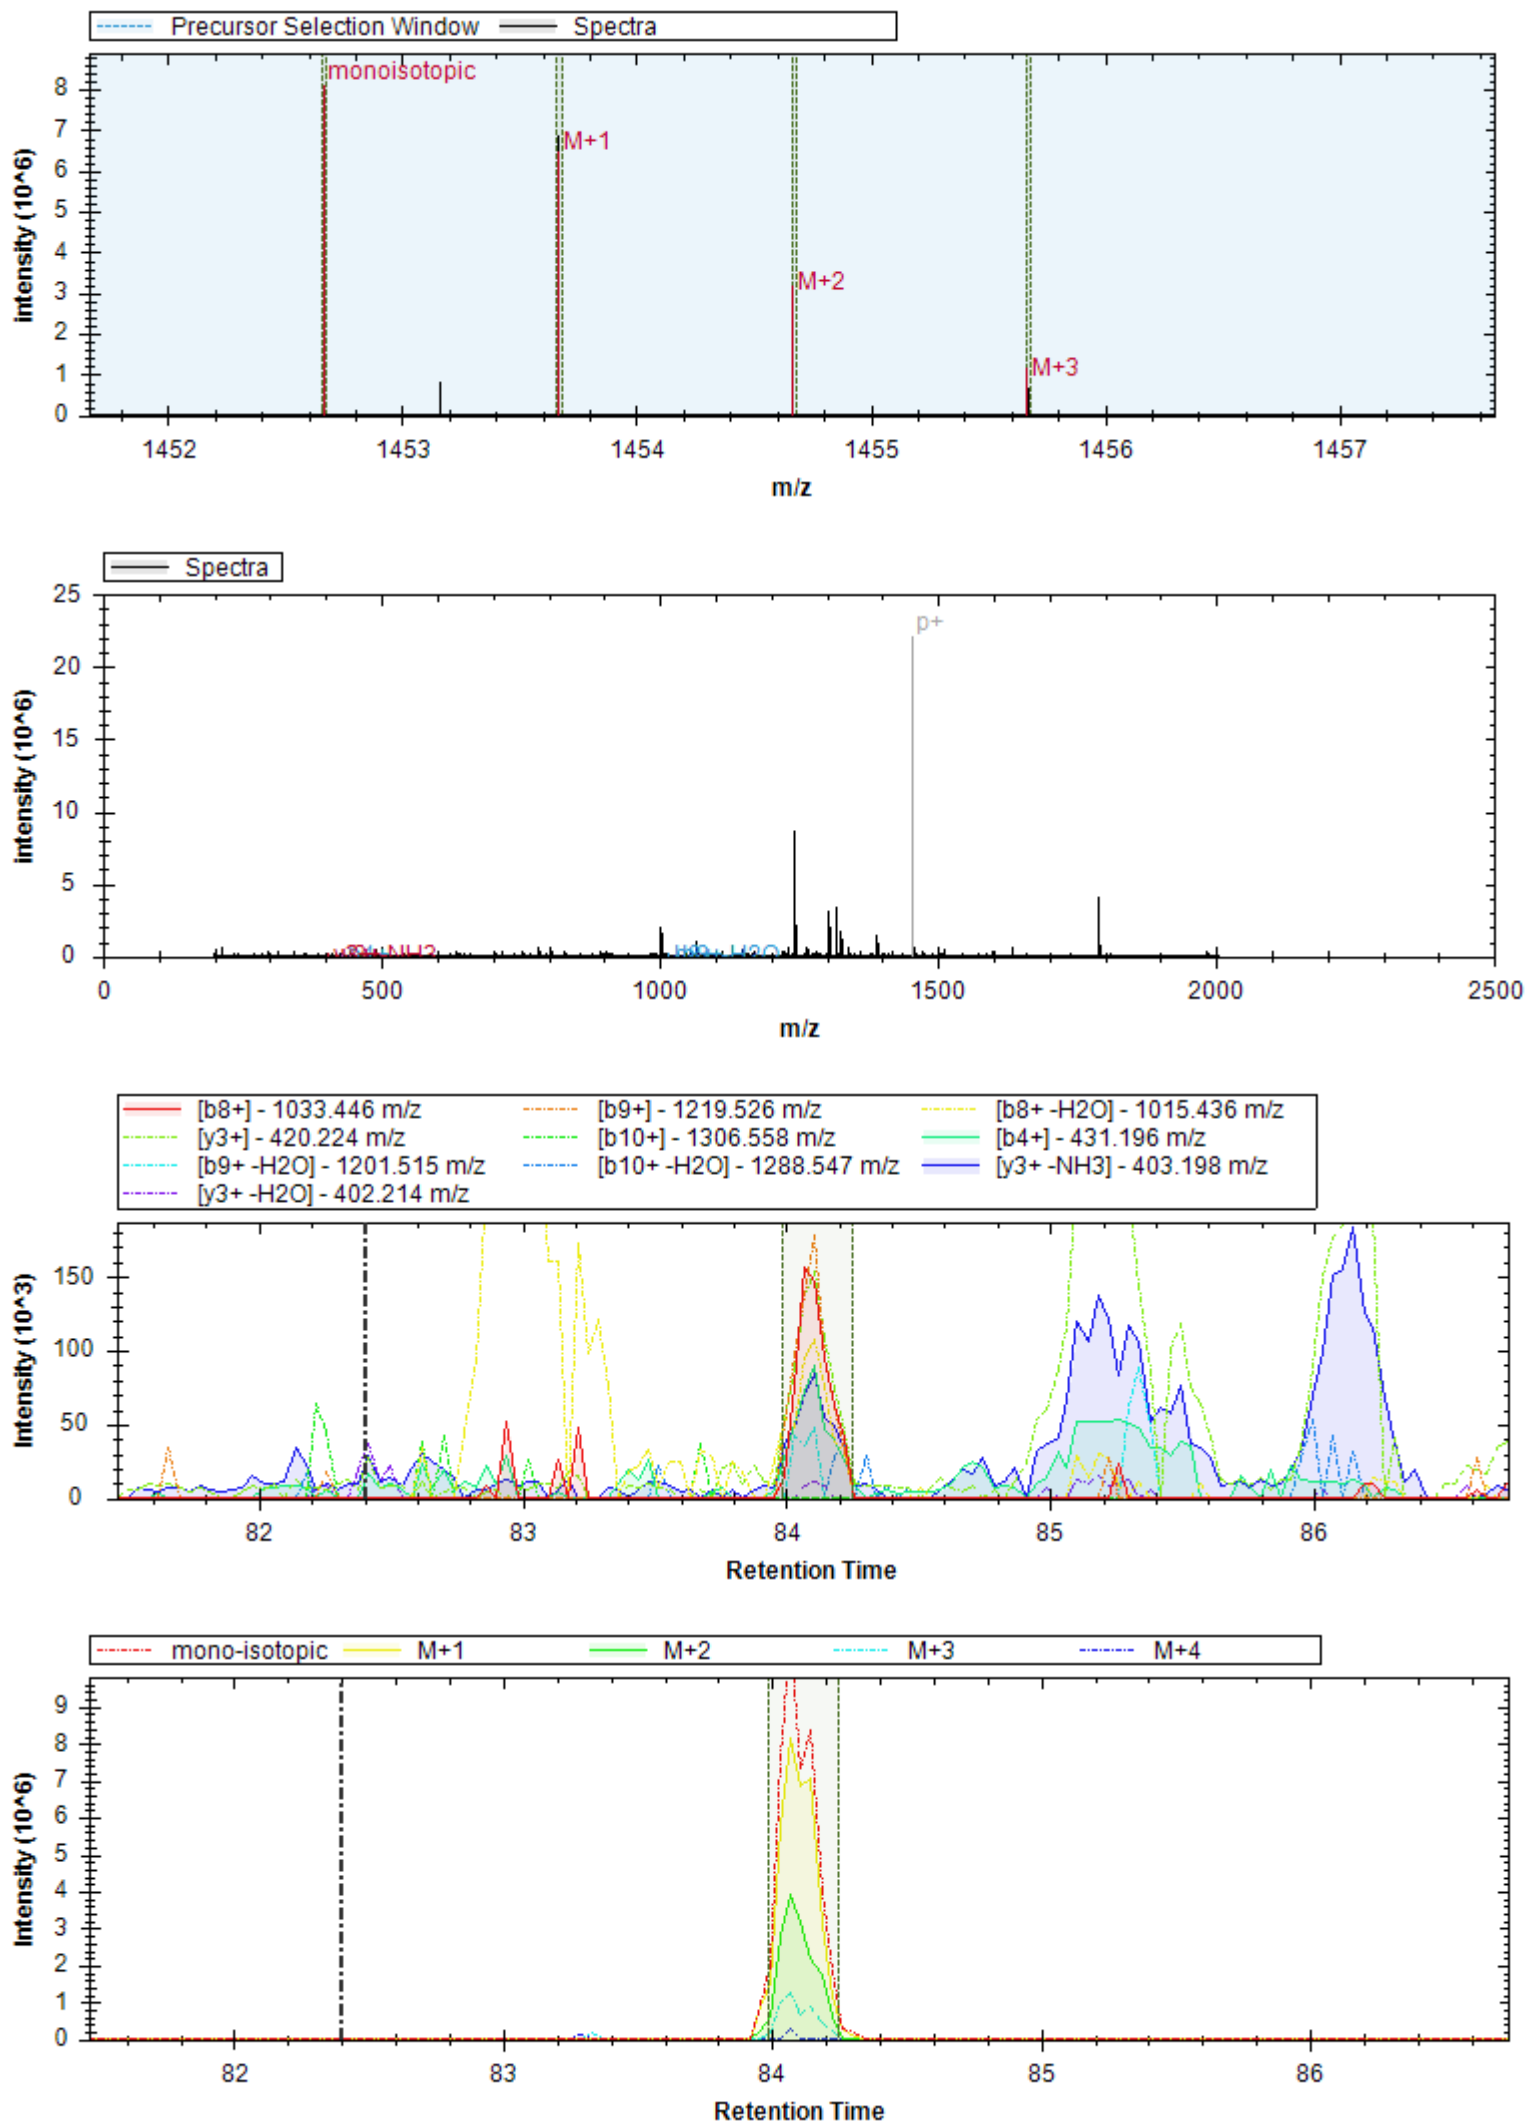

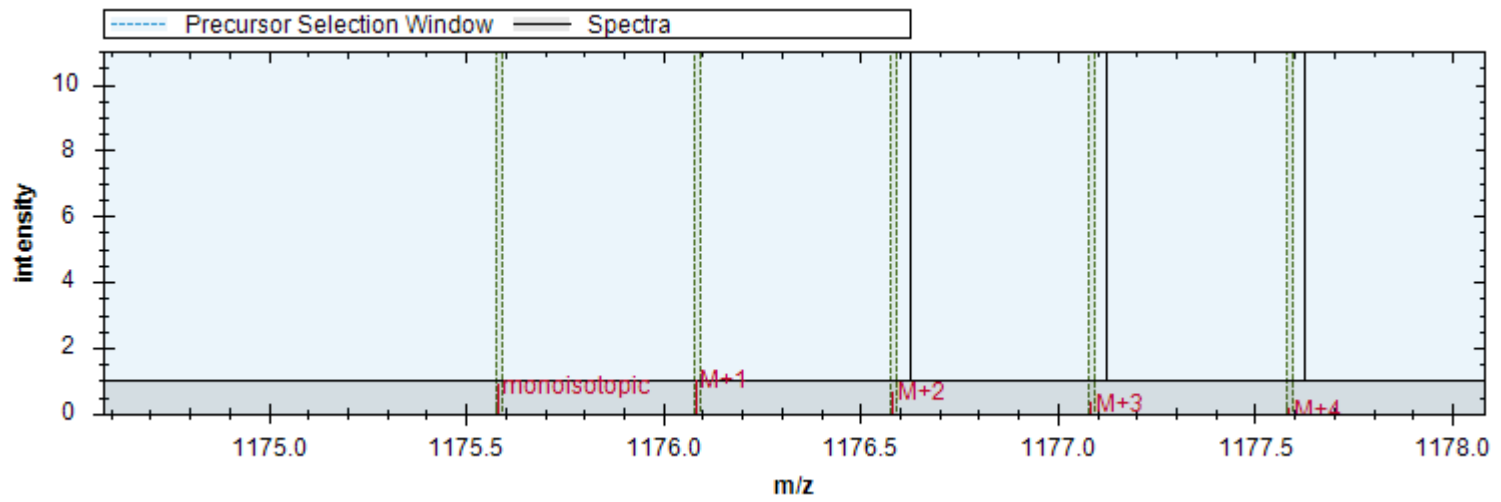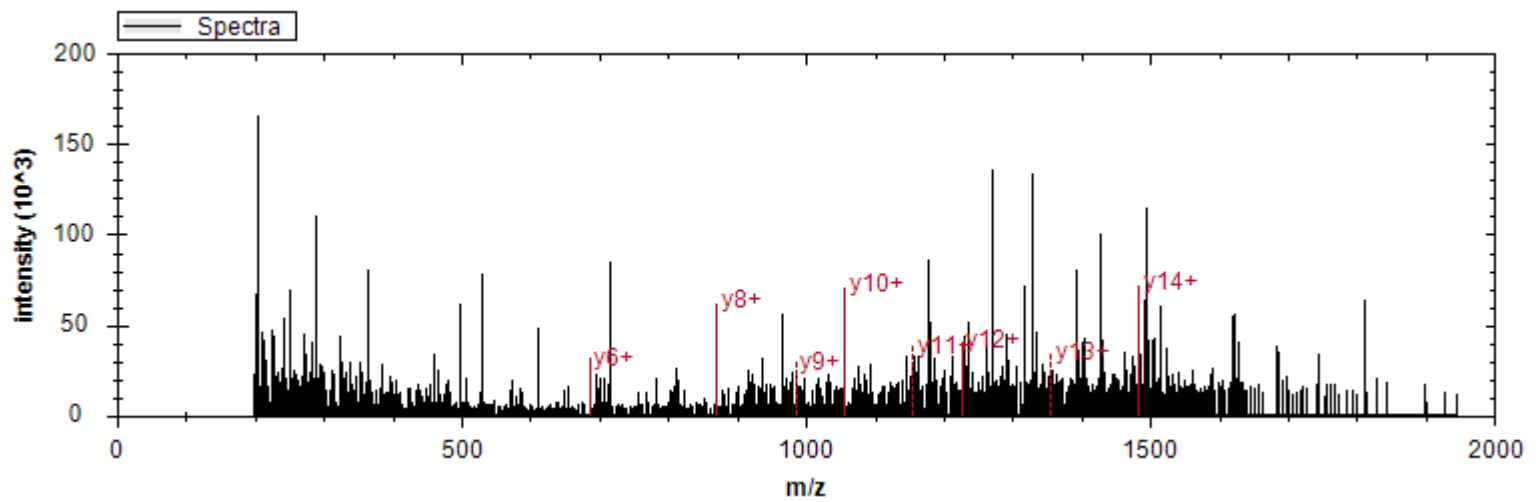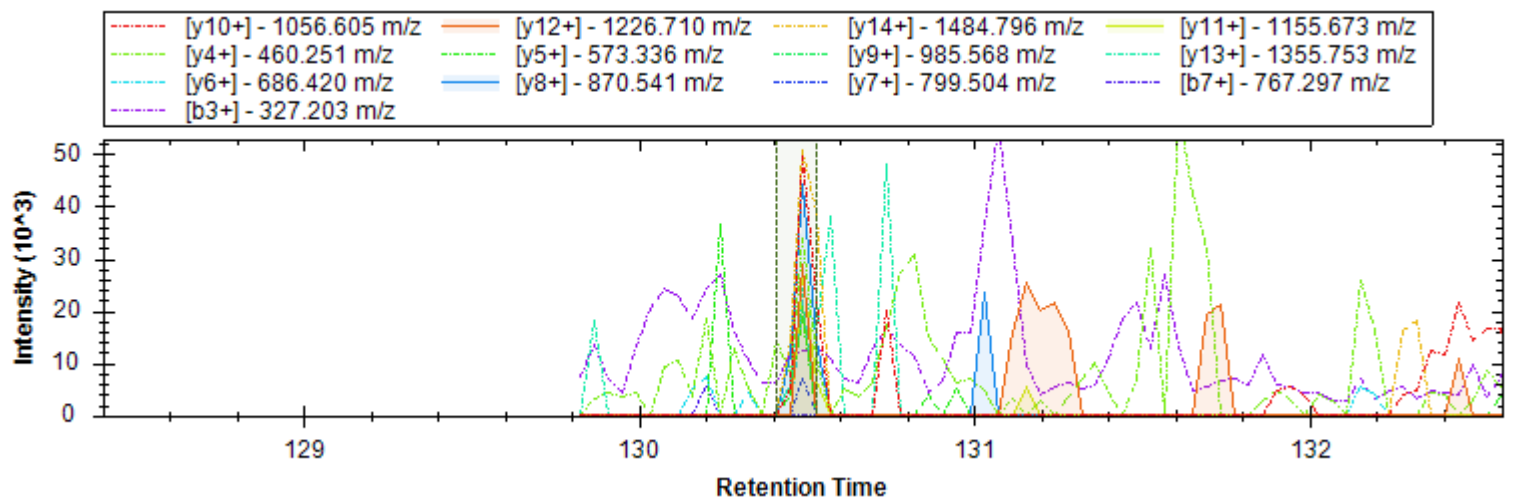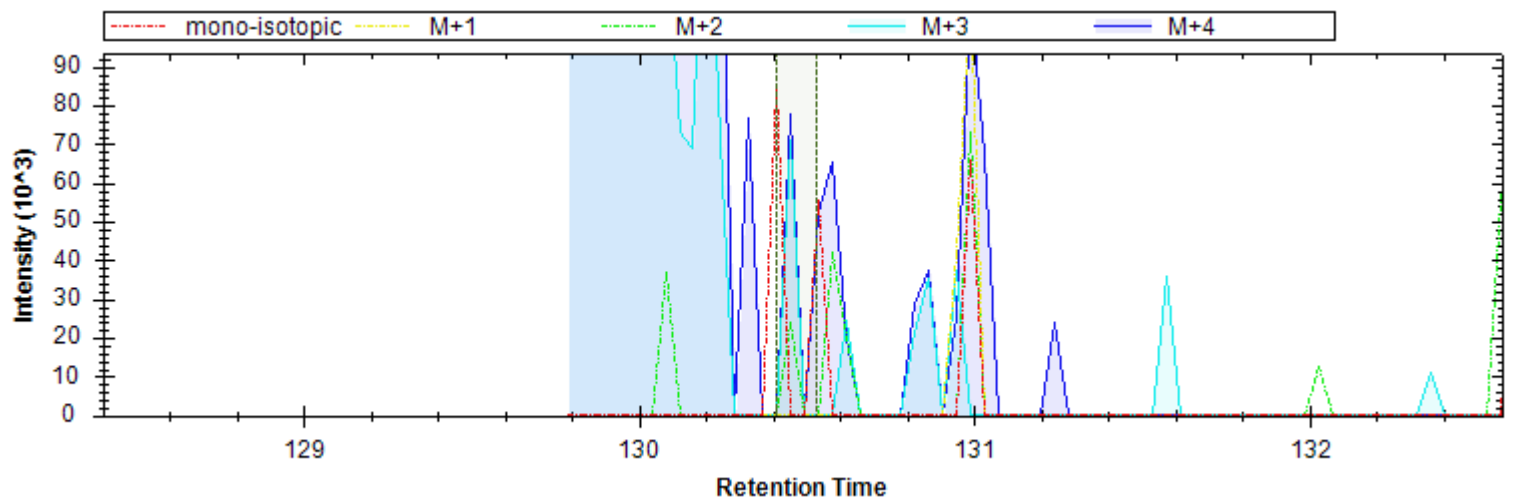

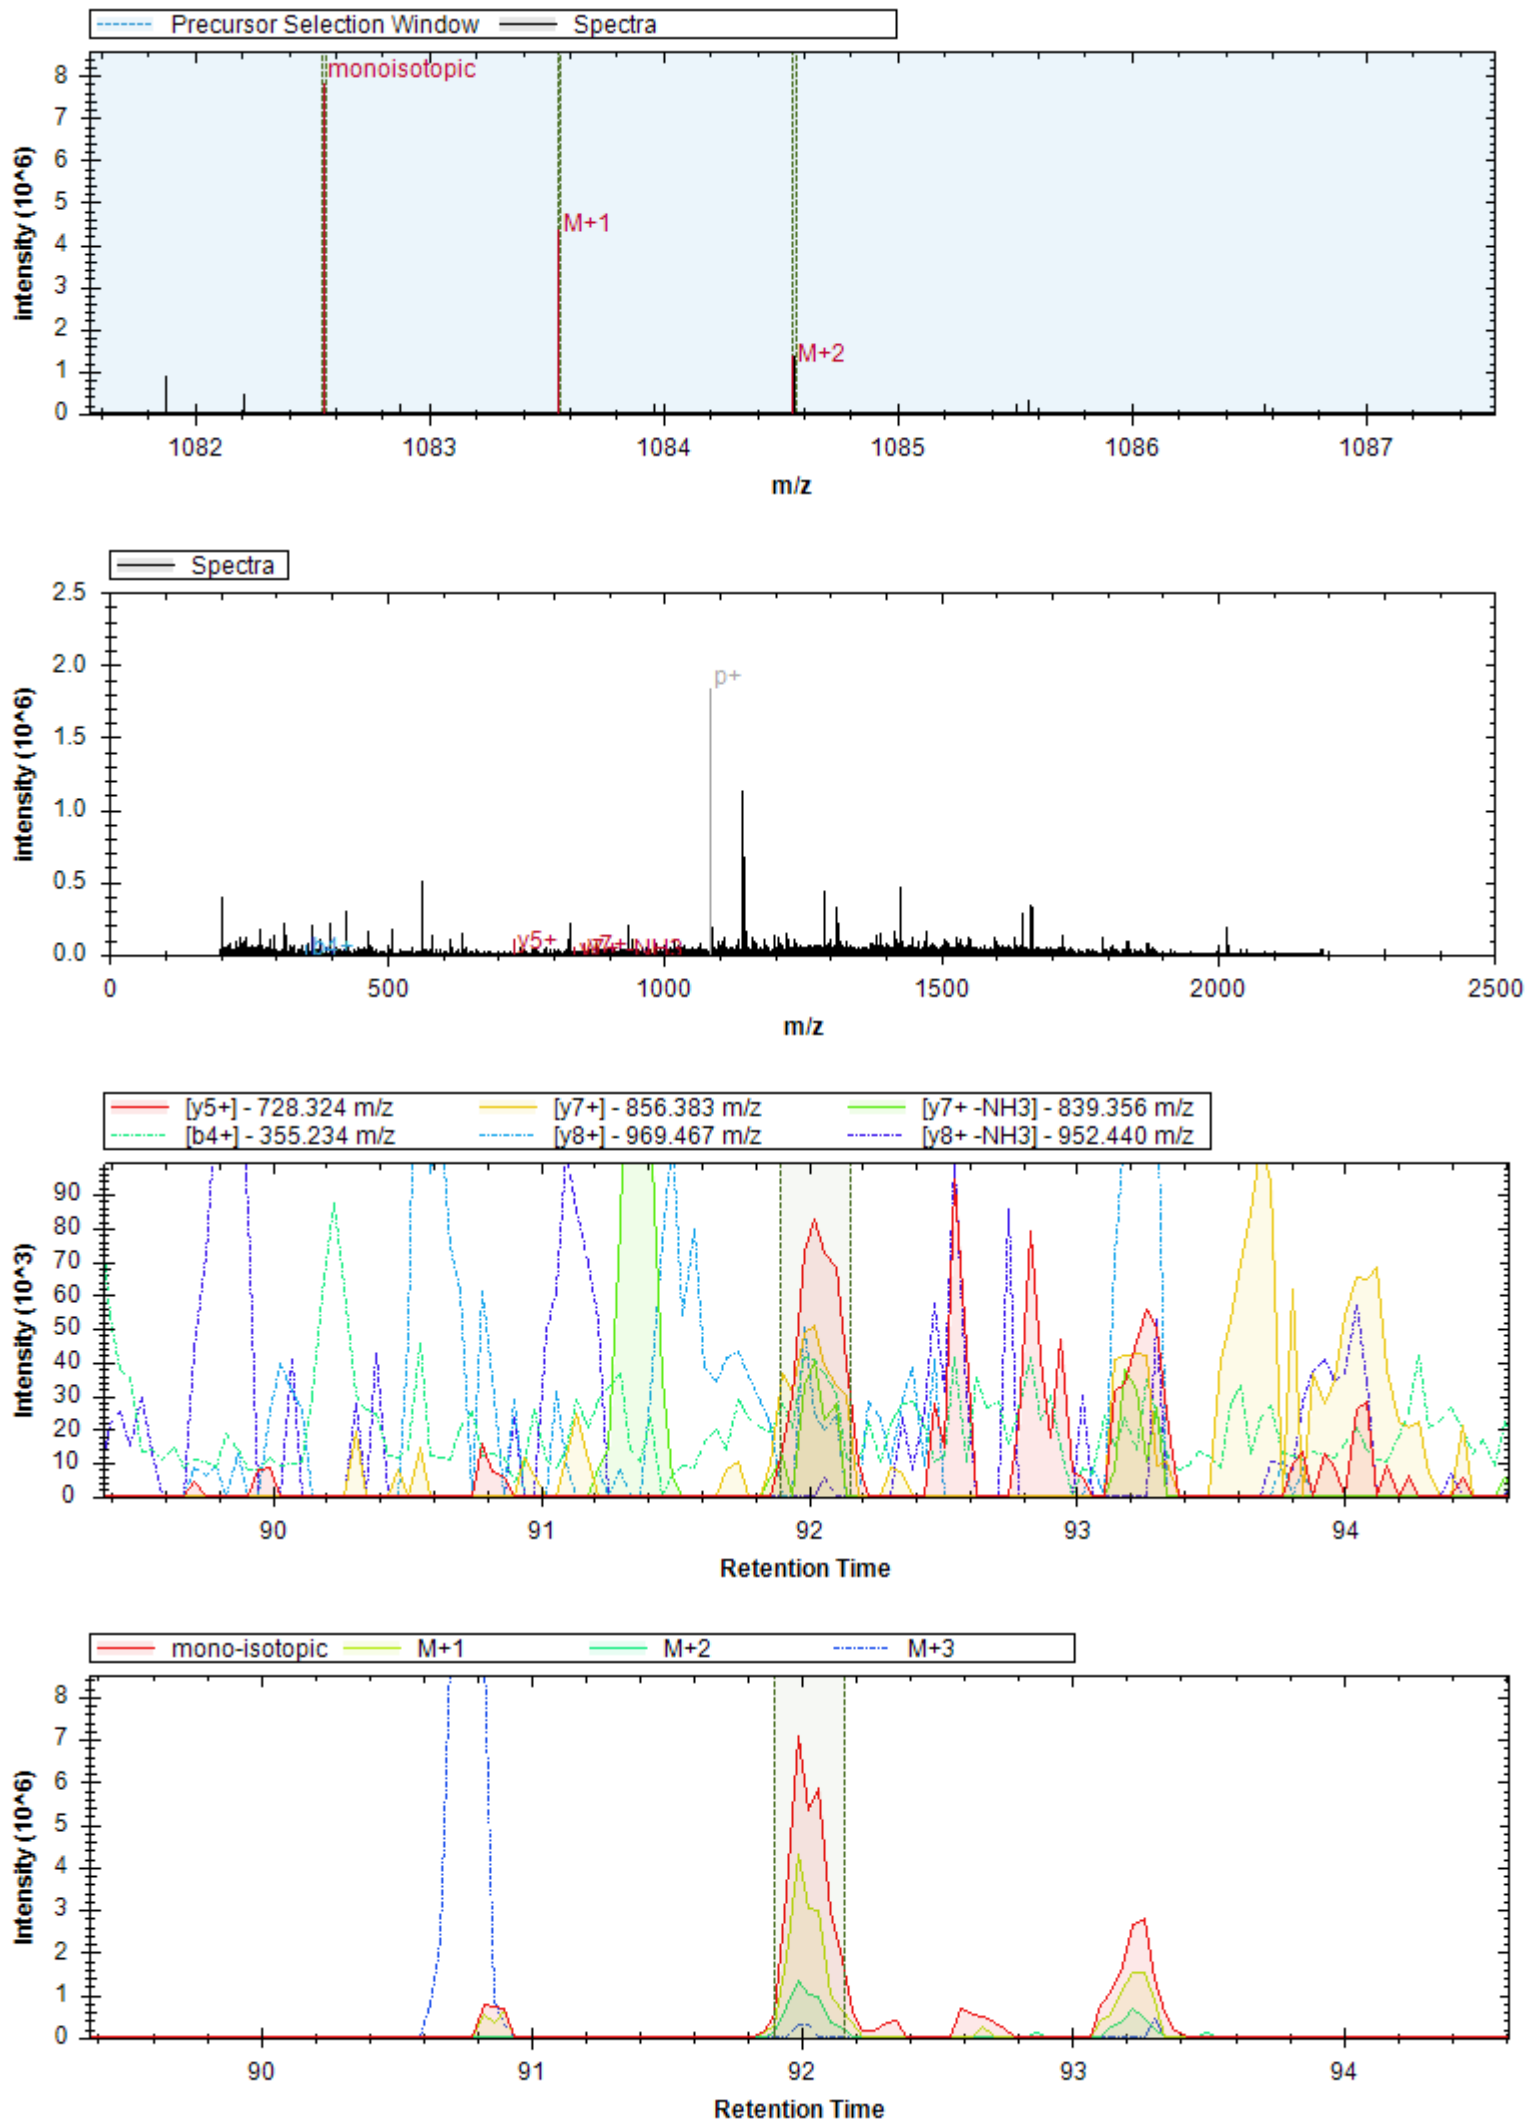

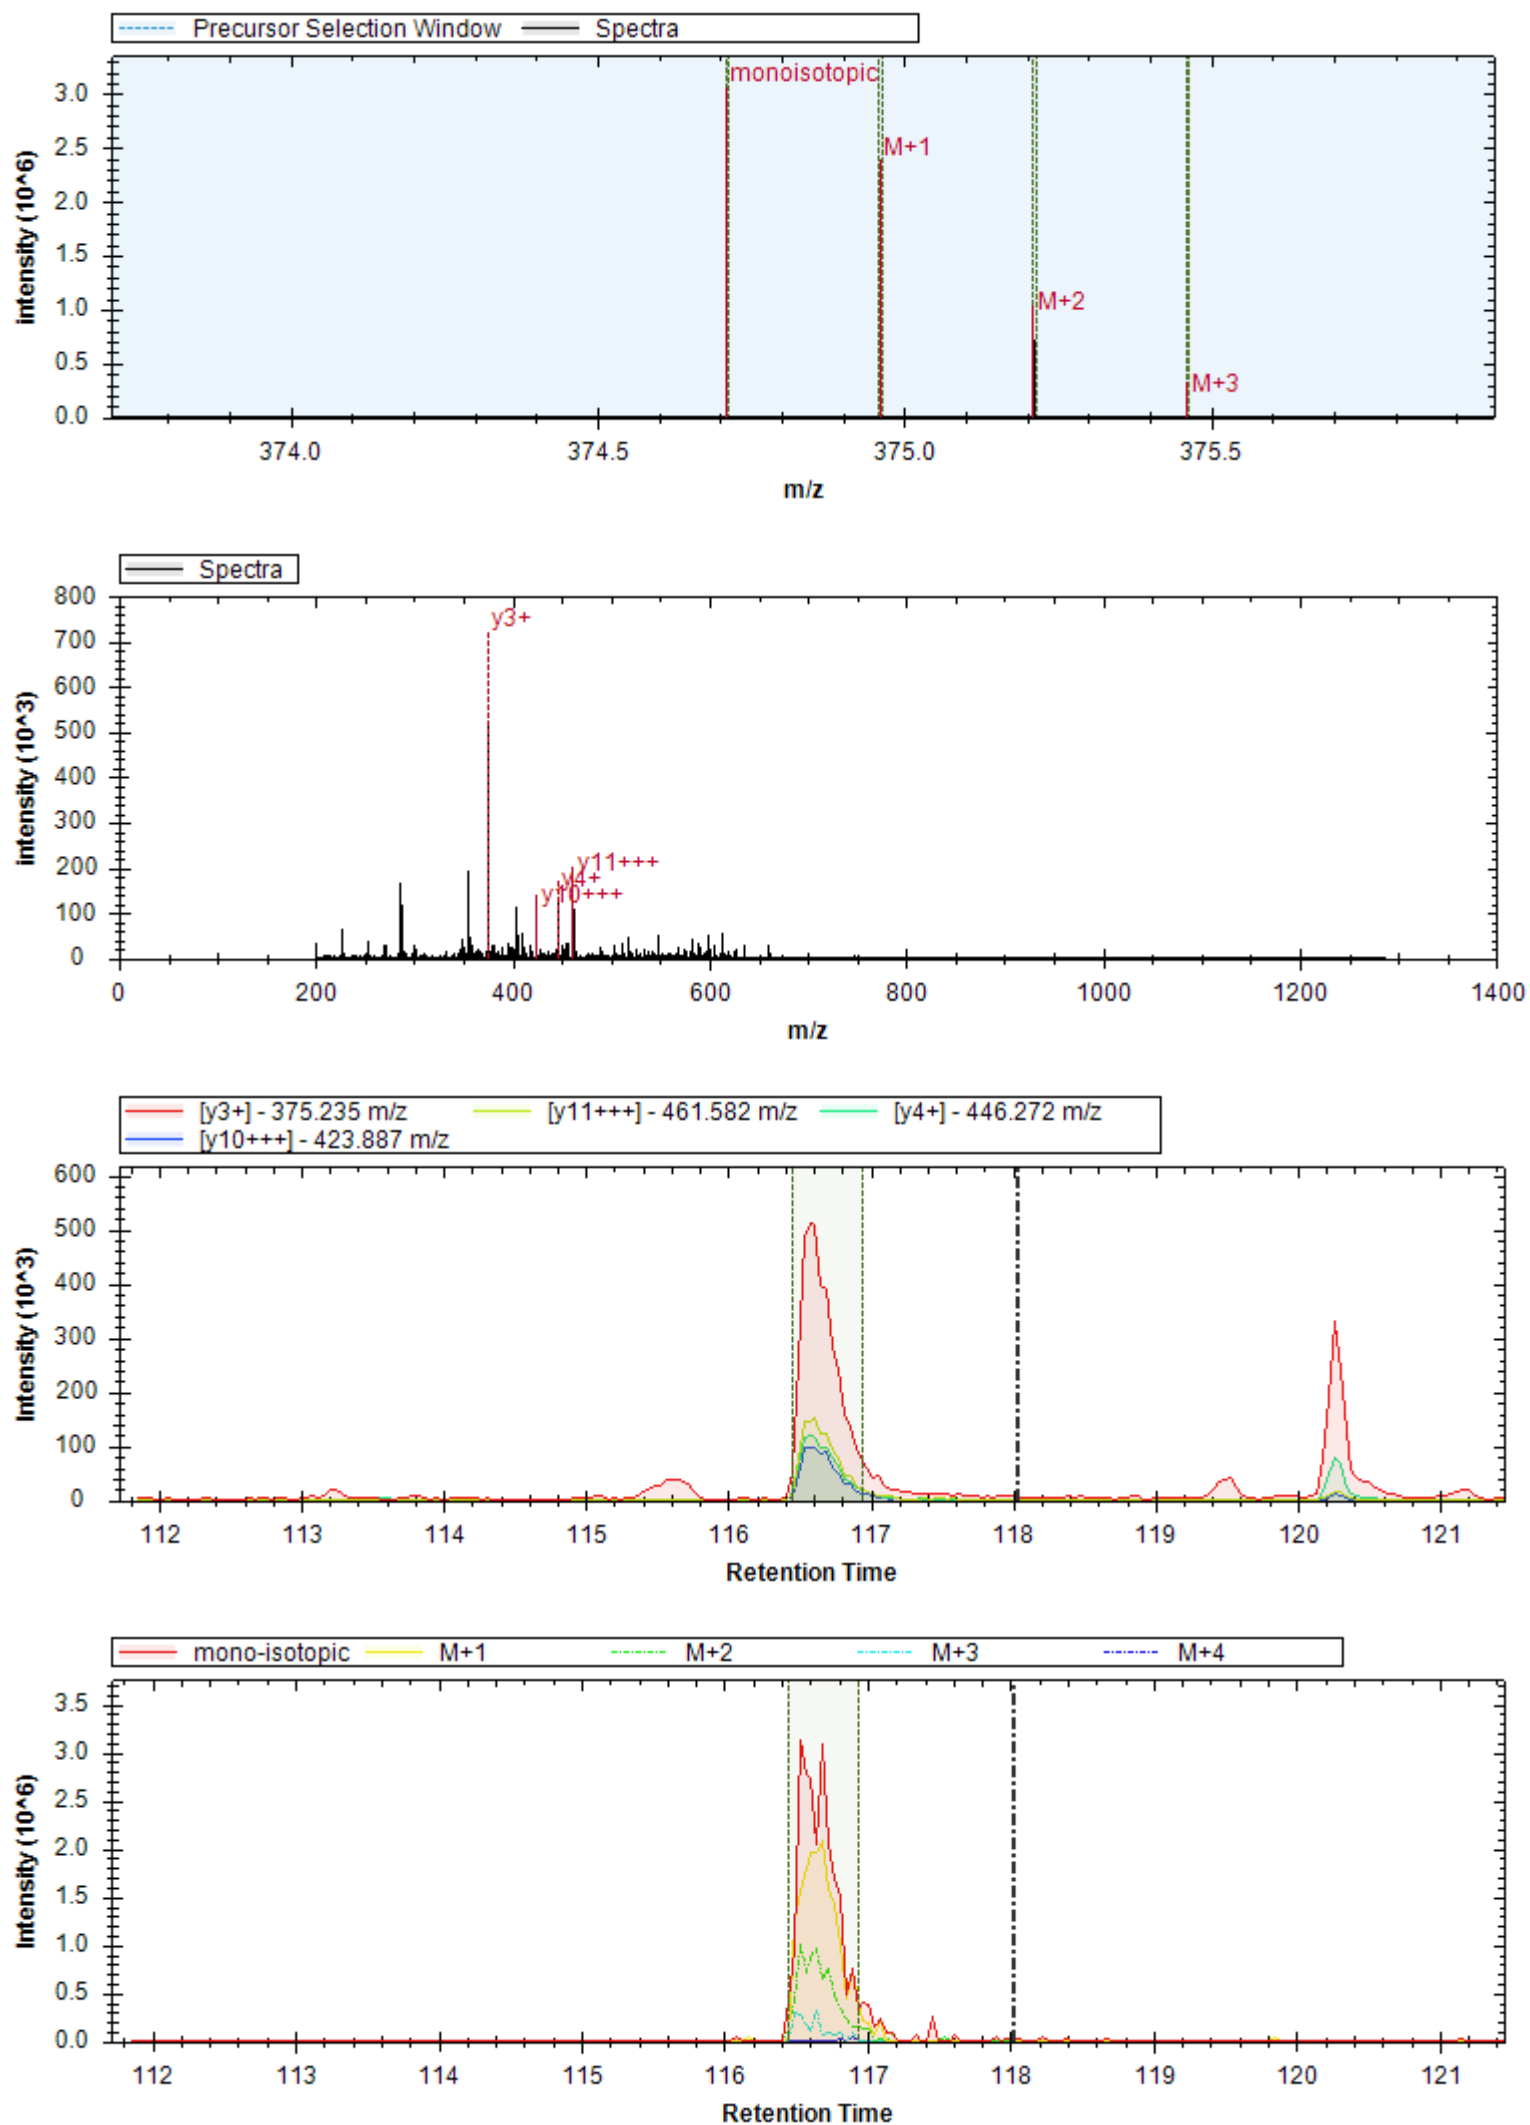

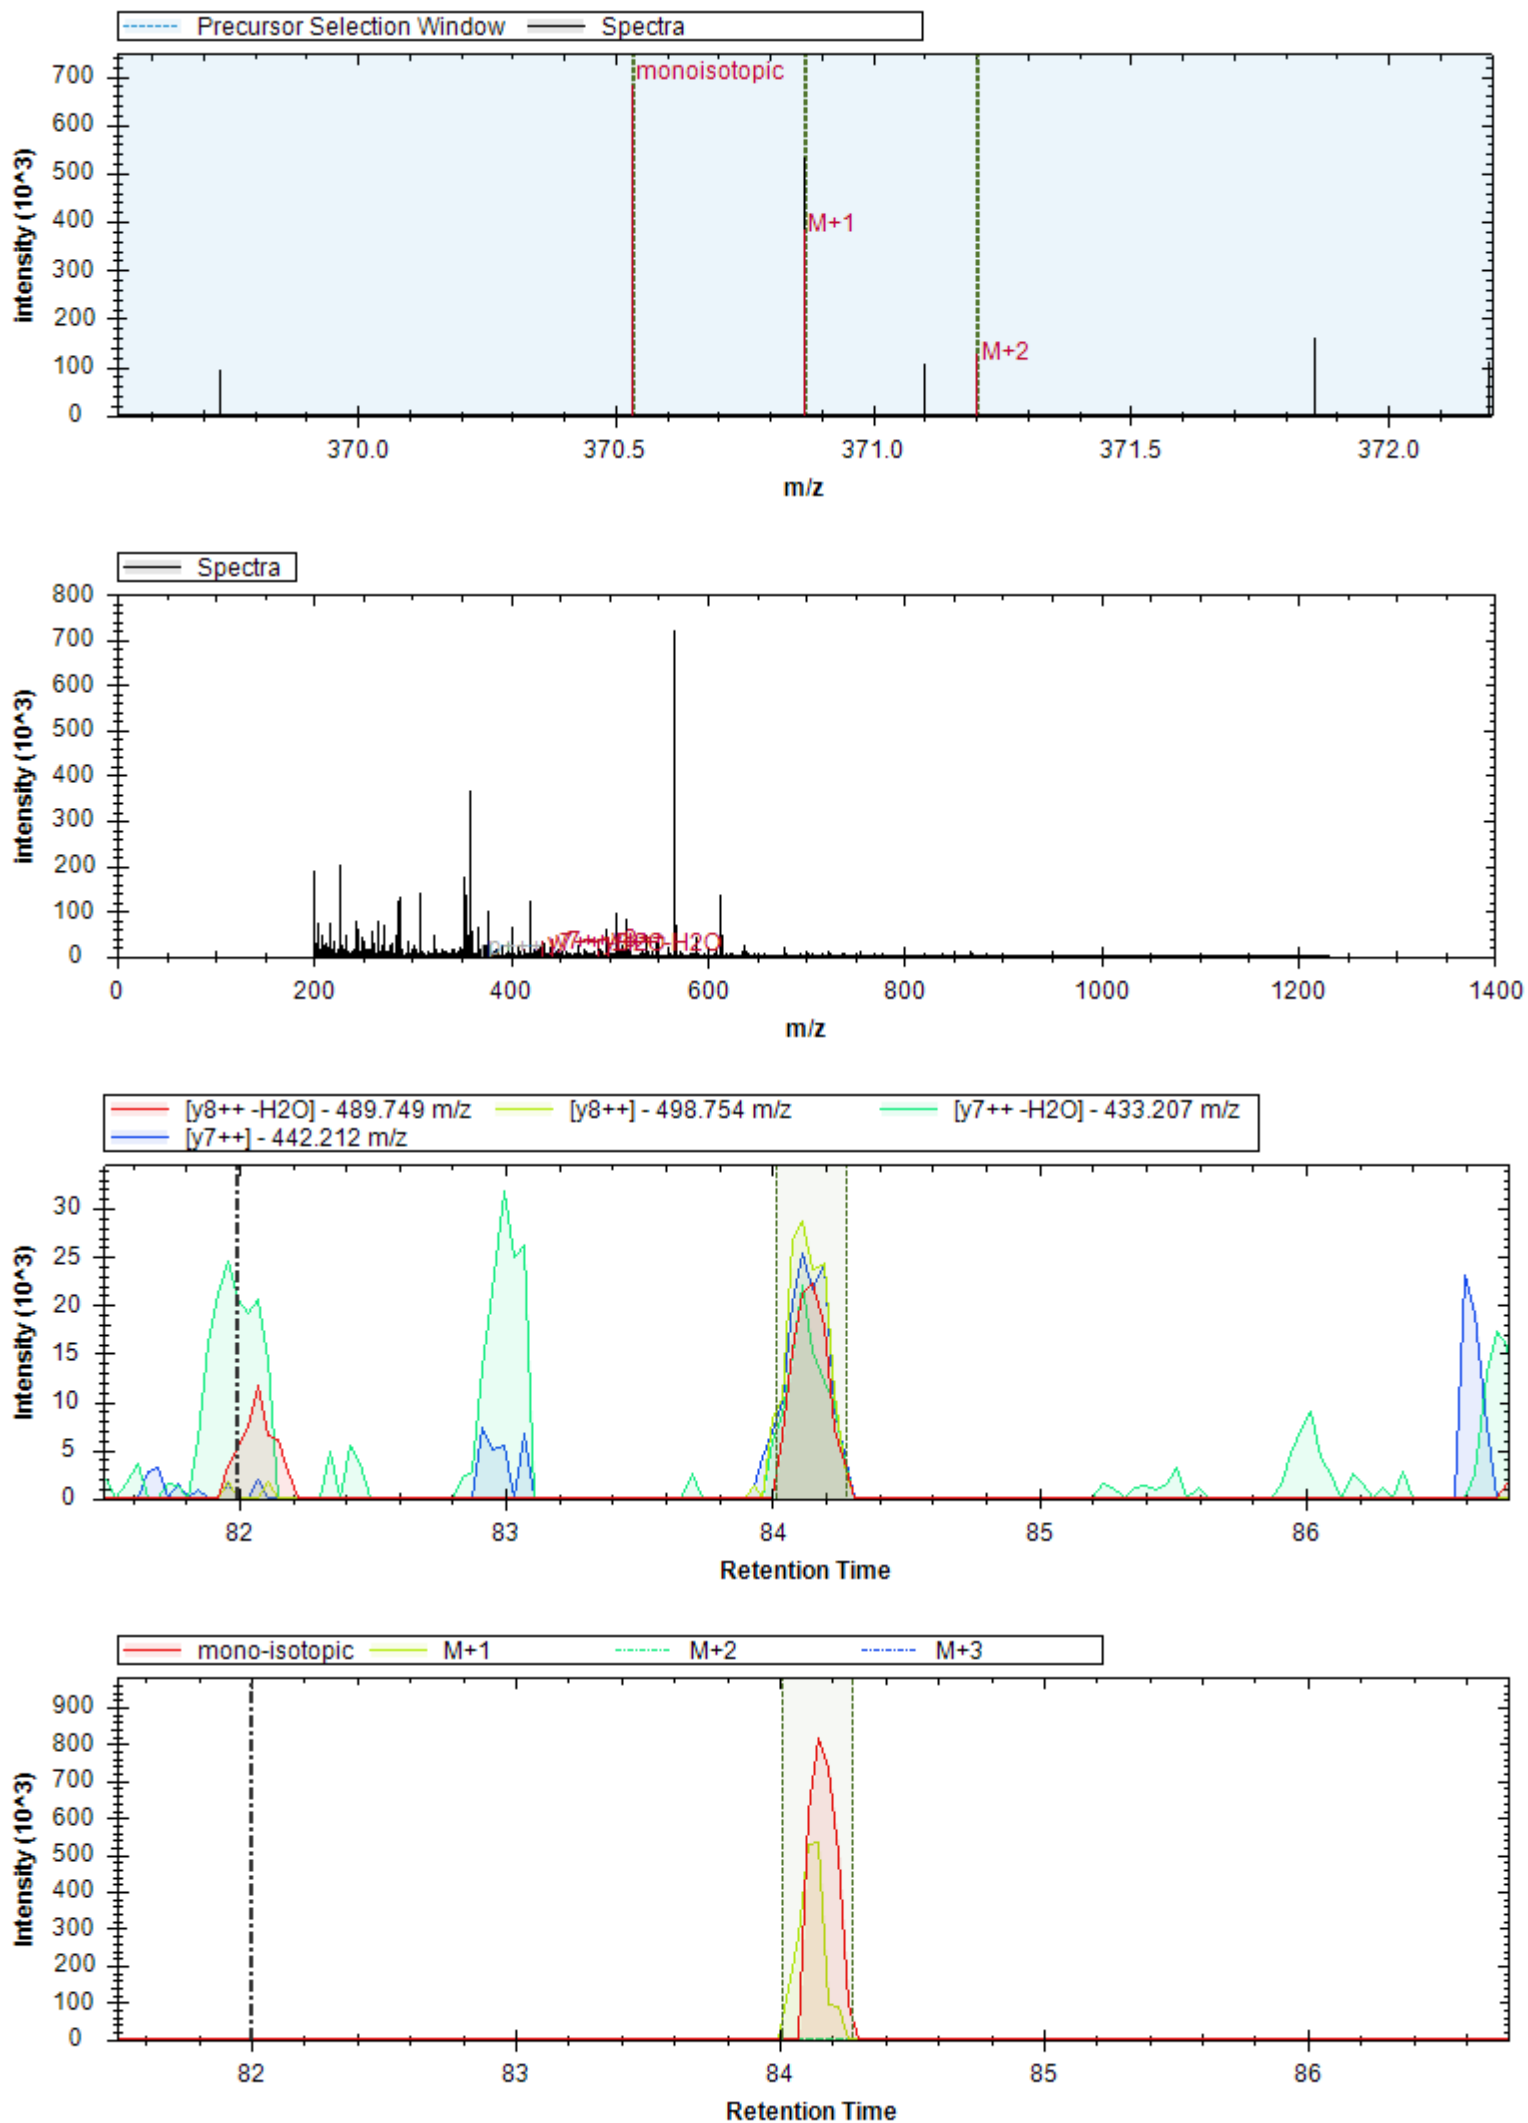

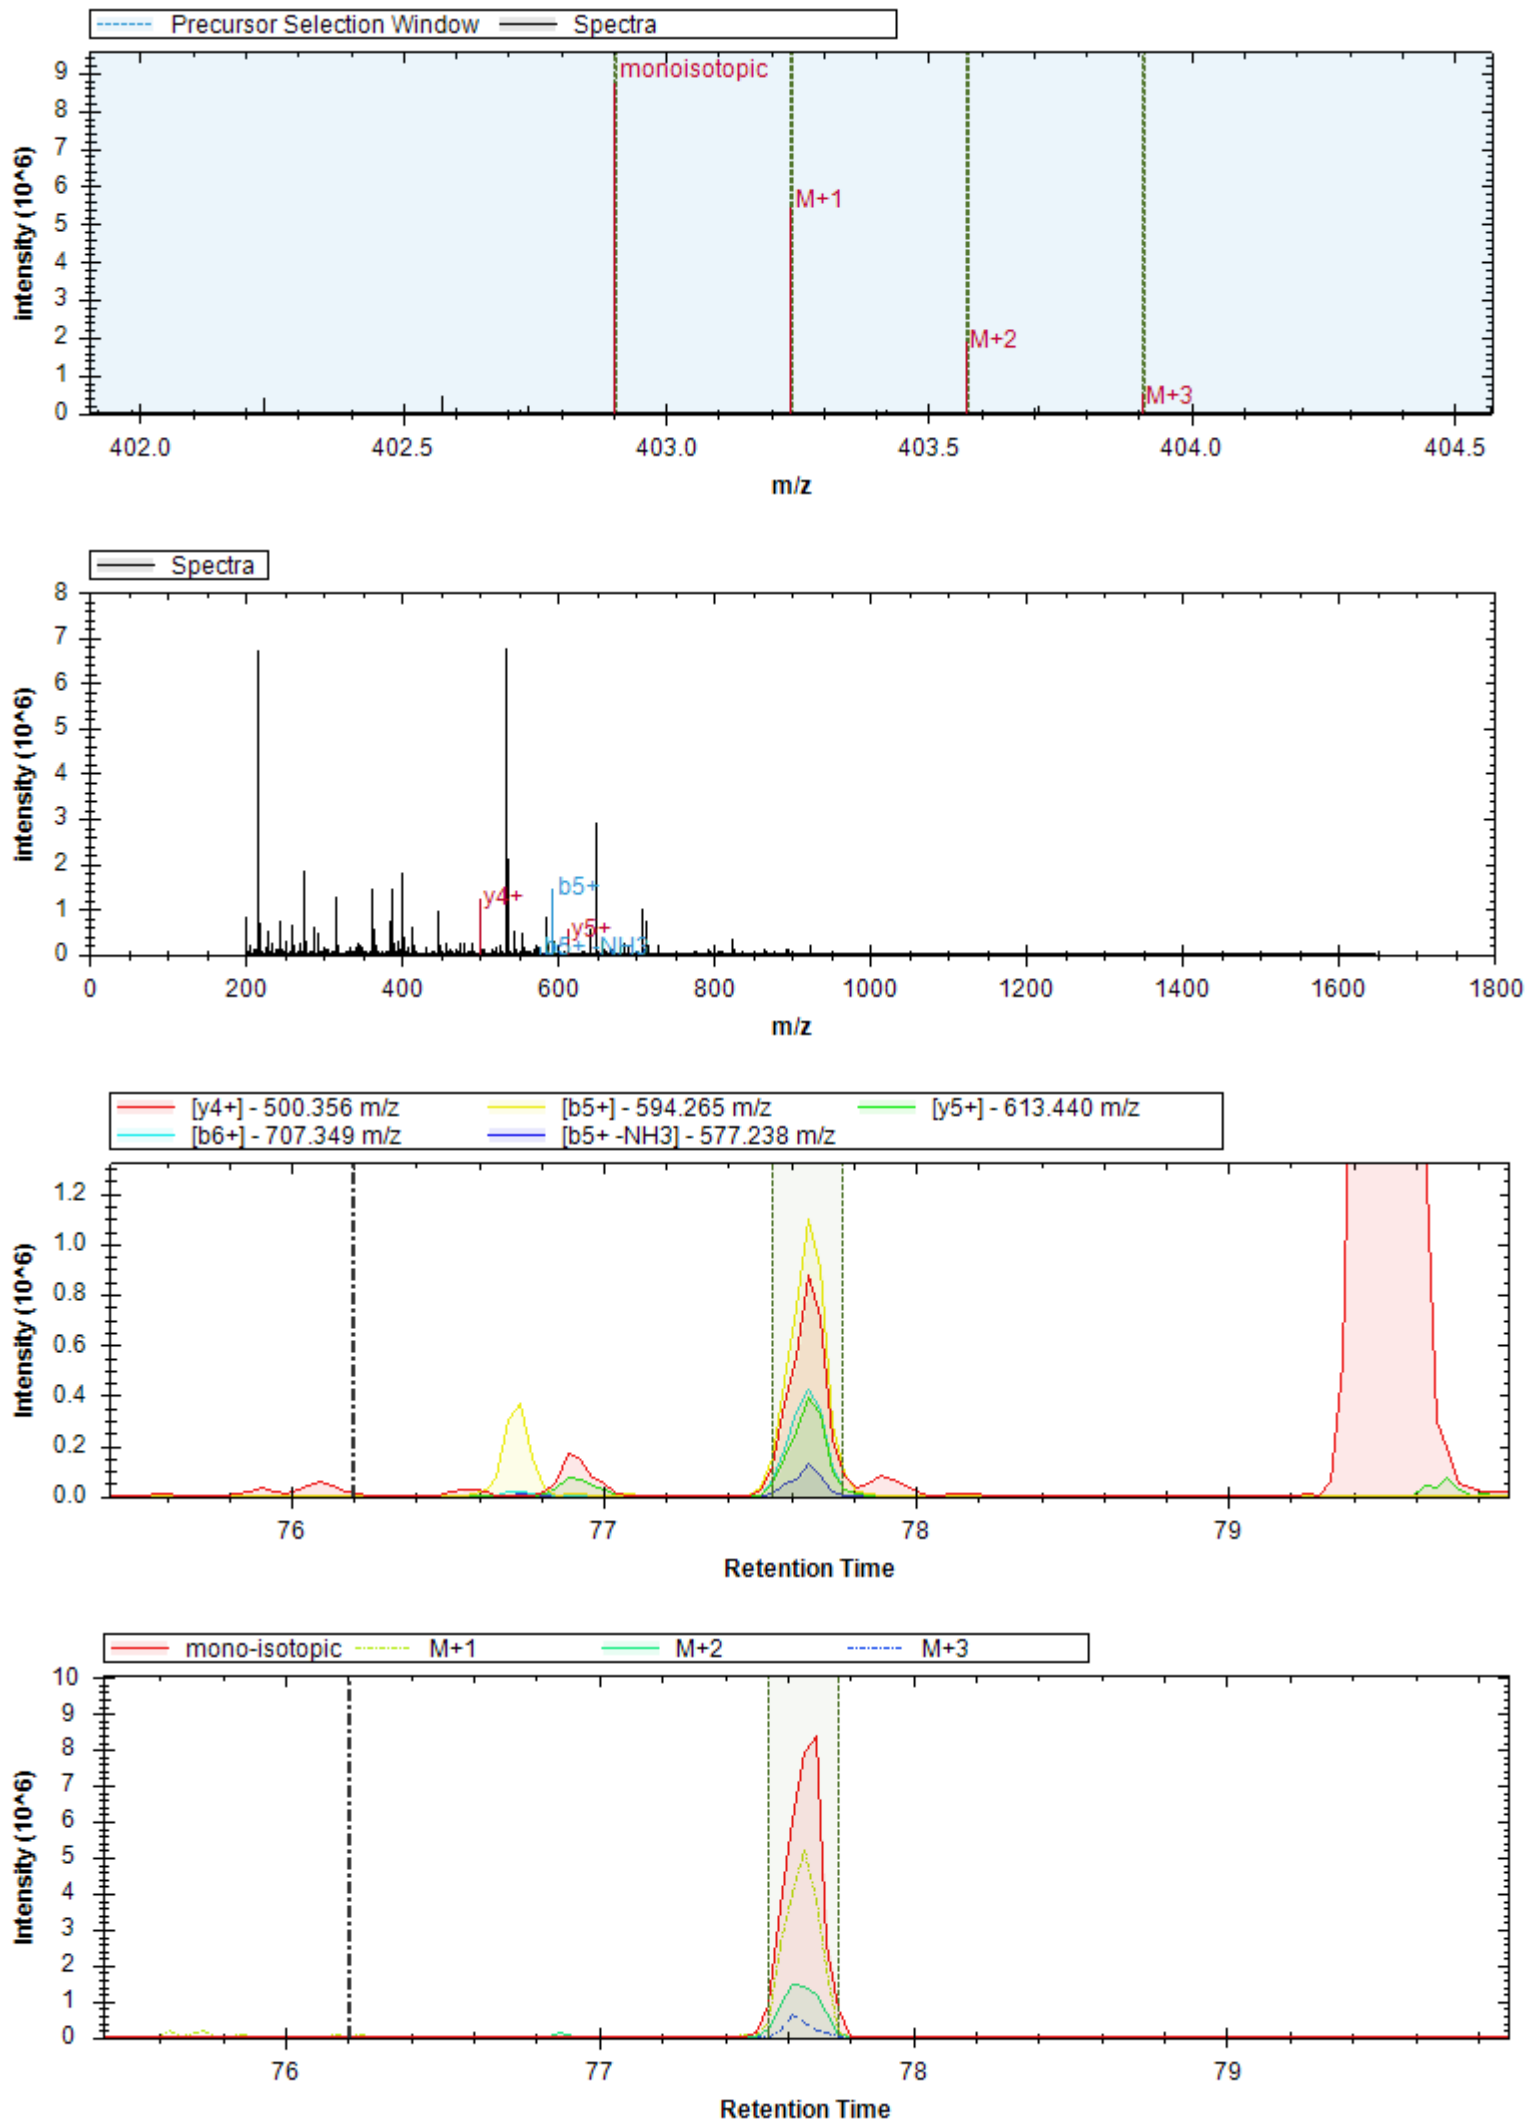



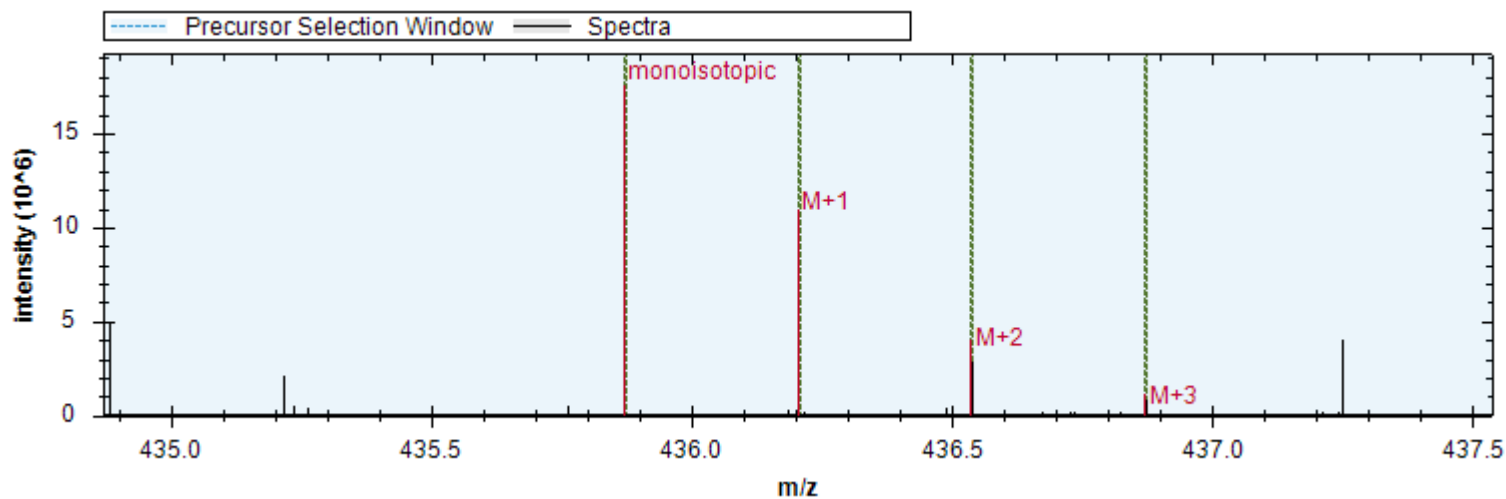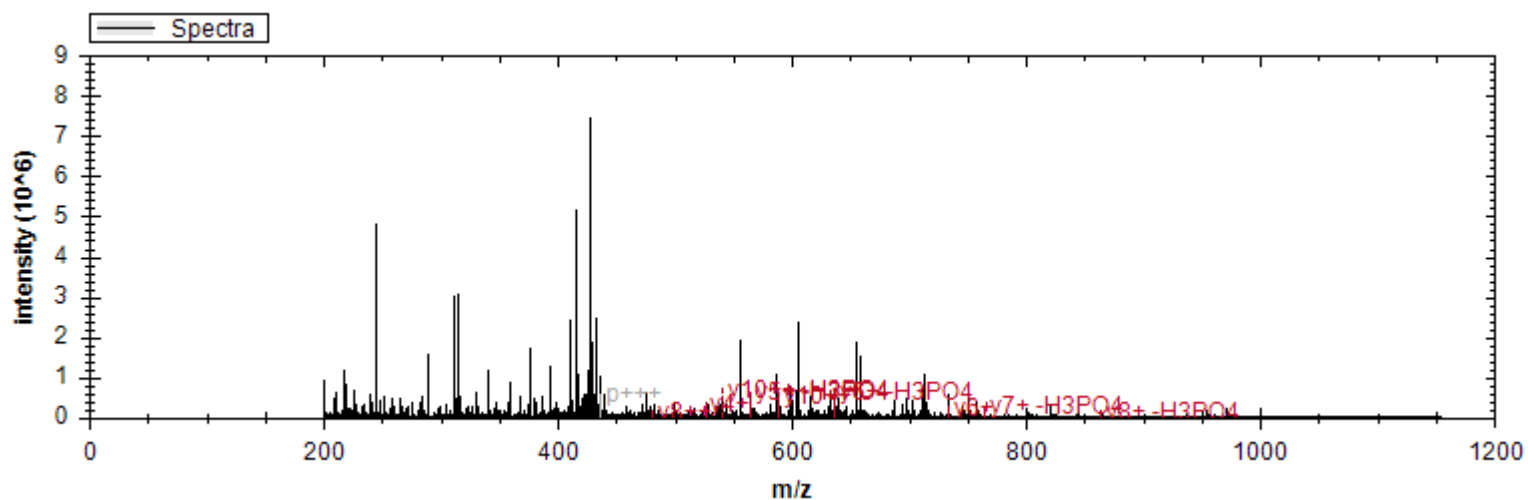

- |                            |                              |                            |
|----------------------------|------------------------------|----------------------------|
| [y3+] - 359.204 m/z        | [y5+ -H3PO4] - 565.284 m/z   | [y6+ -H3PO4] - 636.321 m/z |
| [y4+ -H3PO4] - 428.225 m/z | [y10++ -H3PO4] - 540.265 m/z | [y7+ -H3PO4] - 764.380 m/z |
| [y10++] - 589.254 m/z      | [y7+ -NH3] - 943.130 m/z     | [y6+] - 734.298 m/z        |
| [y5+] - 663.261 m/z        | [y8++] - 481.216 m/z         | [y4+] - 526.202 m/z        |
| [y8+ -H3PO4] - 863.448 m/z | [y6++] - 367.653 m/z         | [y7+ -H2O] - 942.146 m/z   |

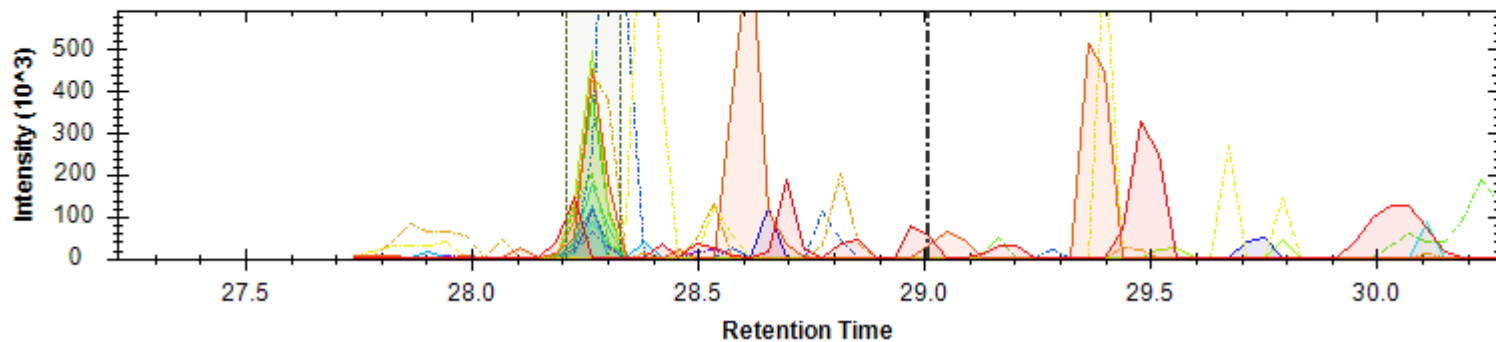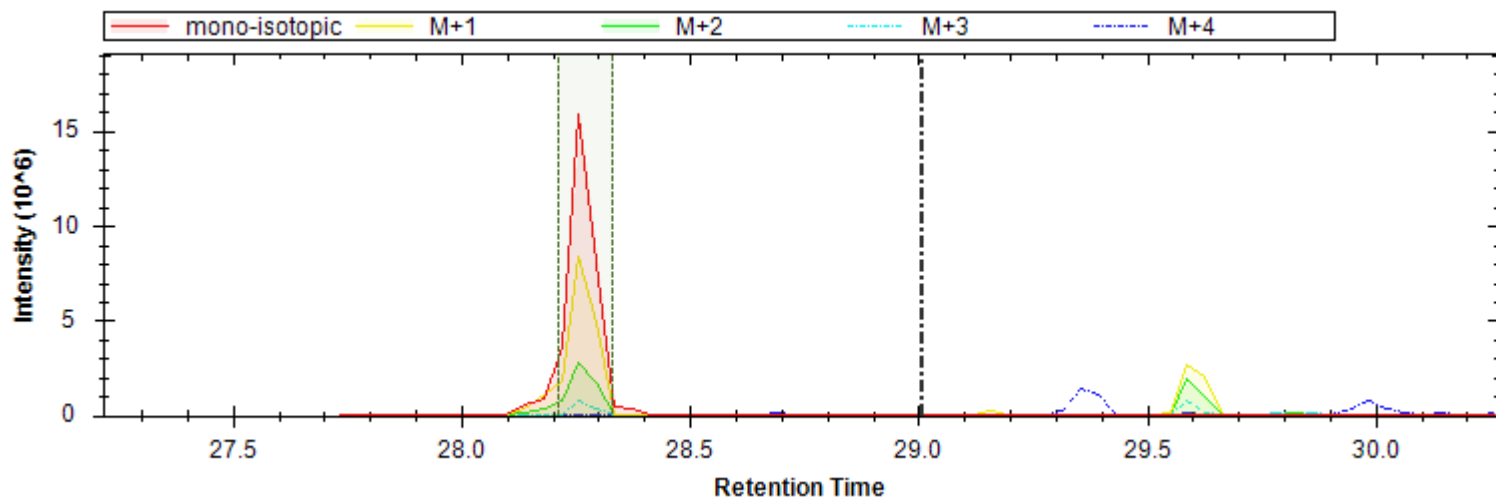

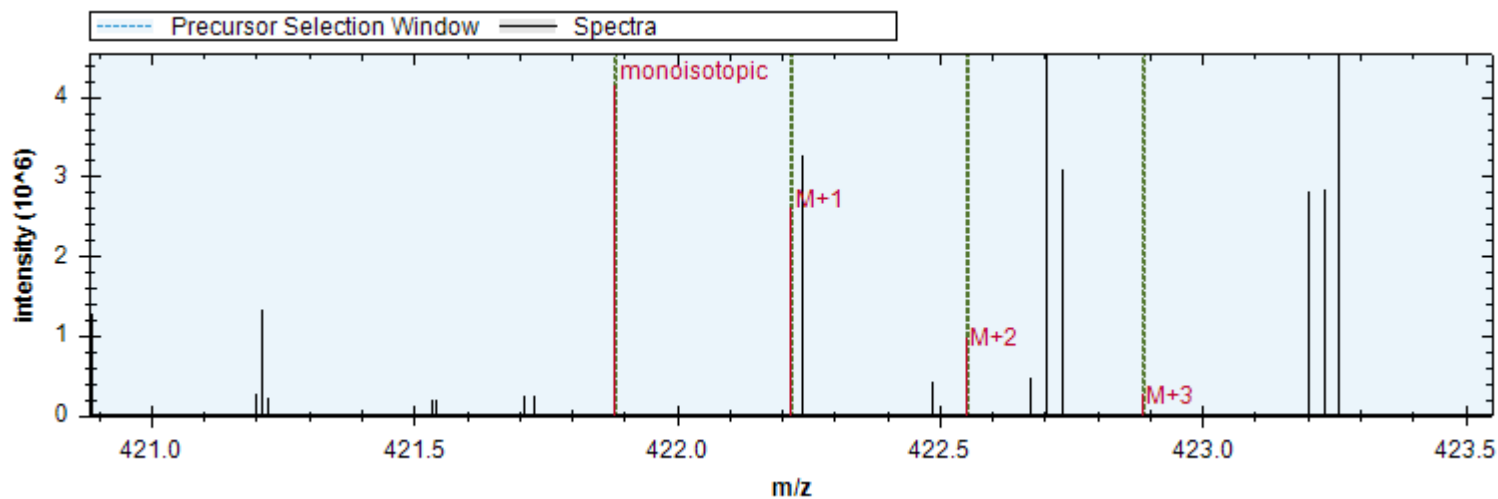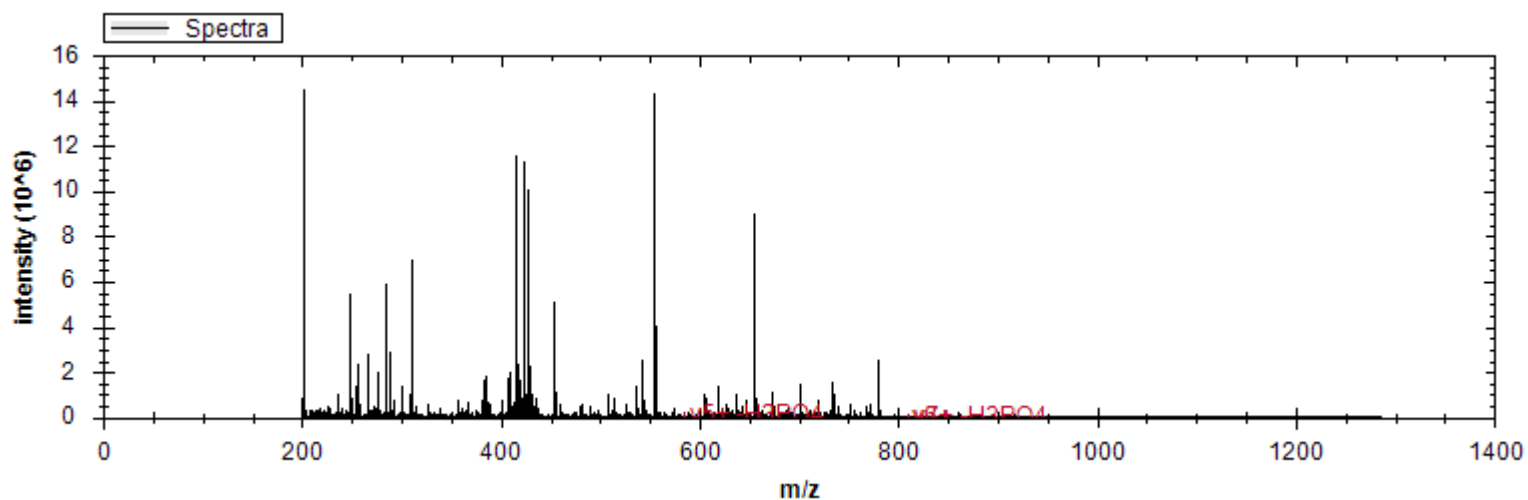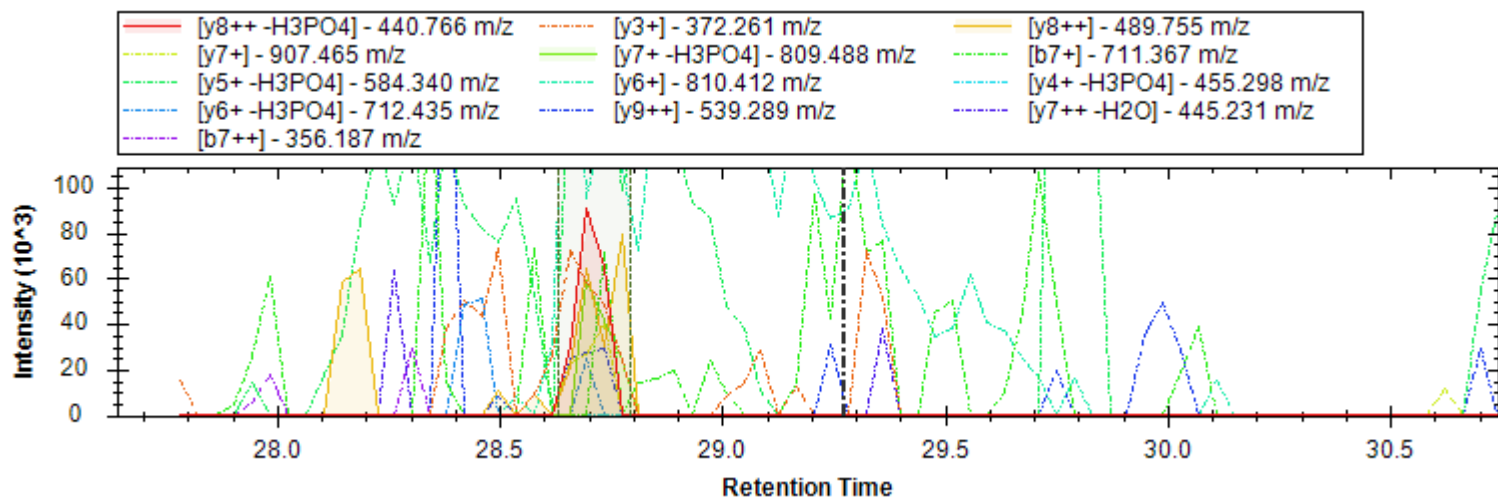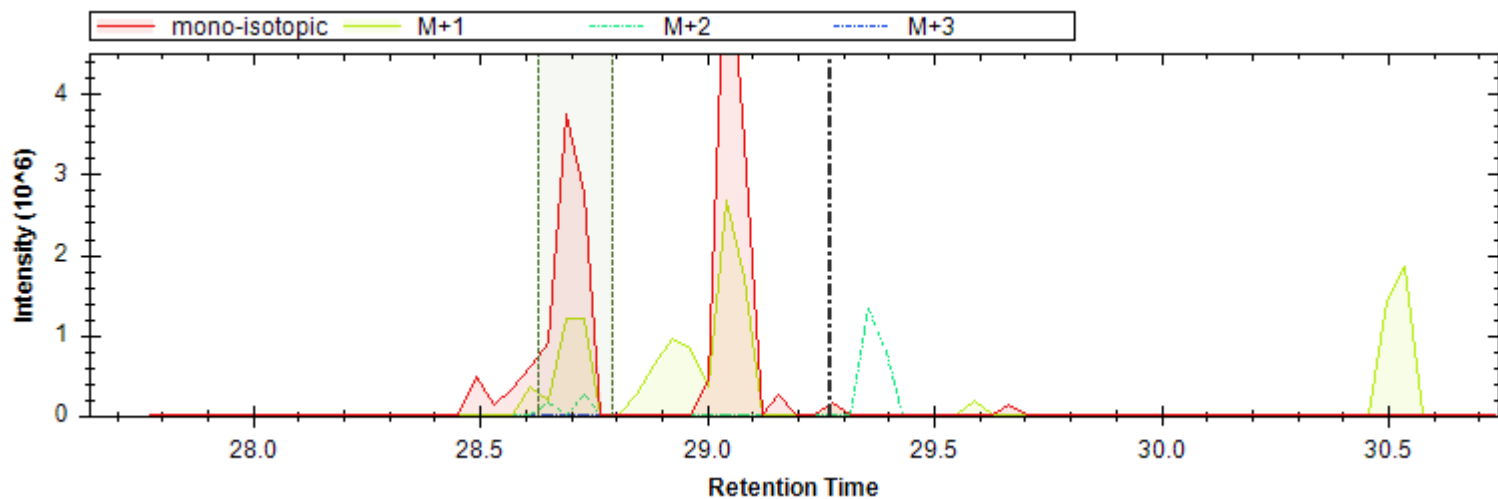

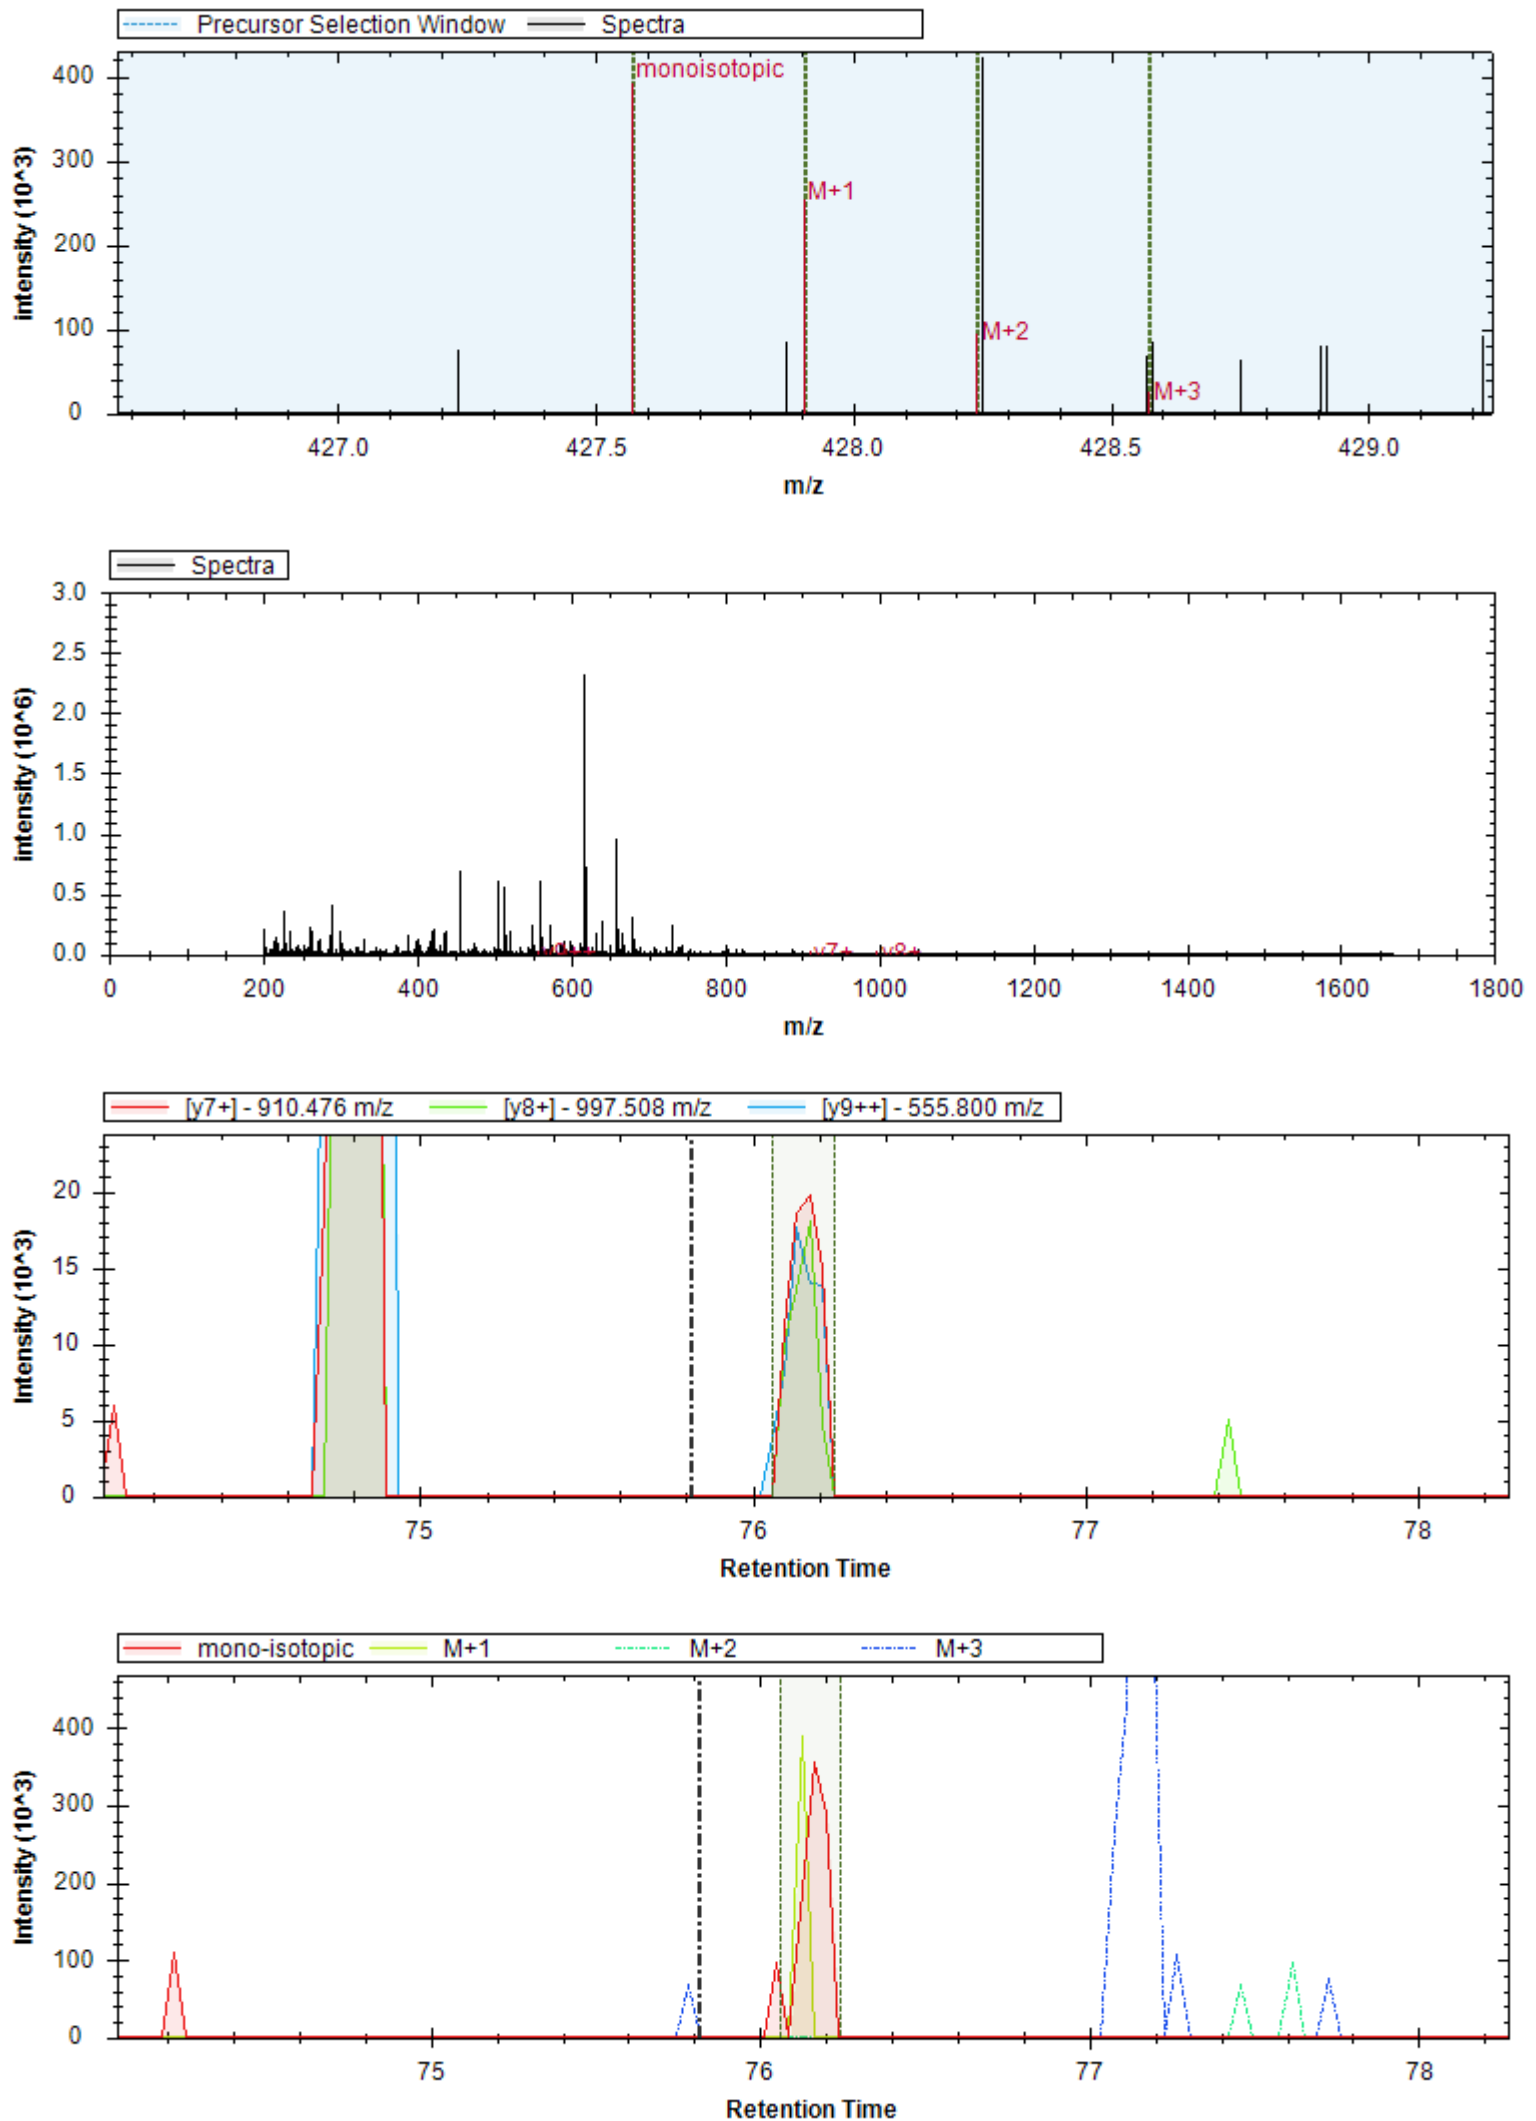

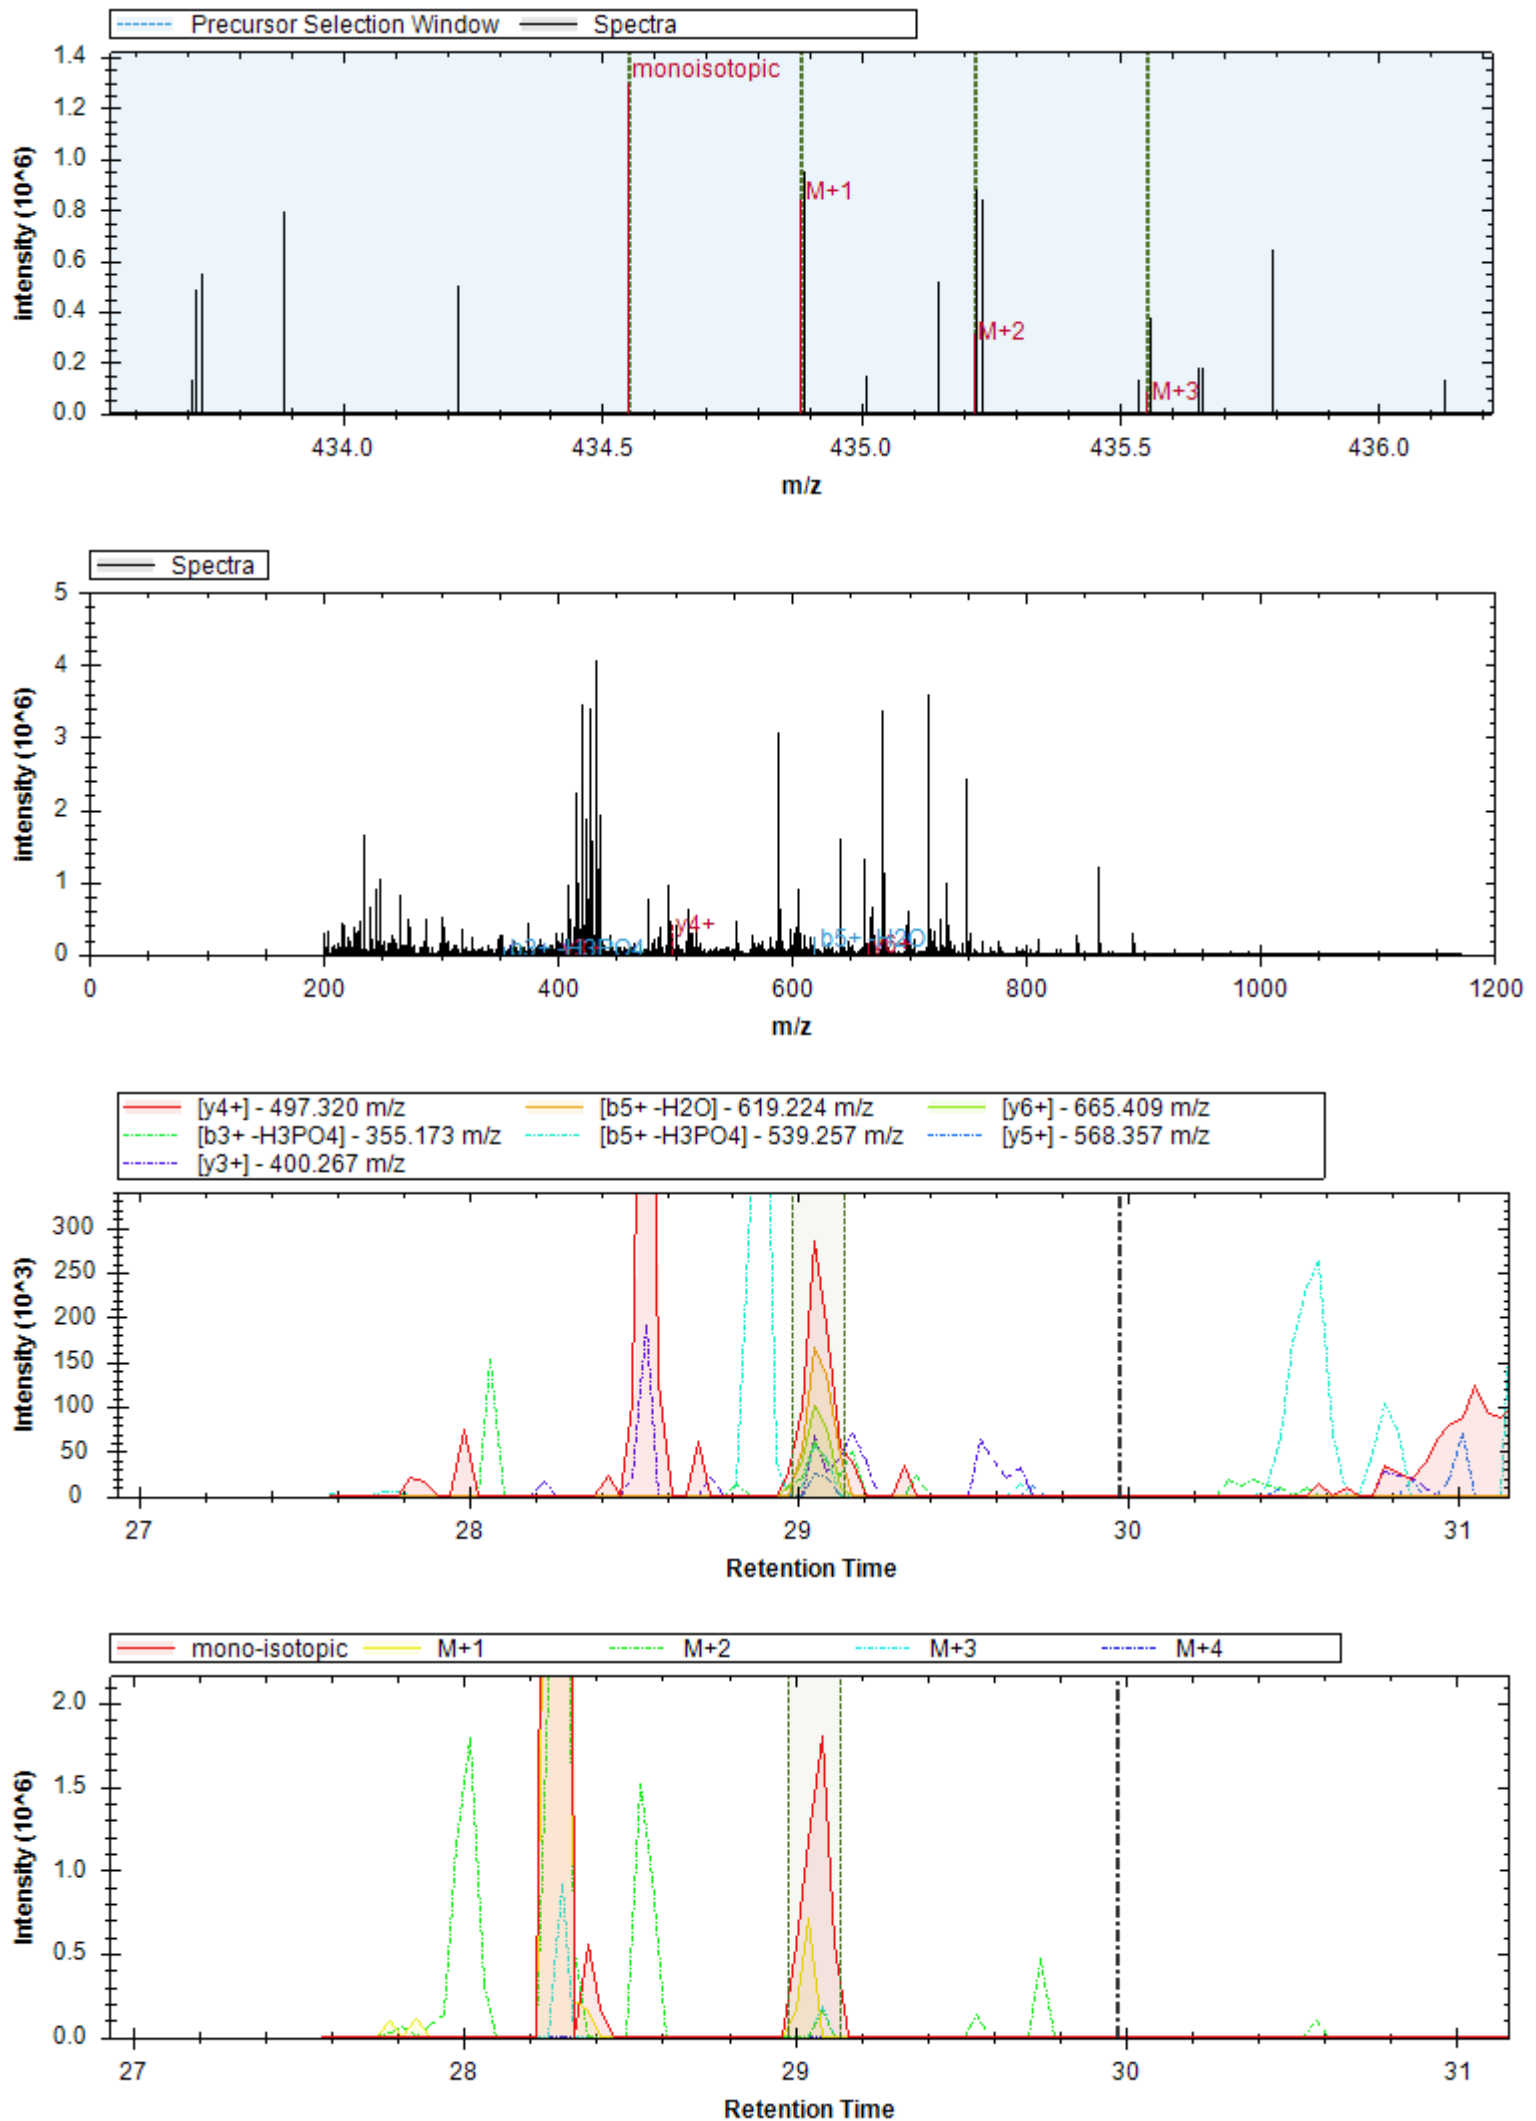

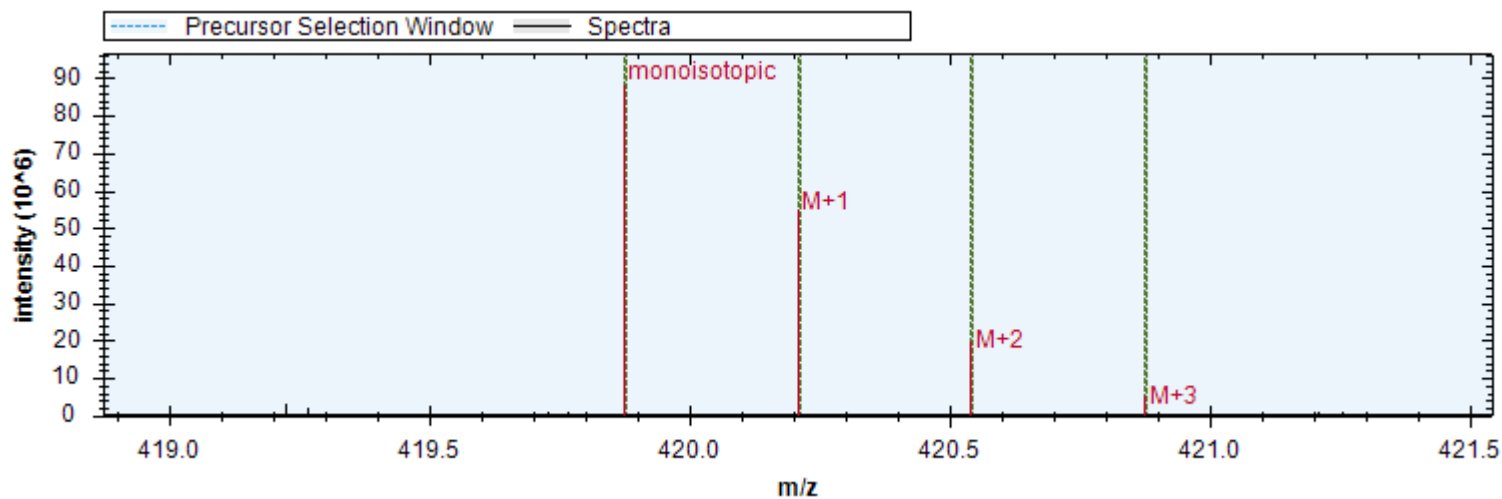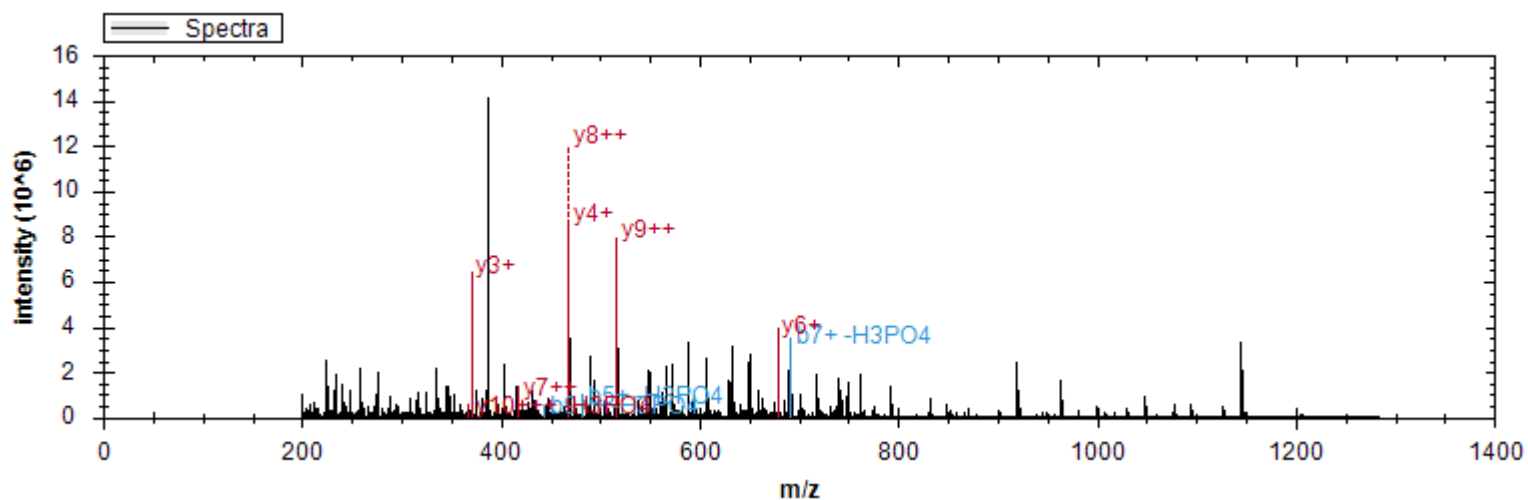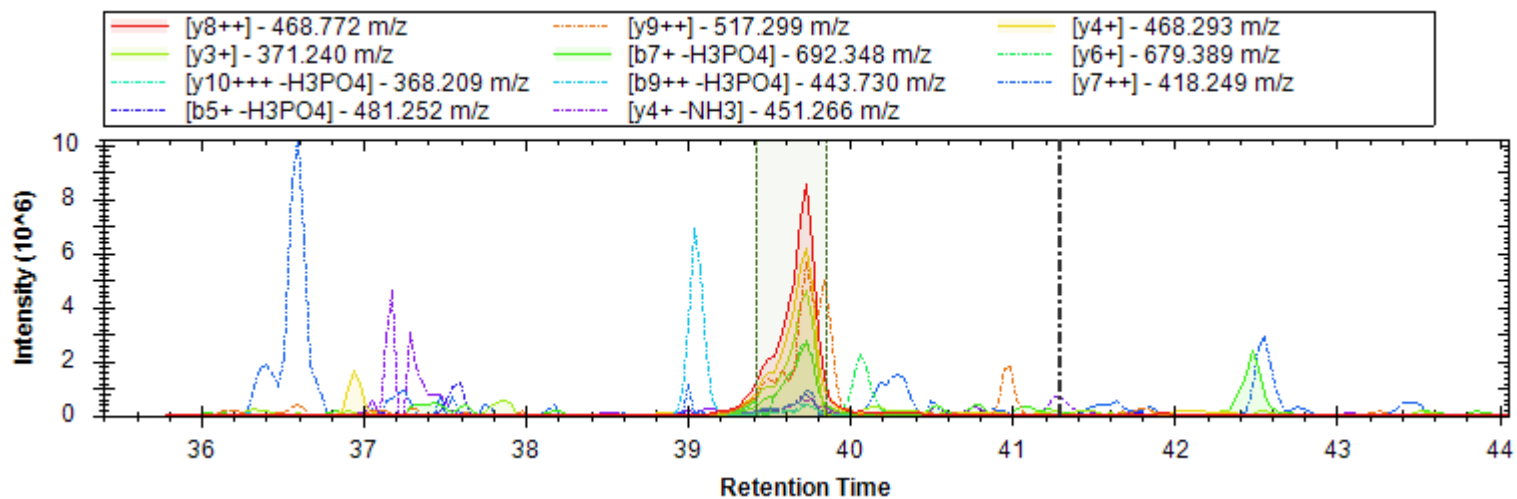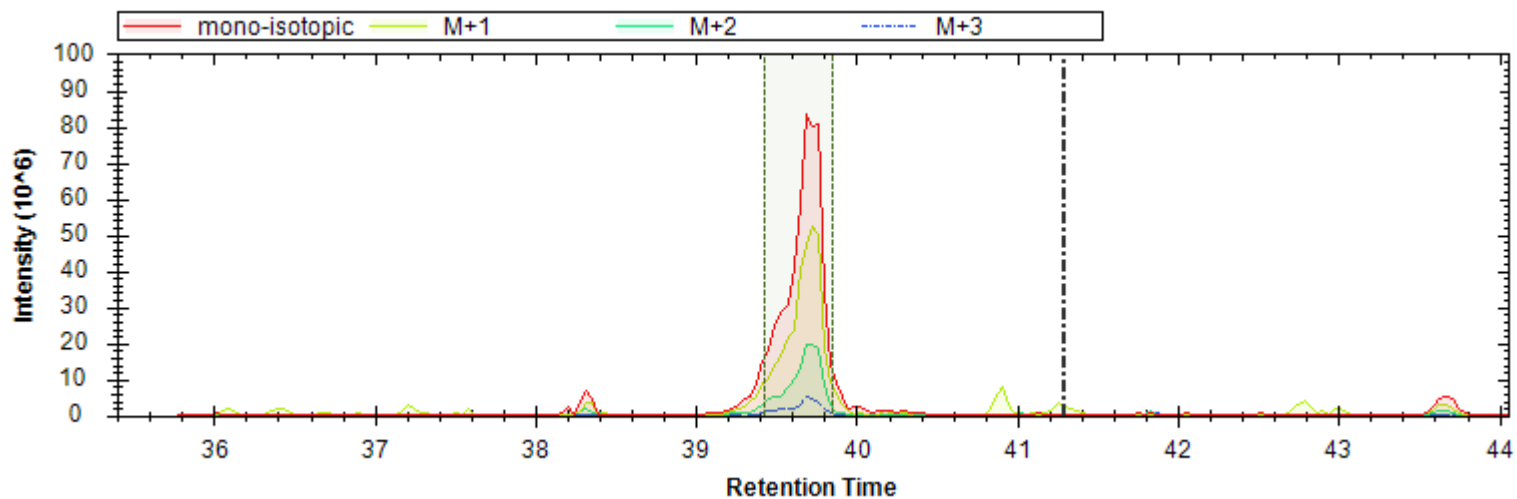

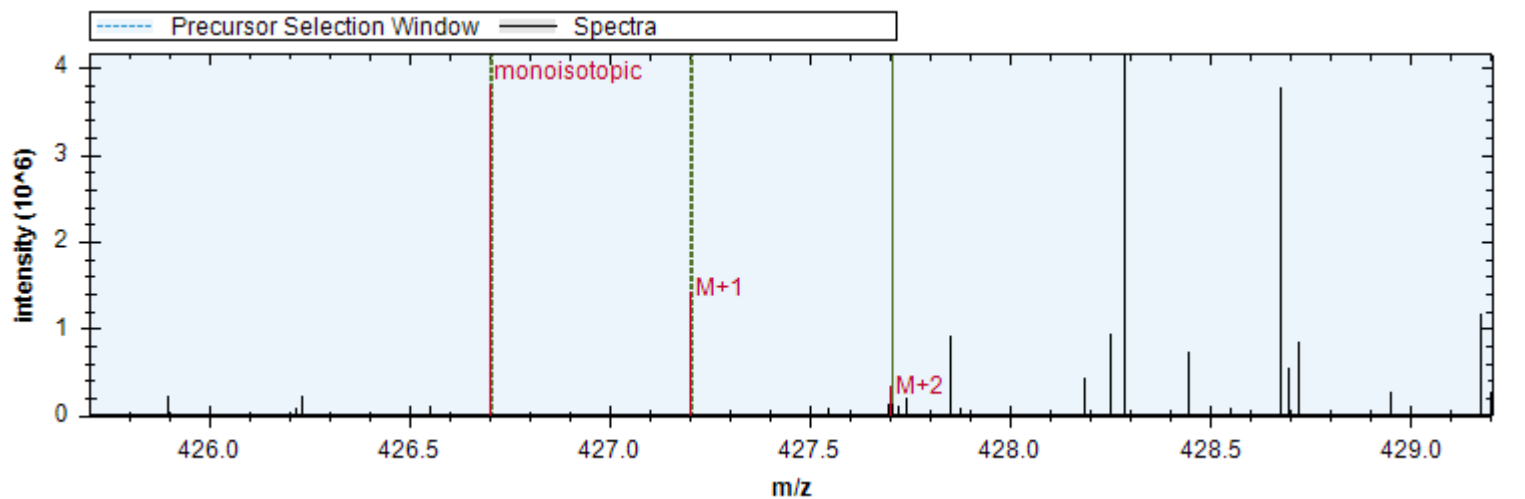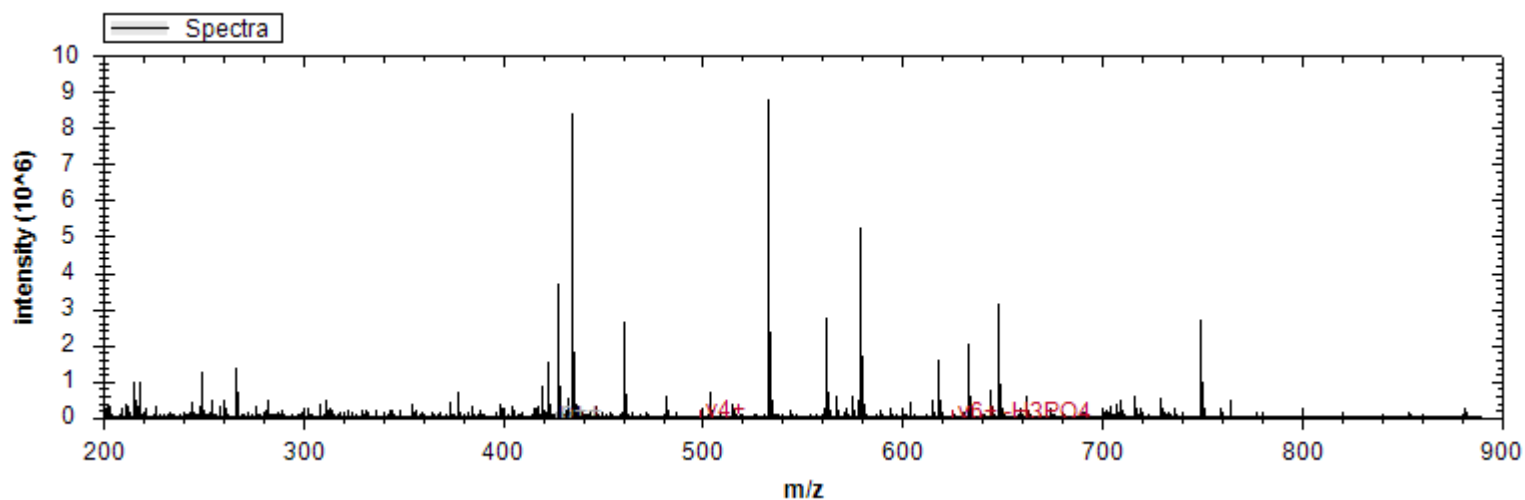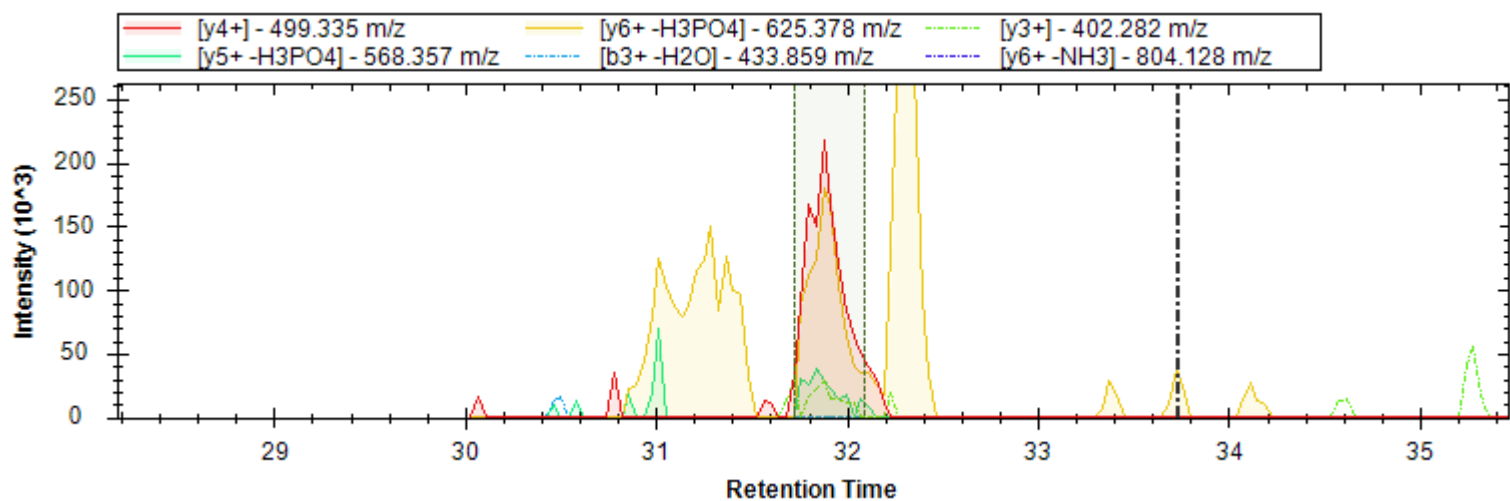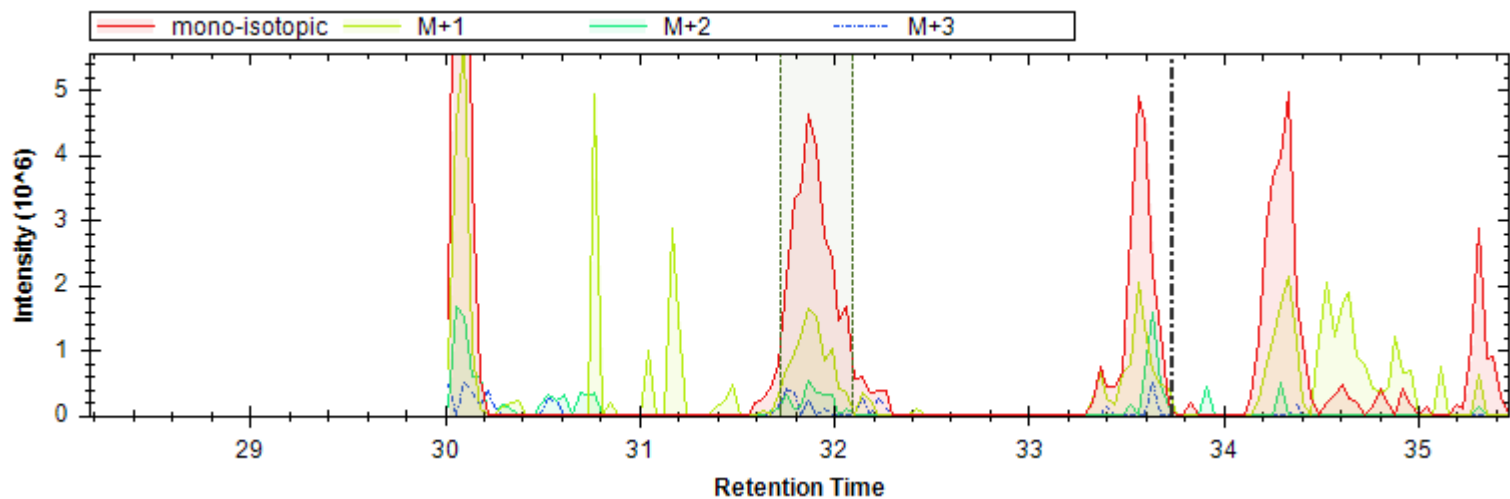

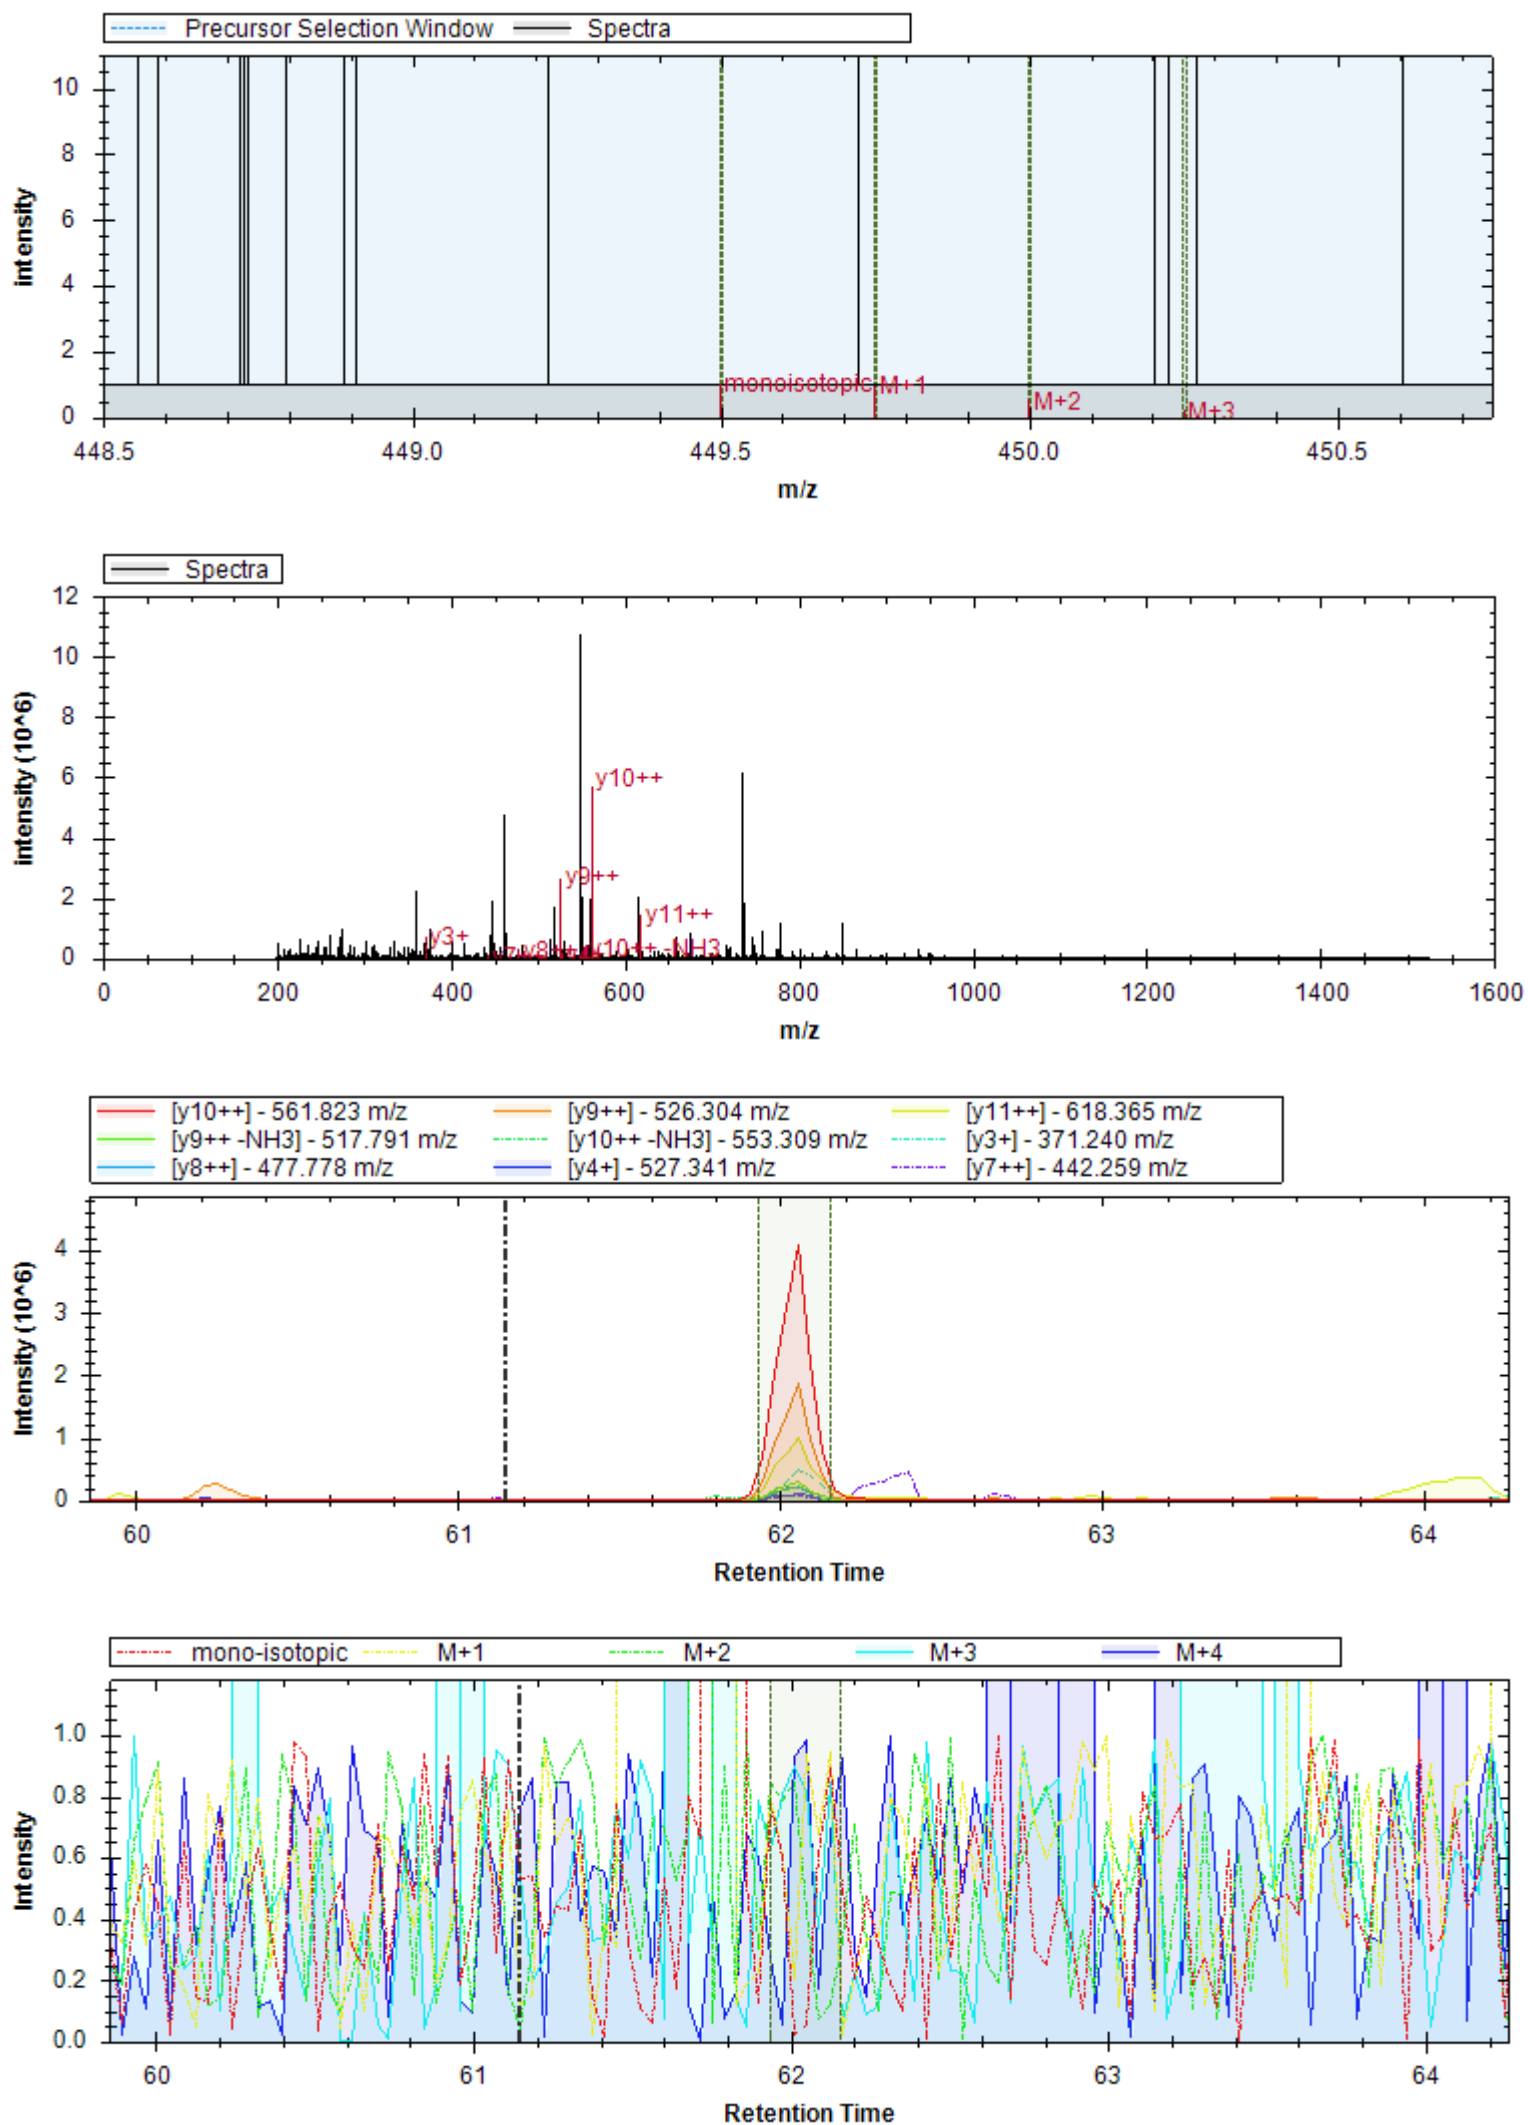

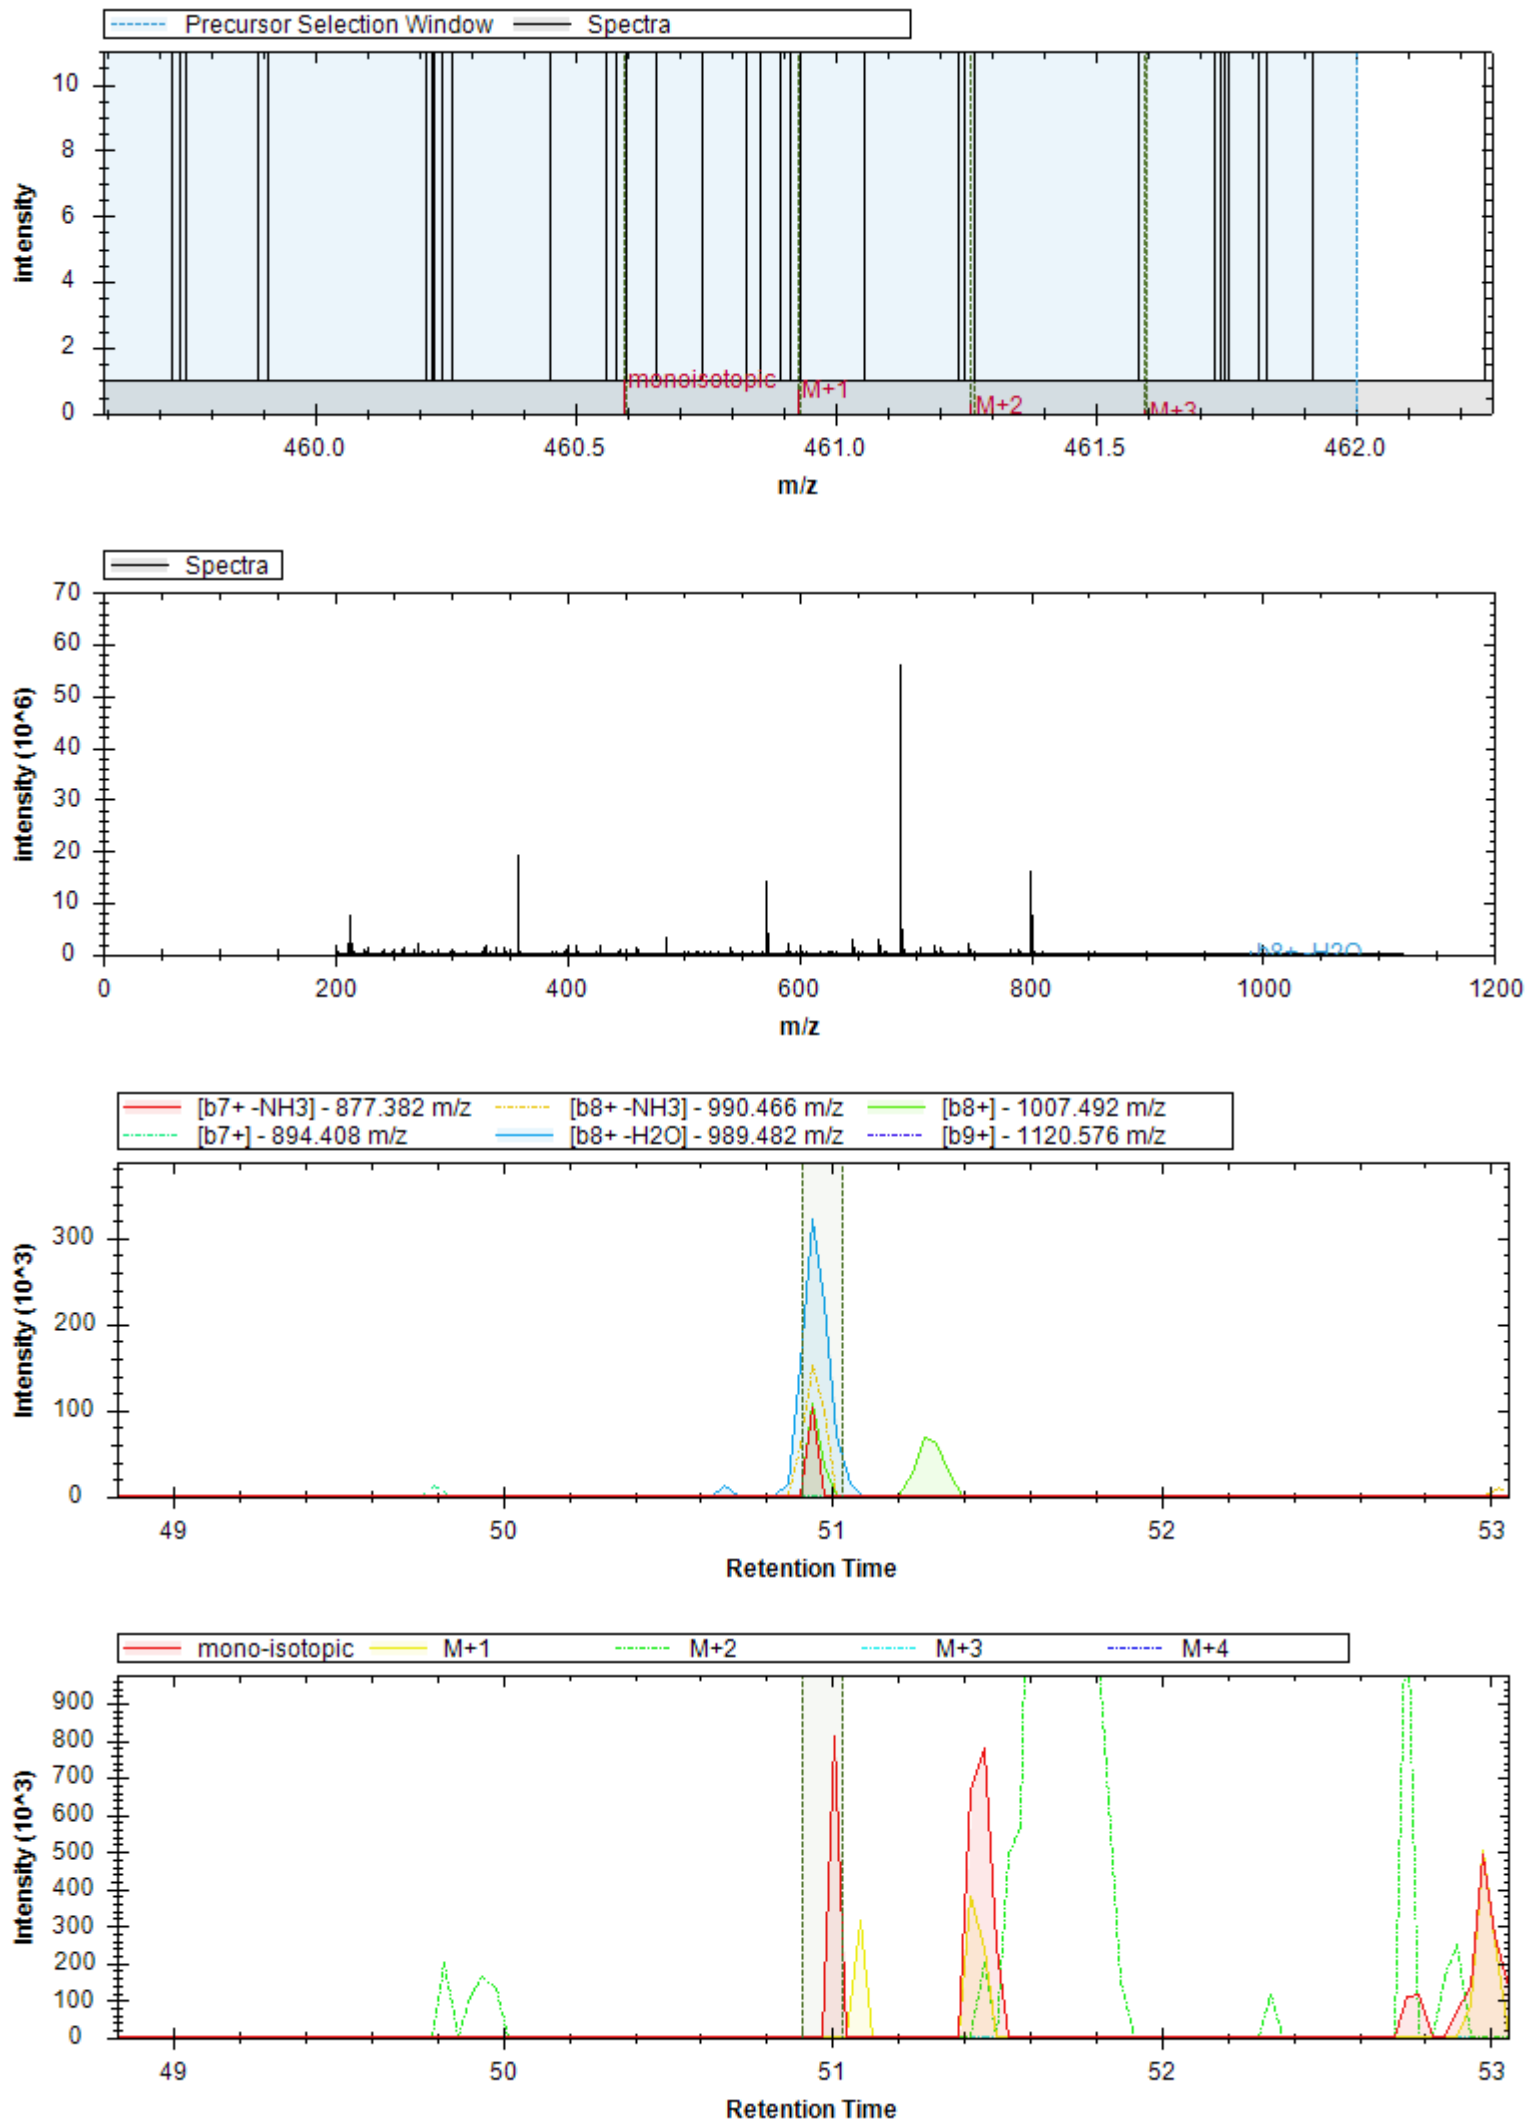



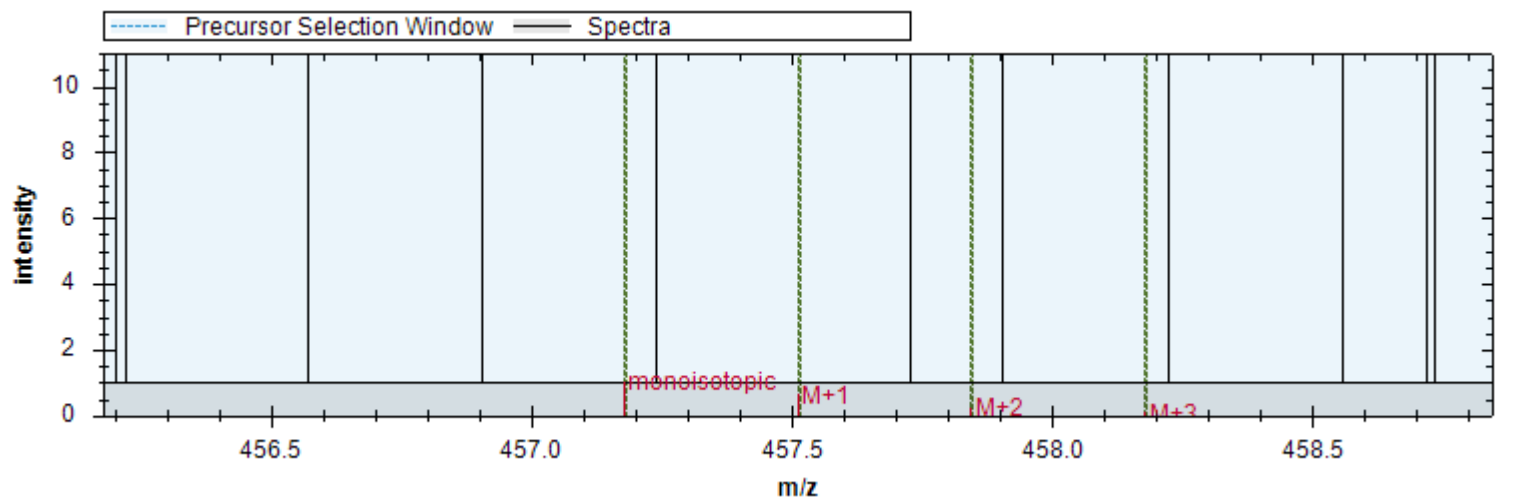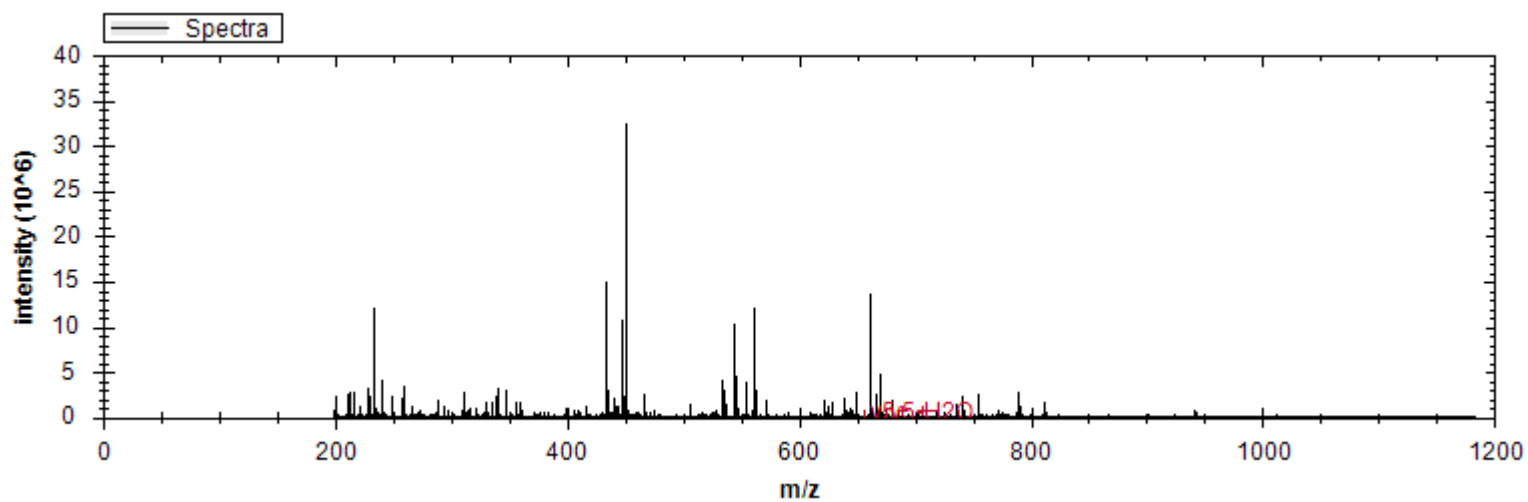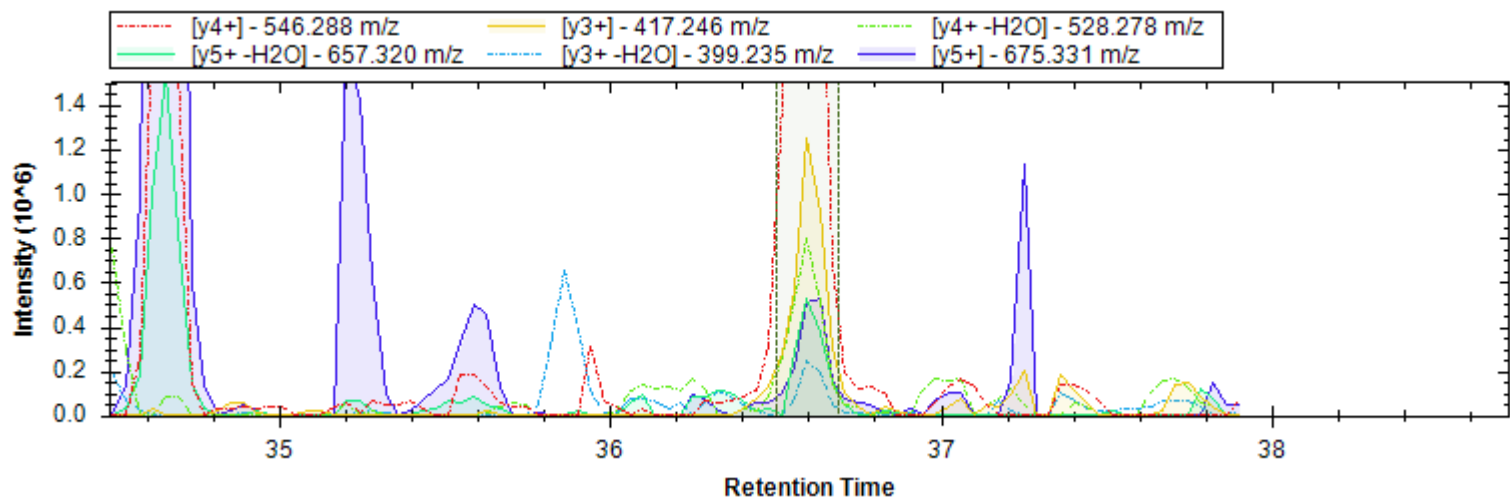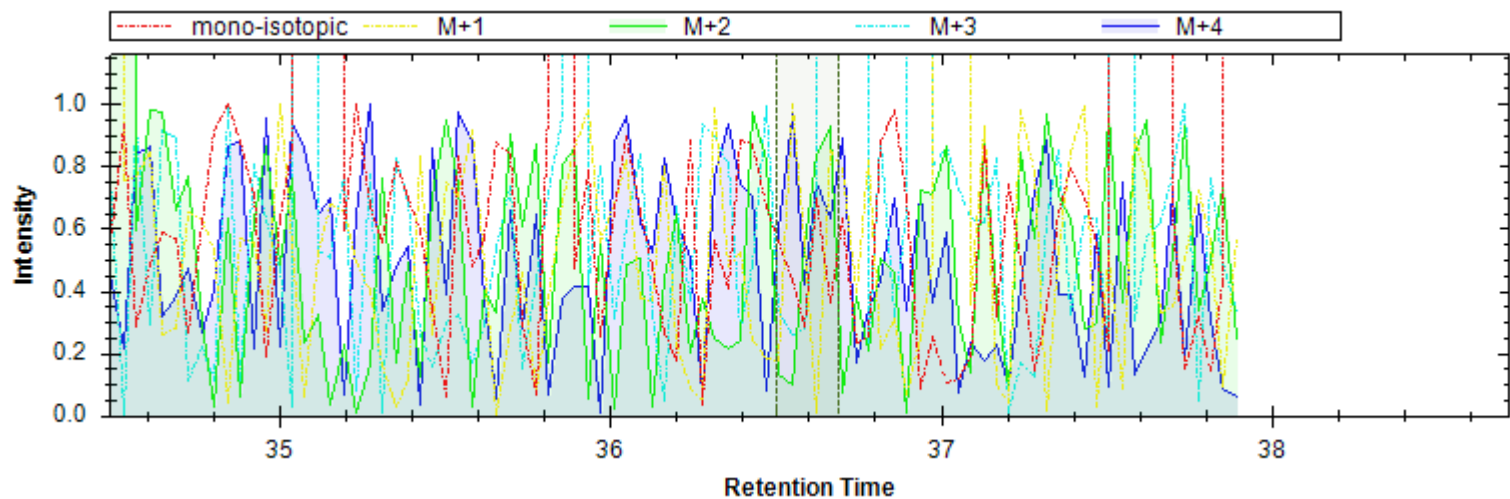

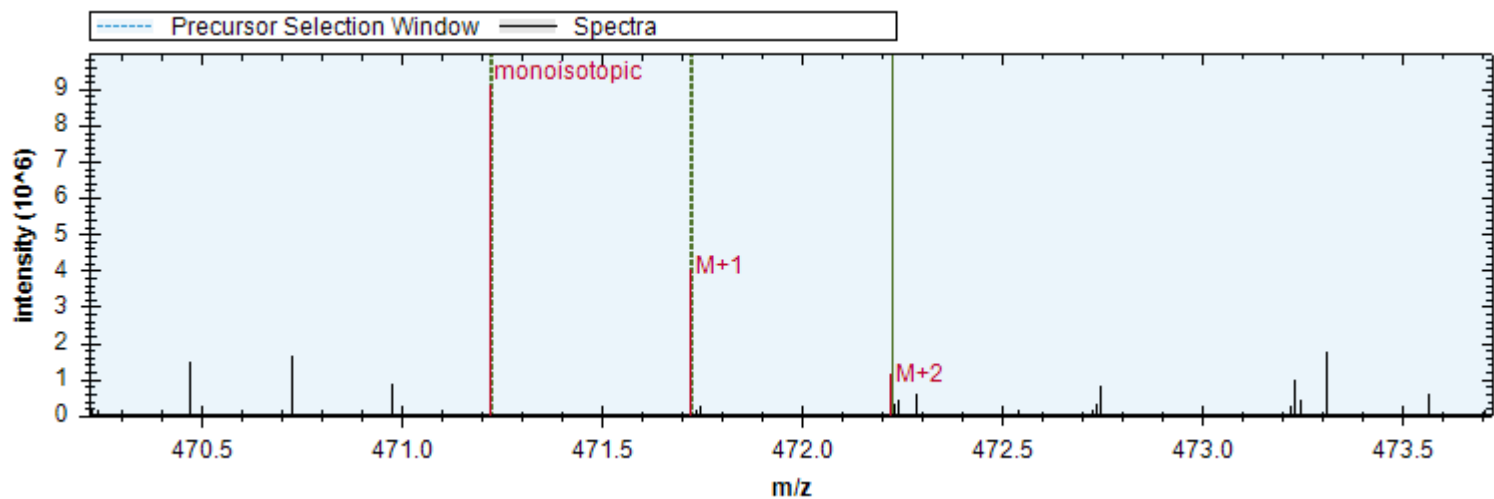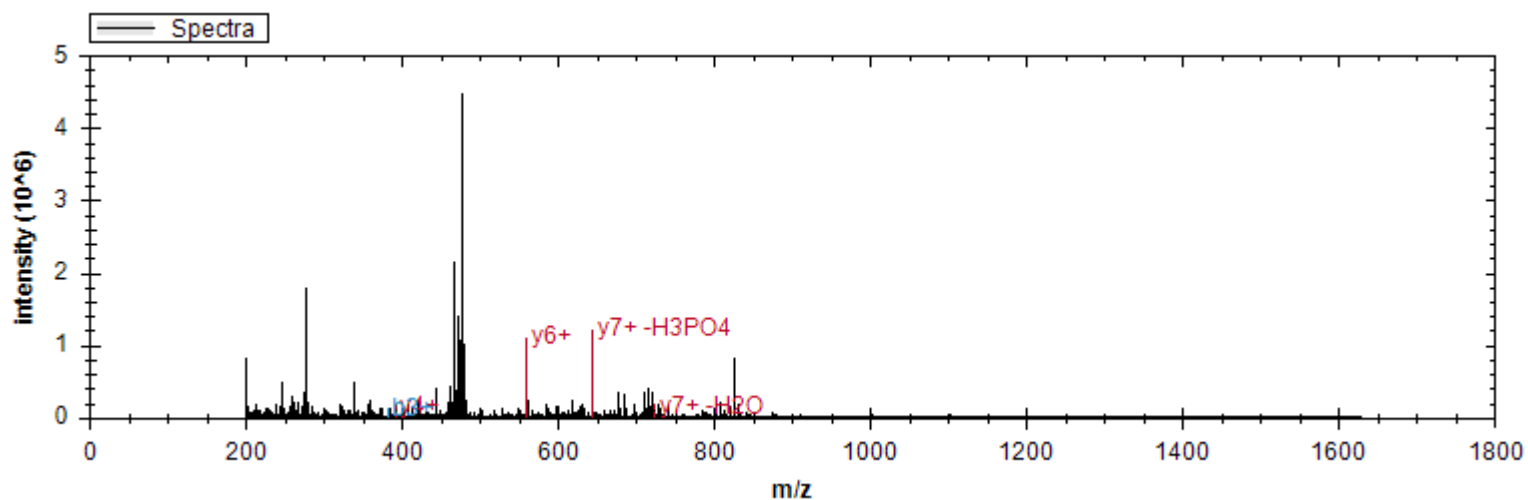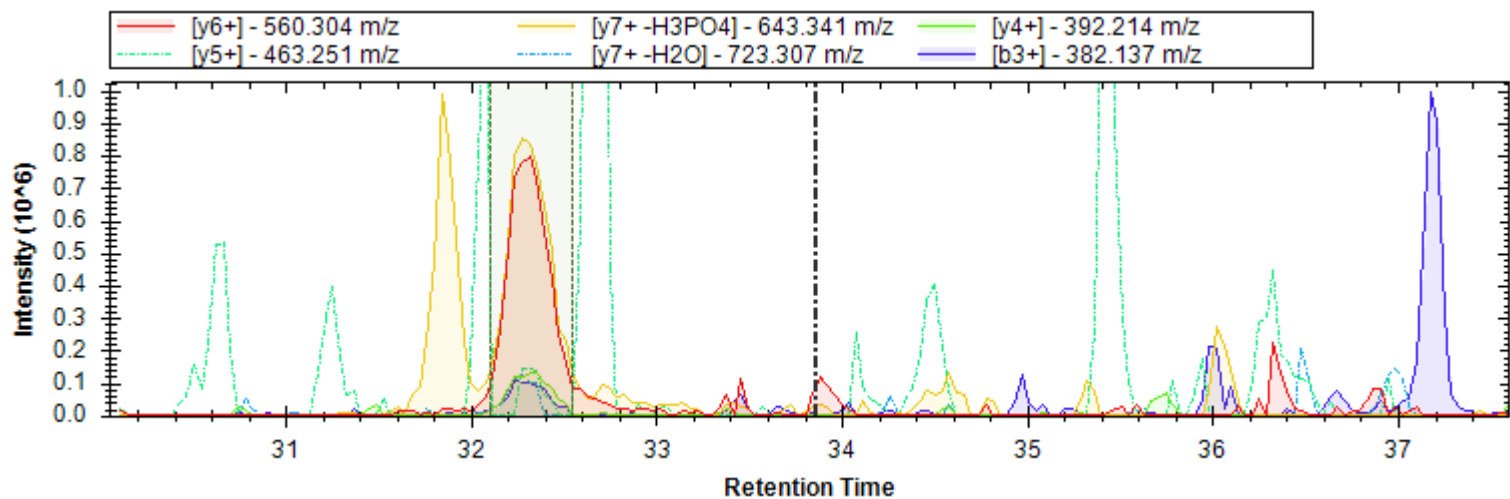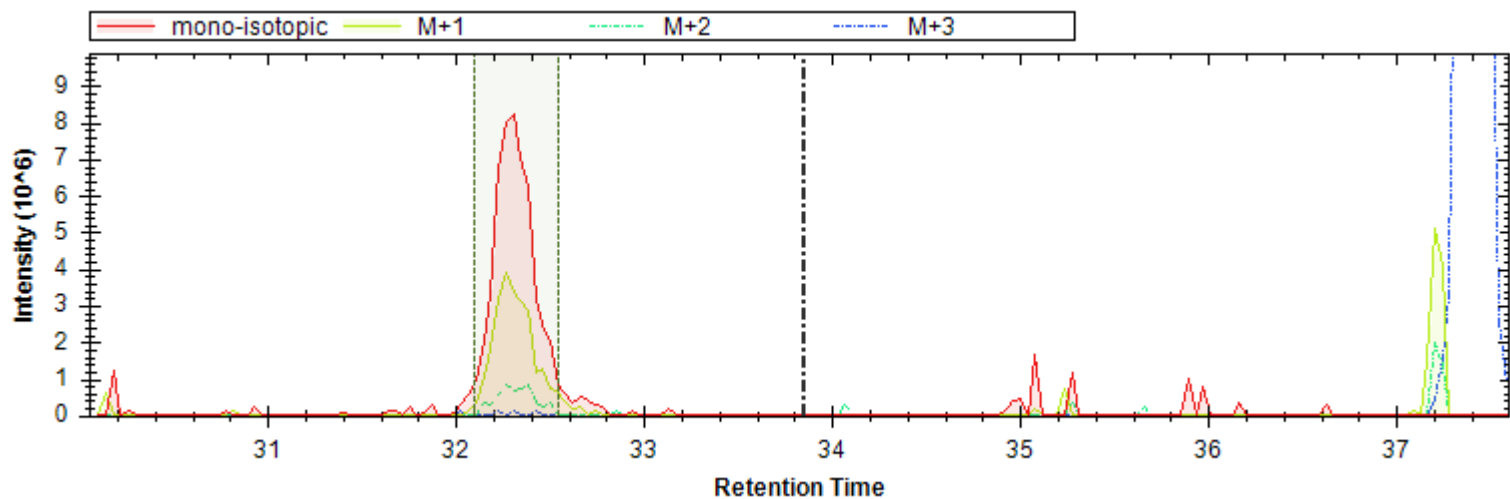

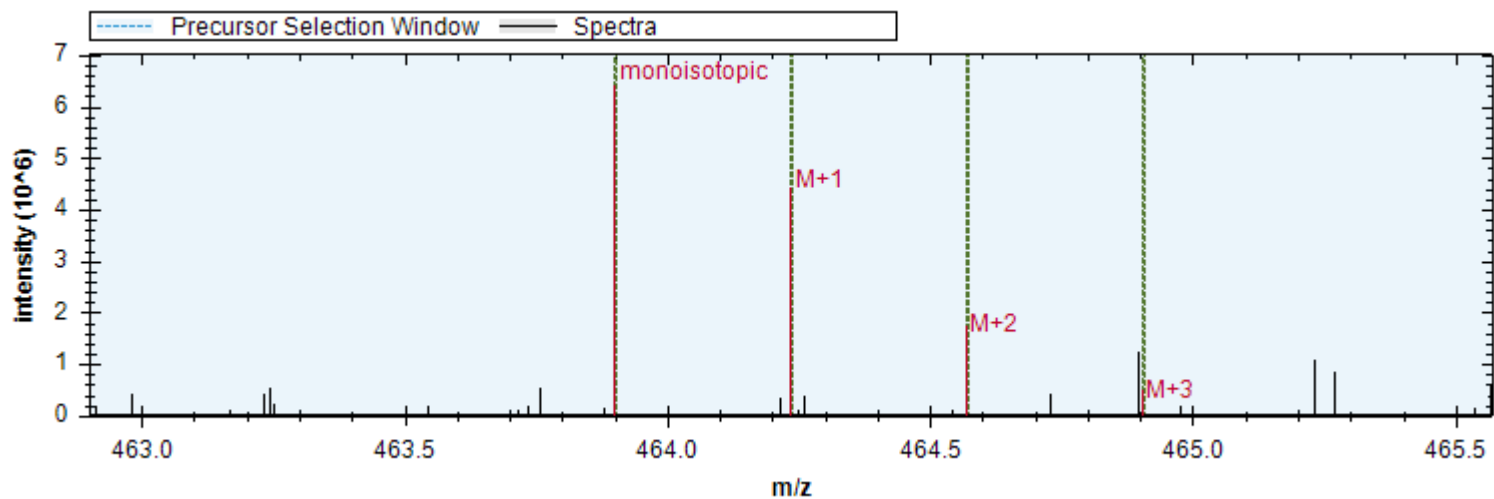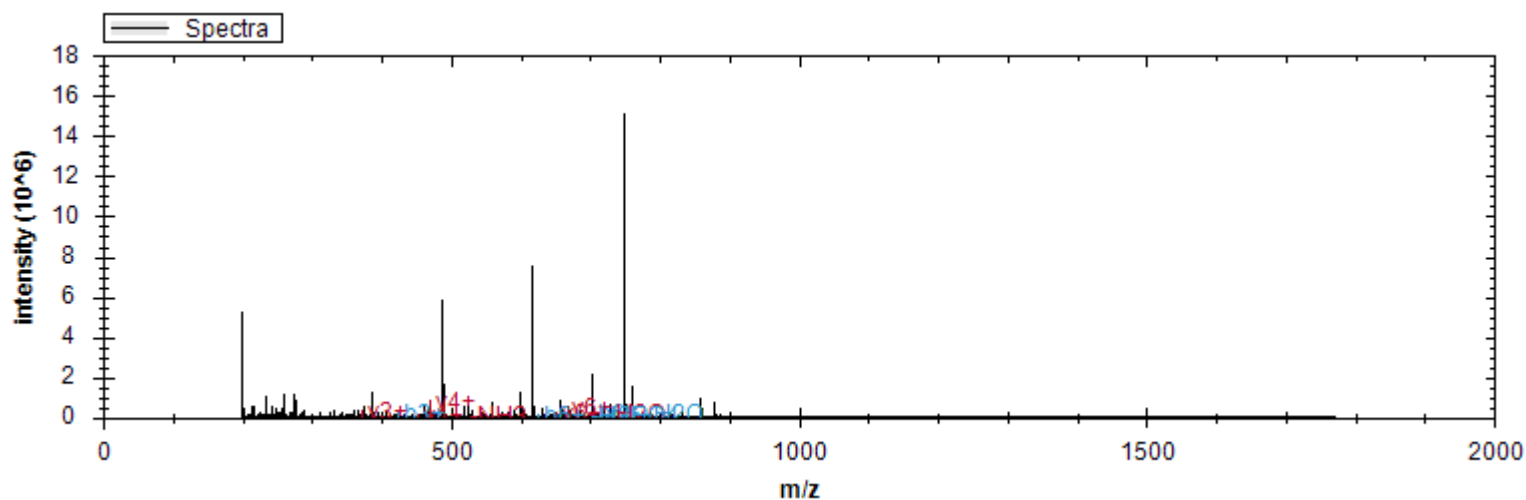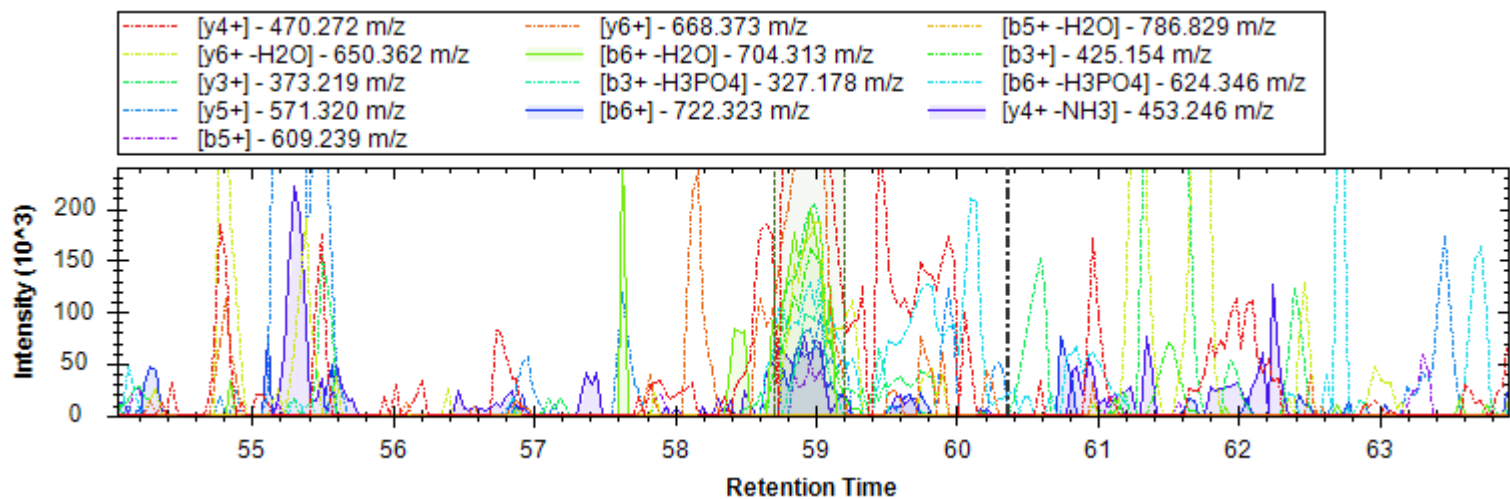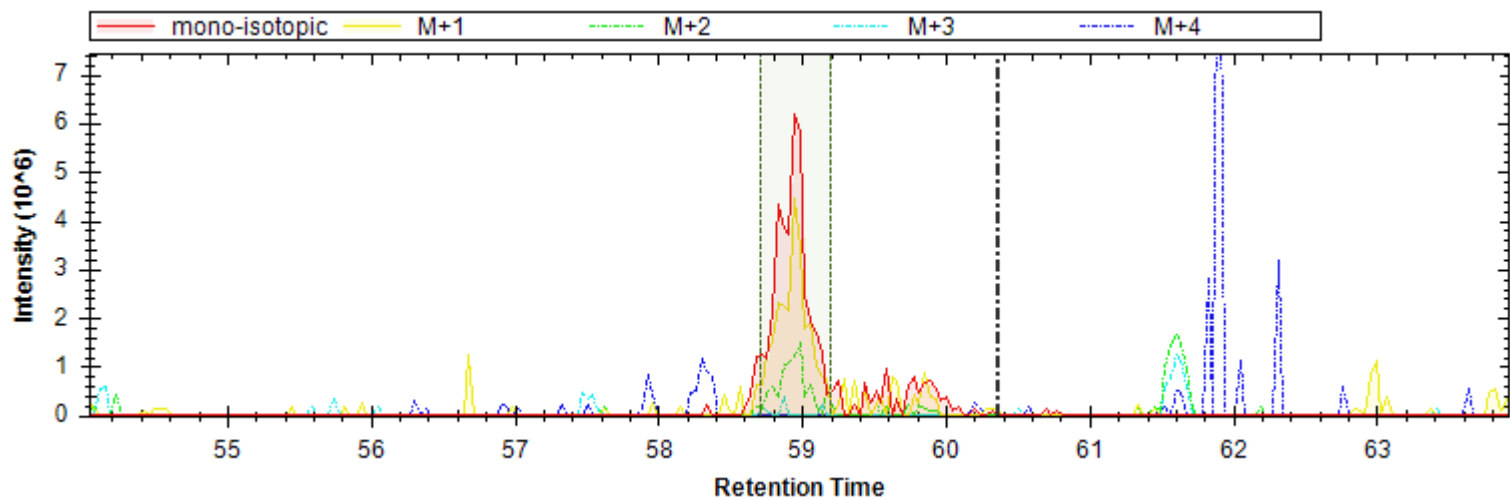

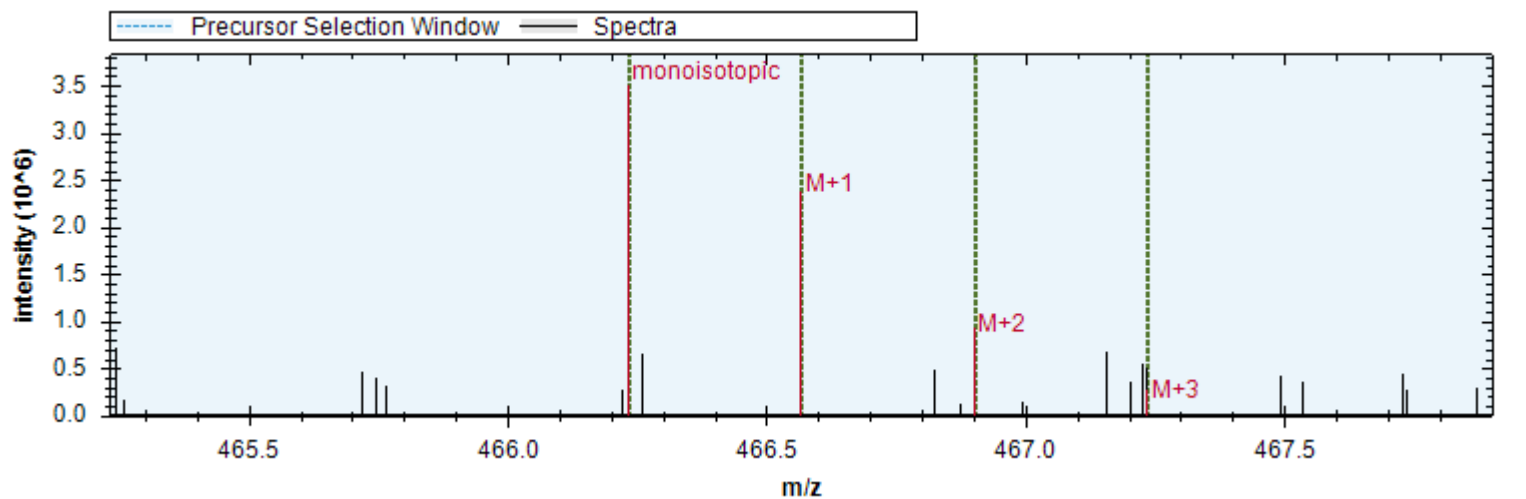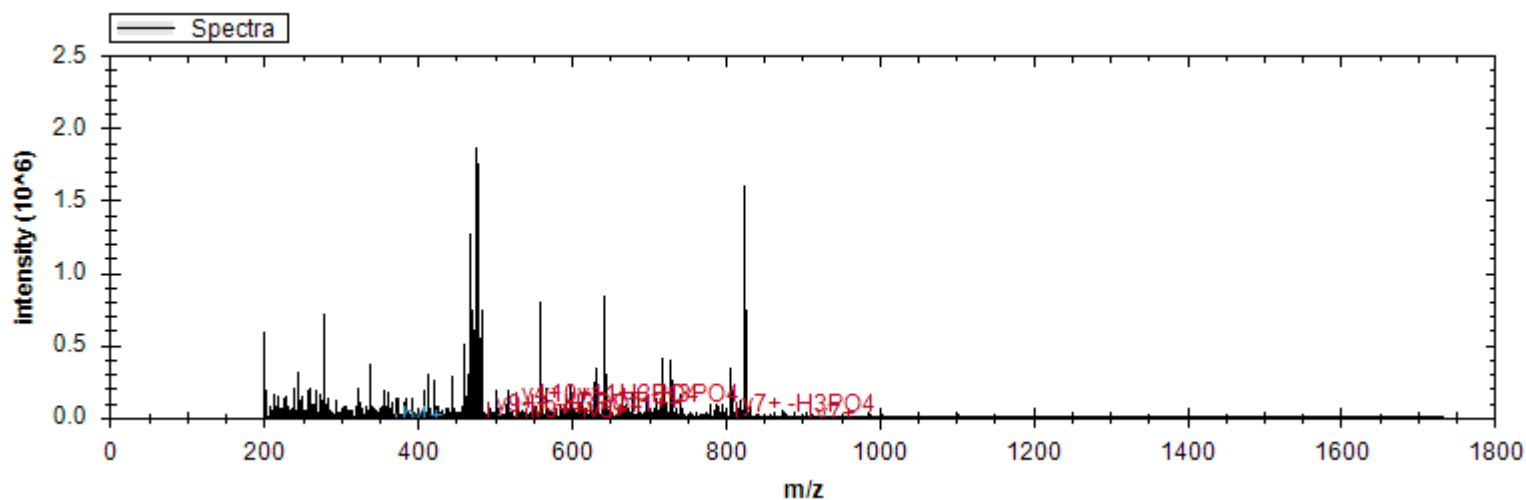

- |                              |                            |                              |
|------------------------------|----------------------------|------------------------------|
| [y5+ -H2O] - 598.331 m/z     | [y4+] - 529.309 m/z        | [y11++ -H3PO4] - 600.323 m/z |
| [y10++ -H3PO4] - 549.799 m/z | [y7+ -H3PO4] - 813.458 m/z | [y9++ -H3PO4] - 492.285 m/z  |
| [y9++] - 541.274 m/z         | [y11++] - 649.311 m/z      | [y5+ -NH3] - 599.315 m/z     |
| [y7+] - 911.435 m/z          | [y10++] - 598.787 m/z      | [y5+] - 616.341 m/z          |
| [b4+] - 373.172 m/z          |                            |                              |

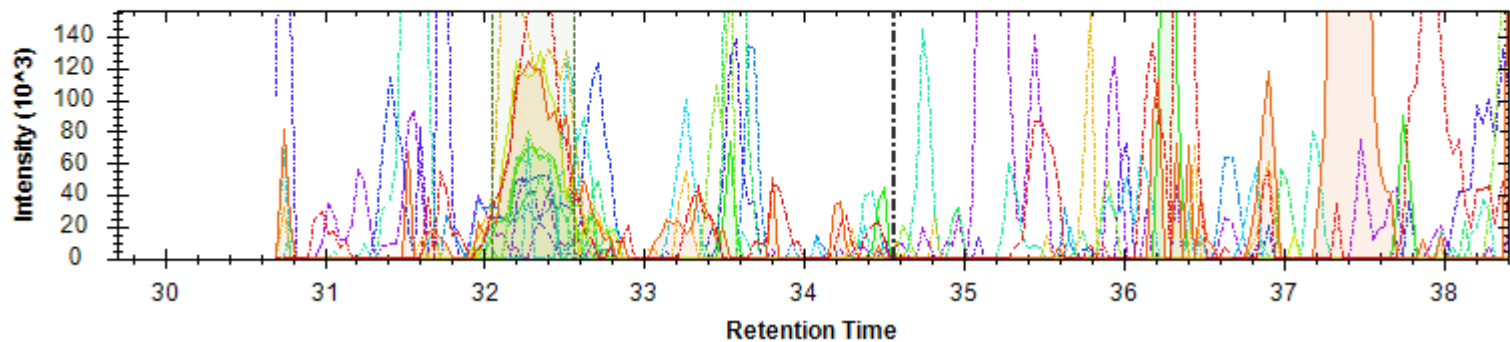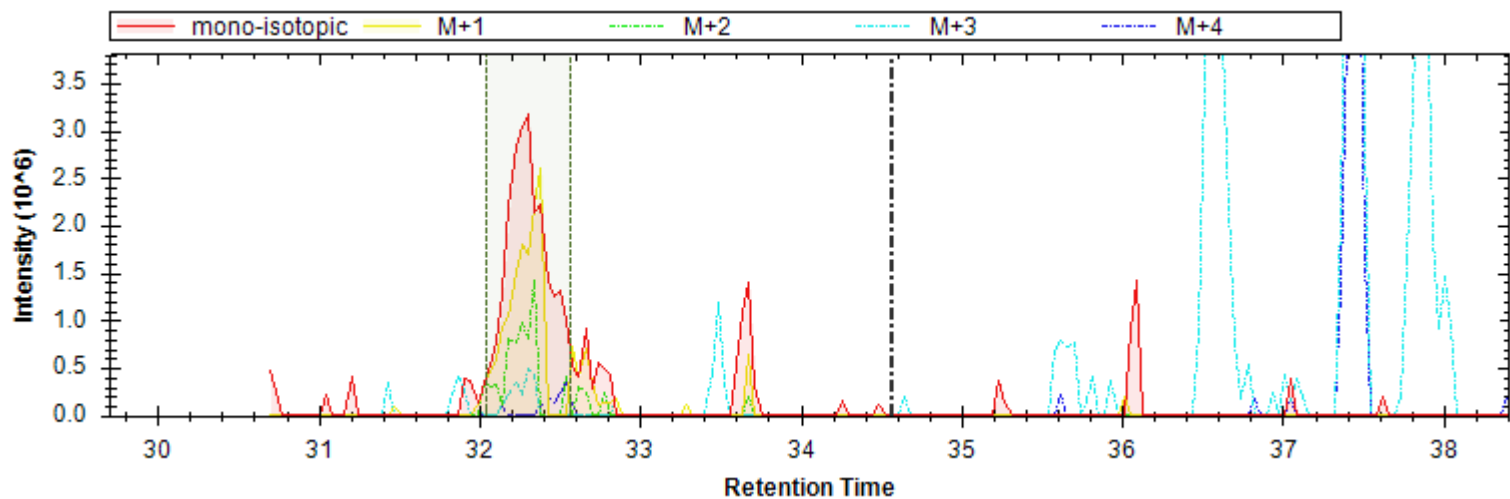

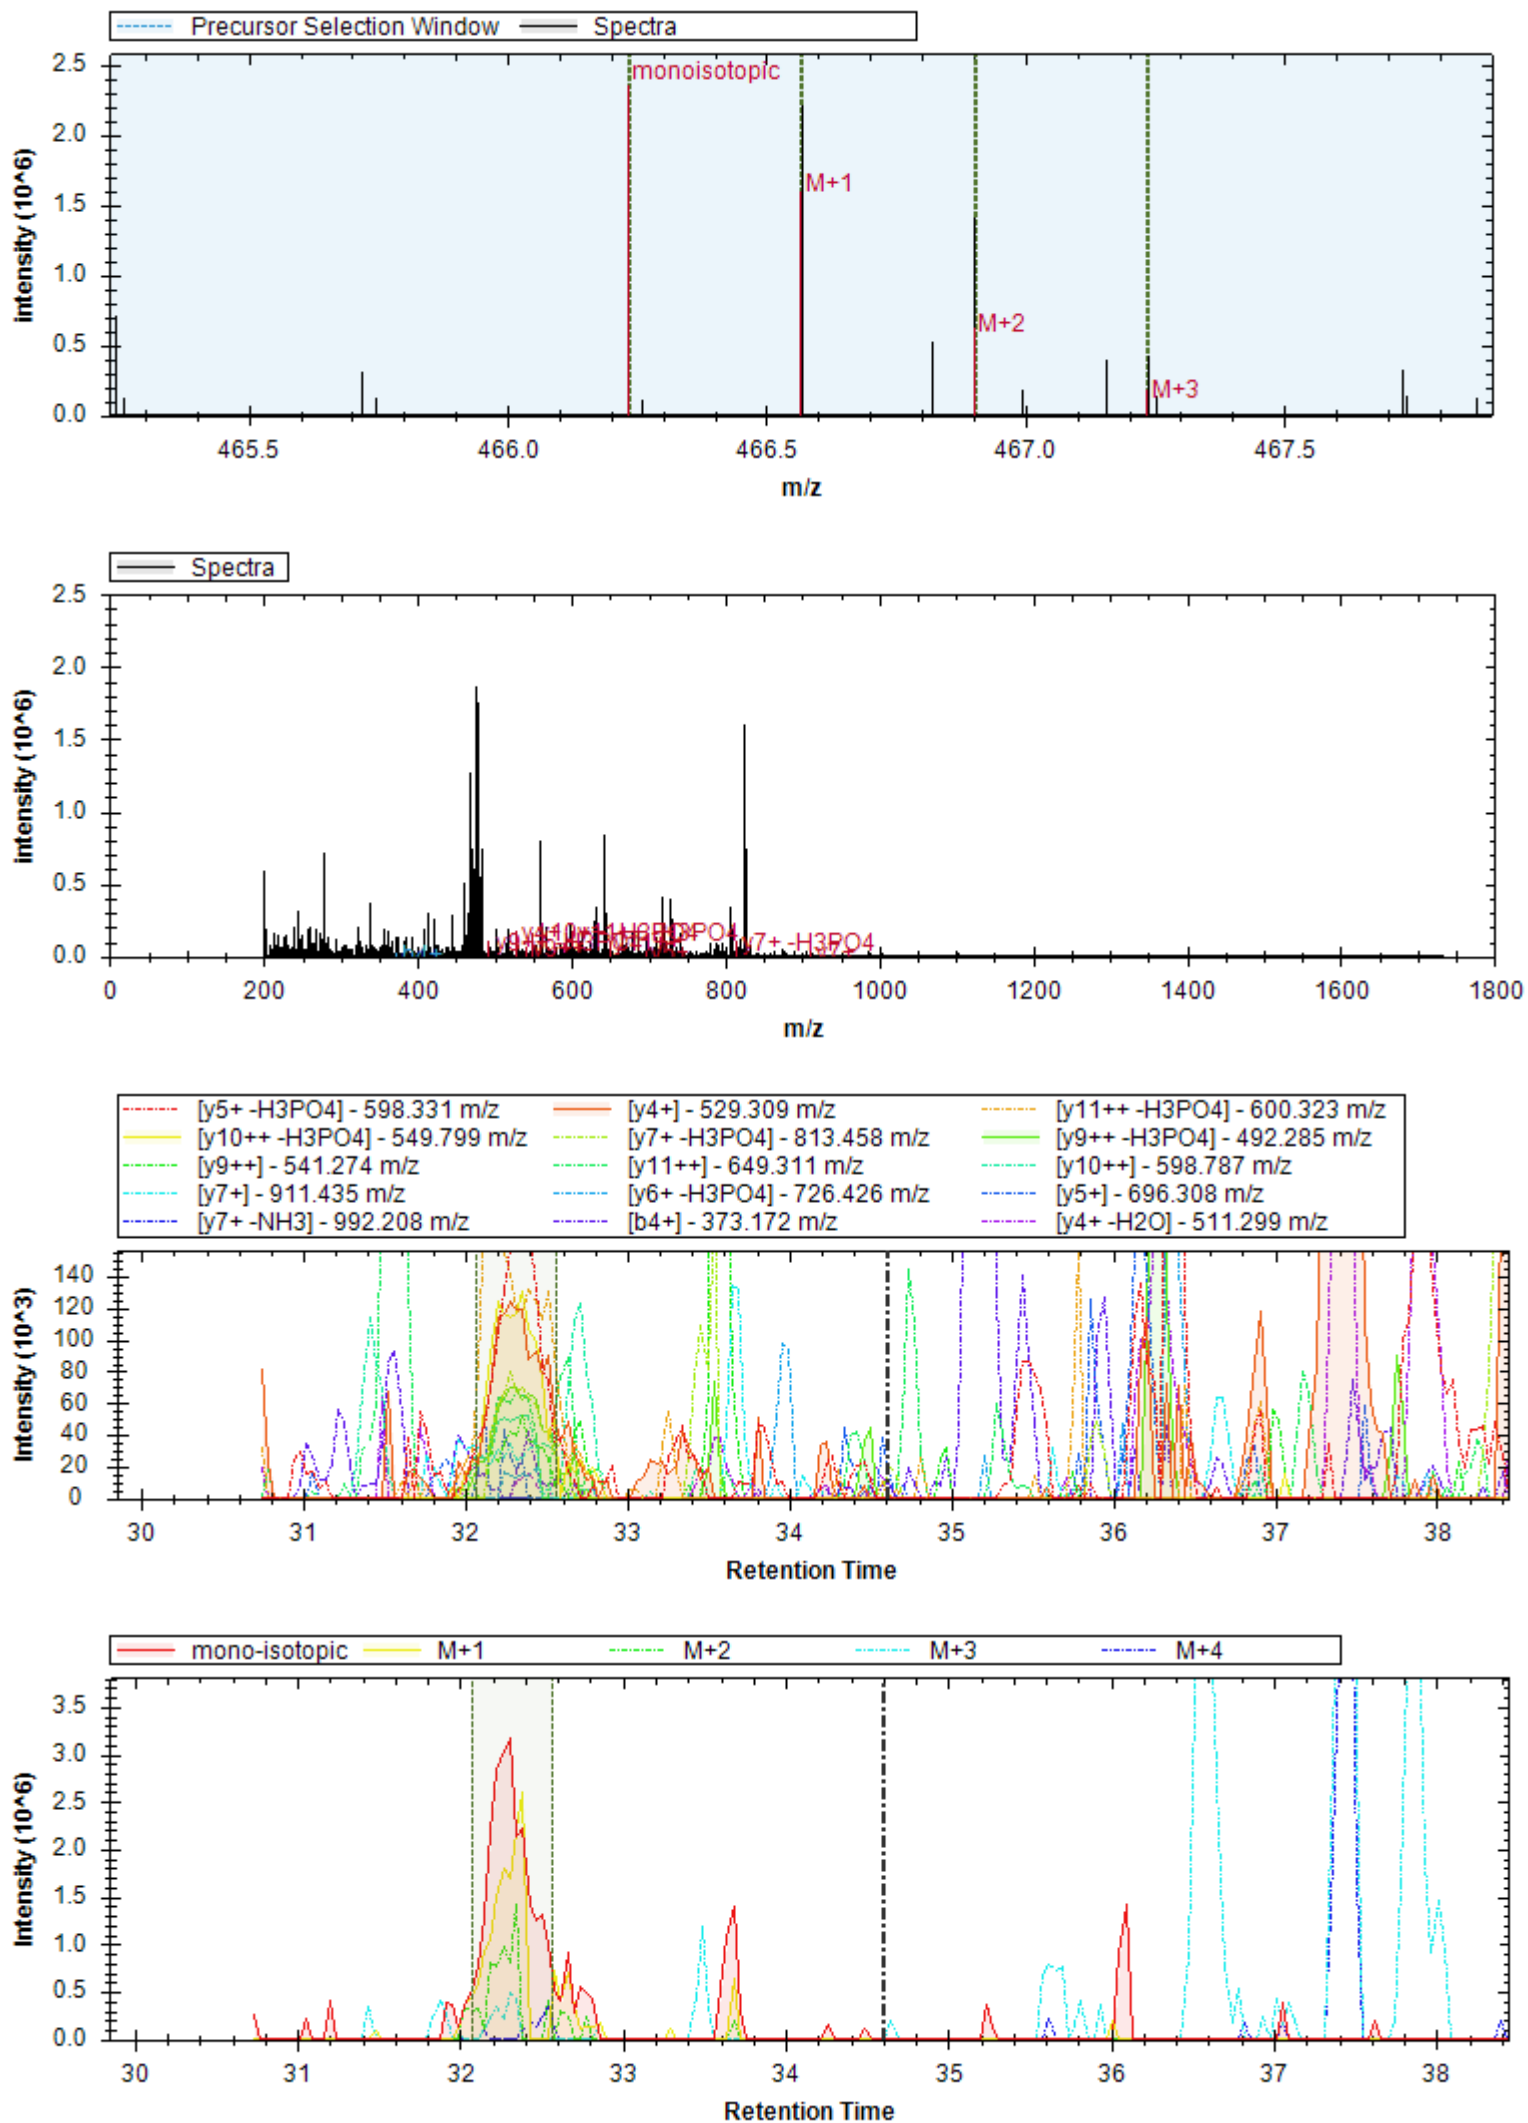

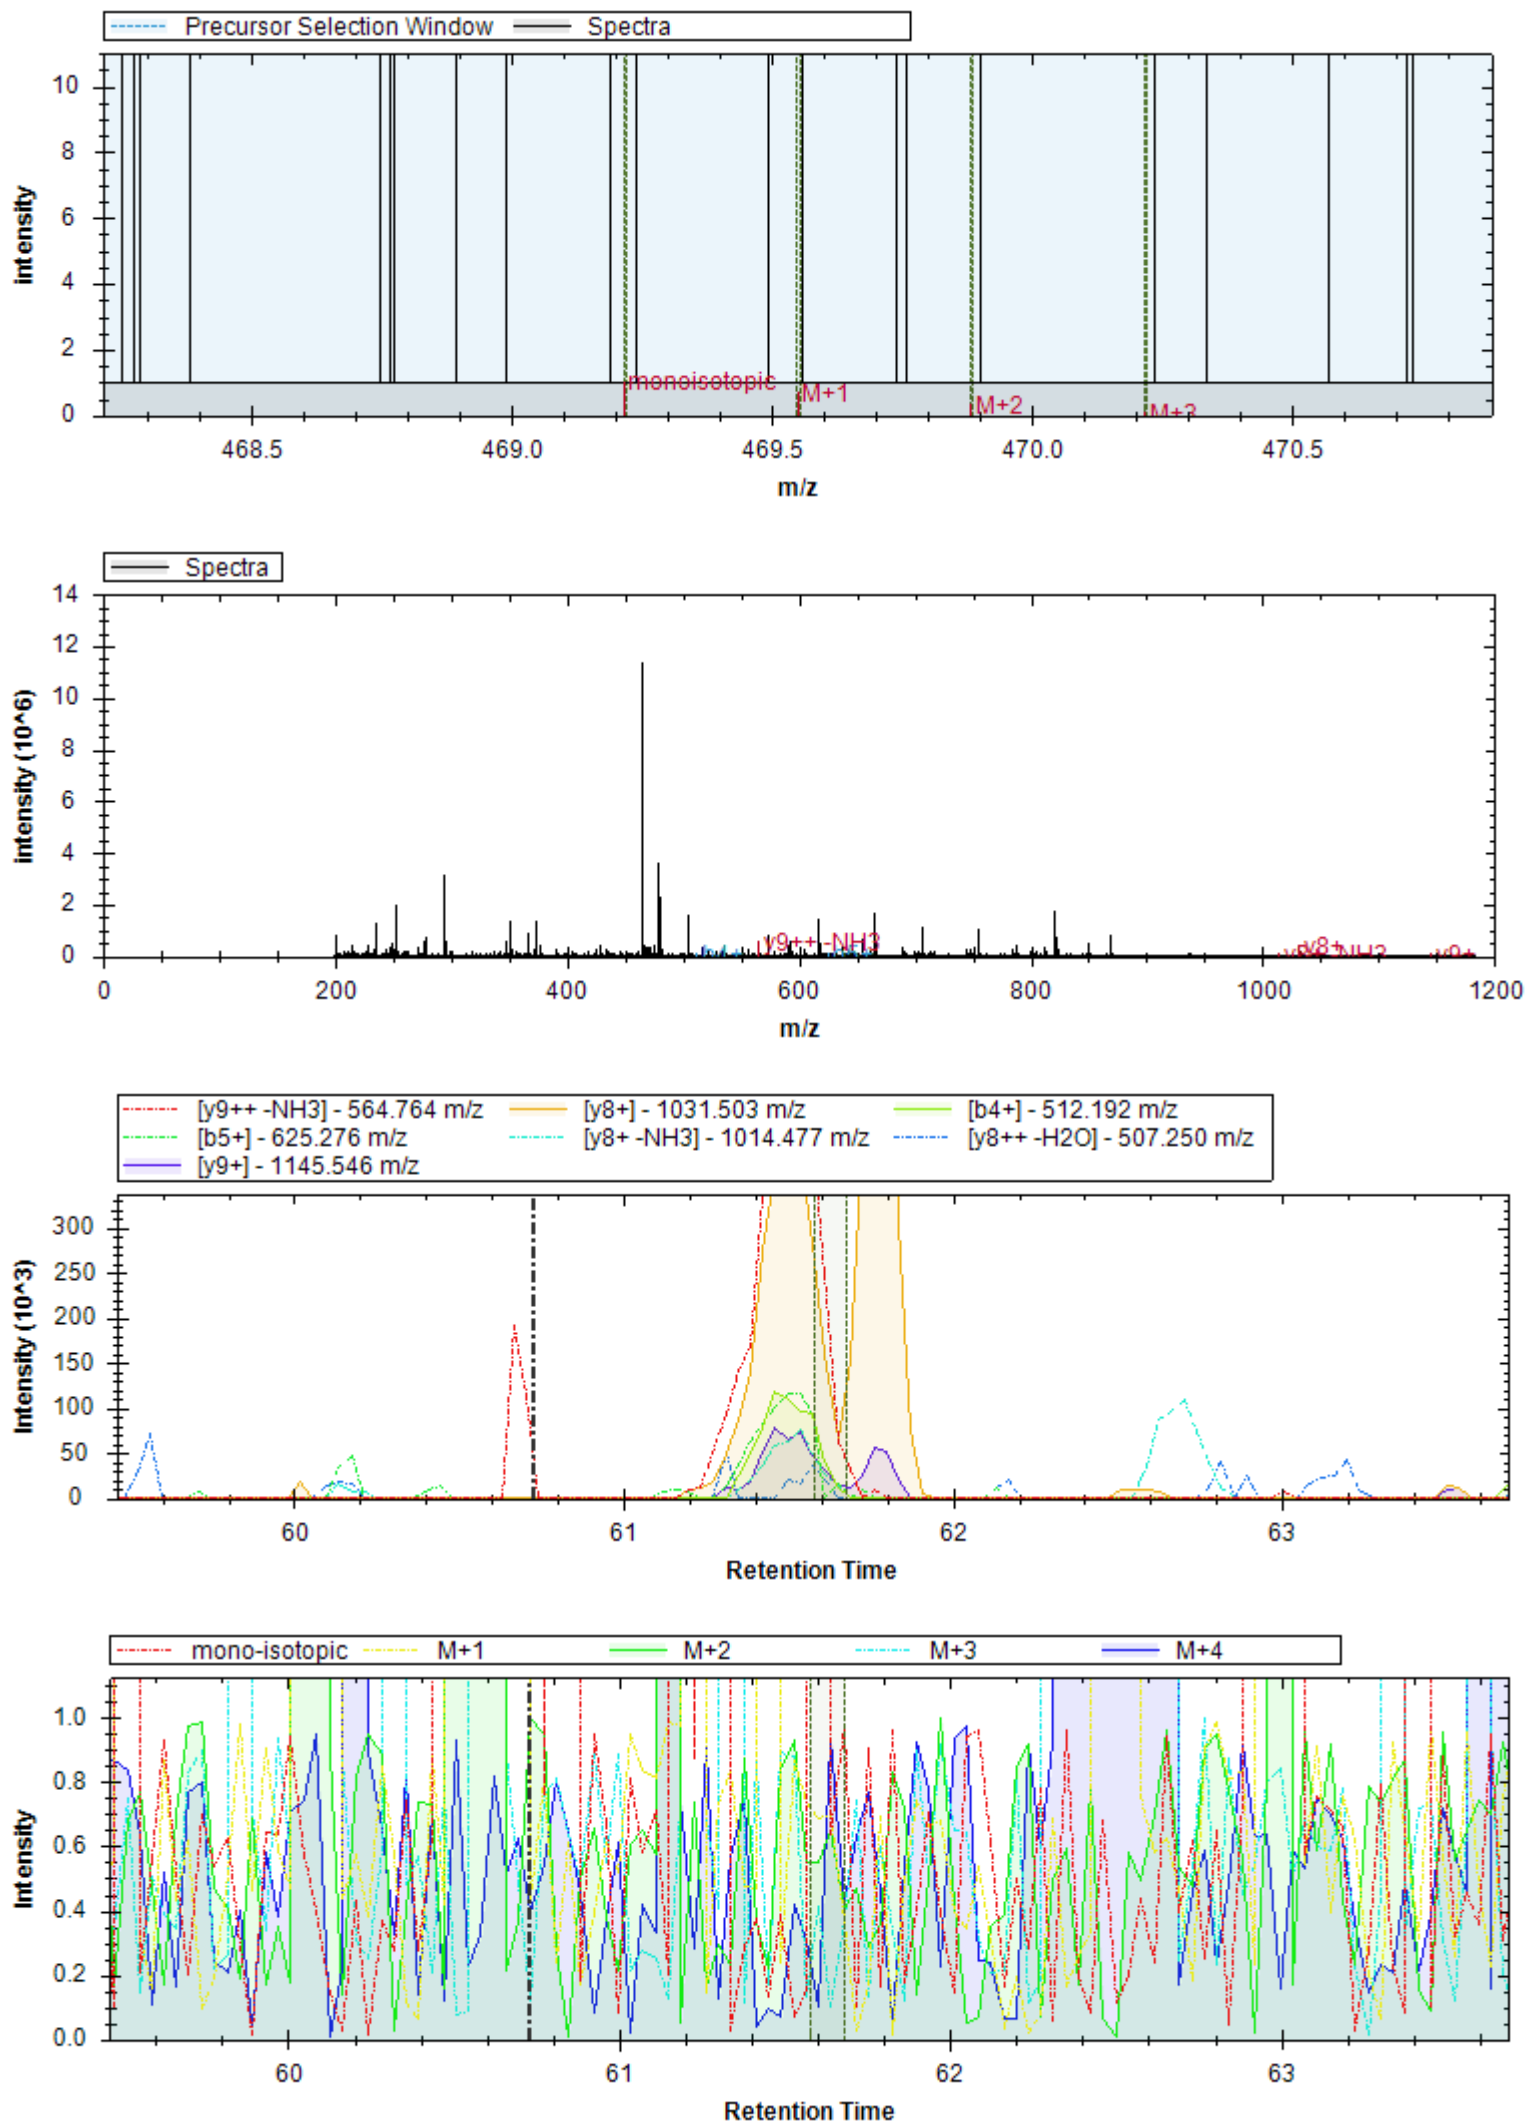

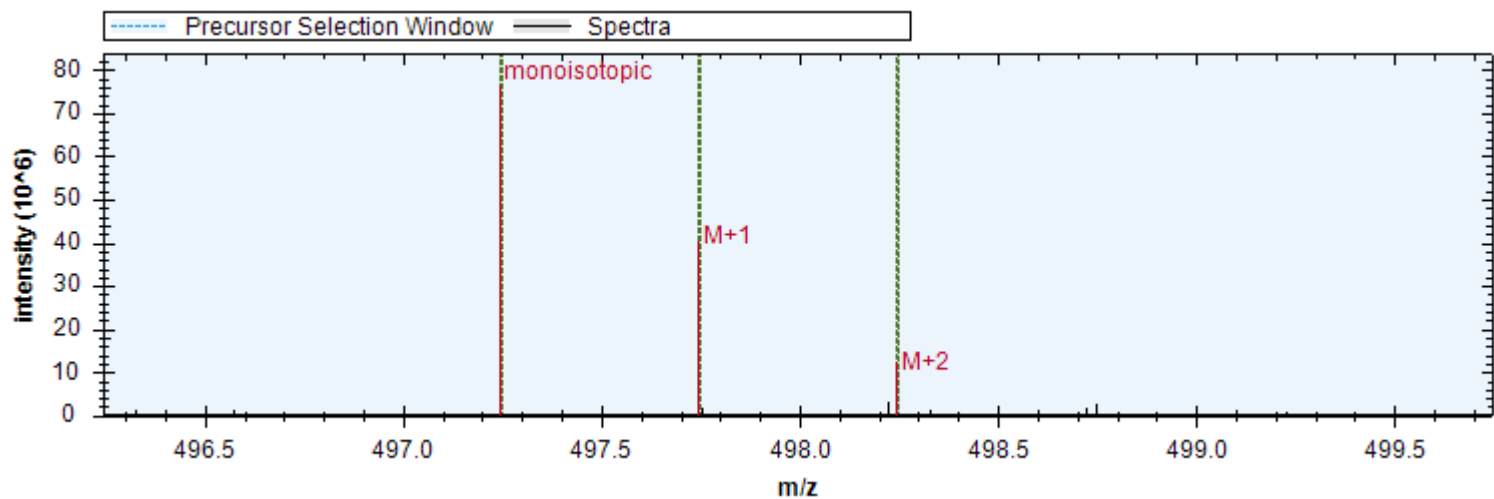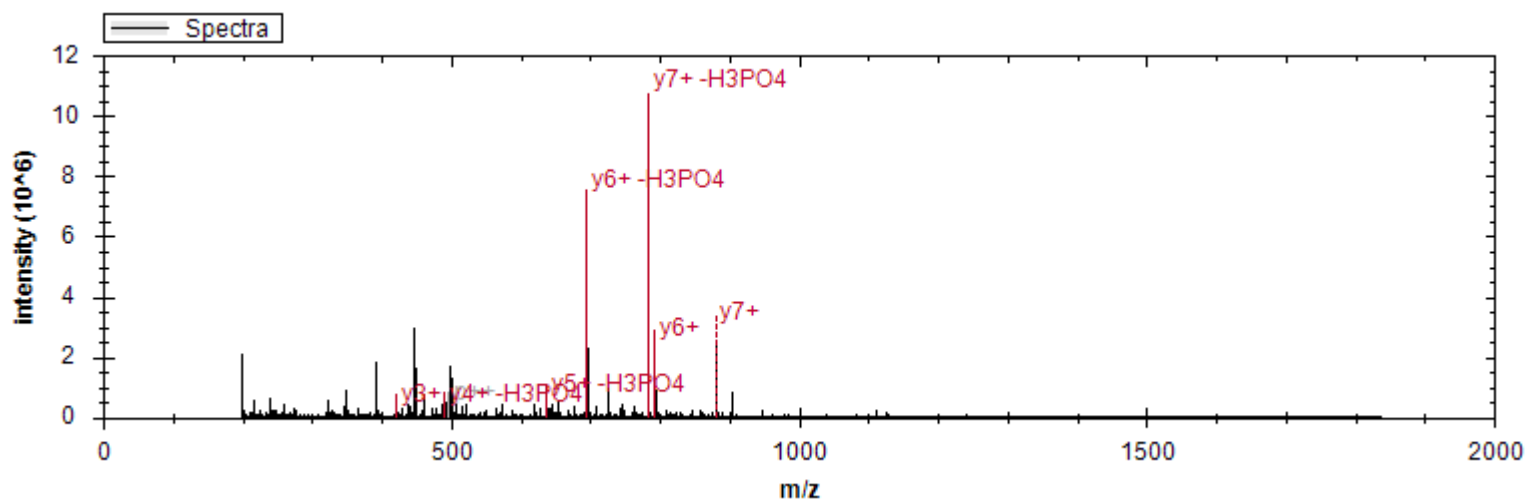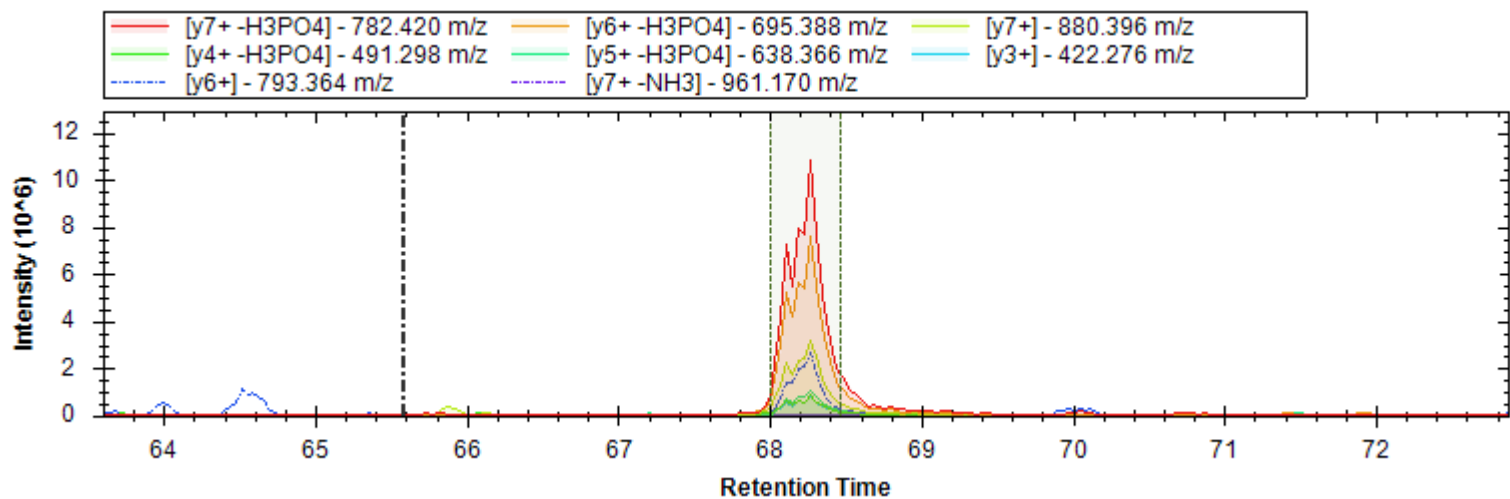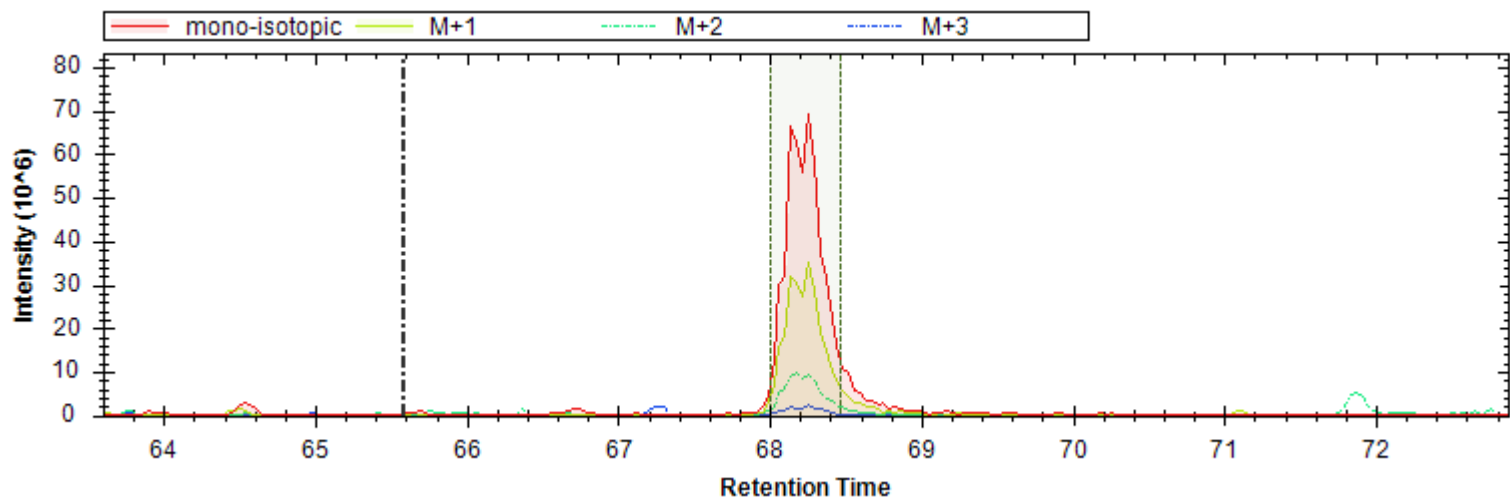

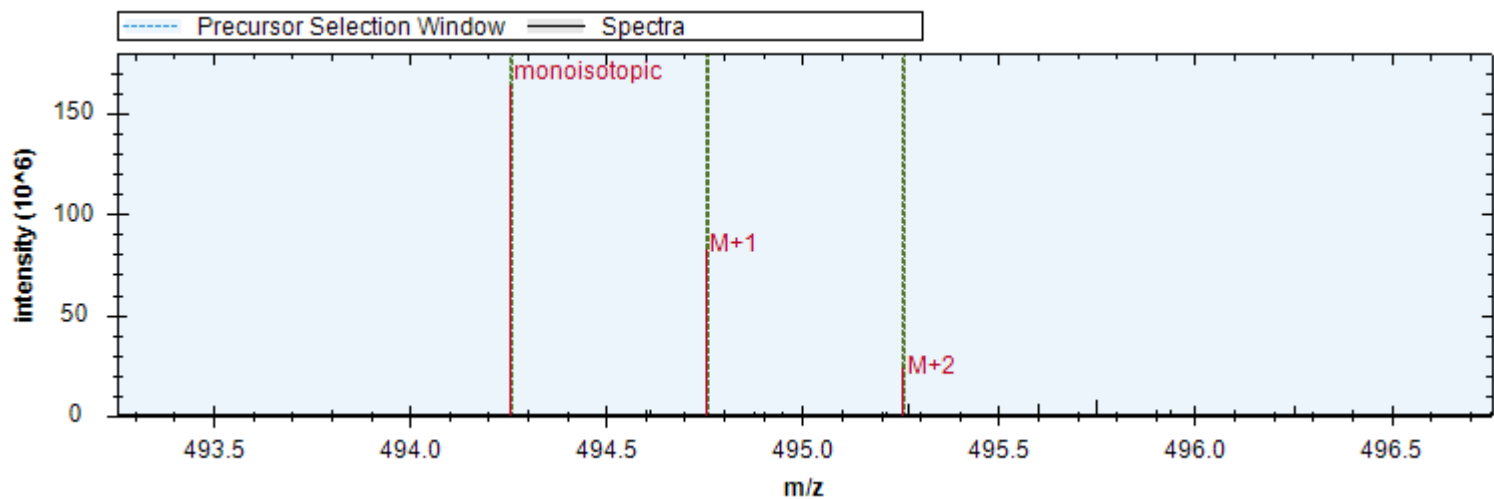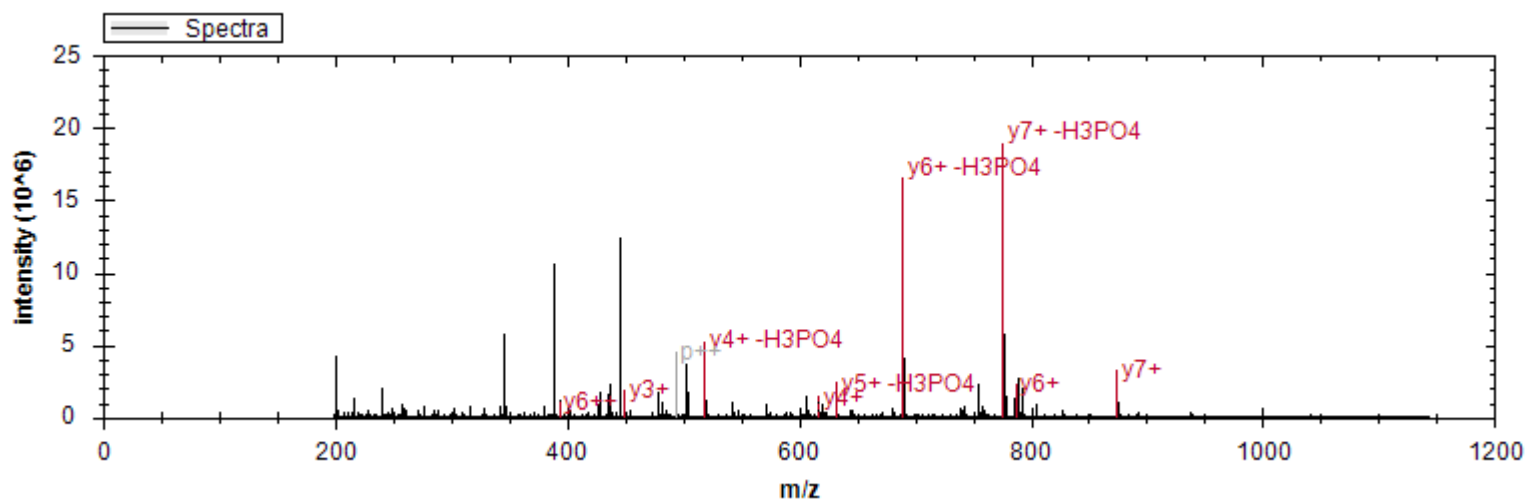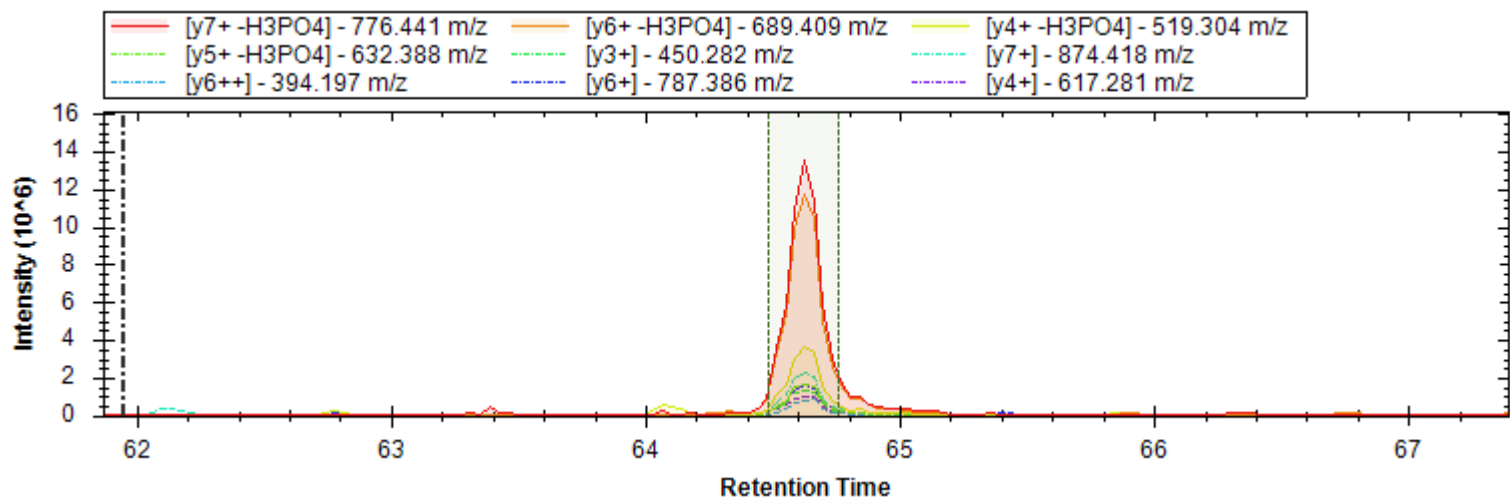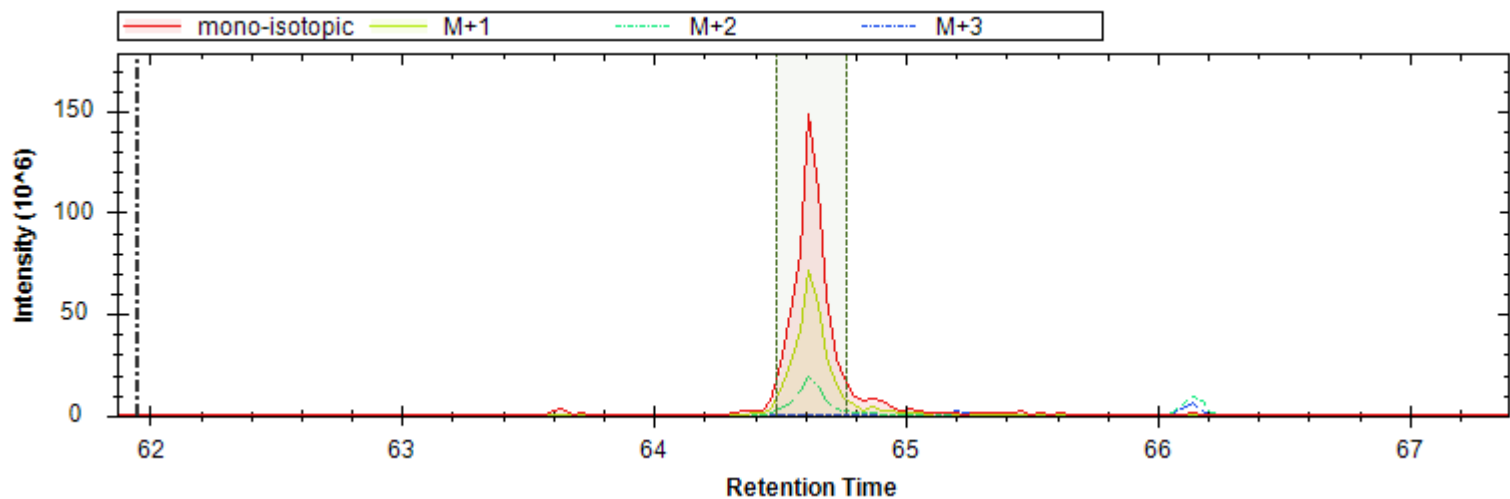



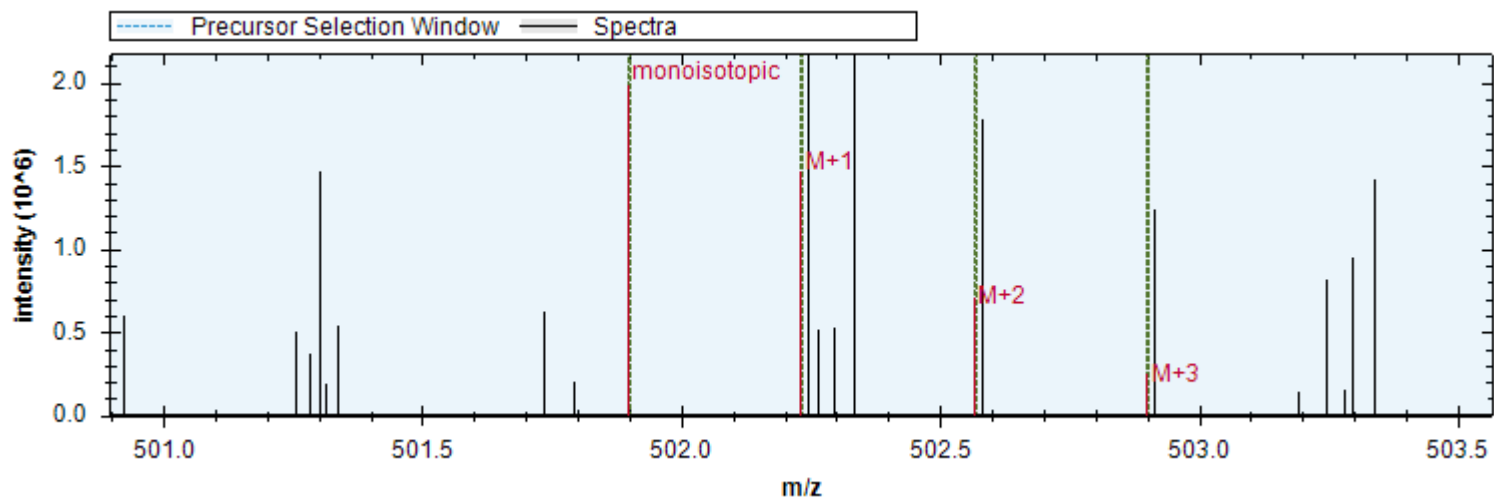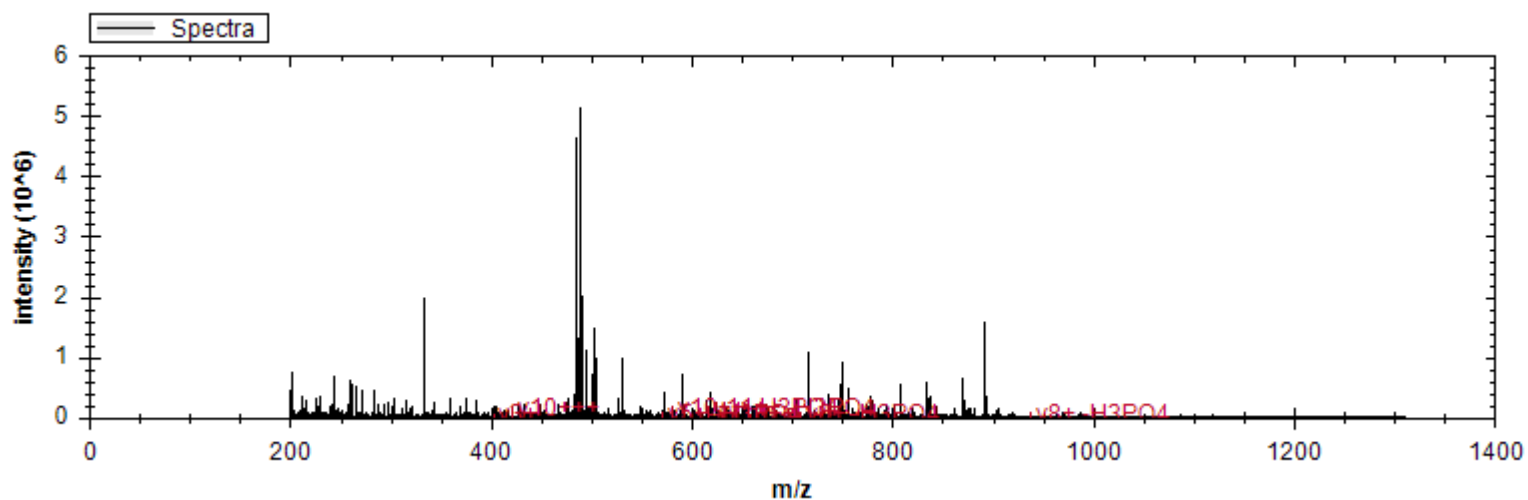

- |                              |                              |                             |
|------------------------------|------------------------------|-----------------------------|
| [y10++ -H3PO4] - 581.793 m/z | [y3+] - 403.212 m/z          | [y5+ -H3PO4] - 571.302 m/z  |
| [y6+ -H3PO4] - 708.361 m/z   | [y8+ -H3PO4] - 937.467 m/z   | [y10+++] - 420.857 m/z      |
| [y4+ -H3PO4] - 472.234 m/z   | [y11++ -H3PO4] - 617.312 m/z | [y10++] - 630.781 m/z       |
| [b5+] - 469.241 m/z          | [y6+] - 806.338 m/z          | [y7+ -H3PO4] - 836.420 m/z  |
| [y8++] - 518.226 m/z         | [y9+ -H3PO4] - 1065.526 m/z  | [y10+++ -NH3] - 415.181 m/z |
| [y4+] - 570.211 m/z          | [y5+] - 669.279 m/z          | [y8+] - 1035.444 m/z        |

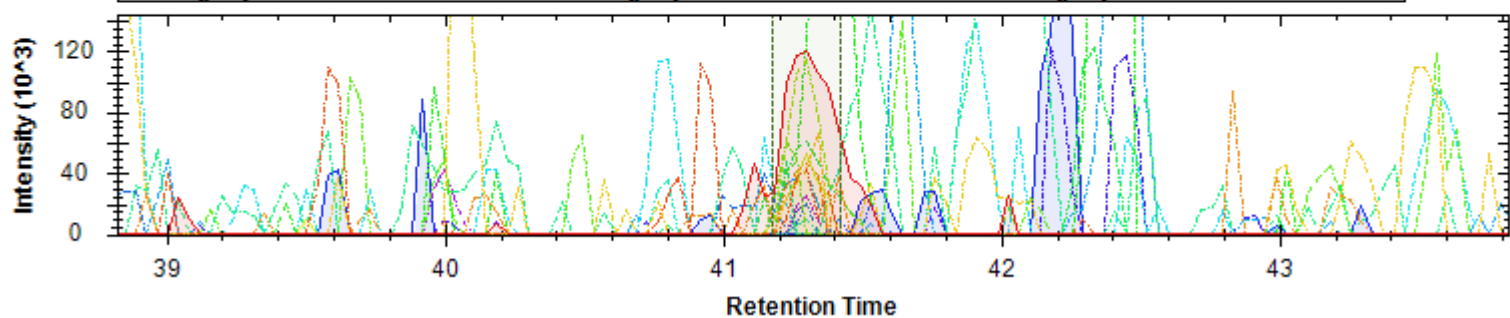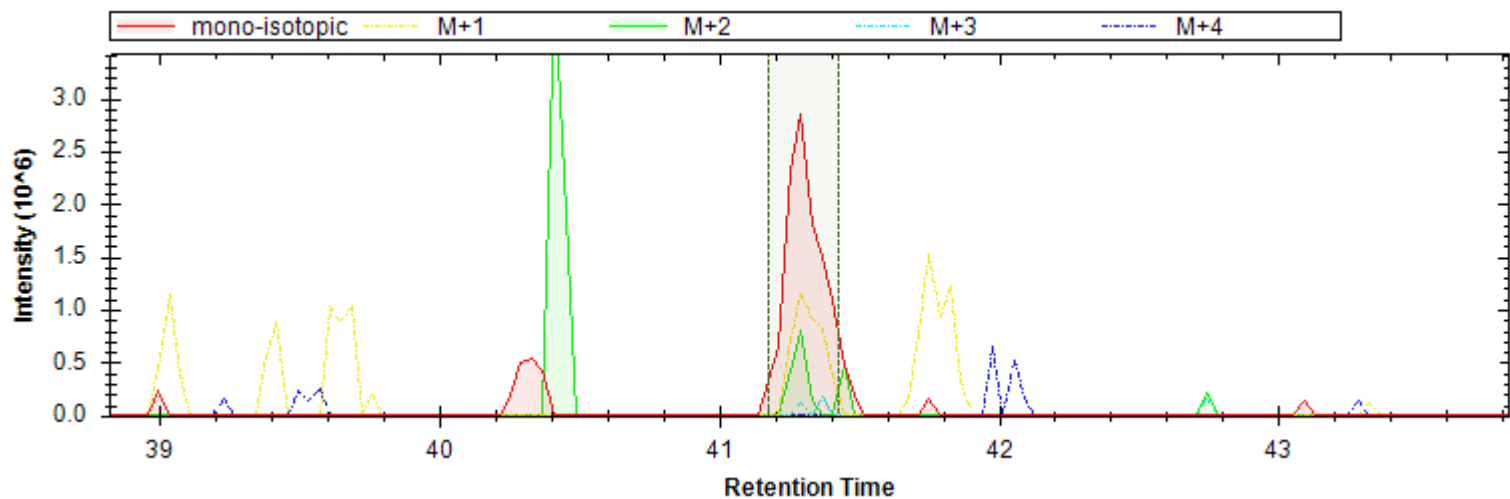

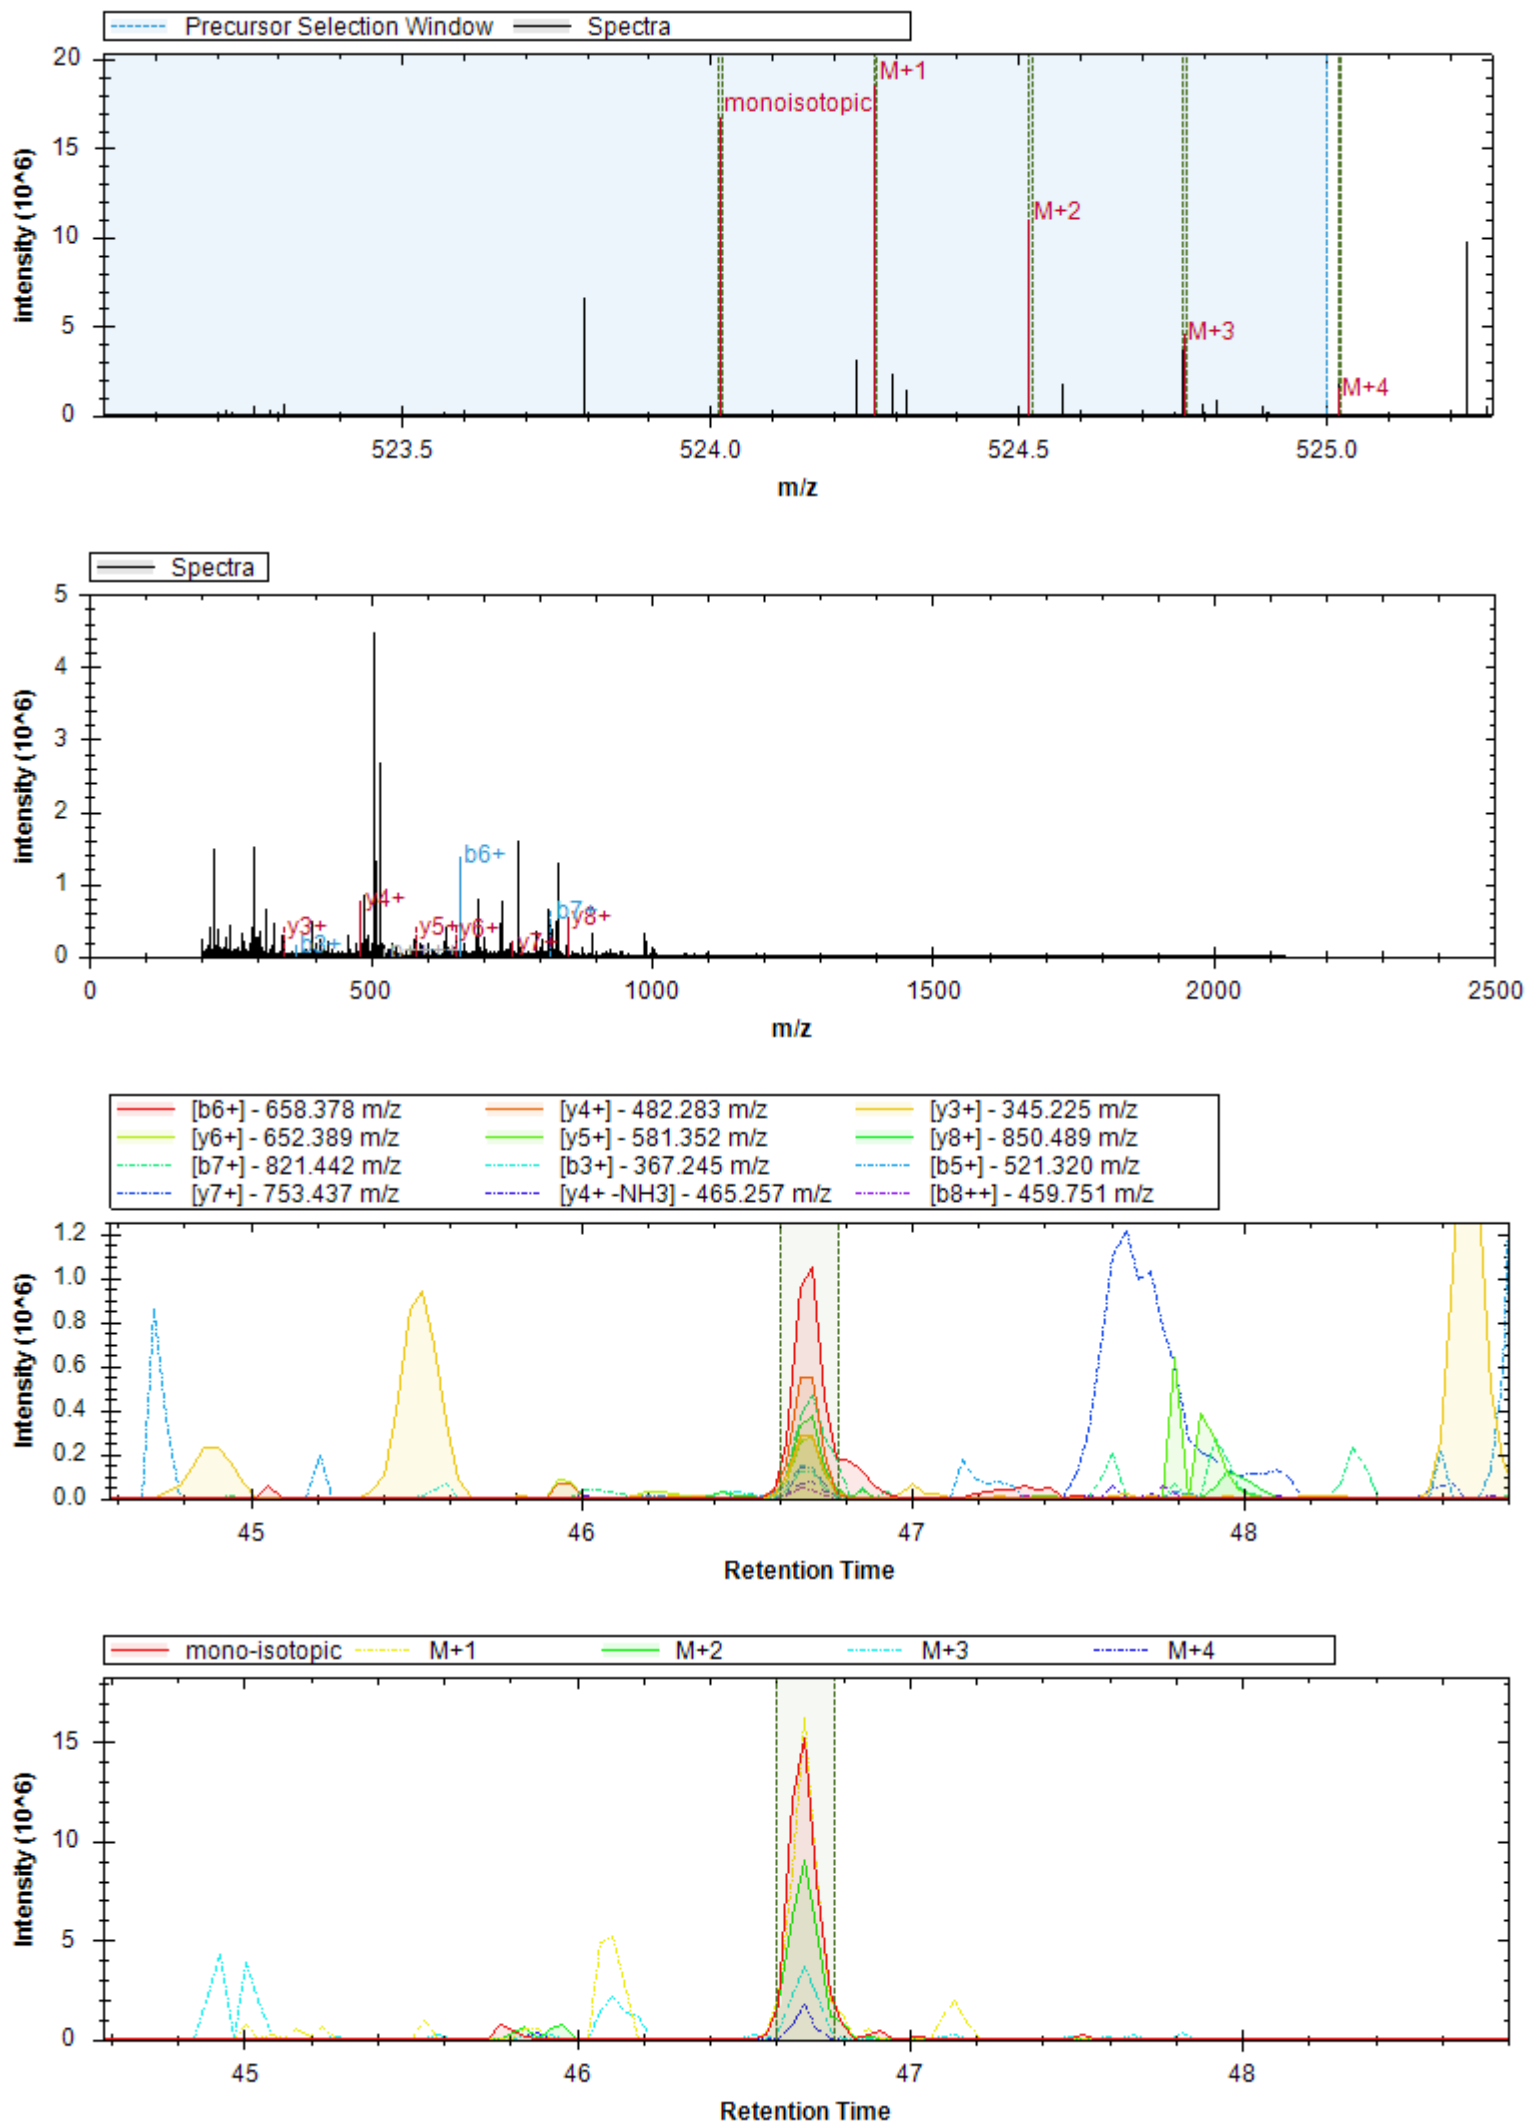

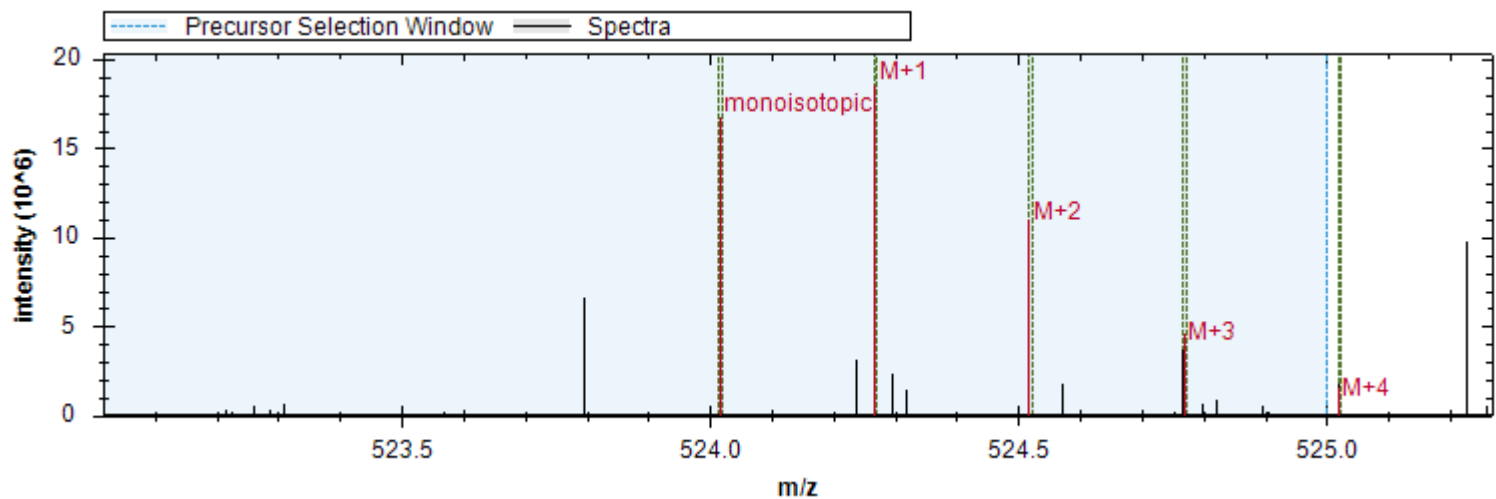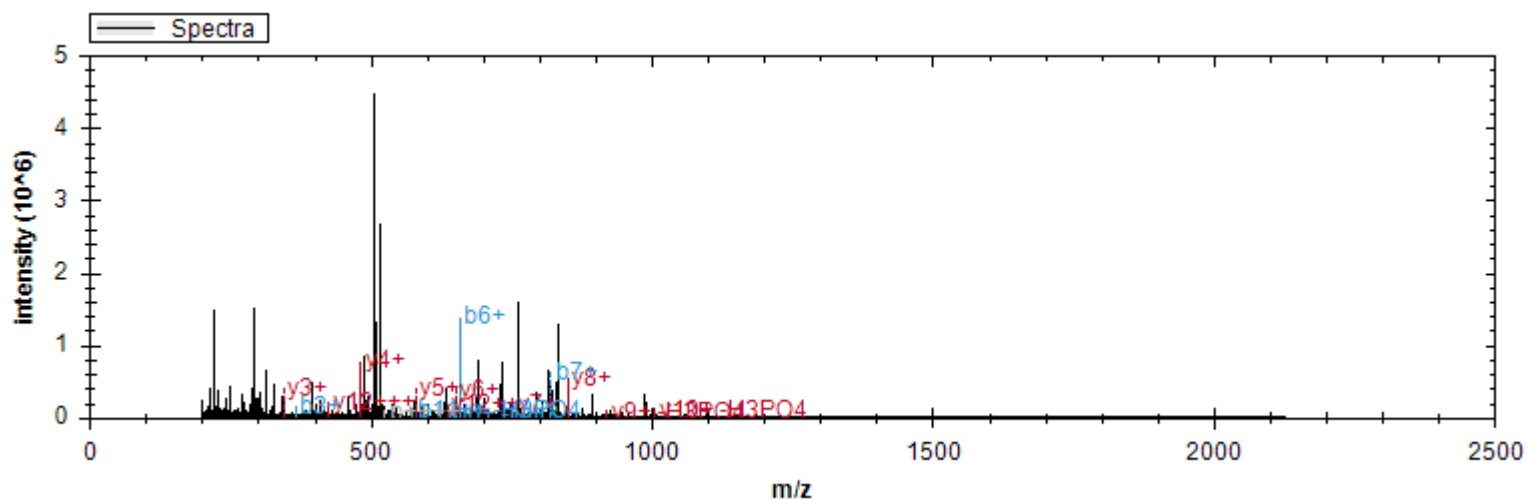

- |                               |                            |                            |
|-------------------------------|----------------------------|----------------------------|
| [b6+] - 658.378 m/z           | [y4+] - 482.283 m/z        | [y3+] - 345.225 m/z        |
| [b7+] - 821.442 m/z           | [y8+] - 850.489 m/z        | [y6+] - 652.389 m/z        |
| [y5+] - 581.352 m/z           | [b5+] - 521.320 m/z        | [y12+++] - 424.875 m/z     |
| [y7+] - 753.437 m/z           | [b9+] - 989.532 m/z        | [b3+] - 367.245 m/z        |
| [b8+++] - 459.751 m/z         | [y11+ -H2O] - 1255.346 m/z | [b6+ -NH3] - 641.352 m/z   |
| [b11+++ -H3PO4] - 573.296 m/z | [y12+++] - 636.809 m/z     | [y9+ -H3PO4] - 919.511 m/z |
| [y10+ -H3PO4] - 1006.543 m/z  | [y4+ -NH3] - 465.257 m/z   |                            |

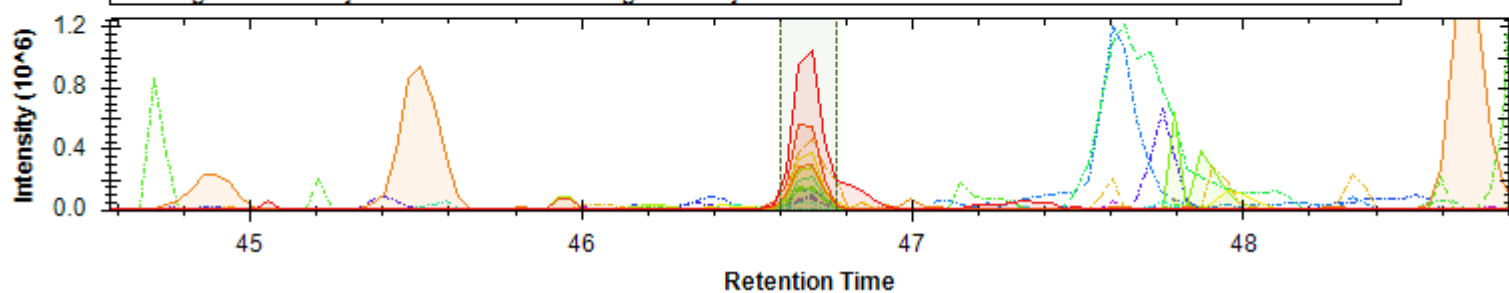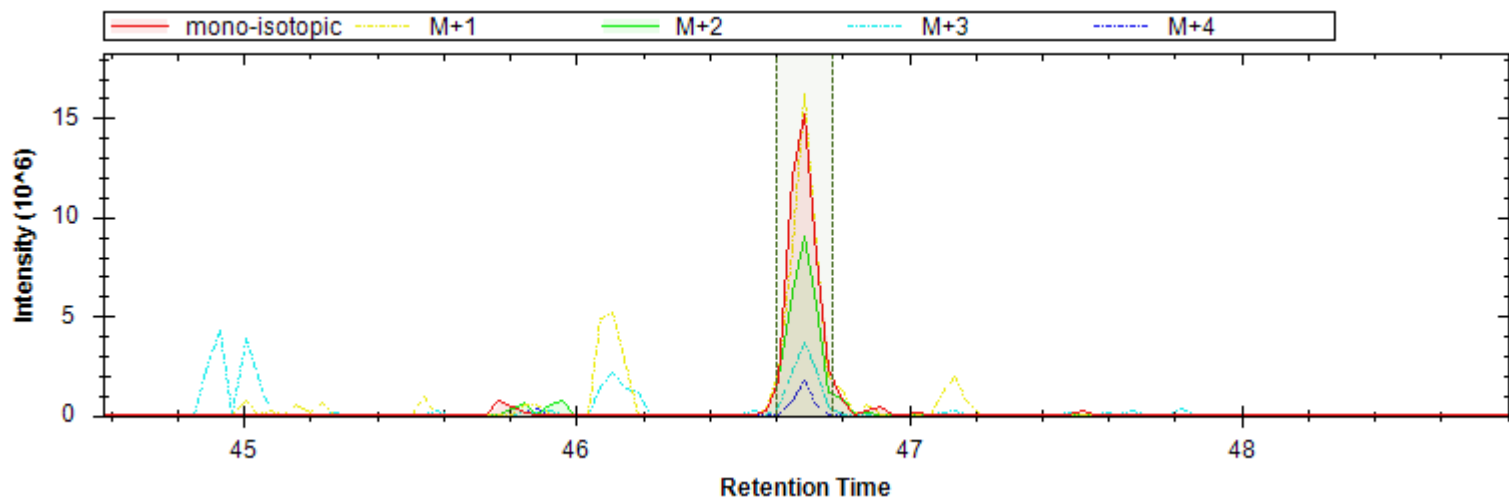

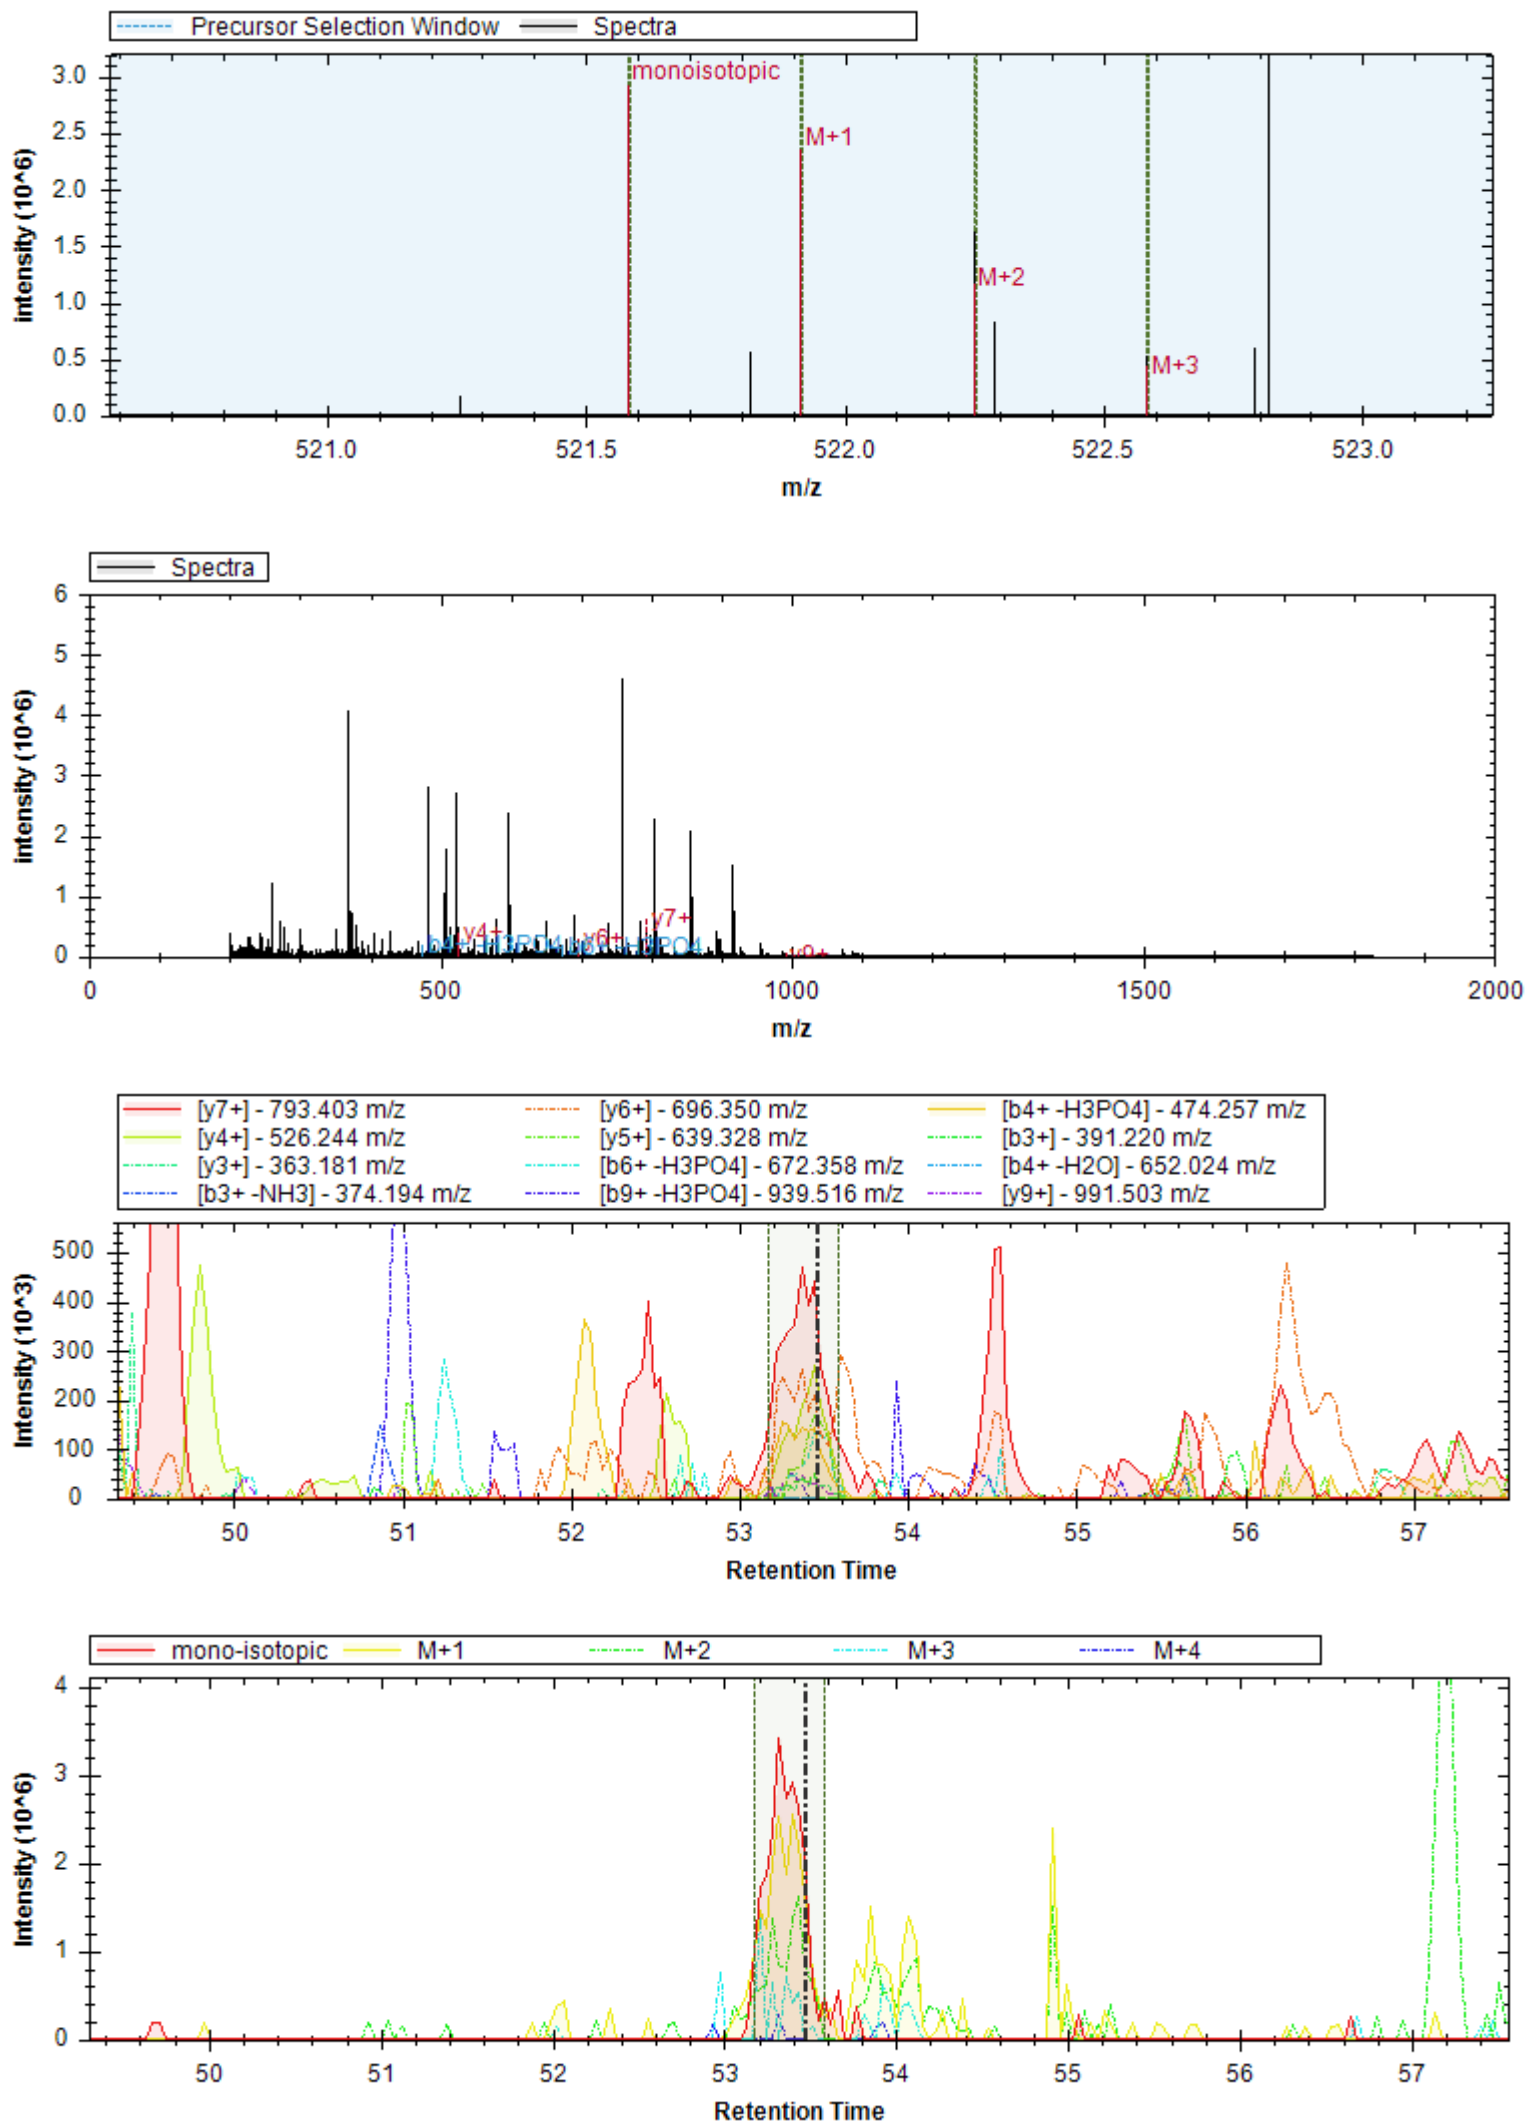

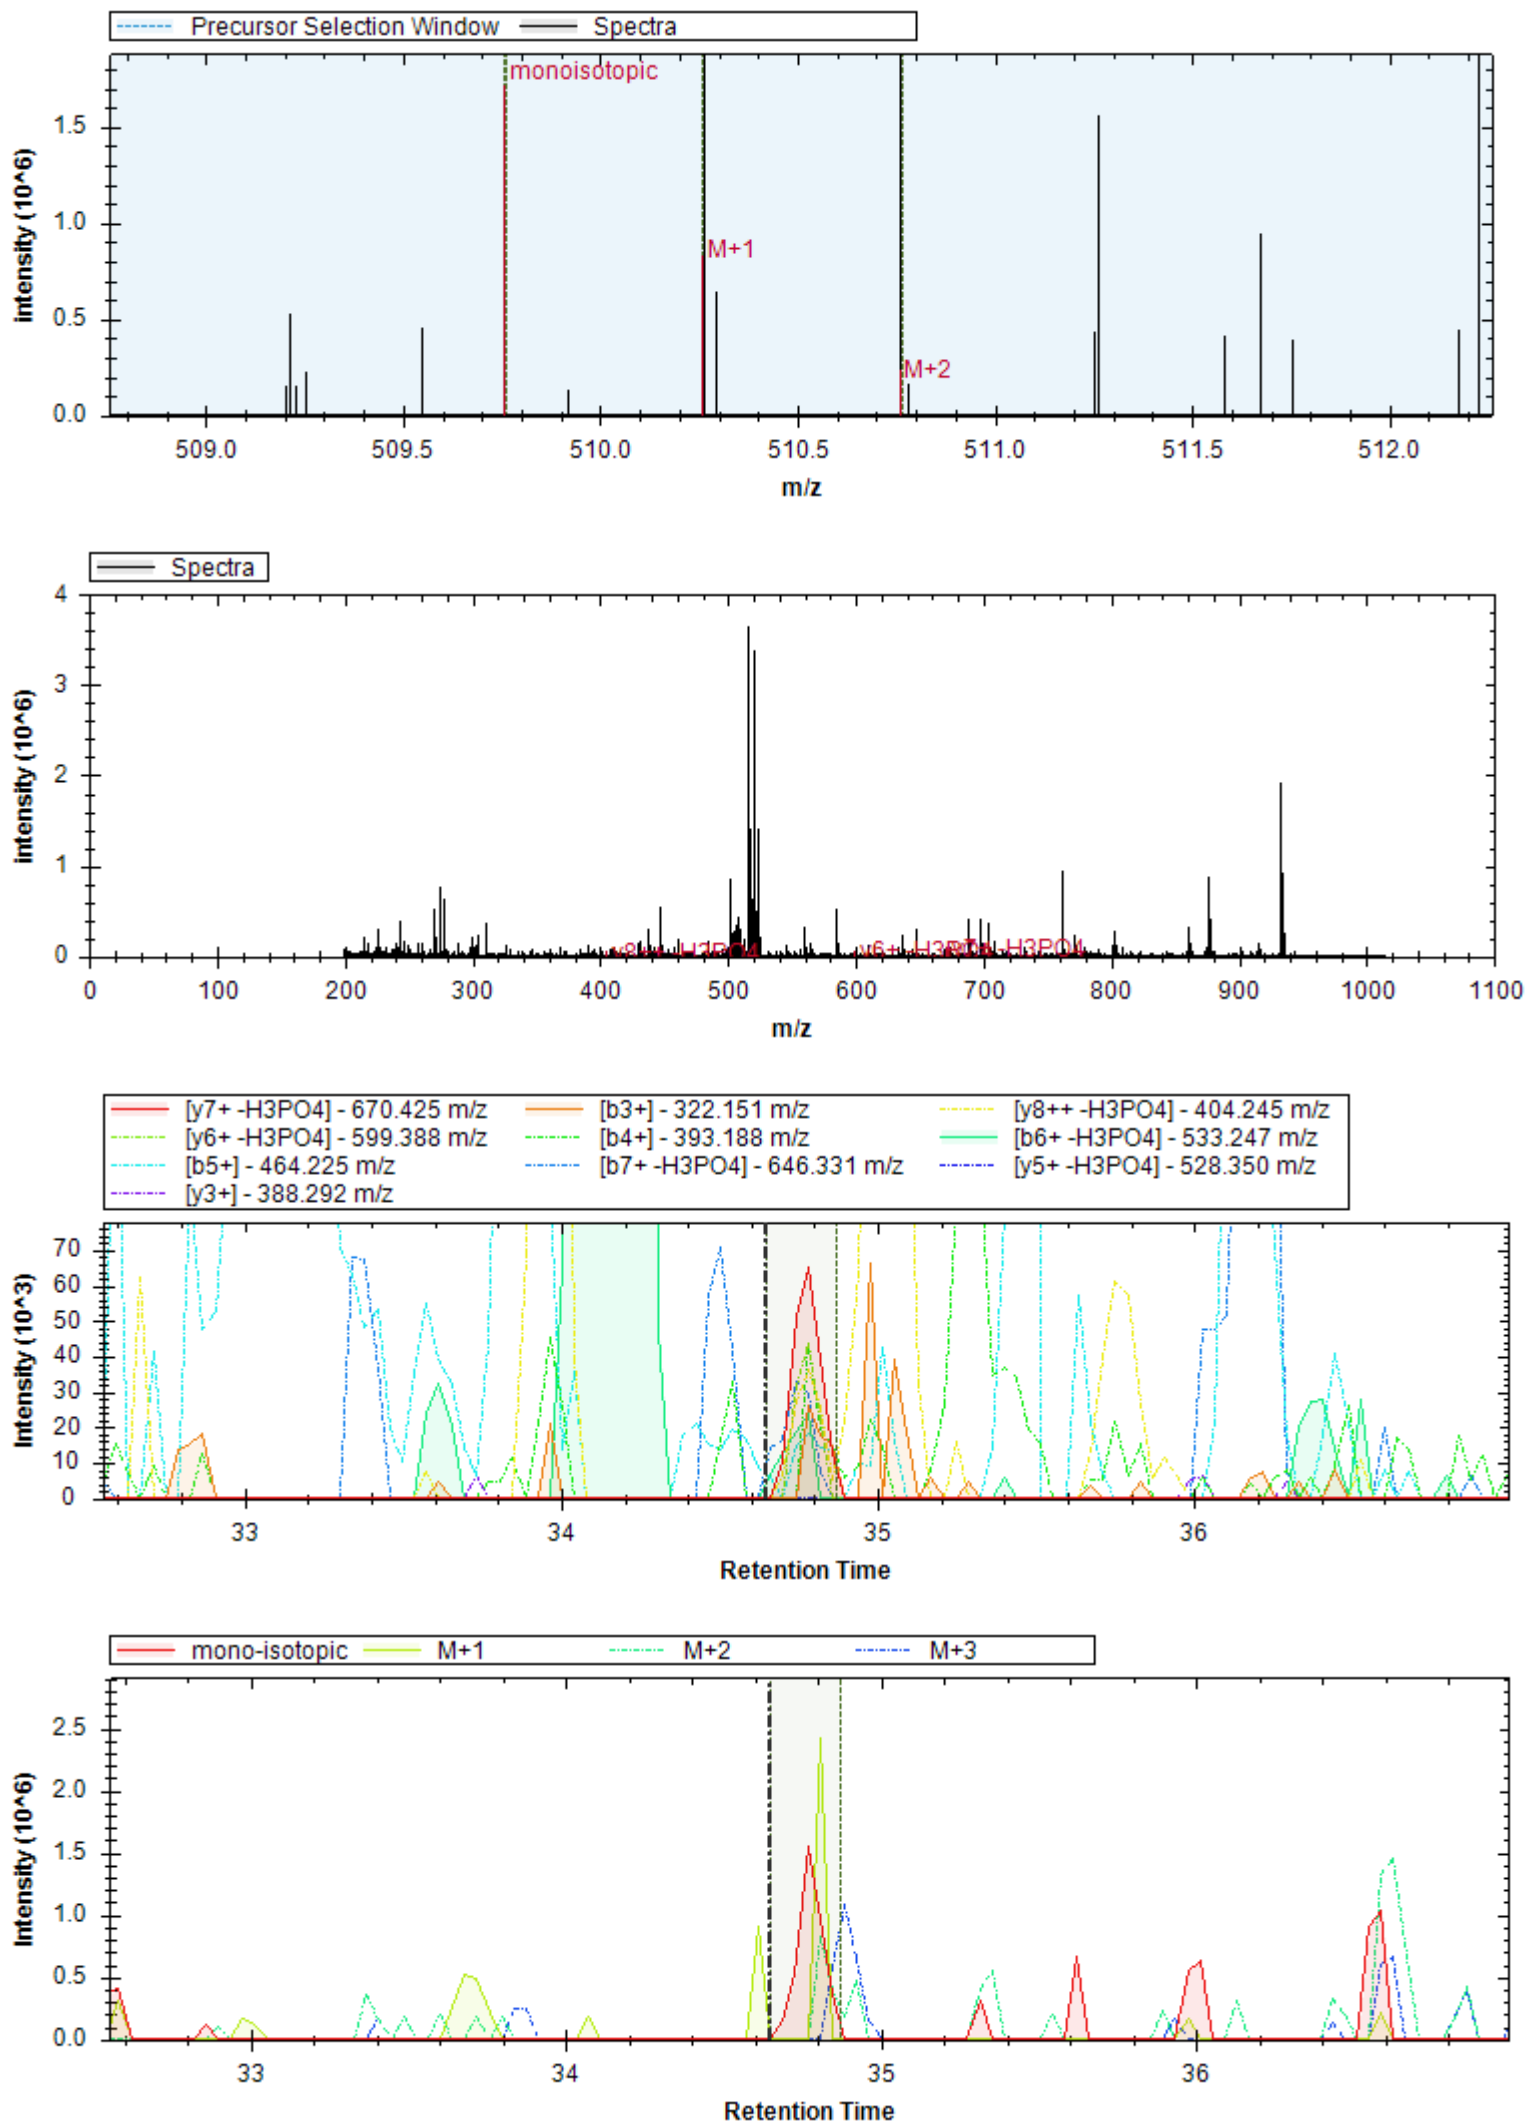

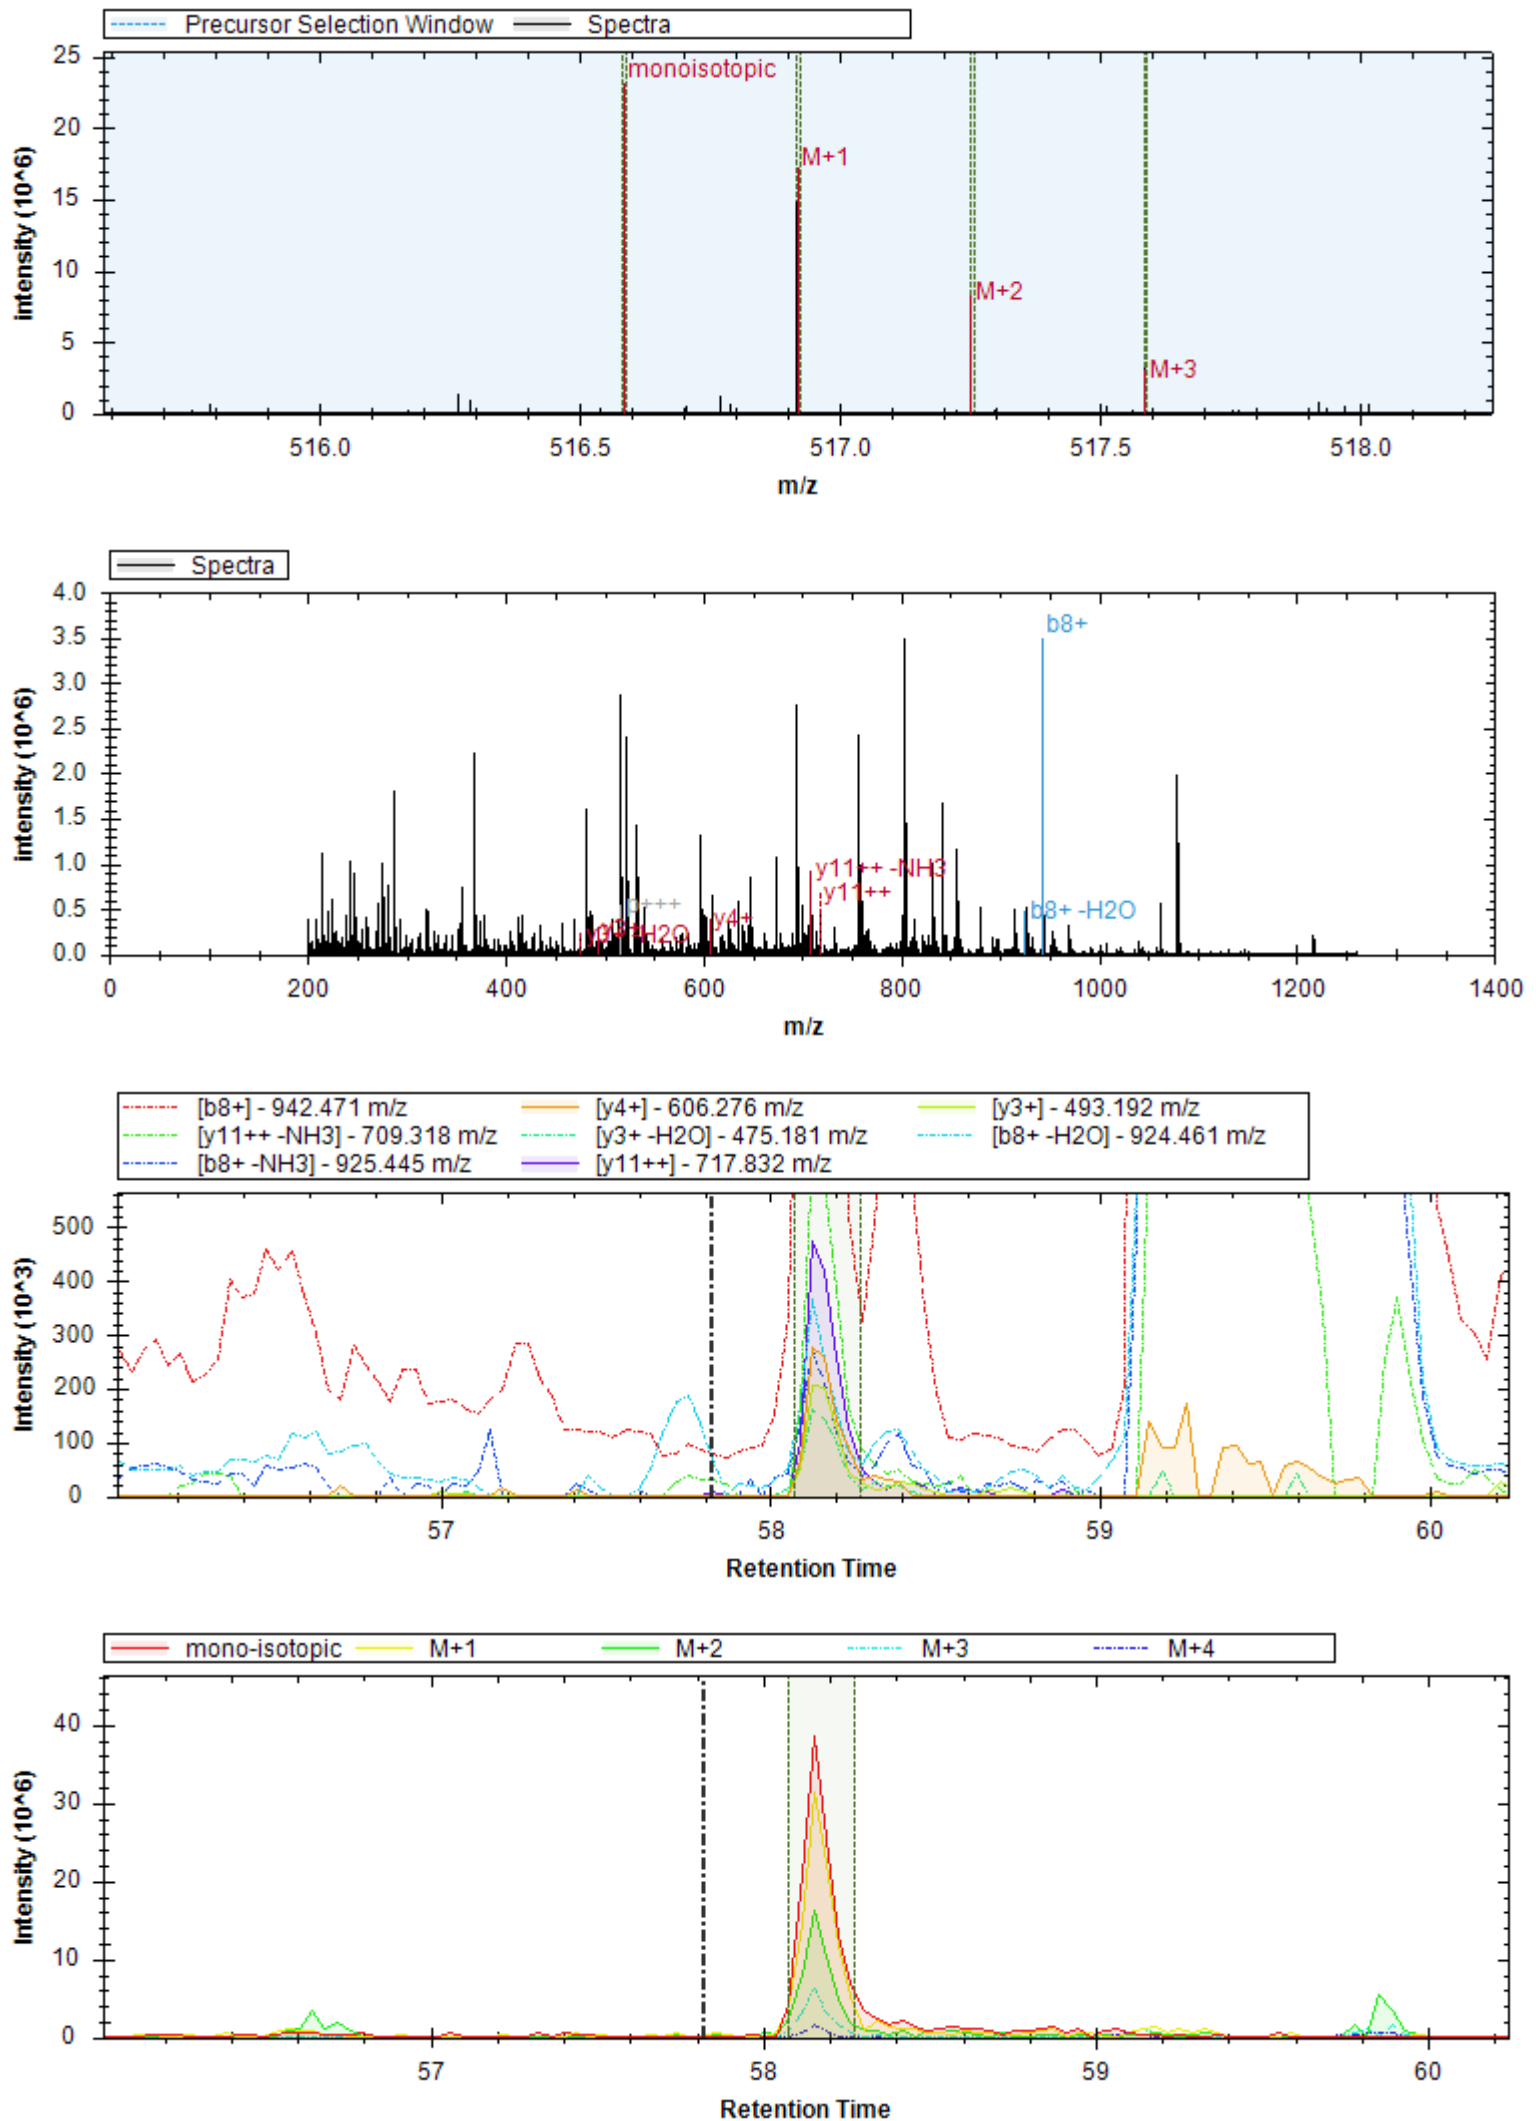

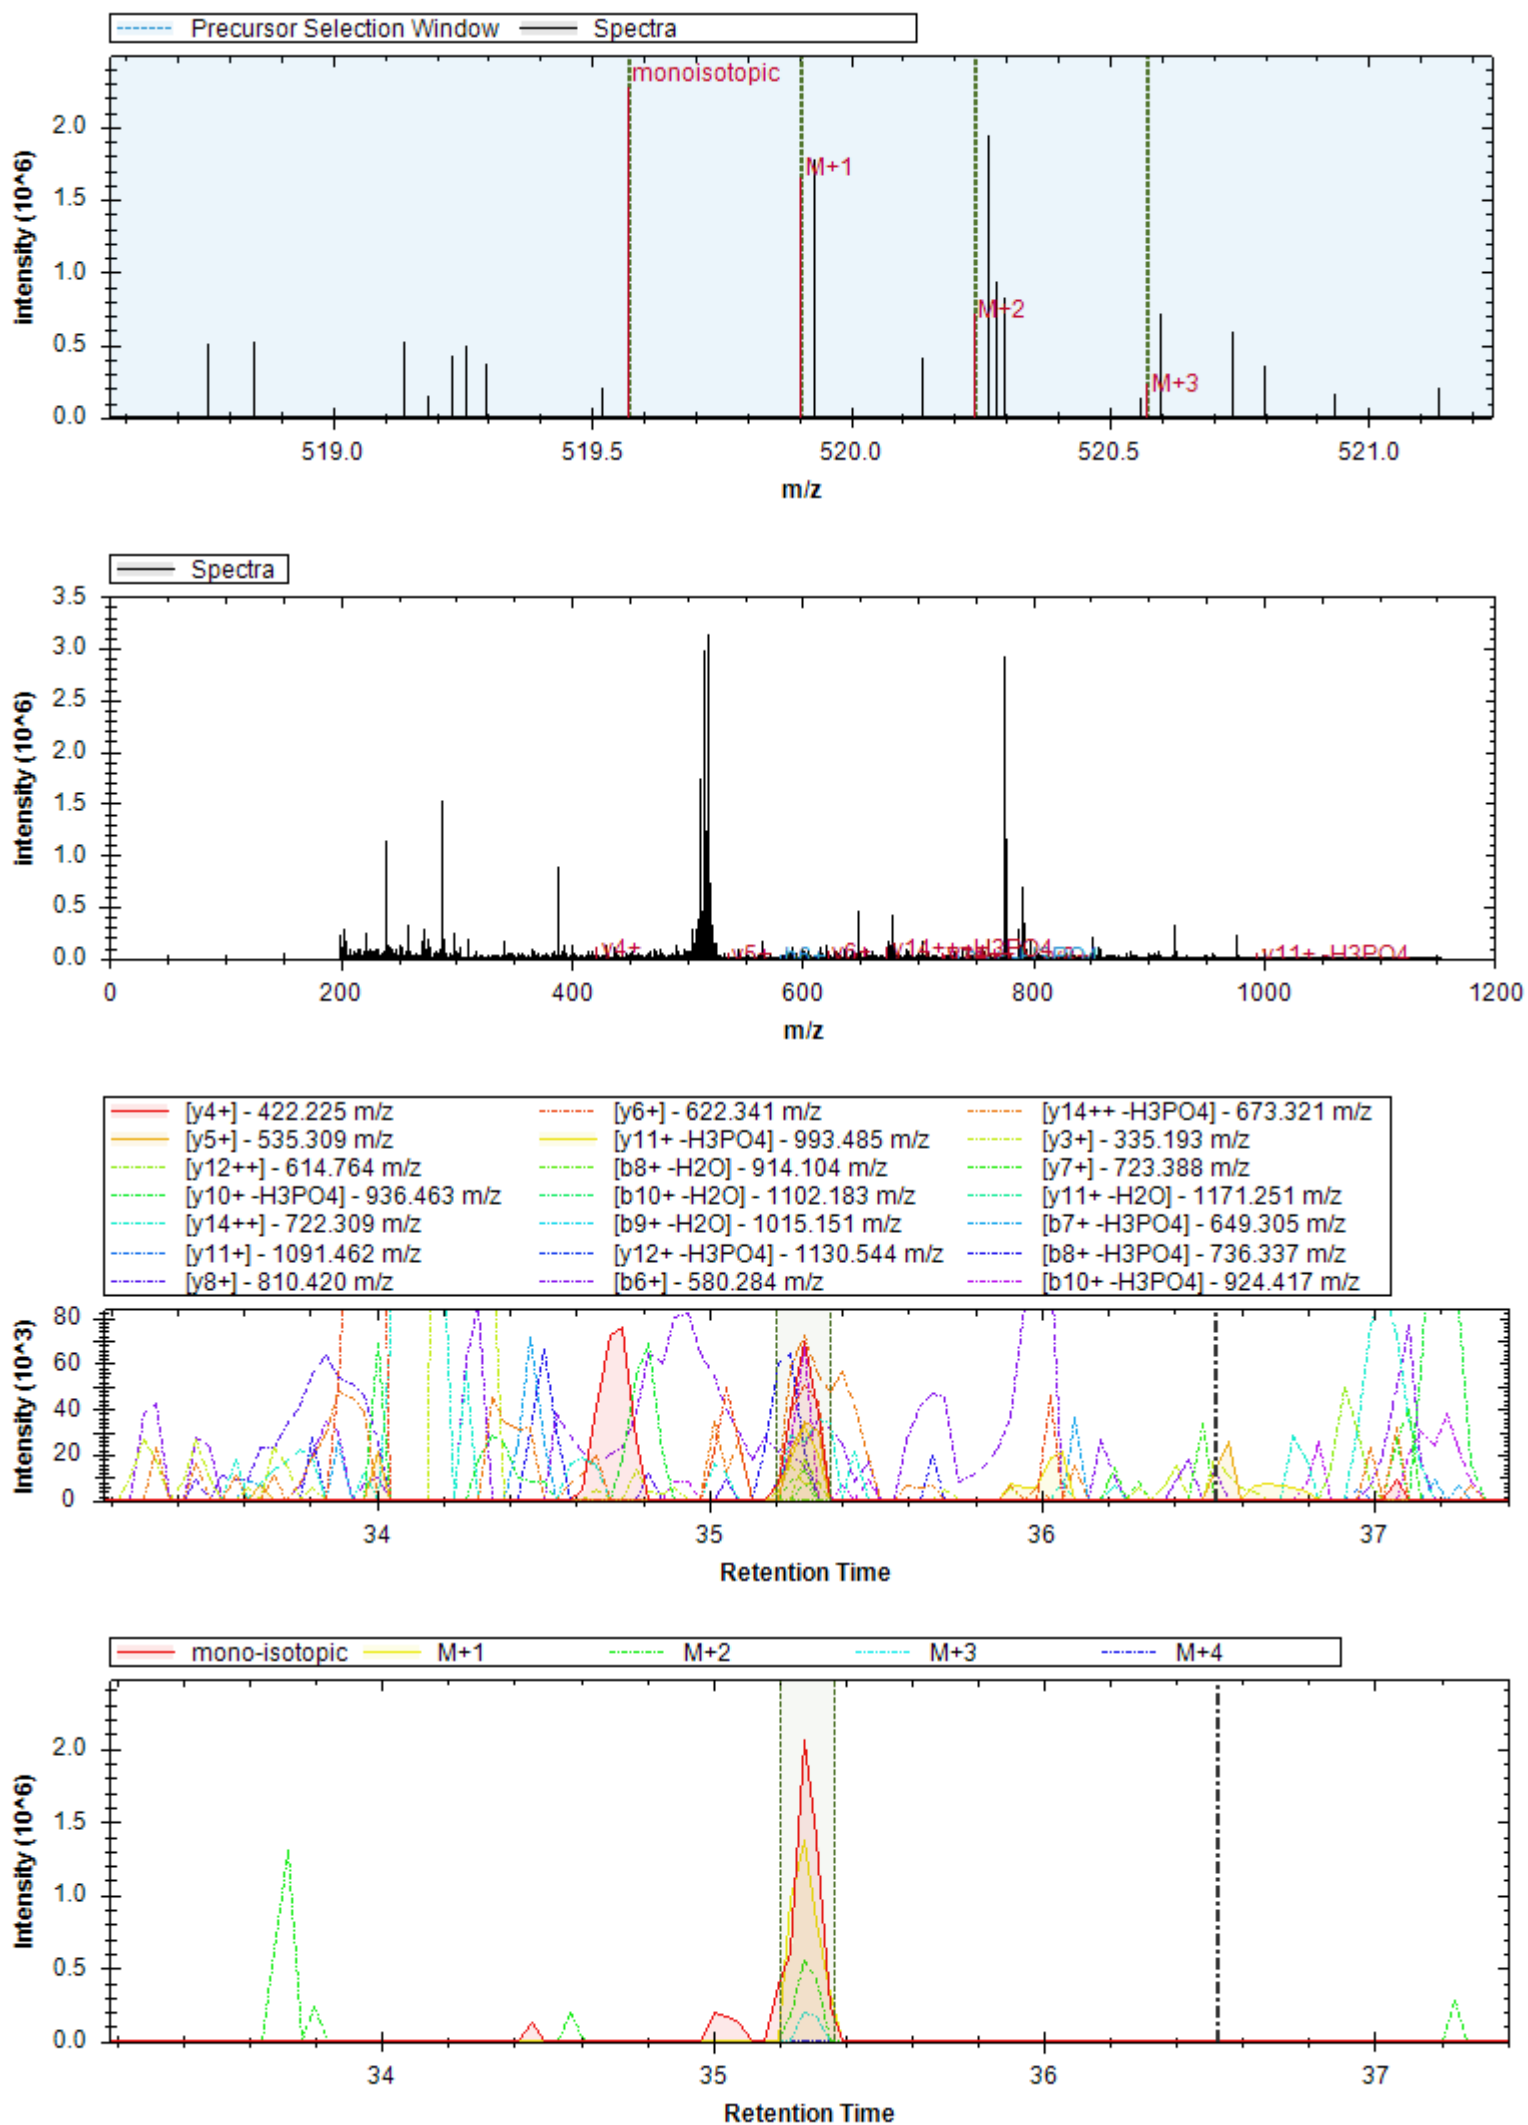

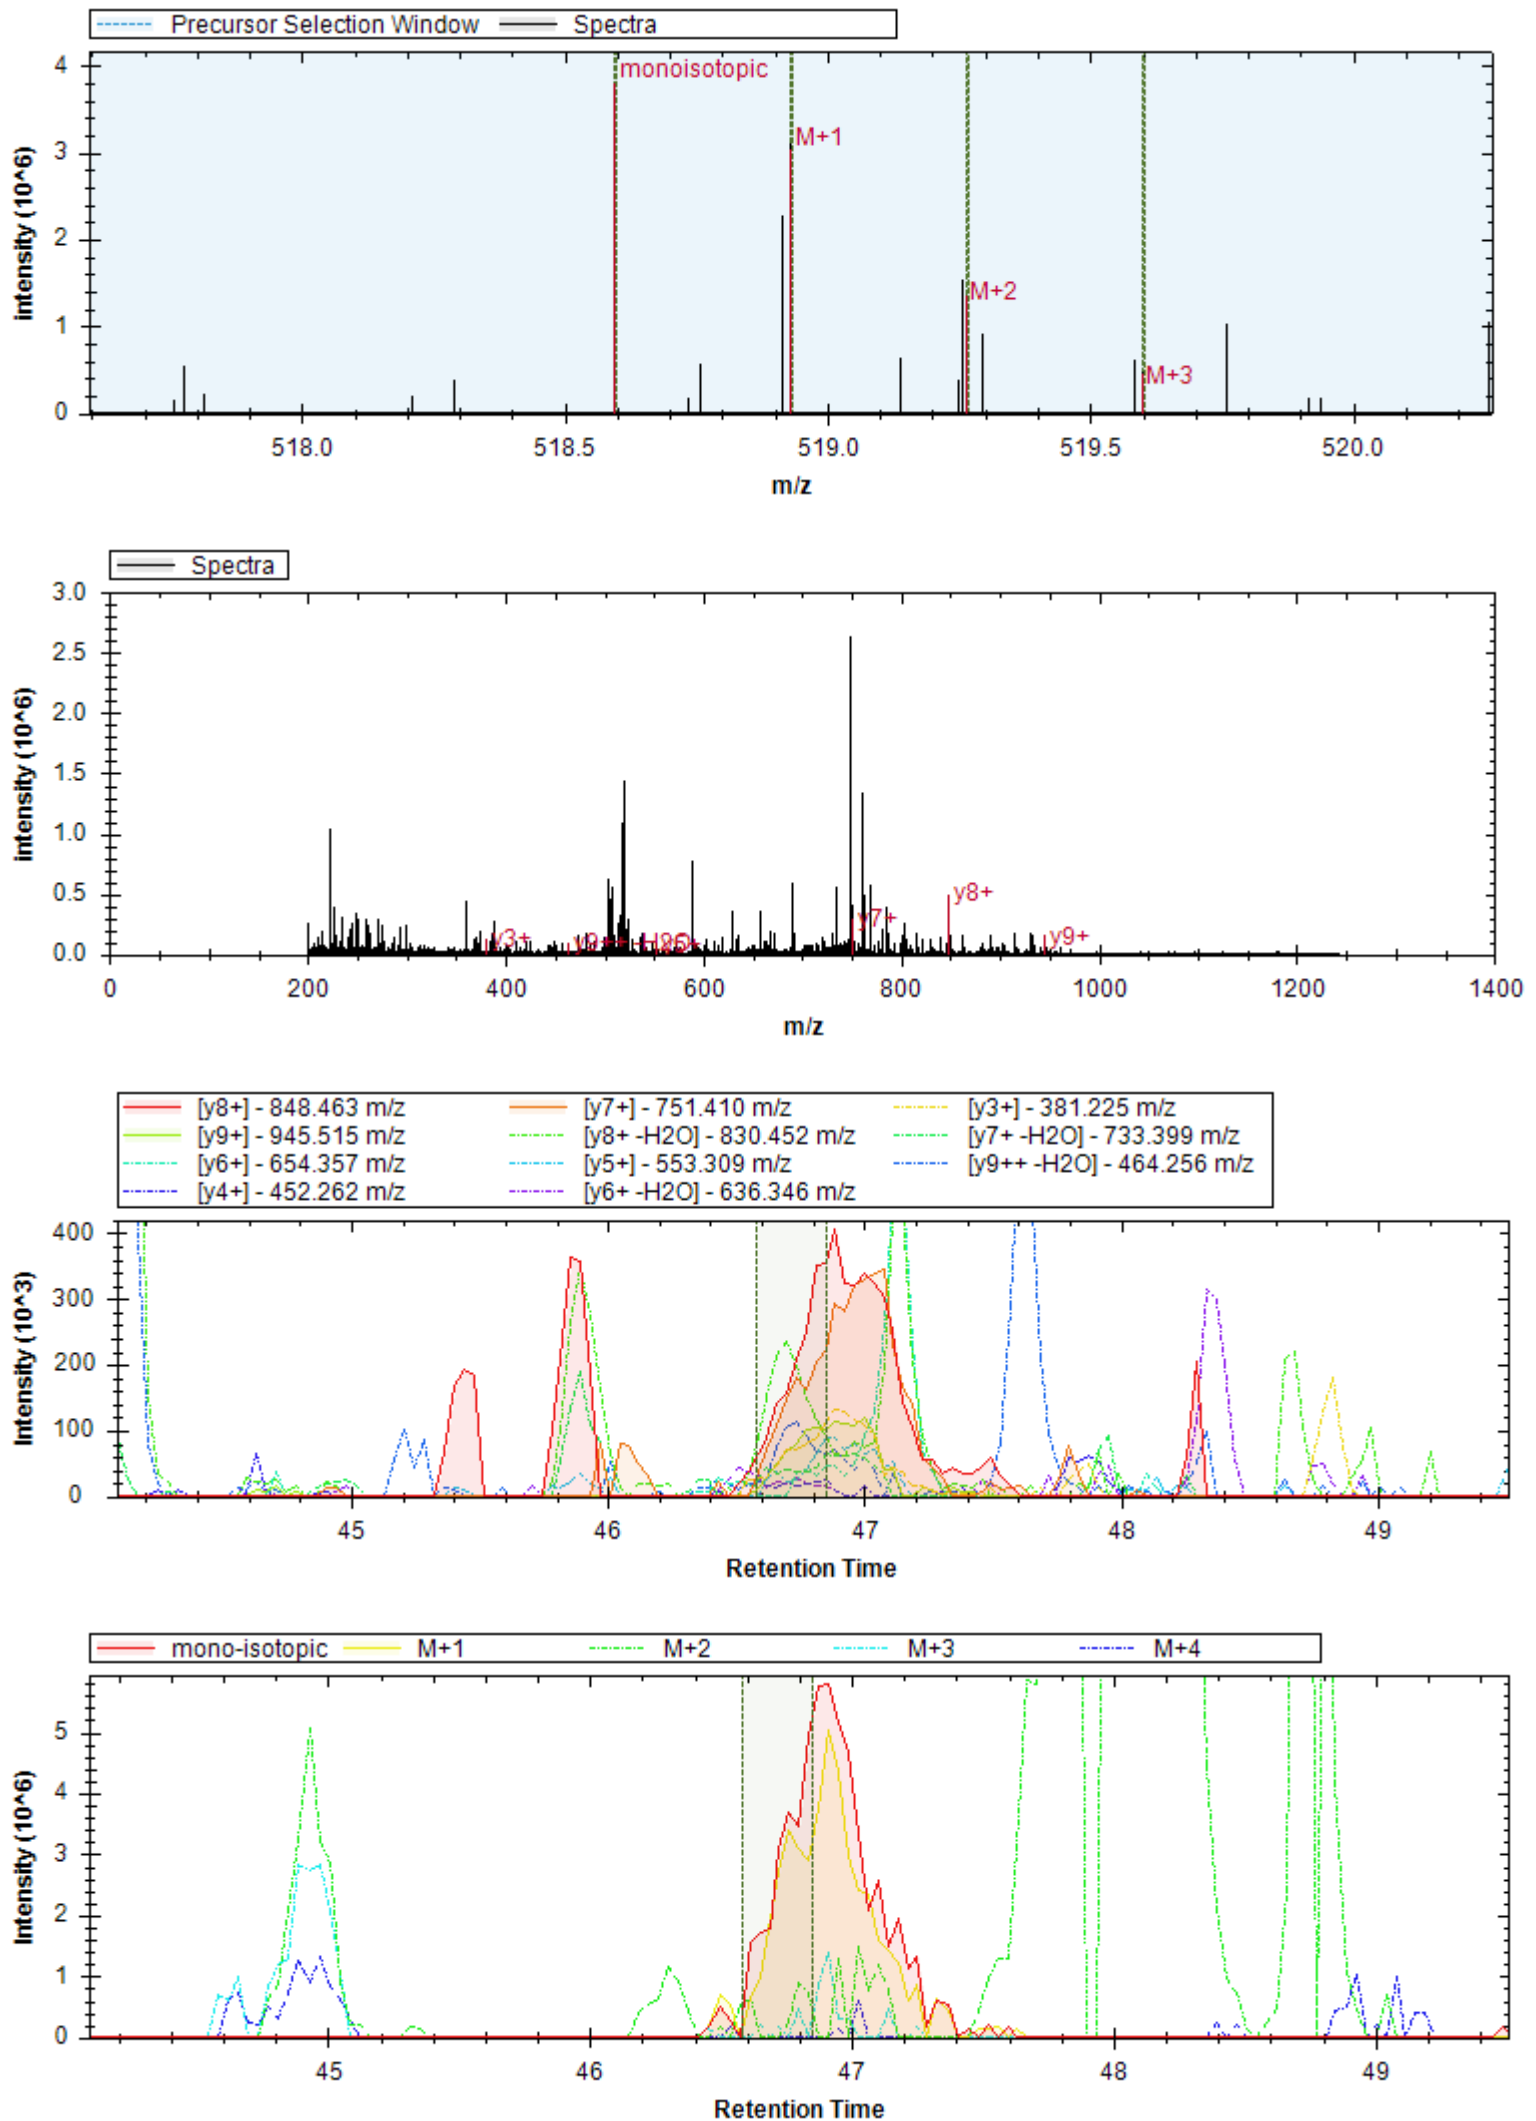



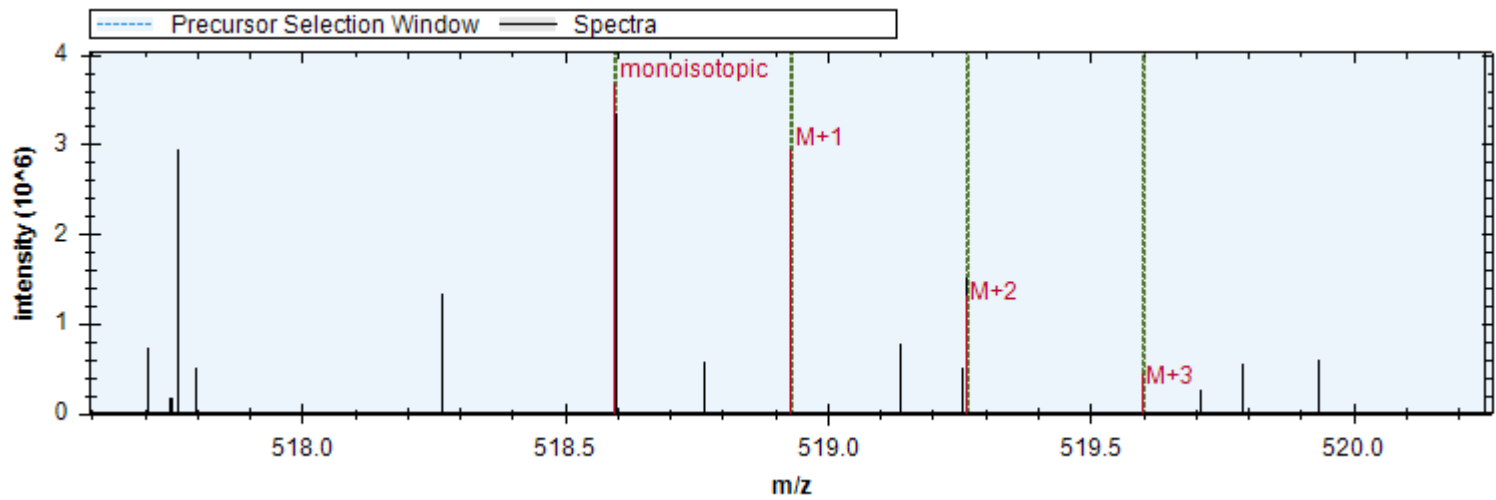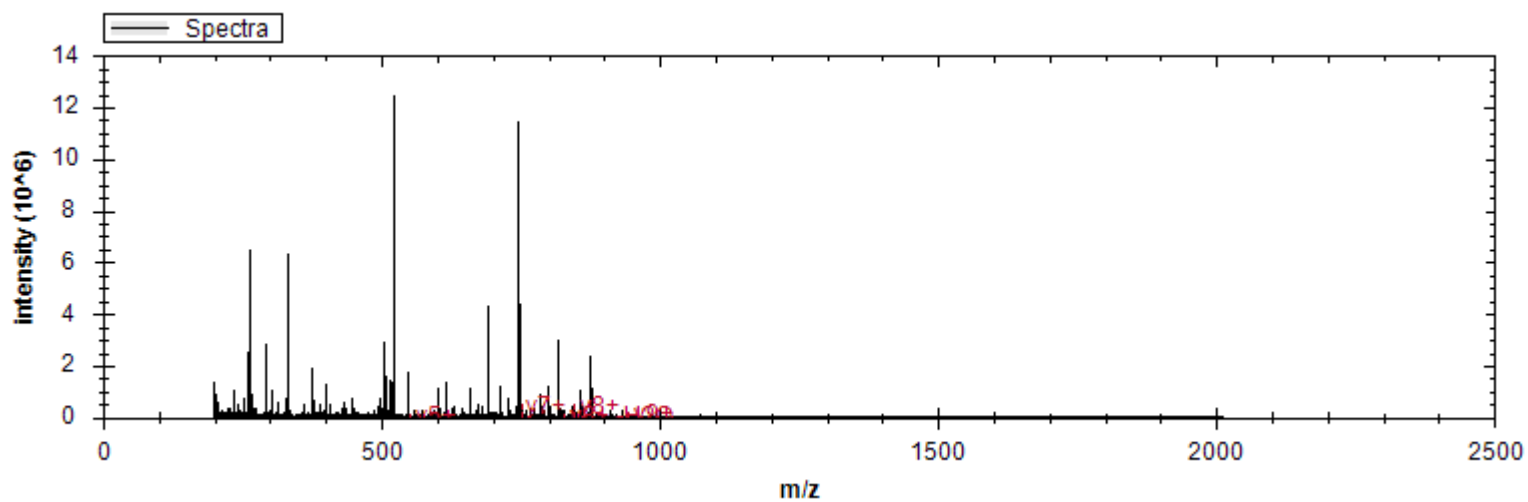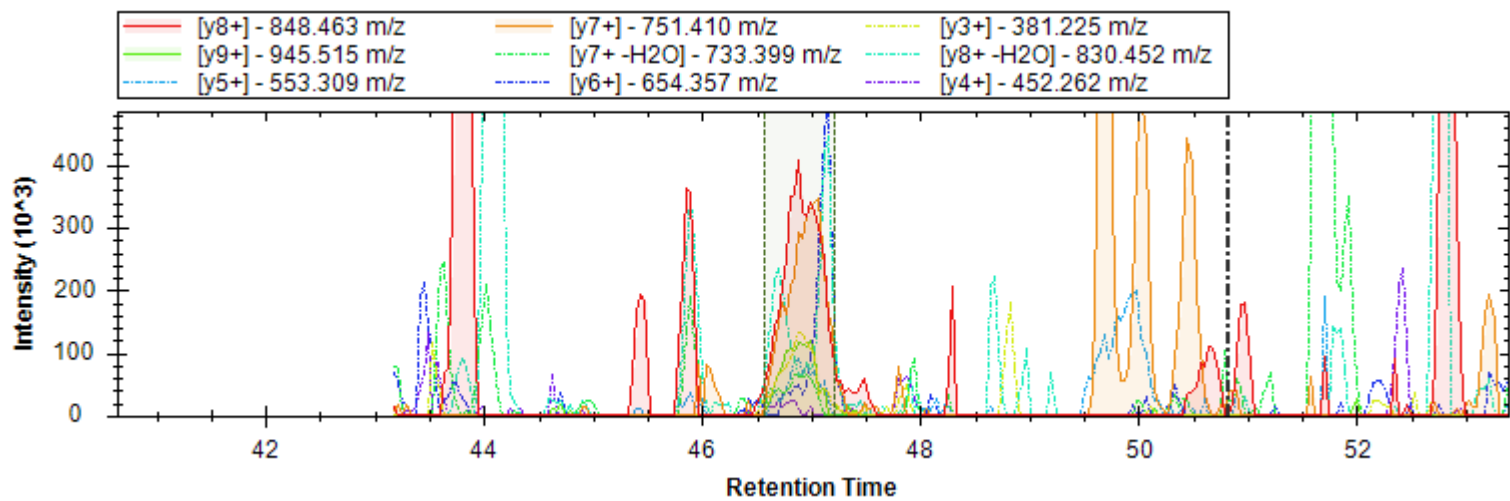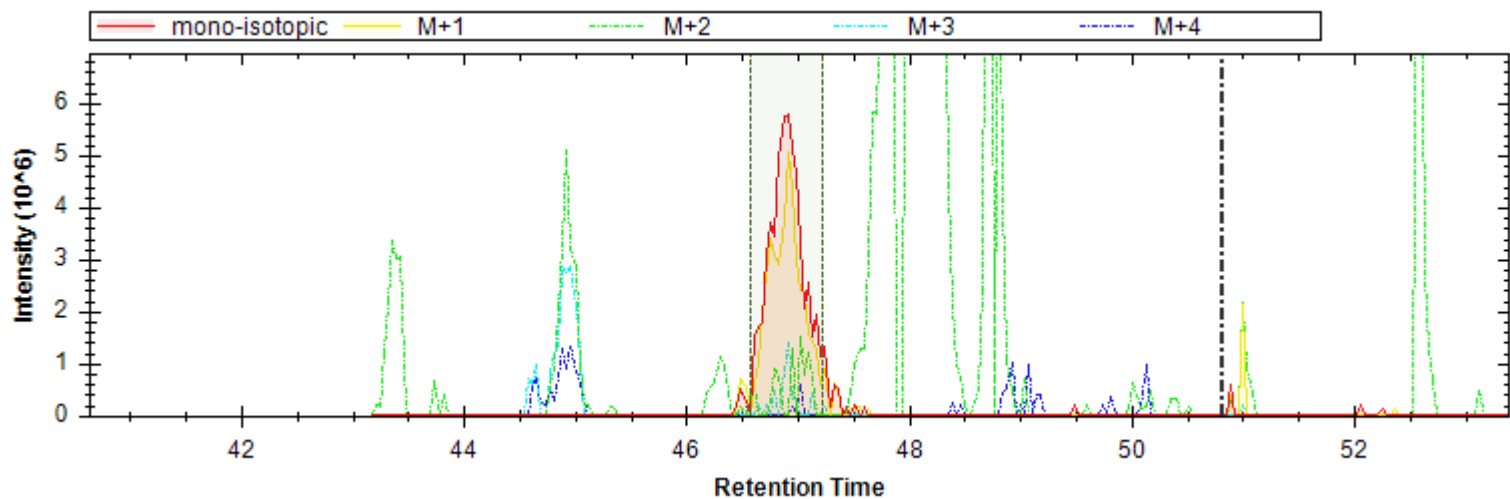

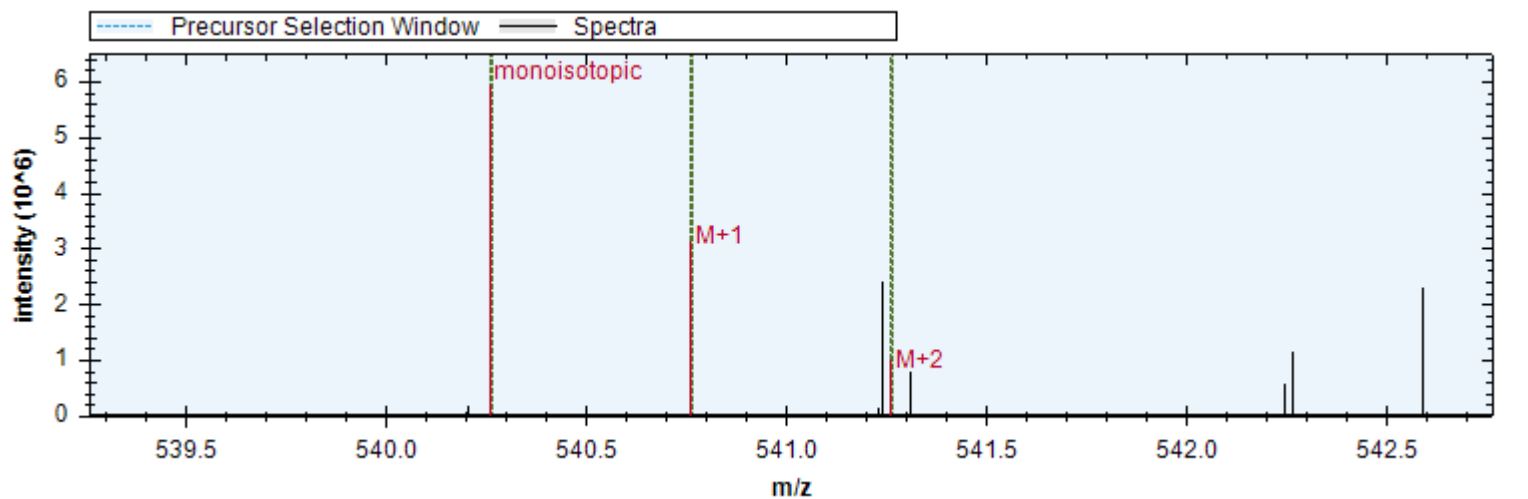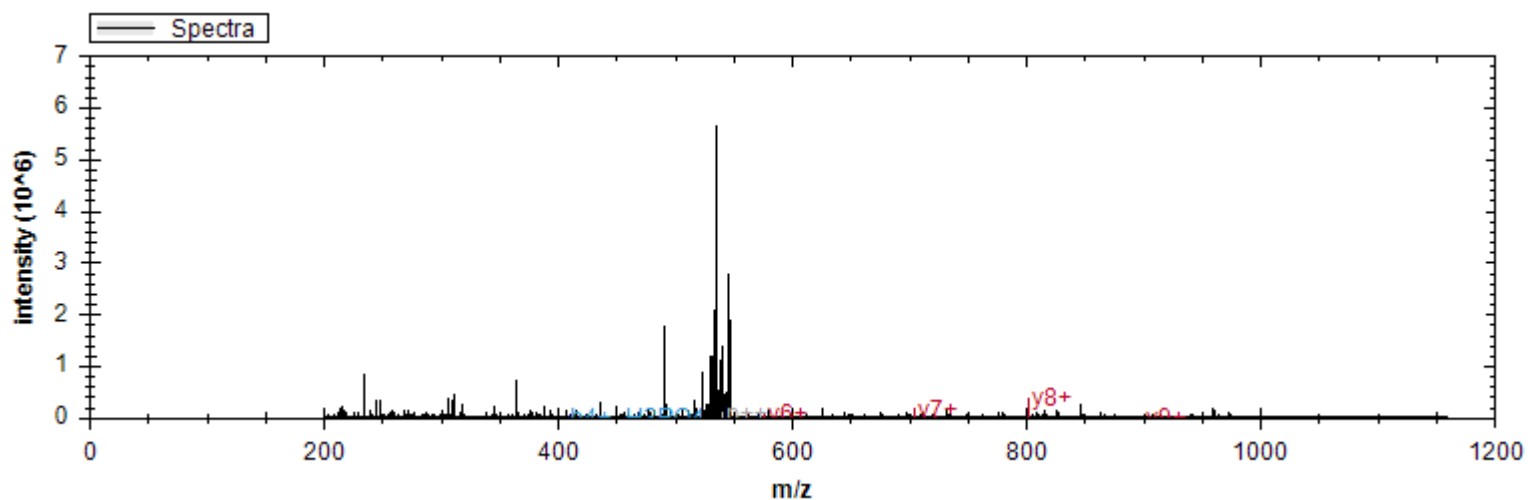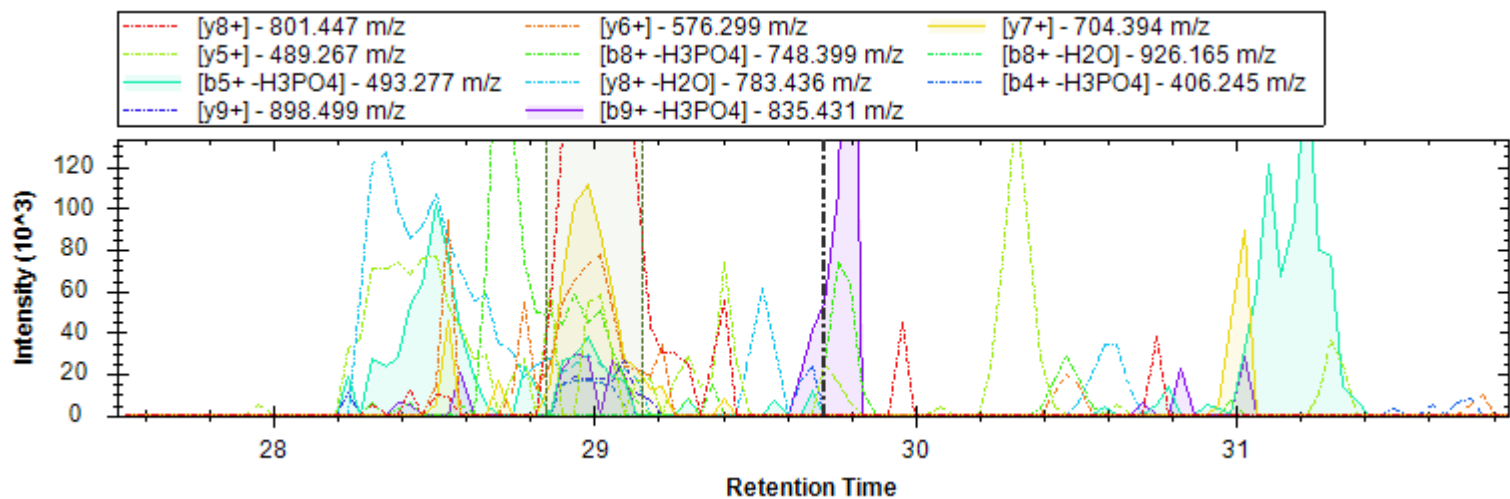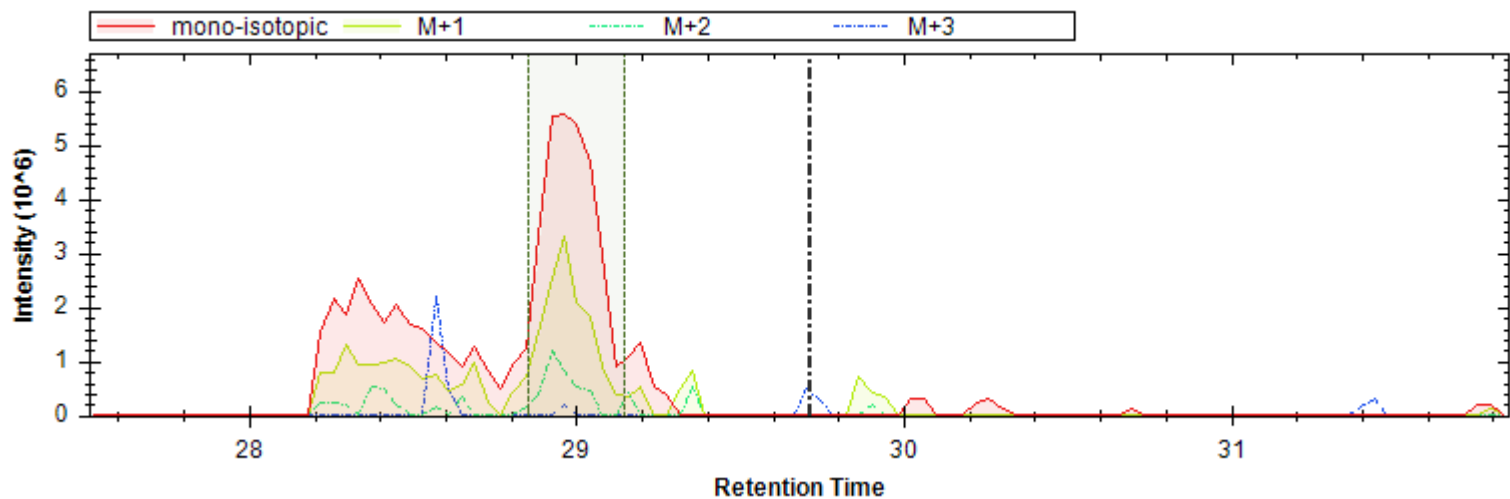

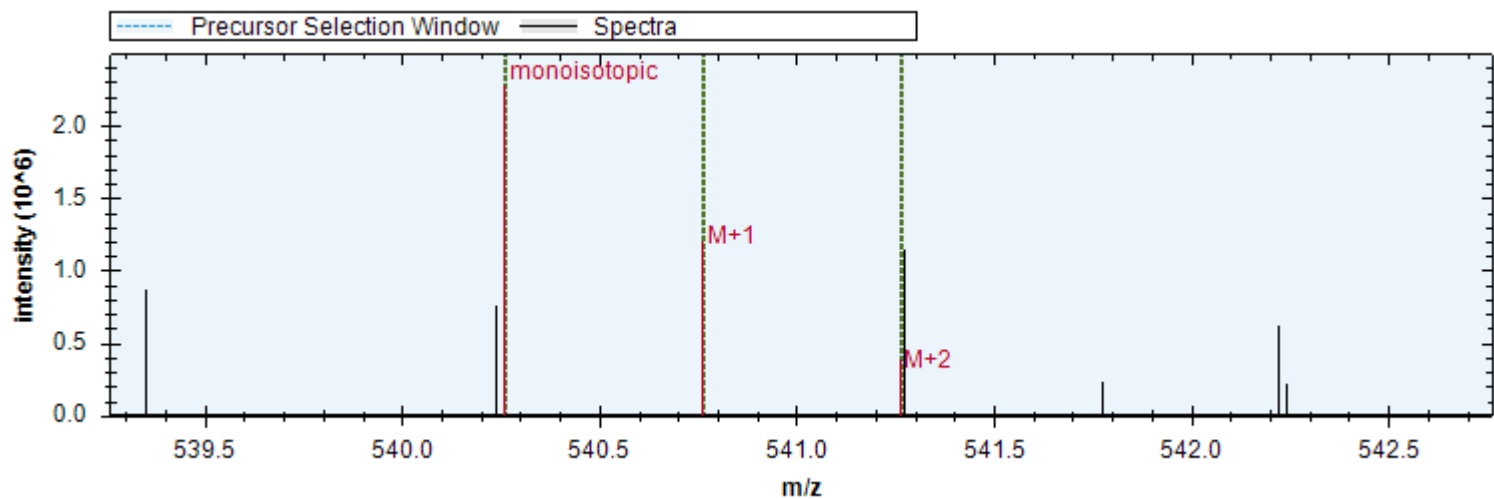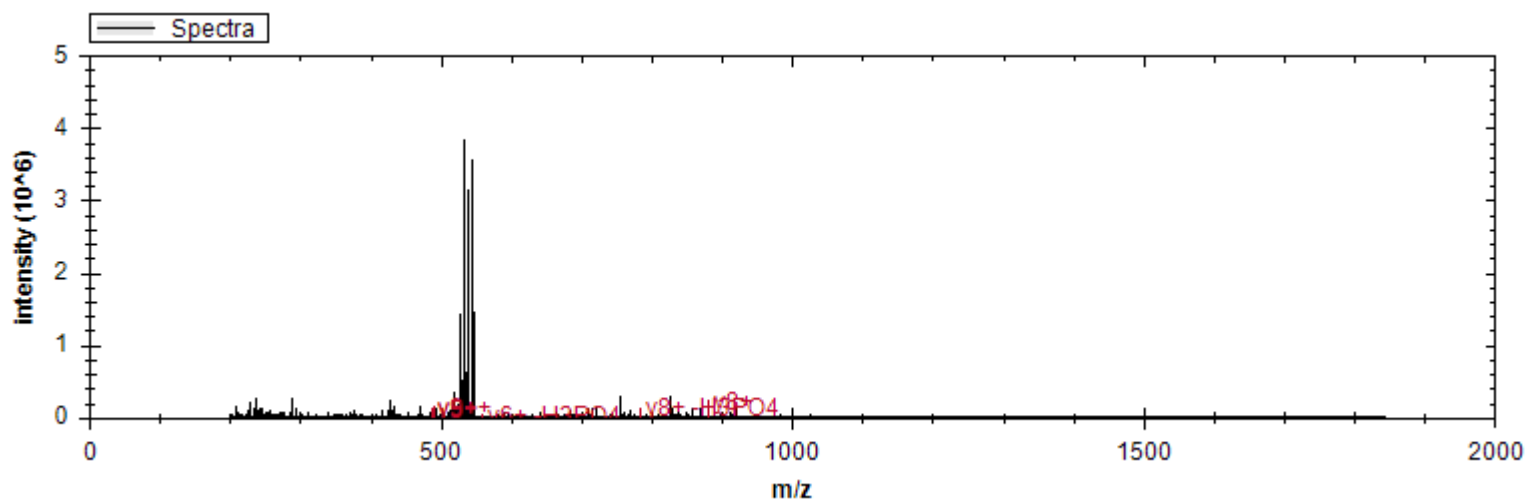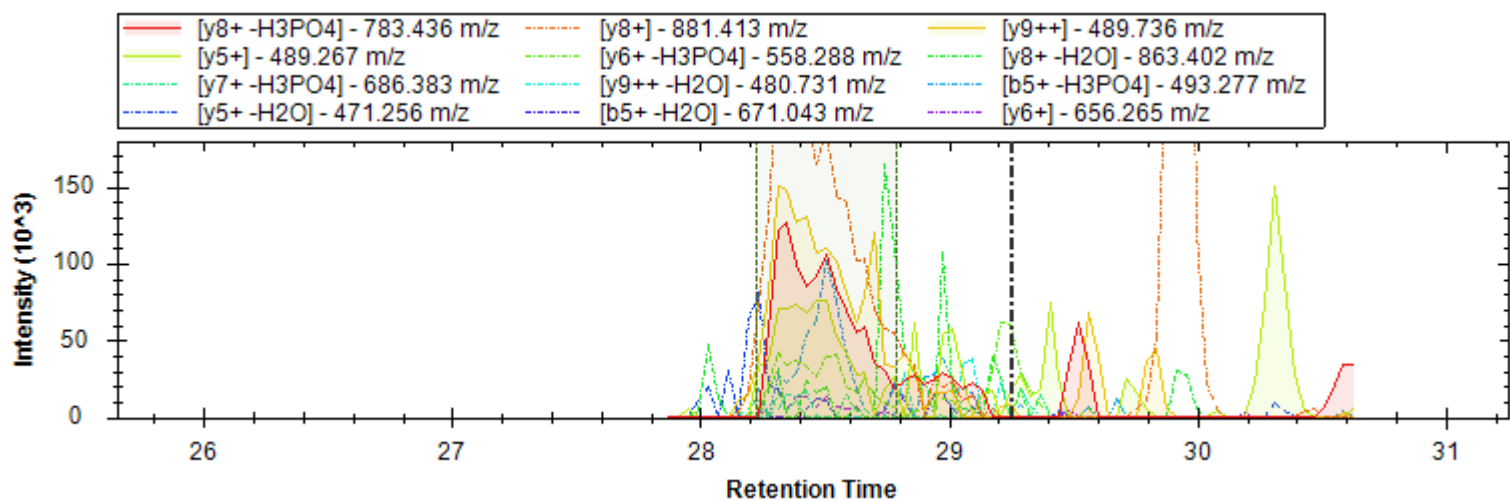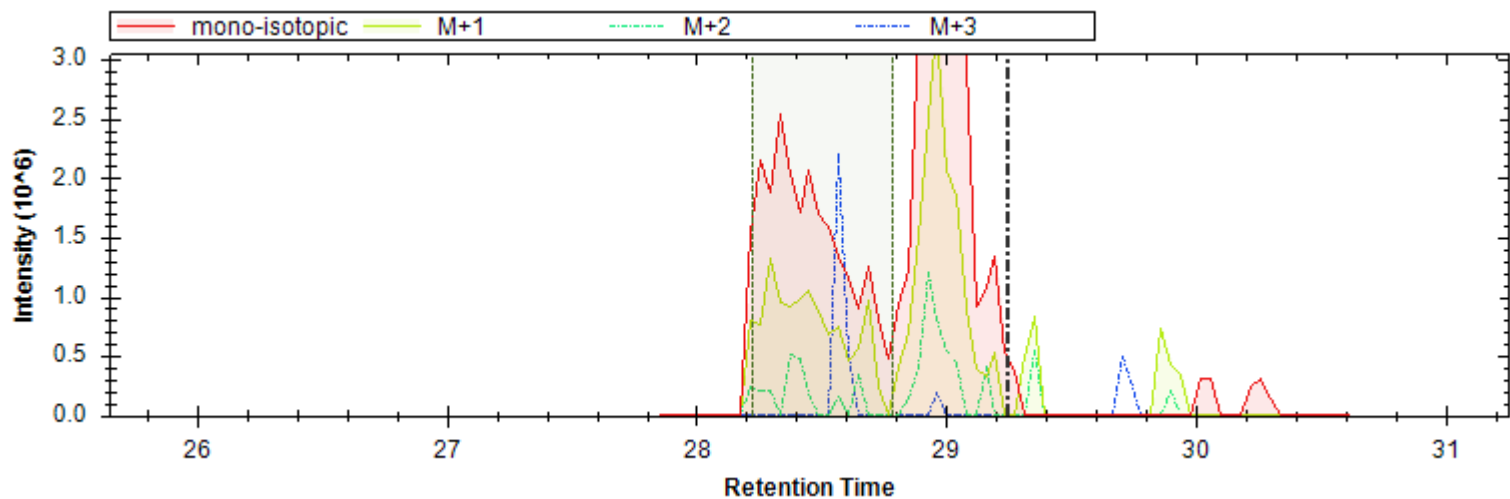

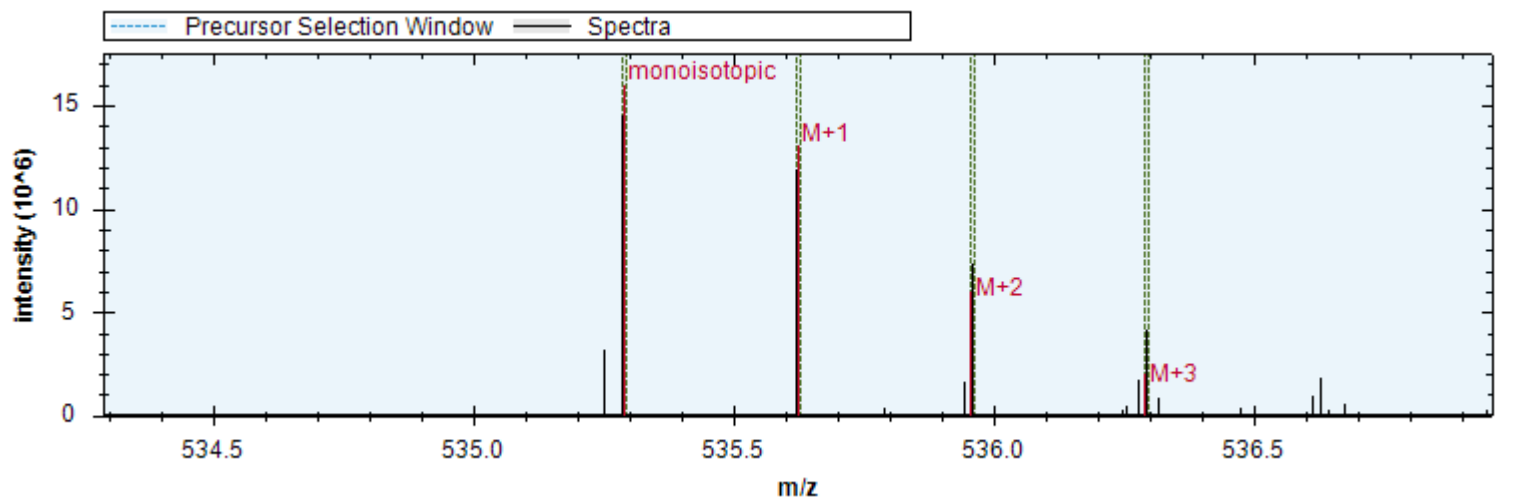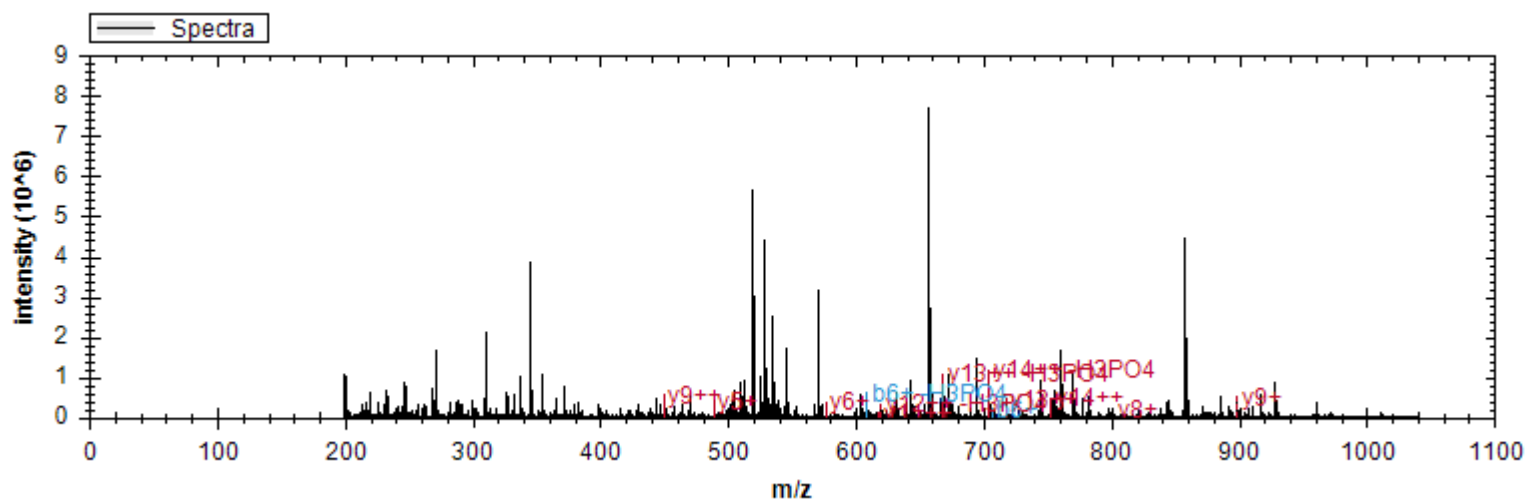

- |                              |                              |                            |
|------------------------------|------------------------------|----------------------------|
| [y14++ -H3PO4] - 703.909 m/z | [y13++ -H3PO4] - 668.391 m/z | [b6+ -H3PO4] - 608.388 m/z |
| [y9+] - 898.499 m/z          | [b10++ -H3PO4] - 509.314 m/z | [y5+] - 489.267 m/z        |
| [y6+] - 576.299 m/z          | [y12++ -H3PO4] - 618.857 m/z | [y14++] - 752.898 m/z      |
| [y8+] - 801.447 m/z          | [y13++] - 717.379 m/z        | [b10++] - 558.302 m/z      |
| [y12++] - 667.845 m/z        | [b6+] - 706.365 m/z          | [y8++] - 401.227 m/z       |
| [y9++] - 449.753 m/z         | [y5+ -H2O] - 471.256 m/z     | [y9+ -H2O] - 880.489 m/z   |
| [y11++] - 618.311 m/z        | [y3+] - 305.182 m/z          | [y4+] - 392.214 m/z        |
| [b5+] - 525.351 m/z          | [y13++ -H2O] - 708.374 m/z   |                            |

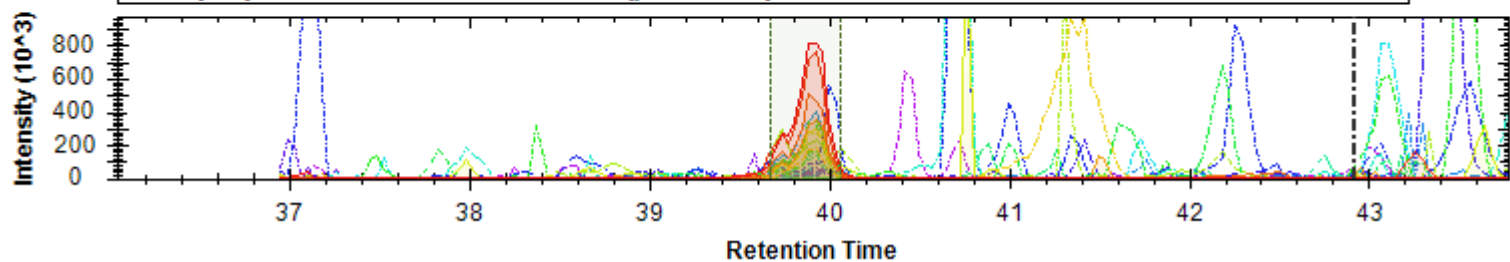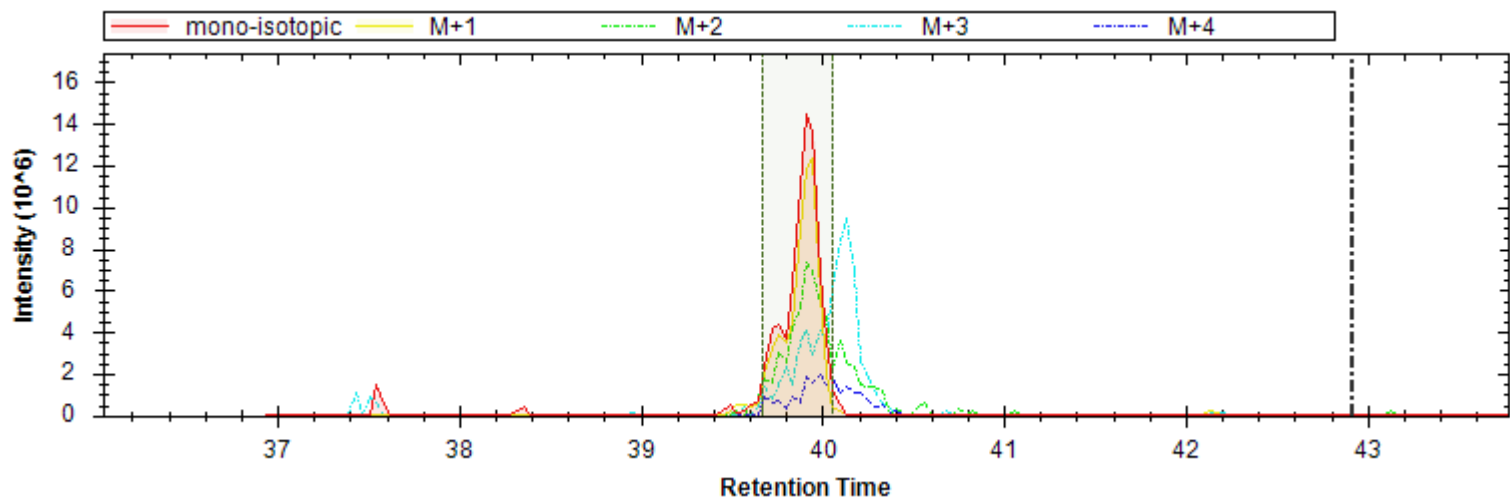

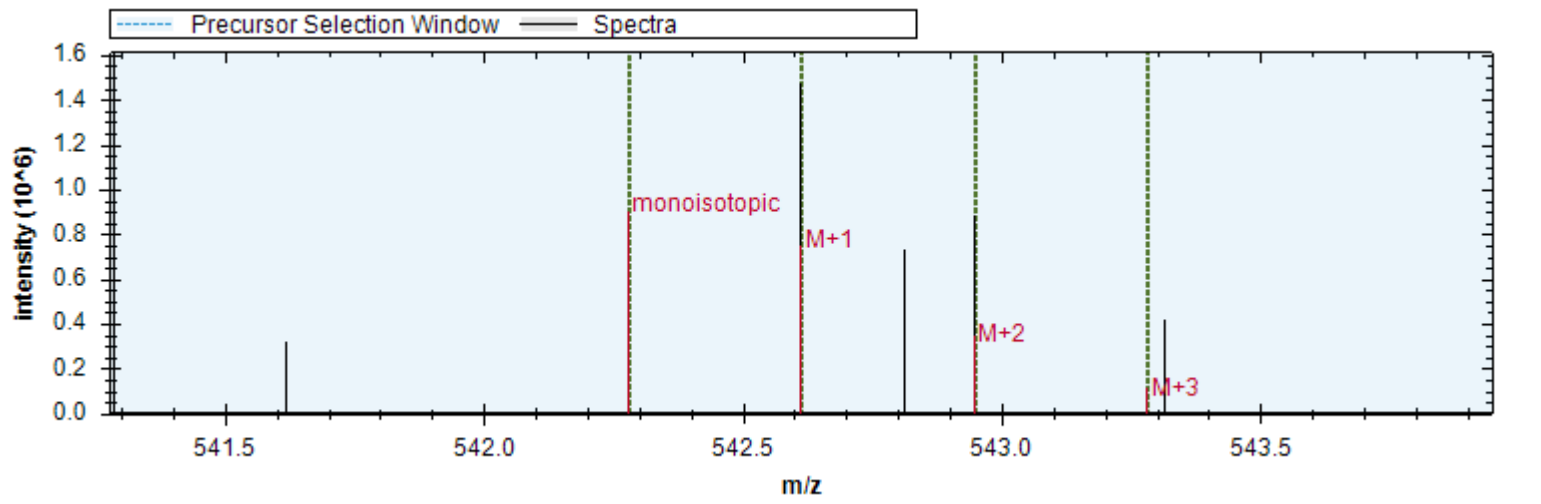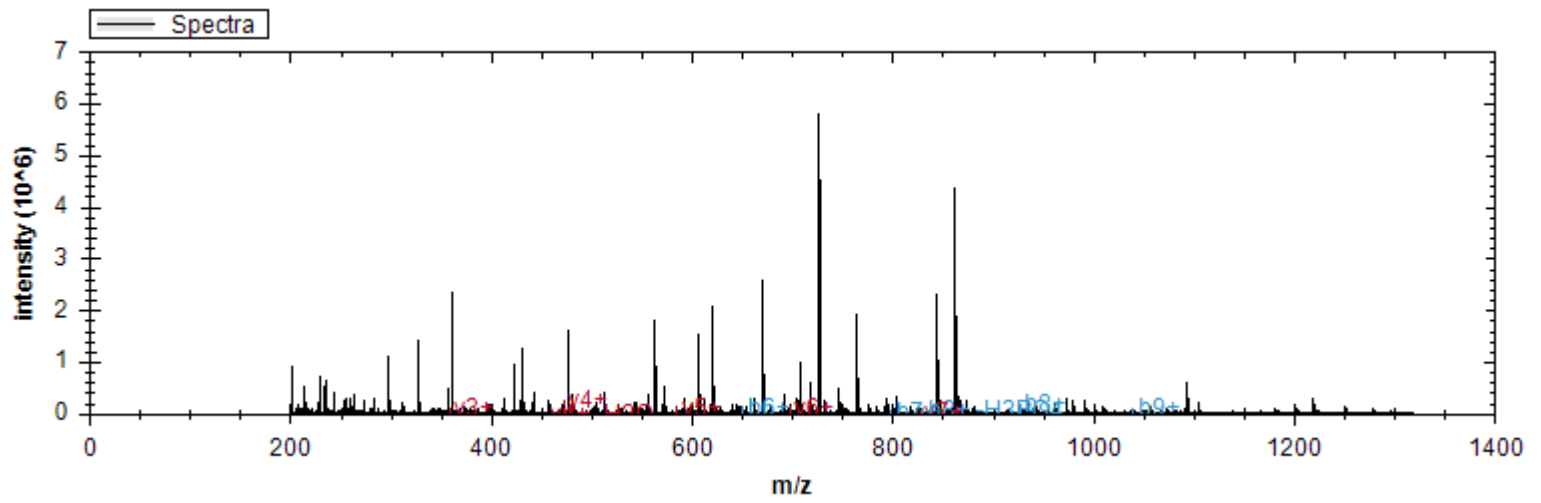

- |                            |                            |                          |
|----------------------------|----------------------------|--------------------------|
| [y4+] - 472.288 m/z        | [b6+] - 651.261 m/z        | [y5+] - 585.372 m/z      |
| [b8+ -H3PO4] - 829.395 m/z | [b8+] - 927.372 m/z        | [y6+] - 698.456 m/z      |
| [y3+] - 359.204 m/z        | [b5+ -H3PO4] - 482.247 m/z | [b5+] - 580.224 m/z      |
| [b7+ -H3PO4] - 700.353 m/z | [b6+ -H3PO4] - 553.284 m/z | [y7+] - 827.499 m/z      |
| [b9+ -H3PO4] - 942.479 m/z | [b7+] - 798.329 m/z        | [b9+] - 1040.456 m/z     |
| [y3+ -NH3] - 342.177 m/z   | [y7+ -H2O] - 809.488 m/z   | [y4+ -H2O] - 454.277 m/z |
| [b6+ -NH3] - 634.234 m/z   | [y8+] - 974.567 m/z        |                          |

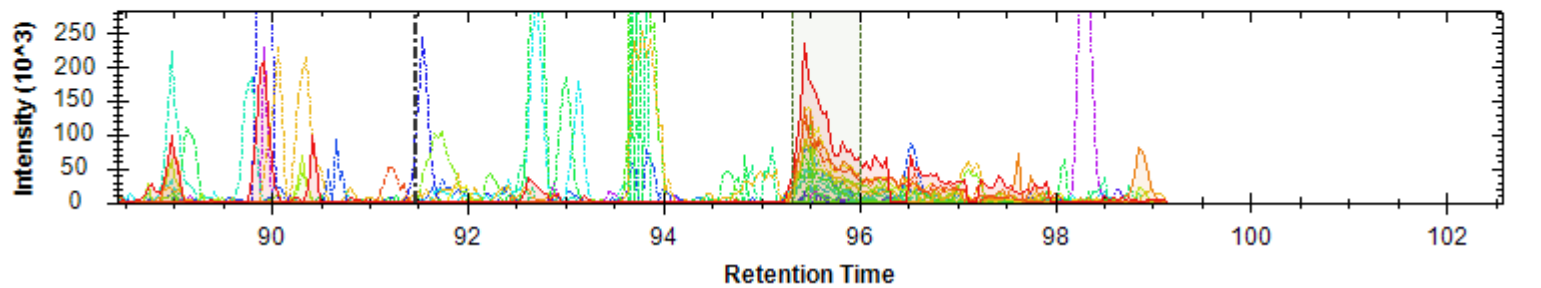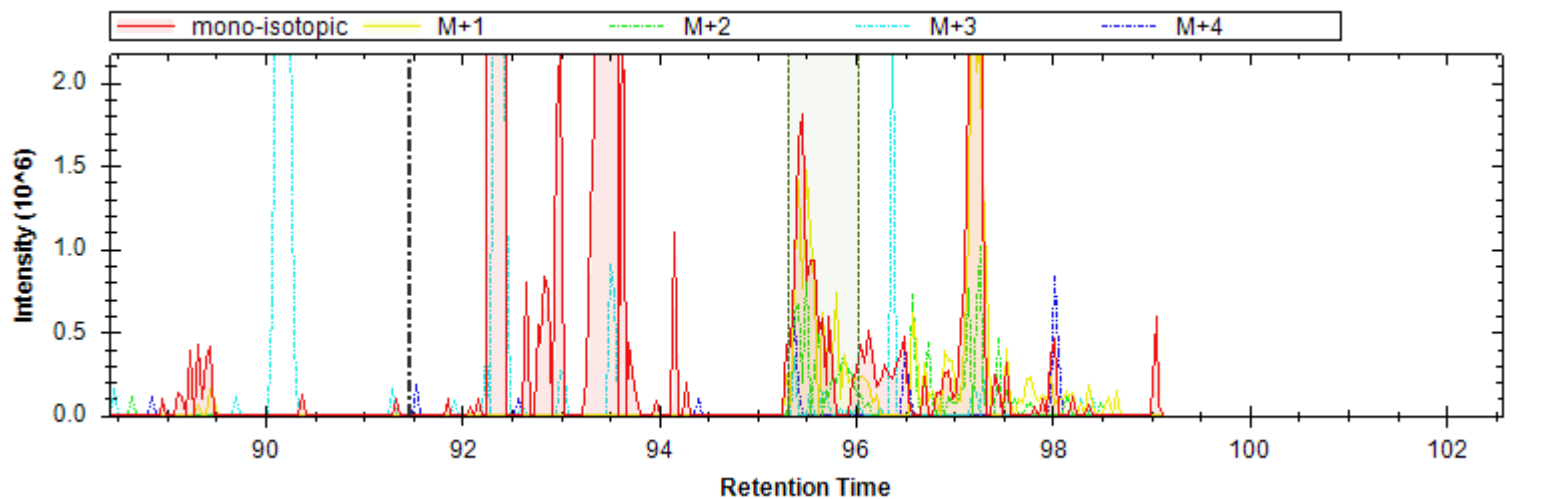

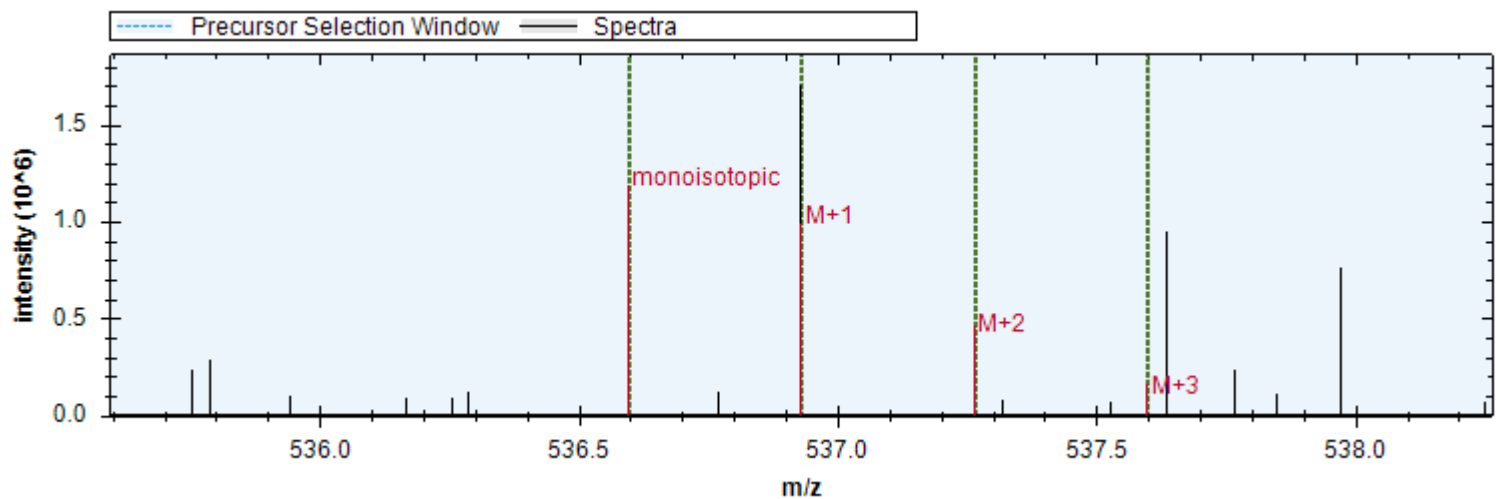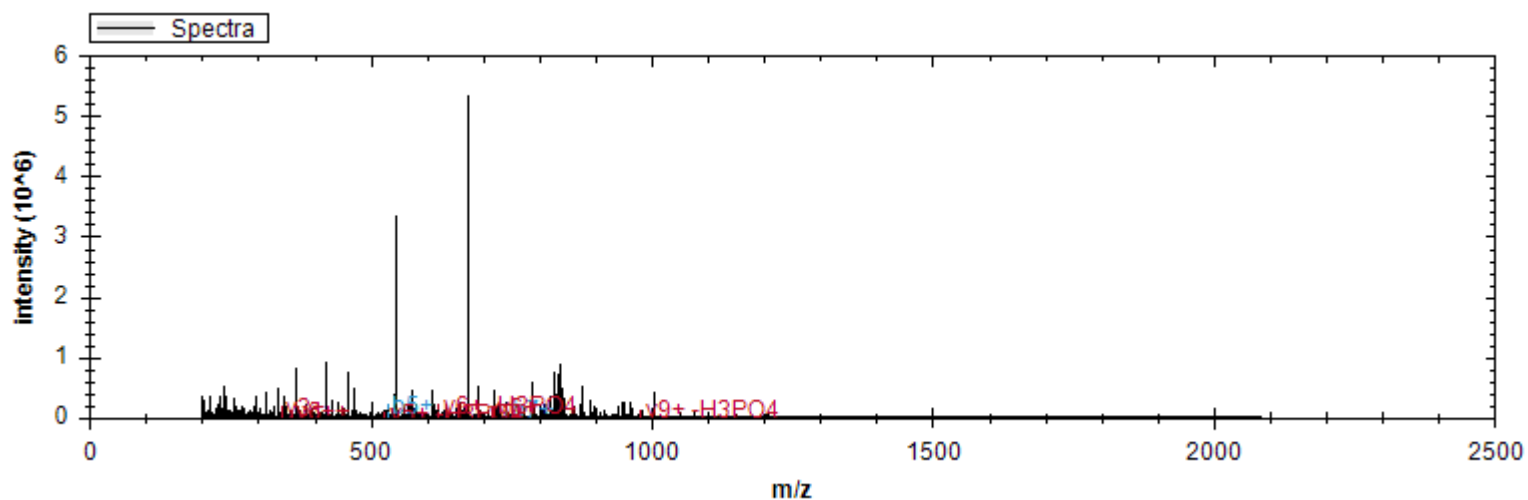

|                            |                            |                          |
|----------------------------|----------------------------|--------------------------|
| [y6+ -H3PO4] - 620.377 m/z | [y3+] - 341.218 m/z        | [b5+] - 531.277 m/z      |
| [y6++] - 359.680 m/z       | [y5+ -H3PO4] - 523.324 m/z | [y6+] - 718.354 m/z      |
| [y4+ -H3PO4] - 410.240 m/z | [b7+] - 743.357 m/z        | [b5+ -H2O] - 513.267 m/z |
| [y7+ -H3PO4] - 767.445 m/z | [y9++] - 539.255 m/z       | [b3+] - 345.177 m/z      |
| [y7++]- 433.215 m/z        | [y8+ -H3PO4] - 882.472 m/z | [b4+] - 432.209 m/z      |
| [y4+] - 508.217 m/z        | [b3+ -H2O] - 327.166 m/z   | [b8+] - 890.425 m/z      |
| [b4+ -H2O] - 414.198 m/z   | [b7+ -H2O] - 725.346 m/z   | [y7+] - 865.422 m/z      |
| [y9+ -H3PO4] - 979.525 m/z |                            |                          |

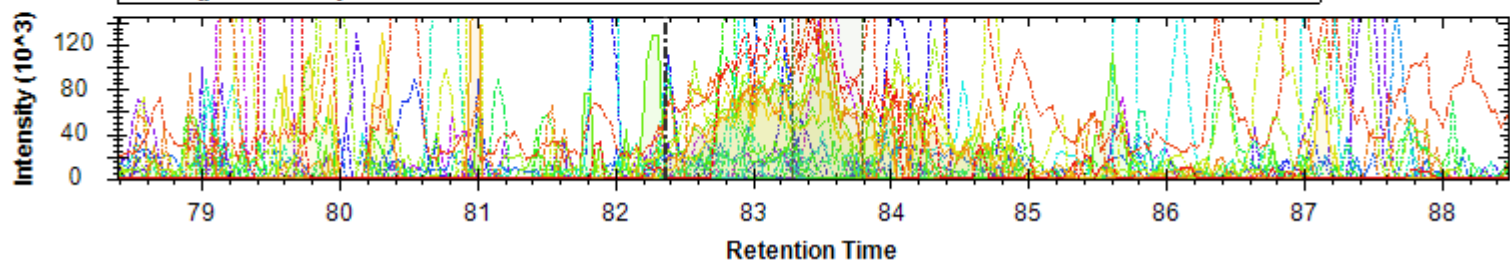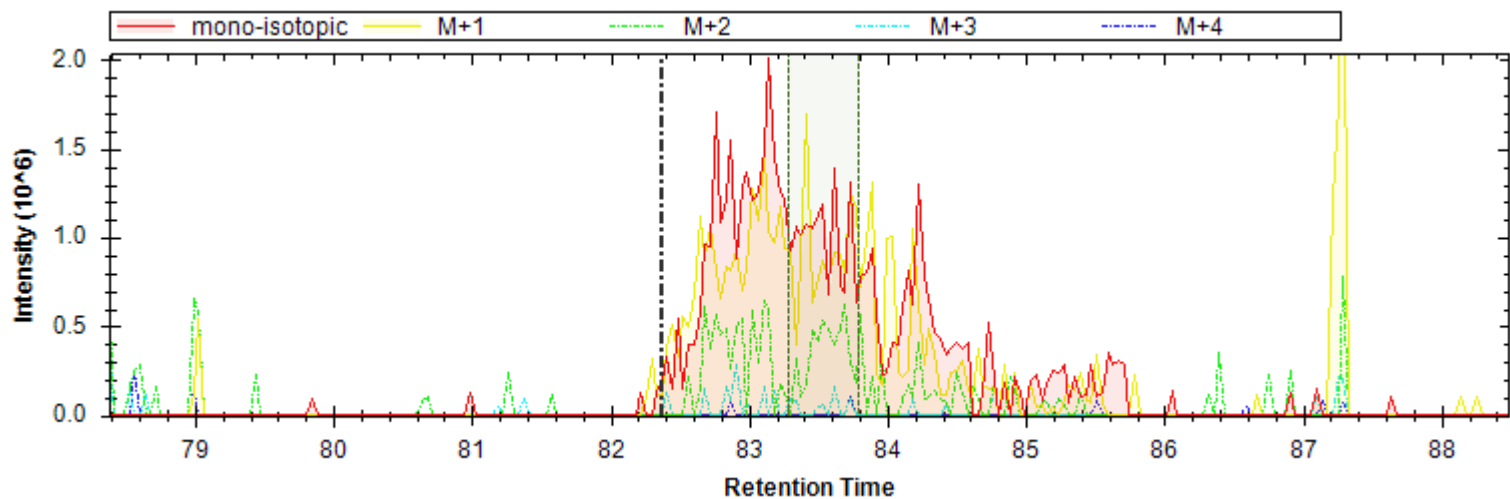

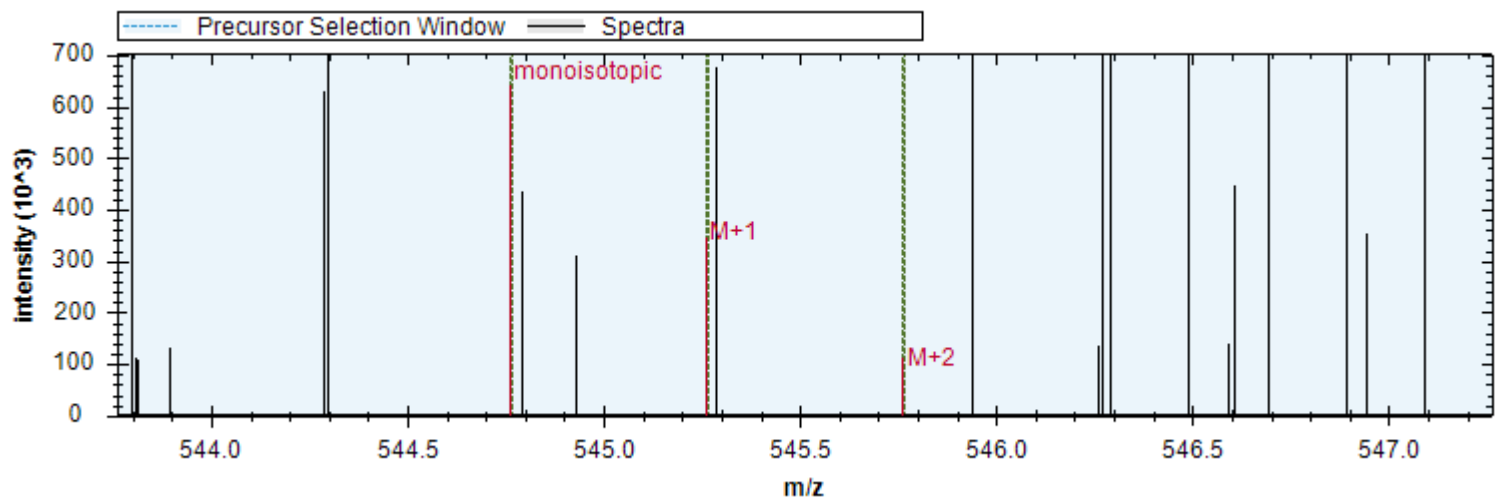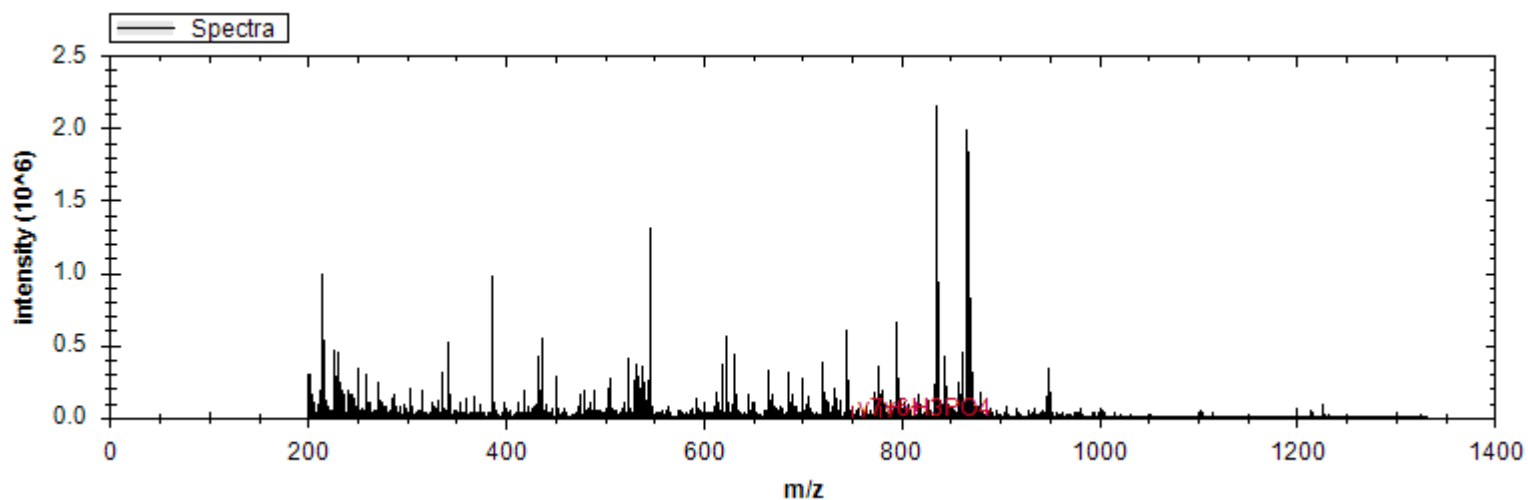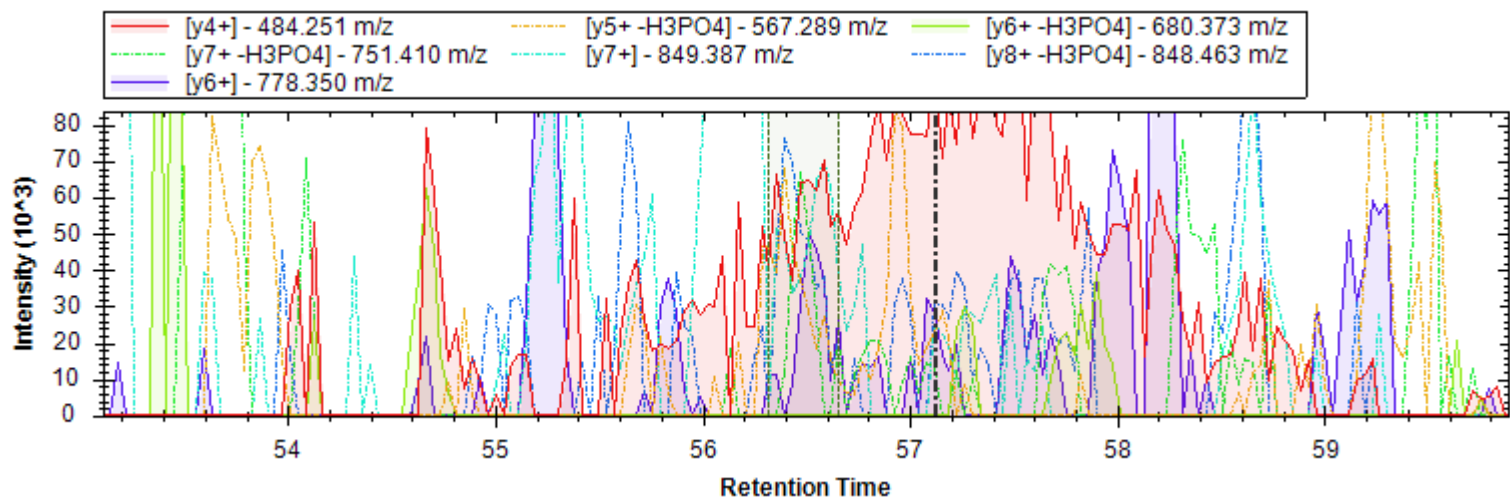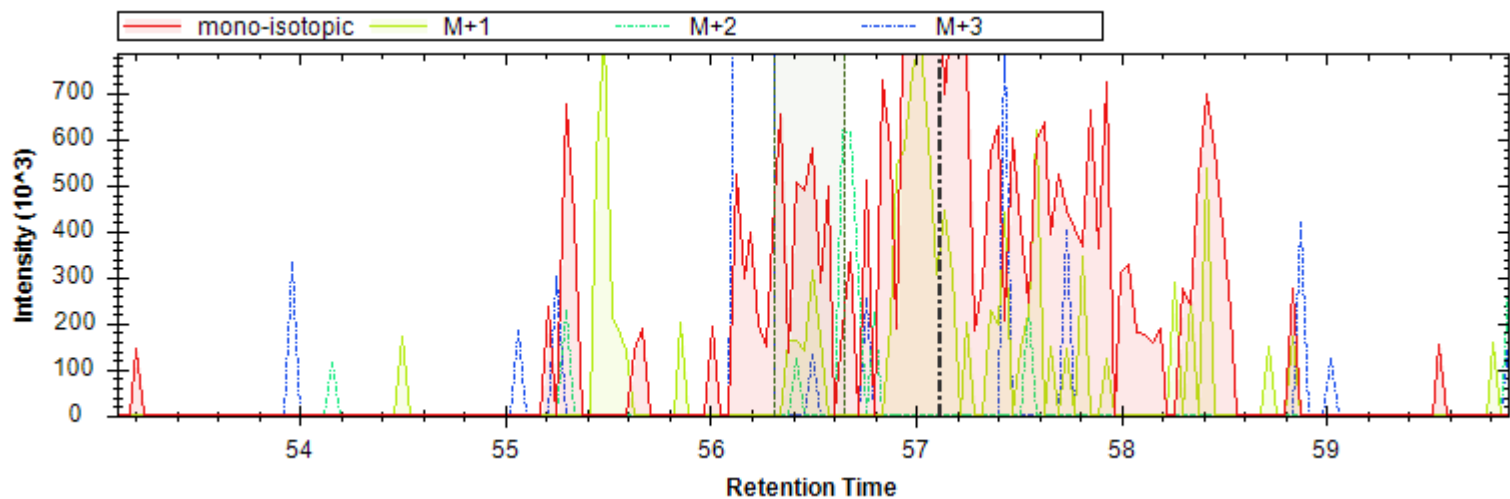

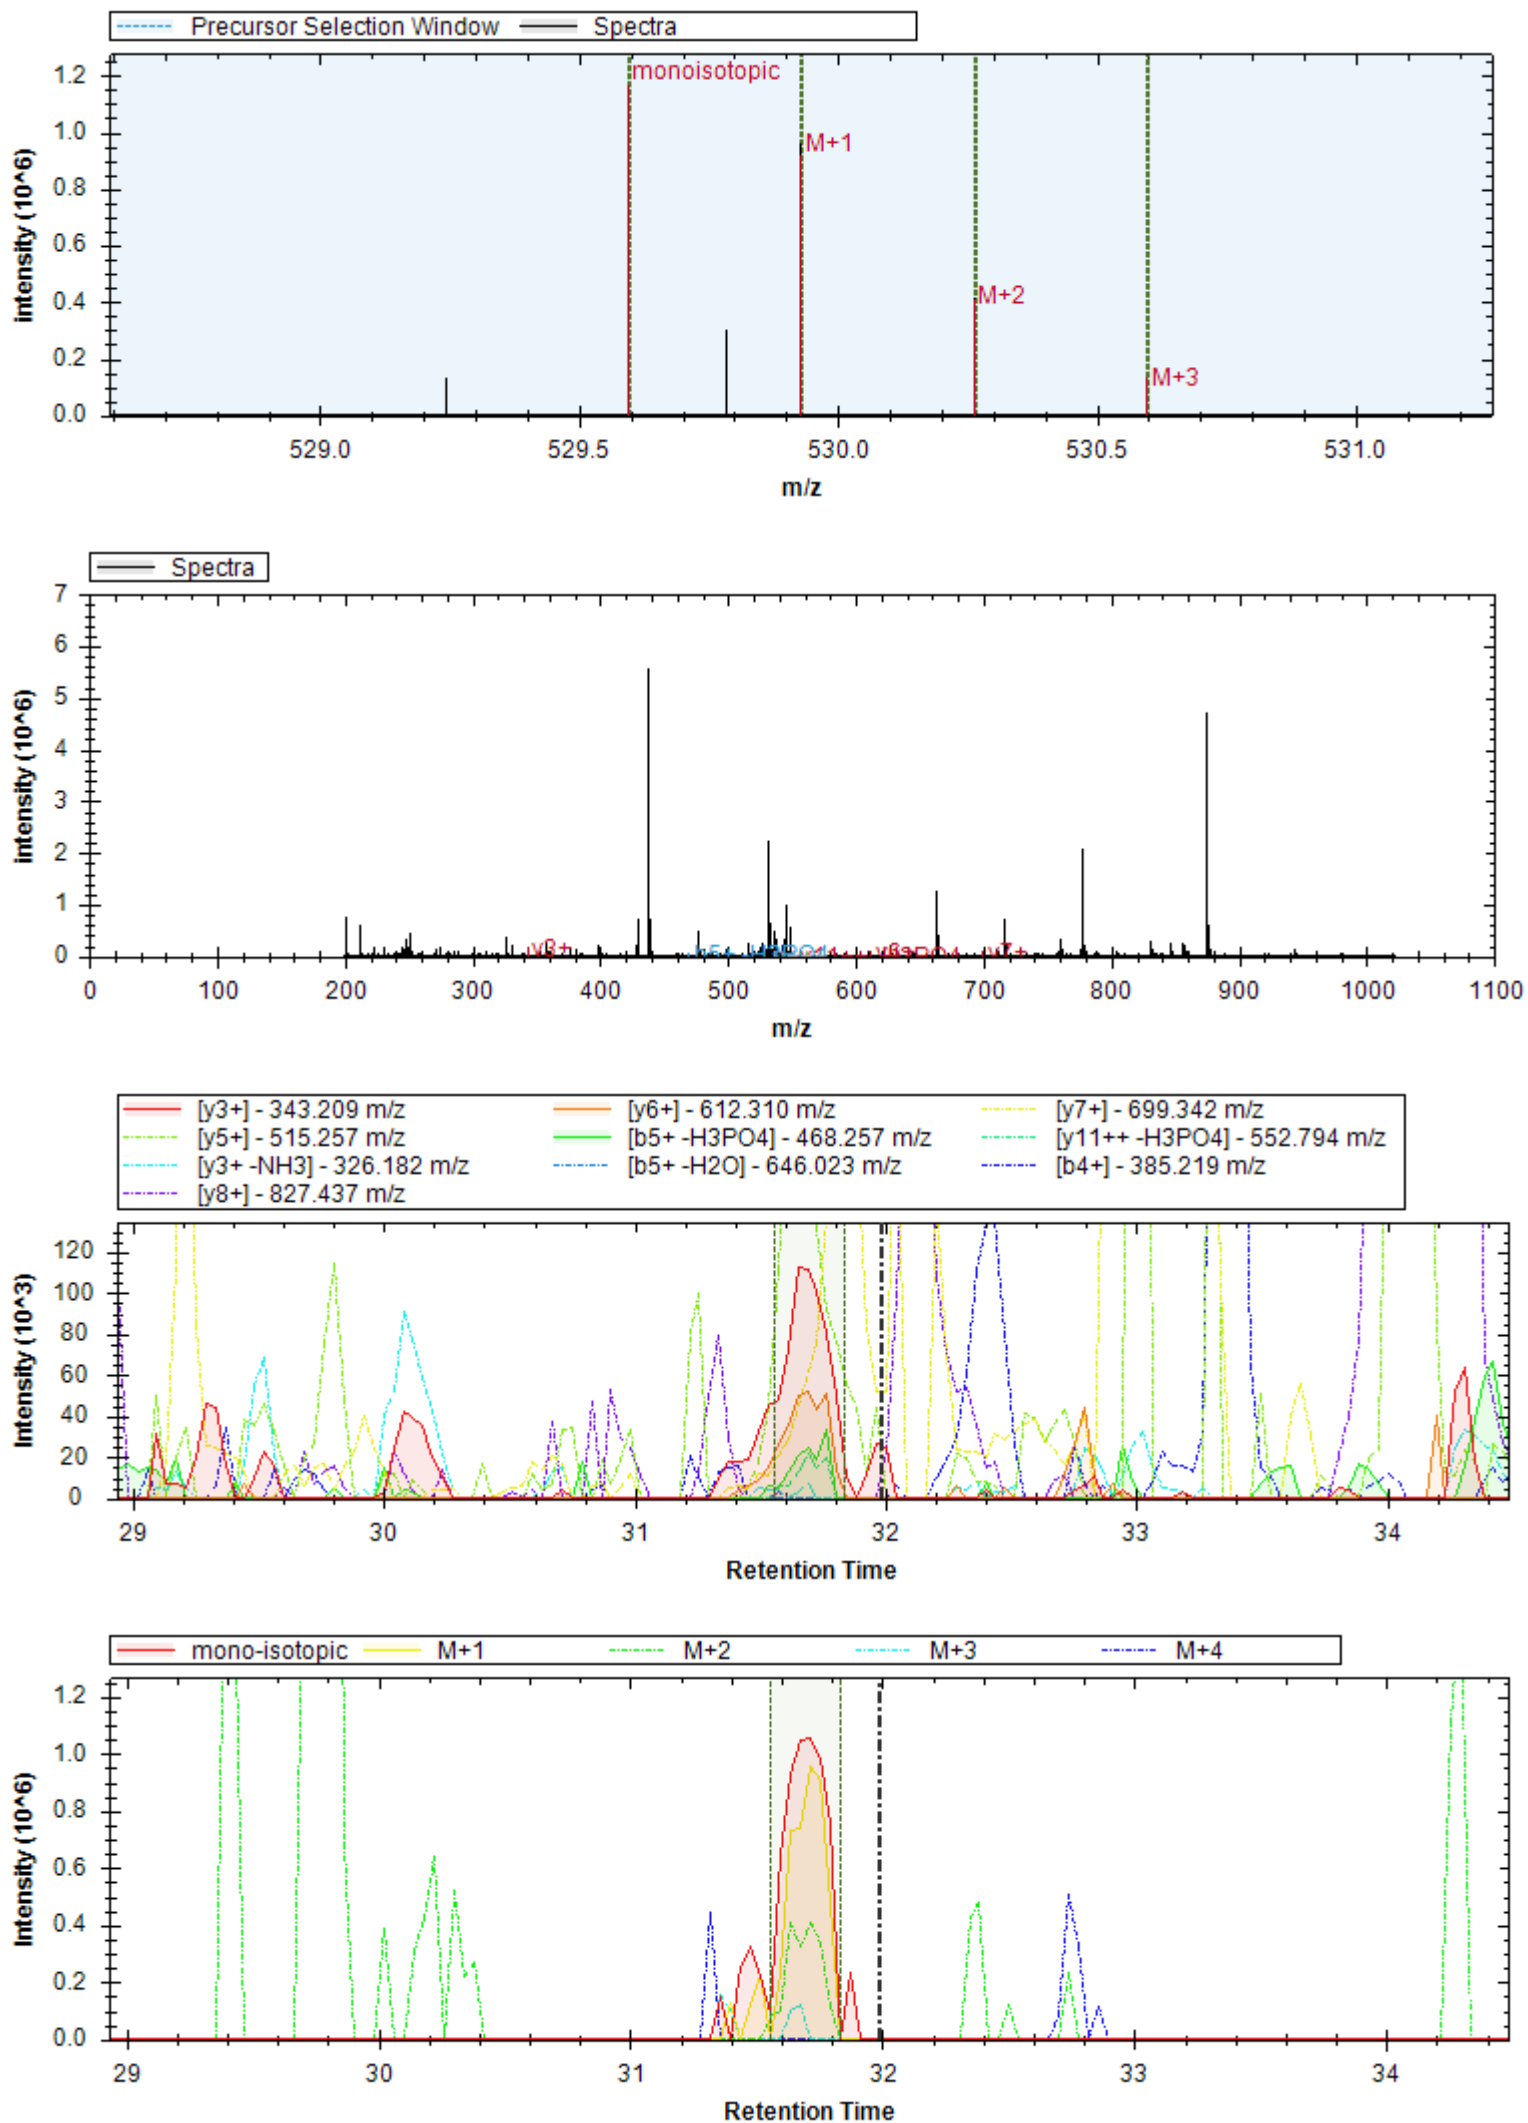



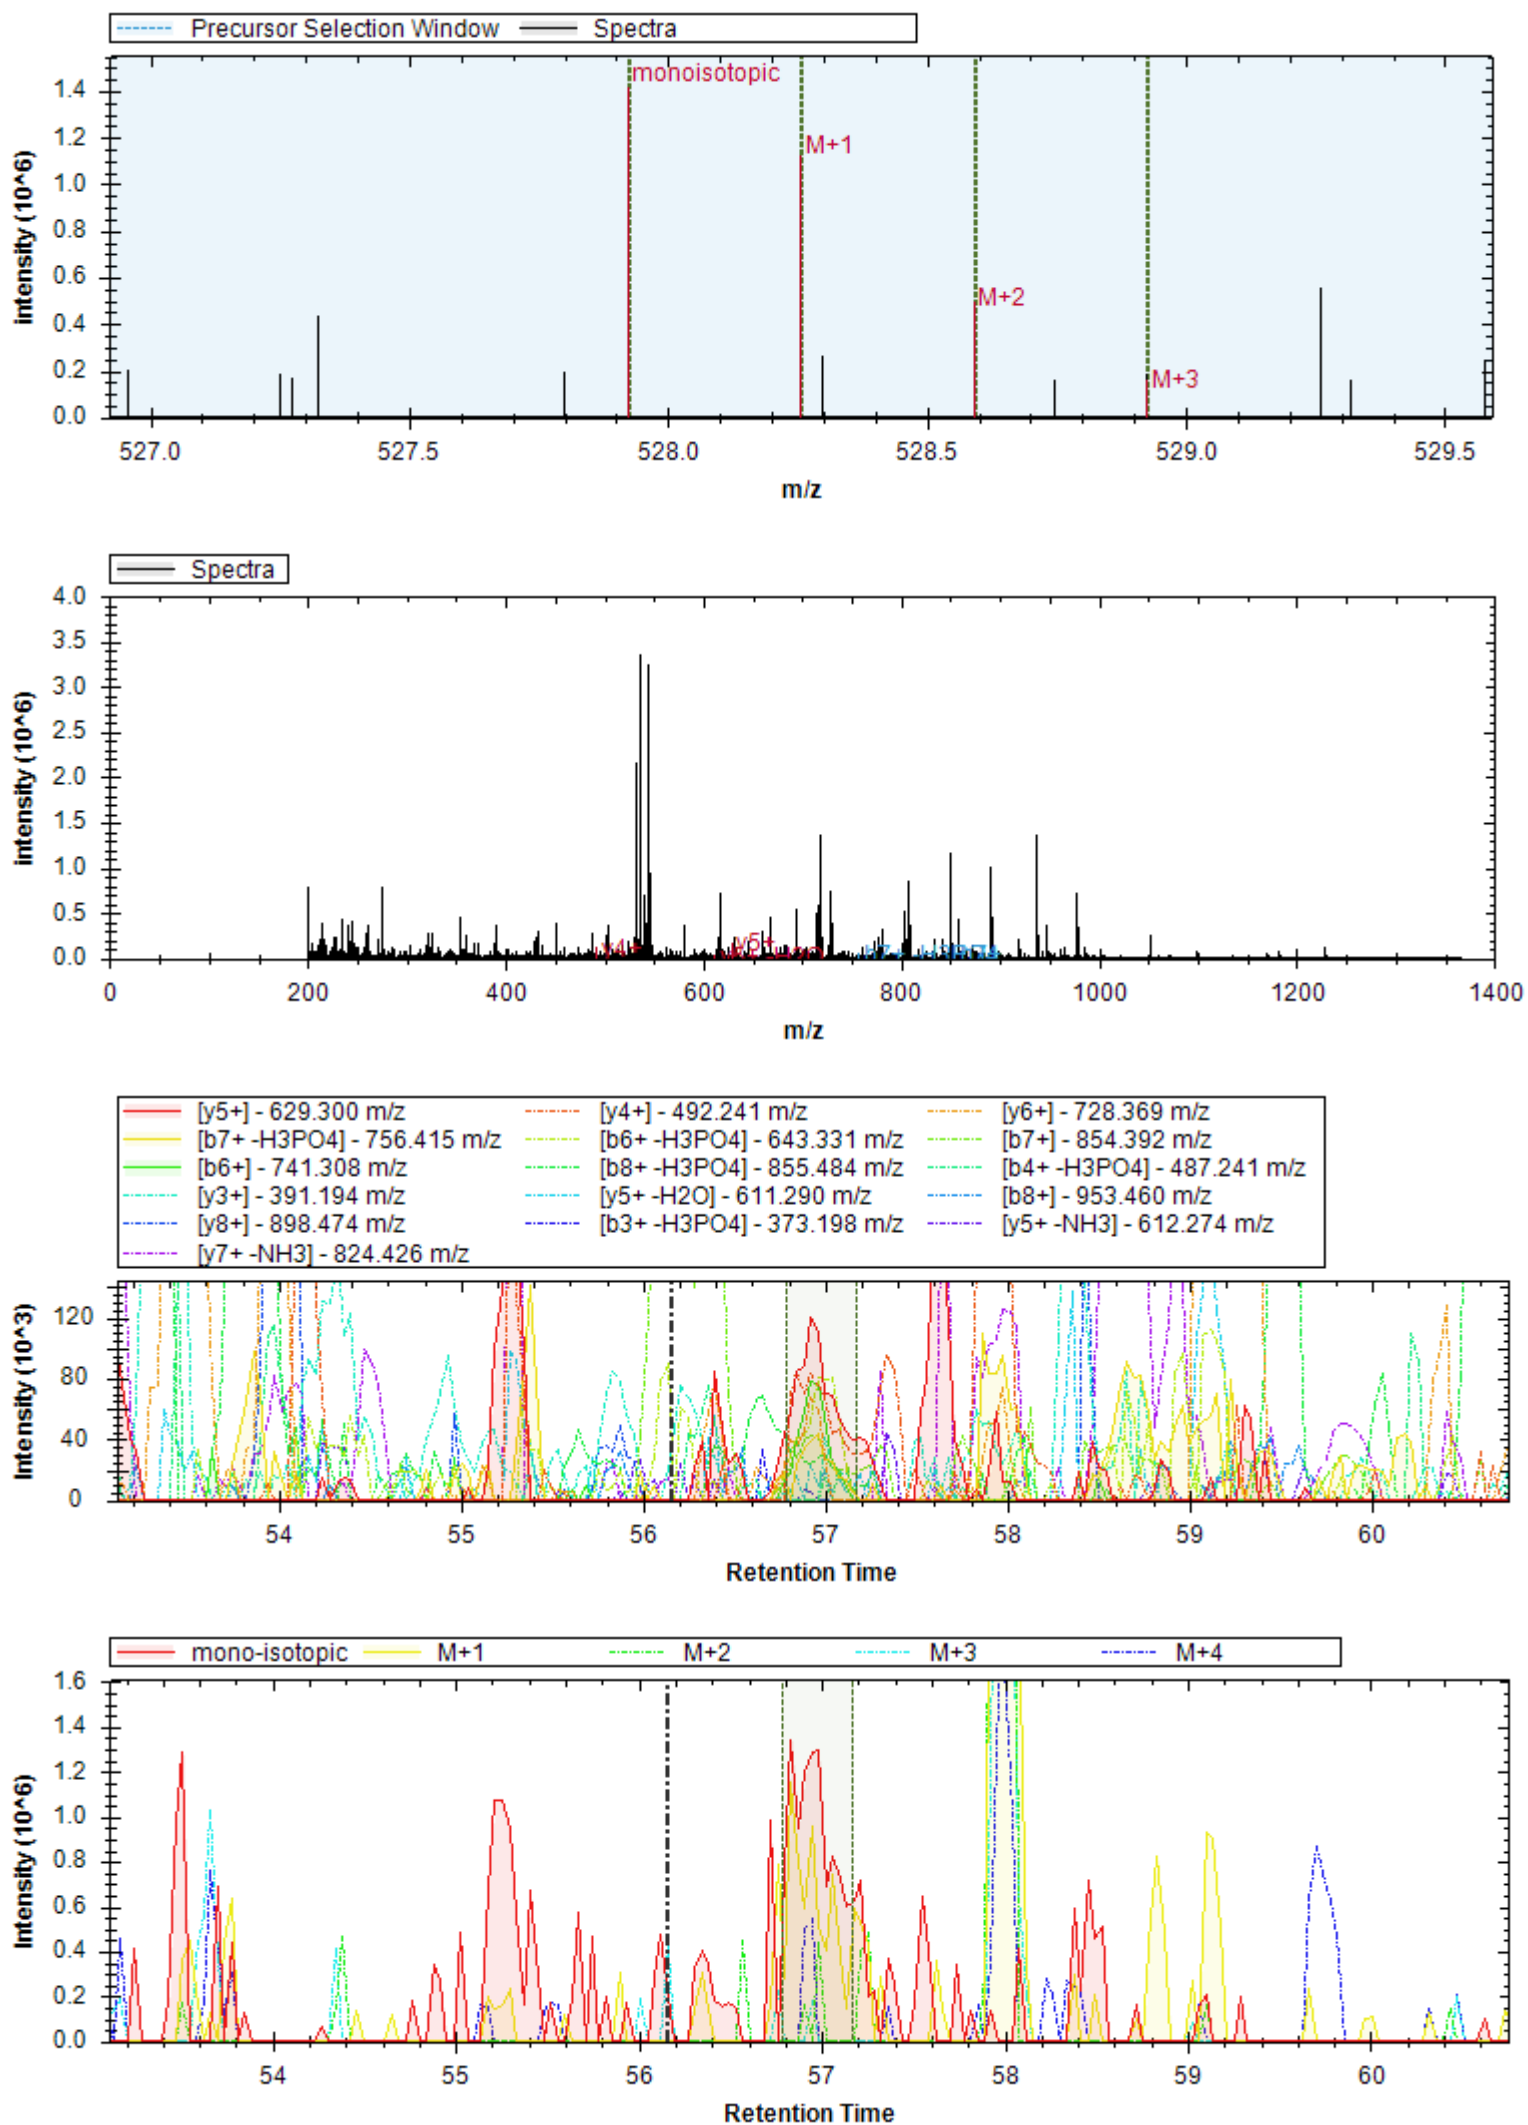

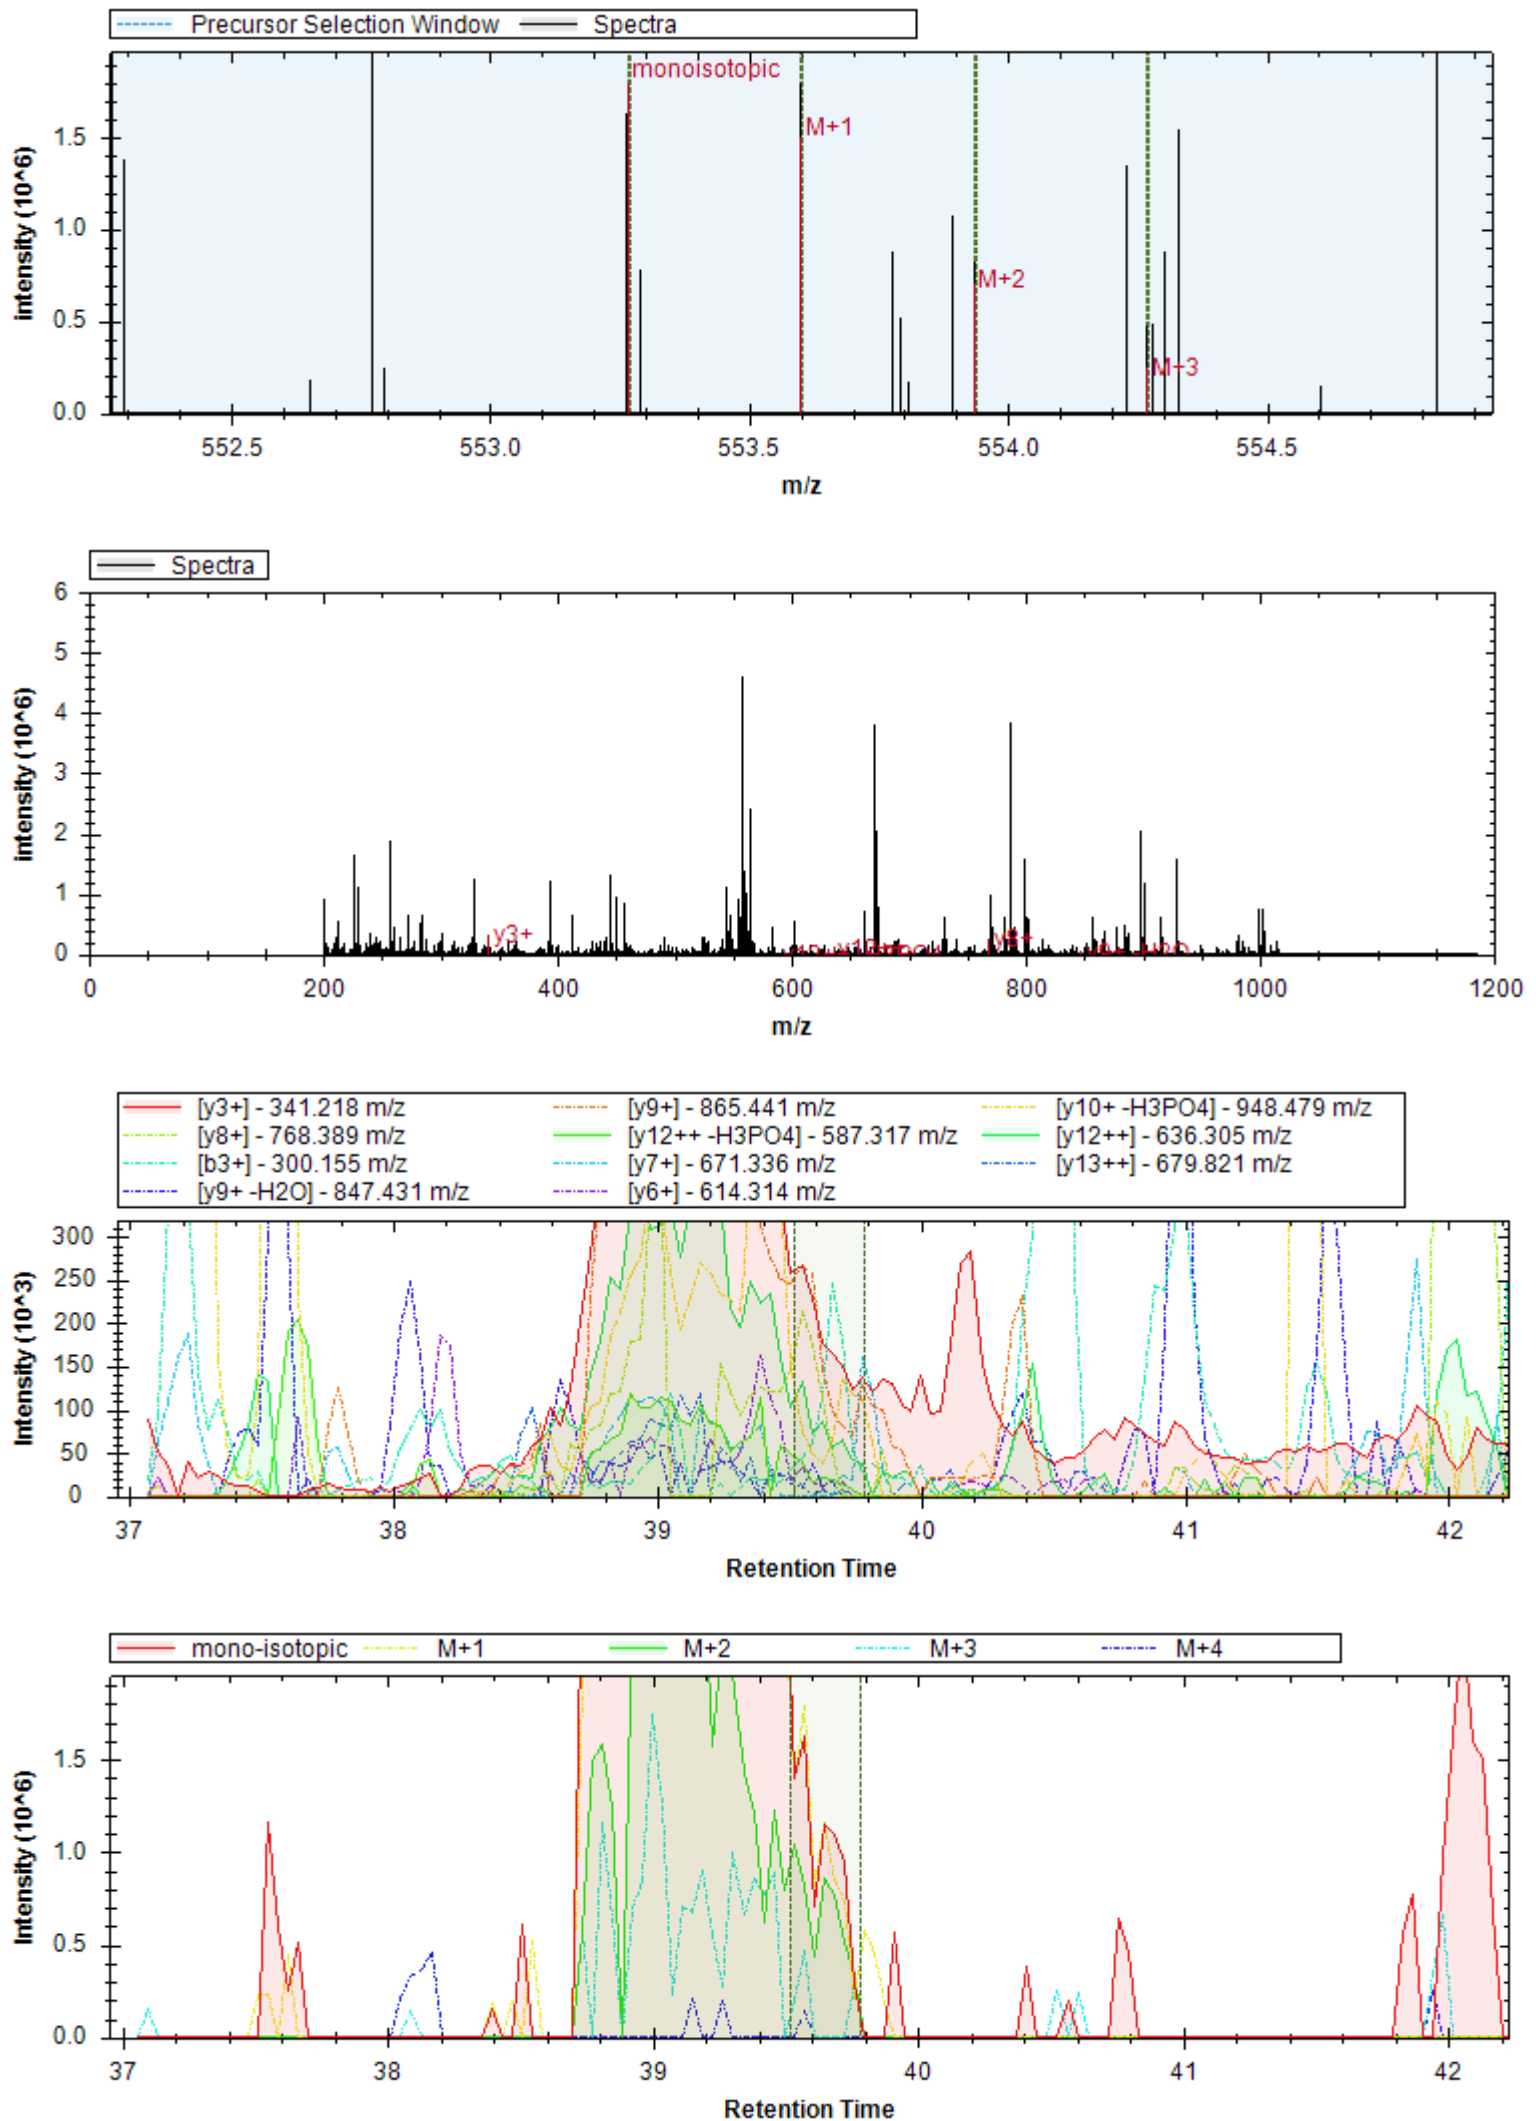

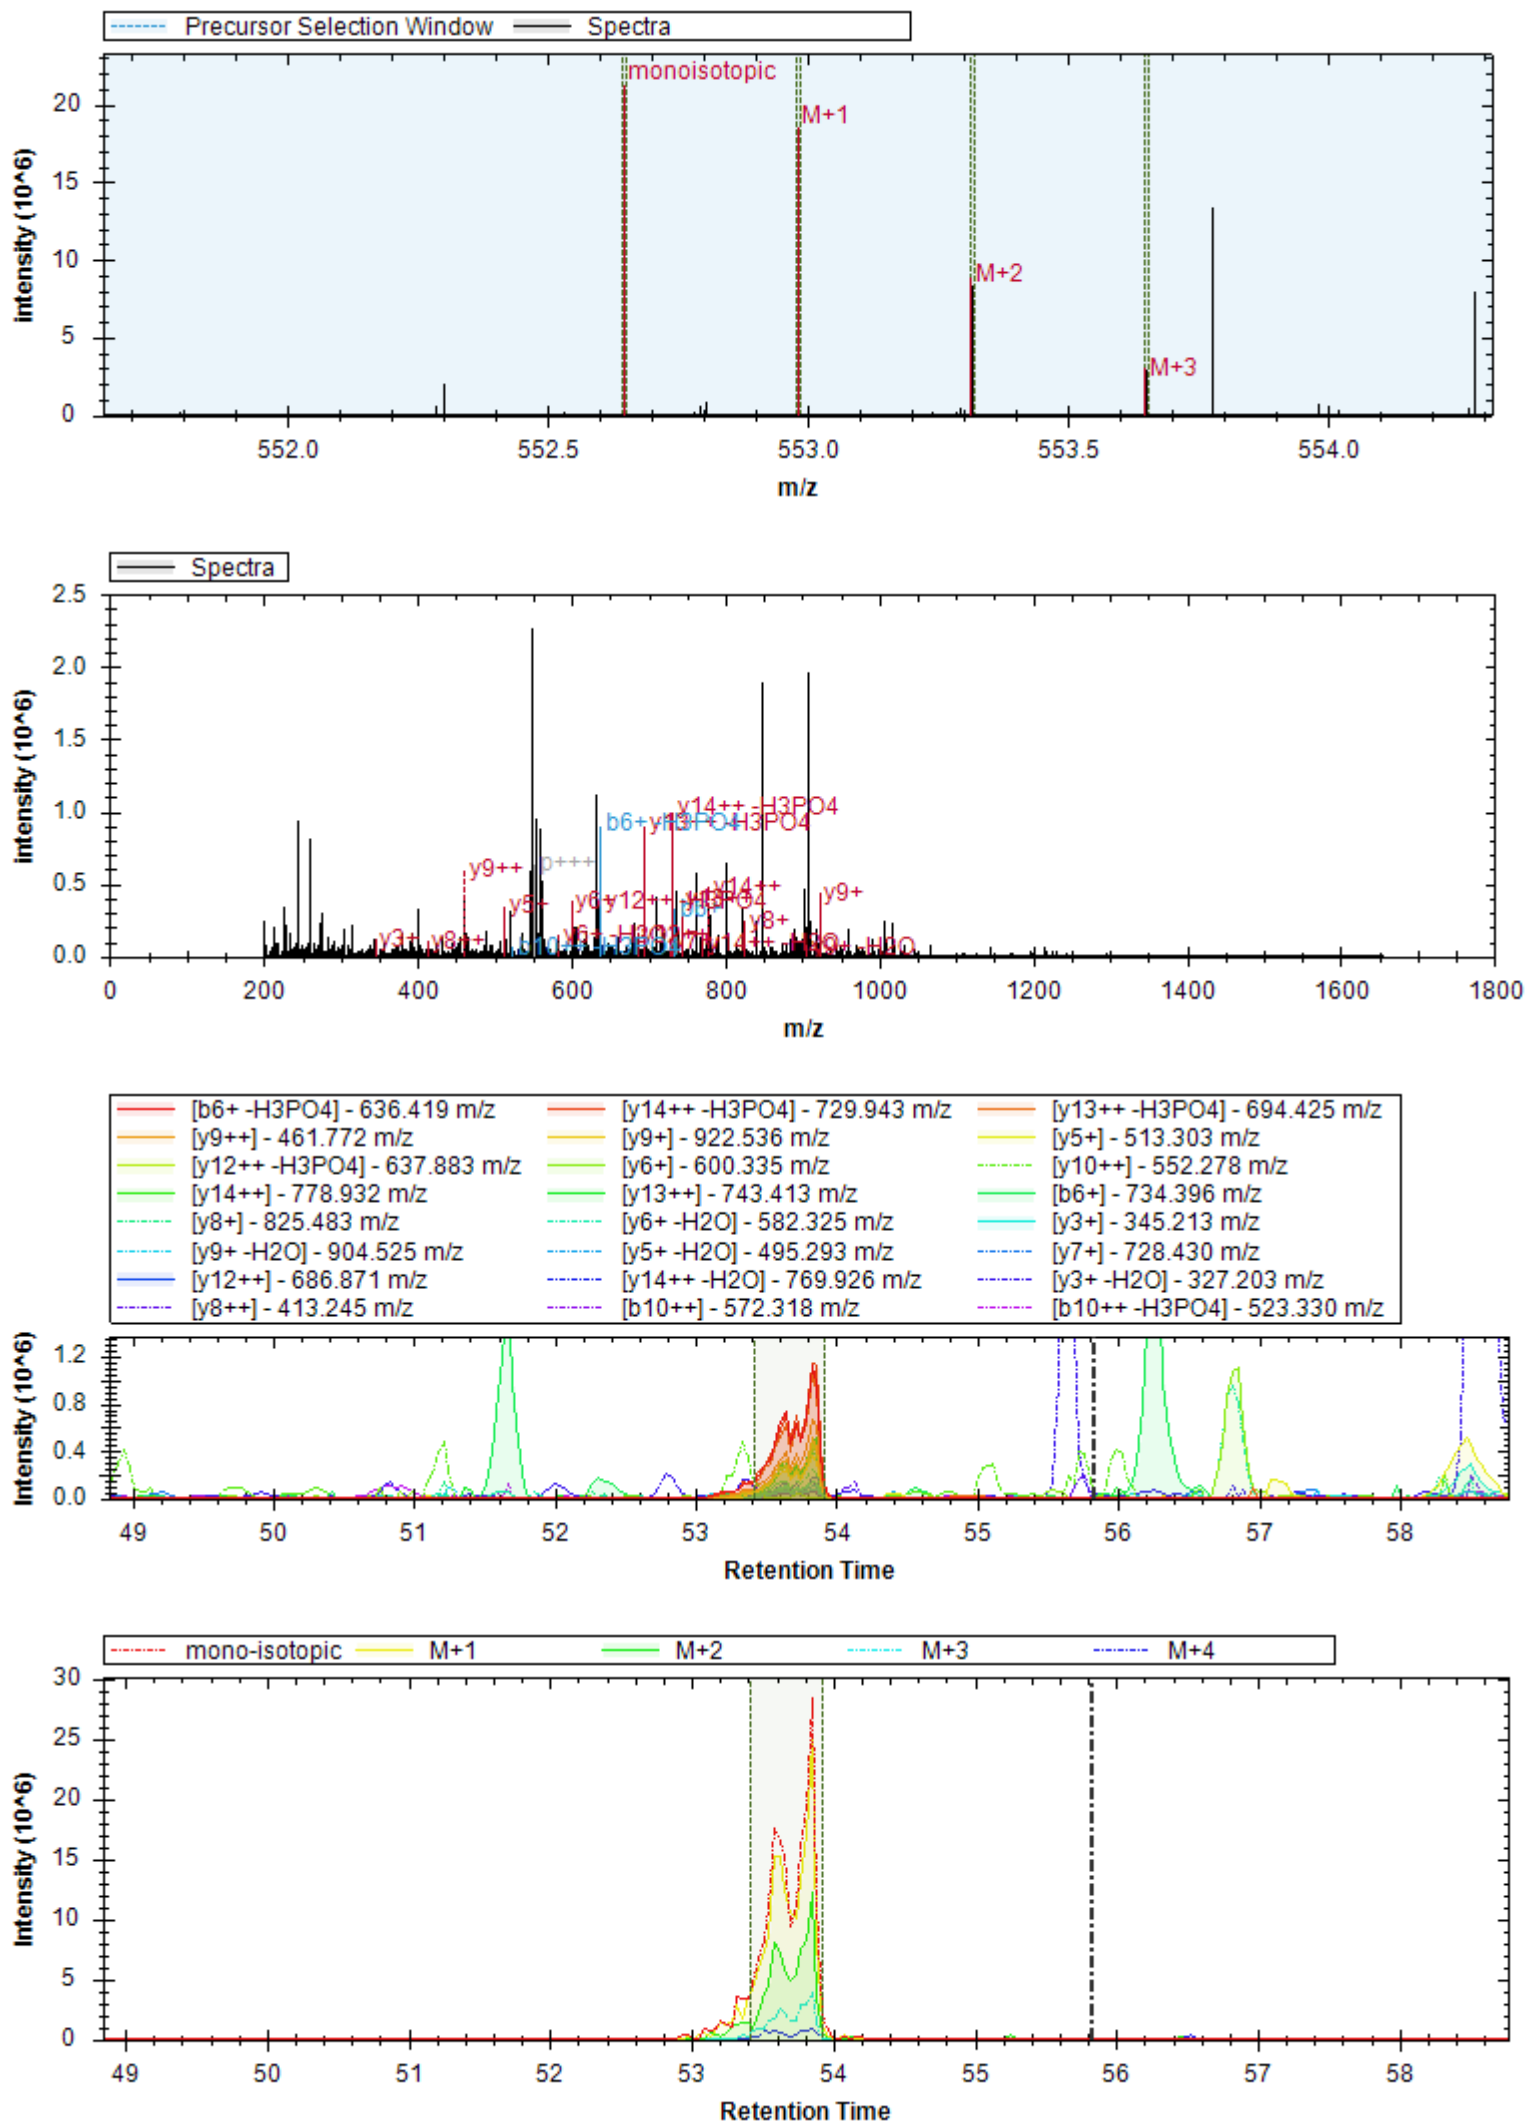

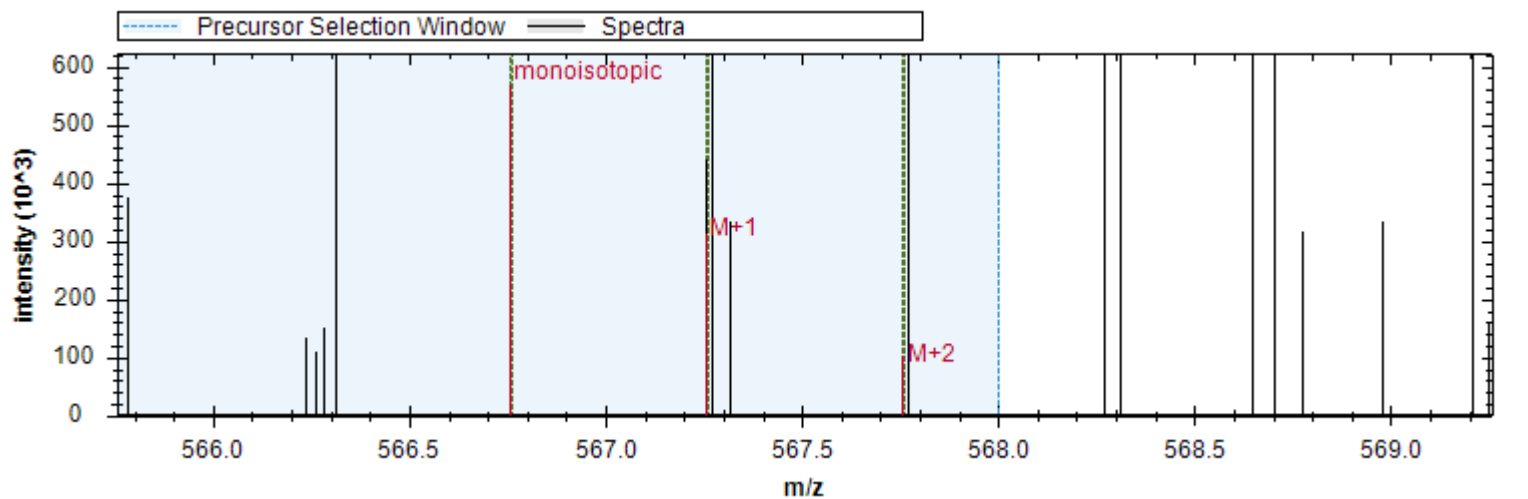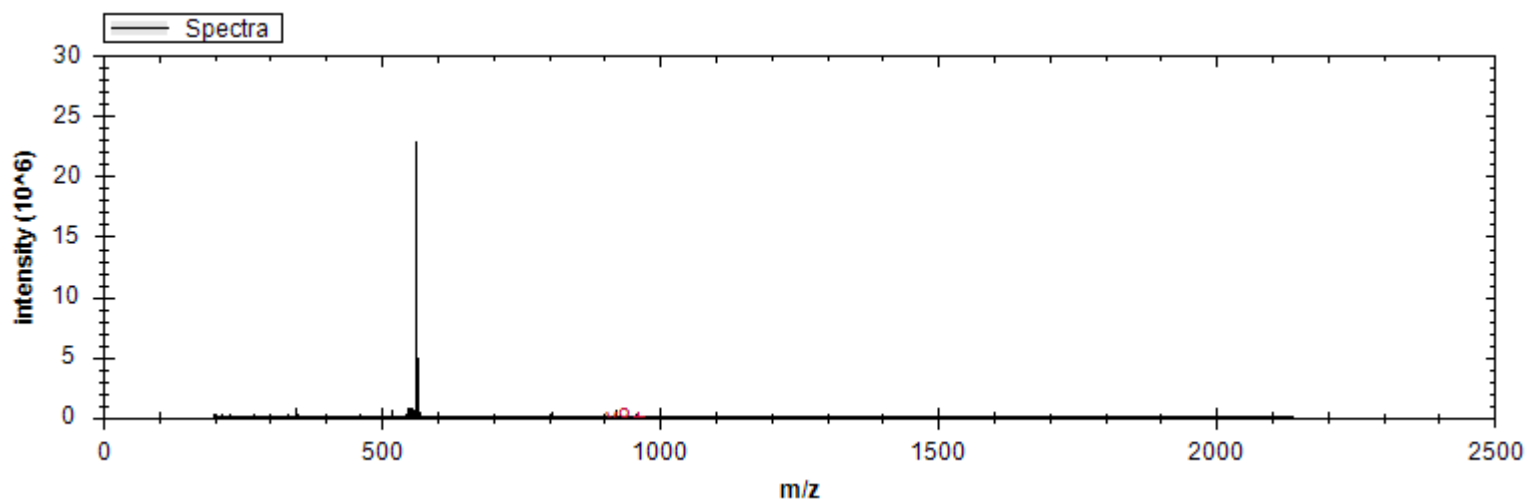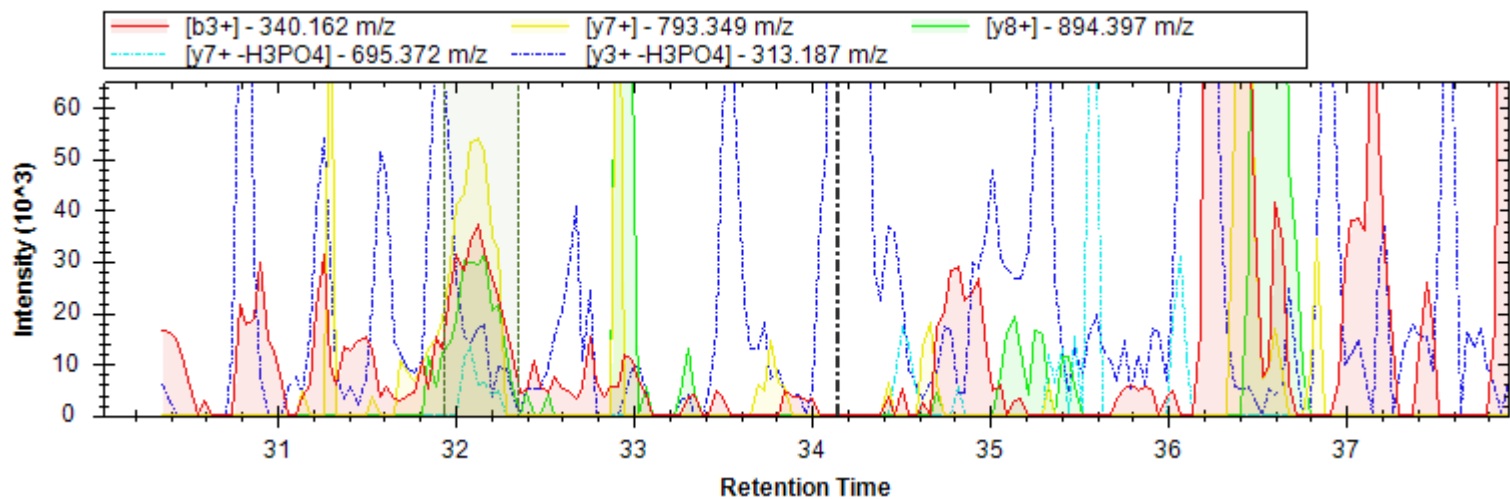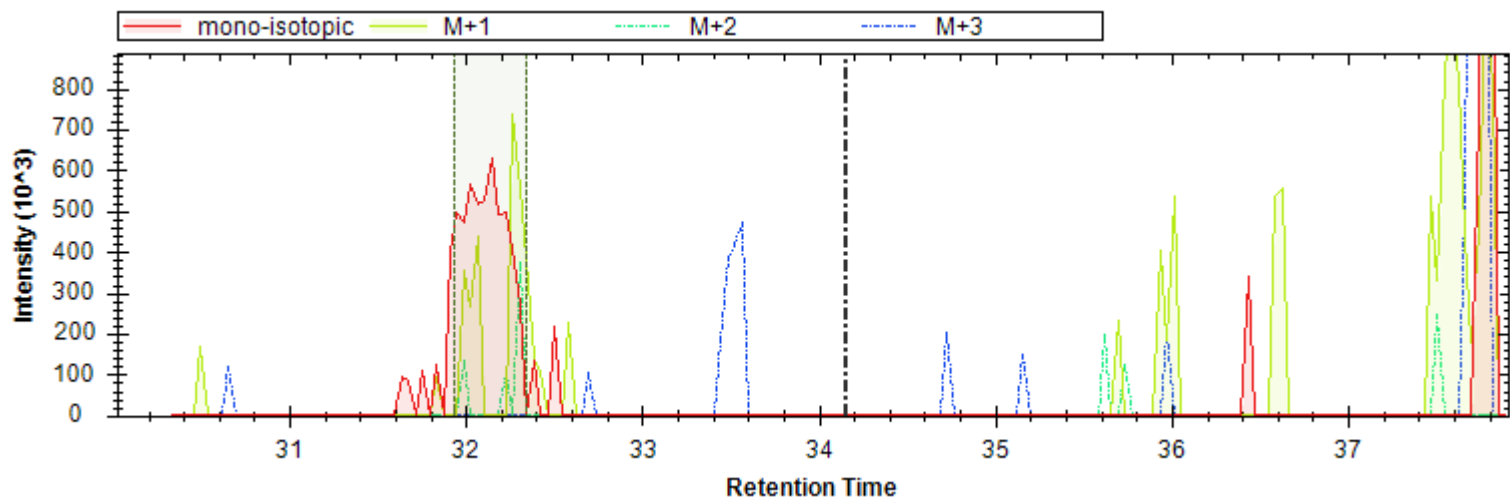

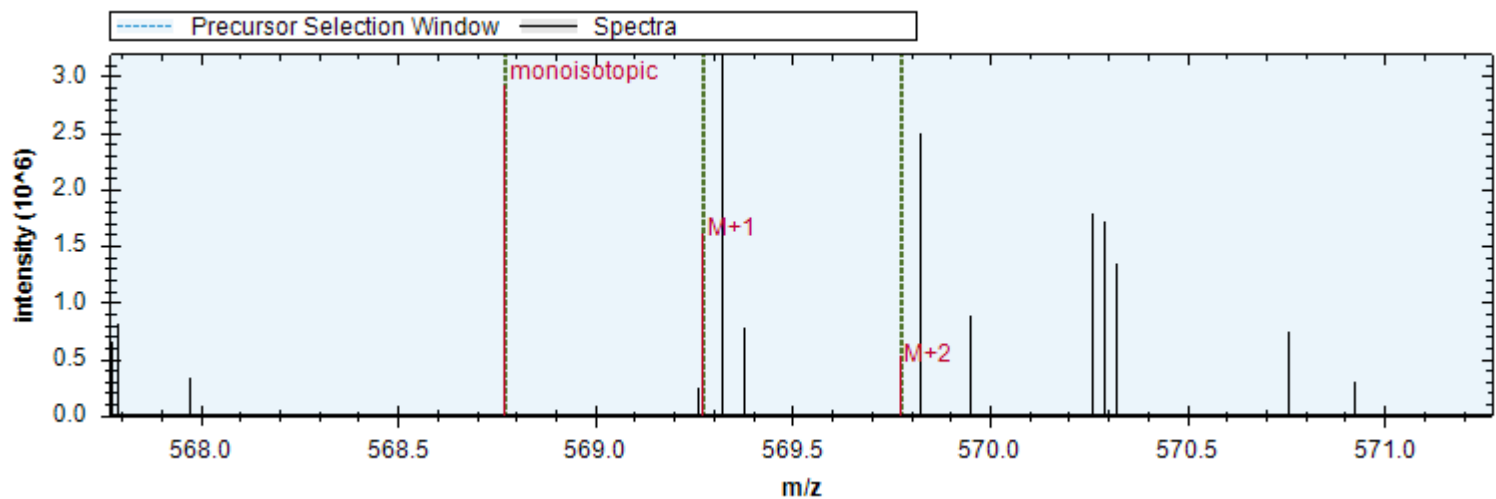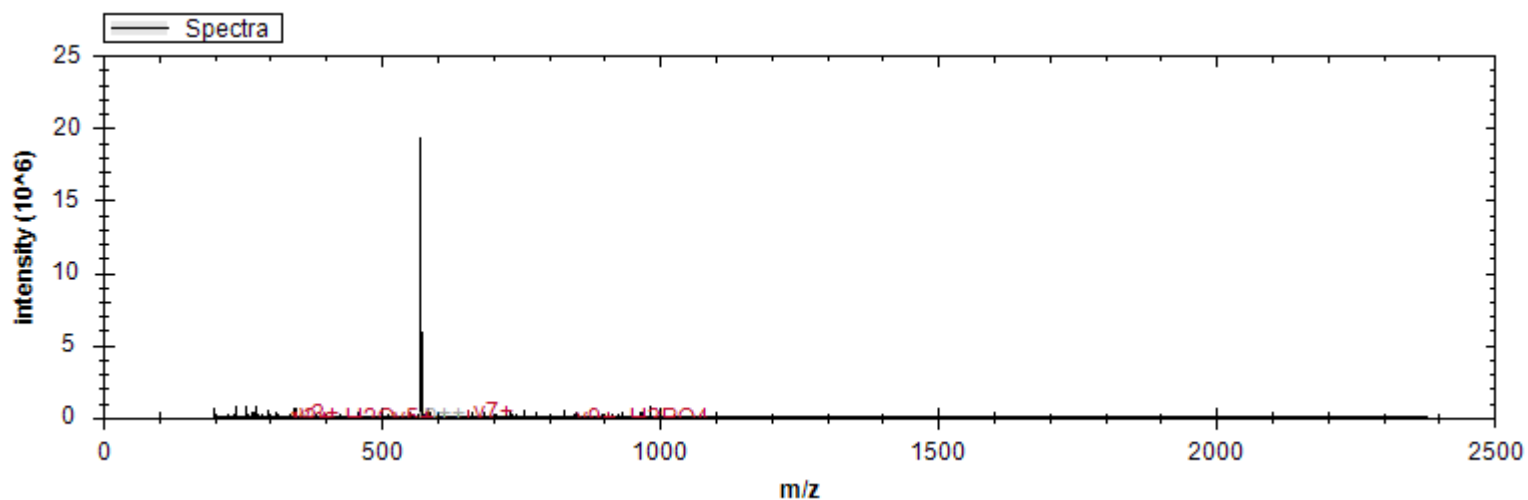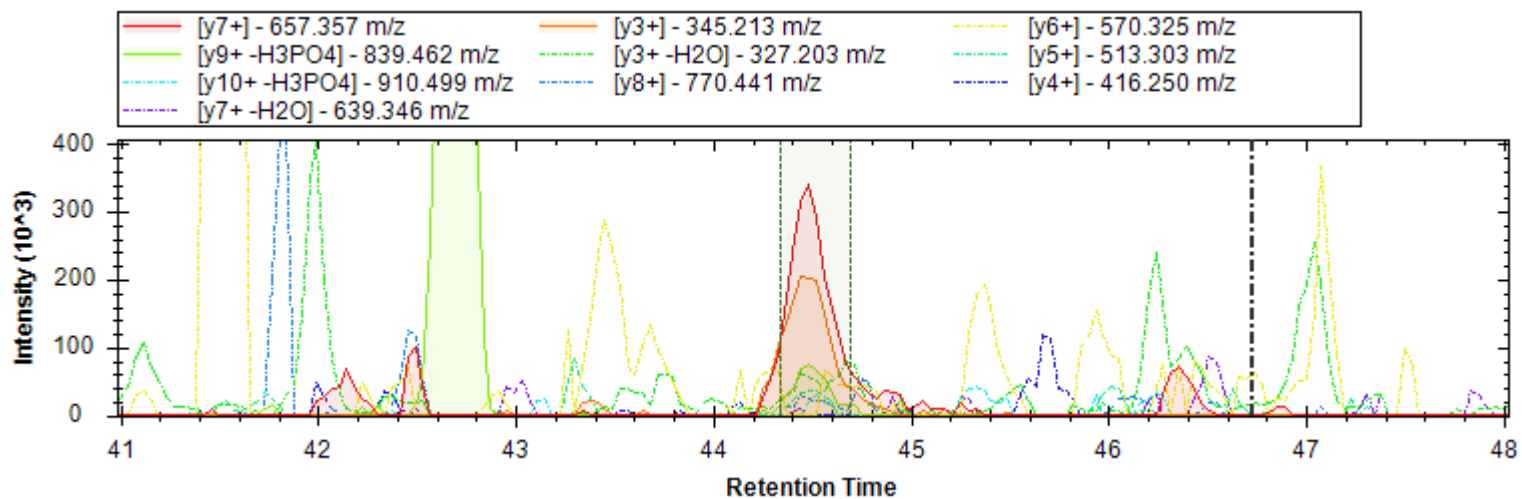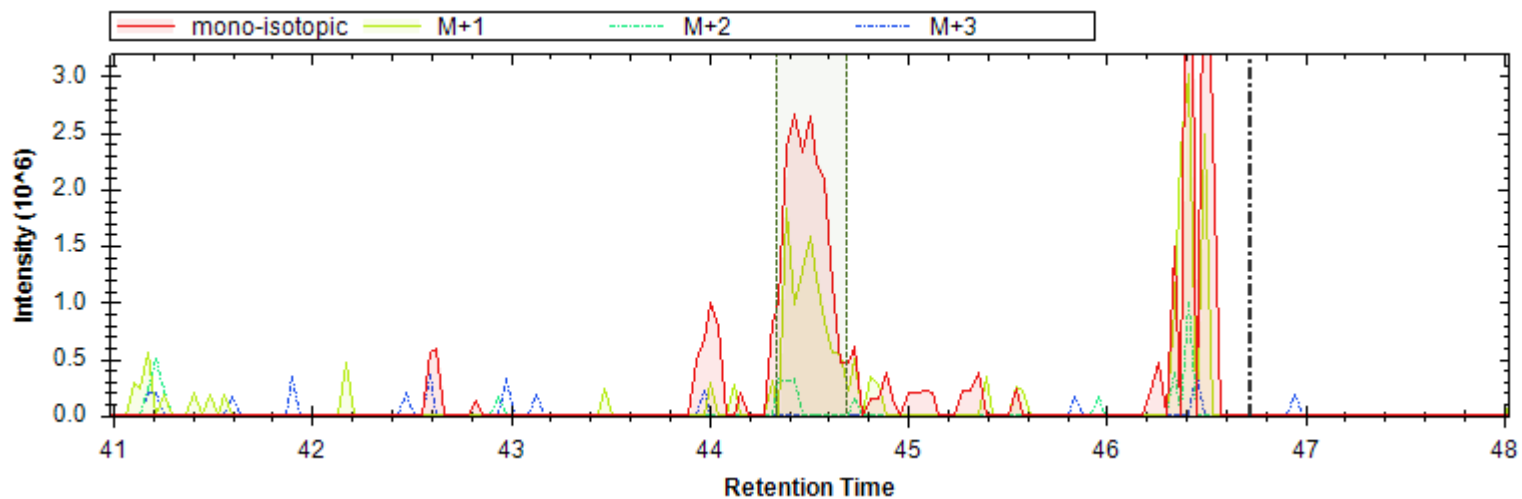

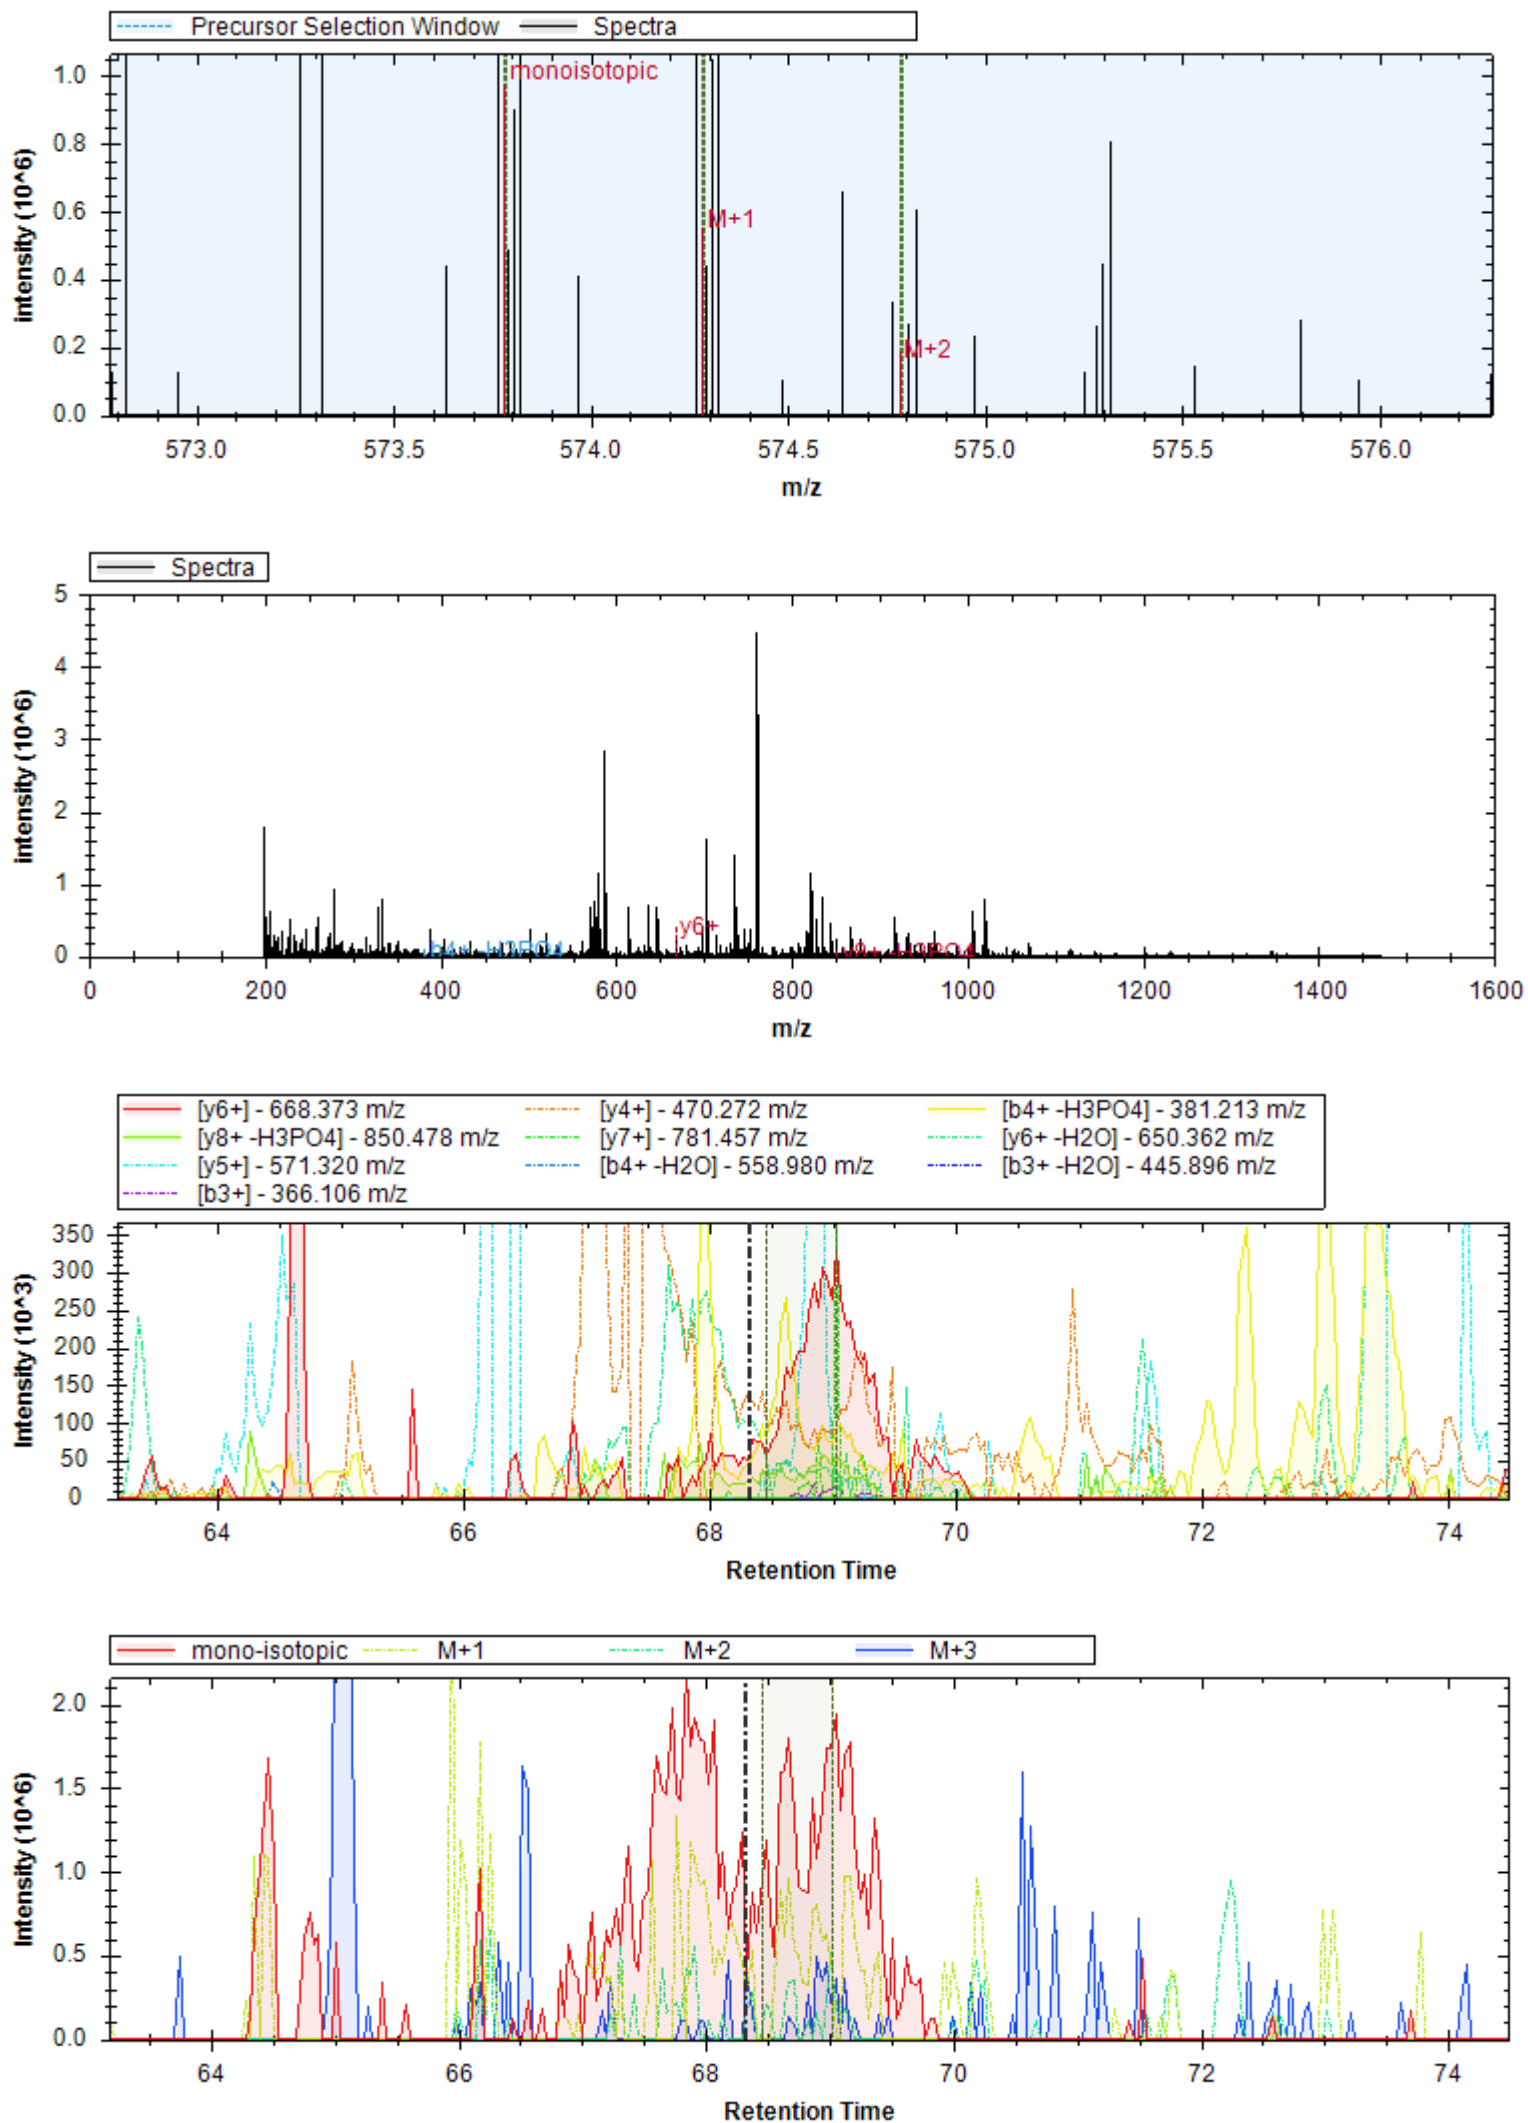

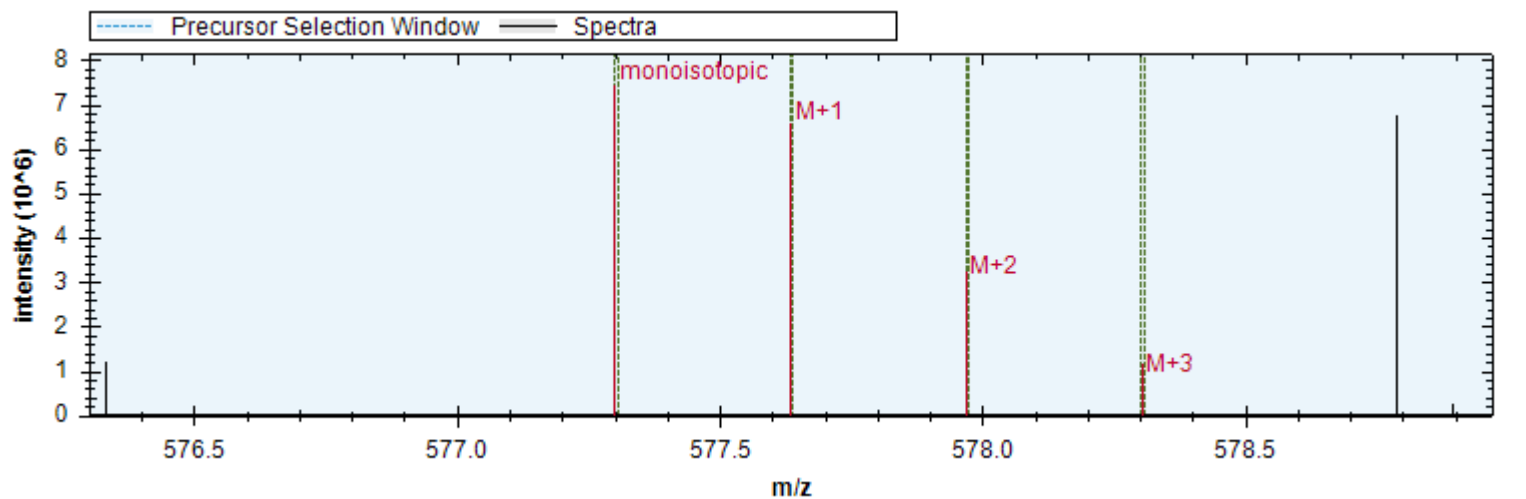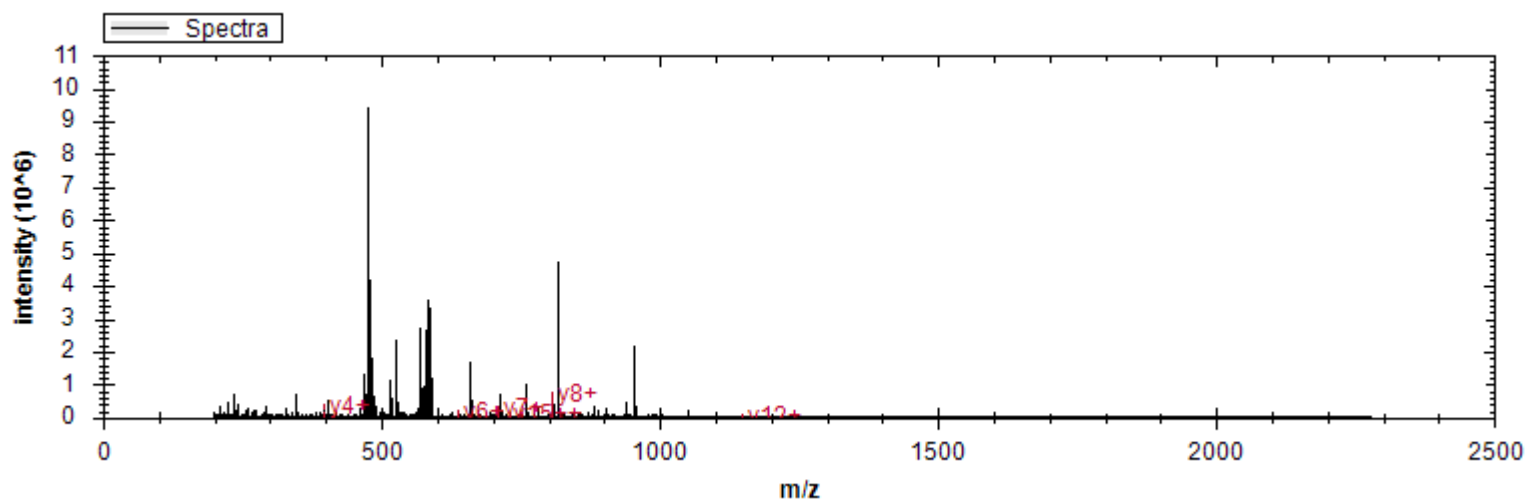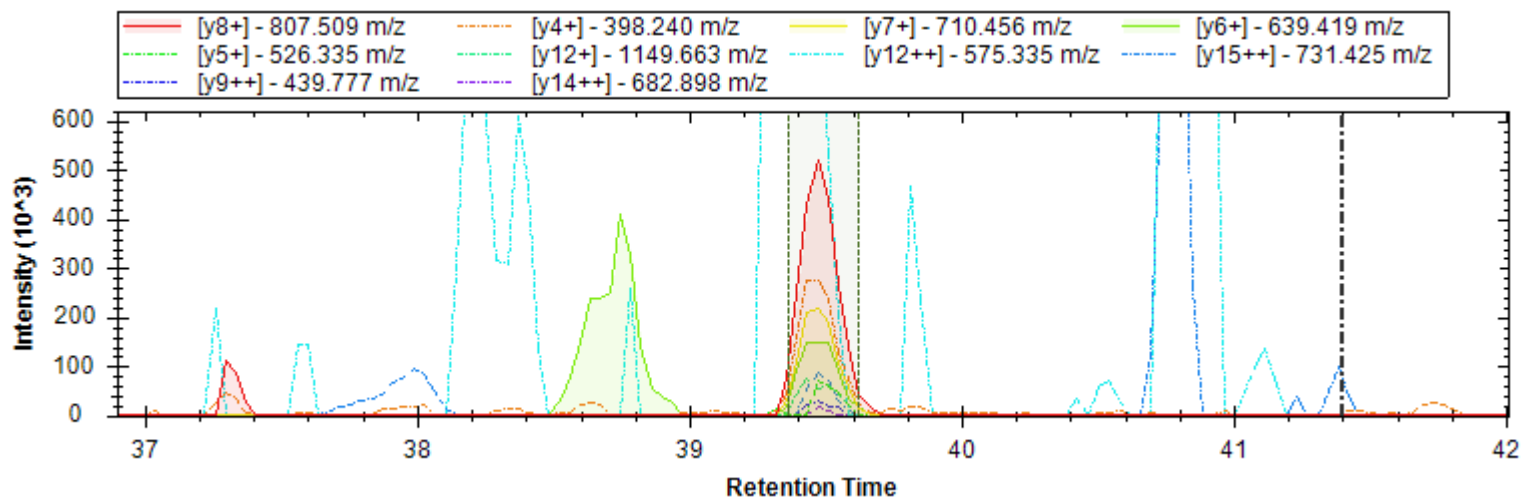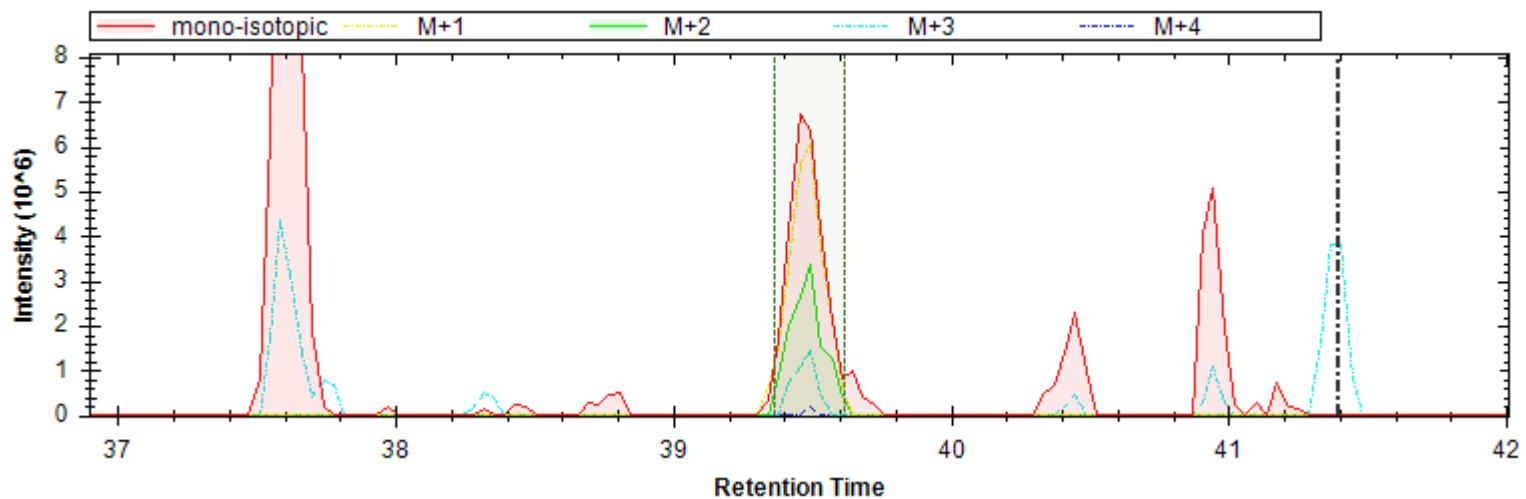

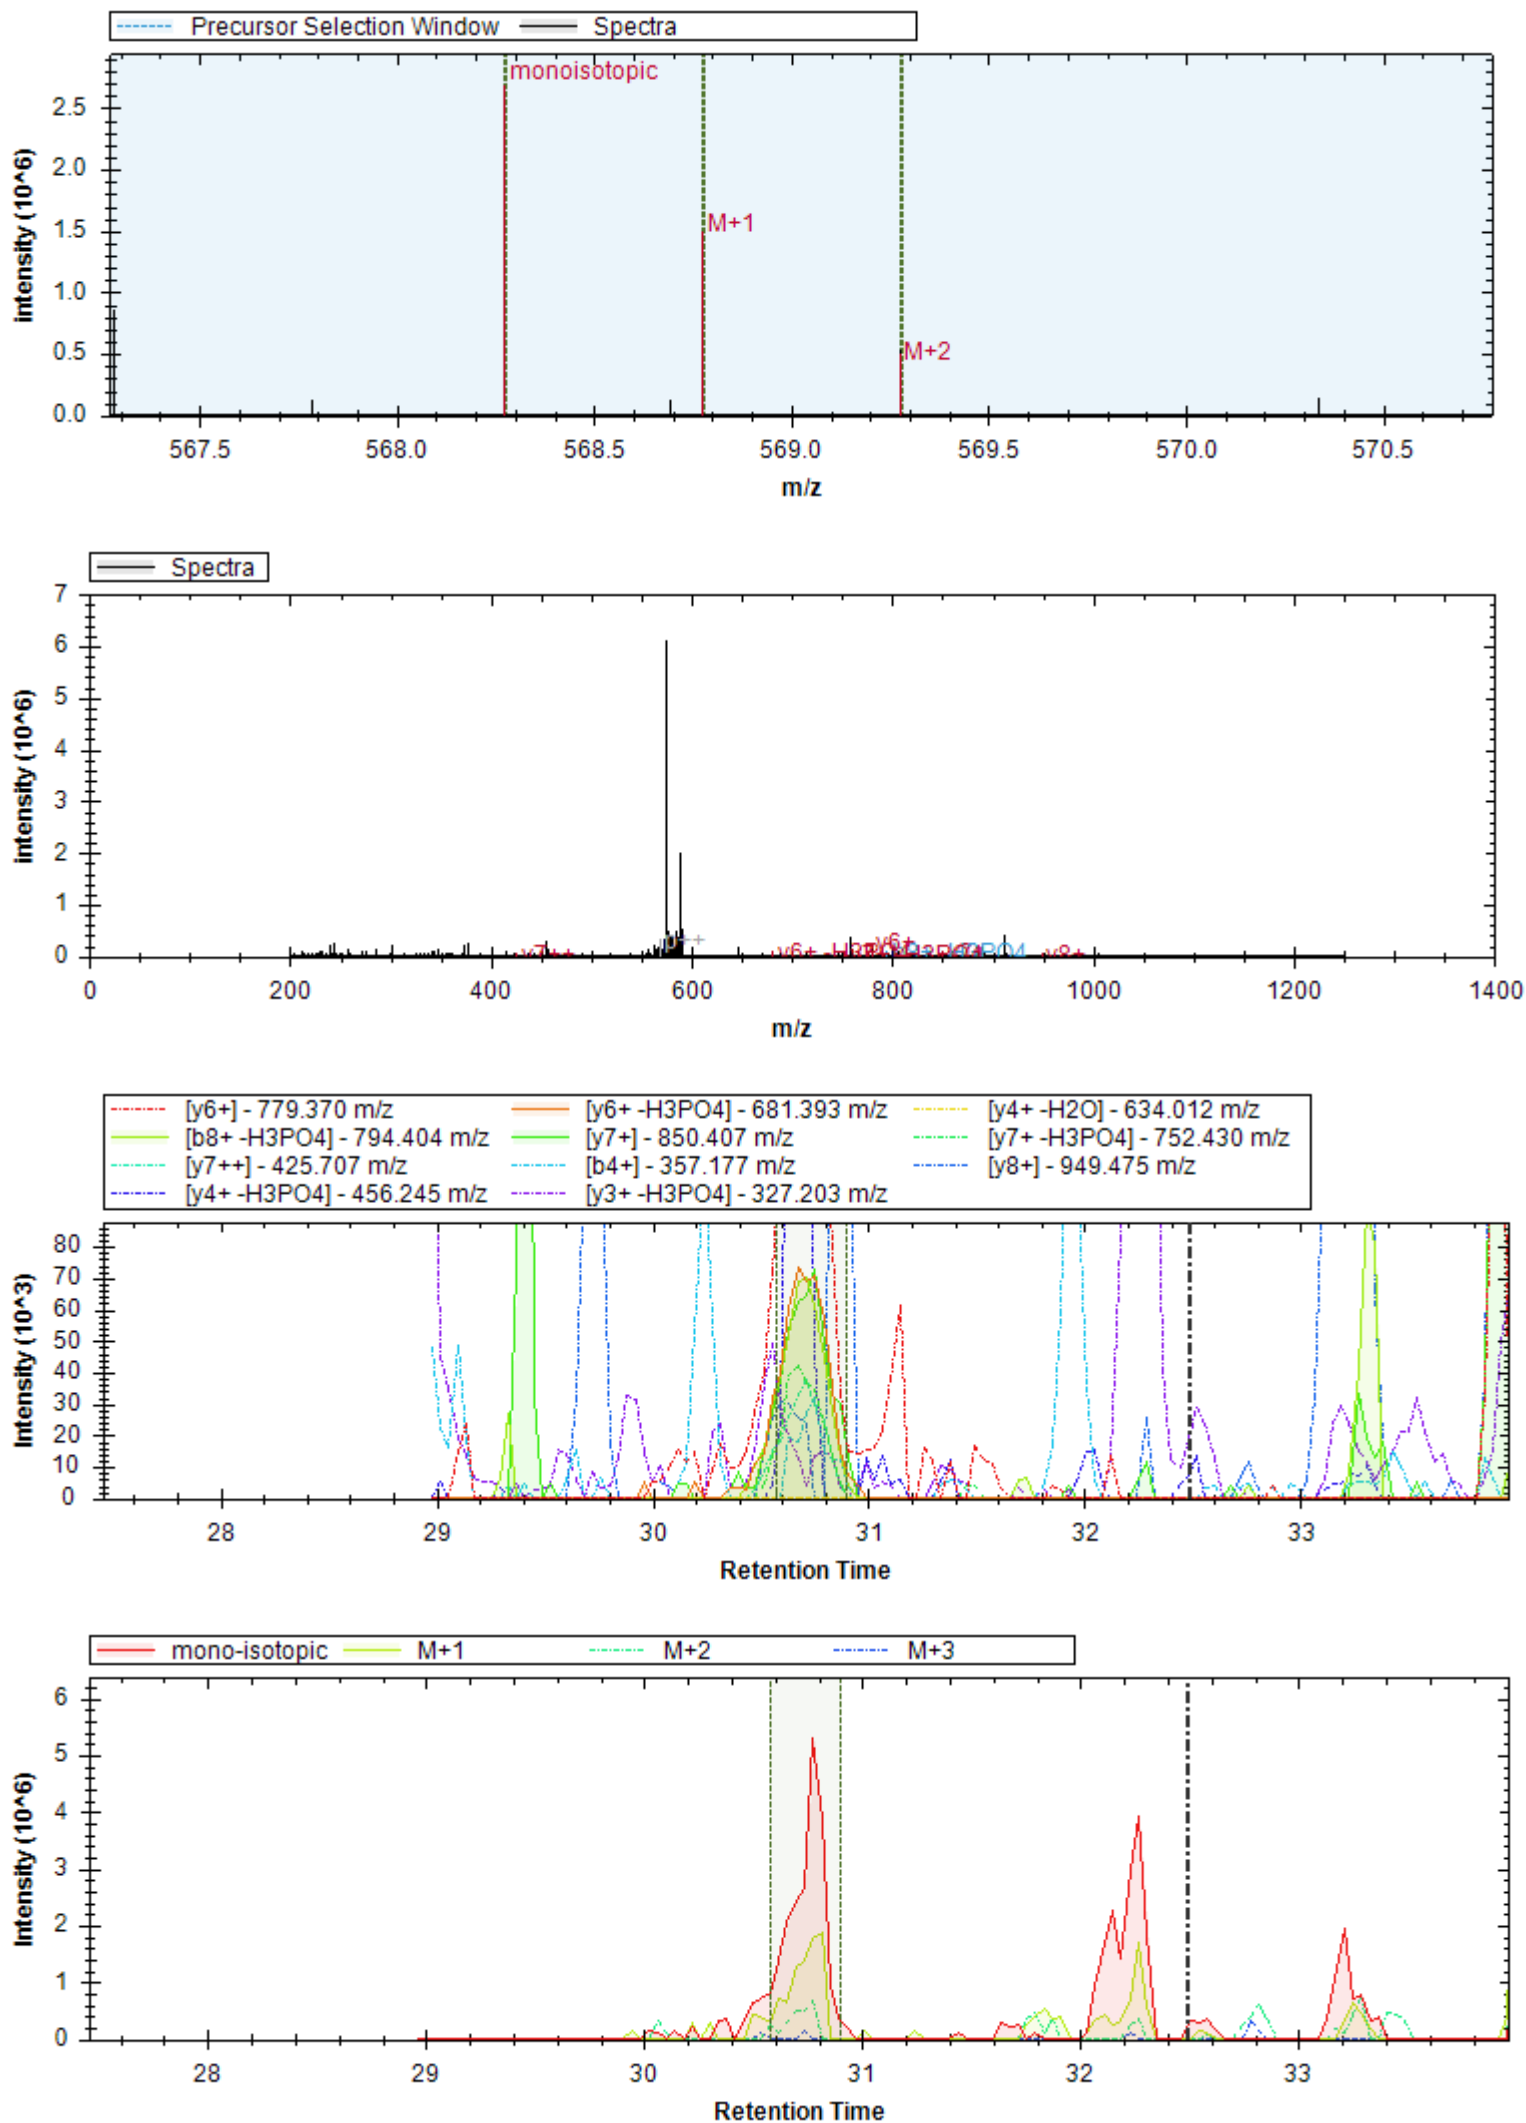



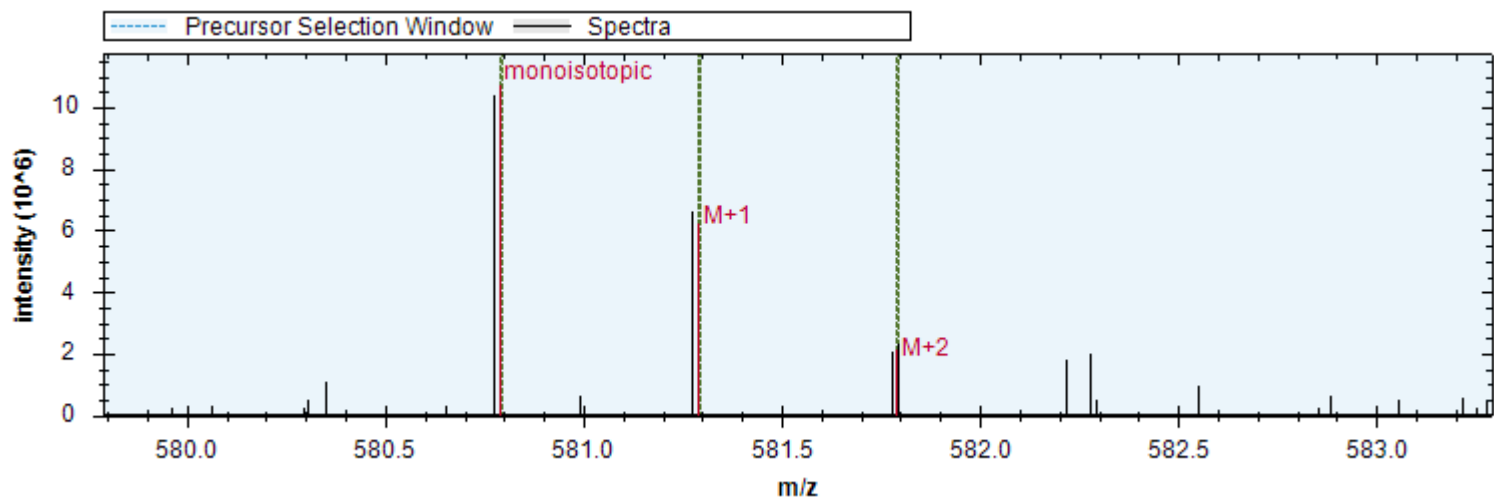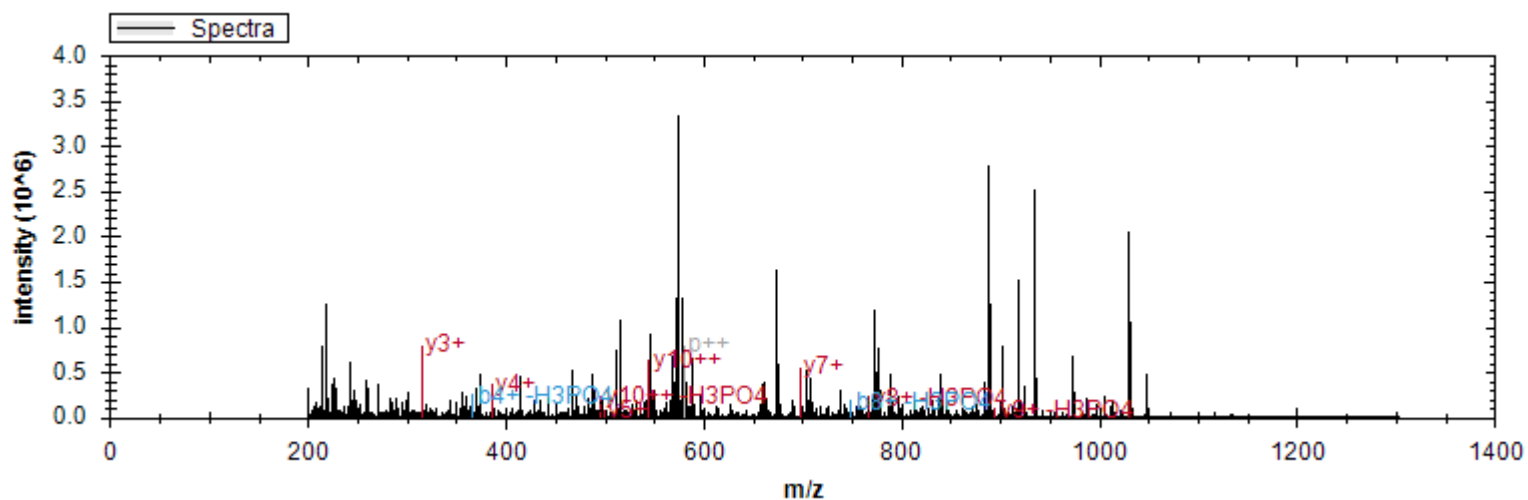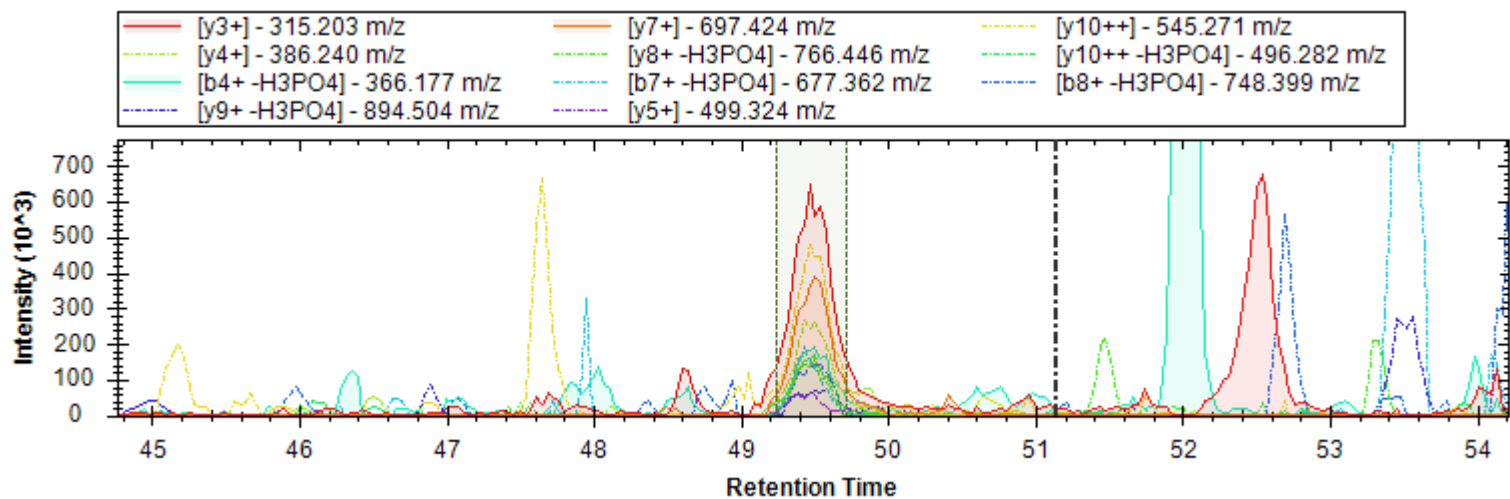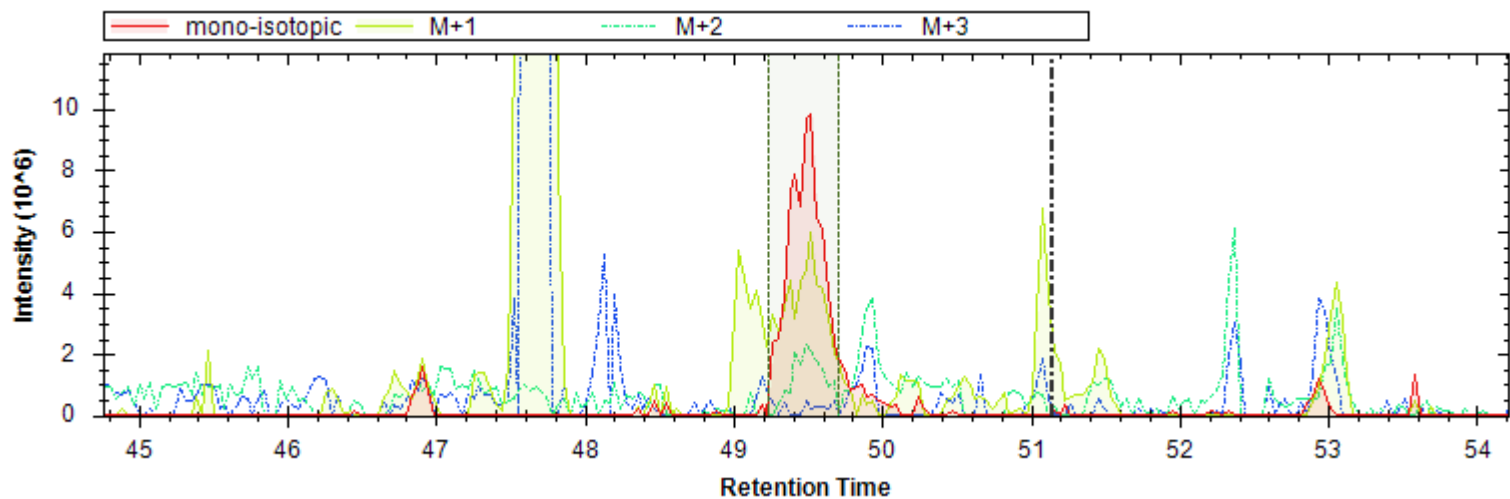

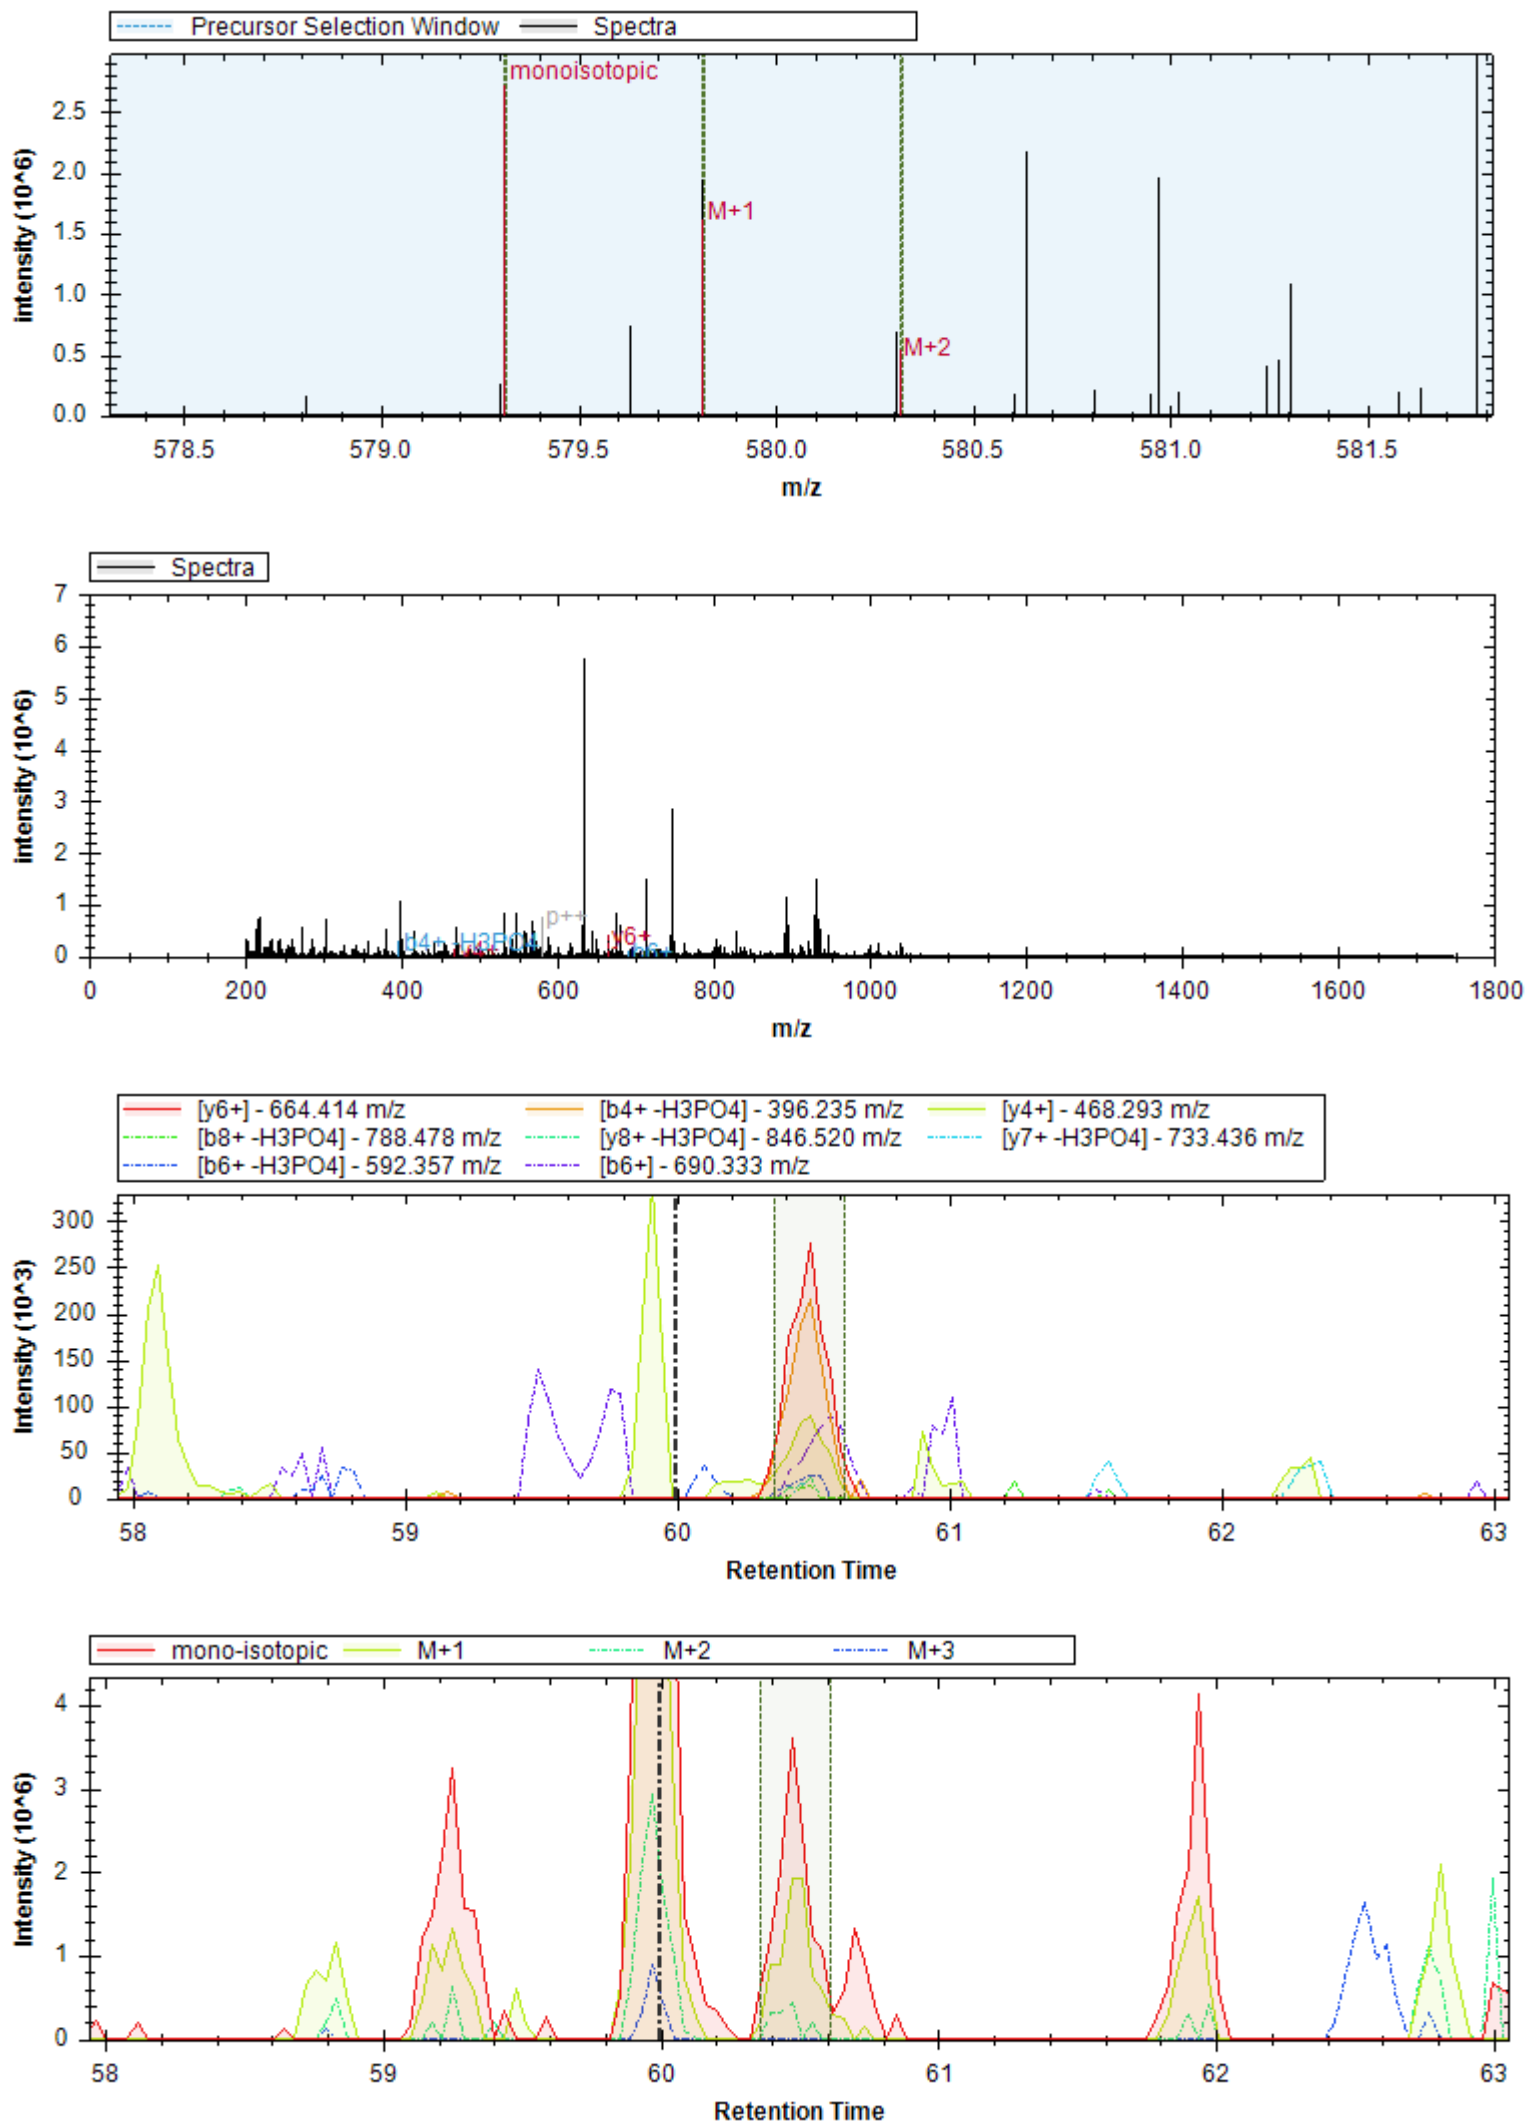

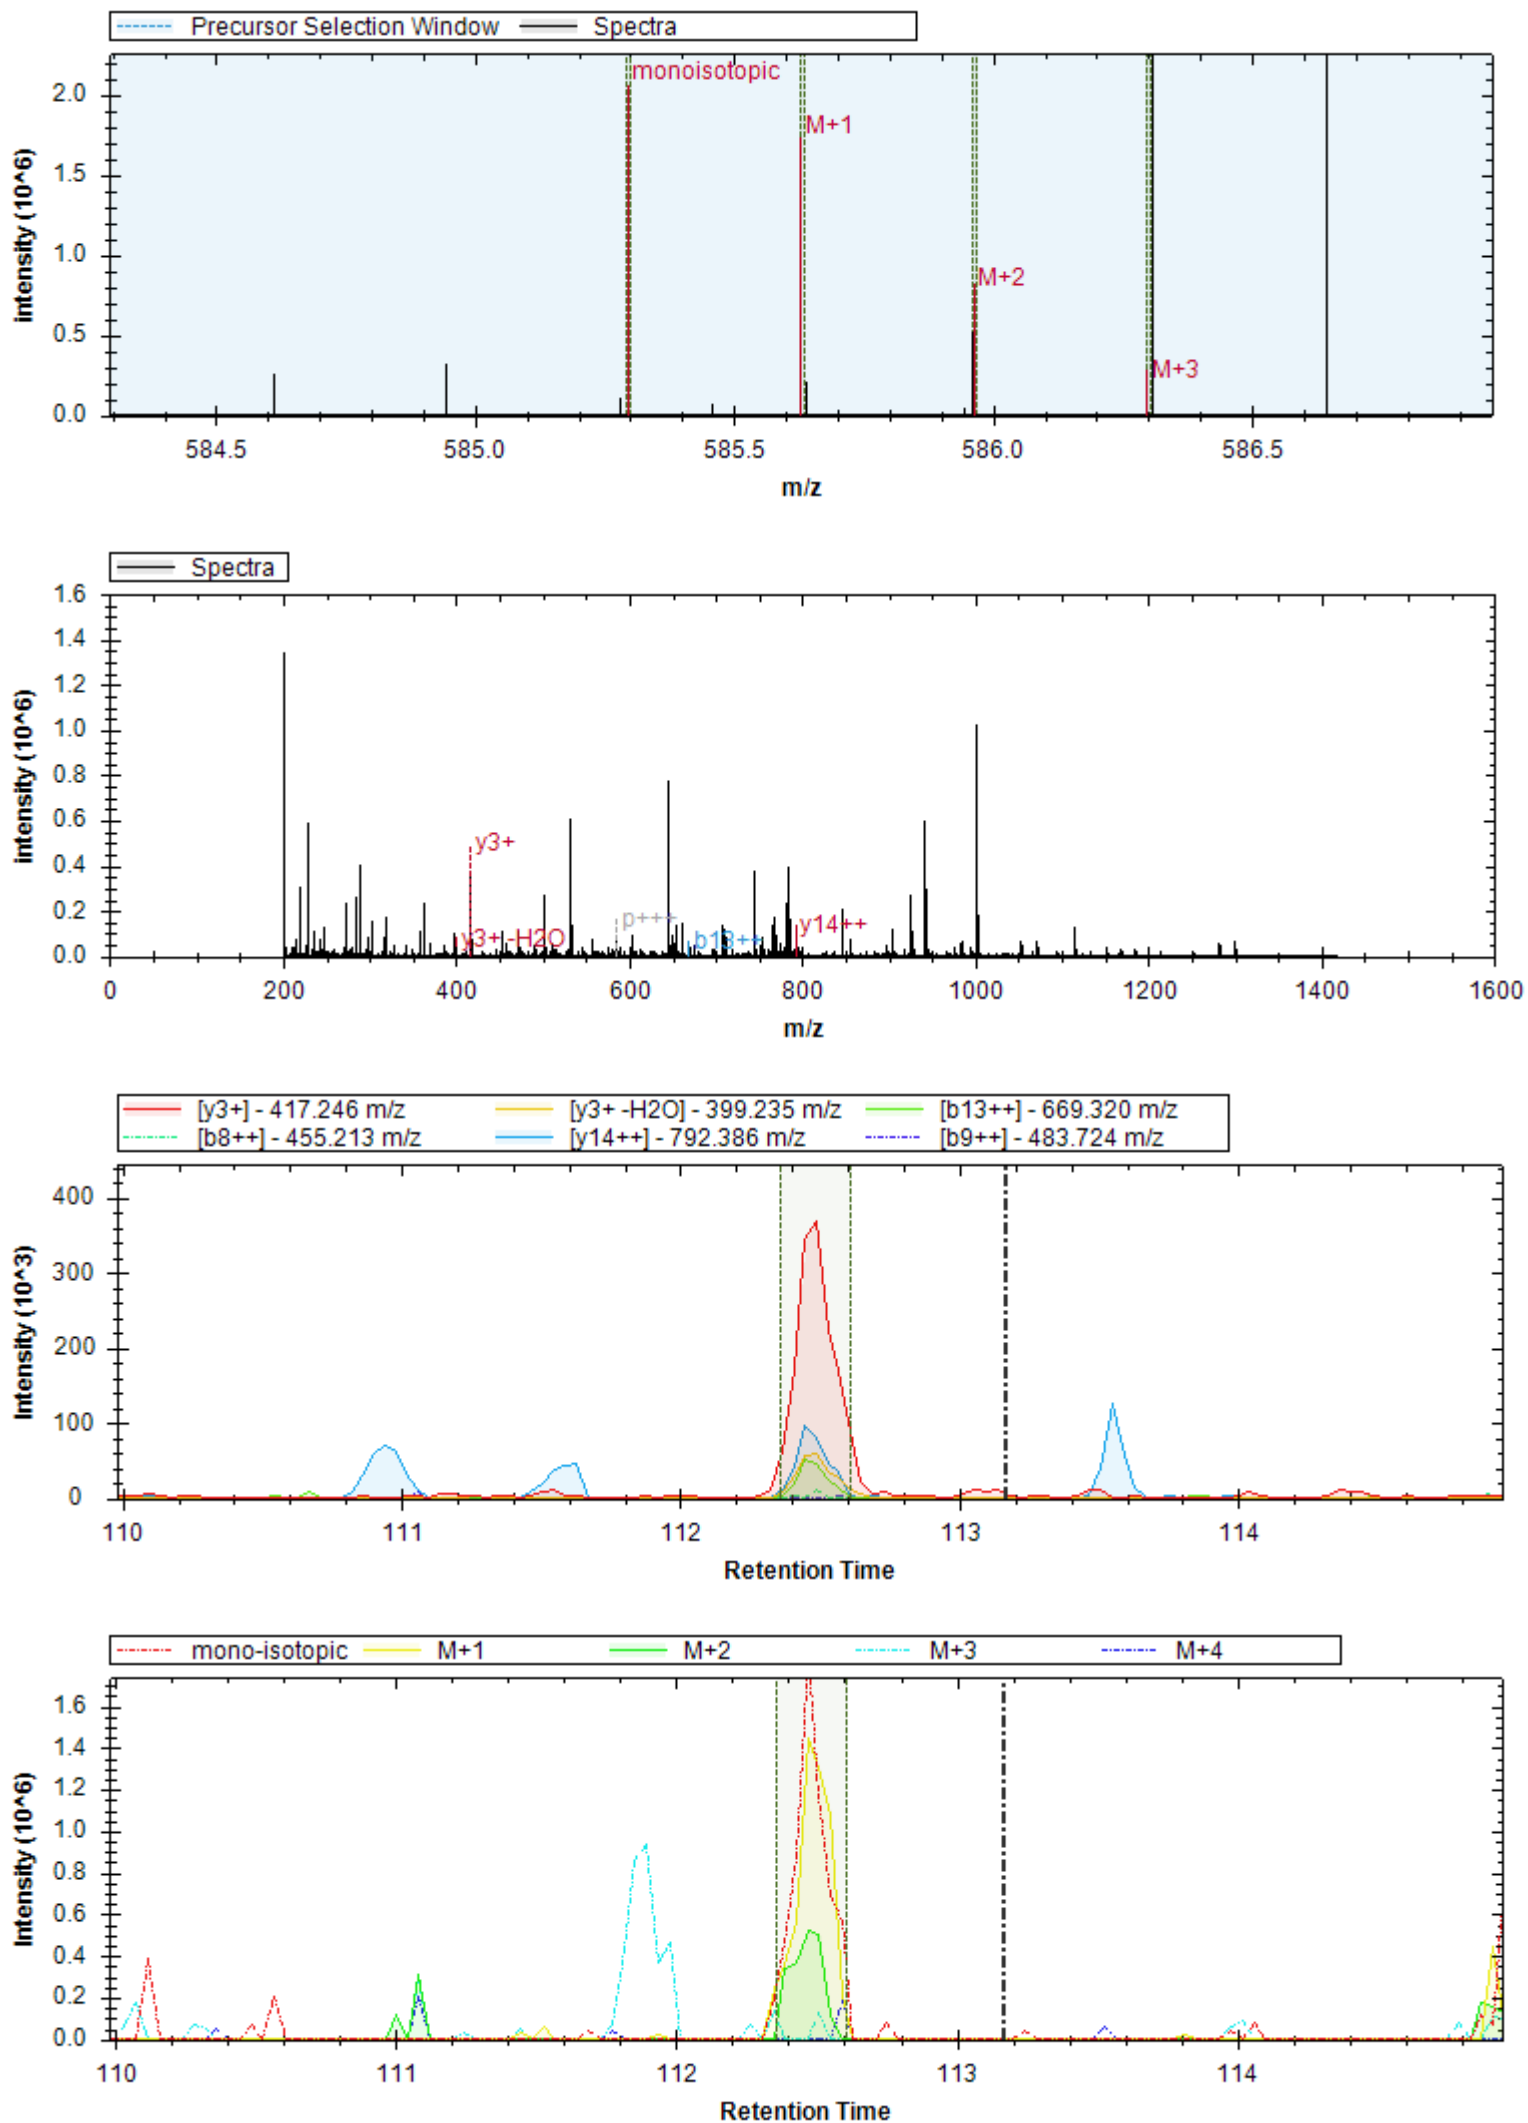

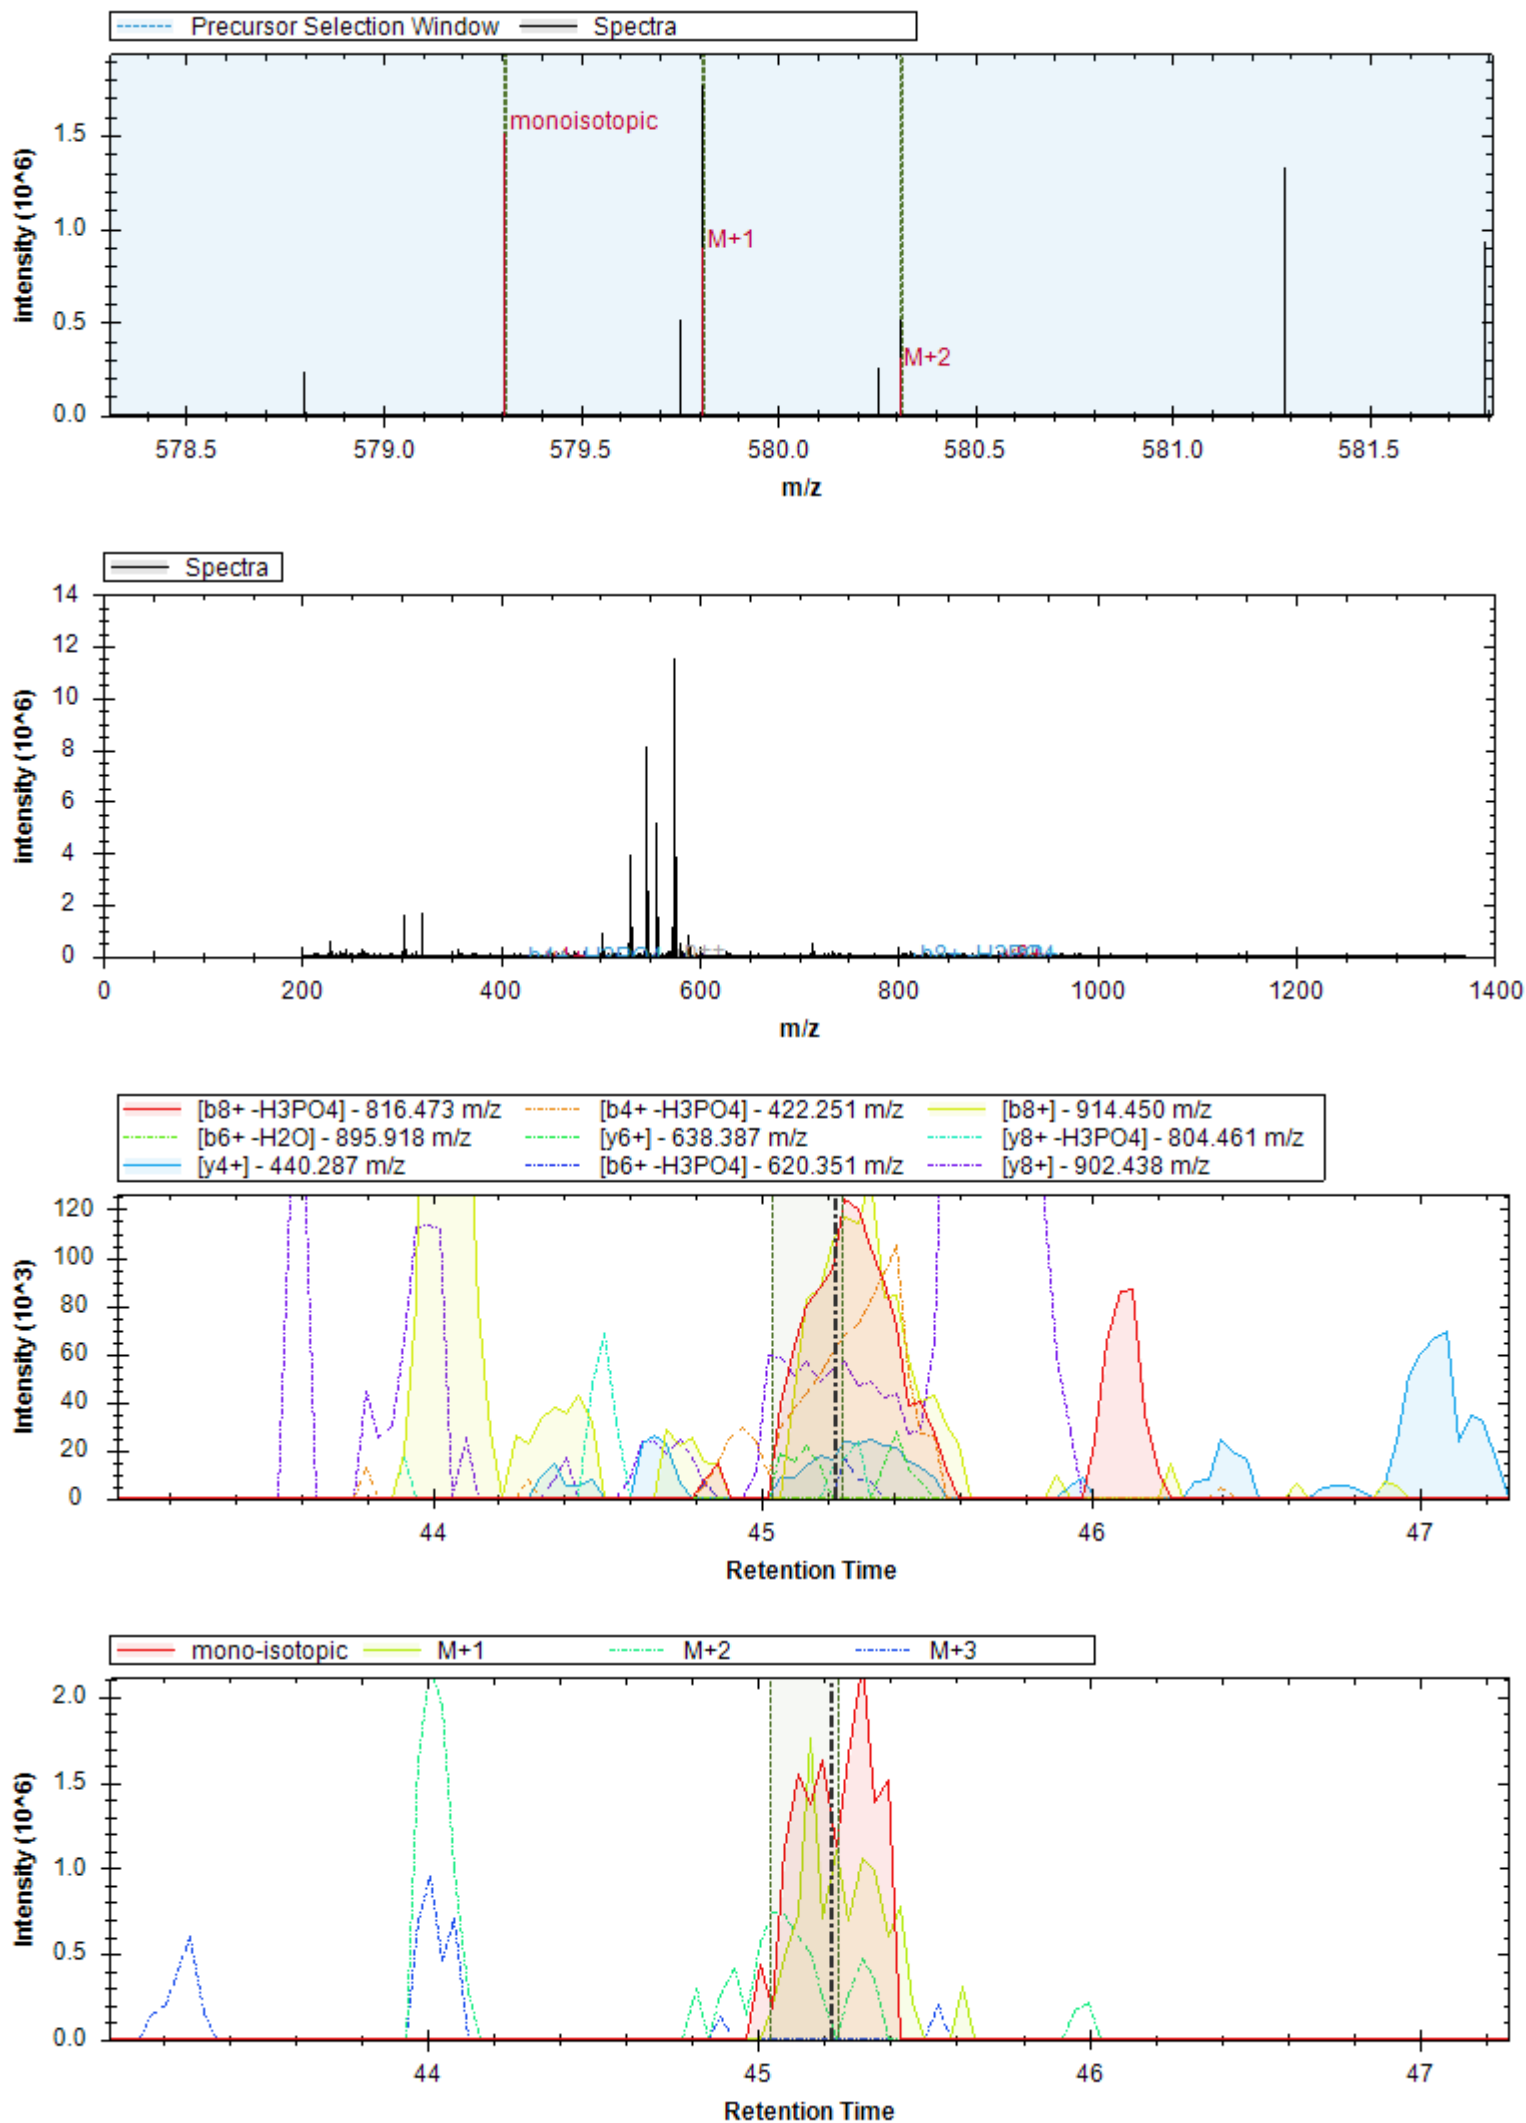

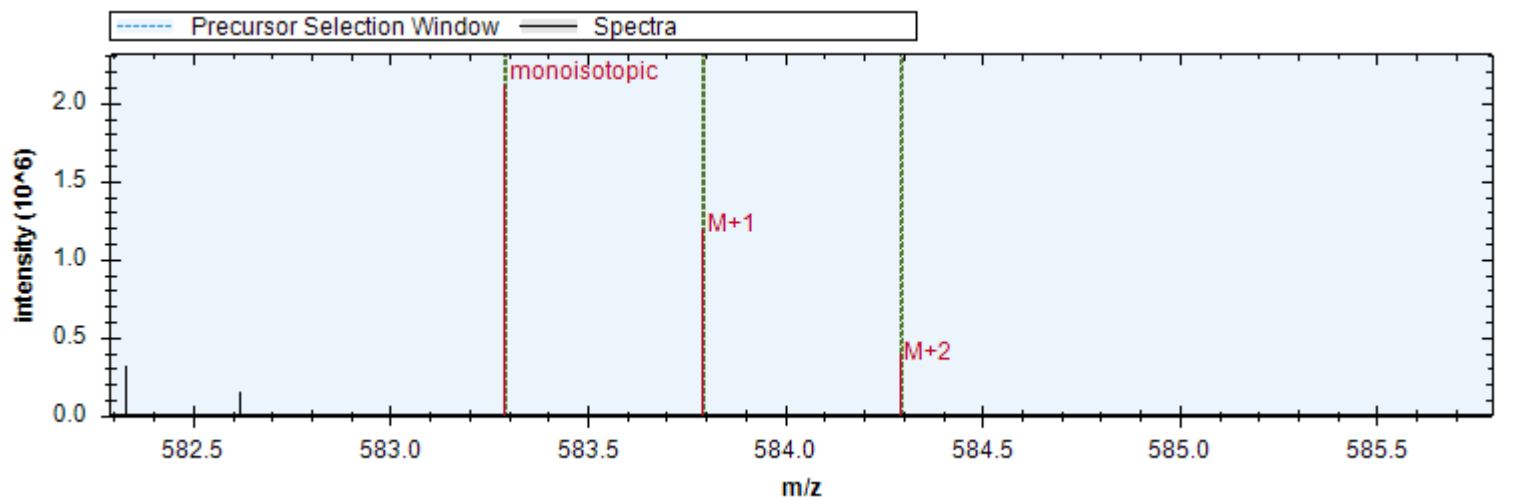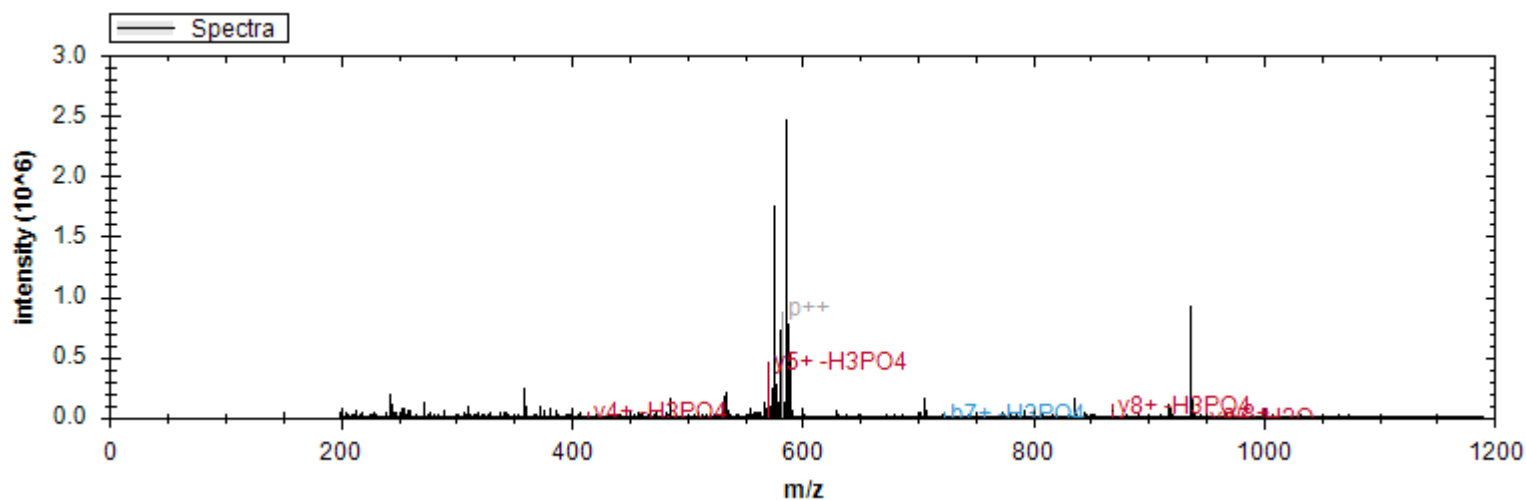

|                             |                            |                            |
|-----------------------------|----------------------------|----------------------------|
| [y8+ -H3PO4] - 868.500 m/z  | [b7+ -H3PO4] - 723.390 m/z | [y3+] - 345.213 m/z        |
| [y8+] - 966.477 m/z         | [y6+ -H3PO4] - 683.420 m/z | [y5+ -H3PO4] - 570.336 m/z |
| [y9++ -H3PO4] - 498.783 m/z | [b4+] - 385.183 m/z        | [b6+] - 654.368 m/z        |
| [y5+] - 668.313 m/z         | [b9+ -H3PO4] - 921.490 m/z | [y8+ -H2O] - 948.466 m/z   |
| [y7+ -H3PO4] - 811.479 m/z  | [b9+ -NH3] - 1100.240 m/z  | [y4+ -H3PO4] - 414.235 m/z |

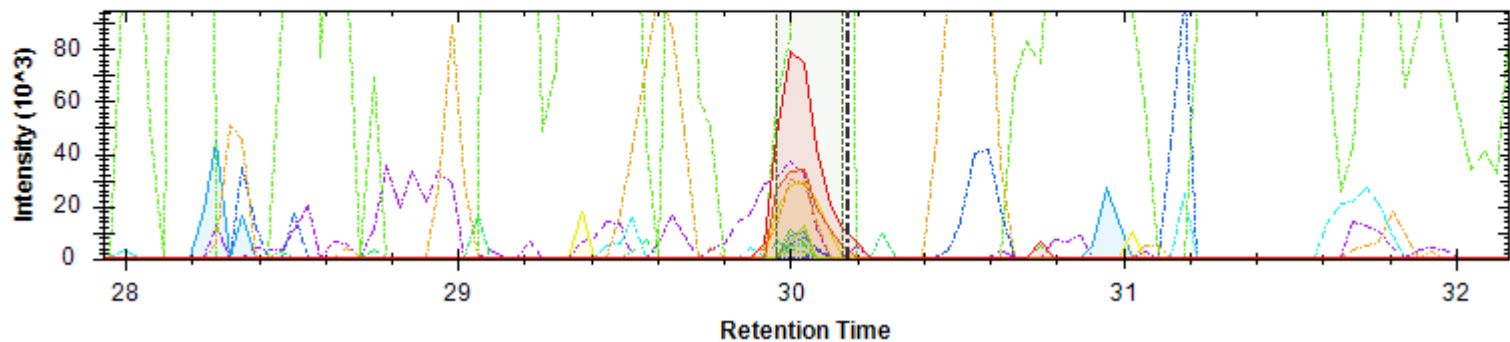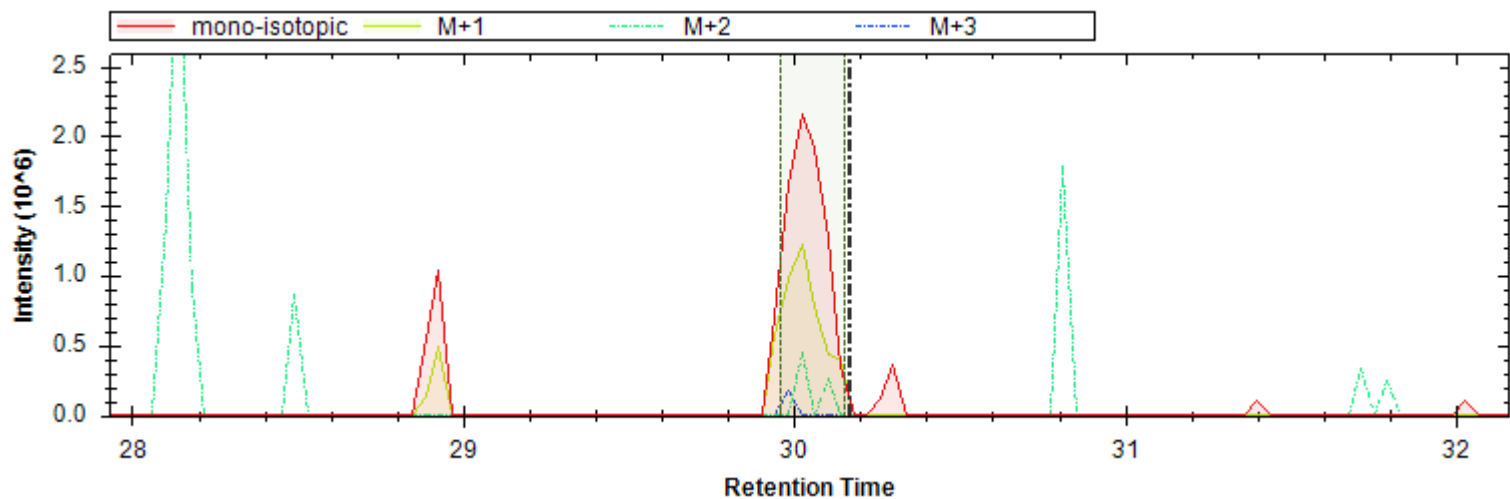

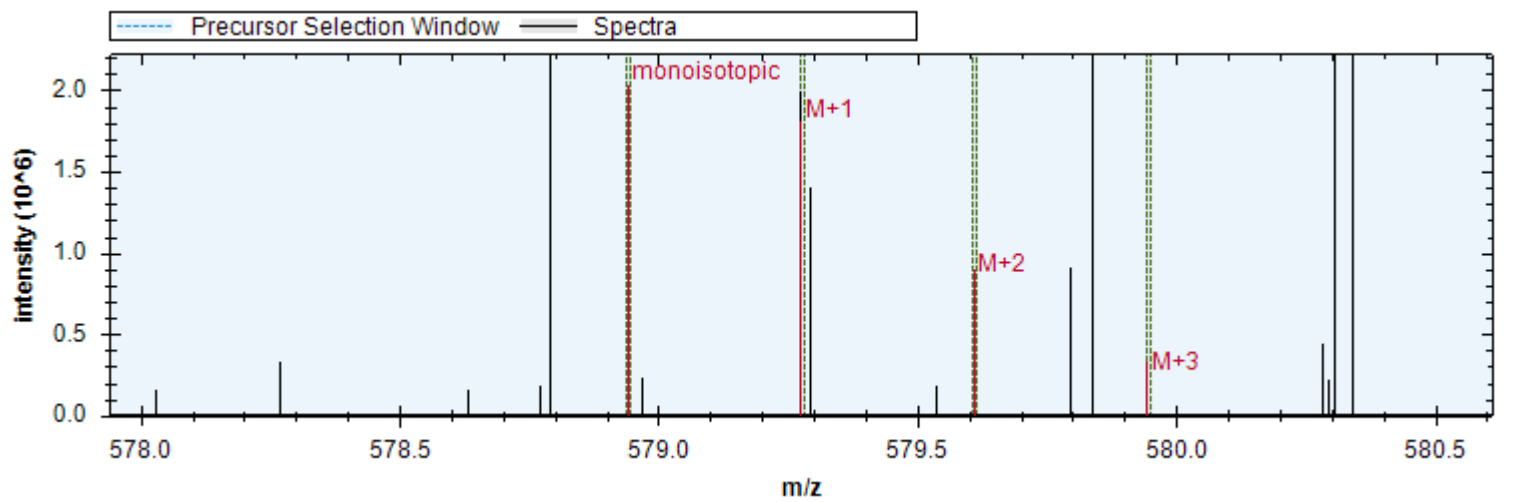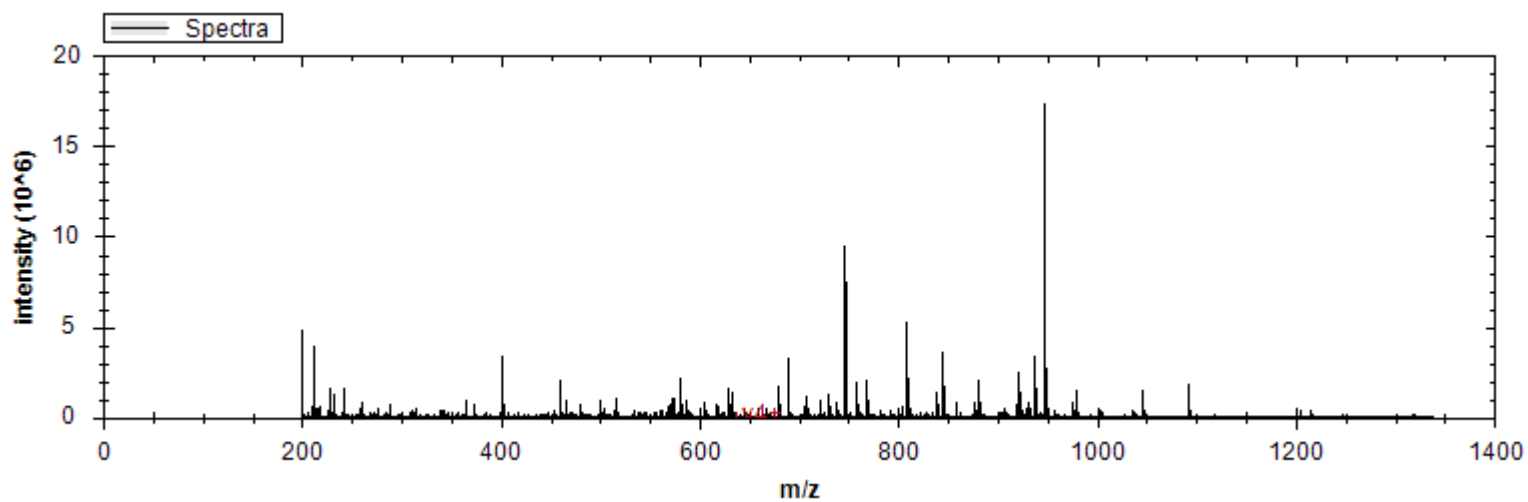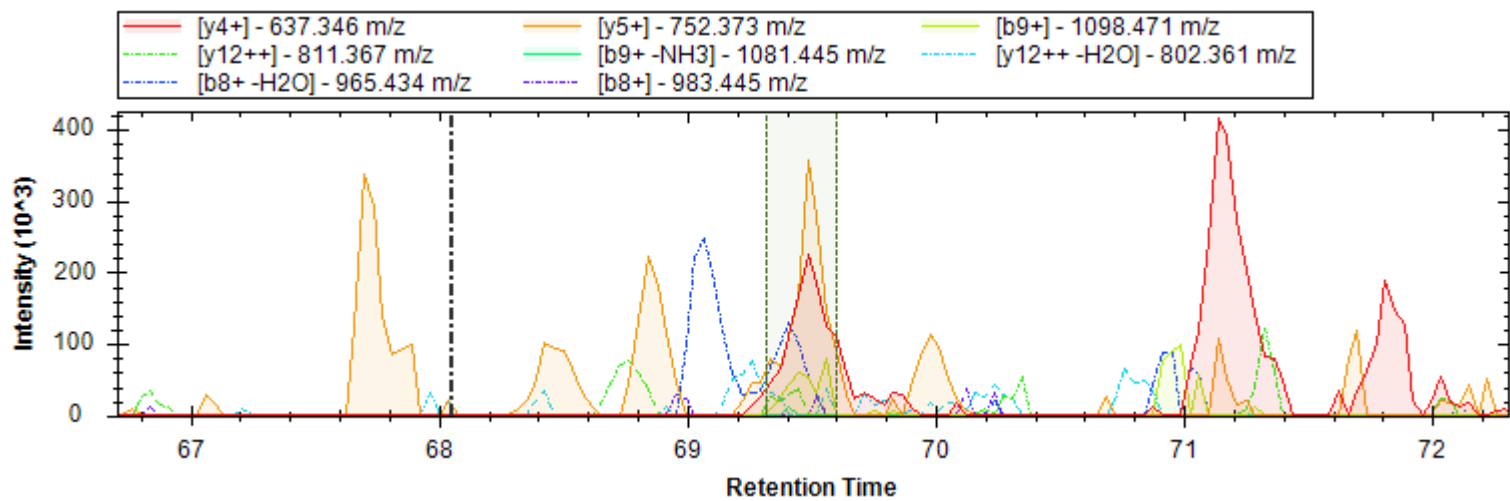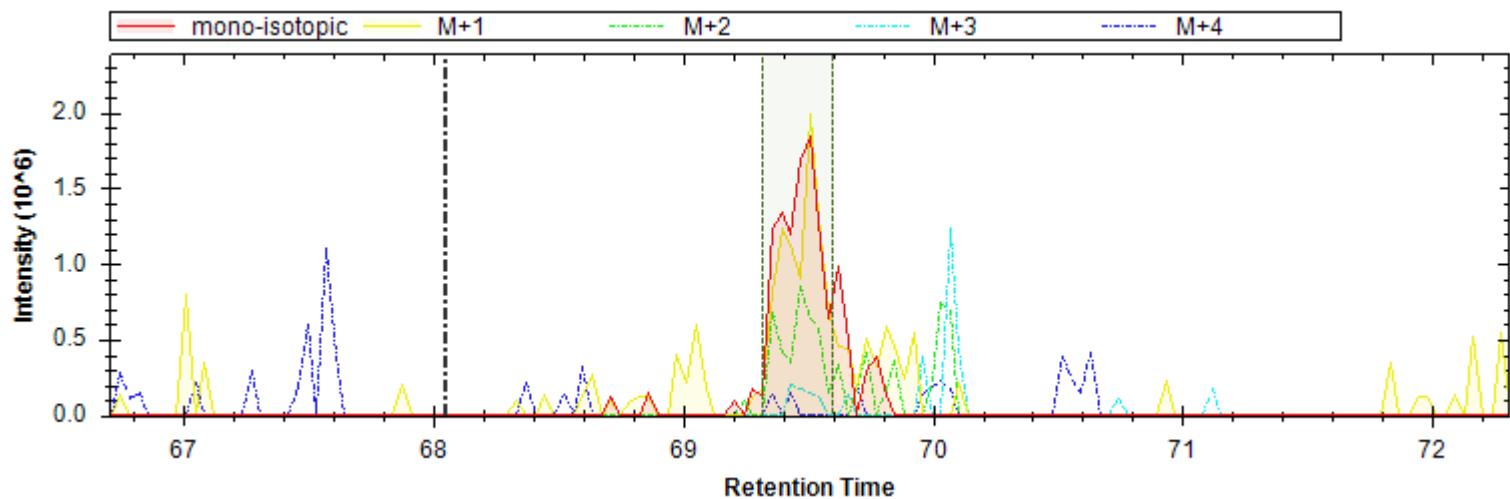

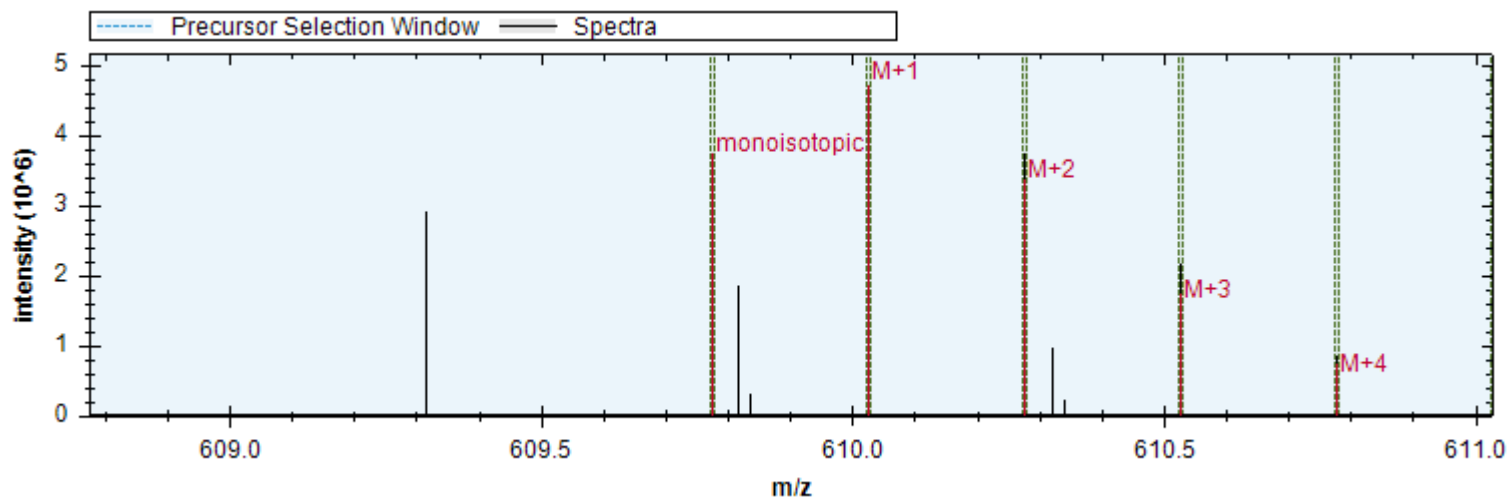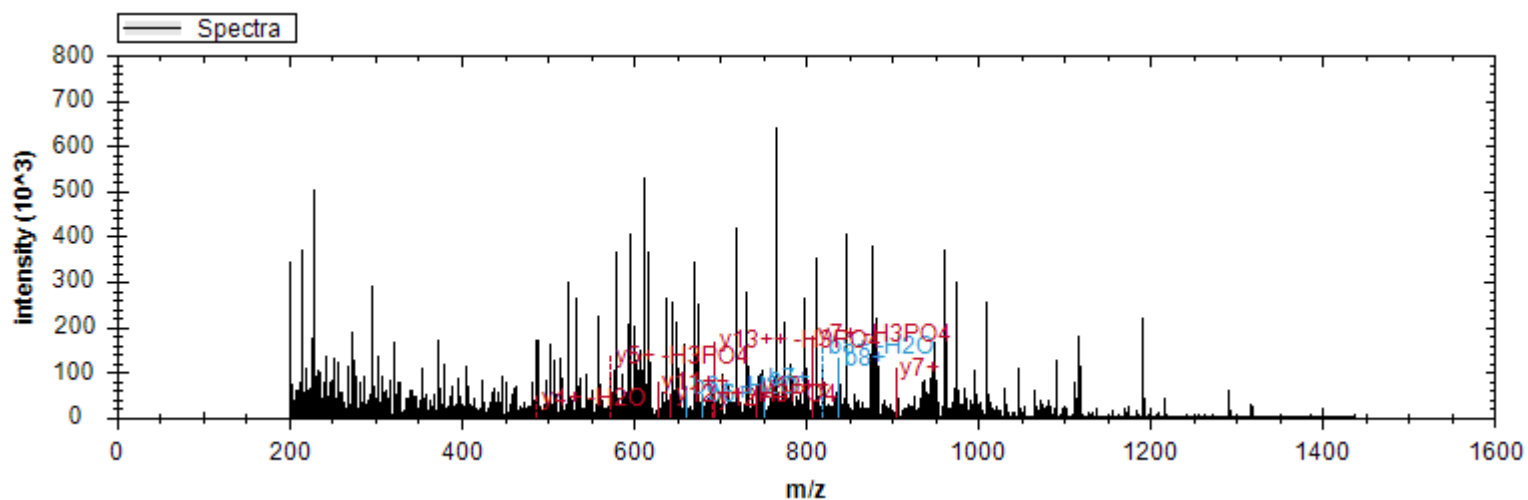

|                              |                              |                              |
|------------------------------|------------------------------|------------------------------|
| [y7+ -H3PO4] - 807.382 m/z   | [y13++ -H3PO4] - 694.325 m/z | [b8+ -H2O] - 820.374 m/z     |
| [y4+] - 504.249 m/z          | [b8+] - 838.384 m/z          | [y7+] - 905.359 m/z          |
| [y11++ -H3PO4] - 579.280 m/z | [y5+ -H3PO4] - 573.270 m/z   | [y12++ -H3PO4] - 643.801 m/z |
| [y11++] - 628.268 m/z        | [y13++] - 743.313 m/z        | [b7+] - 751.352 m/z          |
| [b9++] - 476.238 m/z         | [y6+ -H3PO4] - 710.329 m/z   | [b6+ -H2O] - 662.305 m/z     |
| [y12++] - 692.789 m/z        | [b9+ -H2O] - 933.458 m/z     | [b7+ -H2O] - 733.342 m/z     |
| [b6+] - 680.315 m/z          | [y5+ -NH3] - 752.020 m/z     | [y4+ -H2O] - 486.238 m/z     |
| [b5+] - 593.283 m/z          | [y7++] - 453.183 m/z         | [b3+] - 306.156 m/z          |
| [y10++] - 592.750 m/z        |                              |                              |

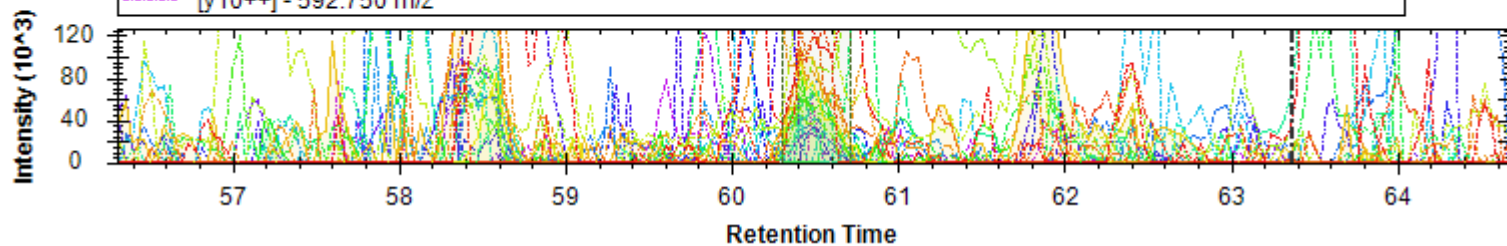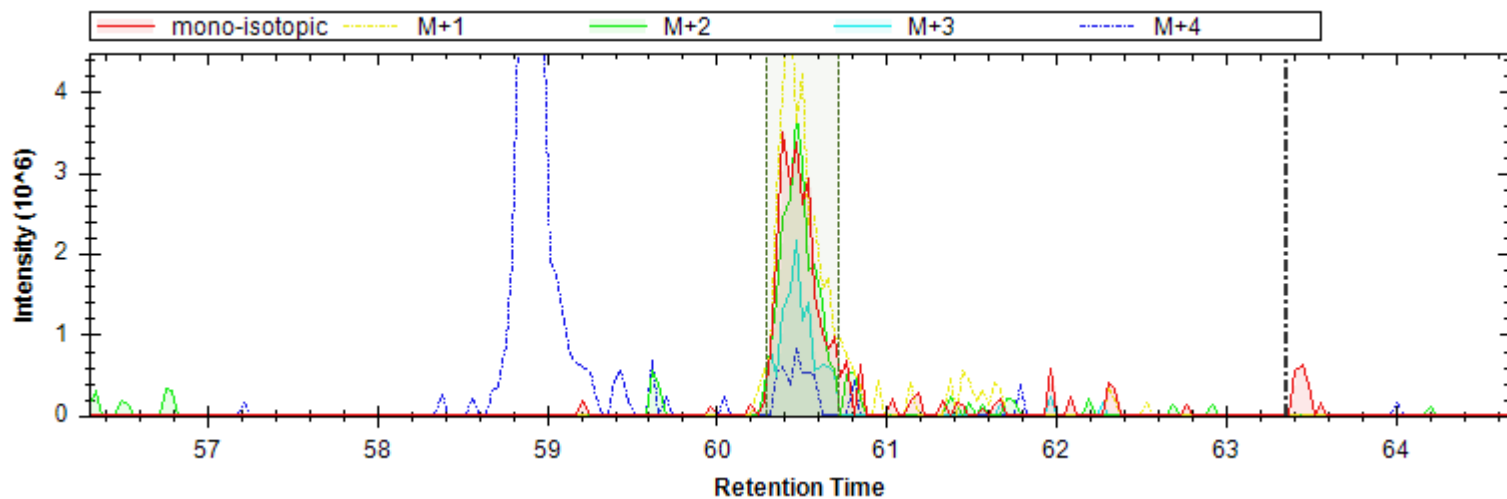

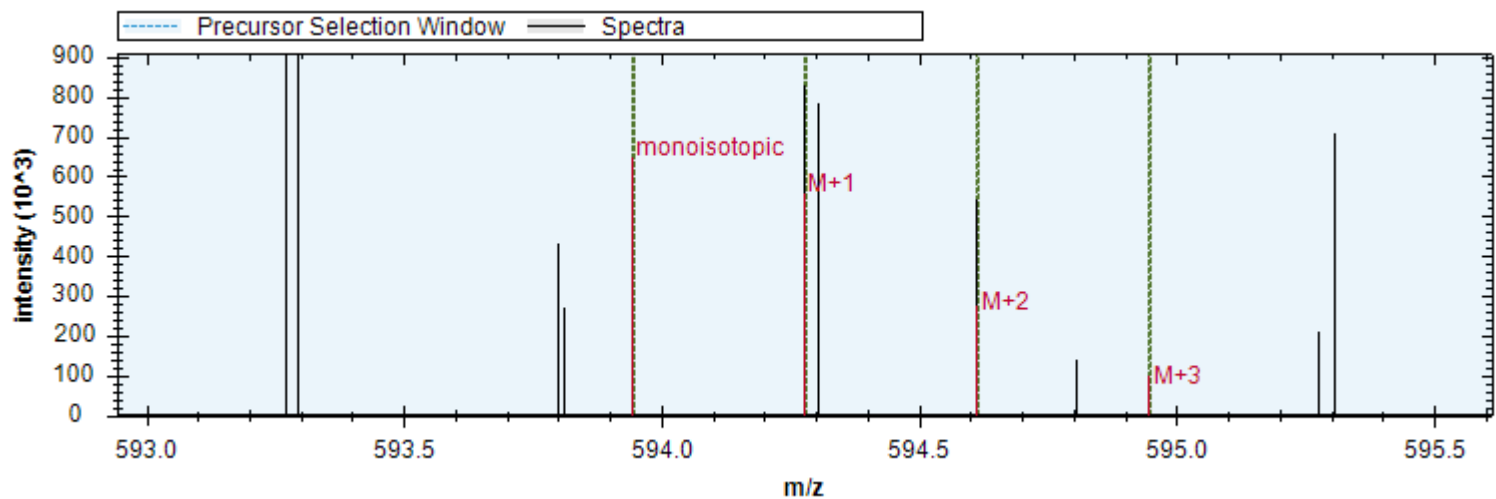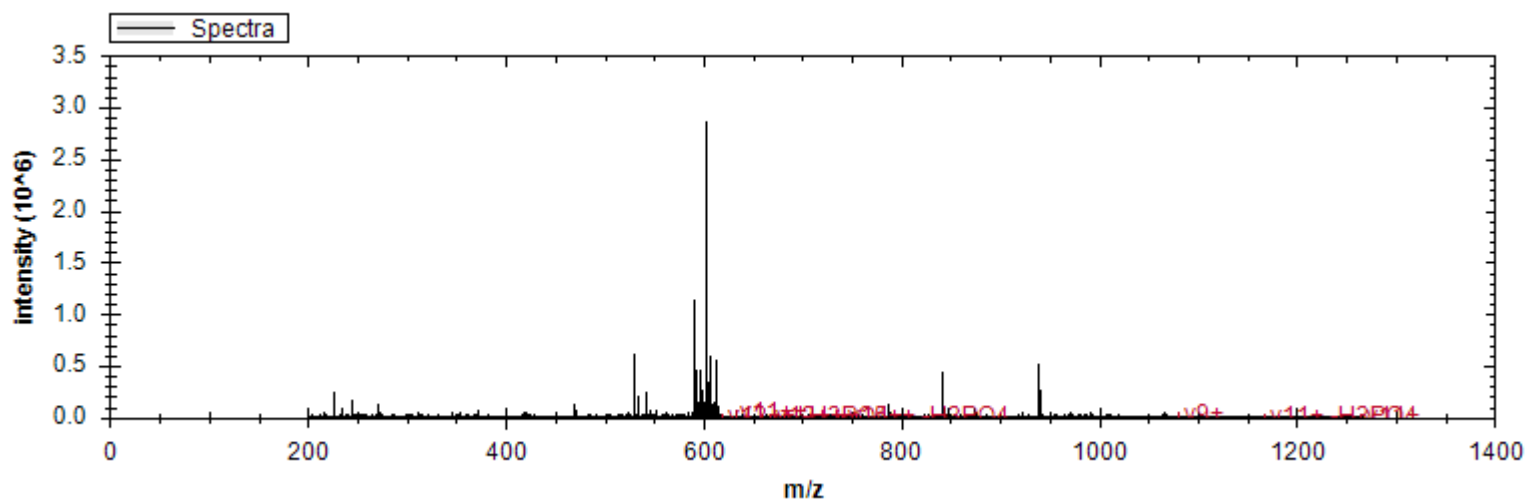

- |                              |                              |                              |
|------------------------------|------------------------------|------------------------------|
| [y9+] - 1081.529 m/z         | [y11++] - 633.311 m/z        | [y4+] - 500.356 m/z          |
| [y11+] - 1265.614 m/z        | [y12++ -H3PO4] - 619.841 m/z | [y11+ -H3PO4] - 1167.637 m/z |
| [b4+ -H2O] - 355.125 m/z     | [y9+ -H3PO4] - 983.552 m/z   | [b3+] - 316.114 m/z          |
| [y15++ -H3PO4] - 741.383 m/z | [y10+ -H3PO4] - 1070.584 m/z | [y12++] - 668.829 m/z        |
| [y7+] - 897.444 m/z          | [y11++ -H2O] - 624.305 m/z   | [y15++] - 790.372 m/z        |
| [y14++ -H3PO4] - 683.870 m/z | [b6+] - 515.210 m/z          |                              |

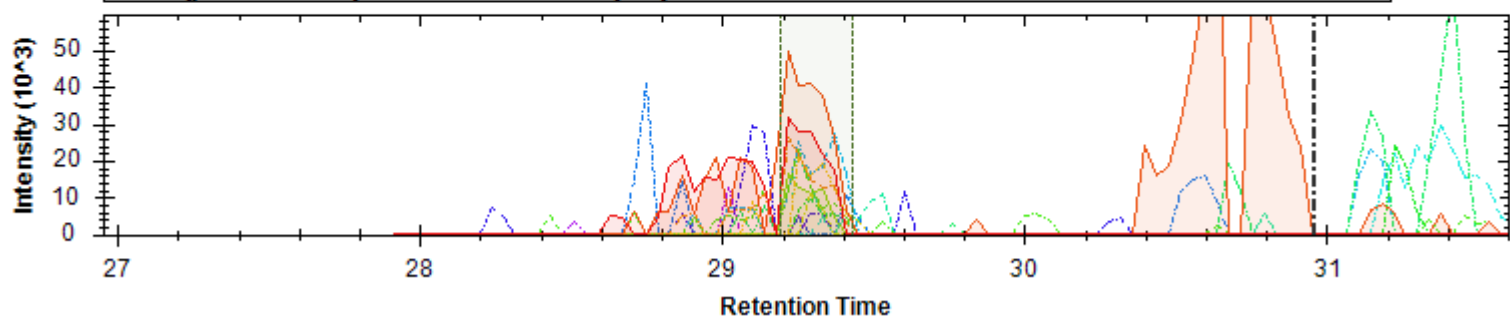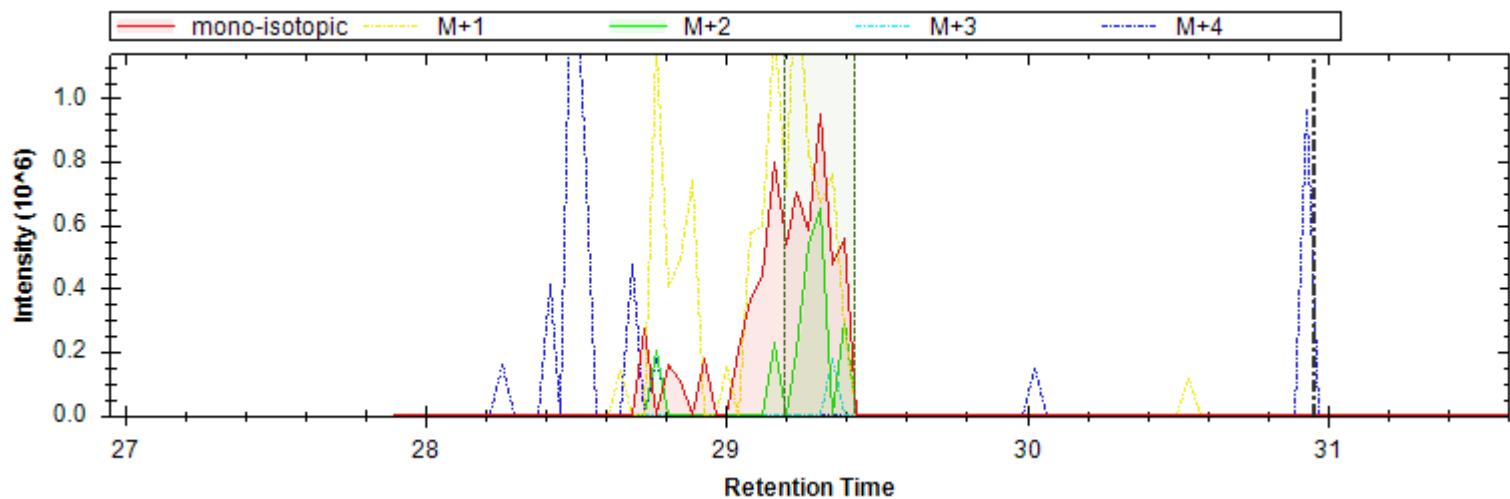



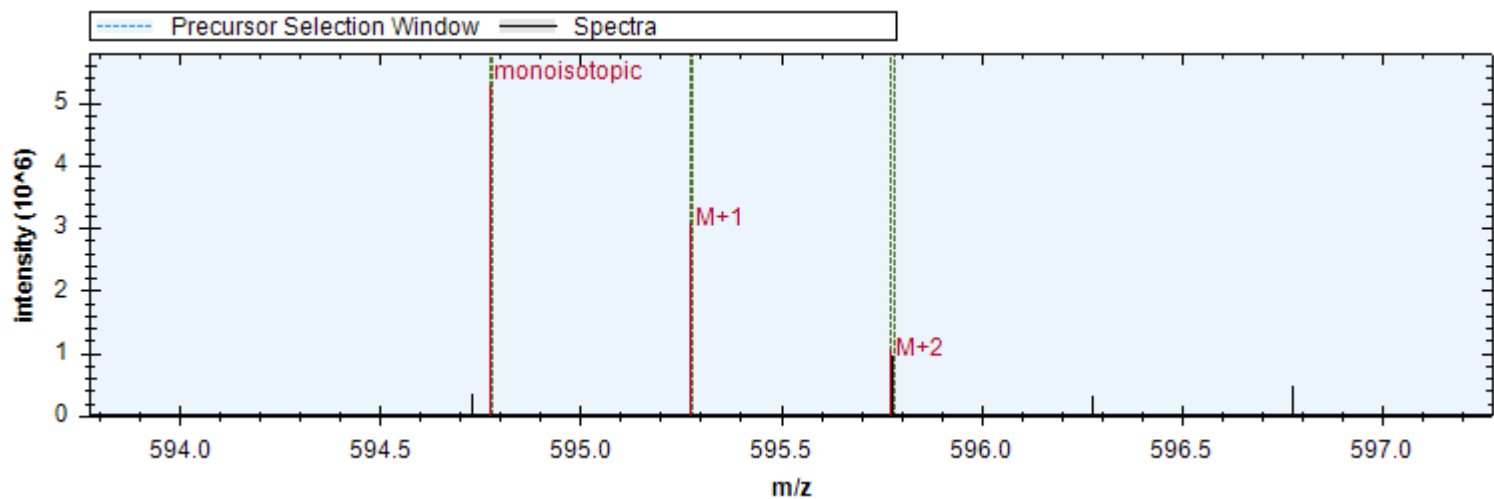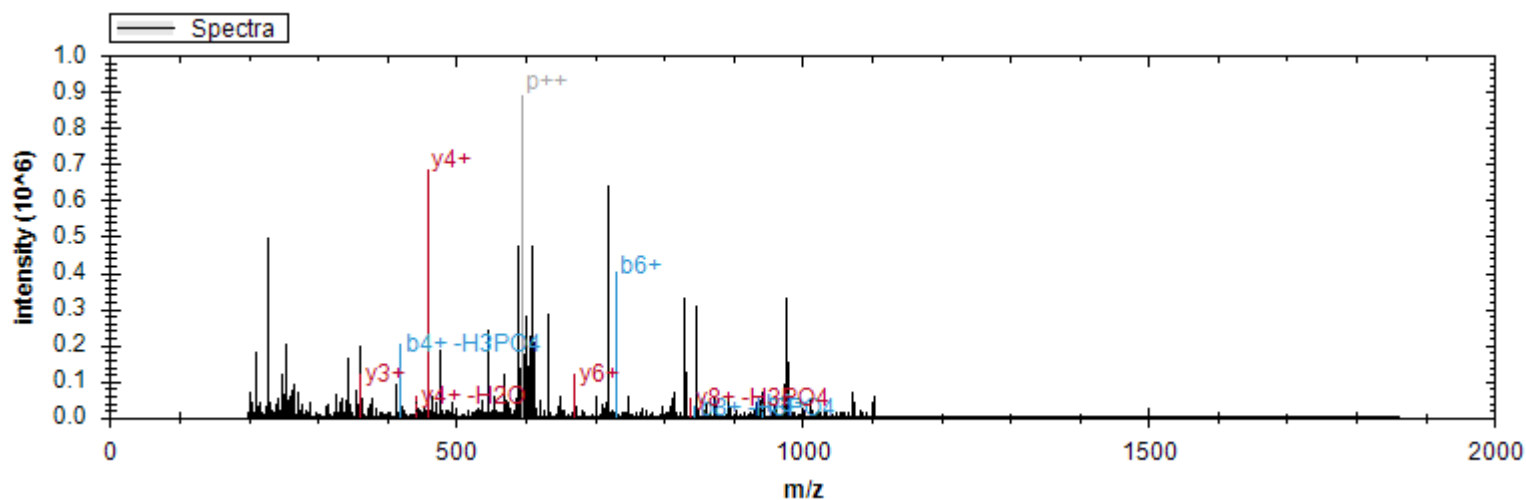

|                            |                            |                          |
|----------------------------|----------------------------|--------------------------|
| [y4+] - 459.256 m/z        | [b6+ -H3PO4] - 632.315 m/z | [b6+] - 730.292 m/z      |
| [b4+ -H3PO4] - 420.235 m/z | [y6+] - 671.336 m/z        | [y4+ -NH3] - 442.230 m/z |
| [y4+ -H2O] - 441.246 m/z   | [b8+ -H3PO4] - 843.411 m/z | [y3+] - 362.203 m/z      |
| [b4+ -H2O] - 598.002 m/z   | [y7+ -H3PO4] - 740.357 m/z | [b8+] - 941.388 m/z      |
| [b9+ -H3PO4] - 944.458 m/z | [y8+ -H3PO4] - 837.410 m/z |                          |

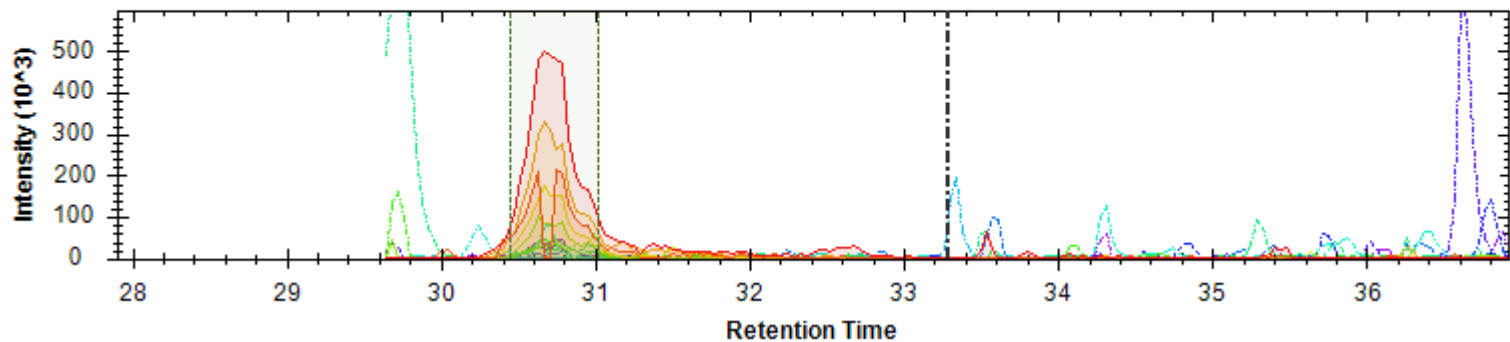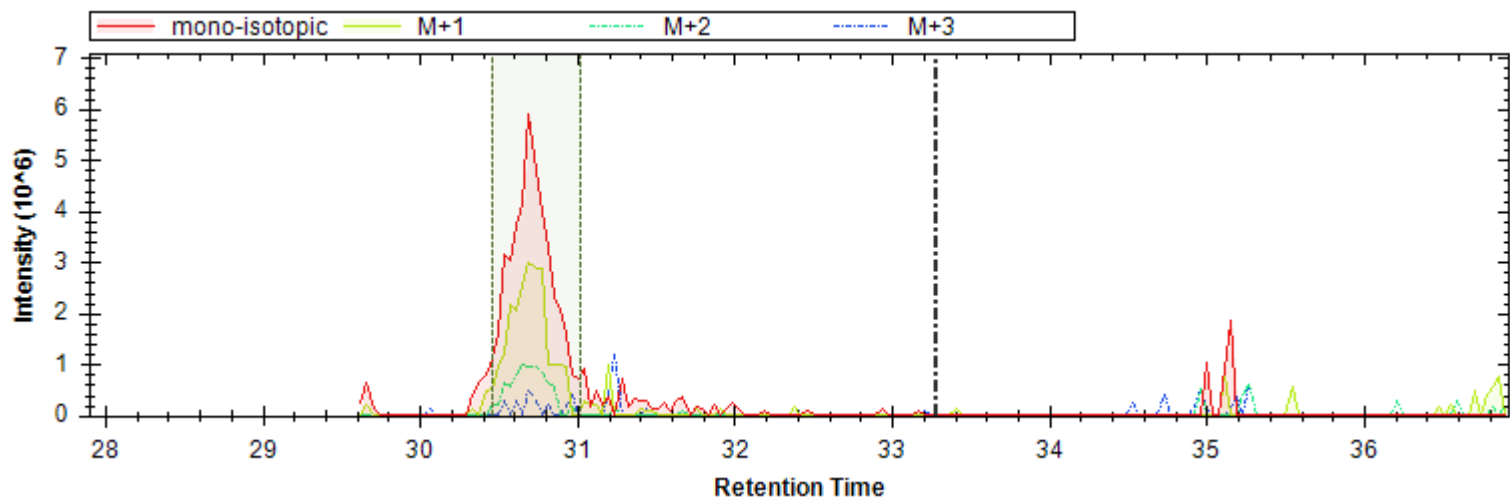

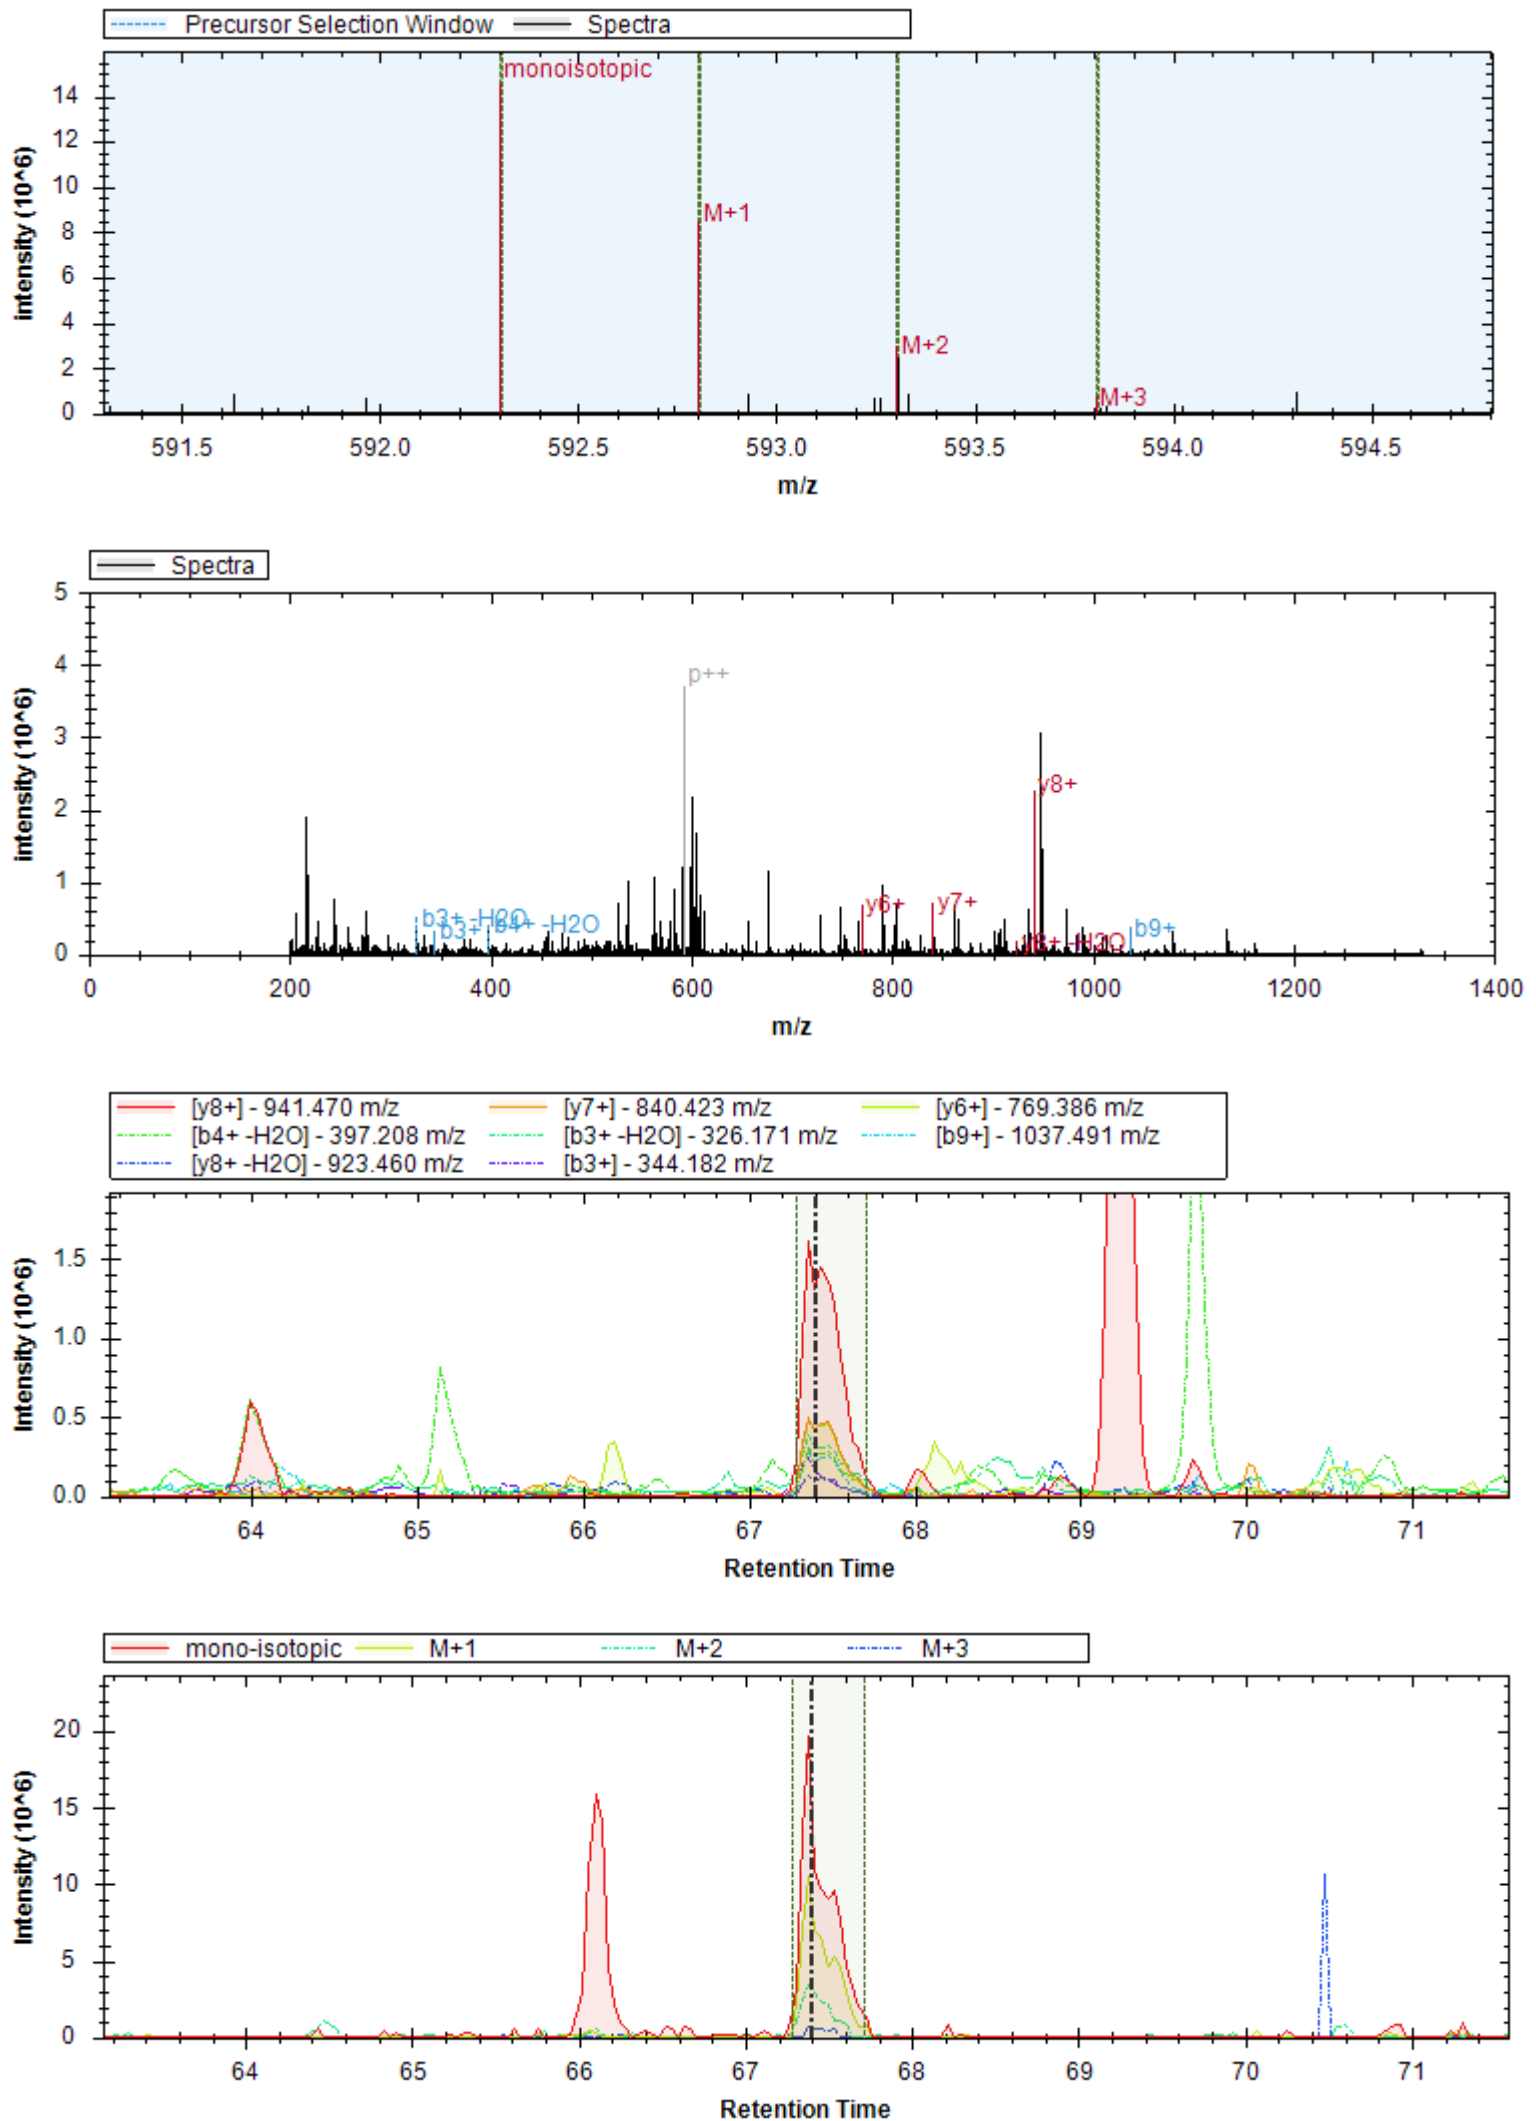

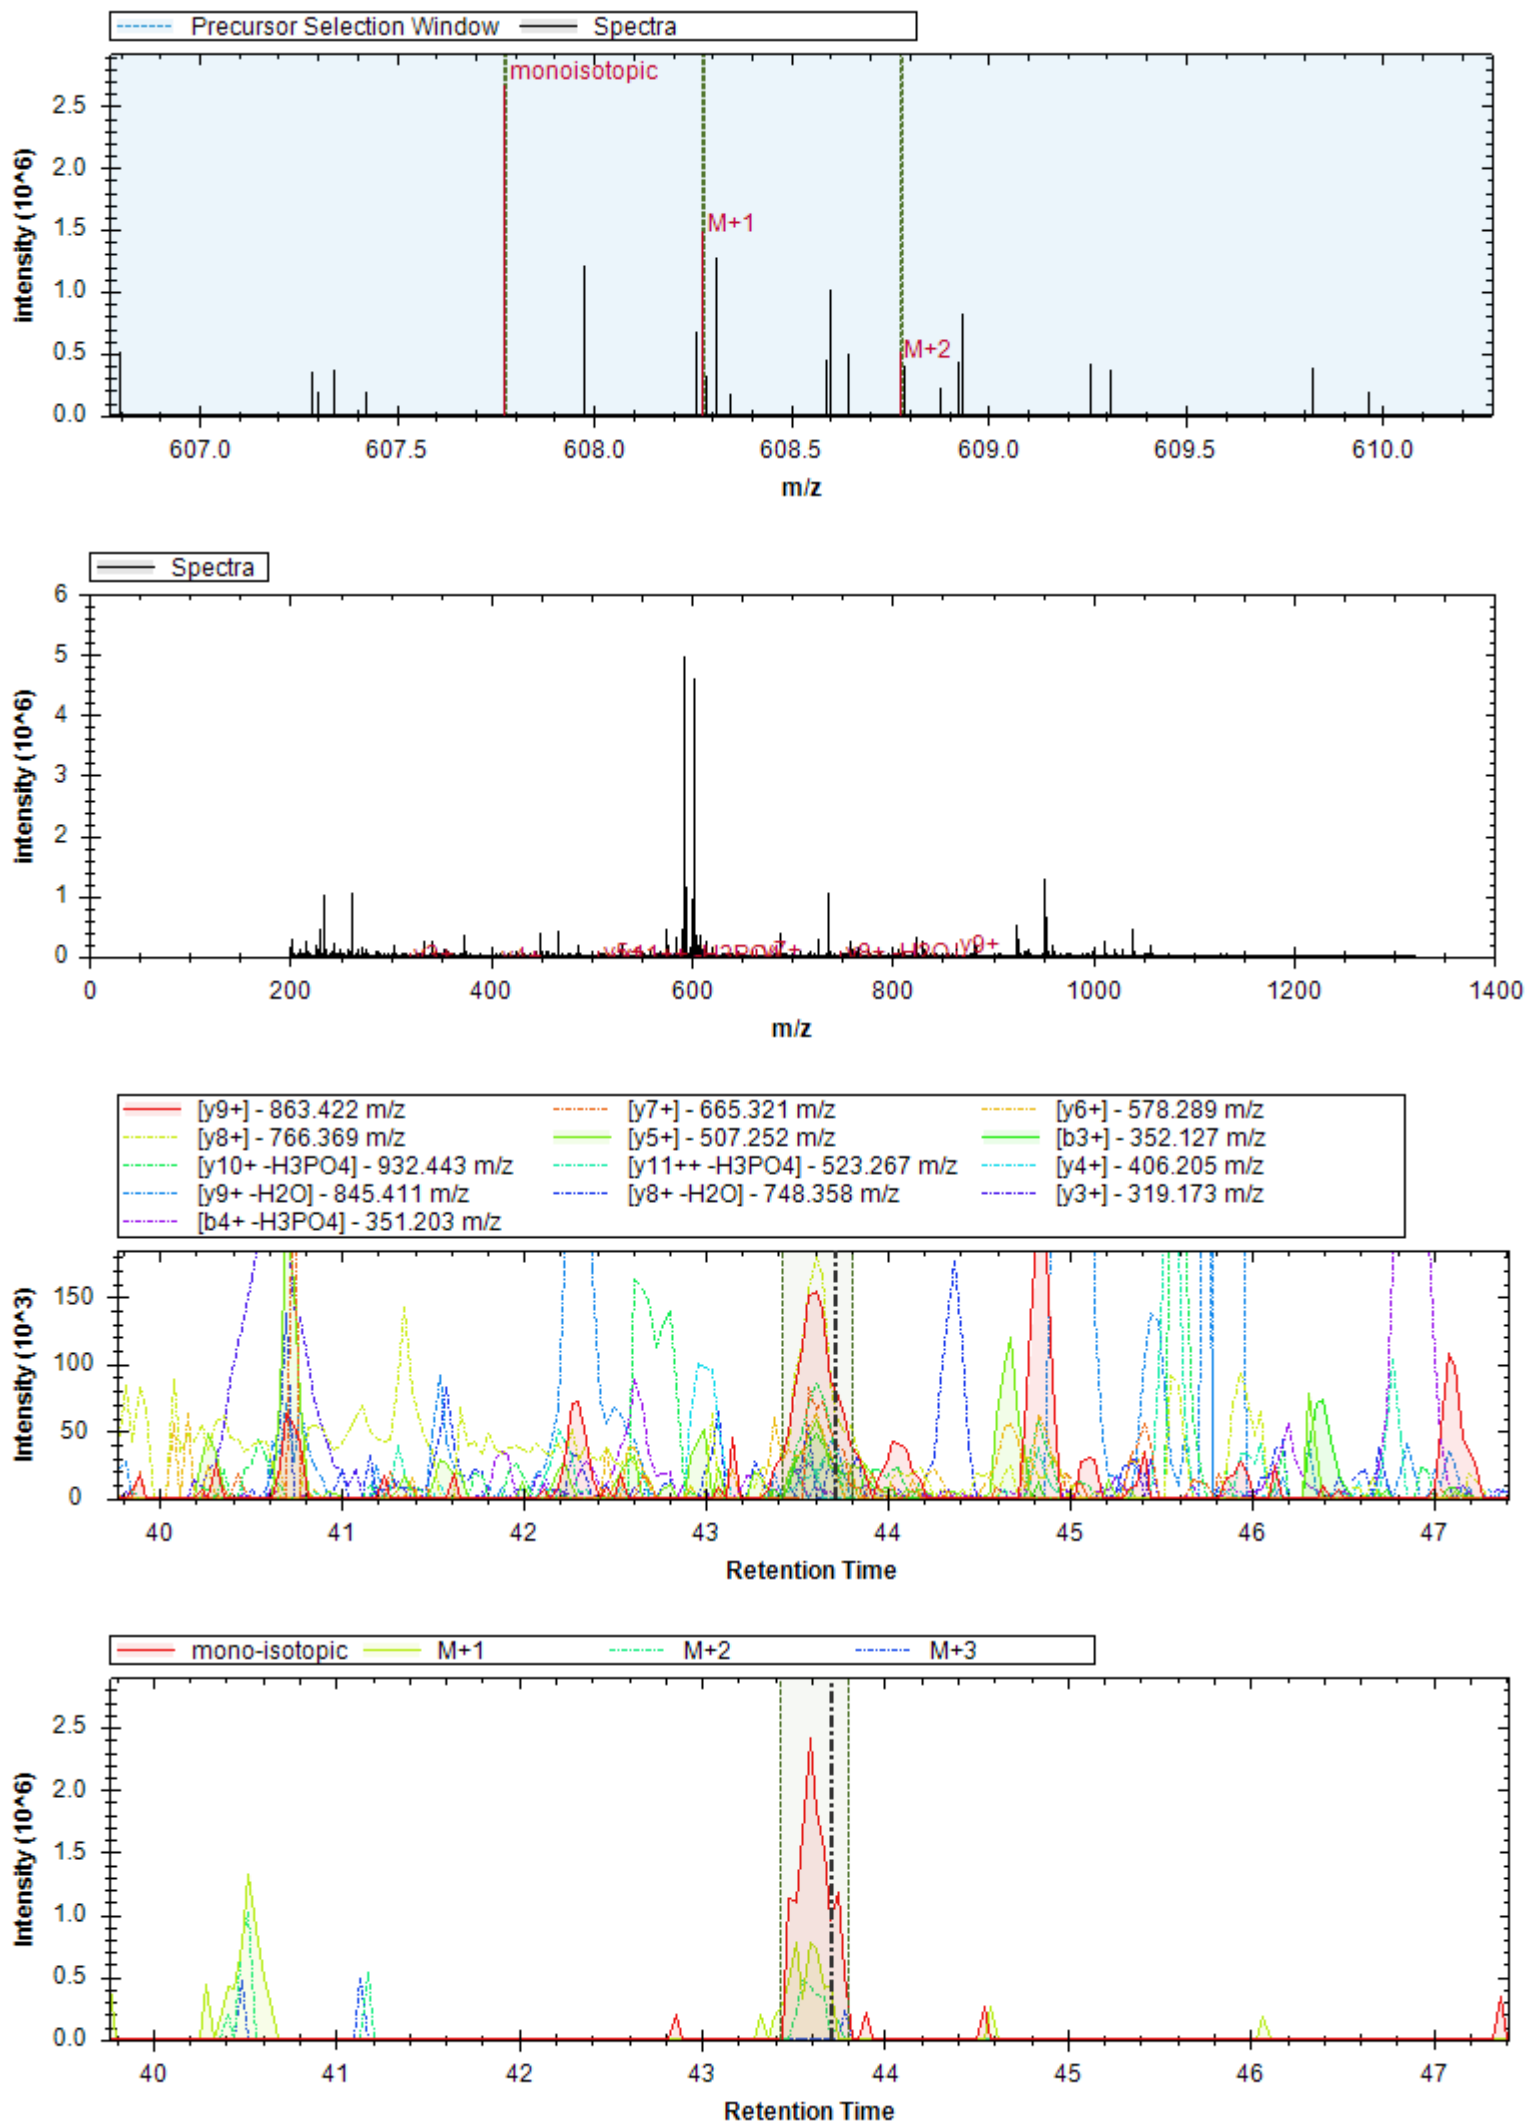

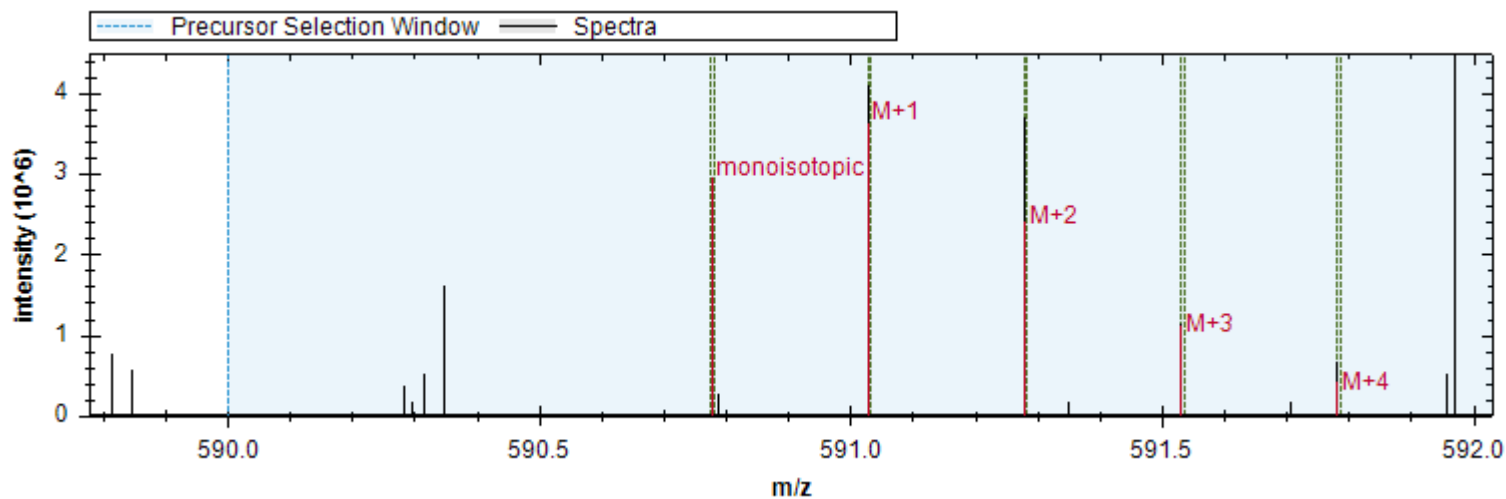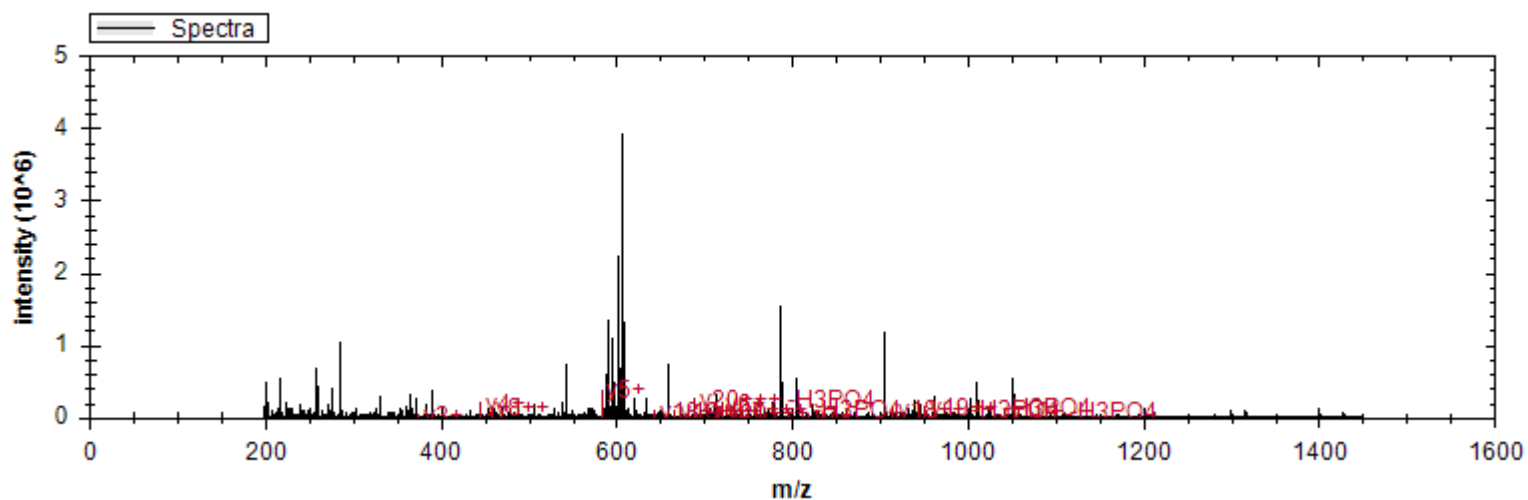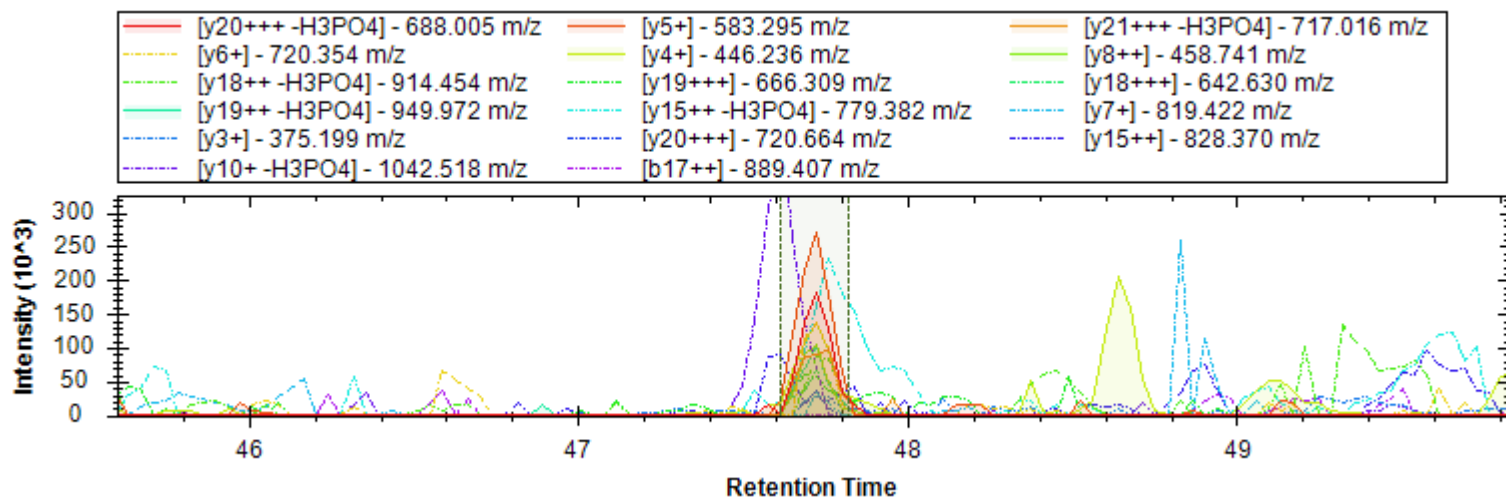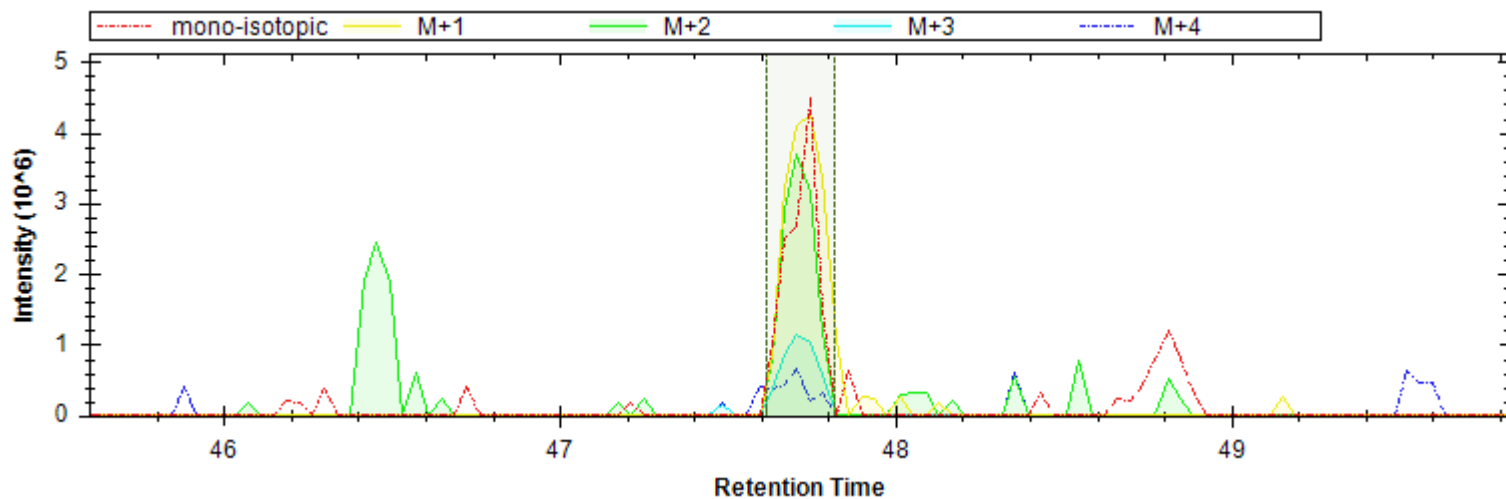

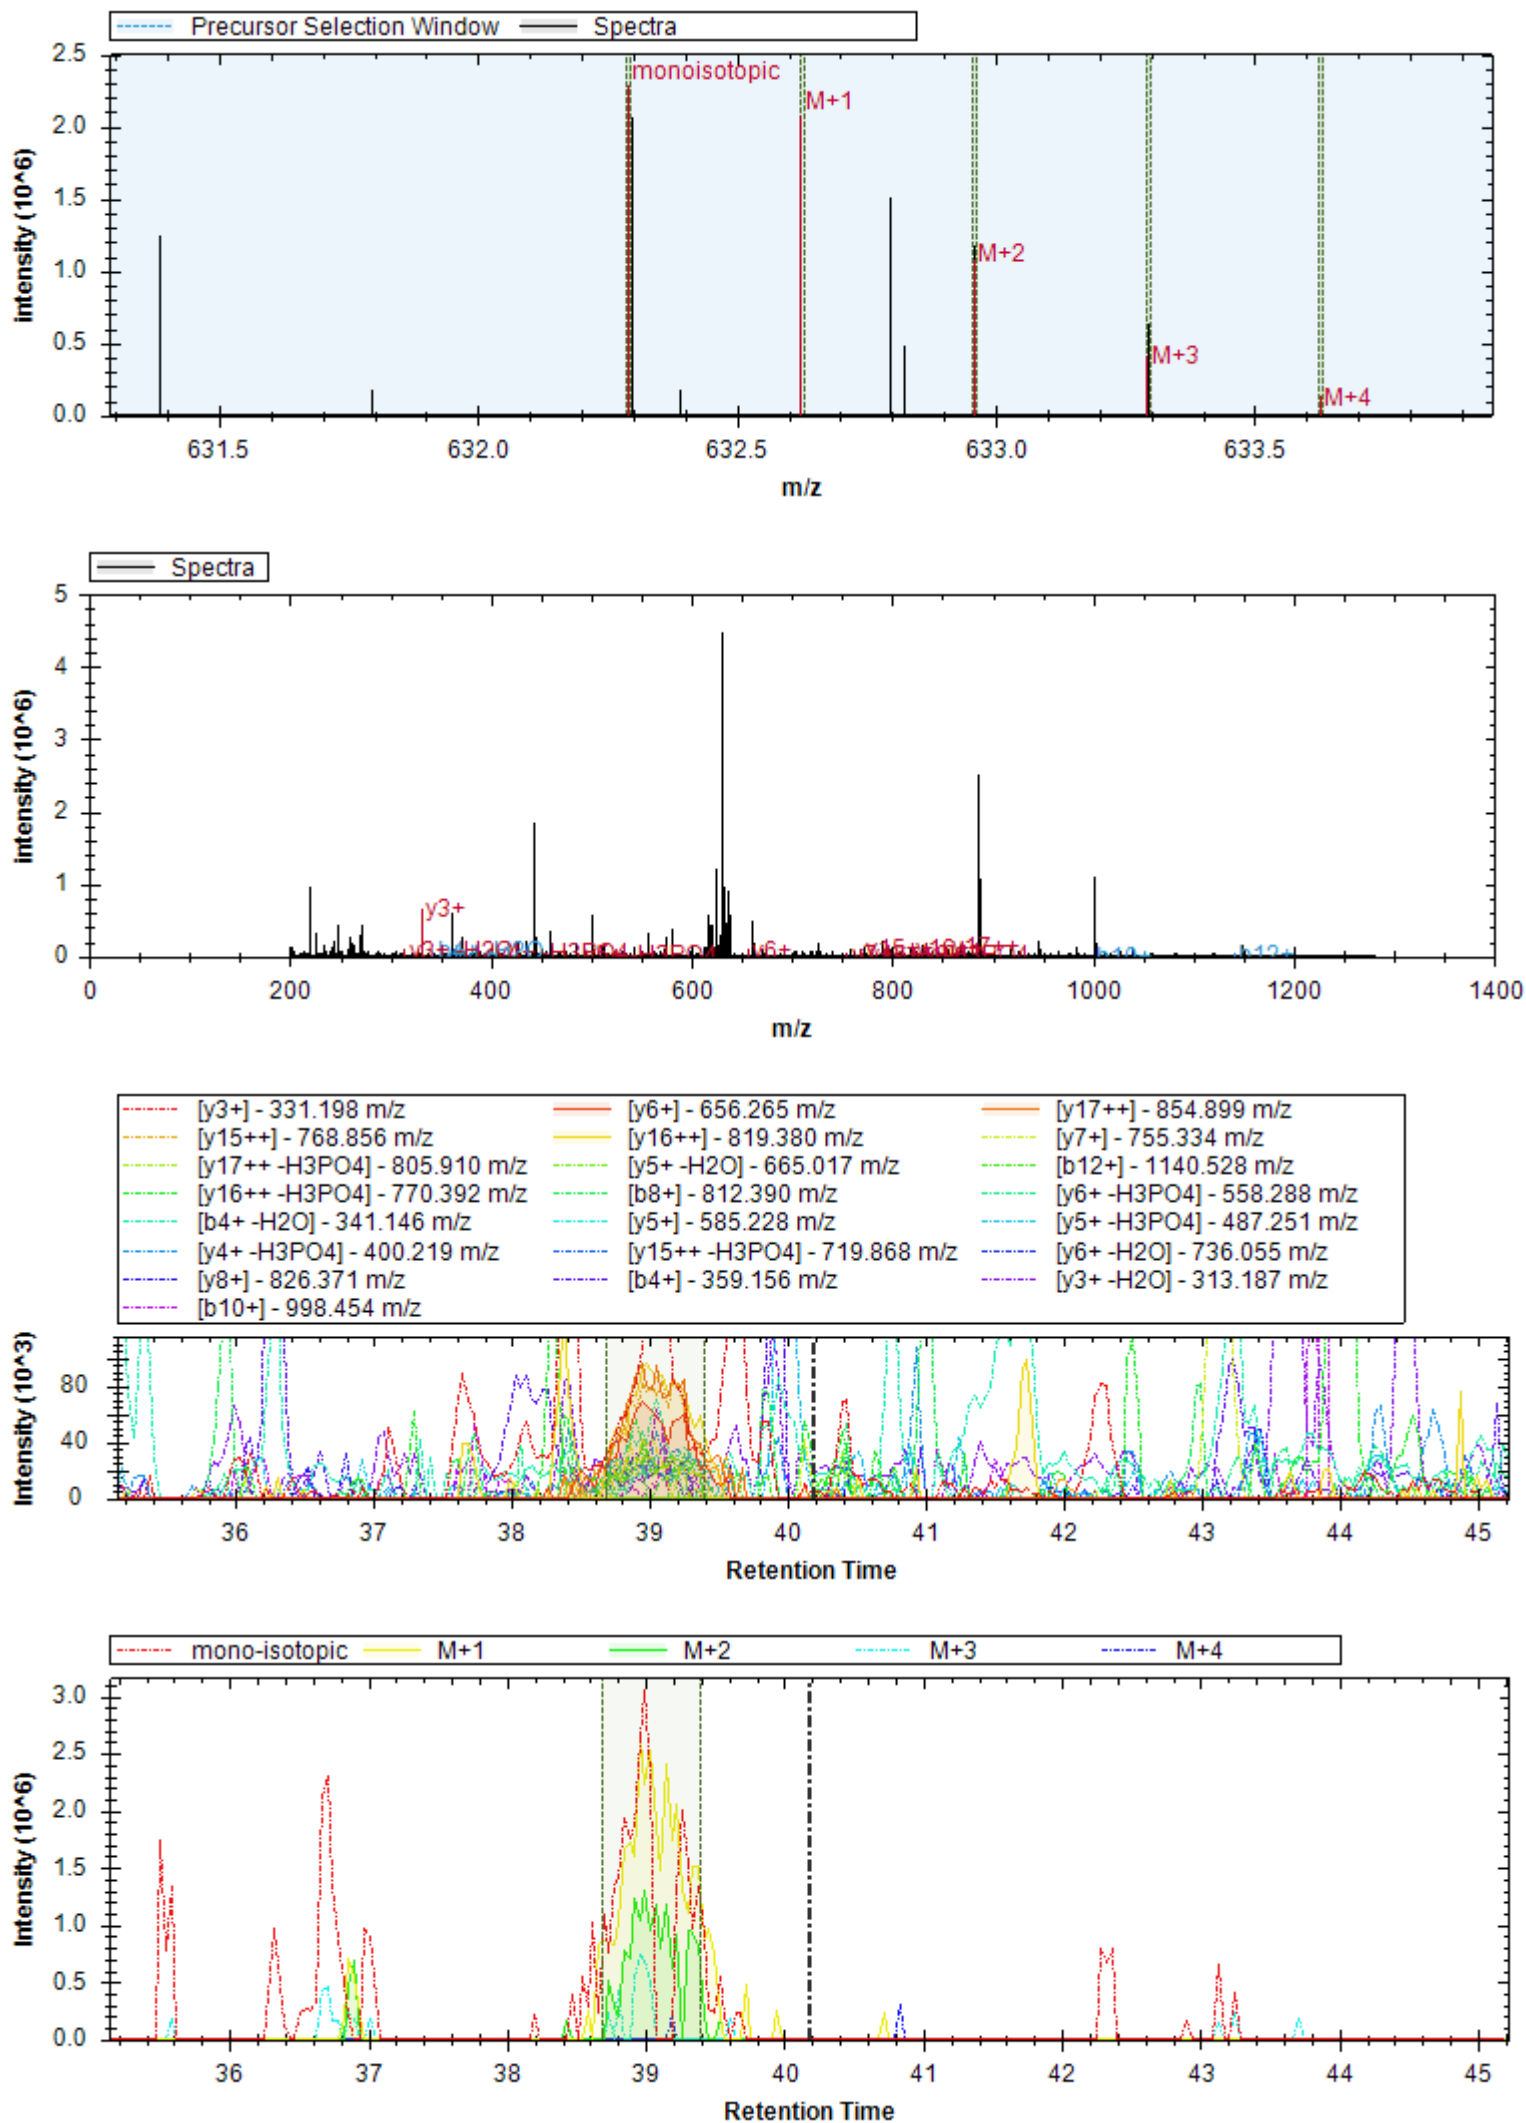

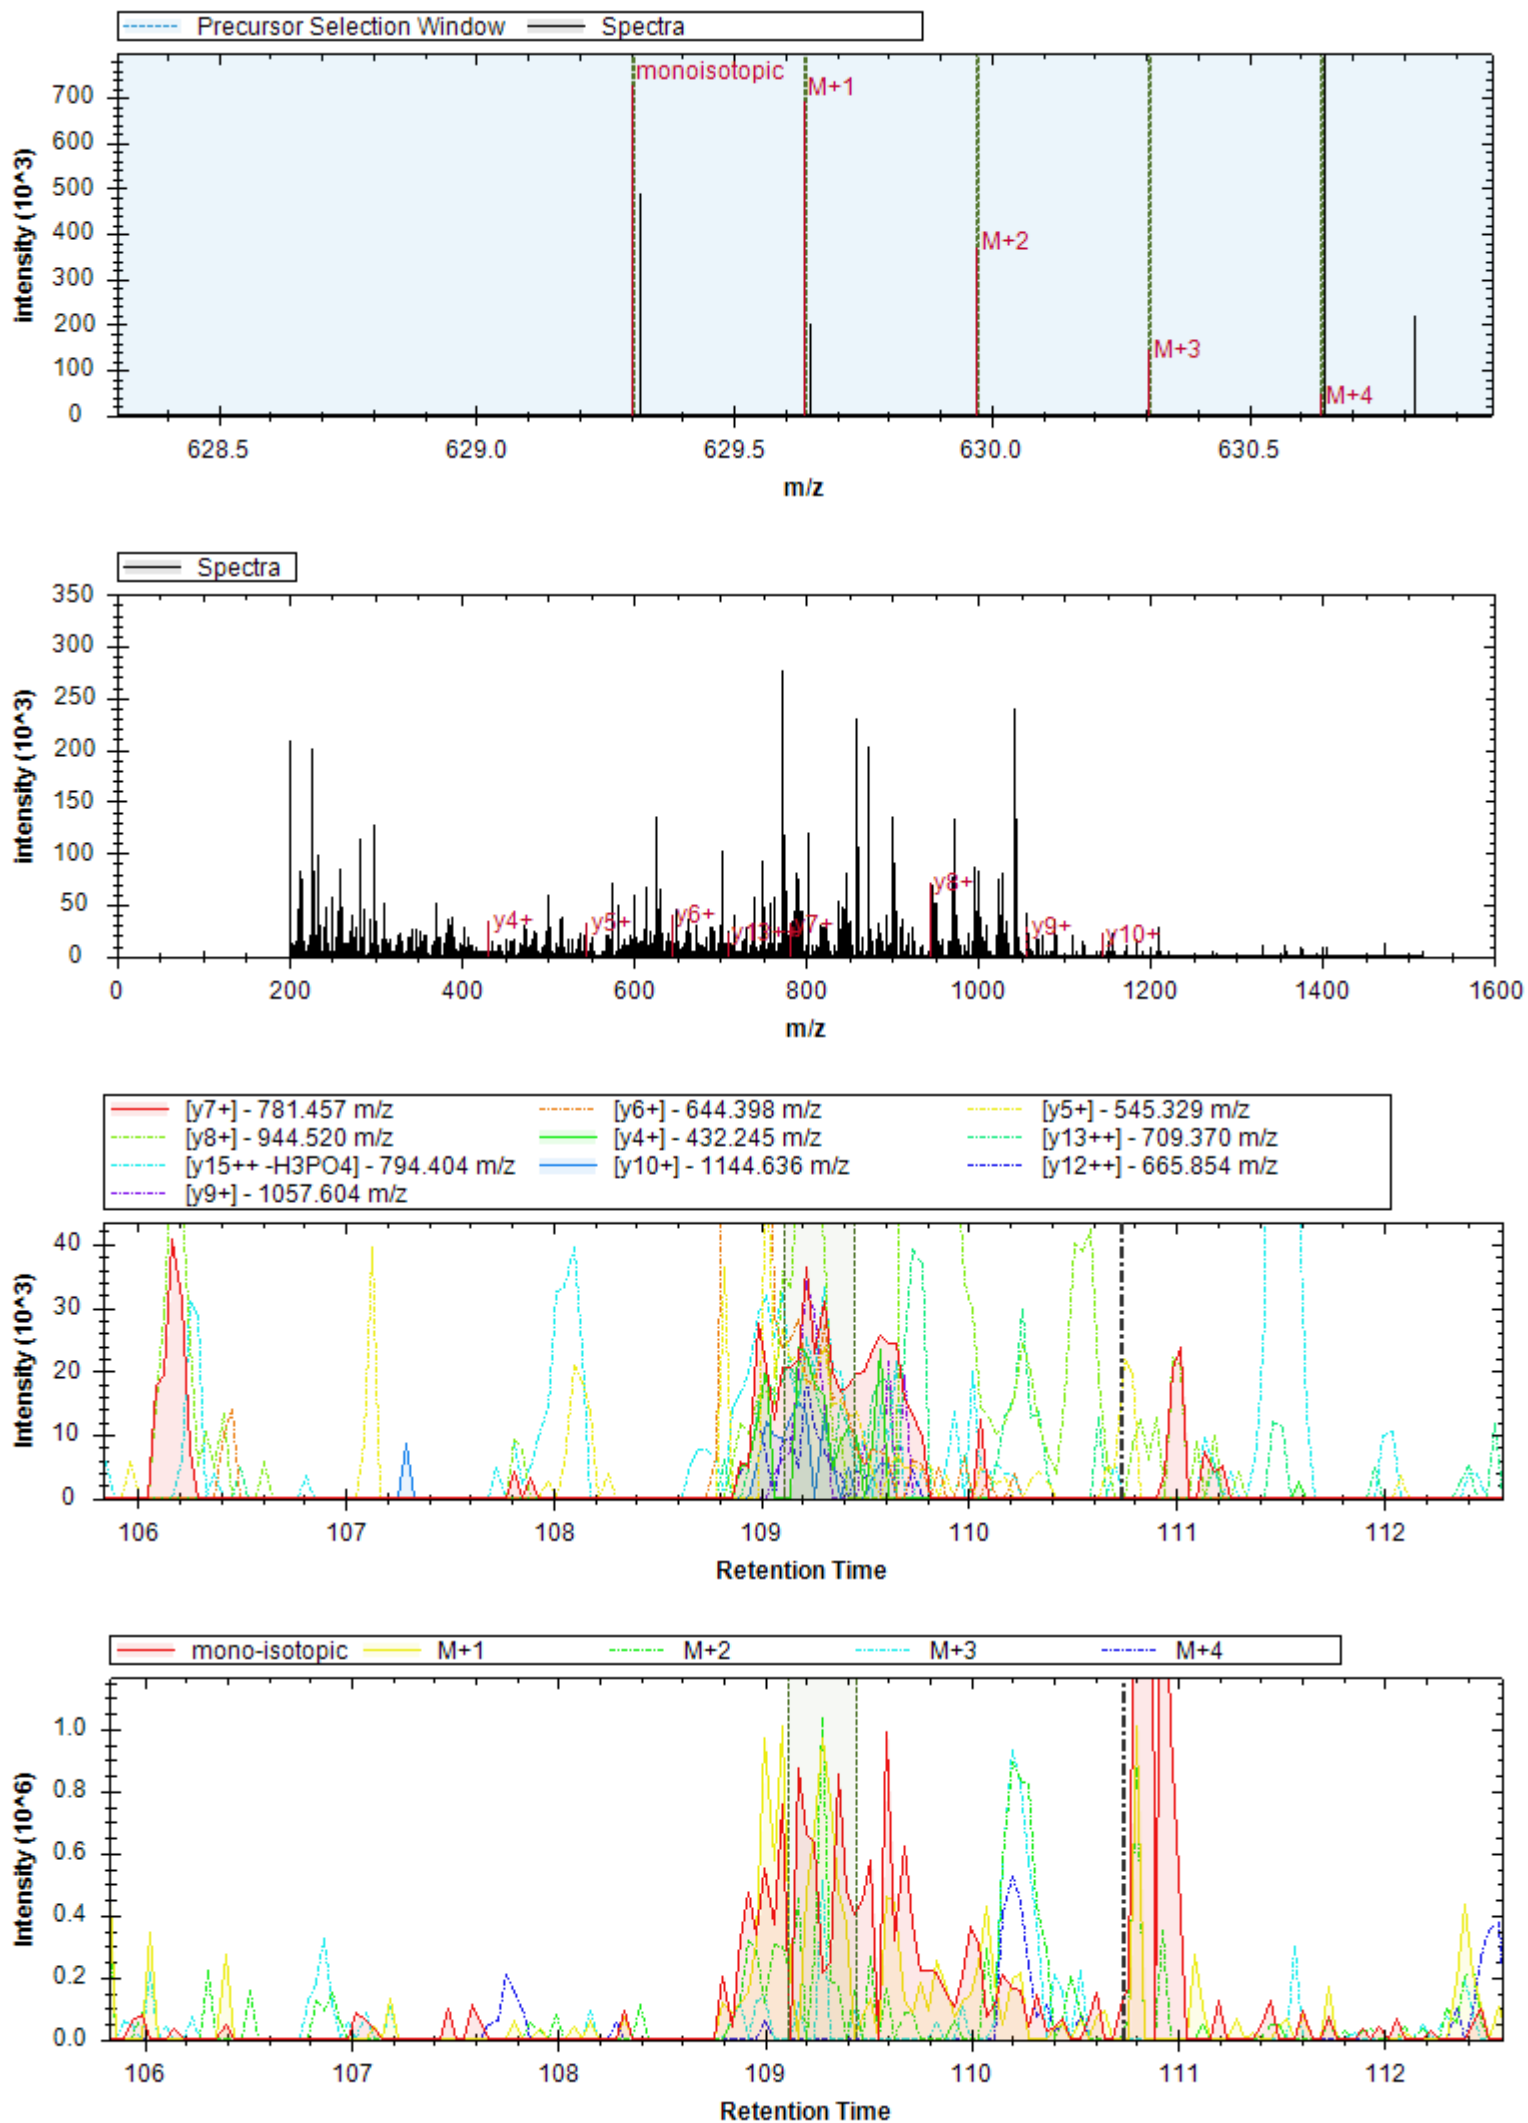

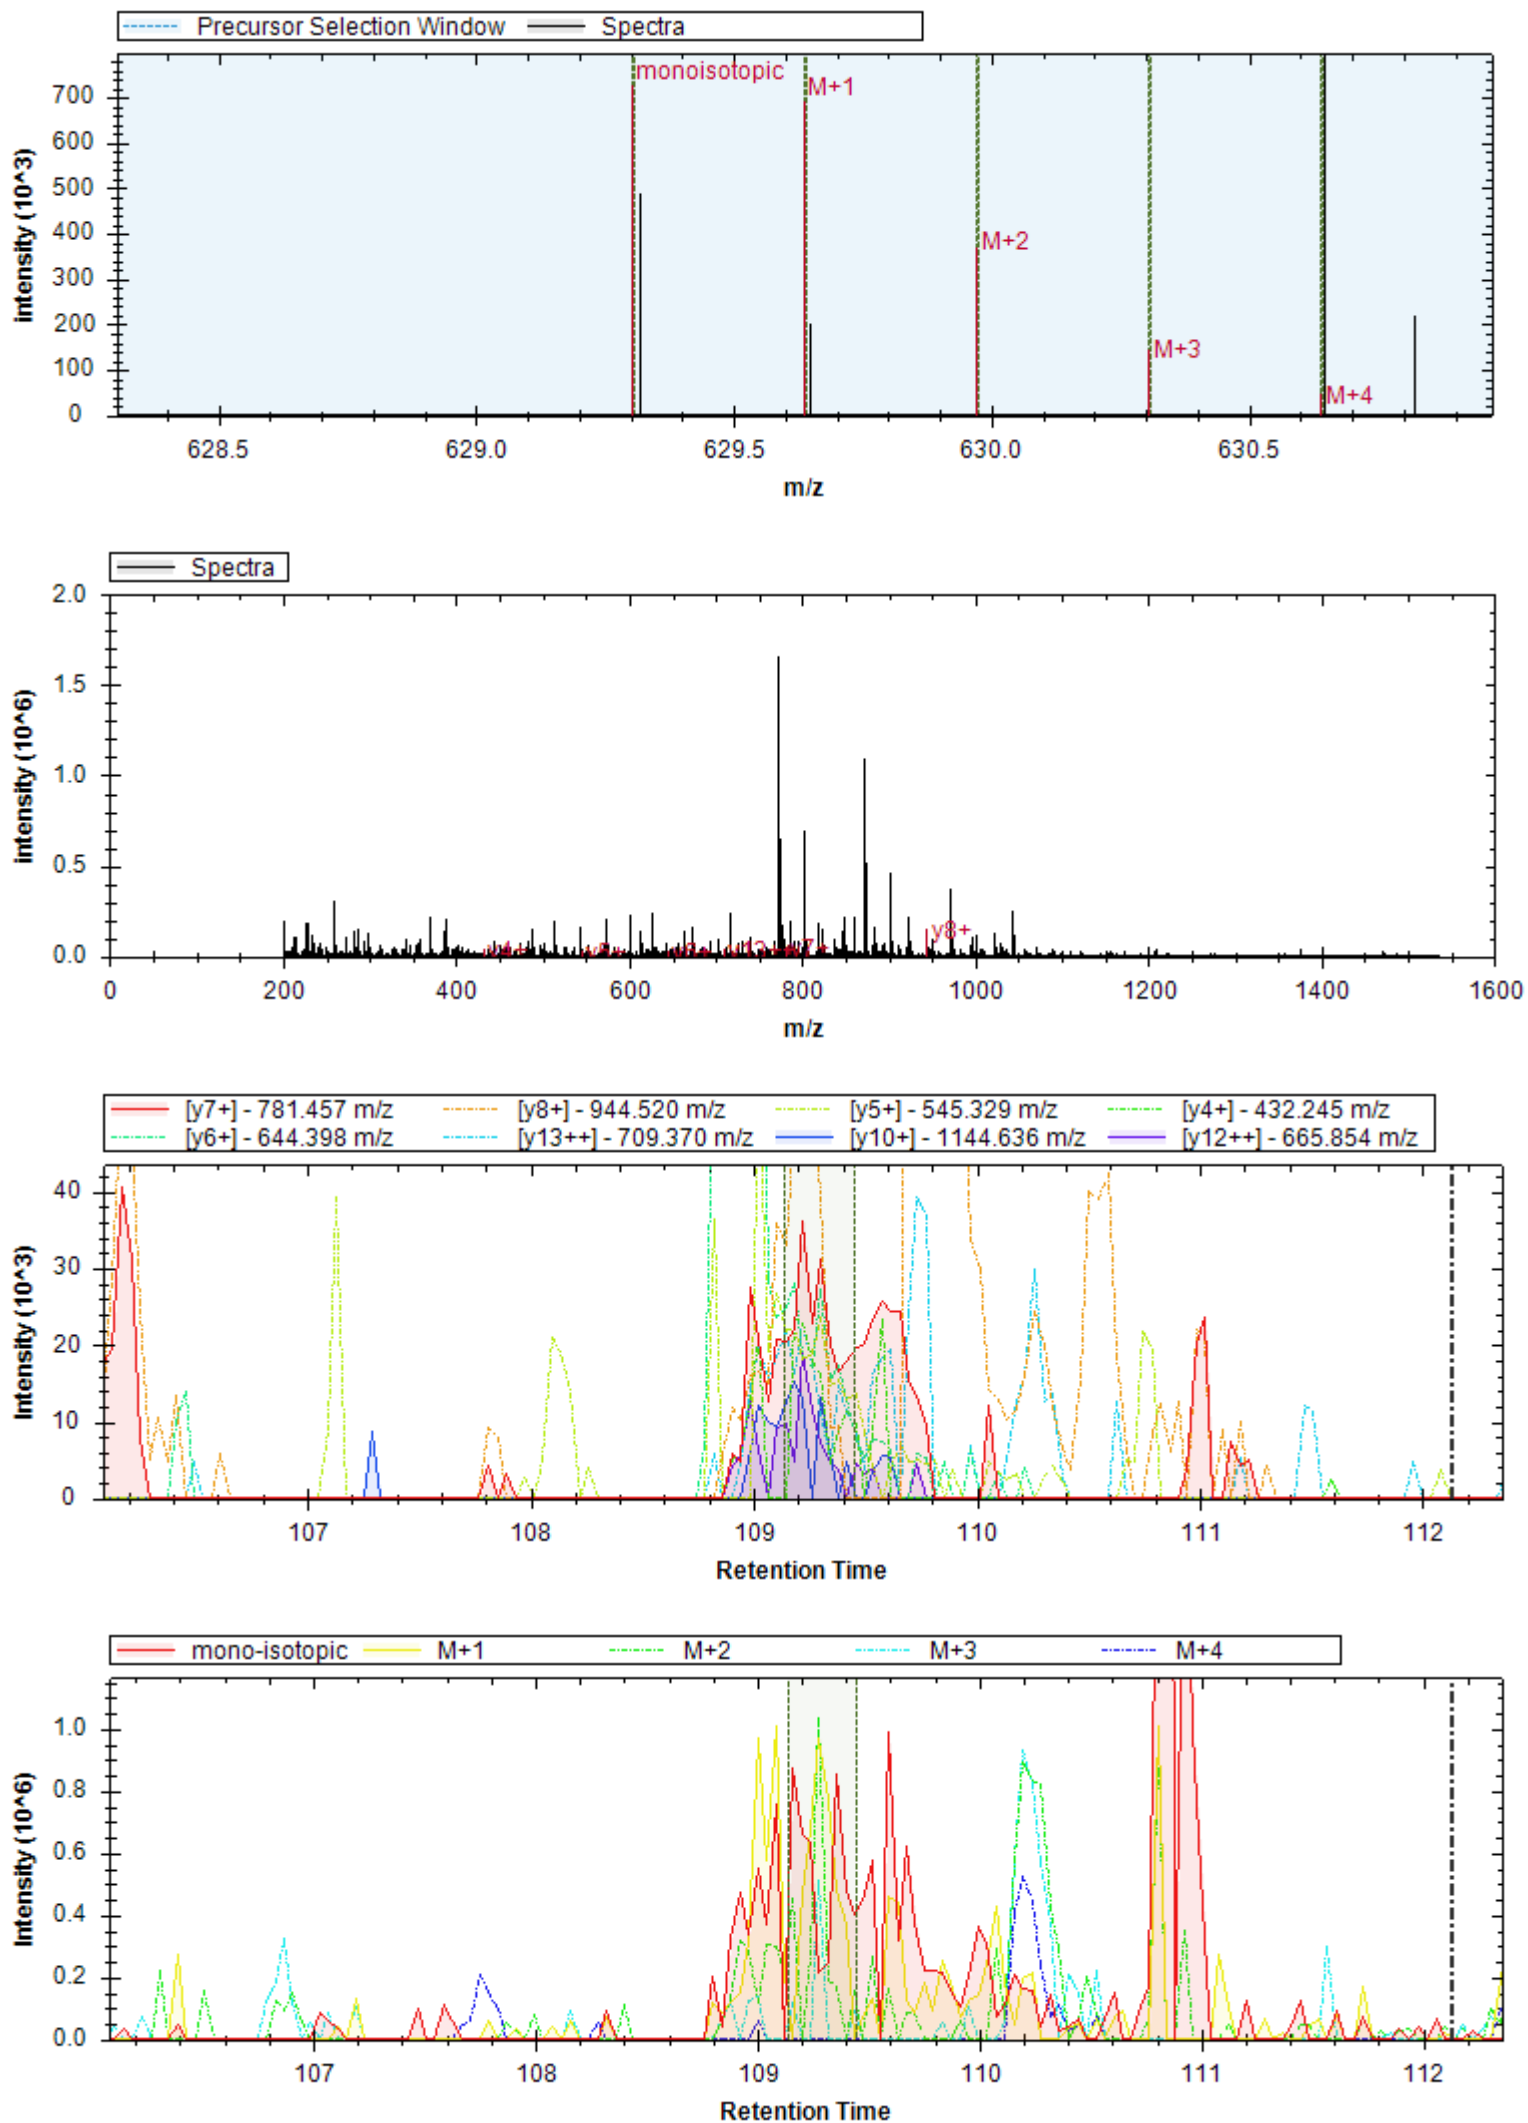

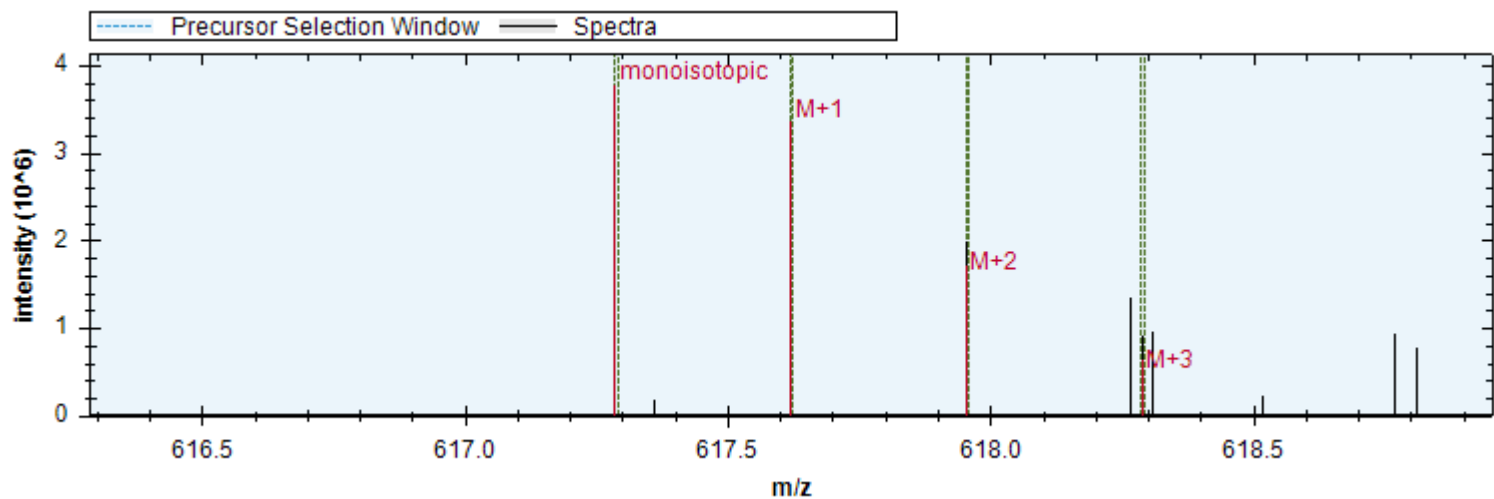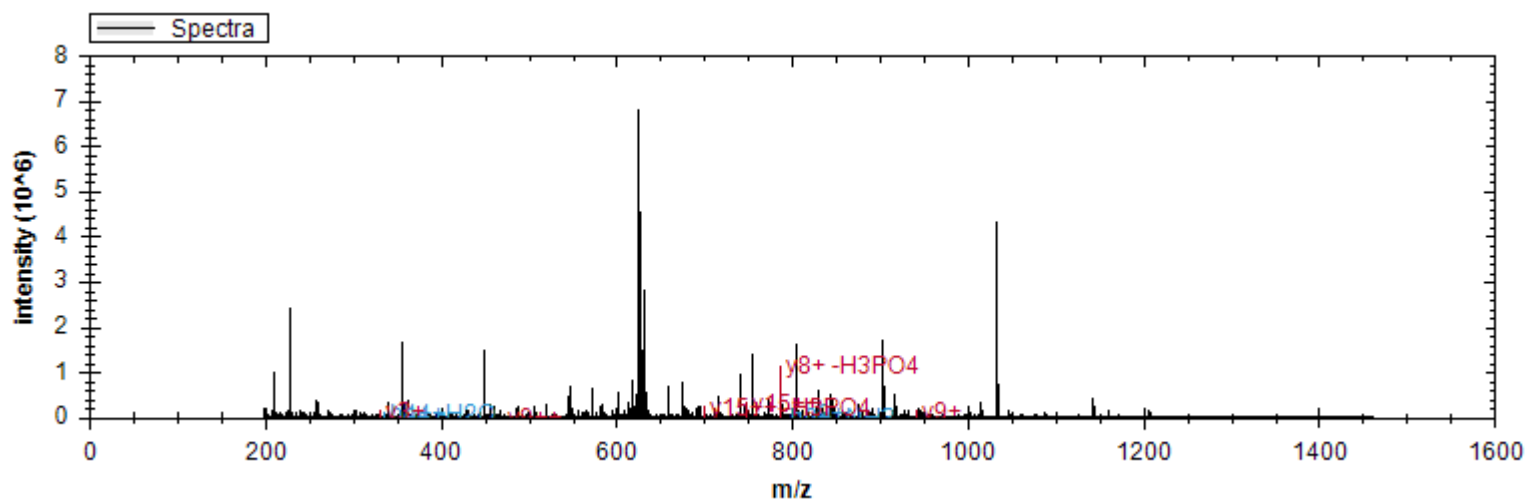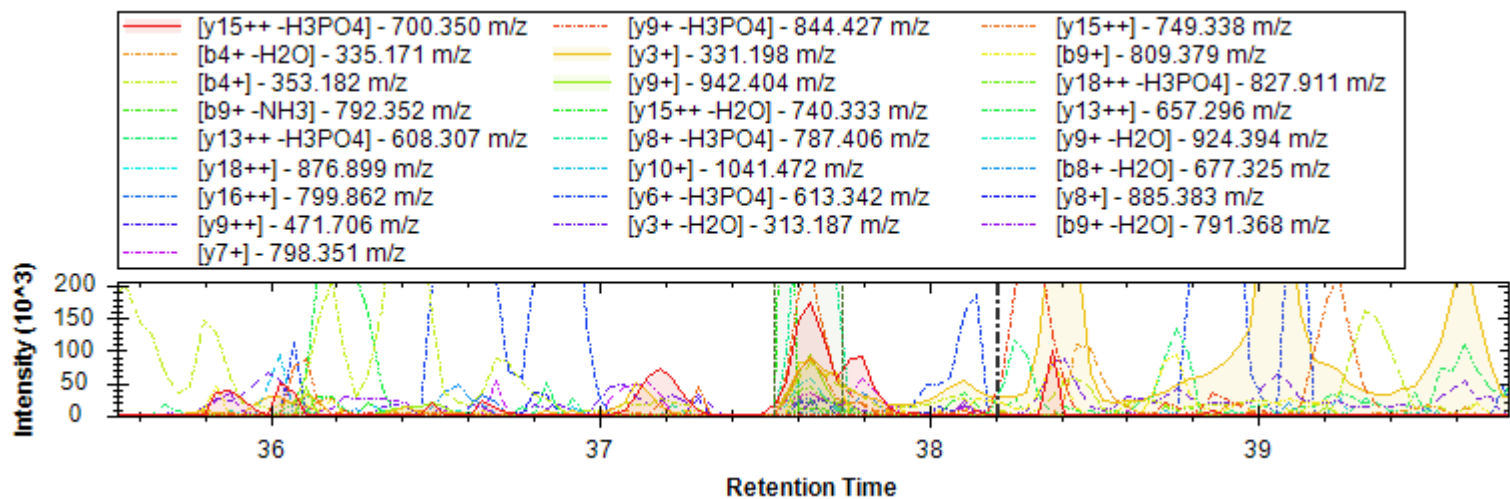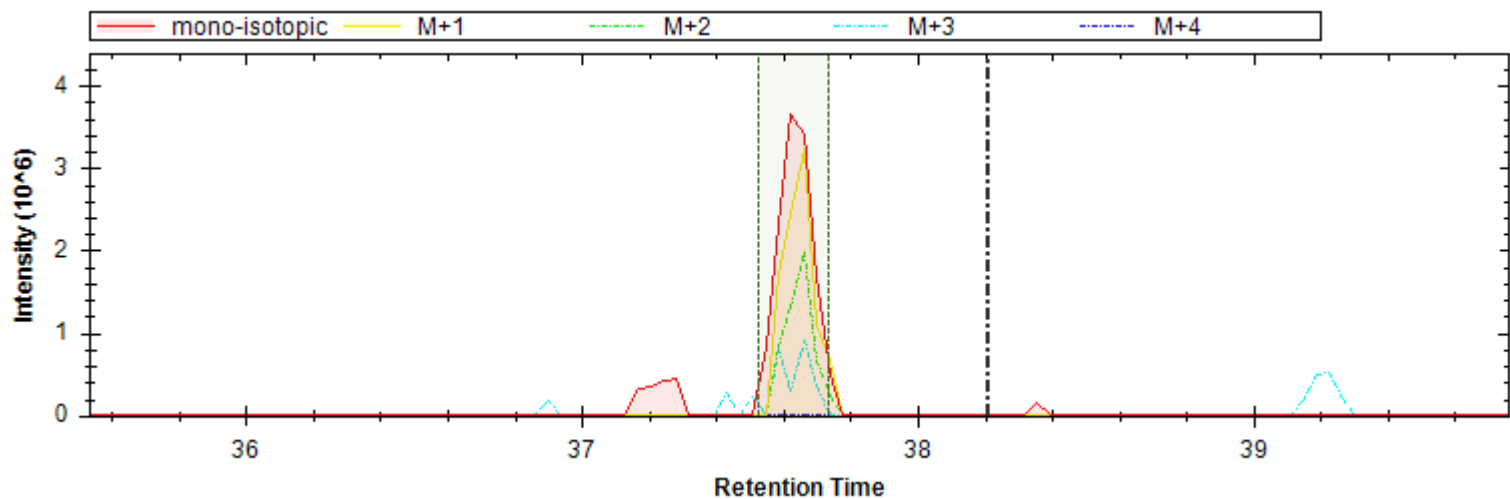



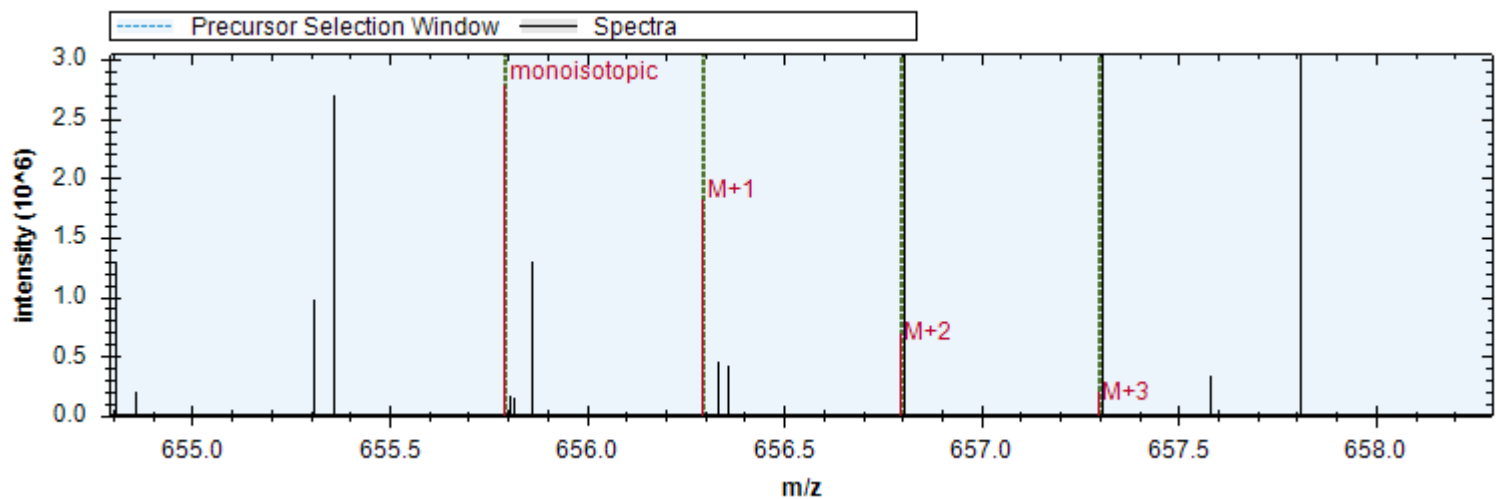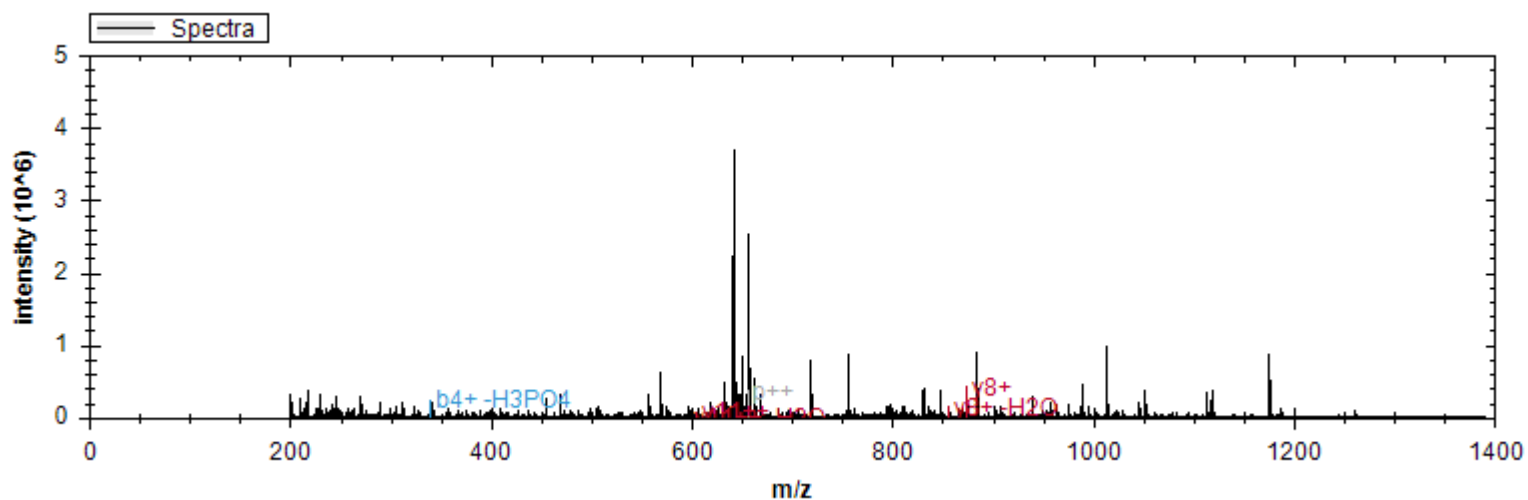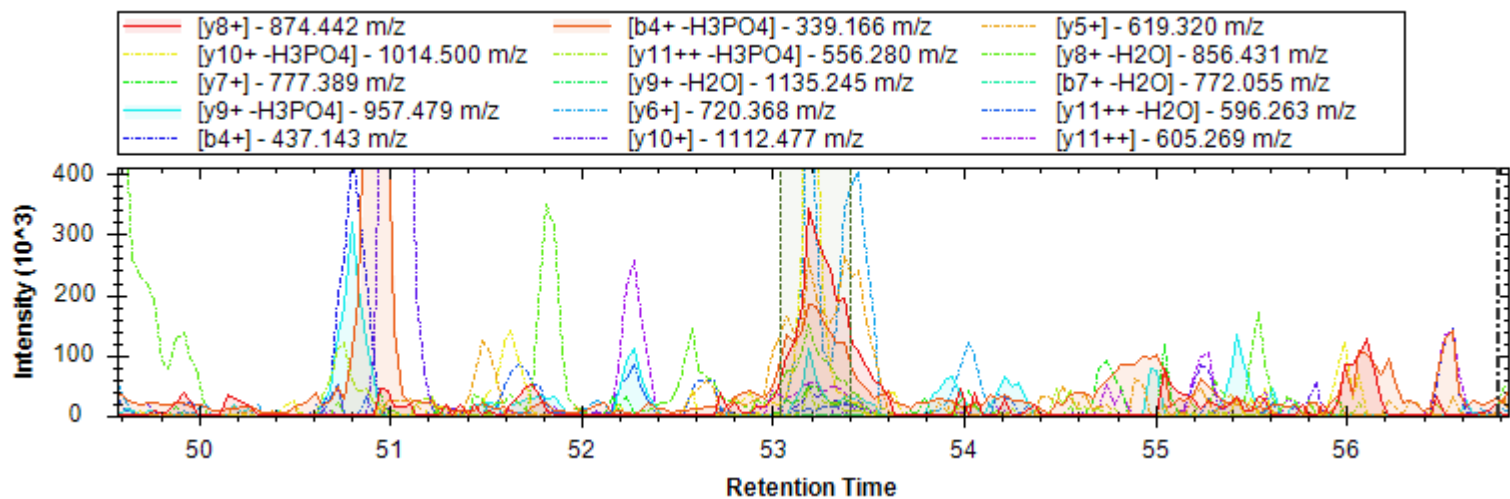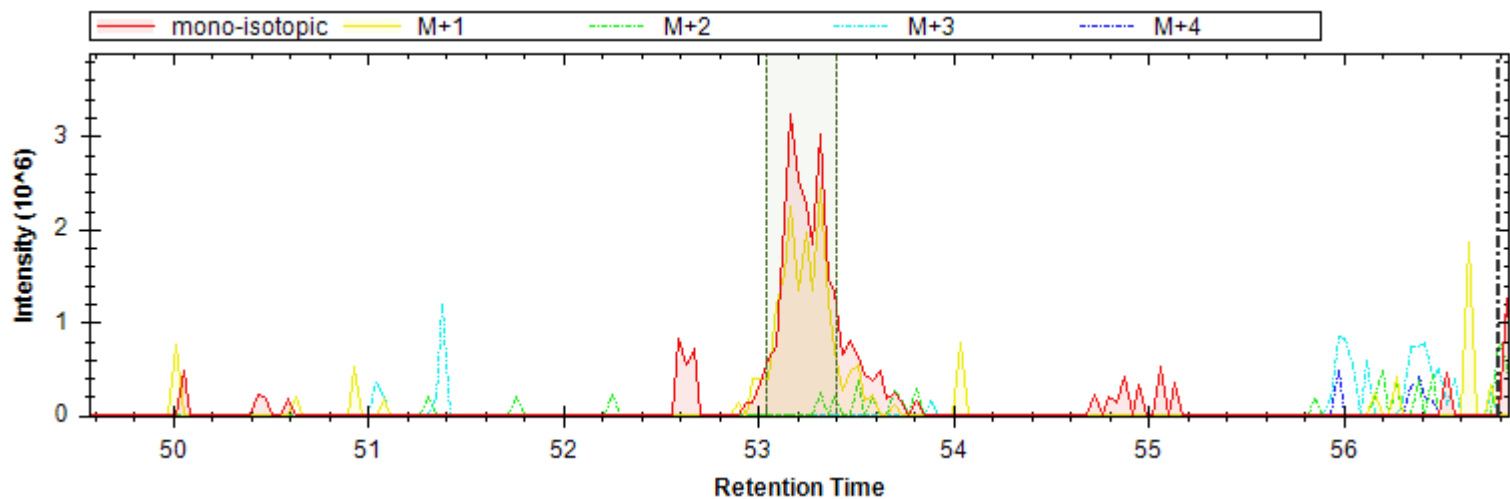

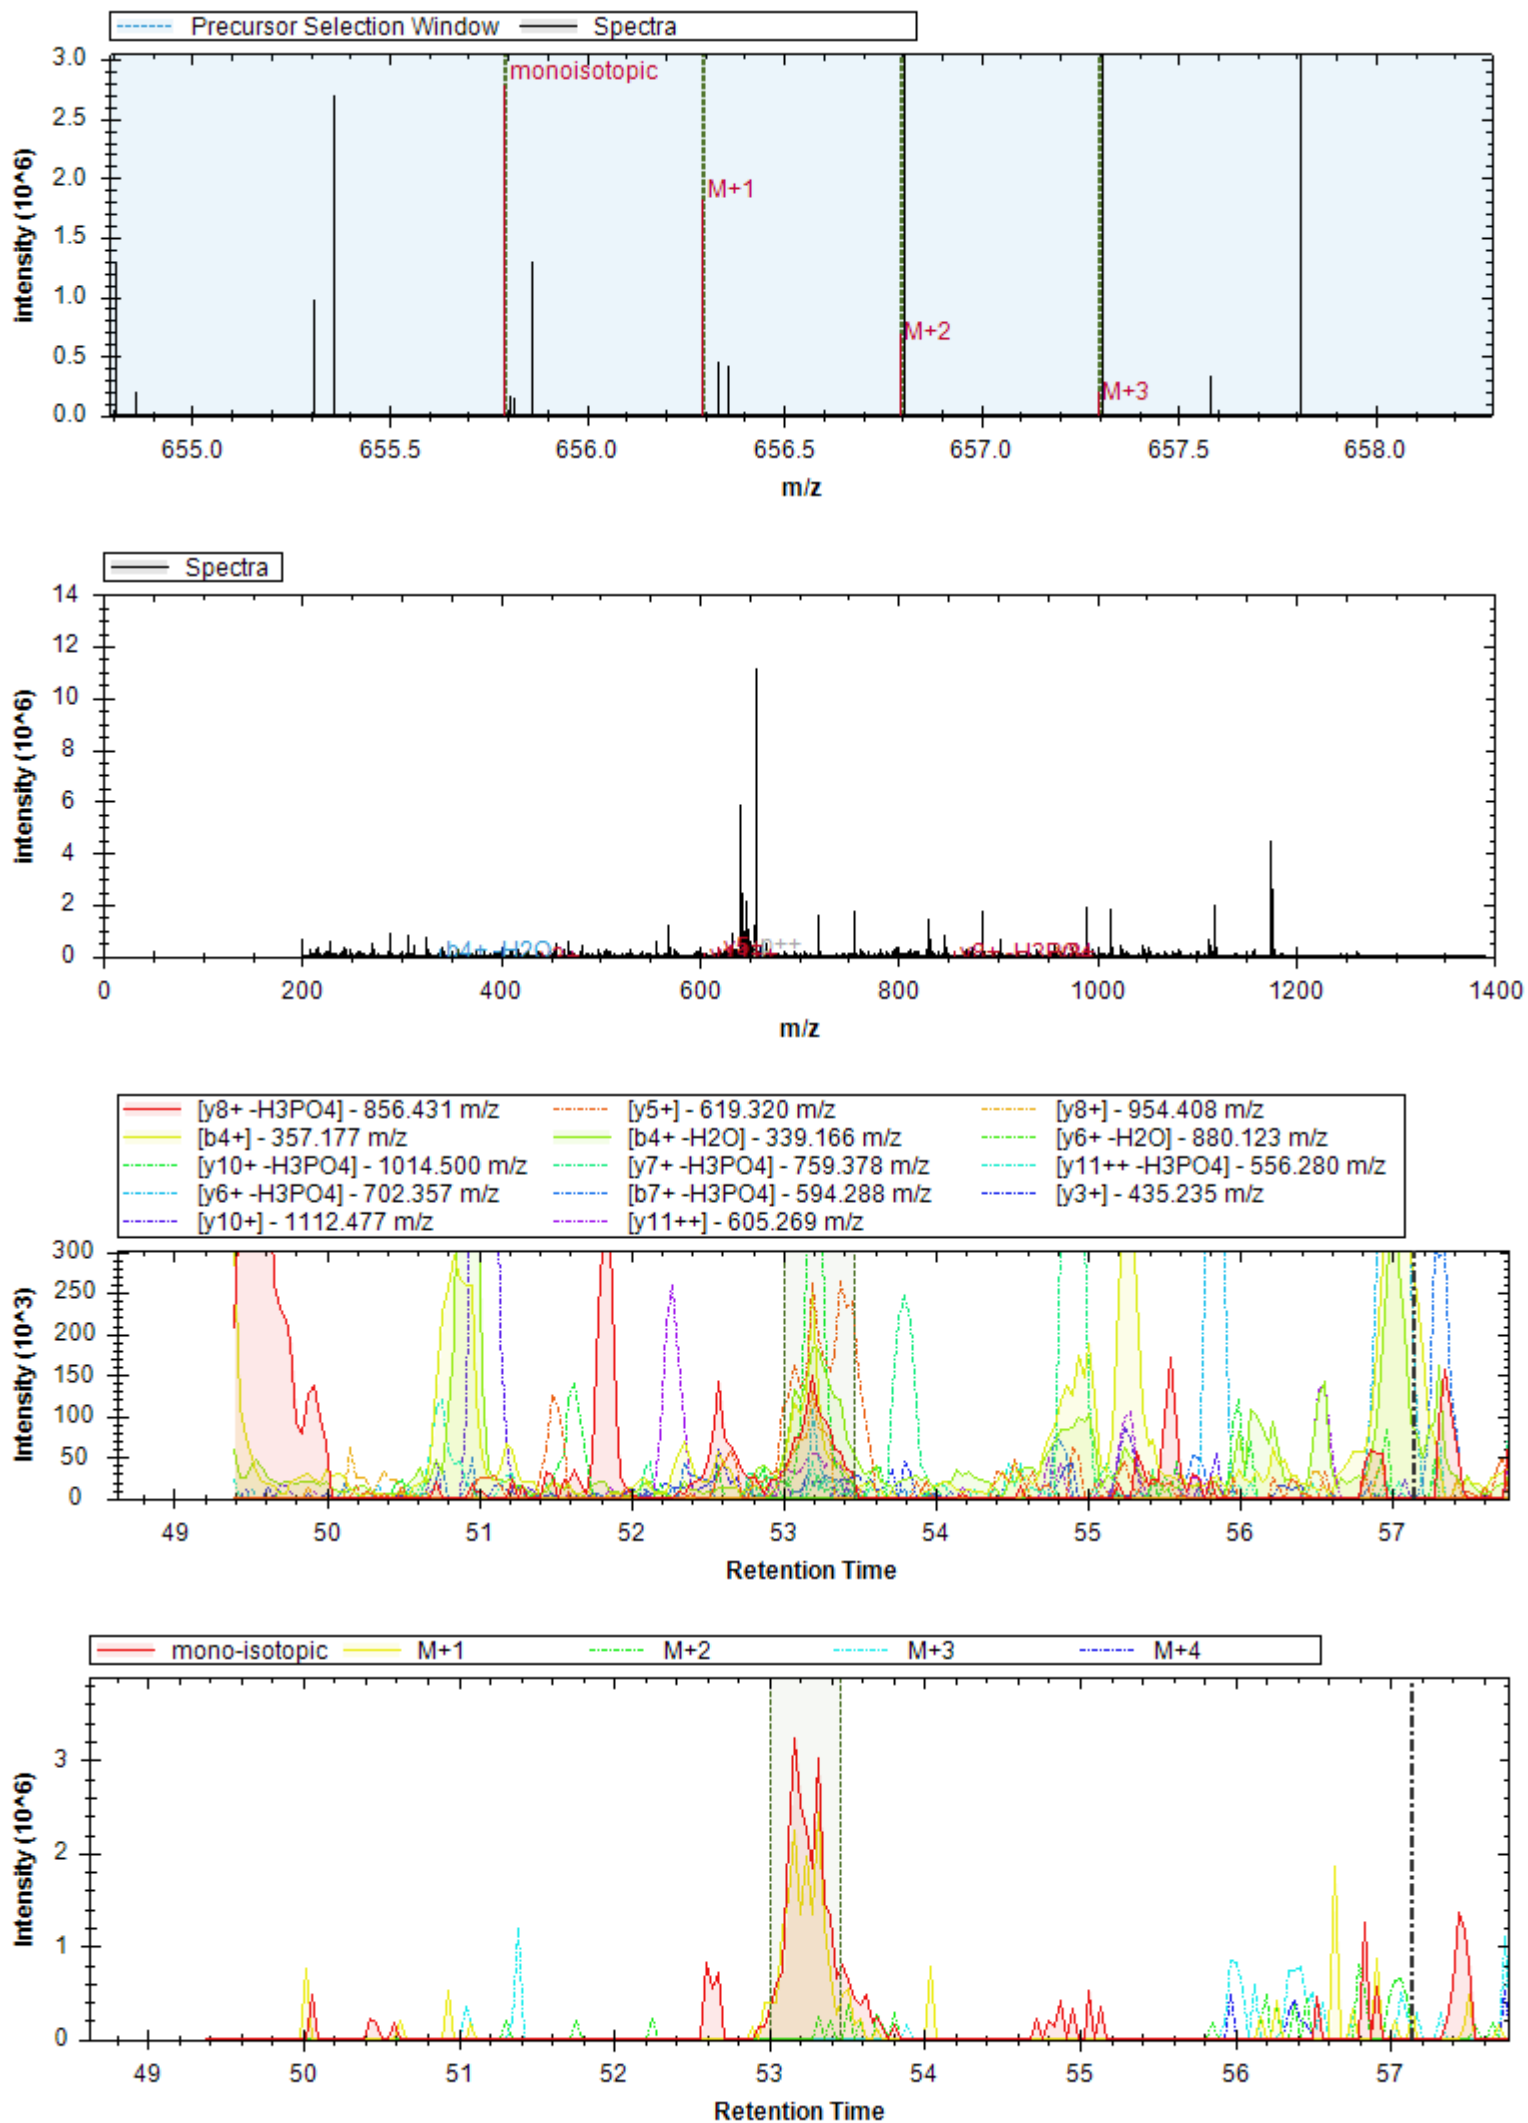

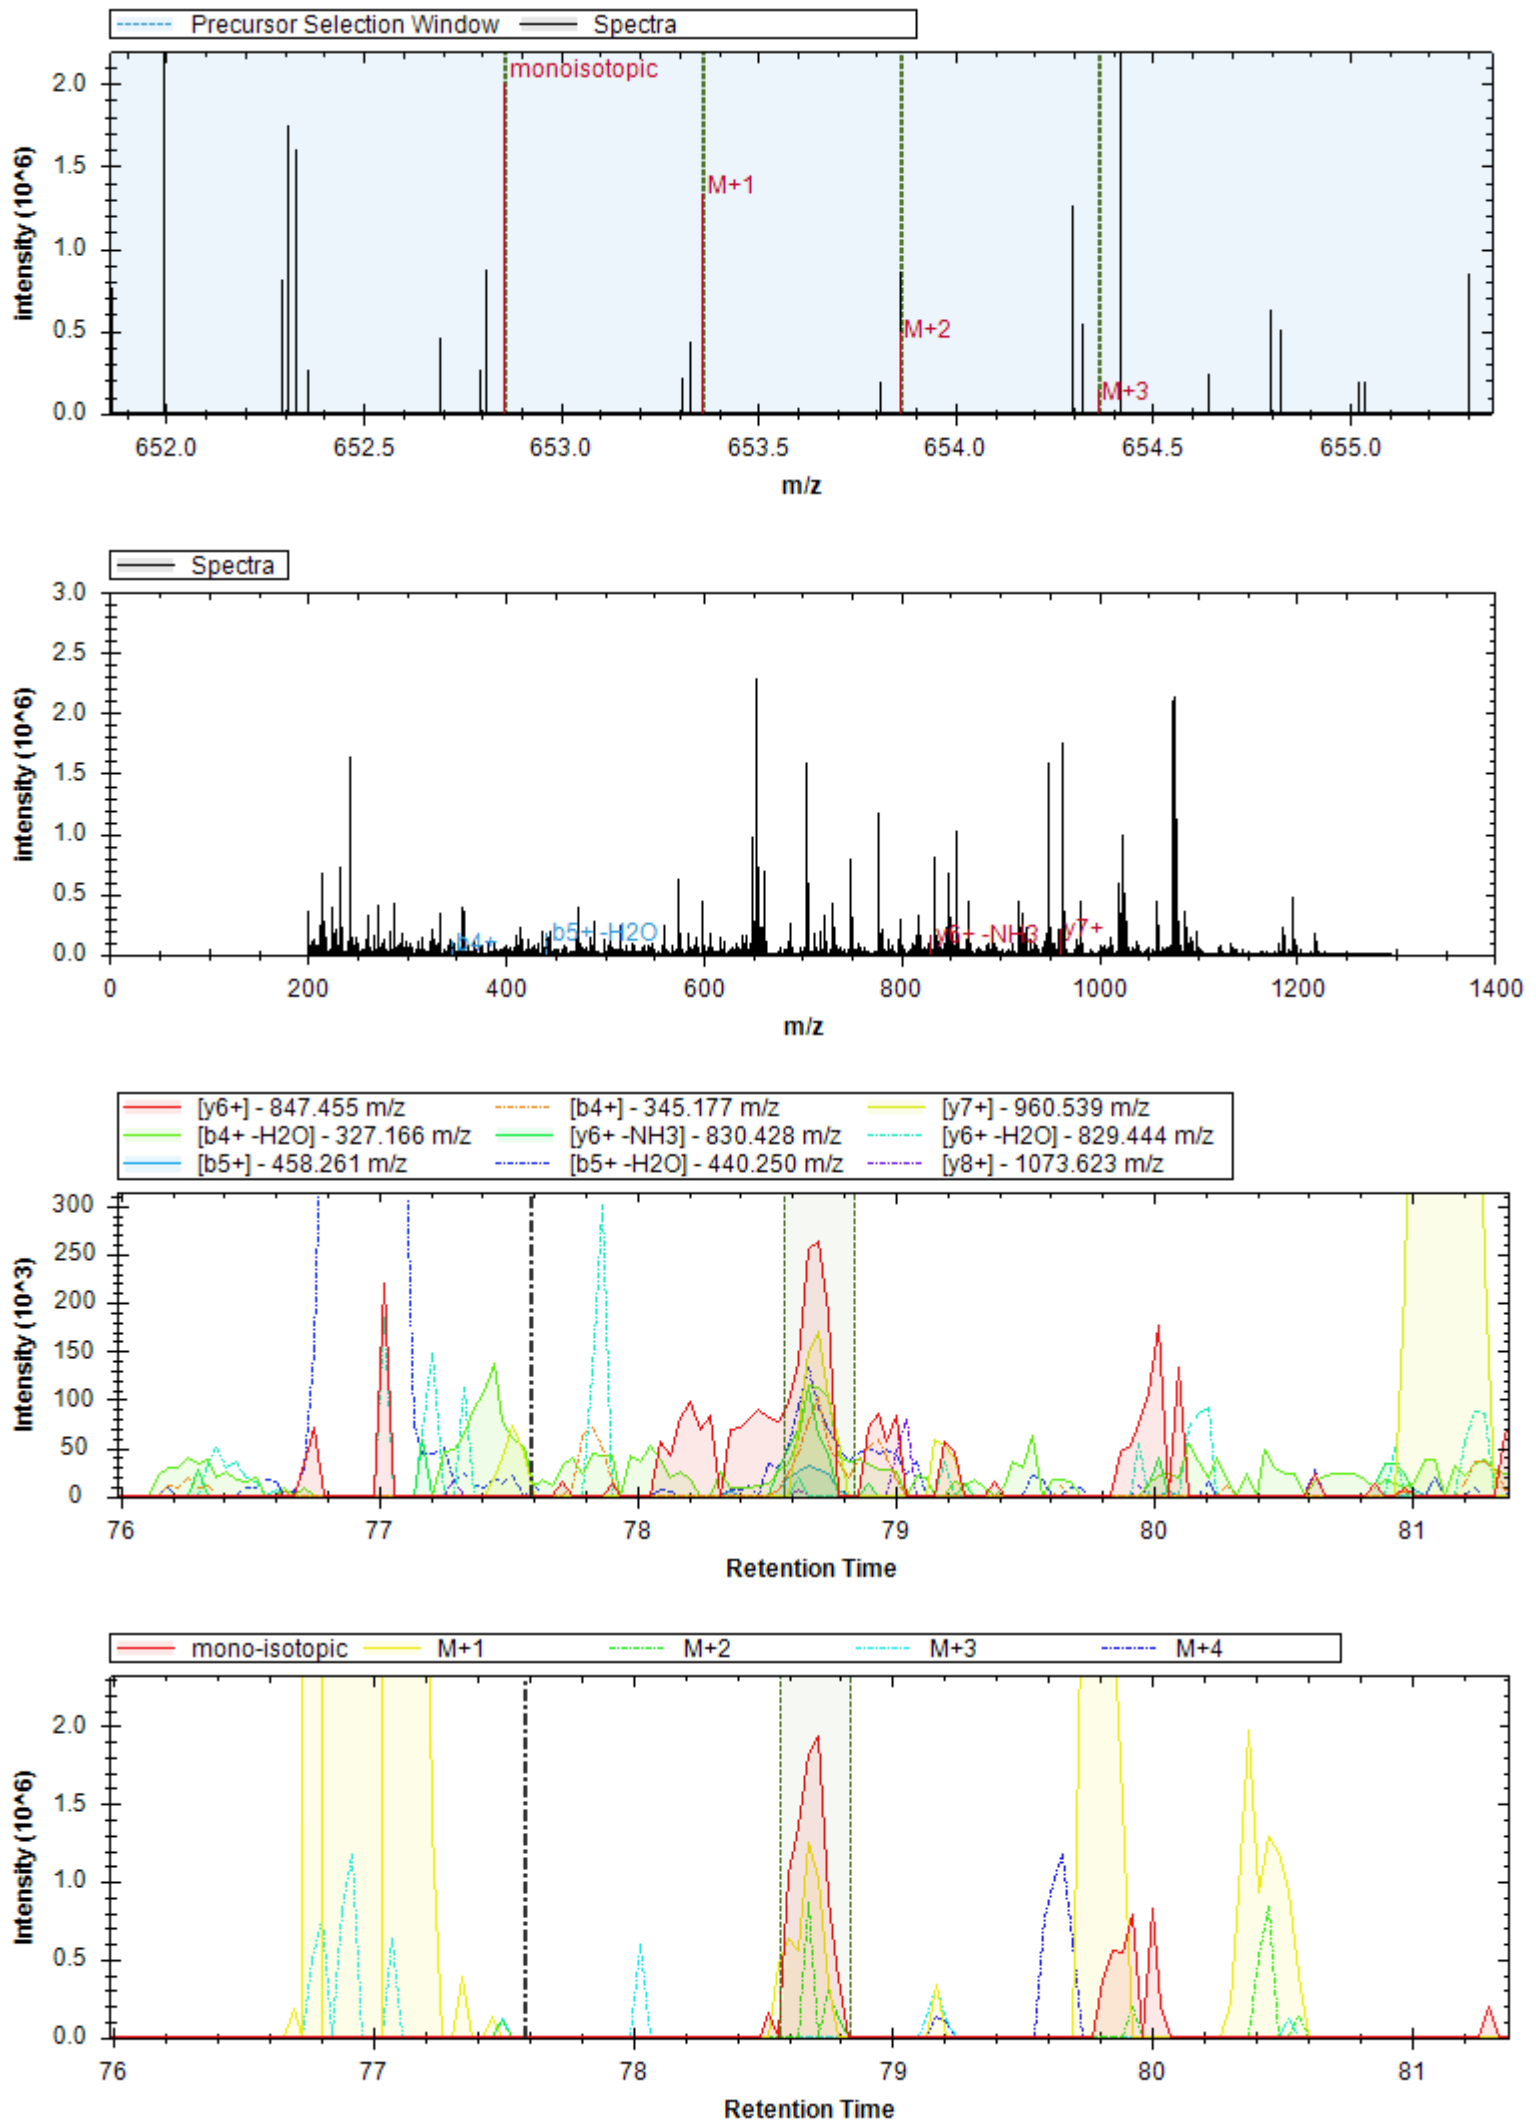

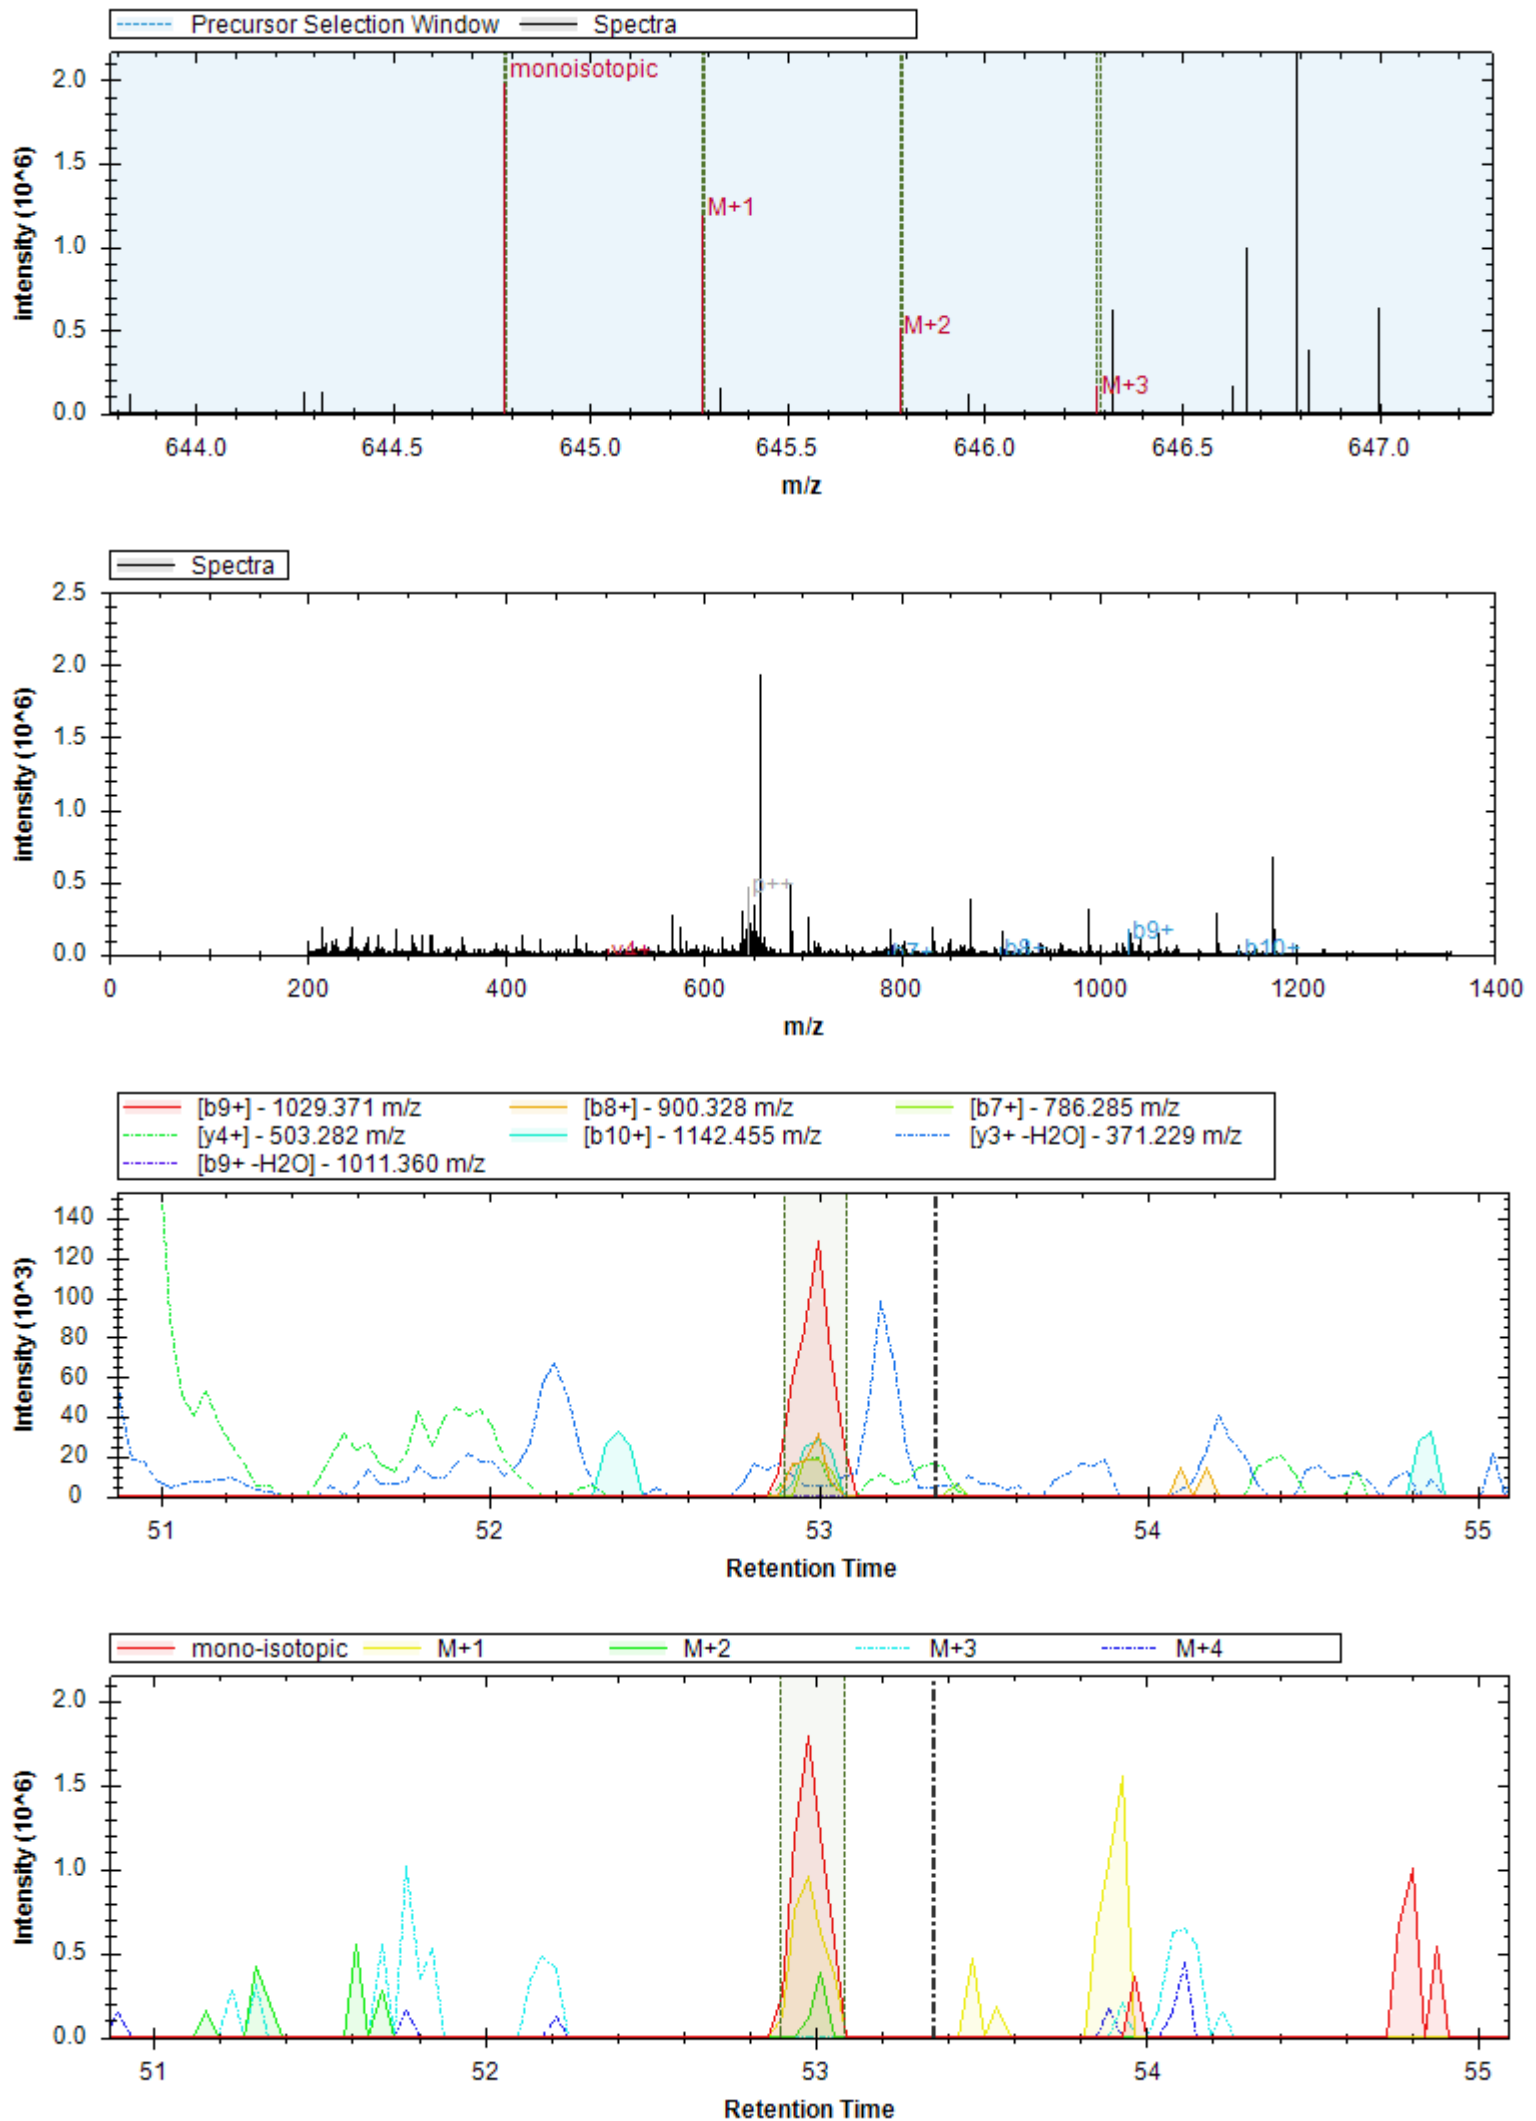

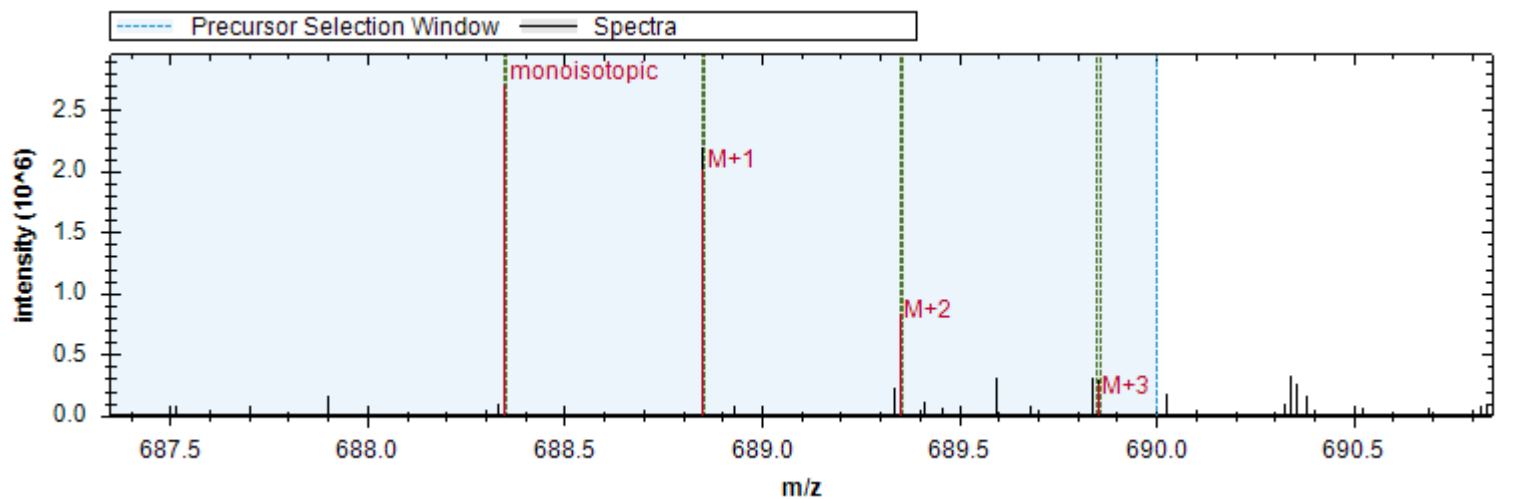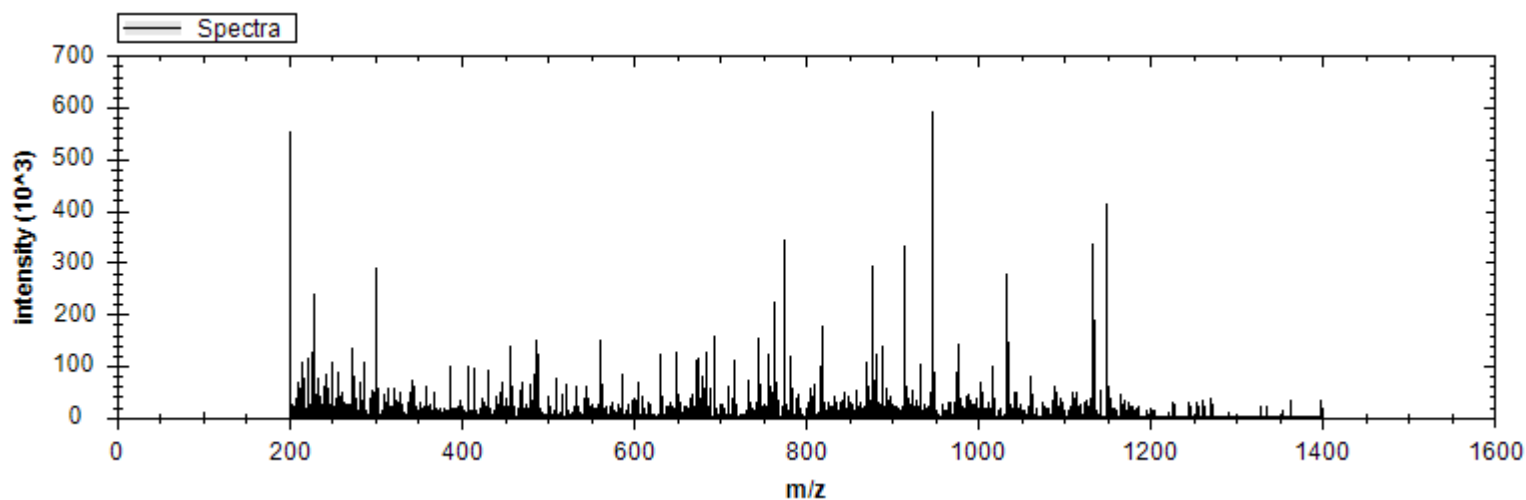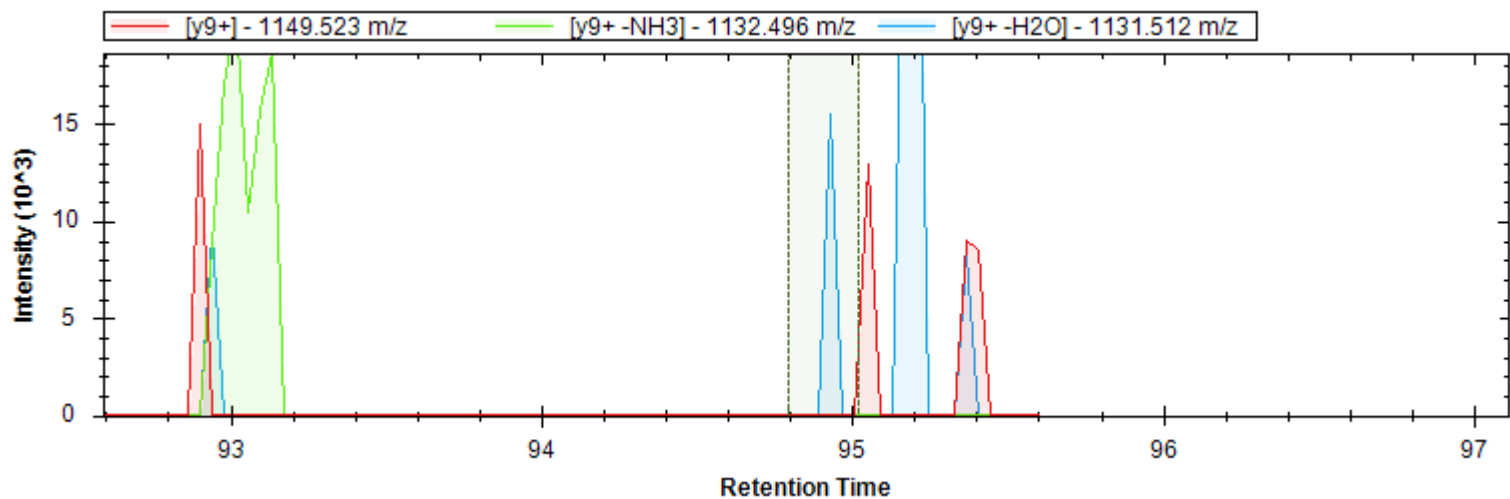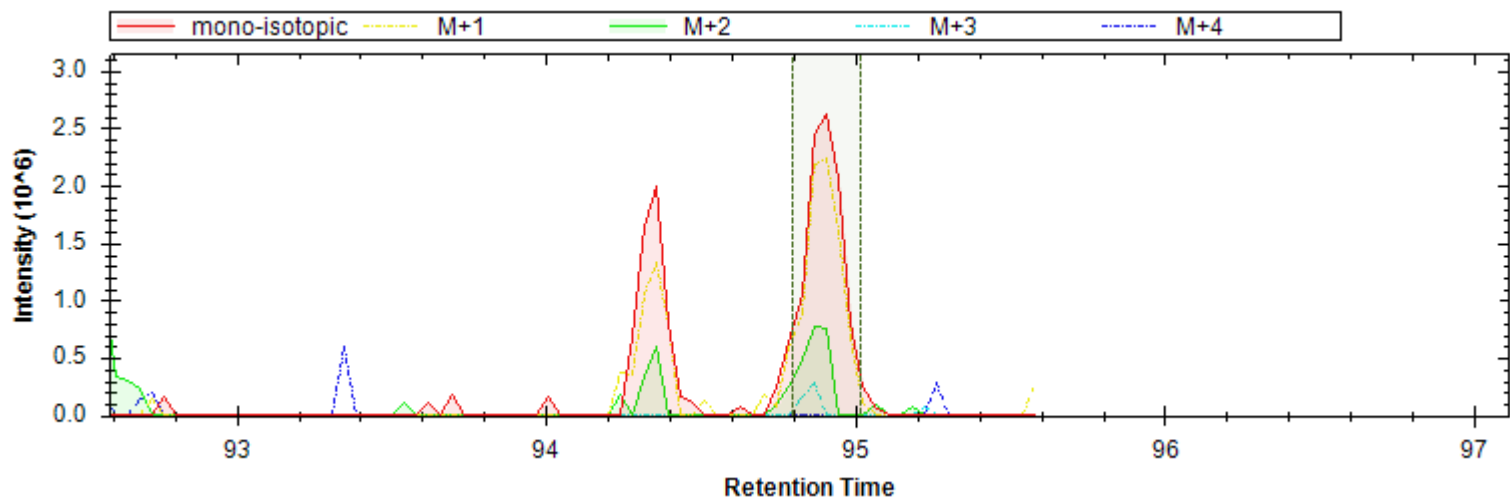

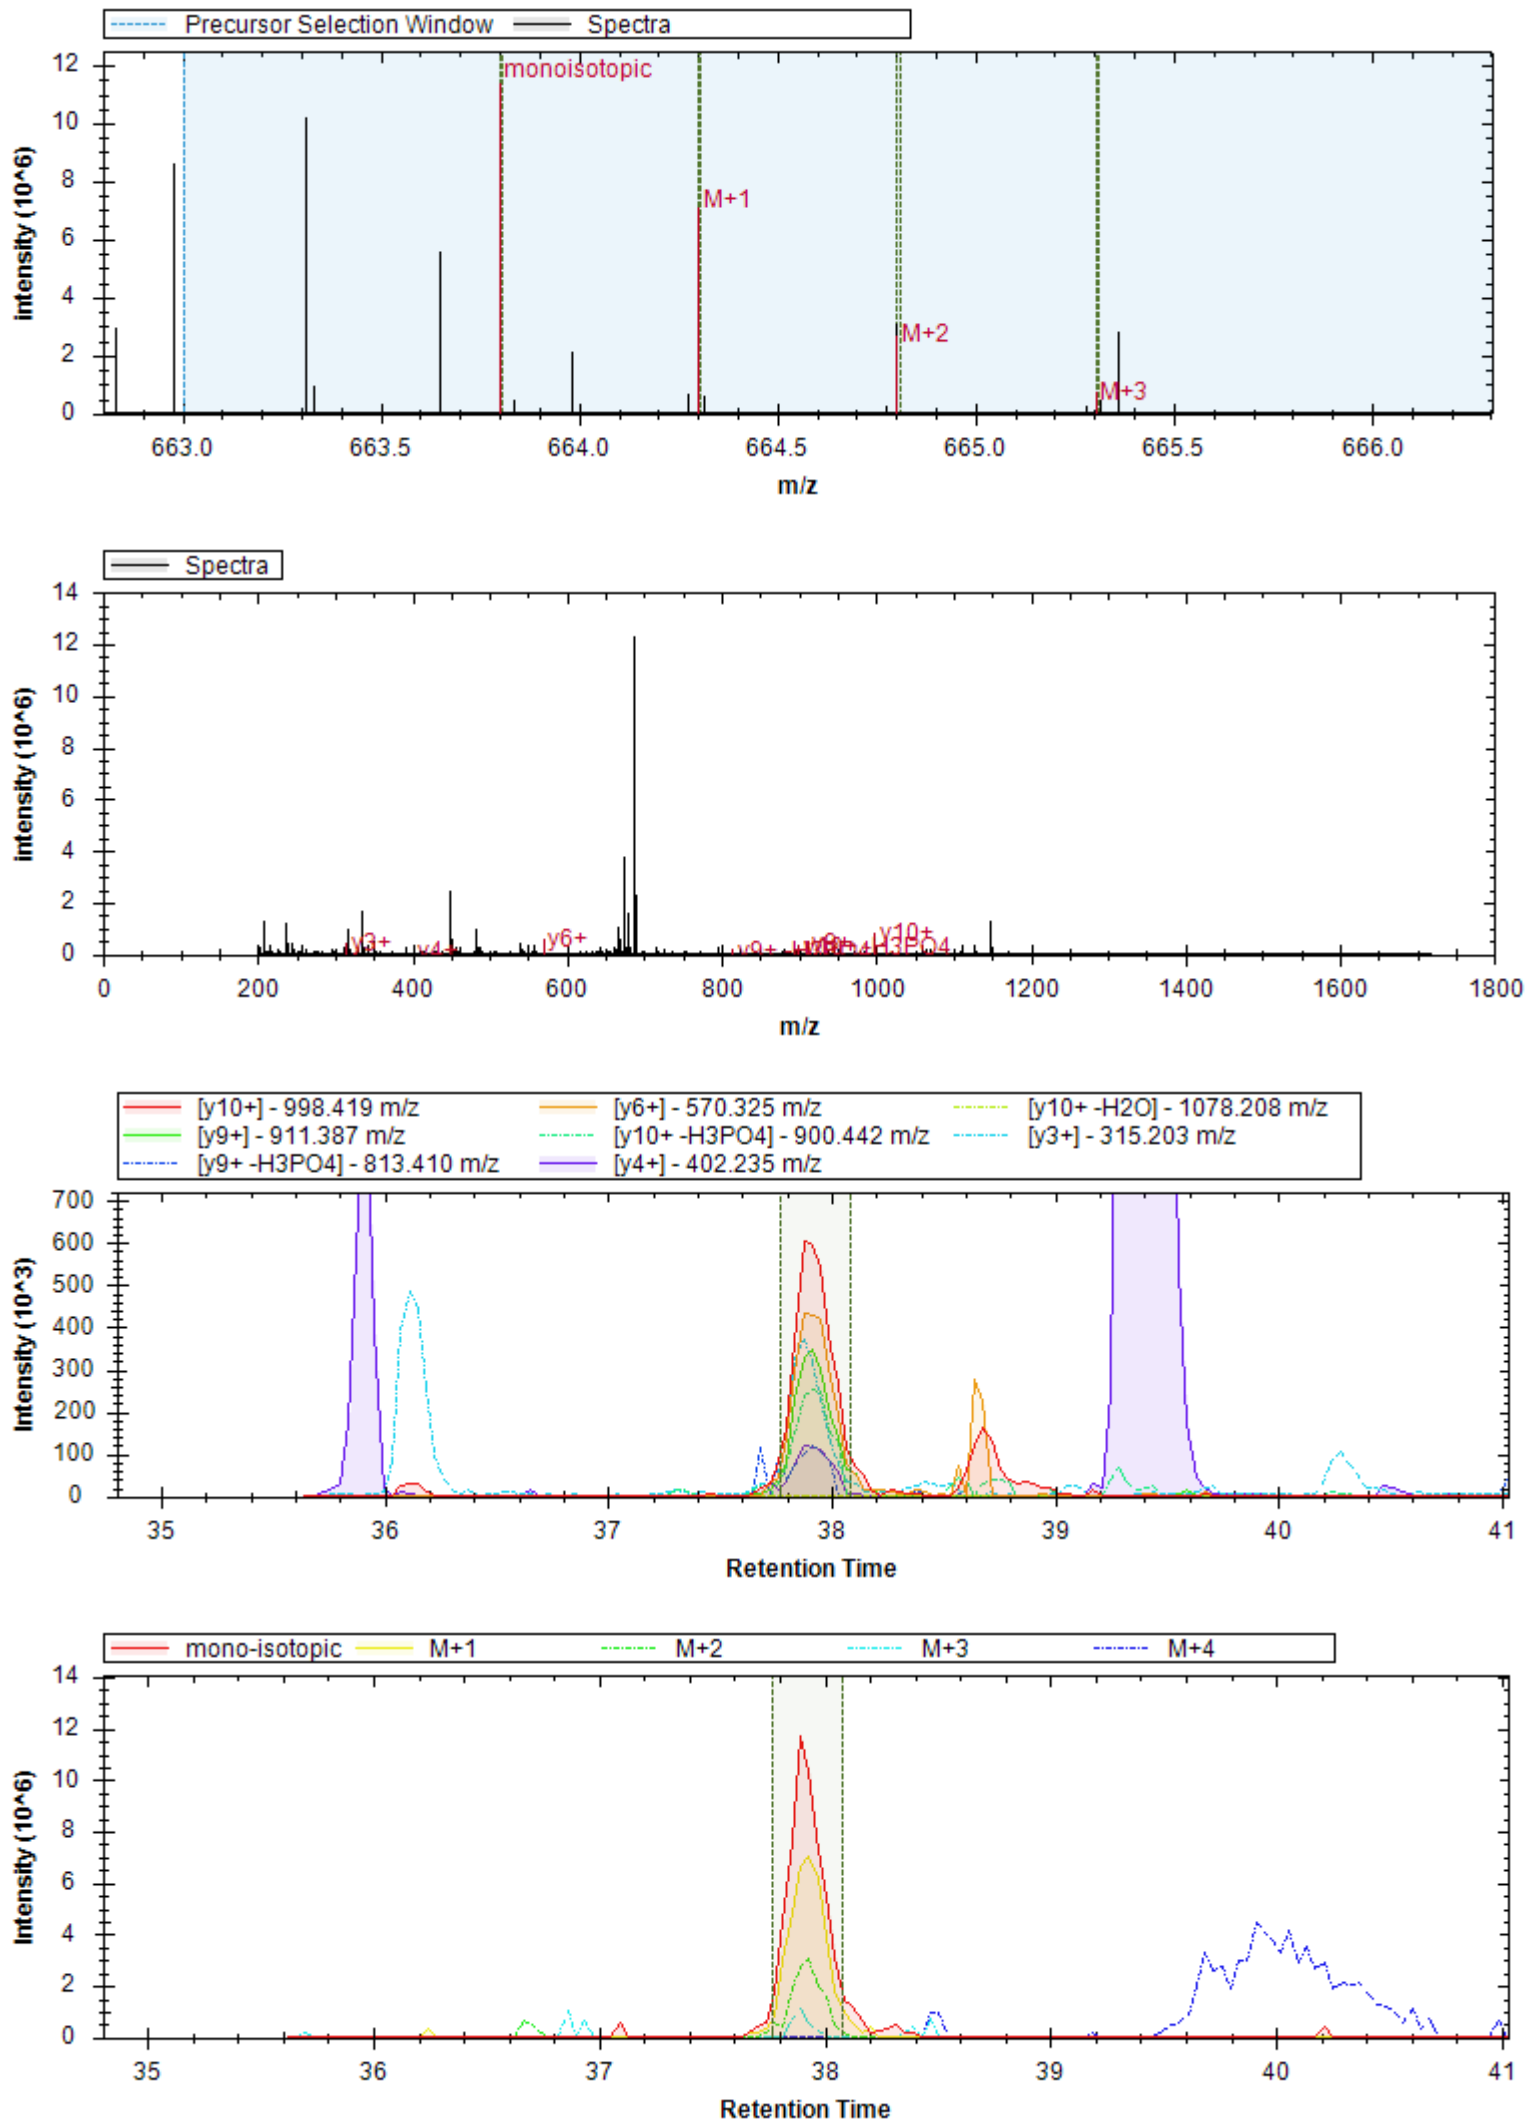

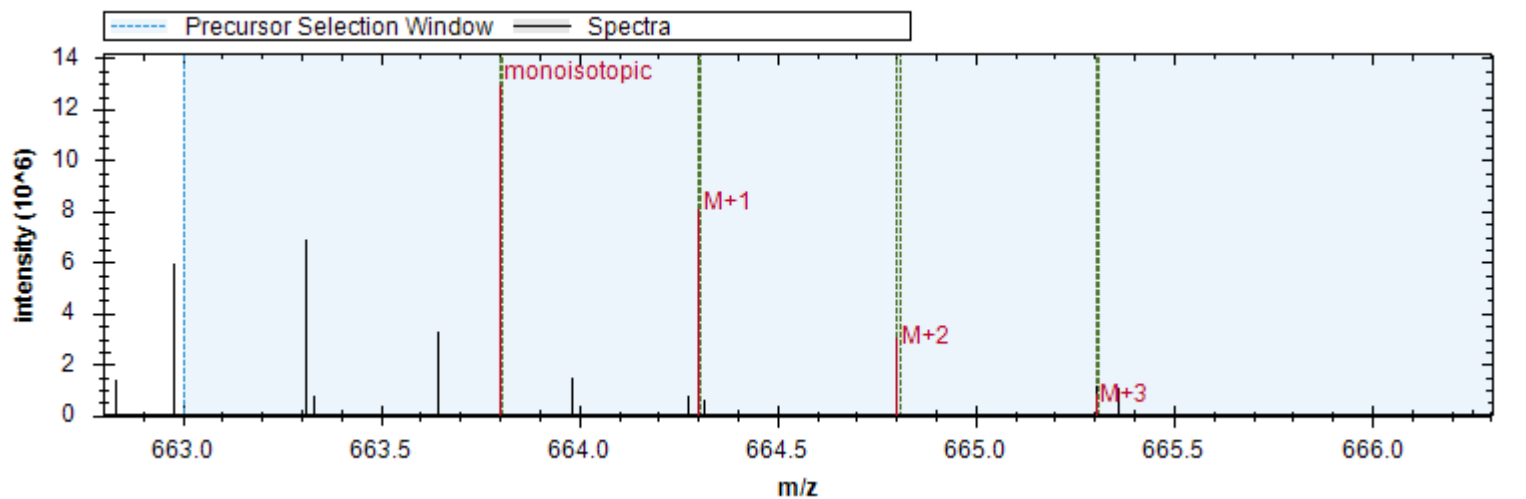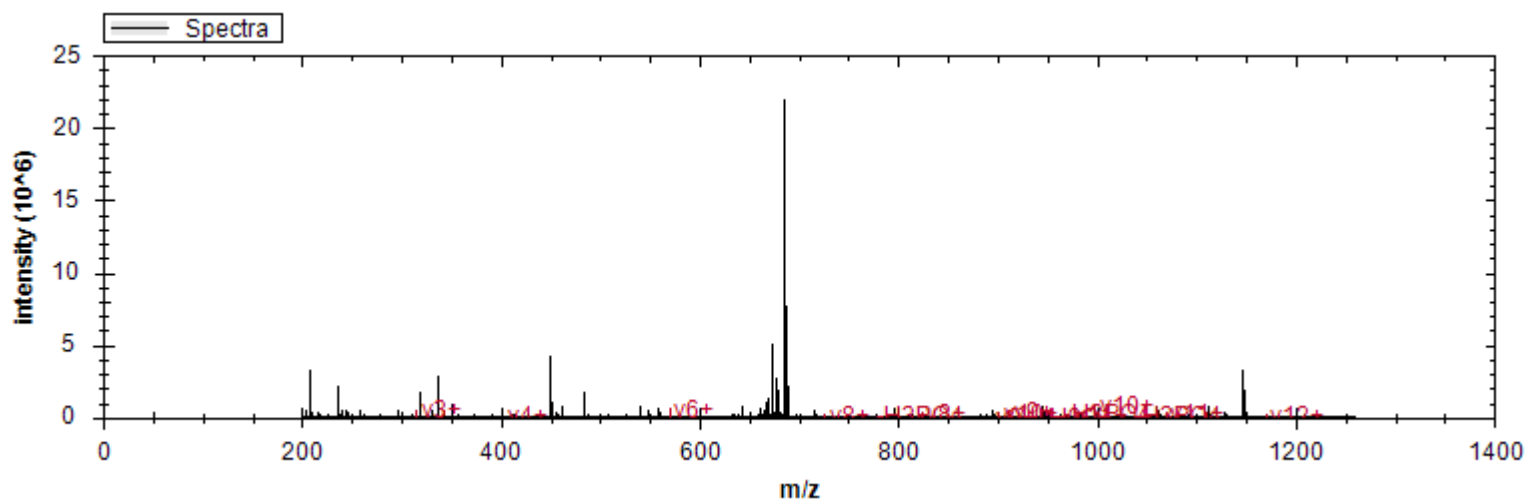

- |                            |                             |                             |
|----------------------------|-----------------------------|-----------------------------|
| [y10+] - 998.419 m/z       | [y6+] - 570.325 m/z         | [y10+ -H3PO4] - 900.442 m/z |
| [y9+] - 911.387 m/z        | [y11+ -H2O] - 1149.246 m/z  | [y3+] - 315.203 m/z         |
| [y8+ -H3PO4] - 726.378 m/z | [y11+] - 1069.456 m/z       | [y8+] - 824.355 m/z         |
| [y4+] - 402.235 m/z        | [y9+ -H3PO4] - 813.410 m/z  | [y8+ -H2O] - 904.144 m/z    |
| [y10+ -H2O] - 1078.208 m/z | [y11+ -H3PO4] - 971.479 m/z | [b5+] - 416.214 m/z         |
| [y10+ -NH3] - 981.393 m/z  | [y12+] - 1170.504 m/z       | [y9+ -H2O] - 893.377 m/z    |

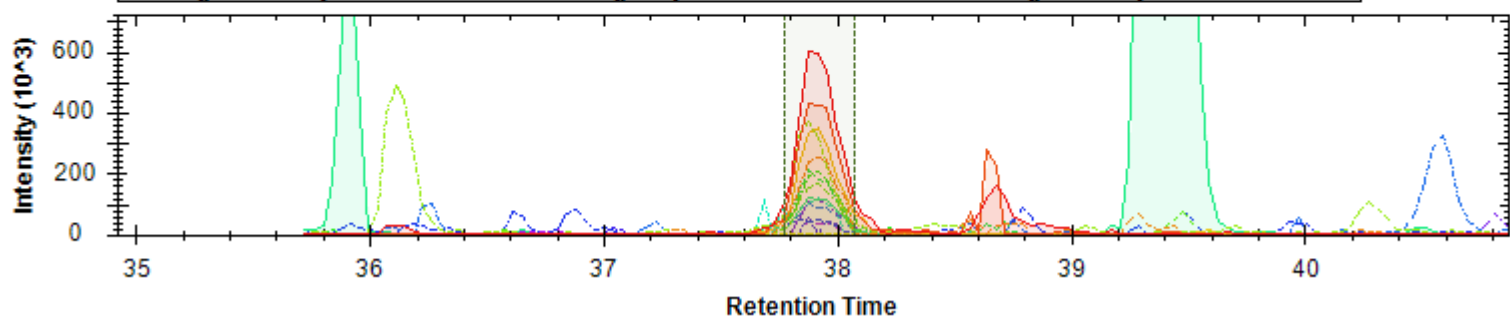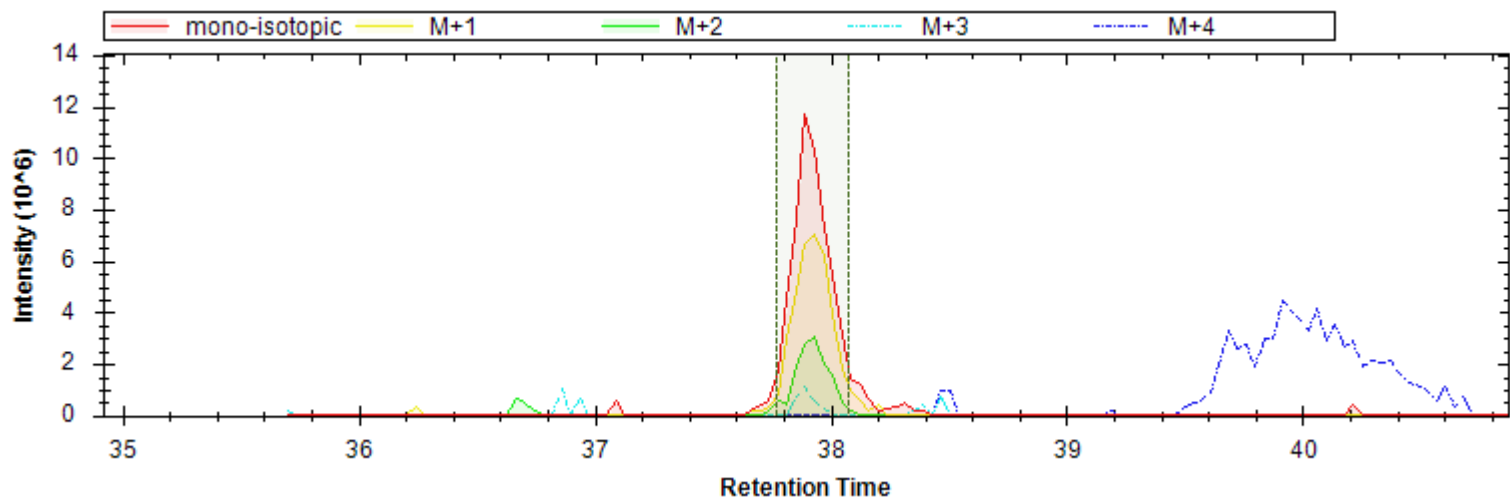

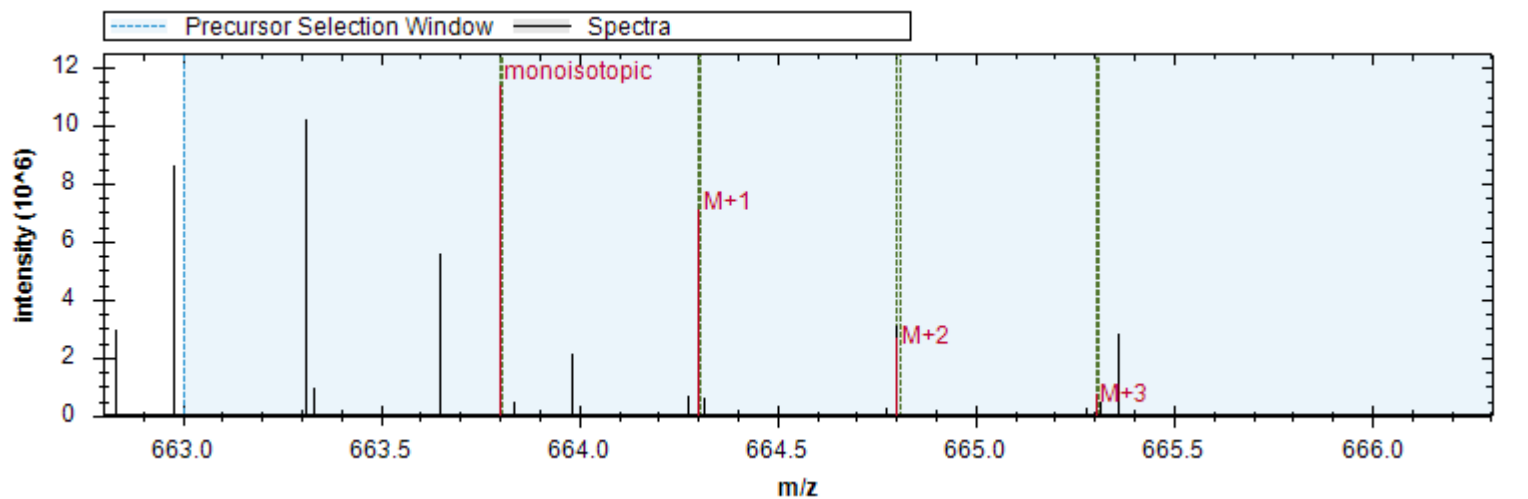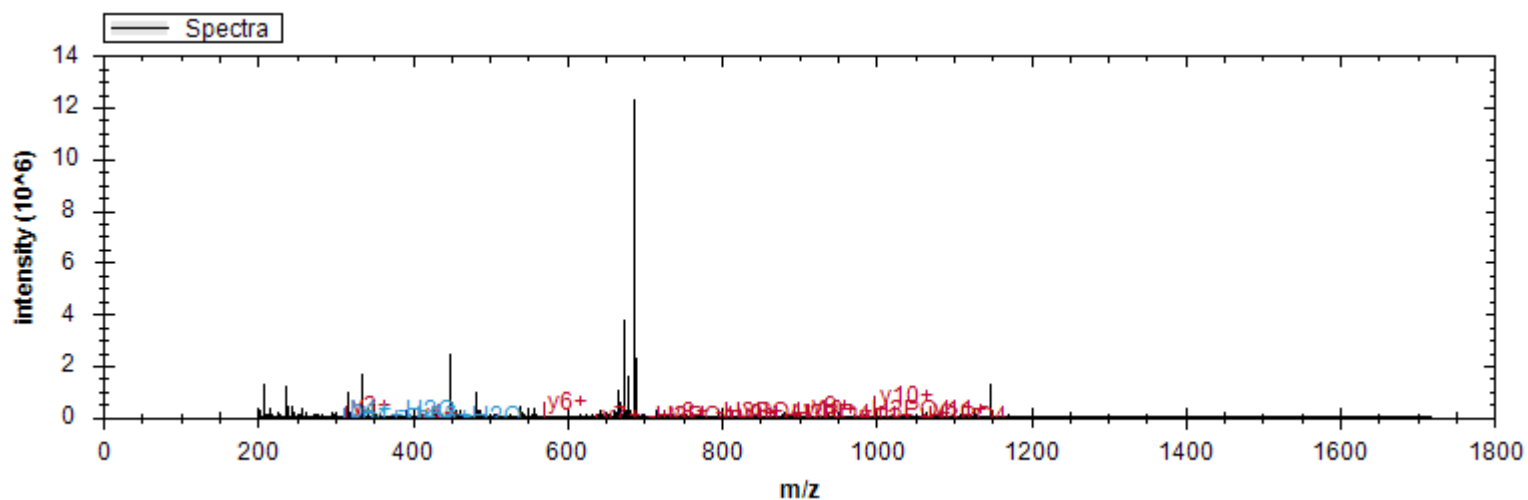

- |                             |                             |                            |
|-----------------------------|-----------------------------|----------------------------|
| [y6+] - 570.325 m/z         | [y10+] - 998.419 m/z        | [b4+ -H2O] - 311.171 m/z   |
| [y4+ -H2O] - 384.224 m/z    | [y10+ -H3PO4] - 900.442 m/z | [y9+] - 911.387 m/z        |
| [y3+] - 315.203 m/z         | [y8+ -H3PO4] - 726.378 m/z  | [y4+] - 402.235 m/z        |
| [y8+] - 824.355 m/z         | [b4+] - 329.182 m/z         | [b5+] - 416.214 m/z        |
| [y11+ -H3PO4] - 971.479 m/z | [b5+ -H2O] - 398.203 m/z    | [y11+] - 1069.456 m/z      |
| [y8+ -H2O] - 904.144 m/z    | [y9+ -H3PO4] - 813.410 m/z  | [y7+ -H3PO4] - 639.346 m/z |
| [y11+ -H2O] - 1247.046 m/z  | [y9+ -H2O] - 991.177 m/z    |                            |

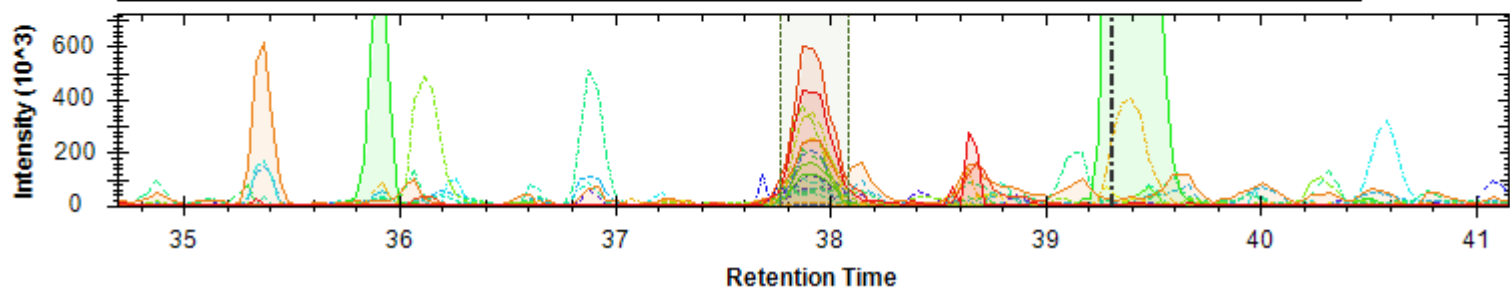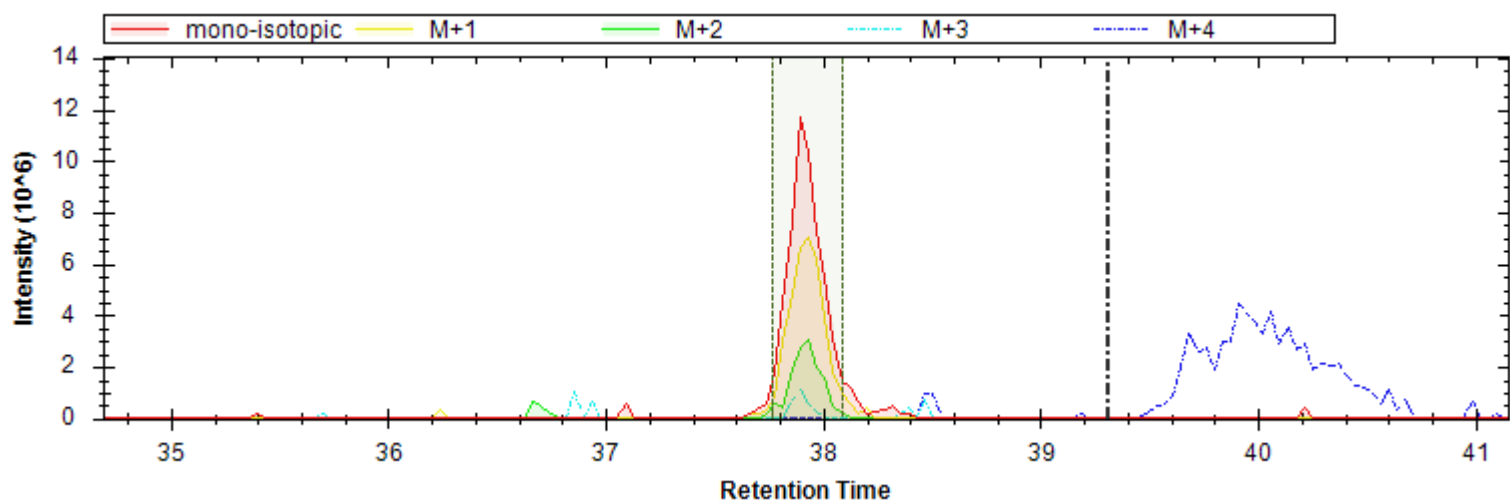



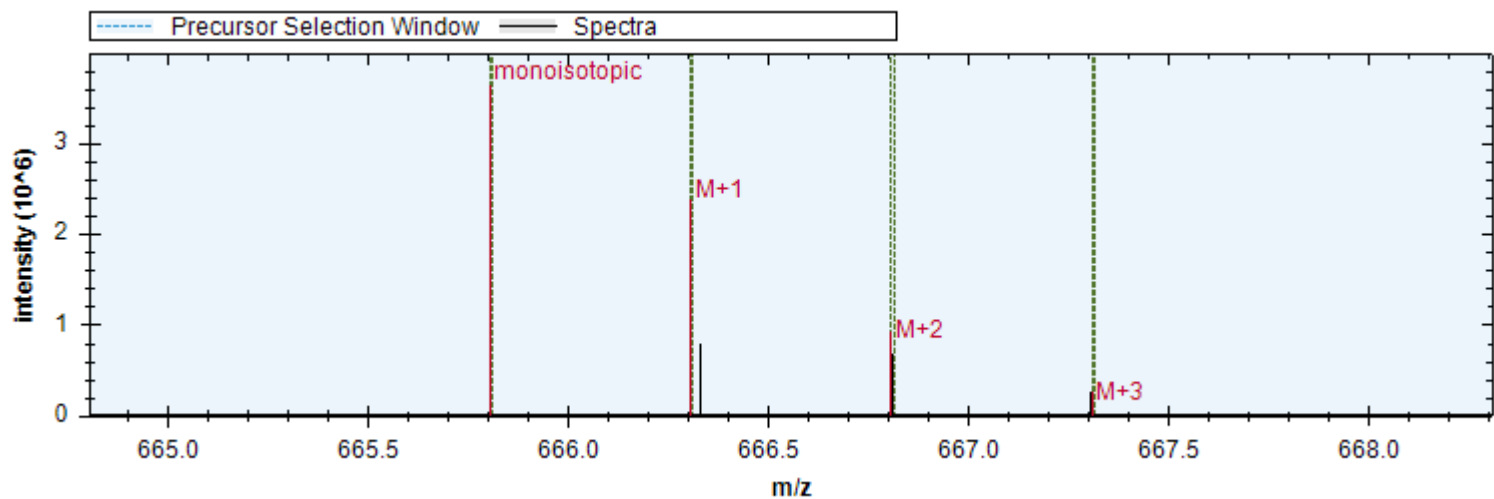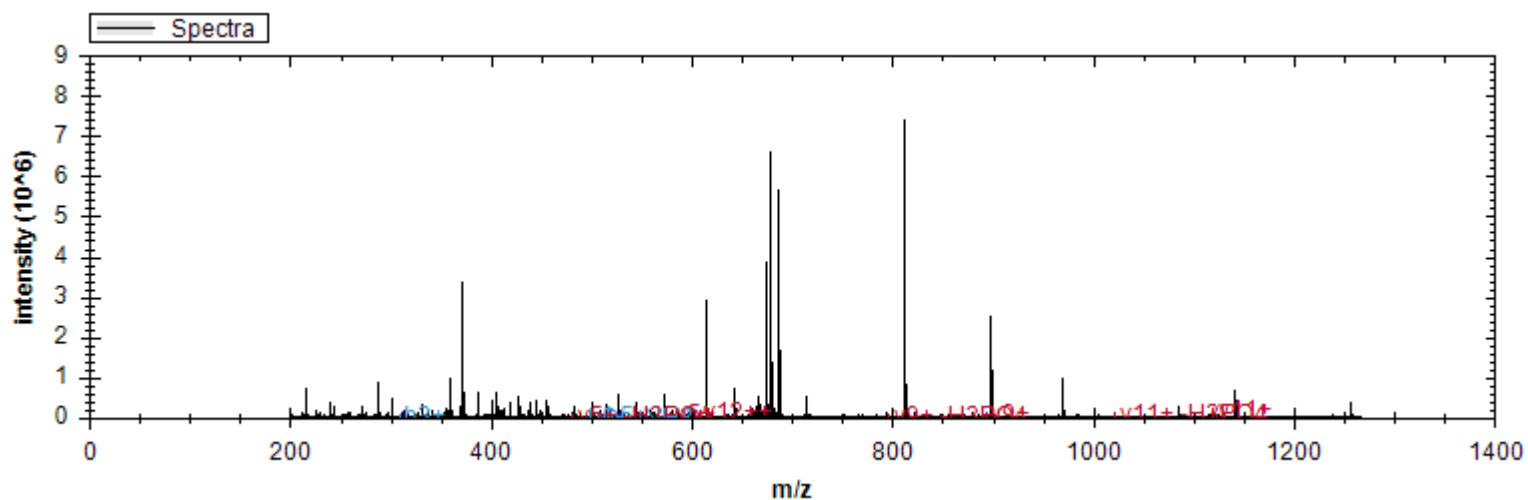

- |                              |                              |                             |
|------------------------------|------------------------------|-----------------------------|
| [y12++ -H3PO4] - 559.796 m/z | [y11+ -H3PO4] - 1021.531 m/z | [y11+] - 1119.508 m/z       |
| [y12++] - 608.784 m/z        | [y5+ -H3PO4] - 481.277 m/z   | [y5+] - 579.254 m/z         |
| [y9+] - 893.413 m/z          | [y9+ -H3PO4] - 795.436 m/z   | [y12++ -H2O] - 599.779 m/z  |
| [y7+] - 751.339 m/z          | [y8+] - 822.376 m/z          | [y6+] - 650.291 m/z         |
| [y8+ -H3PO4] - 724.399 m/z   | [y7+ -H3PO4] - 653.362 m/z   | [y10+ -H3PO4] - 924.479 m/z |
| [b5+ -NH3] - 492.209 m/z     | [y6+ -H3PO4] - 552.314 m/z   | [b3+] - 309.156 m/z         |
| [y9+ -H2O] - 875.402 m/z     | [y11+ -H2O] - 1199.298 m/z   | [b5+] - 509.235 m/z         |
| [y3+ -H3PO4] - 313.187 m/z   | [b4+ -NH3] - 421.172 m/z     |                             |

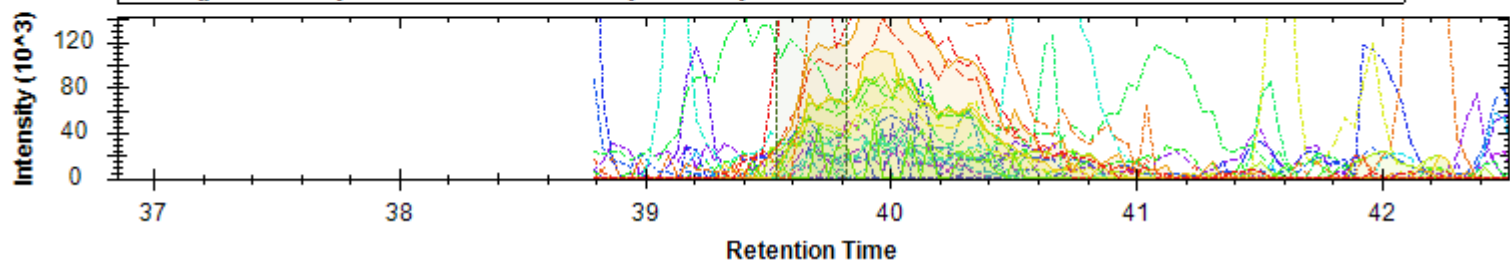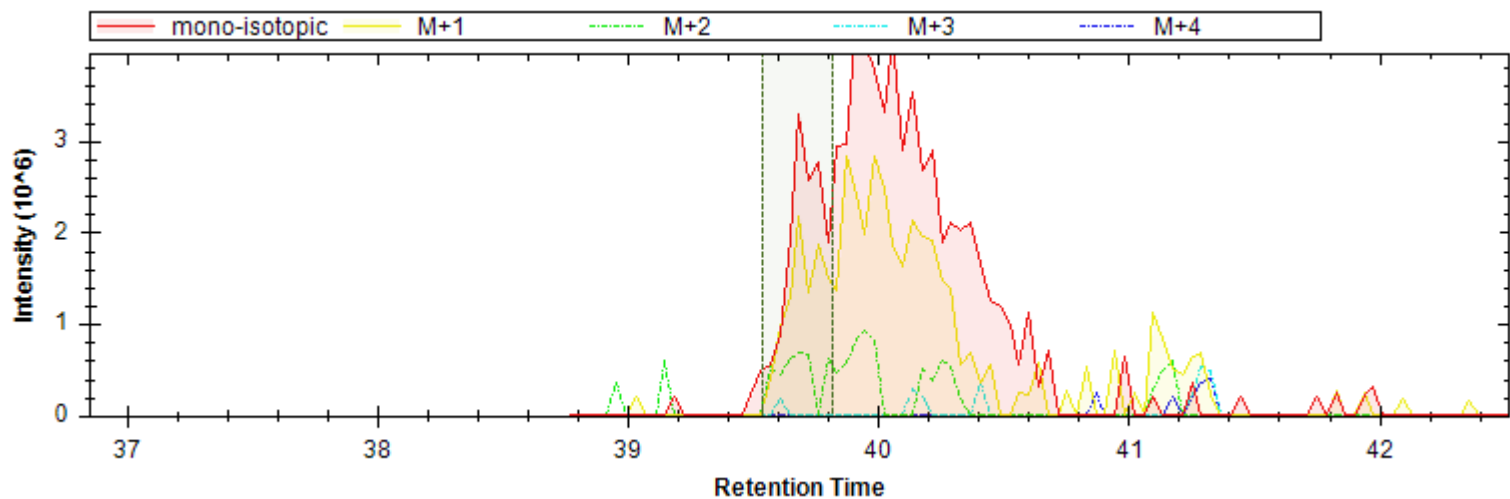

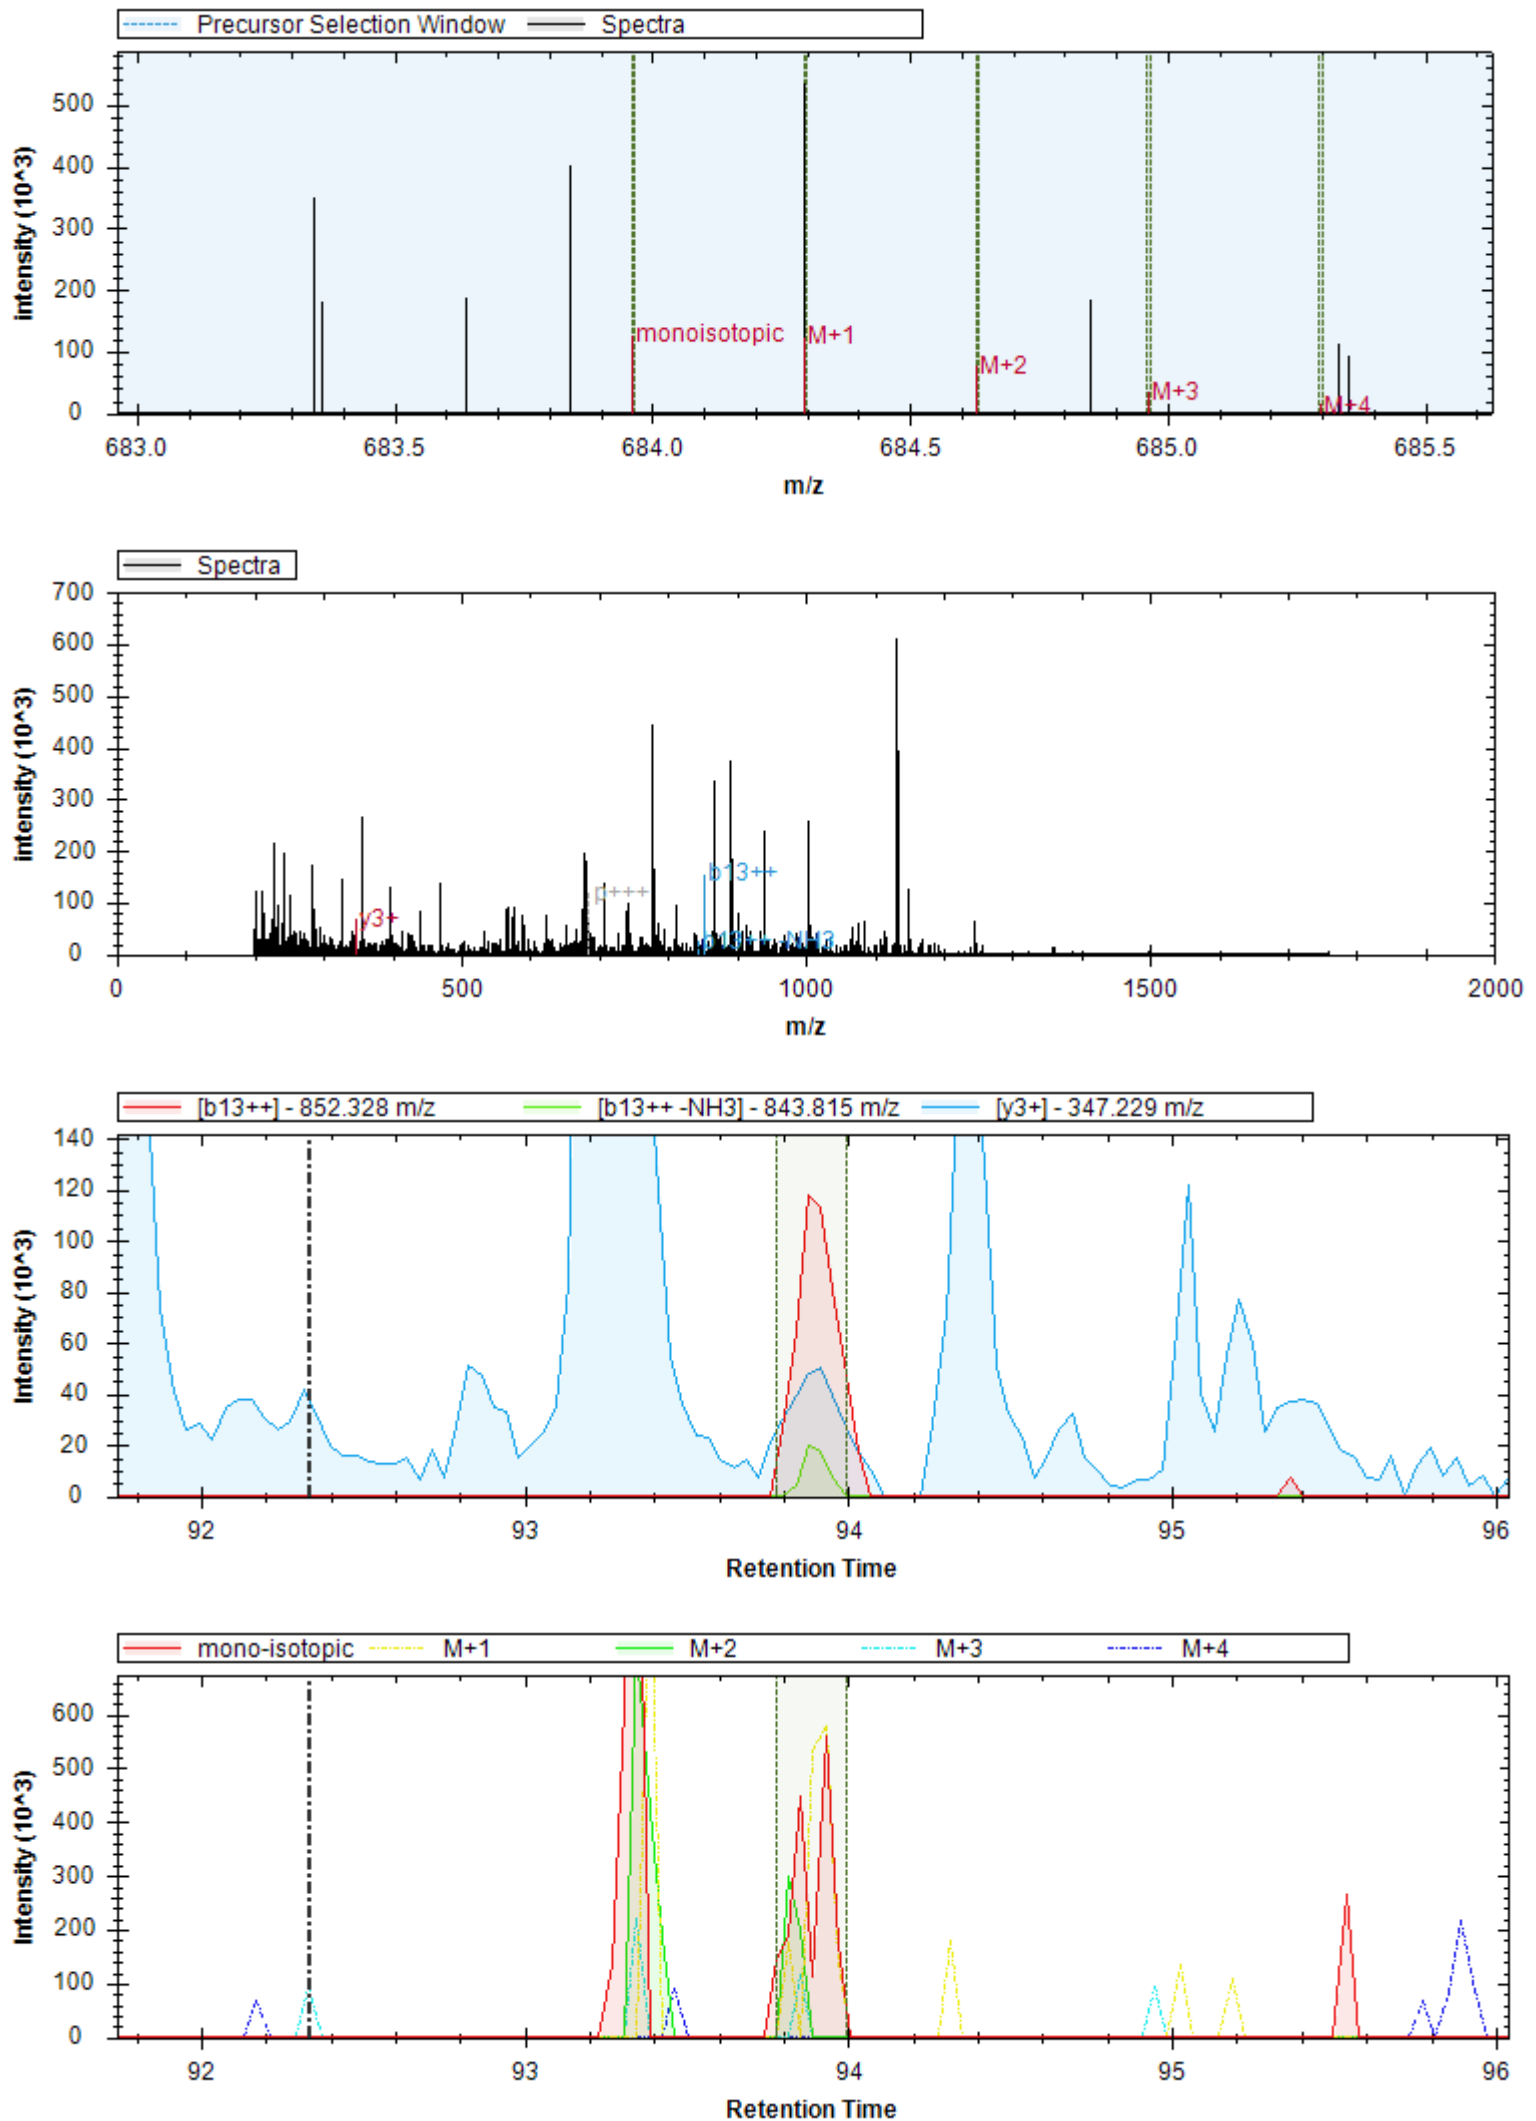

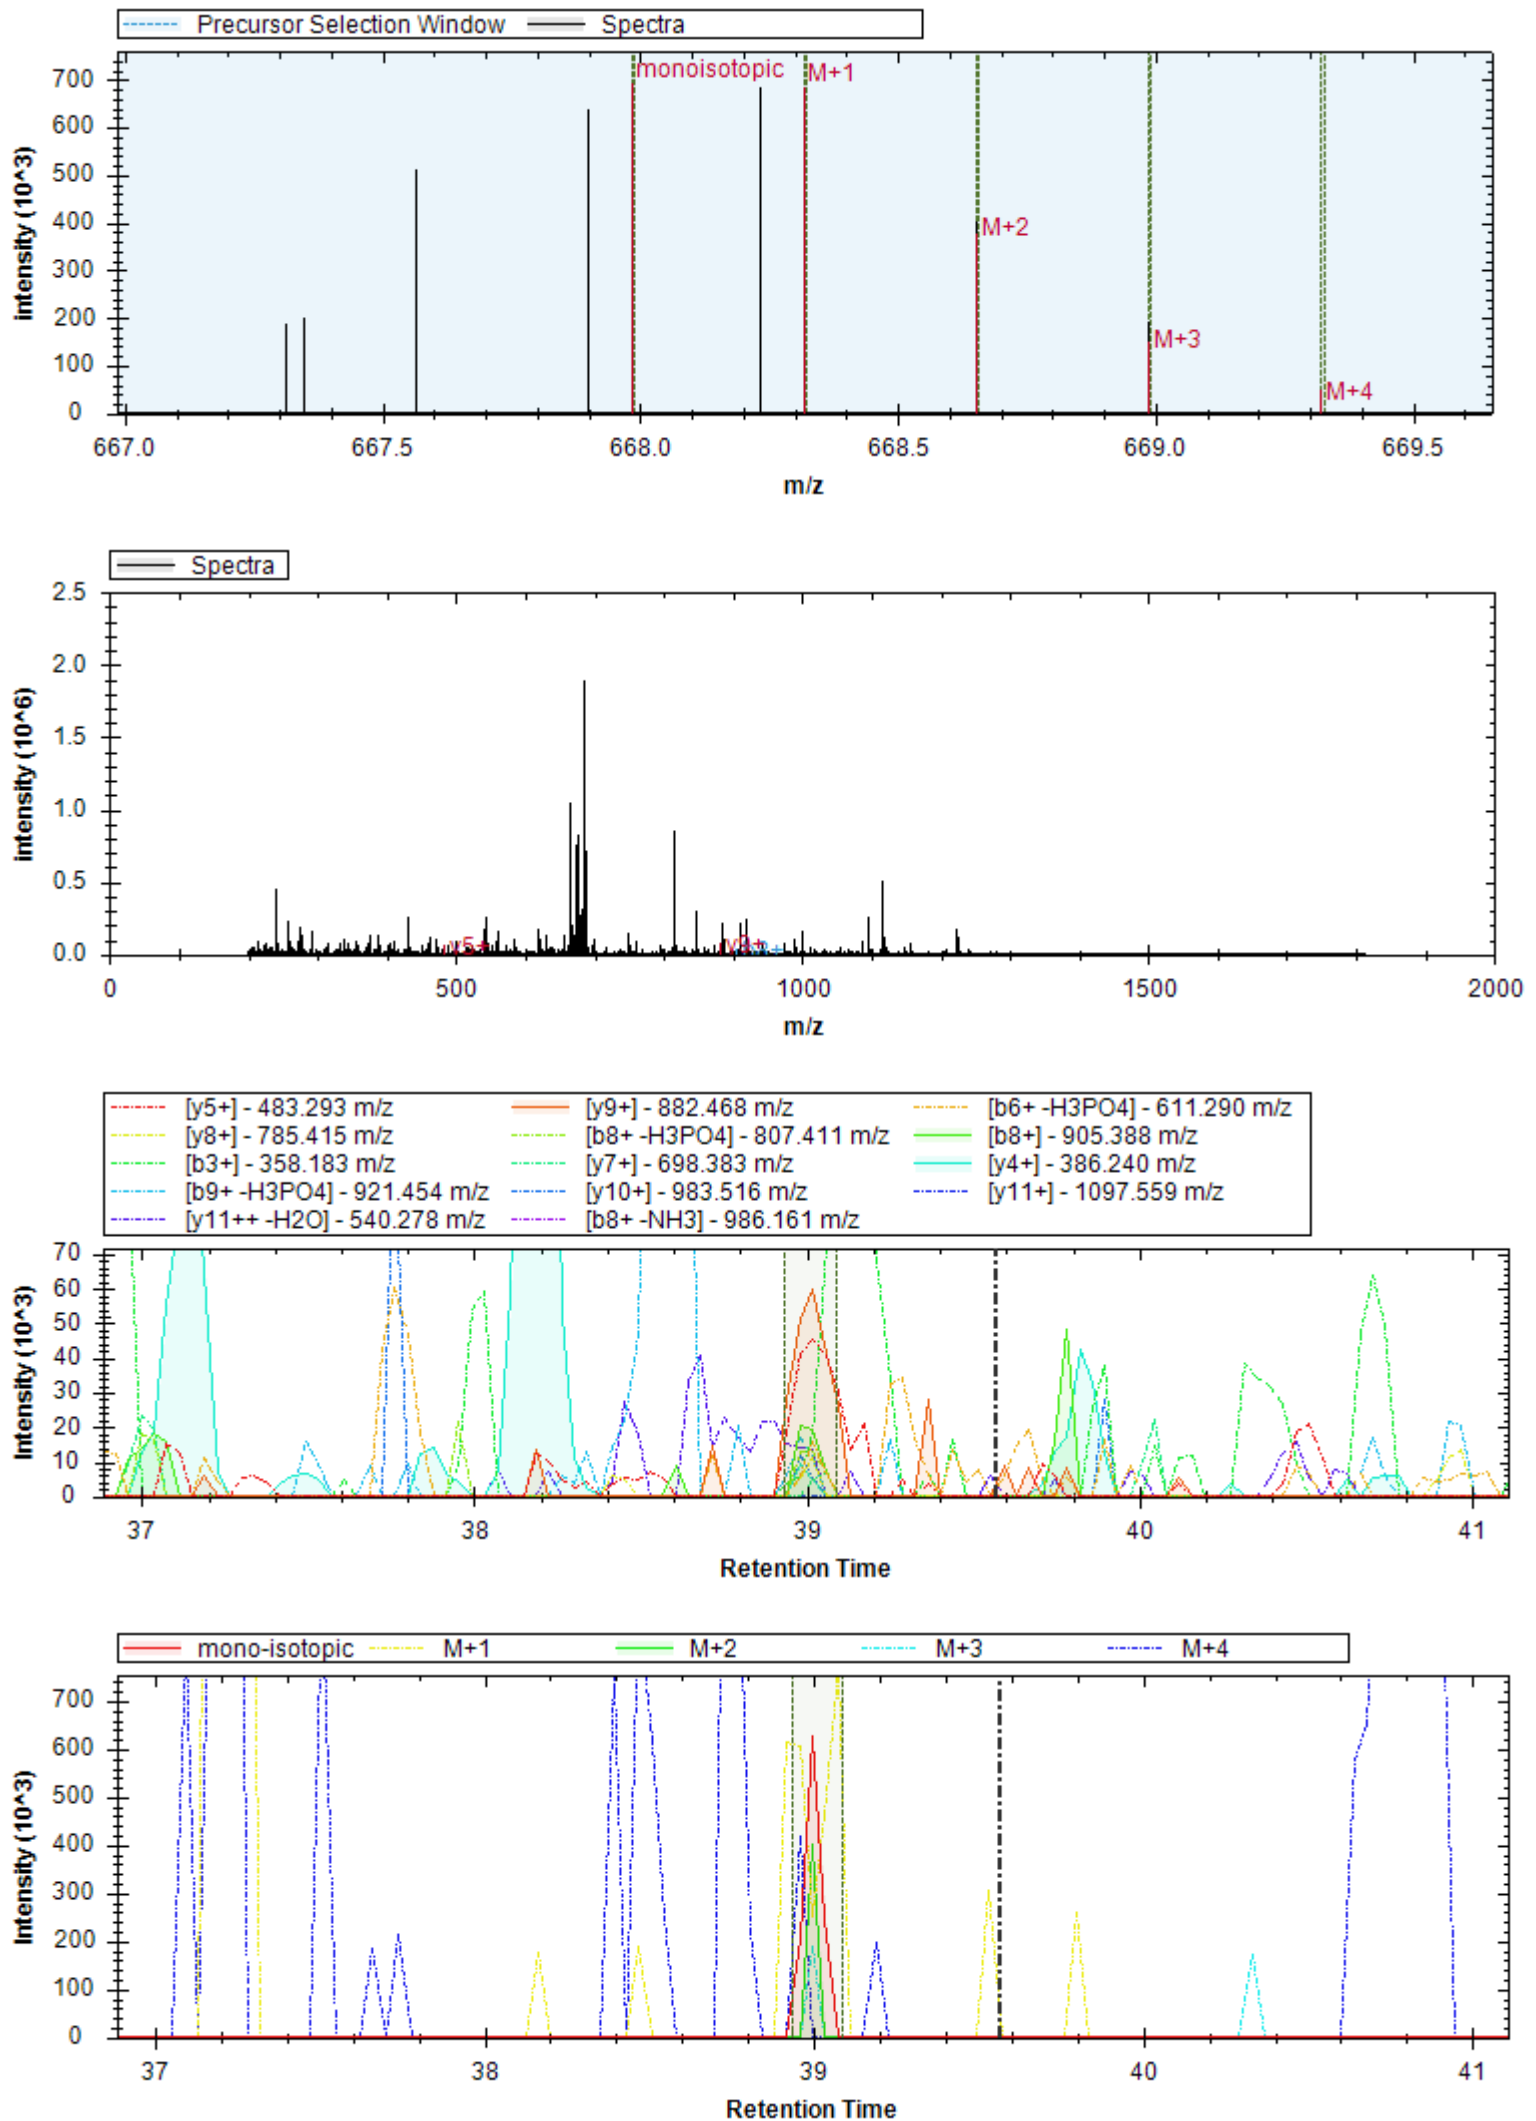

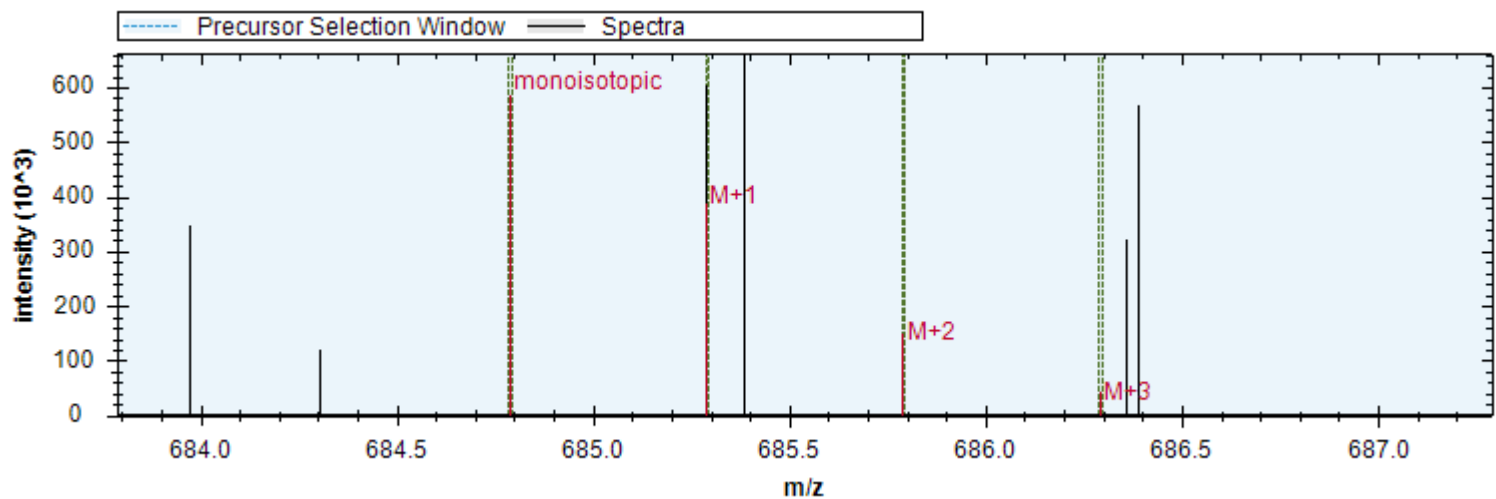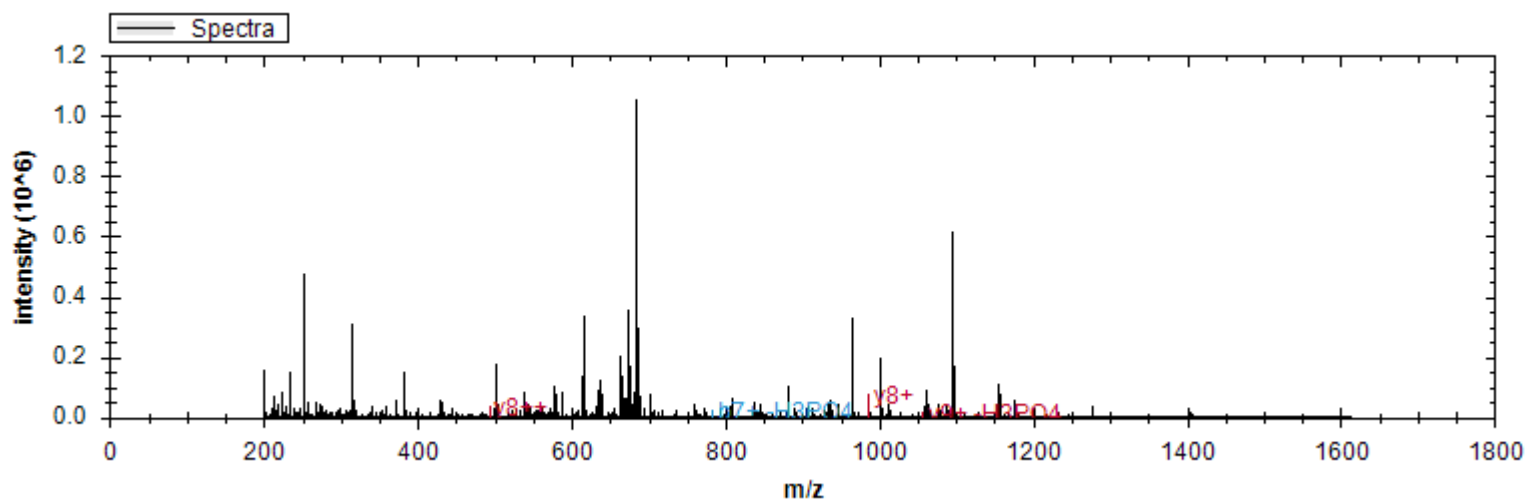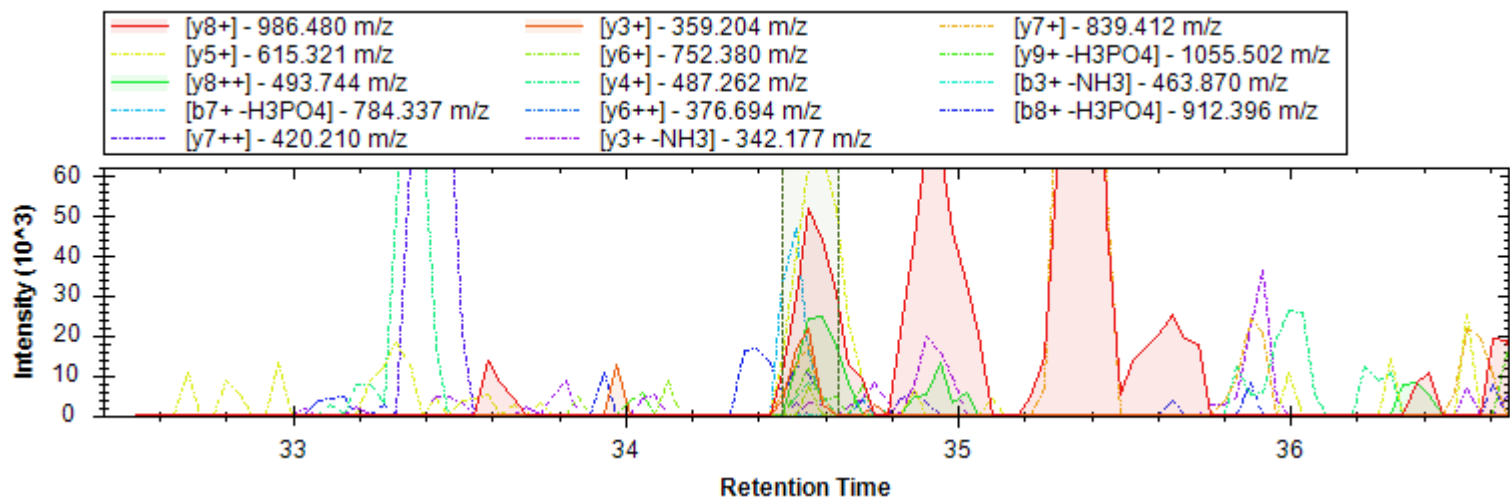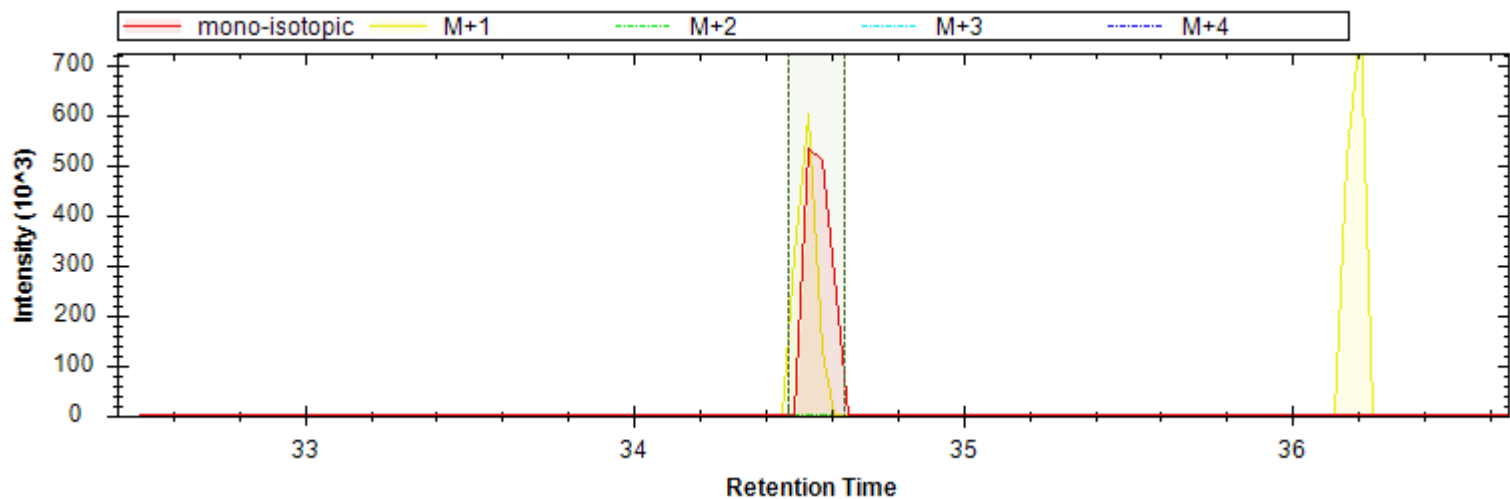

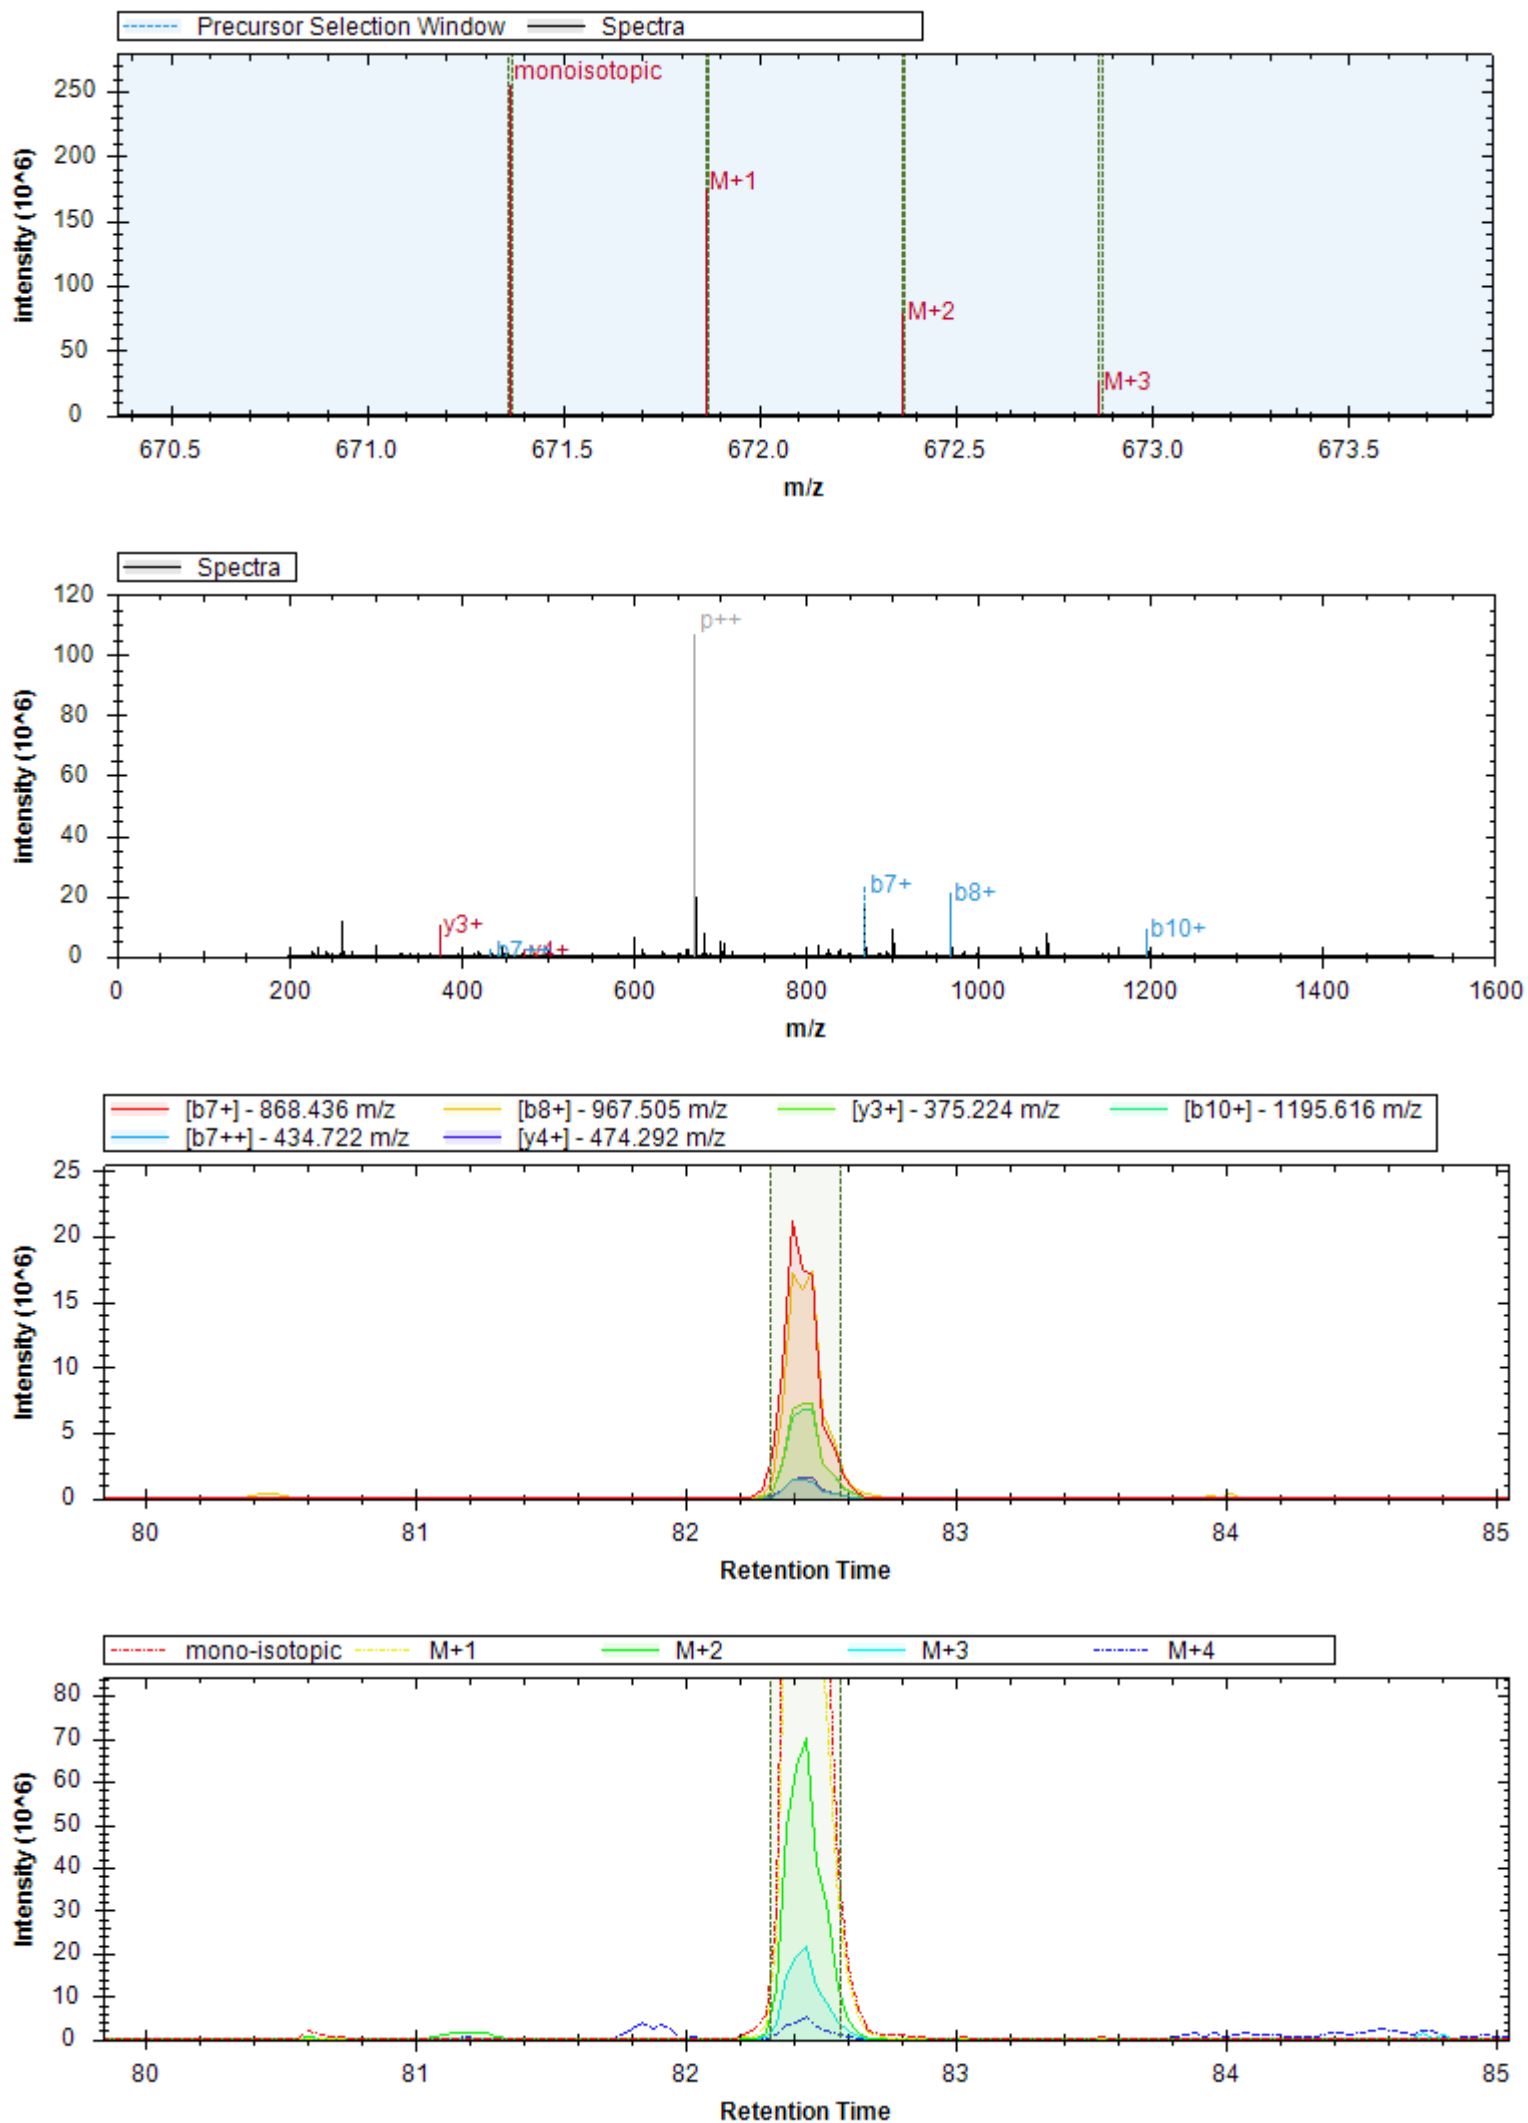

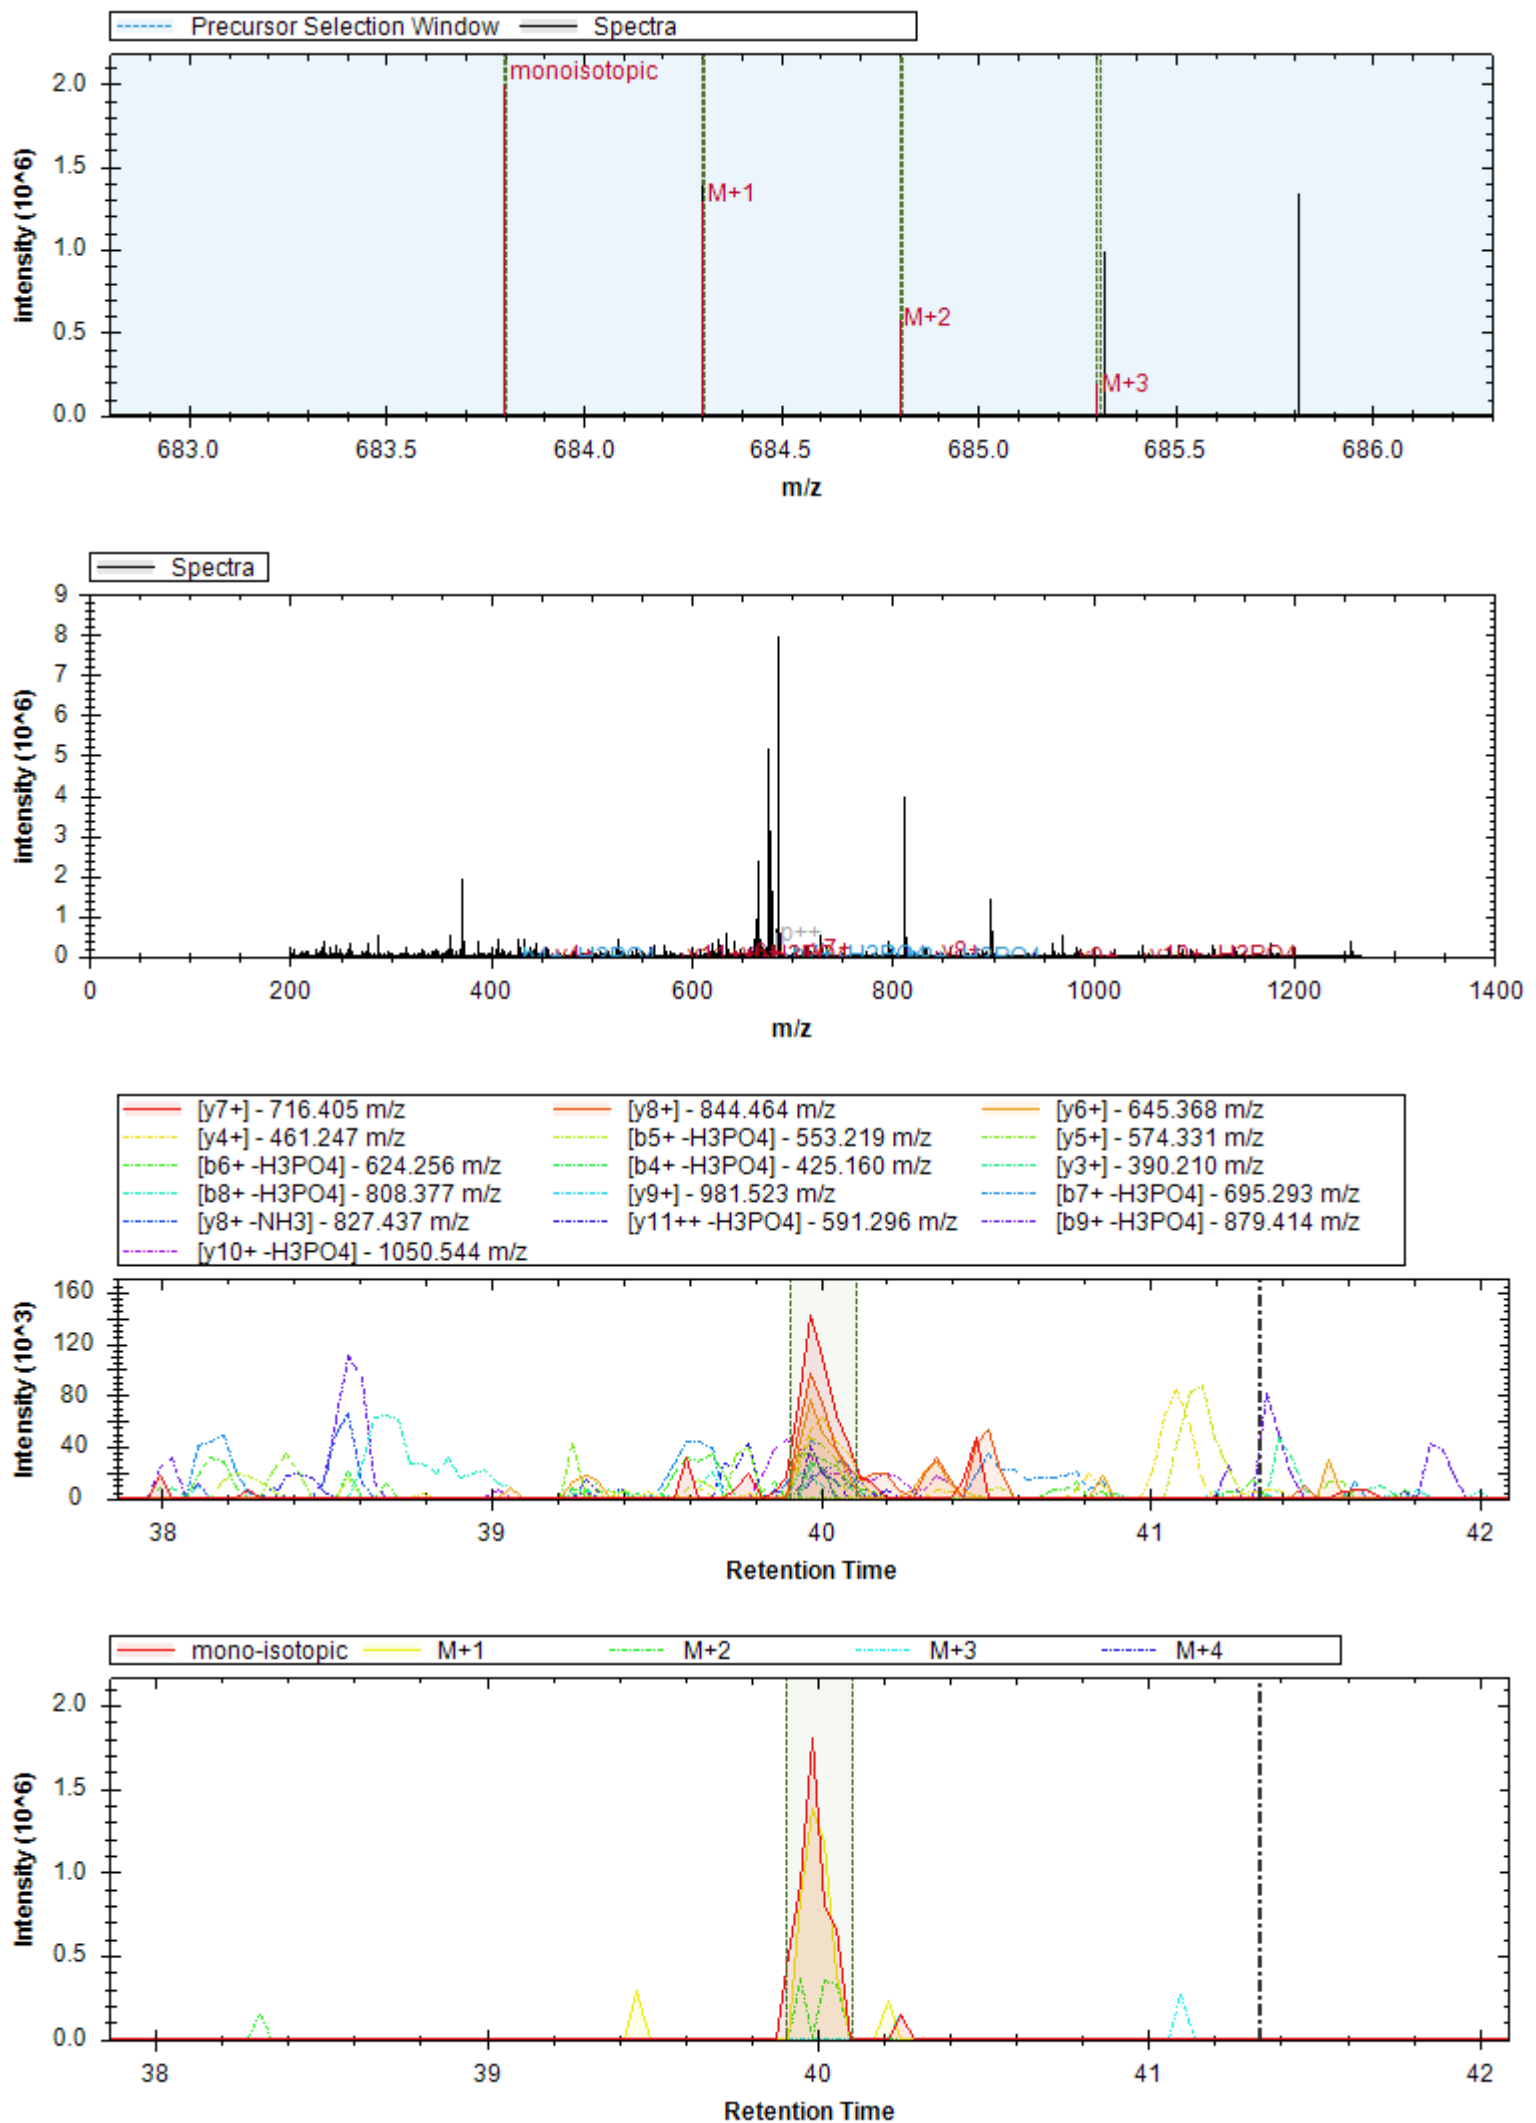

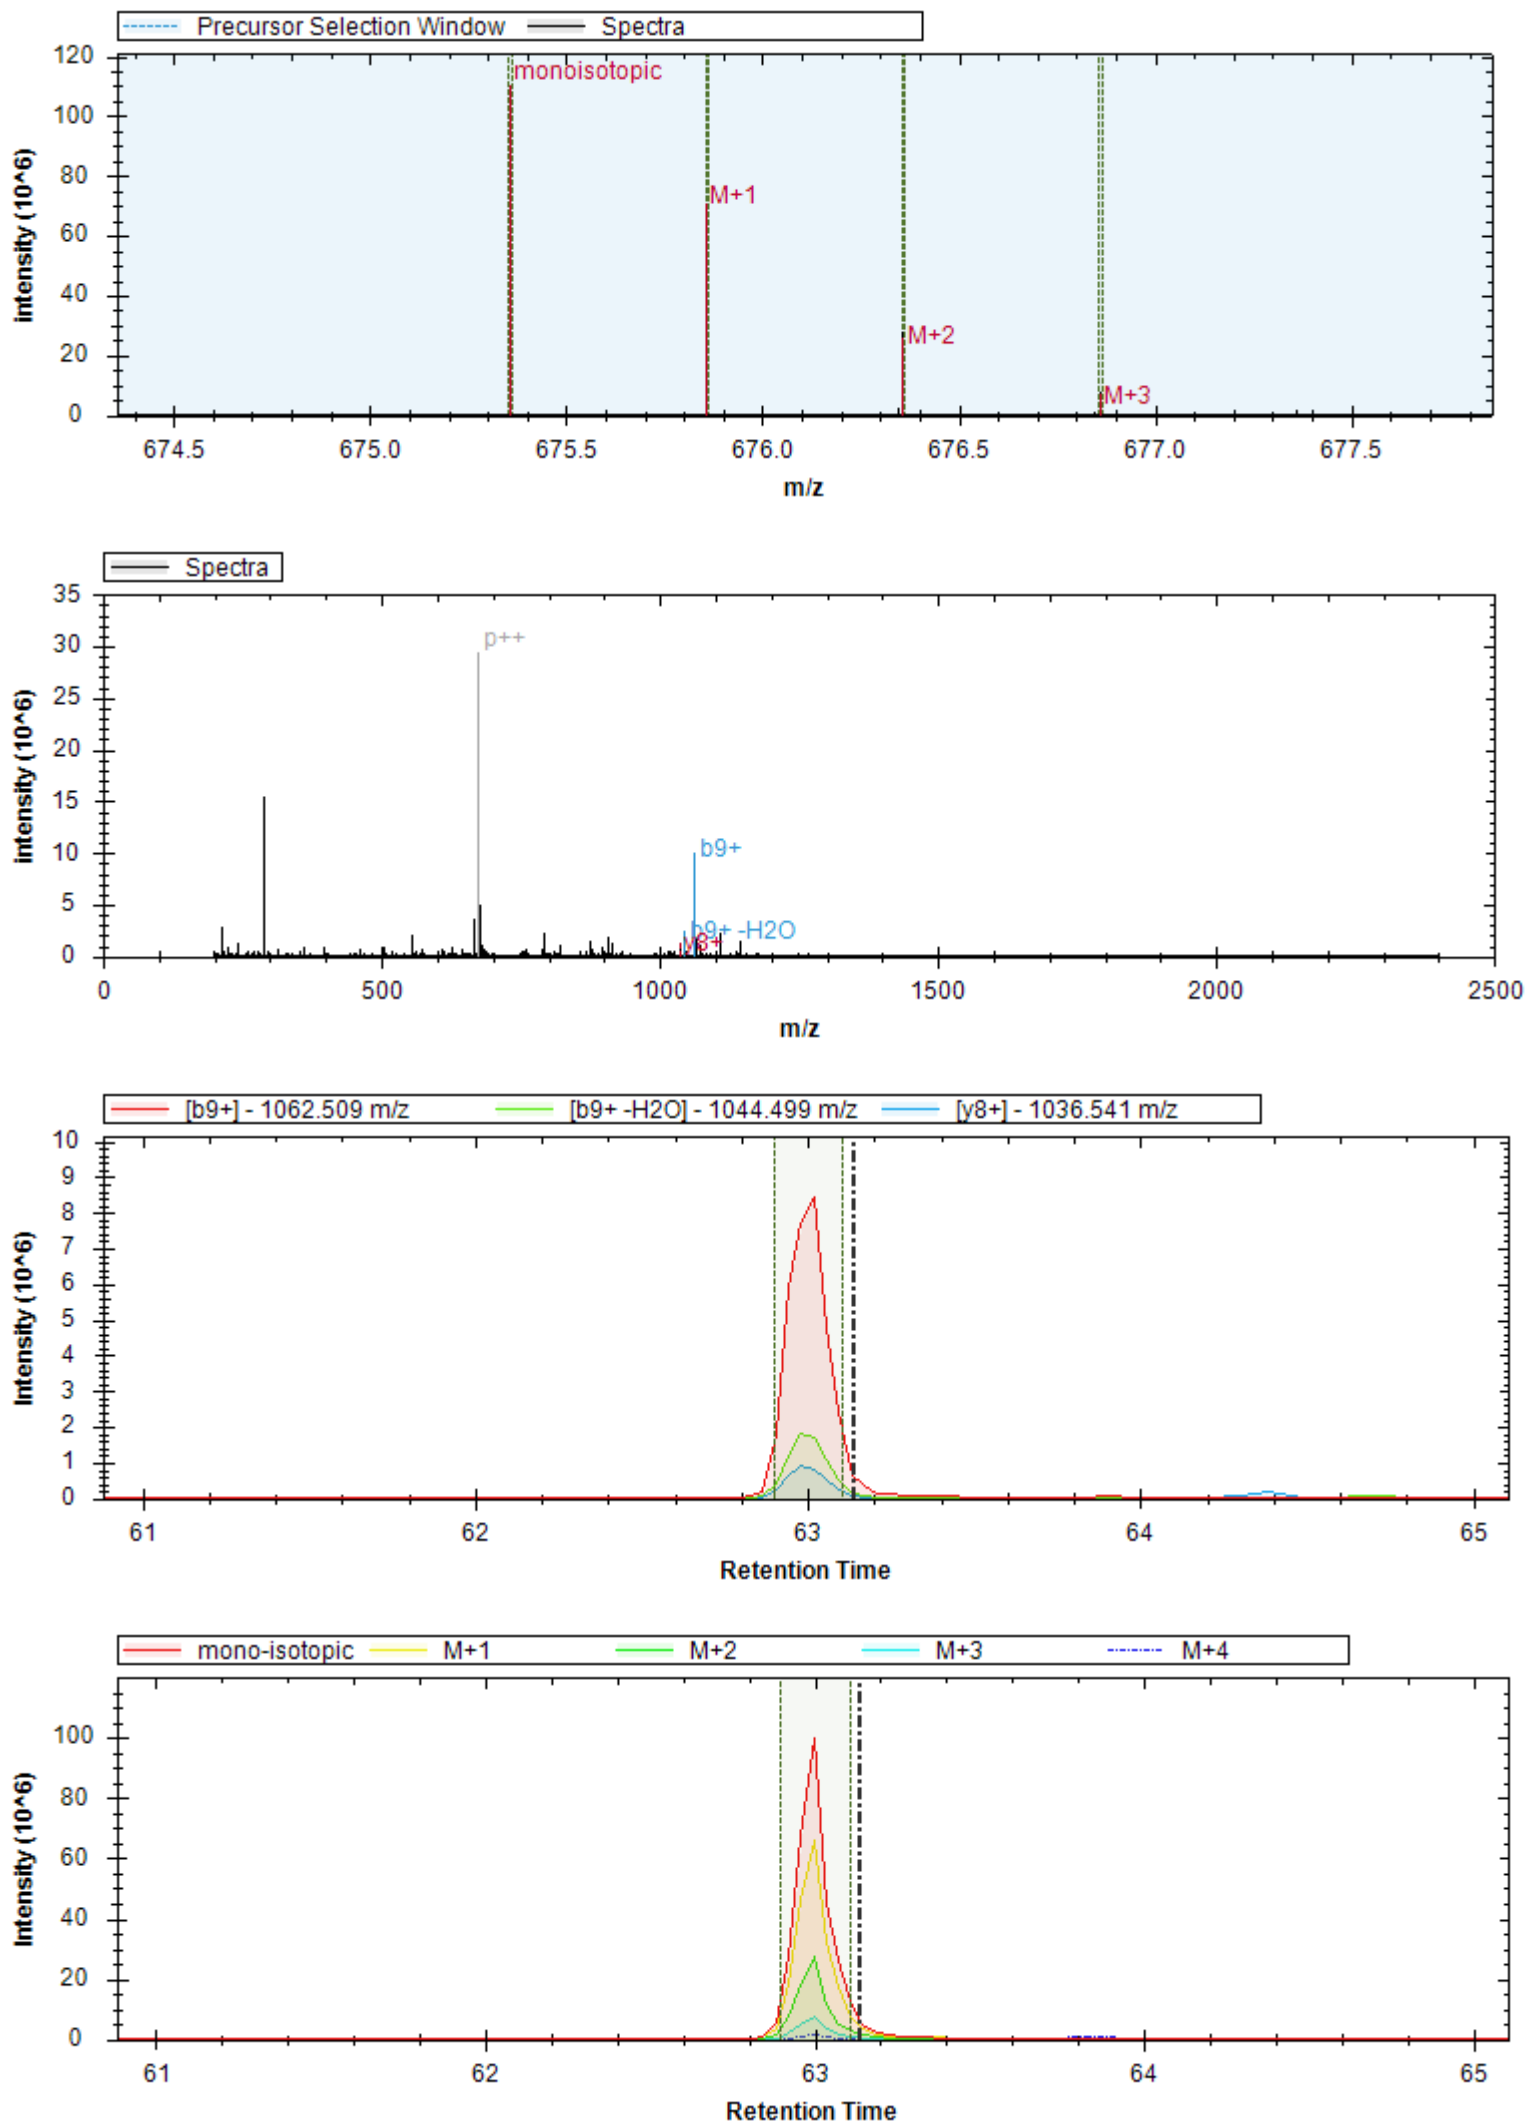

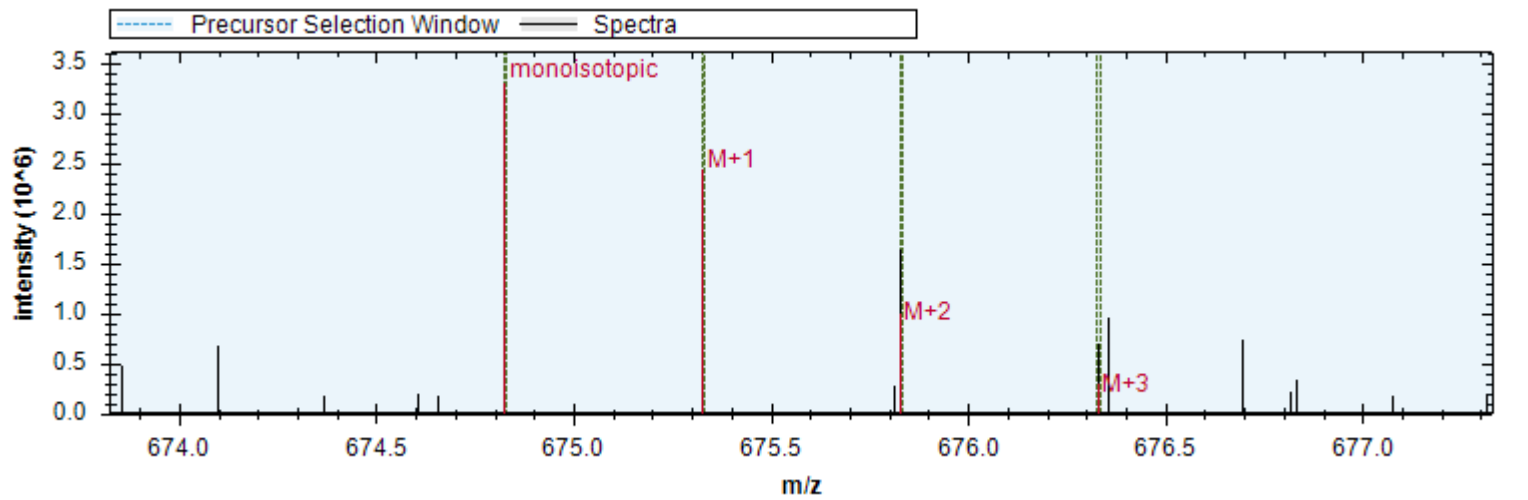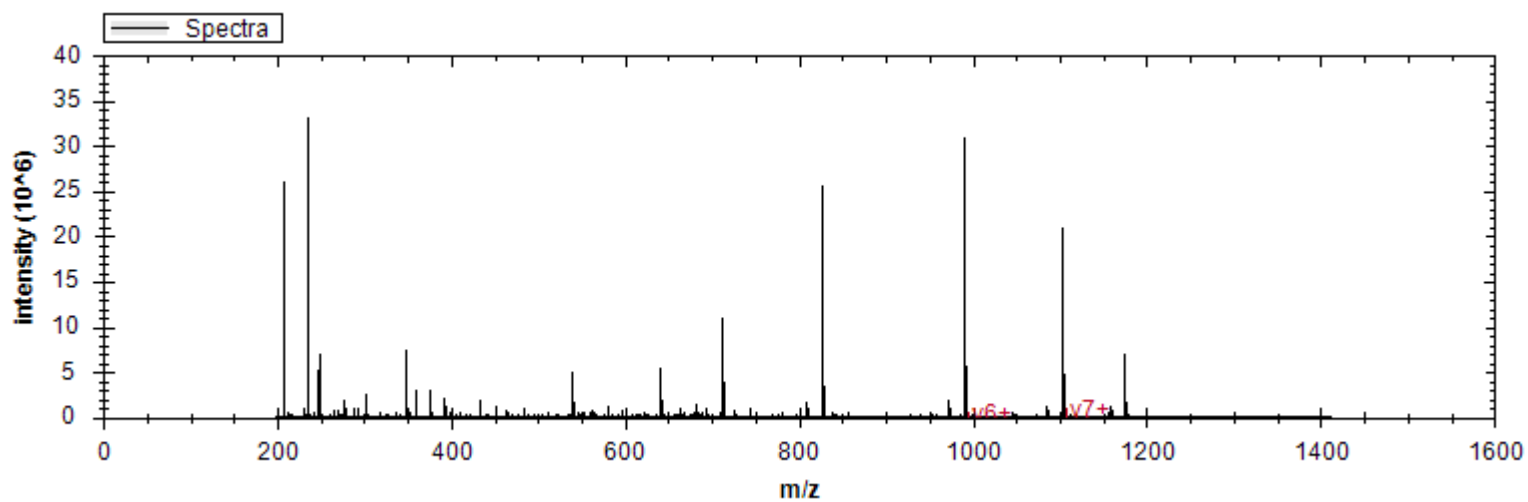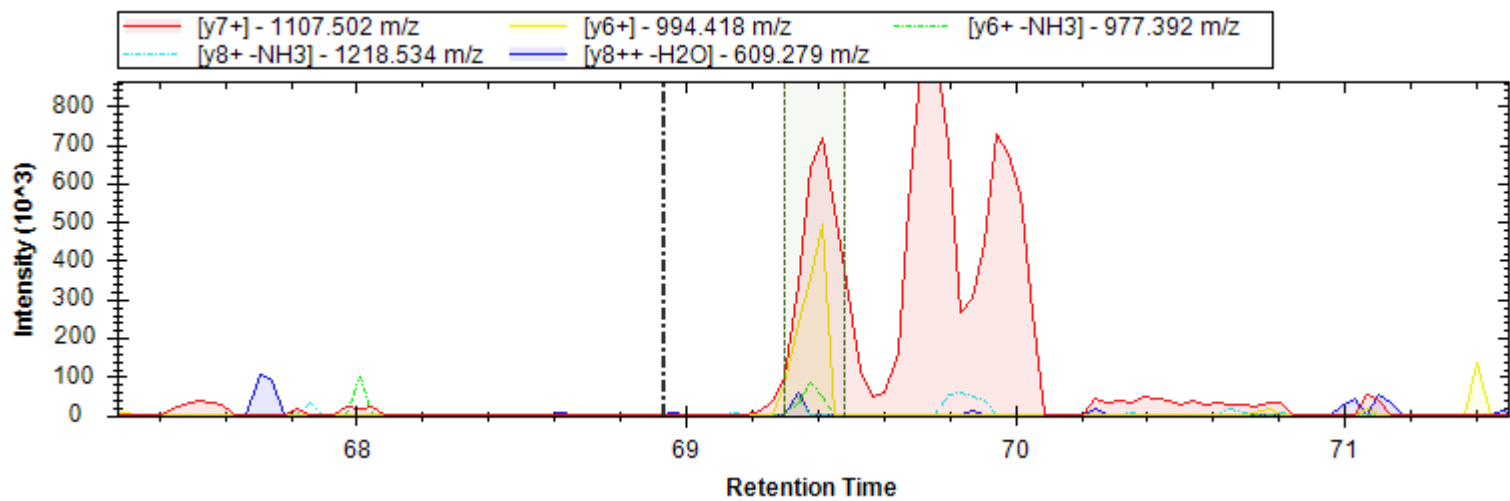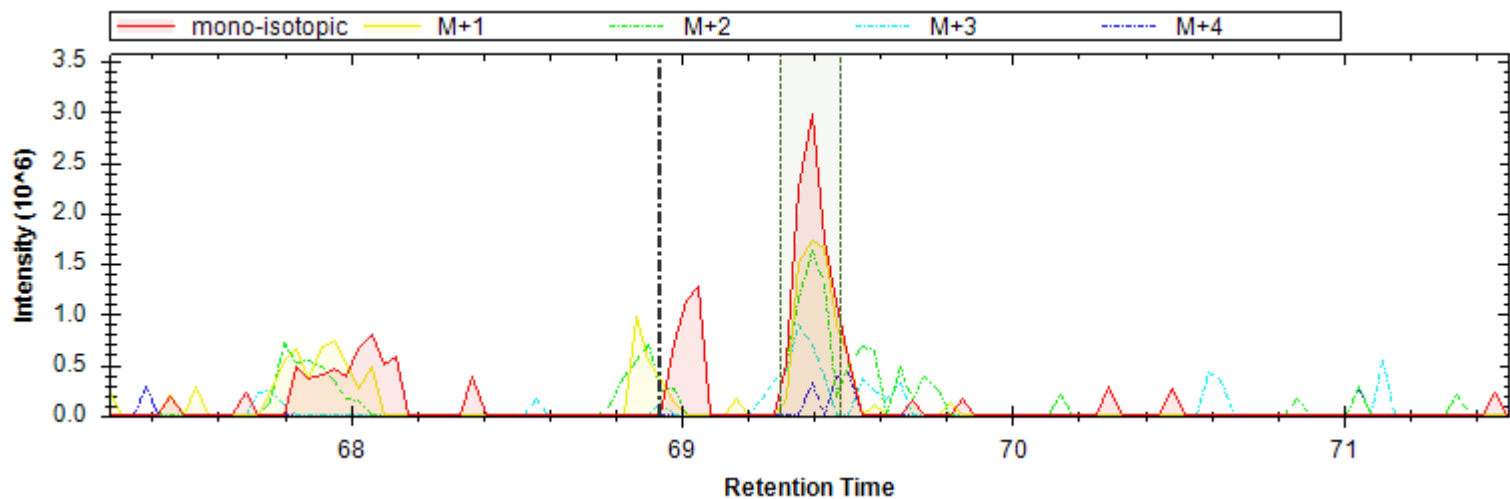



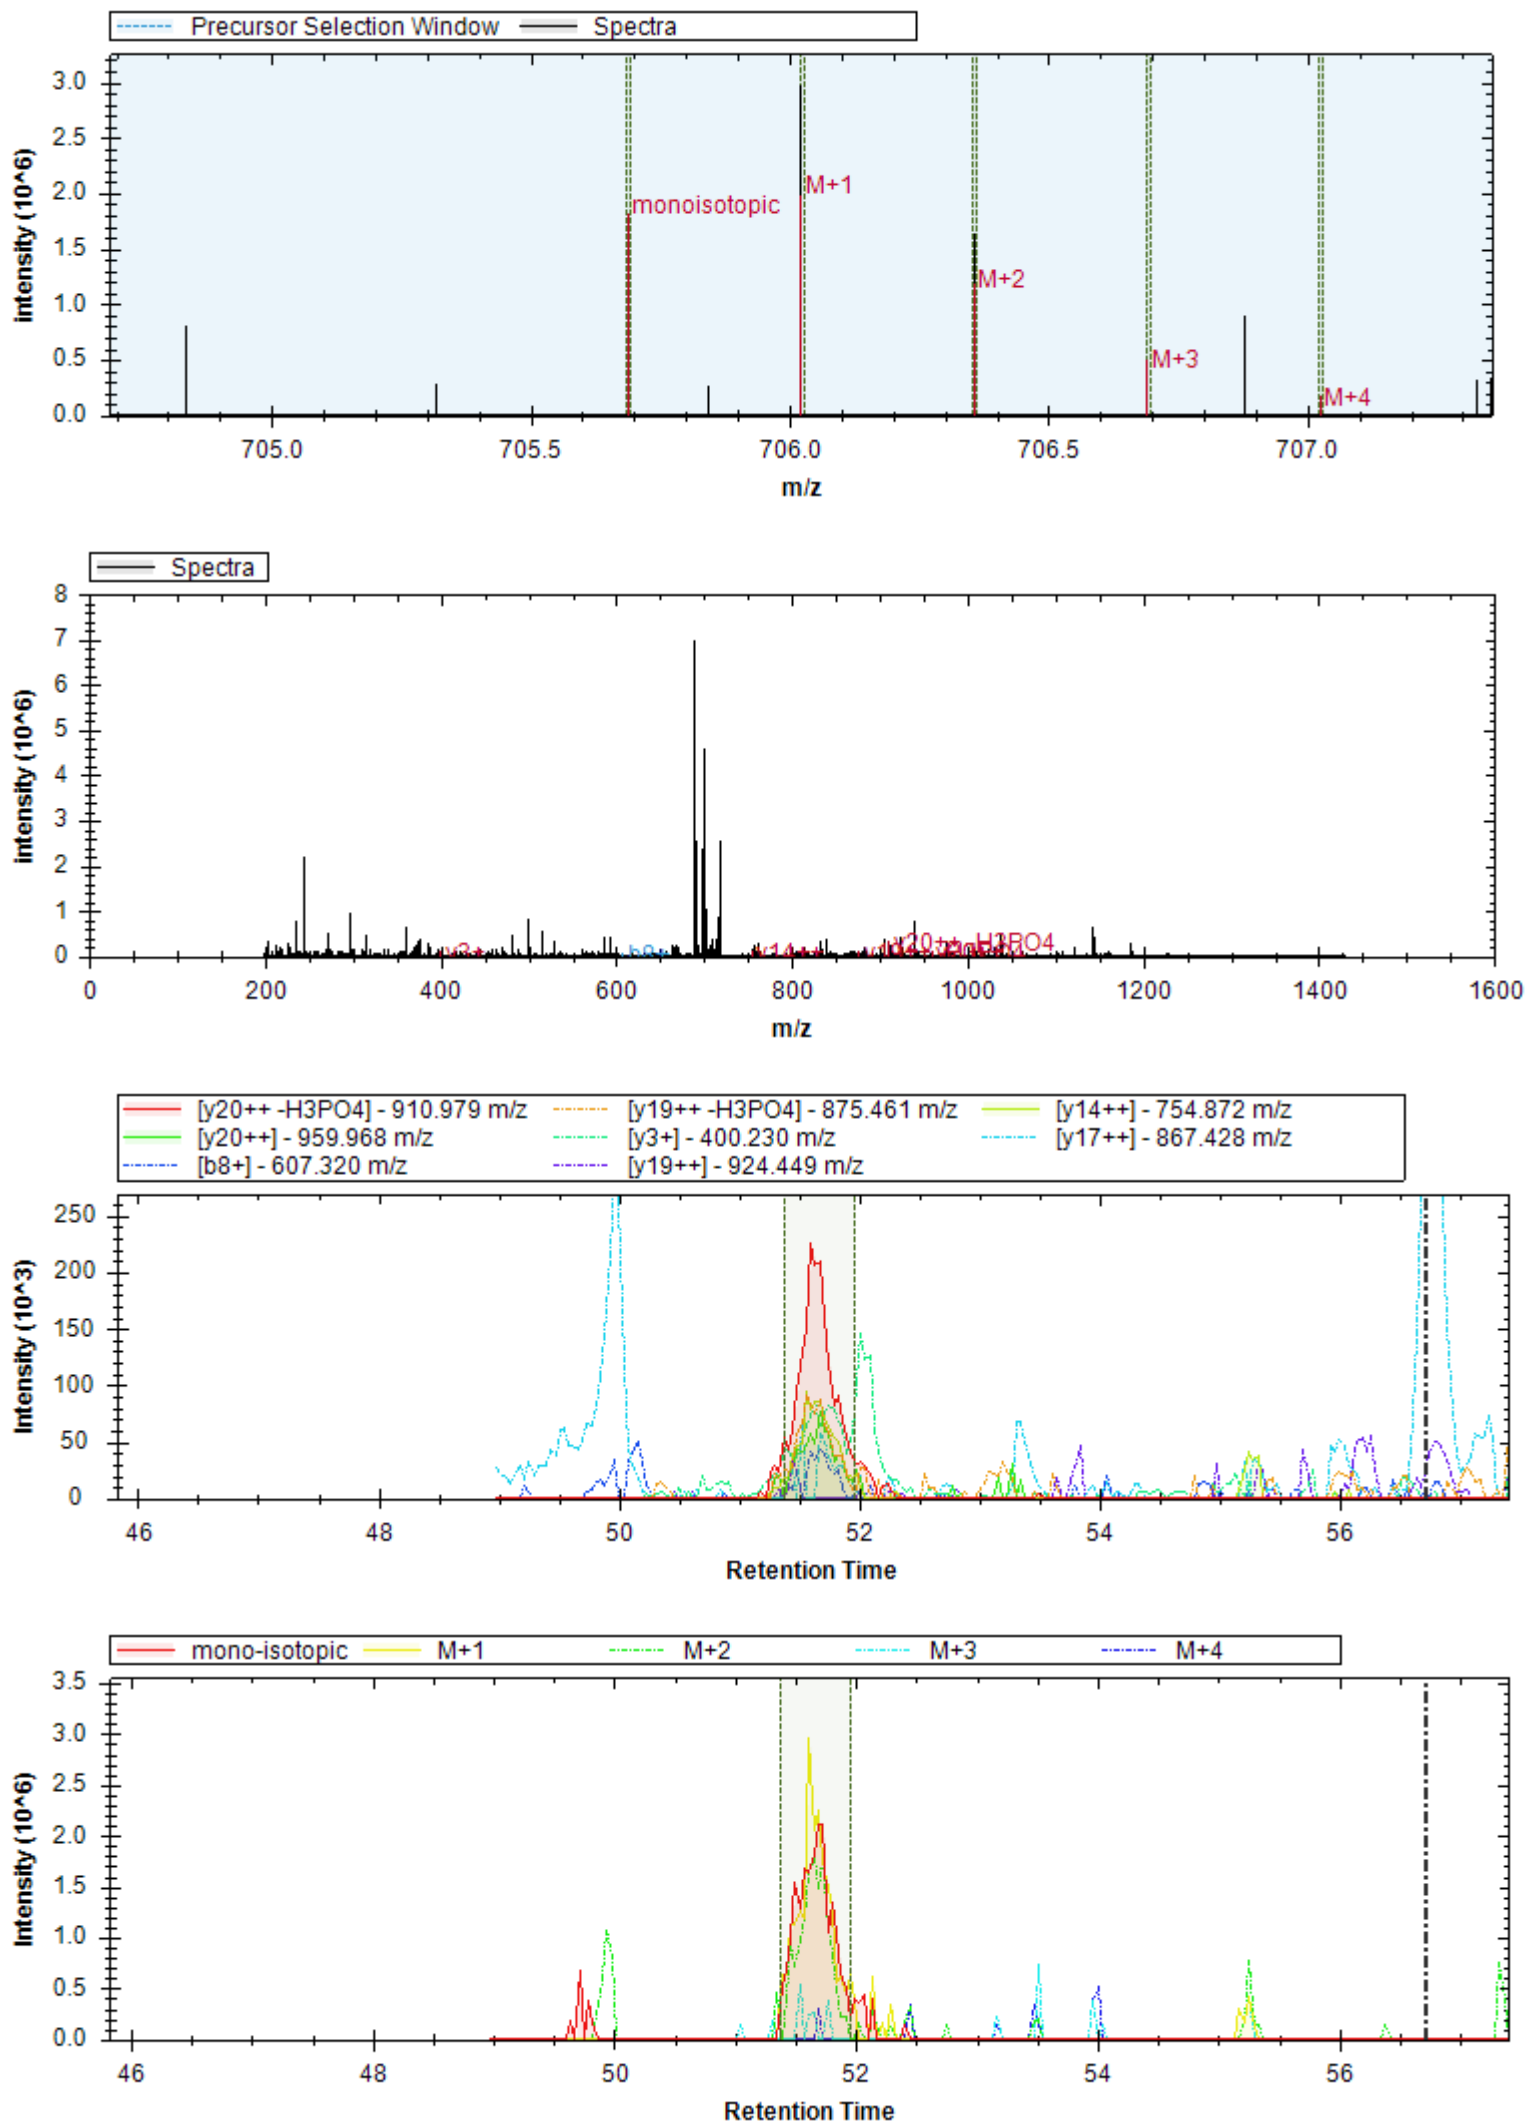

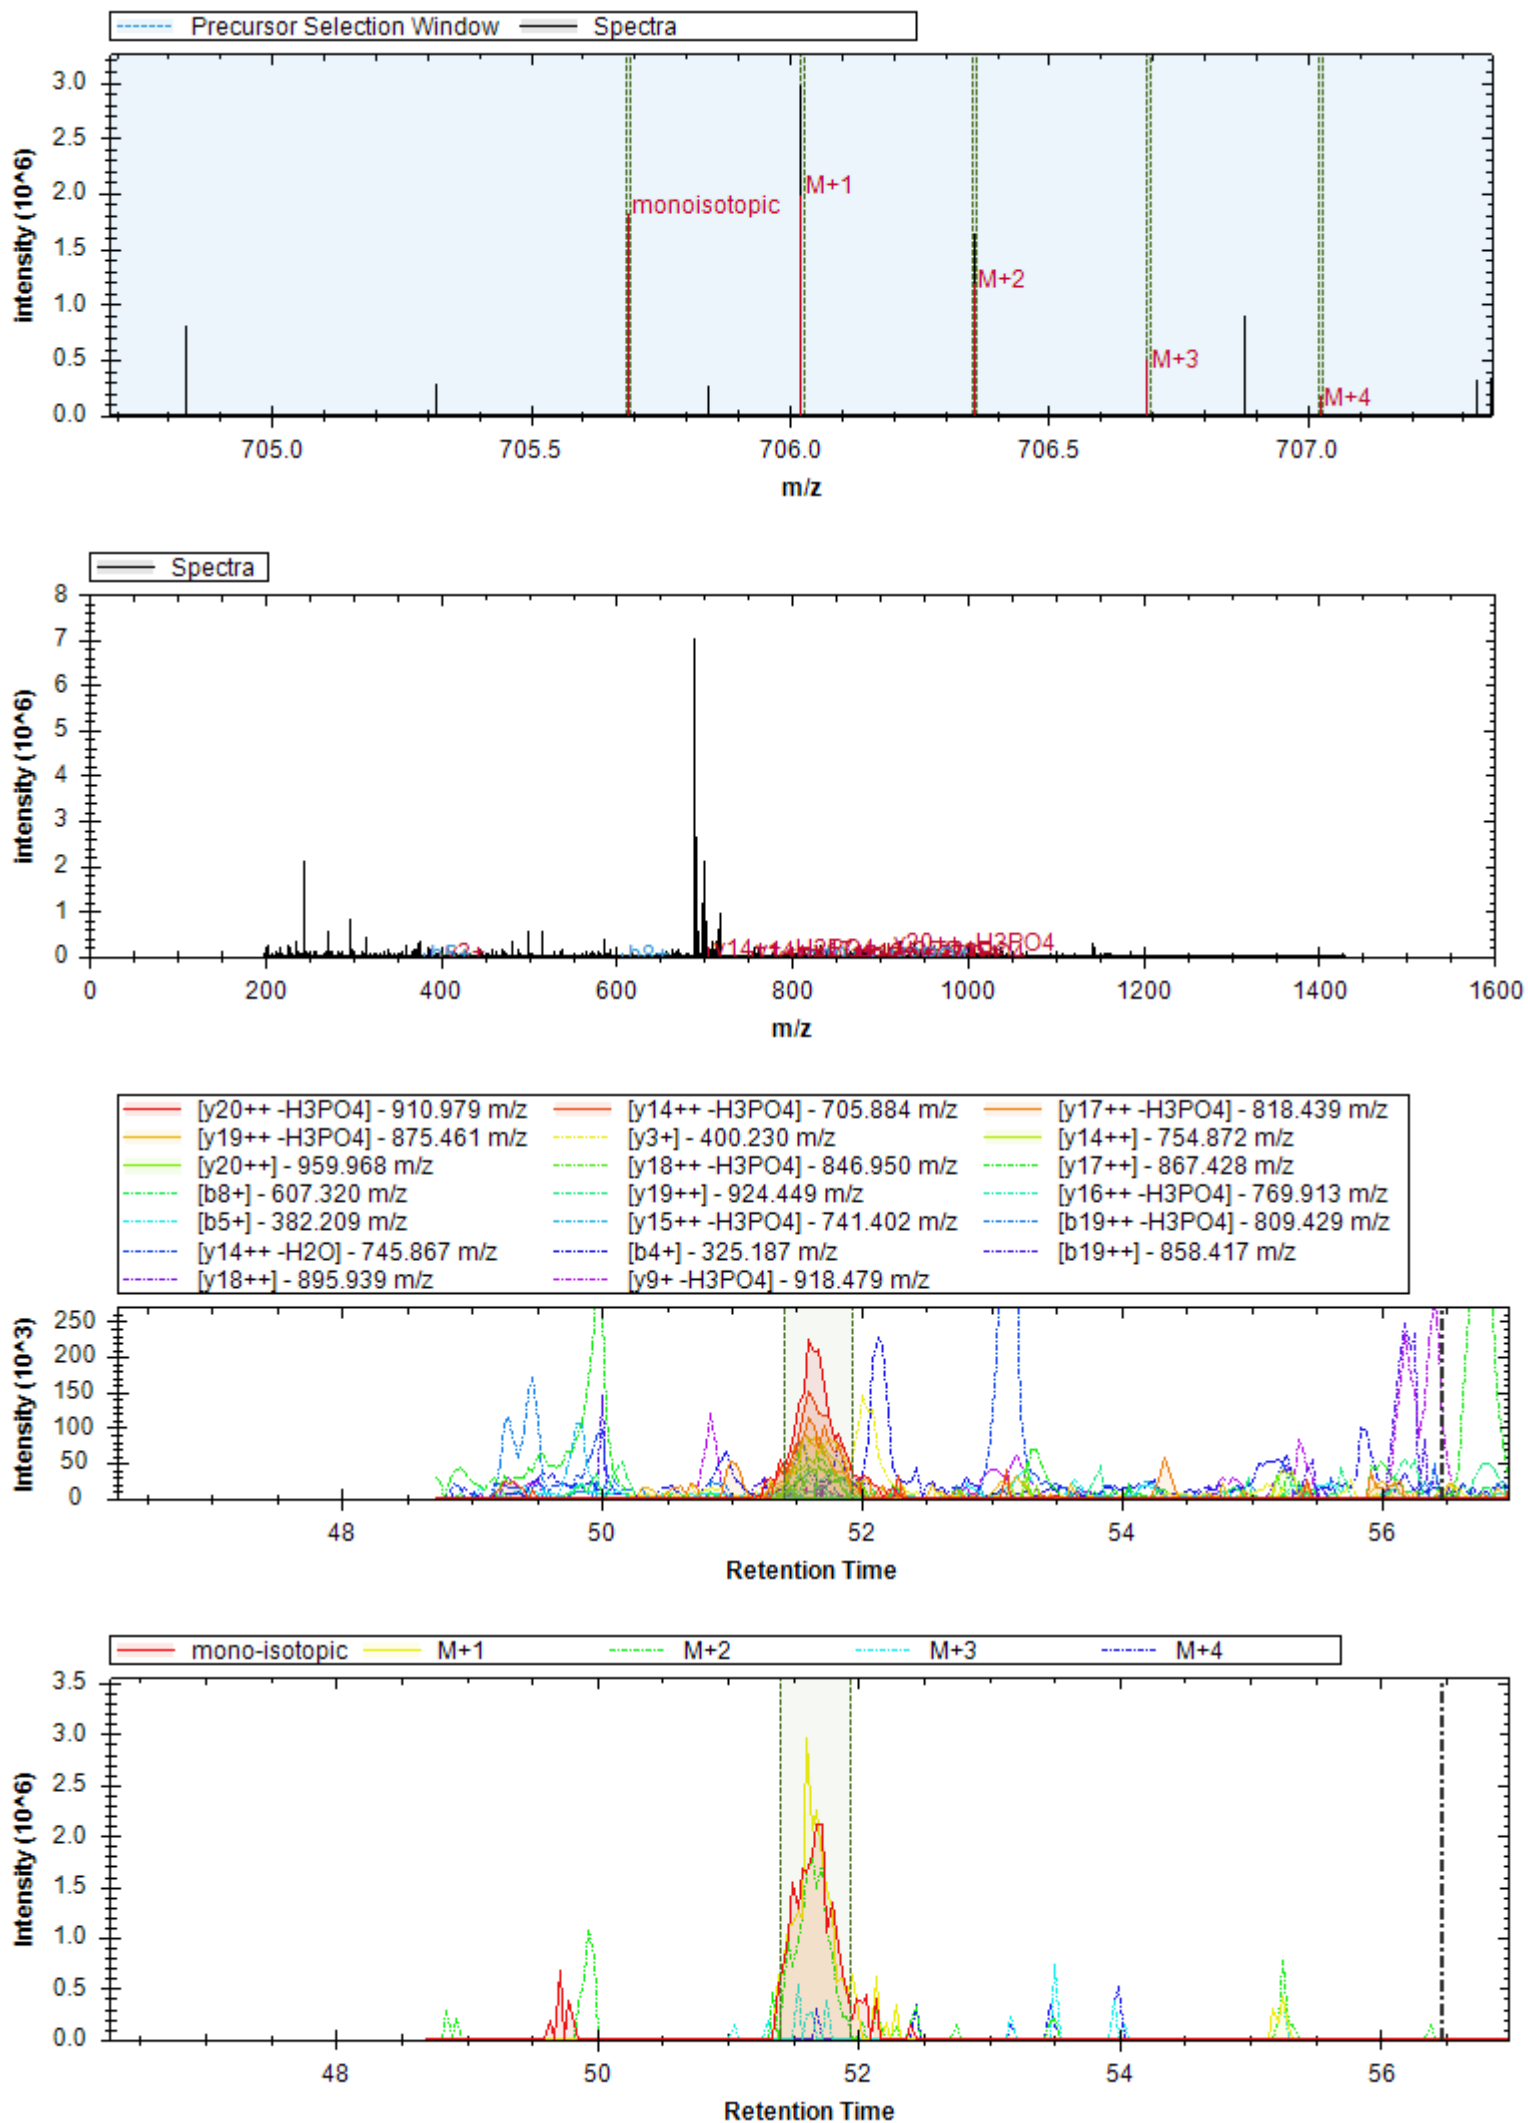

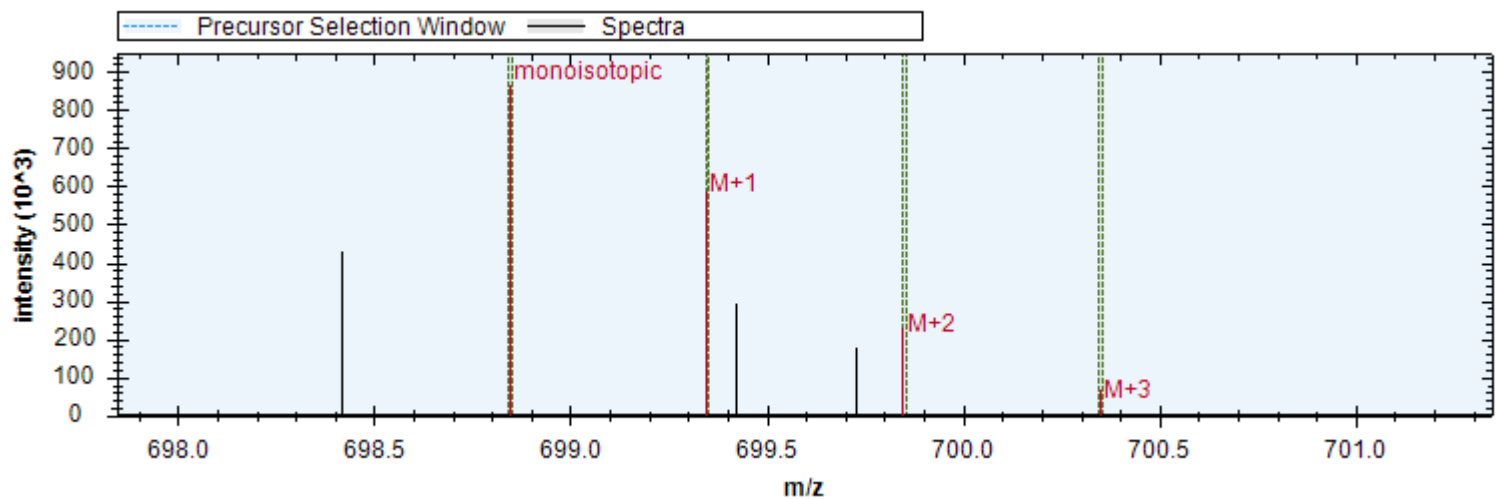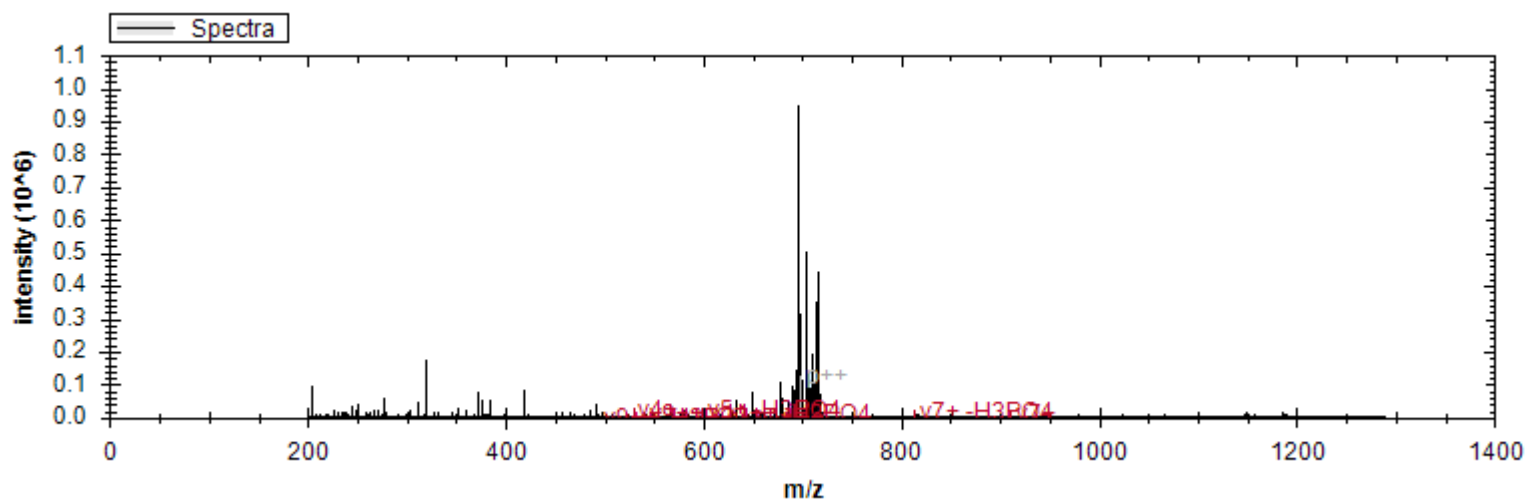

- |                              |                            |                             |
|------------------------------|----------------------------|-----------------------------|
| [y4+] - 529.309 m/z          | [y7+ -H3PO4] - 813.458 m/z | [y5+ -H3PO4] - 598.331 m/z  |
| [y11++ -H3PO4] - 600.323 m/z | [y7+] - 911.435 m/z        | [b4+] - 373.172 m/z         |
| [b8+ -H3PO4] - 770.404 m/z   | [y9++] - 541.274 m/z       | [y11++] - 649.311 m/z       |
| [y10+ -H3PO4] - 1098.590 m/z | [y6+ -H3PO4] - 726.426 m/z | [y10++] - 598.787 m/z       |
| [b5+] - 486.256 m/z          | [y5+] - 696.308 m/z        | [y9++ -H3PO4] - 492.285 m/z |

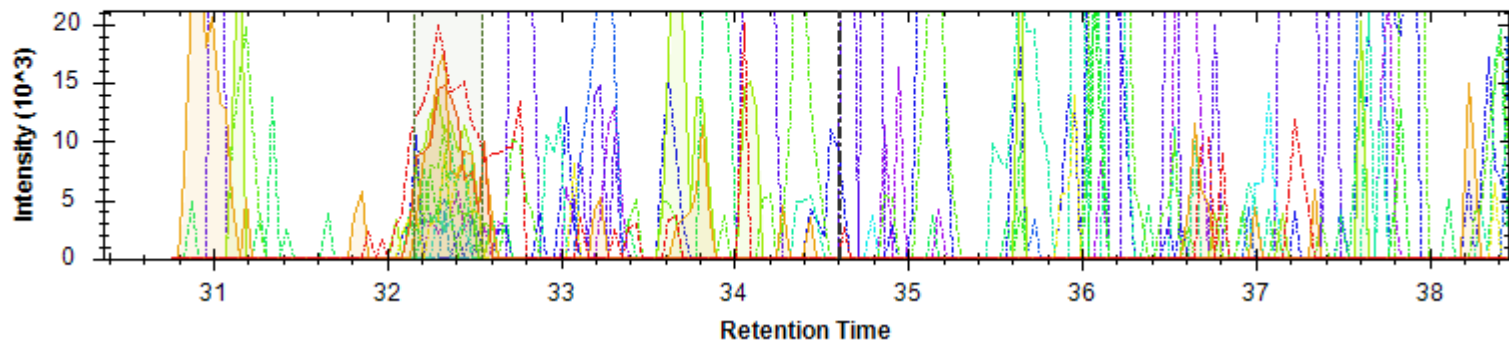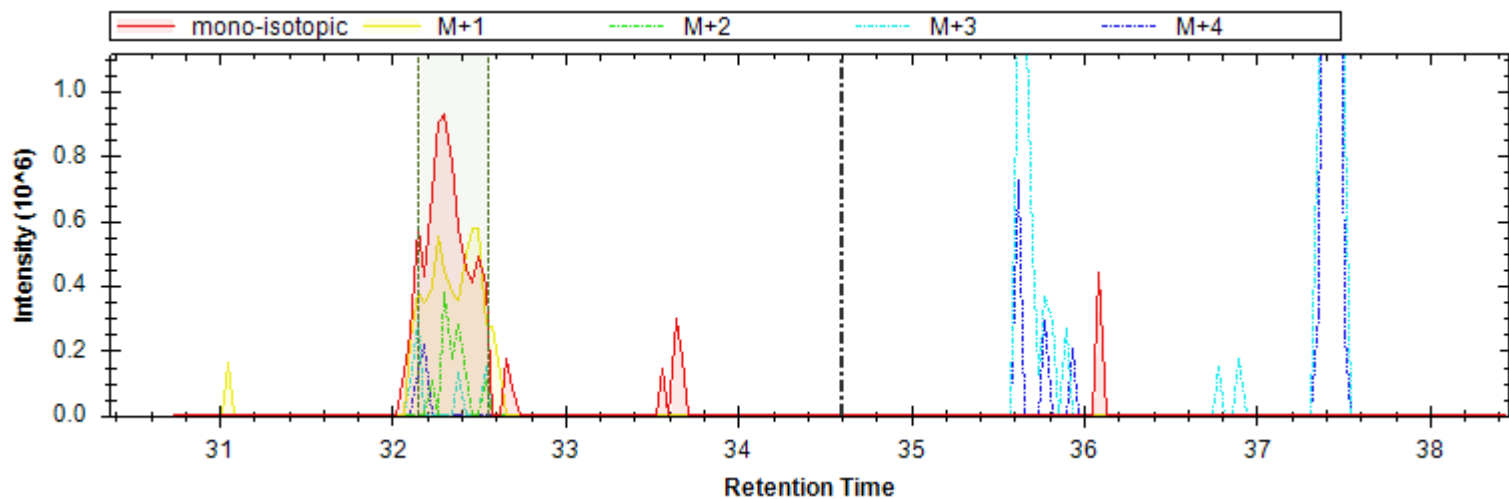

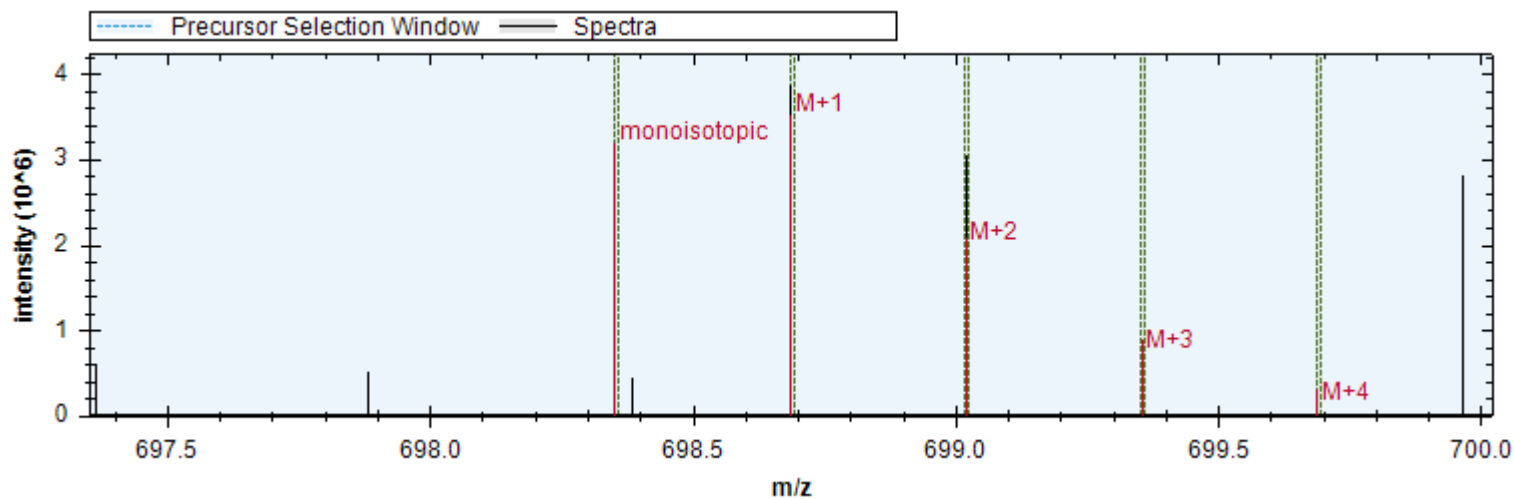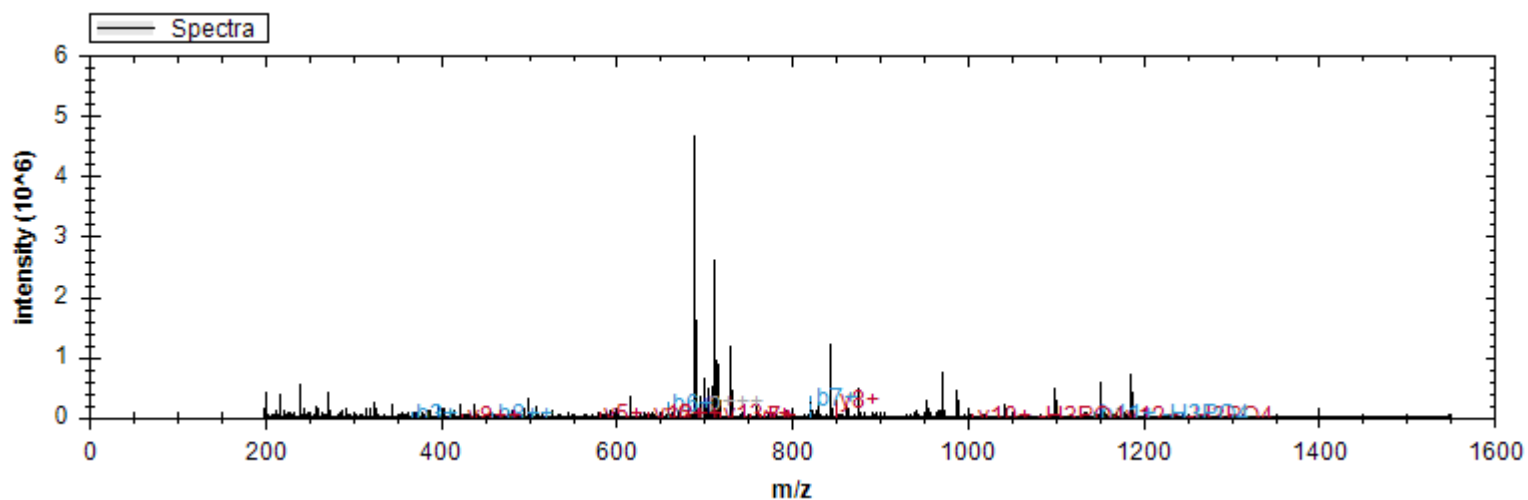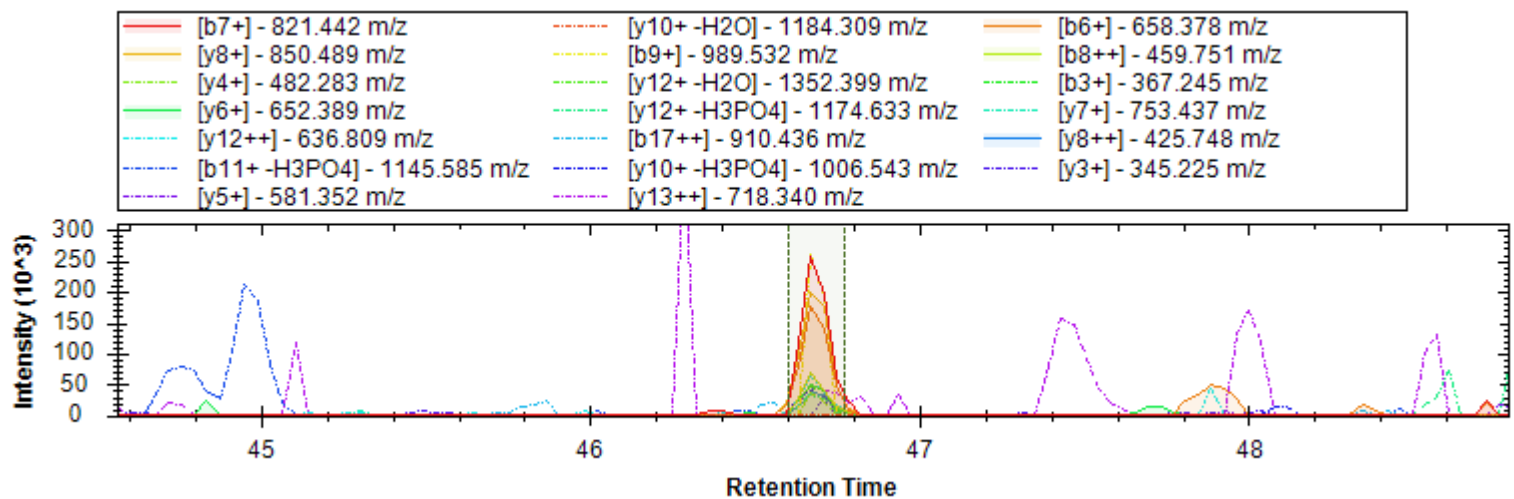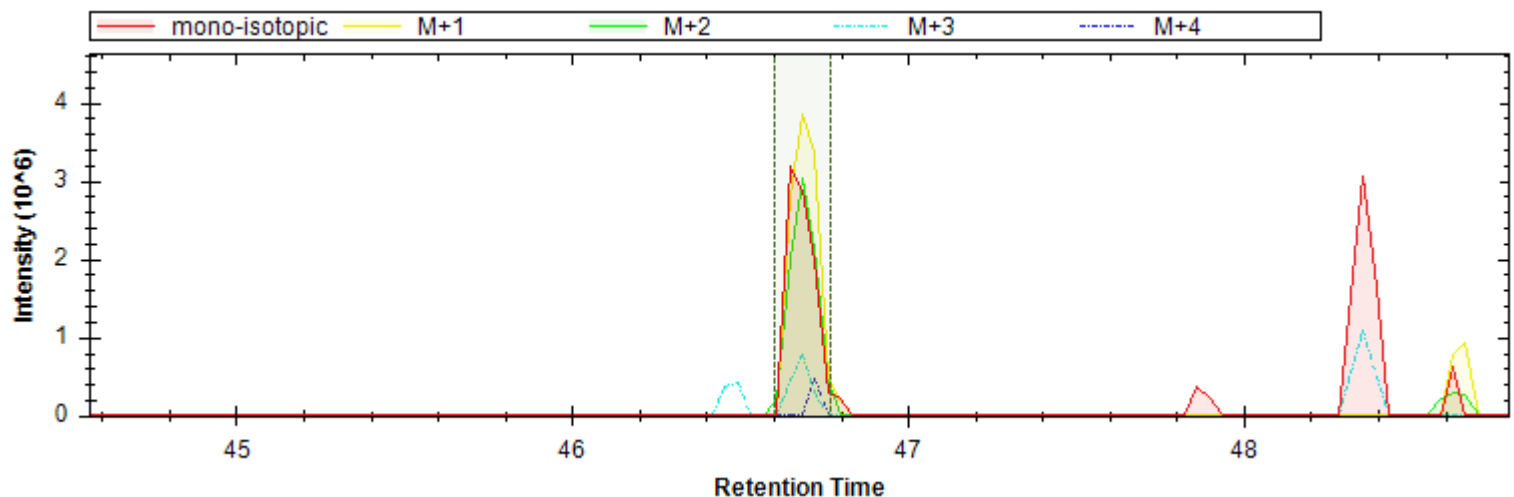

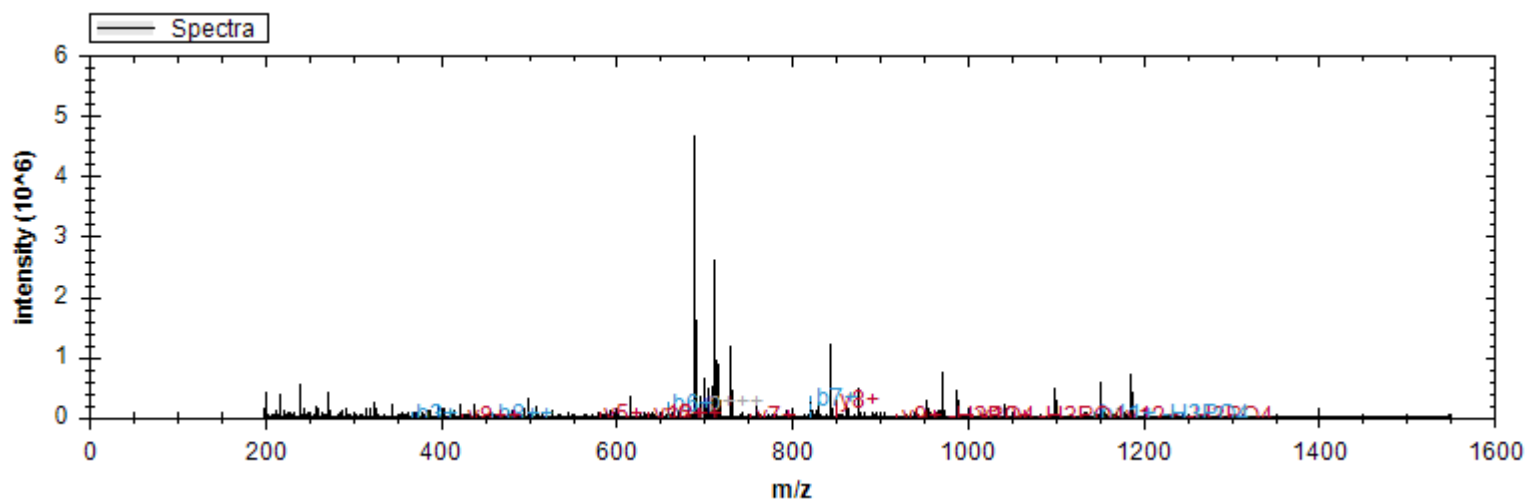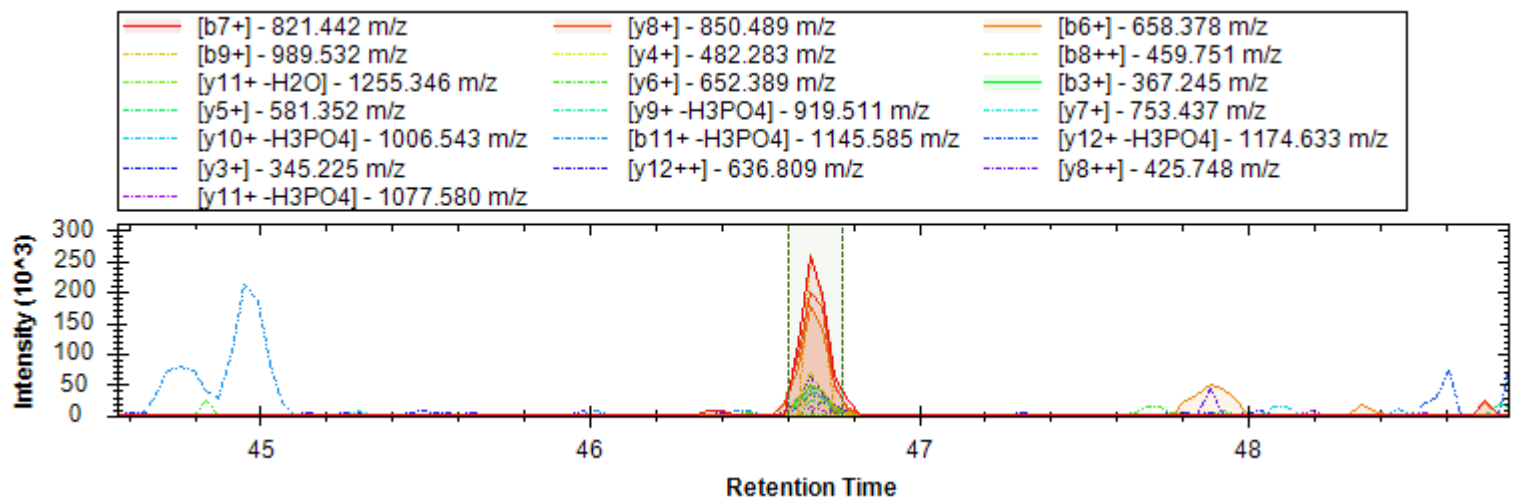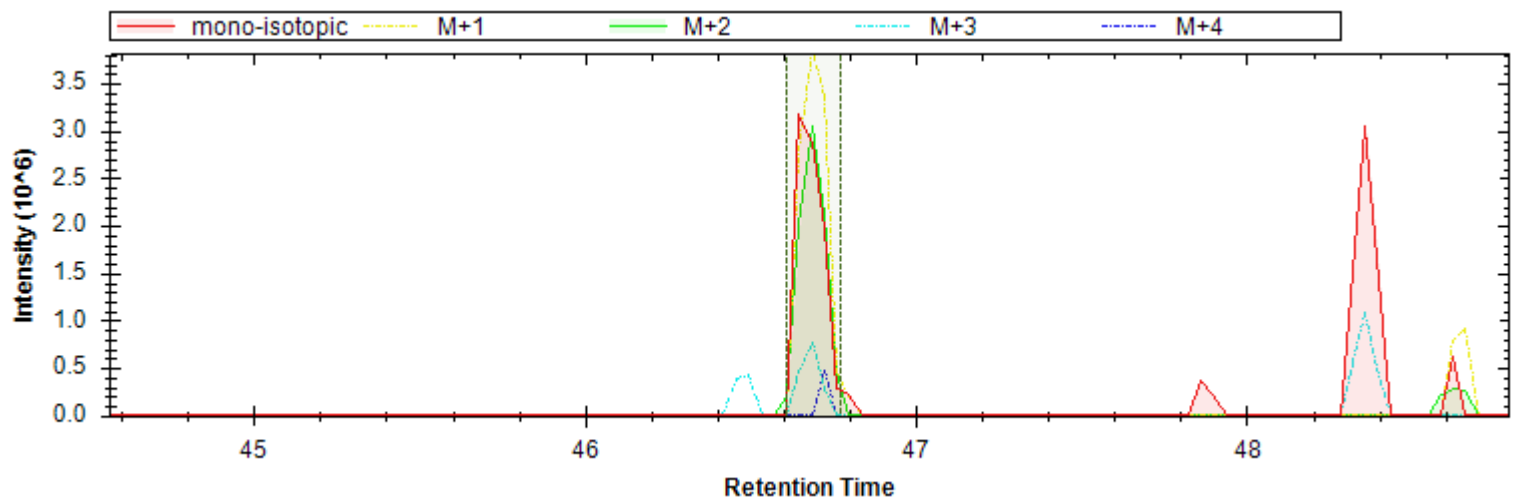

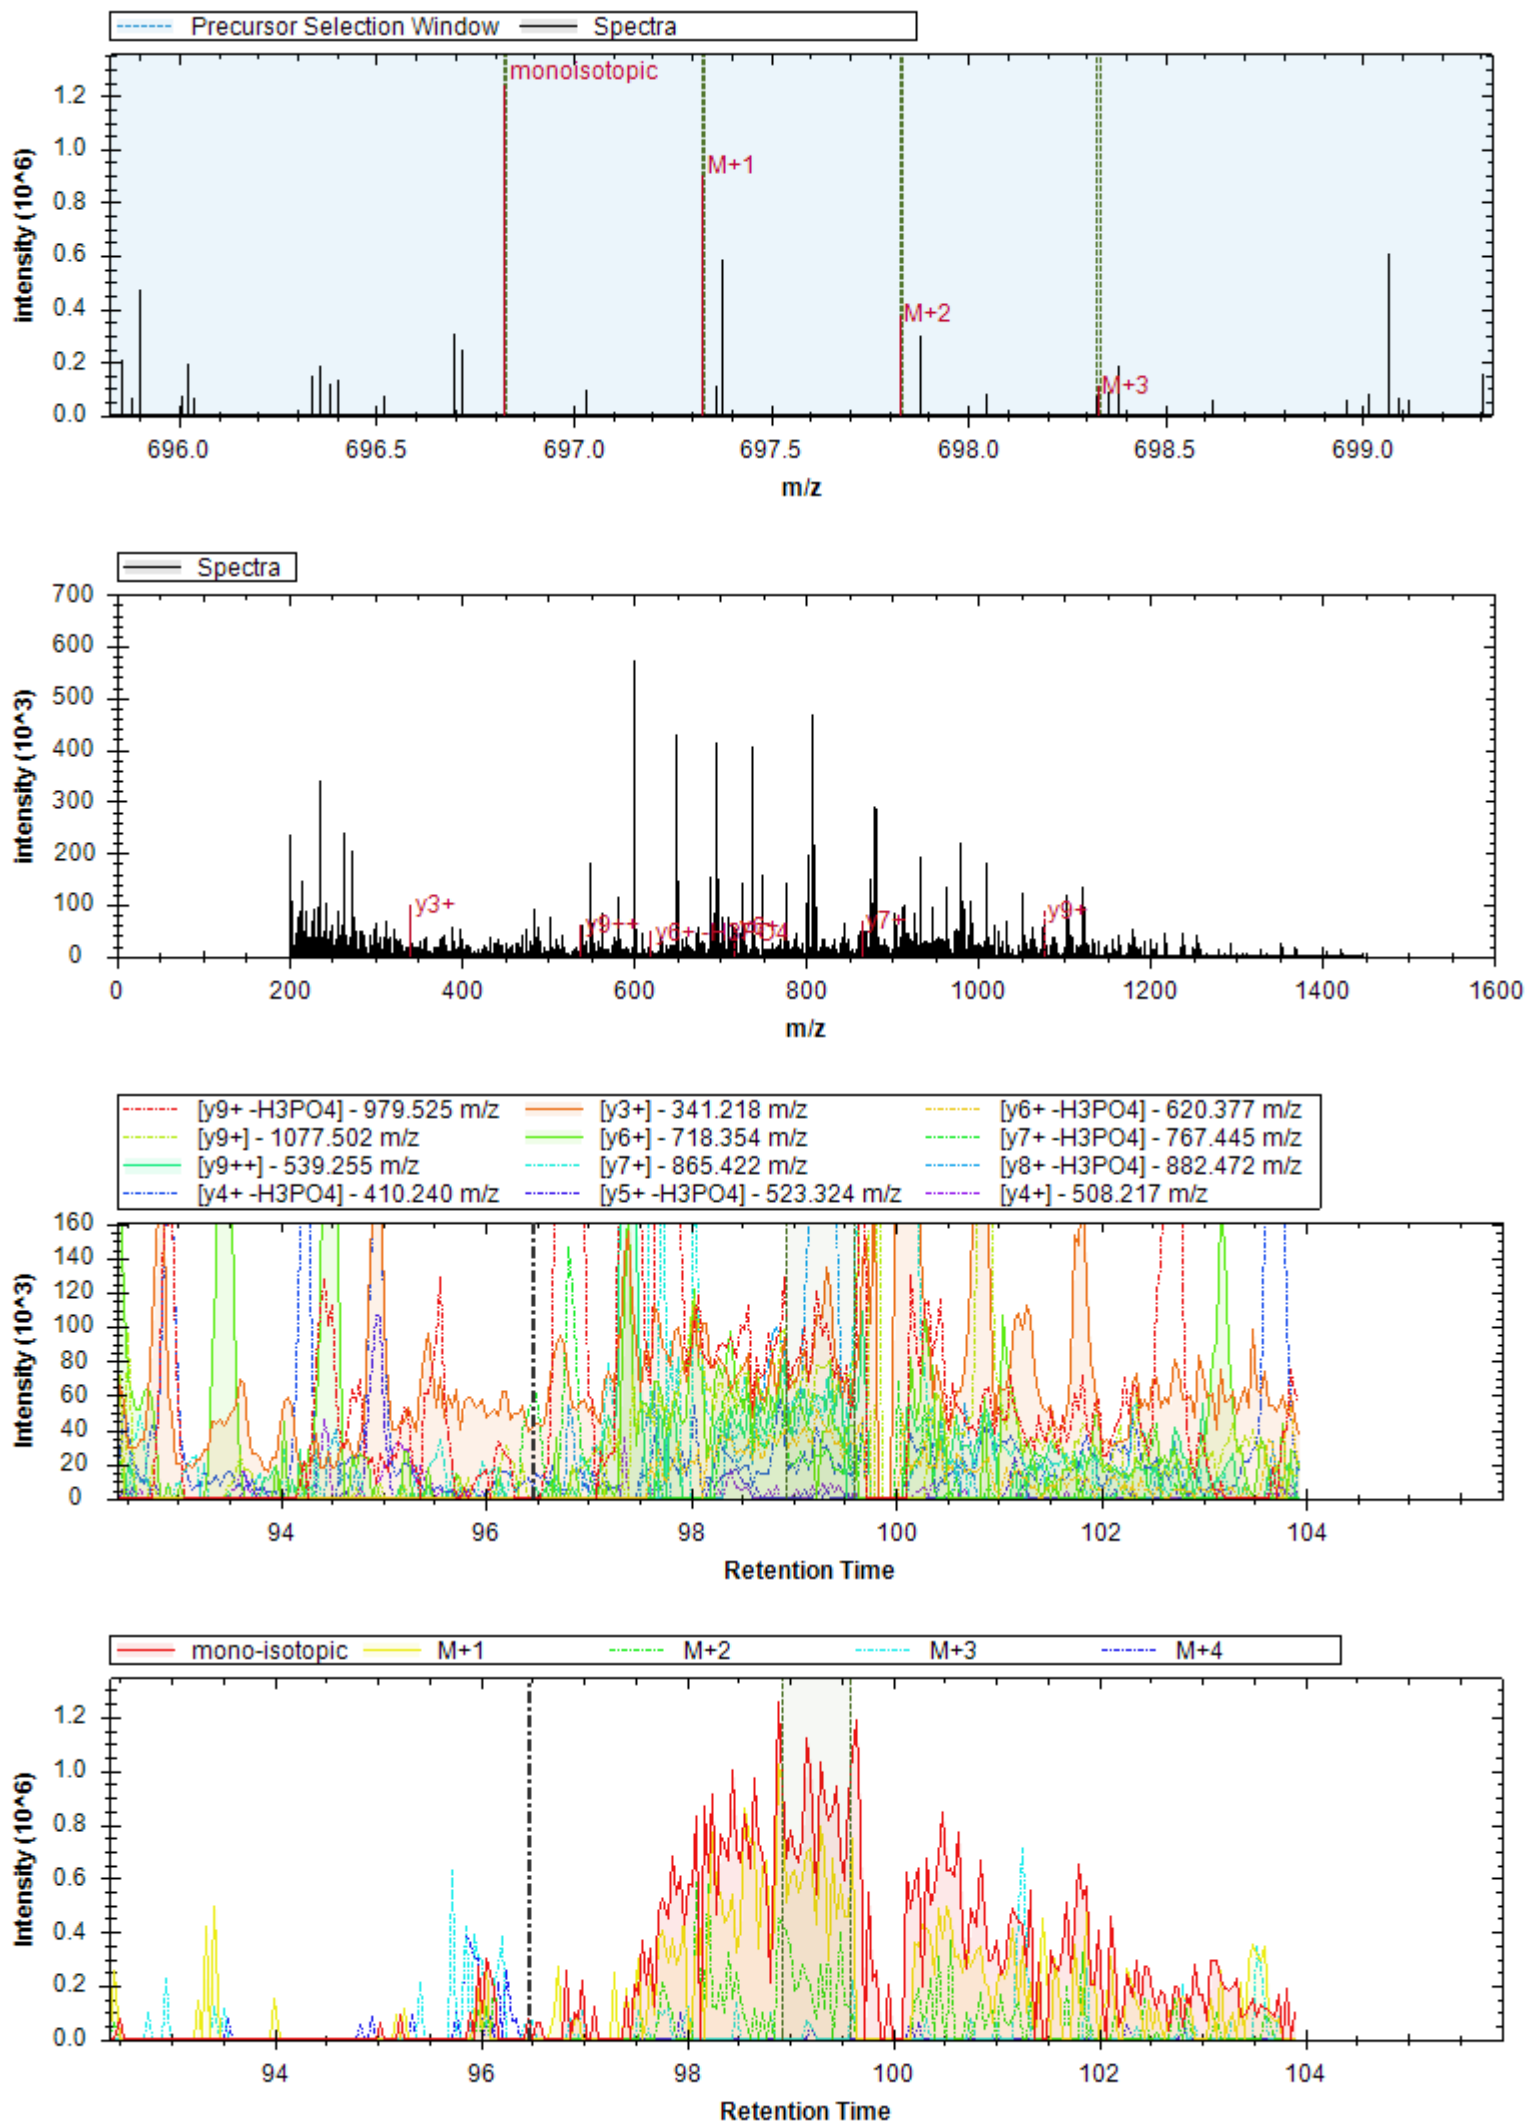

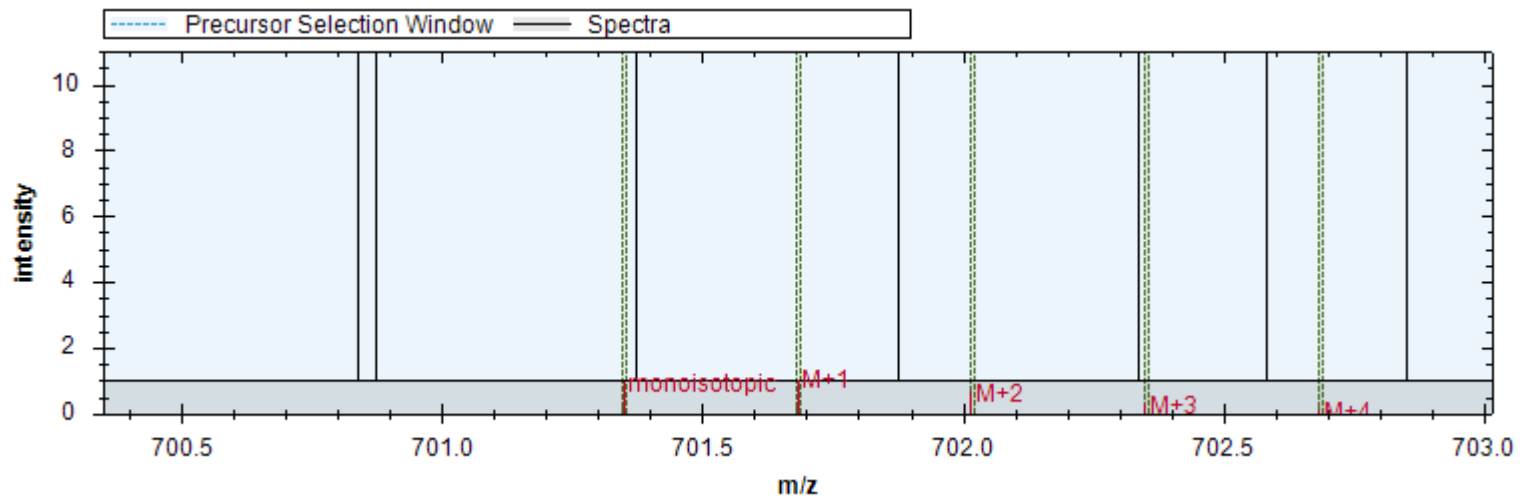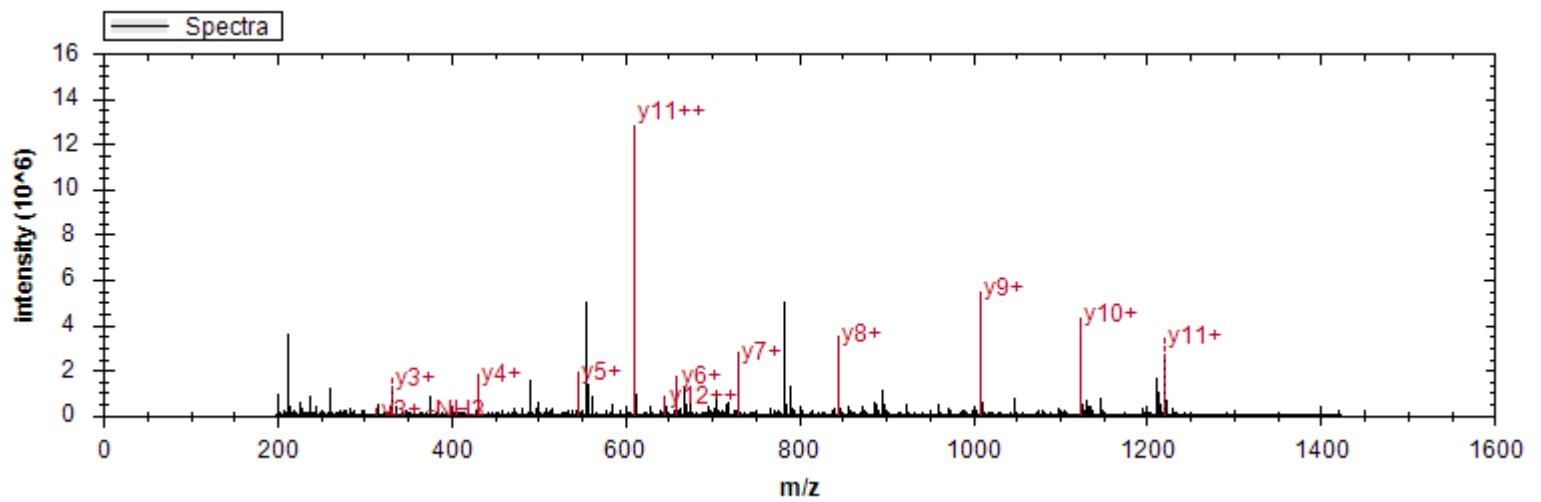

|                          |                       |                       |
|--------------------------|-----------------------|-----------------------|
| [y9+] - 1008.500 m/z     | [y11++] - 610.793 m/z | [y10+] - 1123.527 m/z |
| [y8+] - 845.436 m/z      | [y7+] - 730.409 m/z   | [y11+] - 1220.579 m/z |
| [y4+] - 431.261 m/z      | [y5+] - 546.288 m/z   | [y3+] - 332.193 m/z   |
| [y6+] - 659.372 m/z      | [y12++] - 646.312 m/z | [y13++] - 702.854 m/z |
| [y3+ -NH3] - 315.166 m/z |                       |                       |

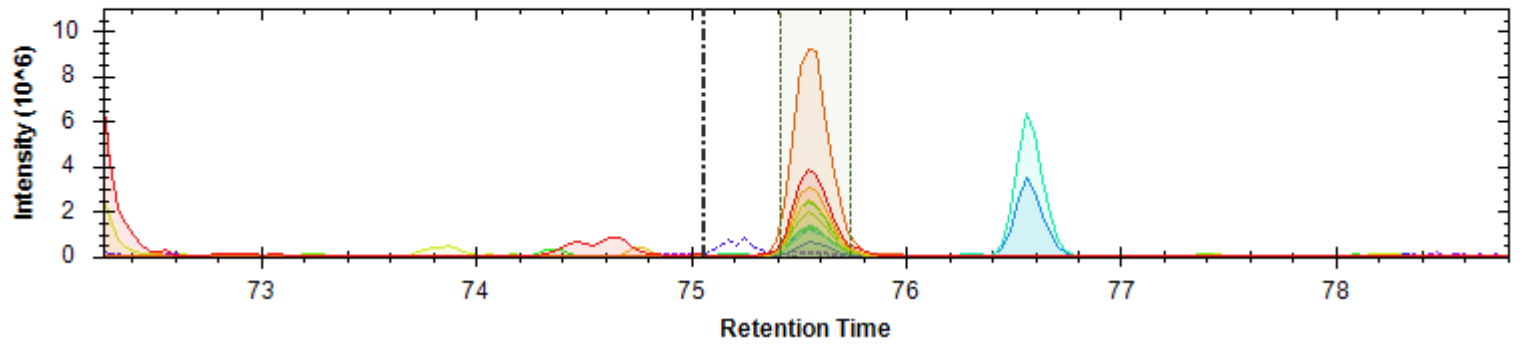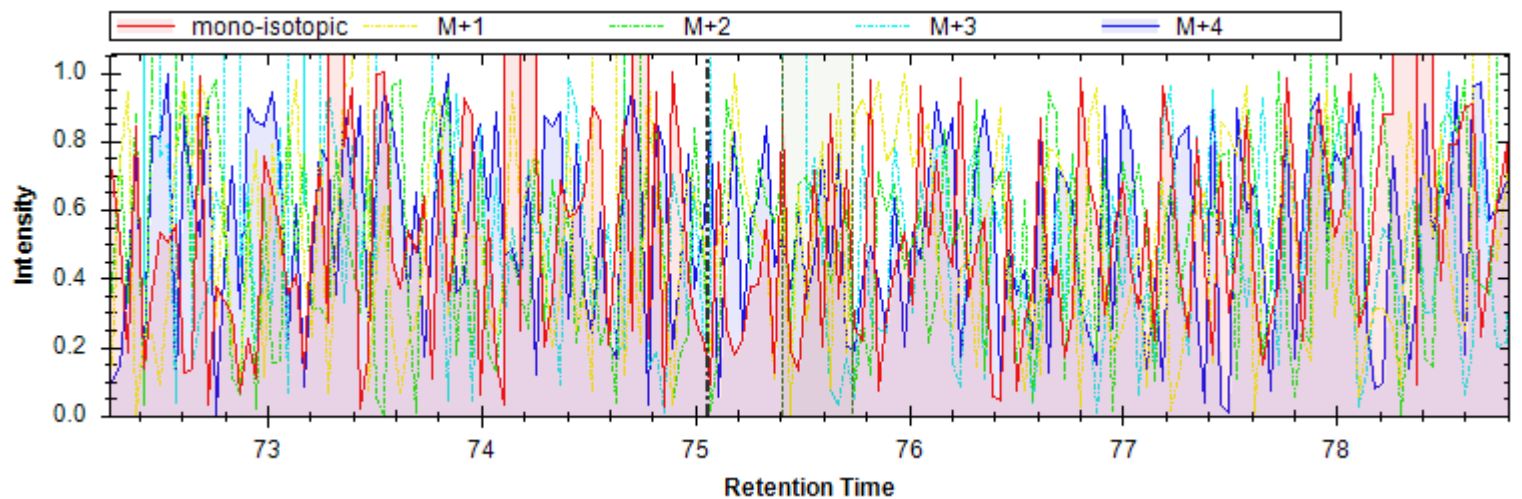

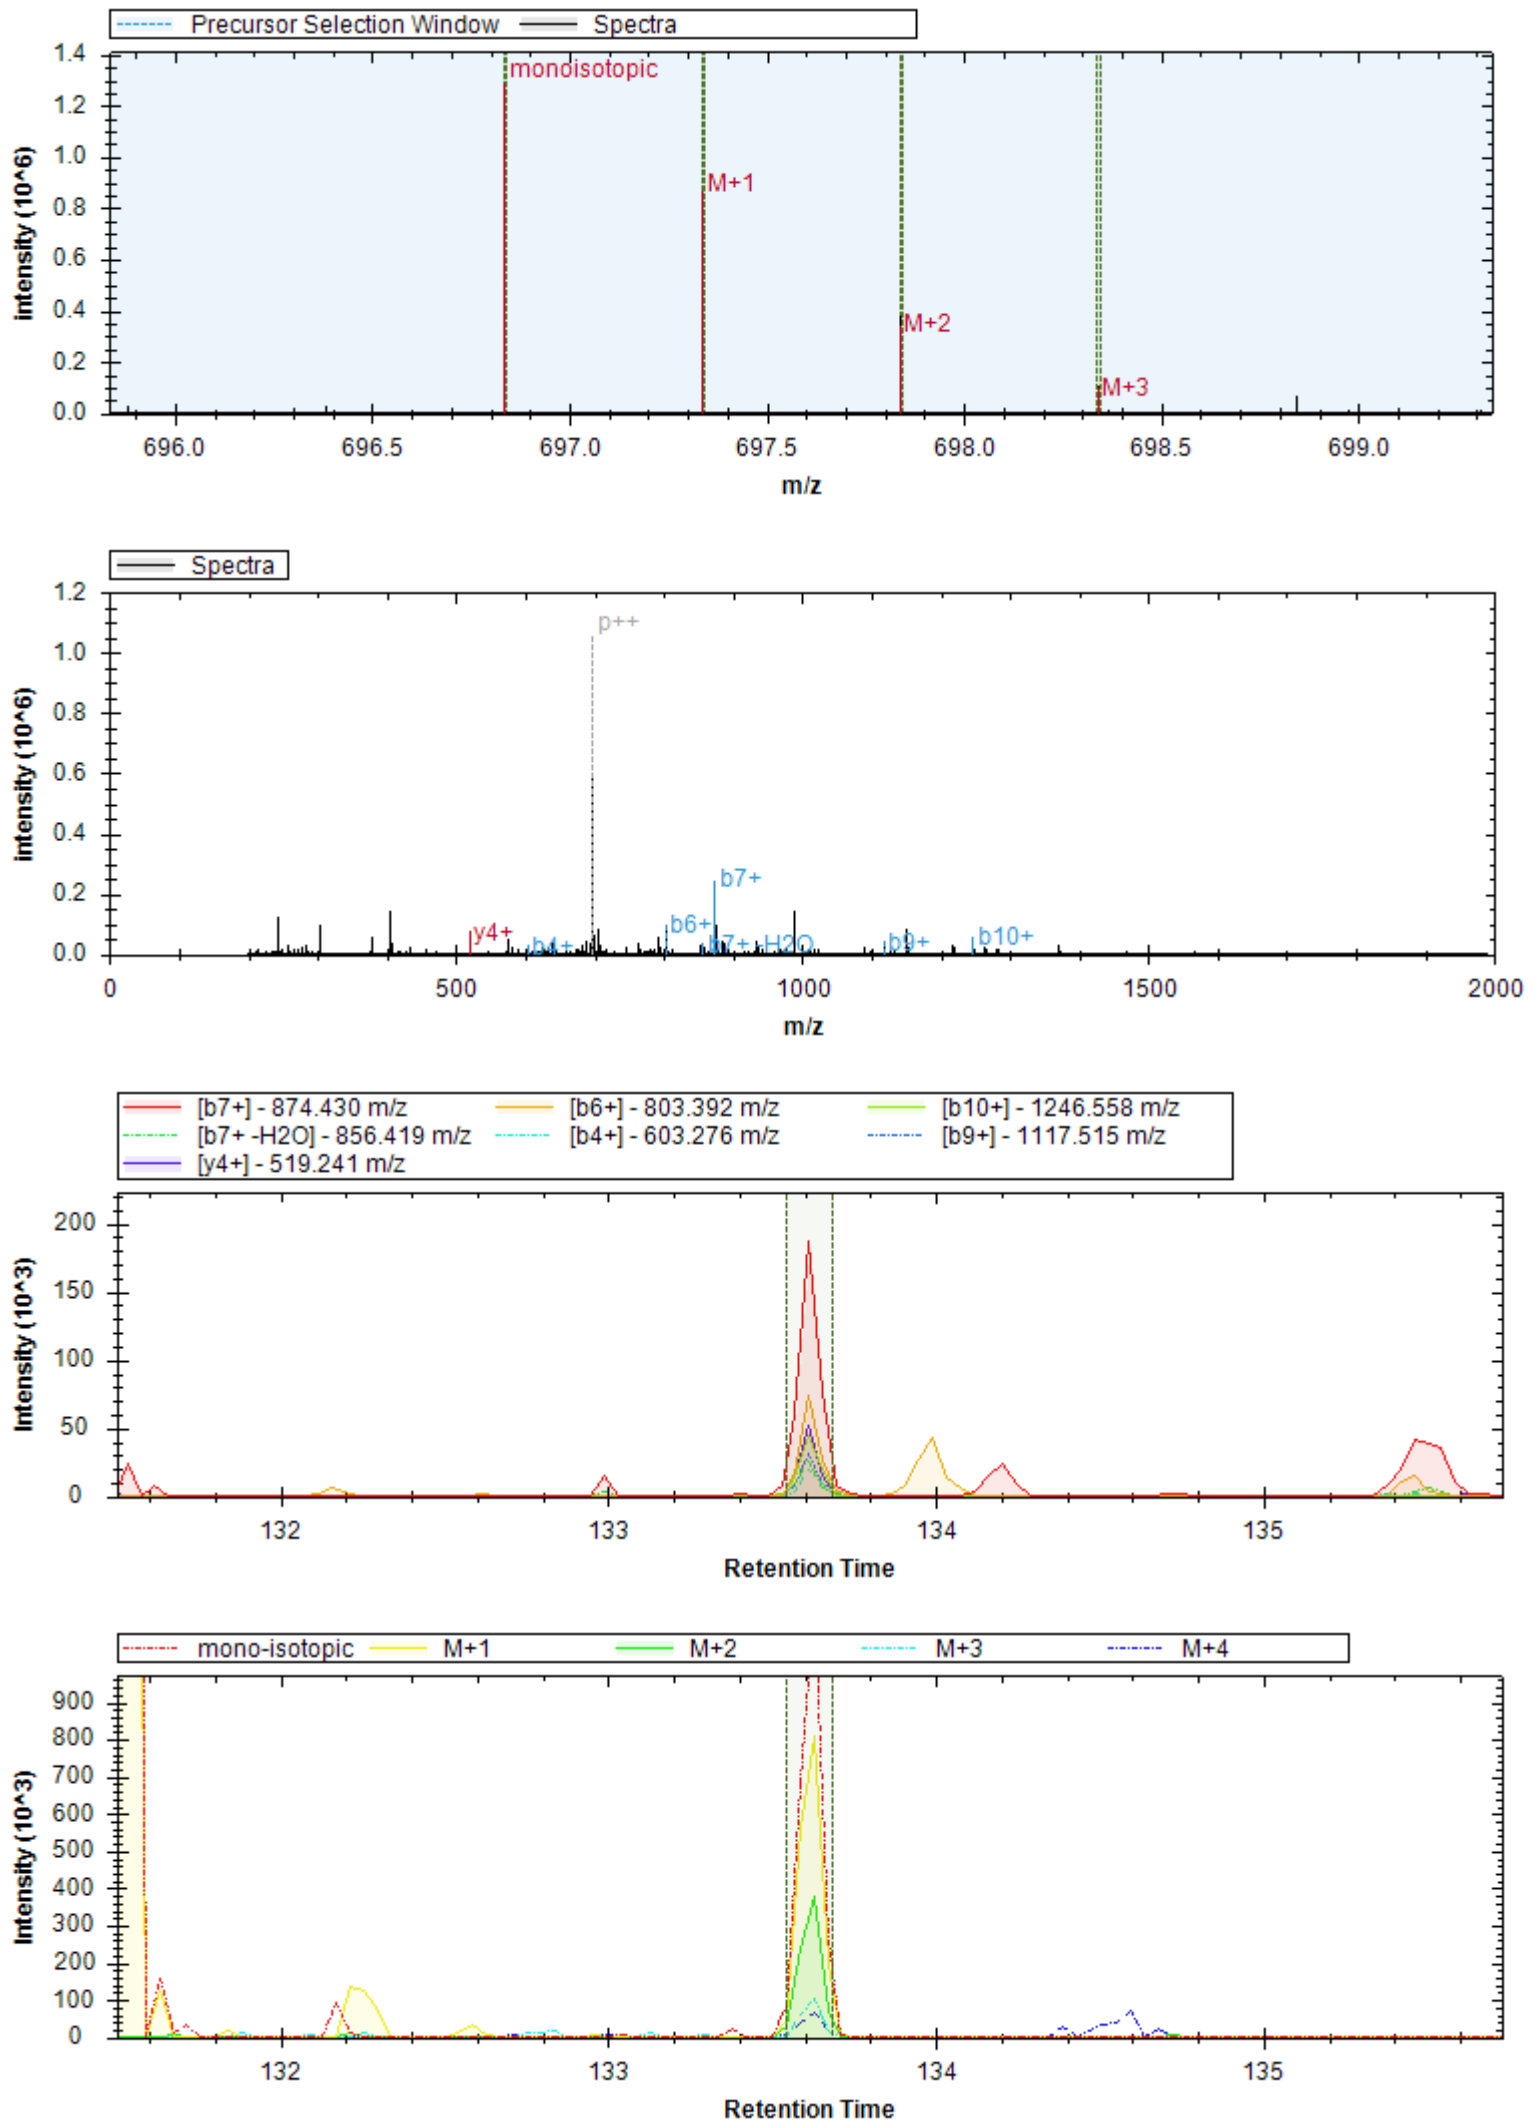



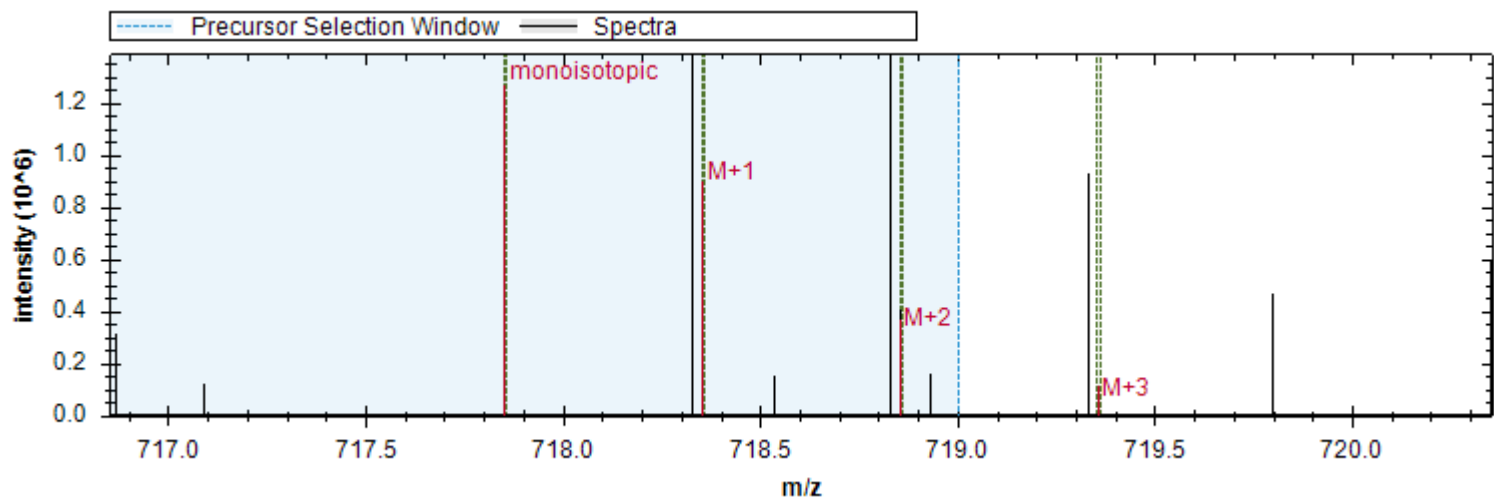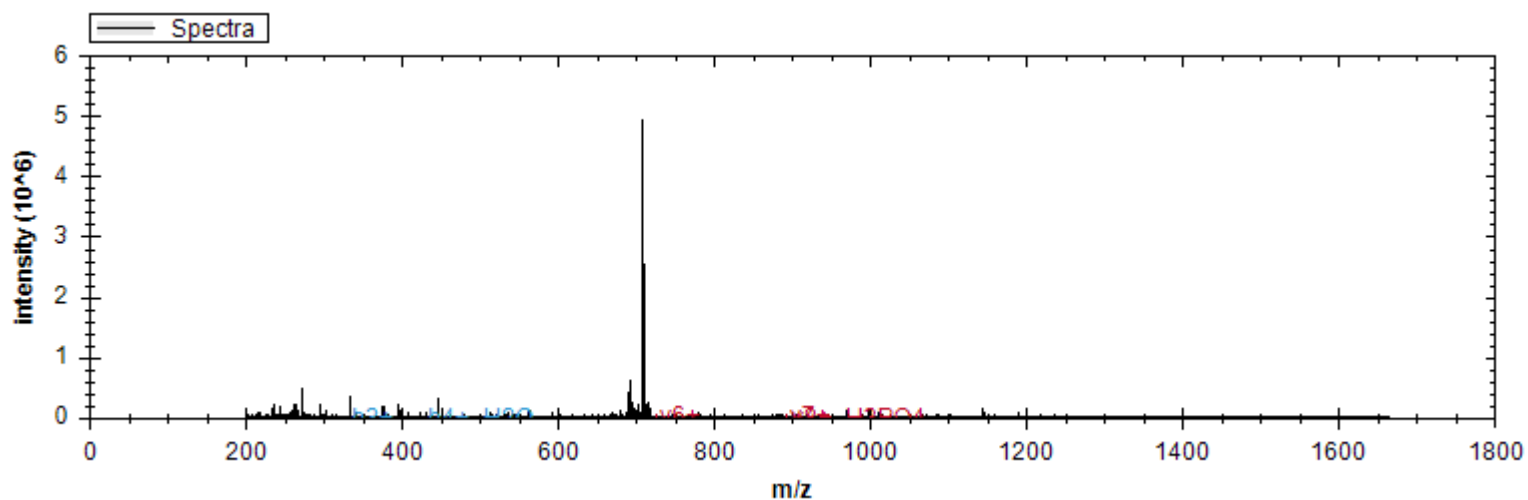

- |                              |                            |                              |
|------------------------------|----------------------------|------------------------------|
| [y3+] - 401.214 m/z          | [y6+] - 725.430 m/z        | [y8+ -H3PO4] - 893.520 m/z   |
| [b3+] - 331.125 m/z          | [y7+ -H3PO4] - 794.452 m/z | [y9+ -H3PO4] - 1006.604 m/z  |
| [b4+] - 444.209 m/z          | [y4+] - 529.309 m/z        | [y11++ -H3PO4] - 611.843 m/z |
| [b7+ -H3PO4] - 709.352 m/z   | [y7+] - 892.429 m/z        | [b3+ -H2O] - 313.114 m/z     |
| [y10+ -H3PO4] - 1135.647 m/z | [b8+ -H3PO4] - 808.420 m/z | [y10++] - 617.316 m/z        |
| [y9++] - 552.794 m/z         | [b4+ -H2O] - 426.198 m/z   | [y8+] - 991.497 m/z          |
| [b4+ -NH3] - 427.182 m/z     | [y7+ -H2O] - 874.418 m/z   | [y5+] - 628.378 m/z          |
| [b9+ -H3PO4] - 936.515 m/z   |                            |                              |

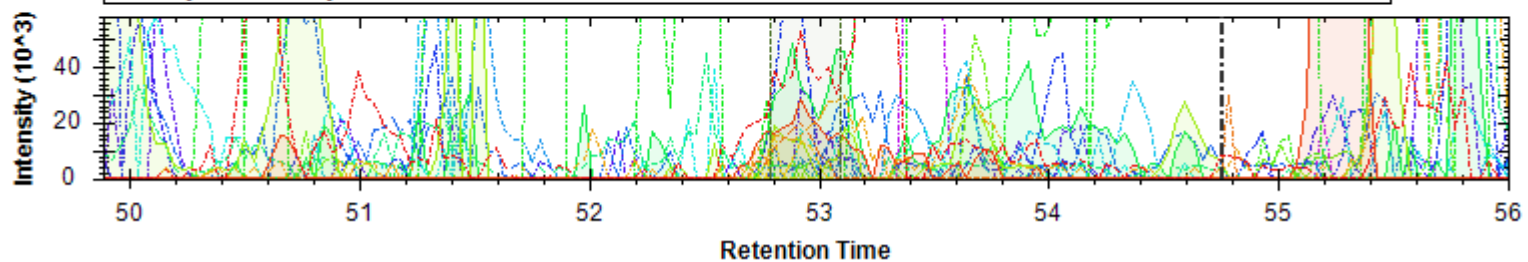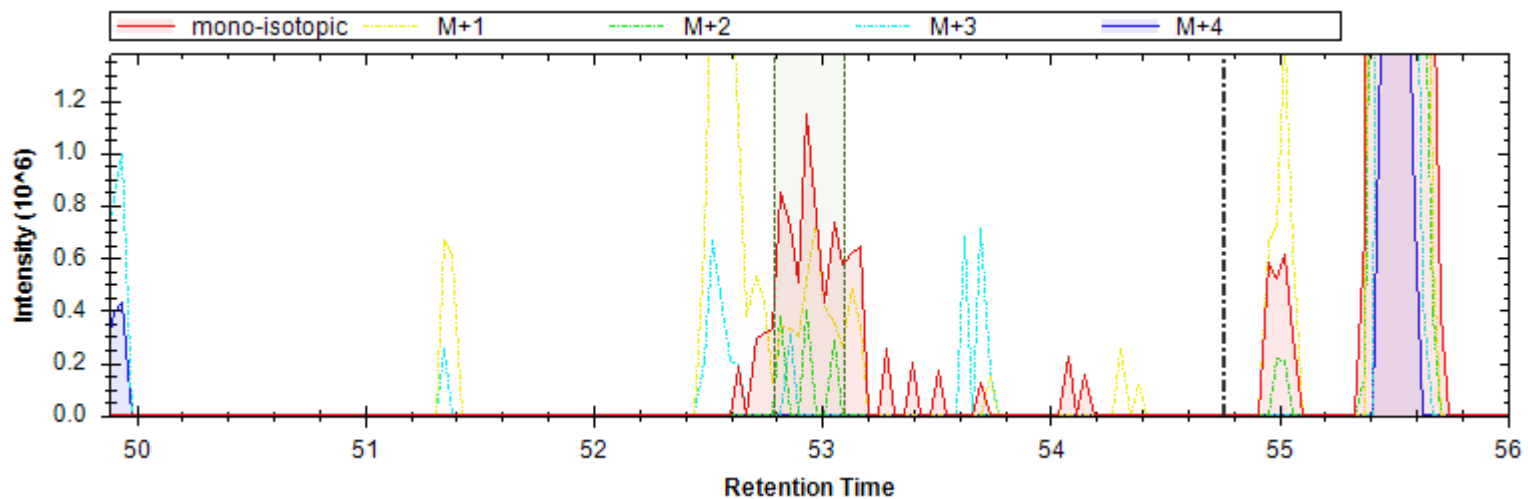

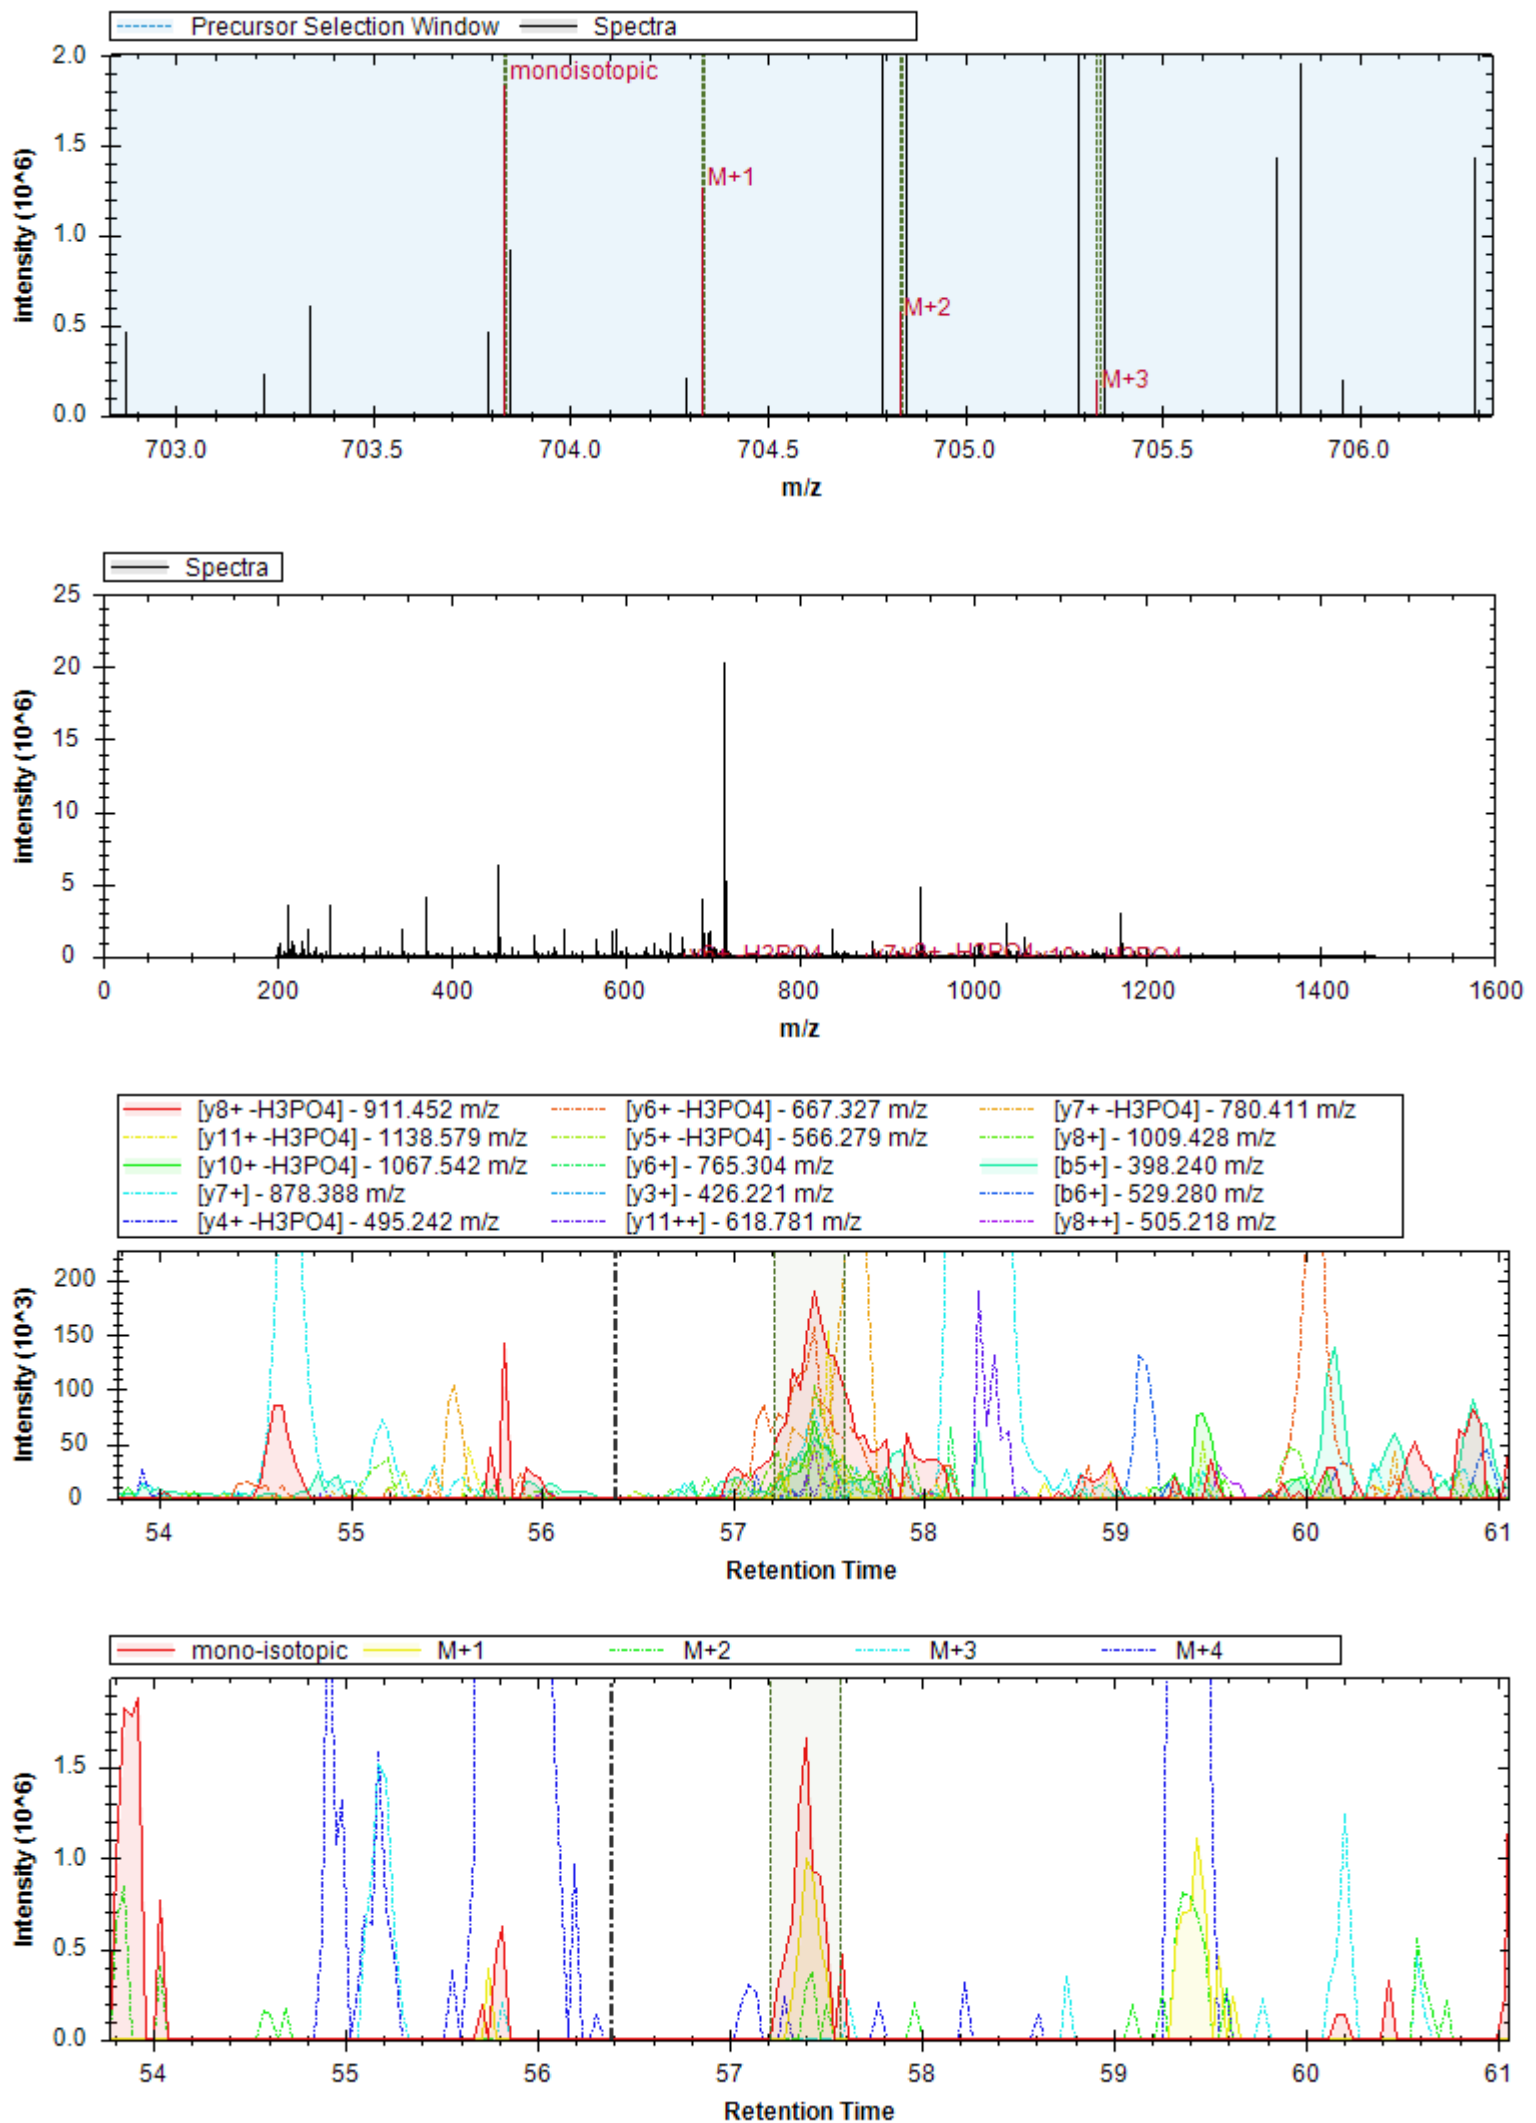

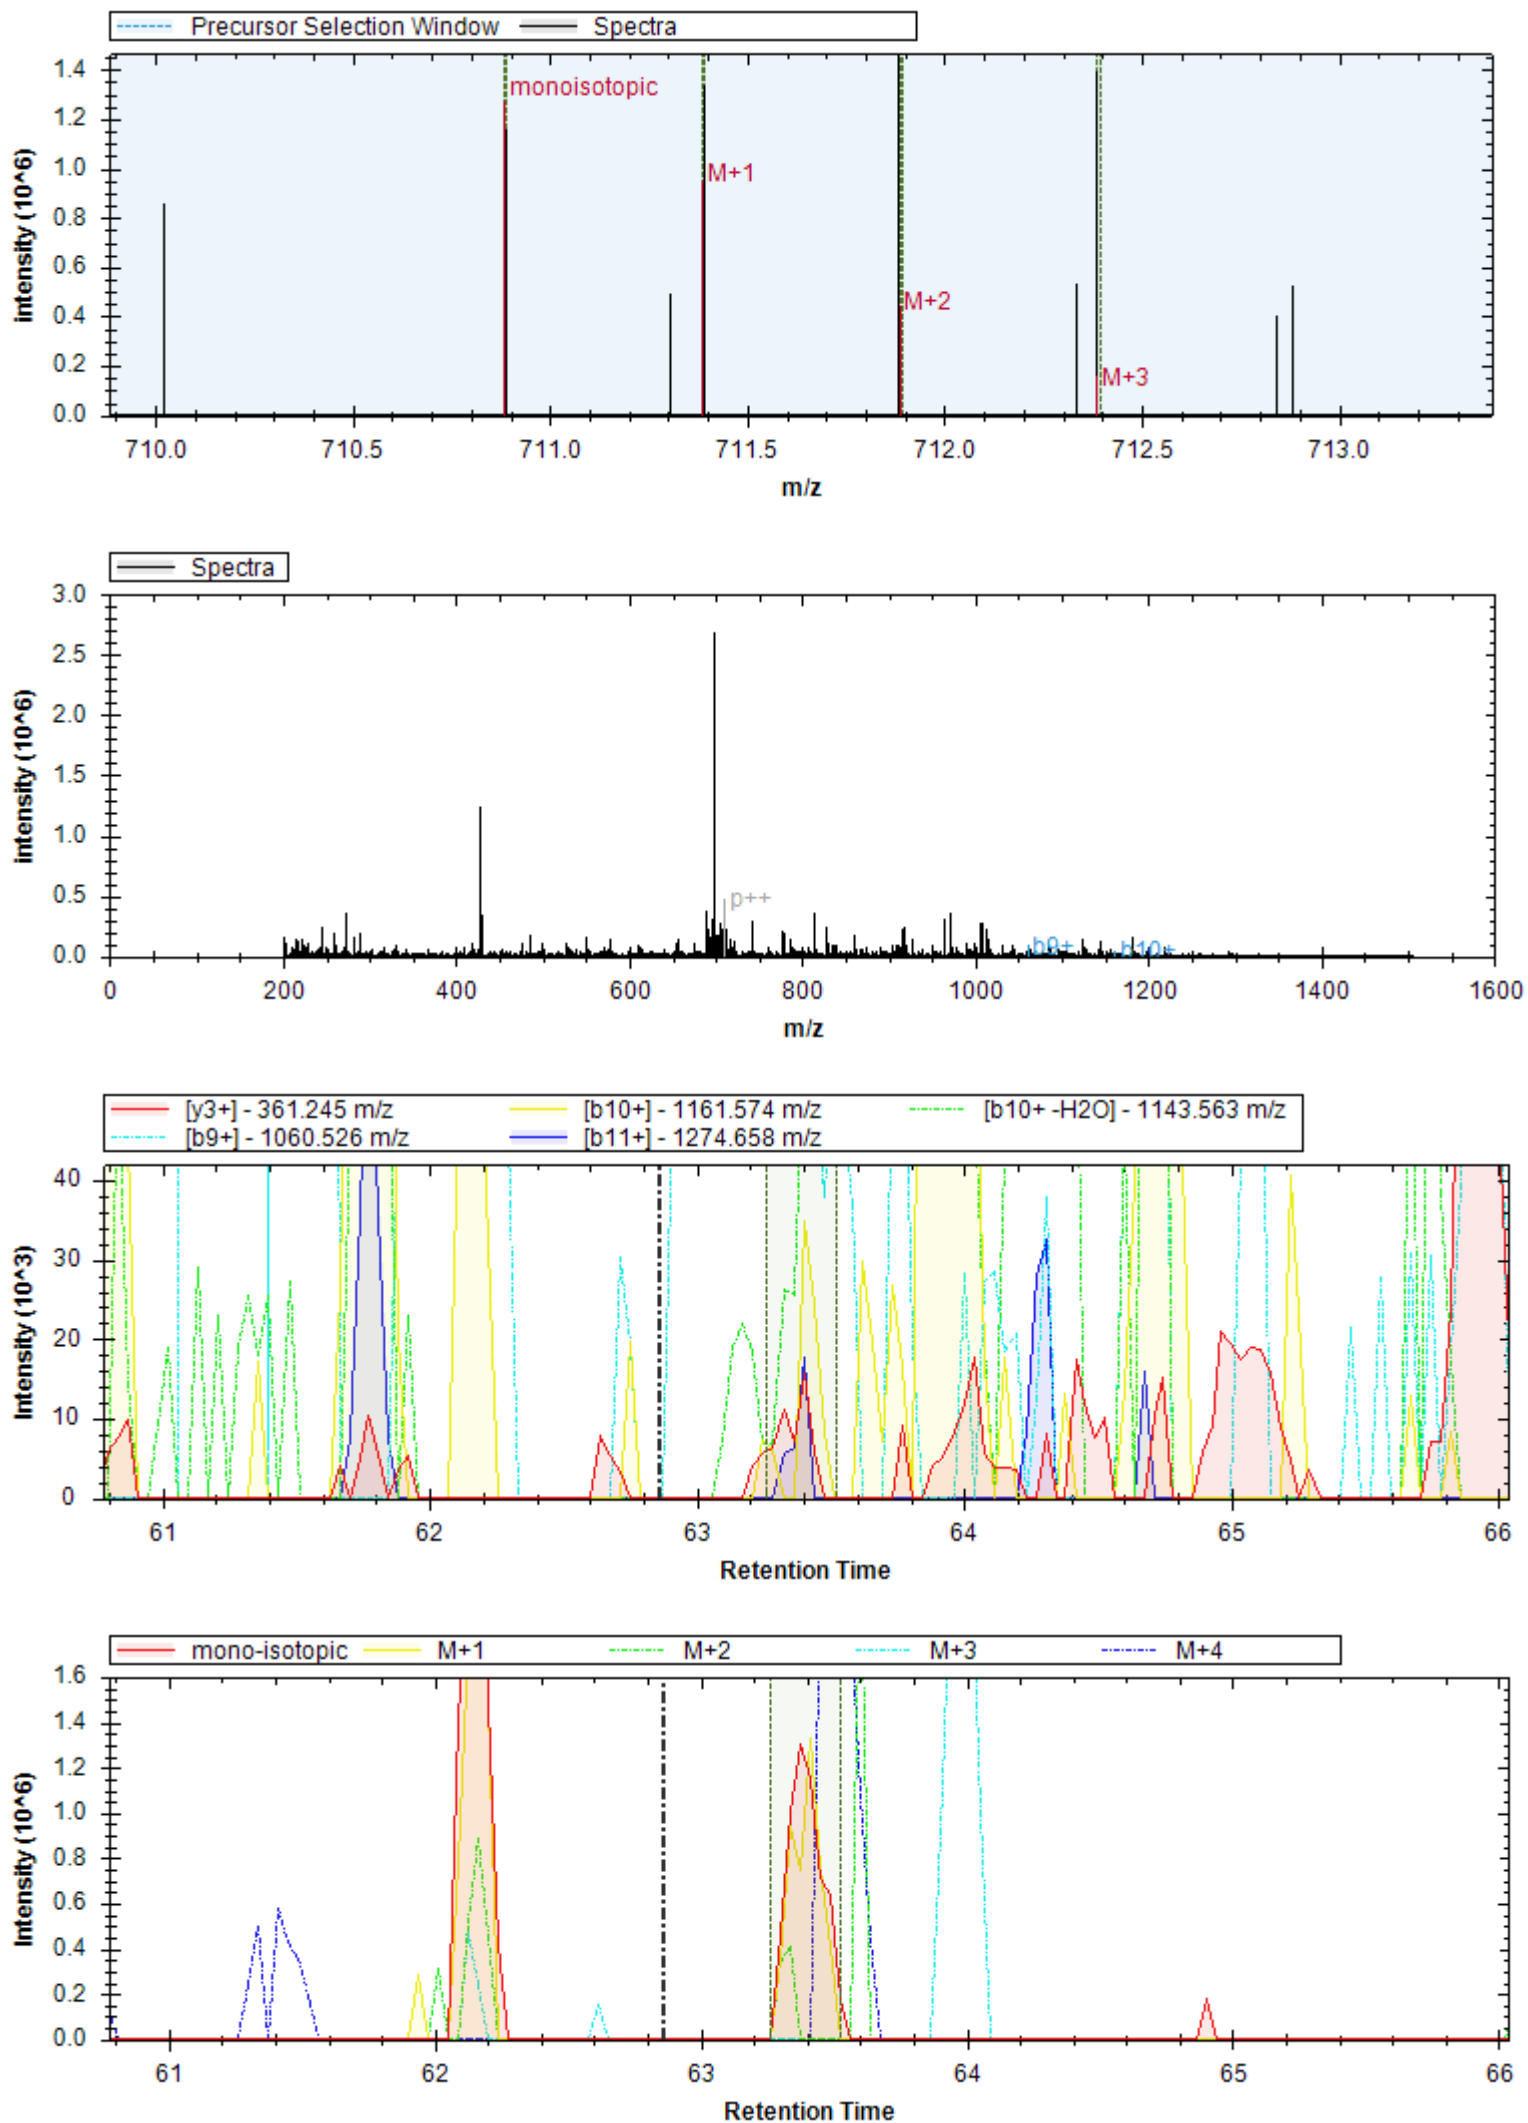

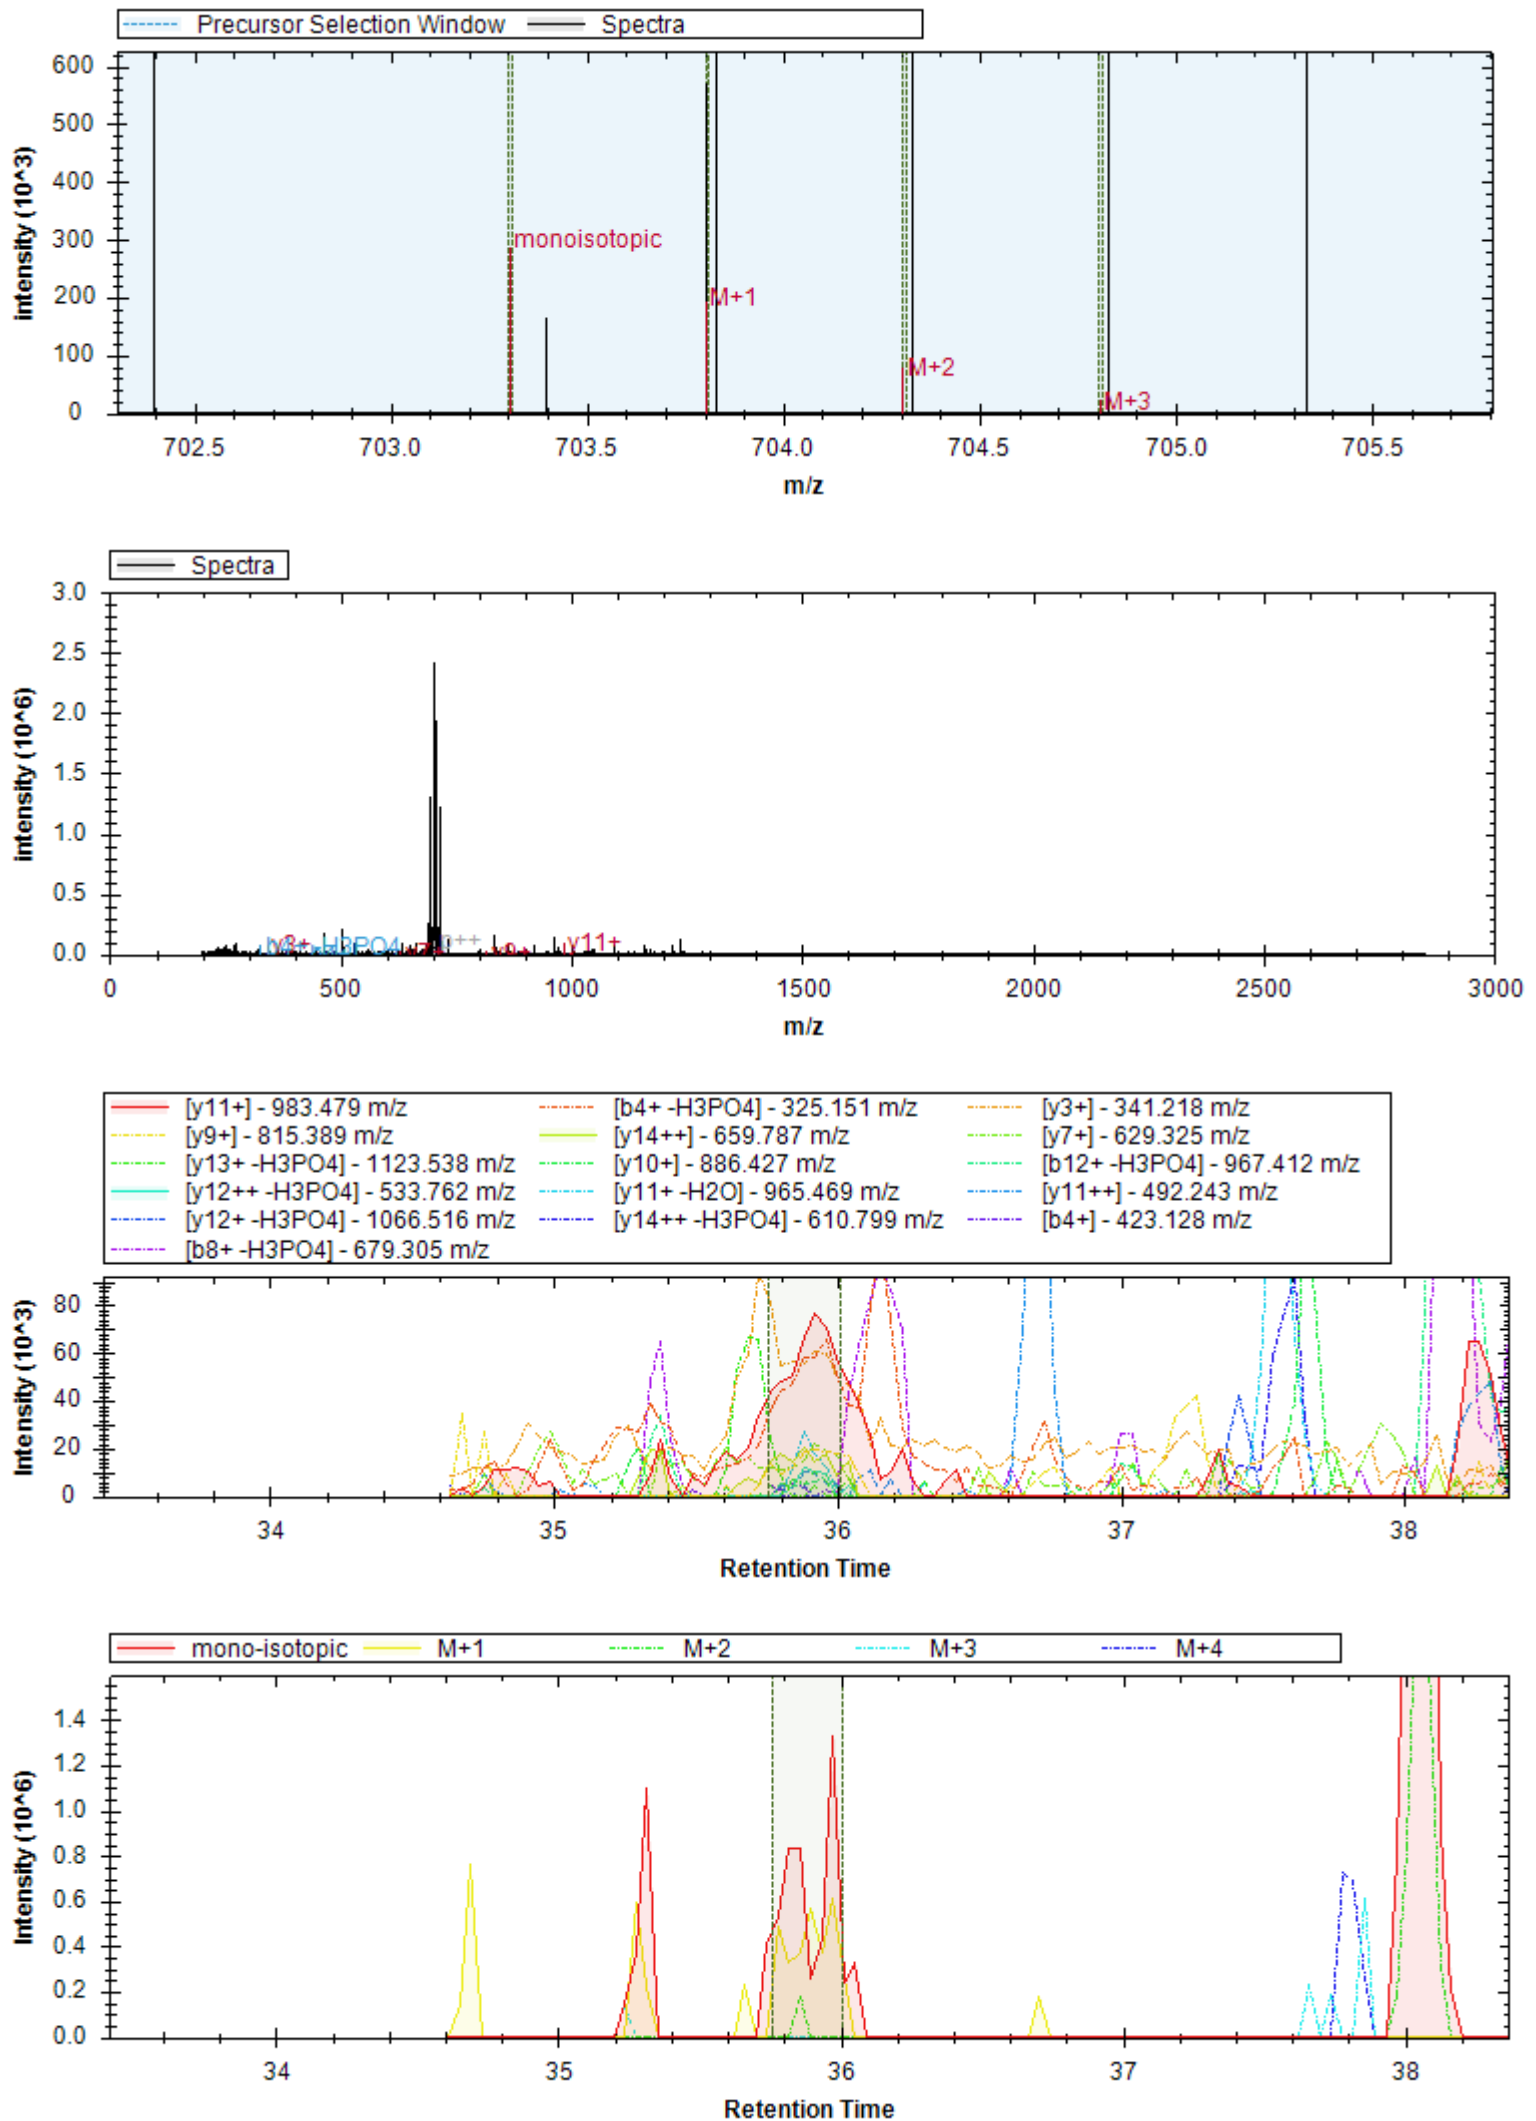

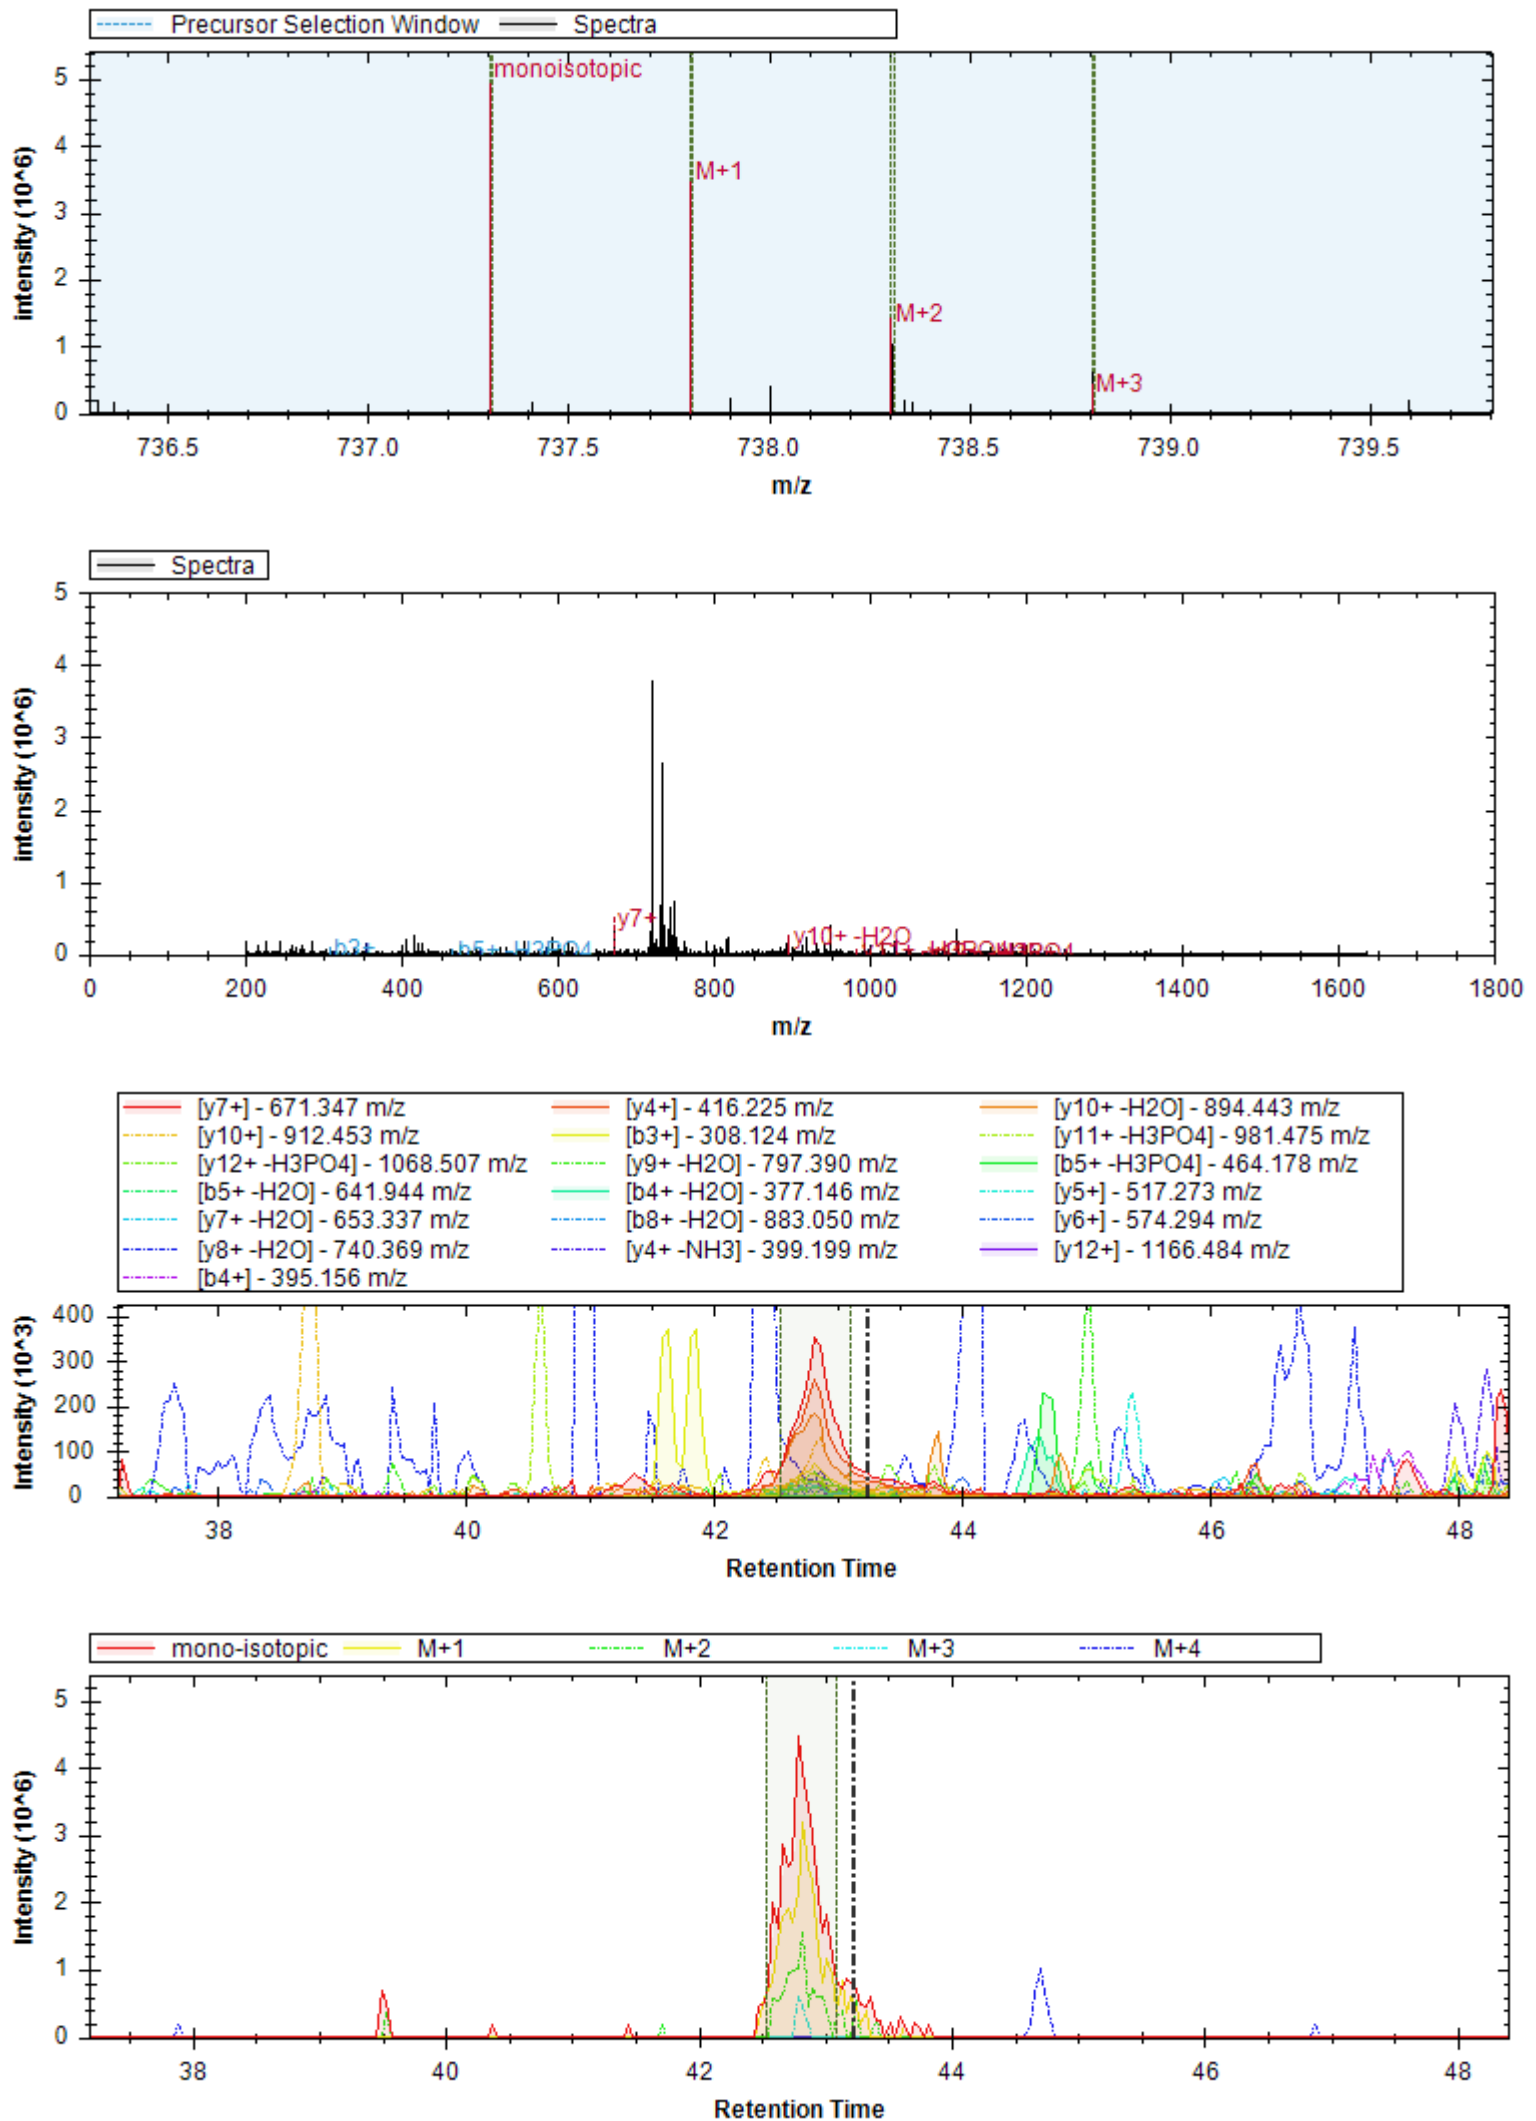

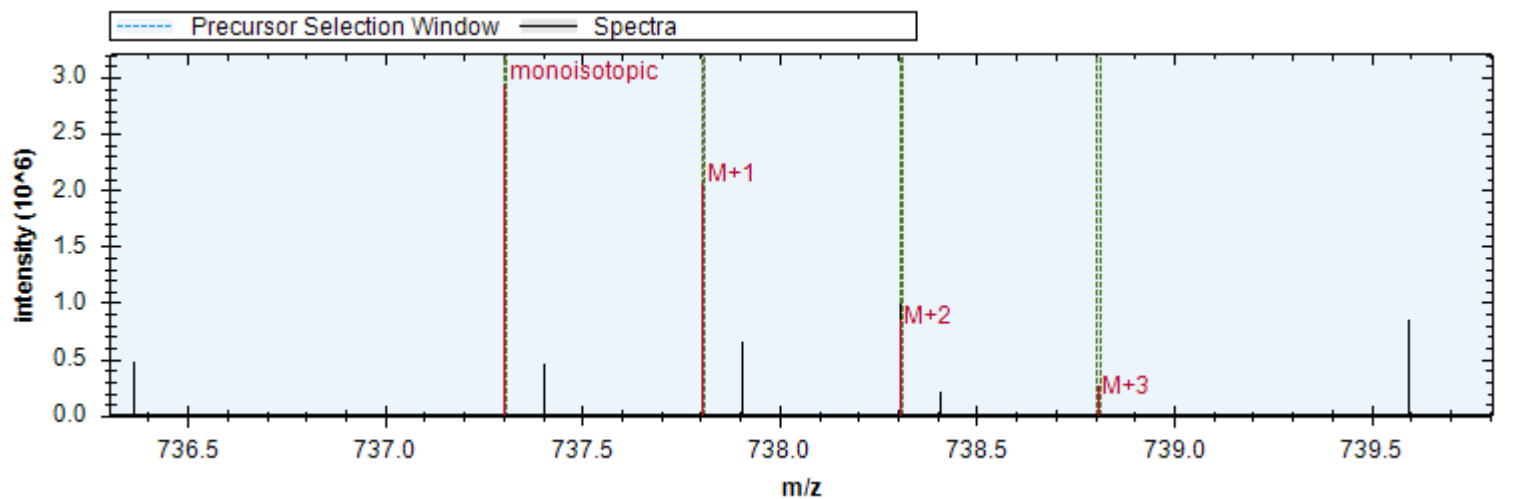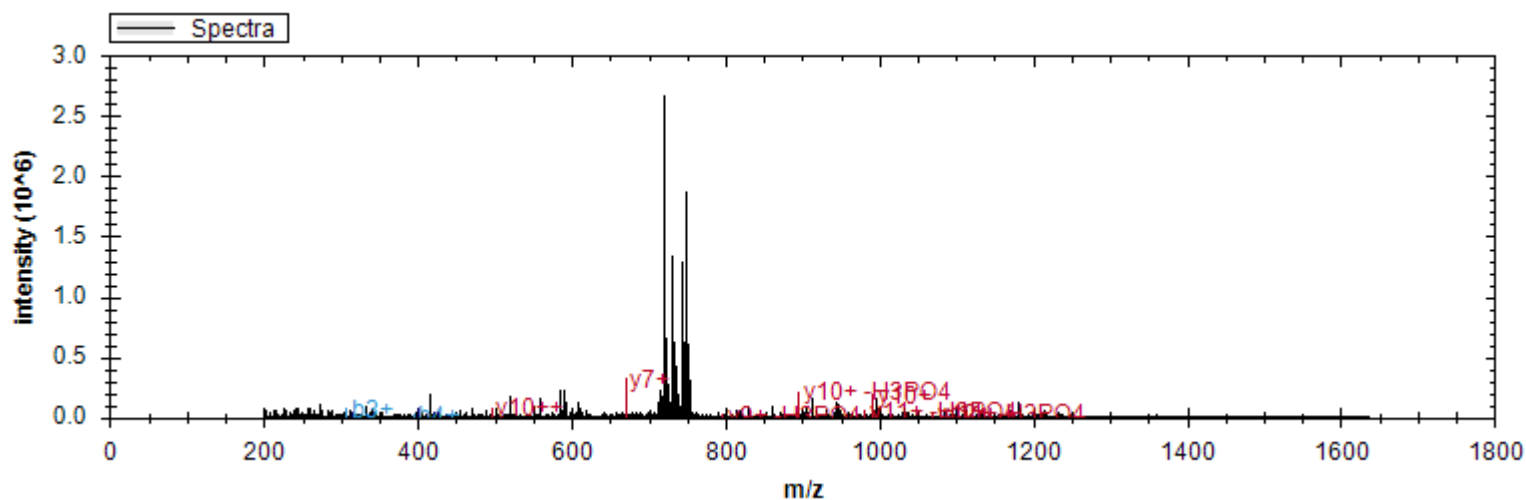

- |                             |                              |                            |
|-----------------------------|------------------------------|----------------------------|
| [y7+] - 671.347 m/z         | [y10+ -H3PO4] - 894.443 m/z  | [y4+] - 416.225 m/z        |
| [y10+] - 992.420 m/z        | [y10++] - 496.714 m/z        | [b3+] - 308.124 m/z        |
| [y11+ -H3PO4] - 981.475 m/z | [y12+ -H3PO4] - 1068.507 m/z | [y9+ -H3PO4] - 797.390 m/z |
| [y11++] - 540.230 m/z       | [y11+] - 1079.452 m/z        | [y7+ -H2O] - 653.337 m/z   |
| [y8+ -H3PO4] - 740.369 m/z  | [y12+] - 1166.484 m/z        | [y10+ -H2O] - 1072.209 m/z |
| [b4+ -H2O] - 377.146 m/z    | [y5+] - 517.273 m/z          | [y10+ -NH3] - 975.393 m/z  |
| [b4+] - 395.156 m/z         |                              |                            |

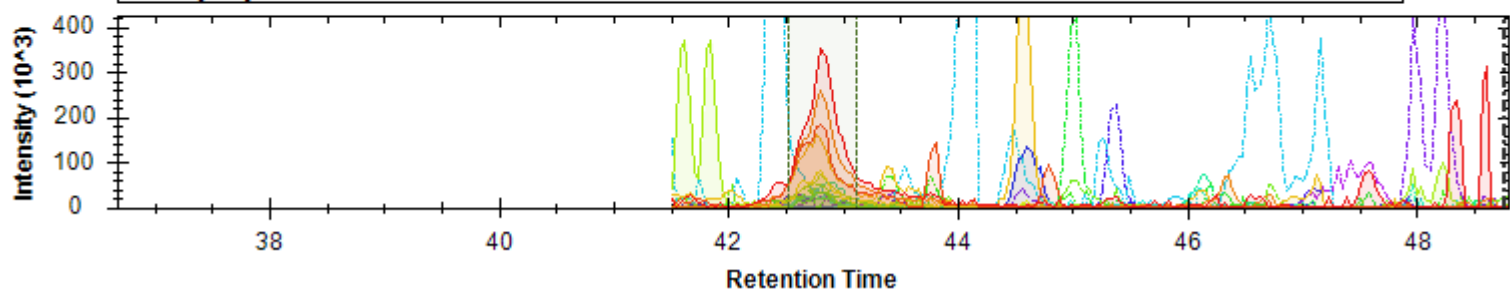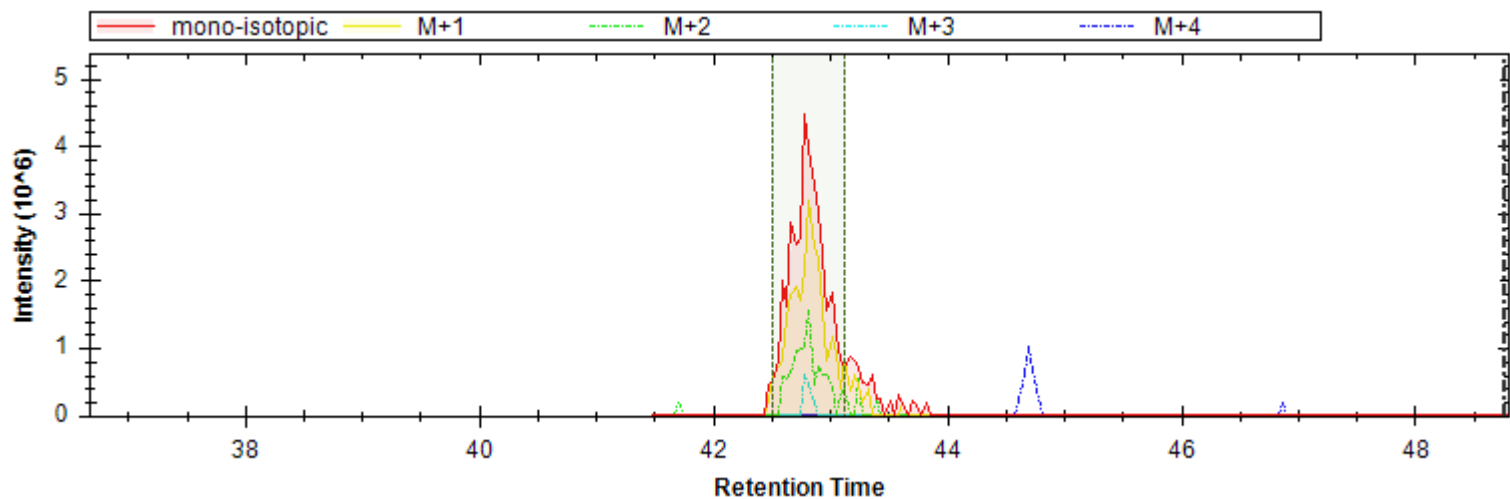

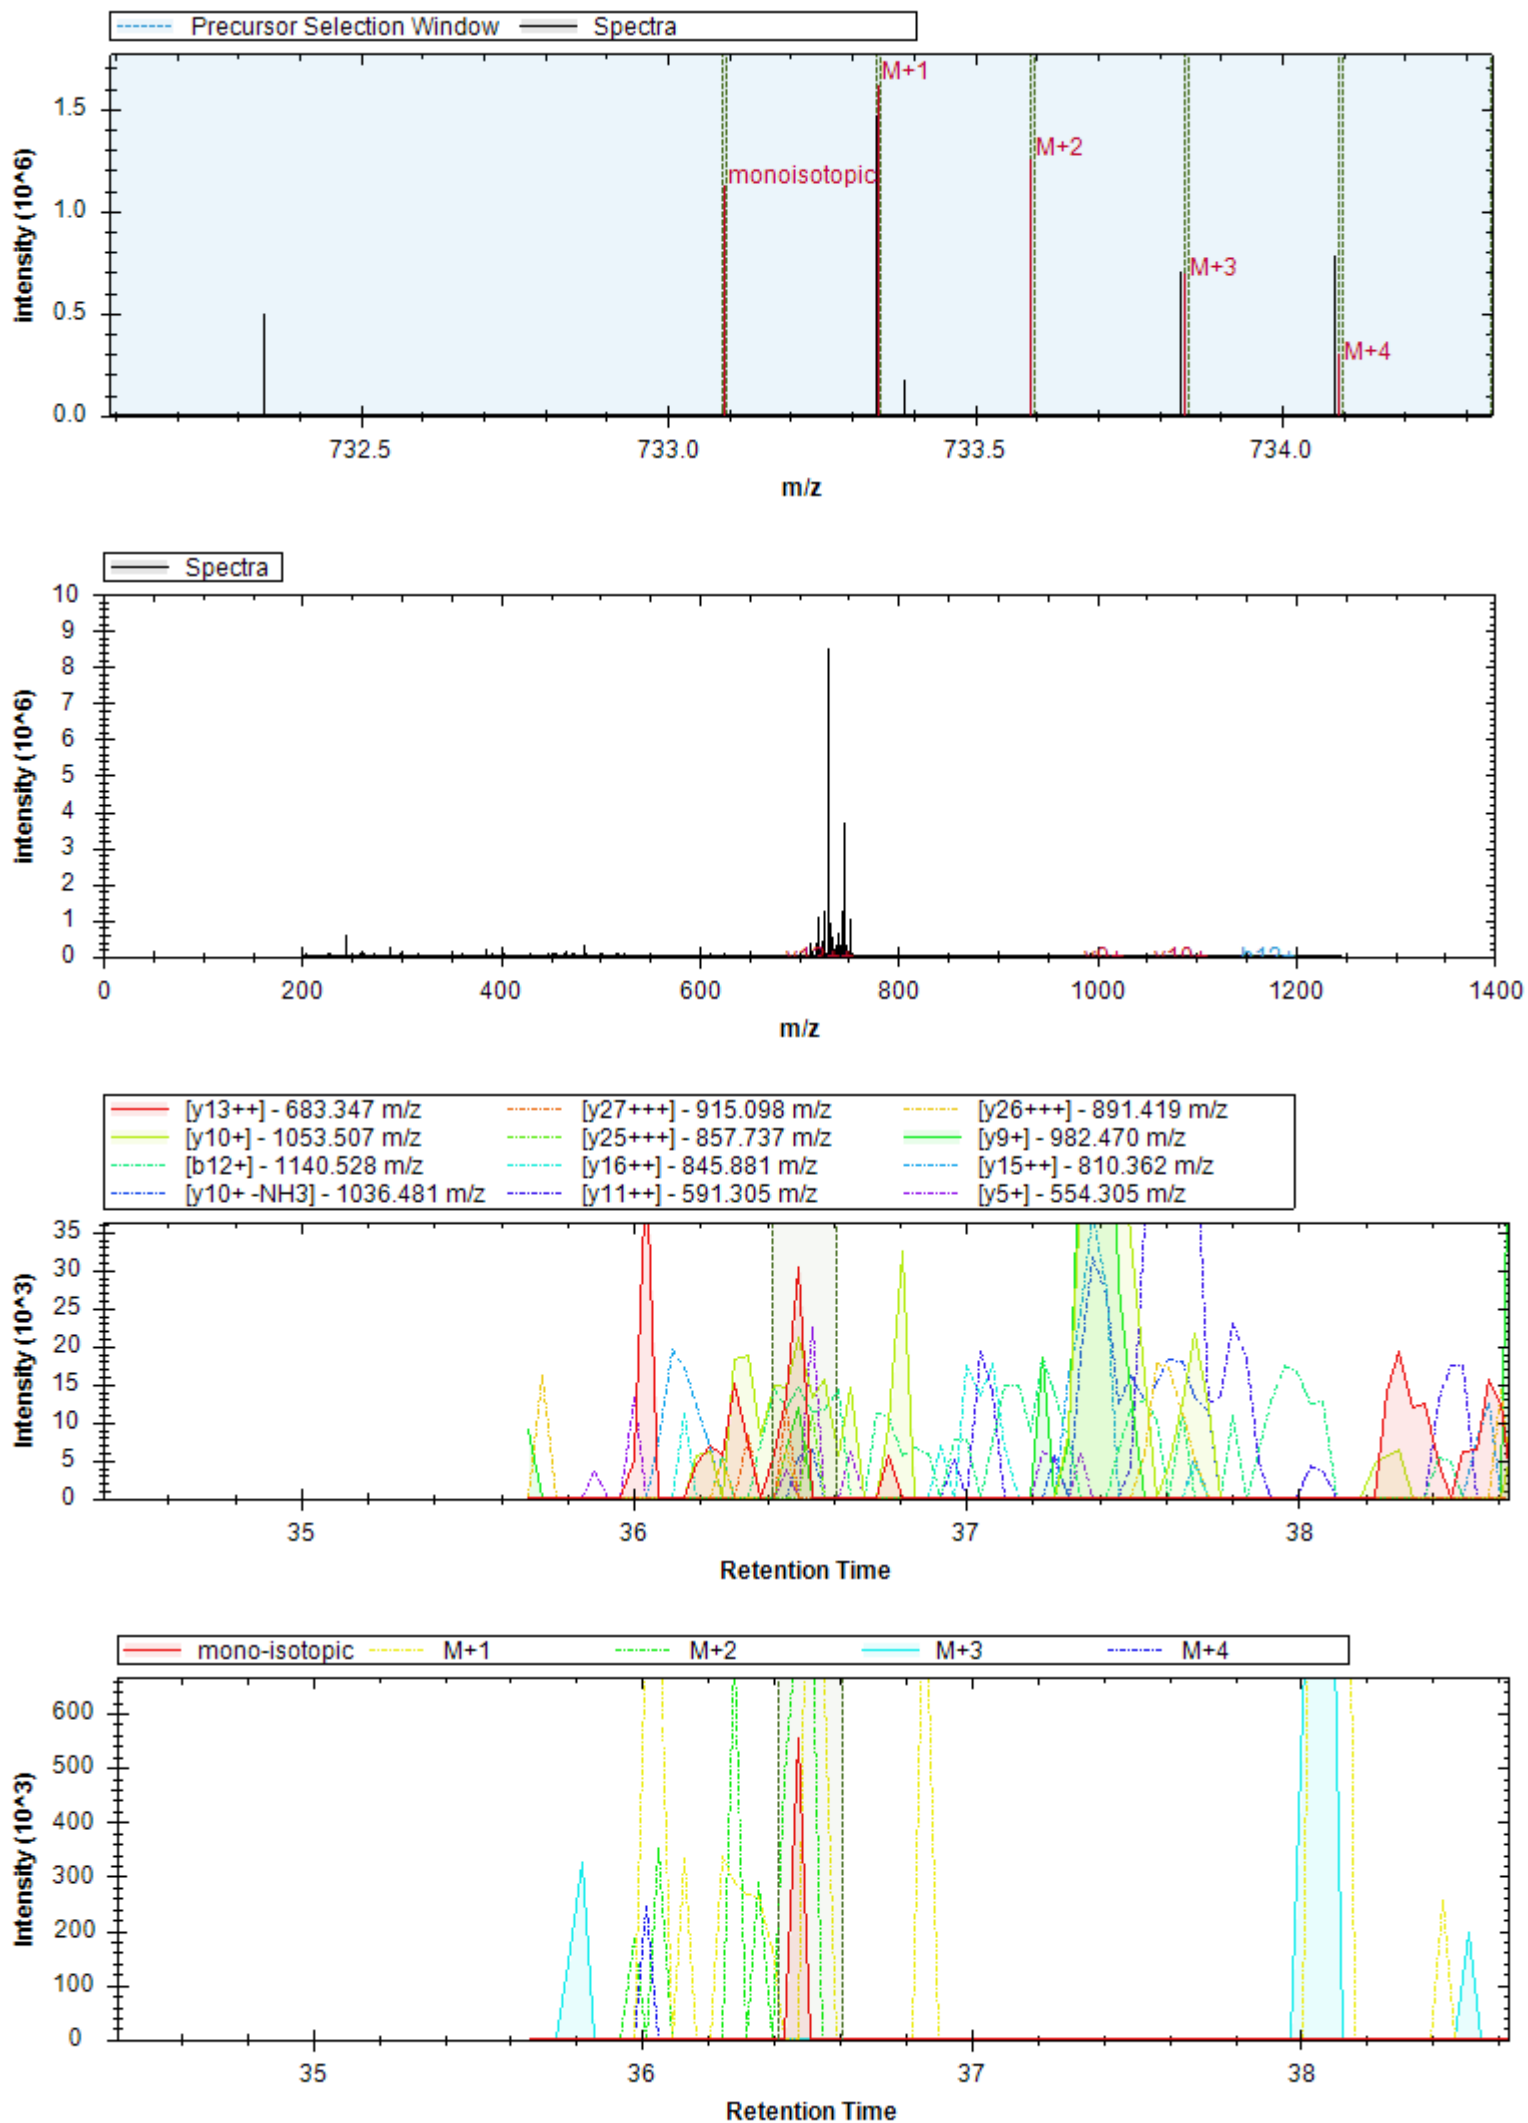

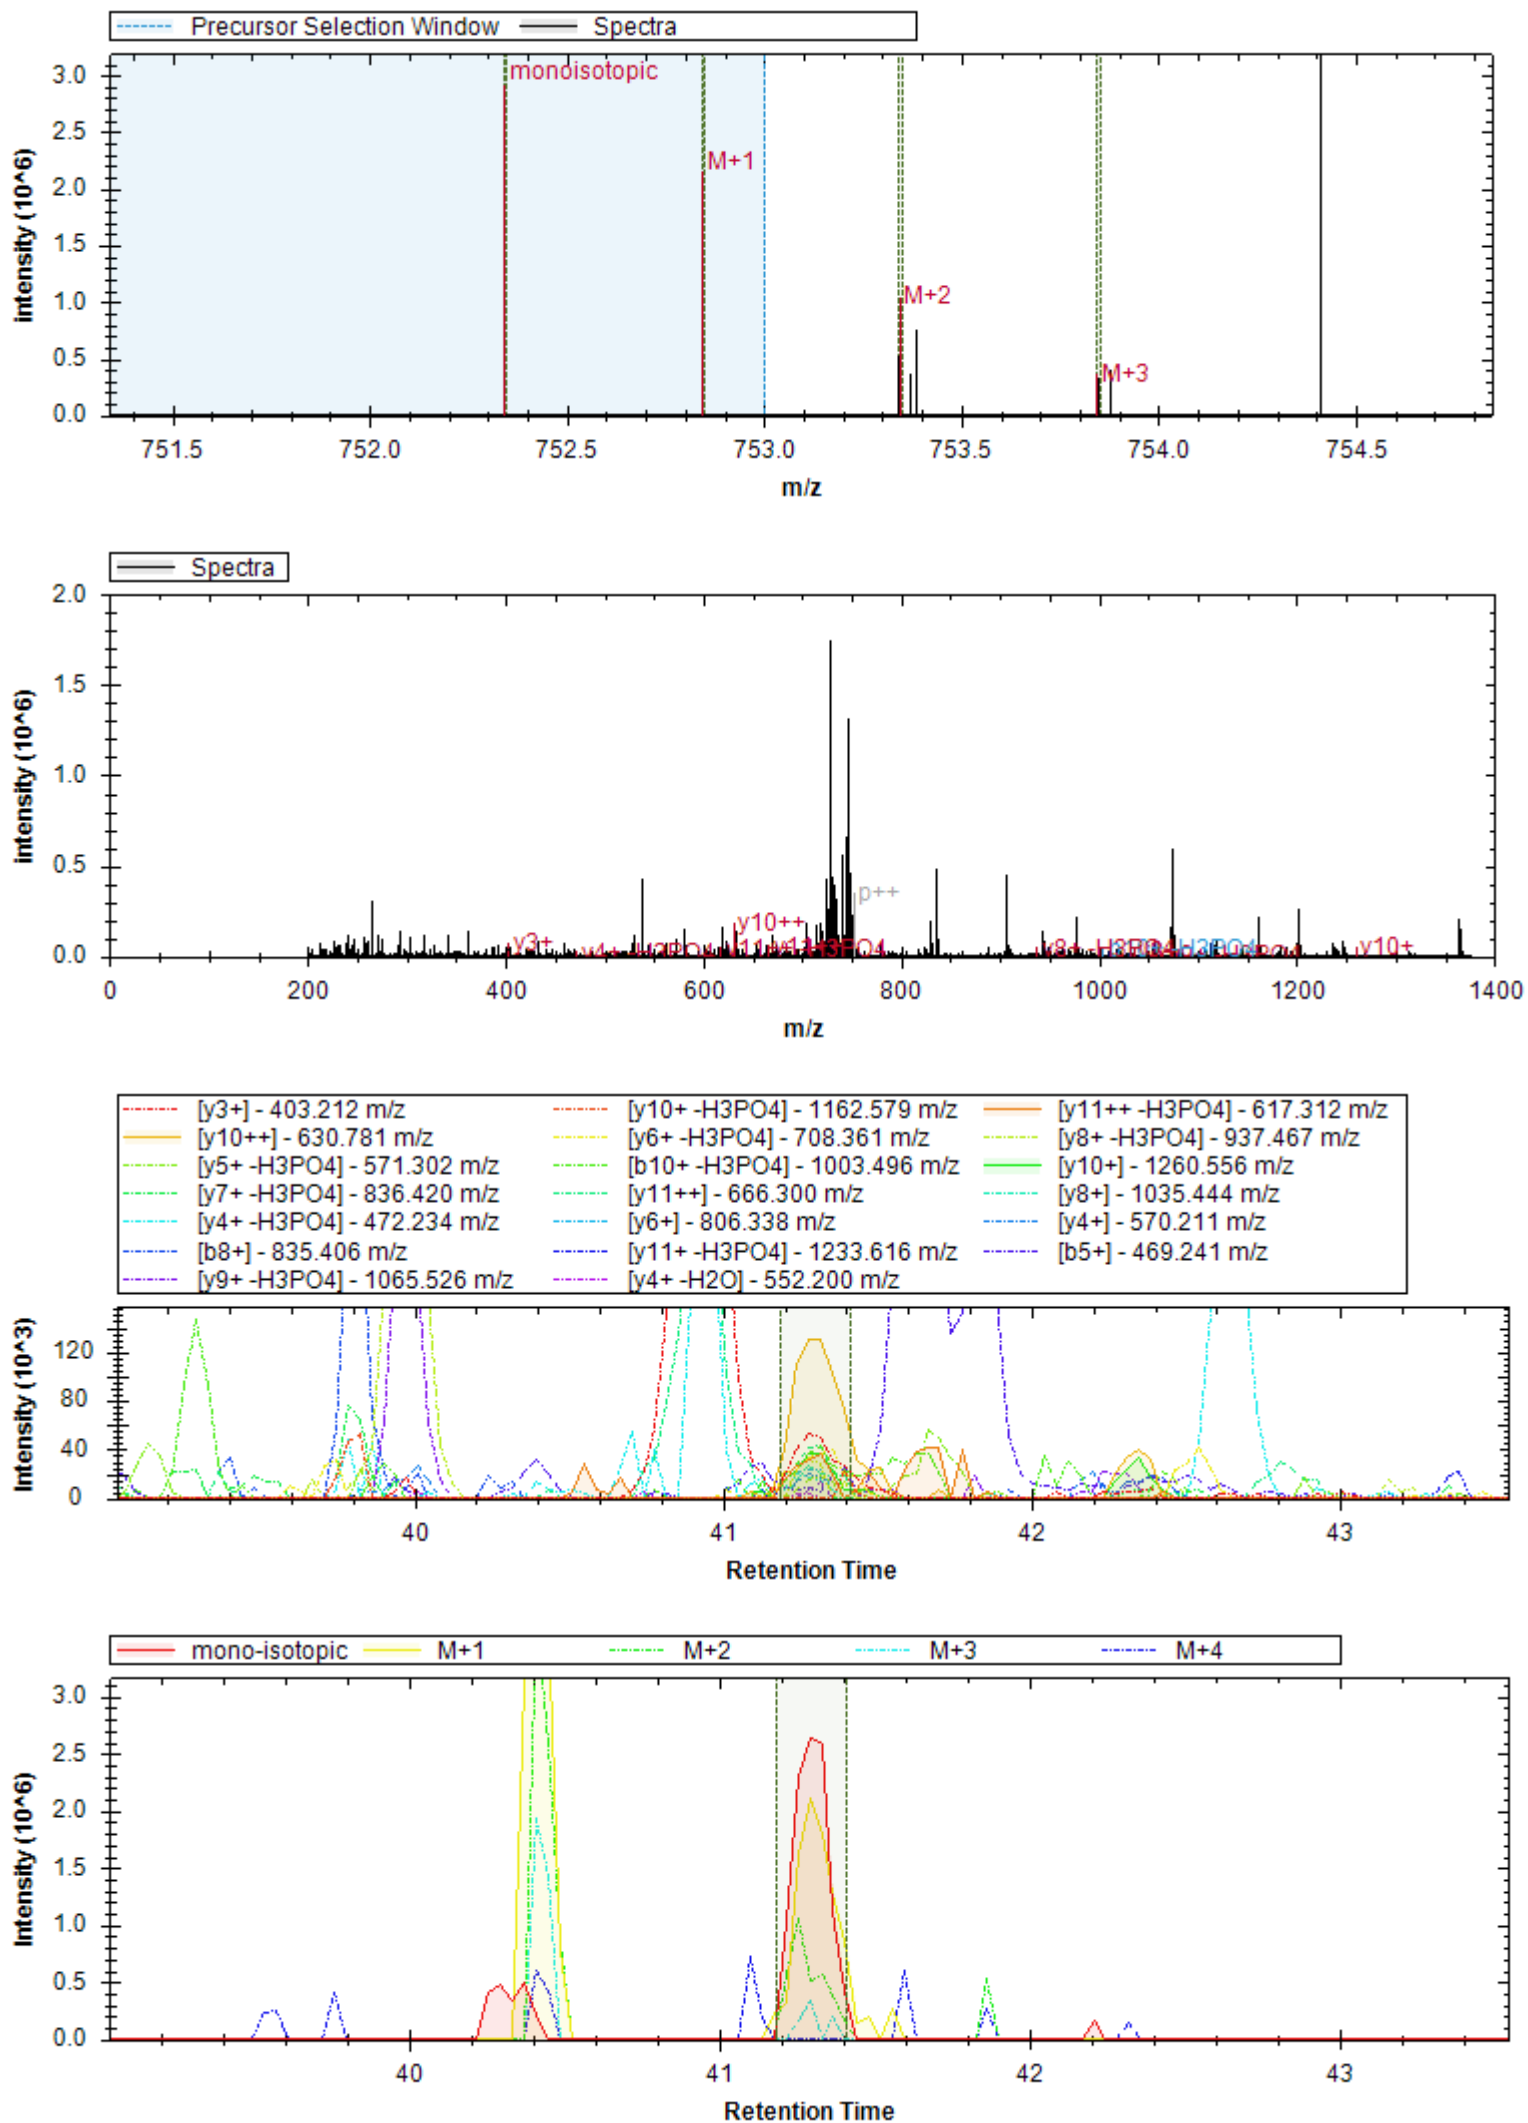



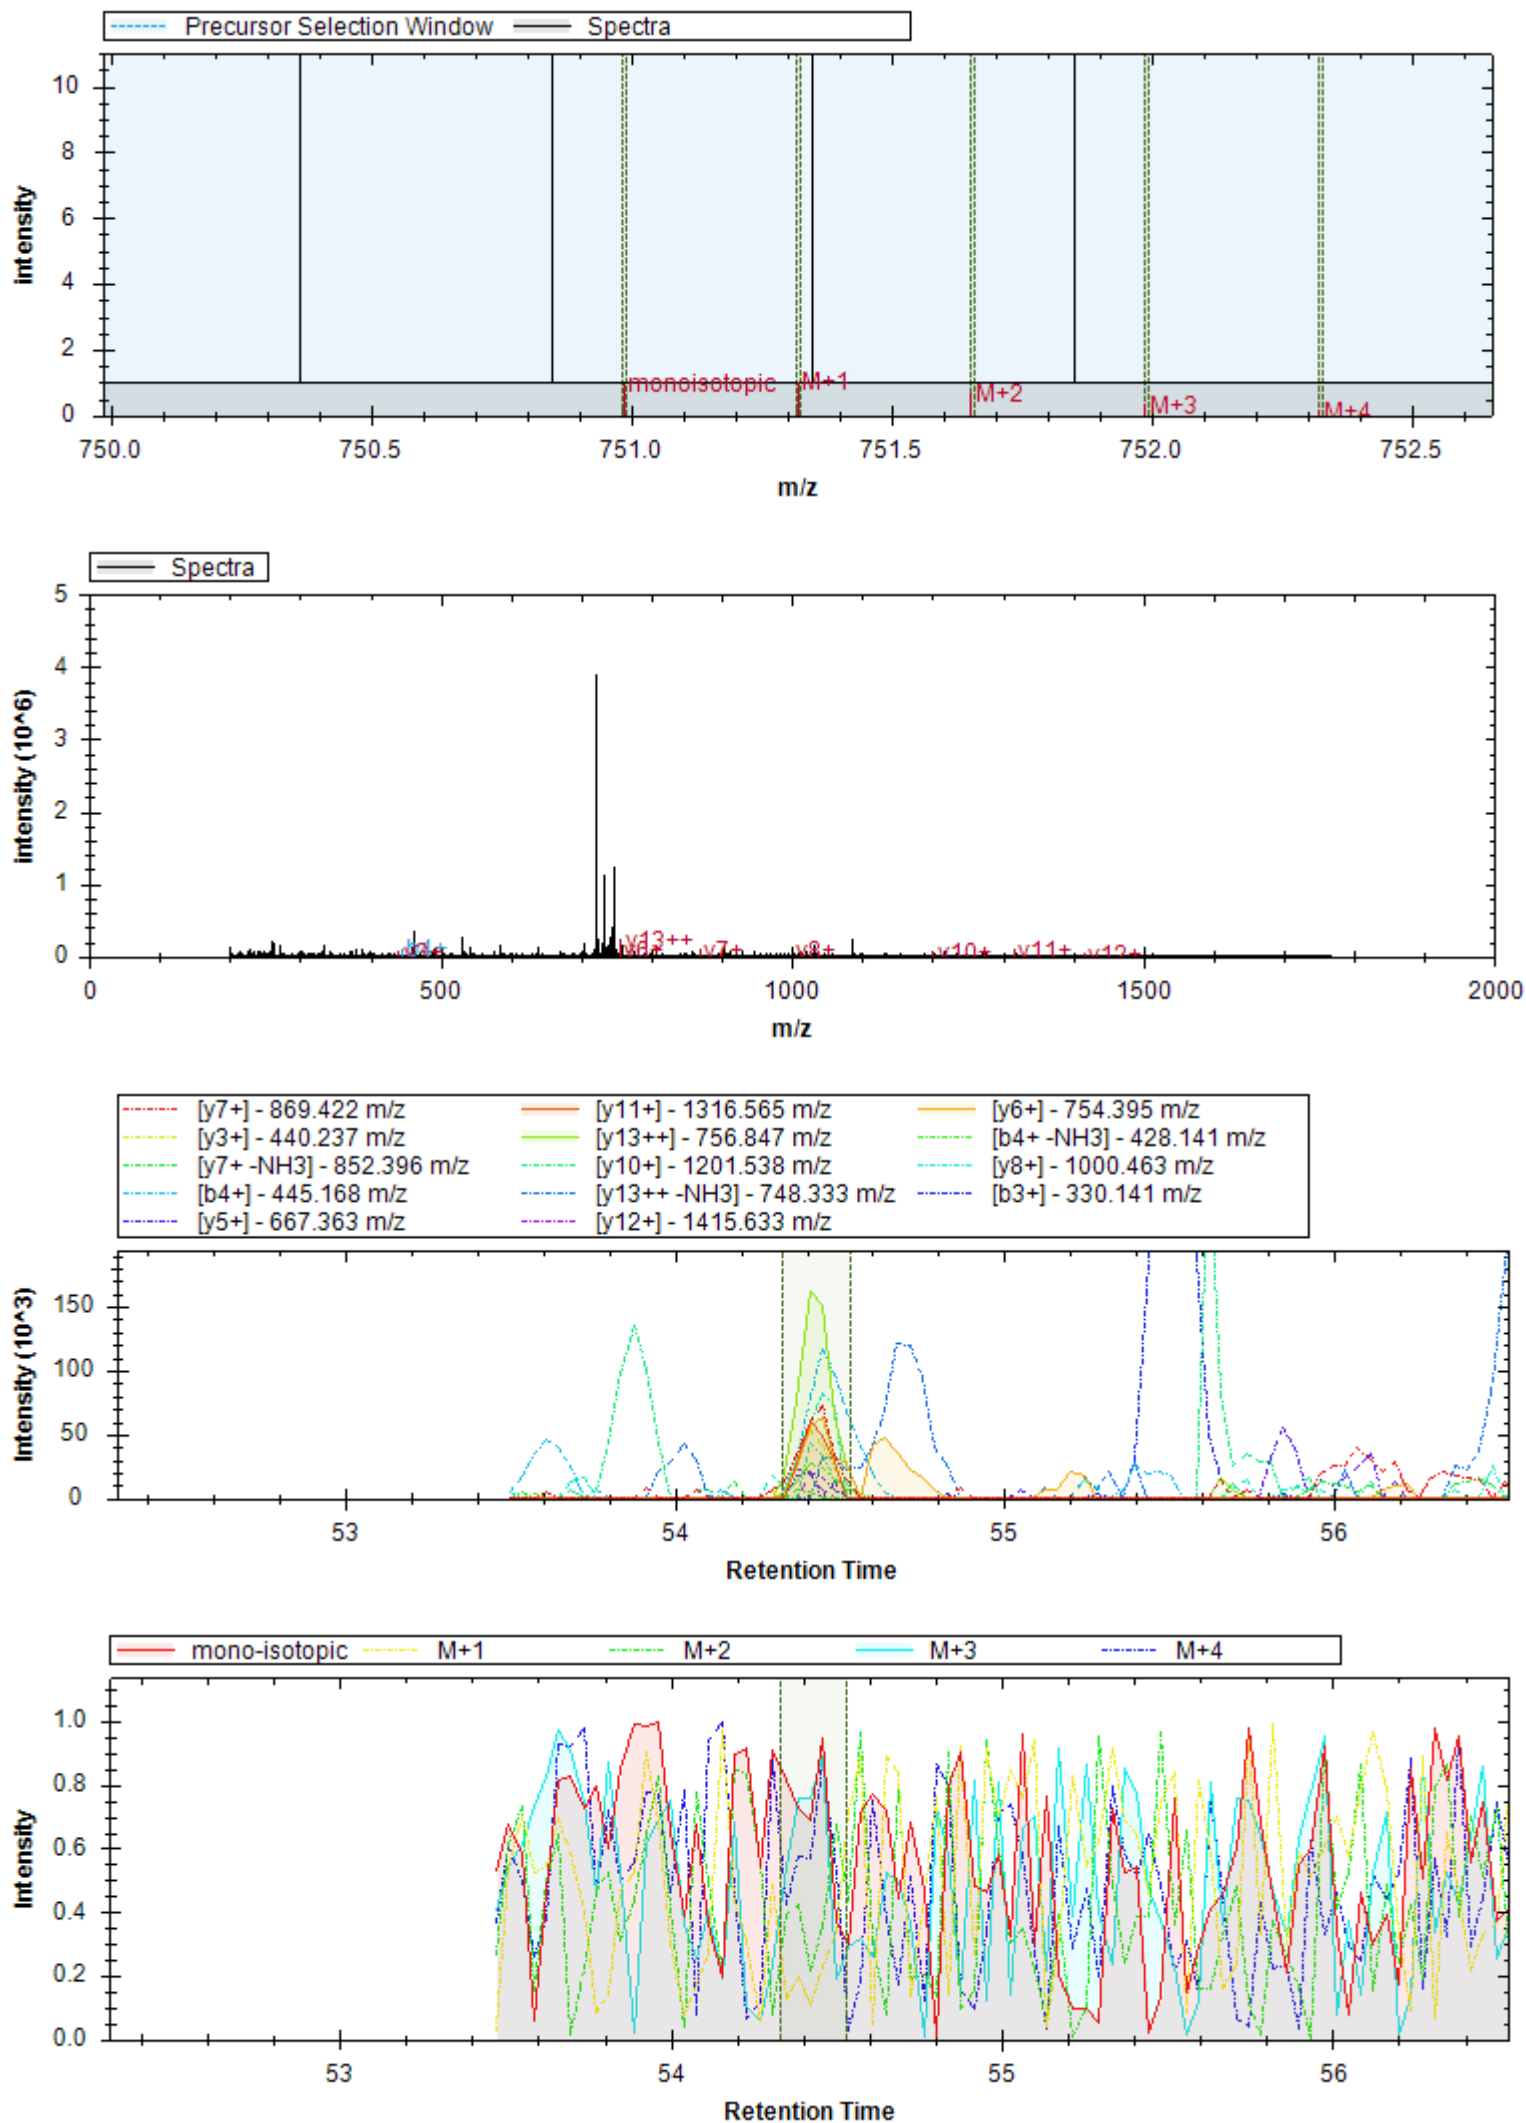

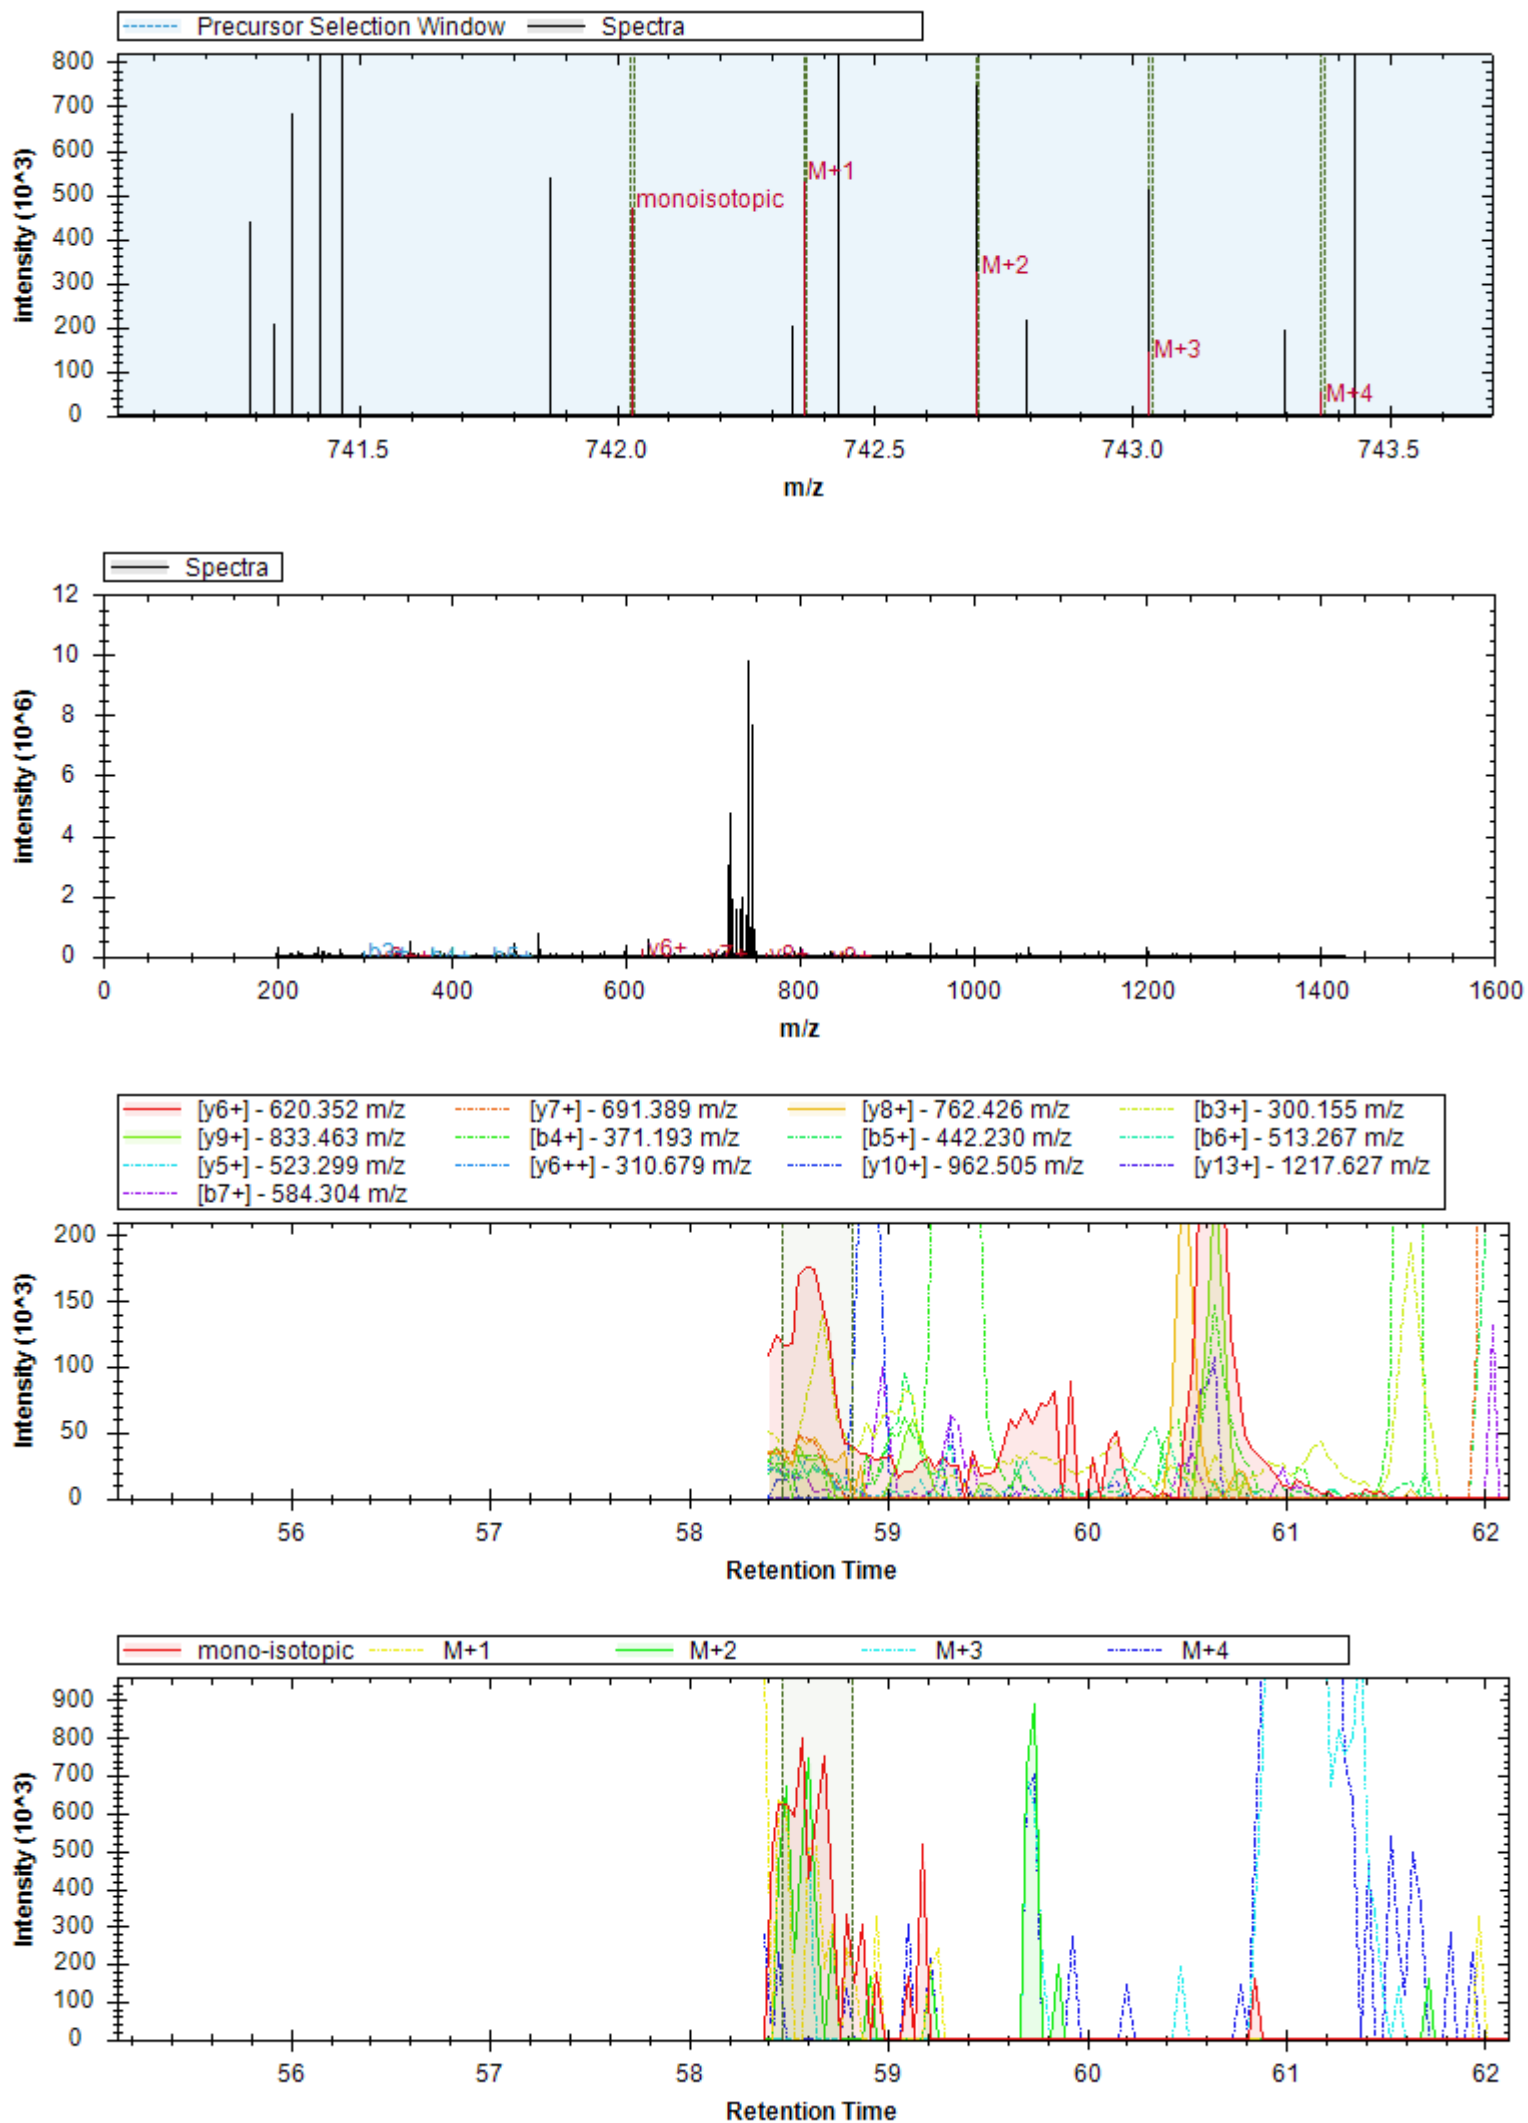

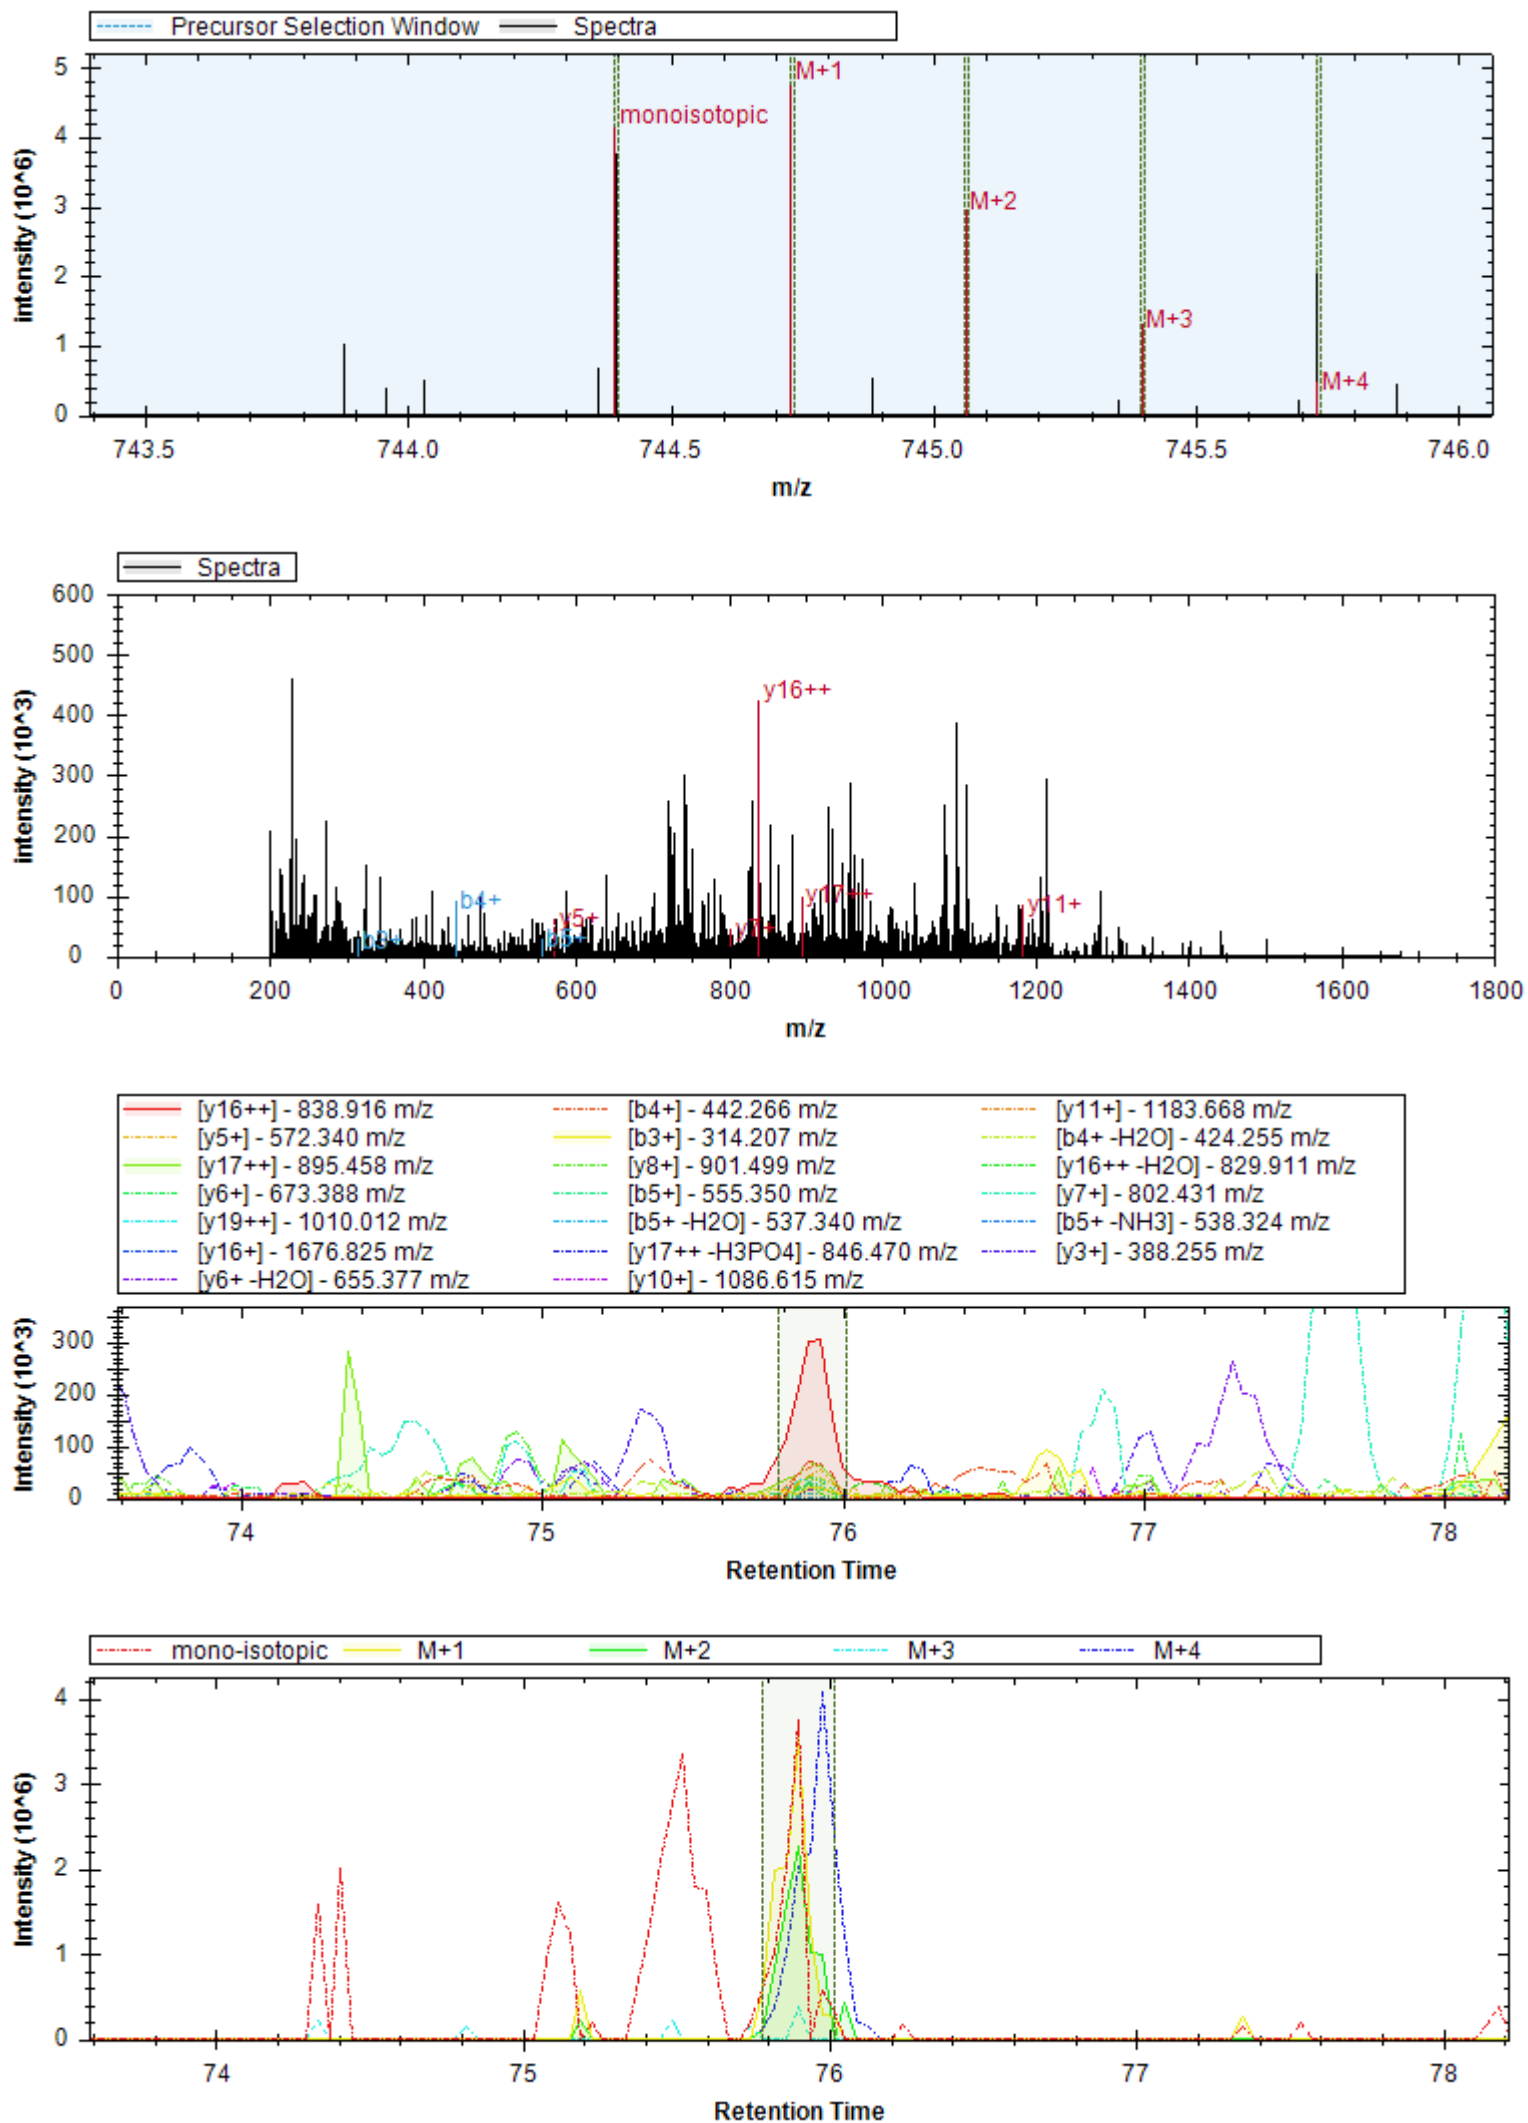

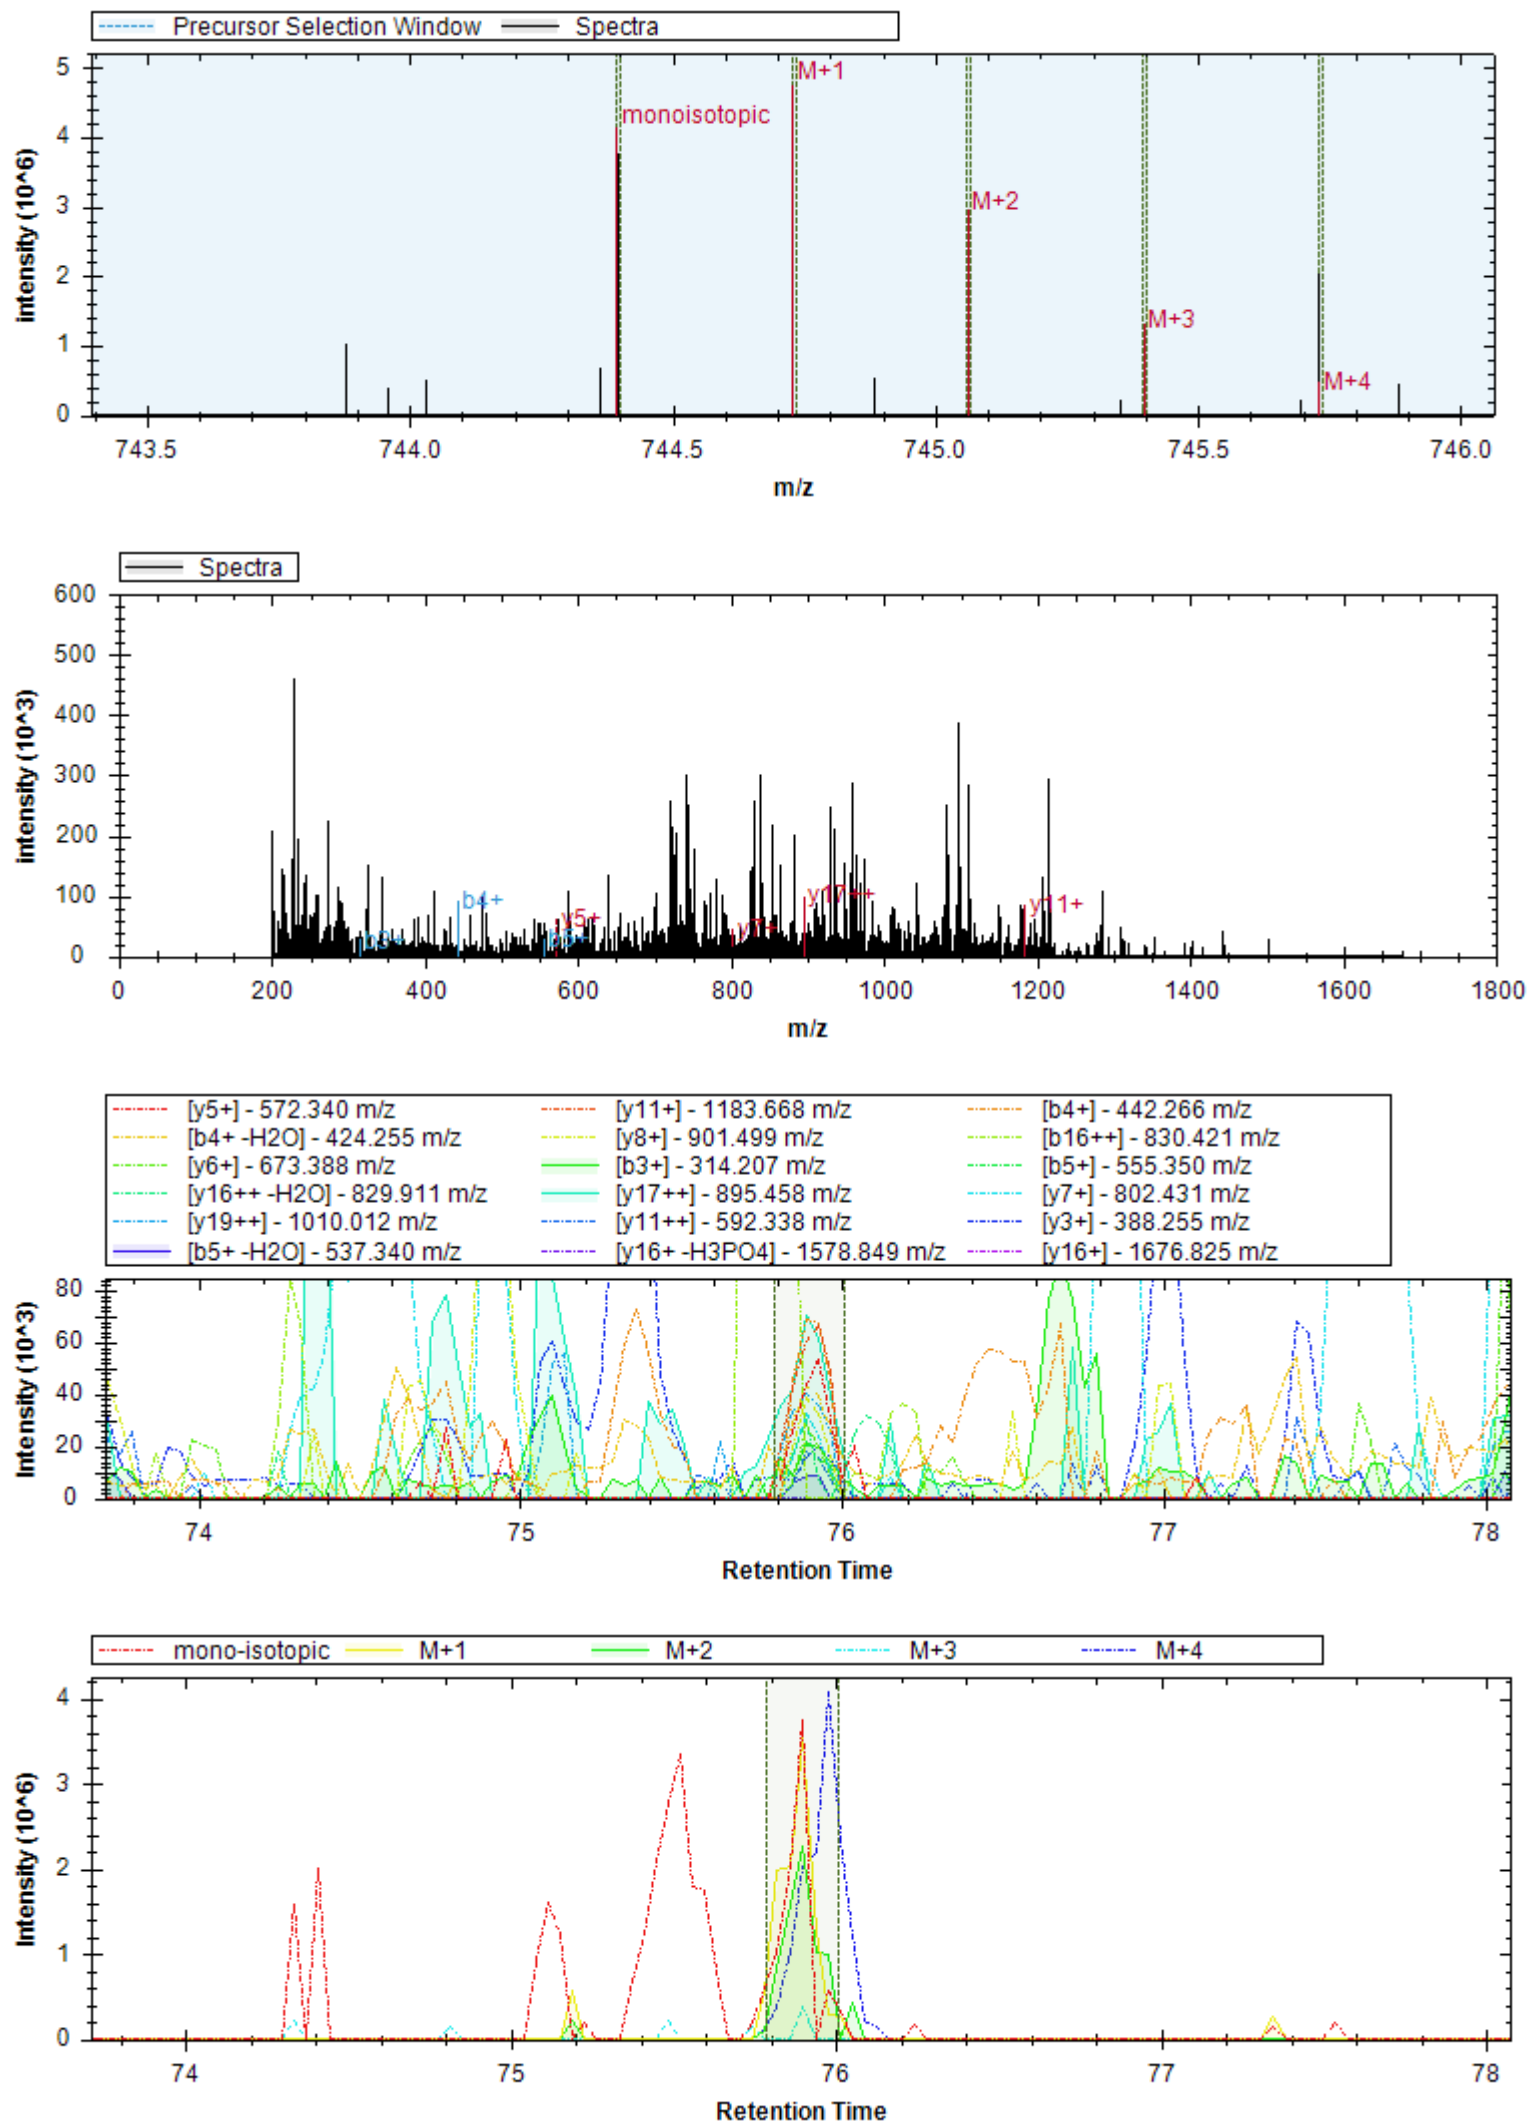

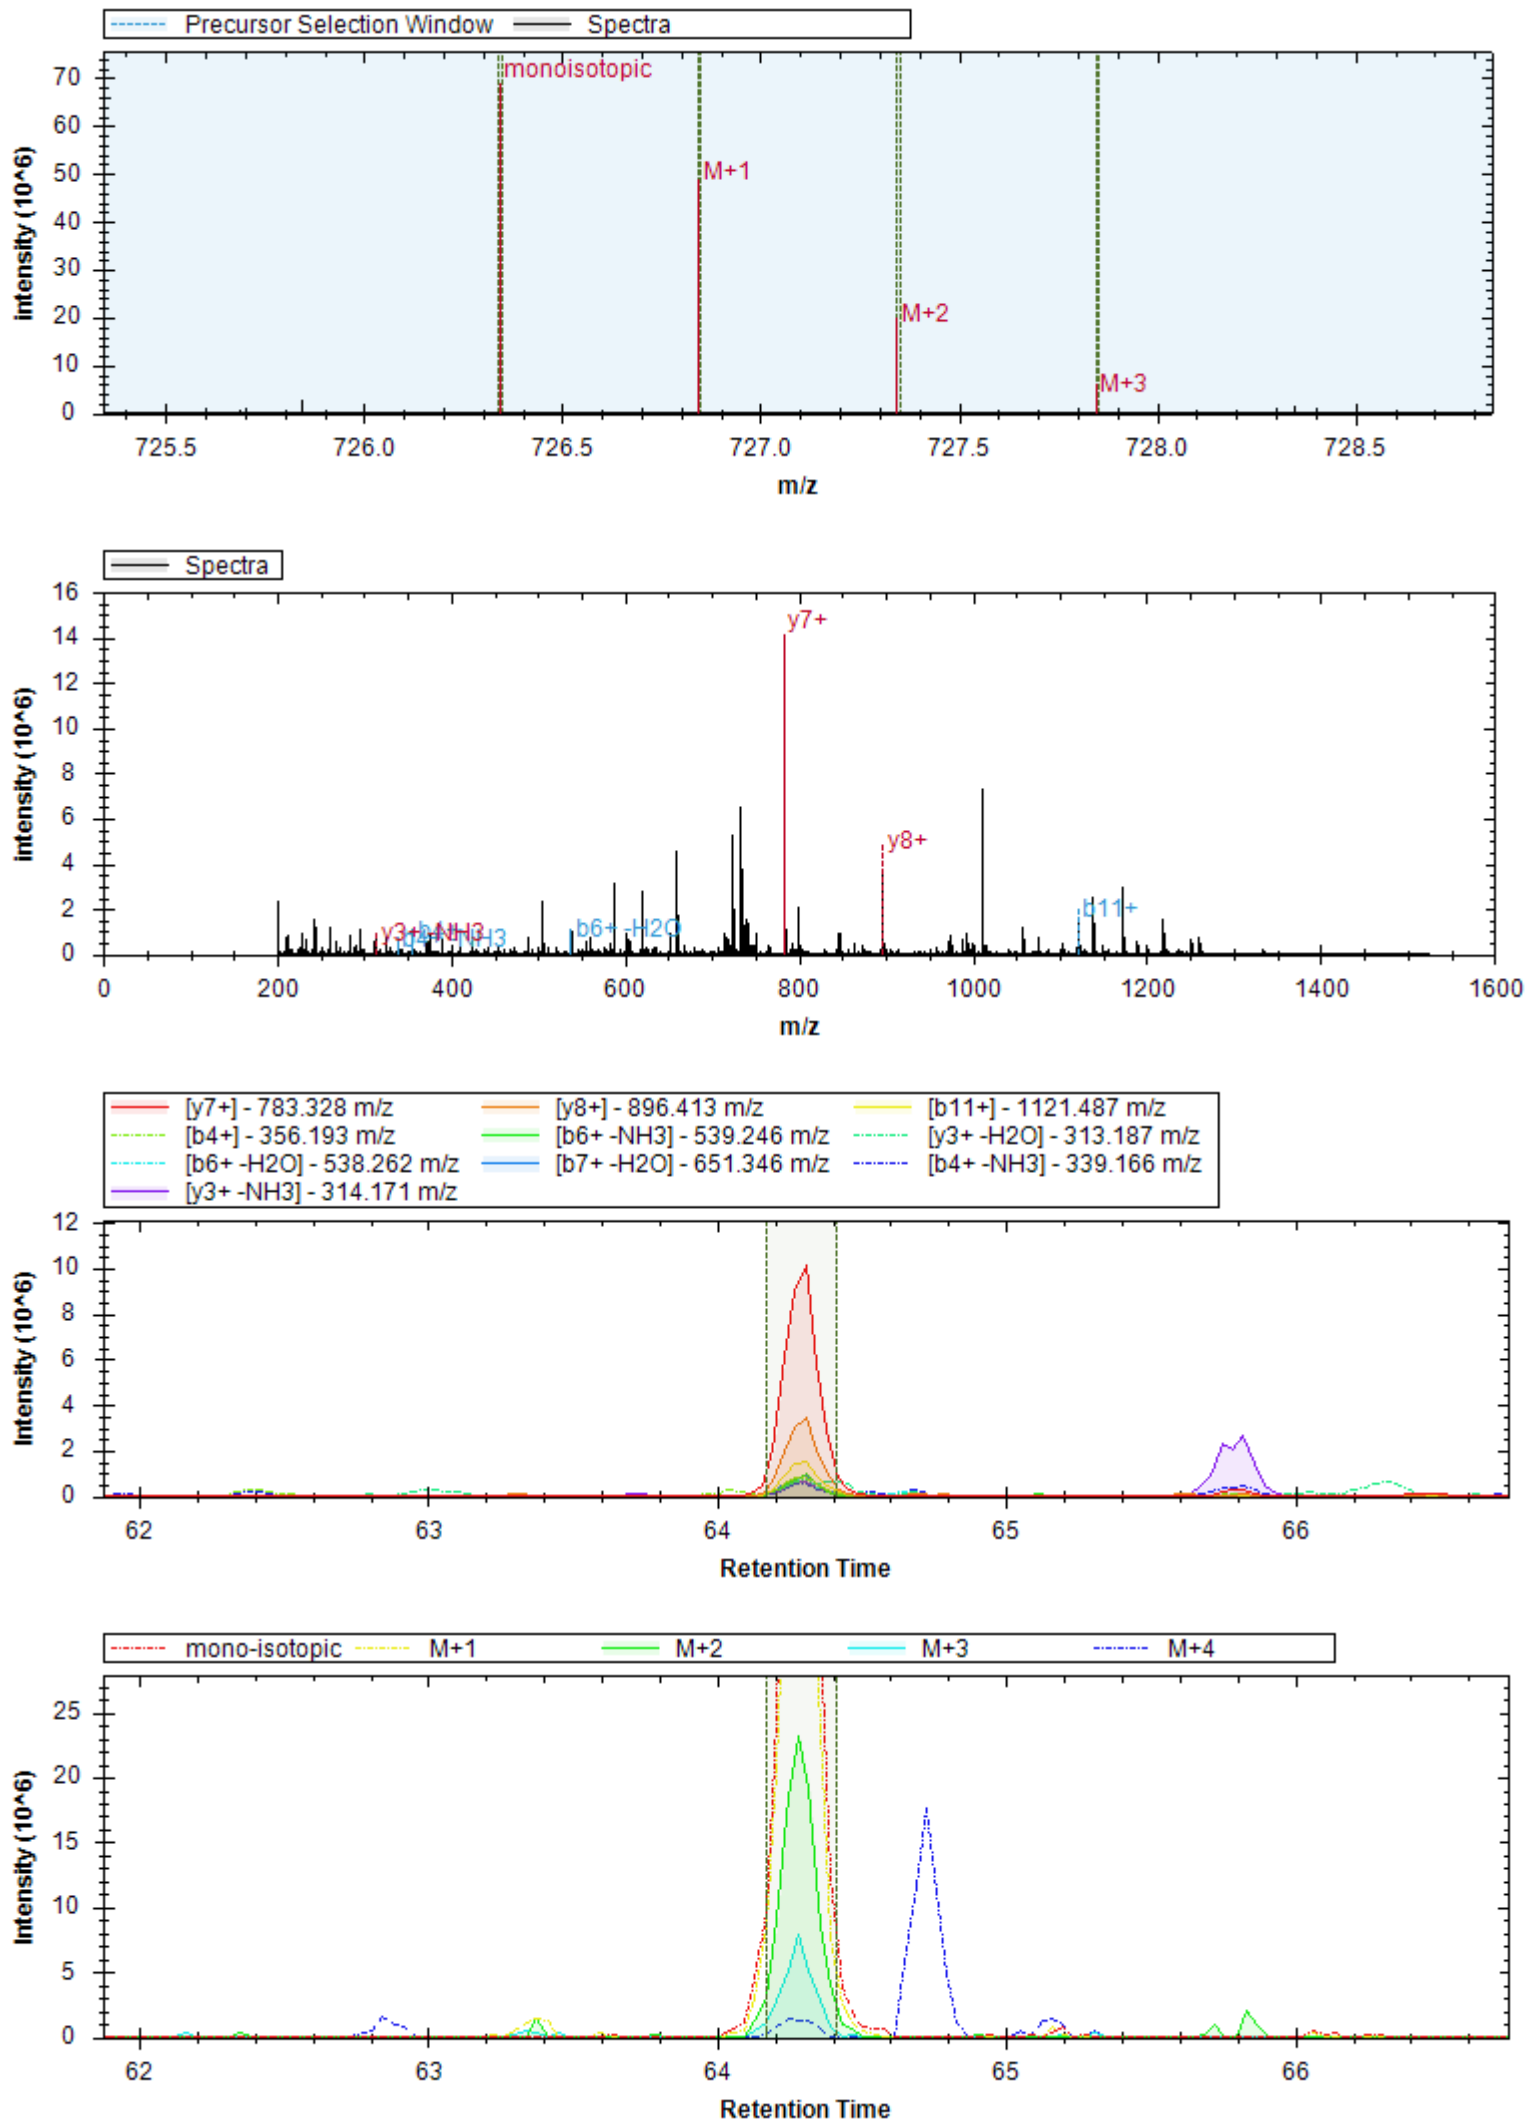

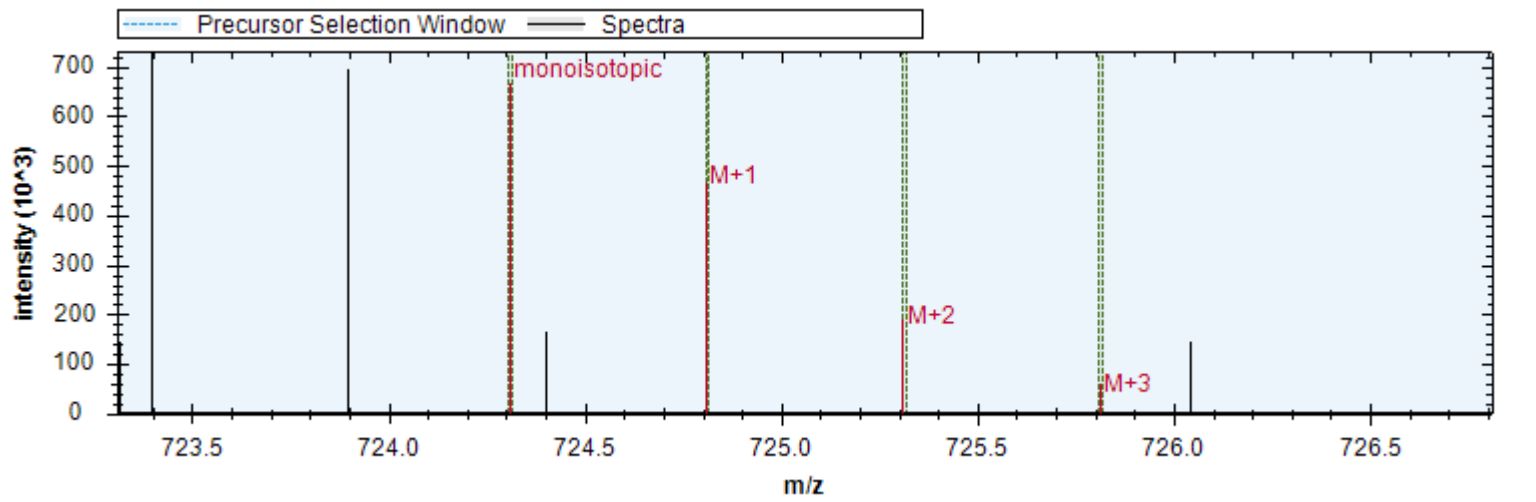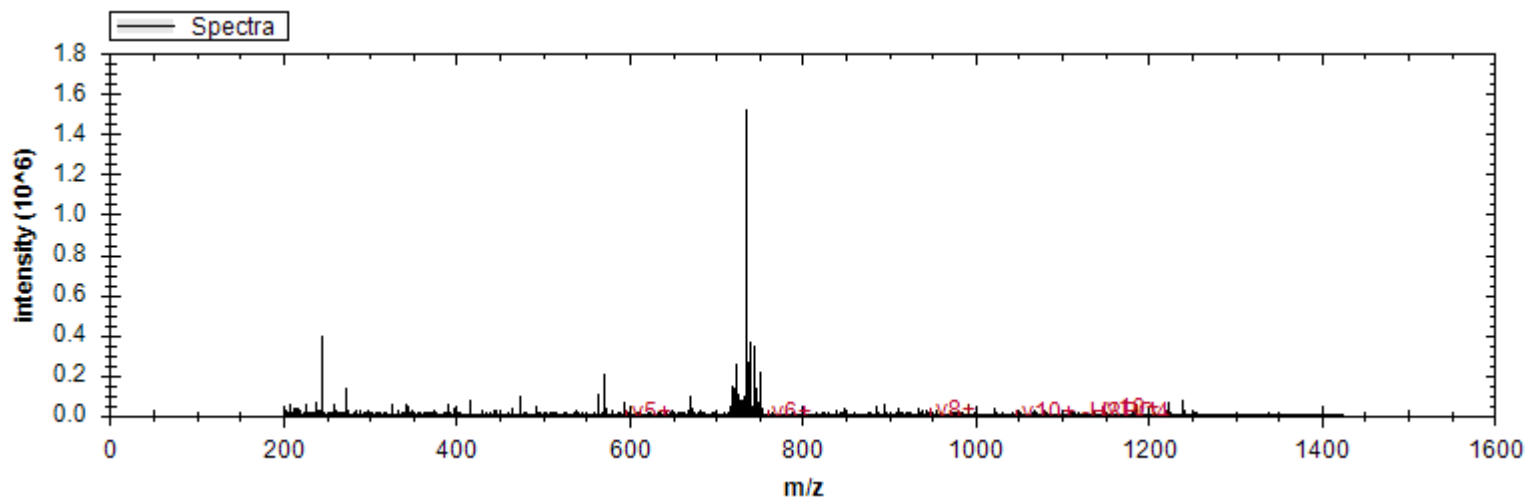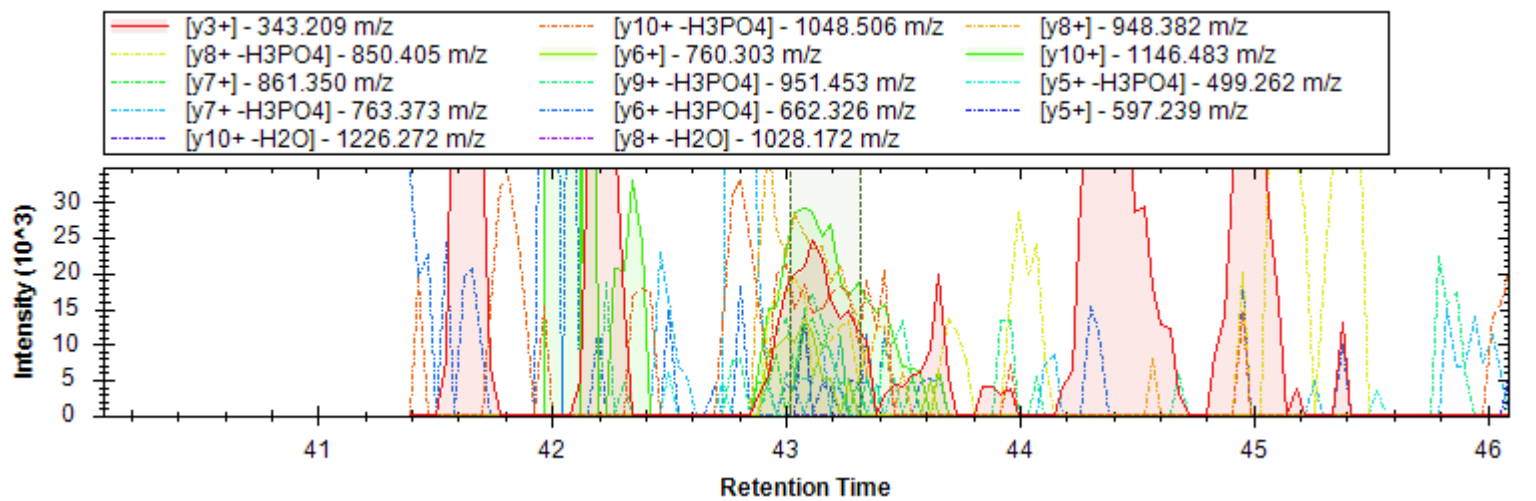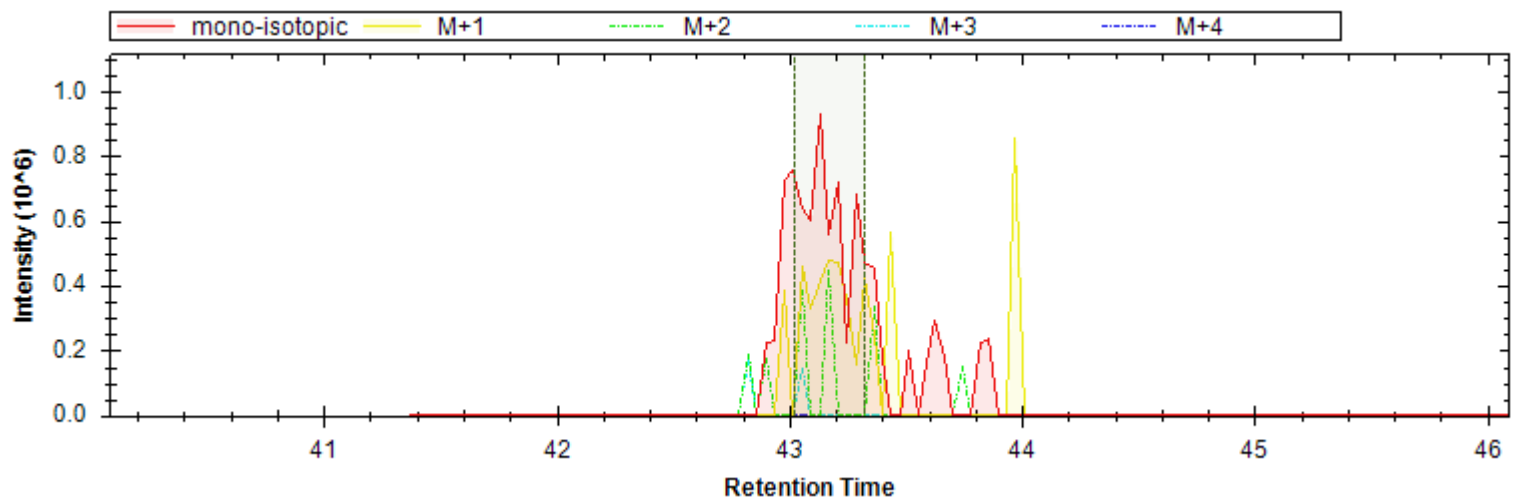

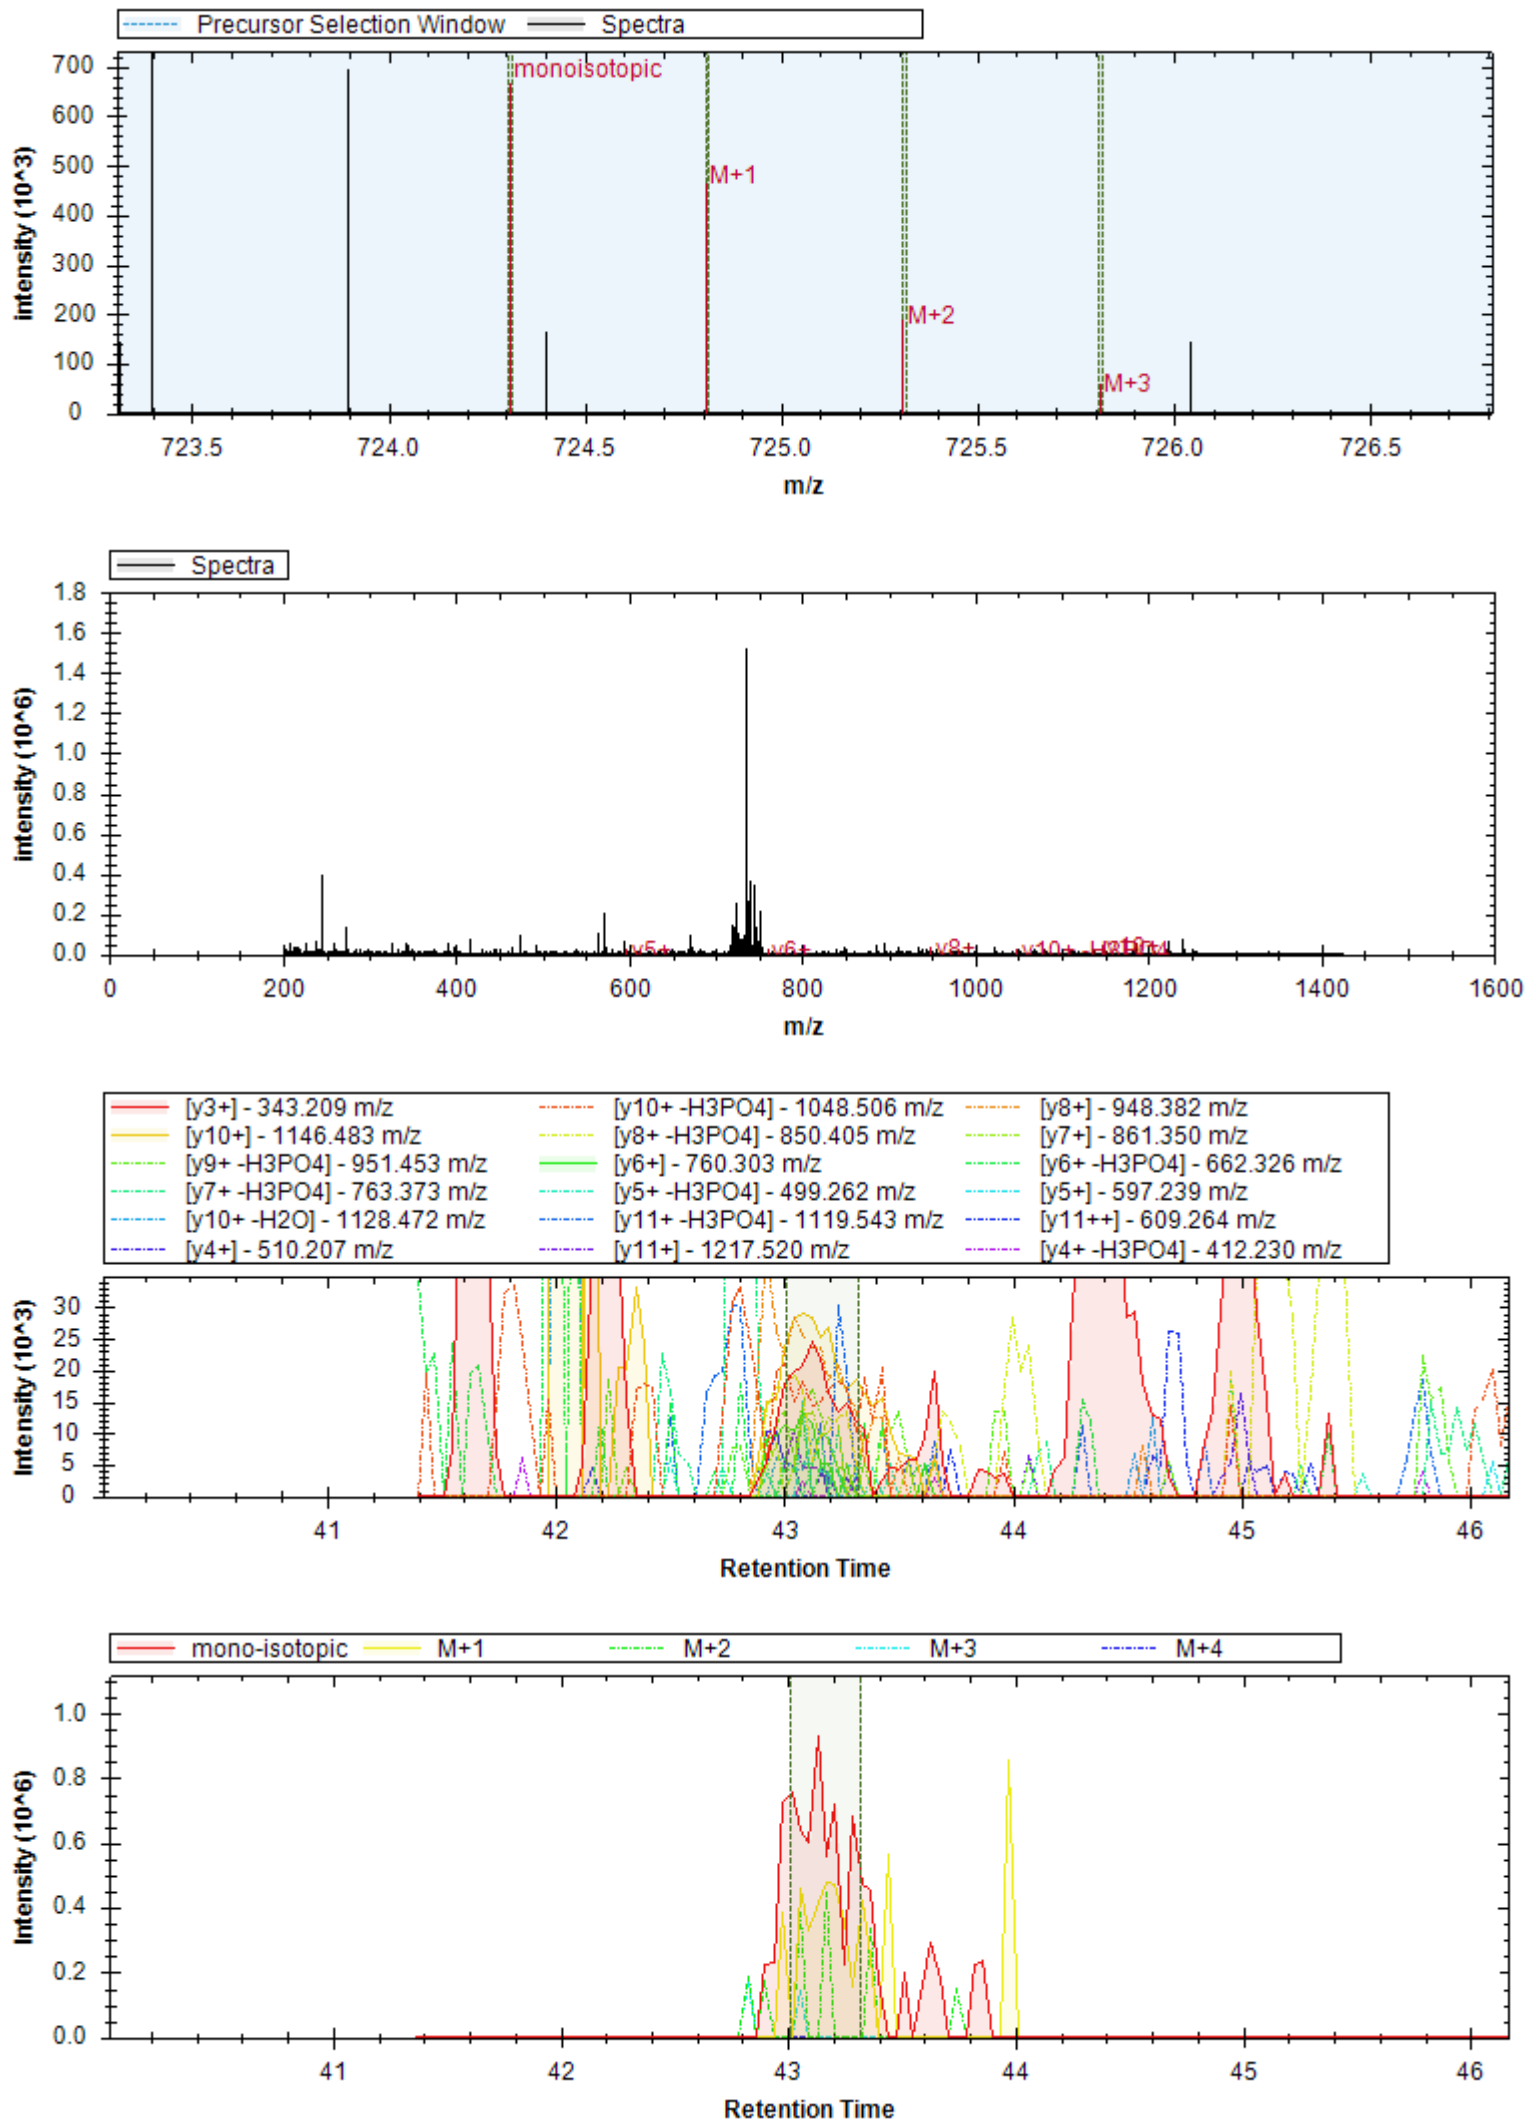

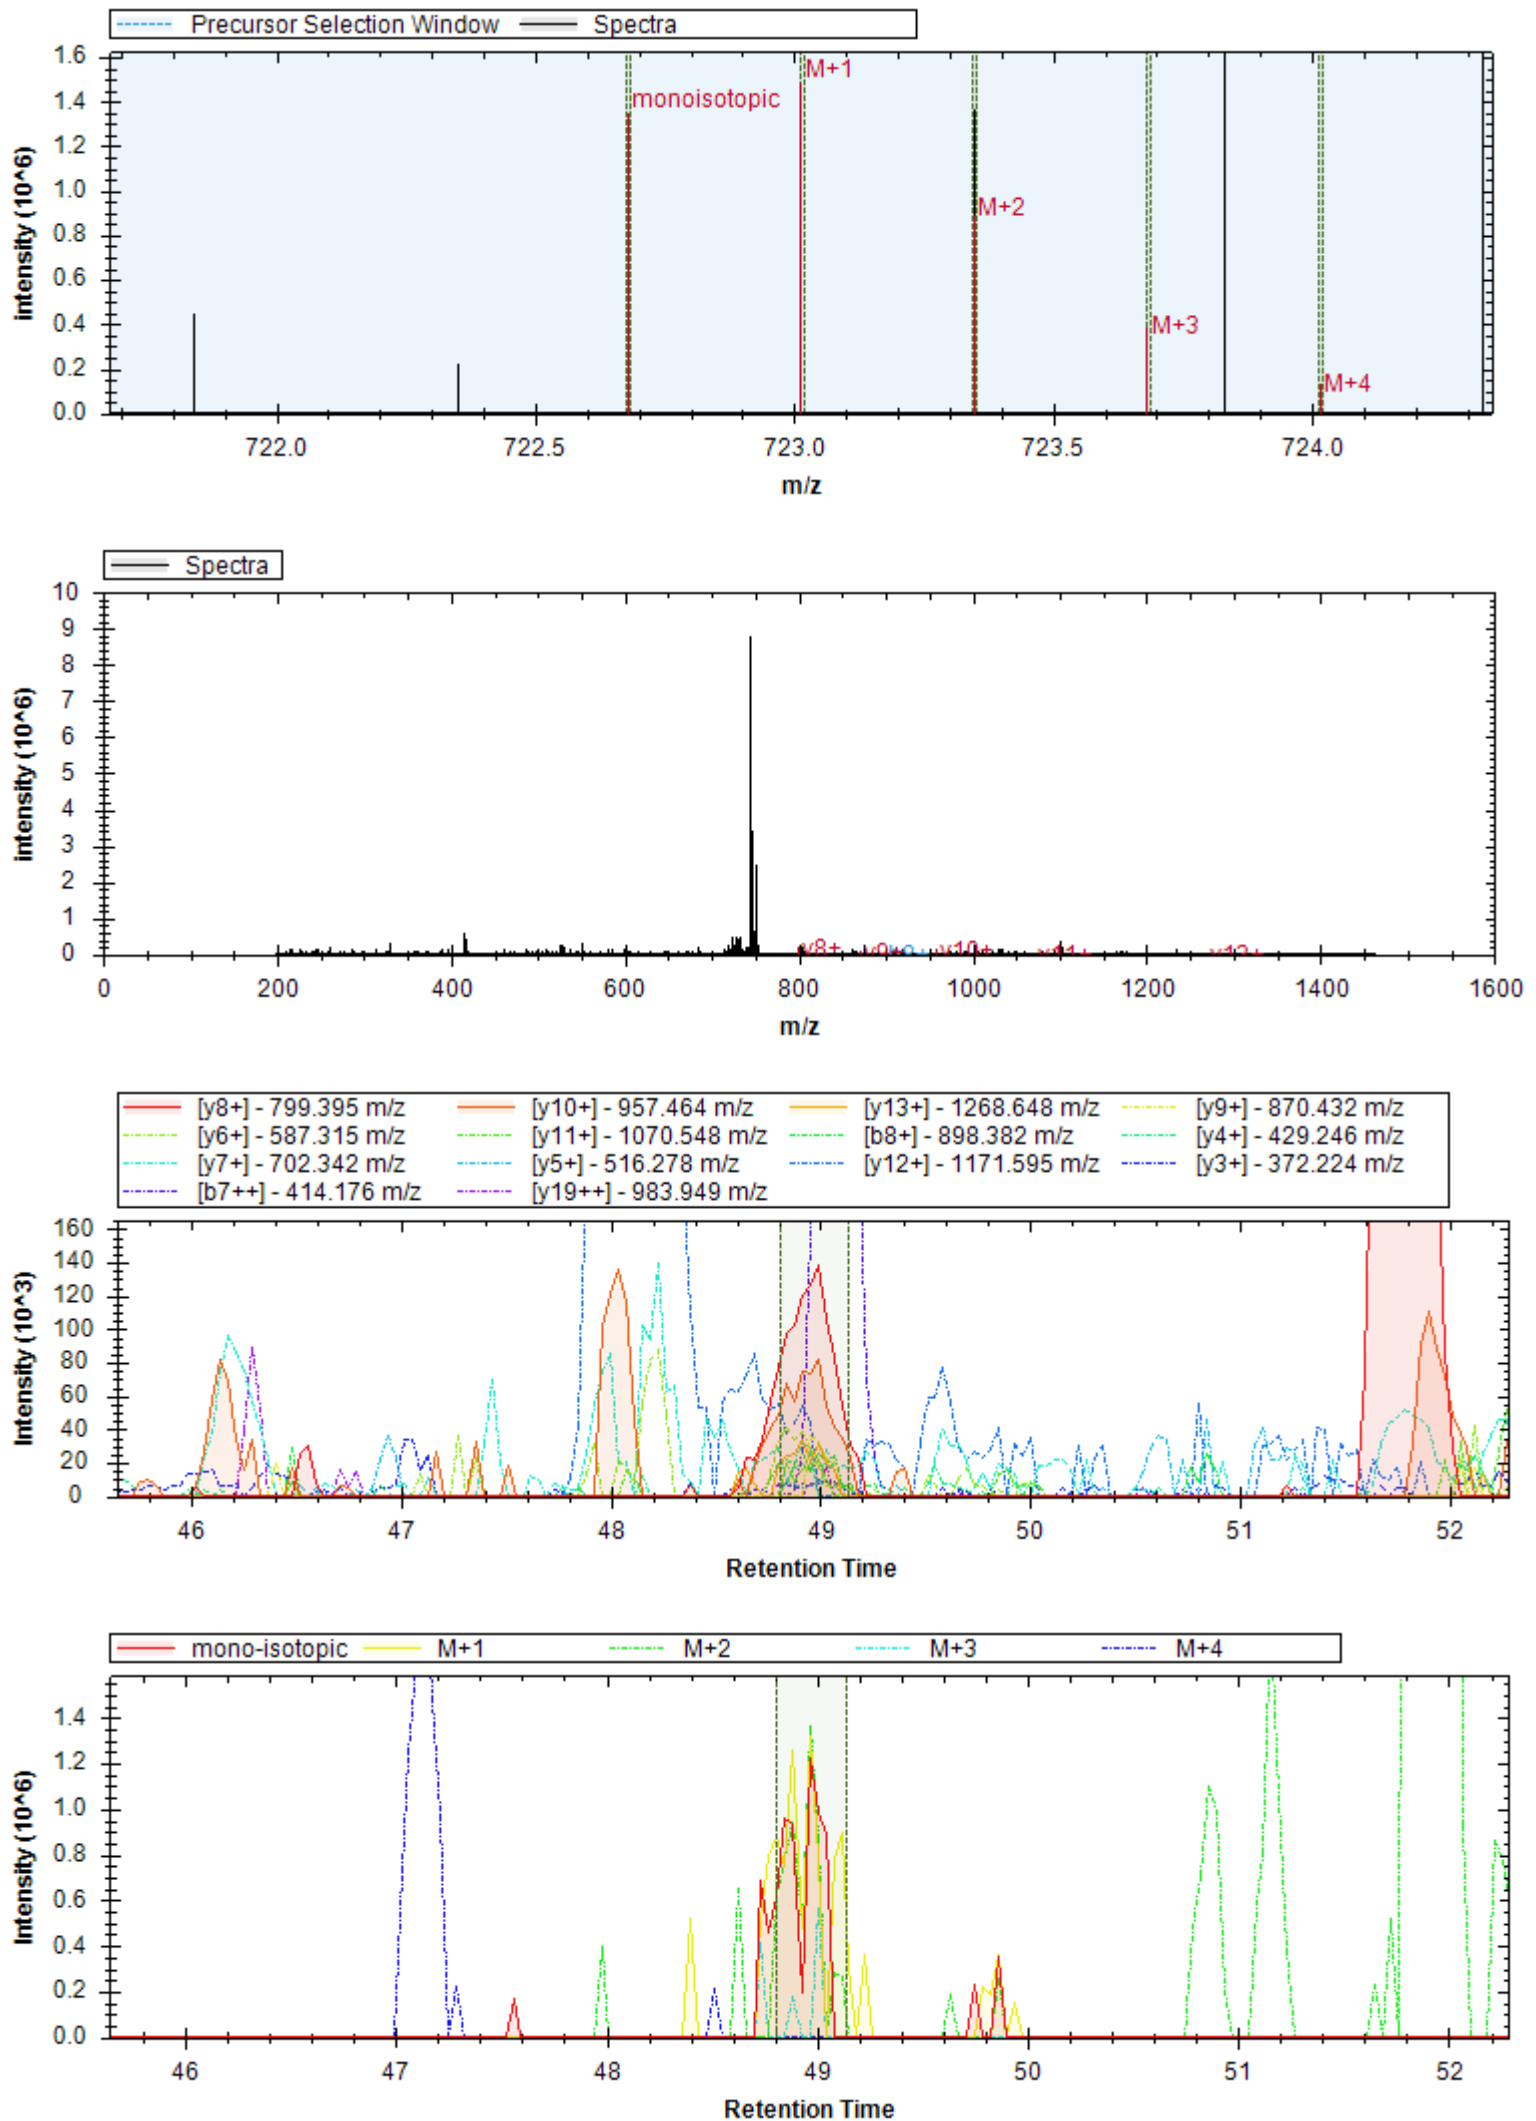



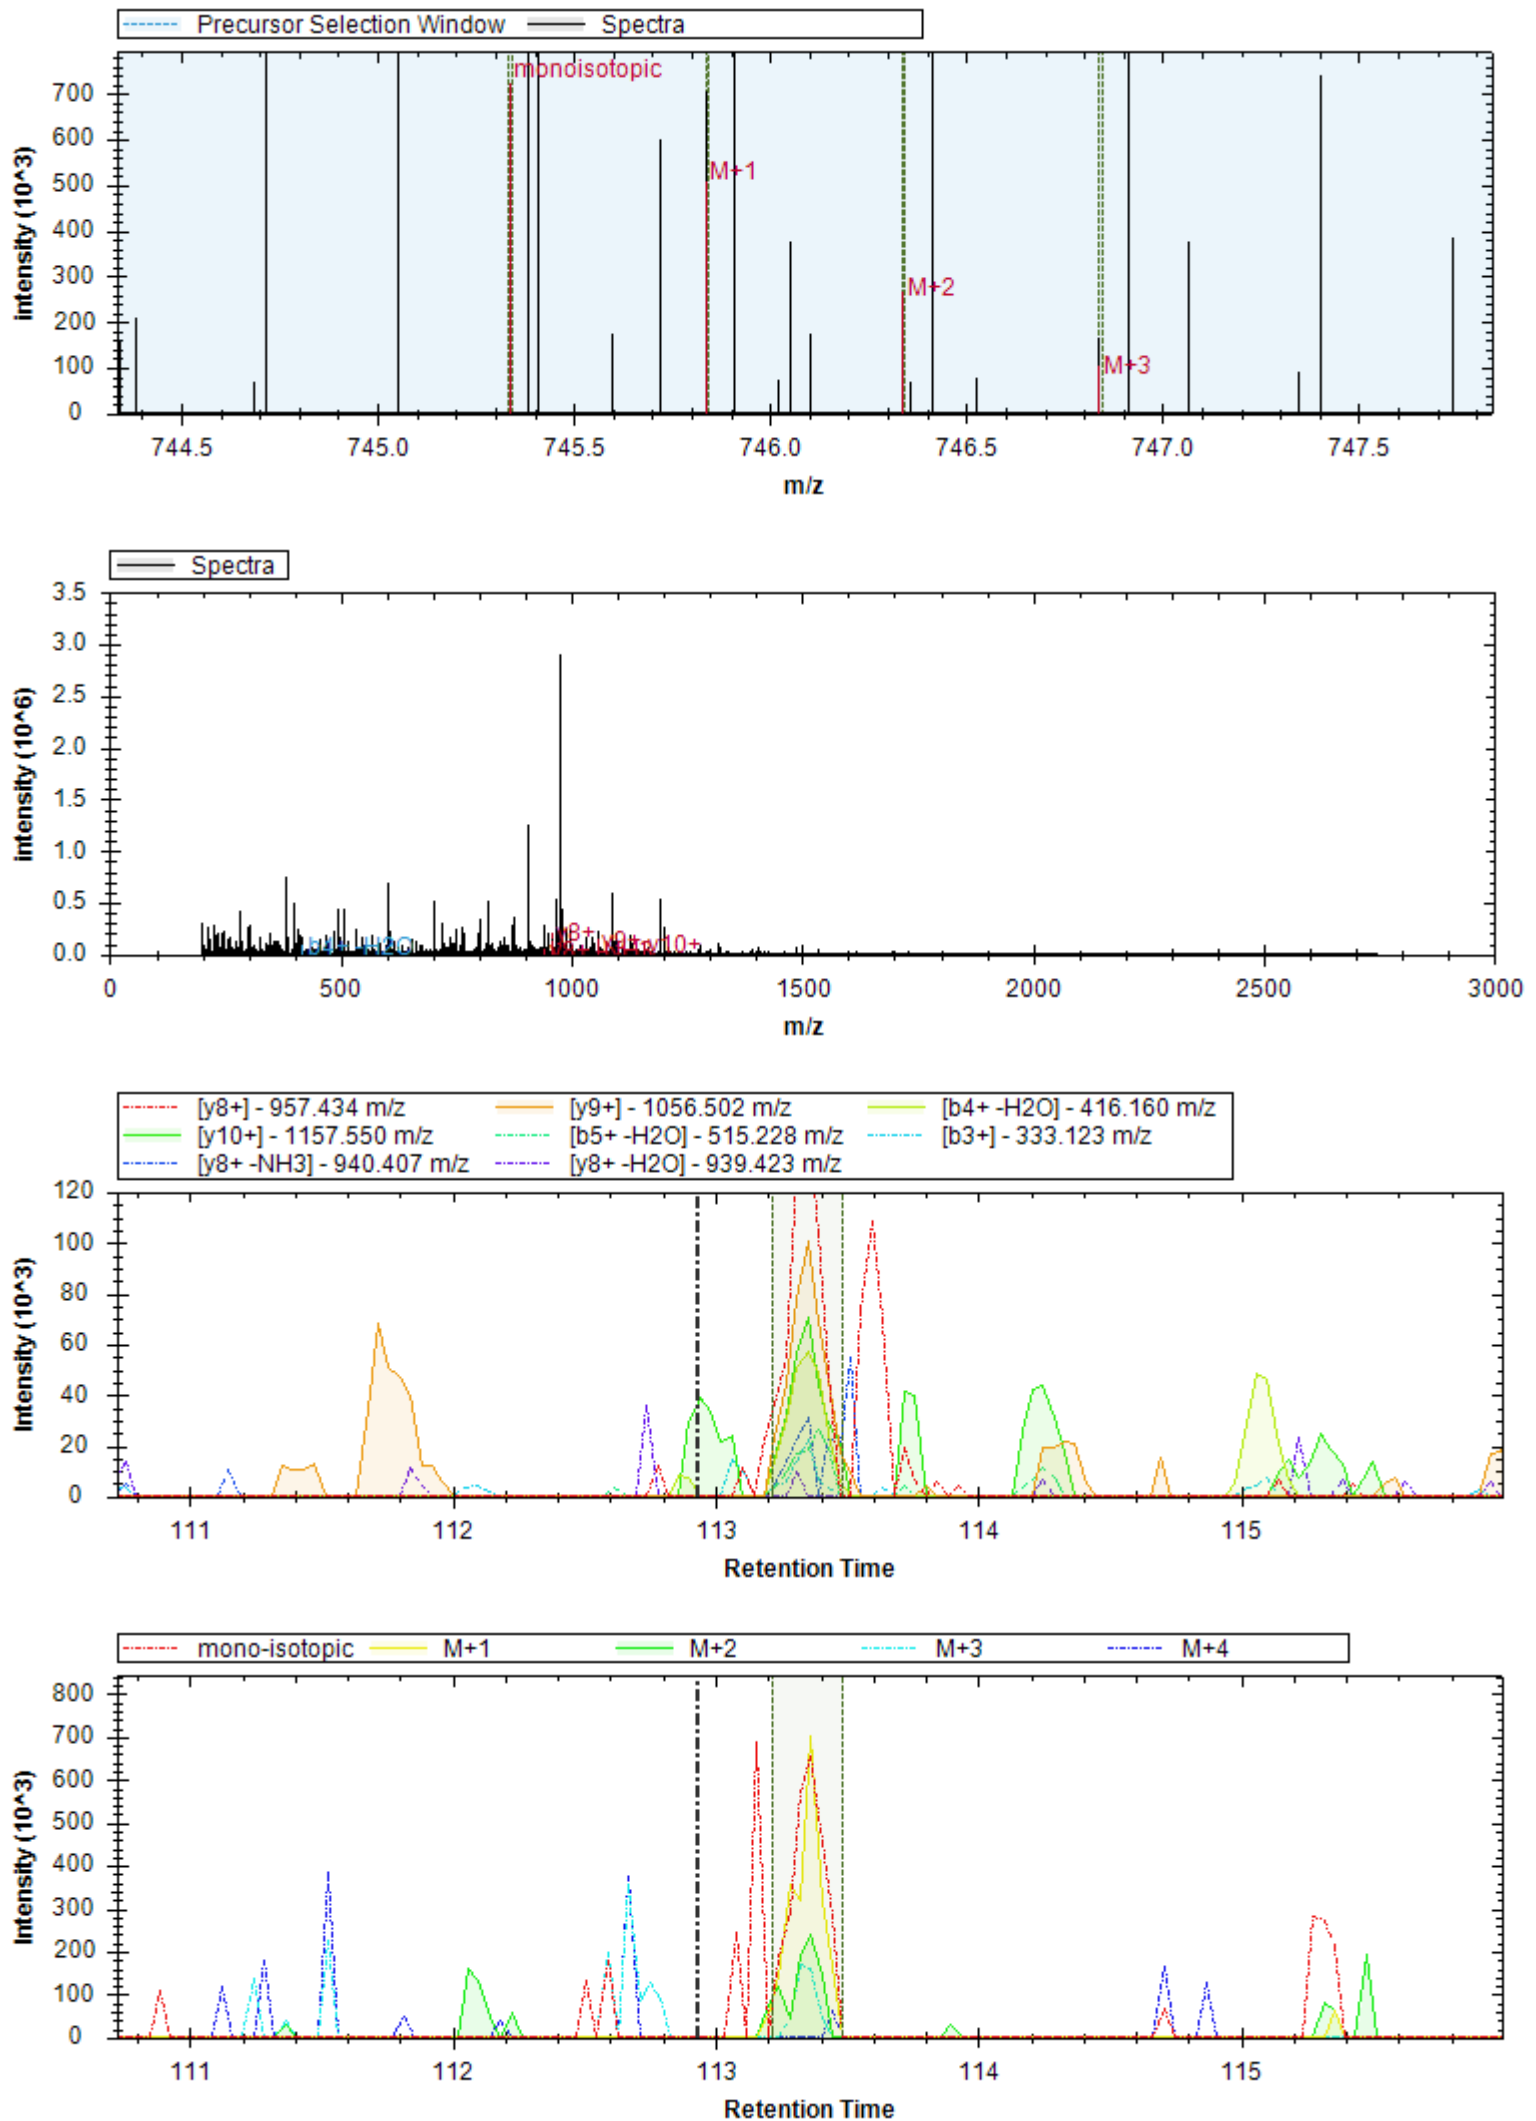

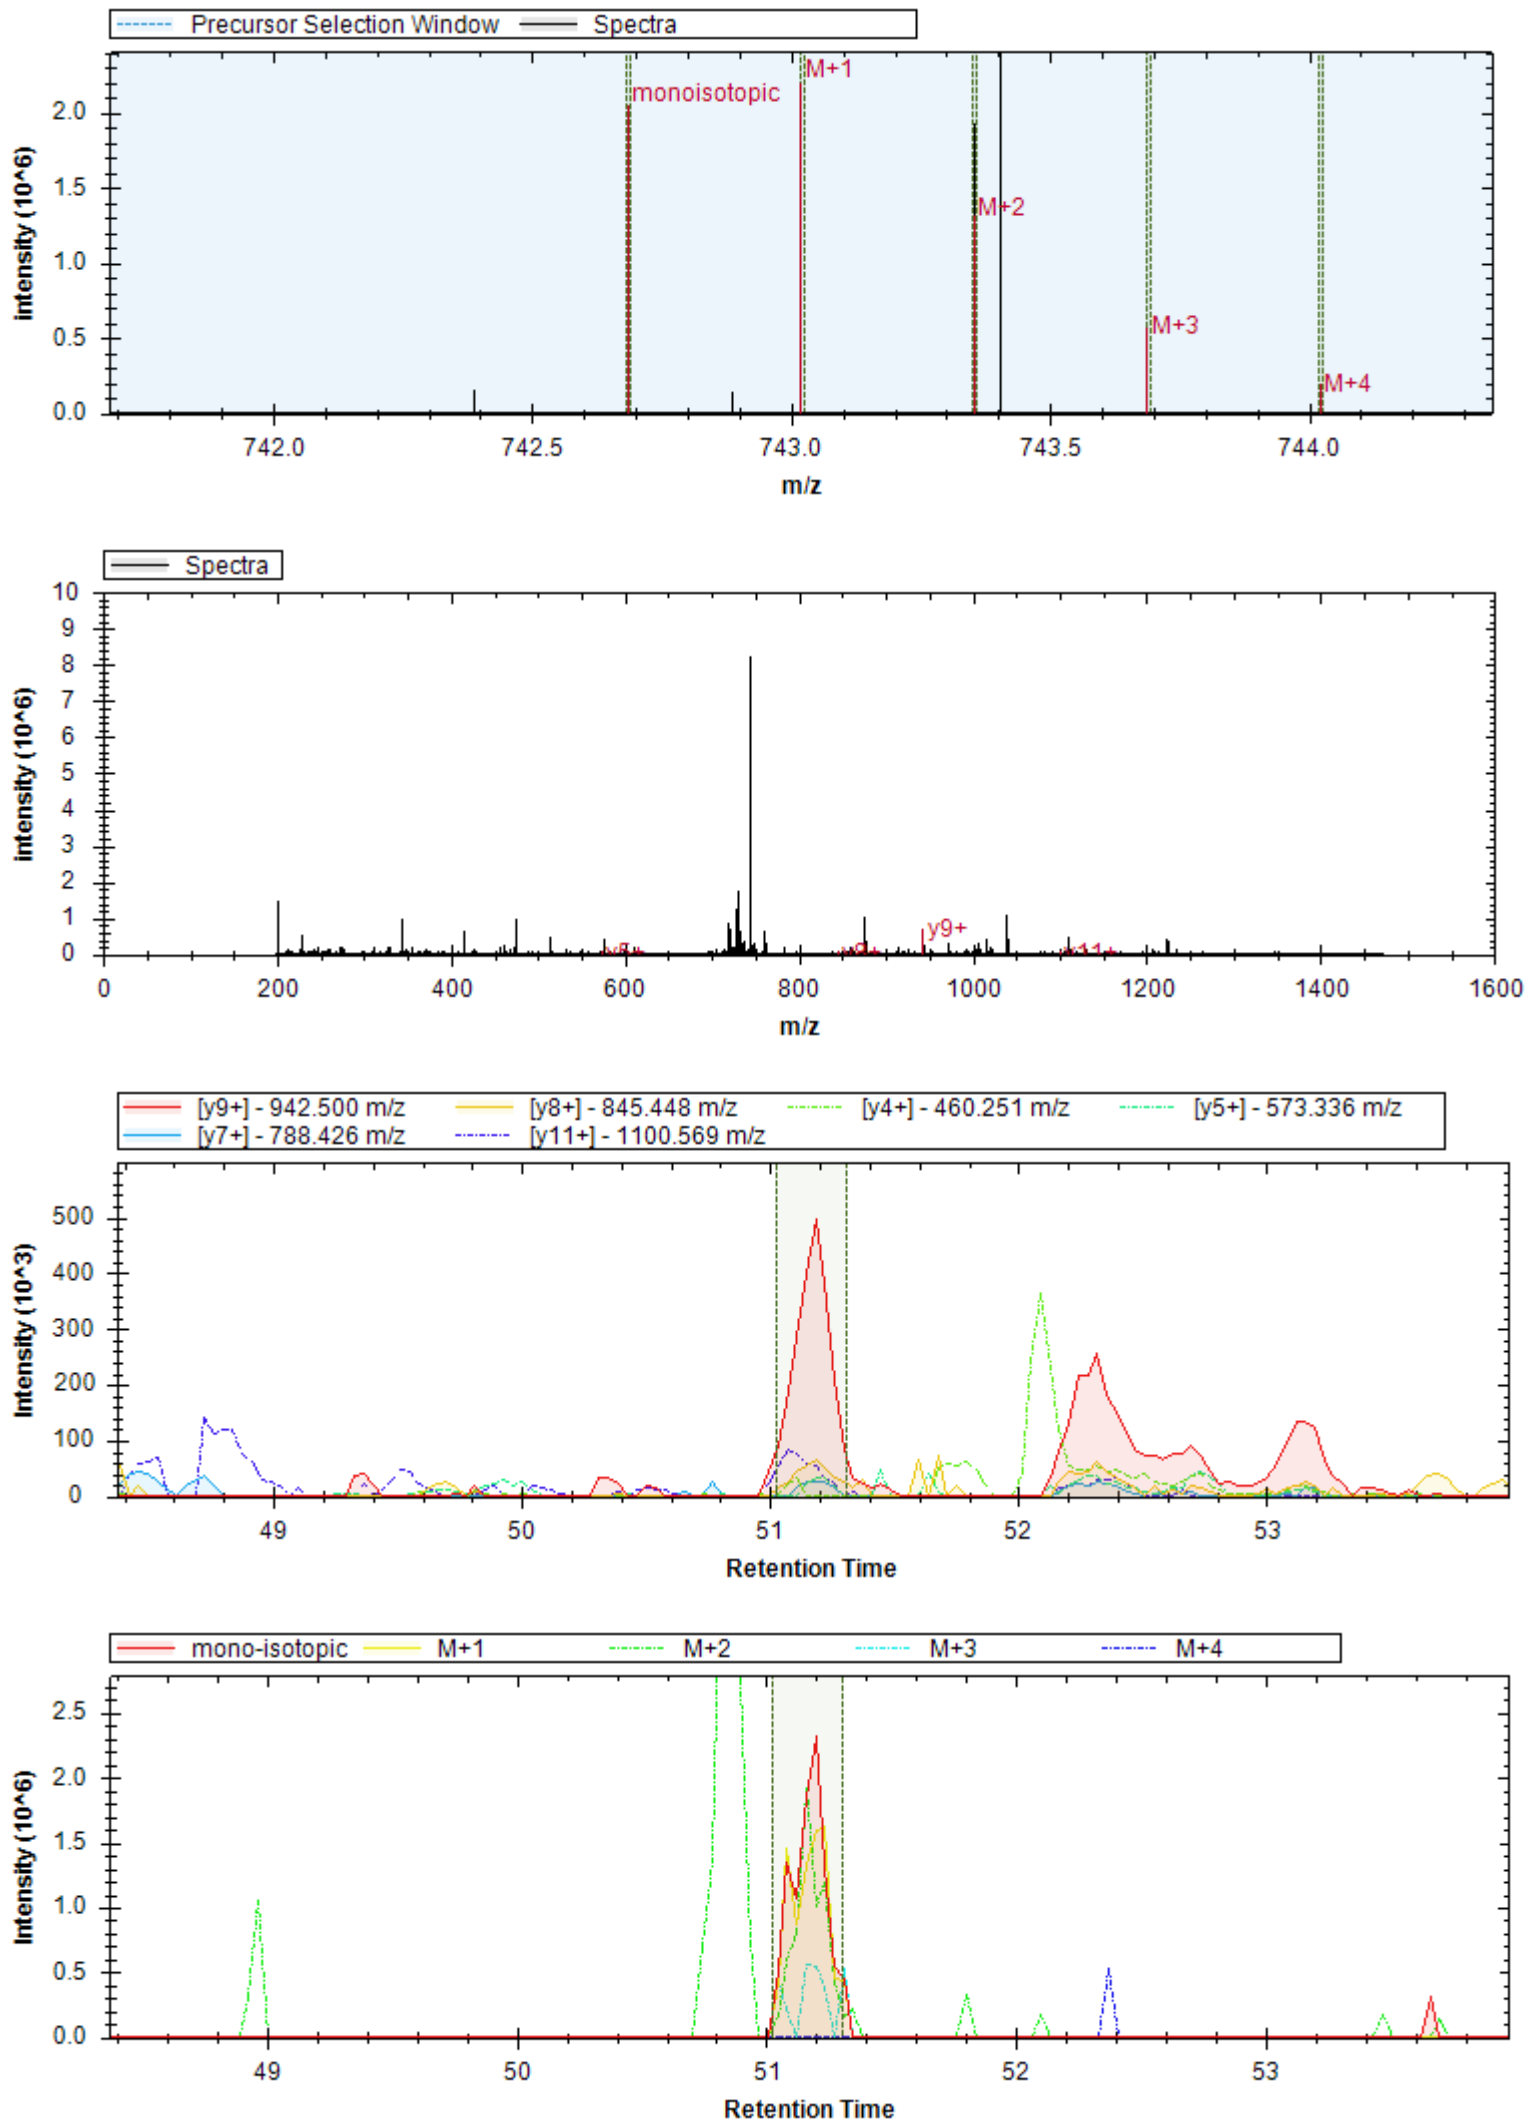

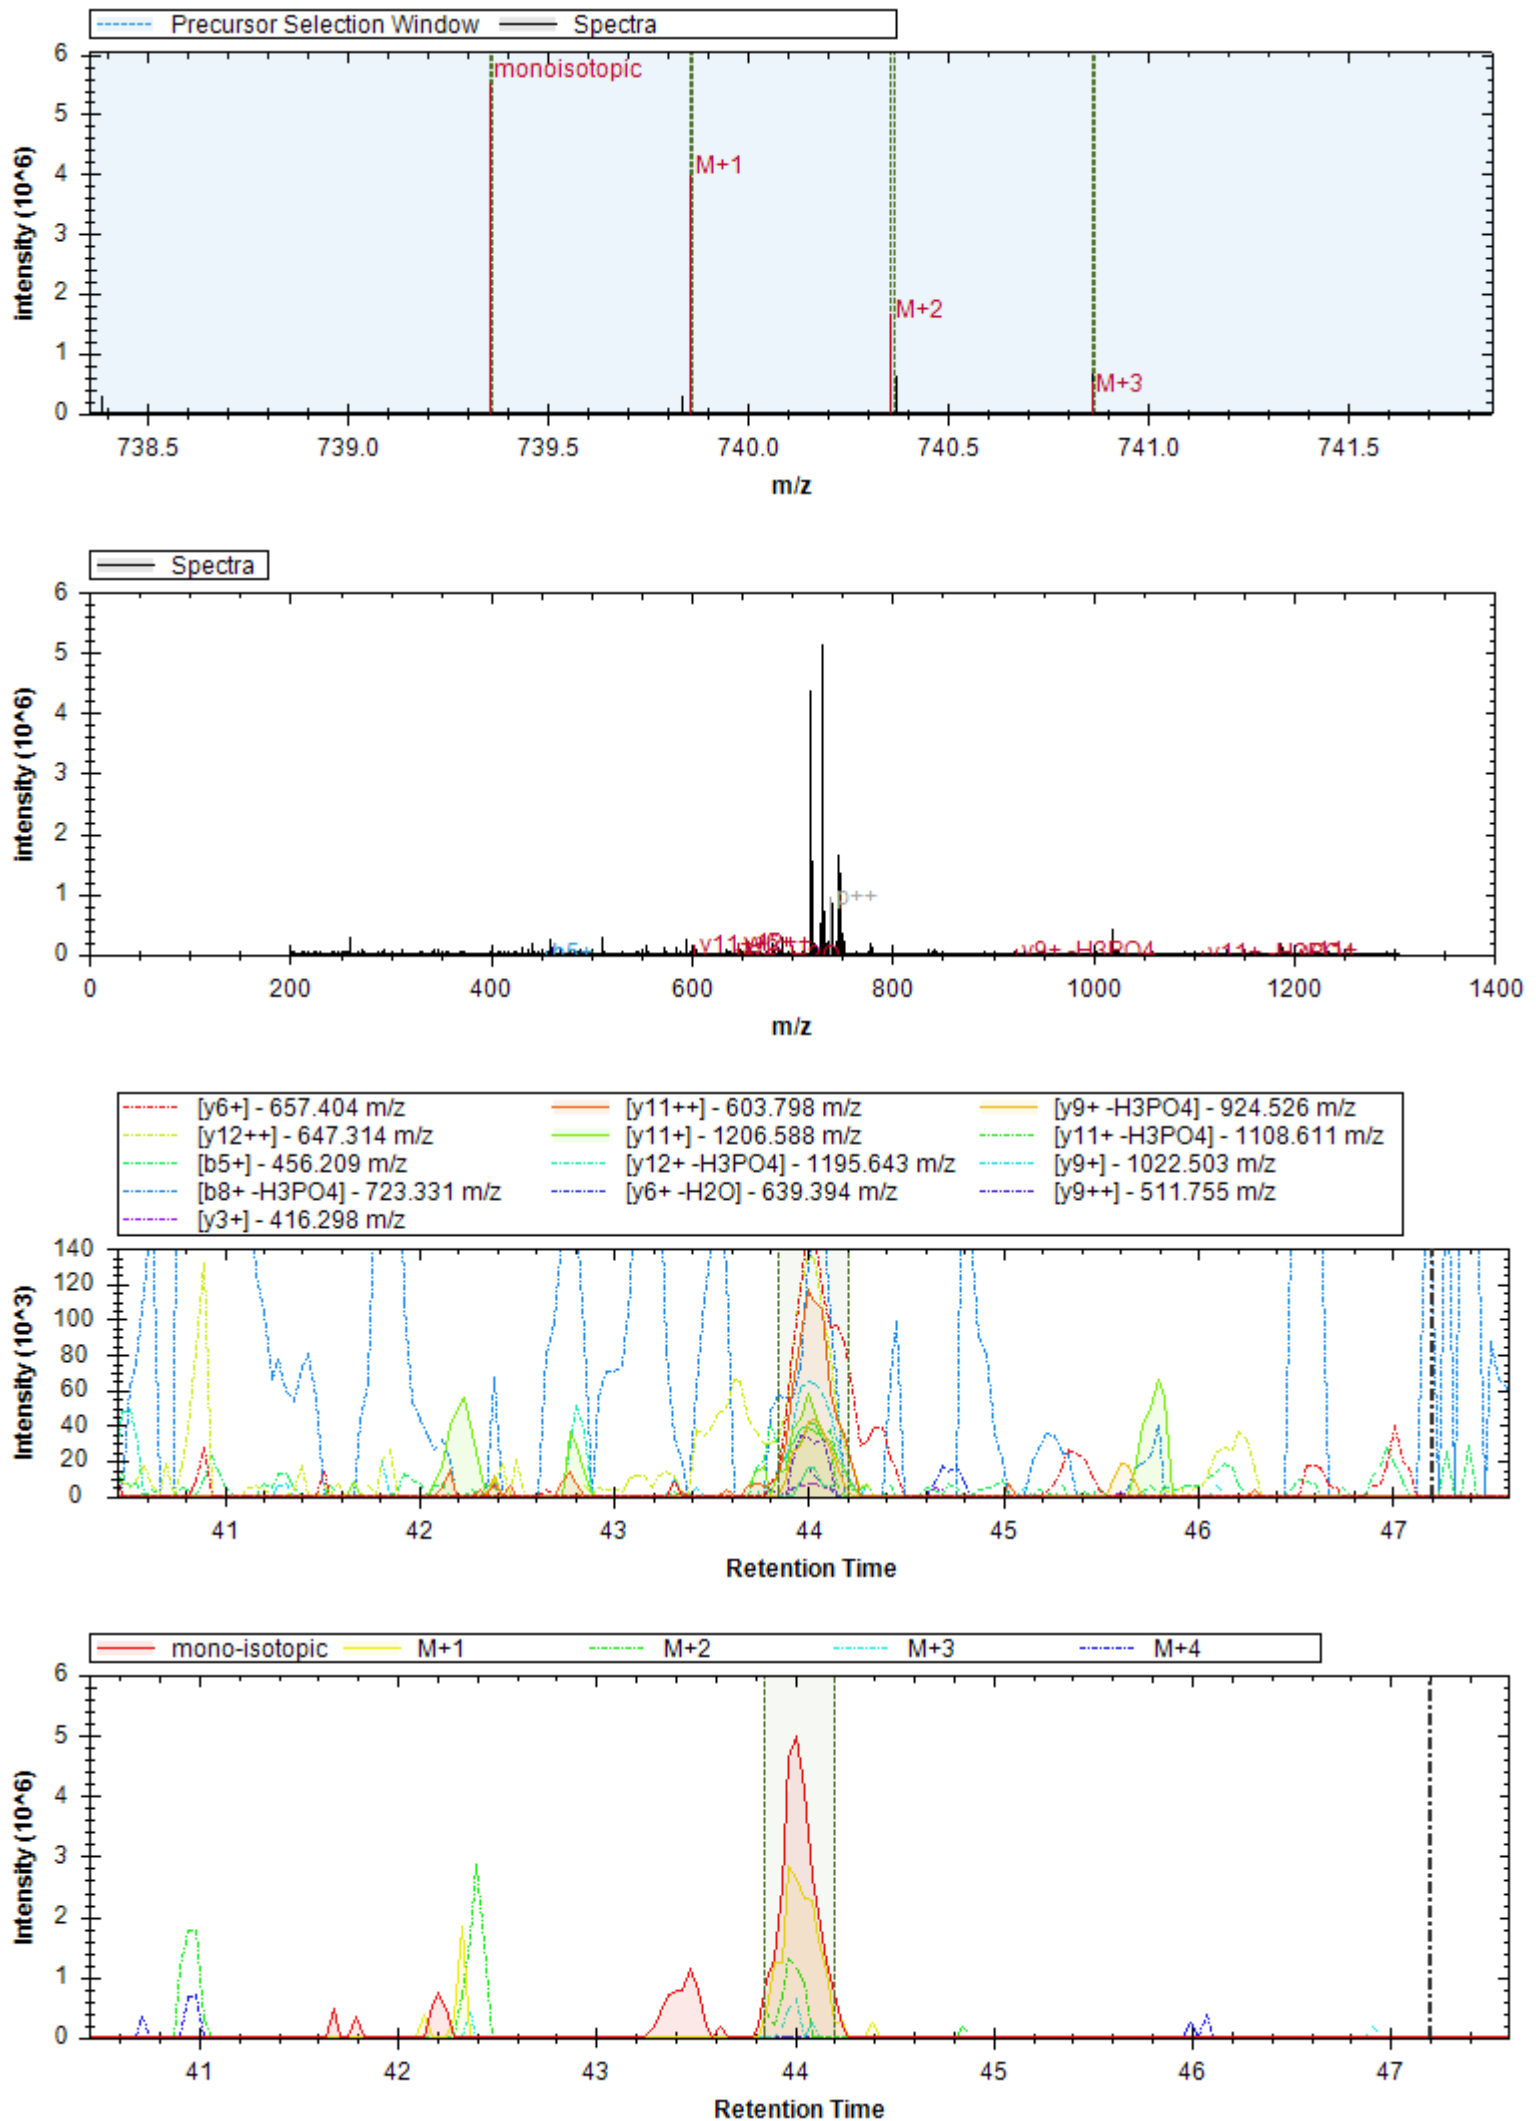

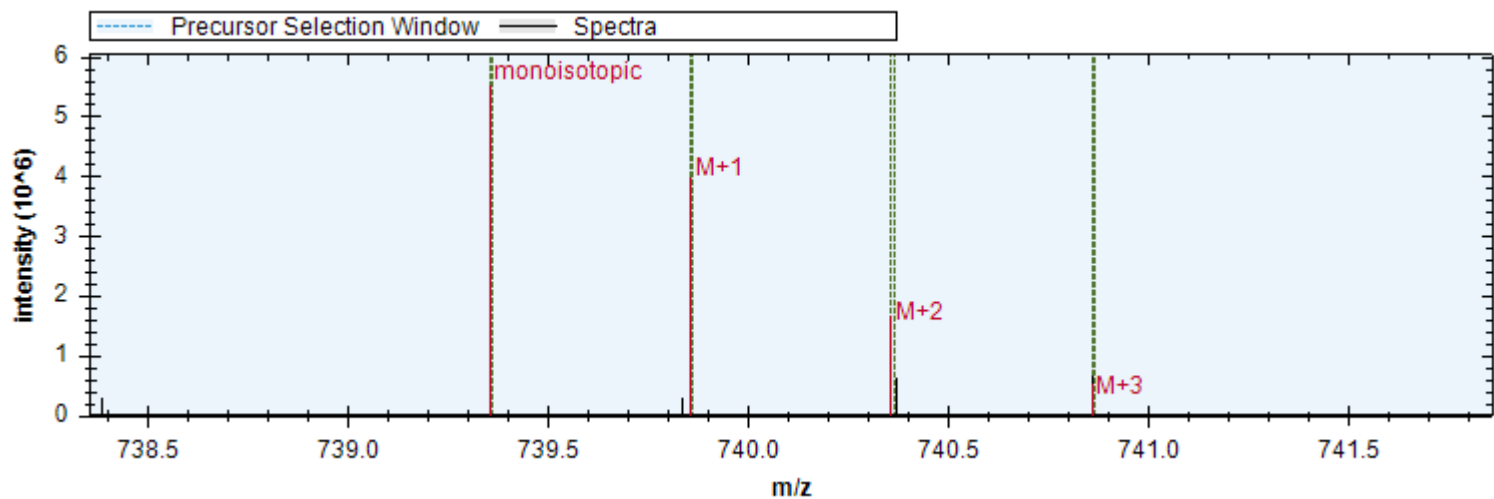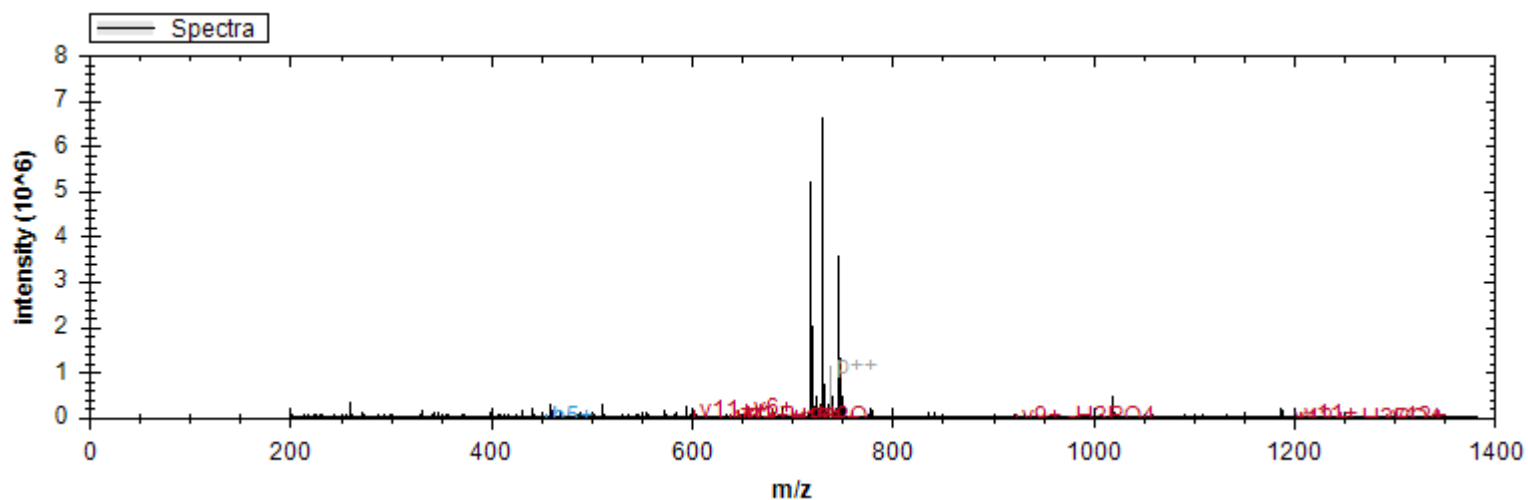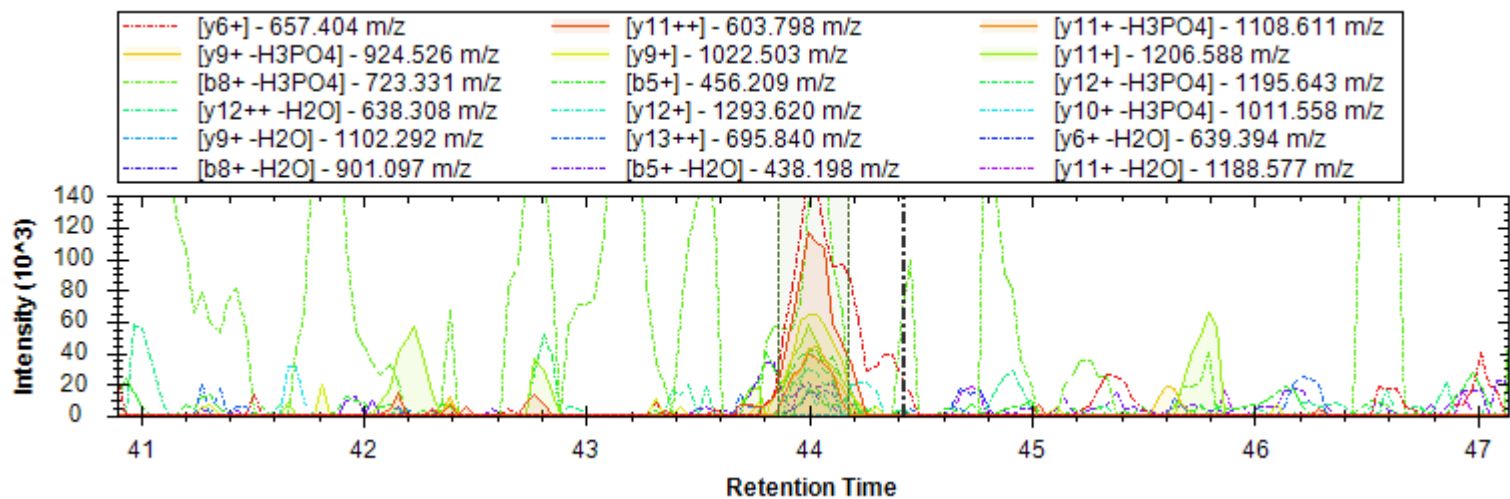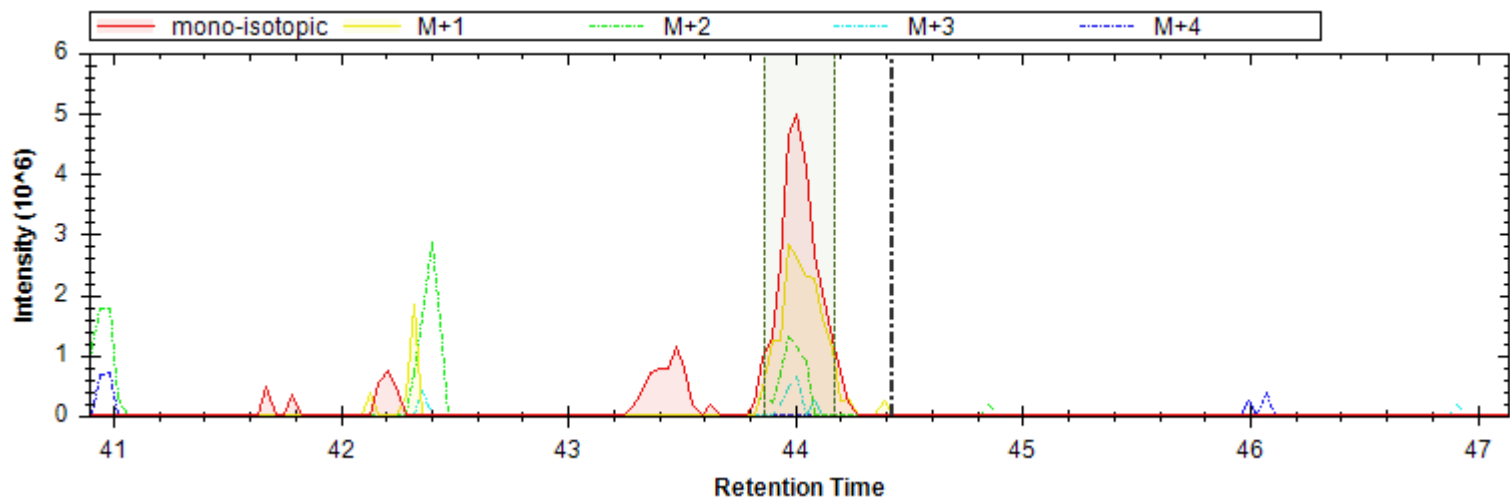

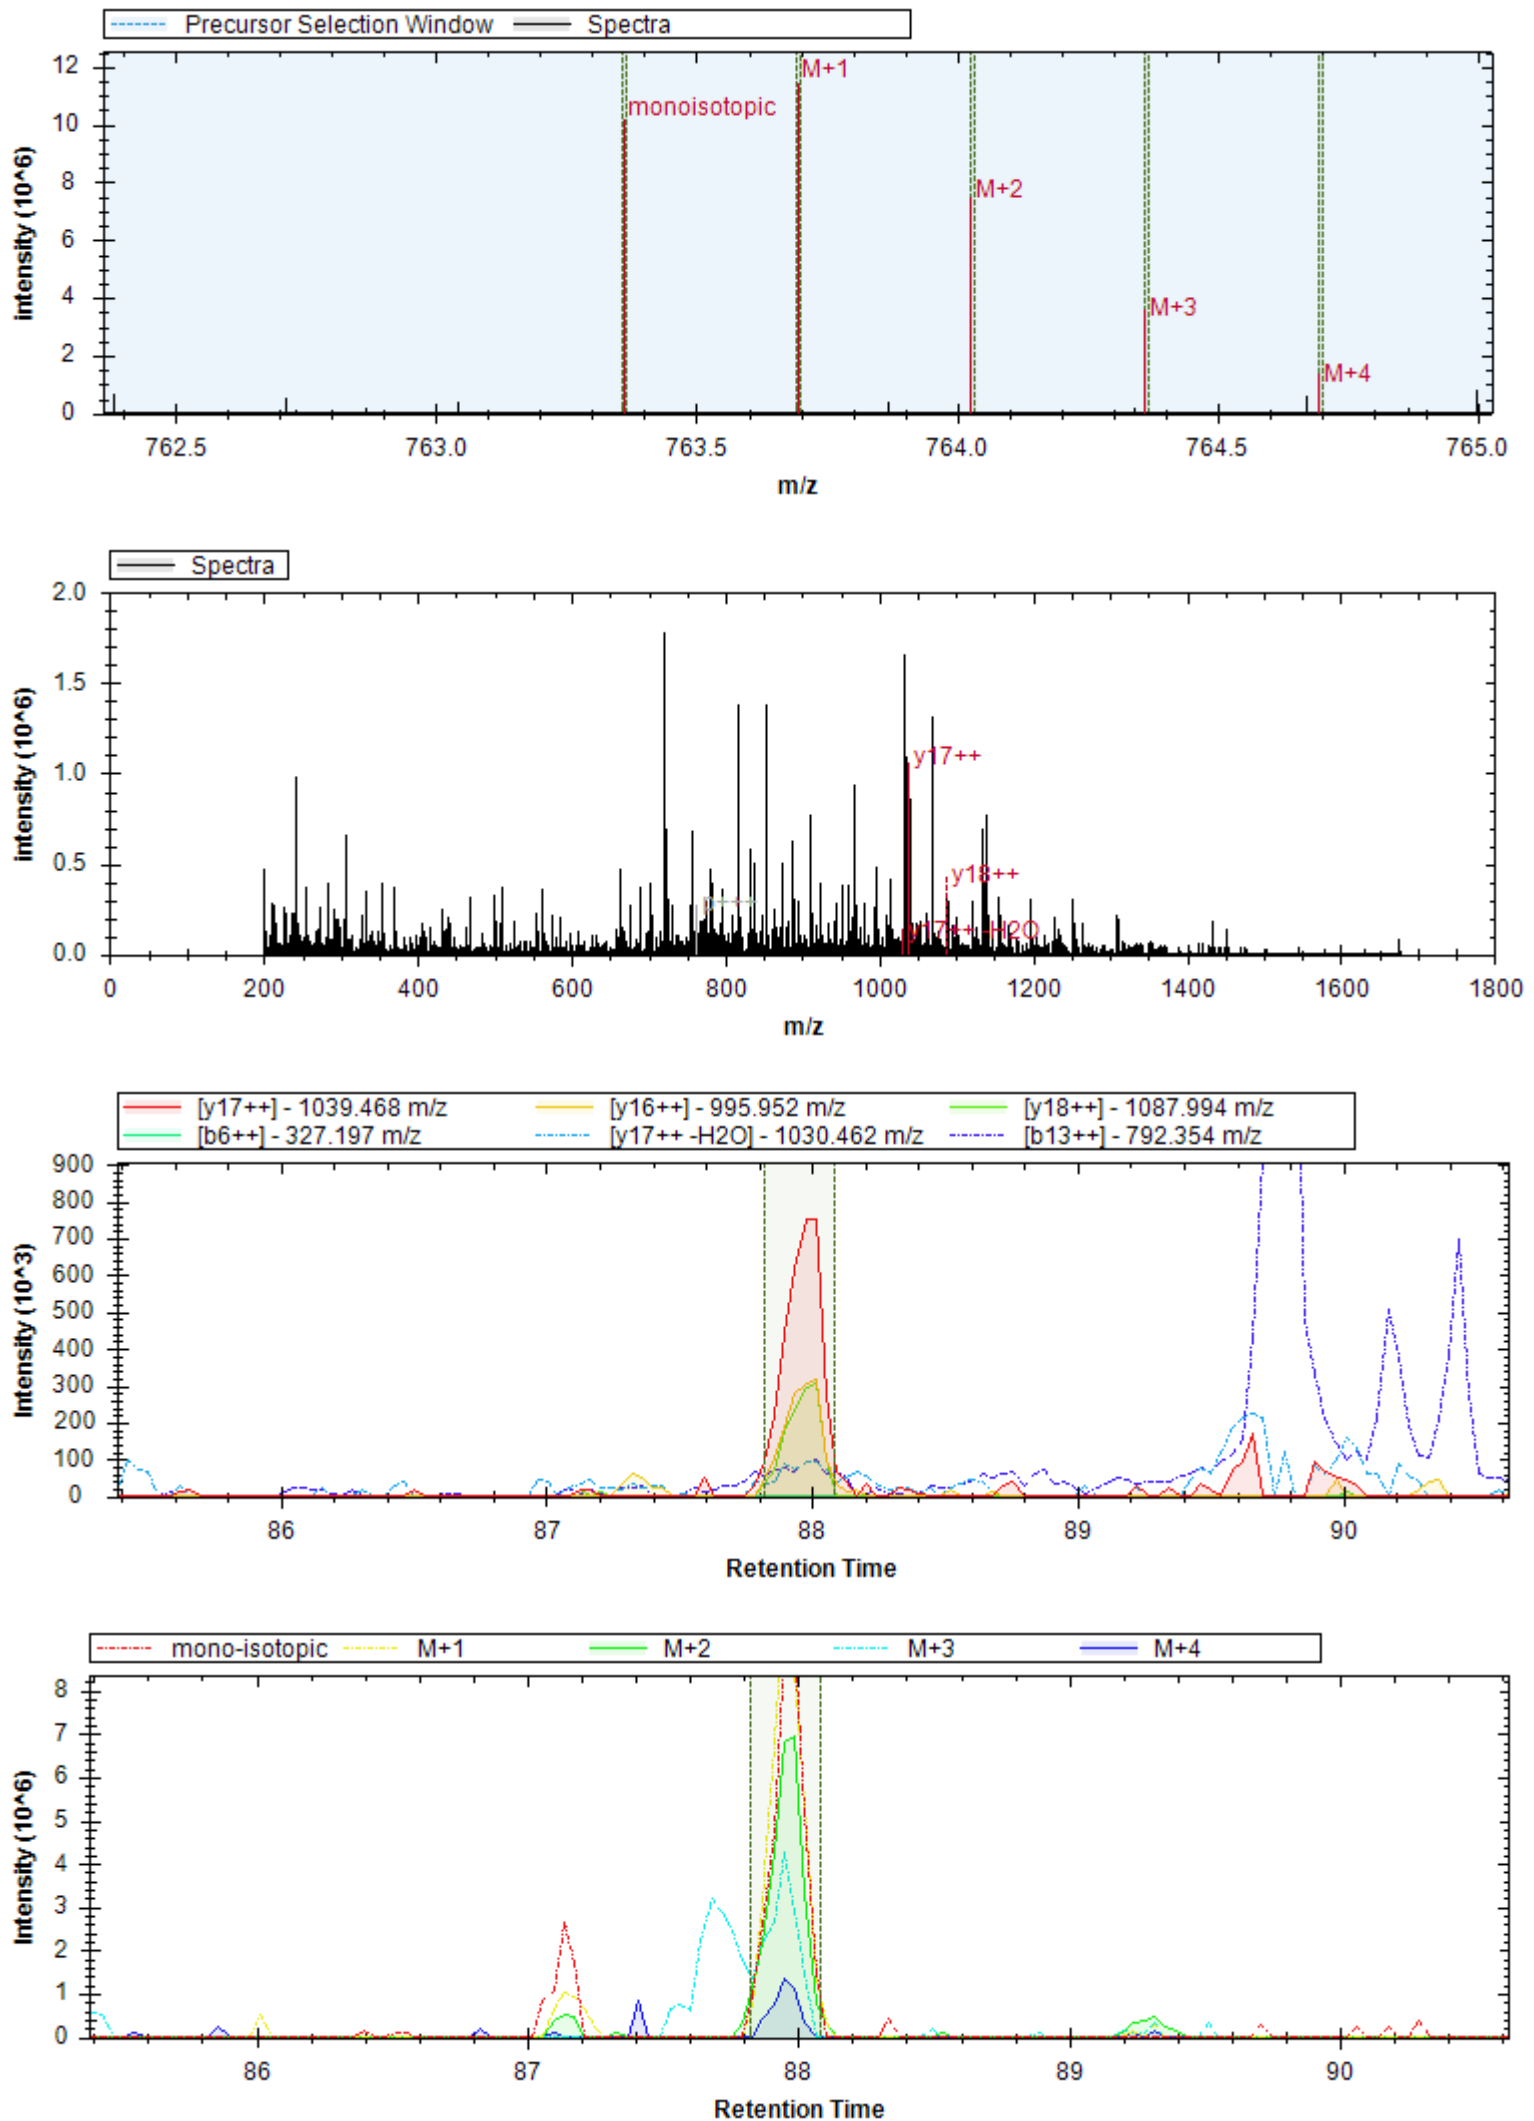

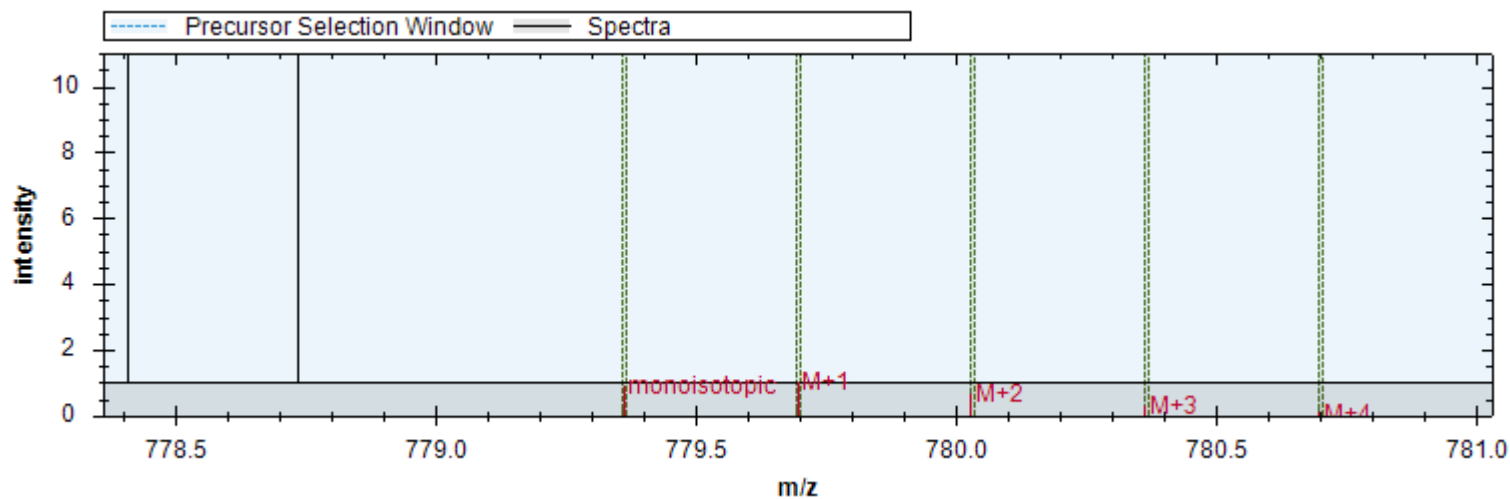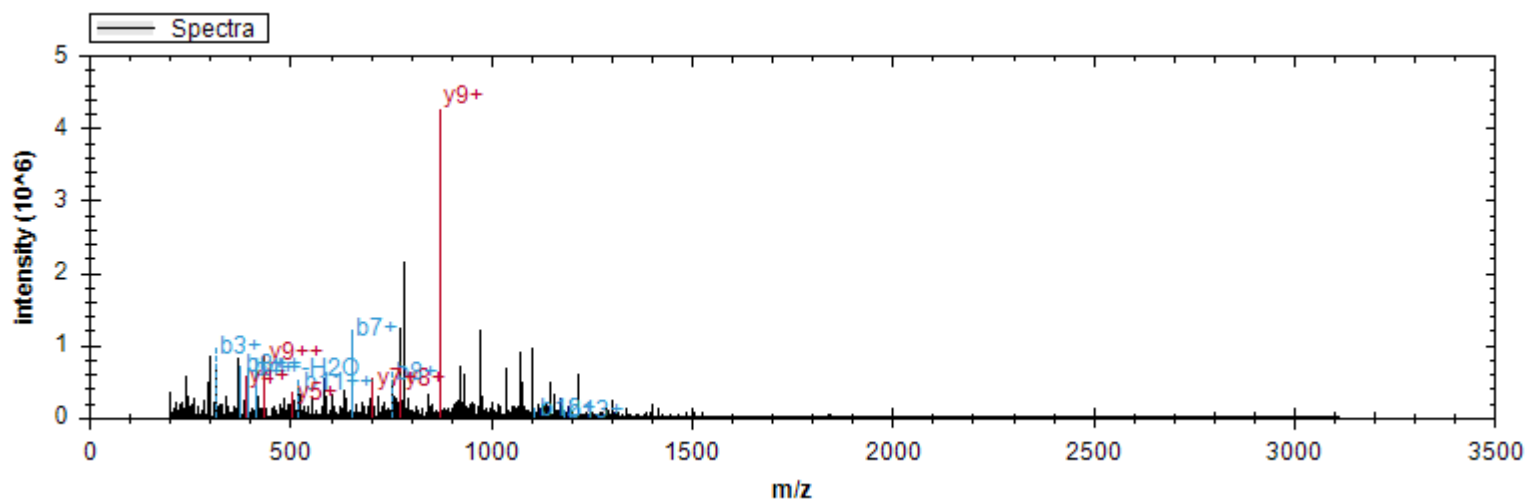

|                          |                          |                            |
|--------------------------|--------------------------|----------------------------|
| [y9+] - 873.431 m/z      | [b7+] - 653.325 m/z      | [b11+] - 1039.505 m/z      |
| [b3+] - 315.130 m/z      | [b8++] - 376.701 m/z     | [y7+] - 705.341 m/z        |
| [b4+] - 414.198 m/z      | [b11++] - 520.256 m/z    | [b7+ -H2O] - 635.315 m/z   |
| [b8+] - 752.394 m/z      | [b4+ -H2O] - 396.188 m/z | [y8+] - 776.379 m/z        |
| [y4+] - 390.235 m/z      | [y11+] - 1155.493 m/z    | [y9++] - 437.219 m/z       |
| [b12+] - 1110.543 m/z    | [y6+] - 634.304 m/z      | [b7+ -NH3] - 636.299 m/z   |
| [y12+] - 1226.530 m/z    | [b5+] - 511.251 m/z      | [b11+ -NH3] - 1022.479 m/z |
| [b4+ -NH3] - 397.172 m/z | [b13+] - 1181.580 m/z    | [b8+ -NH3] - 735.367 m/z   |
| [y5+] - 505.262 m/z      |                          |                            |

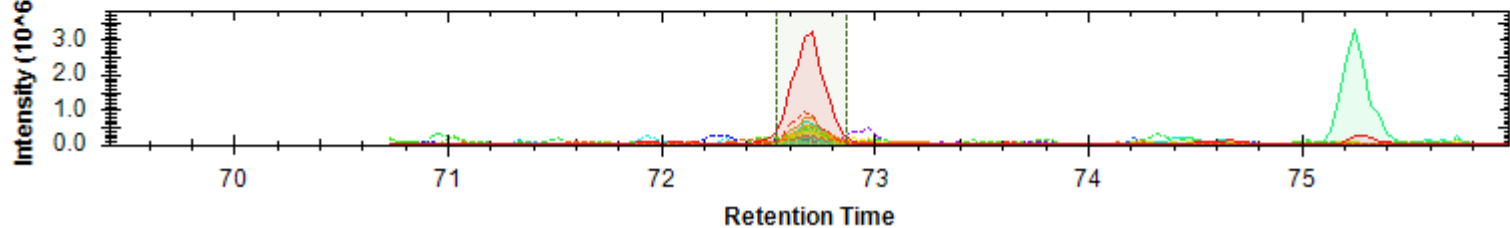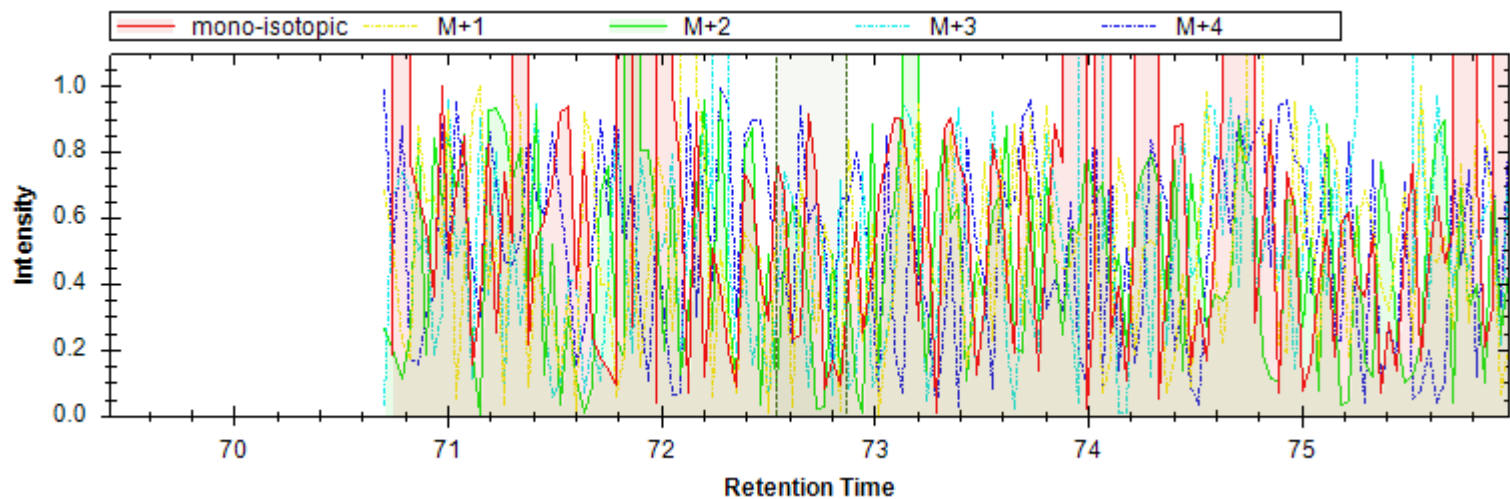

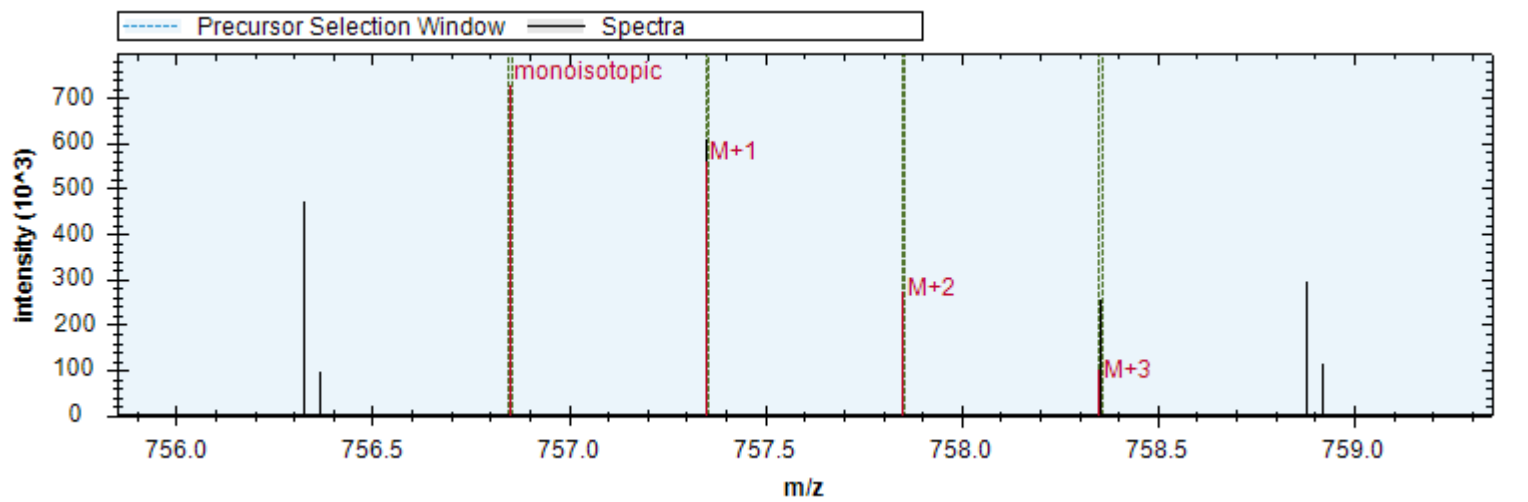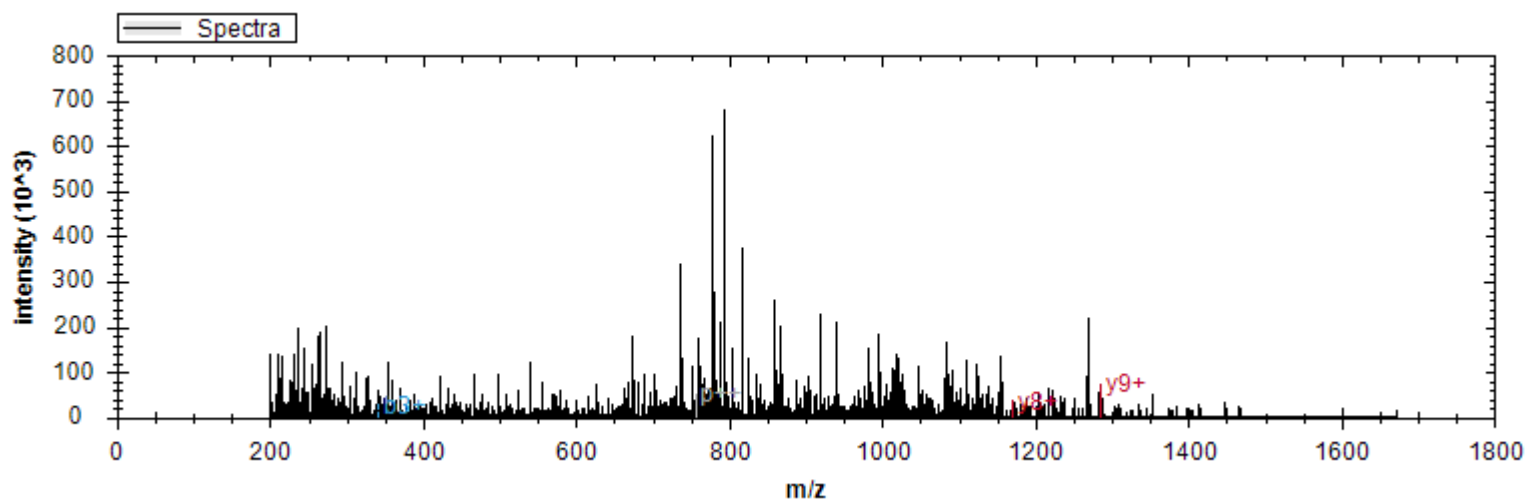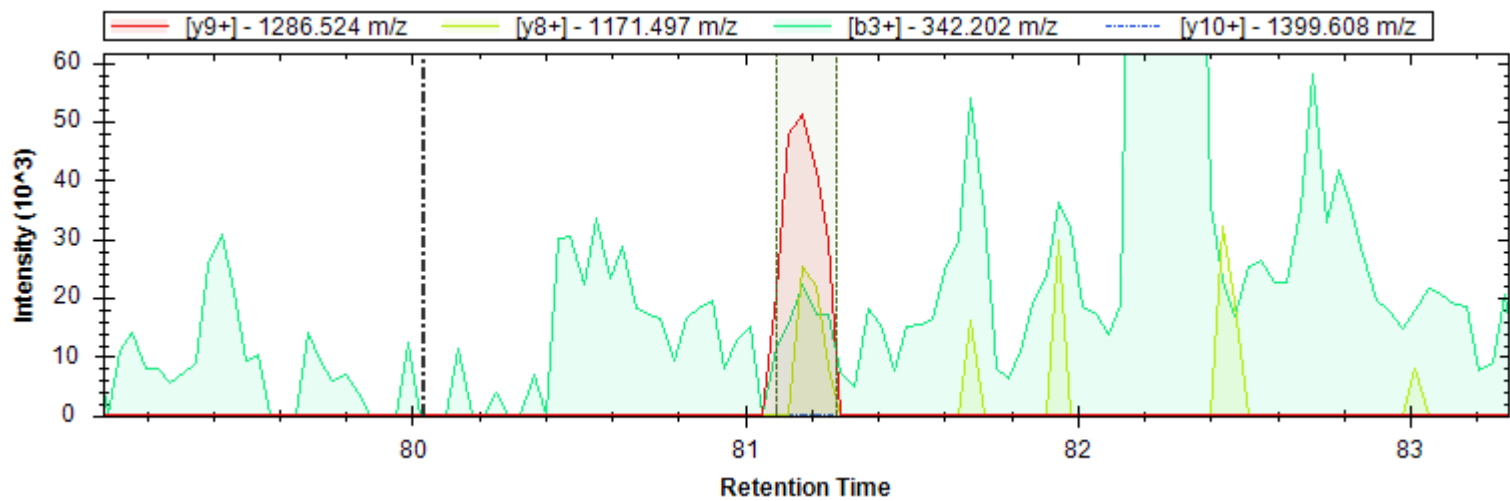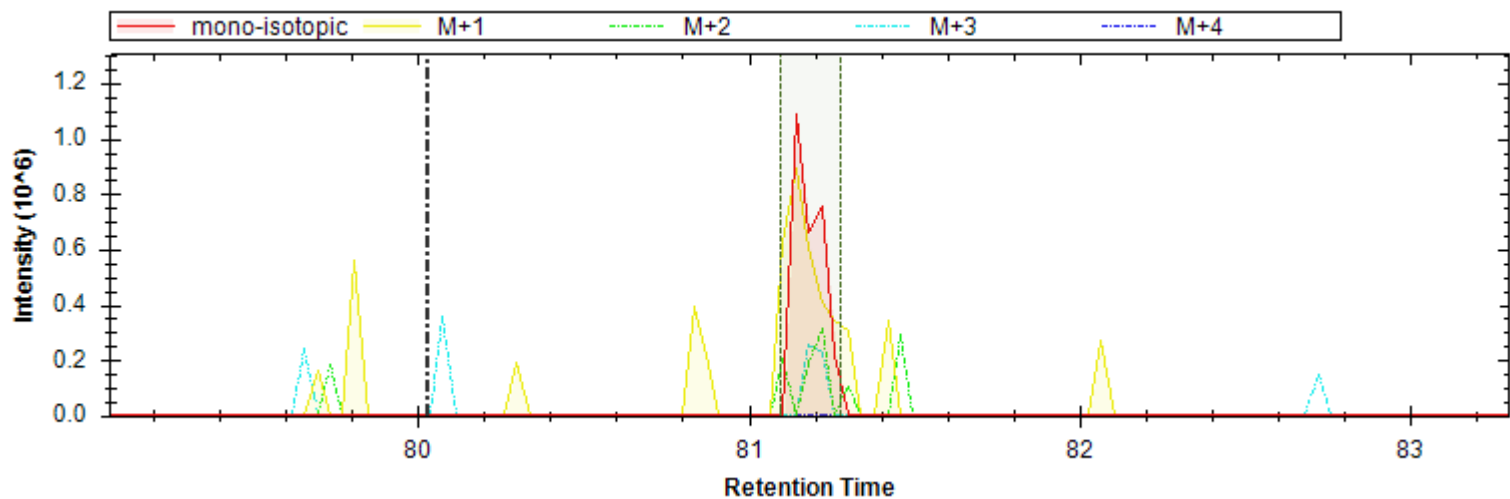

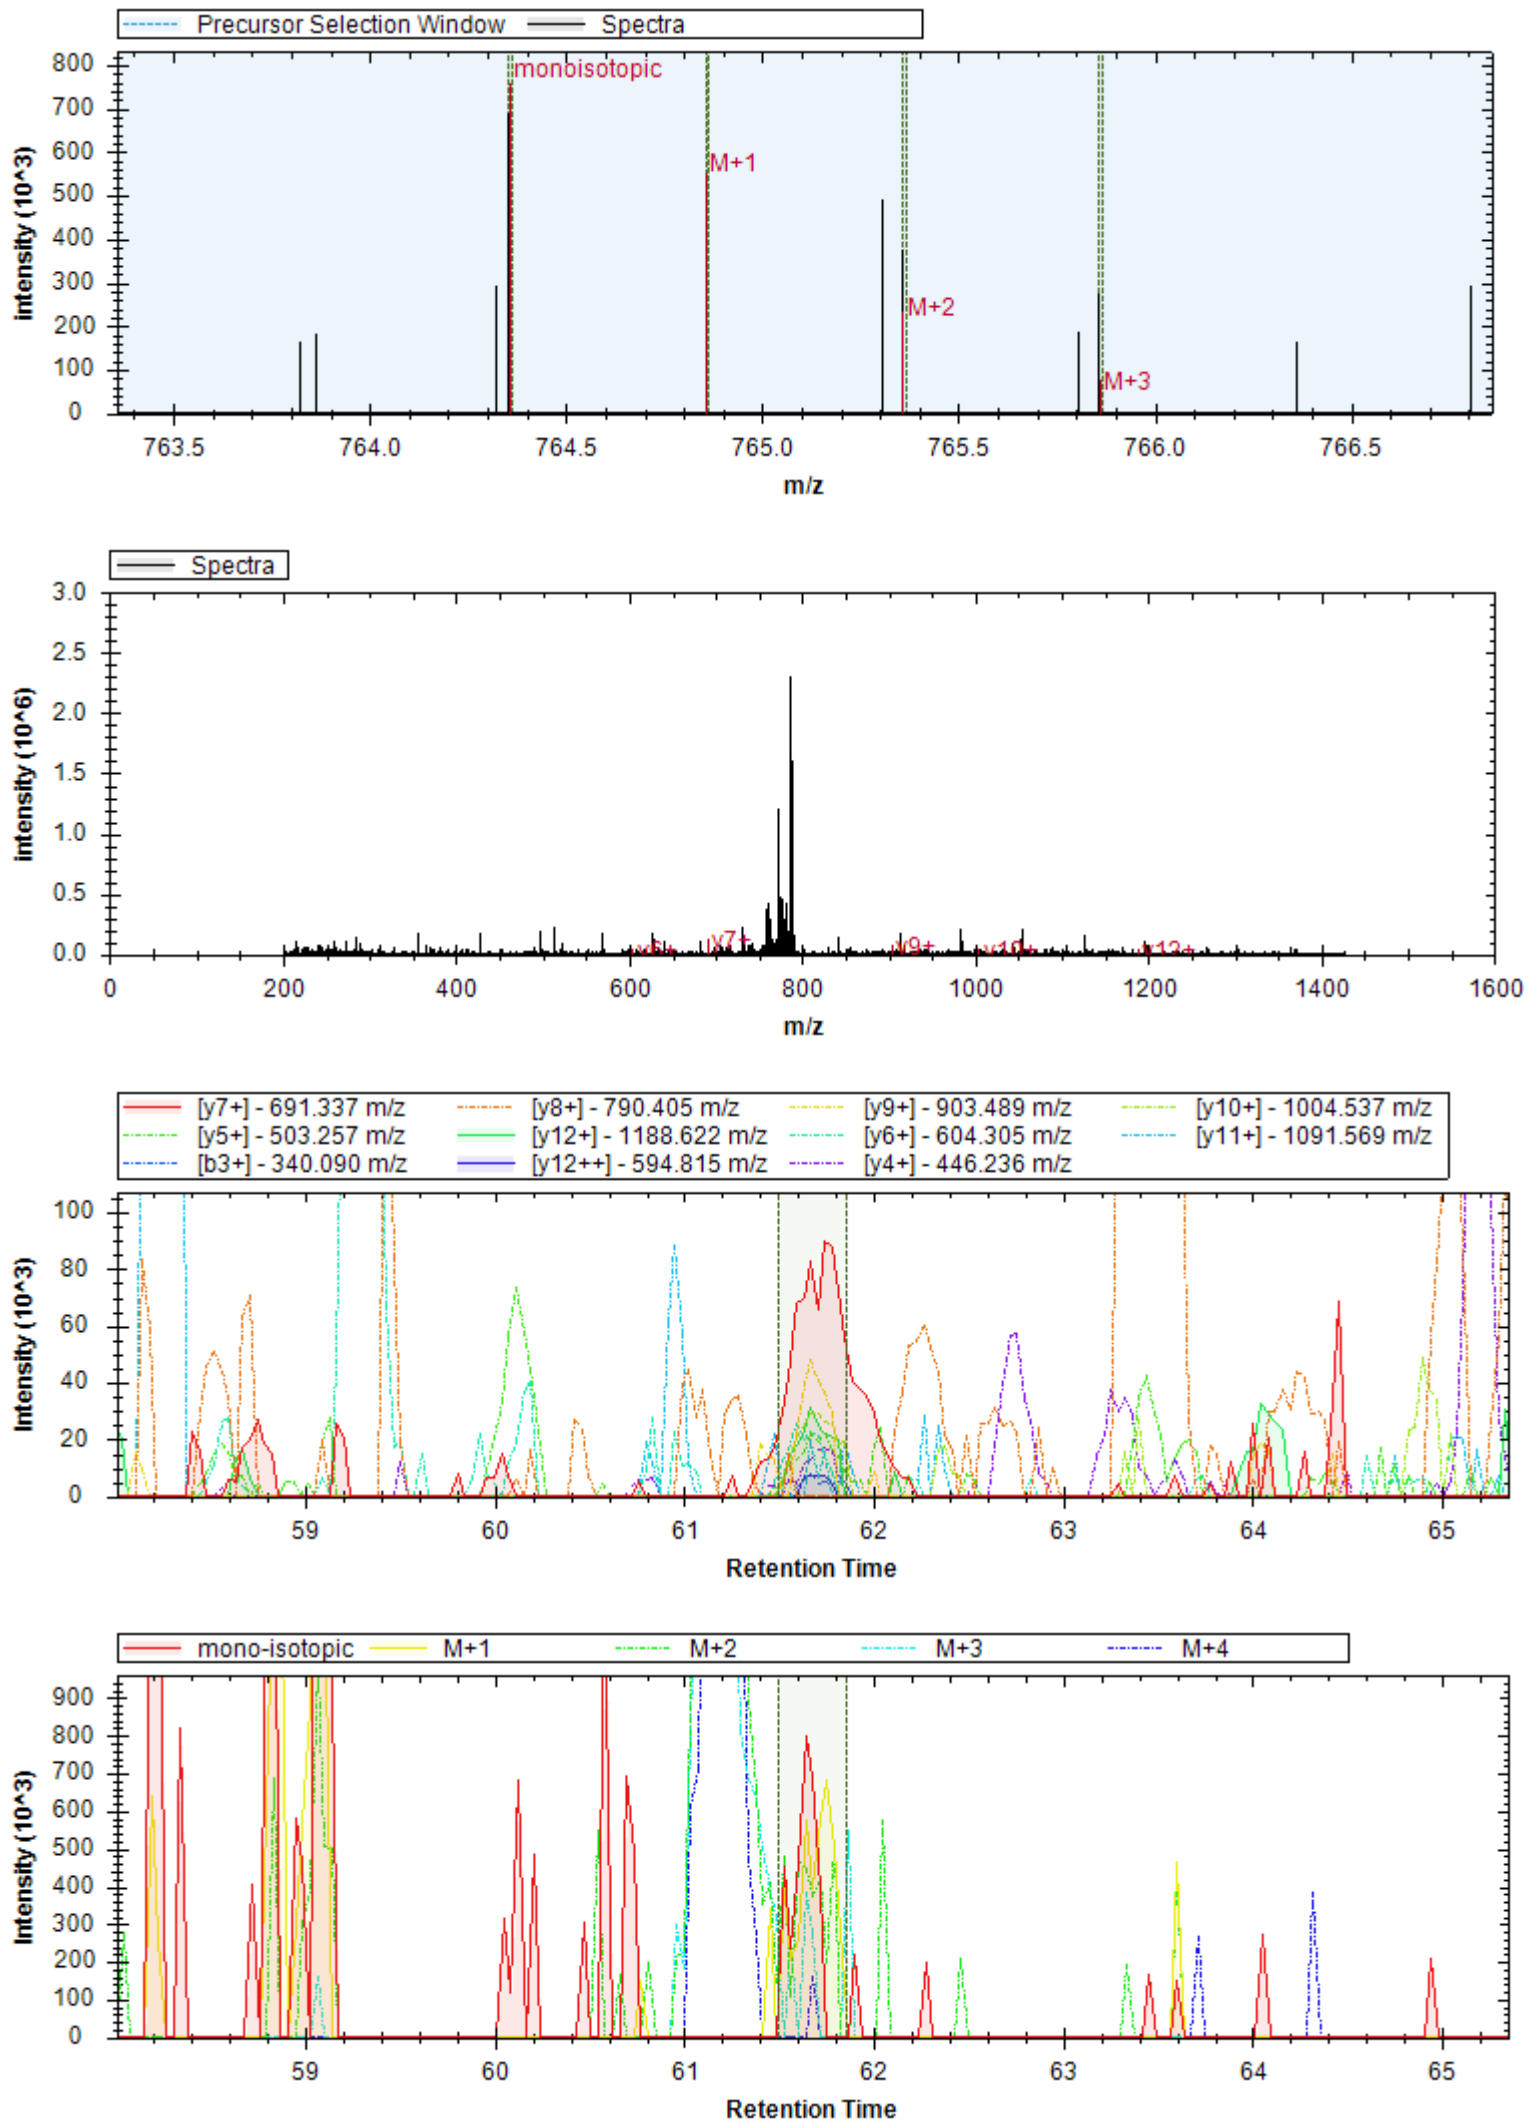



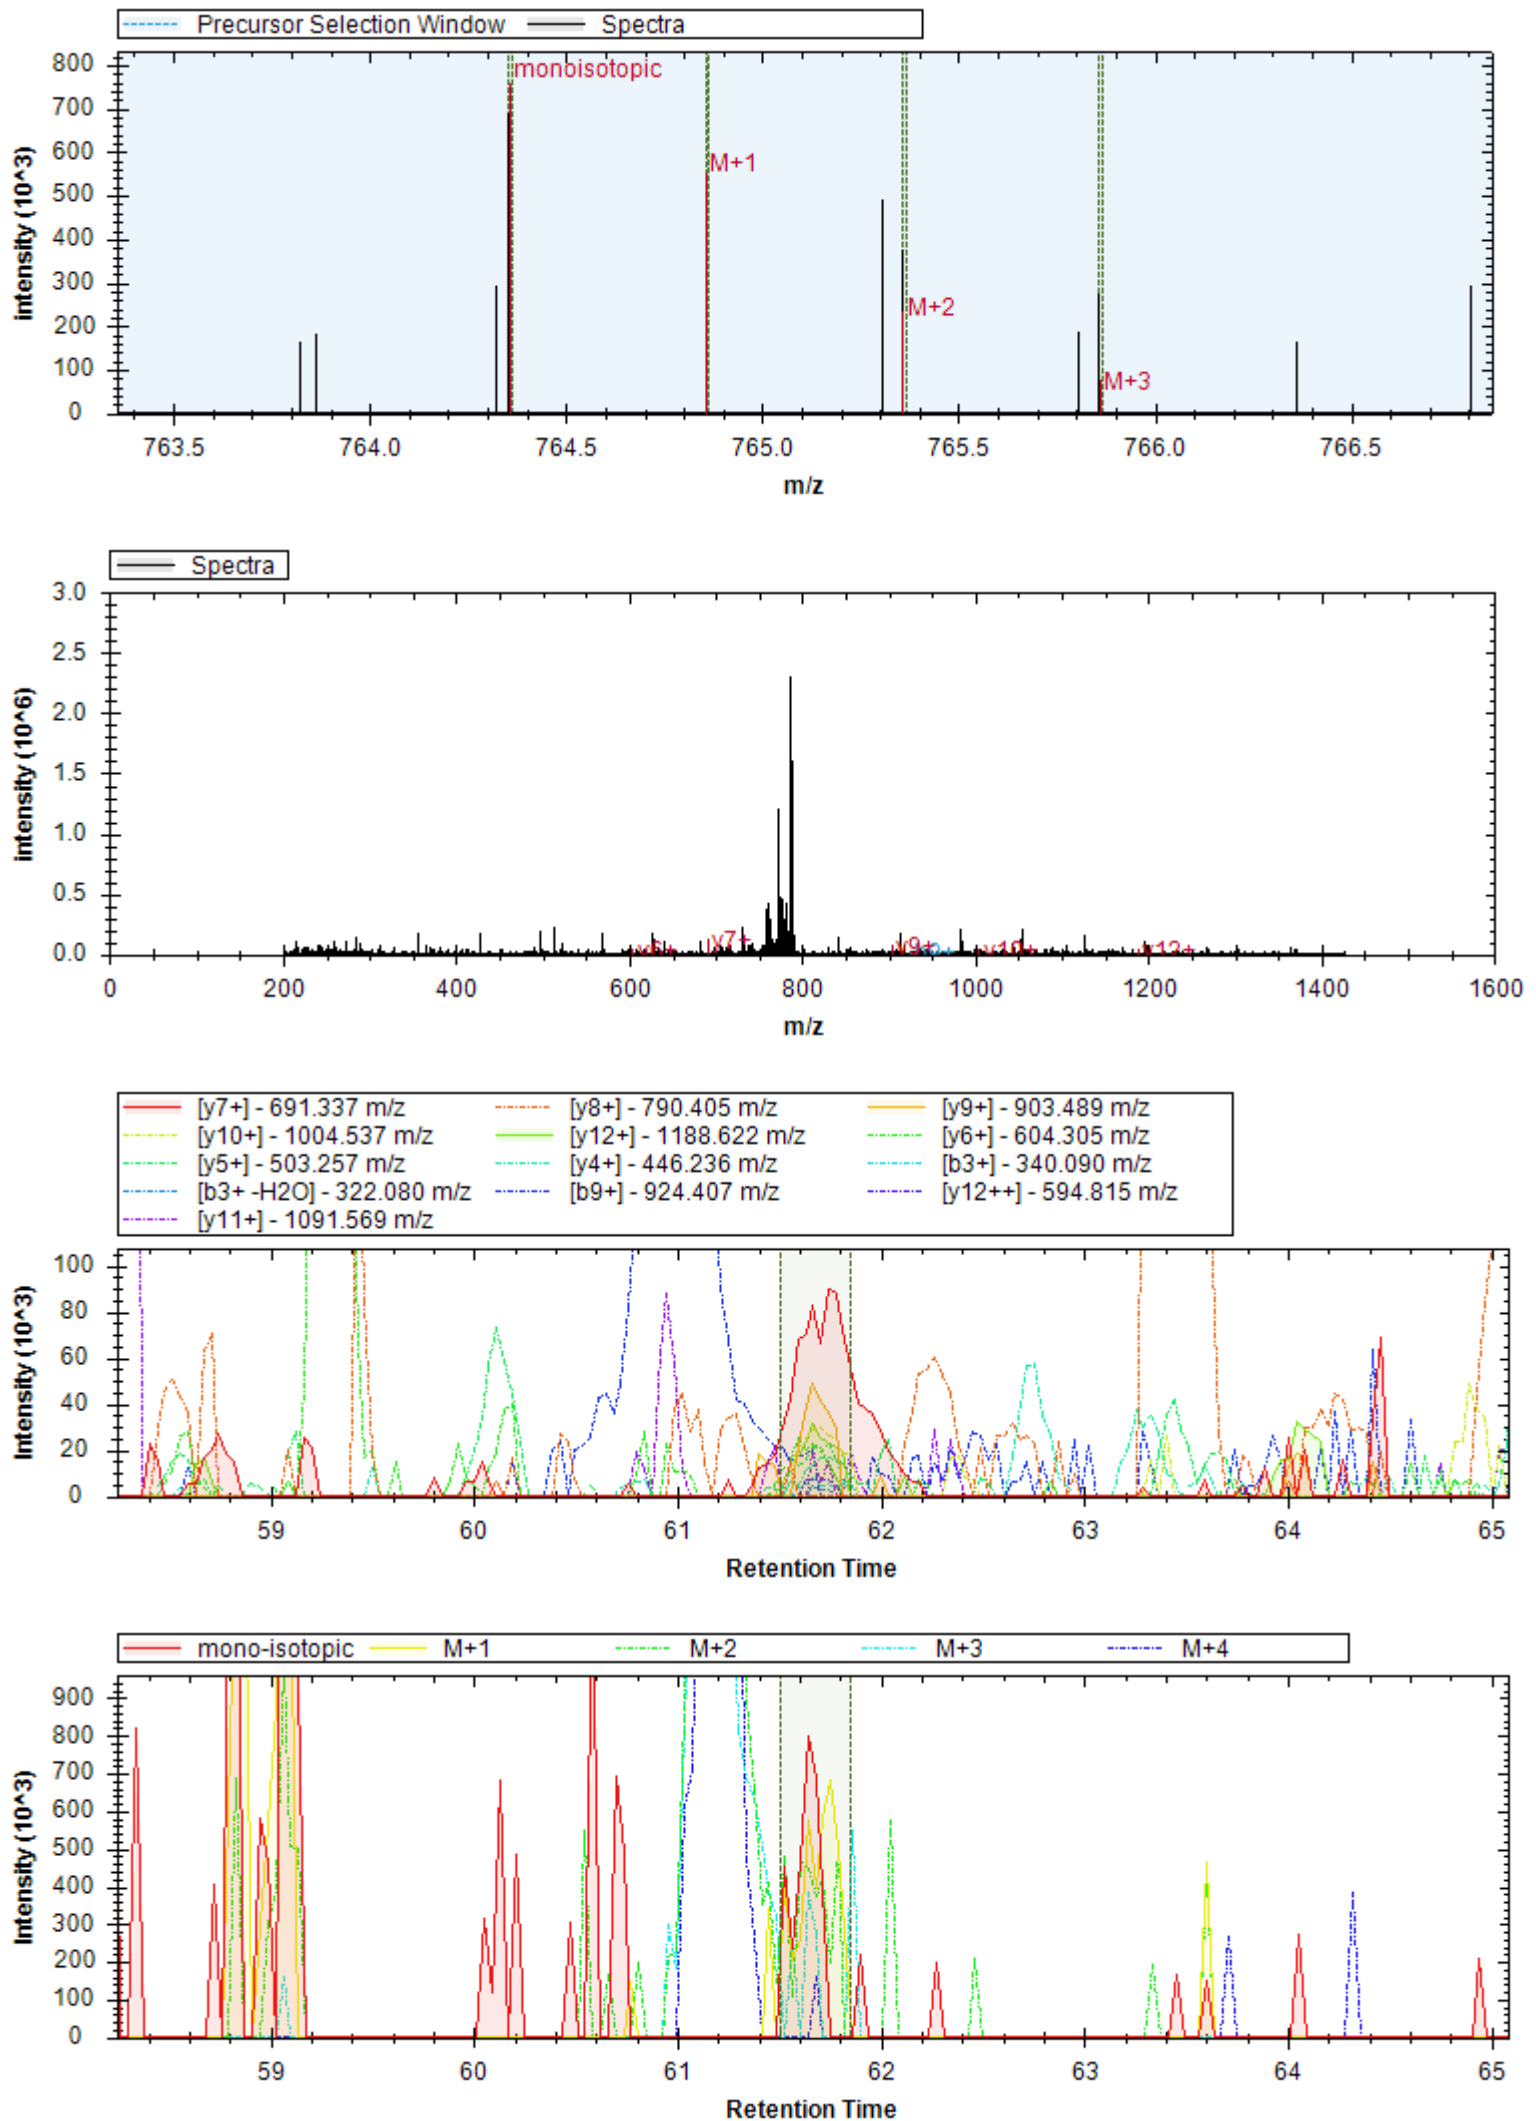

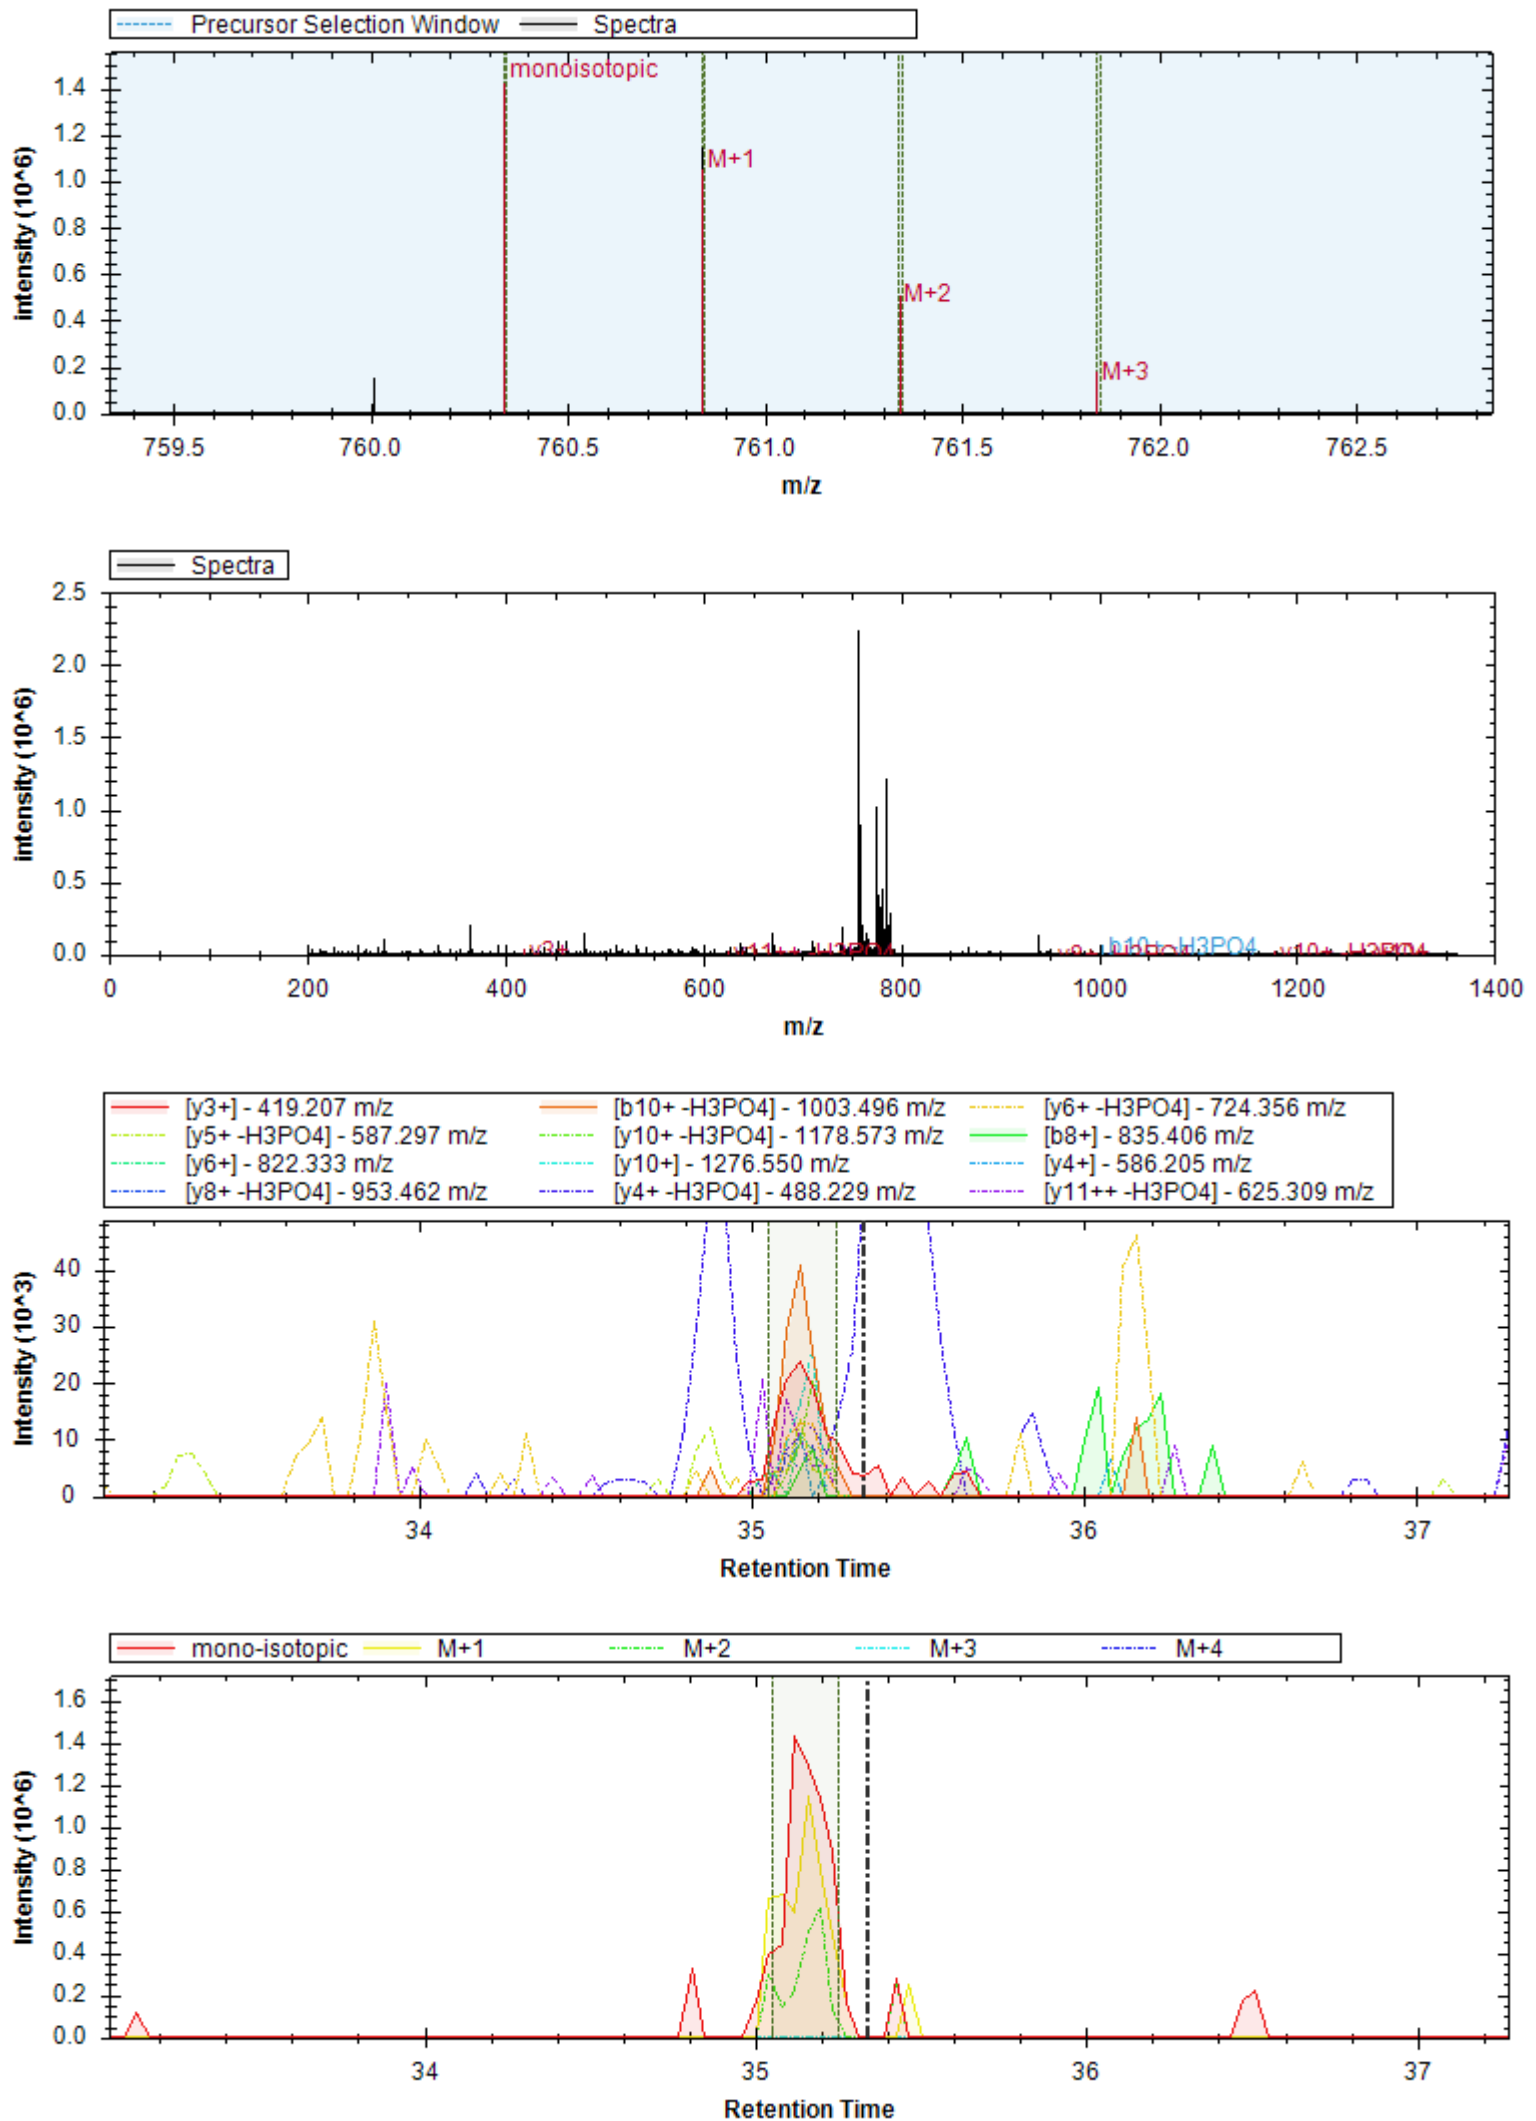

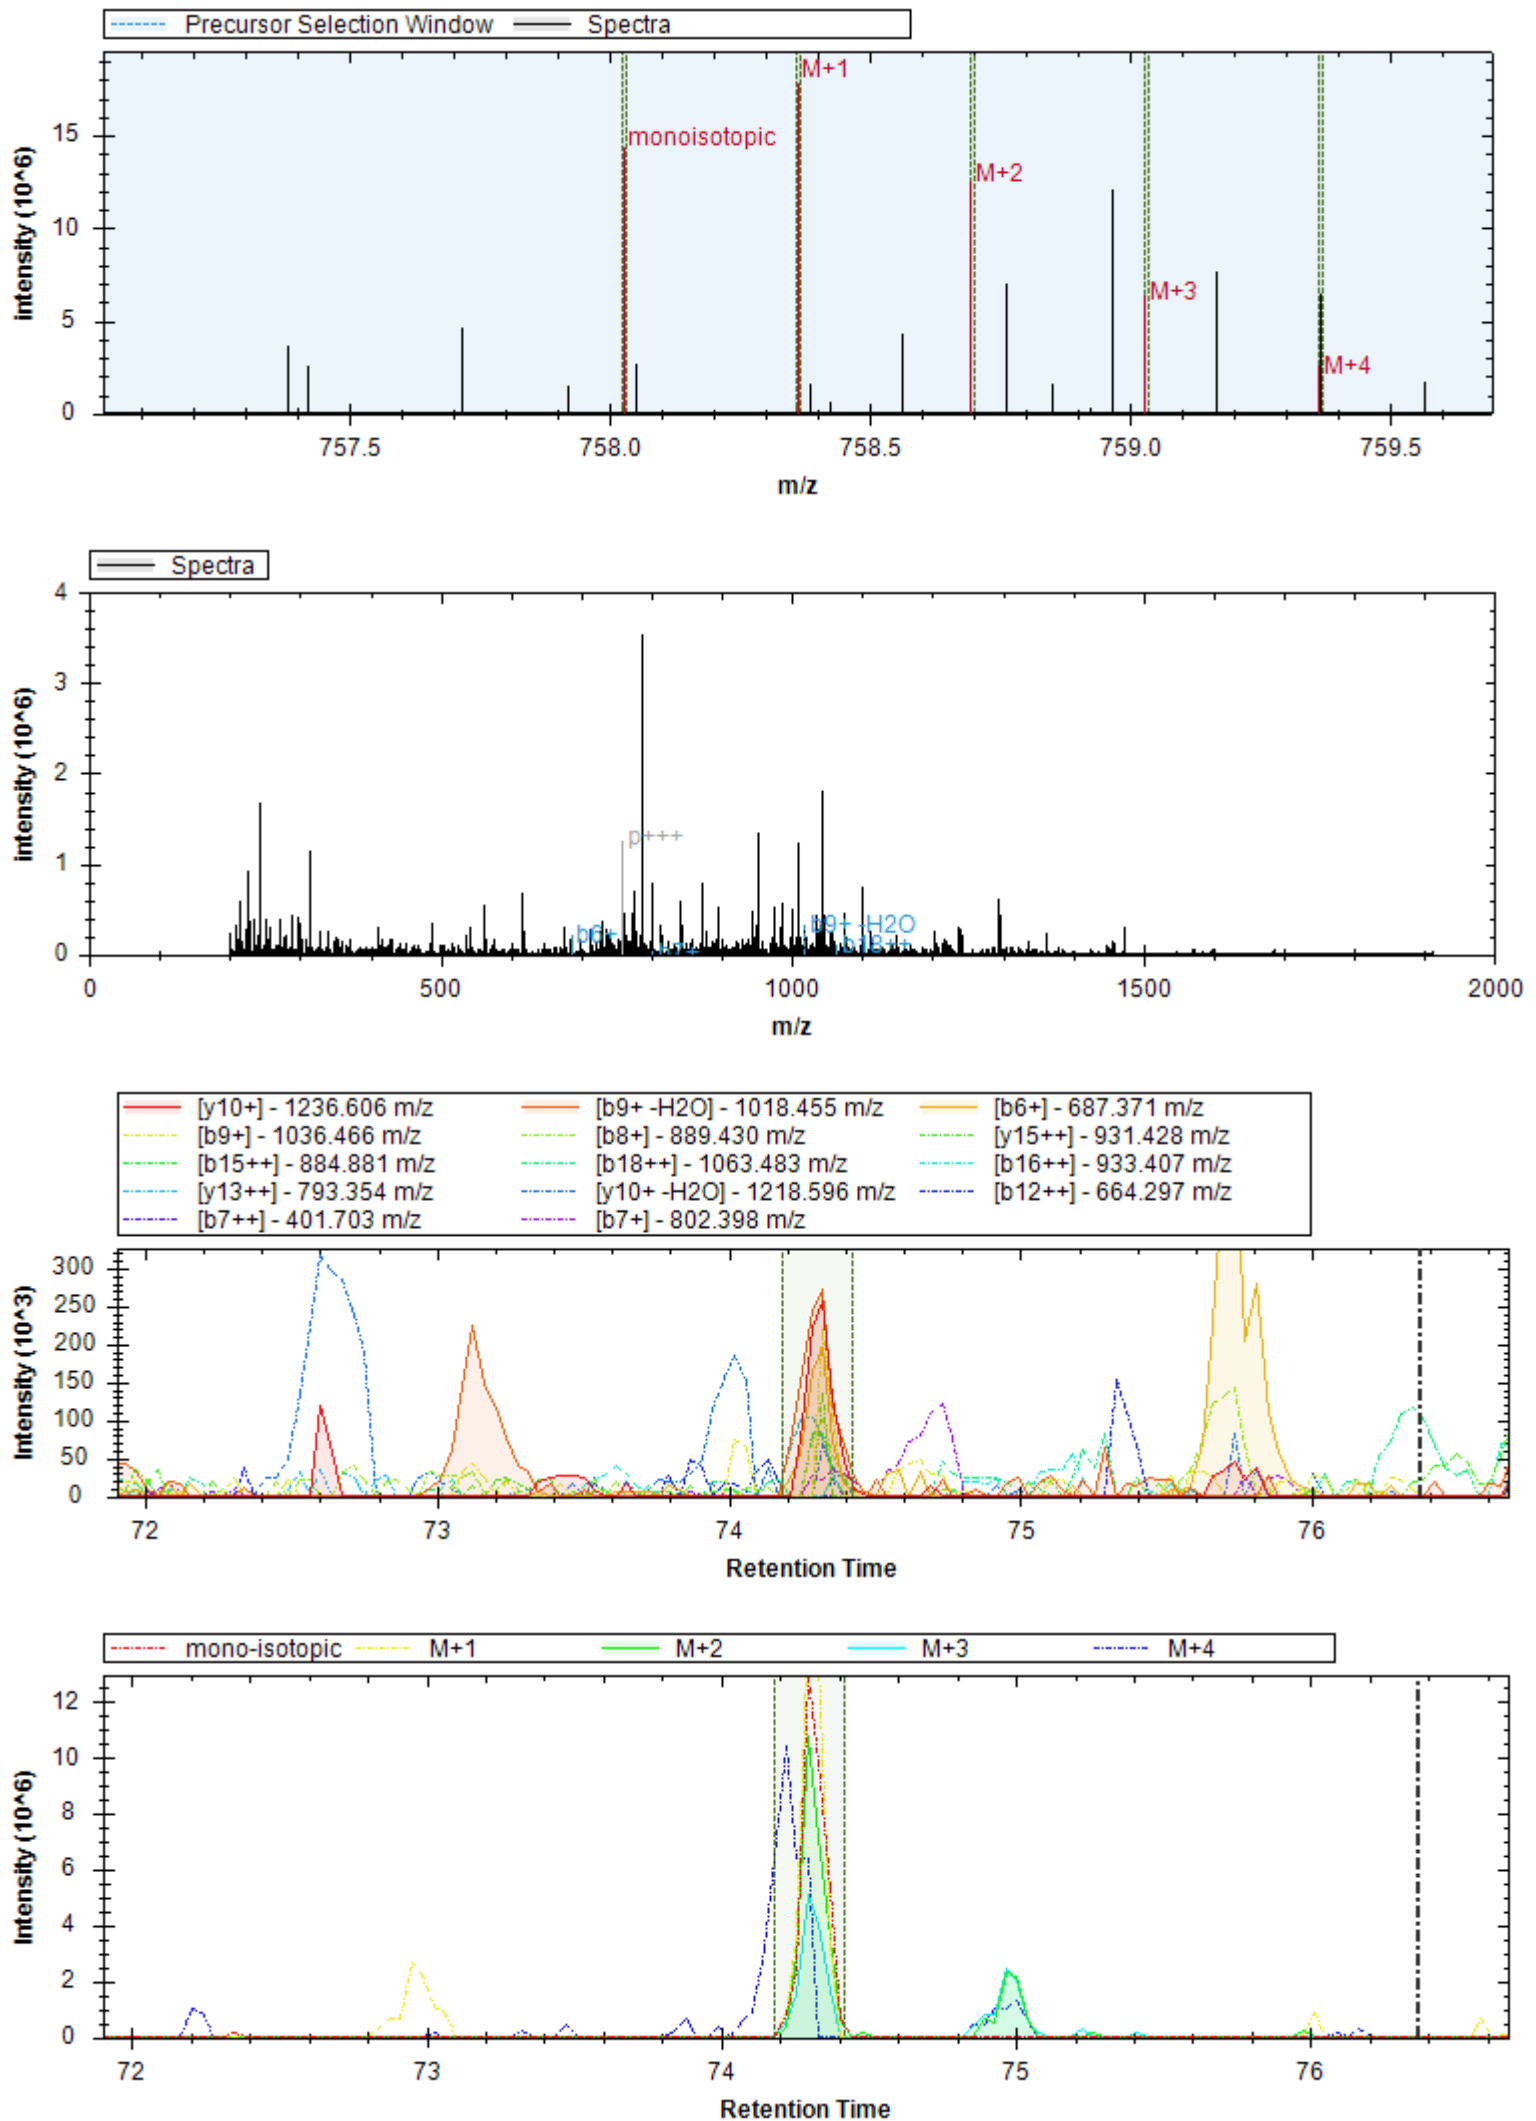

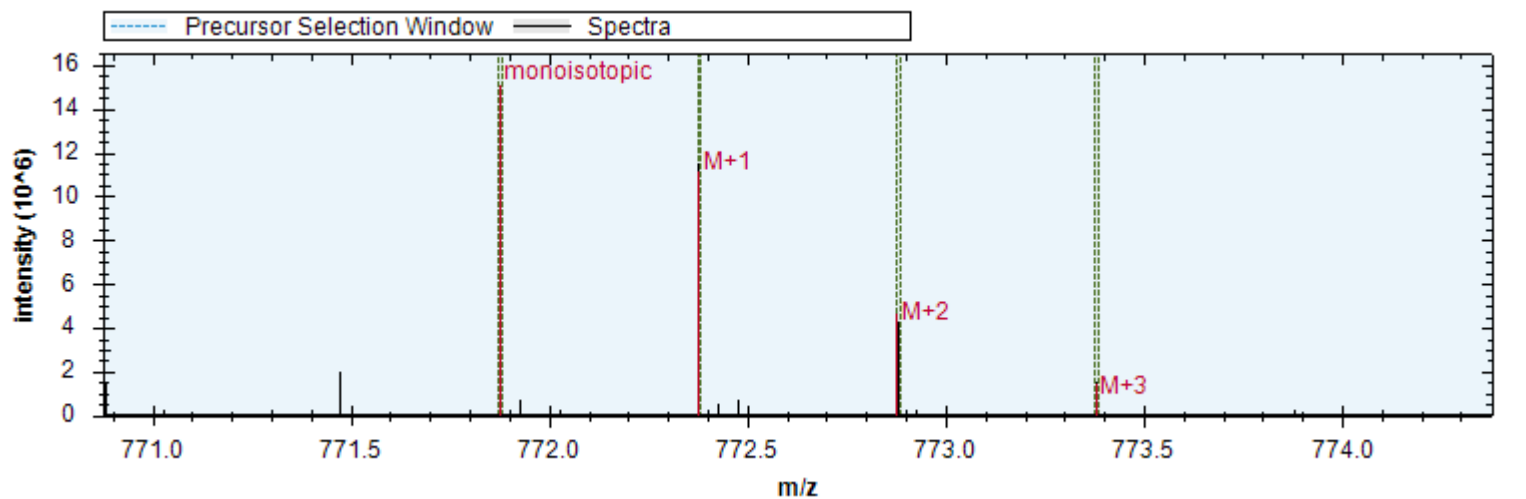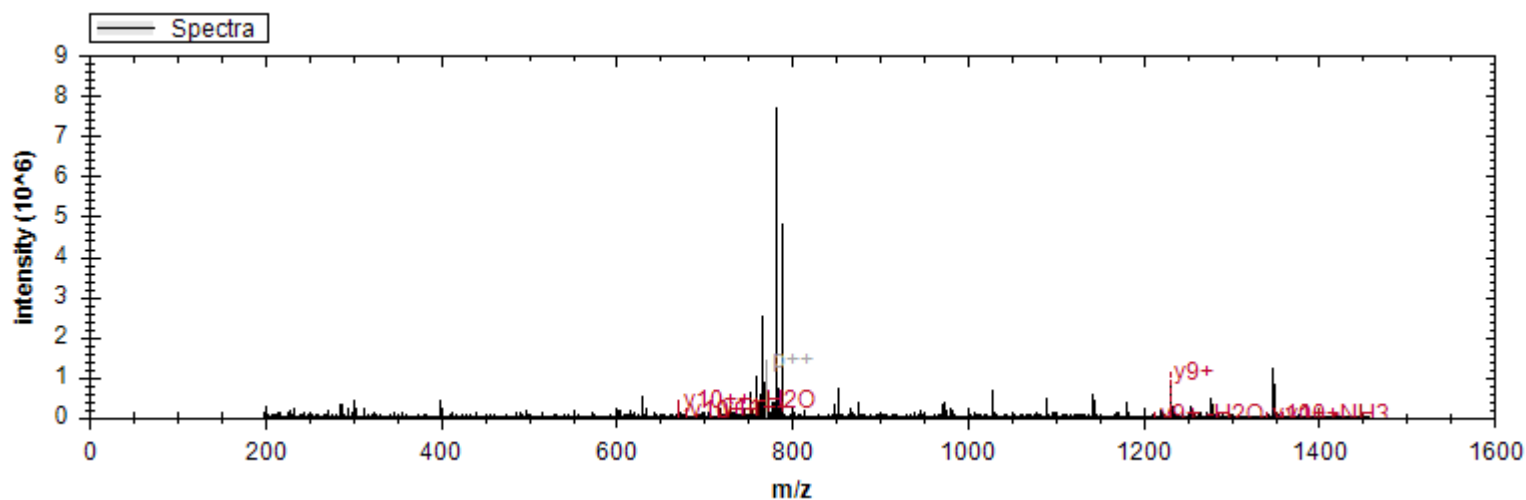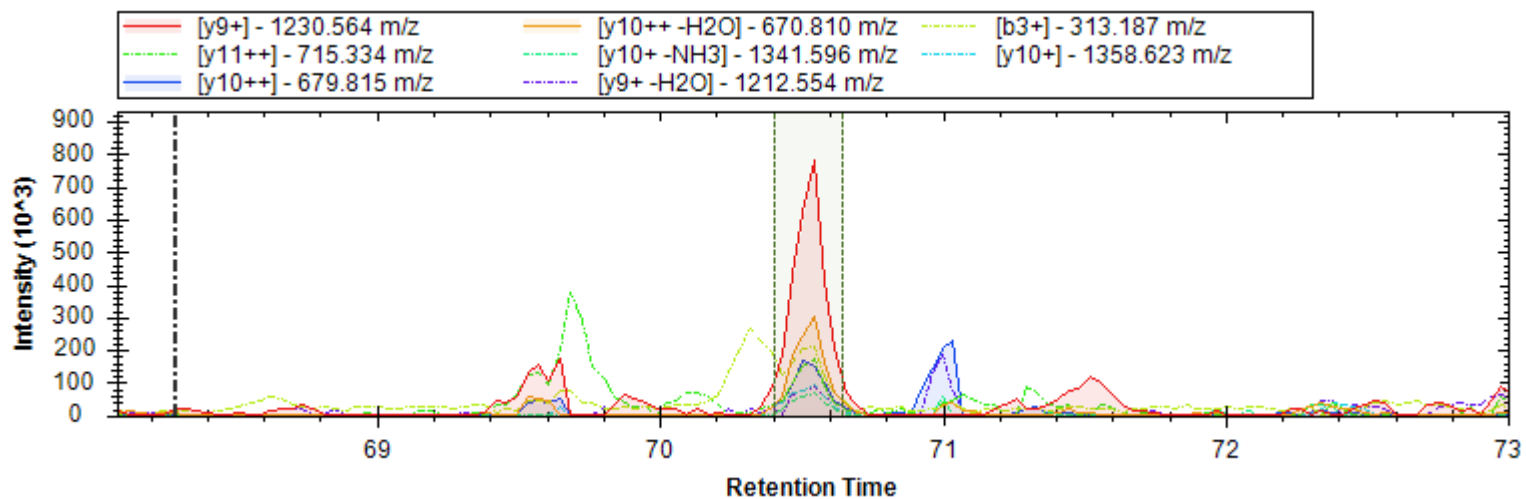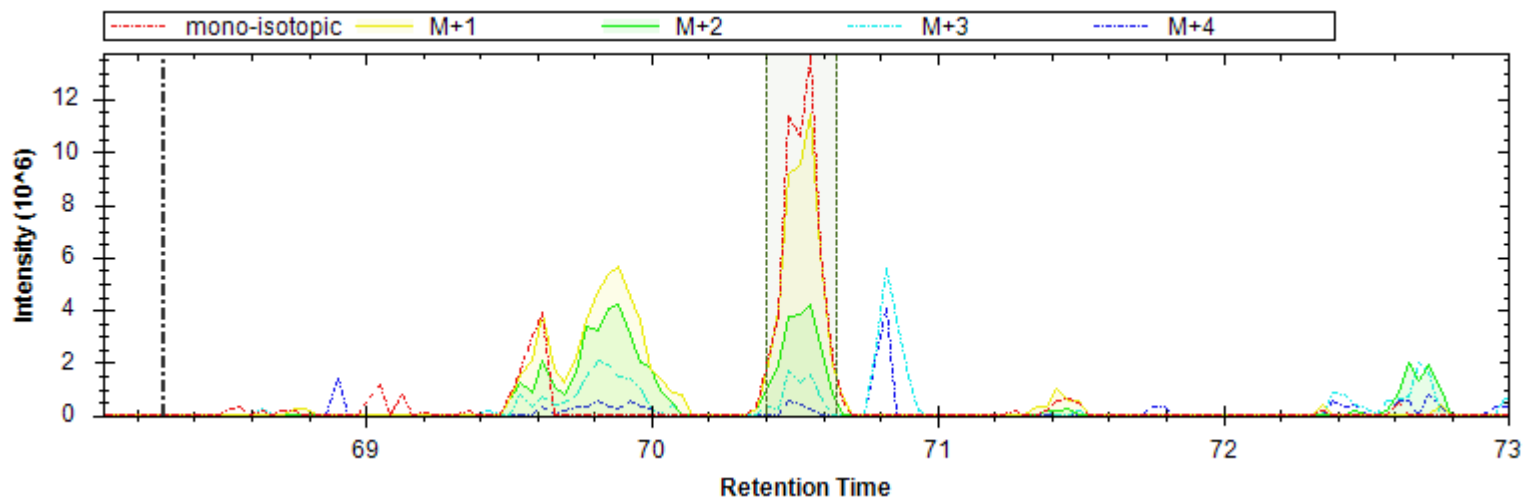

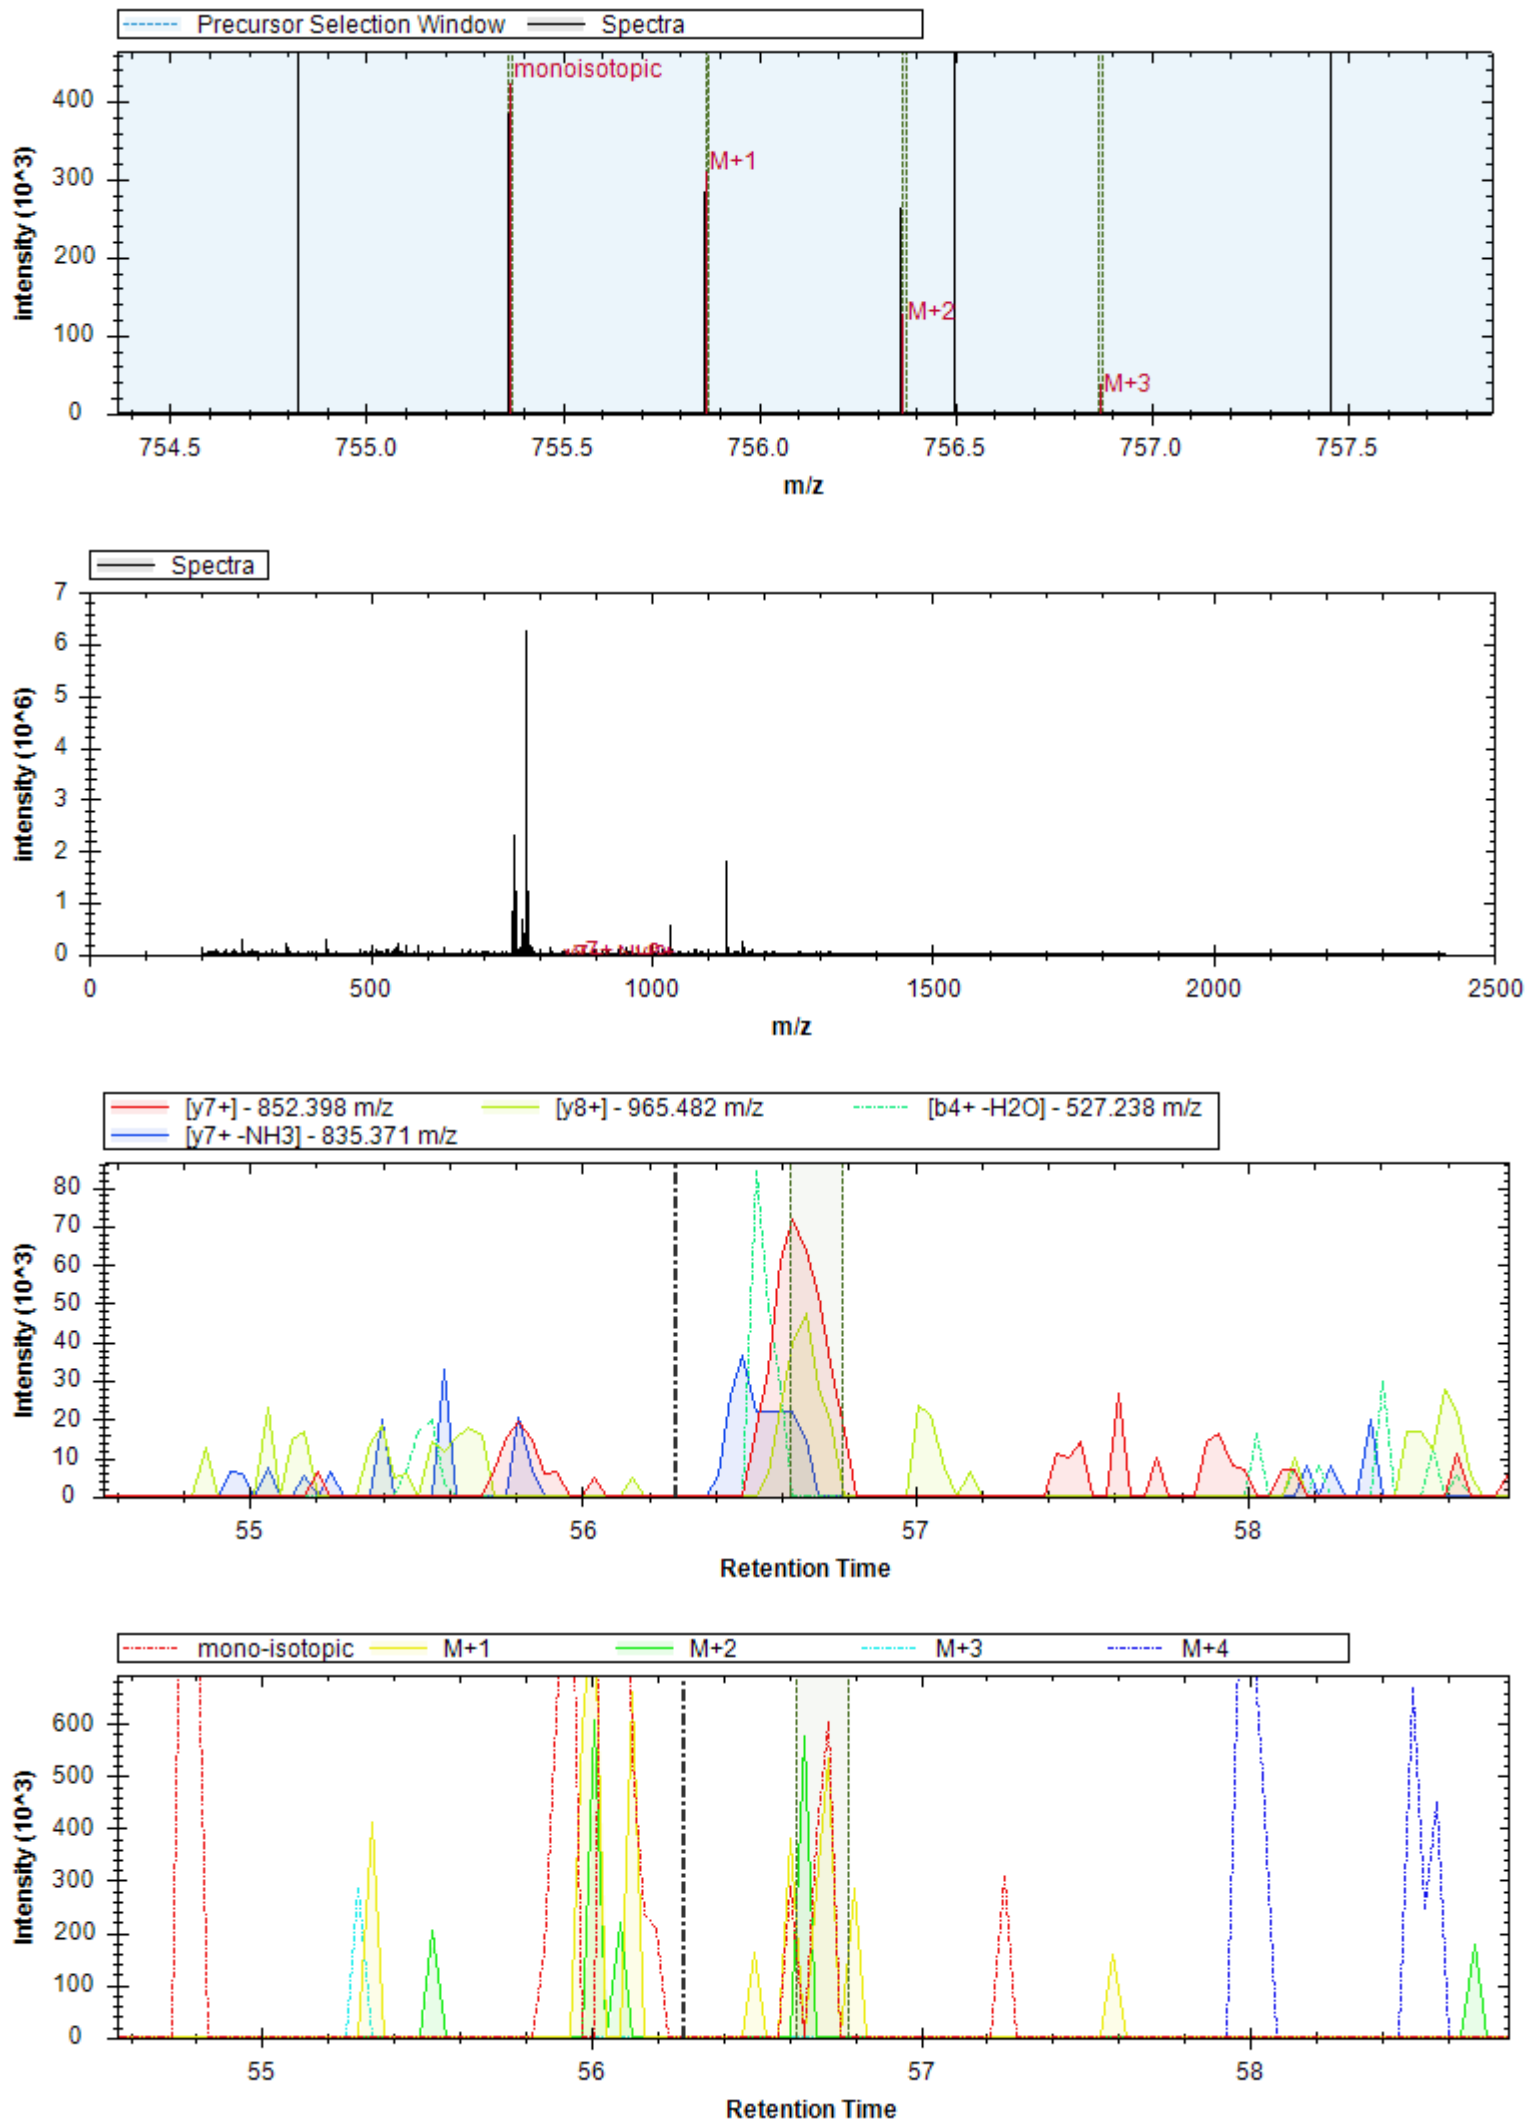

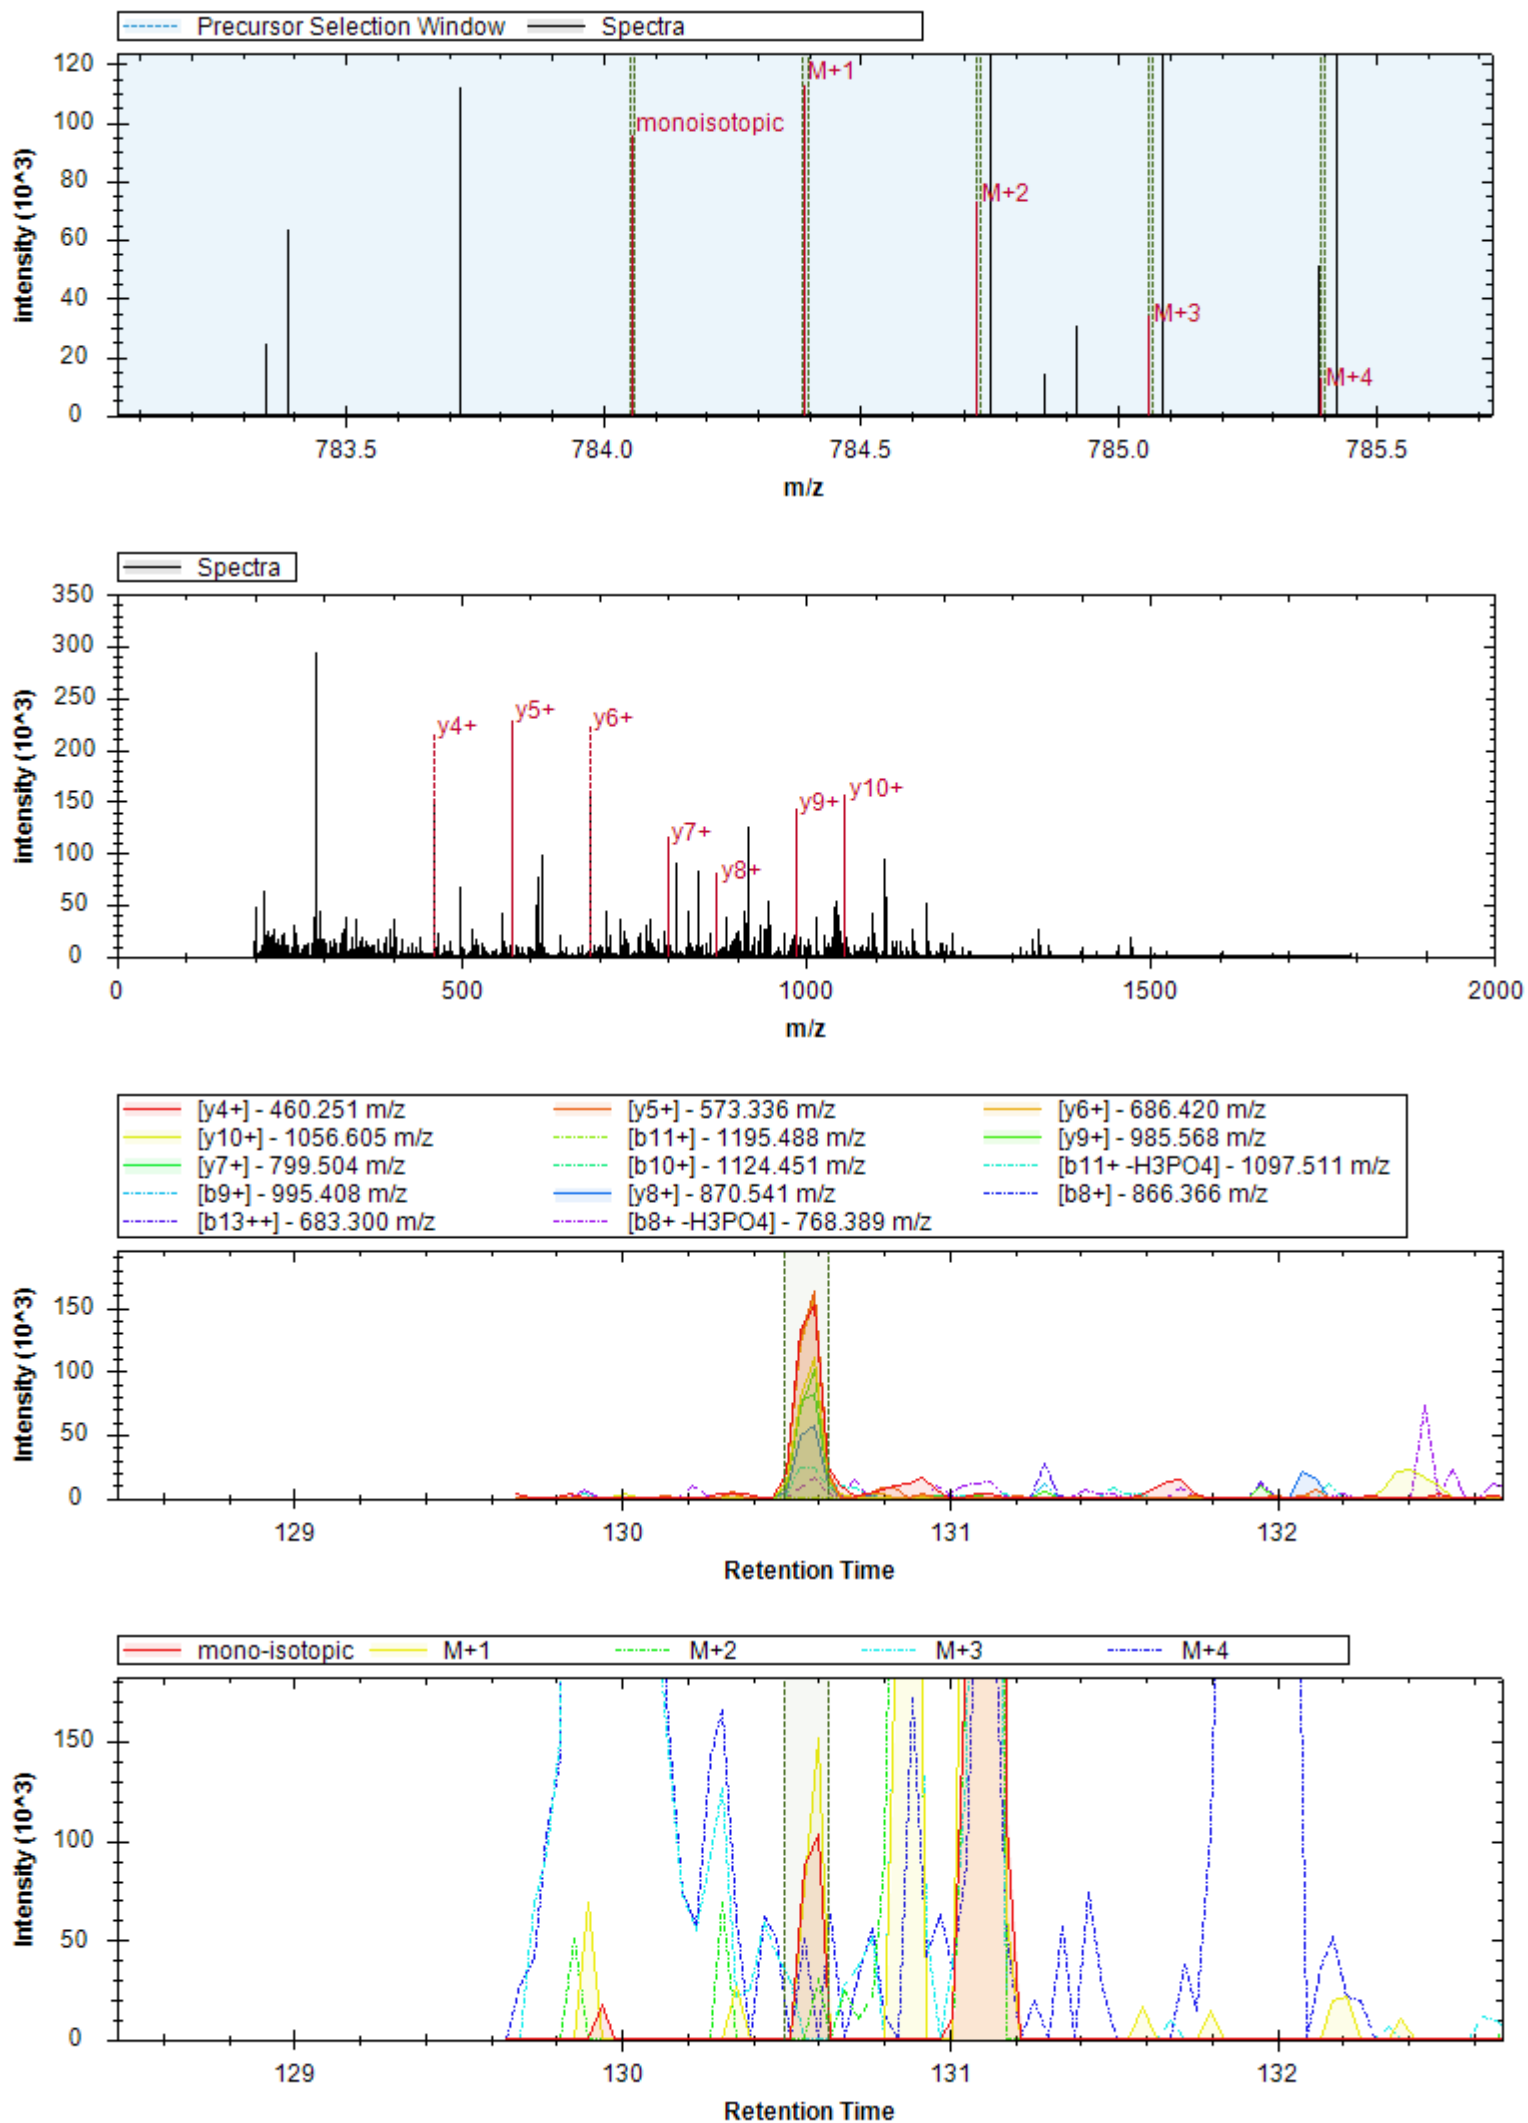

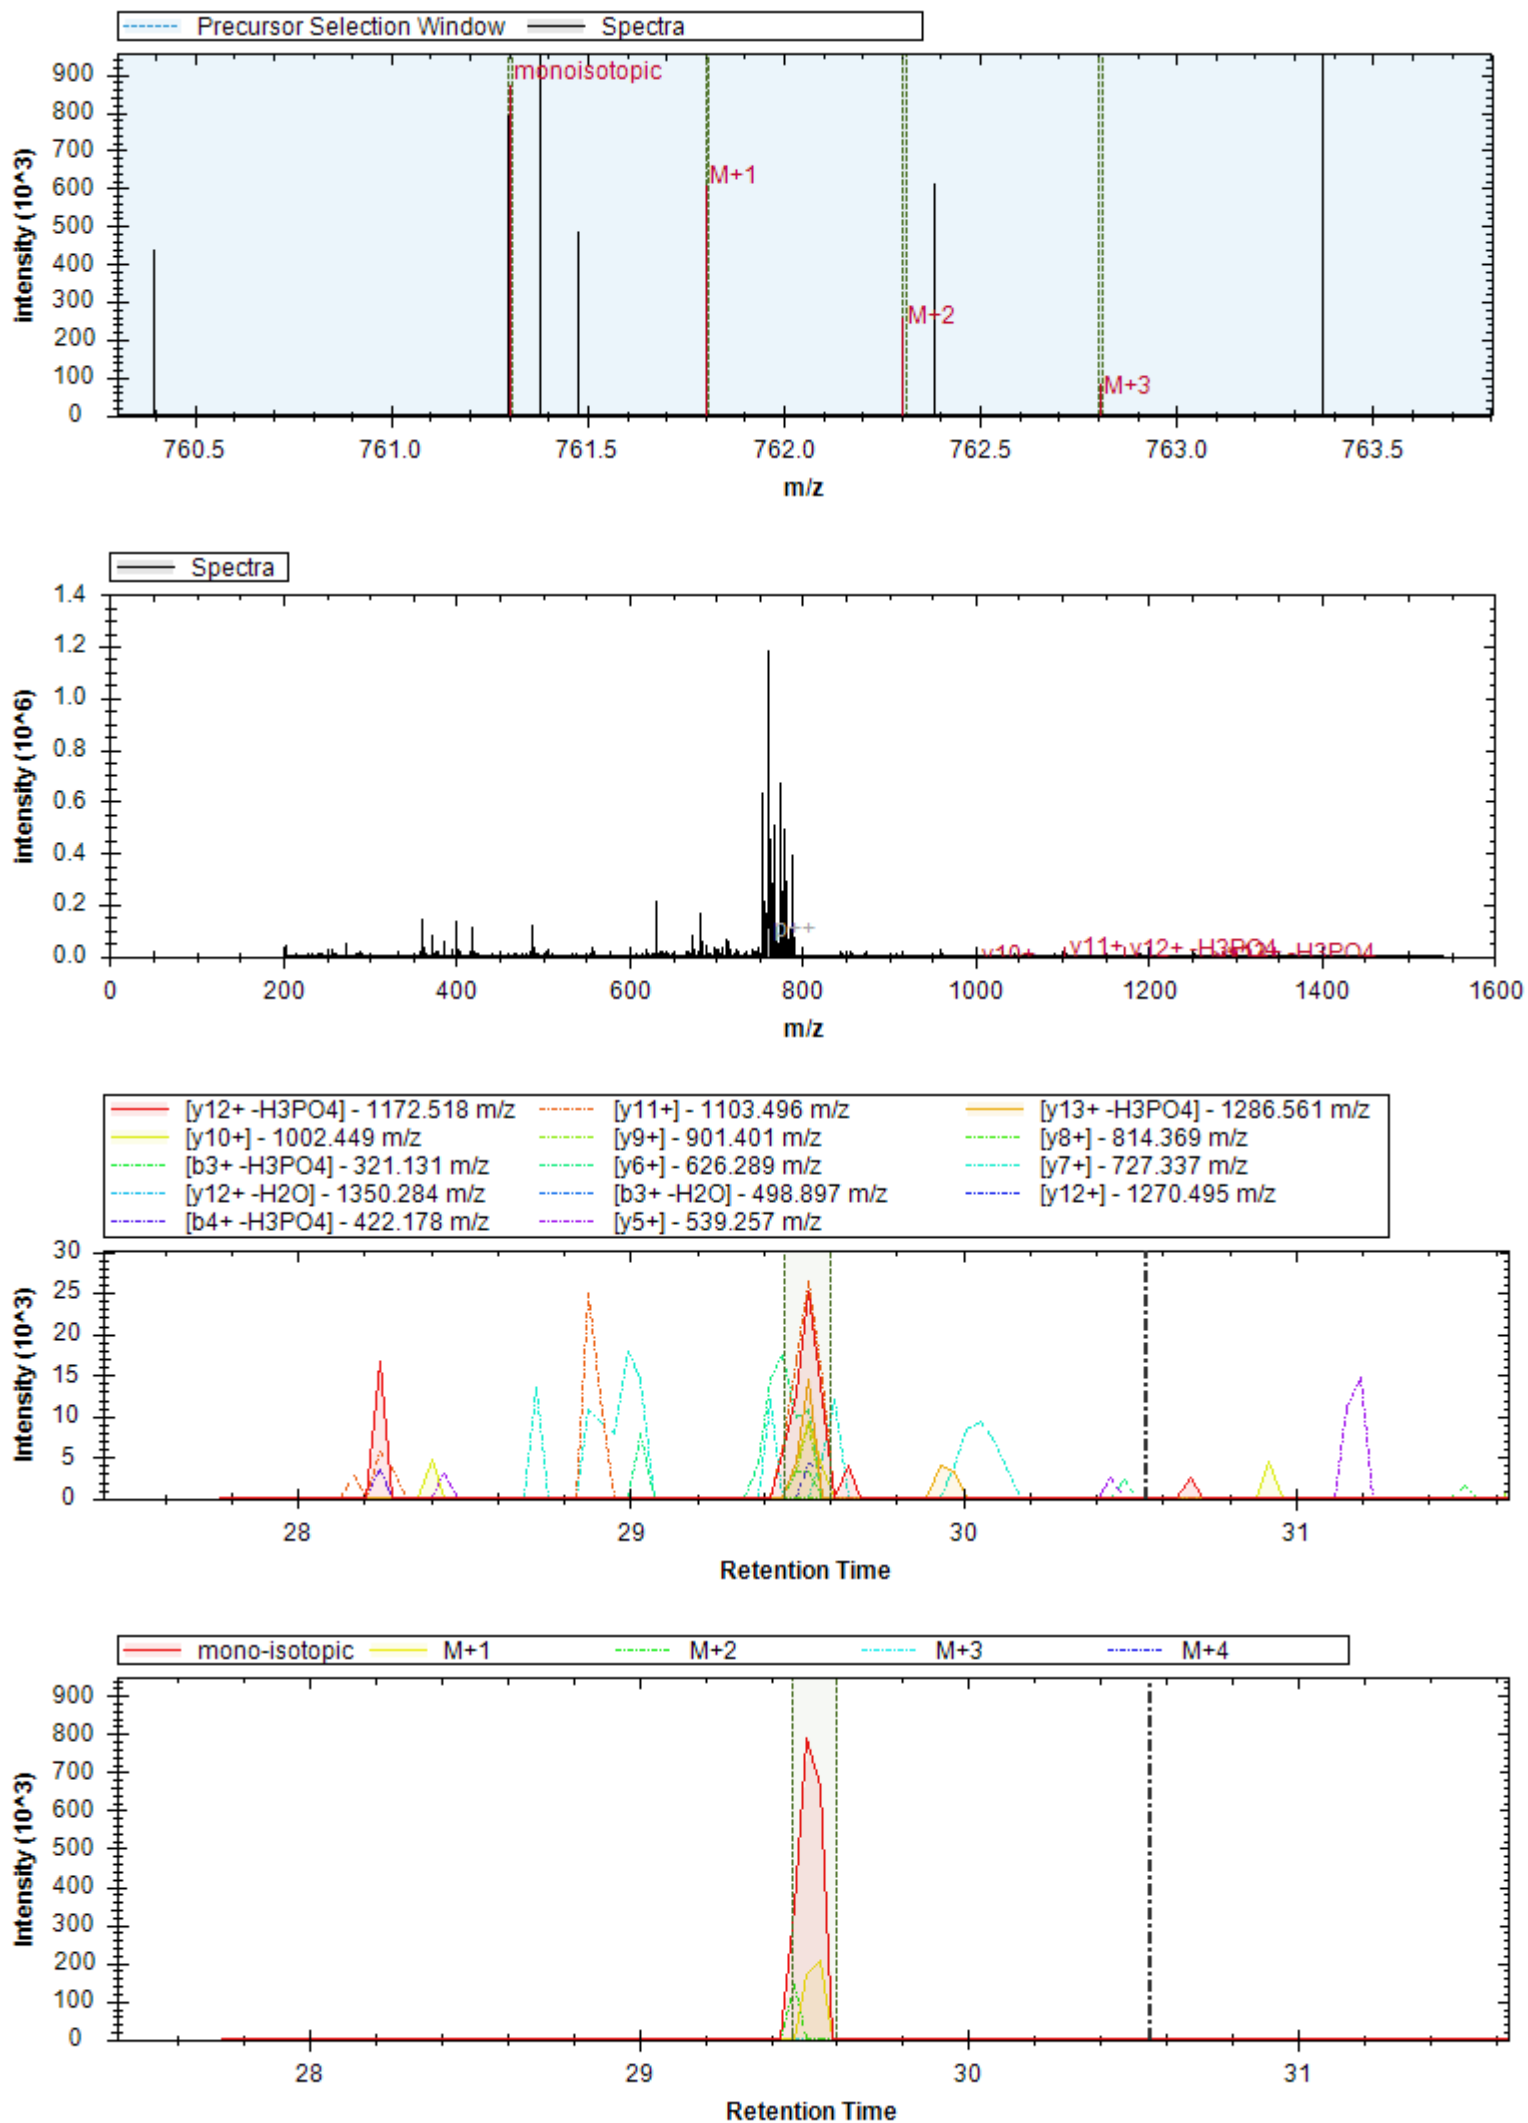

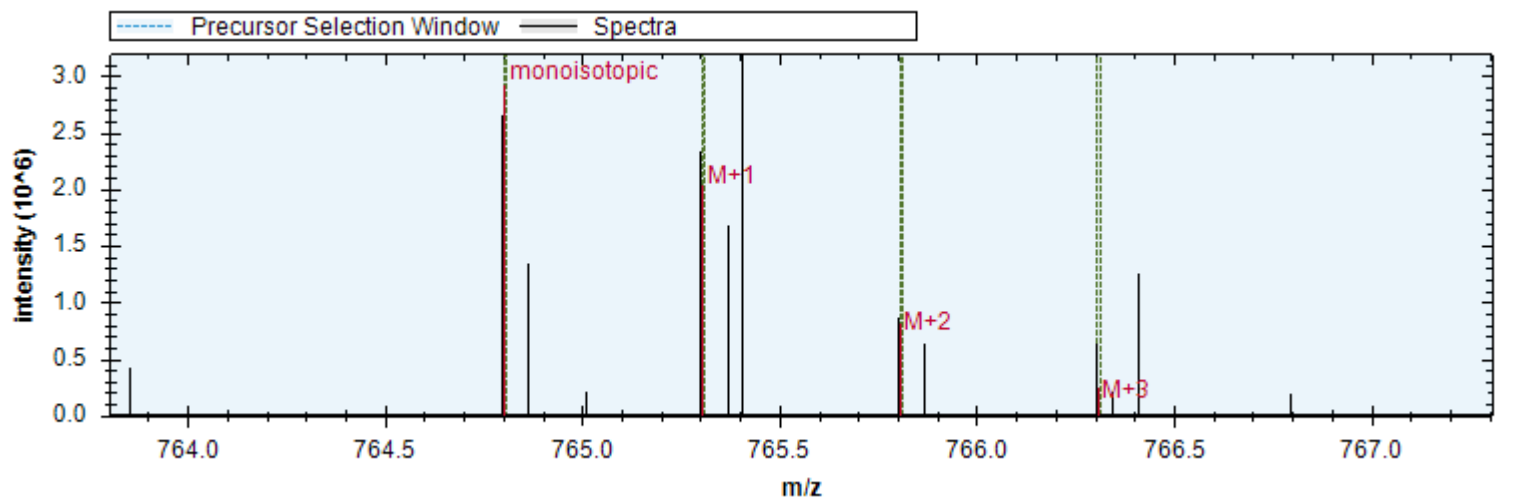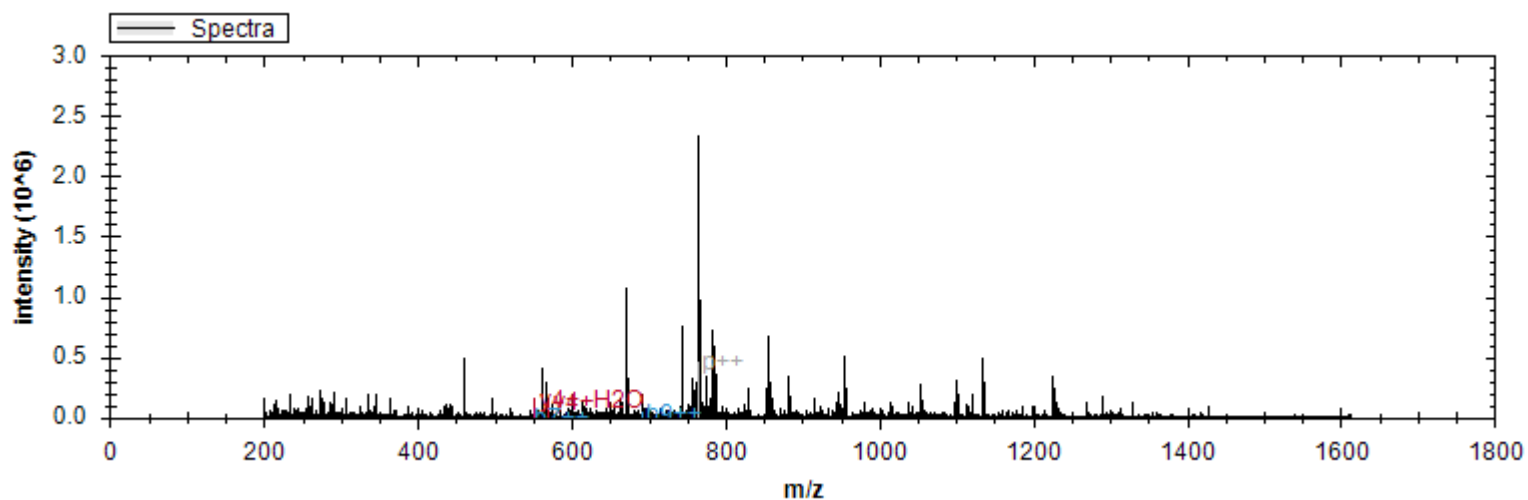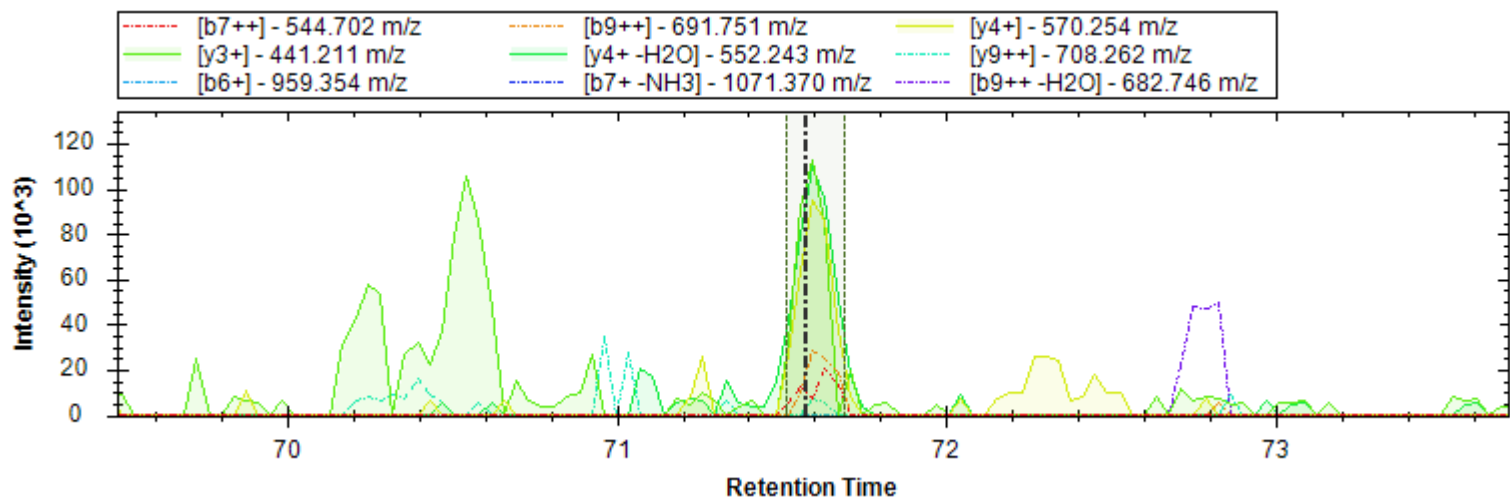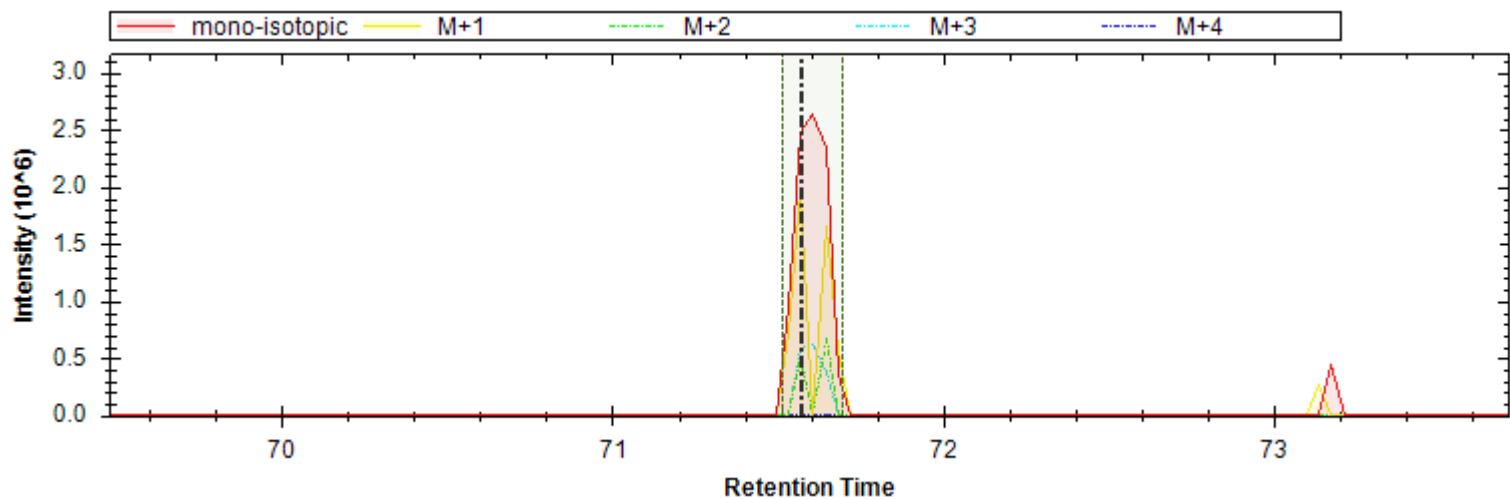



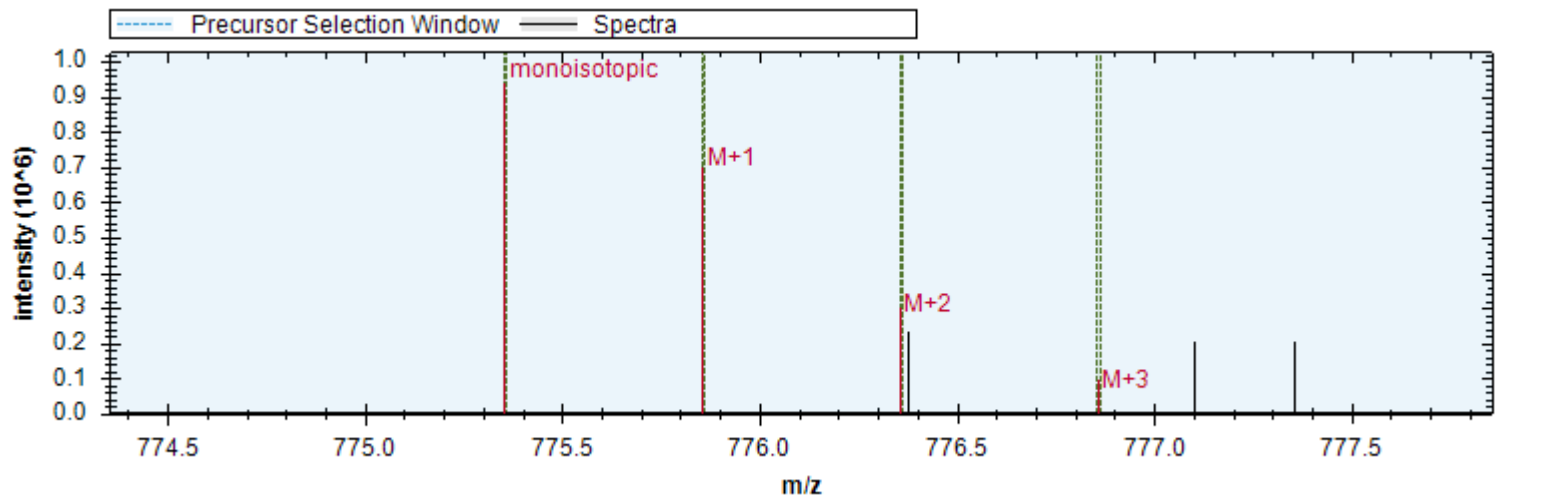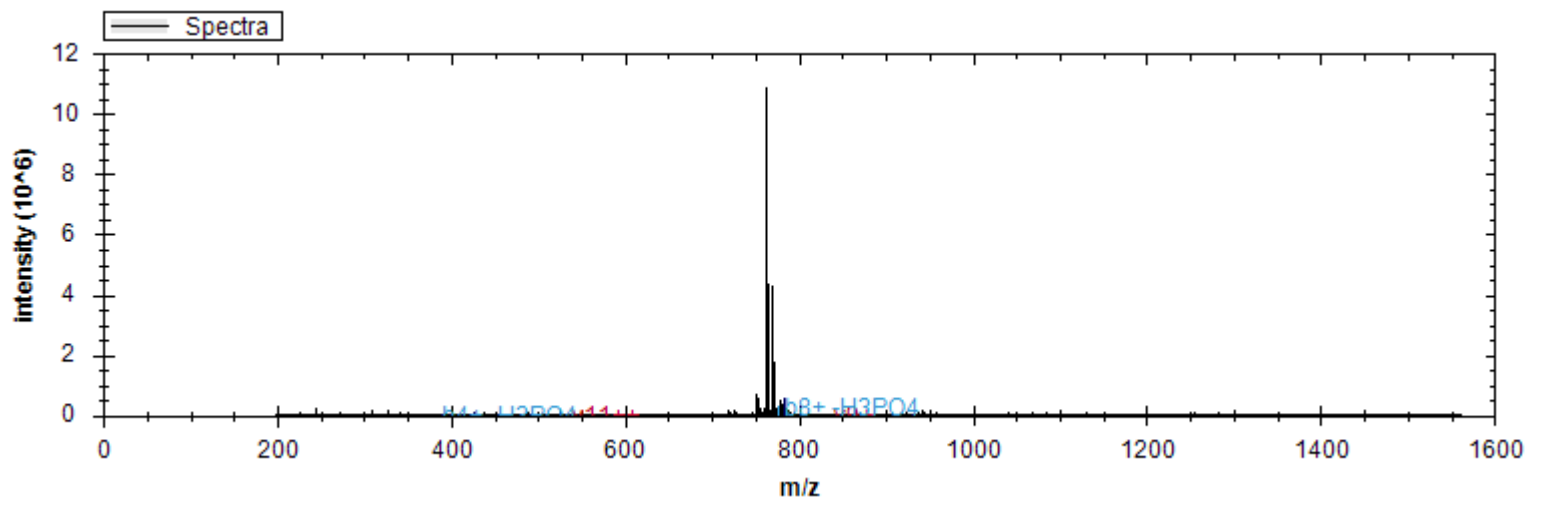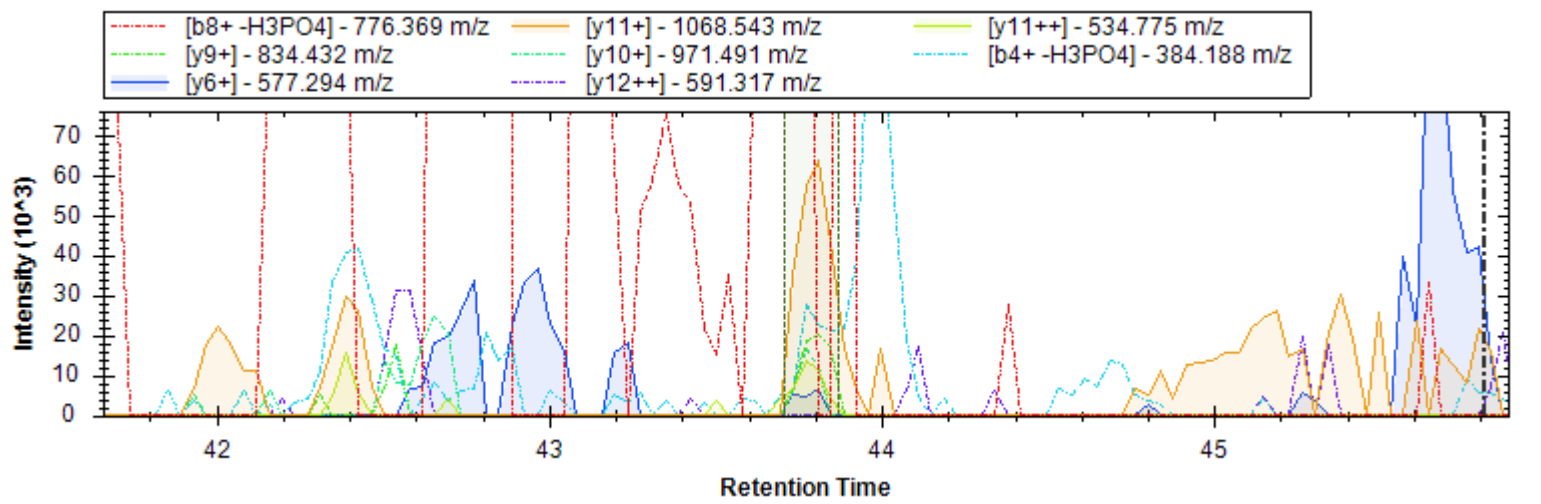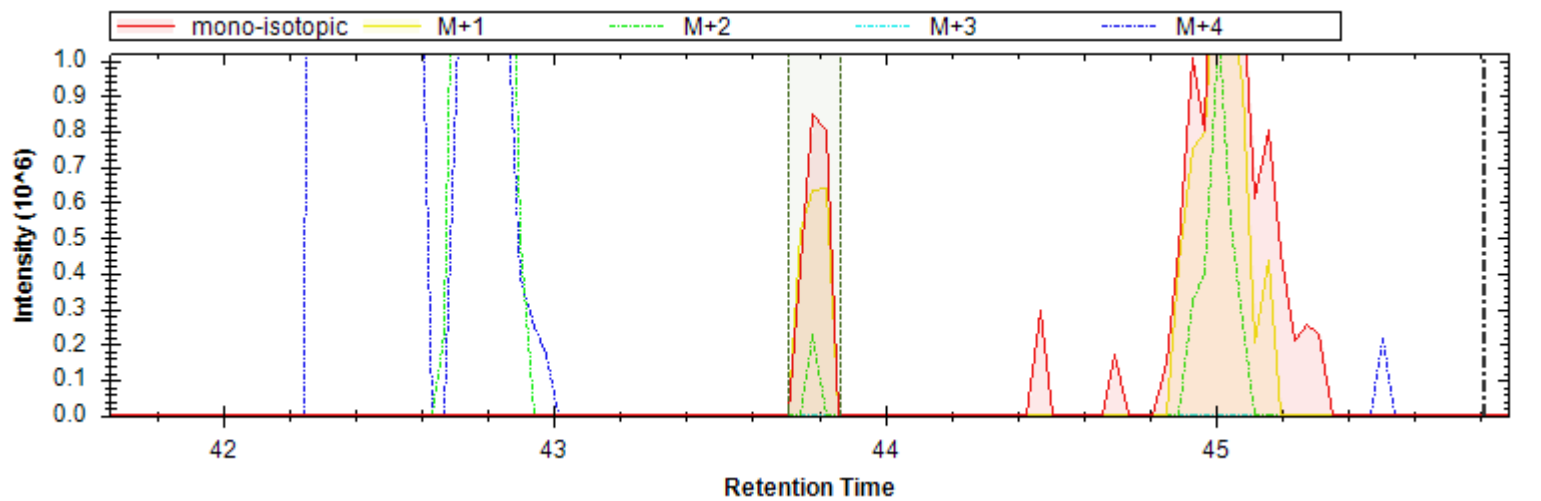

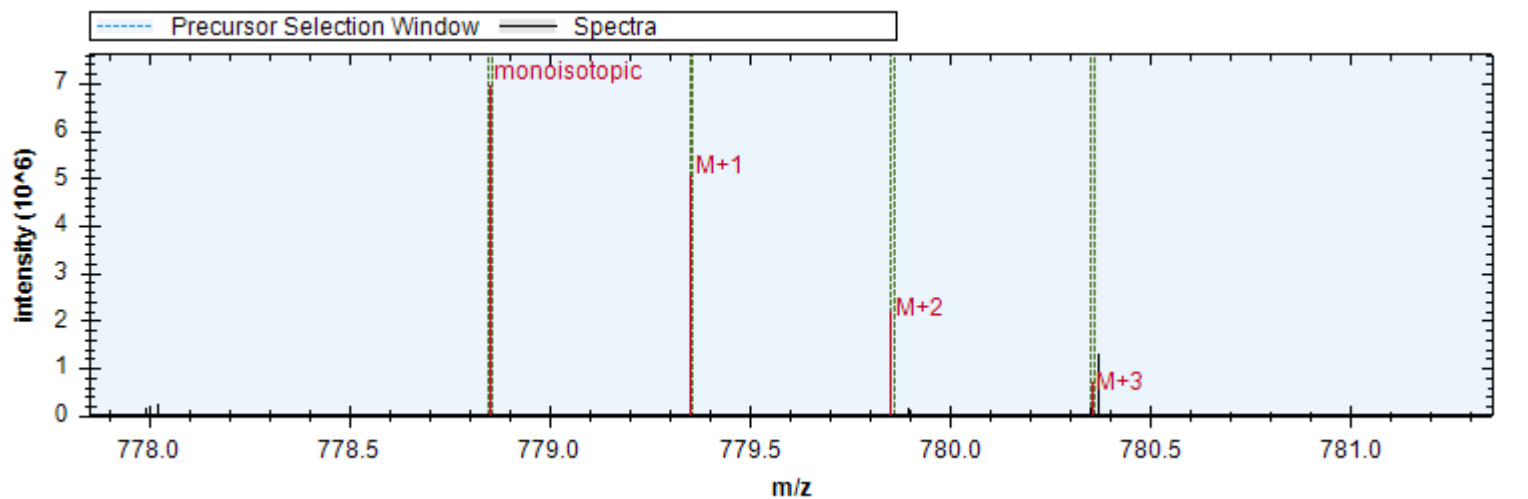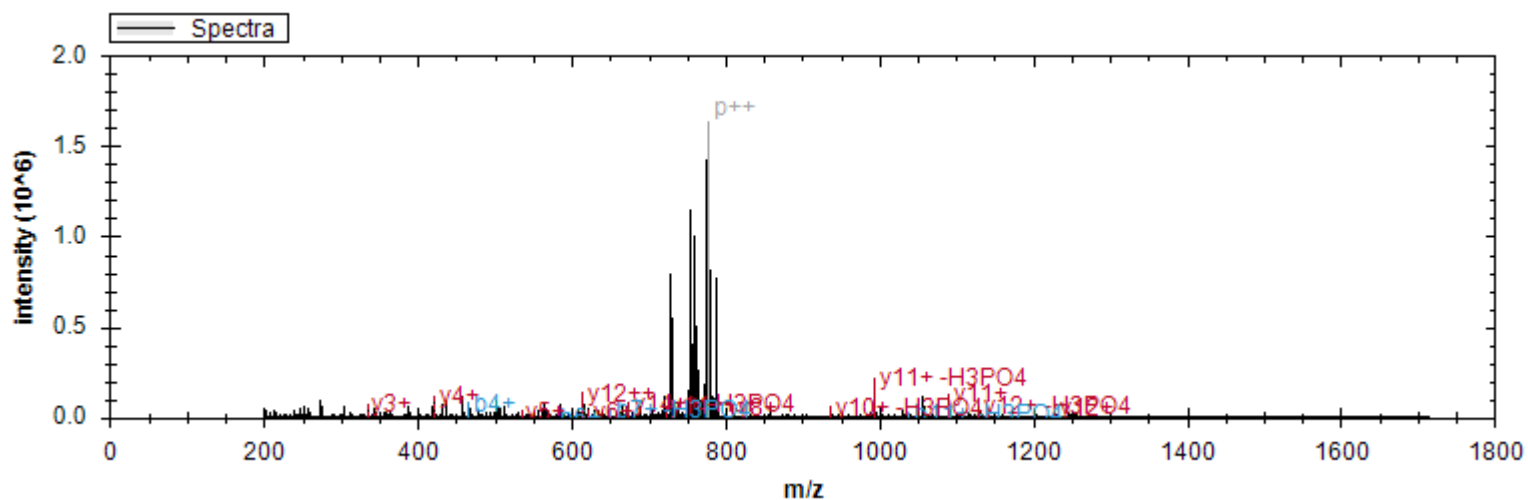

- |                              |                              |                             |
|------------------------------|------------------------------|-----------------------------|
| [y11+ -H3PO4] - 993.485 m/z  | [y4+] - 422.225 m/z          | [b4+] - 466.241 m/z         |
| [y3+] - 335.193 m/z          | [y11+] - 1091.462 m/z        | [y12++] - 614.764 m/z       |
| [y14++ -H3PO4] - 673.321 m/z | [y5+] - 535.309 m/z          | [y11+ -NH3] - 1172.235 m/z  |
| [b6+] - 580.284 m/z          | [y8+] - 810.420 m/z          | [b10+ -H3PO4] - 924.417 m/z |
| [y12+ -H2O] - 1308.310 m/z   | [y12+ -H3PO4] - 1130.544 m/z | [y10+ -H3PO4] - 936.463 m/z |
| [y12+] - 1228.521 m/z        | [y6+] - 622.341 m/z          | [b5+] - 523.262 m/z         |
| [b11+ -H3PO4] - 1037.501 m/z | [b7+ -H3PO4] - 649.305 m/z   | [y14++] - 722.309 m/z       |
| [y4+ -H2O] - 404.214 m/z     |                              |                             |

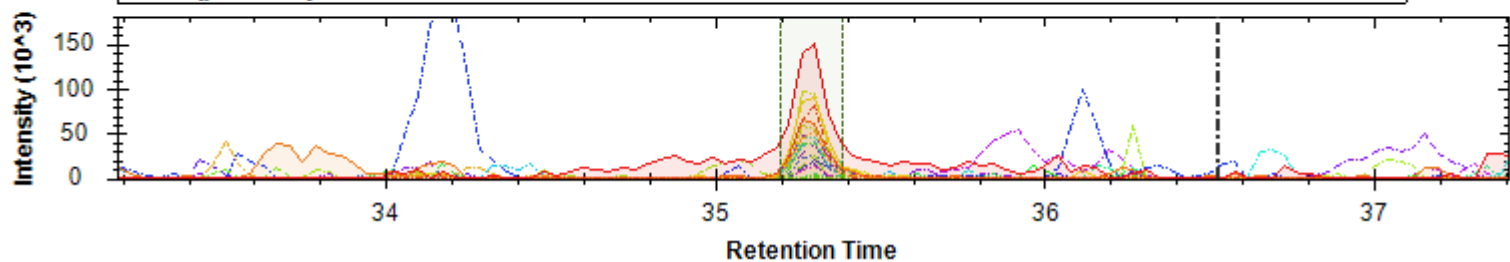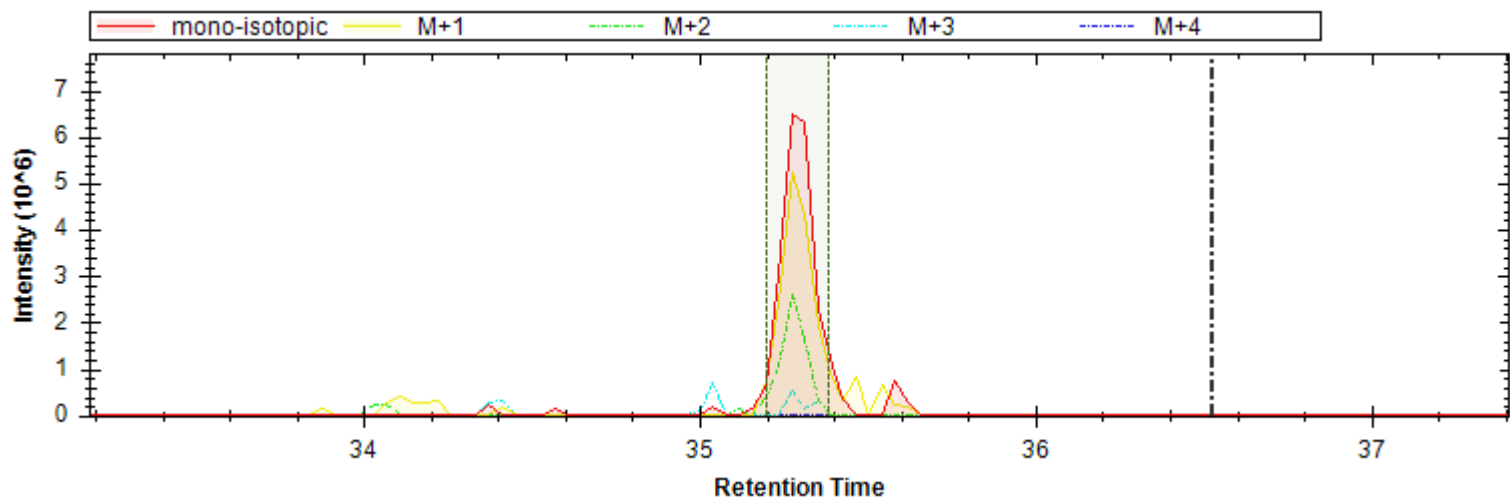

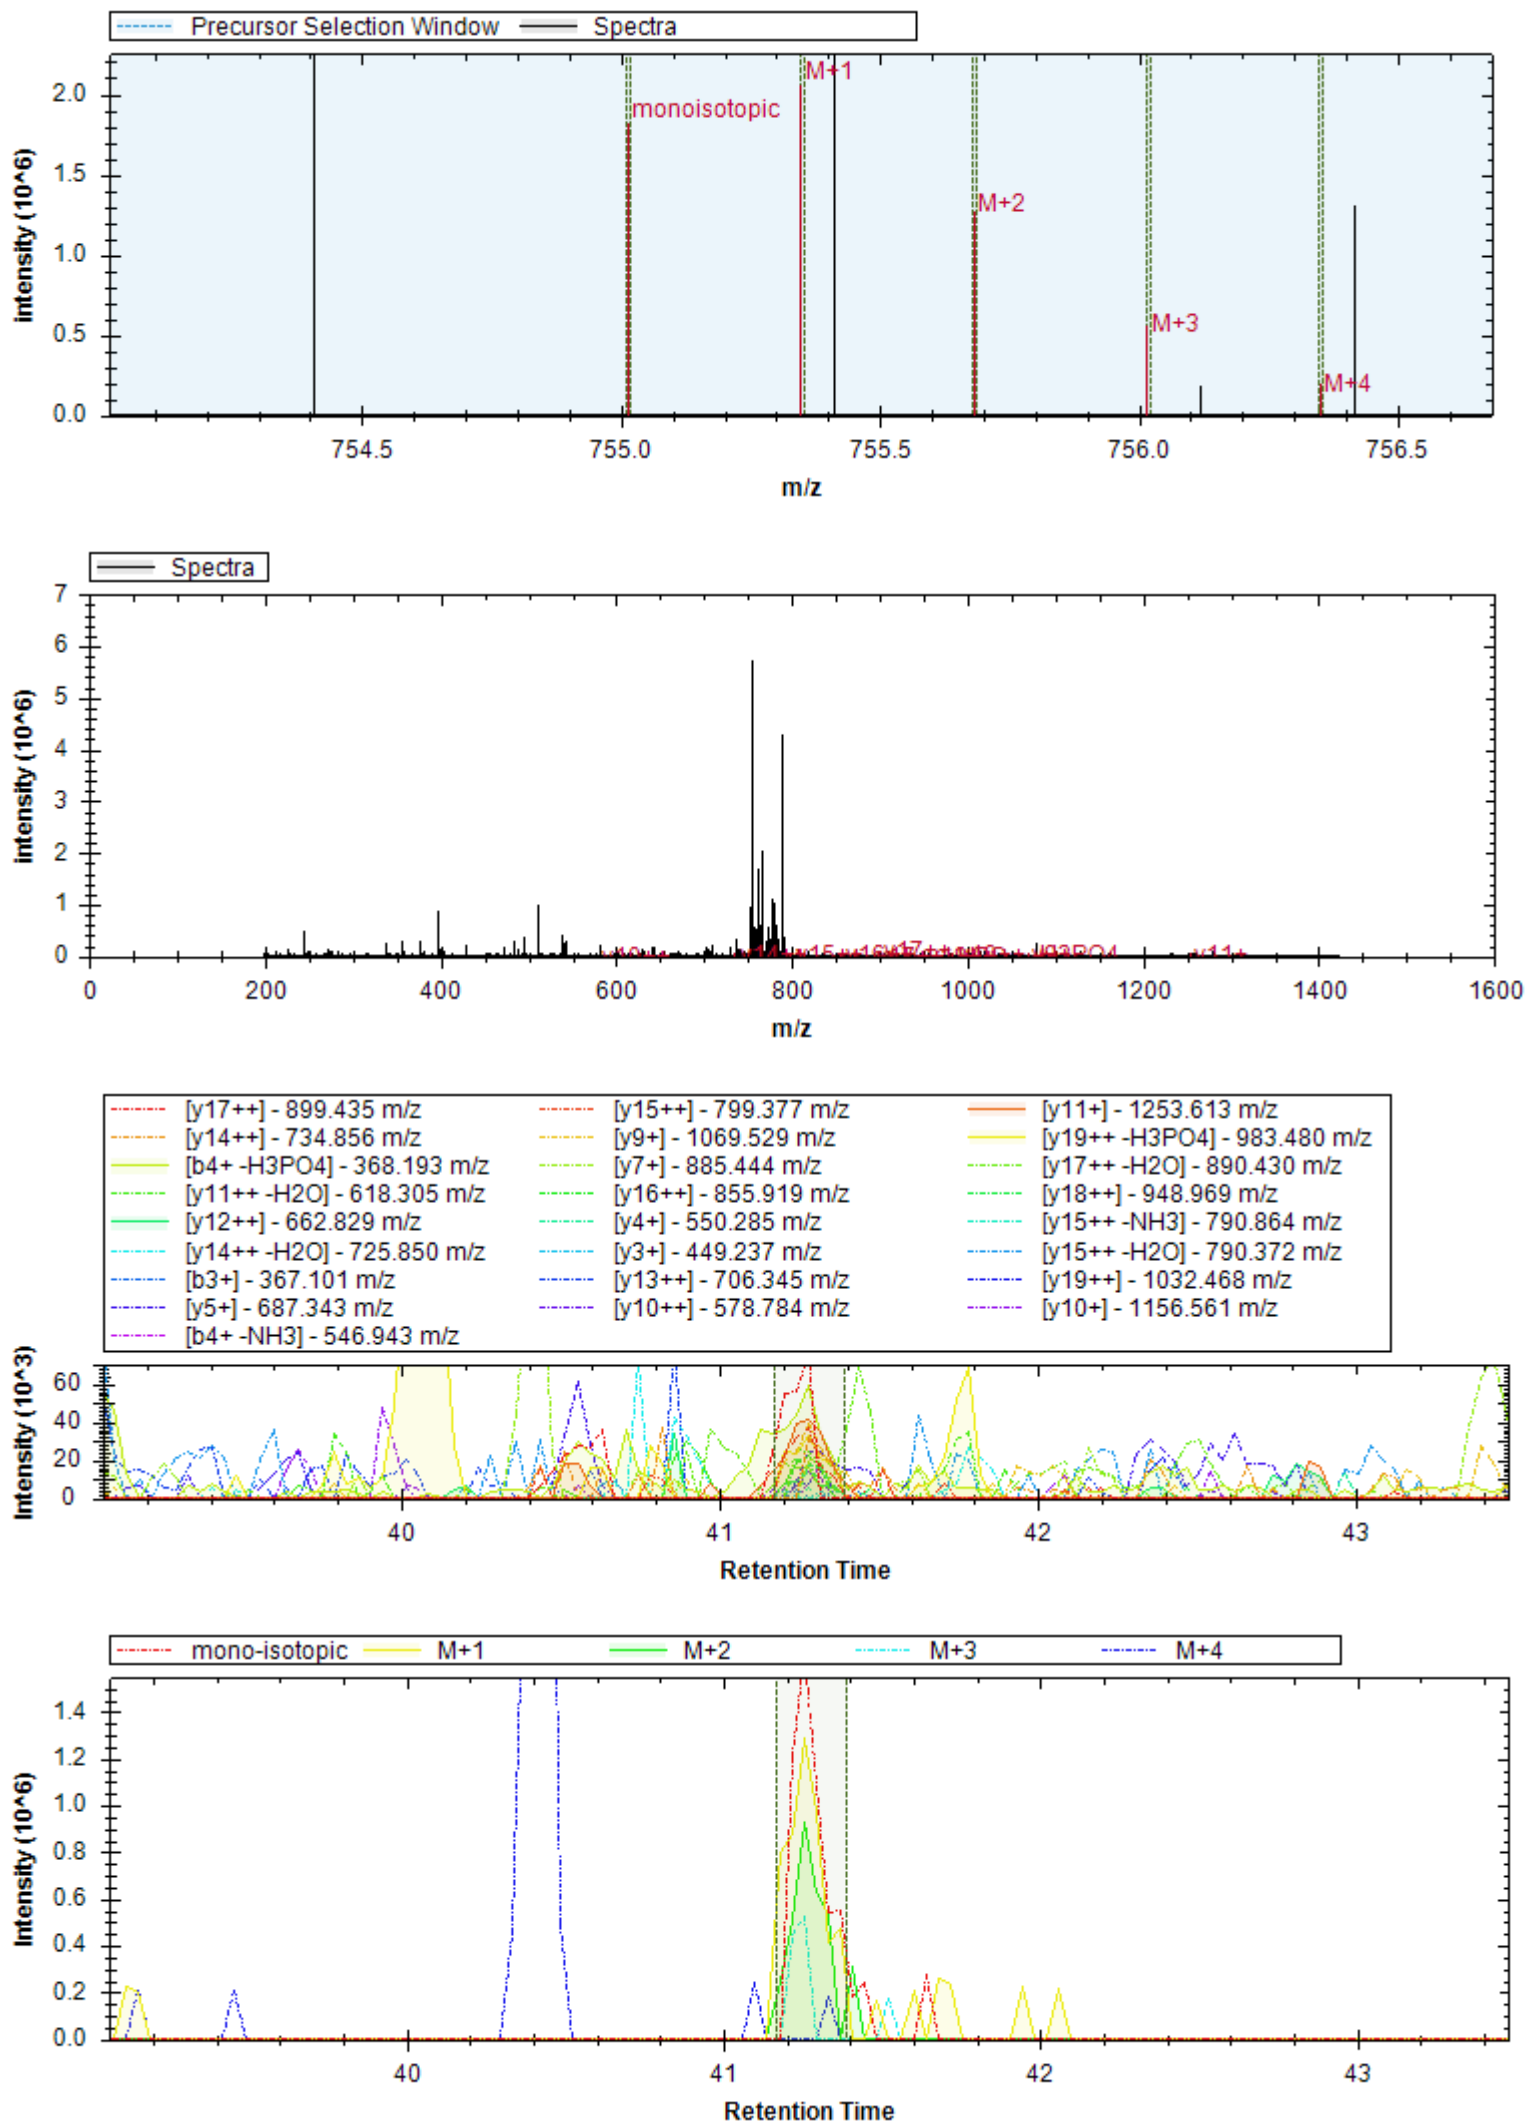

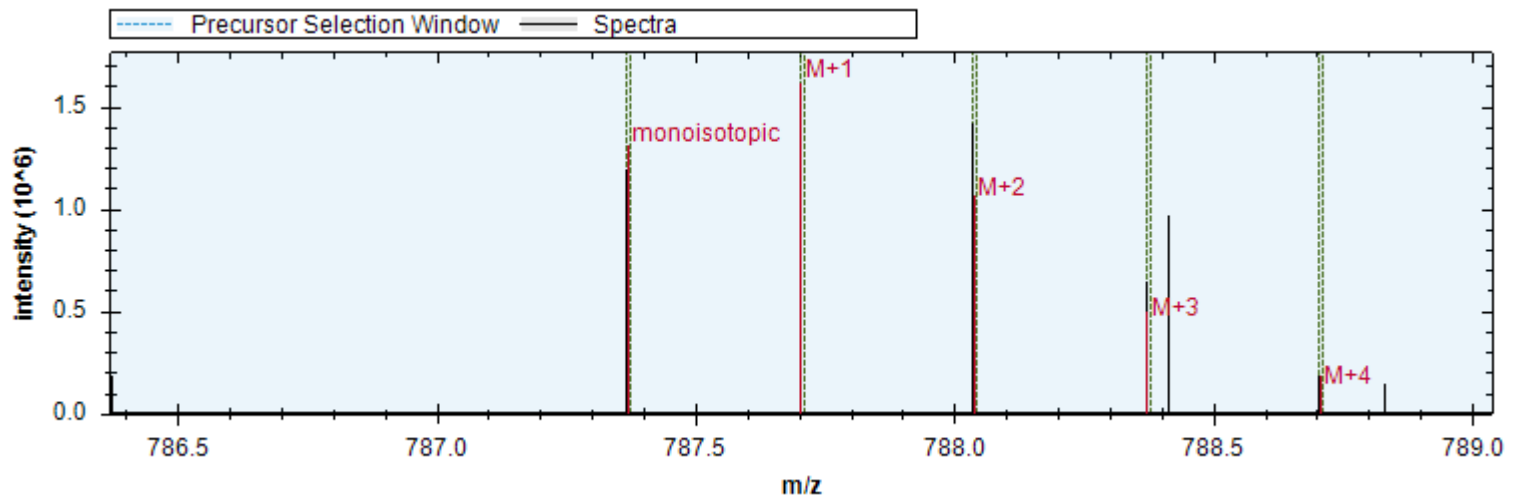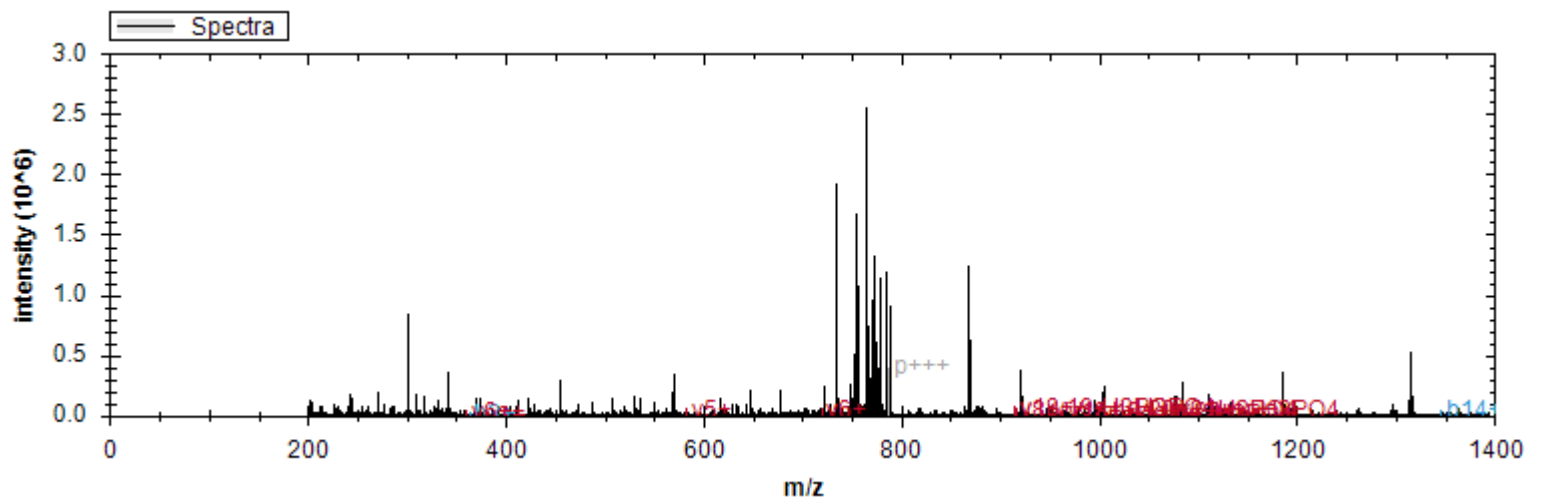

|                              |                               |                               |
|------------------------------|-------------------------------|-------------------------------|
| [y18++ -H3PO4] - 914.454 m/z | [y19++ -H3PO4] - 949.972 m/z  | [y20++ -H3PO4] - 1031.504 m/z |
| [y5+] - 583.295 m/z          | [y21++ -H3PO4] - 1075.020 m/z | [b3+ -H2O] - 346.176 m/z      |
| [b14+ -H3PO4] - 1346.649 m/z | [y6+] - 720.354 m/z           | [y4+] - 446.236 m/z           |
| [b3+] - 364.187 m/z          | [y8+] - 916.475 m/z           | [y6++] - 360.681 m/z          |
| [b7+] - 705.368 m/z          | [y3+] - 375.199 m/z           | [y20++] - 1080.492 m/z        |
| [y17++ -H3PO4] - 885.943 m/z | [y10+ -H3PO4] - 1042.518 m/z  | [b11+] - 1149.569 m/z         |
| [y18++] - 963.442 m/z        | [b12+] - 1220.606 m/z         | [y19++] - 998.961 m/z         |
| [y7+] - 819.422 m/z          | [y21++] - 1124.008 m/z        | [y20+++] - 720.664 m/z        |
| [b13+] - 1277.627 m/z        |                               |                               |

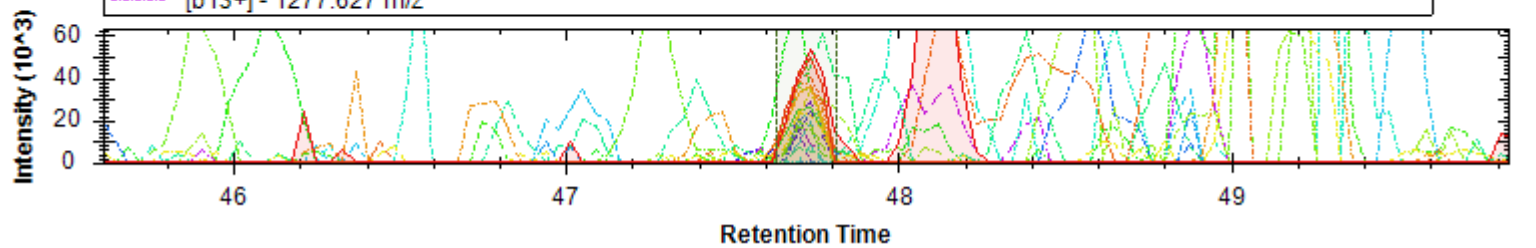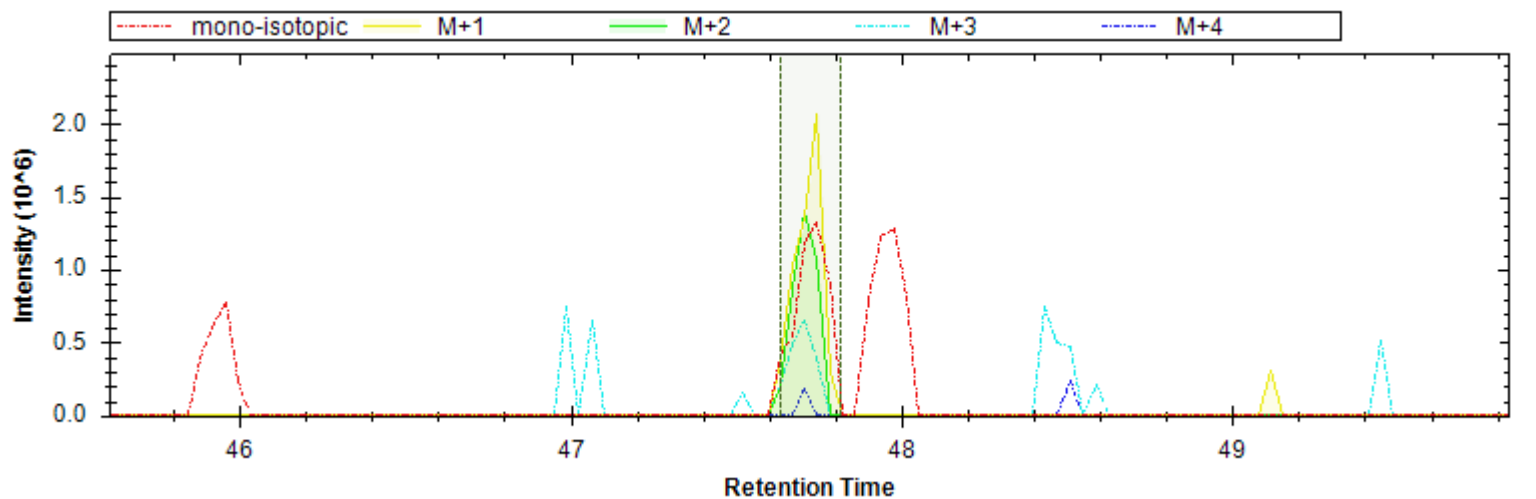

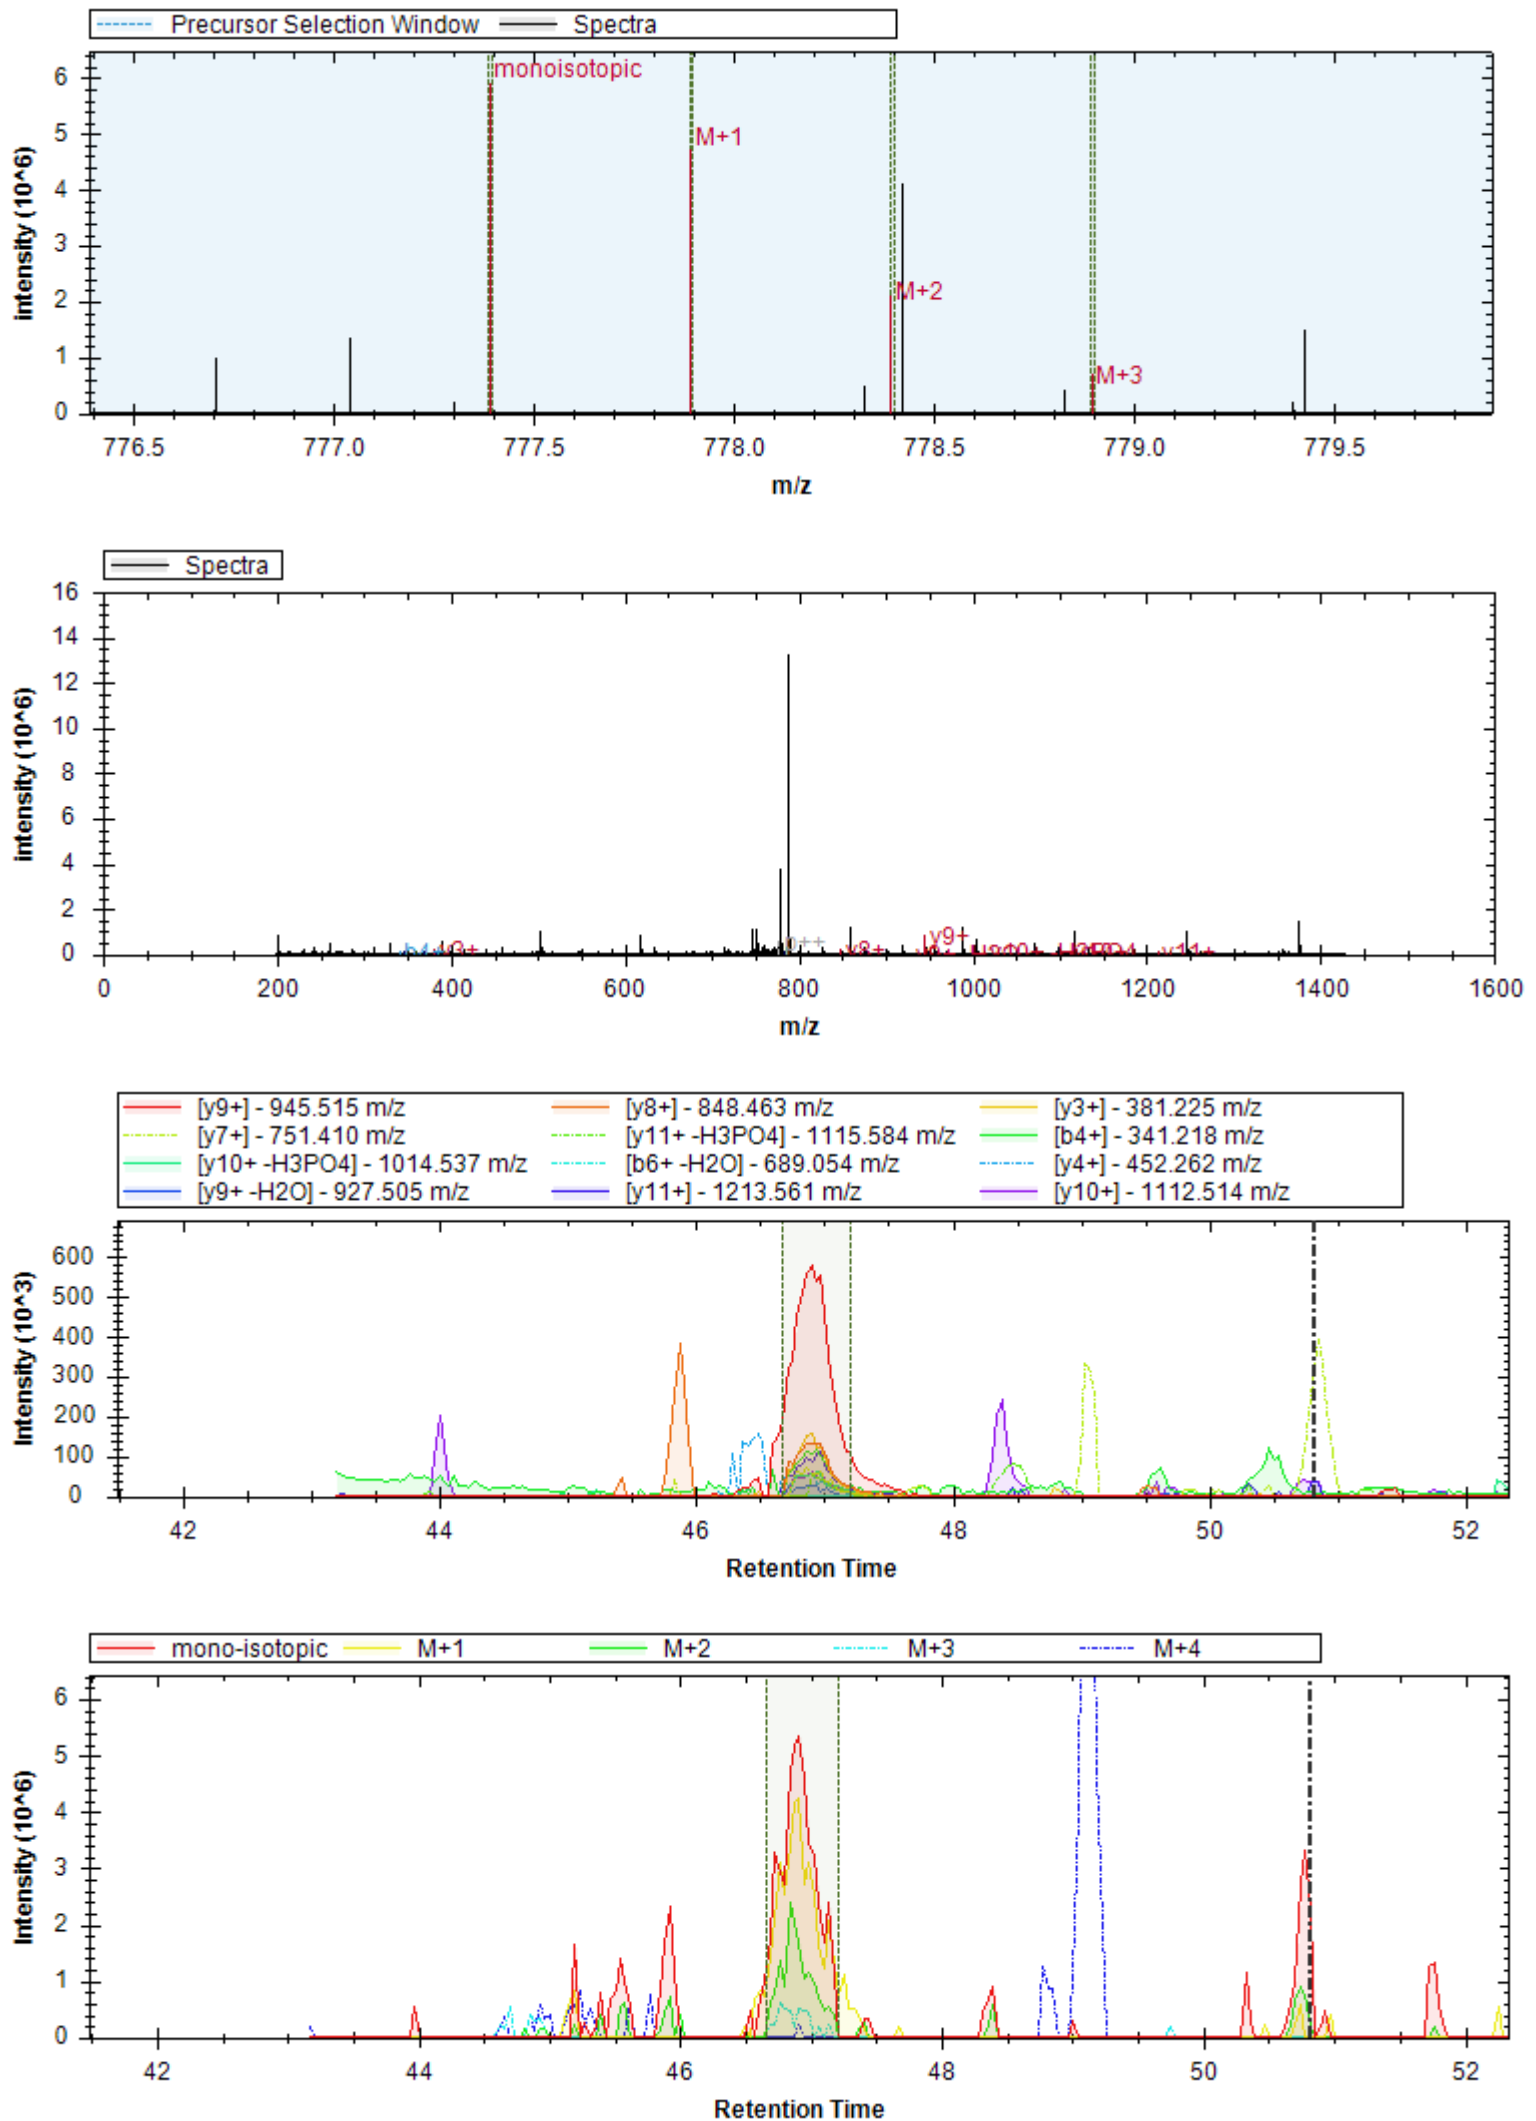

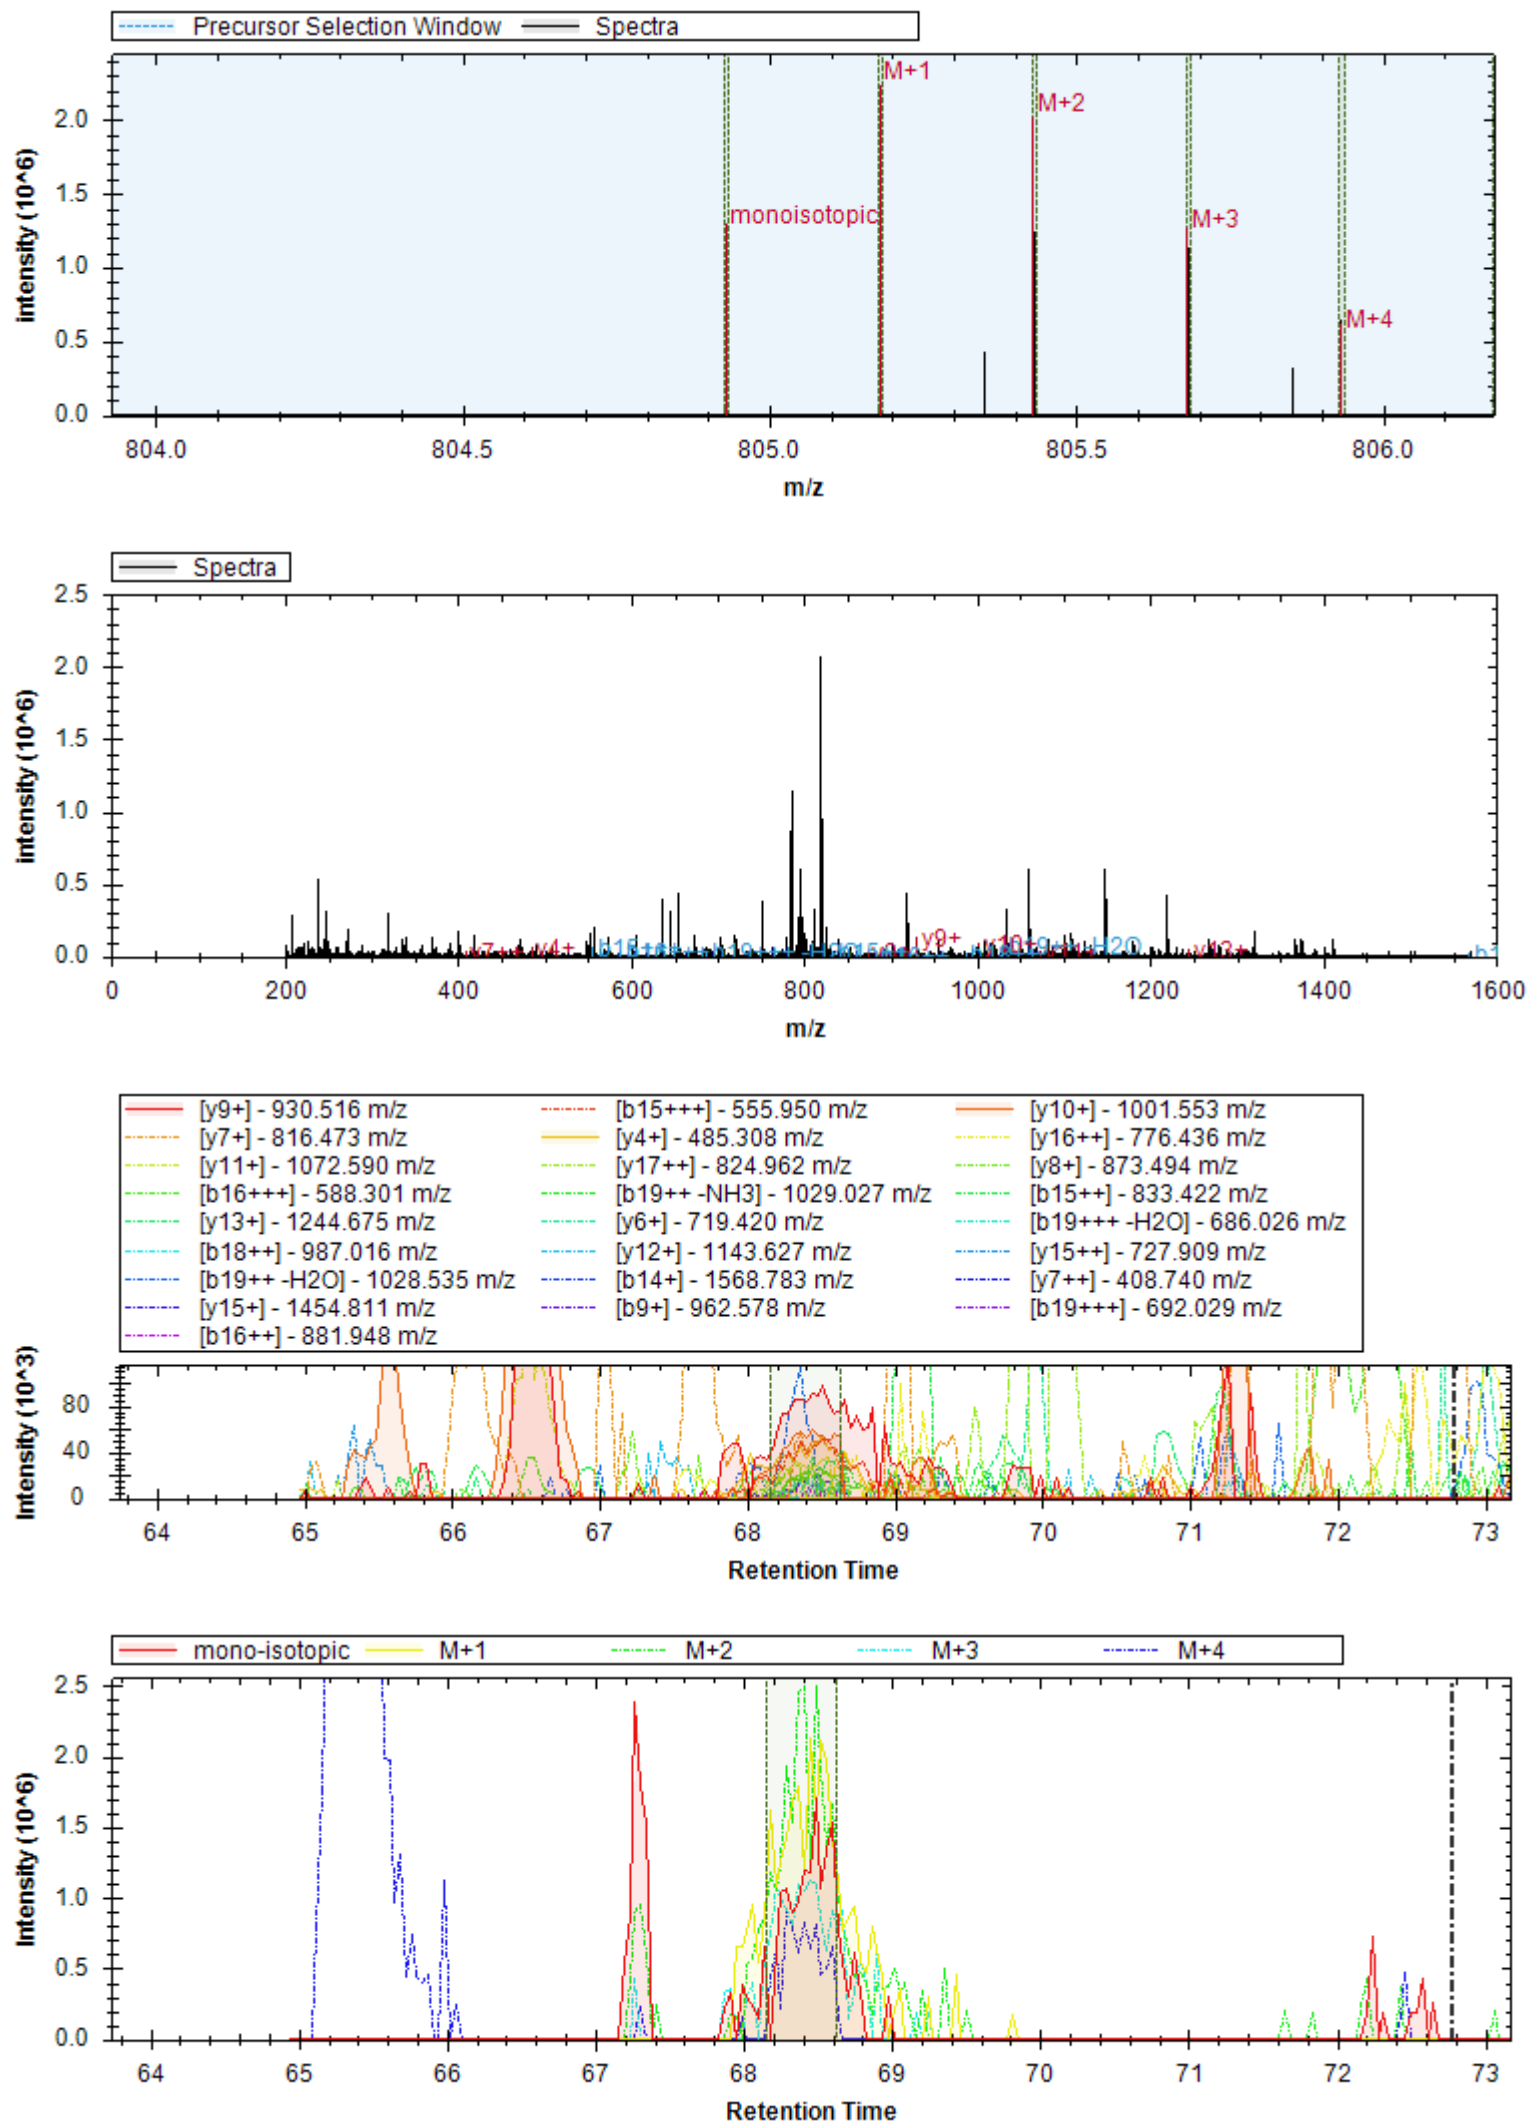

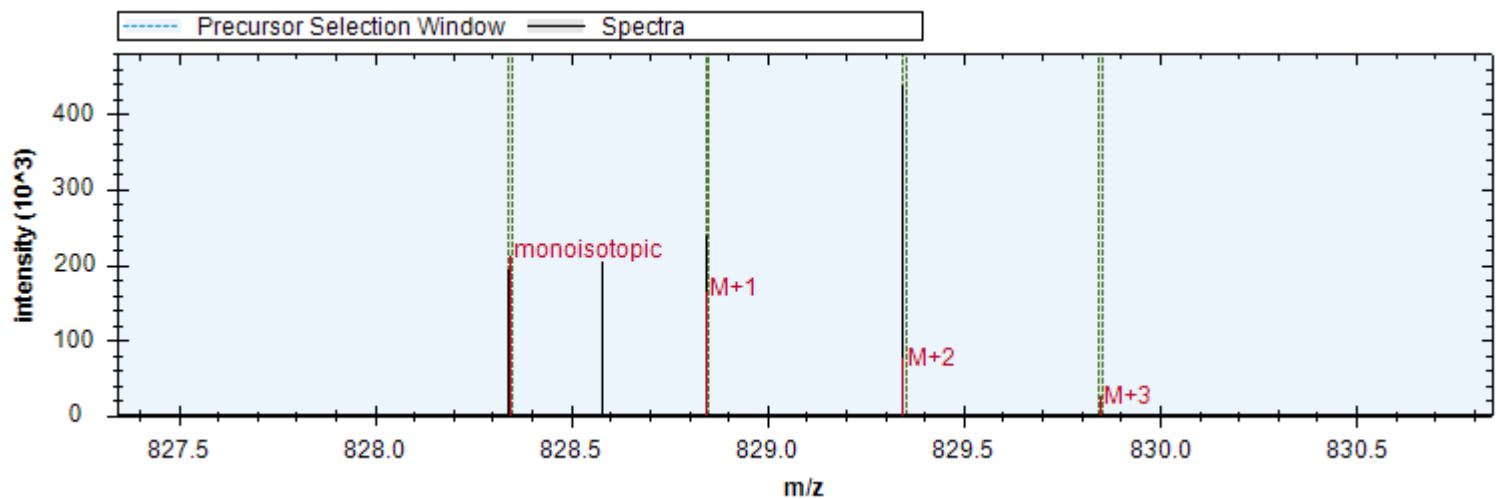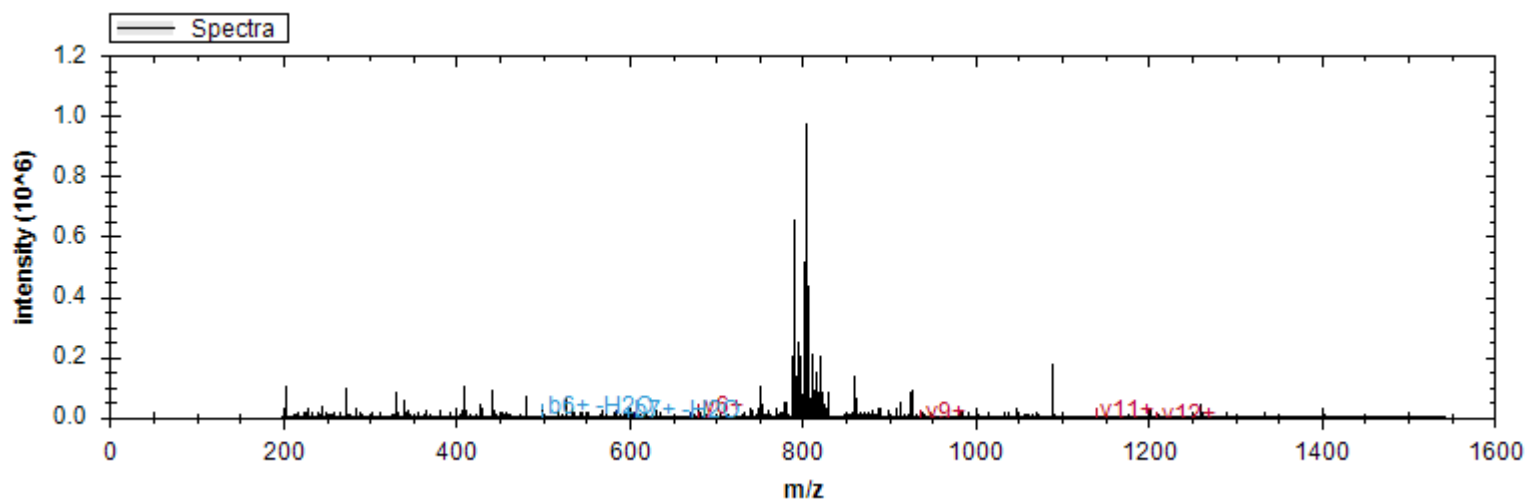

|                            |                            |                              |
|----------------------------|----------------------------|------------------------------|
| [y6+] - 680.302 m/z        | [y11+] - 1139.498 m/z      | [y10+] - 1038.450 m/z        |
| [y8+] - 822.376 m/z        | [y9+] - 937.403 m/z        | [y7+] - 751.339 m/z          |
| [y12+] - 1210.535 m/z      | [y6+ -H3PO4] - 582.325 m/z | [b6+ -H2O] - 499.178 m/z     |
| [b7+ -H2O] - 600.226 m/z   | [y10+ -H2O] - 1118.240 m/z | [y11+ -H3PO4] - 1041.521 m/z |
| [y12+ -H2O] - 1290.325 m/z | [y4+] - 512.212 m/z        |                              |

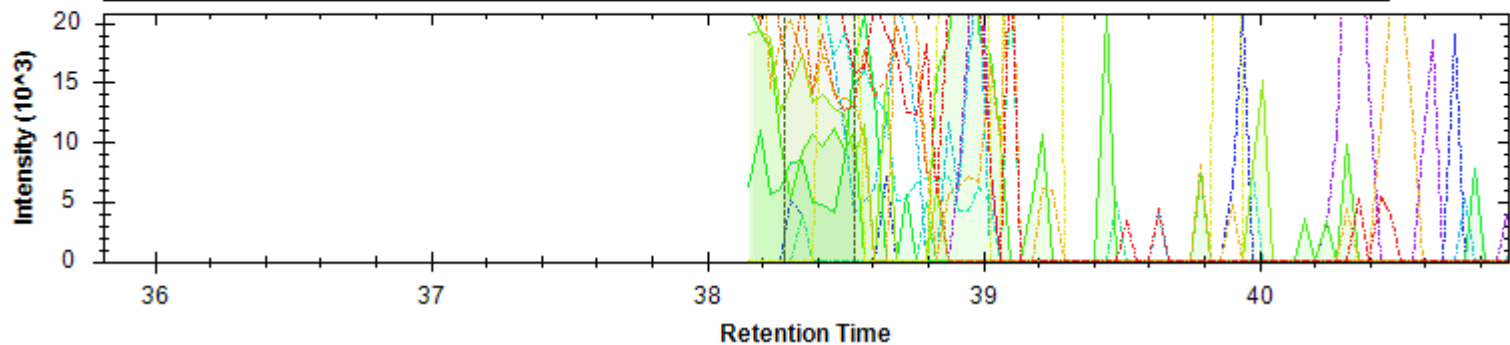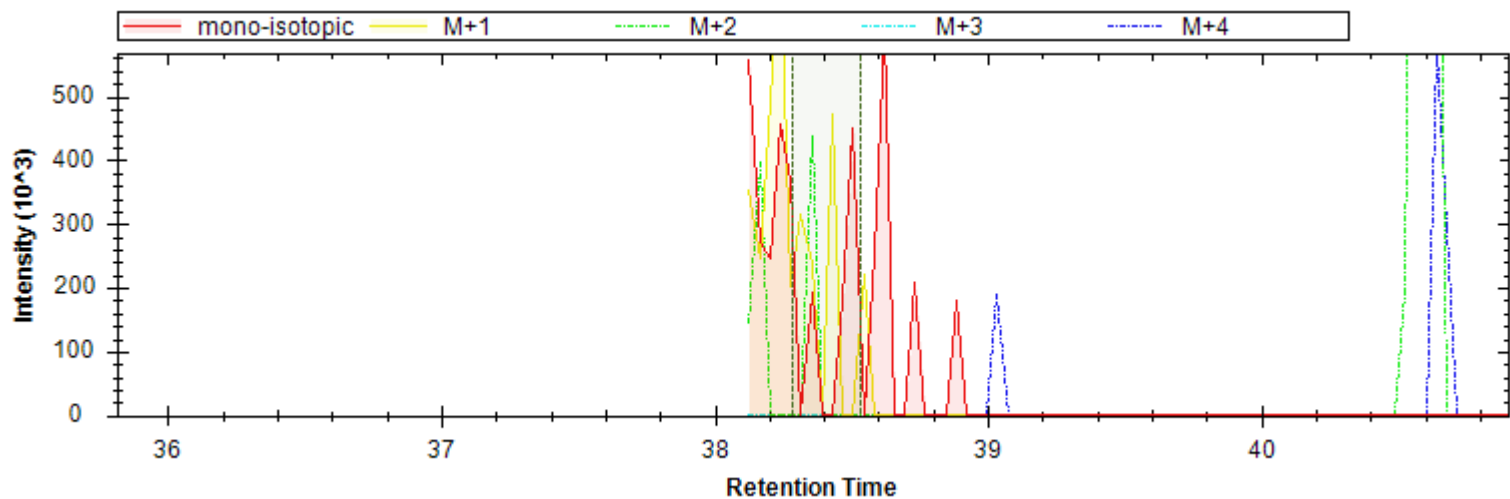

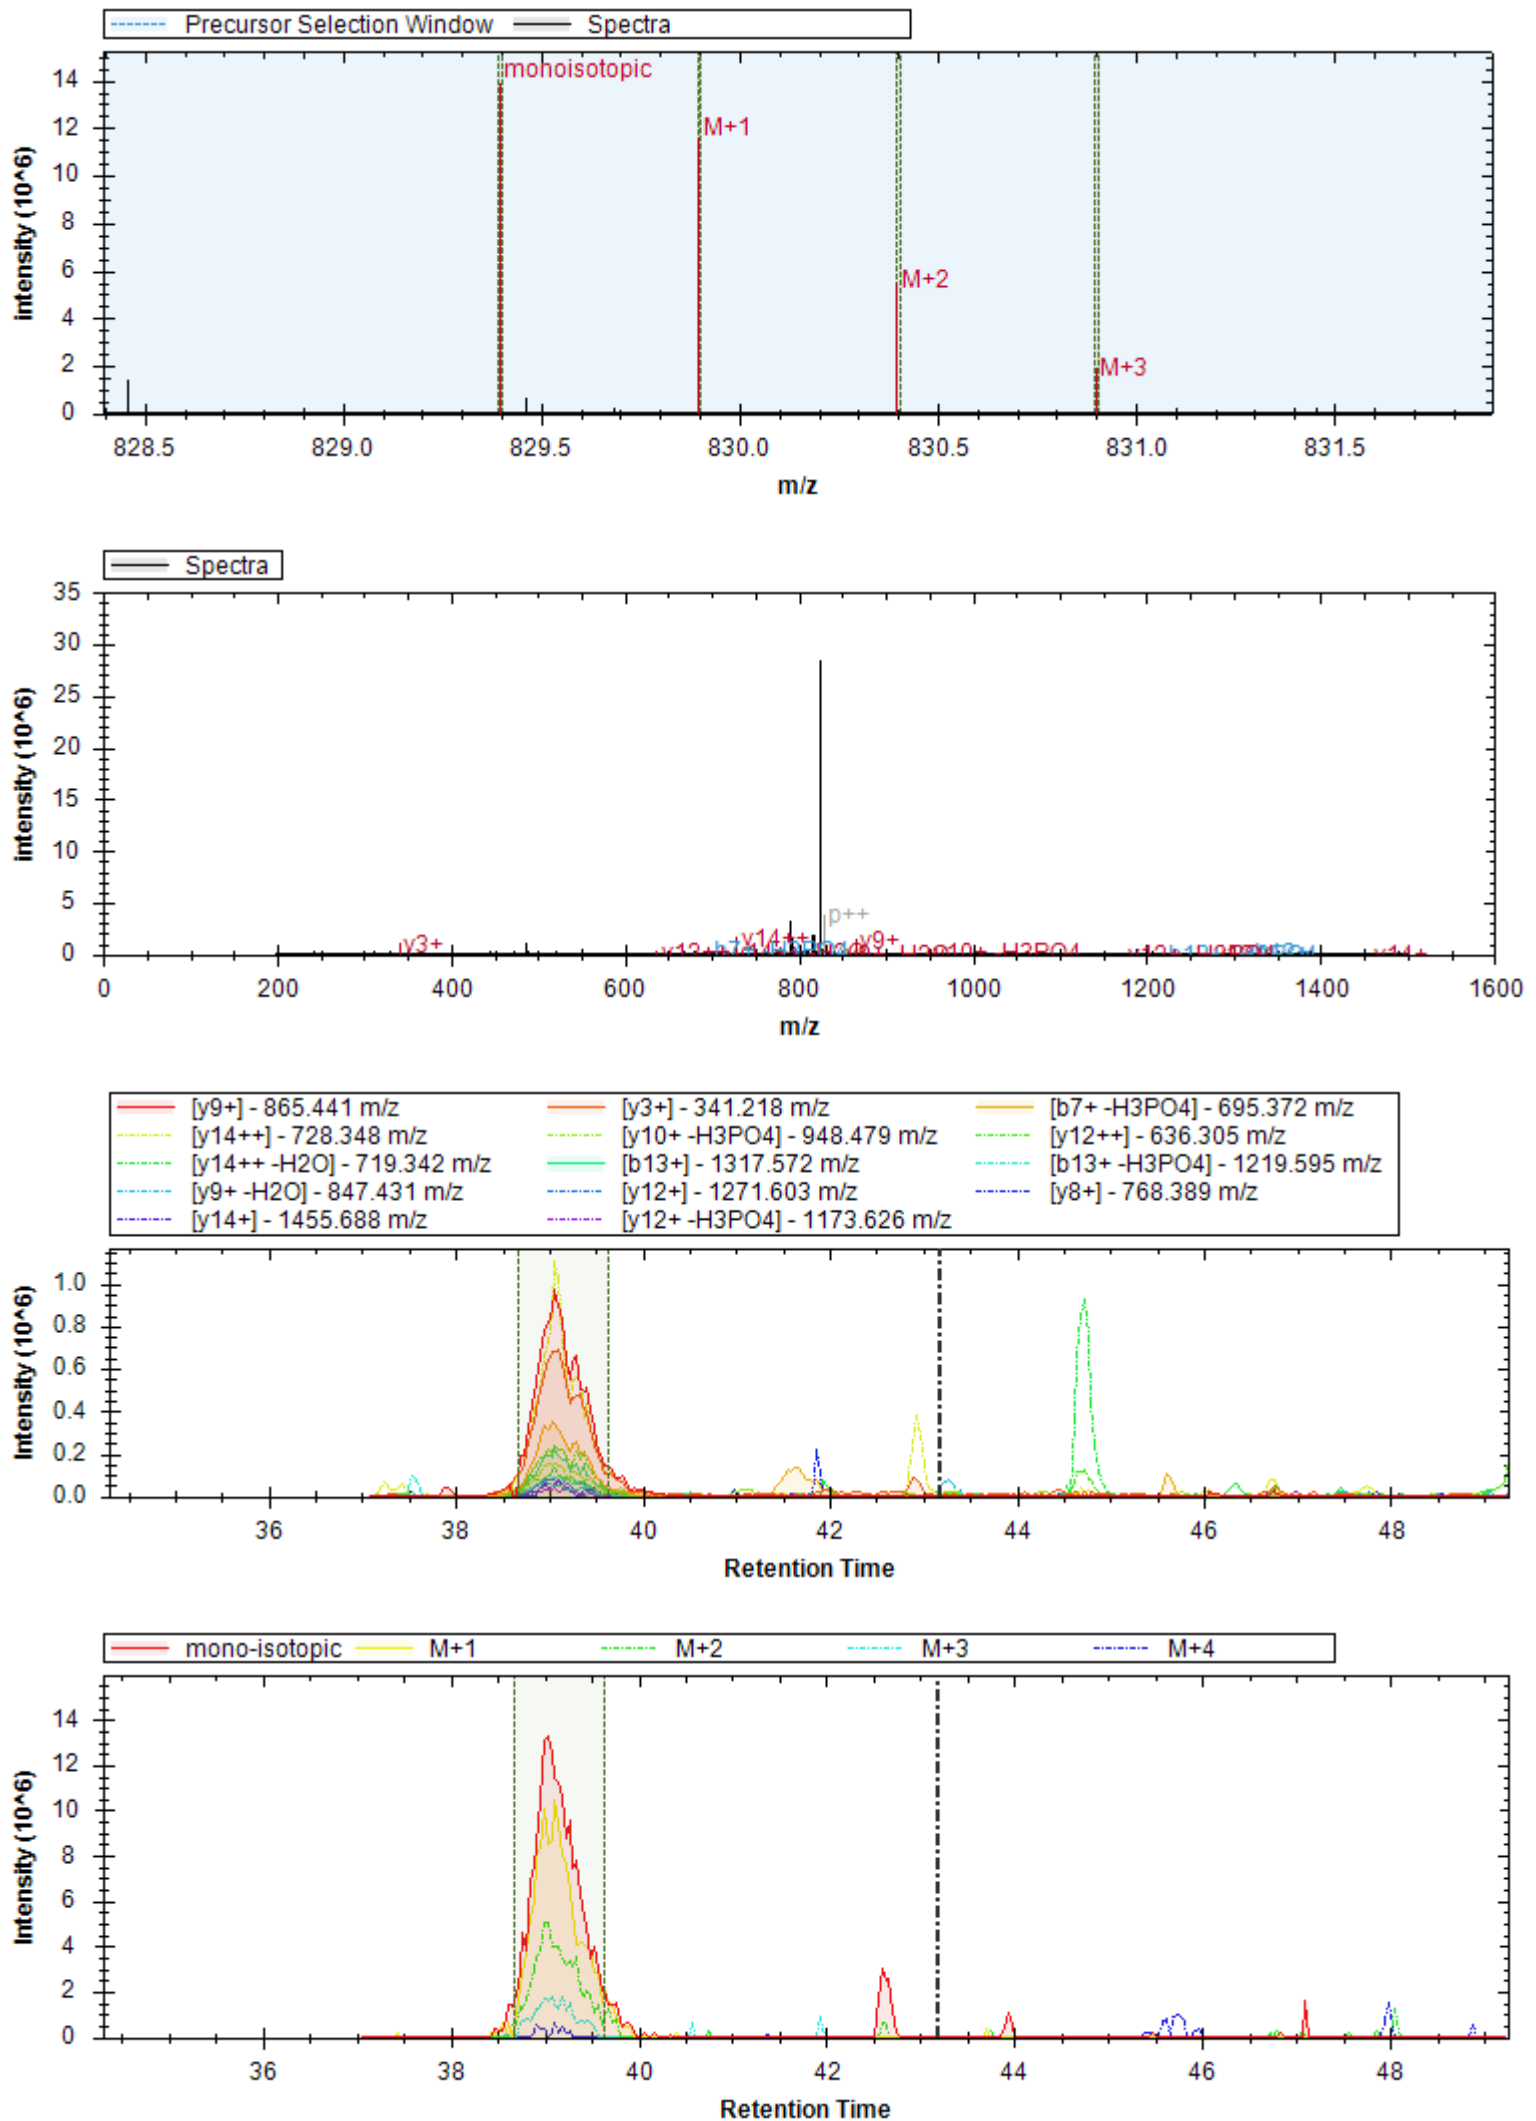



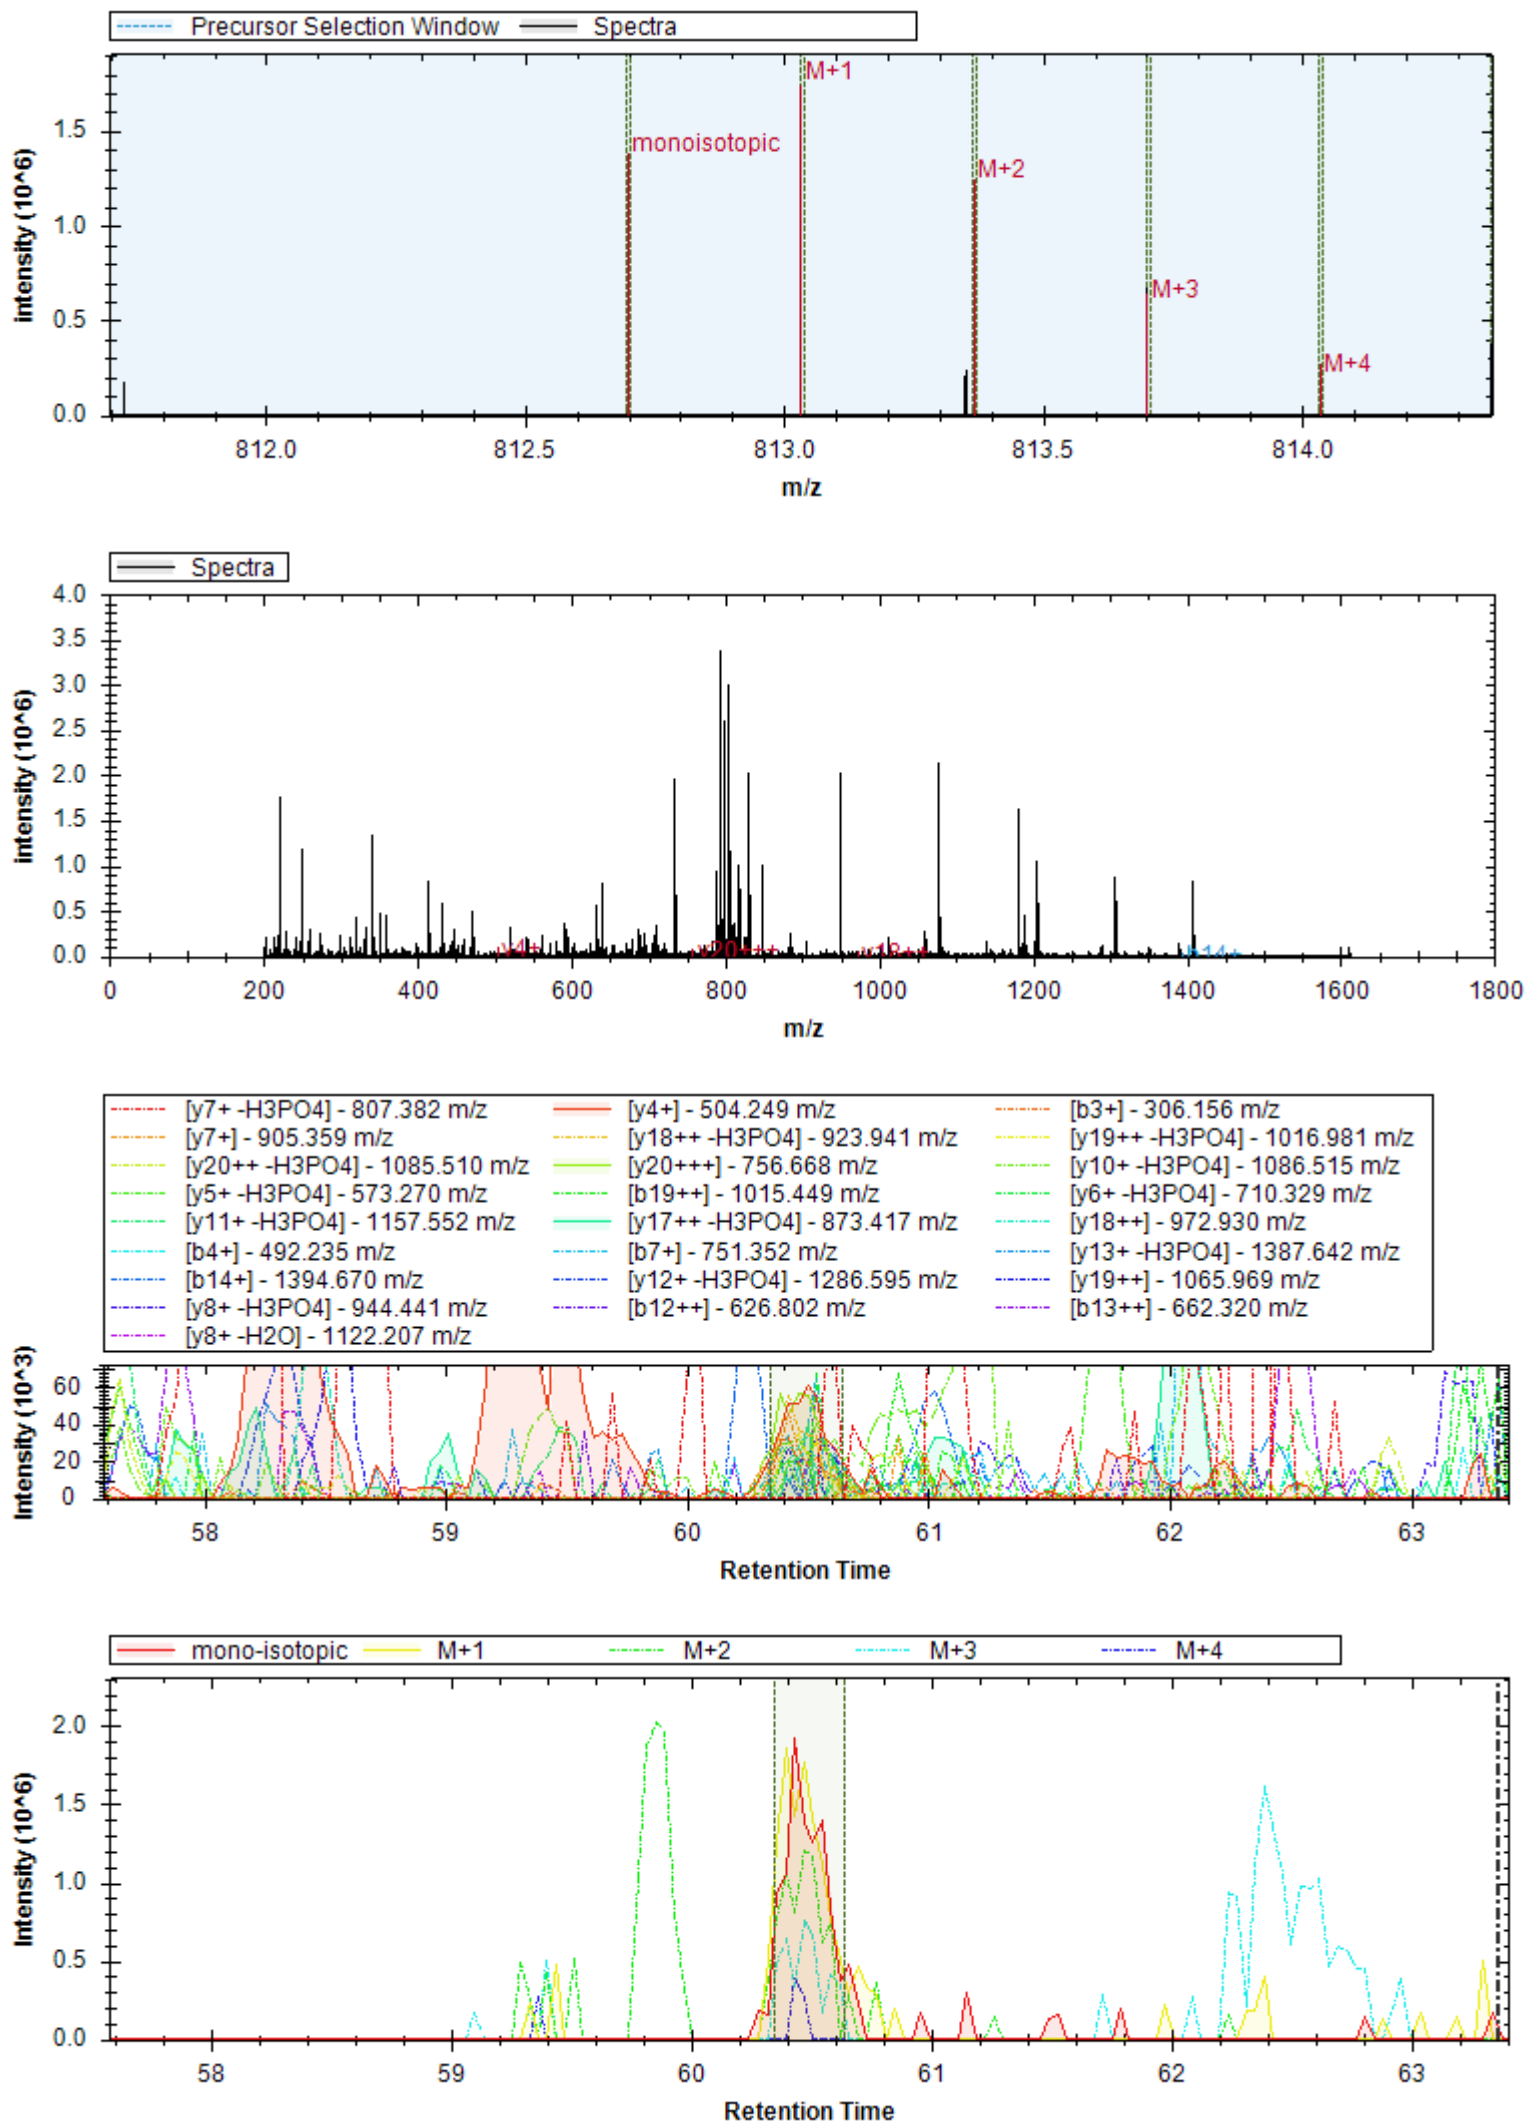

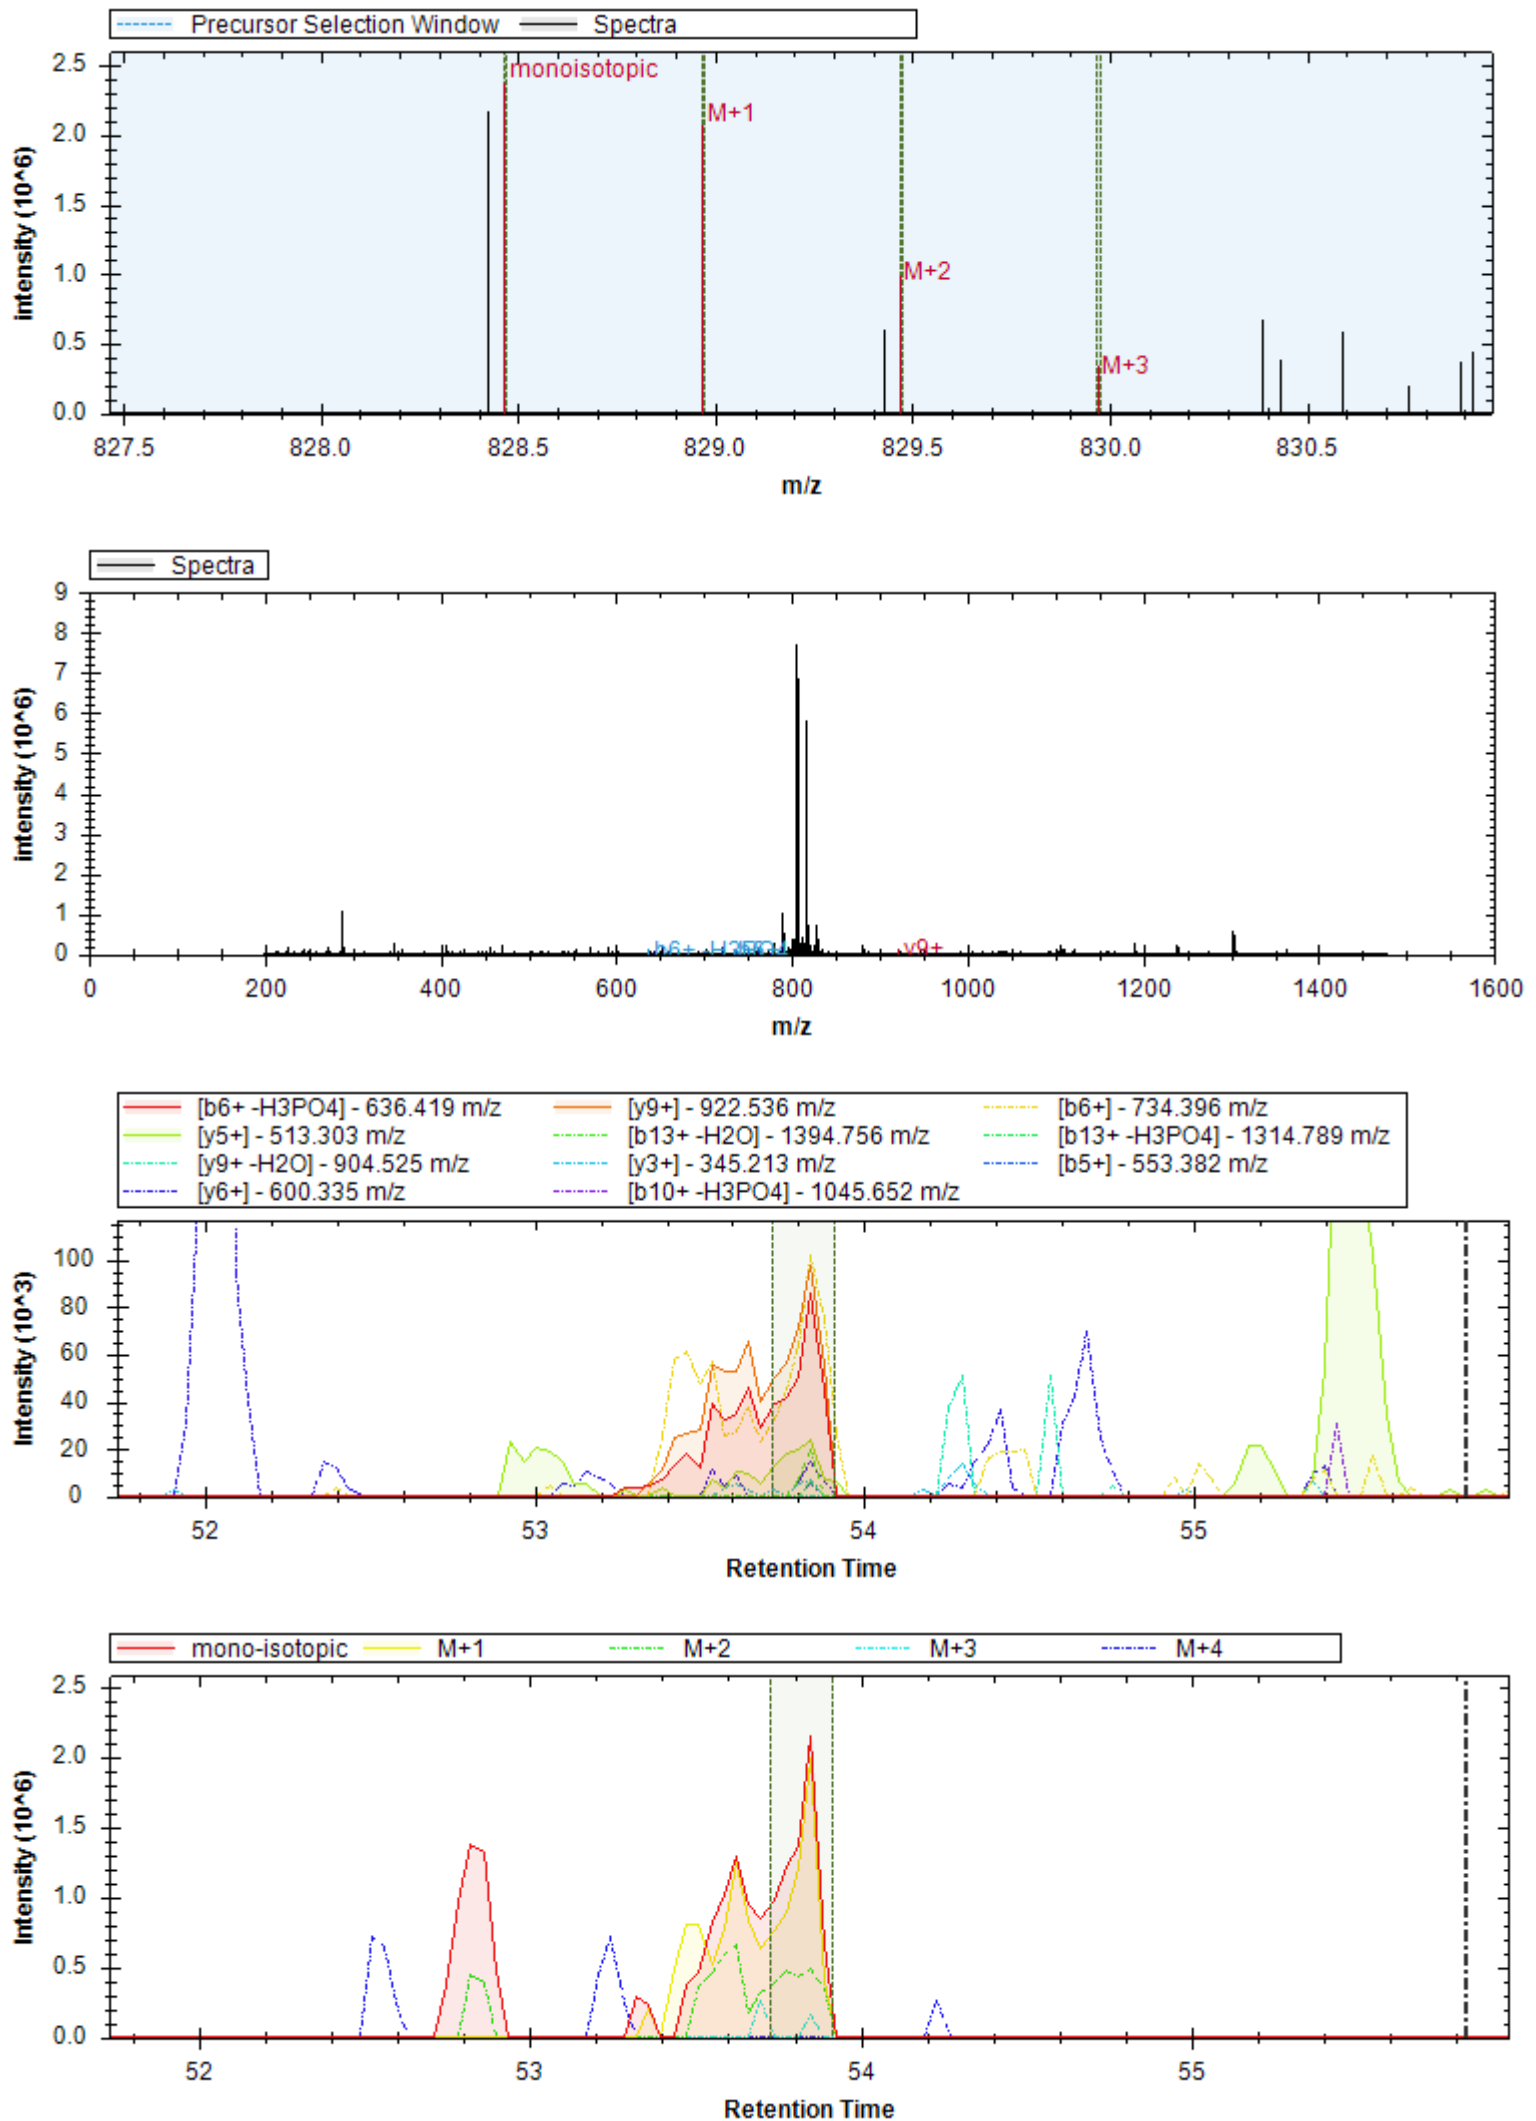

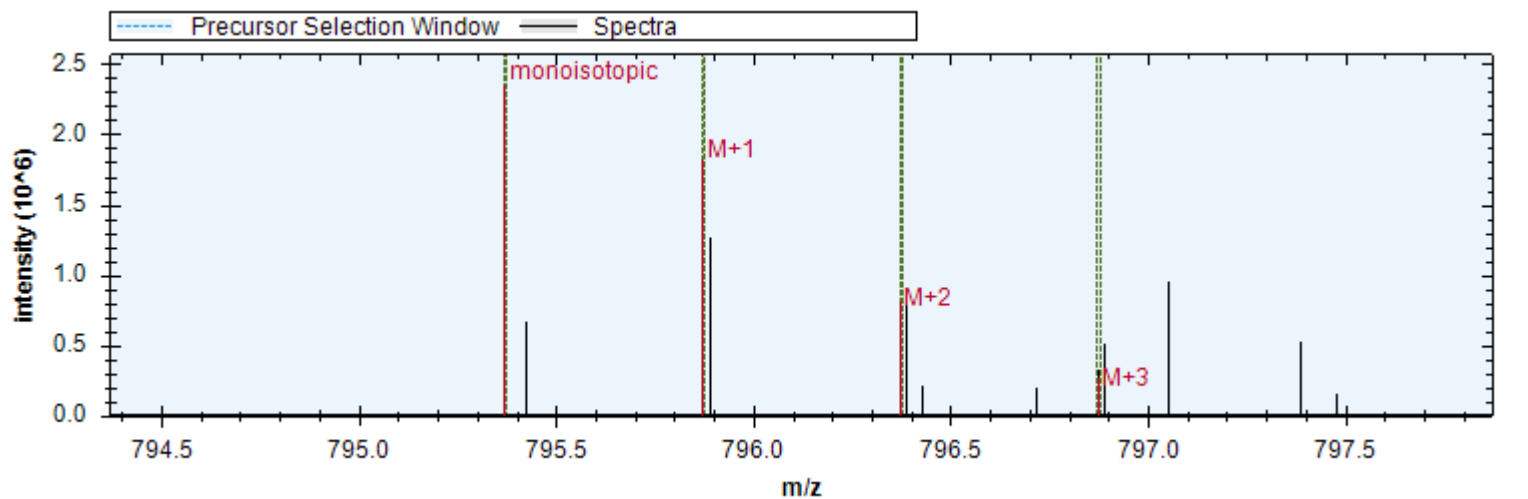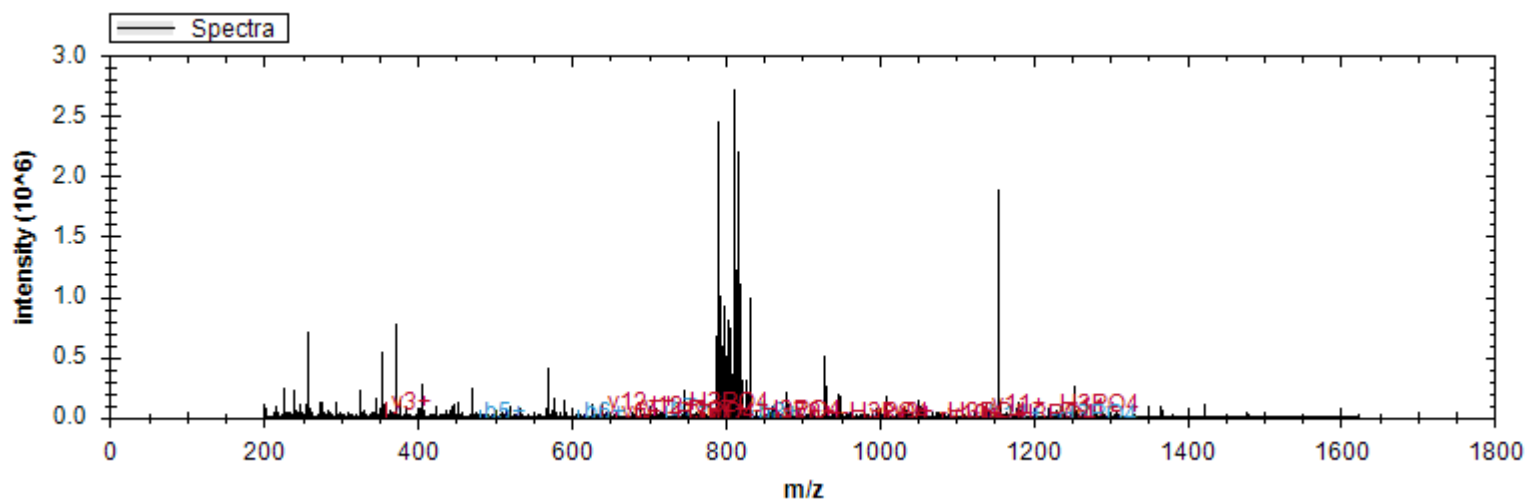

|                              |                              |                              |
|------------------------------|------------------------------|------------------------------|
| [y11+ -H3PO4] - 1140.601 m/z | [y12++ -H3PO4] - 639.334 m/z | [y3+] - 359.204 m/z          |
| [b3+] - 352.162 m/z          | [y7+ -H3PO4] - 770.416 m/z   | [b7+] - 722.347 m/z          |
| [b6+] - 609.263 m/z          | [y6+ -H3PO4] - 657.332 m/z   | [y9+ -H3PO4] - 1012.542 m/z  |
| [y12++]- 688.322 m/z         | [b5+] - 480.220 m/z          | [y10+ -H3PO4] - 1083.579 m/z |
| [y8+ -H3PO4] - 883.500 m/z   | [b8+] - 835.431 m/z          | [y11+] - 1238.578 m/z        |
| [b4+] - 409.183 m/z          | [y6+] - 755.308 m/z          | [y8+] - 981.477 m/z          |
| [y7+] - 868.392 m/z          | [b3+ -H2O] - 334.151 m/z     | [b11+ -H3PO4] - 1133.559 m/z |
| [y9+] - 1110.519 m/z         | [b5+ -H2O] - 462.210 m/z     |                              |

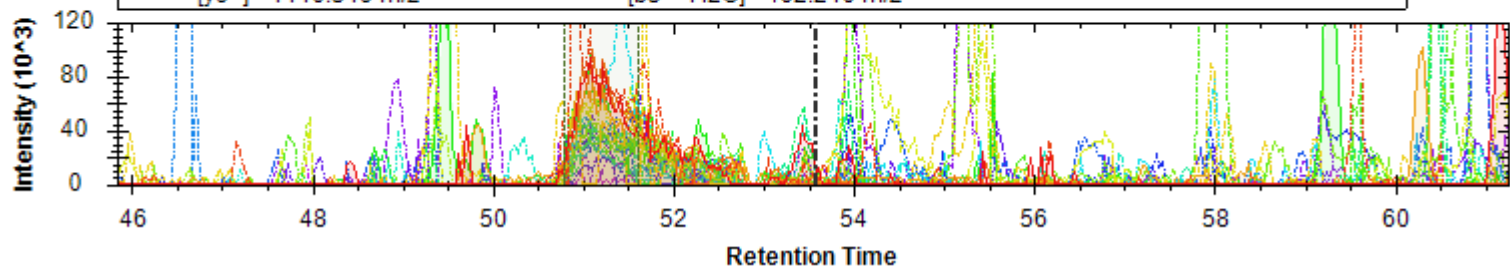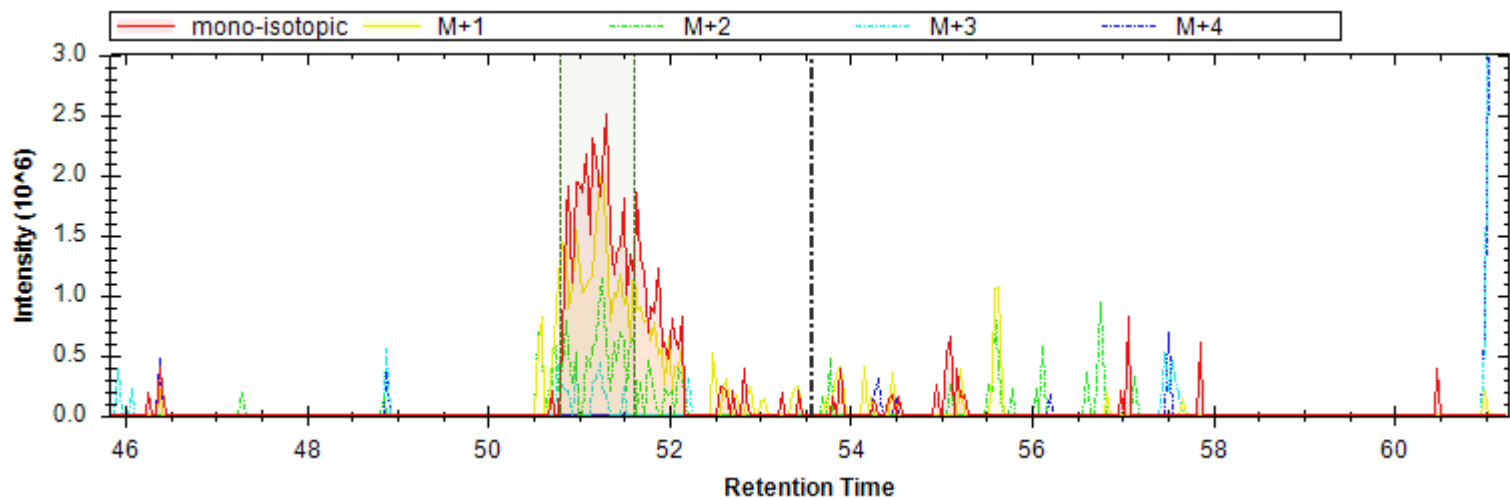

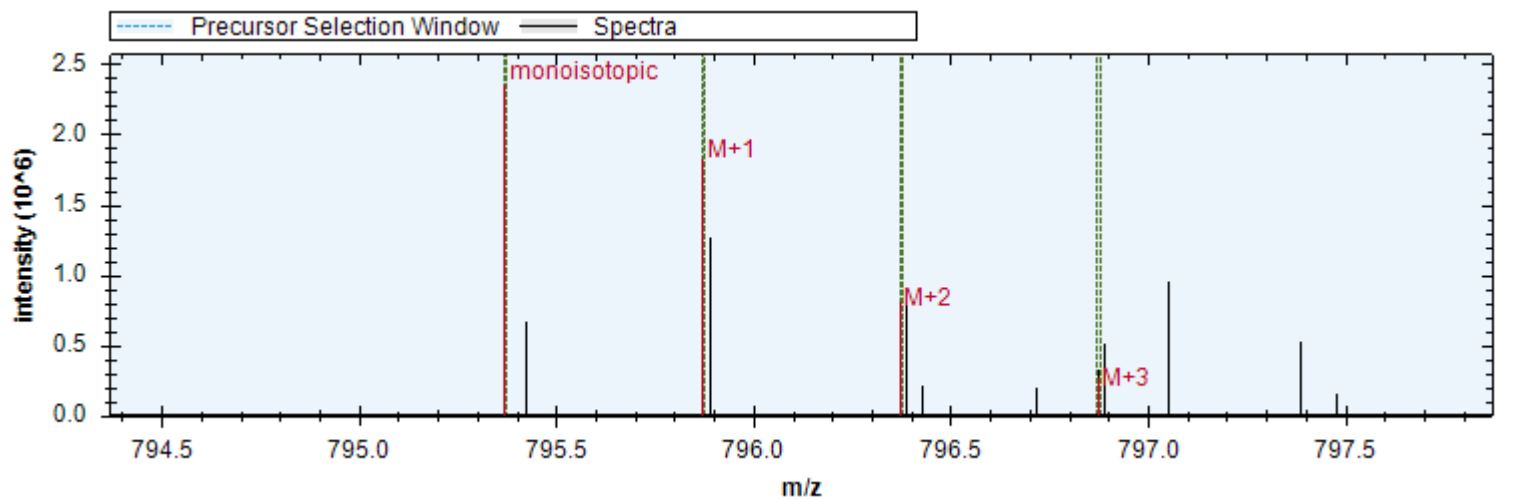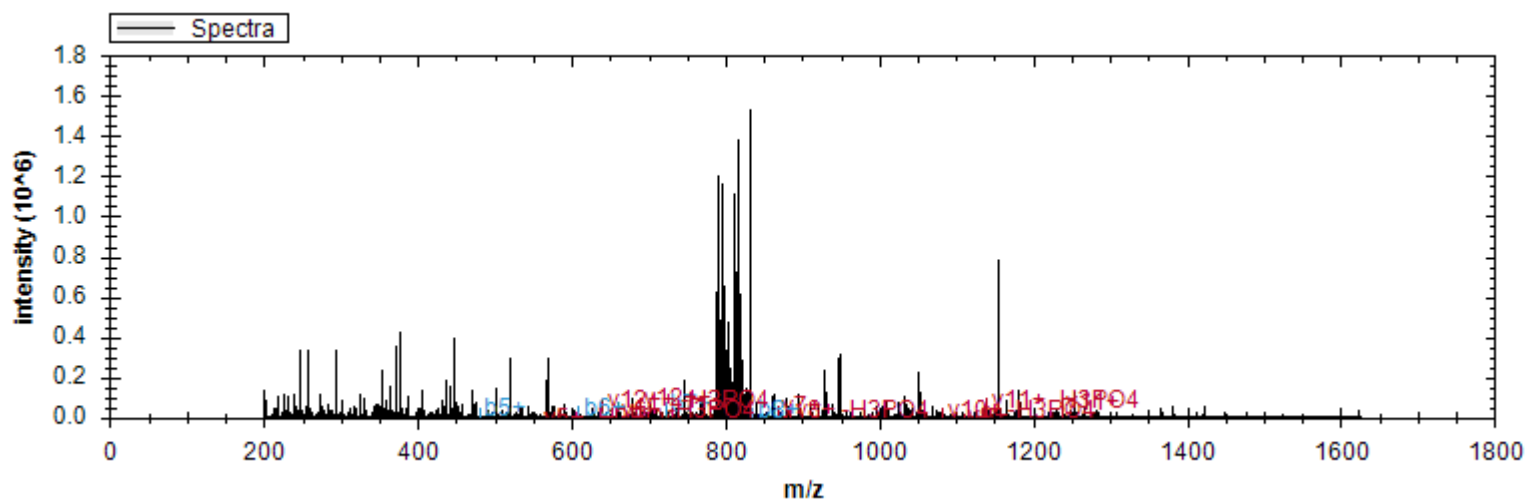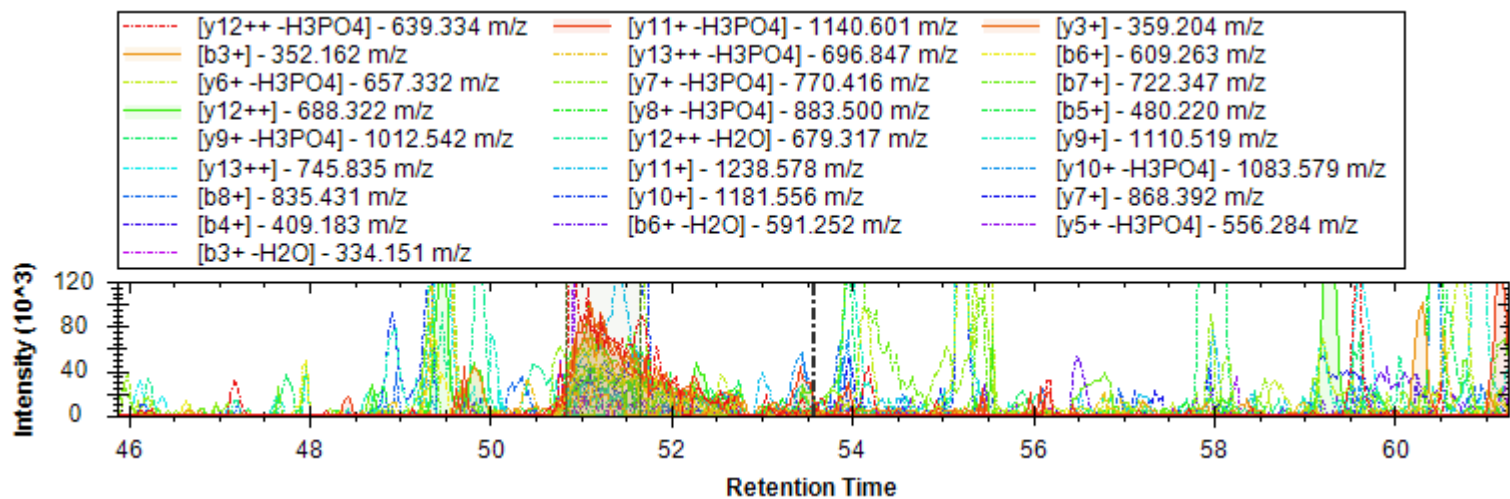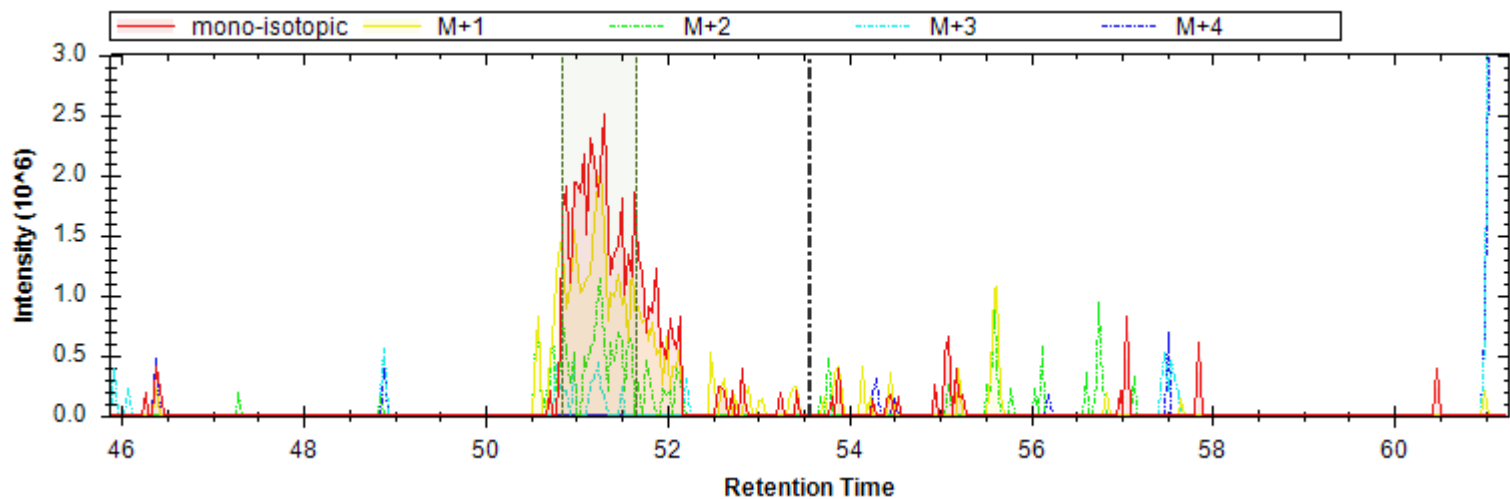

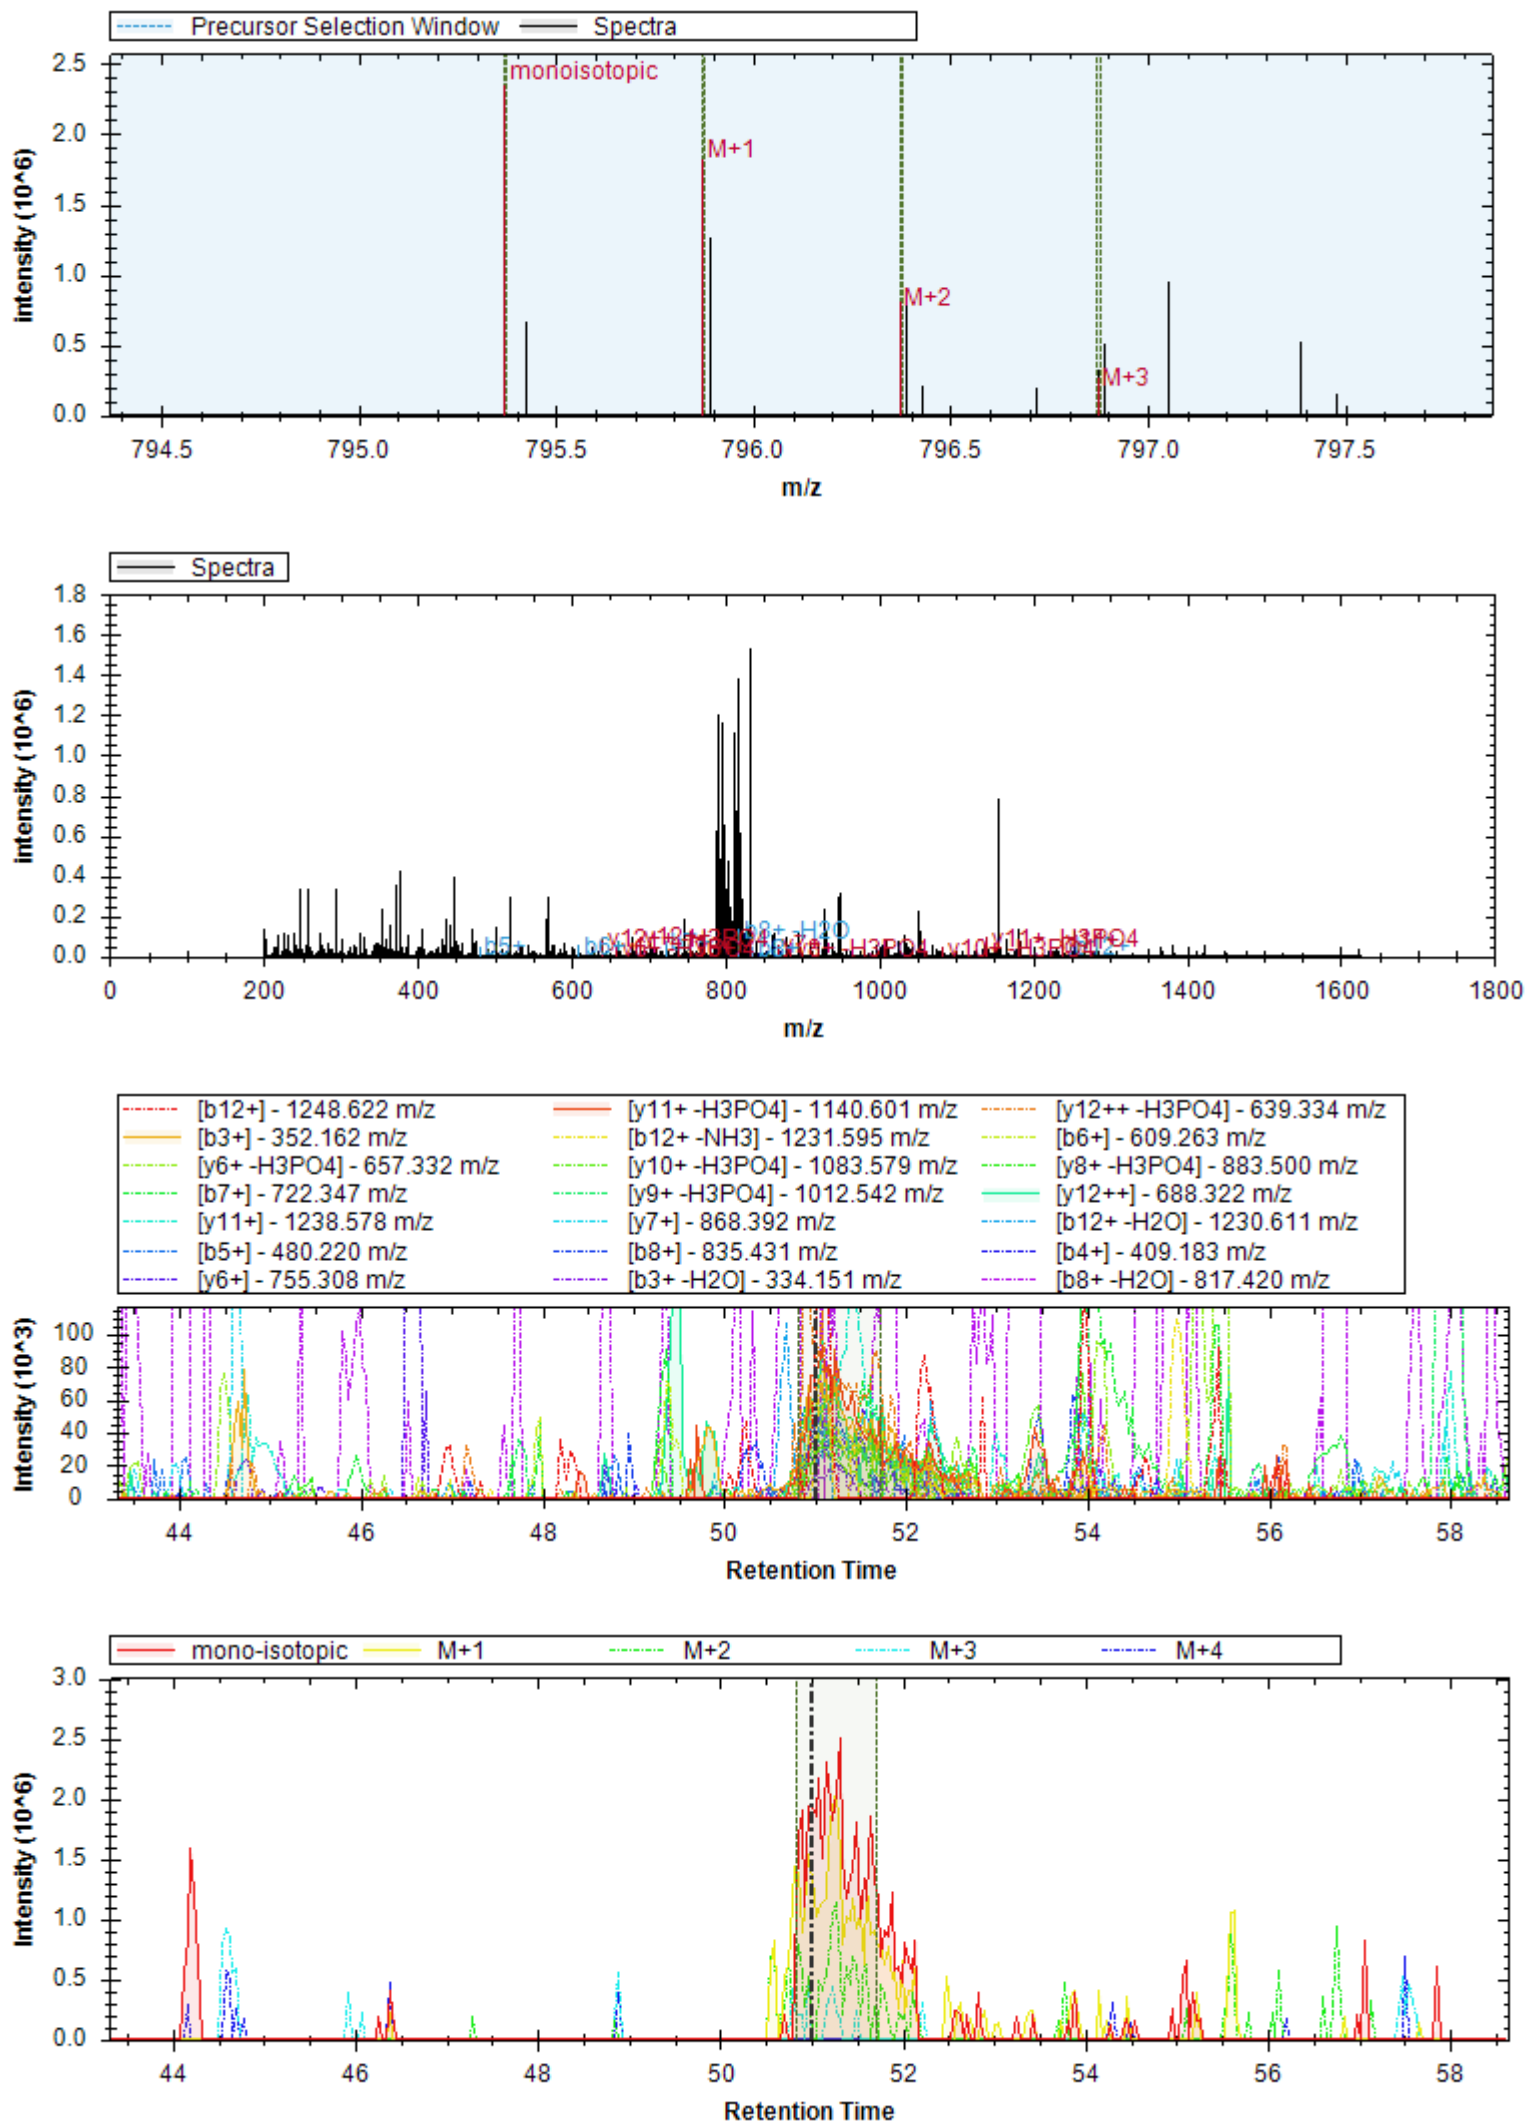

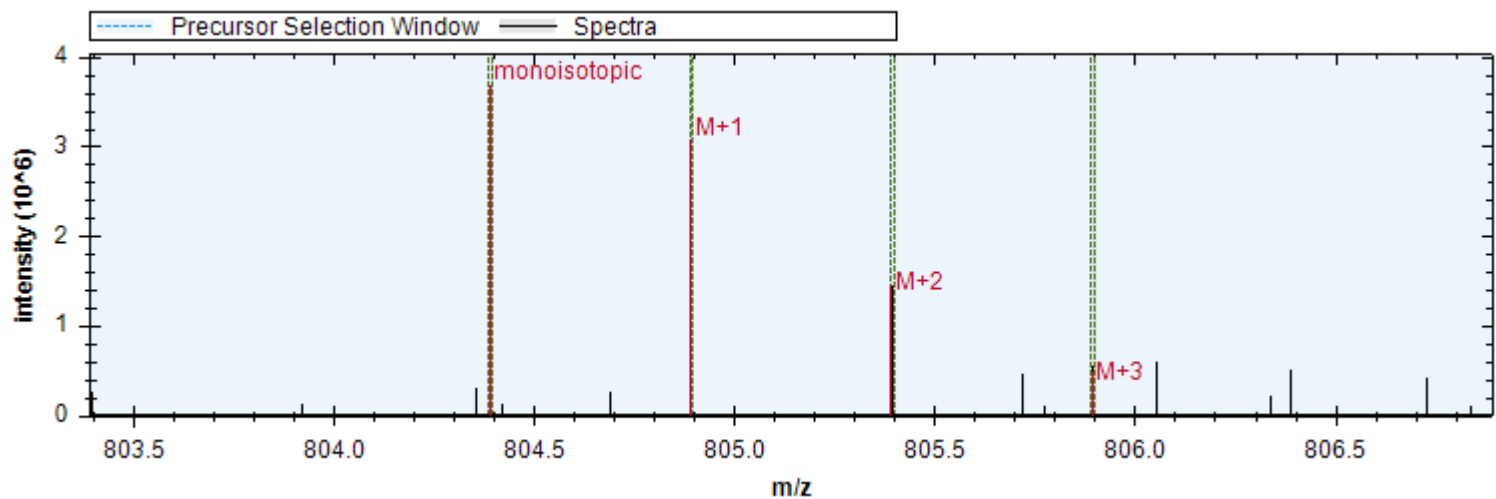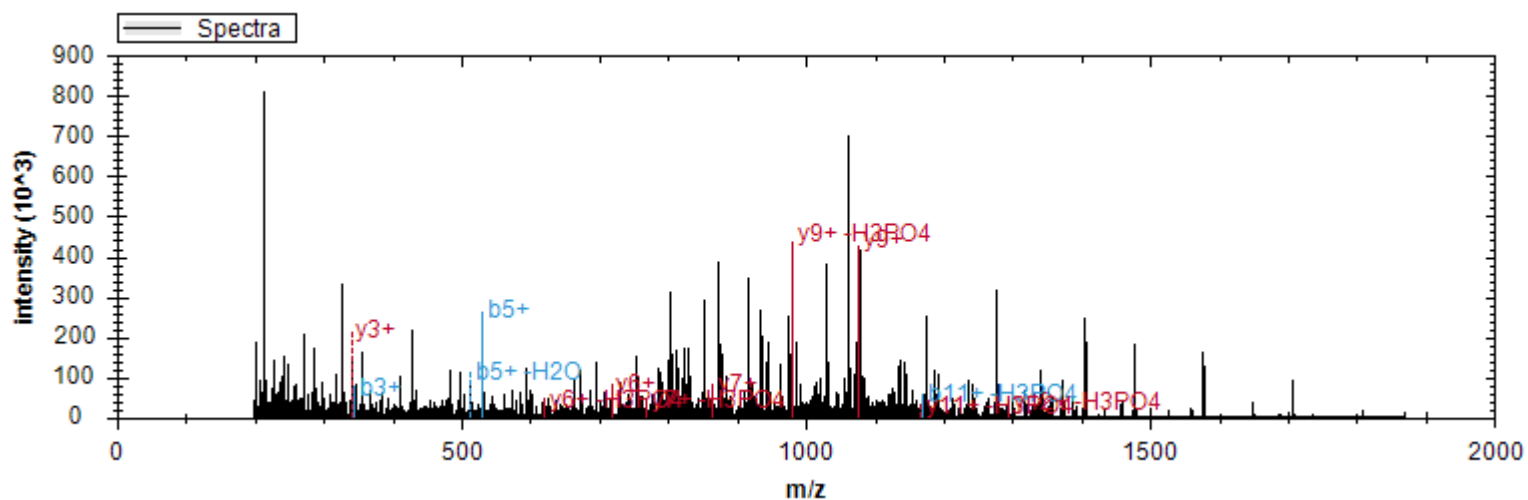

|                              |                              |                            |
|------------------------------|------------------------------|----------------------------|
| [y9+ -H3PO4] - 979.525 m/z   | [y9+] - 1077.502 m/z         | [b5+] - 531.277 m/z        |
| [y3+] - 341.218 m/z          | [b5+ -H2O] - 513.267 m/z     | [y7+ -H3PO4] - 767.445 m/z |
| [y6+ -H3PO4] - 620.377 m/z   | [b3+] - 345.177 m/z          | [y7+] - 865.422 m/z        |
| [y12+ -H3PO4] - 1294.668 m/z | [y11+ -H3PO4] - 1165.625 m/z | [y6+] - 718.354 m/z        |
| [b3+ -H2O] - 327.166 m/z     | [b4+] - 432.209 m/z          | [y4+ -H3PO4] - 410.240 m/z |
| [y8+ -H2O] - 1060.238 m/z    | [b11+ -H3PO4] - 1169.584 m/z |                            |

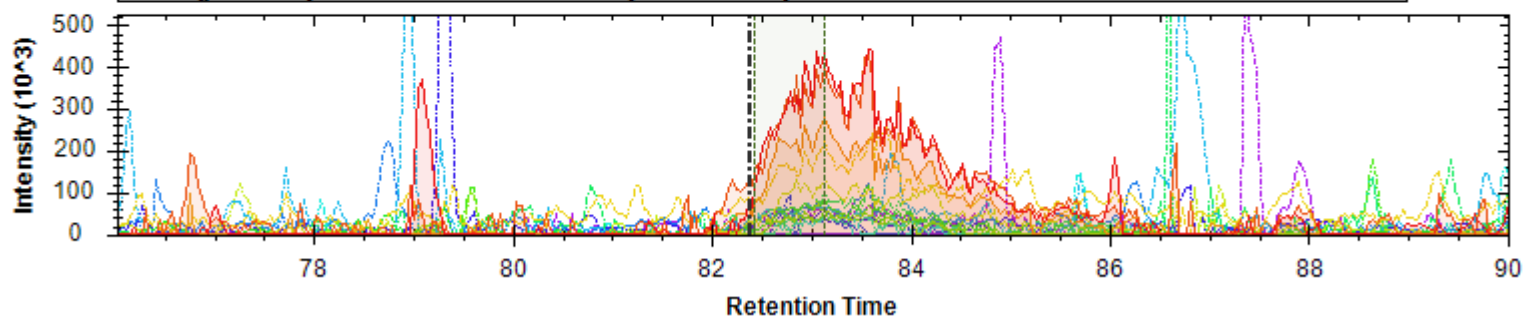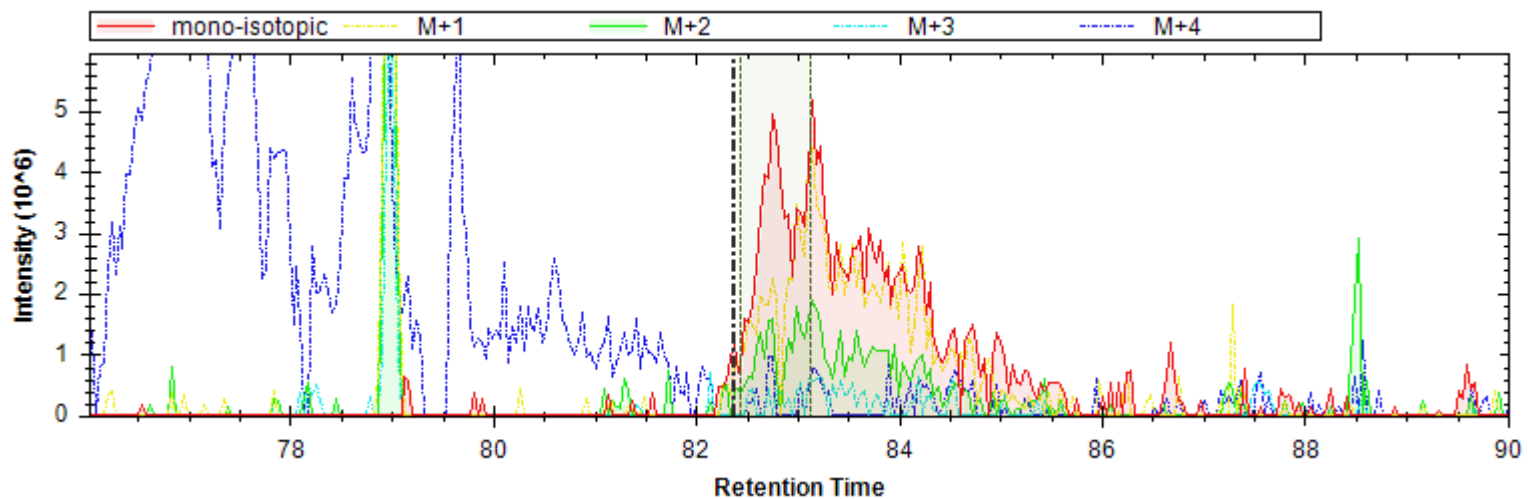

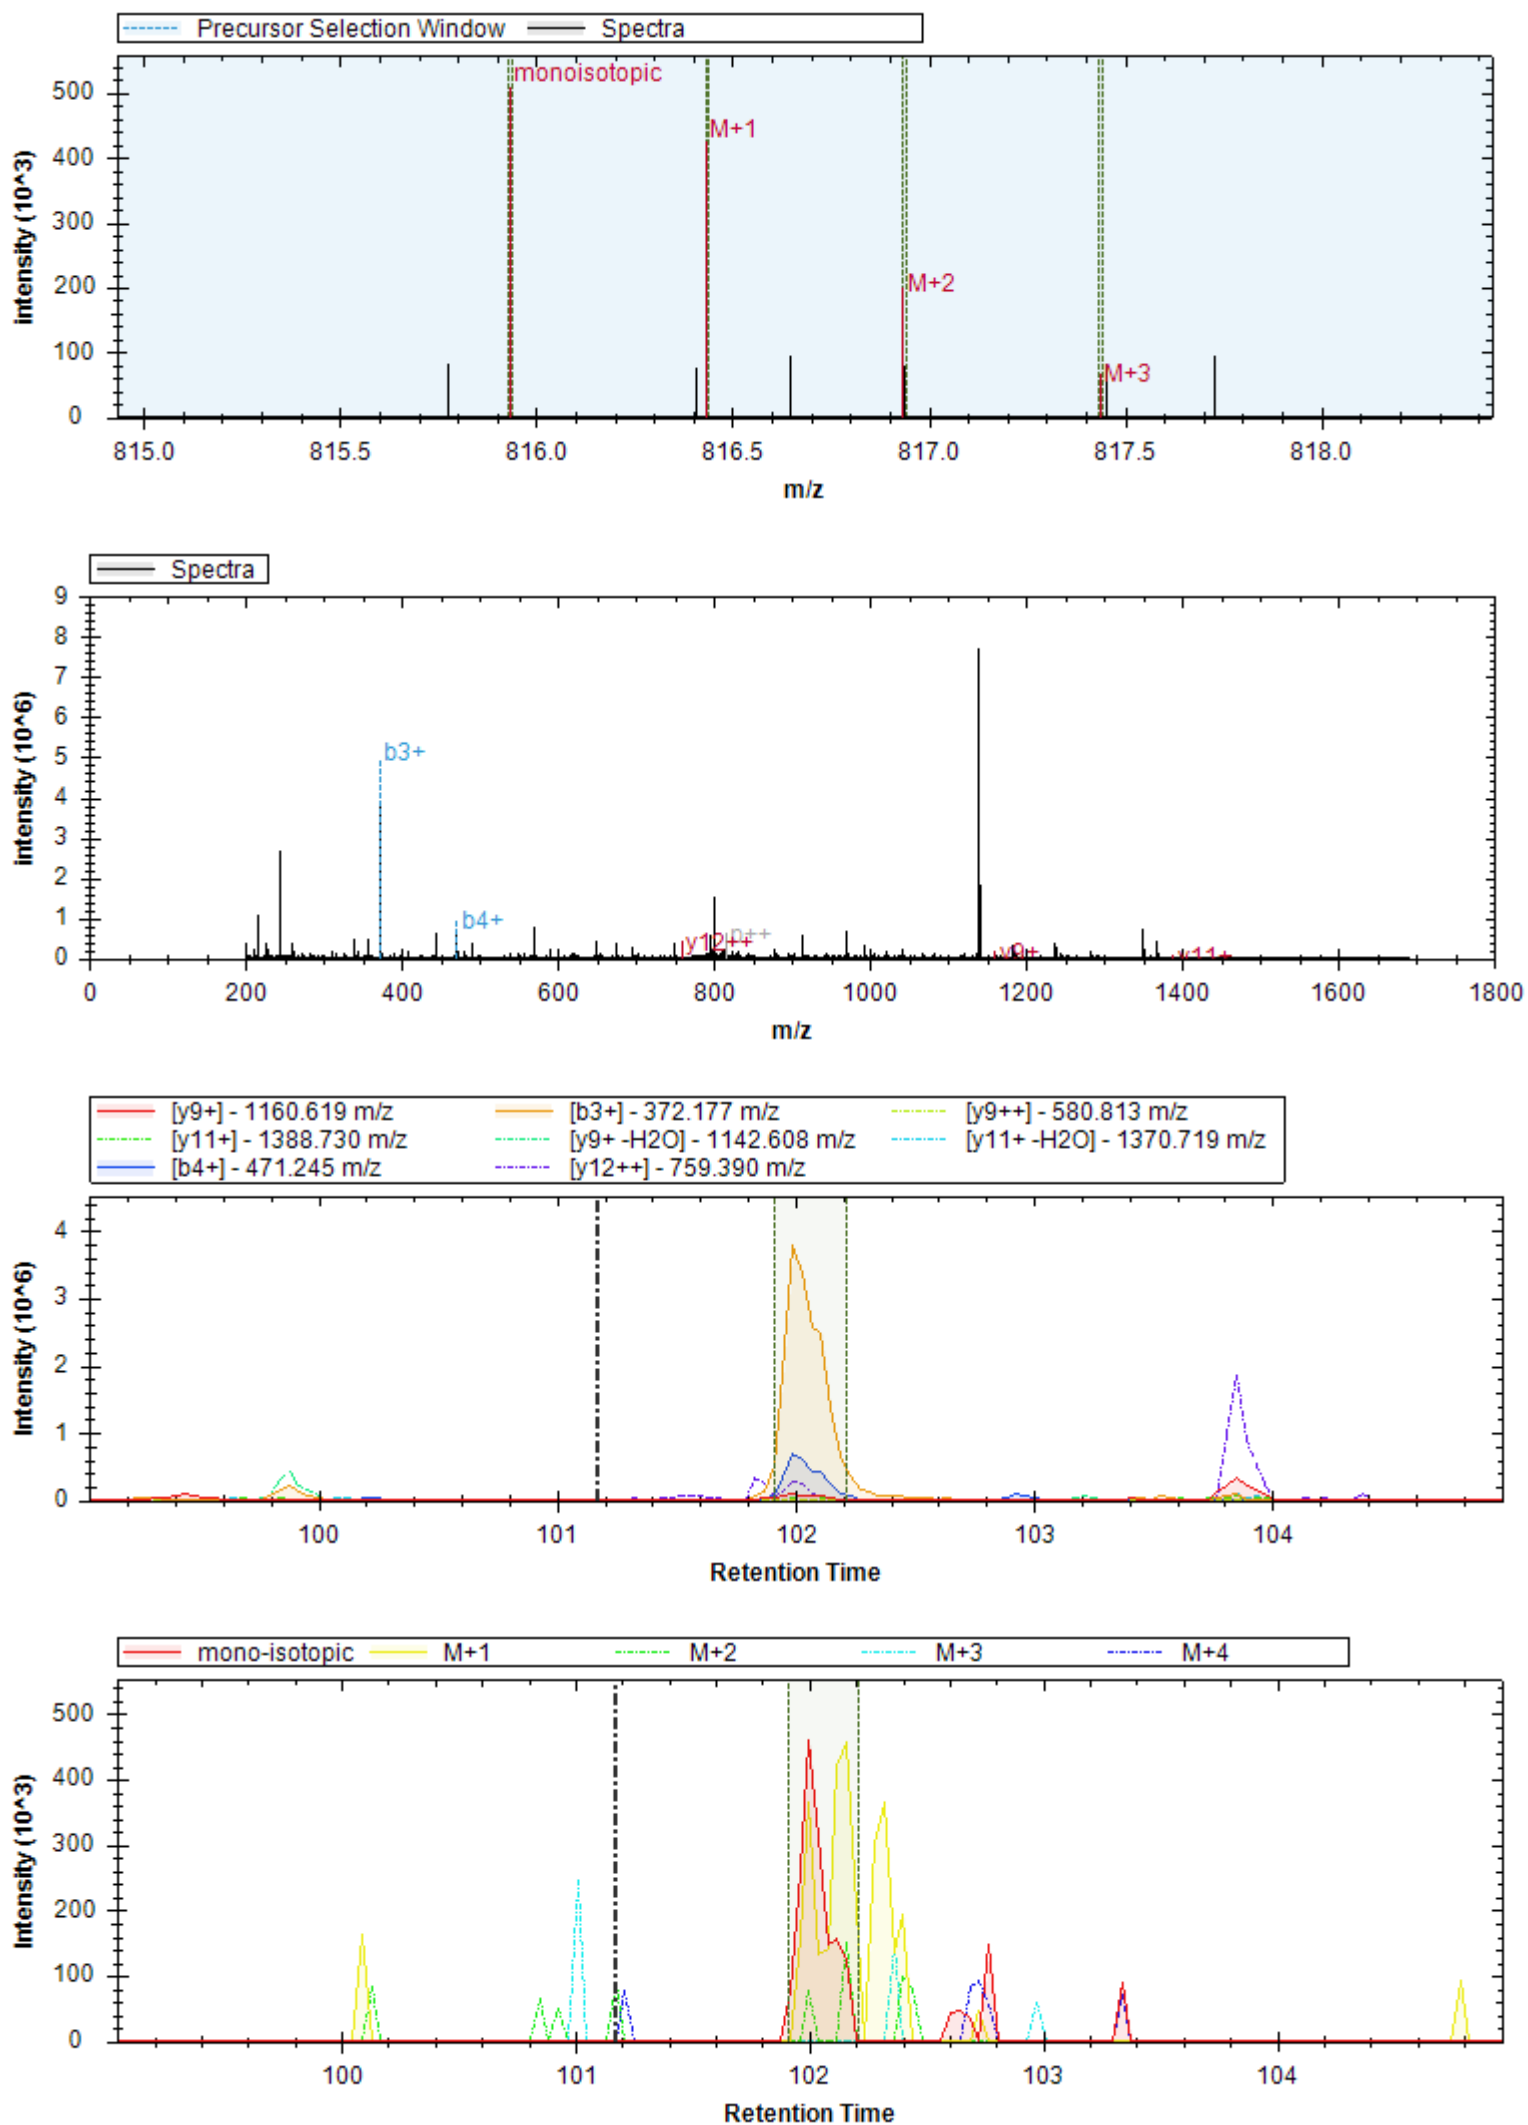

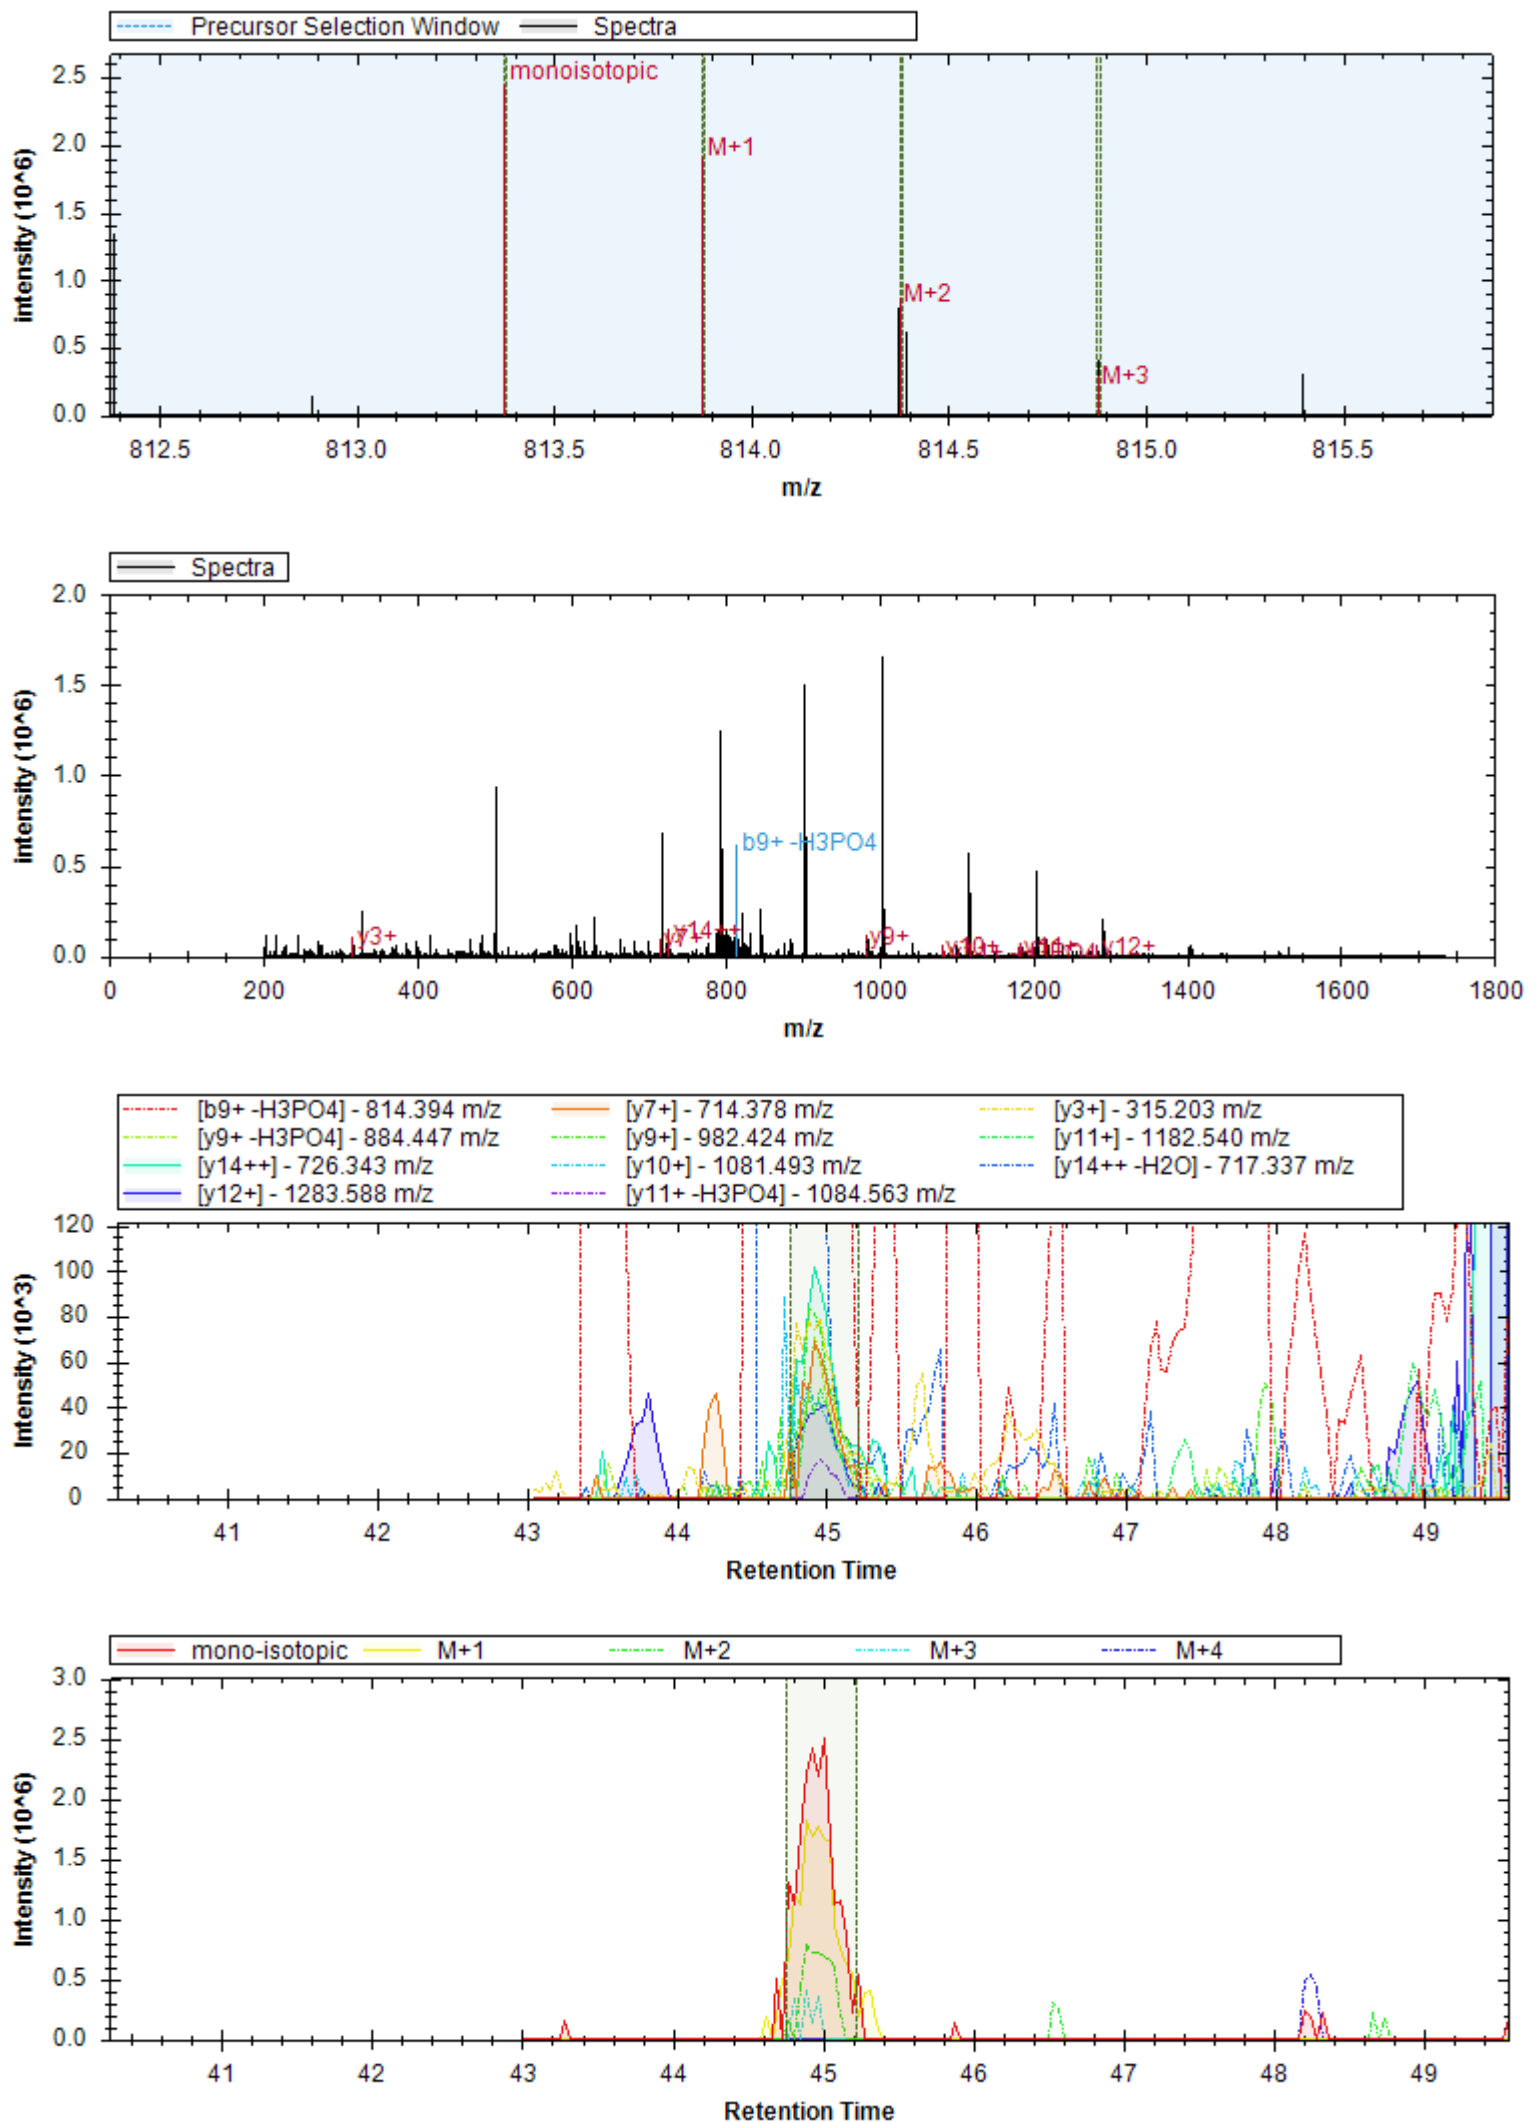



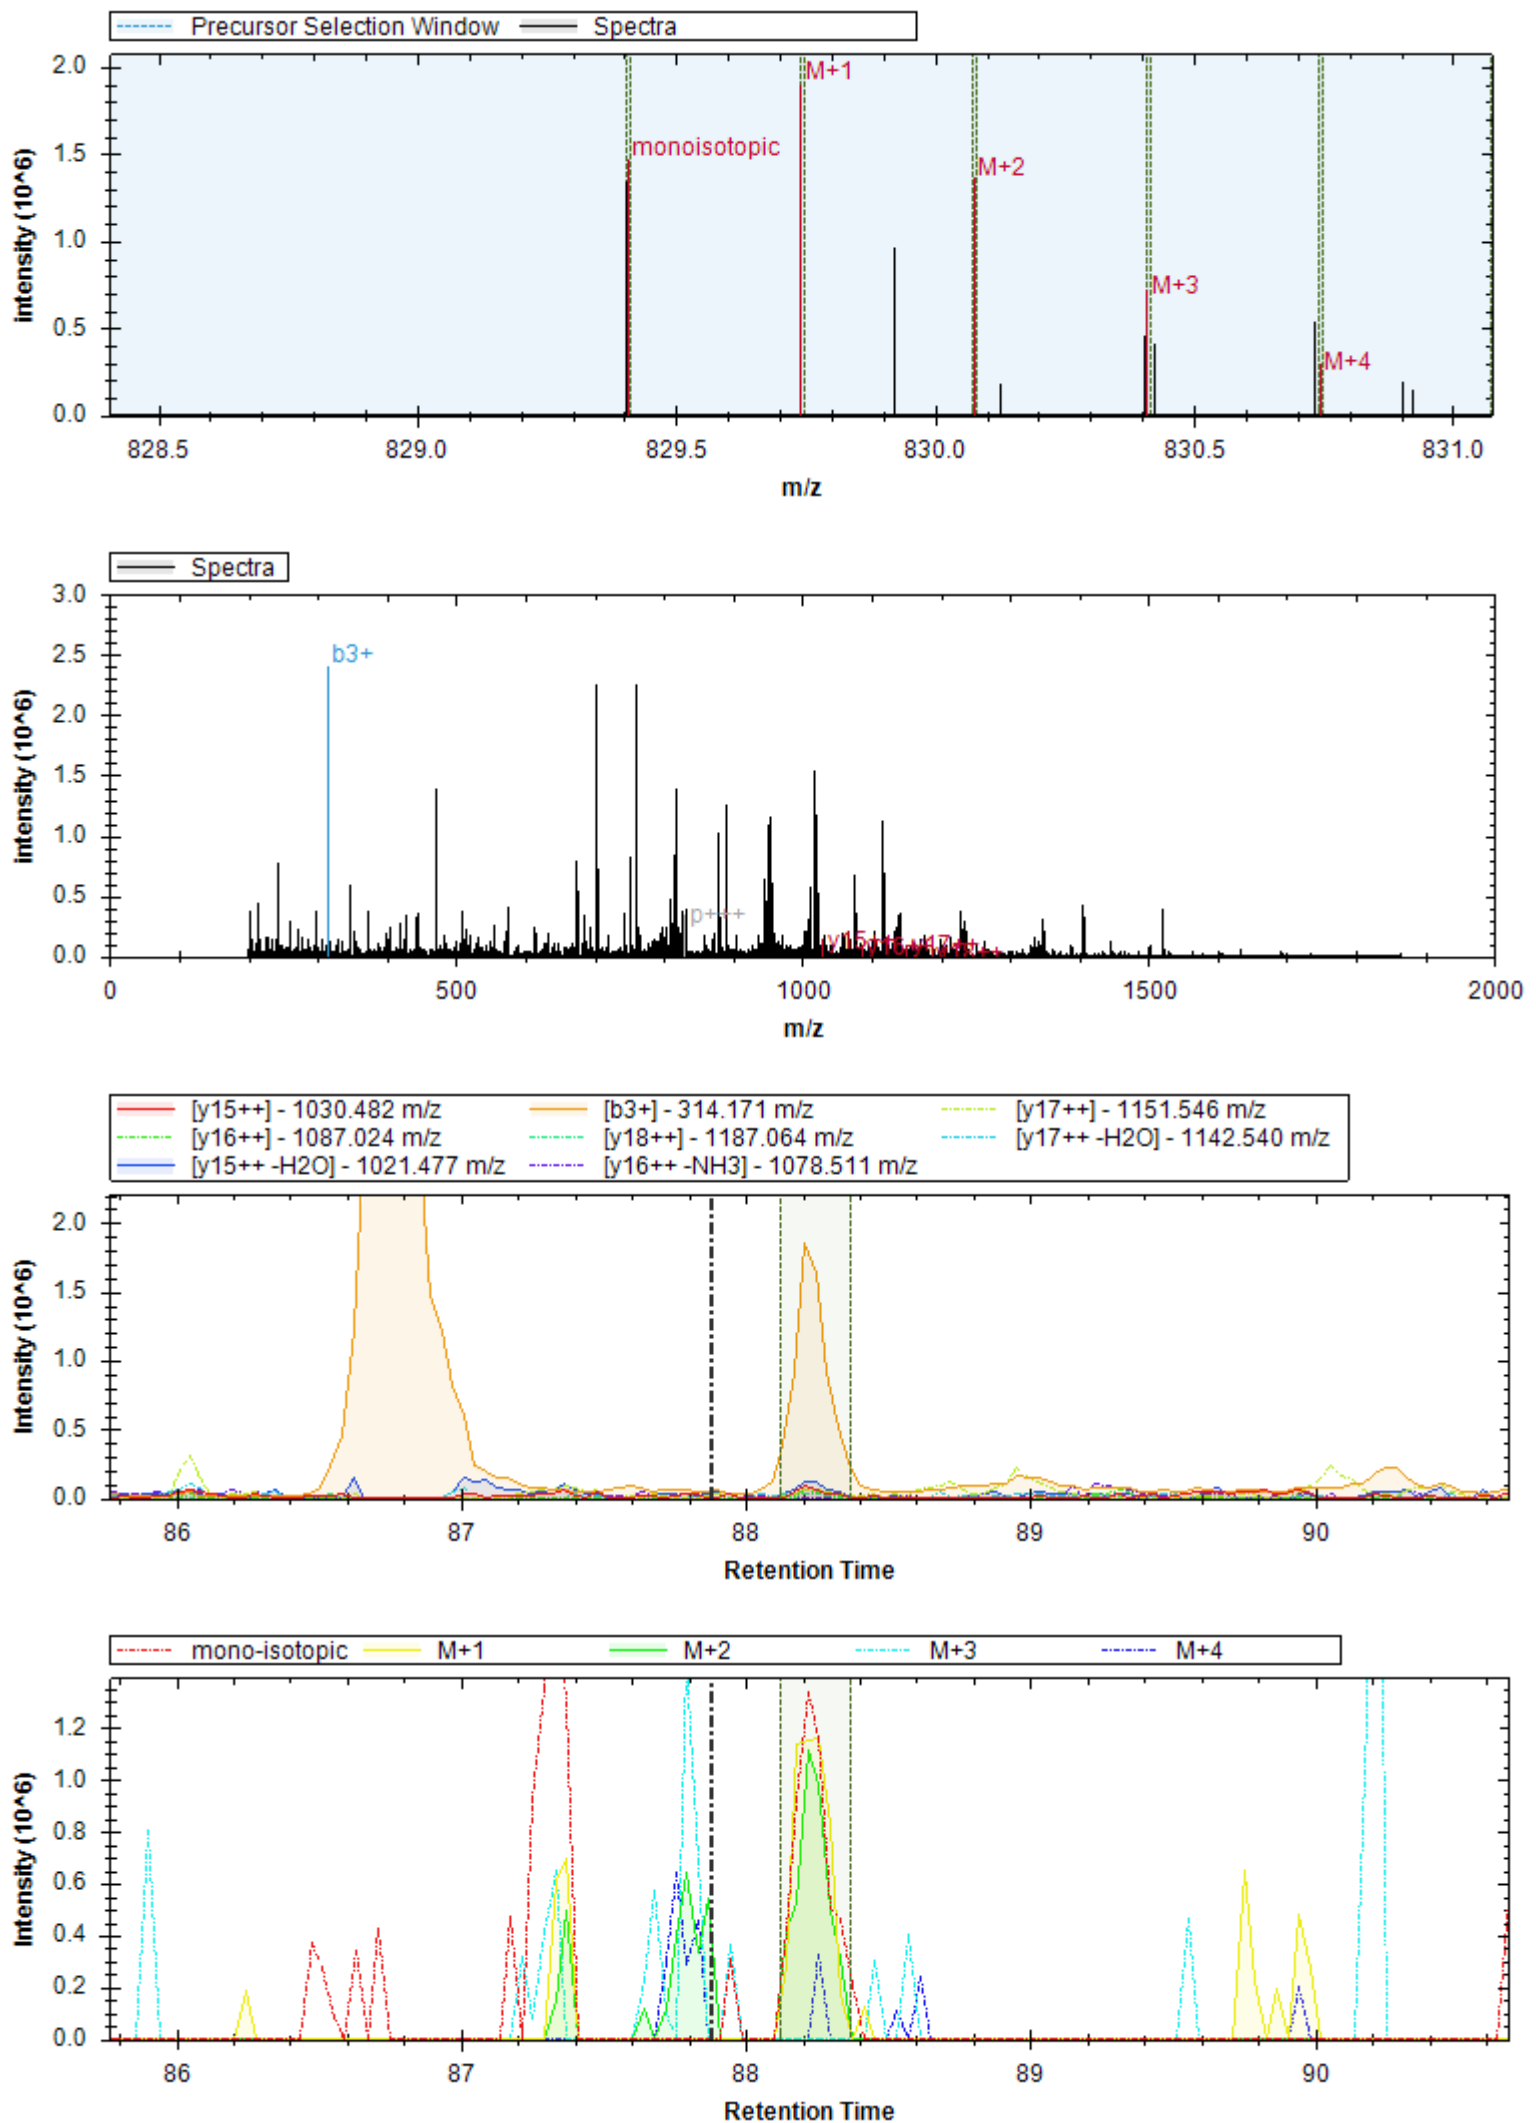

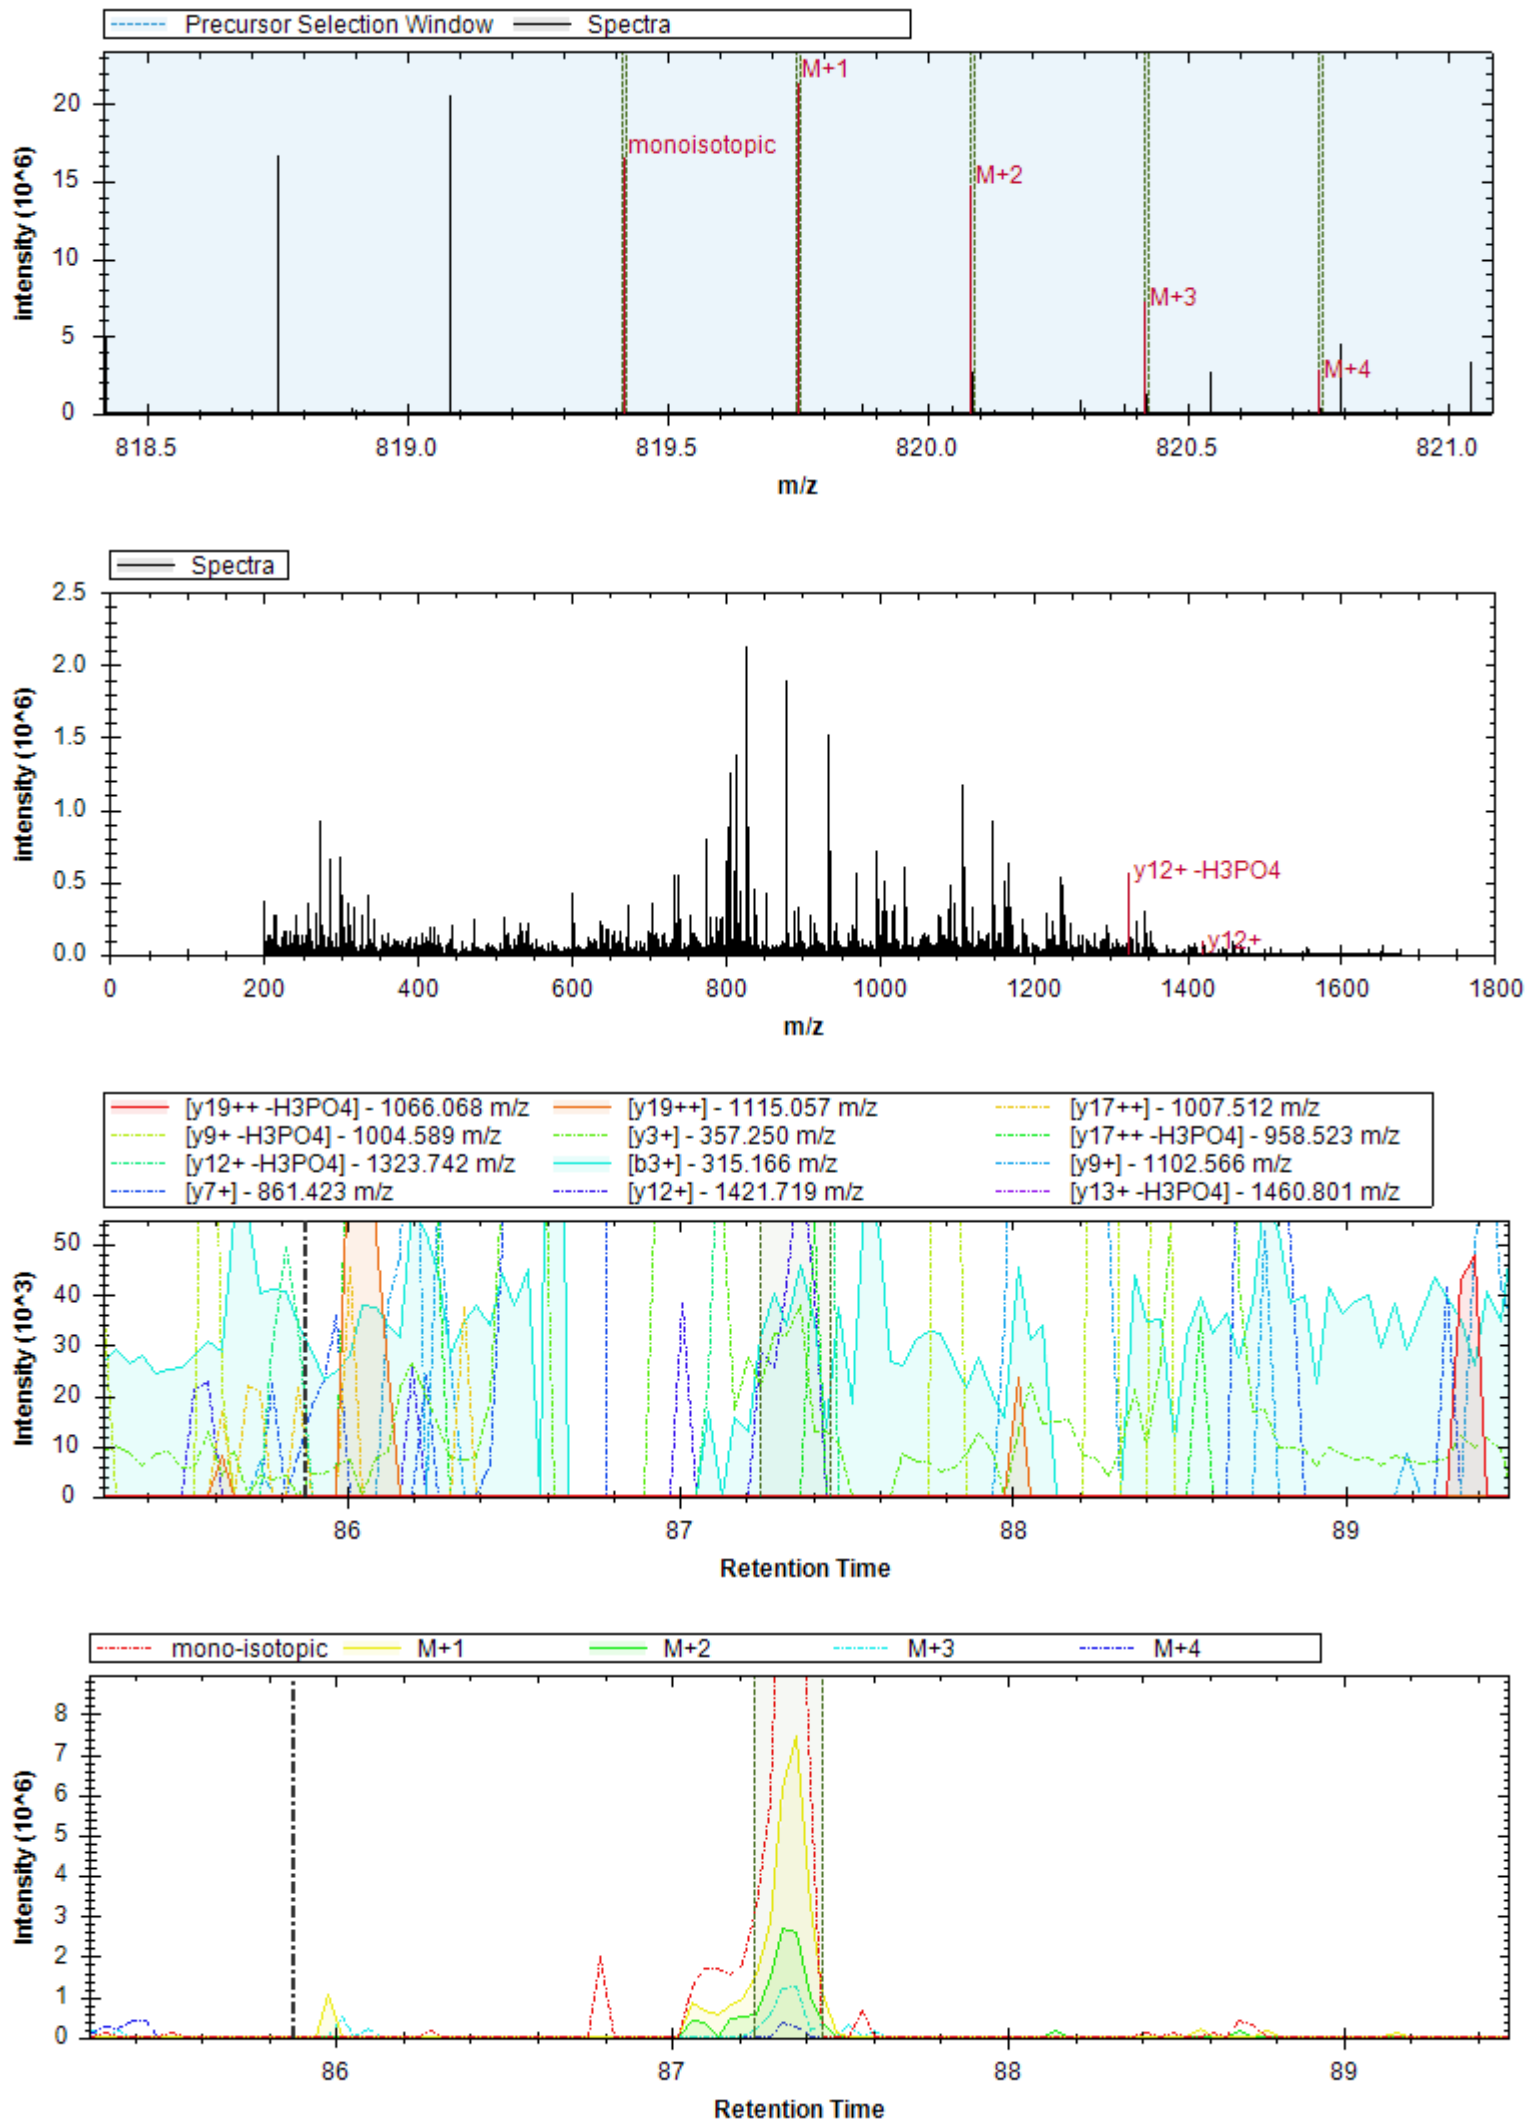

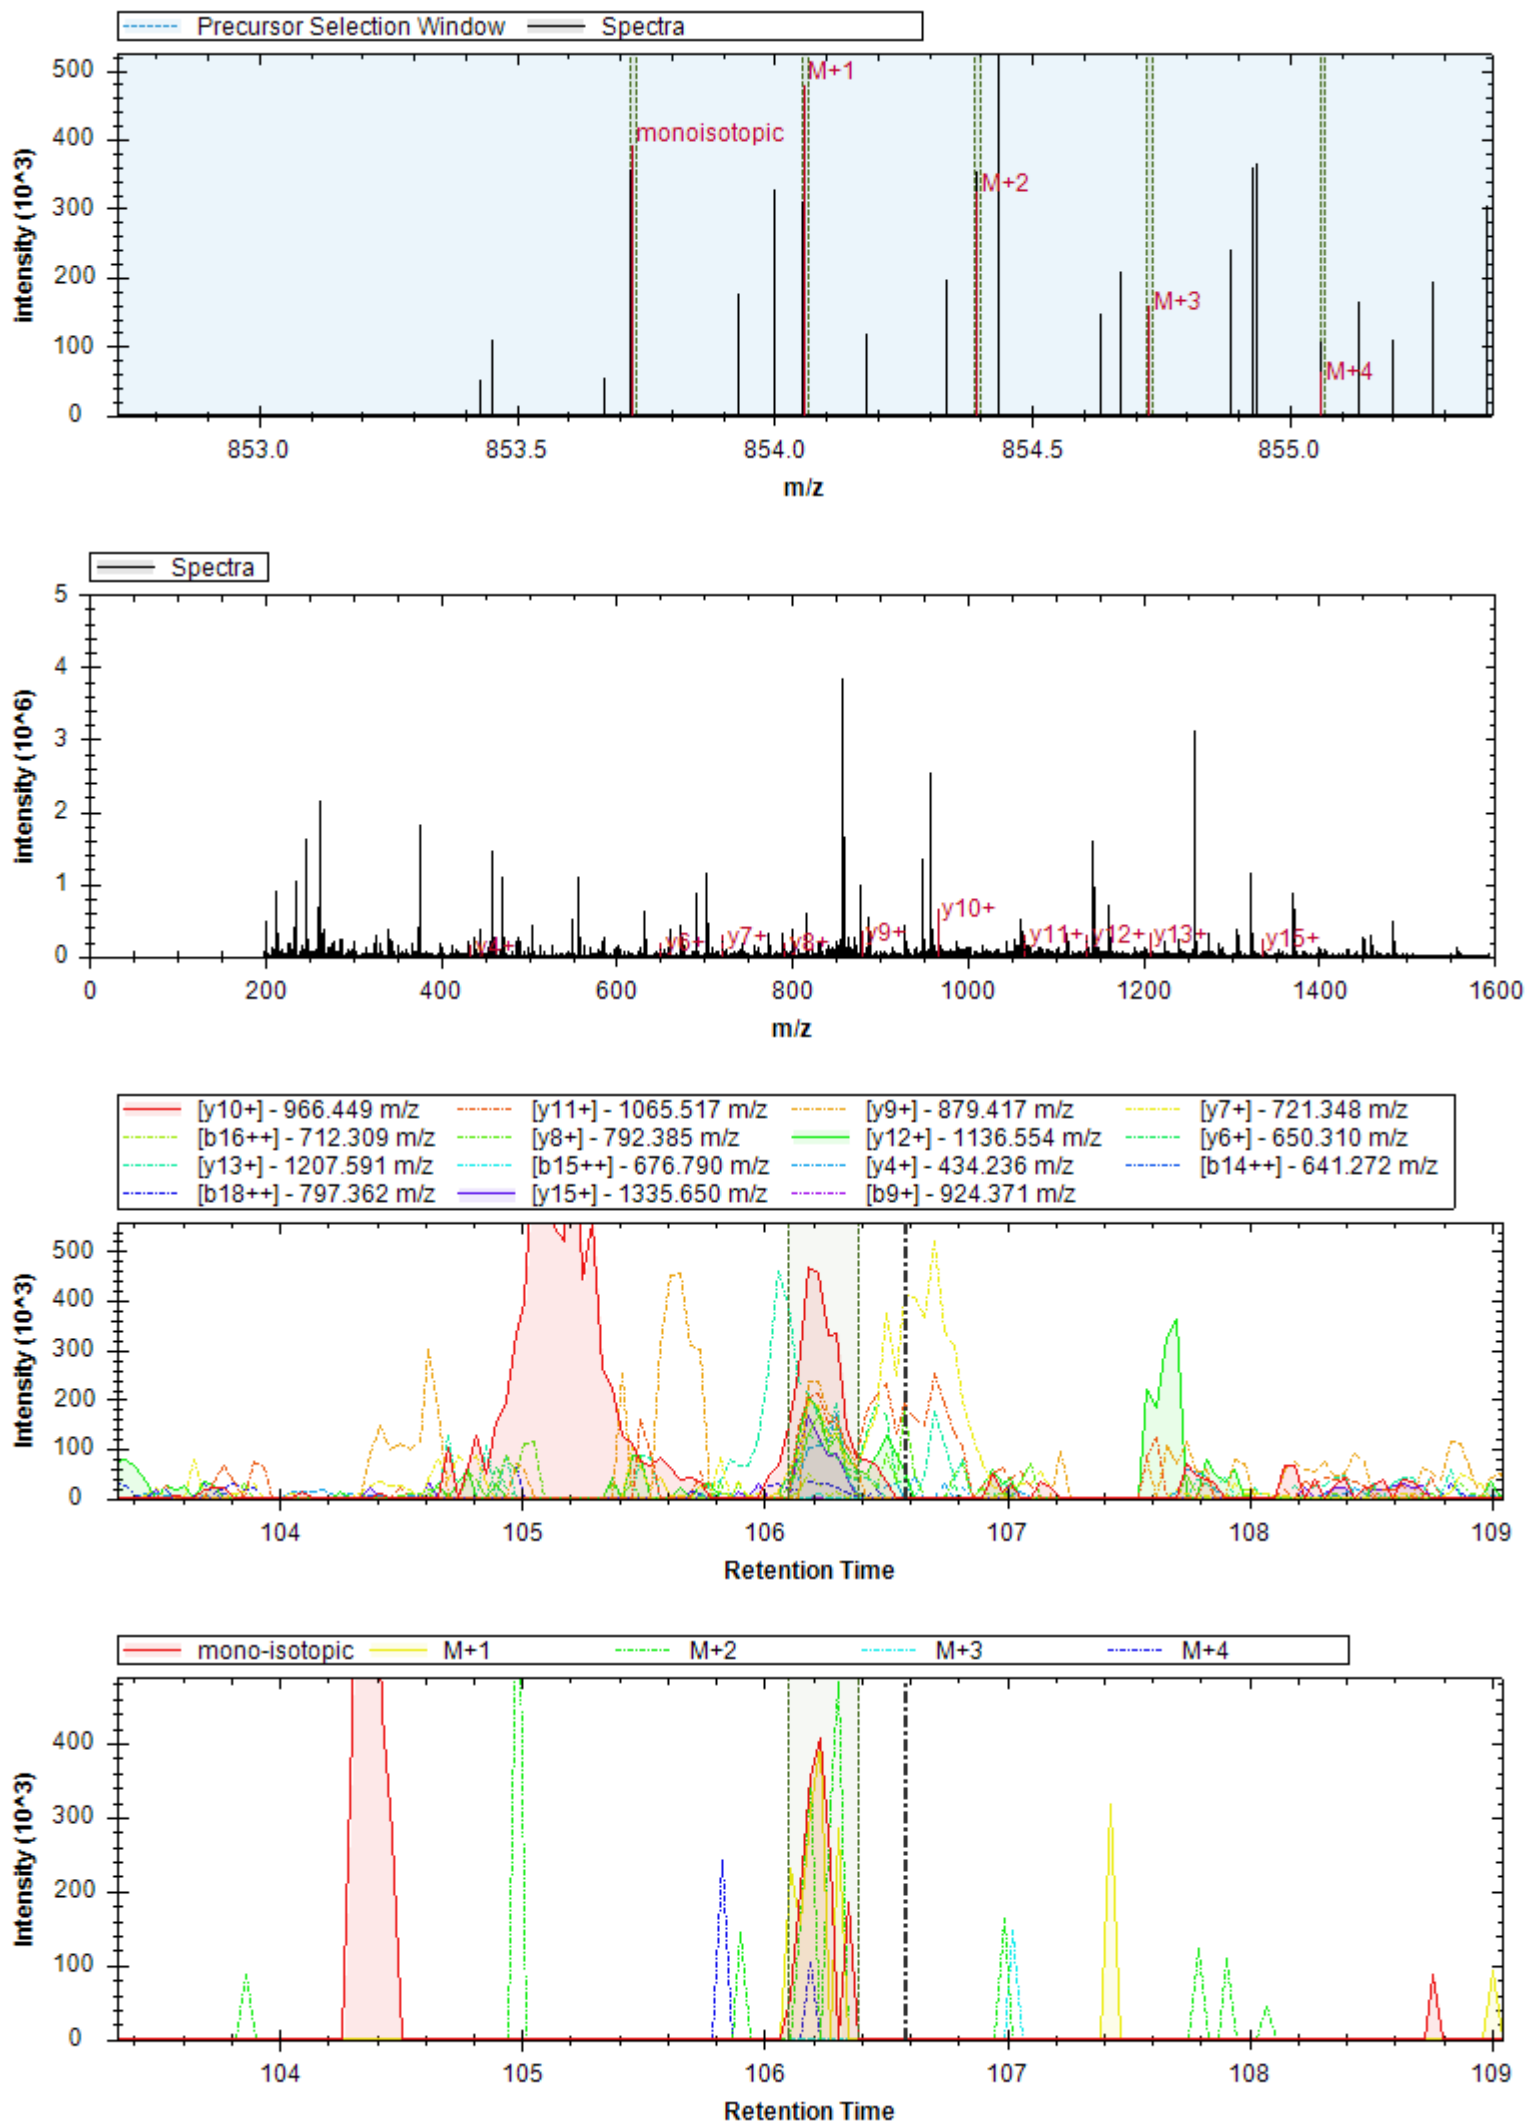

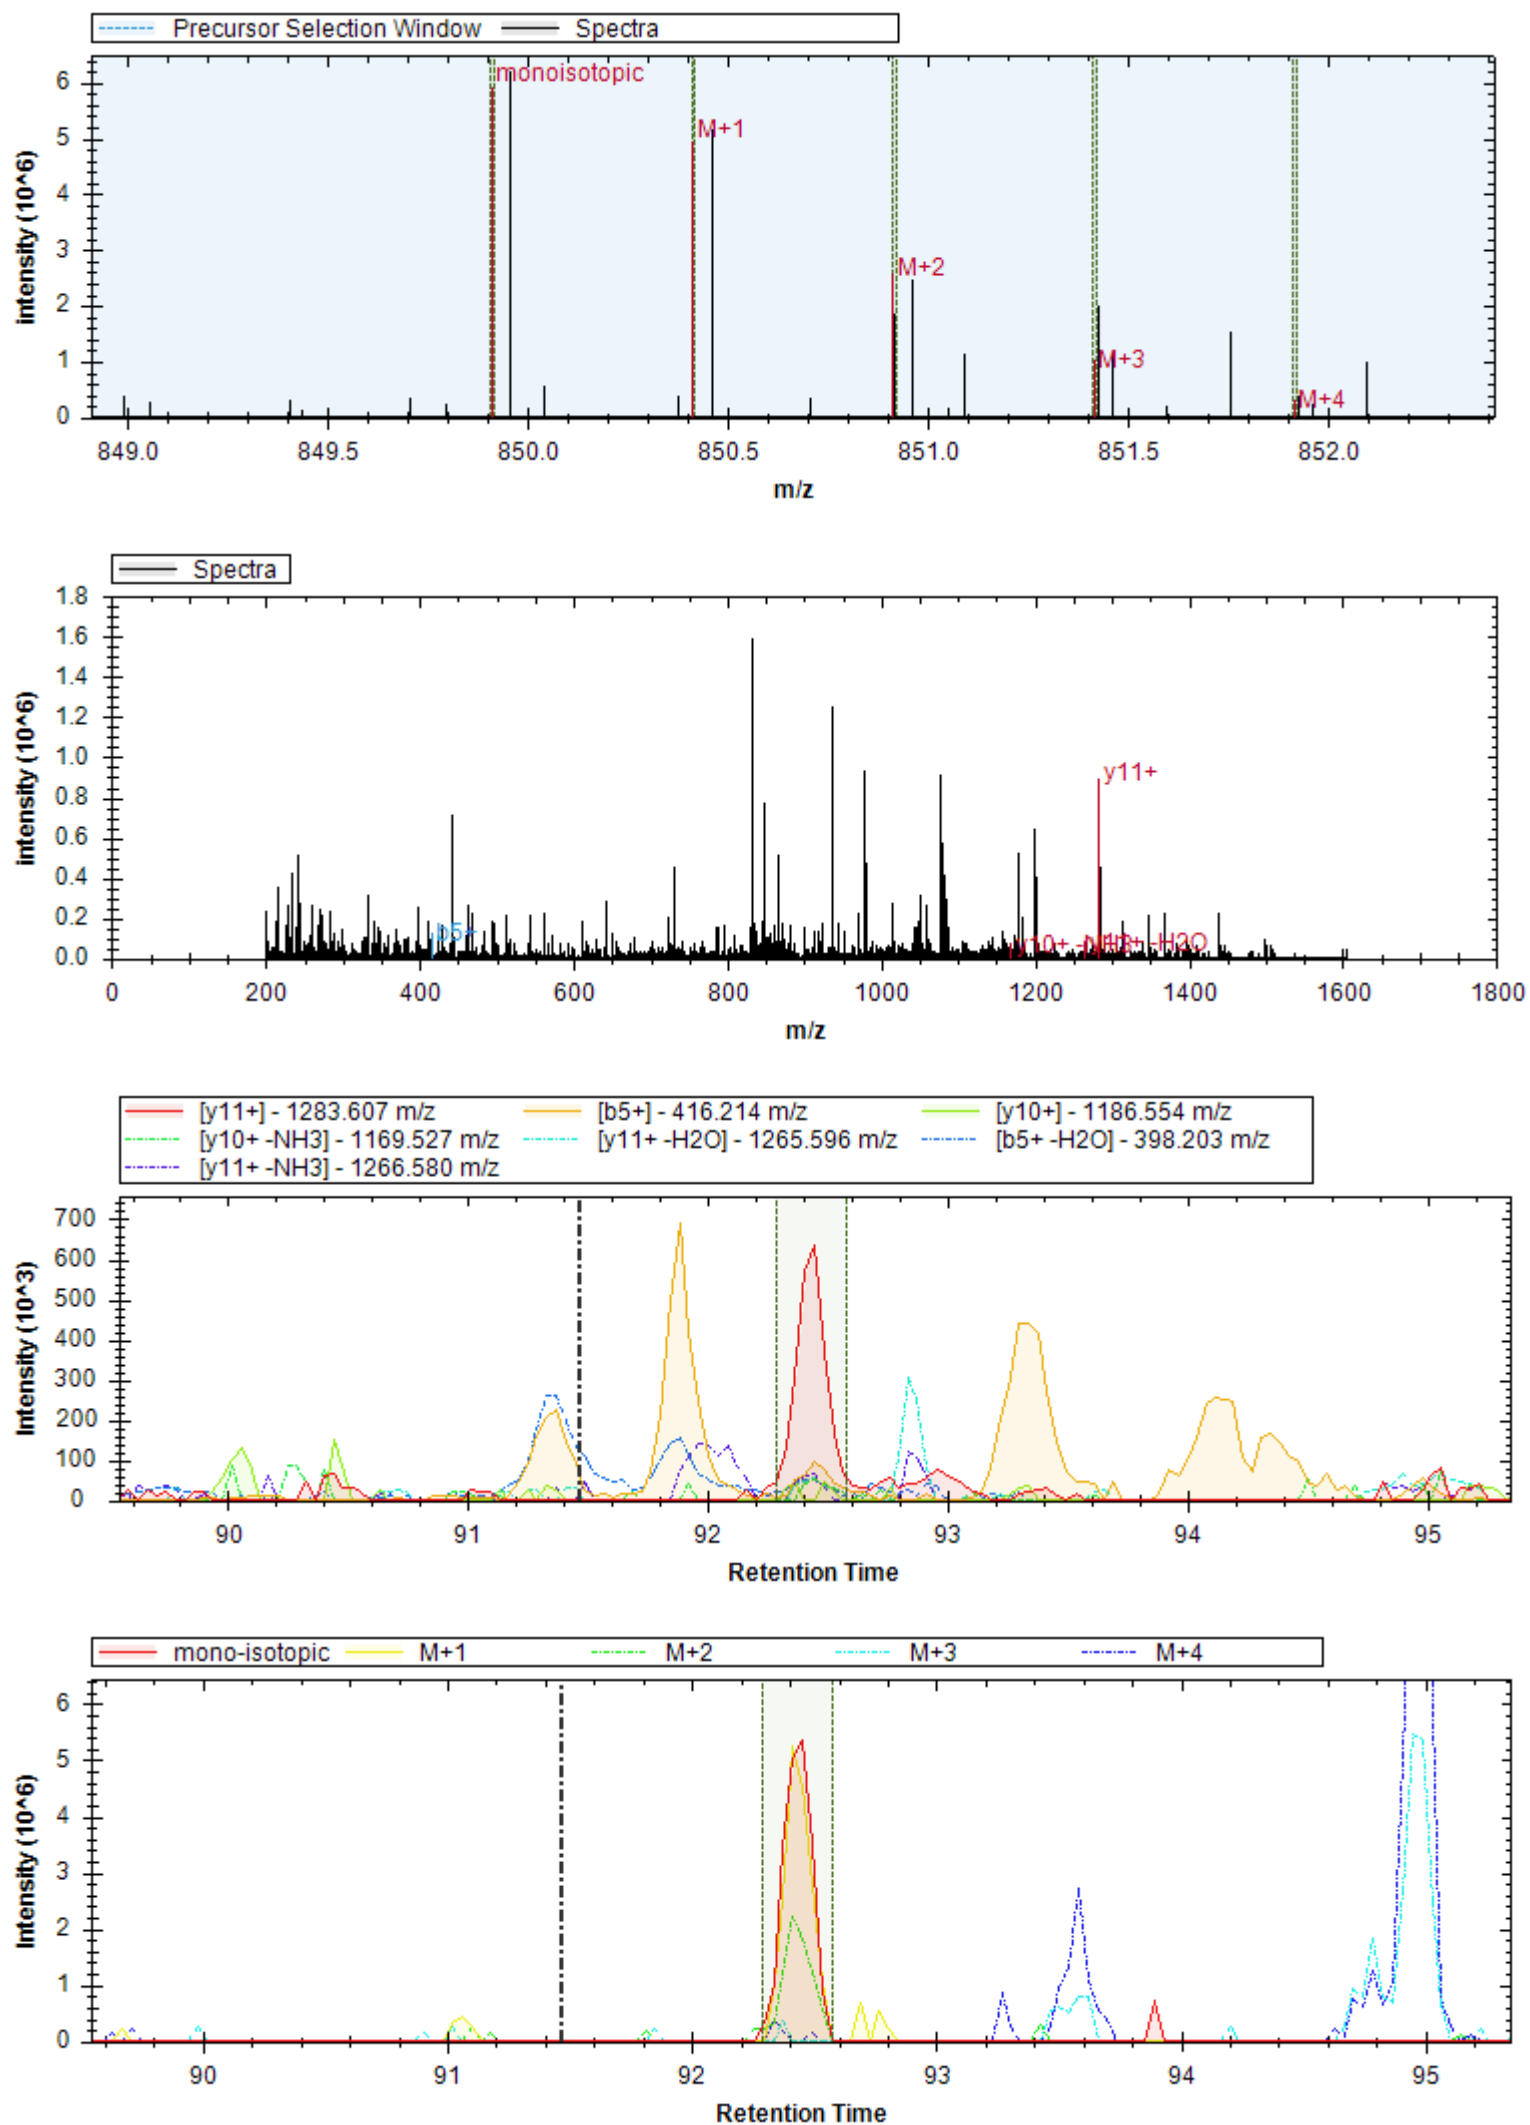

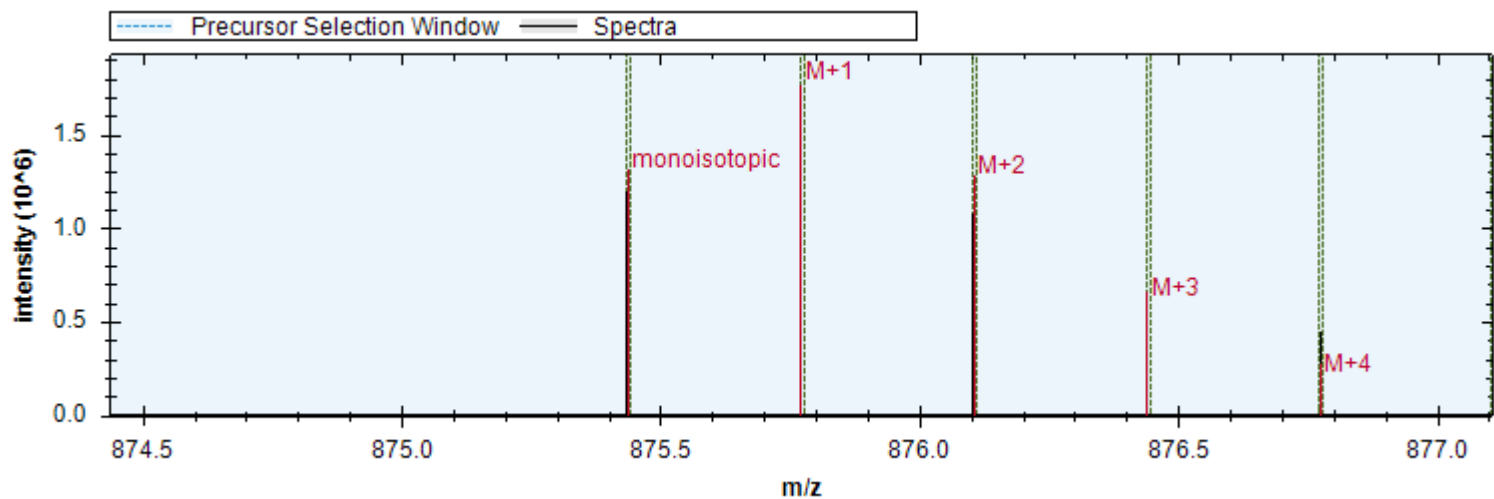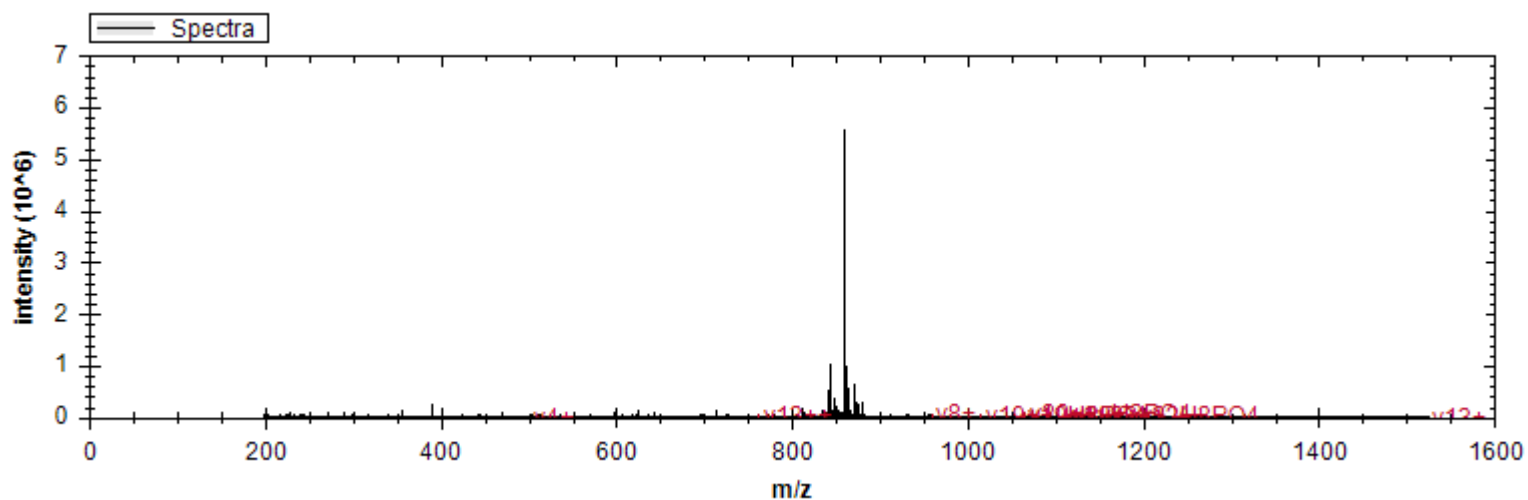

|                               |                               |                              |
|-------------------------------|-------------------------------|------------------------------|
| [y20++ -H3PO4] - 1065.047 m/z | [y8+] - 959.460 m/z           | [y8+ -H3PO4] - 861.483 m/z   |
| [y19++ -H3PO4] - 1014.523 m/z | [y20++] - 1114.036 m/z        | [y13+ -H3PO4] - 1426.769 m/z |
| [y4+] - 501.303 m/z           | [y22++ -H3PO4] - 1143.092 m/z | [y22++] - 1192.081 m/z       |
| [y13++] - 762.877 m/z         | [y13+] - 1524.746 m/z         | [y16++ -H3PO4] - 871.478 m/z |
| [y19++] - 1063.512 m/z        | [b5+] - 398.240 m/z           | [y21++] - 1163.570 m/z       |
| [y7+ -H3PO4] - 764.430 m/z    | [y8+ -H2O] - 941.449 m/z      | [y8++] - 480.234 m/z         |
| [y18++] - 1035.001 m/z        | [y23++] - 1241.615 m/z        | [y16++] - 920.466 m/z        |
| [y12++ -H3PO4] - 665.362 m/z  | [y17++] - 977.980 m/z         | [b6+] - 499.288 m/z          |
| [y15+ -H3PO4] - 1628.864 m/z  |                               |                              |

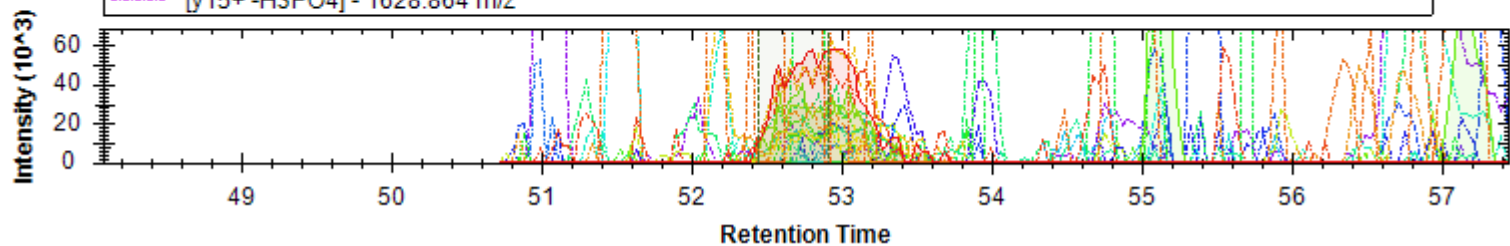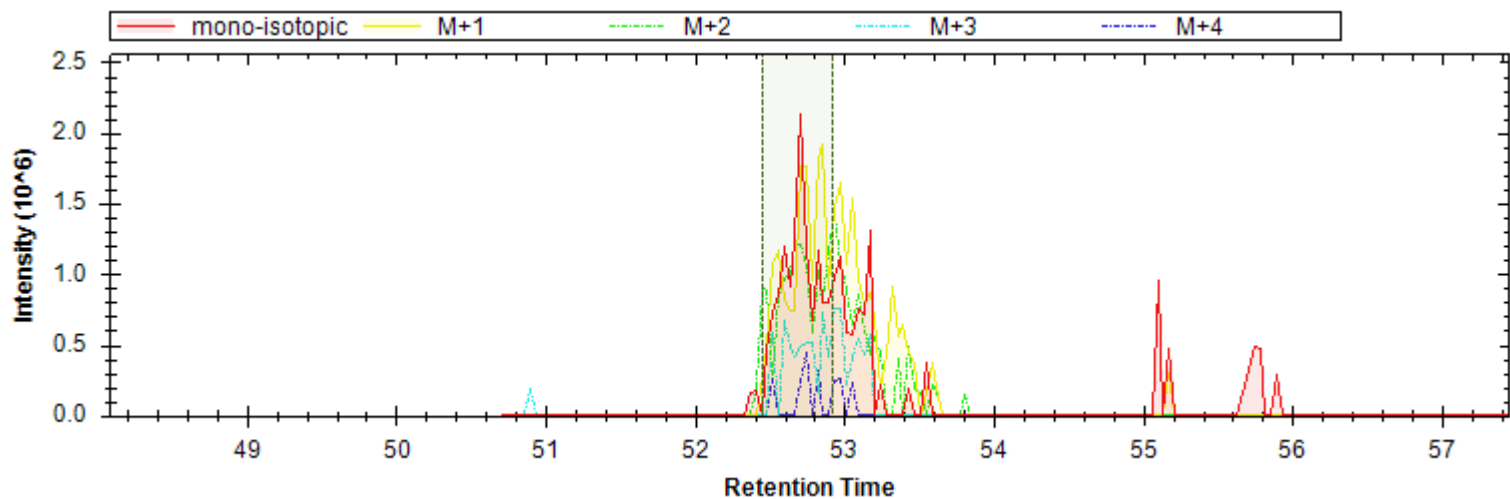

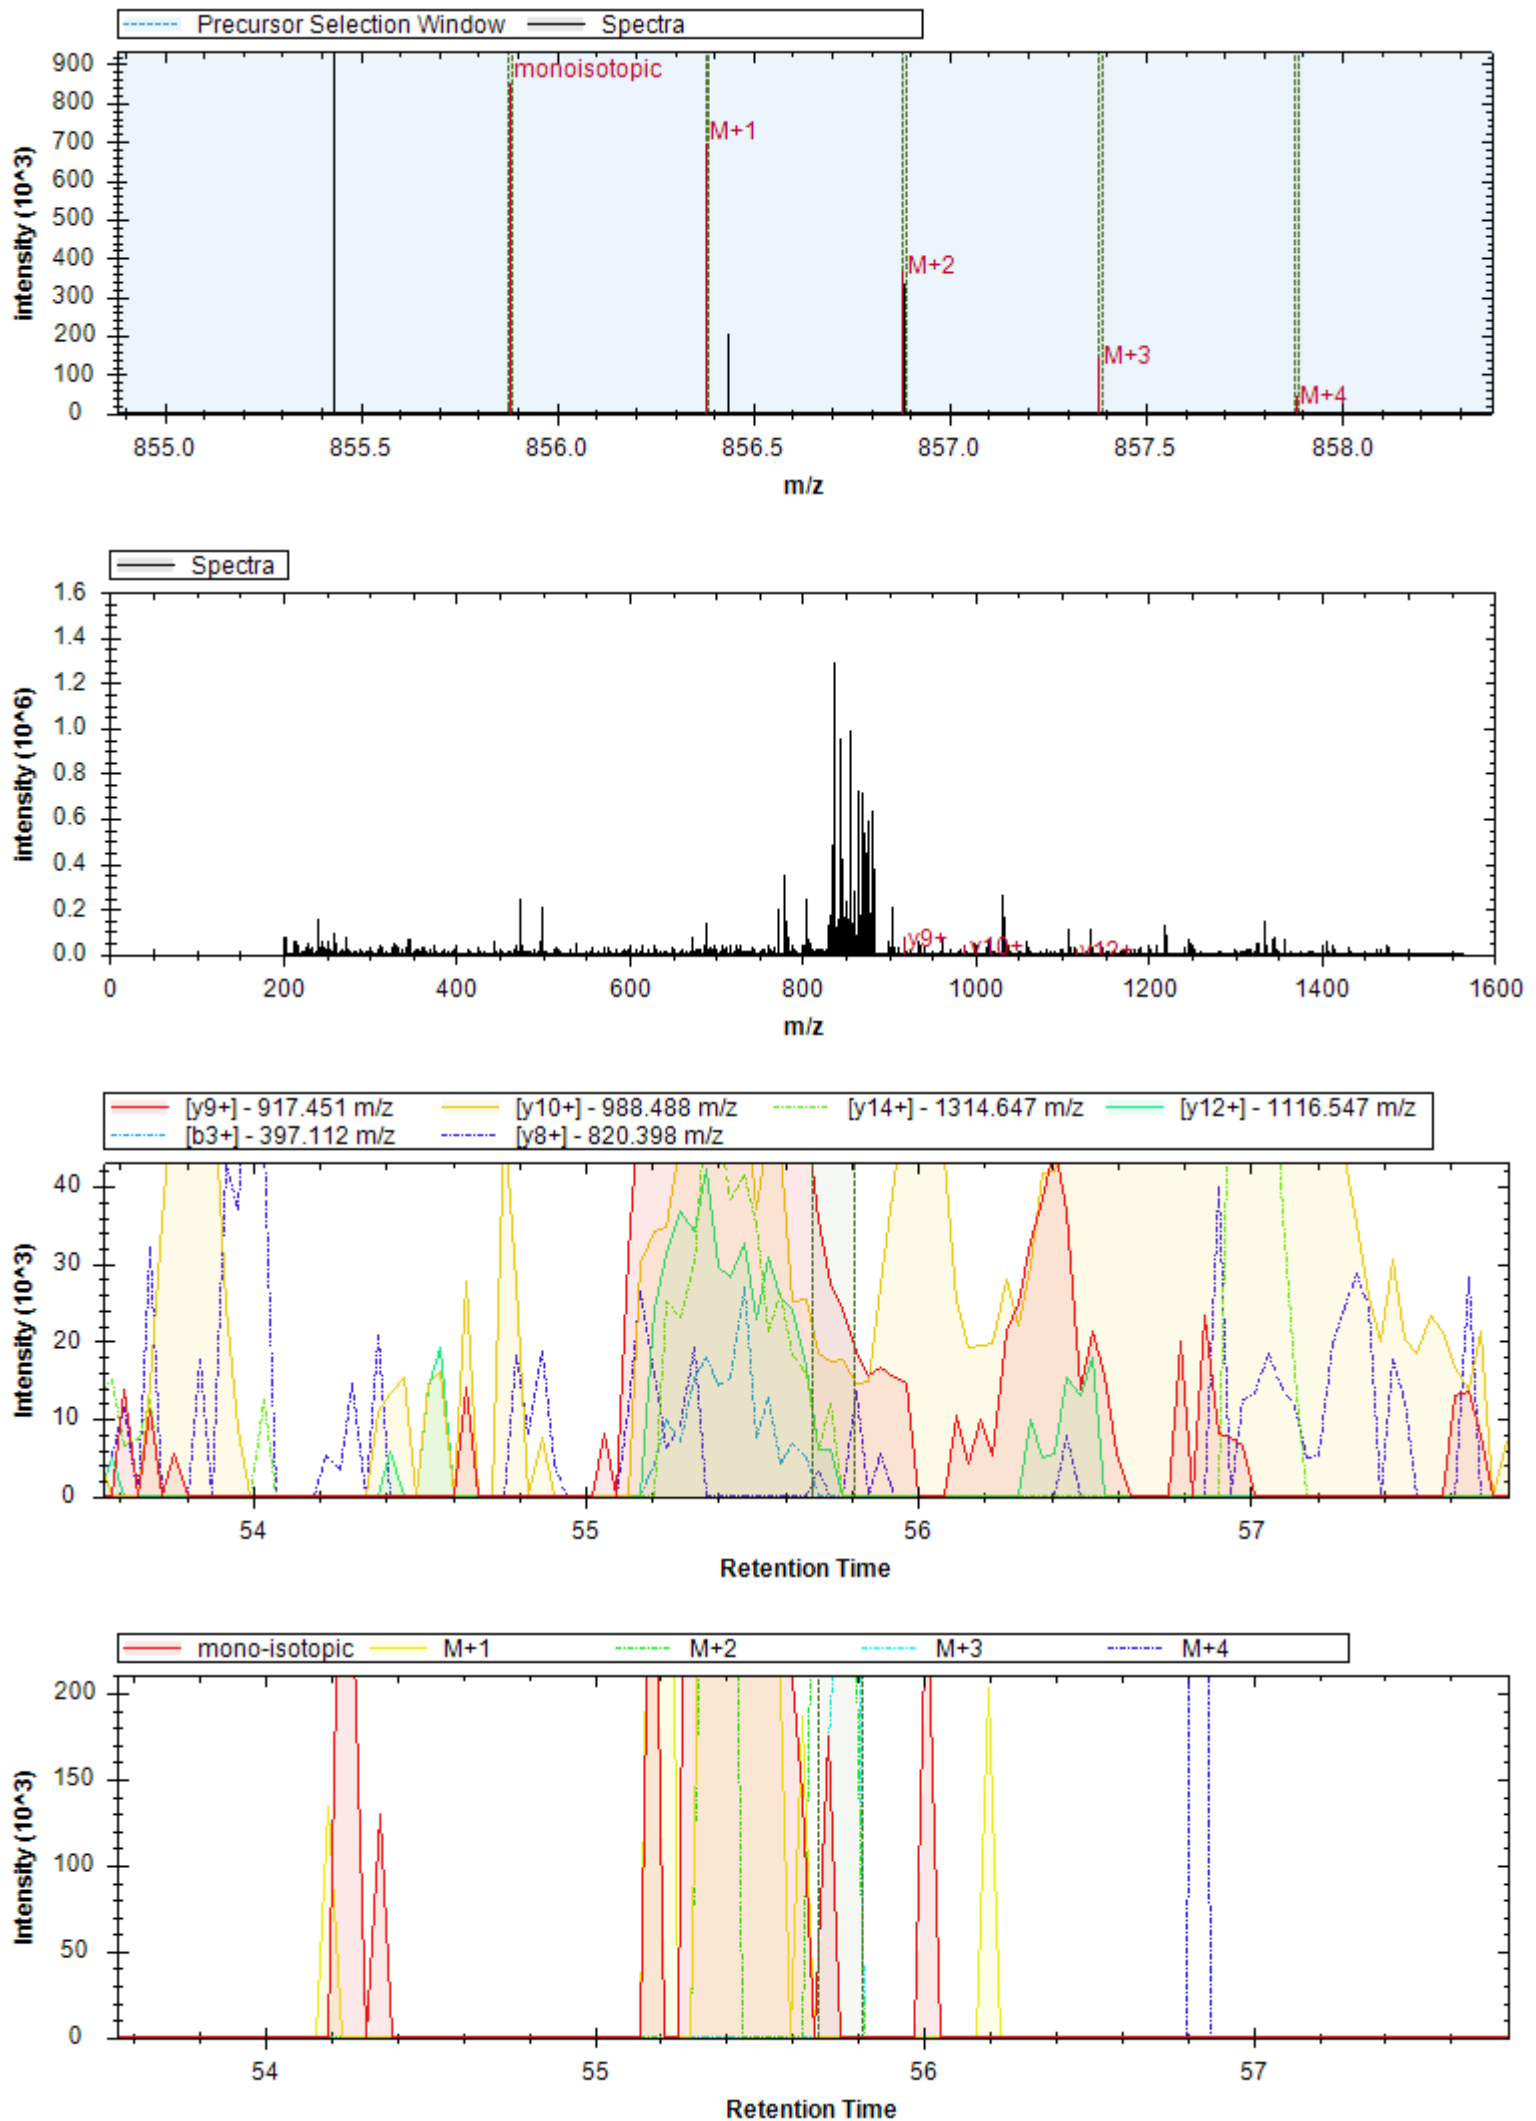

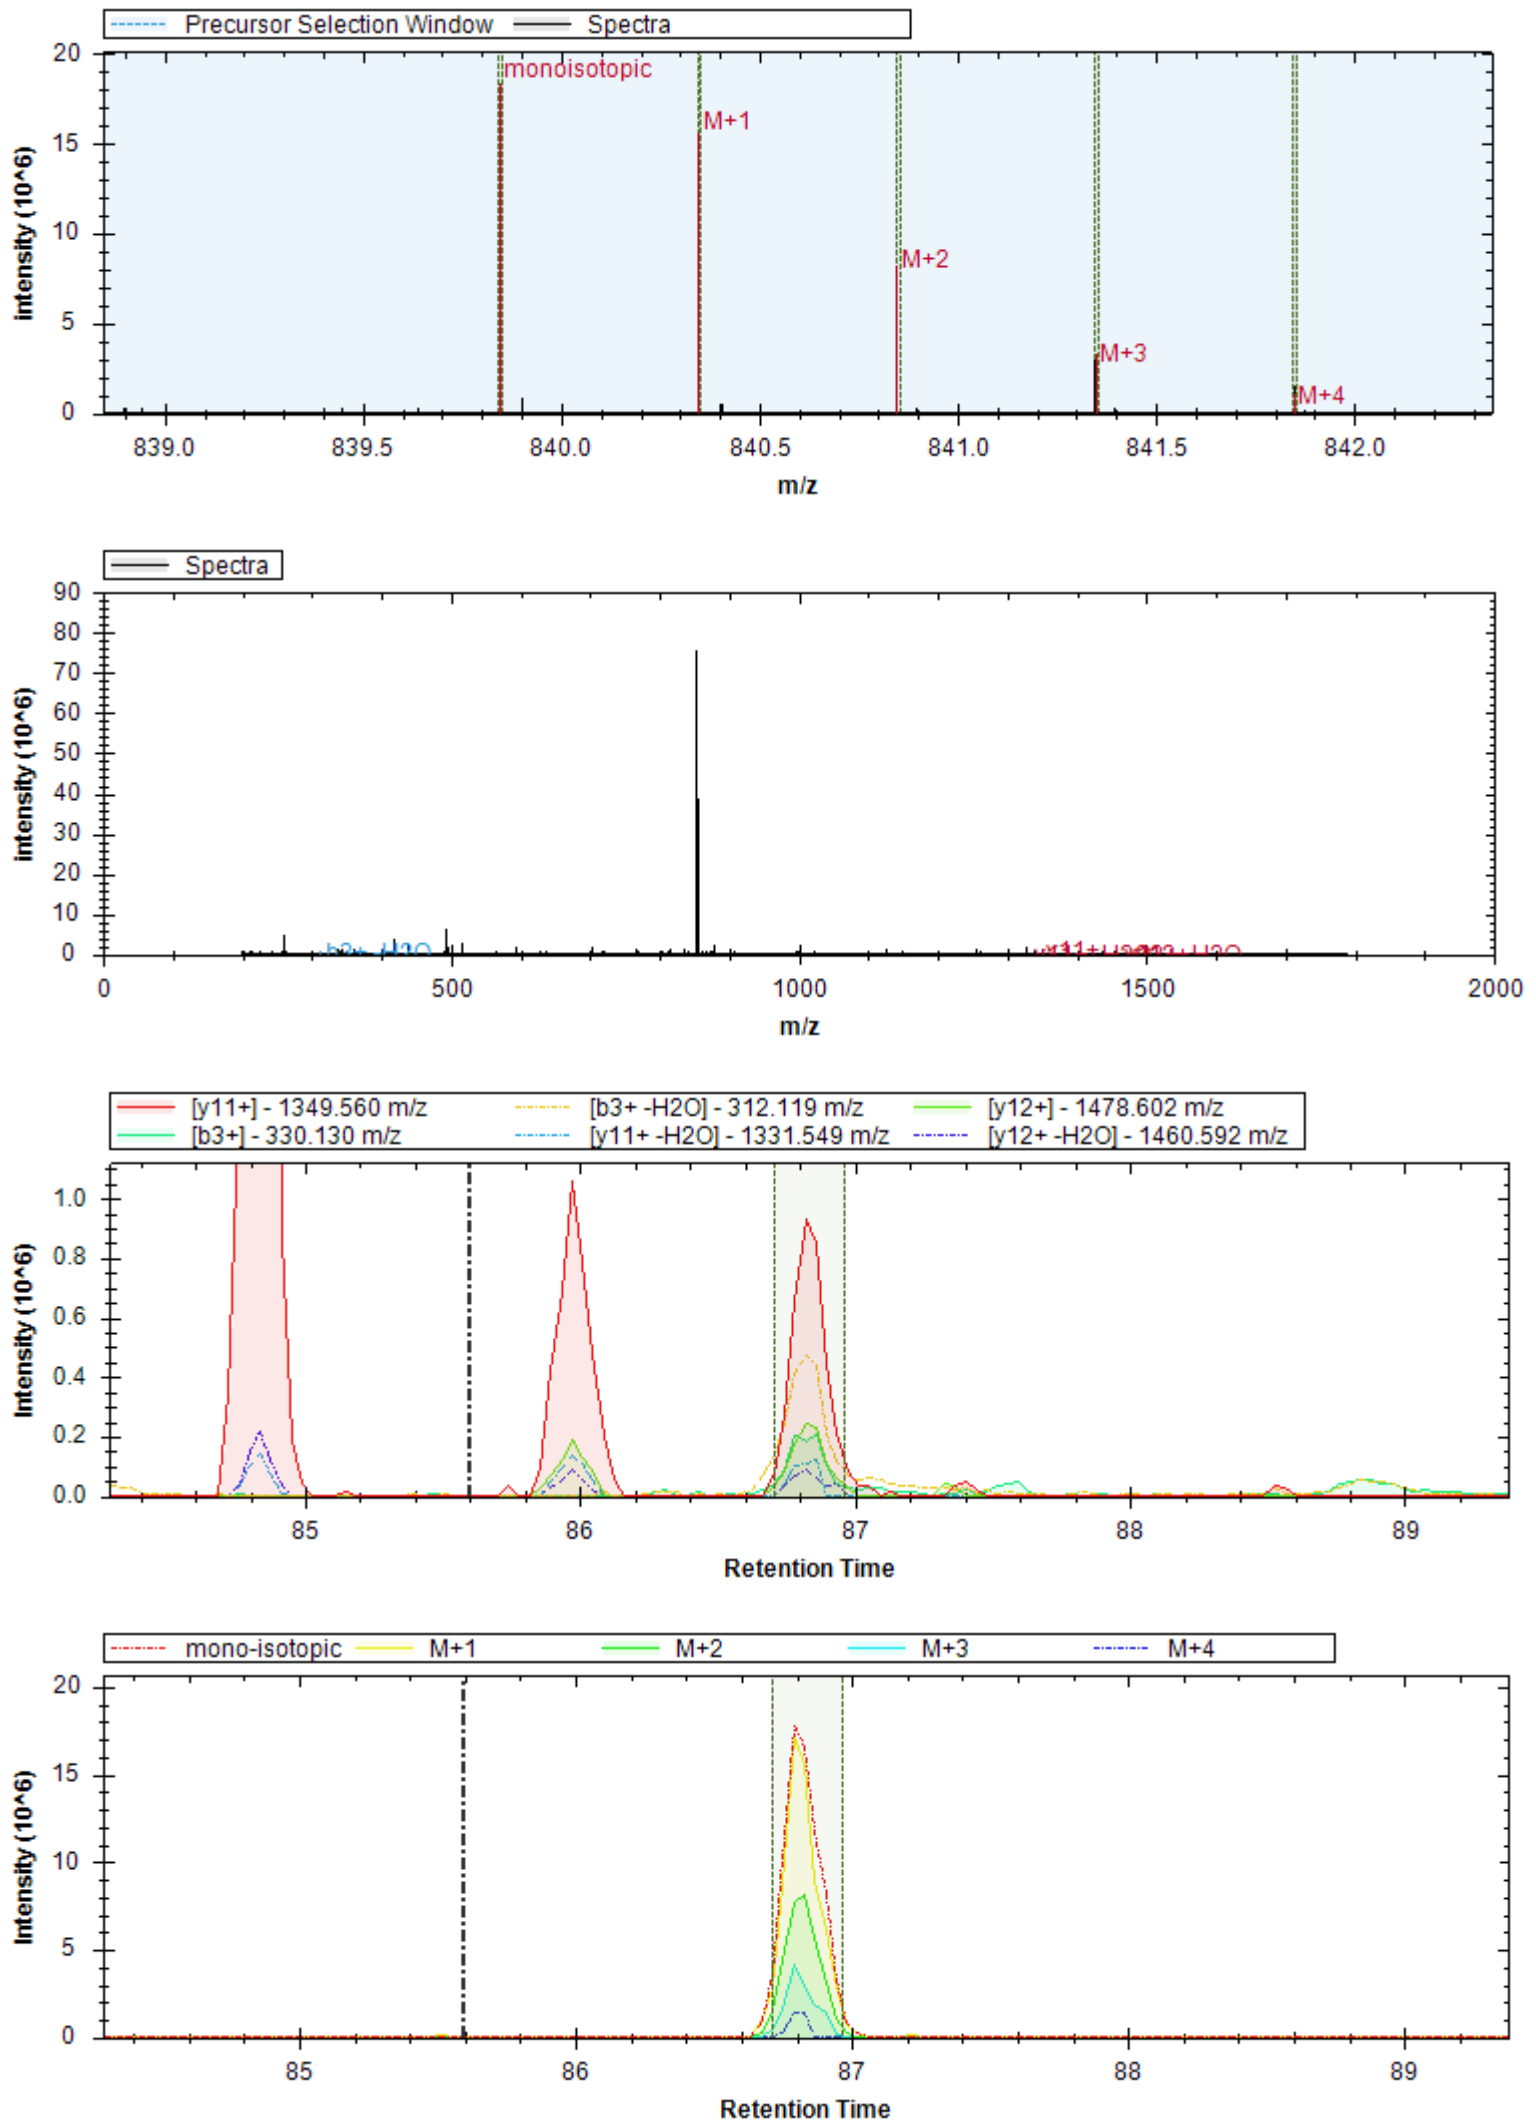

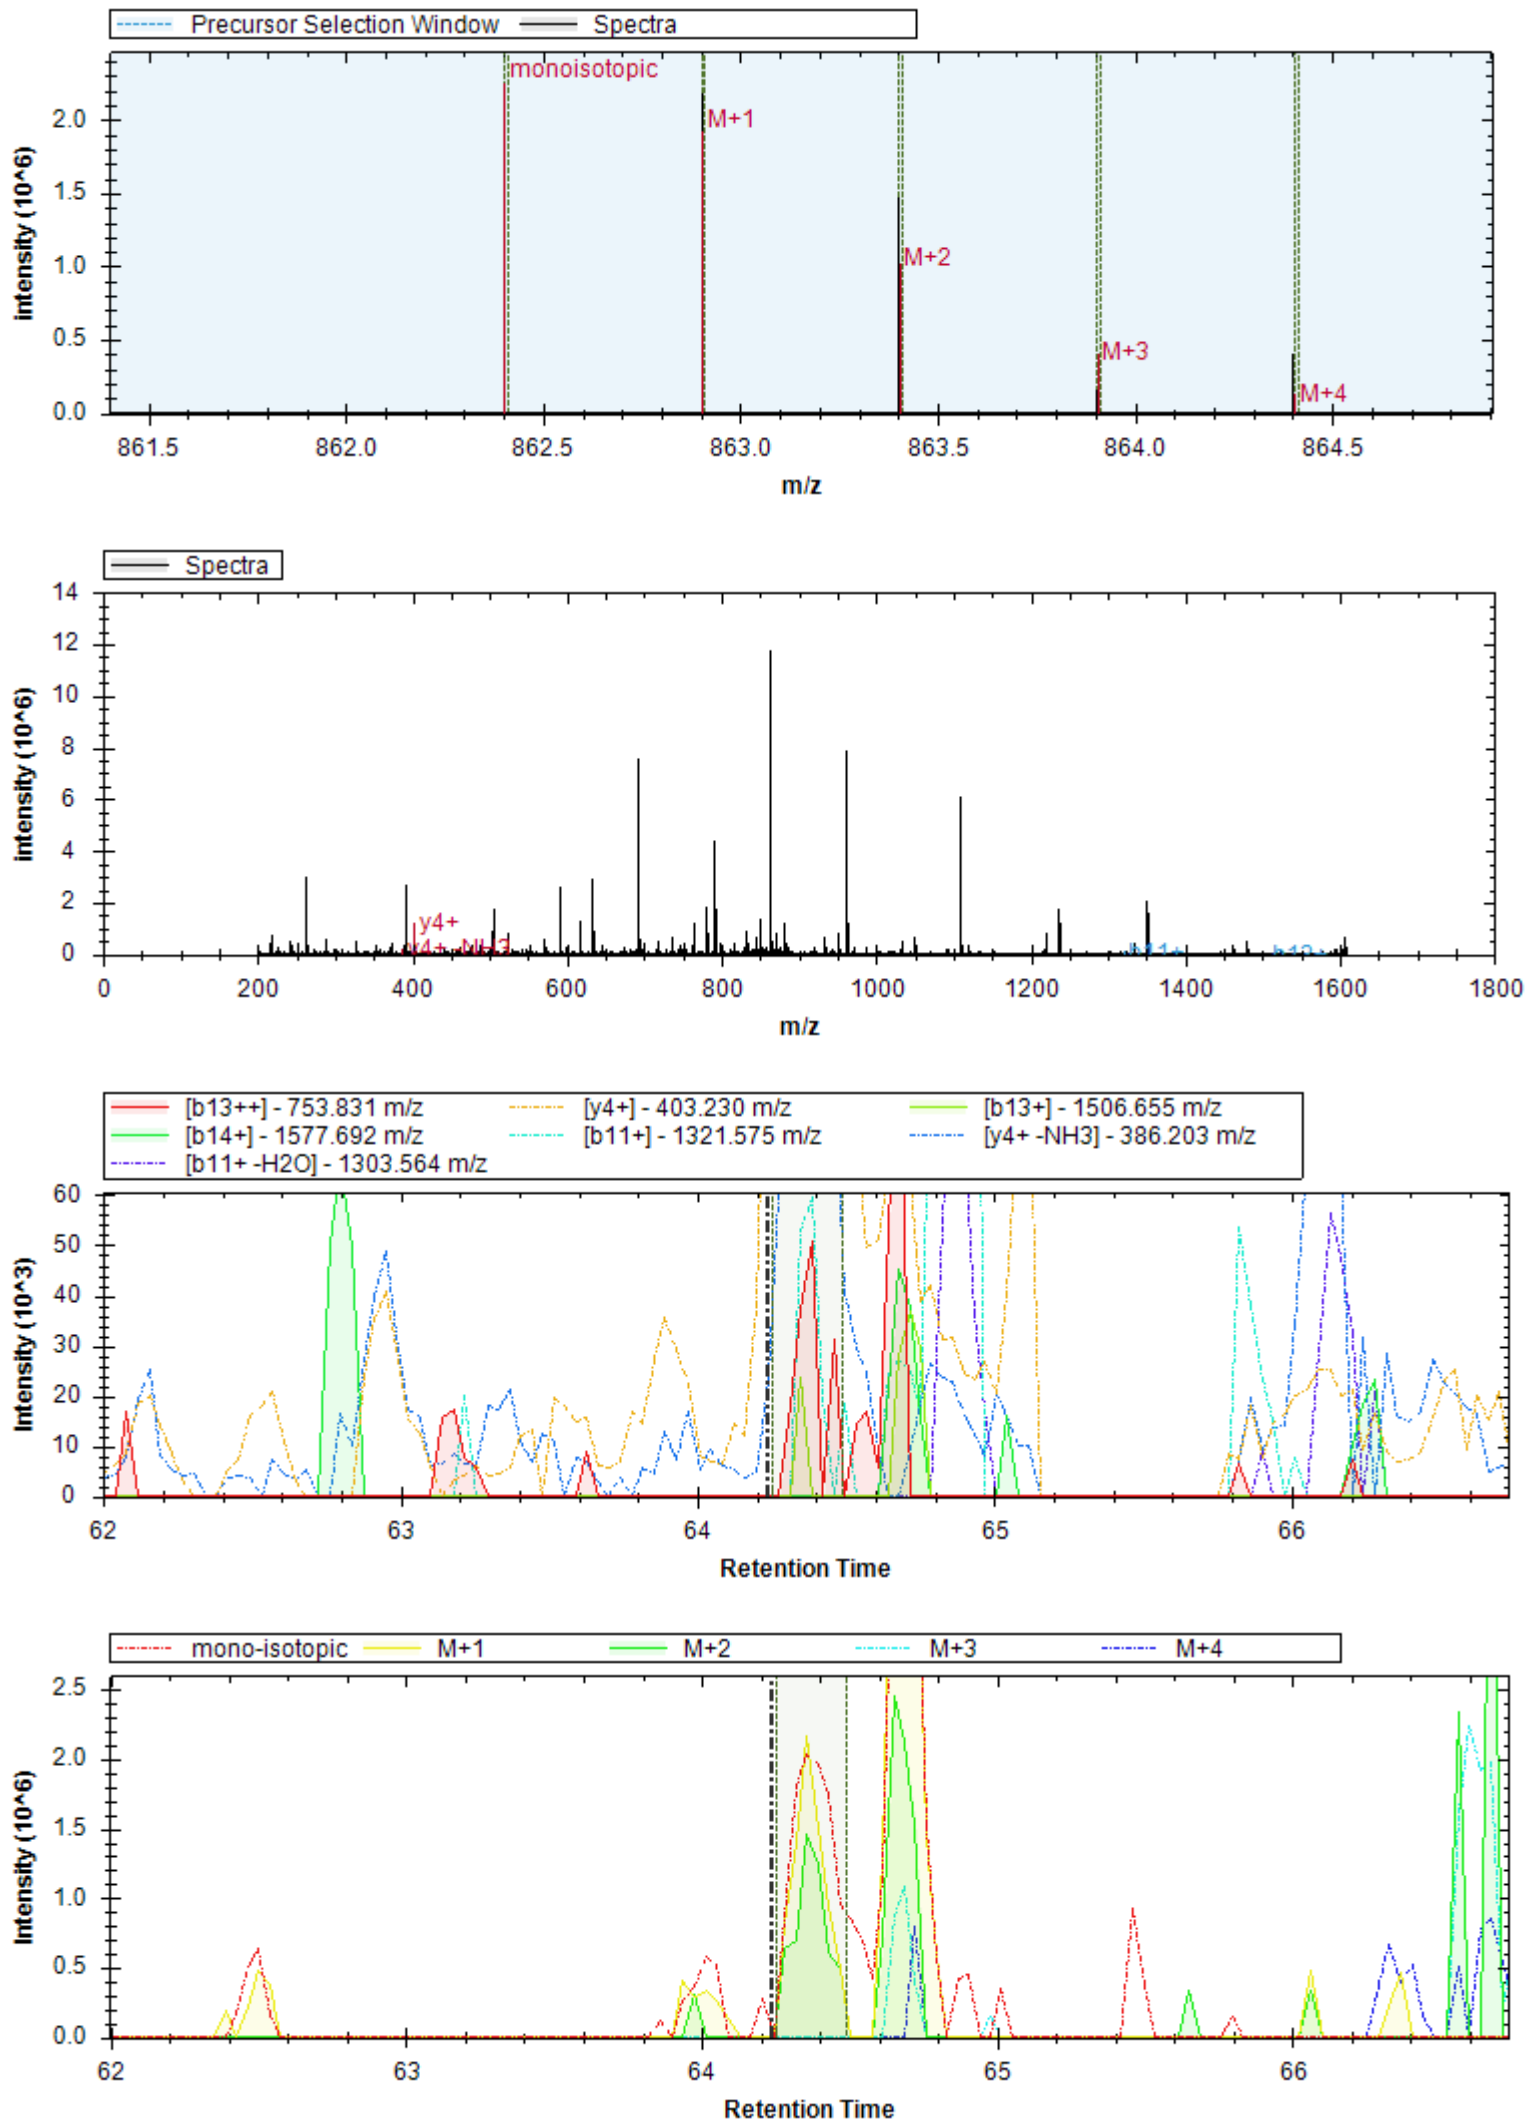



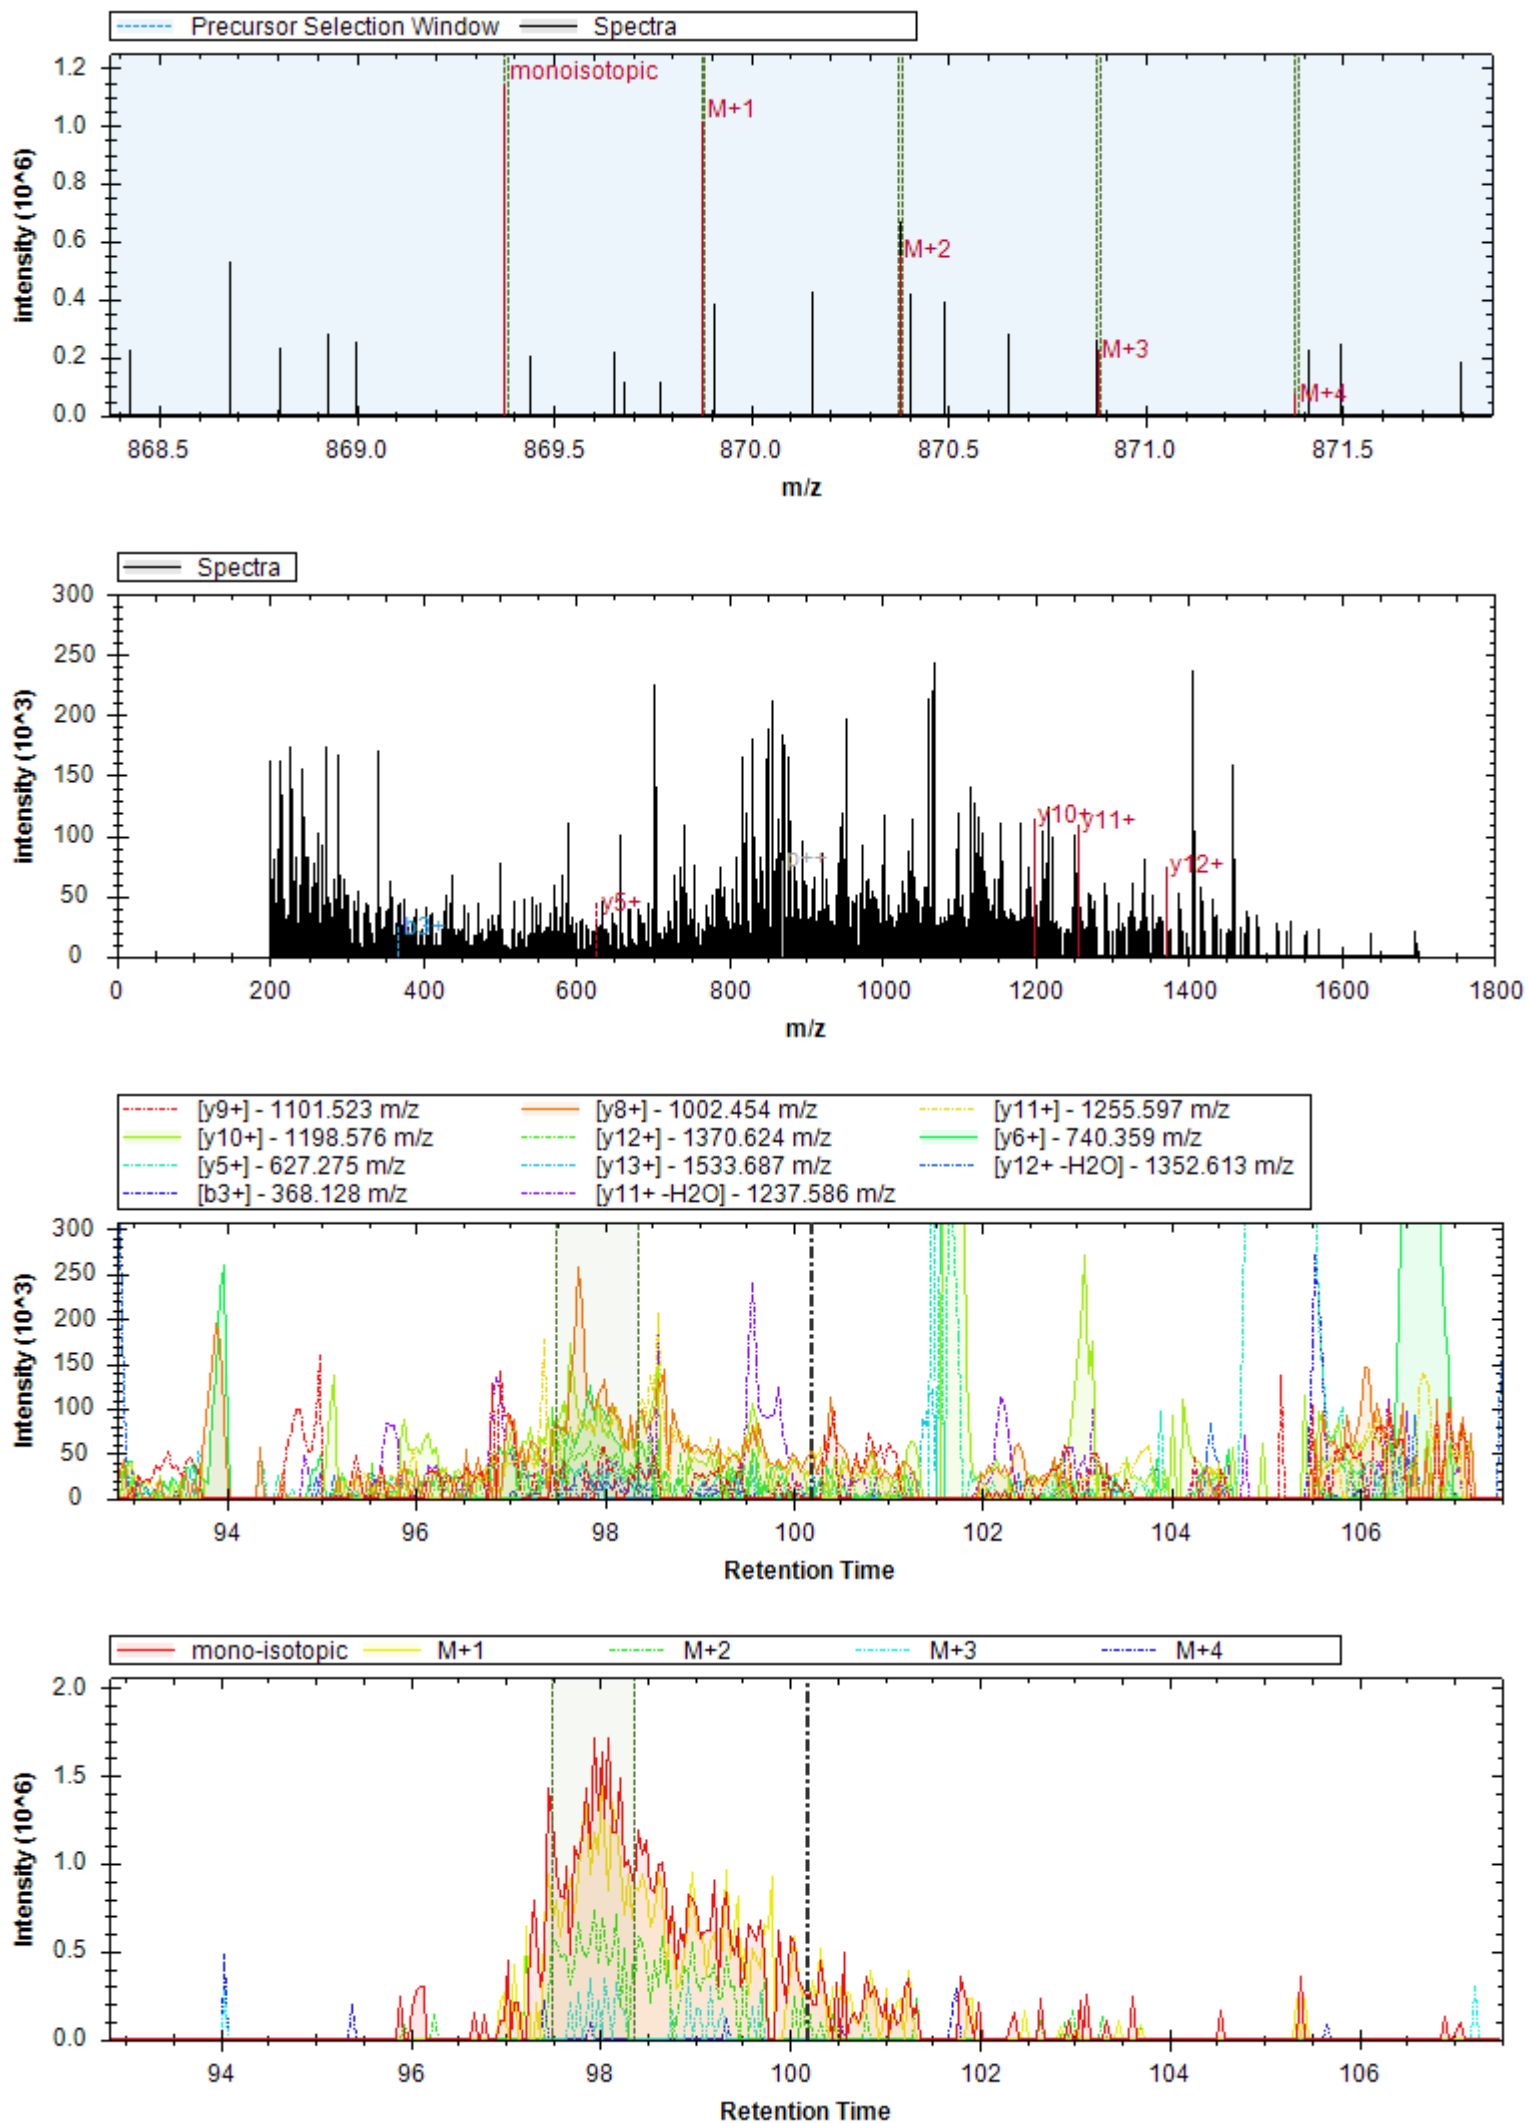

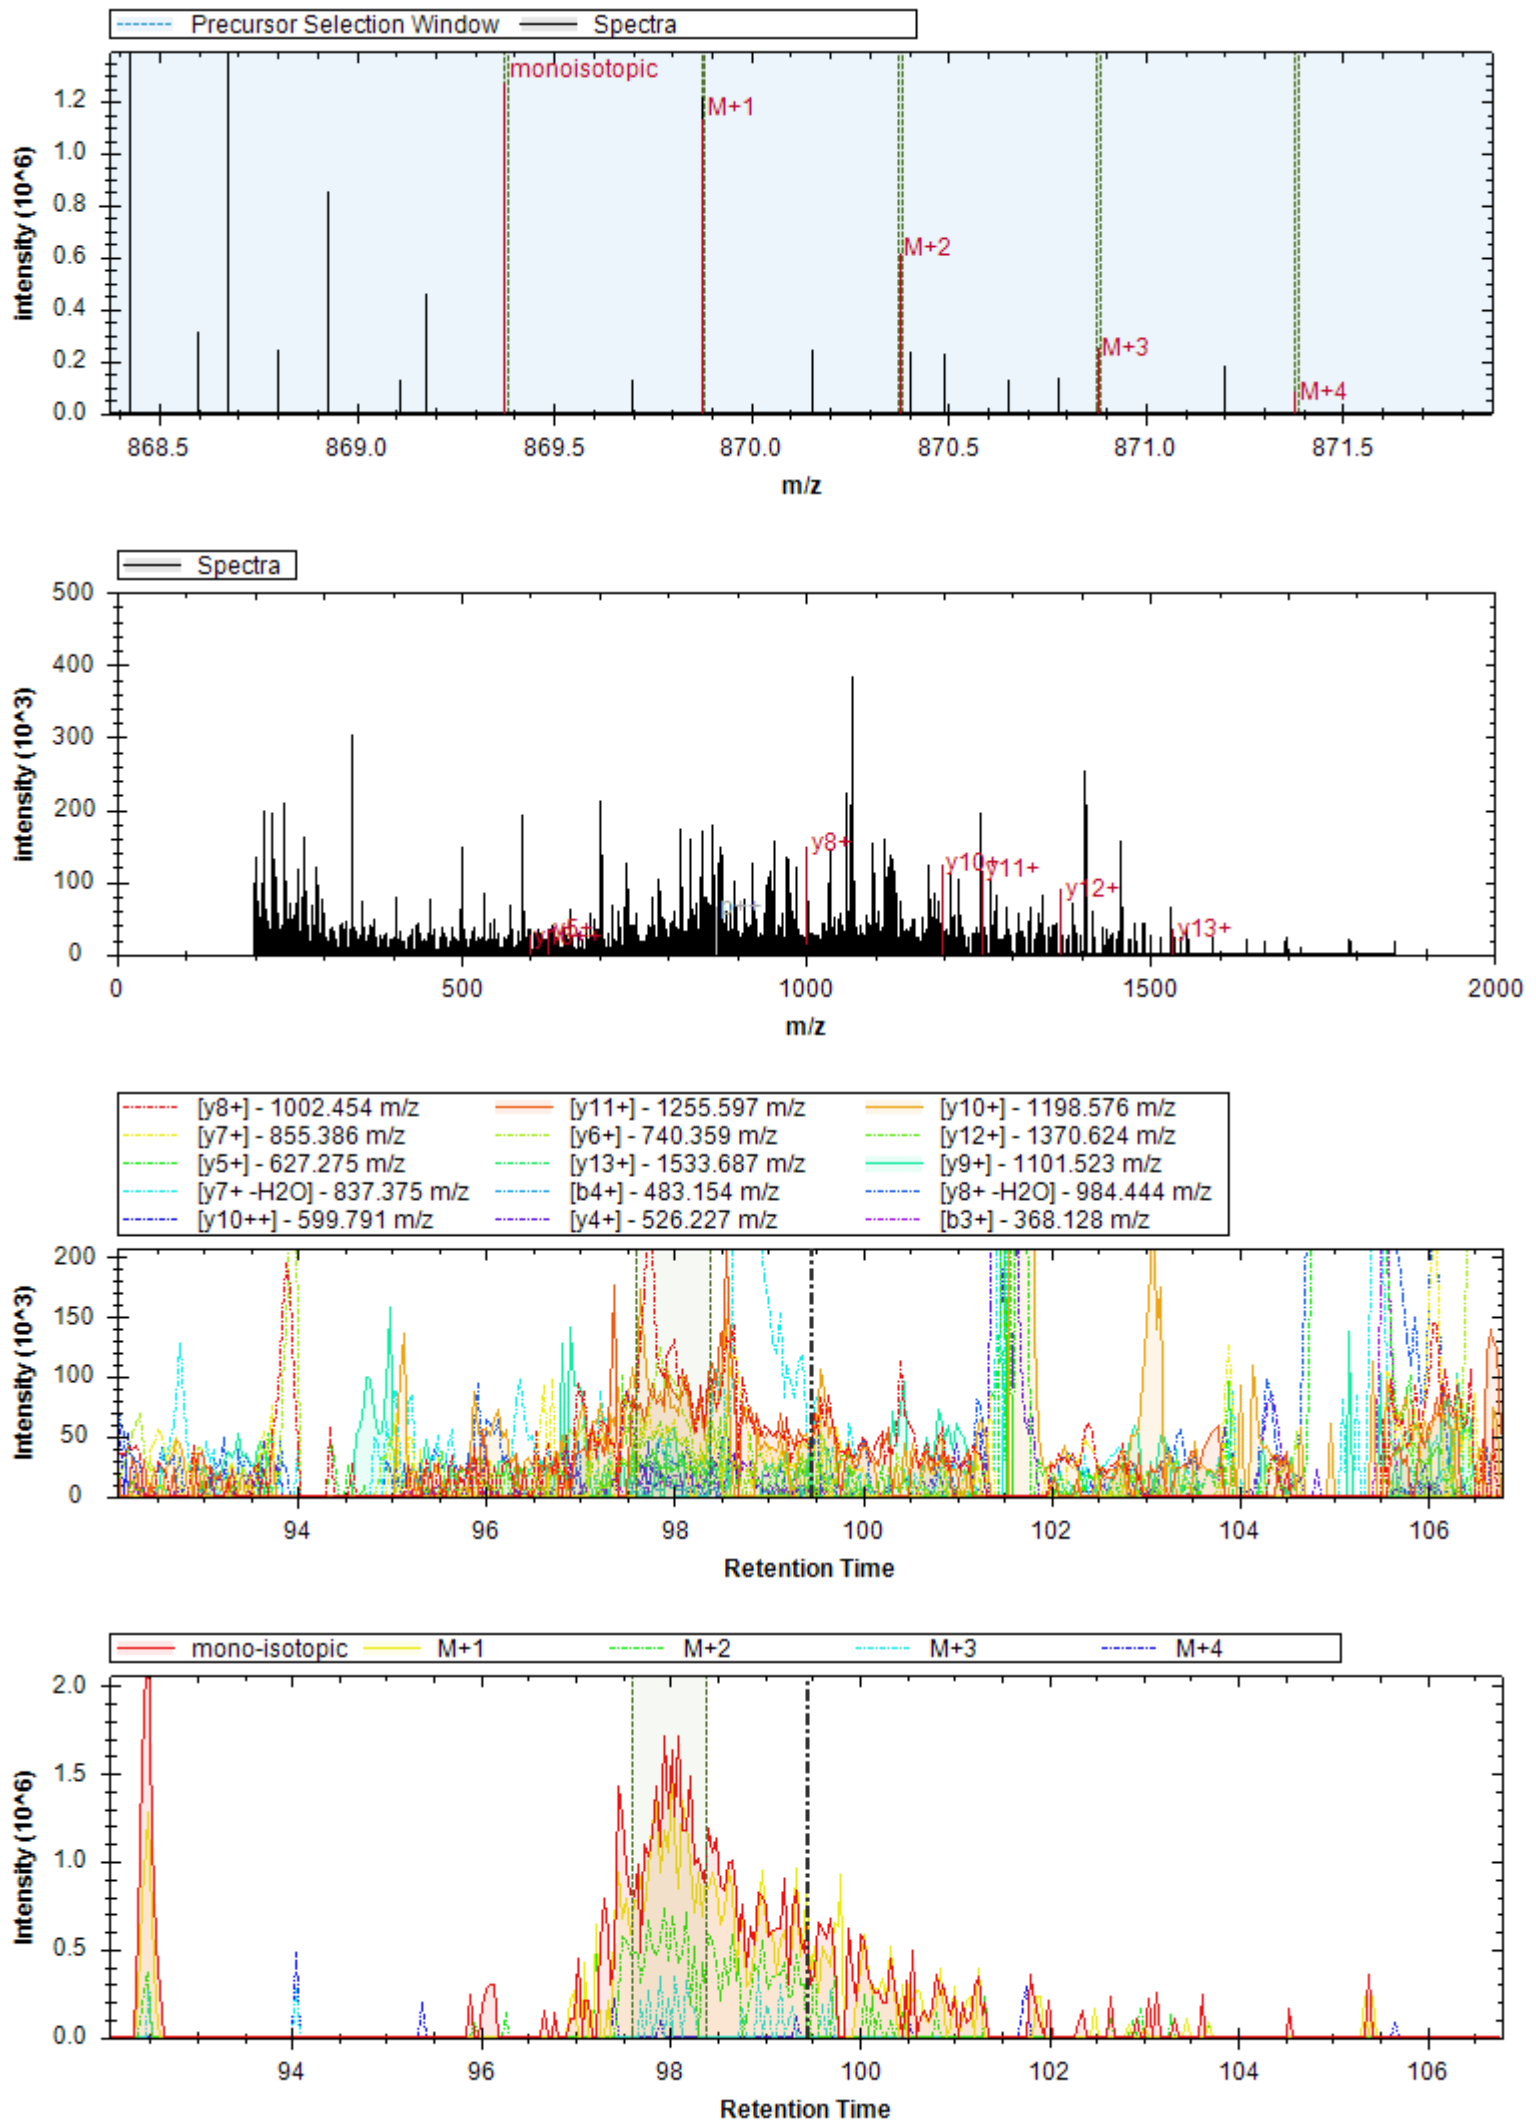

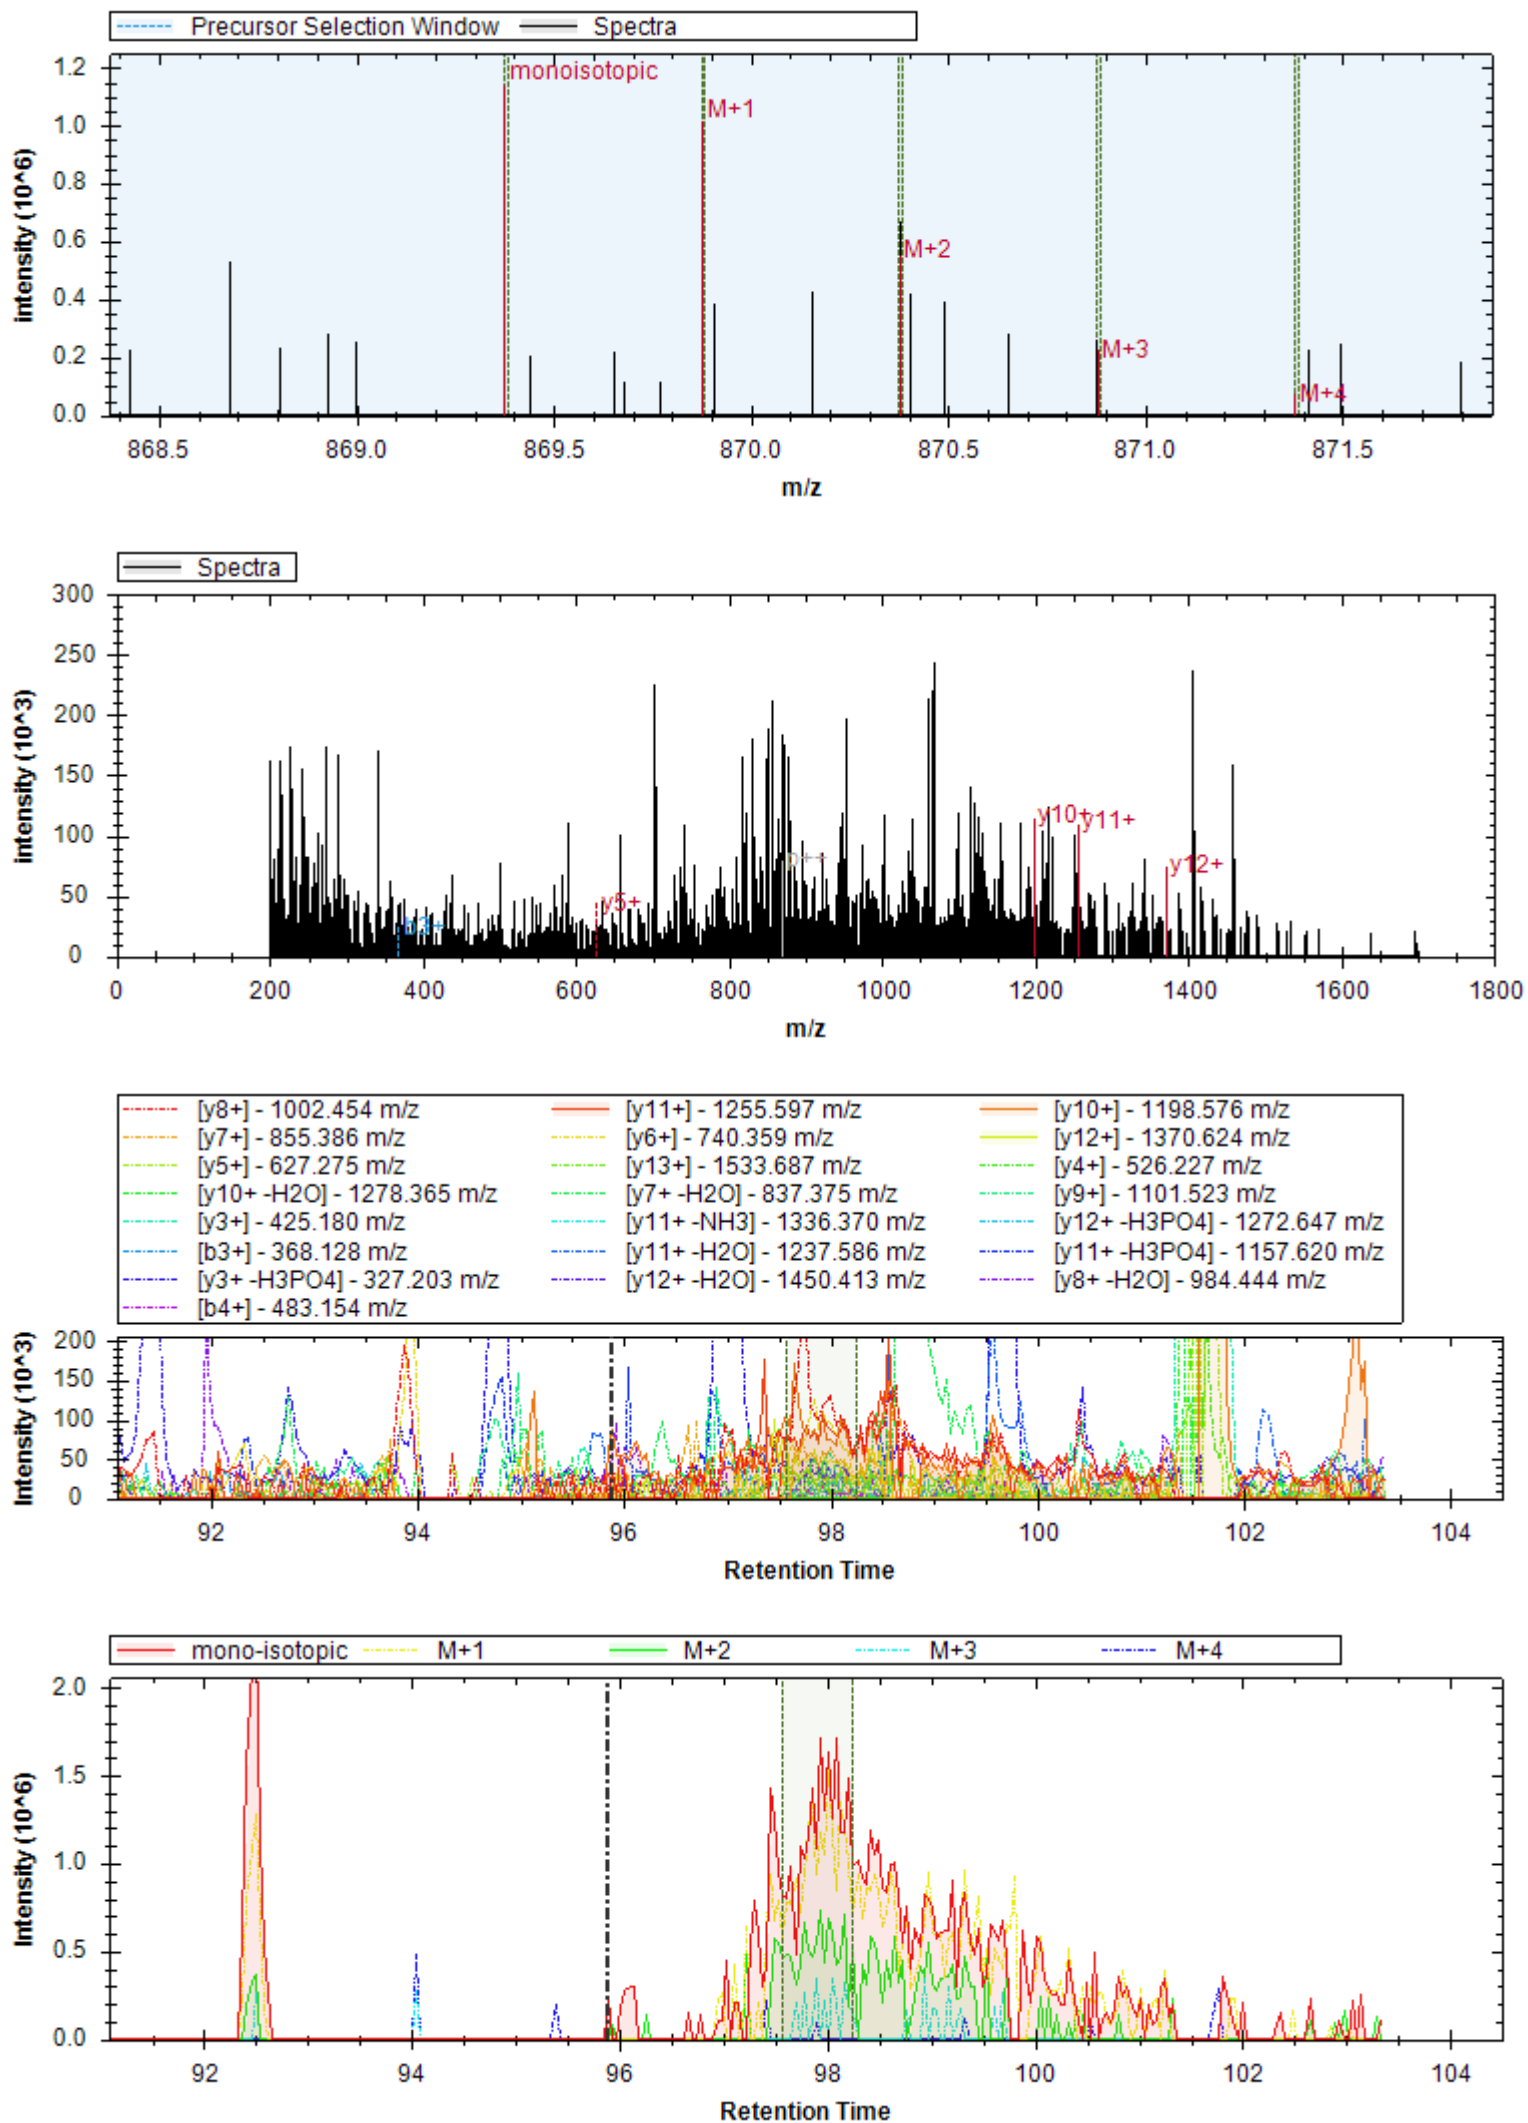

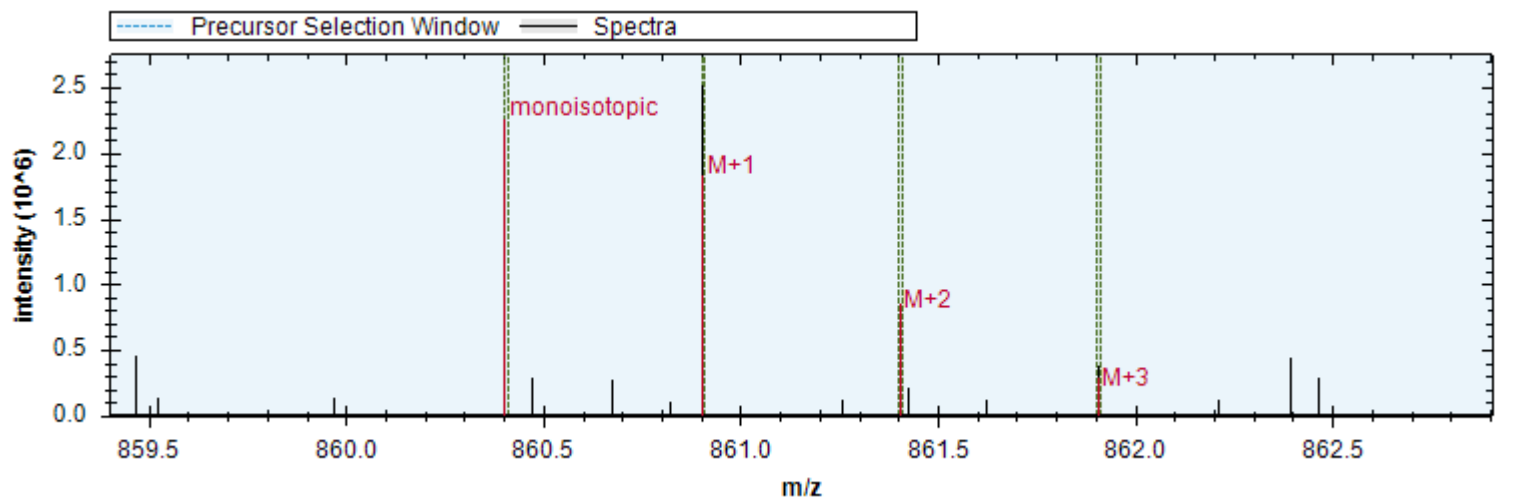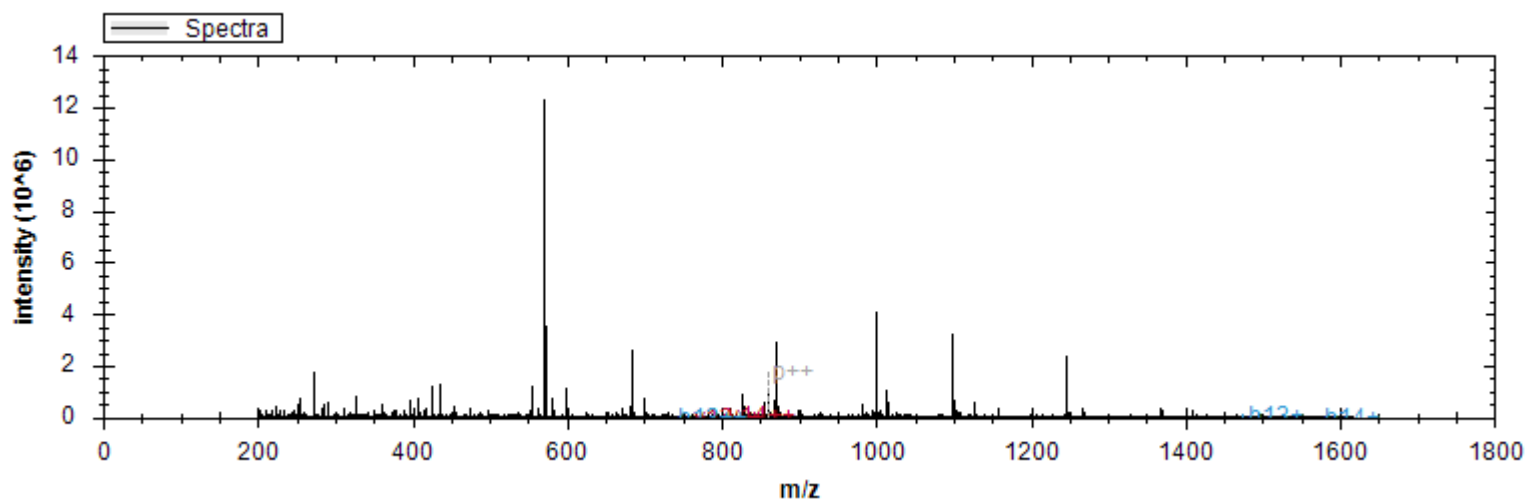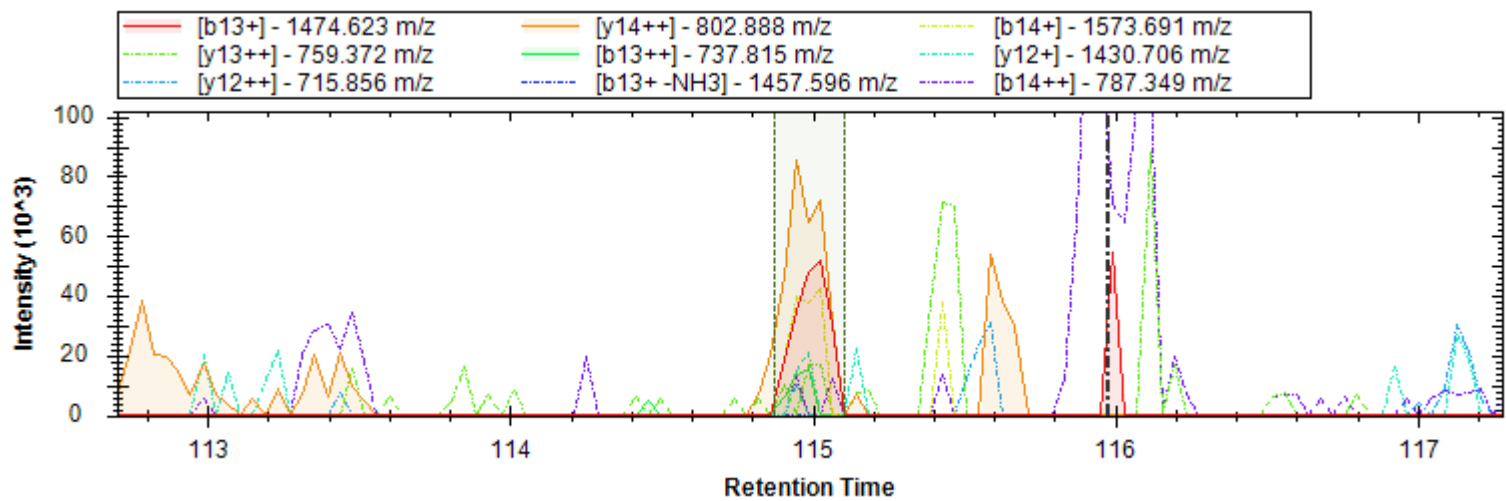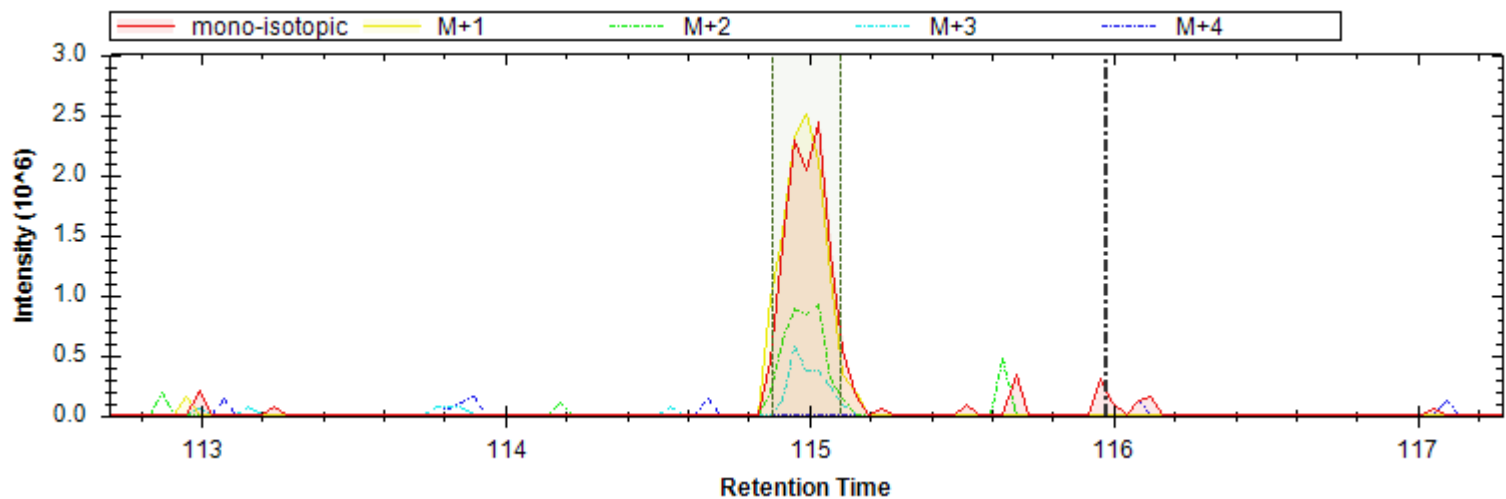

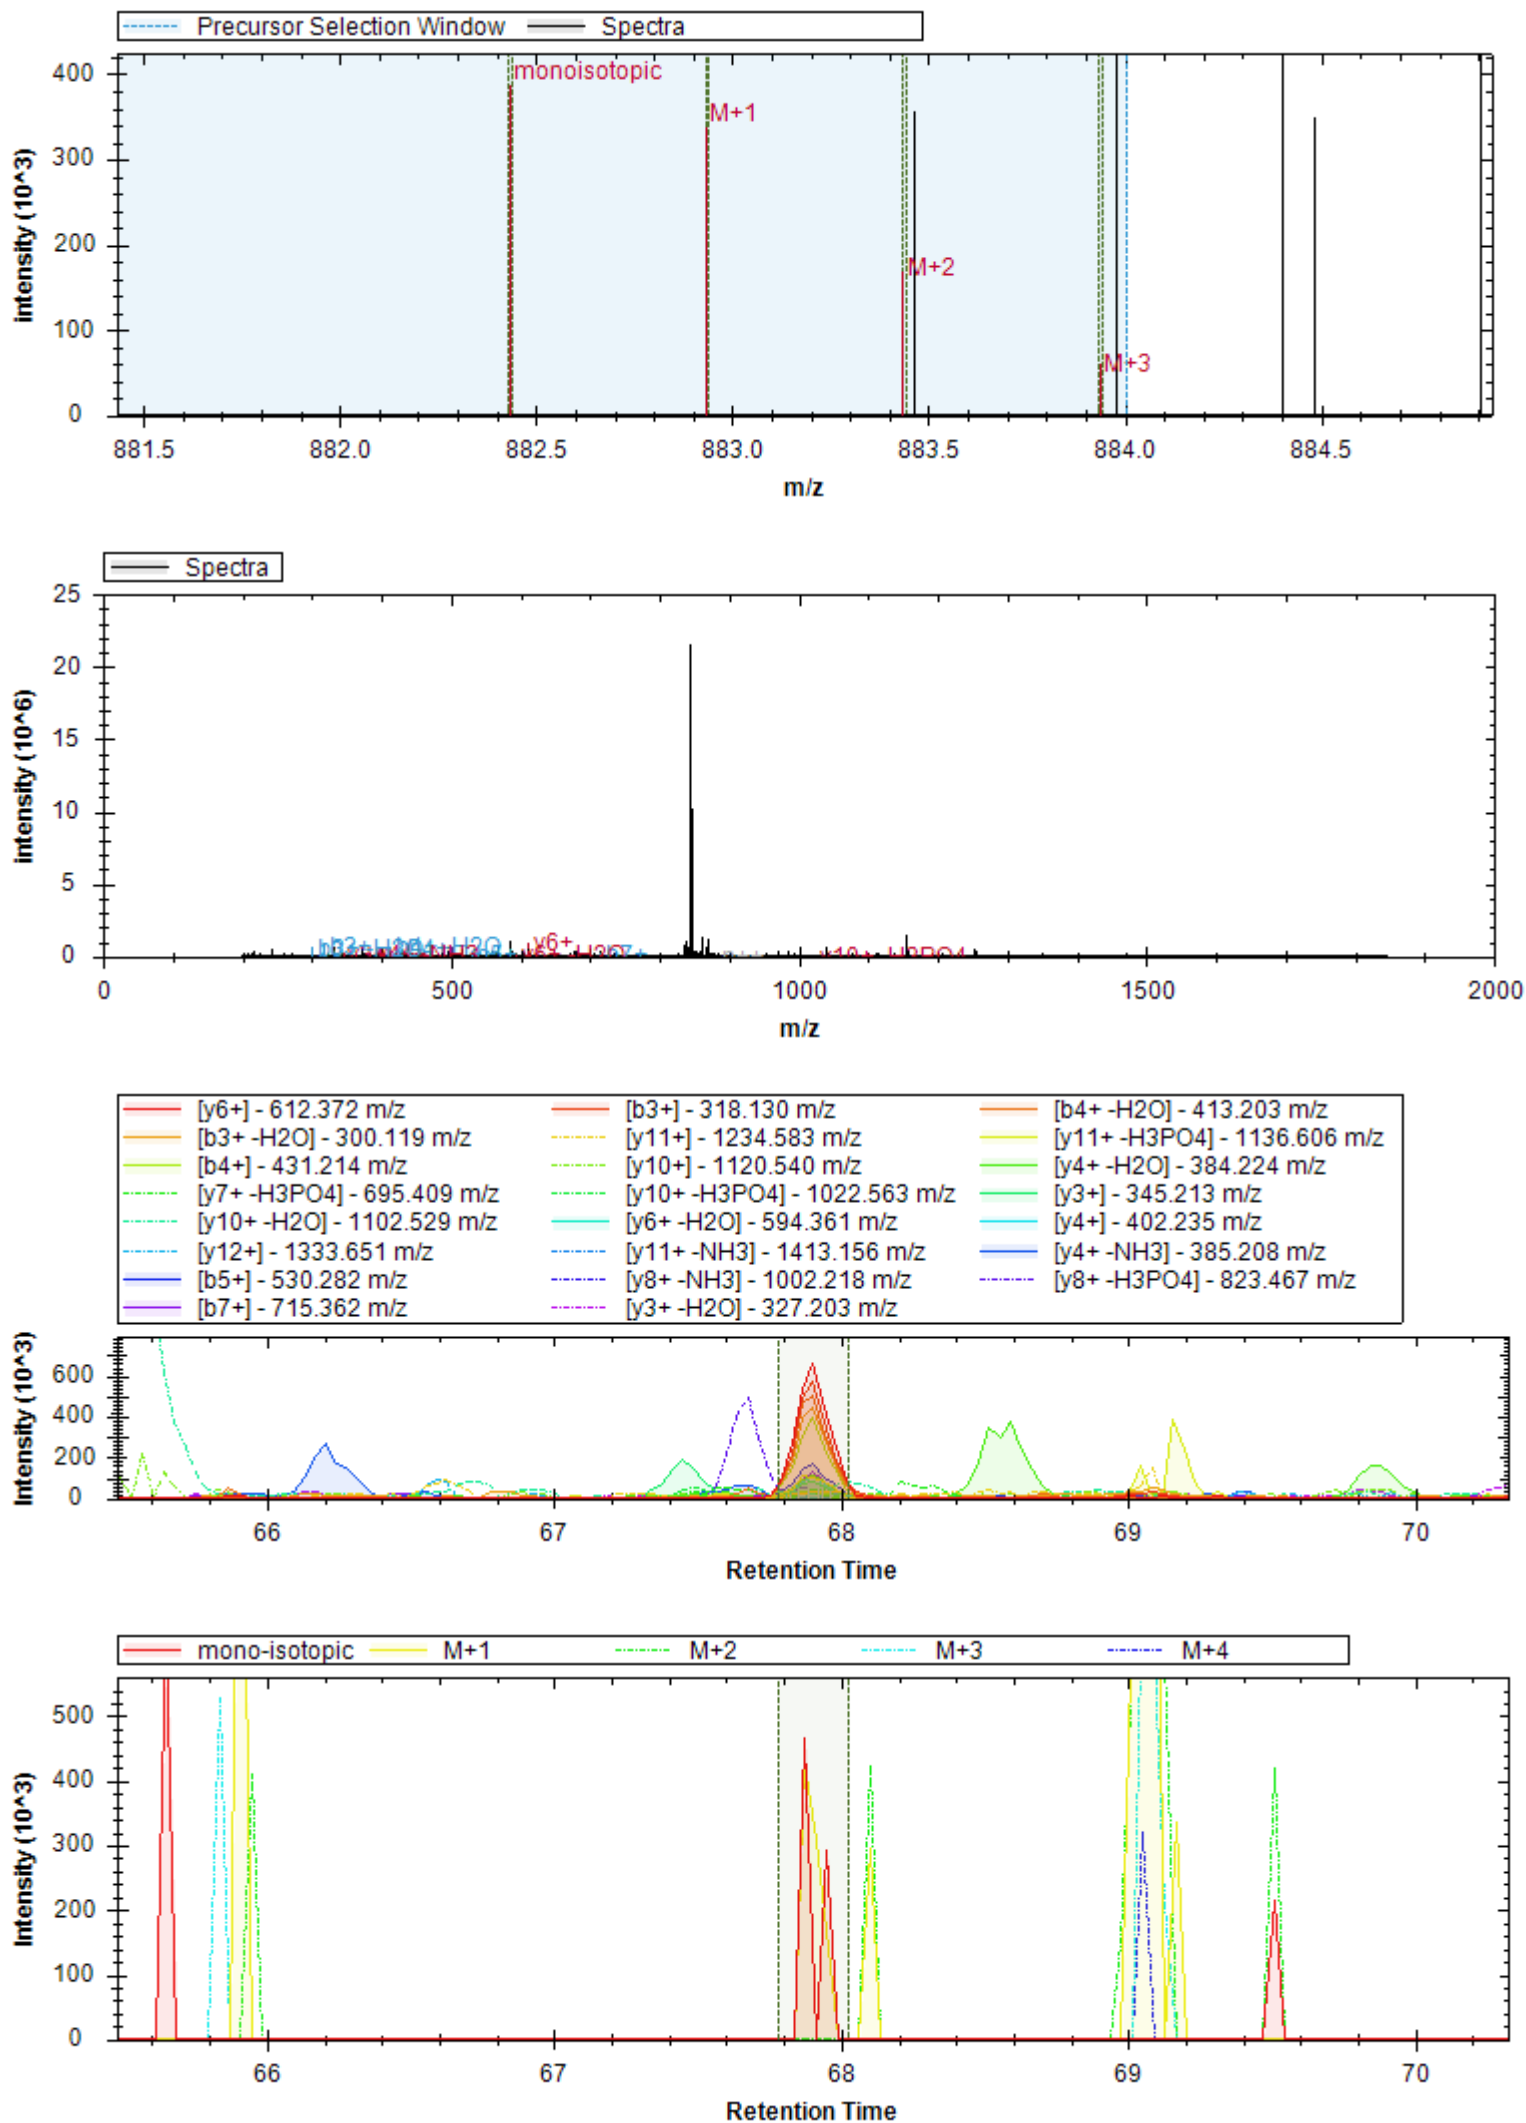

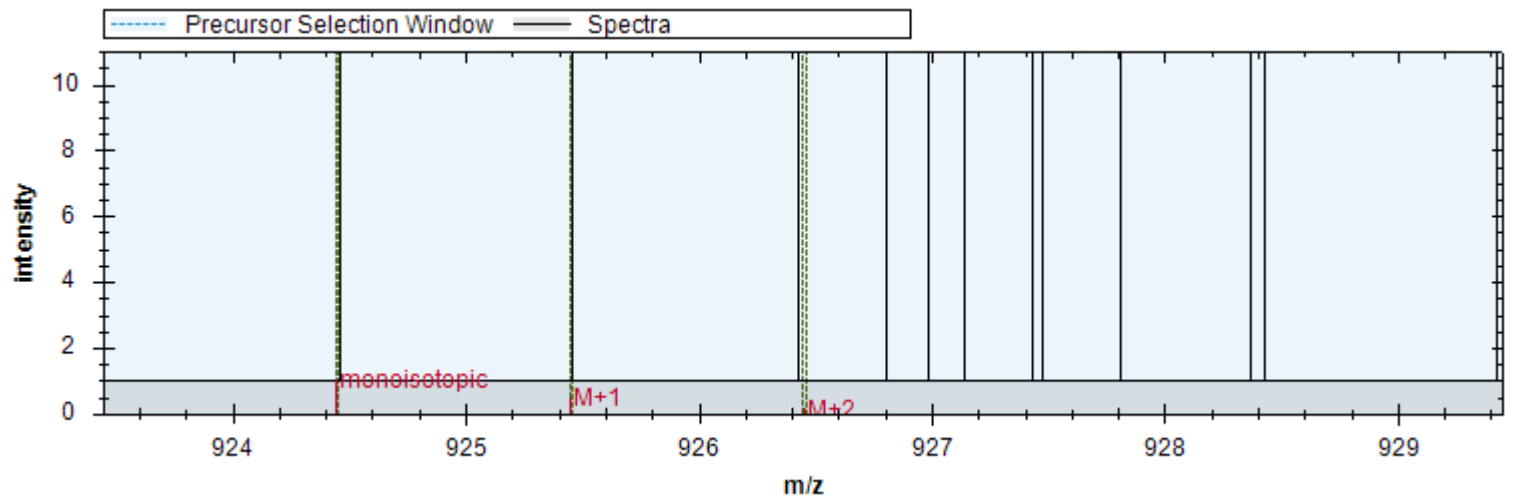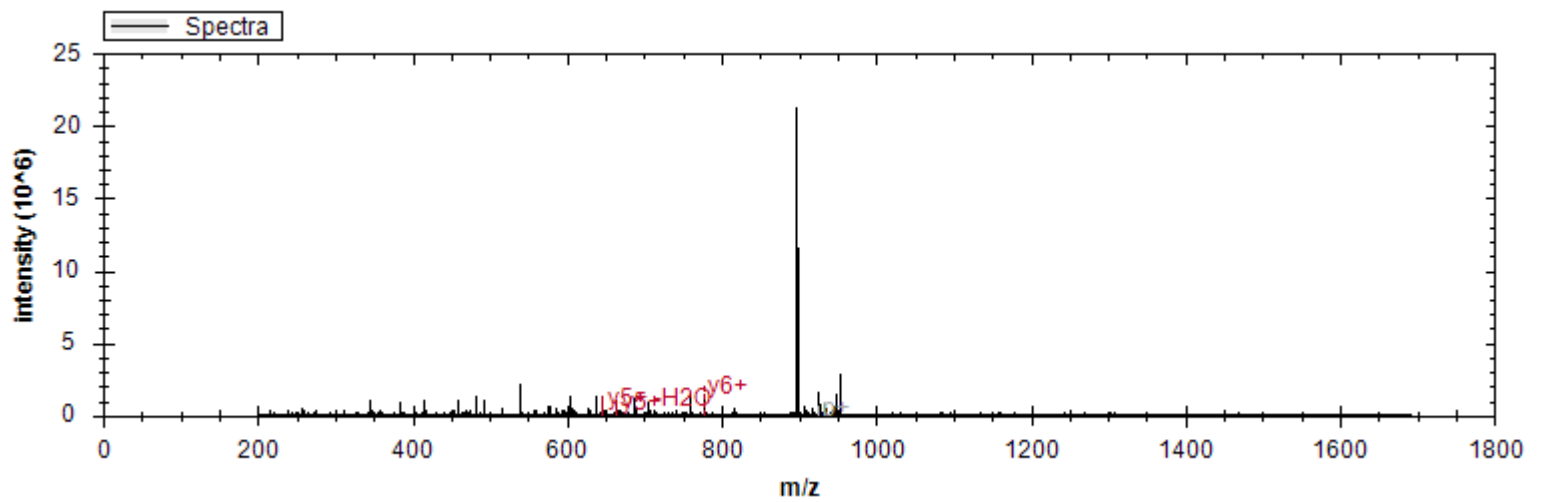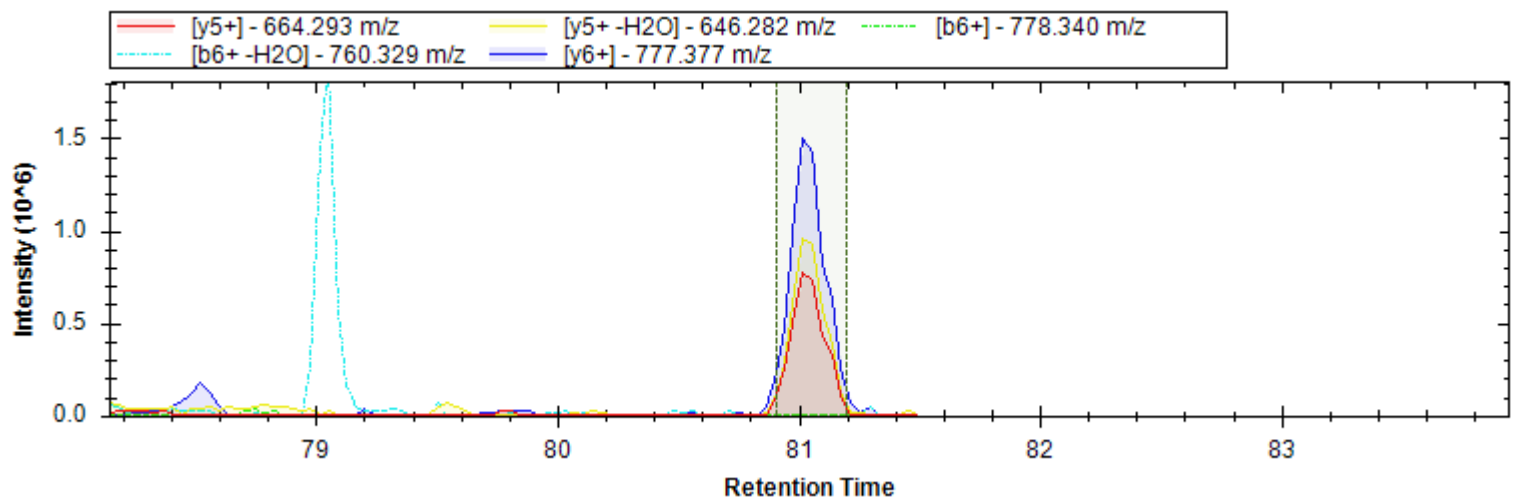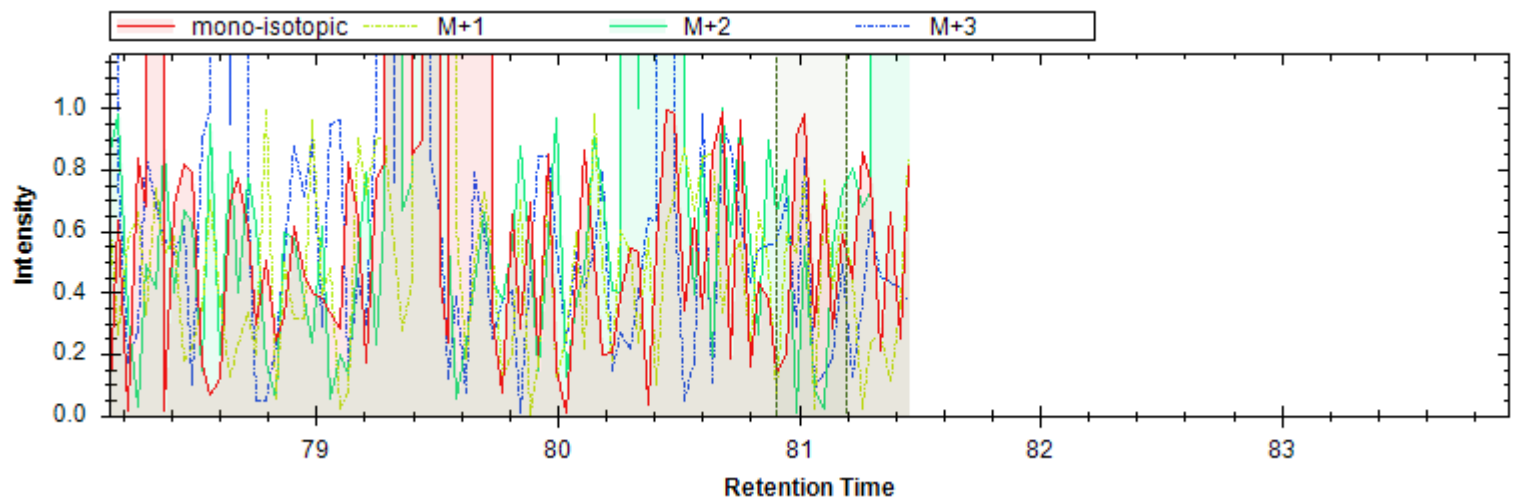

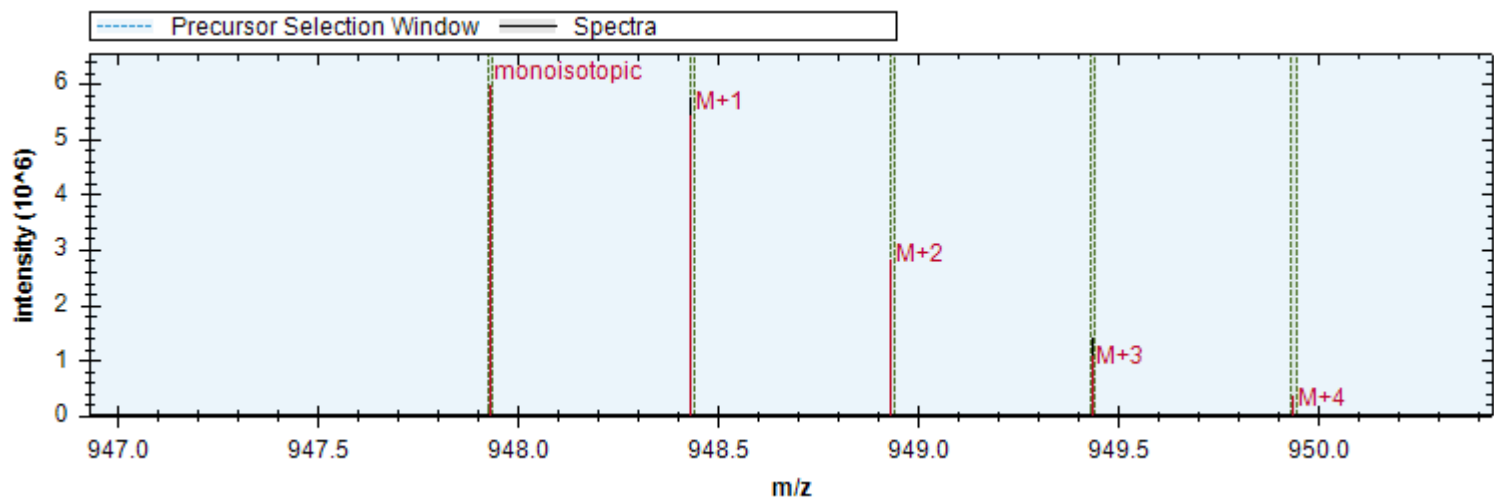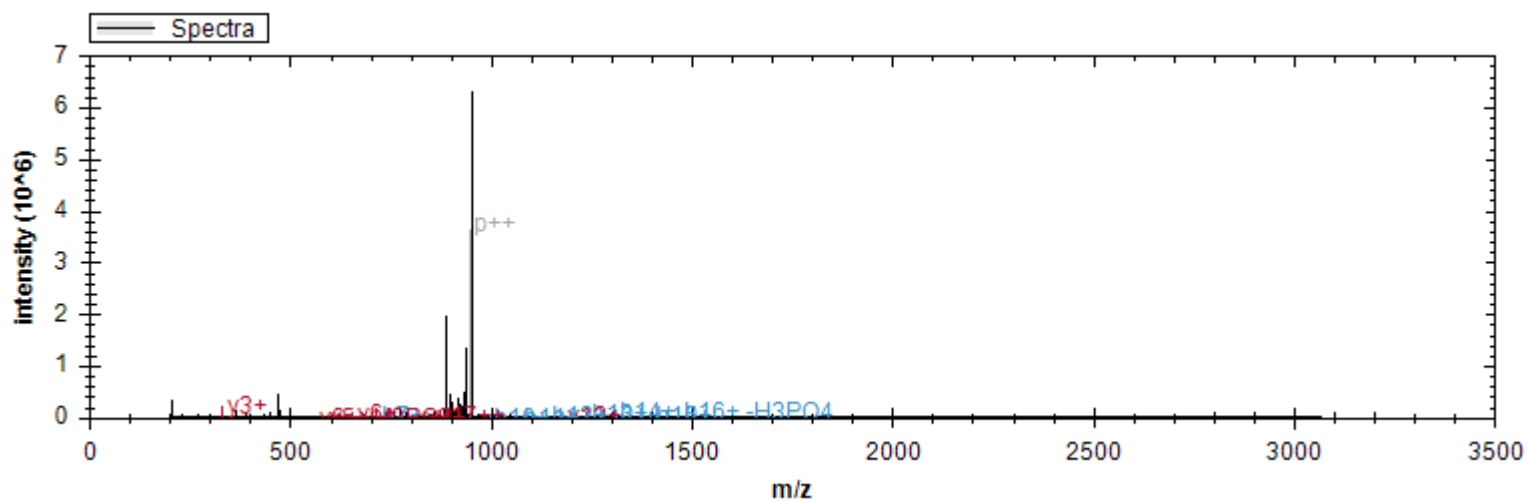

- |                            |                            |                              |
|----------------------------|----------------------------|------------------------------|
| [b14+] - 1310.634 m/z      | [y3+] - 331.198 m/z        | [b16+ -H3PO4] - 1466.687 m/z |
| [b13+] - 1239.596 m/z      | [b7+] - 715.337 m/z        | [b12+] - 1140.528 m/z        |
| [y6+] - 656.265 m/z        | [b15+] - 1397.666 m/z      | [y12+ -H2O] - 1260.314 m/z   |
| [b10+] - 998.454 m/z       | [y12+] - 1180.525 m/z      | [y4+] - 498.196 m/z          |
| [y17++] - 854.899 m/z      | [b16+ -H2O] - 1644.453 m/z | [b11+] - 1069.491 m/z        |
| [y4+ -H3PO4] - 400.219 m/z | [b15+ -H2O] - 1379.655 m/z | [y5+ -H3PO4] - 487.251 m/z   |
| [y9+] - 897.408 m/z        | [y4+ -NH3] - 578.969 m/z   | [y3+ -H2O] - 313.187 m/z     |
| [y5+] - 585.228 m/z        | [y6+ -H3PO4] - 558.288 m/z | [b16+ -NH3] - 1645.437 m/z   |
| [y8+] - 826.371 m/z        |                            |                              |

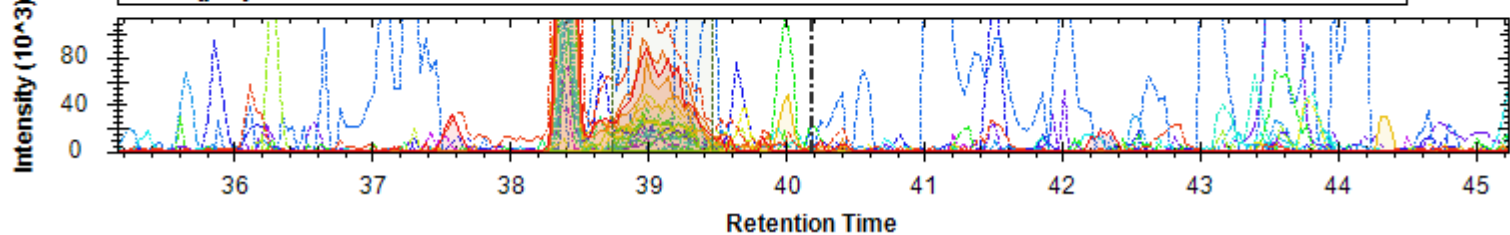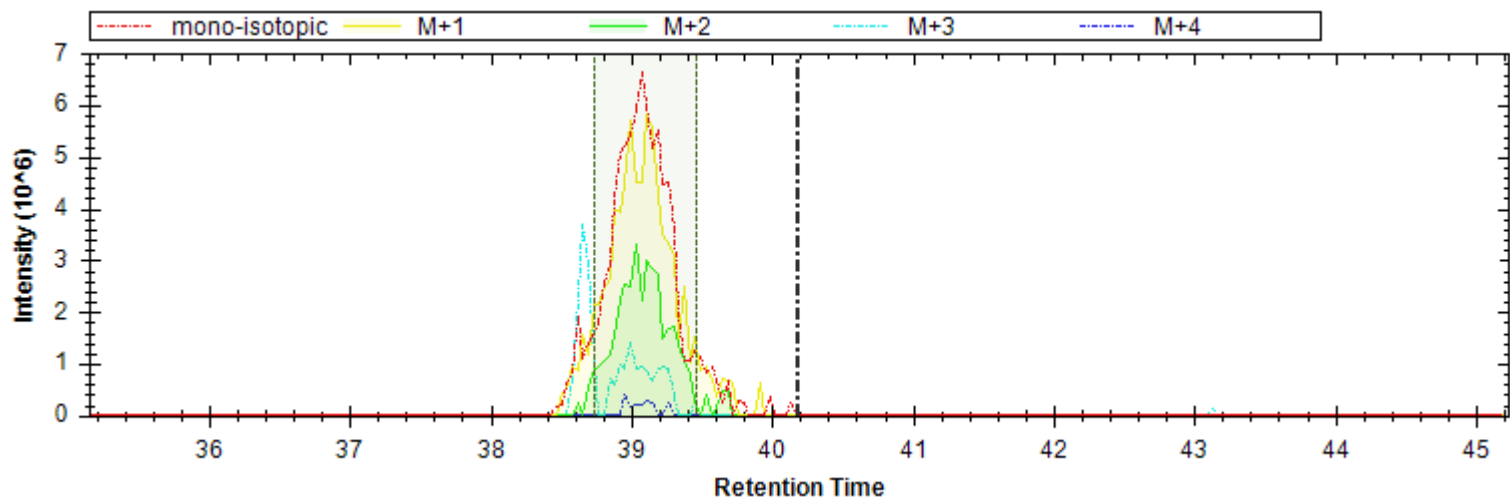

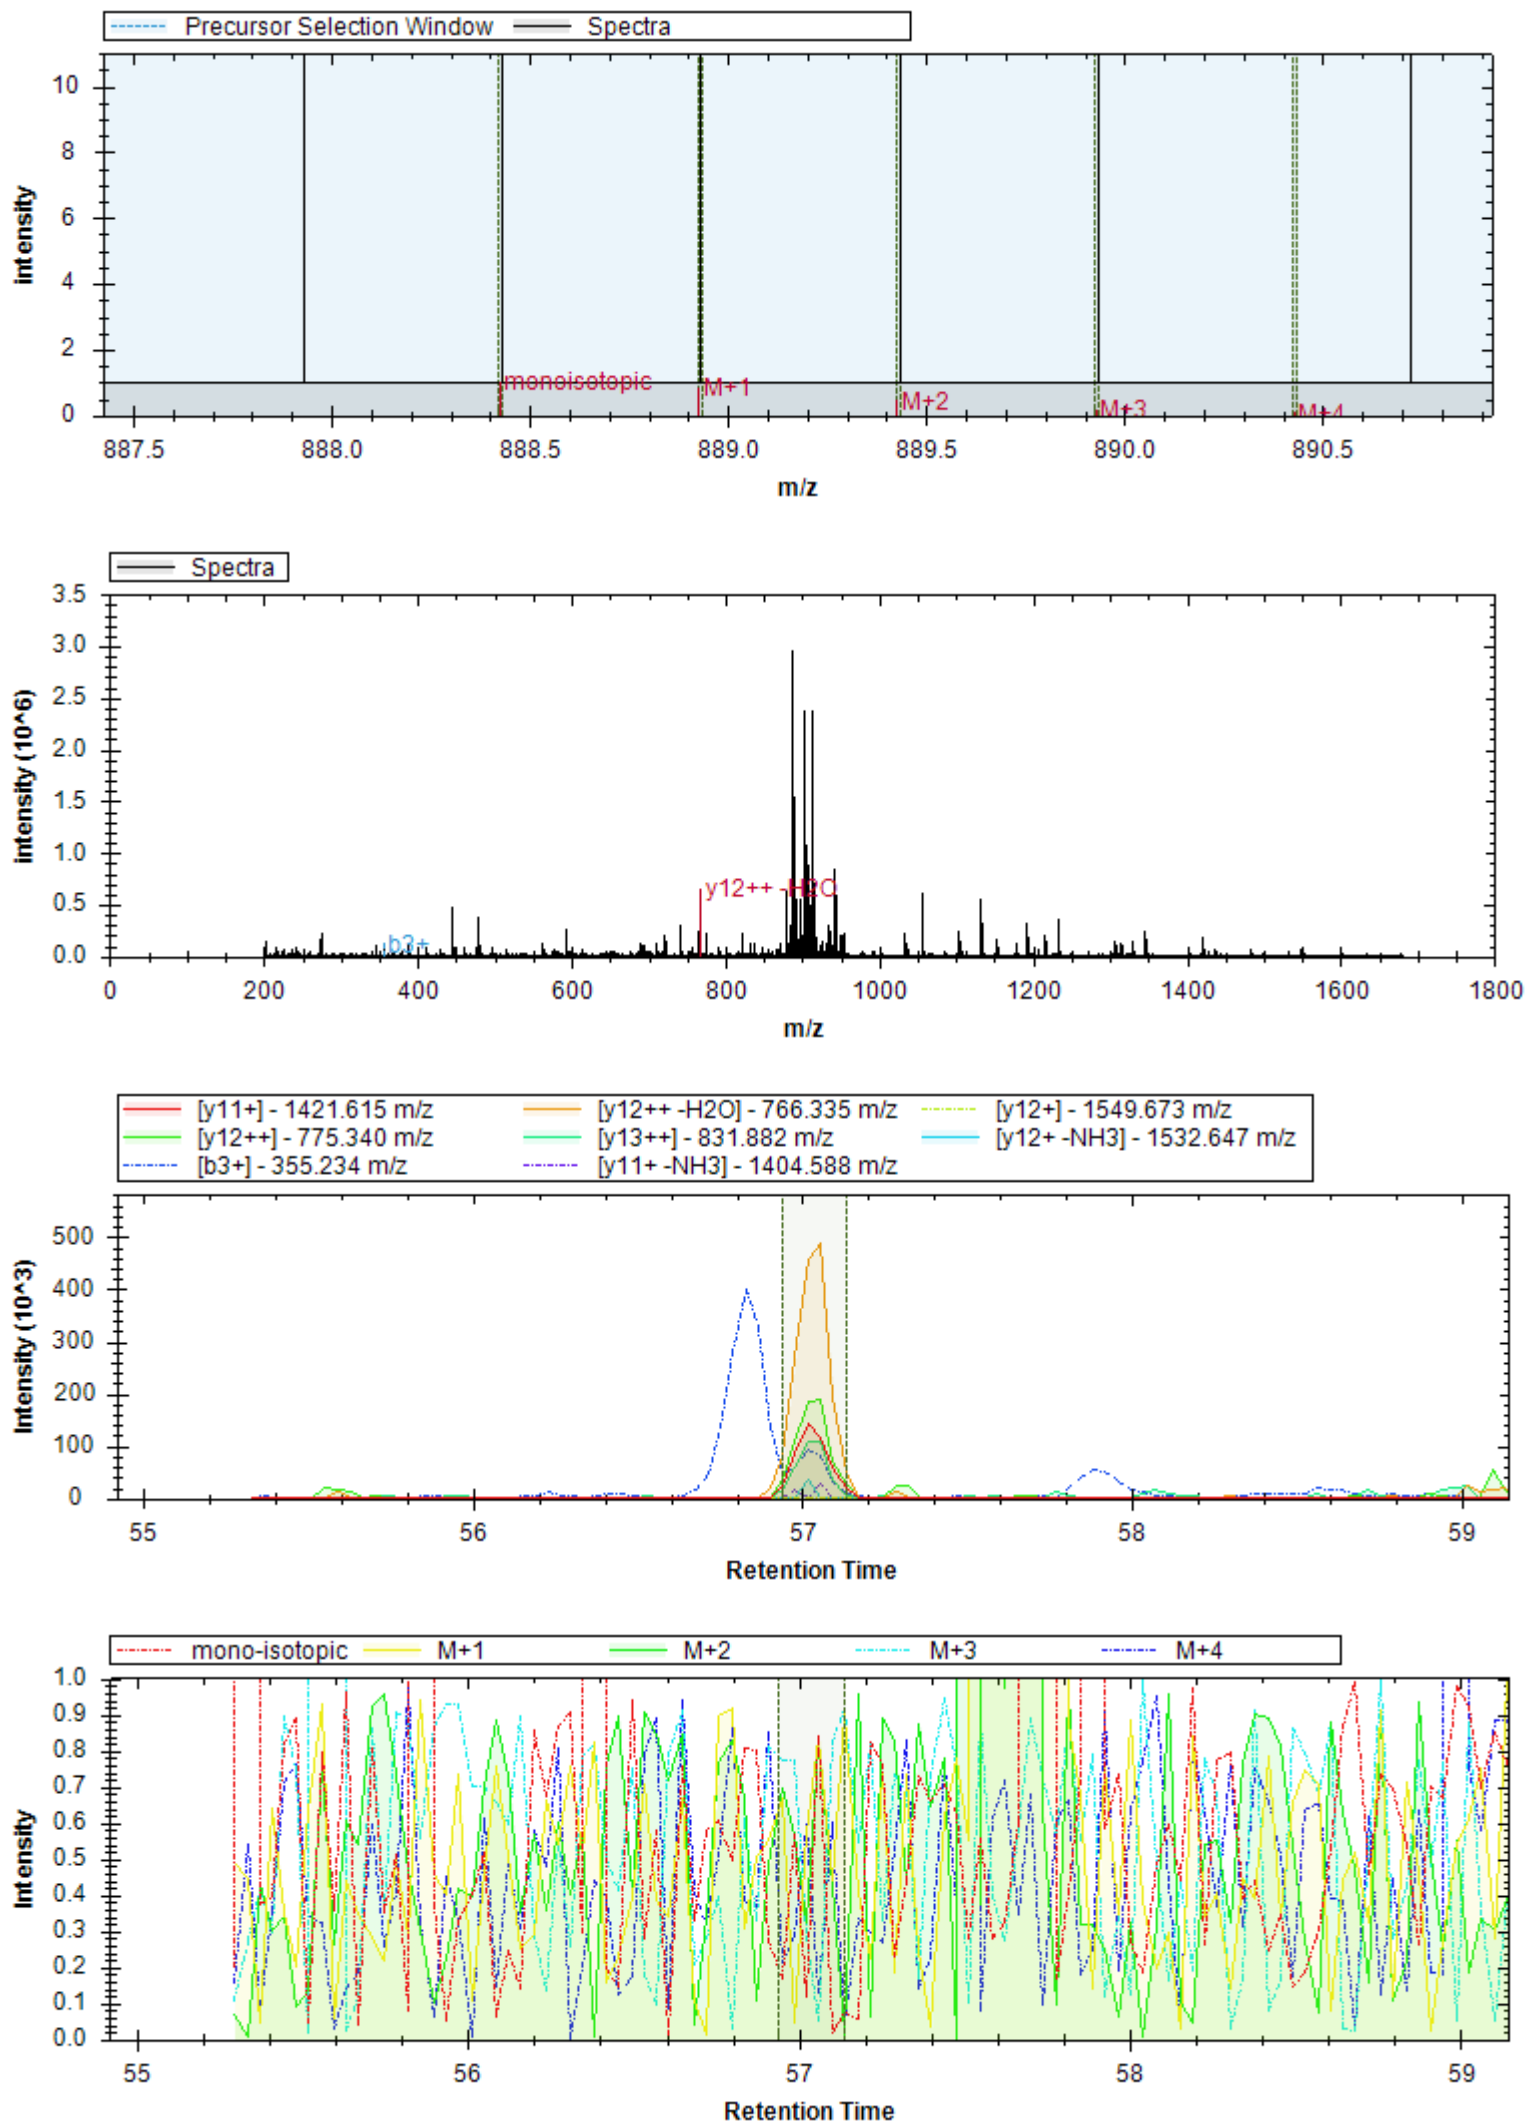



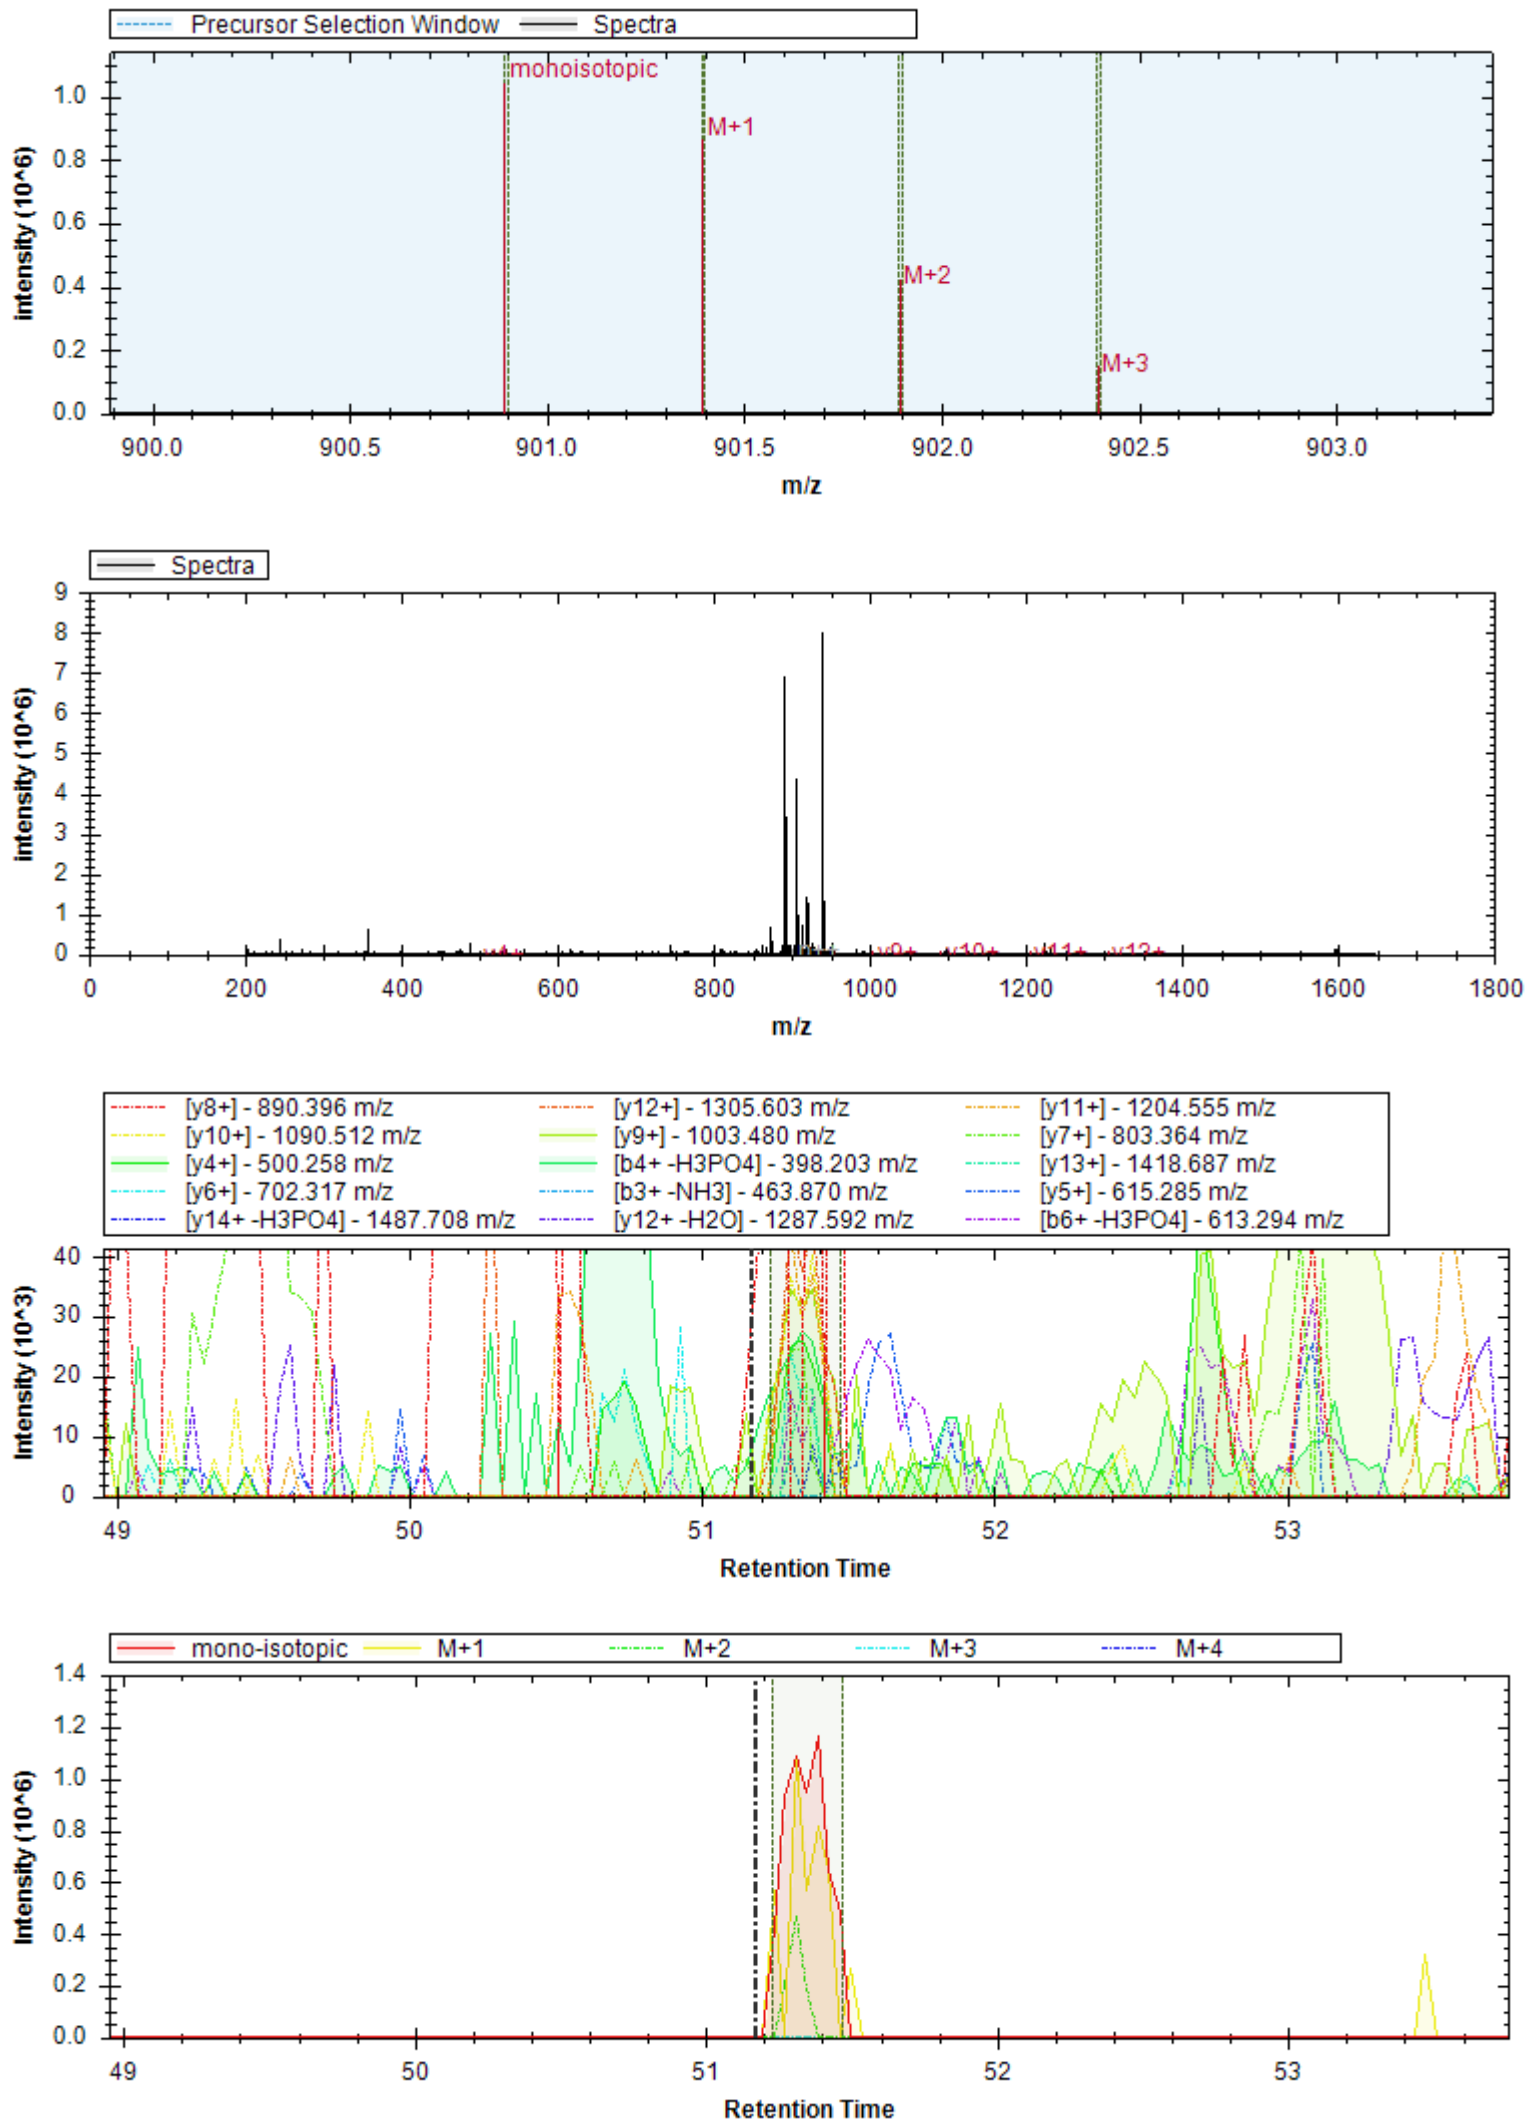

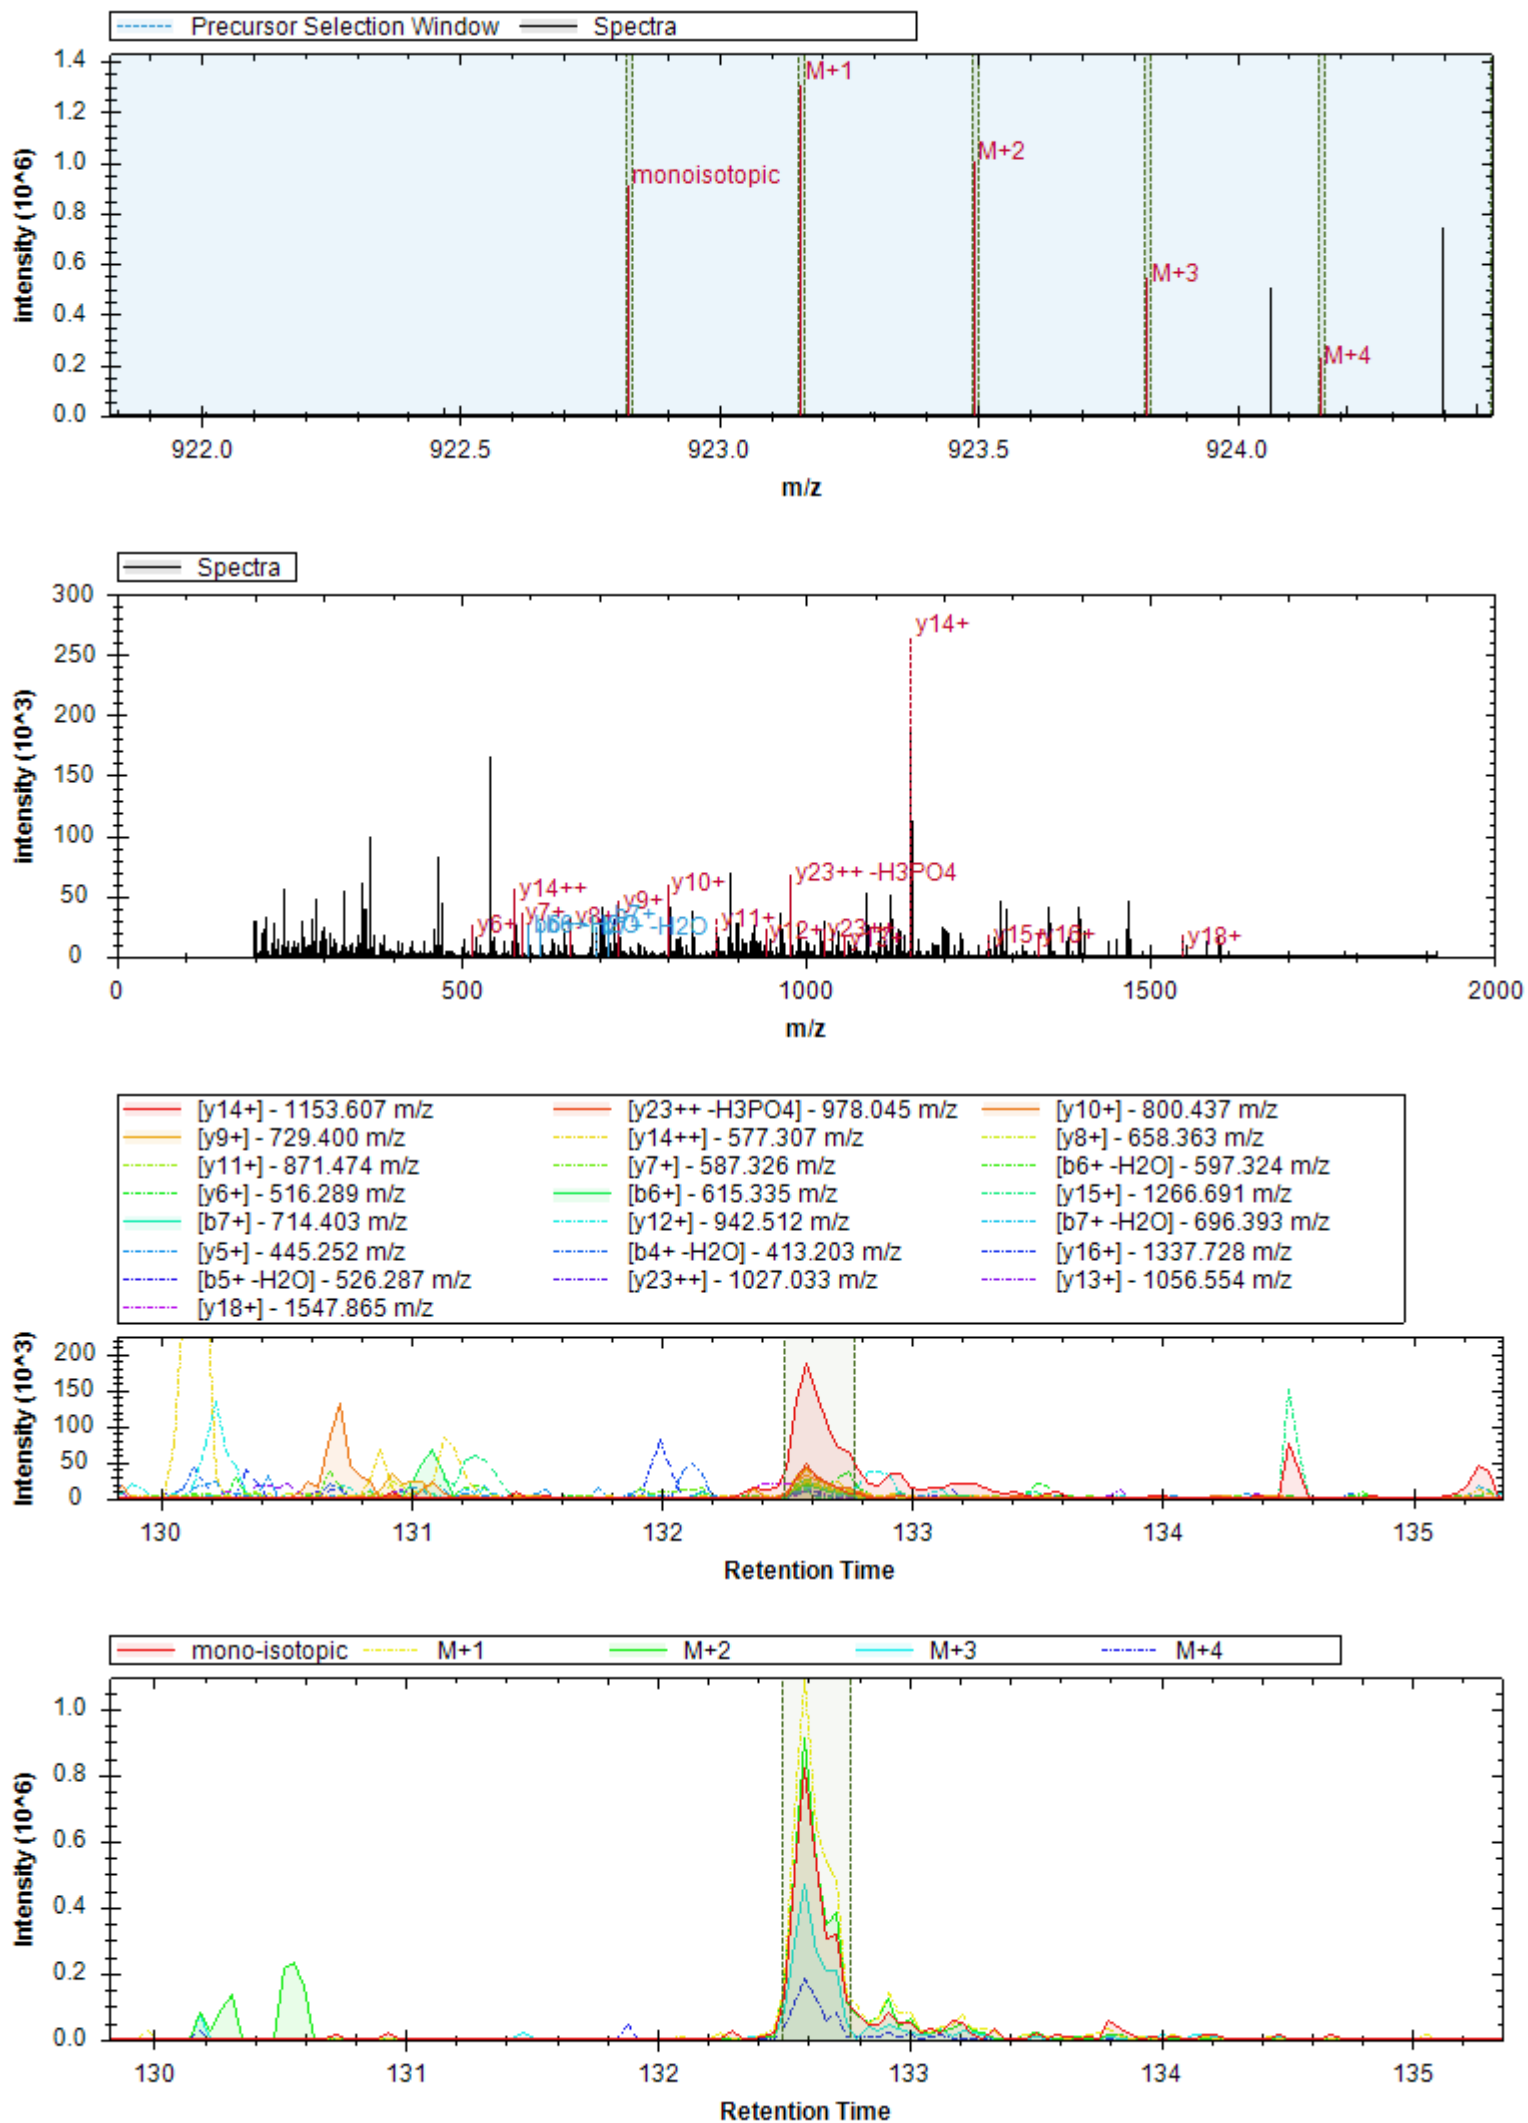

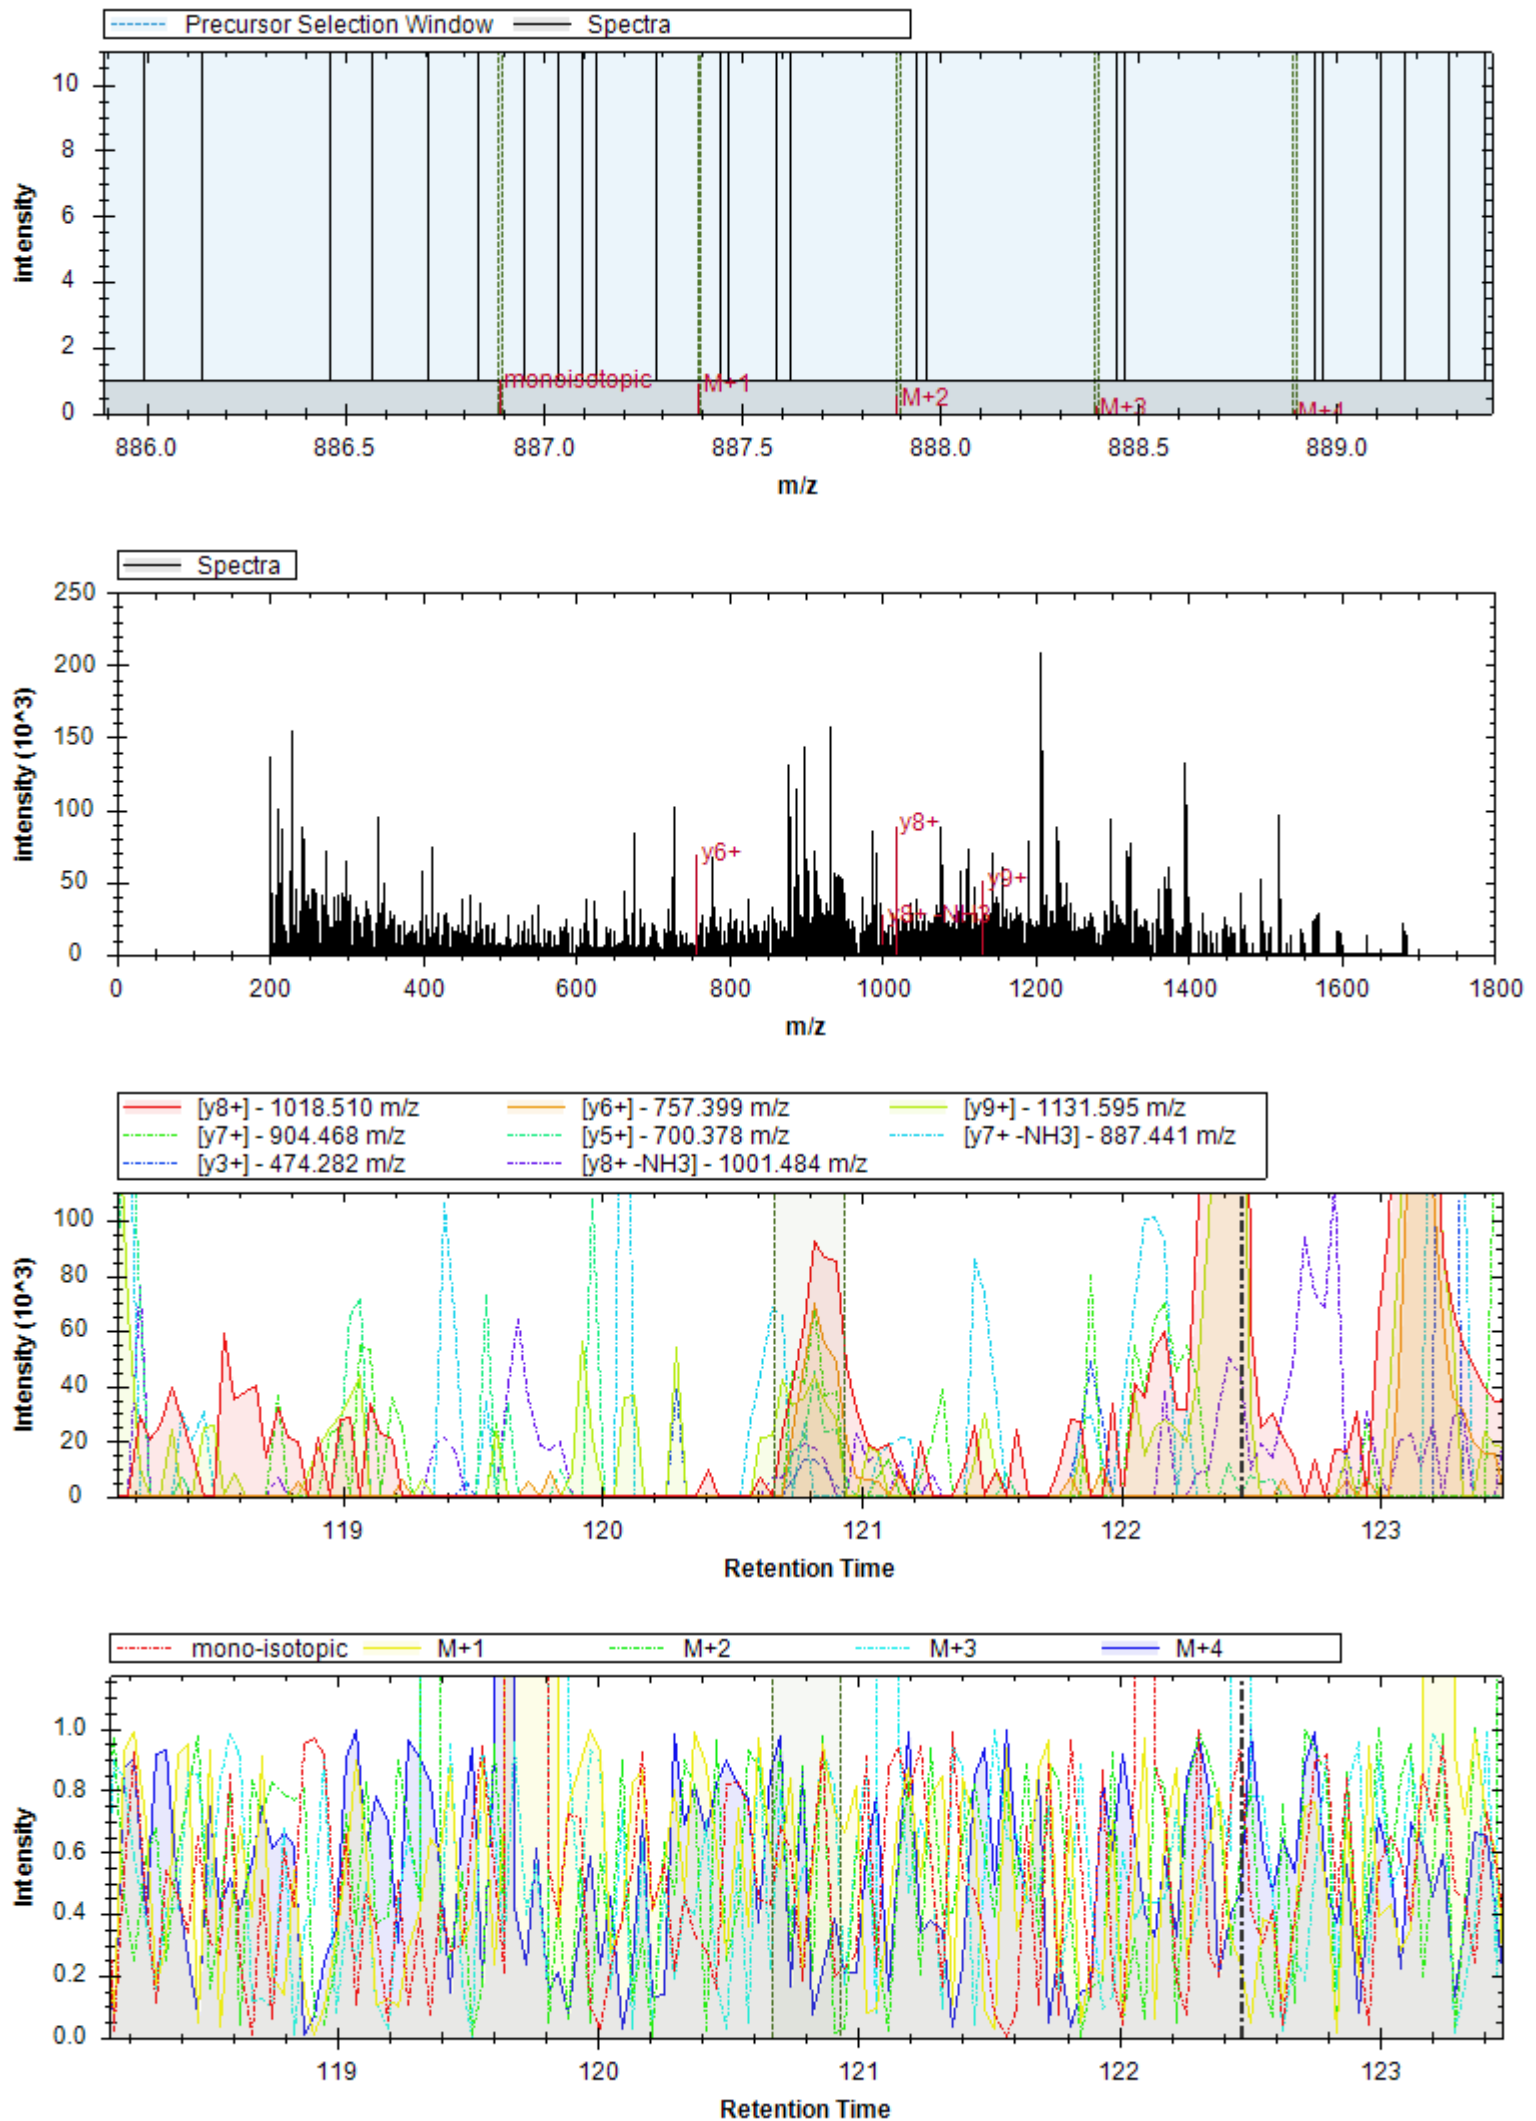

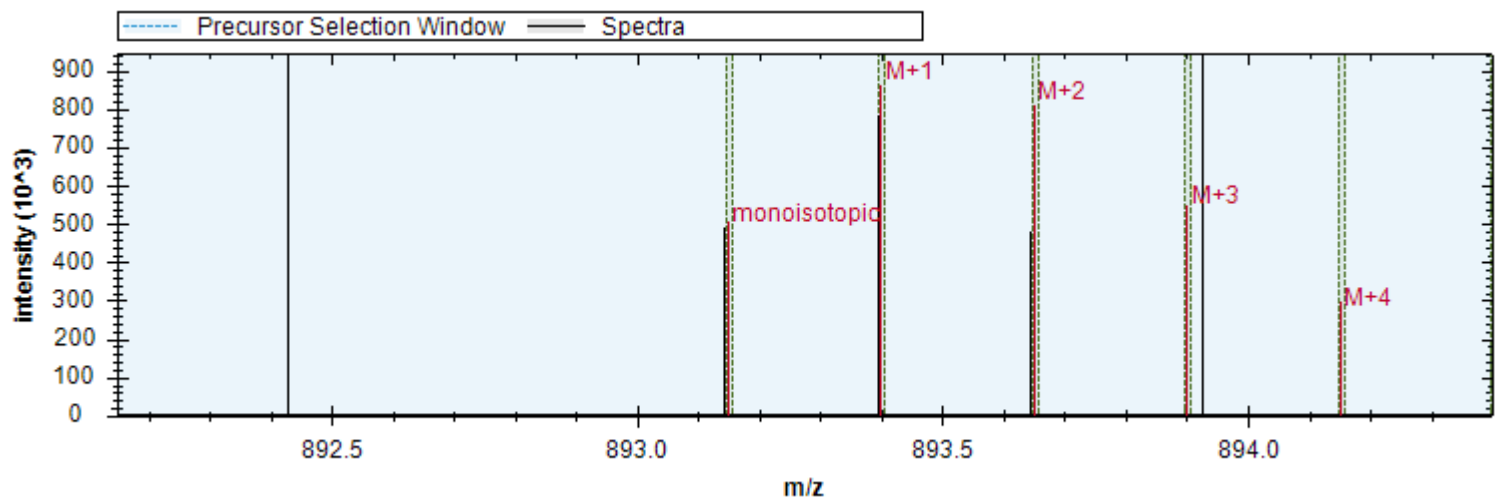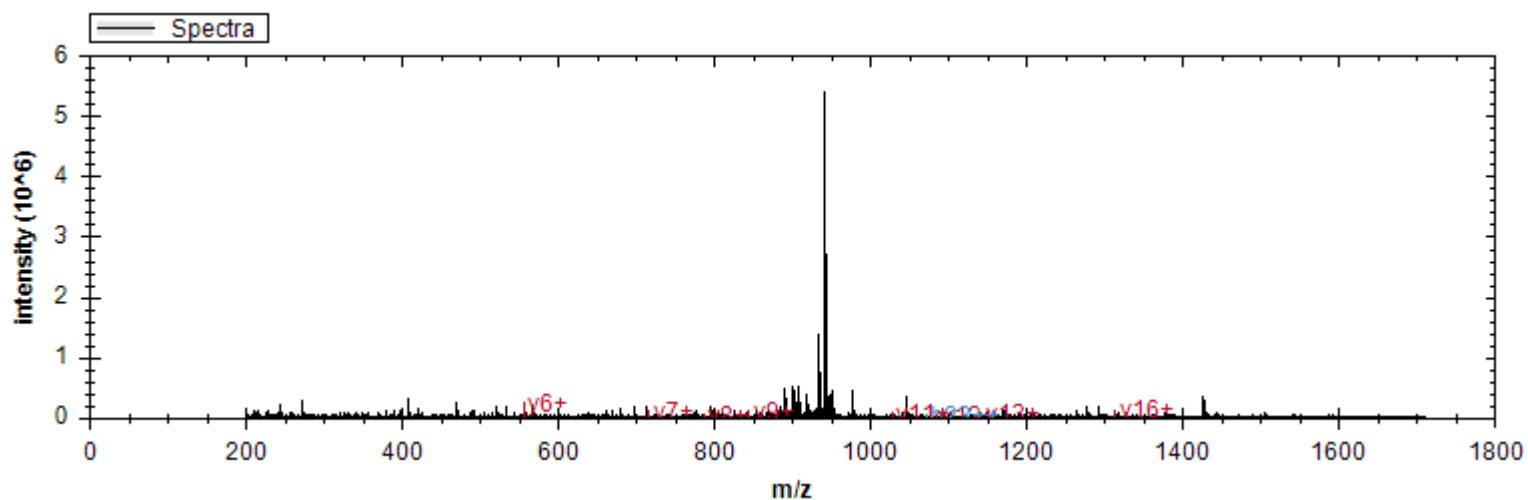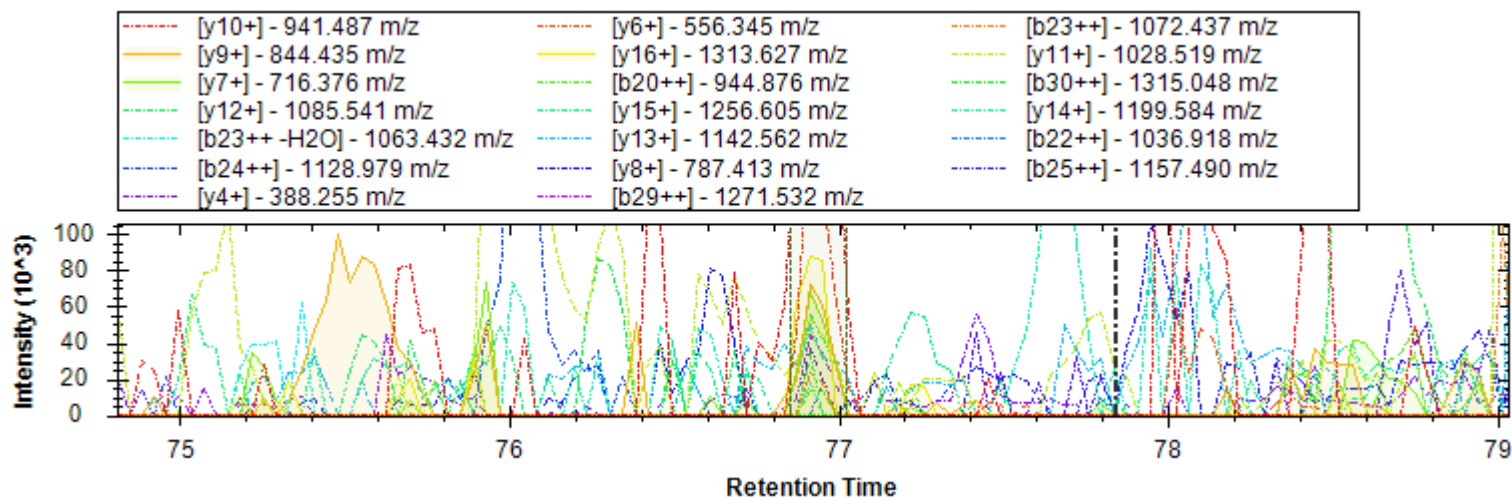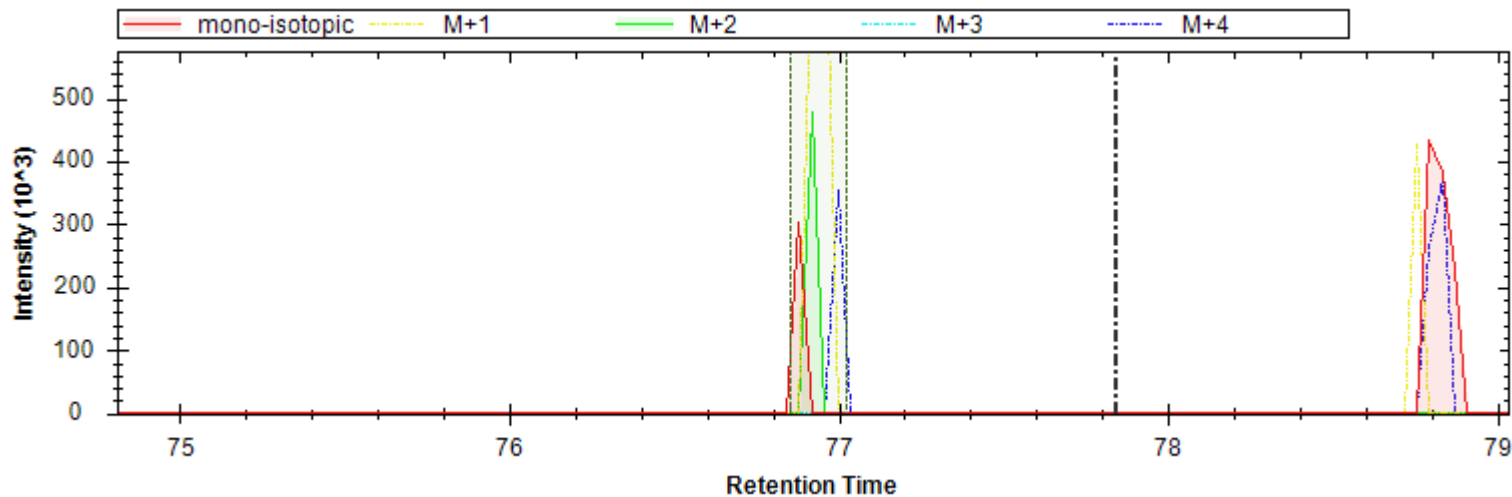

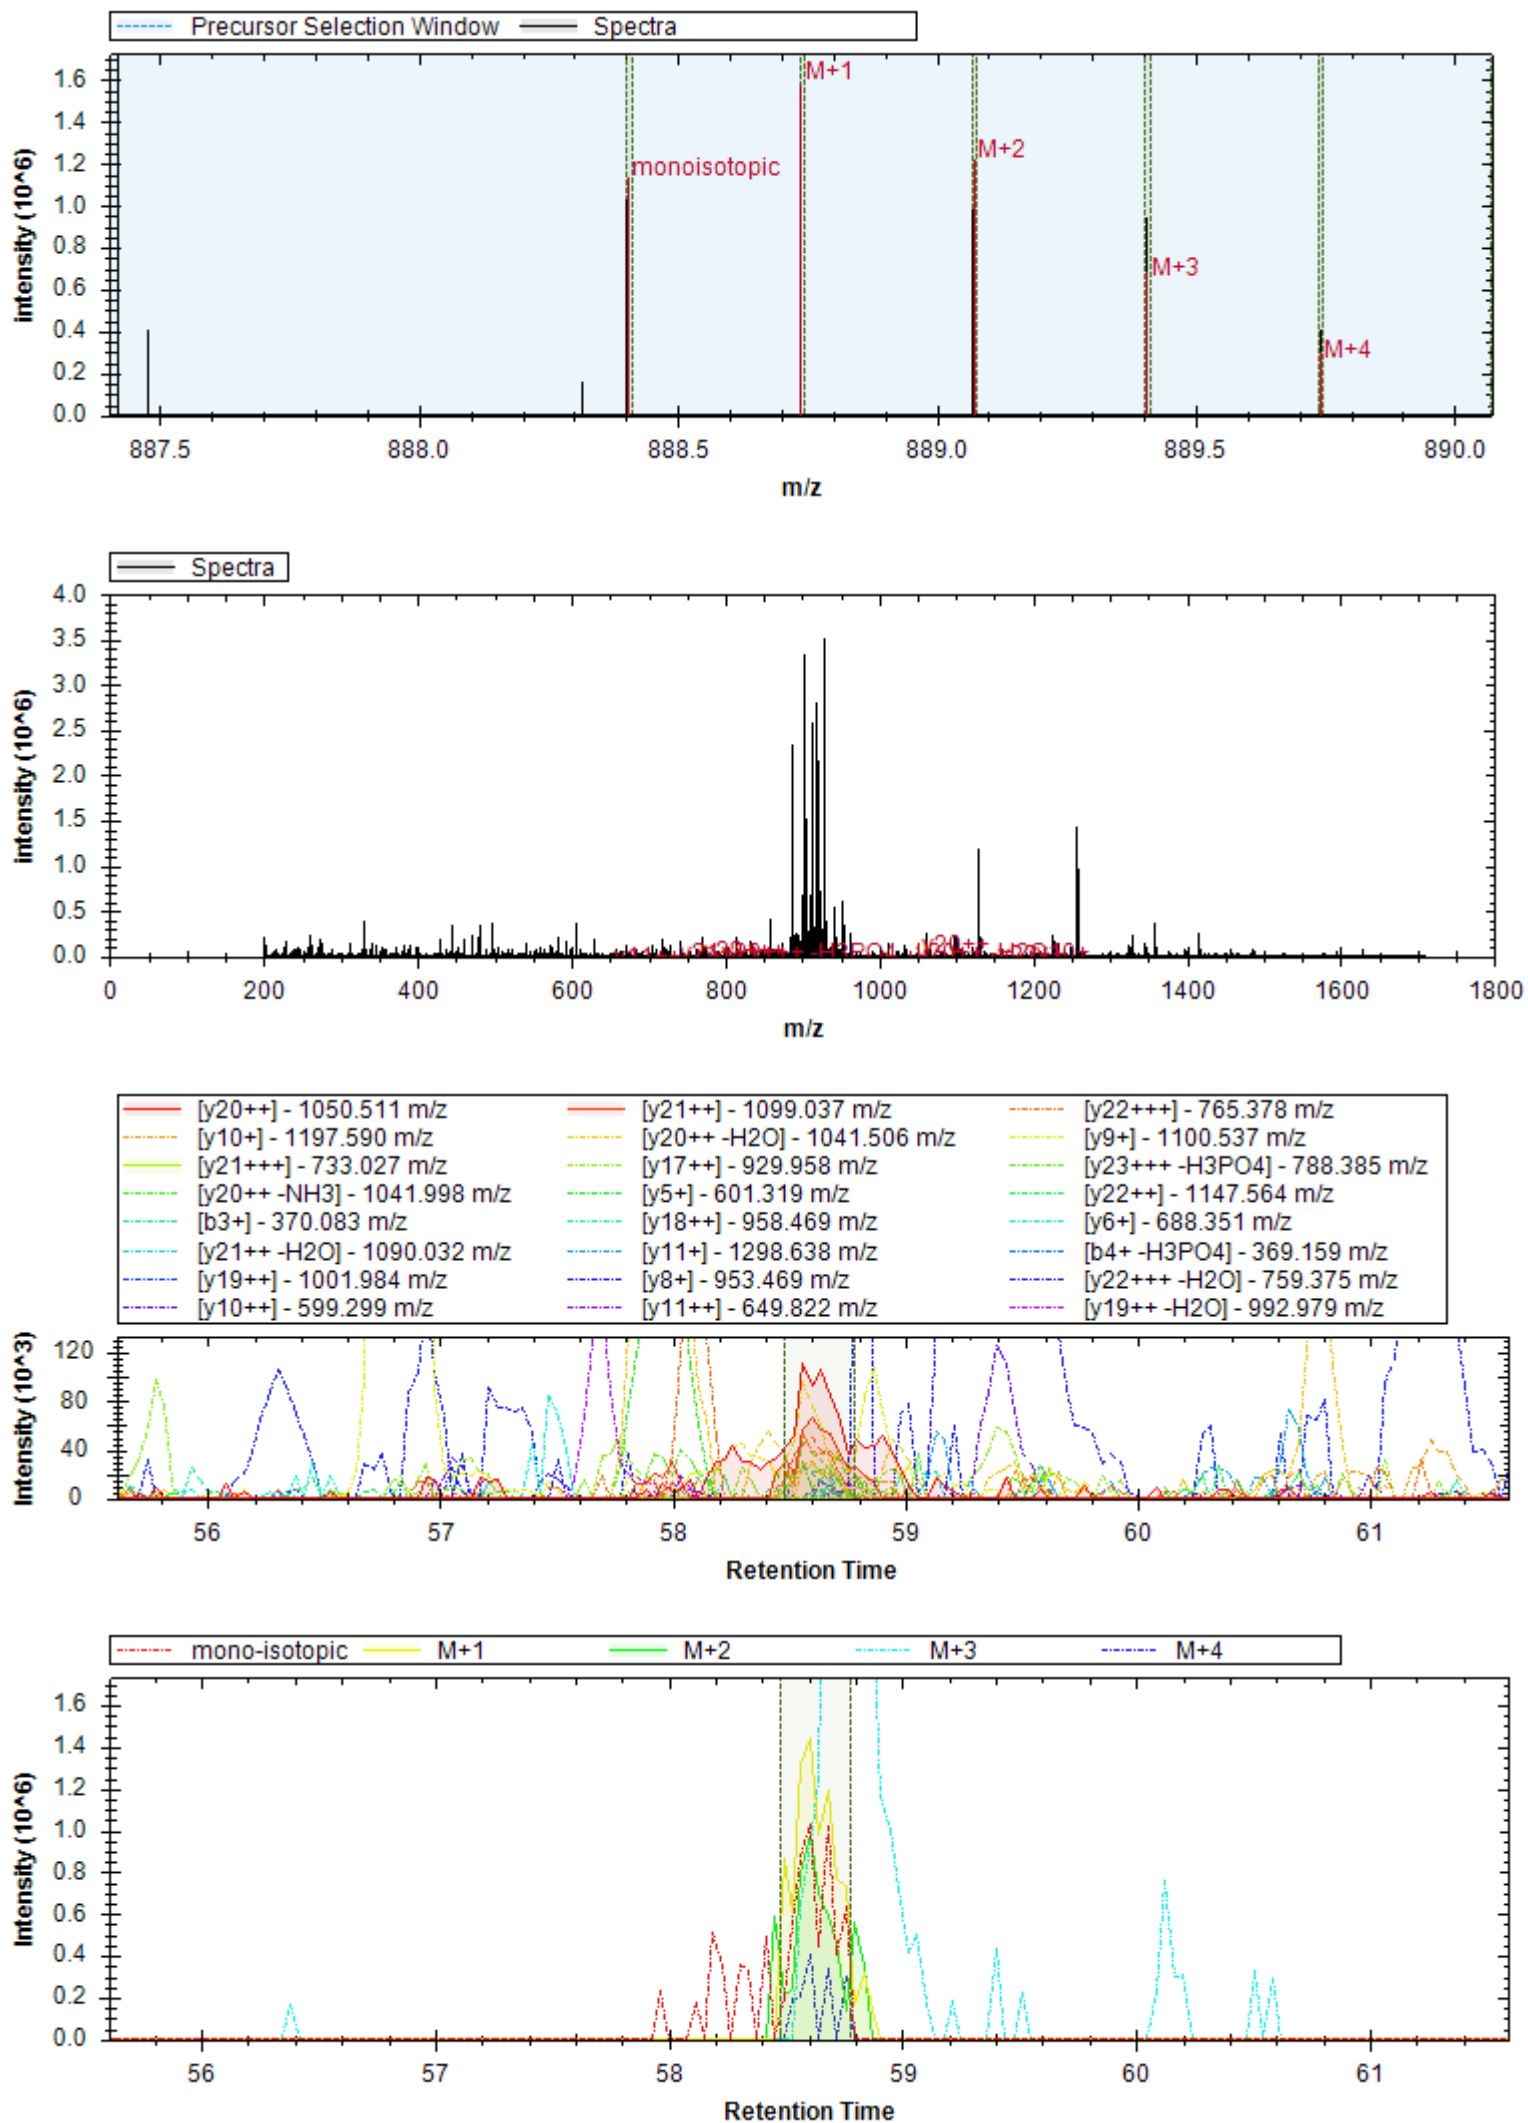

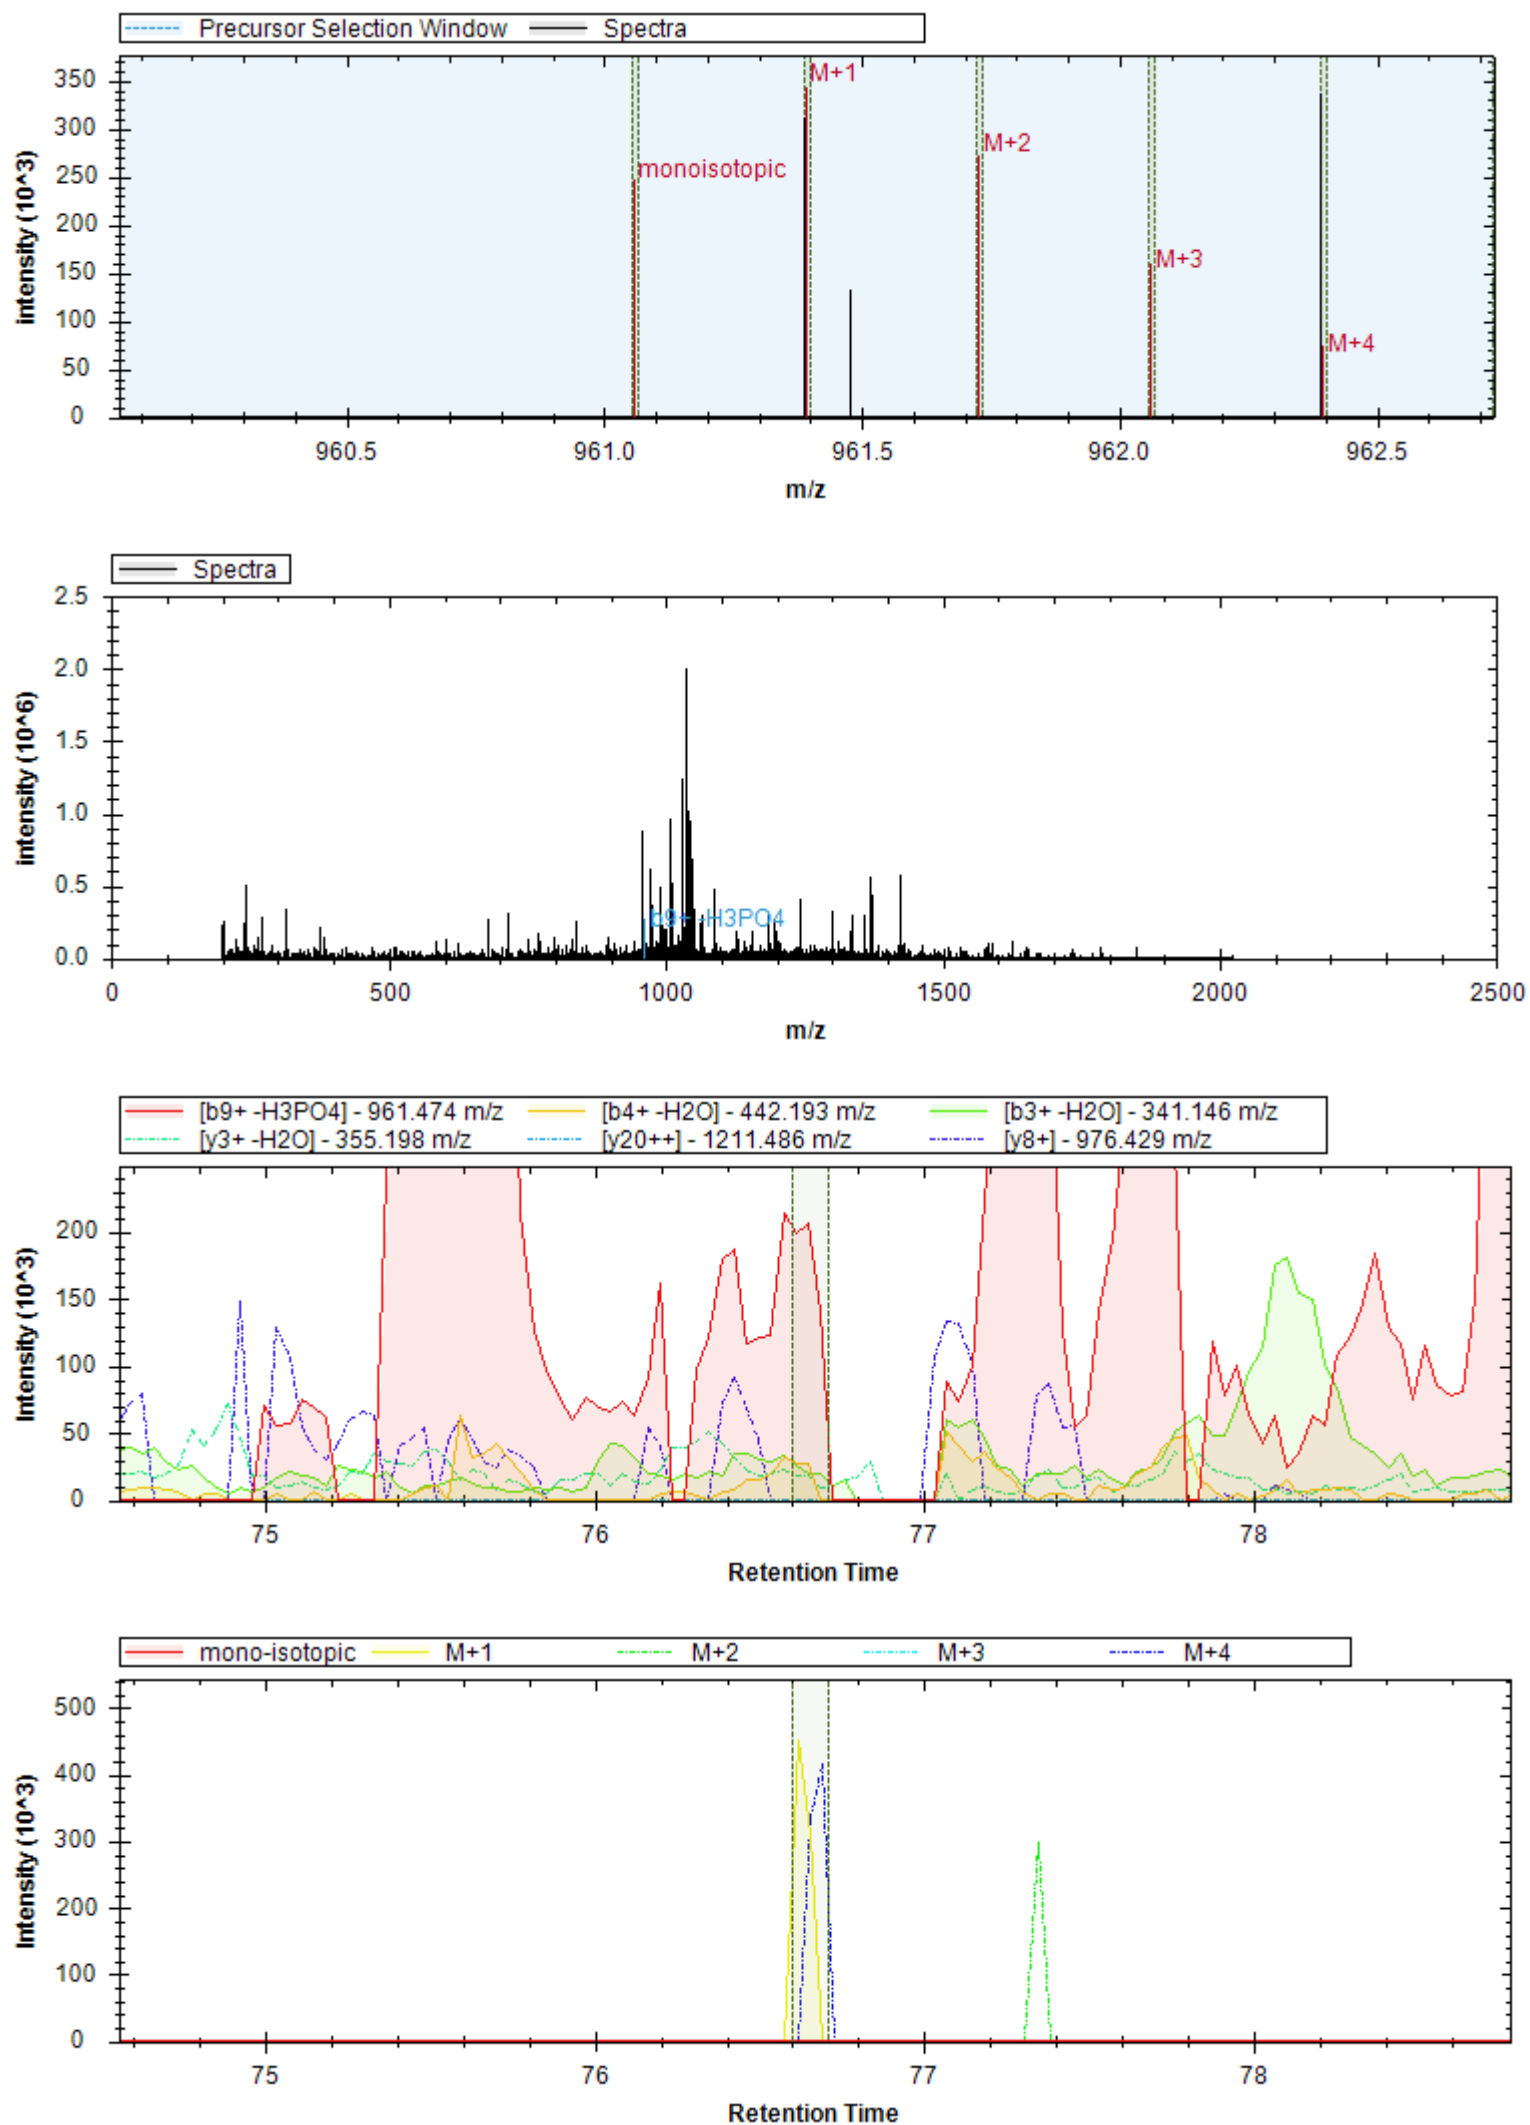

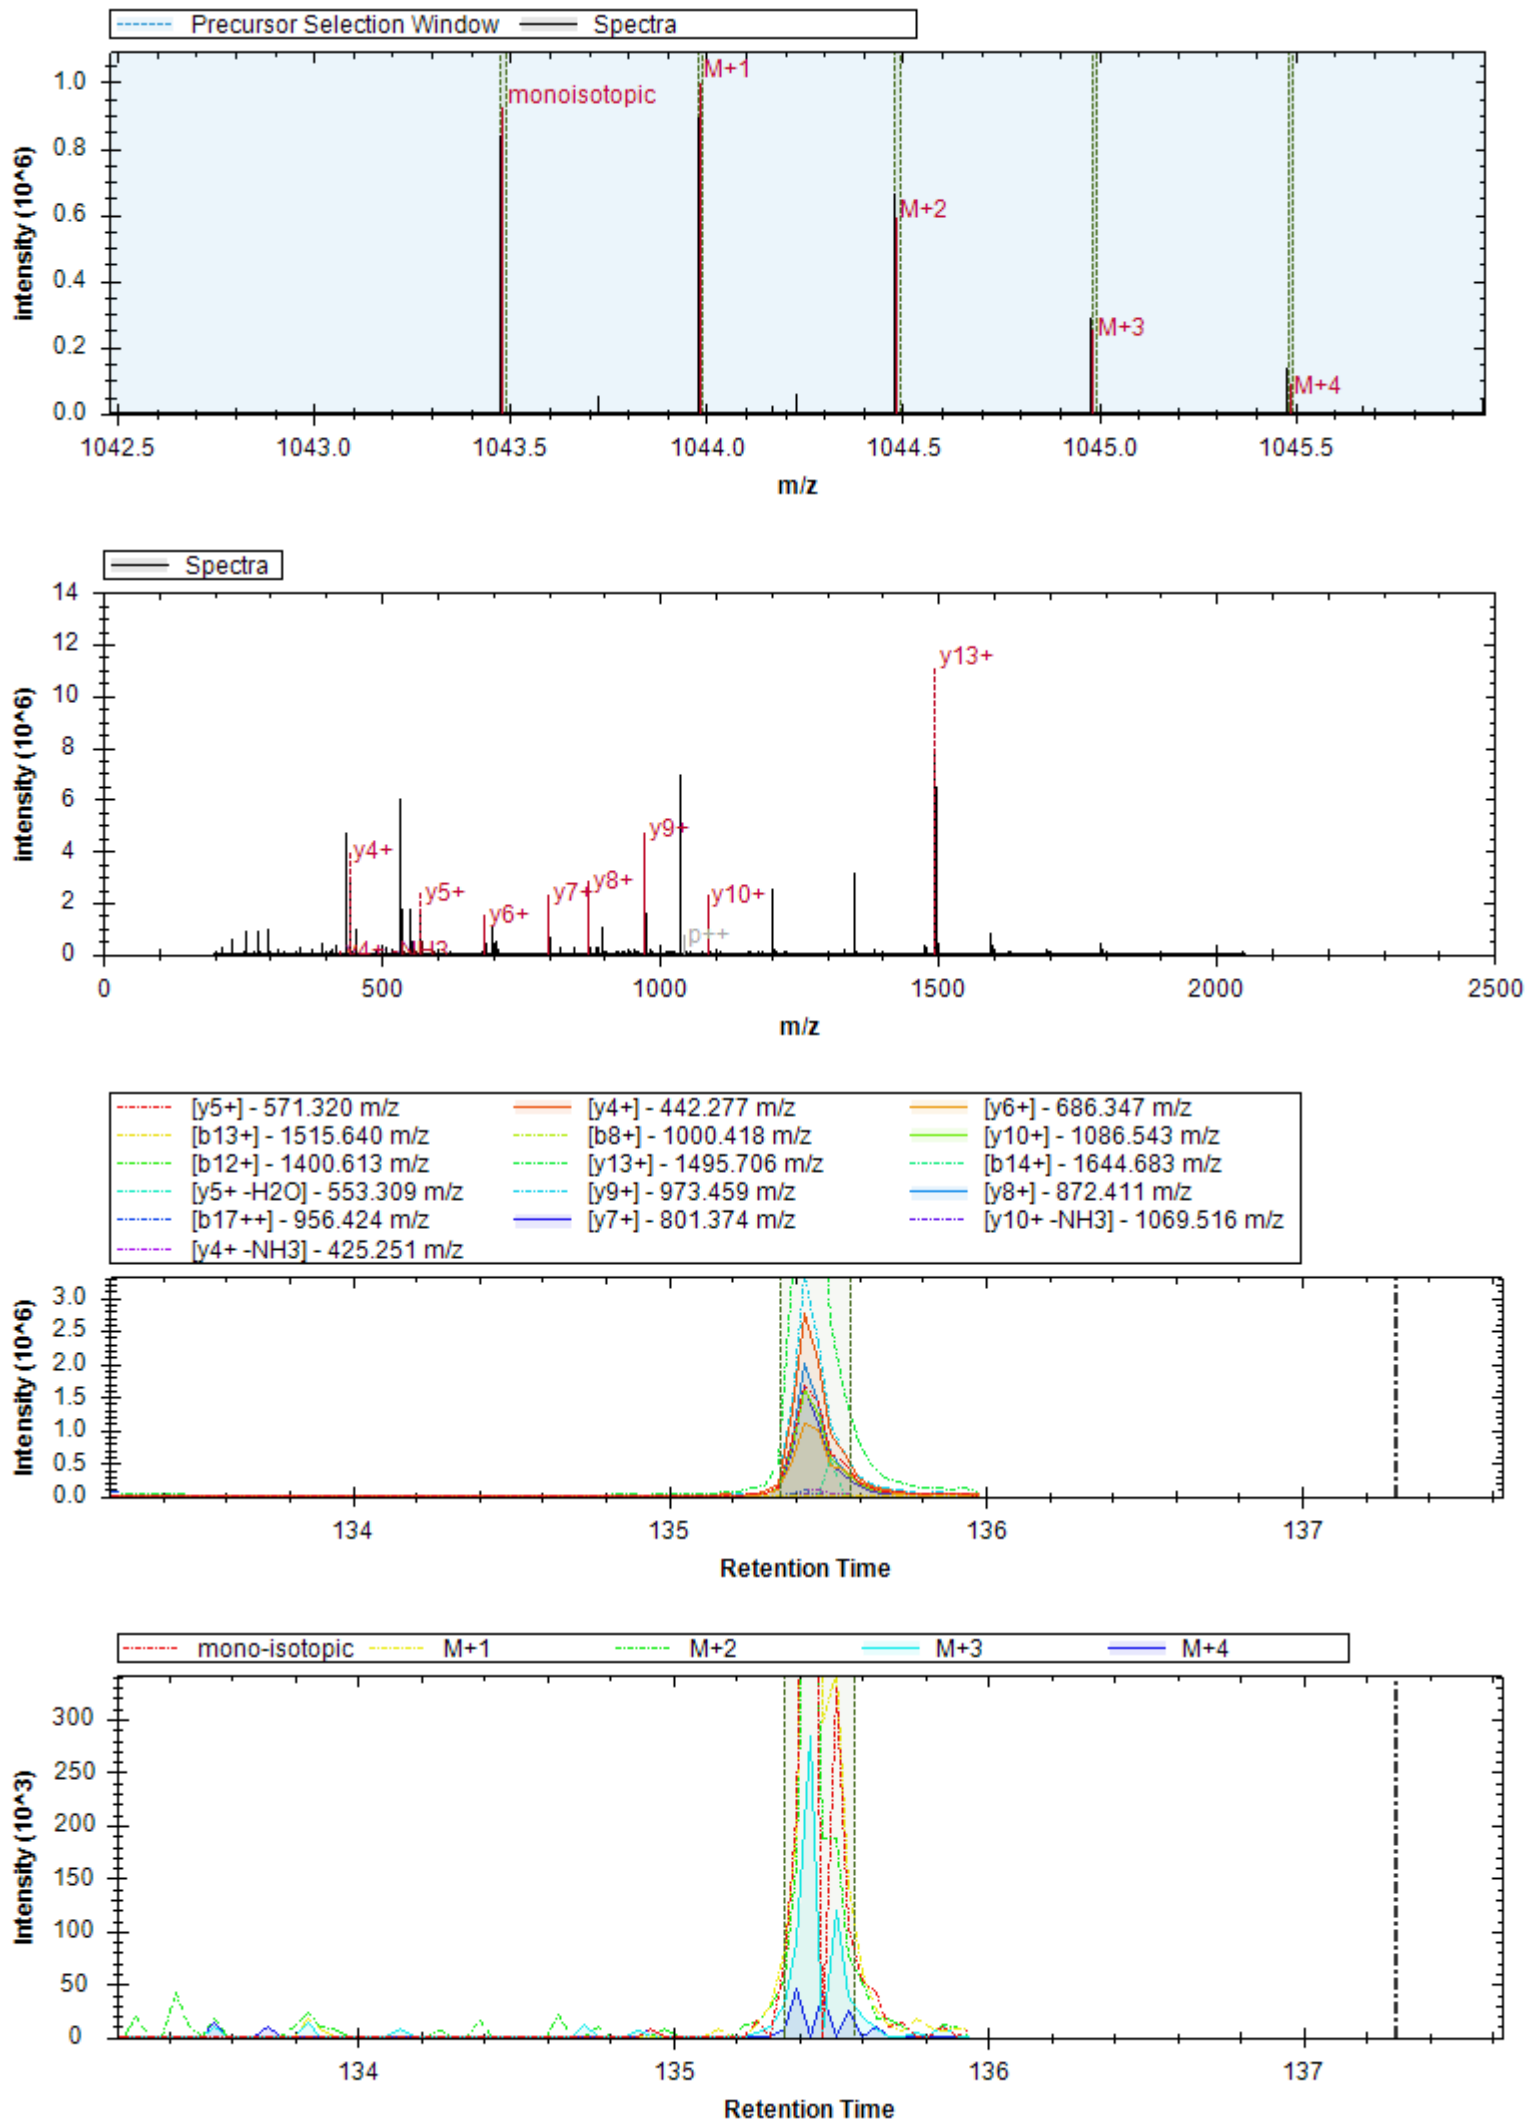

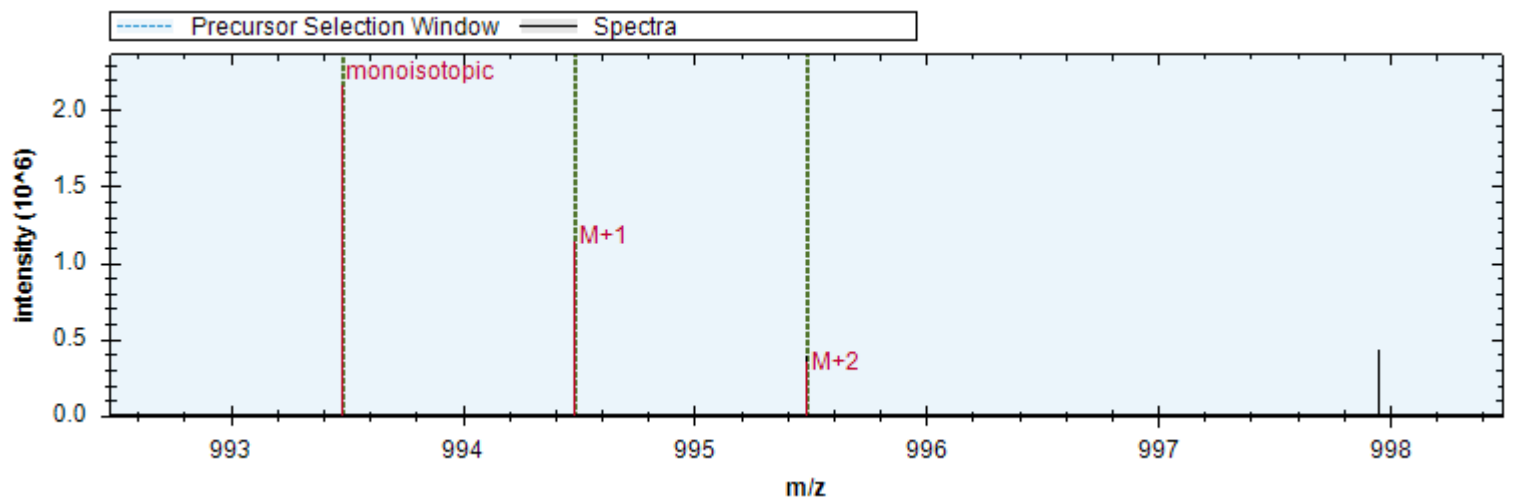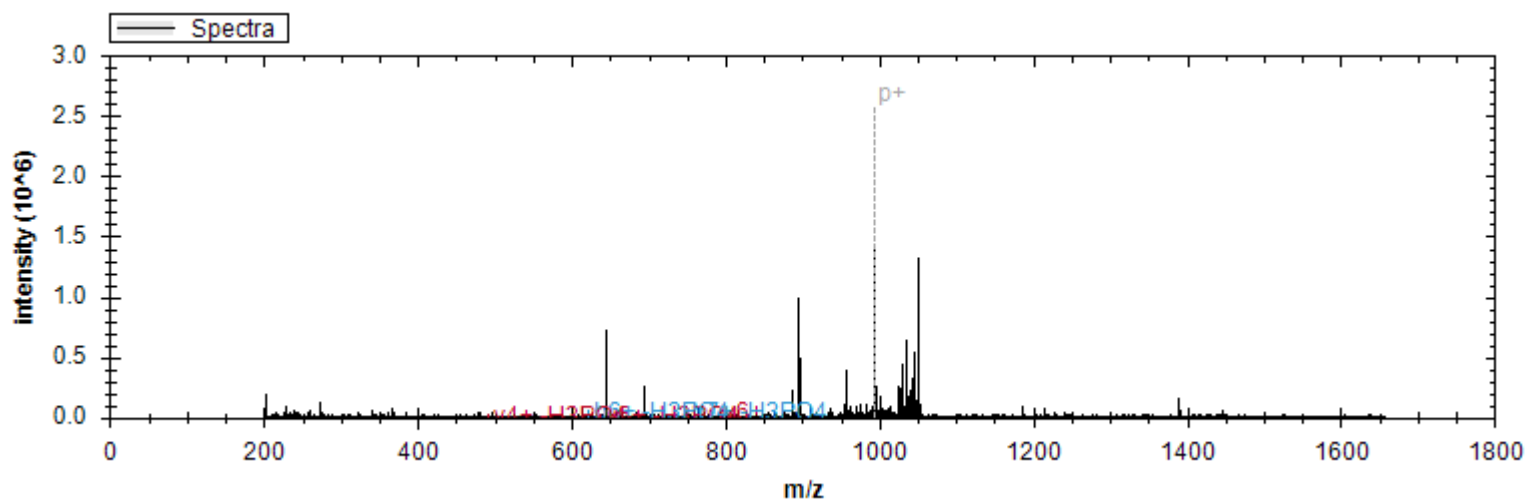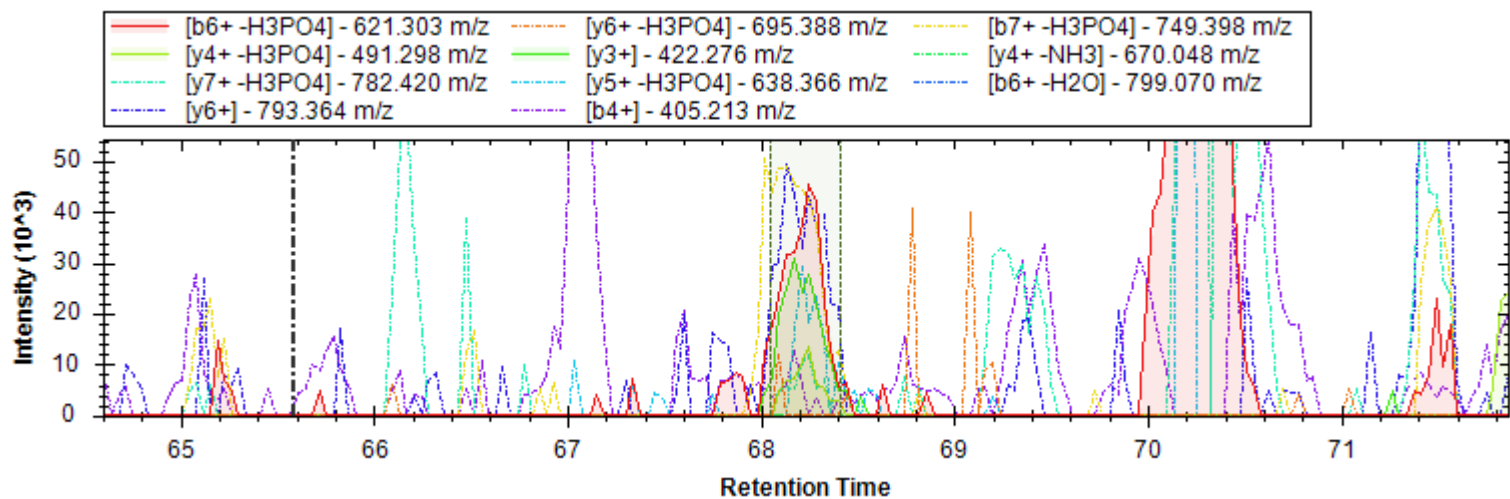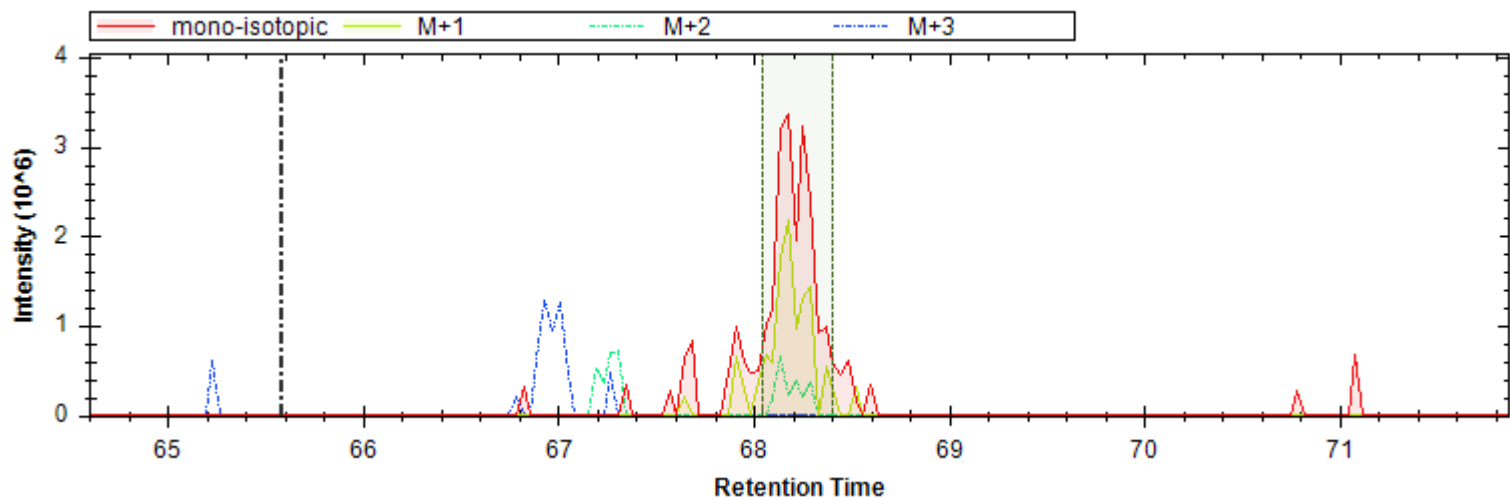



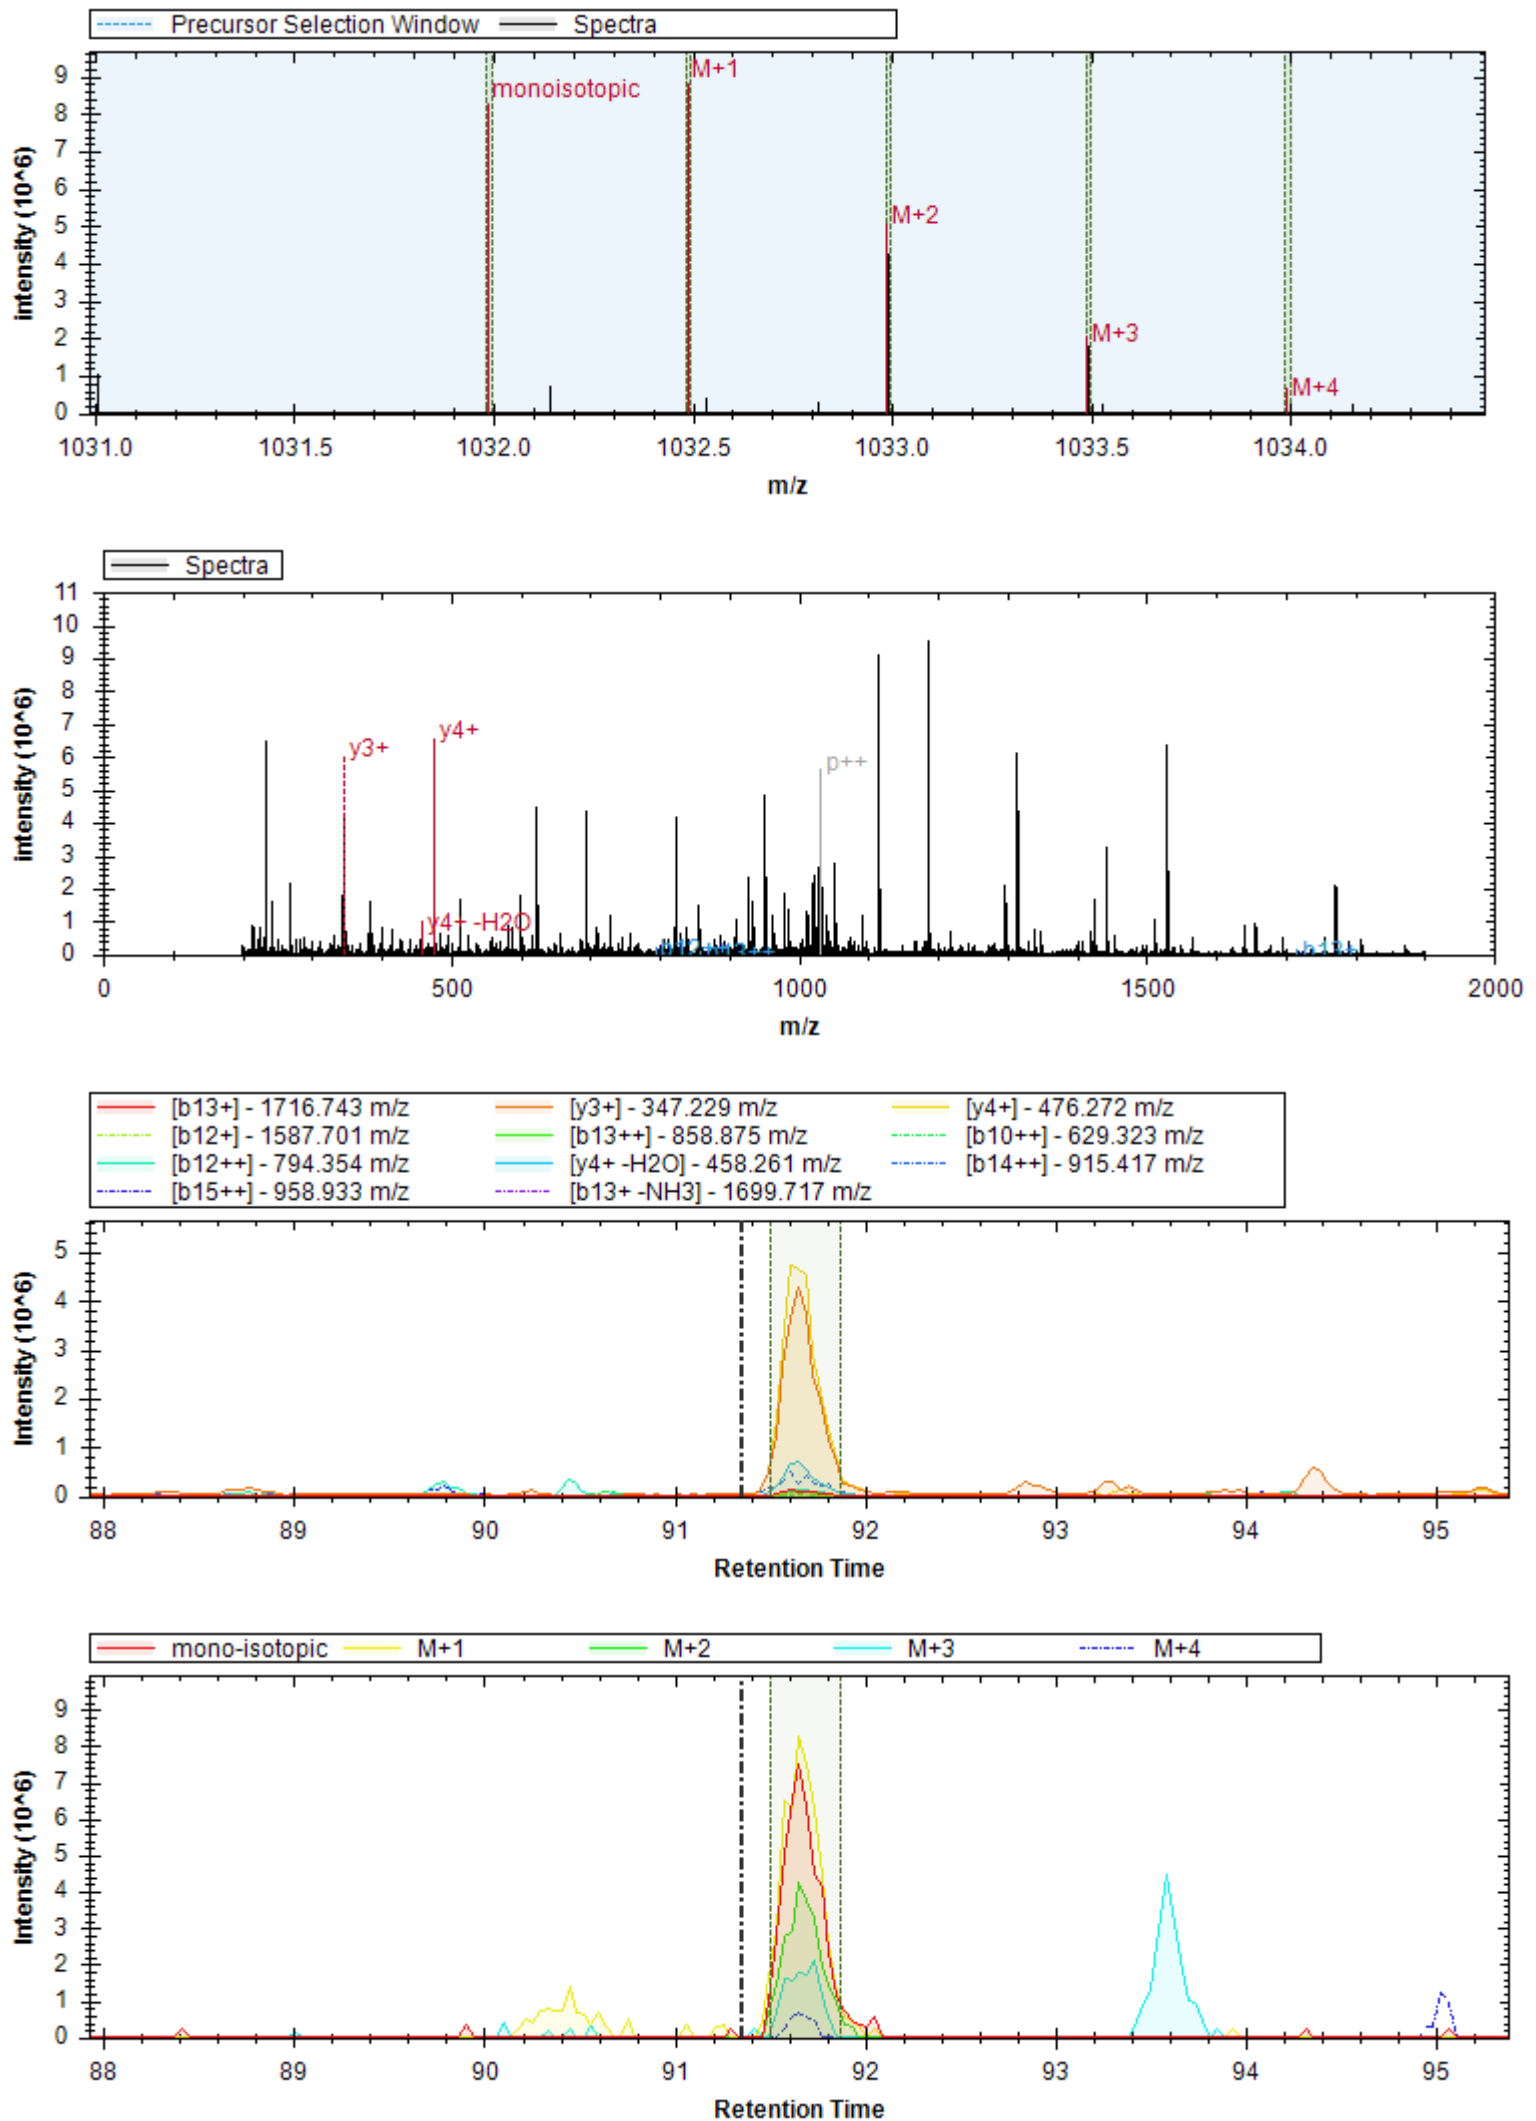

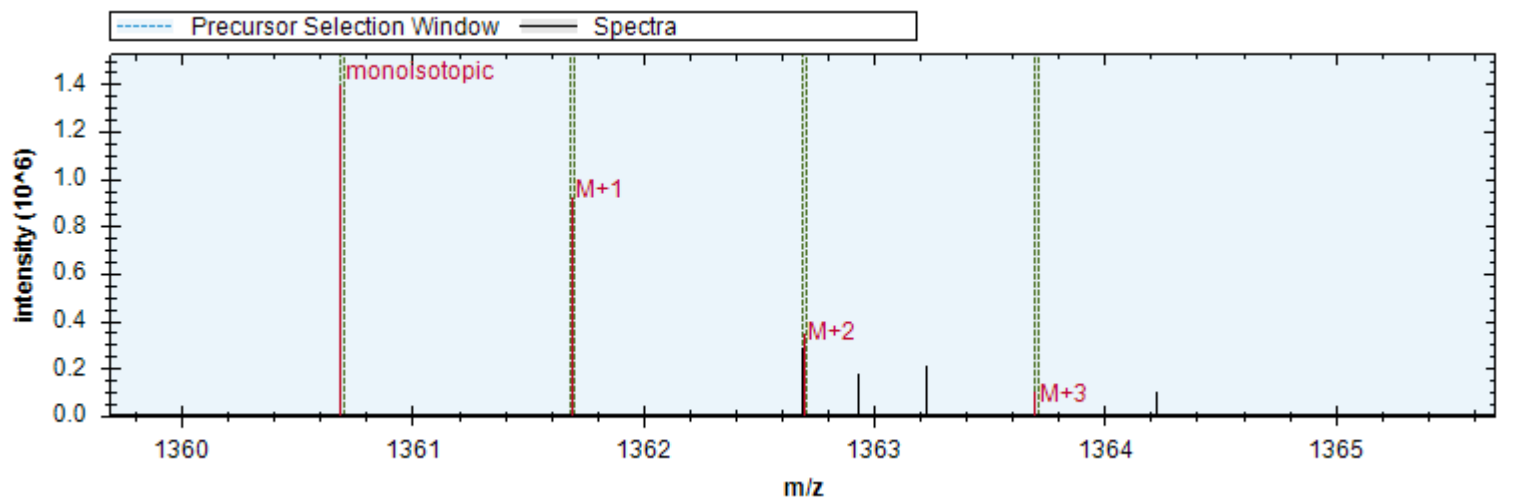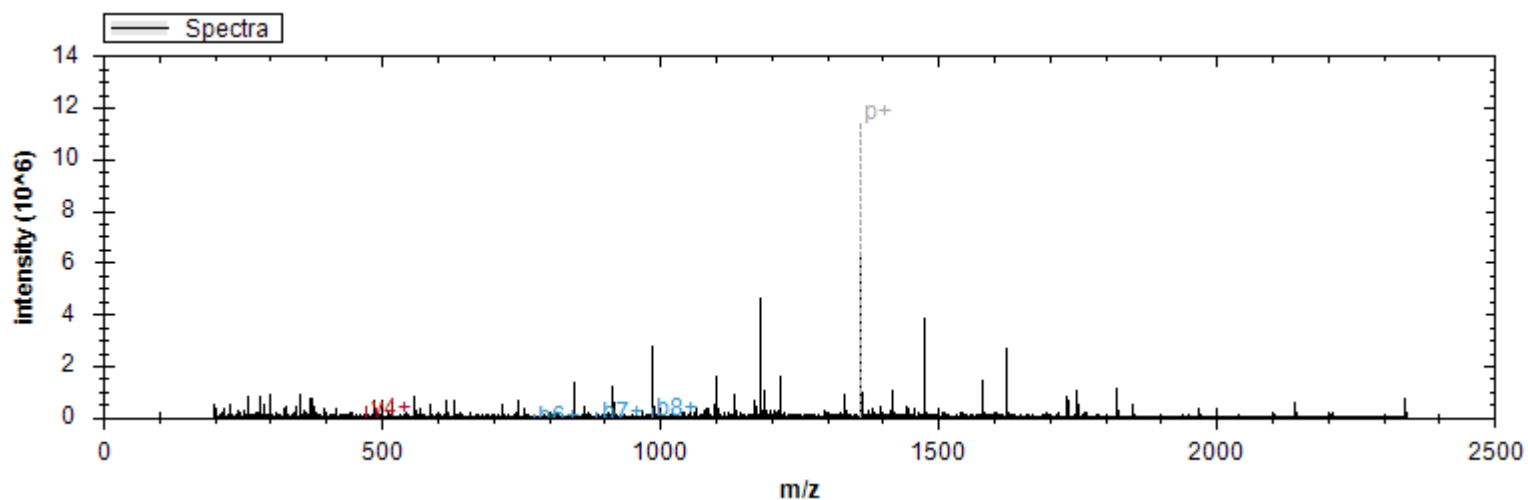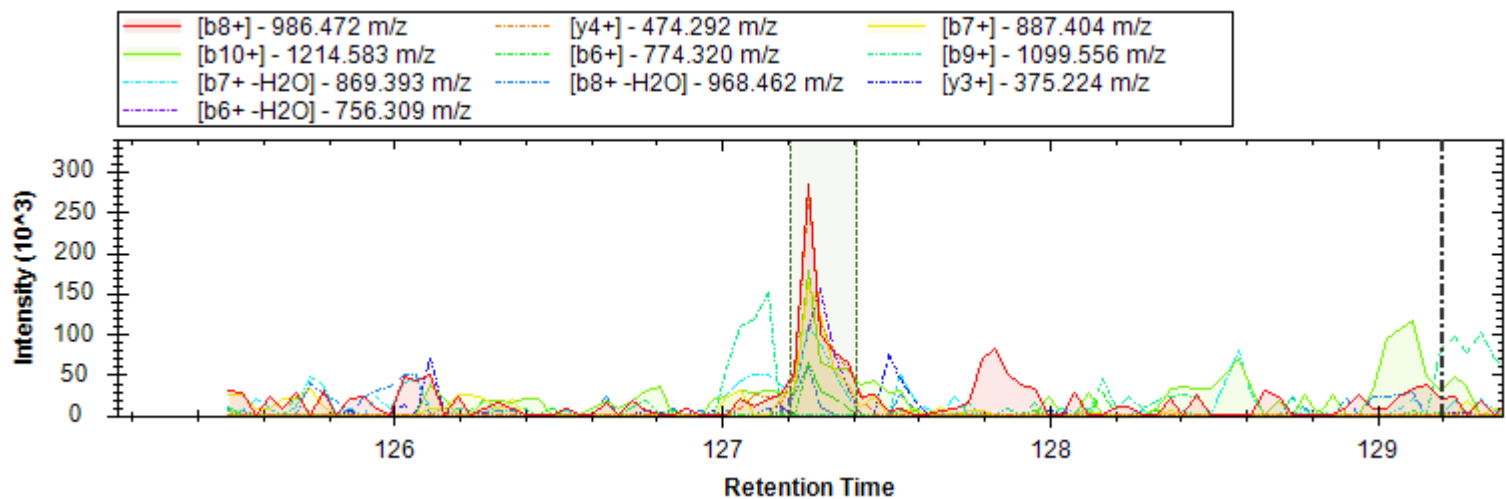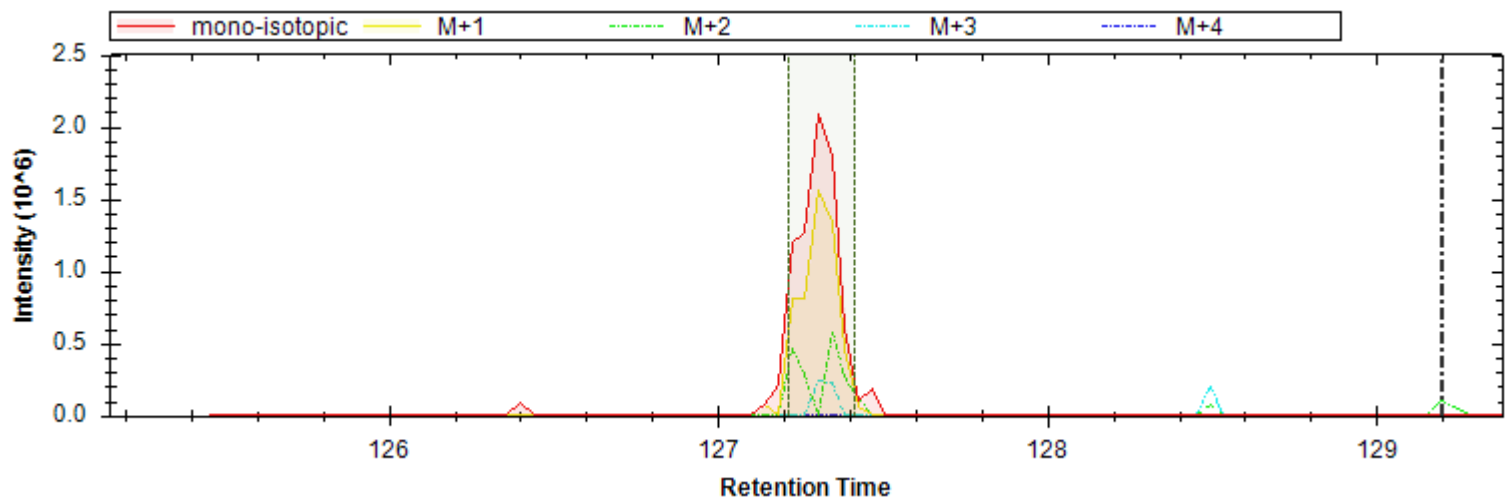

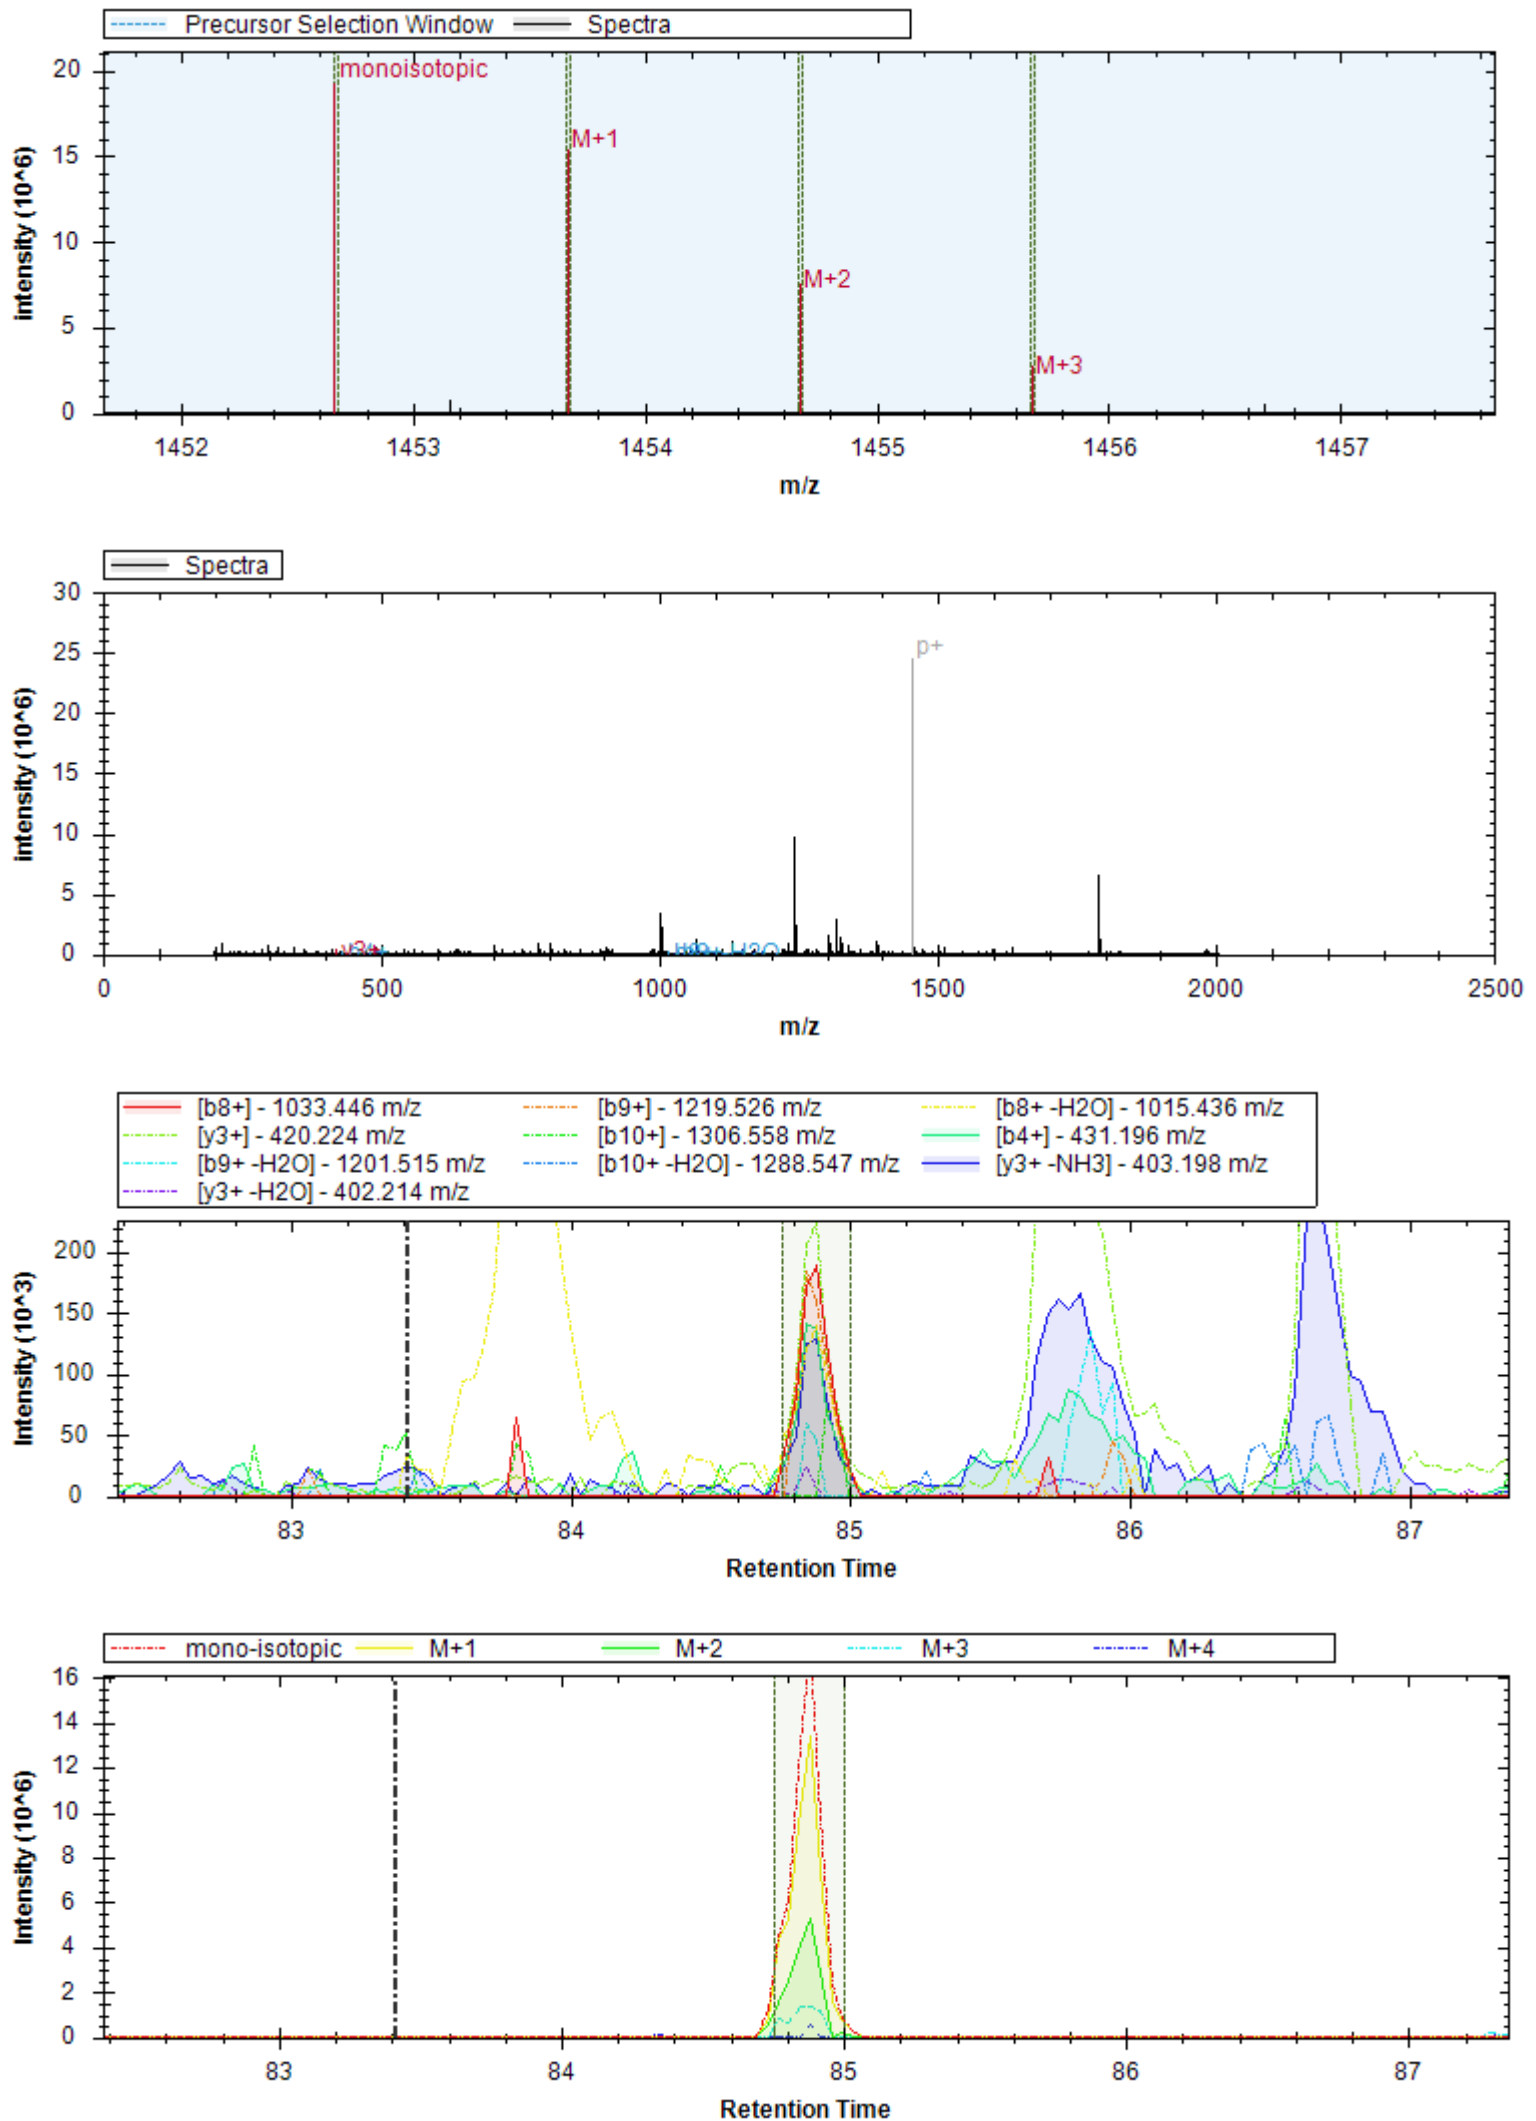

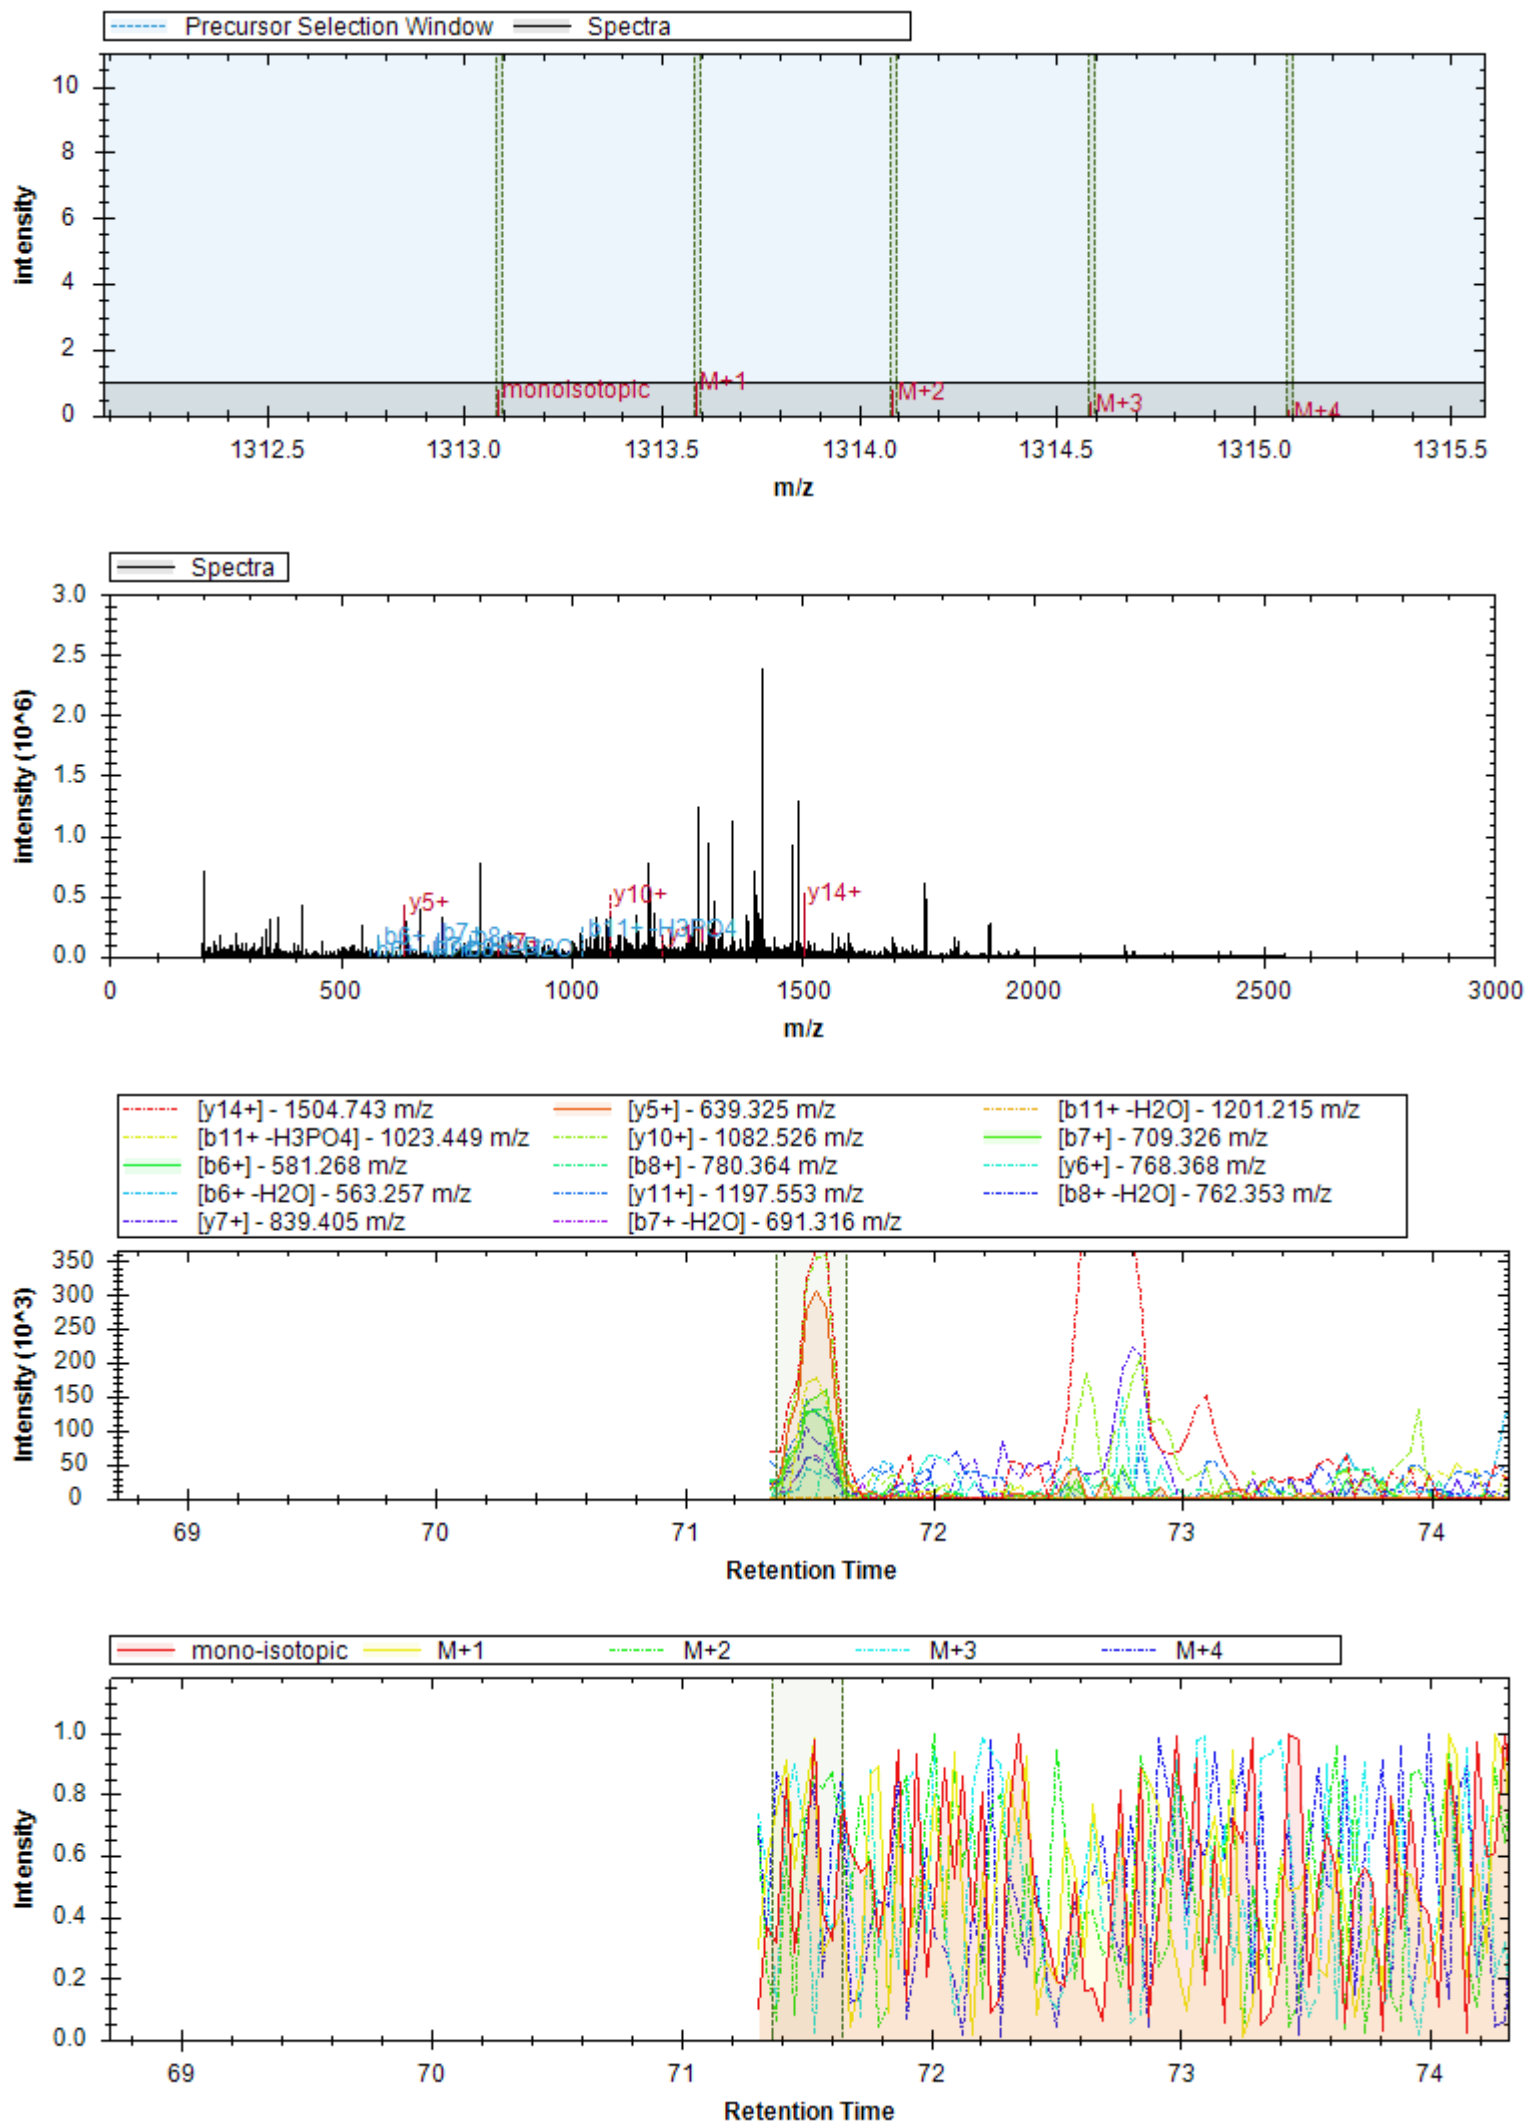

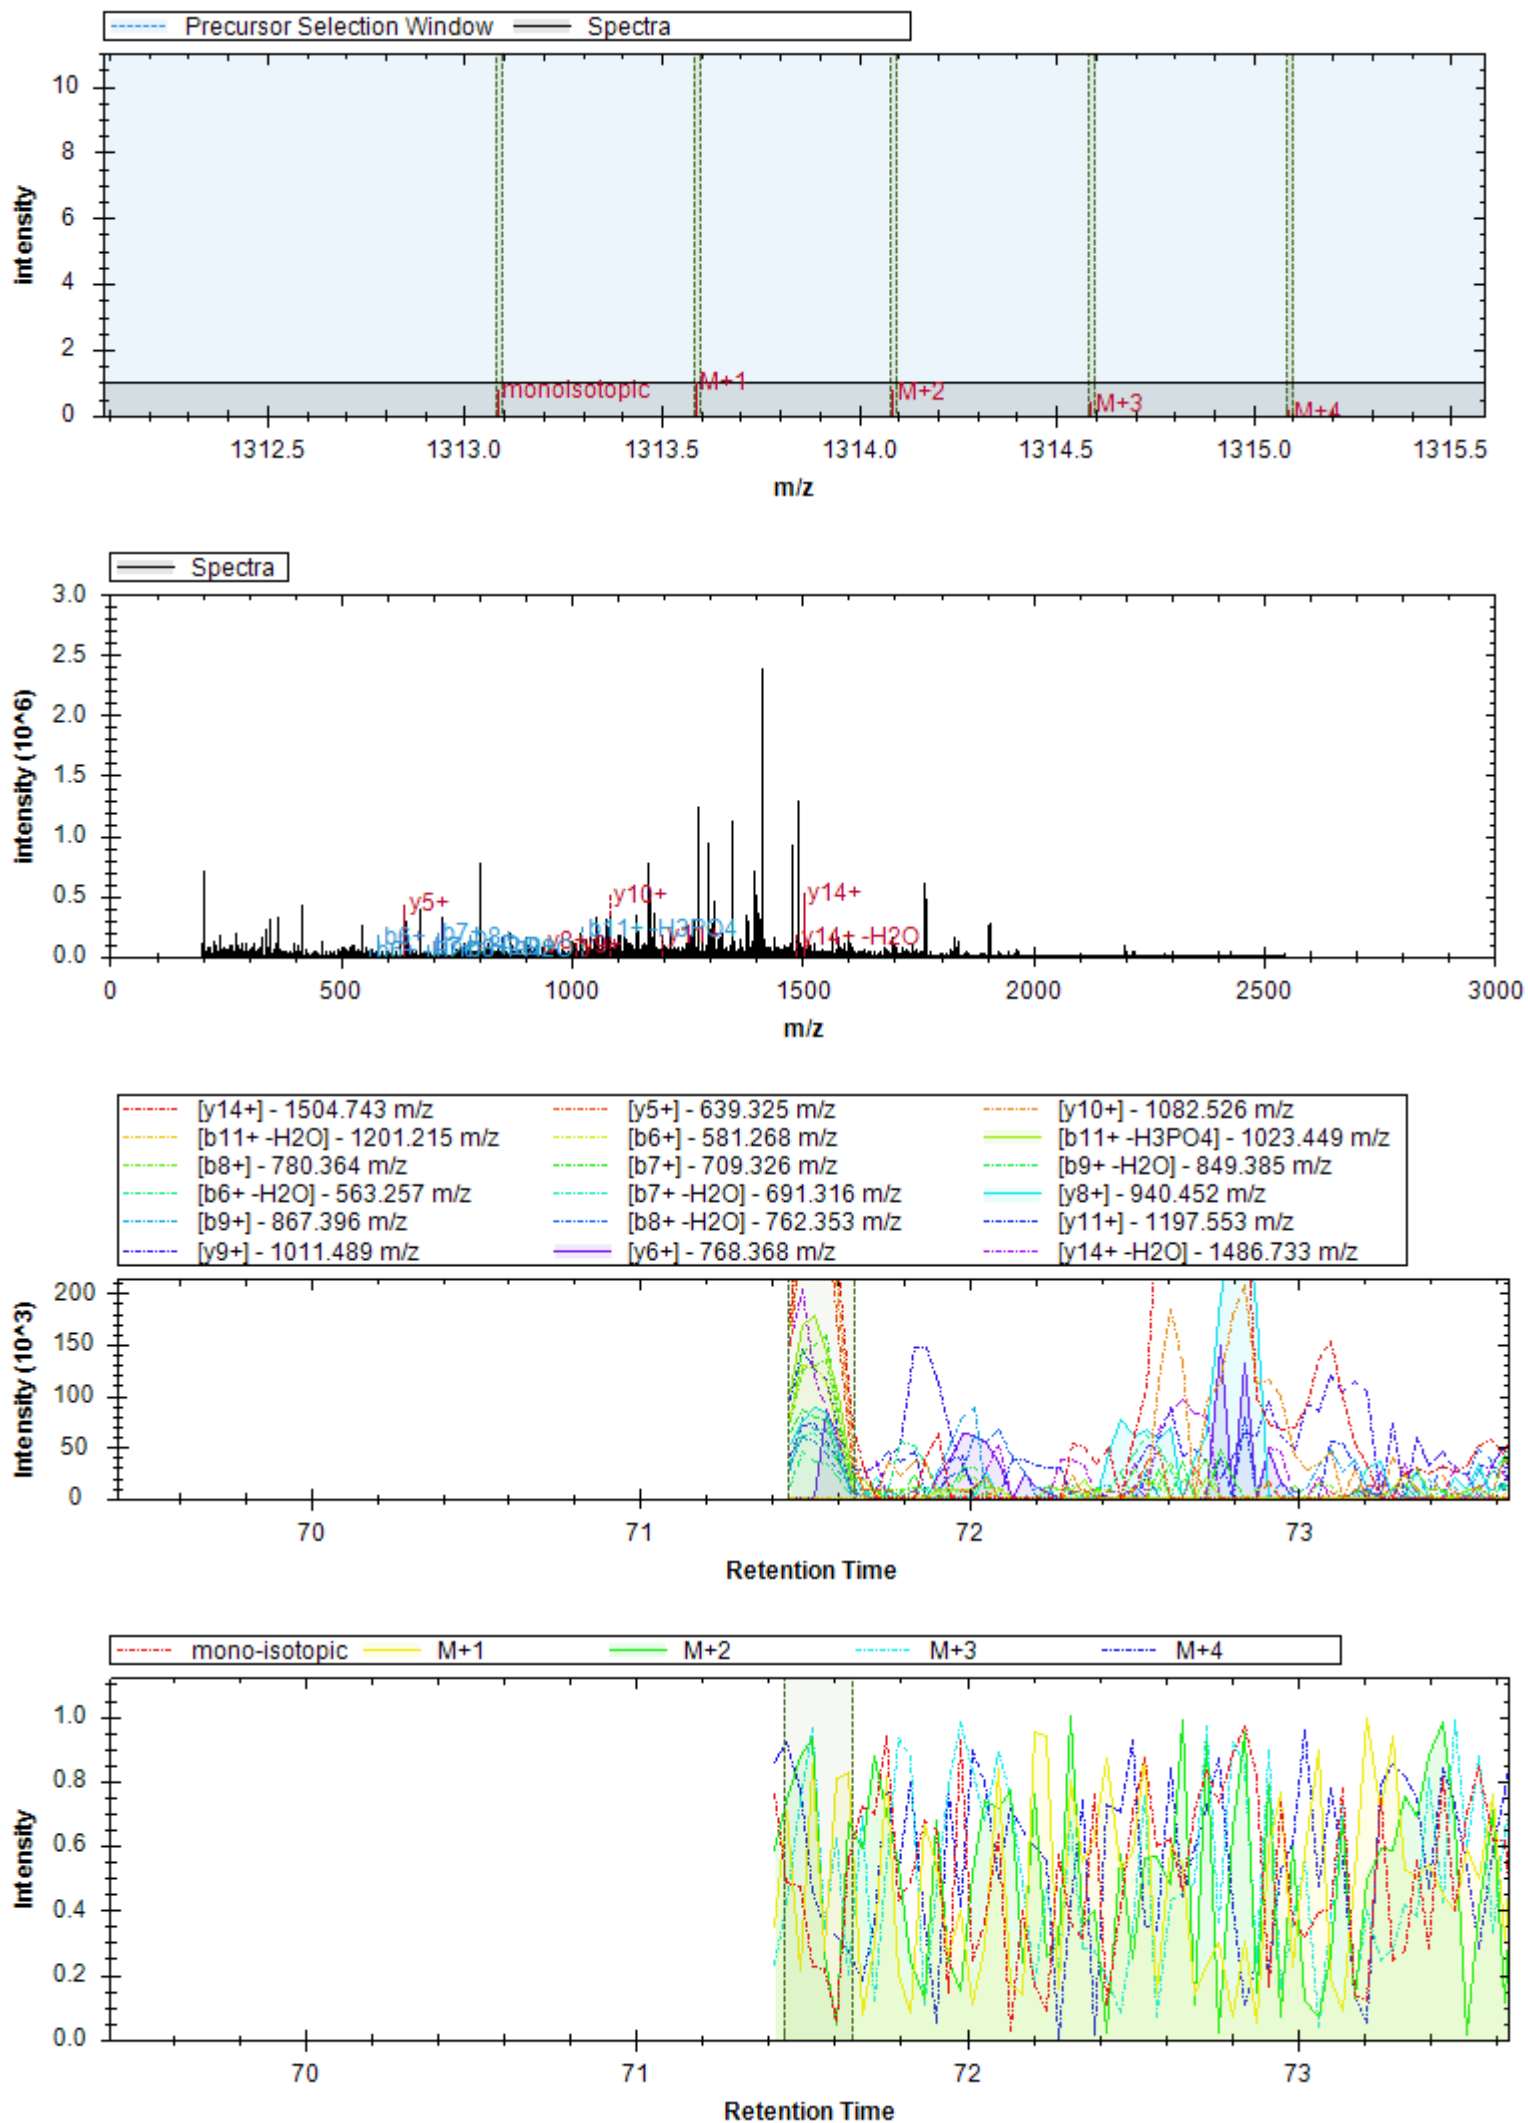

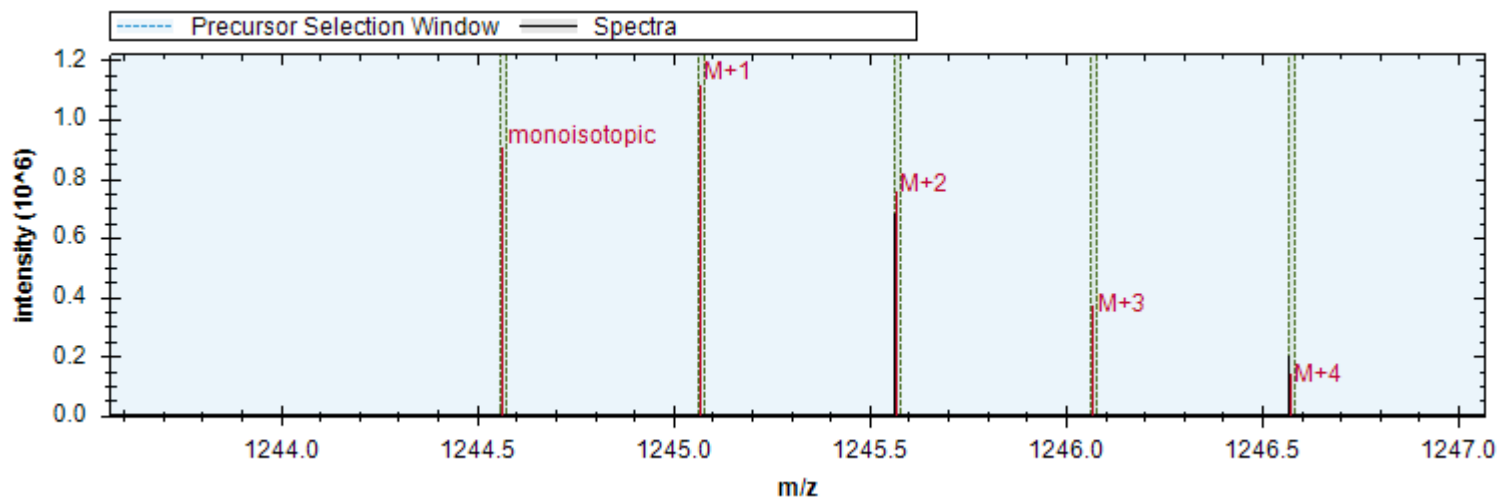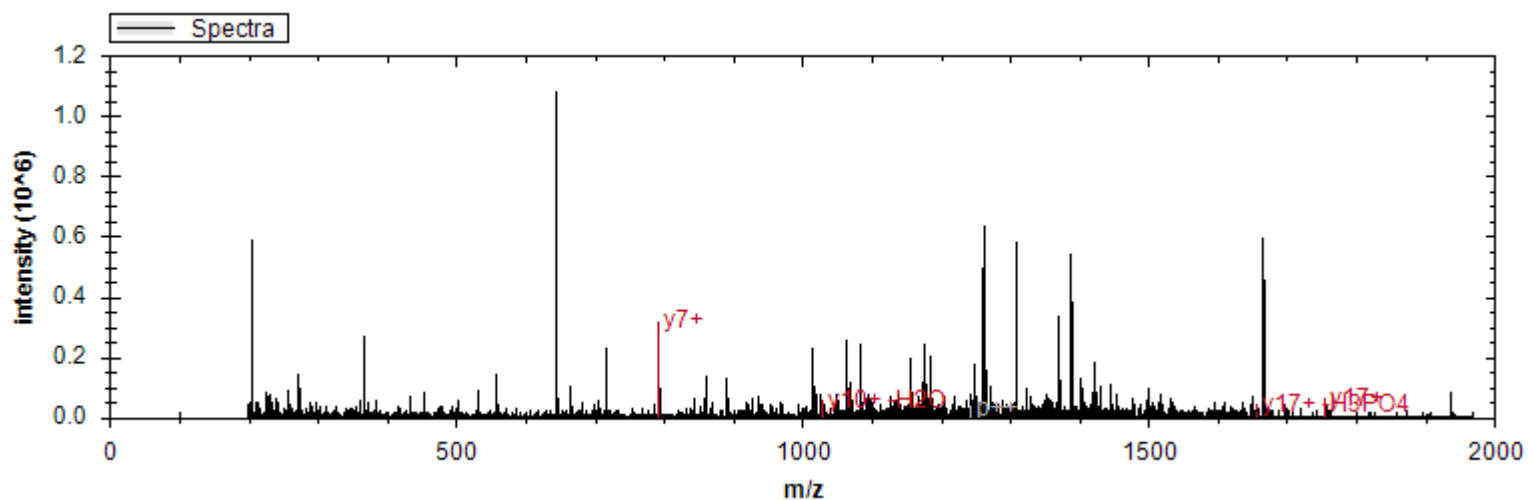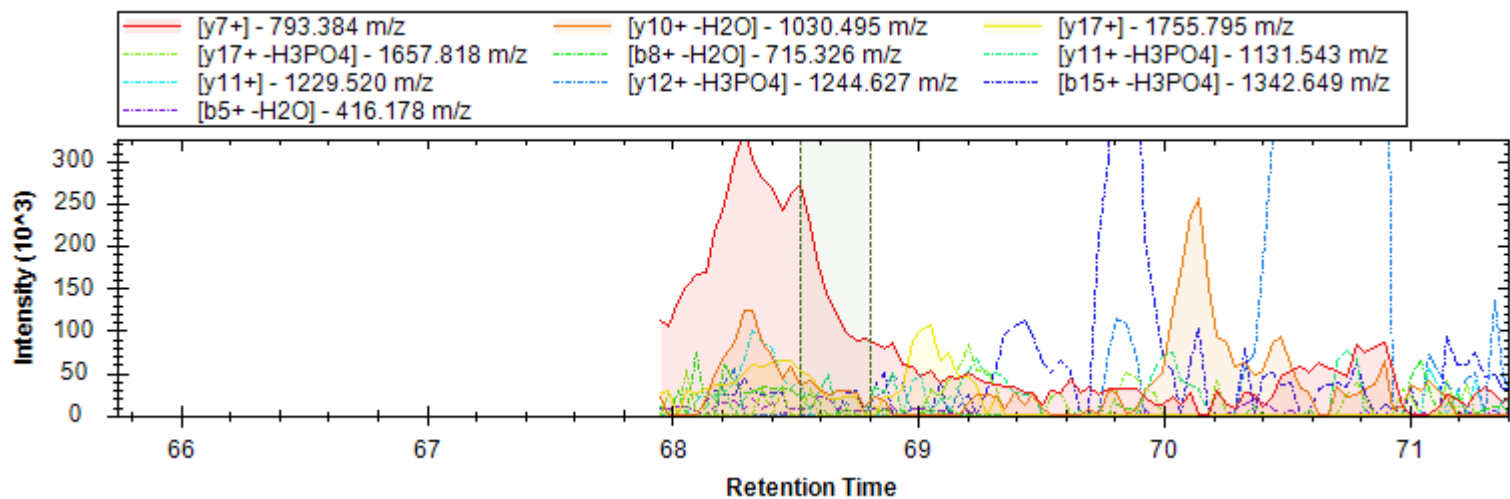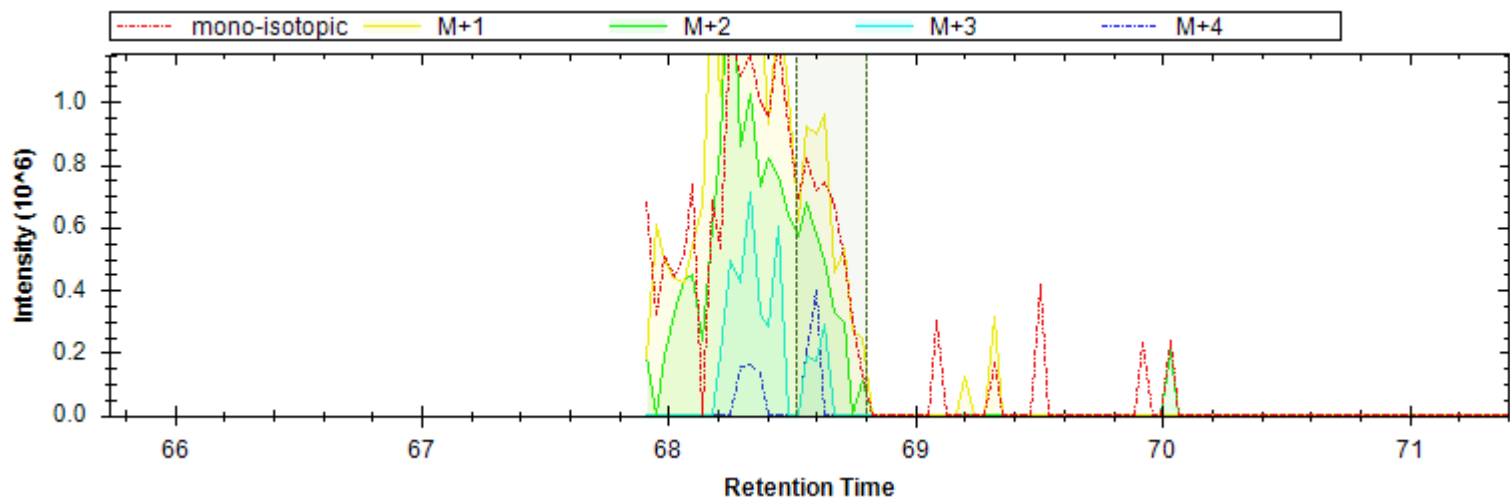

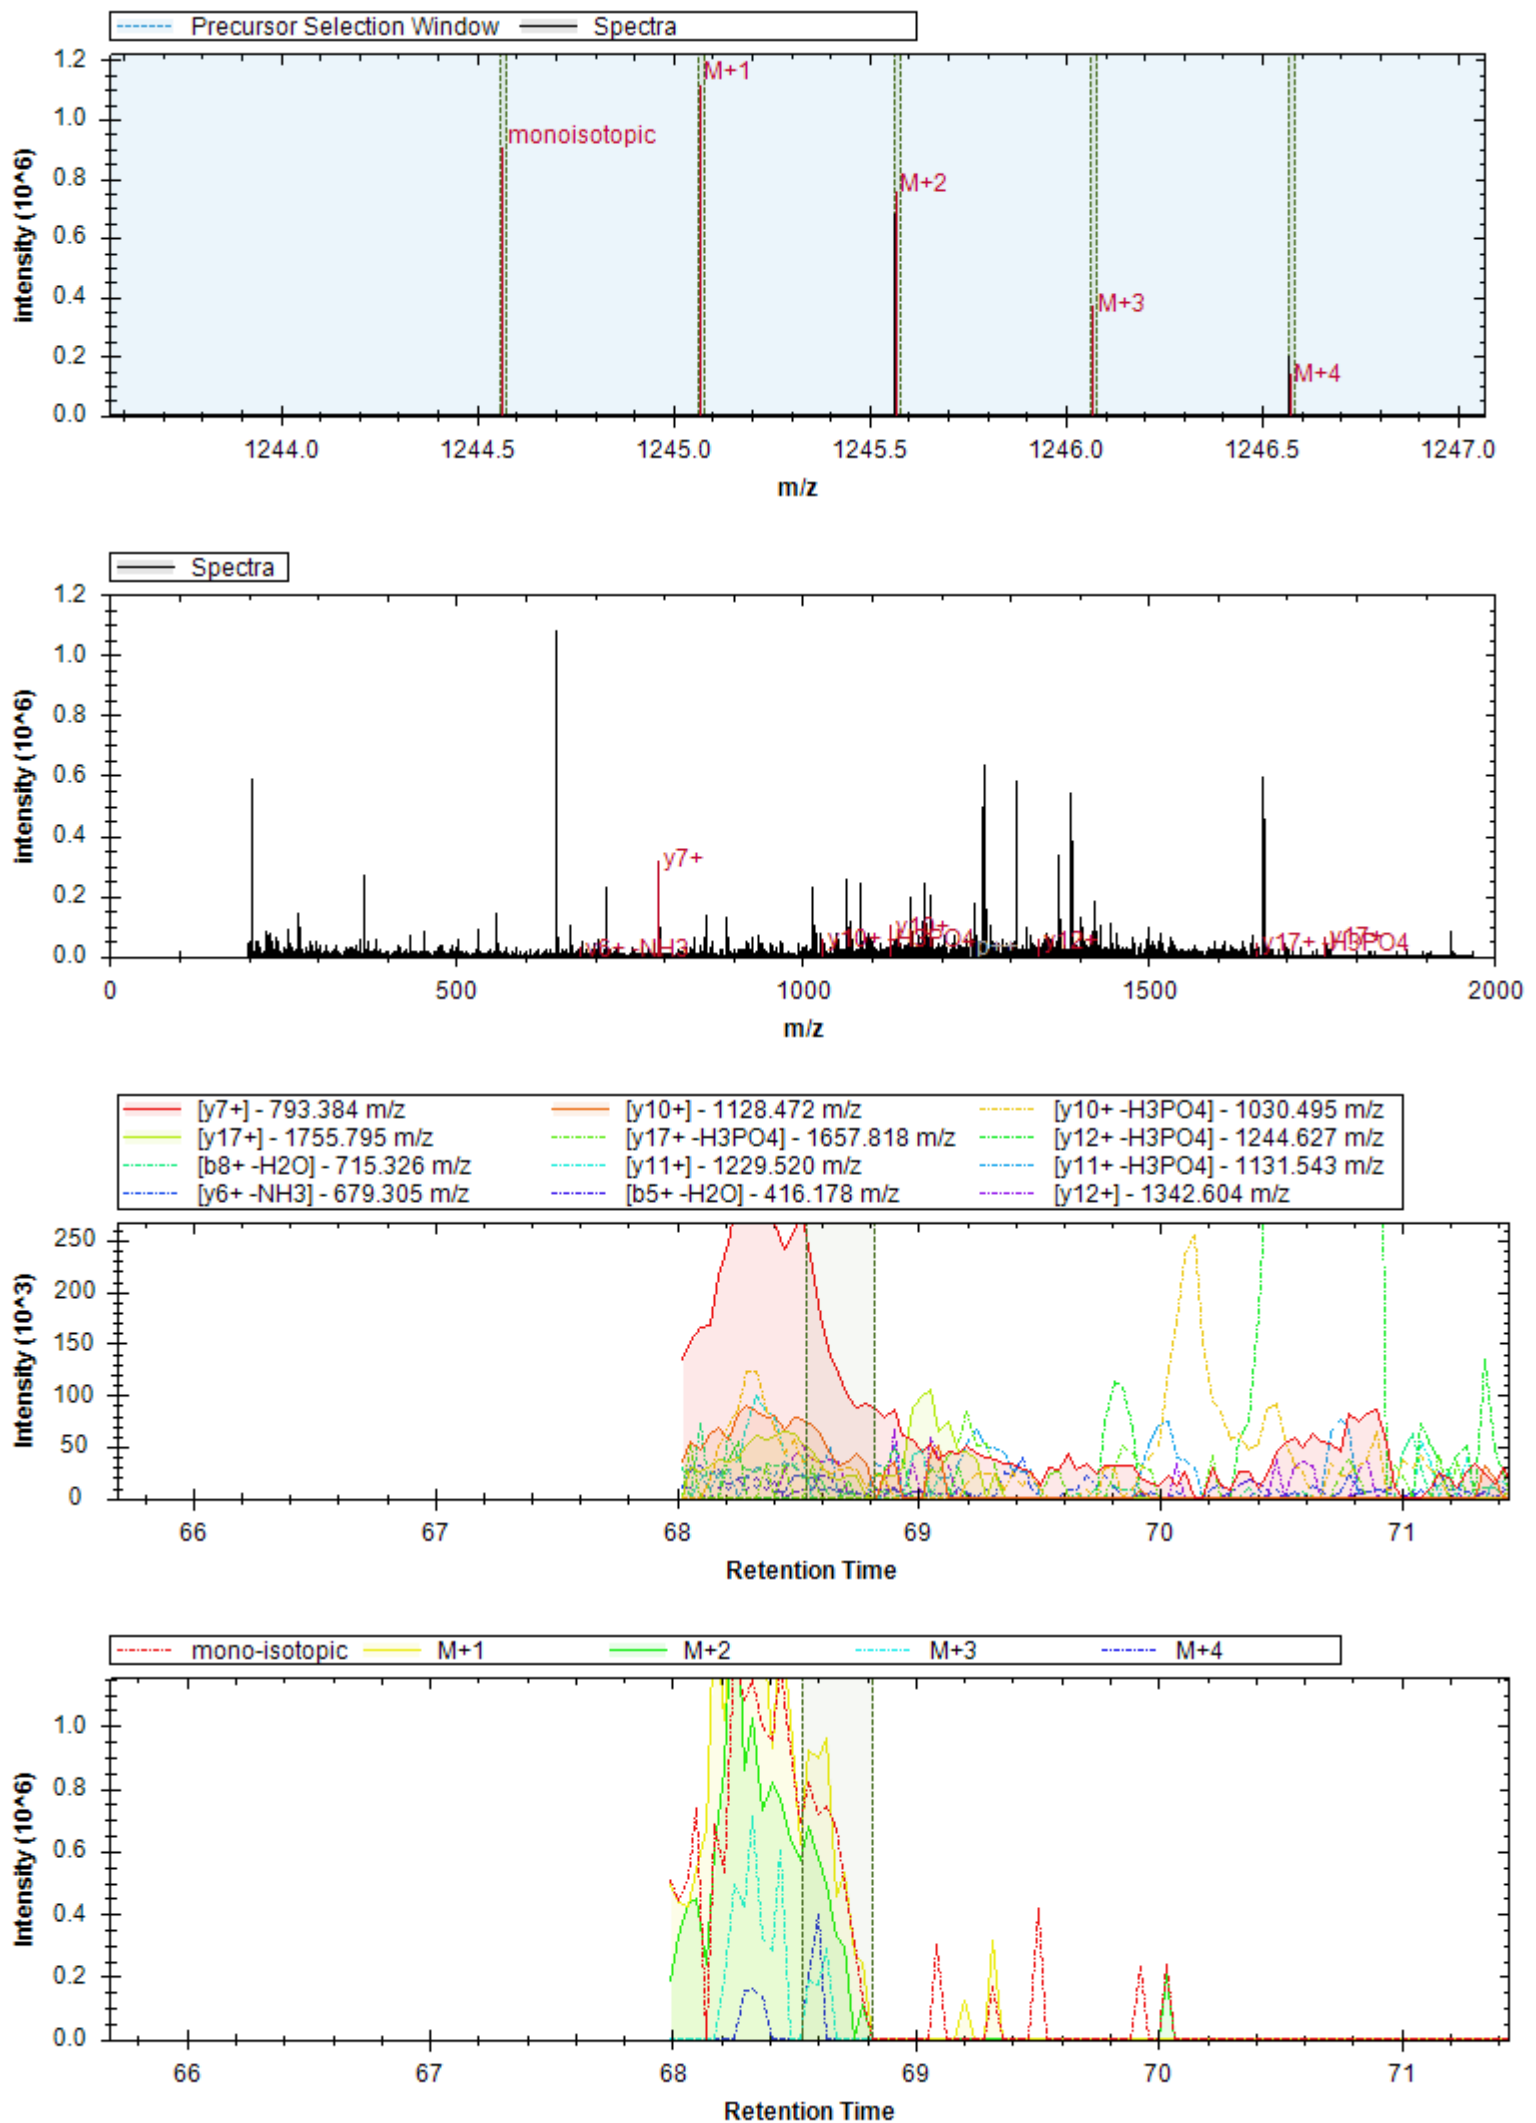

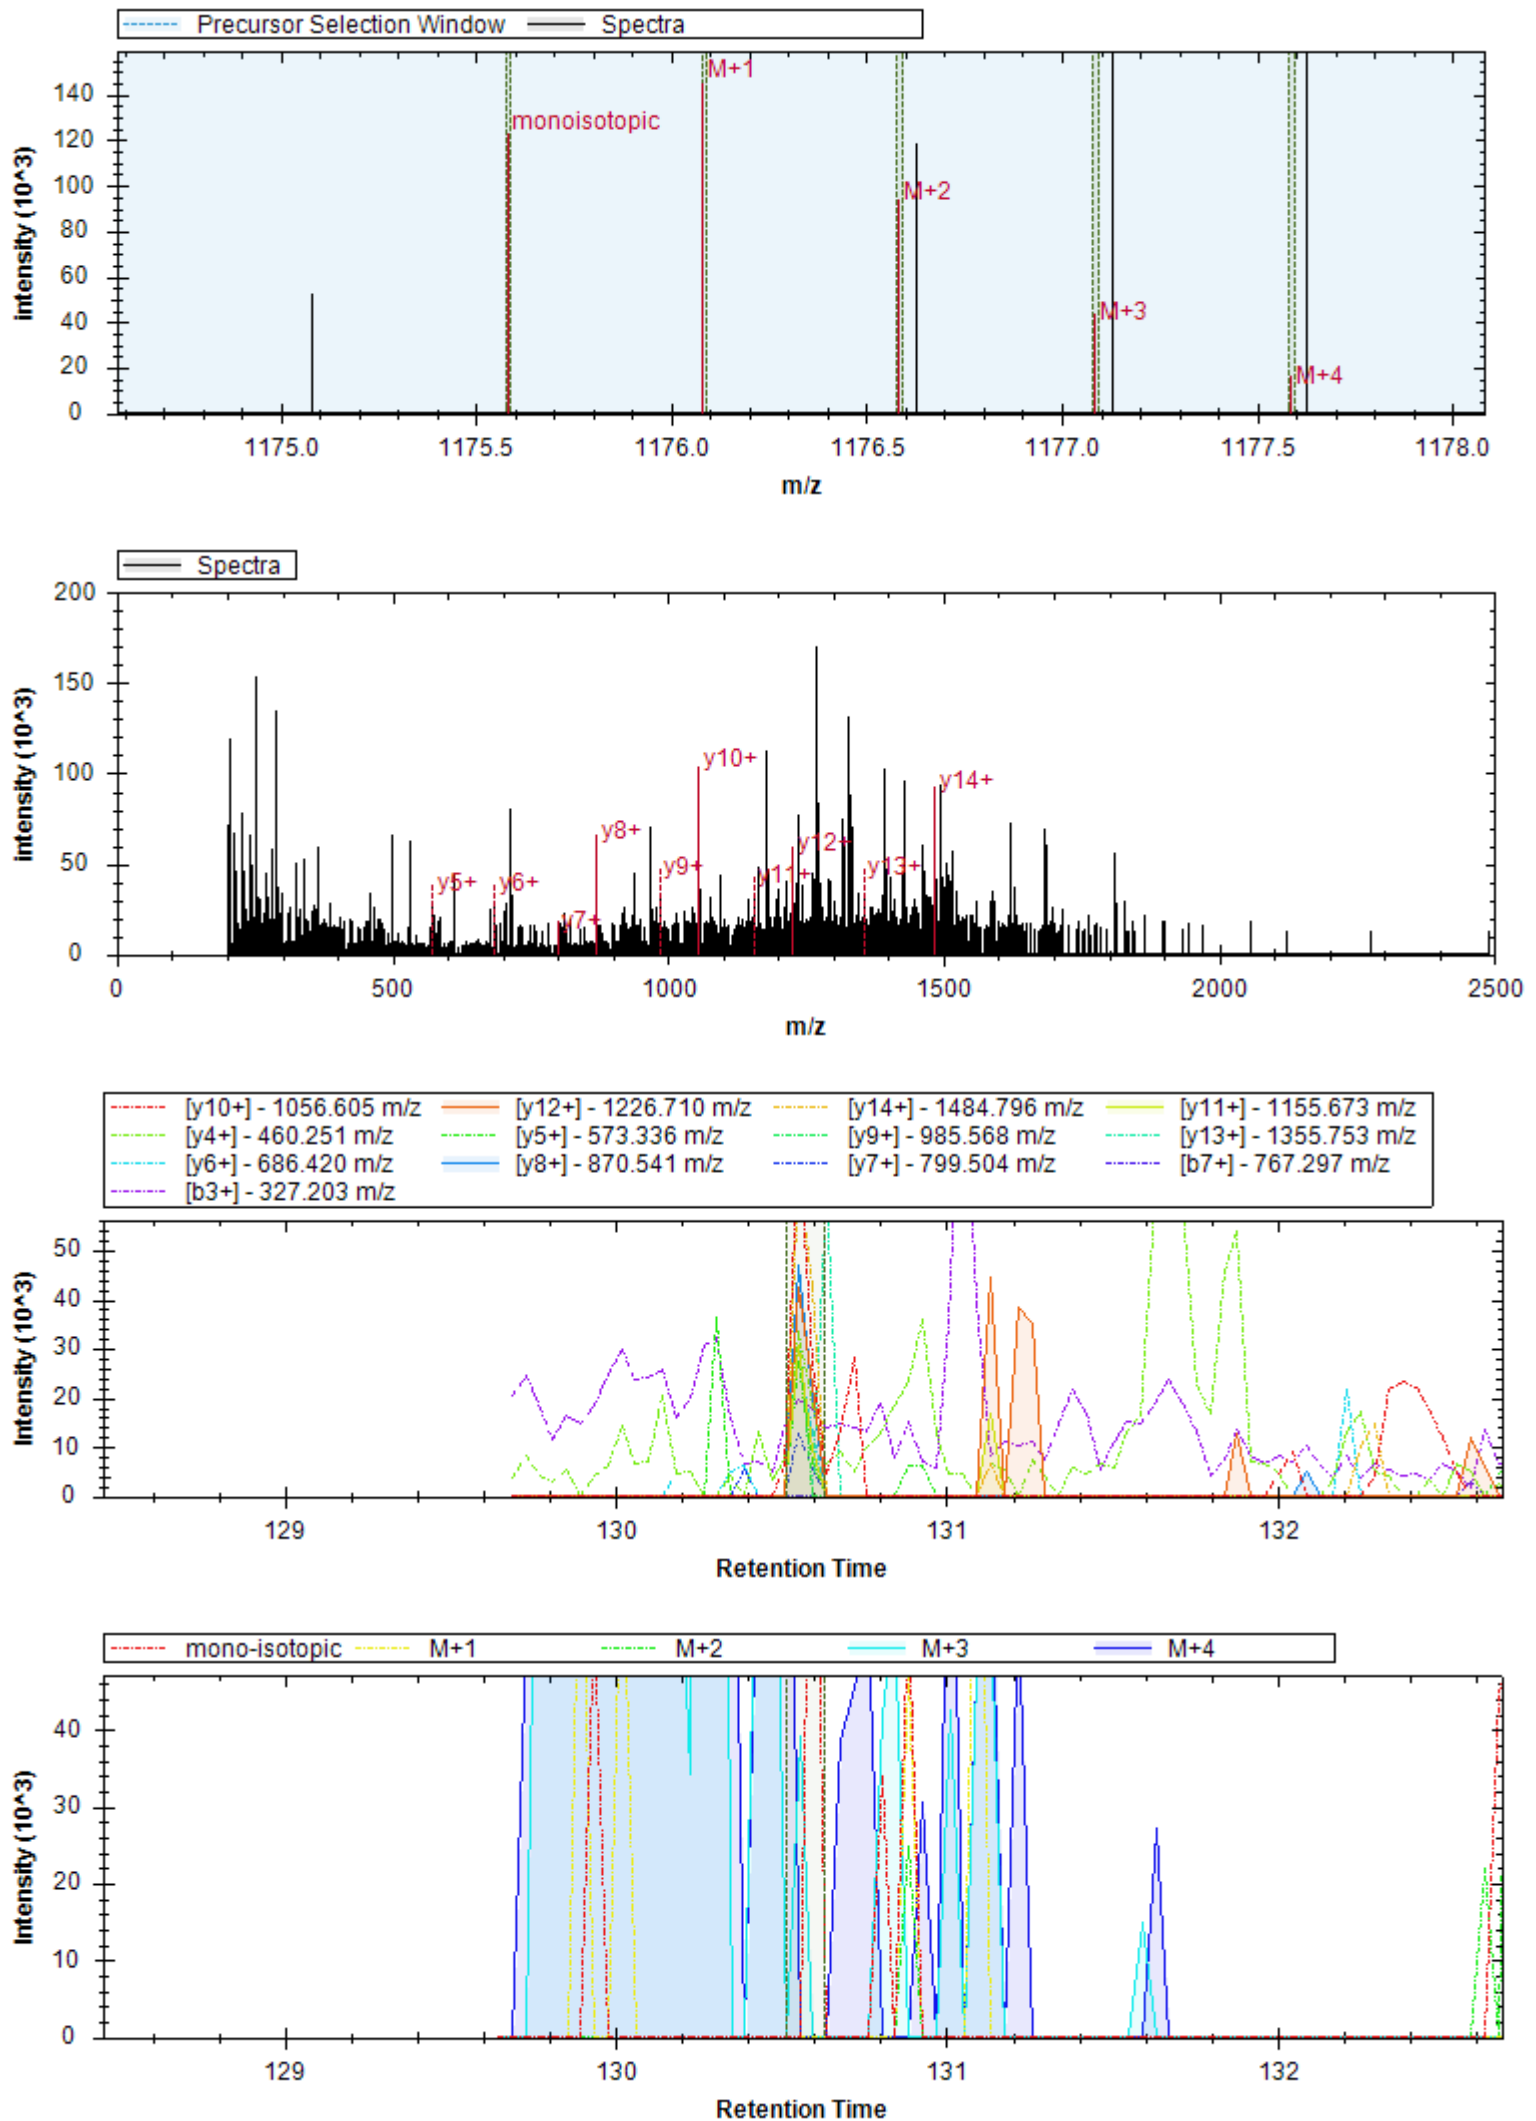



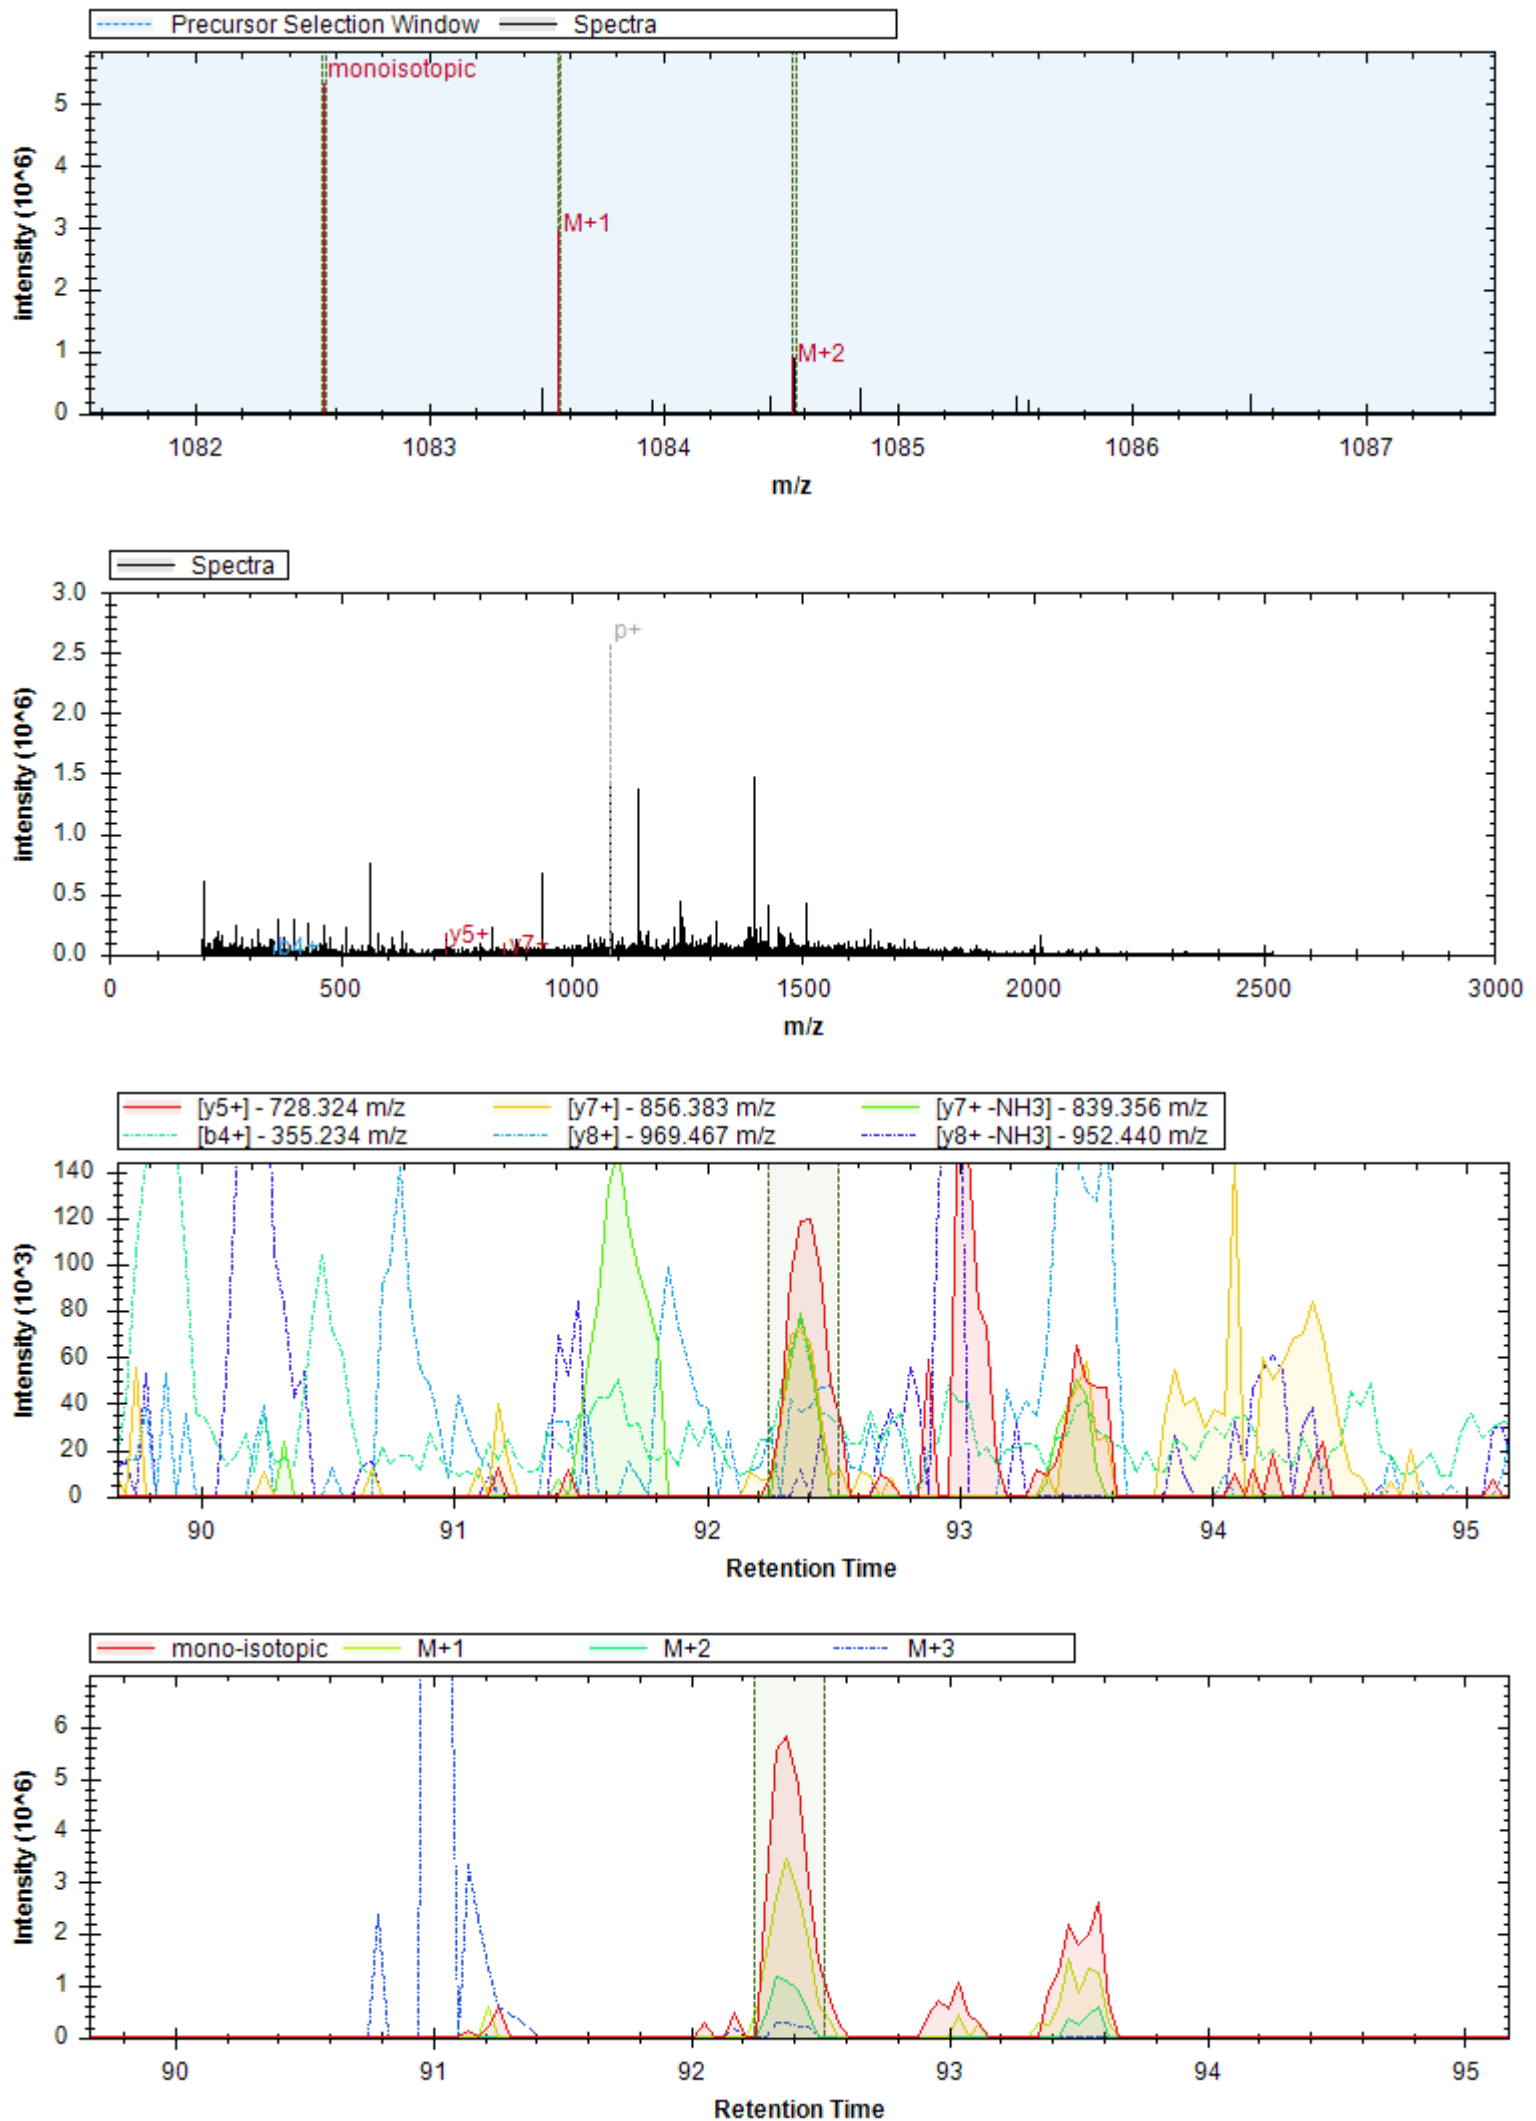

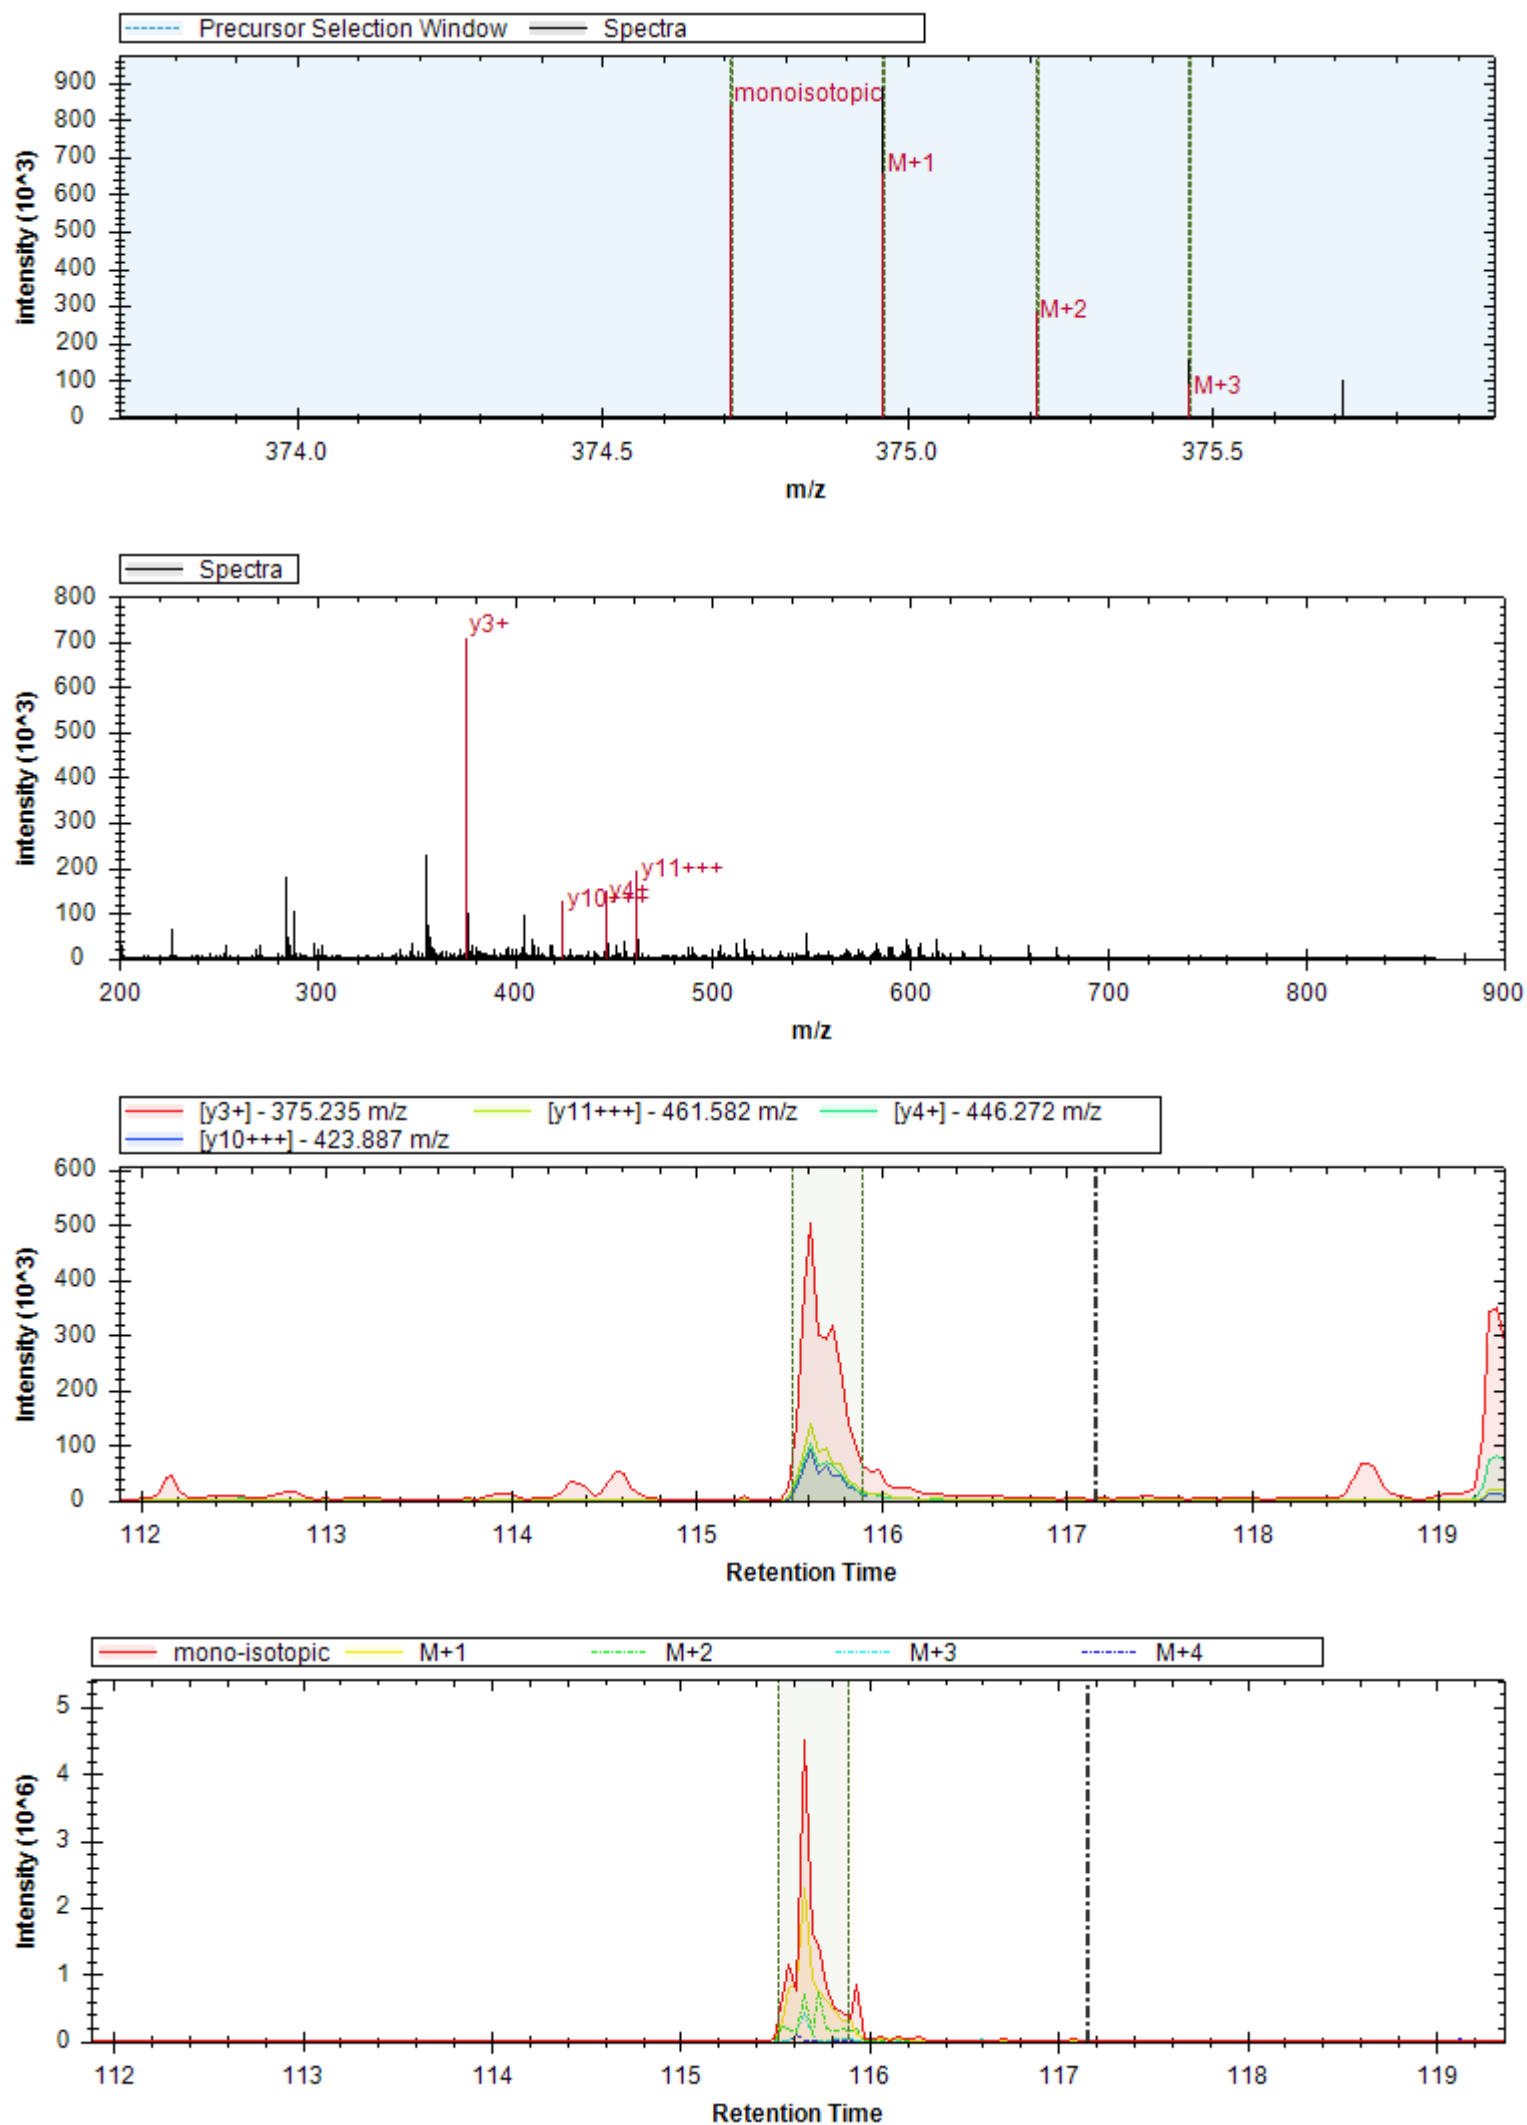

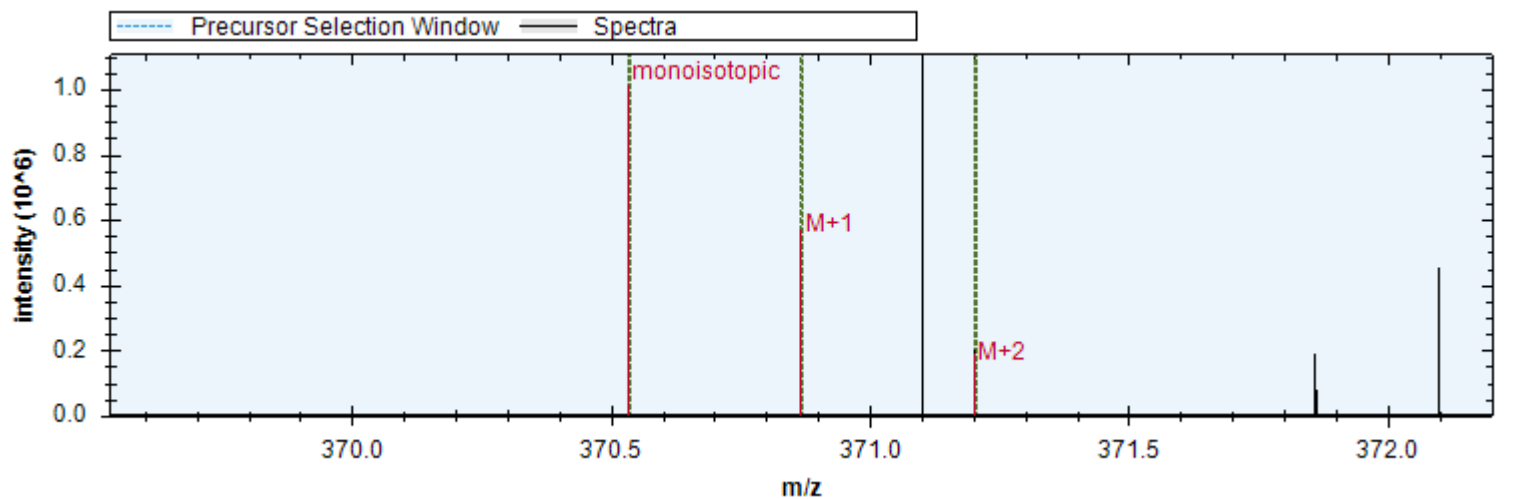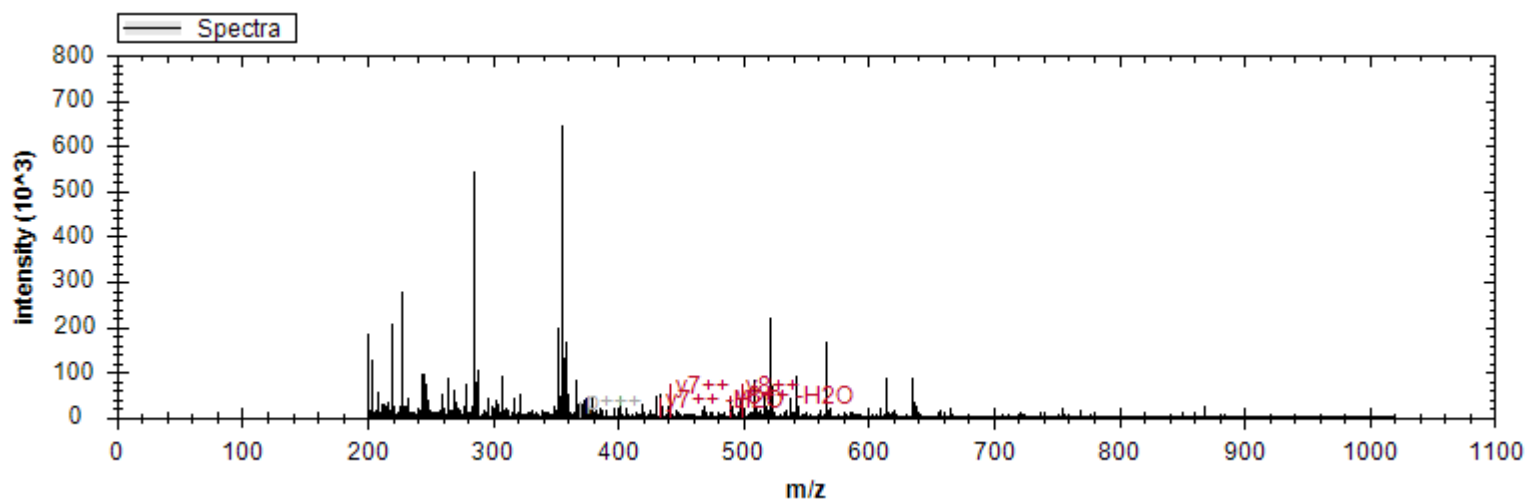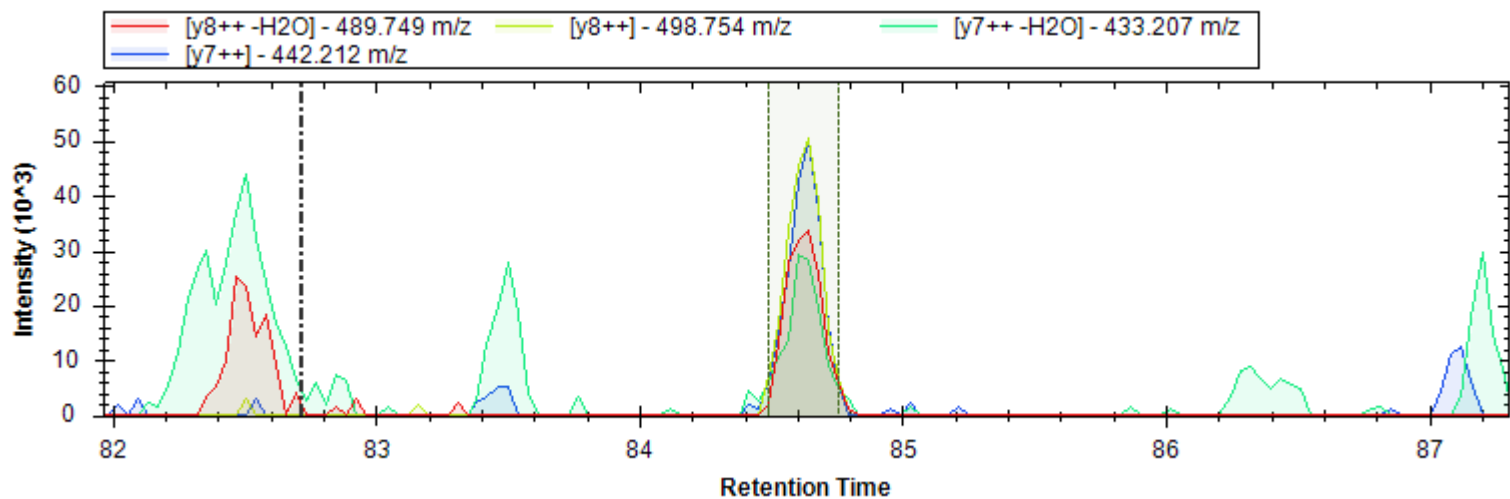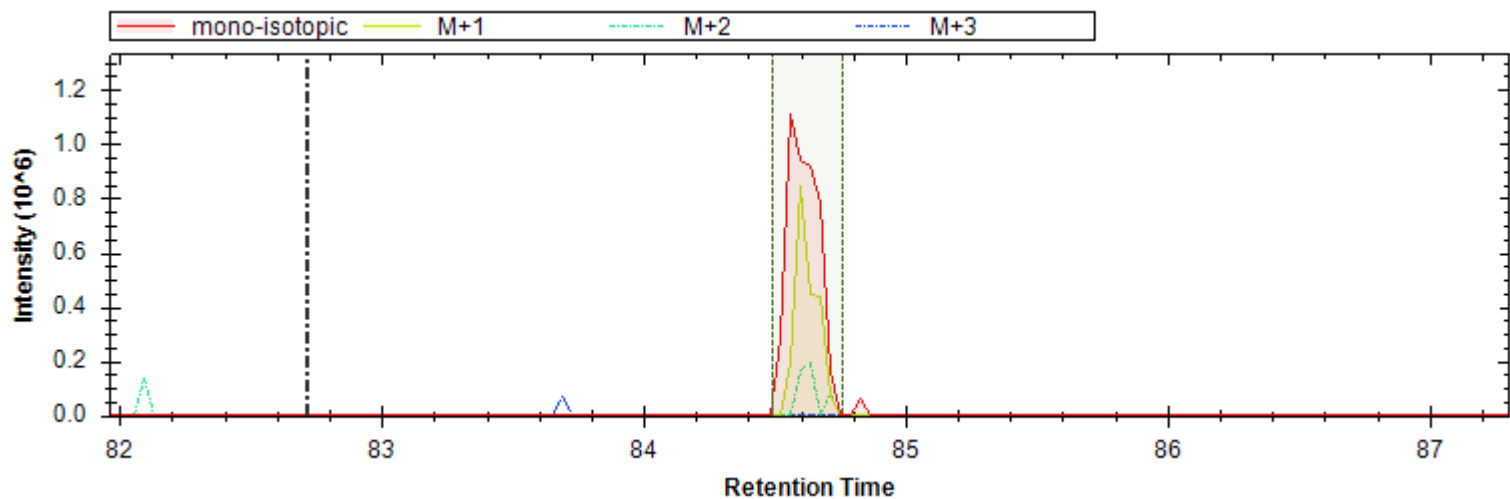

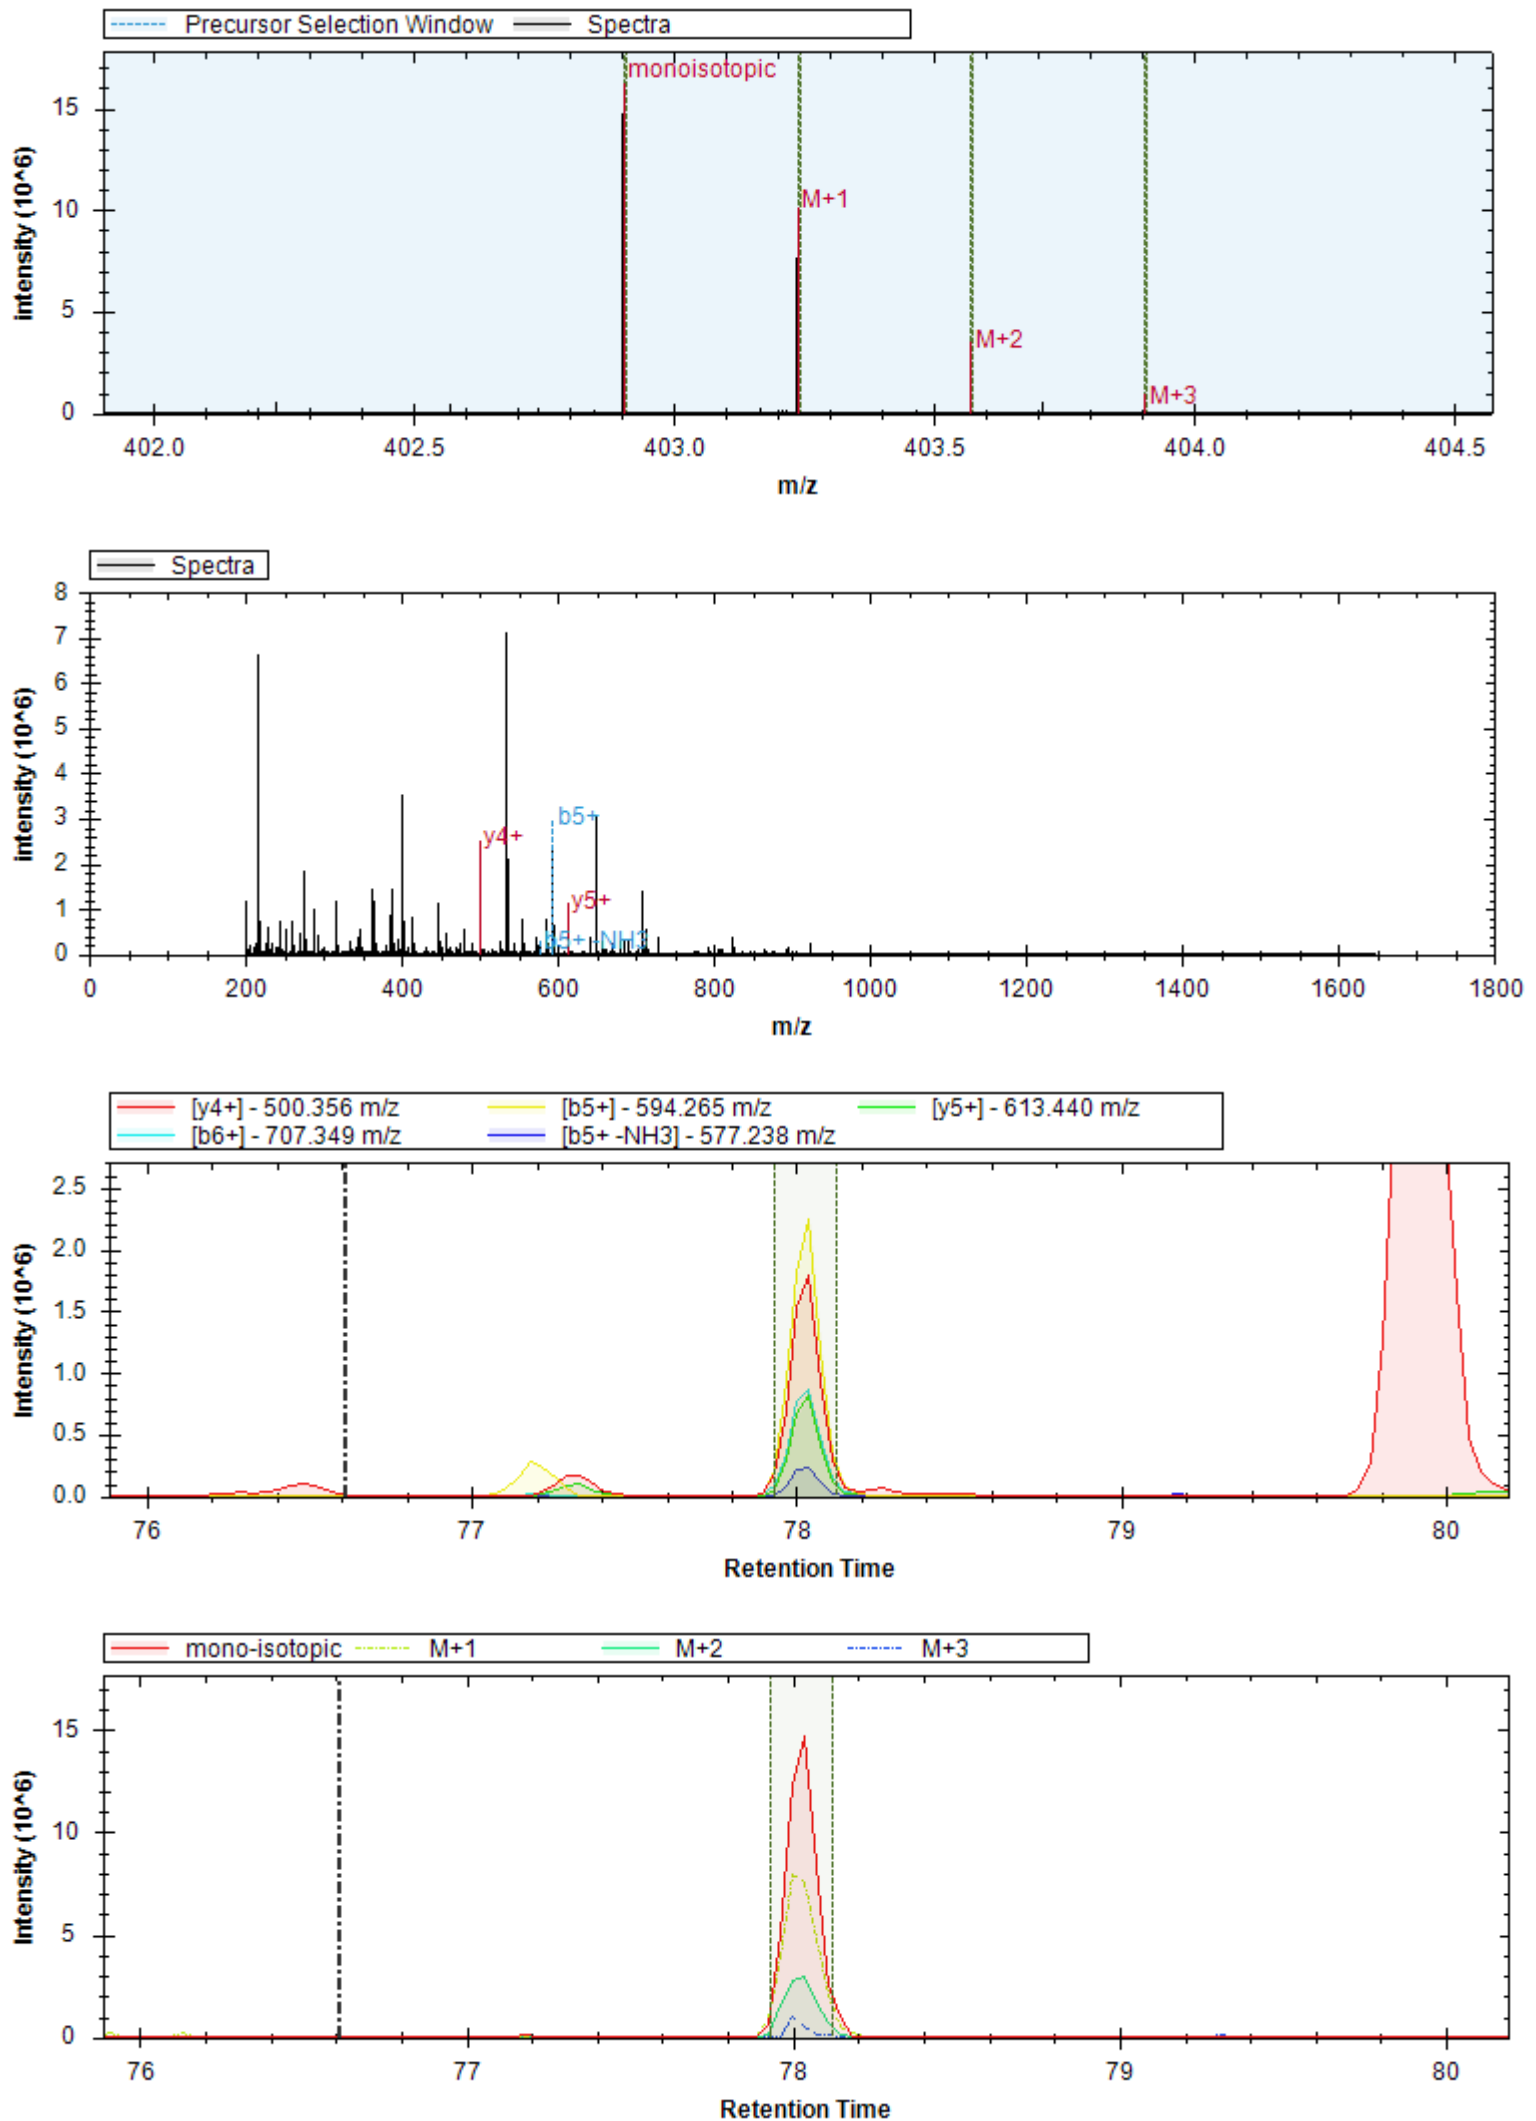

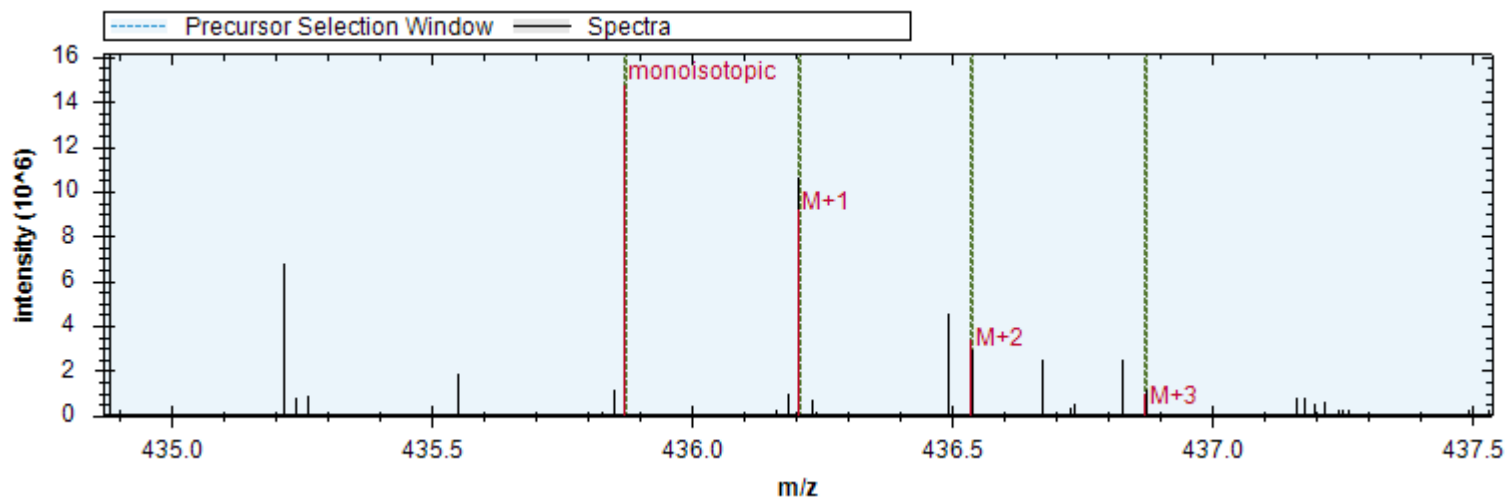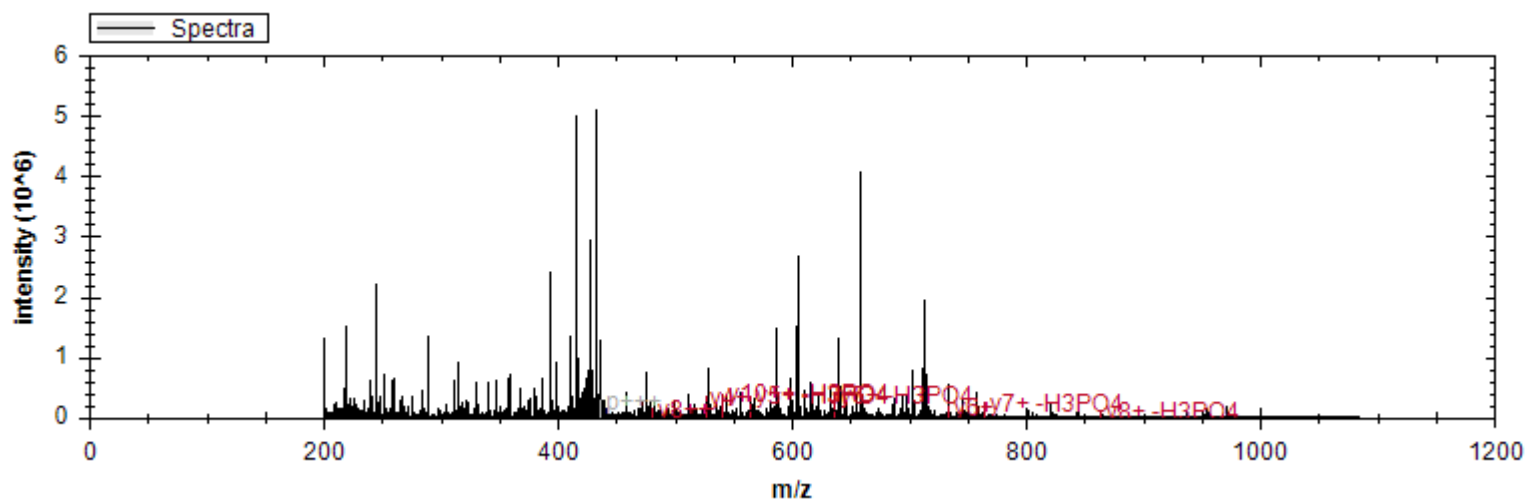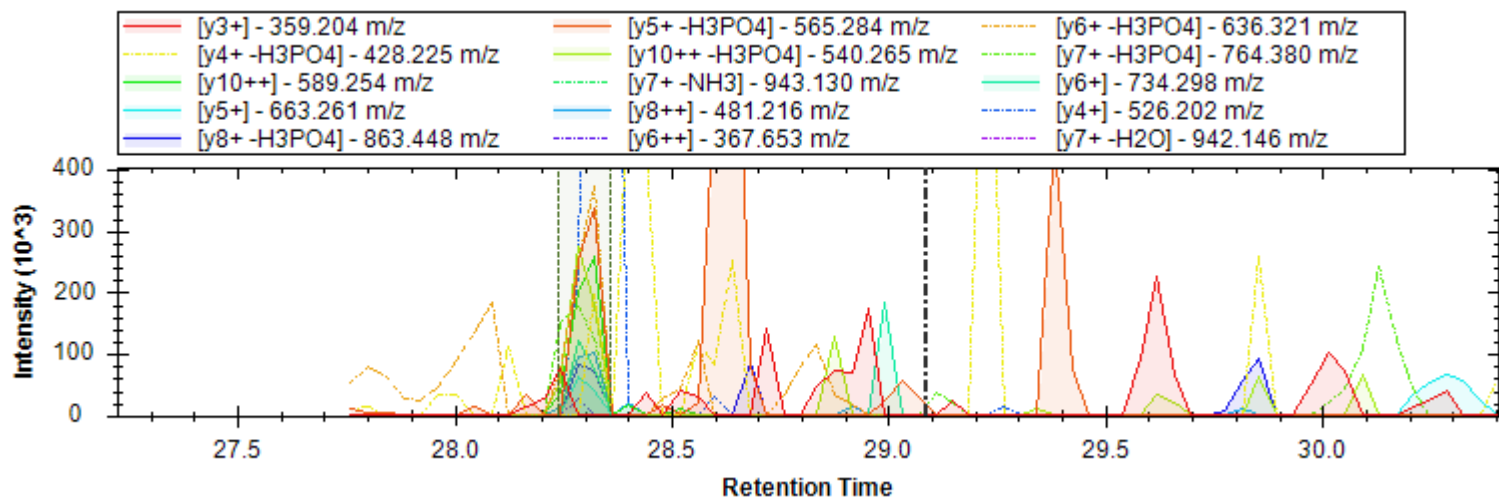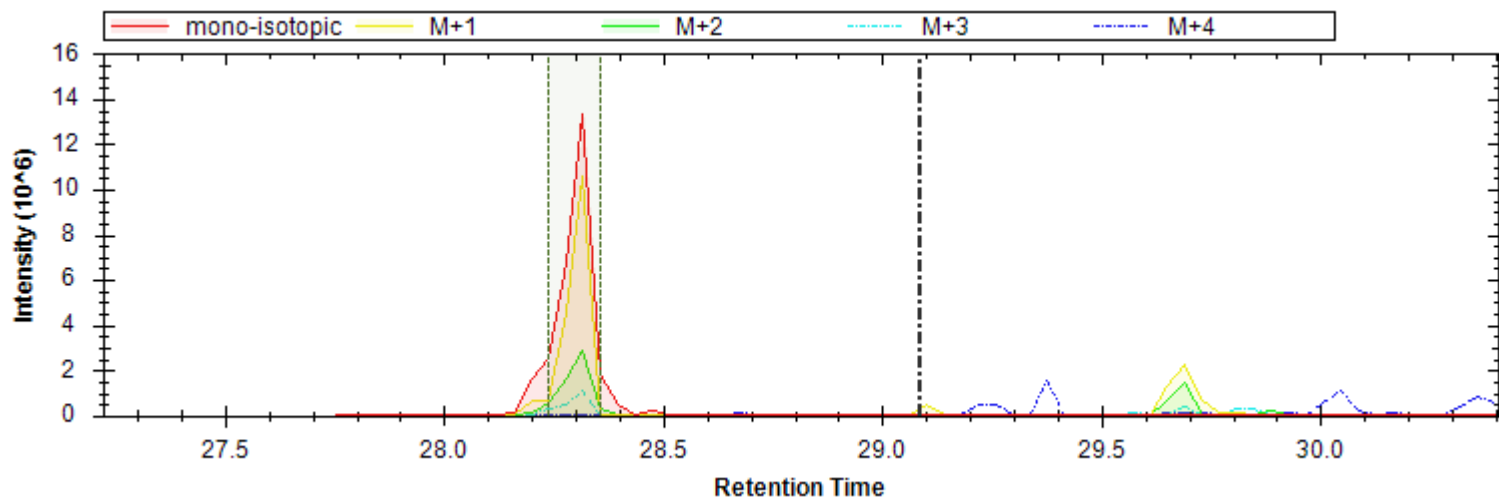

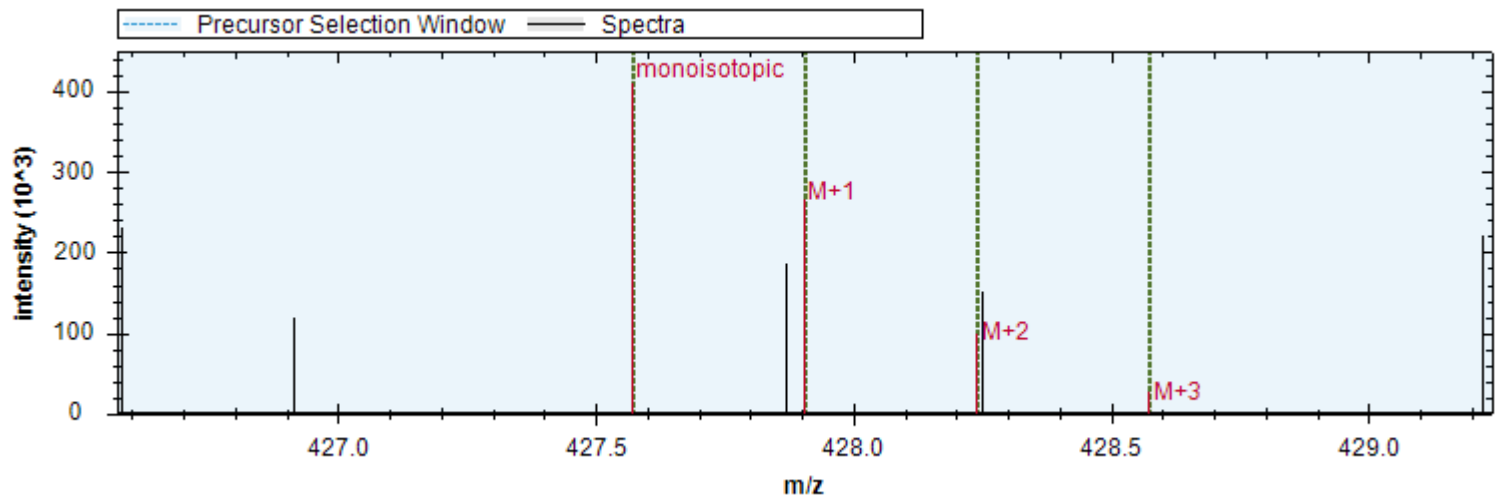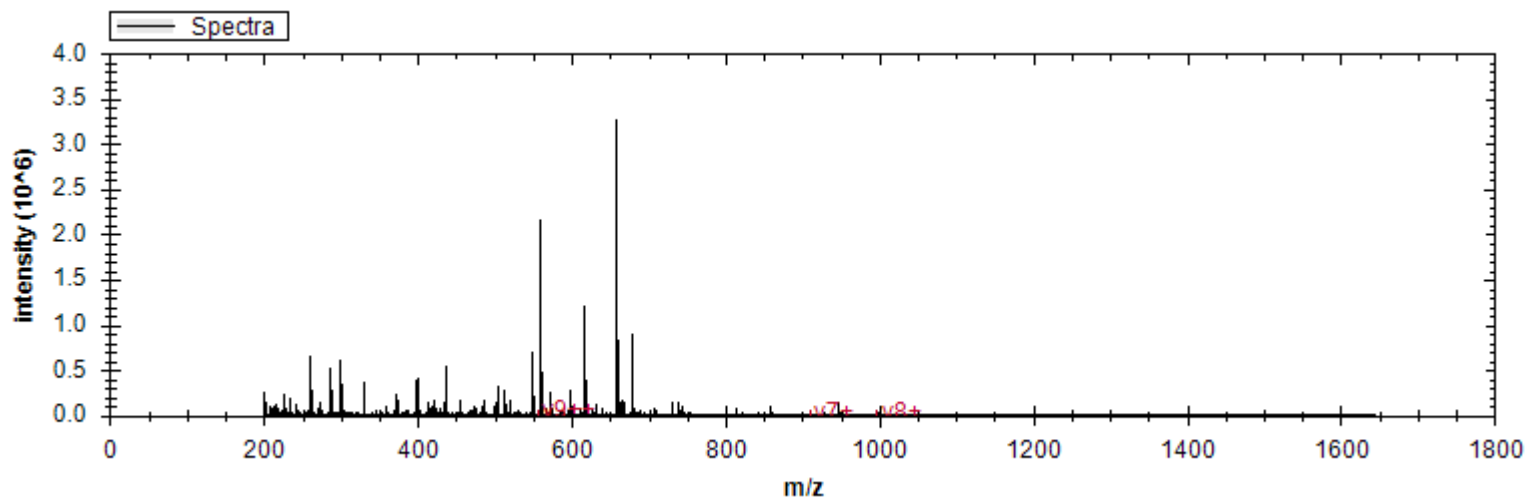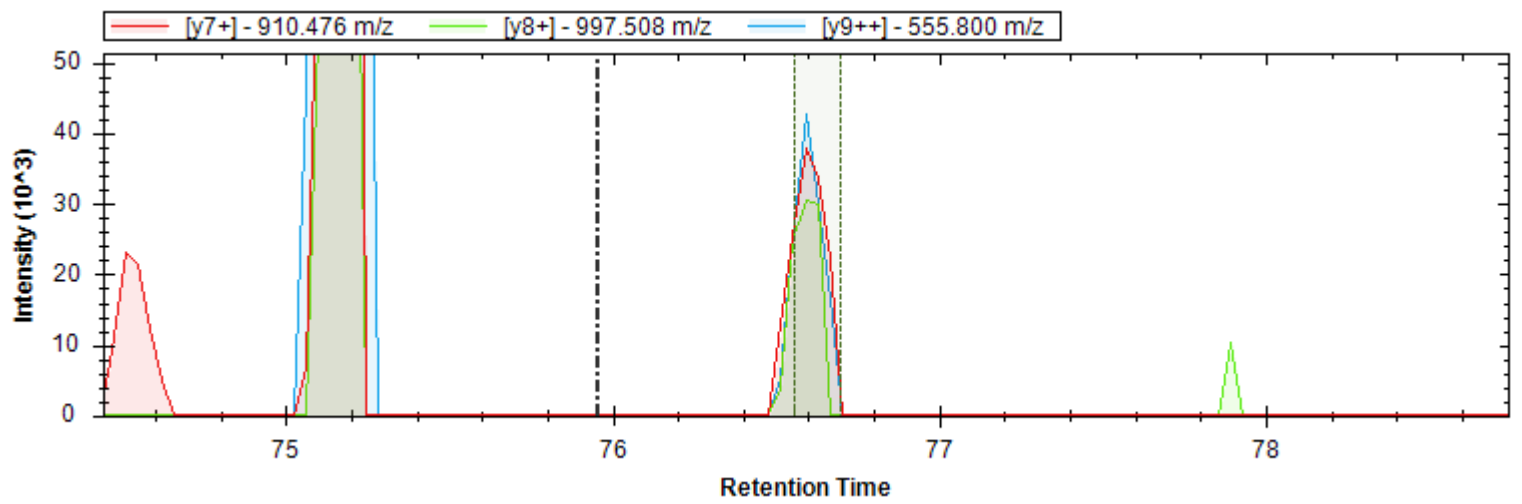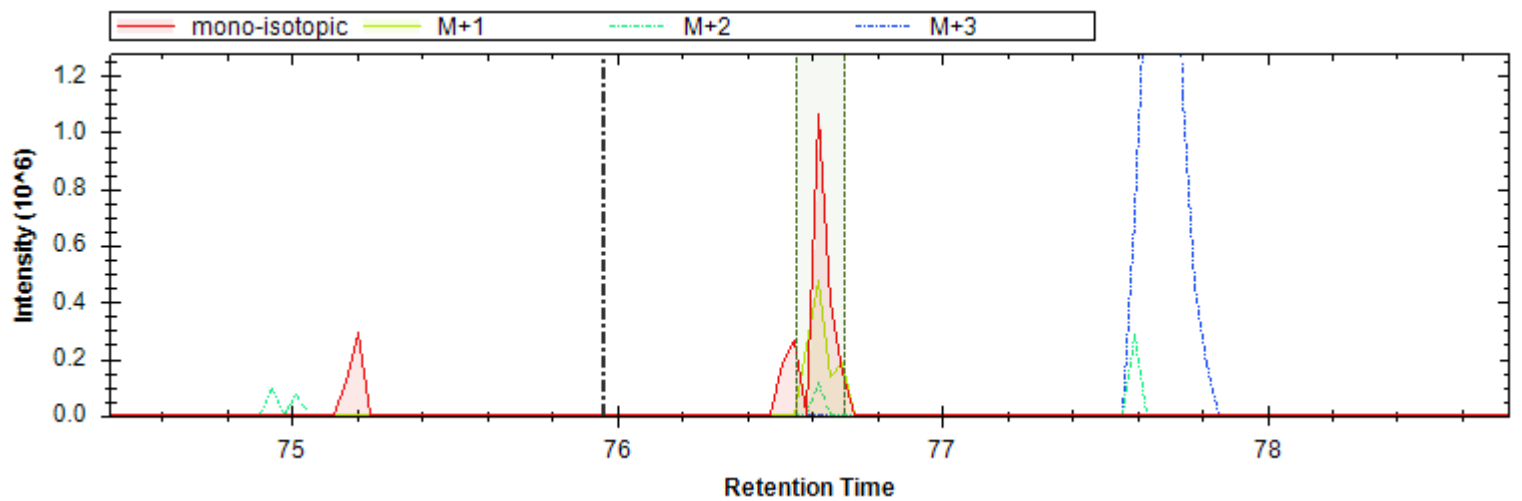

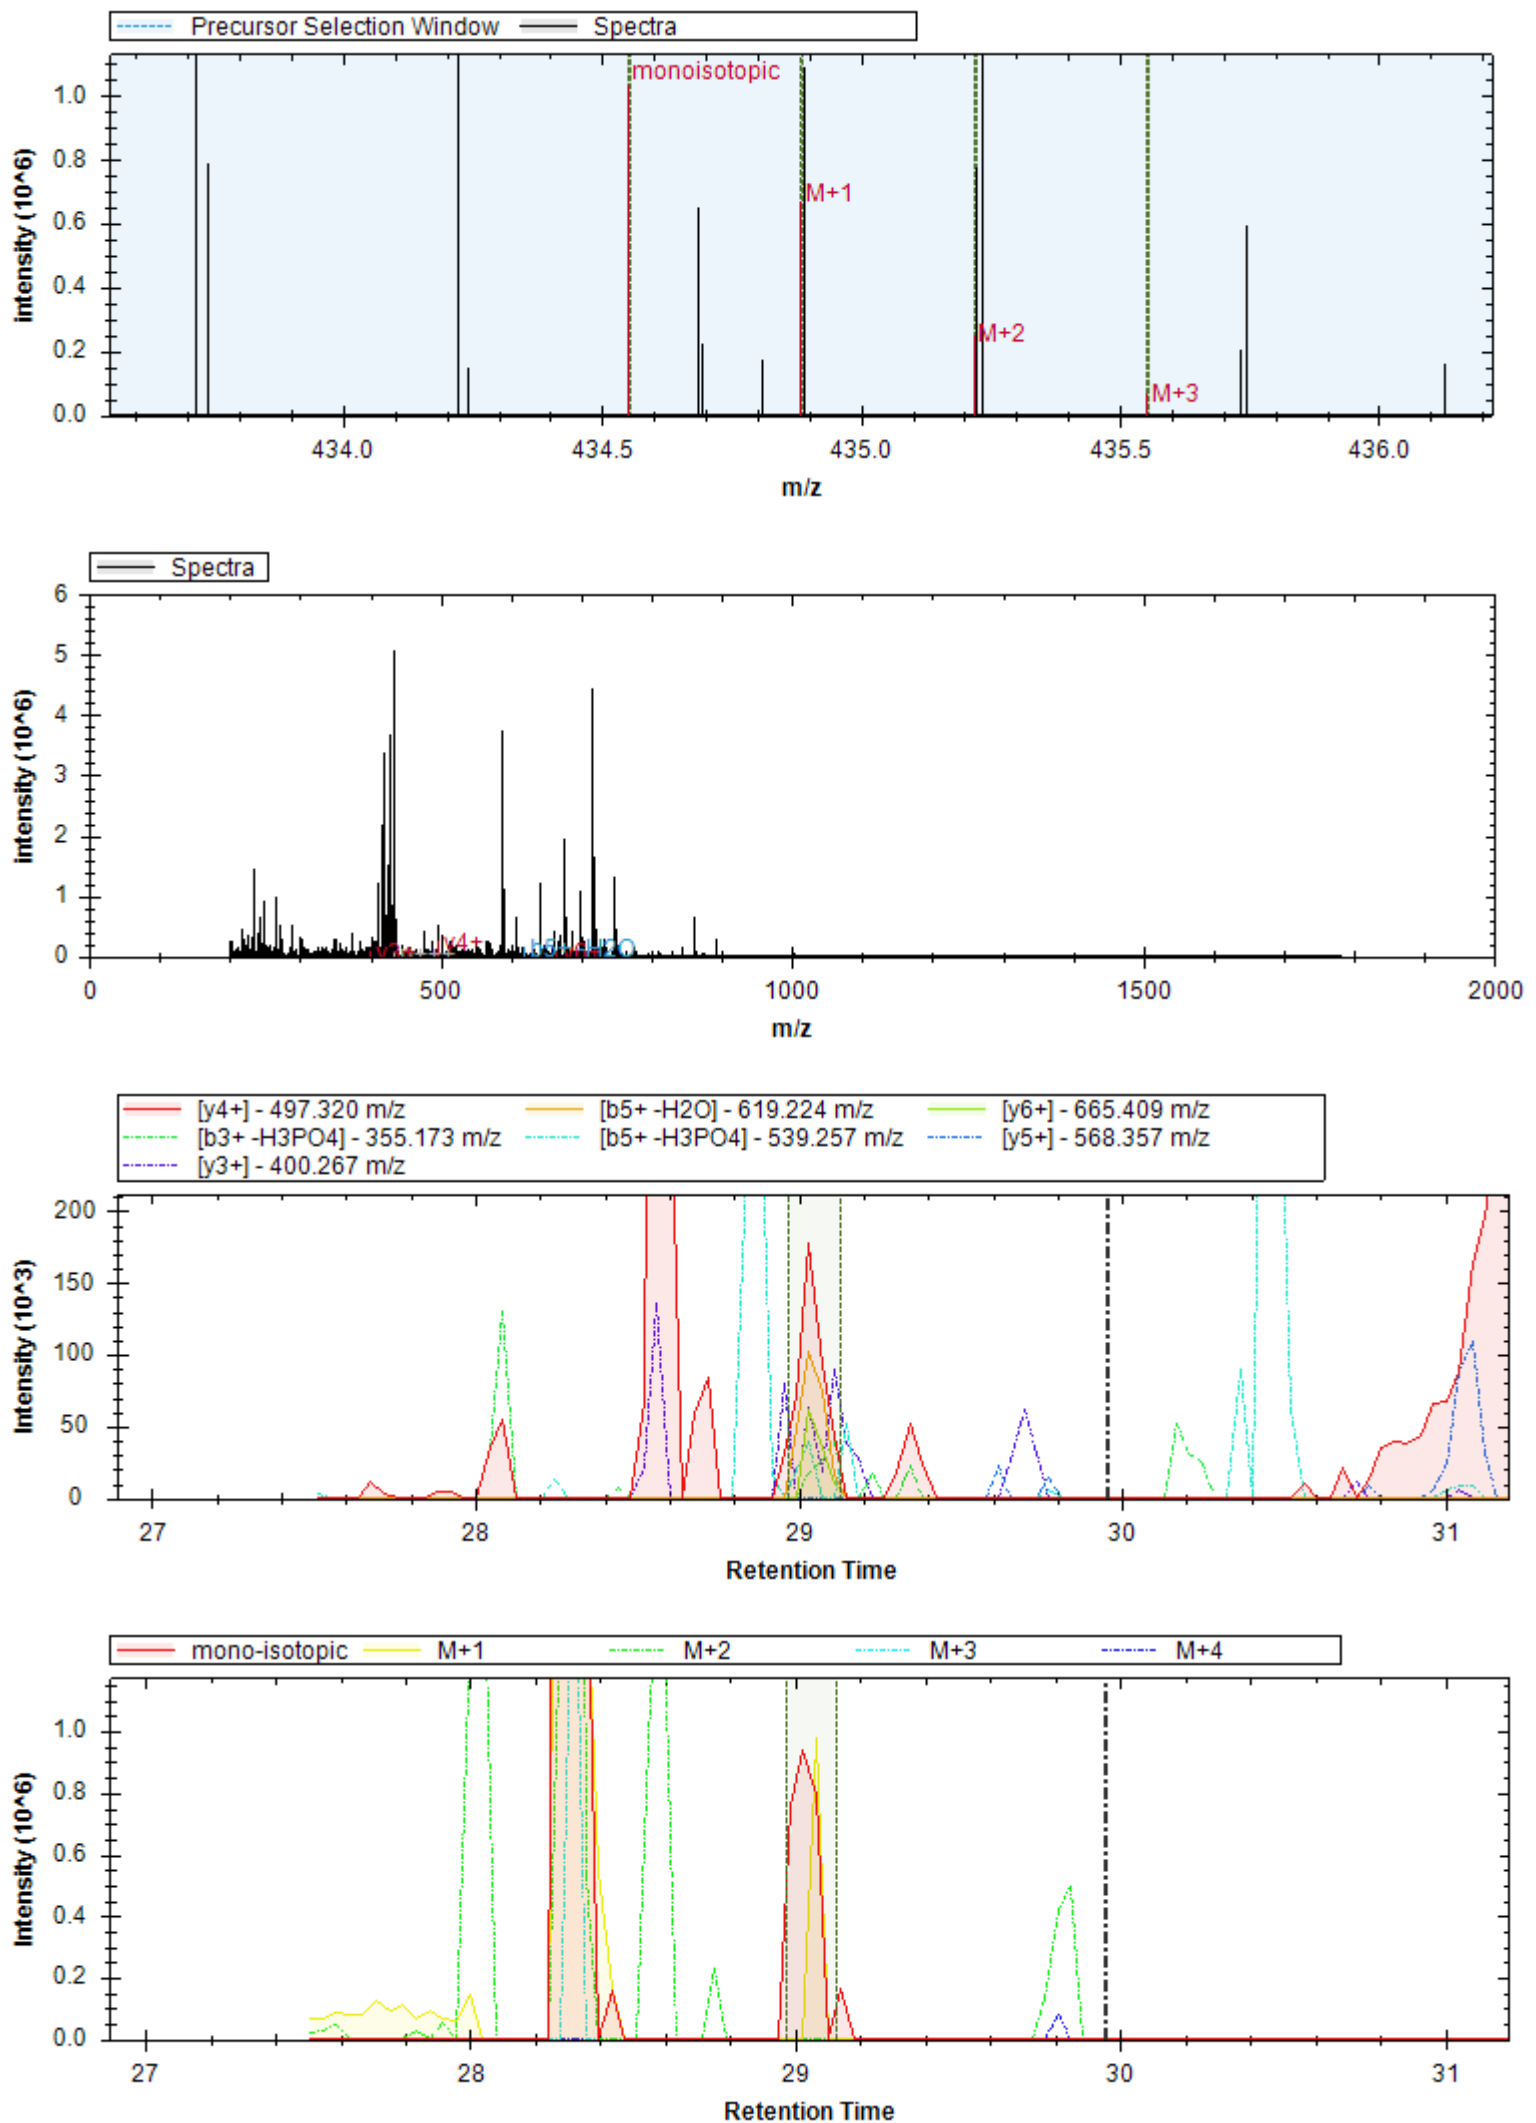

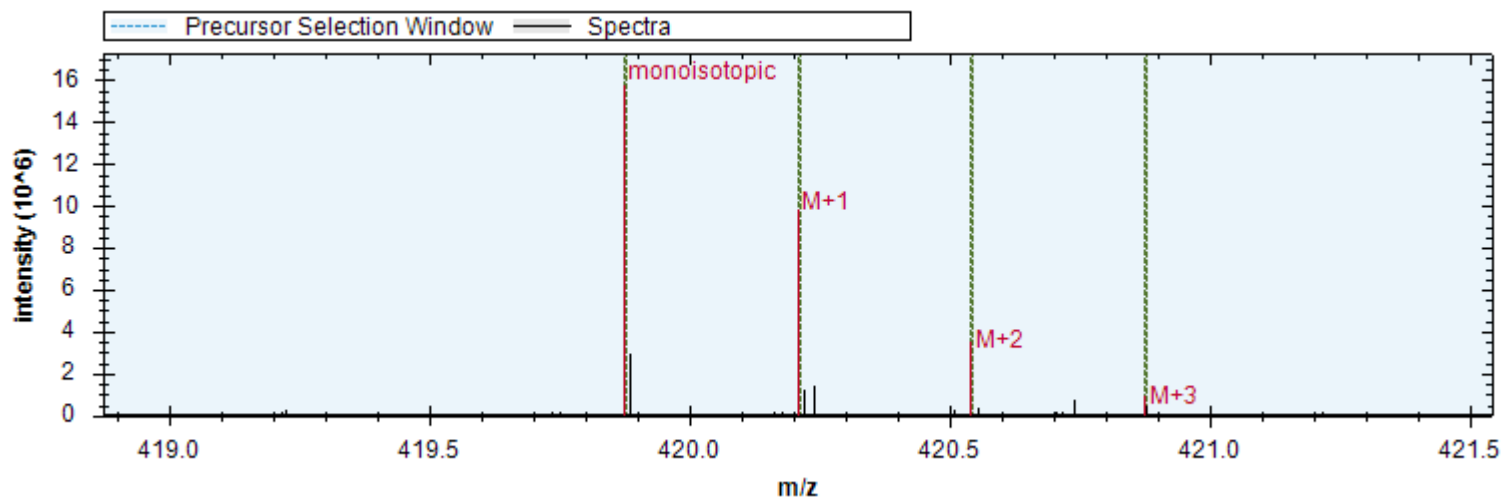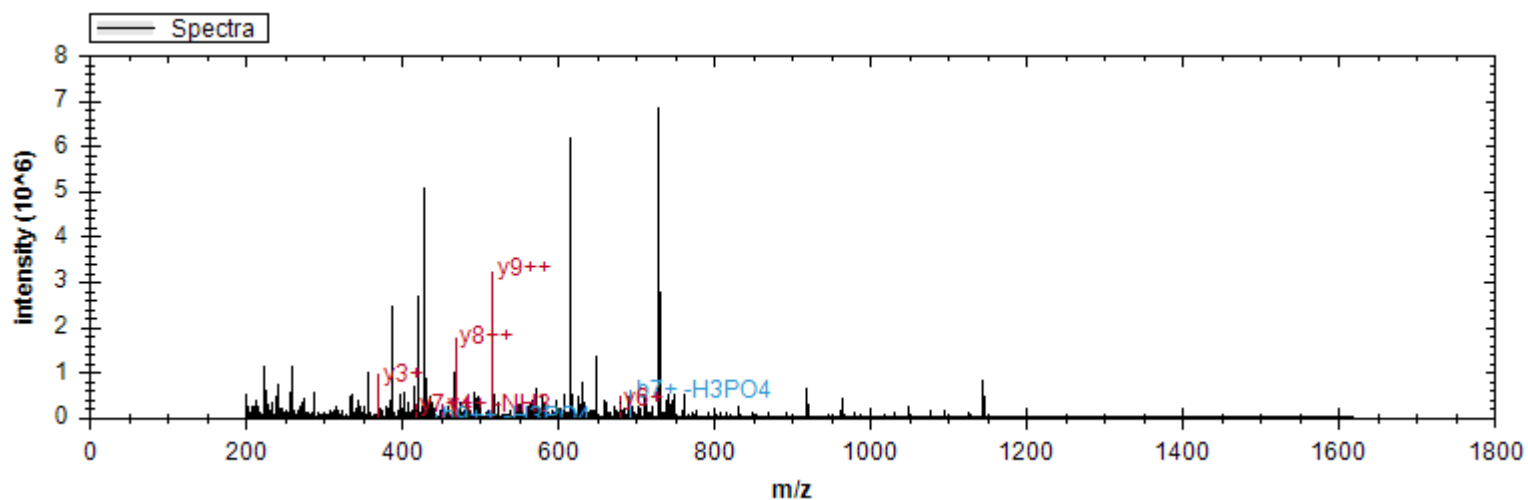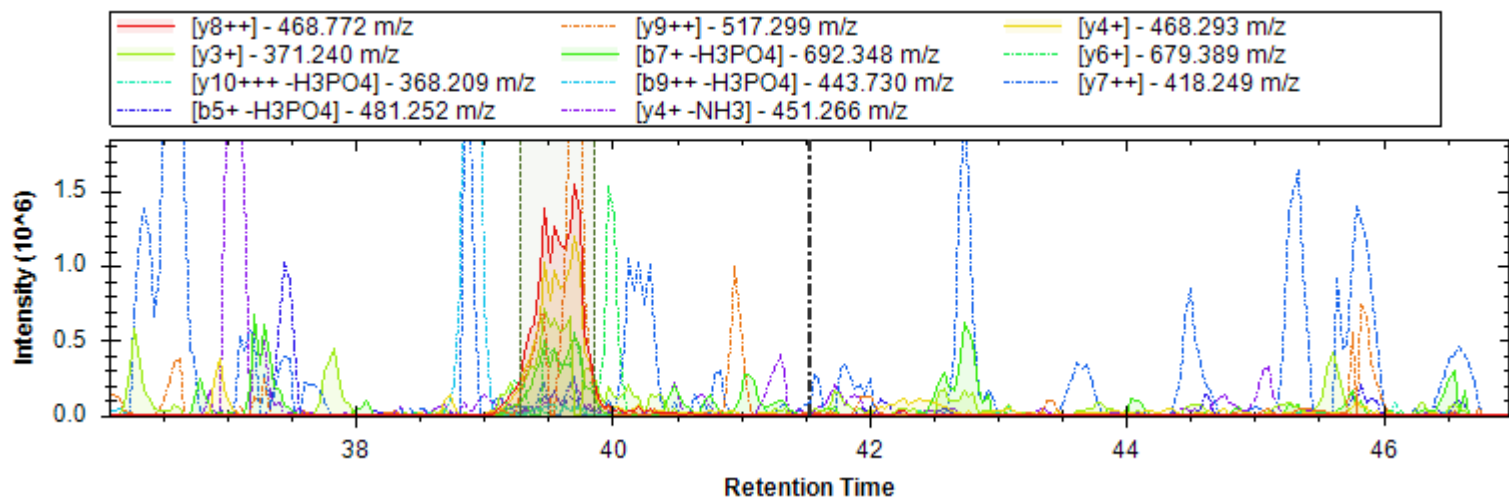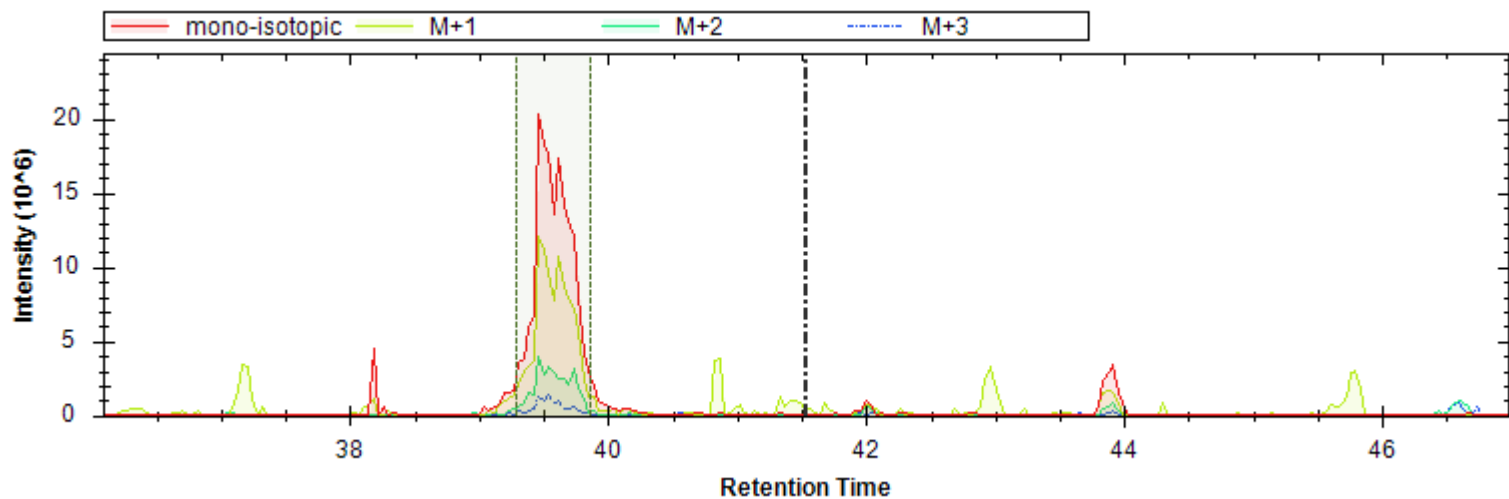



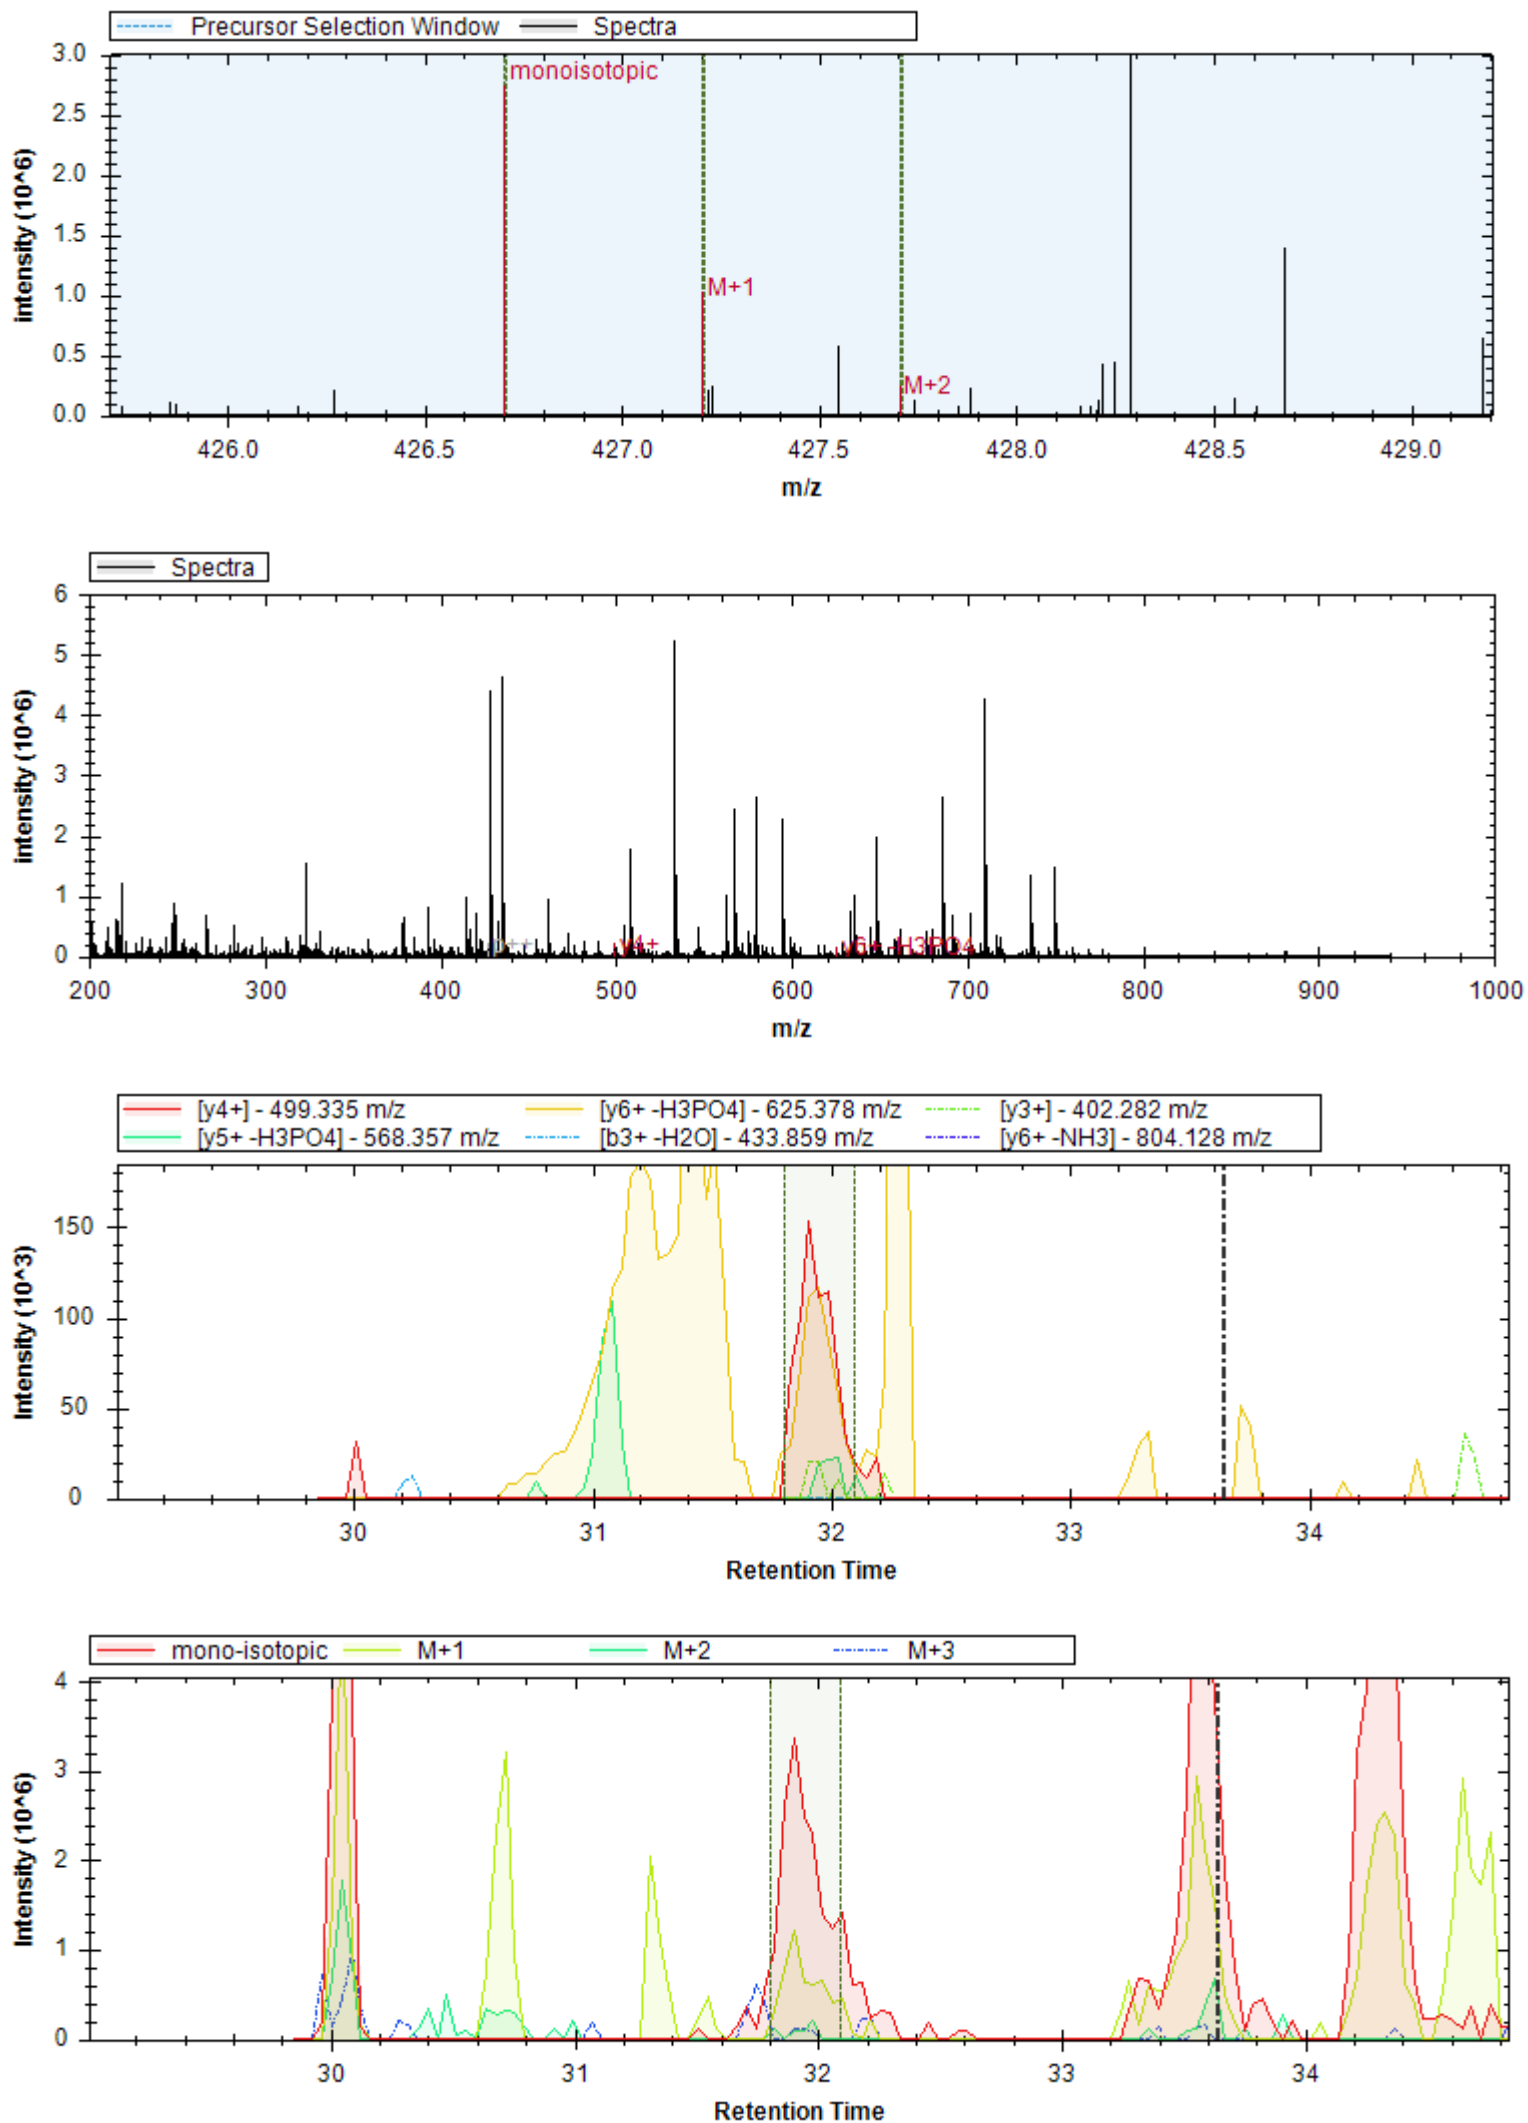

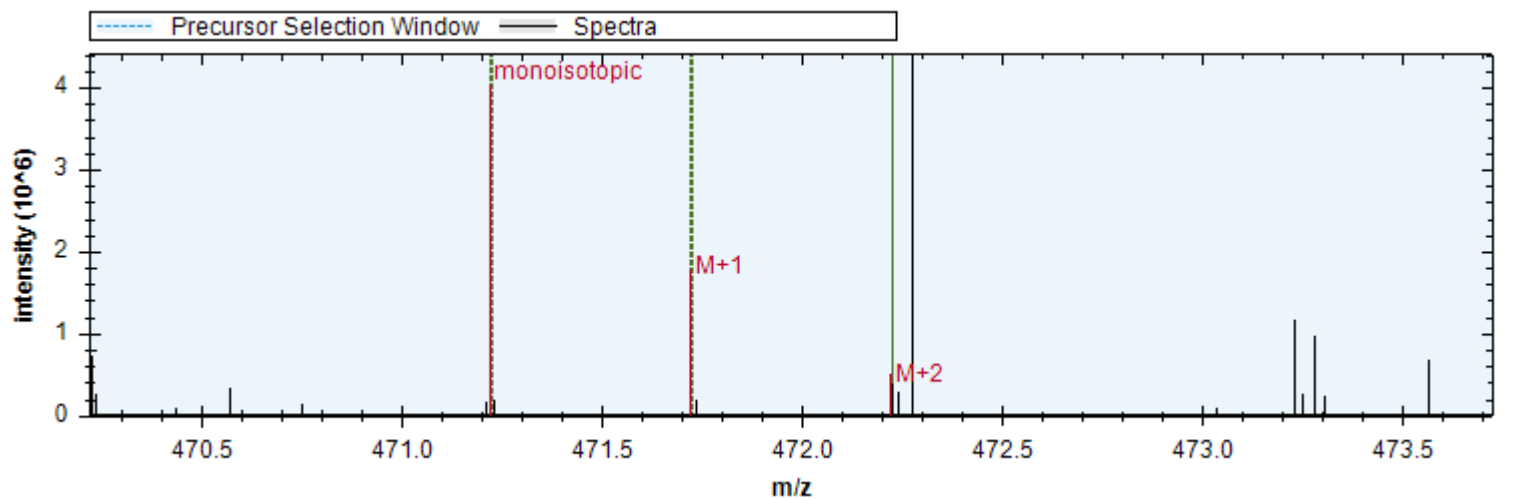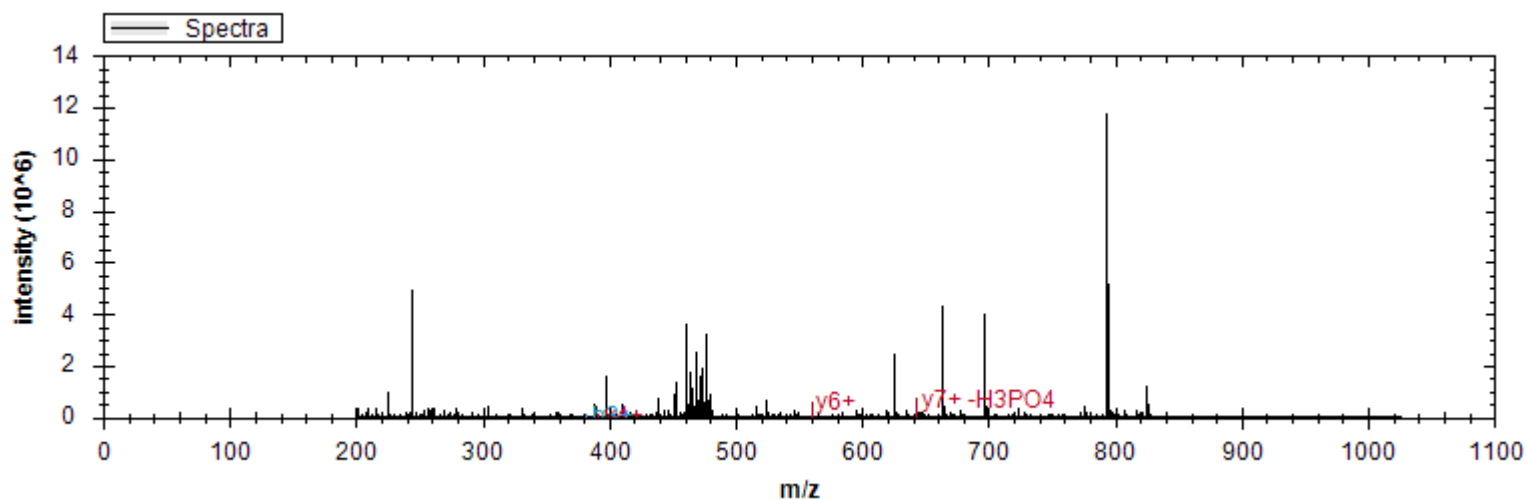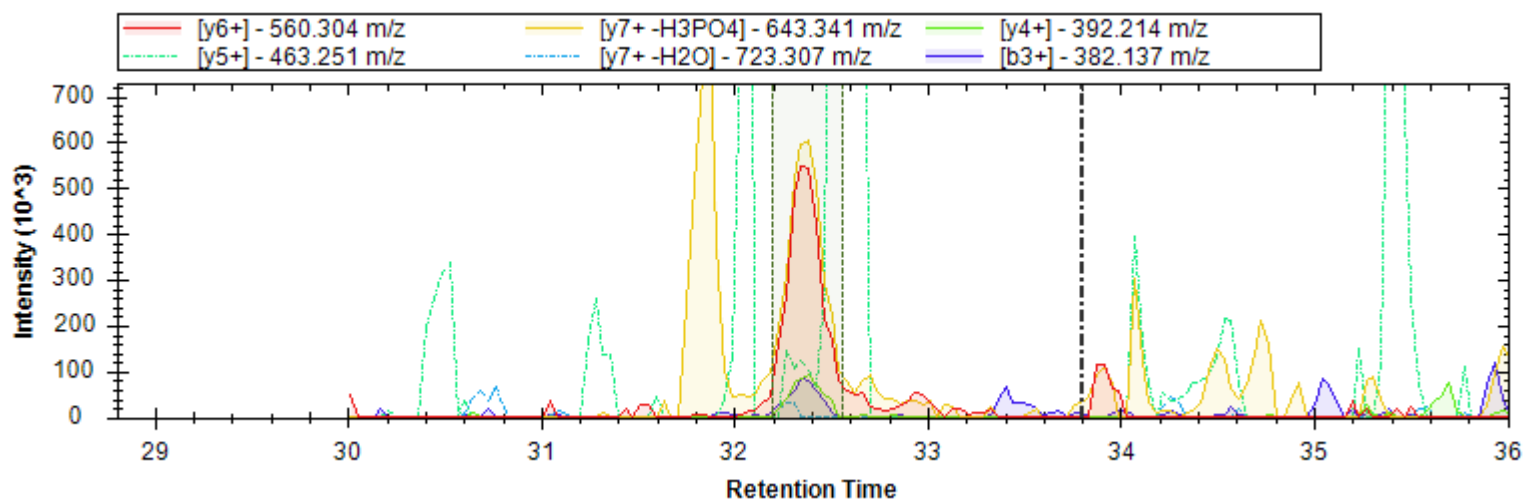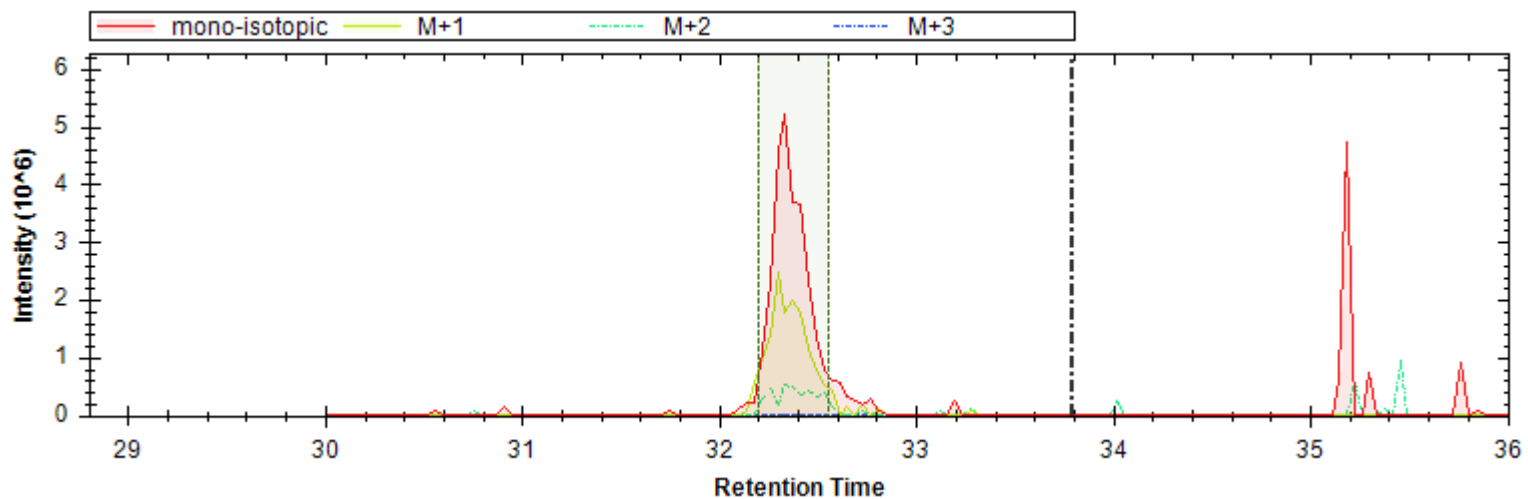

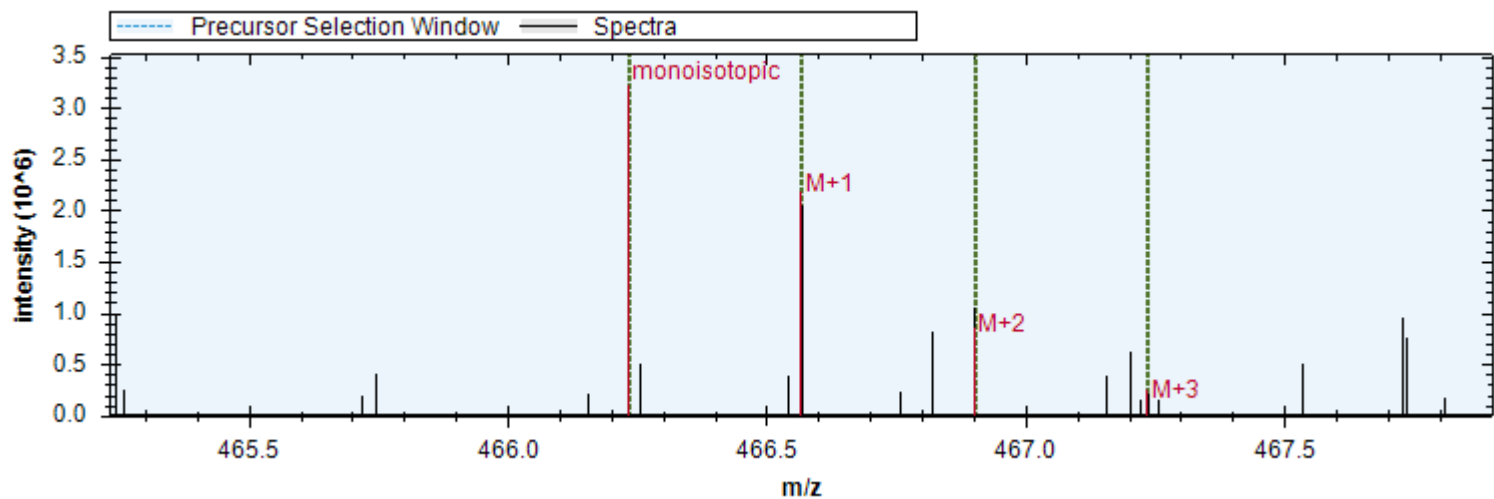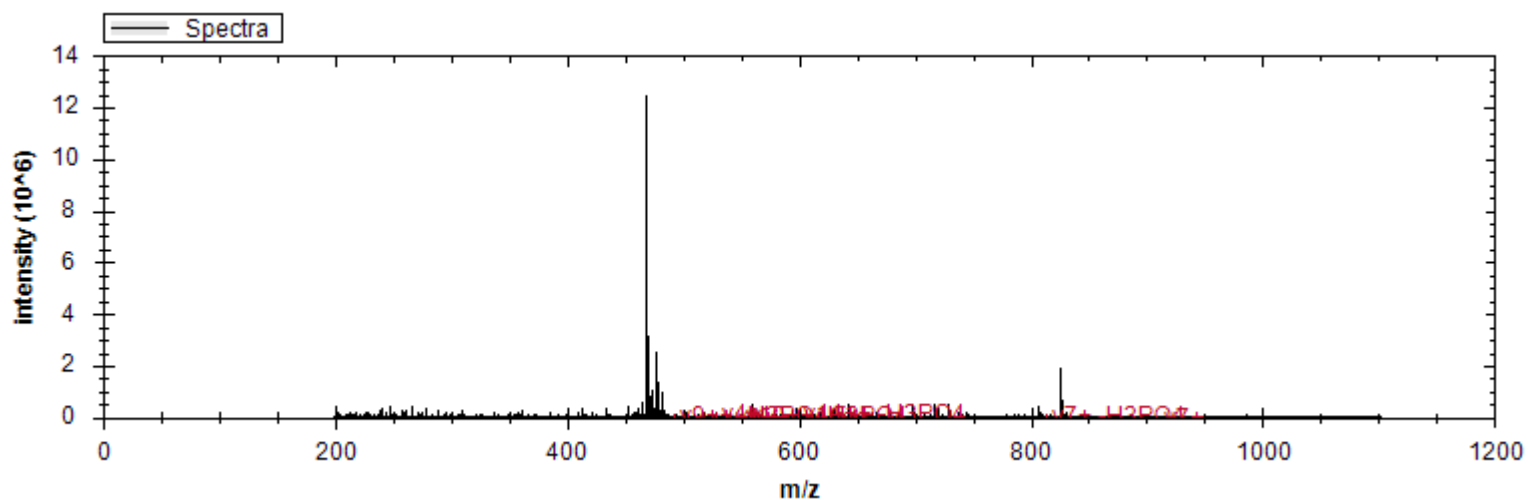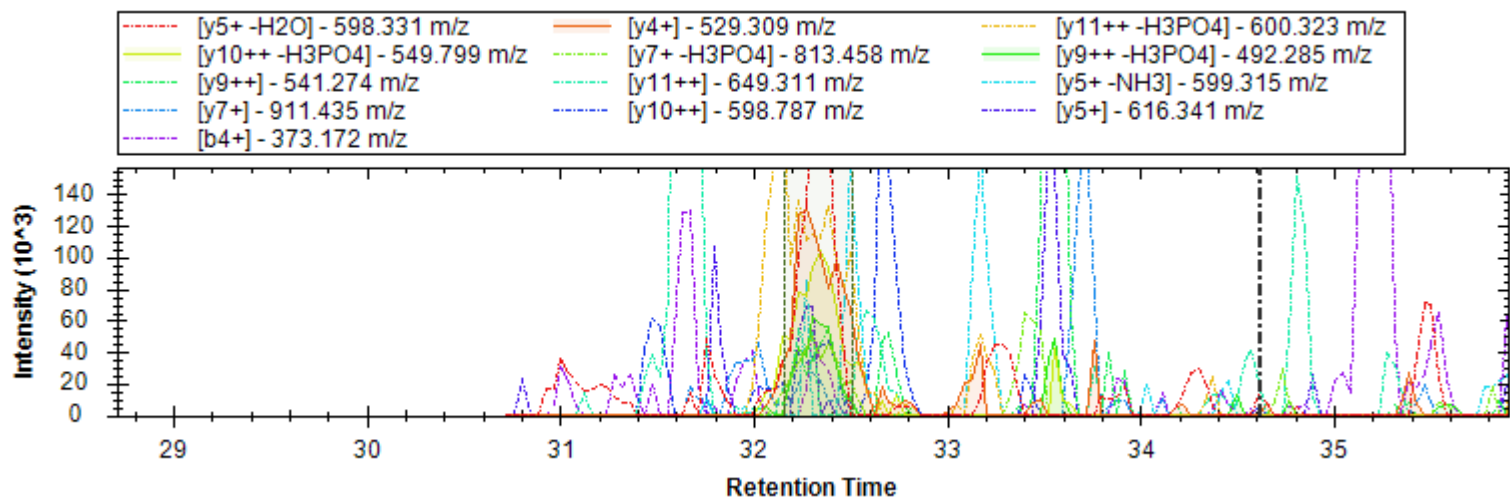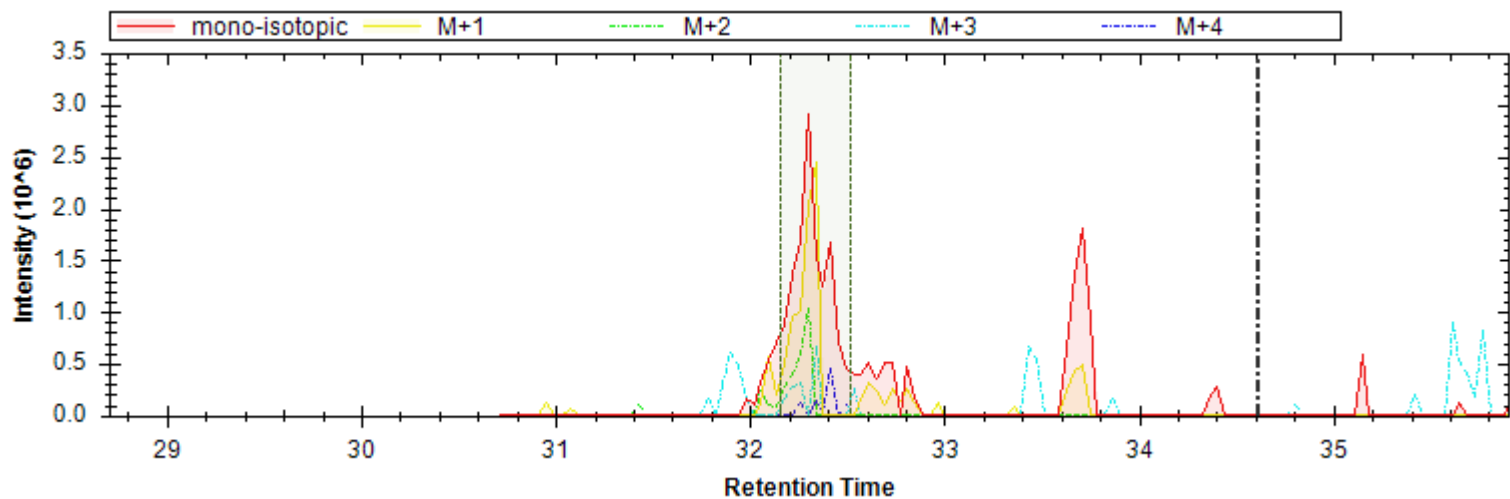

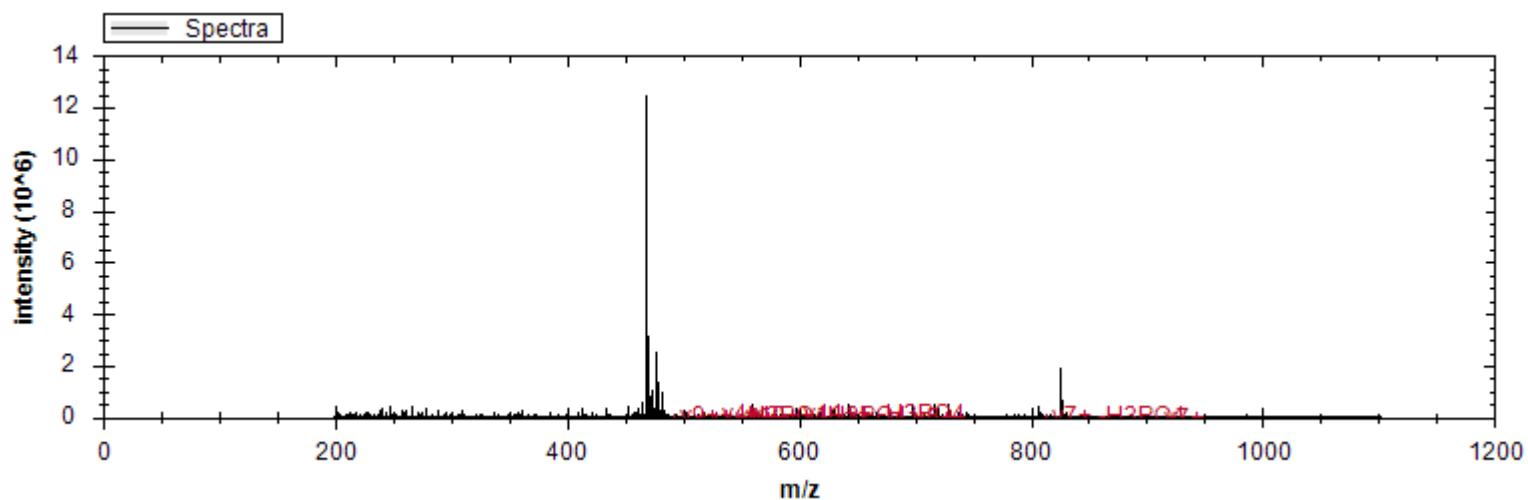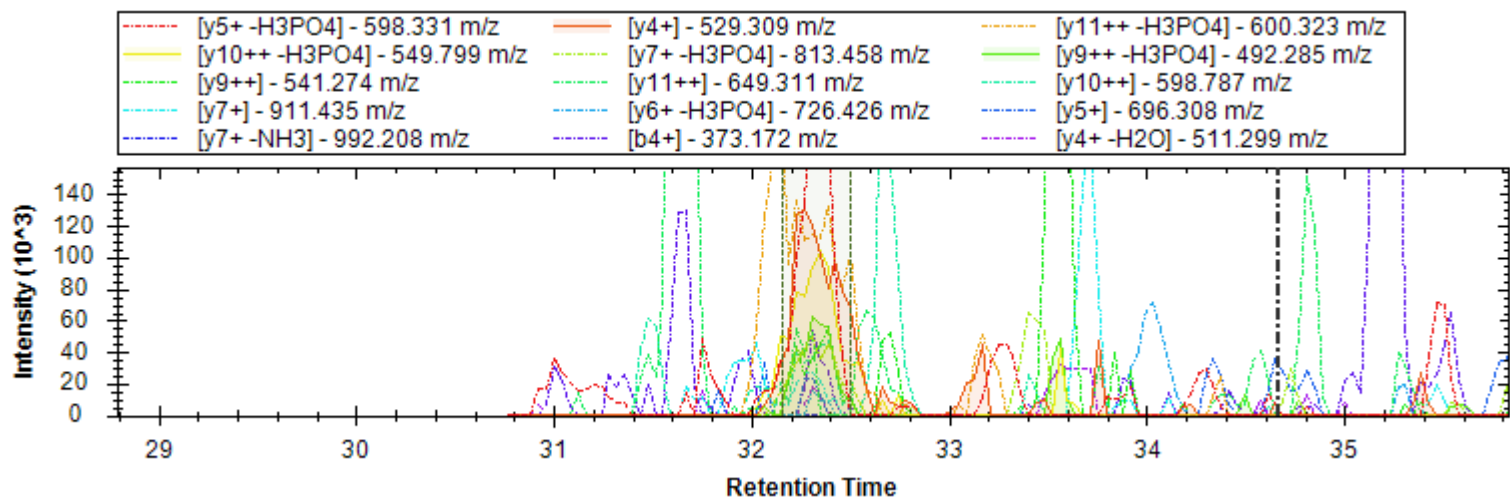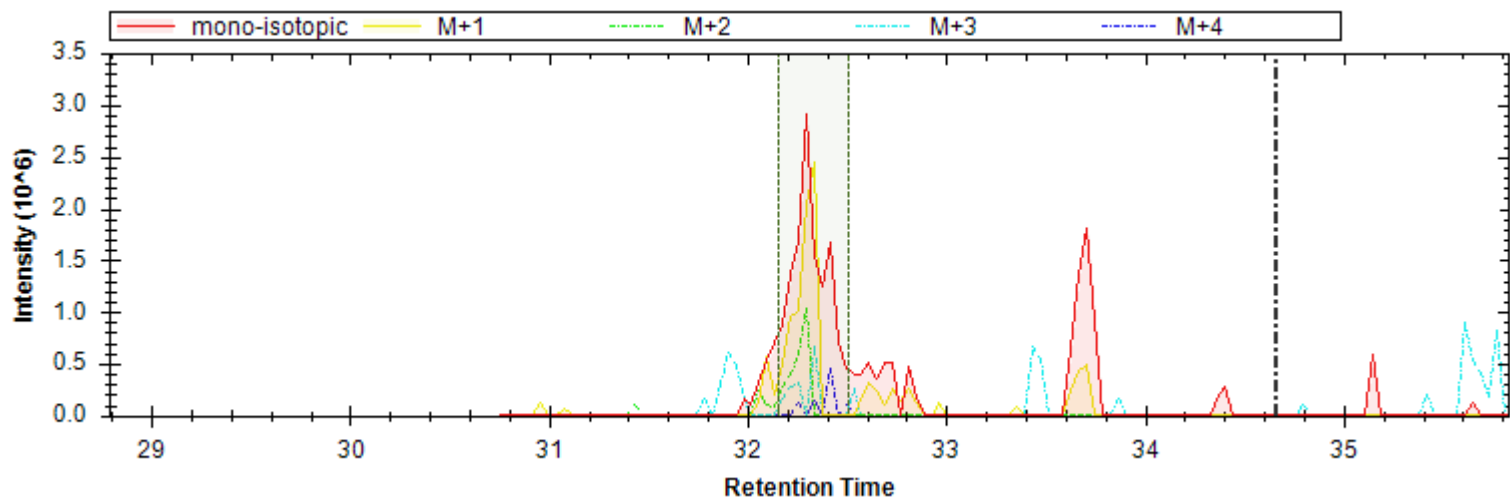

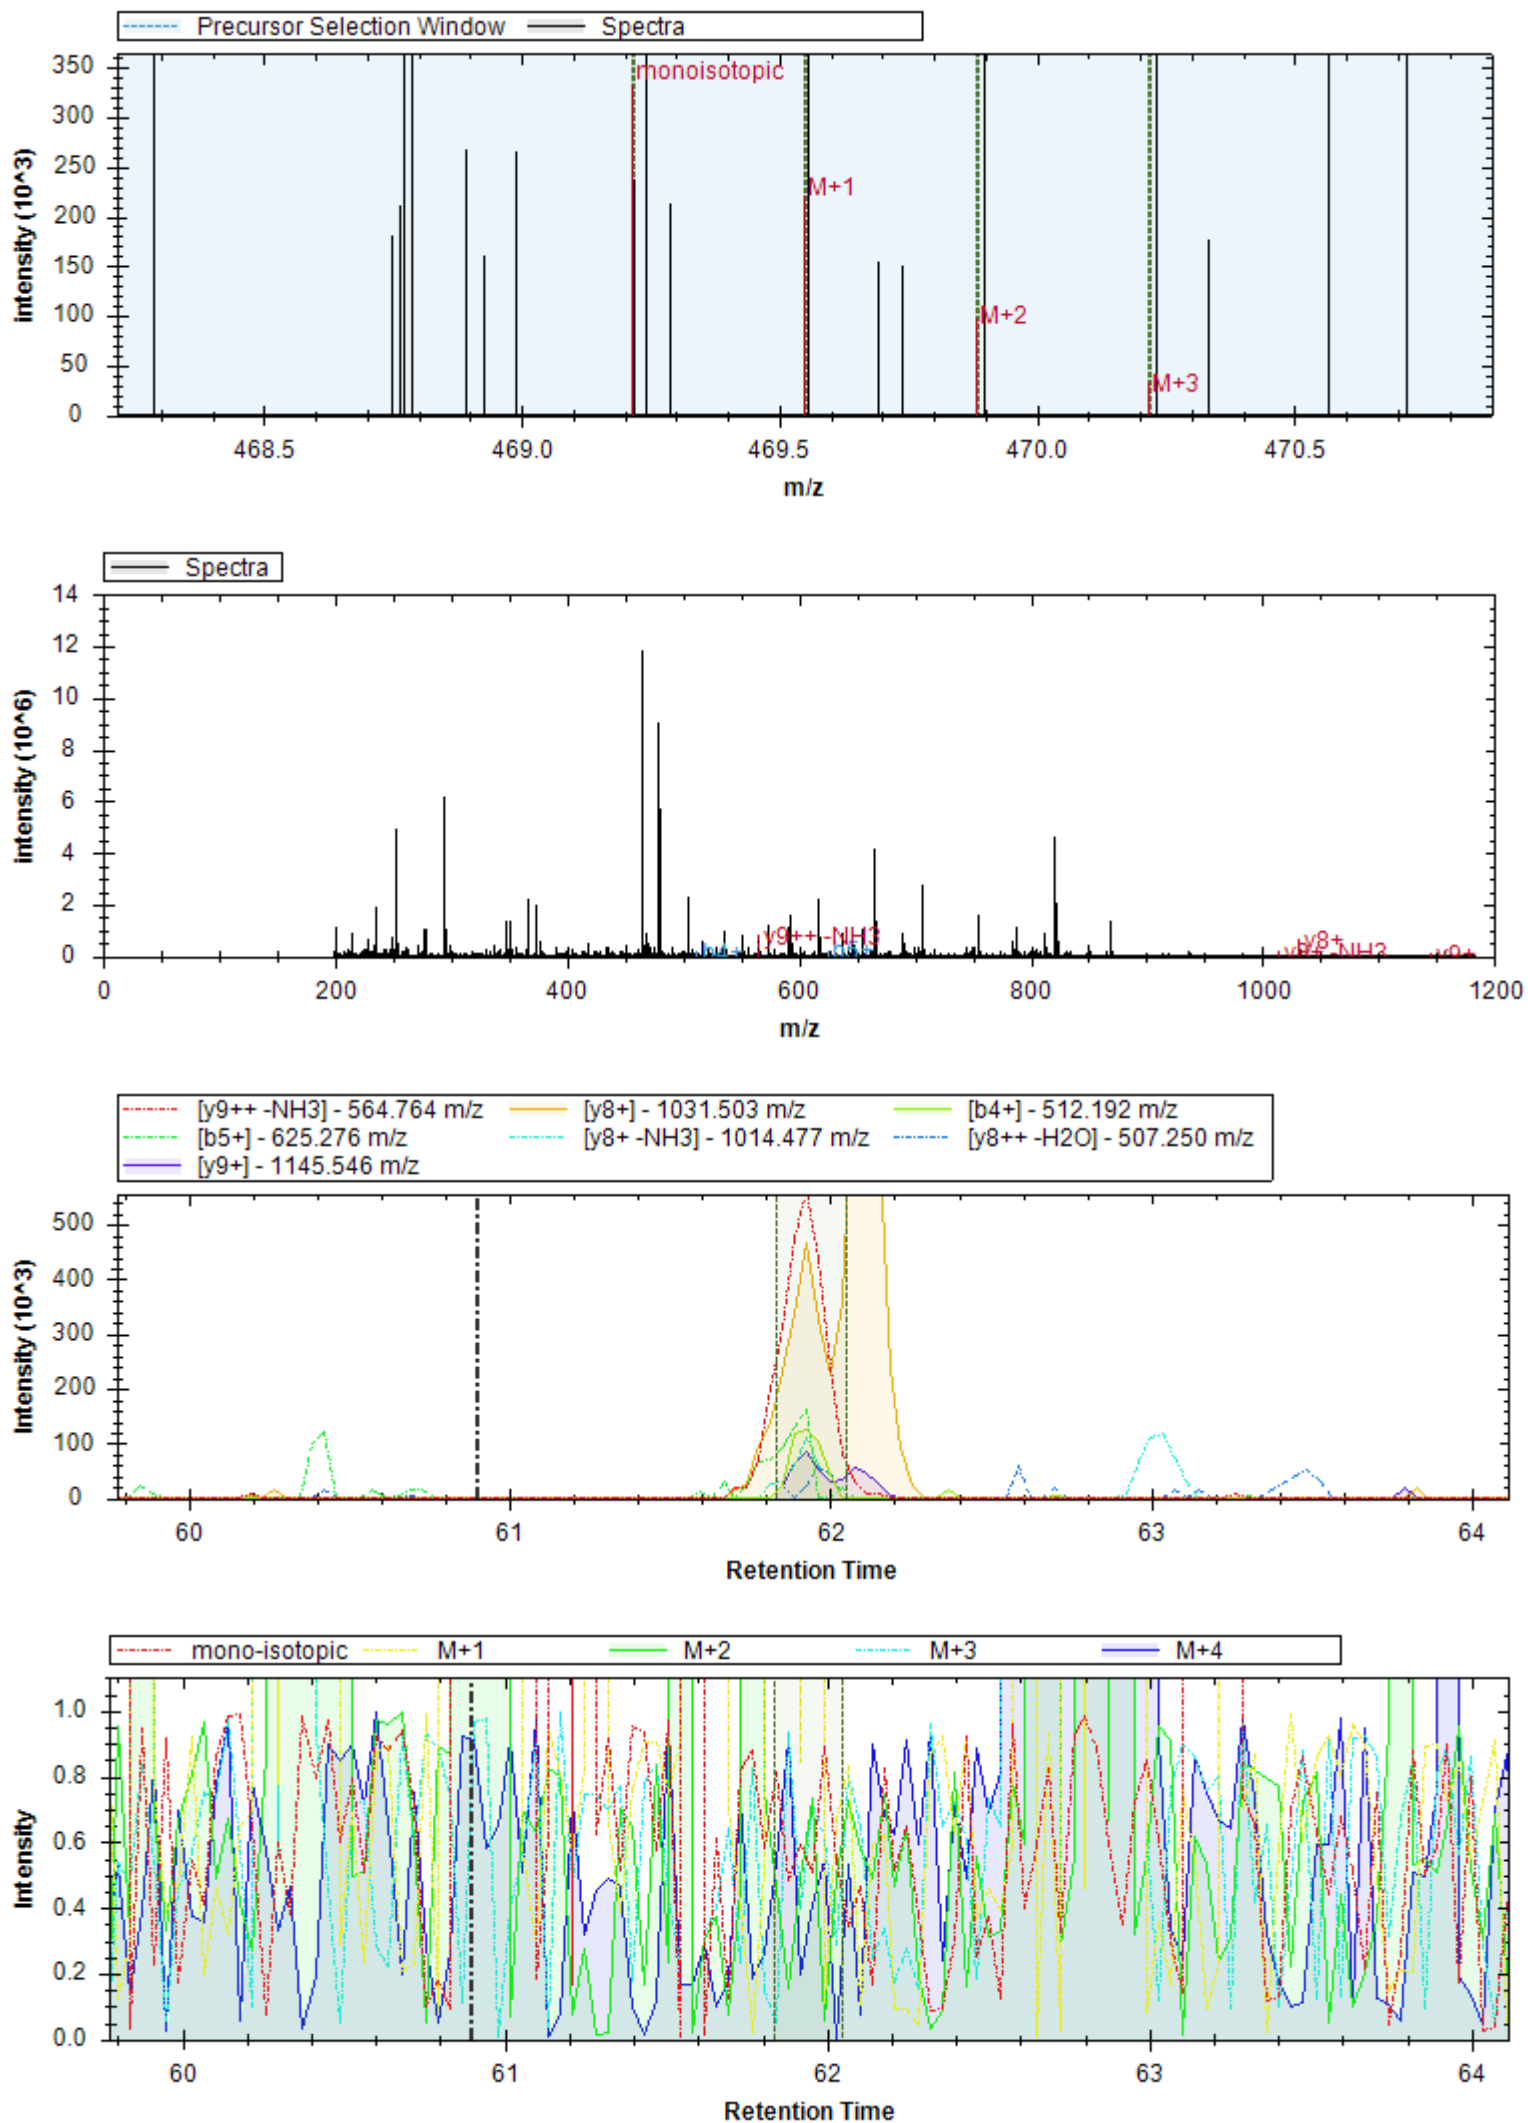

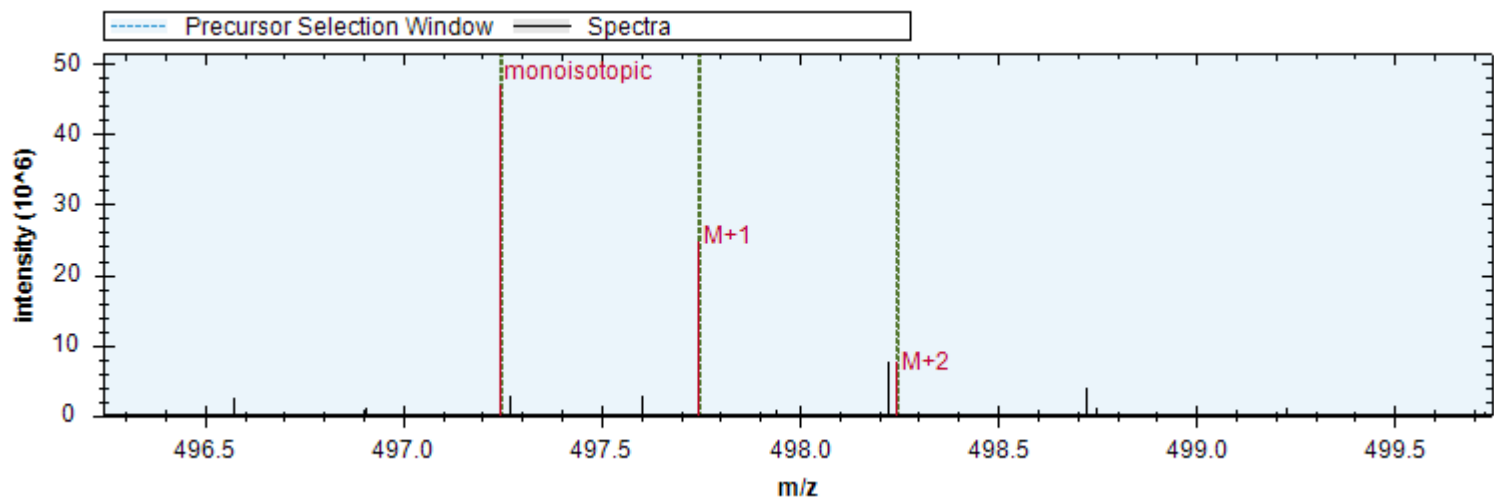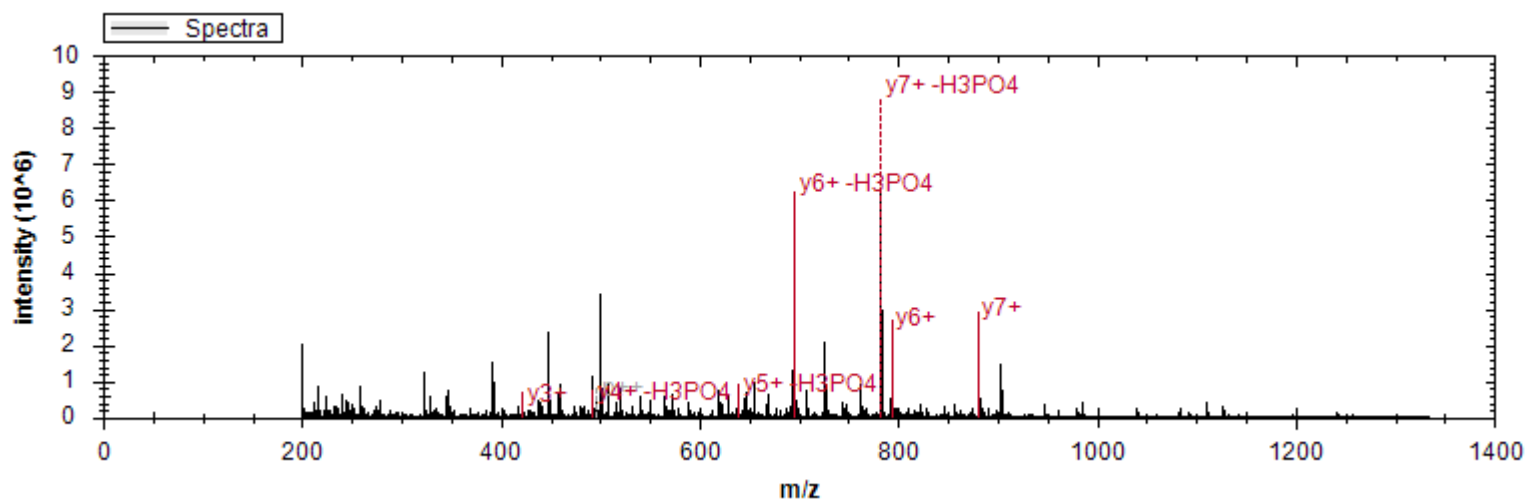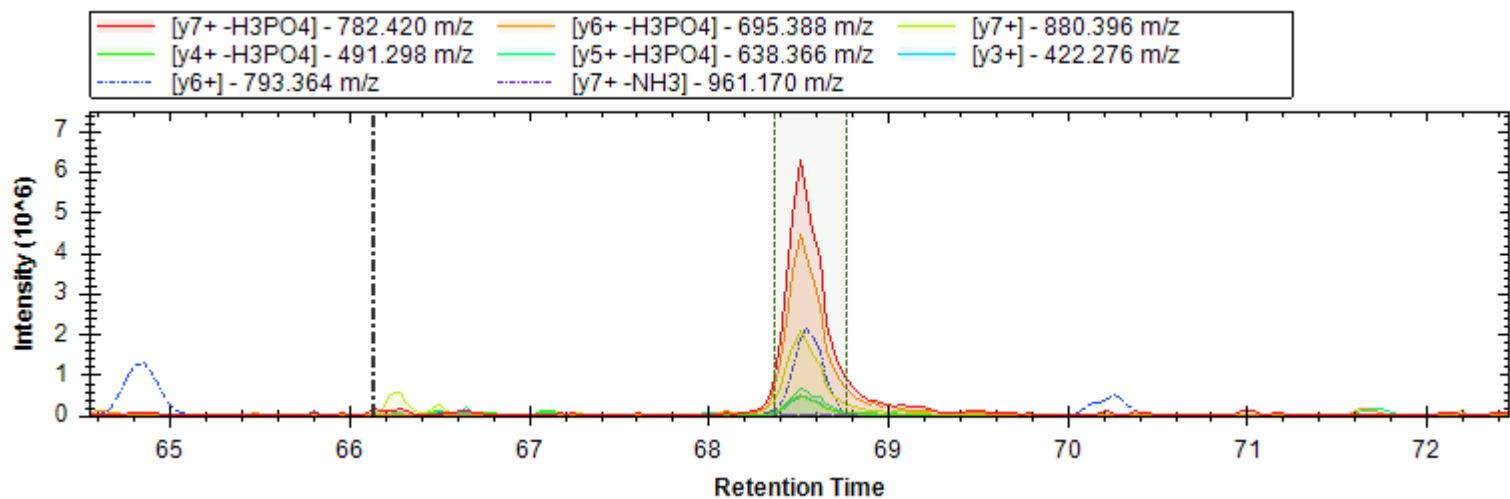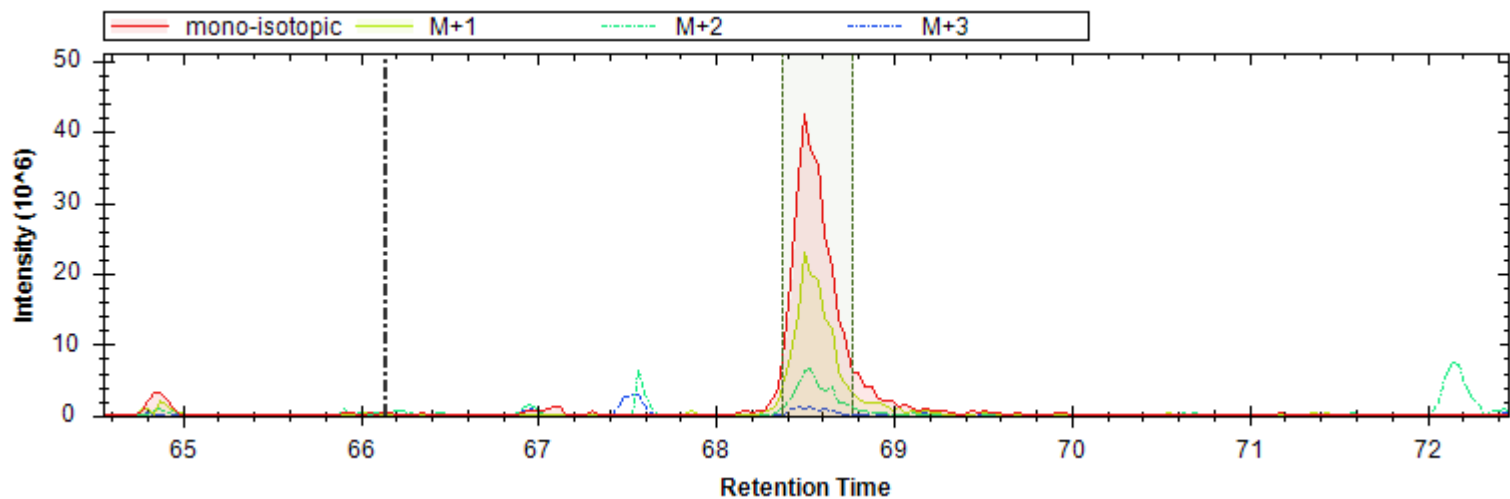

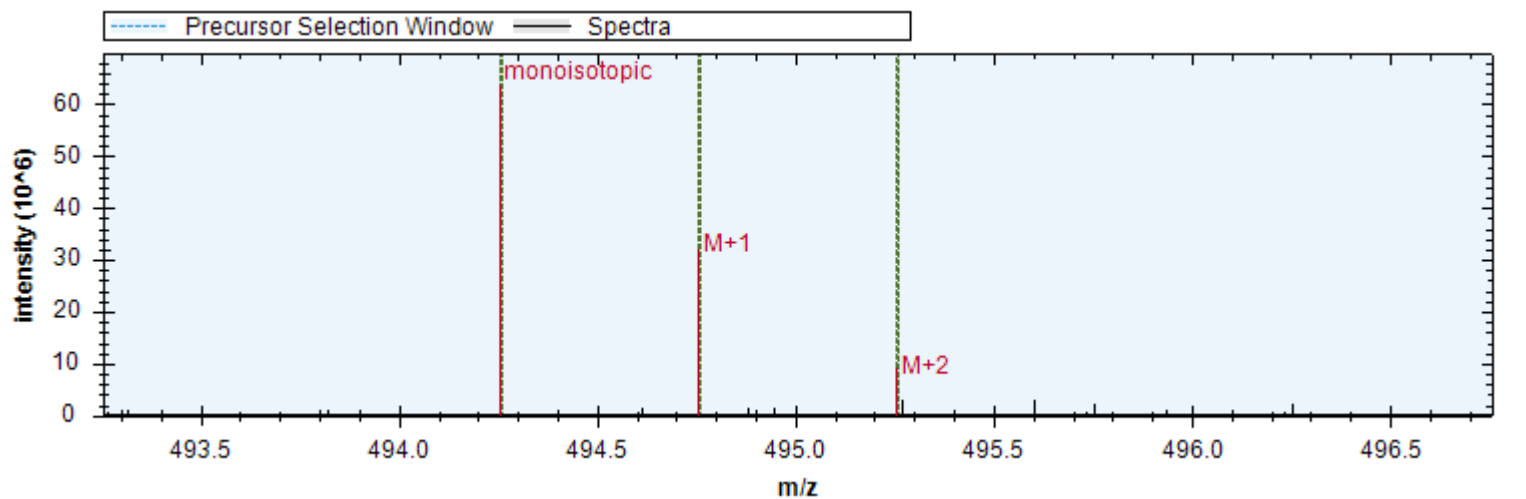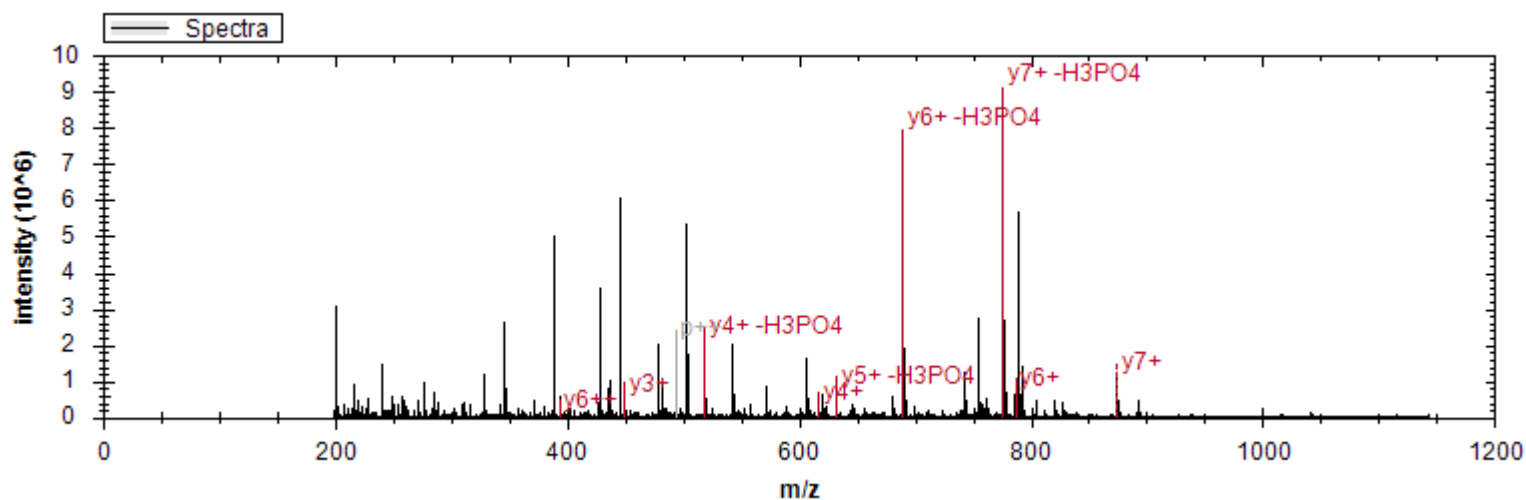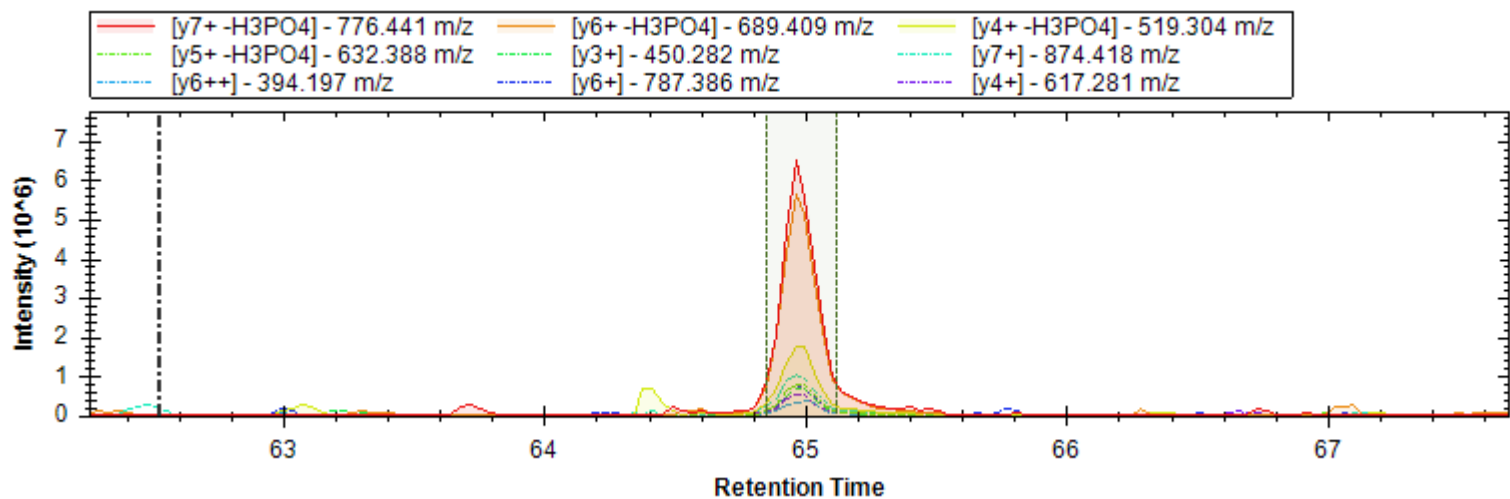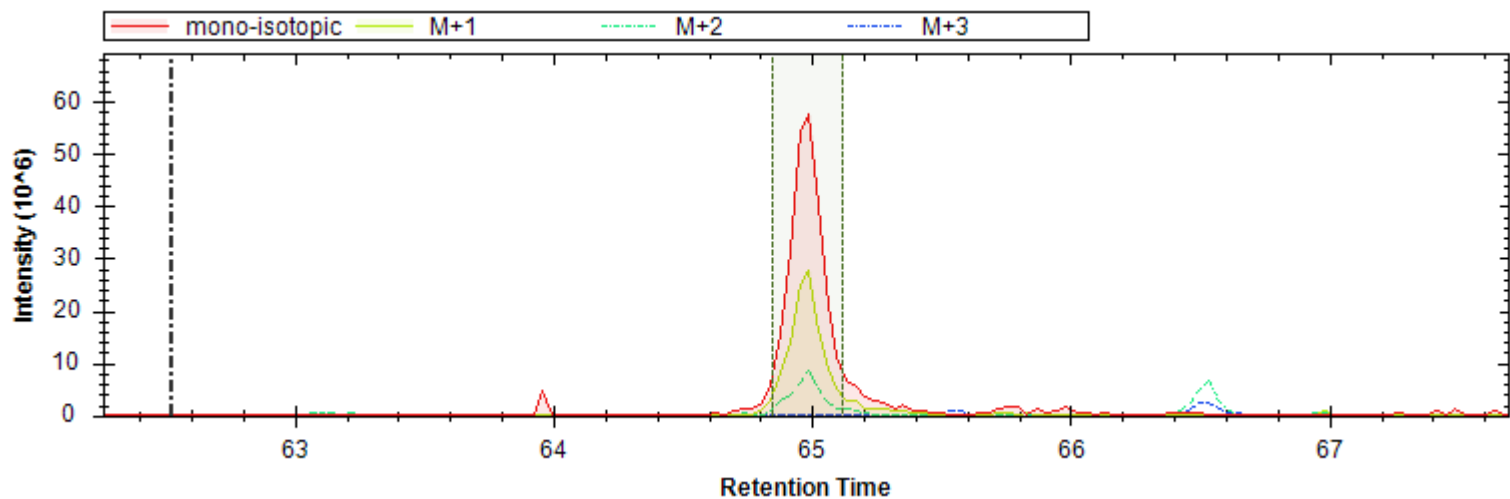

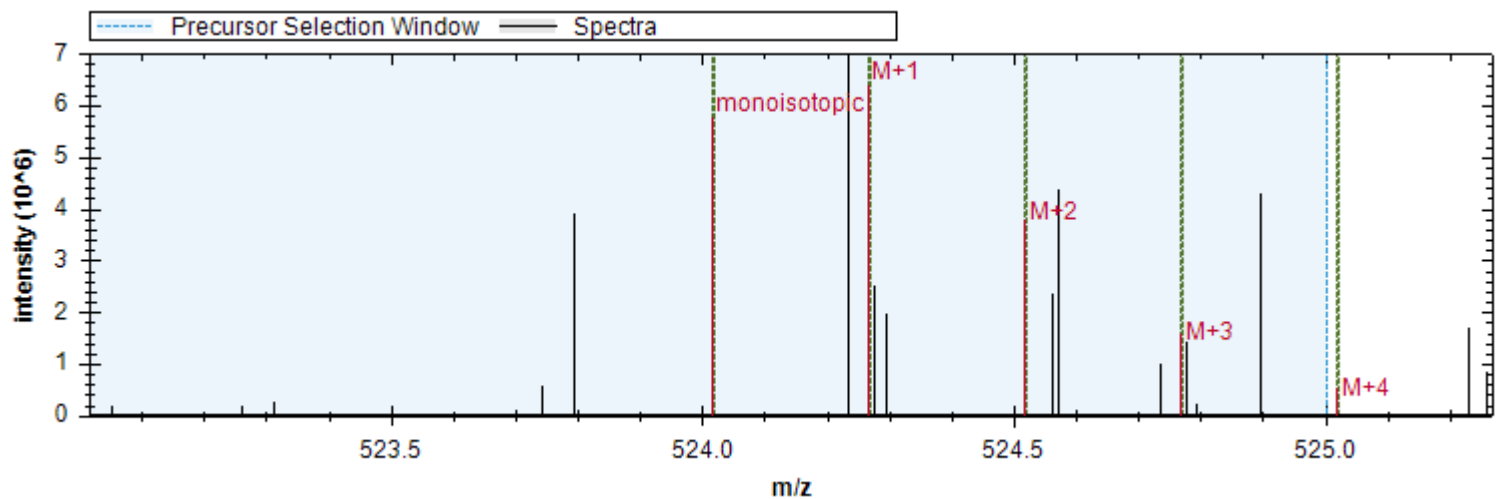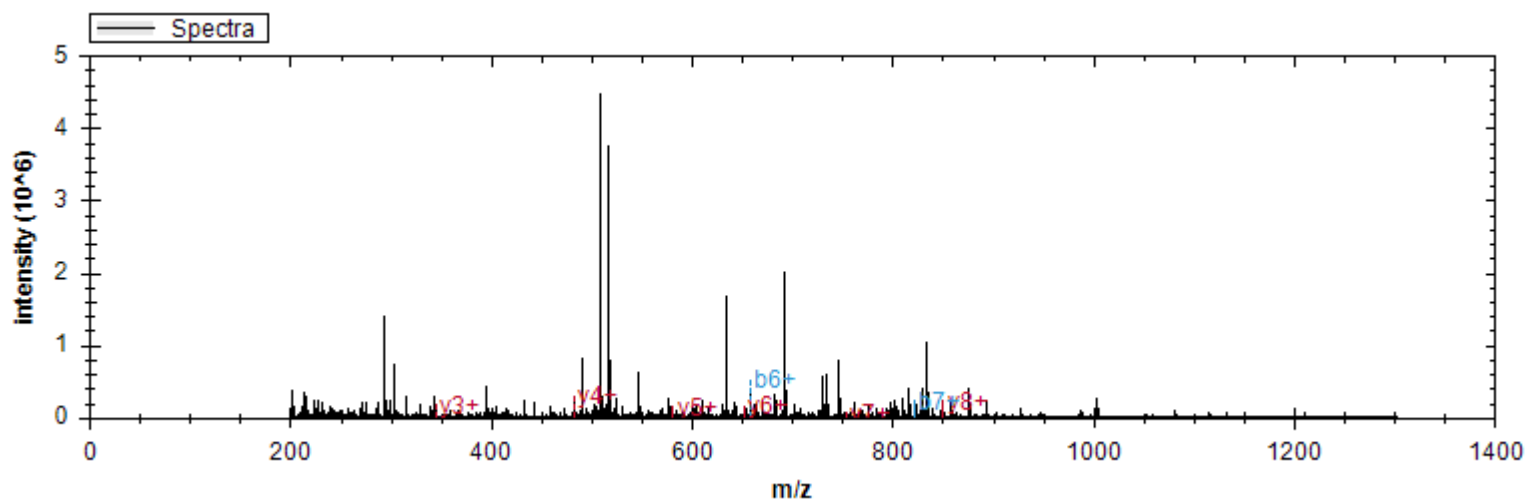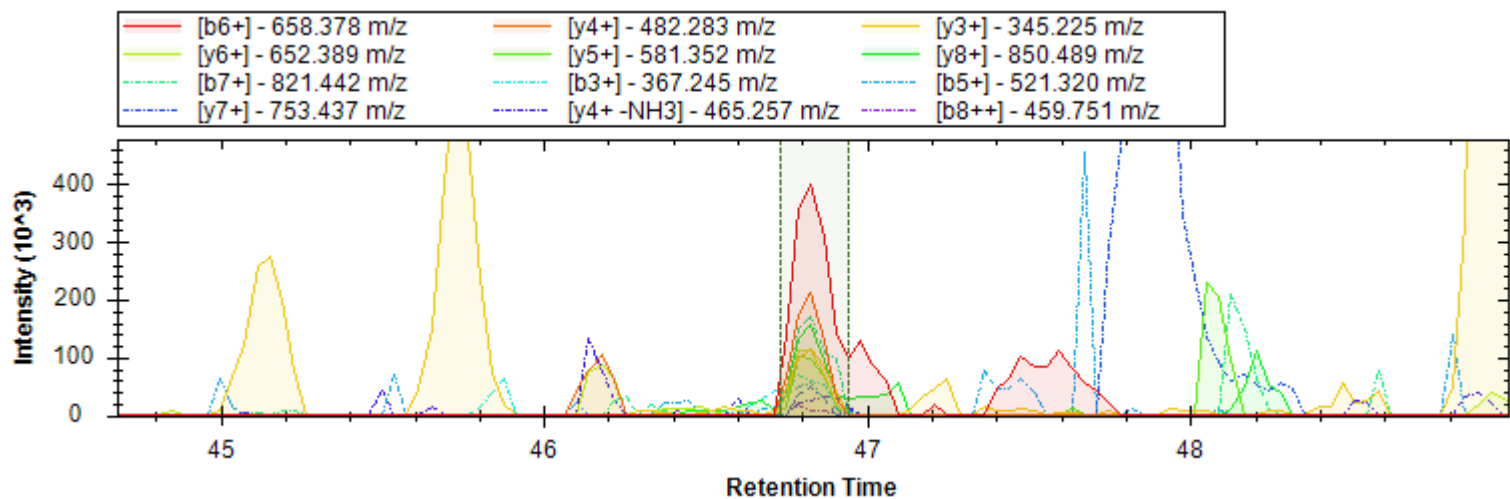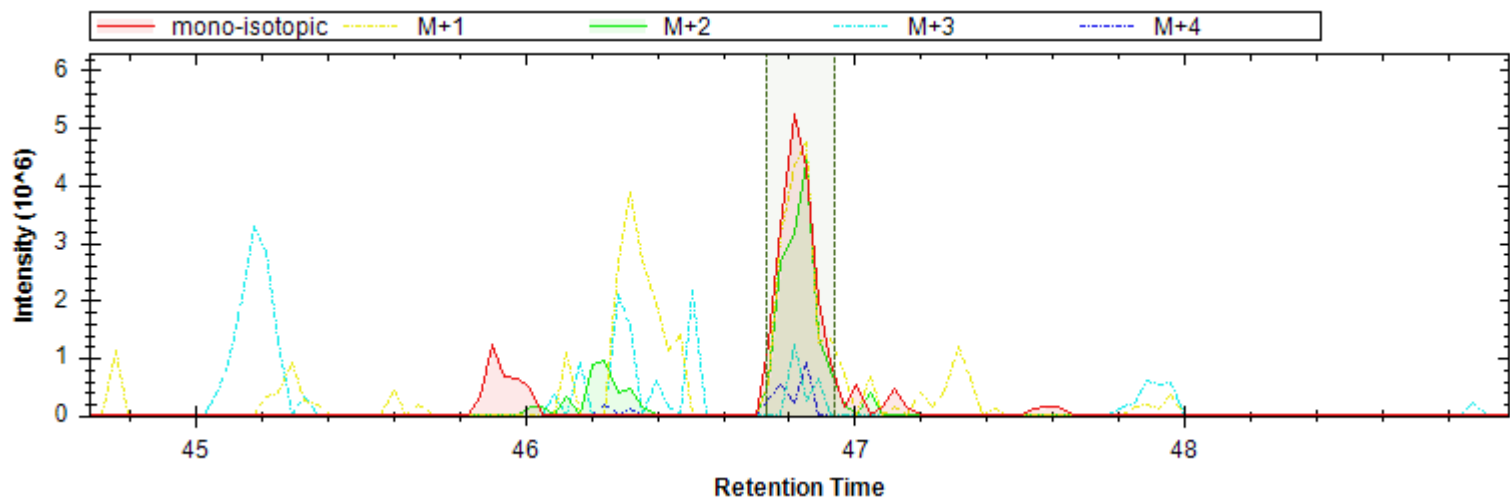



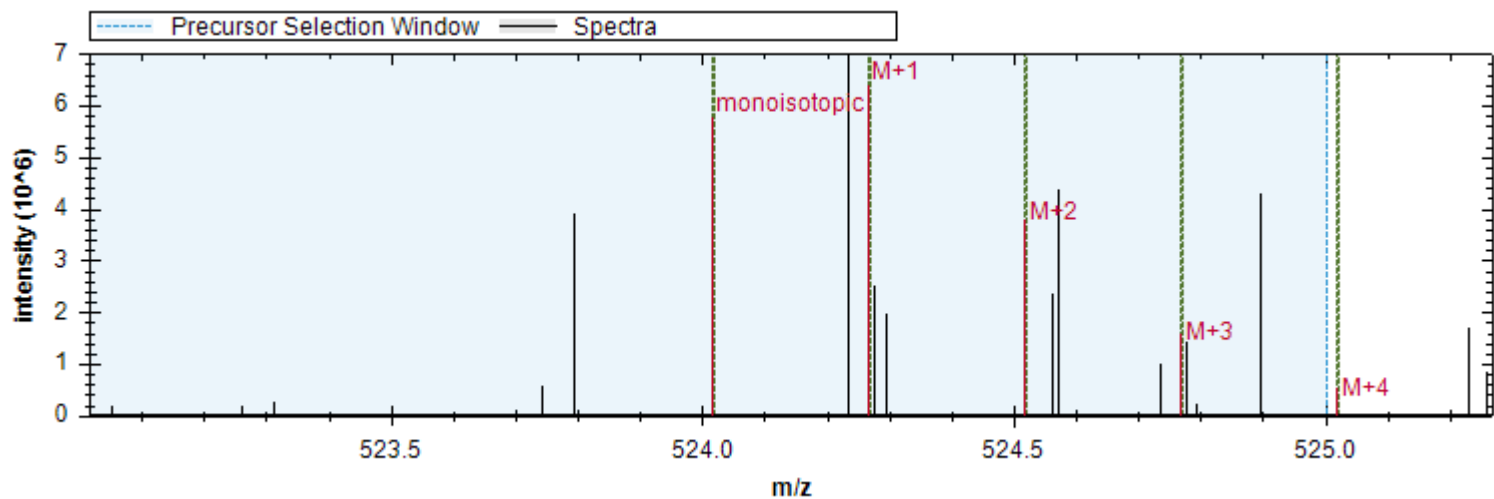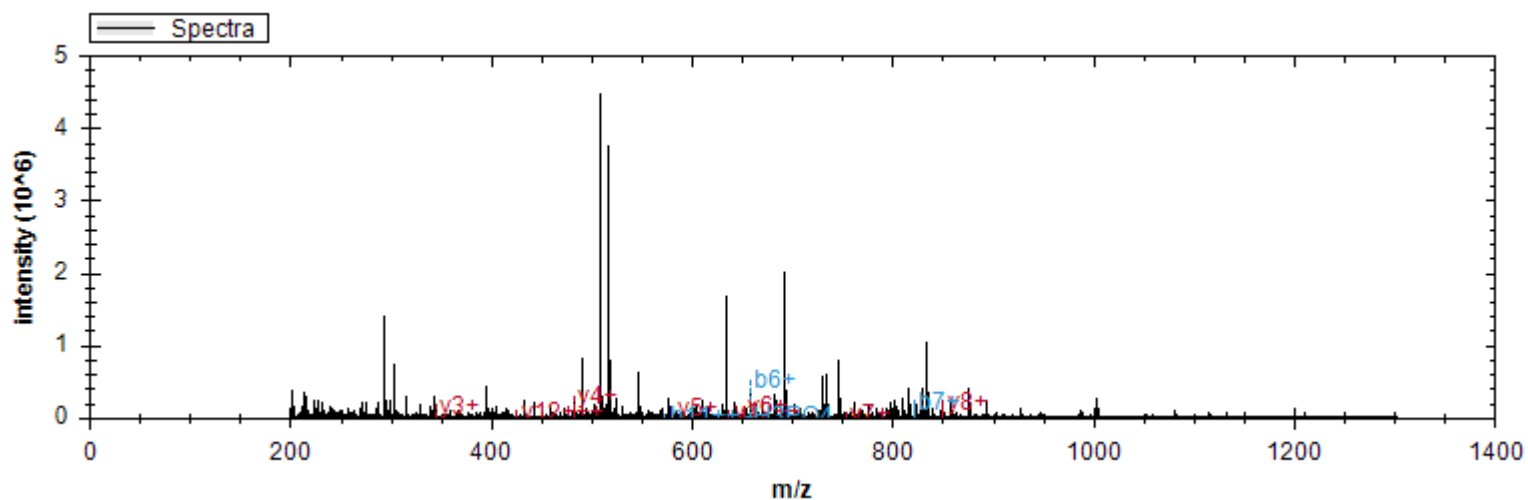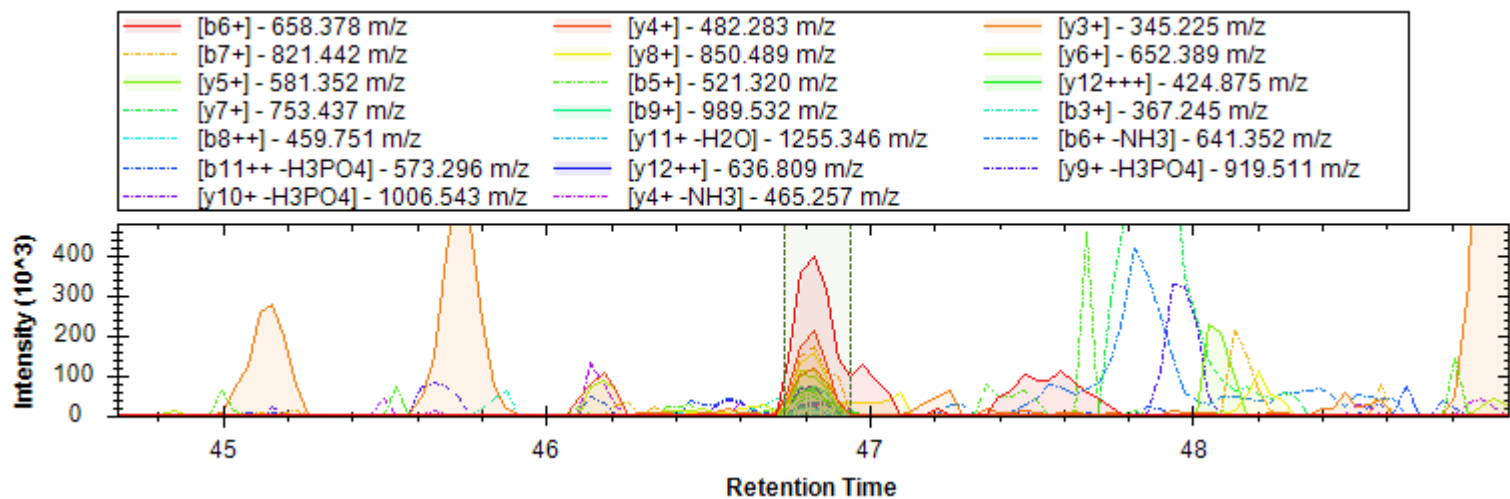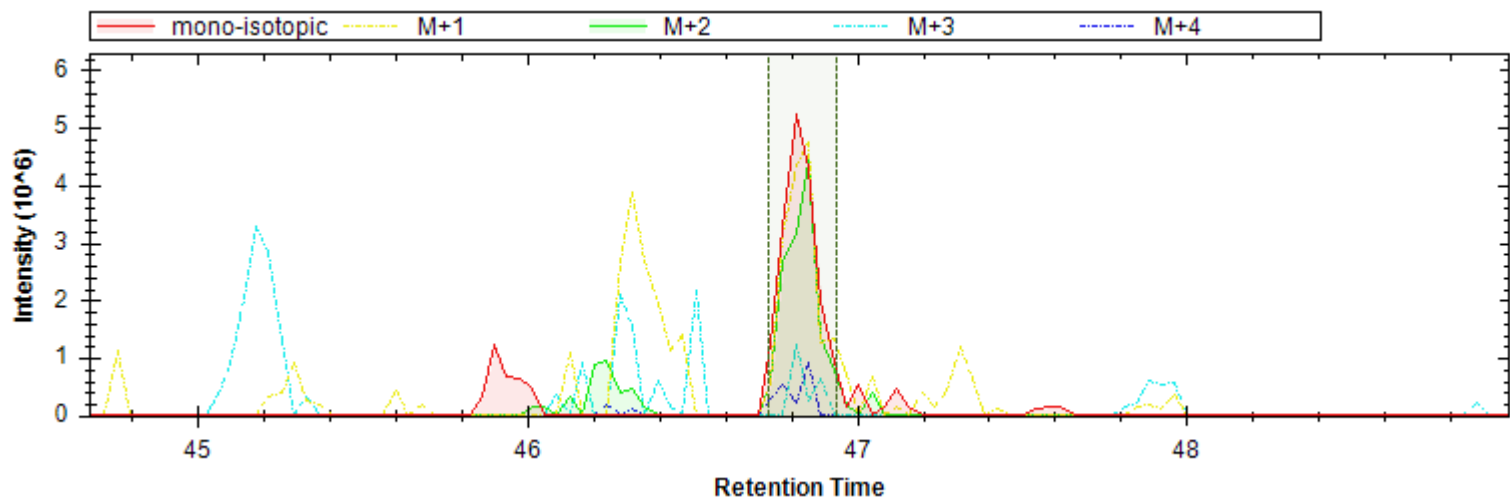

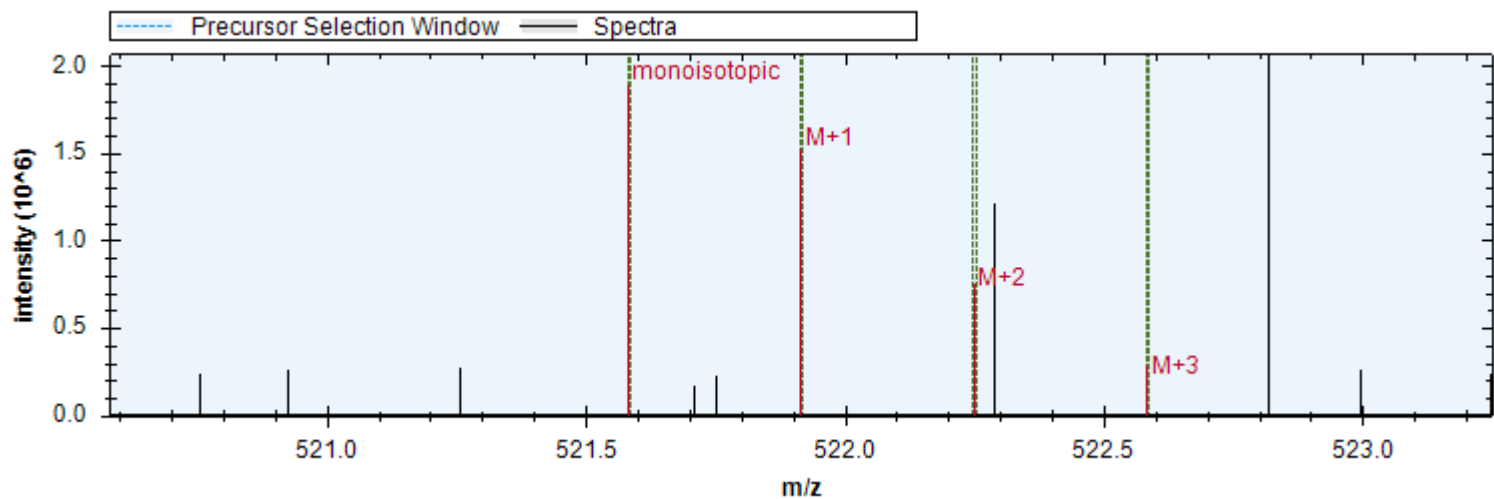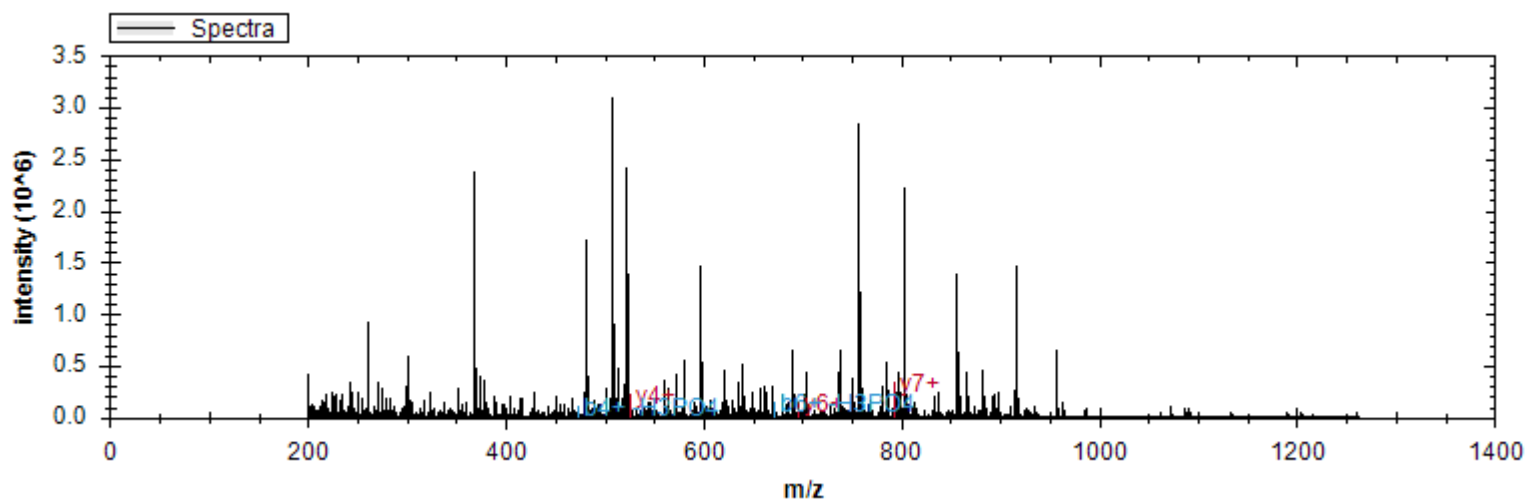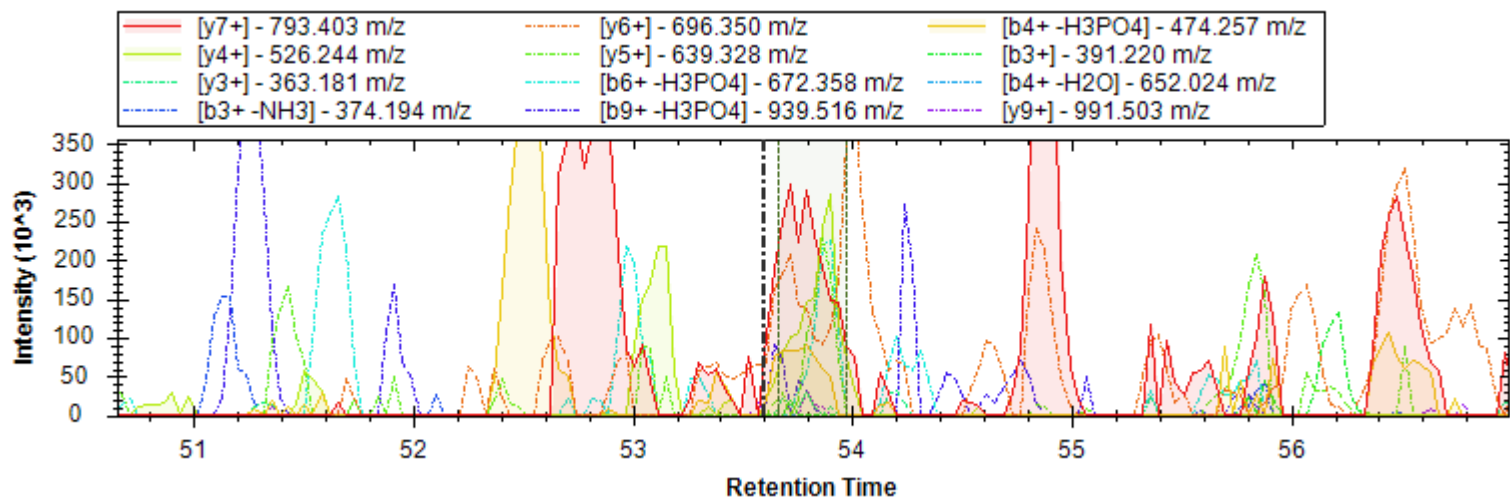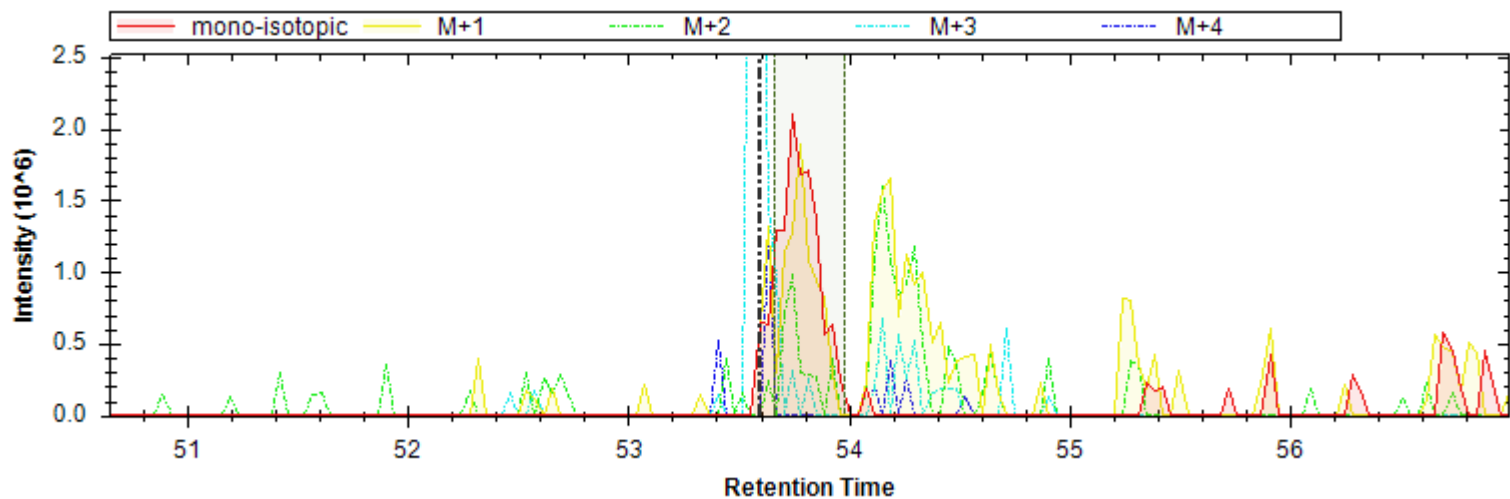

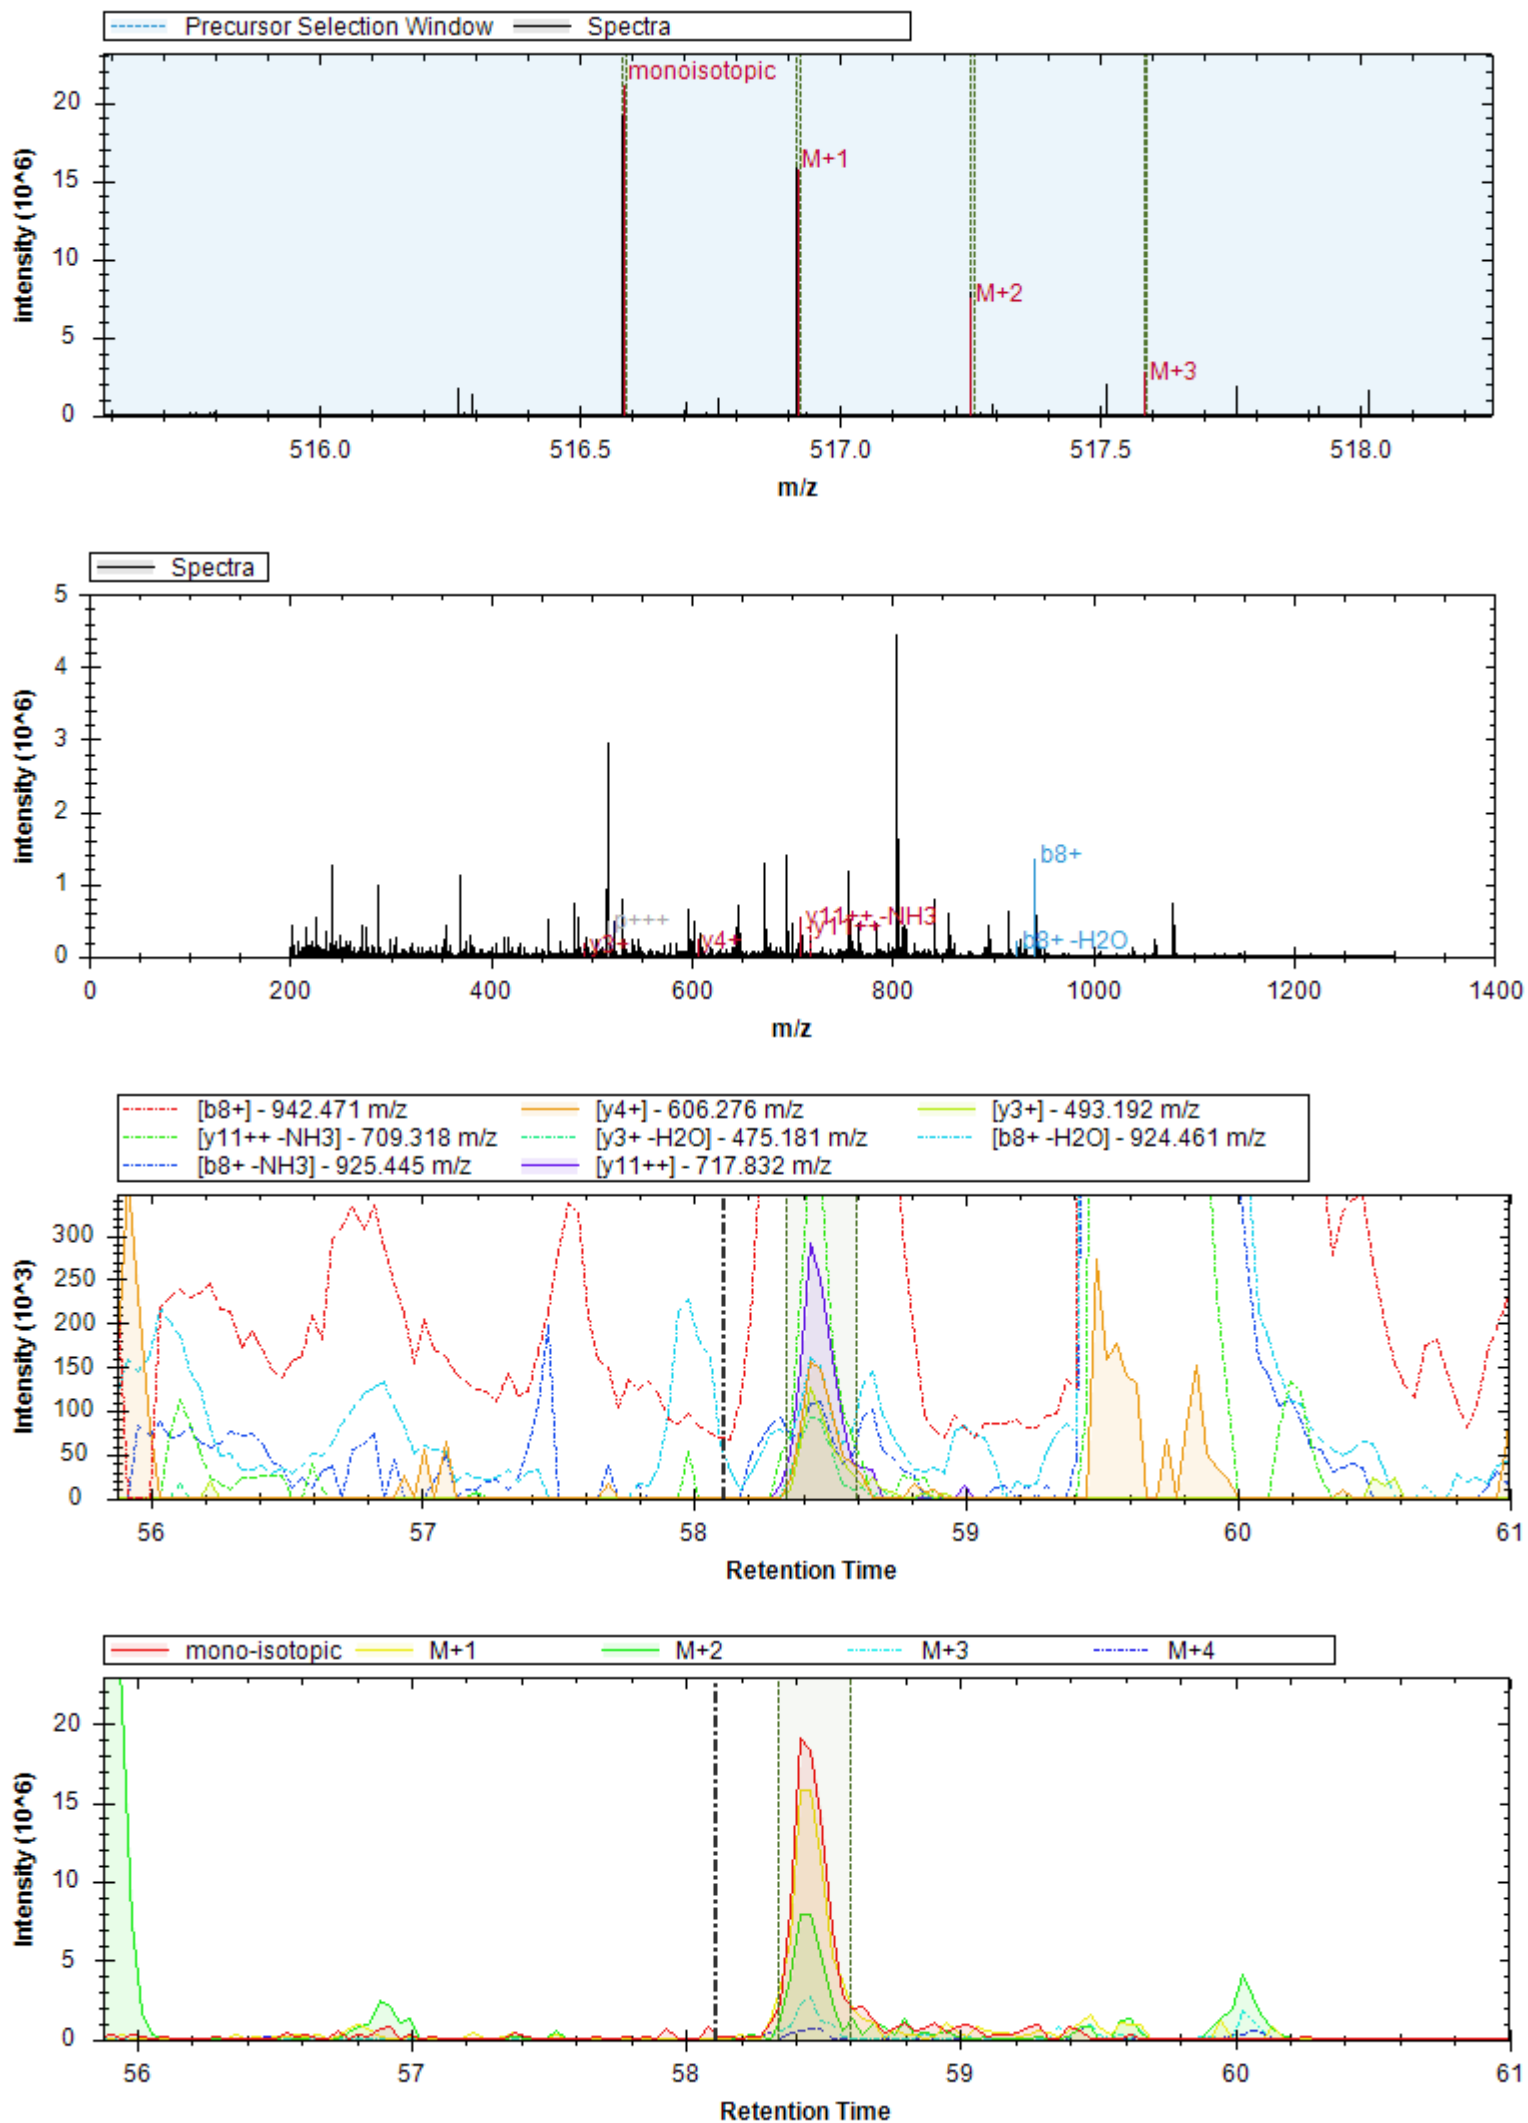

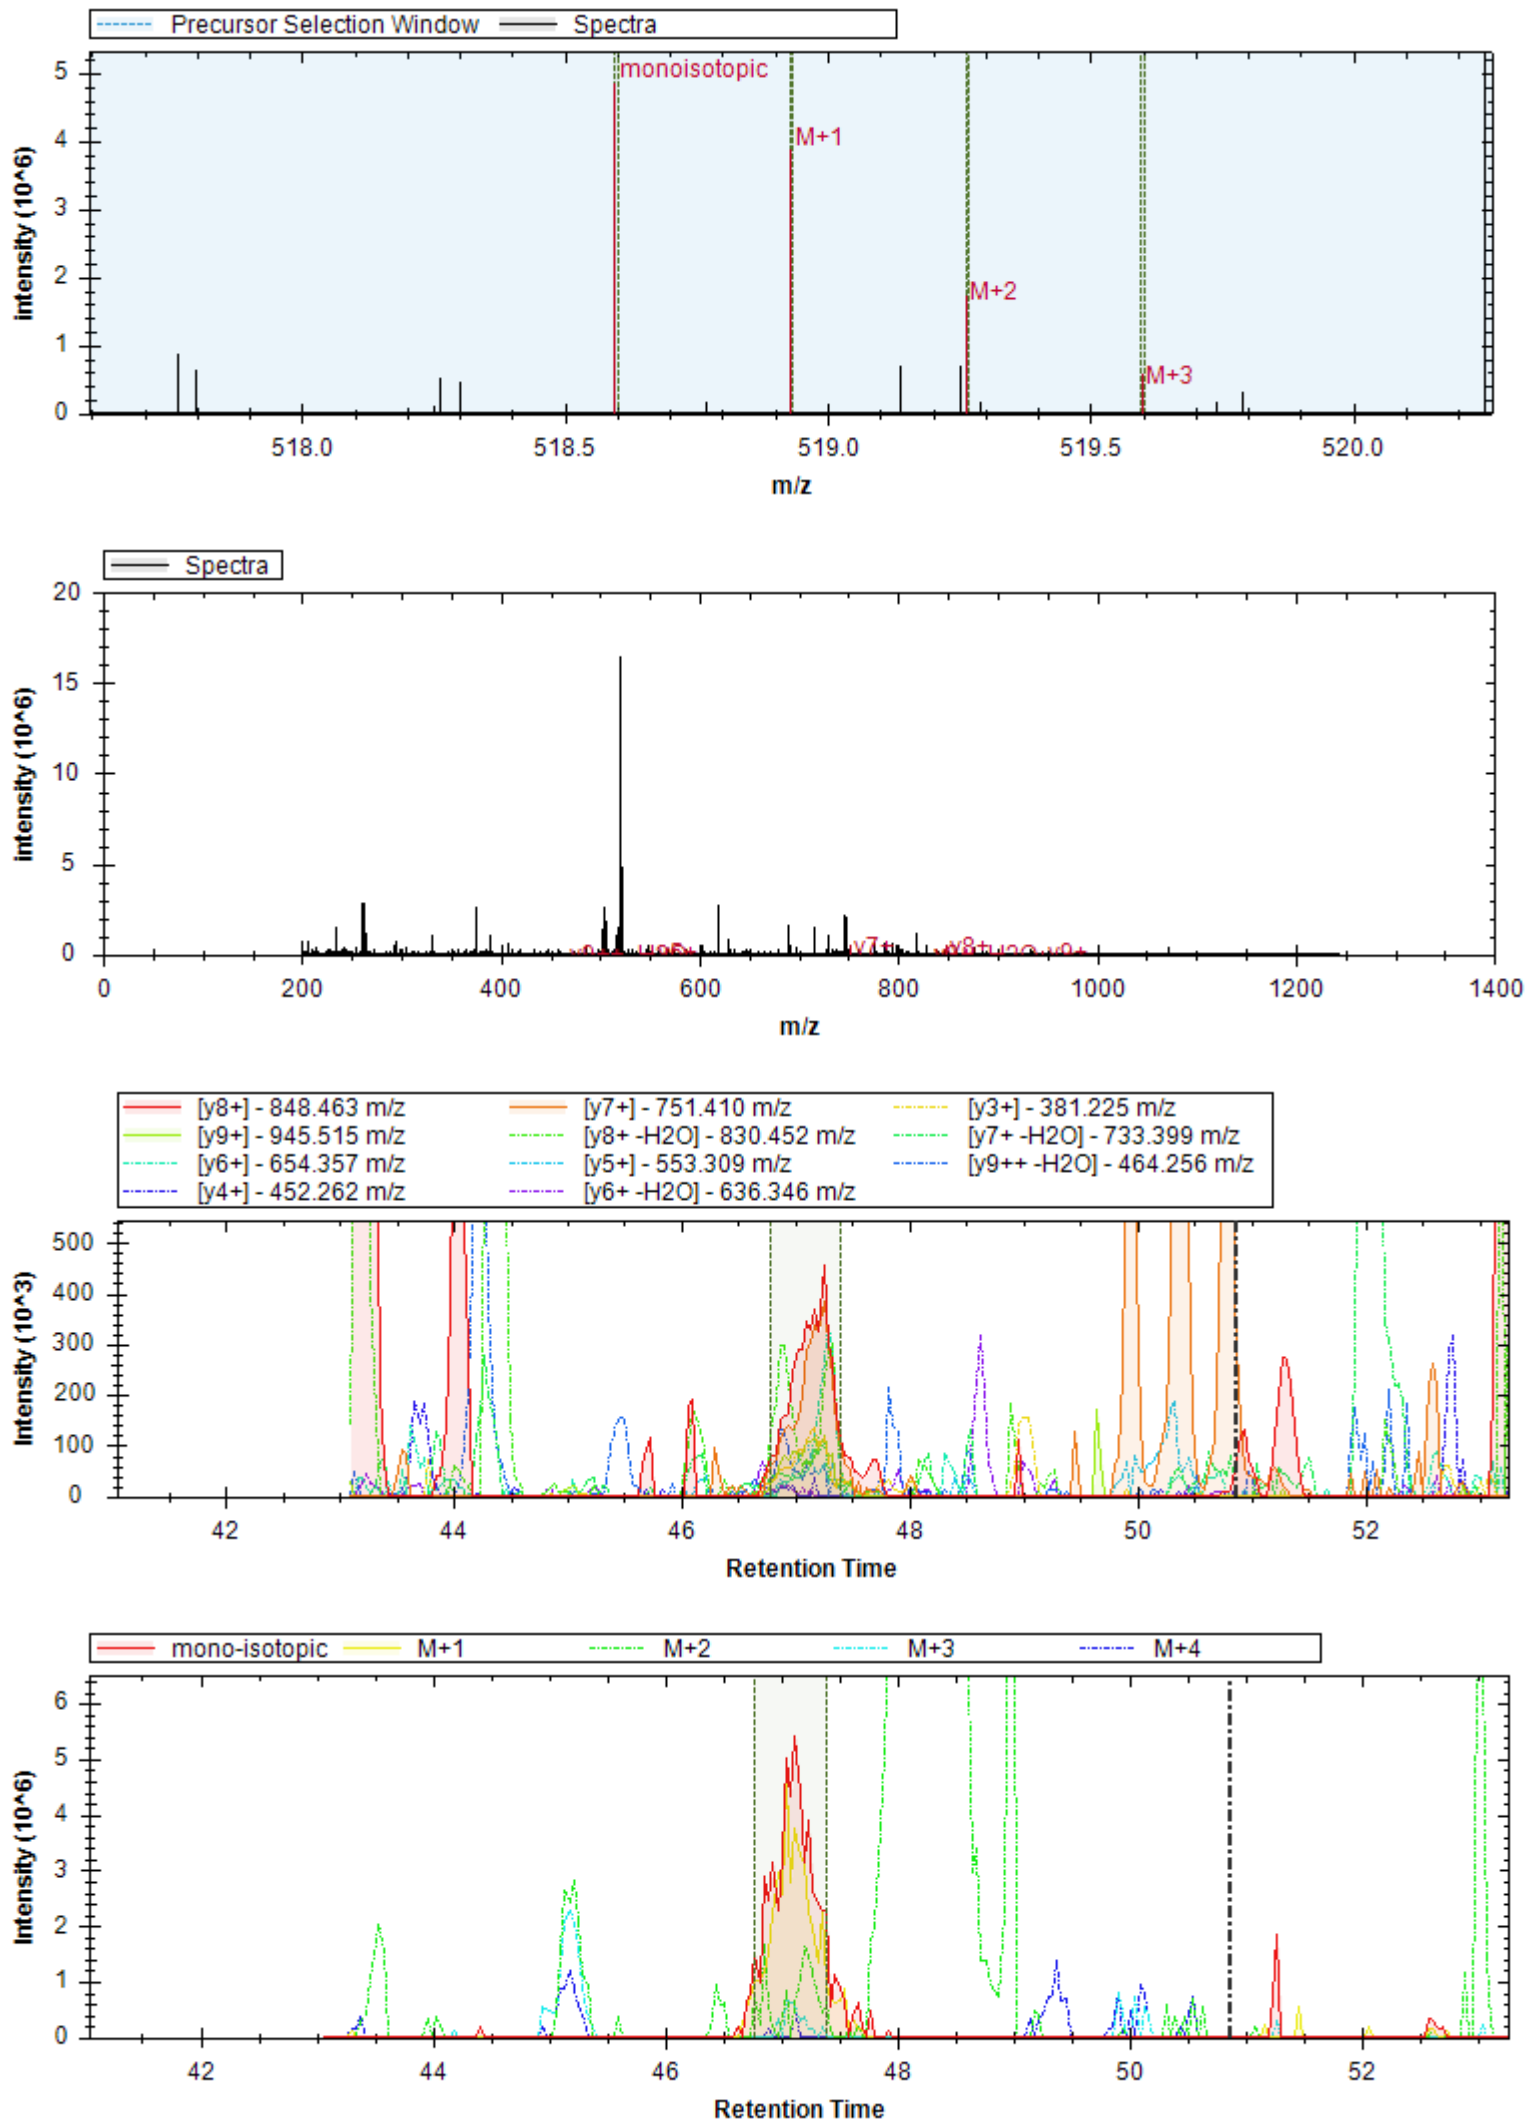

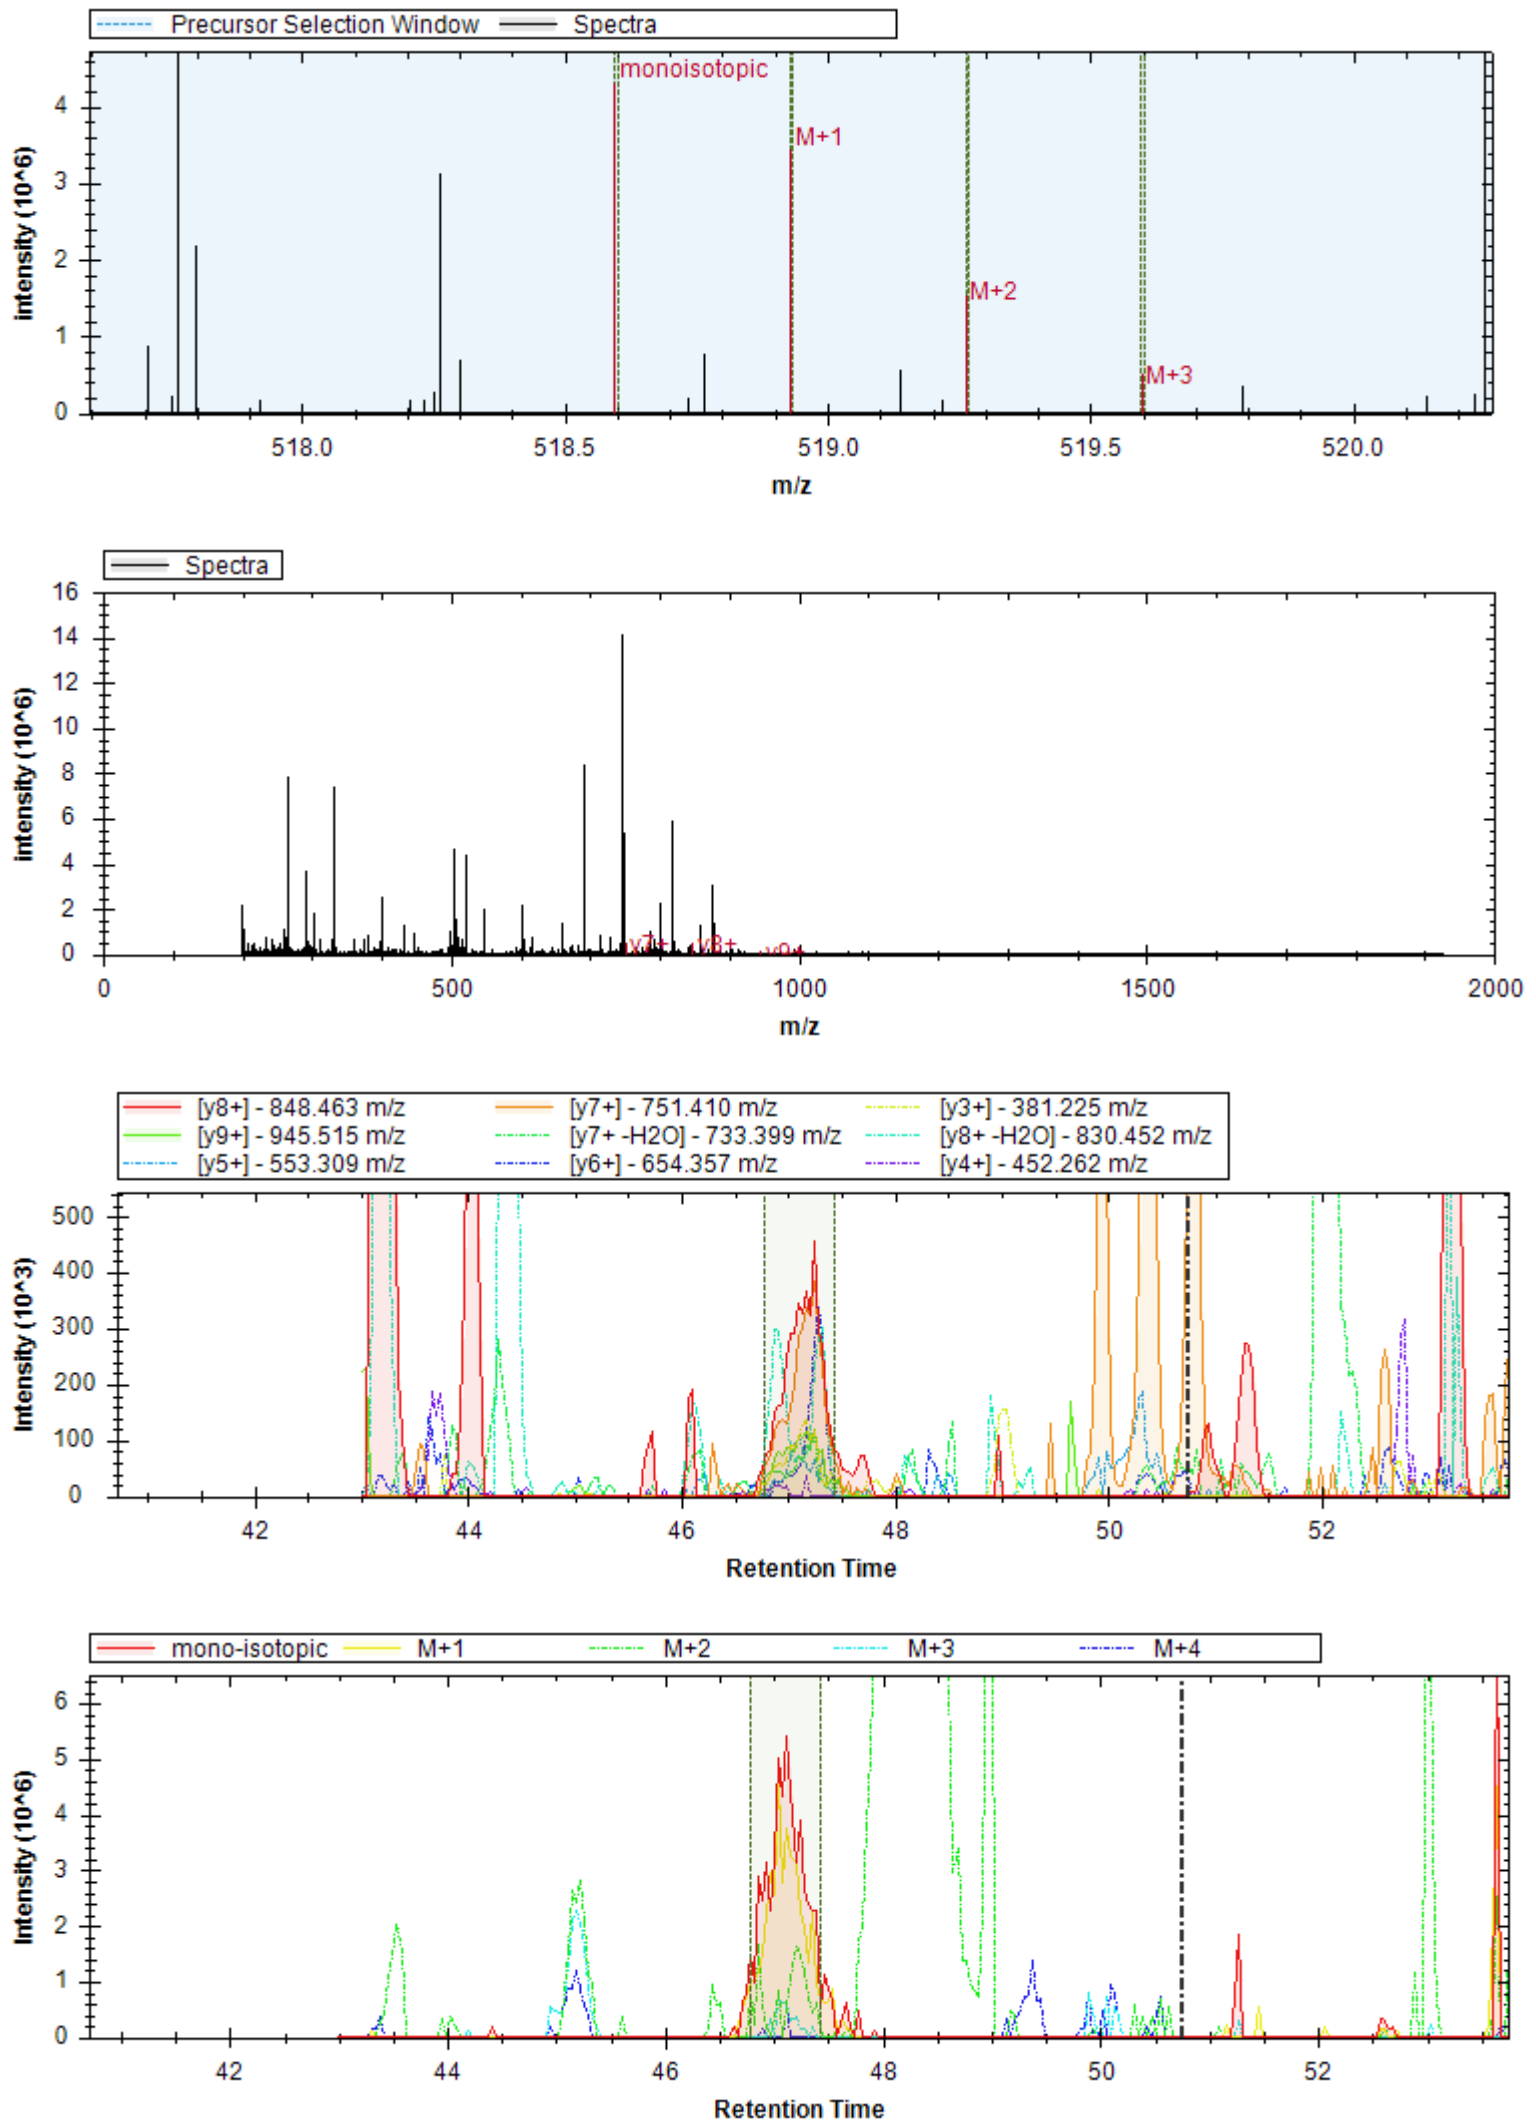

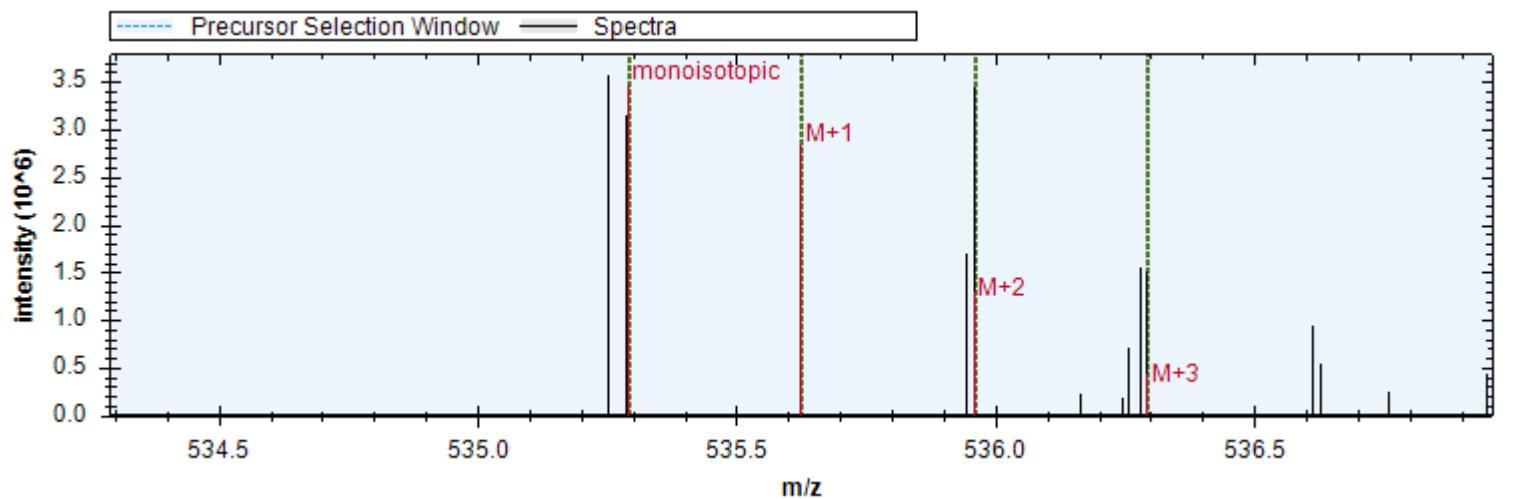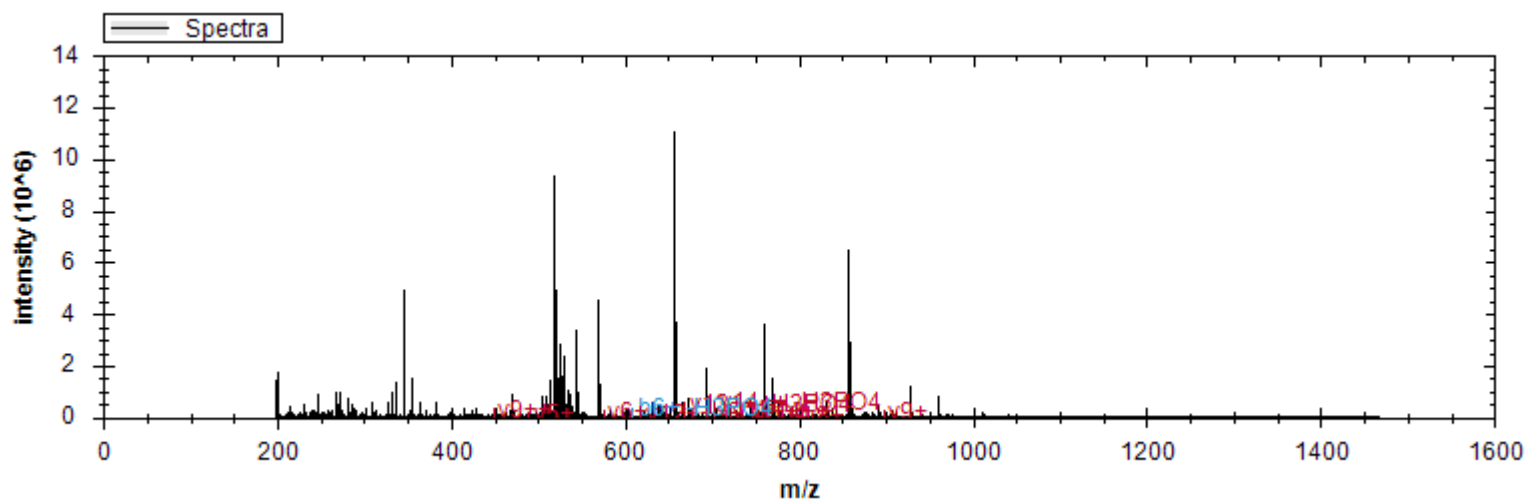

- |                              |                              |                            |
|------------------------------|------------------------------|----------------------------|
| [y14++ -H3PO4] - 703.909 m/z | [y13++ -H3PO4] - 668.391 m/z | [b6+ -H3PO4] - 608.388 m/z |
| [y9+] - 898.499 m/z          | [b10++ -H3PO4] - 509.314 m/z | [y5+] - 489.267 m/z        |
| [y6+] - 576.299 m/z          | [y12++ -H3PO4] - 618.857 m/z | [y14++] - 752.898 m/z      |
| [y8+] - 801.447 m/z          | [y13++] - 717.379 m/z        | [b10++] - 558.302 m/z      |
| [y12++] - 667.845 m/z        | [b6+] - 706.365 m/z          | [y8++] - 401.227 m/z       |
| [y9++] - 449.753 m/z         | [y5+ -H2O] - 471.256 m/z     | [y9+ -H2O] - 880.489 m/z   |
| [y11++] - 618.311 m/z        | [y3+] - 305.182 m/z          | [y4+] - 392.214 m/z        |
| [b5+] - 525.351 m/z          | [y13++ -H2O] - 708.374 m/z   |                            |

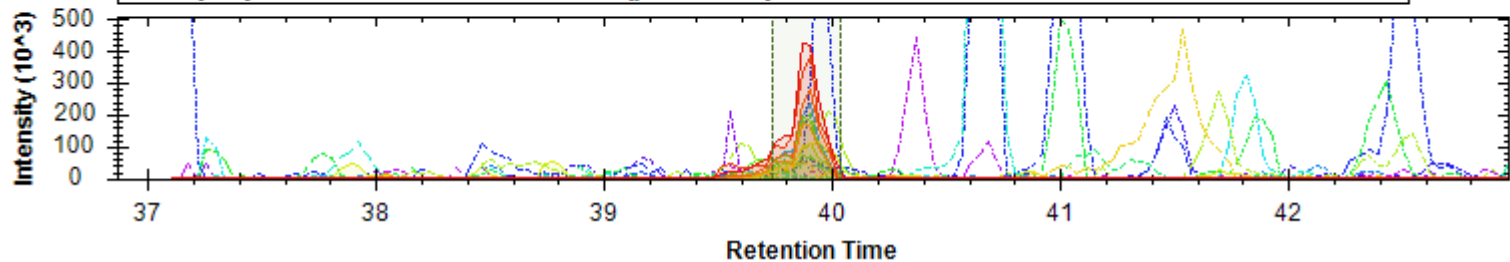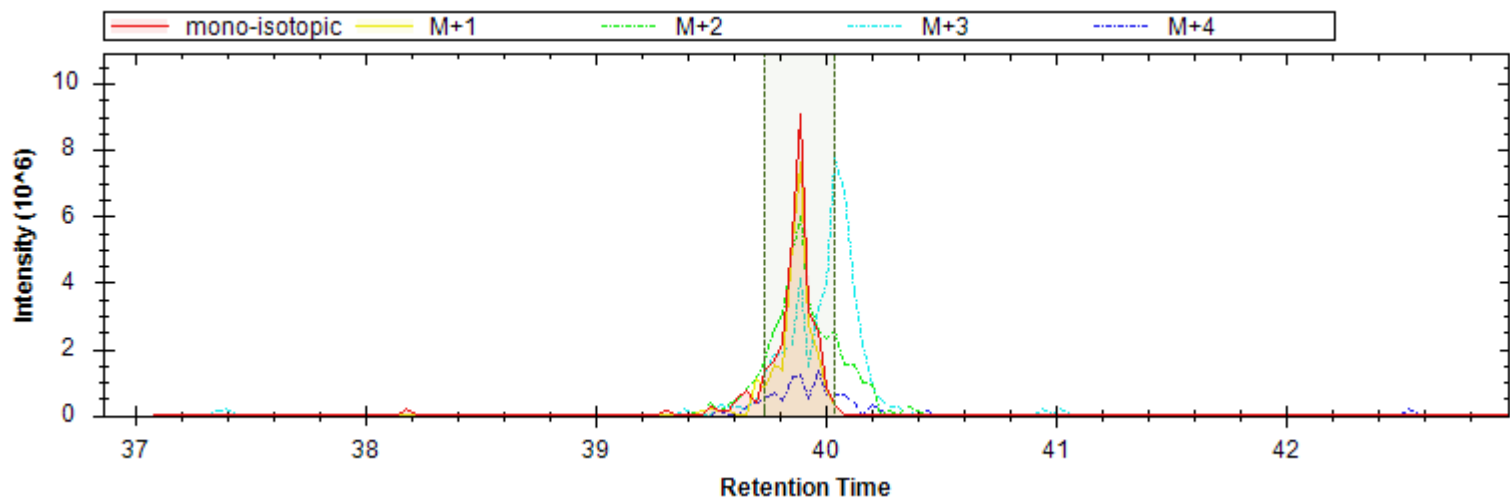

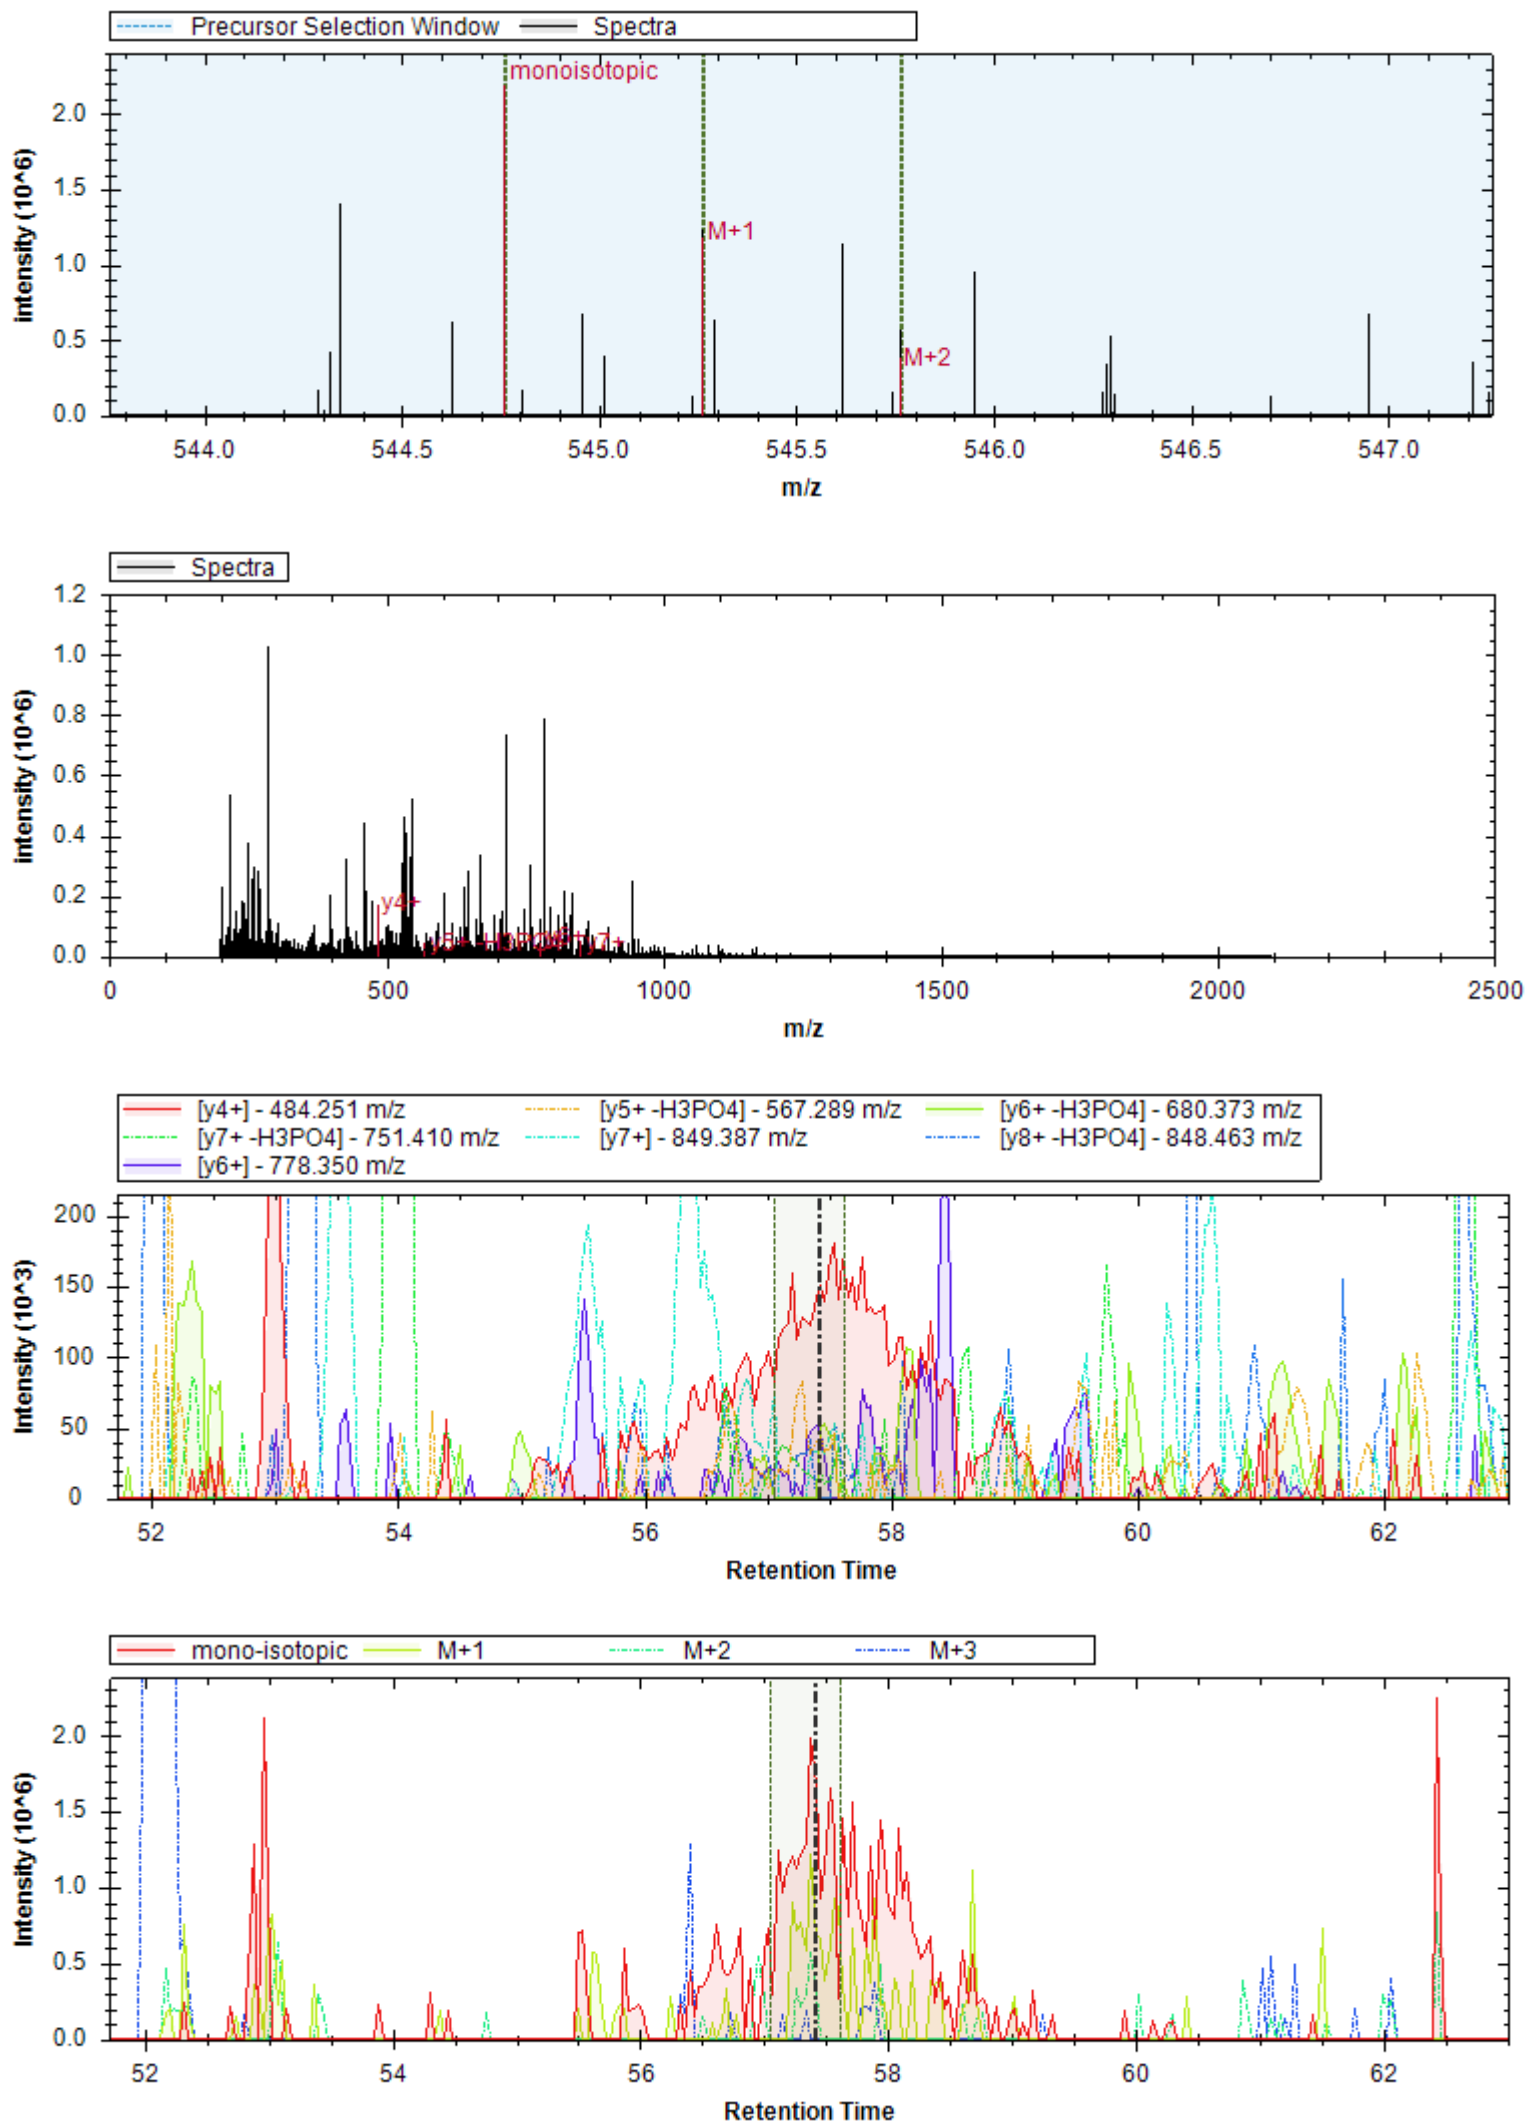

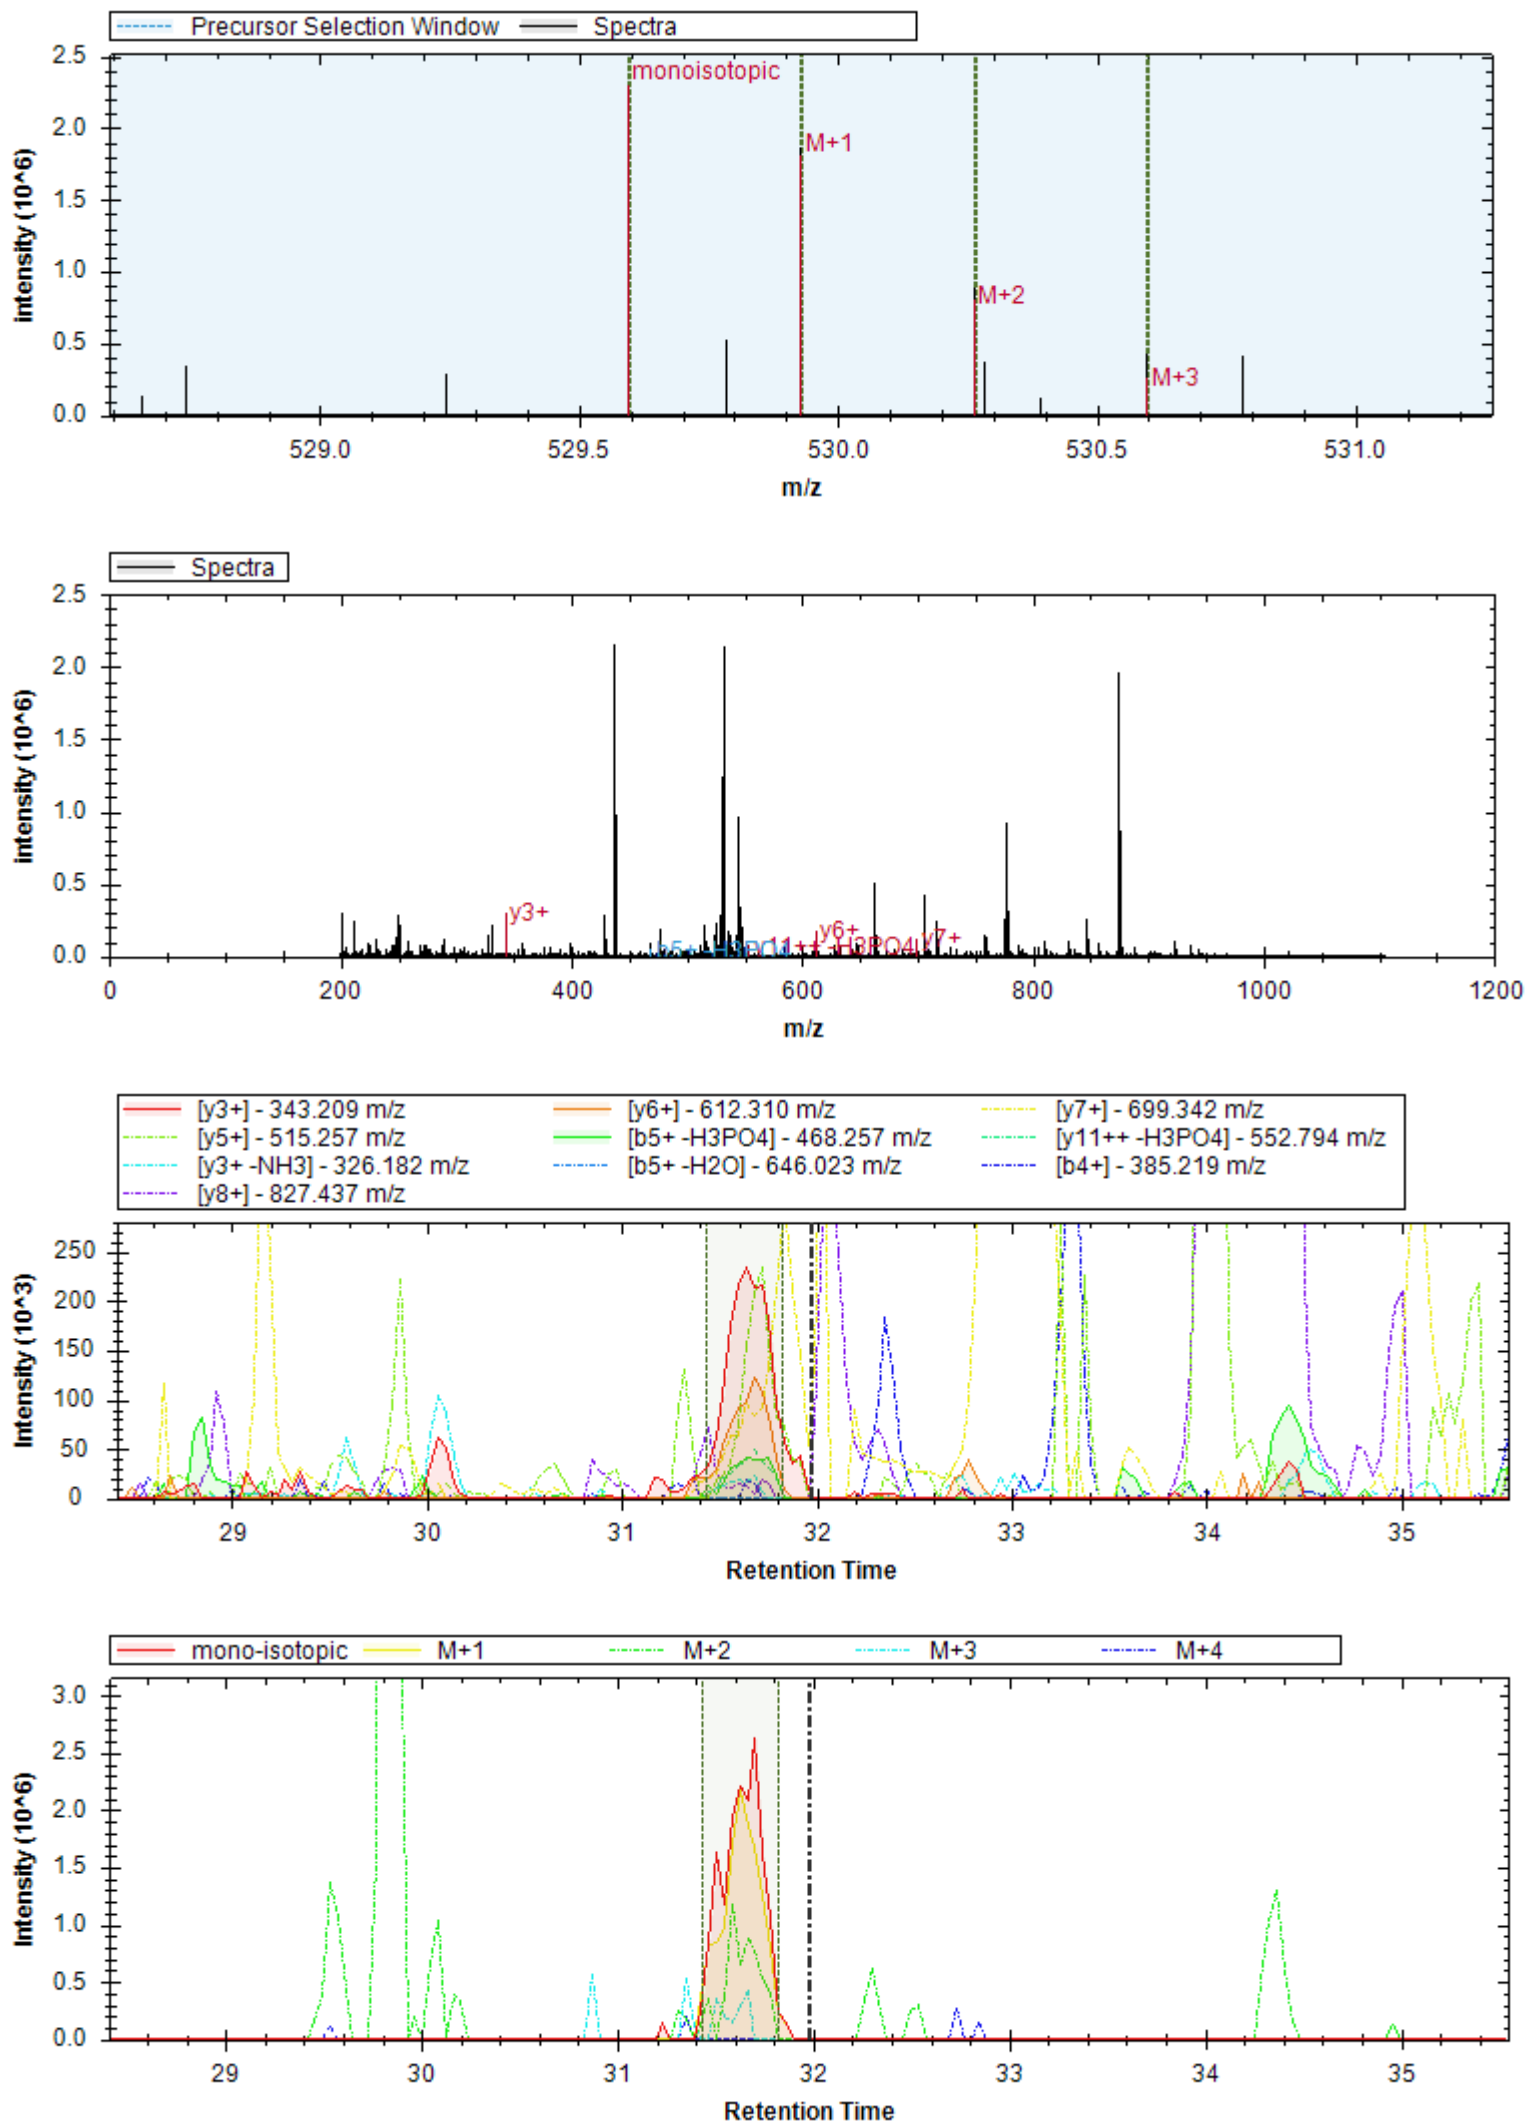



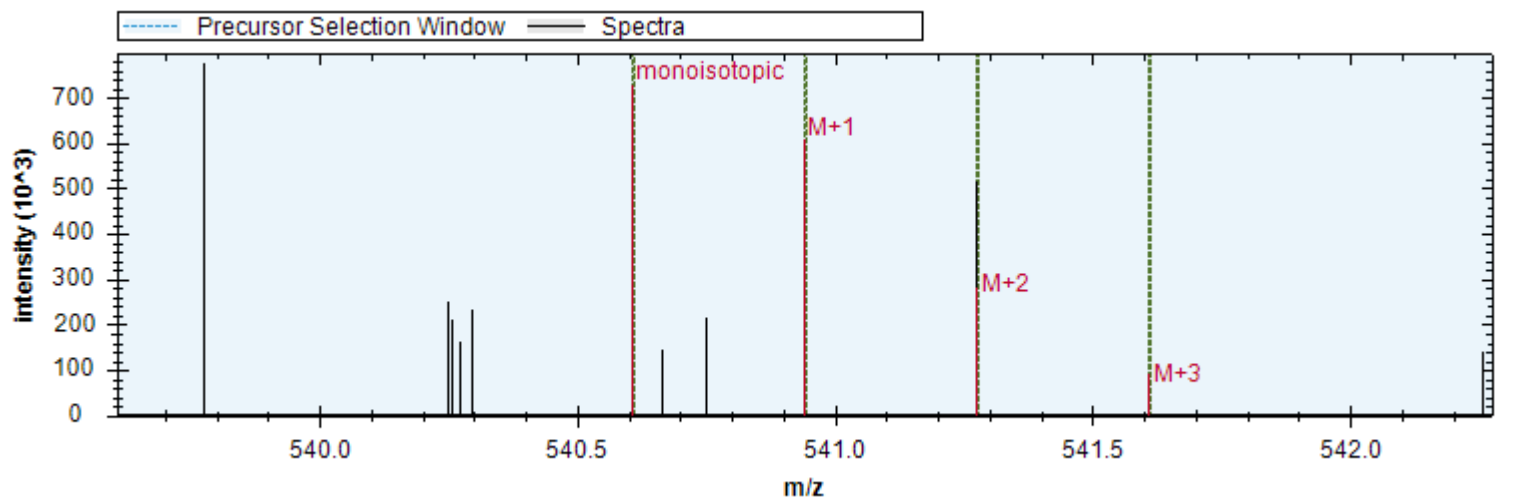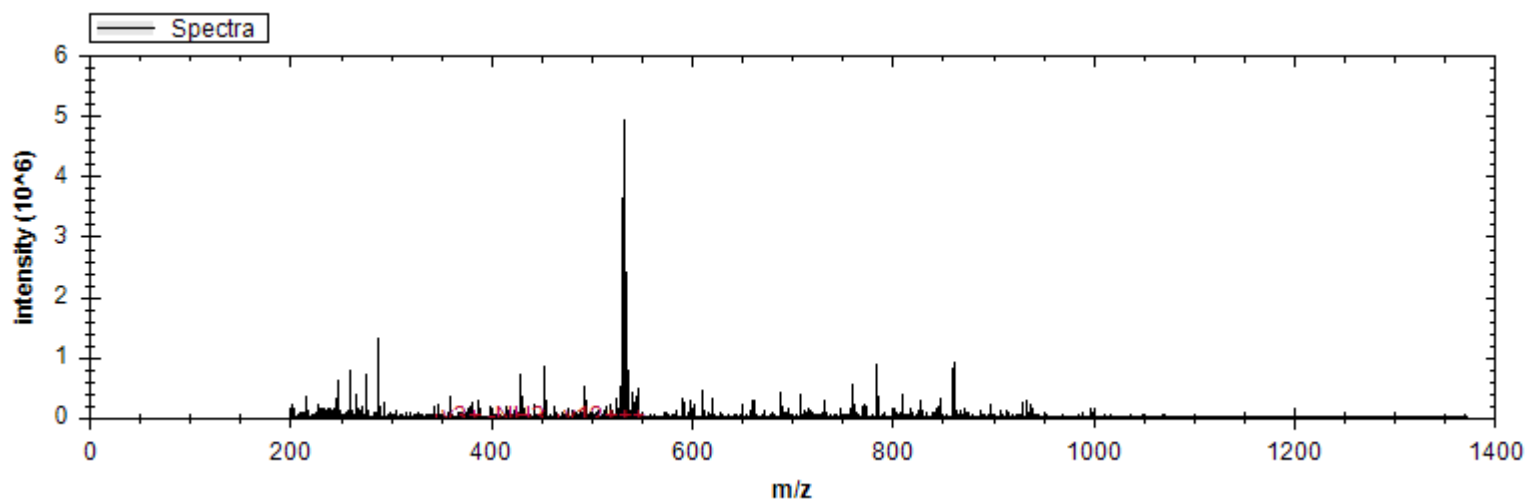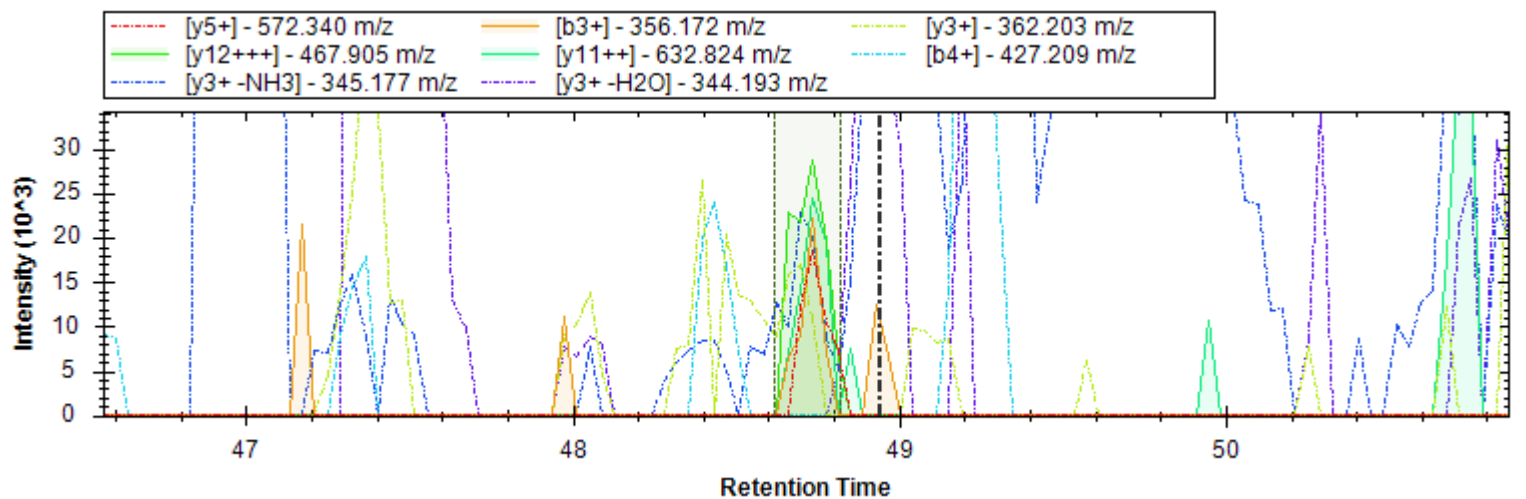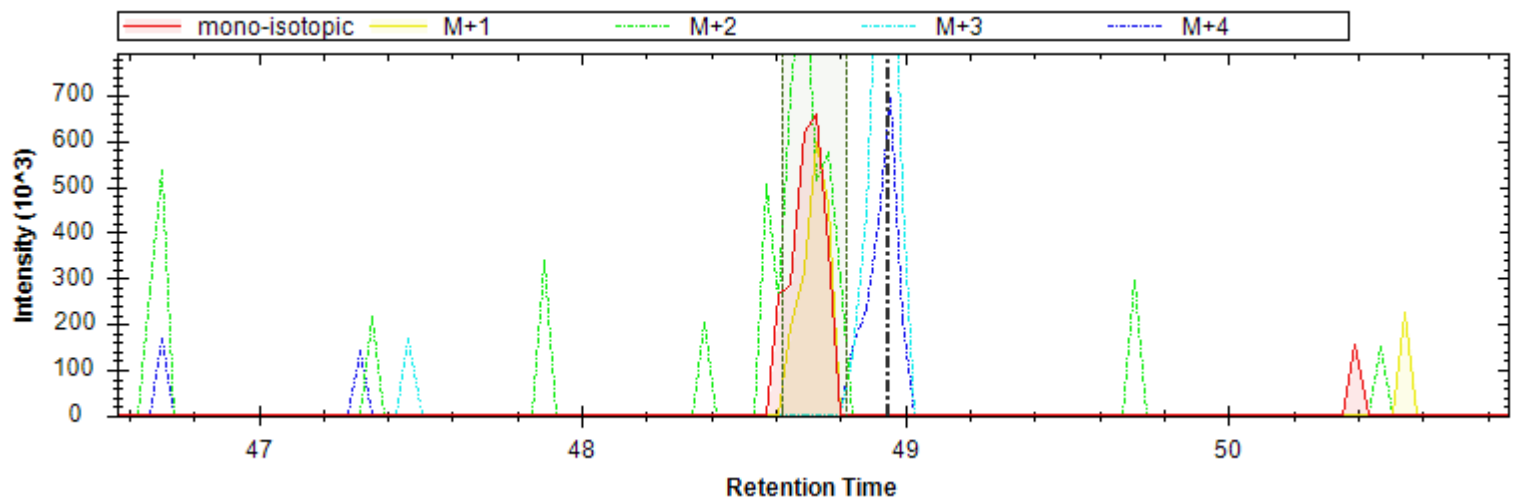

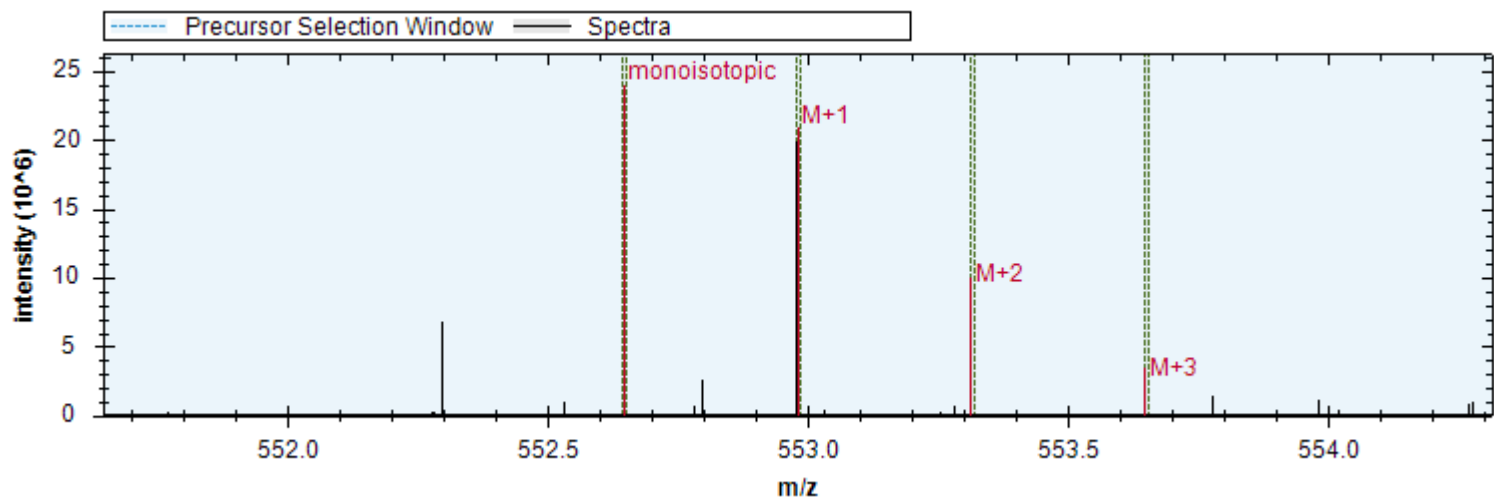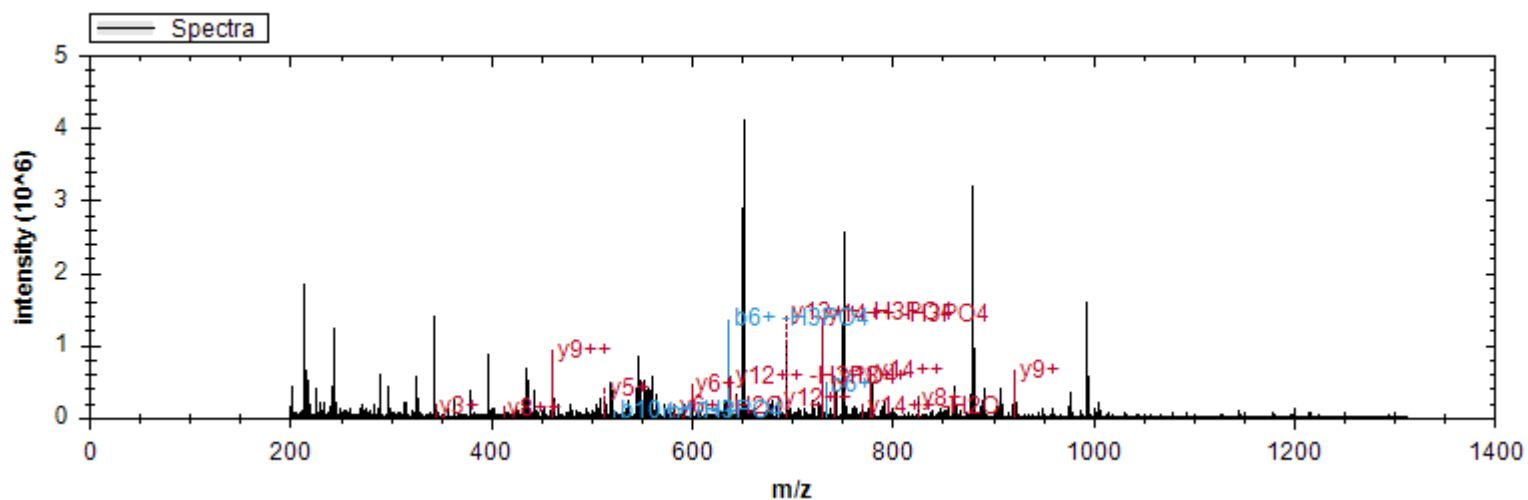

- |                              |                              |                              |
|------------------------------|------------------------------|------------------------------|
| [b6+ -H3PO4] - 636.419 m/z   | [y14++ -H3PO4] - 729.943 m/z | [y13++ -H3PO4] - 694.425 m/z |
| [y9++] - 461.772 m/z         | [y9+] - 922.536 m/z          | [y5+] - 513.303 m/z          |
| [y12++ -H3PO4] - 637.883 m/z | [y6+] - 600.335 m/z          | [y10++] - 552.278 m/z        |
| [y14++] - 778.932 m/z        | [y13++] - 743.413 m/z        | [b6+] - 734.396 m/z          |
| [y8+] - 825.483 m/z          | [y6+ -H2O] - 582.325 m/z     | [y3+] - 345.213 m/z          |
| [y9+ -H2O] - 904.525 m/z     | [y5+ -H2O] - 495.293 m/z     | [y7+] - 728.430 m/z          |
| [y12++] - 686.871 m/z        | [y14++ -H2O] - 769.926 m/z   | [y3+ -H2O] - 327.203 m/z     |
| [y8++] - 413.245 m/z         | [b10++] - 572.318 m/z        | [b10++ -H3PO4] - 523.330 m/z |

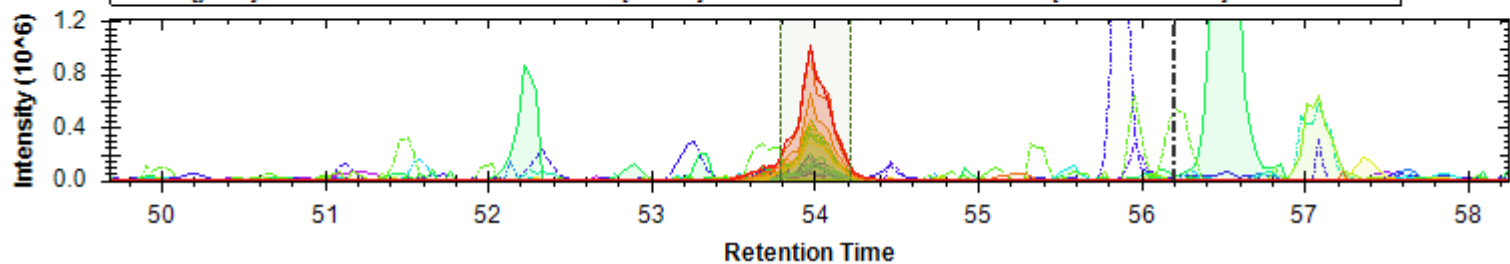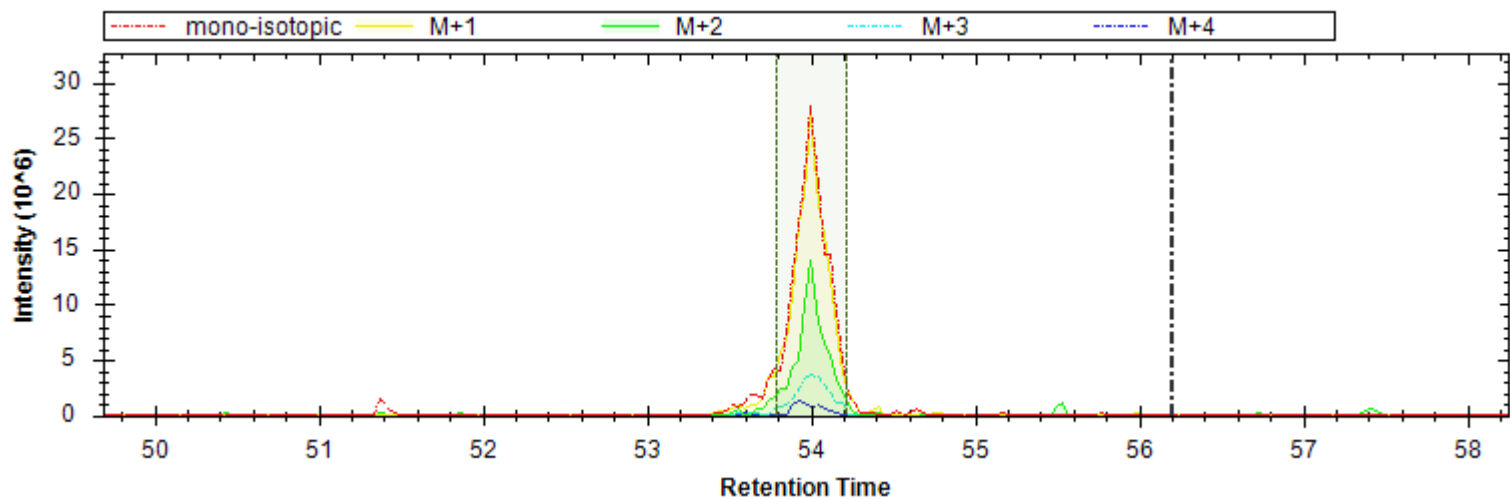

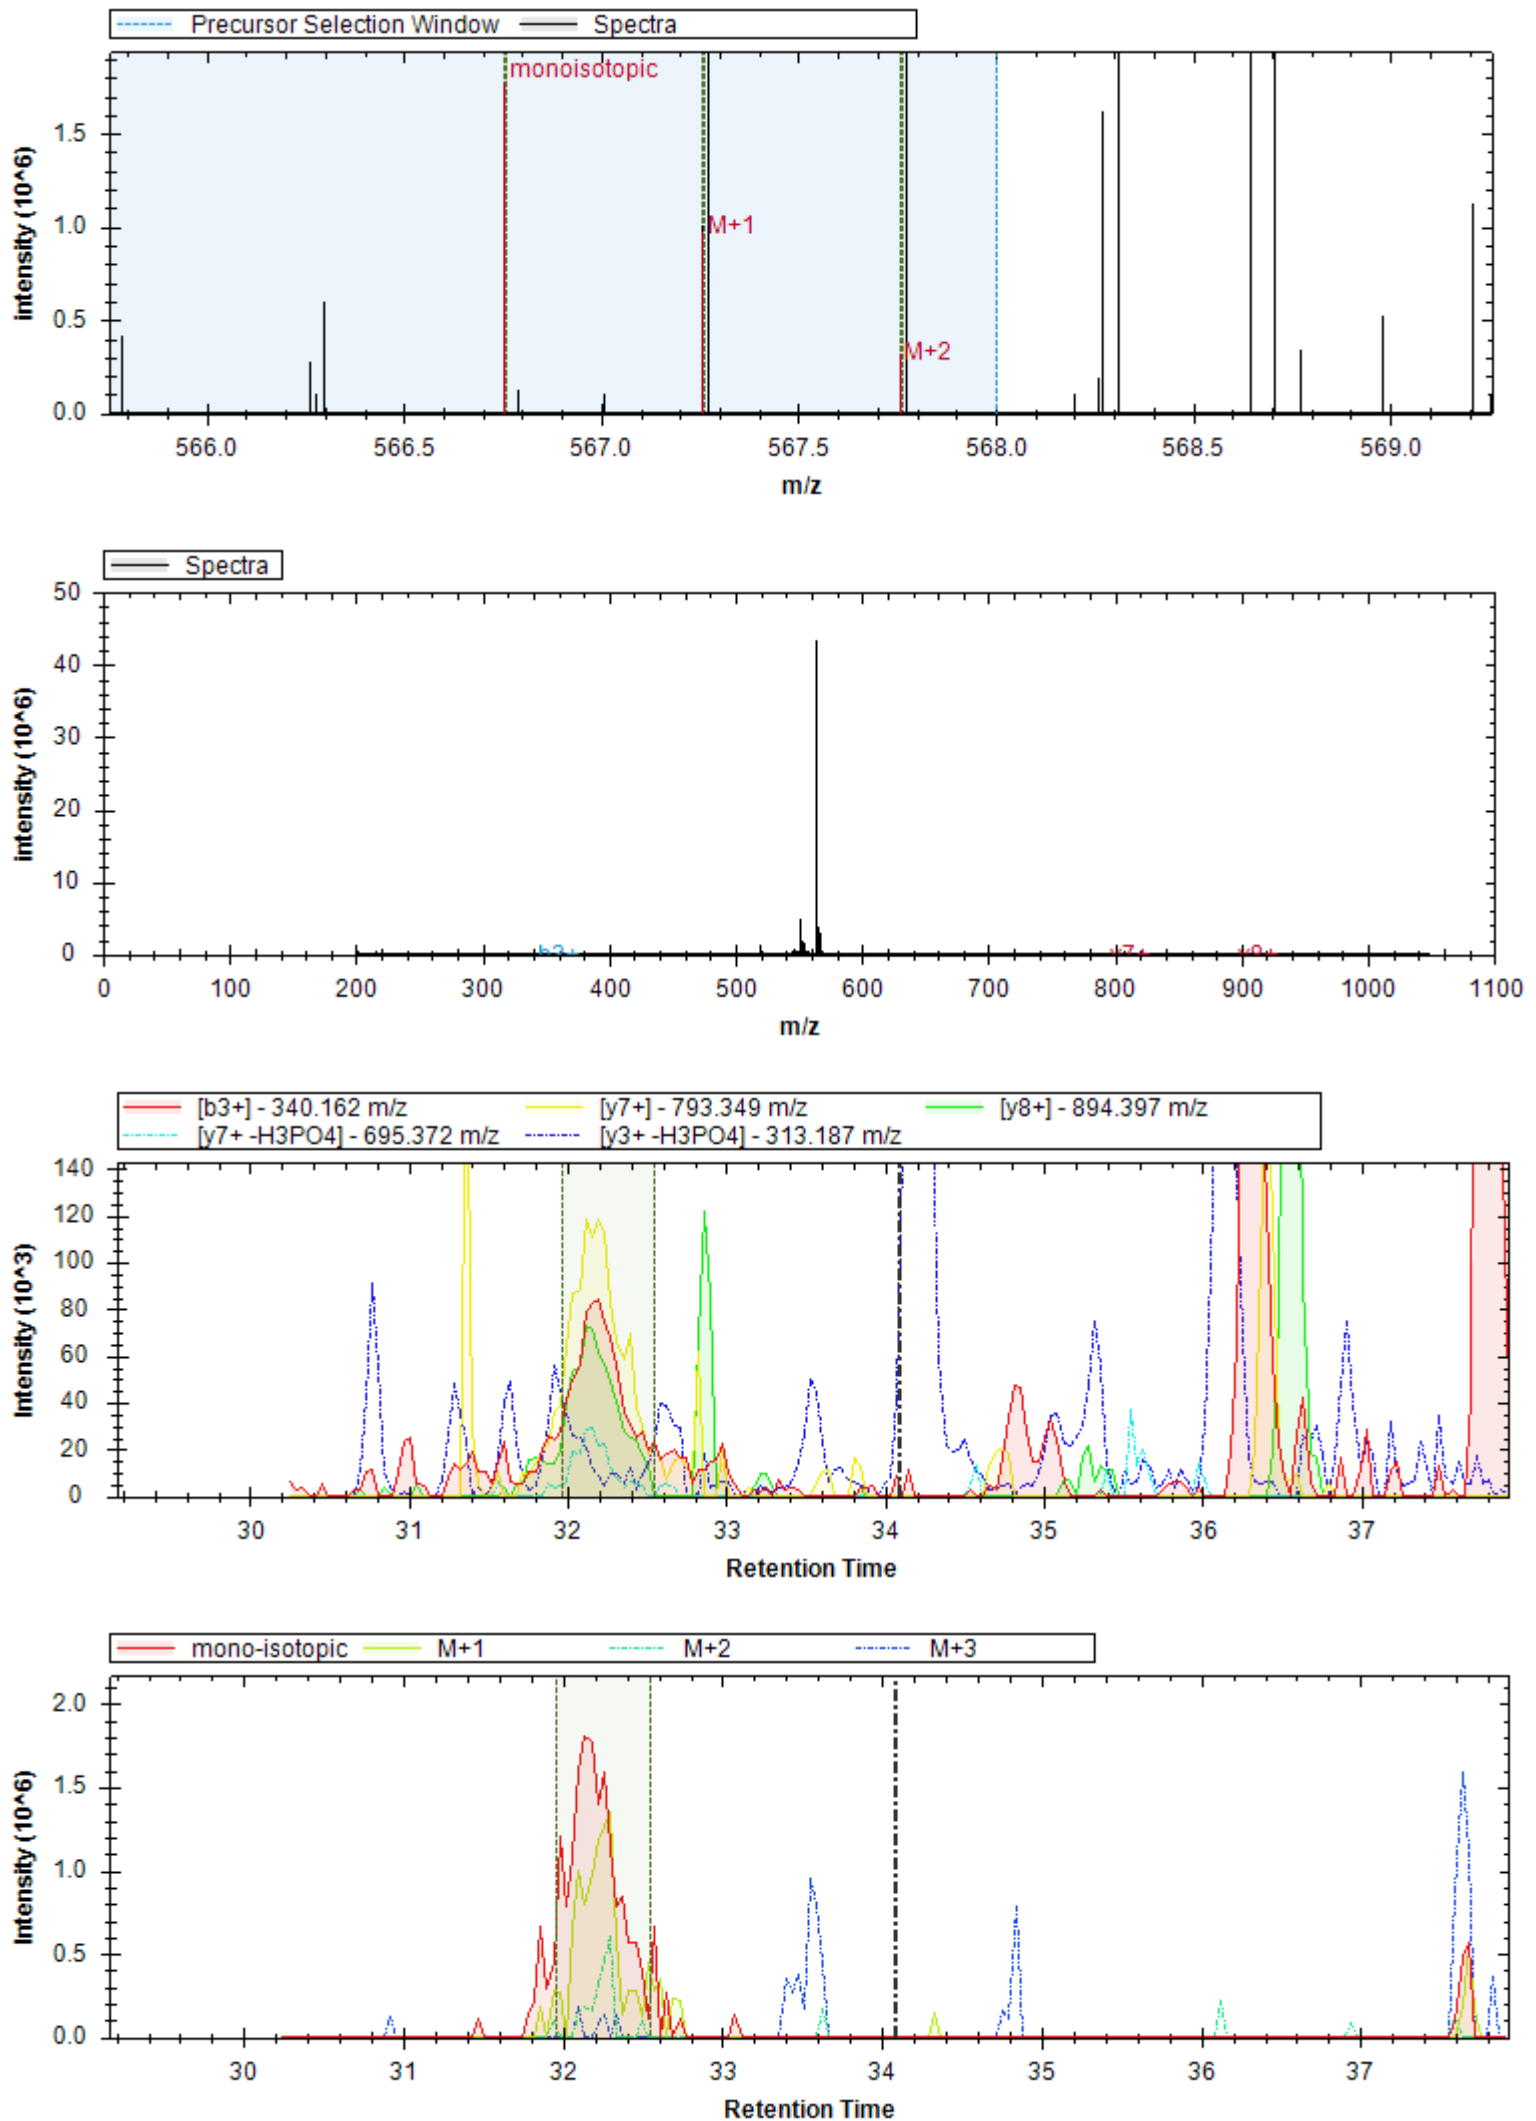

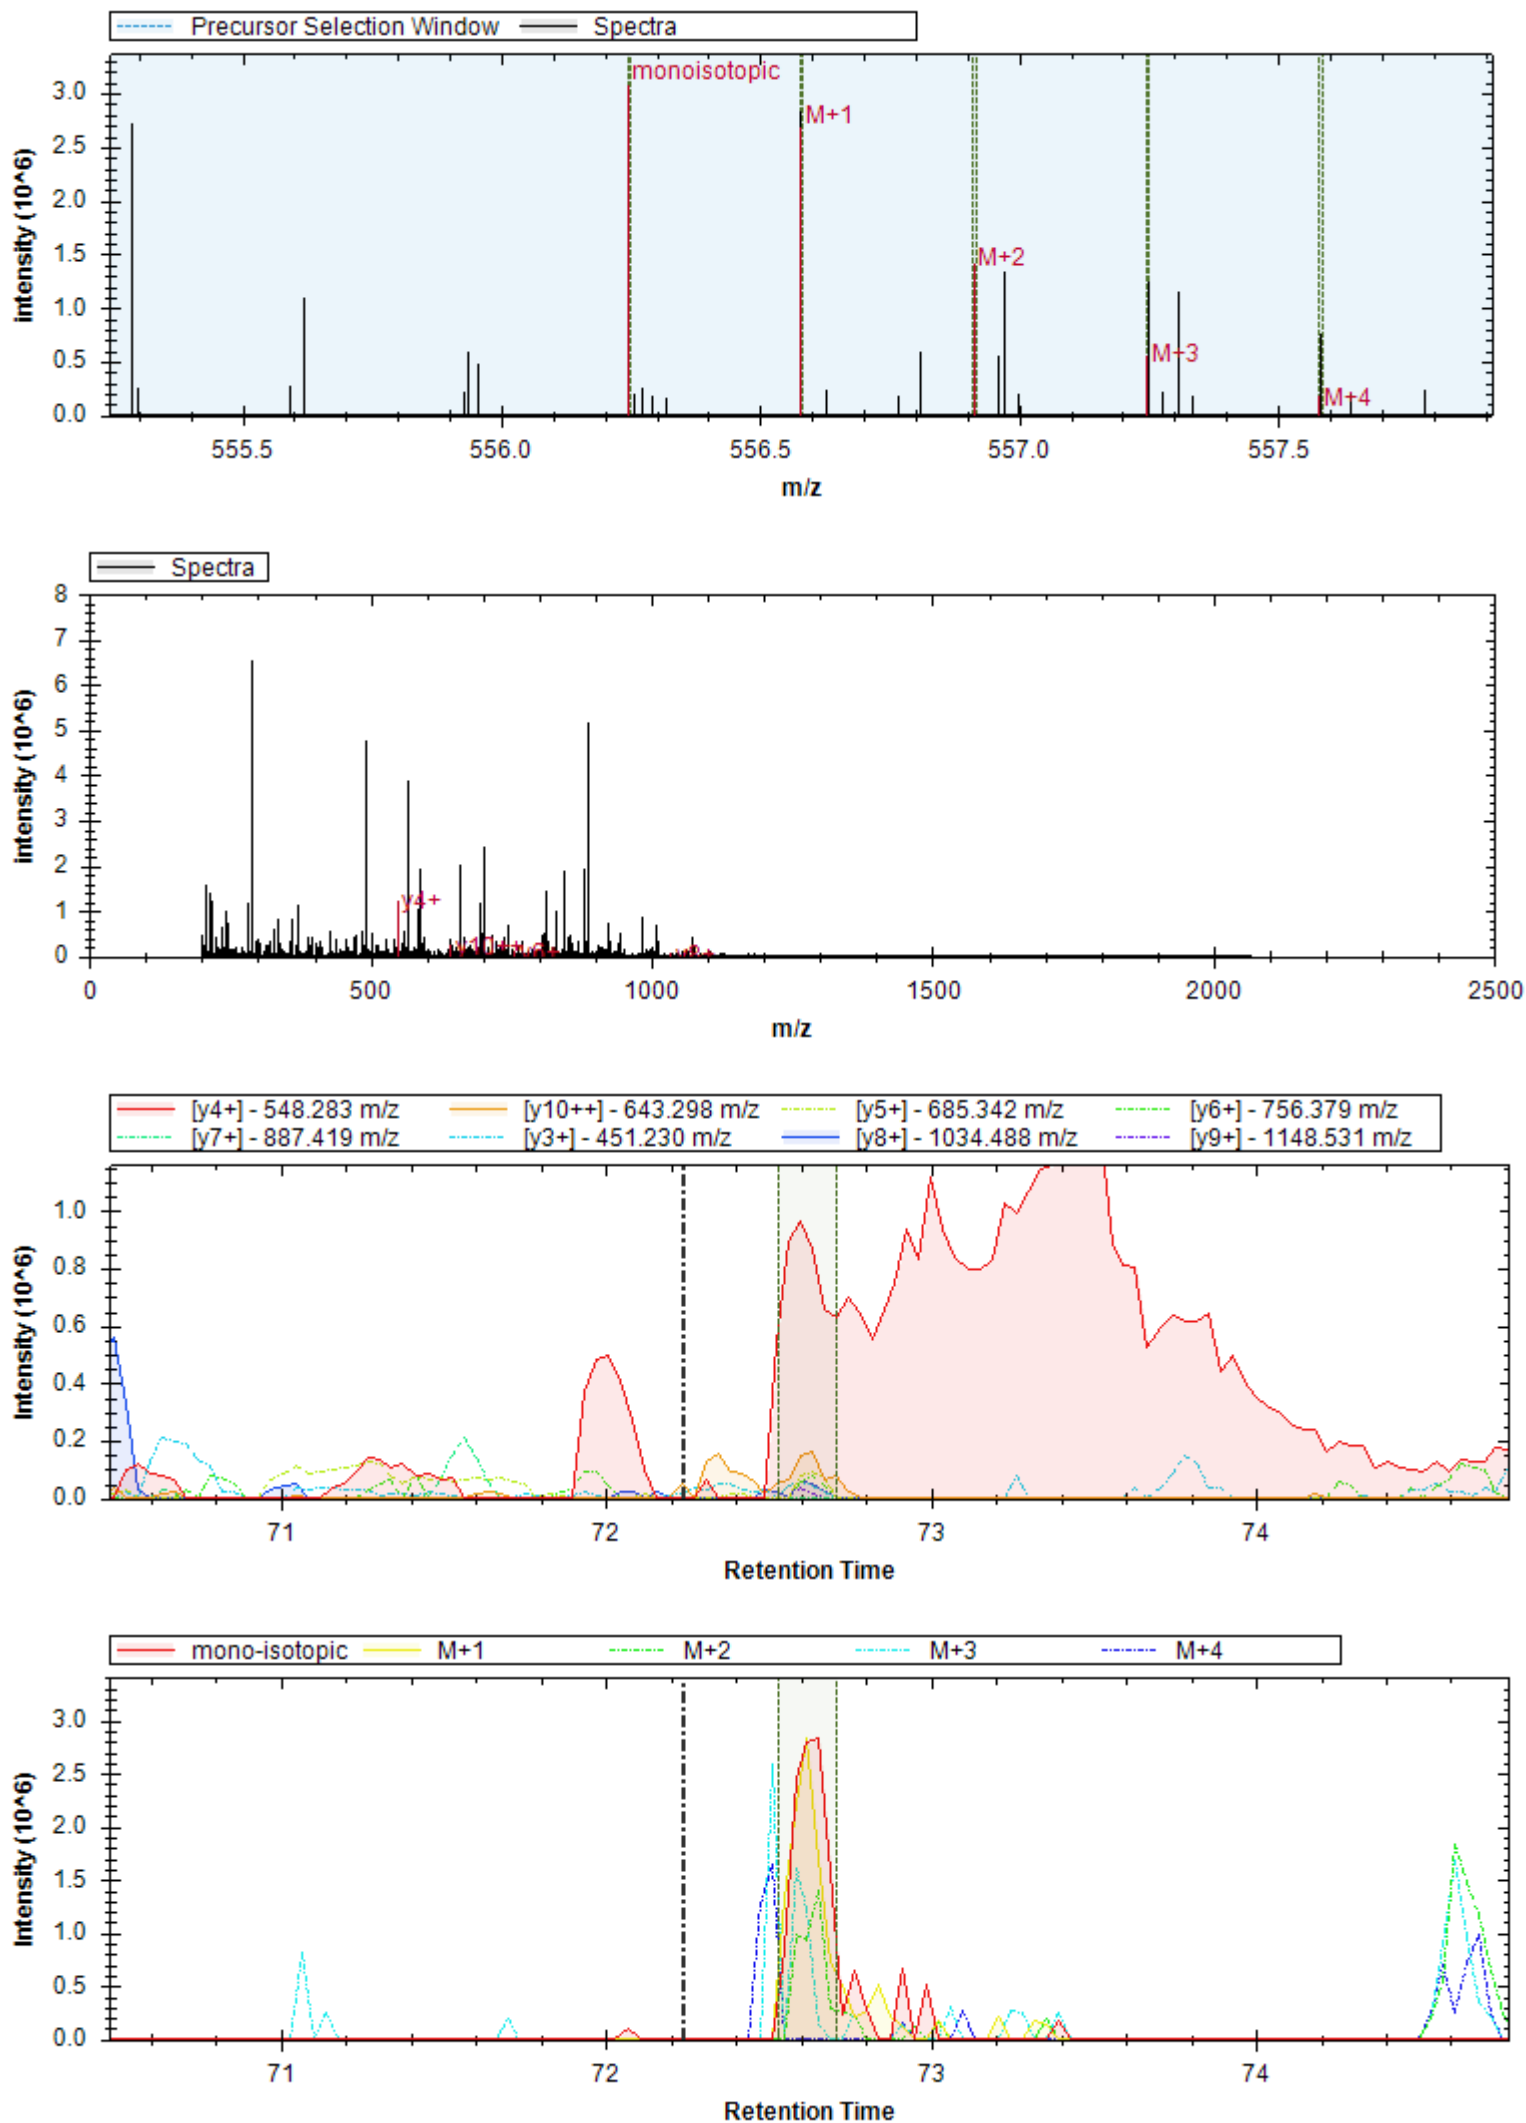

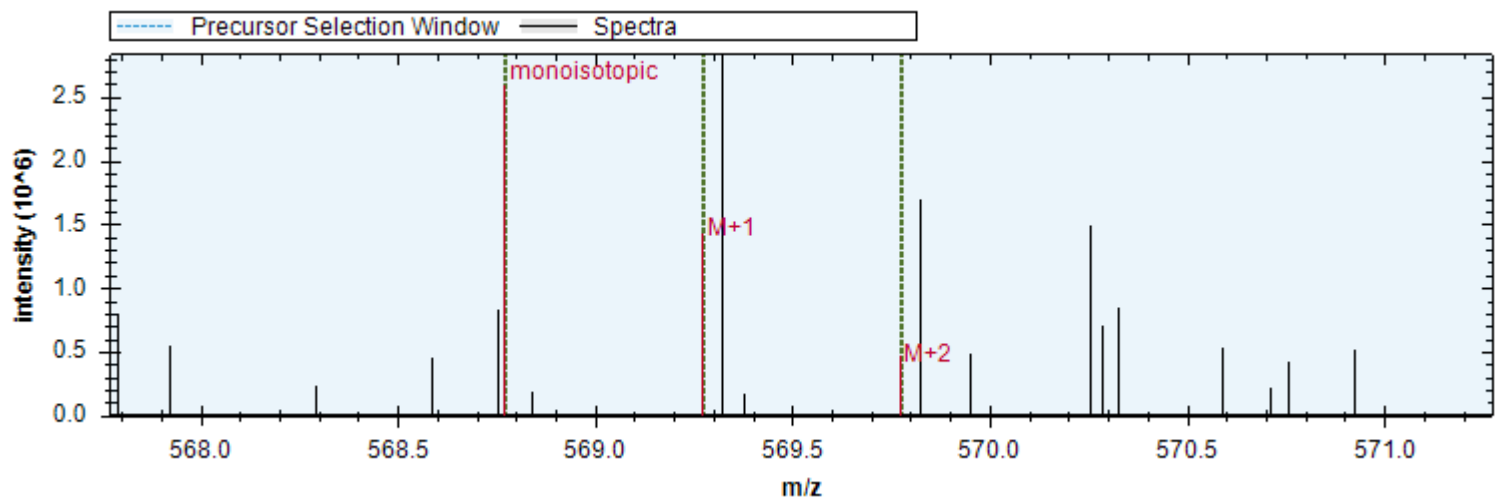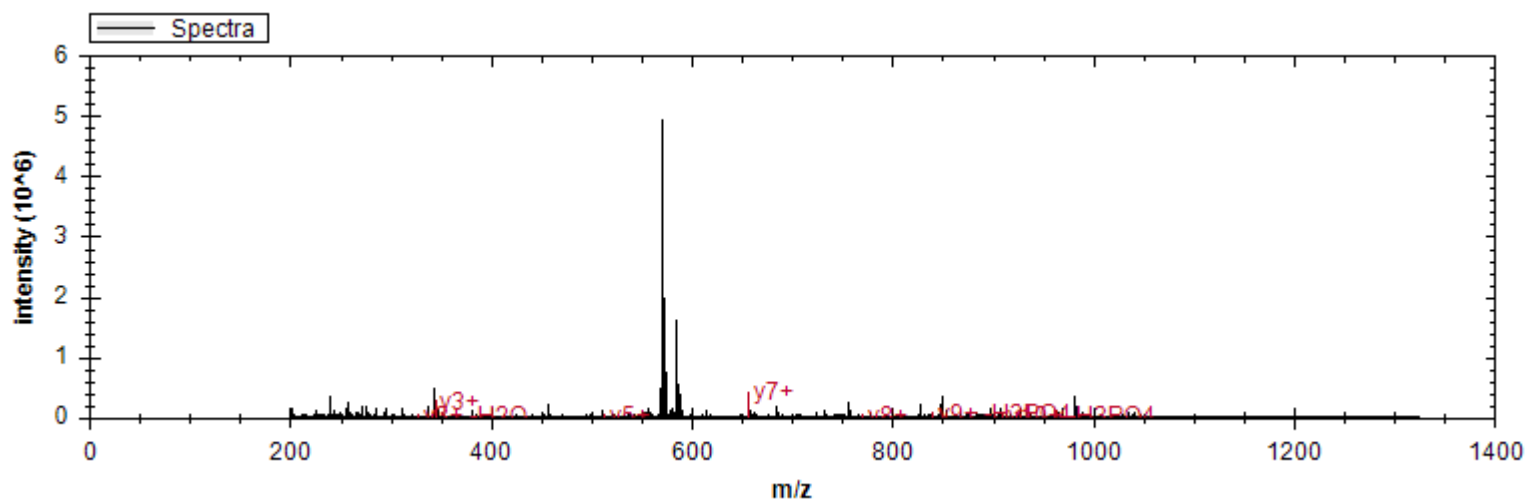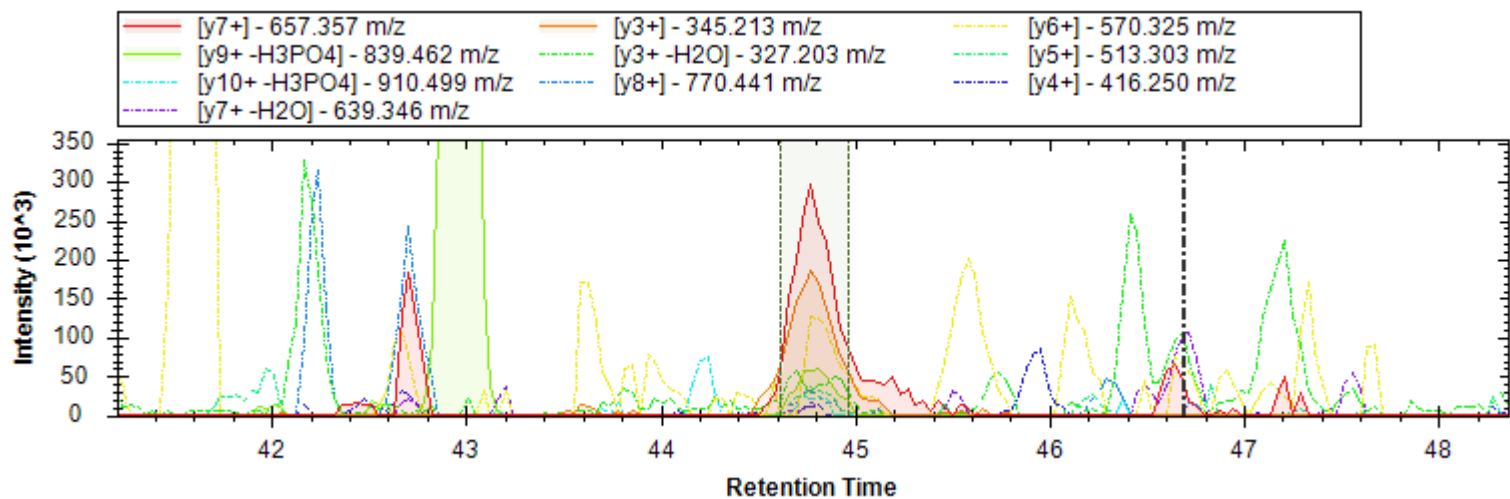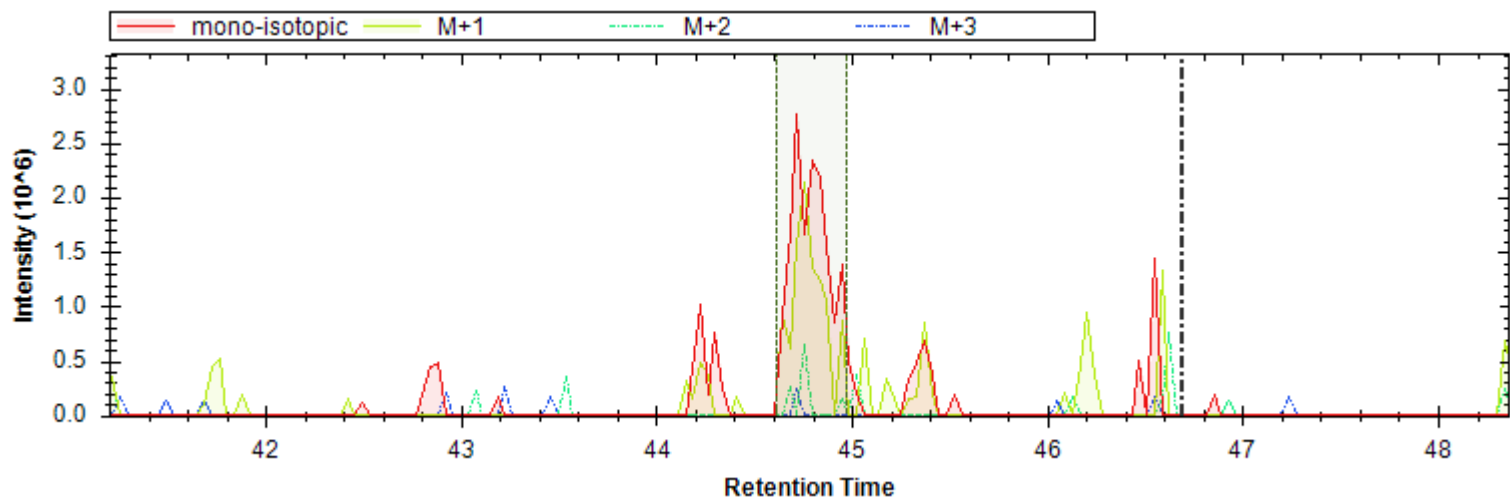

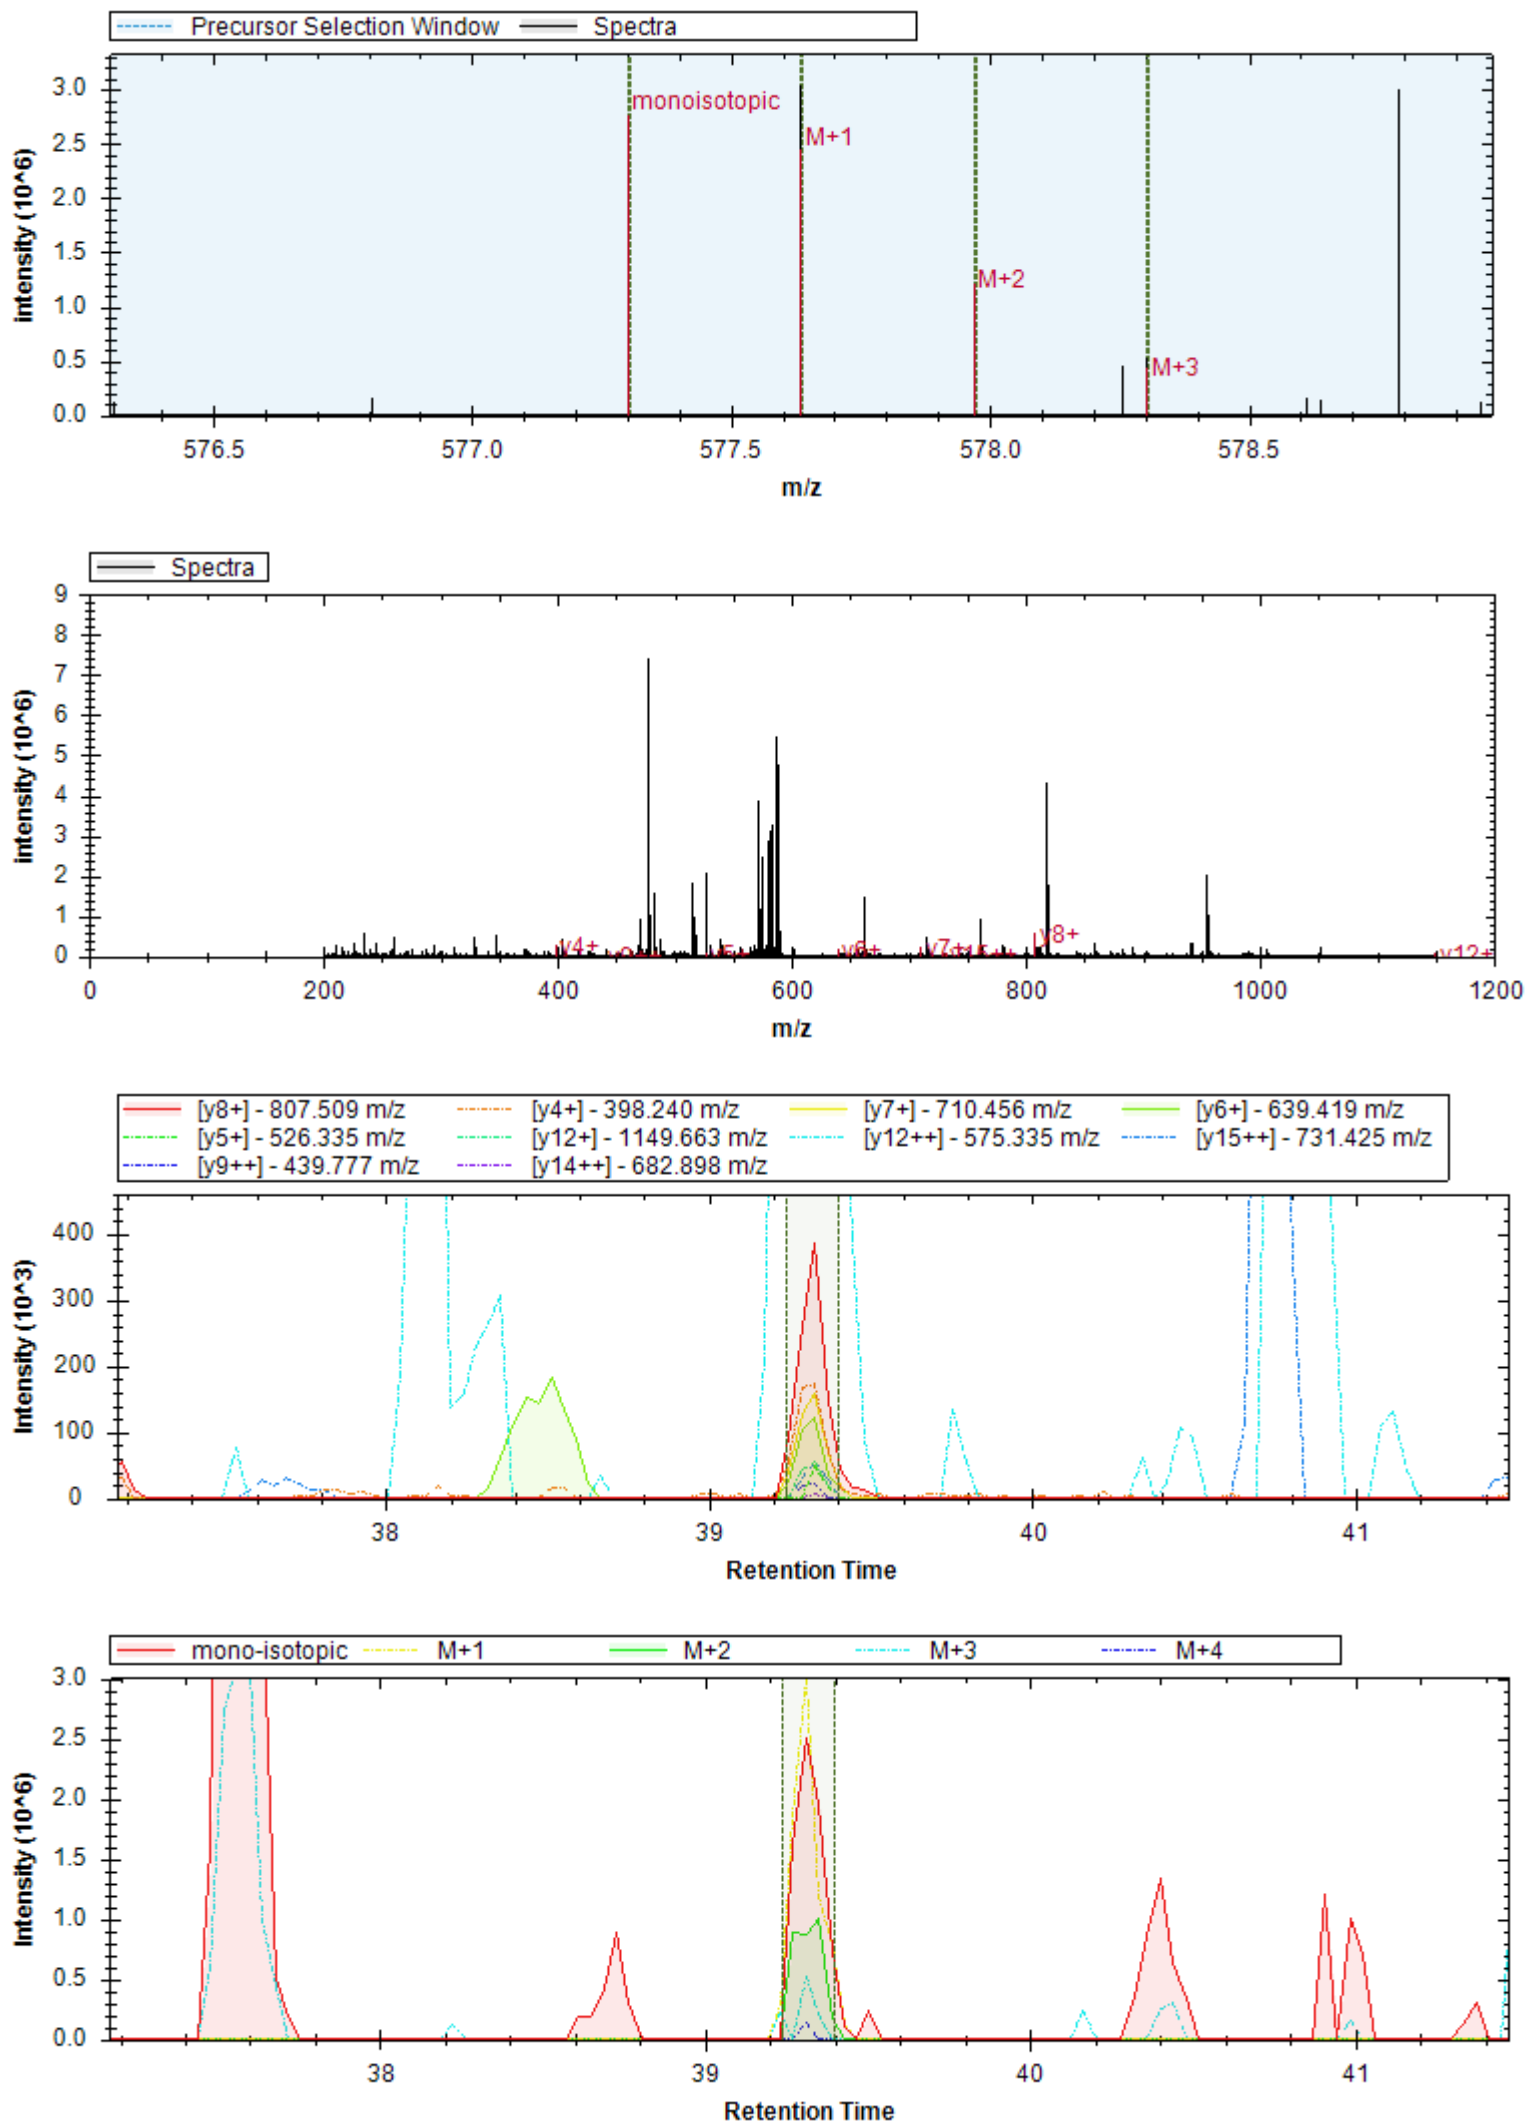

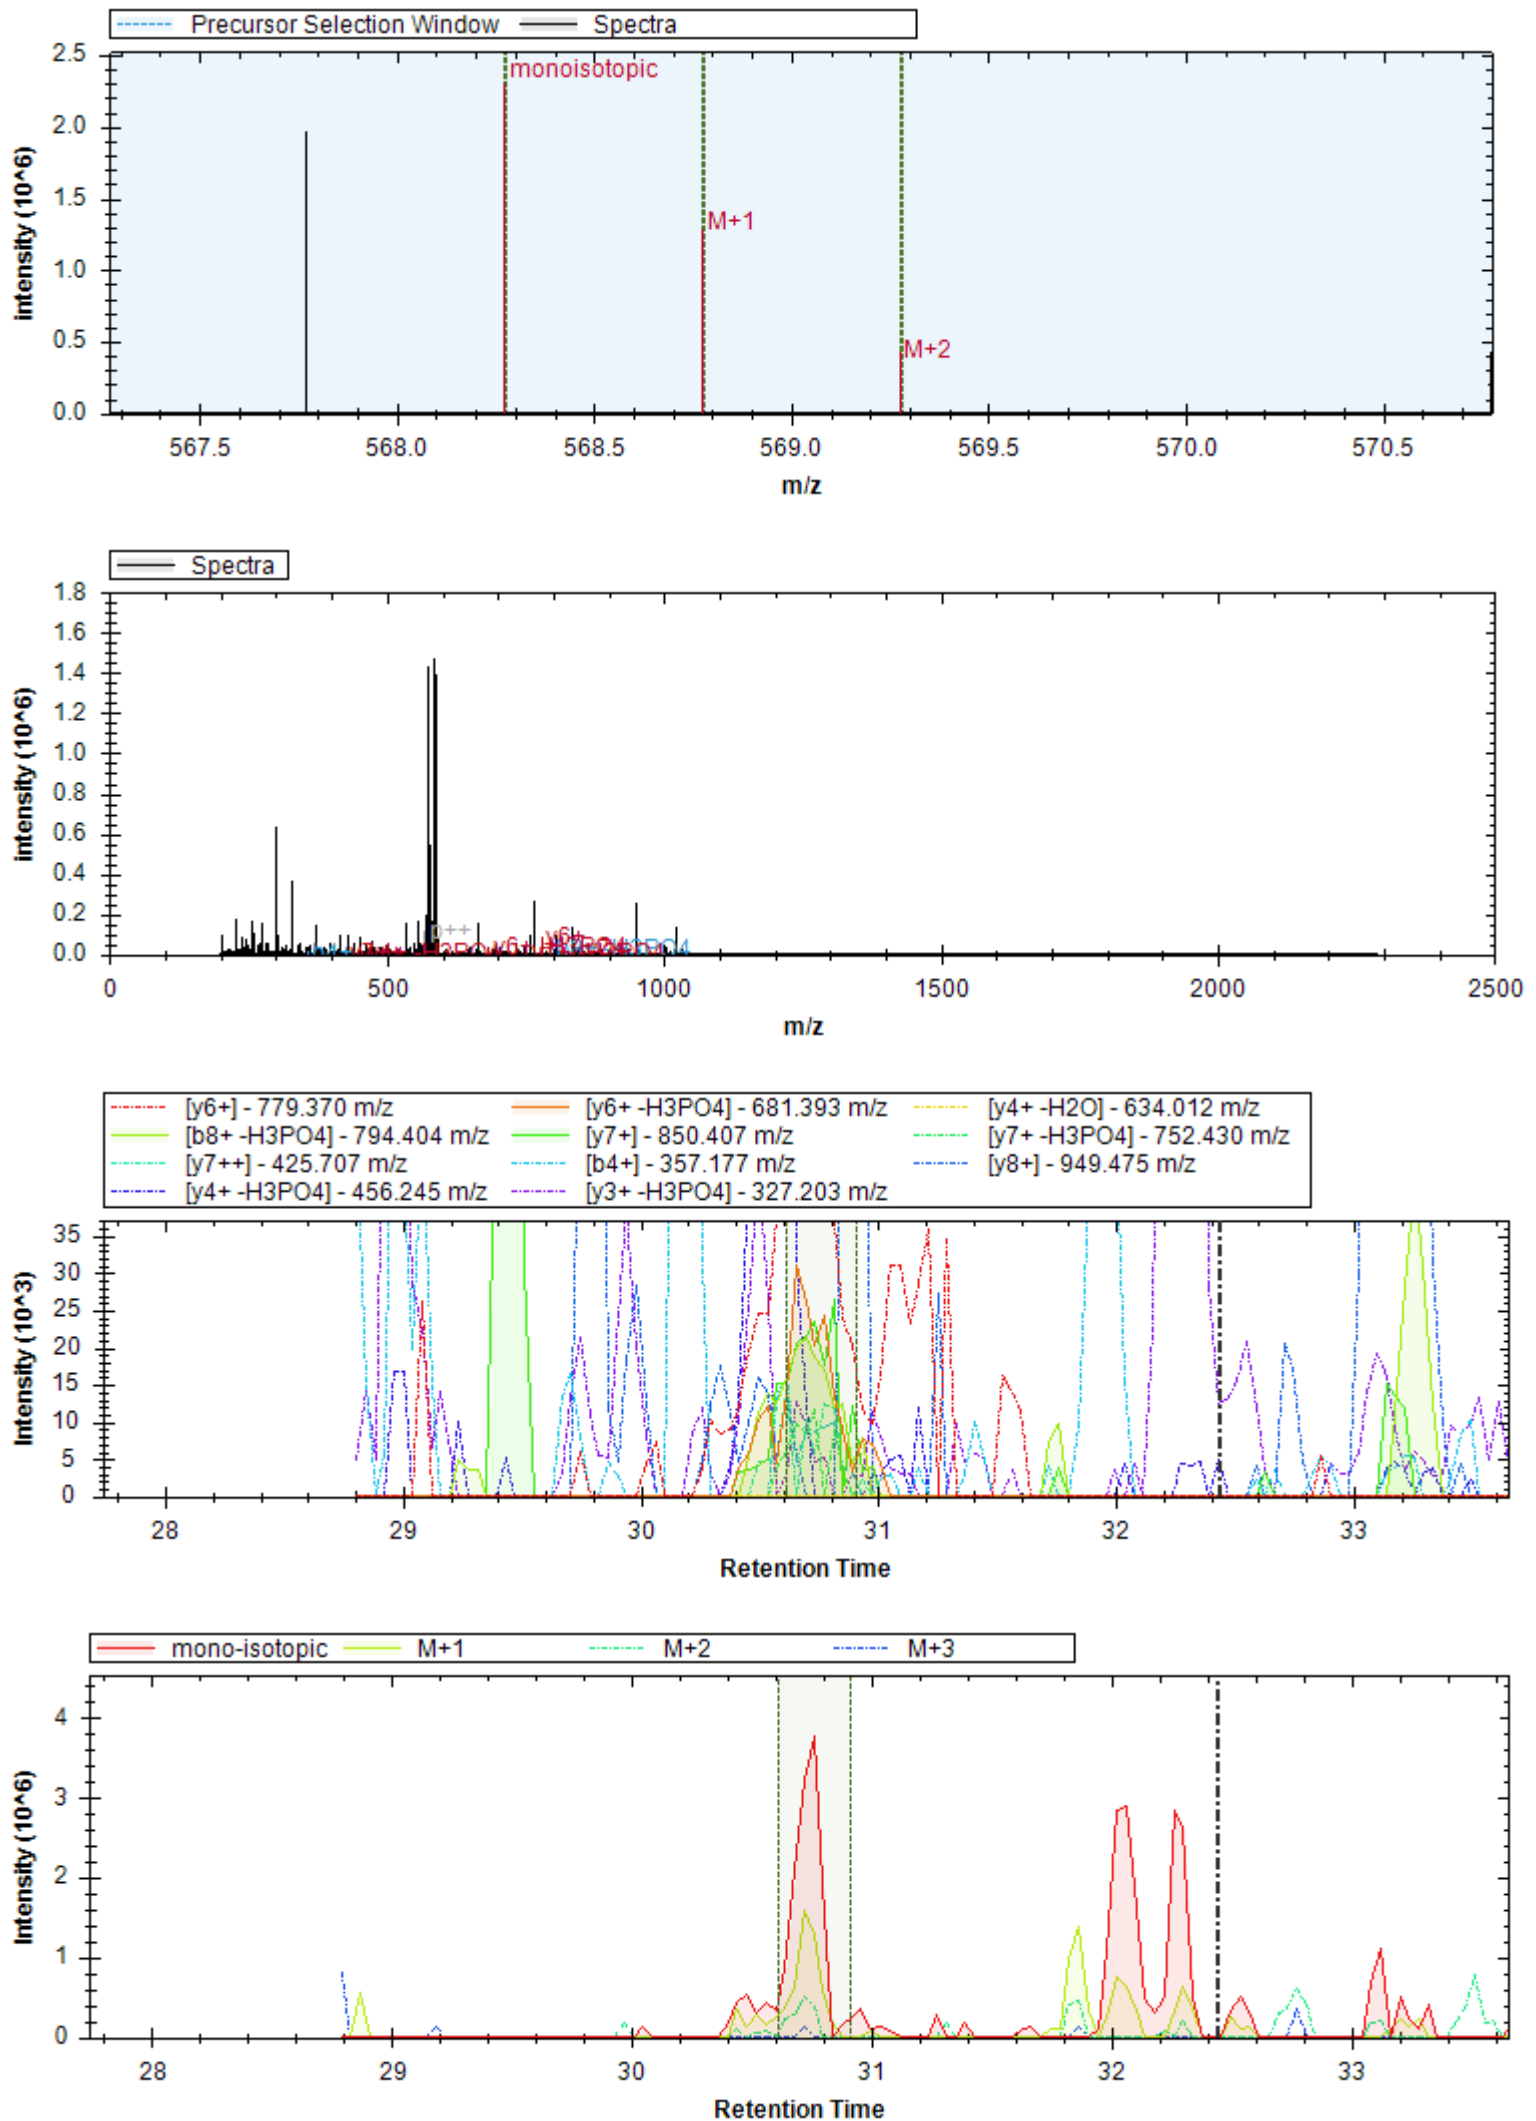

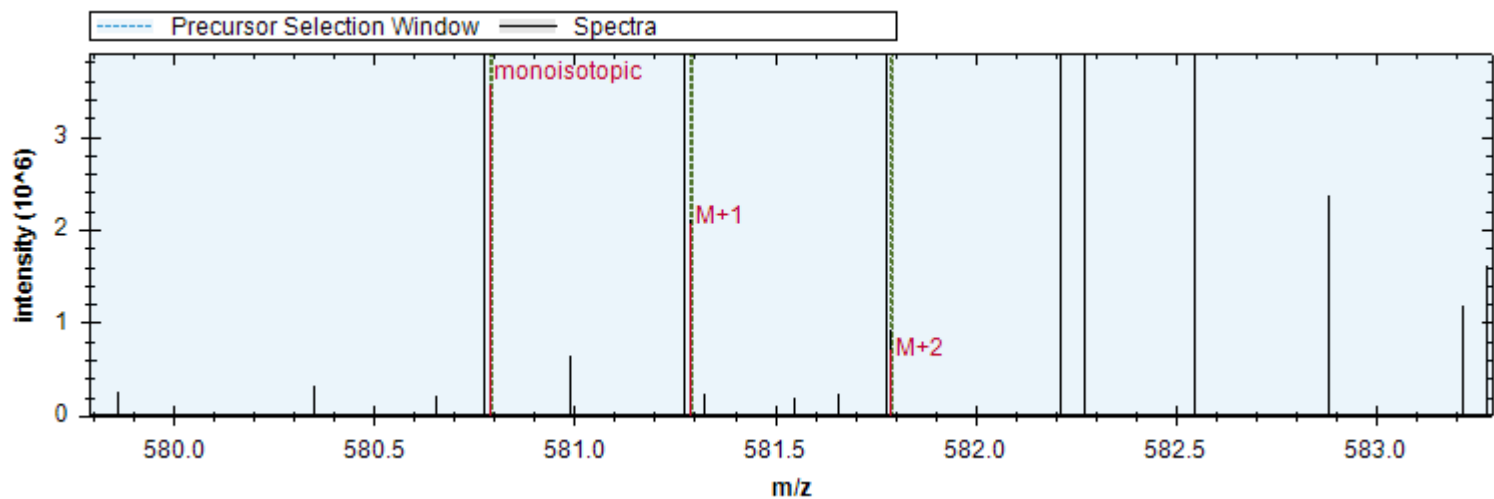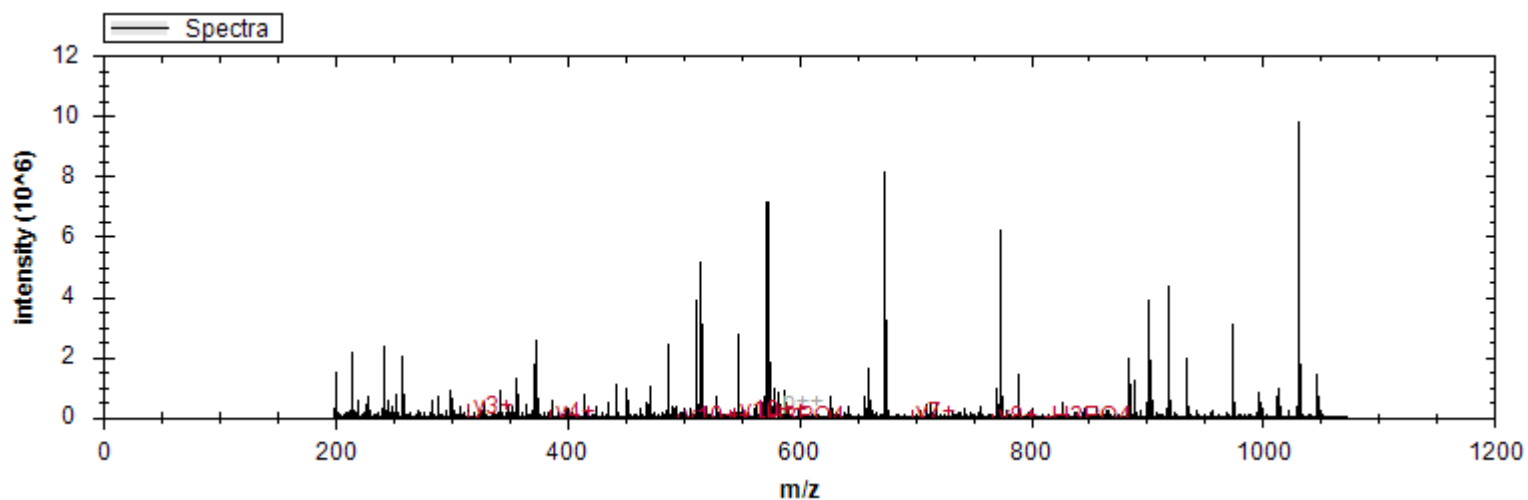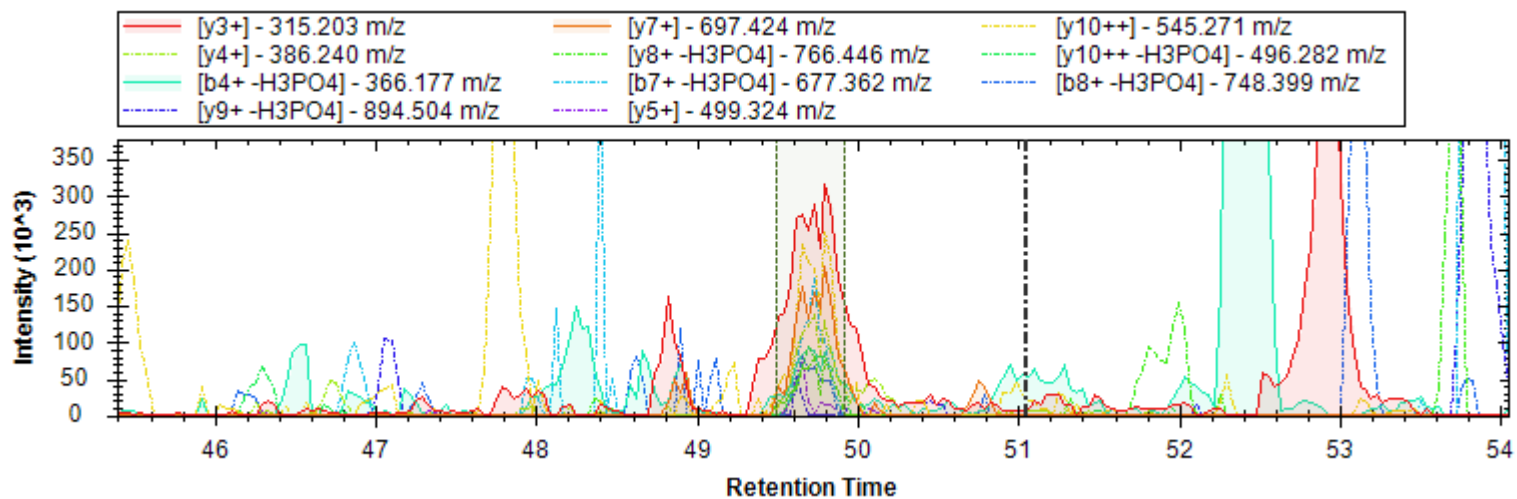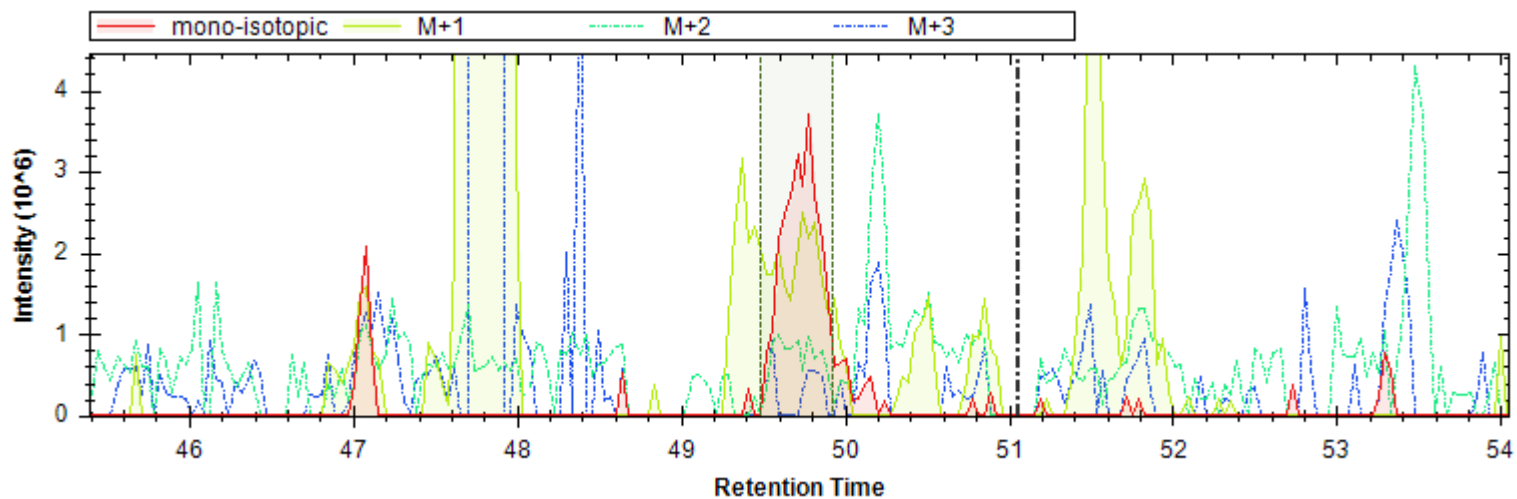



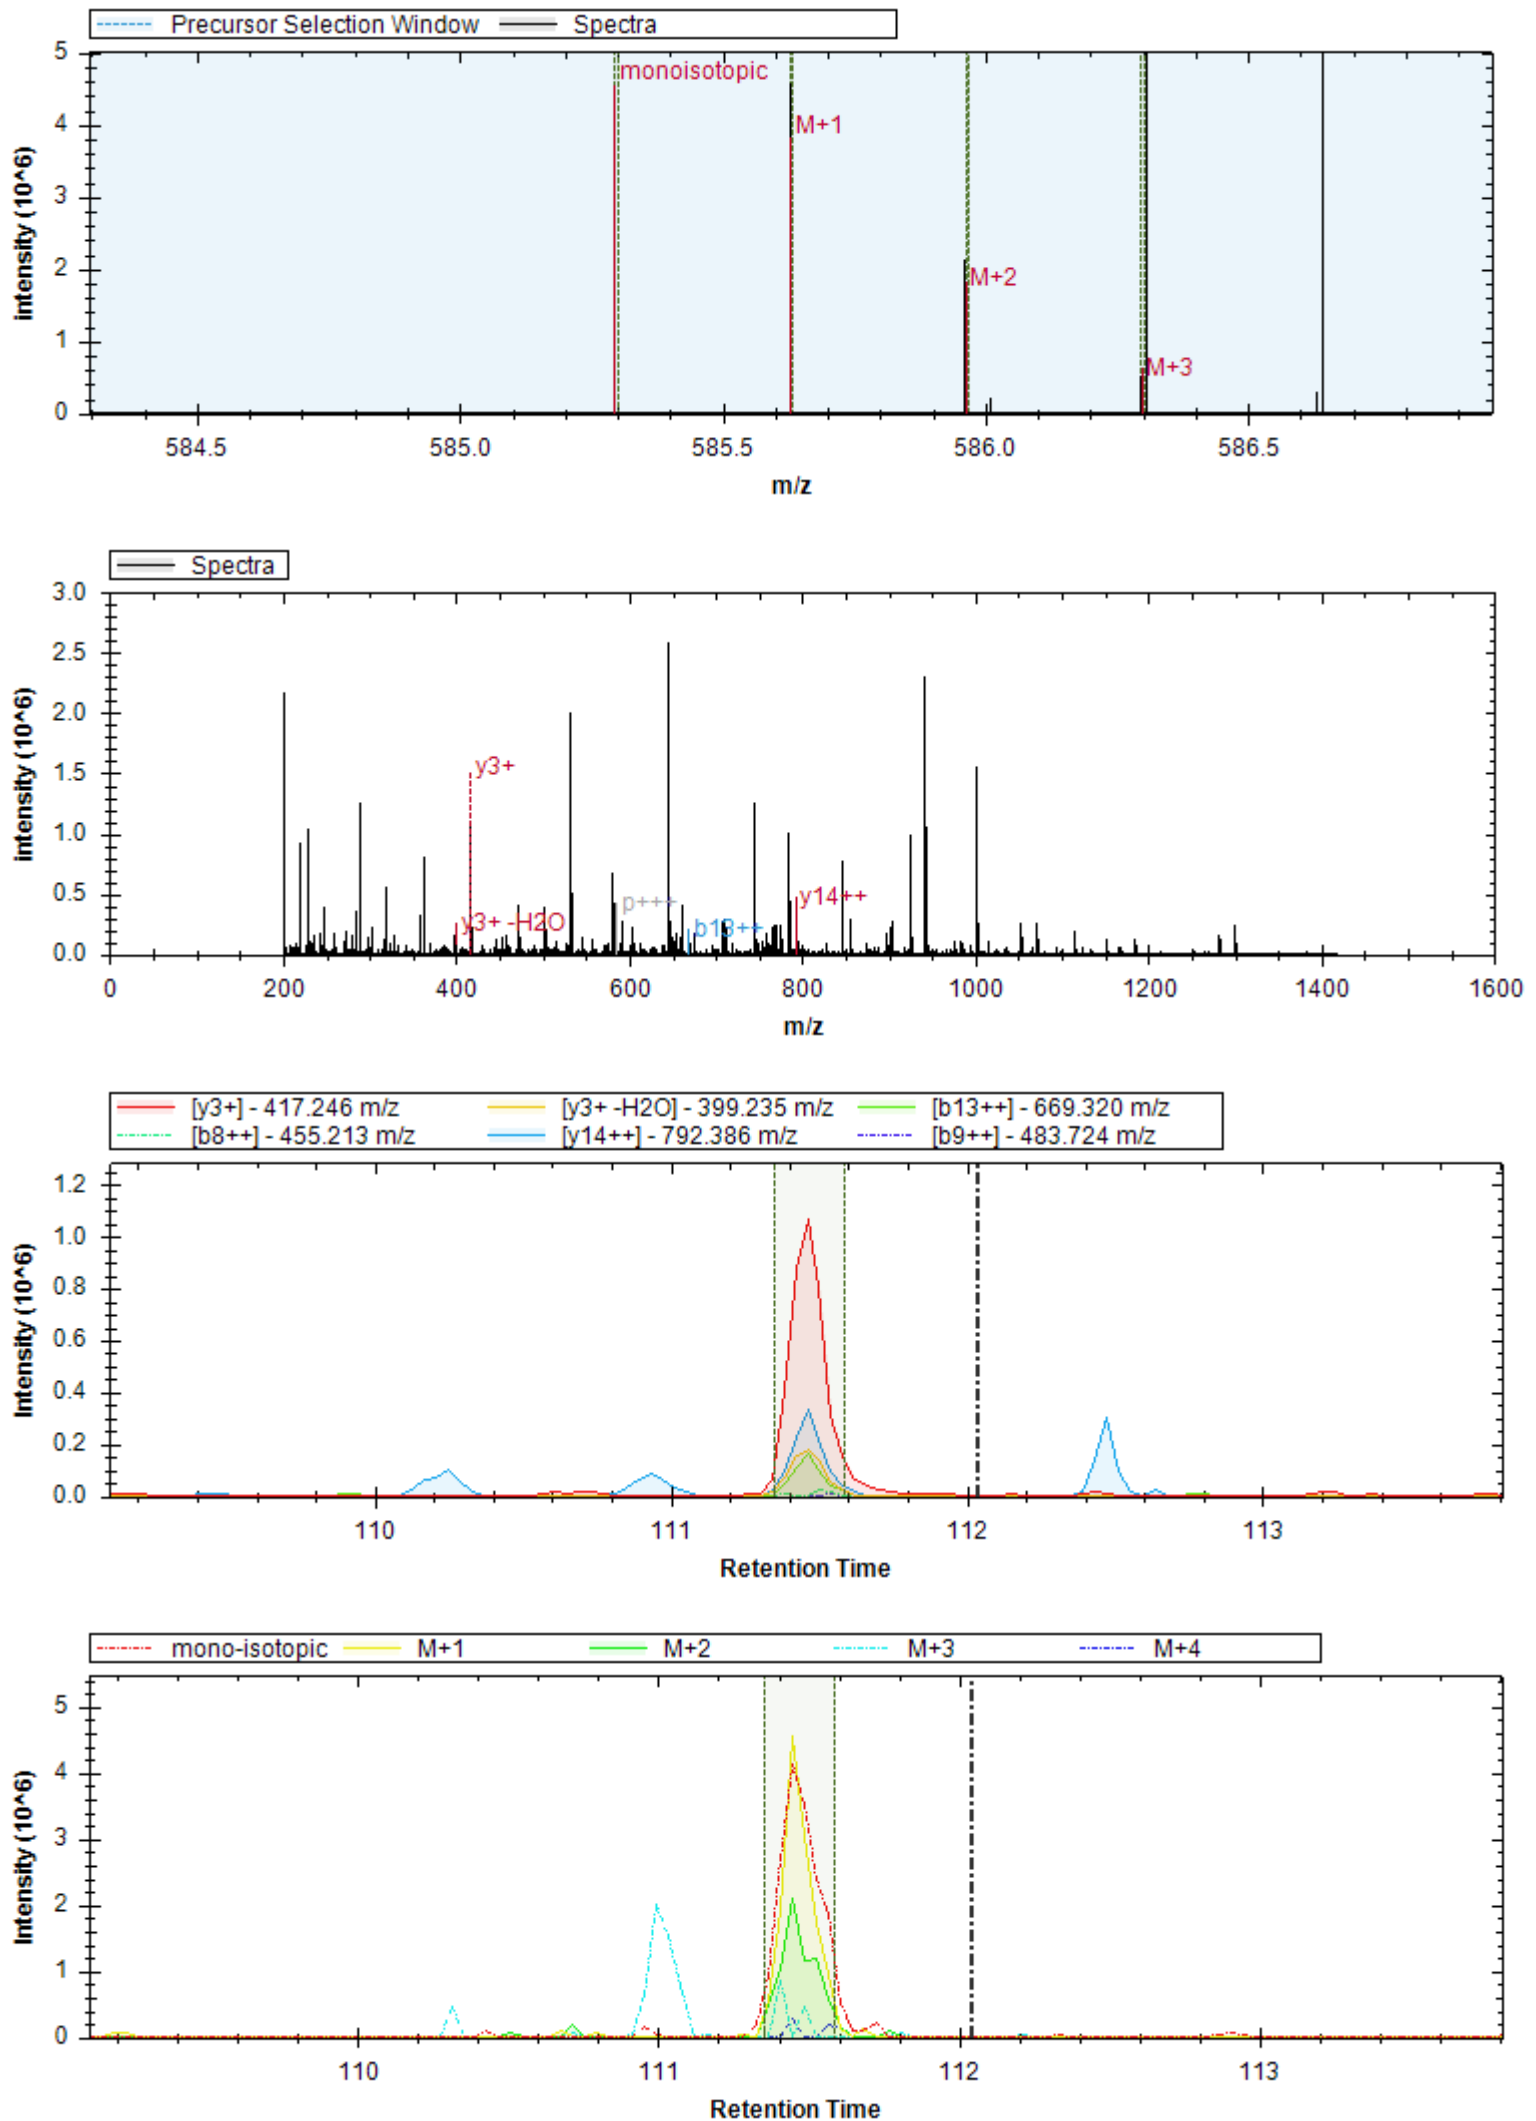

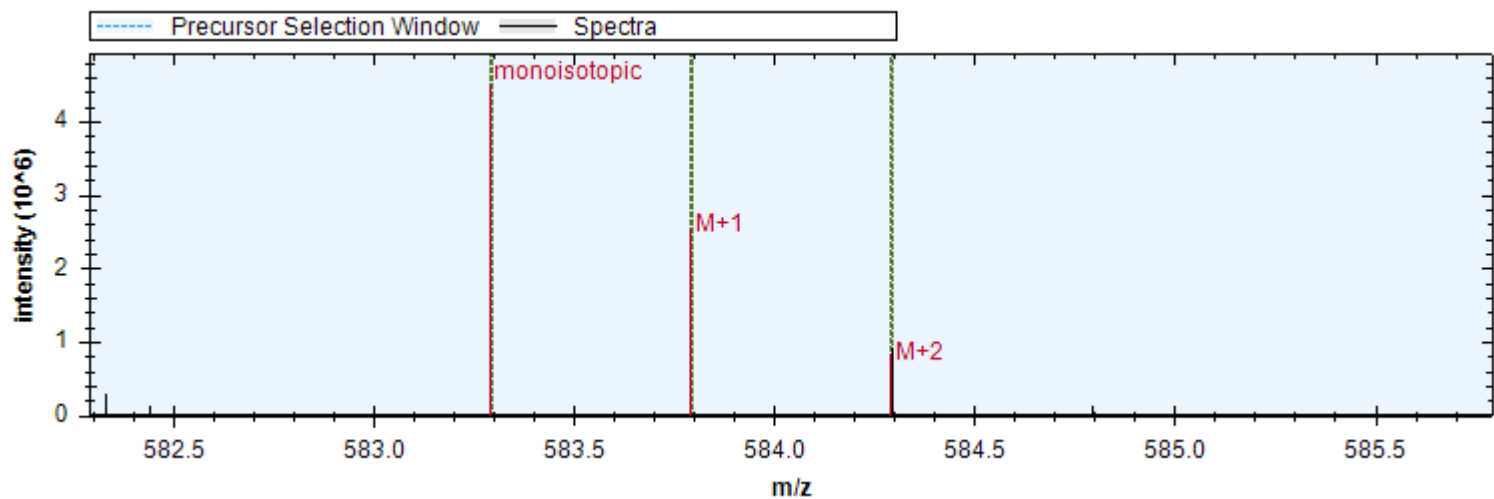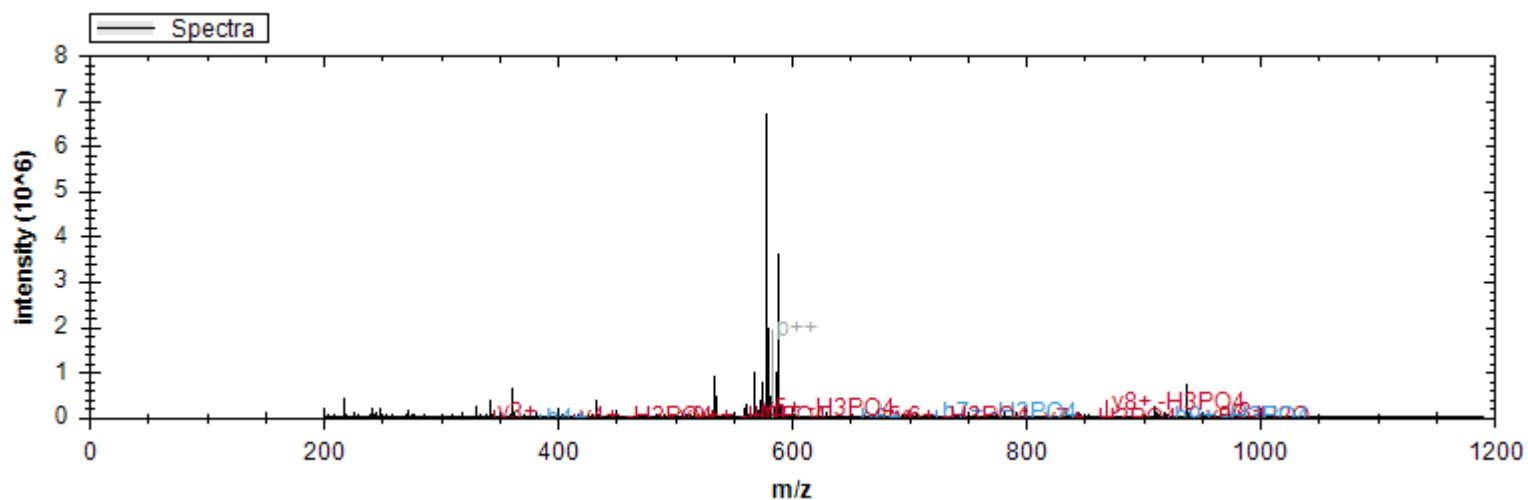

- |                             |                            |                            |
|-----------------------------|----------------------------|----------------------------|
| [y8+ -H3PO4] - 868.500 m/z  | [b7+ -H3PO4] - 723.390 m/z | [y3+] - 345.213 m/z        |
| [y8+] - 966.477 m/z         | [y6+ -H3PO4] - 683.420 m/z | [y5+ -H3PO4] - 570.336 m/z |
| [y9++ -H3PO4] - 498.783 m/z | [b4+] - 385.183 m/z        | [b6+] - 654.368 m/z        |
| [y5+] - 668.313 m/z         | [b9+ -H3PO4] - 921.490 m/z | [y8+ -H2O] - 948.466 m/z   |
| [y7+ -H3PO4] - 811.479 m/z  | [b9+ -NH3] - 1100.240 m/z  | [y4+ -H3PO4] - 414.235 m/z |

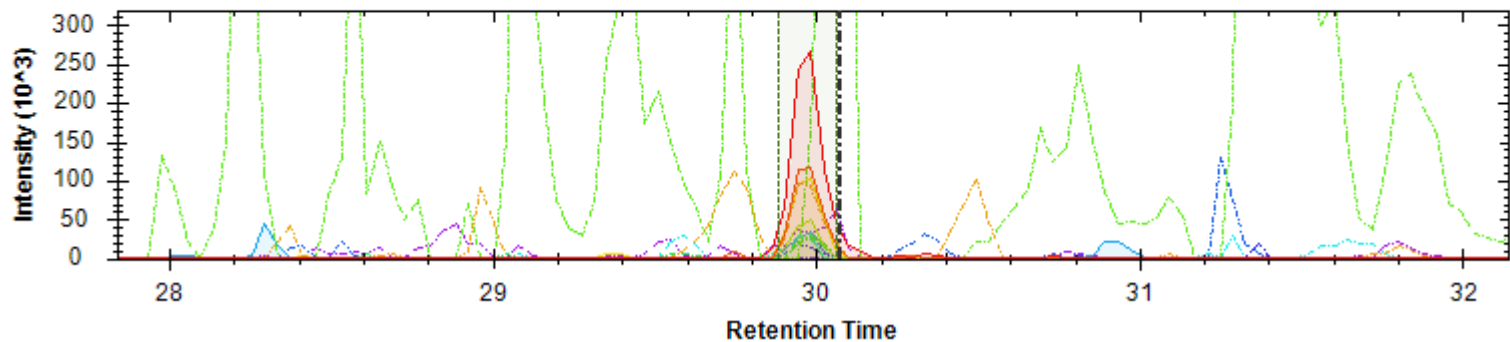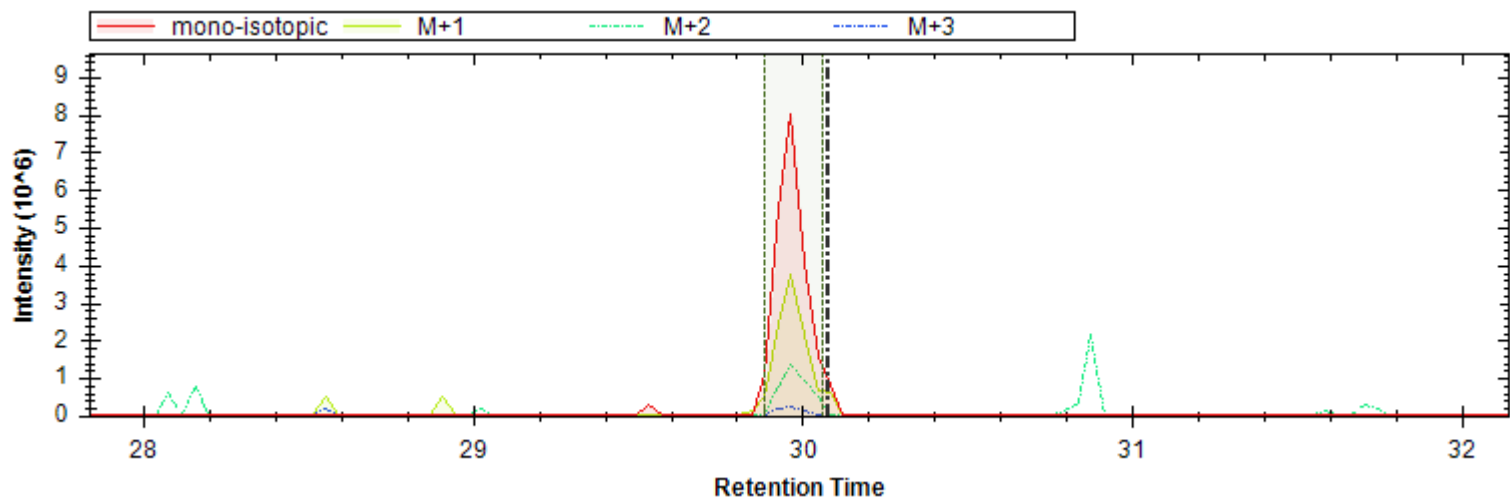

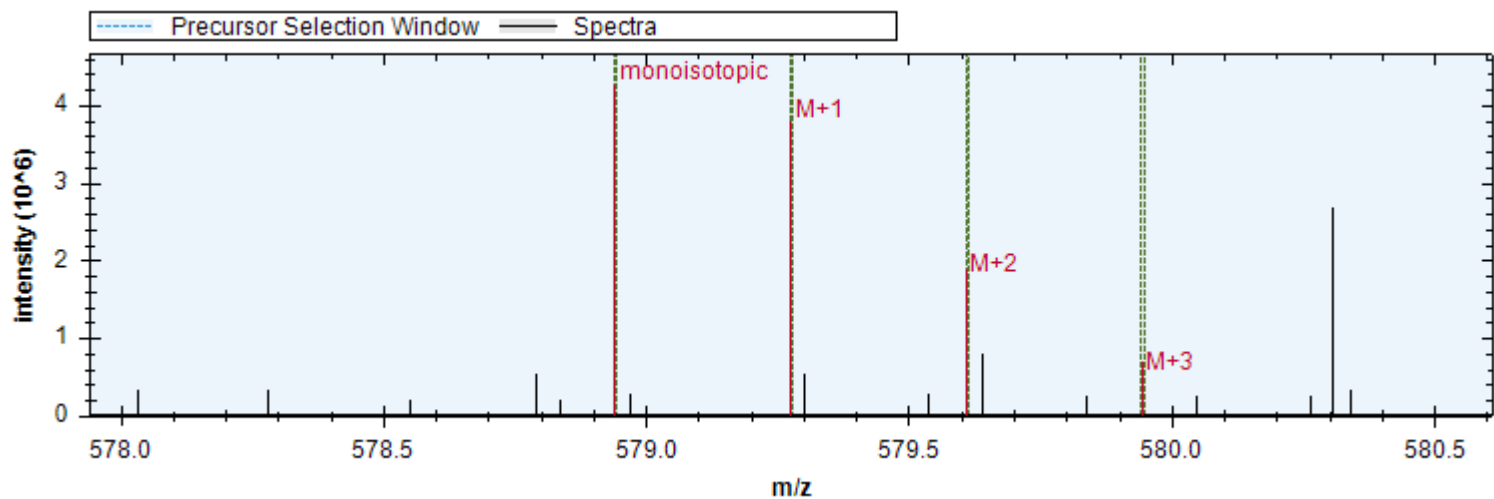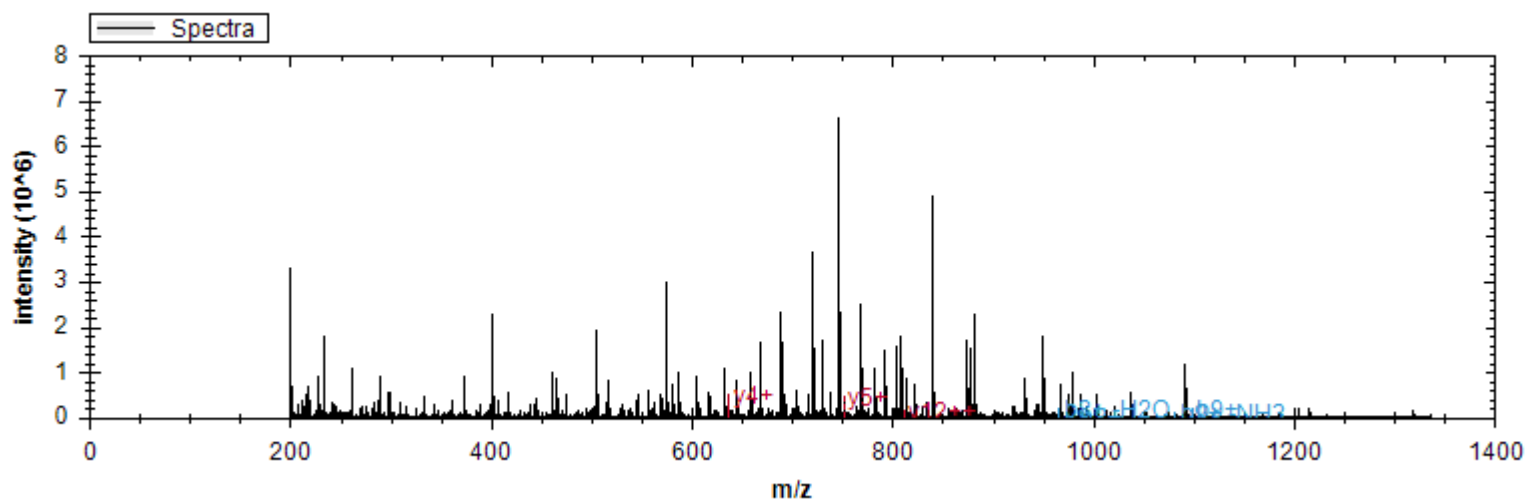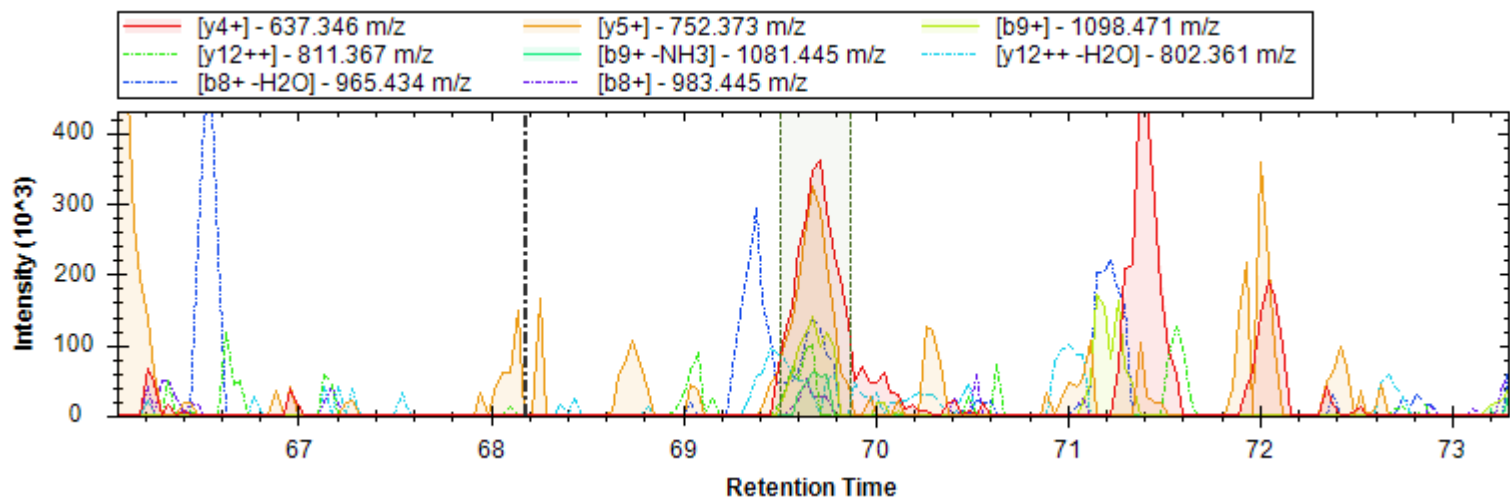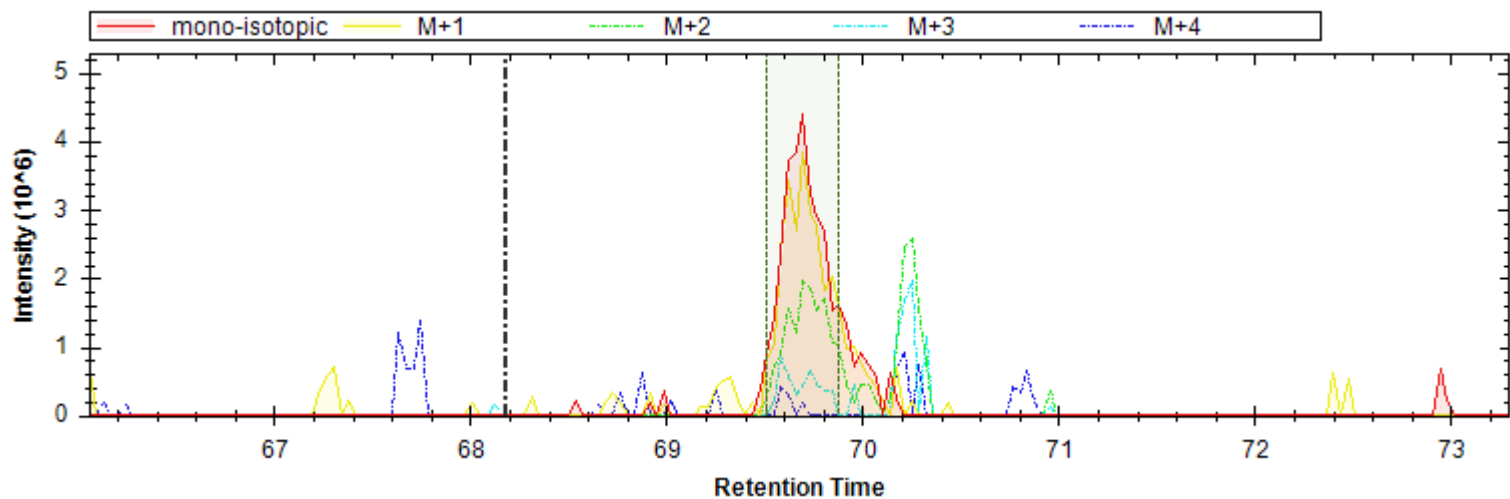

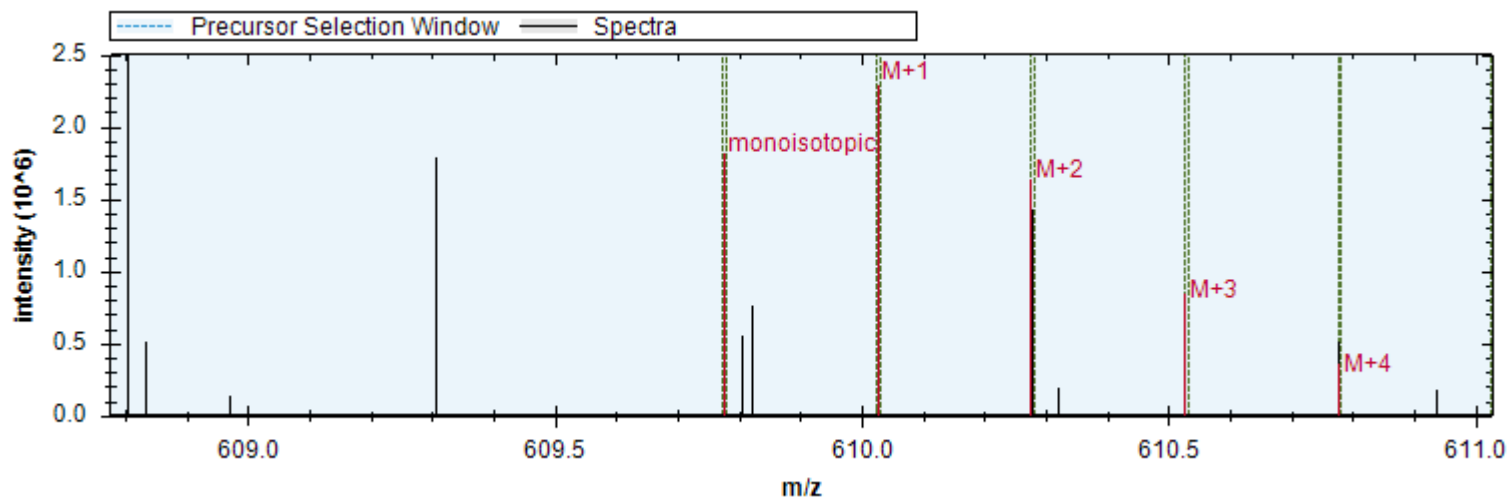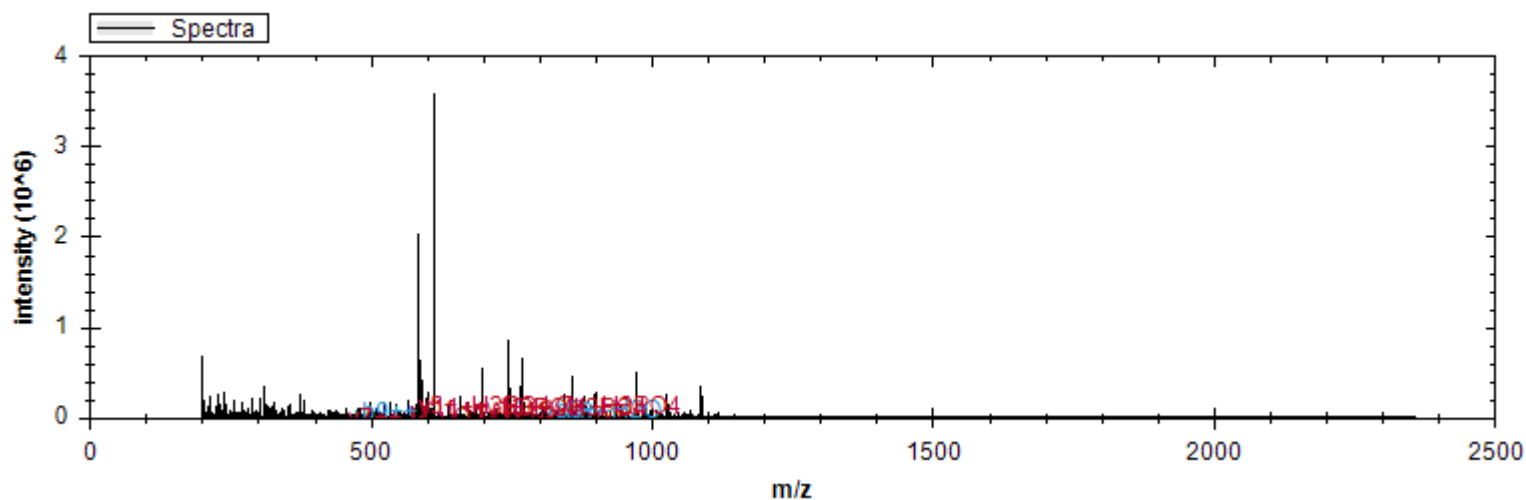

- |                              |                              |                              |
|------------------------------|------------------------------|------------------------------|
| [y7+ -H3PO4] - 807.382 m/z   | [y13++ -H3PO4] - 694.325 m/z | [b8+ -H2O] - 820.374 m/z     |
| [y4+] - 504.249 m/z          | [b8+] - 838.384 m/z          | [y7+] - 905.359 m/z          |
| [y11++ -H3PO4] - 579.280 m/z | [y5+ -H3PO4] - 573.270 m/z   | [y12++ -H3PO4] - 643.801 m/z |
| [y11++] - 628.268 m/z        | [y13++] - 743.313 m/z        | [b7+] - 751.352 m/z          |
| [b9++] - 476.238 m/z         | [y6+ -H3PO4] - 710.329 m/z   | [b6+ -H2O] - 662.305 m/z     |
| [y12++] - 692.789 m/z        | [b9+ -H2O] - 933.458 m/z     | [b7+ -H2O] - 733.342 m/z     |
| [b6+] - 680.315 m/z          | [y5+ -NH3] - 752.020 m/z     | [y4+ -H2O] - 486.238 m/z     |
| [b5+] - 593.283 m/z          | [y7++] - 453.183 m/z         | [b3+] - 306.156 m/z          |
| [y10++] - 592.750 m/z        |                              |                              |

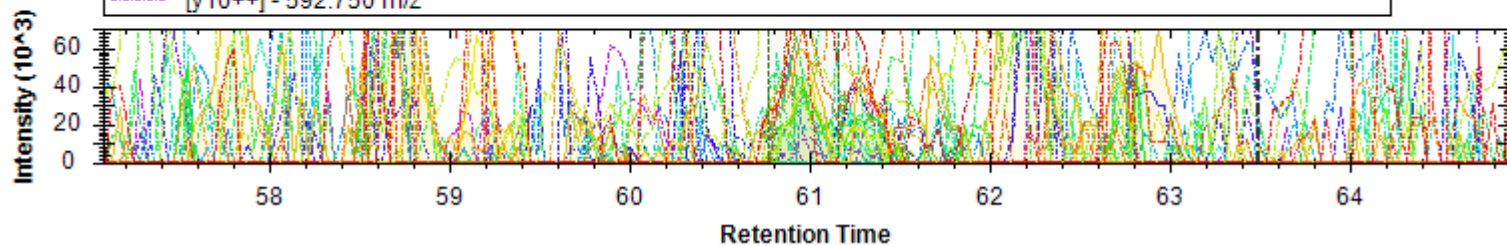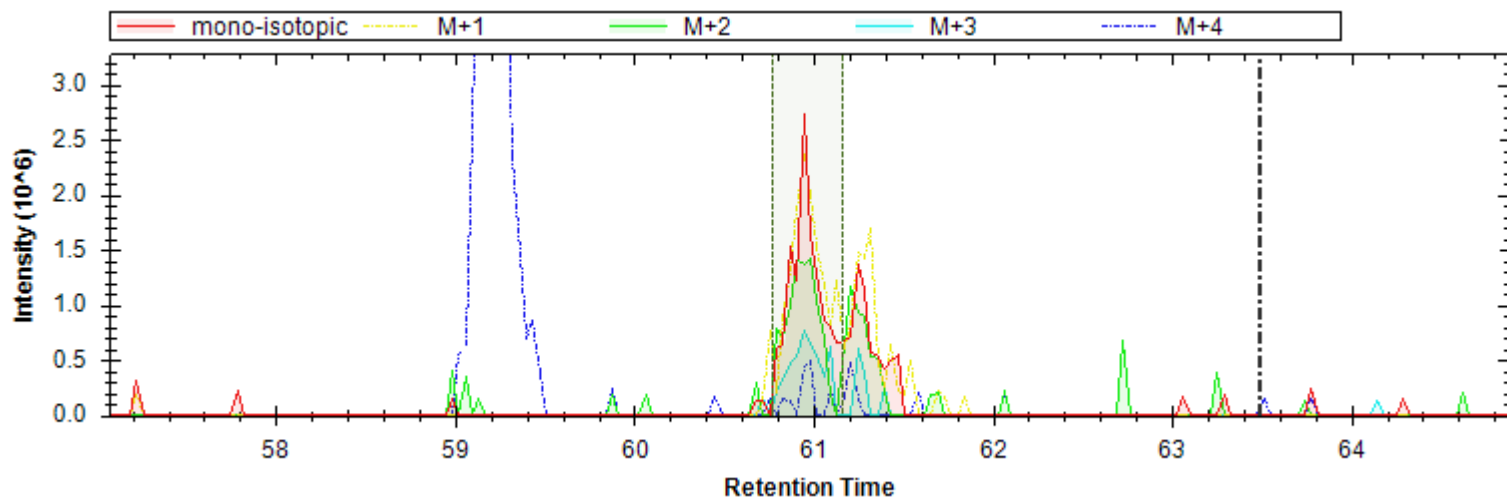

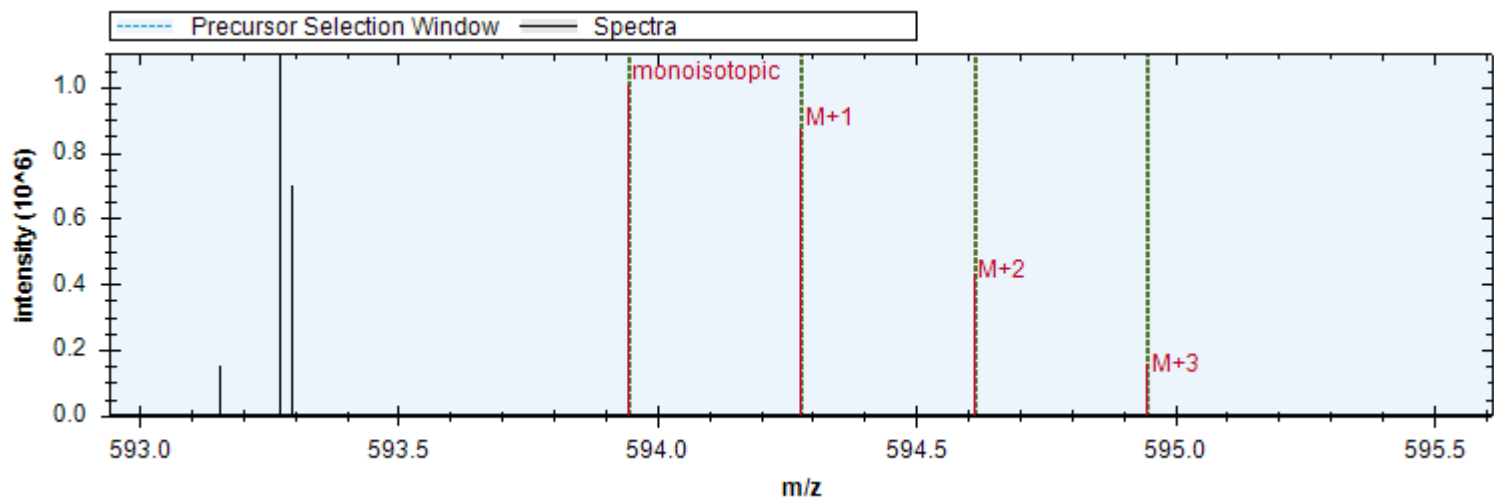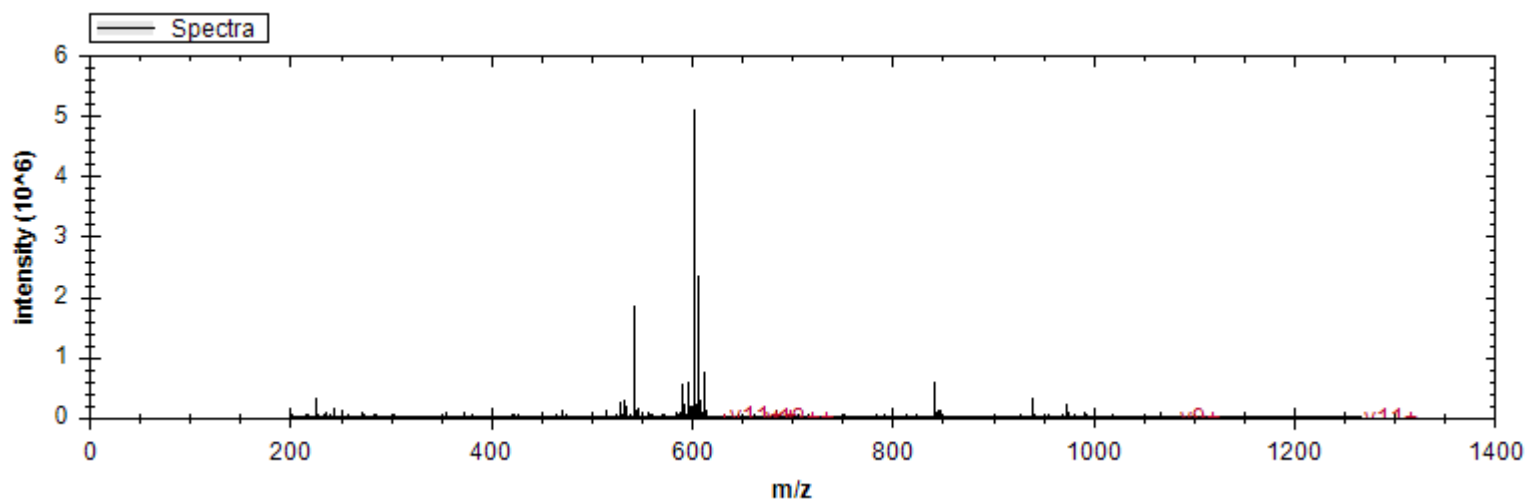

- |                              |                              |                              |
|------------------------------|------------------------------|------------------------------|
| [y9+] - 1081.529 m/z         | [y11++] - 633.311 m/z        | [y4+] - 500.356 m/z          |
| [y11+] - 1265.614 m/z        | [y12++ -H3PO4] - 619.841 m/z | [y11+ -H3PO4] - 1167.637 m/z |
| [b4+ -H2O] - 355.125 m/z     | [y9+ -H3PO4] - 983.552 m/z   | [b3+] - 316.114 m/z          |
| [y15++ -H3PO4] - 741.383 m/z | [y10+ -H3PO4] - 1070.584 m/z | [y12++] - 668.829 m/z        |
| [y7+] - 897.444 m/z          | [y11++ -H2O] - 624.305 m/z   | [y15++] - 790.372 m/z        |
| [y14++ -H3PO4] - 683.870 m/z | [b6+] - 515.210 m/z          |                              |

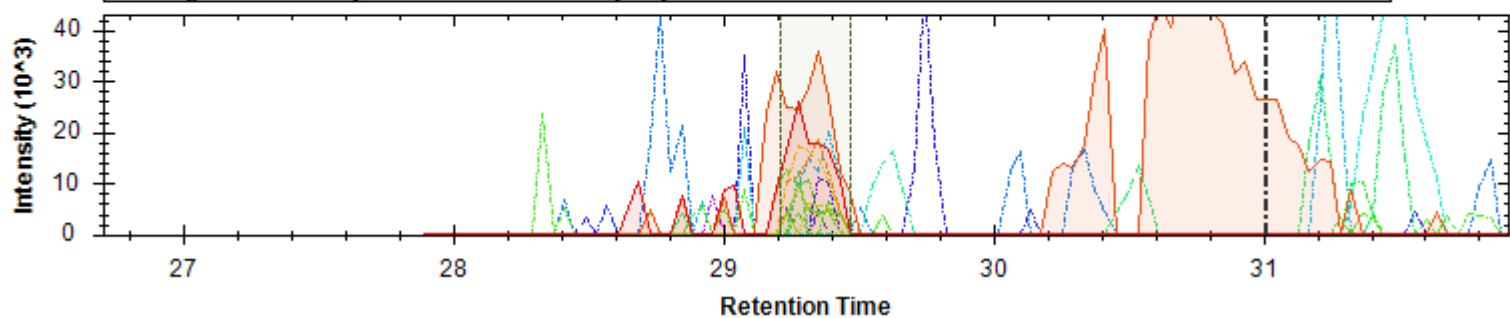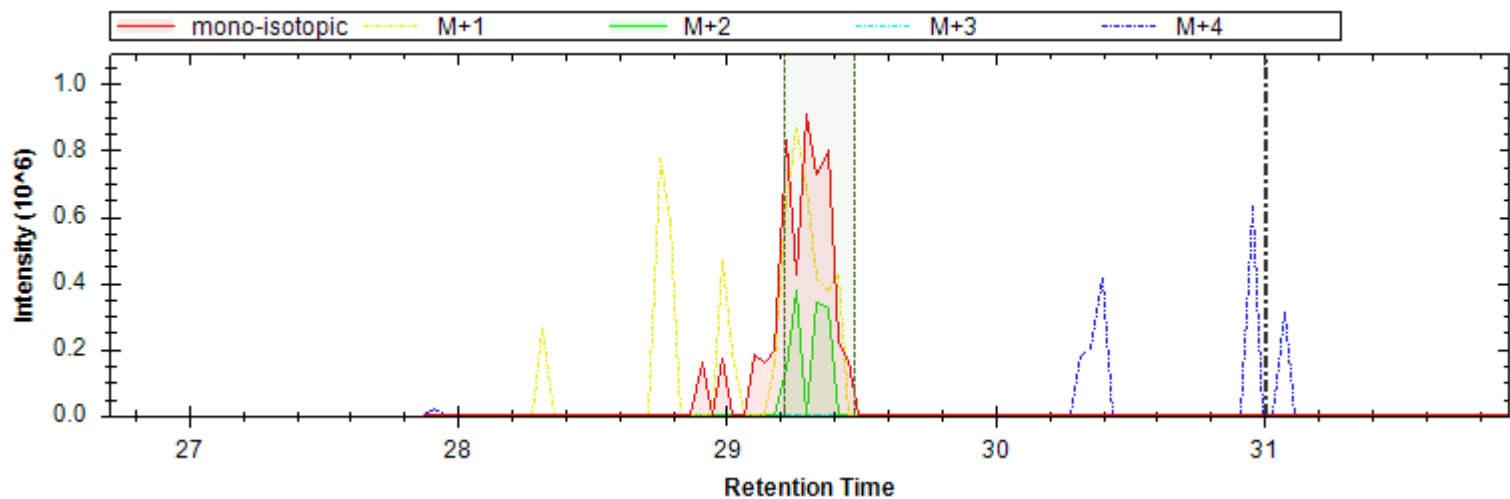

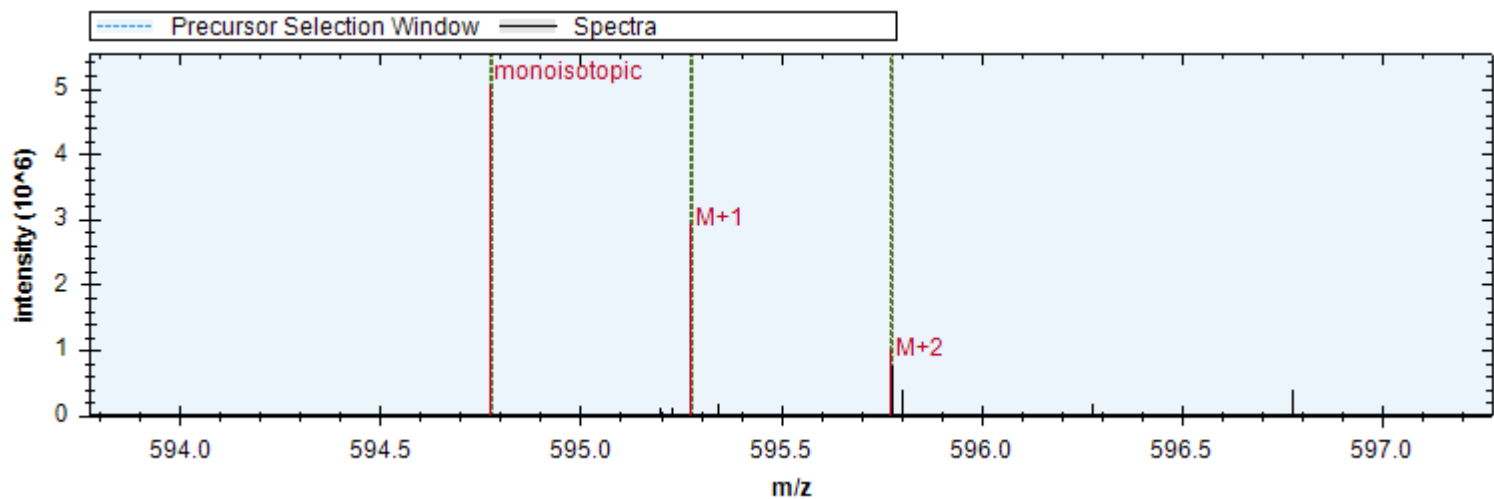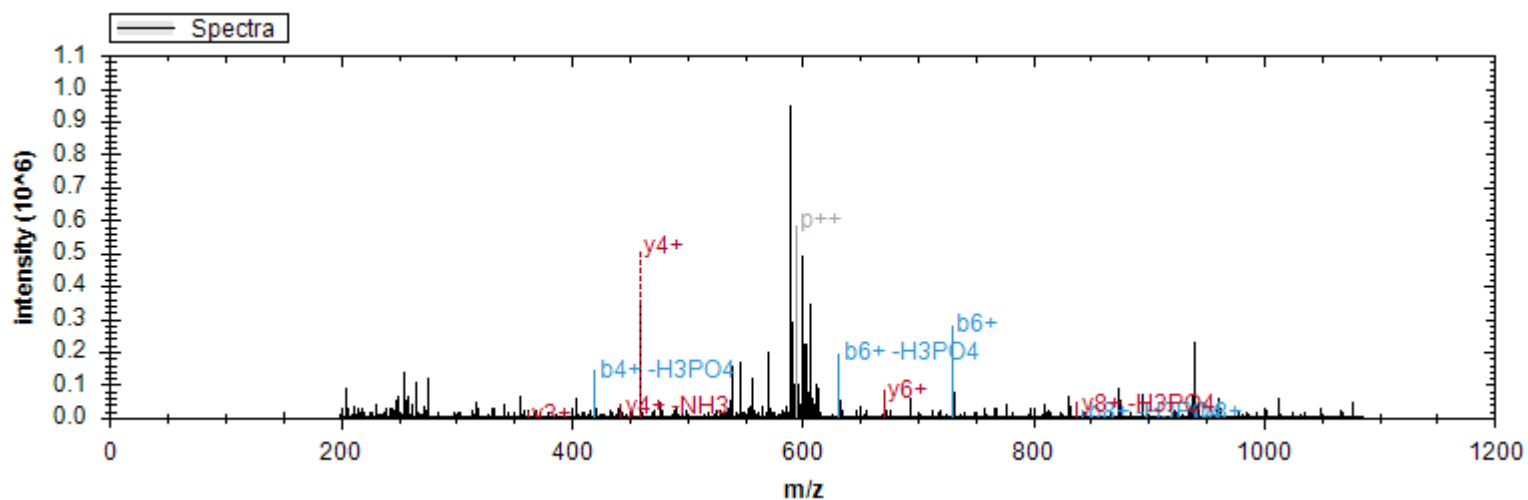

|                                     |                                     |                                  |
|-------------------------------------|-------------------------------------|----------------------------------|
| [ $y_4^+$ ] - 459.256 m/z           | [ $b_6^+ - H_3PO_4$ ] - 632.315 m/z | [ $b_6^+$ ] - 730.292 m/z        |
| [ $b_4^+ - H_3PO_4$ ] - 420.235 m/z | [ $y_6^+$ ] - 671.336 m/z           | [ $y_4^+ - NH_3$ ] - 442.230 m/z |
| [ $y_4^+ - H_2O$ ] - 441.246 m/z    | [ $b_8^+ - H_3PO_4$ ] - 843.411 m/z | [ $y_3^+$ ] - 362.203 m/z        |
| [ $b_4^+ - H_2O$ ] - 598.002 m/z    | [ $y_7^+ - H_3PO_4$ ] - 740.357 m/z | [ $b_8^+$ ] - 941.388 m/z        |
| [ $b_9^+ - H_3PO_4$ ] - 944.458 m/z | [ $y_8^+ - H_3PO_4$ ] - 837.410 m/z |                                  |

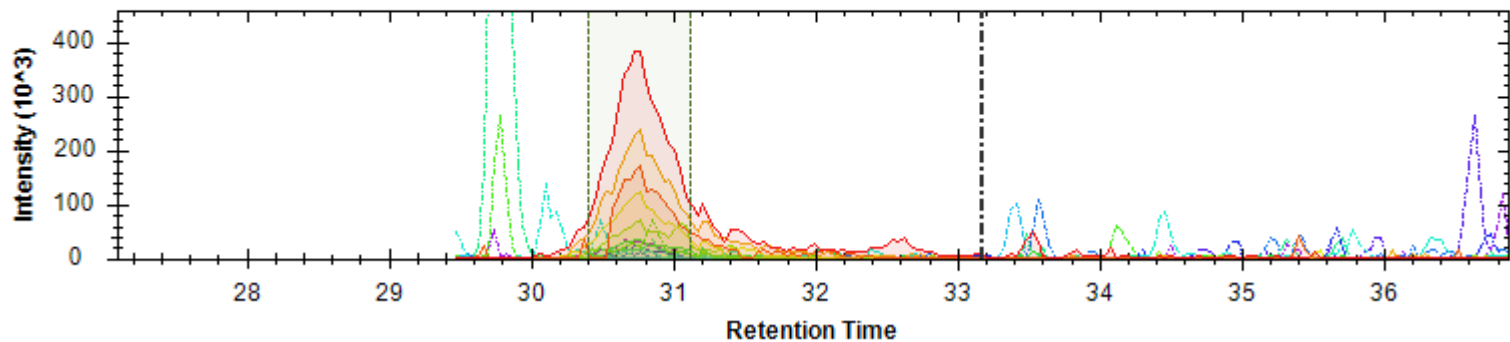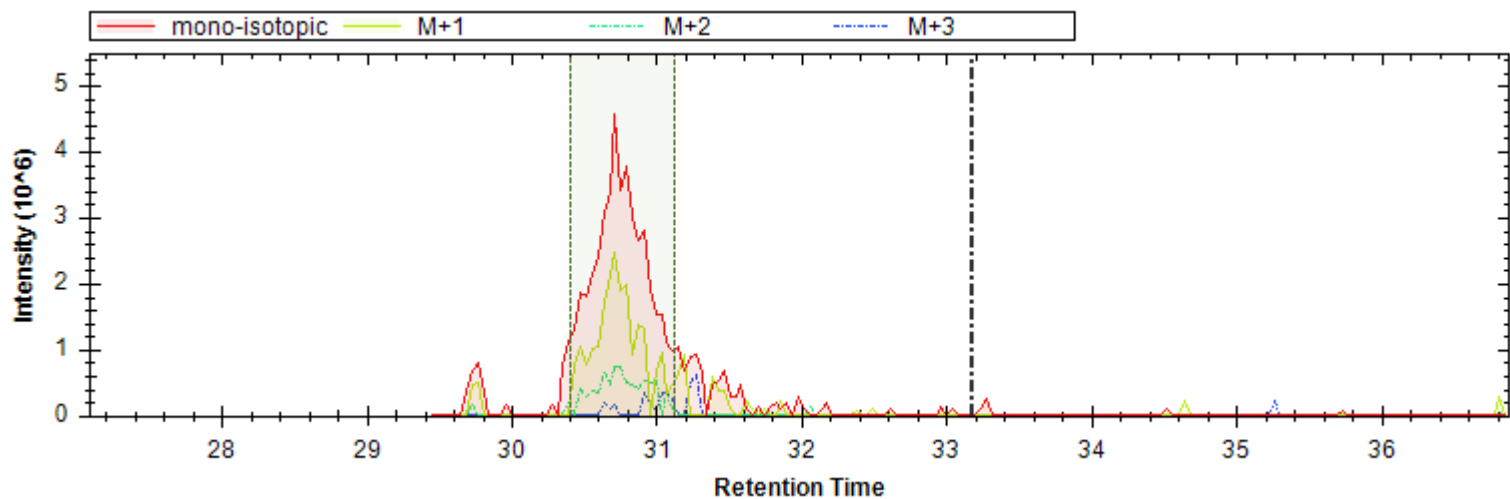

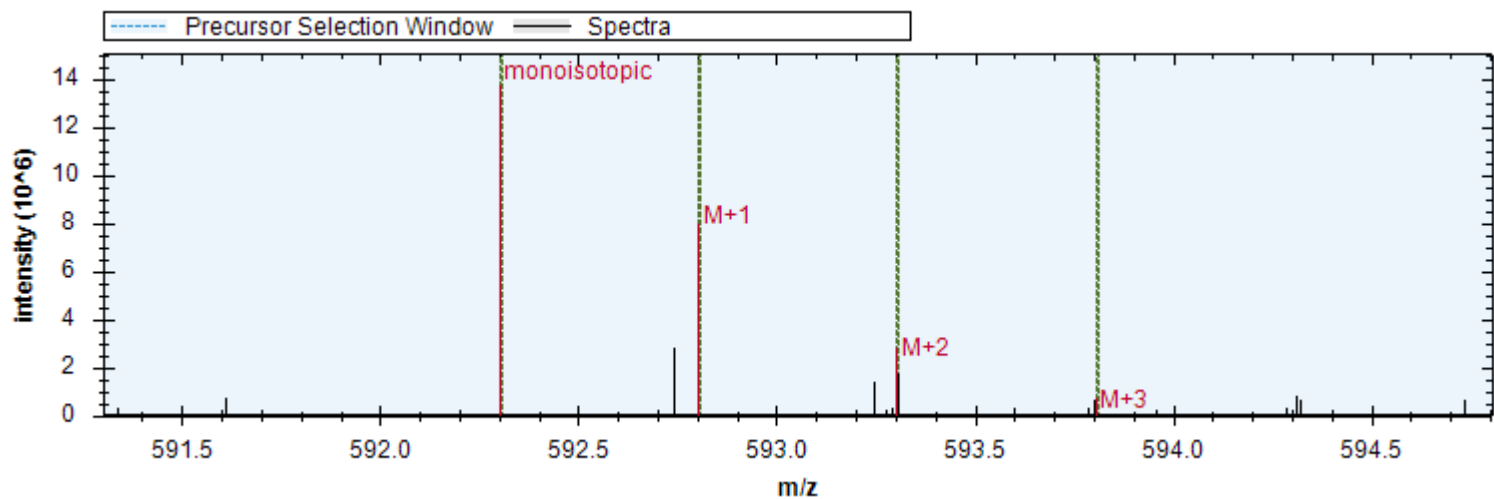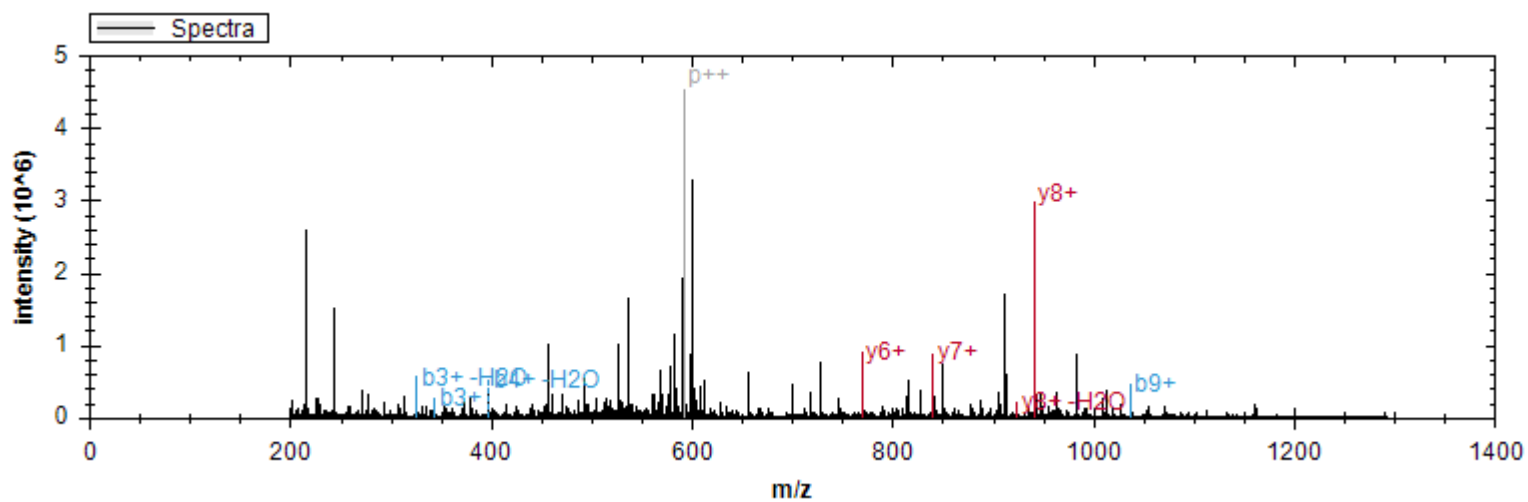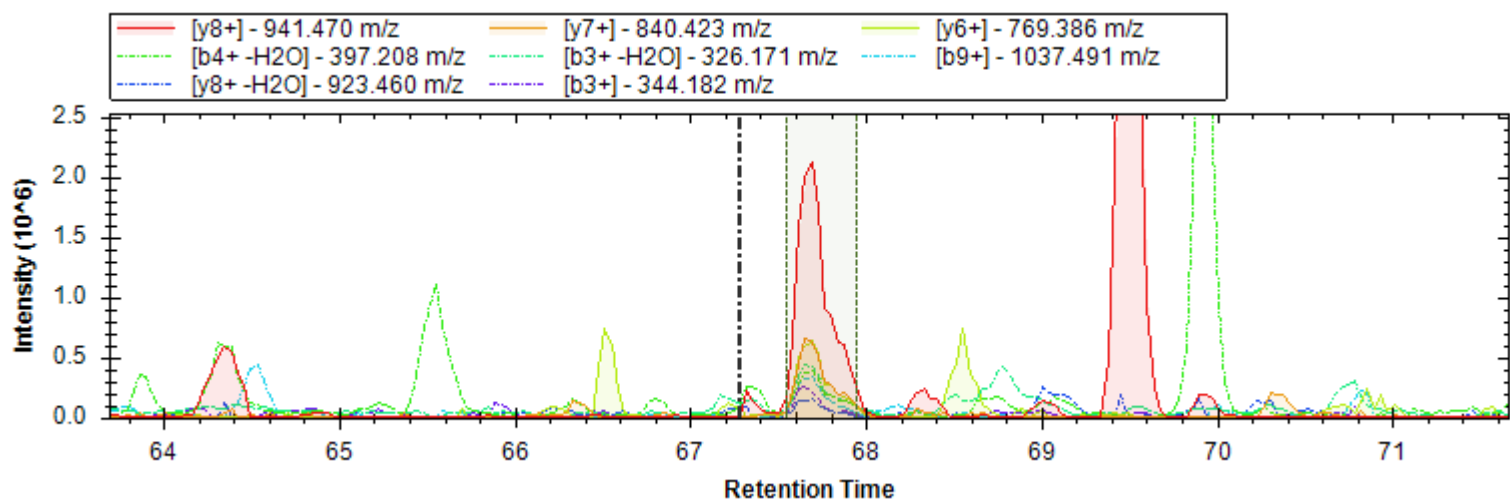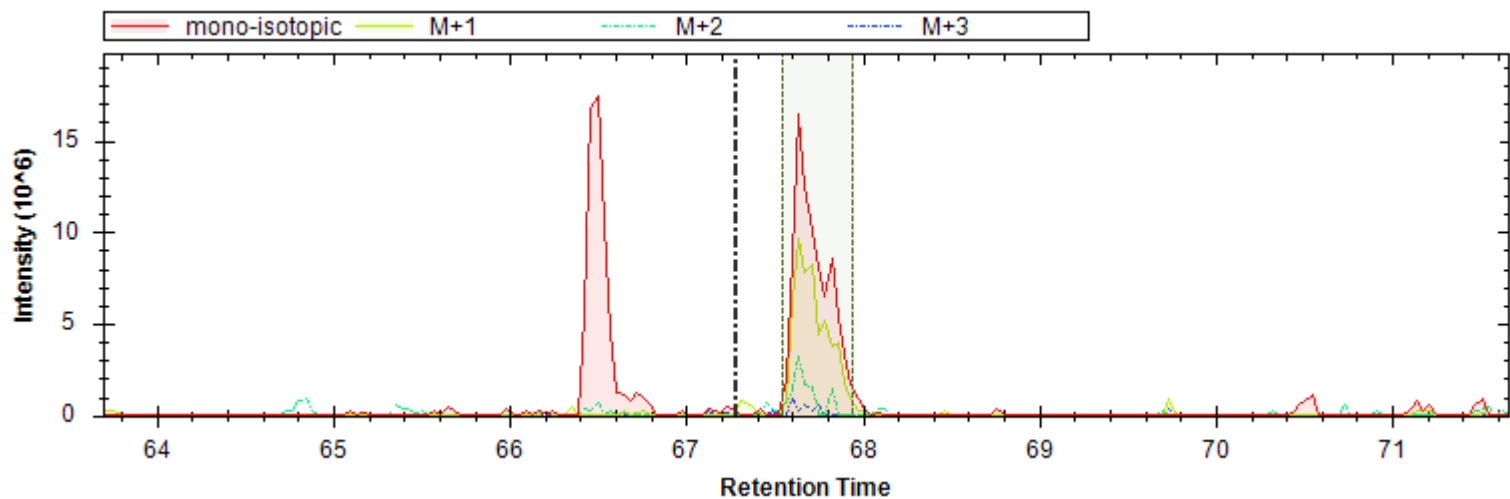

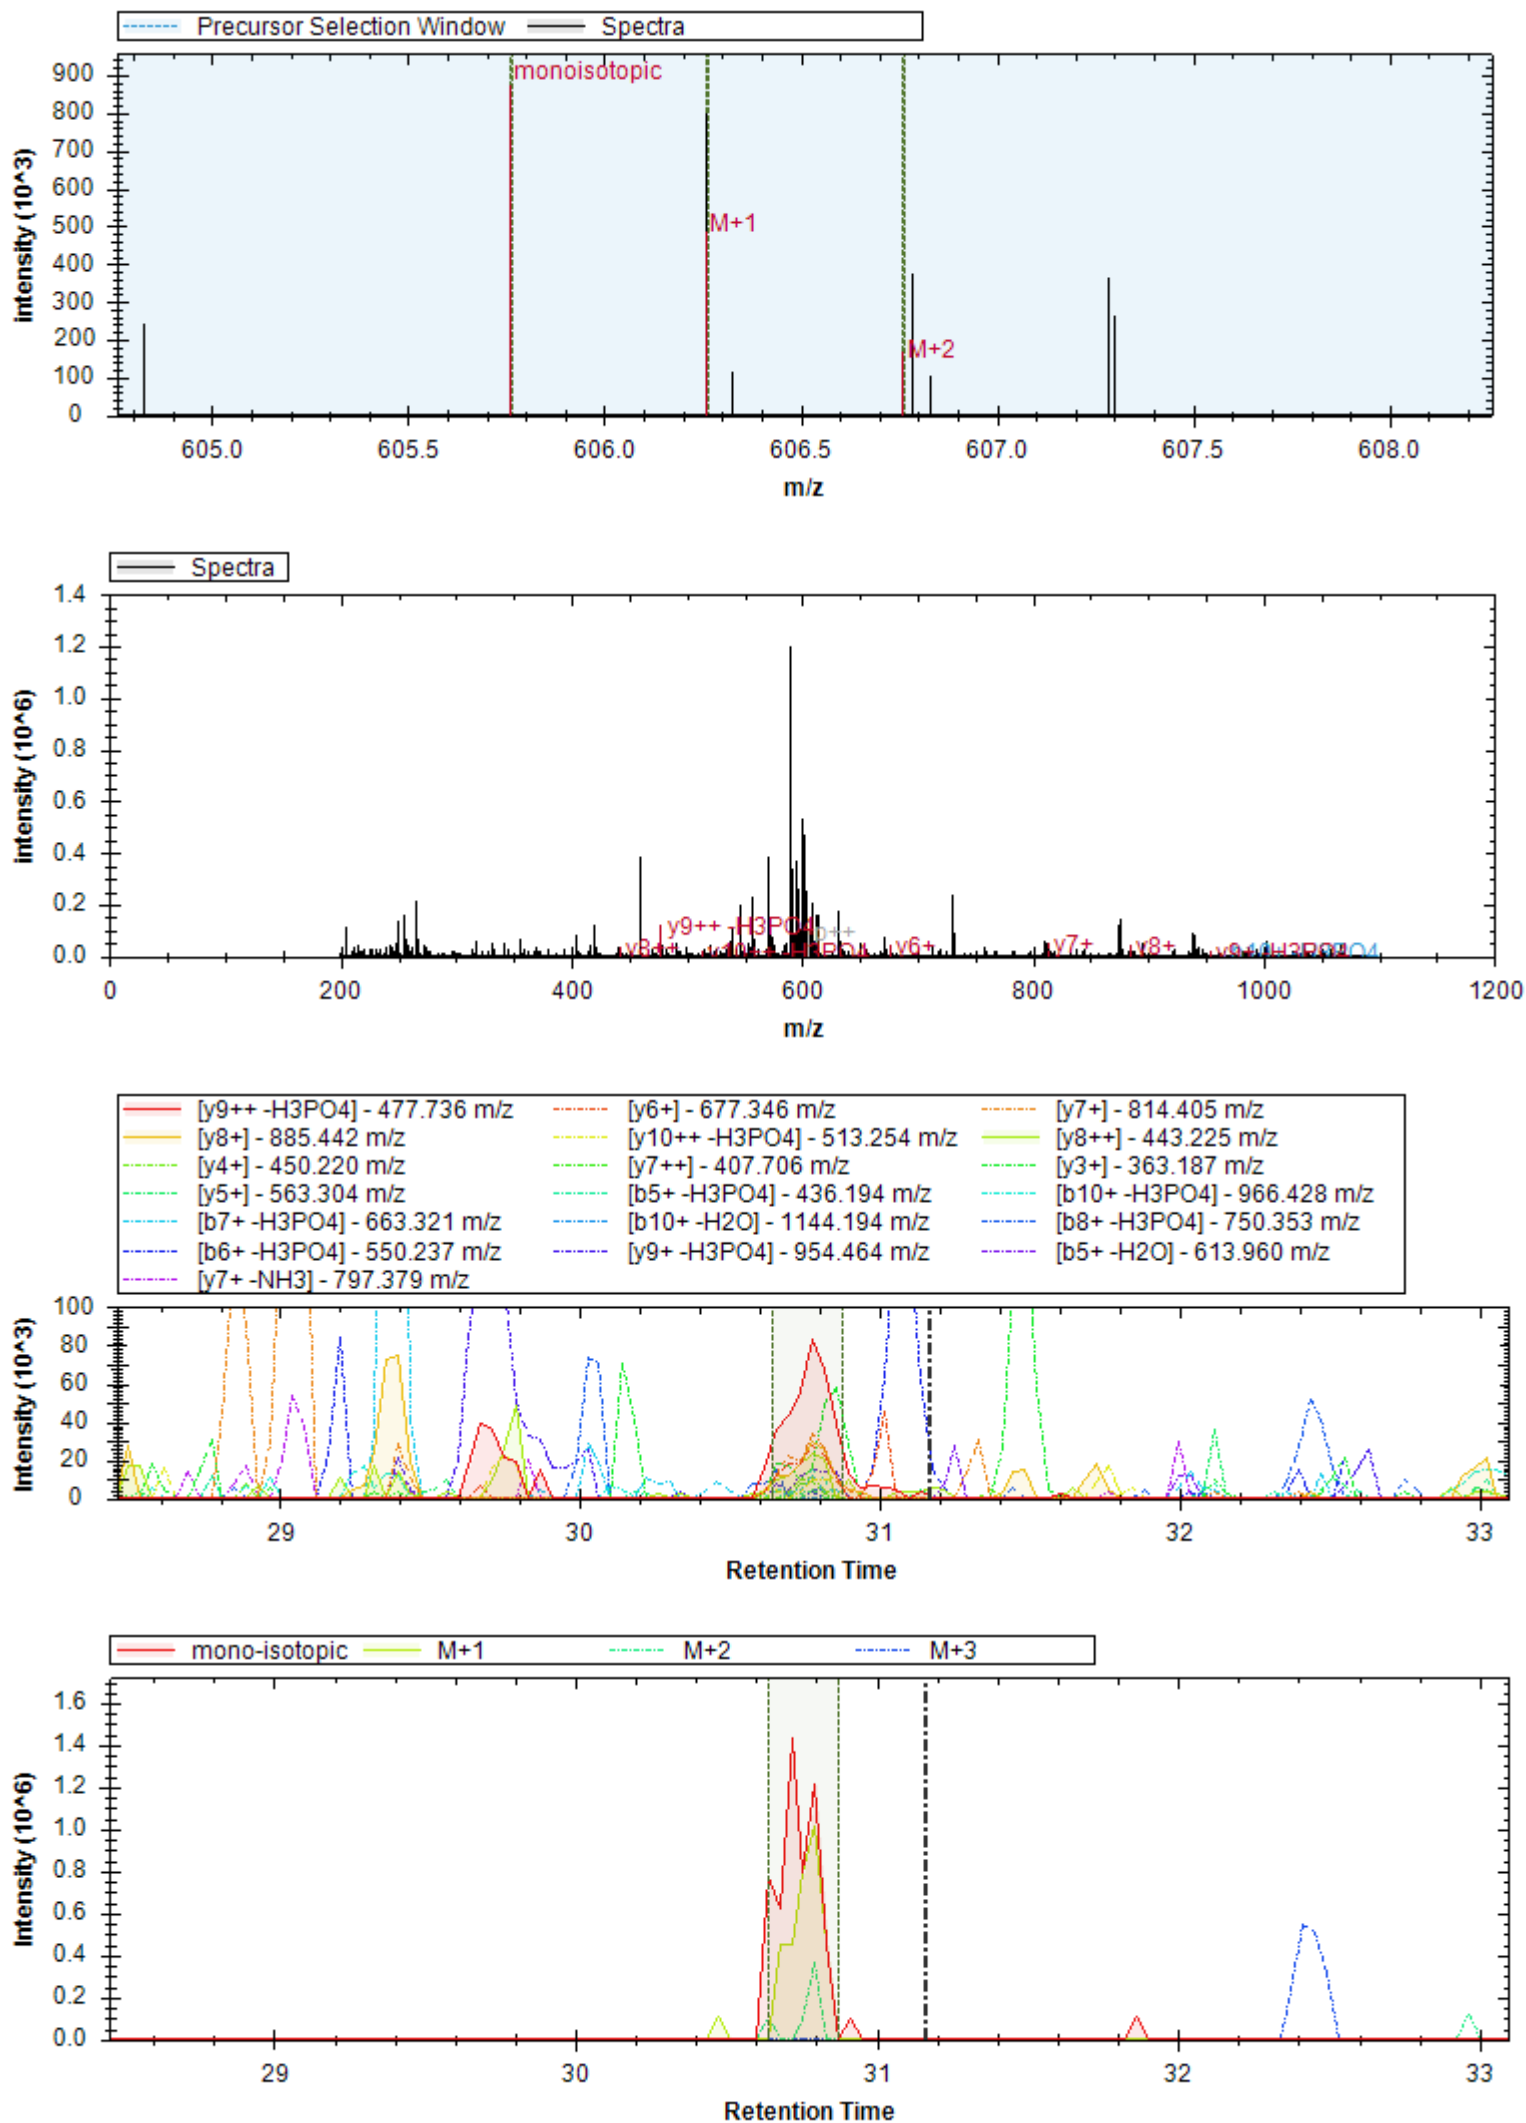



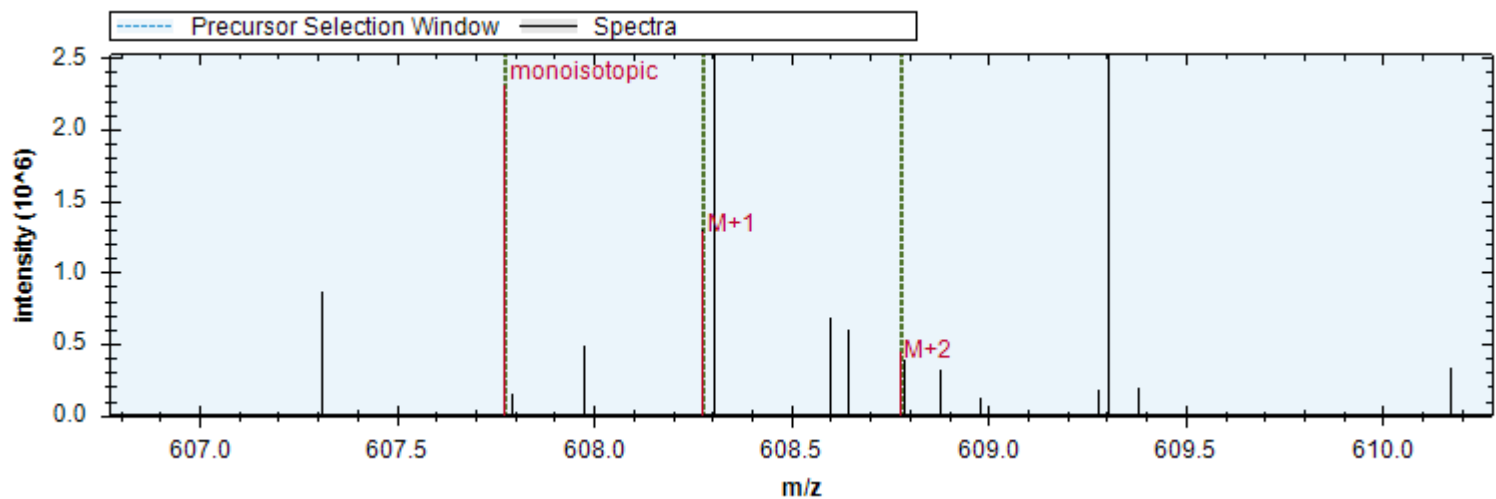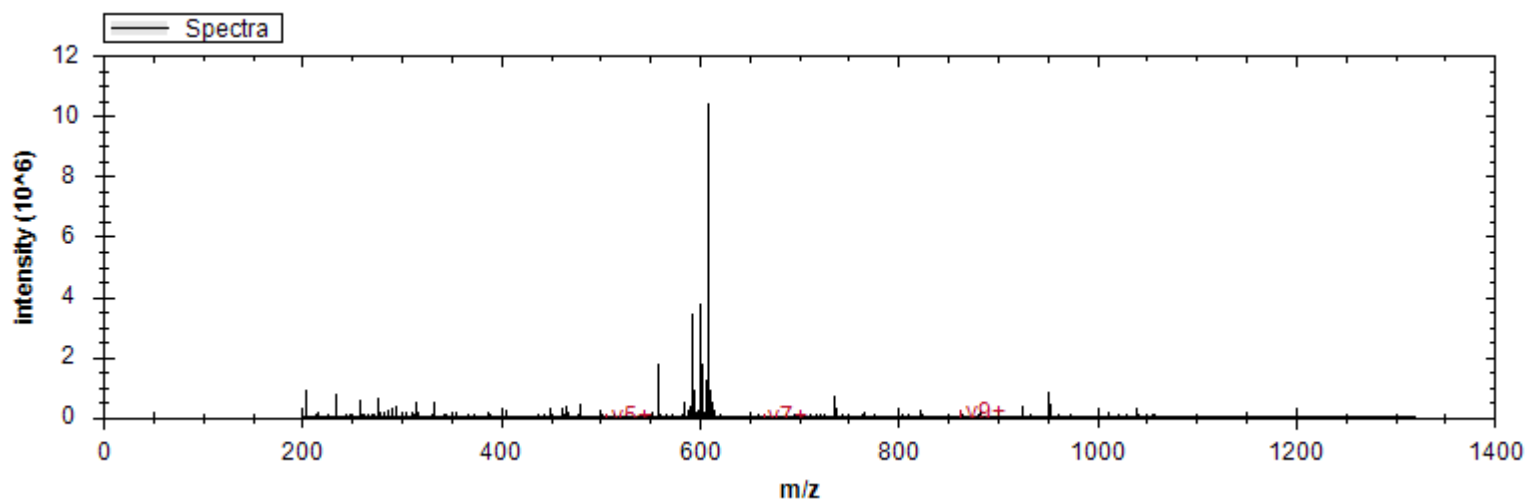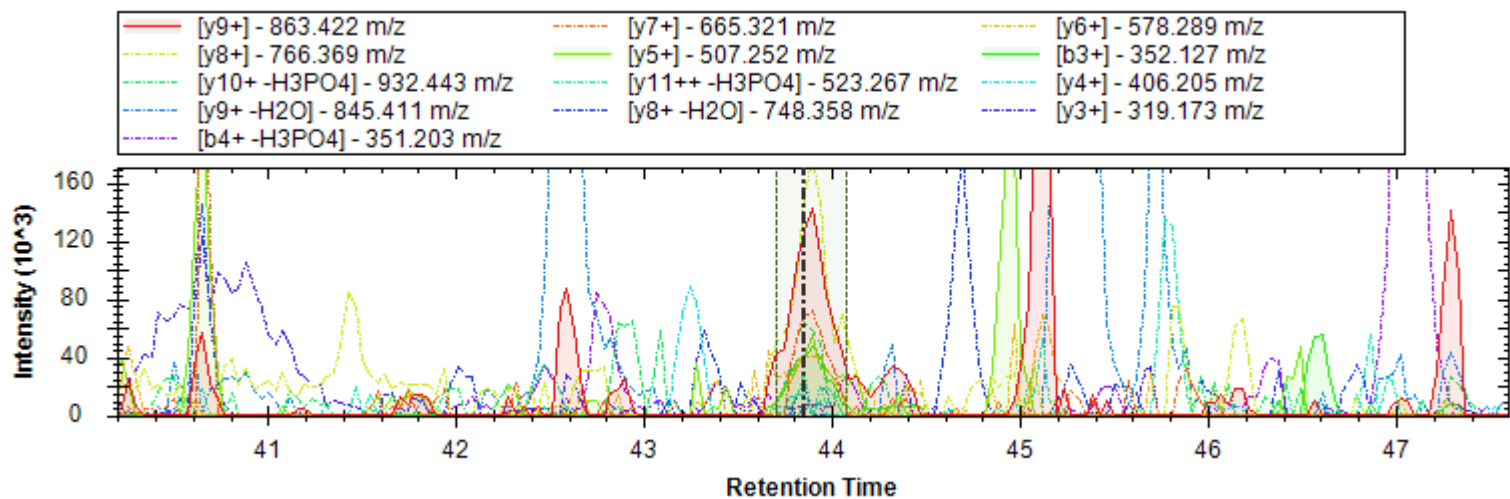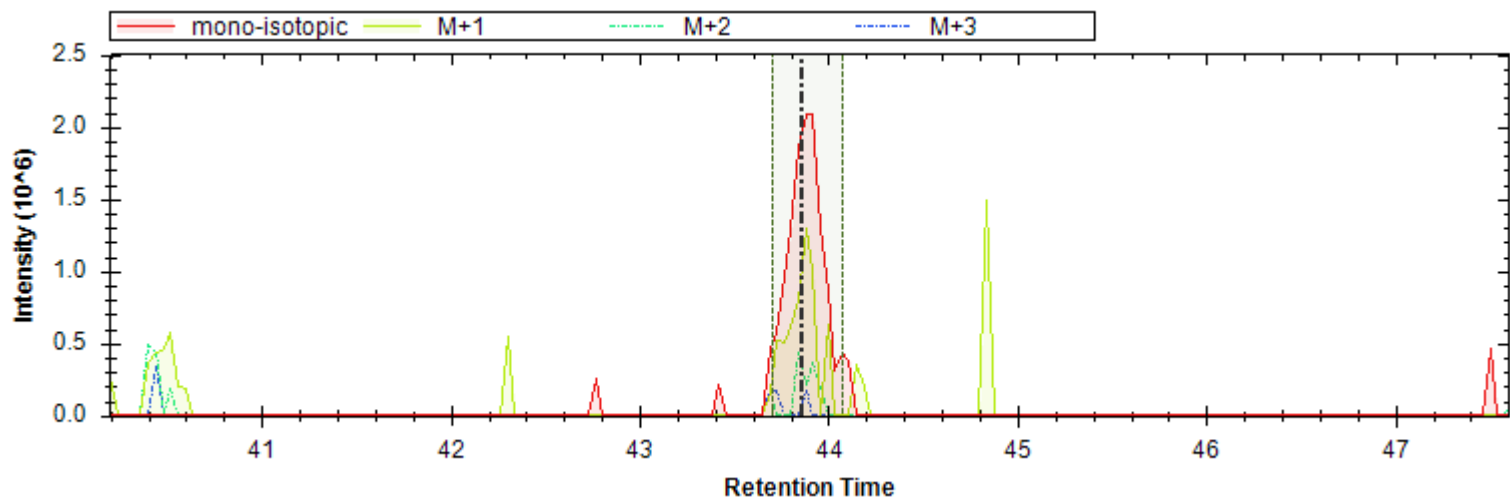

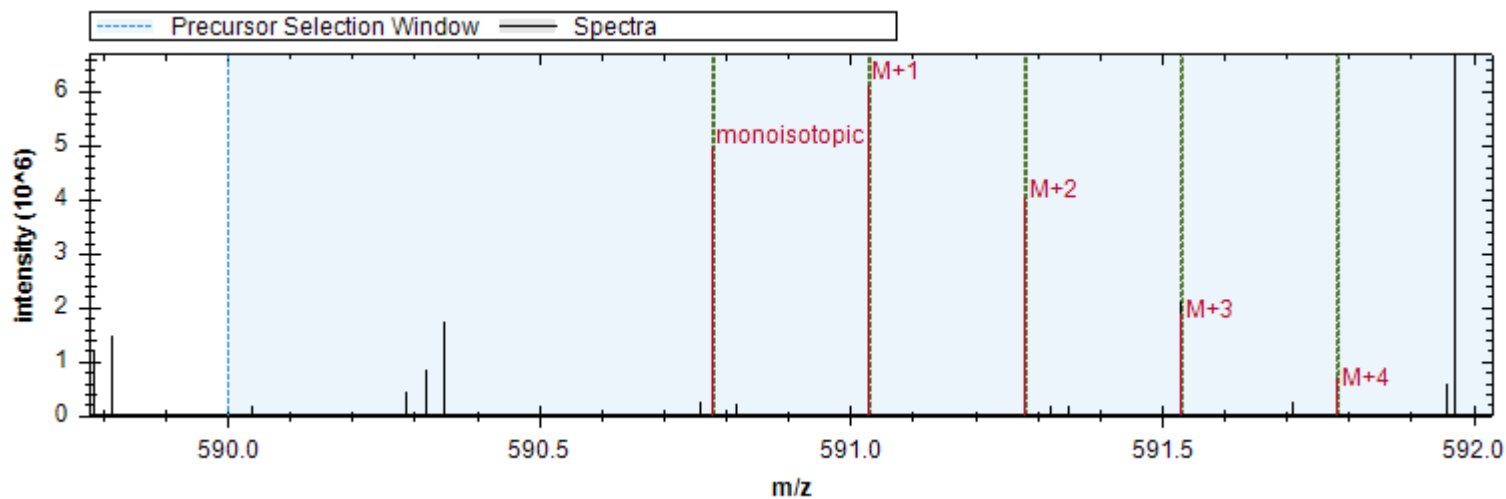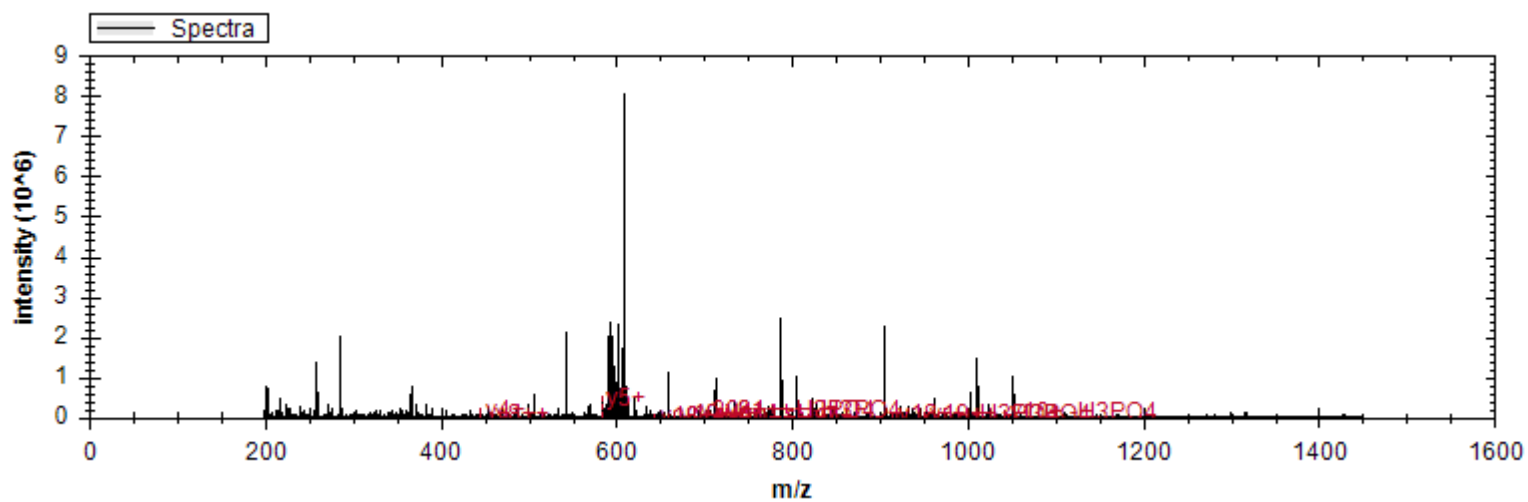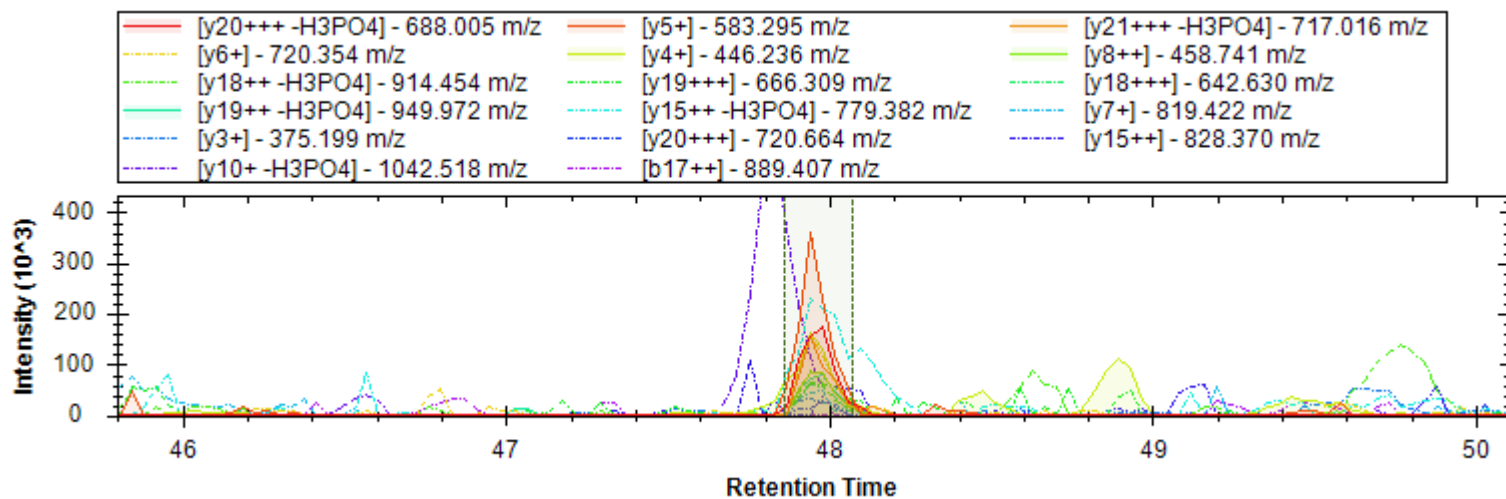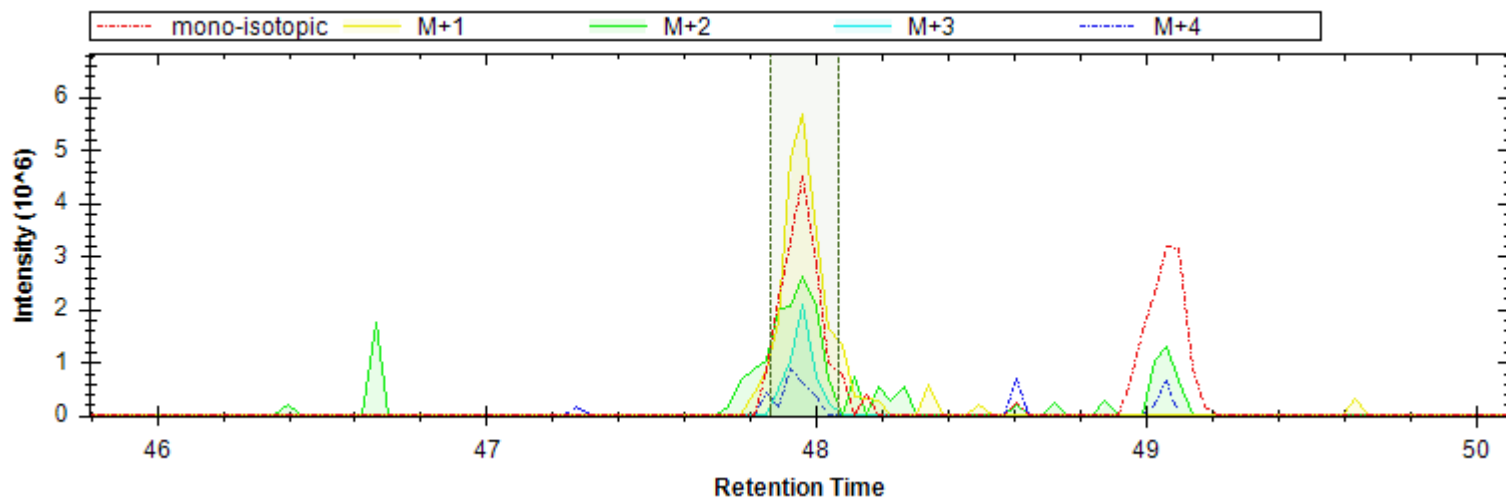

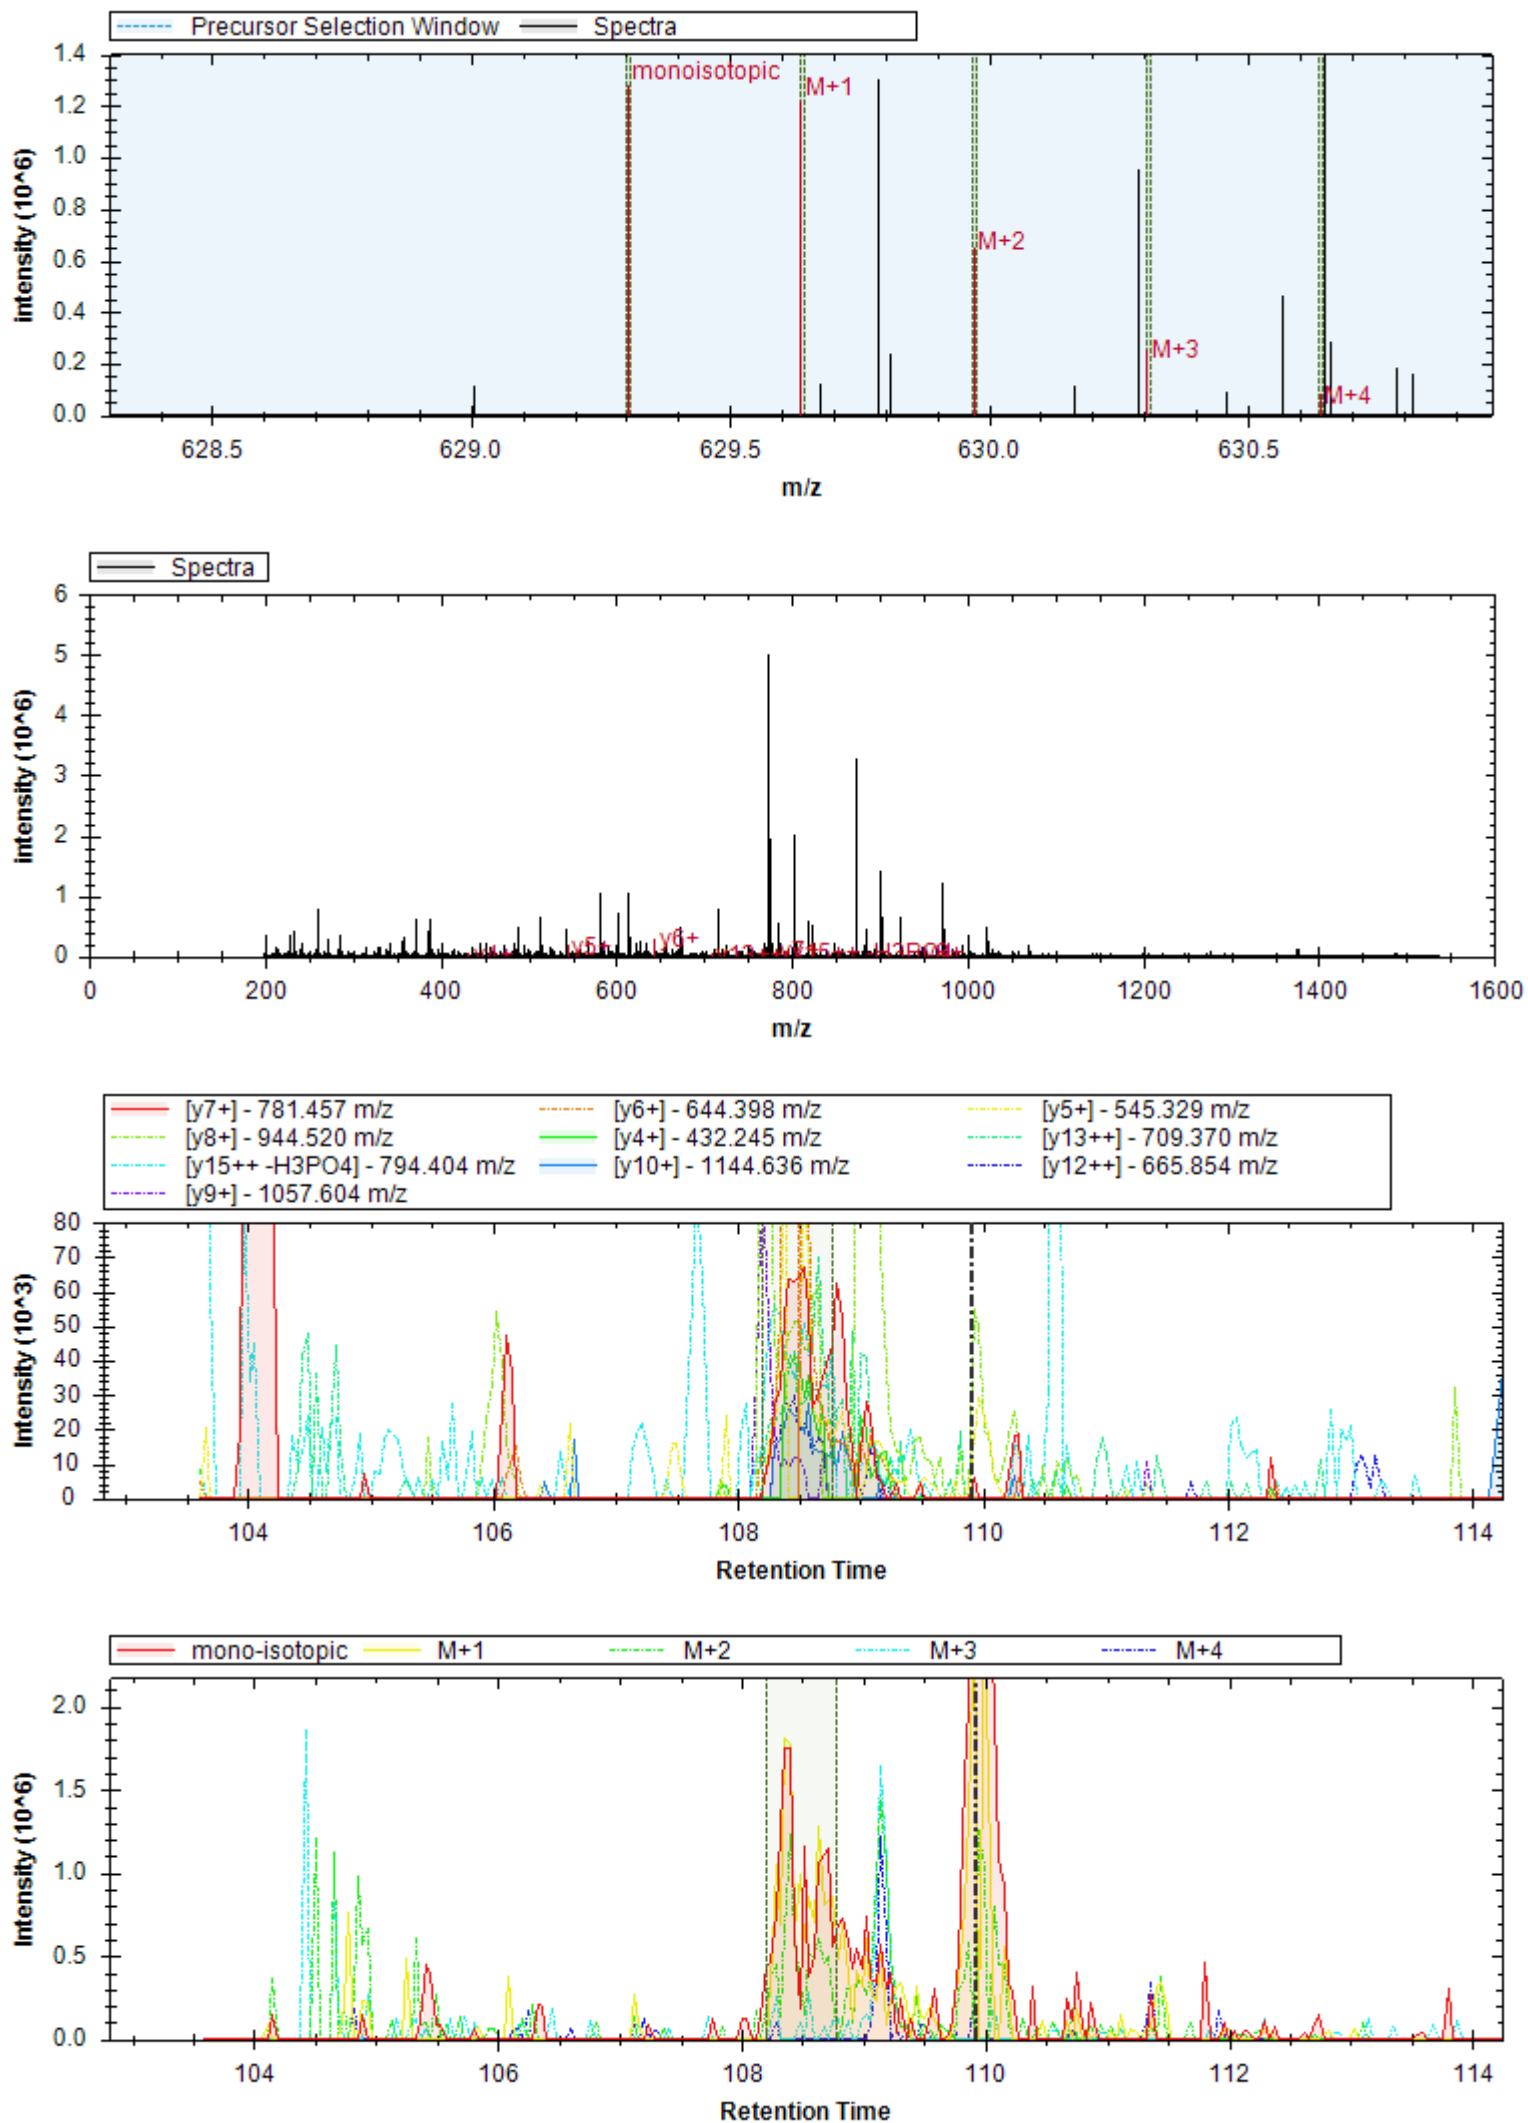

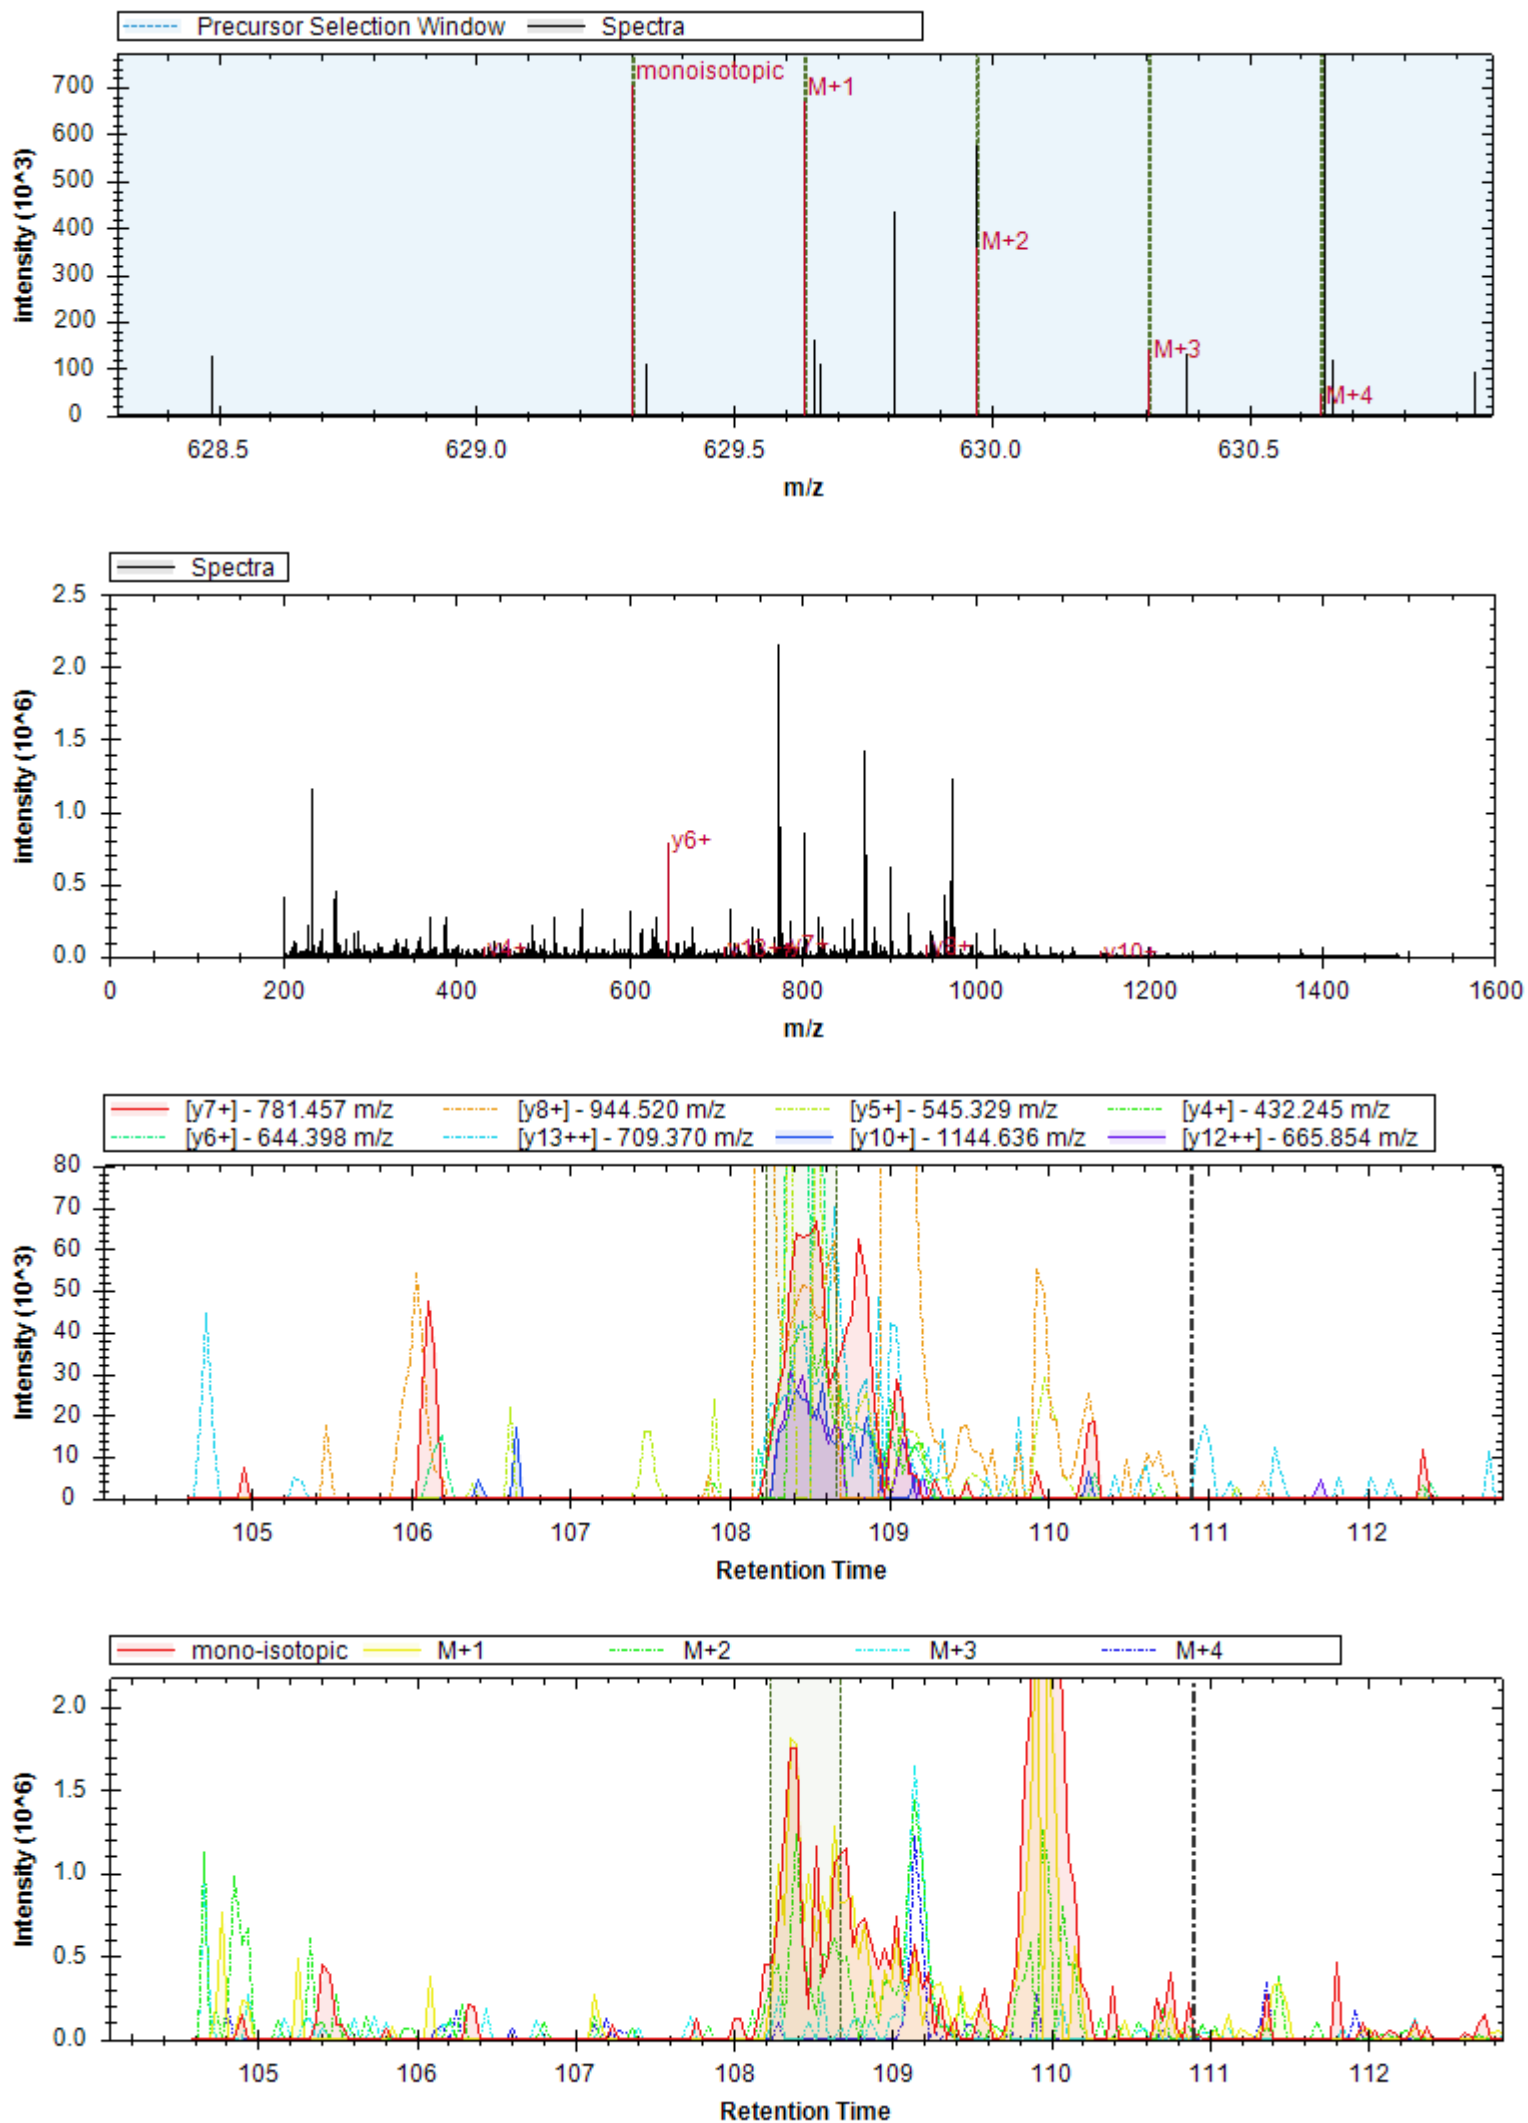

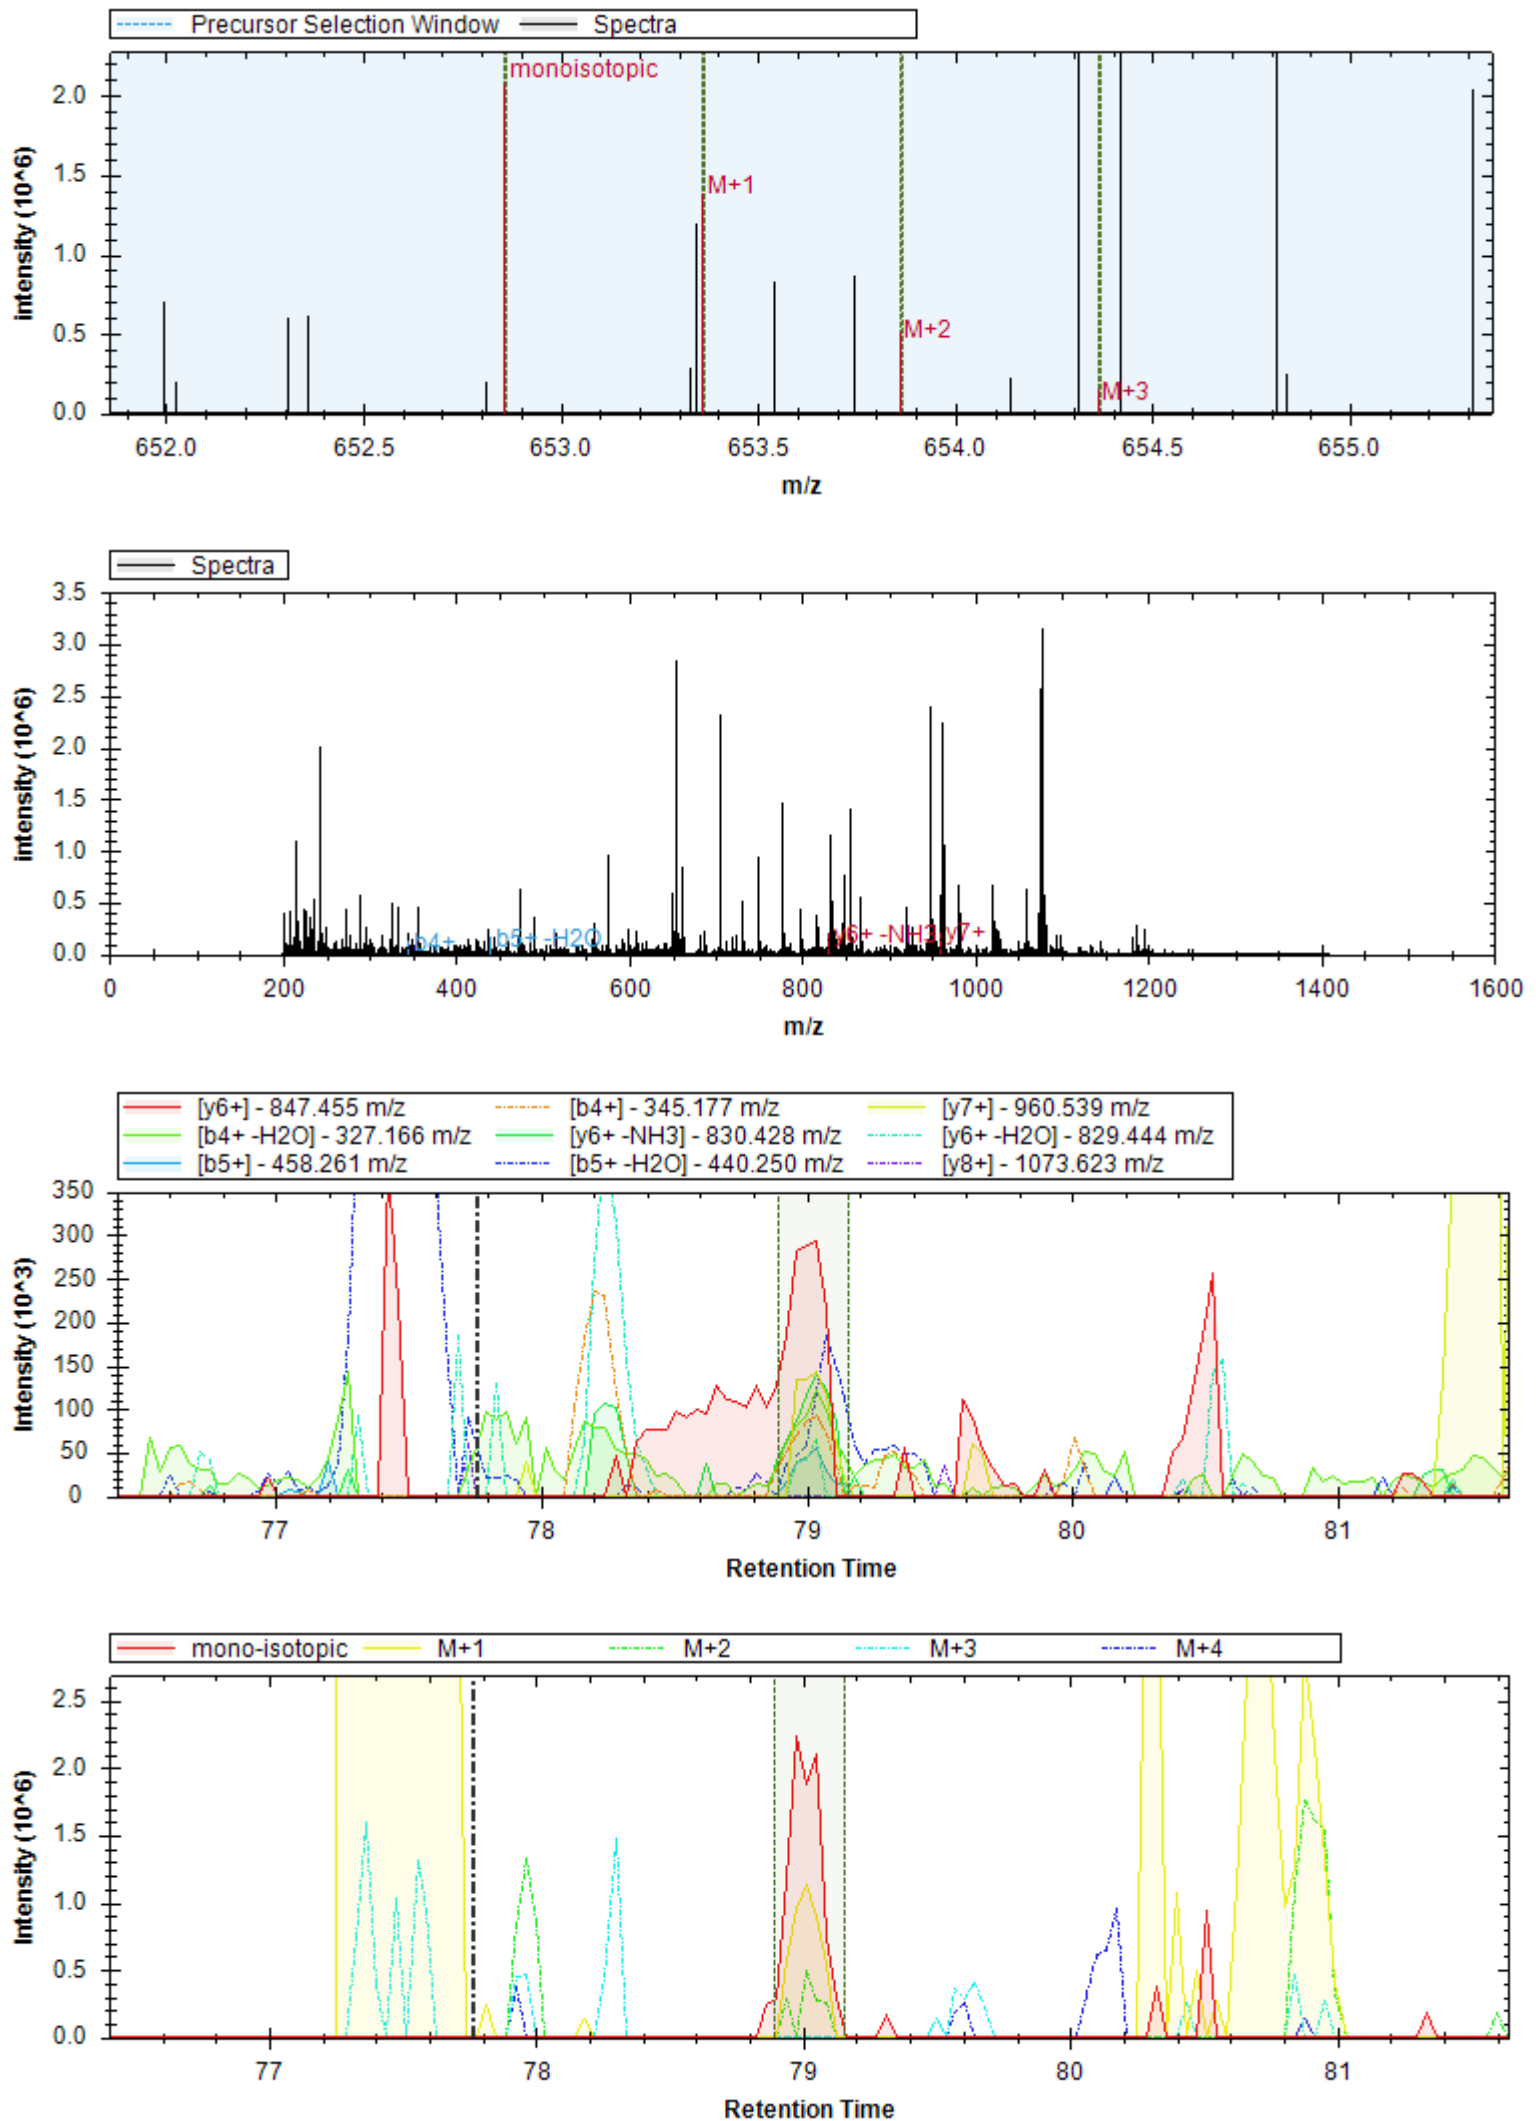

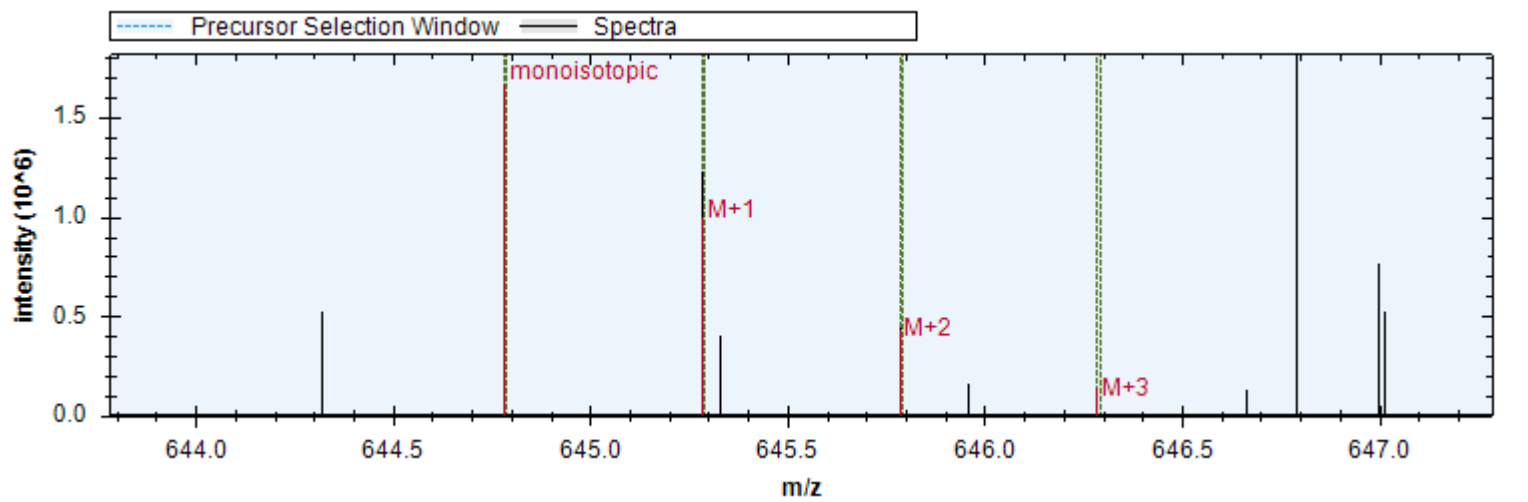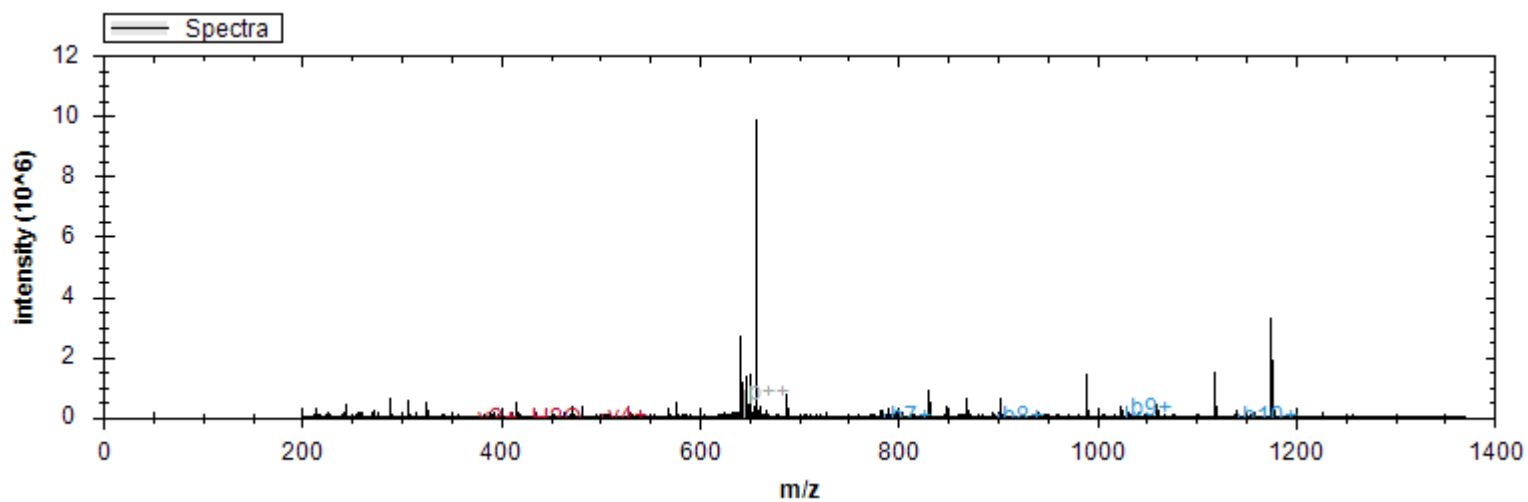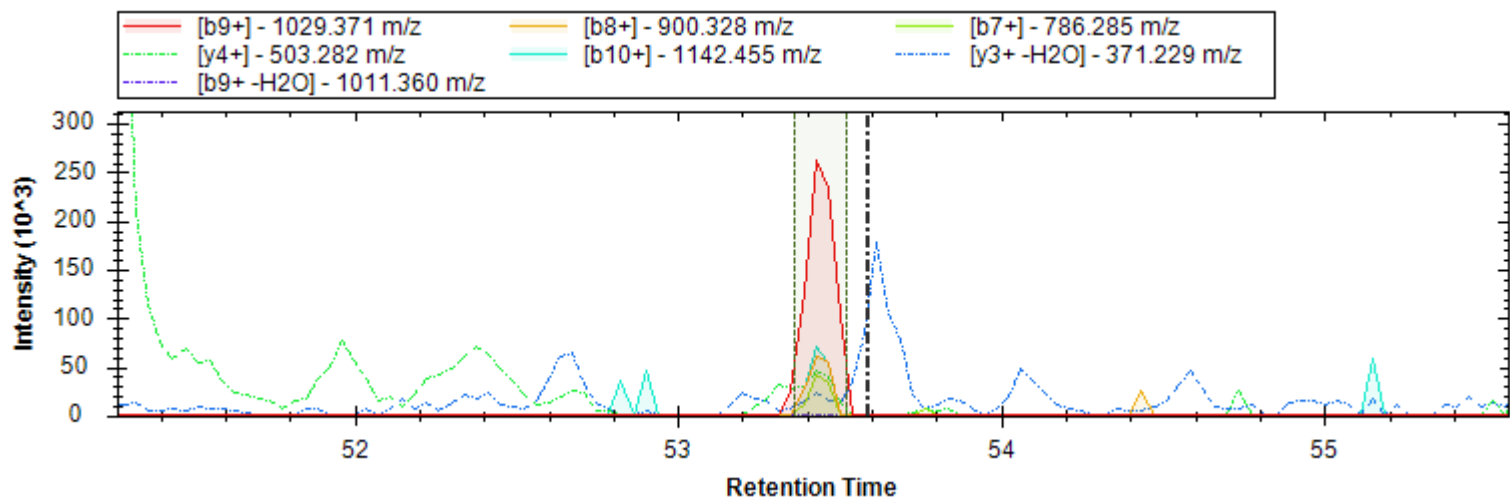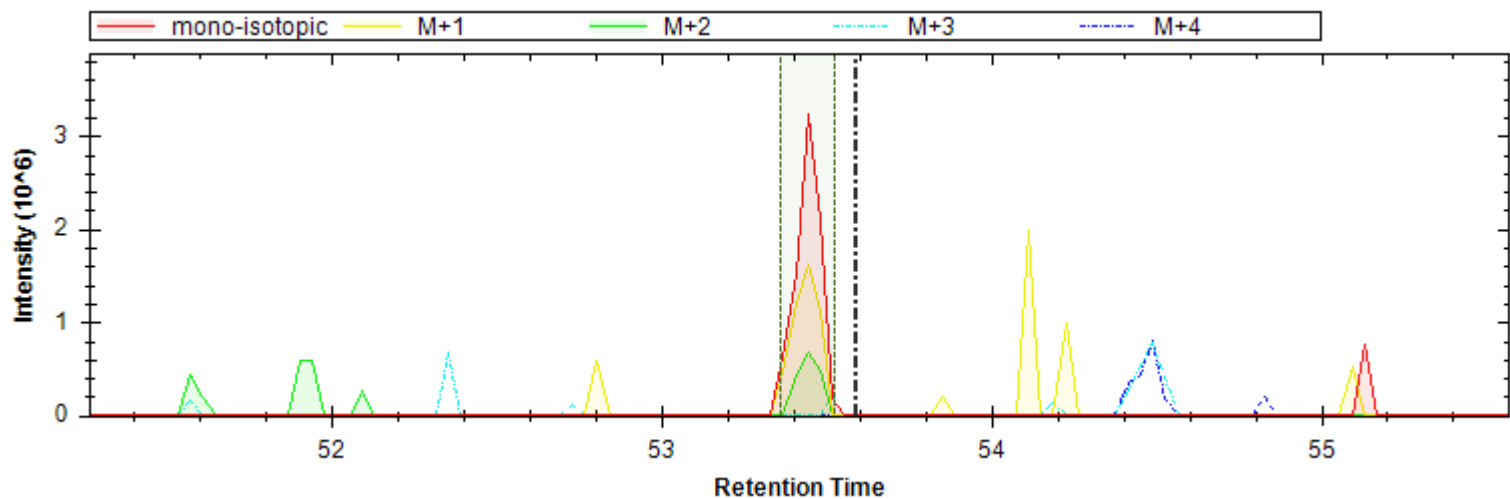

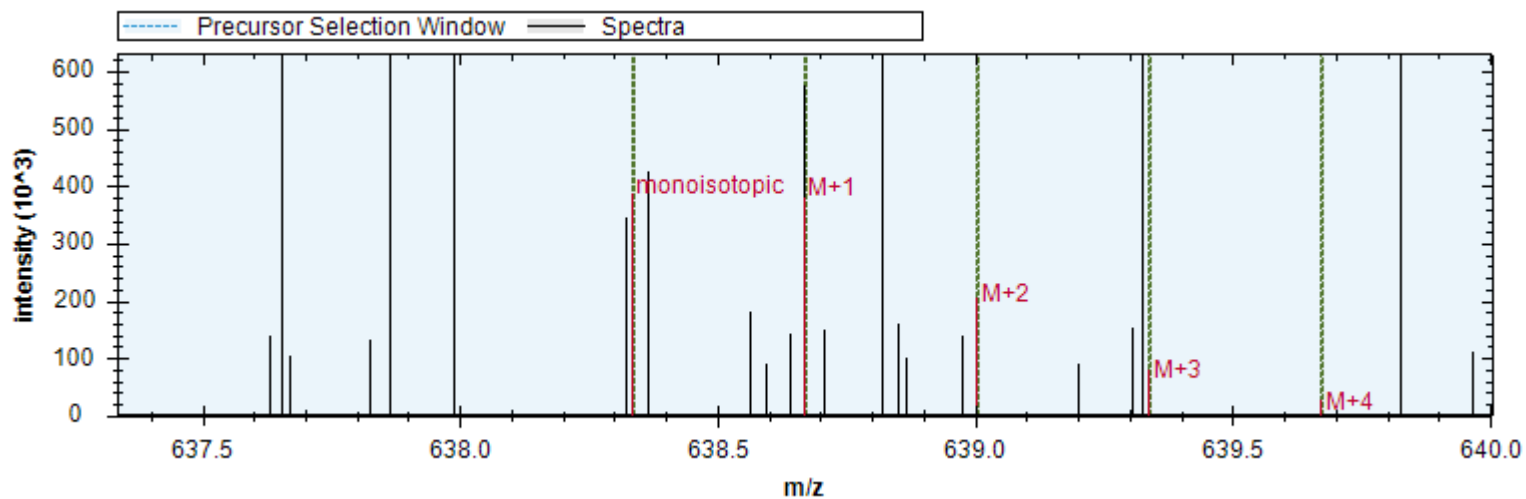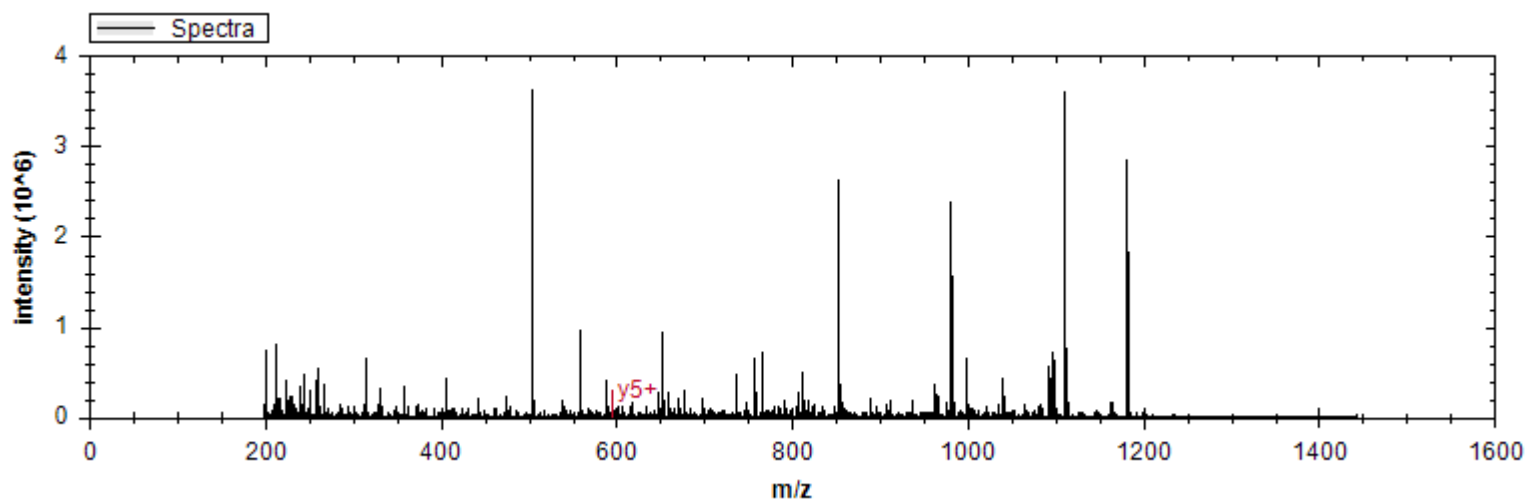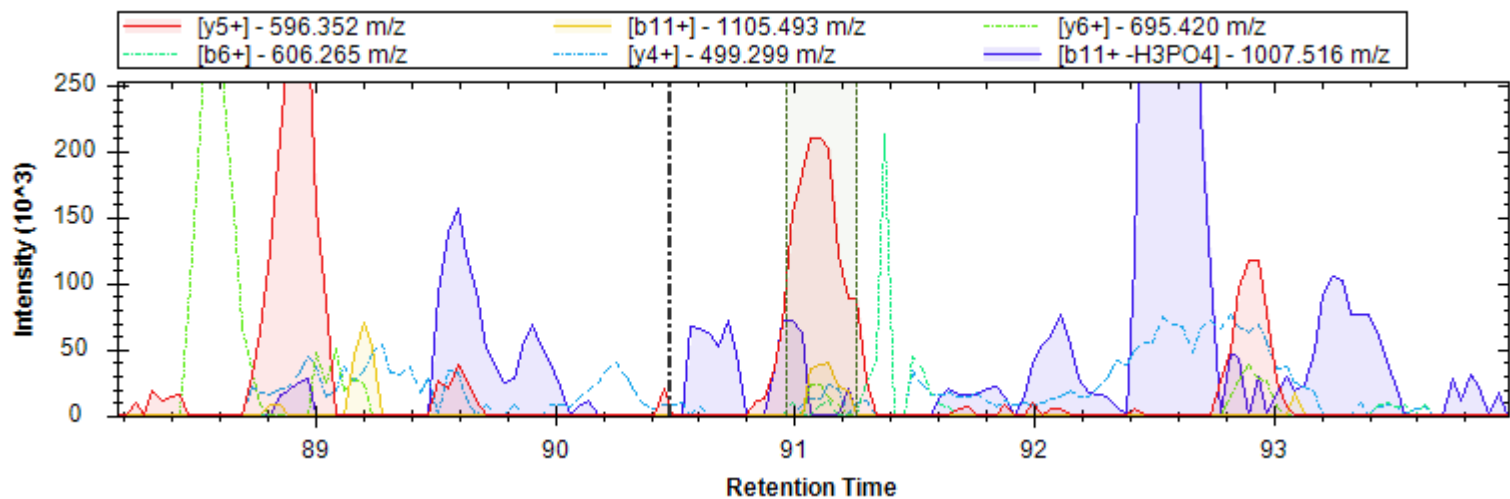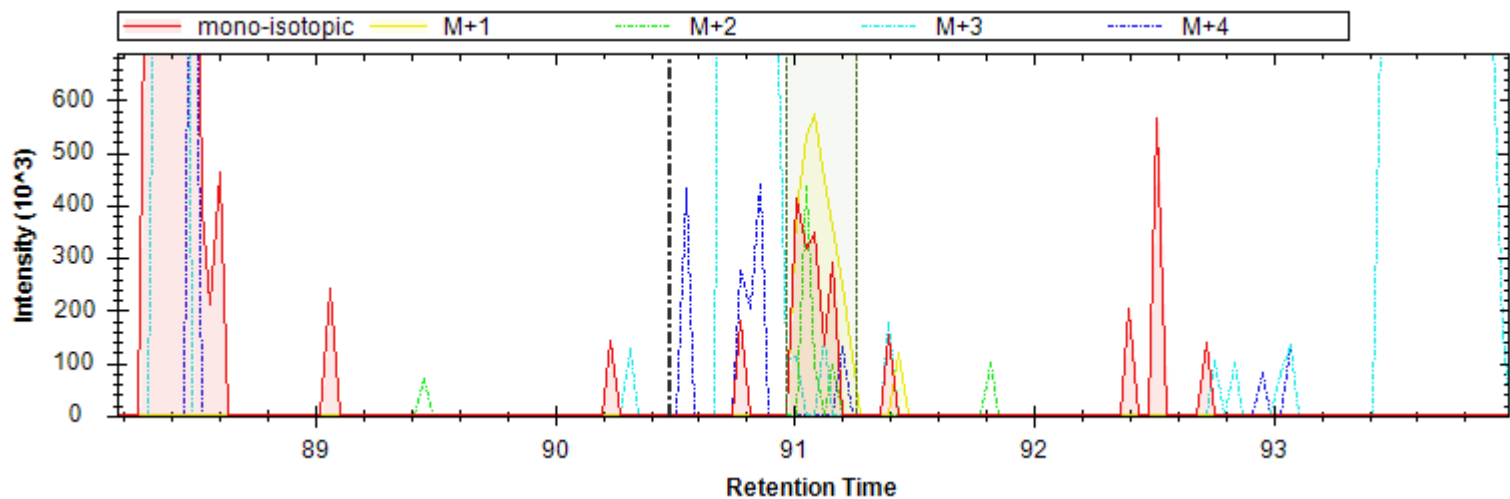

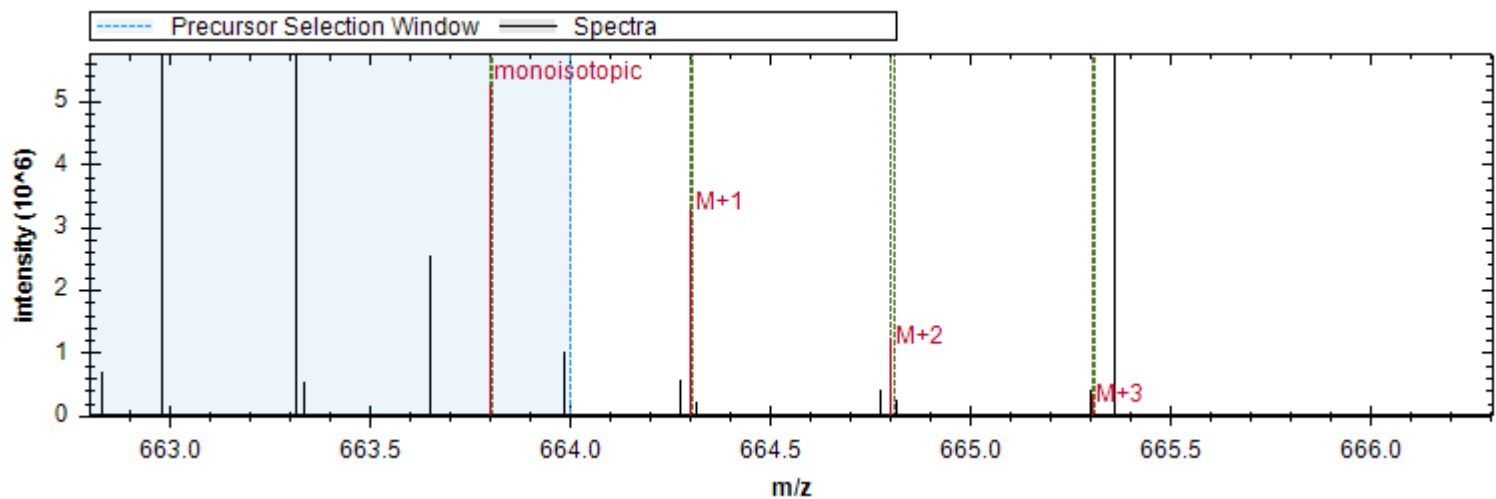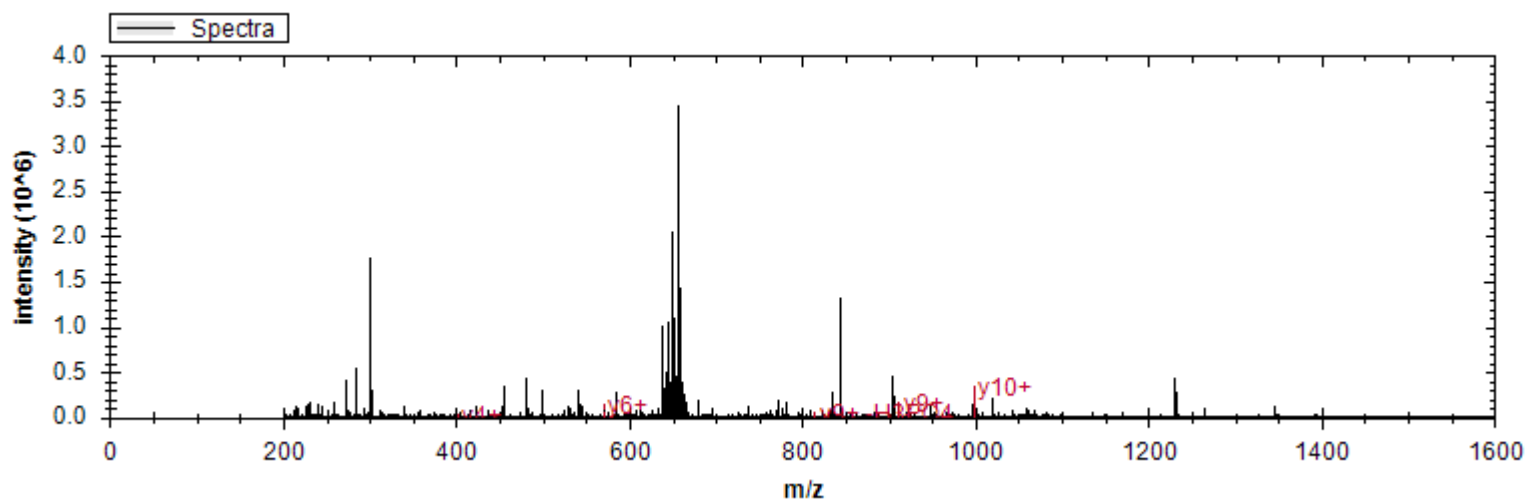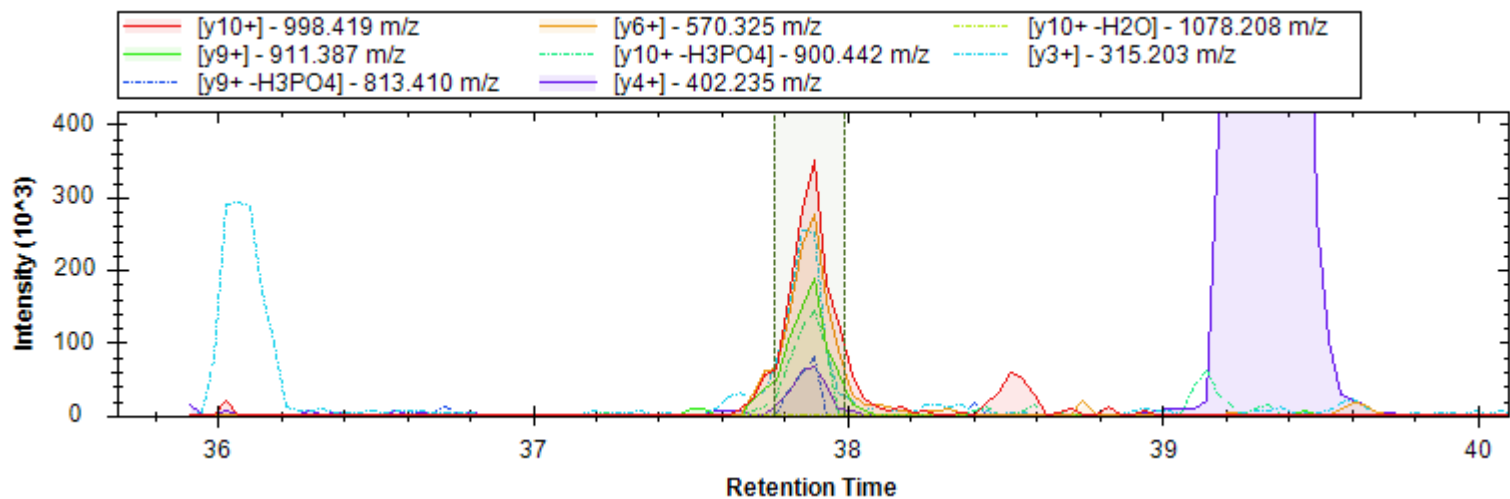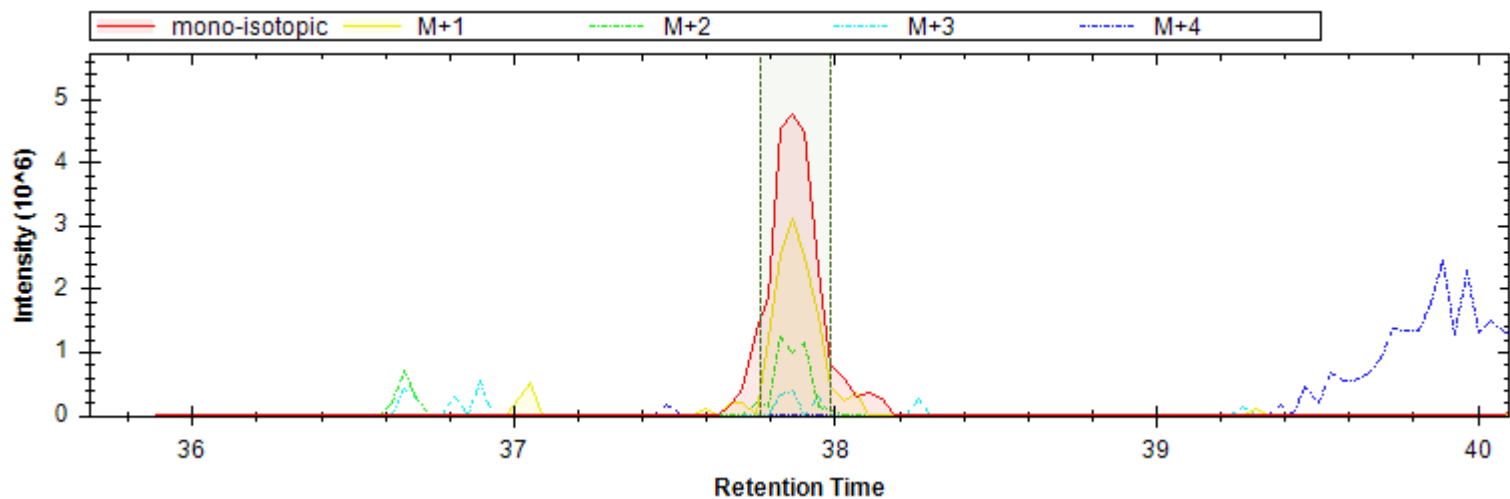



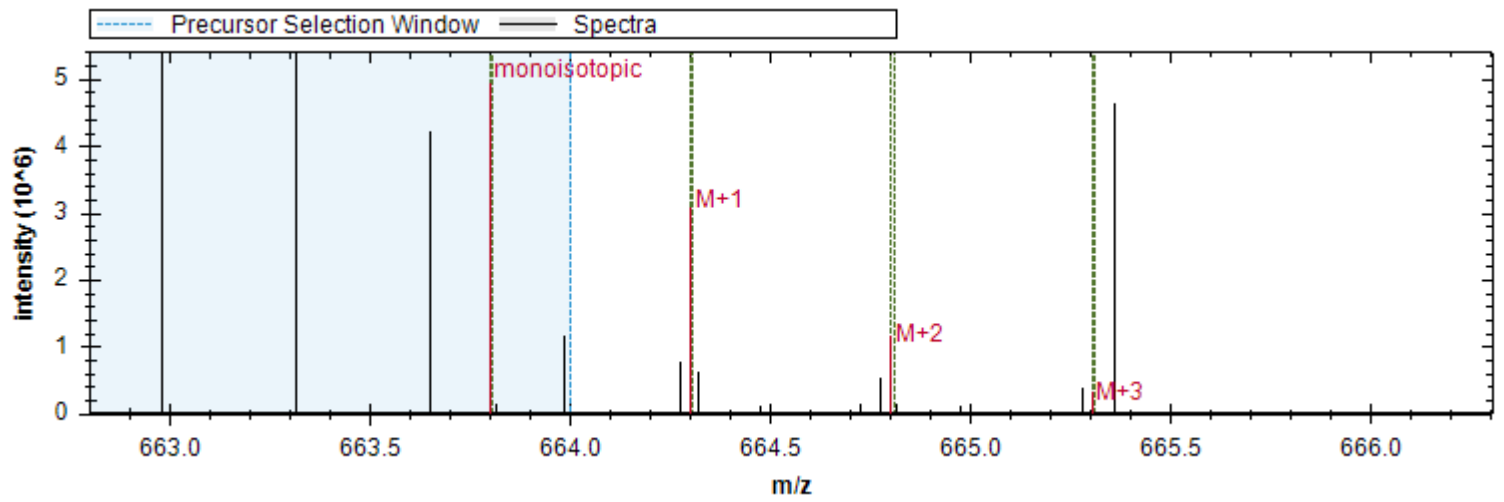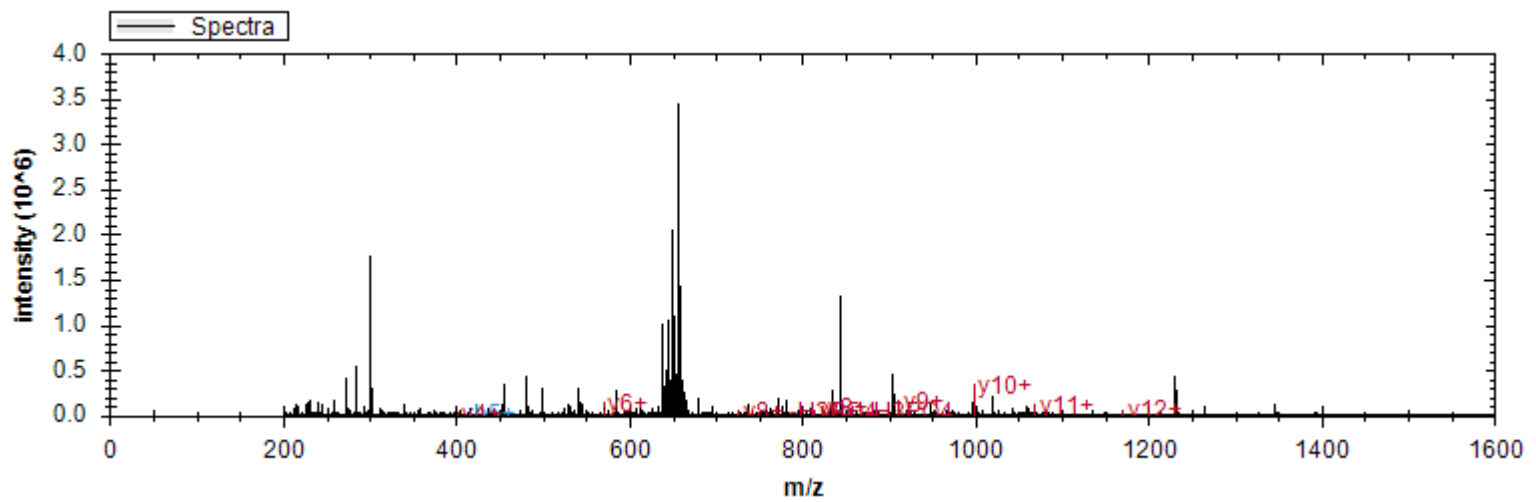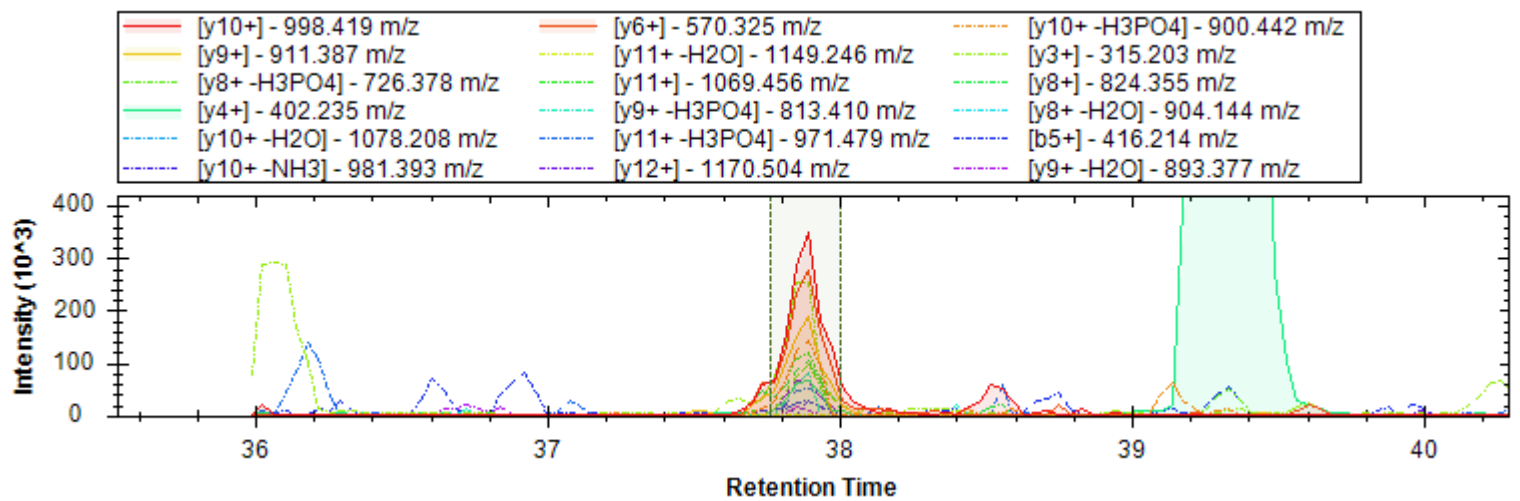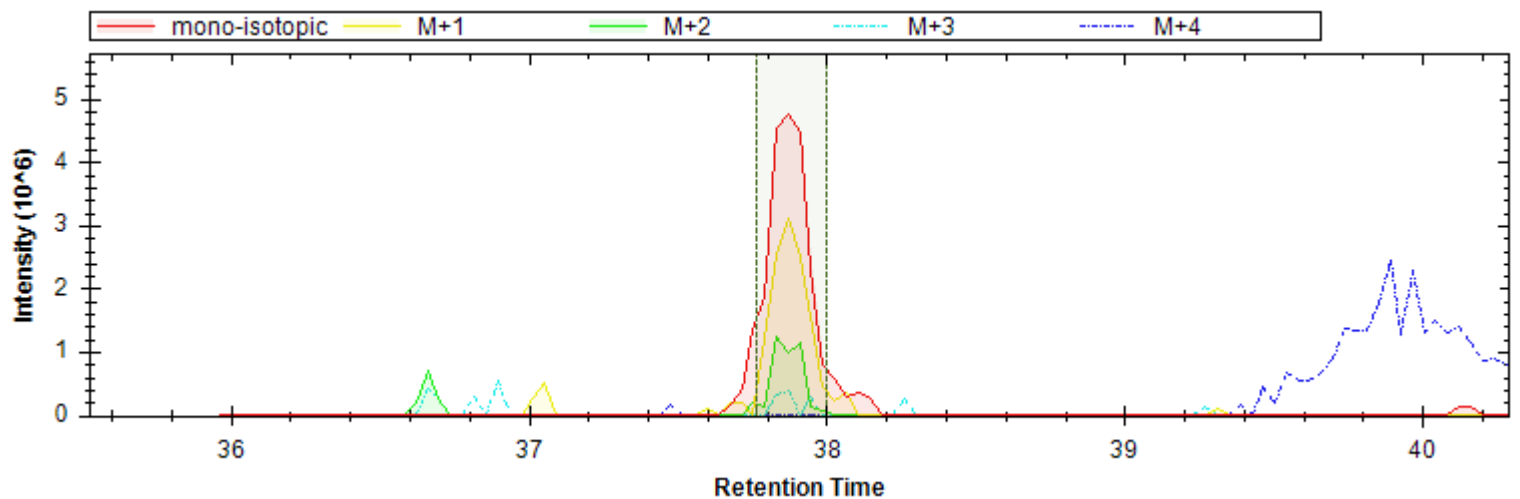

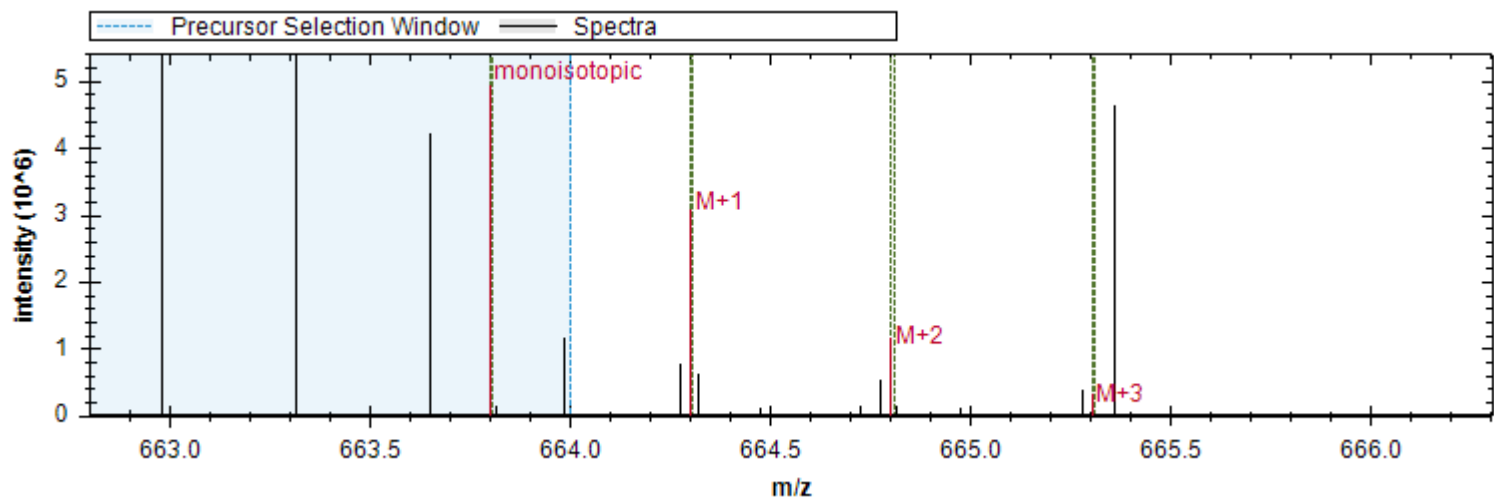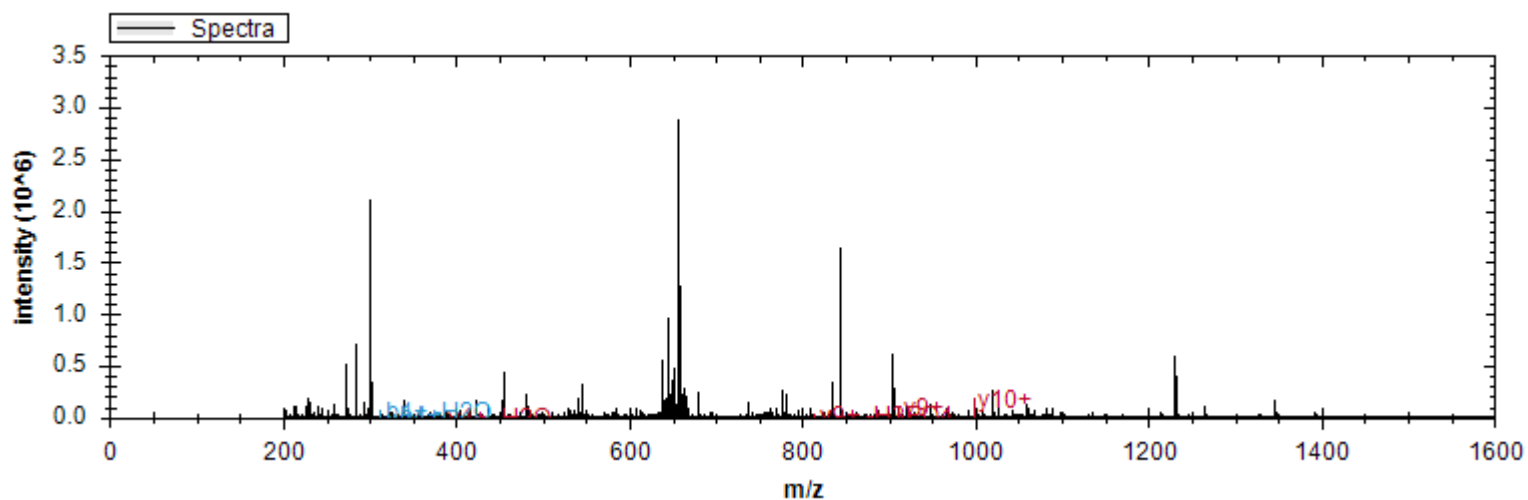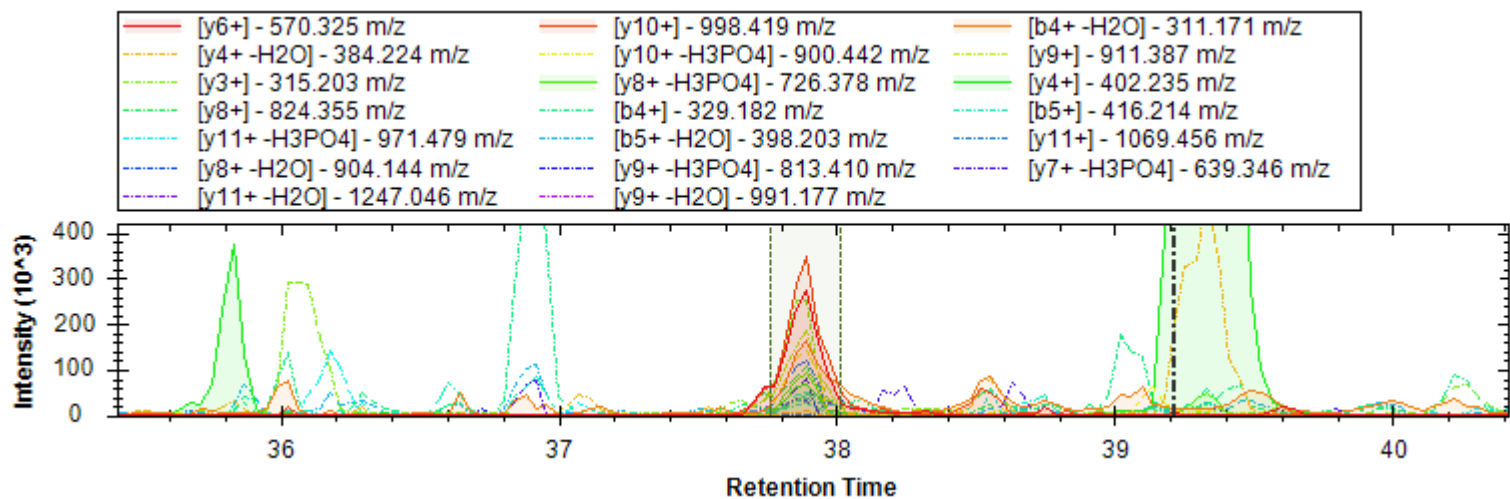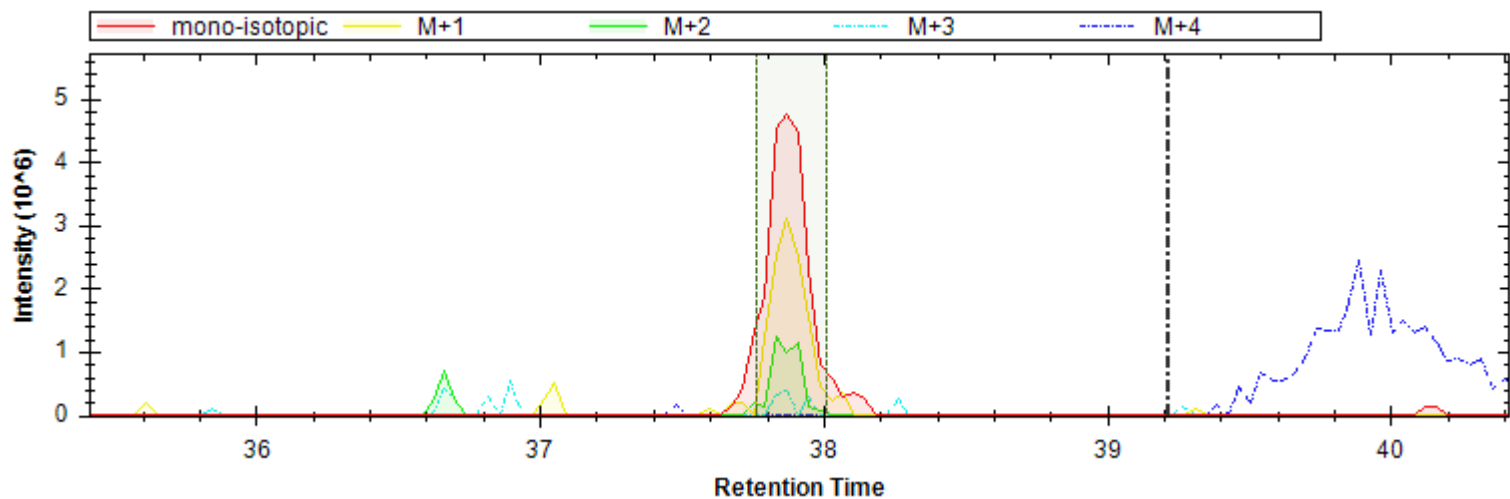

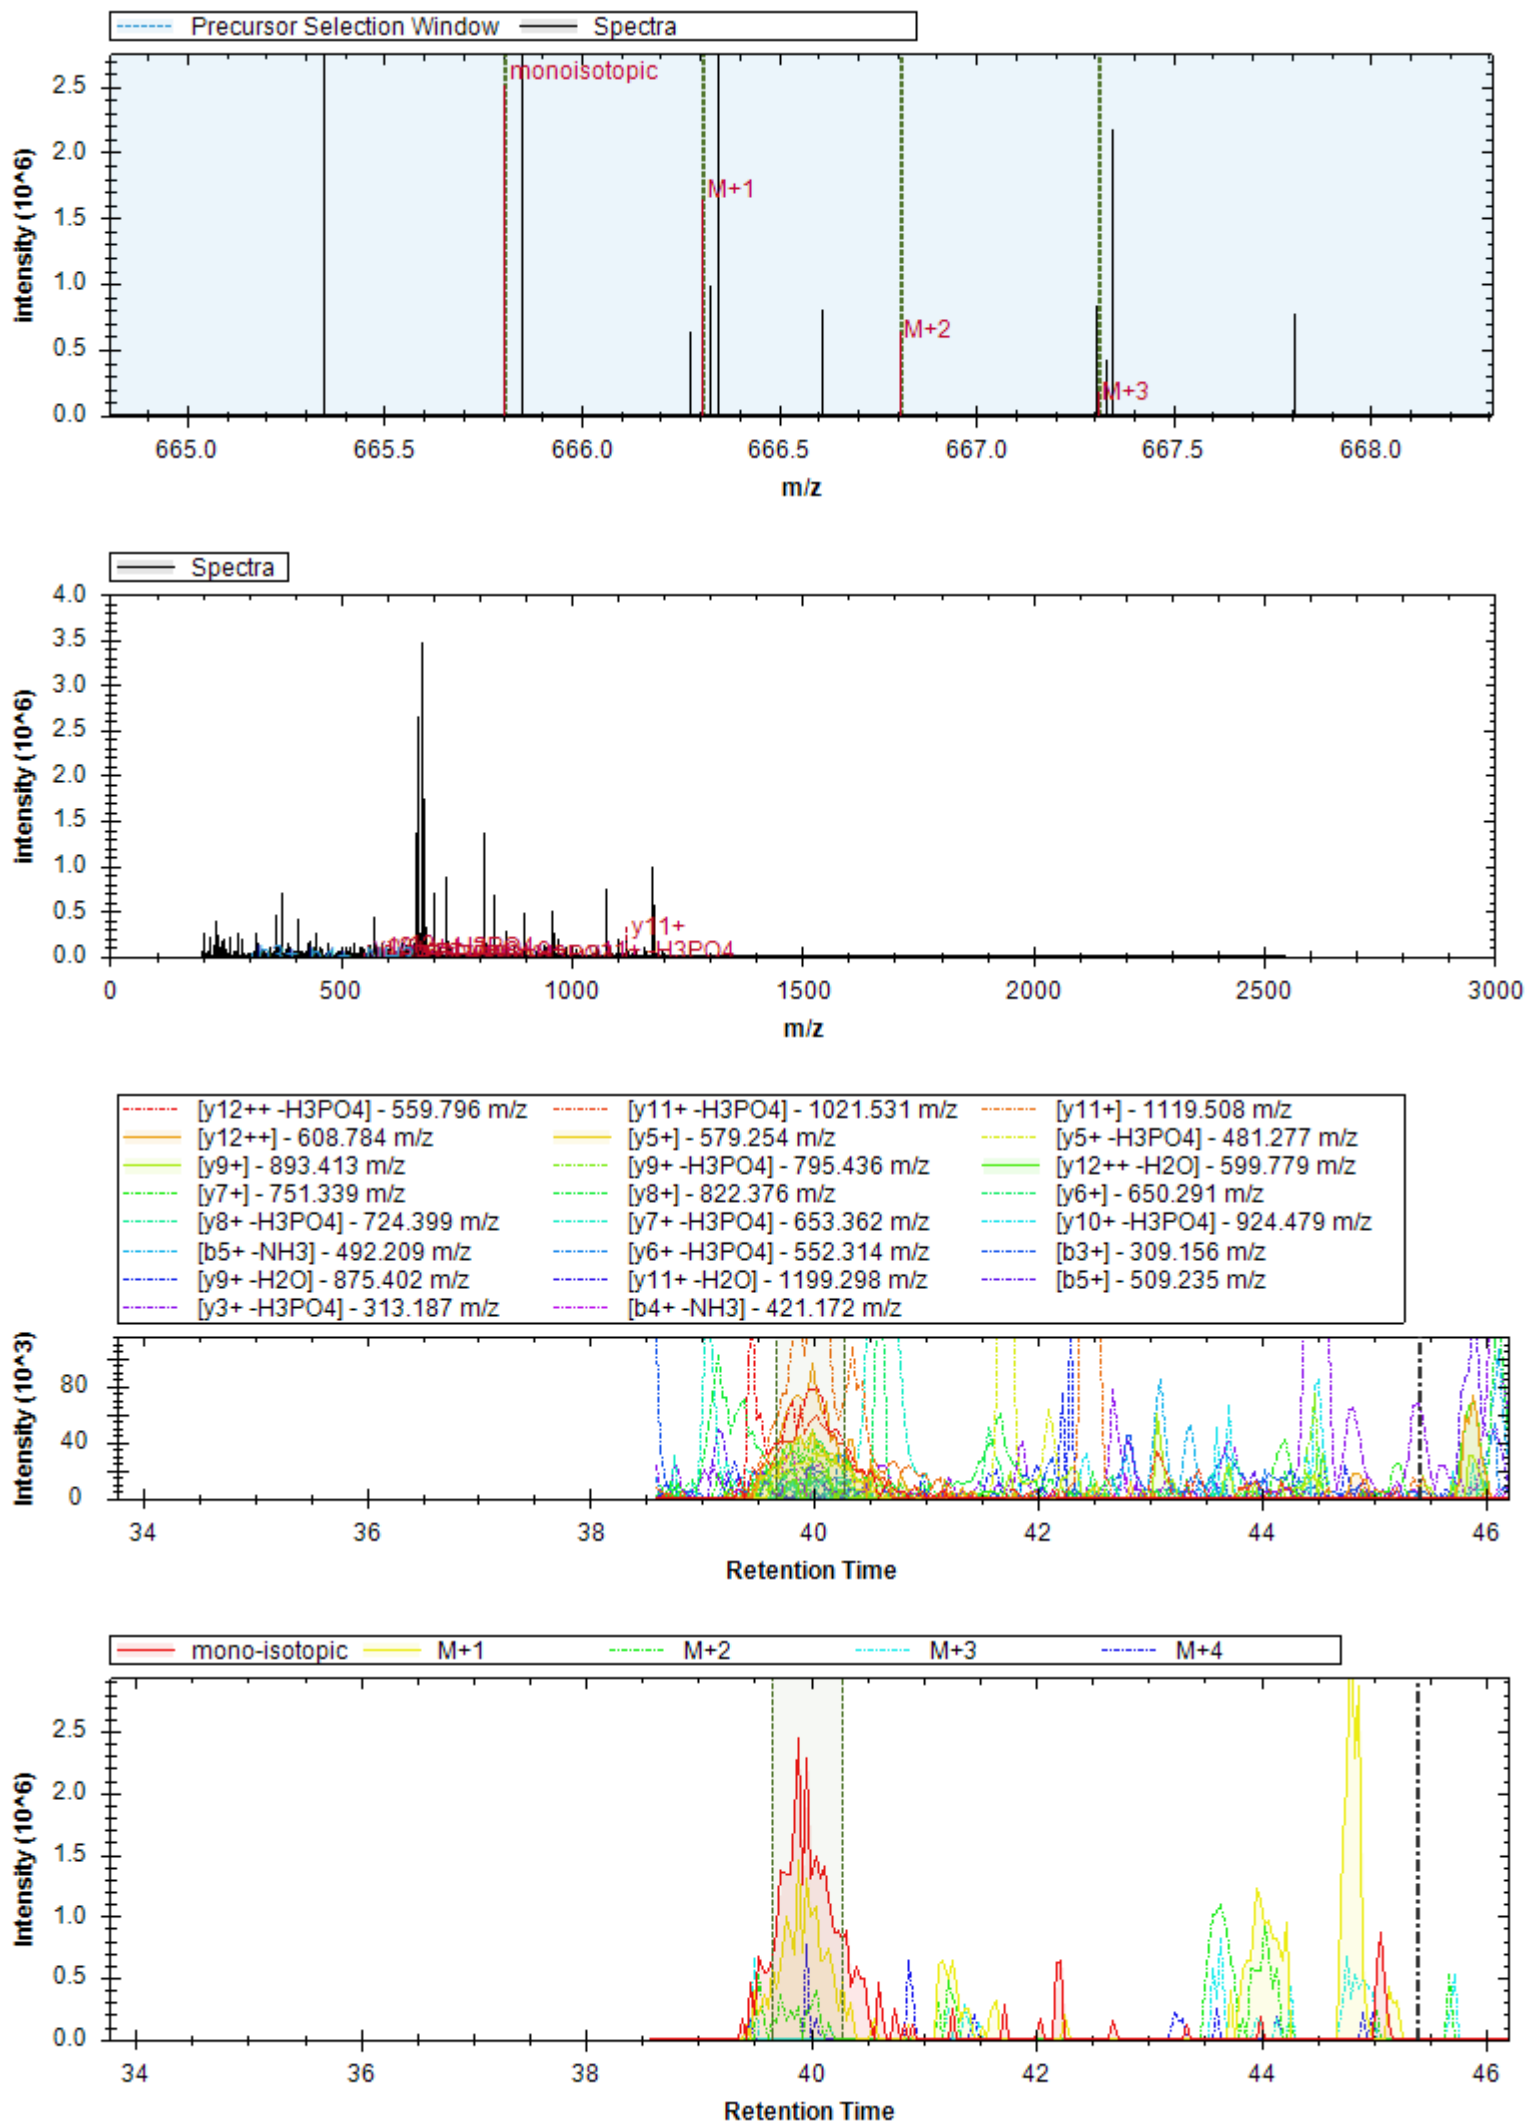

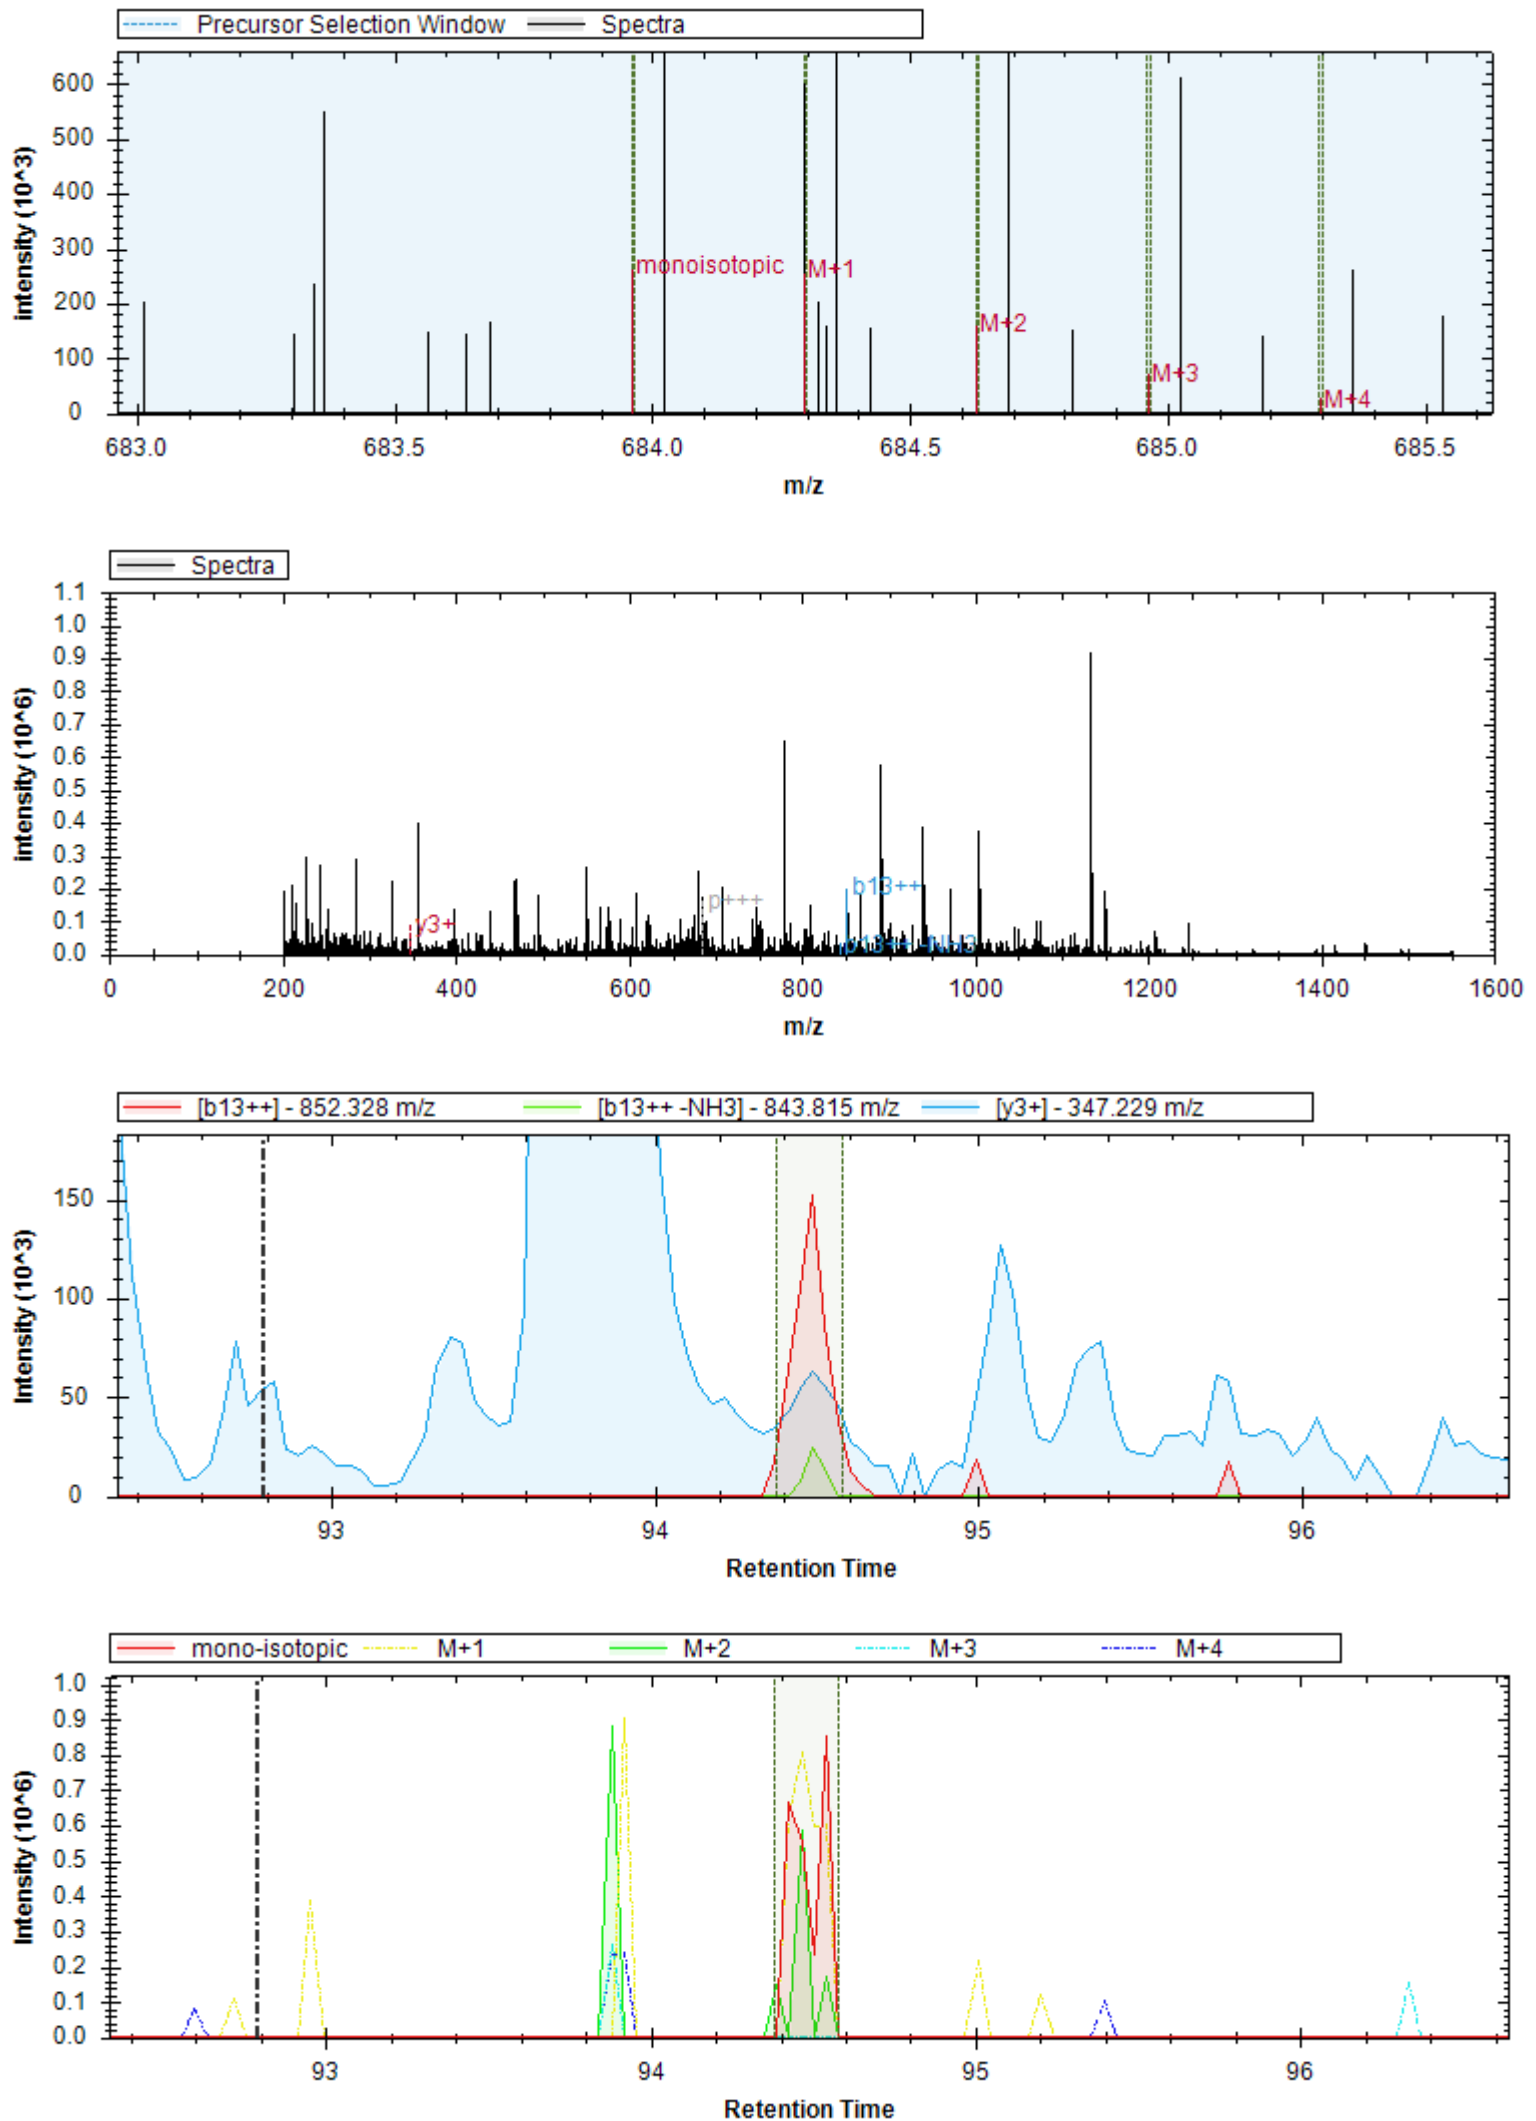

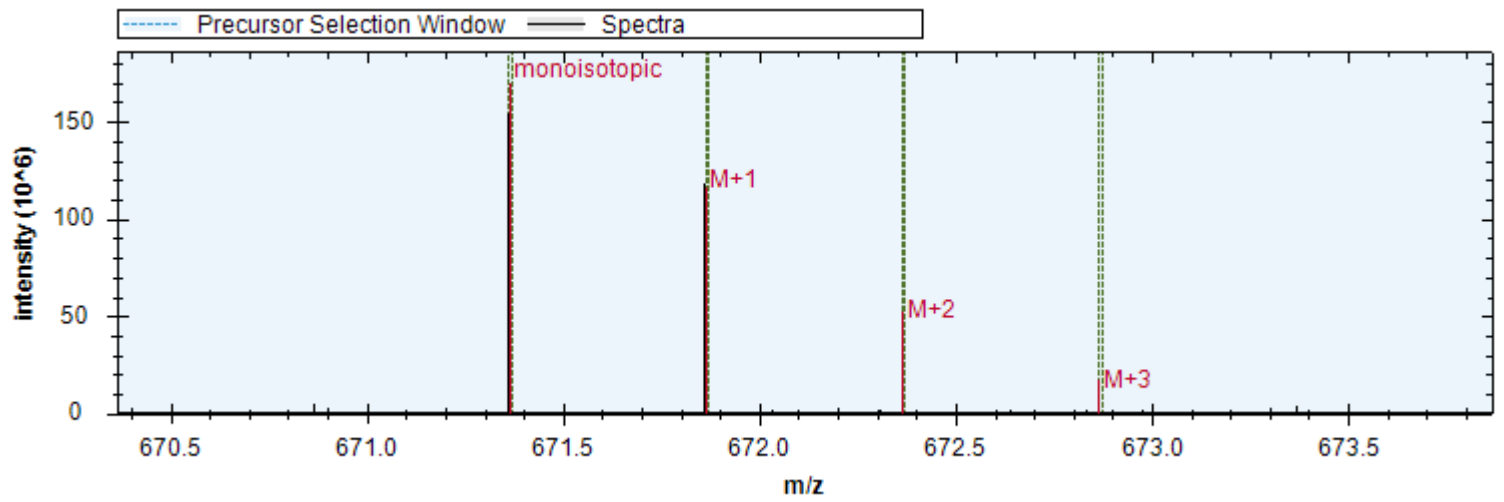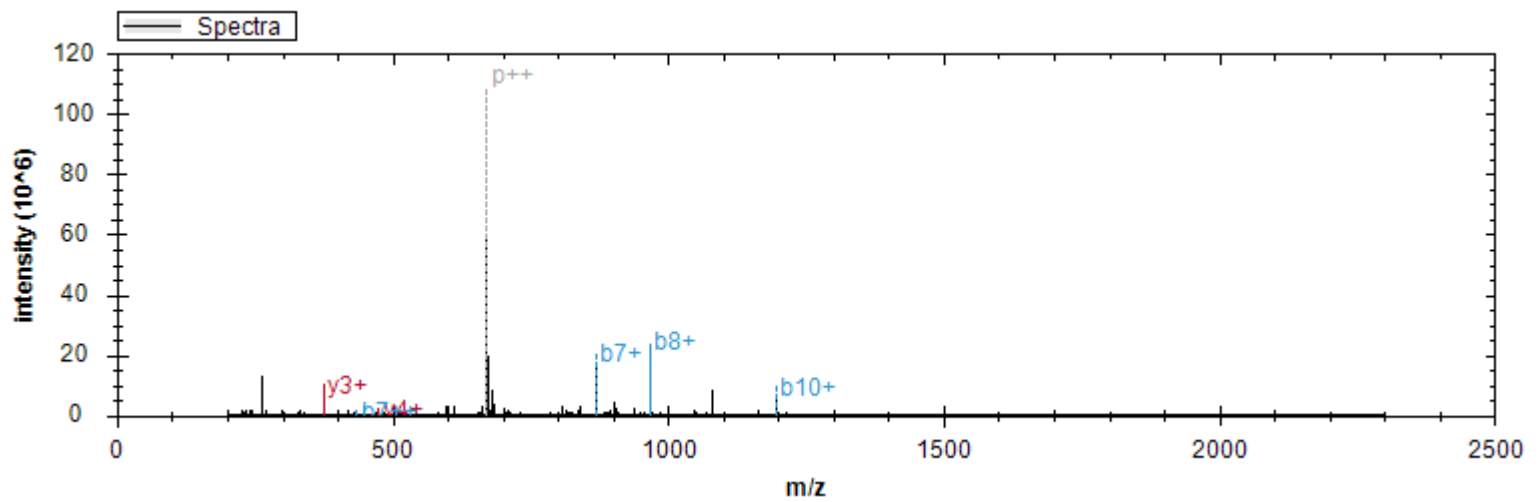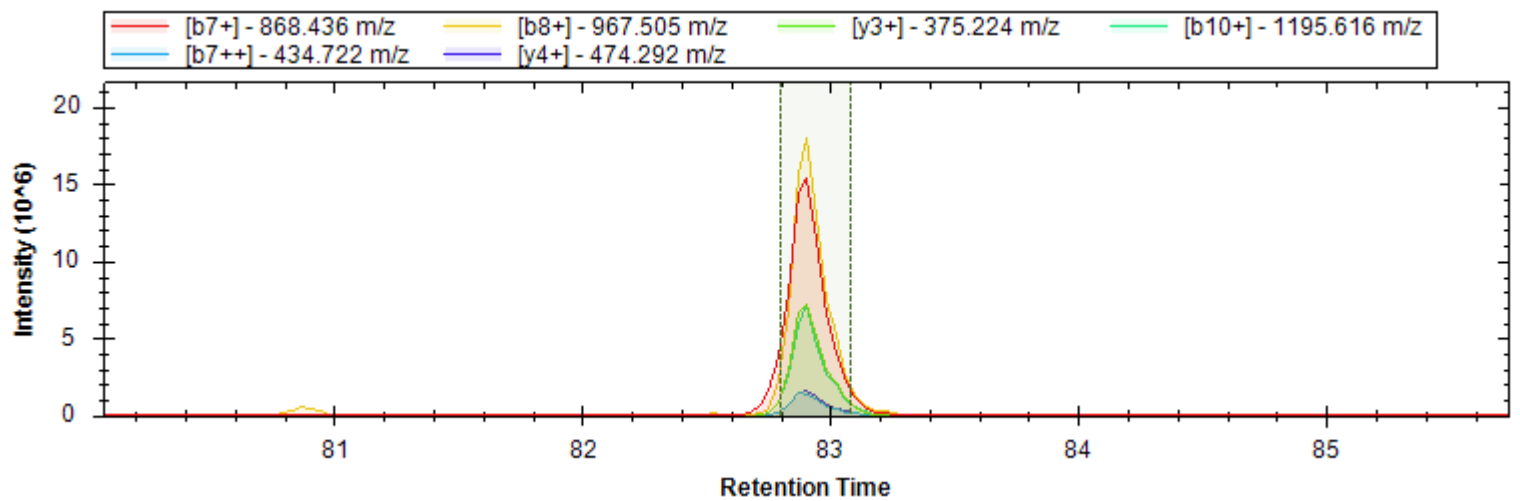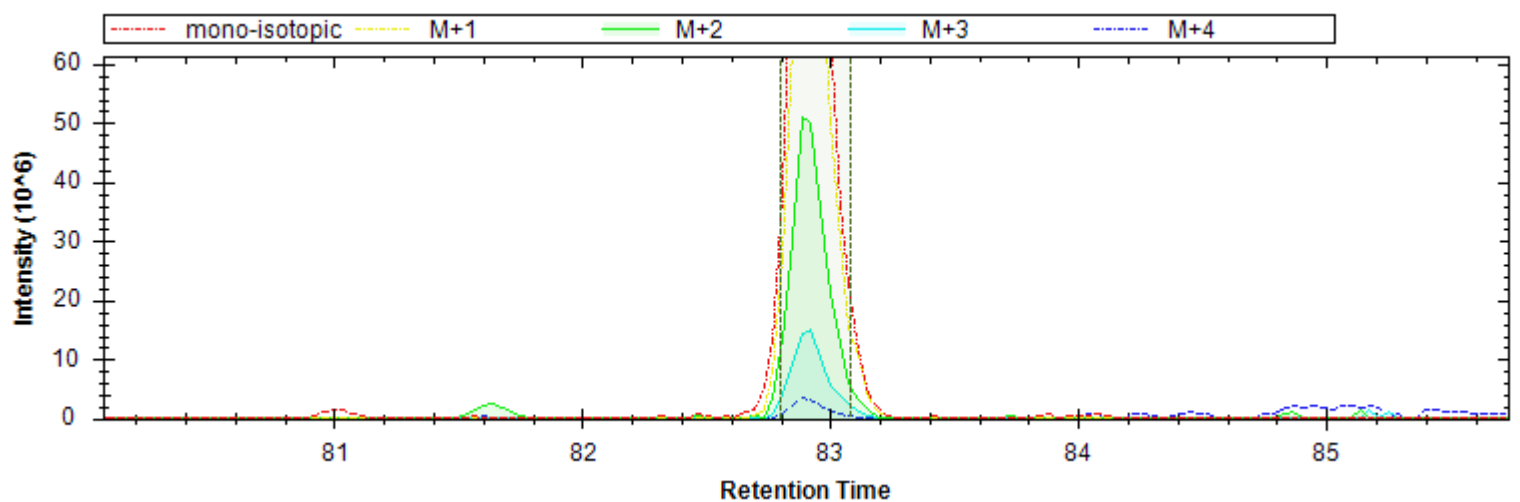

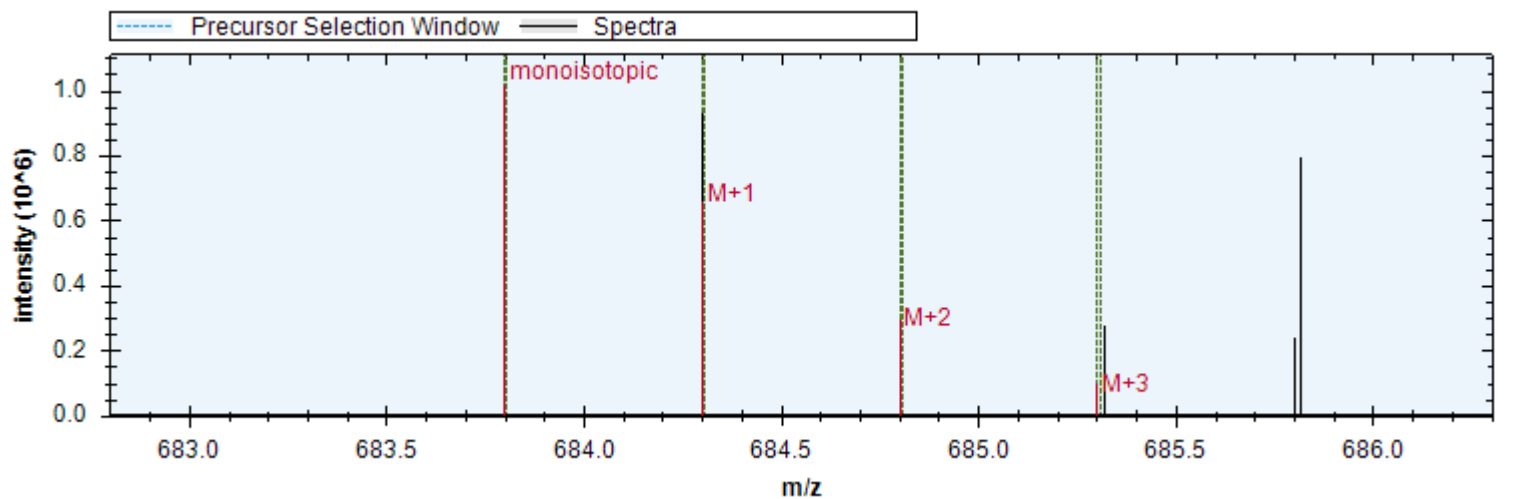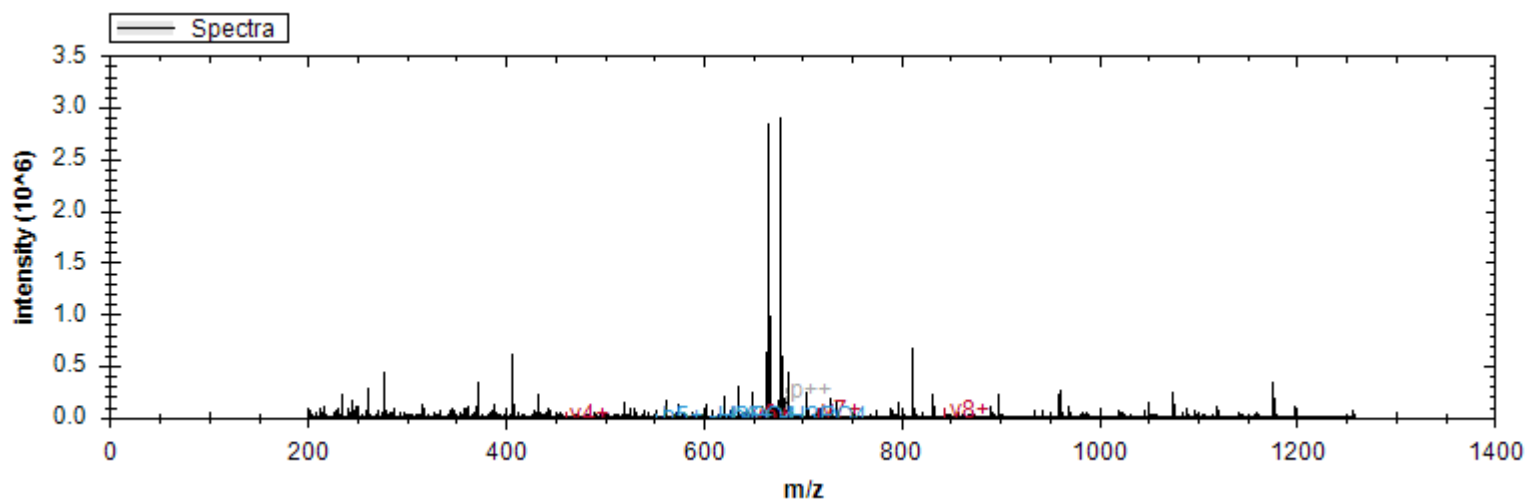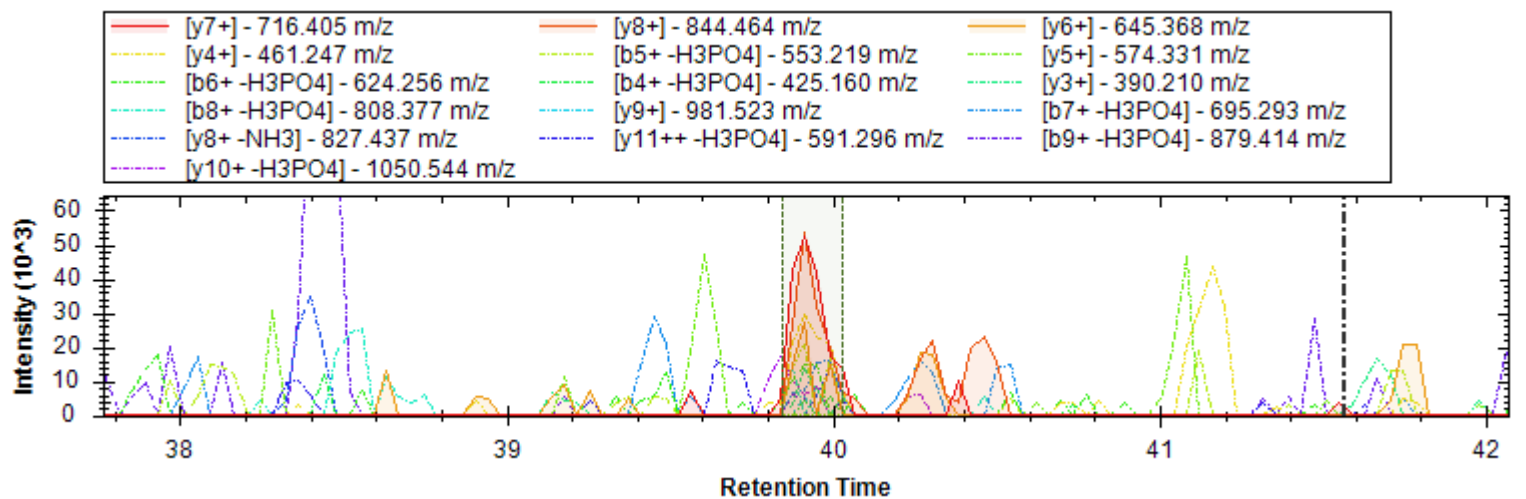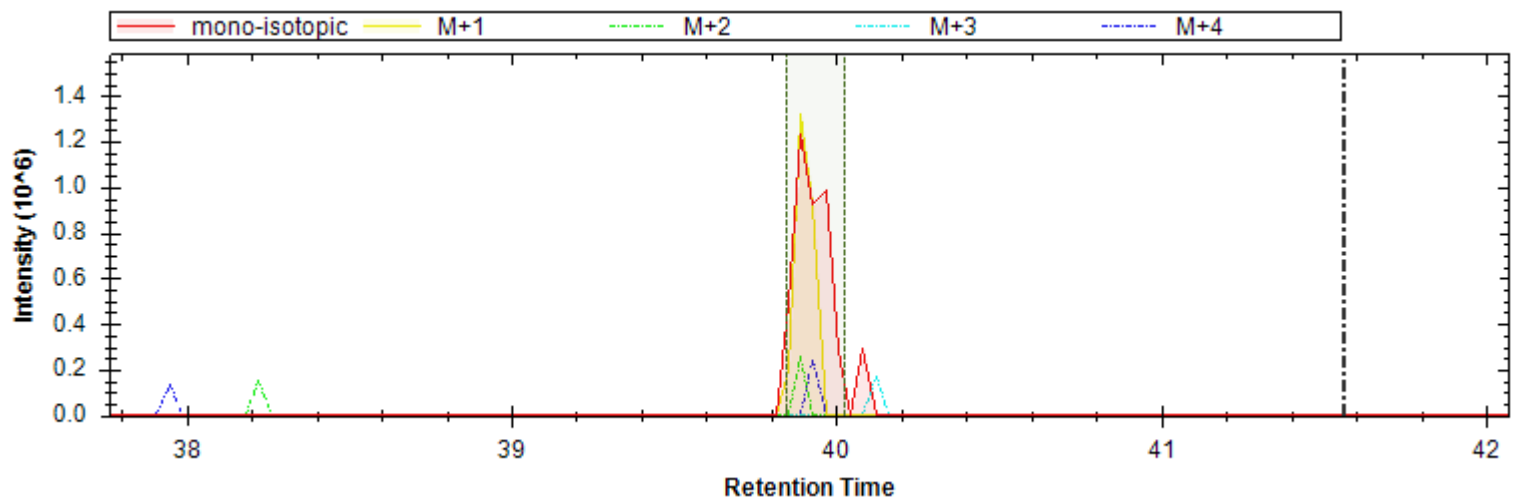

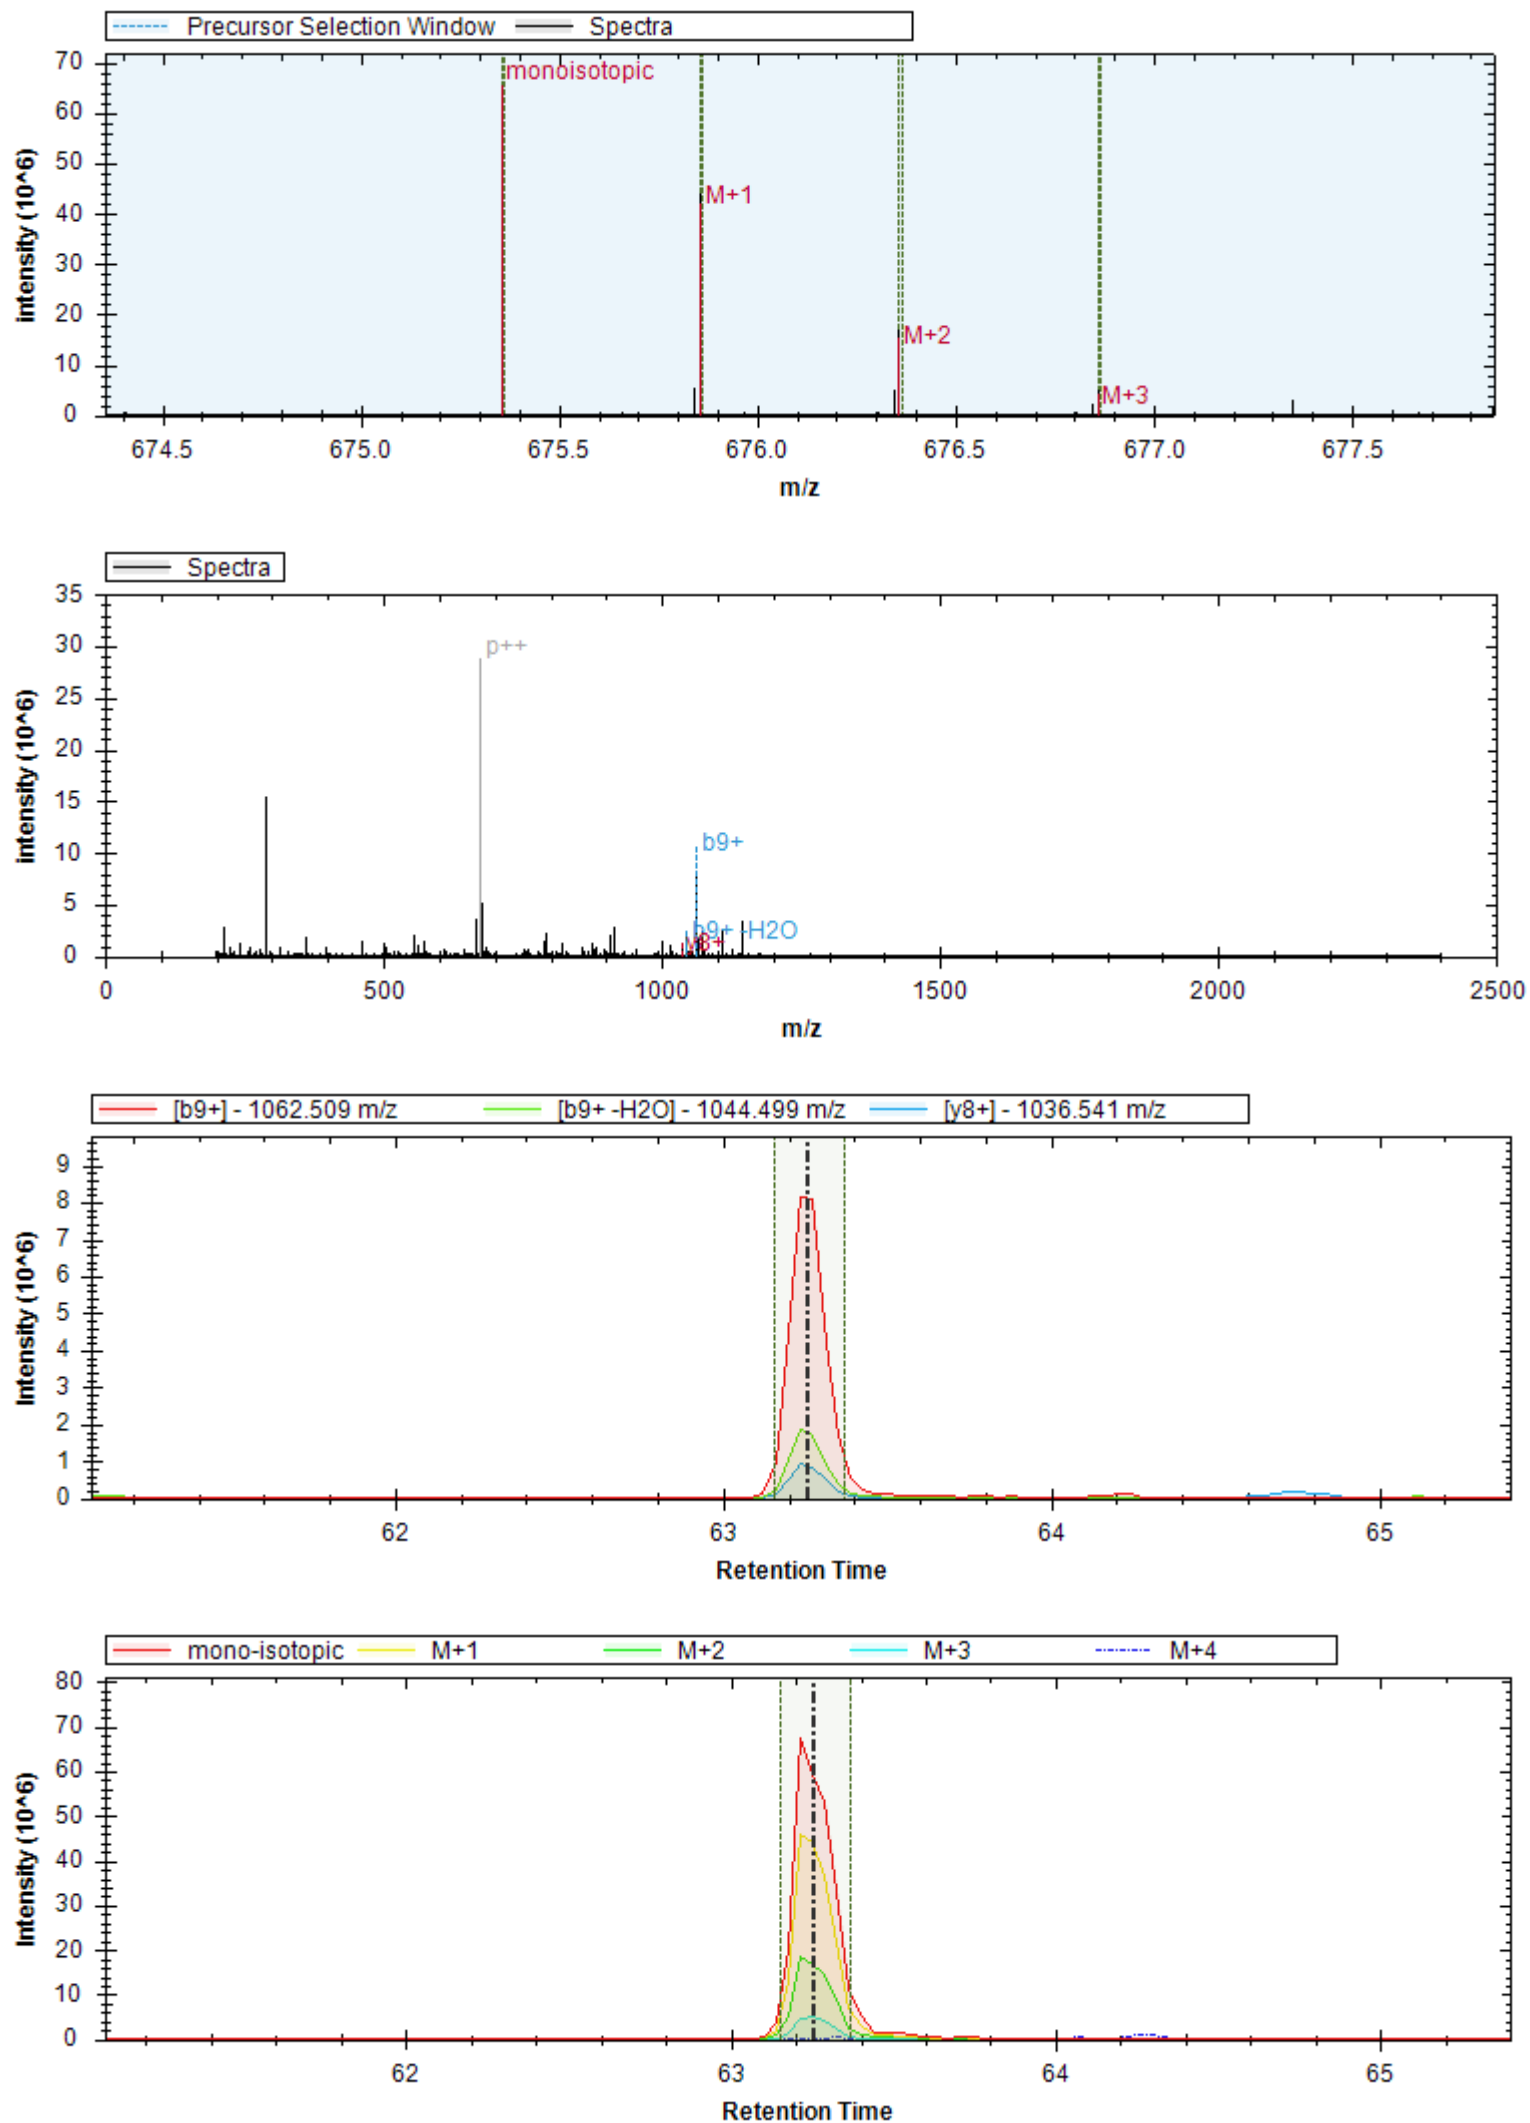

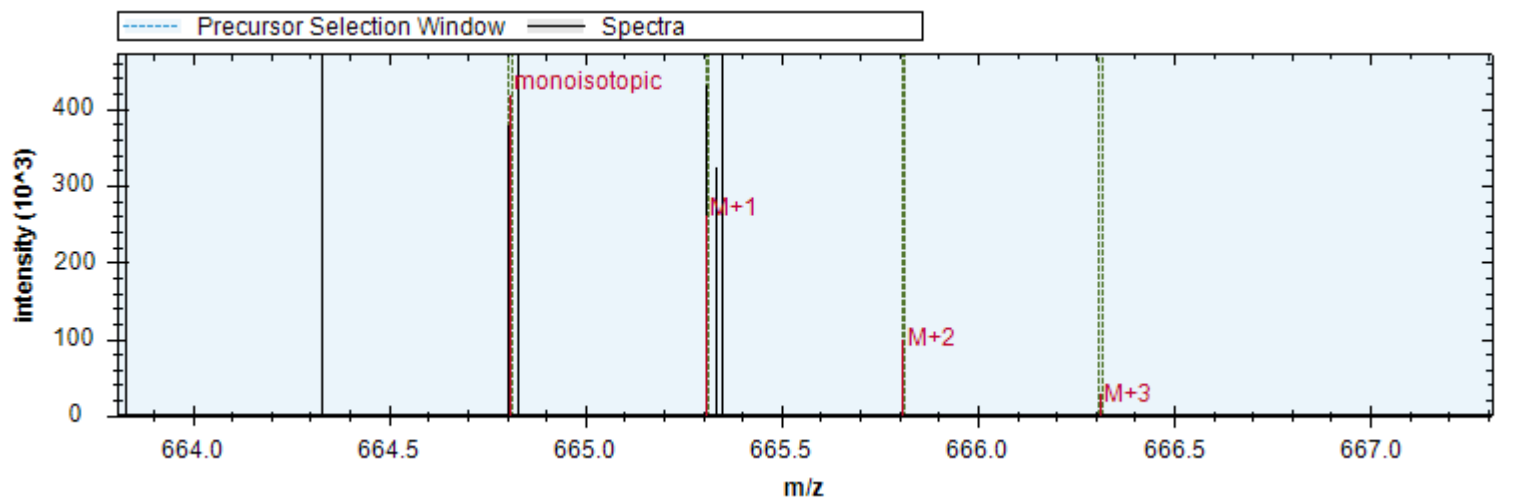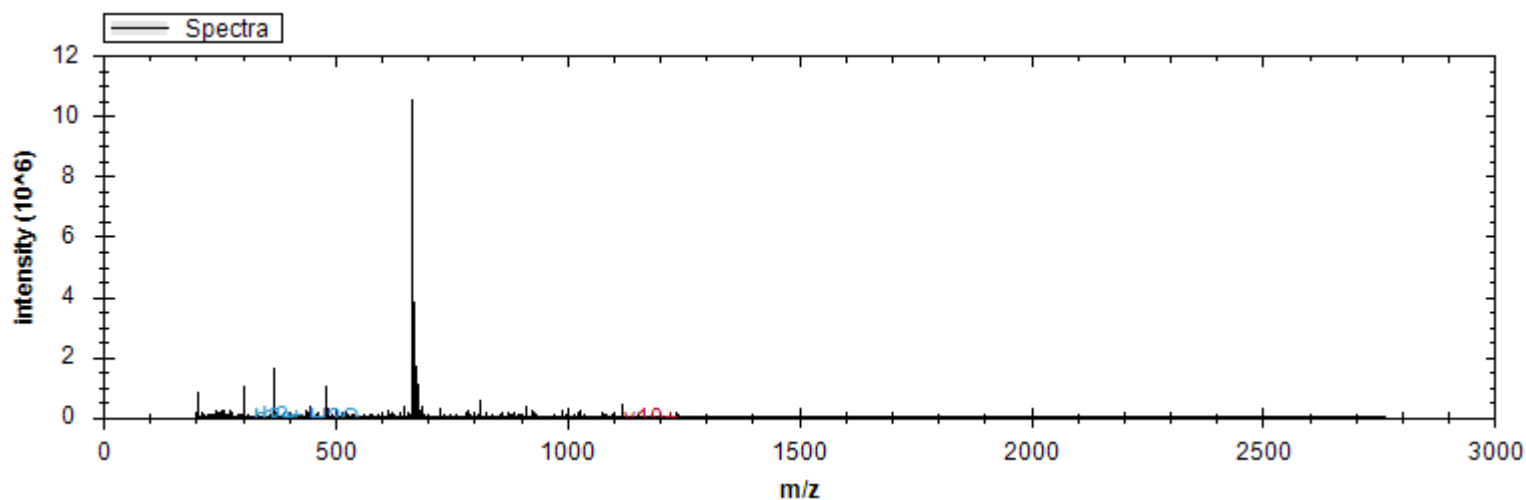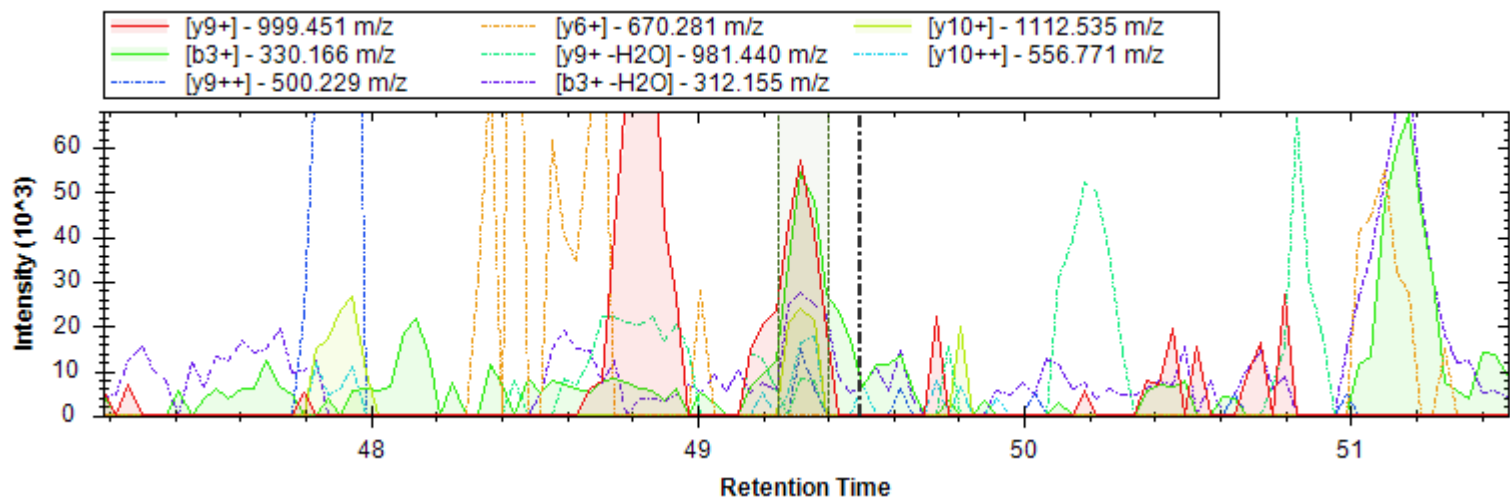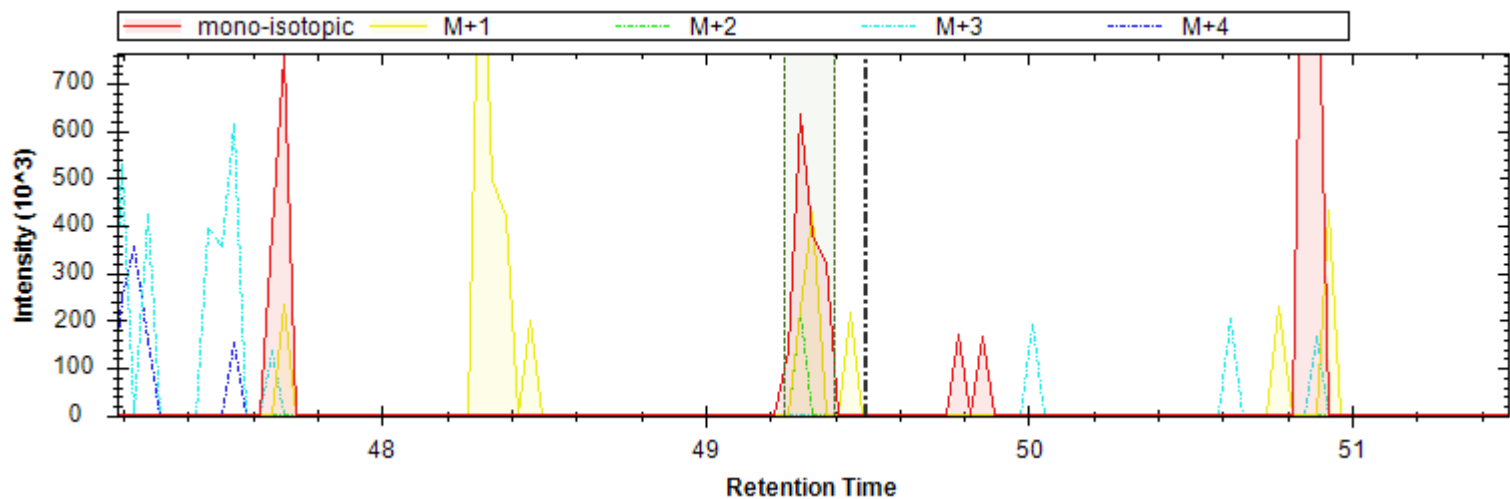



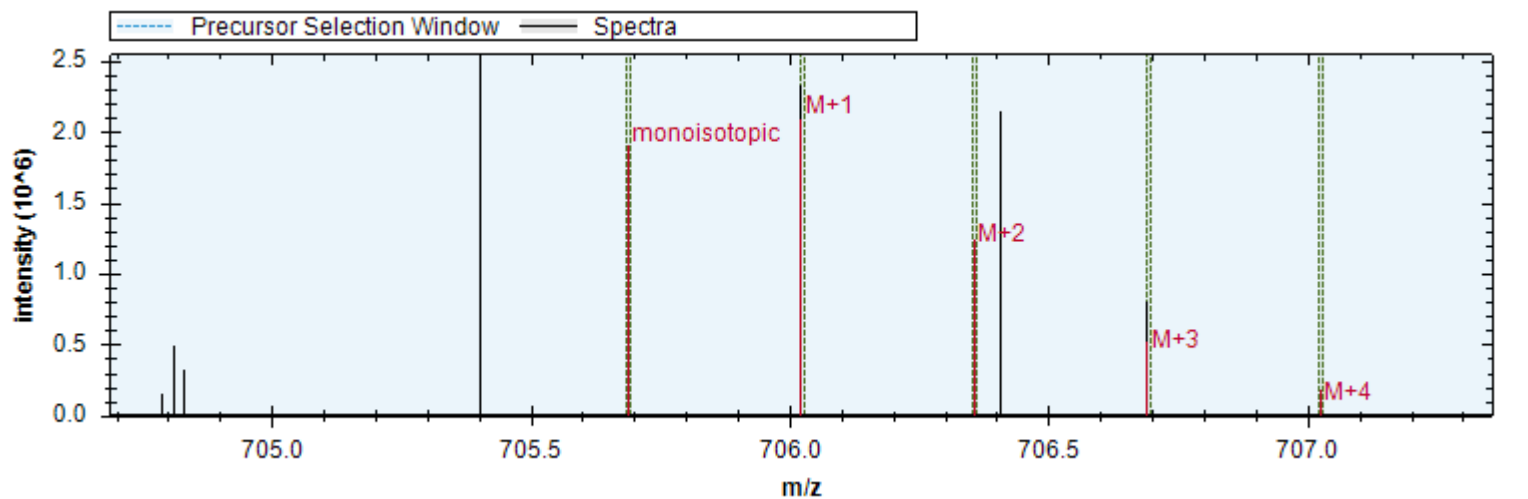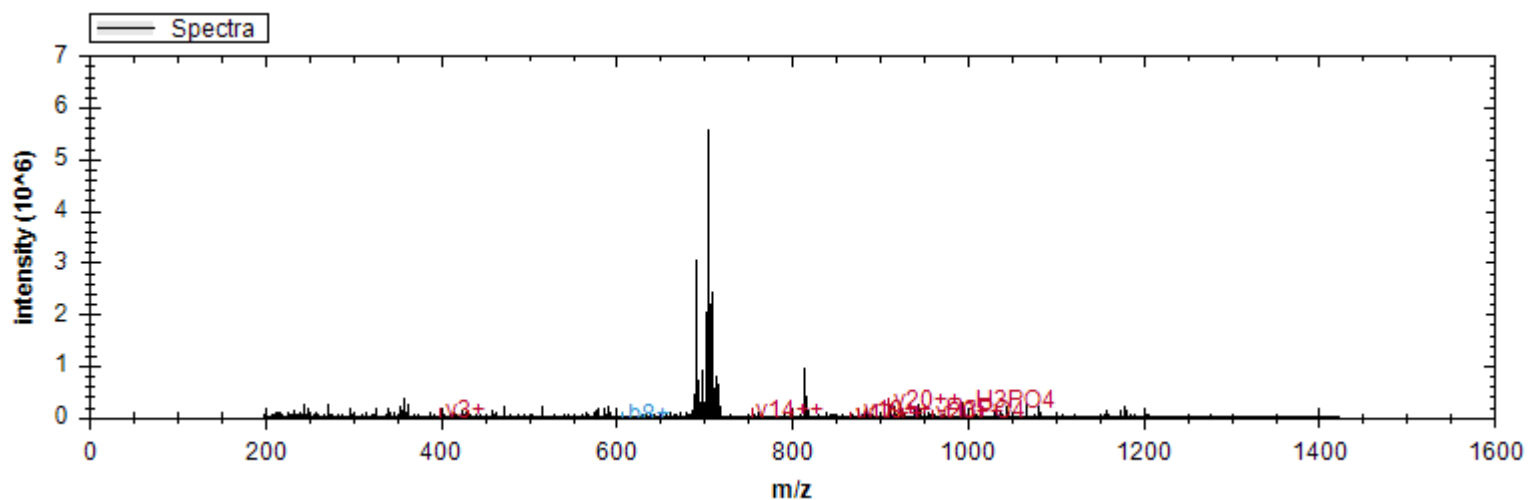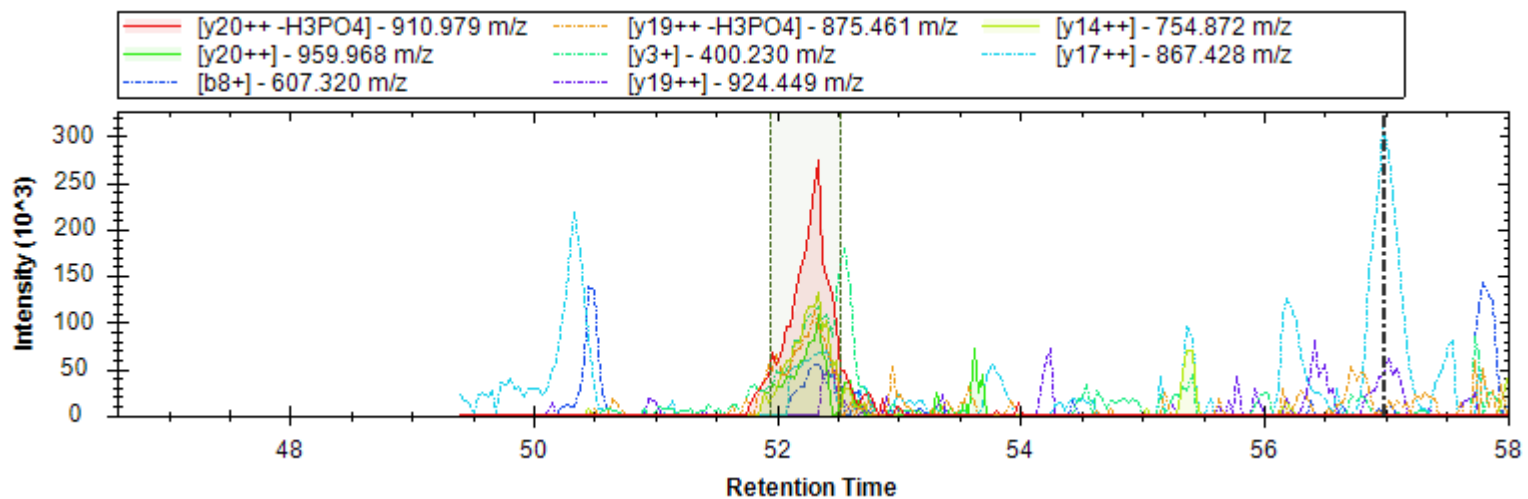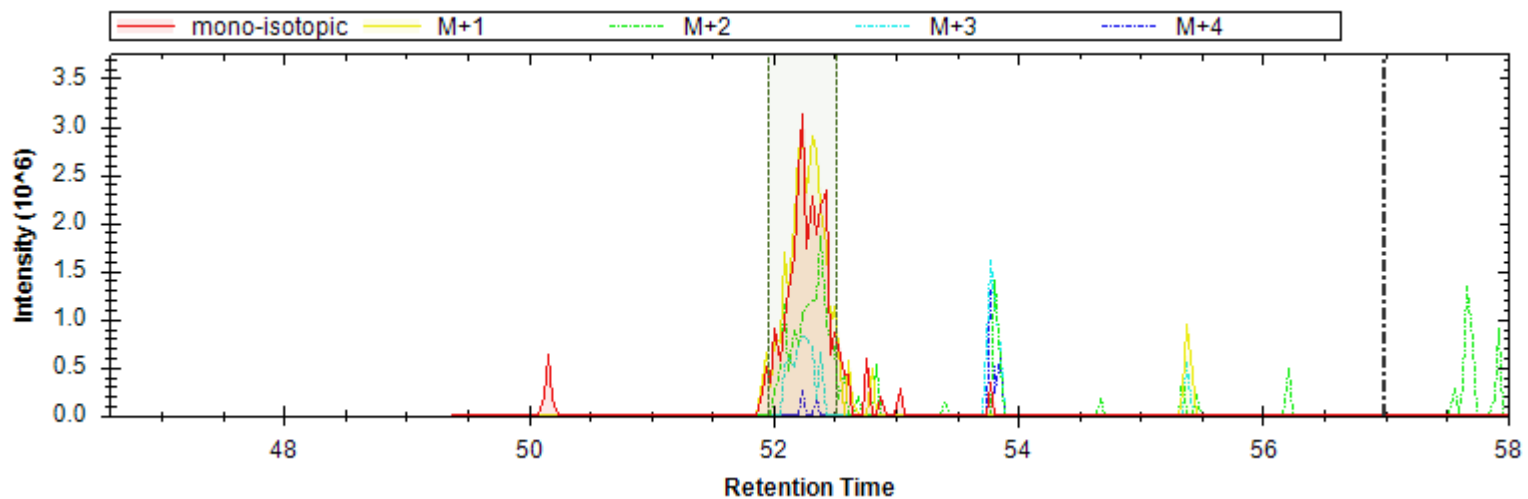

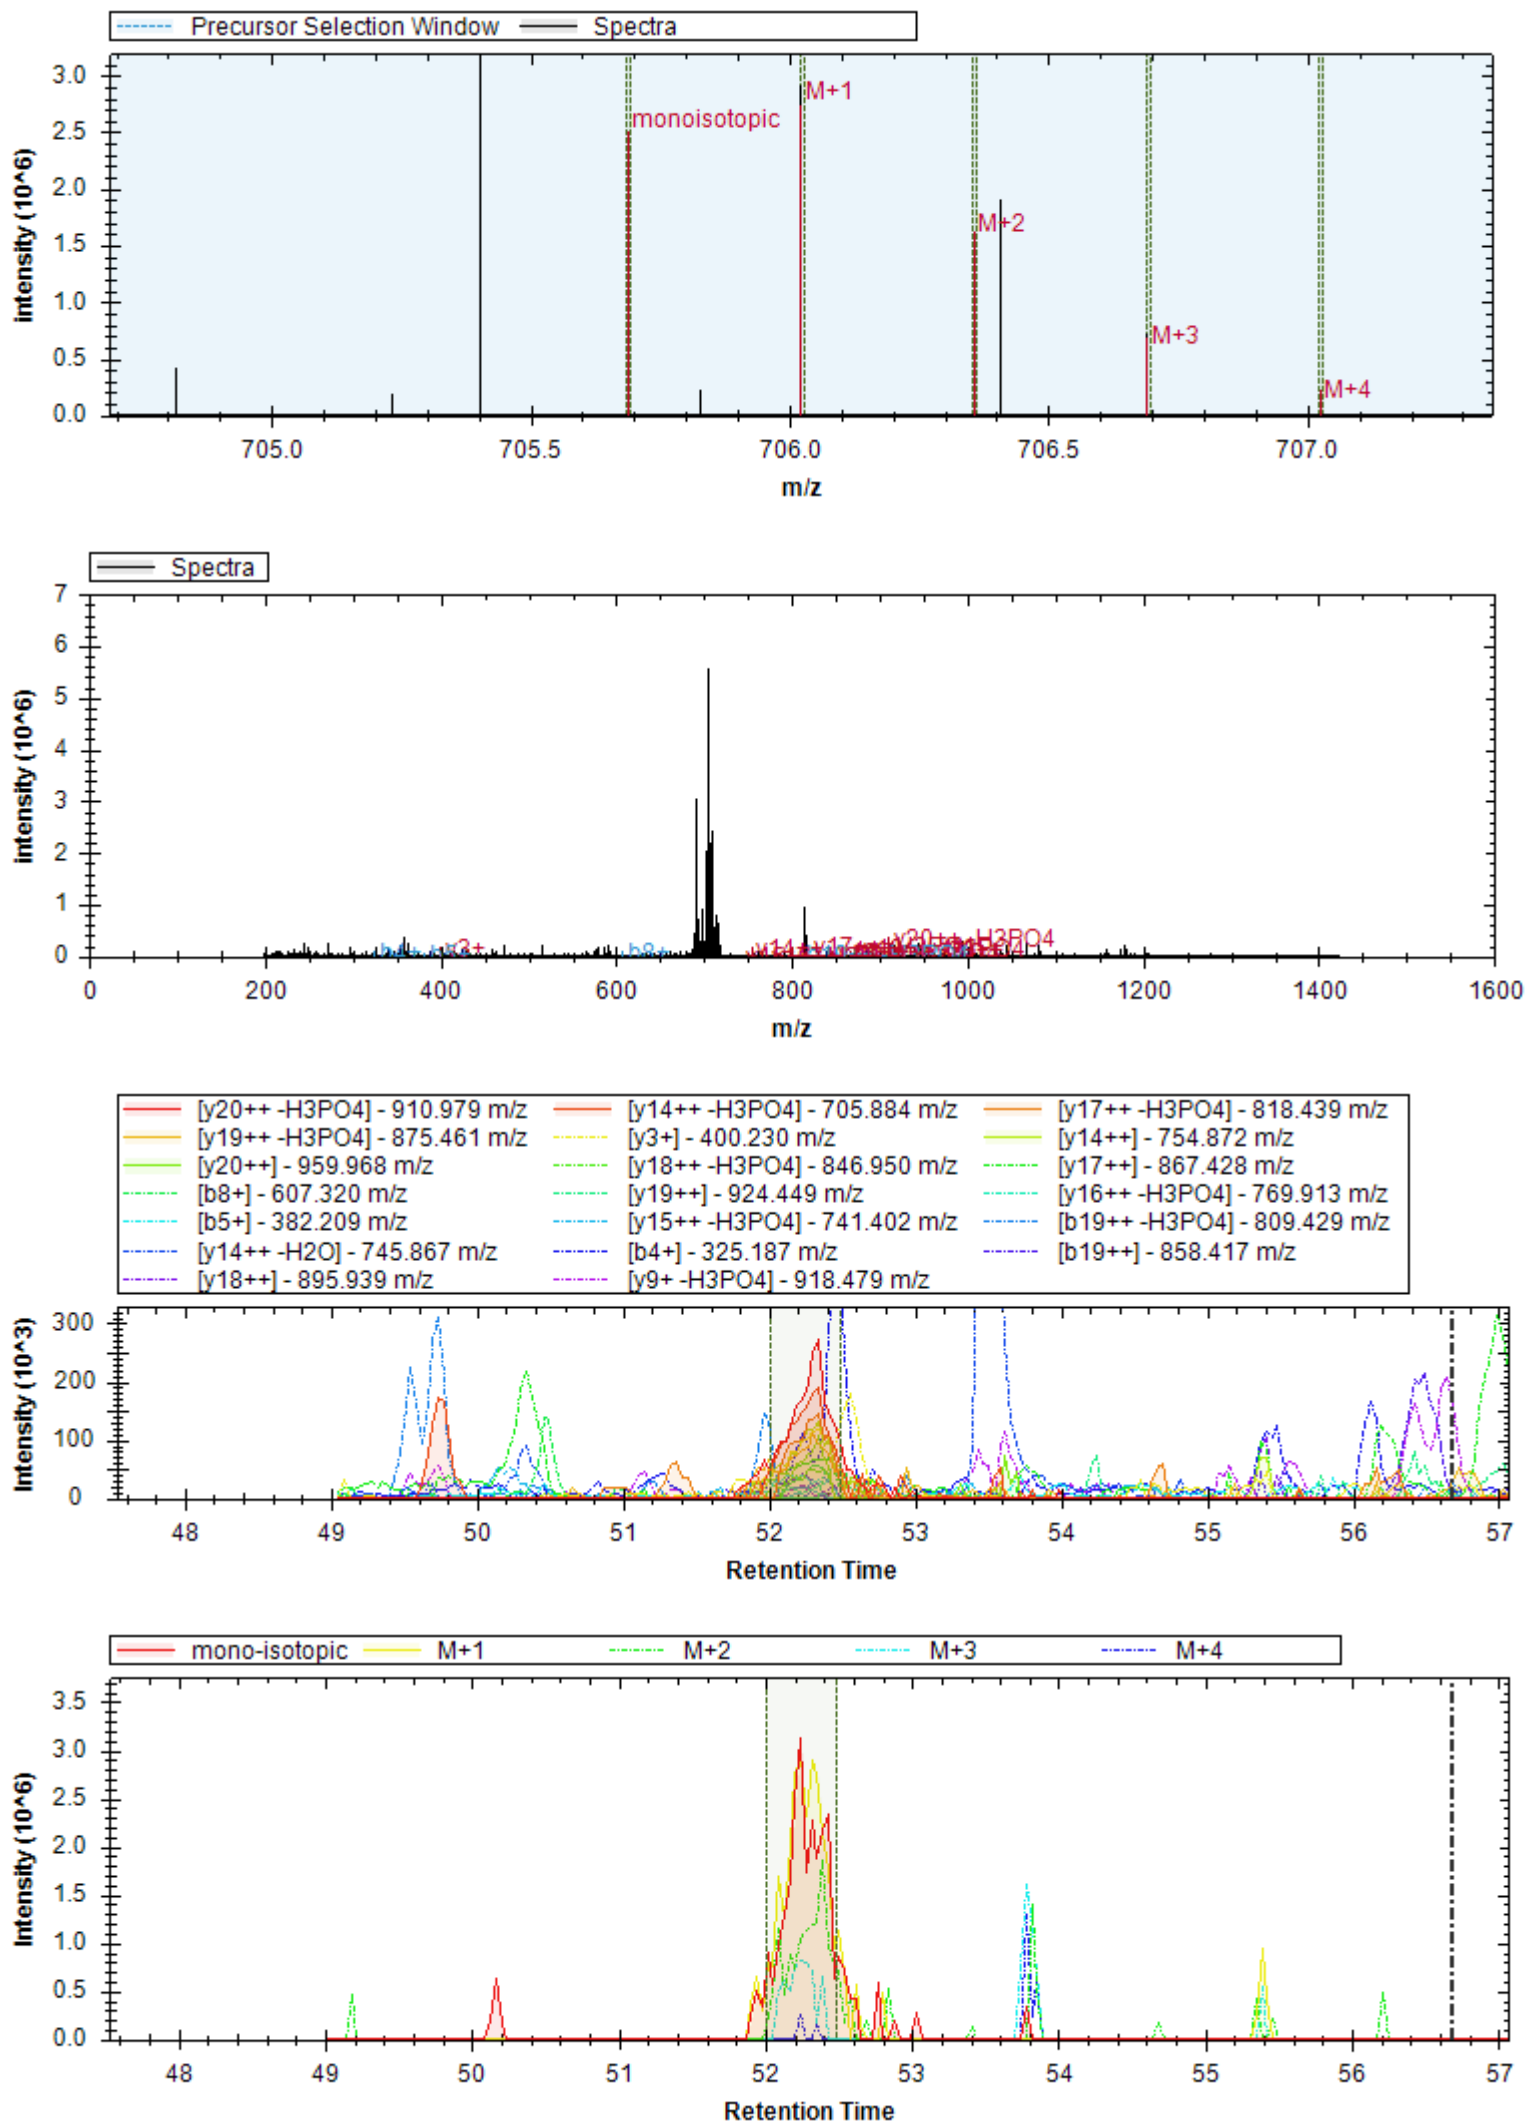

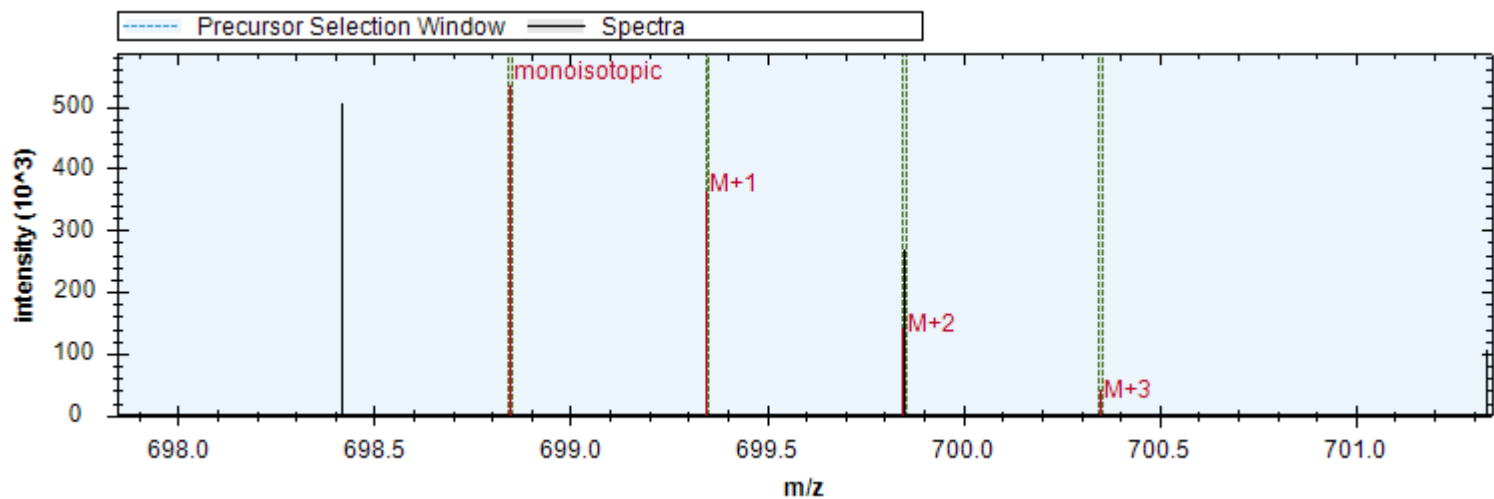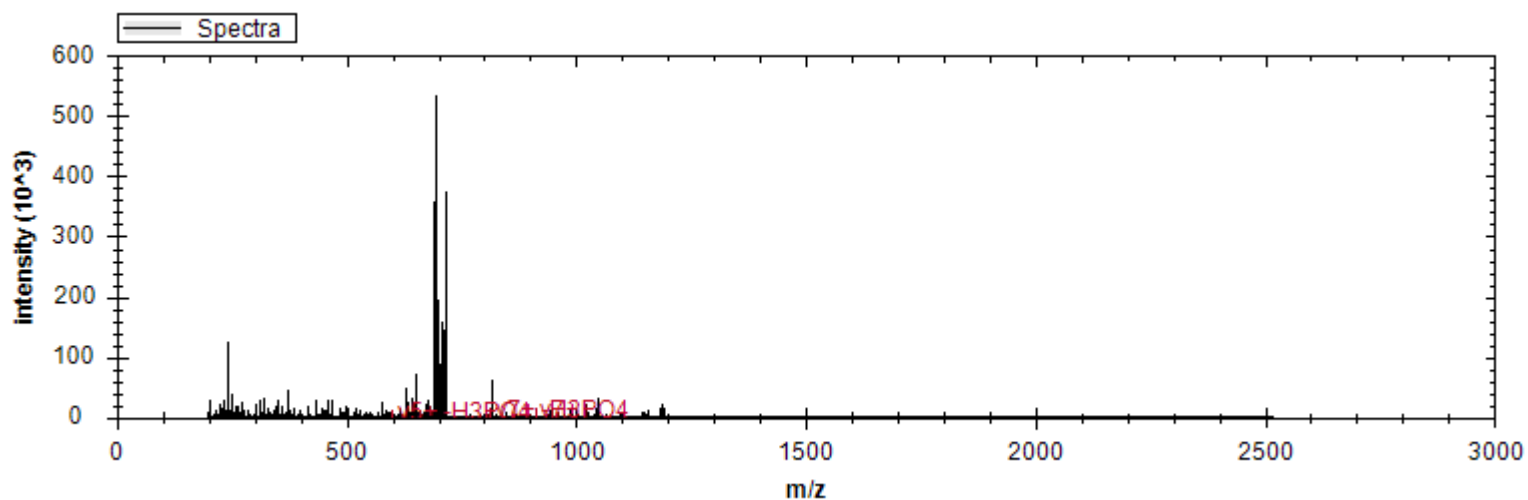

- |                              |                            |                             |
|------------------------------|----------------------------|-----------------------------|
| [y4+] - 529.309 m/z          | [y7+ -H3PO4] - 813.458 m/z | [y5+ -H3PO4] - 598.331 m/z  |
| [y11++ -H3PO4] - 600.323 m/z | [y7+] - 911.435 m/z        | [b4+] - 373.172 m/z         |
| [b8+ -H3PO4] - 770.404 m/z   | [y9++] - 541.274 m/z       | [y11++] - 649.311 m/z       |
| [y10+ -H3PO4] - 1098.590 m/z | [y6+ -H3PO4] - 726.426 m/z | [y10++] - 598.787 m/z       |
| [b5+] - 486.256 m/z          | [y5+] - 696.308 m/z        | [y9++ -H3PO4] - 492.285 m/z |

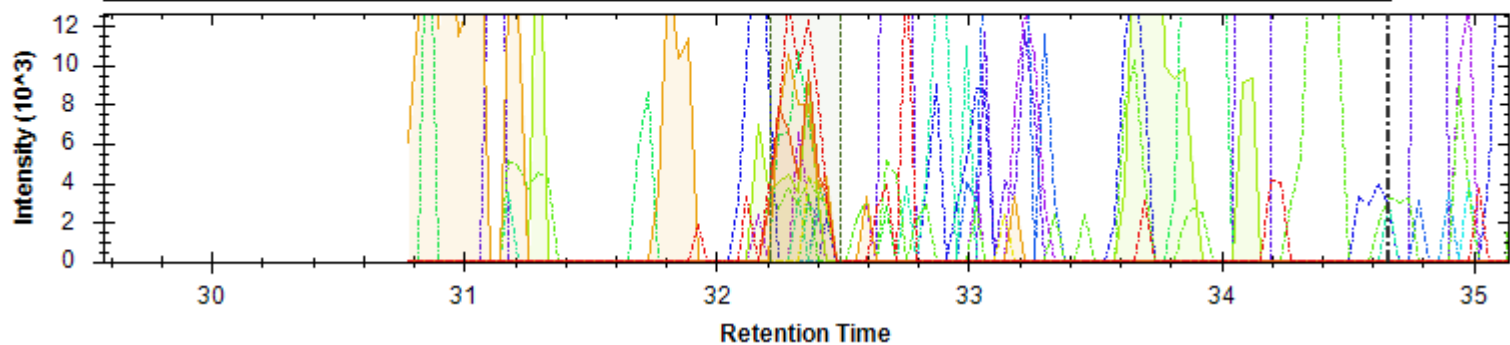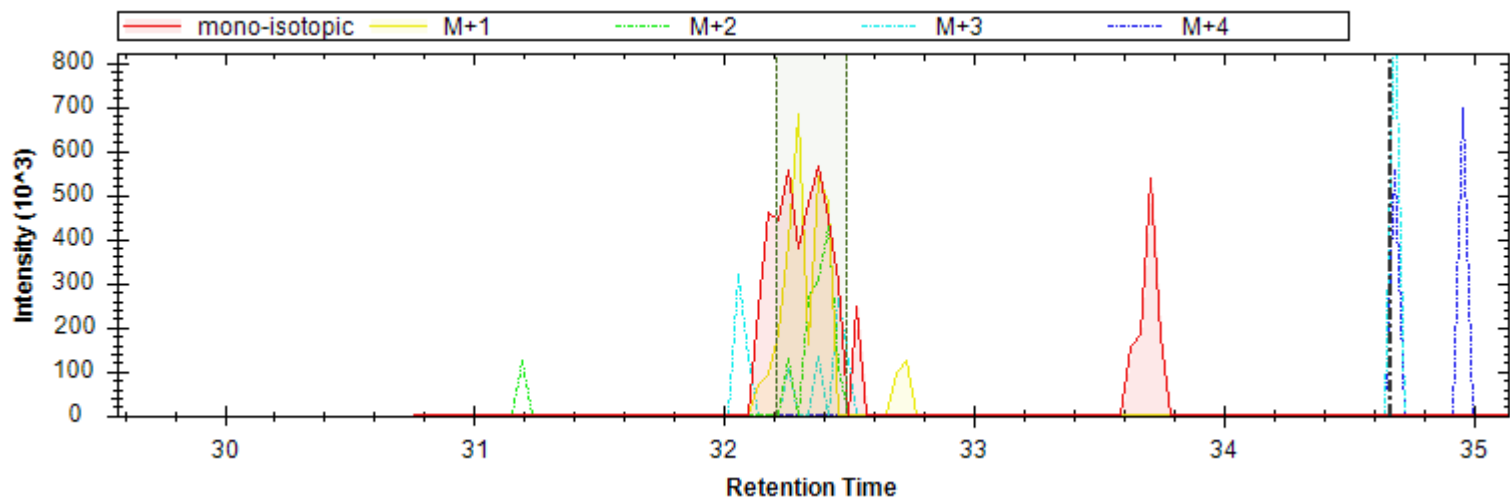

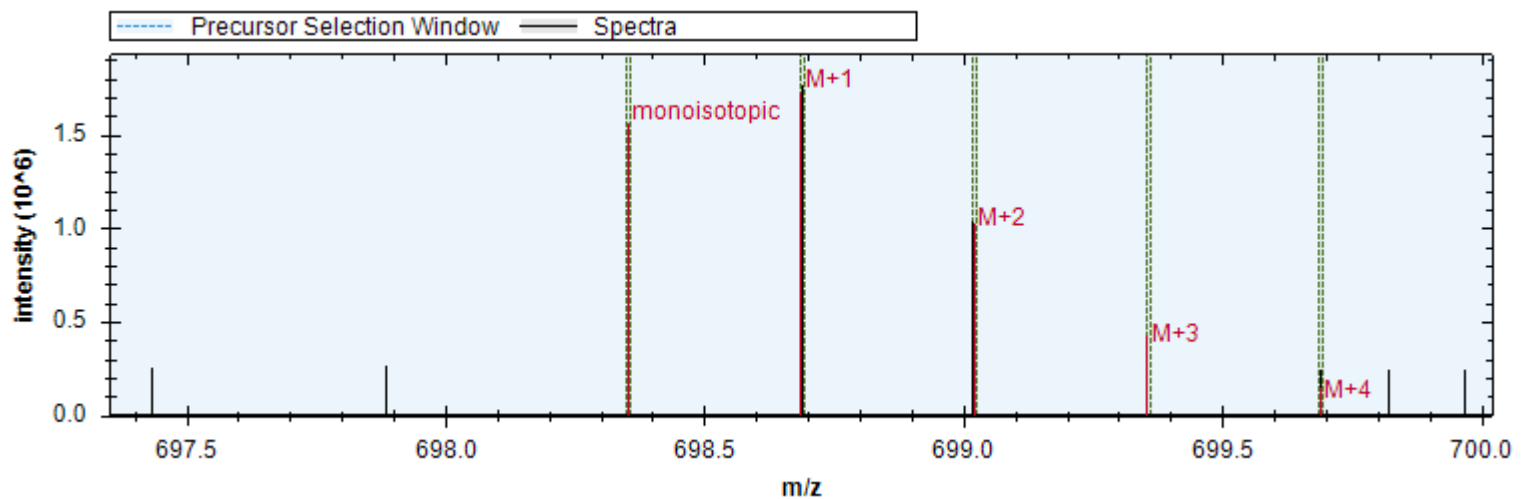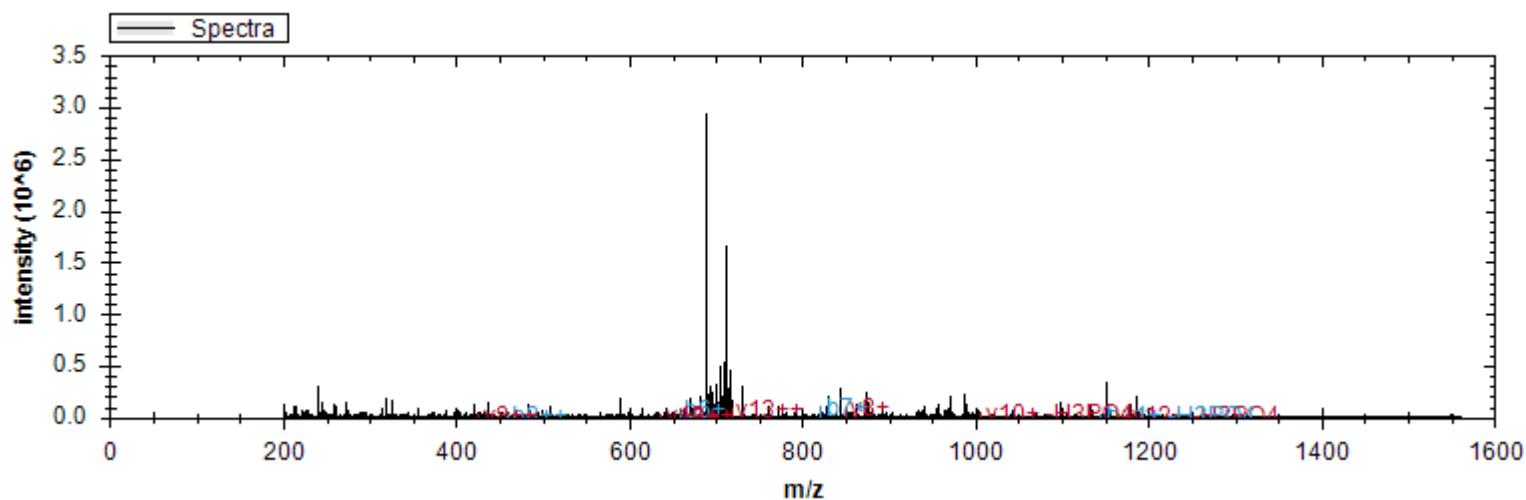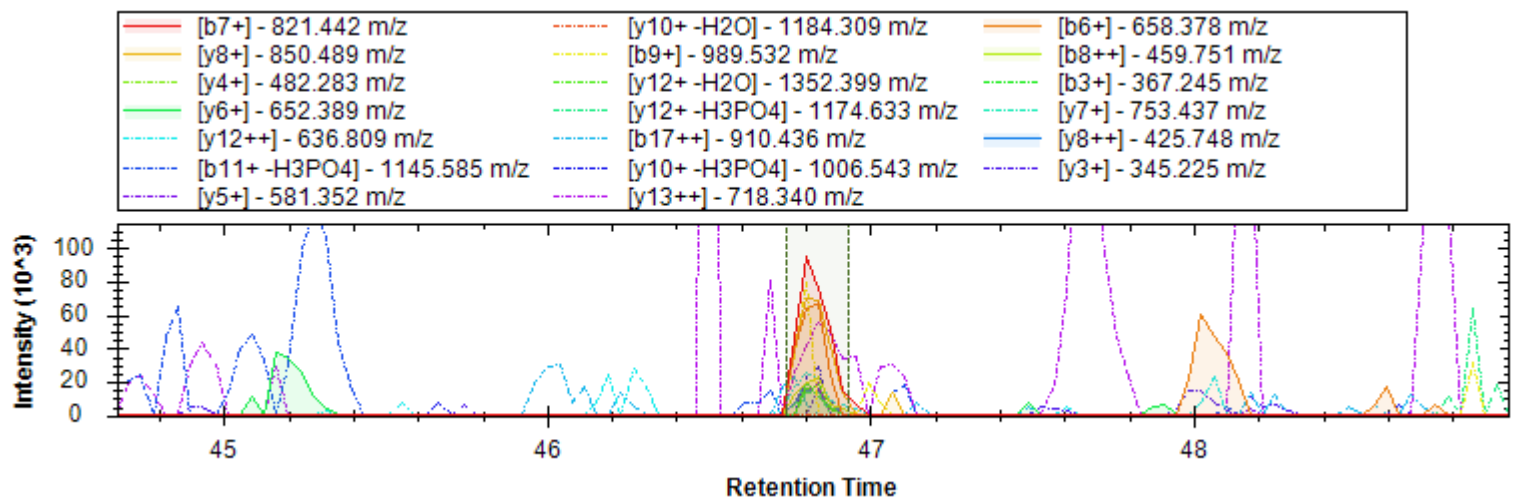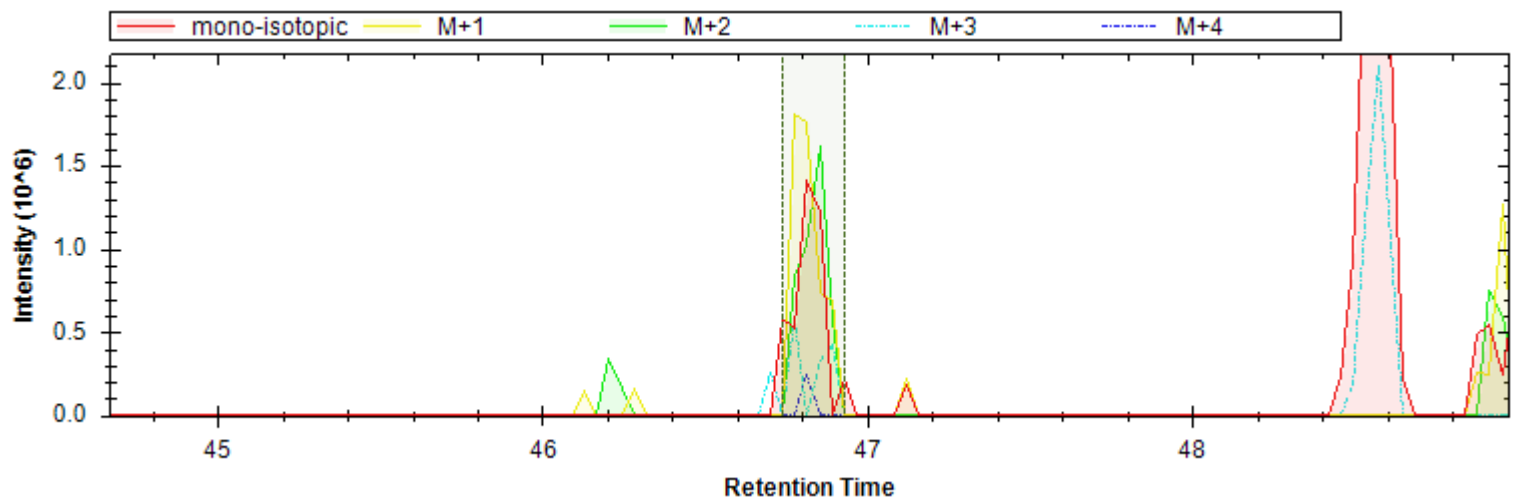

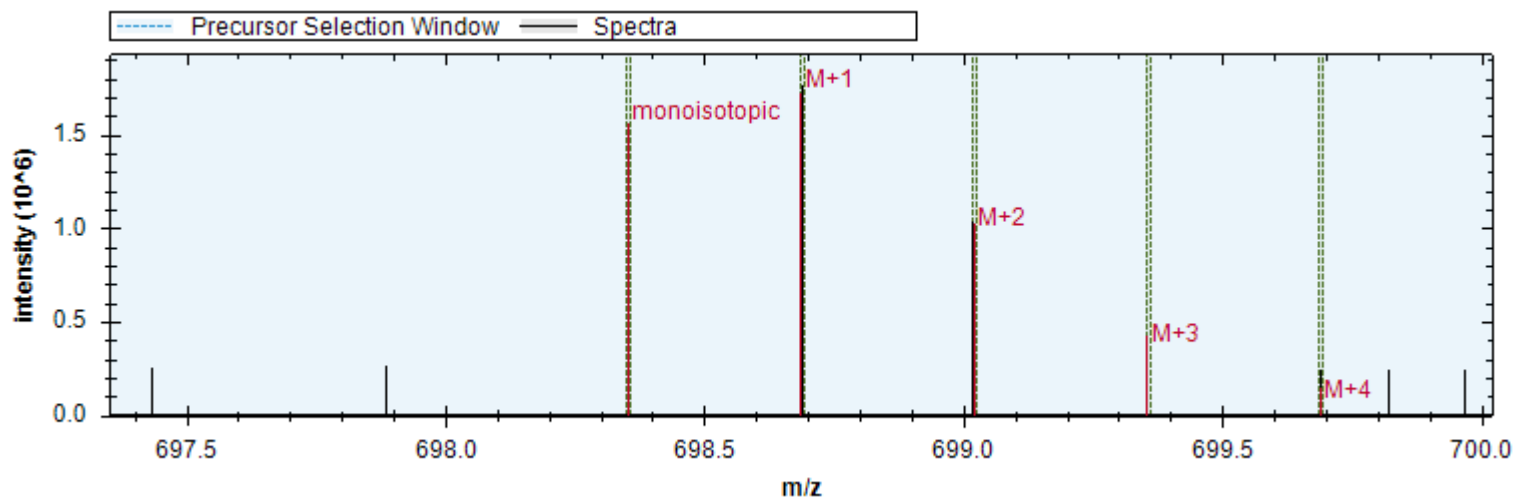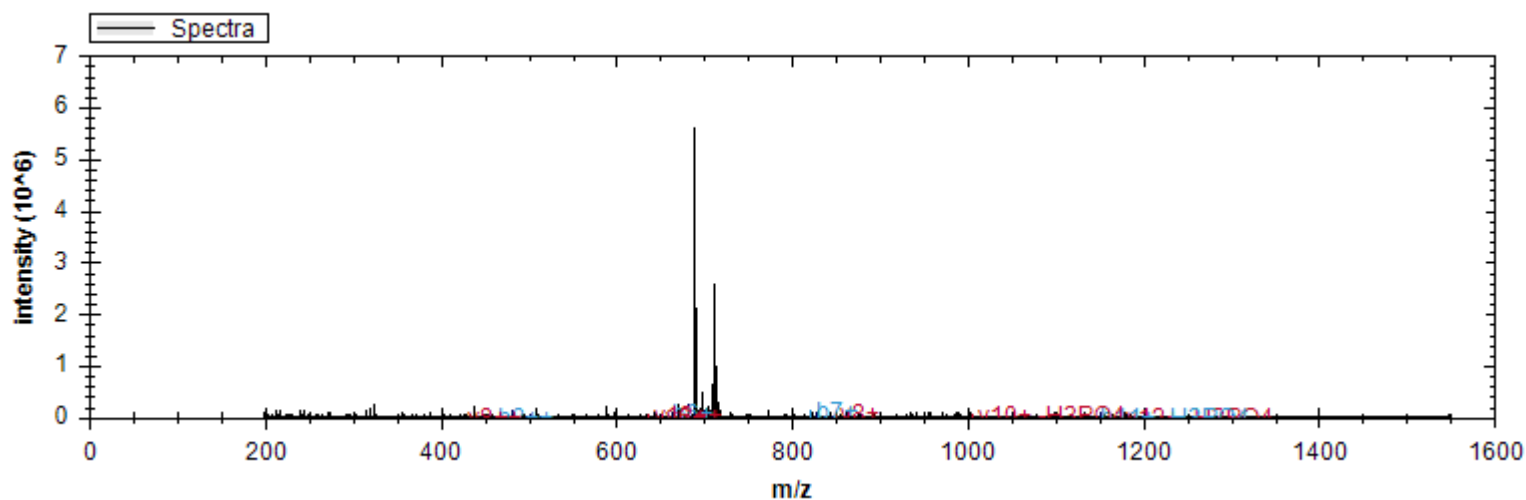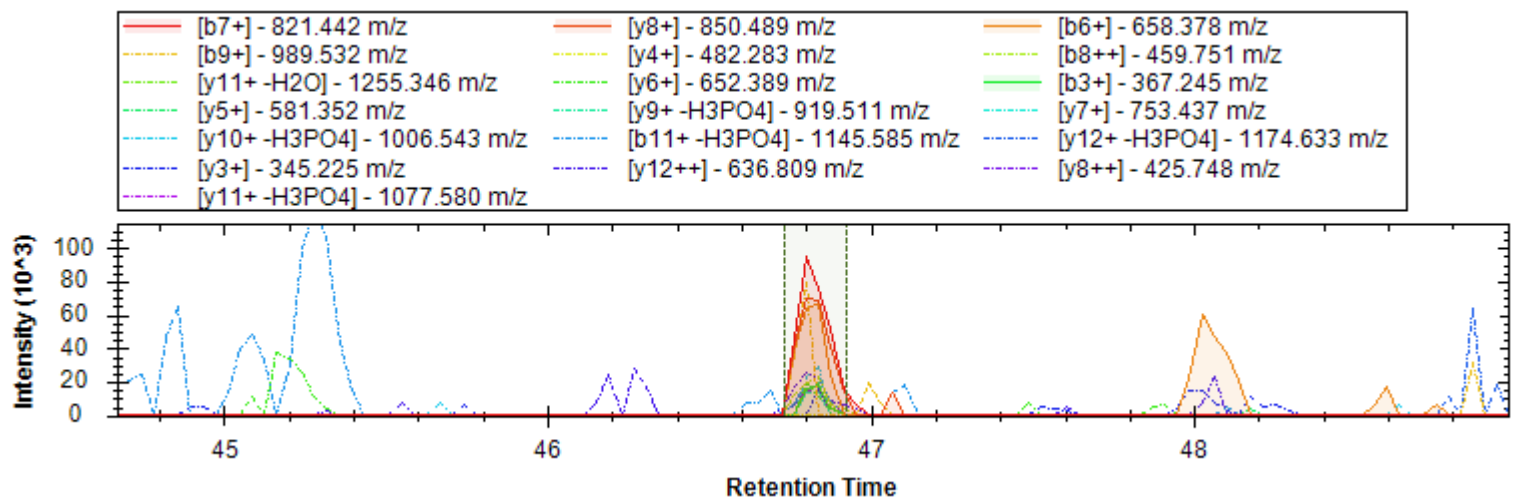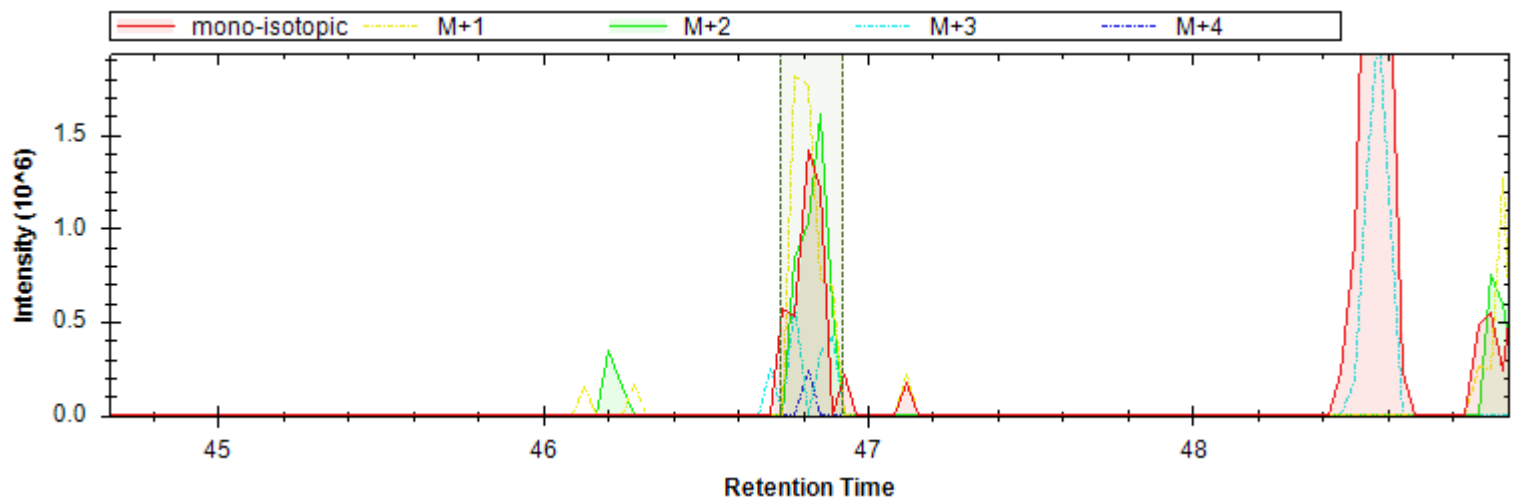

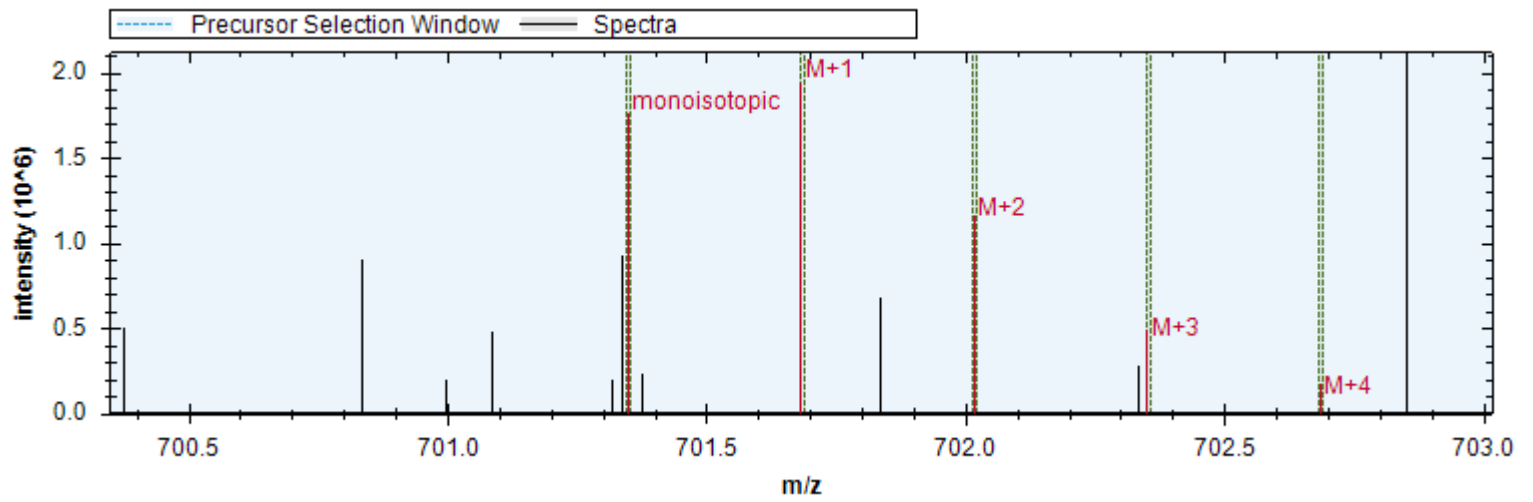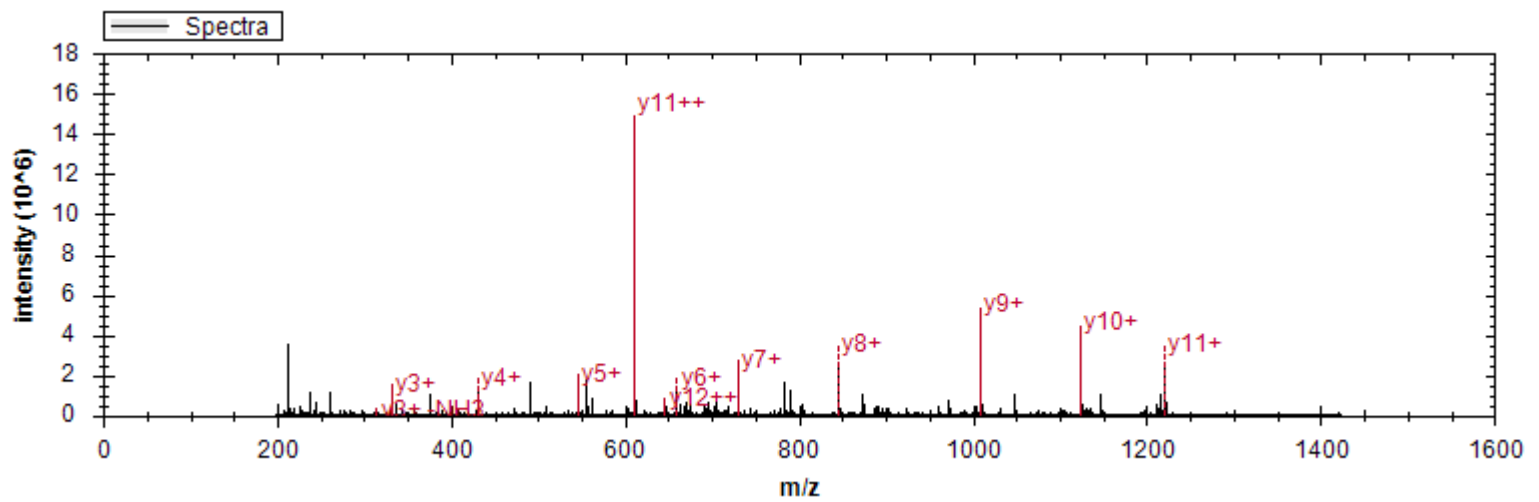

|                          |                       |                       |
|--------------------------|-----------------------|-----------------------|
| [y9+] - 1008.500 m/z     | [y11++] - 610.793 m/z | [y10+] - 1123.527 m/z |
| [y8+] - 845.436 m/z      | [y7+] - 730.409 m/z   | [y11+] - 1220.579 m/z |
| [y4+] - 431.261 m/z      | [y5+] - 546.288 m/z   | [y3+] - 332.193 m/z   |
| [y6+] - 659.372 m/z      | [y12++] - 646.312 m/z | [y13++] - 702.854 m/z |
| [y3+ -NH3] - 315.166 m/z |                       |                       |

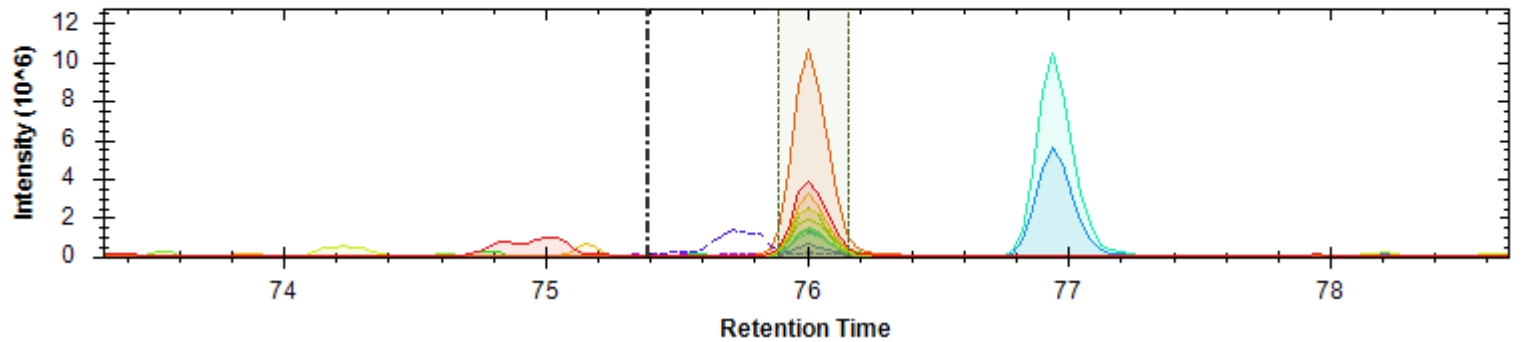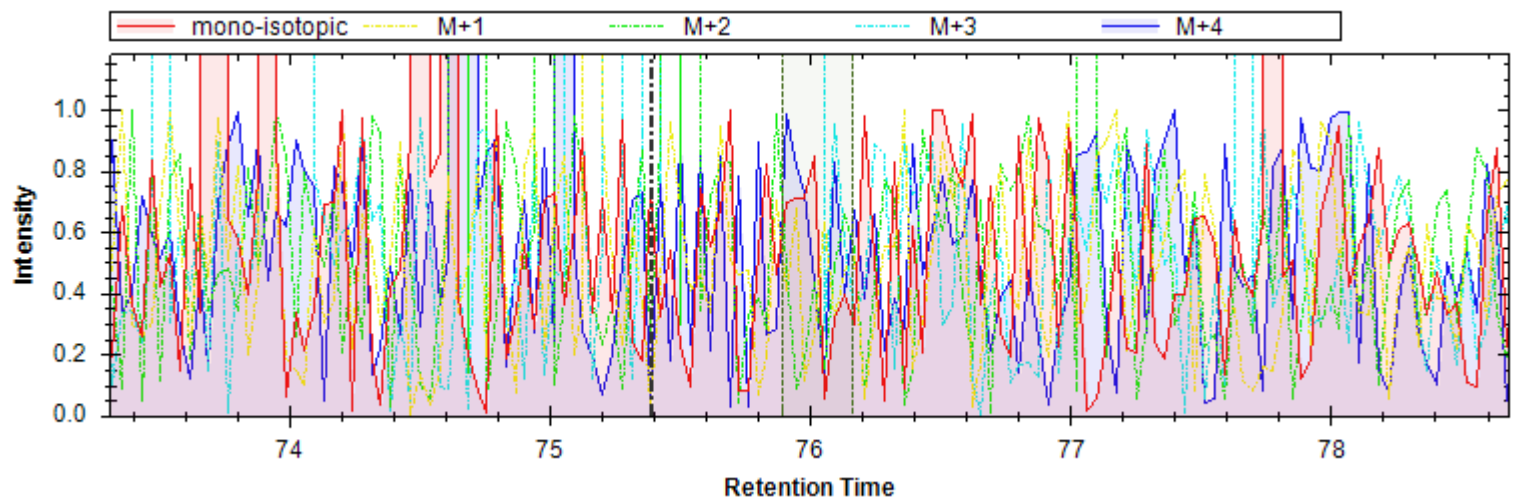

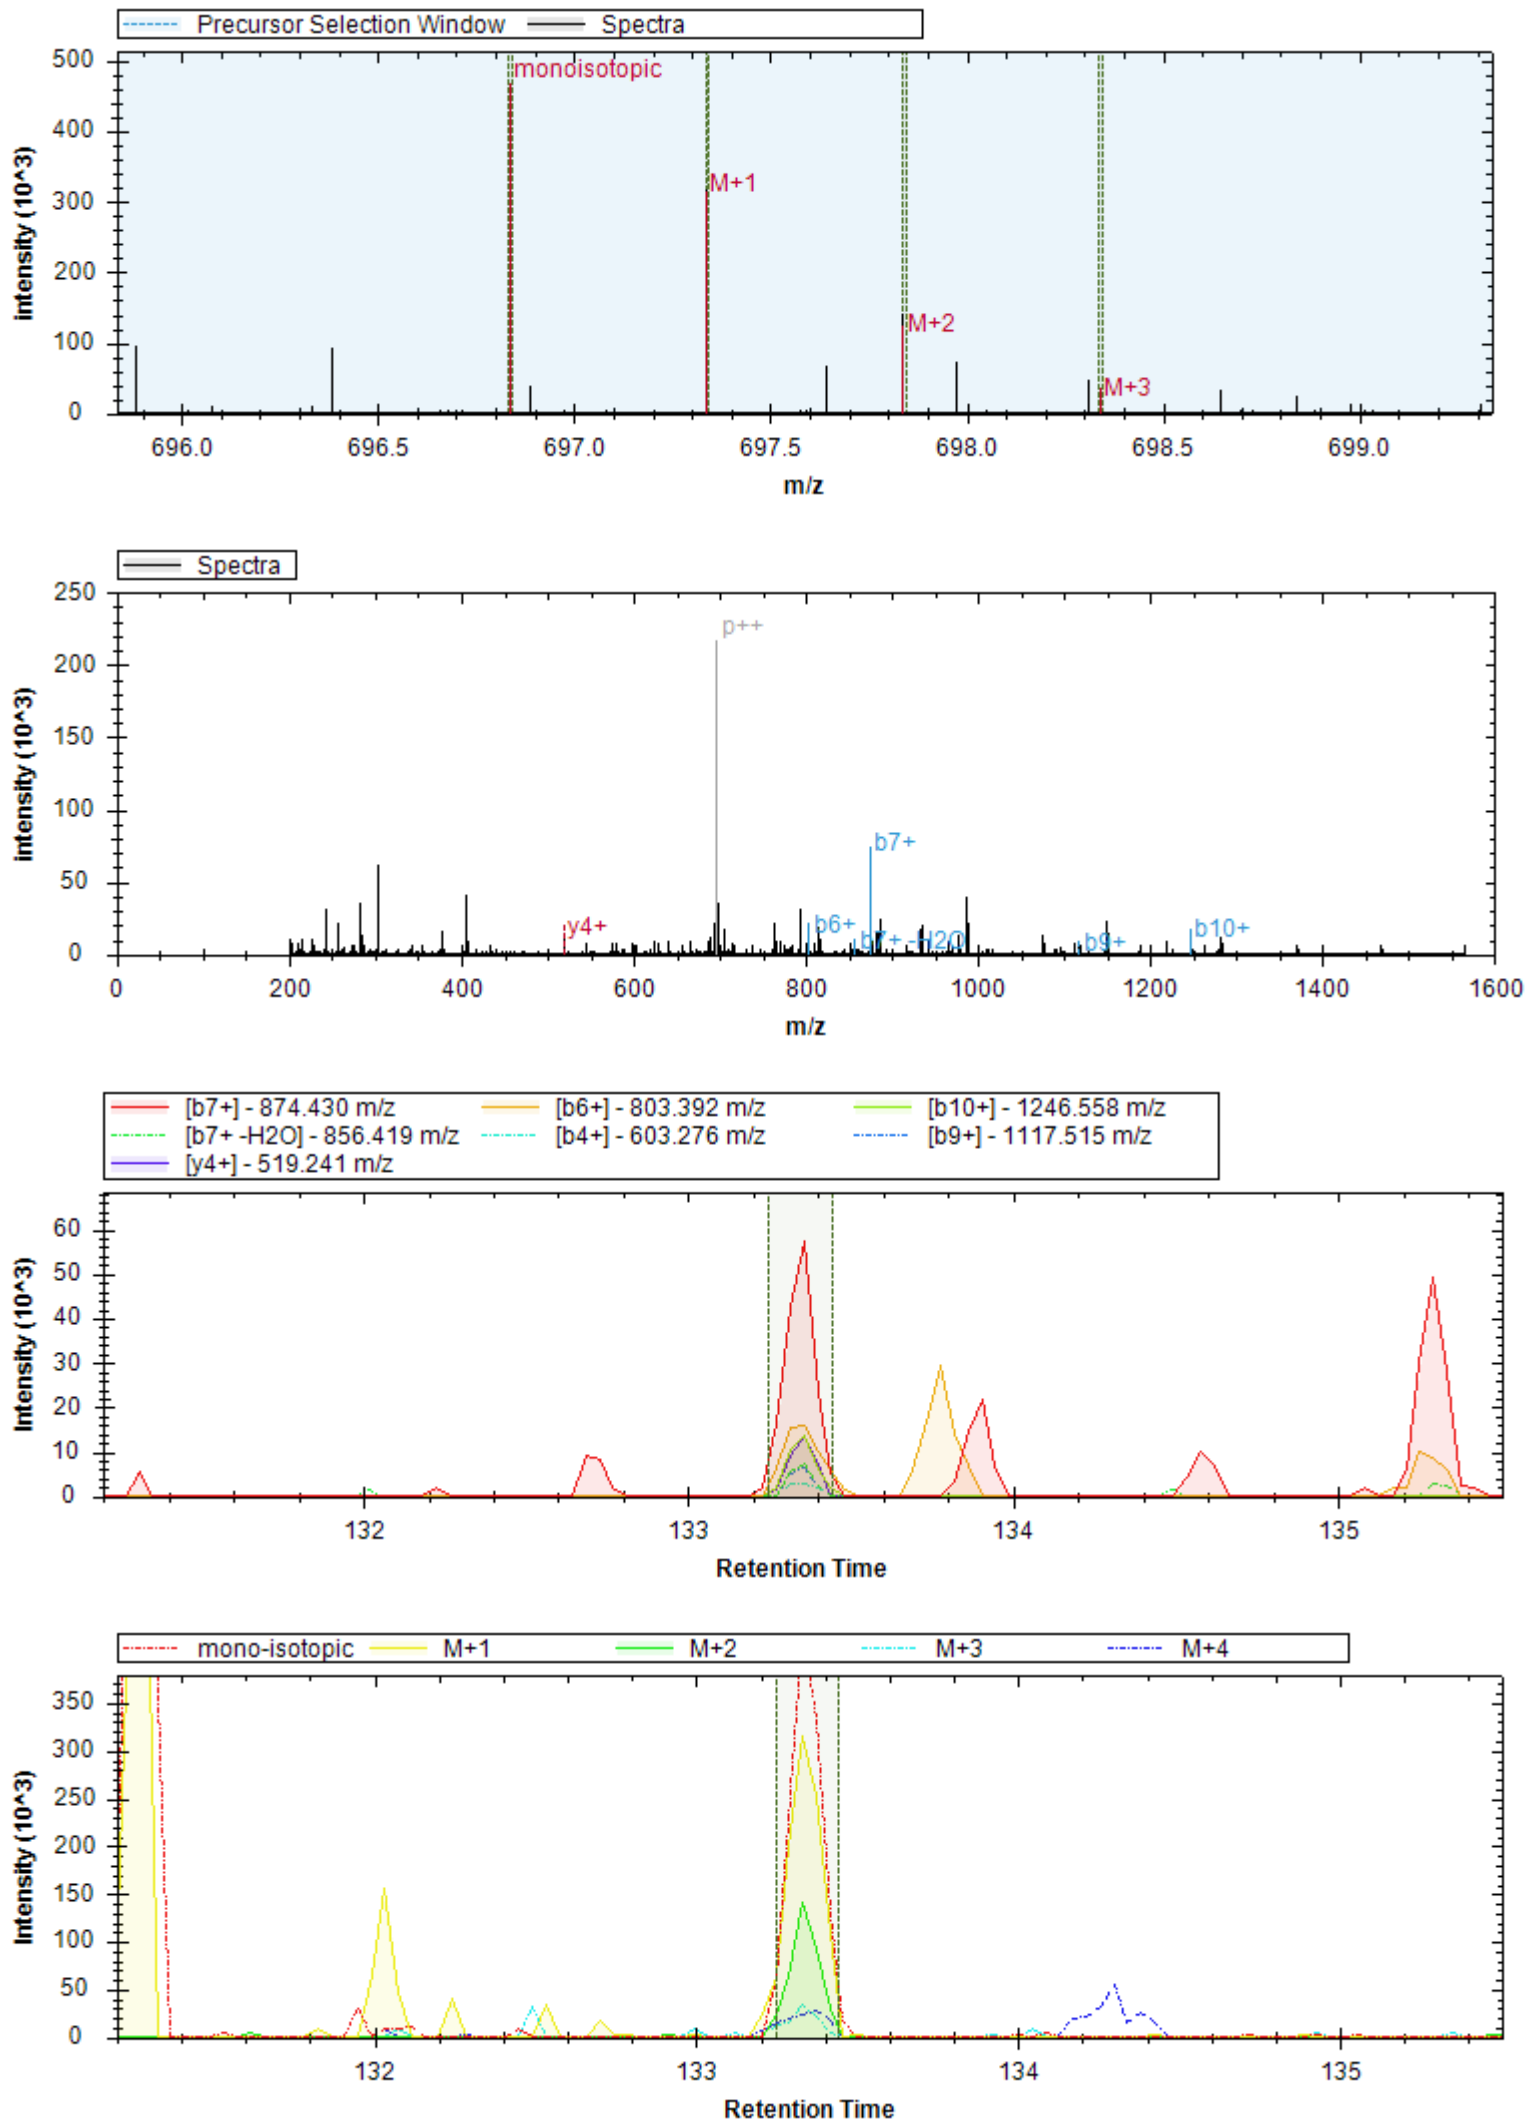

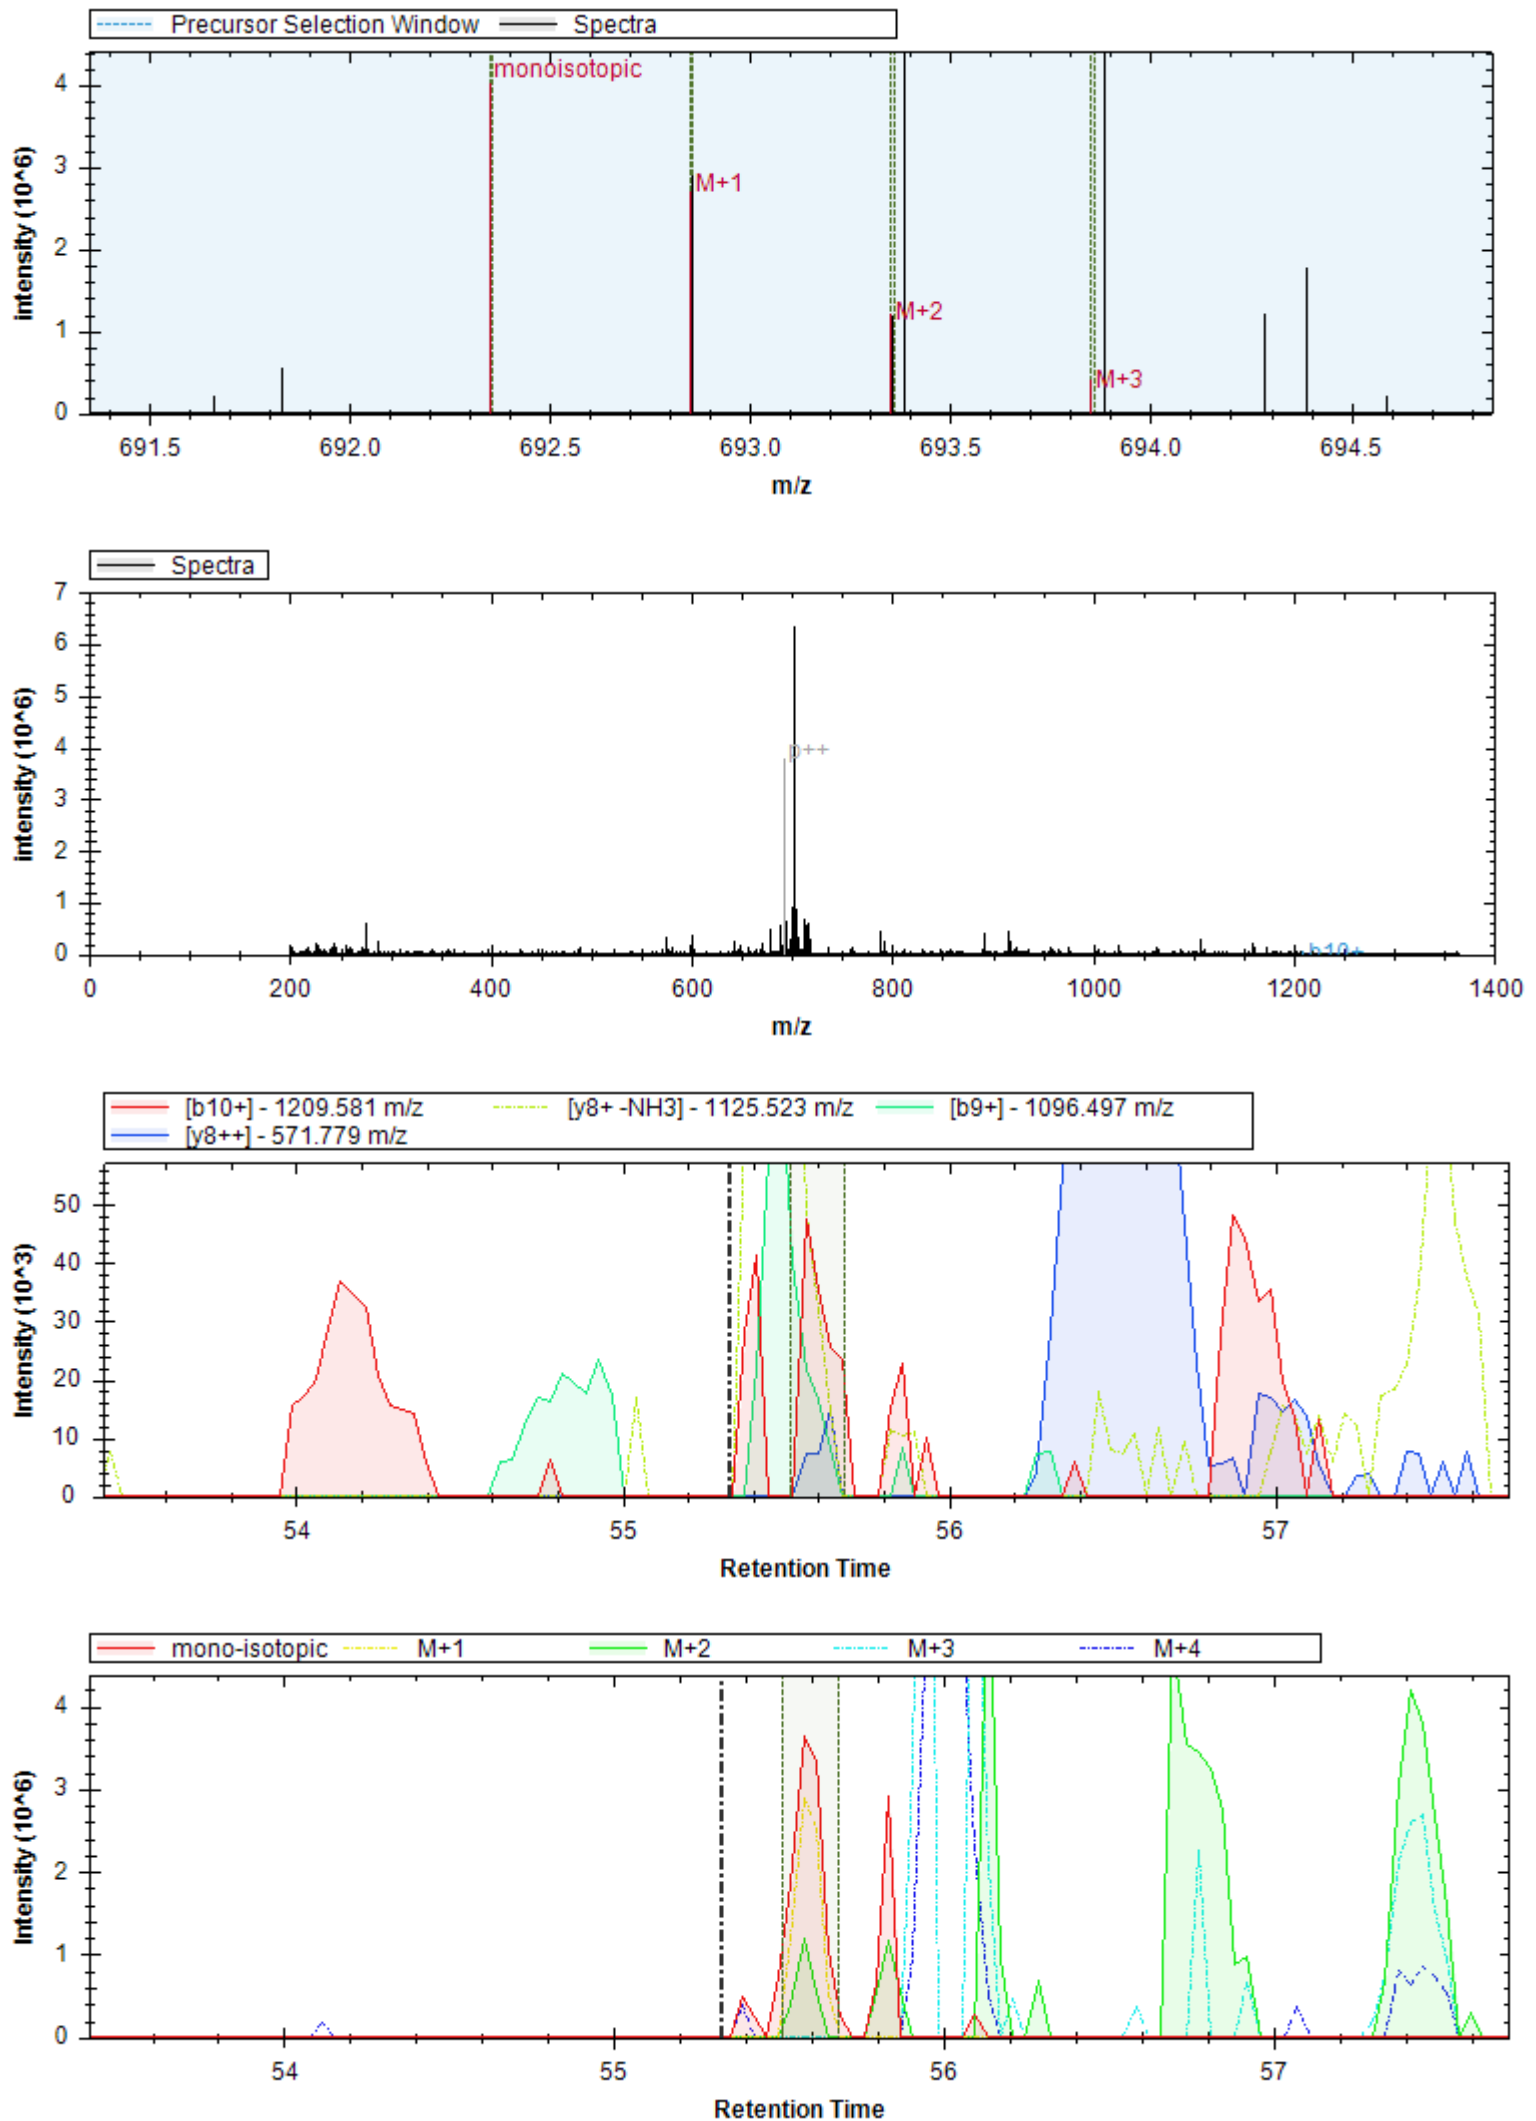



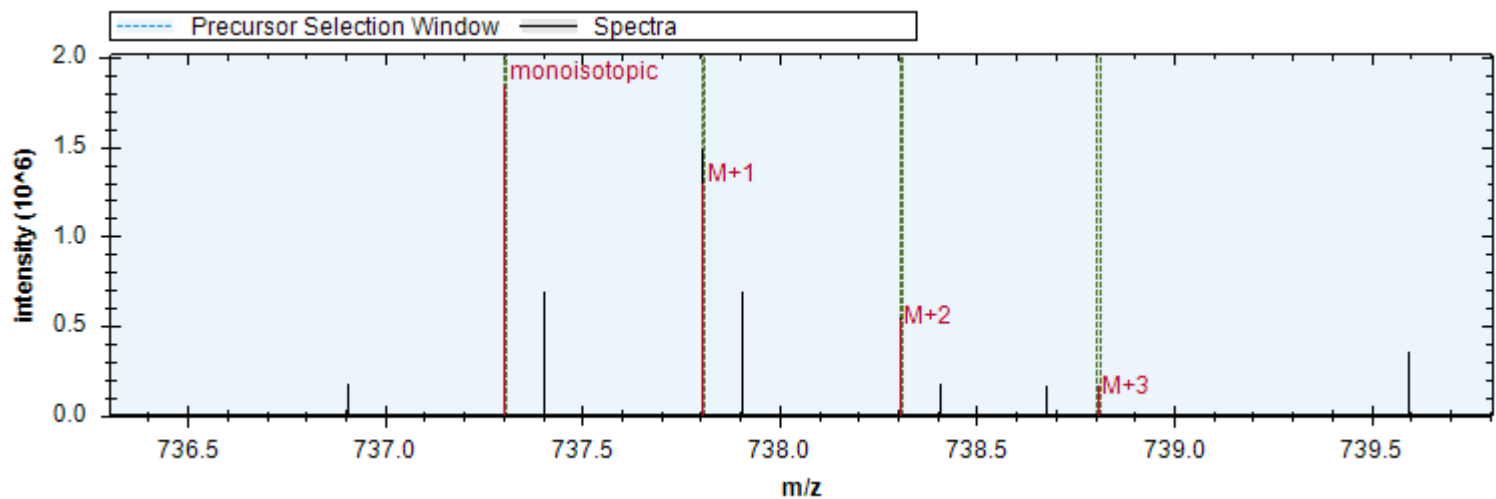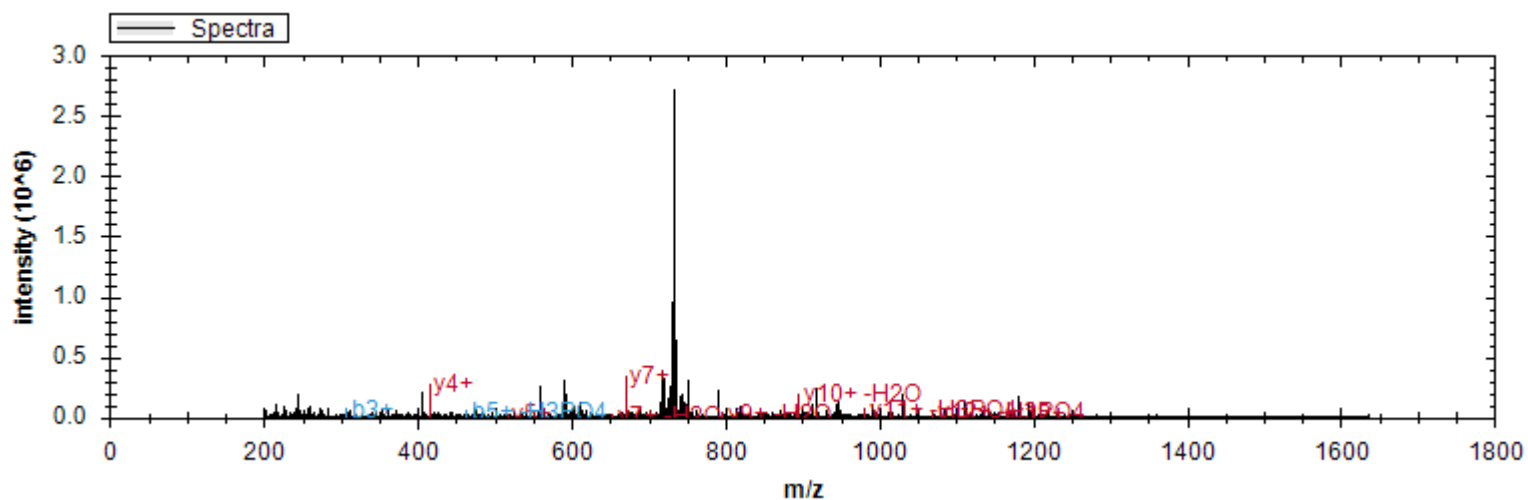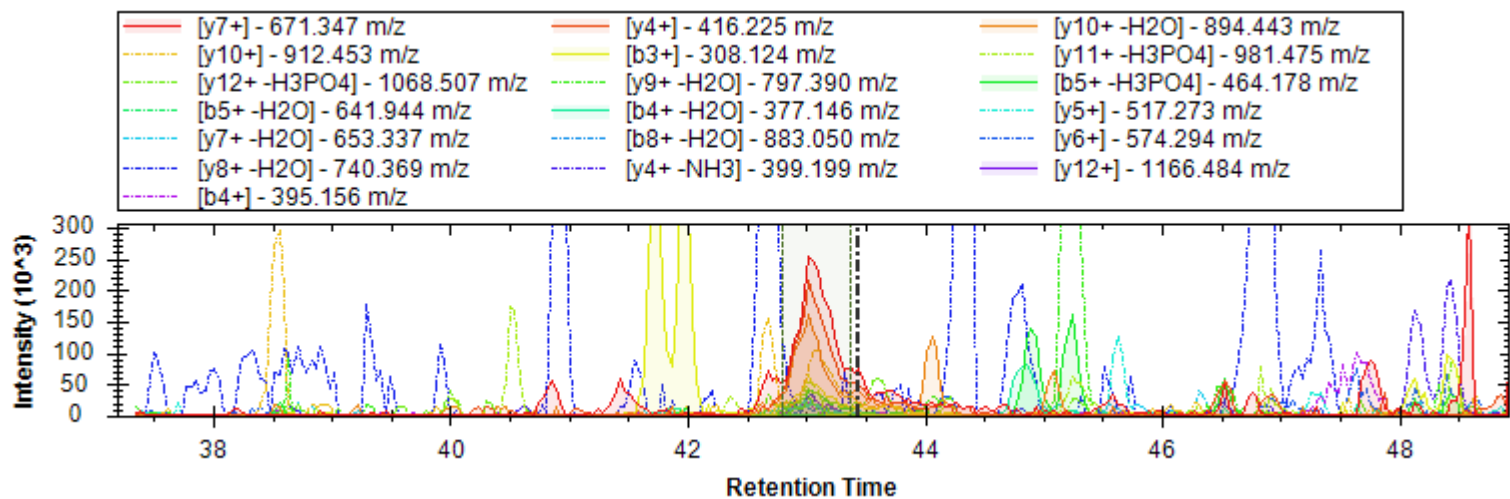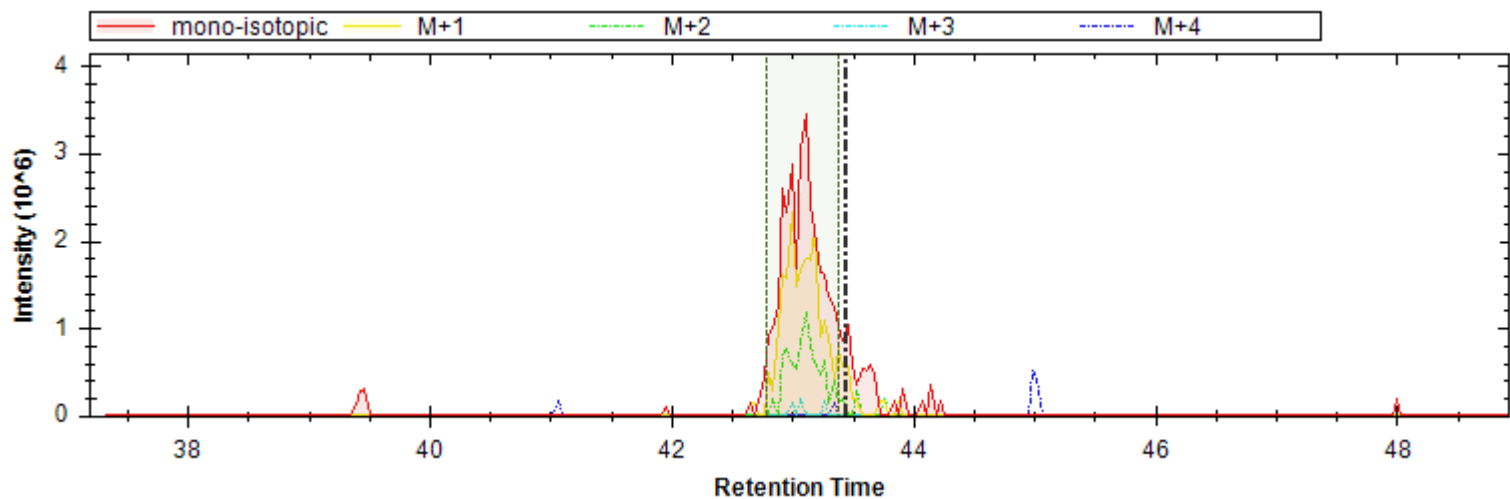

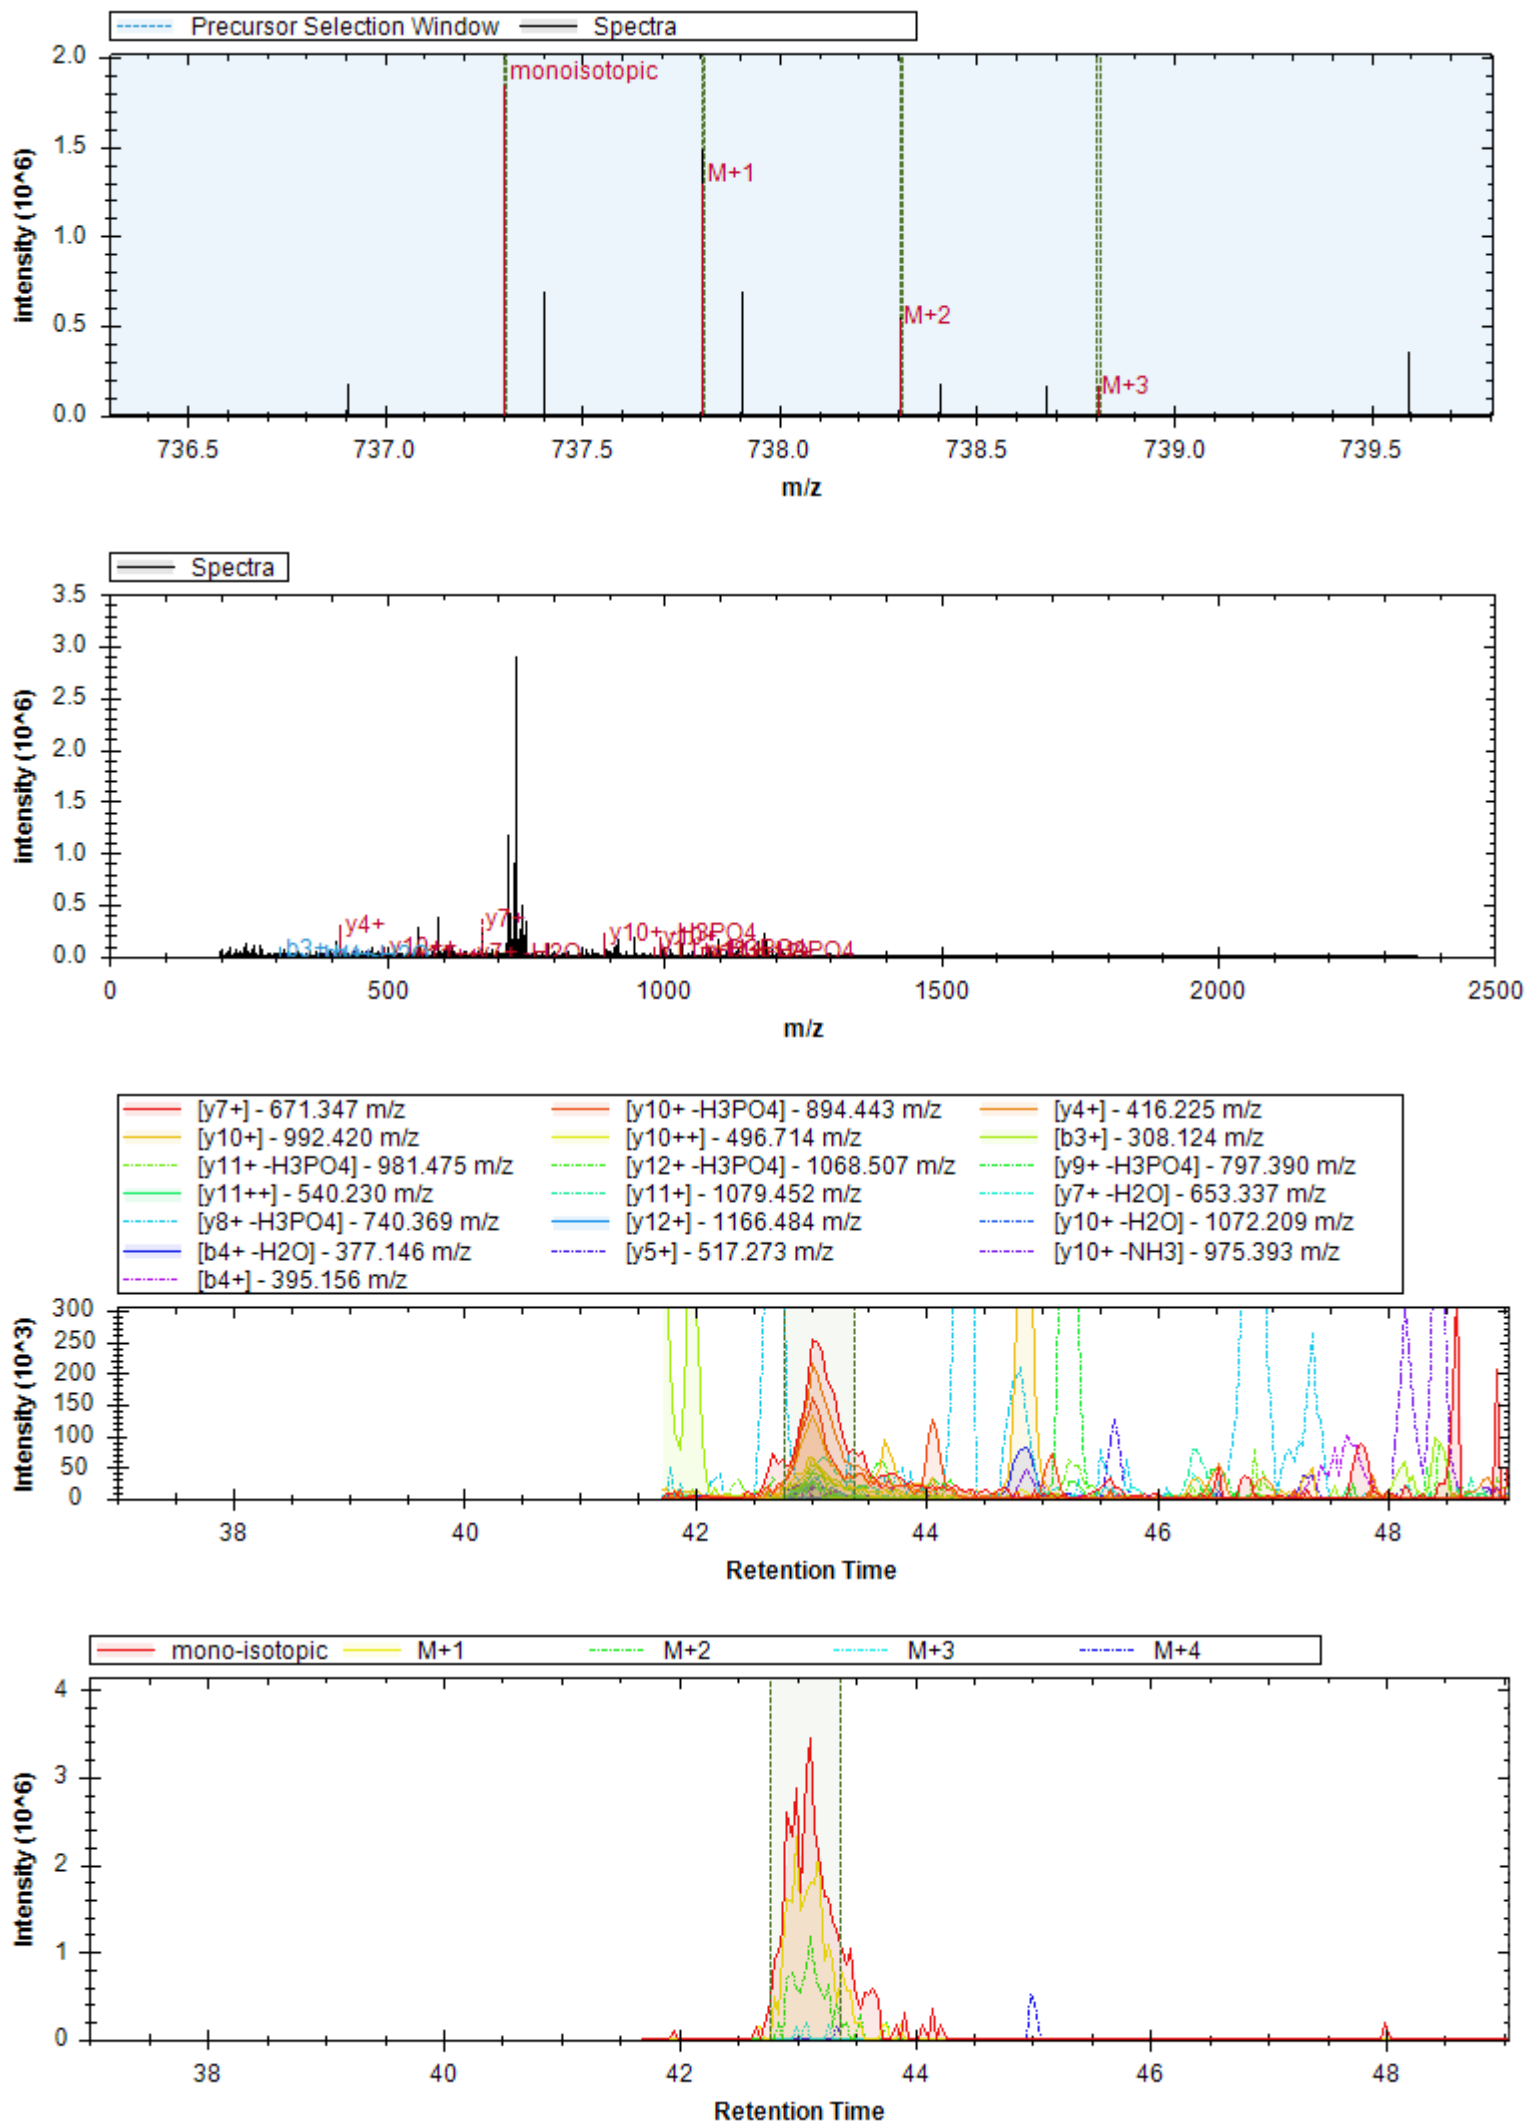

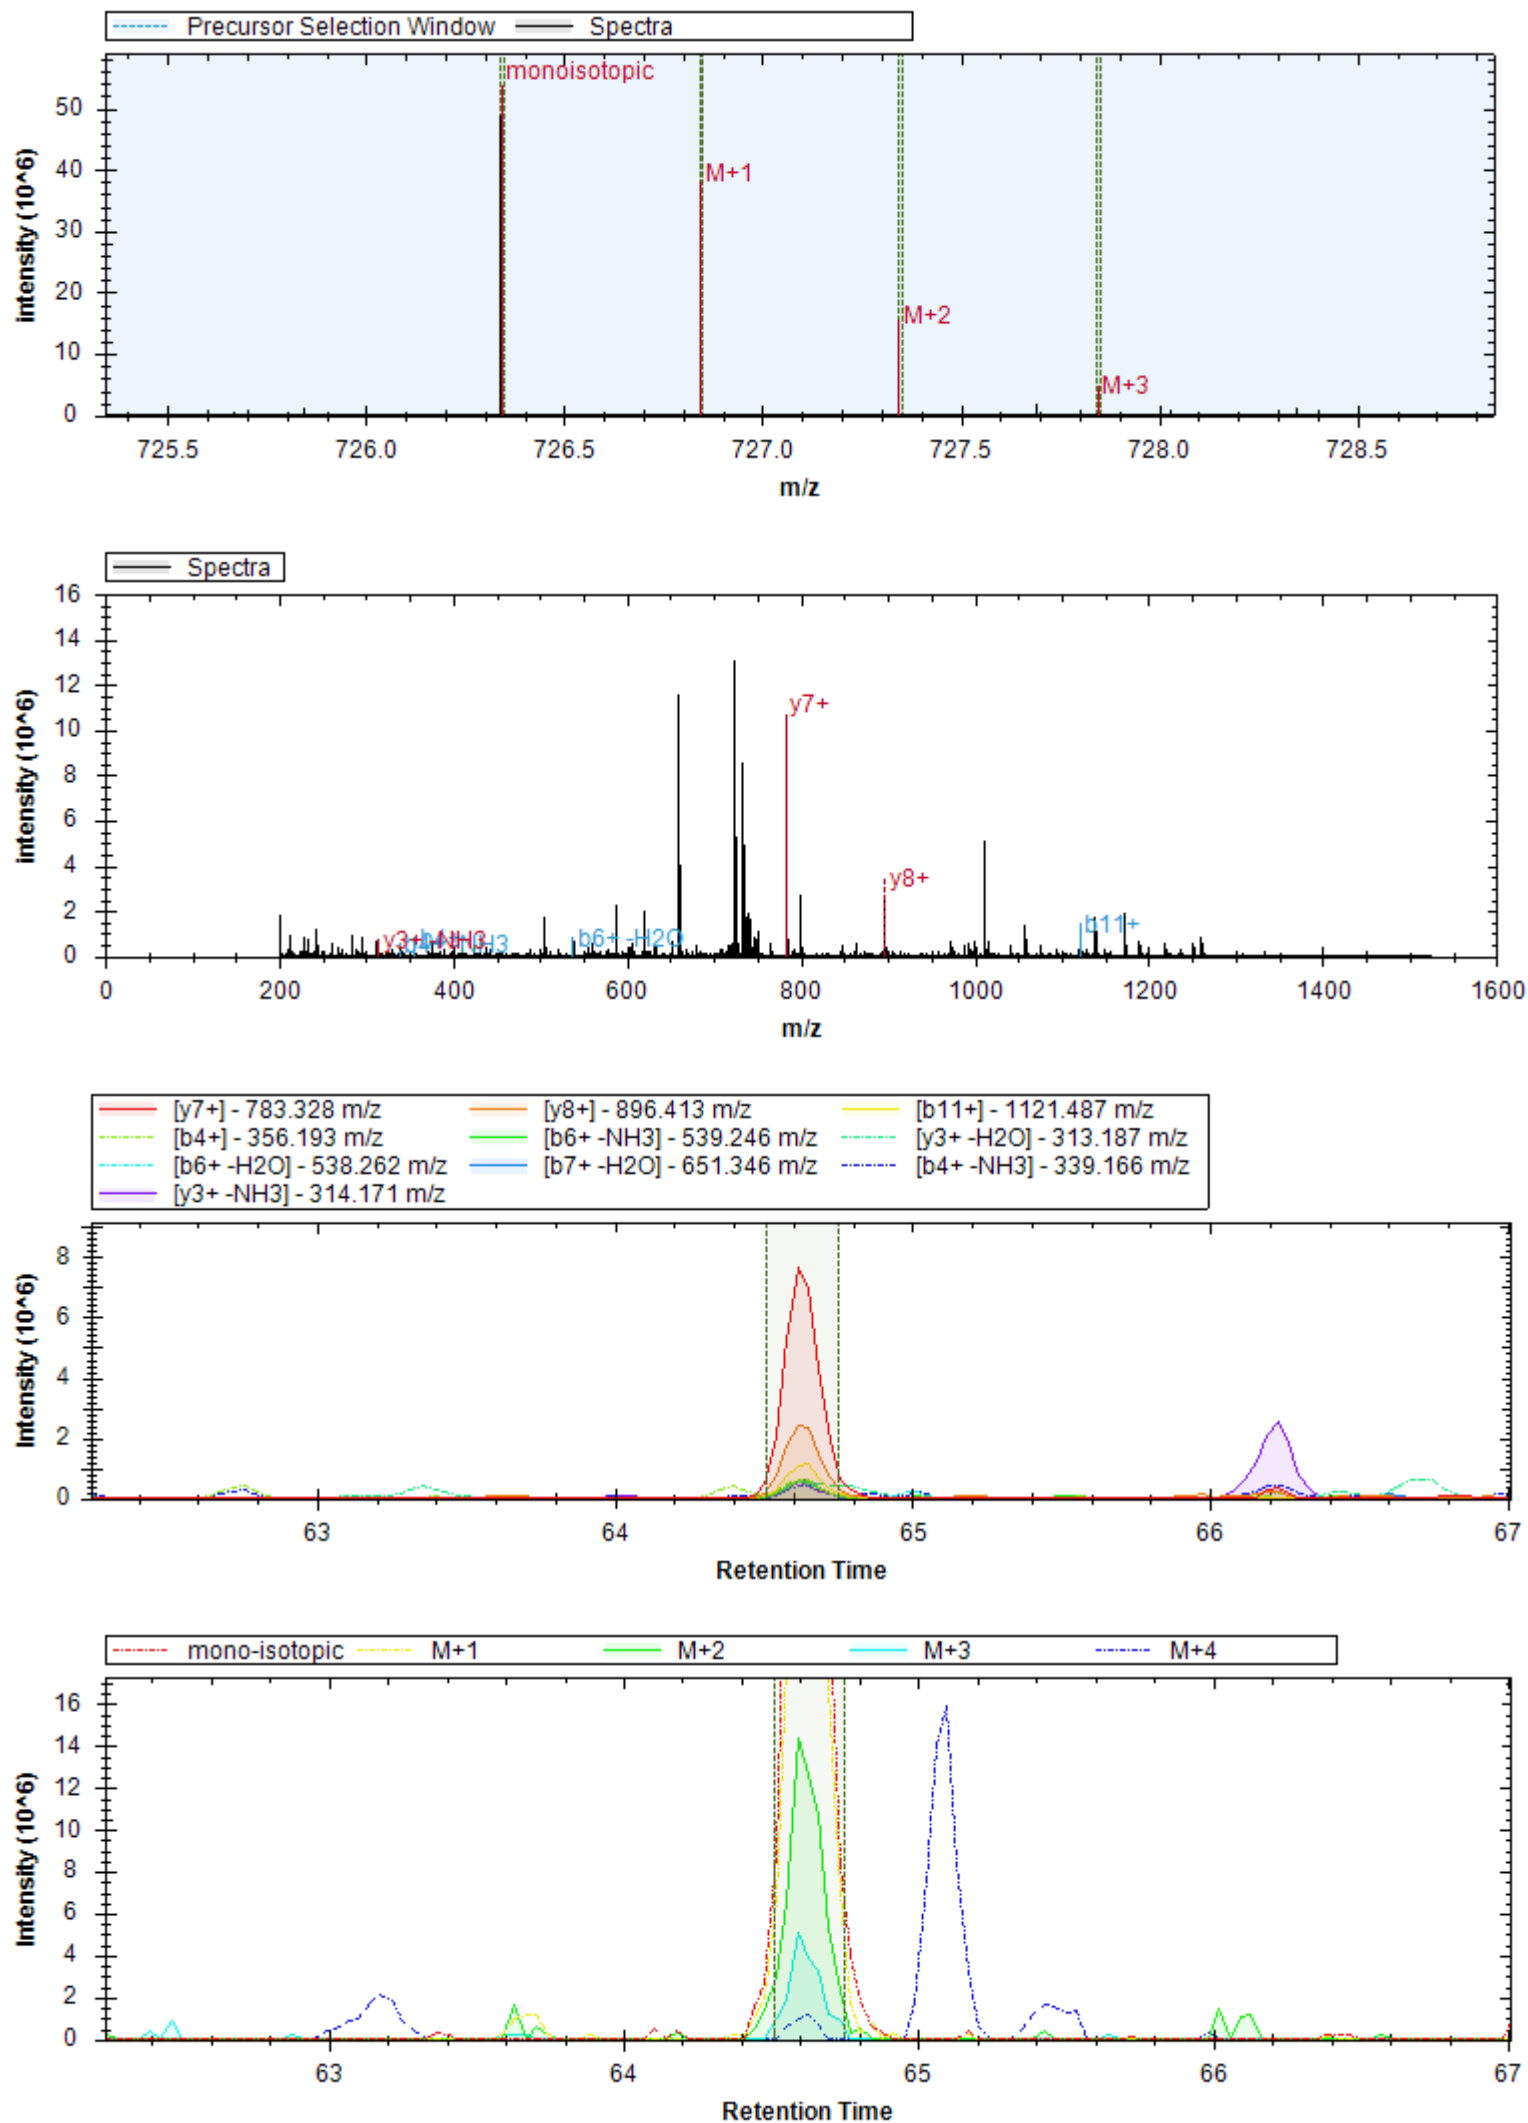

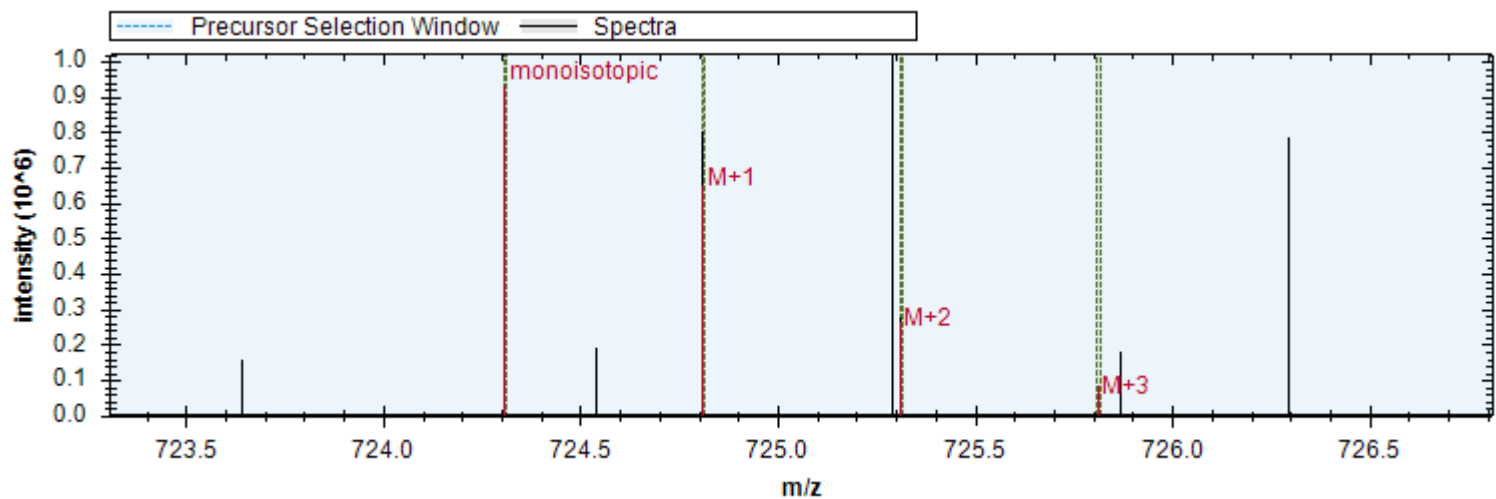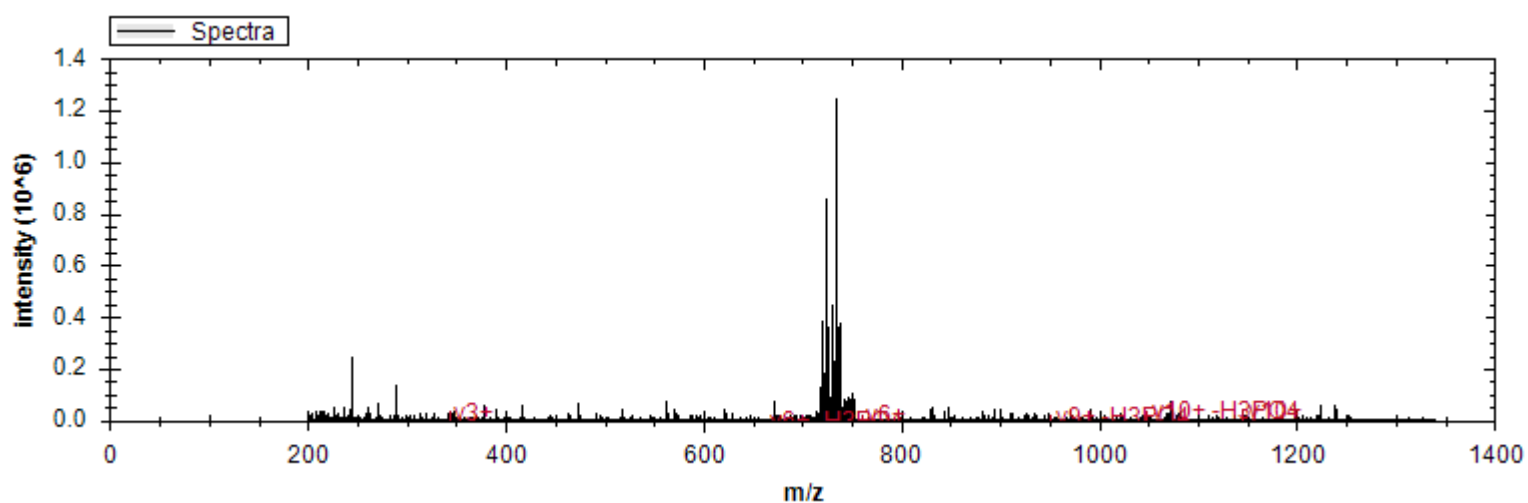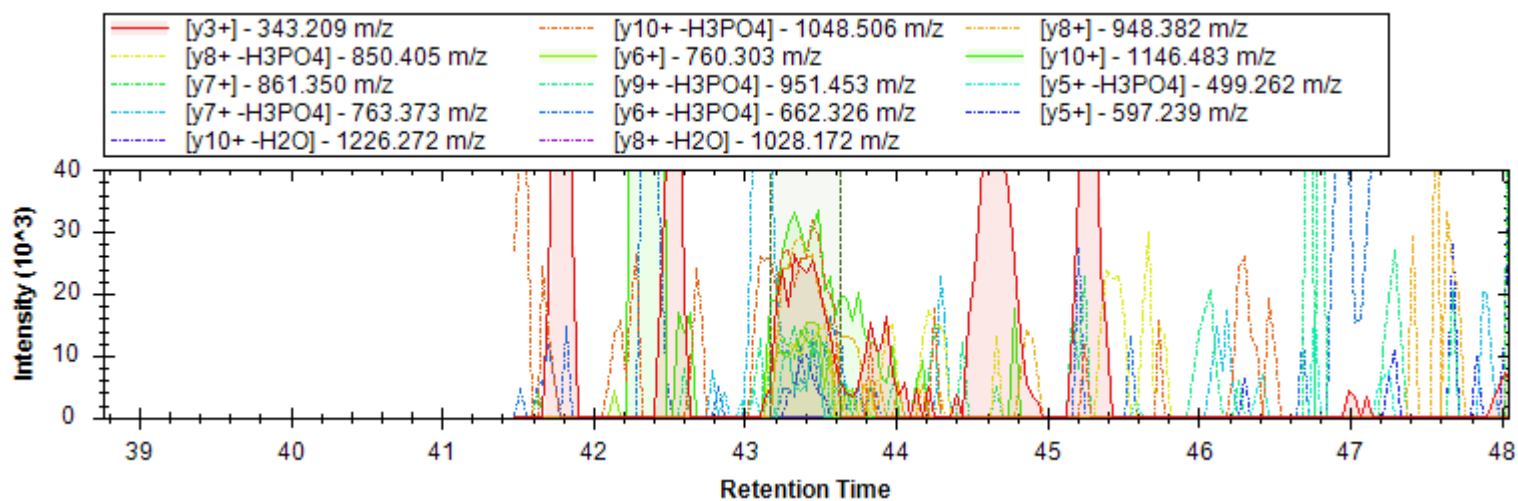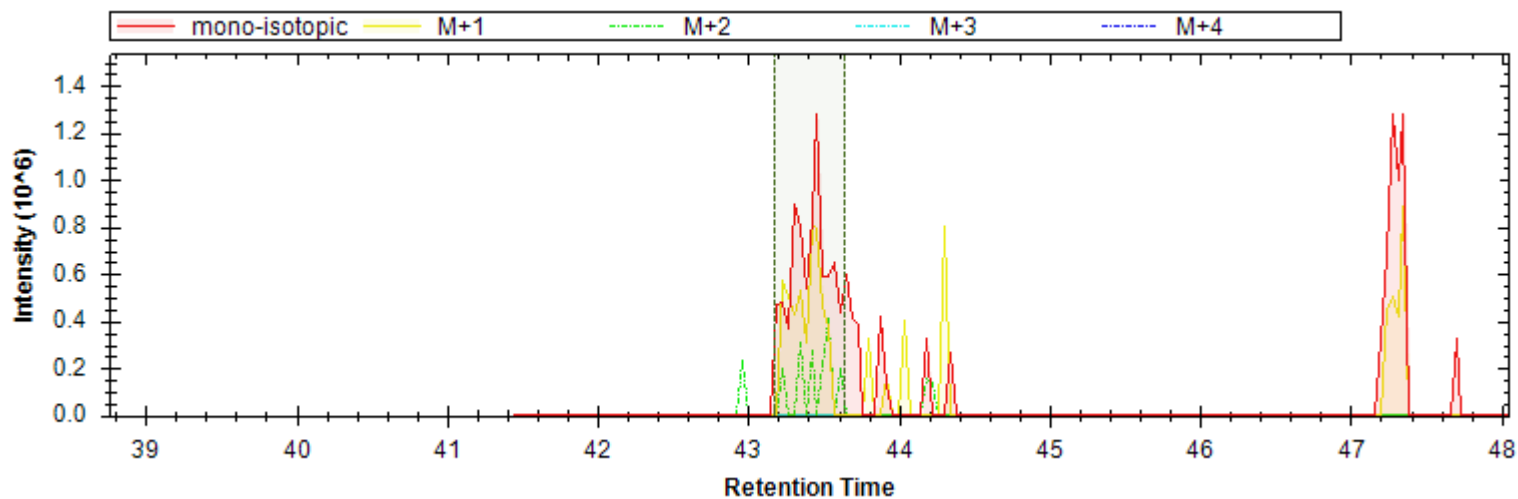

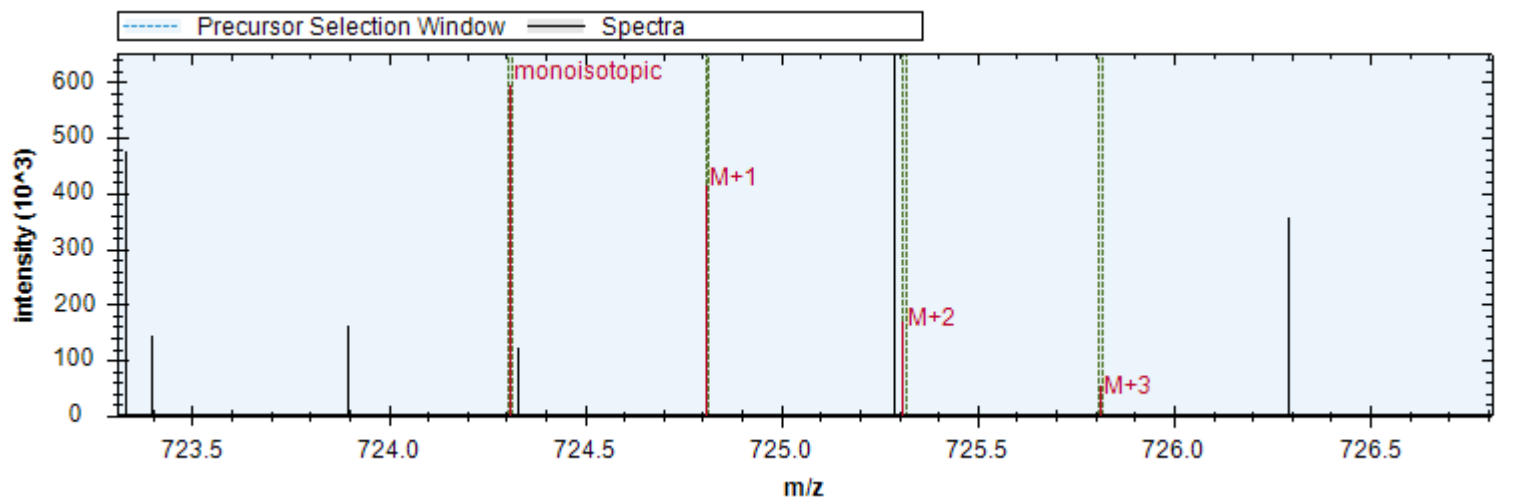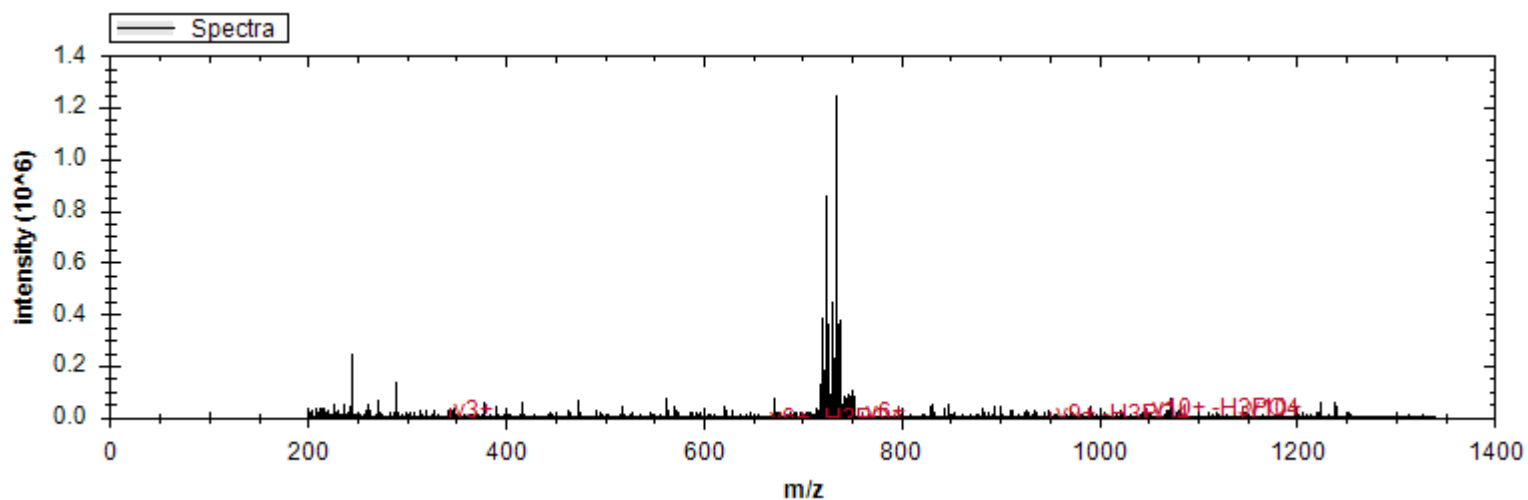

|                            |                              |                            |
|----------------------------|------------------------------|----------------------------|
| [y3+] - 343.209 m/z        | [y10+ -H3PO4] - 1048.506 m/z | [y8+] - 948.382 m/z        |
| [y10+] - 1146.483 m/z      | [y8+ -H3PO4] - 850.405 m/z   | [y7+] - 861.350 m/z        |
| [y9+ -H3PO4] - 951.453 m/z | [y6+] - 760.303 m/z          | [y6+ -H3PO4] - 662.326 m/z |
| [y7+ -H3PO4] - 763.373 m/z | [y5+ -H3PO4] - 499.262 m/z   | [y5+] - 597.239 m/z        |
| [y10+ -H2O] - 1128.472 m/z | [y11+ -H3PO4] - 1119.543 m/z | [y11+] - 609.264 m/z       |
| [y4+] - 510.207 m/z        | [y11+] - 1217.520 m/z        | [y4+ -H3PO4] - 412.230 m/z |

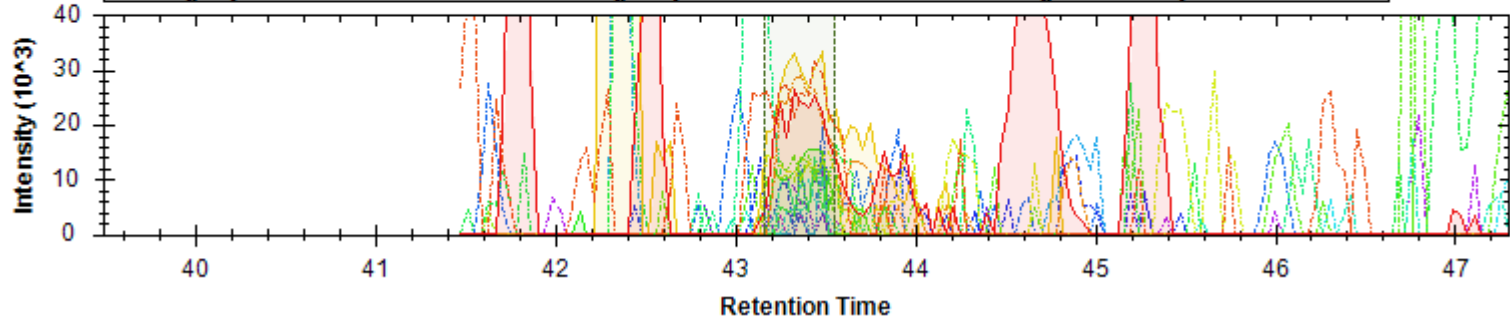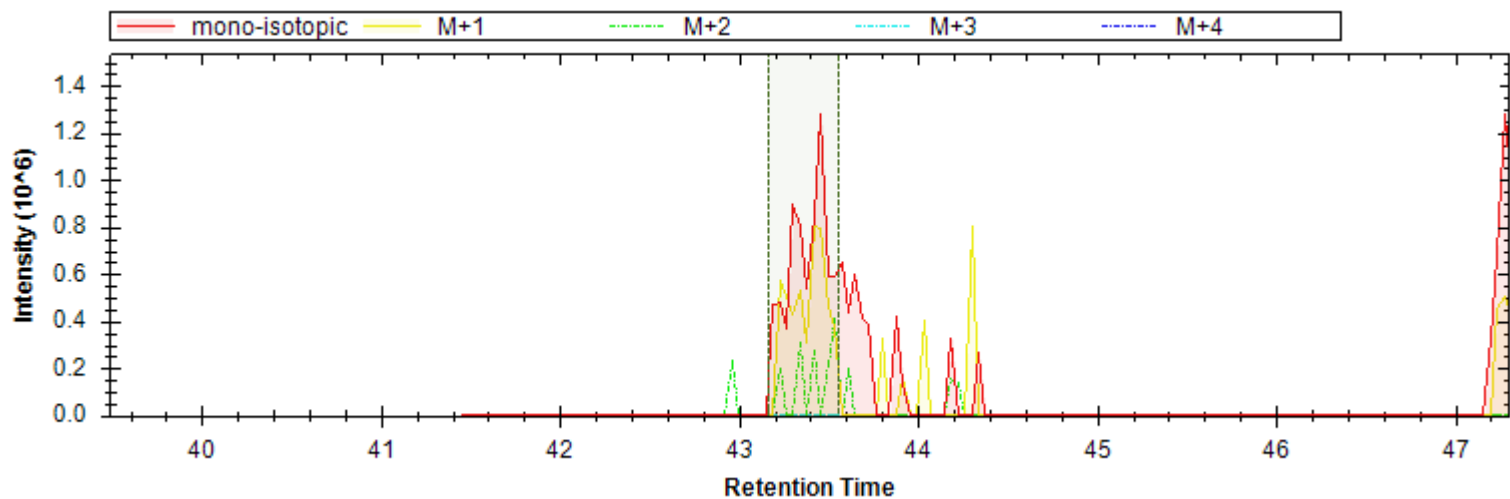

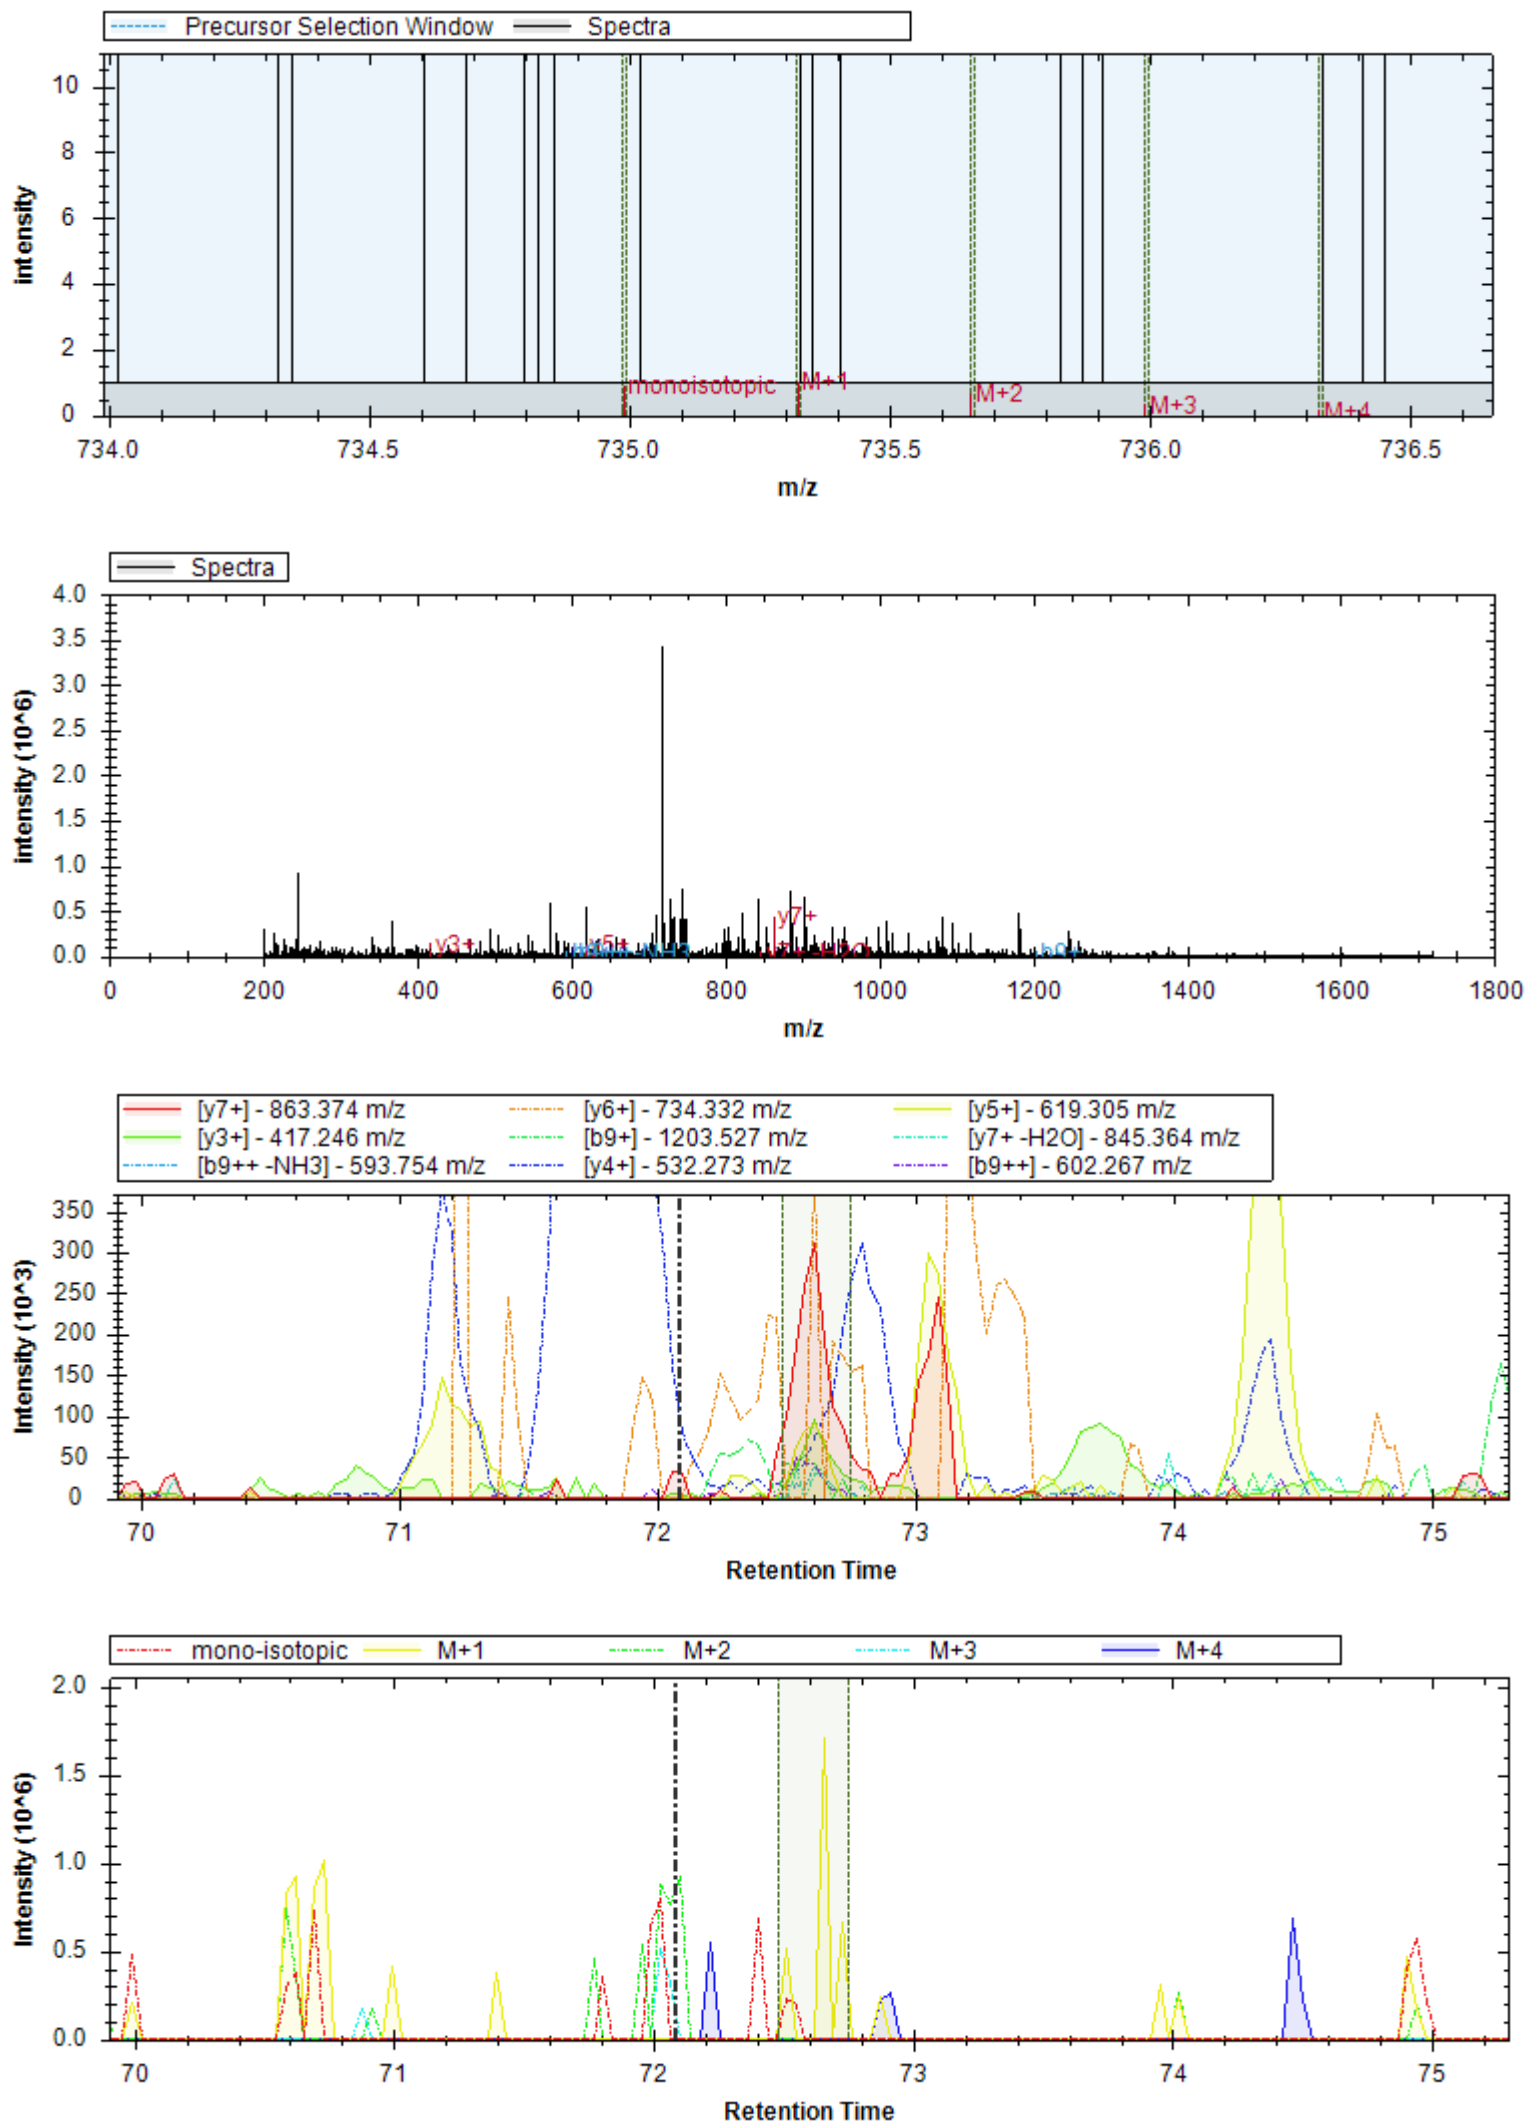

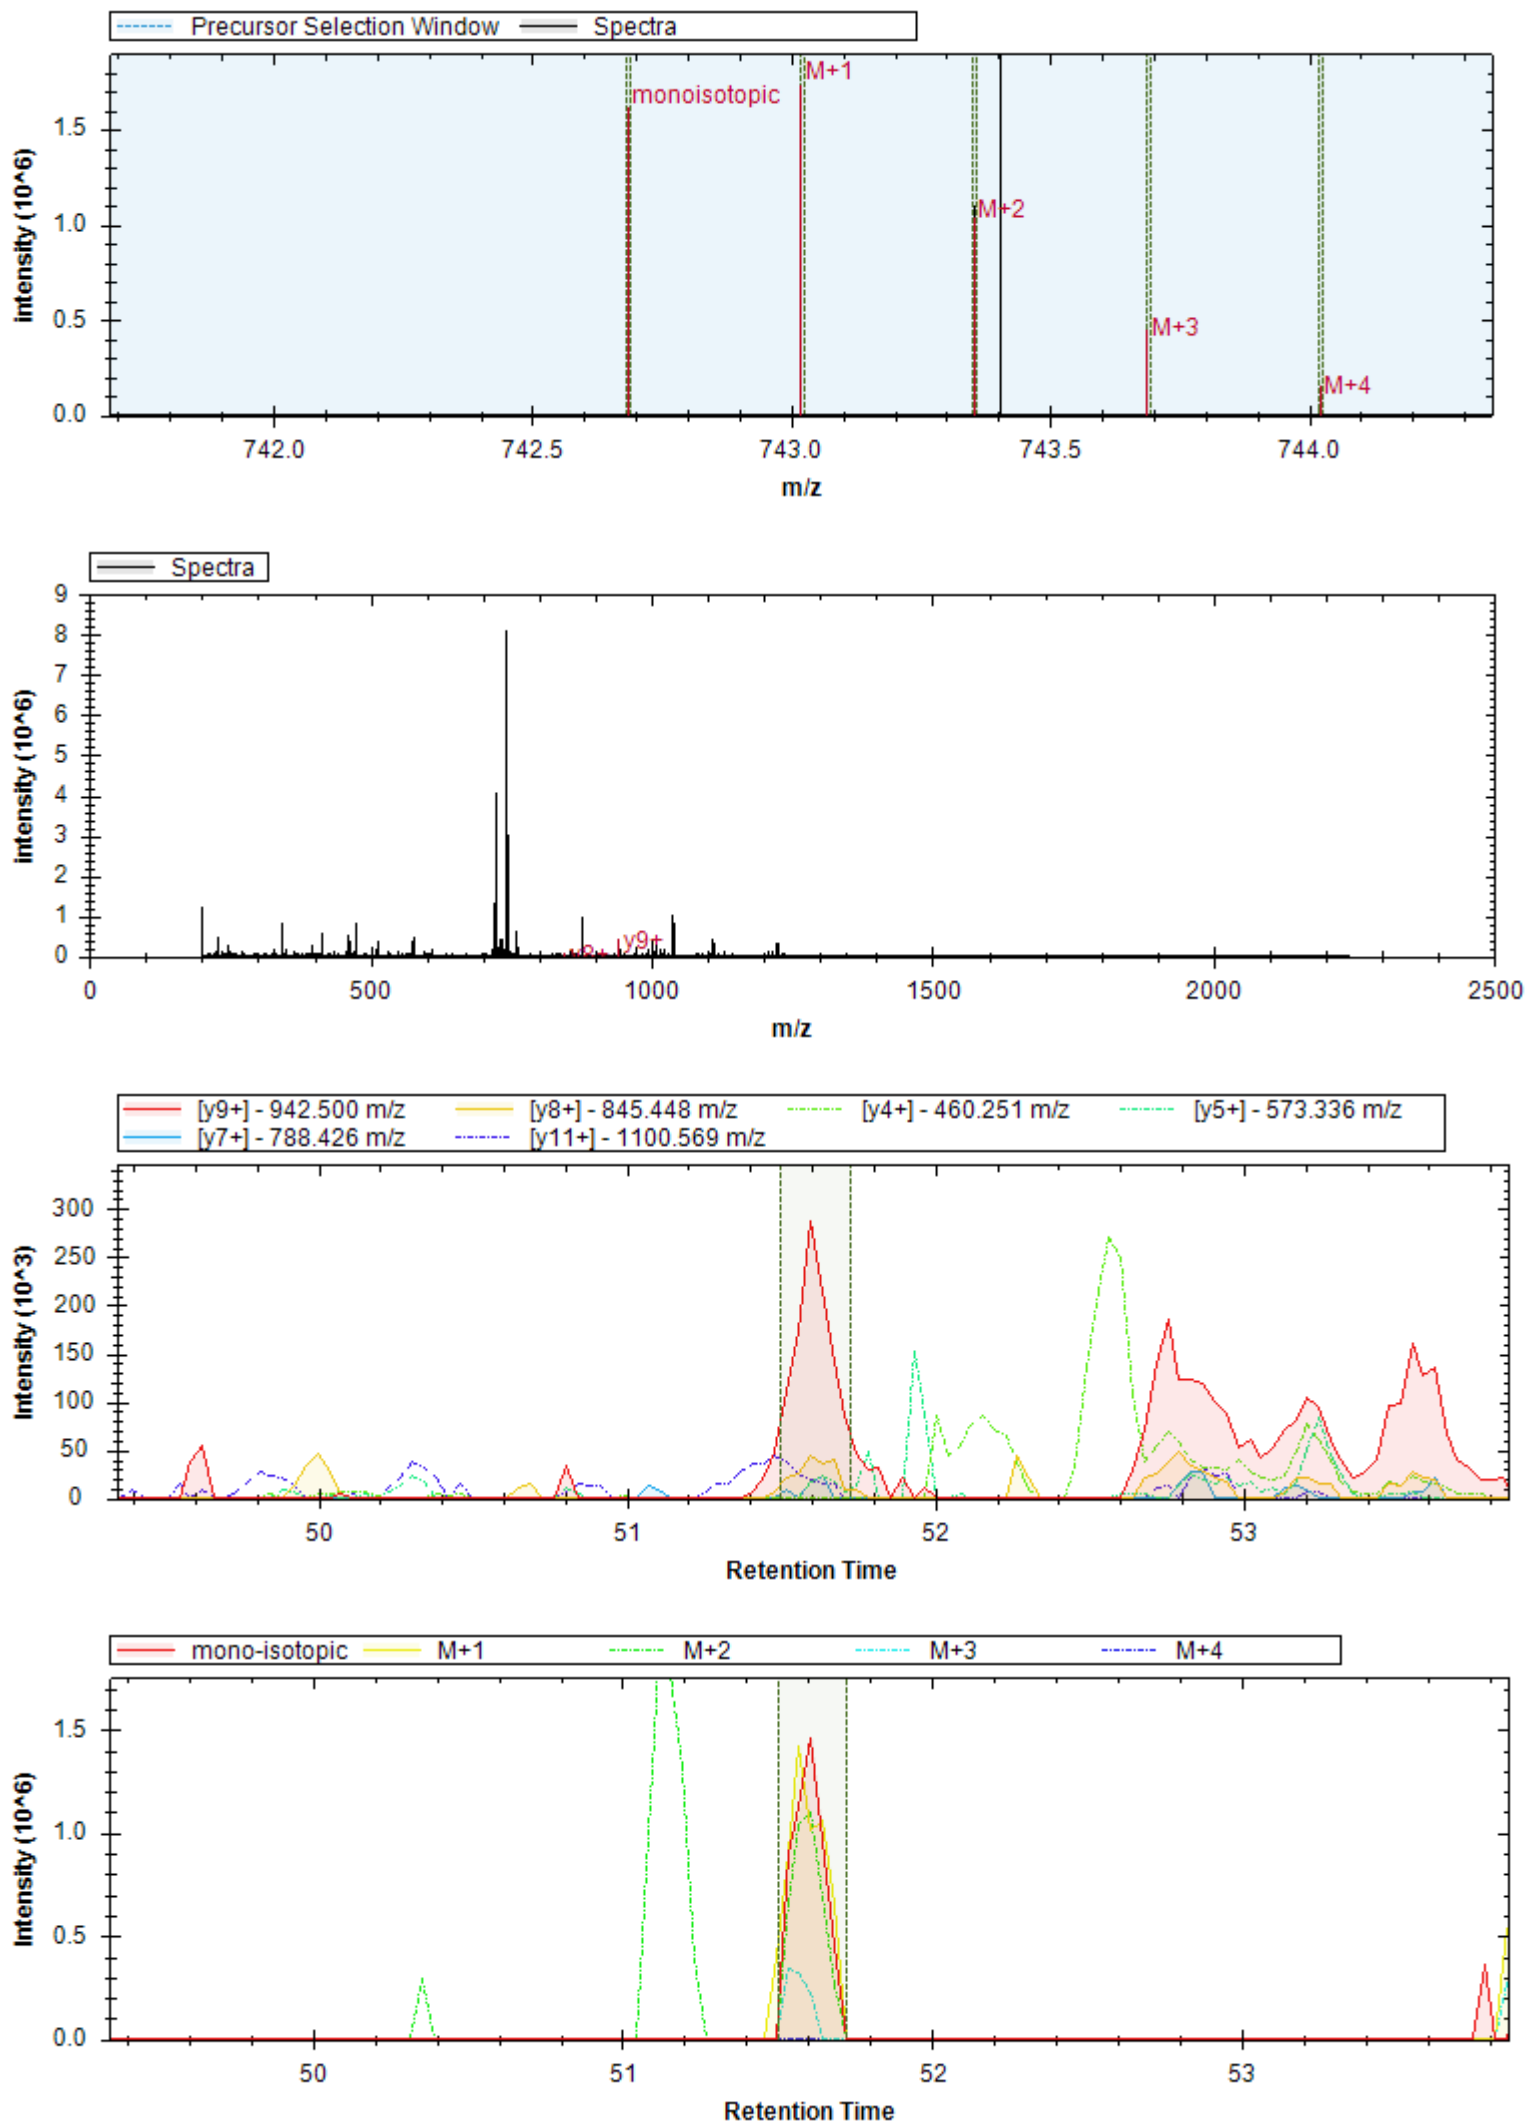

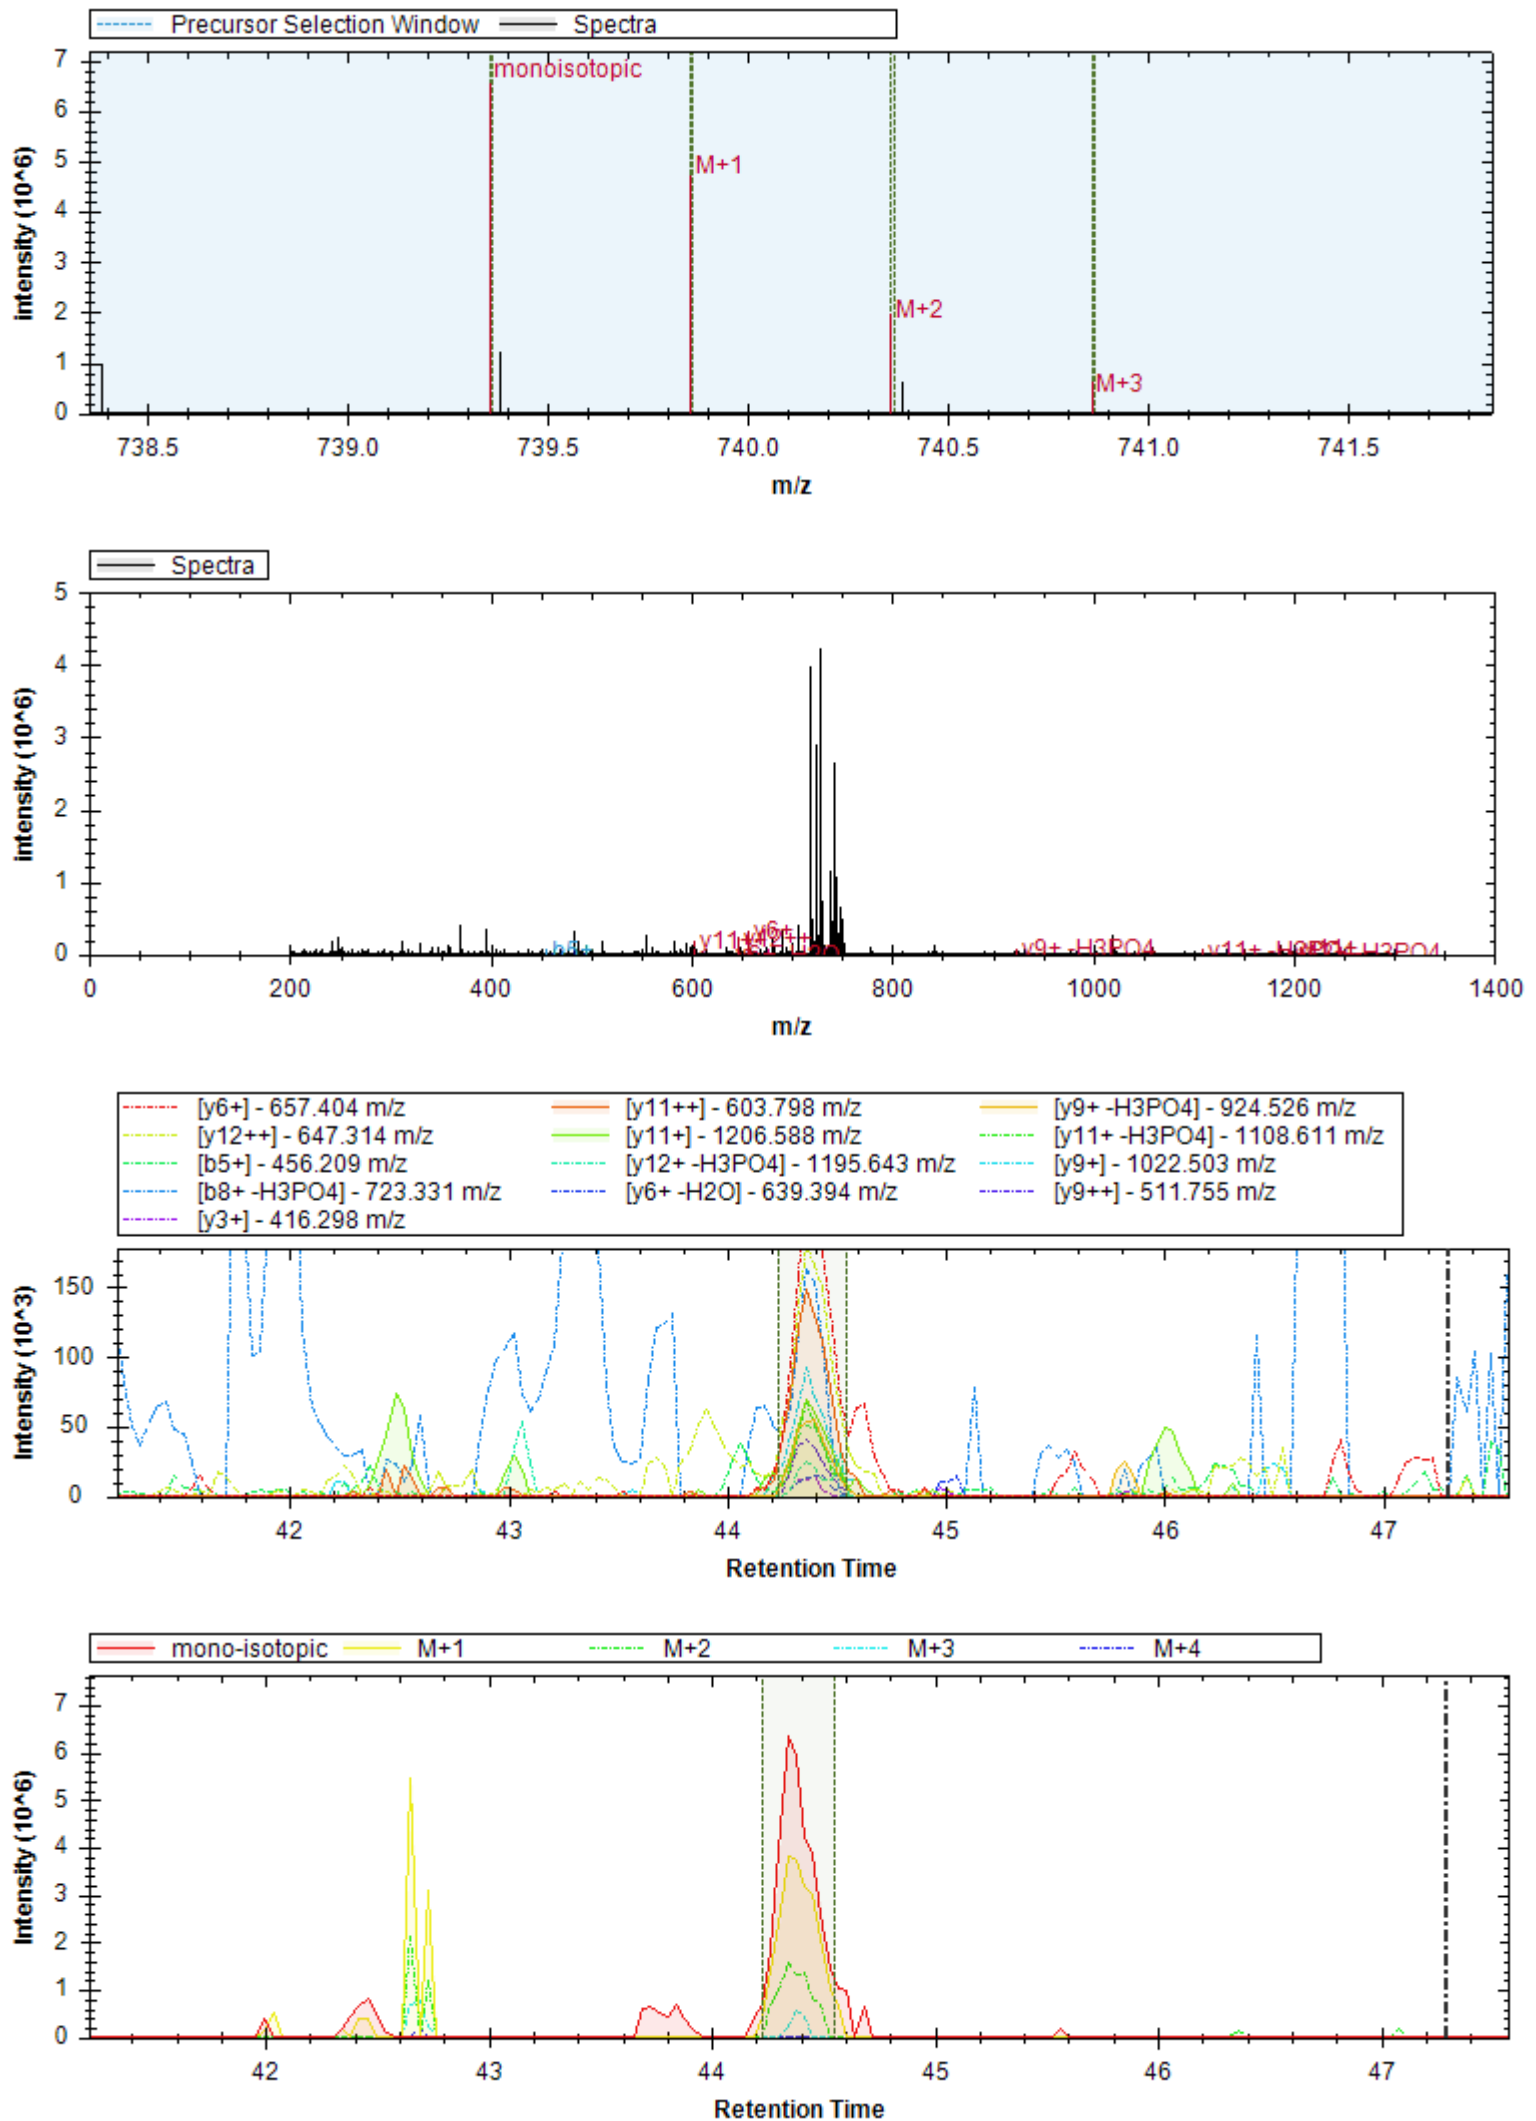



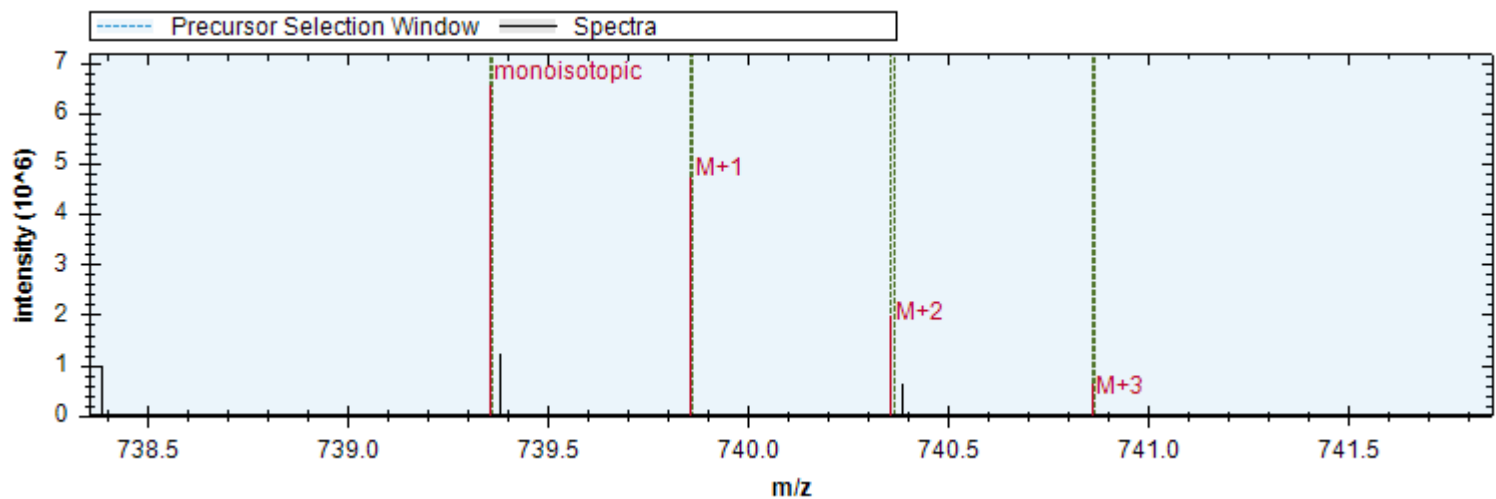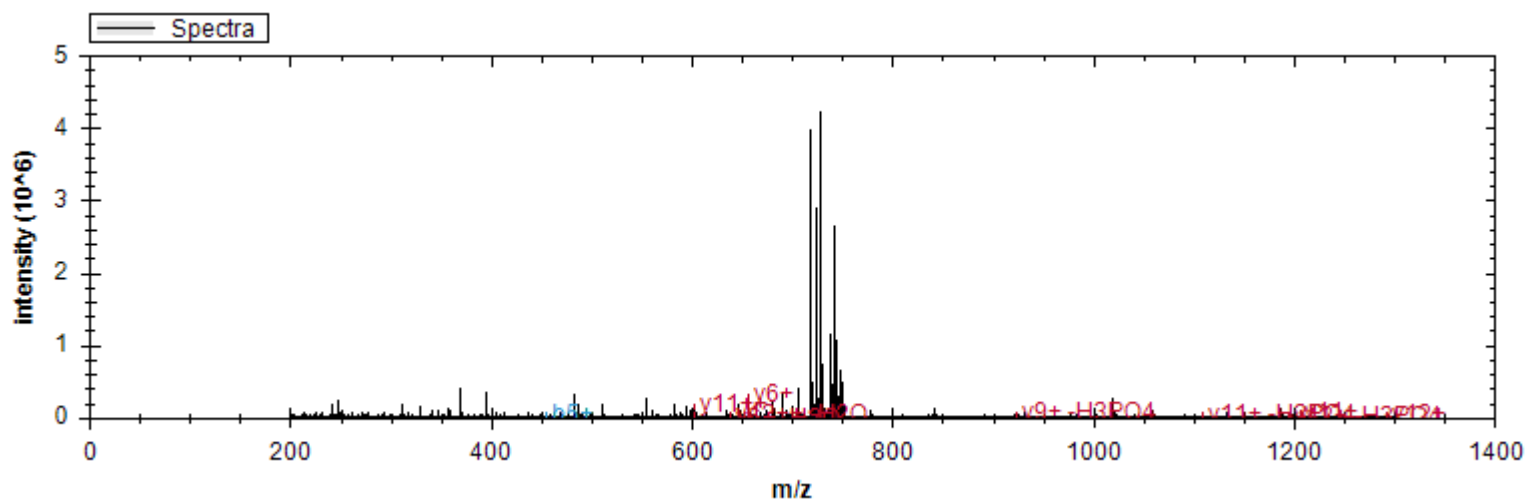

- |                            |                          |                              |
|----------------------------|--------------------------|------------------------------|
| [y6+] - 657.404 m/z        | [y11++] - 603.798 m/z    | [y11+ -H3PO4] - 1108.611 m/z |
| [y9+ -H3PO4] - 924.526 m/z | [y9+] - 1022.503 m/z     | [y11+] - 1206.588 m/z        |
| [b8+ -H3PO4] - 723.331 m/z | [b5+] - 456.209 m/z      | [y12+ -H3PO4] - 1195.643 m/z |
| [y12++ -H2O] - 638.308 m/z | [y12+] - 1293.620 m/z    | [y10+ -H3PO4] - 1011.558 m/z |
| [y9+ -H2O] - 1102.292 m/z  | [y13++] - 695.840 m/z    | [y6+ -H2O] - 639.394 m/z     |
| [b8+ -H2O] - 901.097 m/z   | [b5+ -H2O] - 438.198 m/z | [y11+ -H2O] - 1188.577 m/z   |

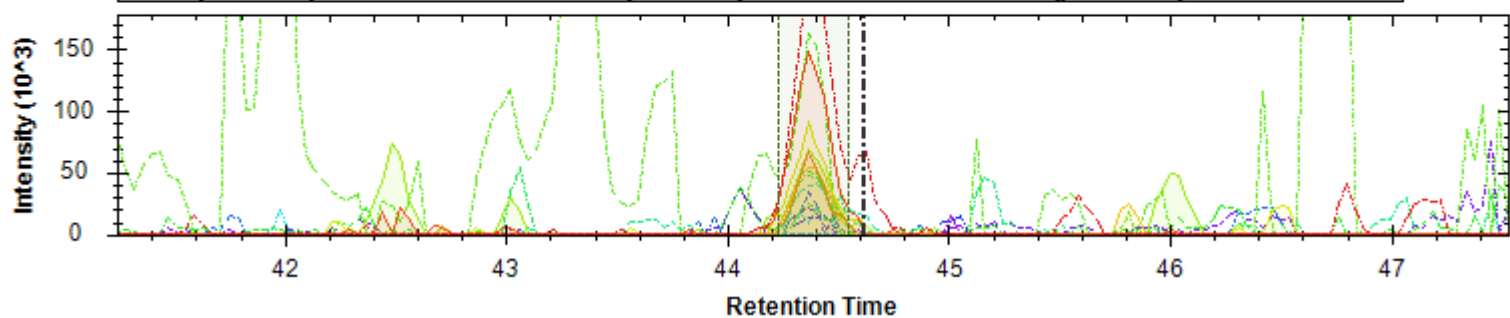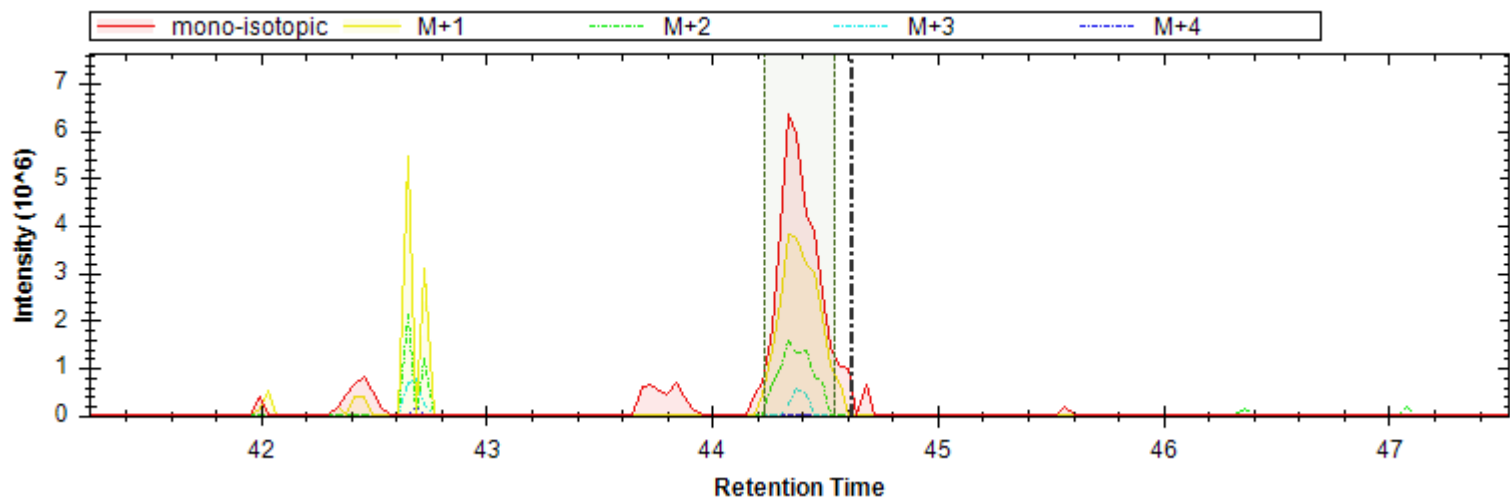

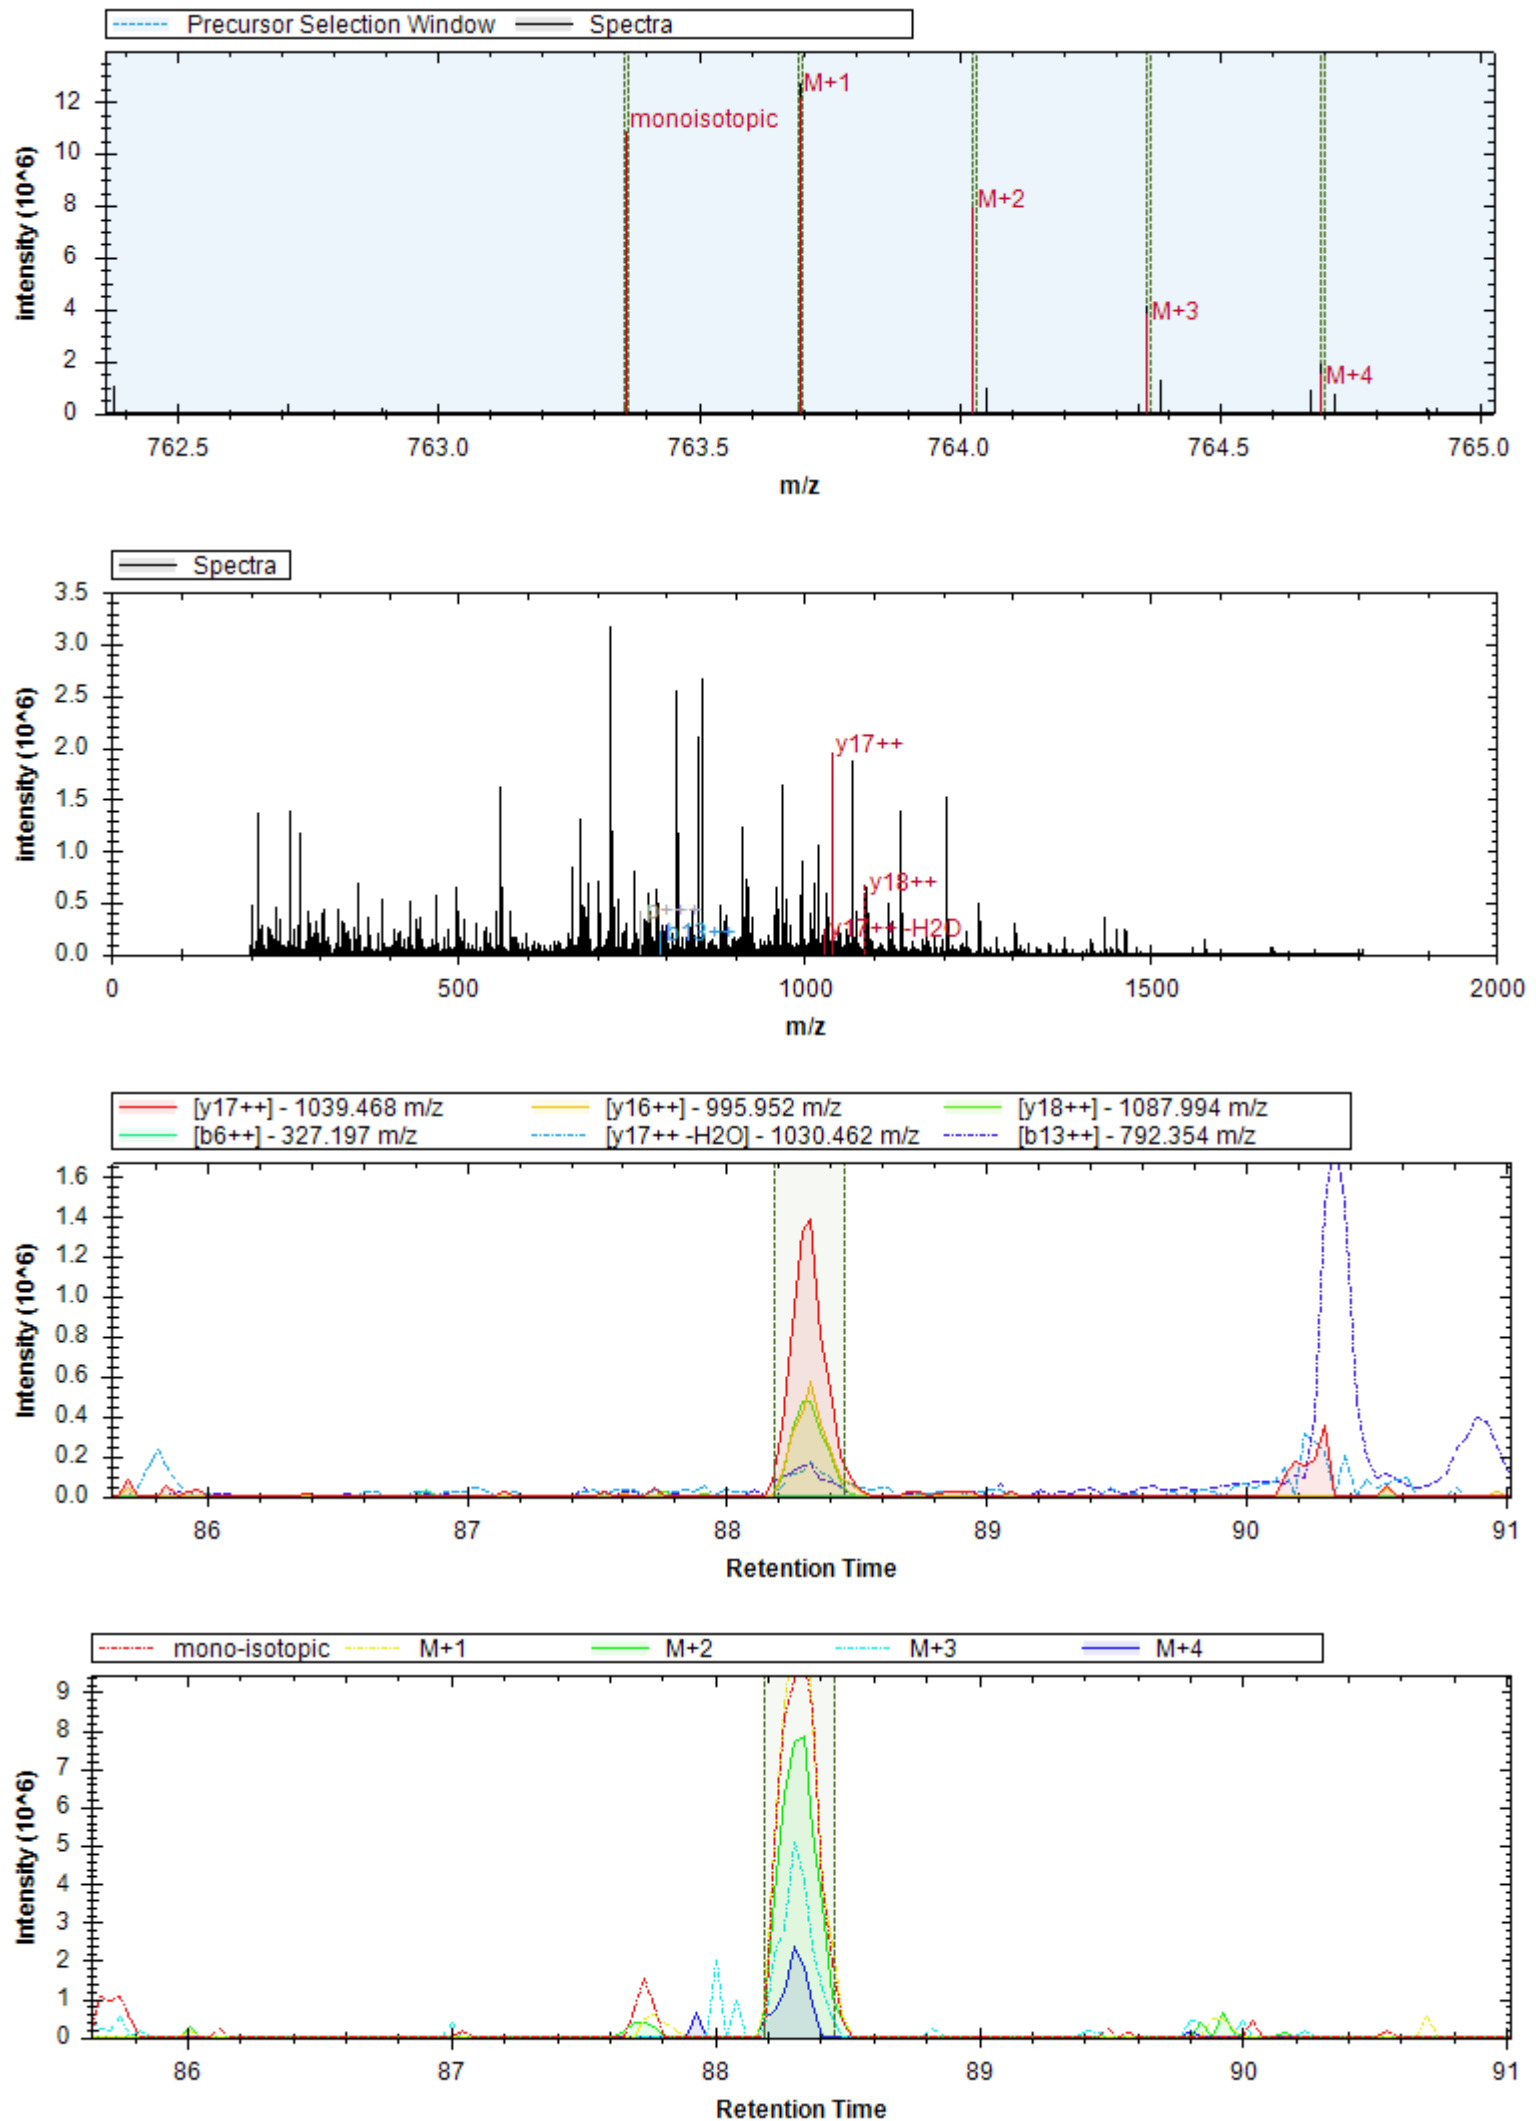

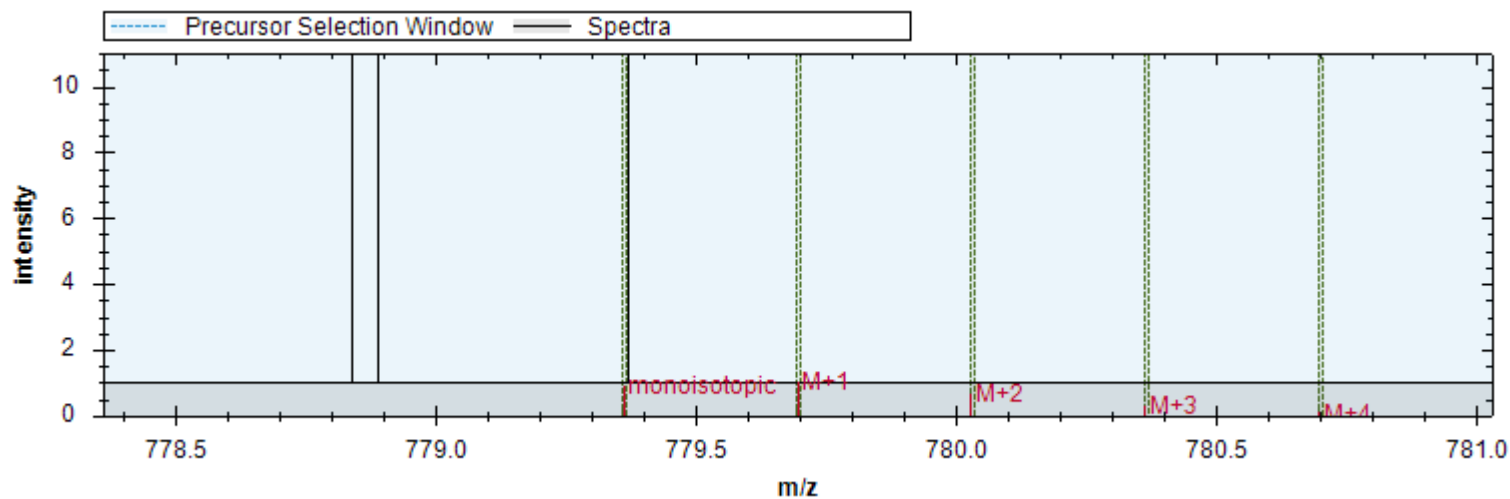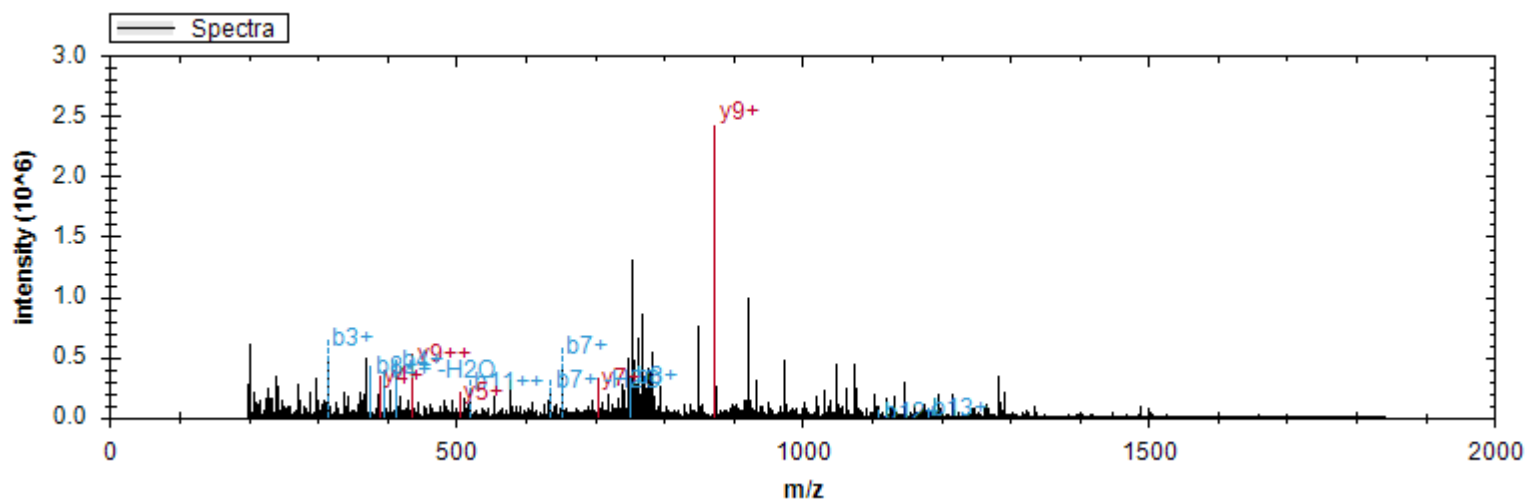

|                          |                          |                            |
|--------------------------|--------------------------|----------------------------|
| [y9+] - 873.431 m/z      | [b7+] - 653.325 m/z      | [b11+] - 1039.505 m/z      |
| [b3+] - 315.130 m/z      | [b8++] - 376.701 m/z     | [y7+] - 705.341 m/z        |
| [b4+] - 414.198 m/z      | [b11++] - 520.256 m/z    | [b7+ -H2O] - 635.315 m/z   |
| [b8+] - 752.394 m/z      | [b4+ -H2O] - 396.188 m/z | [y8+] - 776.379 m/z        |
| [y4+] - 390.235 m/z      | [y11+] - 1155.493 m/z    | [y9++] - 437.219 m/z       |
| [b12+] - 1110.543 m/z    | [y6+] - 634.304 m/z      | [b7+ -NH3] - 636.299 m/z   |
| [y12+] - 1226.530 m/z    | [b5+] - 511.251 m/z      | [b11+ -NH3] - 1022.479 m/z |
| [b4+ -NH3] - 397.172 m/z | [b13+] - 1181.580 m/z    | [b8+ -NH3] - 735.367 m/z   |
| [y5+] - 505.262 m/z      |                          |                            |

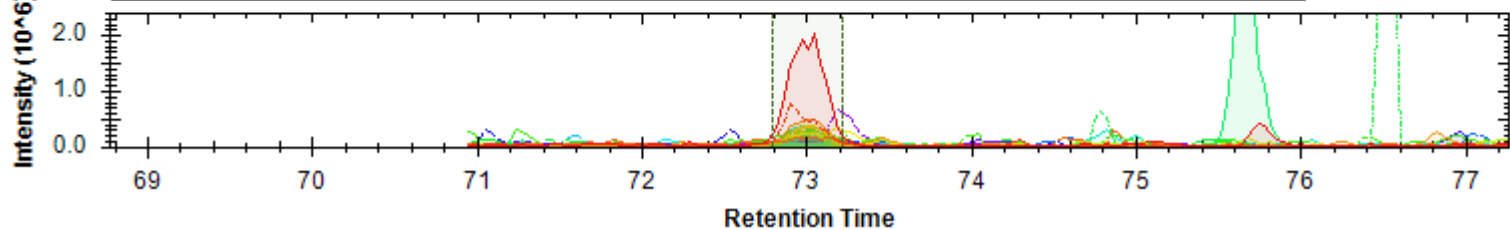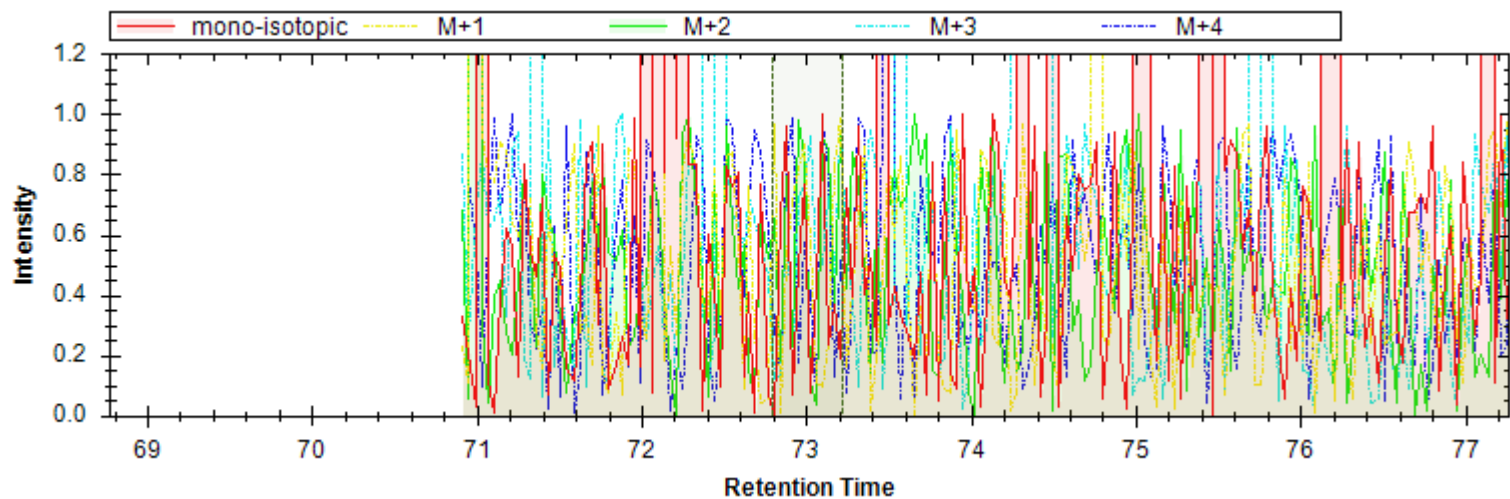

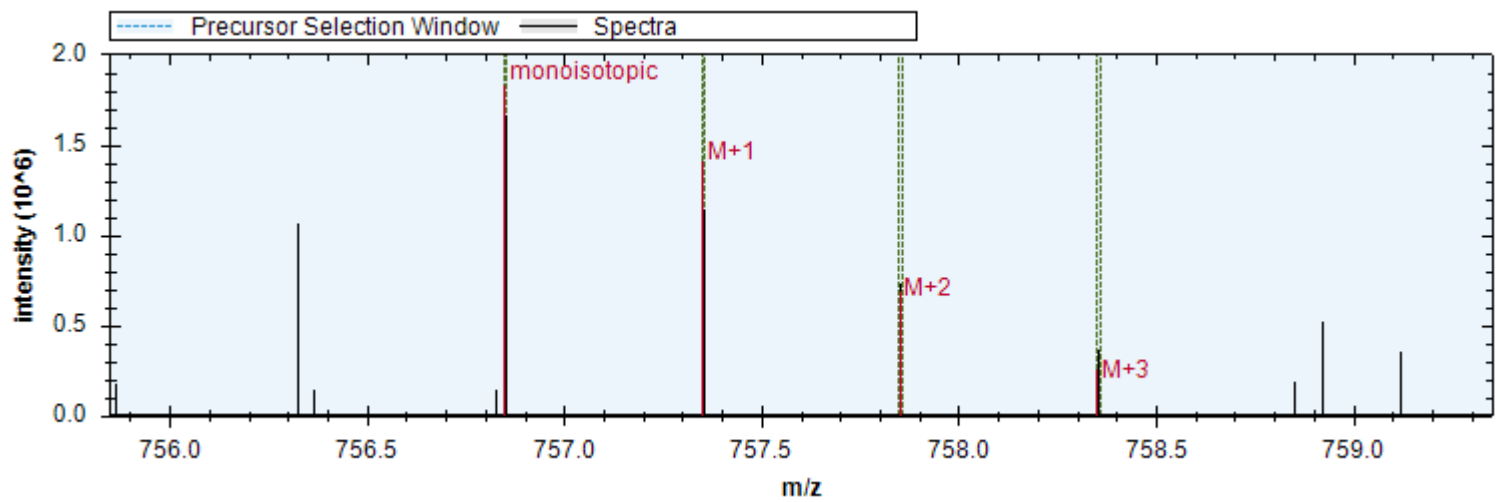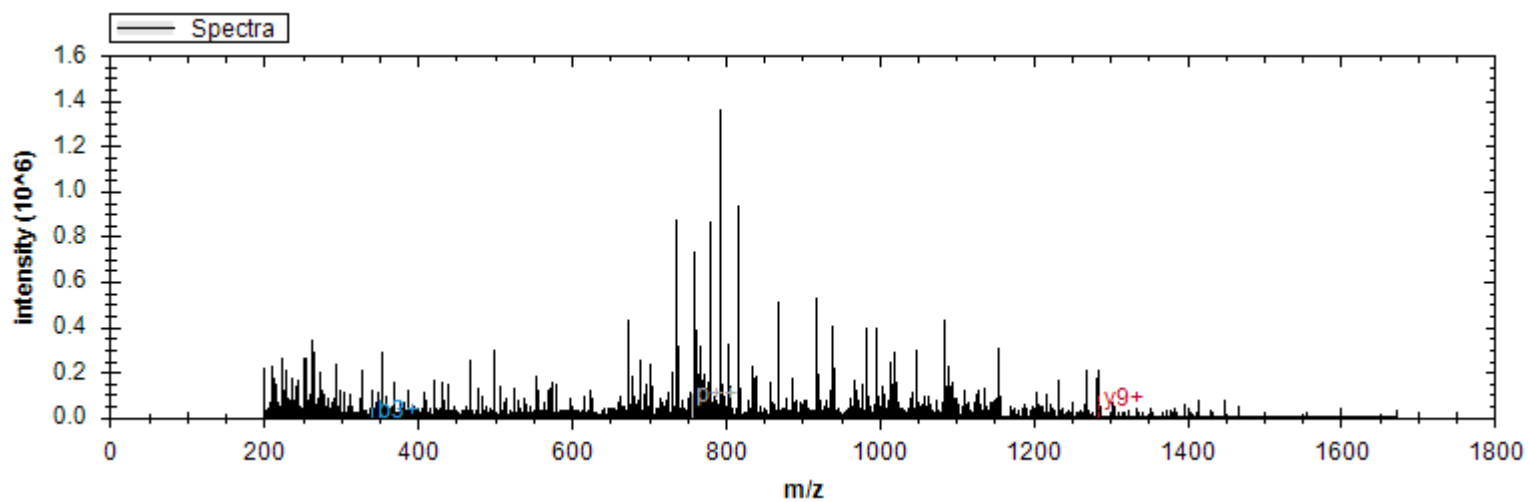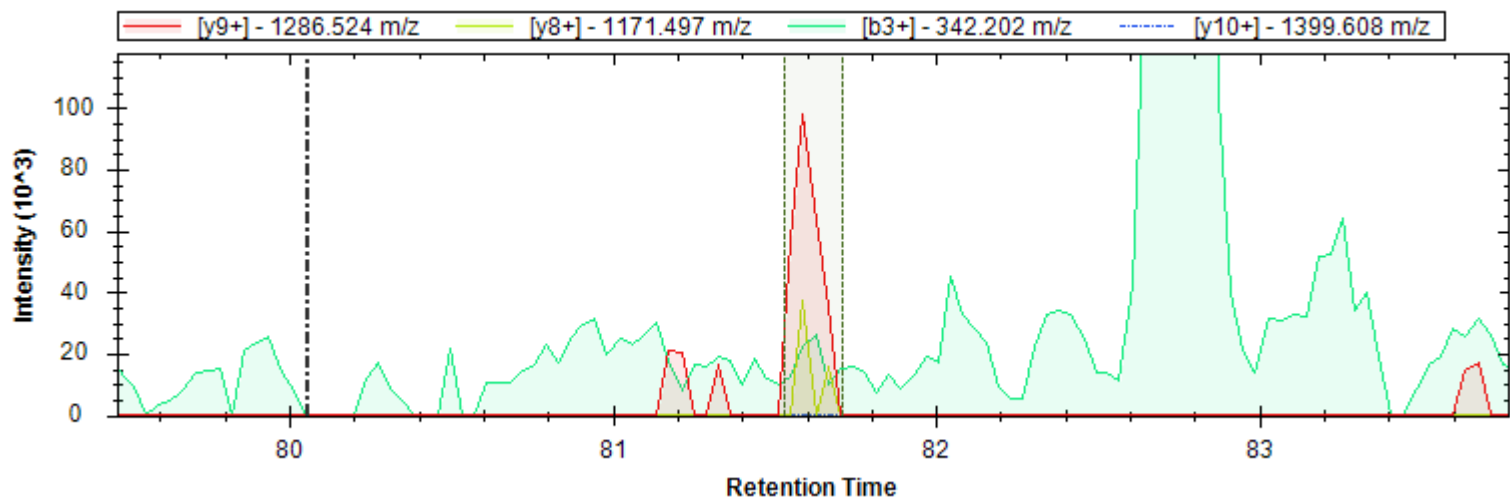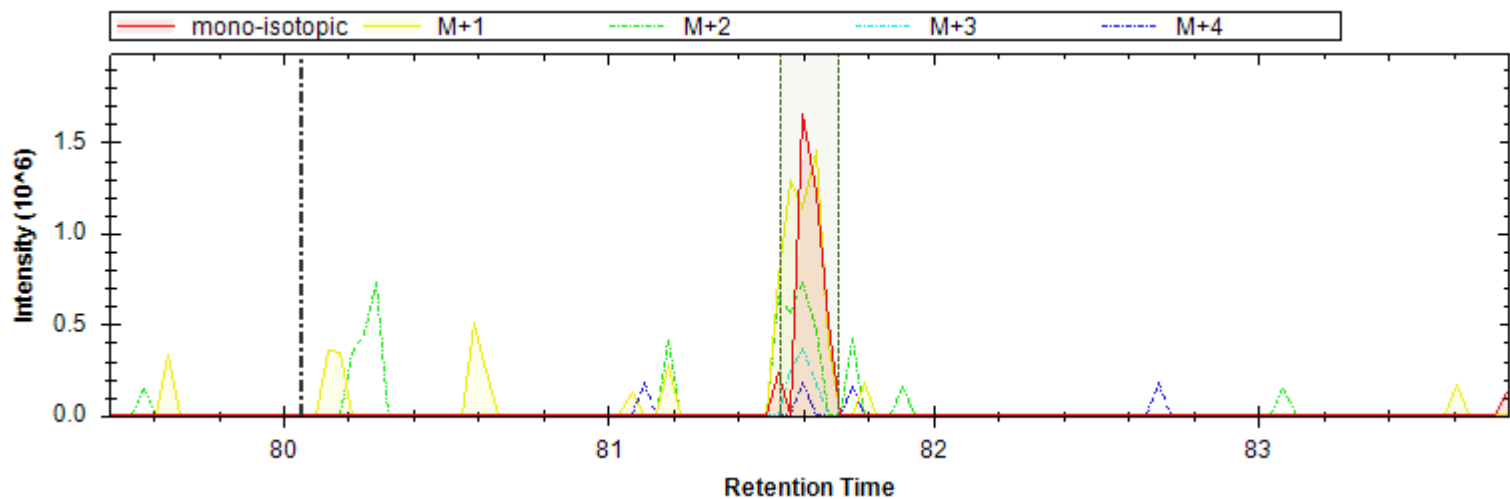

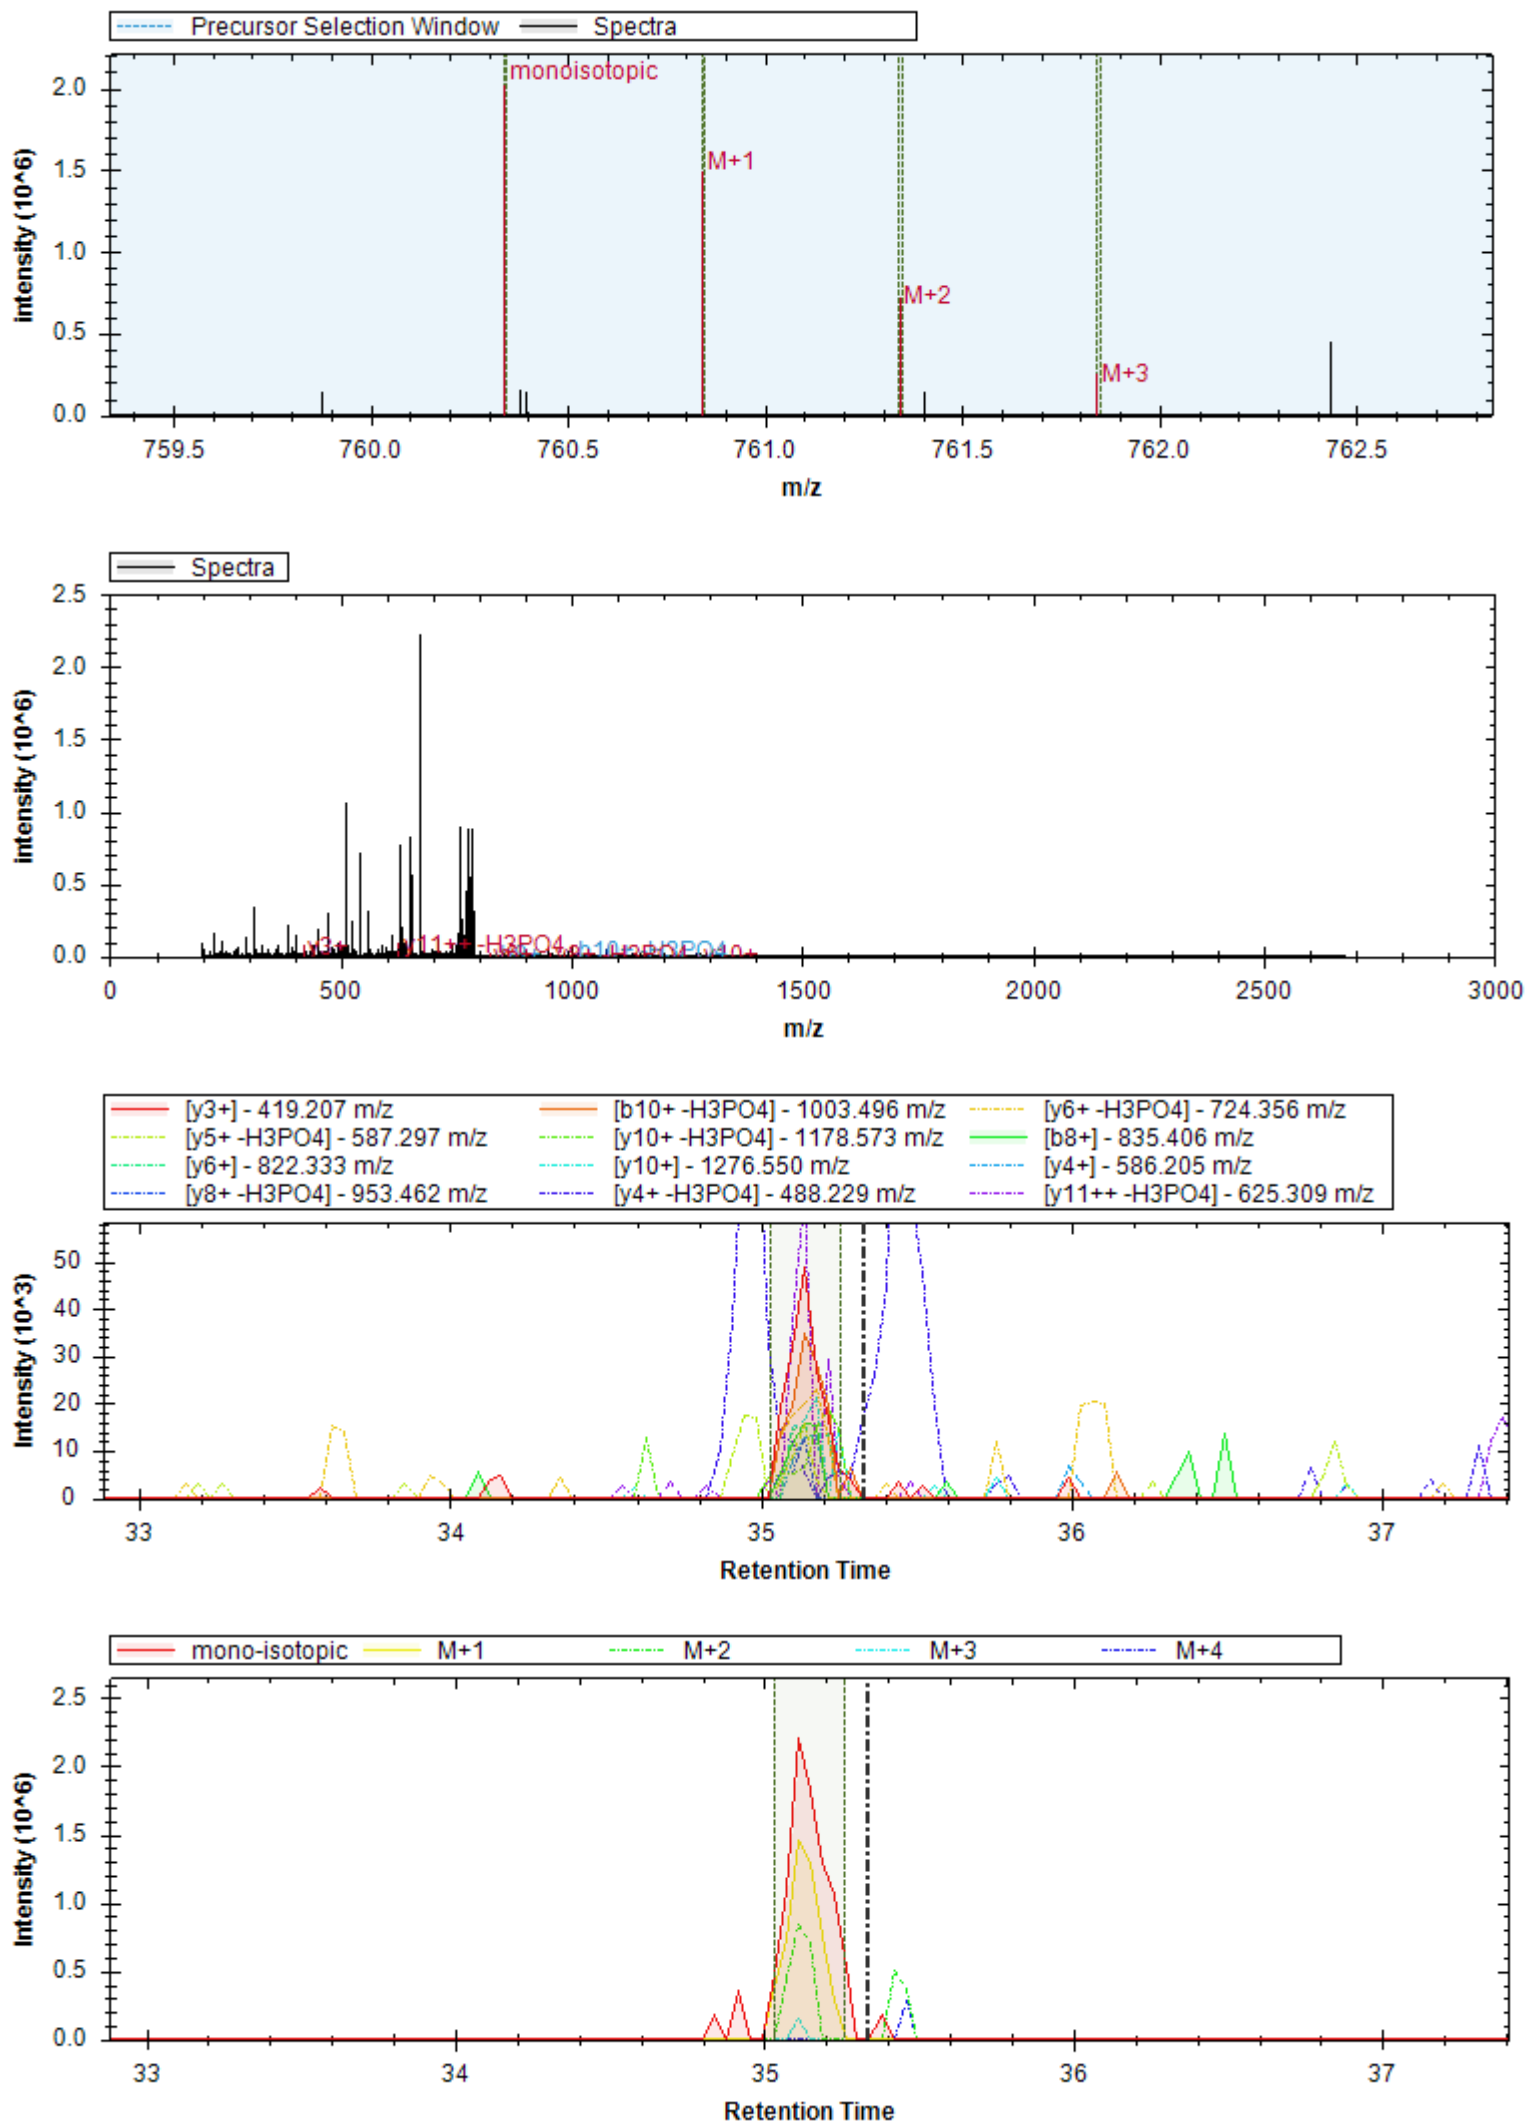

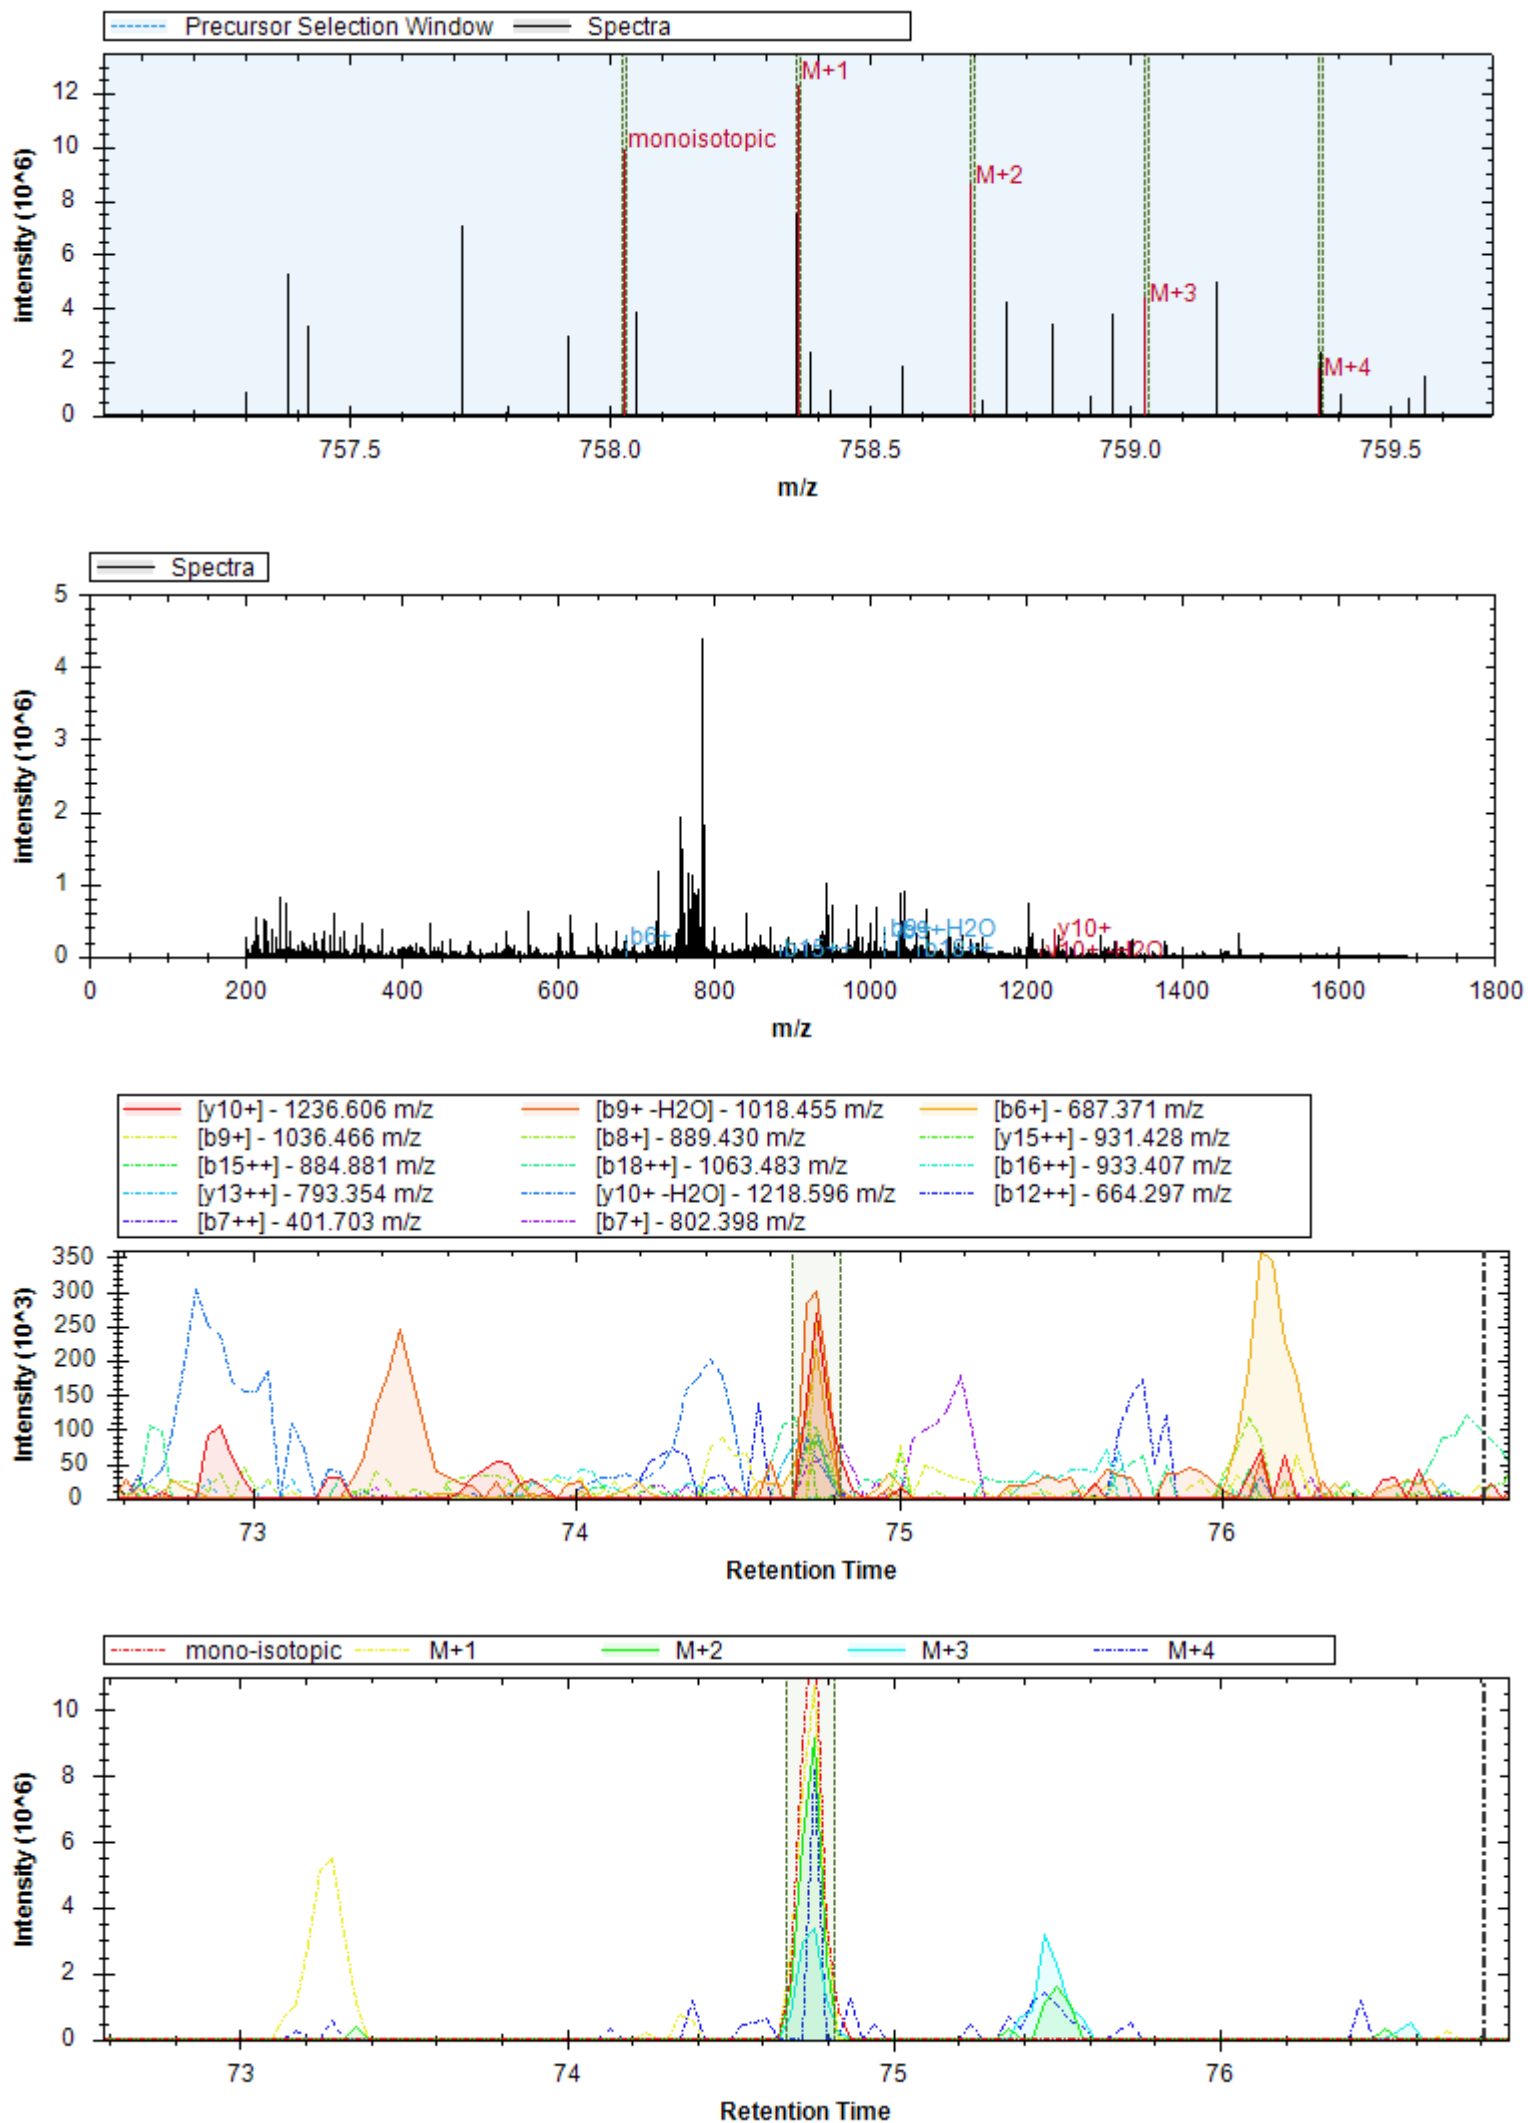

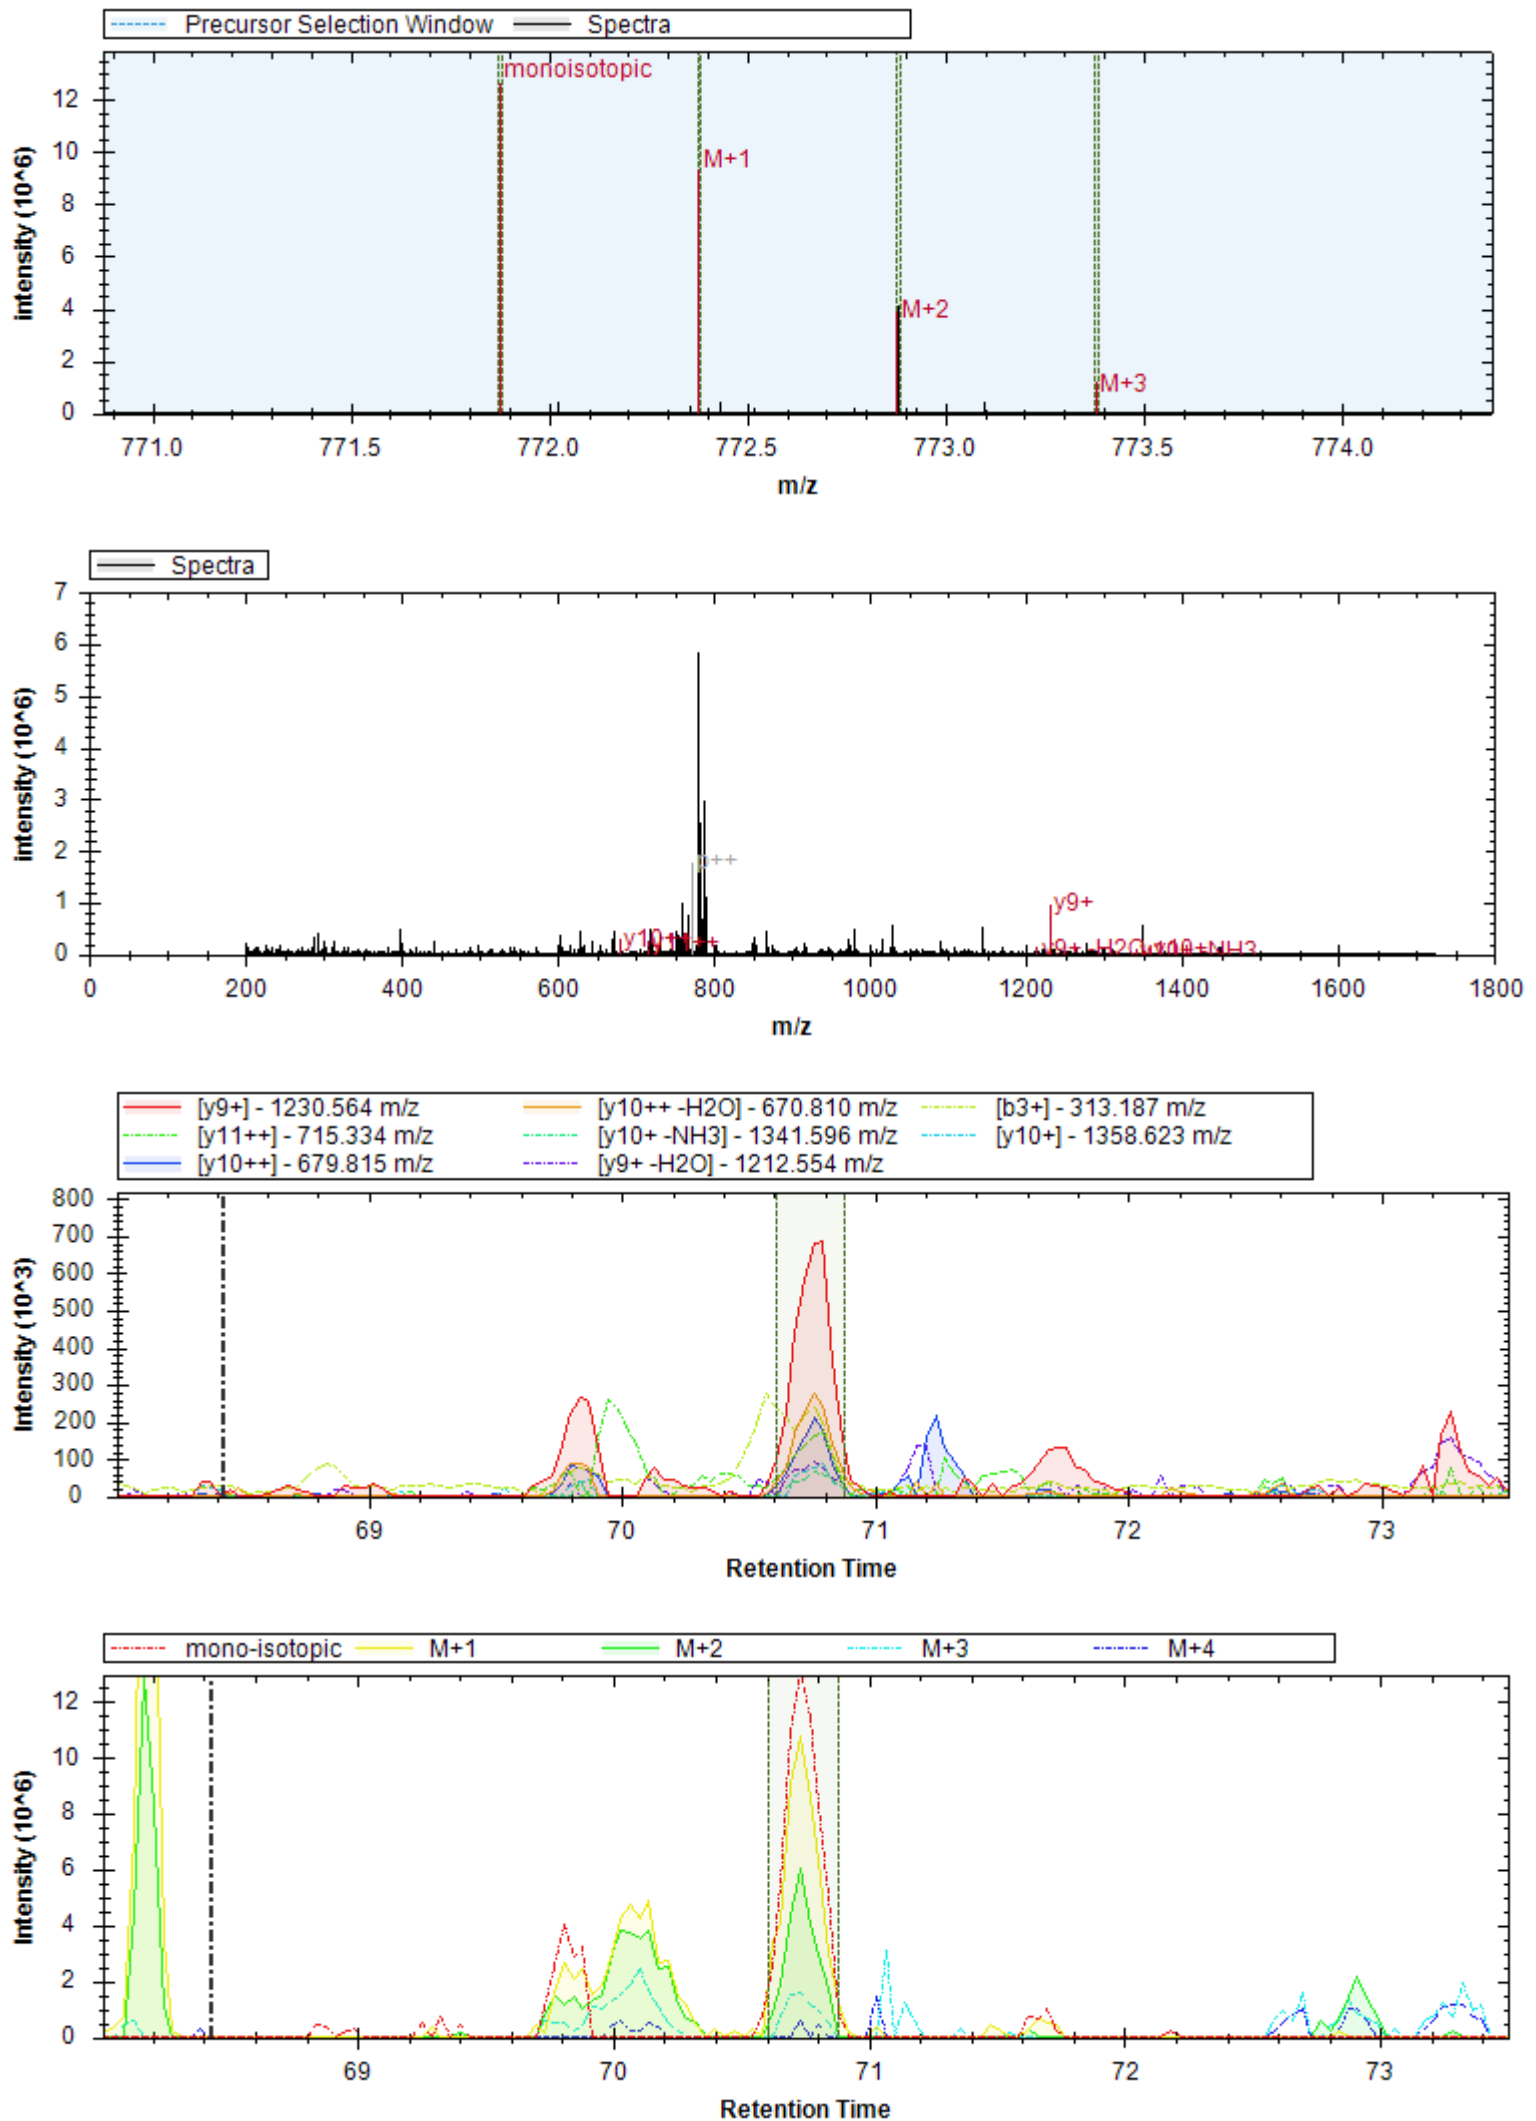

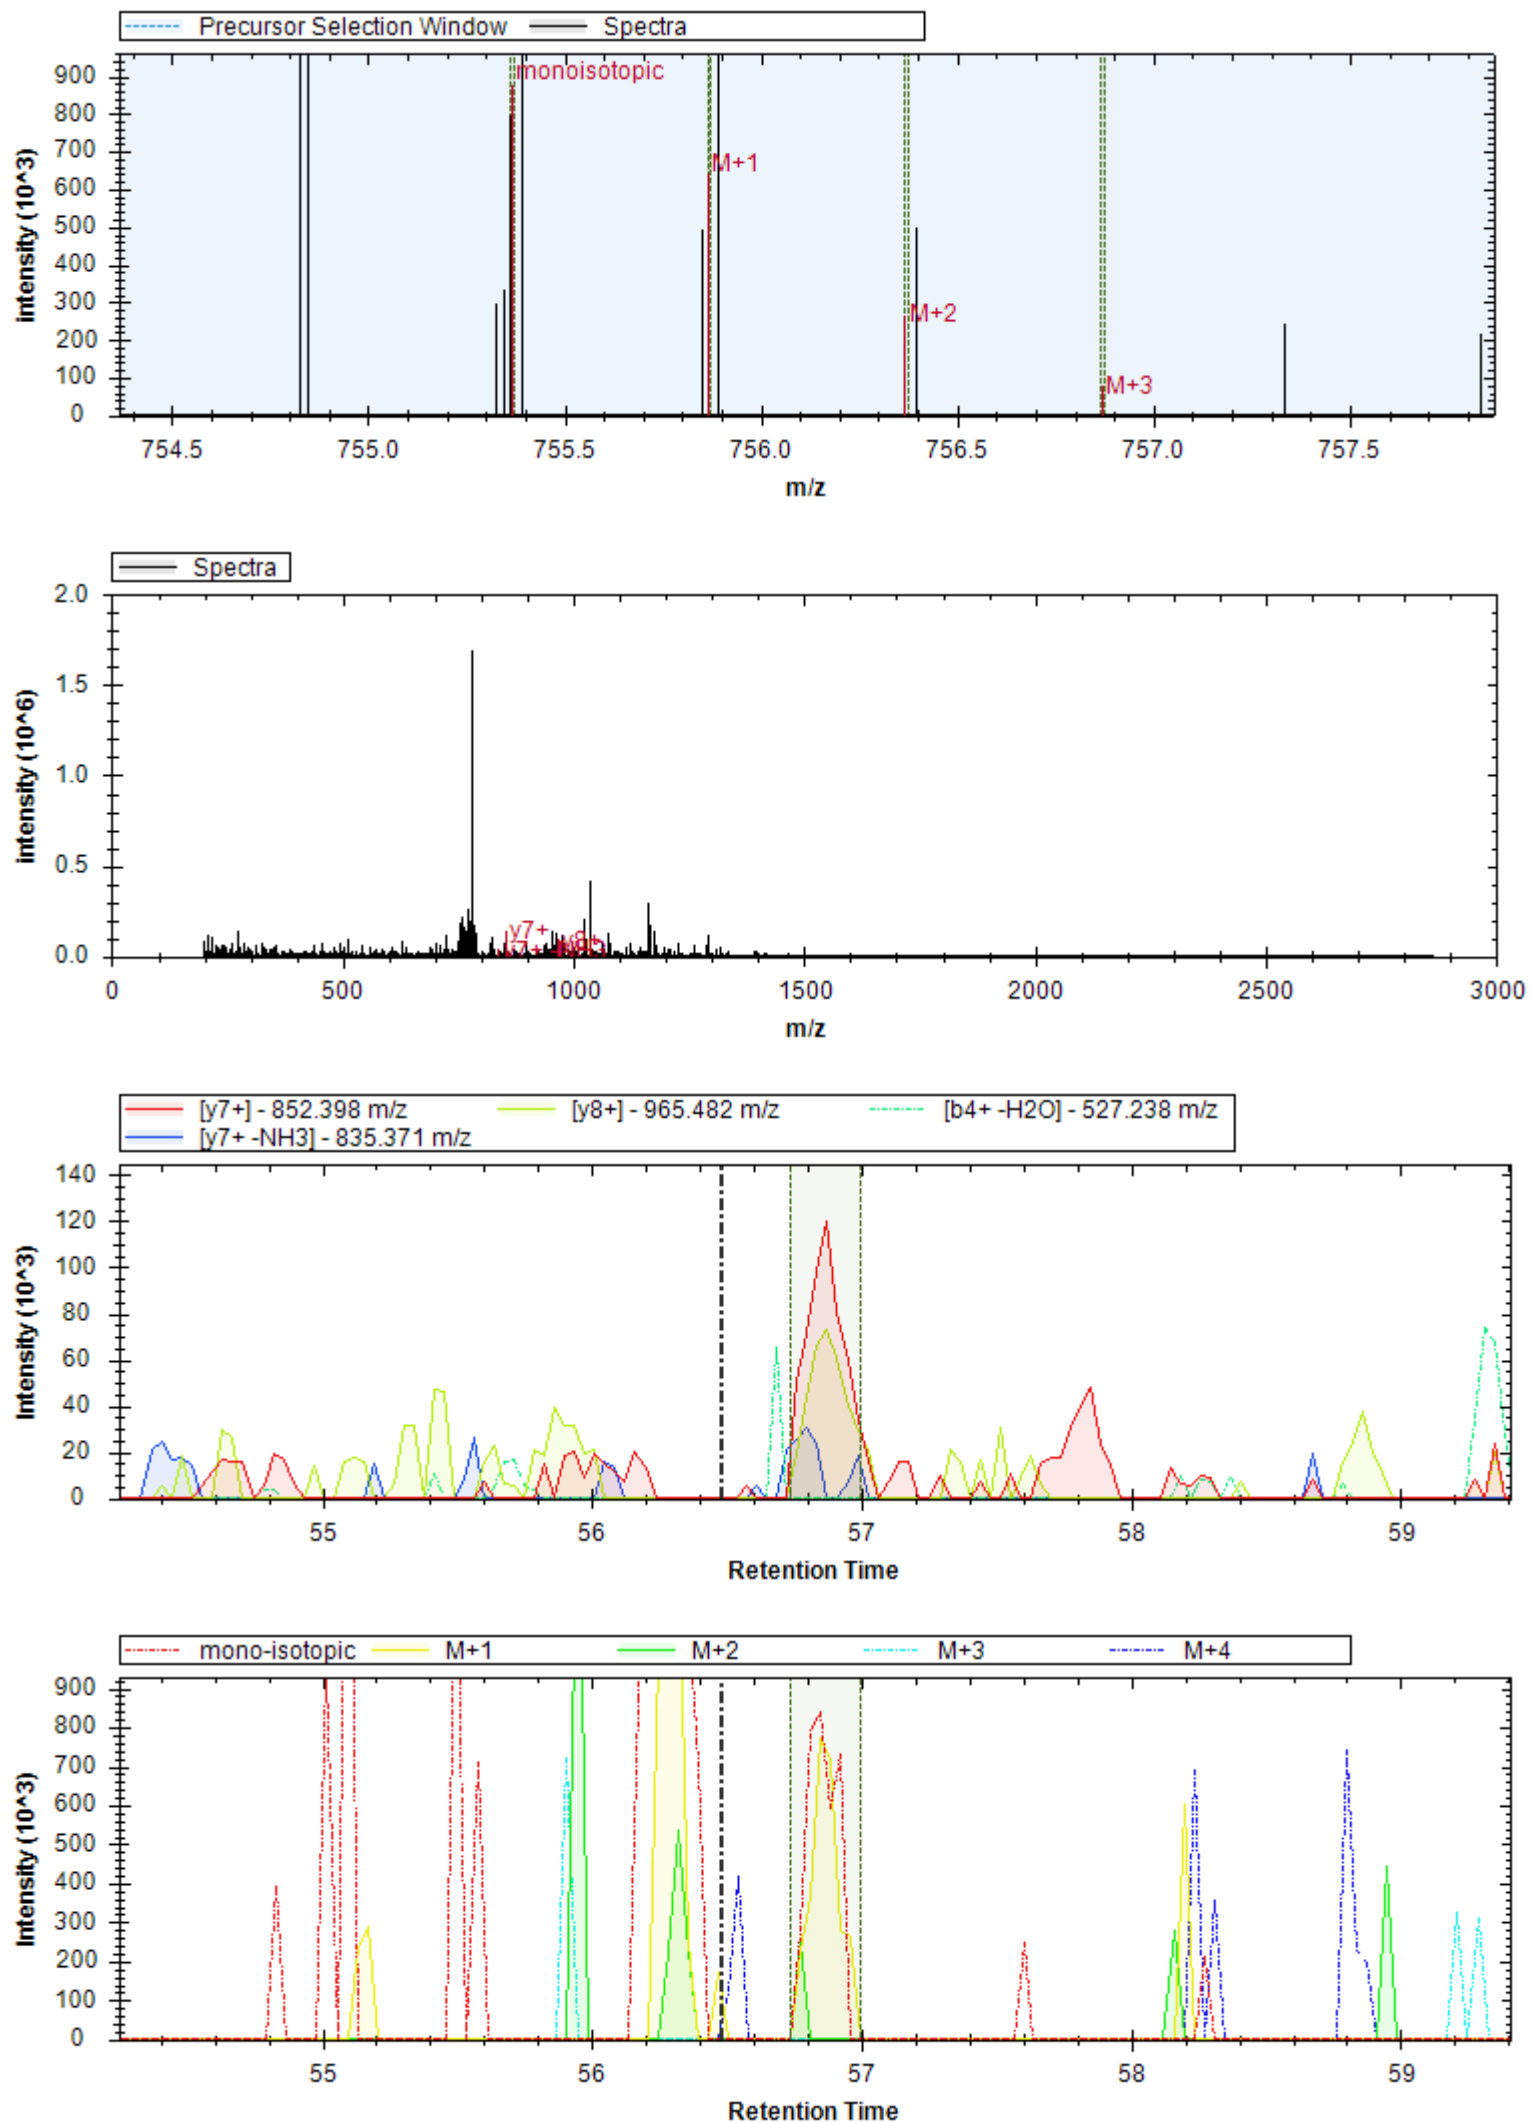



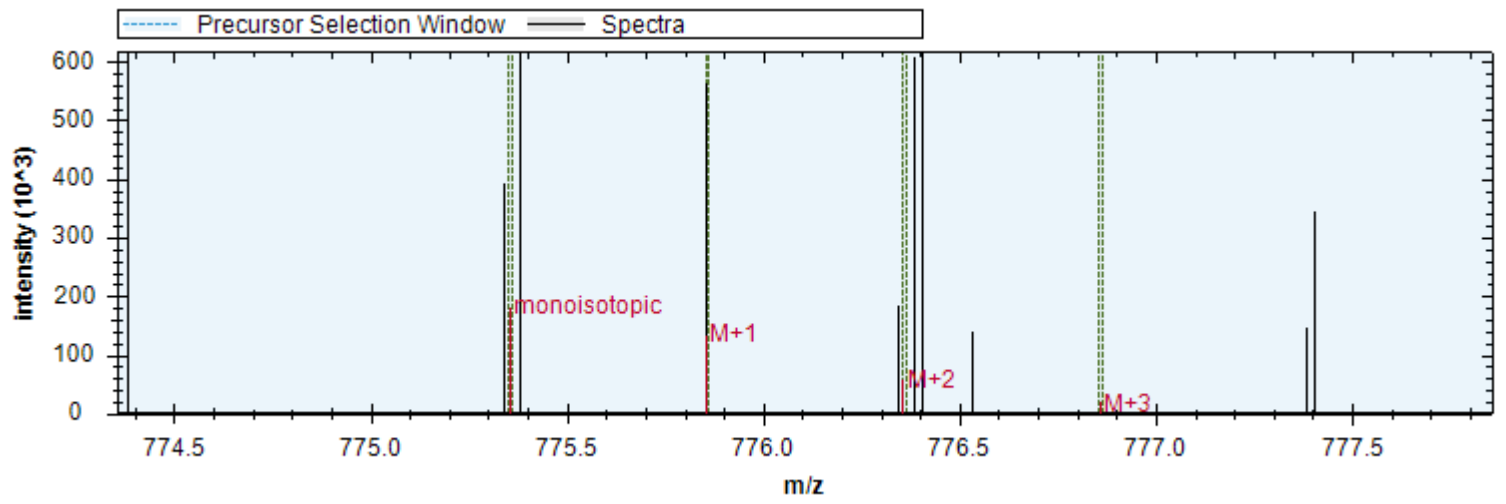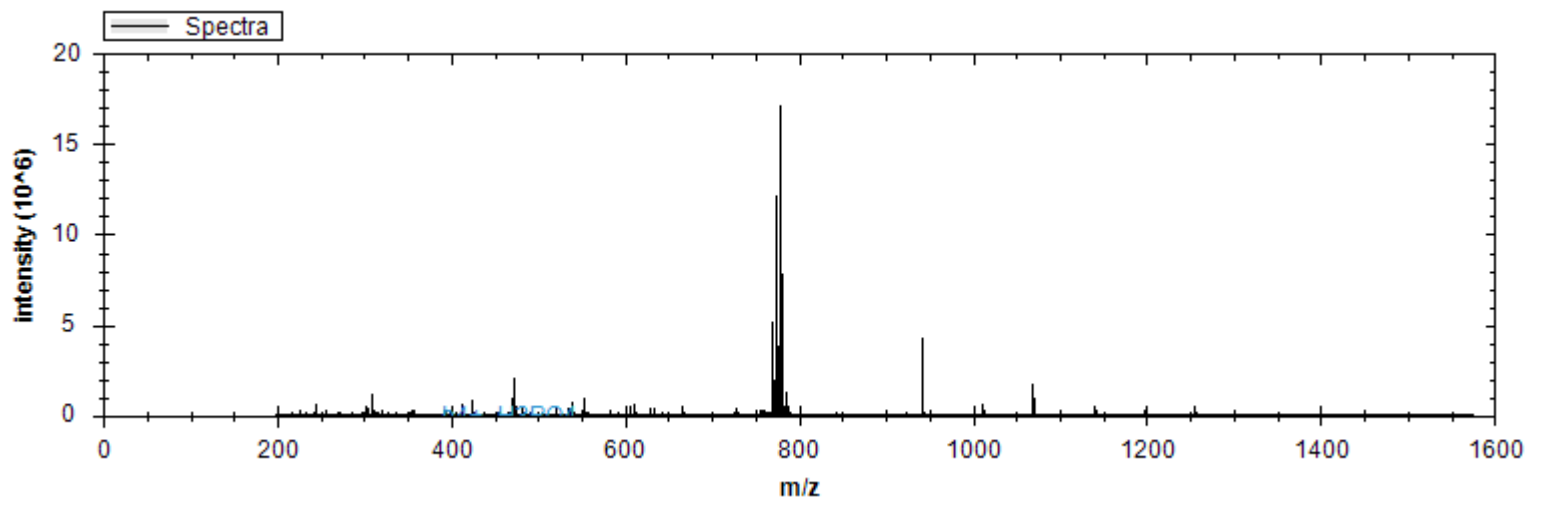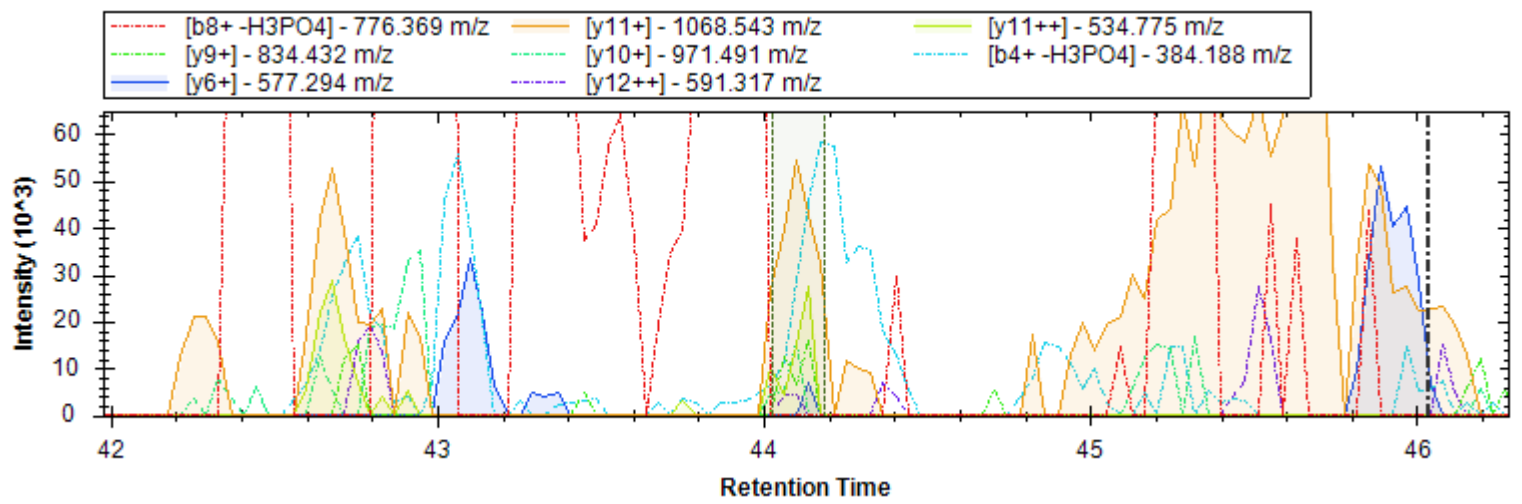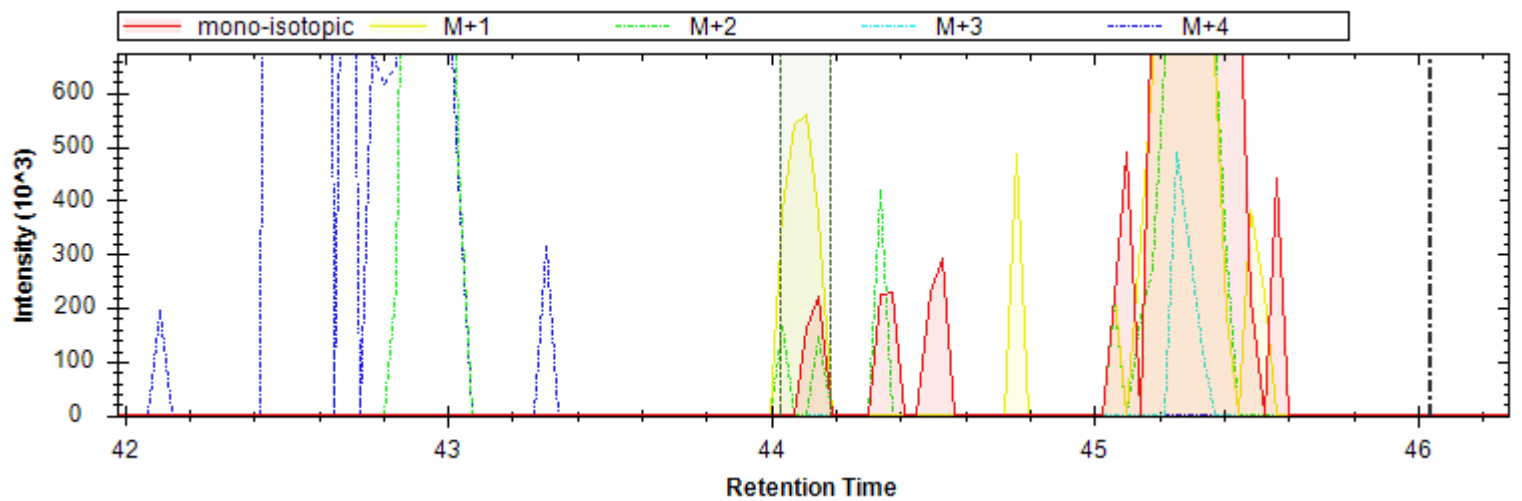

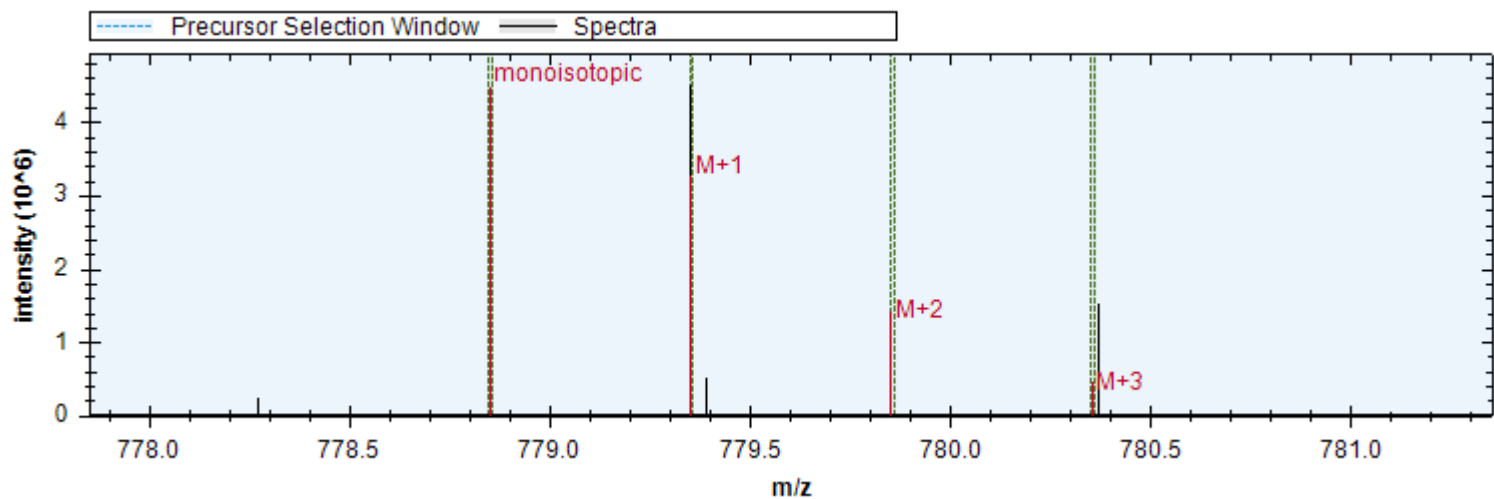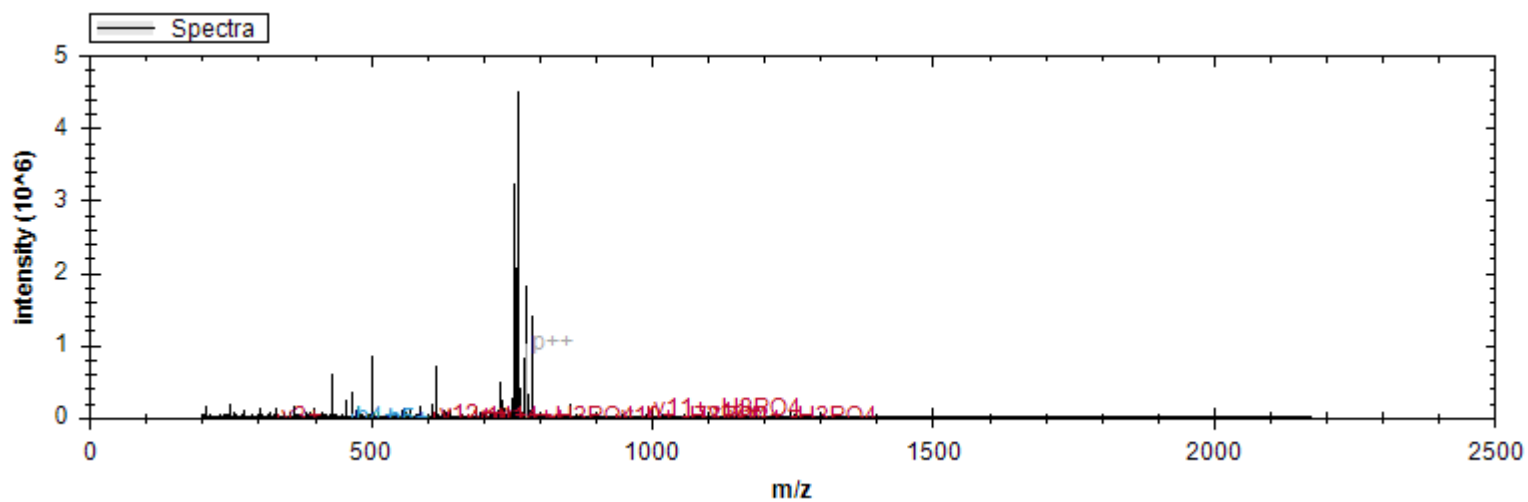

|                              |                              |                             |
|------------------------------|------------------------------|-----------------------------|
| [y11+ -H3PO4] - 993.485 m/z  | [y4+] - 422.225 m/z          | [b4+] - 466.241 m/z         |
| [y3+] - 335.193 m/z          | [y11+] - 1091.462 m/z        | [y12++] - 614.764 m/z       |
| [y14++ -H3PO4] - 673.321 m/z | [y5+] - 535.309 m/z          | [y11+ -NH3] - 1172.235 m/z  |
| [b6+] - 580.284 m/z          | [y8+] - 810.420 m/z          | [b10+ -H3PO4] - 924.417 m/z |
| [y12+ -H2O] - 1308.310 m/z   | [y12+ -H3PO4] - 1130.544 m/z | [y10+ -H3PO4] - 936.463 m/z |
| [y12+] - 1228.521 m/z        | [y6+] - 622.341 m/z          | [b5+] - 523.262 m/z         |
| [b11+ -H3PO4] - 1037.501 m/z | [b7+ -H3PO4] - 649.305 m/z   | [y14++] - 722.309 m/z       |
| [y4+ -H2O] - 404.214 m/z     |                              |                             |

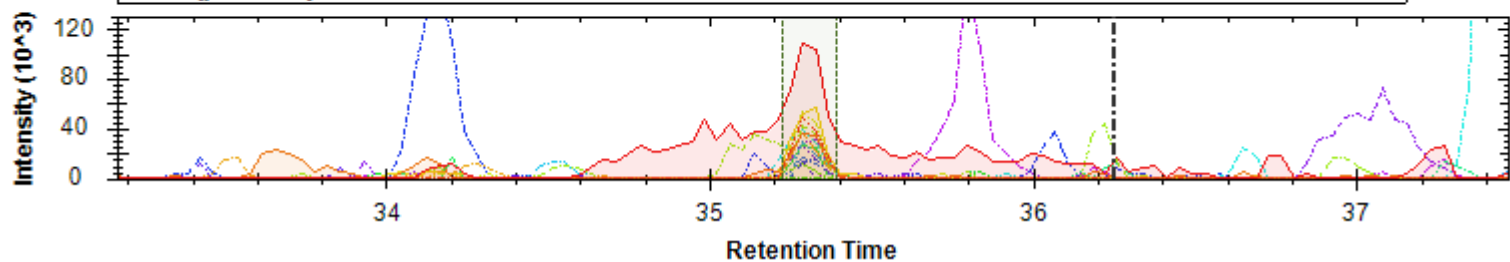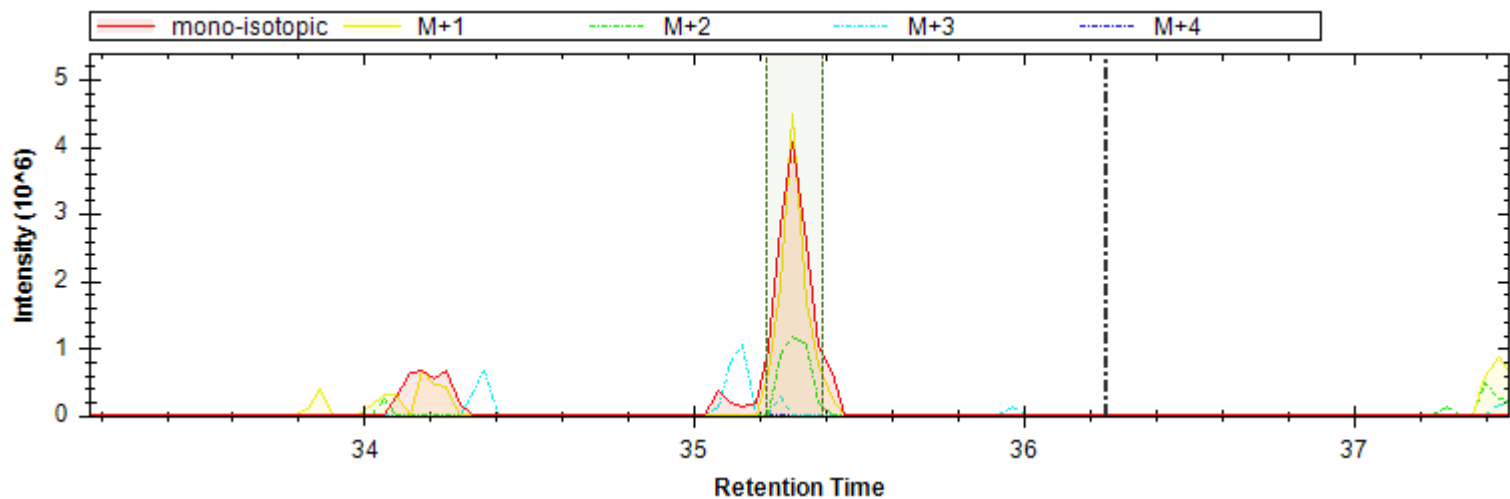

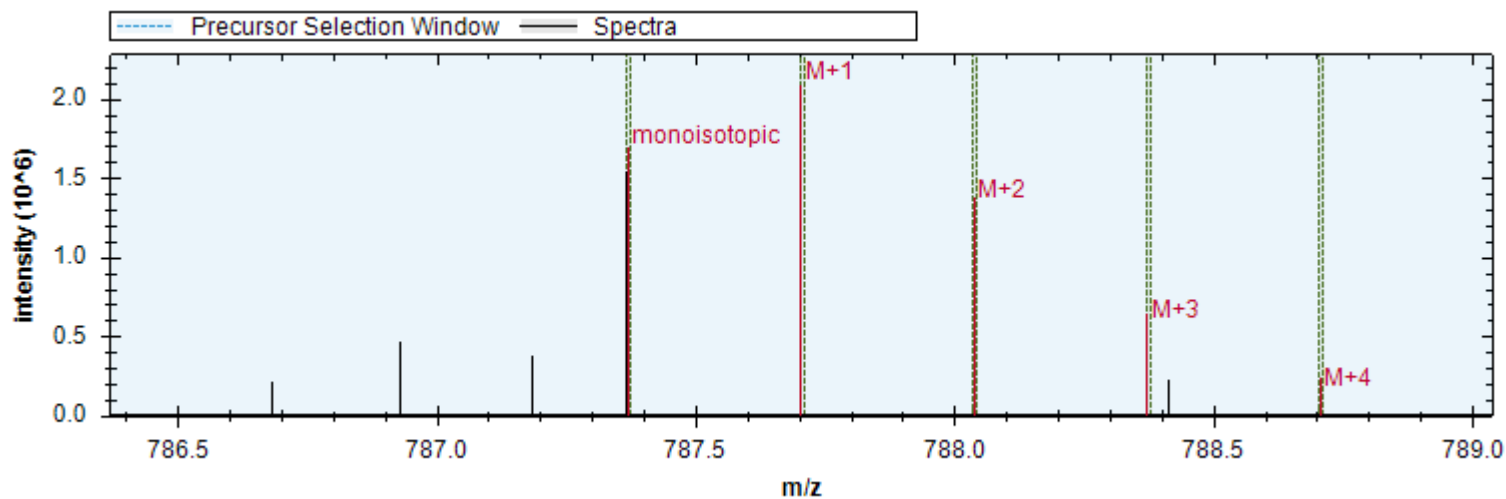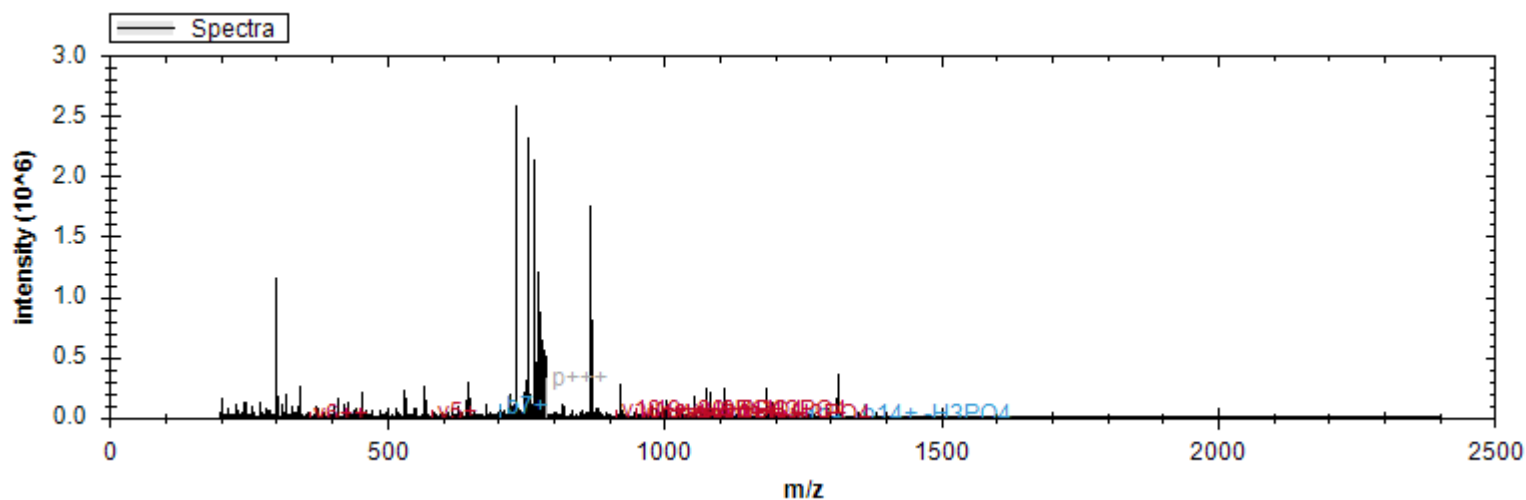

|                              |                               |                               |
|------------------------------|-------------------------------|-------------------------------|
| [y18++ -H3PO4] - 914.454 m/z | [y19++ -H3PO4] - 949.972 m/z  | [y20++ -H3PO4] - 1031.504 m/z |
| [y5+] - 583.295 m/z          | [y21++ -H3PO4] - 1075.020 m/z | [b3+ -H2O] - 346.176 m/z      |
| [b14+ -H3PO4] - 1346.649 m/z | [y6+] - 720.354 m/z           | [y4+] - 446.236 m/z           |
| [b3+] - 364.187 m/z          | [y8+] - 916.475 m/z           | [y6++] - 360.681 m/z          |
| [b7+] - 705.368 m/z          | [y3+] - 375.199 m/z           | [y20++] - 1080.492 m/z        |
| [y17++ -H3PO4] - 885.943 m/z | [y10+ -H3PO4] - 1042.518 m/z  | [b11+] - 1149.569 m/z         |
| [y18++] - 963.442 m/z        | [b12+] - 1220.606 m/z         | [y19++] - 998.961 m/z         |
| [y7+] - 819.422 m/z          | [y21++] - 1124.008 m/z        | [y20+++] - 720.664 m/z        |
| [b13+] - 1277.627 m/z        |                               |                               |

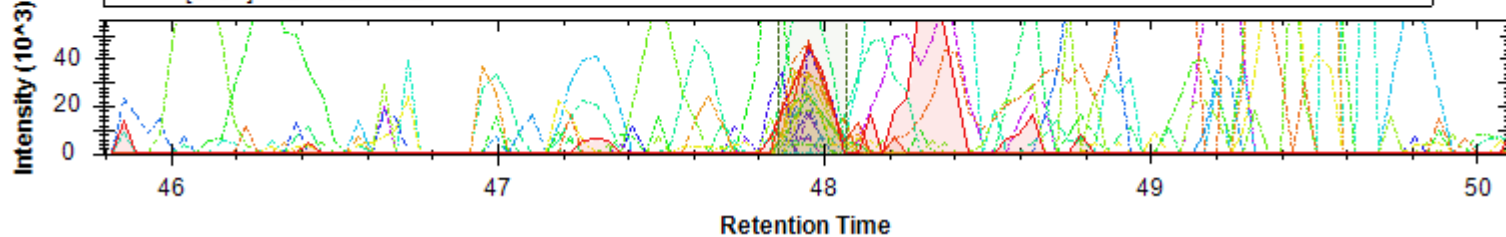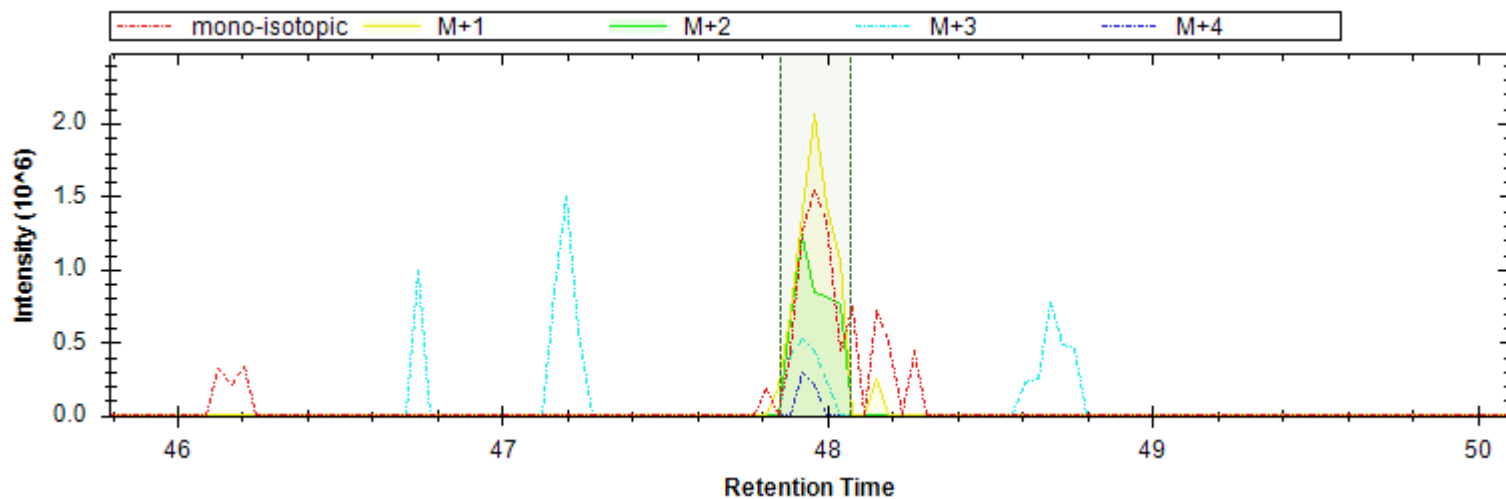

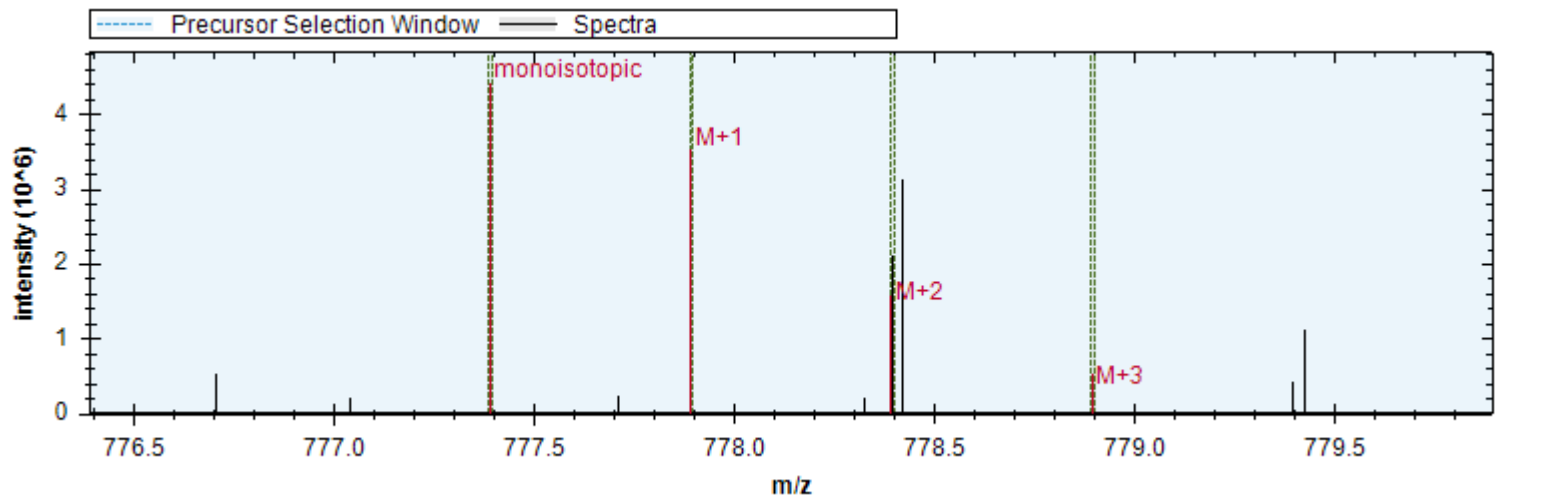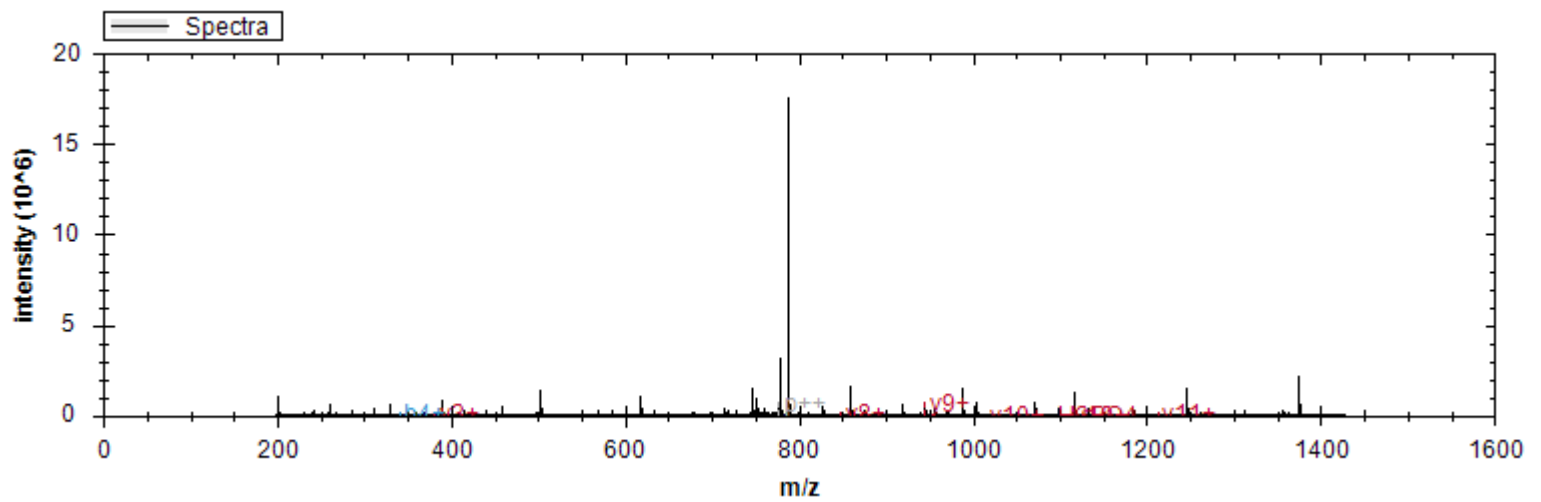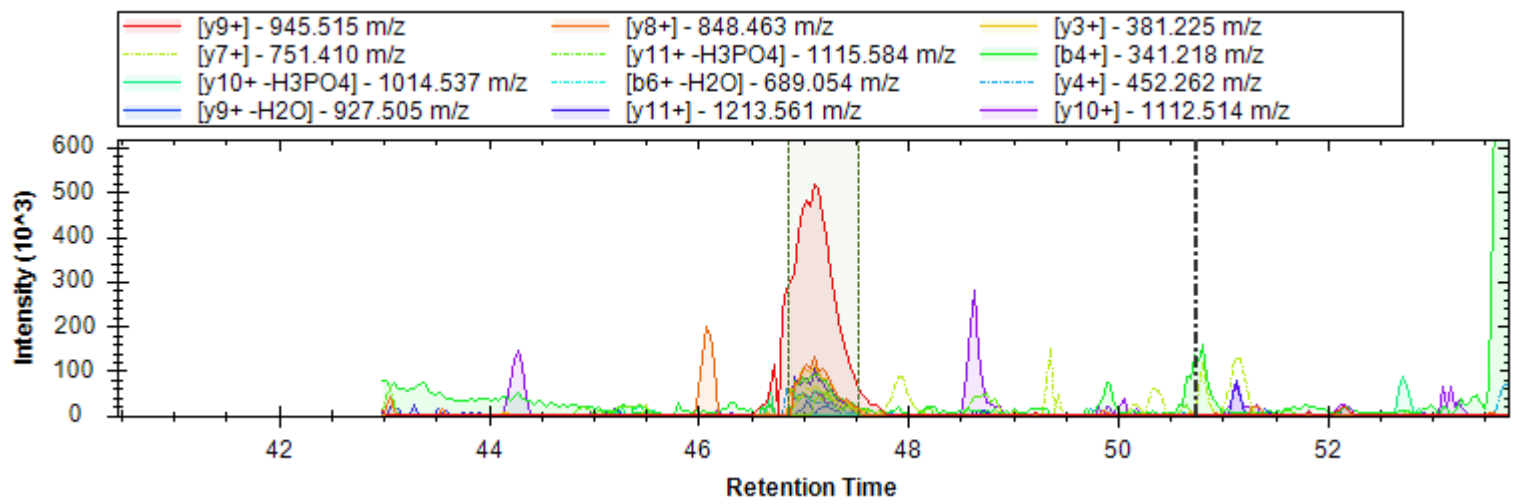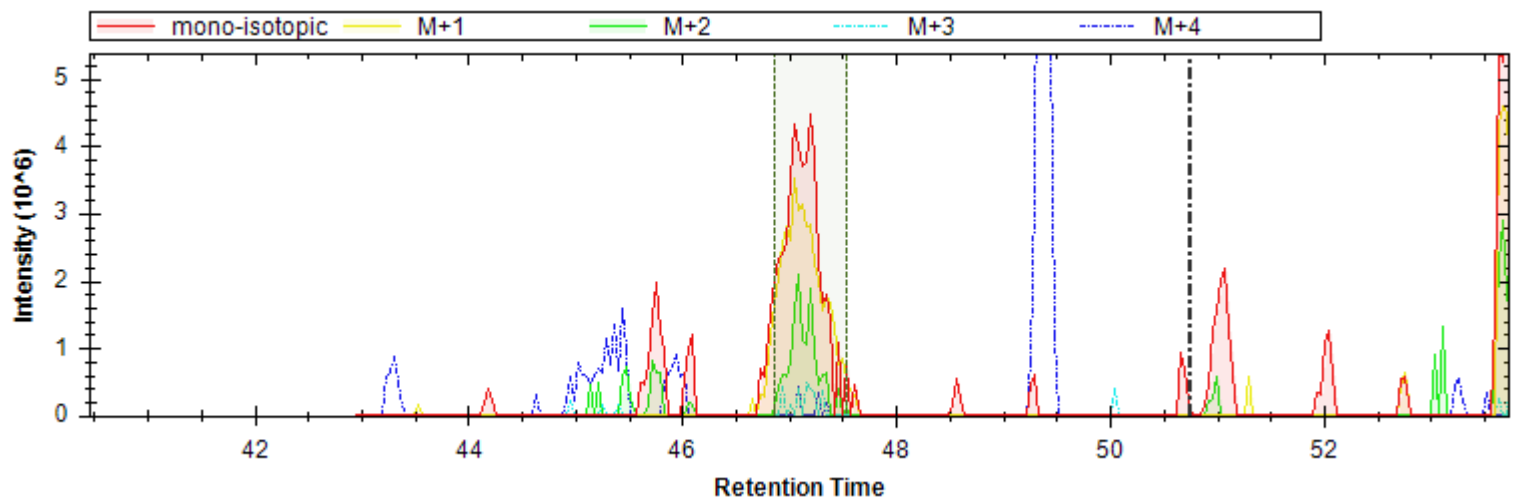

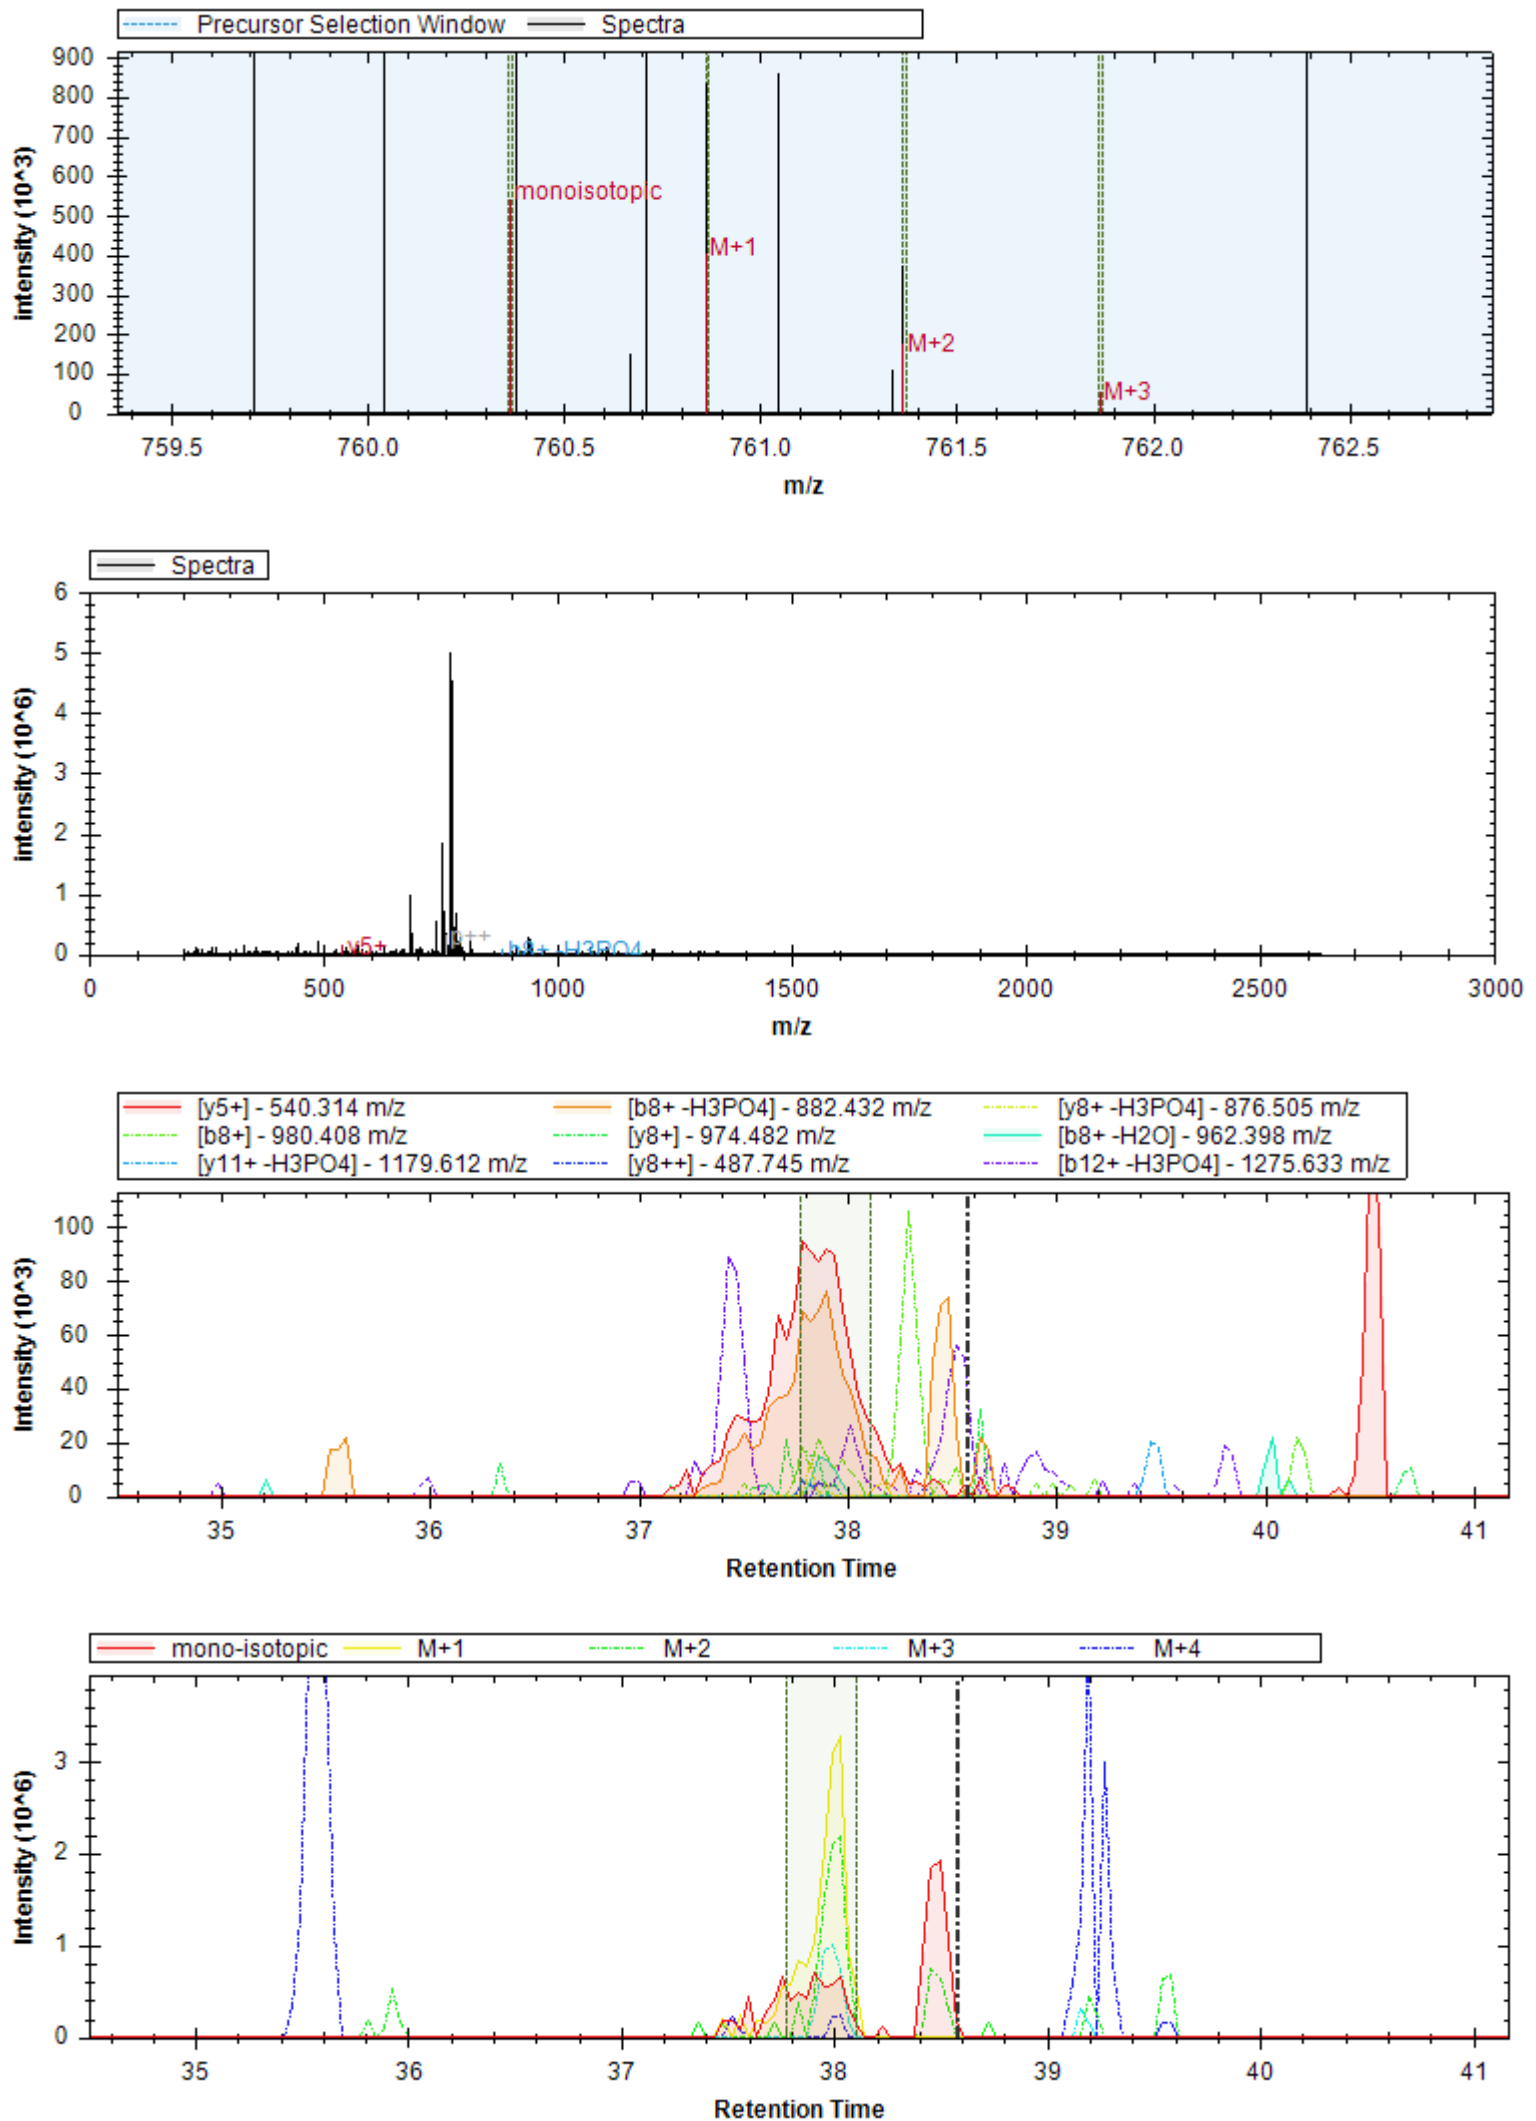

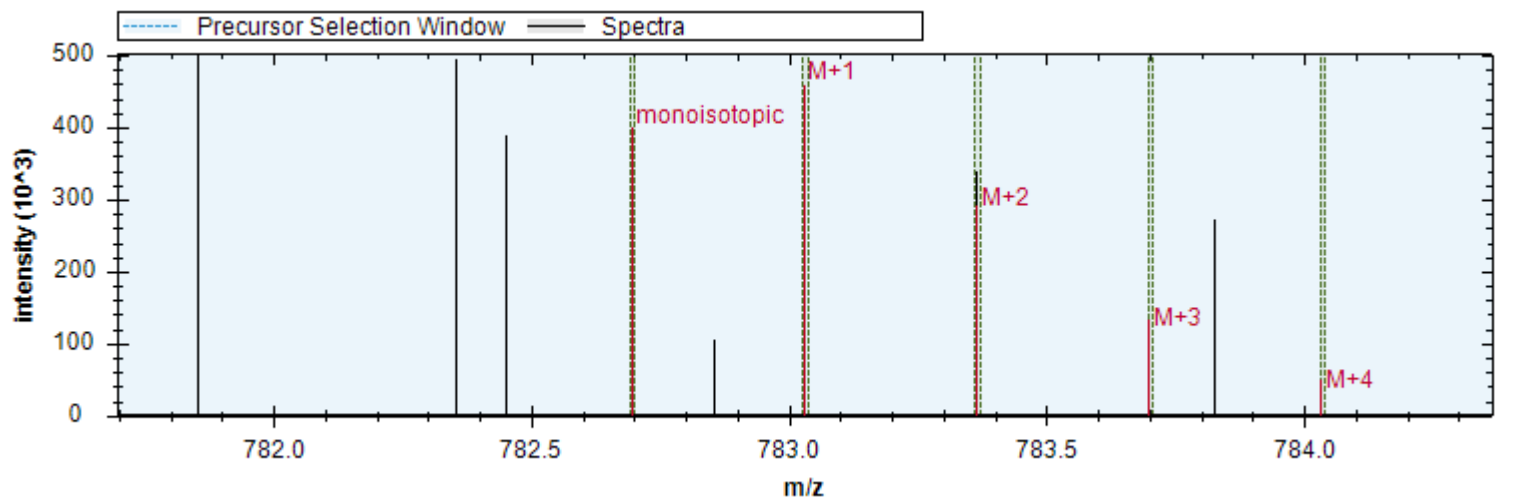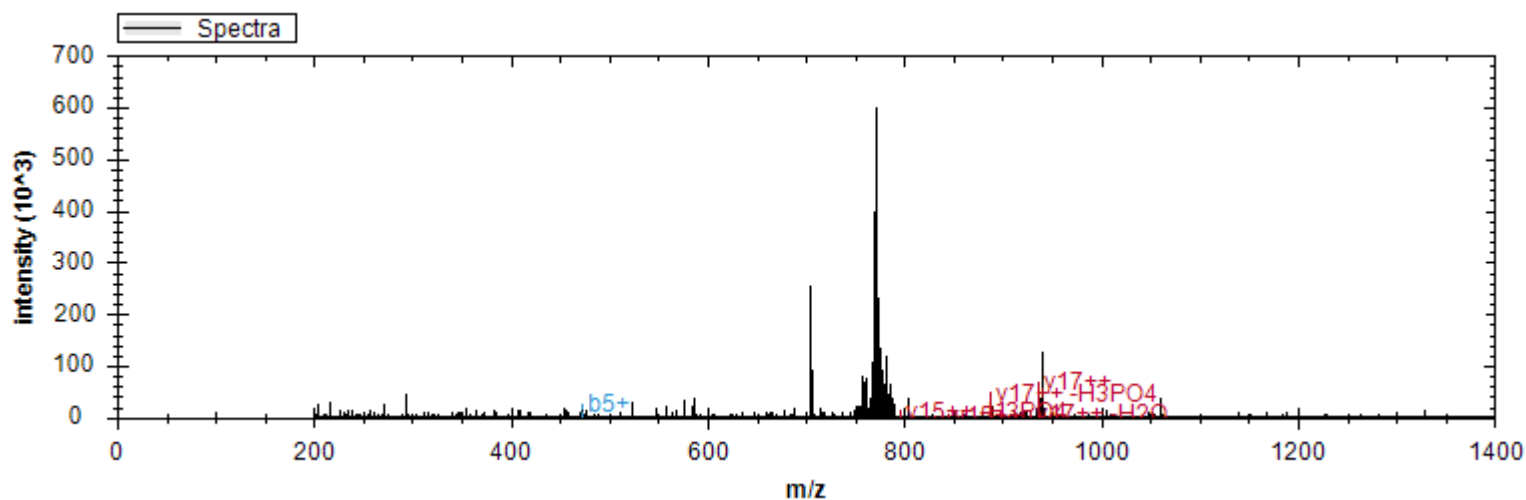

|                                          |                                           |                                          |
|------------------------------------------|-------------------------------------------|------------------------------------------|
| [y17 <sup>++</sup> -H3PO4] - 888.455 m/z | [y17 <sup>++</sup> ] - 937.444 m/z        | [b4 <sup>+</sup> -H2O] - 384.151 m/z     |
| [y15 <sup>++</sup> -H3PO4] - 796.413 m/z | [b3 <sup>+</sup> -H2O] - 313.114 m/z      | [y7 <sup>+</sup> ] - 829.441 m/z         |
| [y18 <sup>++</sup> -H3PO4] - 923.974 m/z | [y17 <sup>++</sup> -H2O] - 928.439 m/z    | [y15 <sup>++</sup> ] - 845.401 m/z       |
| [y18 <sup>++</sup> ] - 972.962 m/z       | [y20 <sup>++</sup> -H3PO4] - 1003.008 m/z | [y16 <sup>++</sup> -H3PO4] - 839.929 m/z |
| [b4 <sup>+</sup> ] - 402.162 m/z         | [b5 <sup>+</sup> -H2O] - 455.189 m/z      | [b5 <sup>+</sup> ] - 473.199 m/z         |
| [b3 <sup>+</sup> ] - 331.125 m/z         | [y4 <sup>+</sup> ] - 533.257 m/z          |                                          |

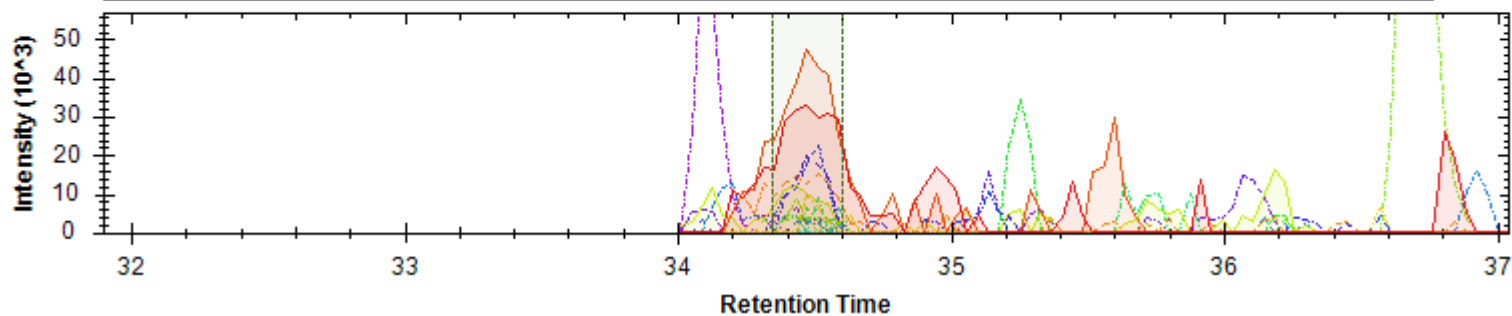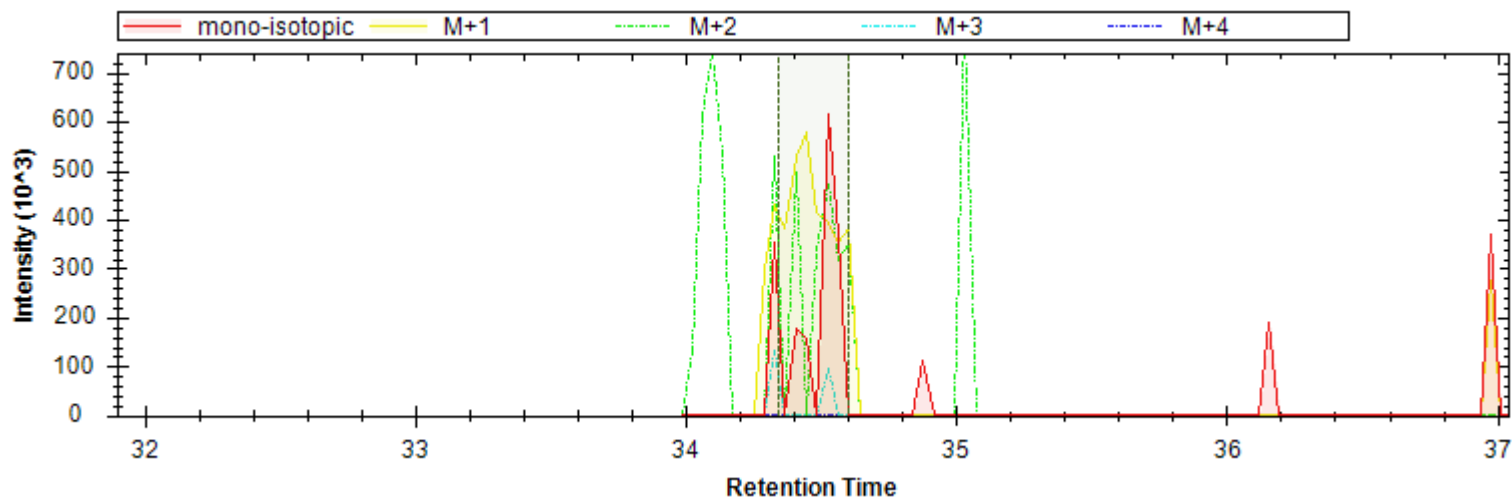

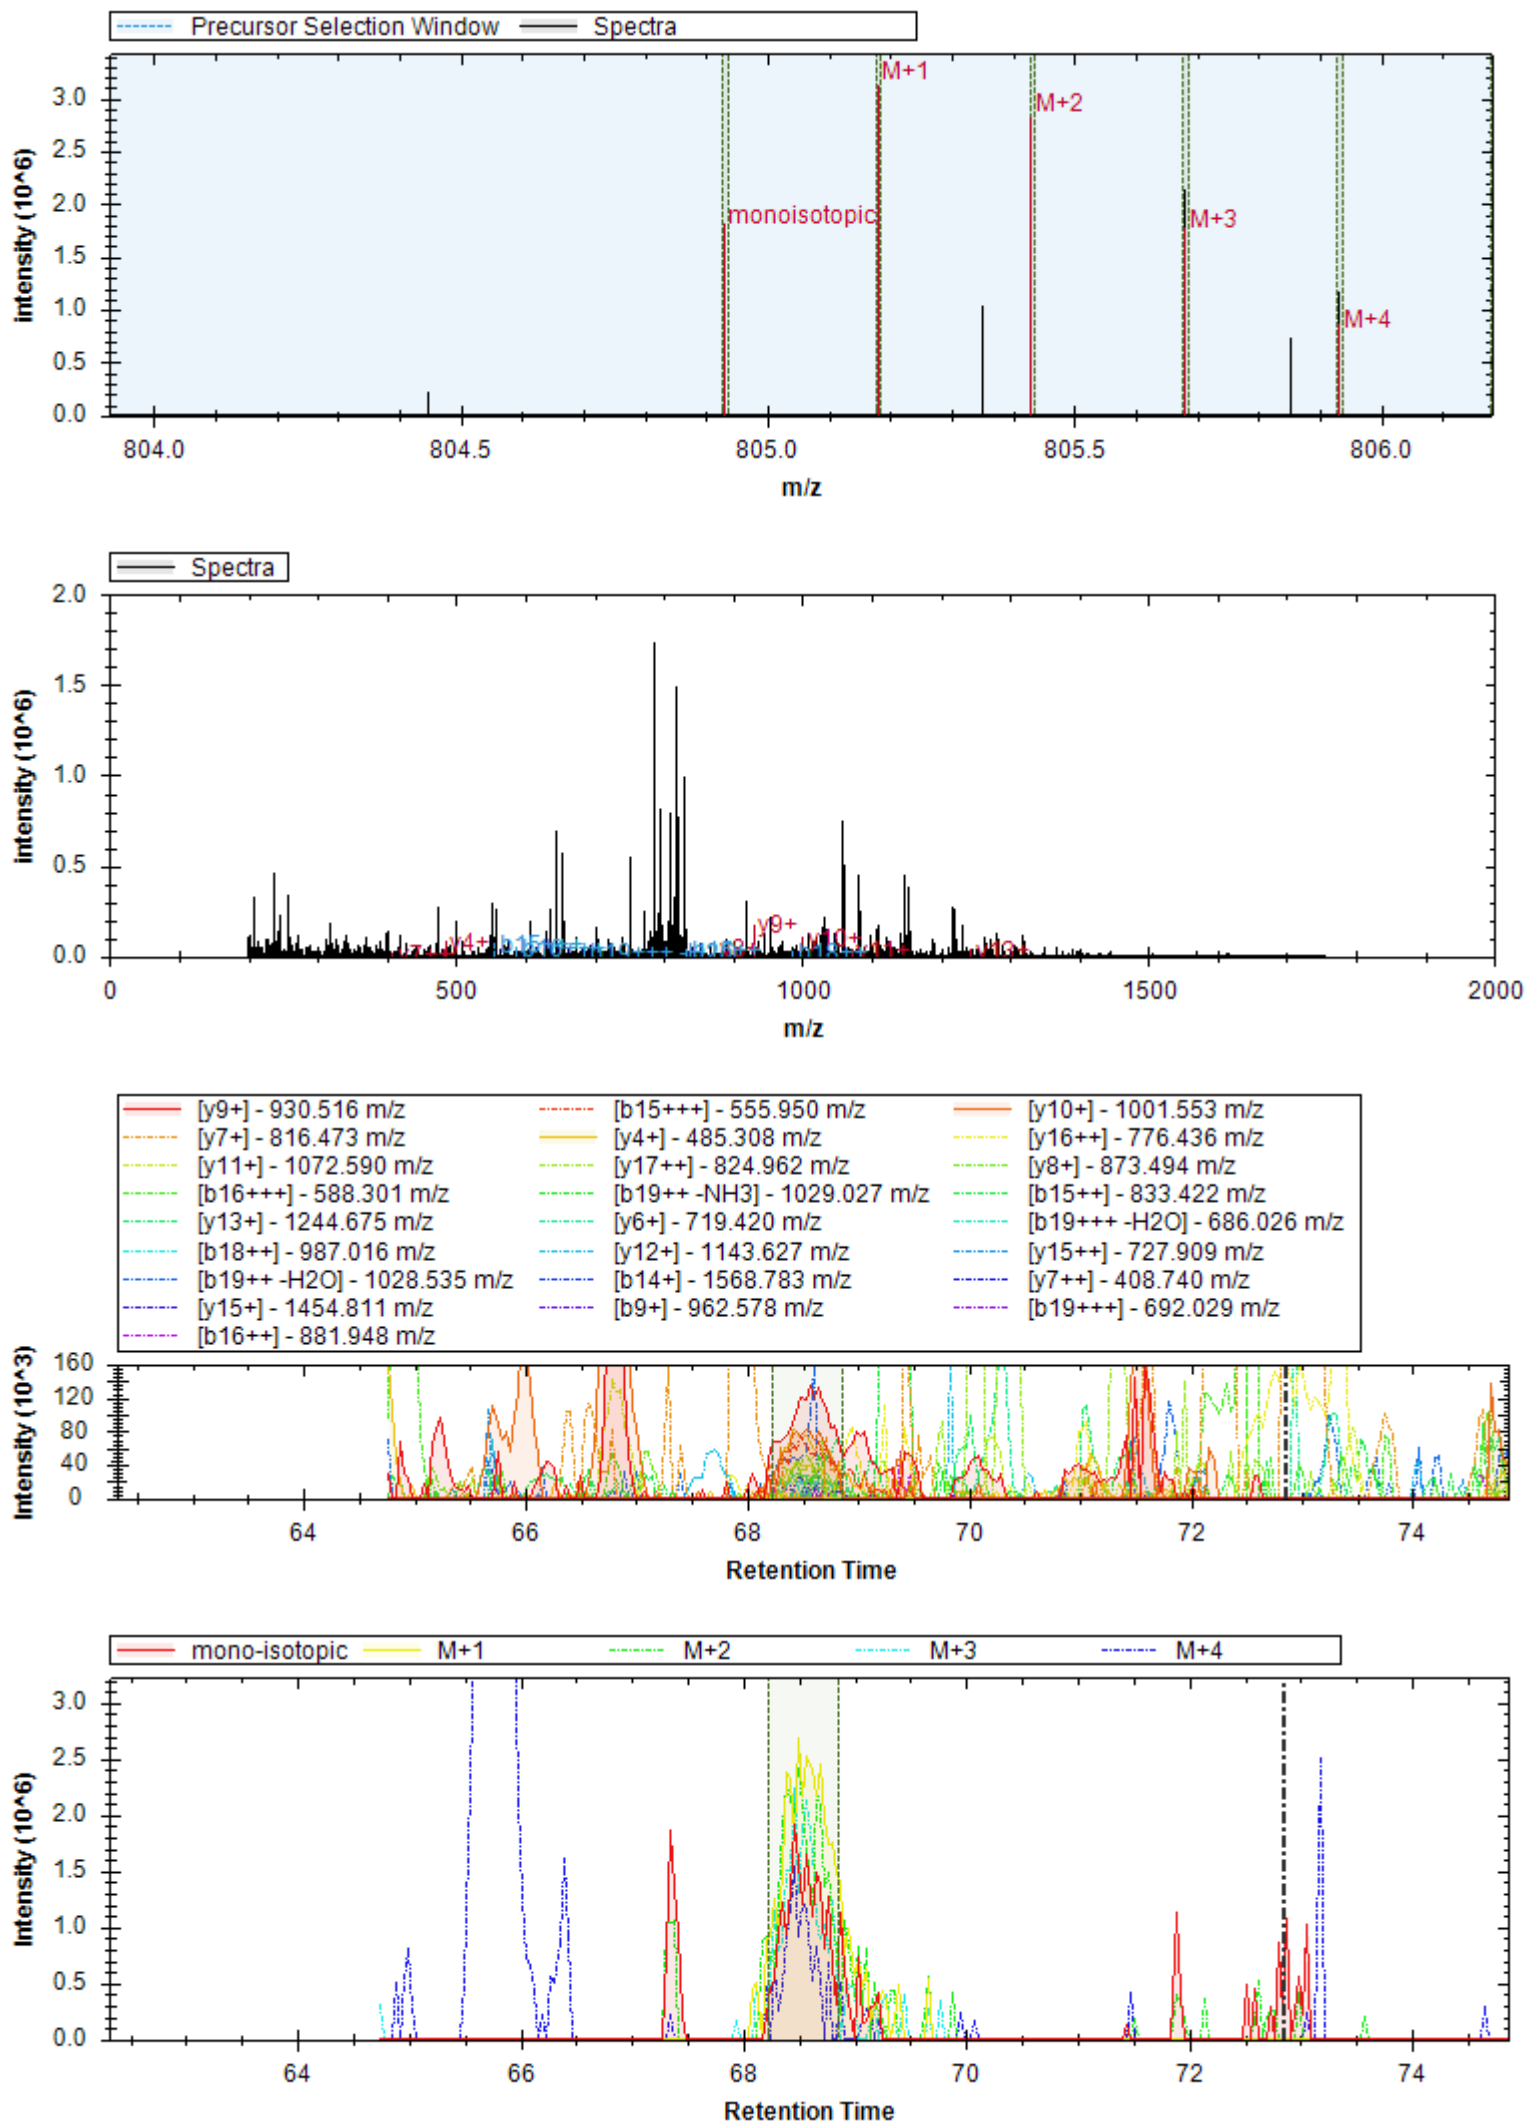

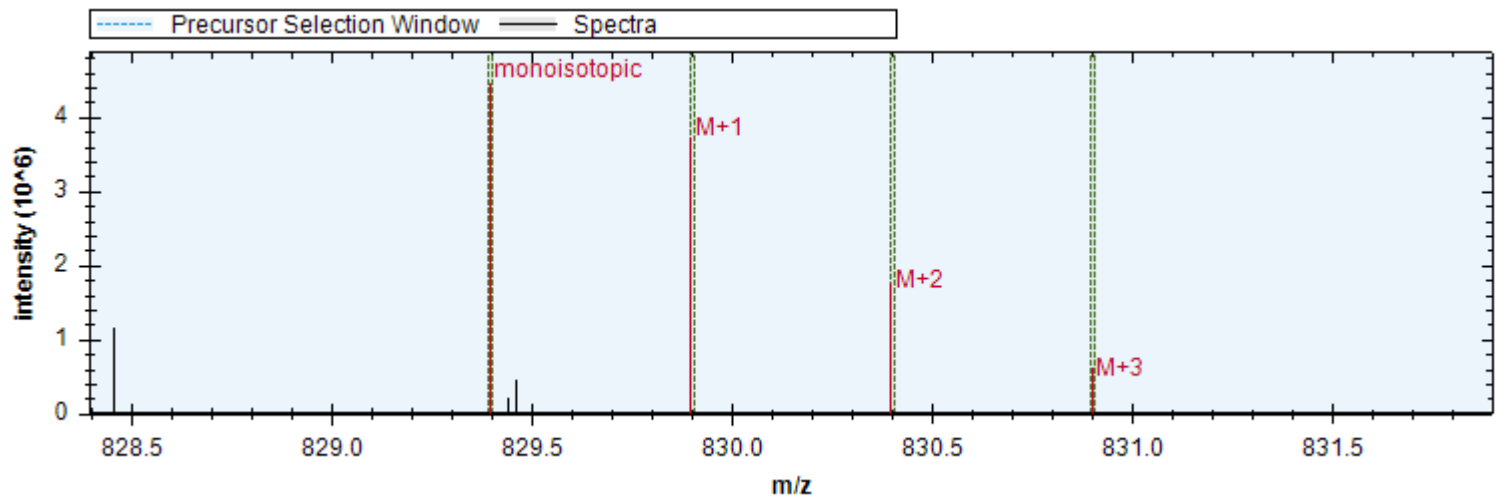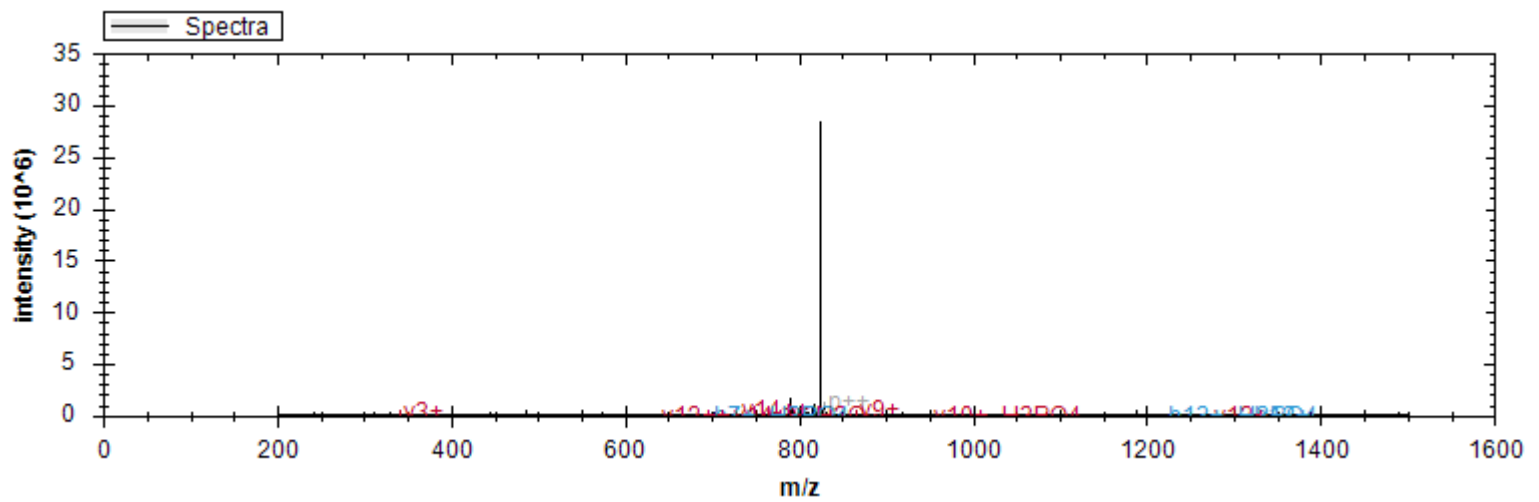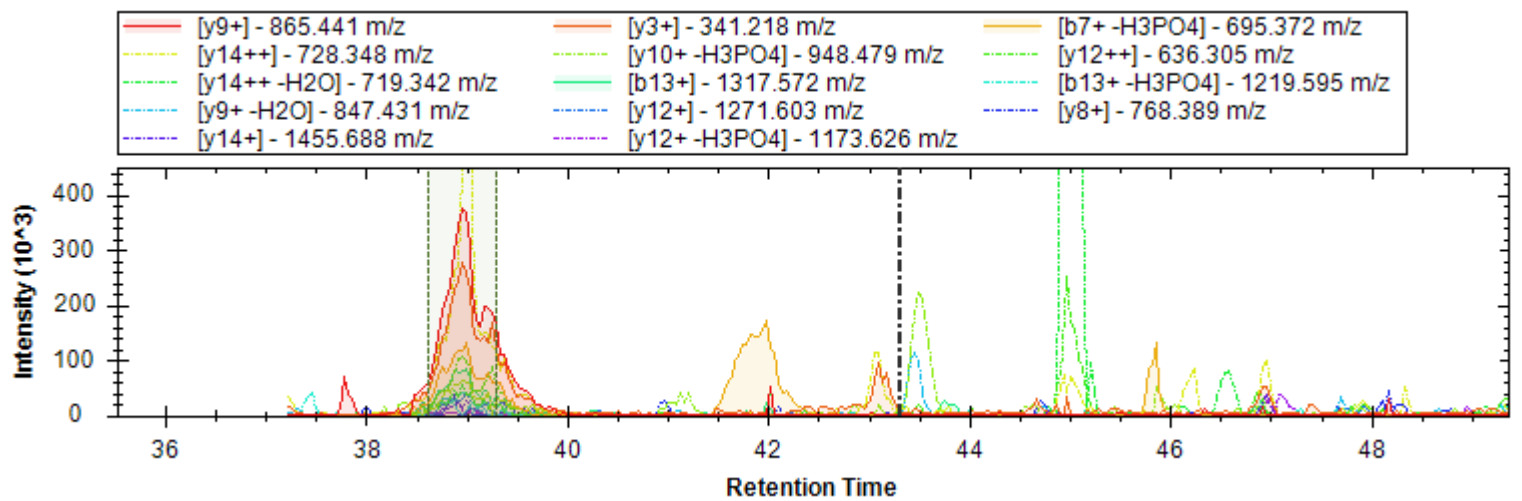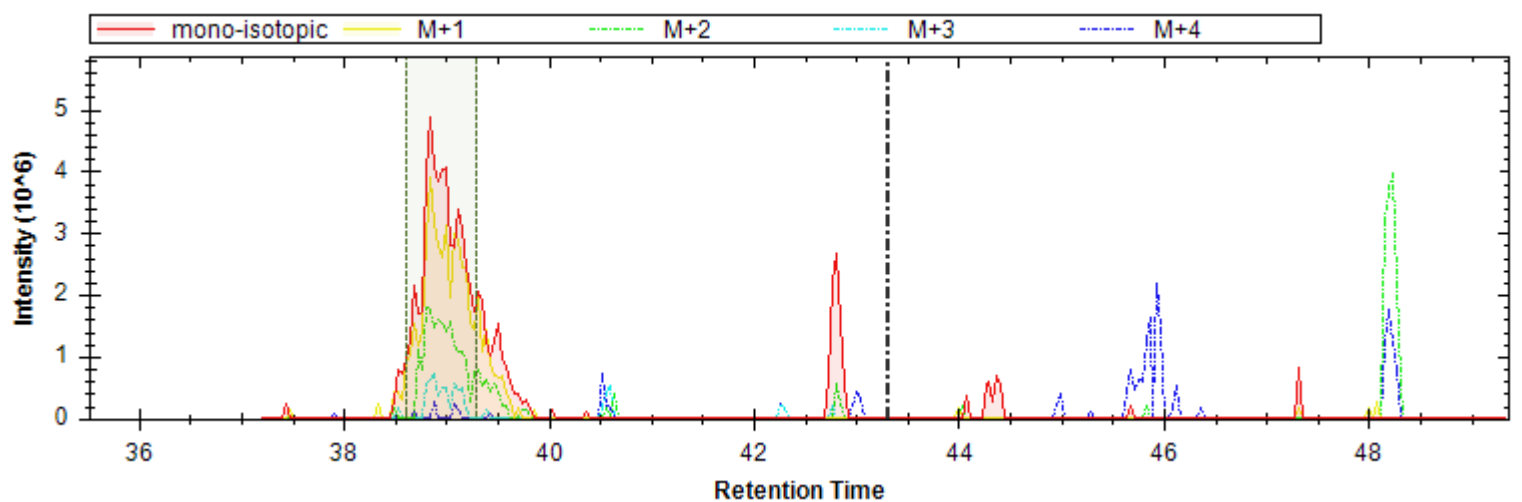



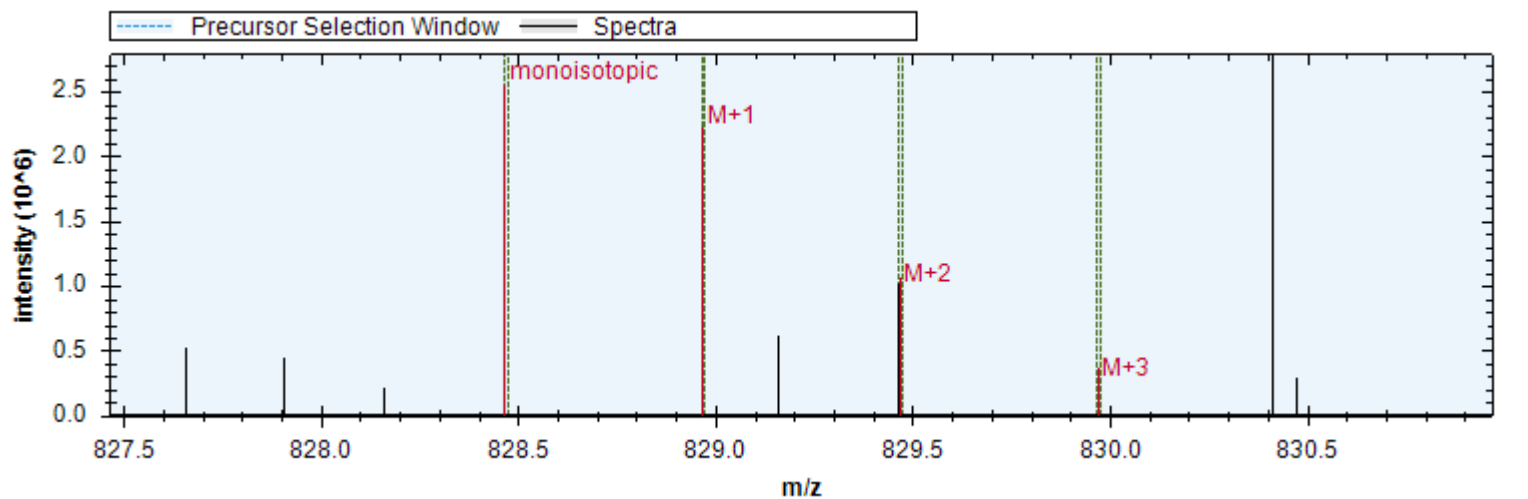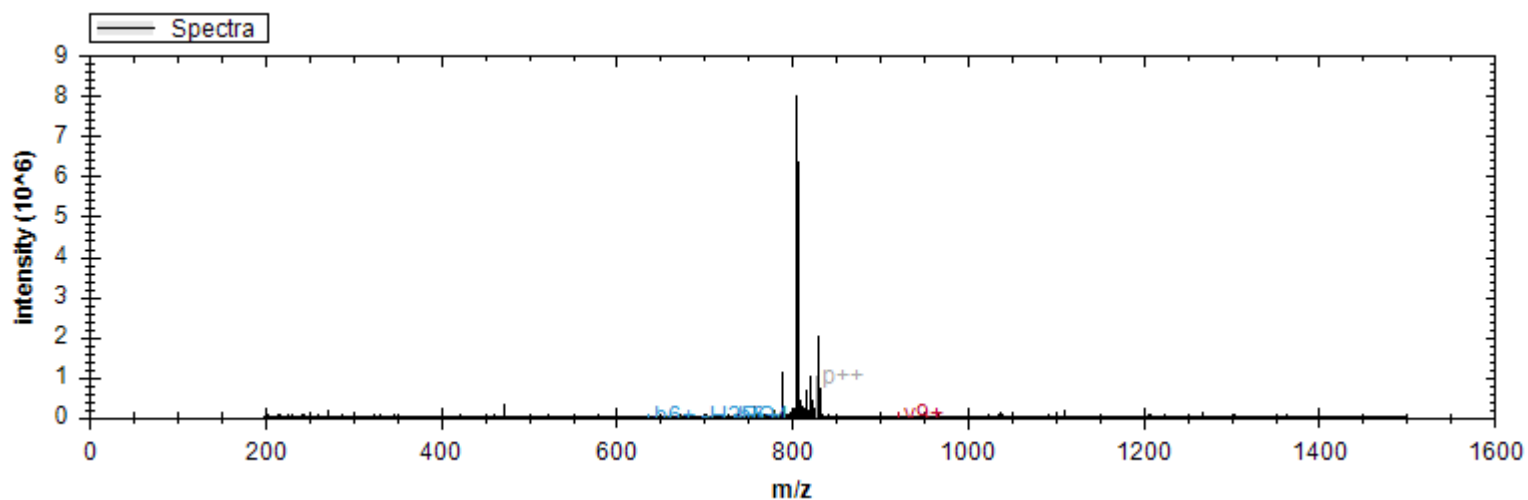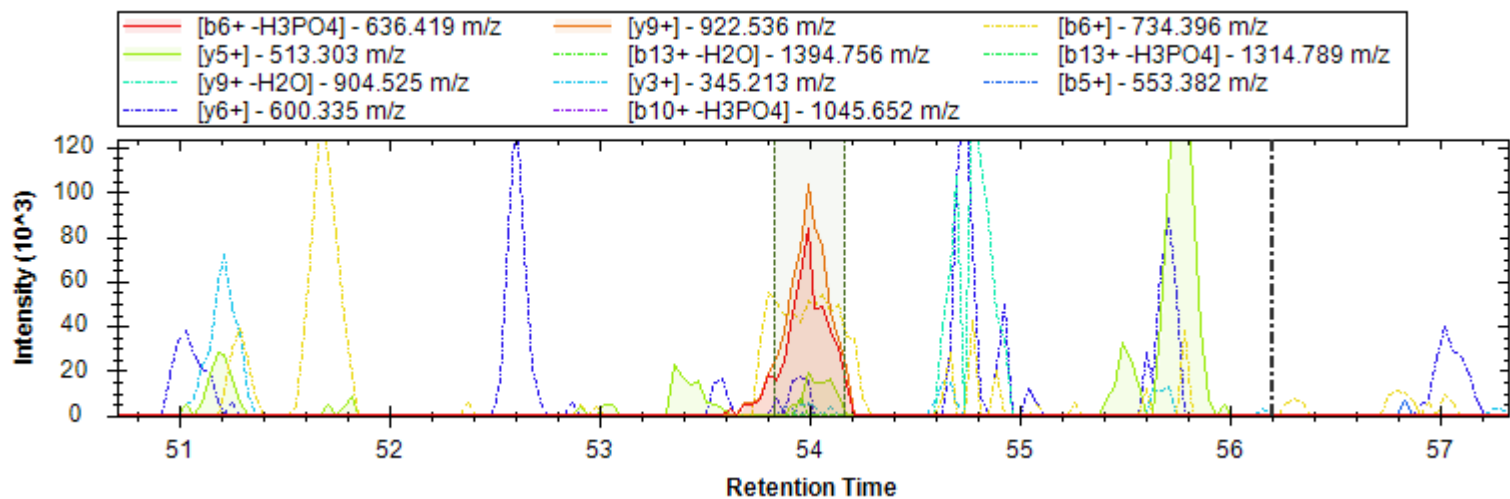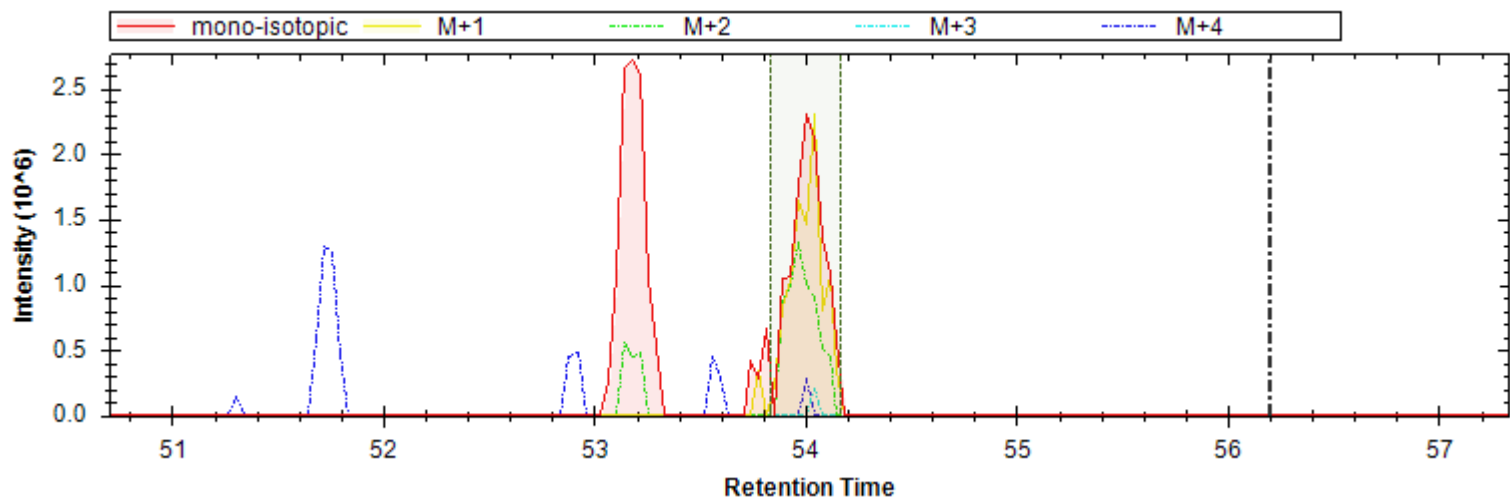



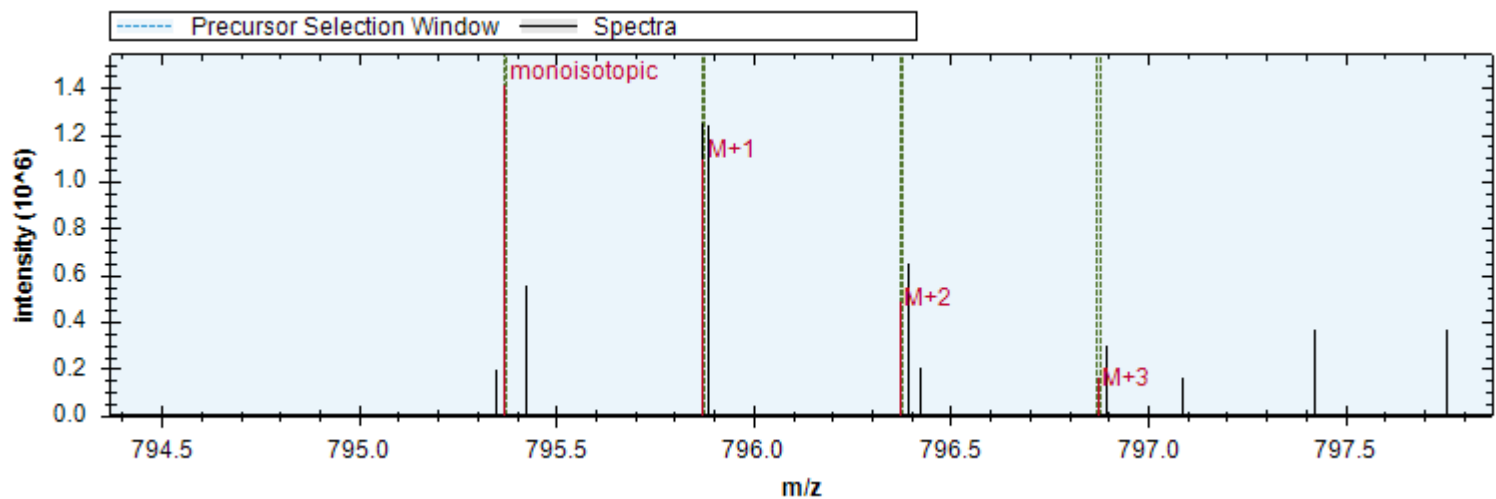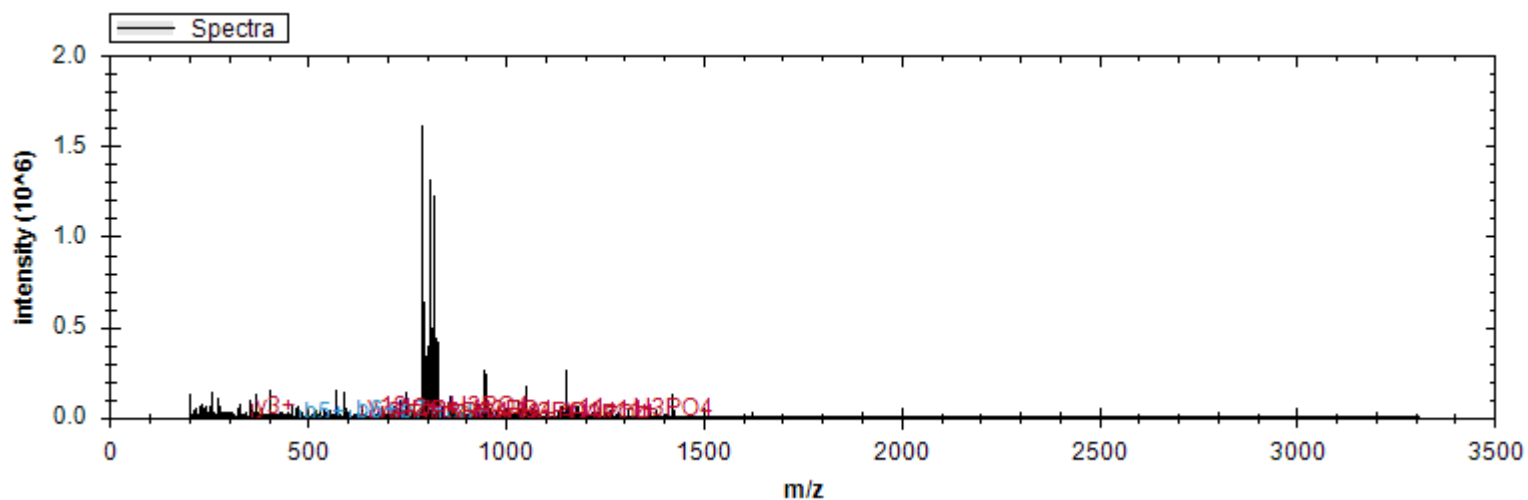

- |                              |                              |                              |
|------------------------------|------------------------------|------------------------------|
| [y12++ -H3PO4] - 639.334 m/z | [y11+ -H3PO4] - 1140.601 m/z | [y3+] - 359.204 m/z          |
| [b3+] - 352.162 m/z          | [y13++ -H3PO4] - 696.847 m/z | [b6+] - 609.263 m/z          |
| [y6+ -H3PO4] - 657.332 m/z   | [y7+ -H3PO4] - 770.416 m/z   | [b7+] - 722.347 m/z          |
| [y12++] - 688.322 m/z        | [y8+ -H3PO4] - 883.500 m/z   | [b5+] - 480.220 m/z          |
| [y9+ -H3PO4] - 1012.542 m/z  | [y12++ -H2O] - 679.317 m/z   | [y9+] - 1110.519 m/z         |
| [y13++] - 745.835 m/z        | [y11+] - 1238.578 m/z        | [y10+ -H3PO4] - 1083.579 m/z |
| [b8+] - 835.431 m/z          | [y10+] - 1181.556 m/z        | [y7+] - 868.392 m/z          |
| [b4+] - 409.183 m/z          | [b6+ -H2O] - 591.252 m/z     | [y5+ -H3PO4] - 556.284 m/z   |
| [b3+ -H2O] - 334.151 m/z     |                              |                              |

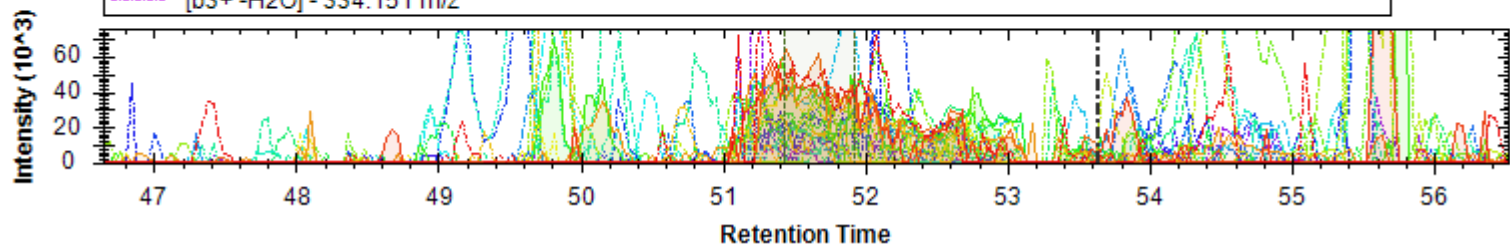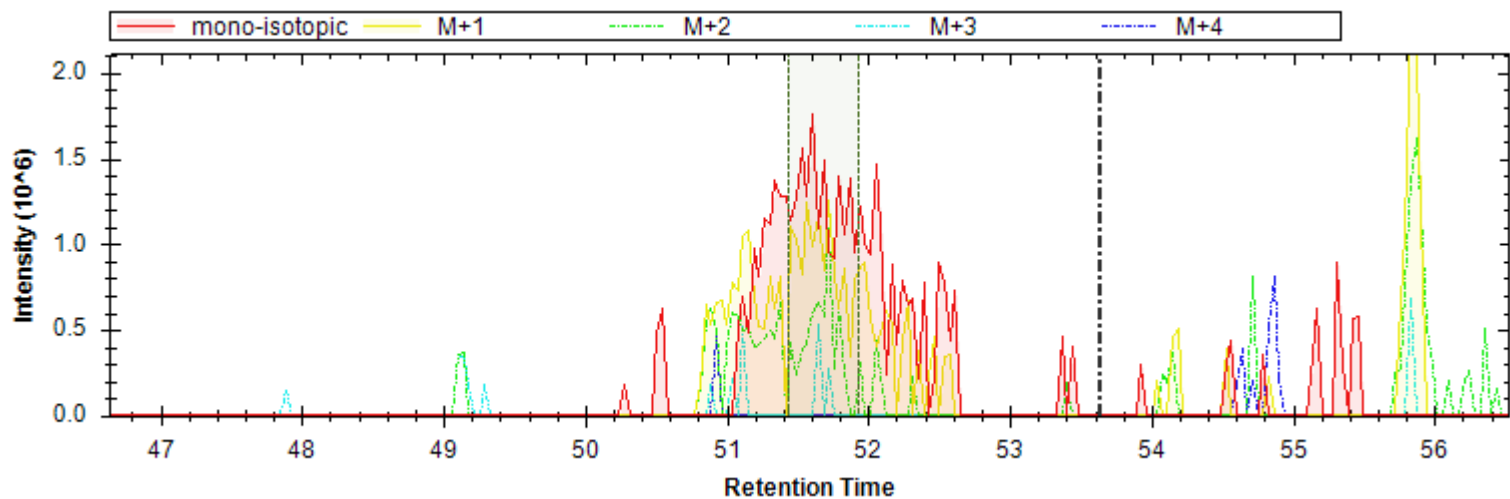

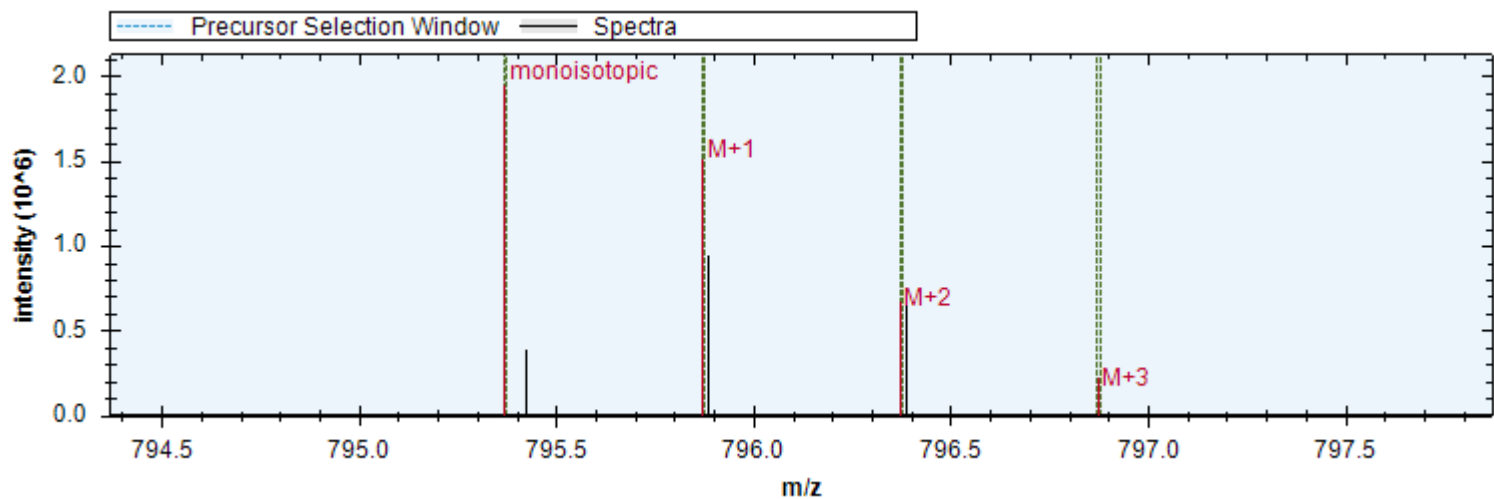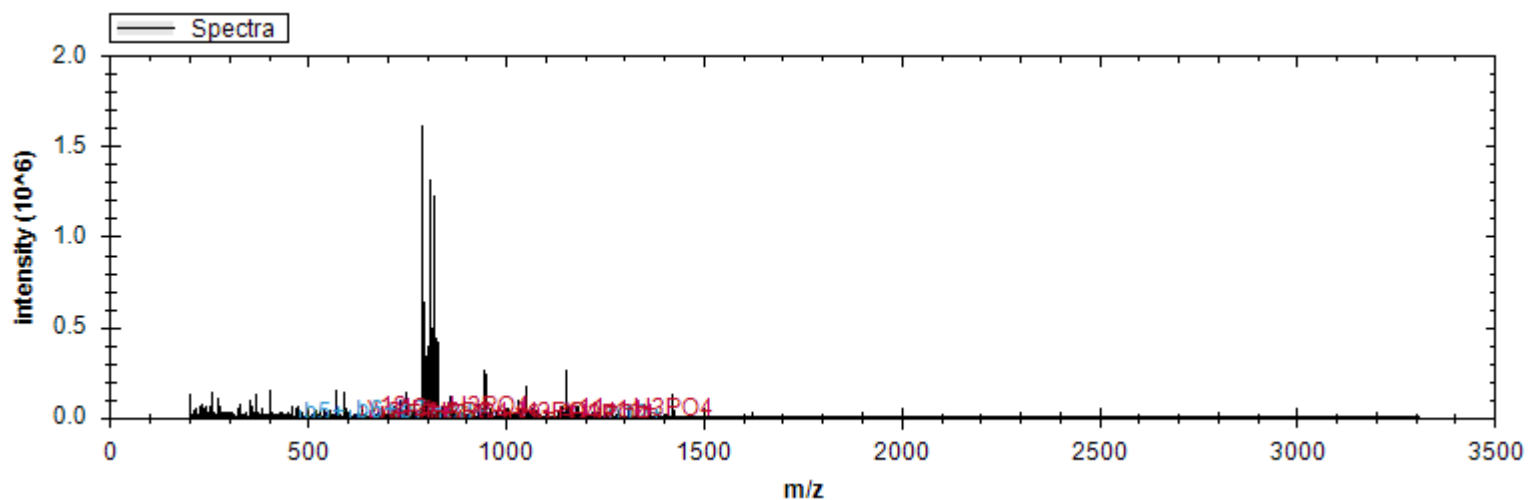

|                            |                              |                              |
|----------------------------|------------------------------|------------------------------|
| [b12+] - 1248.622 m/z      | [y11+ -H3PO4] - 1140.601 m/z | [y12++ -H3PO4] - 639.334 m/z |
| [b3+] - 352.162 m/z        | [b12+ -NH3] - 1231.595 m/z   | [b6+] - 609.263 m/z          |
| [y6+ -H3PO4] - 657.332 m/z | [y10+ -H3PO4] - 1083.579 m/z | [y8+ -H3PO4] - 883.500 m/z   |
| [b7+] - 722.347 m/z        | [y9+ -H3PO4] - 1012.542 m/z  | [y12++] - 688.322 m/z        |
| [y11+] - 1238.578 m/z      | [y7+] - 868.392 m/z          | [b12+ -H2O] - 1230.611 m/z   |
| [b5+] - 480.220 m/z        | [b8+] - 835.431 m/z          | [b4+] - 409.183 m/z          |
| [y6+] - 755.308 m/z        | [b3+ -H2O] - 334.151 m/z     | [b8+ -H2O] - 817.420 m/z     |

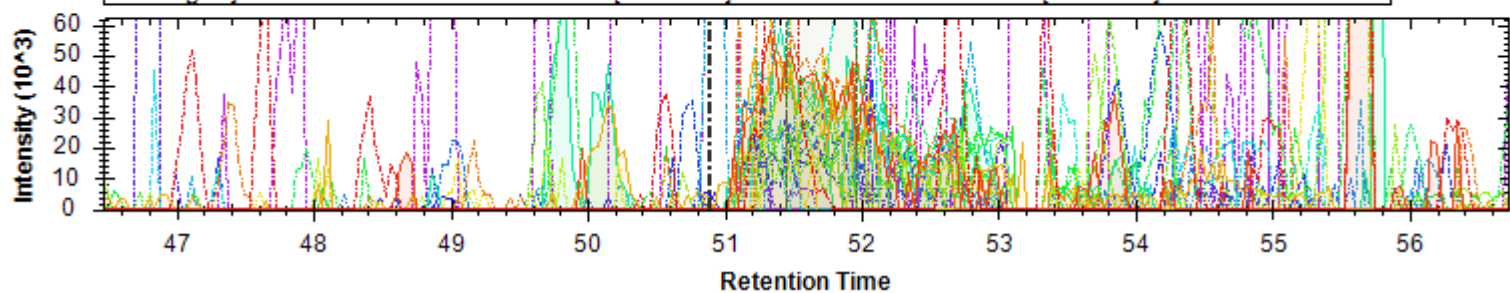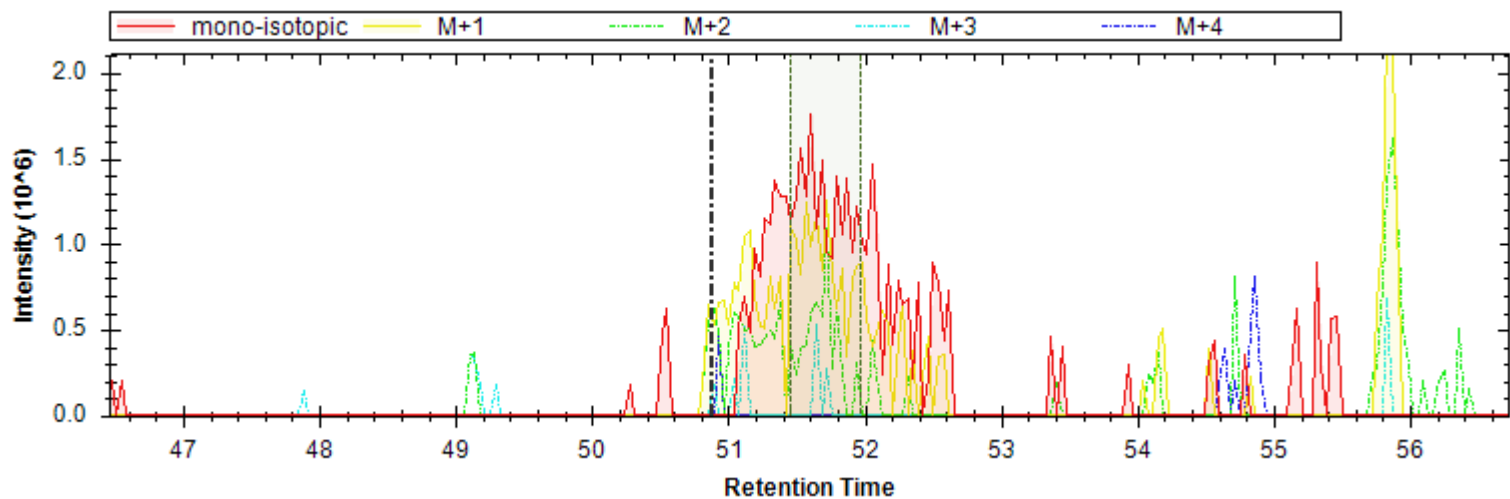

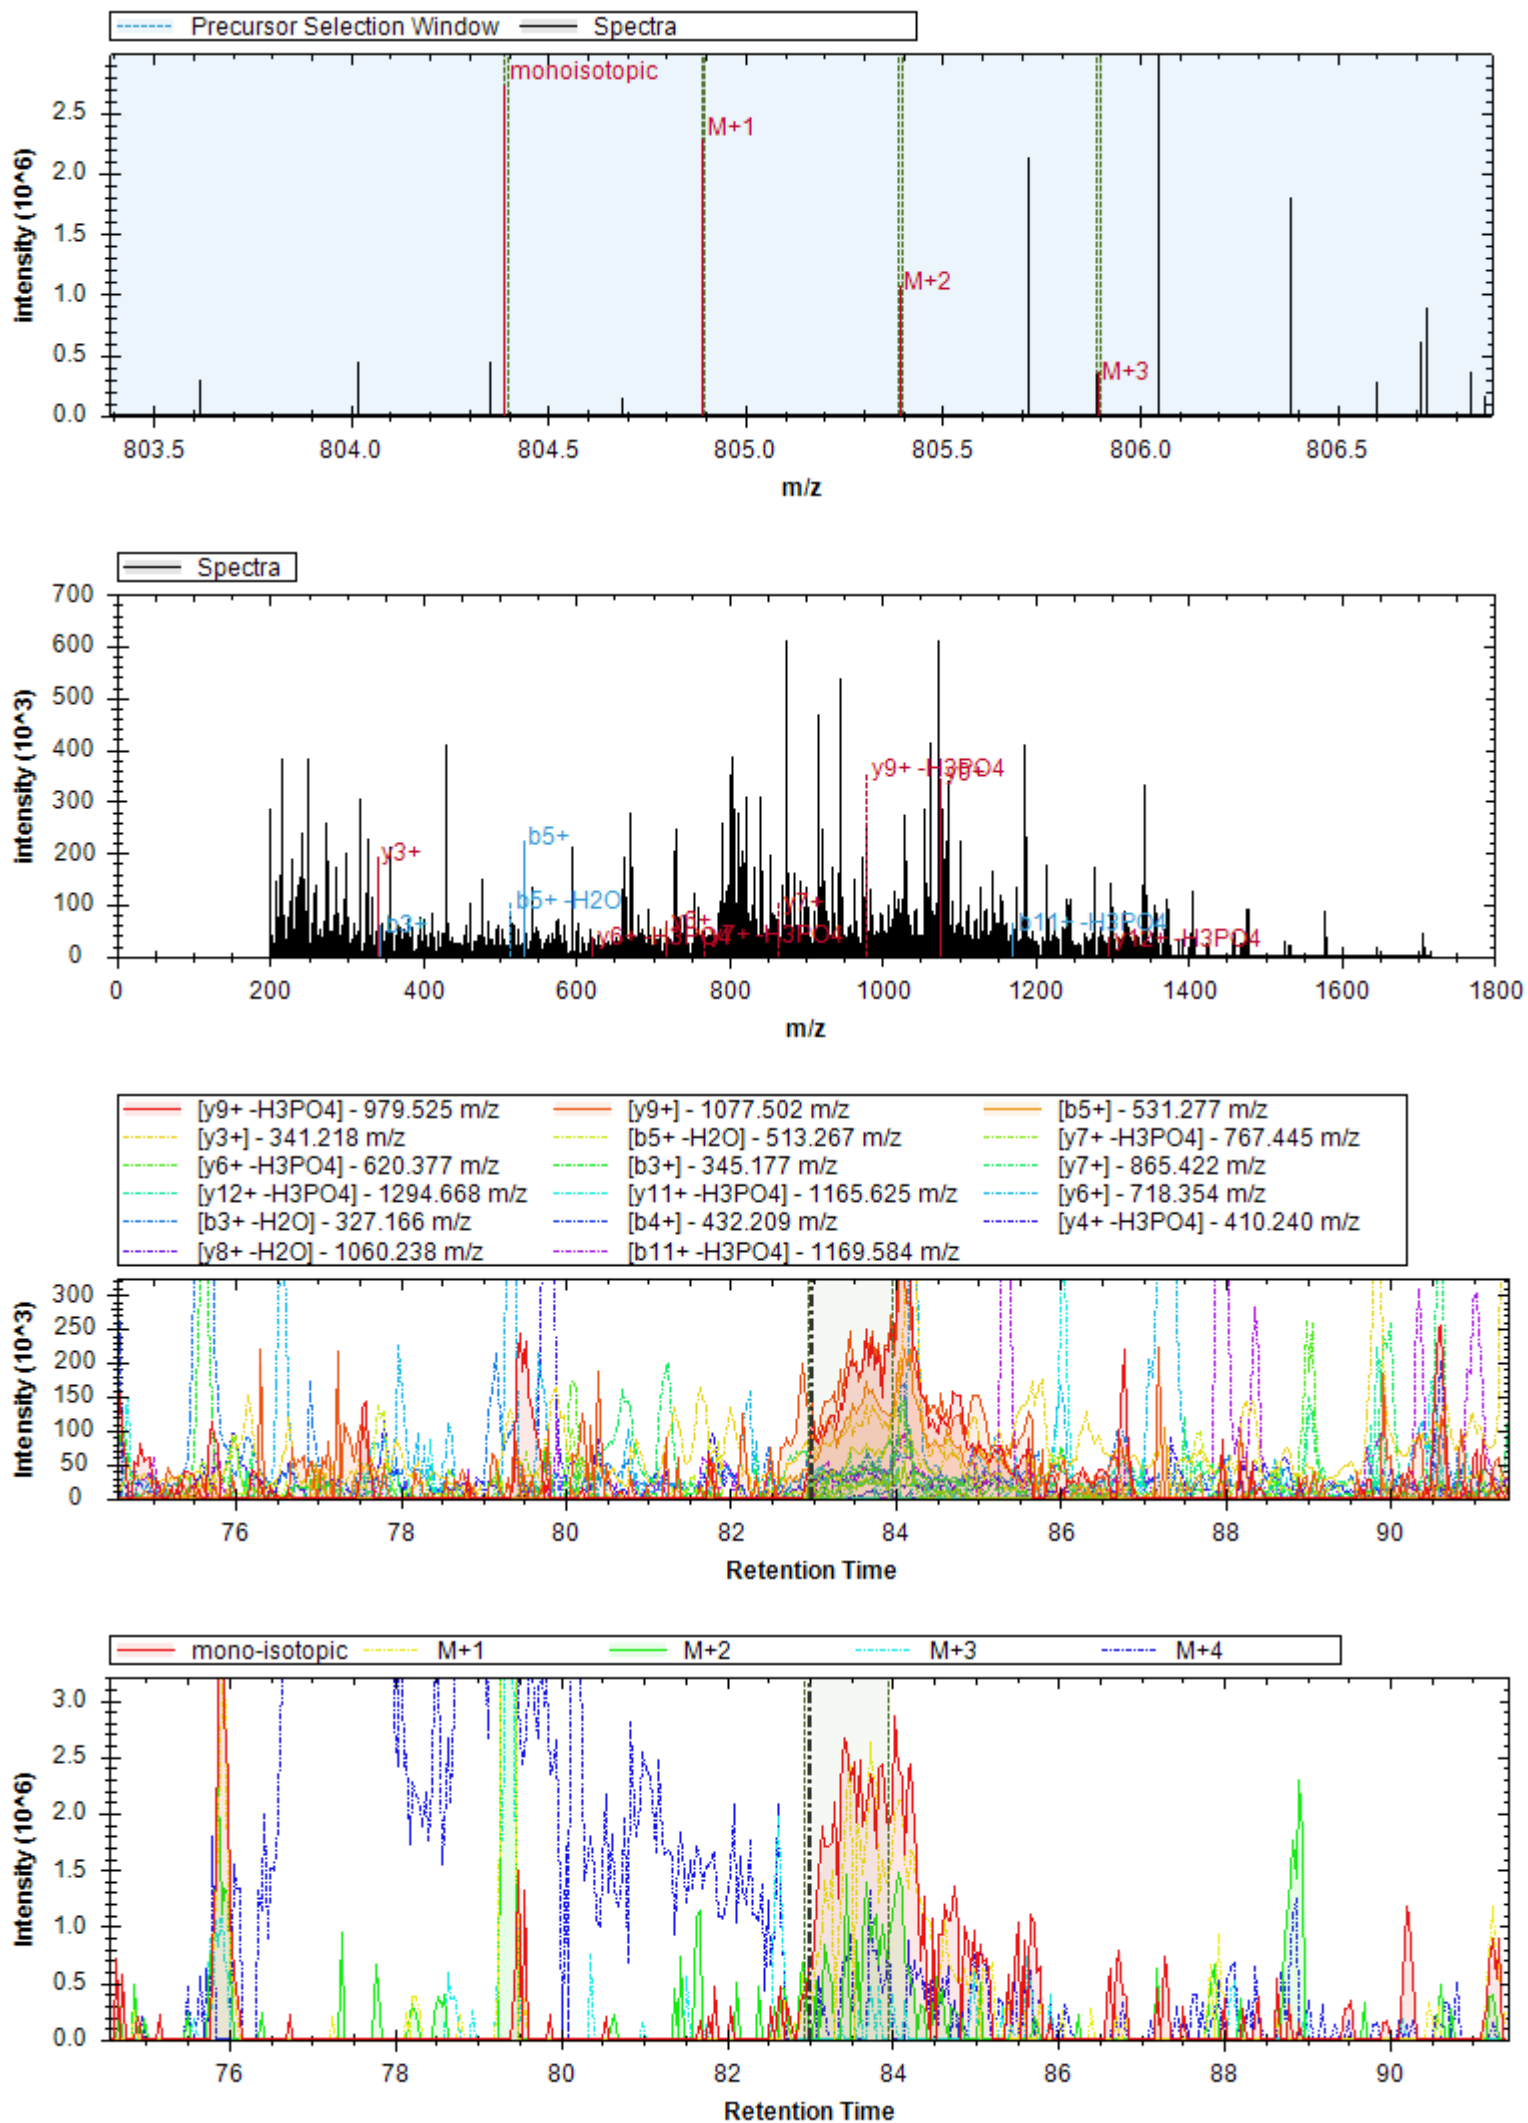

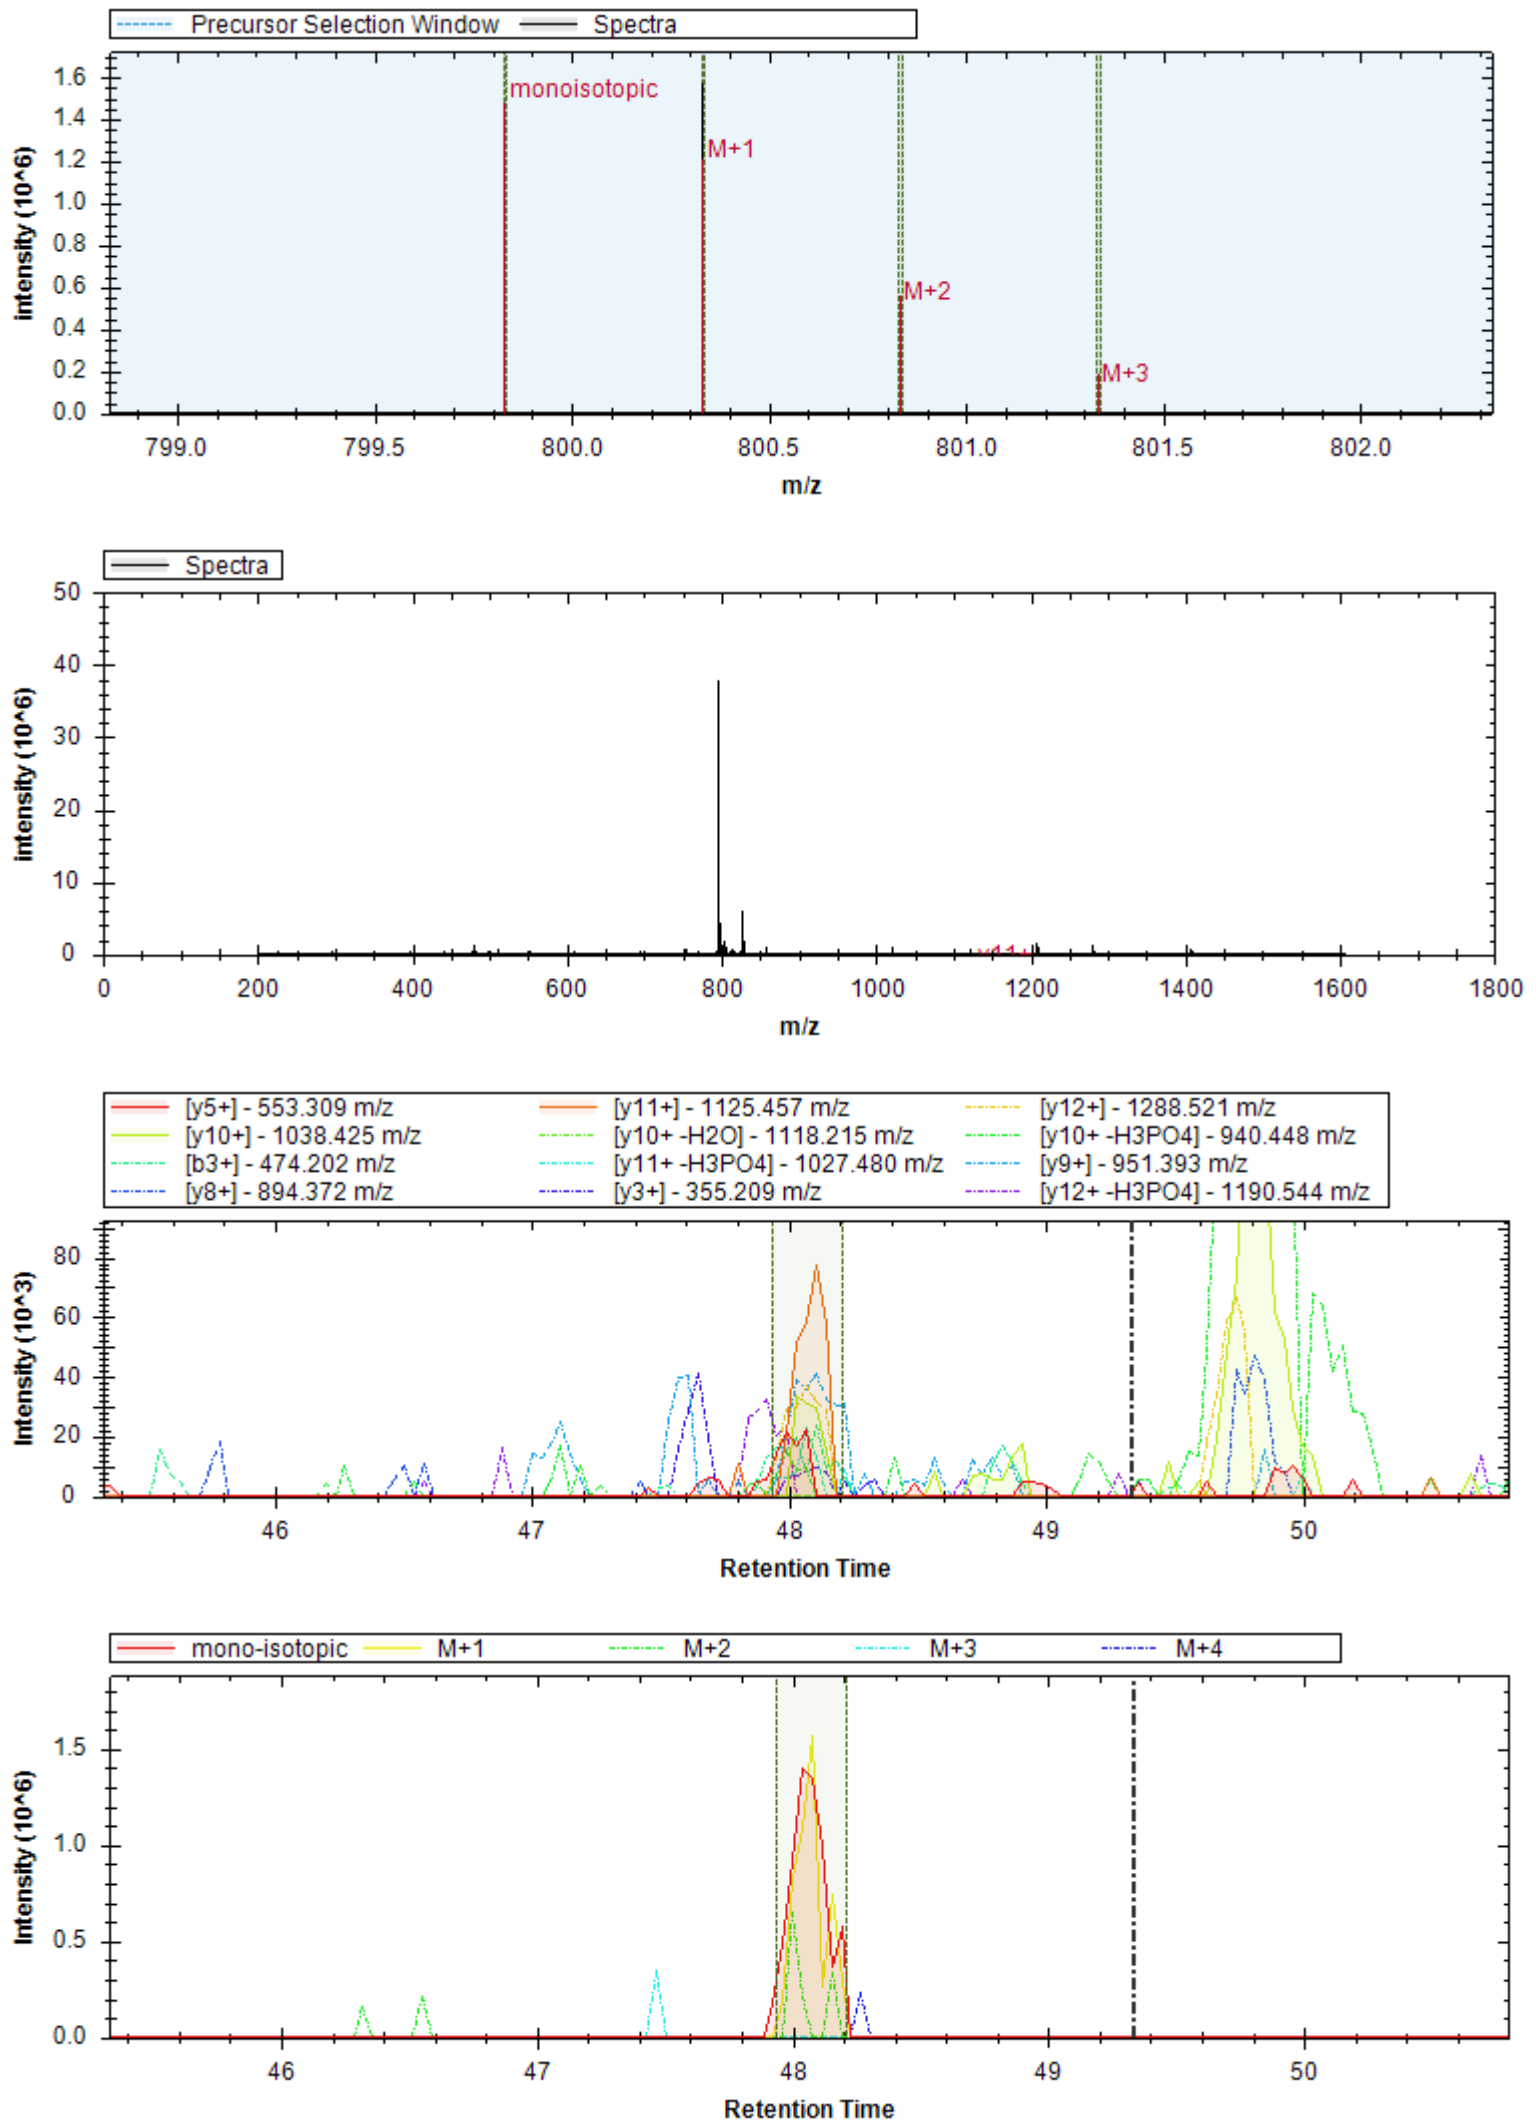

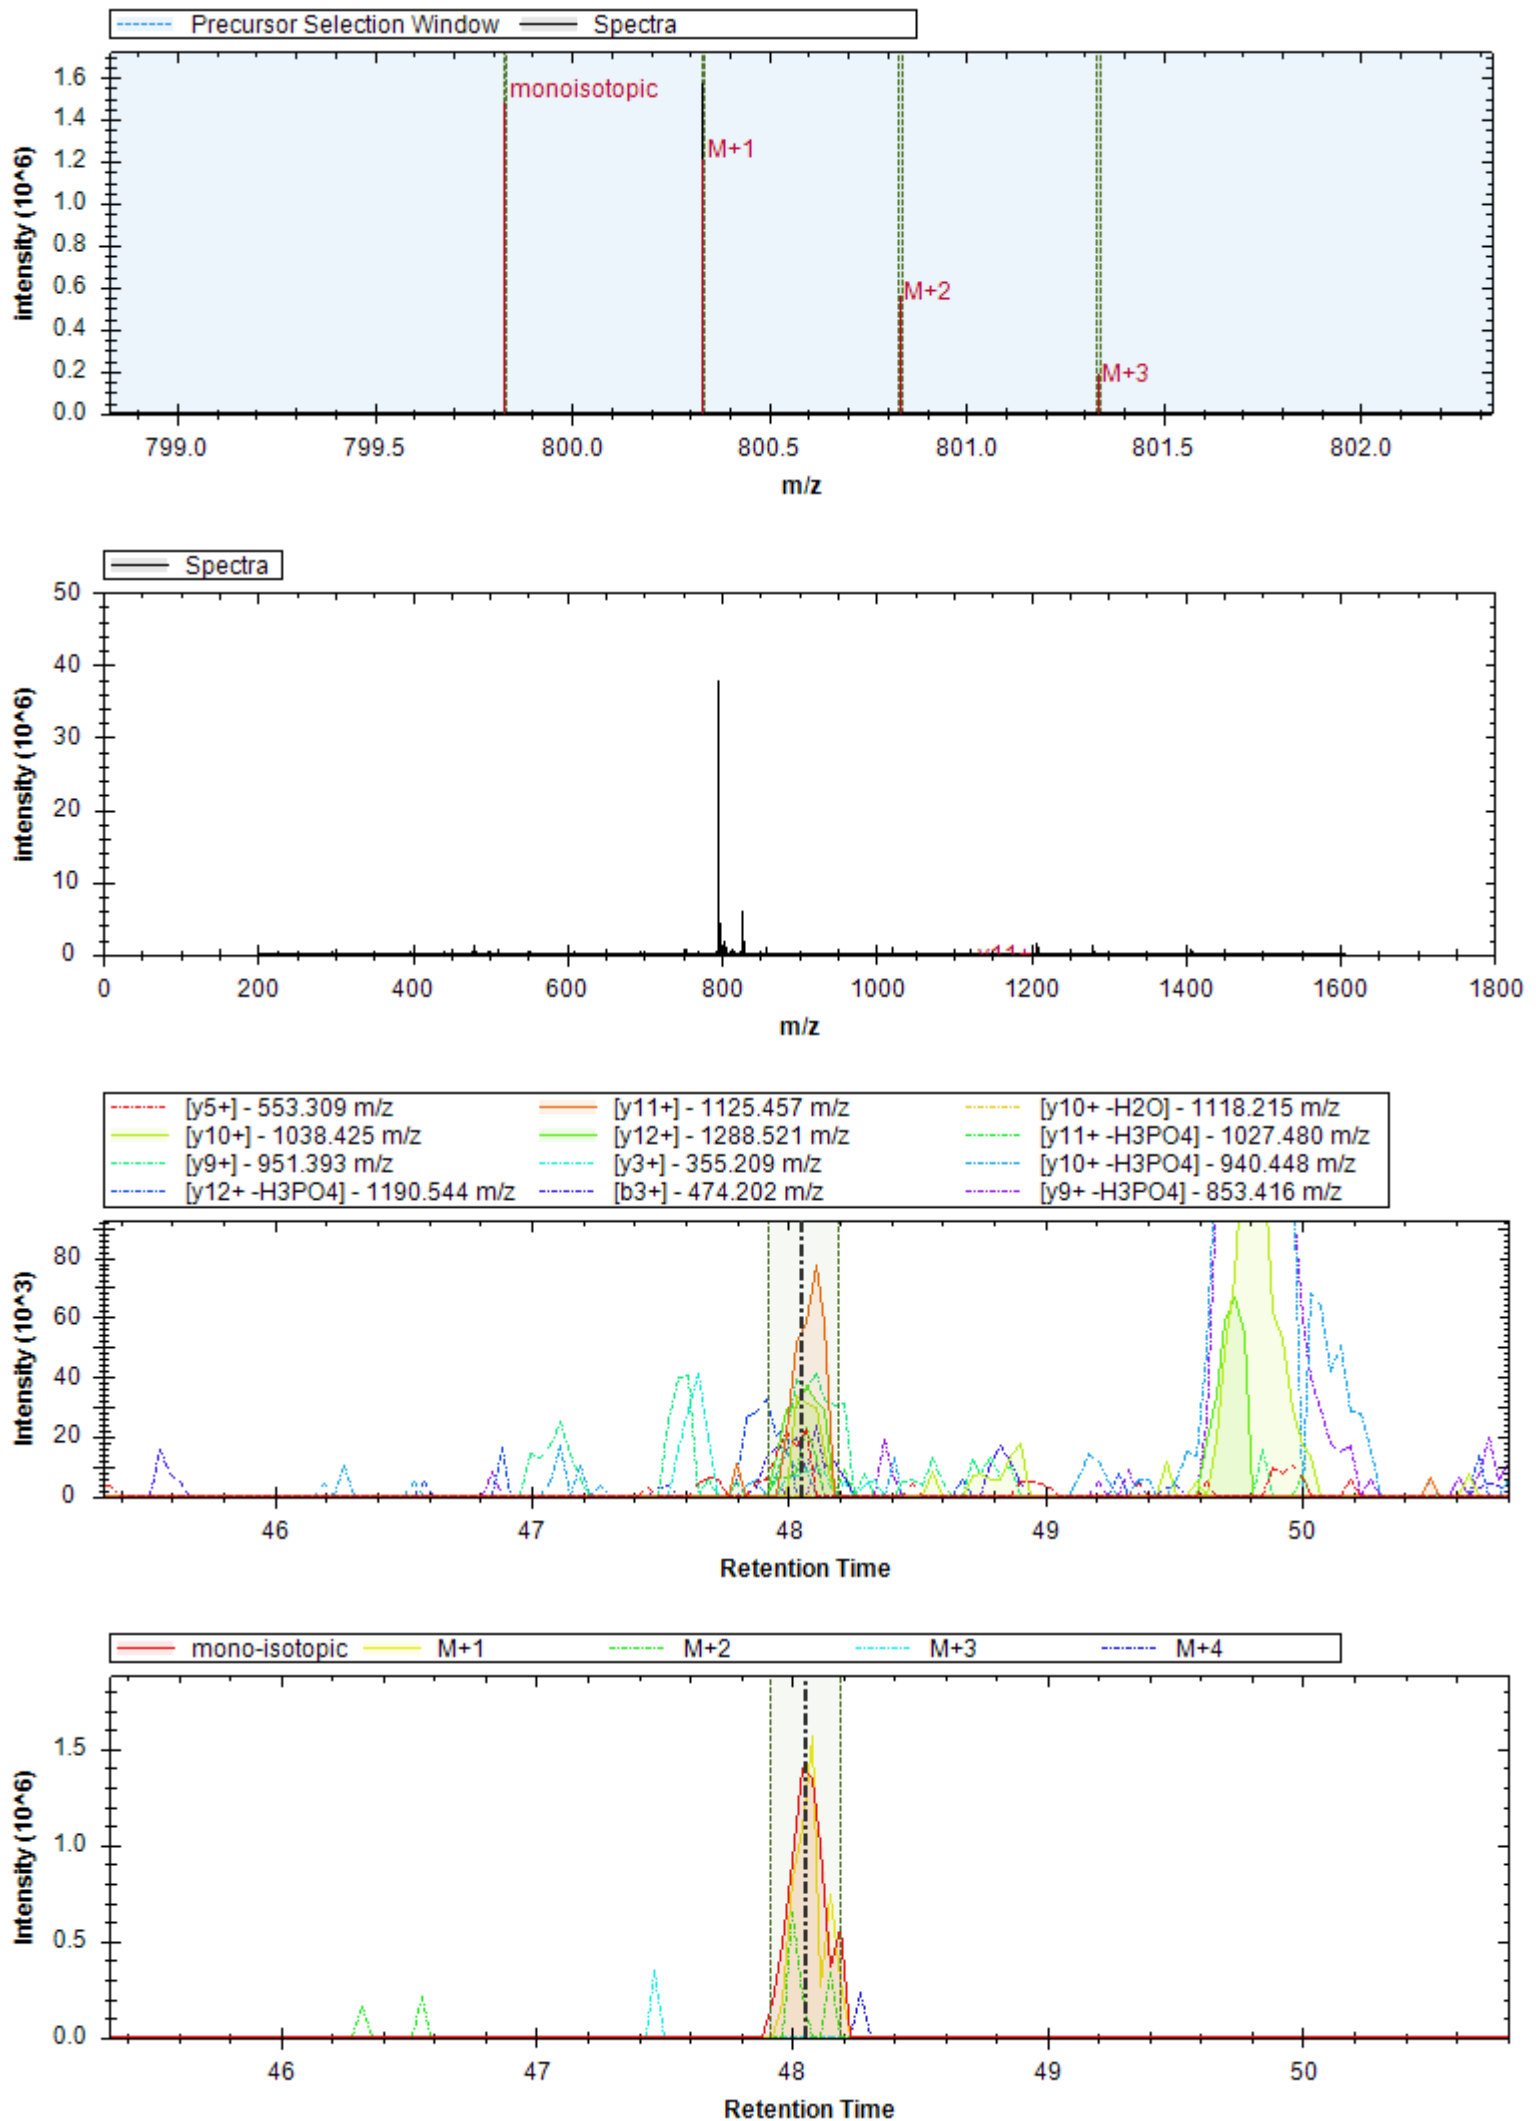

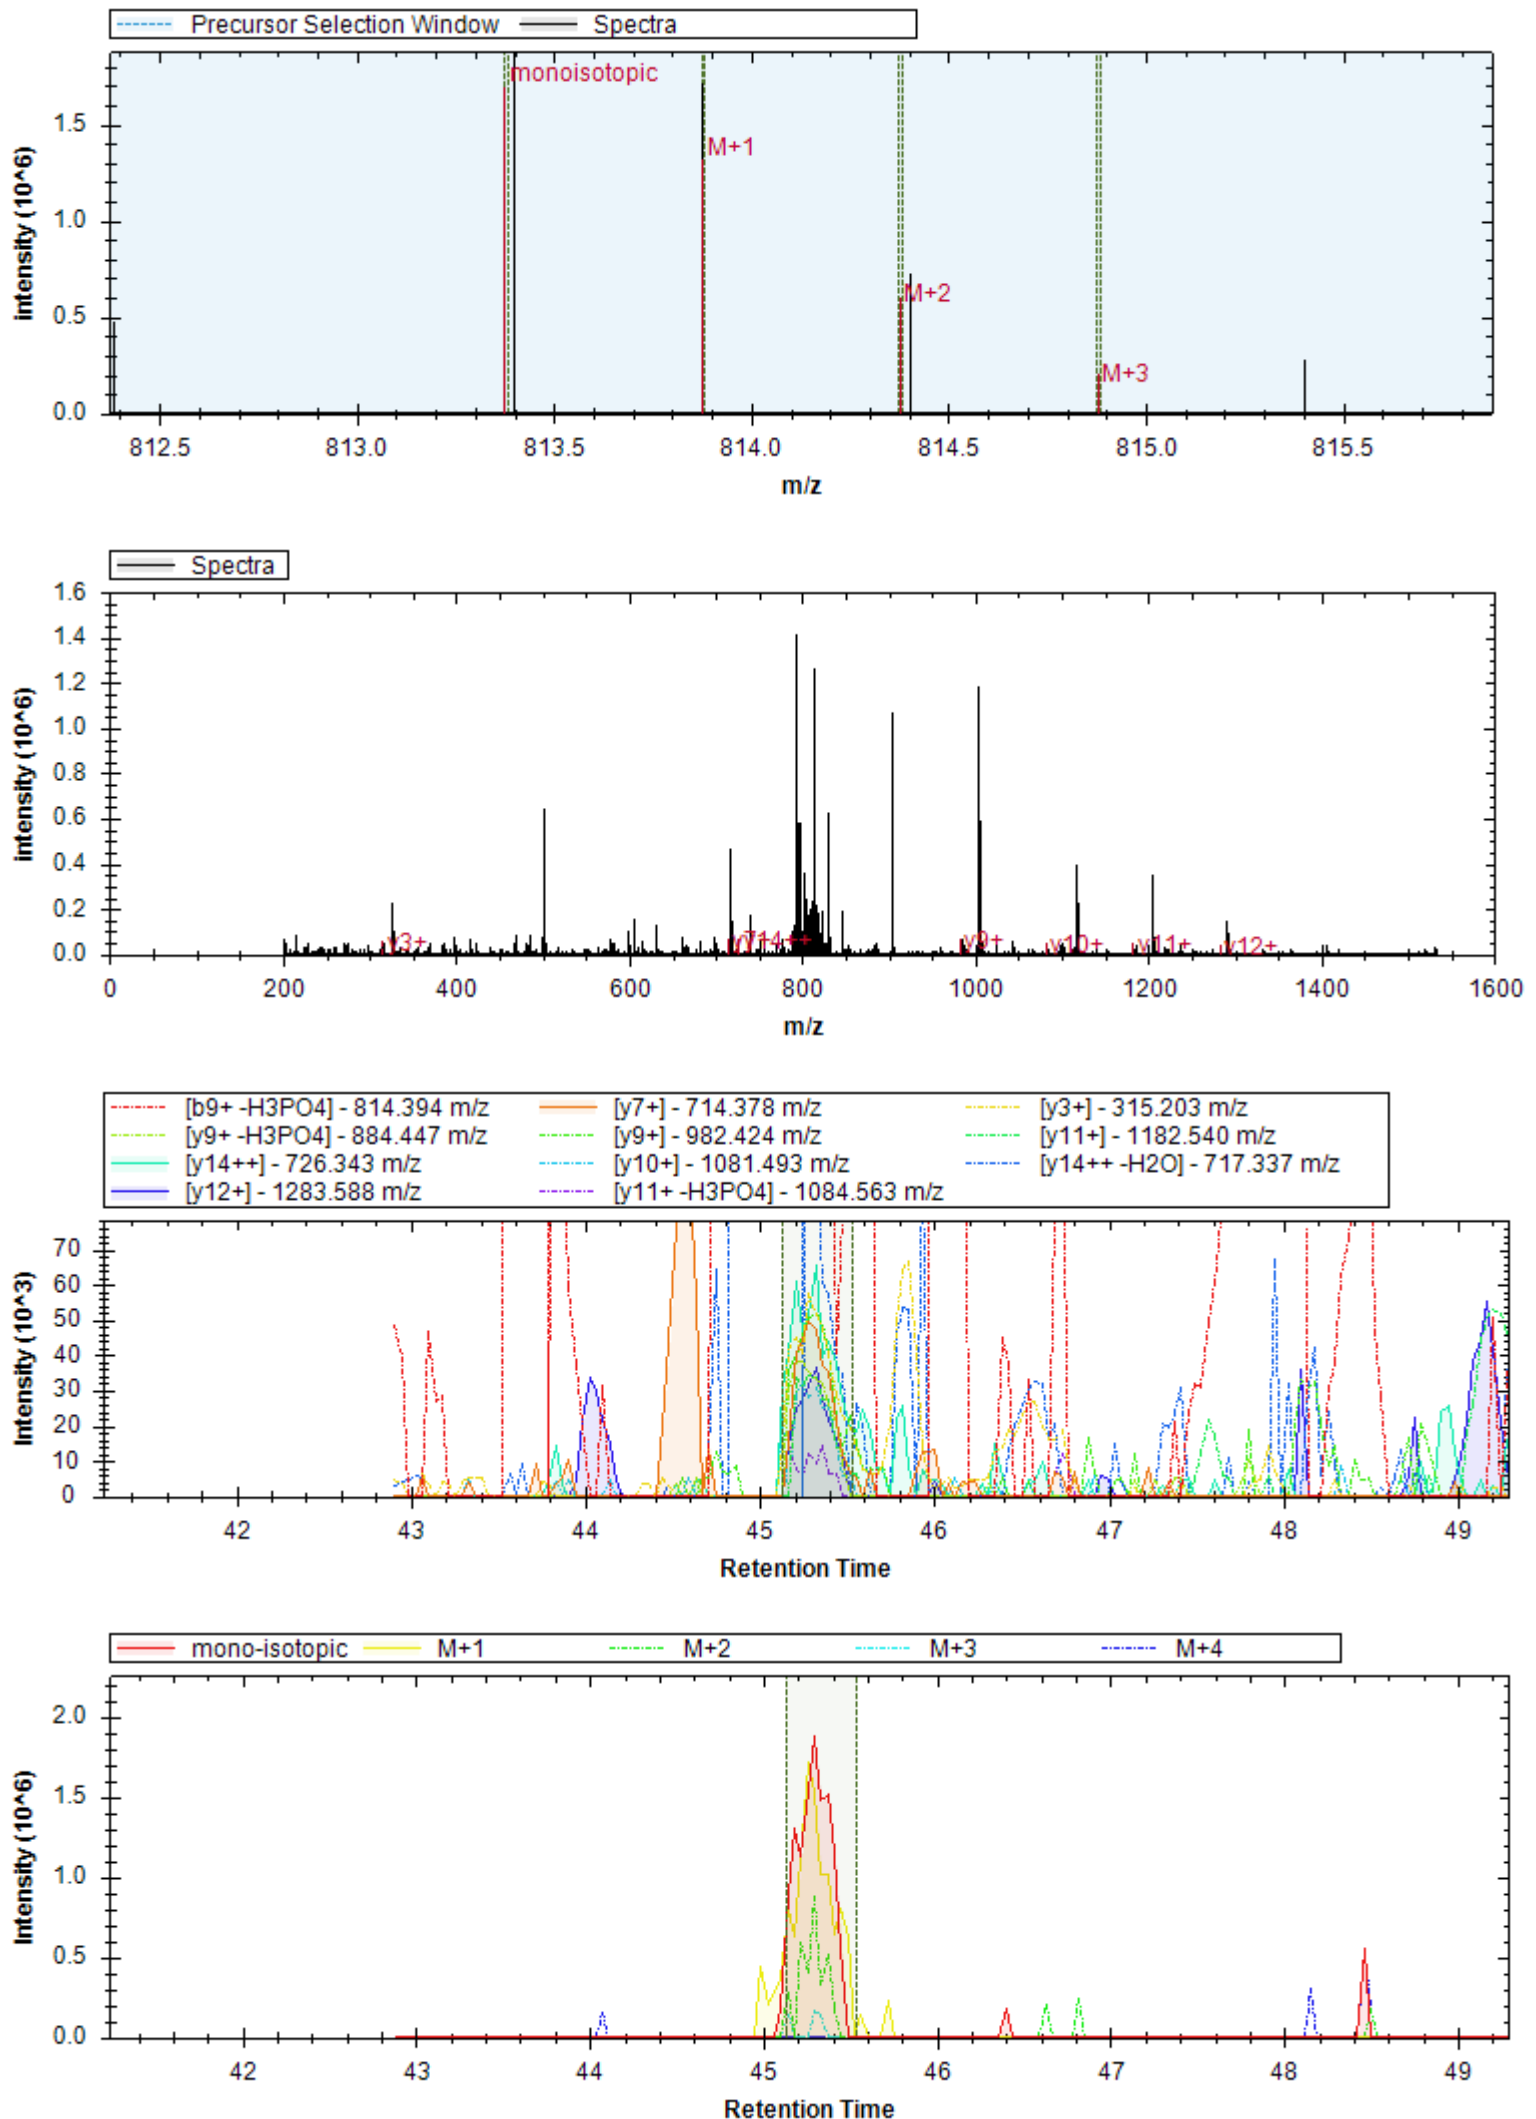



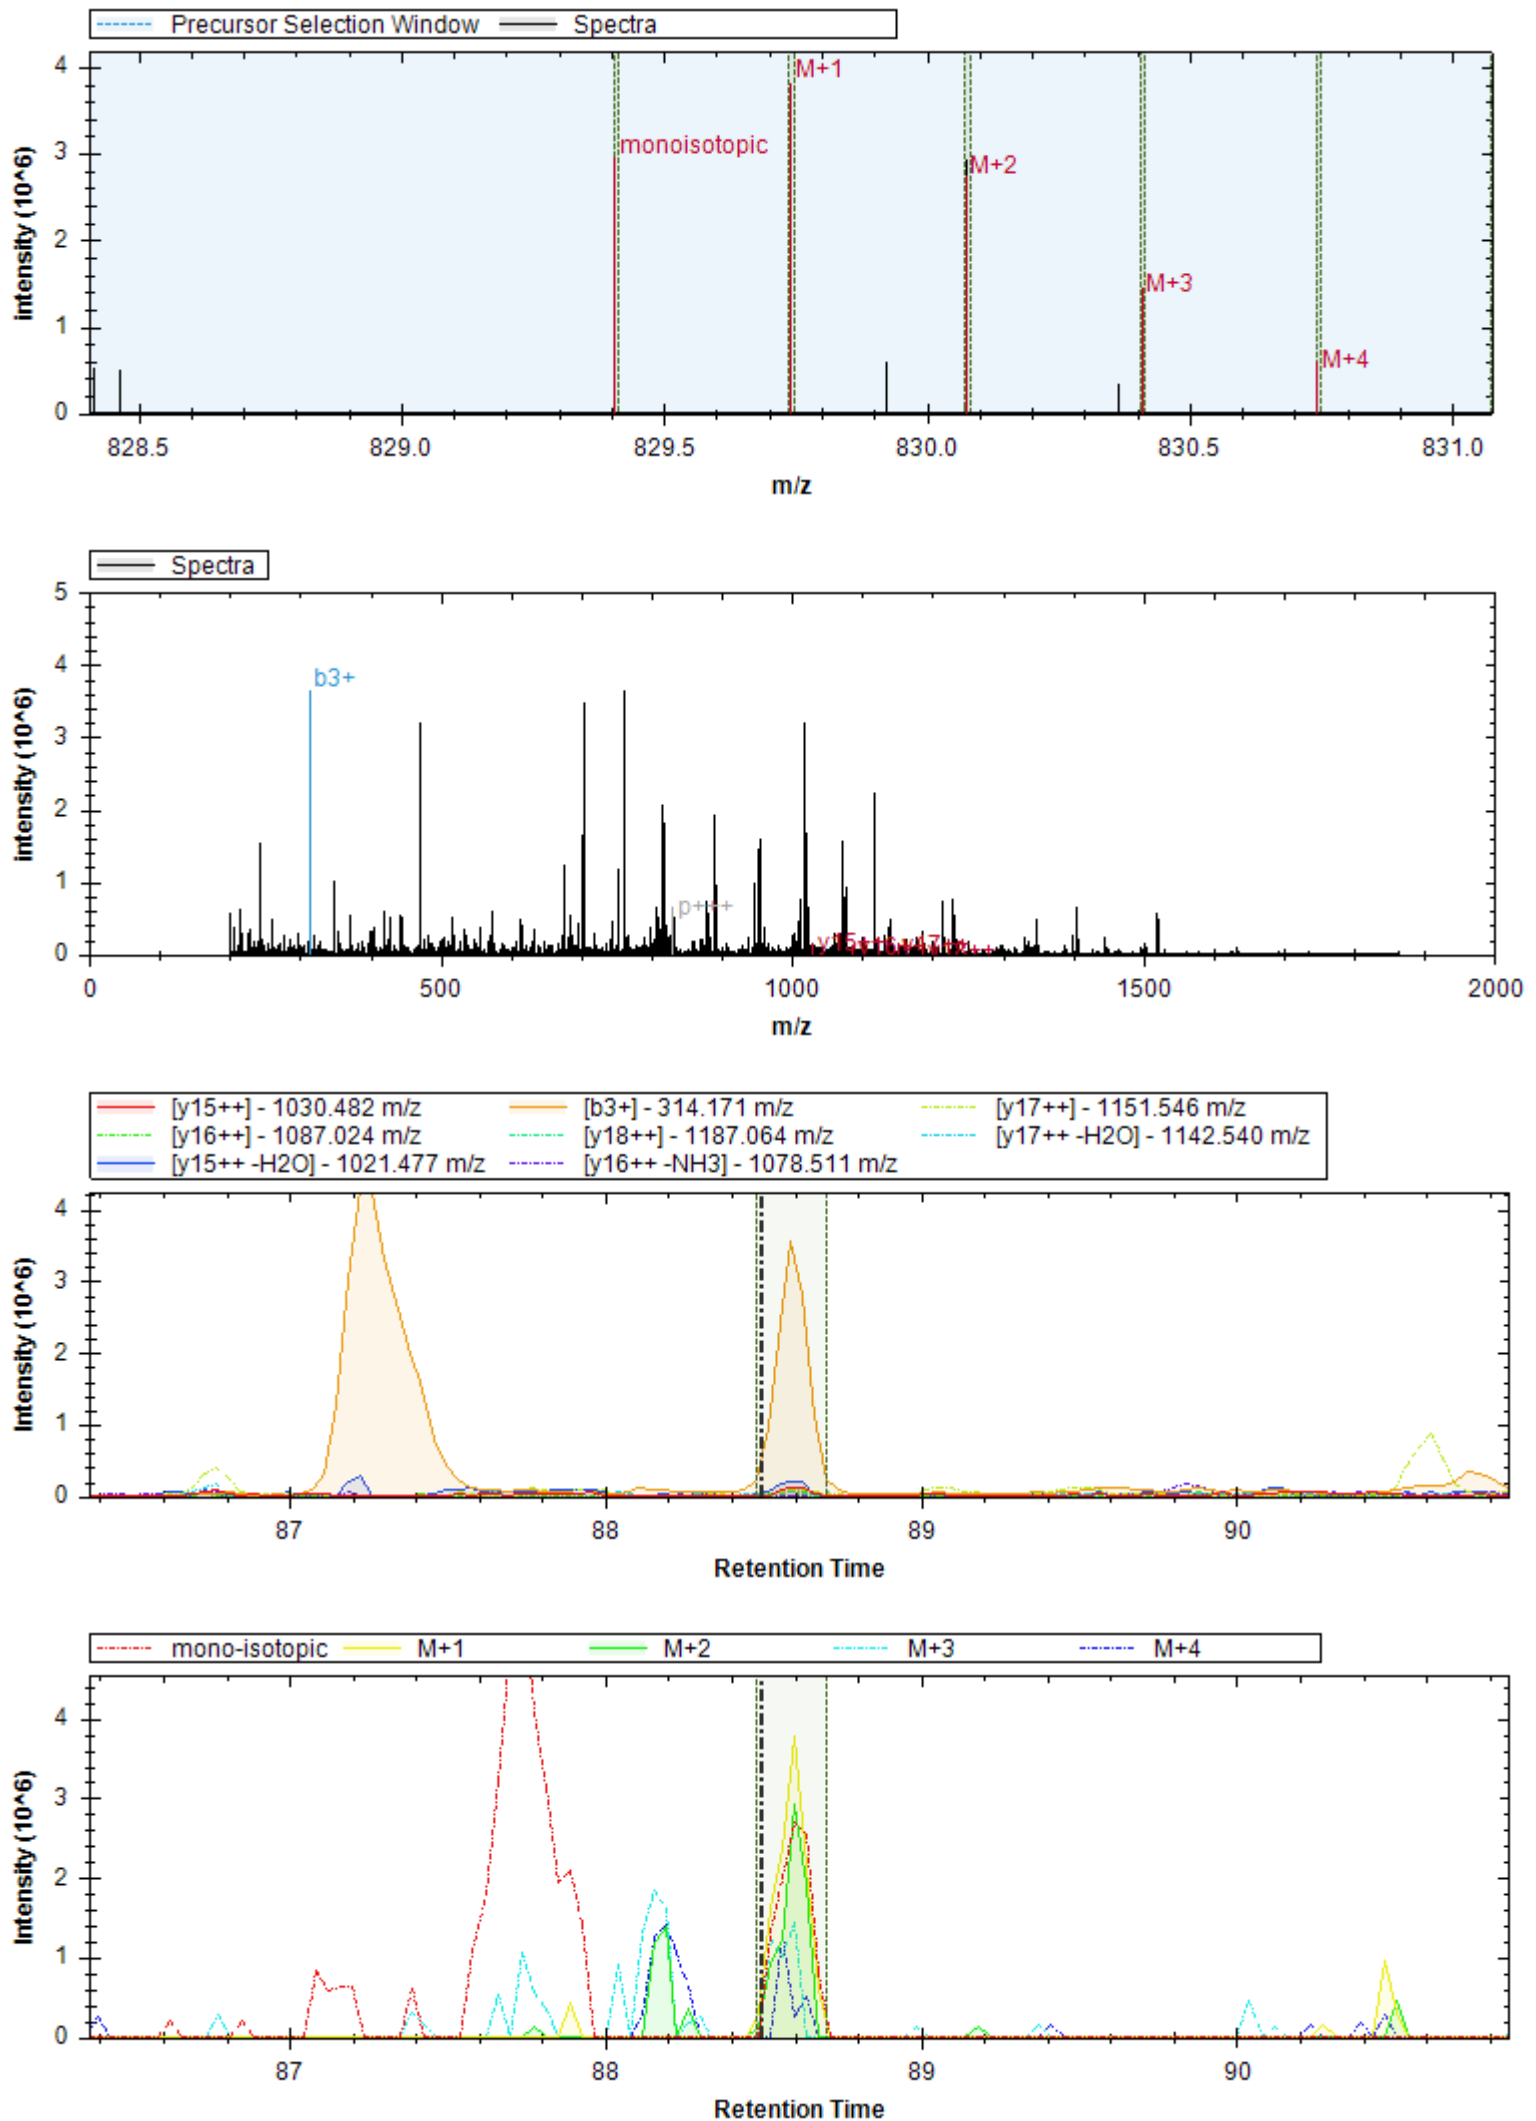

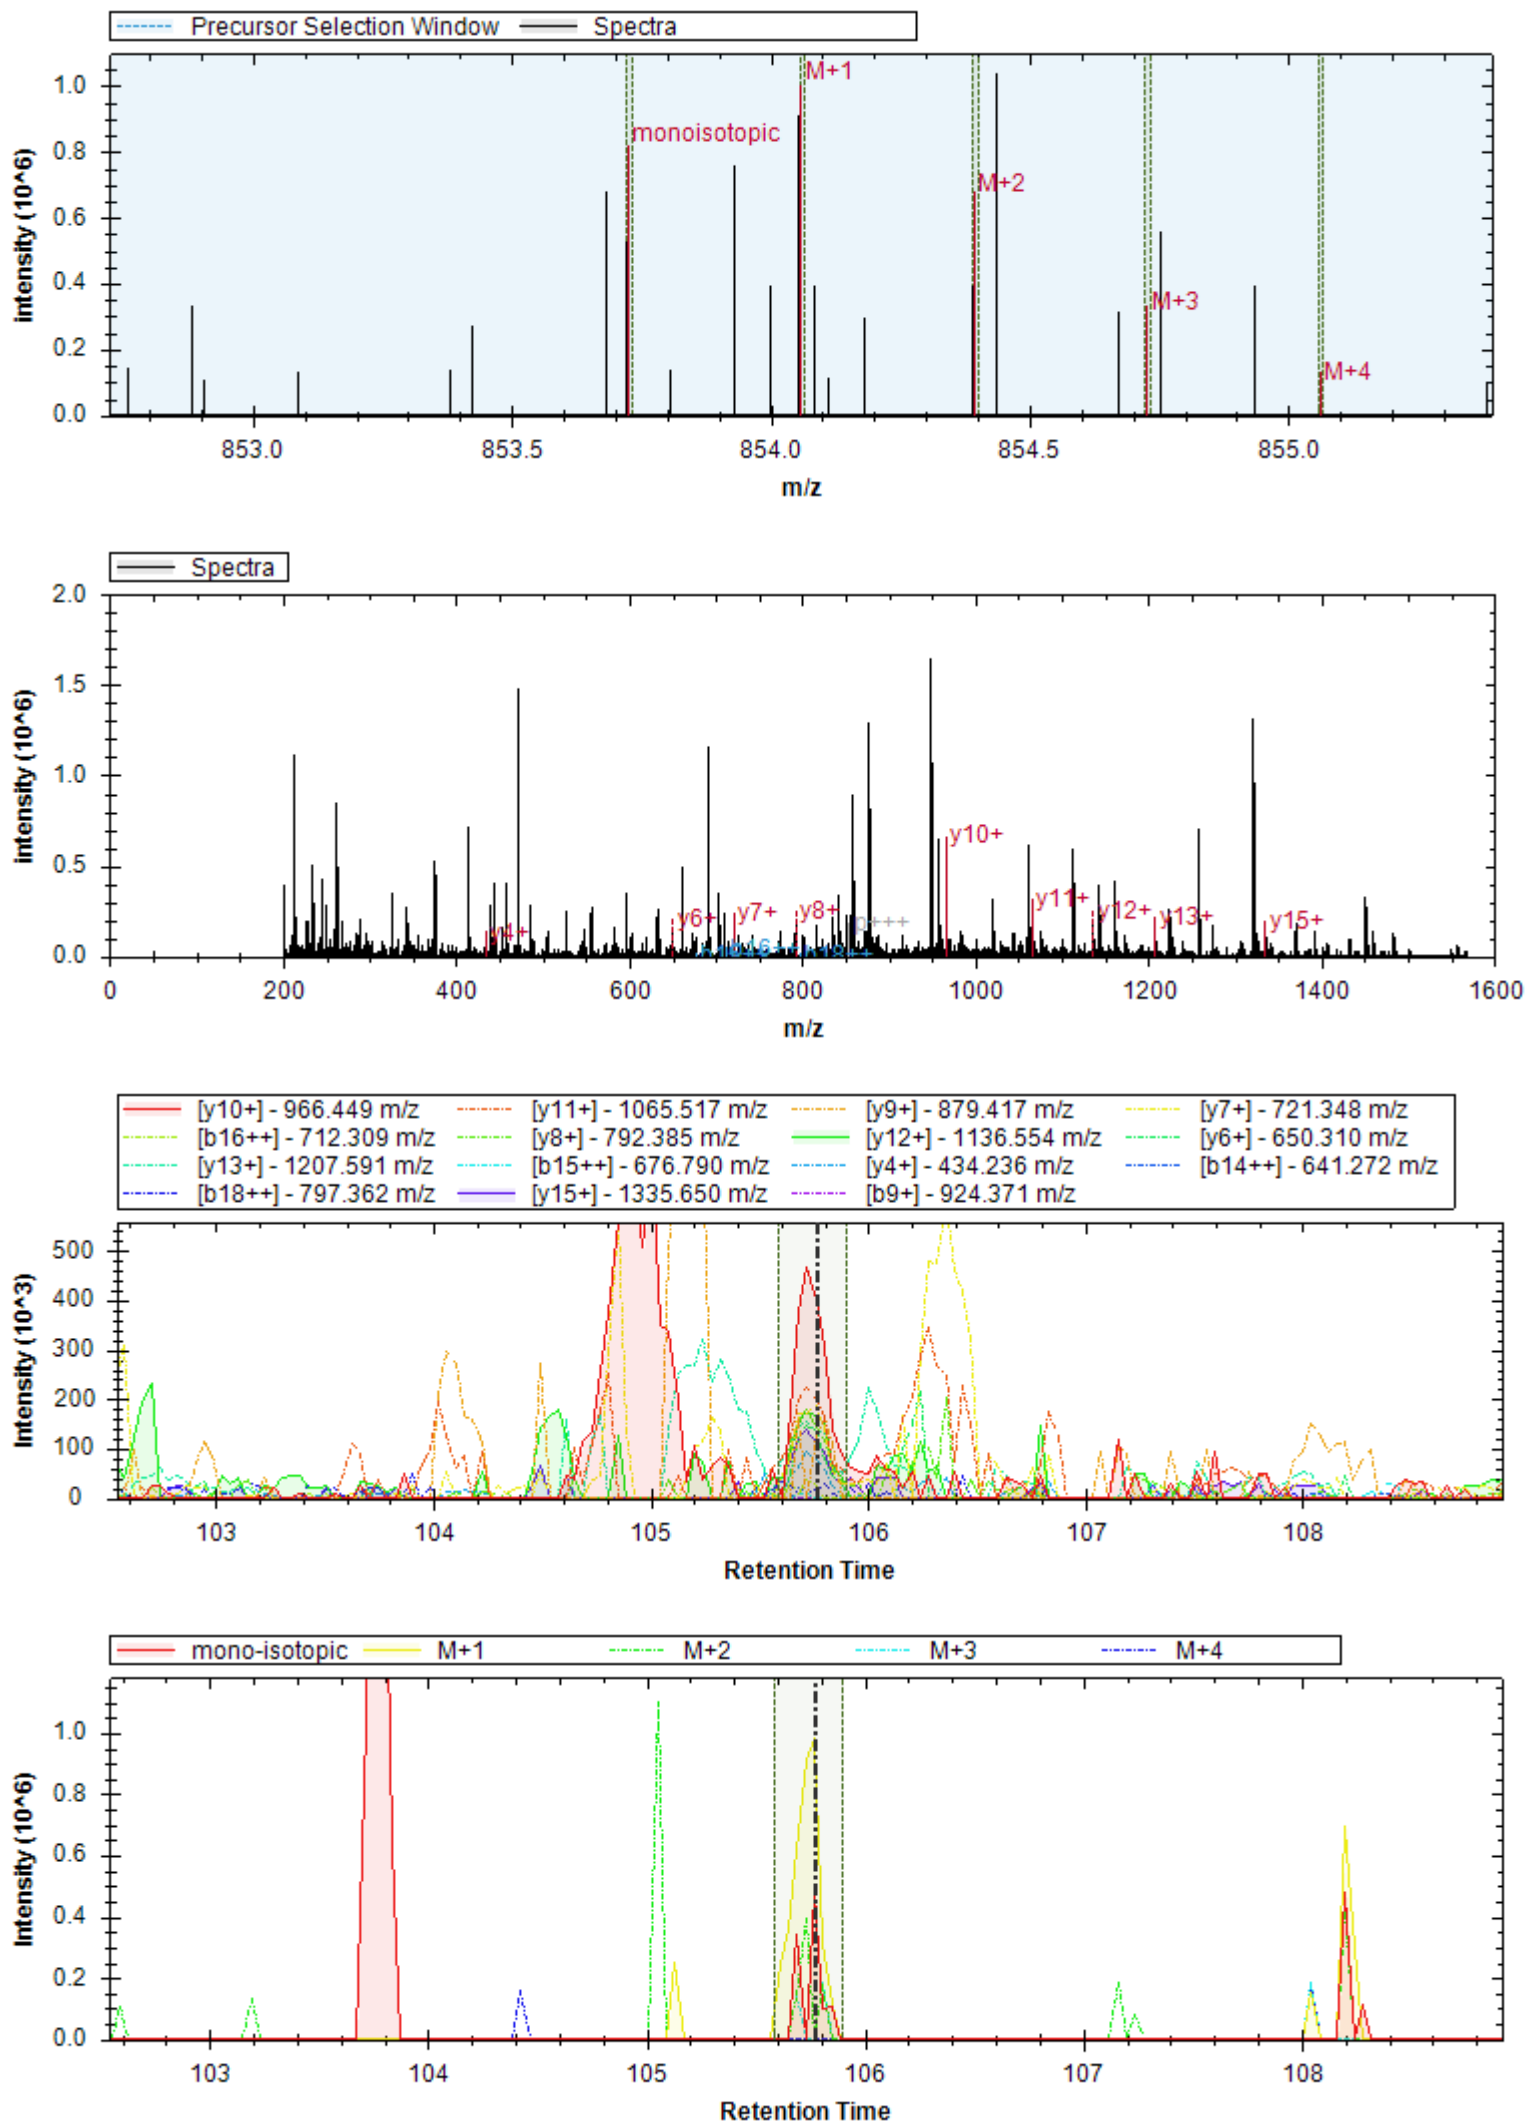

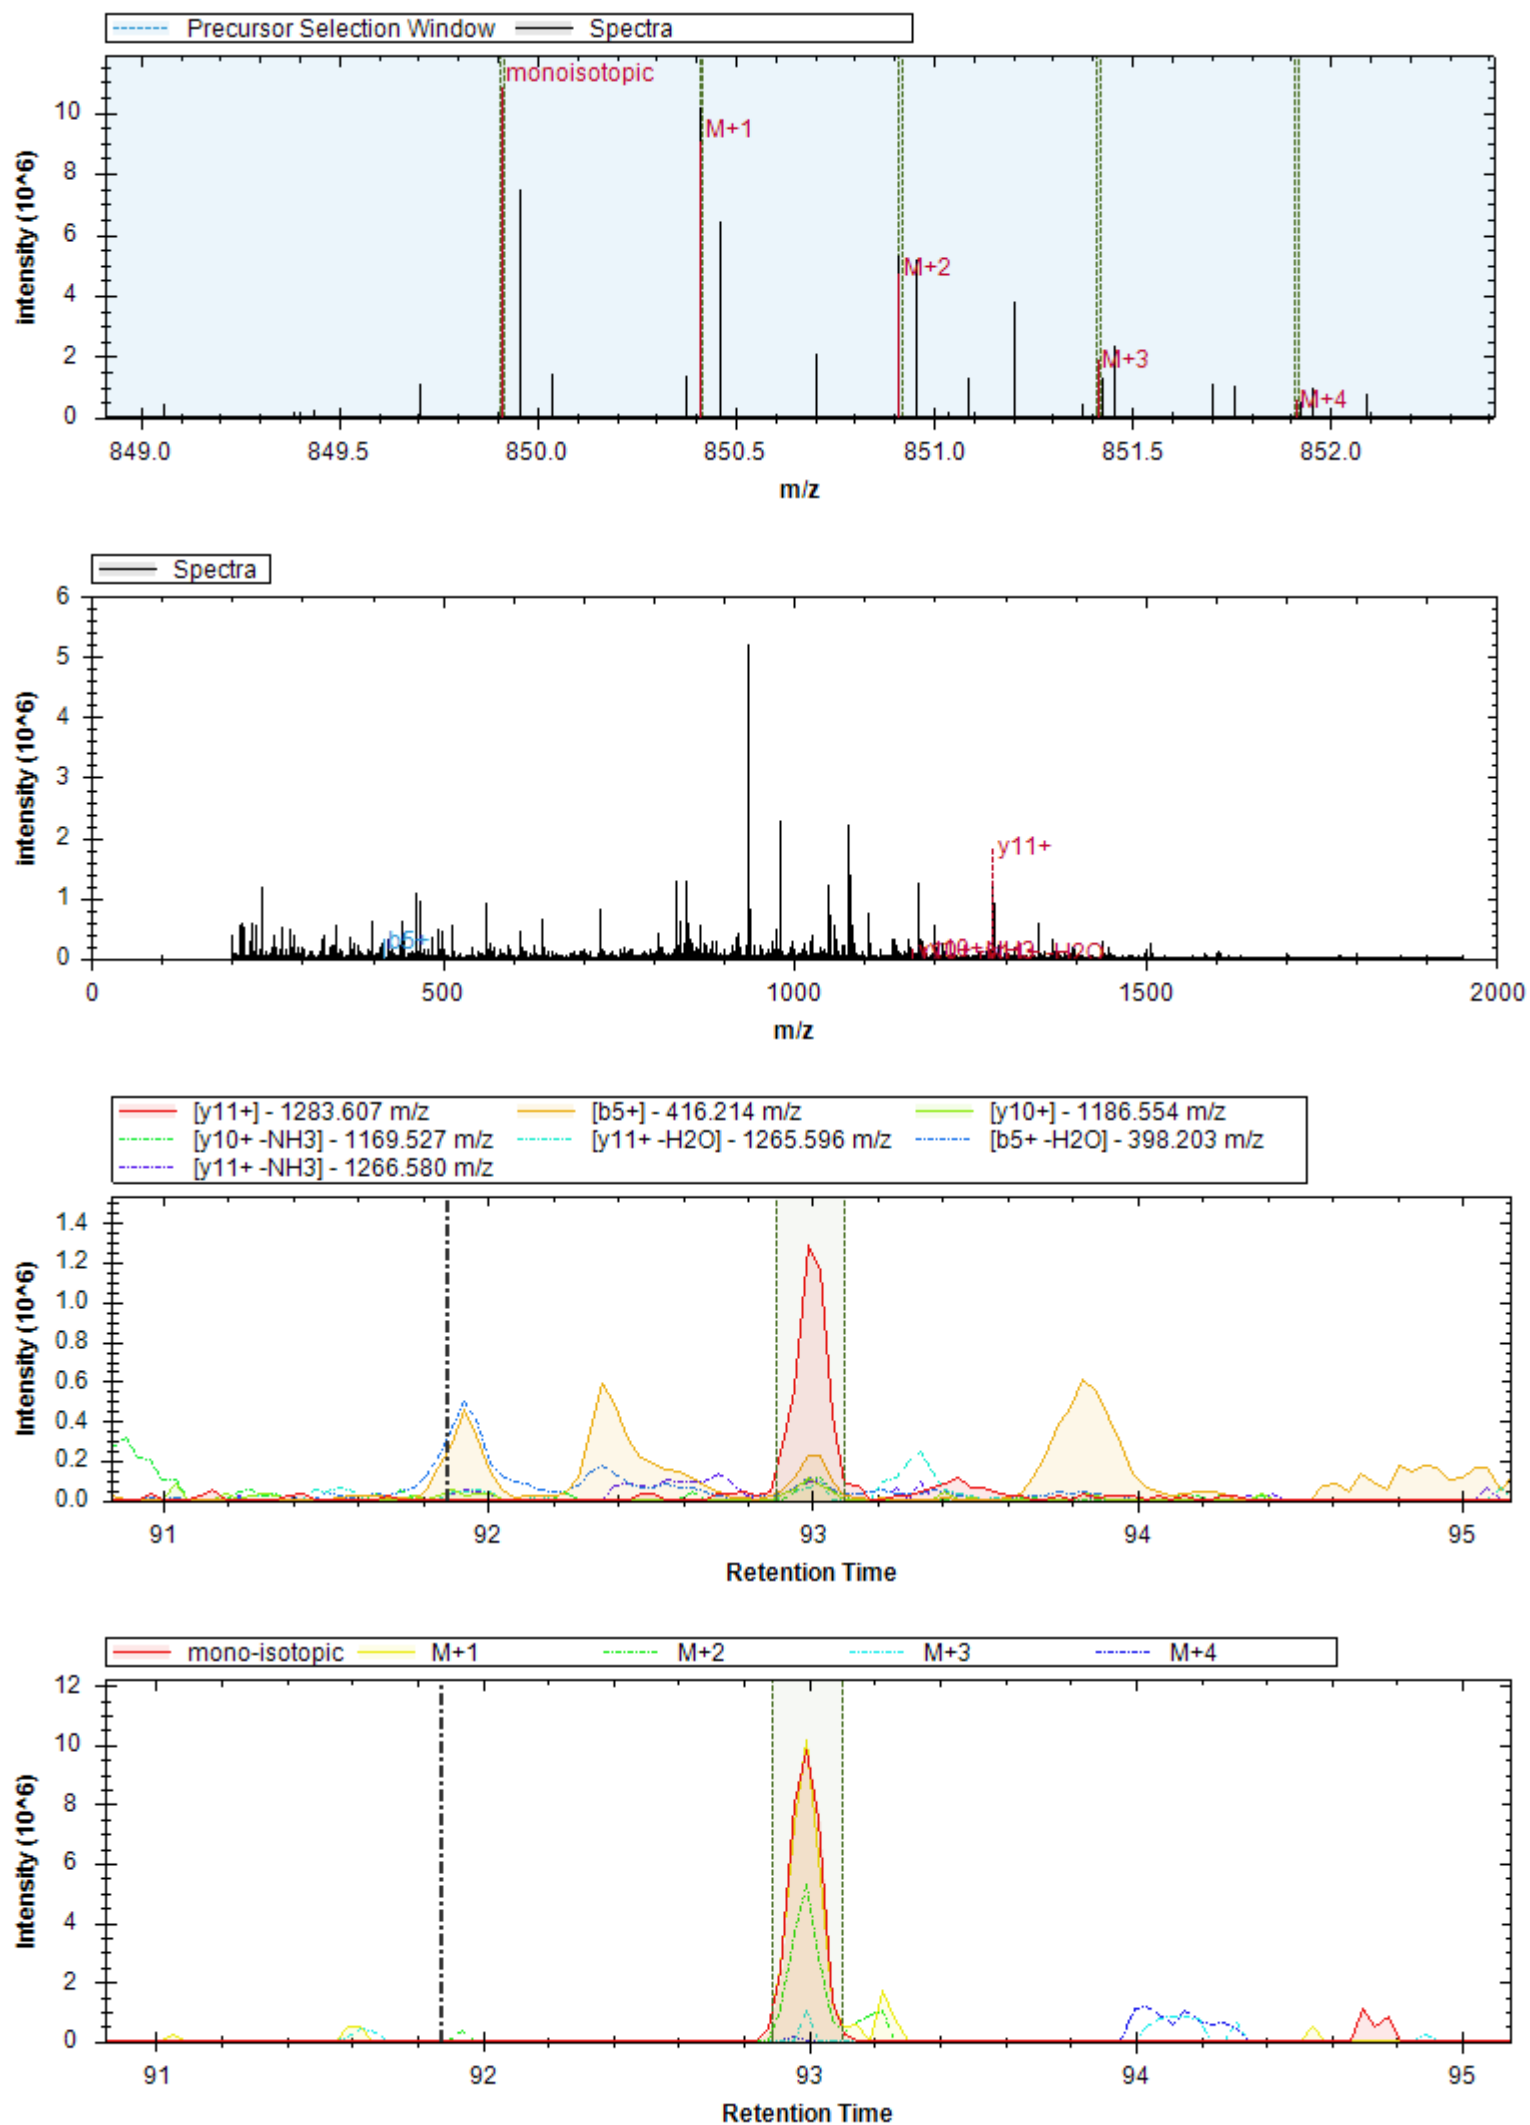

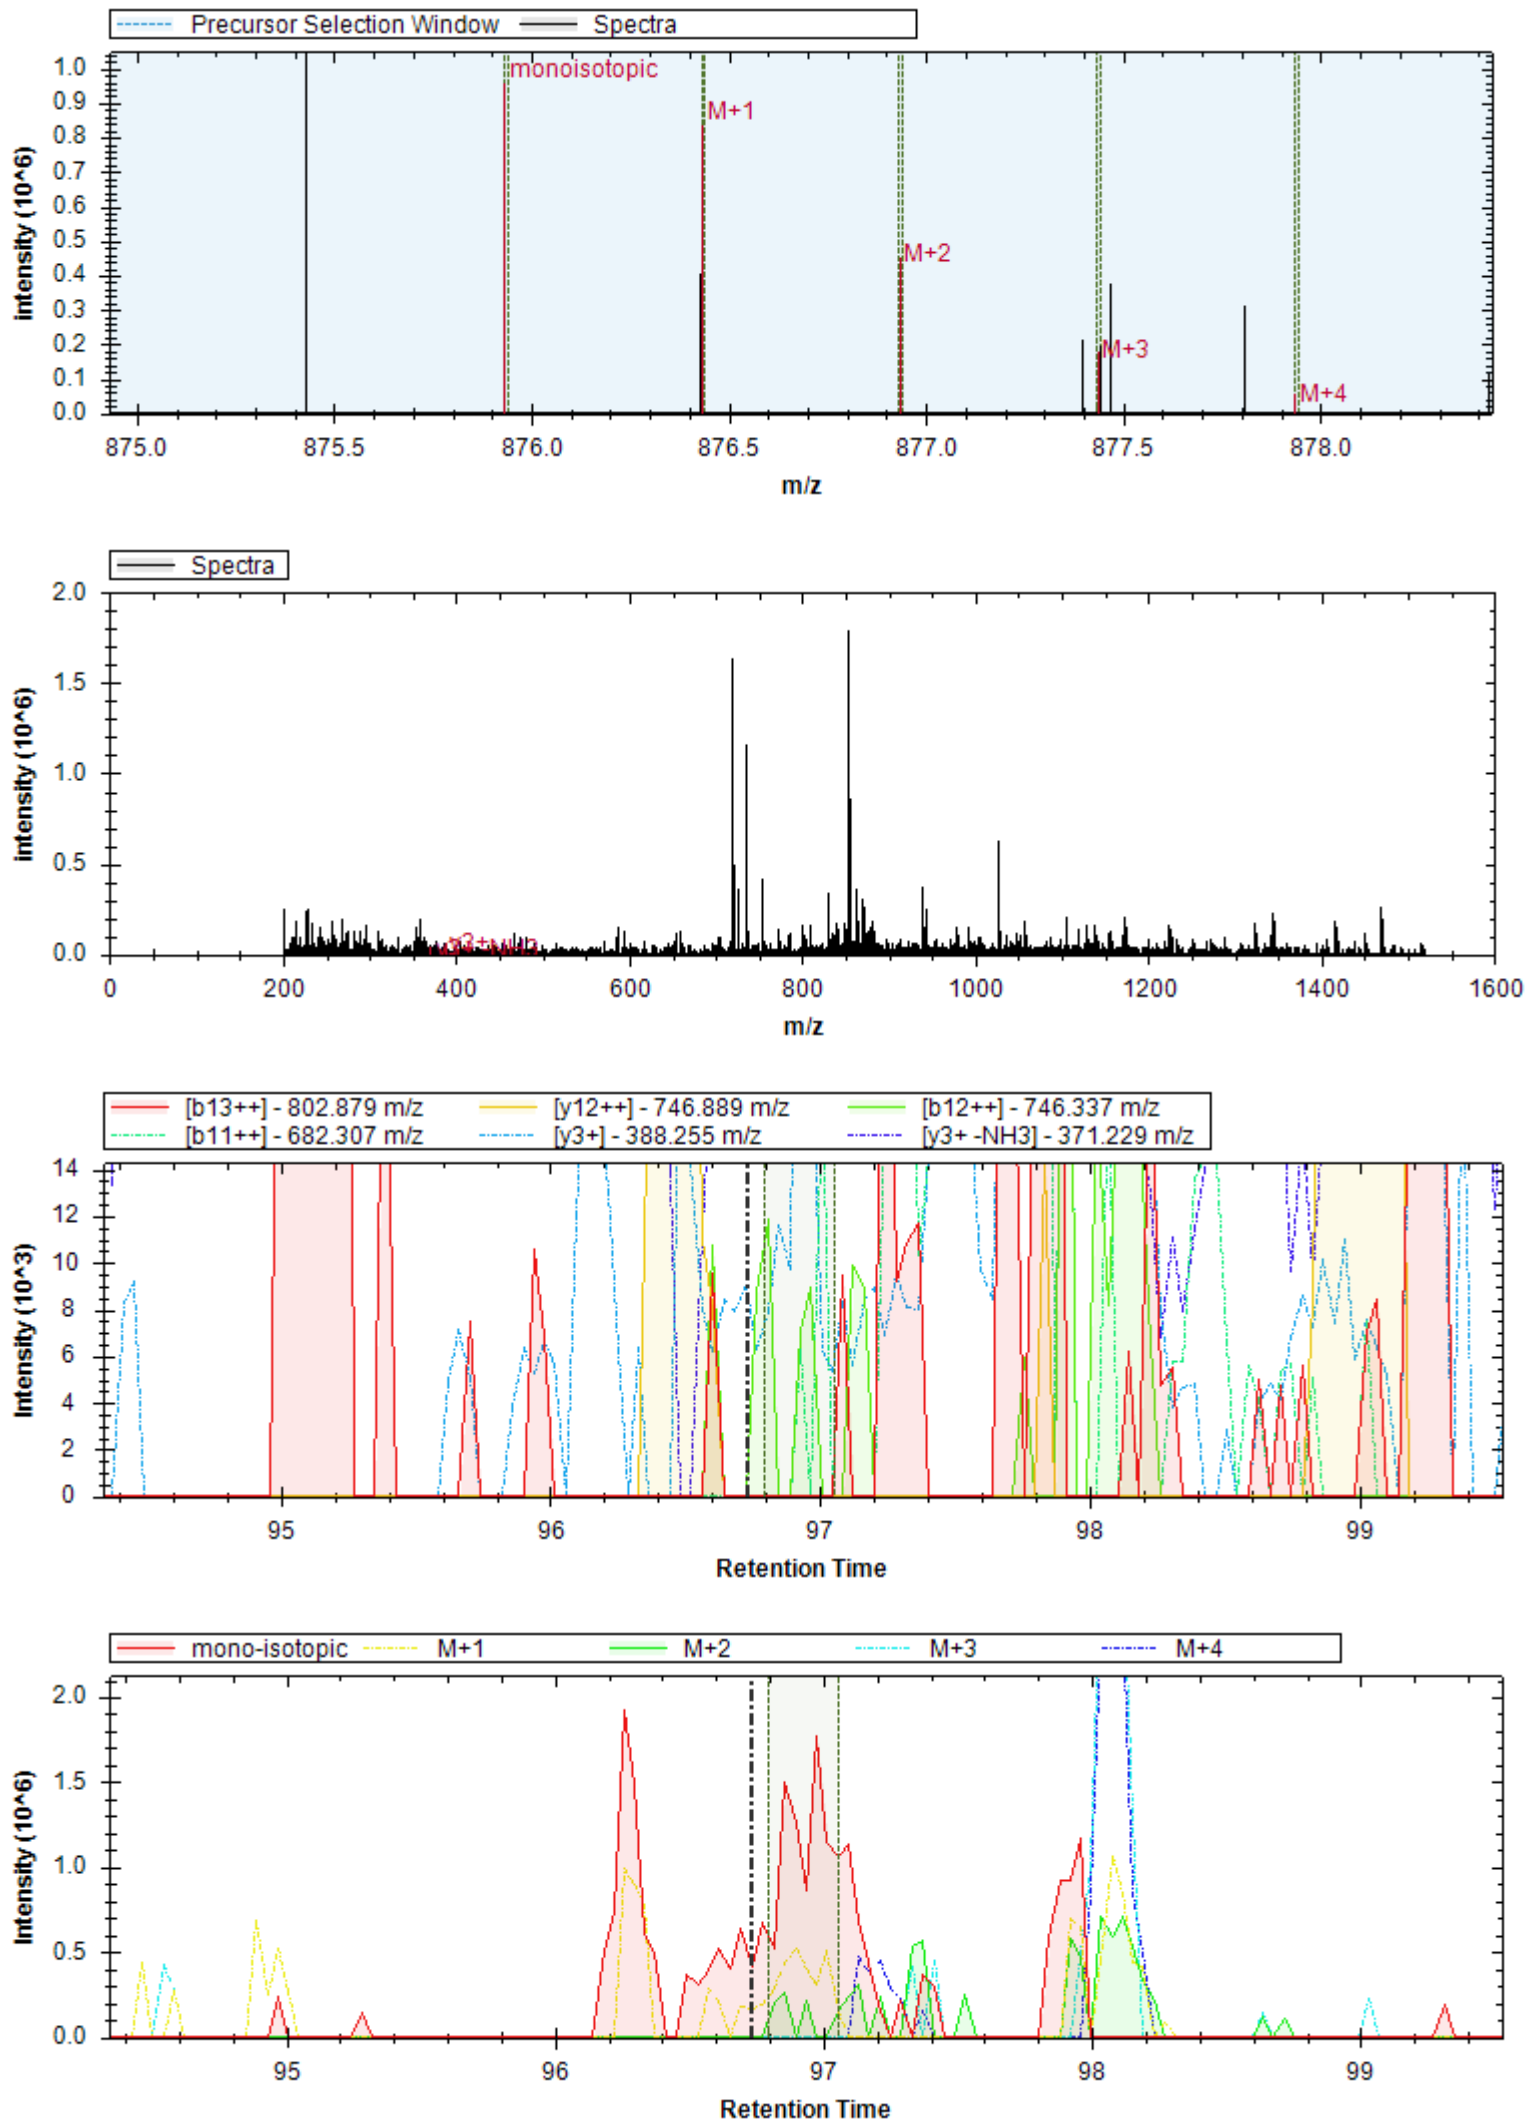

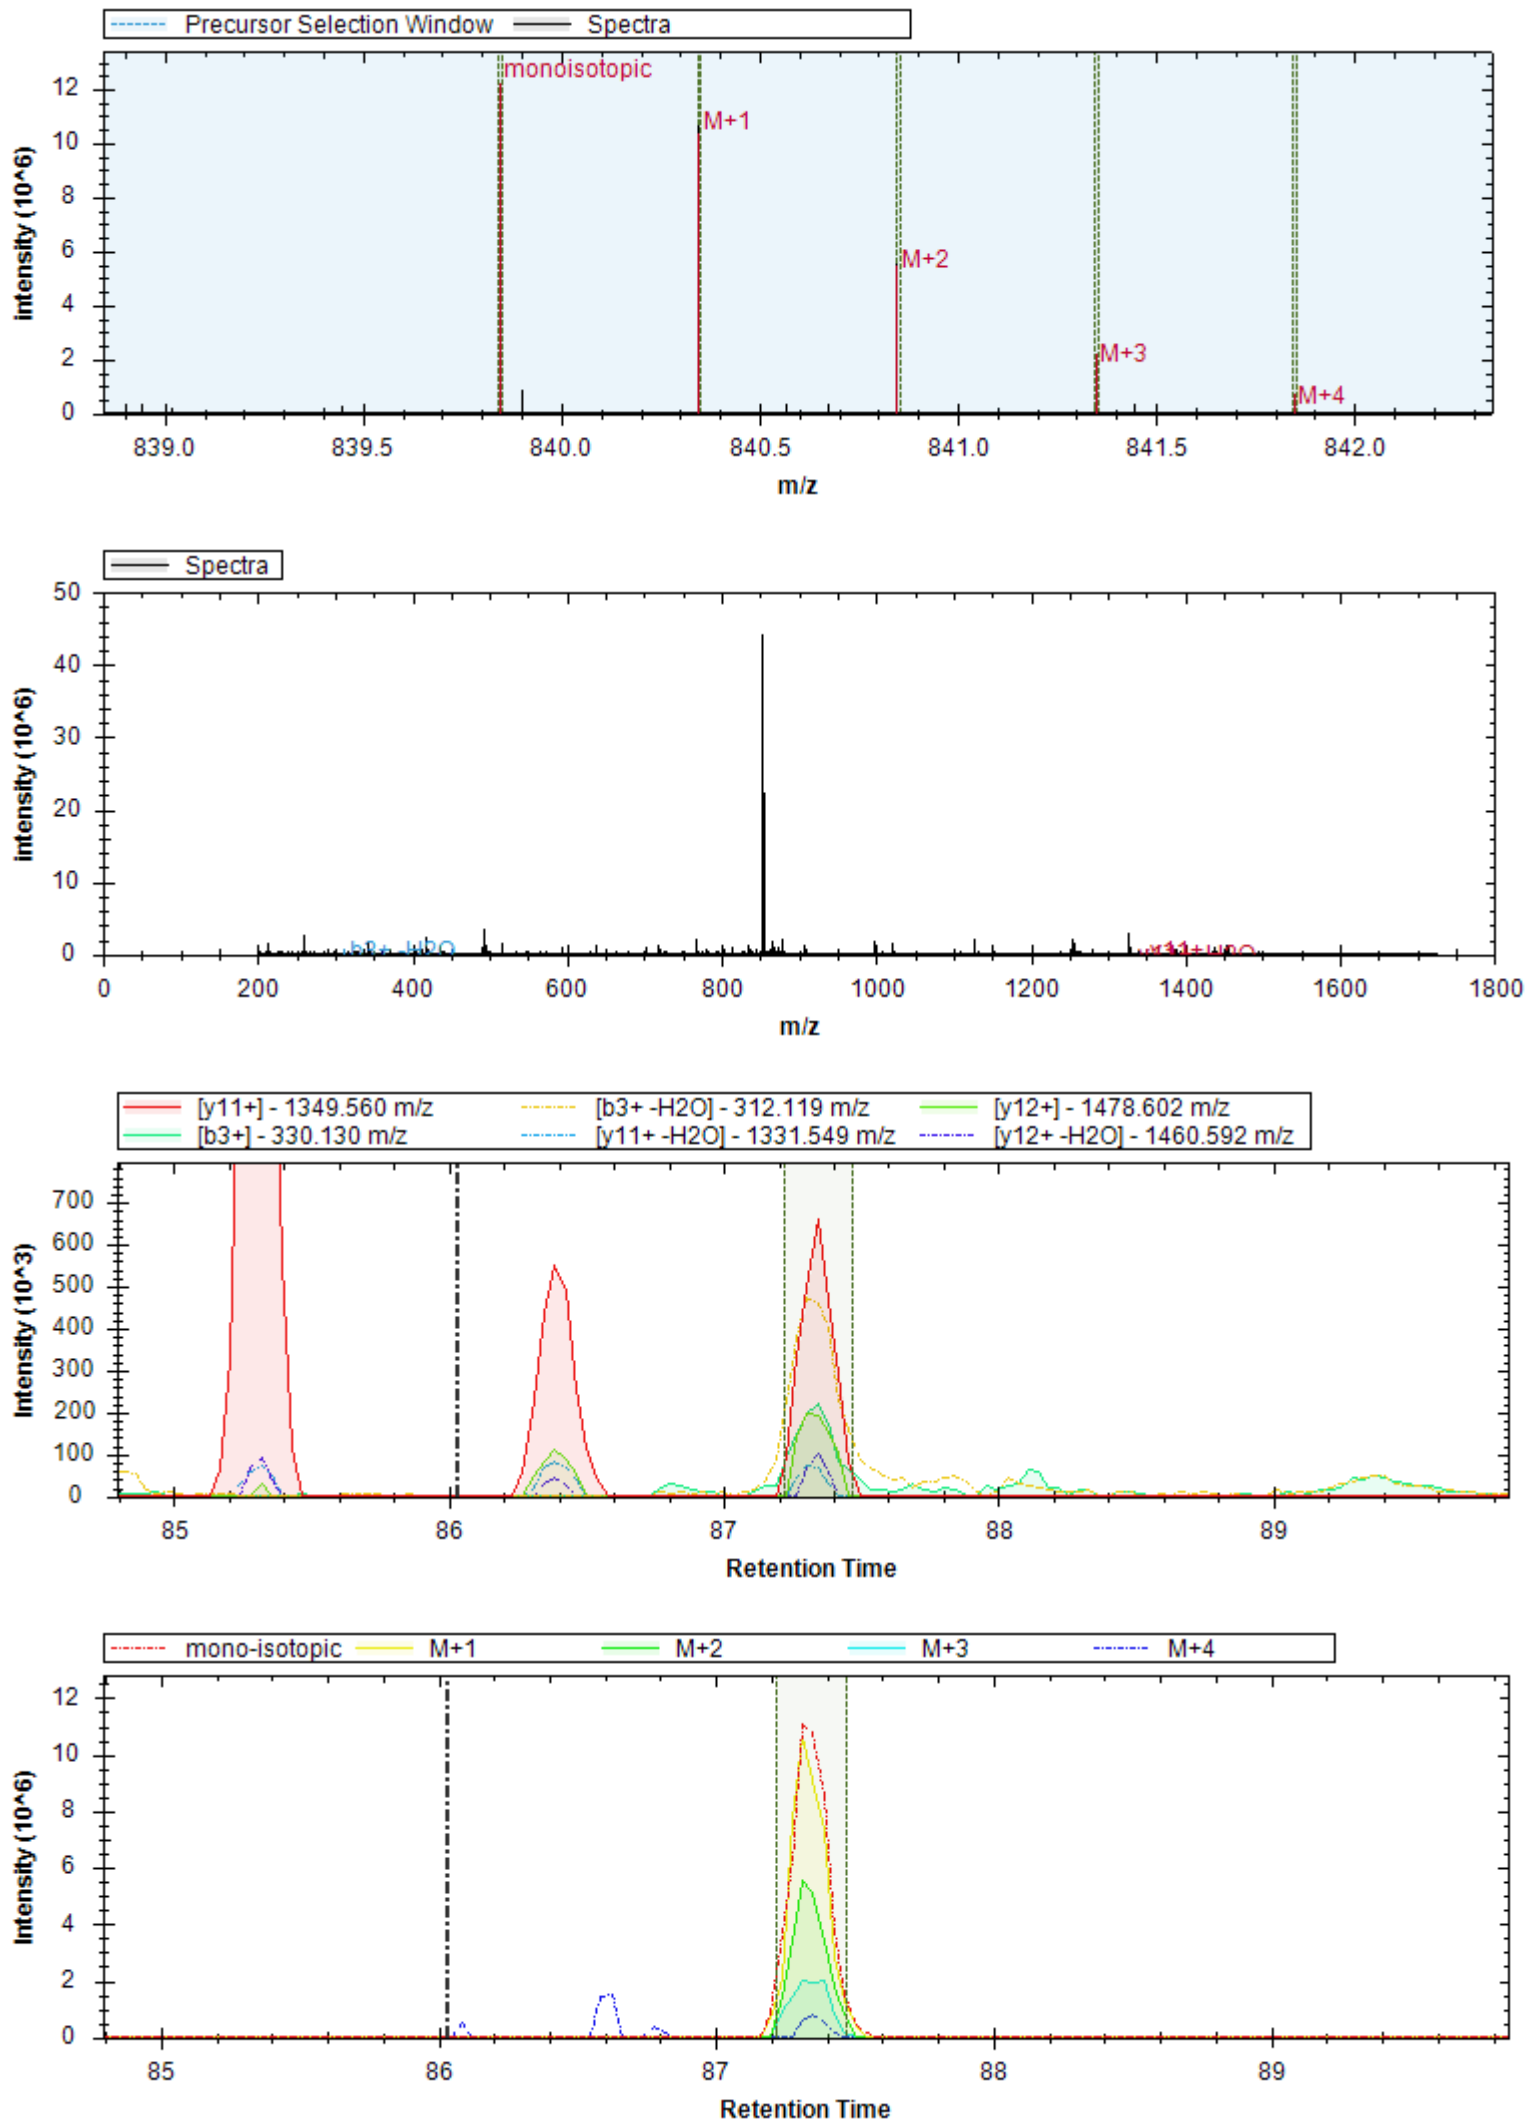

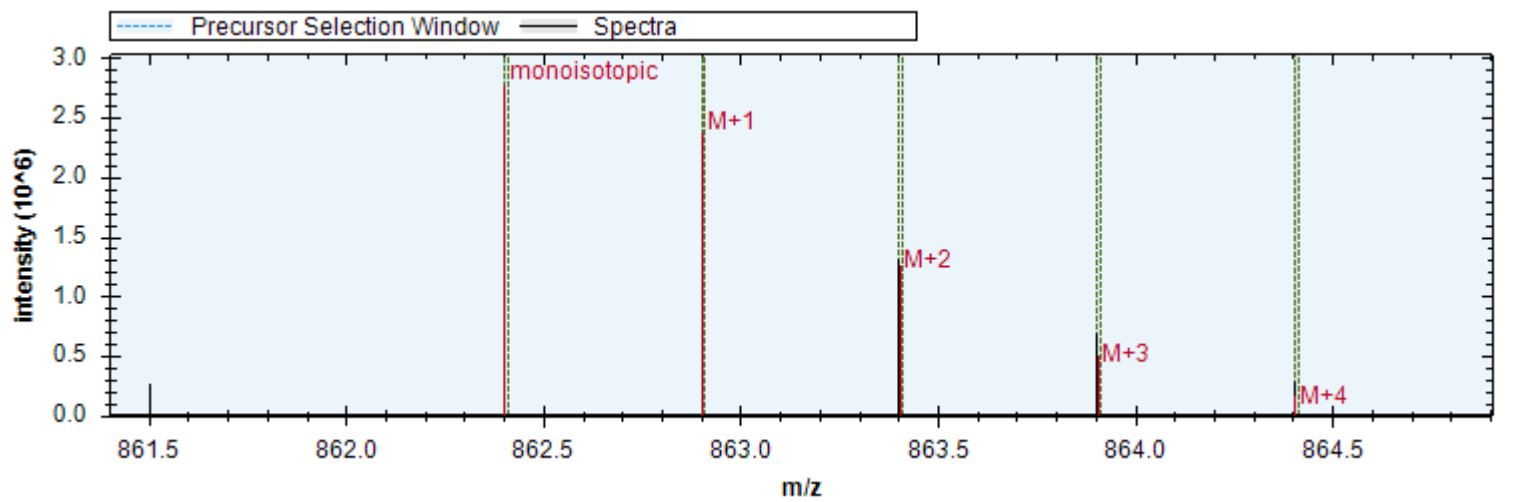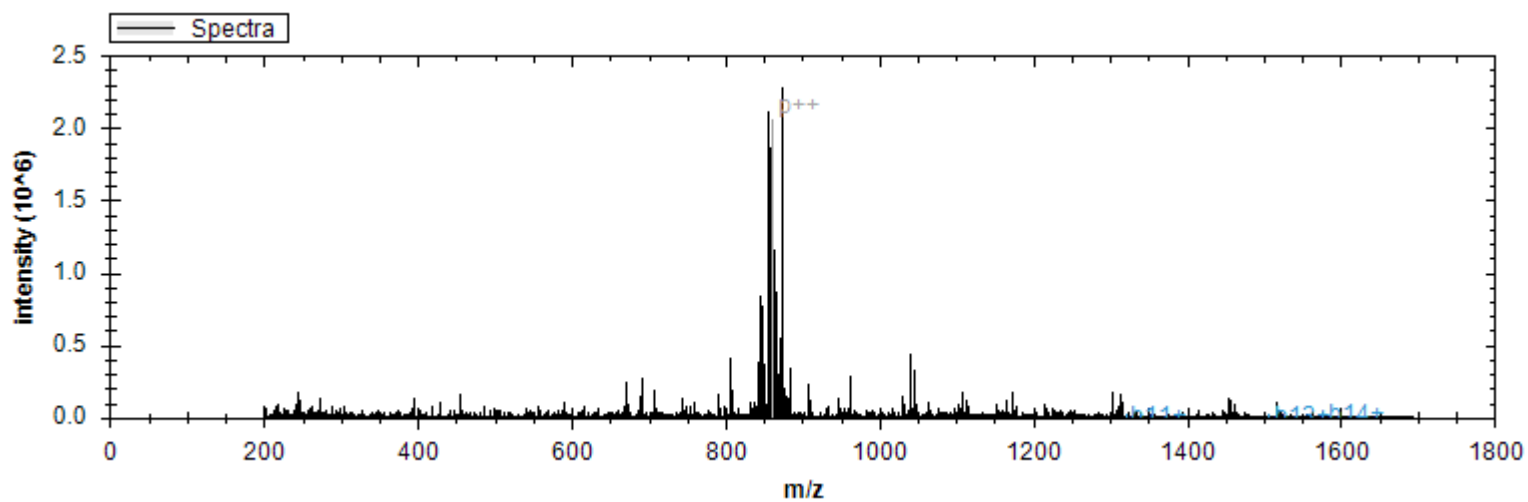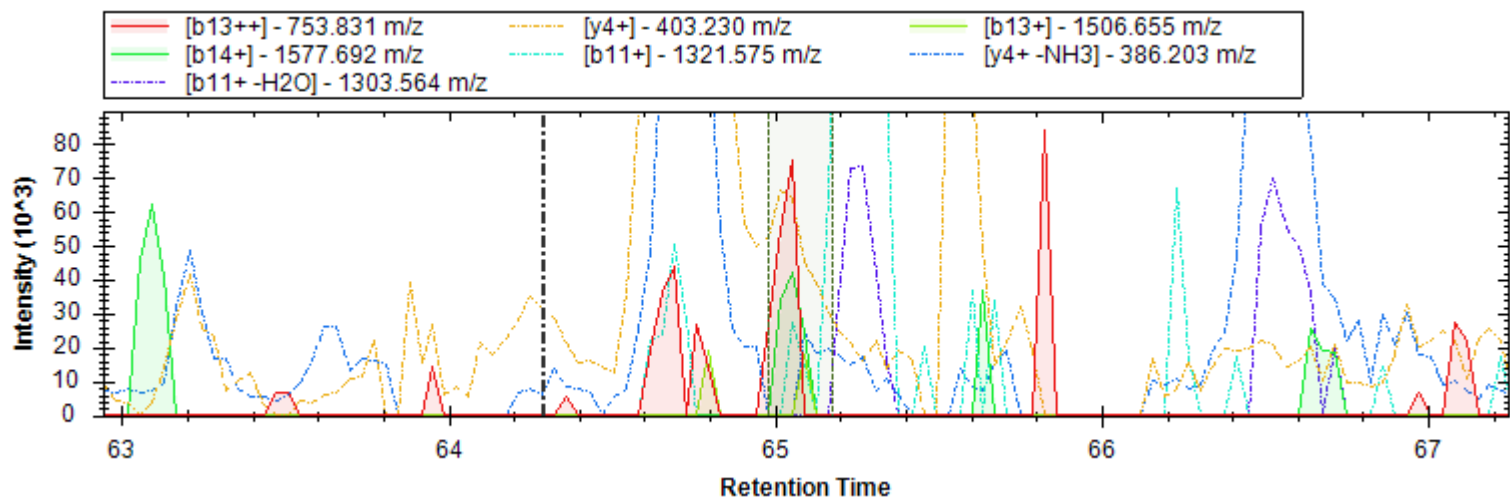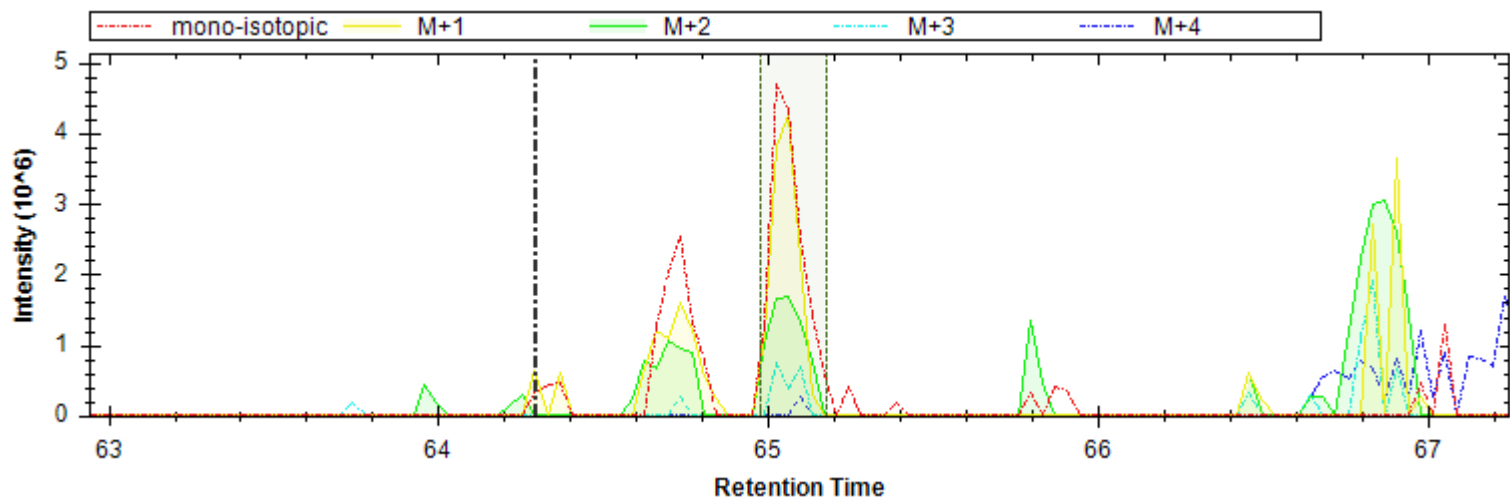

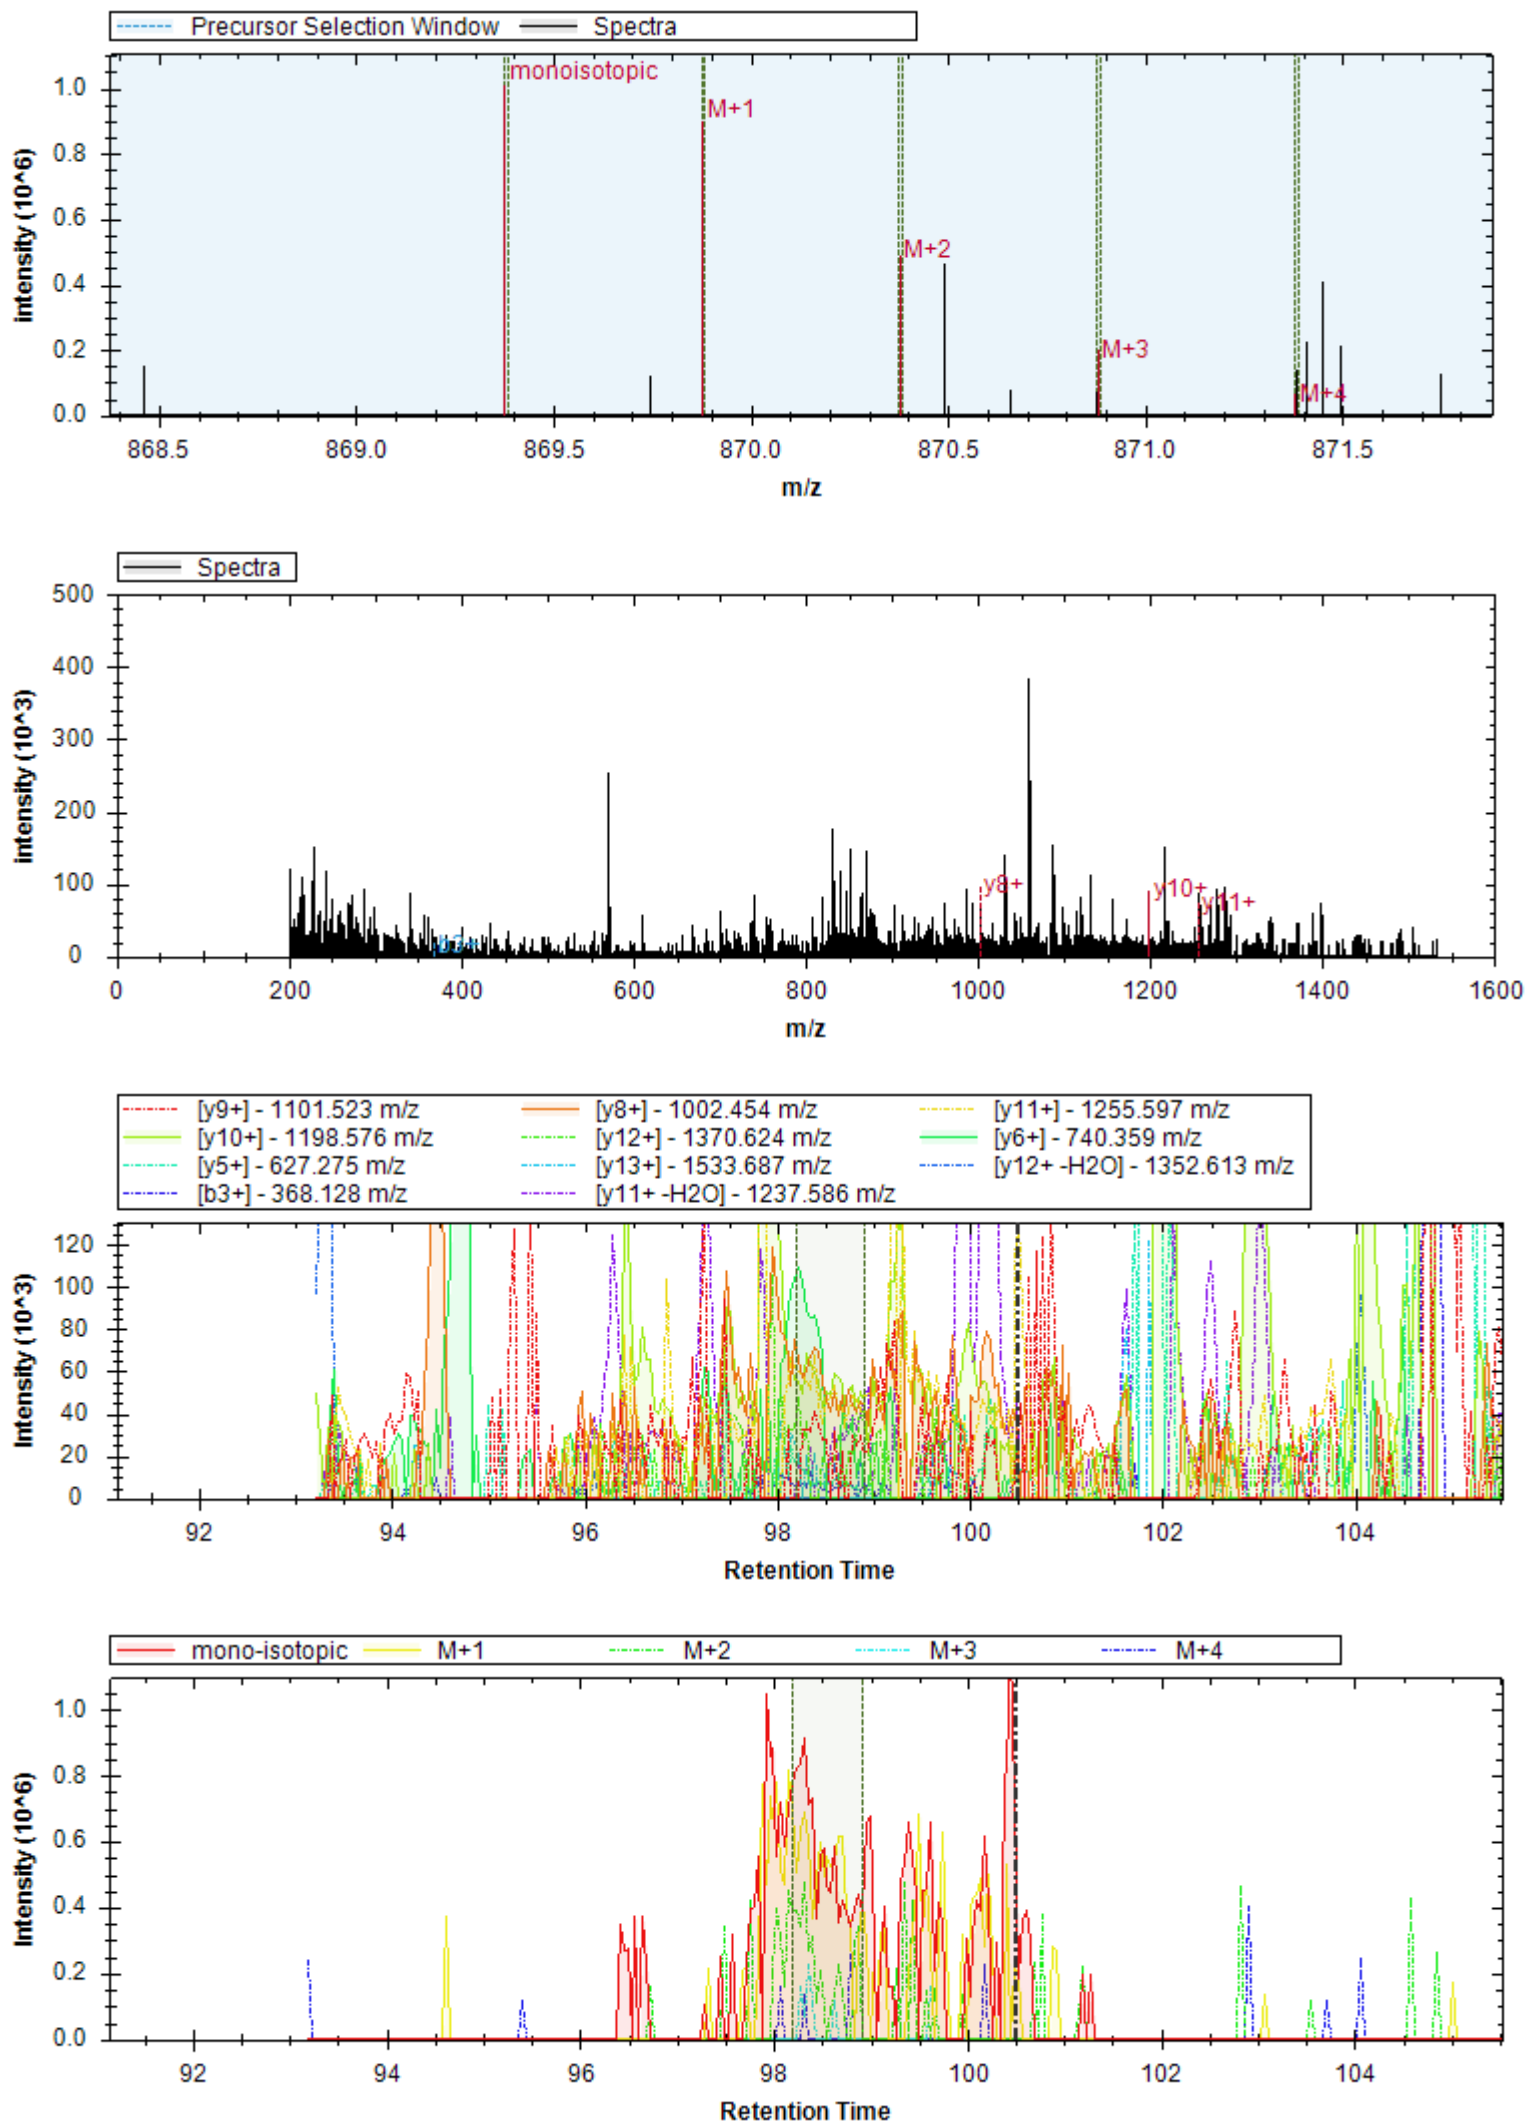

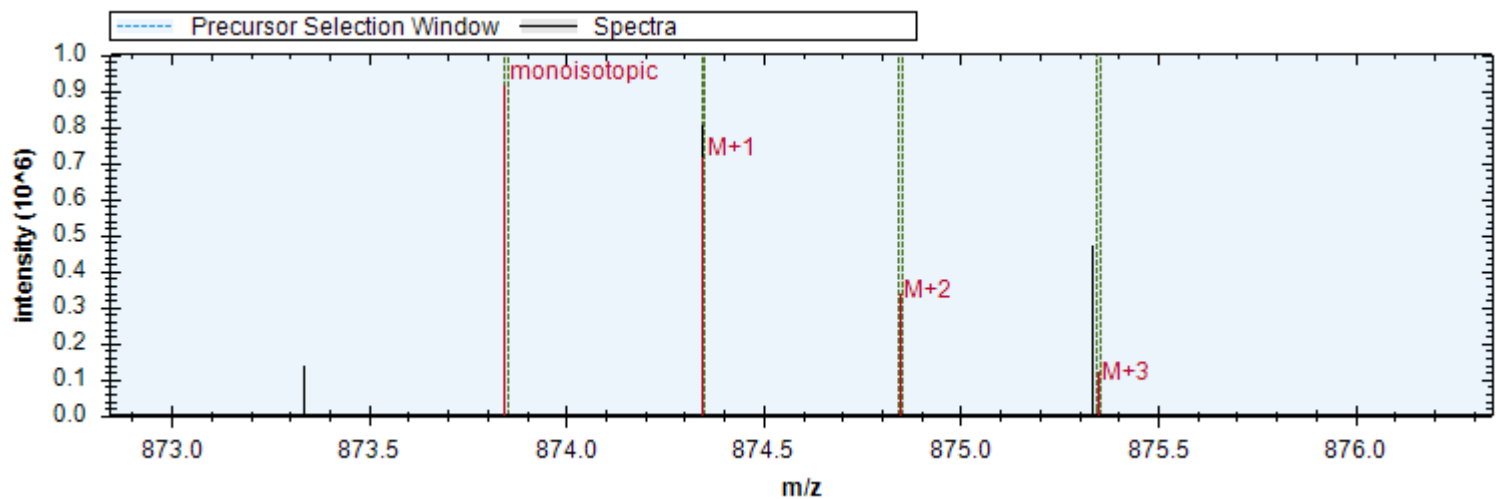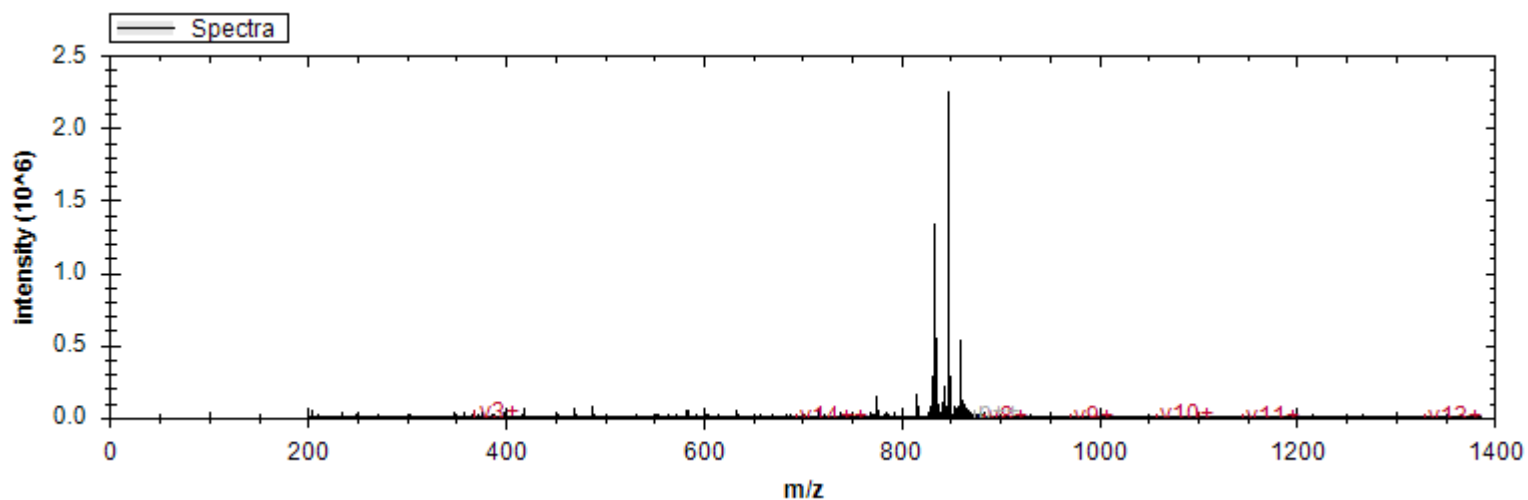

|                             |                              |                            |
|-----------------------------|------------------------------|----------------------------|
| [y3+] - 369.225 m/z         | [y13+] - 1329.532 m/z        | [y10+] - 1058.415 m/z      |
| [y9+] - 971.383 m/z         | [y11+] - 1145.447 m/z        | [y8+] - 884.351 m/z        |
| [y10+ -H3PO4] - 960.438 m/z | [y13+ -H3PO4] - 1231.555 m/z | [y8+ -H3PO4] - 786.374 m/z |
| [y12+] - 1232.479 m/z       | [y7+] - 797.319 m/z          | [b5+] - 418.157 m/z        |
| [b4+] - 361.135 m/z         | [y14++] - 693.780 m/z        | [y10+ -H2O] - 1138.204 m/z |
| [y16++] - 794.810 m/z       |                              |                            |

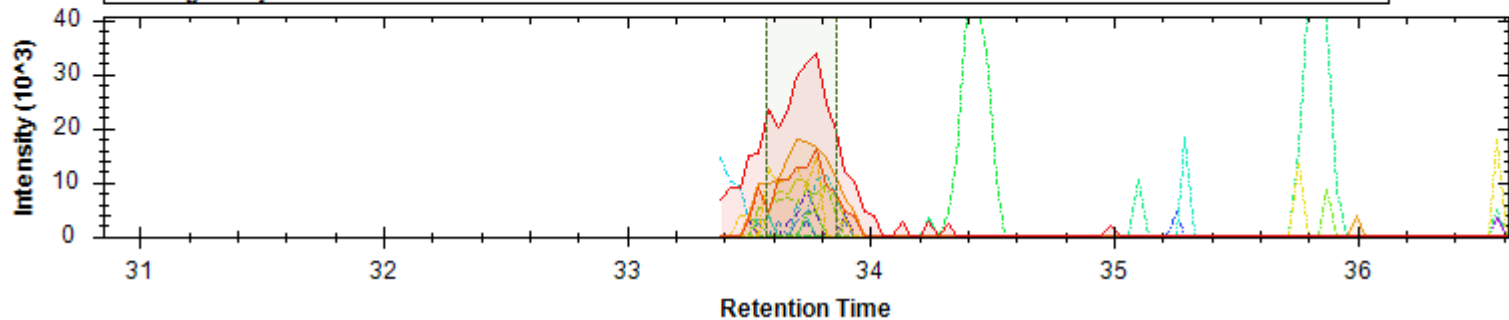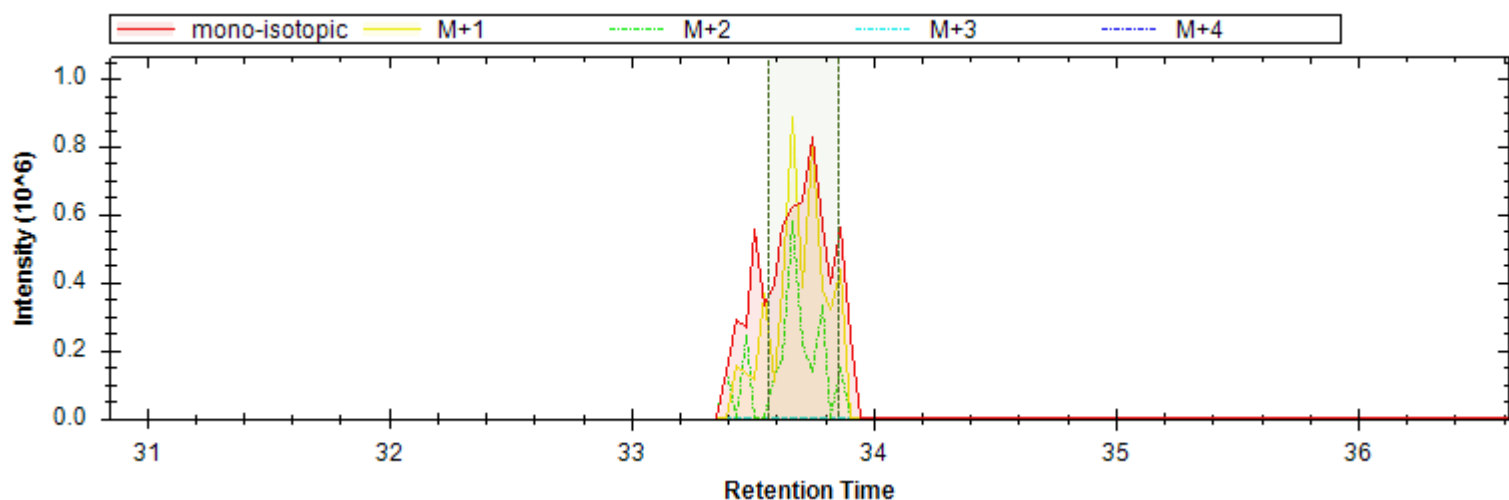



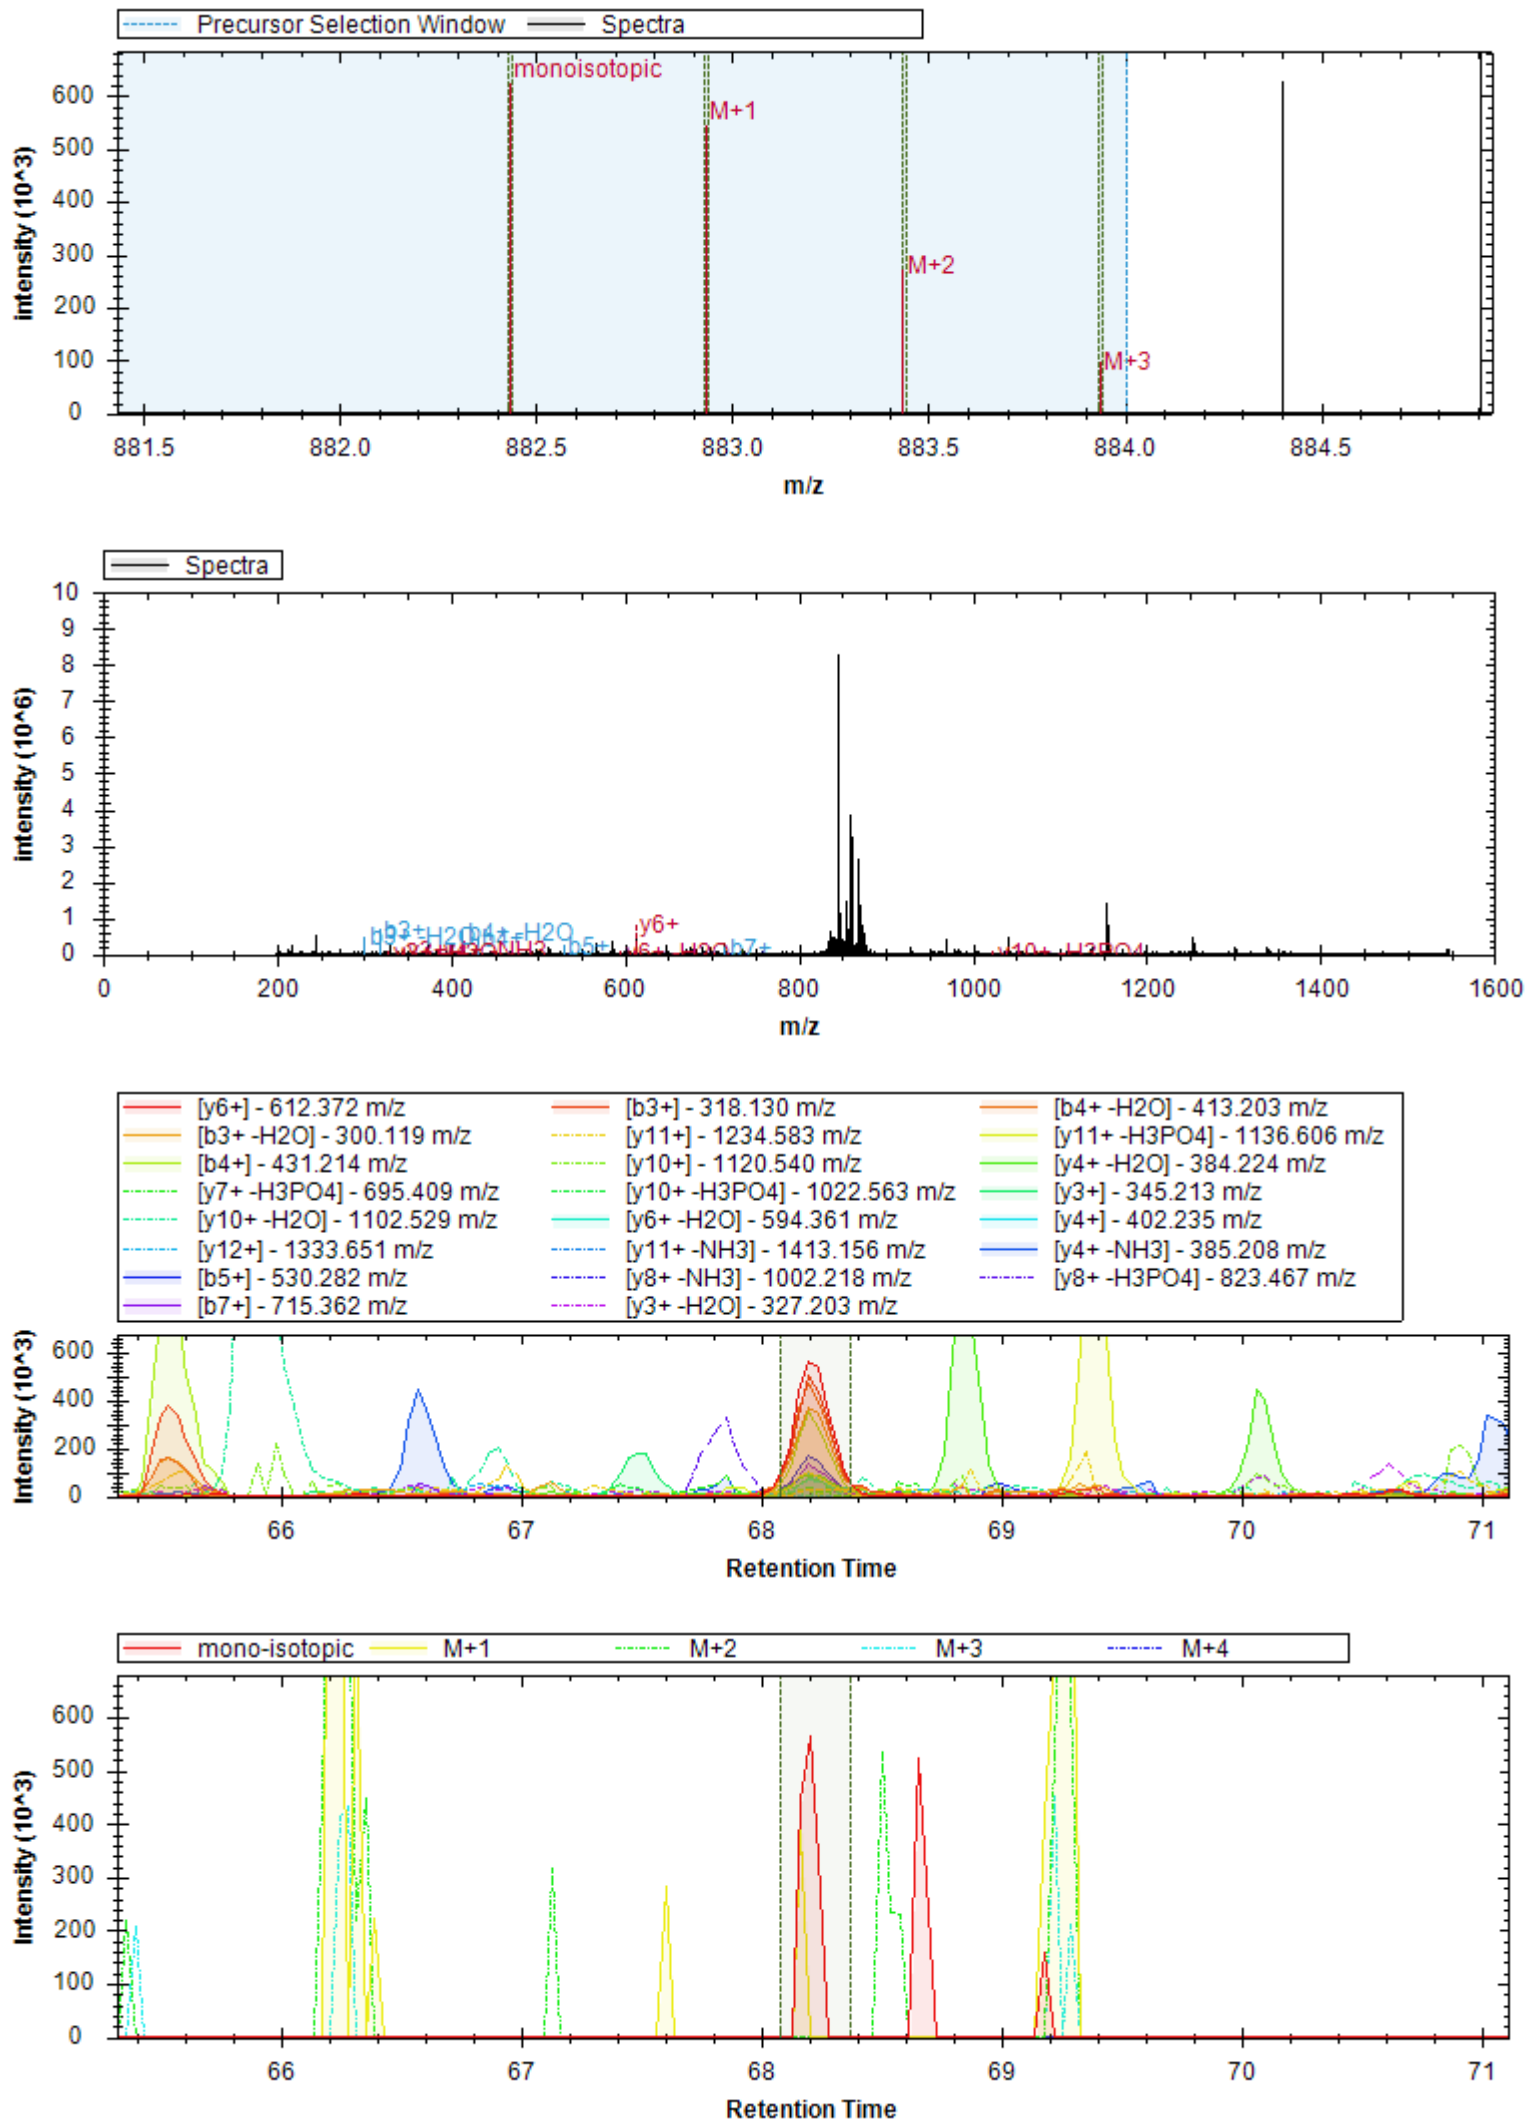

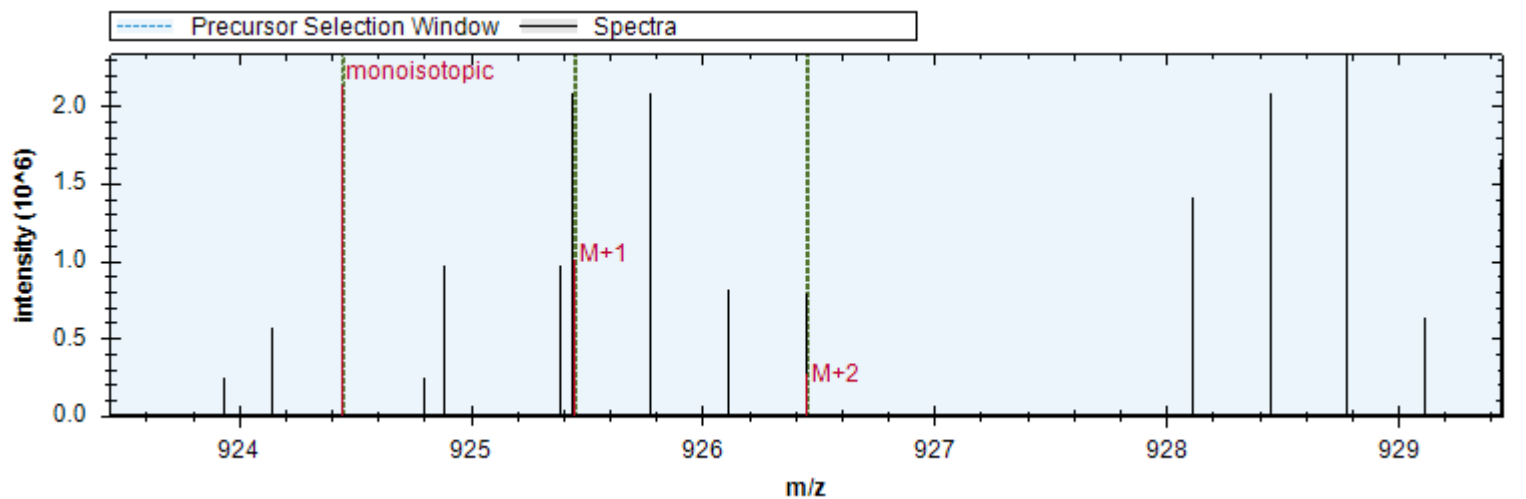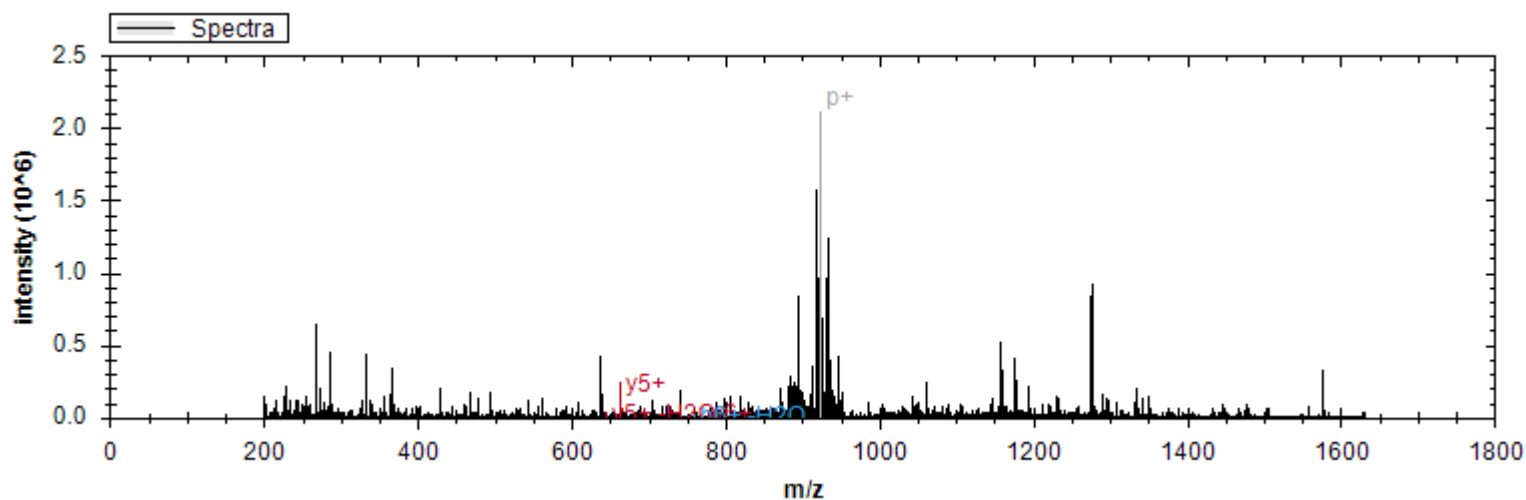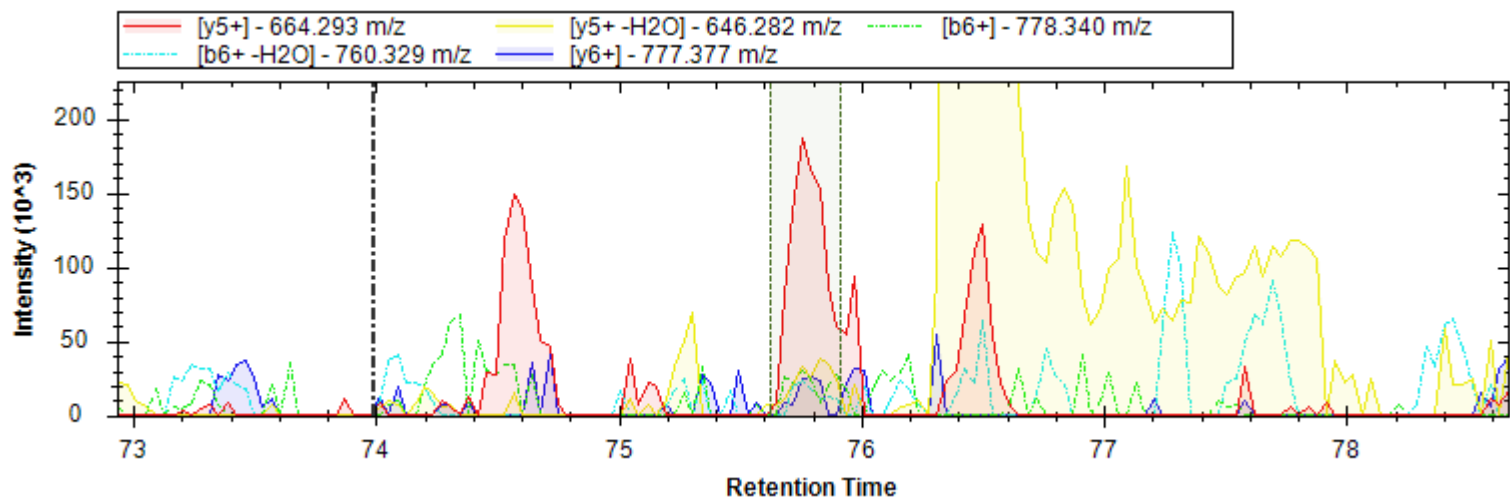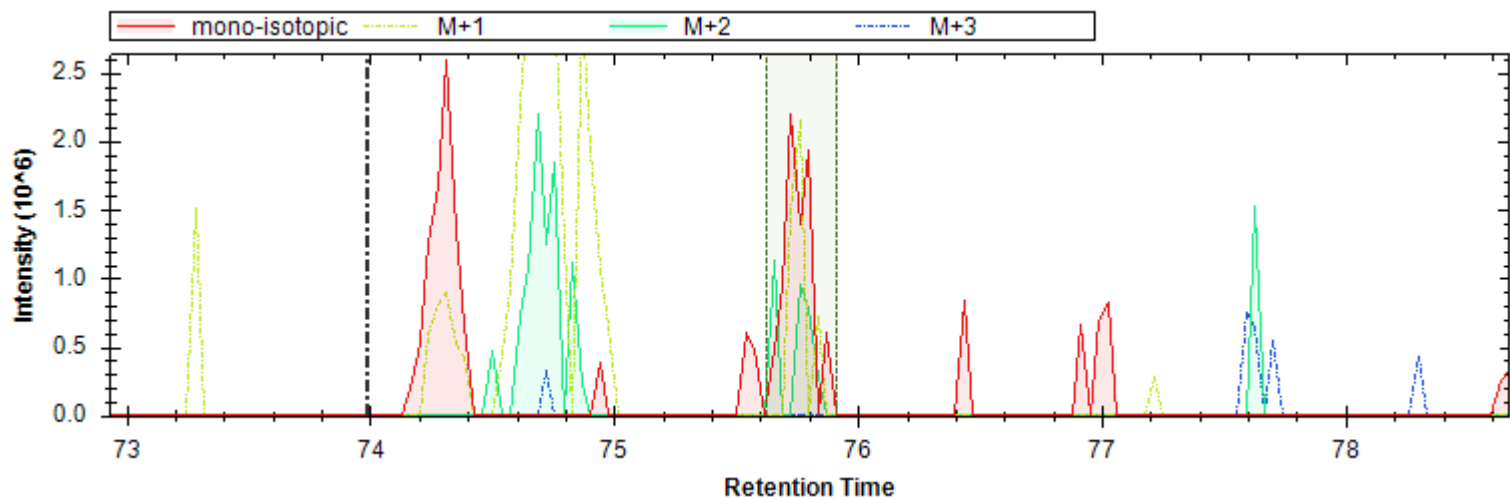

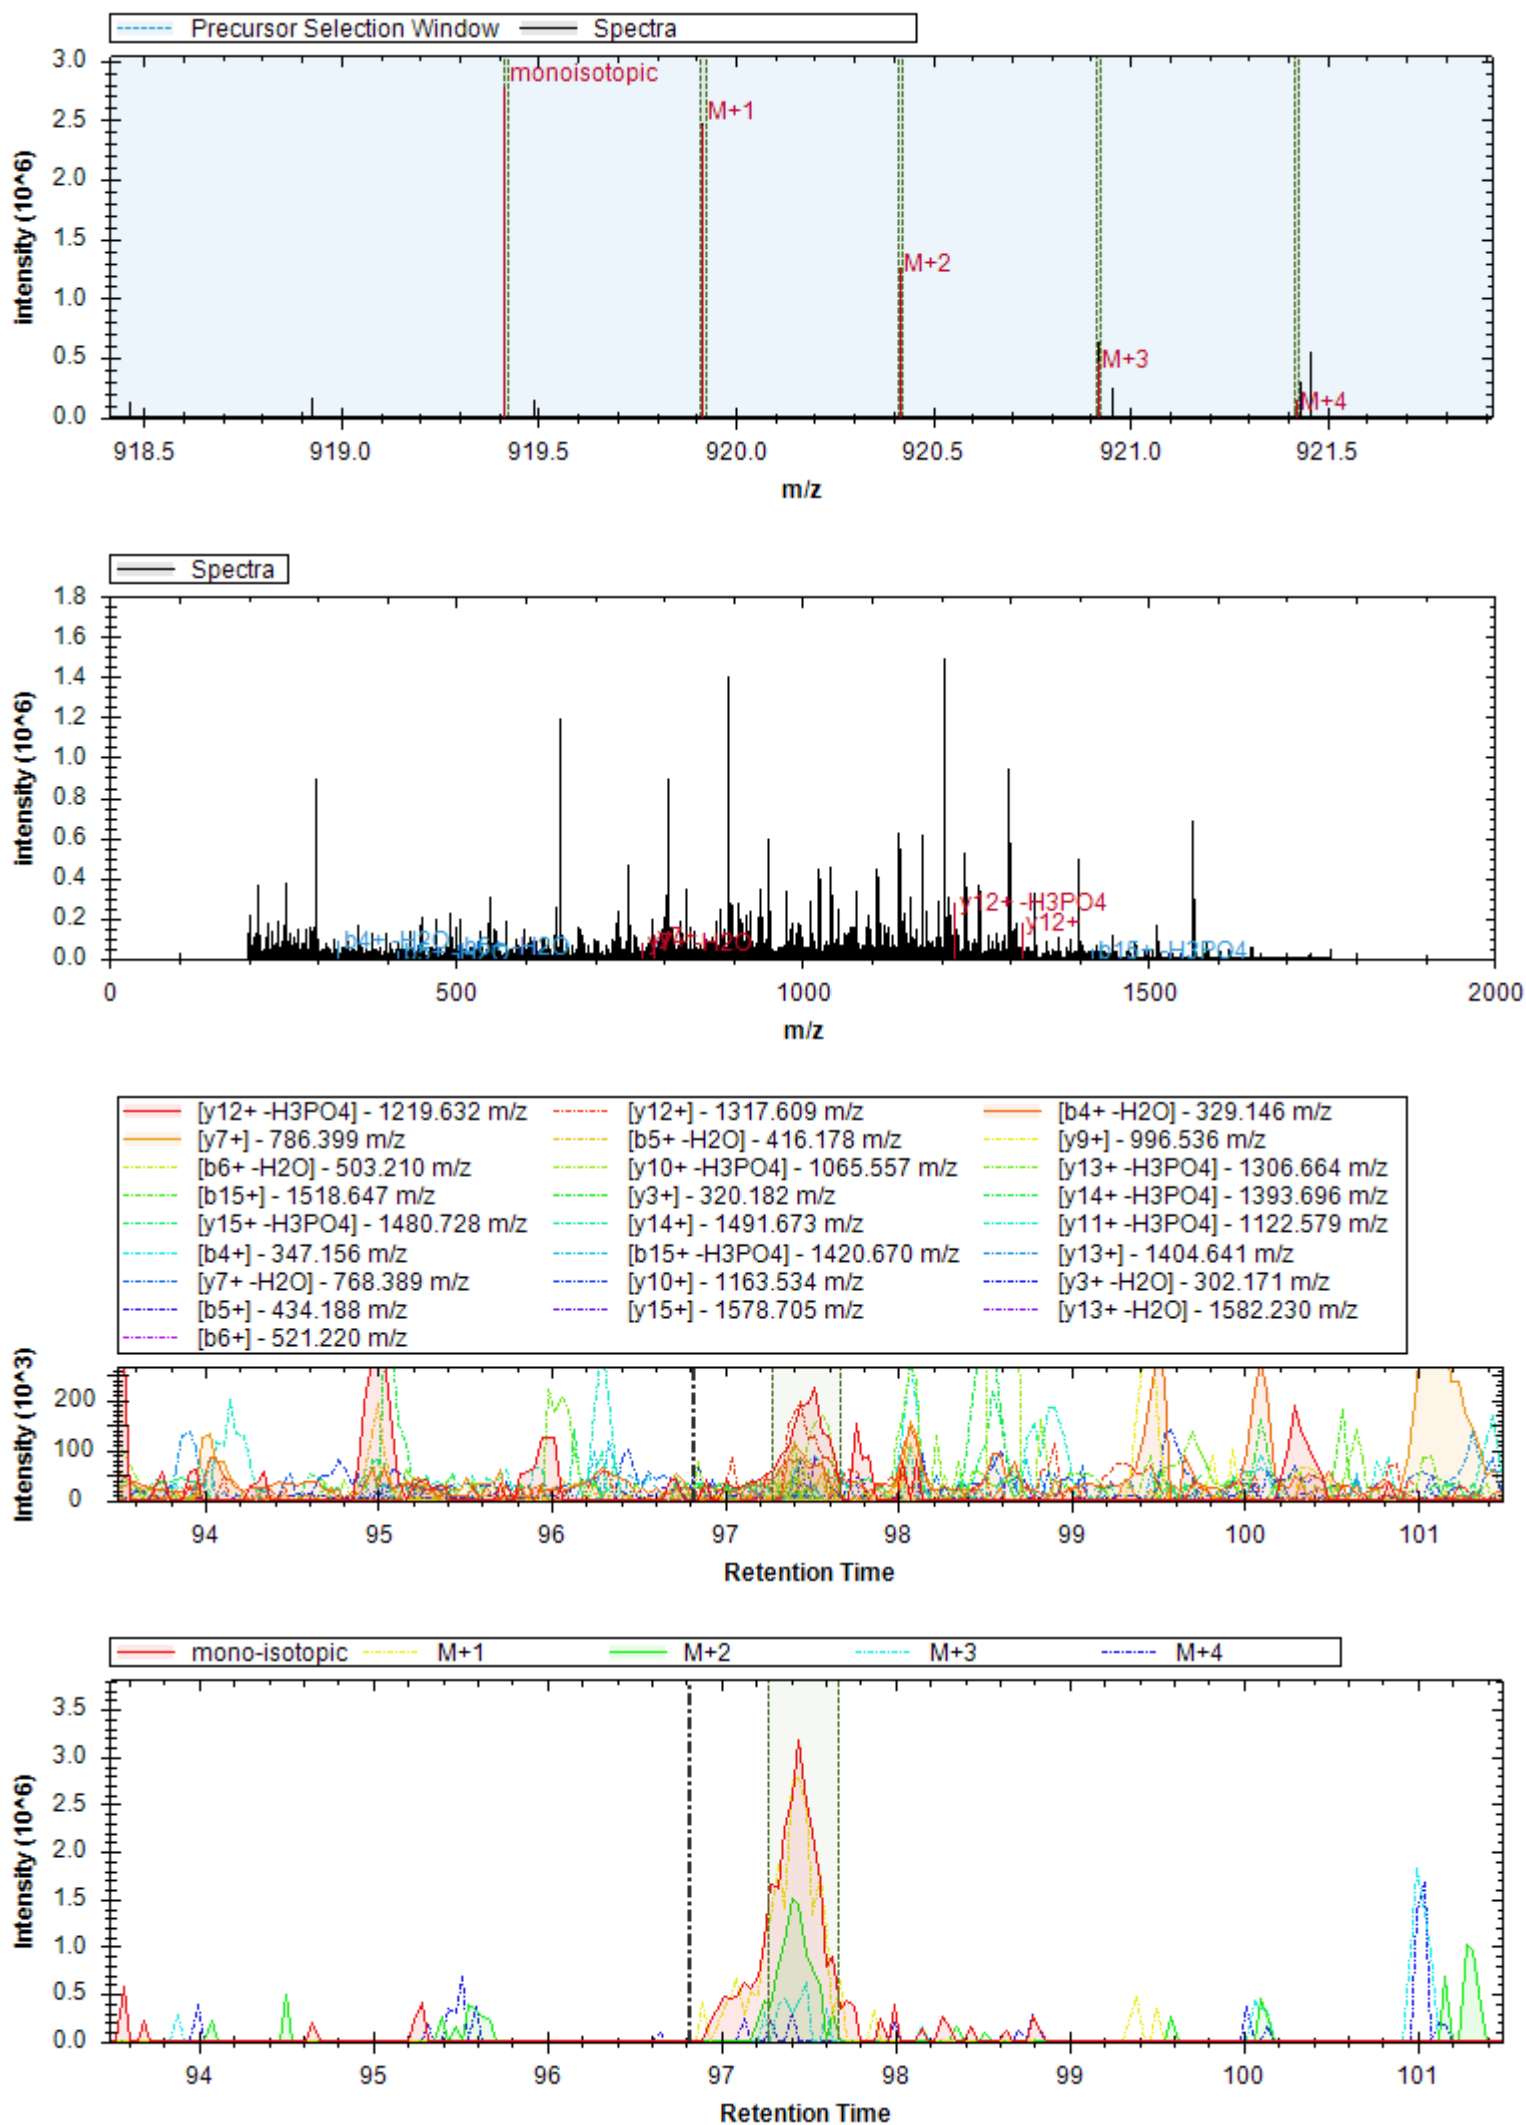

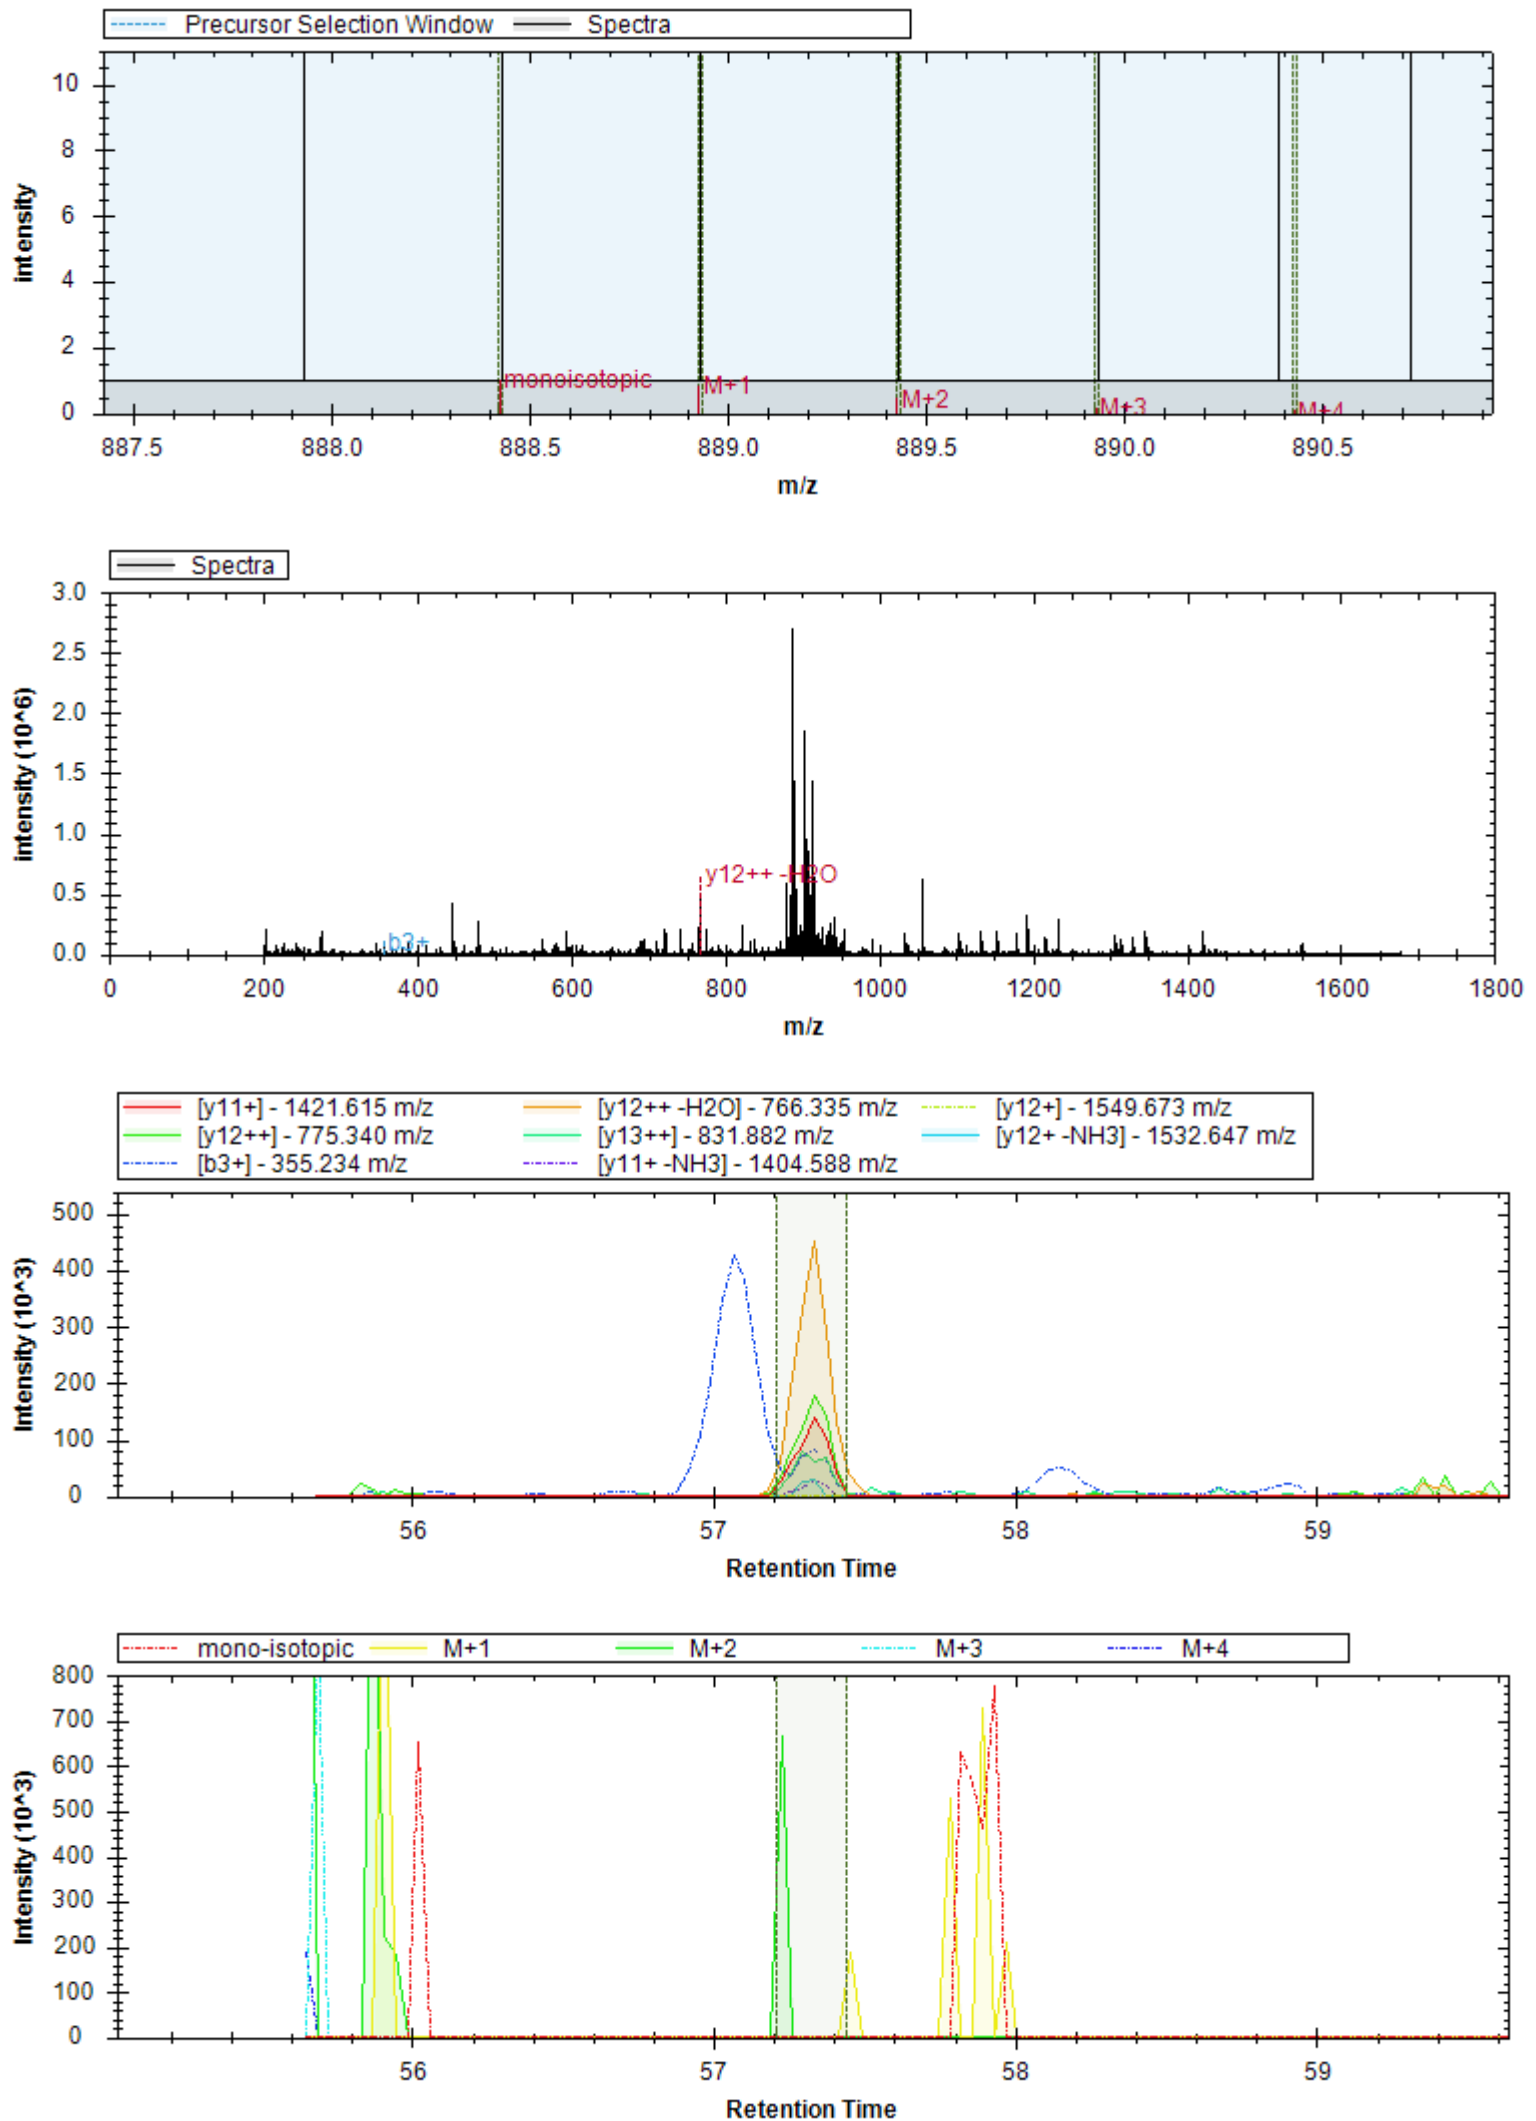

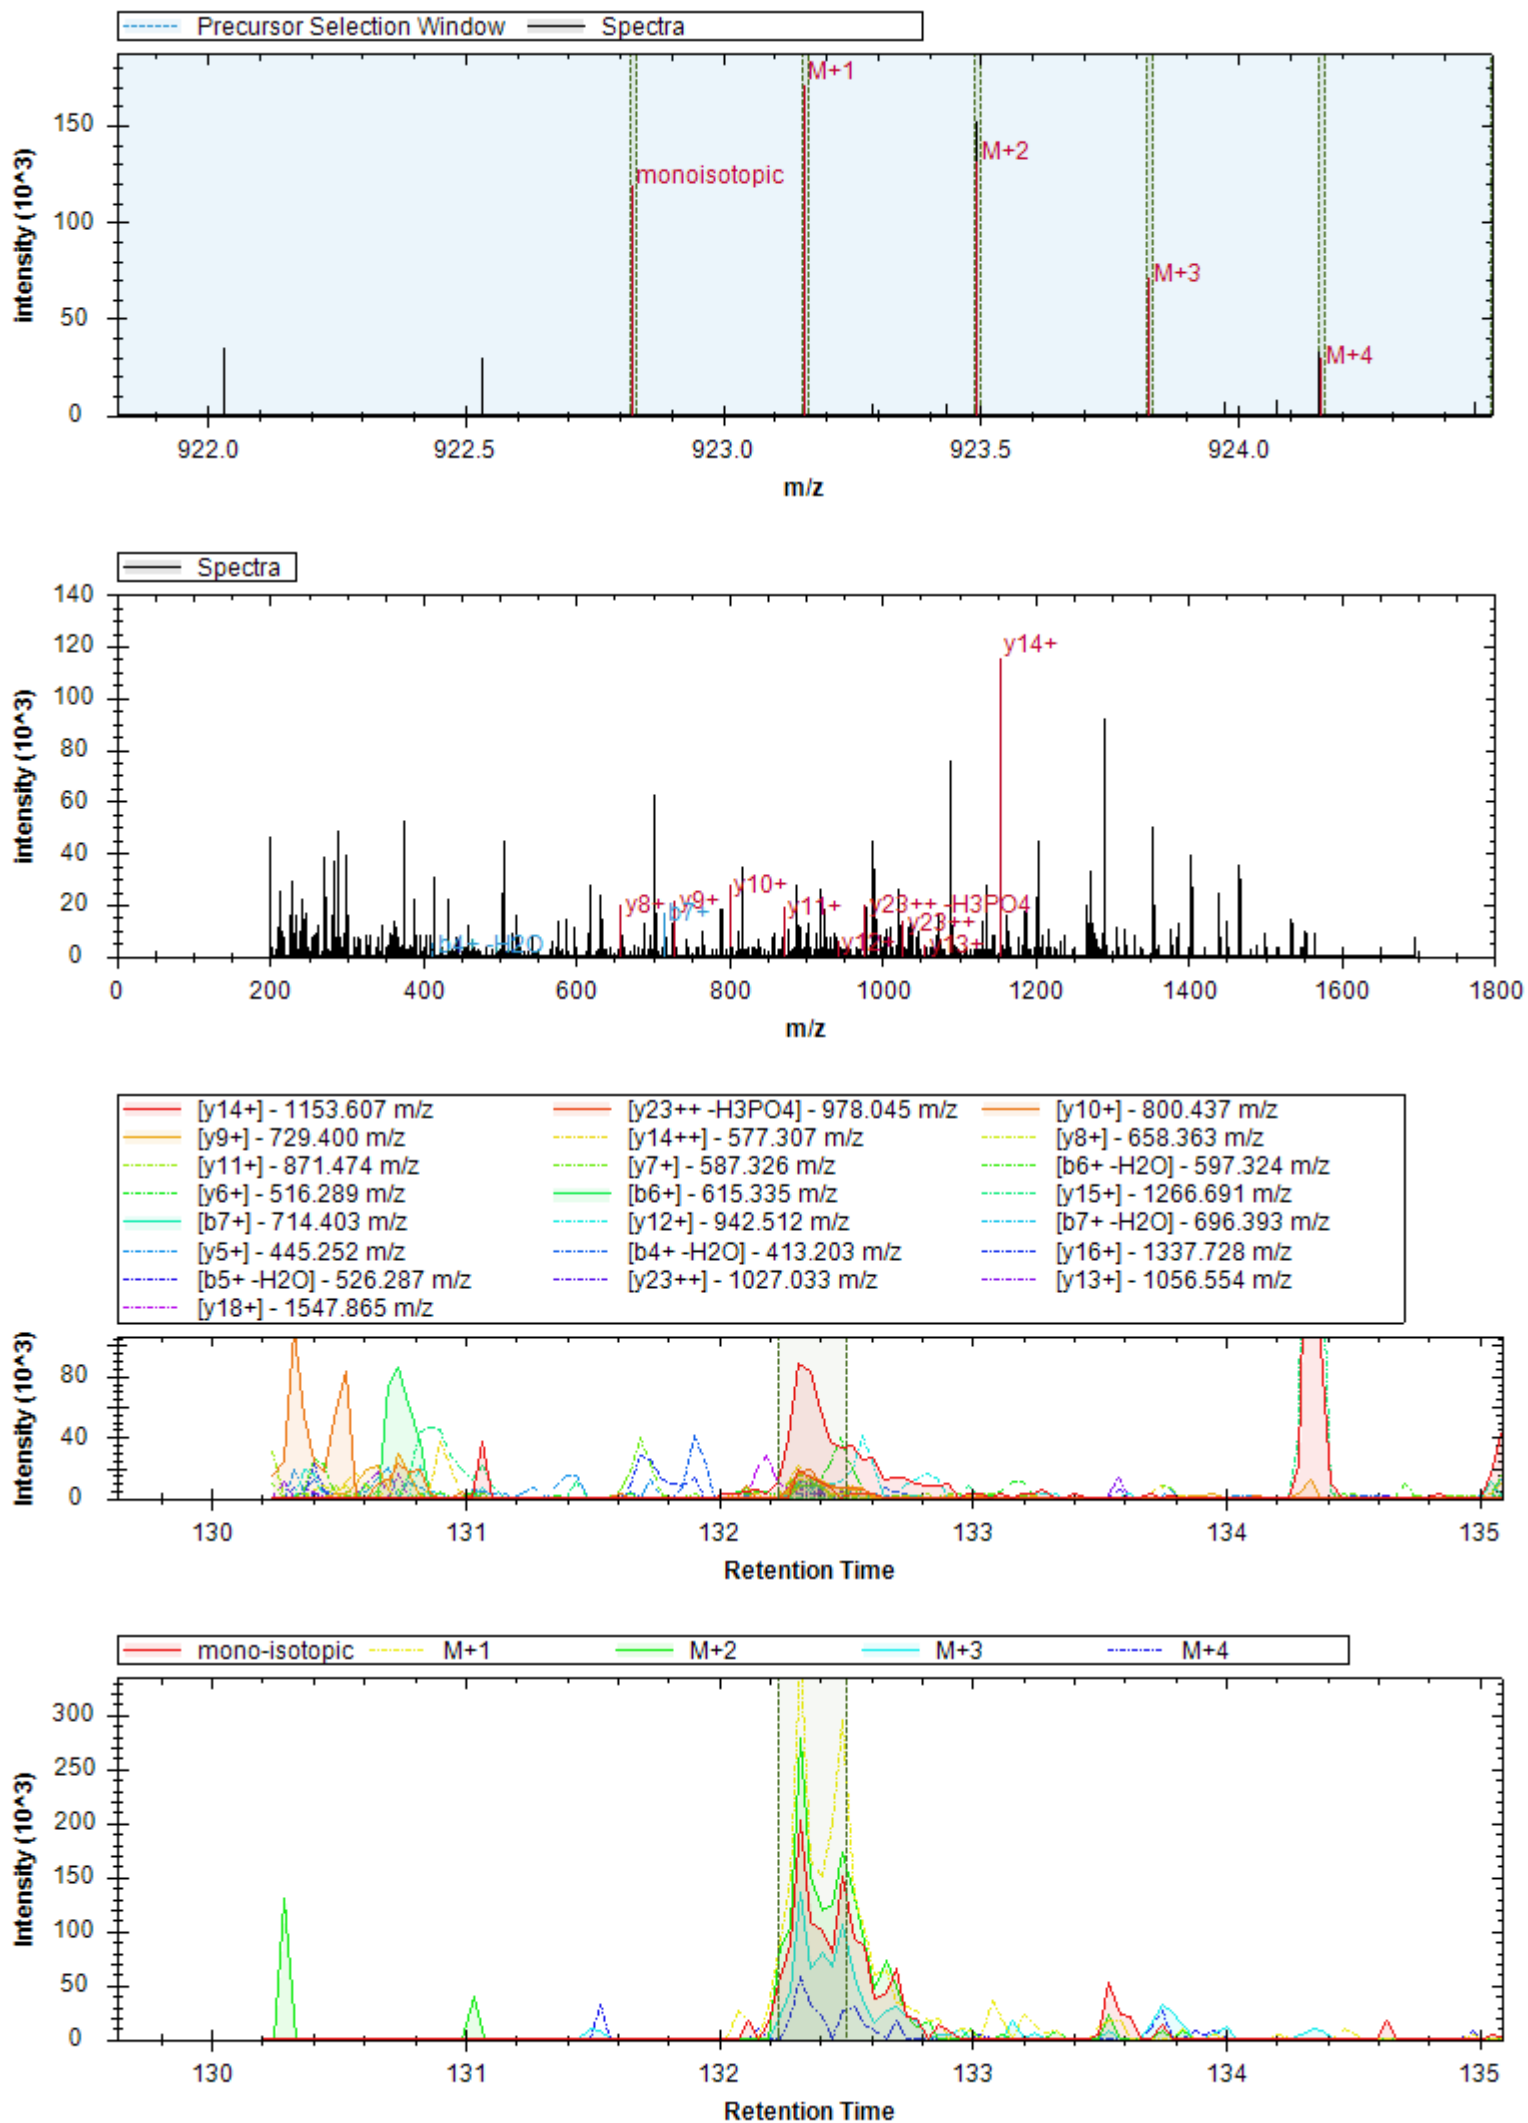

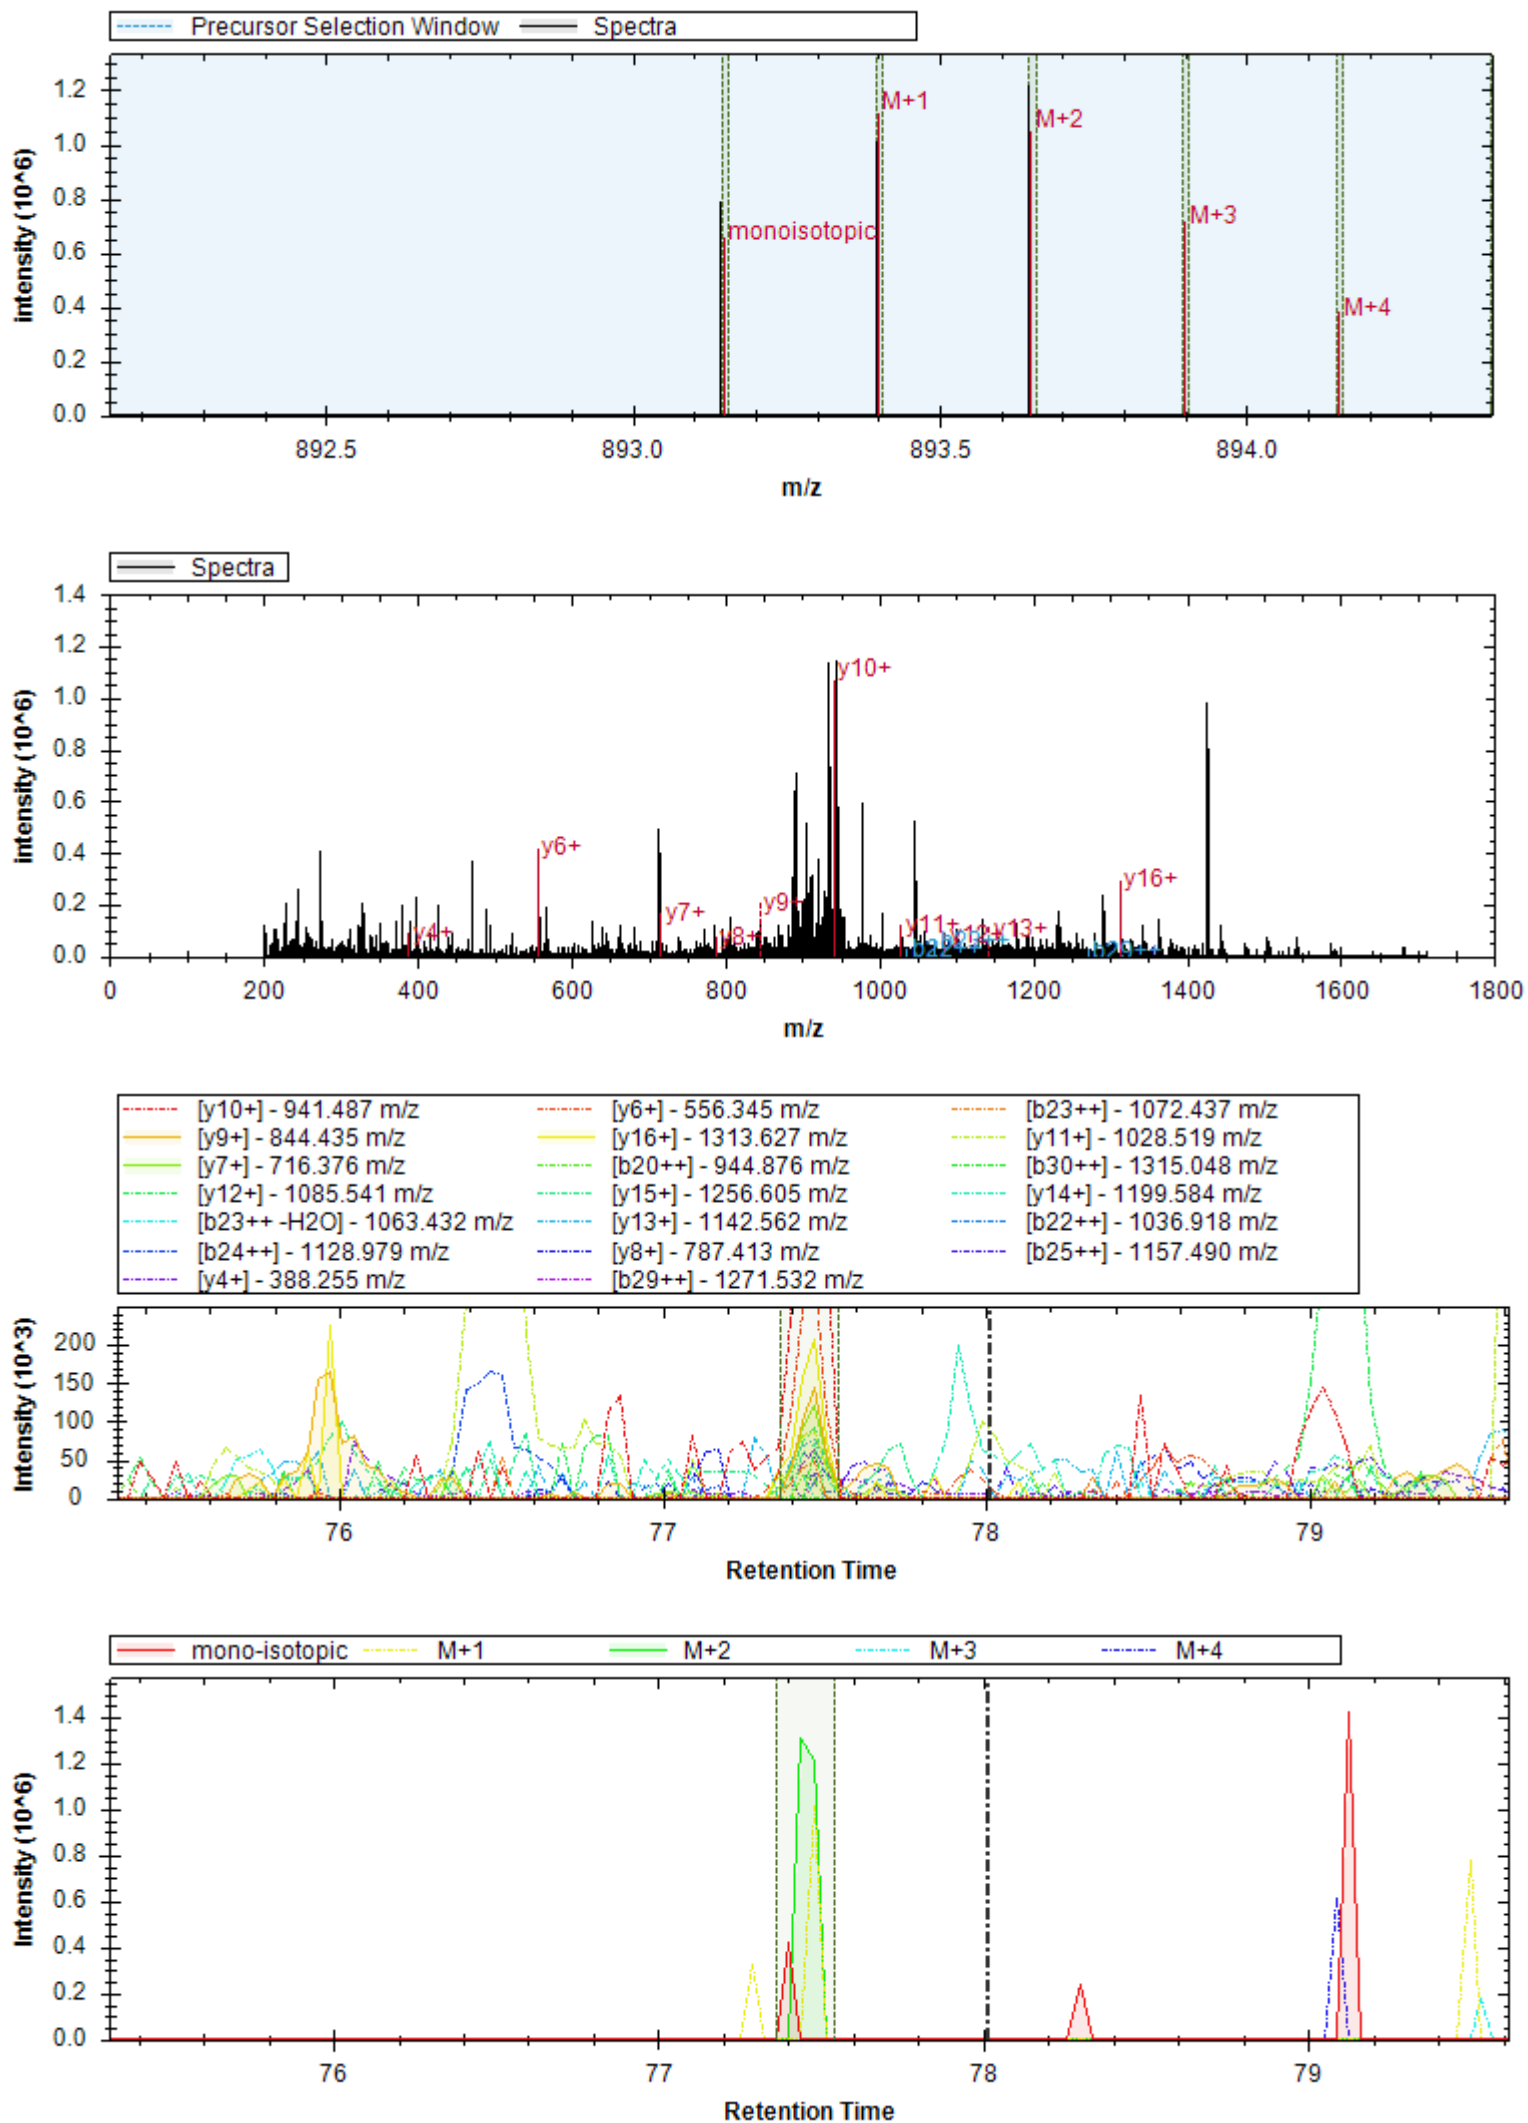

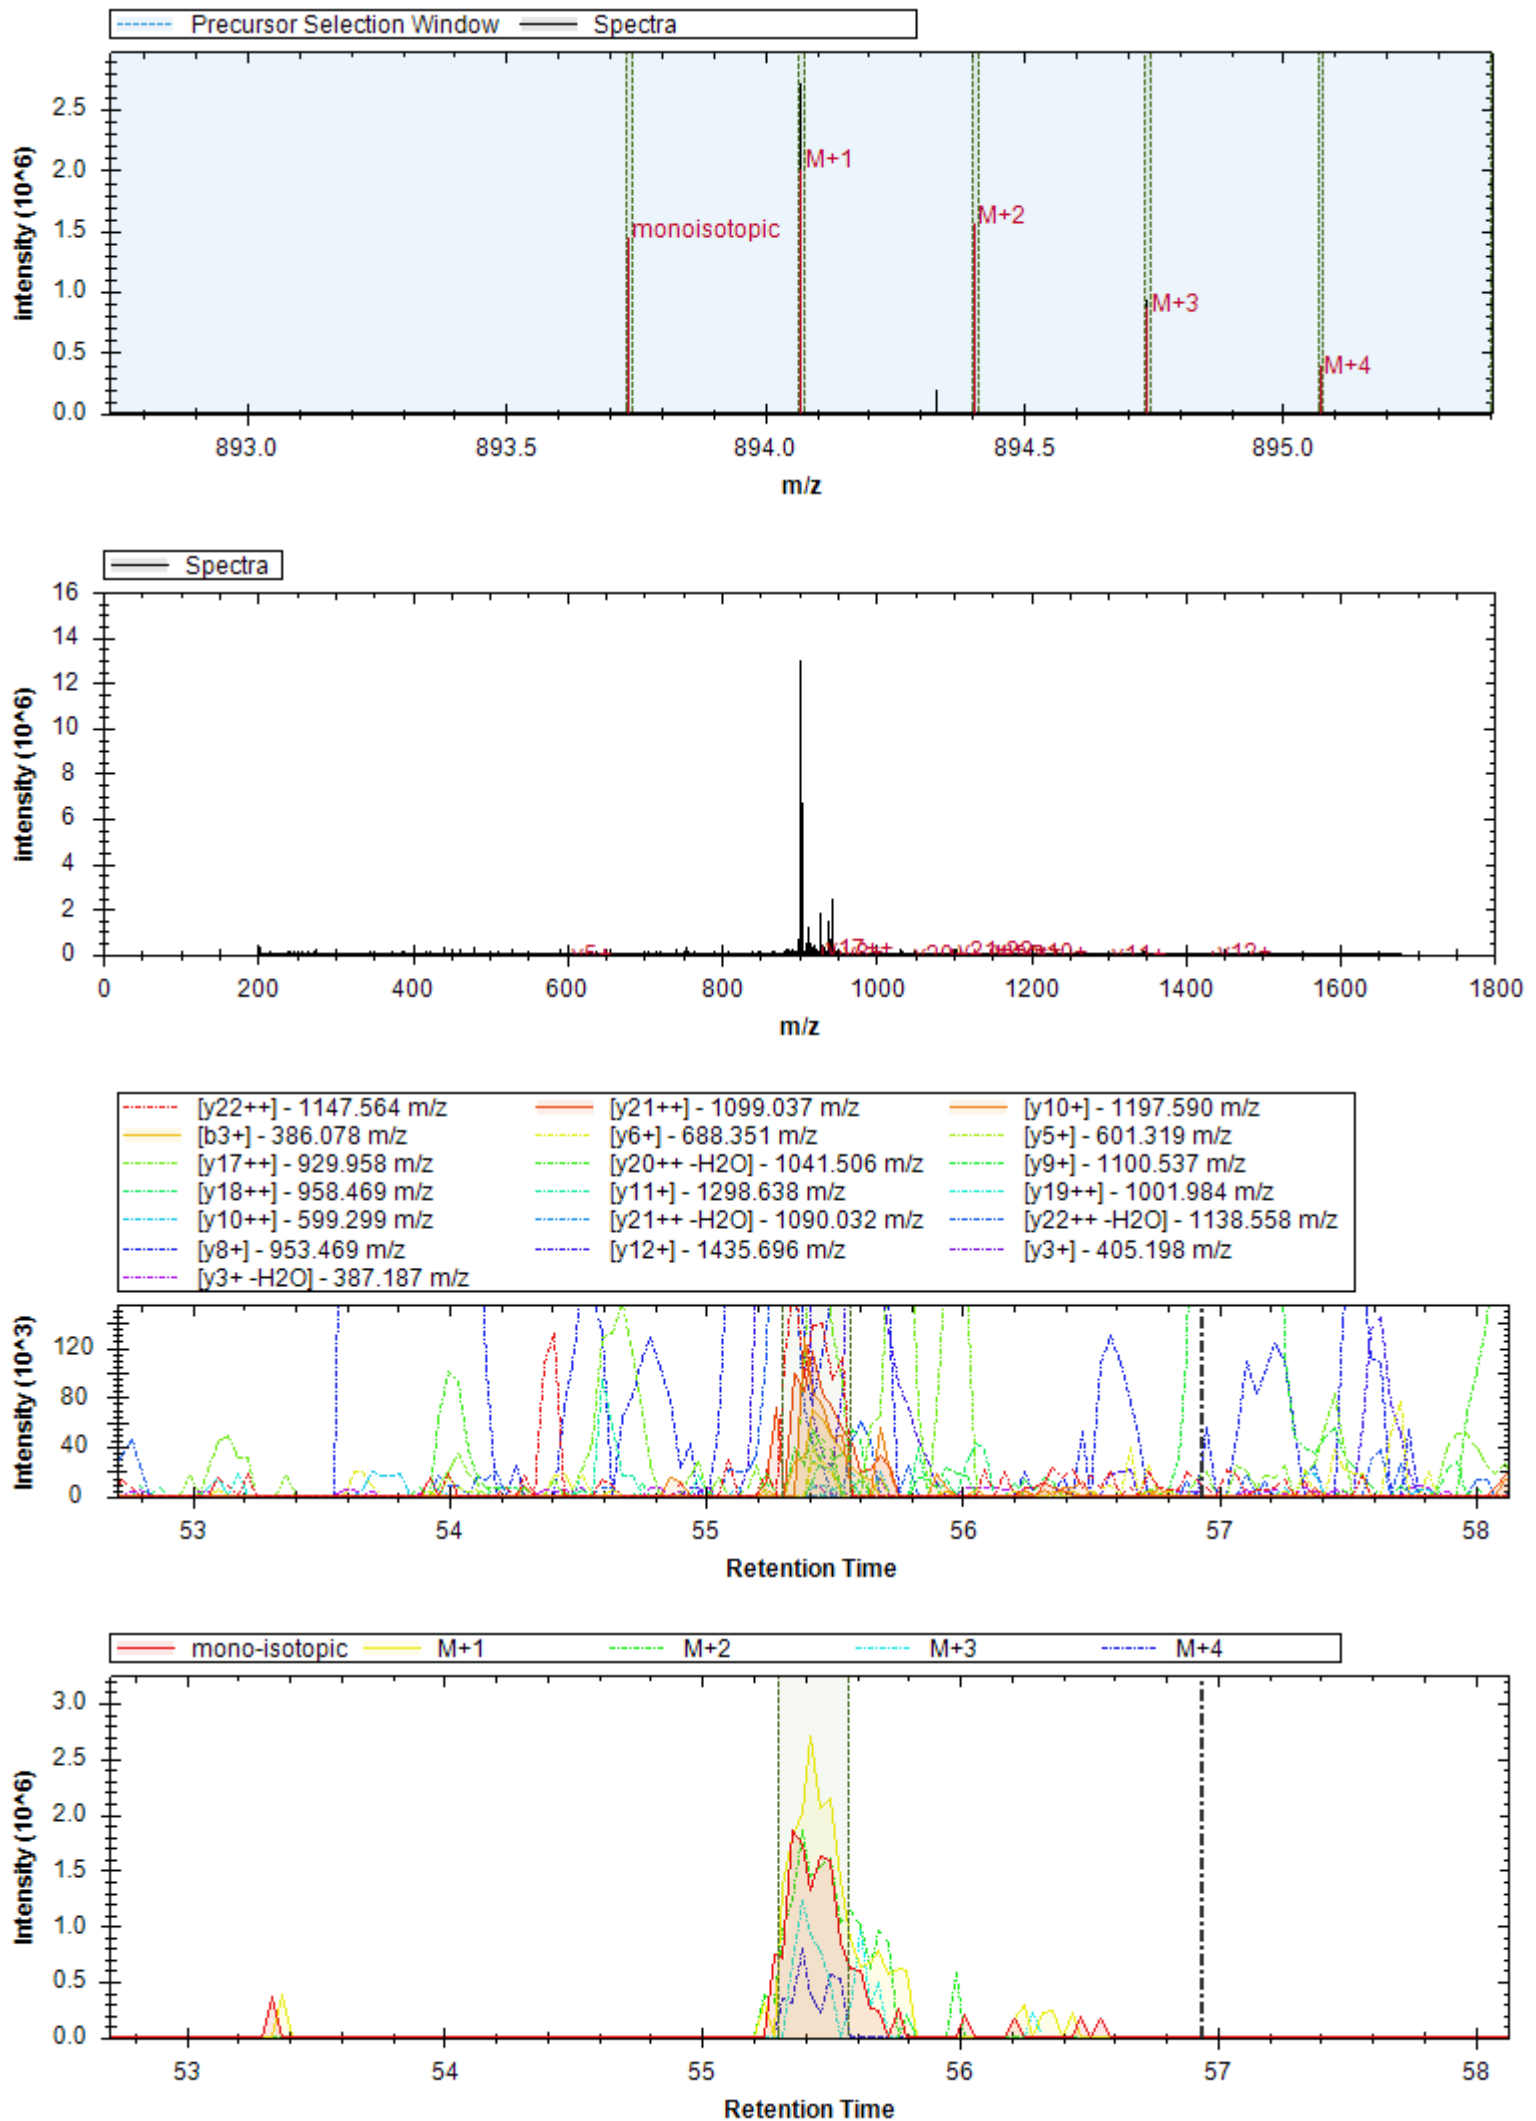

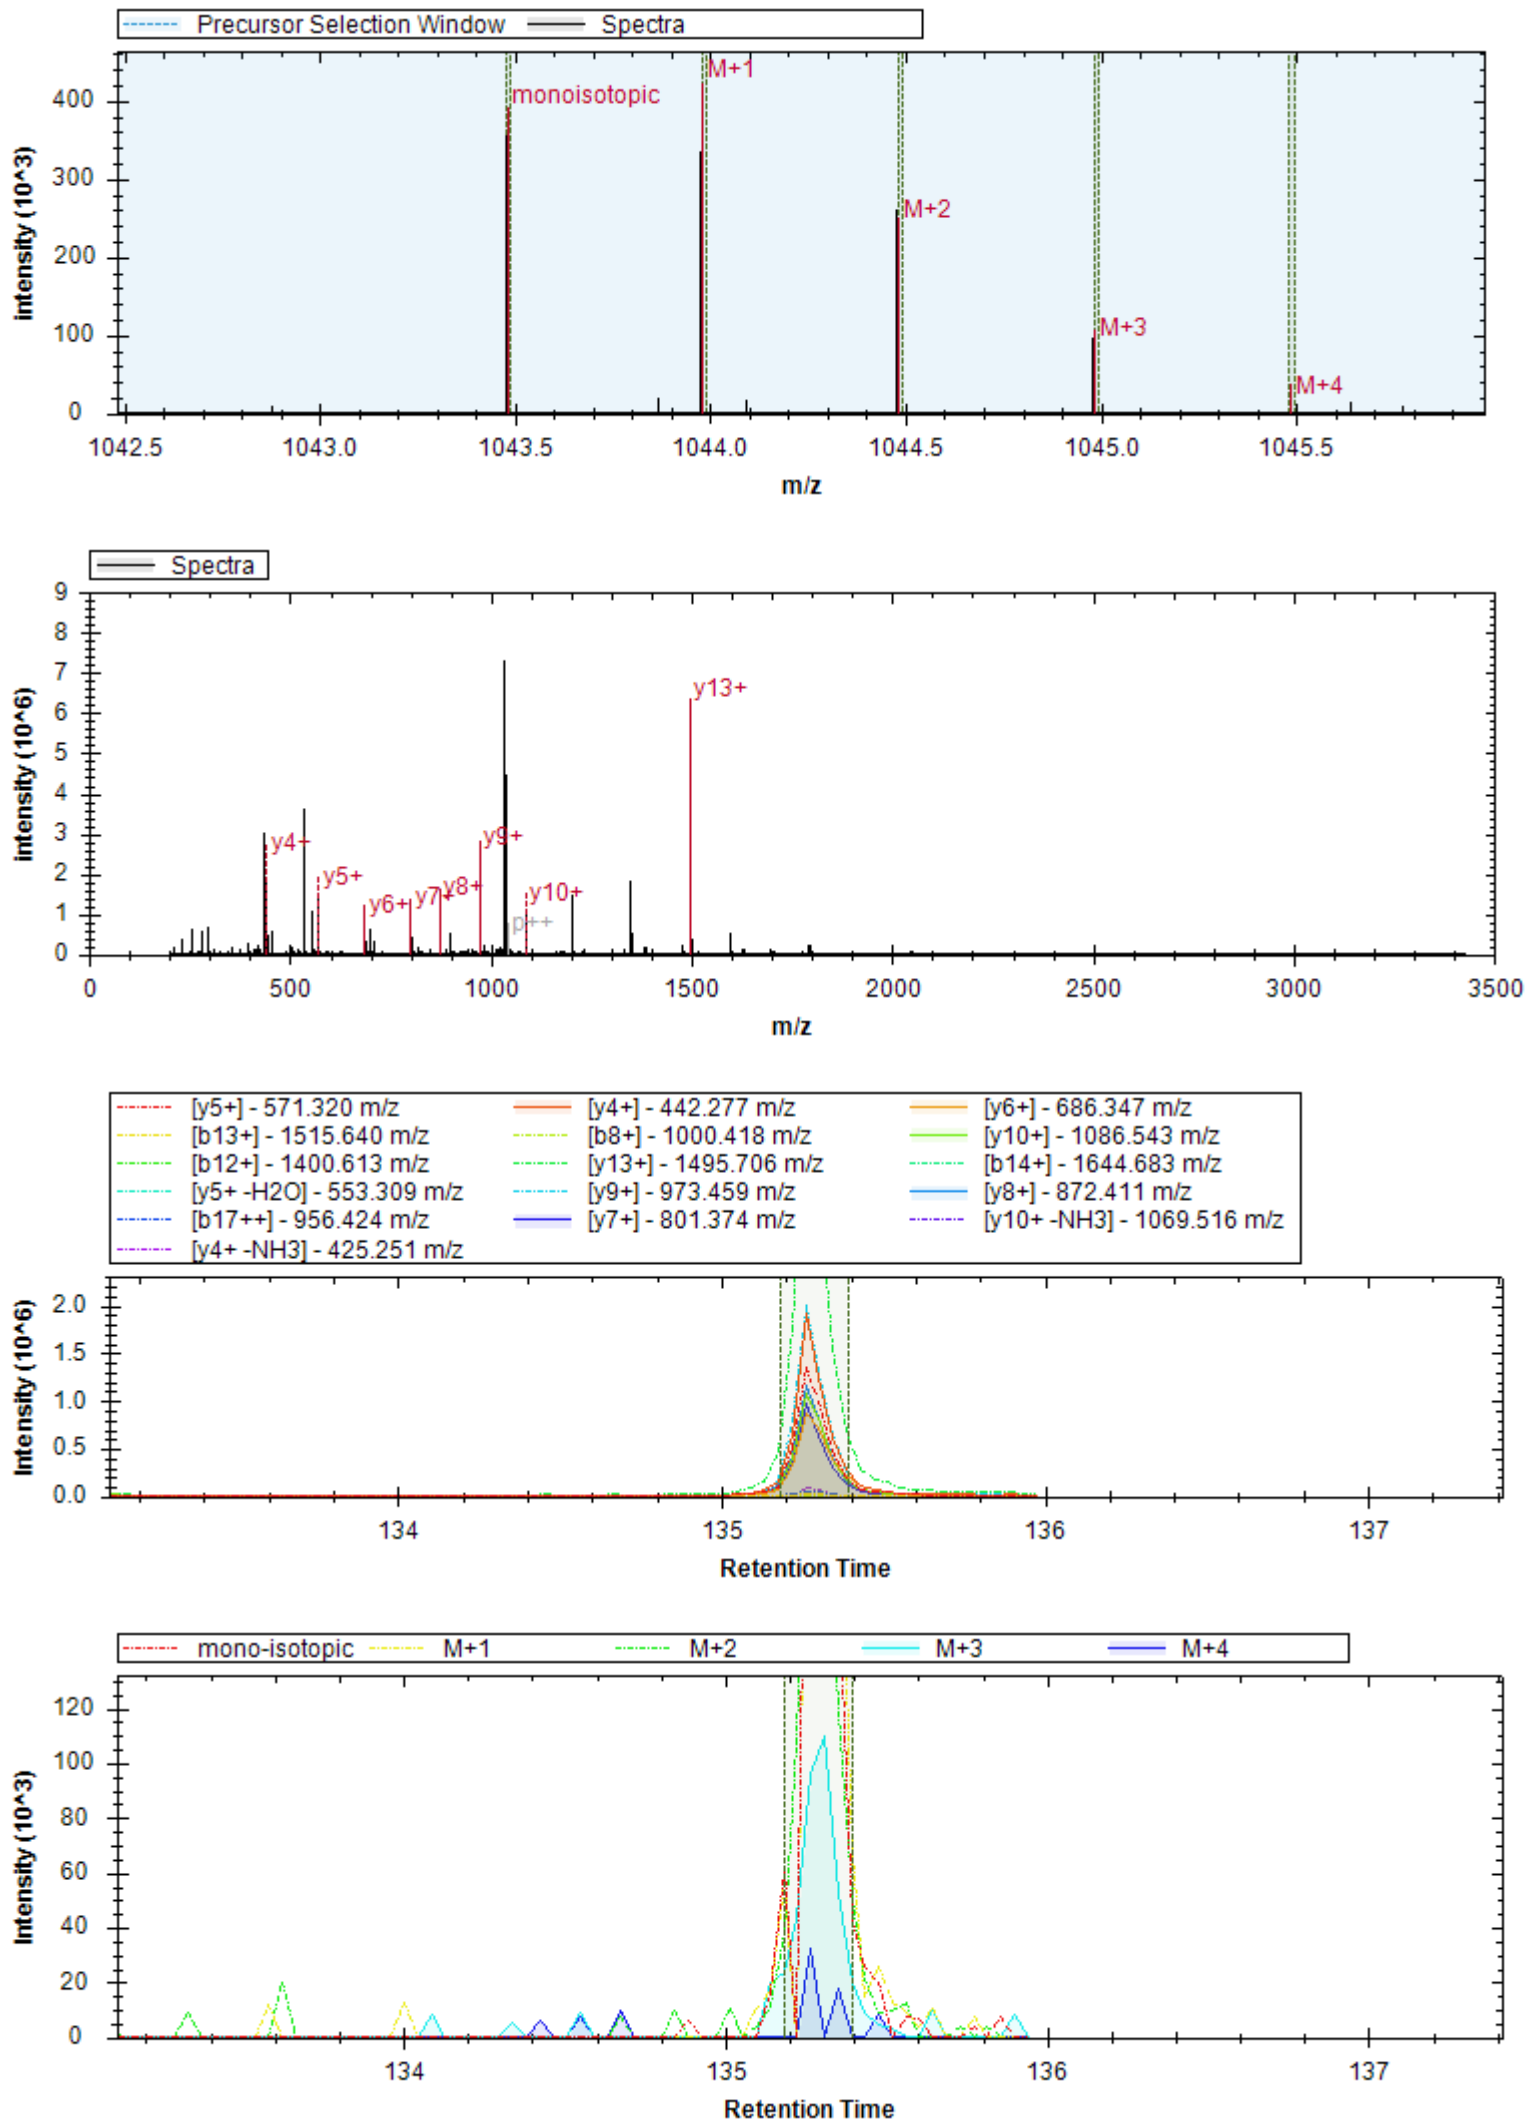



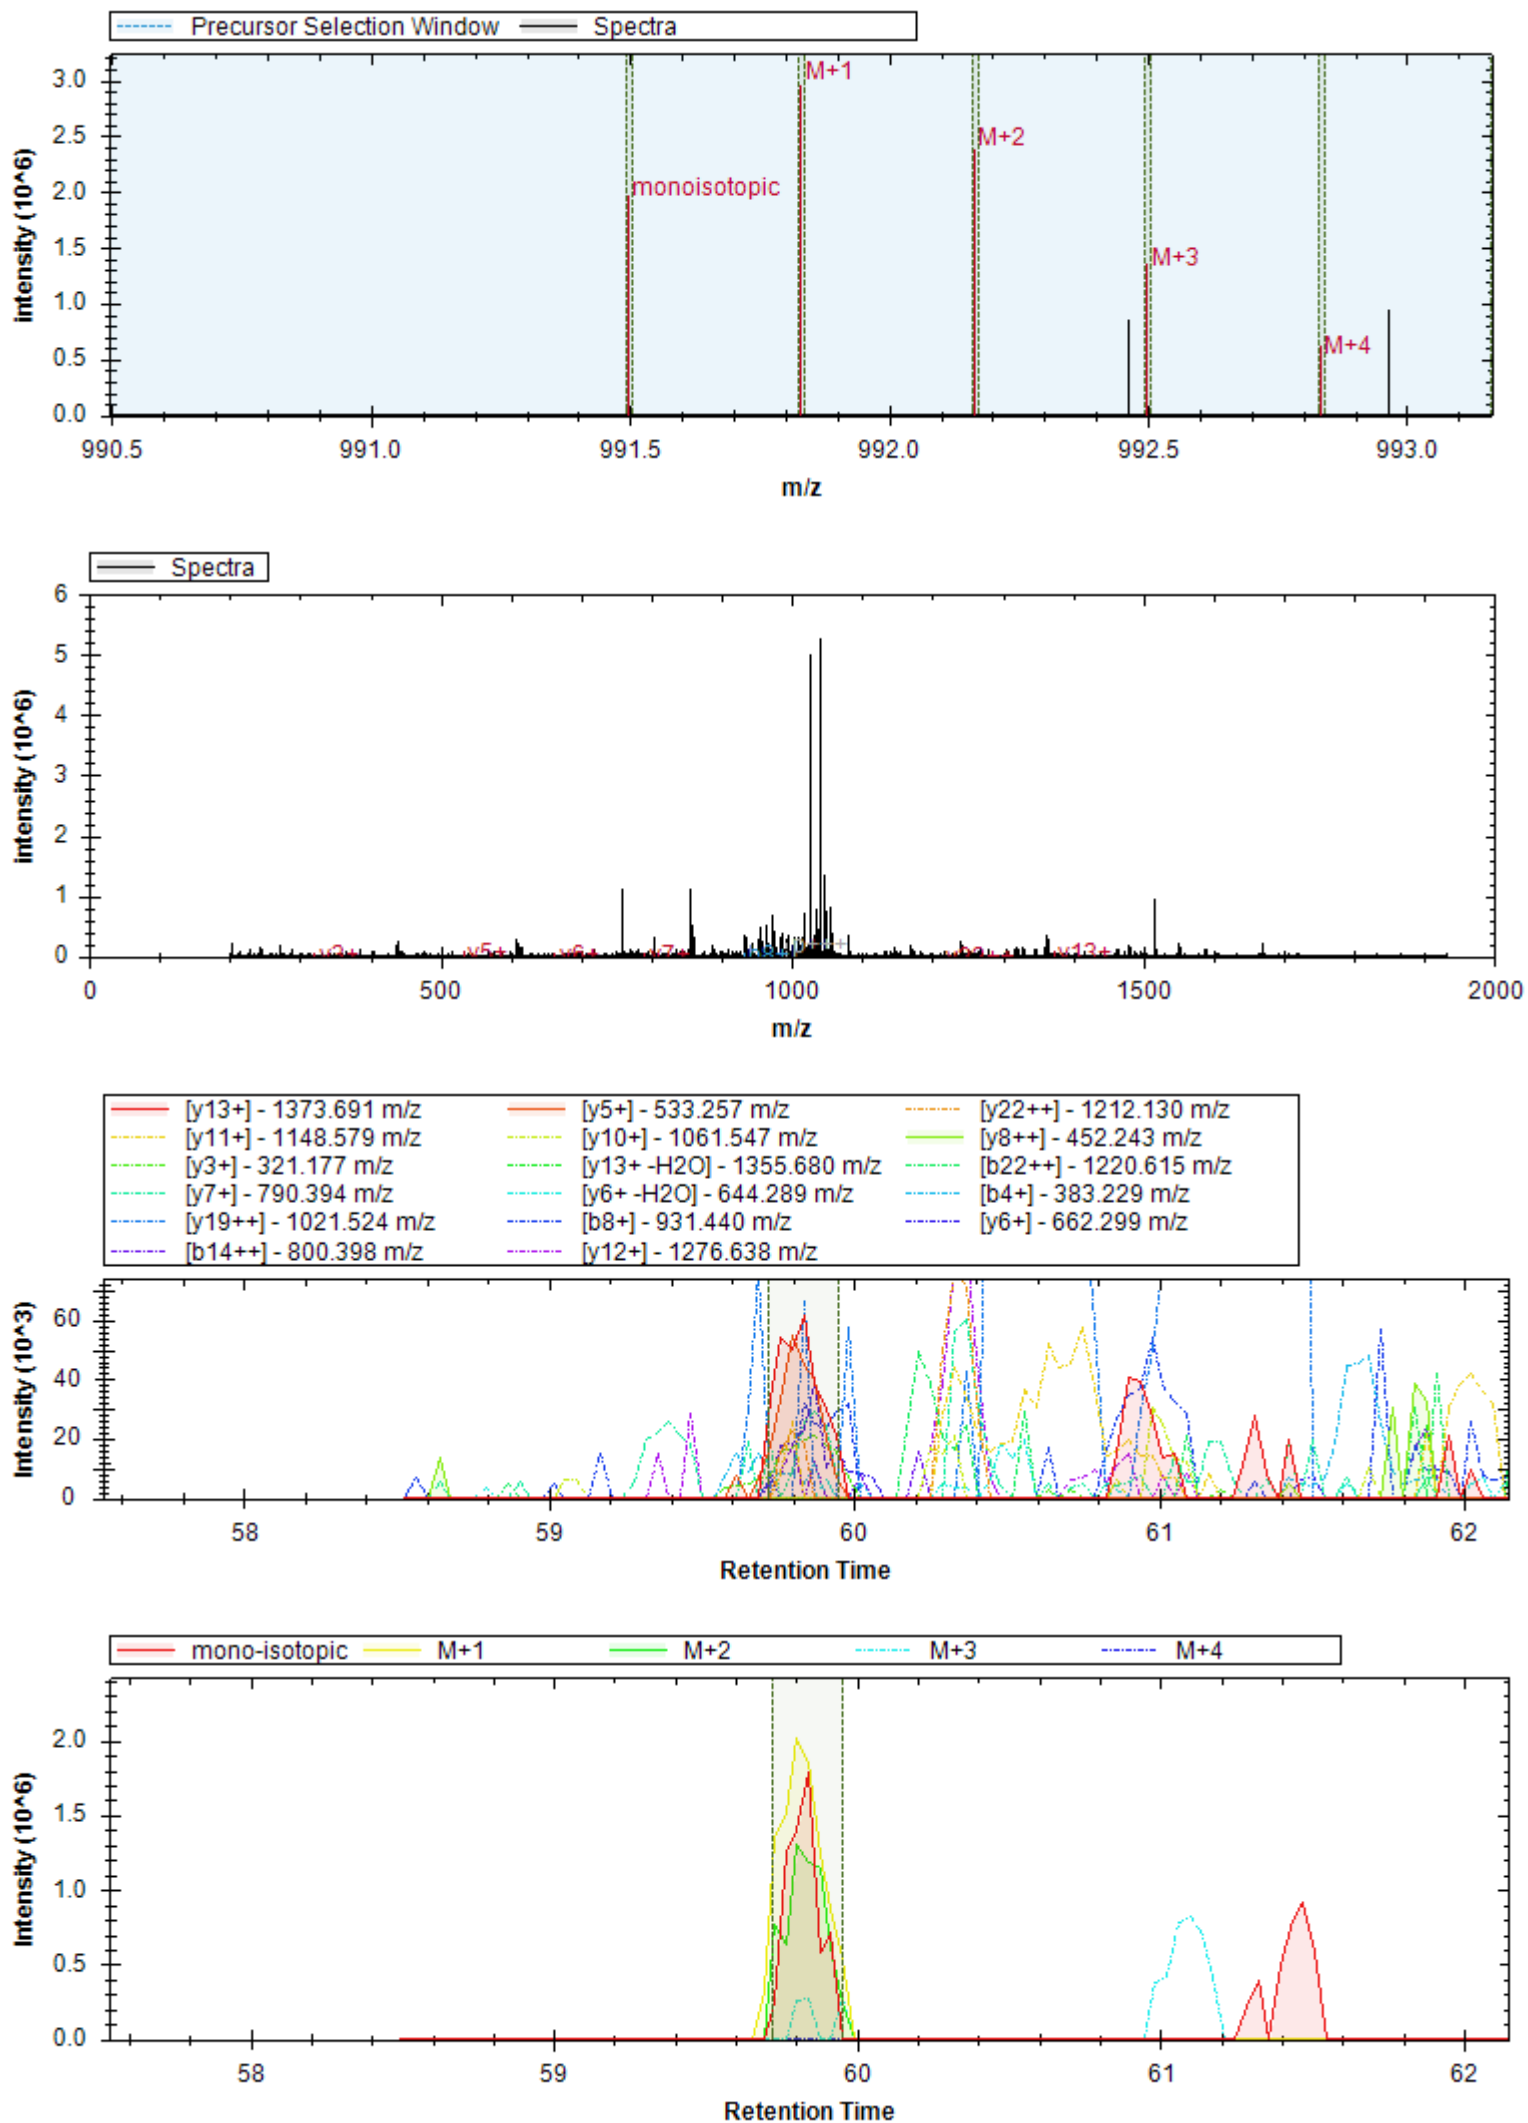

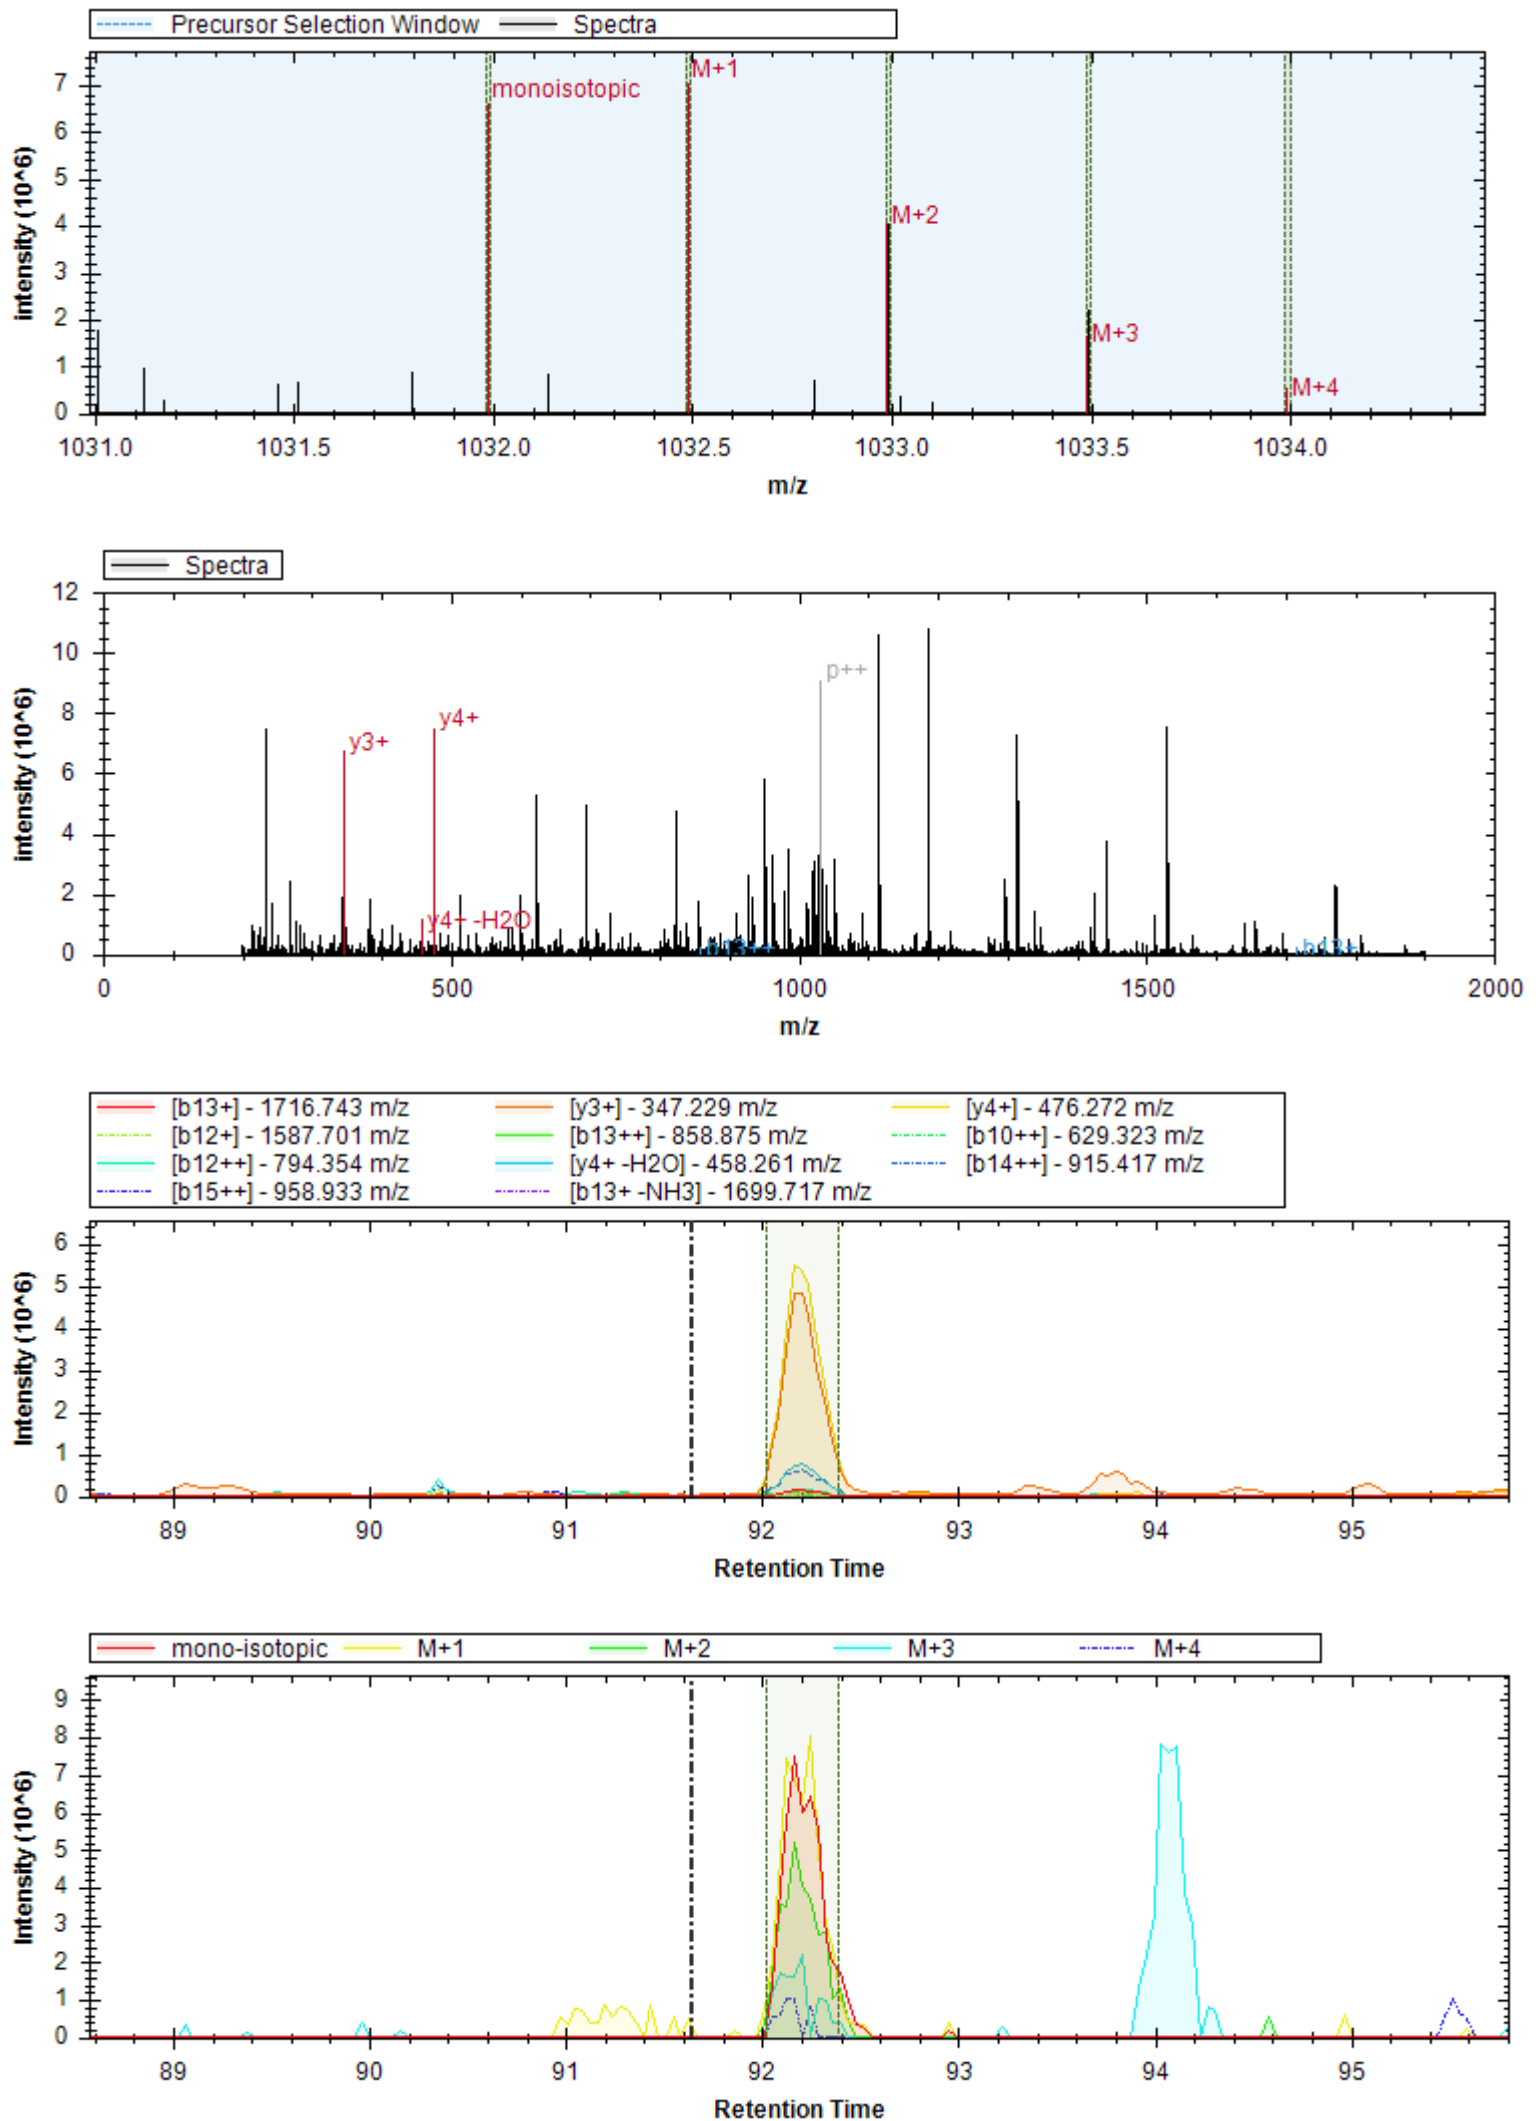

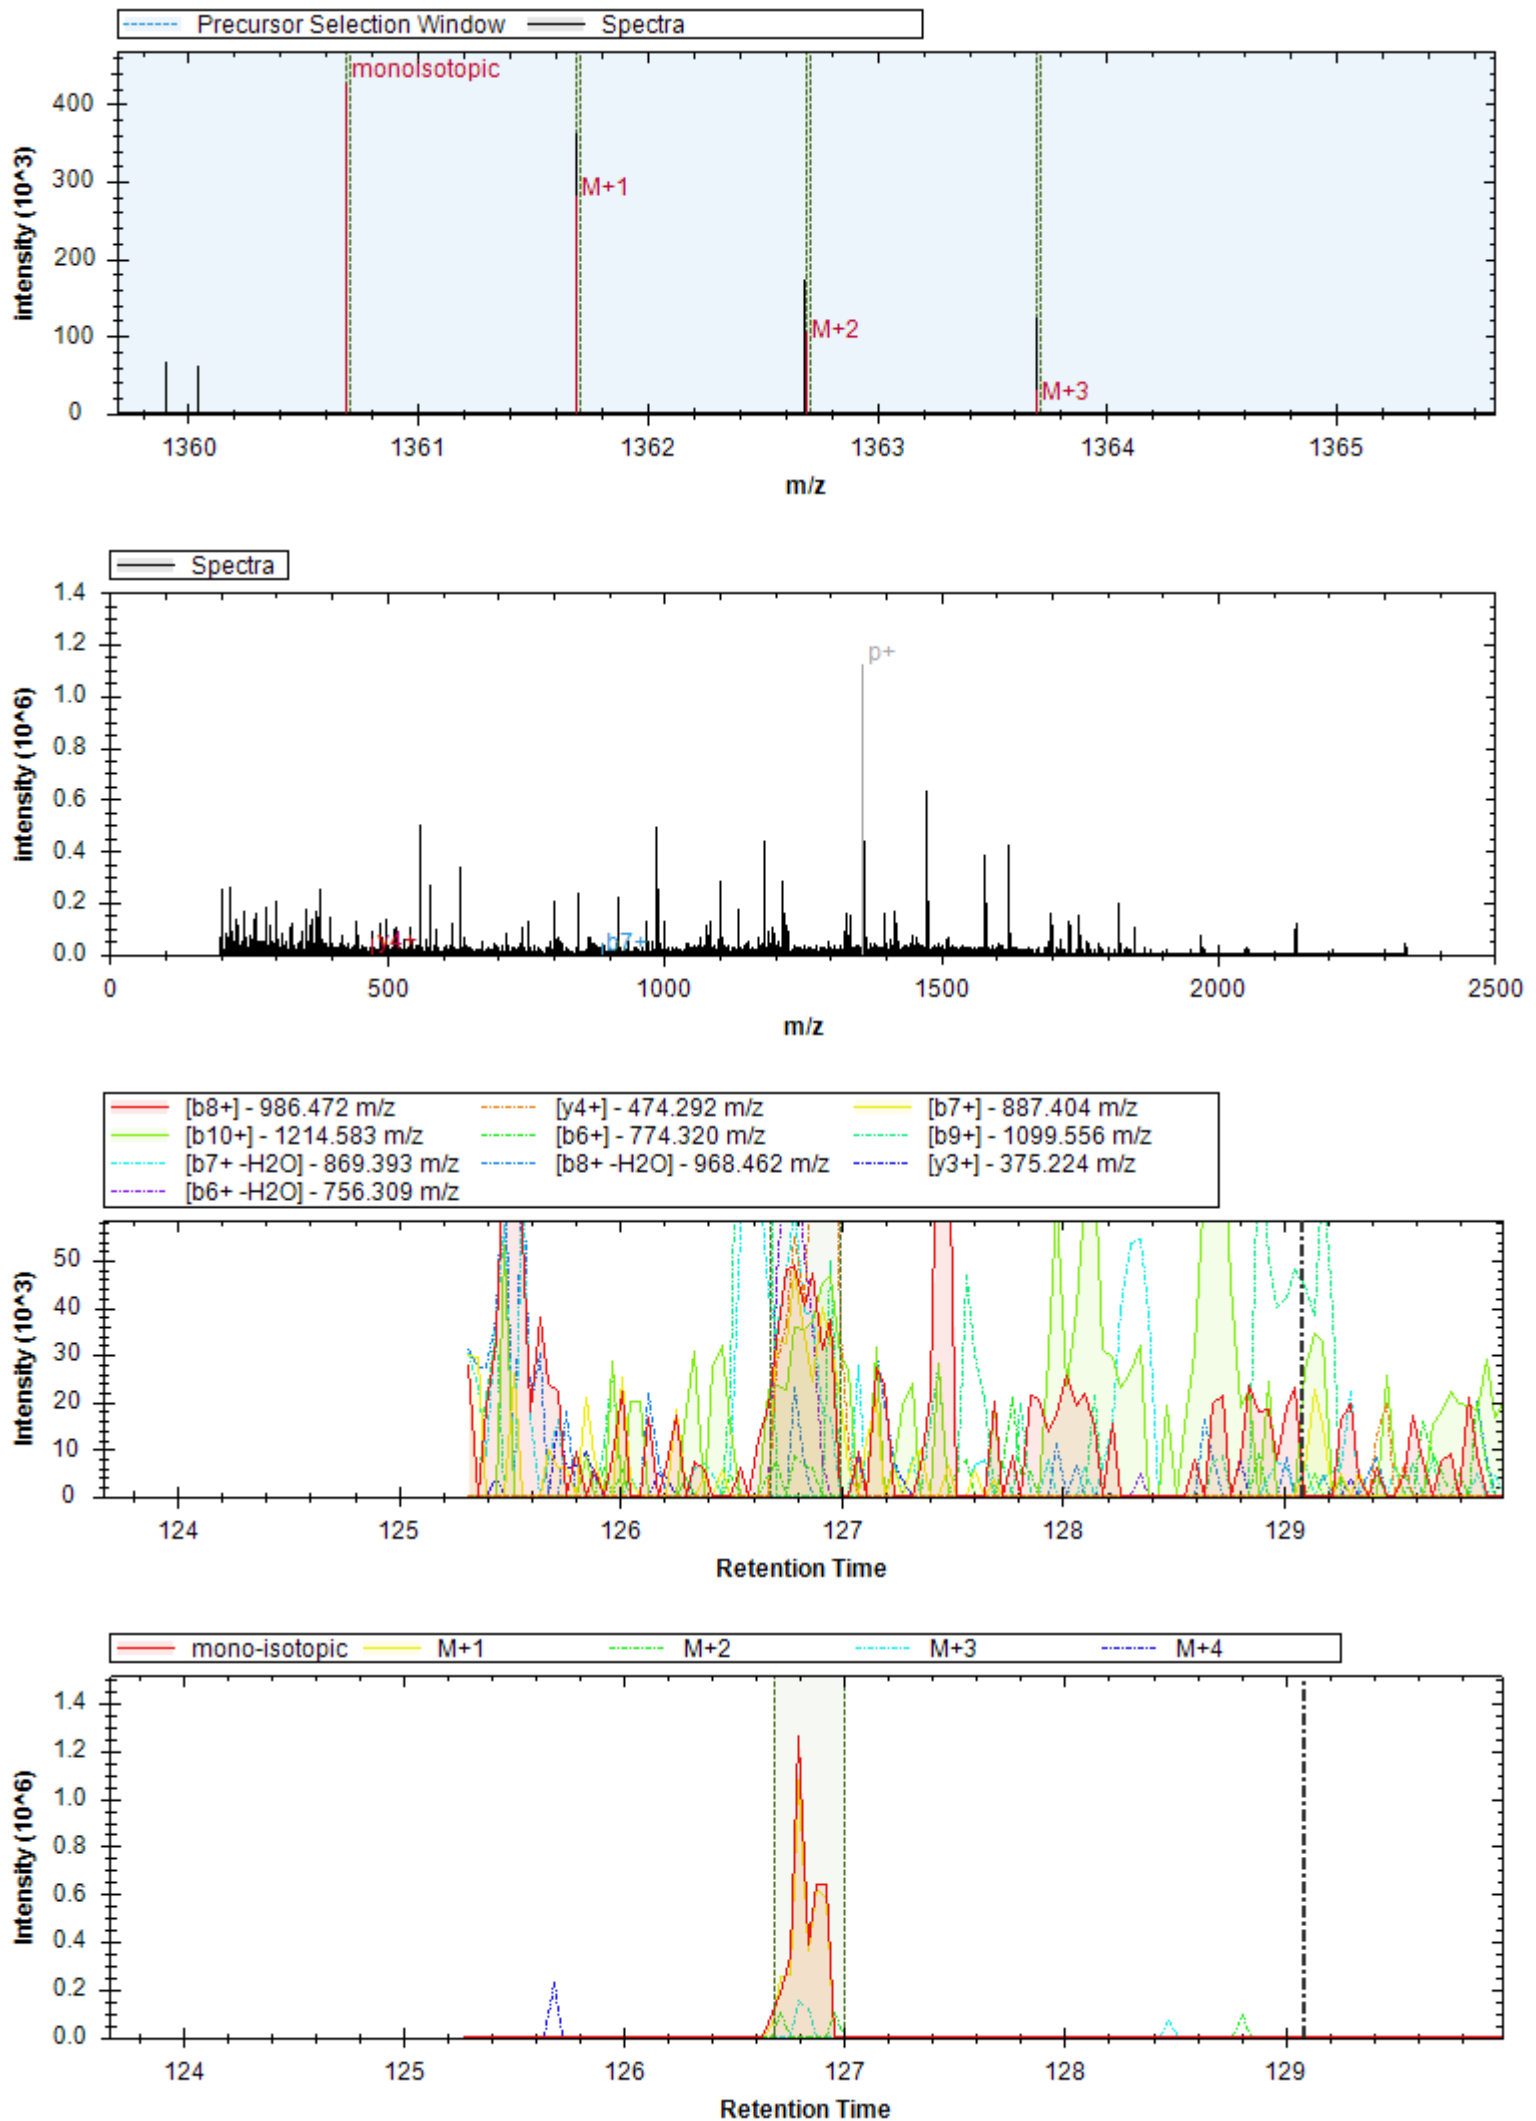

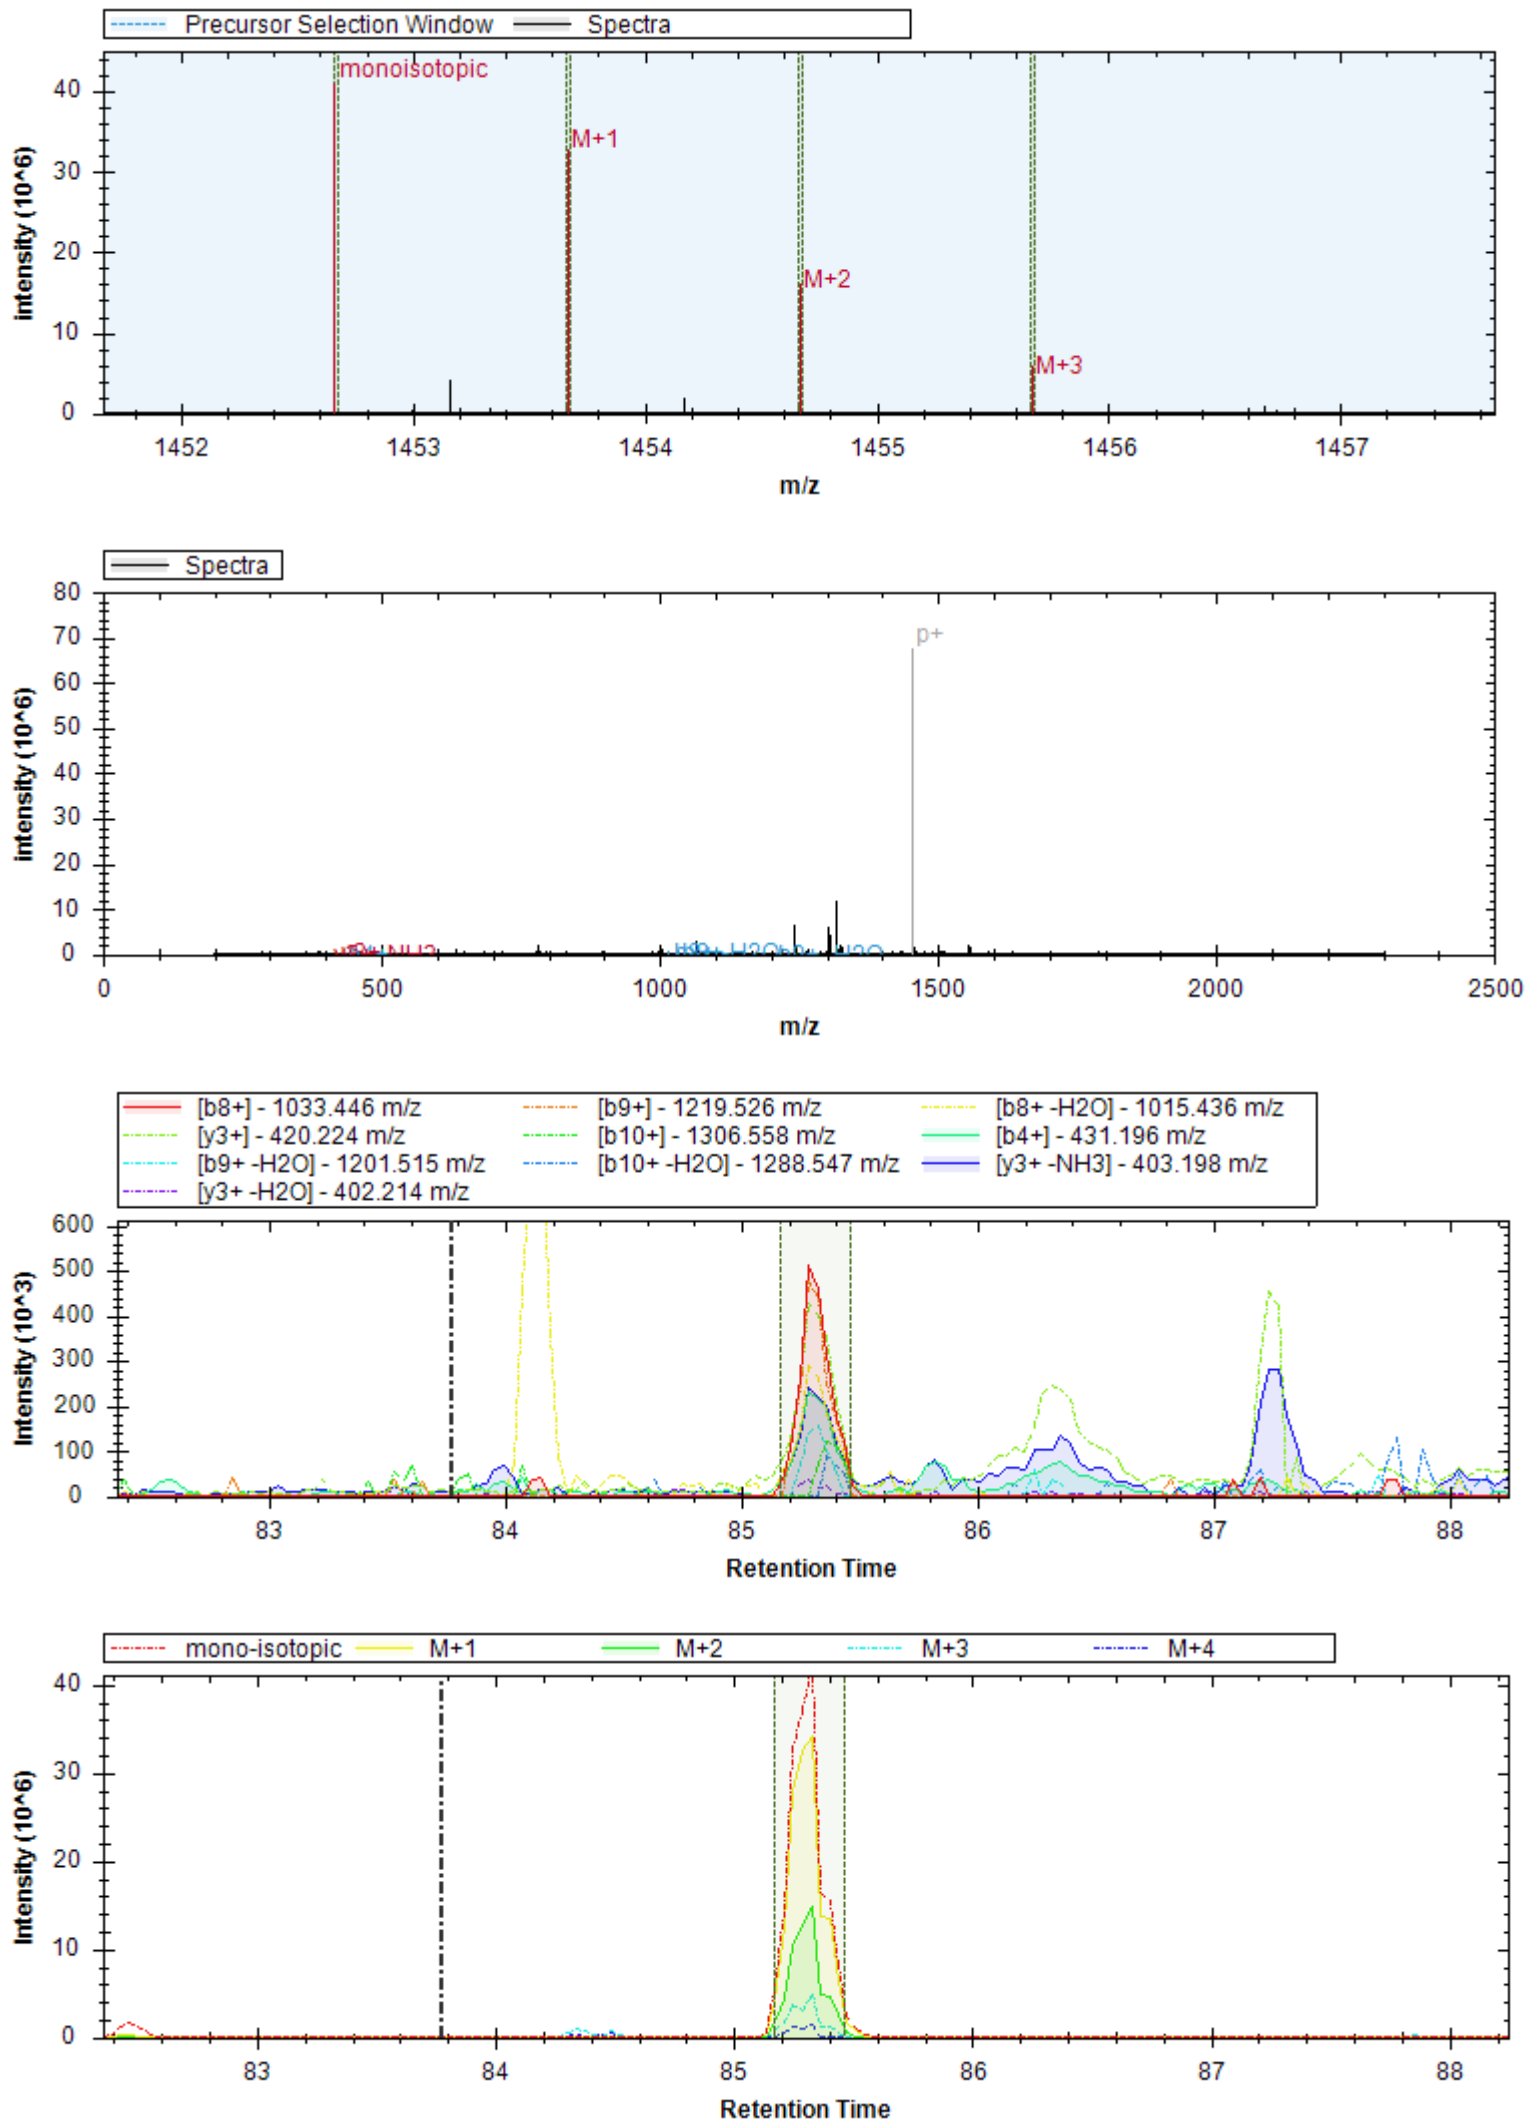

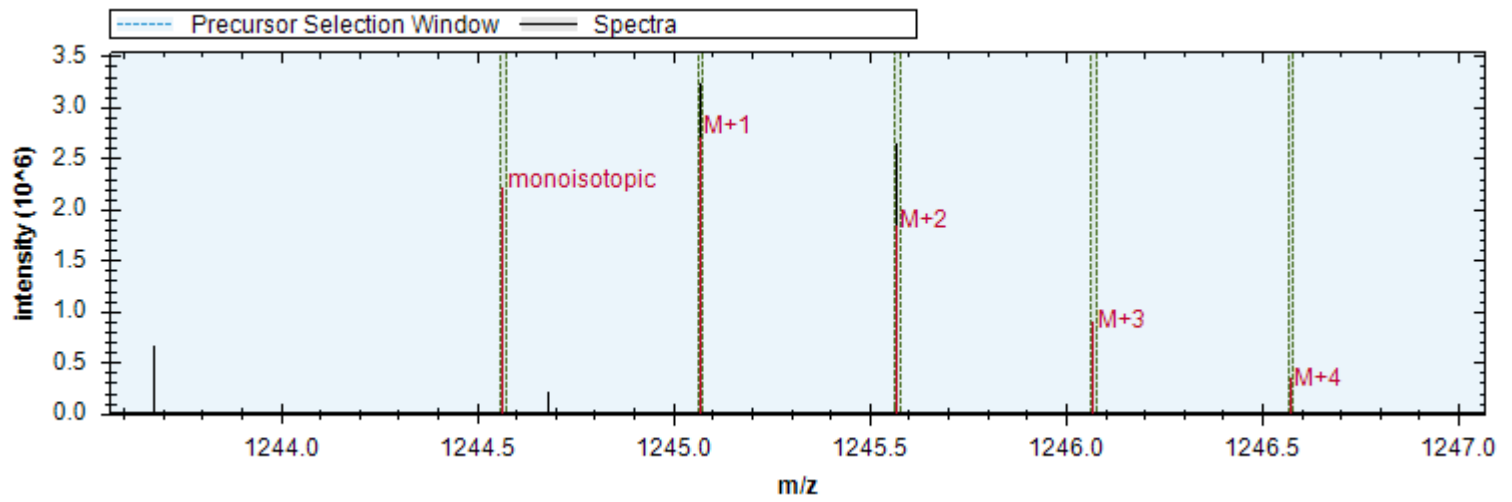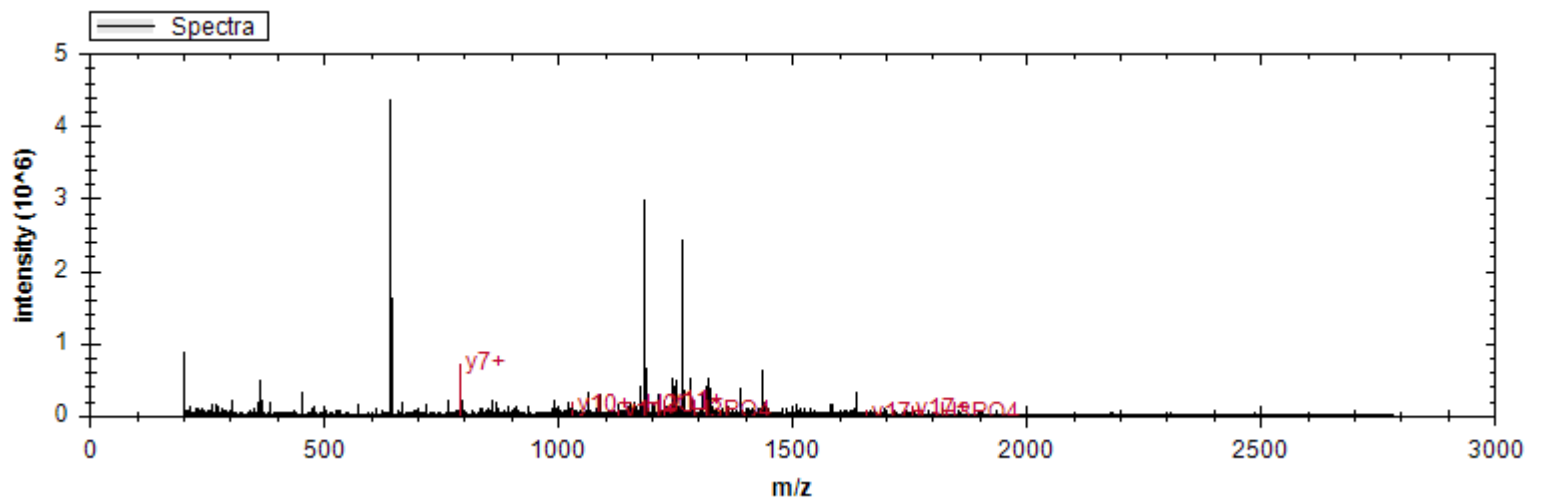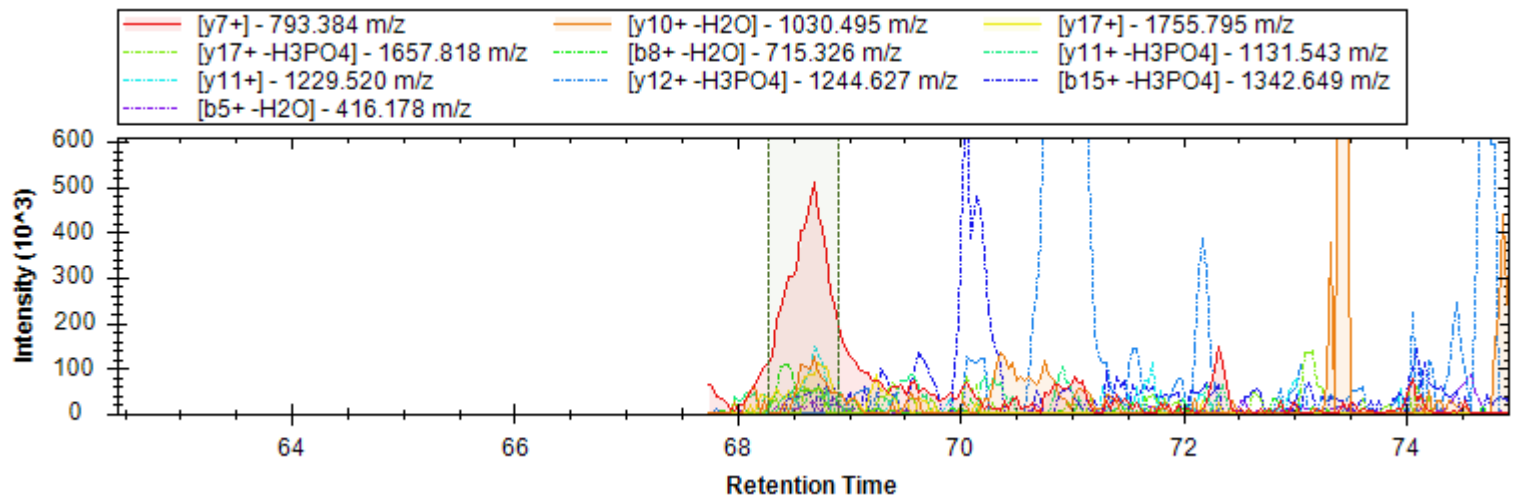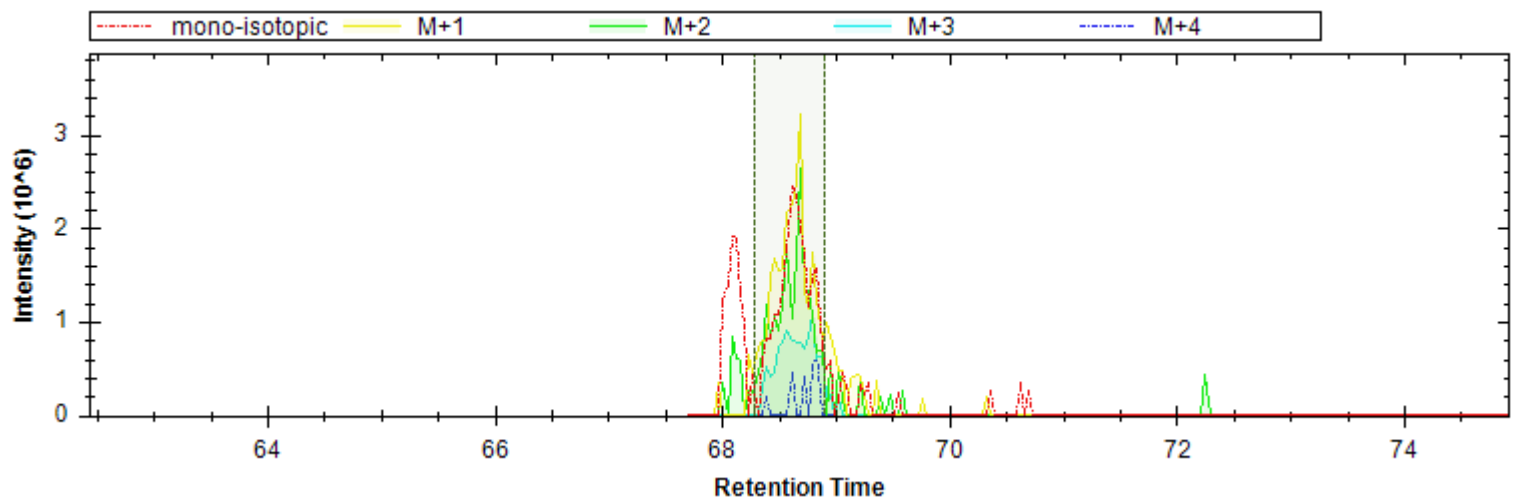

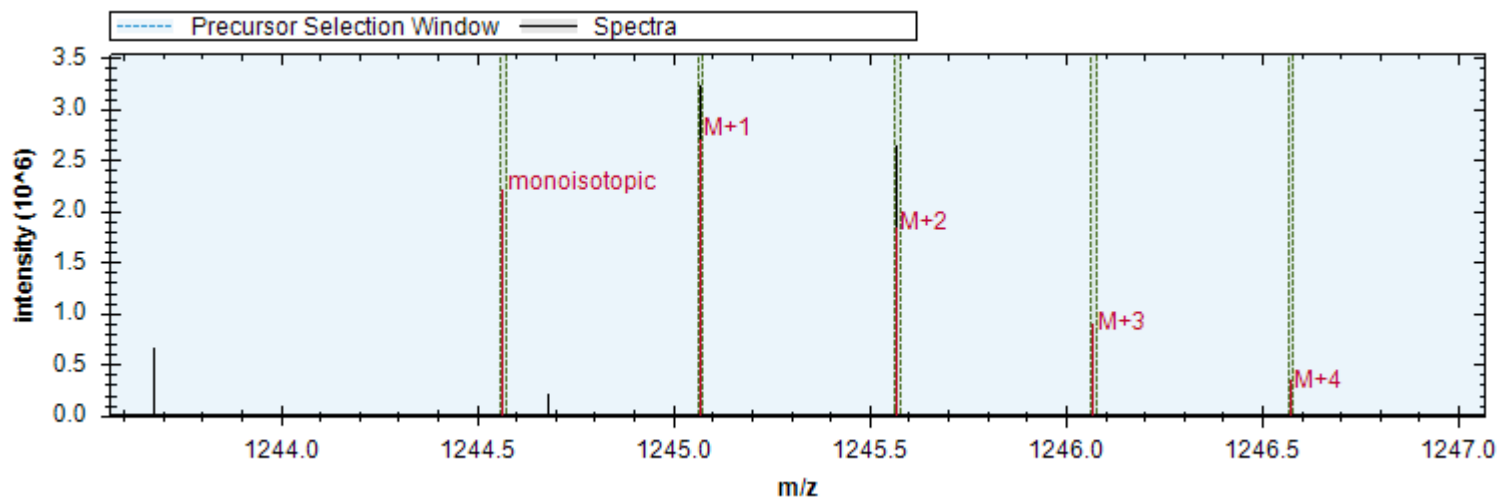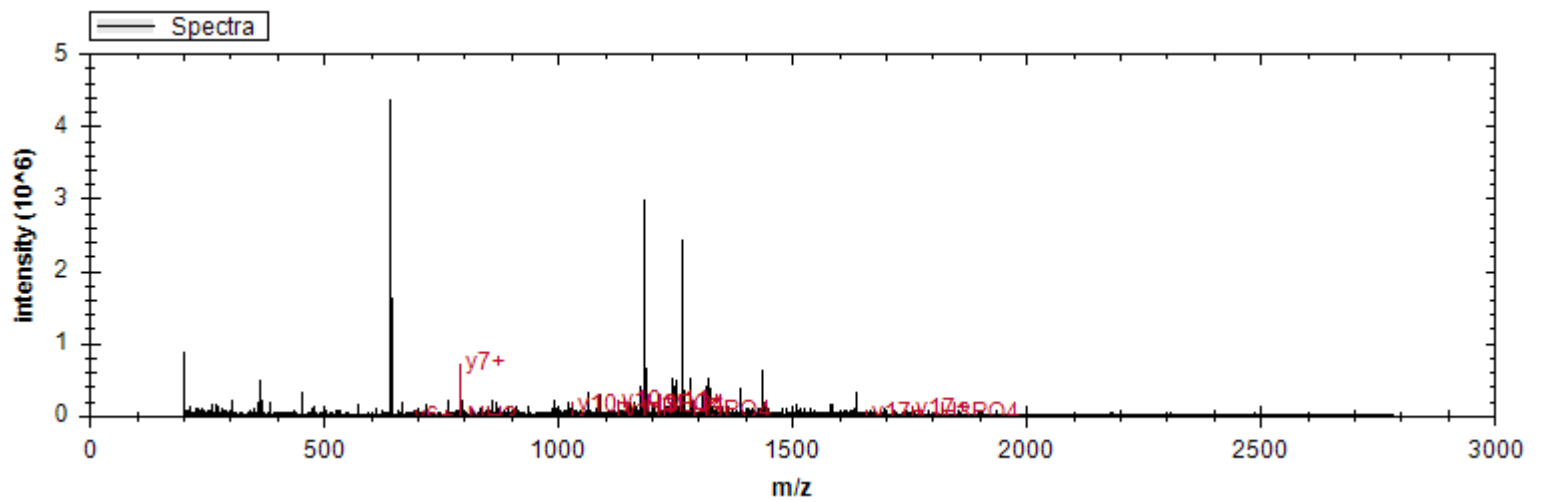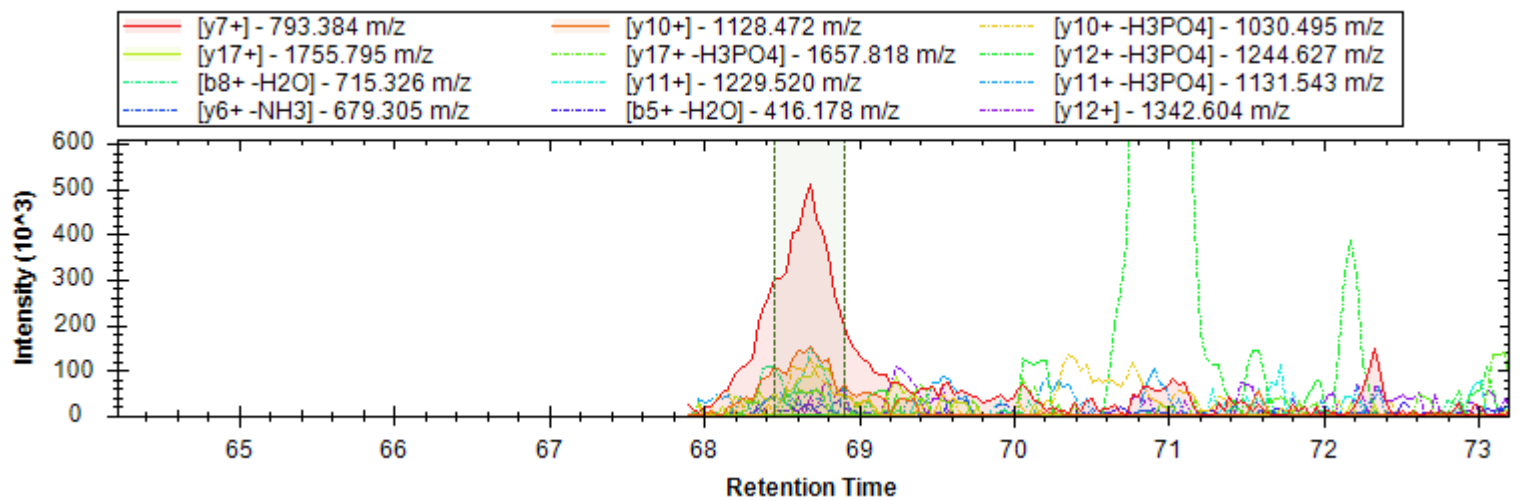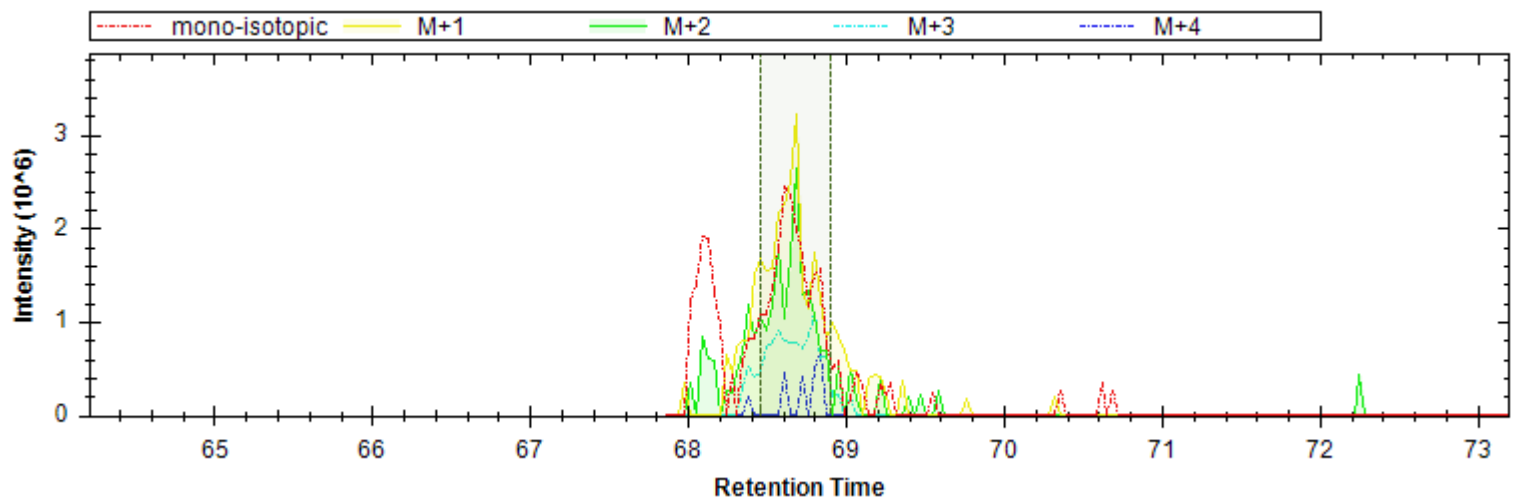

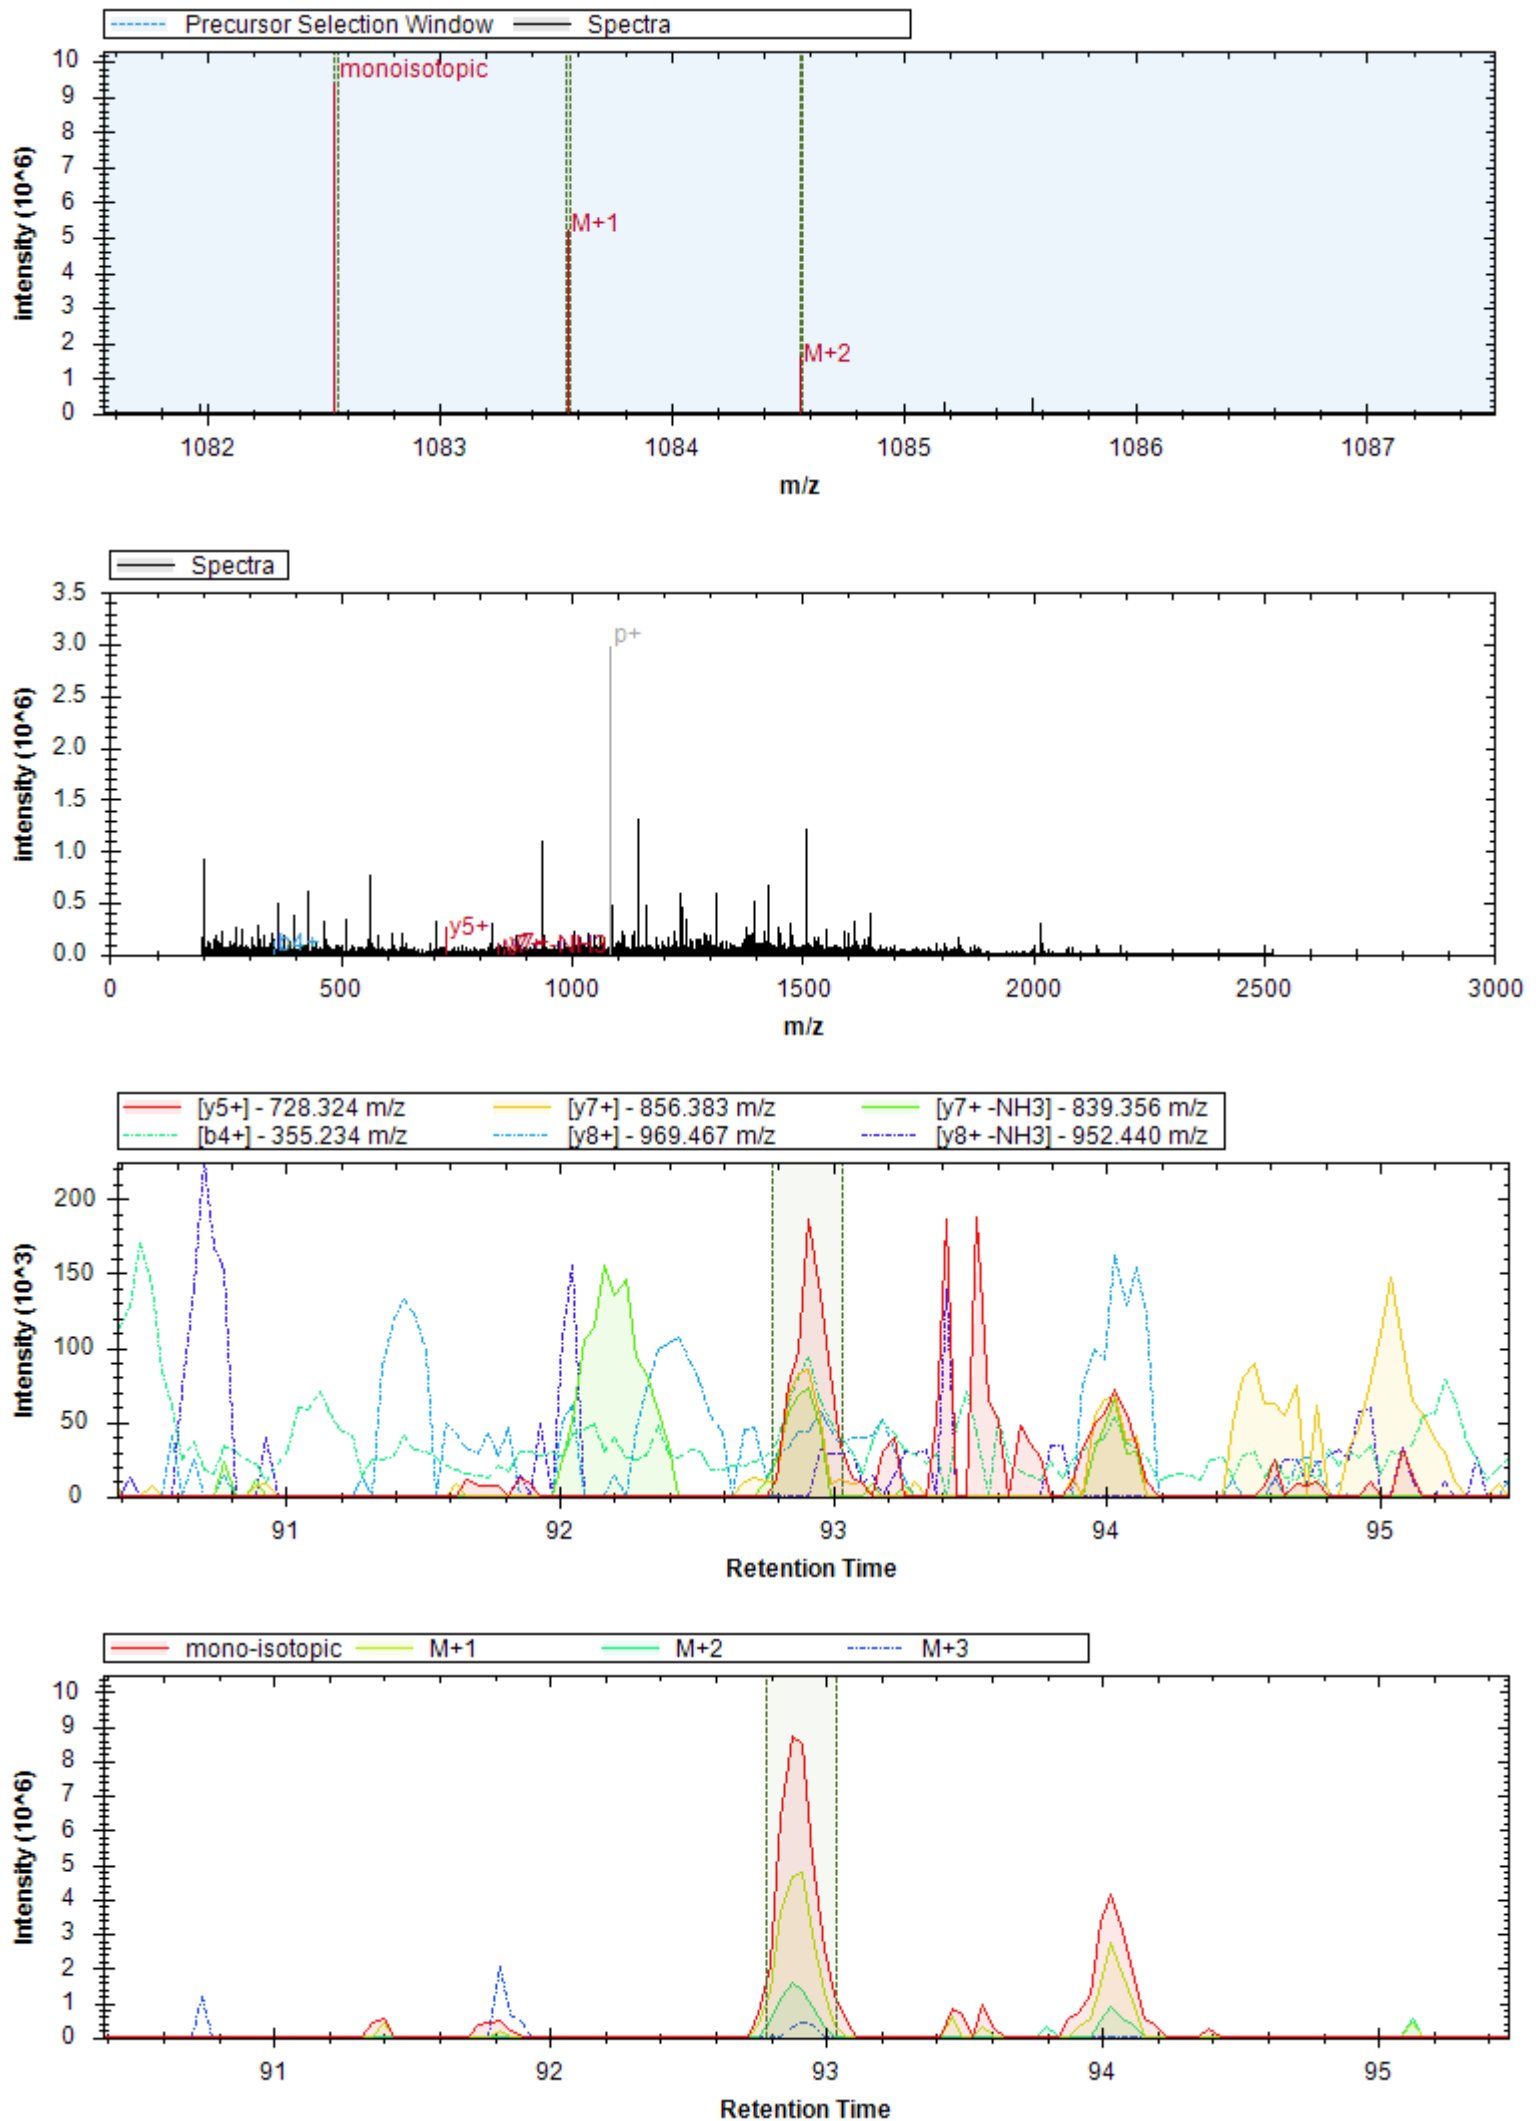

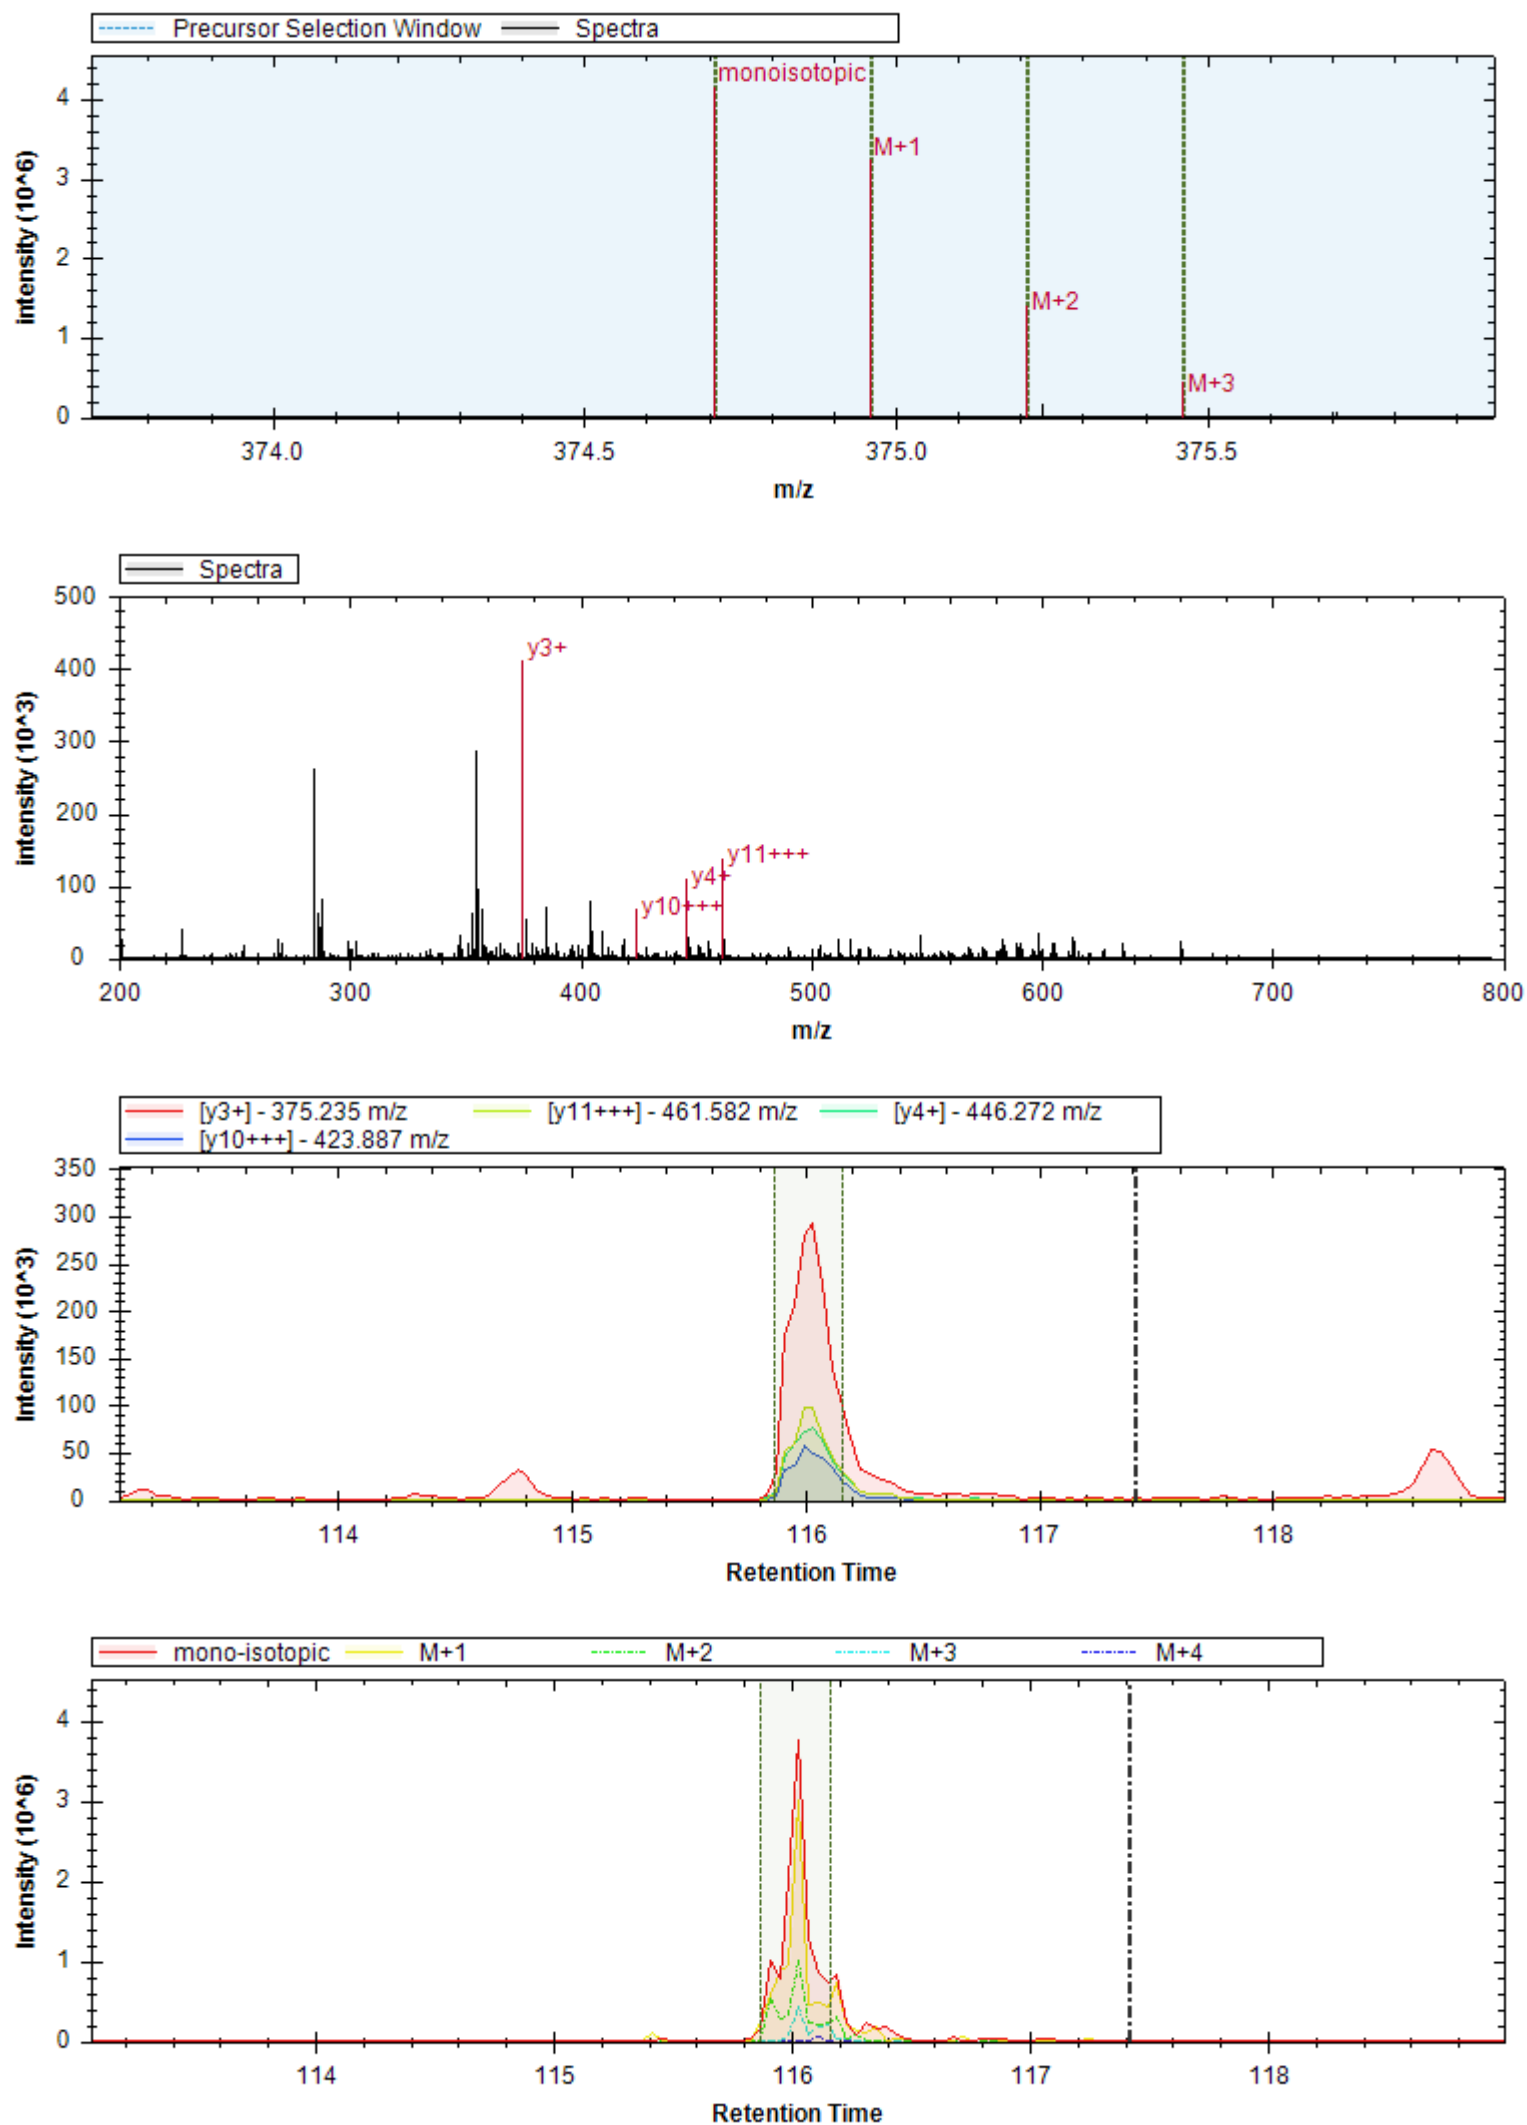



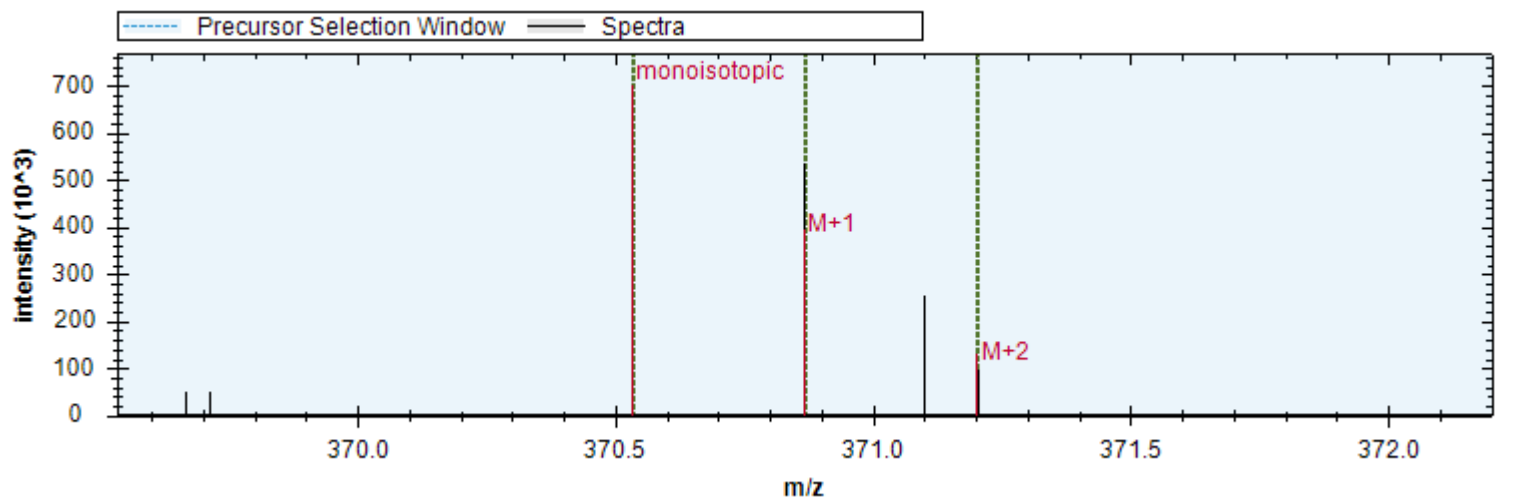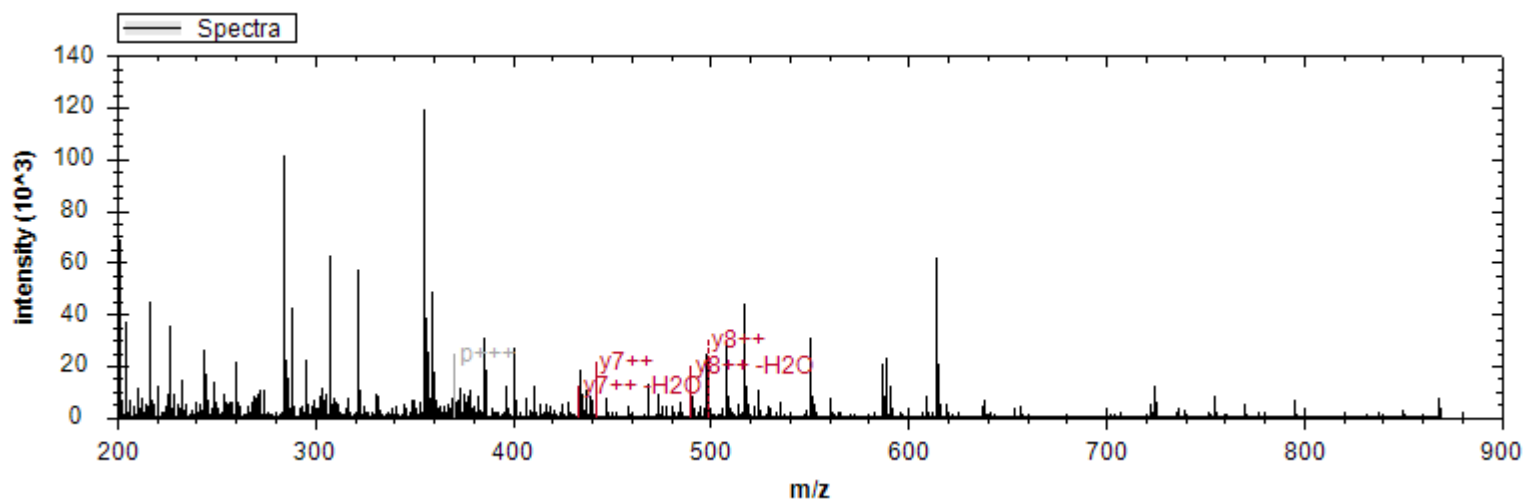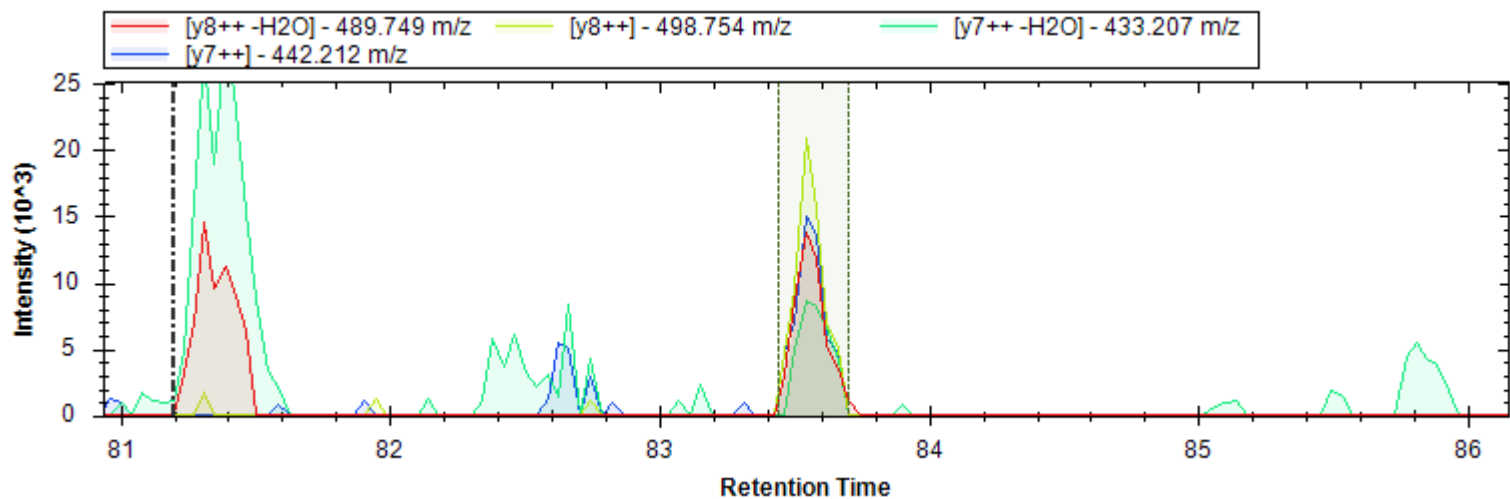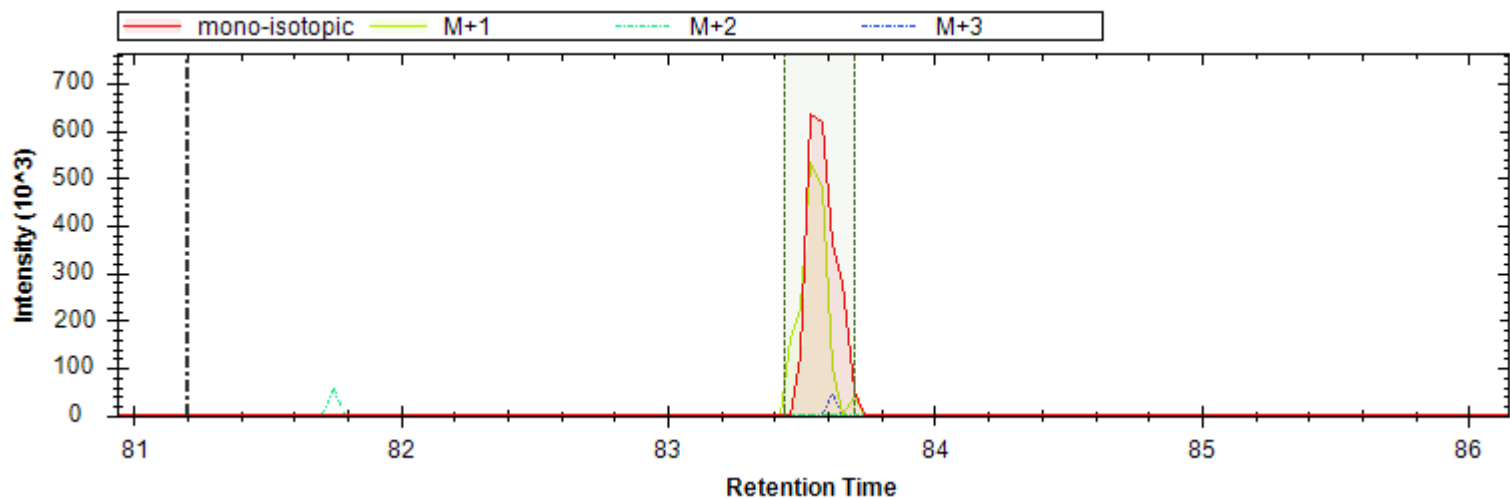

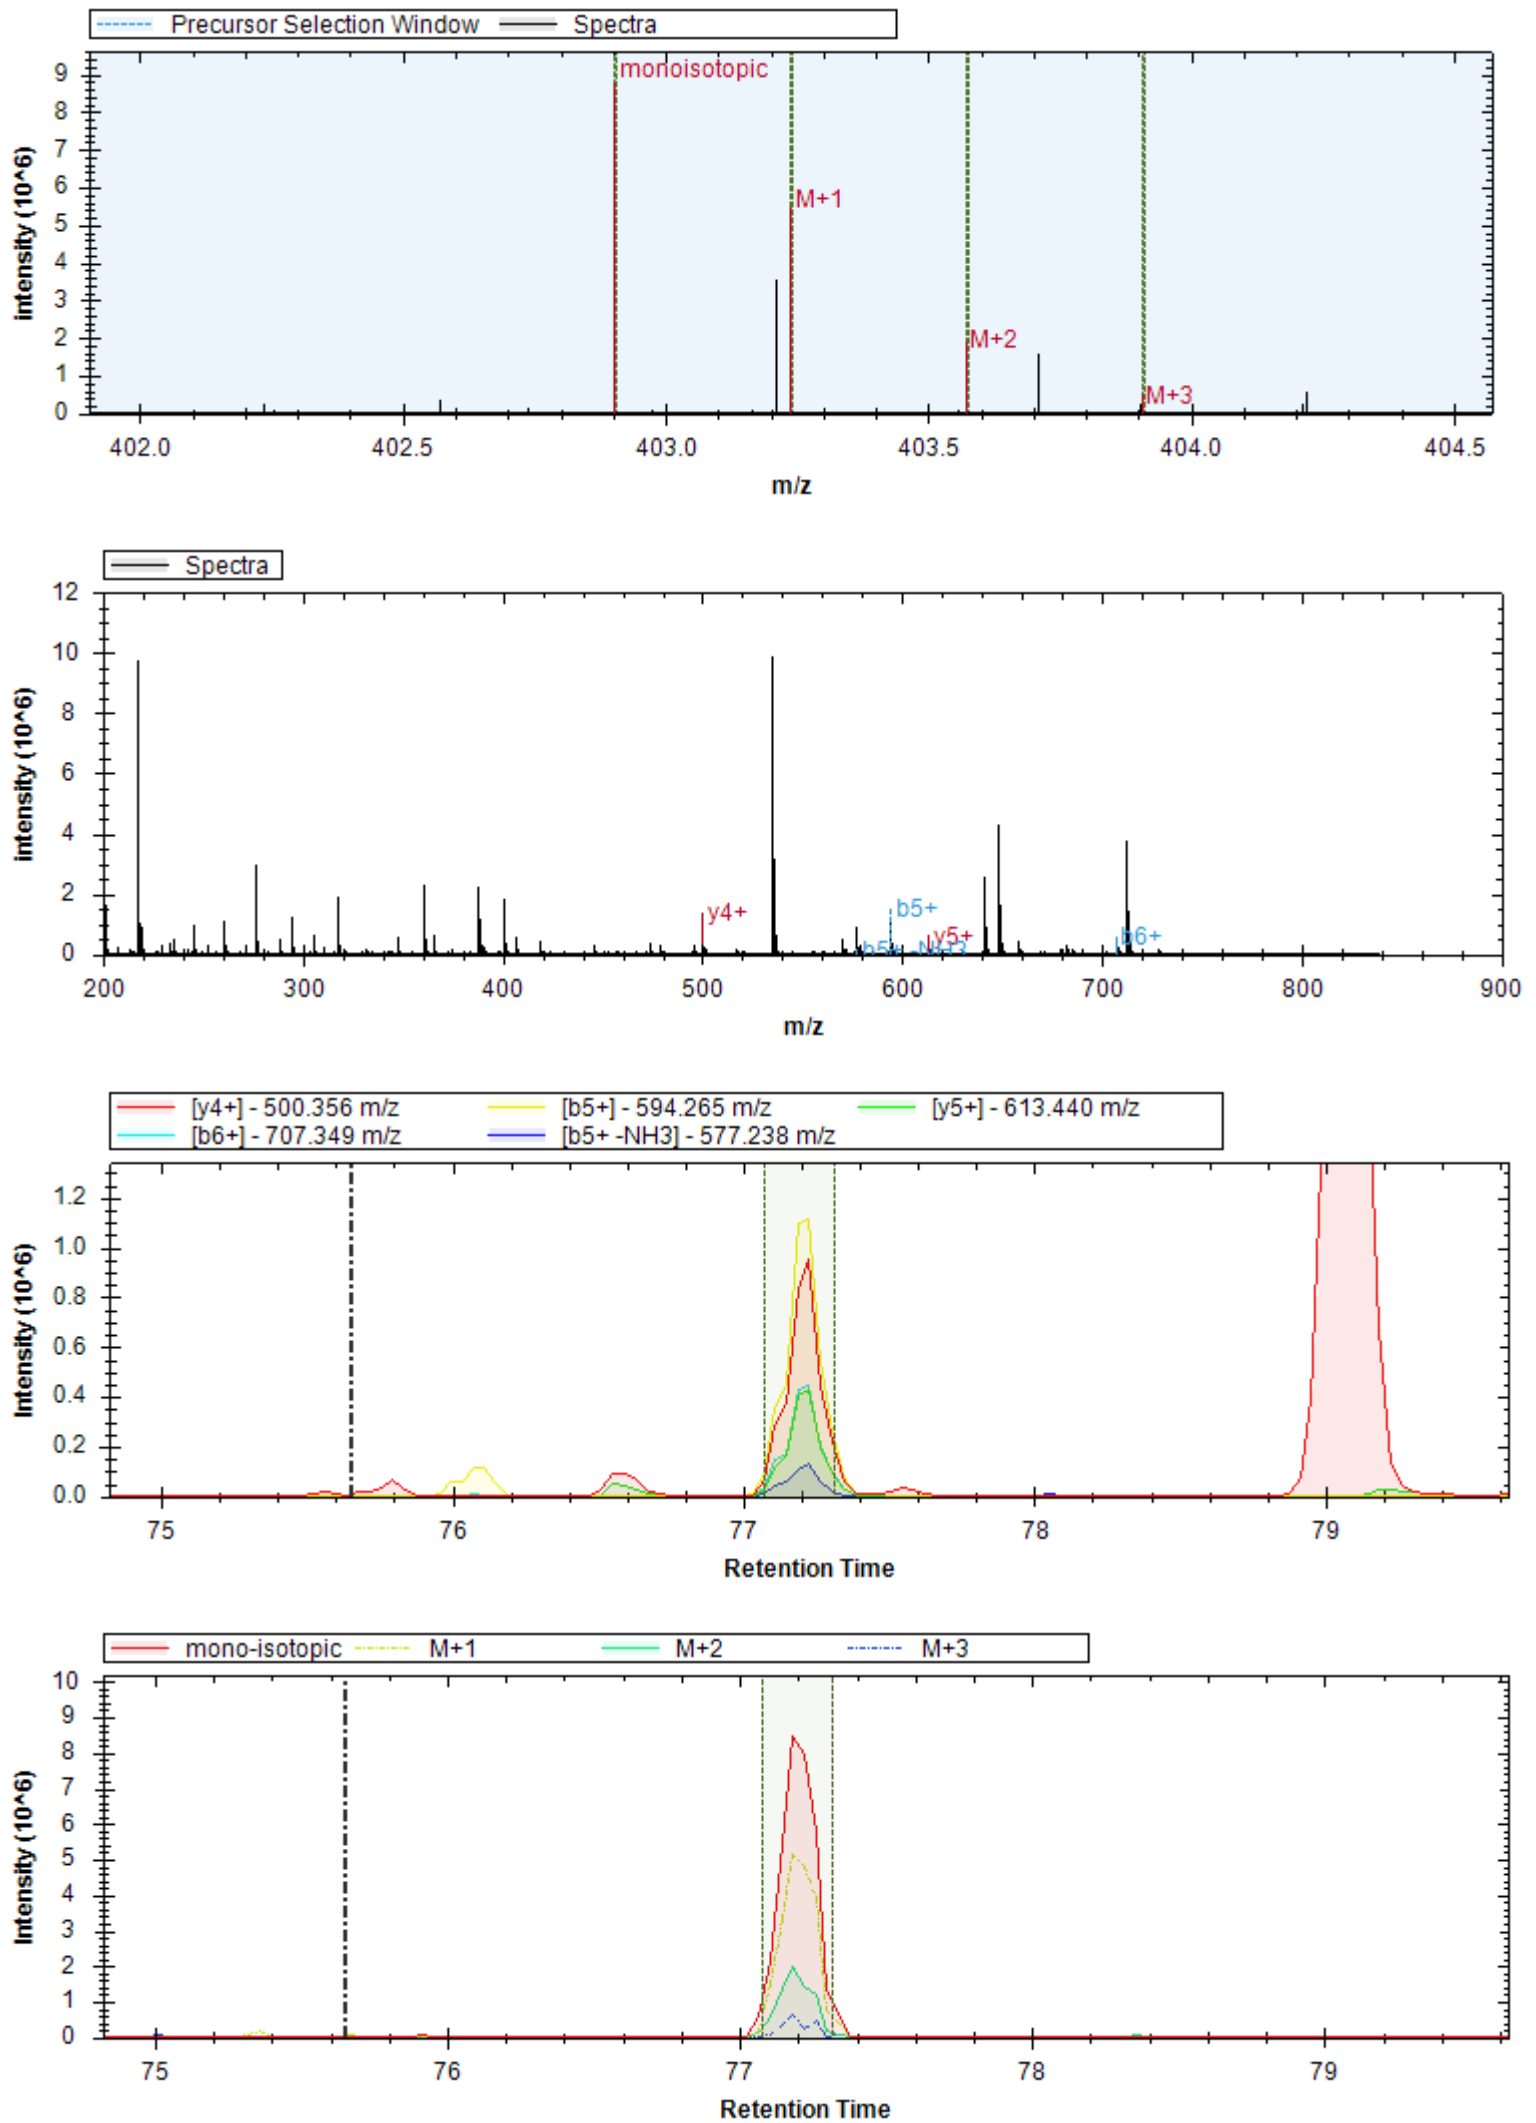

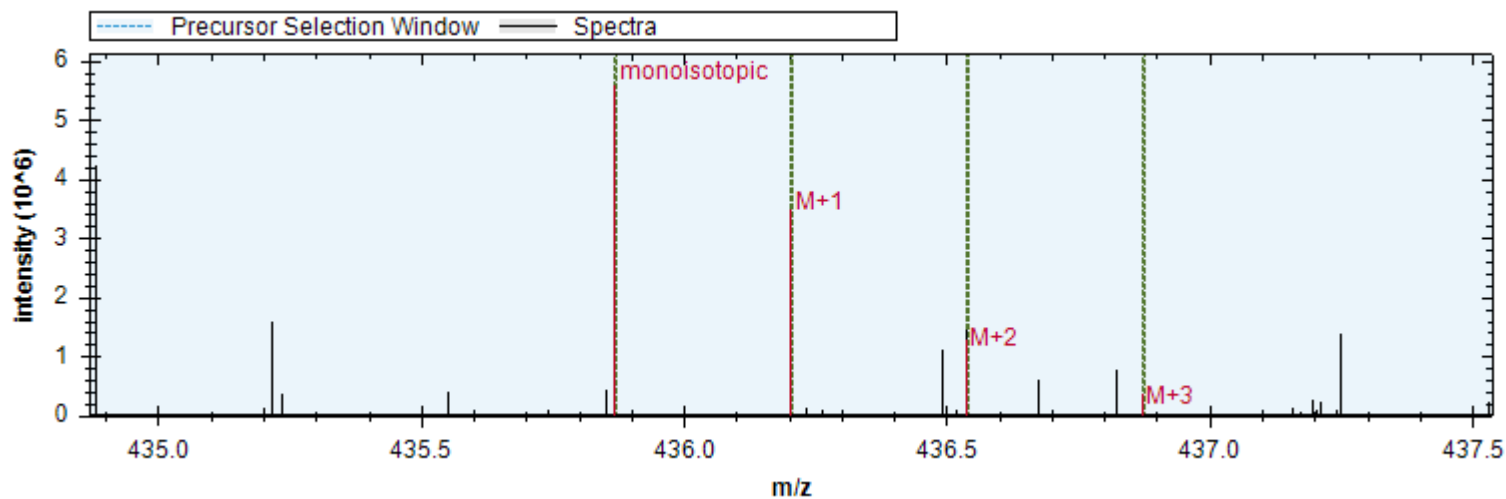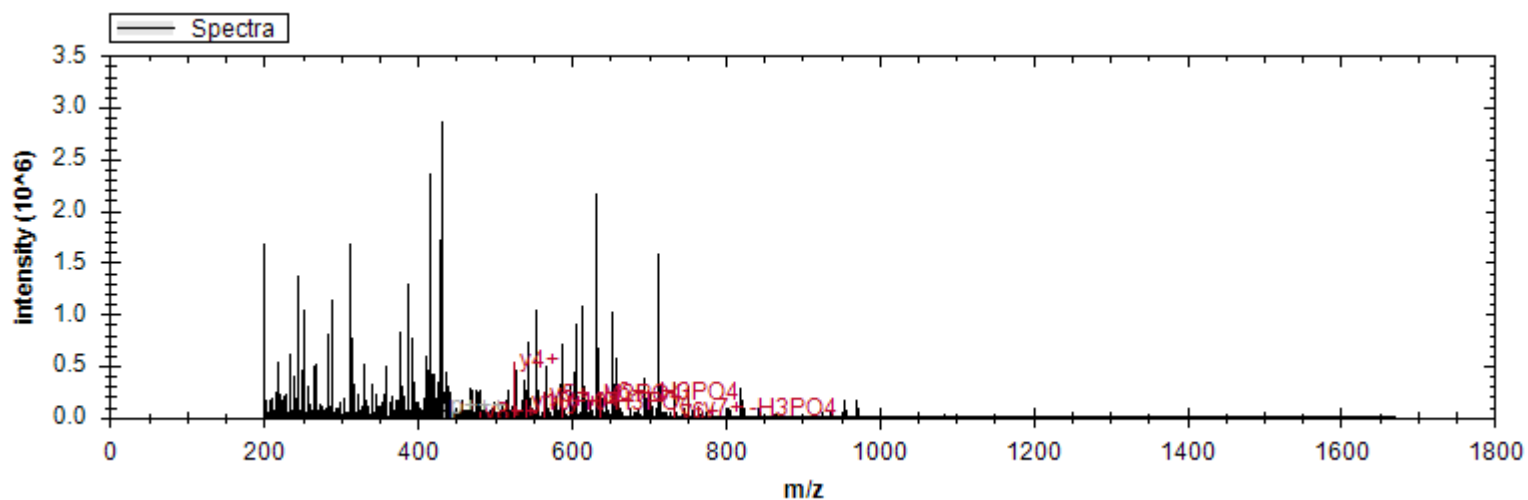

|                            |                              |                            |
|----------------------------|------------------------------|----------------------------|
| [y3+] - 359.204 m/z        | [y5+ -H3PO4] - 565.284 m/z   | [y6+ -H3PO4] - 636.321 m/z |
| [y4+ -H3PO4] - 428.225 m/z | [y10++ -H3PO4] - 540.265 m/z | [y7+ -H3PO4] - 764.380 m/z |
| [y10++] - 589.254 m/z      | [y7+ -NH3] - 943.130 m/z     | [y6+] - 734.298 m/z        |
| [y5+] - 663.261 m/z        | [y8++] - 481.216 m/z         | [y4+] - 526.202 m/z        |
| [y8+ -H3PO4] - 863.448 m/z | [y6++] - 367.653 m/z         | [y7+ -H2O] - 942.146 m/z   |

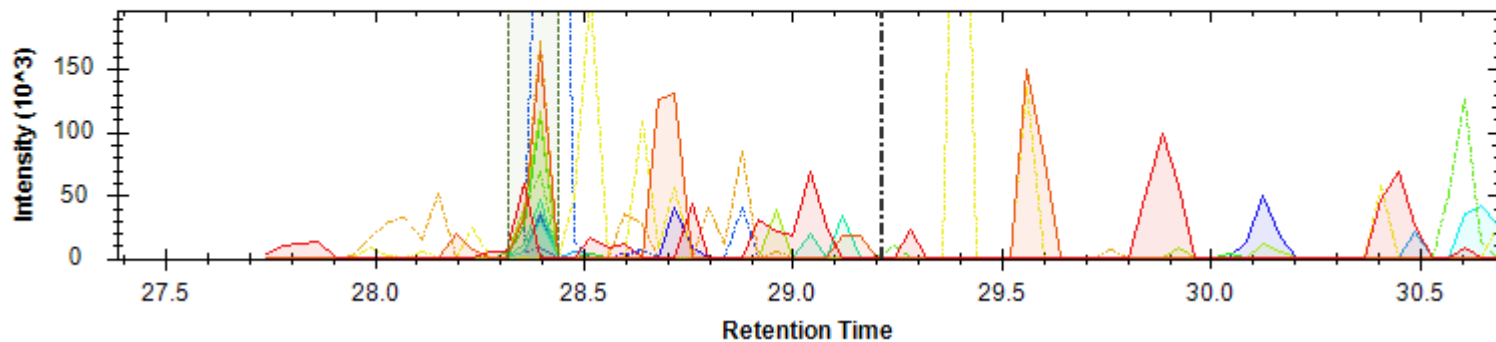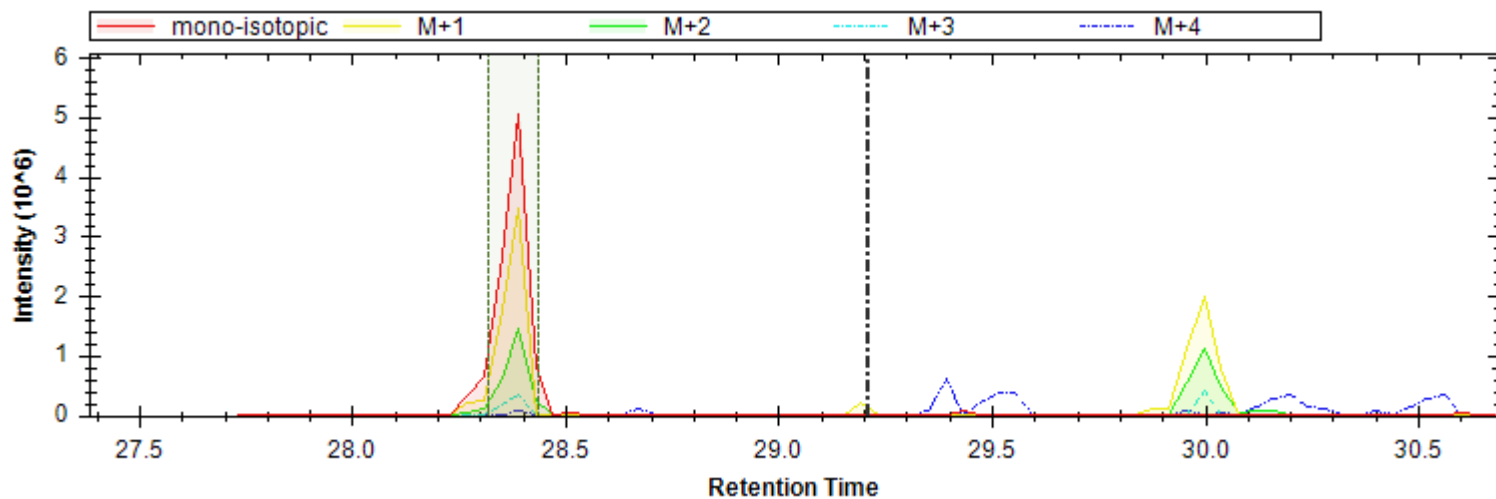

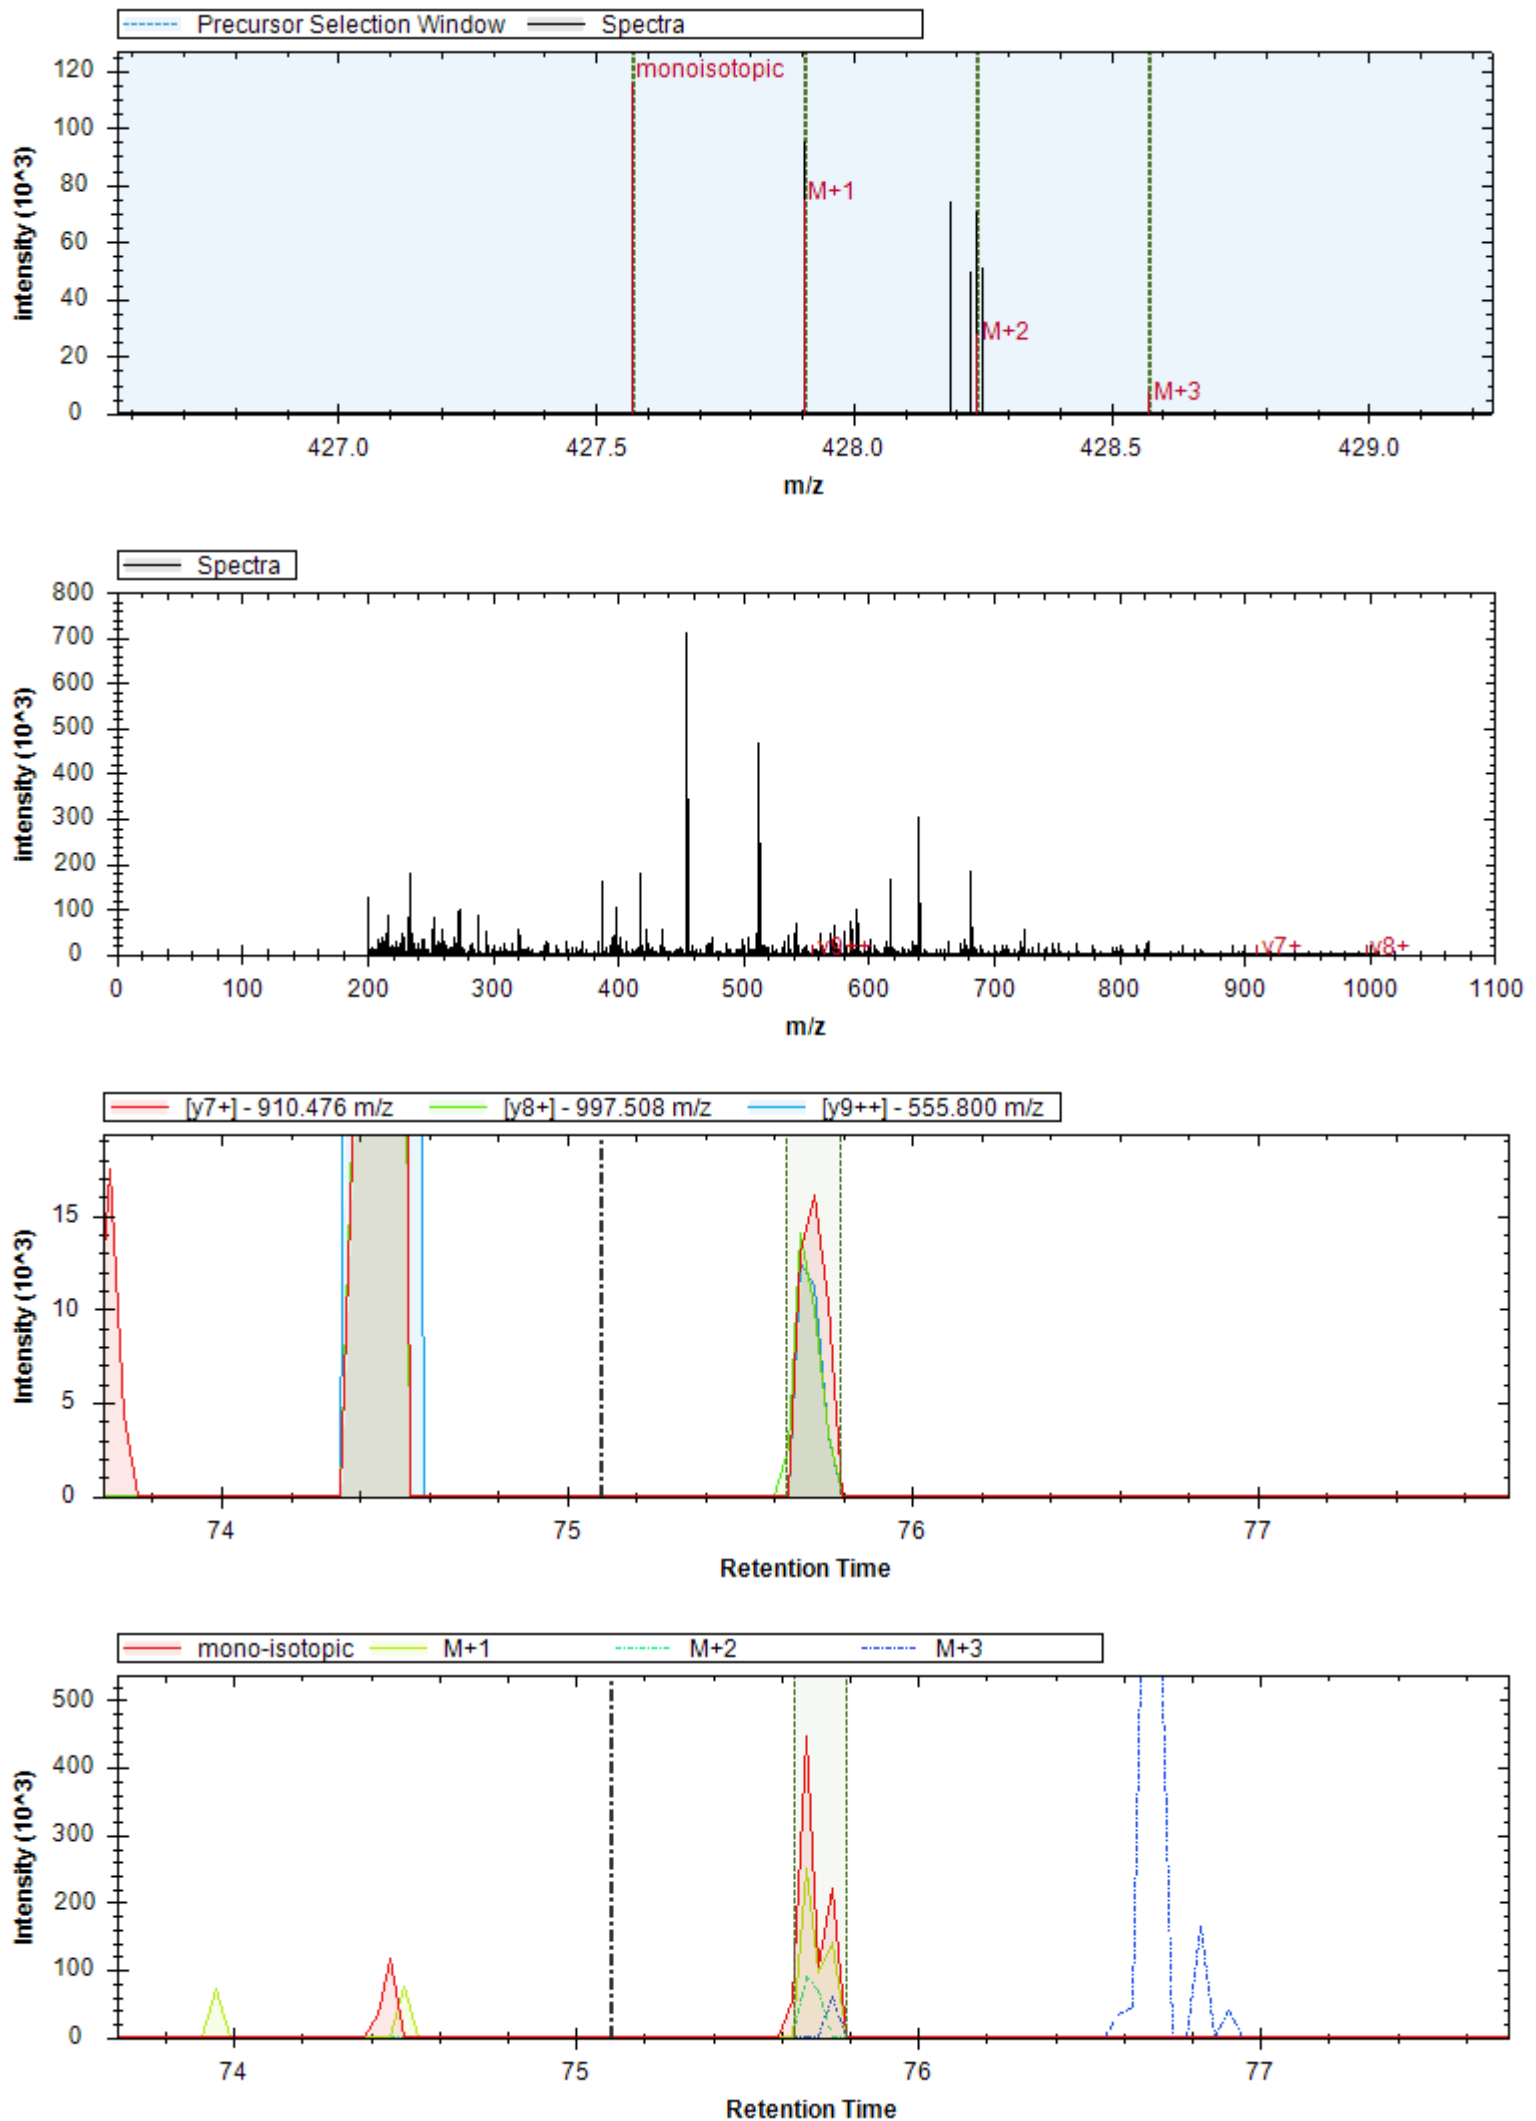

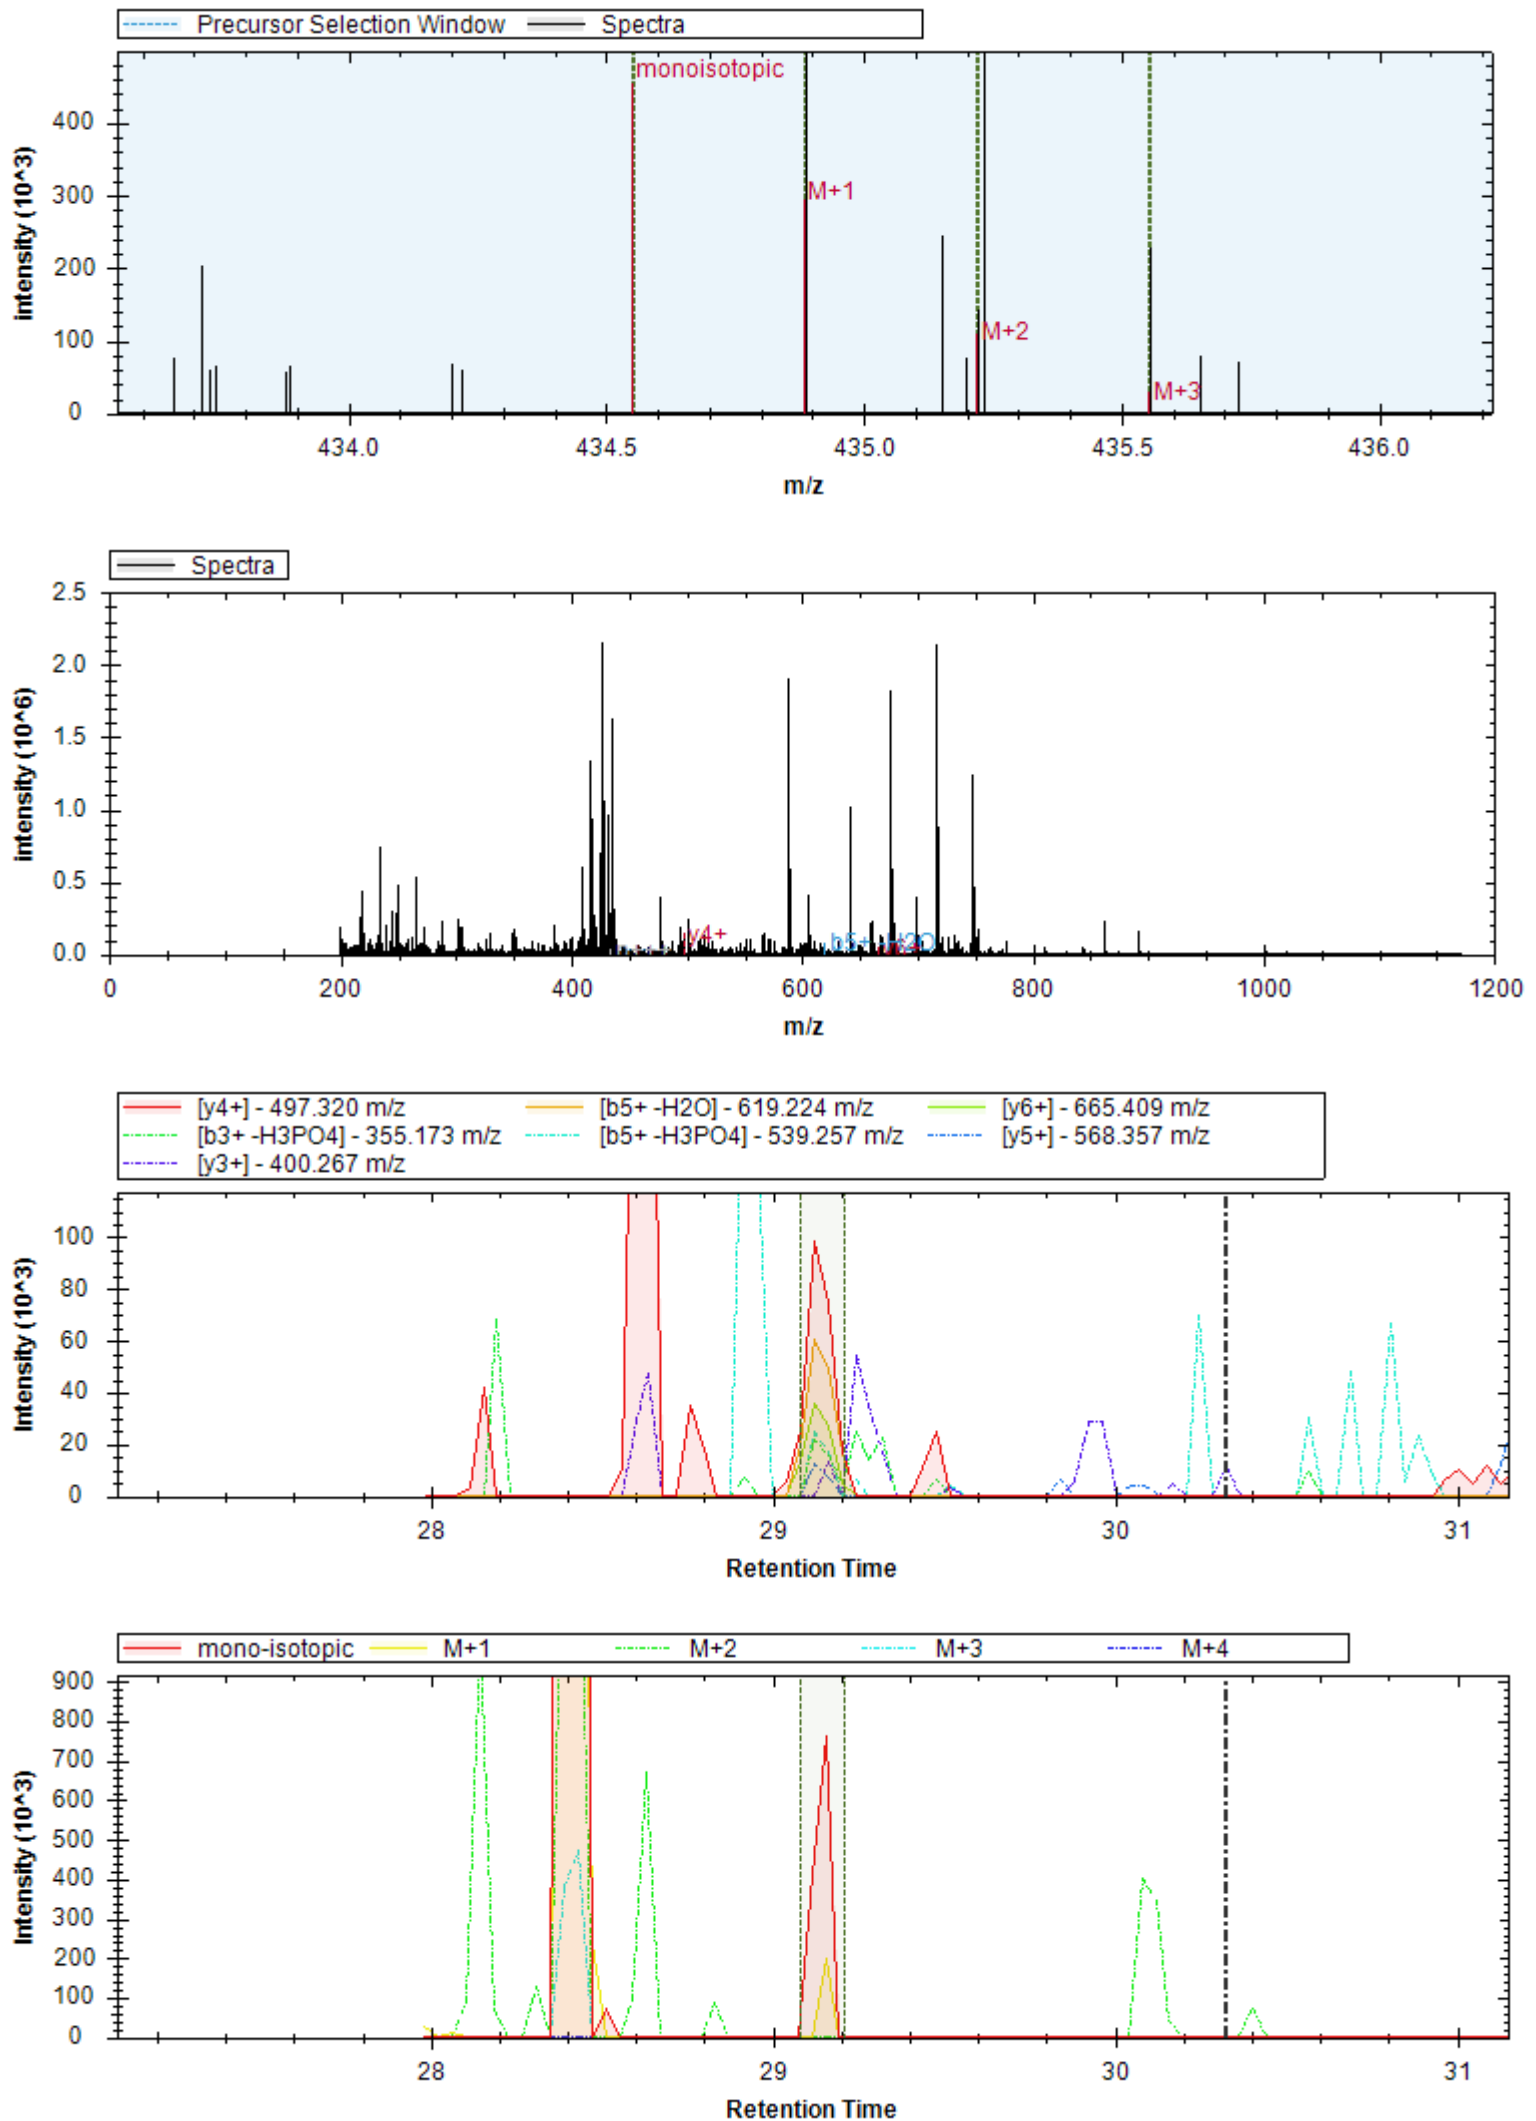

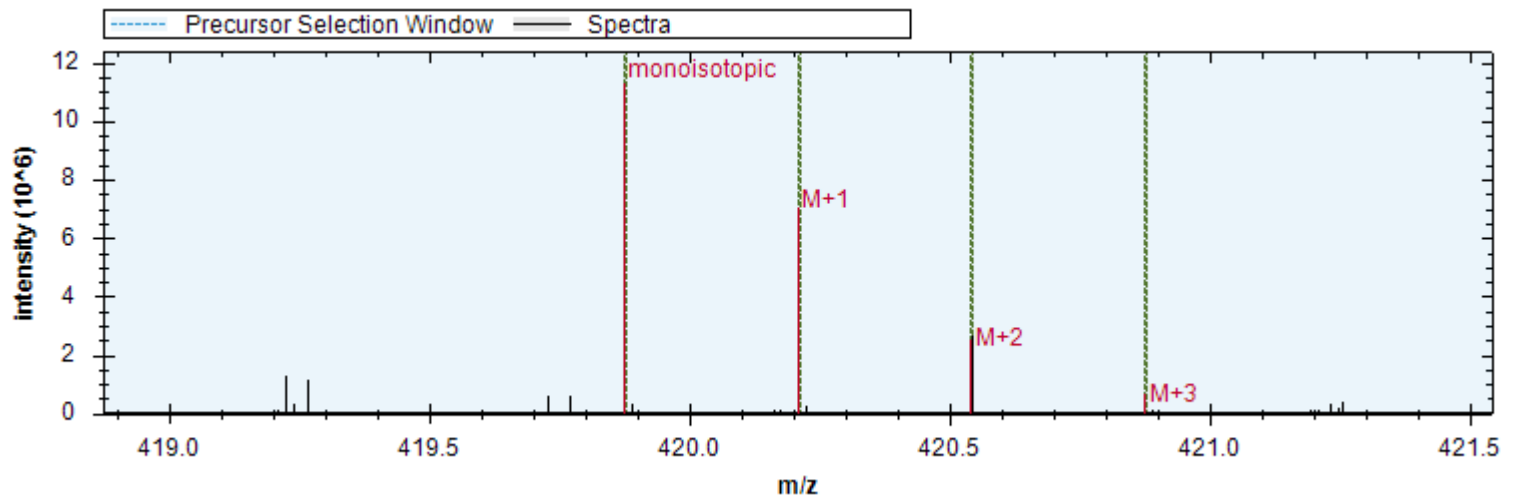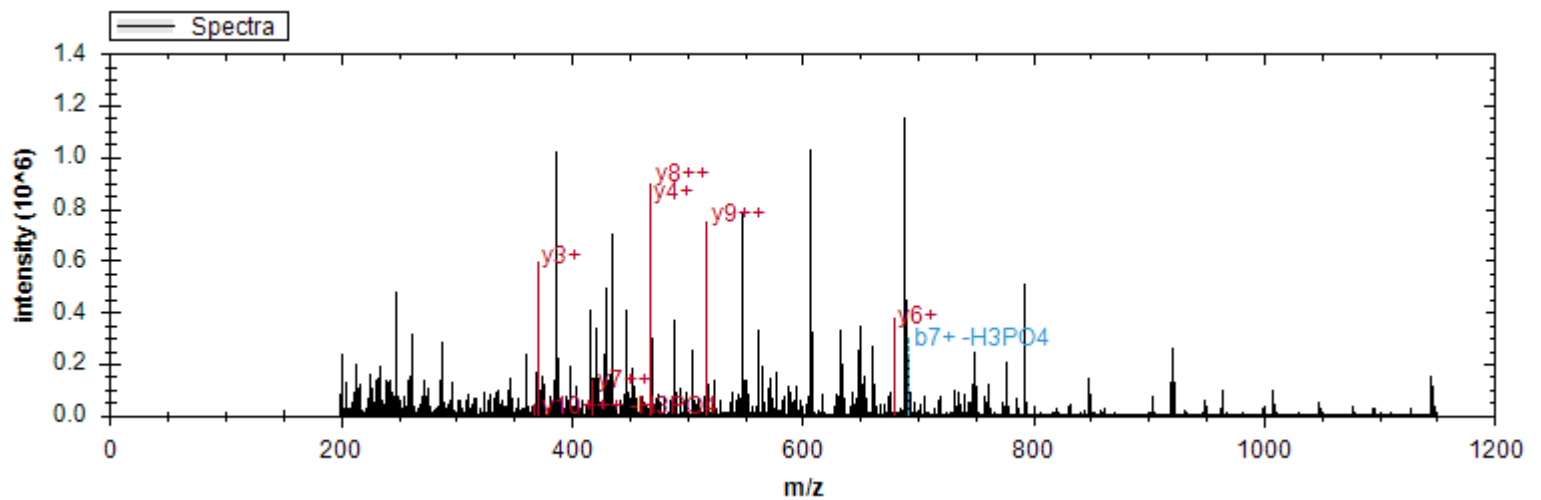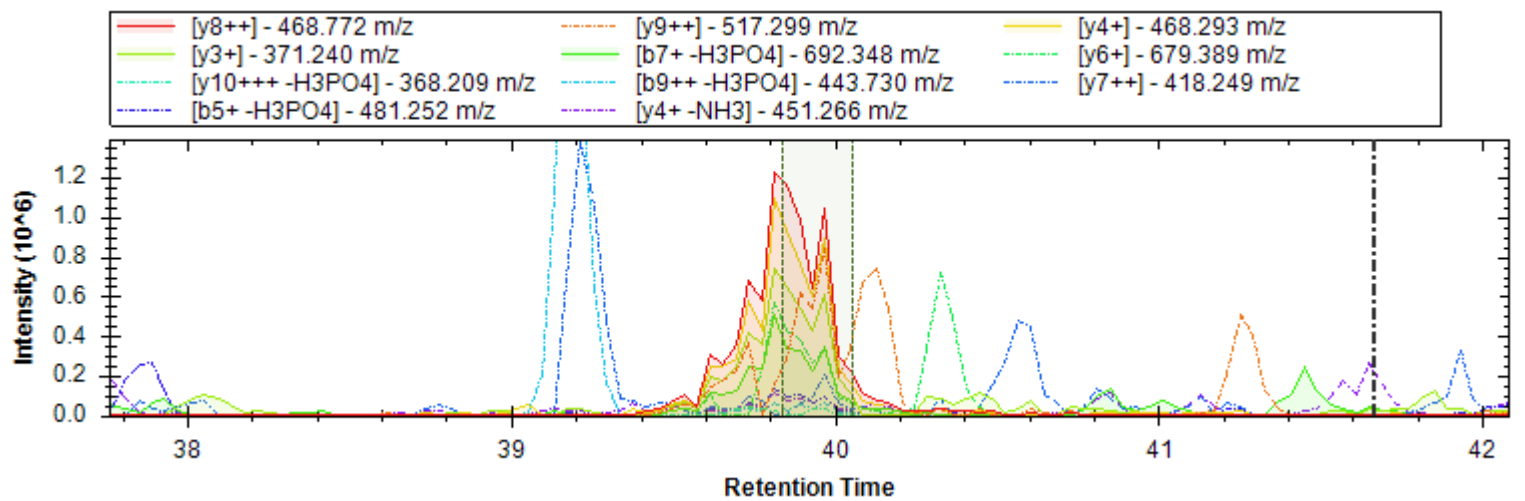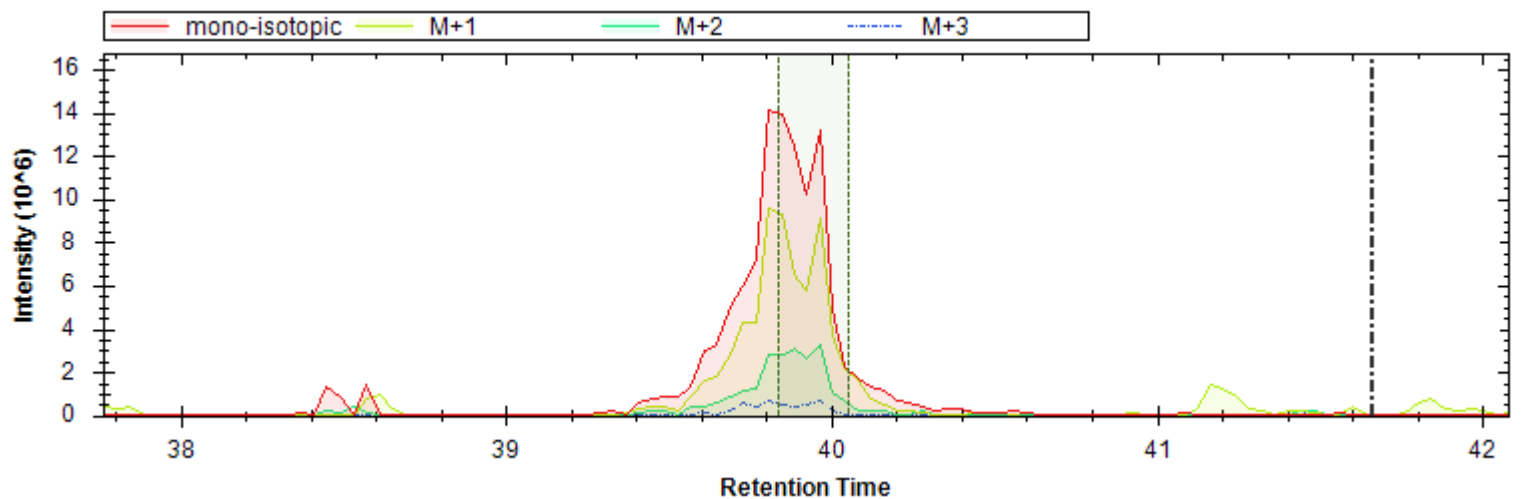

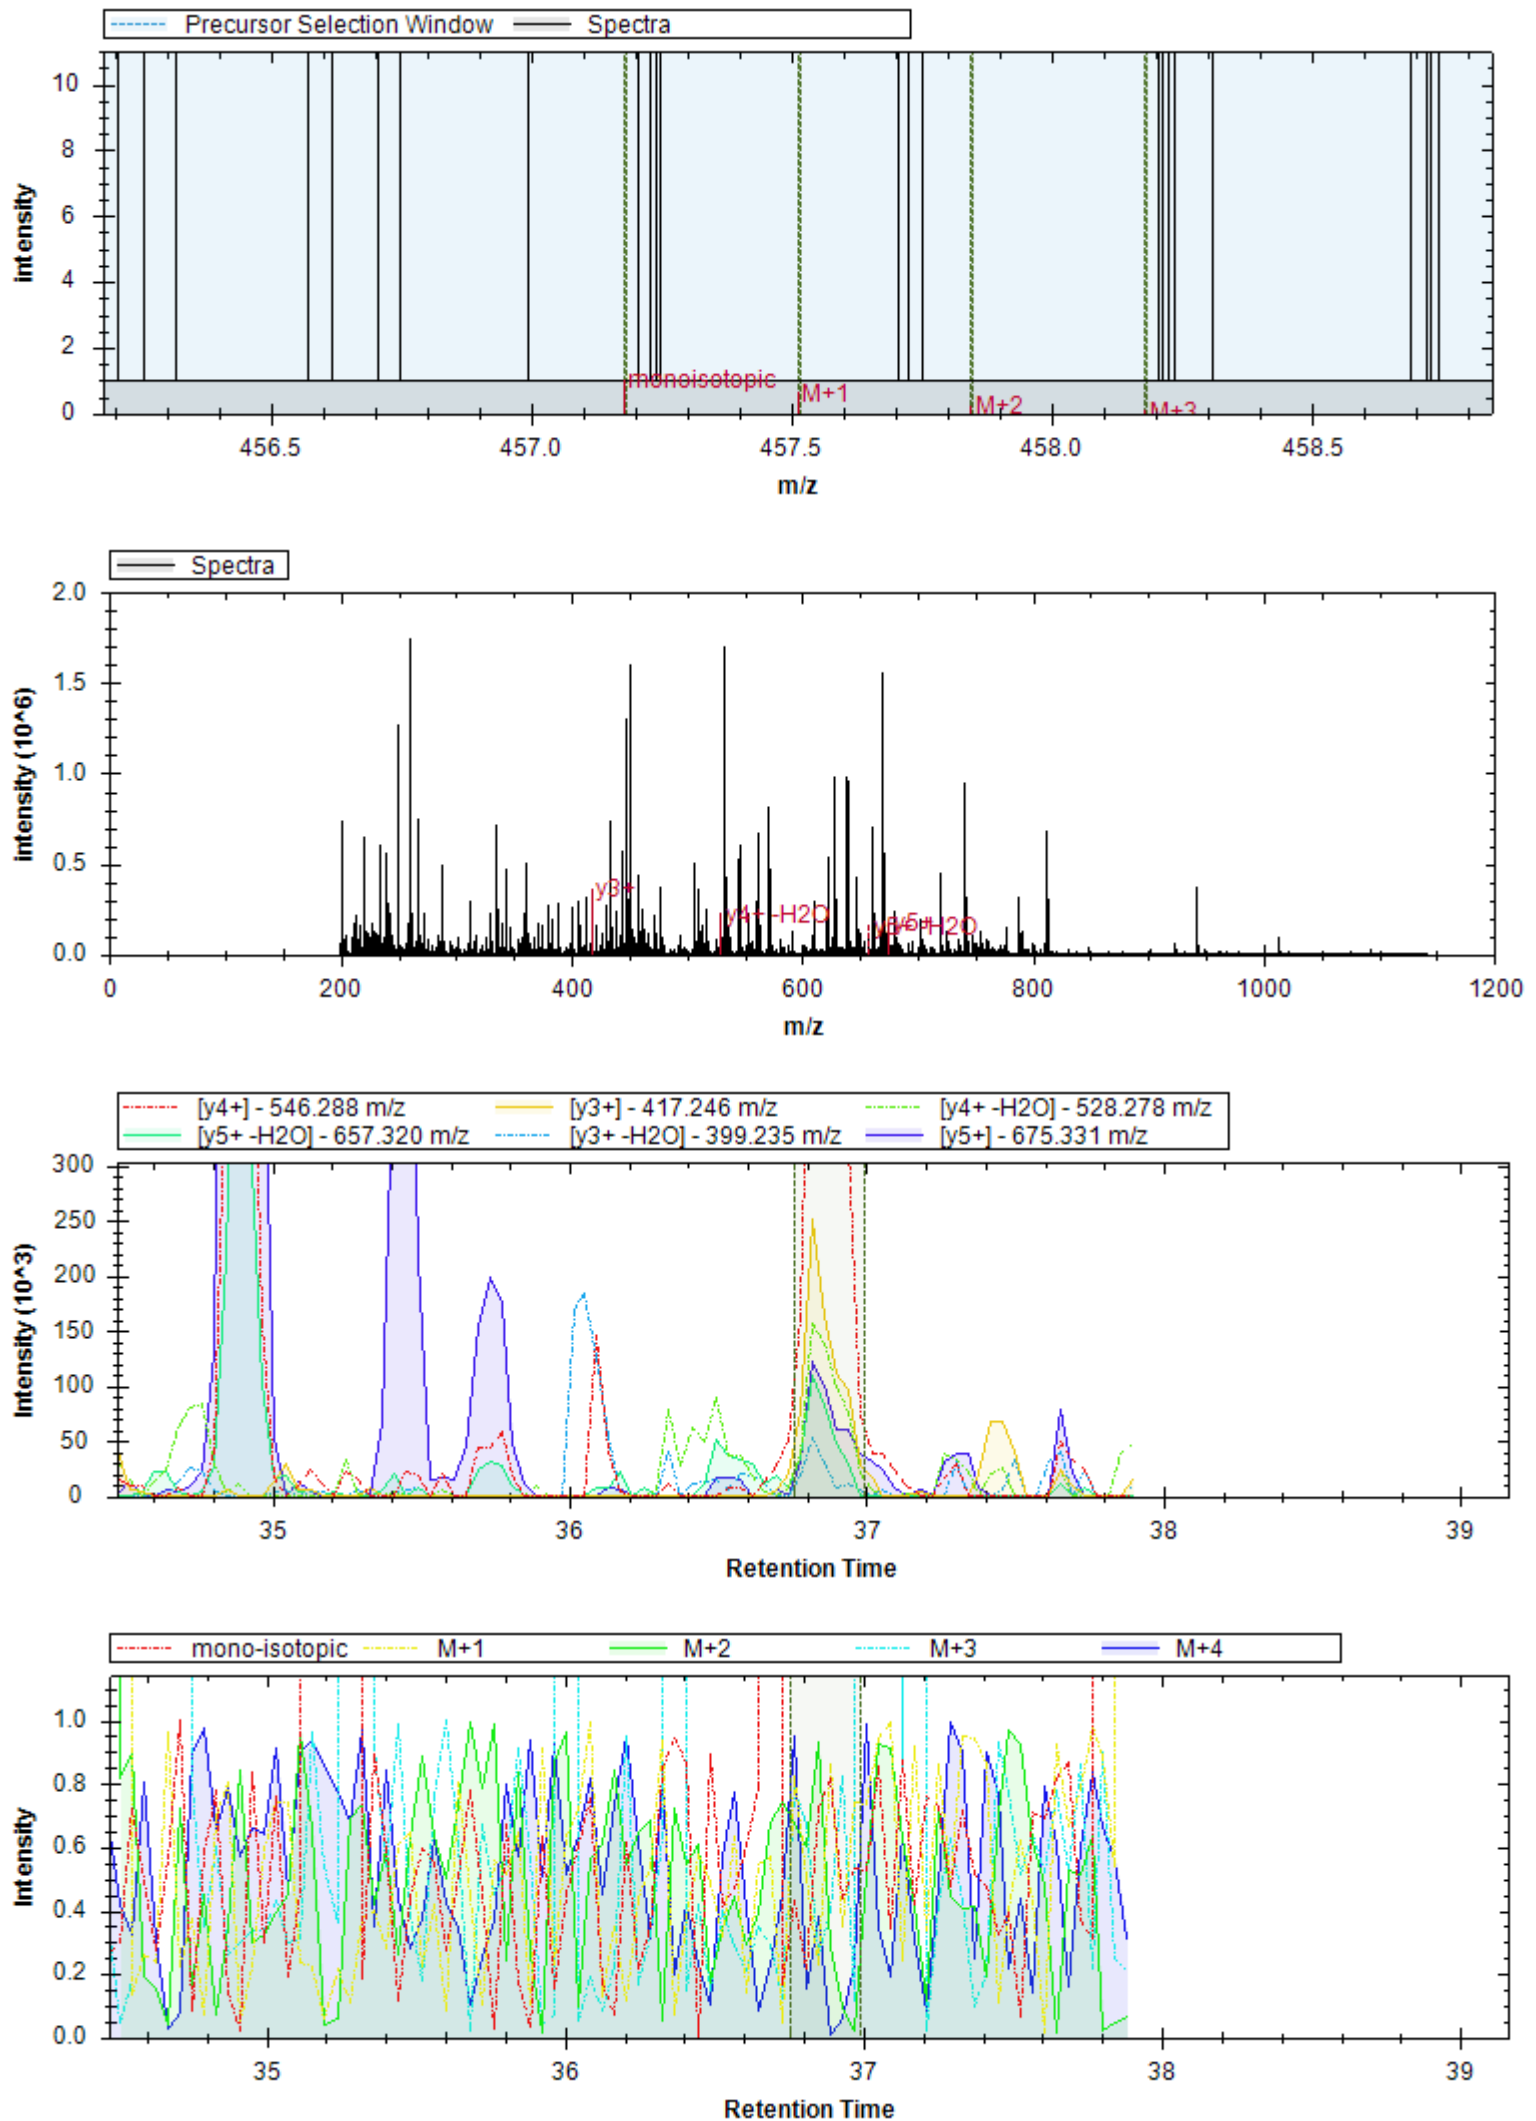

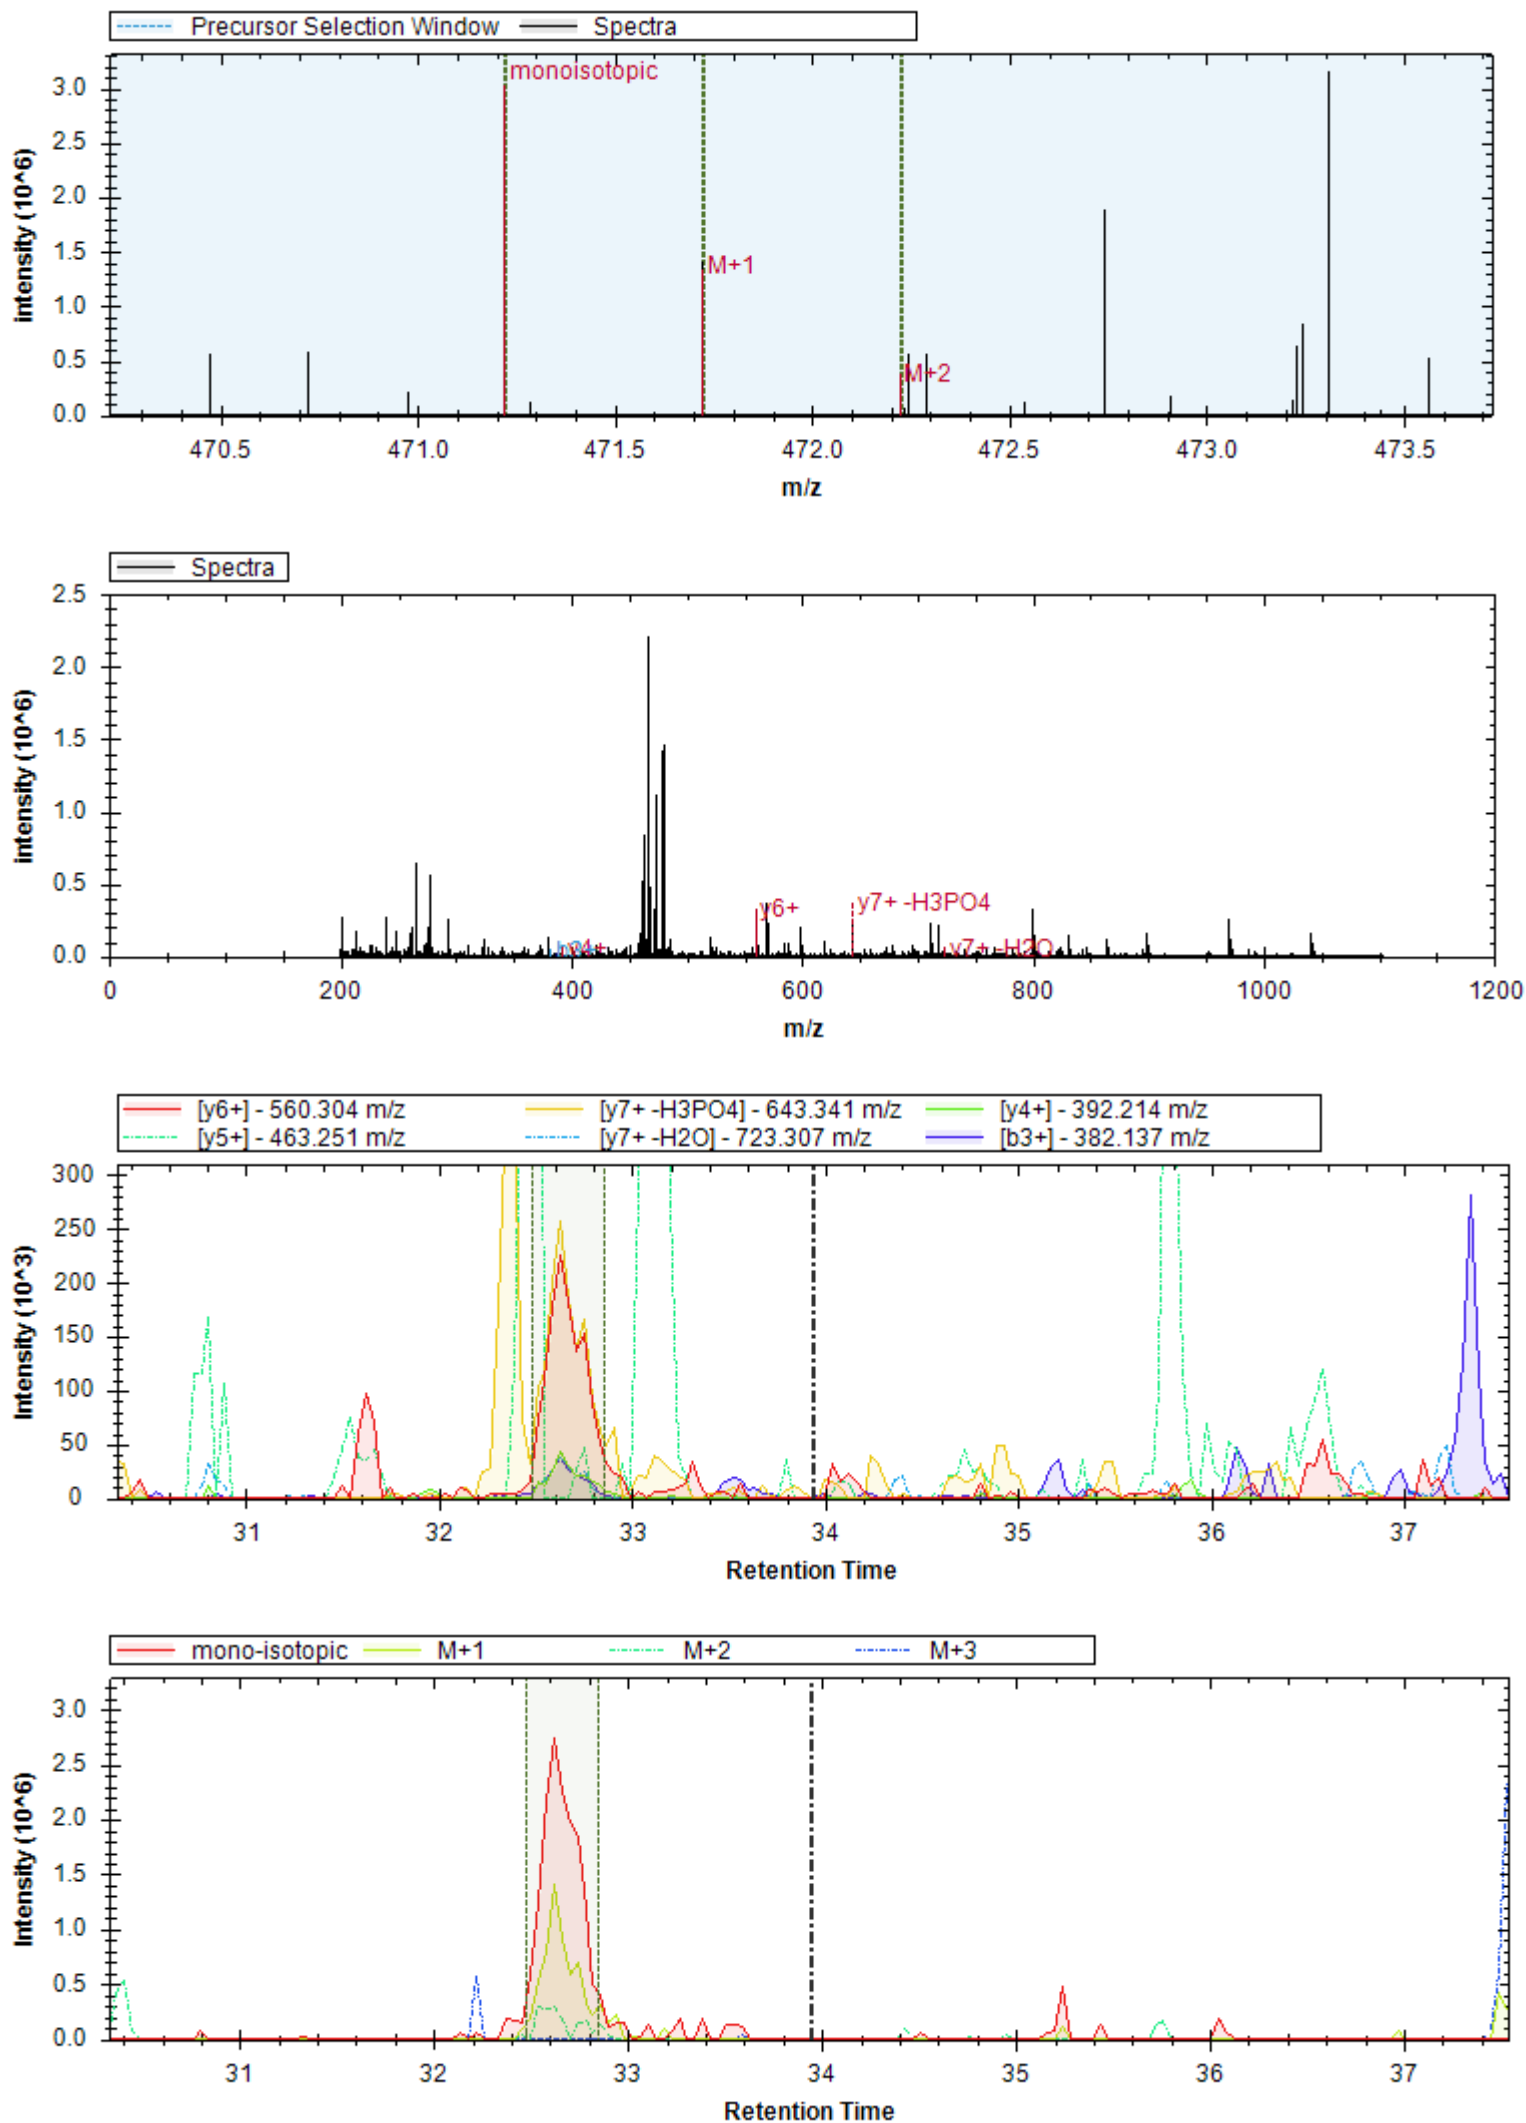



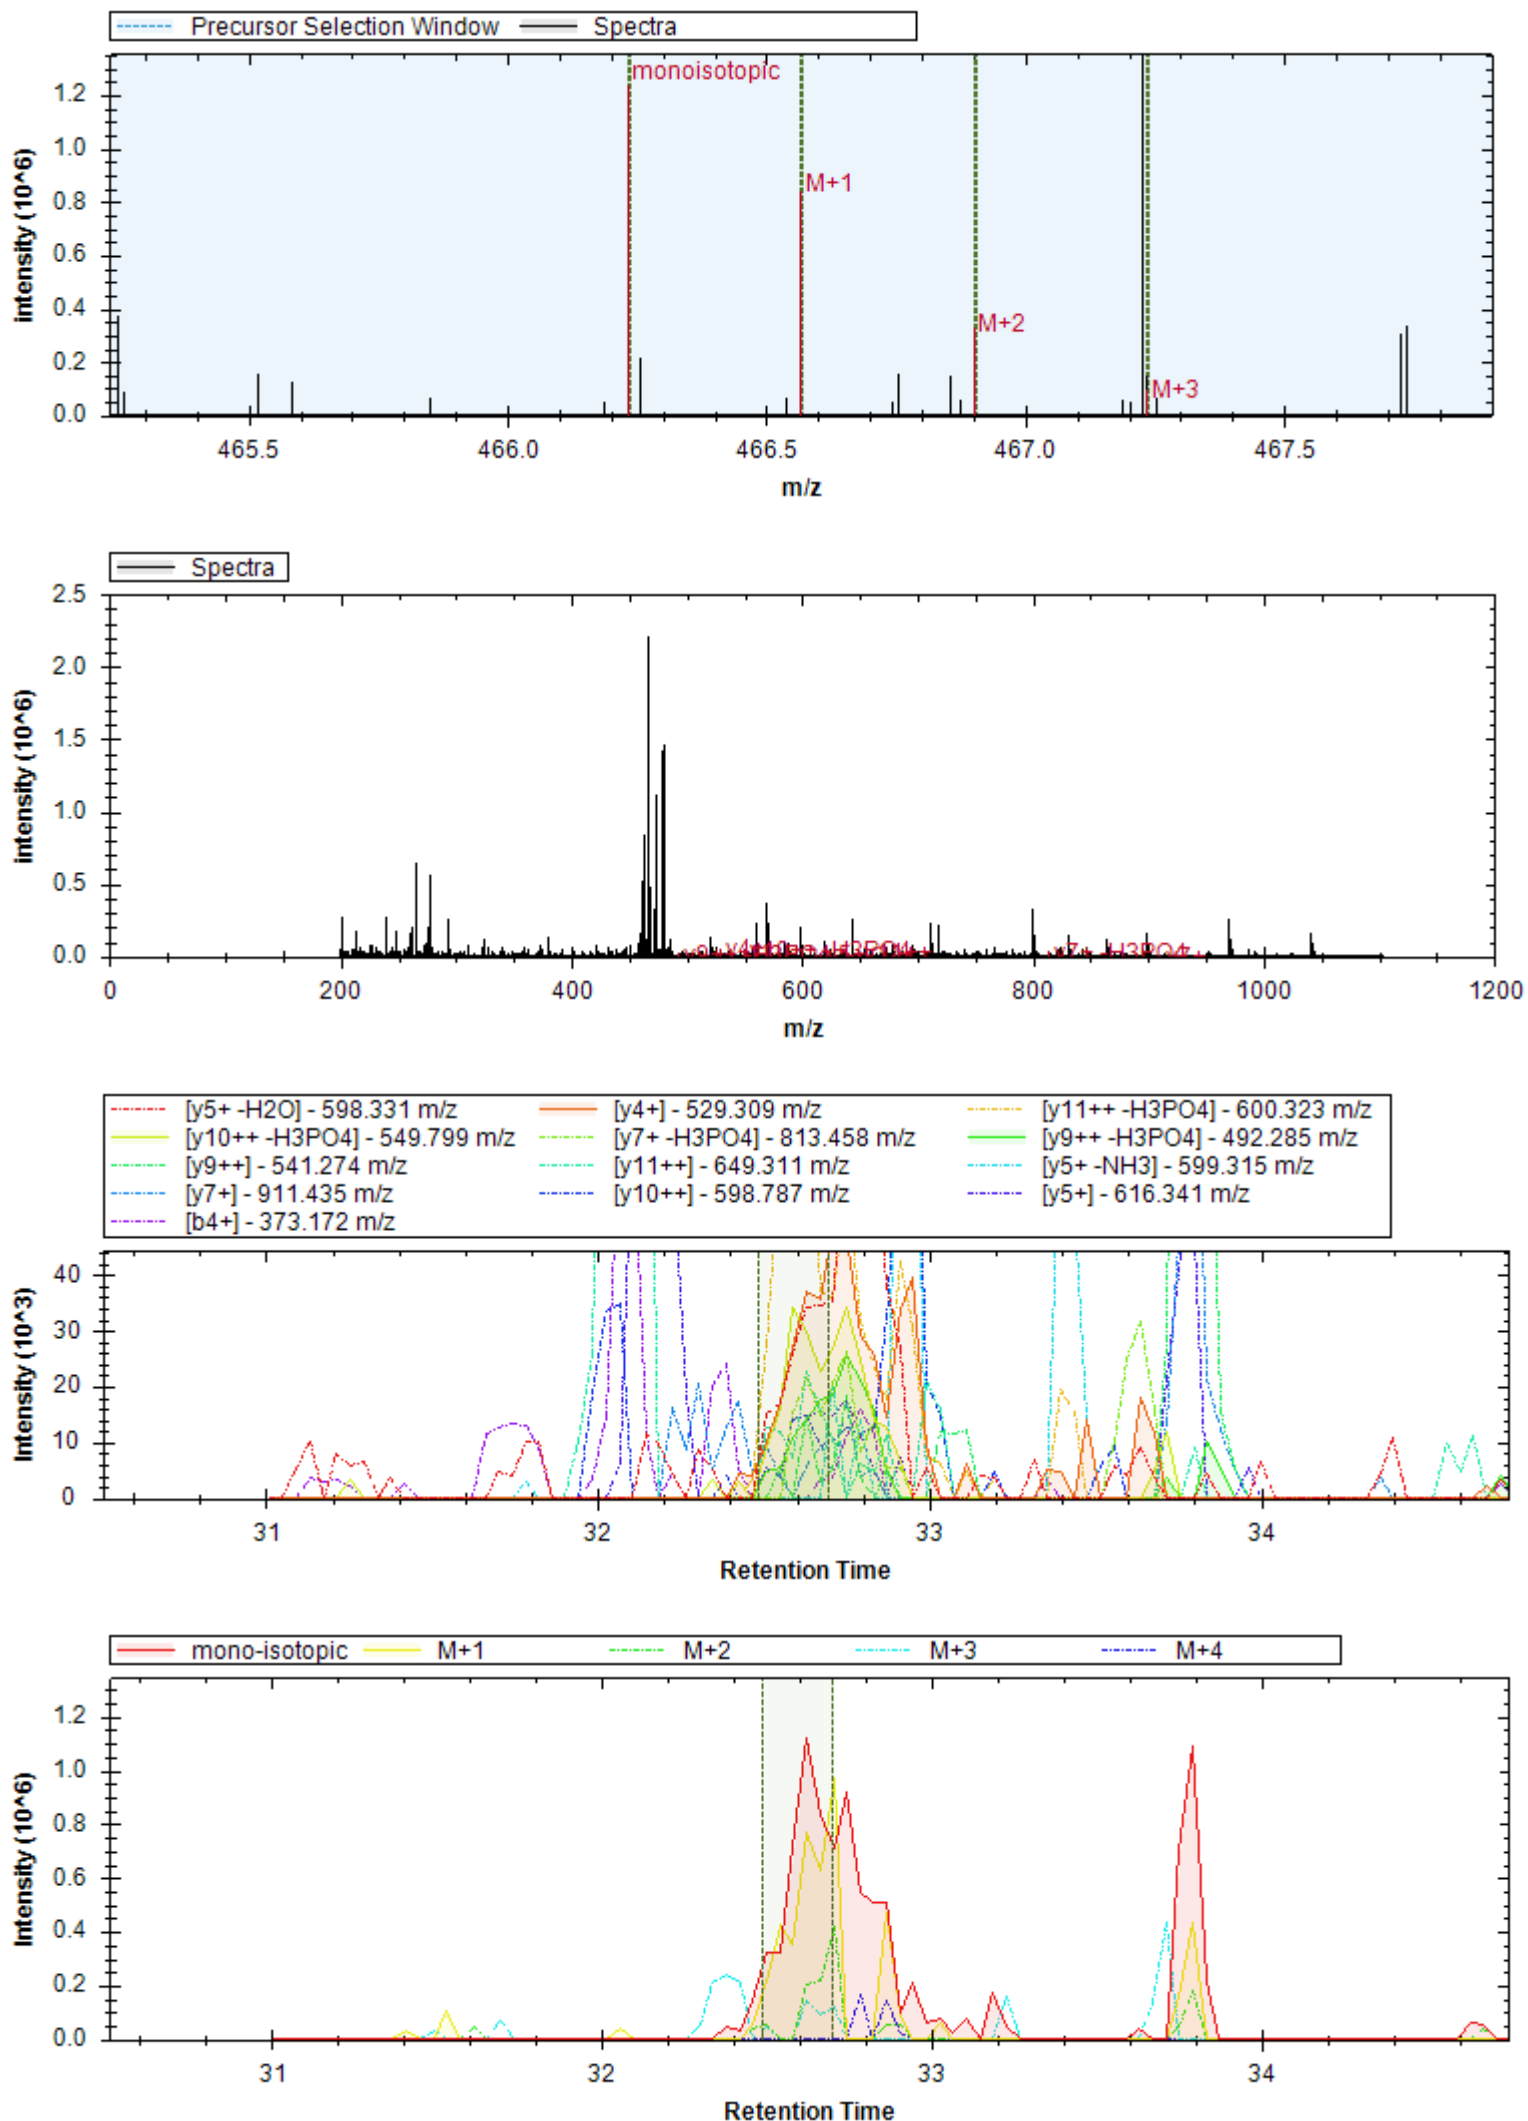

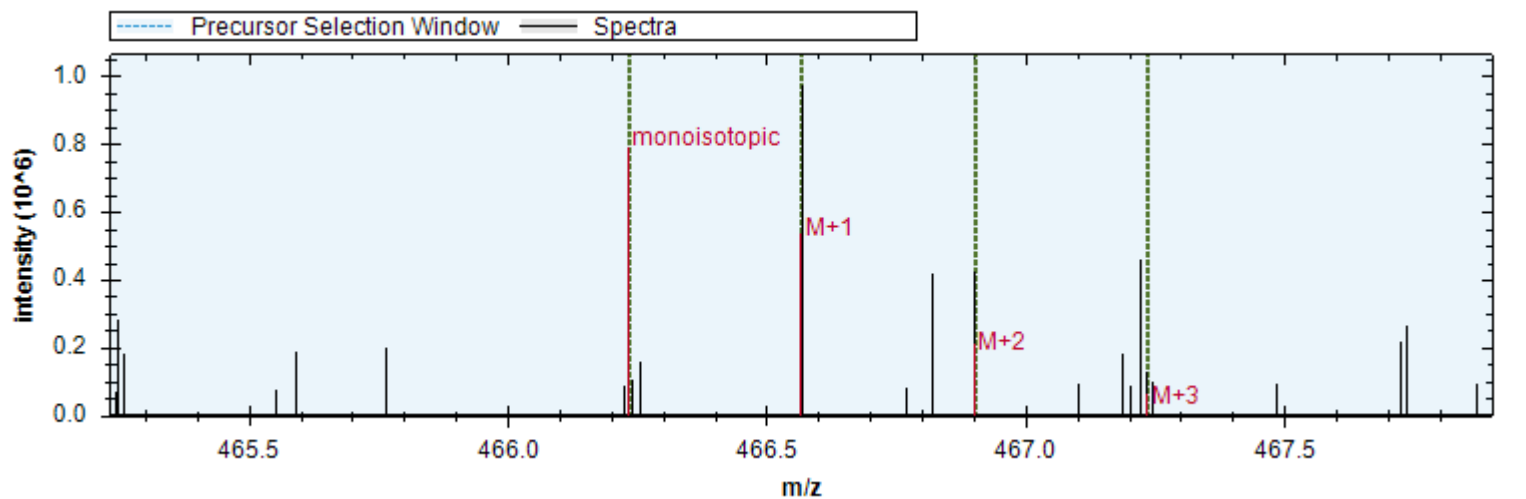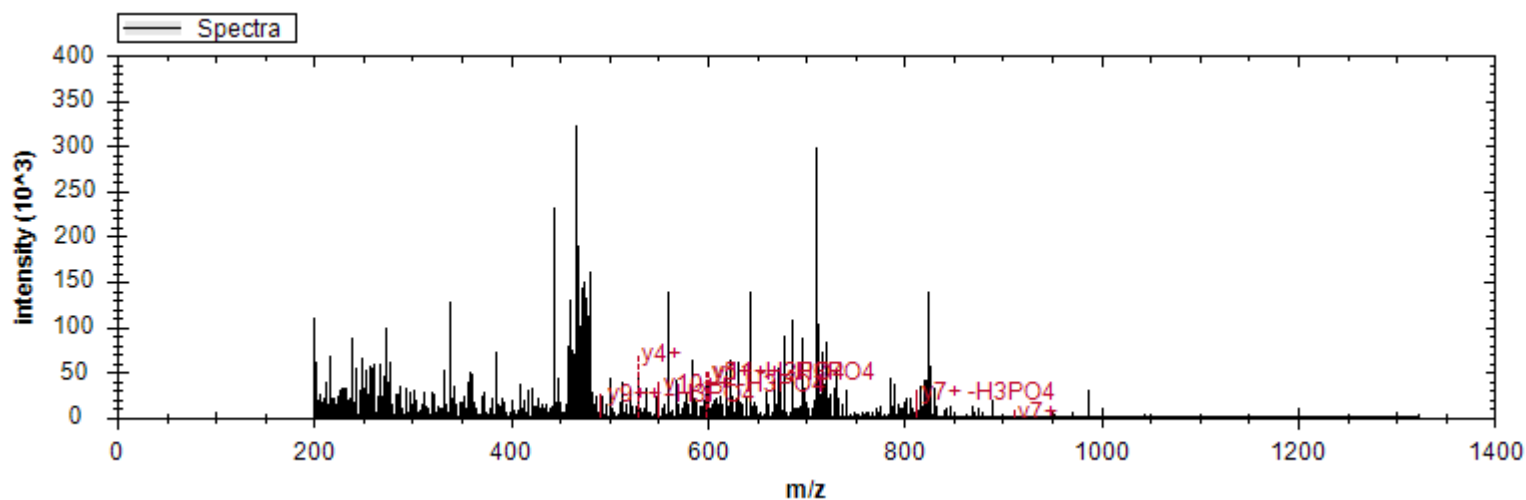

- |                              |                            |                              |
|------------------------------|----------------------------|------------------------------|
| [y5+ -H3PO4] - 598.331 m/z   | [y4+] - 529.309 m/z        | [y11++ -H3PO4] - 600.323 m/z |
| [y10++ -H3PO4] - 549.799 m/z | [y7+ -H3PO4] - 813.458 m/z | [y9++ -H3PO4] - 492.285 m/z  |
| [y9++ ] - 541.274 m/z        | [y11++ ] - 649.311 m/z     | [y10++ ] - 598.787 m/z       |
| [y7+ ] - 911.435 m/z         | [y6+ -H3PO4] - 726.426 m/z | [y5+ ] - 696.308 m/z         |
| [y7+ -NH3] - 992.208 m/z     | [b4+] - 373.172 m/z        | [y4+ -H2O] - 511.299 m/z     |

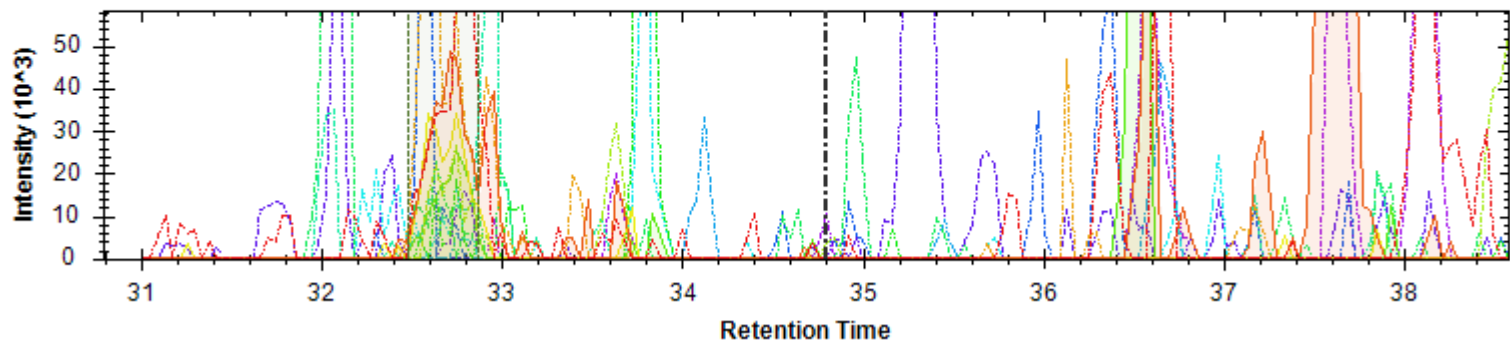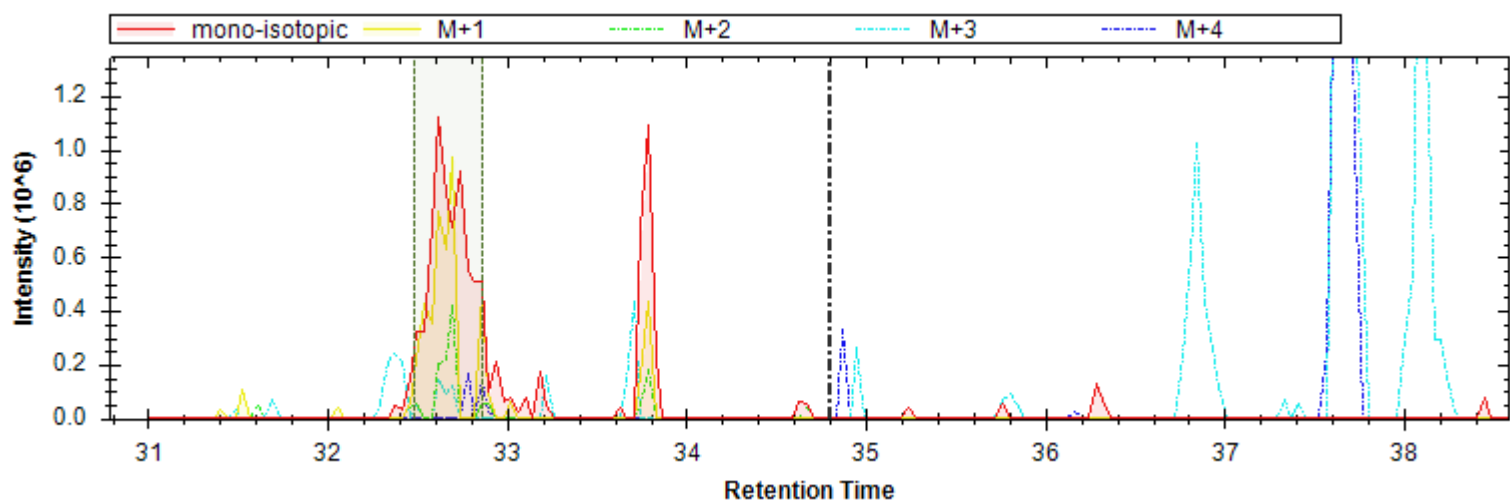

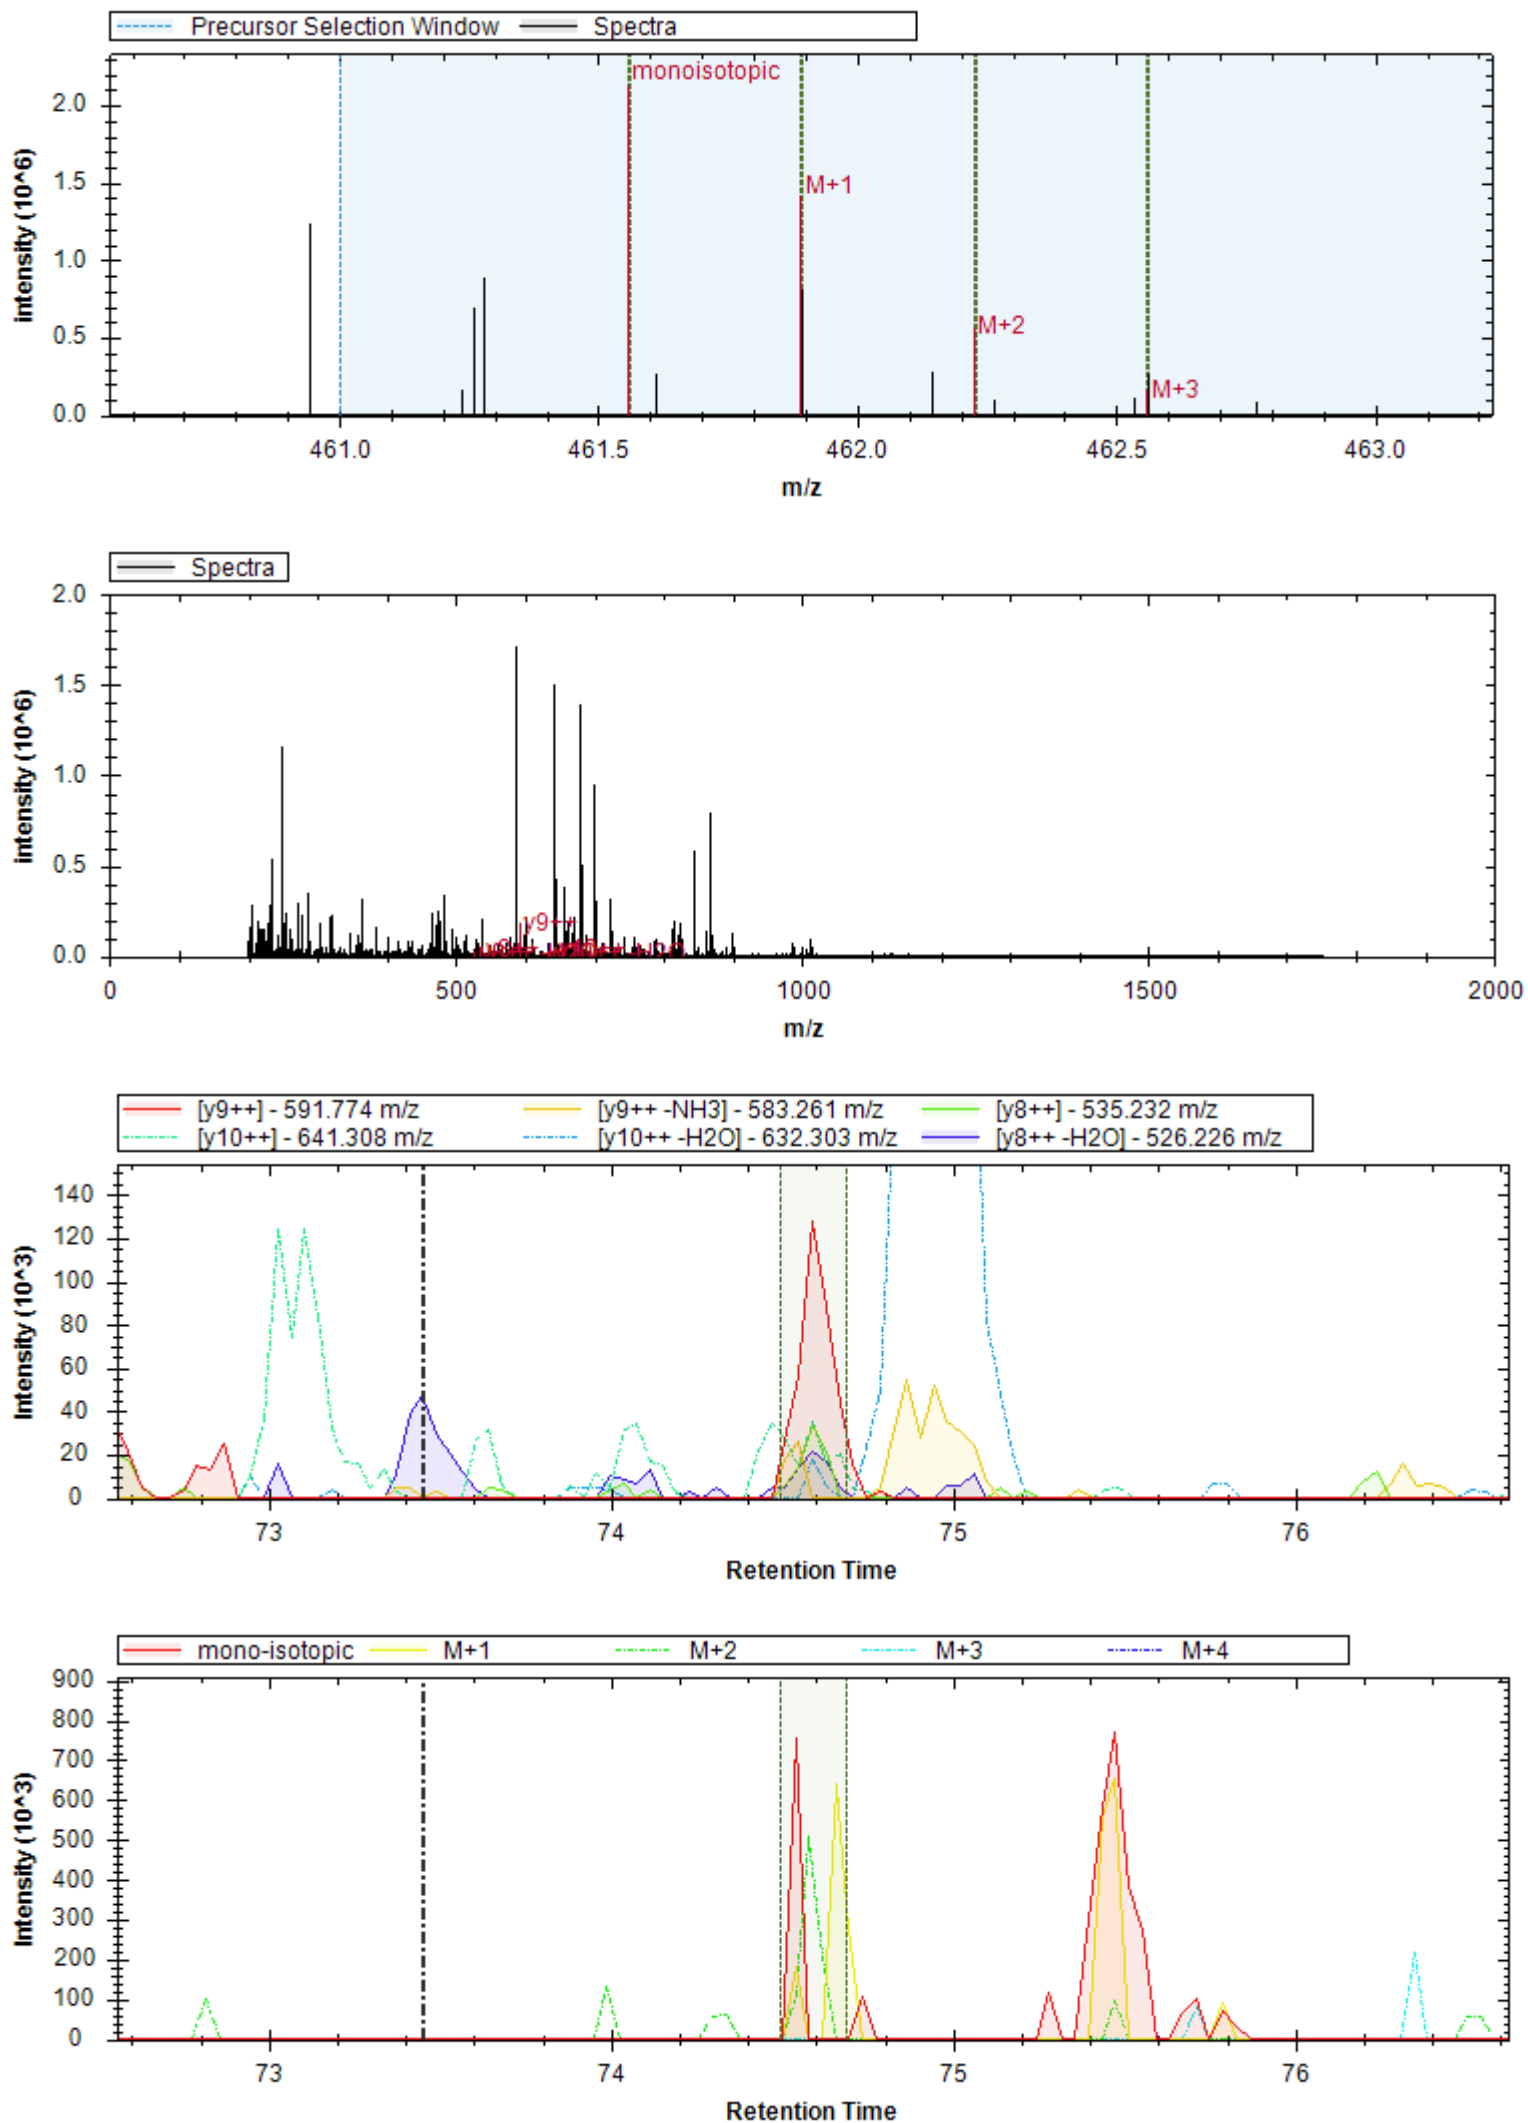

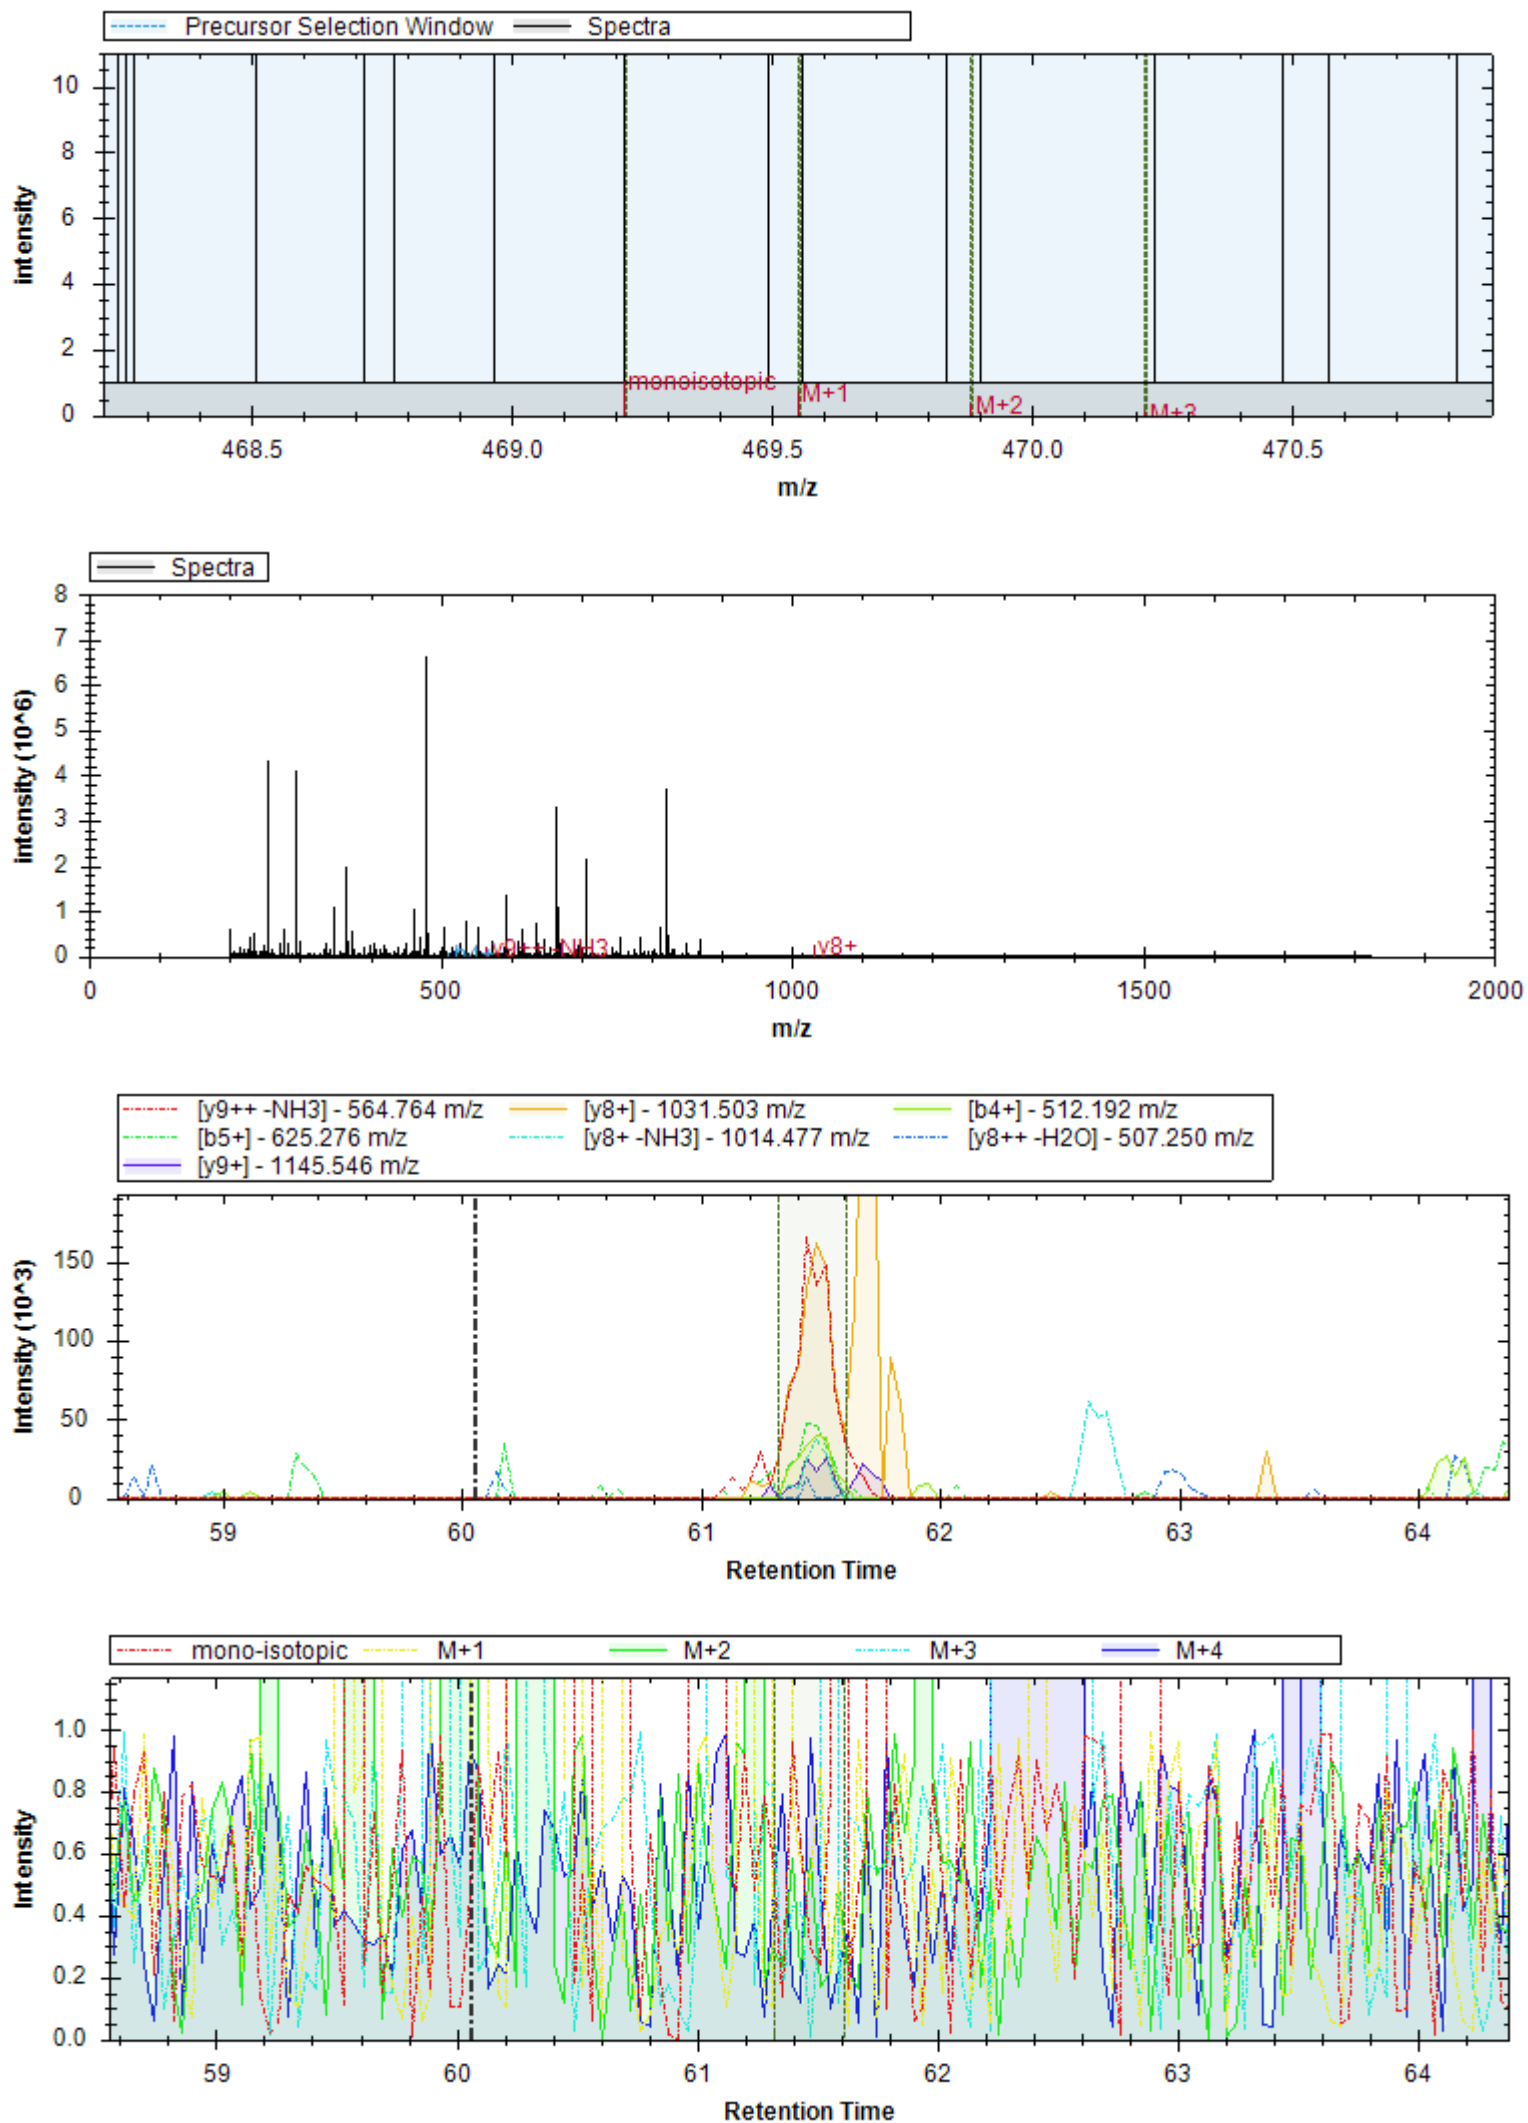

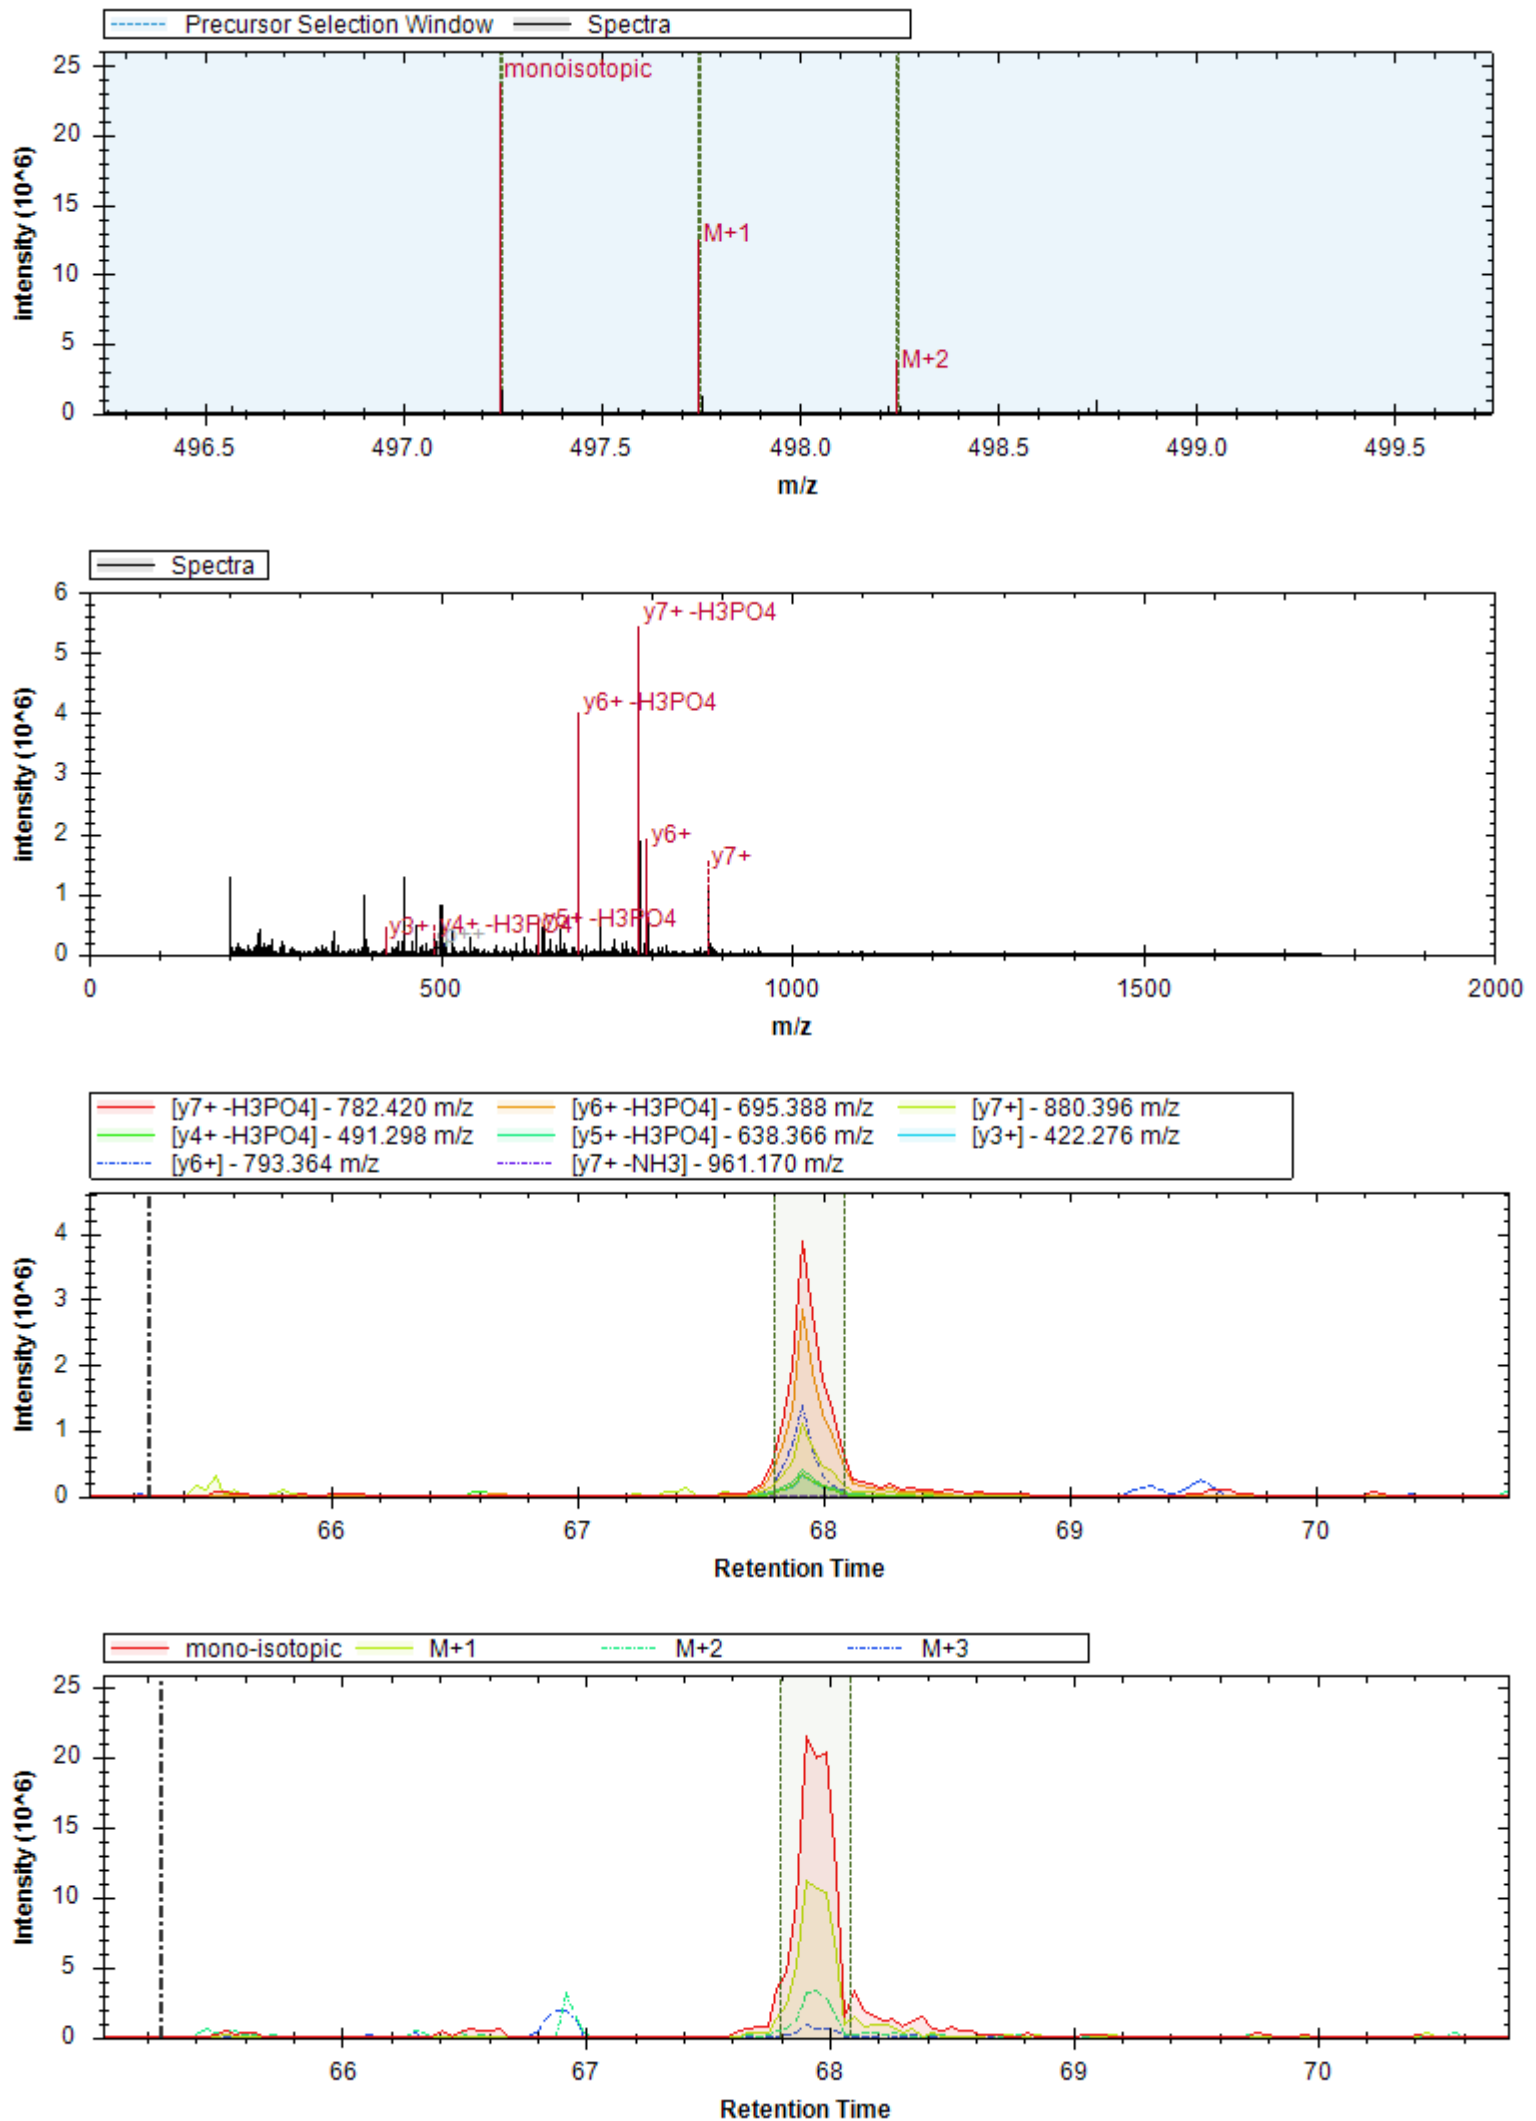

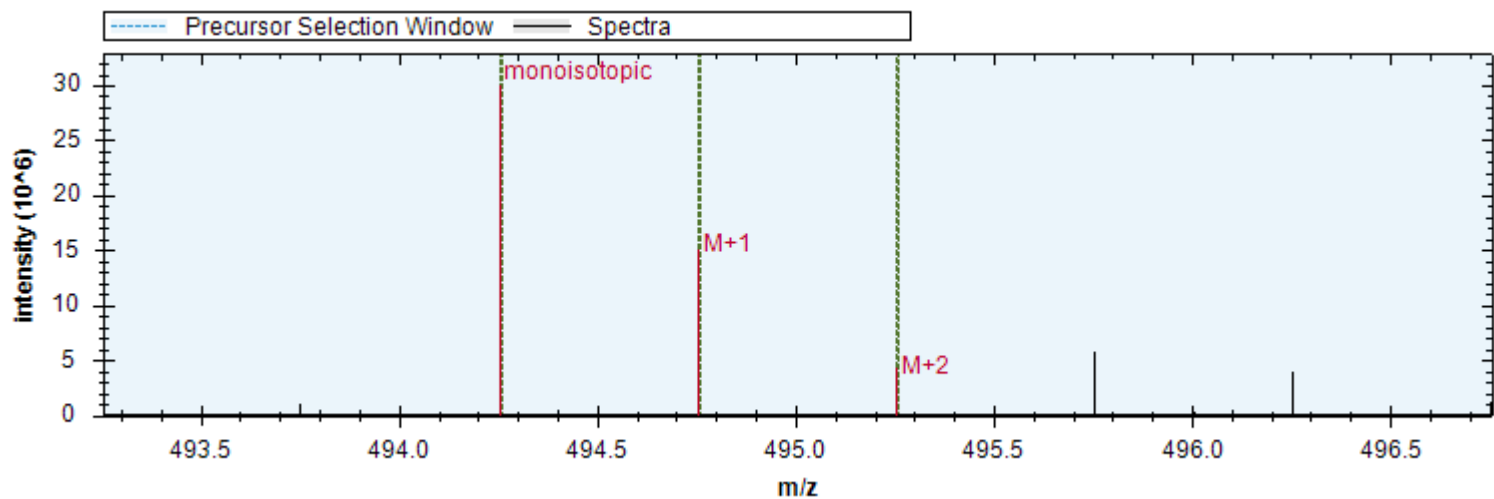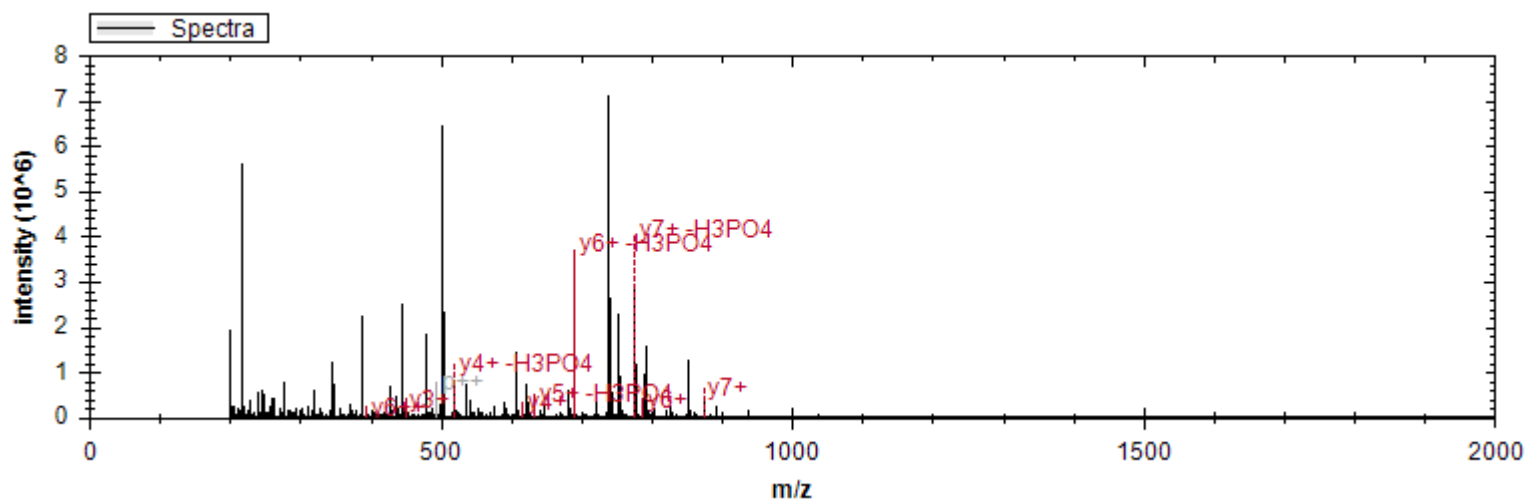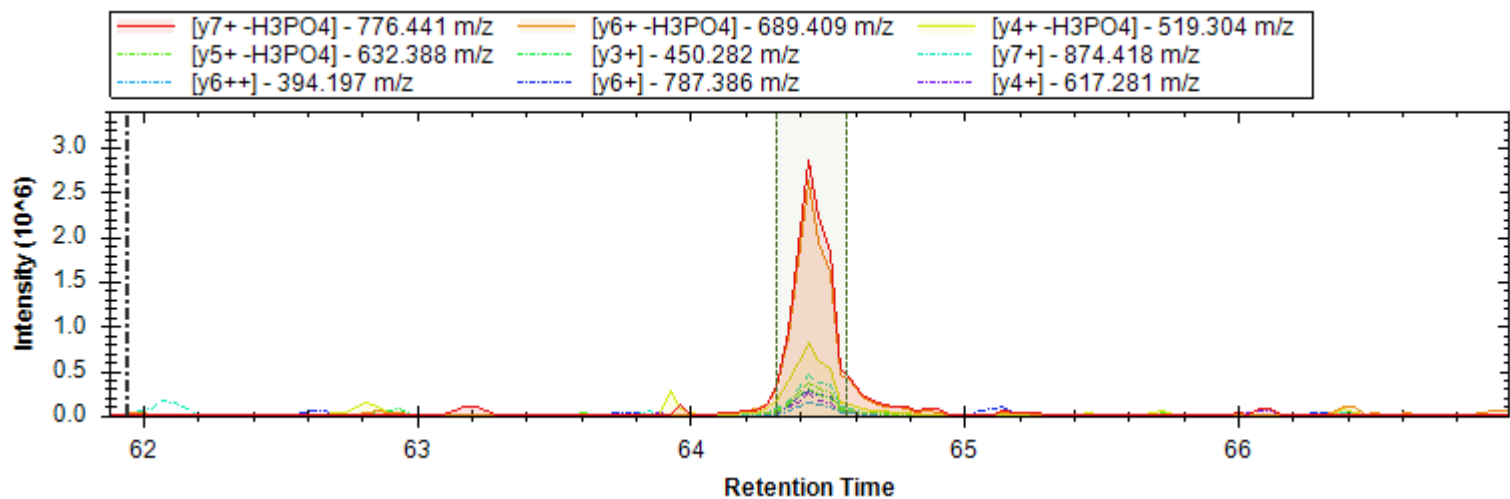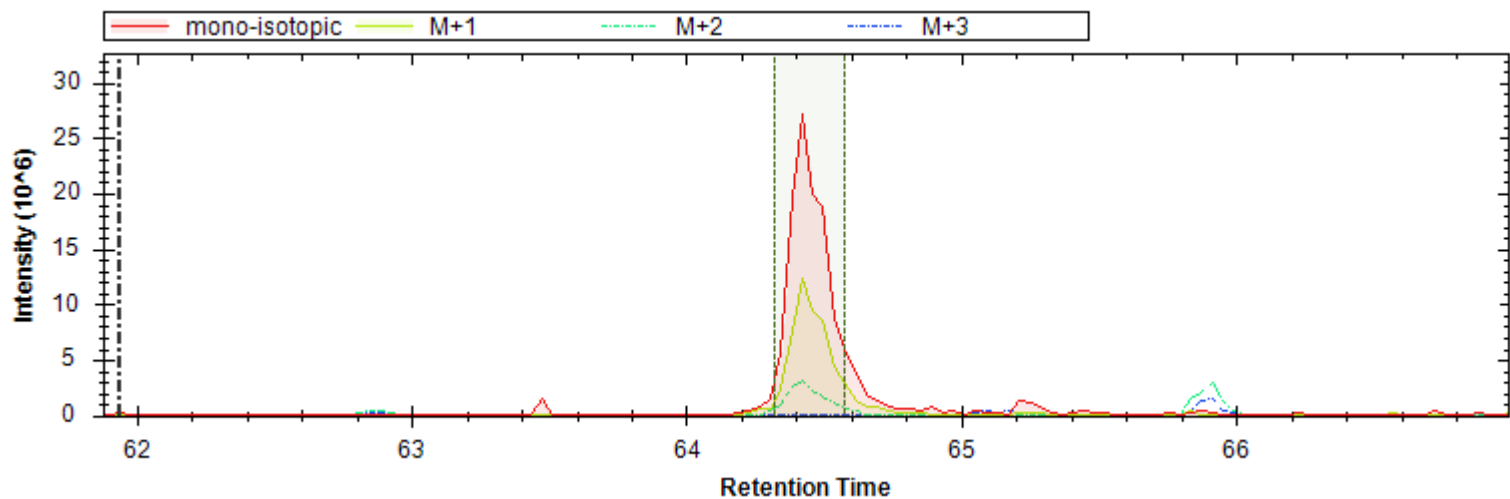

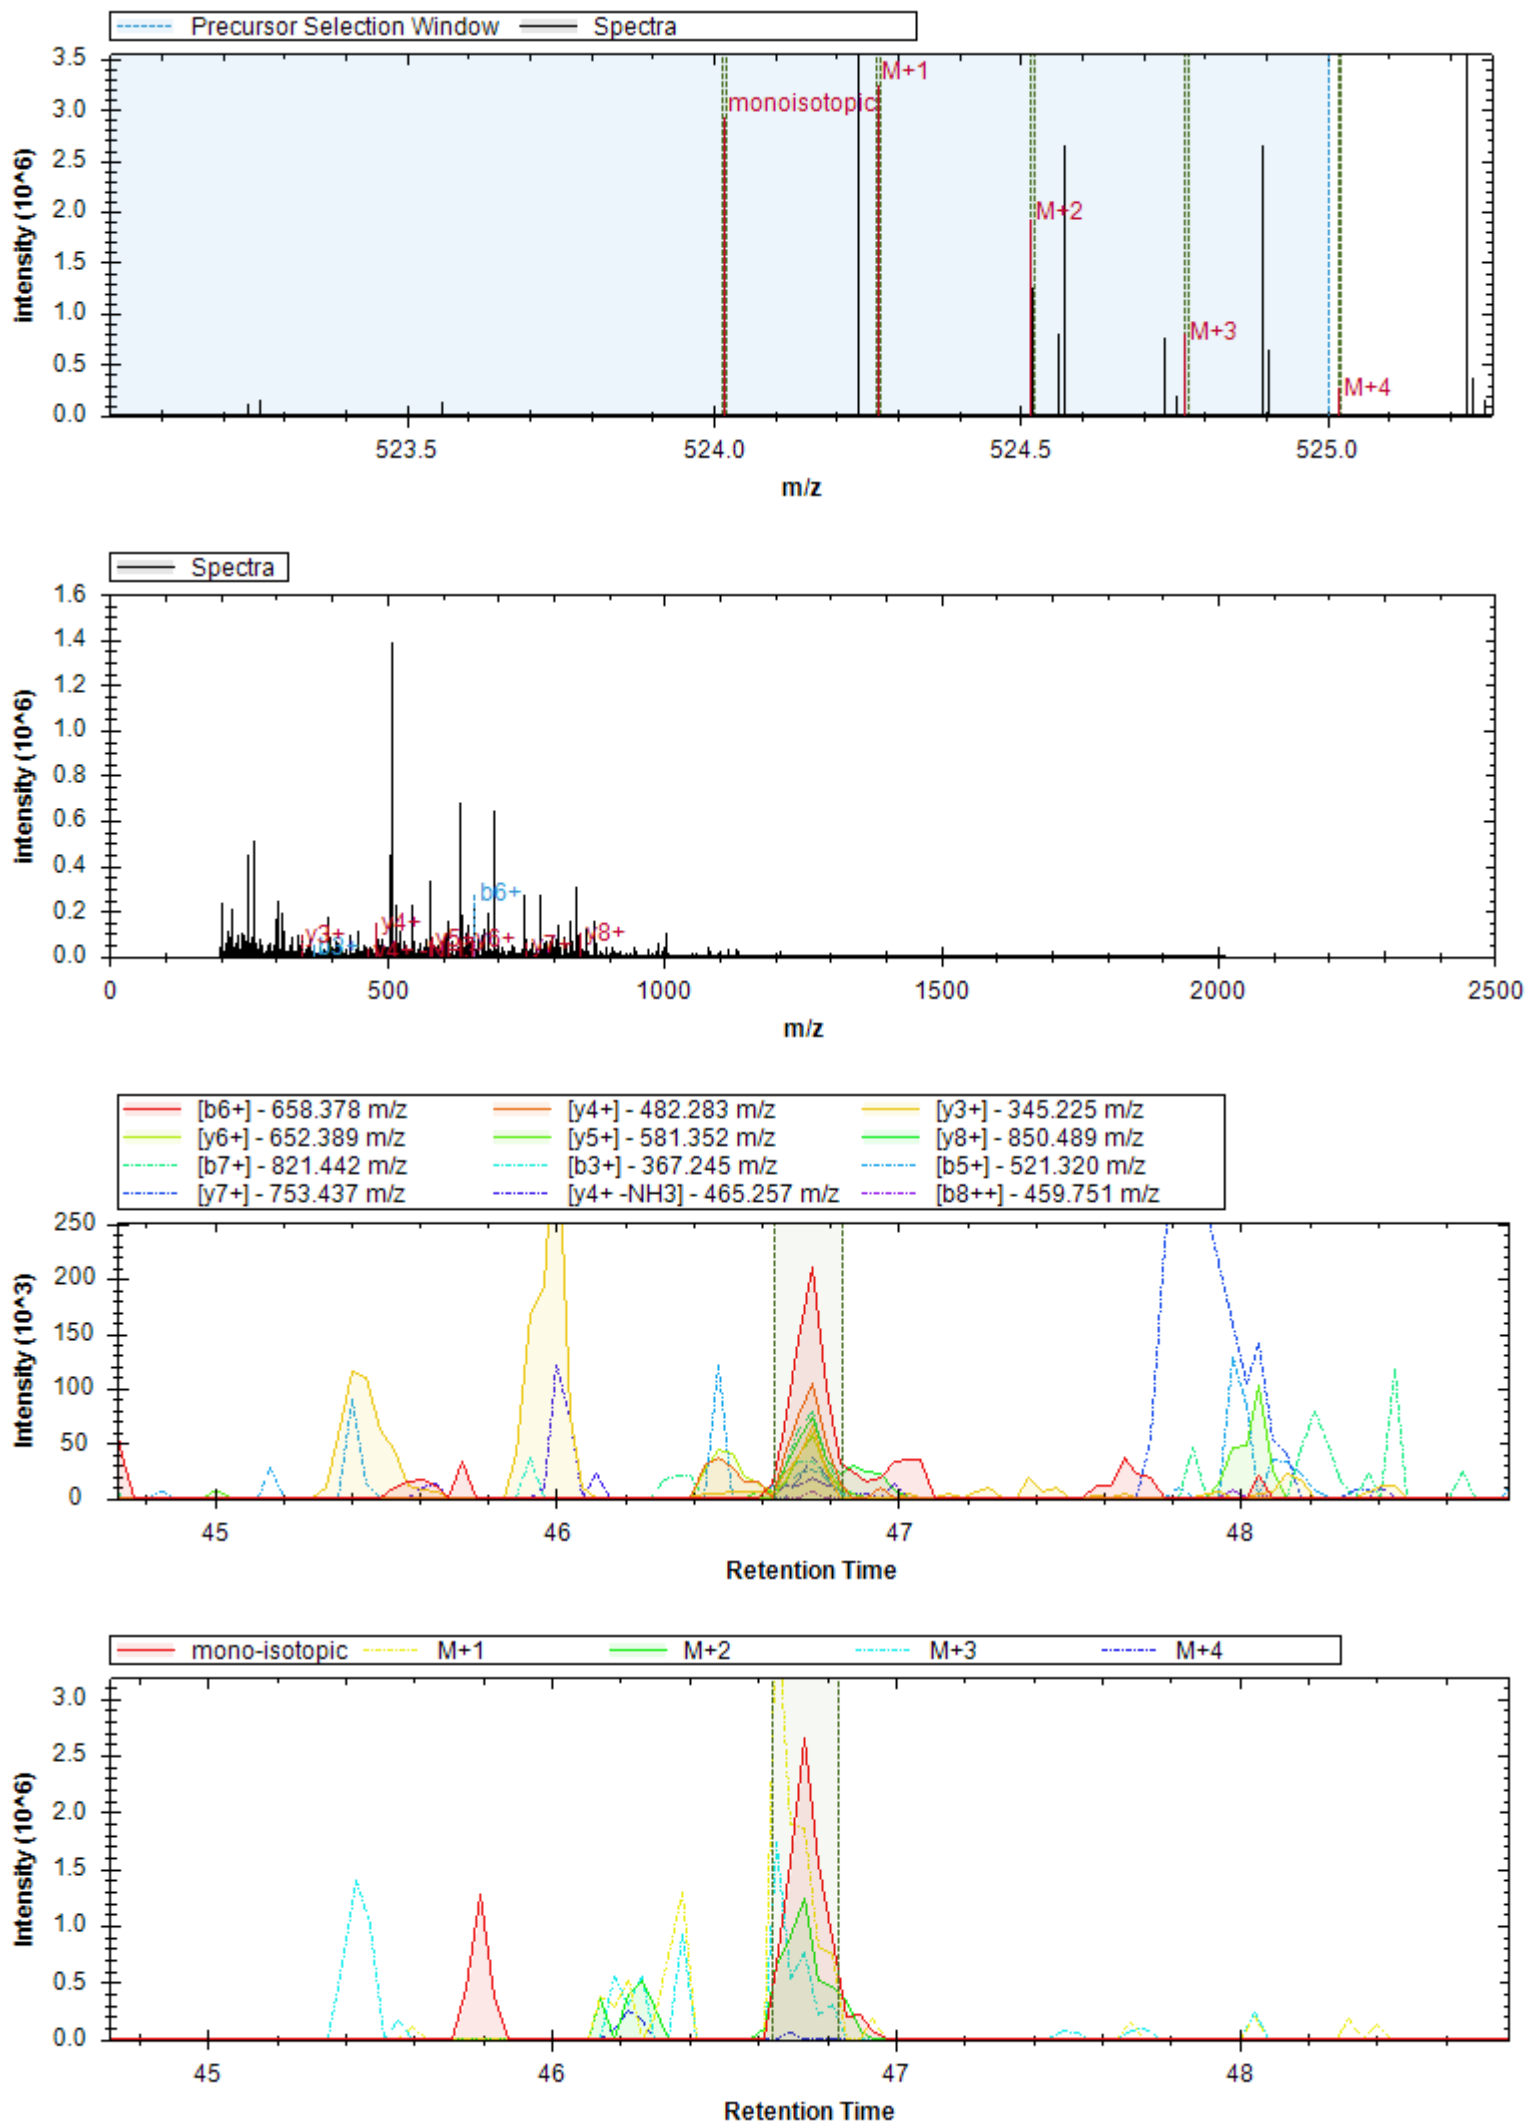

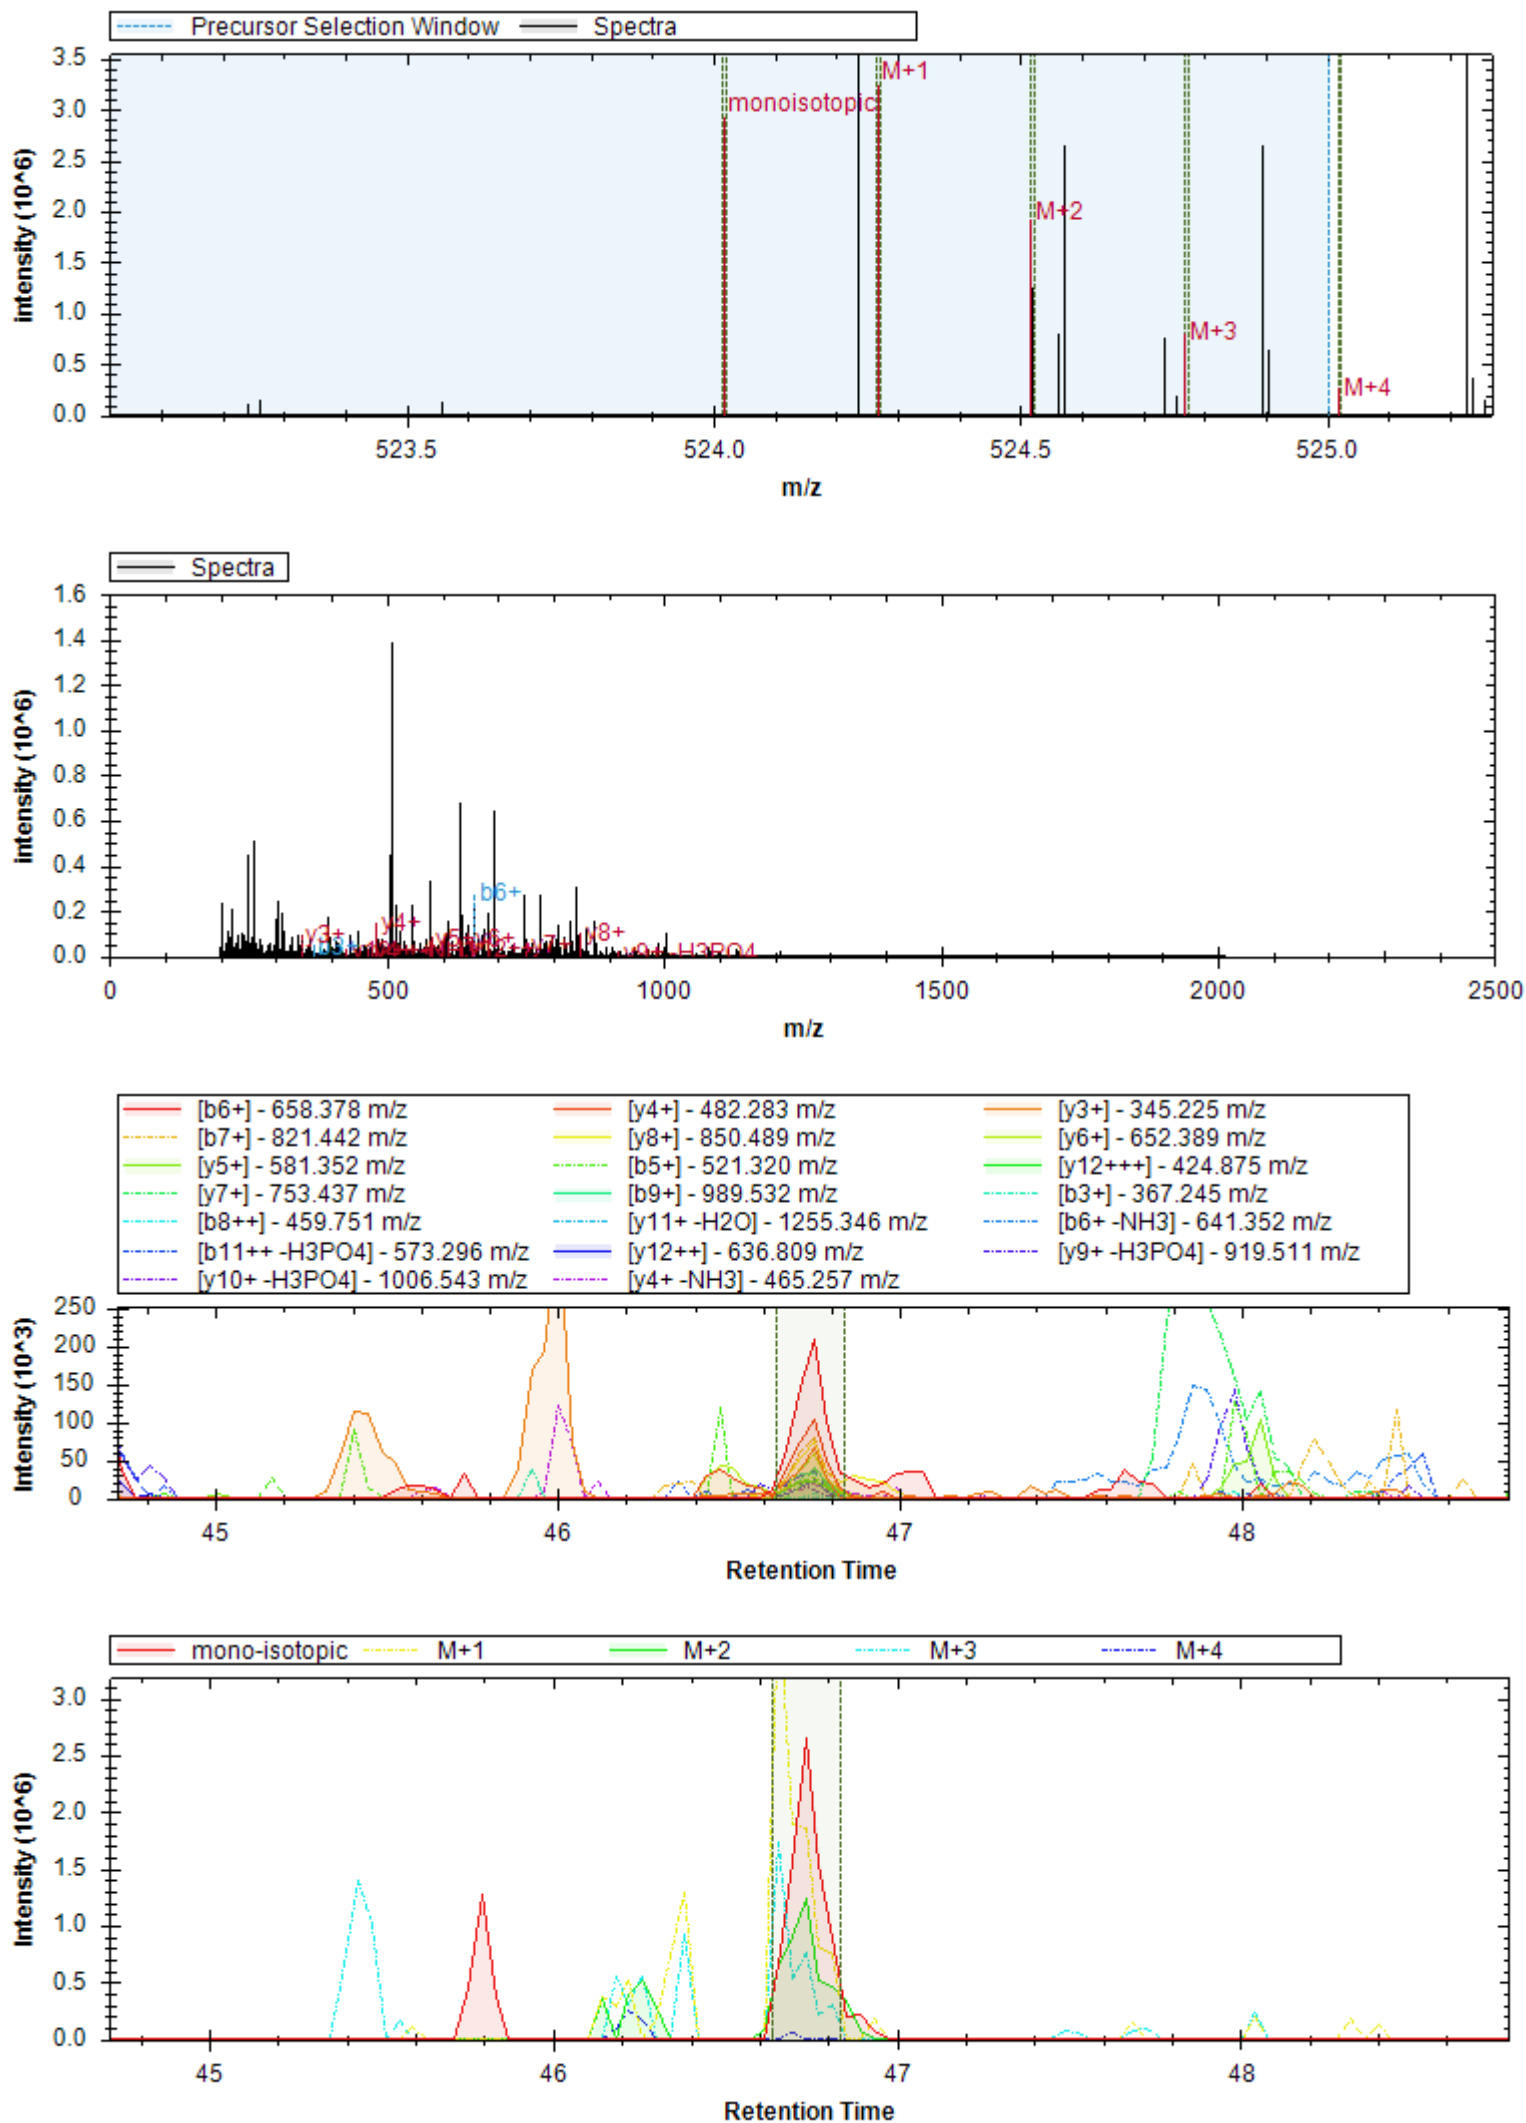



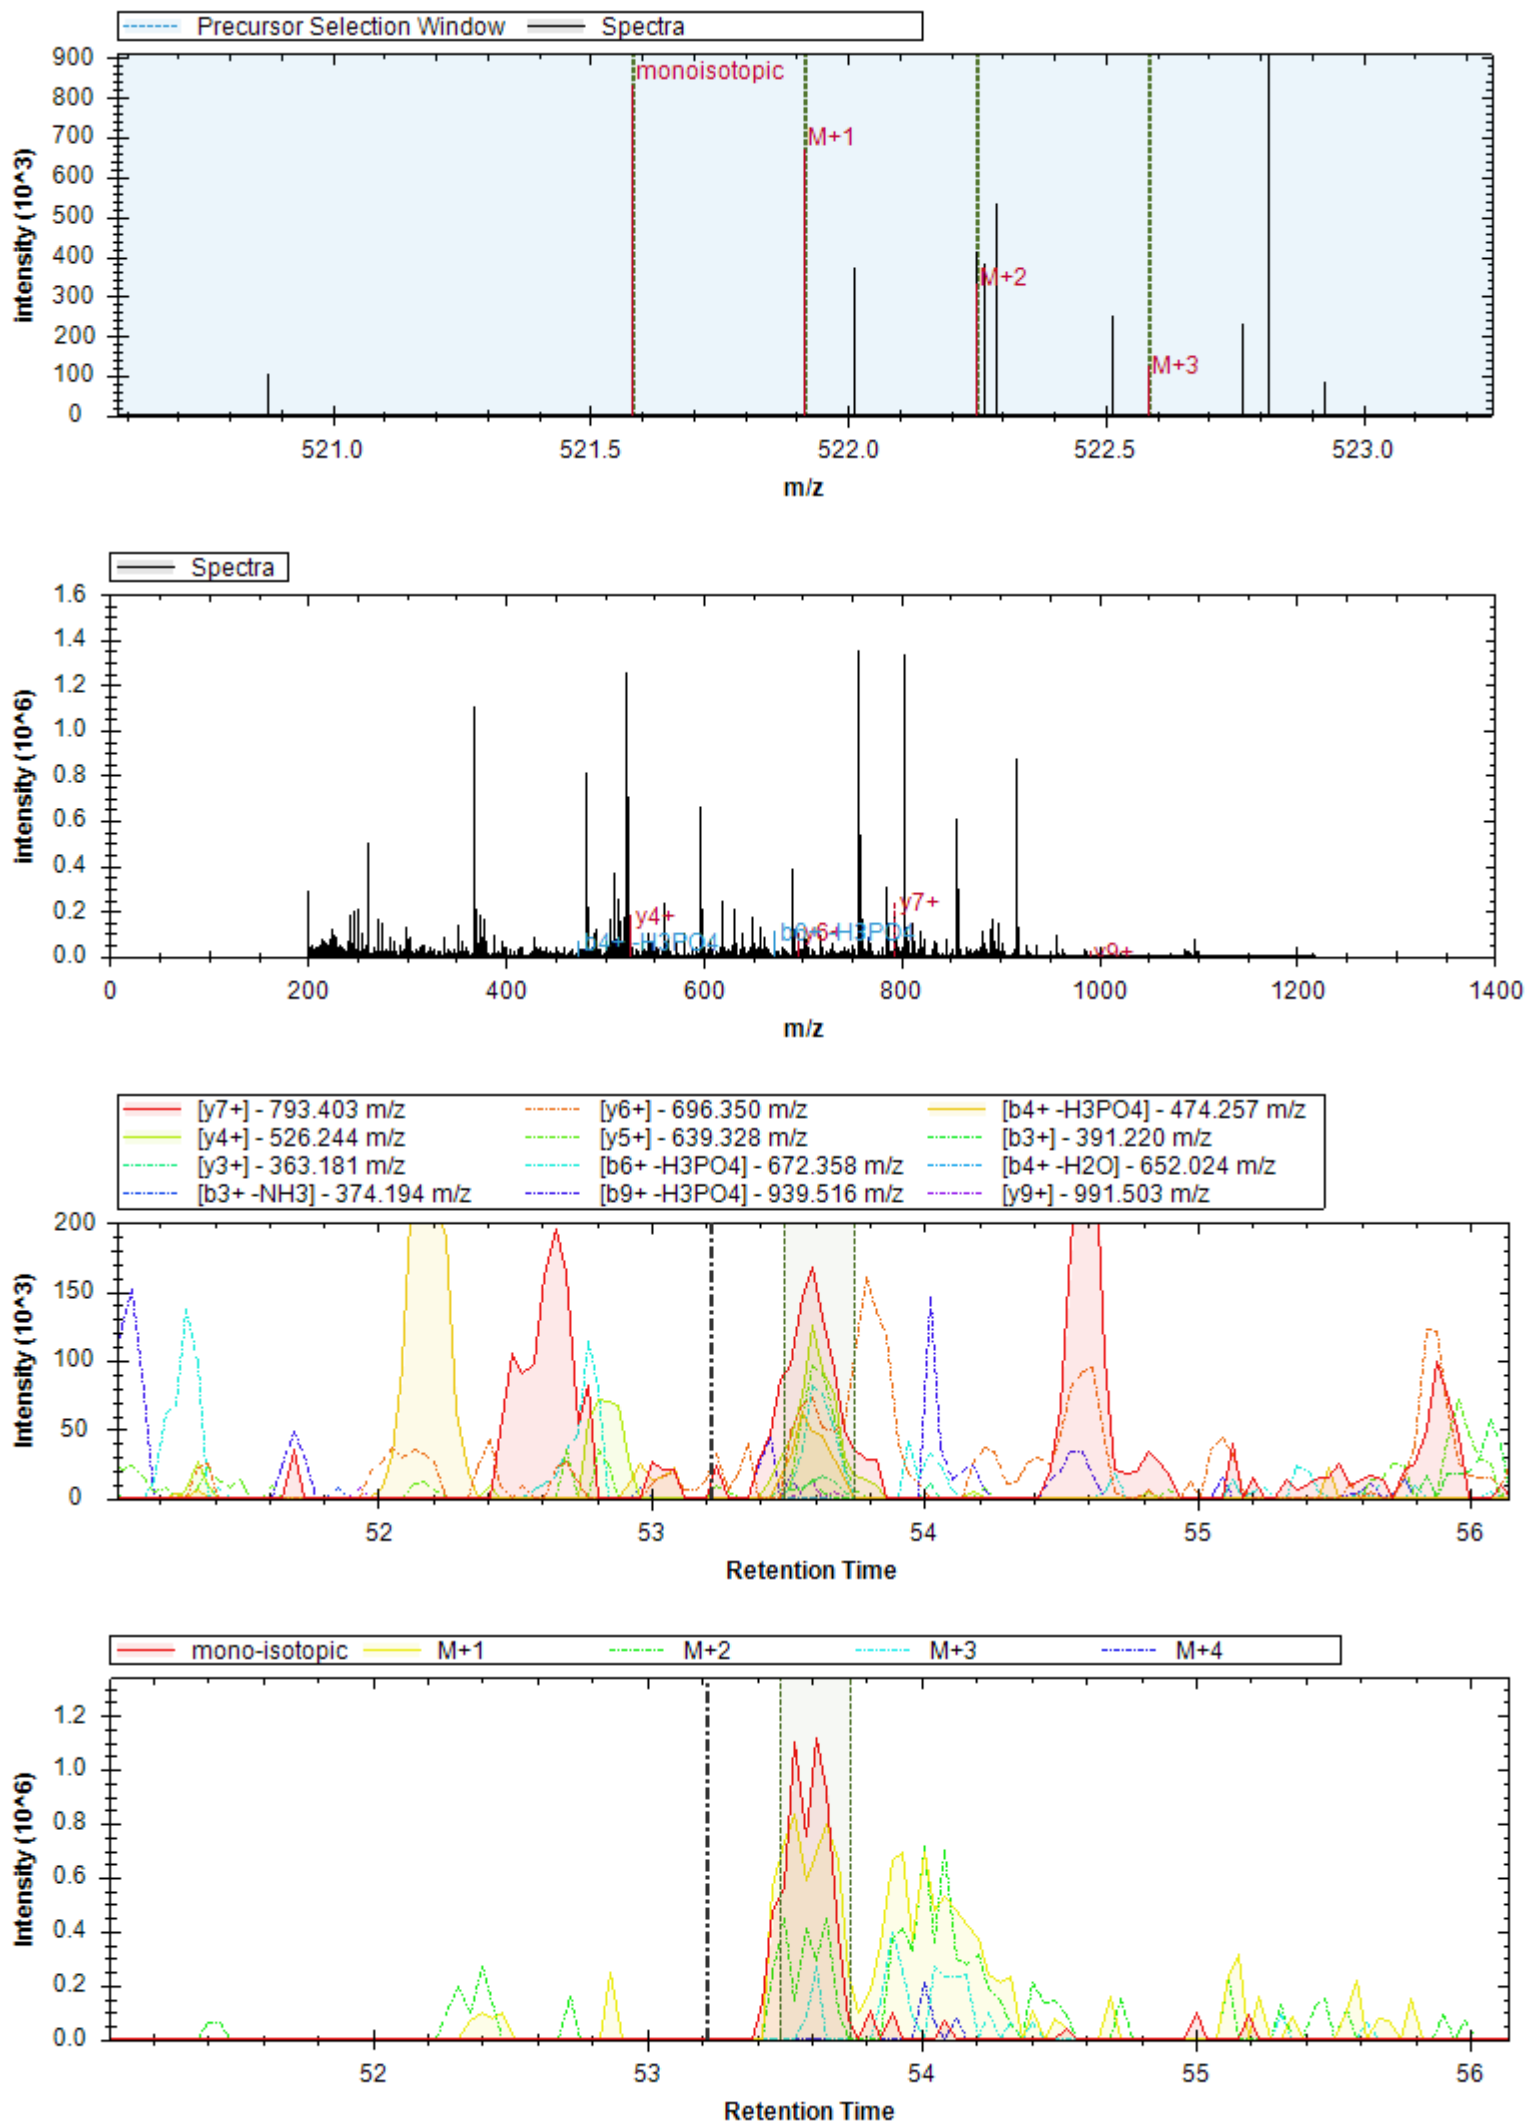

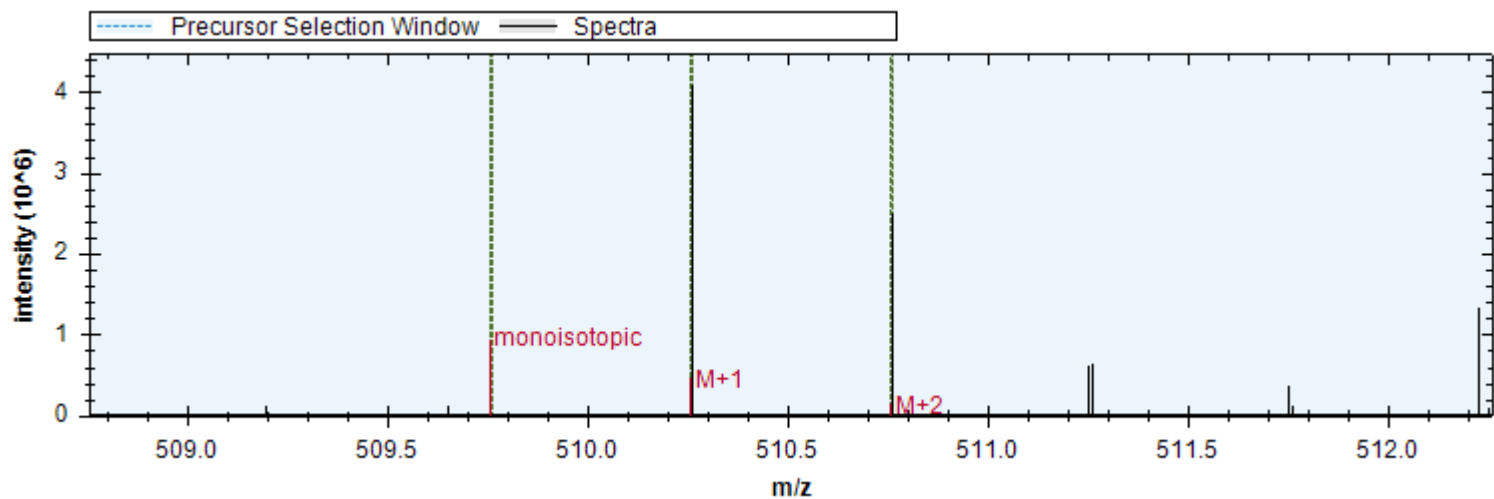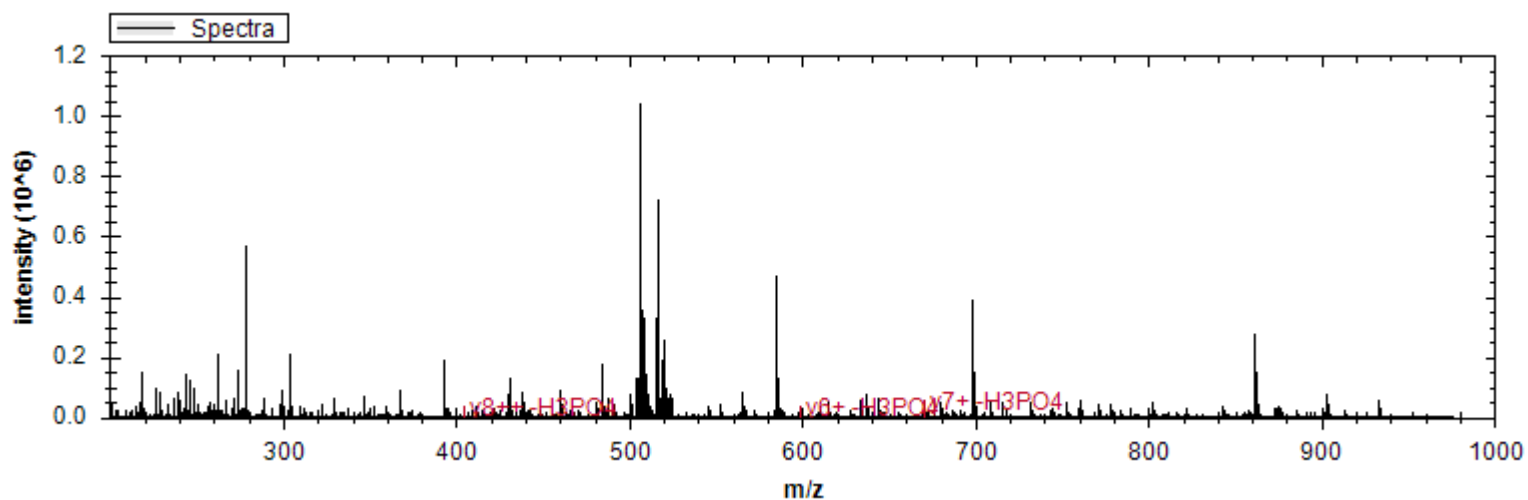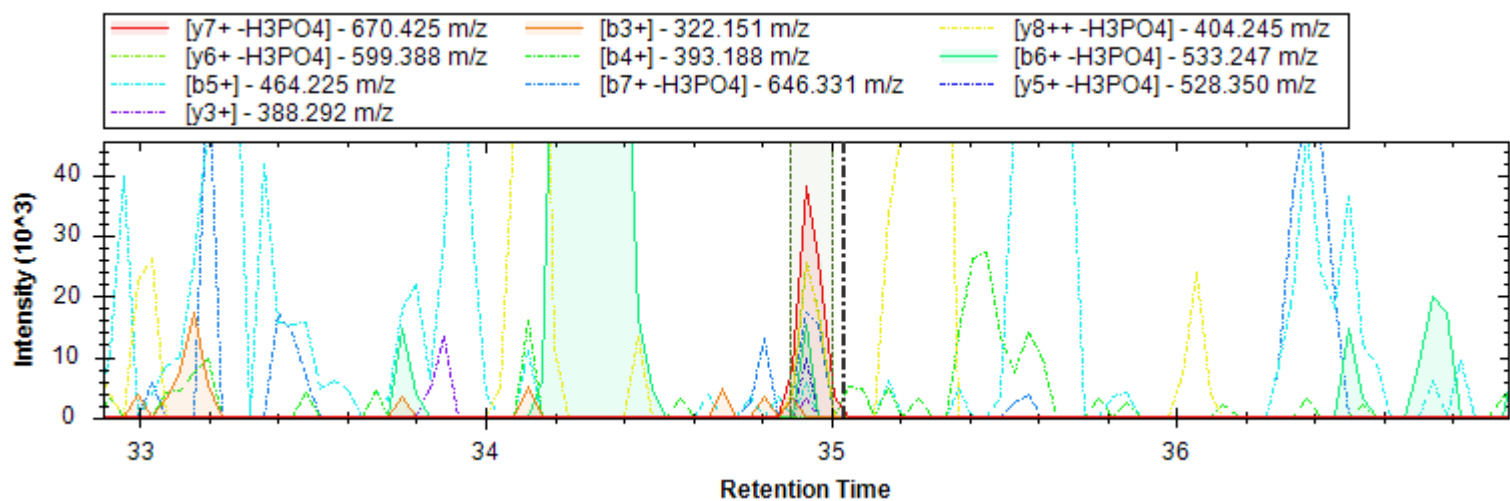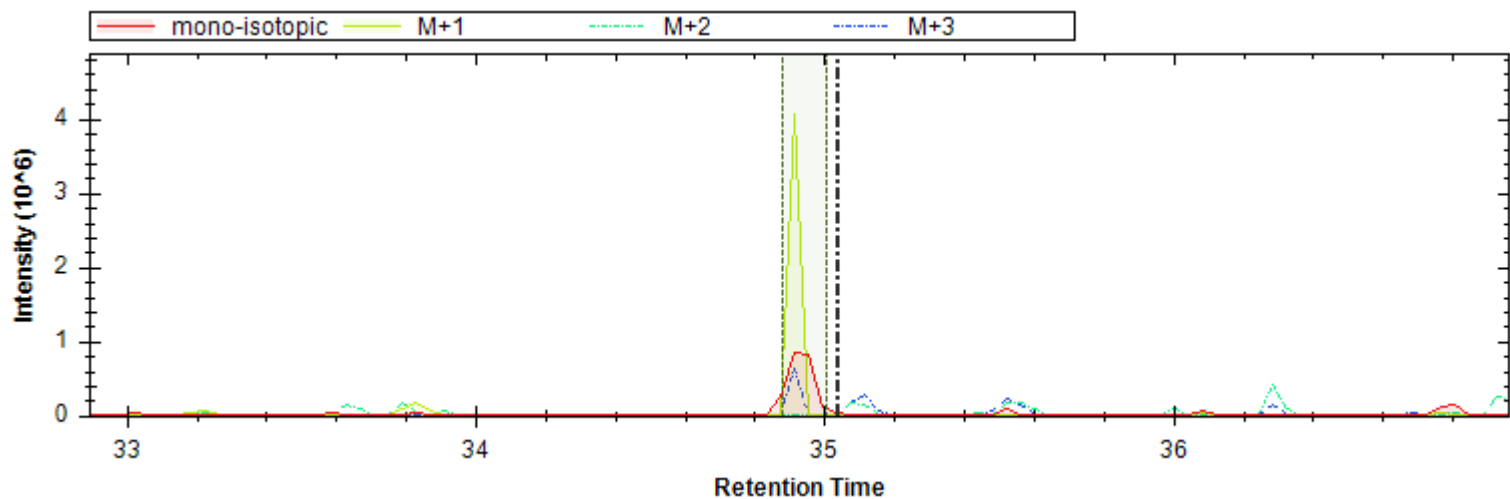

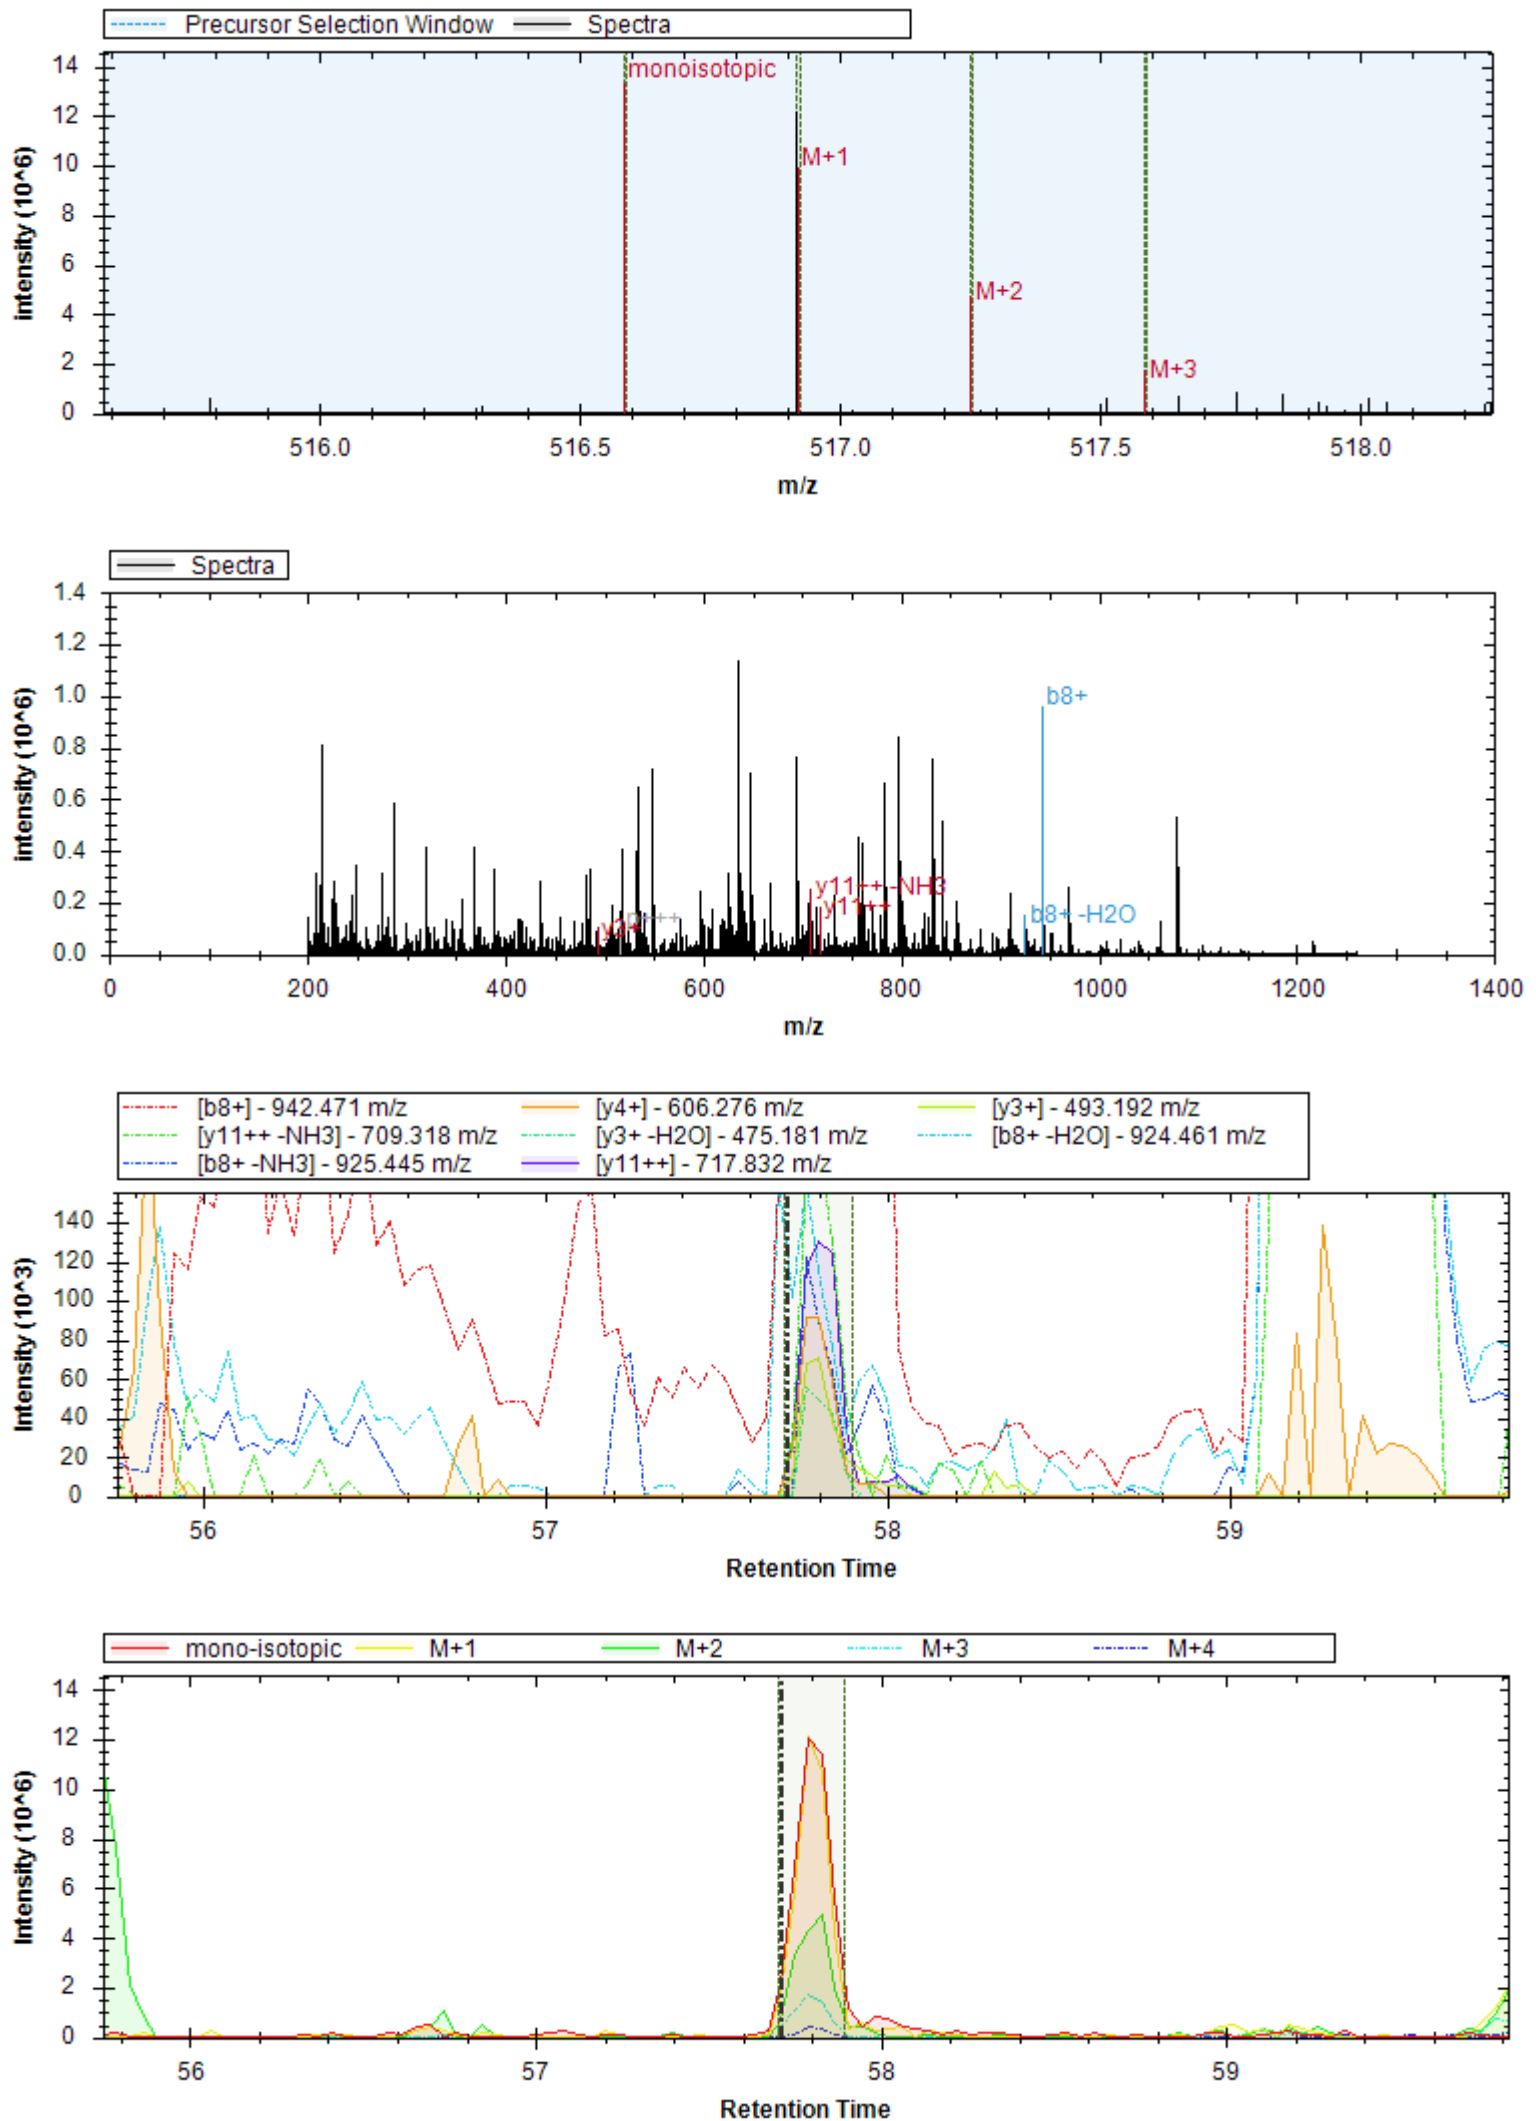

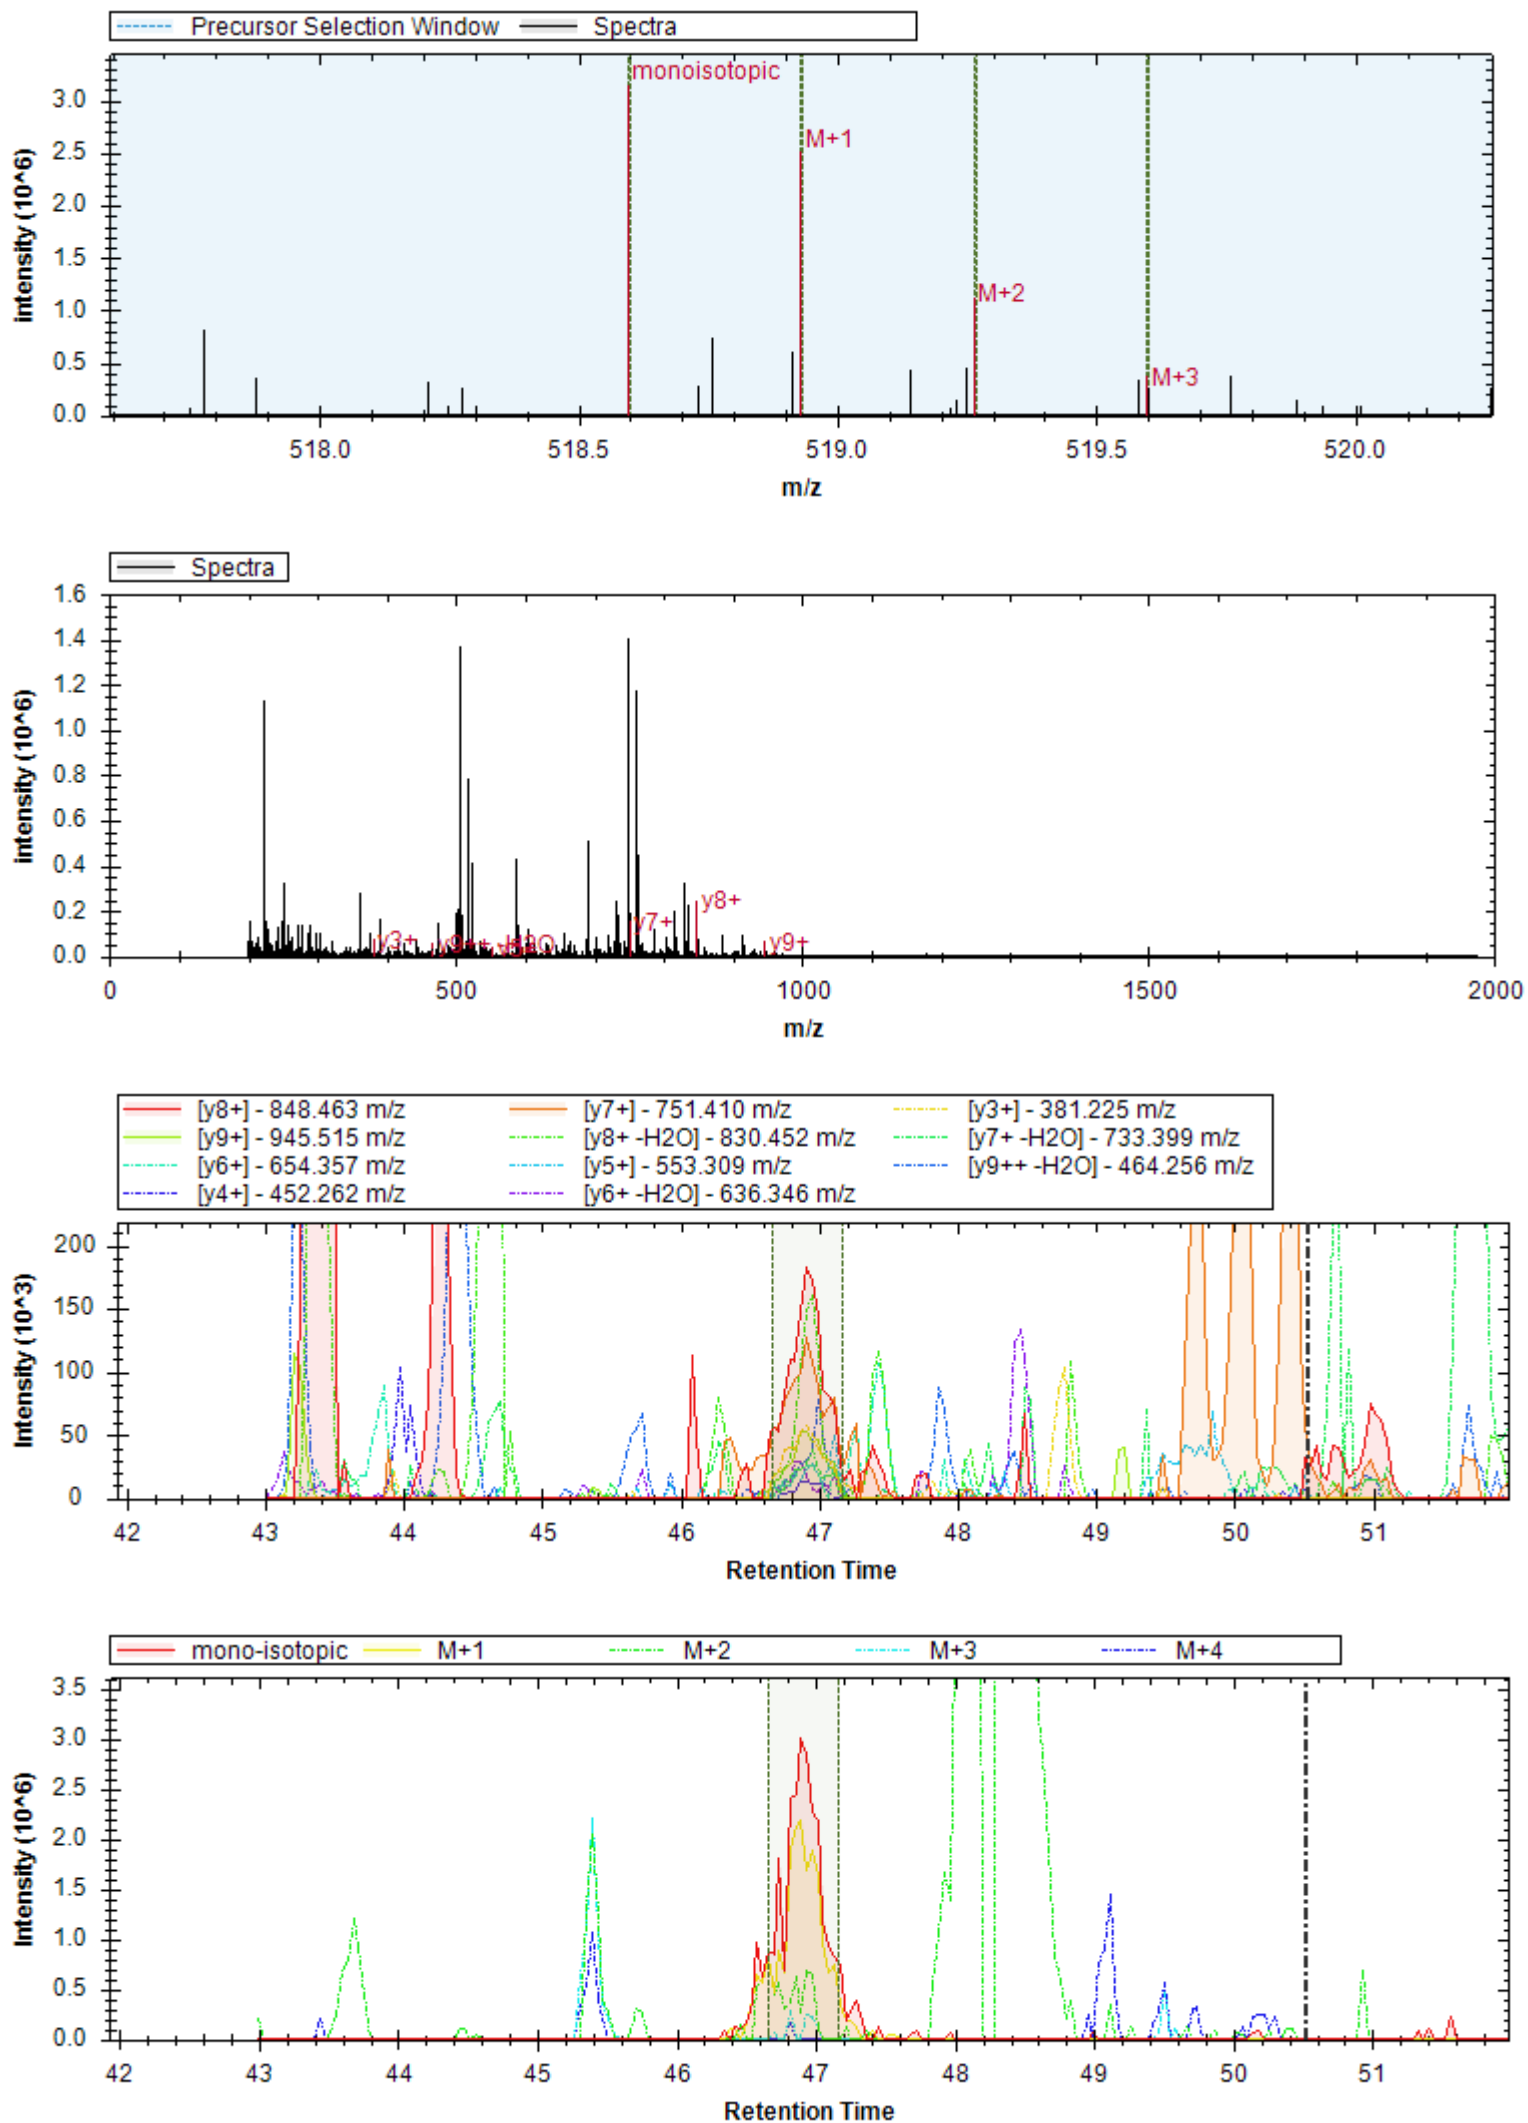

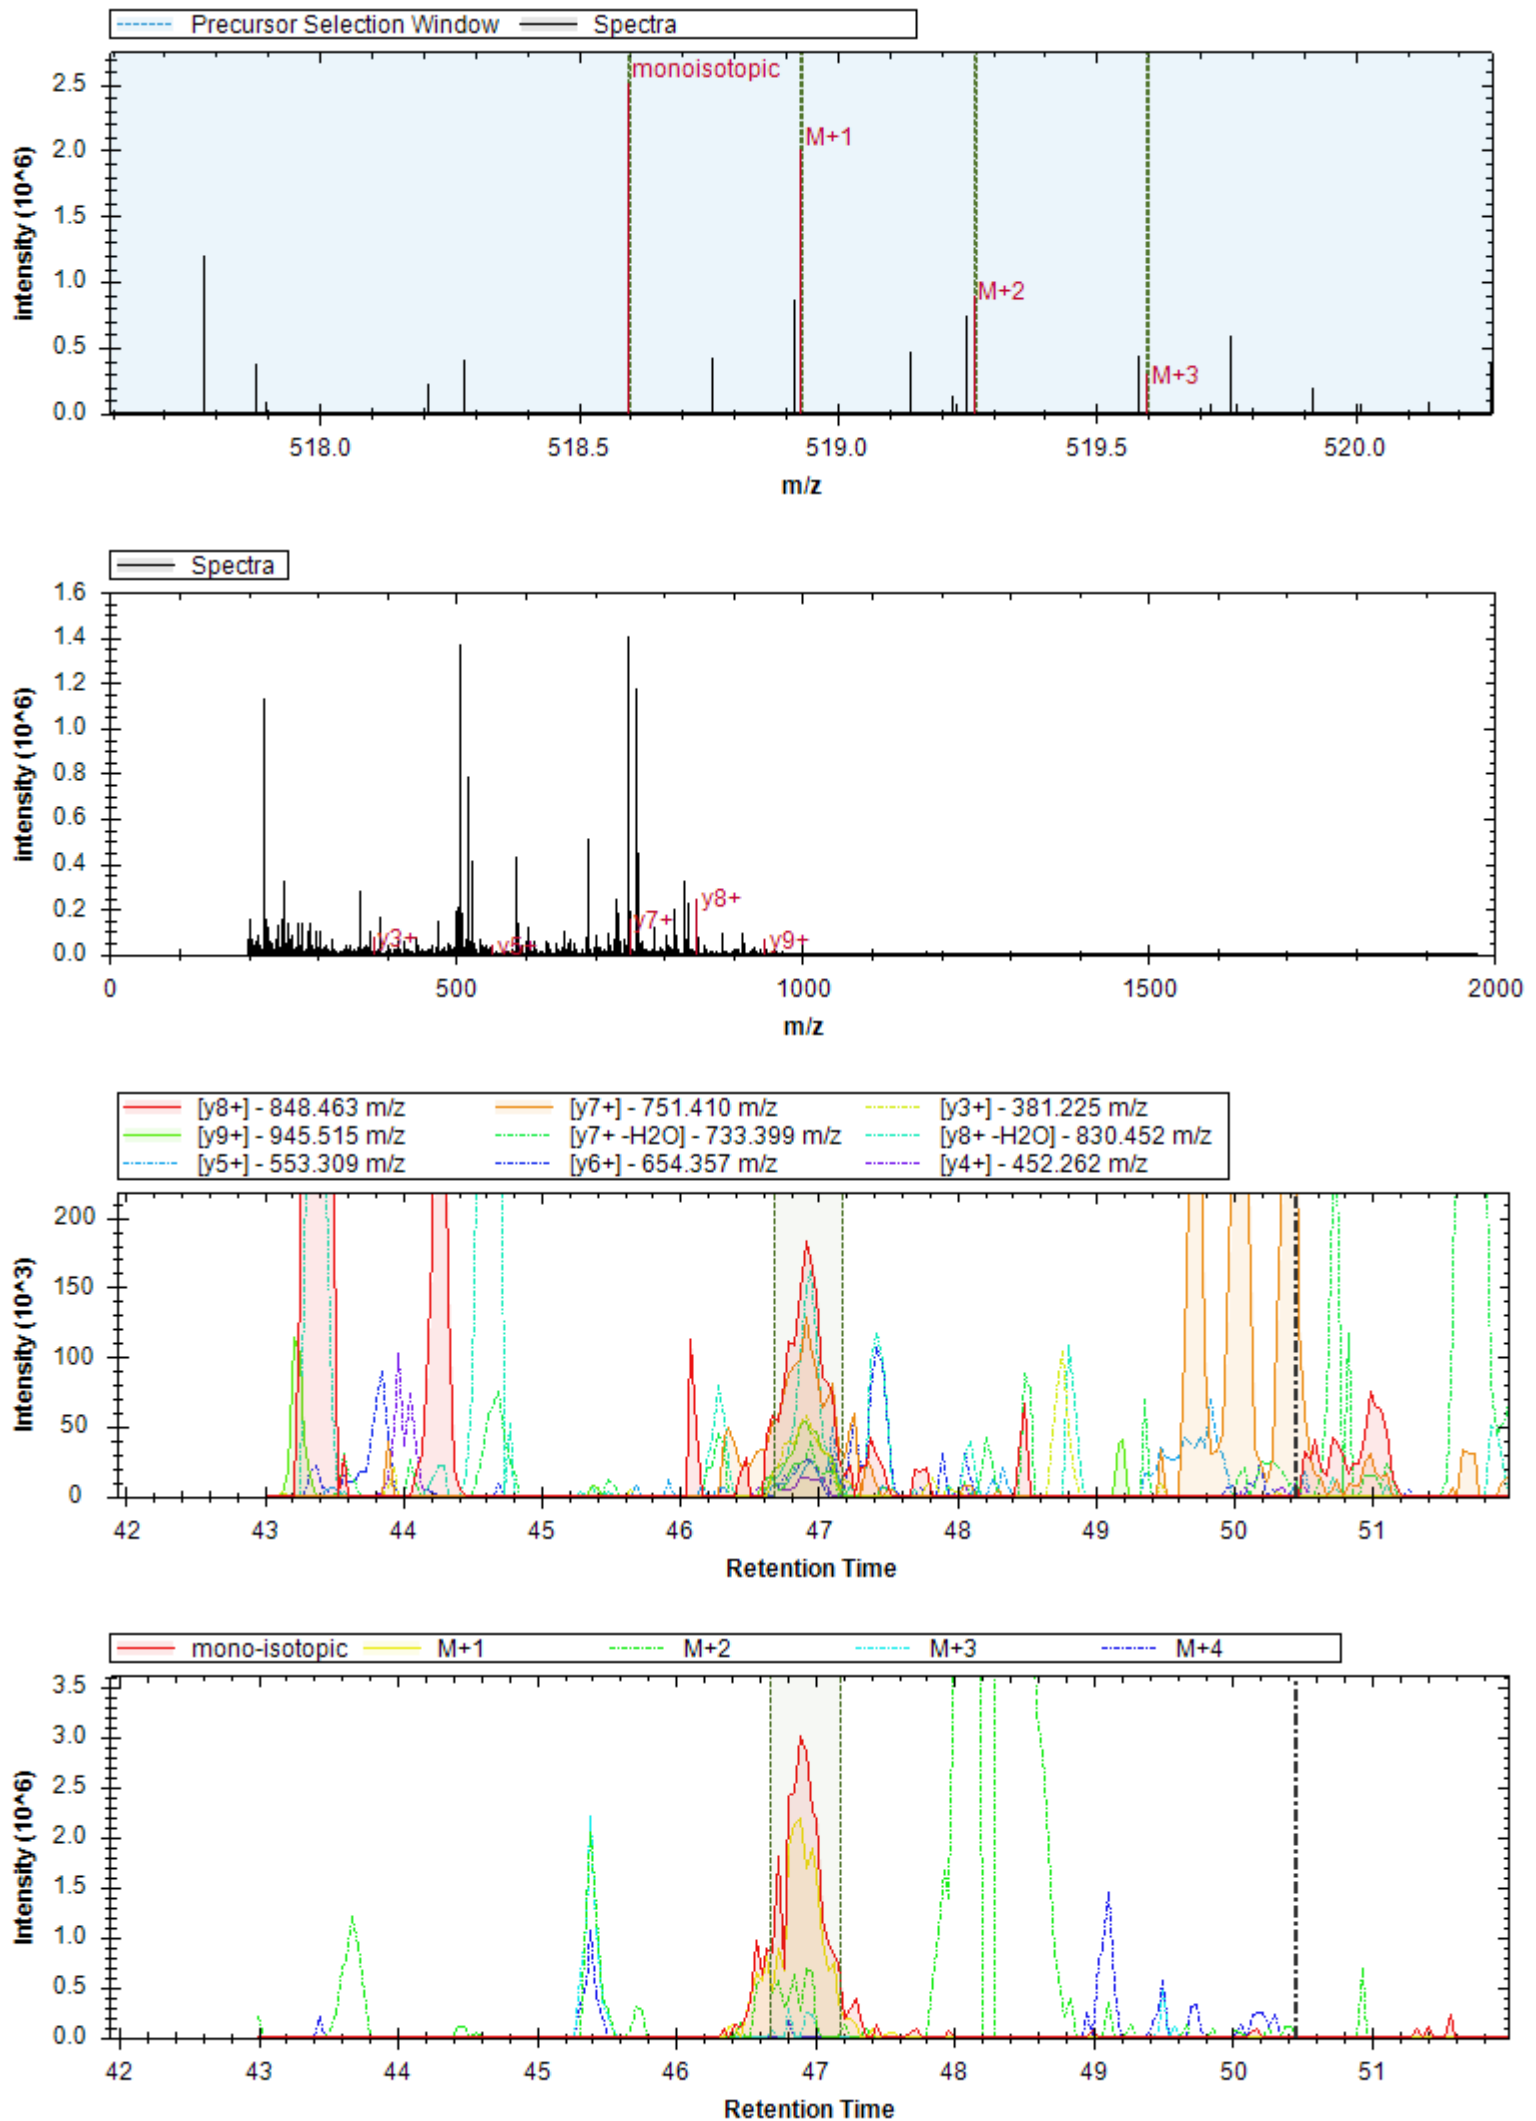

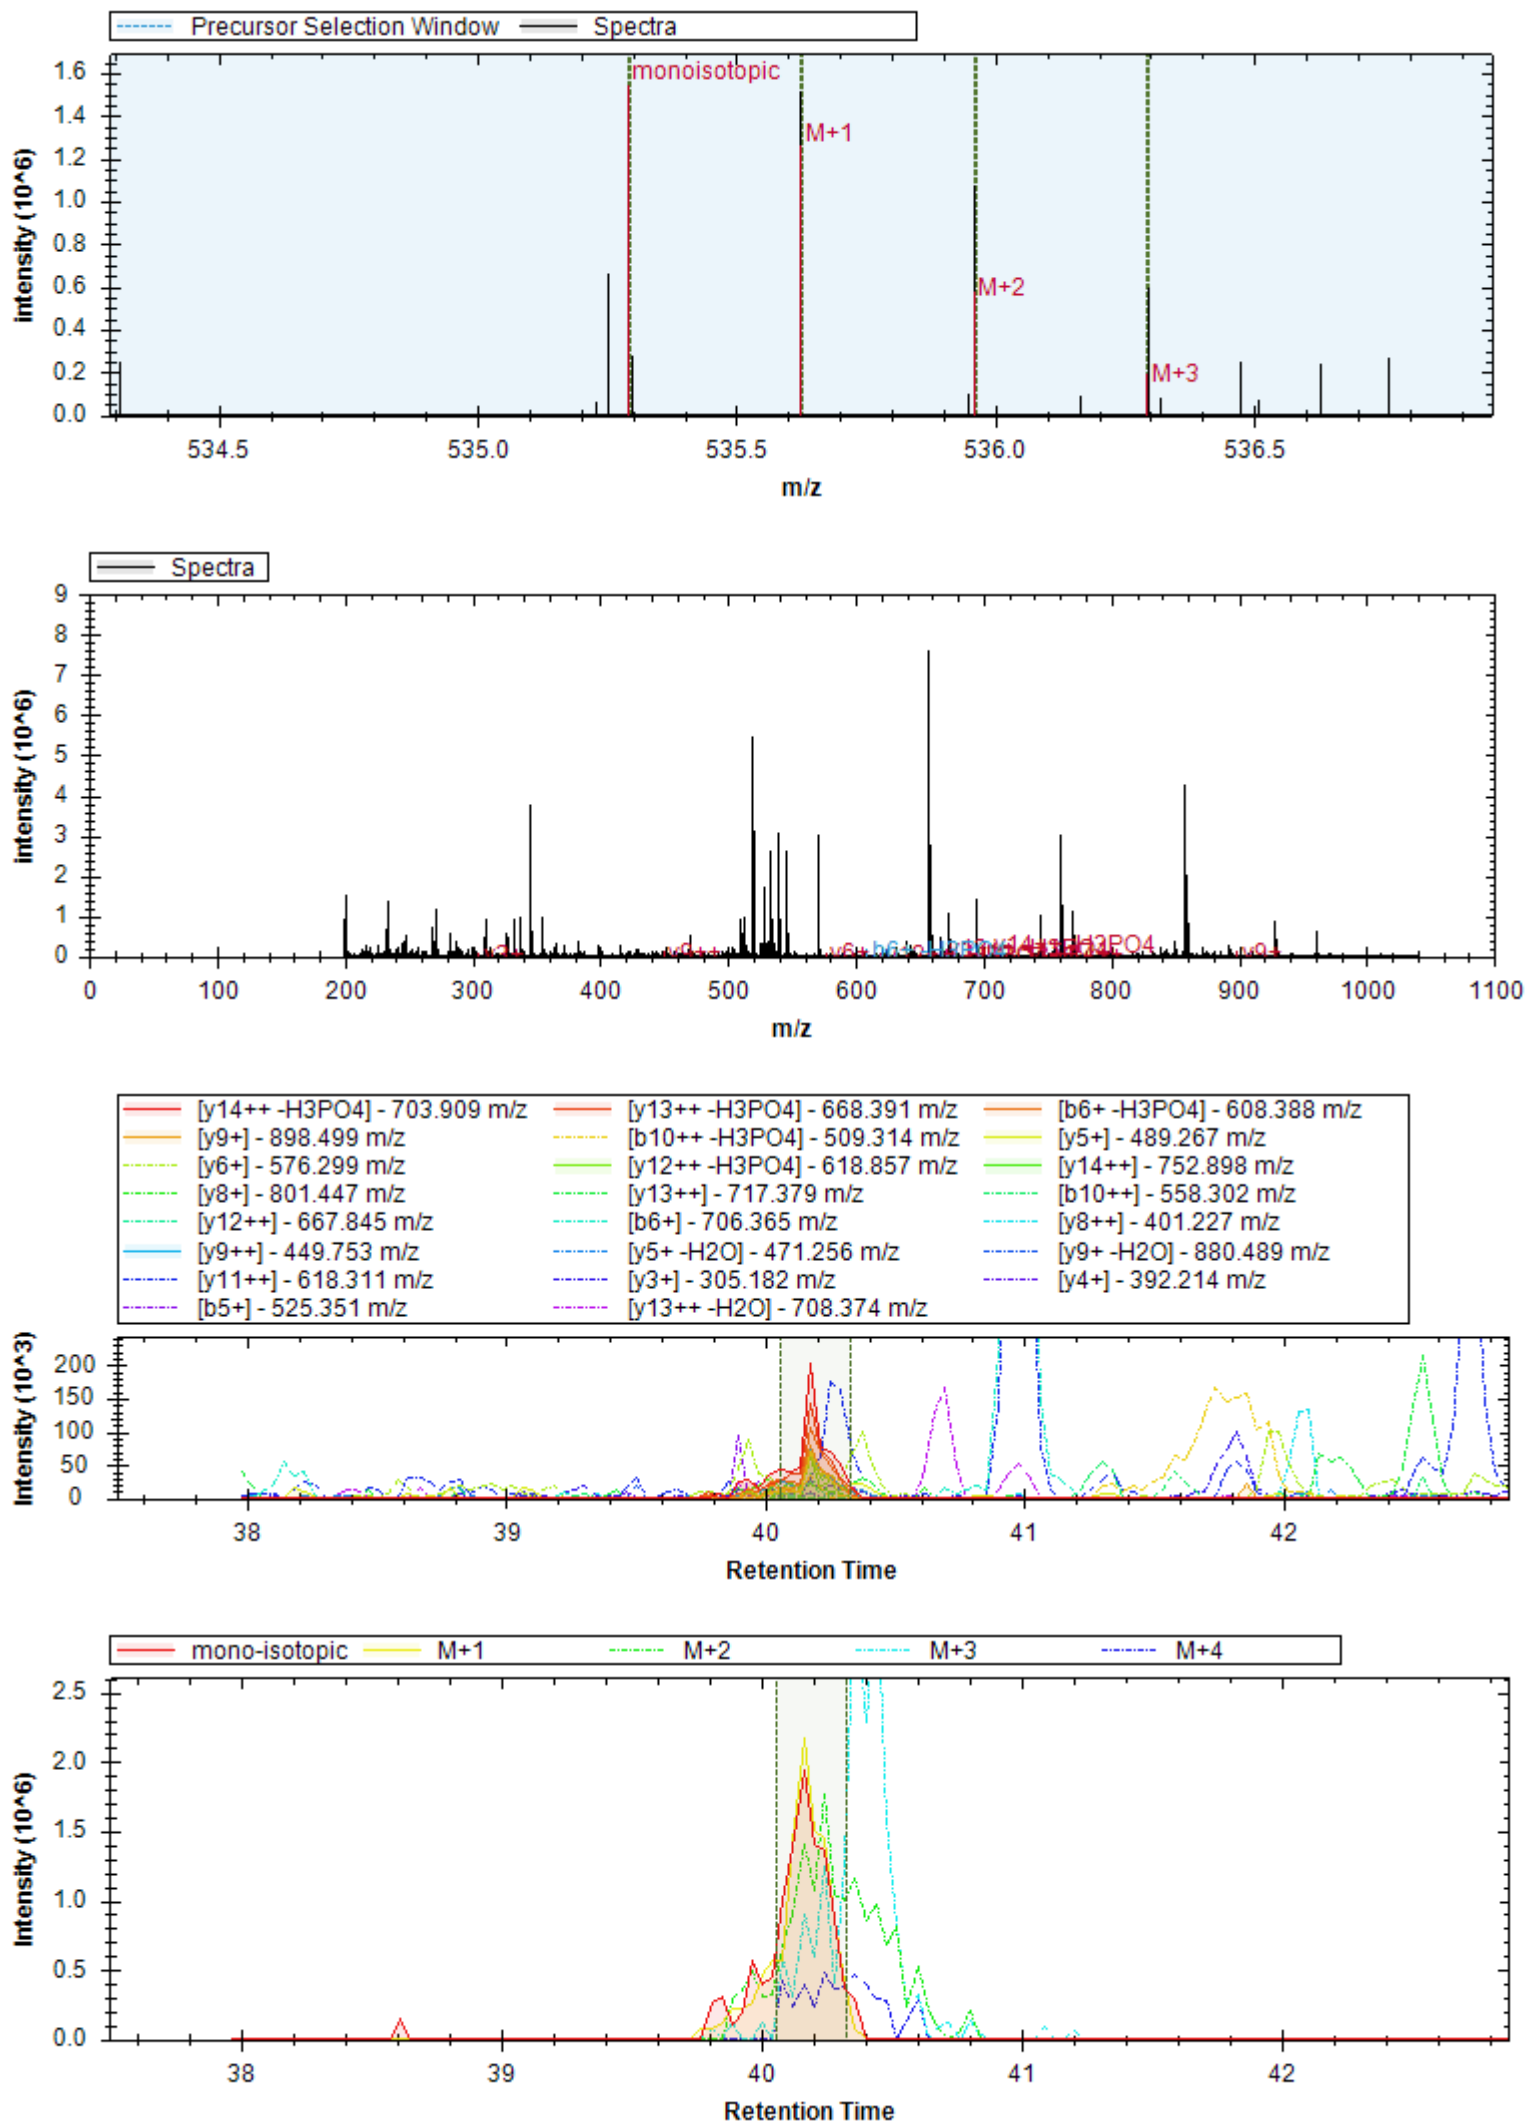

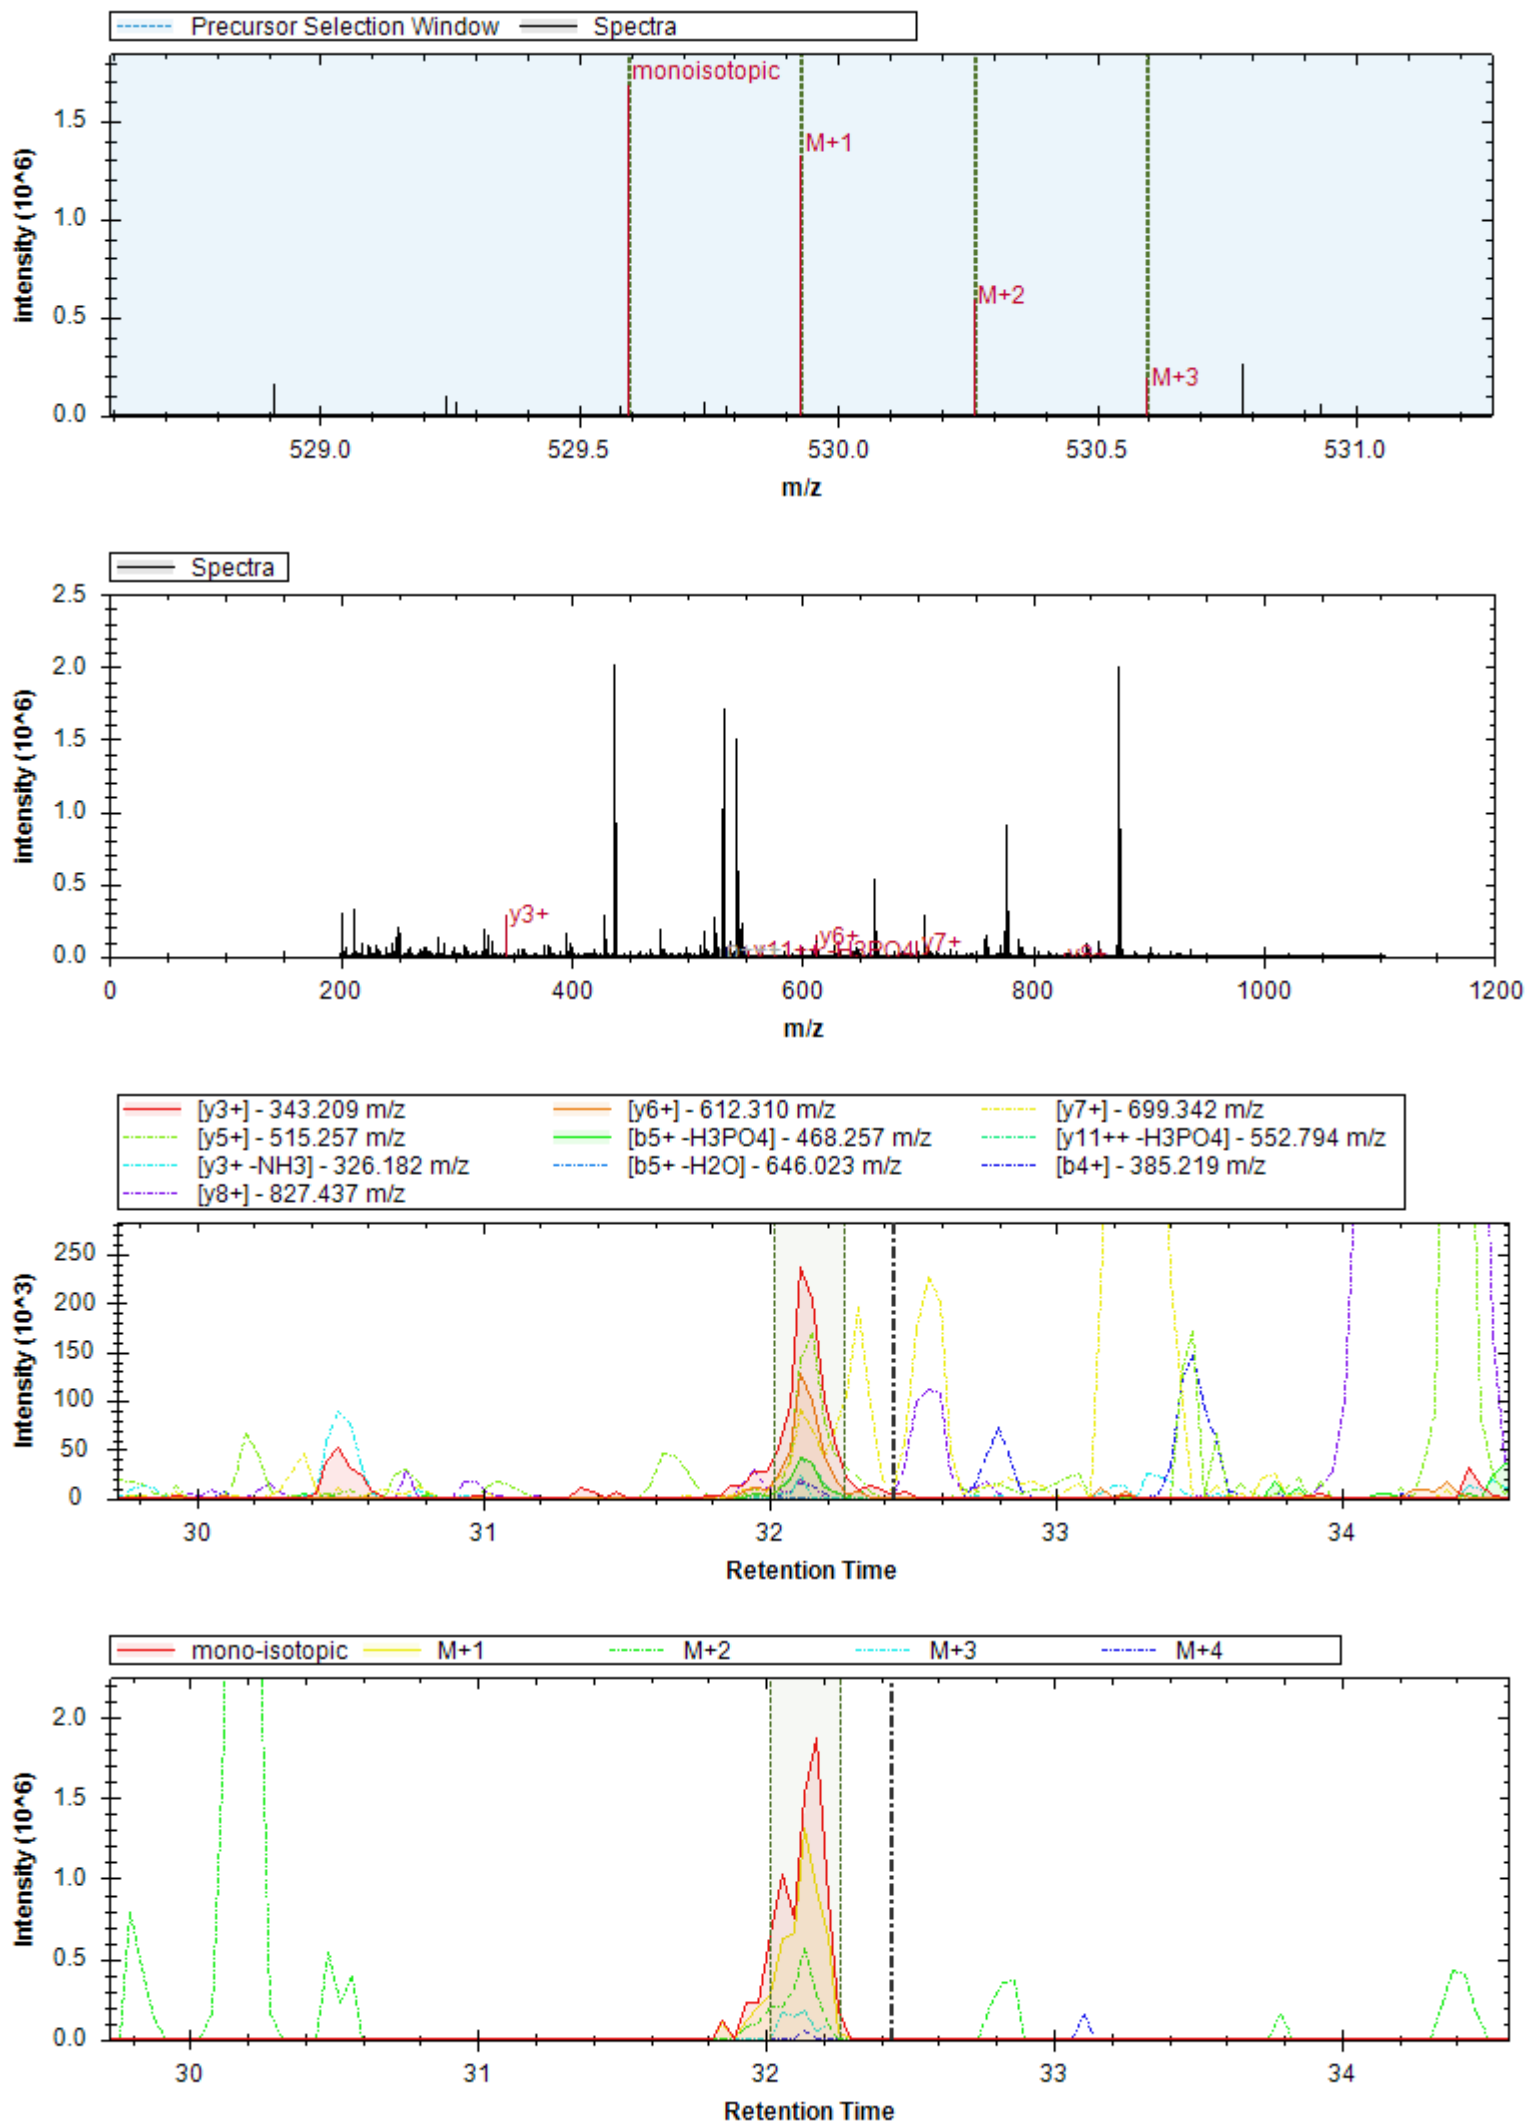

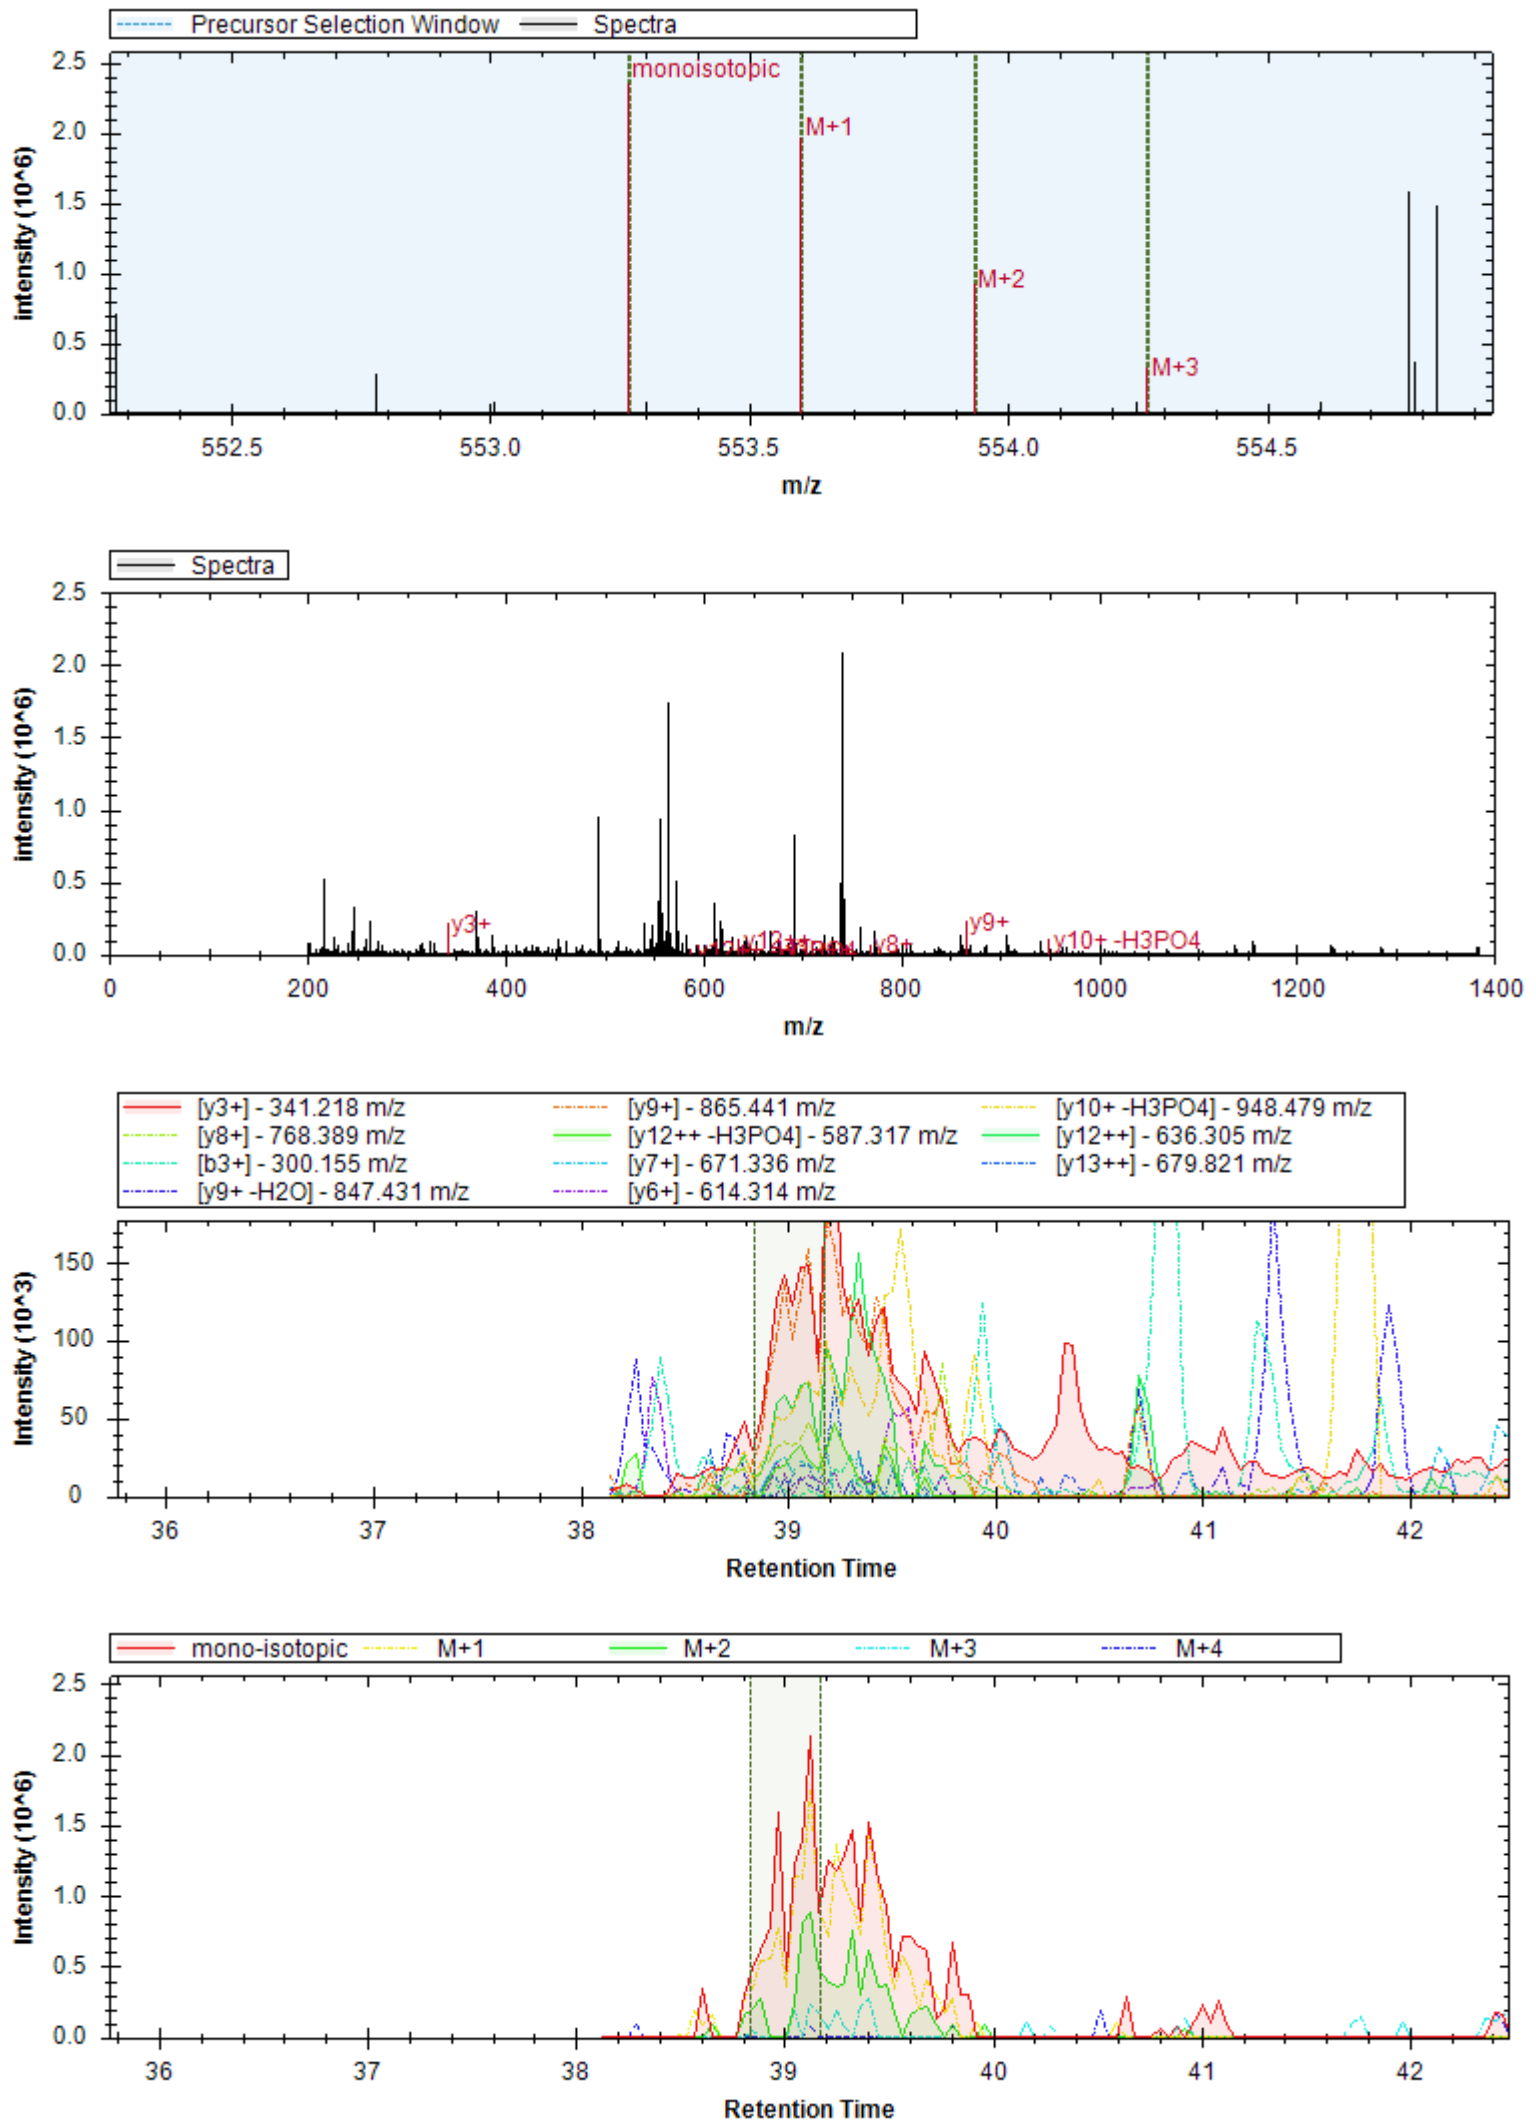



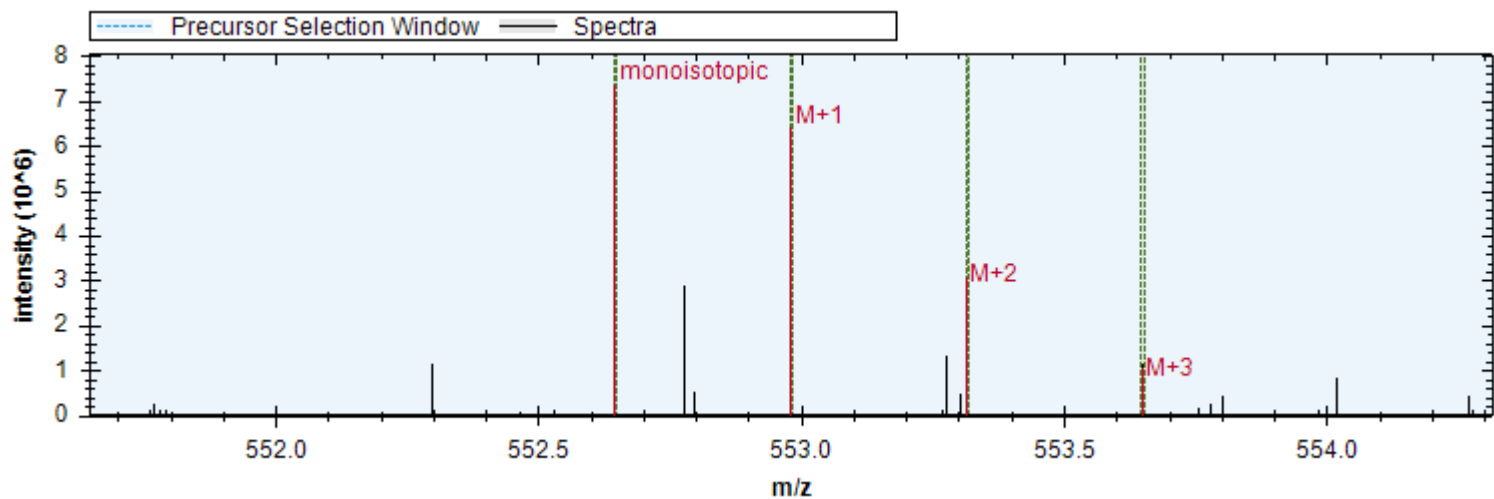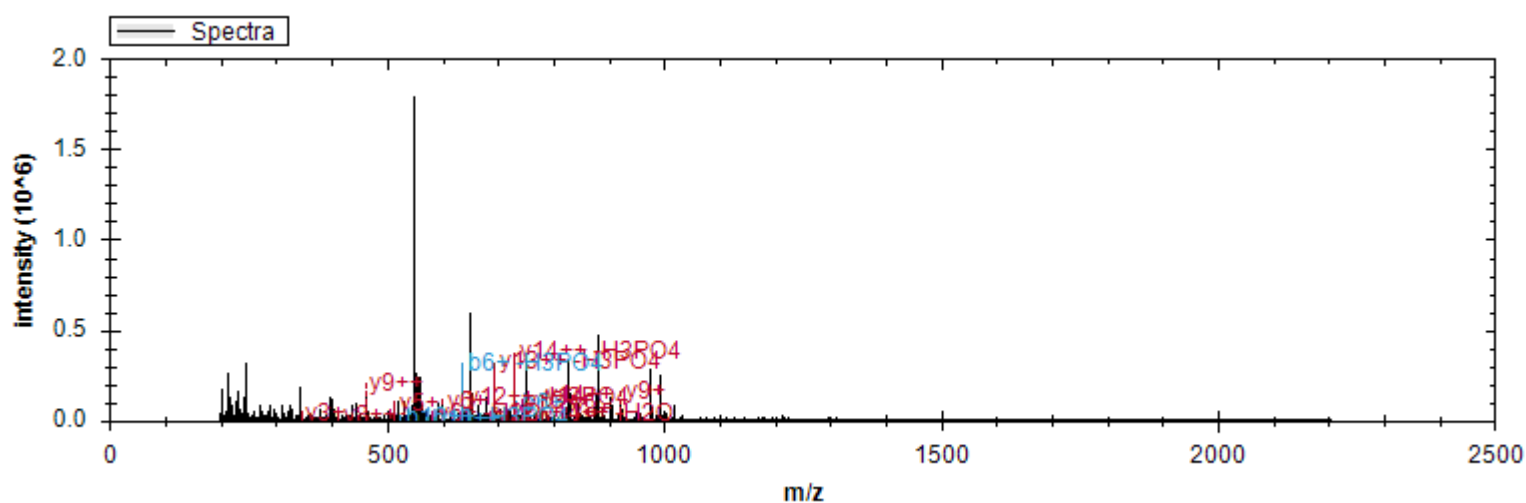

|                              |                              |                              |
|------------------------------|------------------------------|------------------------------|
| [b6+ -H3PO4] - 636.419 m/z   | [y14++ -H3PO4] - 729.943 m/z | [y13++ -H3PO4] - 694.425 m/z |
| [y9++] - 461.772 m/z         | [y9+] - 922.536 m/z          | [y5+] - 513.303 m/z          |
| [y12++ -H3PO4] - 637.883 m/z | [y6+] - 600.335 m/z          | [y10++] - 552.278 m/z        |
| [y14++] - 778.932 m/z        | [y13++] - 743.413 m/z        | [b6+] - 734.396 m/z          |
| [y8+] - 825.483 m/z          | [y6+ -H2O] - 582.325 m/z     | [y3+] - 345.213 m/z          |
| [y9+ -H2O] - 904.525 m/z     | [y5+ -H2O] - 495.293 m/z     | [y7+] - 728.430 m/z          |
| [y12++] - 686.871 m/z        | [y14++ -H2O] - 769.926 m/z   | [y3+ -H2O] - 327.203 m/z     |
| [y8++] - 413.245 m/z         | [b10++] - 572.318 m/z        | [b10++ -H3PO4] - 523.330 m/z |

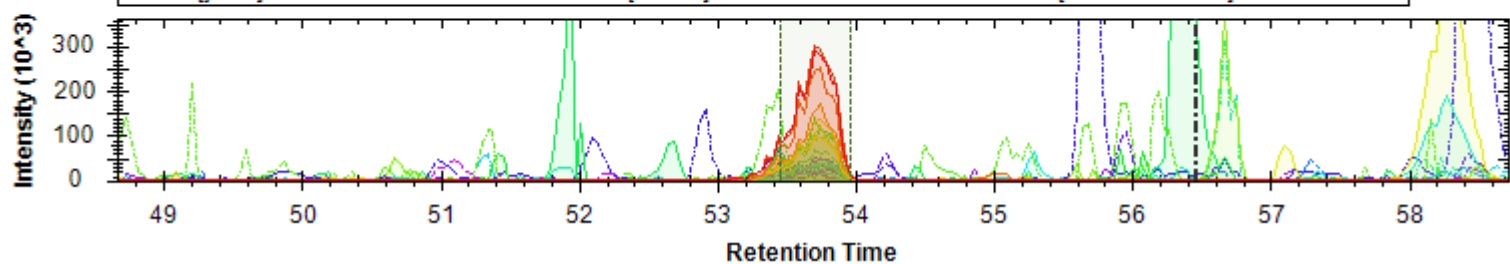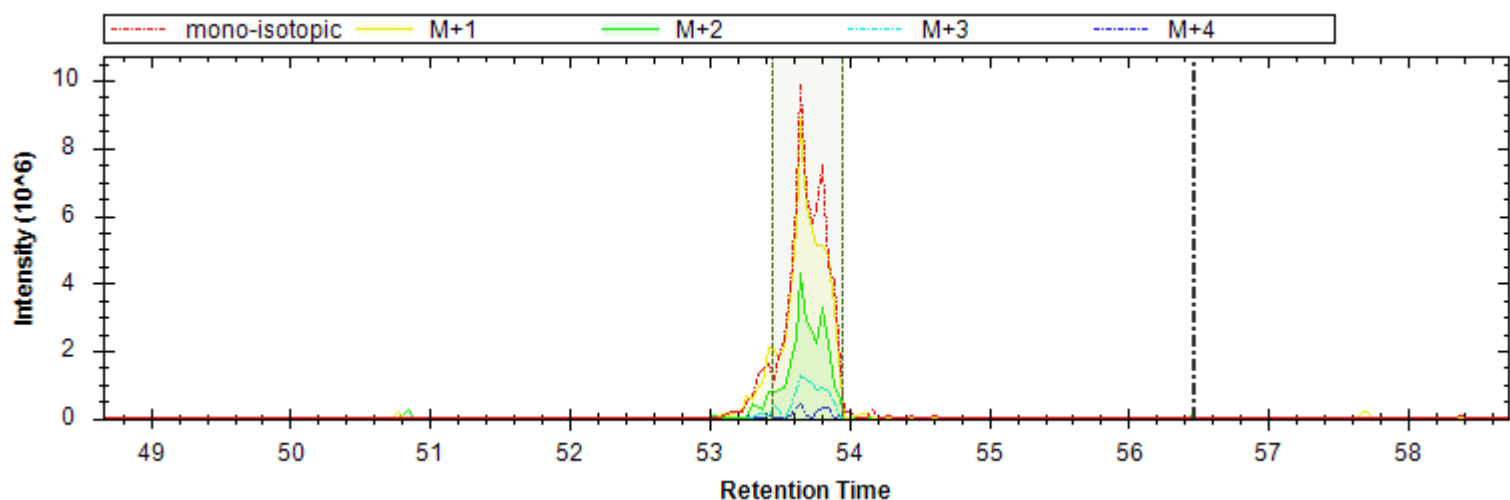

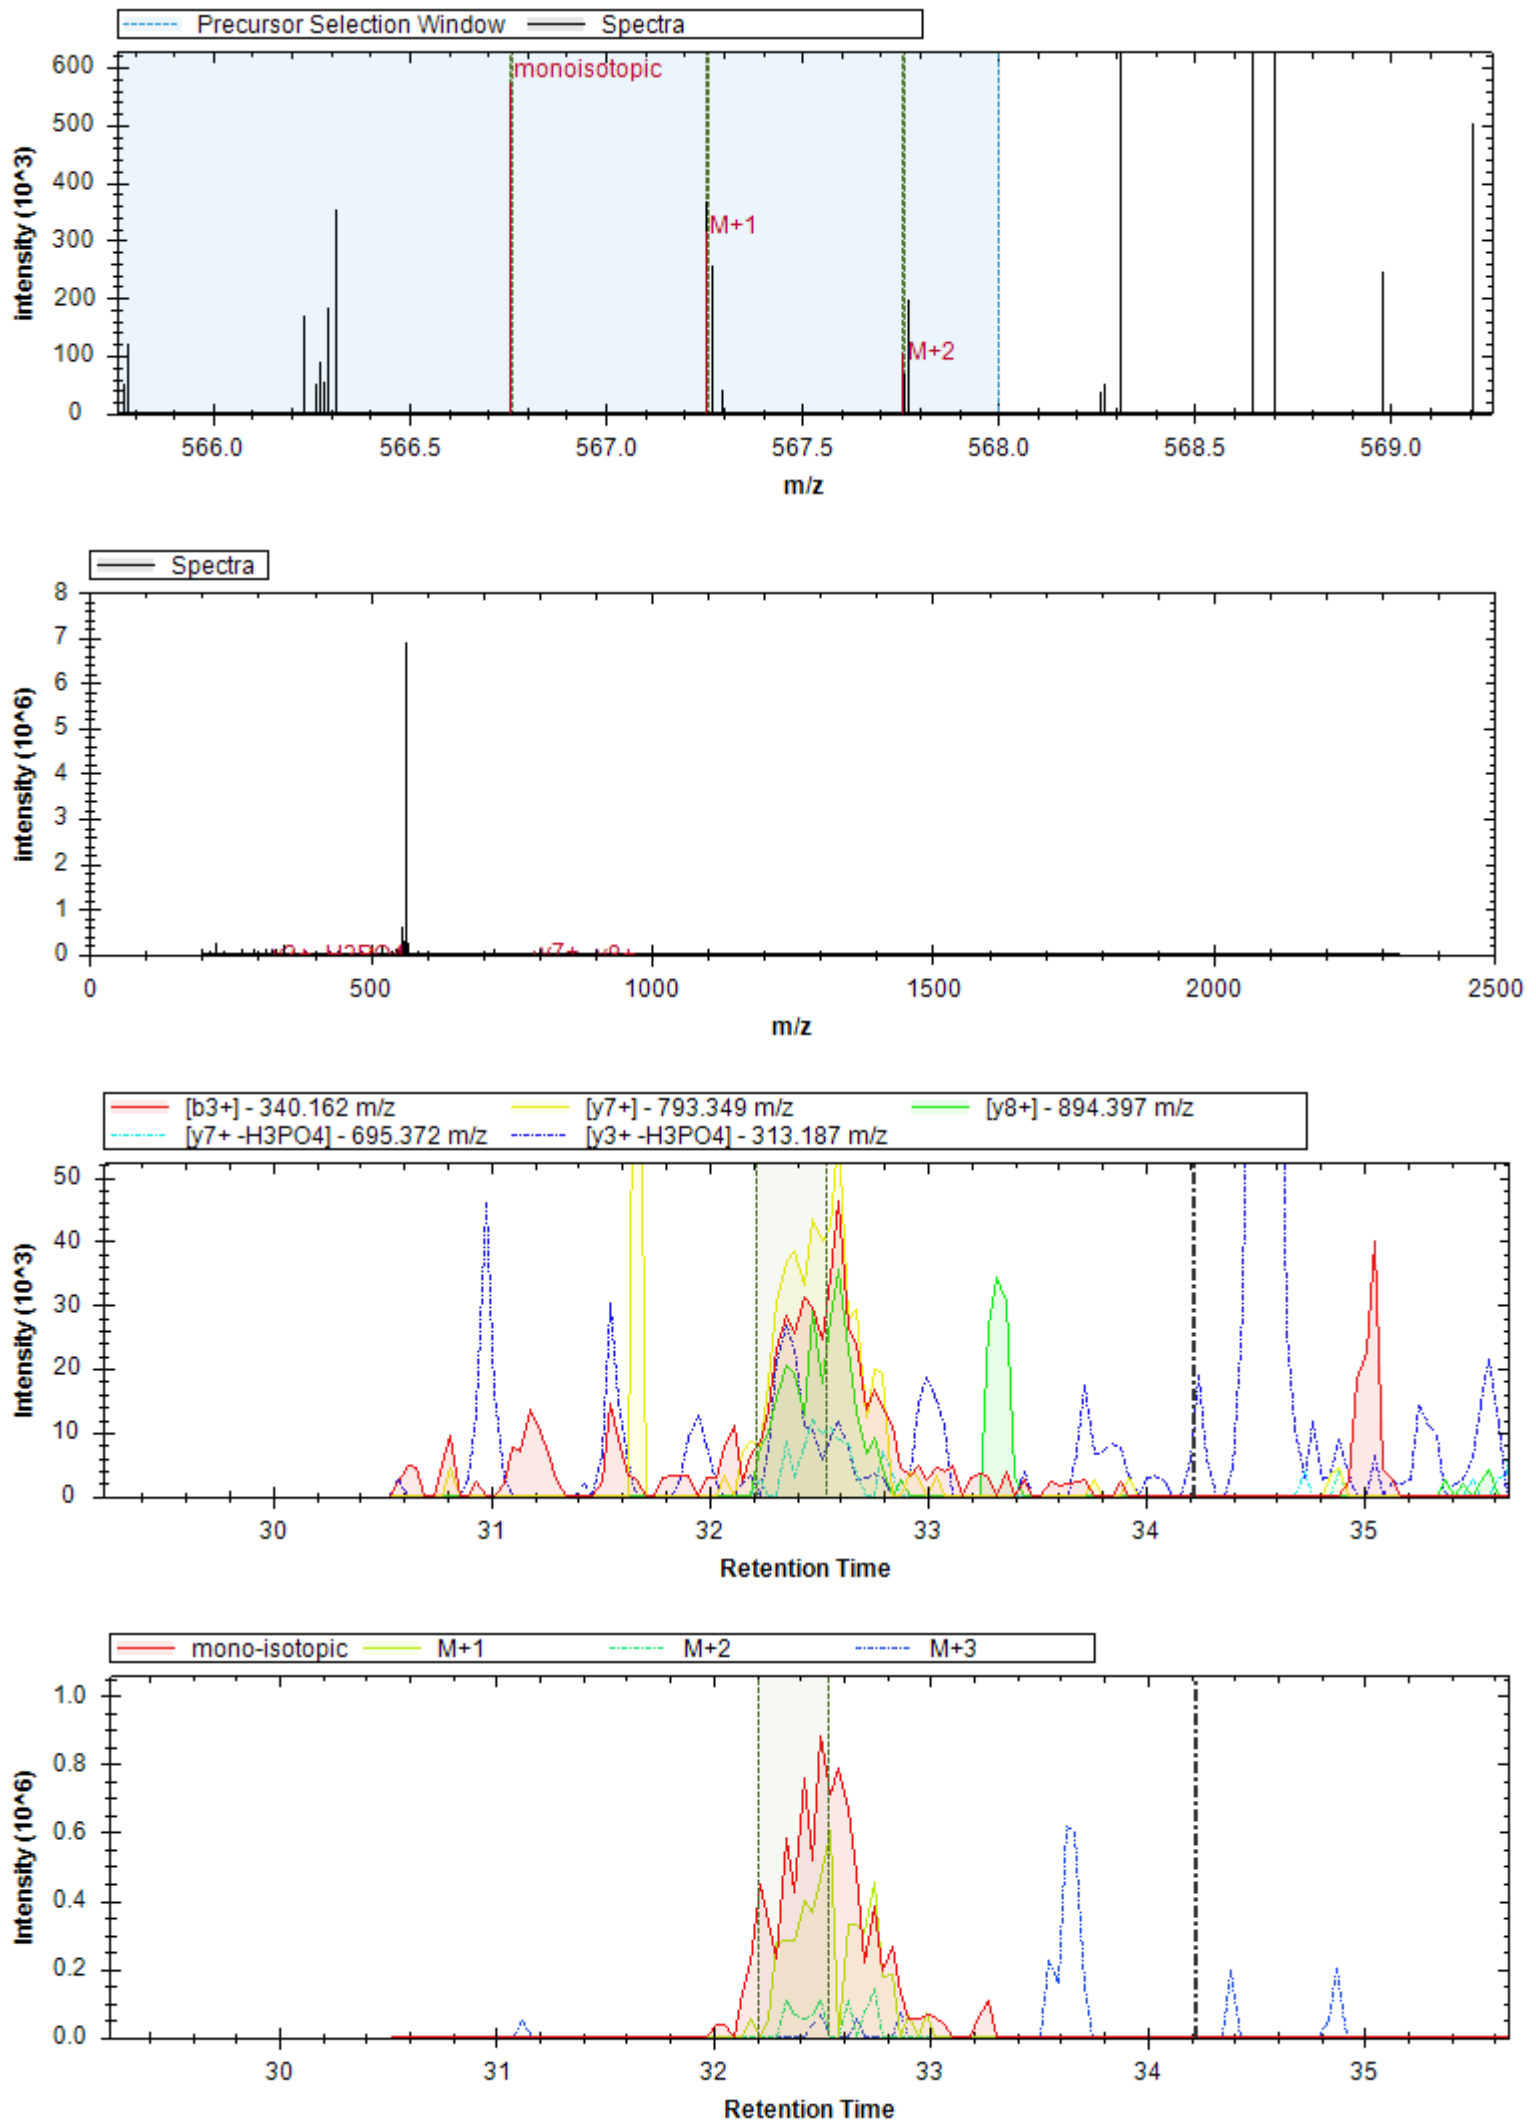

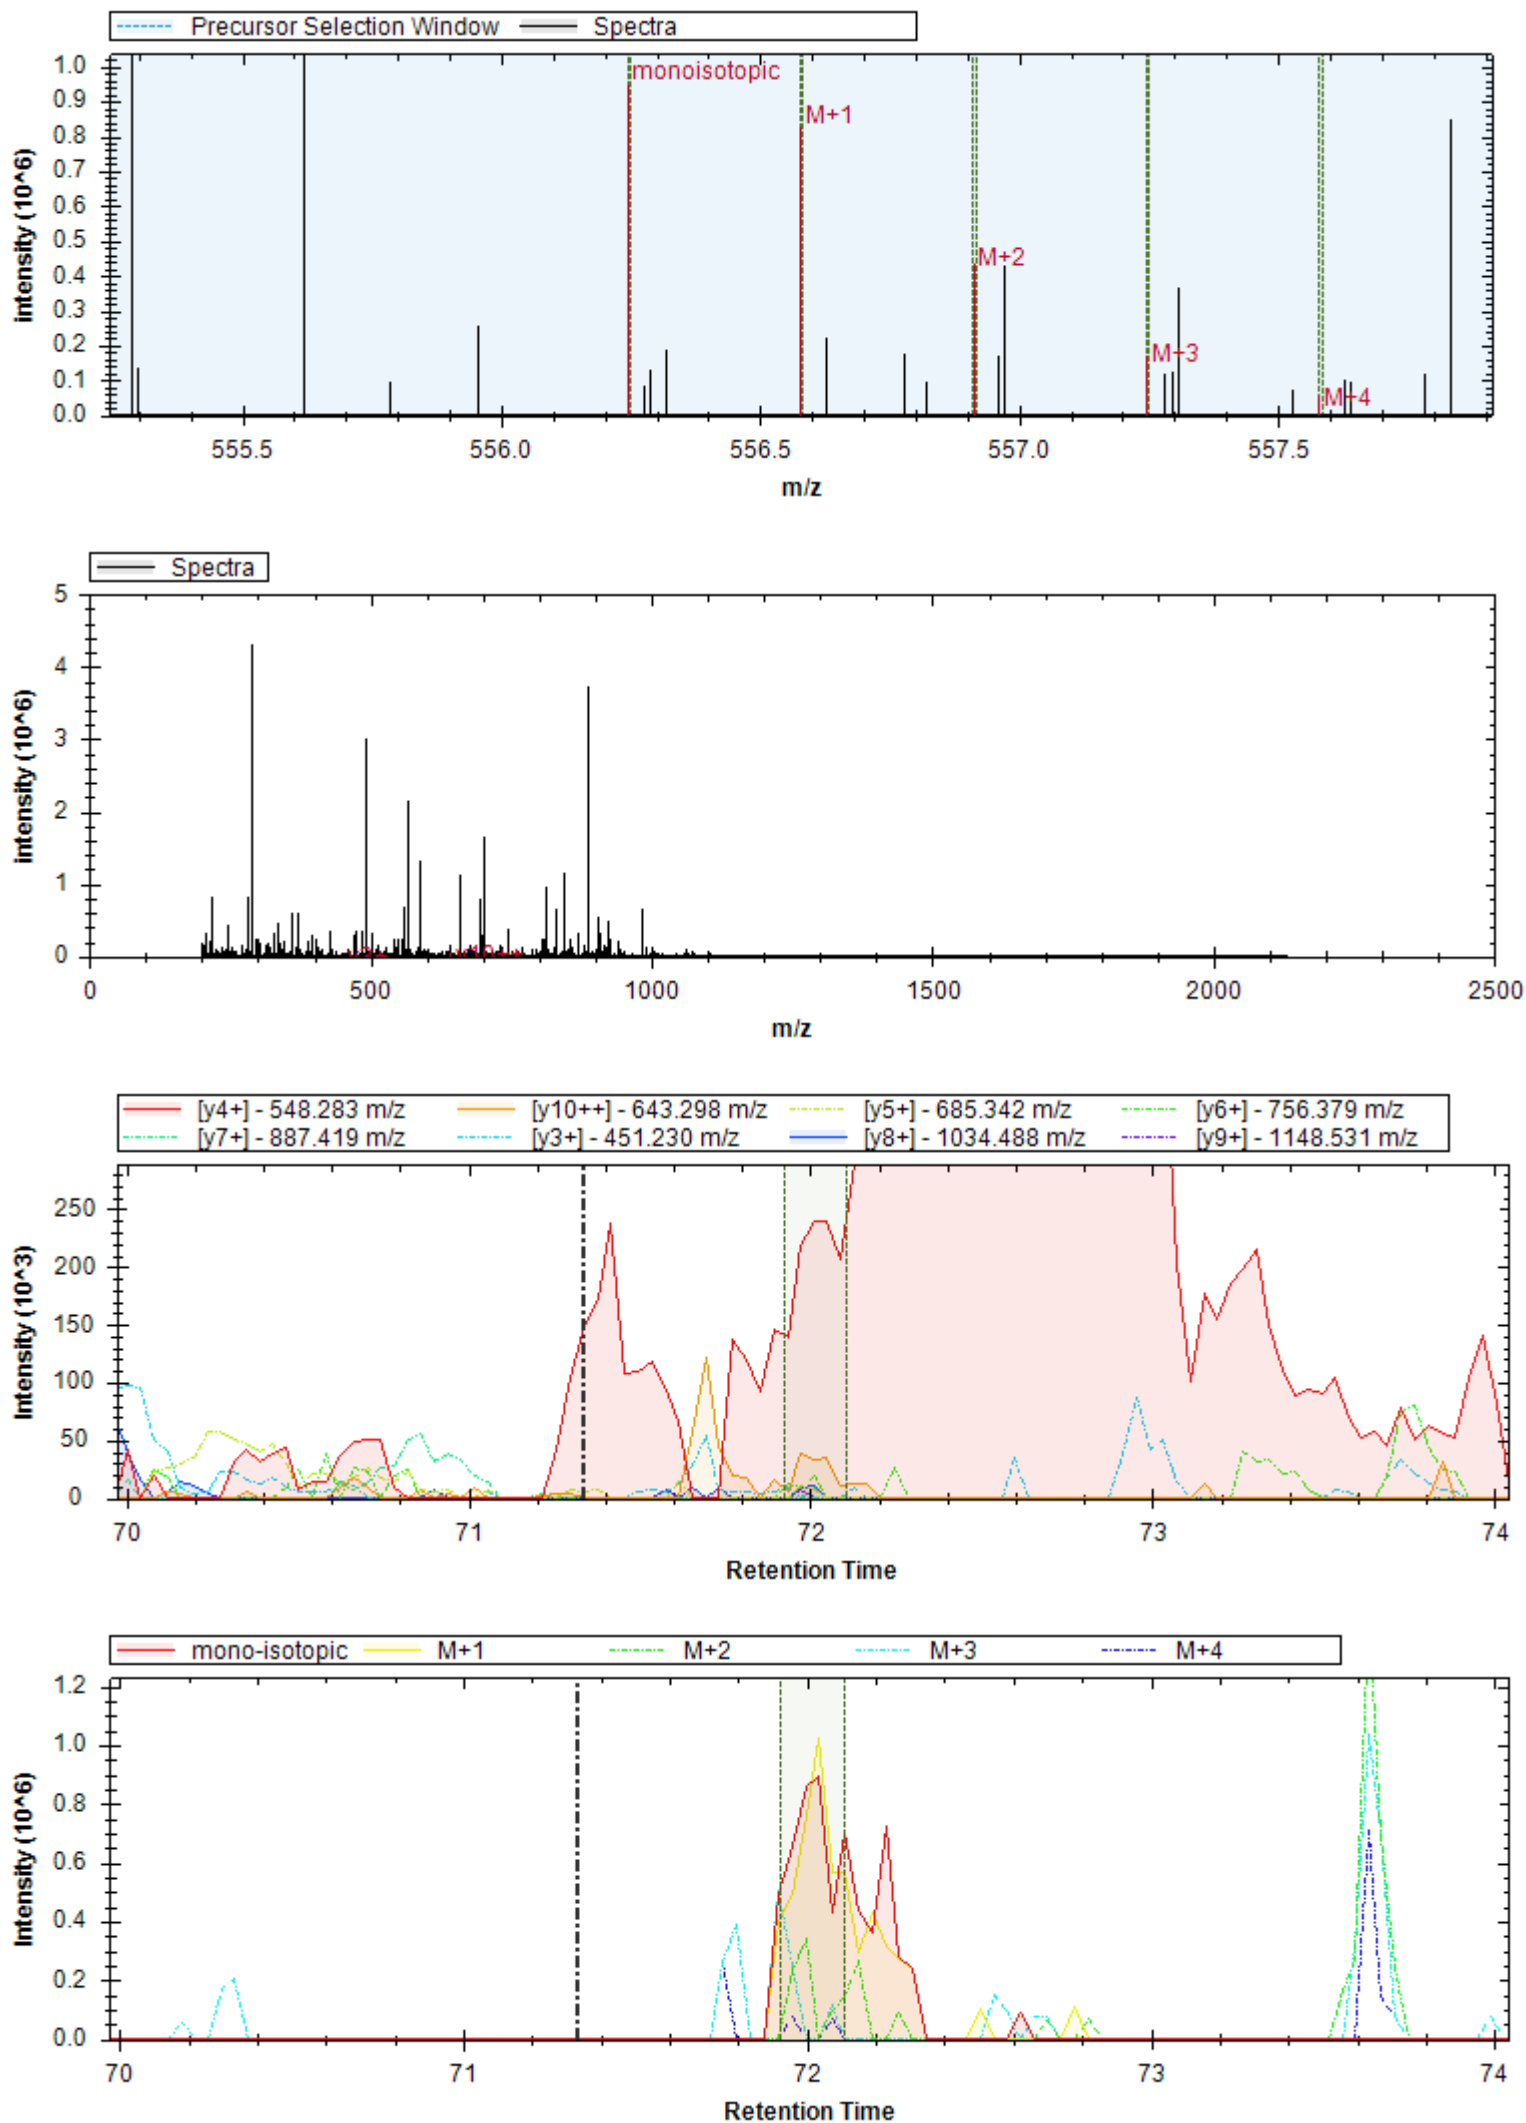

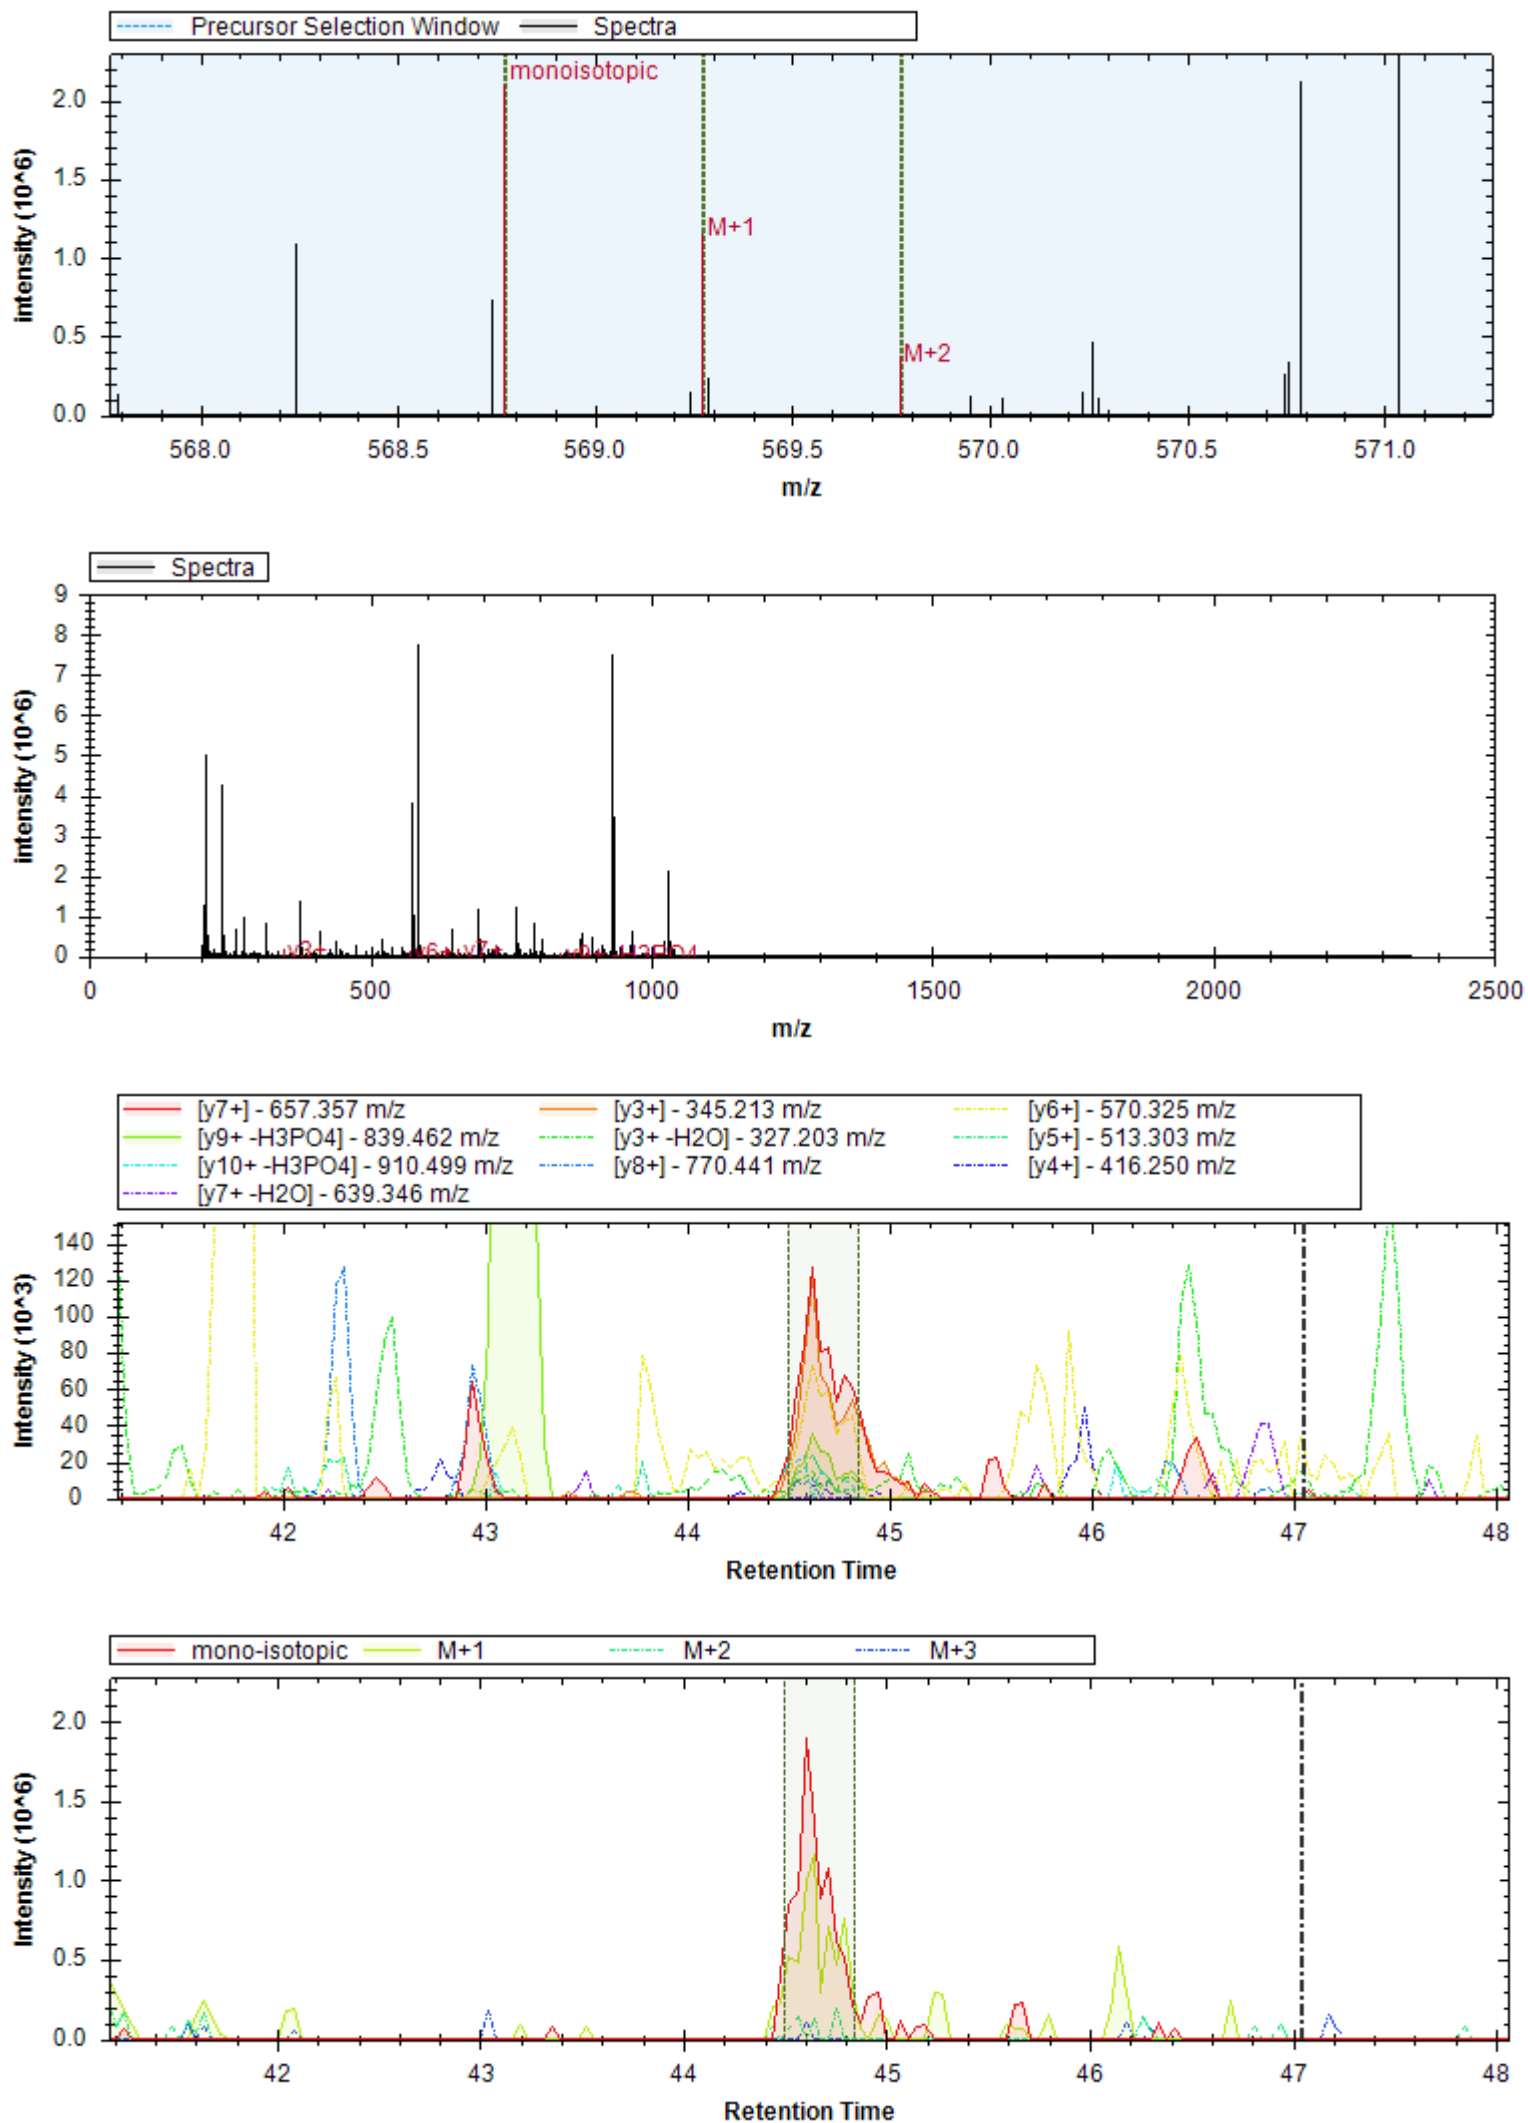

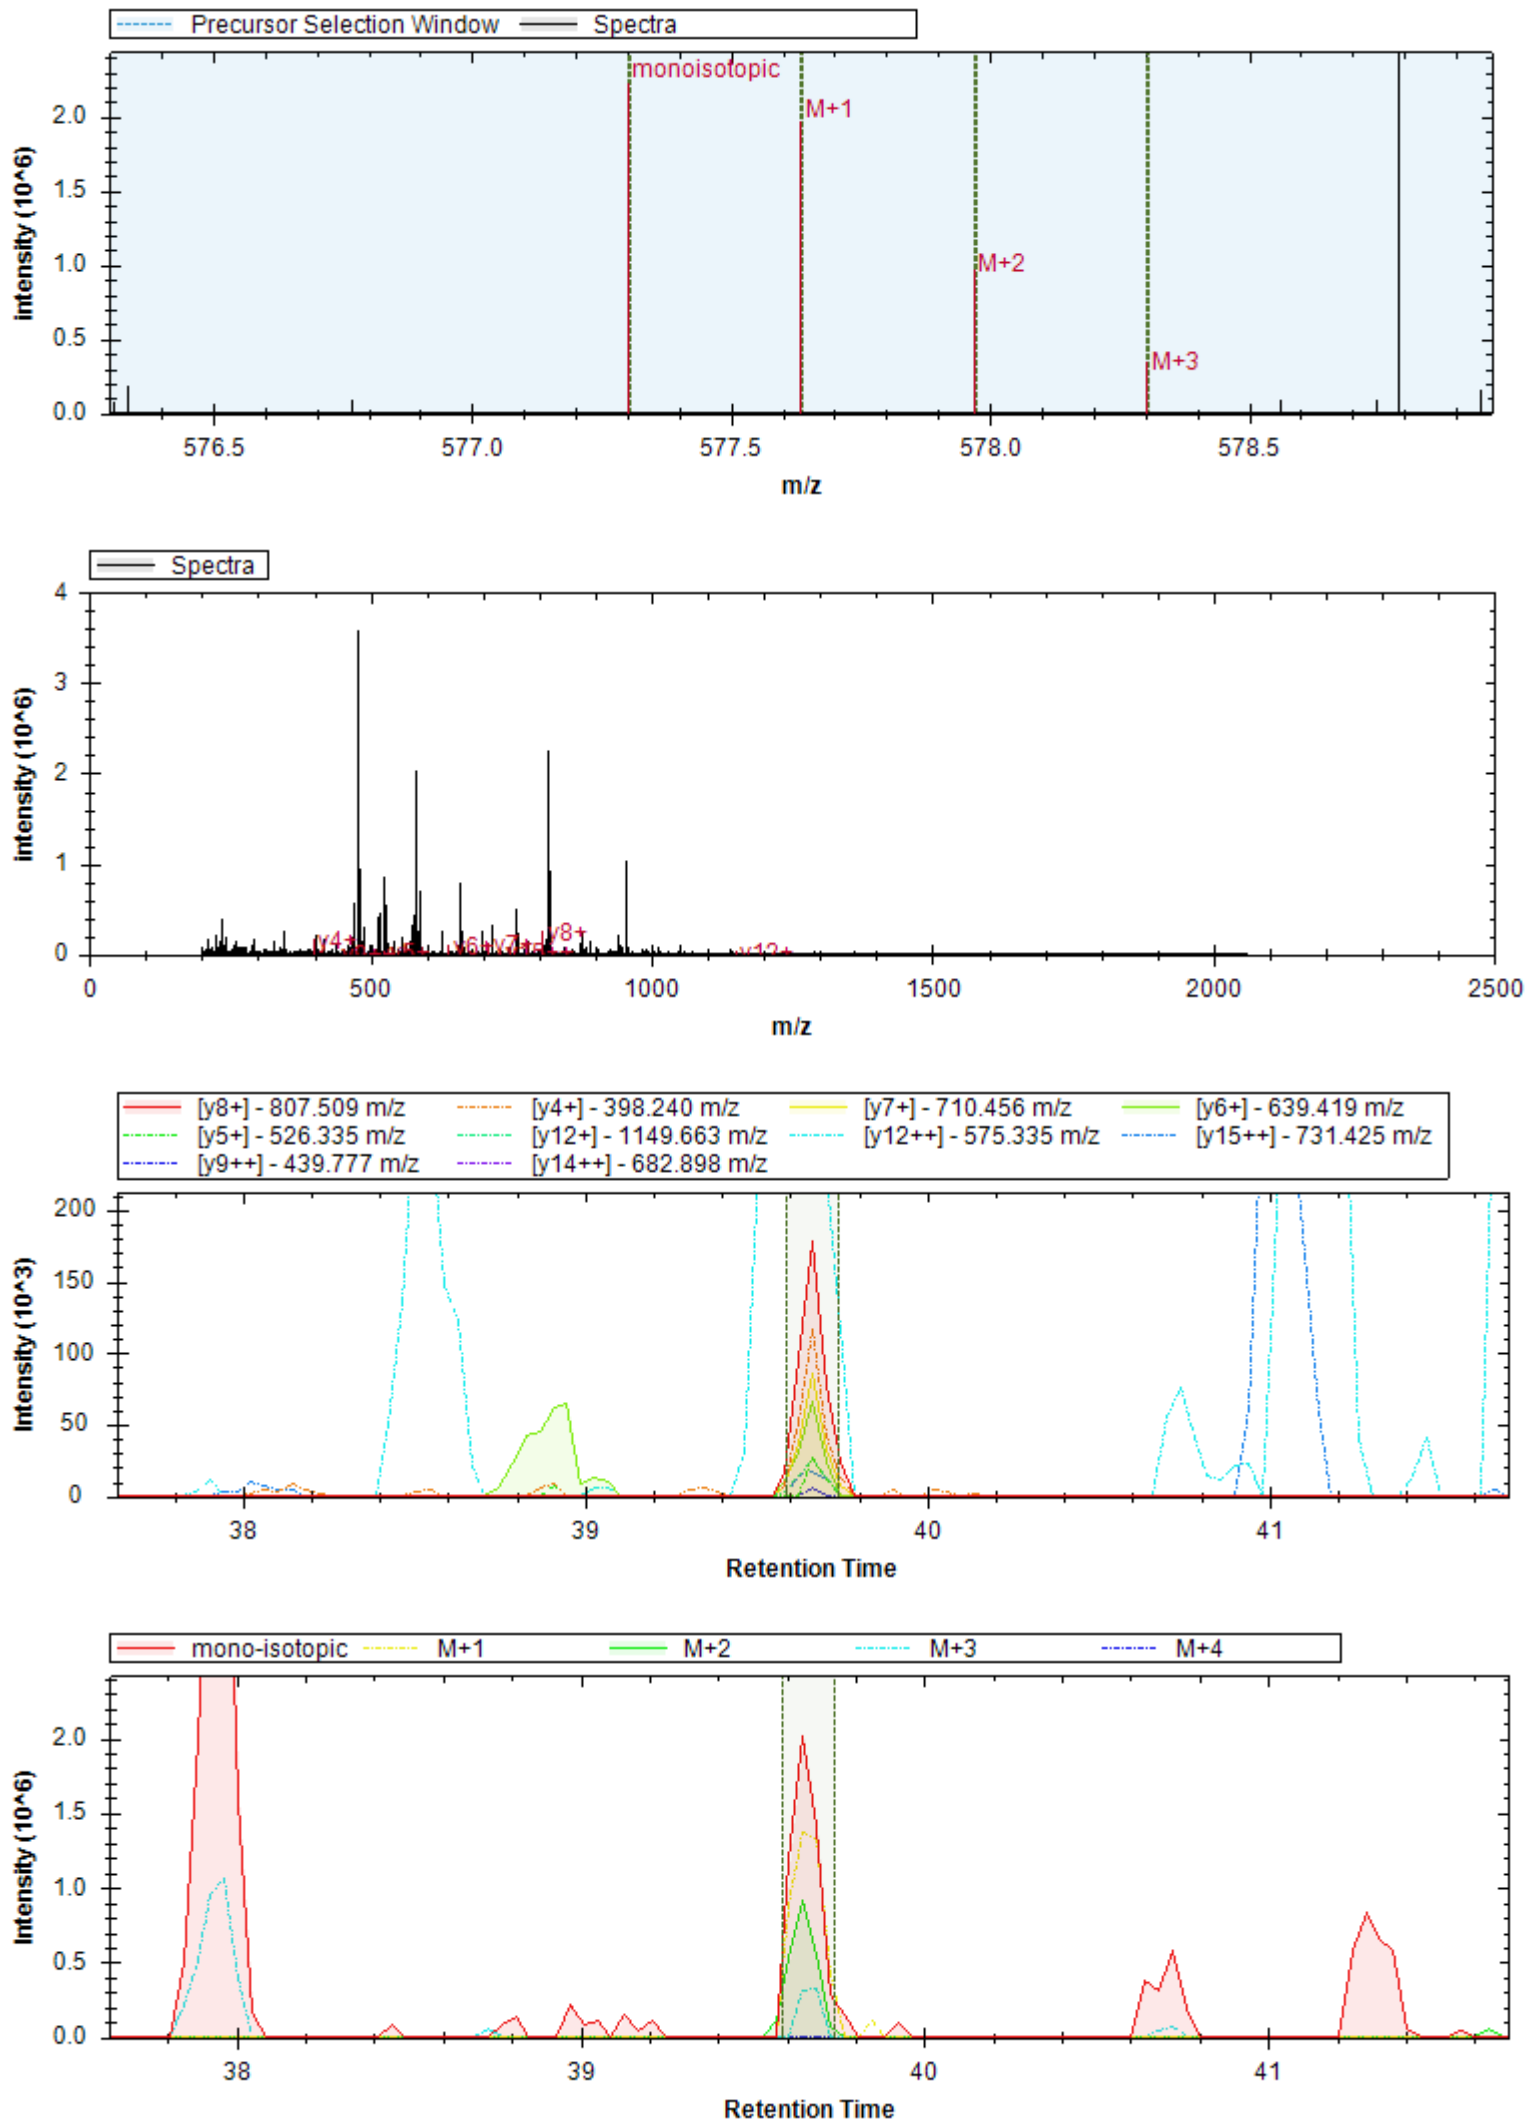

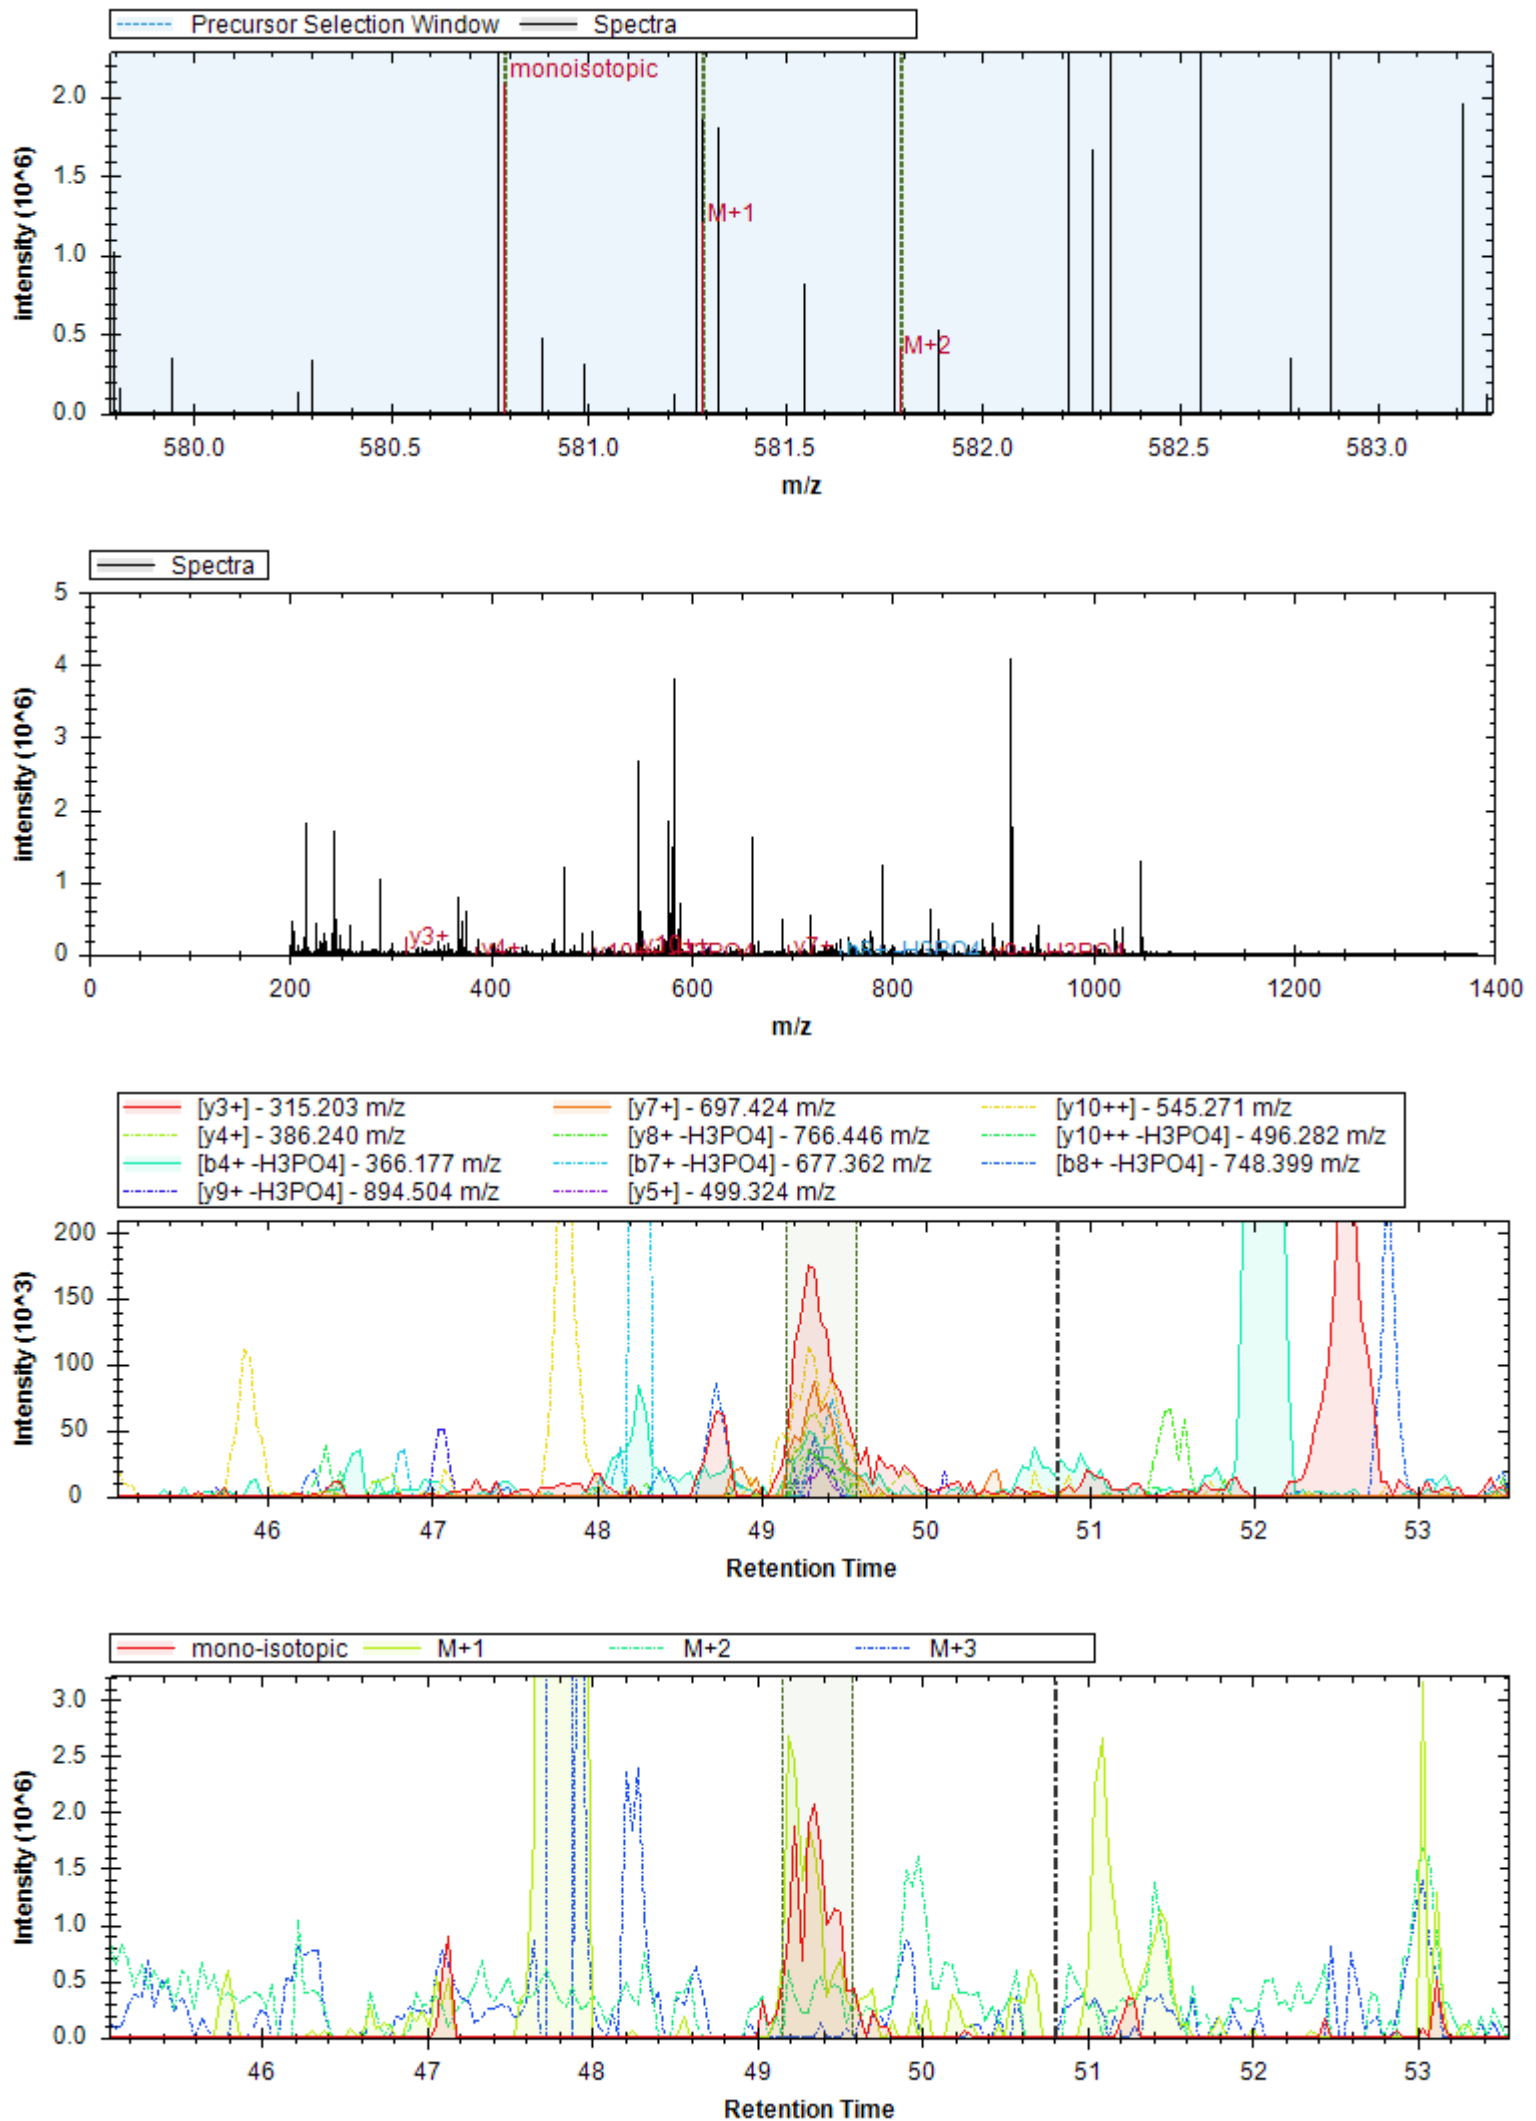

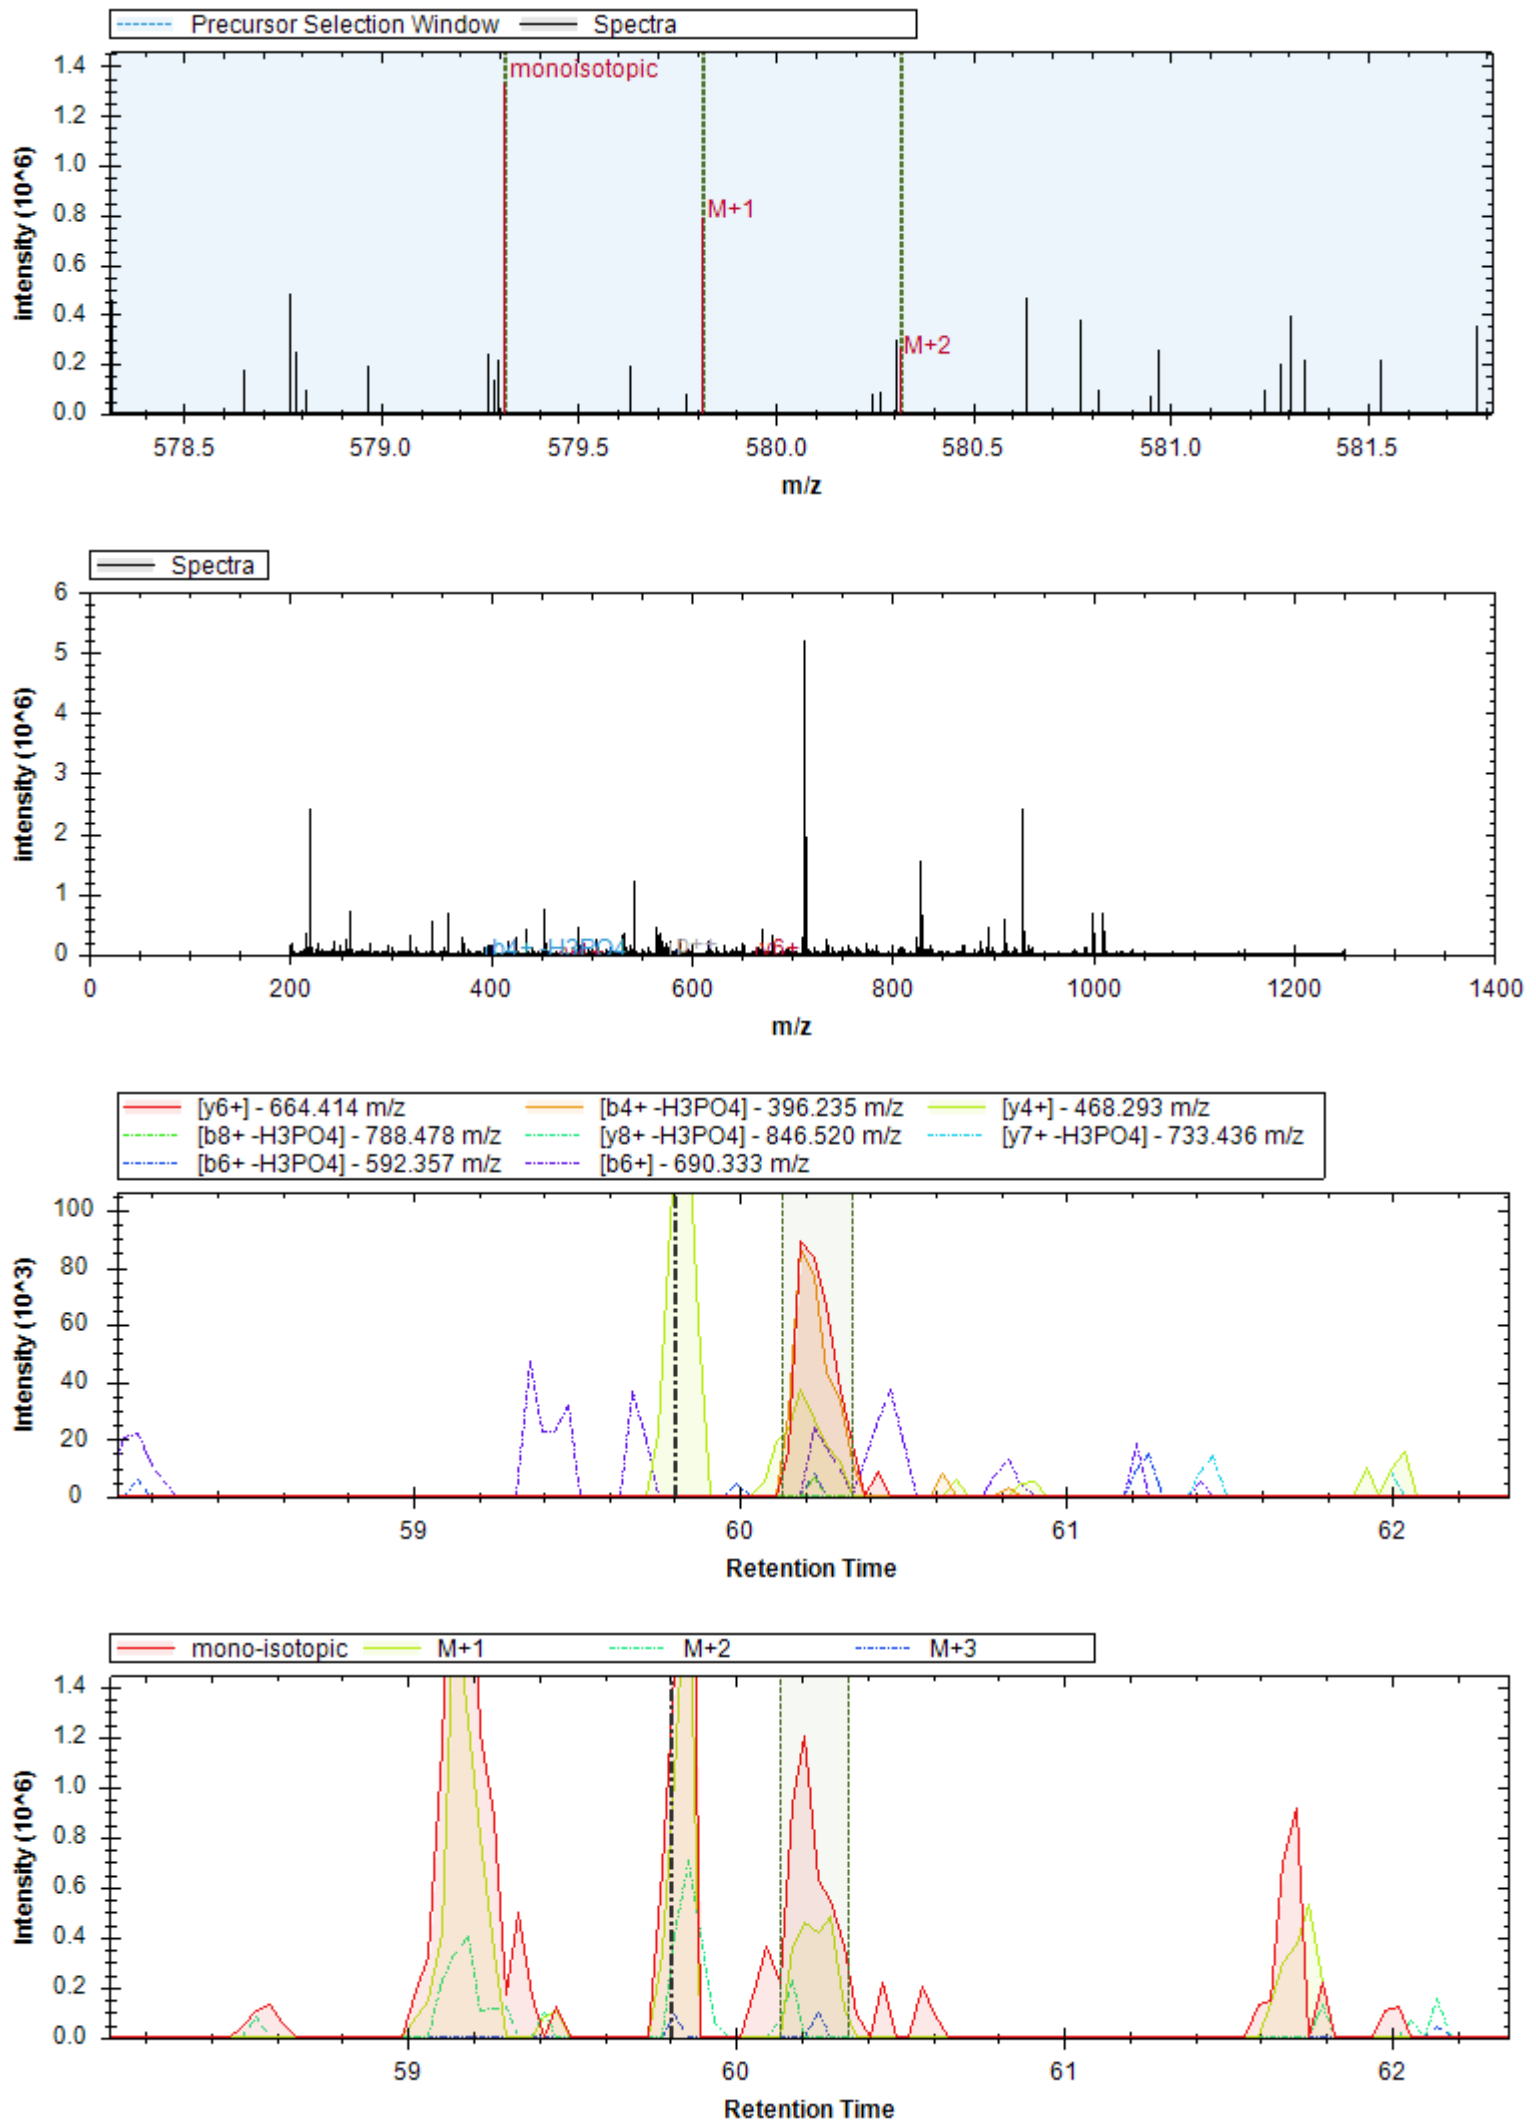

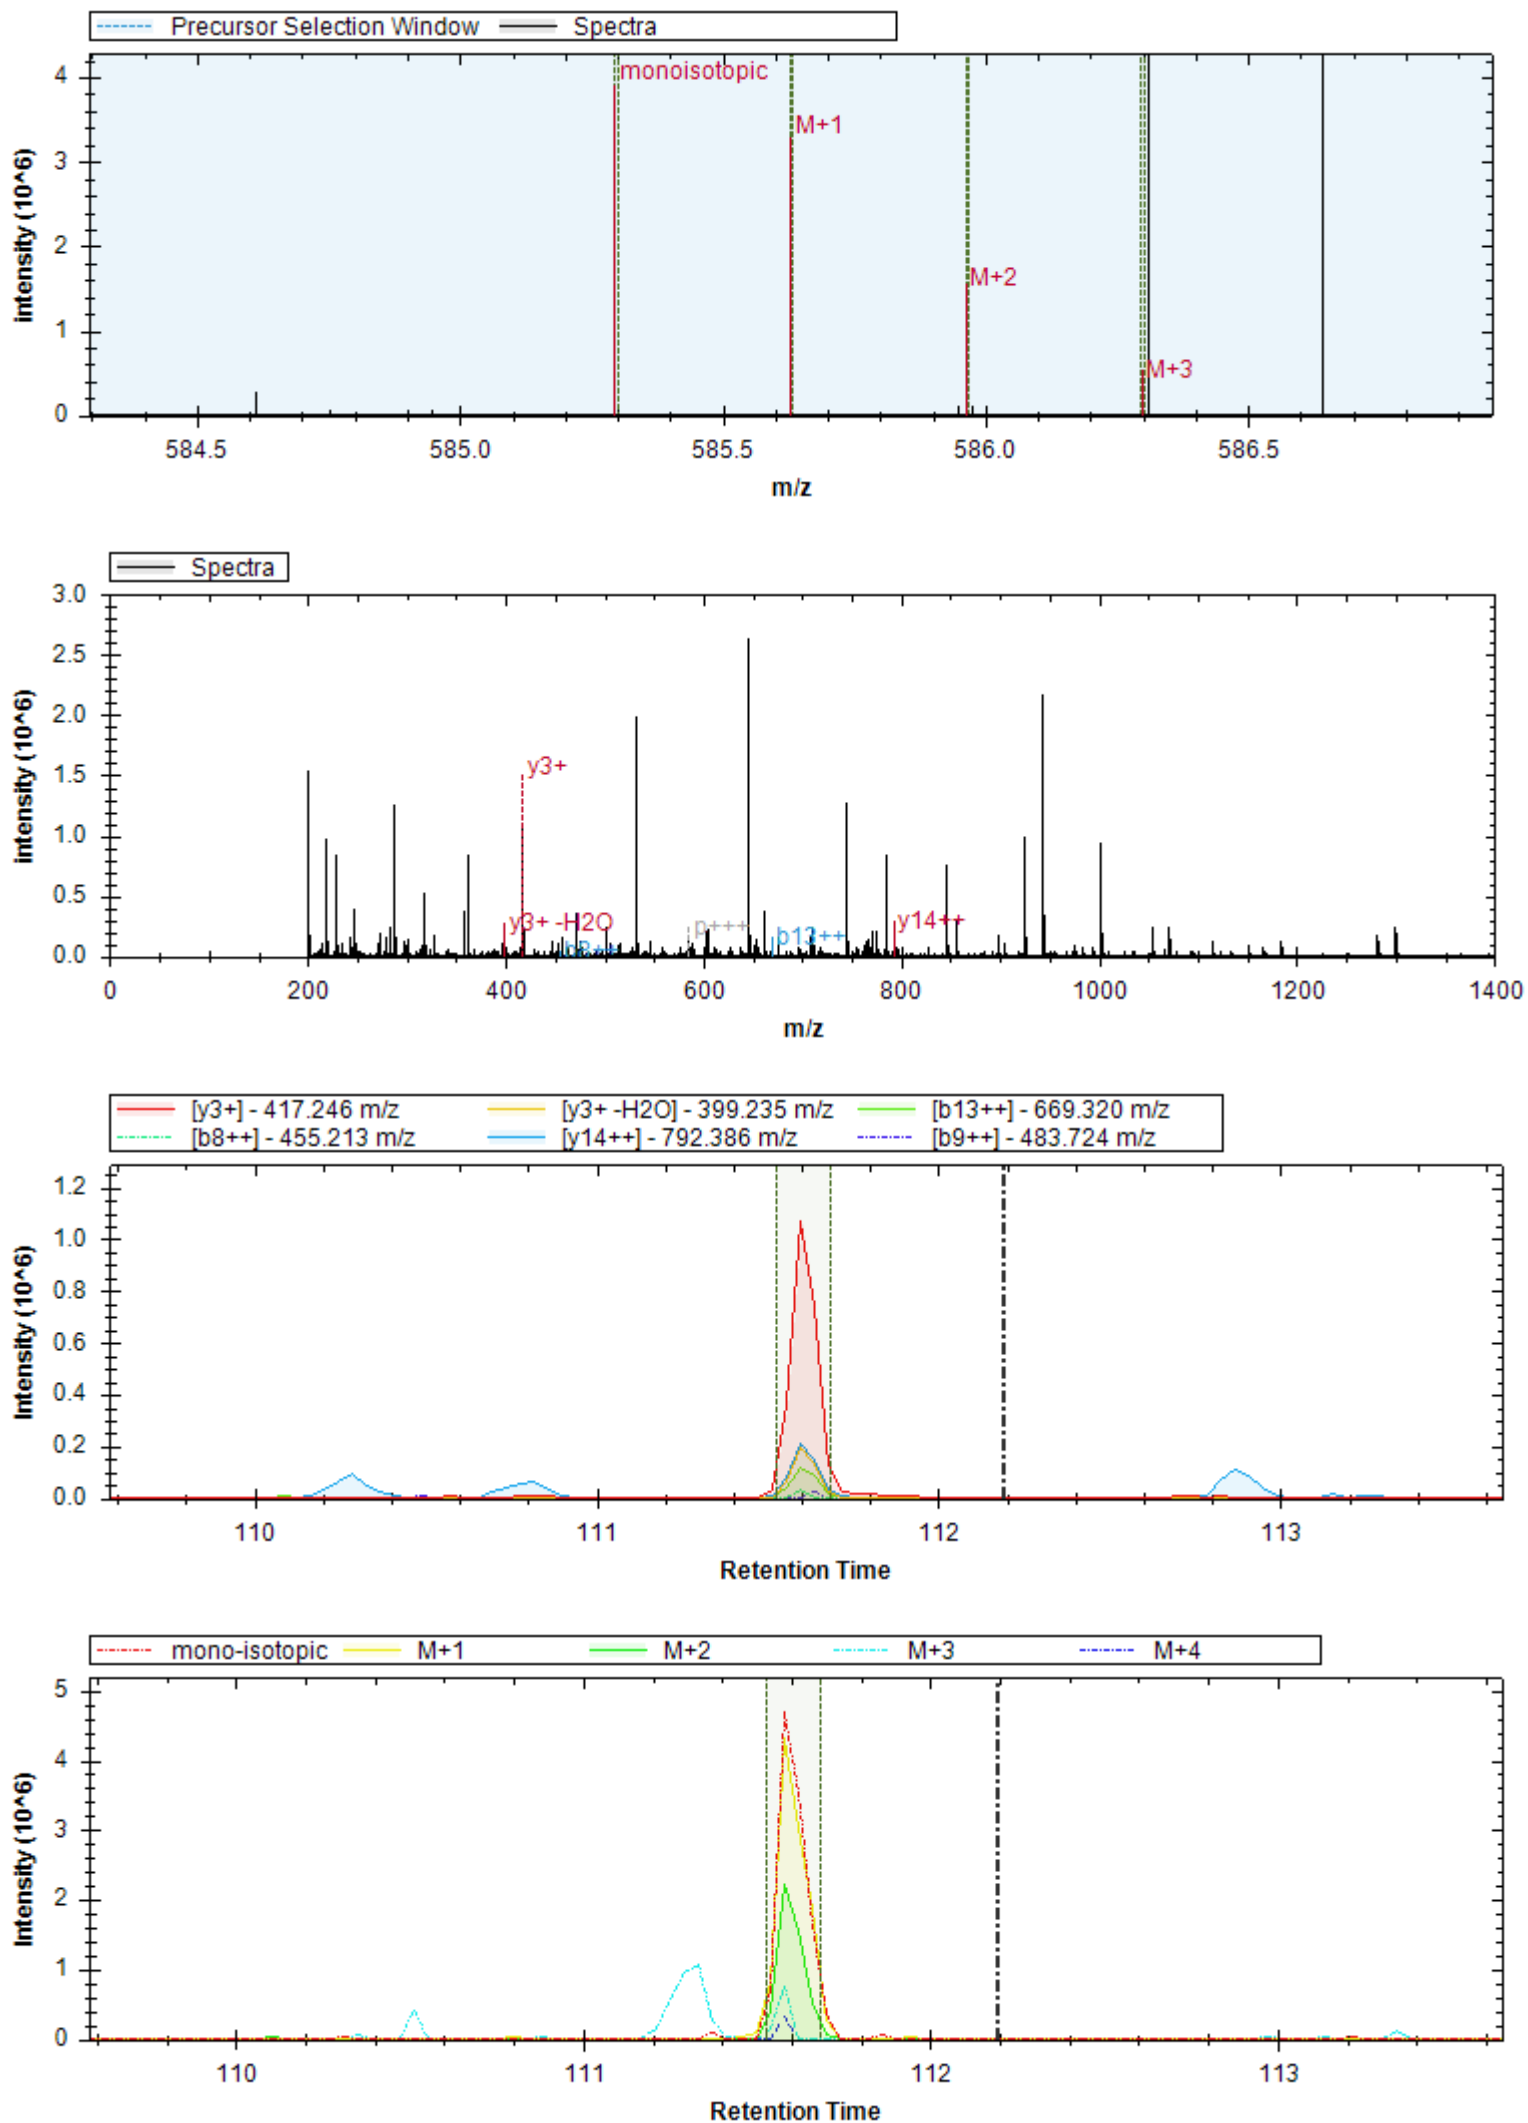



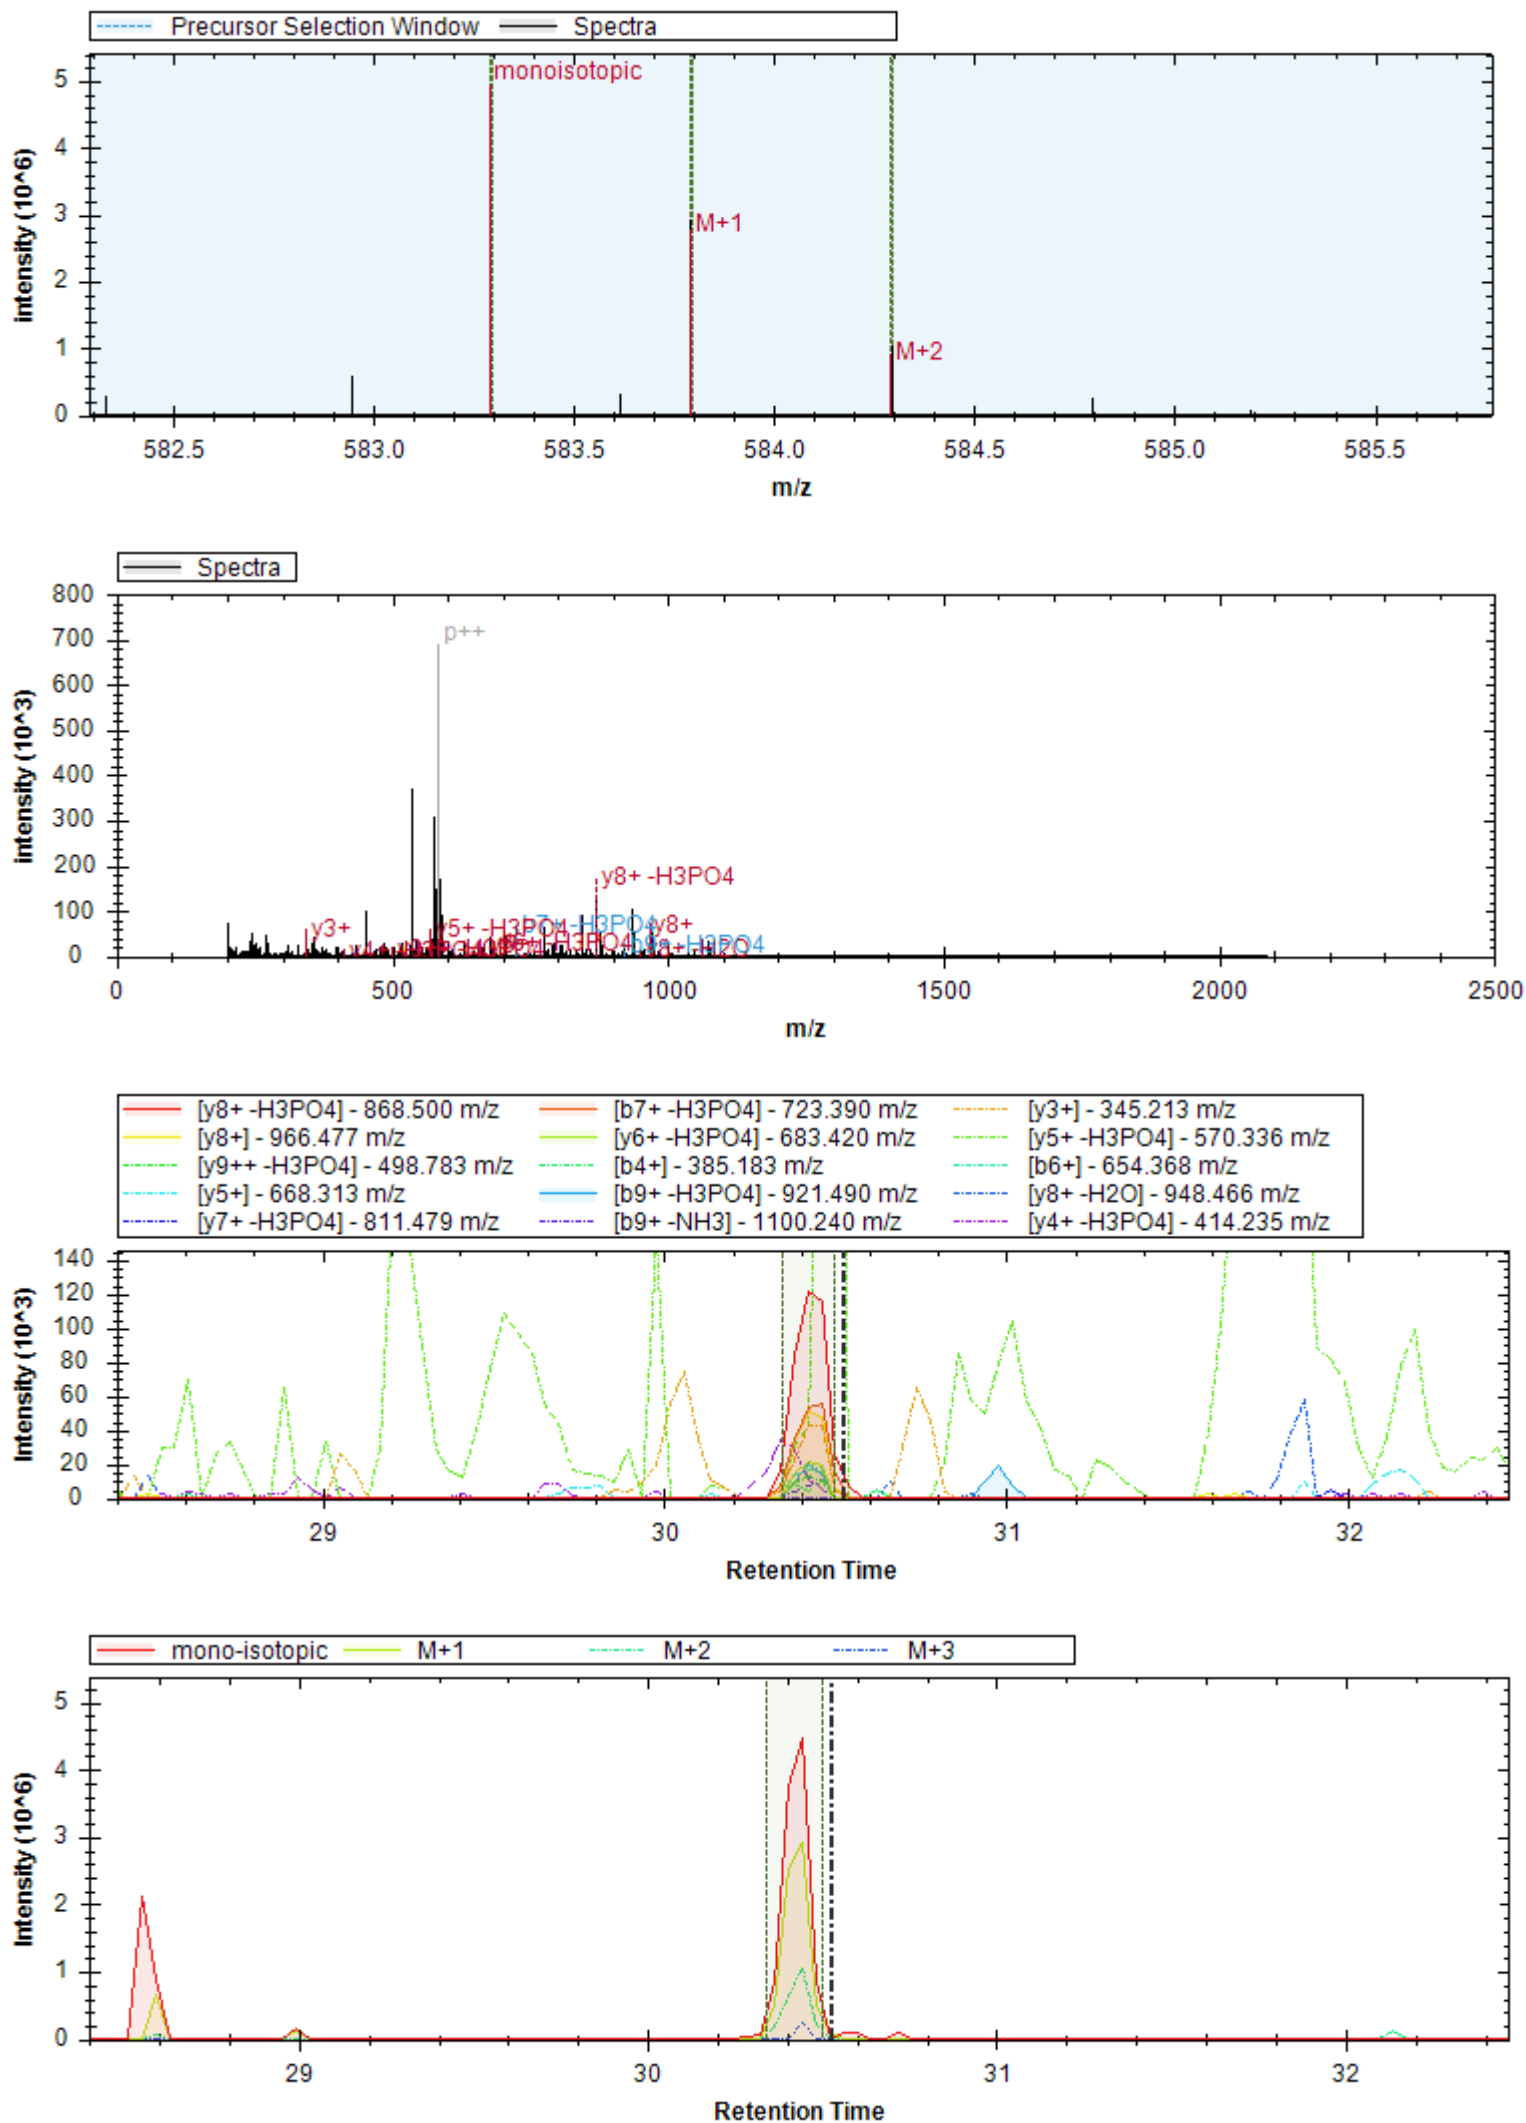

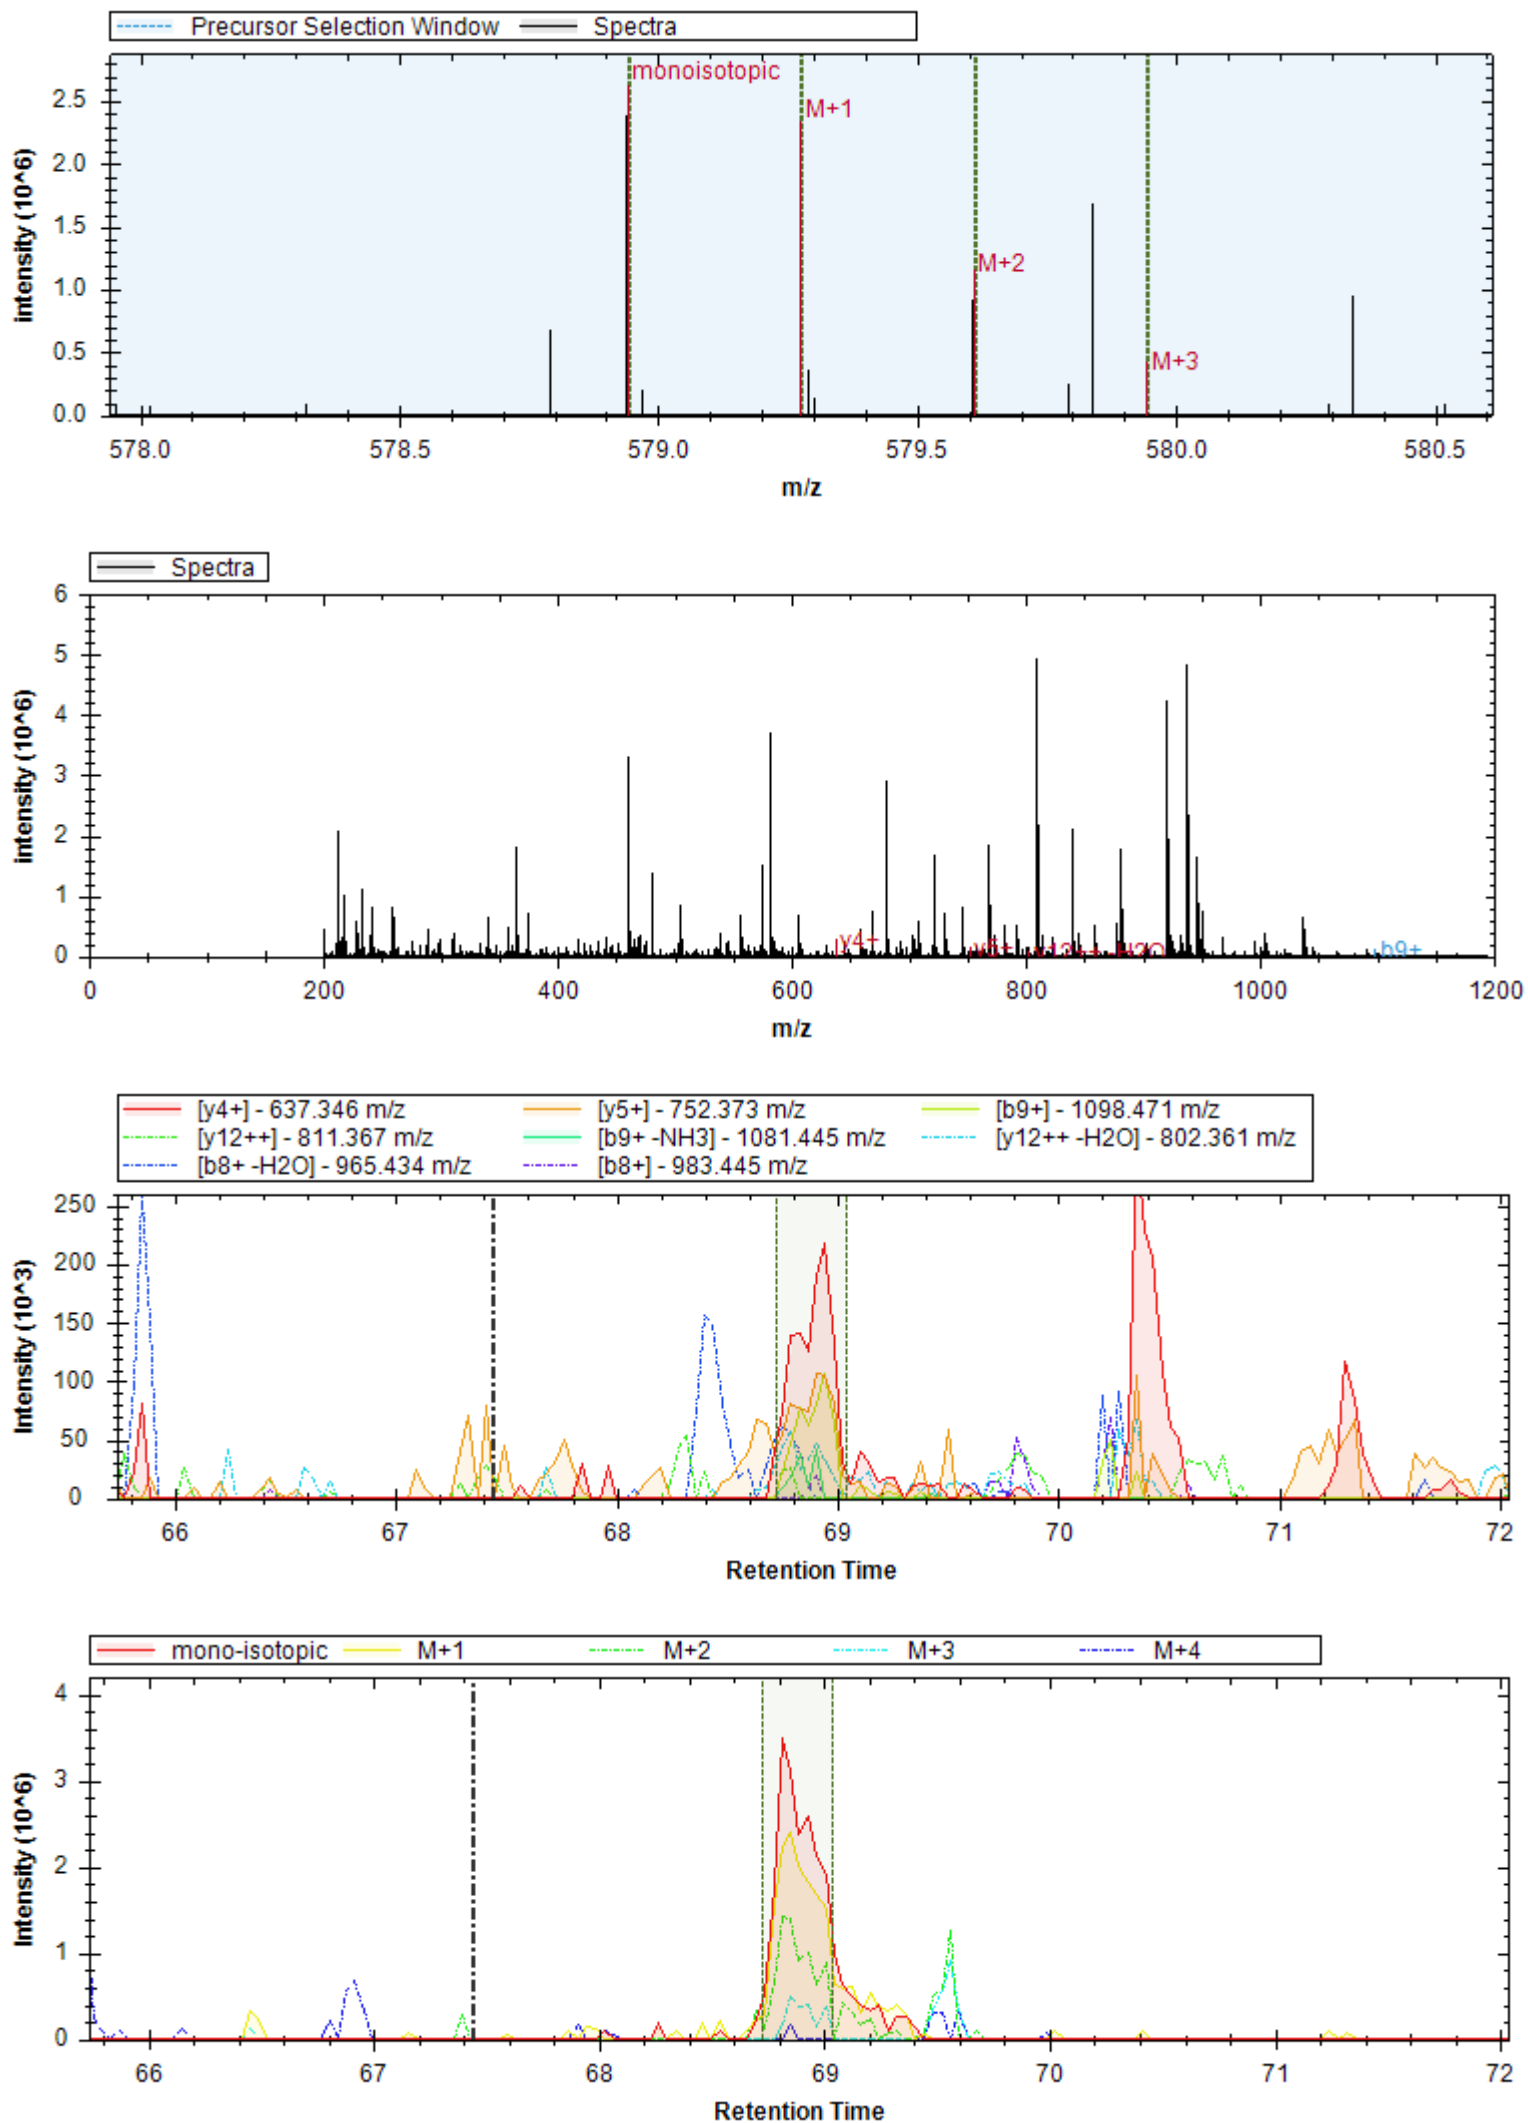

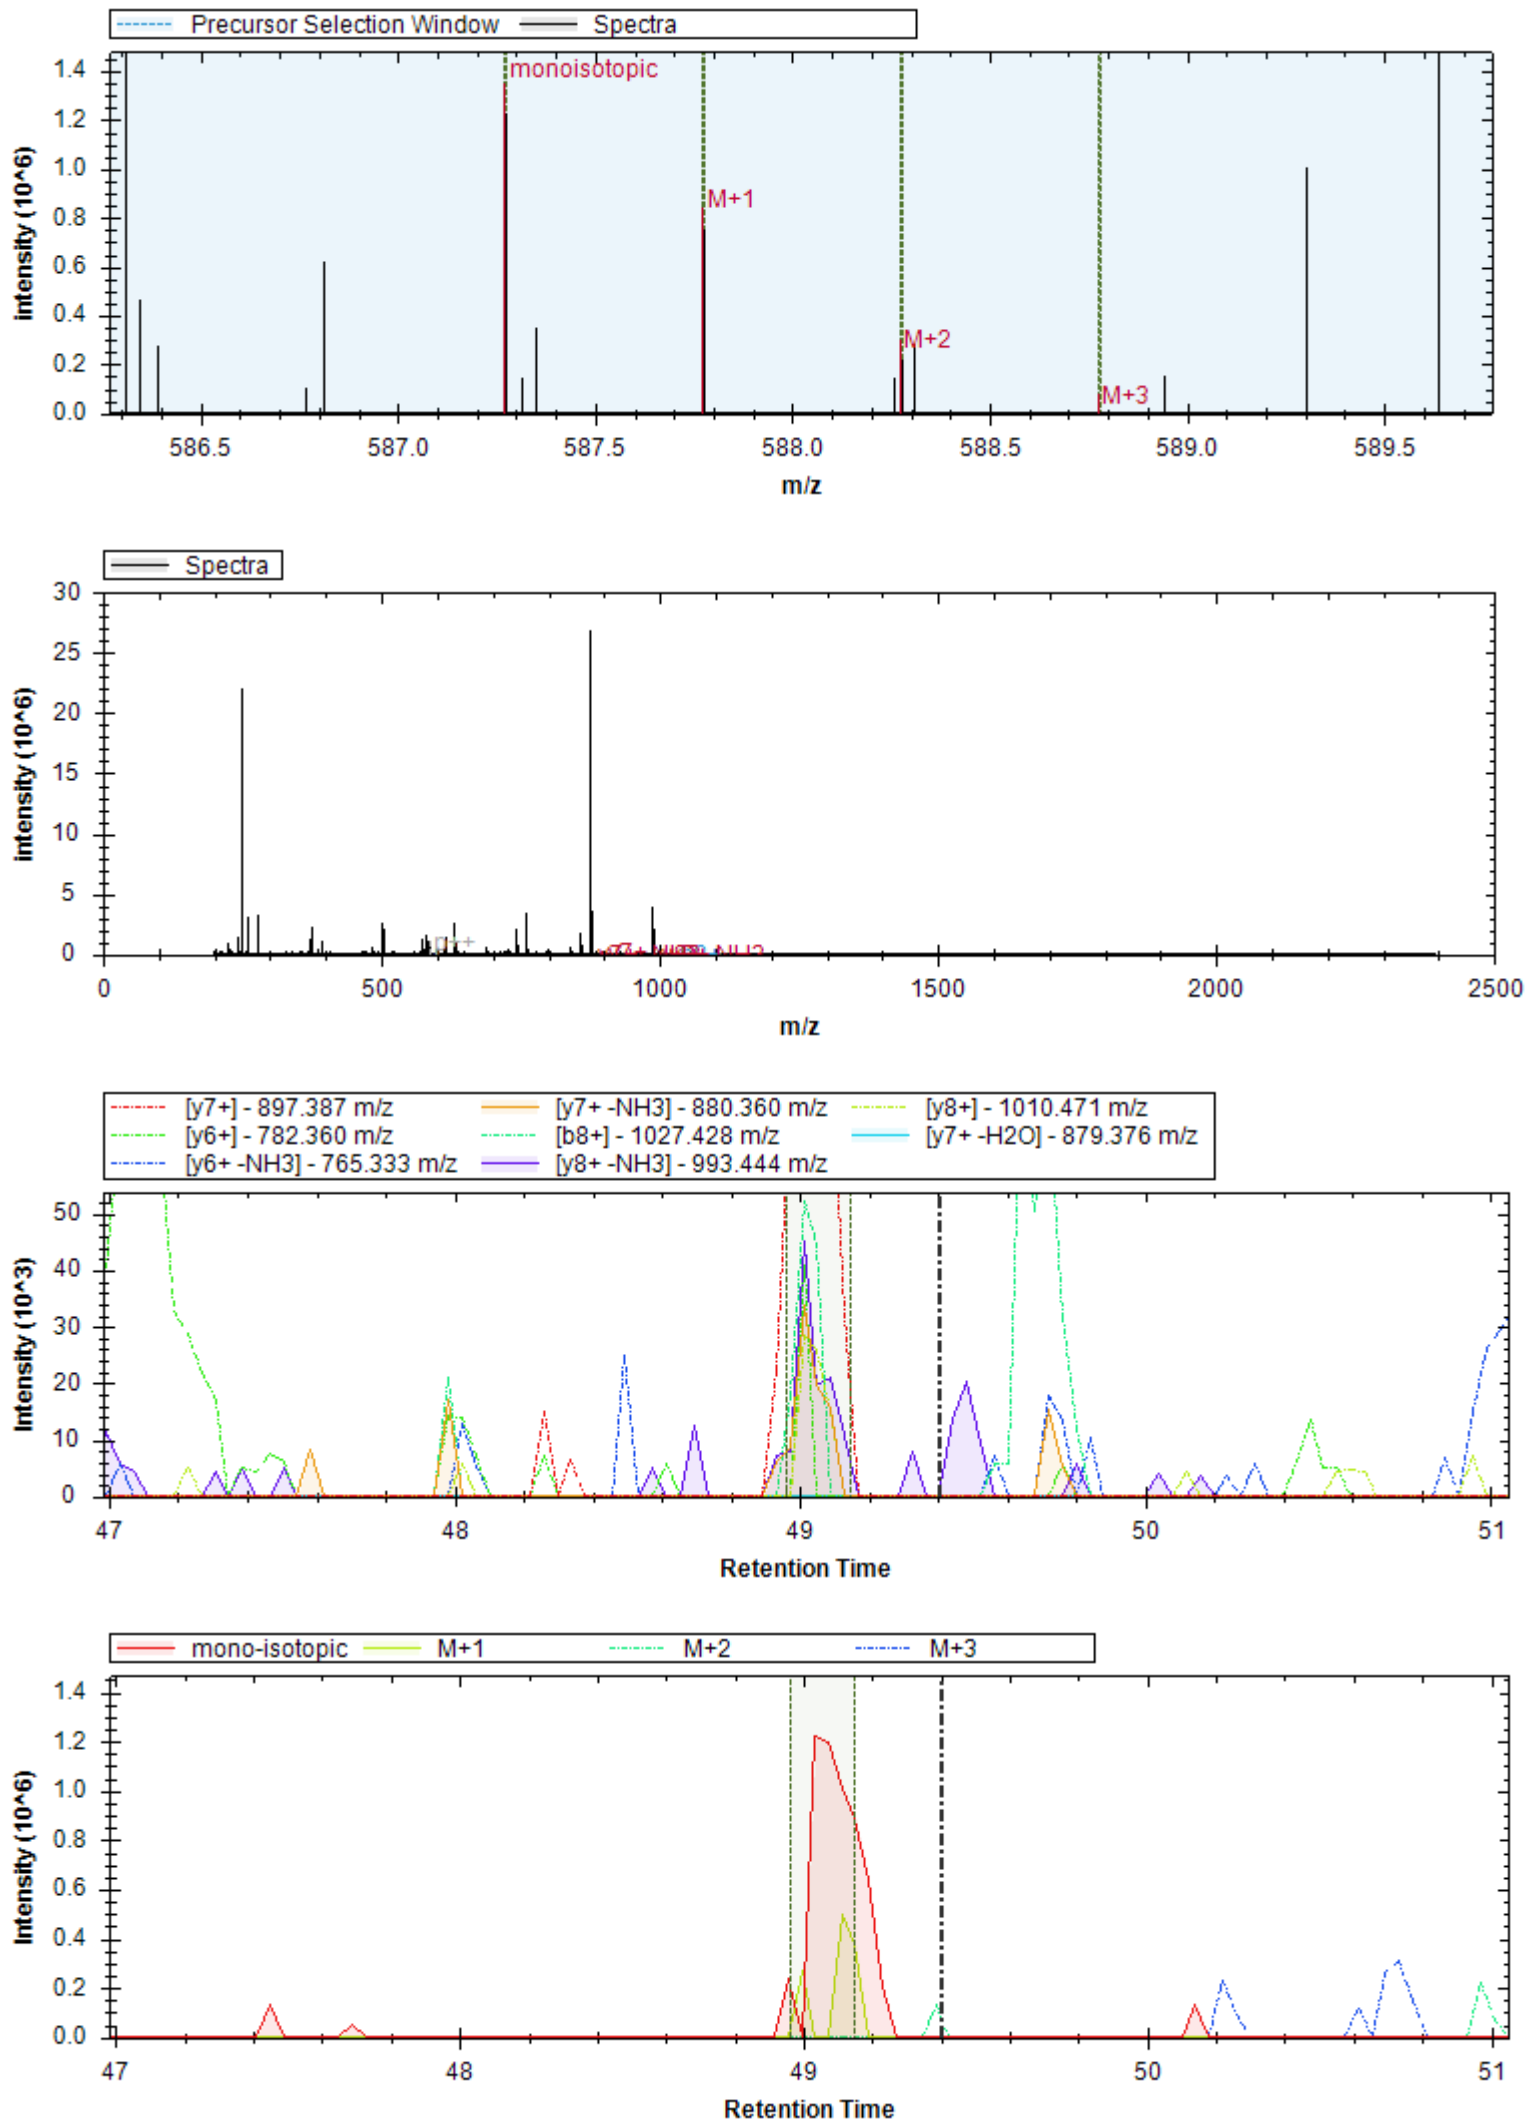

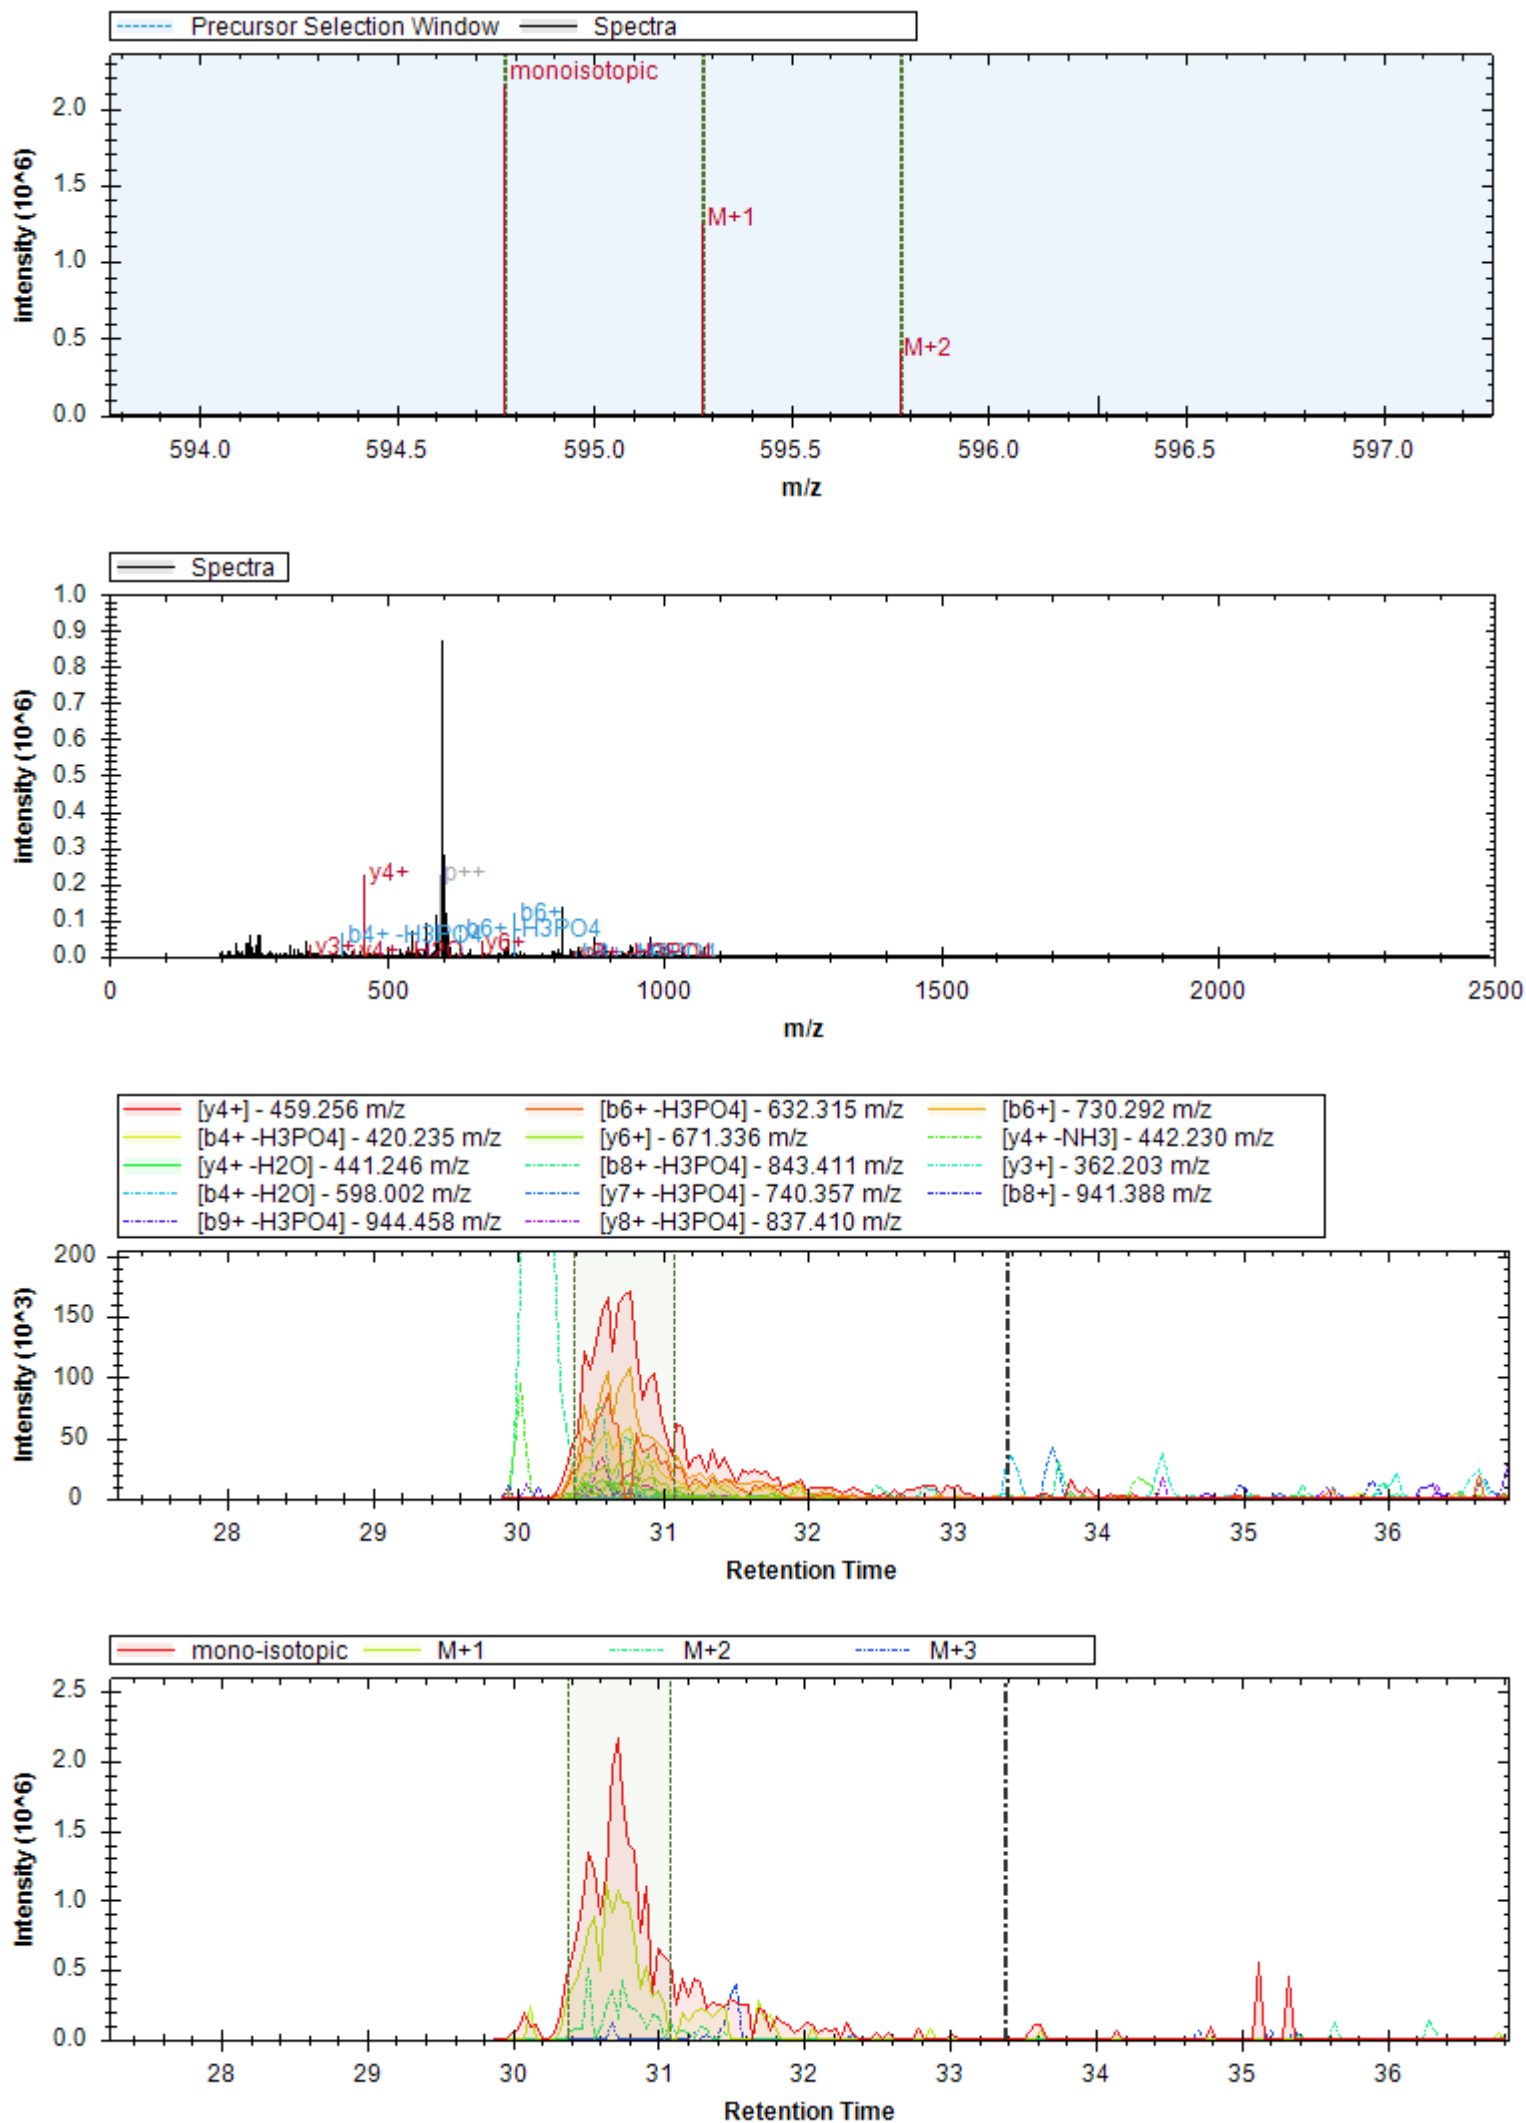

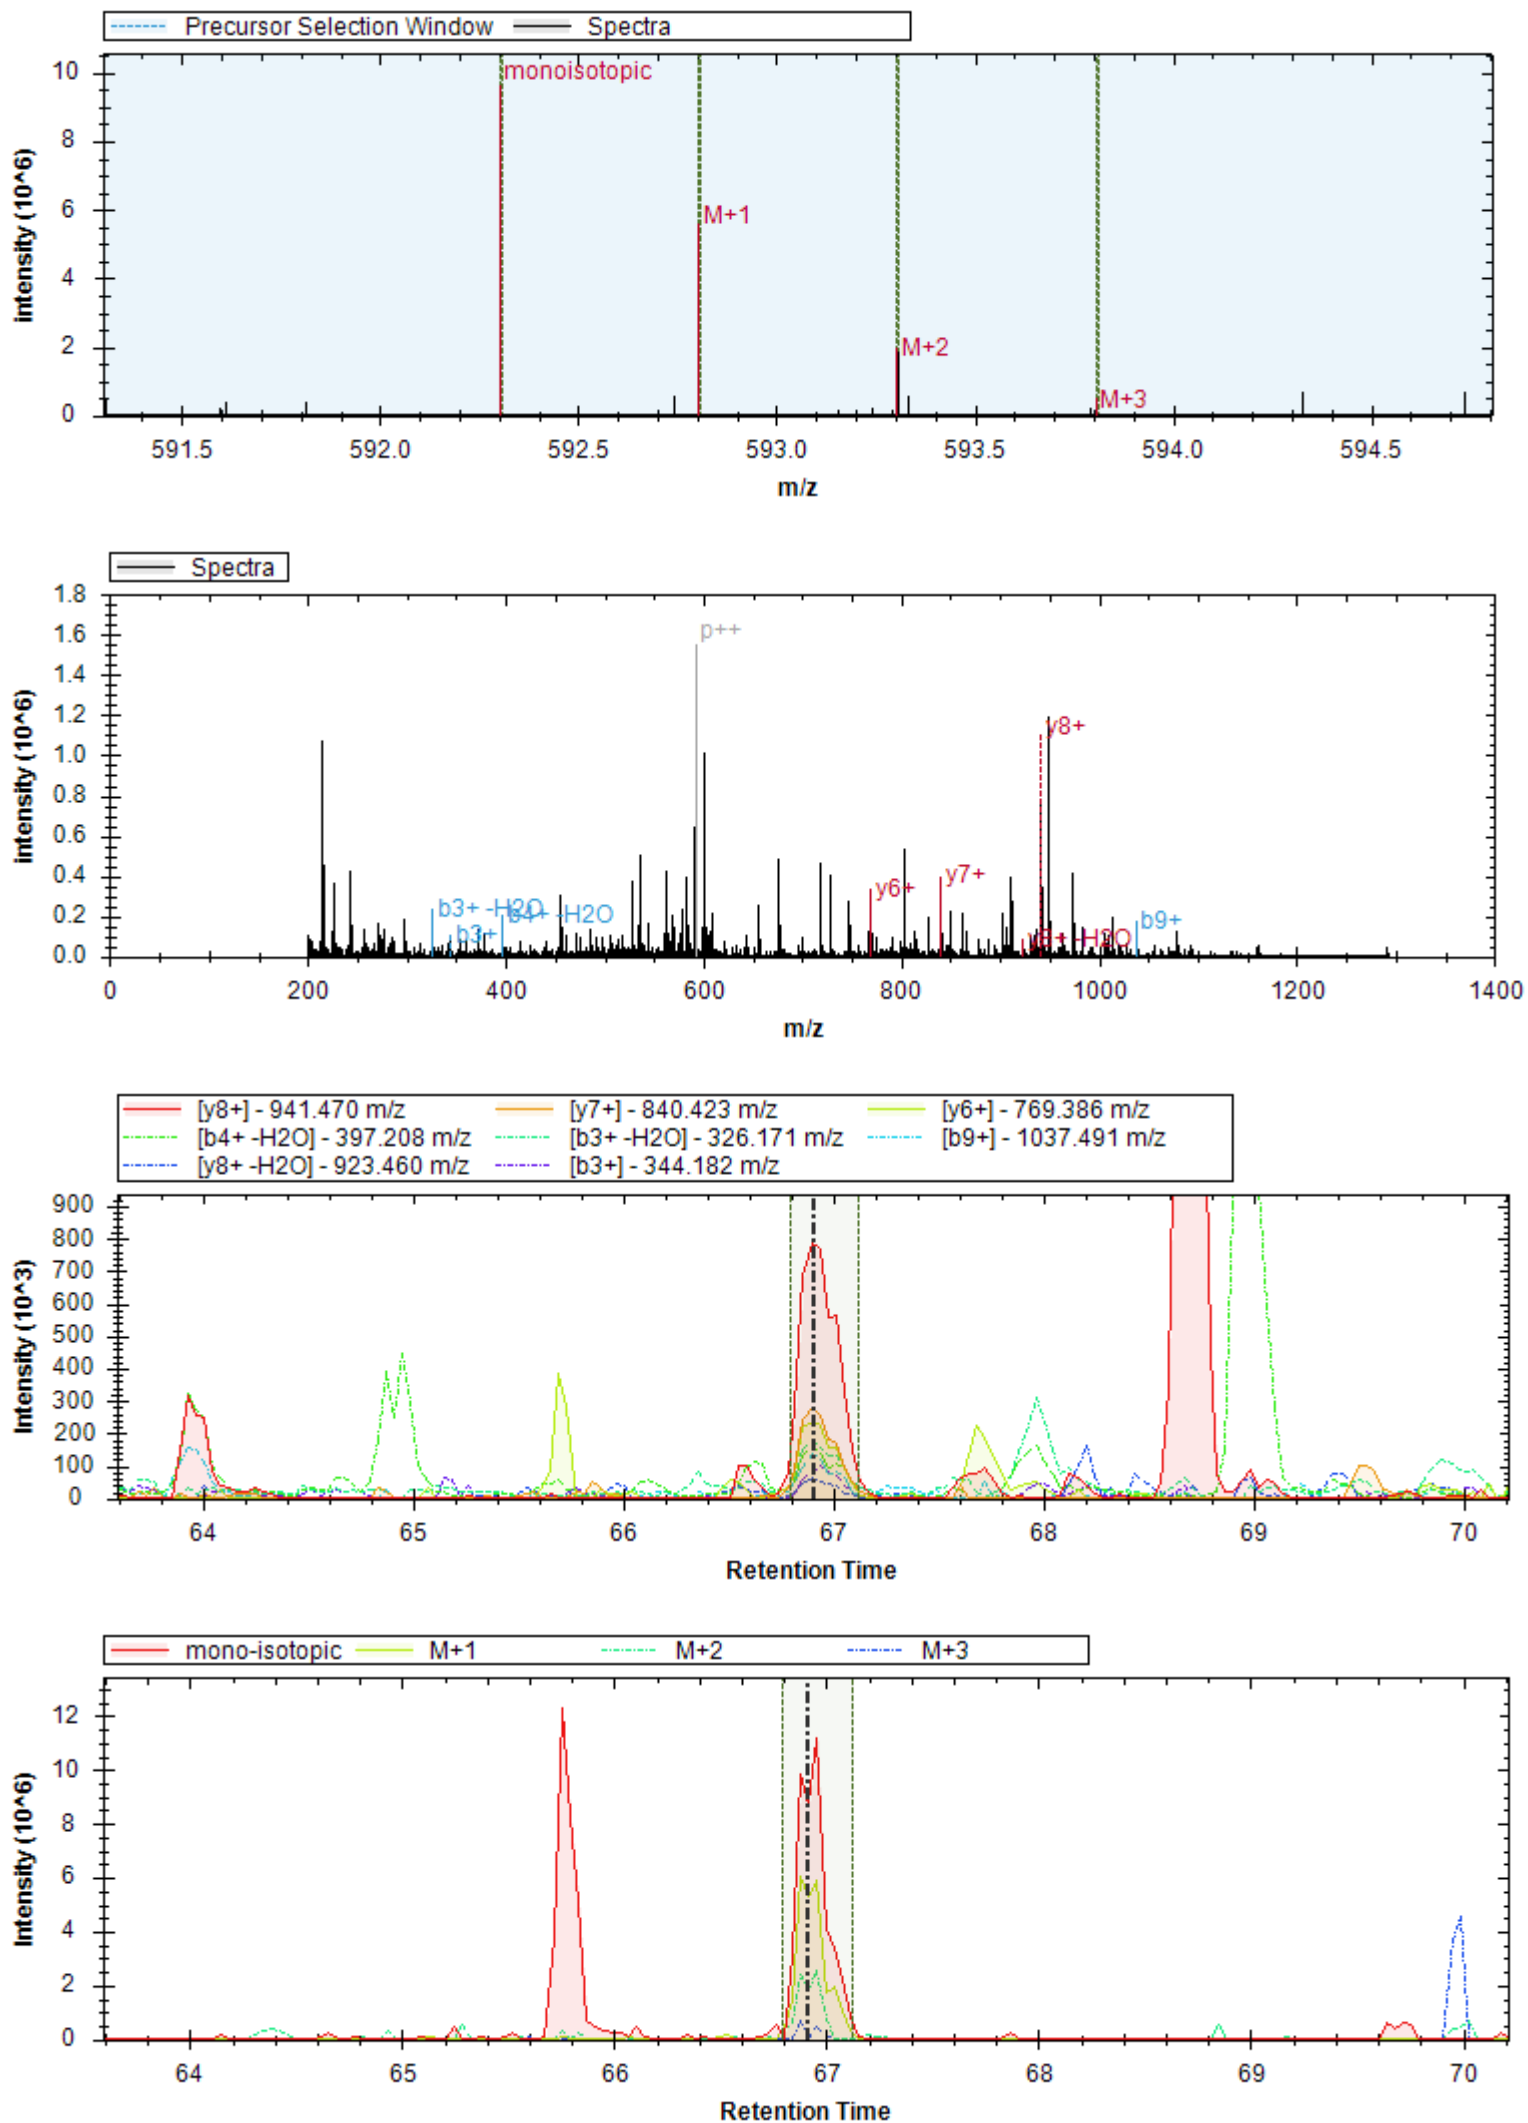



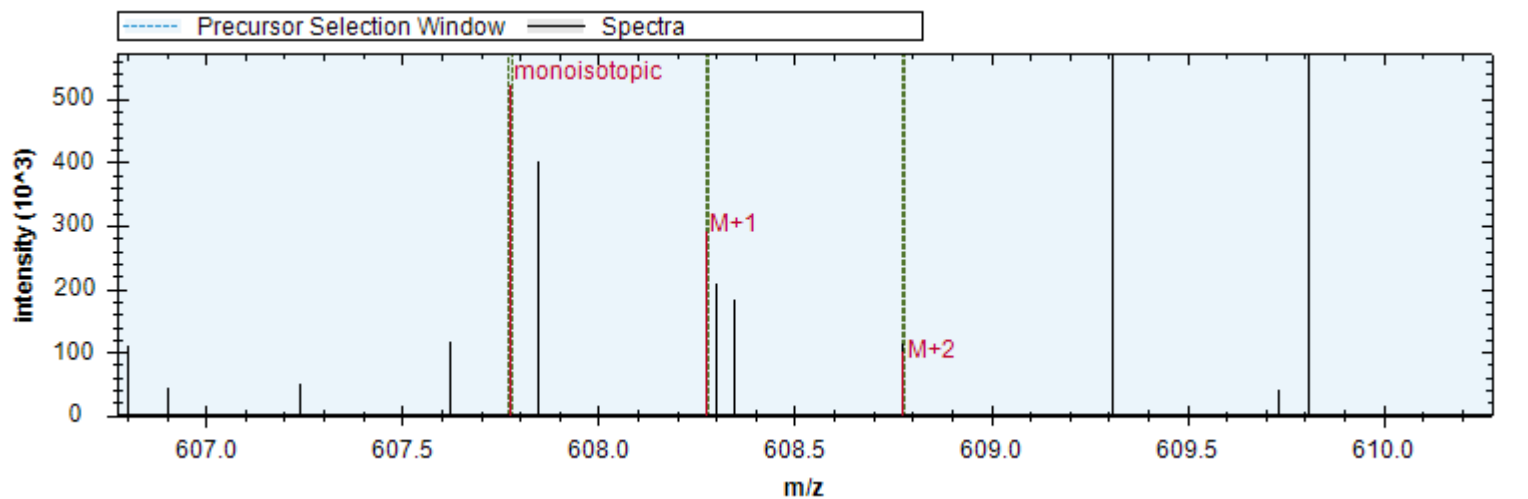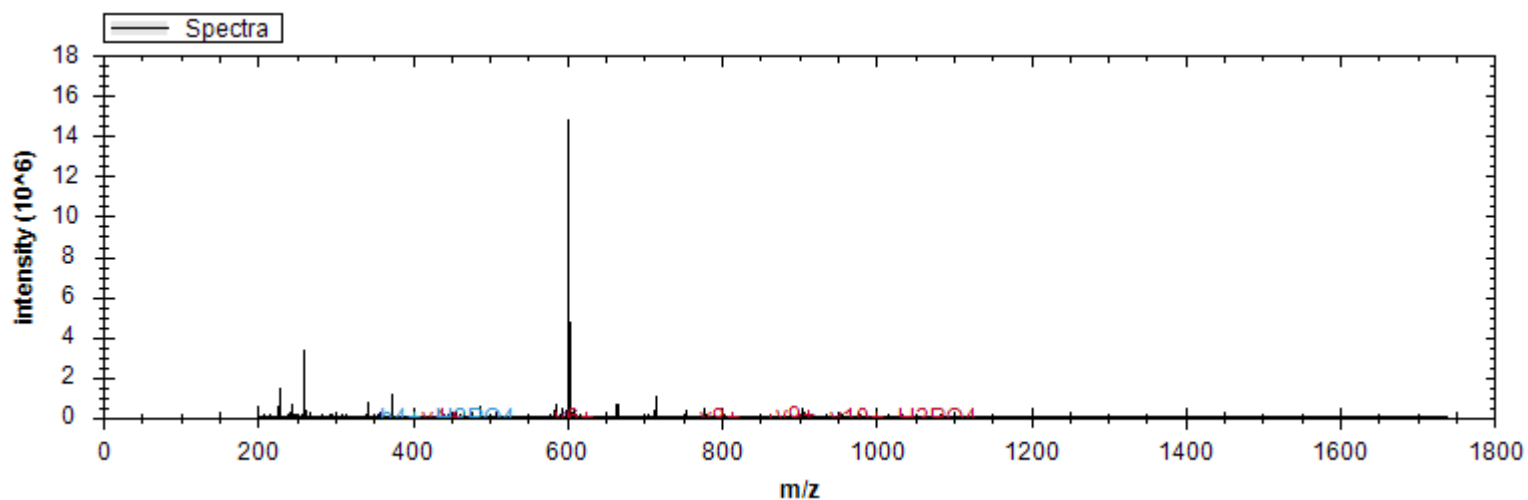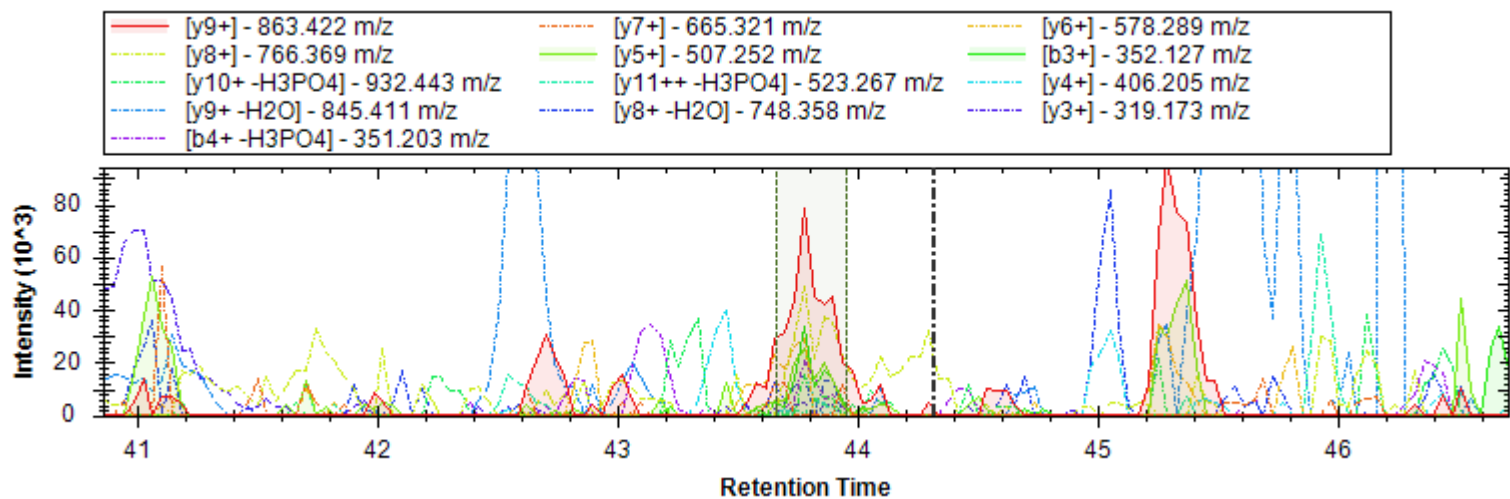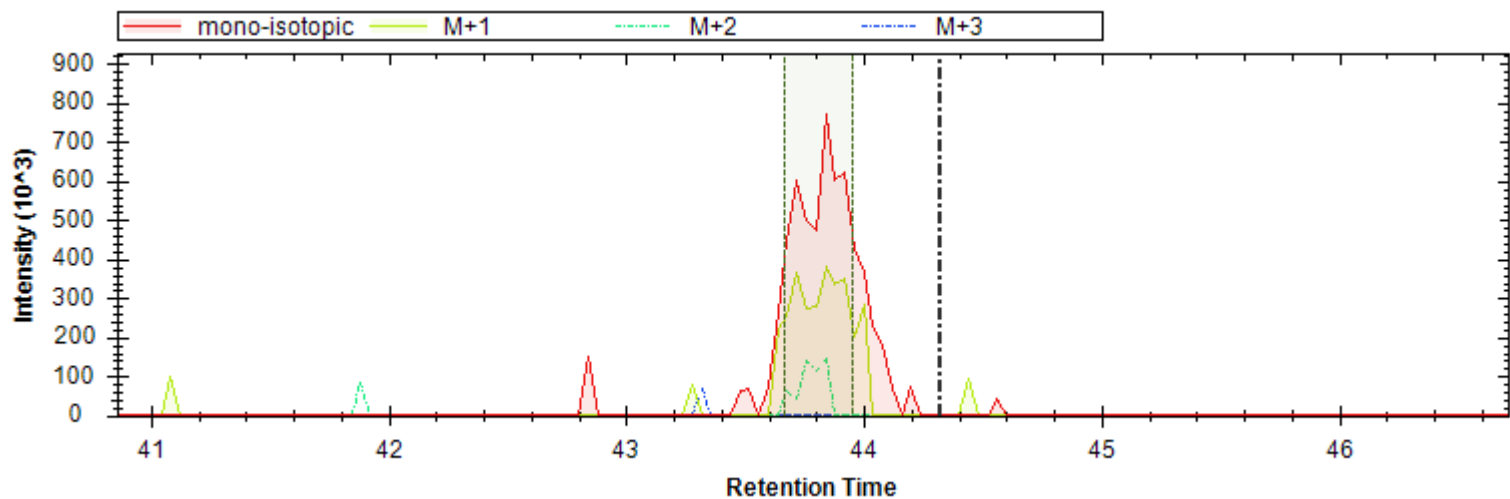





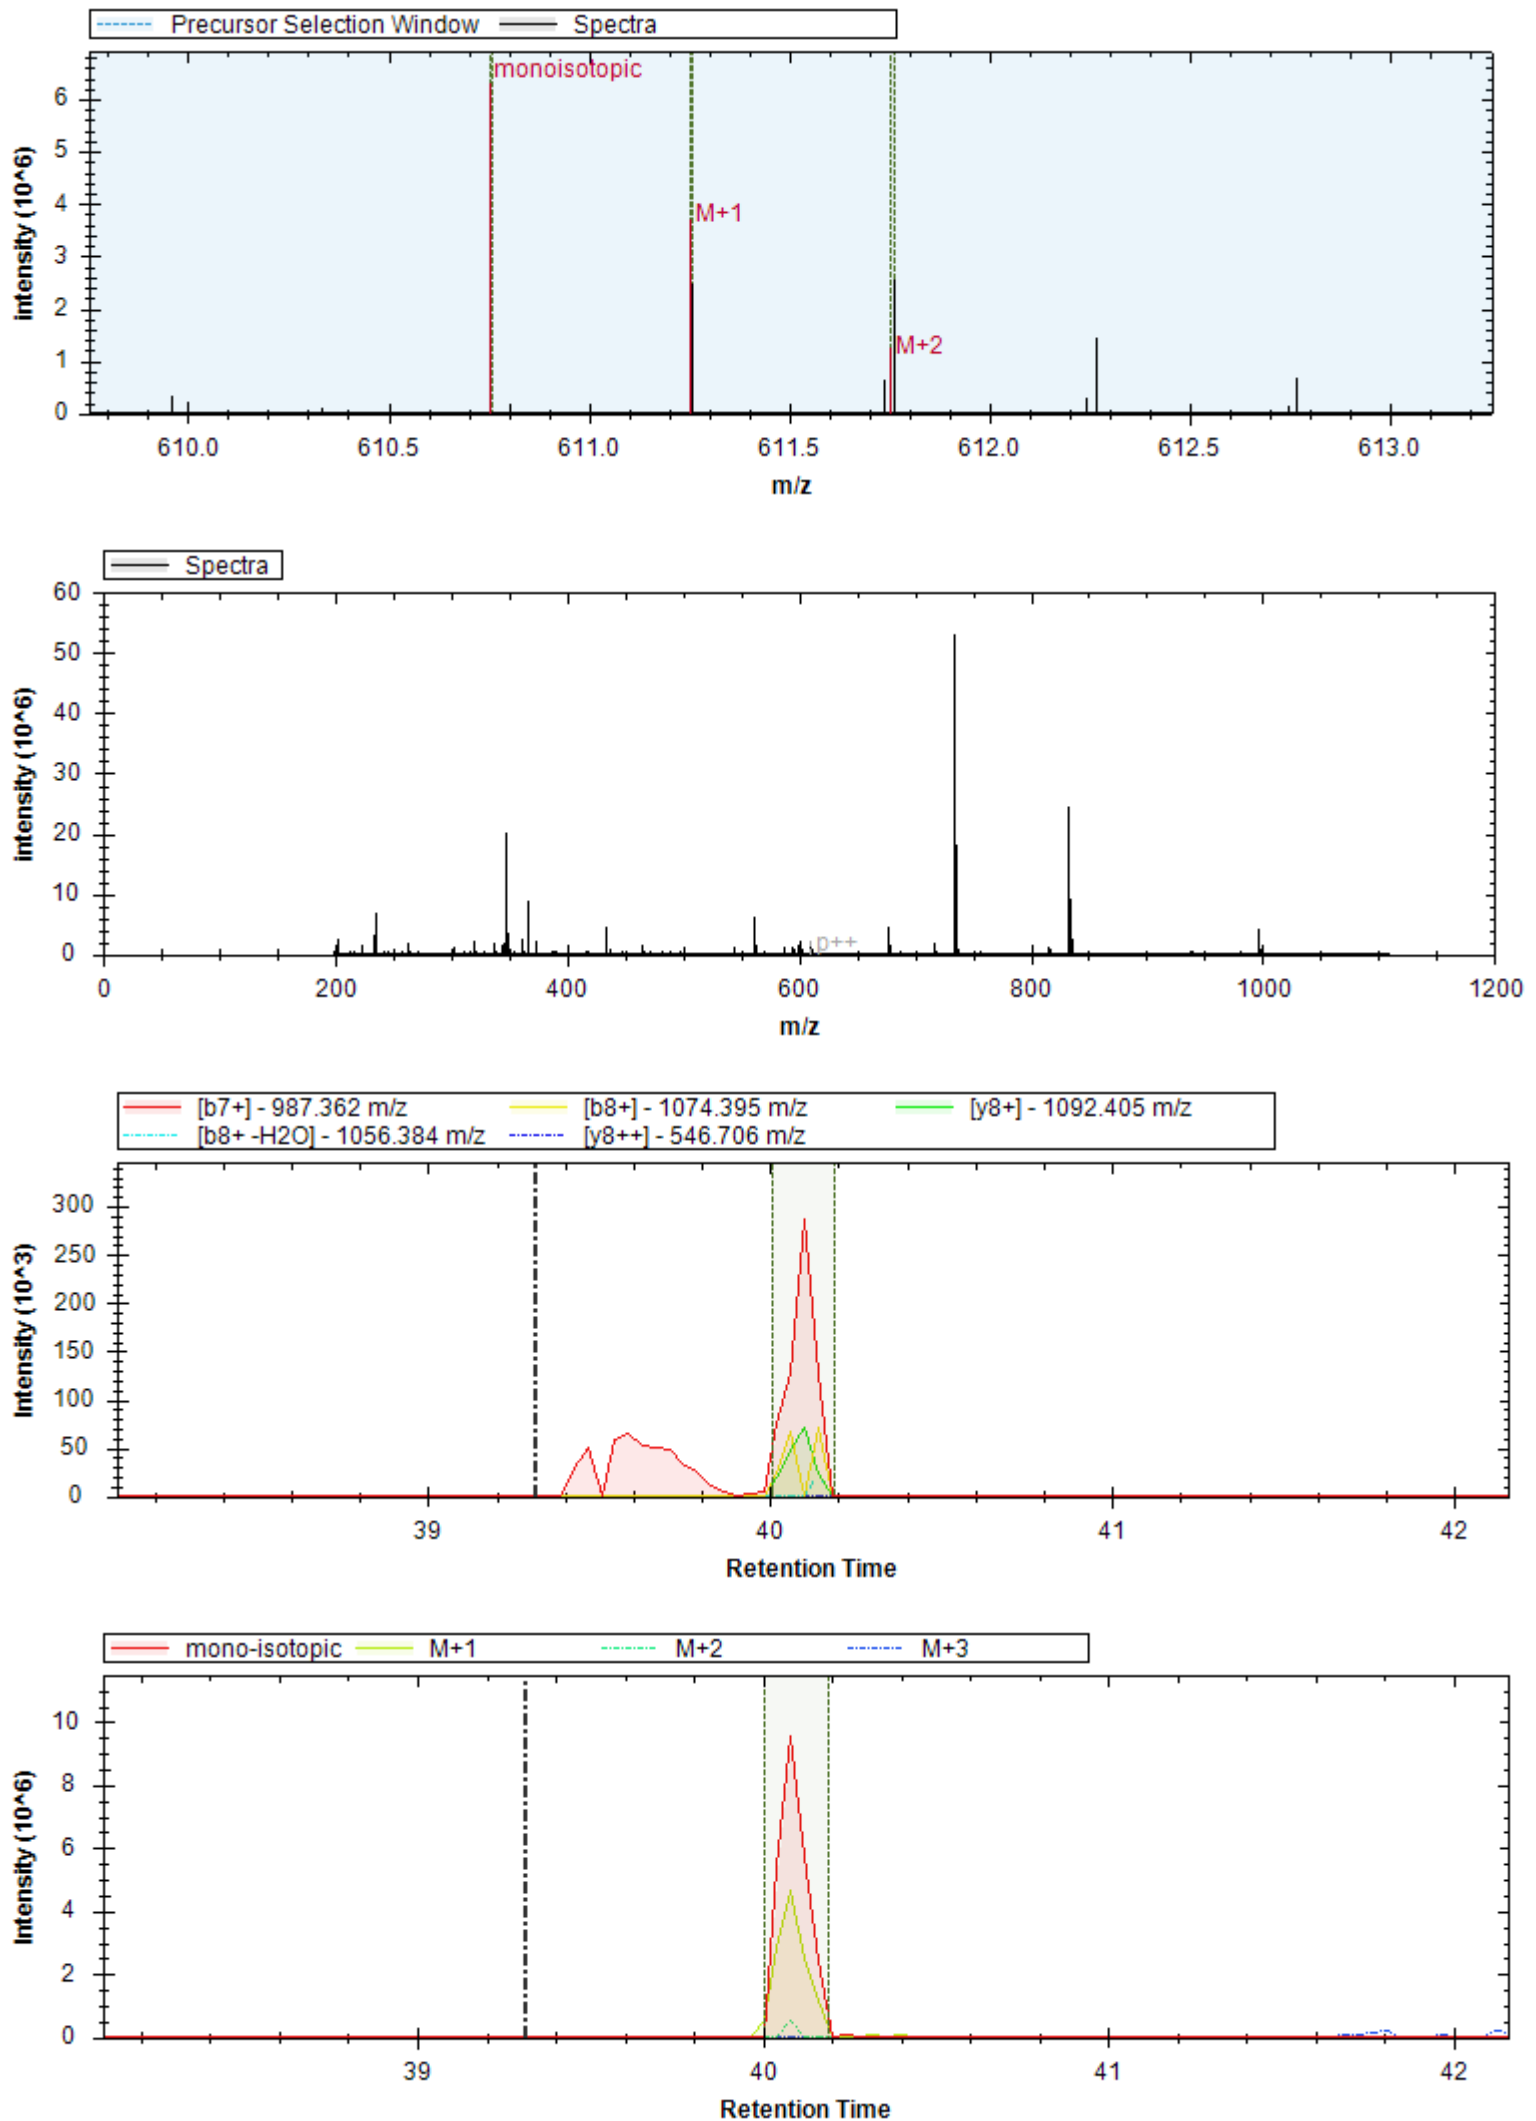

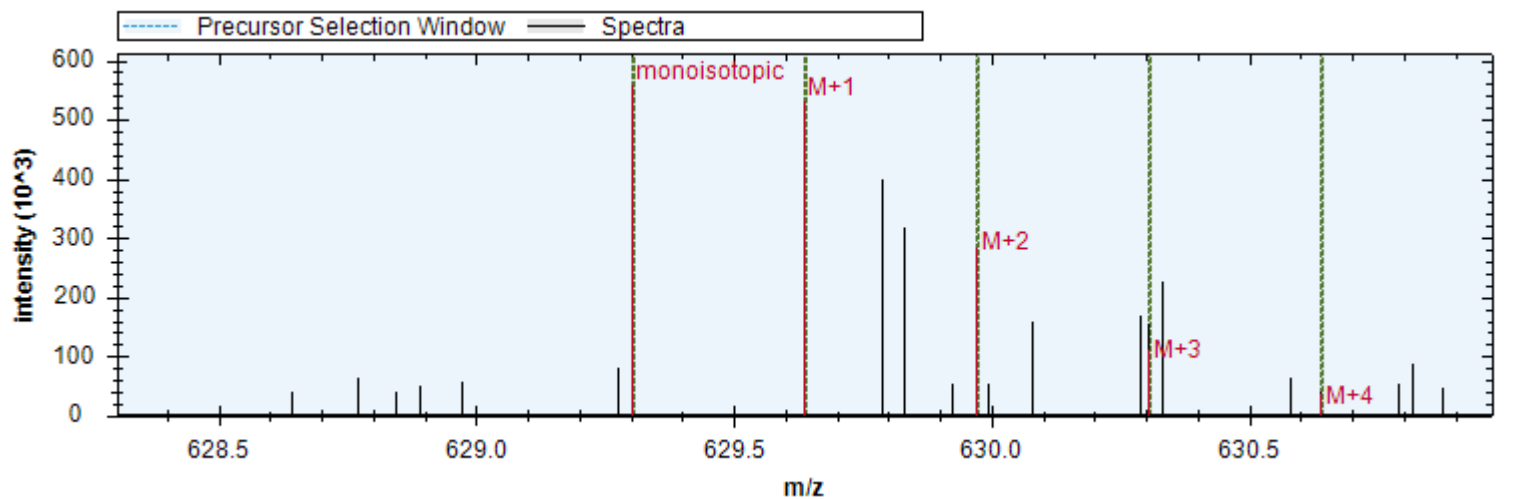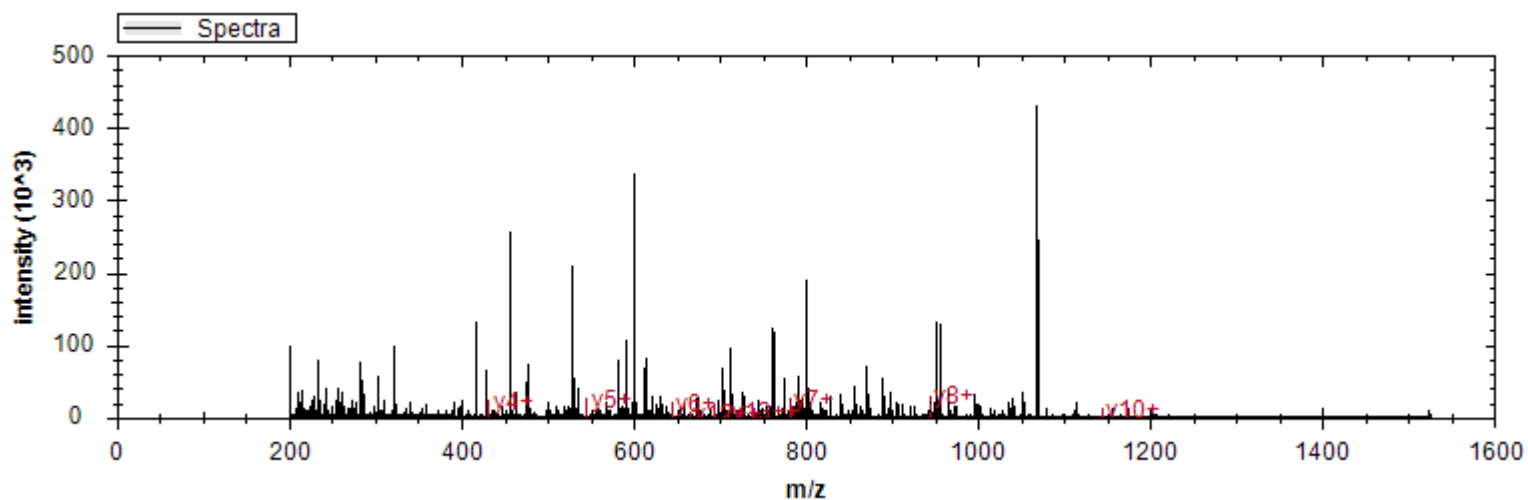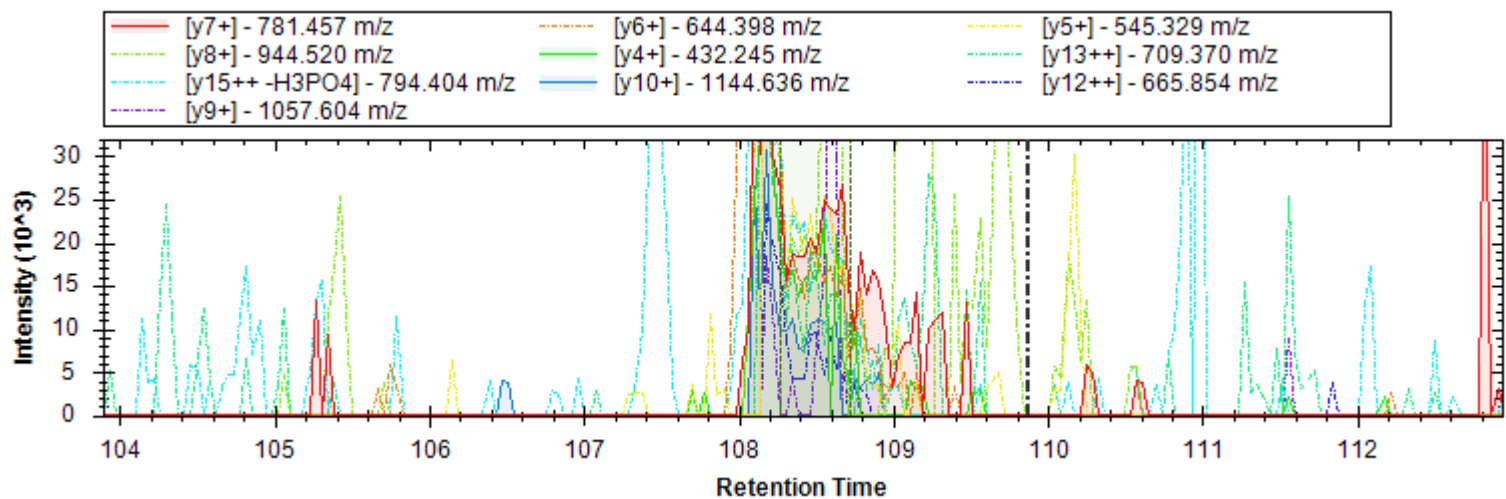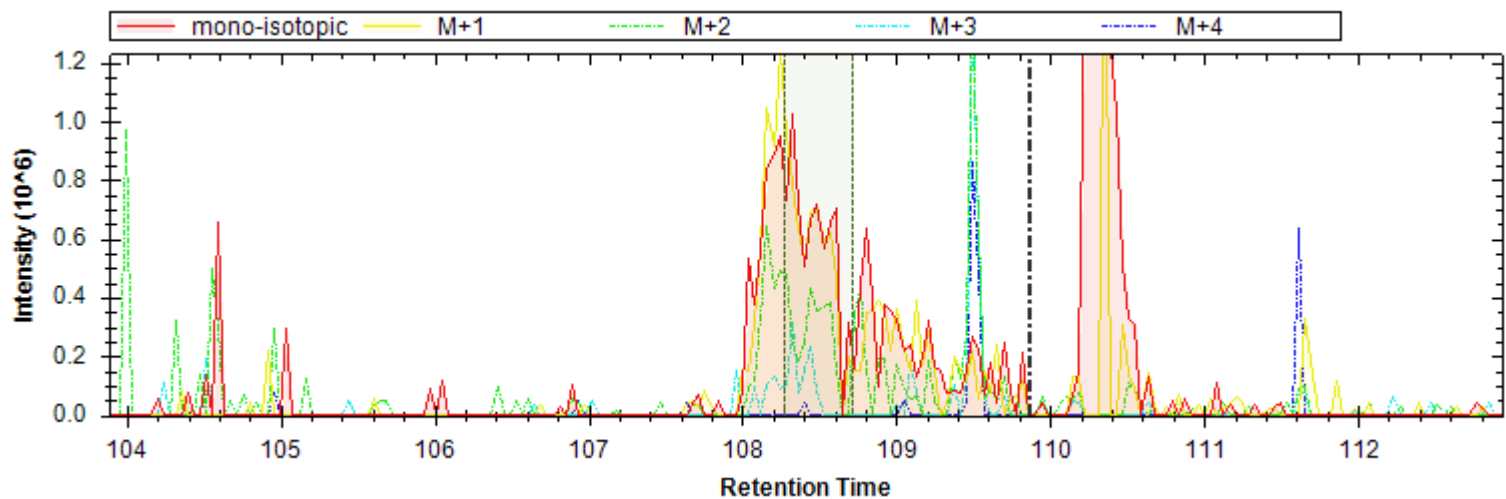

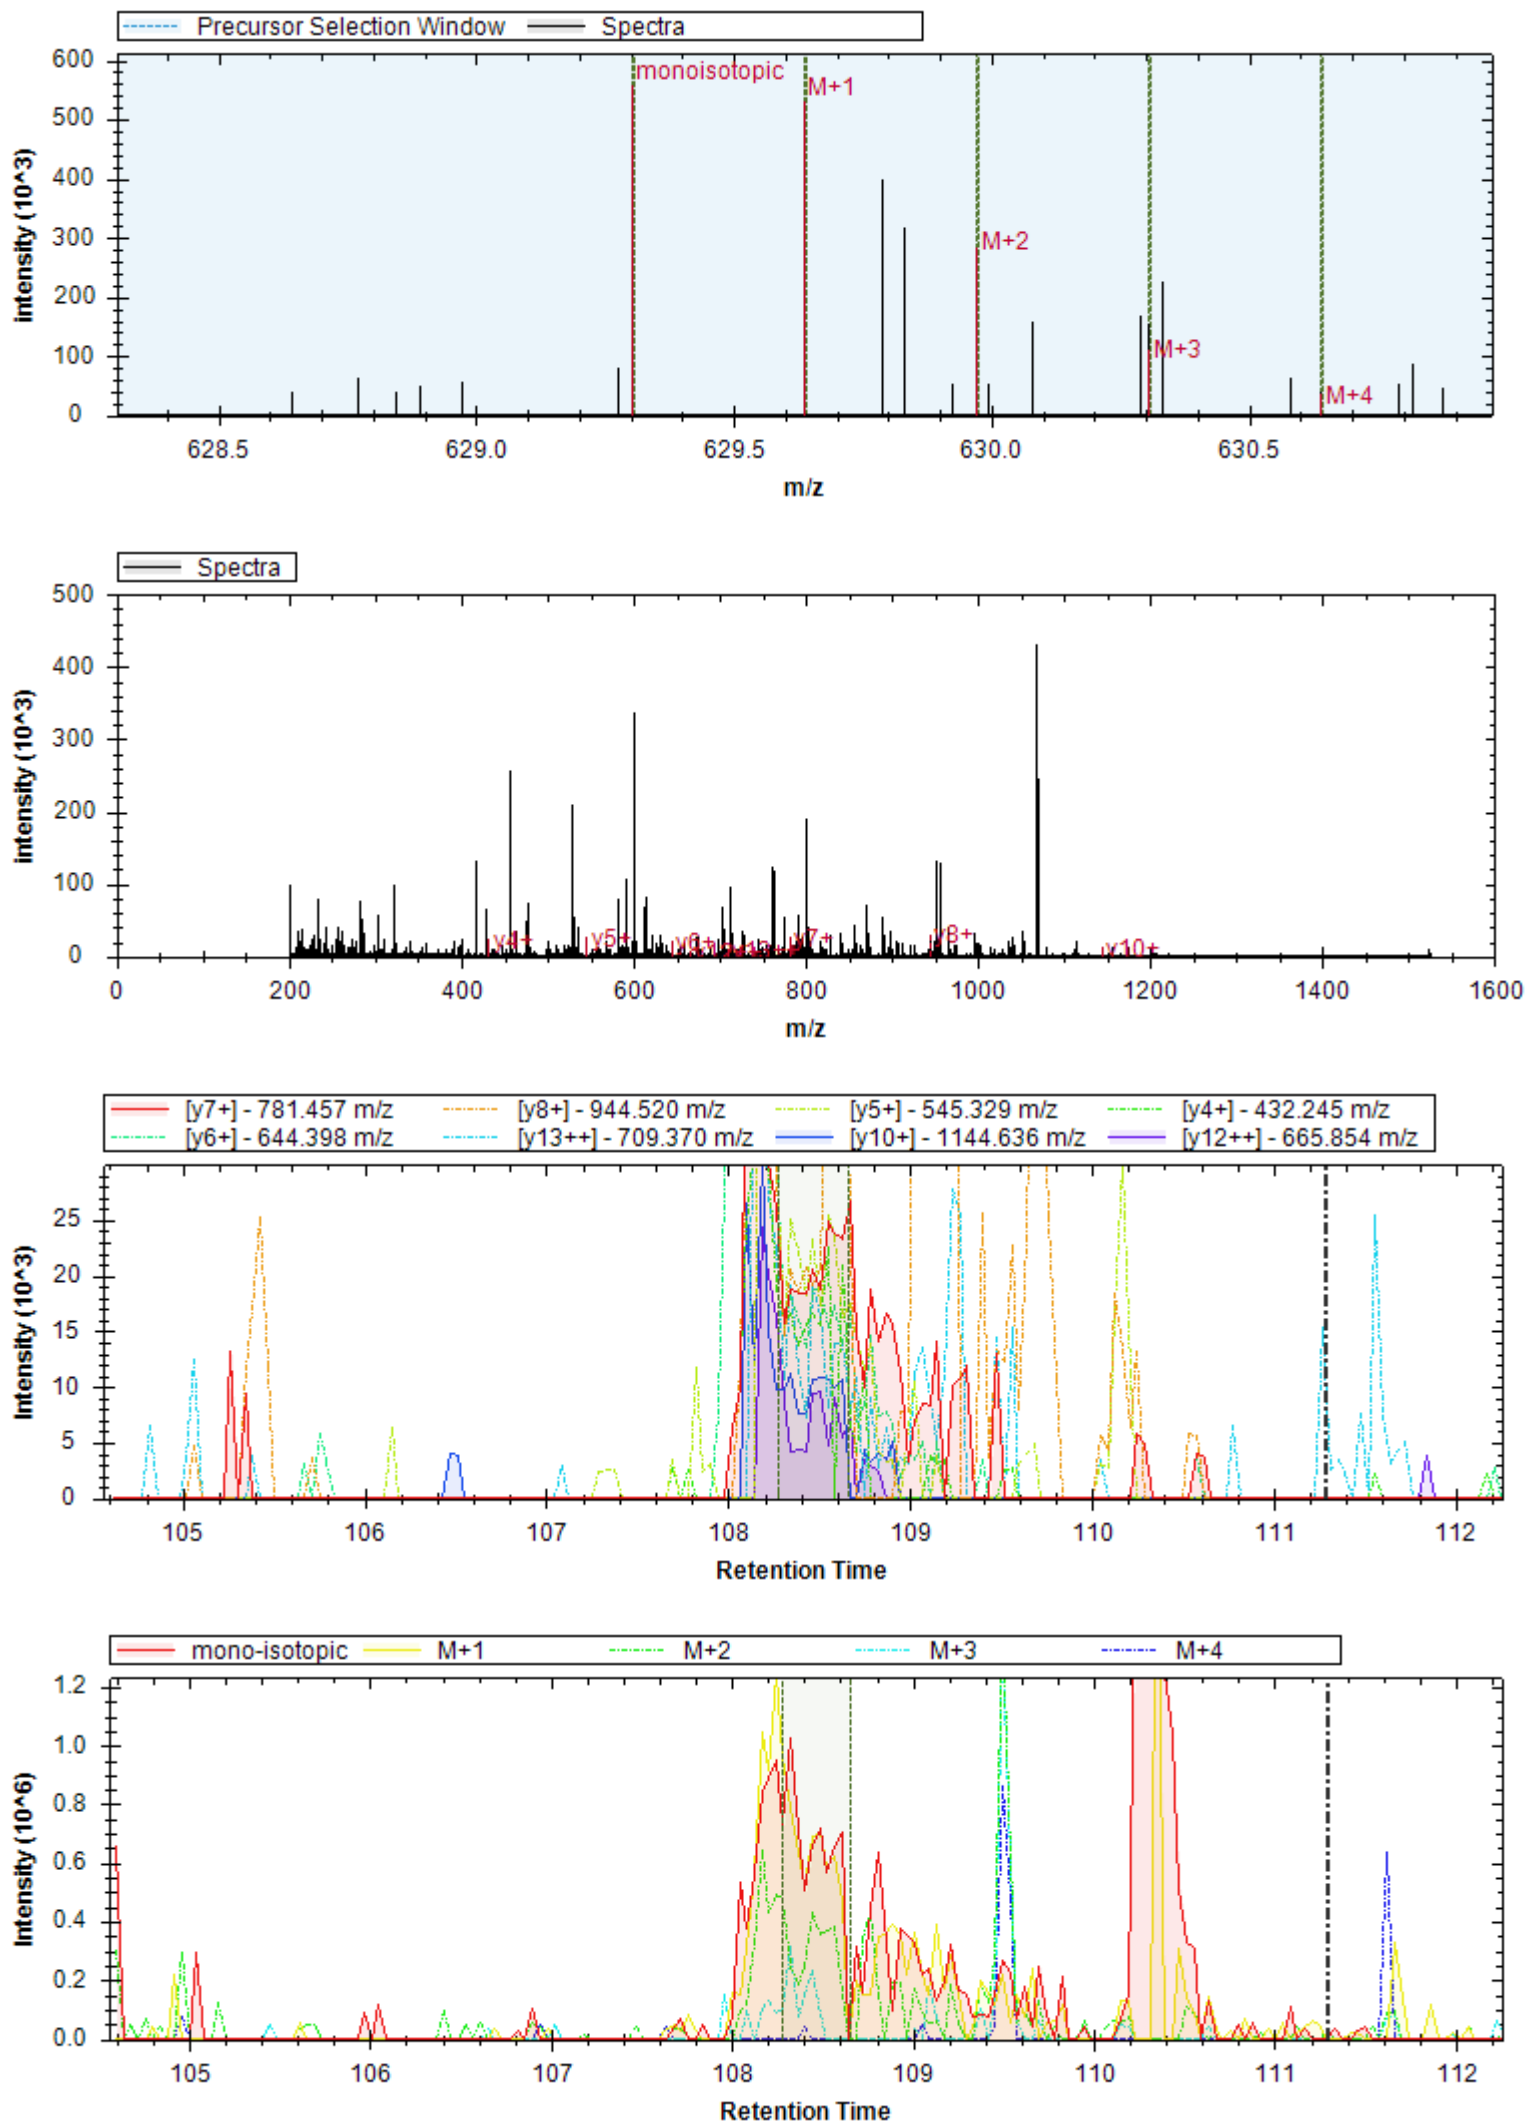

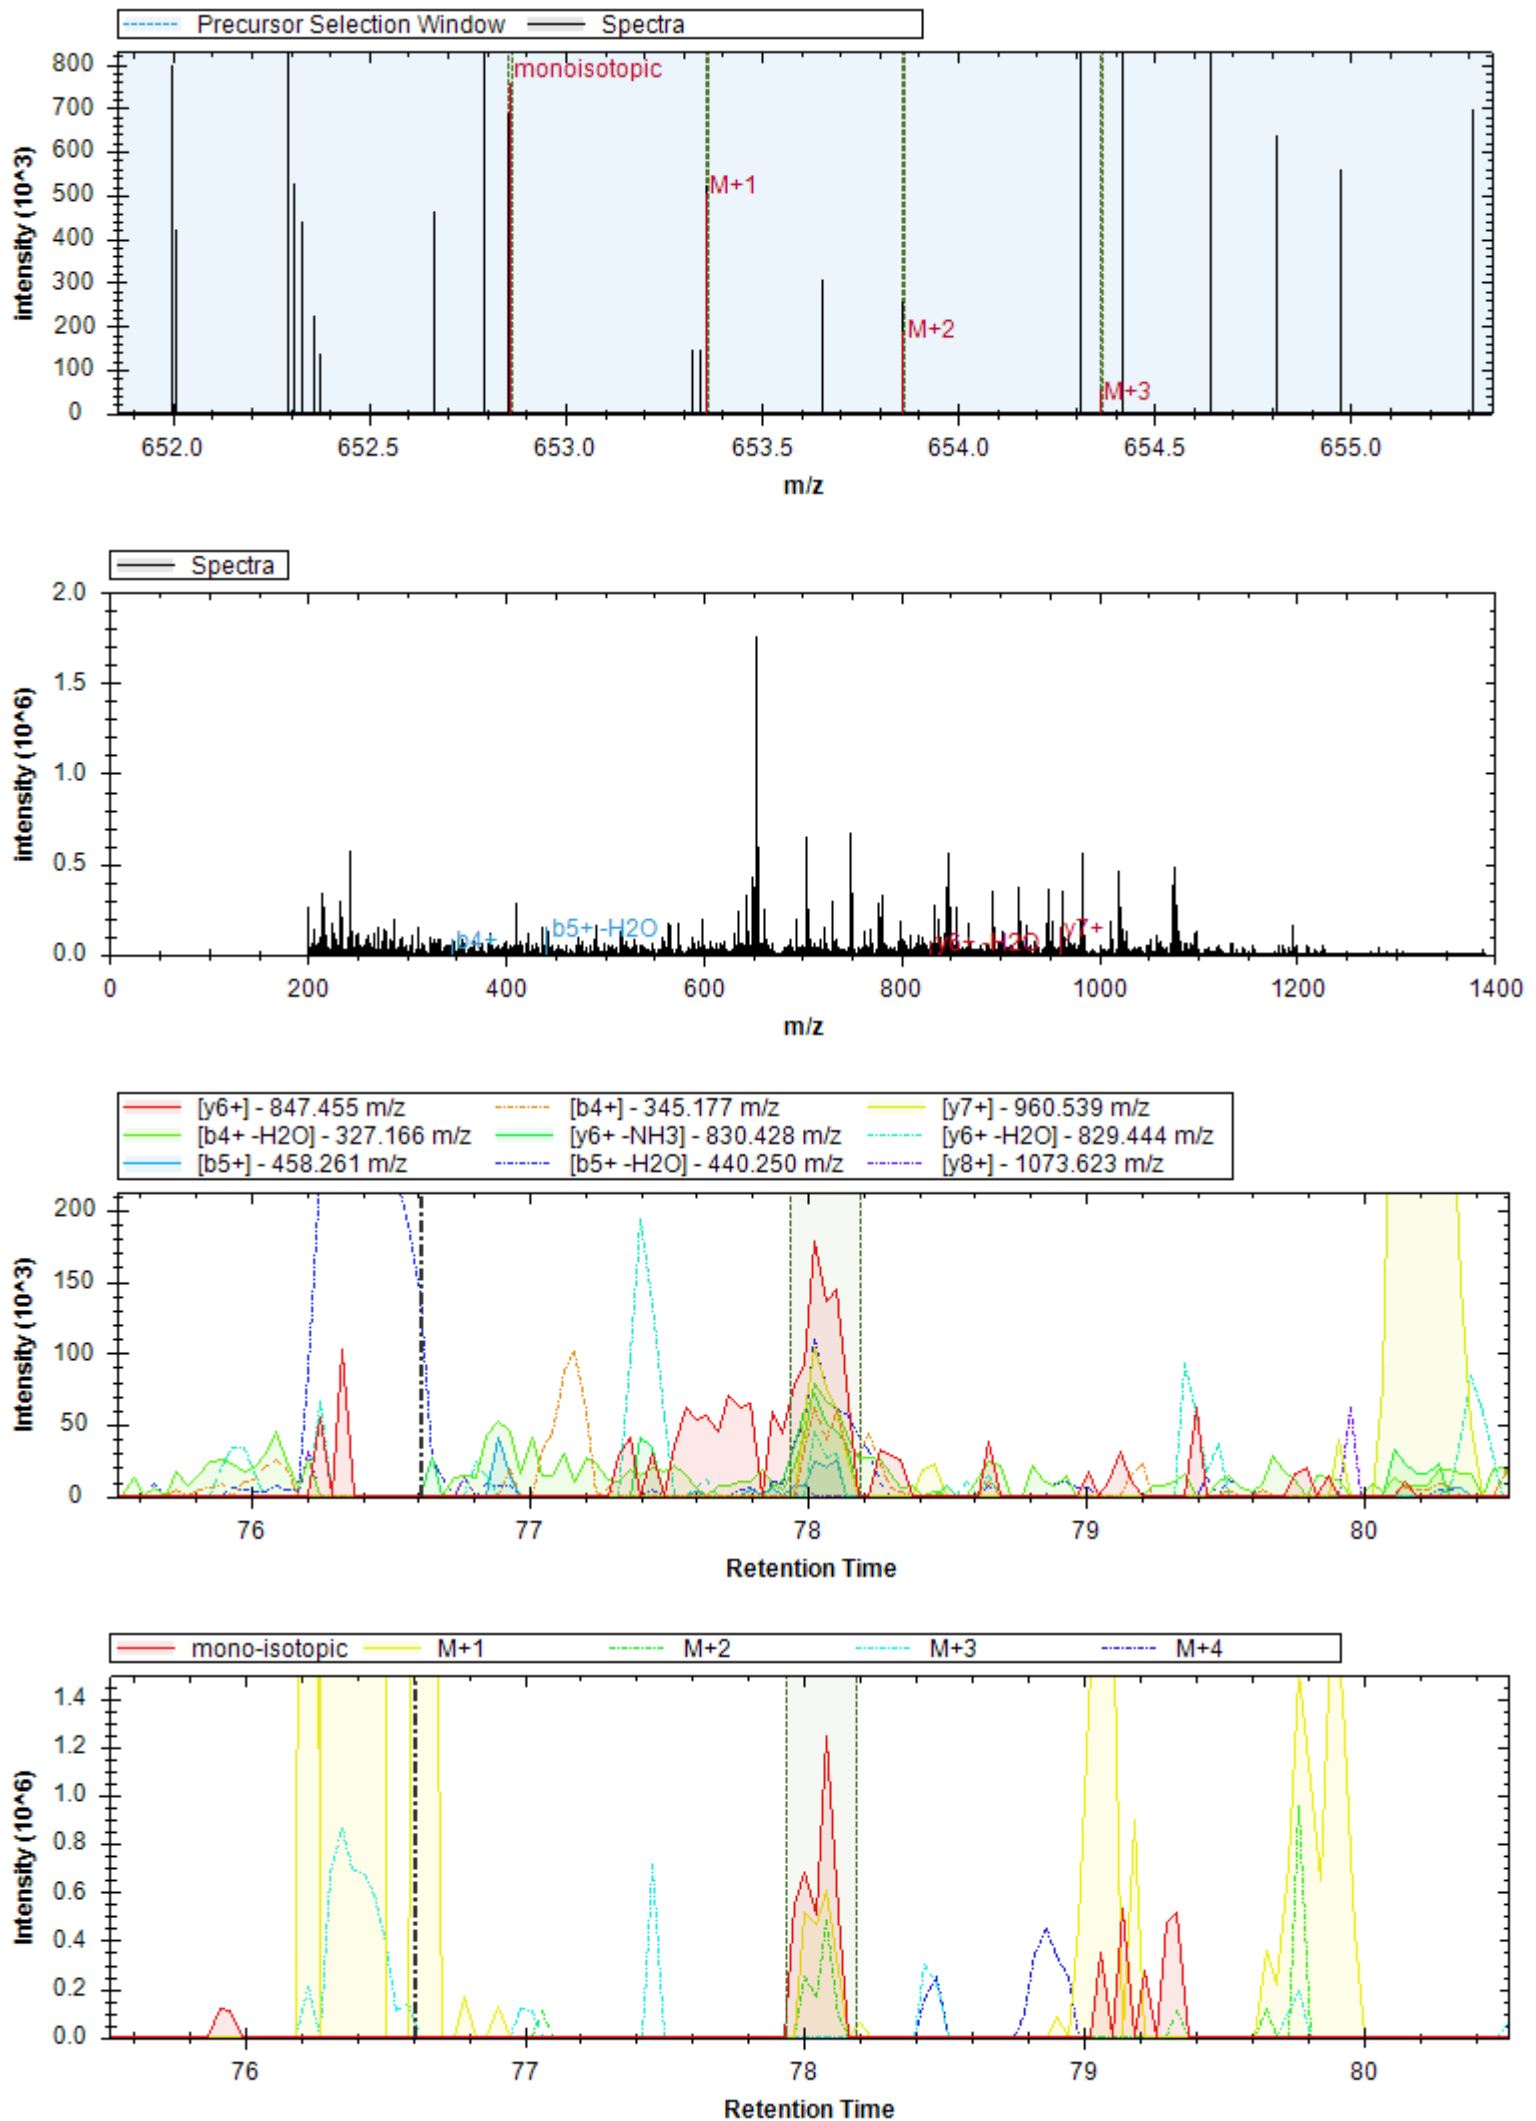

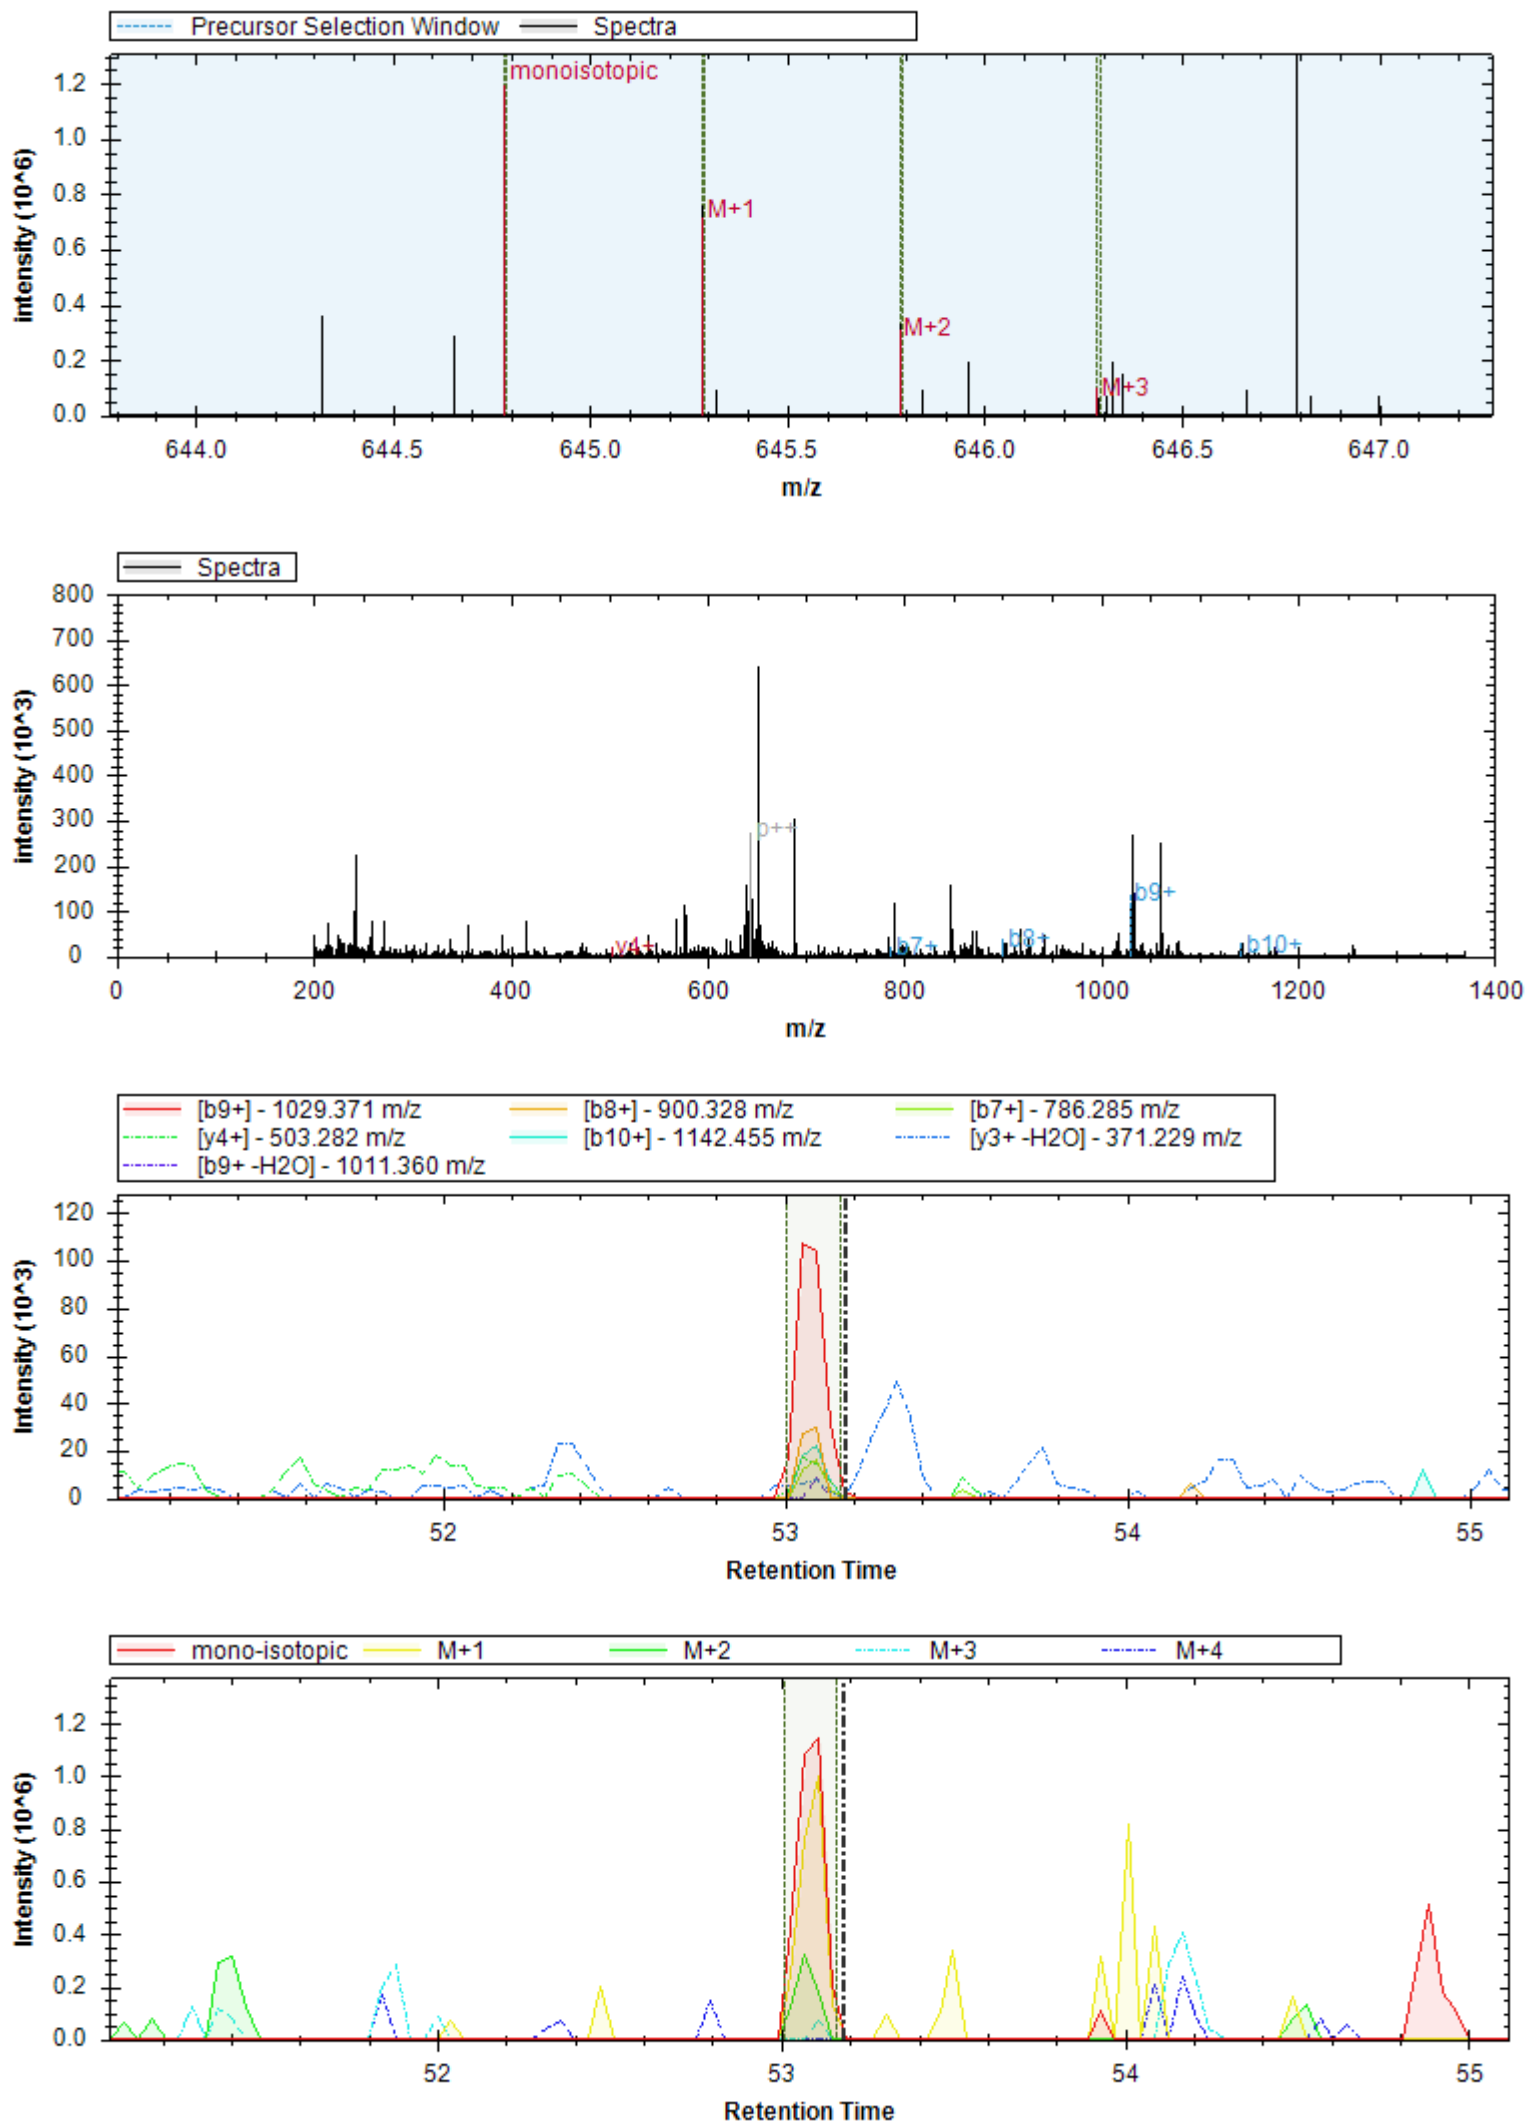

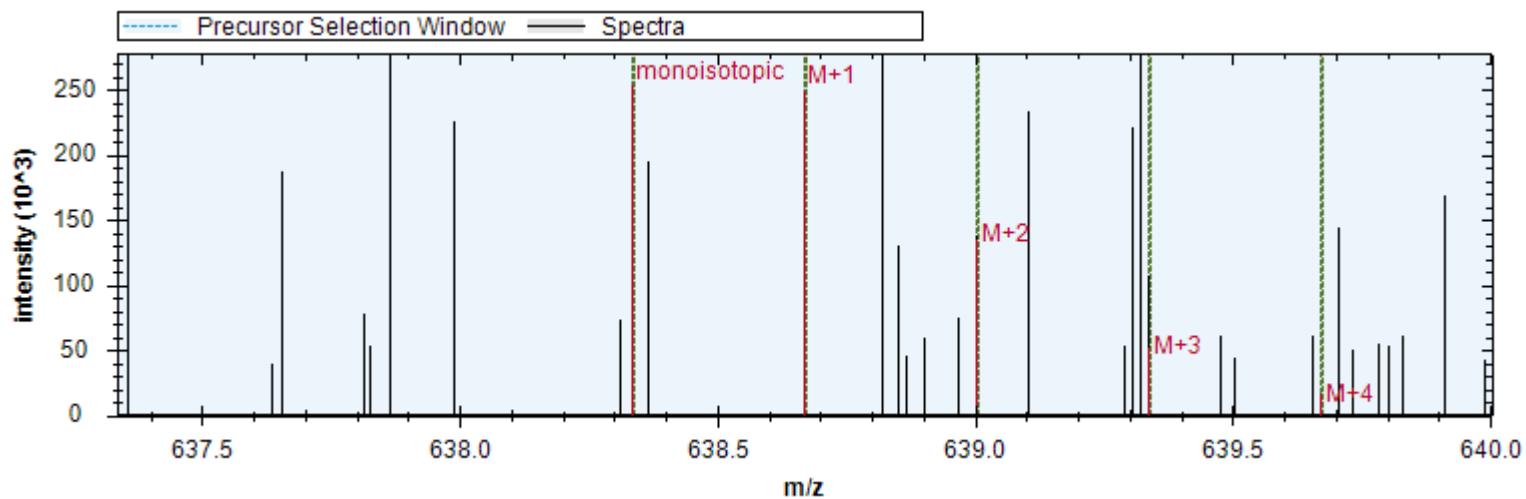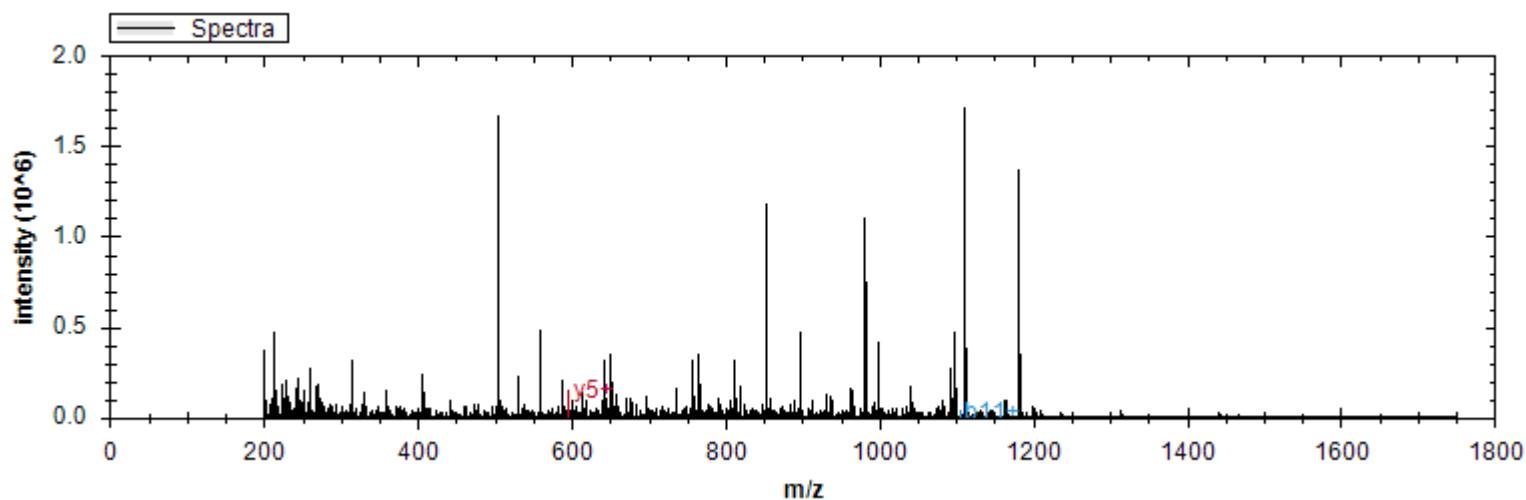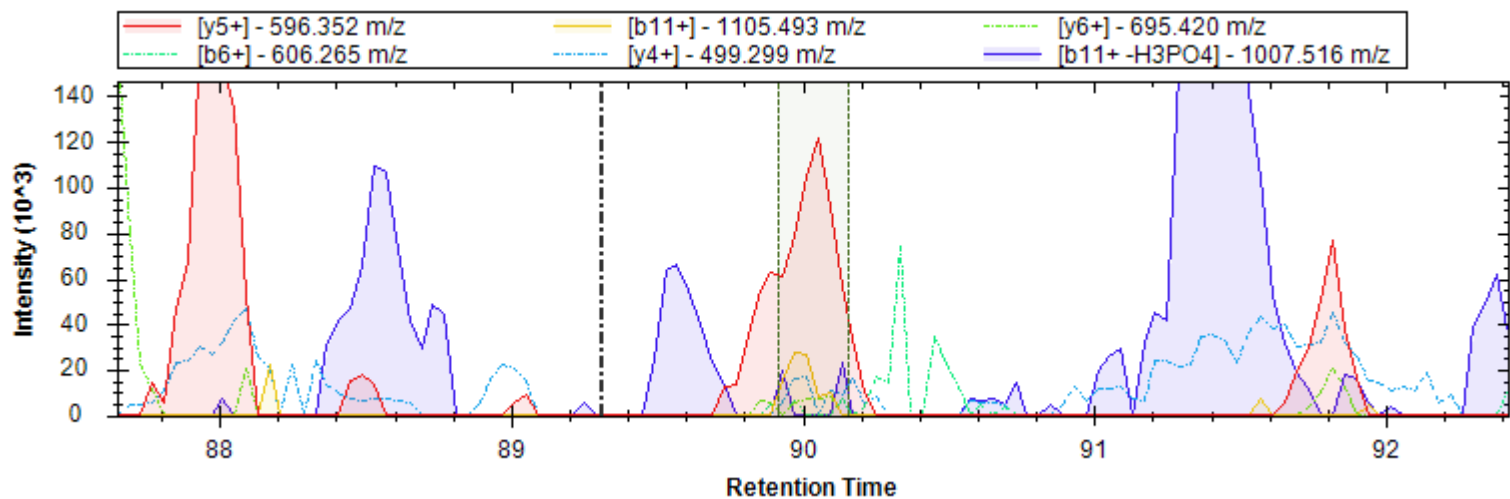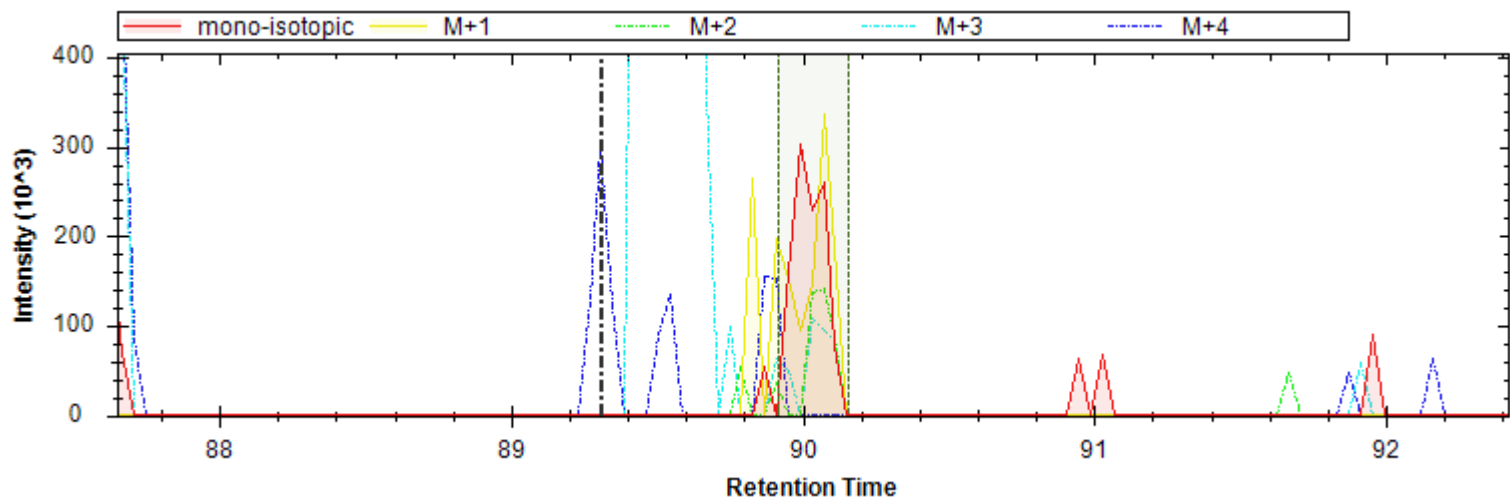

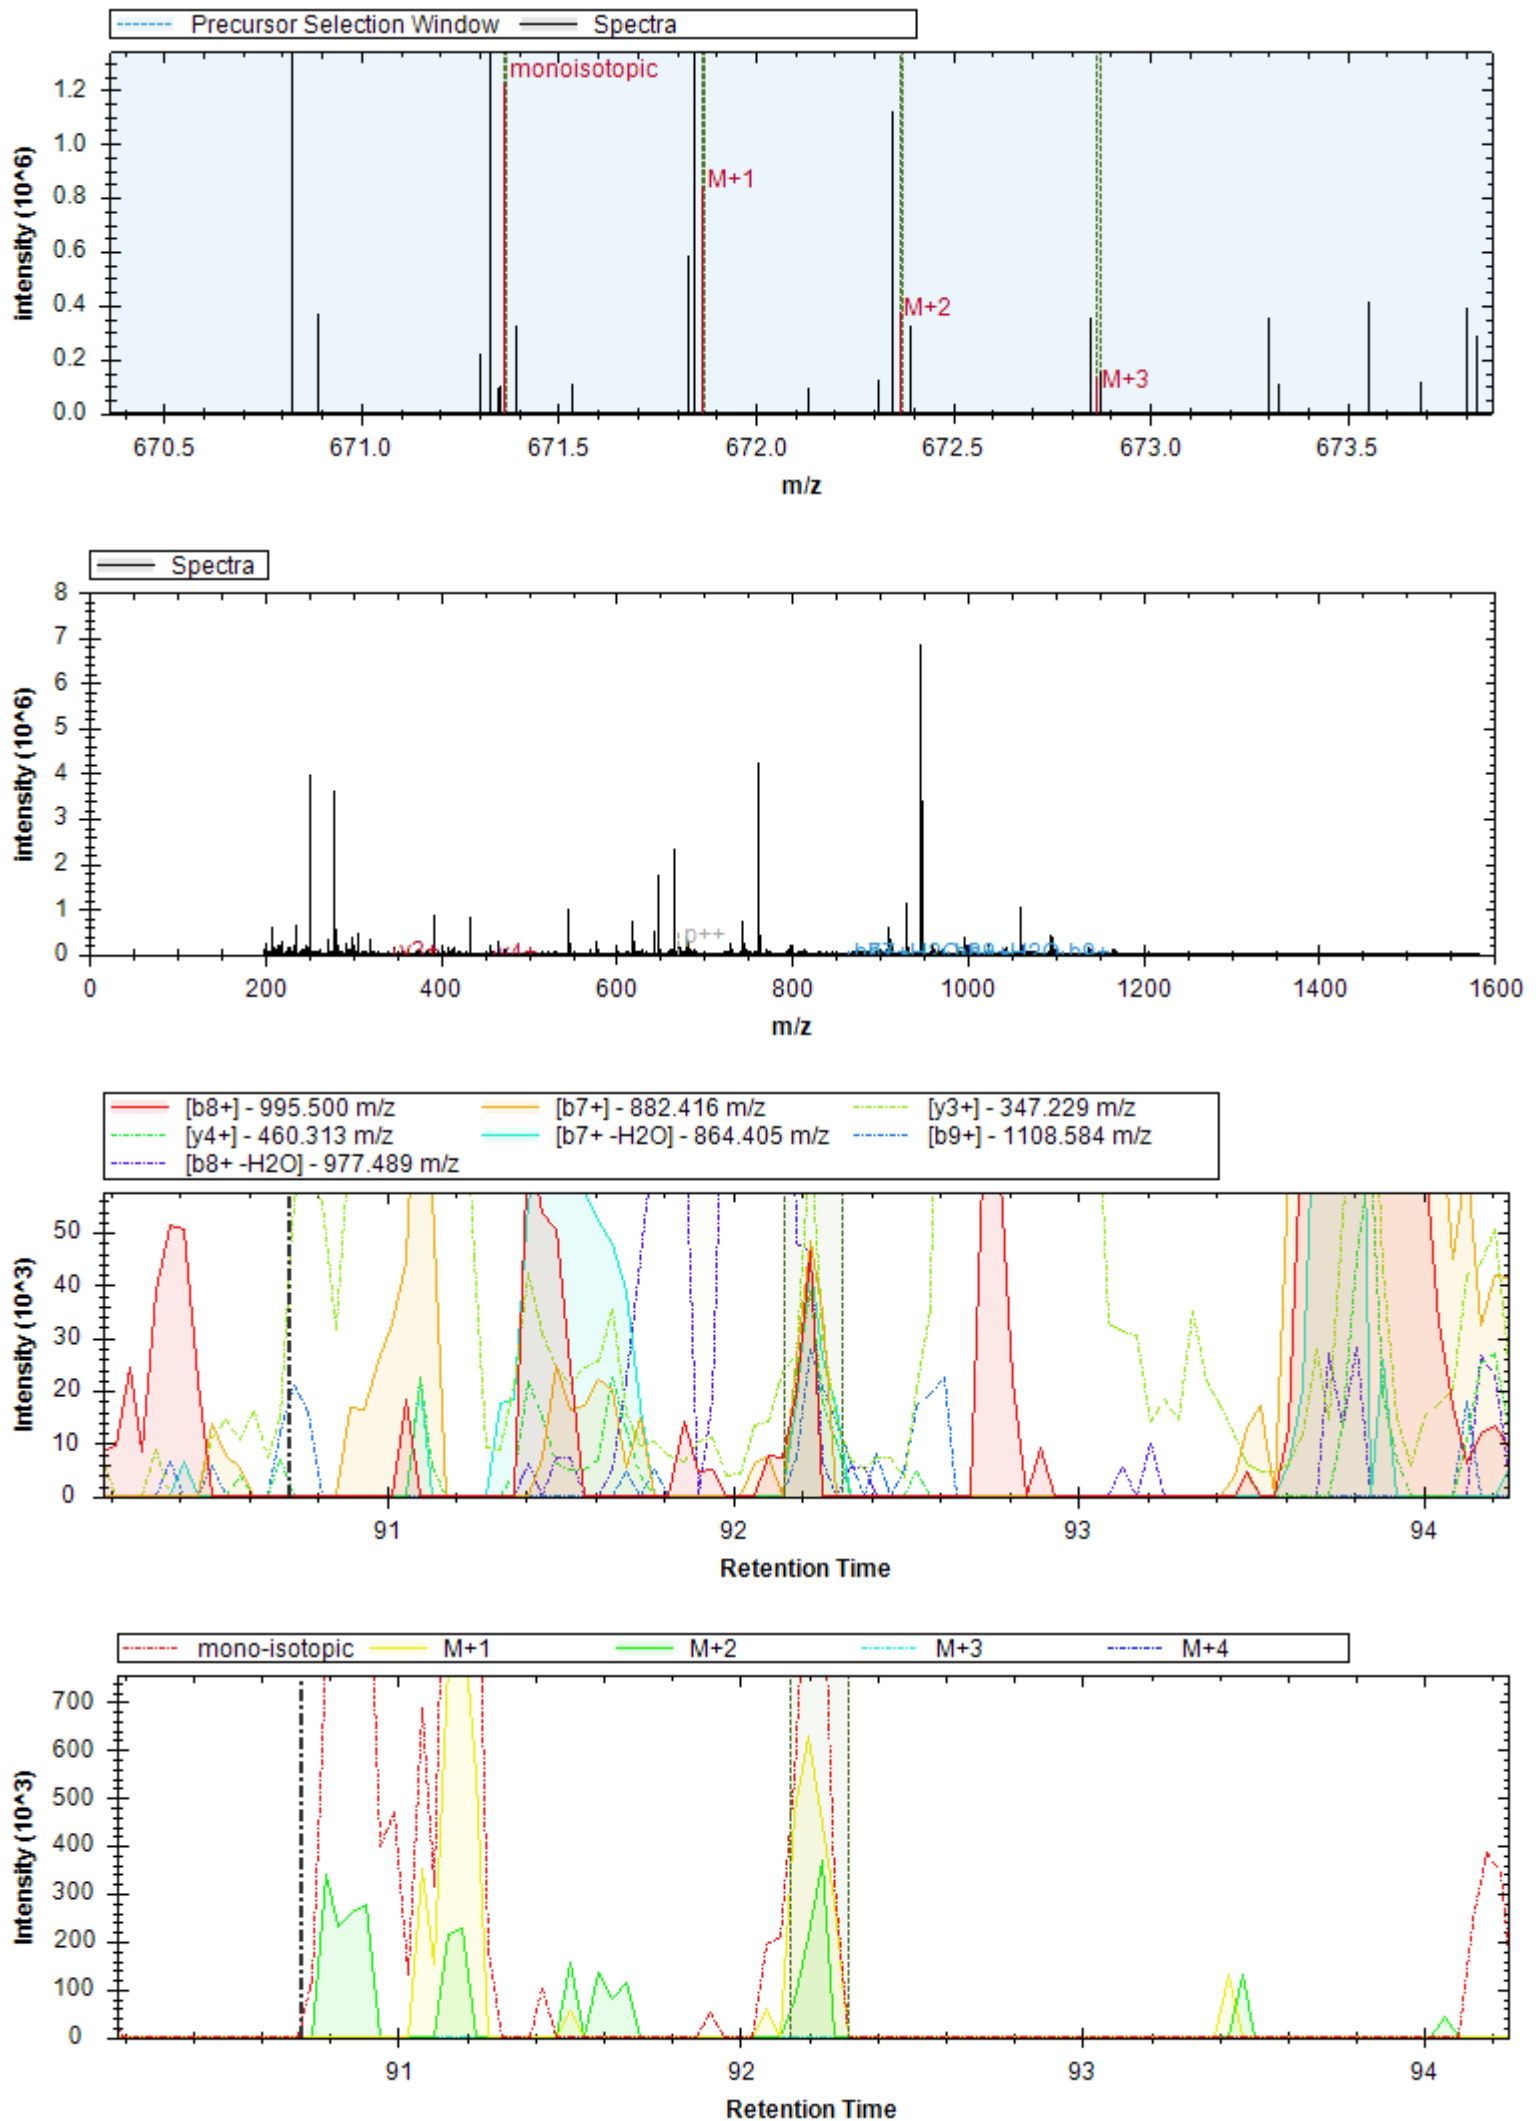

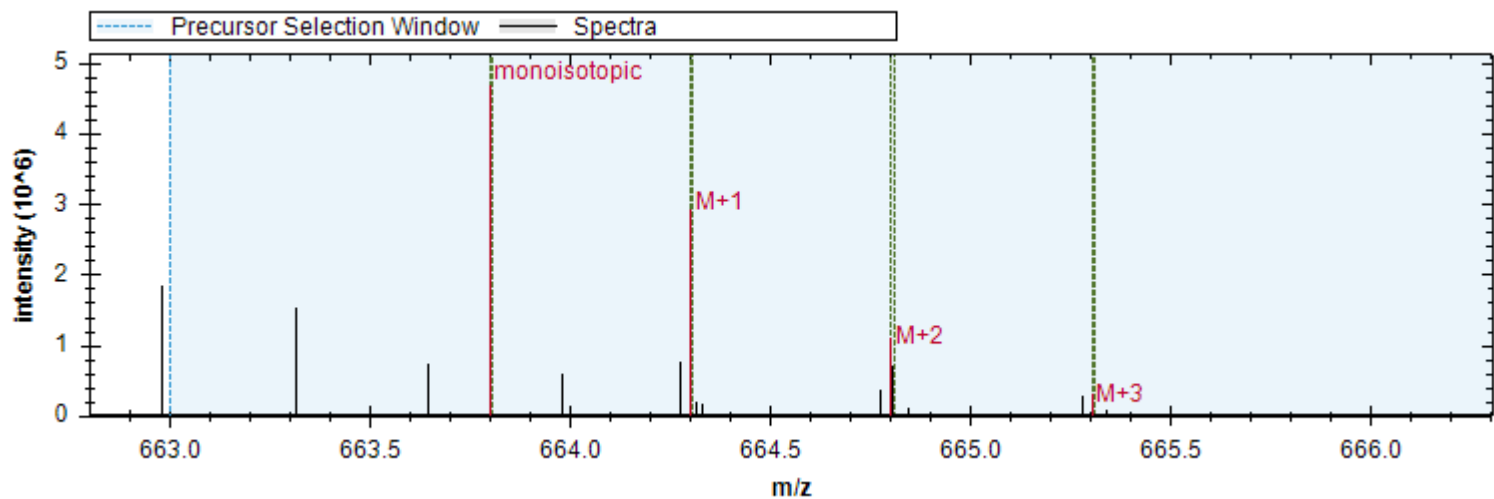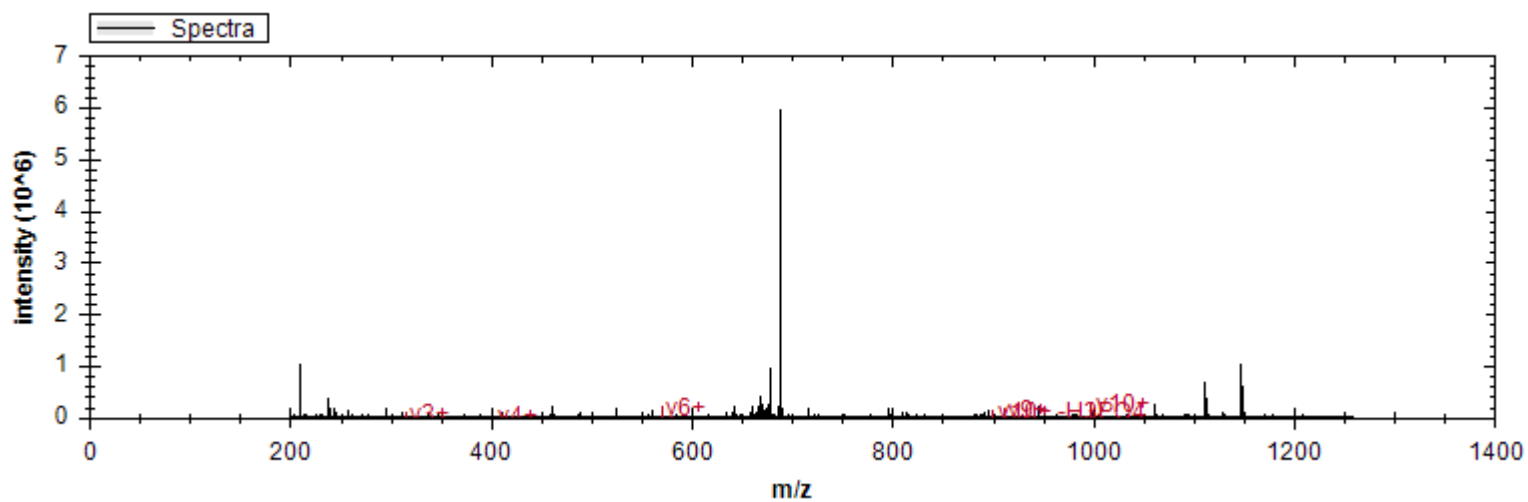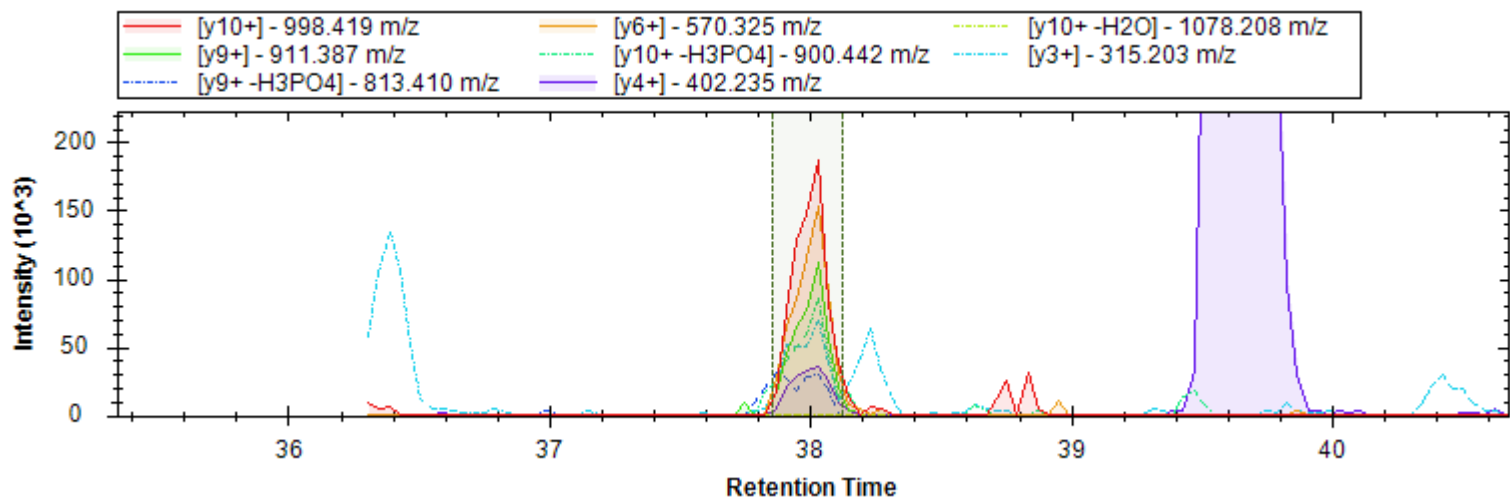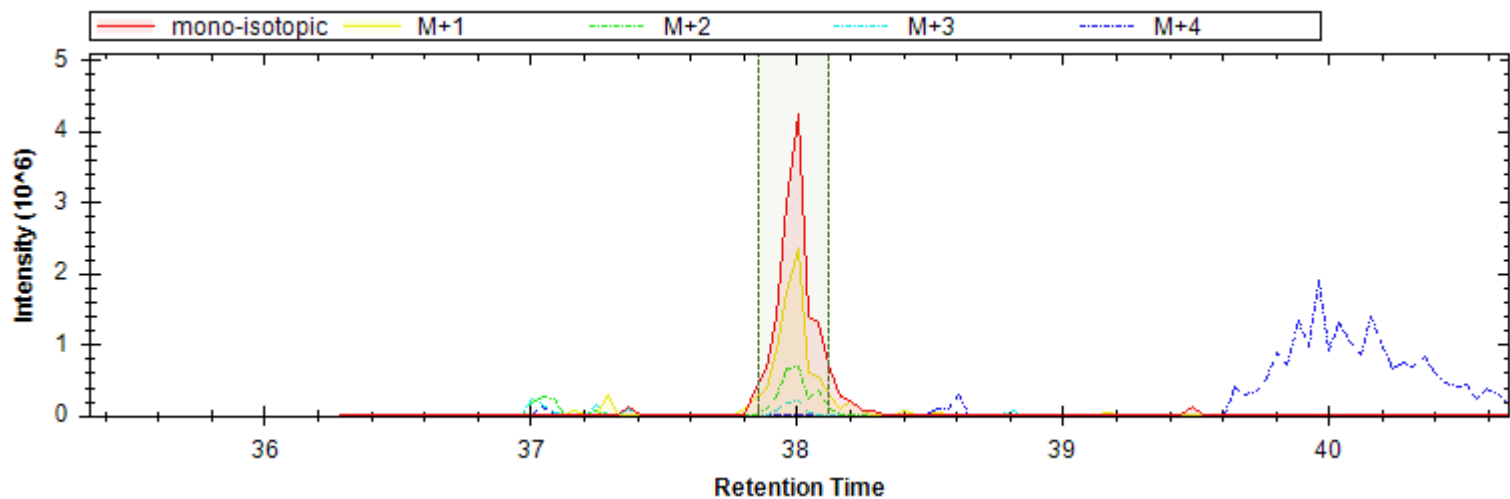



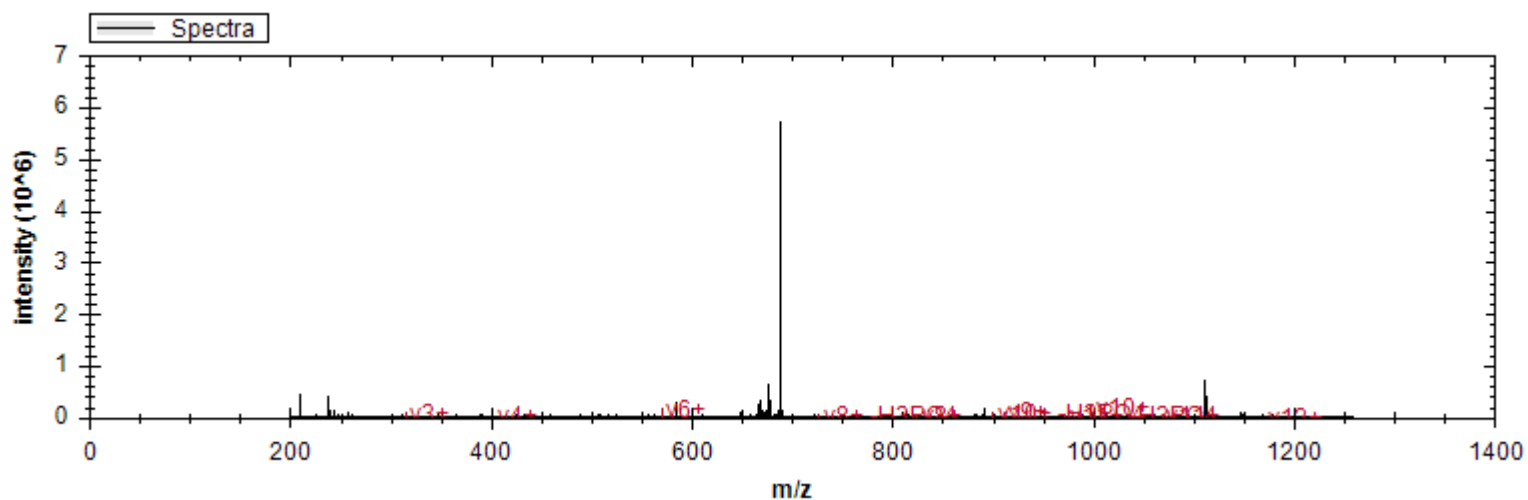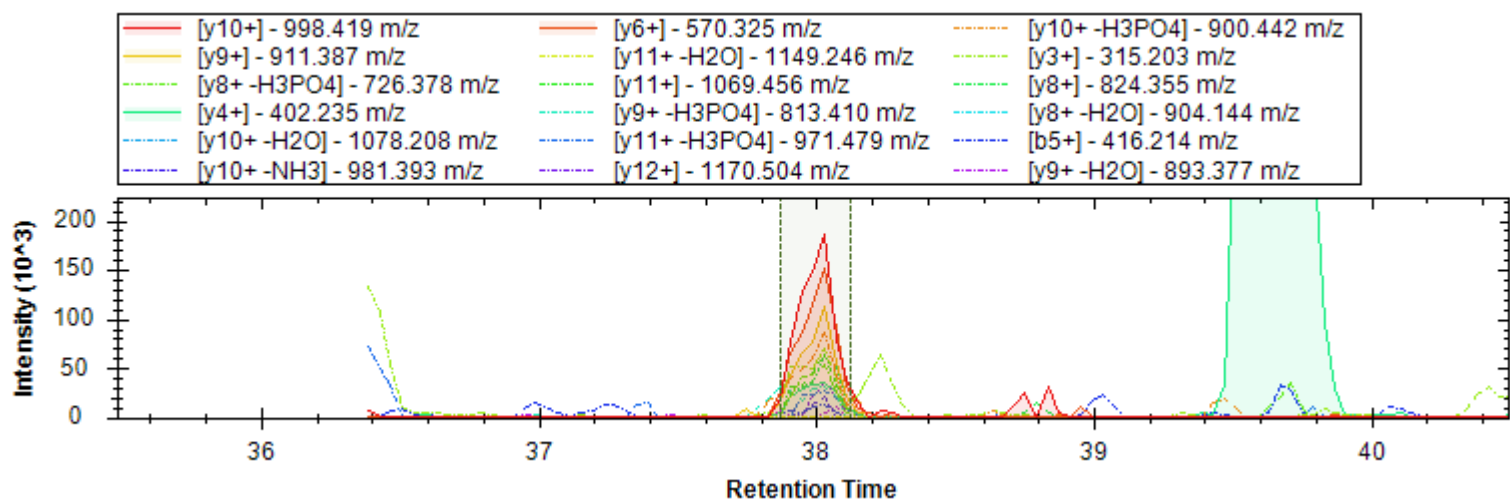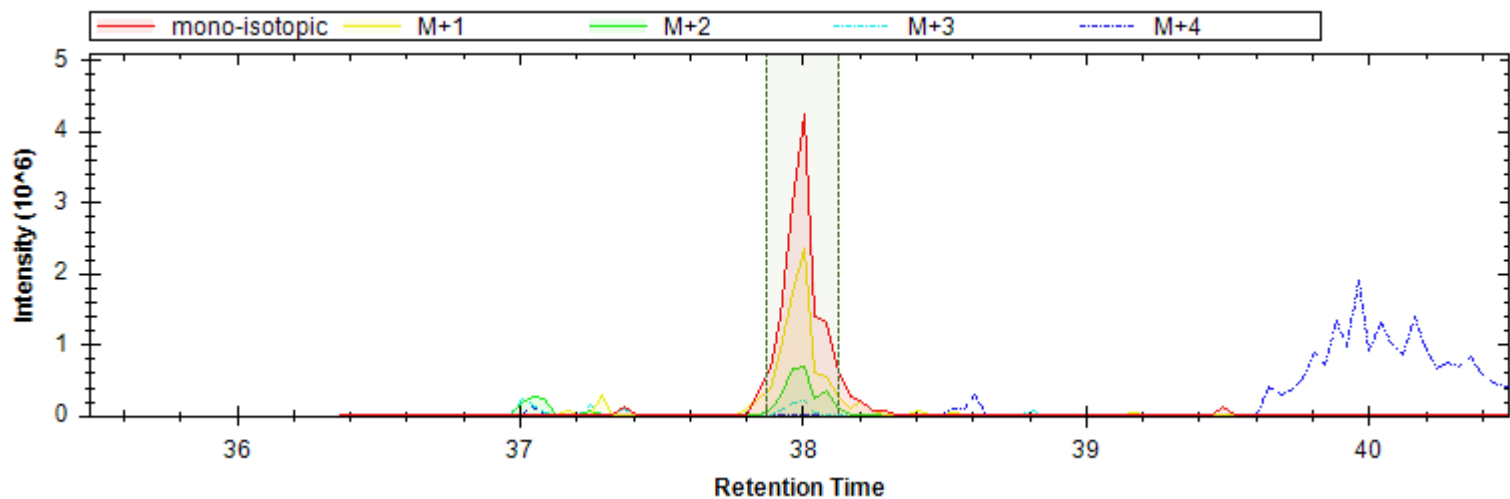

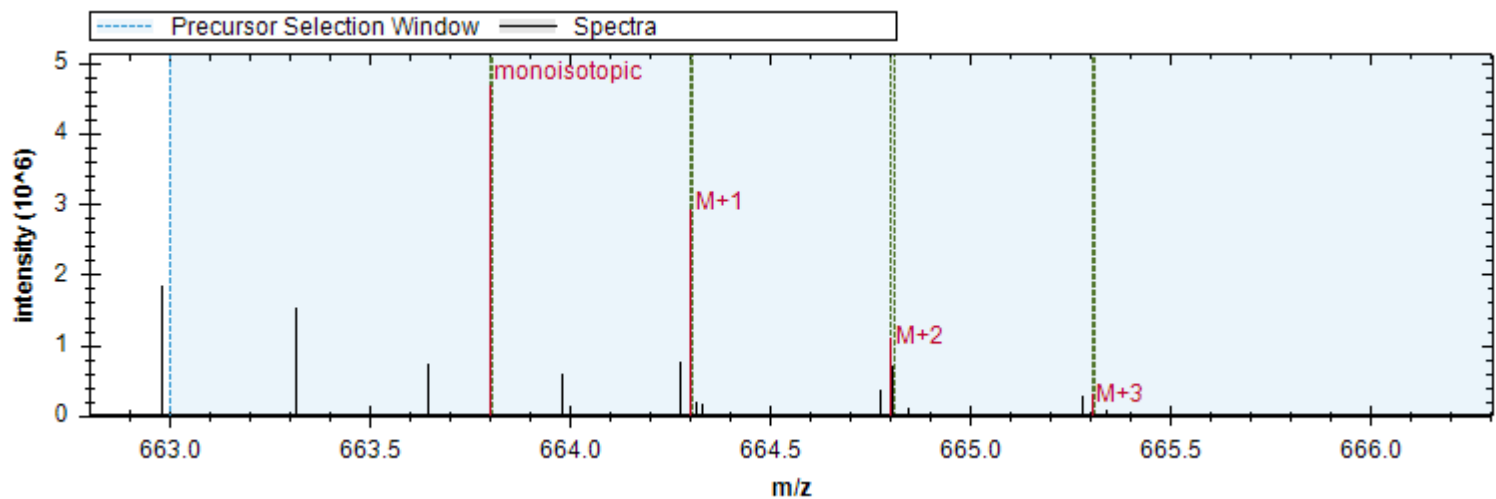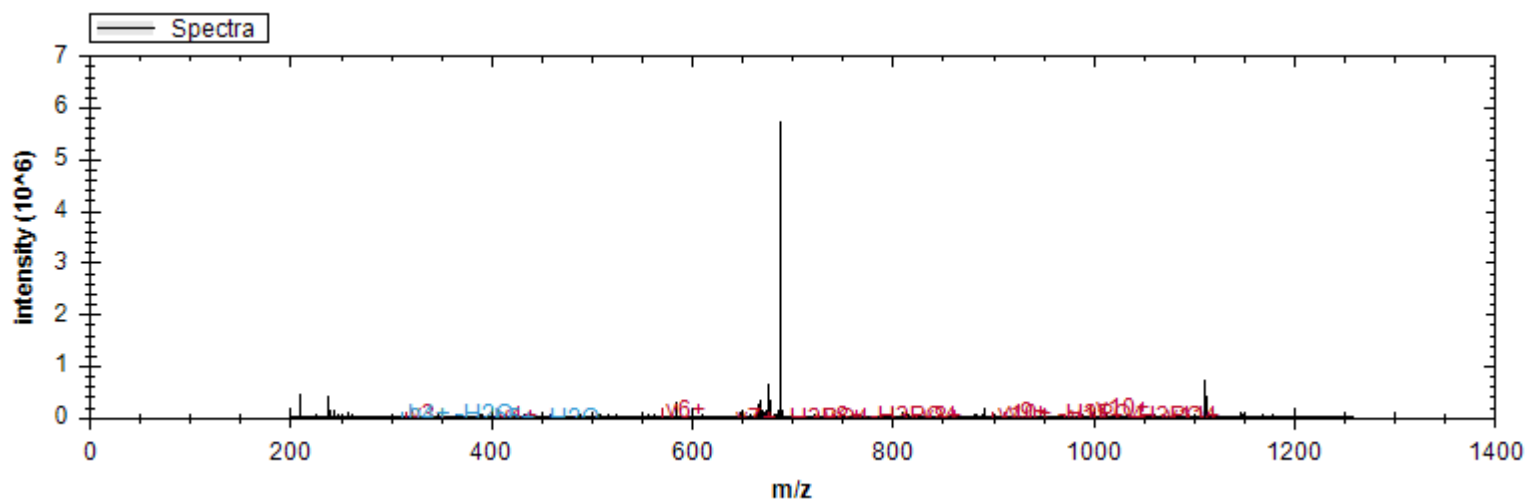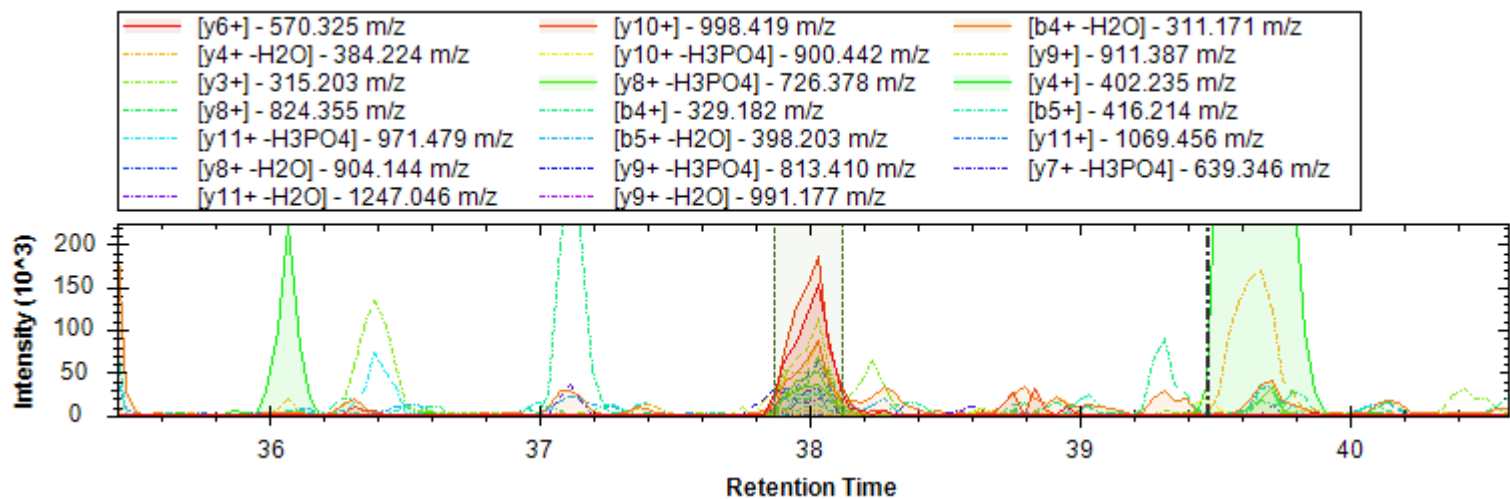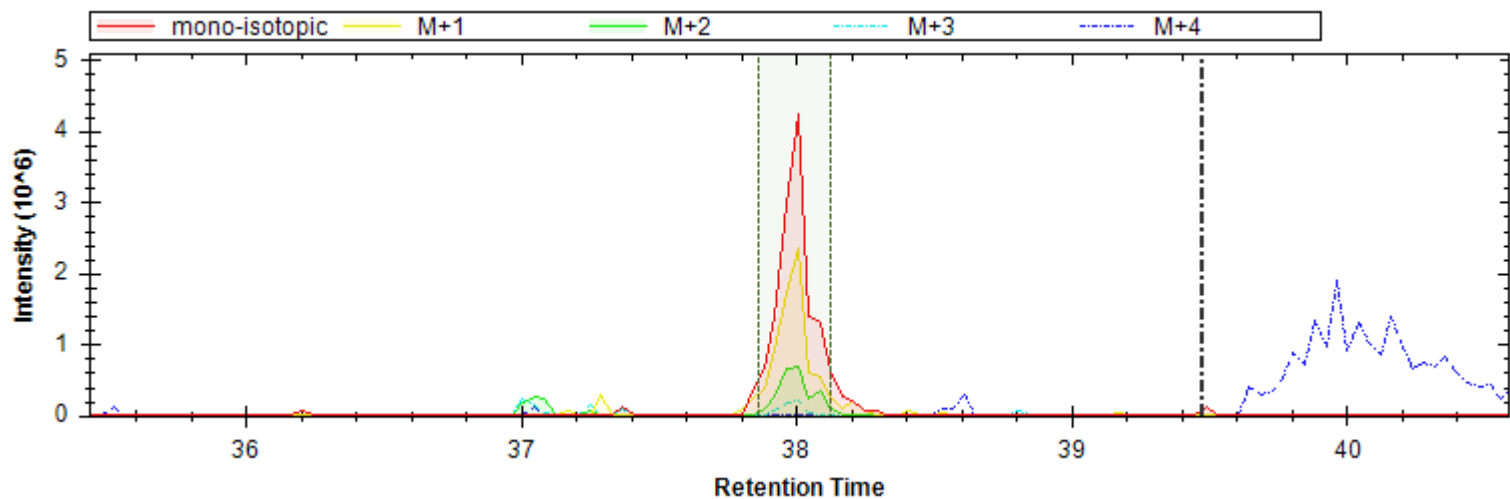

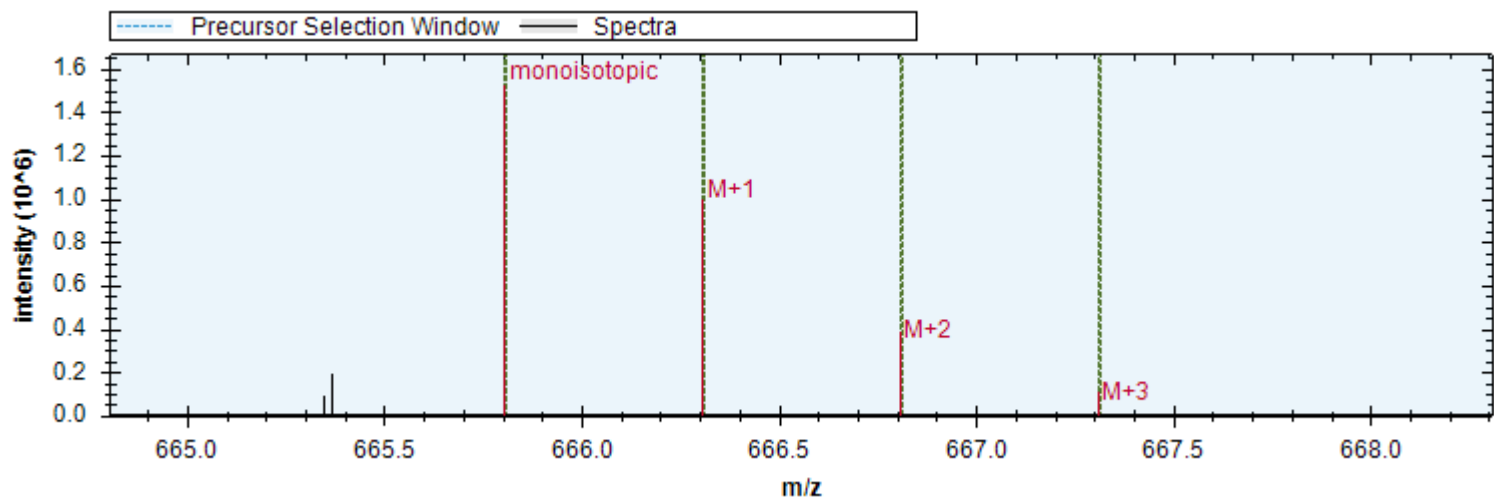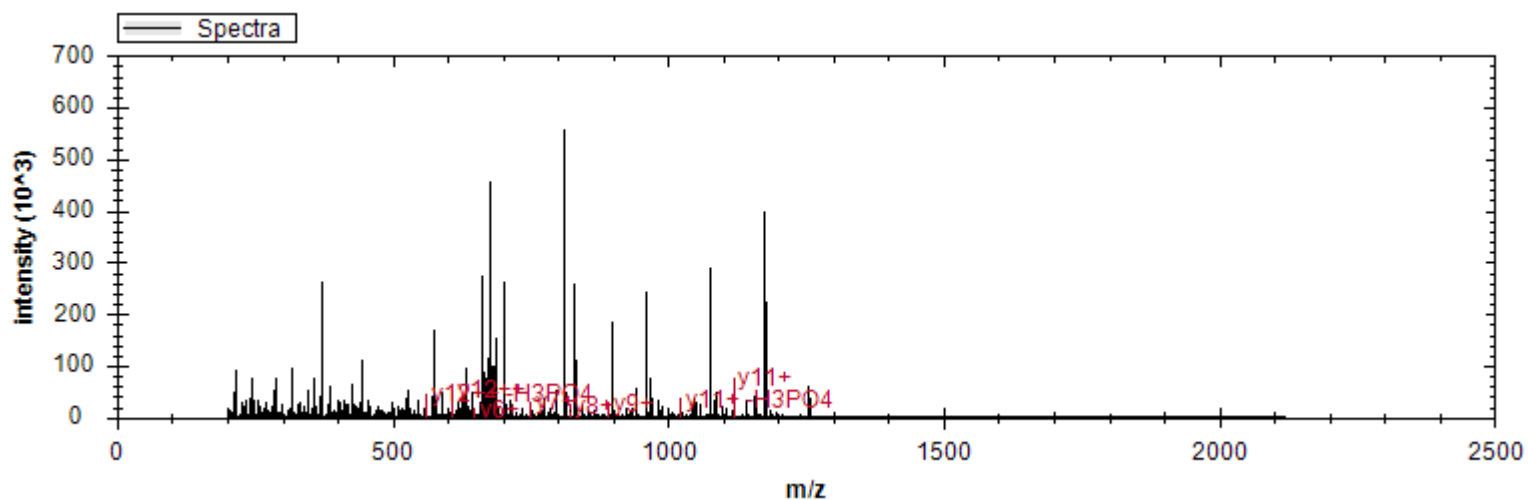

|                              |                              |                             |
|------------------------------|------------------------------|-----------------------------|
| [y12++ -H3PO4] - 559.796 m/z | [y11+ -H3PO4] - 1021.531 m/z | [y11+] - 1119.508 m/z       |
| [y12++] - 608.784 m/z        | [y5+] - 579.254 m/z          | [y5+ -H3PO4] - 481.277 m/z  |
| [y9+] - 893.413 m/z          | [y9+ -H3PO4] - 795.436 m/z   | [y12++ -H2O] - 599.779 m/z  |
| [y7+] - 751.339 m/z          | [y8+] - 822.376 m/z          | [y6+] - 650.291 m/z         |
| [y8+ -H3PO4] - 724.399 m/z   | [y7+ -H3PO4] - 653.362 m/z   | [y10+ -H3PO4] - 924.479 m/z |
| [b5+ -NH3] - 492.209 m/z     | [y6+ -H3PO4] - 552.314 m/z   | [b3+] - 309.156 m/z         |
| [y9+ -H2O] - 875.402 m/z     | [y11+ -H2O] - 1199.298 m/z   | [b5+] - 509.235 m/z         |
| [y3+ -H3PO4] - 313.187 m/z   | [b4+ -NH3] - 421.172 m/z     |                             |

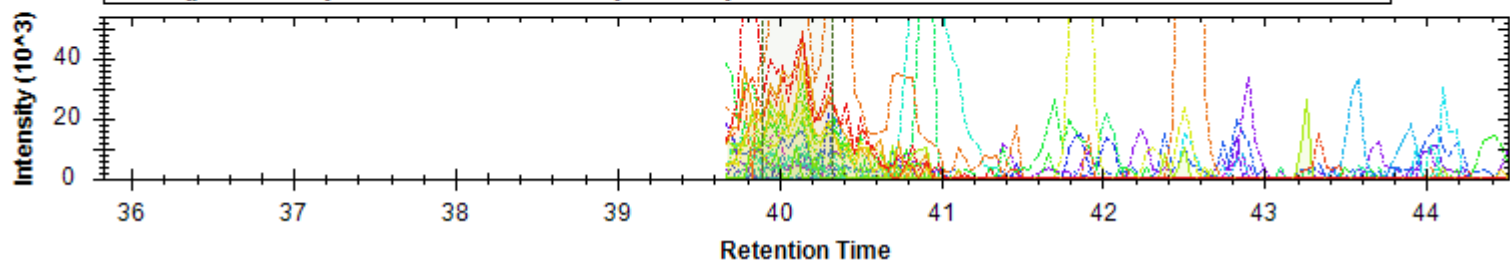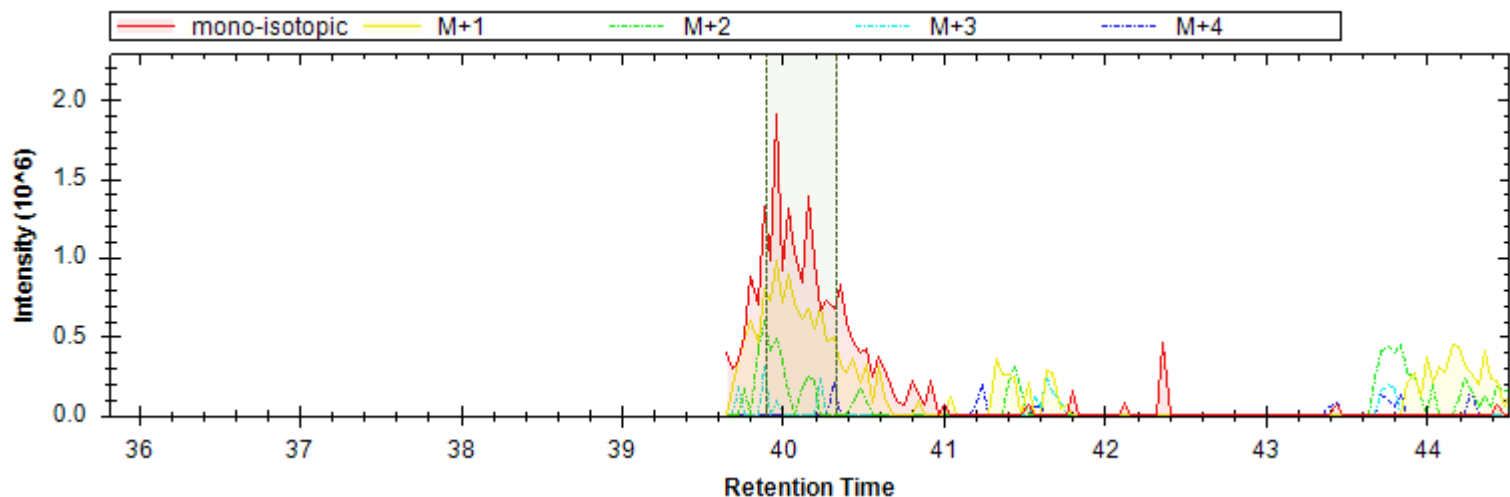

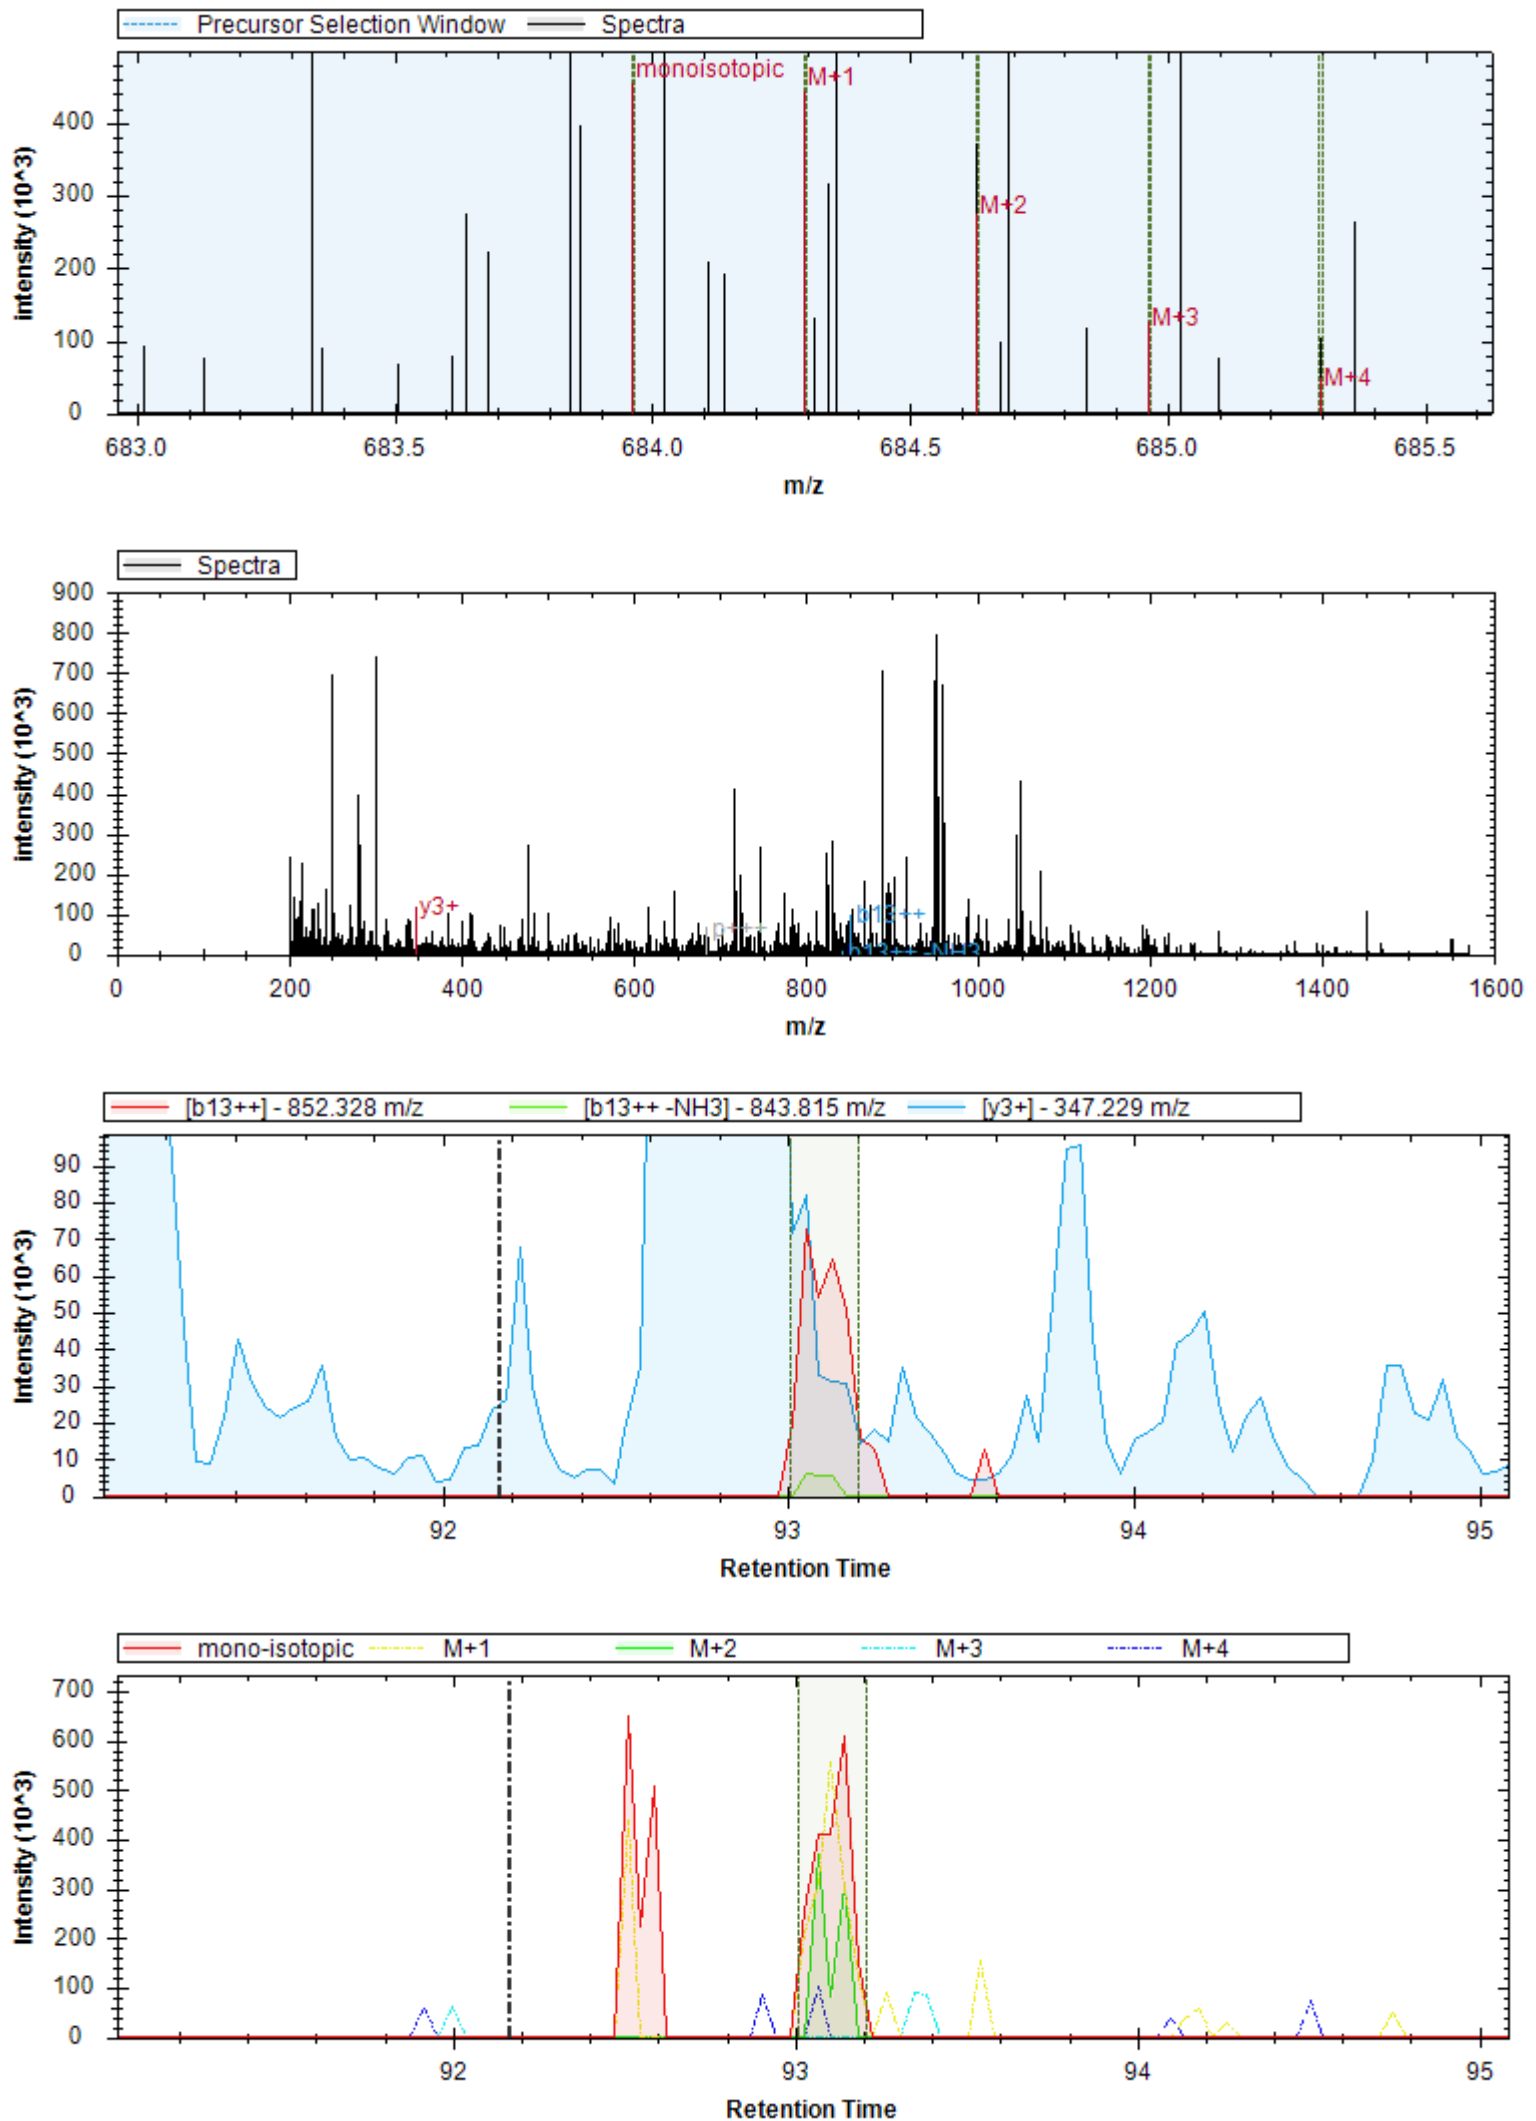

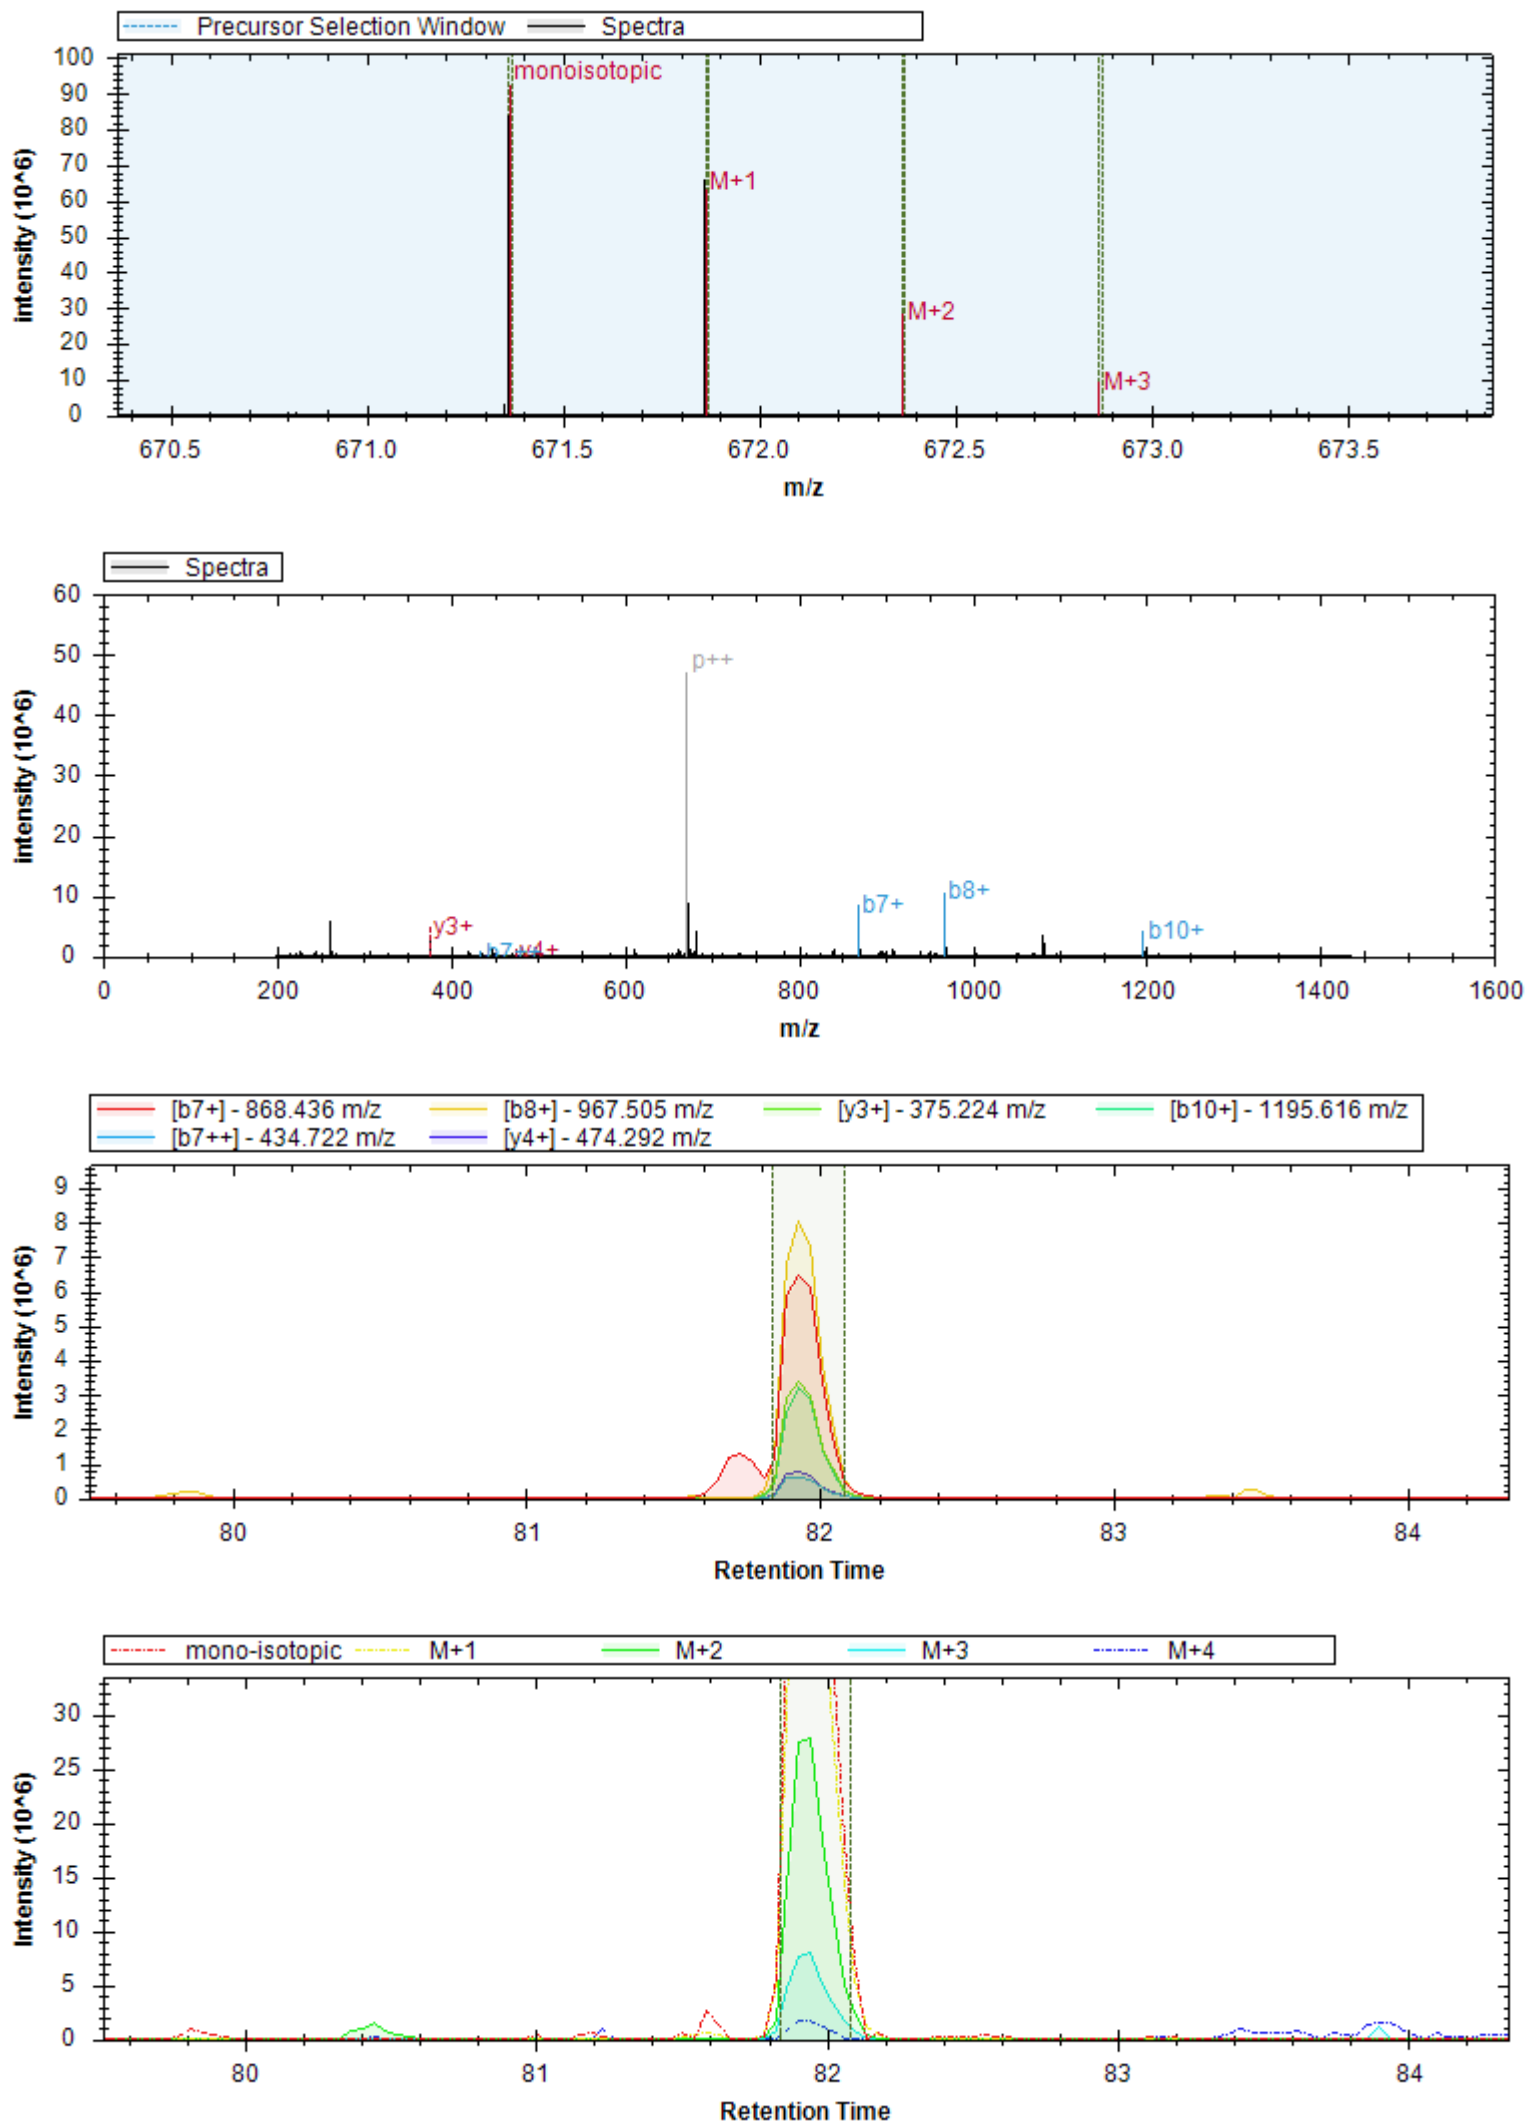

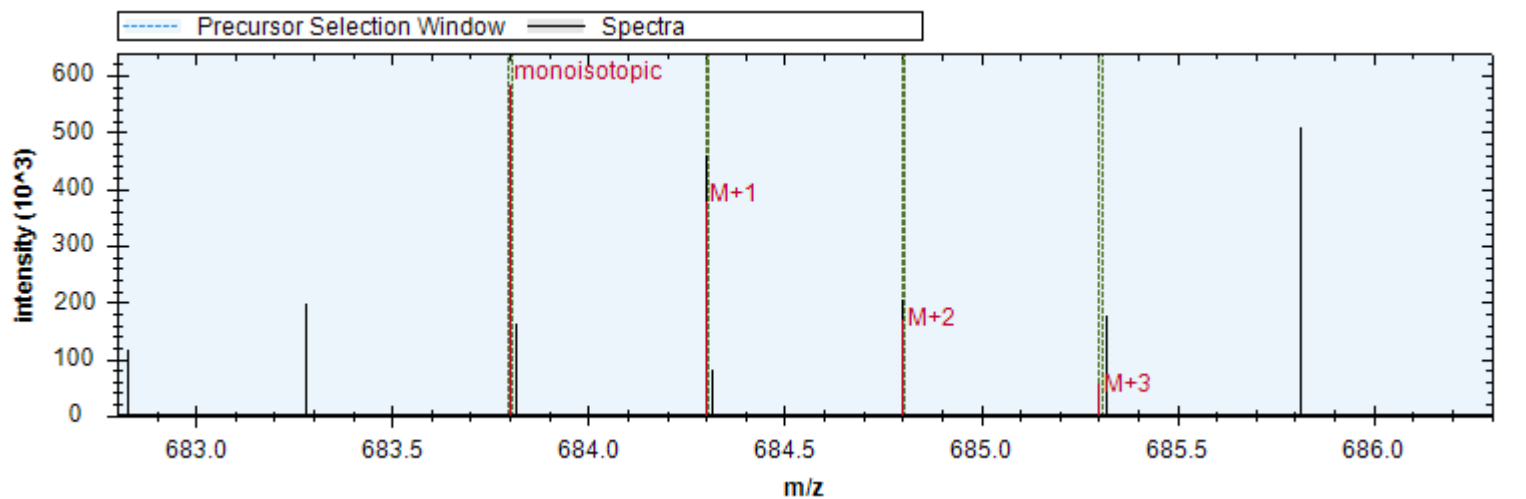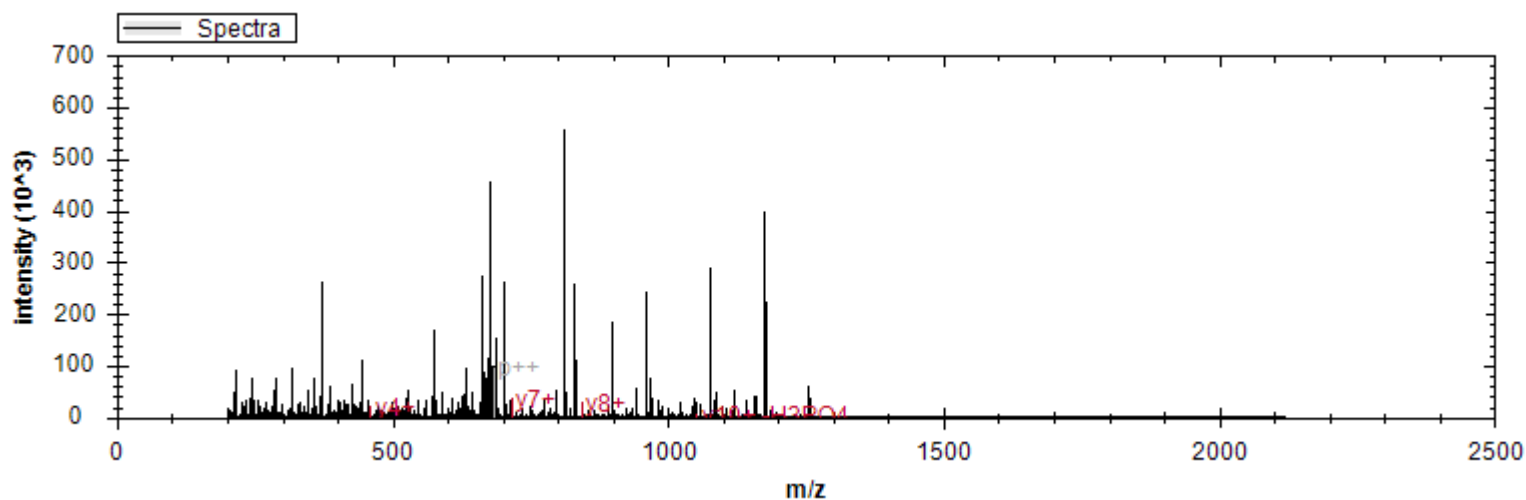

|                              |                              |                            |
|------------------------------|------------------------------|----------------------------|
| [y7+] - 716.405 m/z          | [y8+] - 844.464 m/z          | [y6+] - 645.368 m/z        |
| [y4+] - 461.247 m/z          | [b5+ -H3PO4] - 553.219 m/z   | [y5+] - 574.331 m/z        |
| [b6+ -H3PO4] - 624.256 m/z   | [b4+ -H3PO4] - 425.160 m/z   | [y3+] - 390.210 m/z        |
| [b8+ -H3PO4] - 808.377 m/z   | [y9+] - 981.523 m/z          | [b7+ -H3PO4] - 695.293 m/z |
| [y8+ -NH3] - 827.437 m/z     | [y11++ -H3PO4] - 591.296 m/z | [b9+ -H3PO4] - 879.414 m/z |
| [y10+ -H3PO4] - 1050.544 m/z |                              |                            |

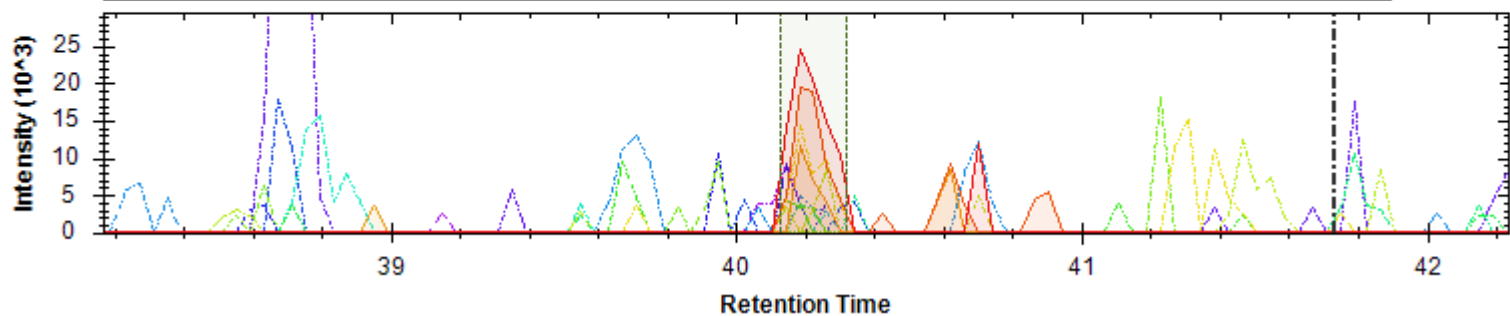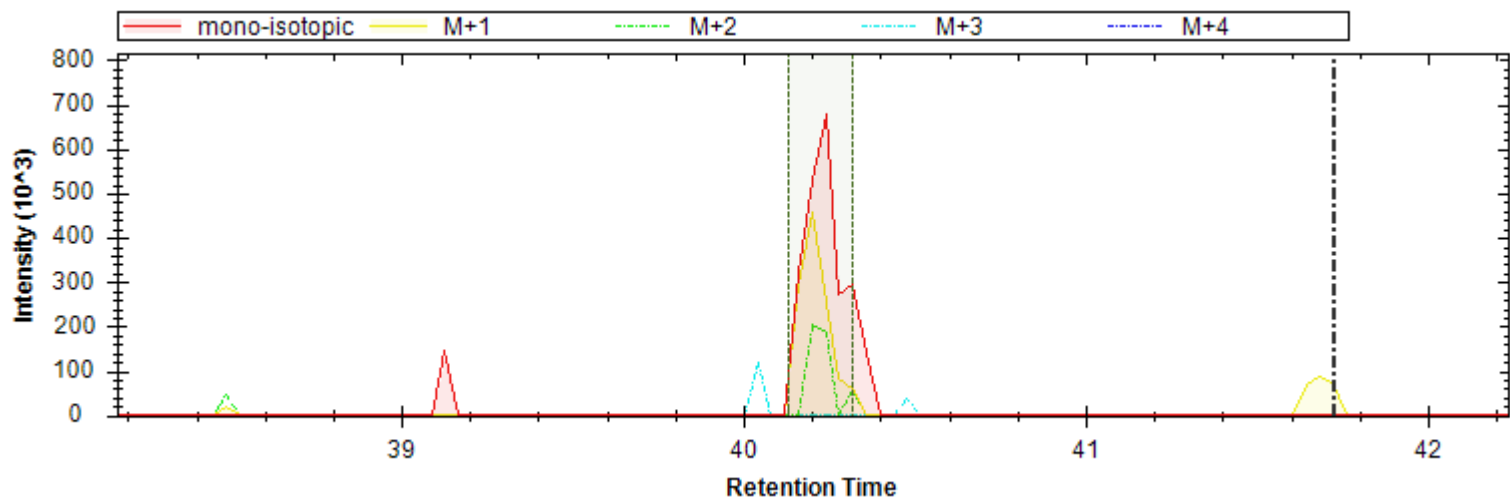

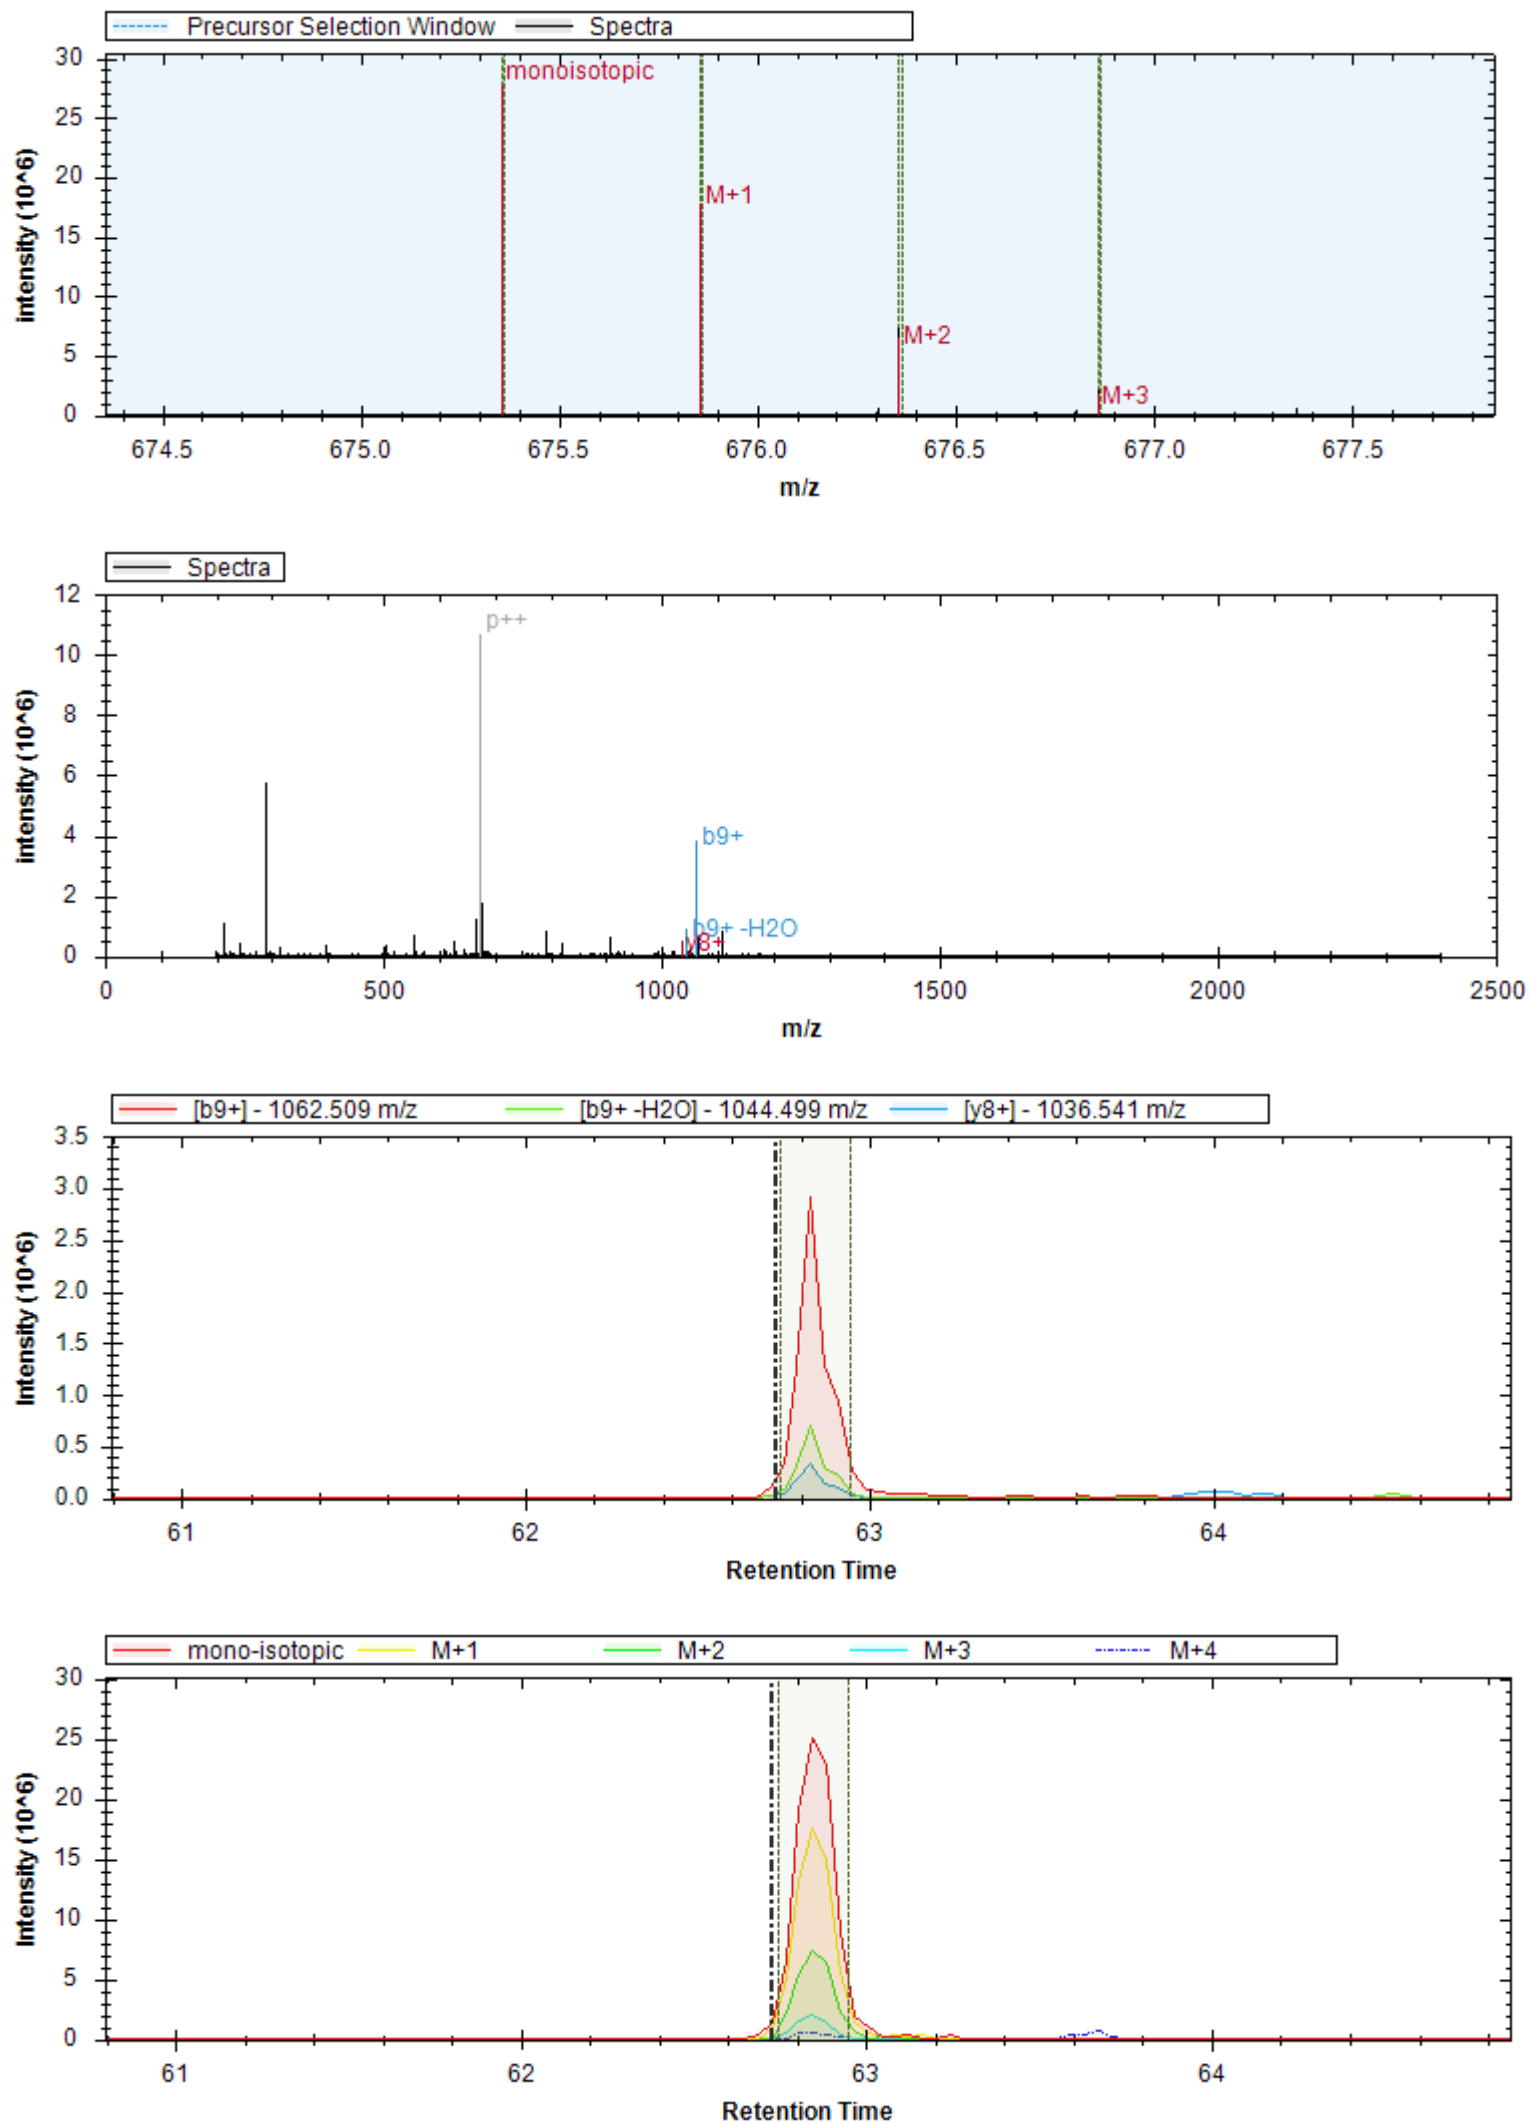

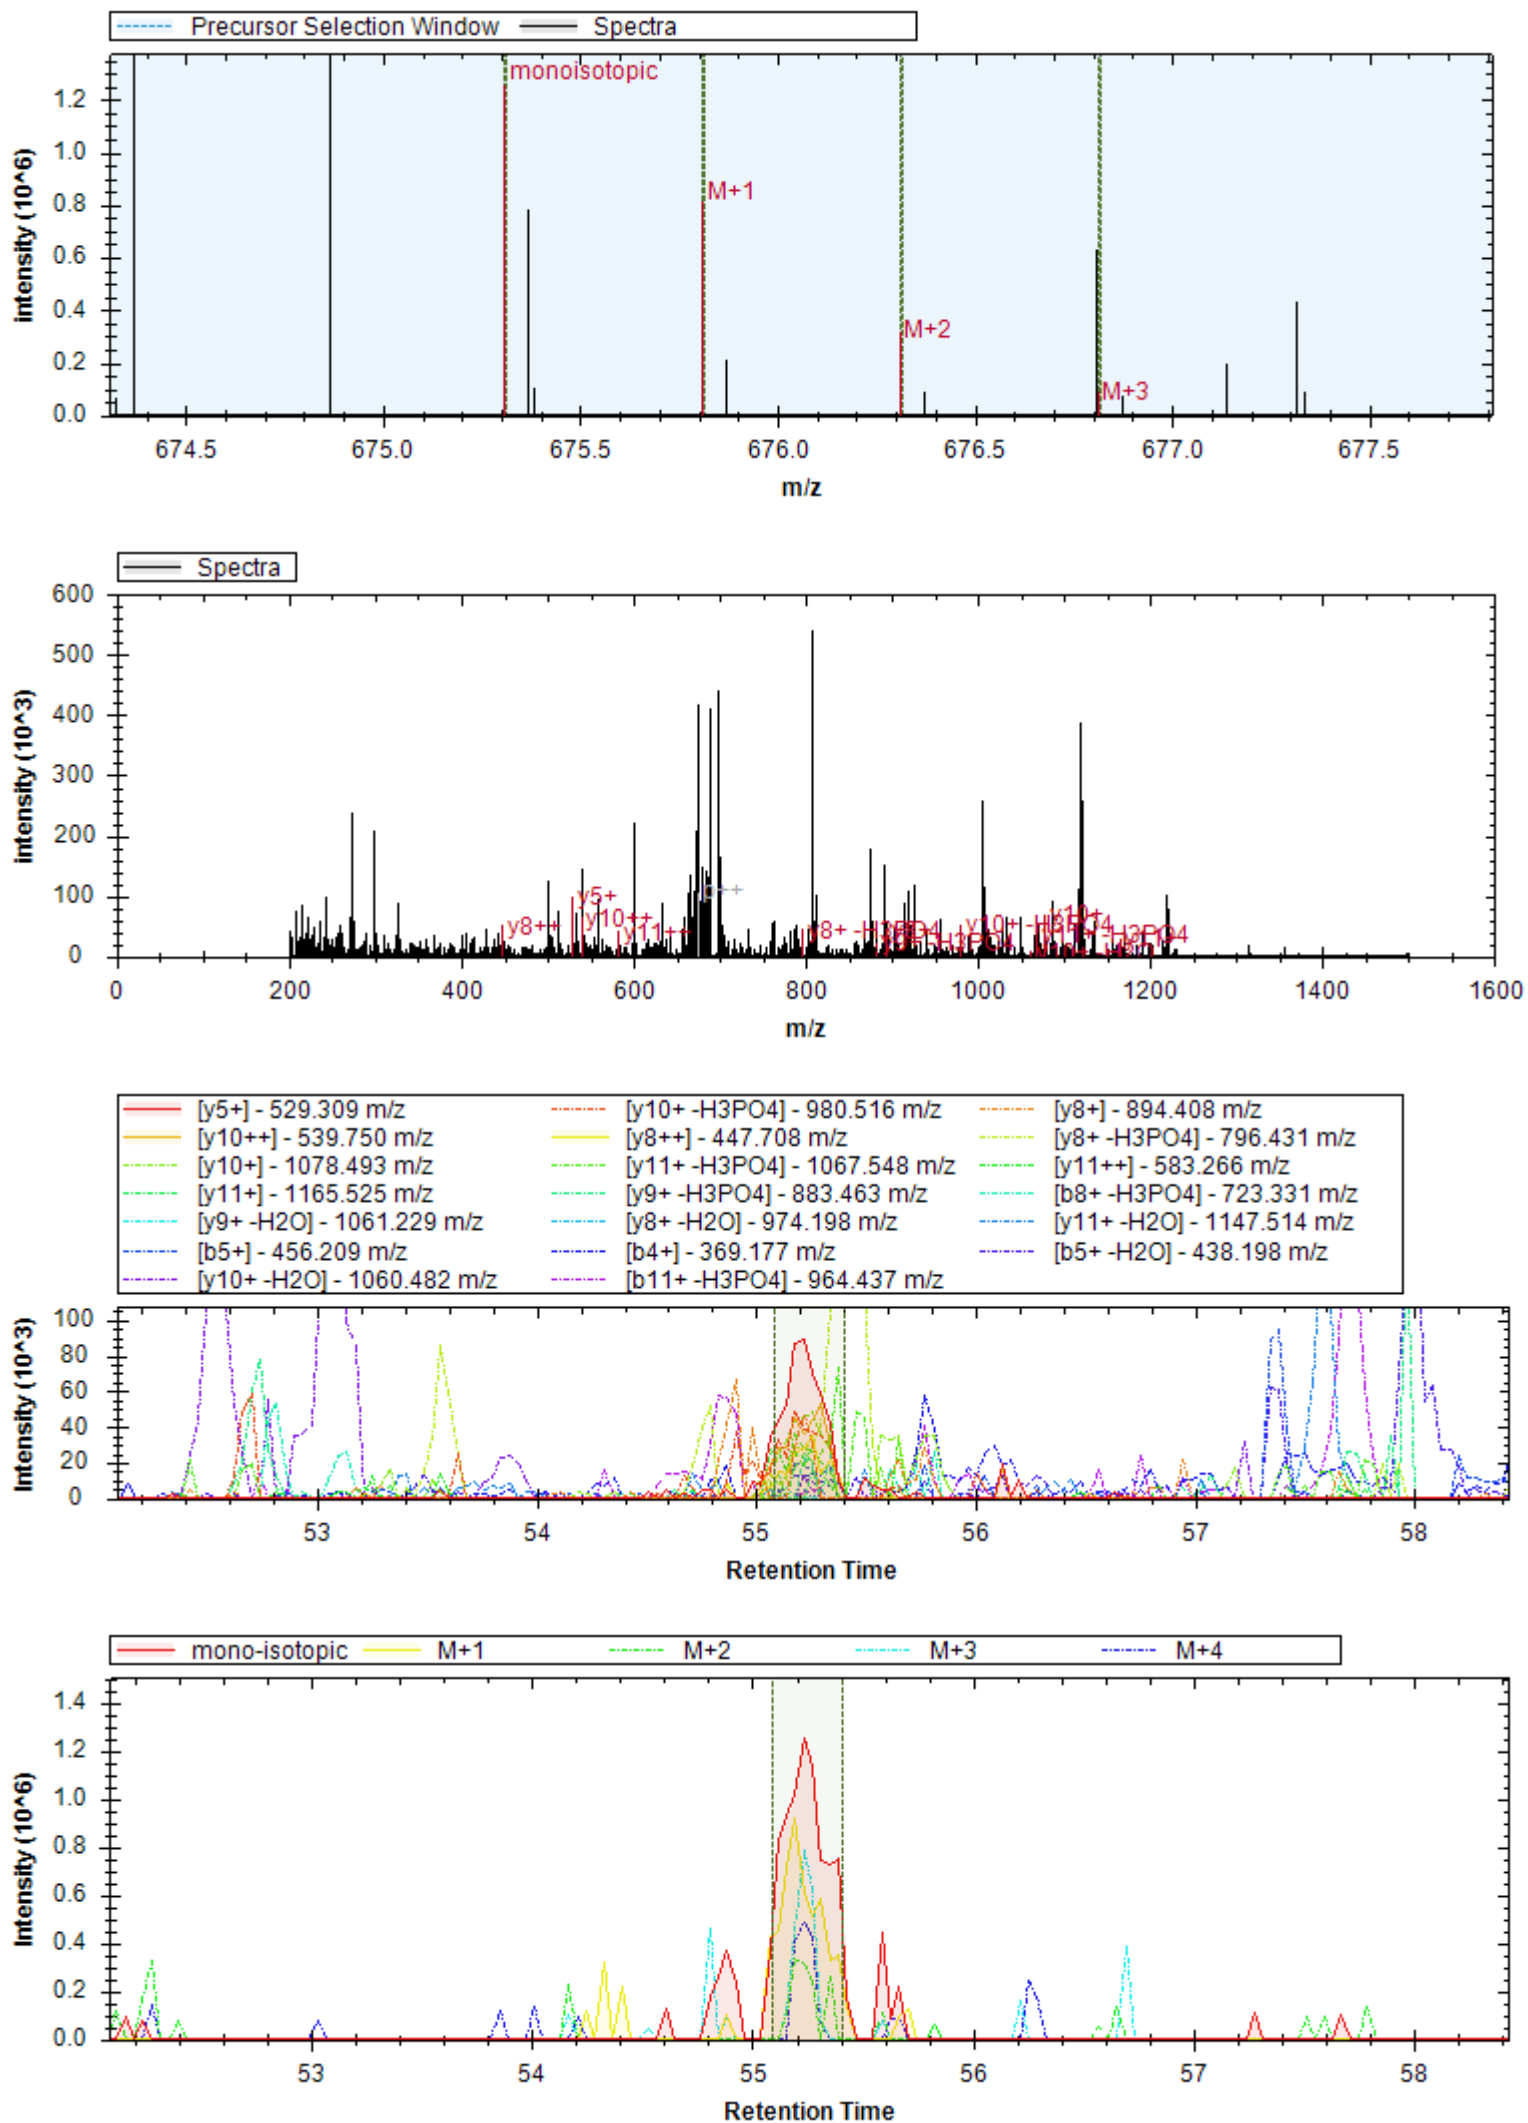



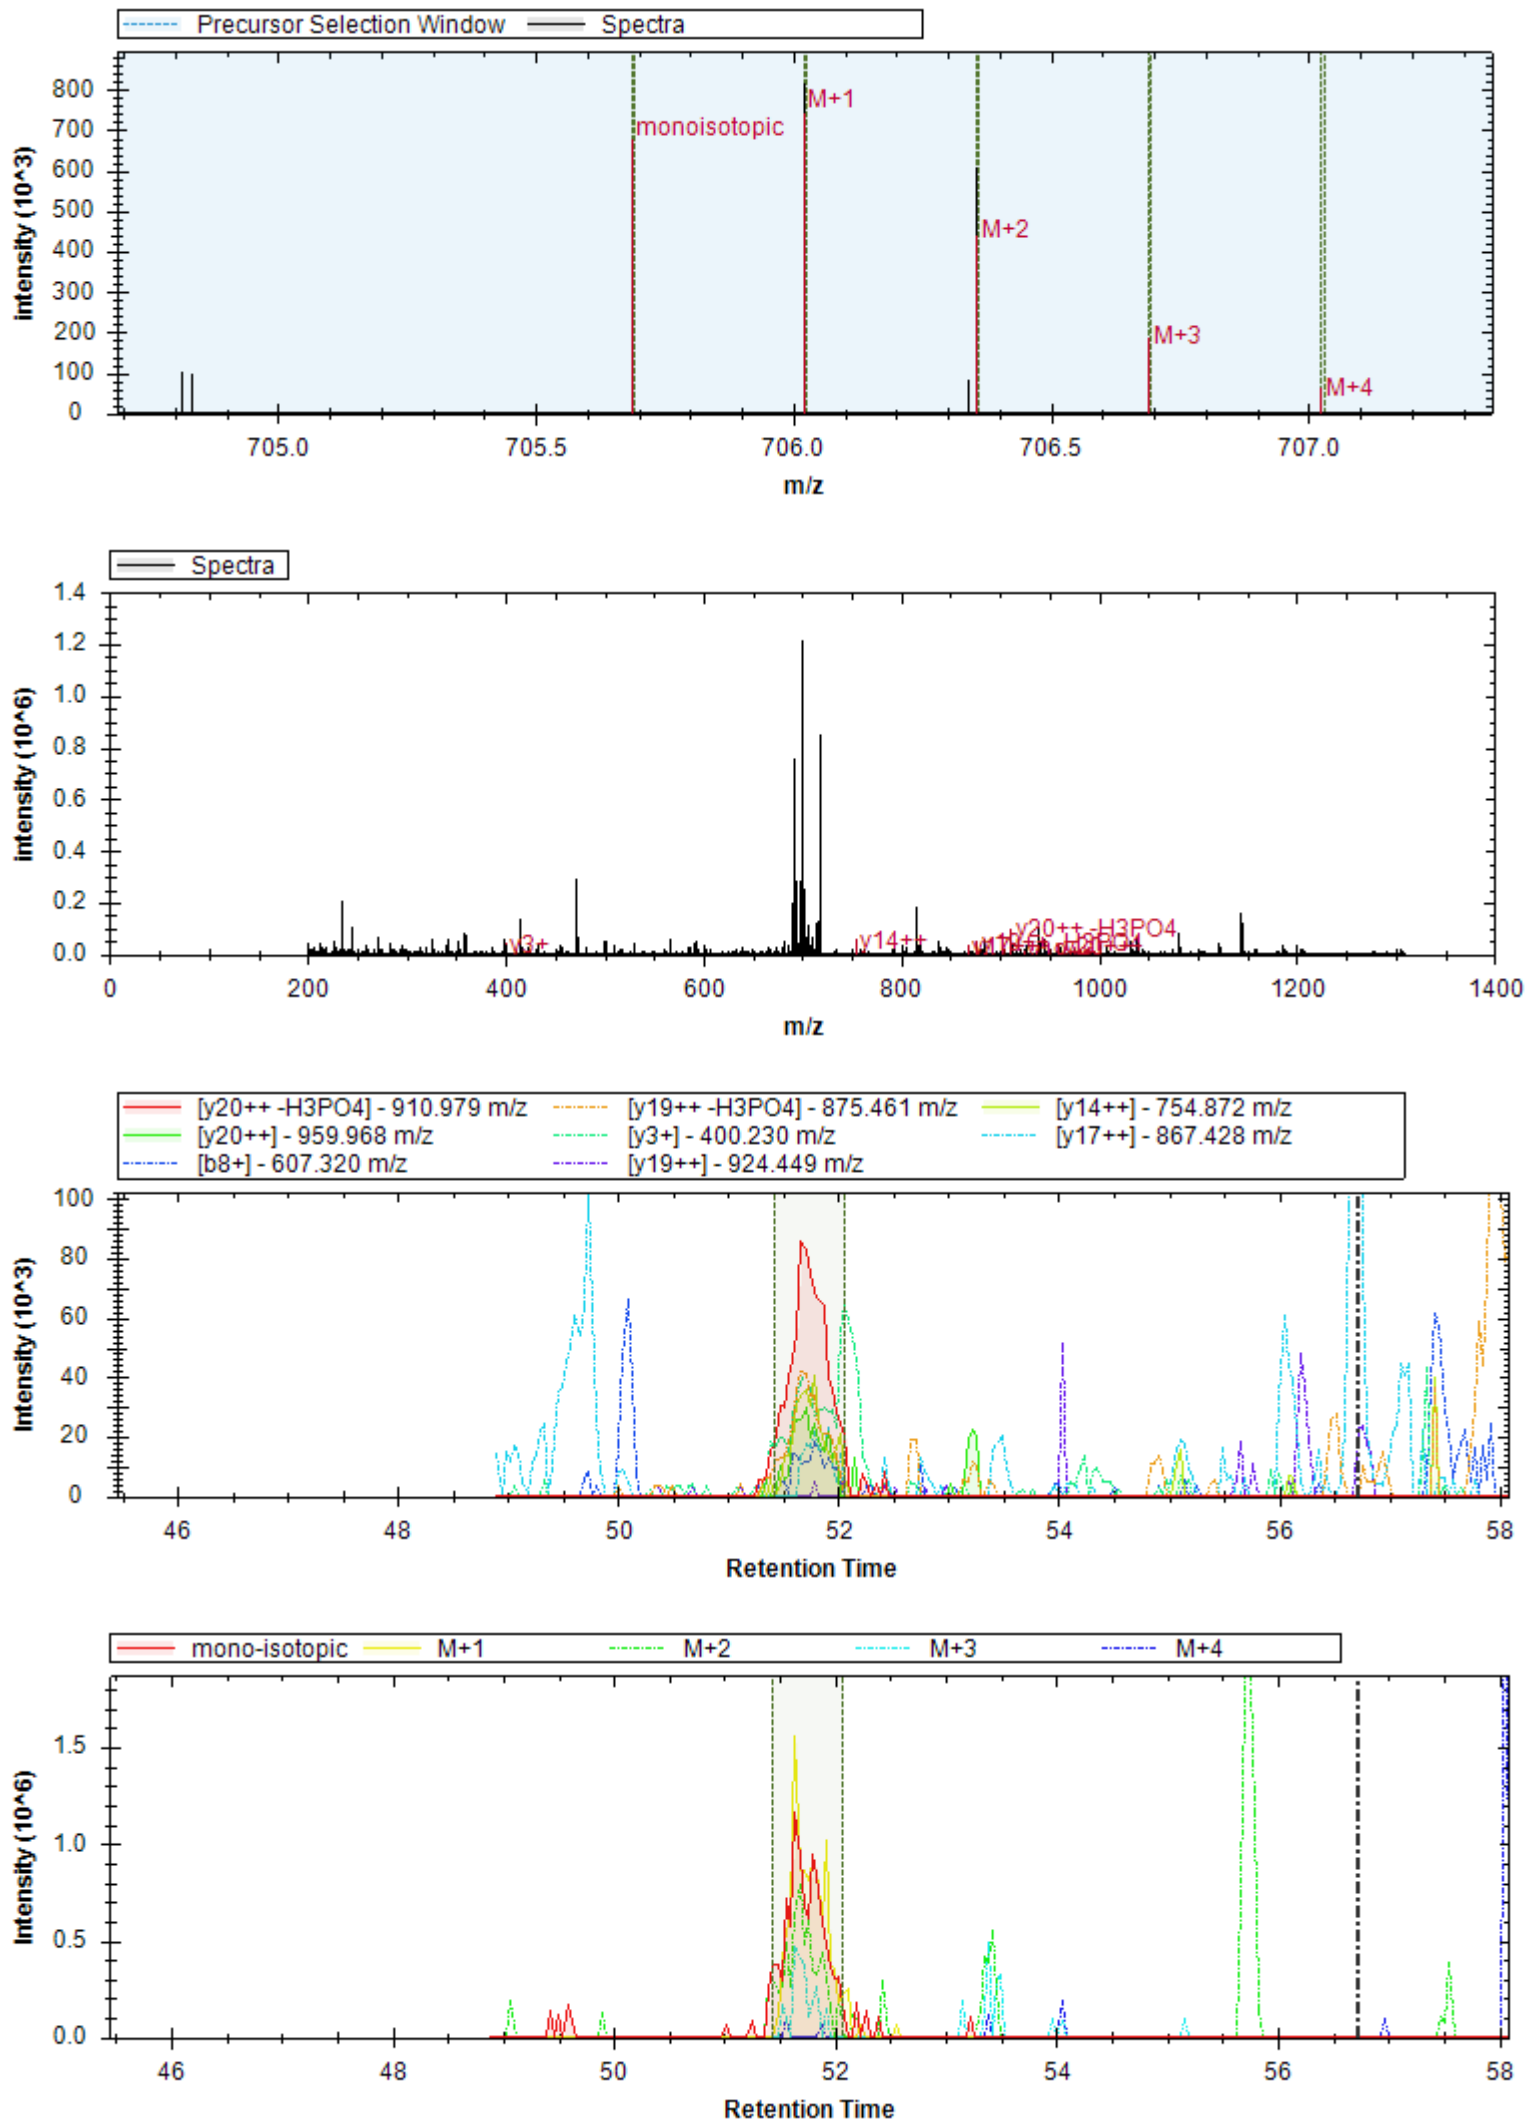

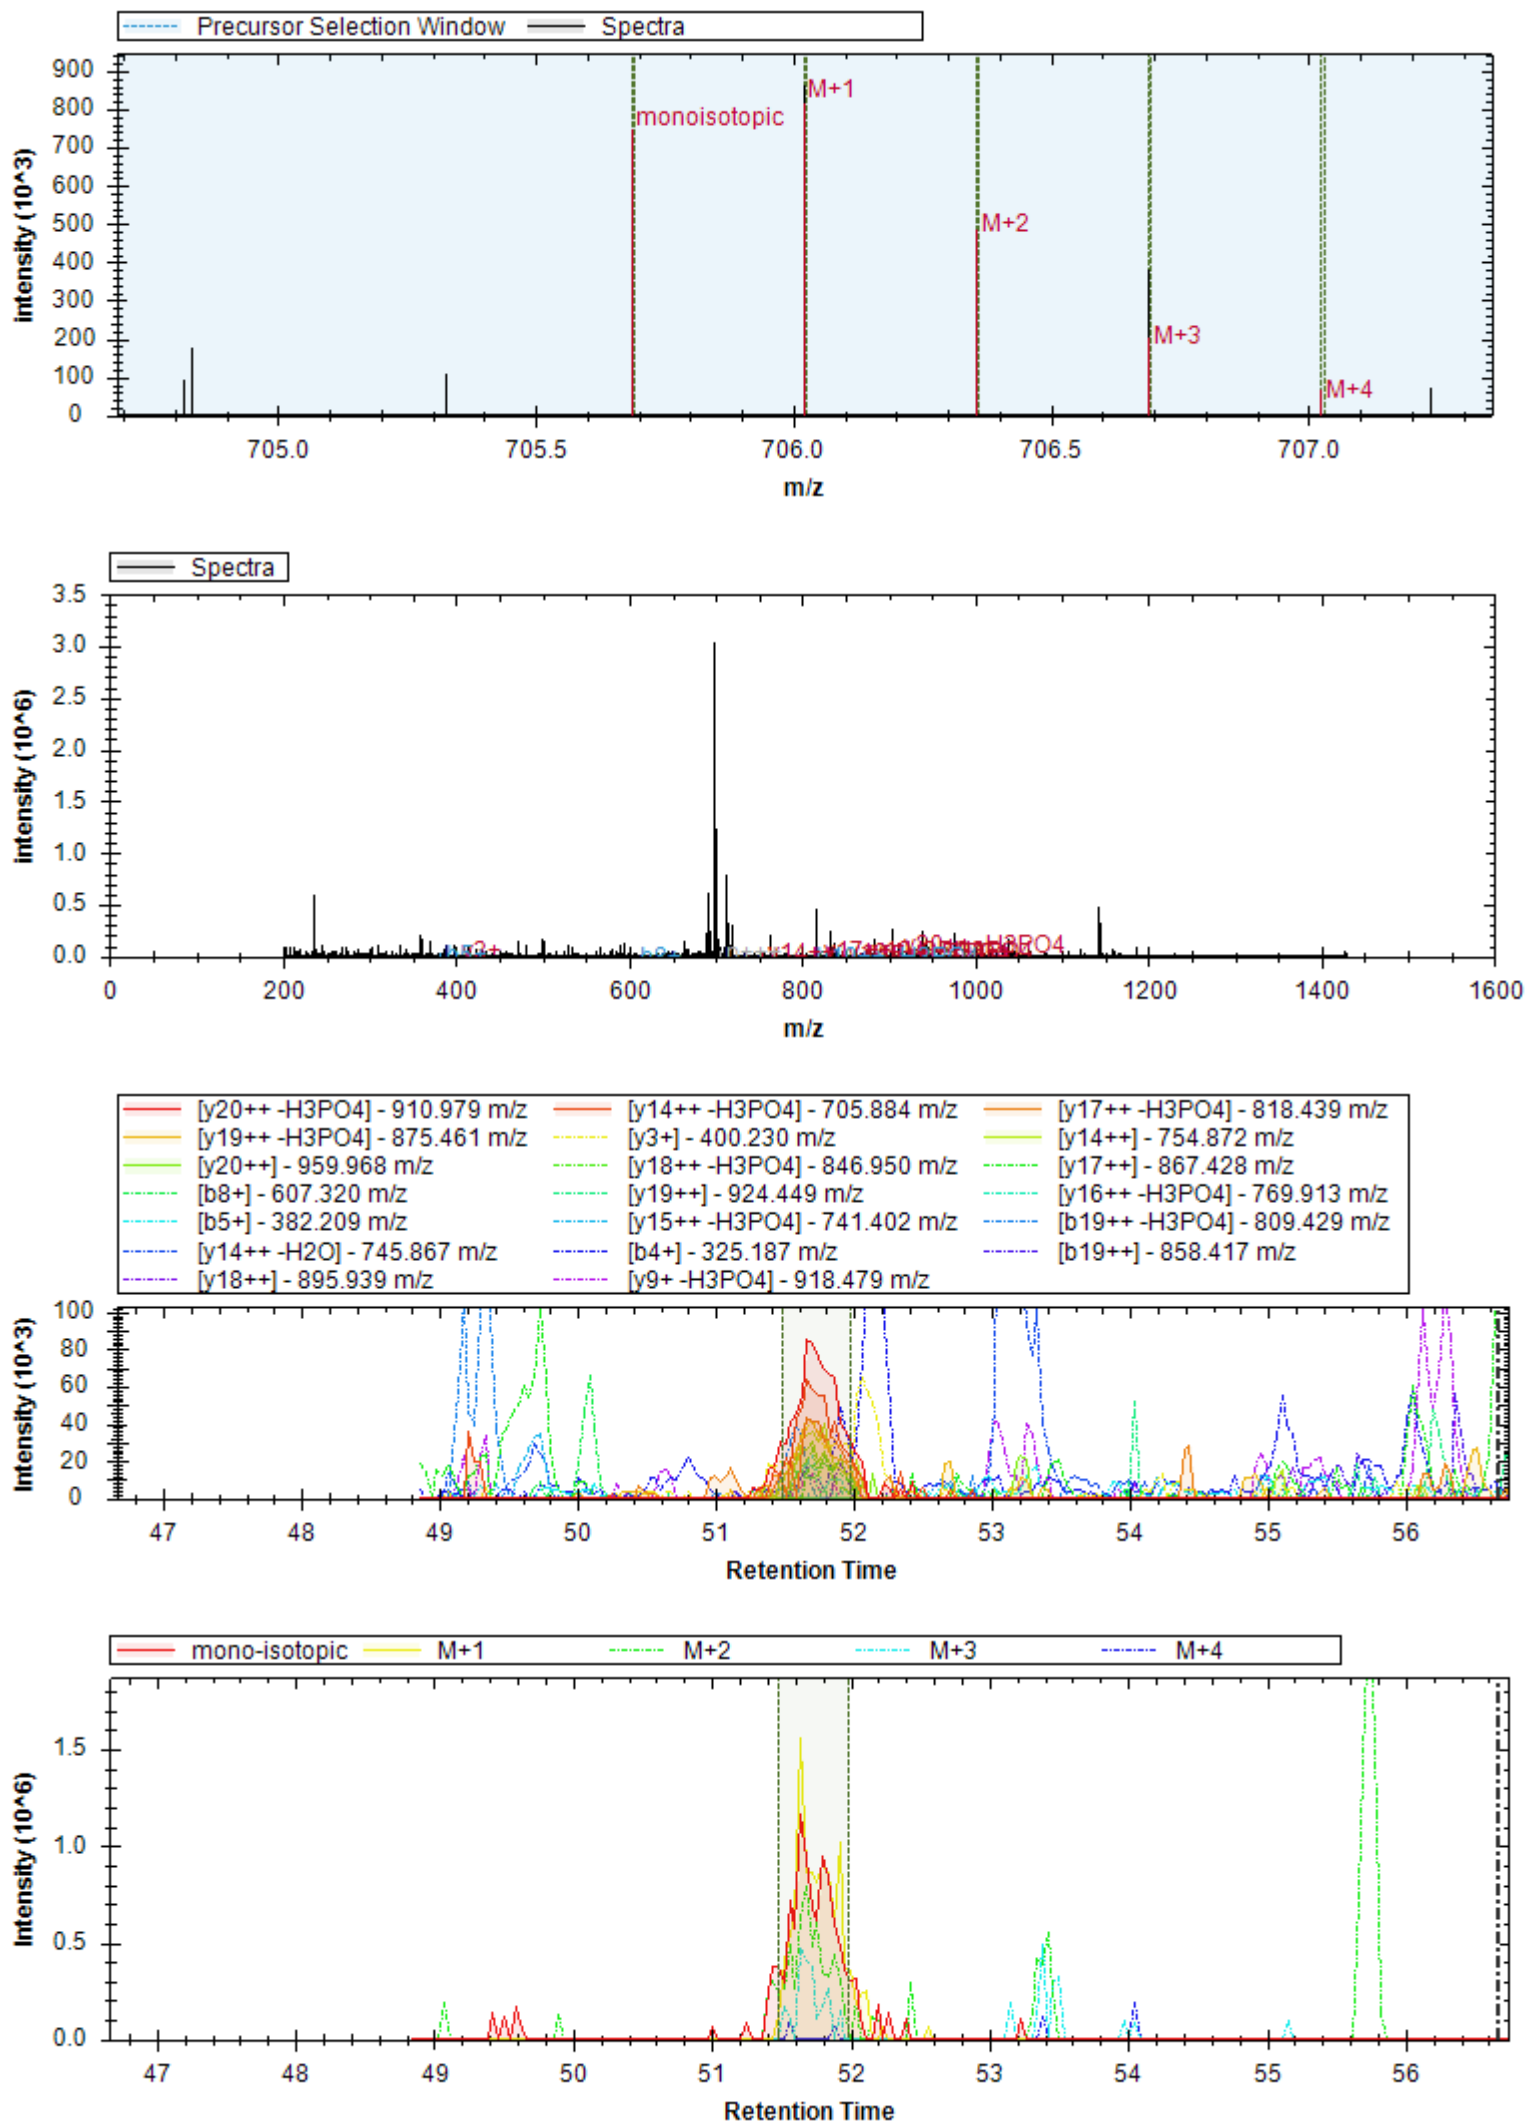

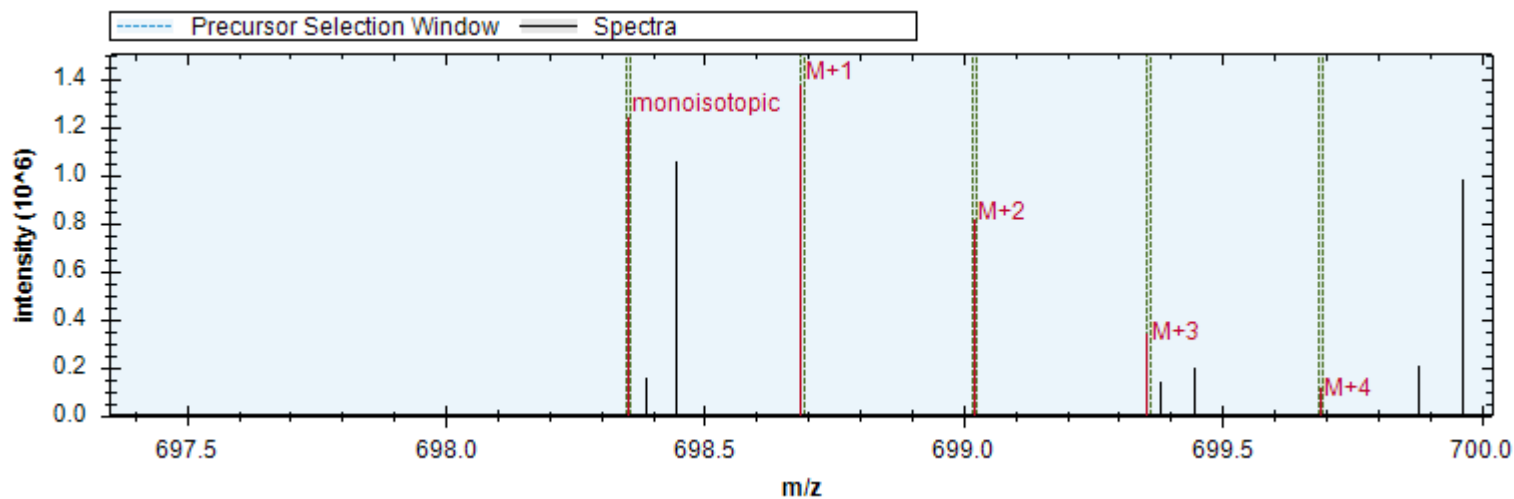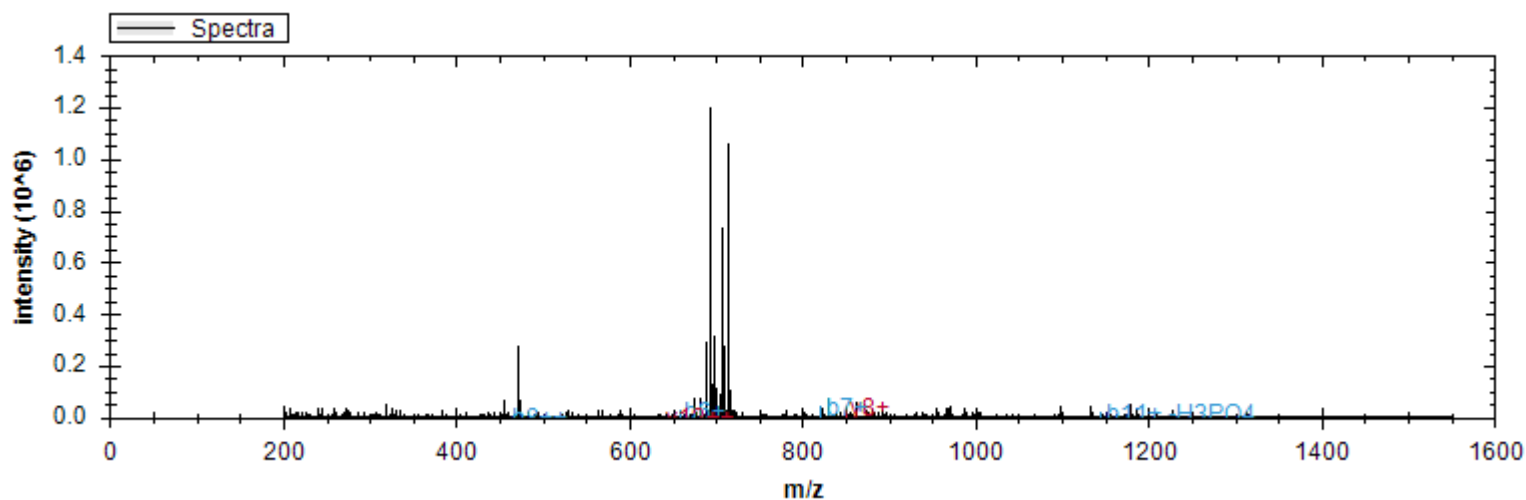

|                              |                              |                      |
|------------------------------|------------------------------|----------------------|
| [b7+] - 821.442 m/z          | [y10+ -H2O] - 1184.309 m/z   | [b6+] - 658.378 m/z  |
| [y8+] - 850.489 m/z          | [b9+] - 989.532 m/z          | [b8++] - 459.751 m/z |
| [y4+] - 482.283 m/z          | [y12+ -H2O] - 1352.399 m/z   | [b3+] - 367.245 m/z  |
| [y6+] - 652.389 m/z          | [y12+ -H3PO4] - 1174.633 m/z | [y7+] - 753.437 m/z  |
| [y12++] - 636.809 m/z        | [b17++] - 910.436 m/z        | [y8++] - 425.748 m/z |
| [b11+ -H3PO4] - 1145.585 m/z | [y10+ -H3PO4] - 1006.543 m/z | [y3+] - 345.225 m/z  |
| [y5+] - 581.352 m/z          | [y13++] - 718.340 m/z        |                      |

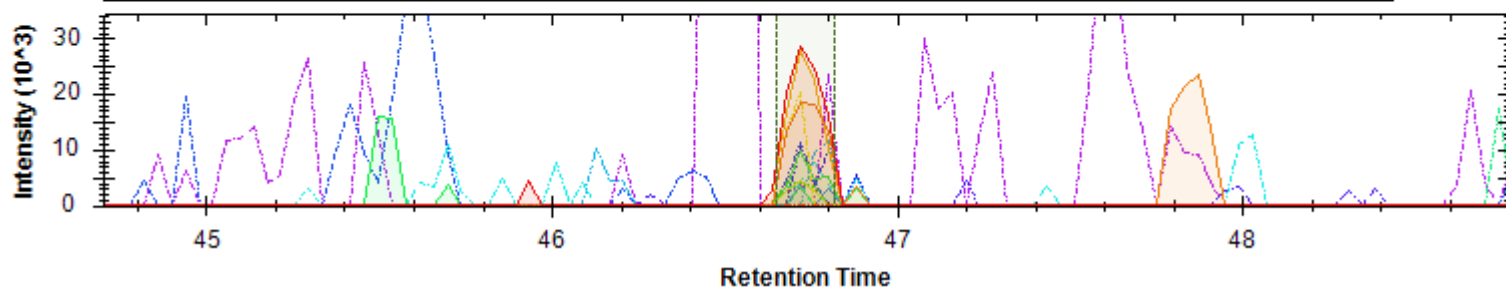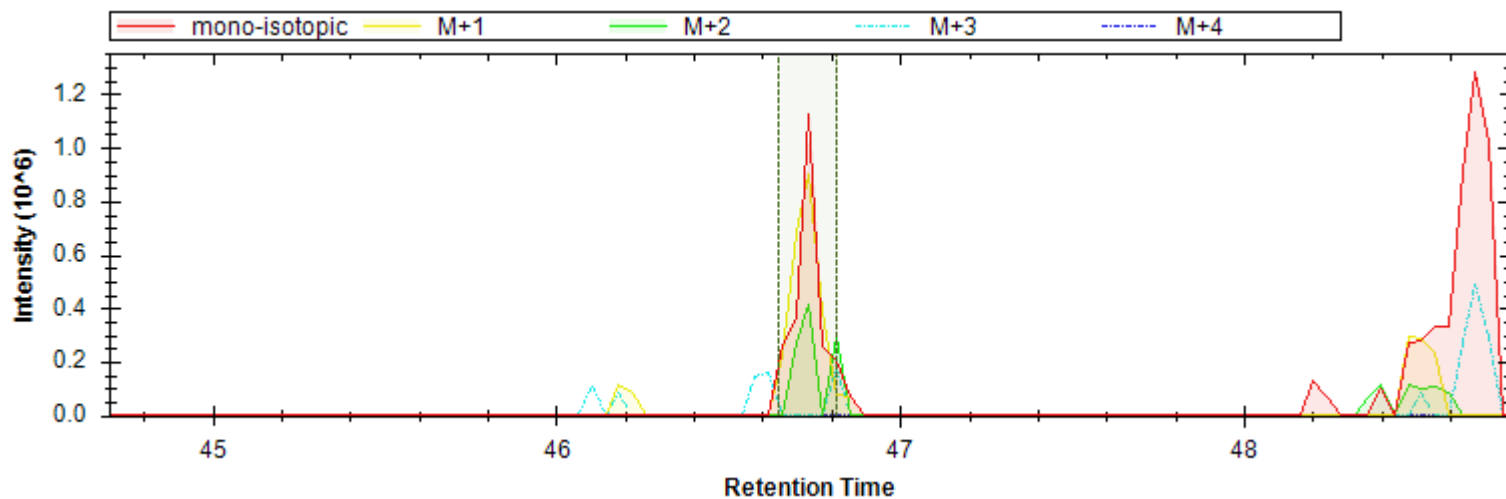



- |                              |                              |                              |
|------------------------------|------------------------------|------------------------------|
| [b7+] - 821.442 m/z          | [y8+] - 850.489 m/z          | [b6+] - 658.378 m/z          |
| [b9+] - 989.532 m/z          | [y4+] - 482.283 m/z          | [b8++] - 459.751 m/z         |
| [y11+ -H2O] - 1255.346 m/z   | [y6+] - 652.389 m/z          | [b3+] - 367.245 m/z          |
| [y5+] - 581.352 m/z          | [y9+ -H3PO4] - 919.511 m/z   | [y7+] - 753.437 m/z          |
| [y10+ -H3PO4] - 1006.543 m/z | [b11+ -H3PO4] - 1145.585 m/z | [y12+ -H3PO4] - 1174.633 m/z |
| [y3+] - 345.225 m/z          | [y12++] - 636.809 m/z        | [y8++] - 425.748 m/z         |
| [y11+ -H3PO4] - 1077.580 m/z |                              |                              |

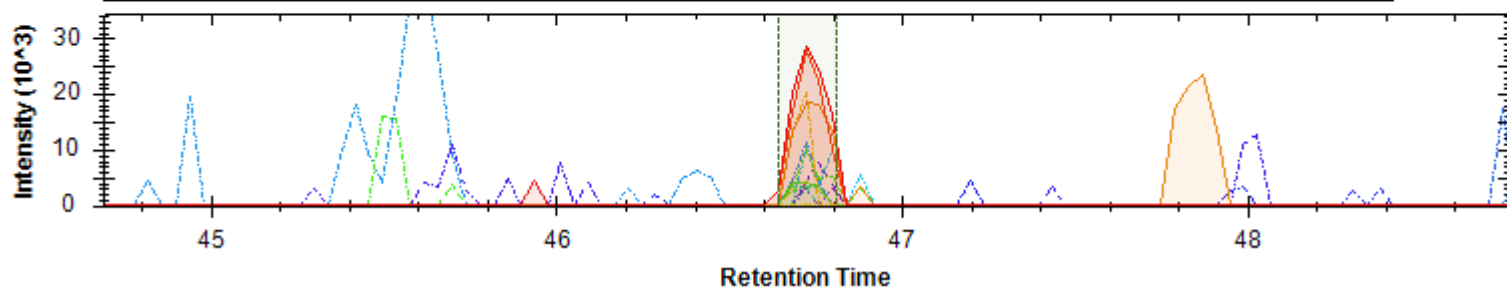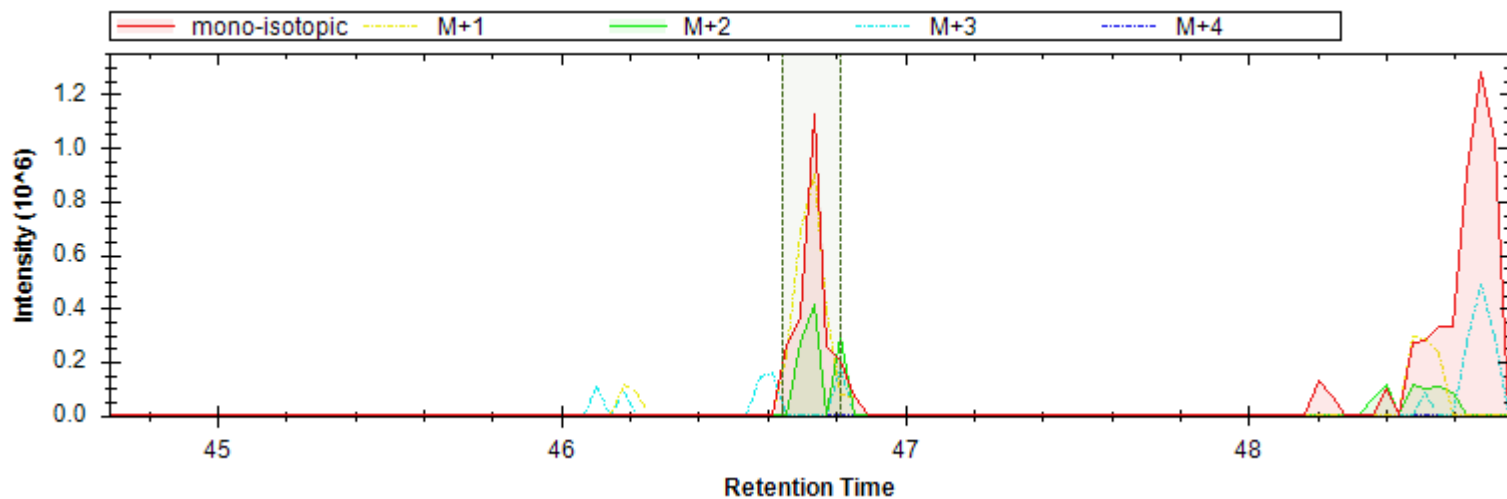

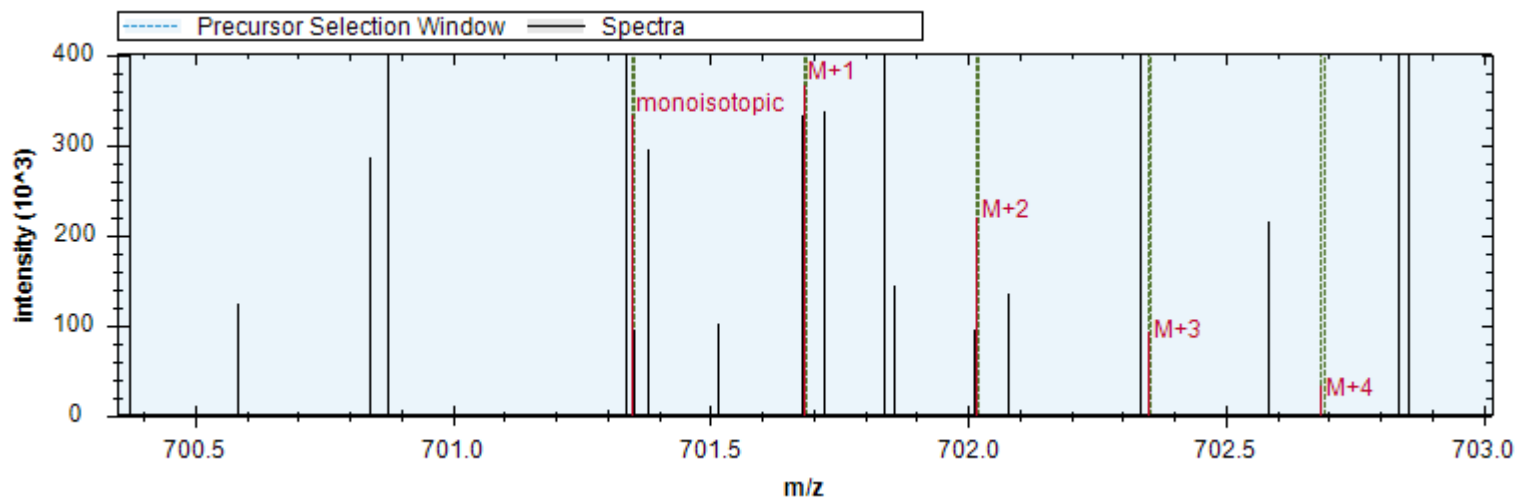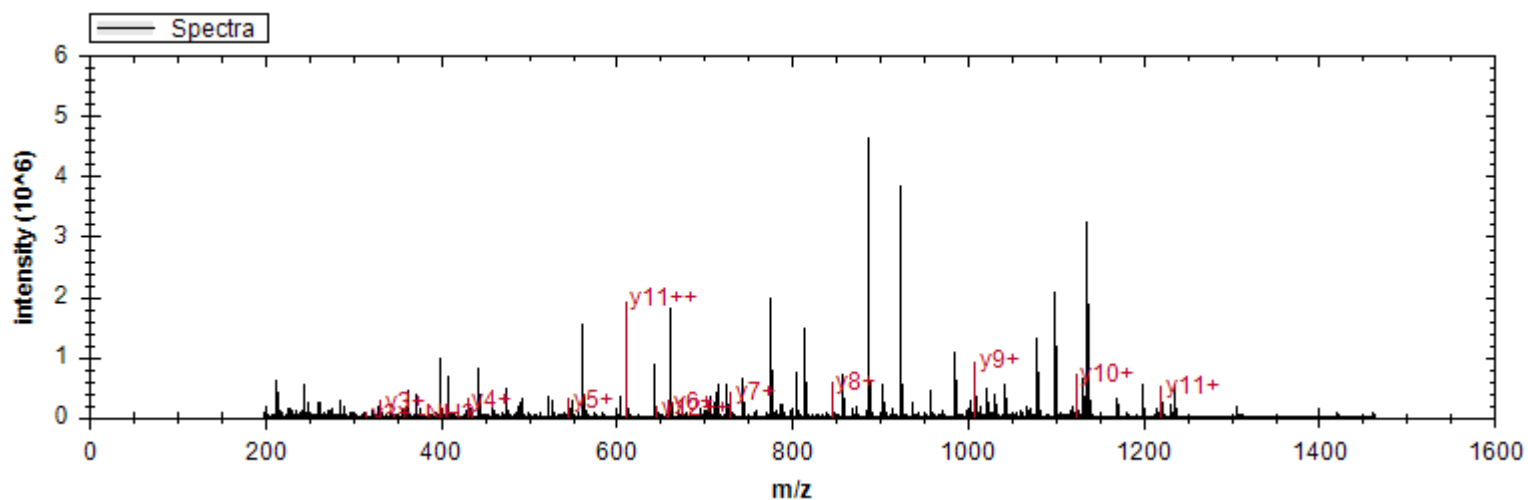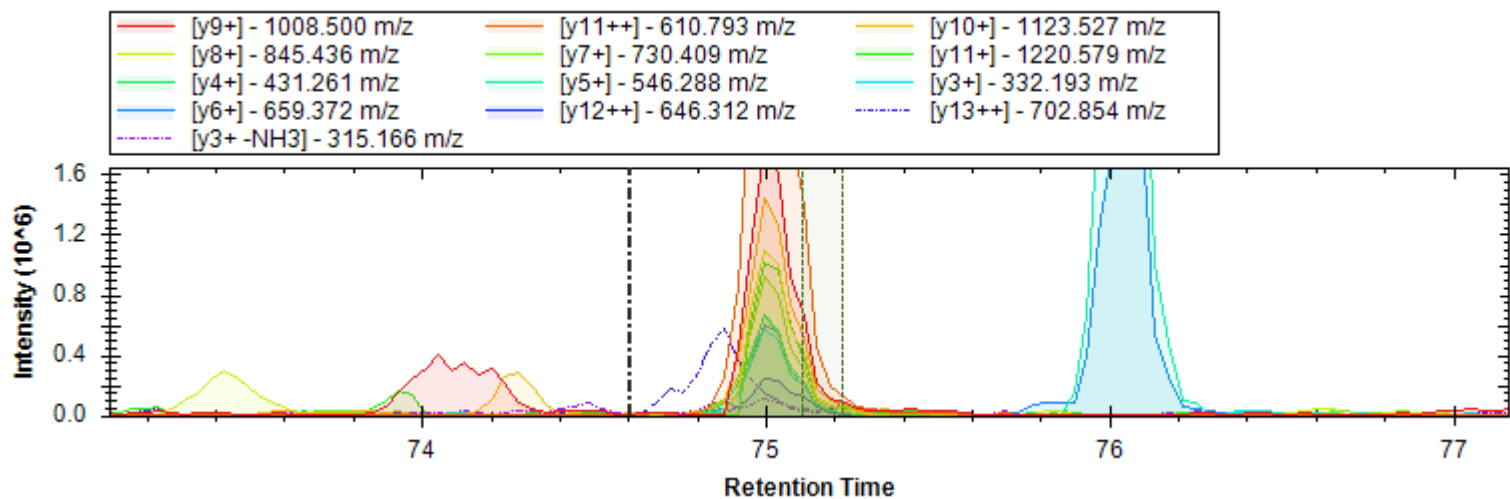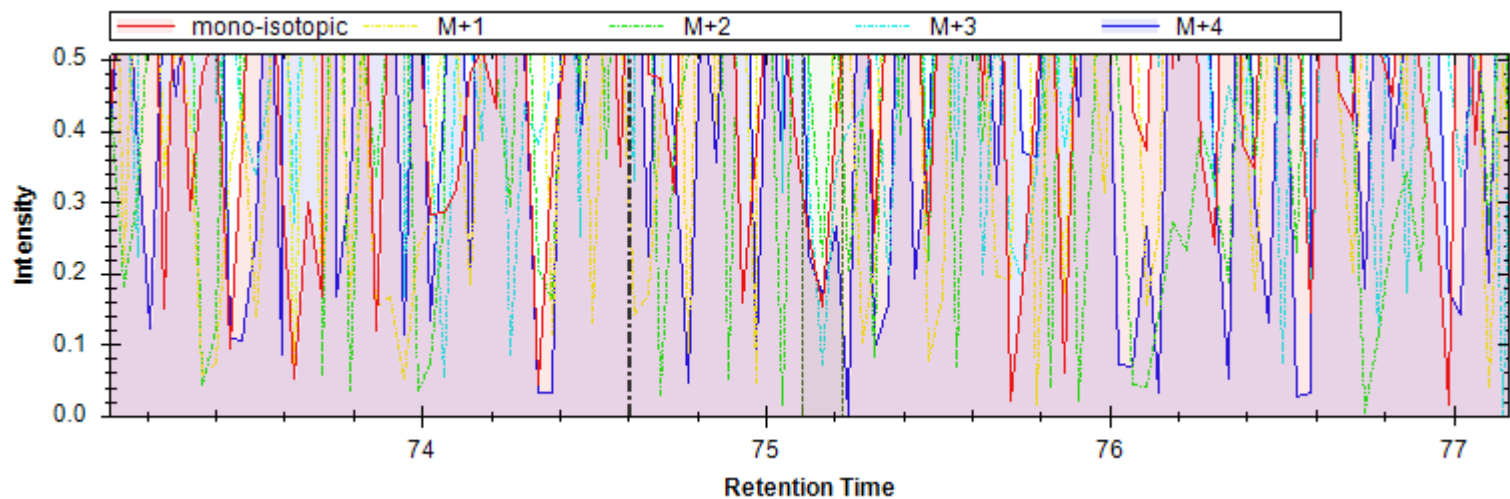

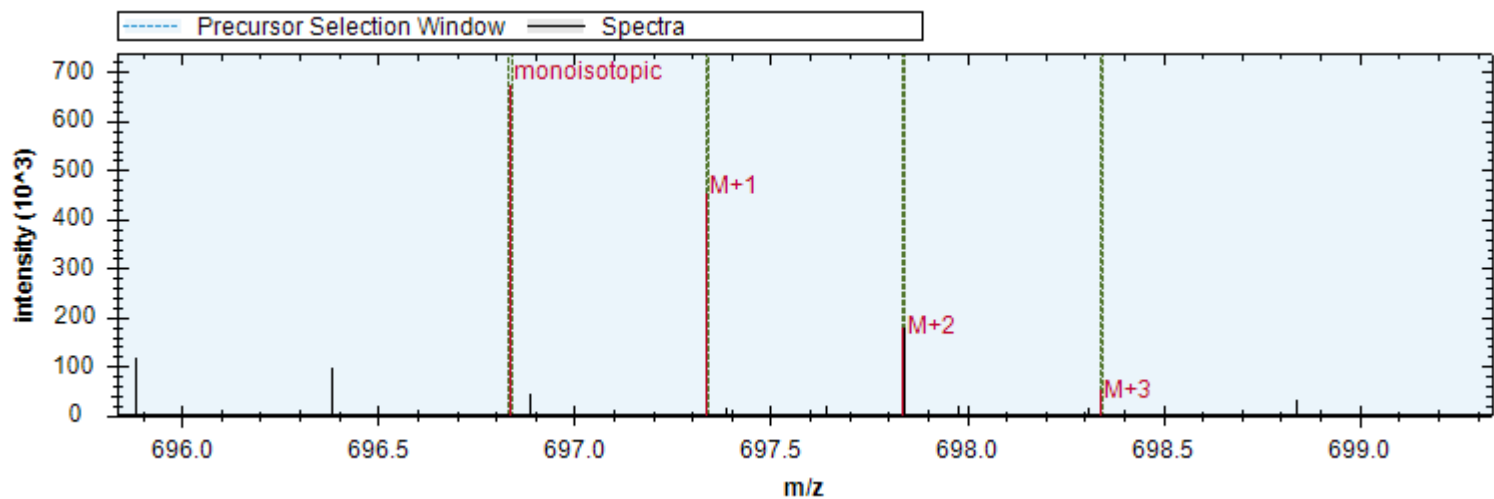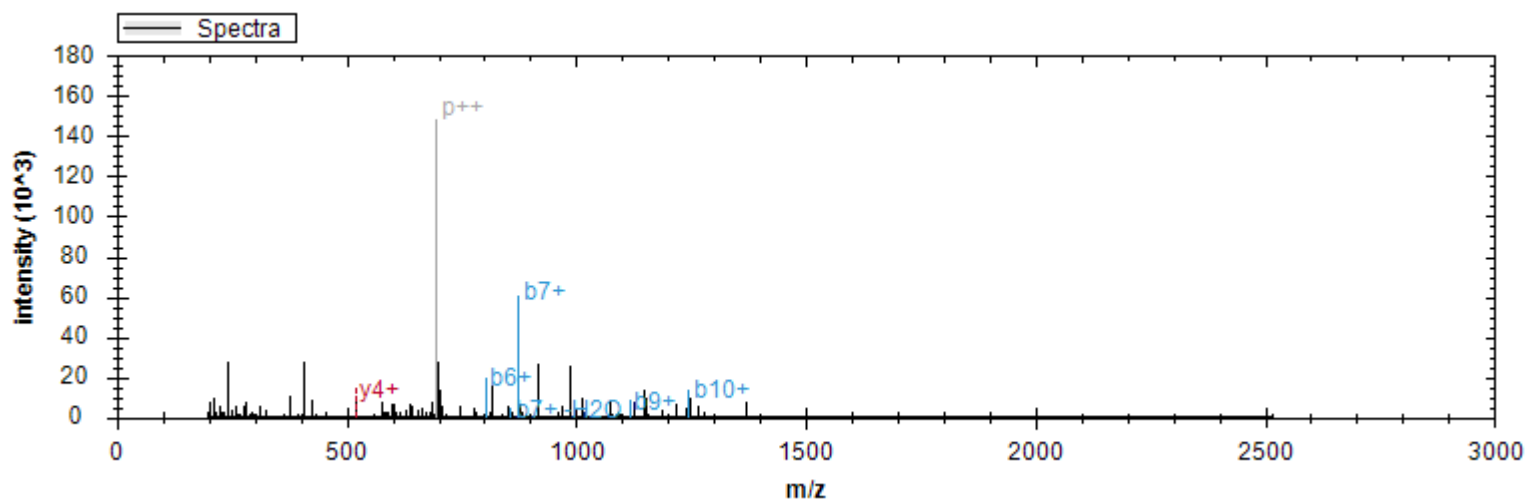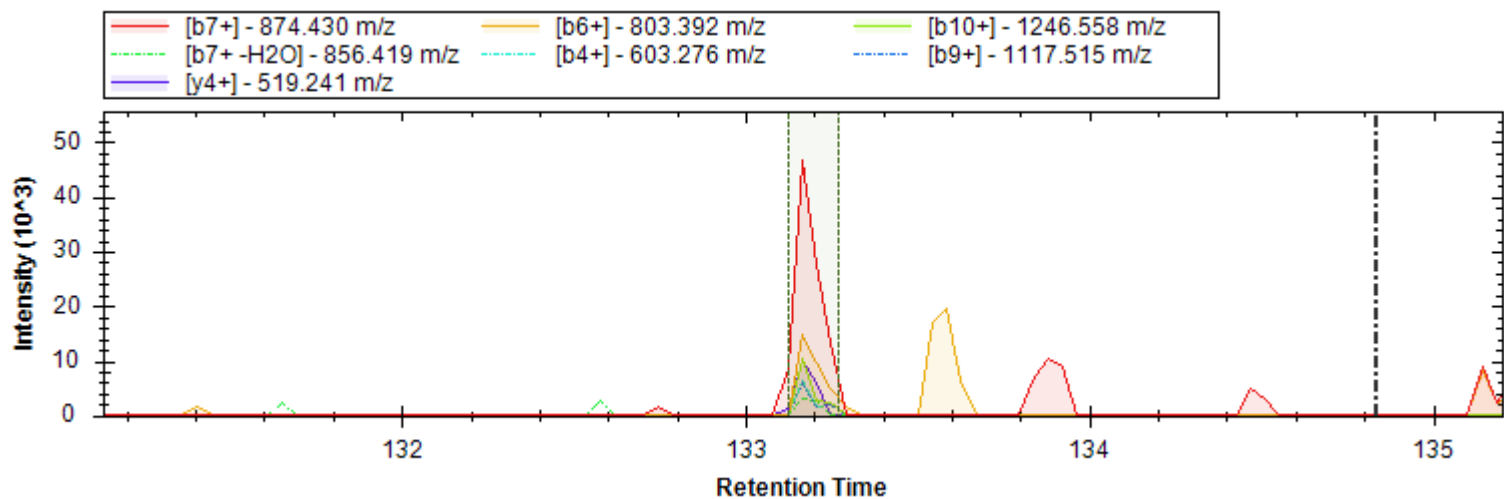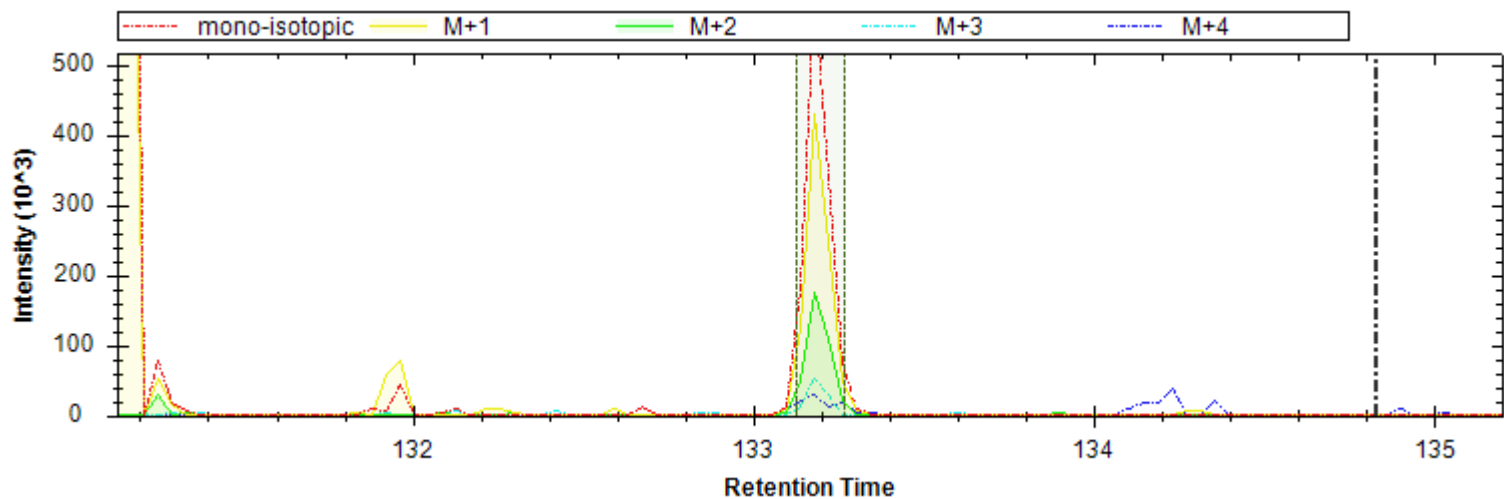

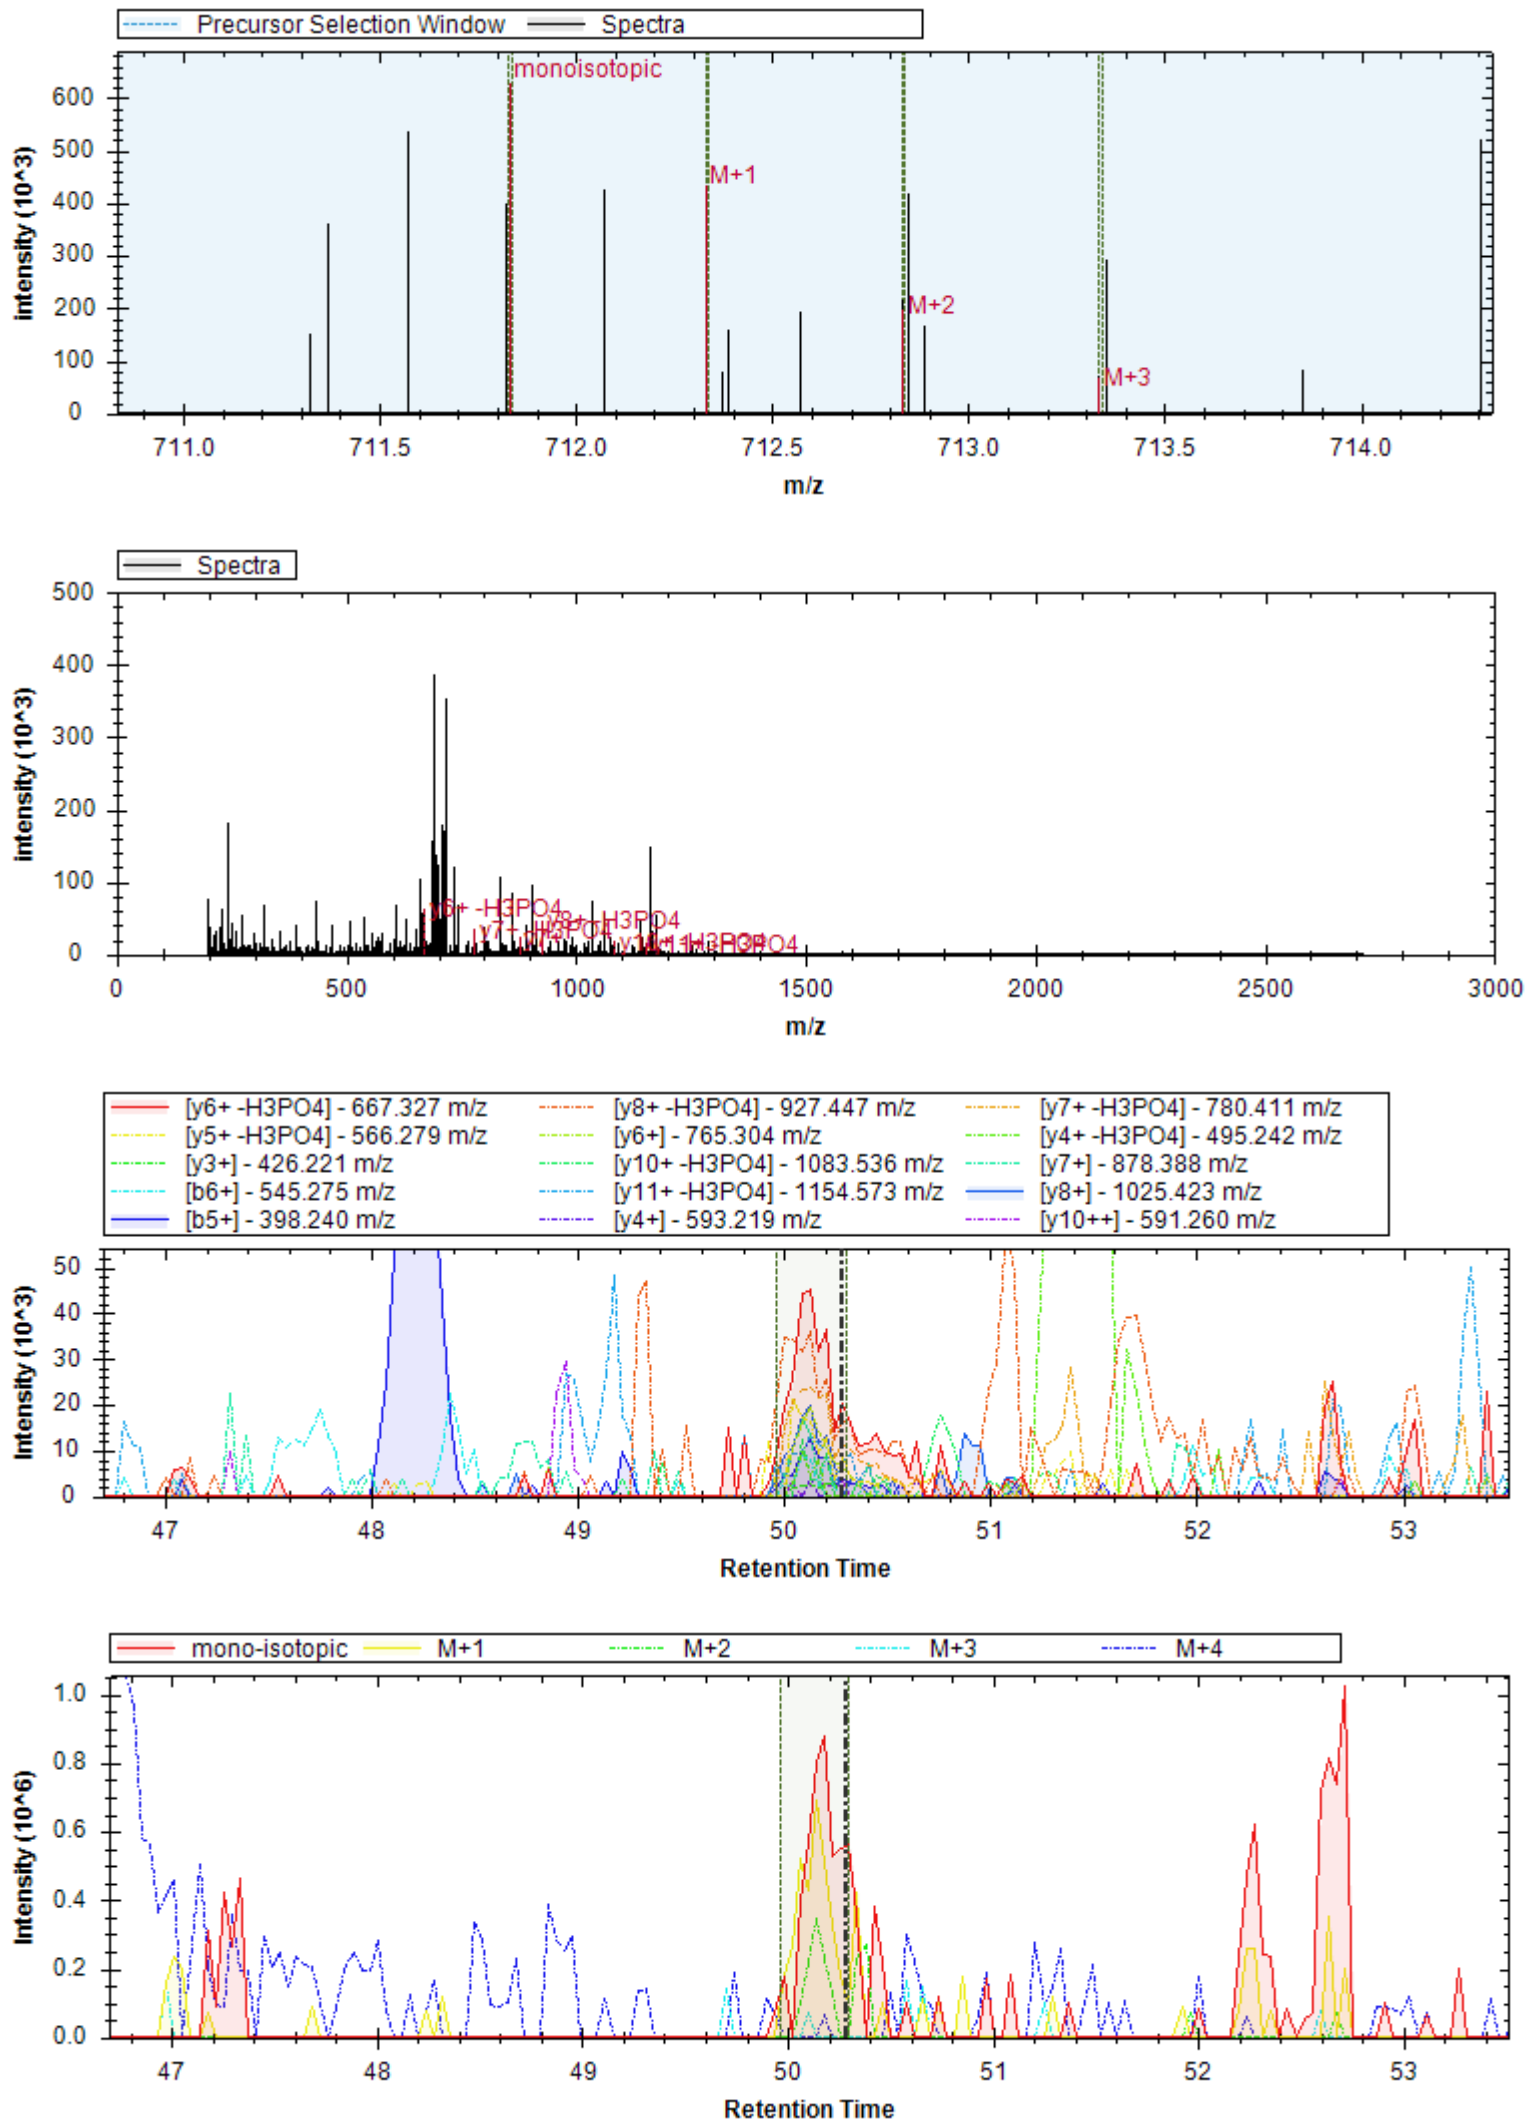

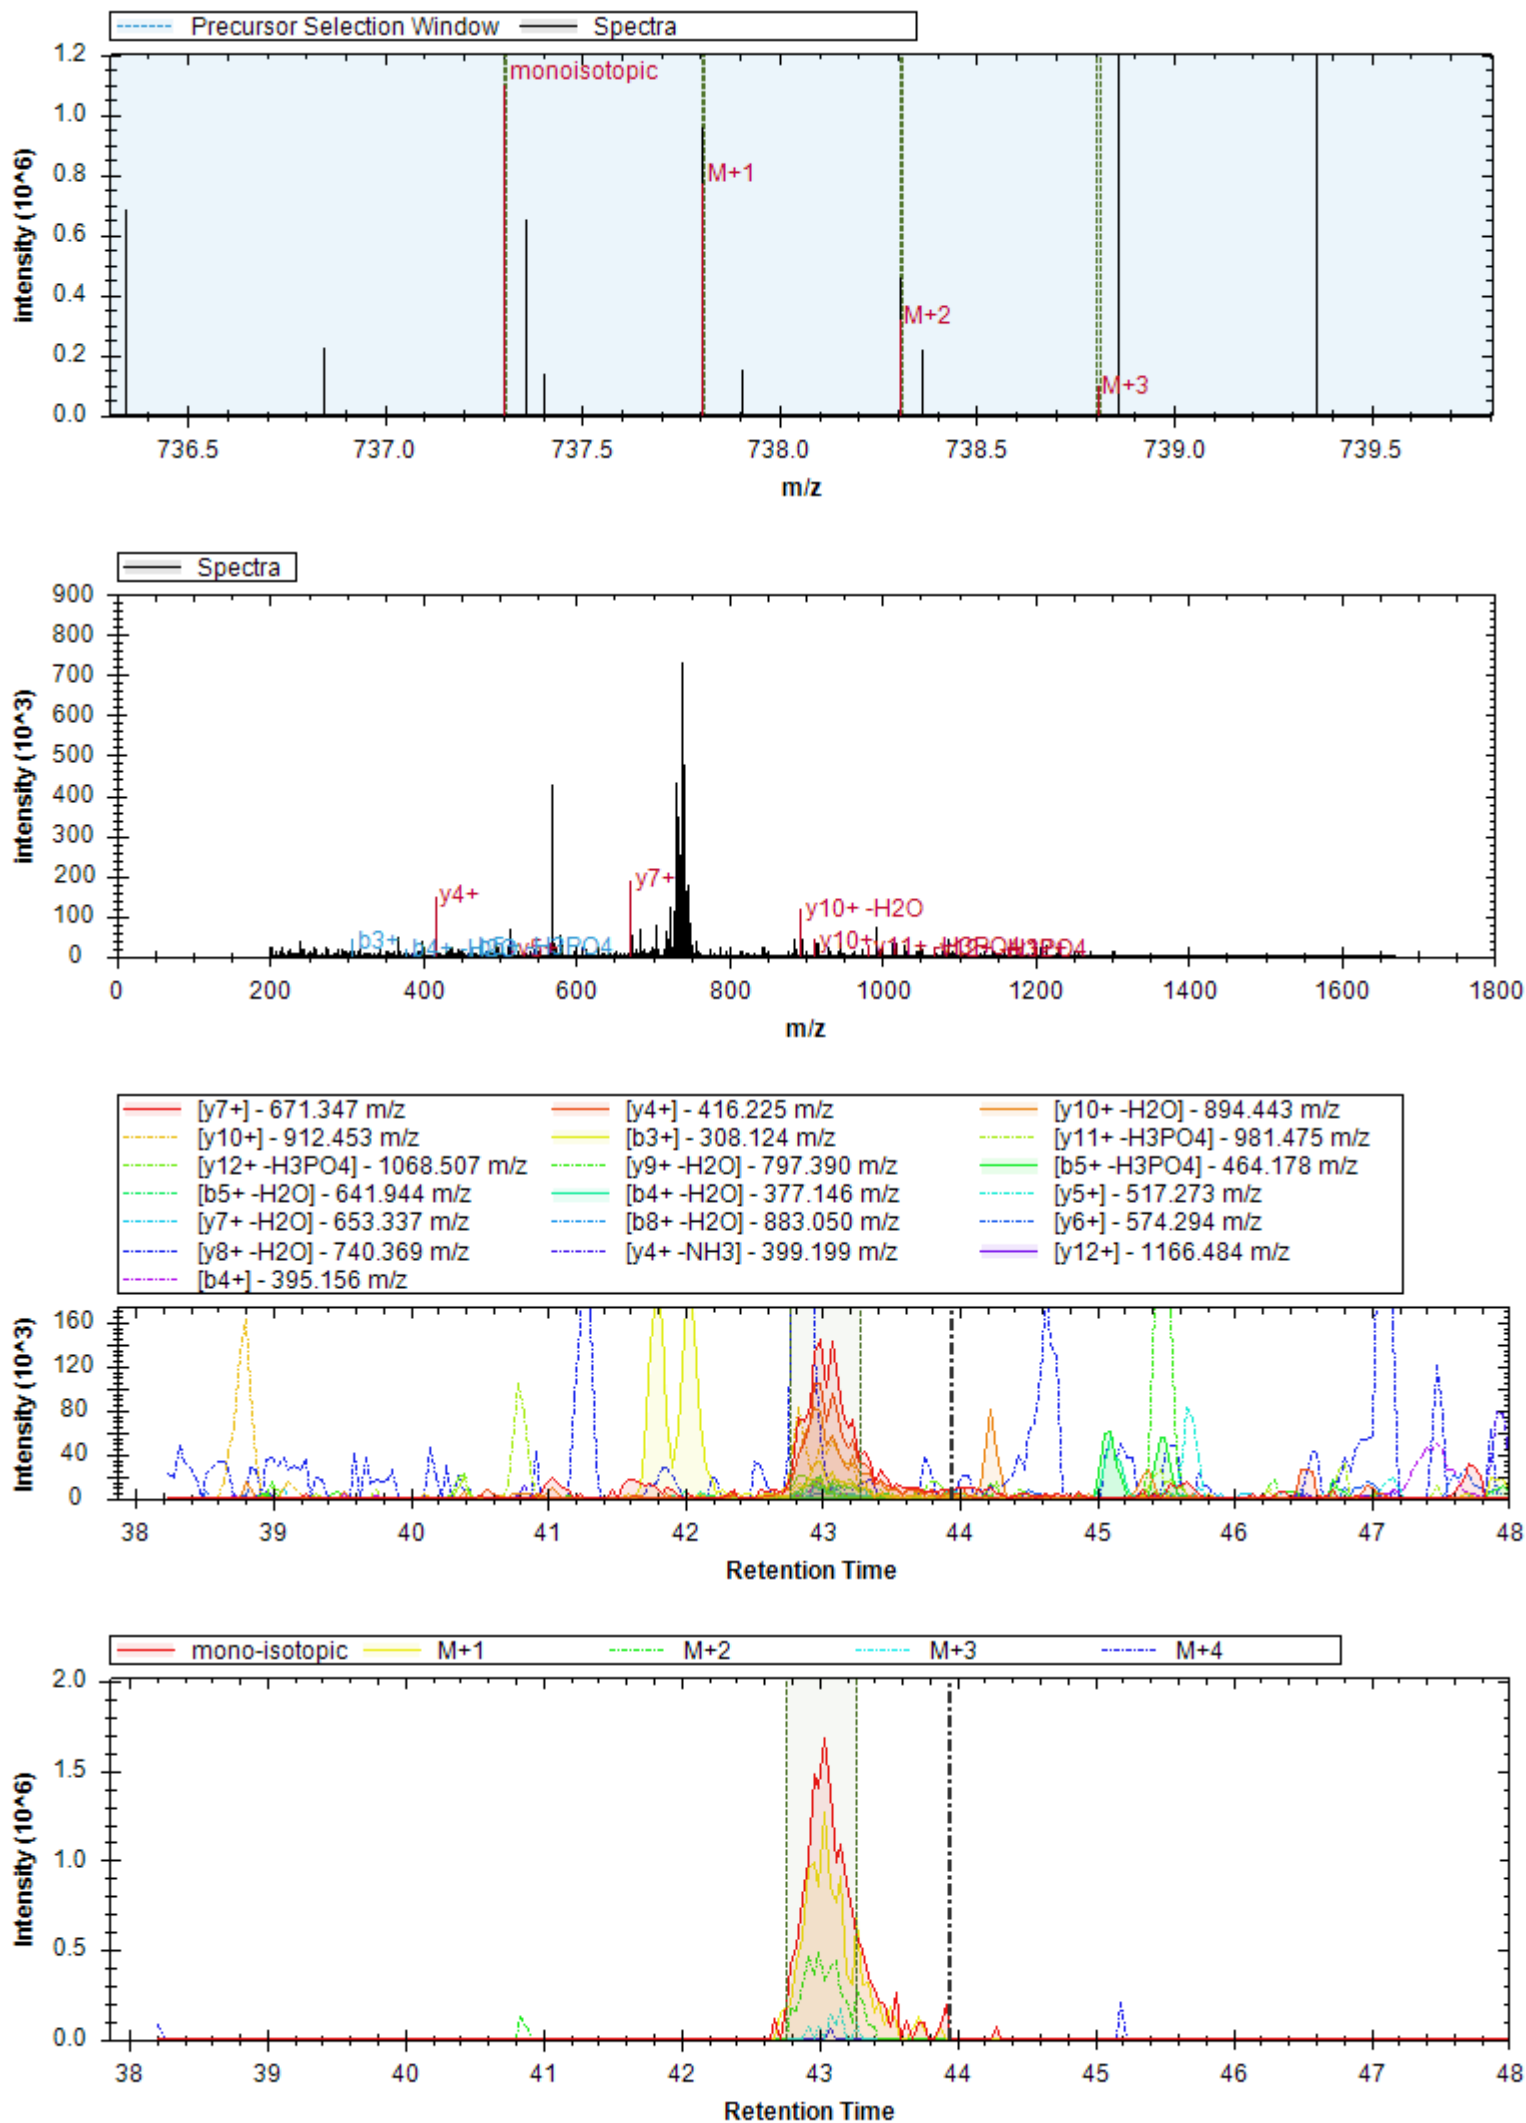



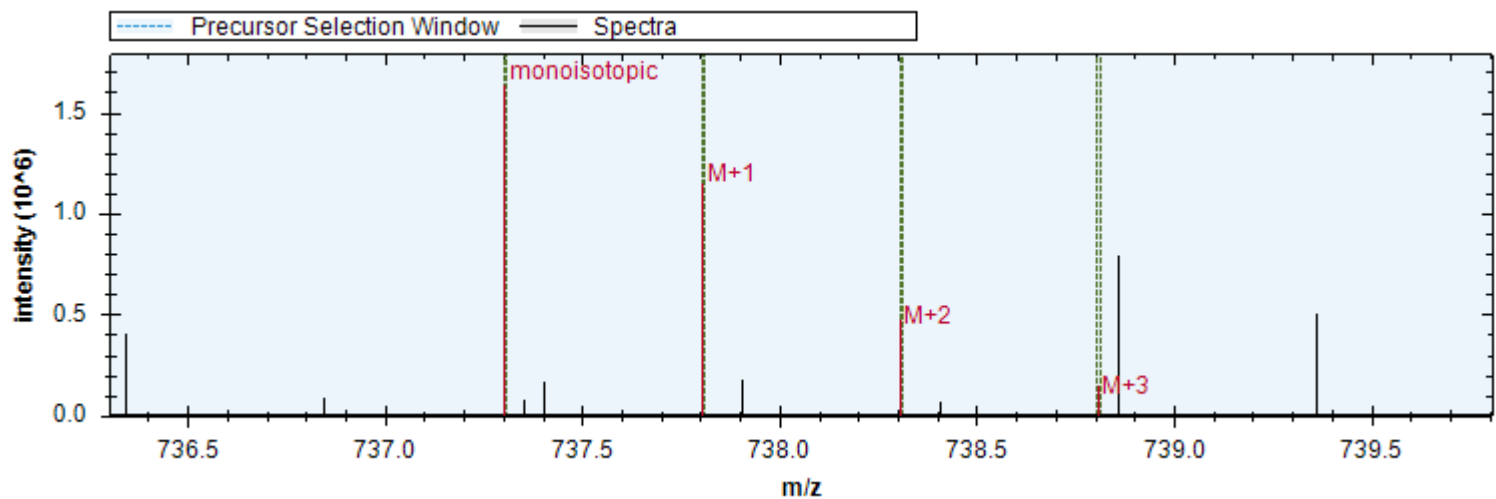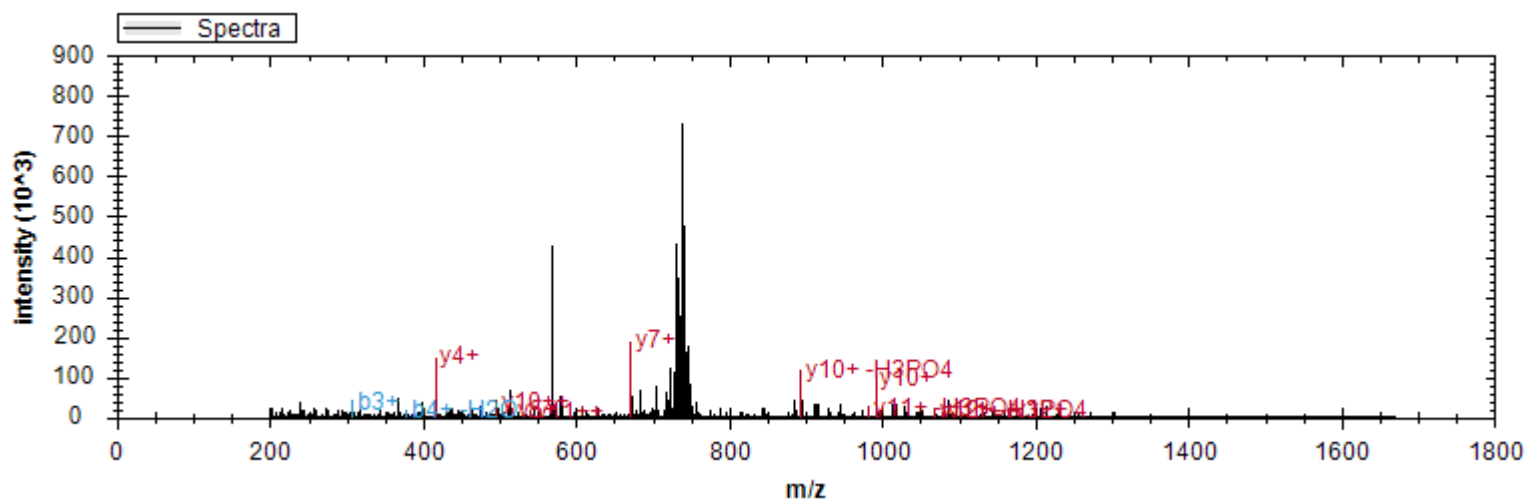

- |                             |                              |                            |
|-----------------------------|------------------------------|----------------------------|
| [y7+] - 671.347 m/z         | [y10+ -H3PO4] - 894.443 m/z  | [y4+] - 416.225 m/z        |
| [y10+] - 992.420 m/z        | [y10++] - 496.714 m/z        | [b3+] - 308.124 m/z        |
| [y11+ -H3PO4] - 981.475 m/z | [y12+ -H3PO4] - 1068.507 m/z | [y9+ -H3PO4] - 797.390 m/z |
| [y11++] - 540.230 m/z       | [y11+] - 1079.452 m/z        | [y7+ -H2O] - 653.337 m/z   |
| [y8+ -H3PO4] - 740.369 m/z  | [y12+] - 1166.484 m/z        | [y10+ -H2O] - 1072.209 m/z |
| [b4+ -H2O] - 377.146 m/z    | [y5+] - 517.273 m/z          | [y10+ -NH3] - 975.393 m/z  |
| [b4+] - 395.156 m/z         |                              |                            |

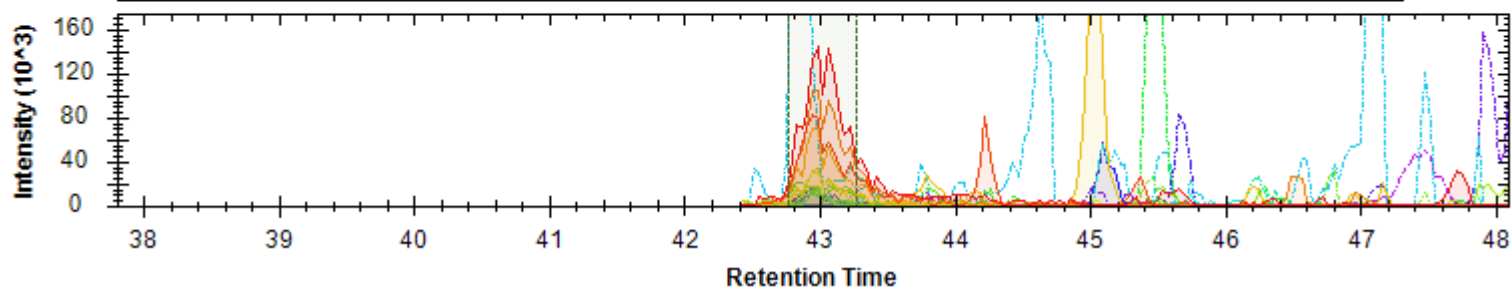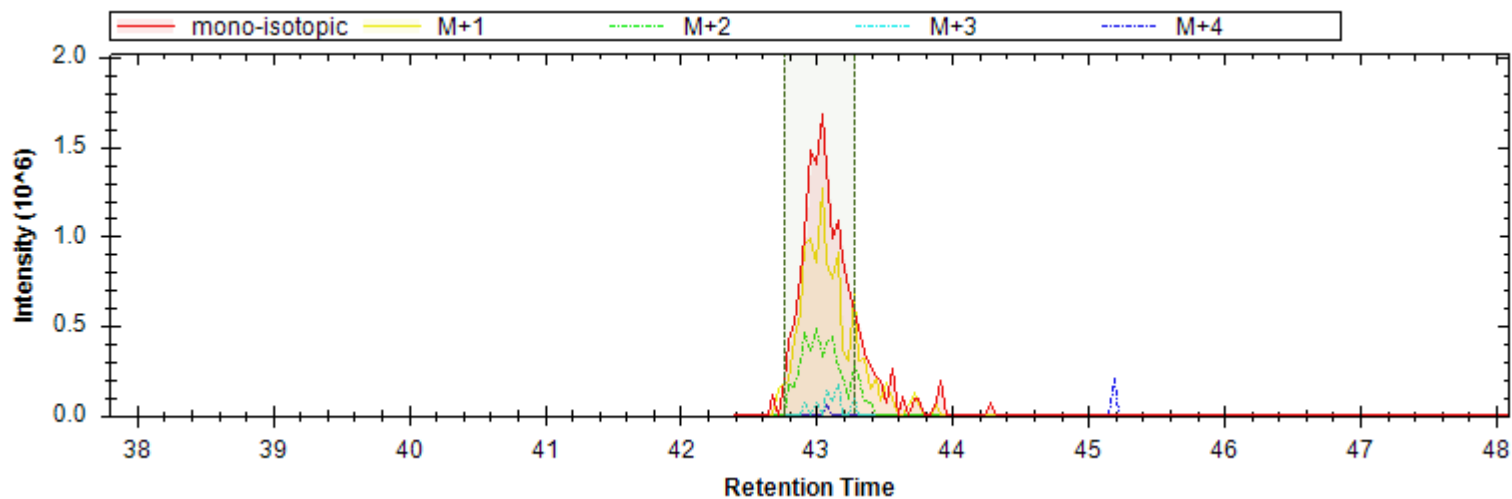

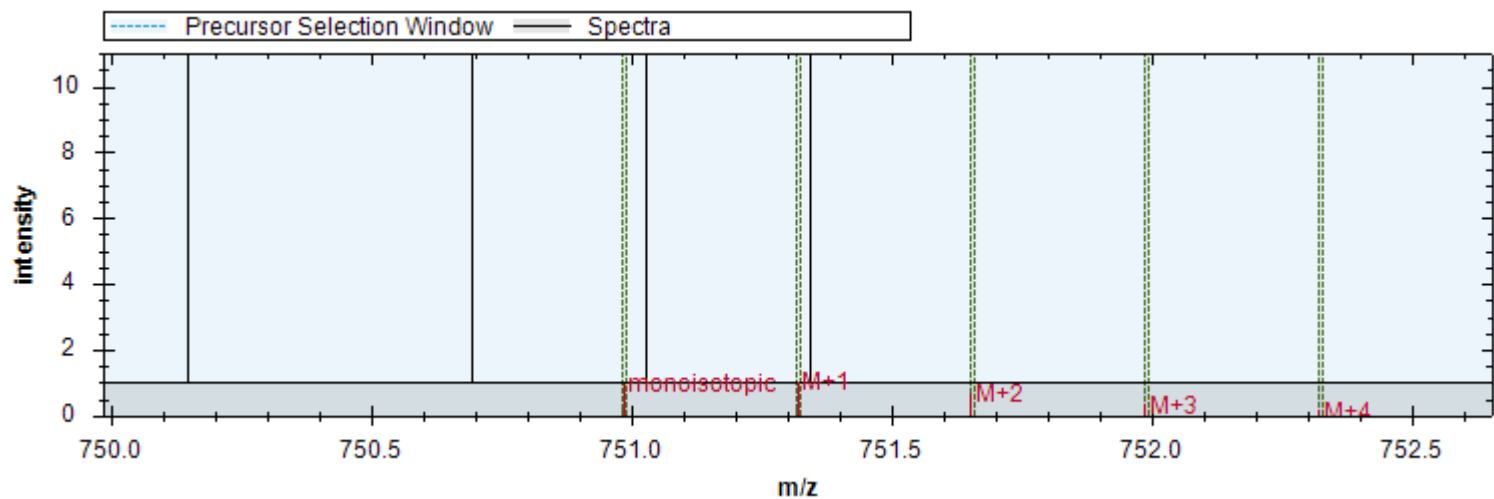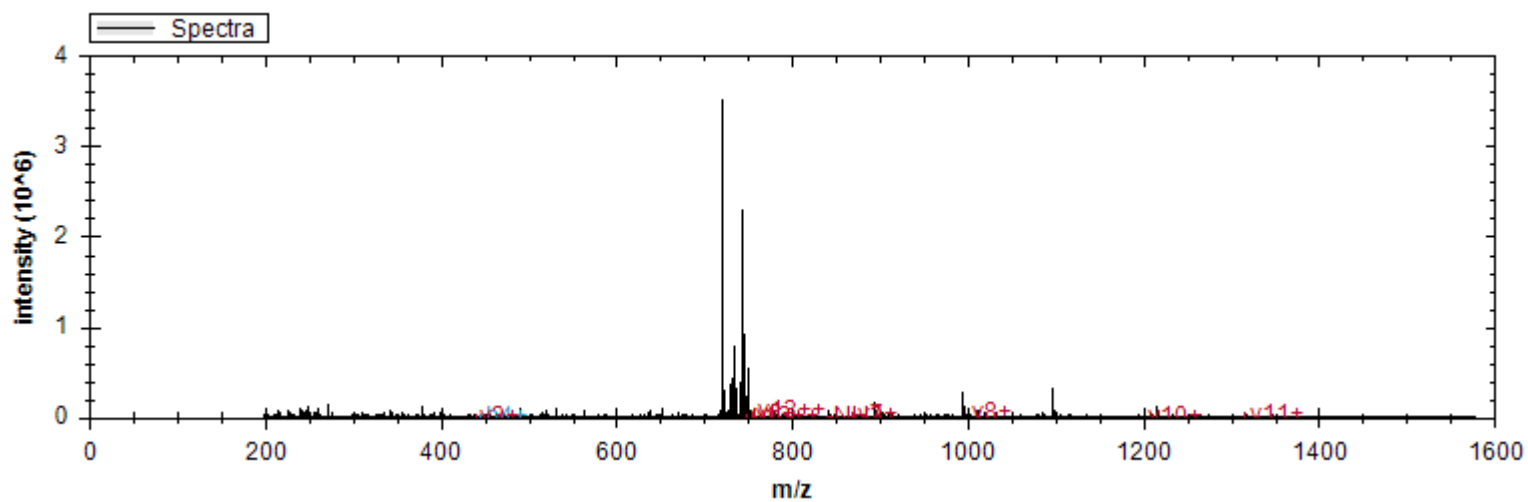

- |                          |                            |                          |
|--------------------------|----------------------------|--------------------------|
| [y7+] - 869.422 m/z      | [y11+] - 1316.565 m/z      | [y6+] - 754.395 m/z      |
| [y3+] - 440.237 m/z      | [y13++] - 756.847 m/z      | [b4+ -NH3] - 428.141 m/z |
| [y7+ -NH3] - 852.396 m/z | [y10+] - 1201.538 m/z      | [y8+] - 1000.463 m/z     |
| [b4+] - 445.168 m/z      | [y13++ -NH3] - 748.333 m/z | [b3+] - 330.141 m/z      |
| [y5+] - 667.363 m/z      | [y12+] - 1415.633 m/z      |                          |

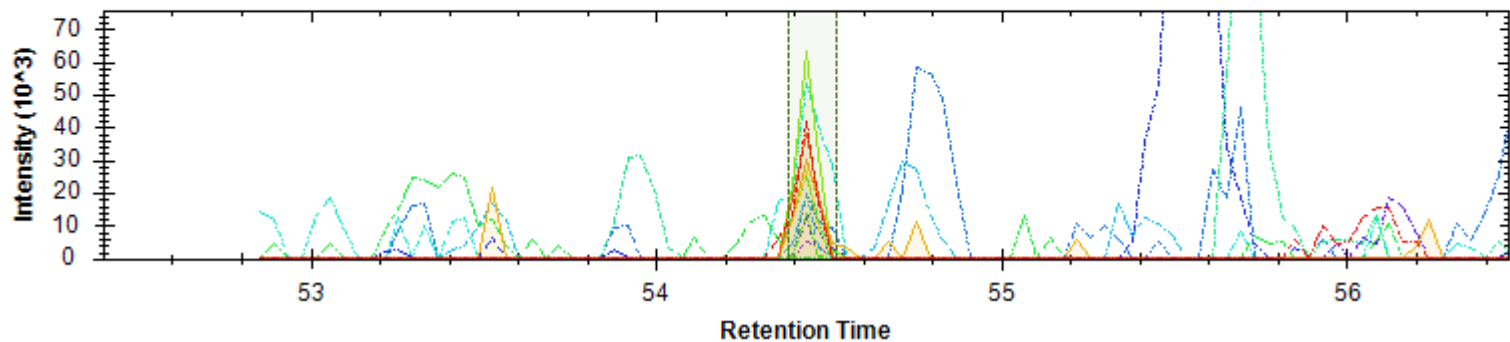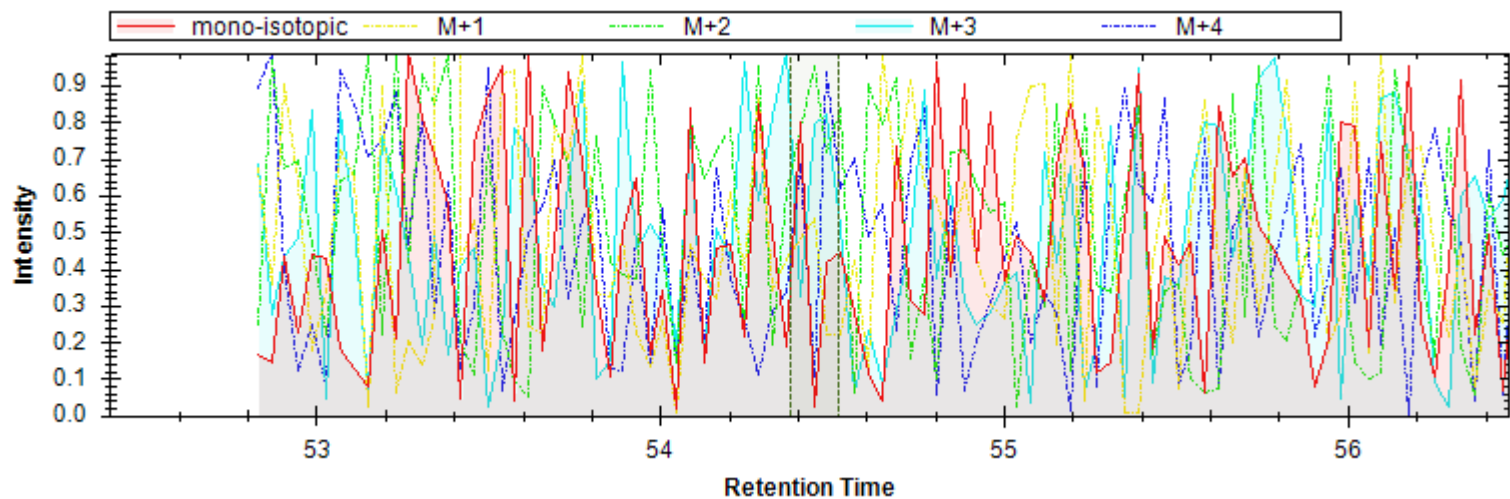

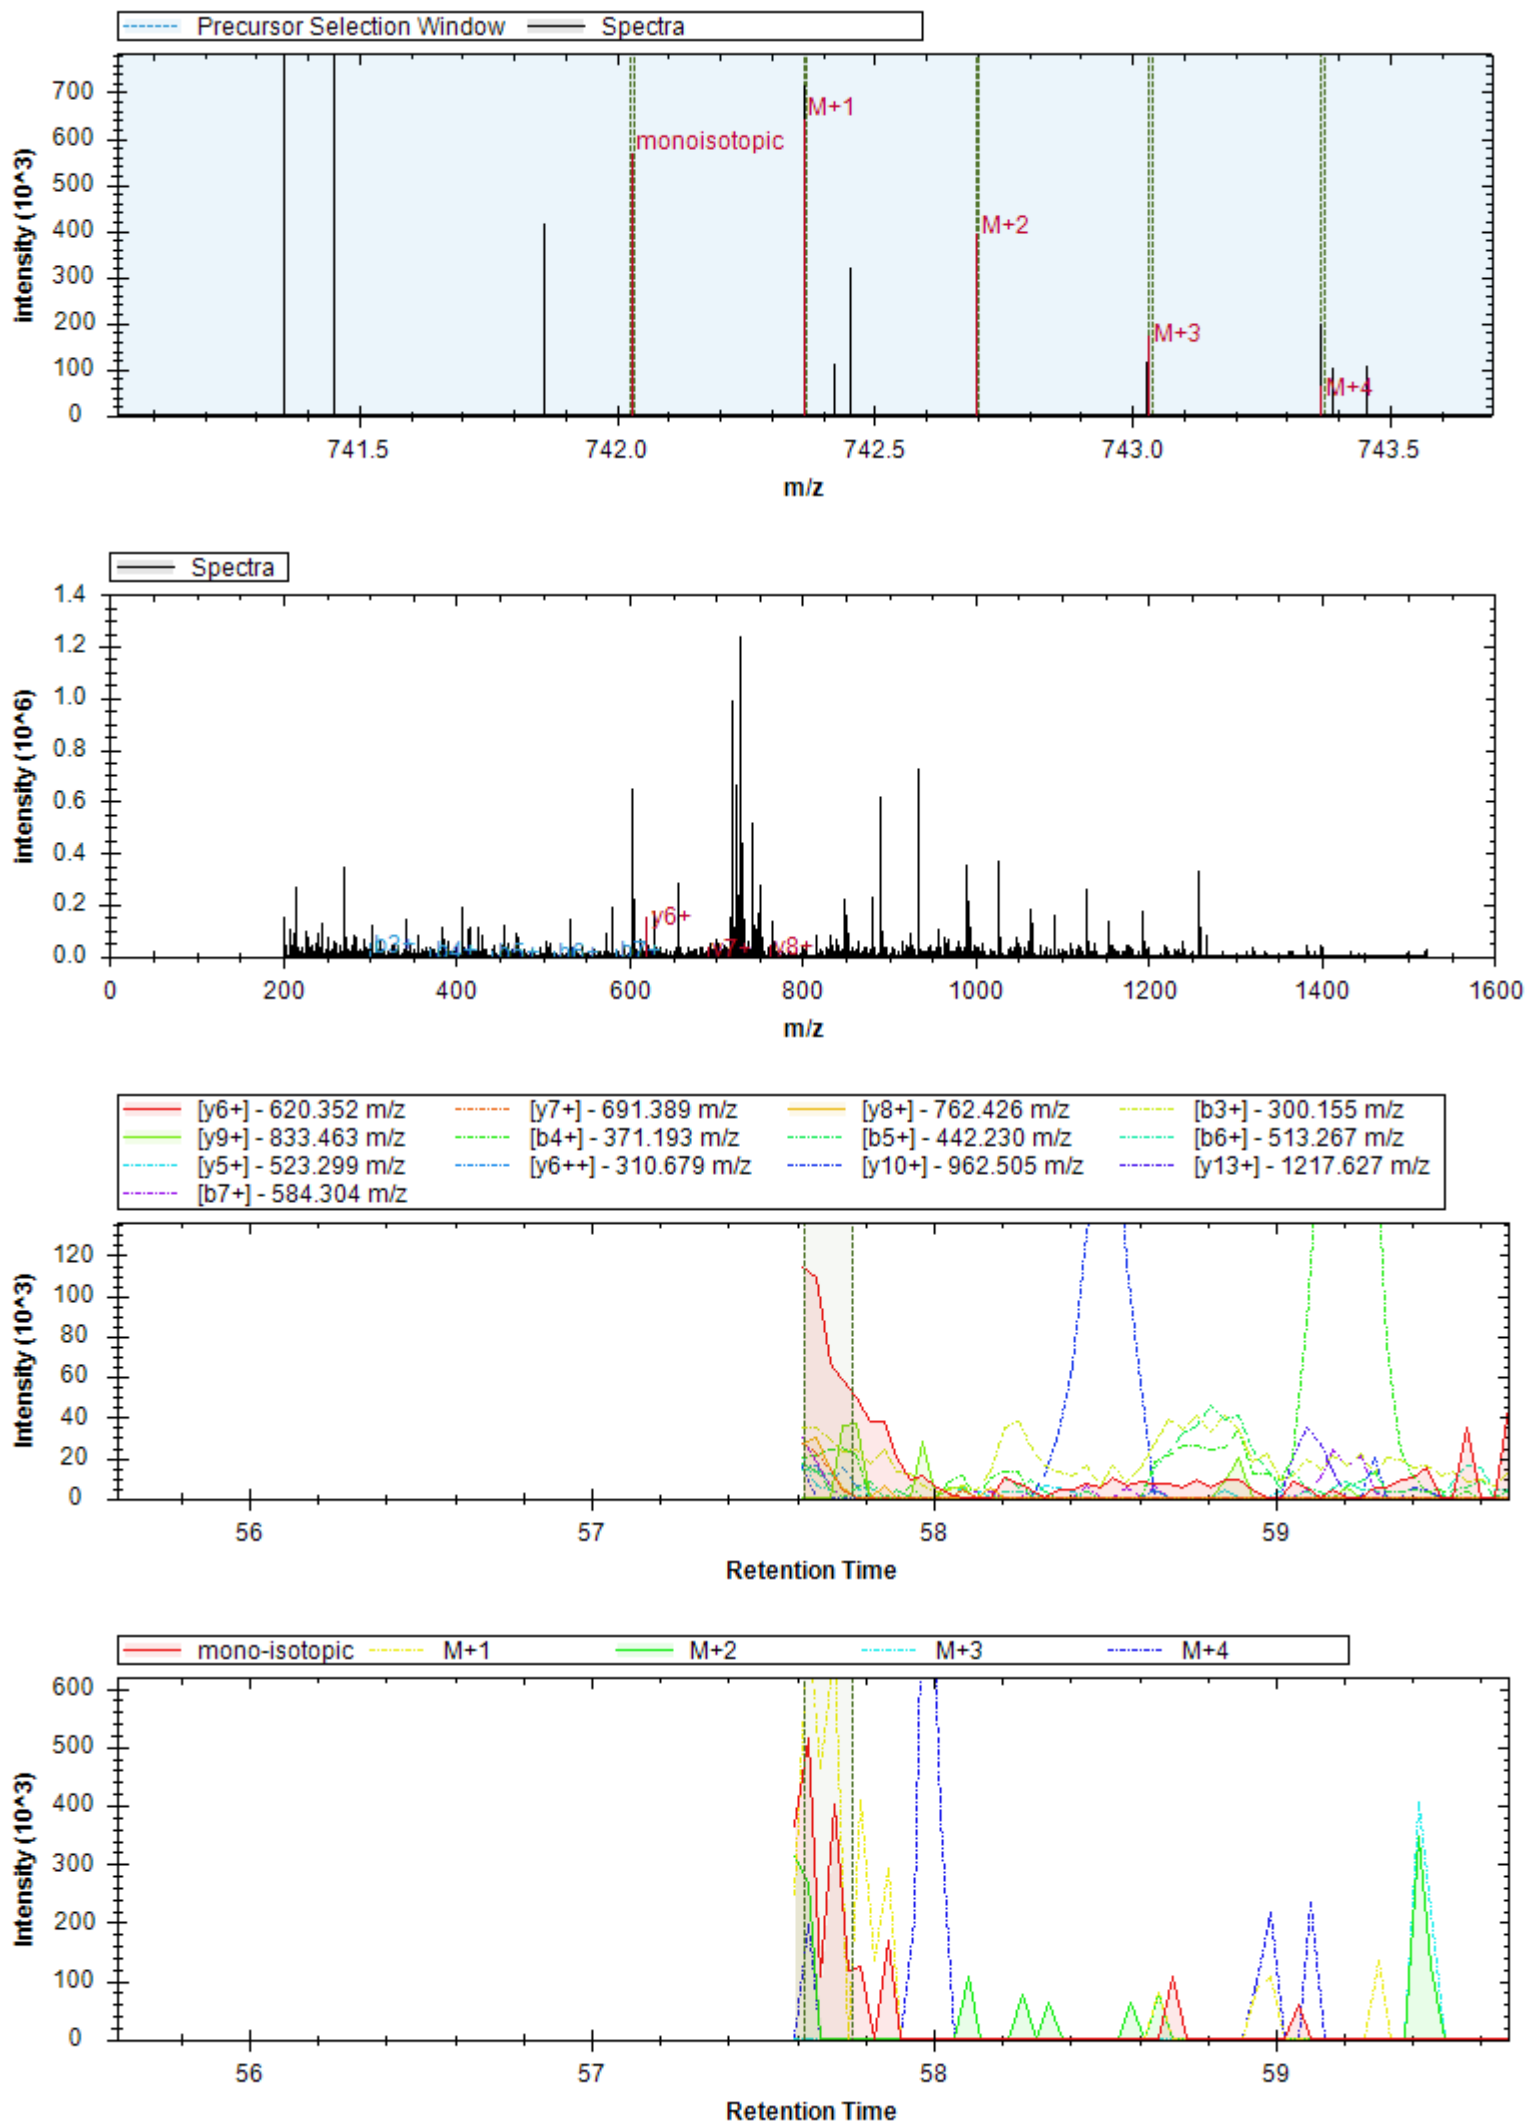

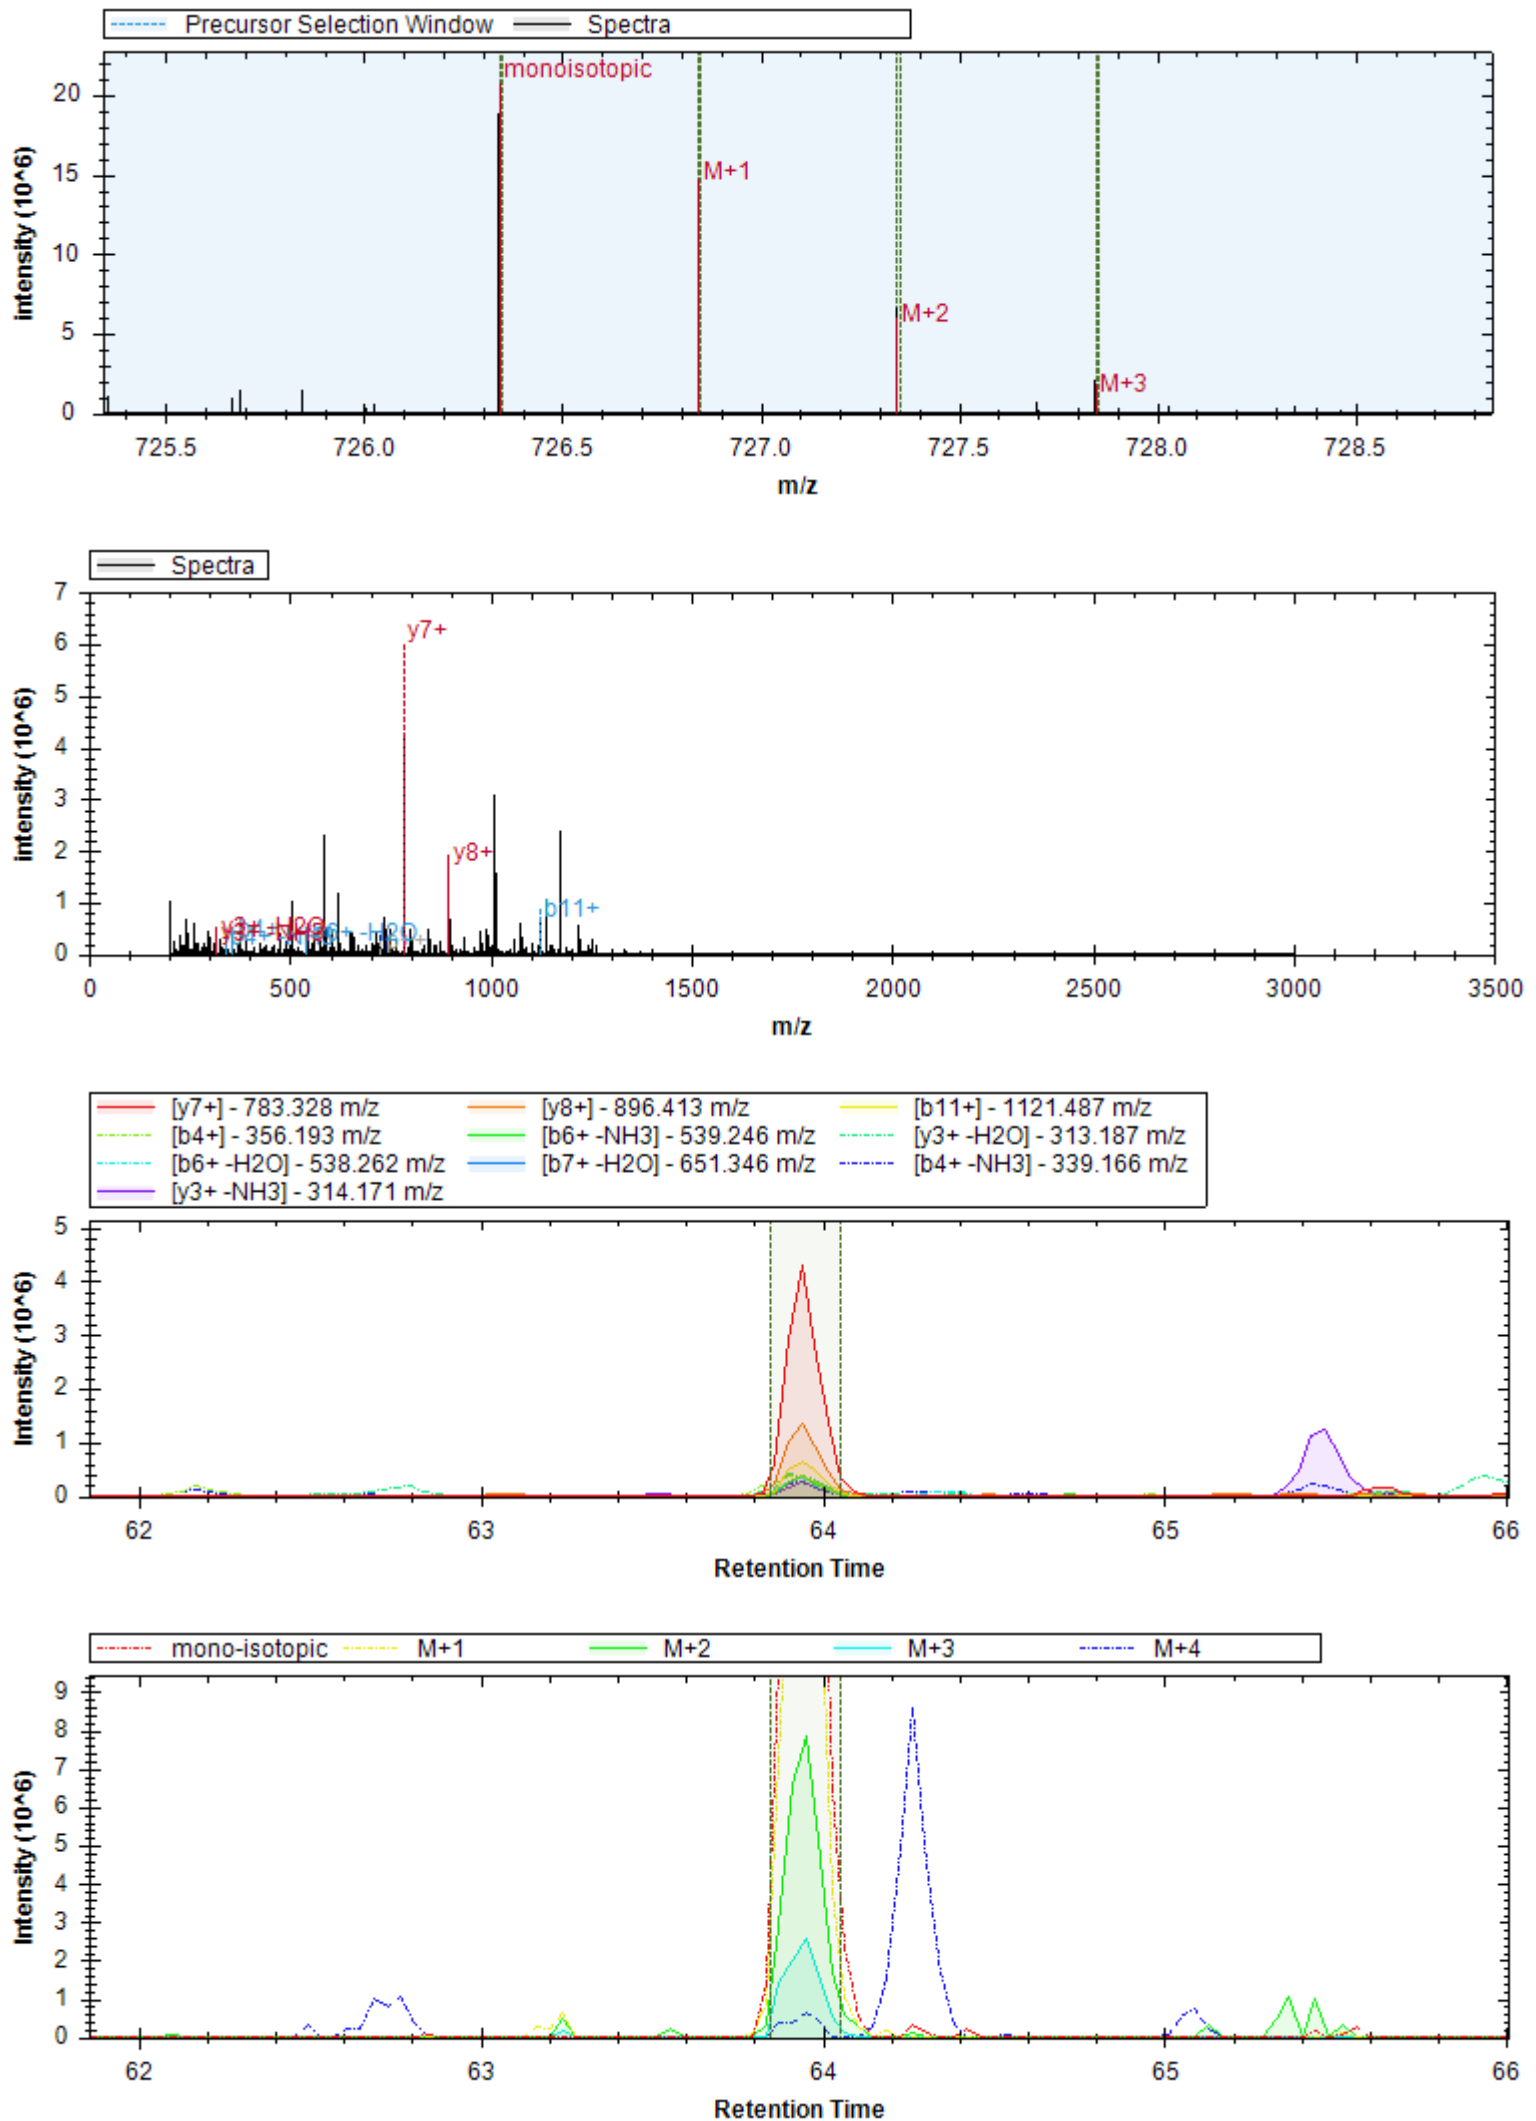

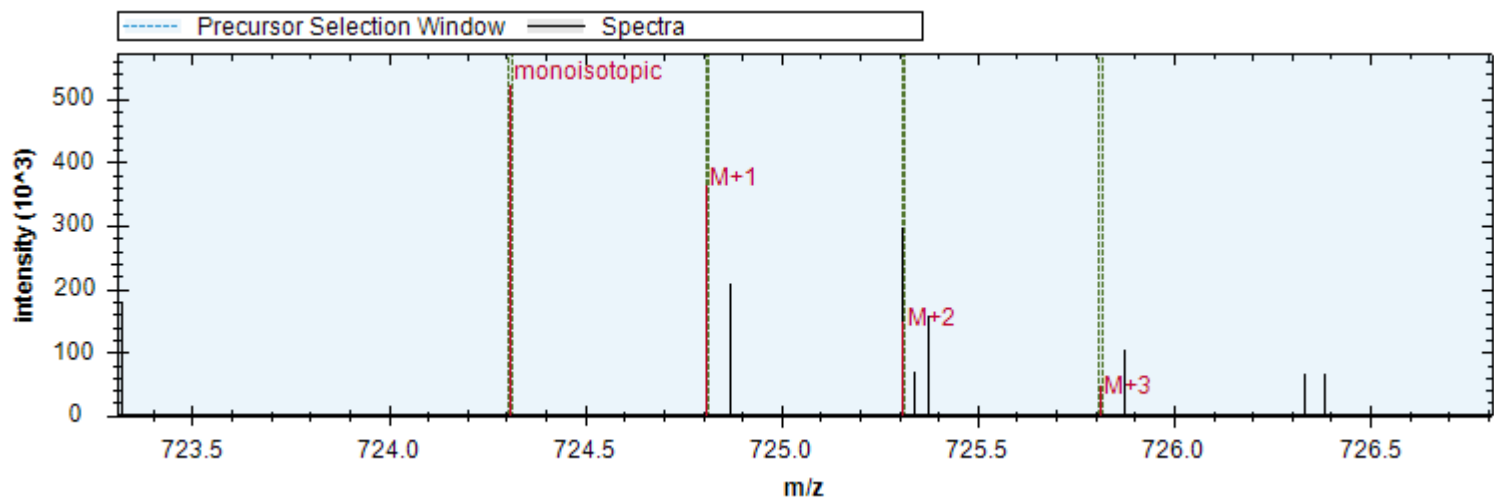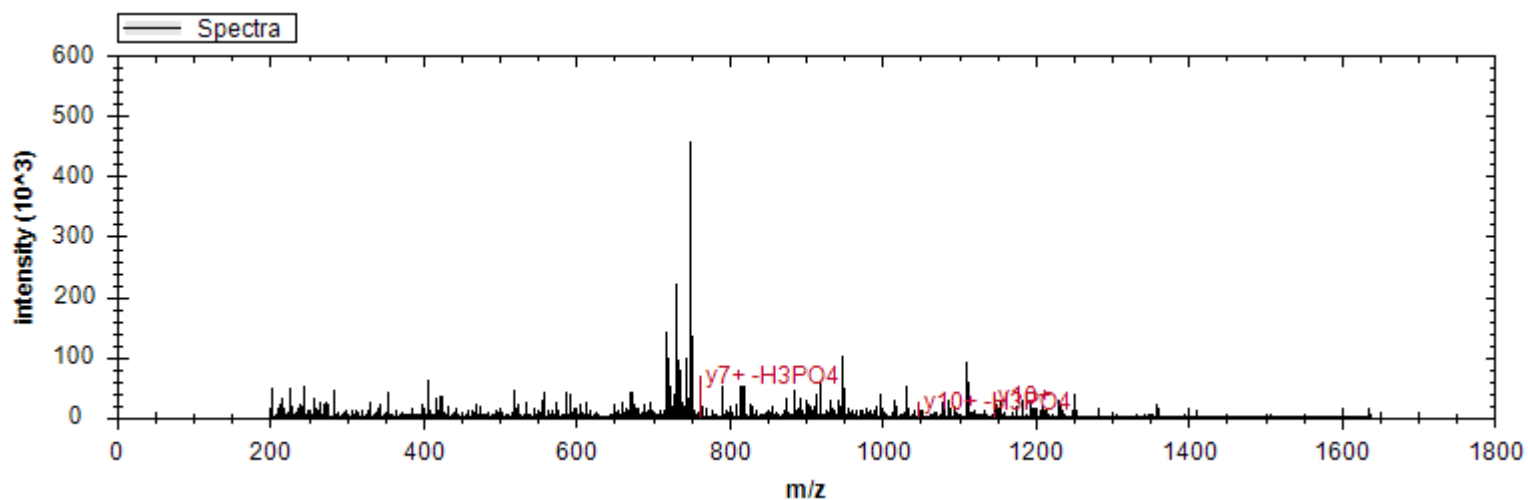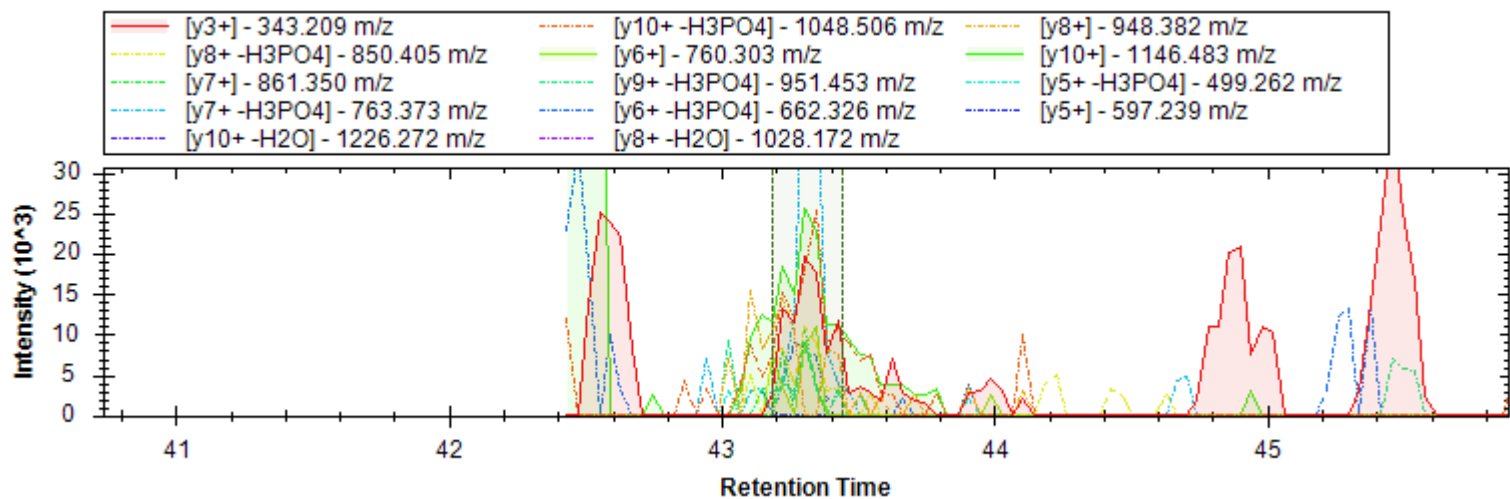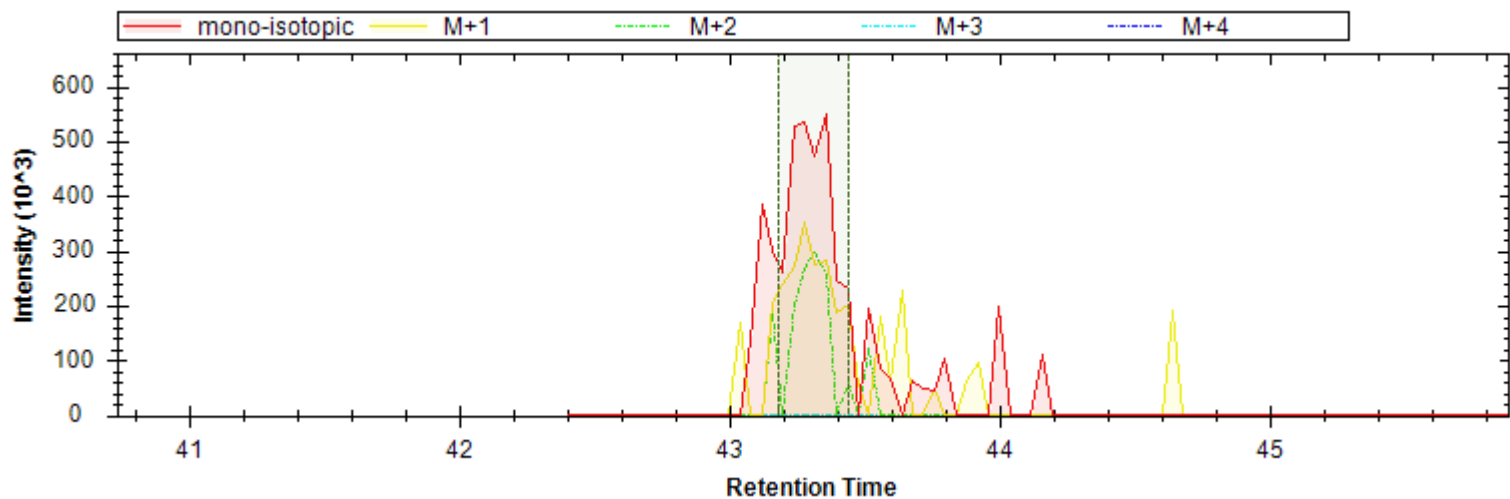

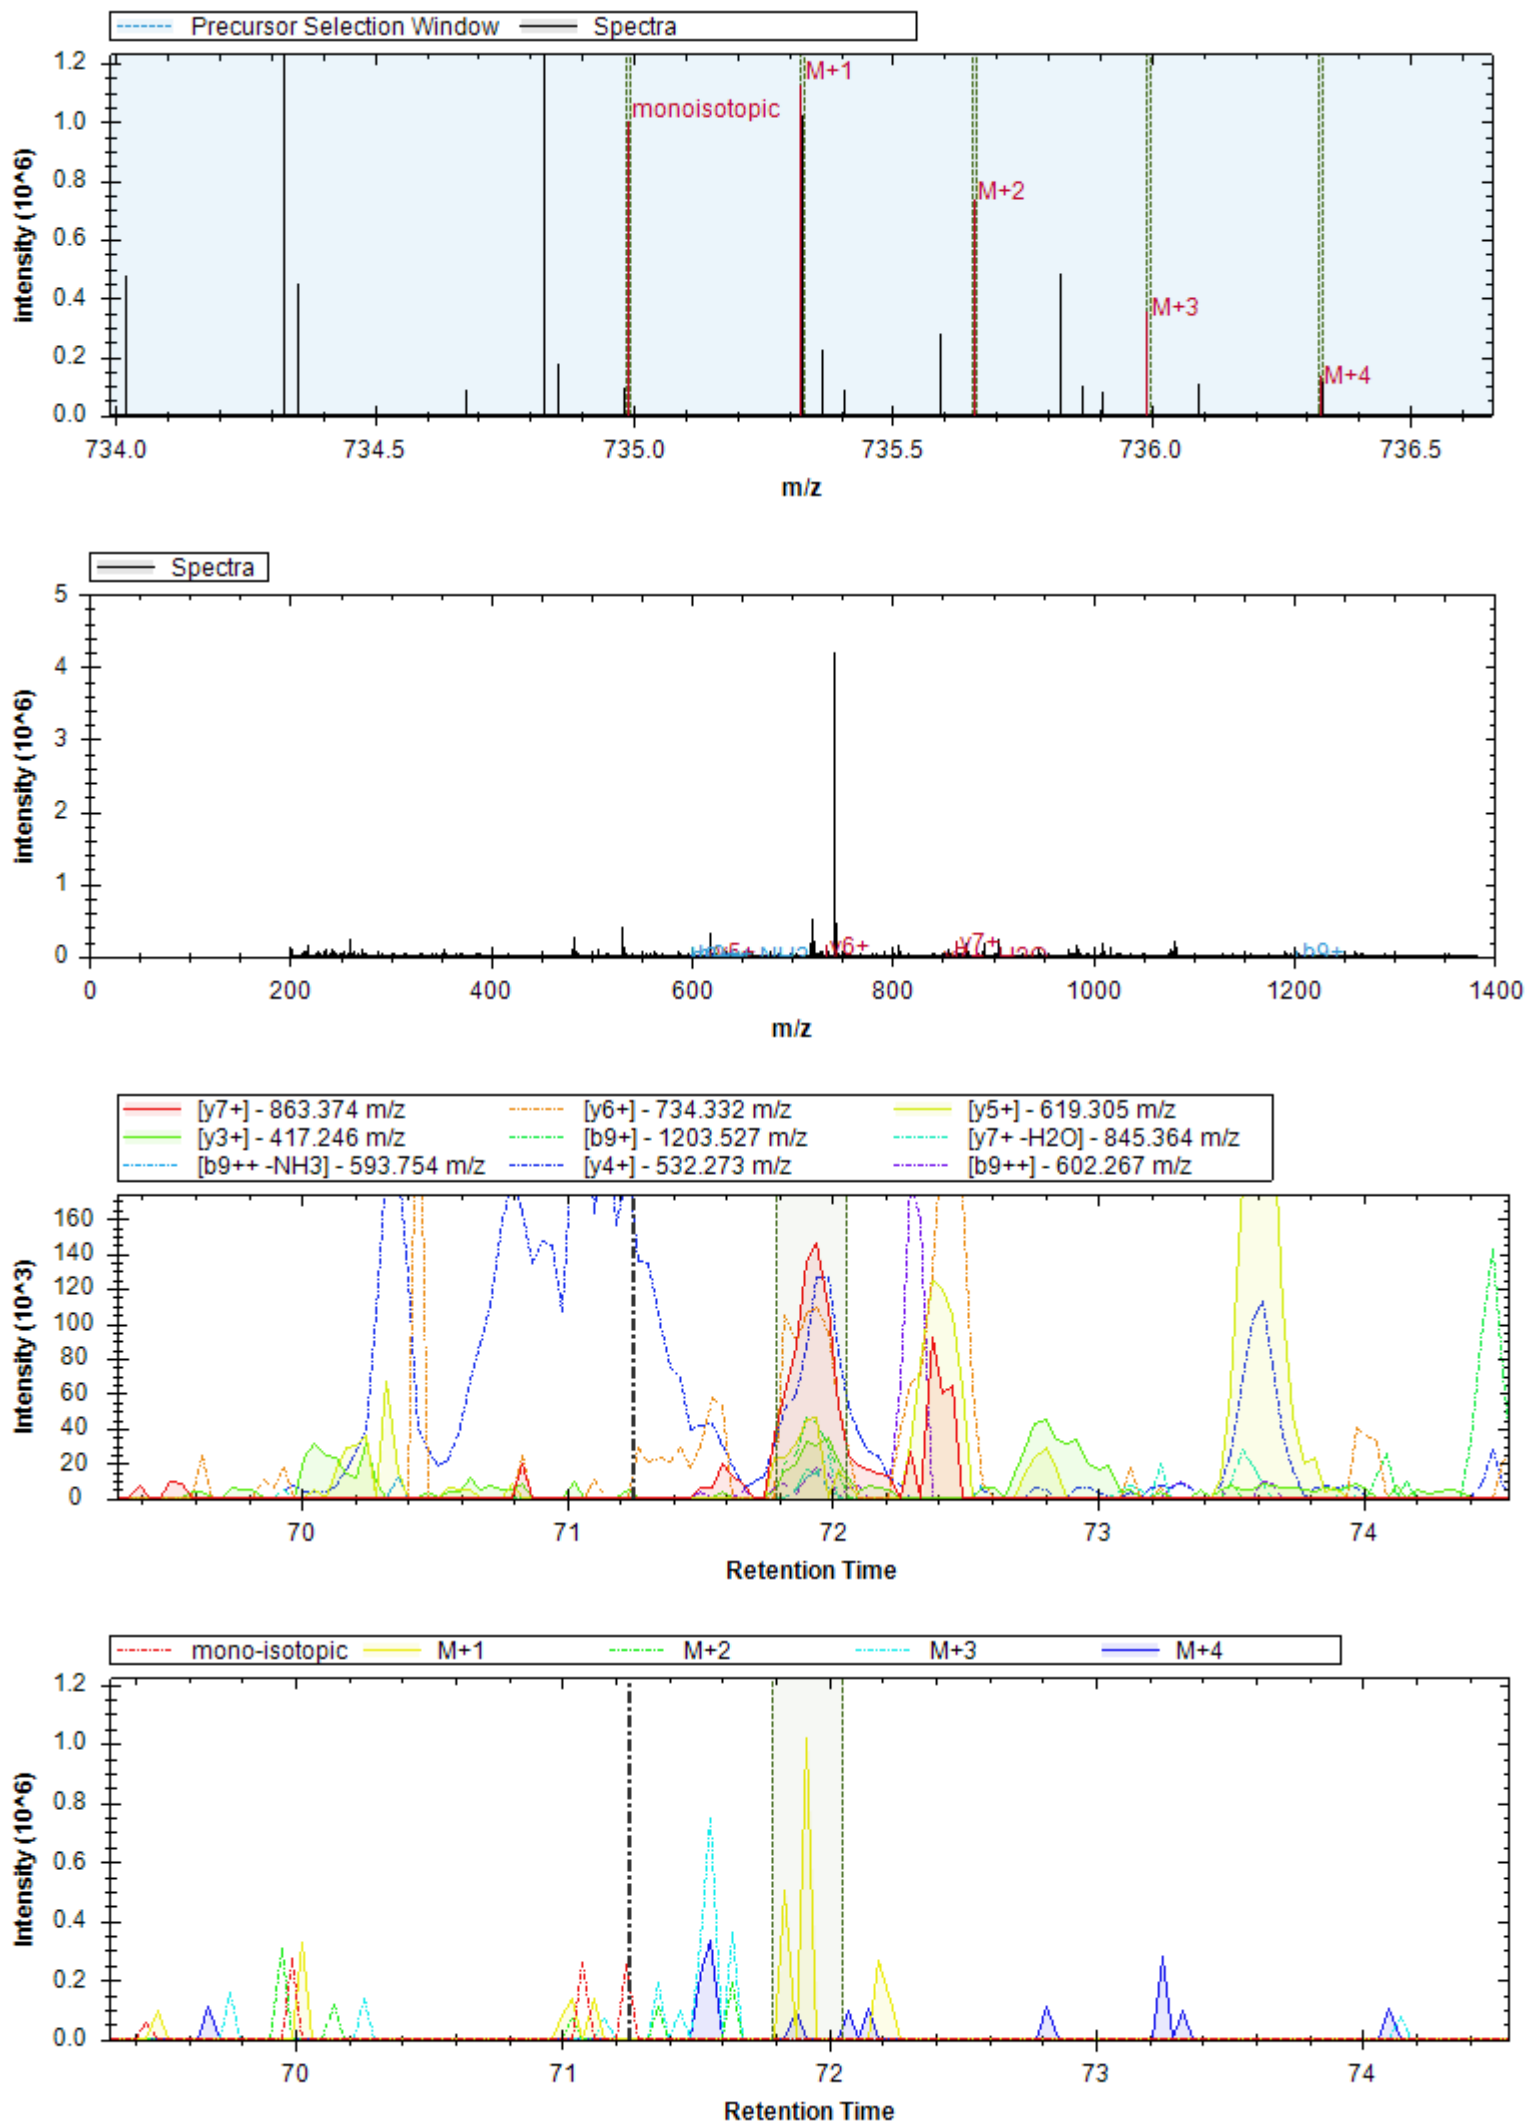

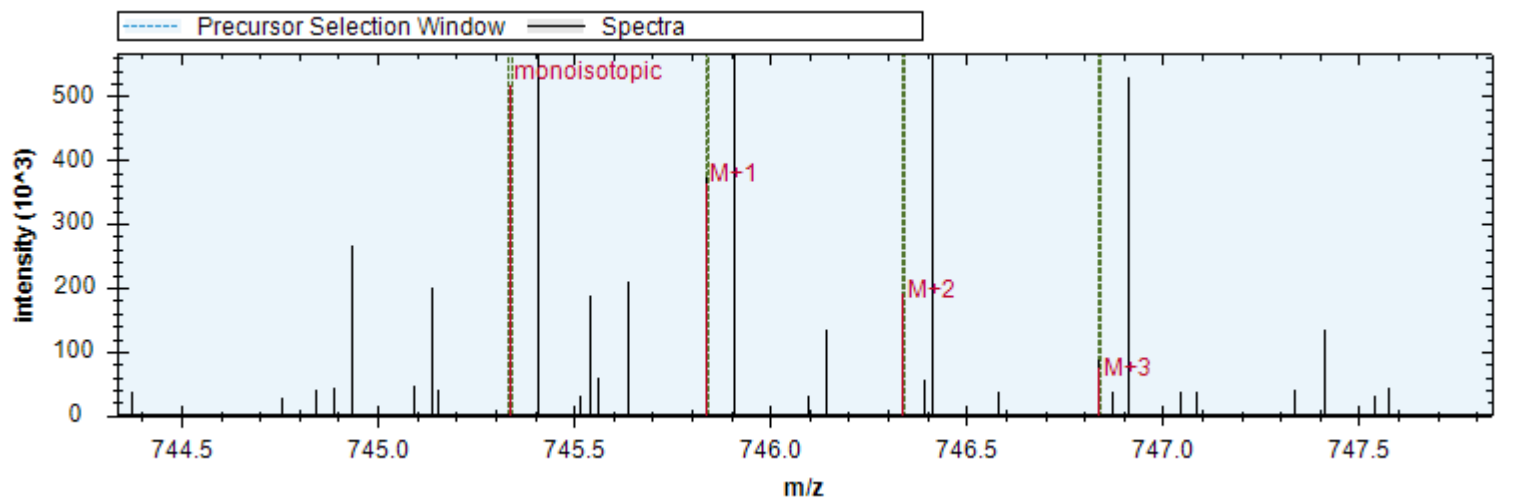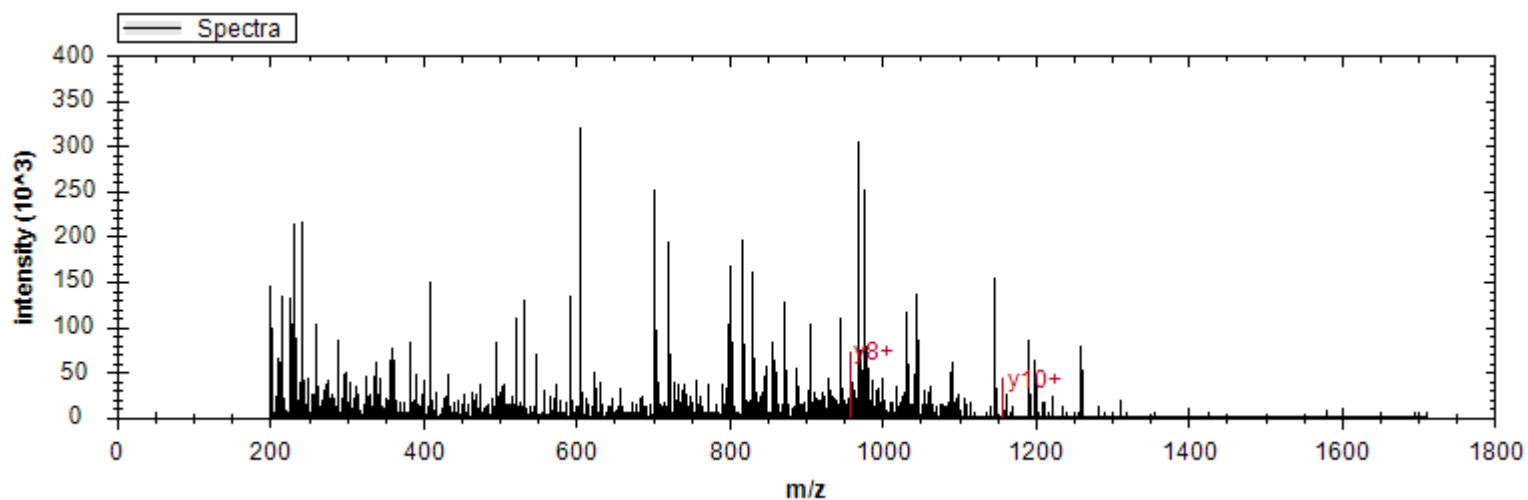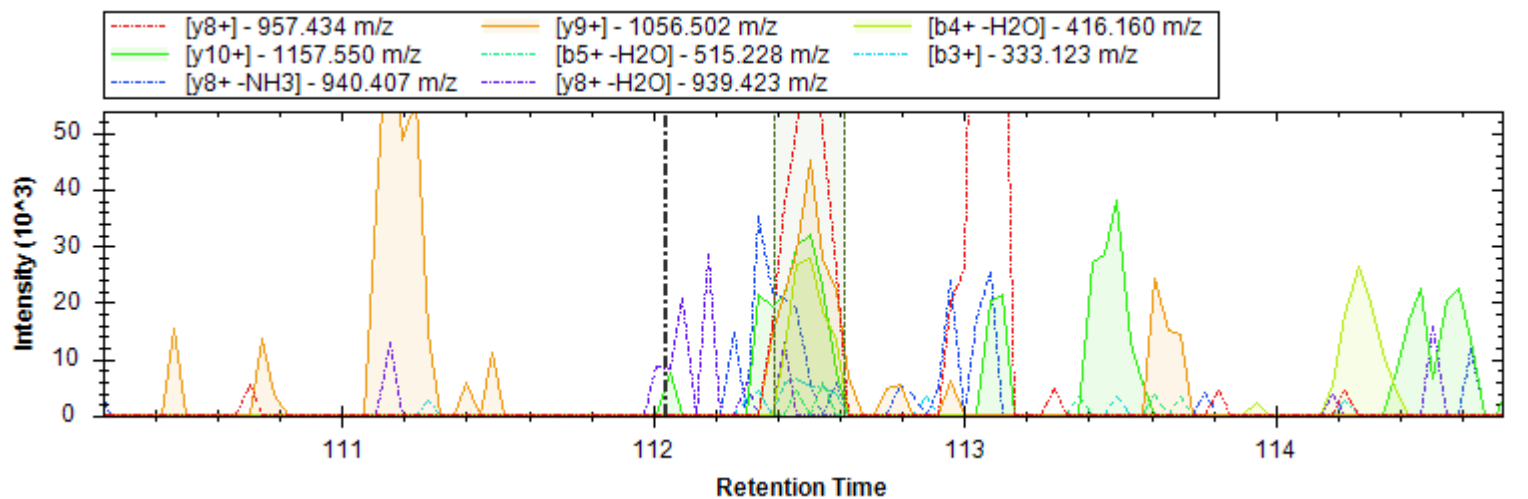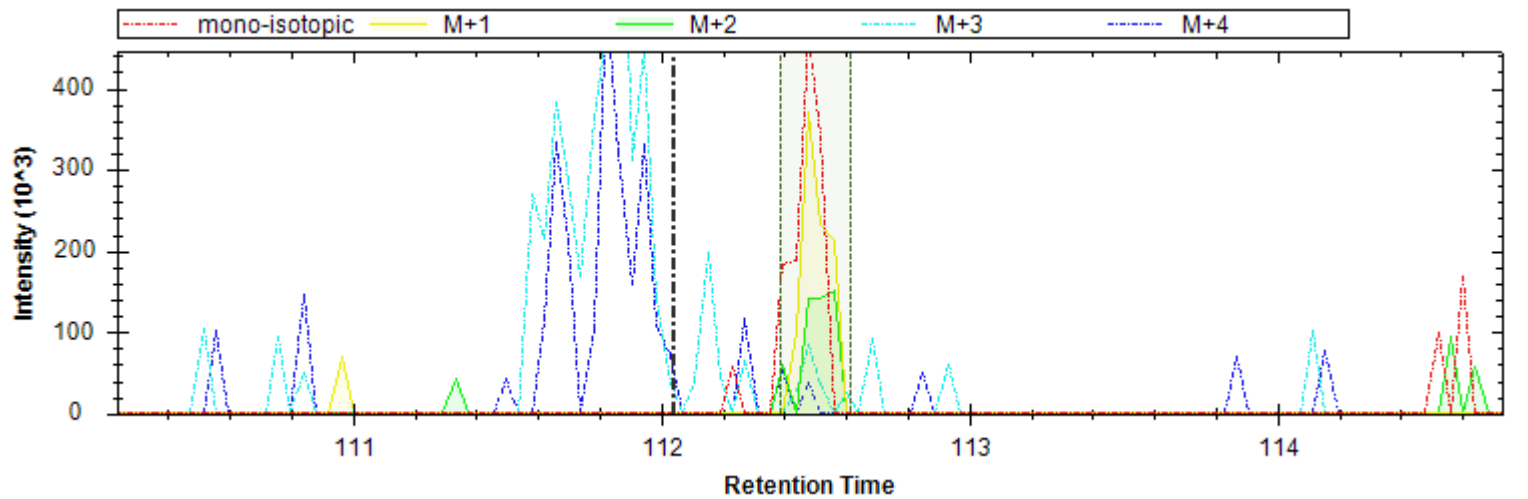

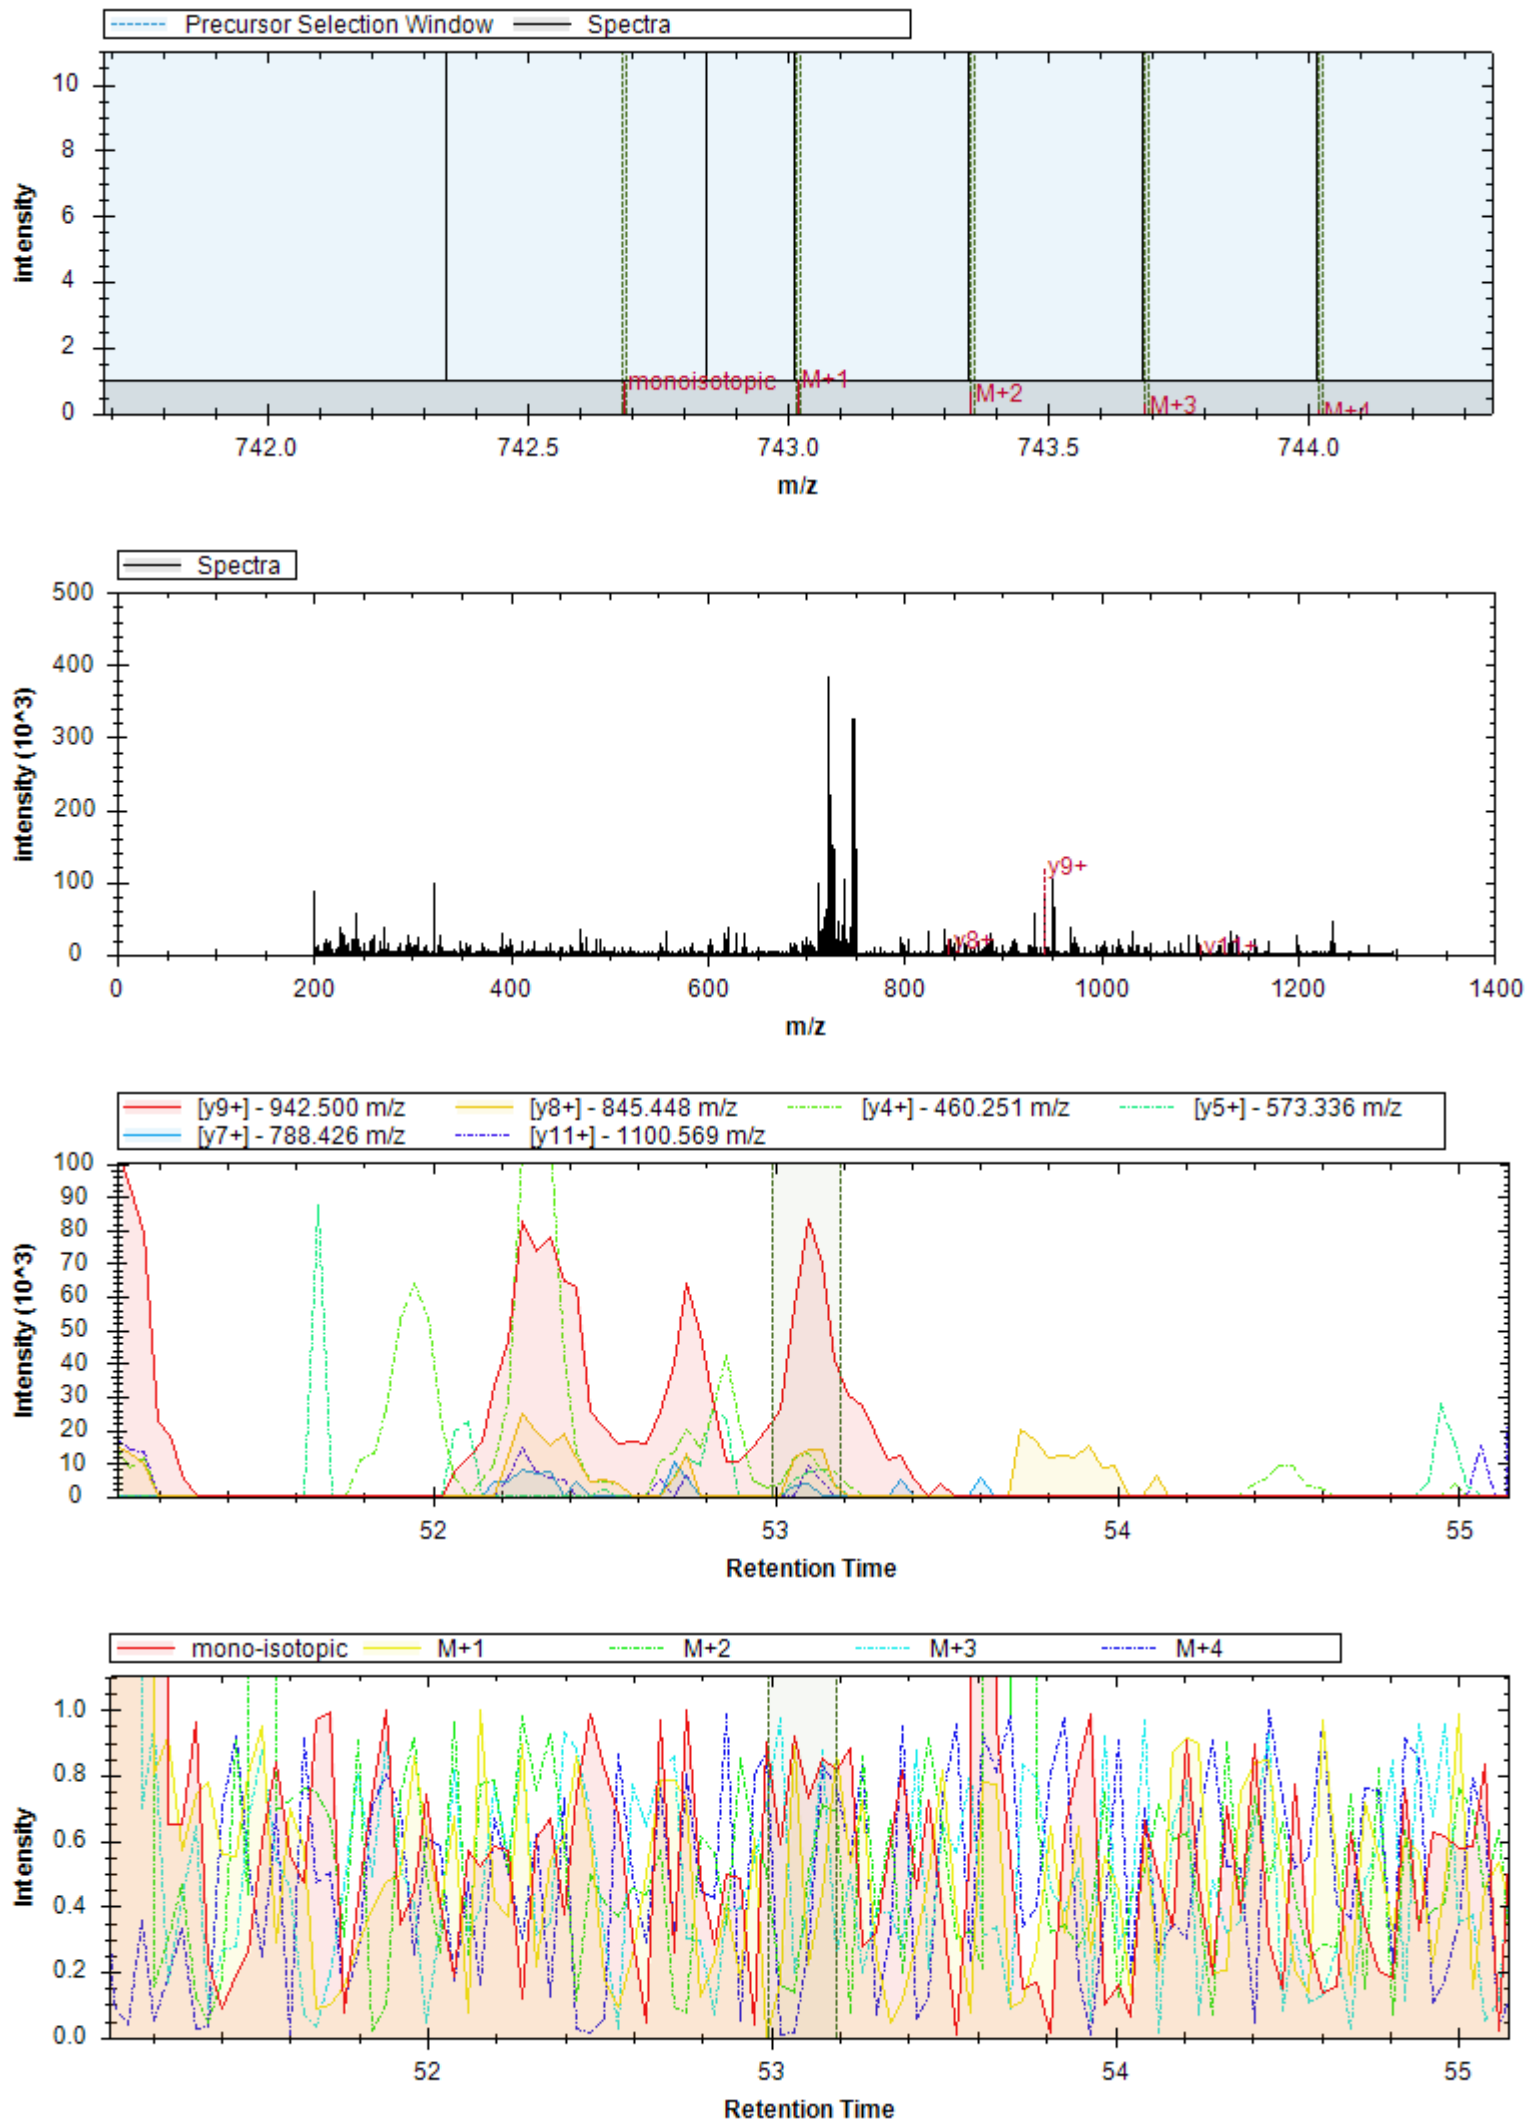



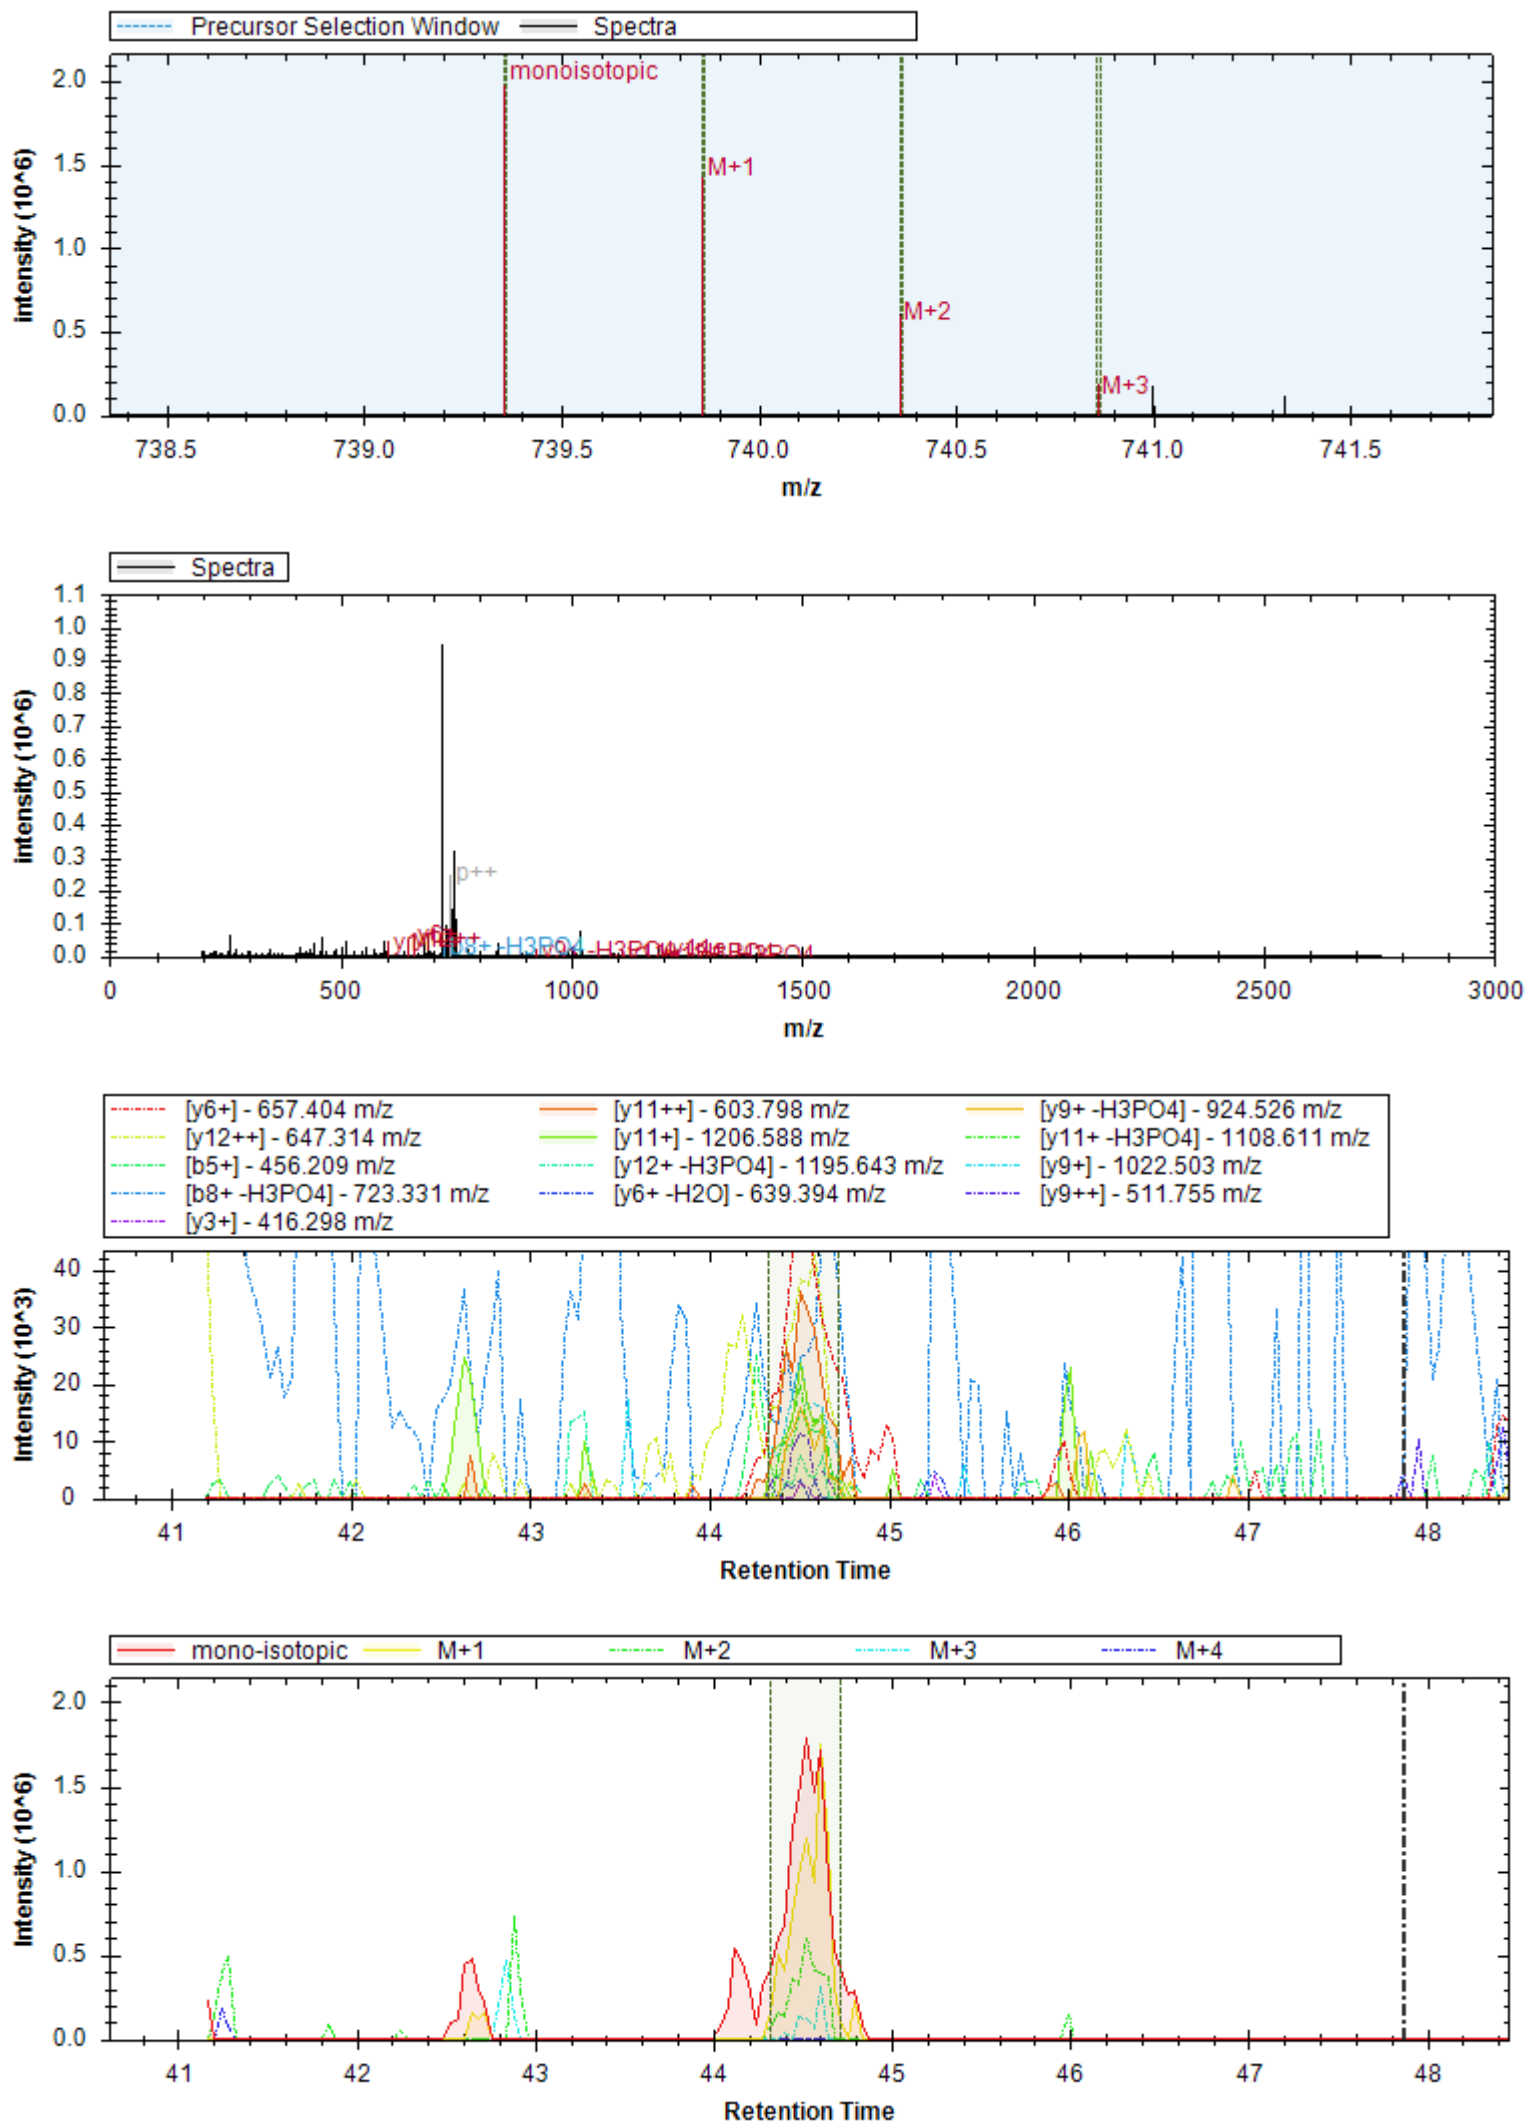

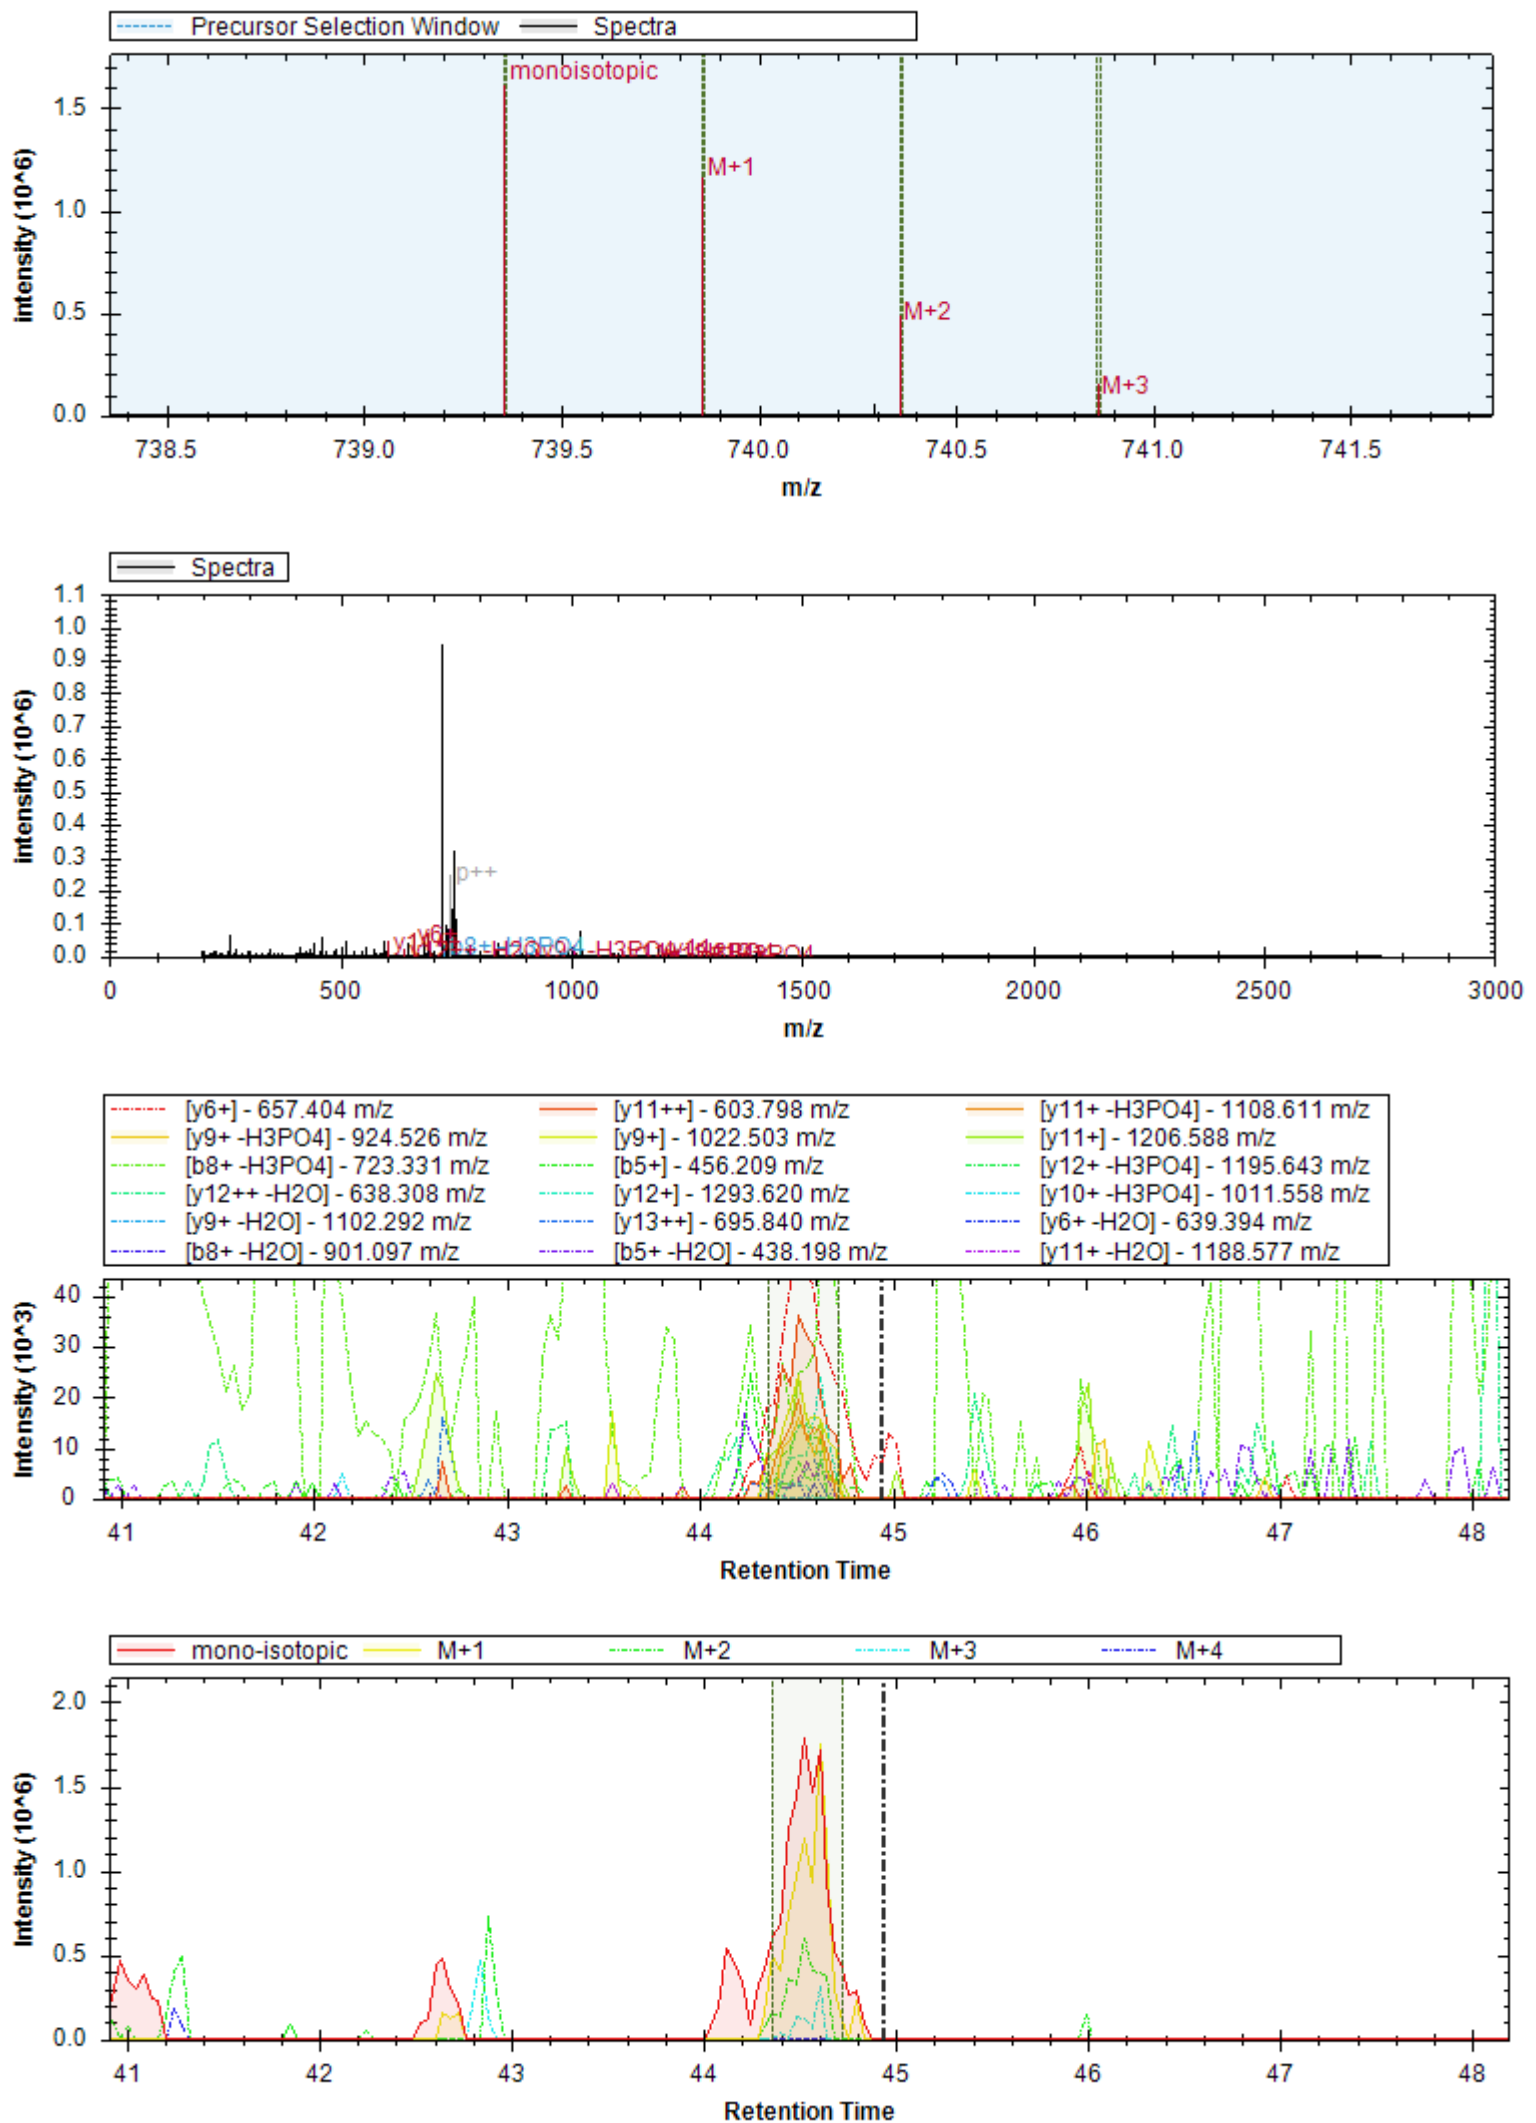

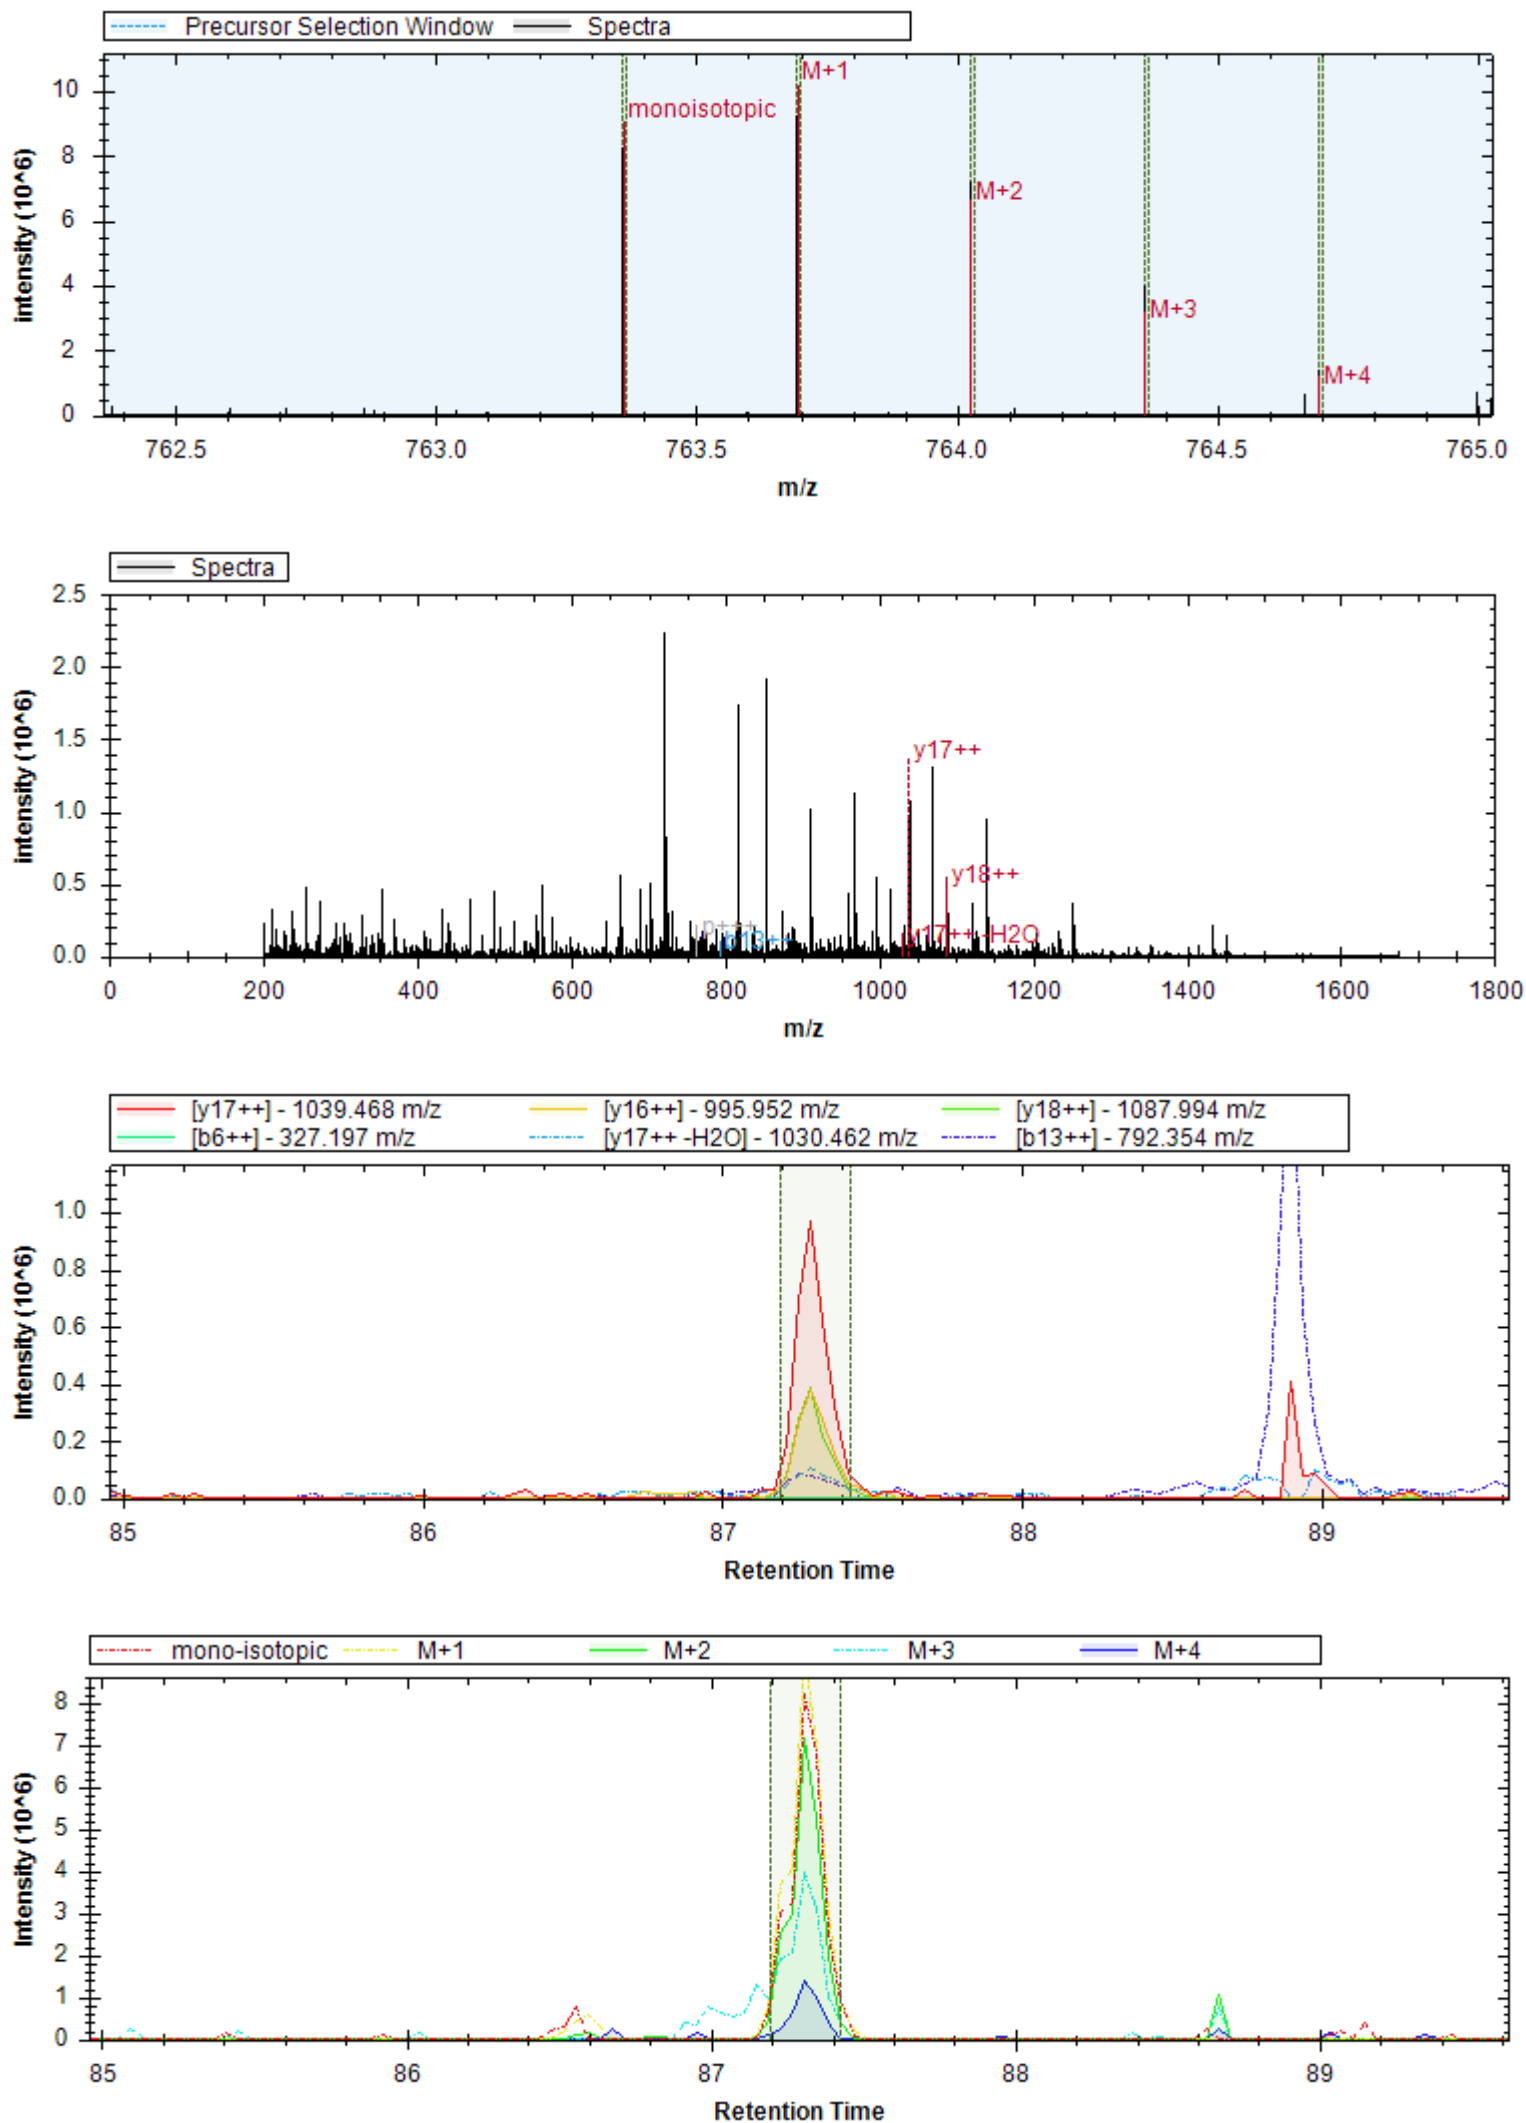

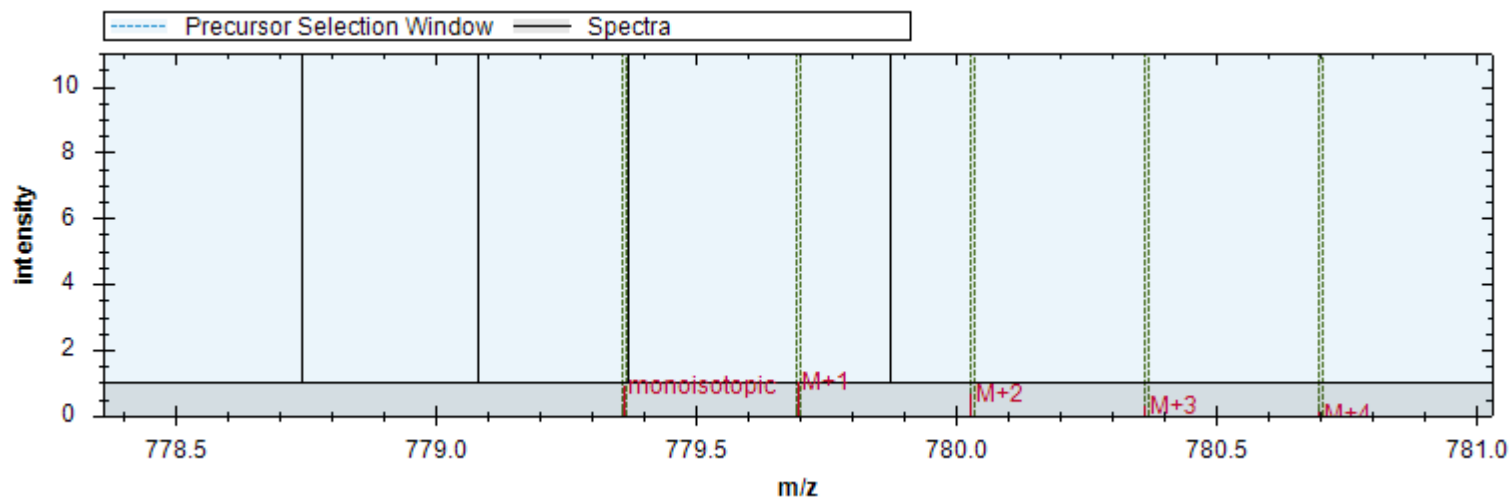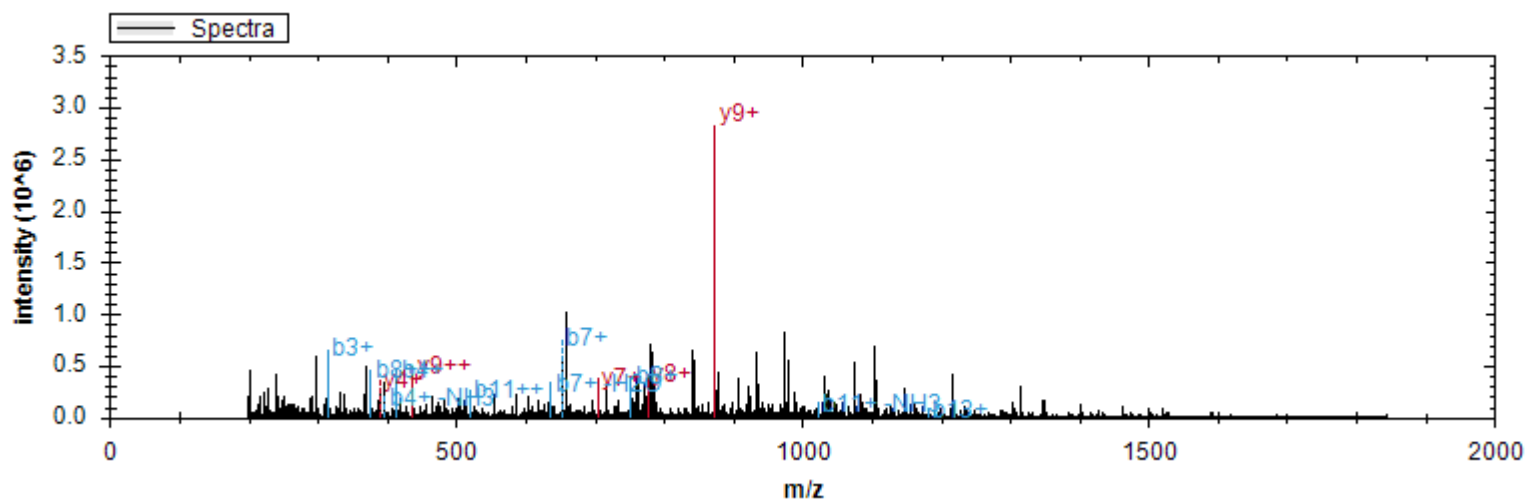

|                          |                          |                            |
|--------------------------|--------------------------|----------------------------|
| [y9+] - 873.431 m/z      | [b7+] - 653.325 m/z      | [b11+] - 1039.505 m/z      |
| [b3+] - 315.130 m/z      | [b8++] - 376.701 m/z     | [y7+] - 705.341 m/z        |
| [b4+] - 414.198 m/z      | [b11++] - 520.256 m/z    | [b7+ -H2O] - 635.315 m/z   |
| [b8+] - 752.394 m/z      | [b4+ -H2O] - 396.188 m/z | [y8+] - 776.379 m/z        |
| [y4+] - 390.235 m/z      | [y11+] - 1155.493 m/z    | [y9++] - 437.219 m/z       |
| [b12+] - 1110.543 m/z    | [y6+] - 634.304 m/z      | [b7+ -NH3] - 636.299 m/z   |
| [y12+] - 1226.530 m/z    | [b5+] - 511.251 m/z      | [b11+ -NH3] - 1022.479 m/z |
| [b4+ -NH3] - 397.172 m/z | [b13+] - 1181.580 m/z    | [b8+ -NH3] - 735.367 m/z   |
| [y5+] - 505.262 m/z      |                          |                            |

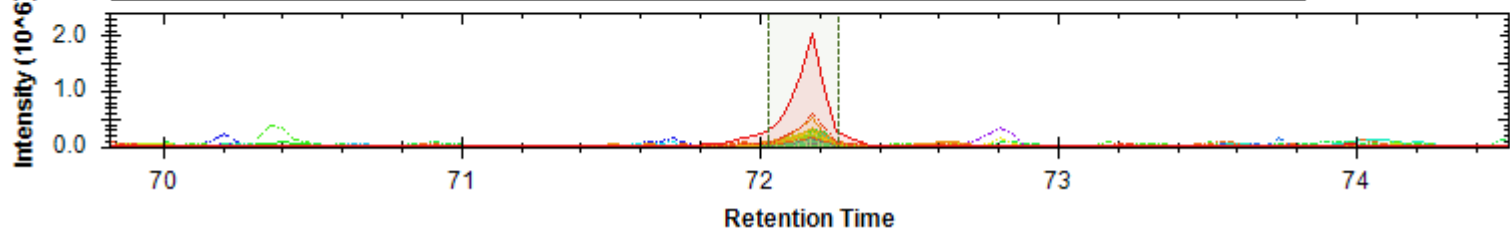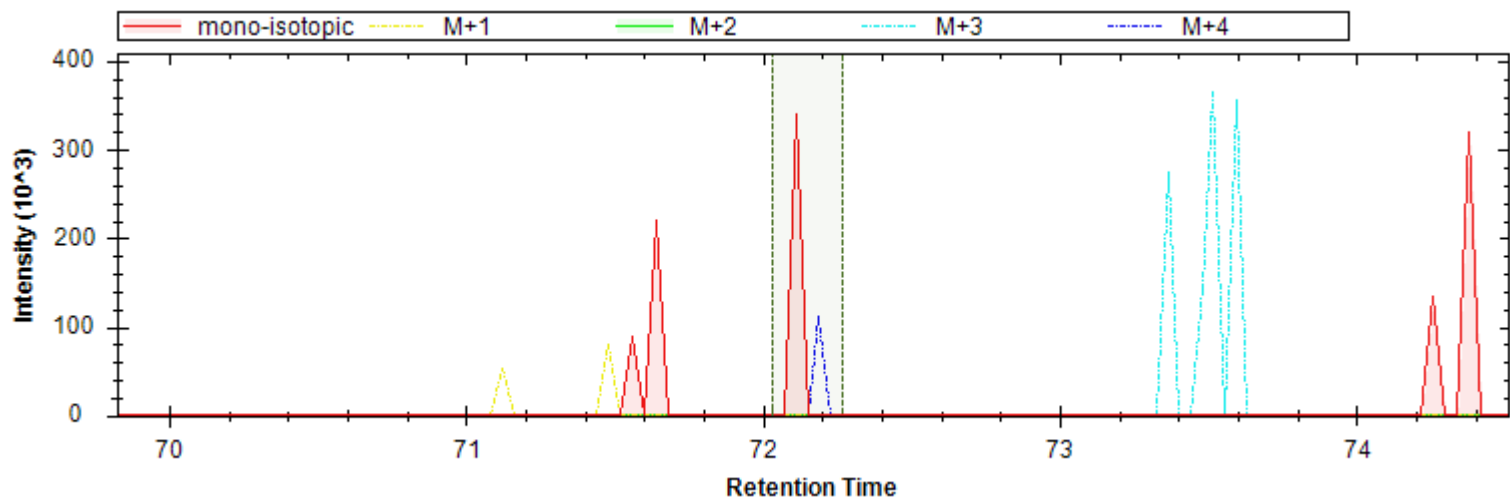

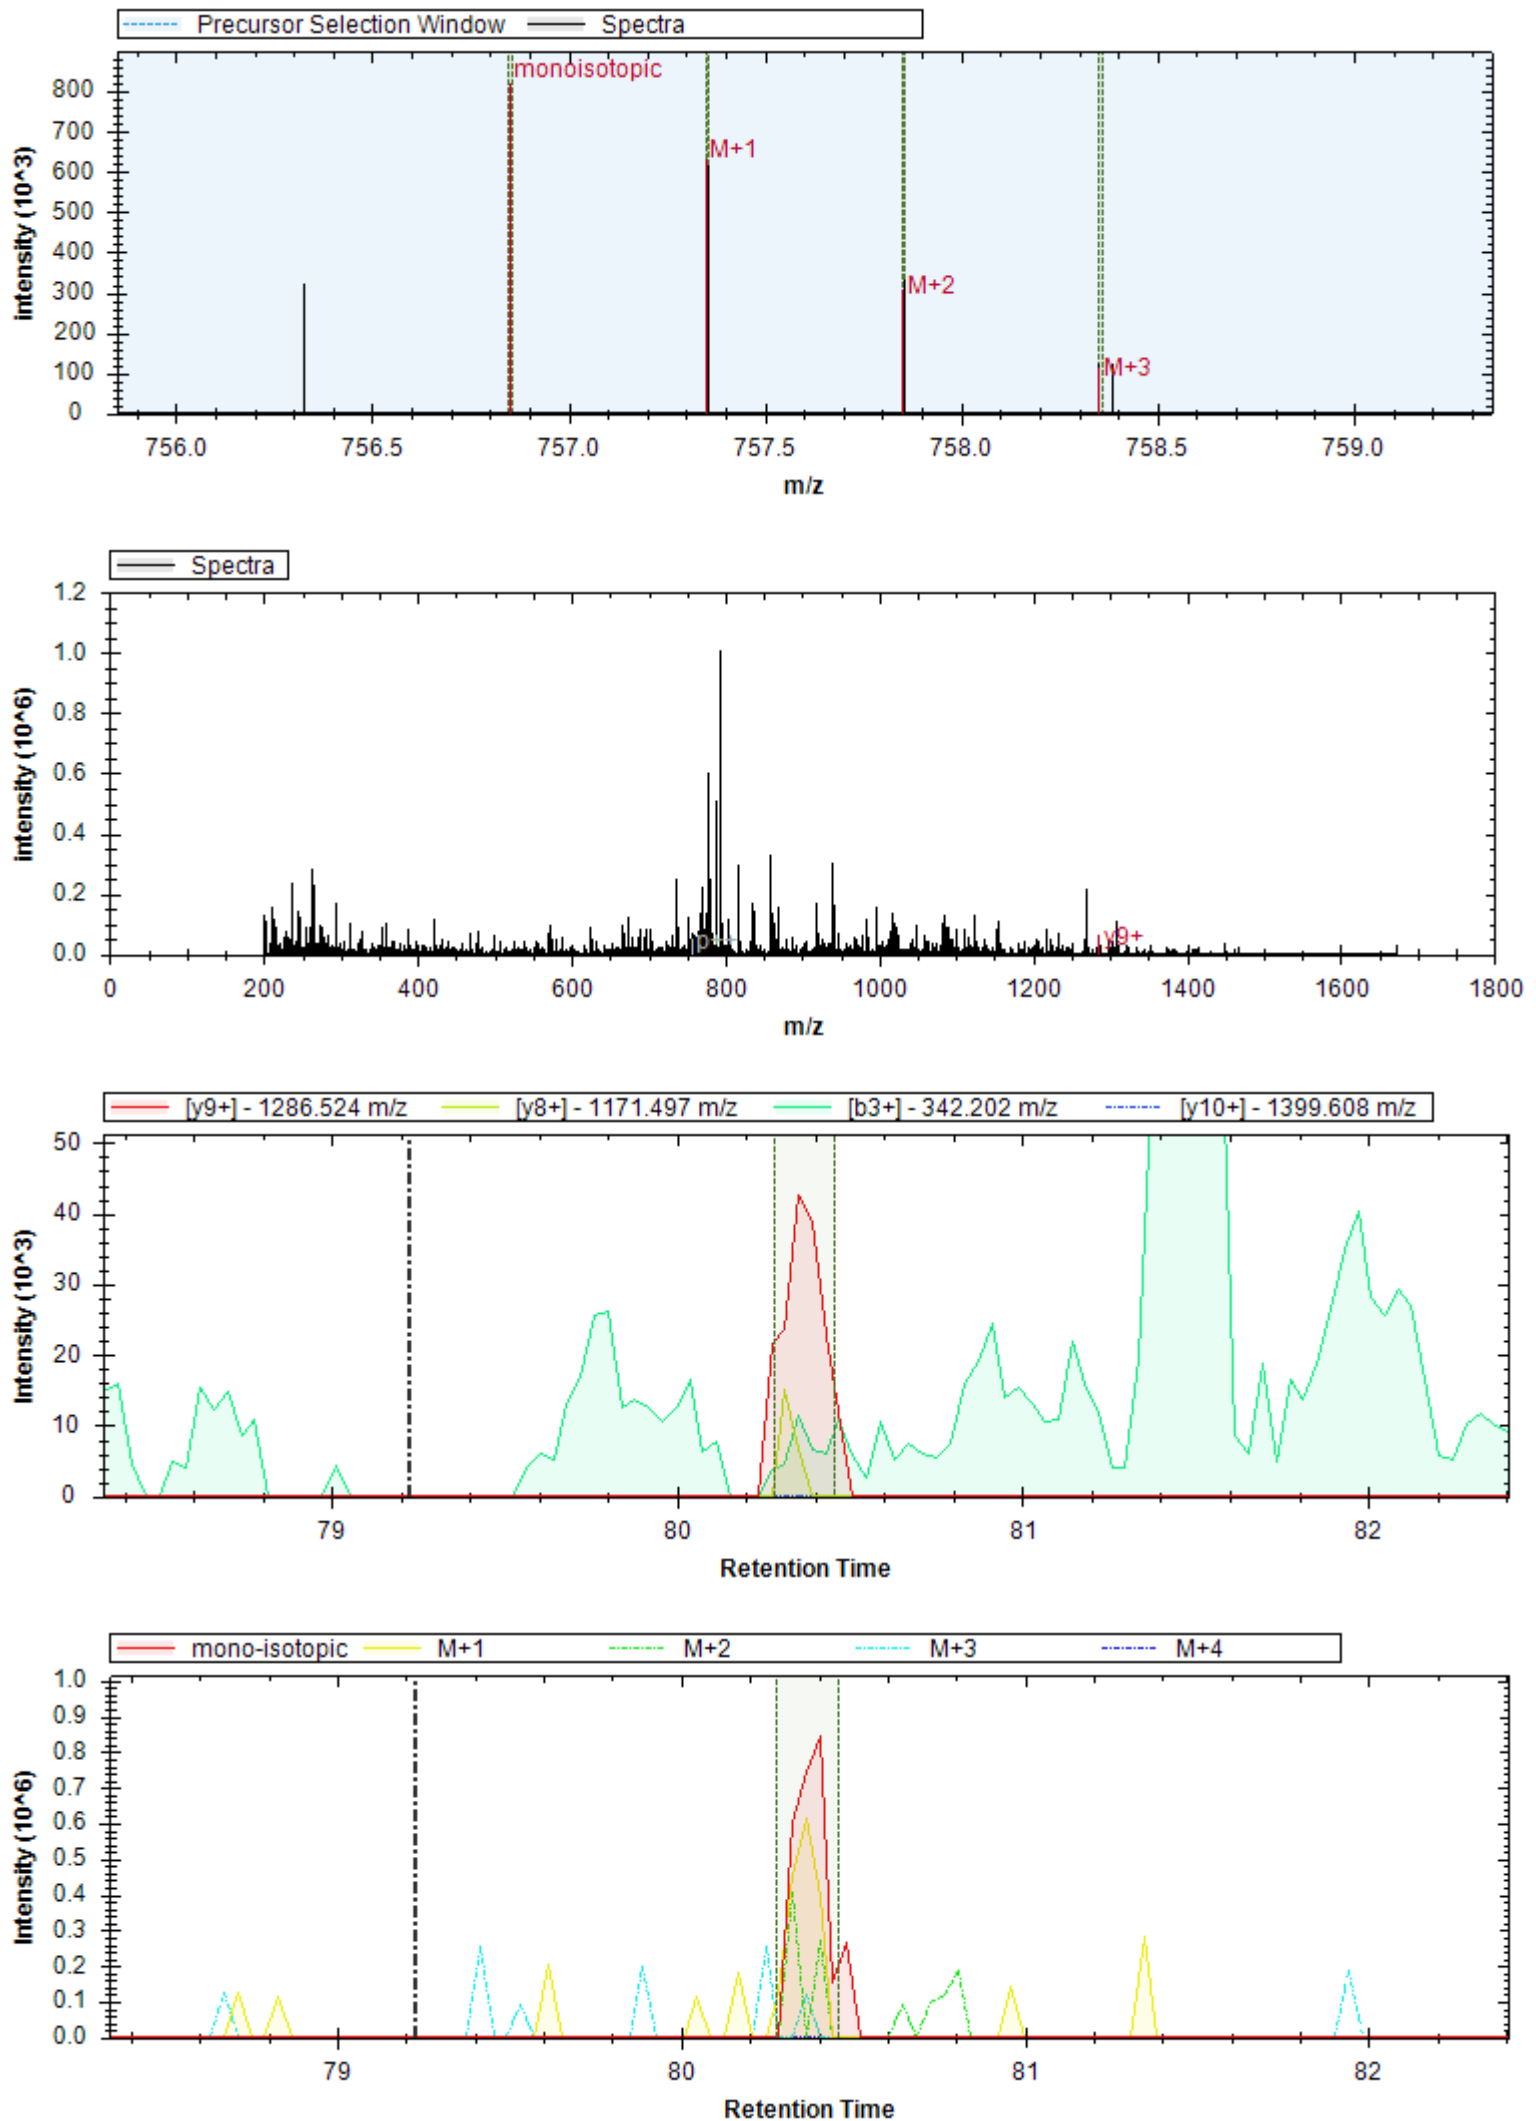

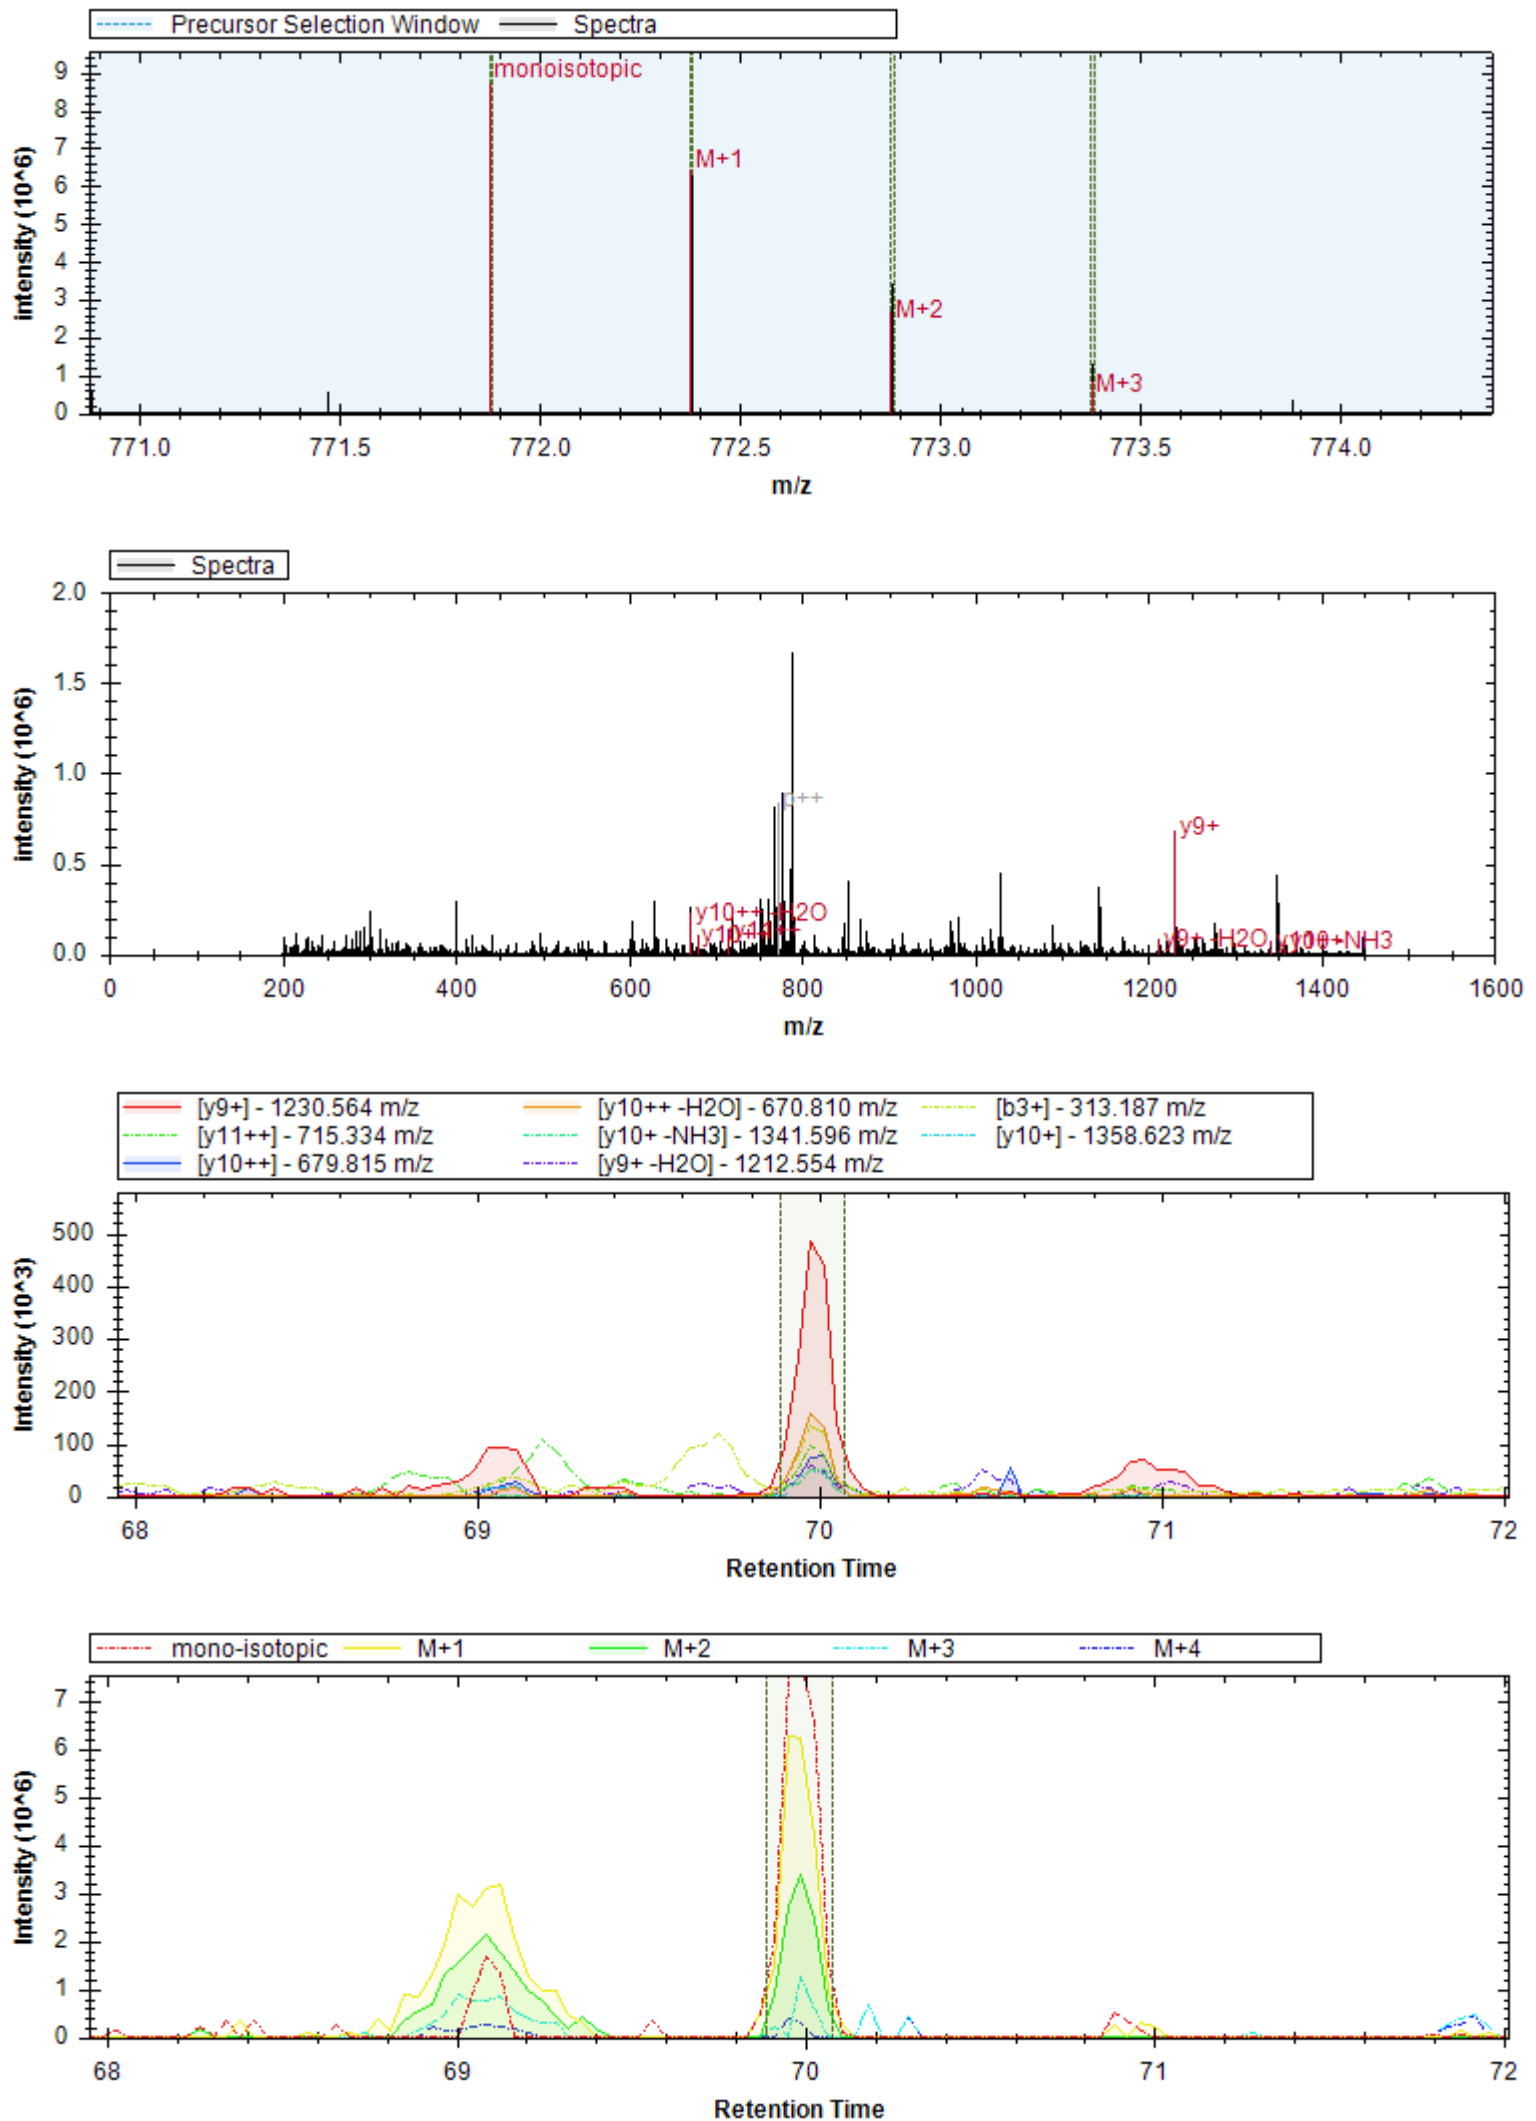

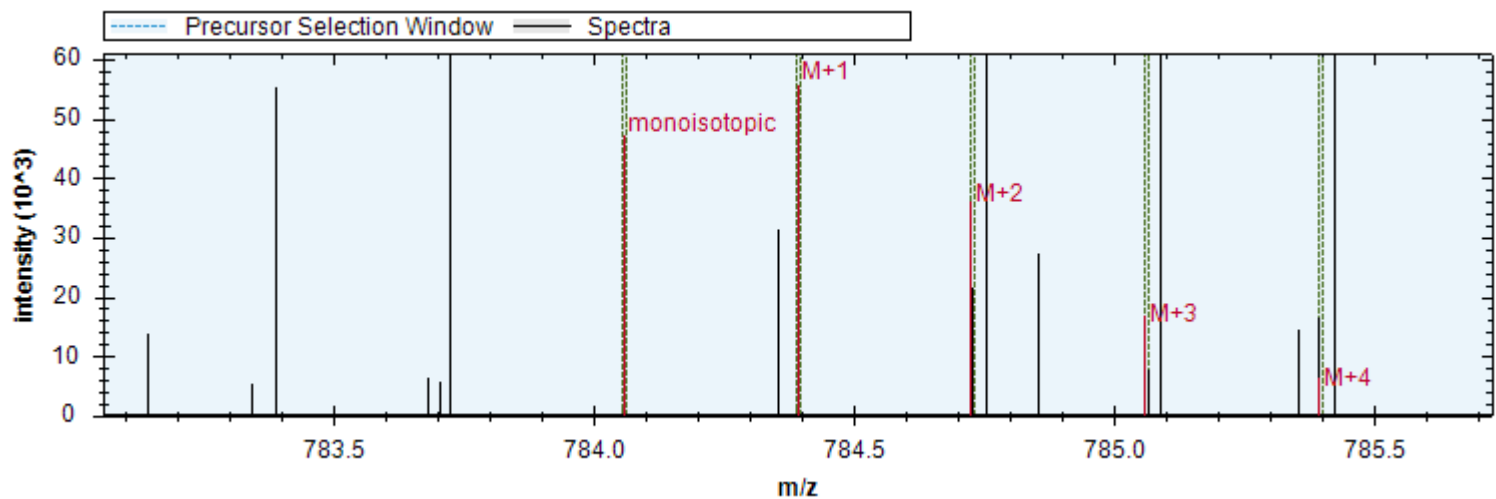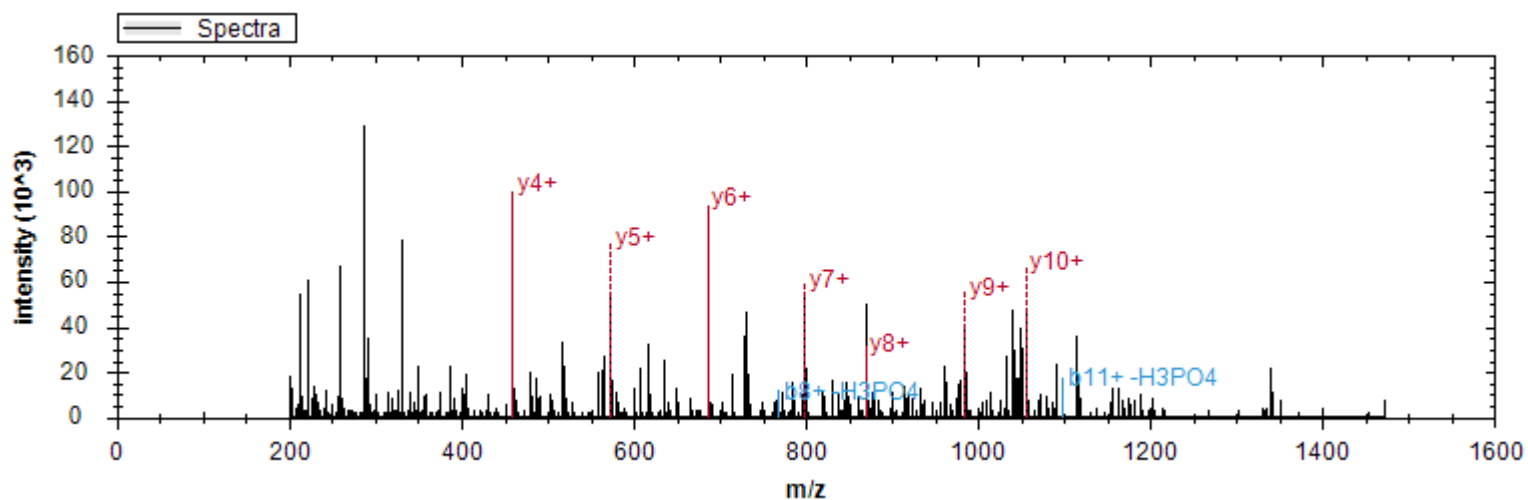

|                       |                            |                              |
|-----------------------|----------------------------|------------------------------|
| [y4+] - 460.251 m/z   | [y5+] - 573.336 m/z        | [y6+] - 686.420 m/z          |
| [y10+] - 1056.605 m/z | [b11+] - 1195.488 m/z      | [y9+] - 985.568 m/z          |
| [y7+] - 799.504 m/z   | [b10+] - 1124.451 m/z      | [b11+ -H3PO4] - 1097.511 m/z |
| [b9+] - 995.408 m/z   | [y8+] - 870.541 m/z        | [b8+] - 866.366 m/z          |
| [b13++] - 683.300 m/z | [b8+ -H3PO4] - 768.389 m/z |                              |

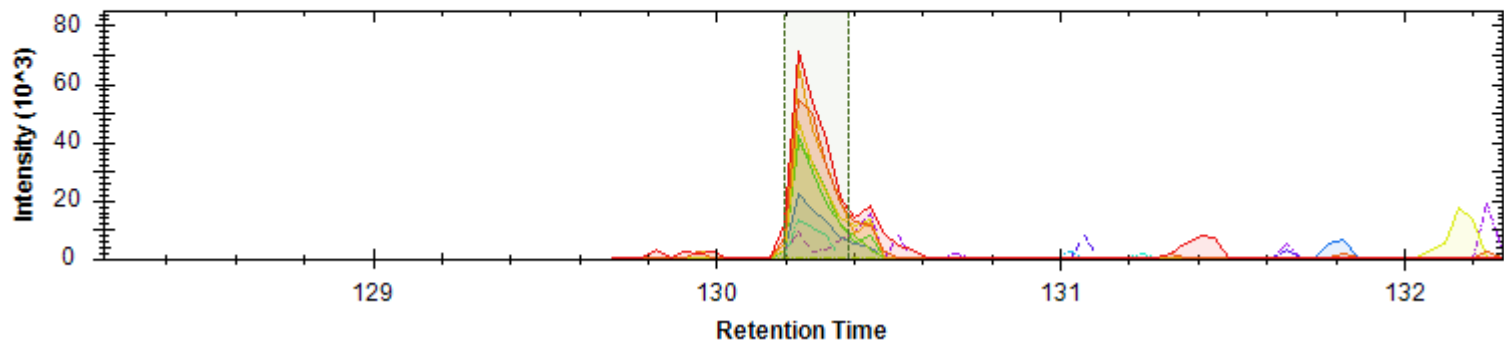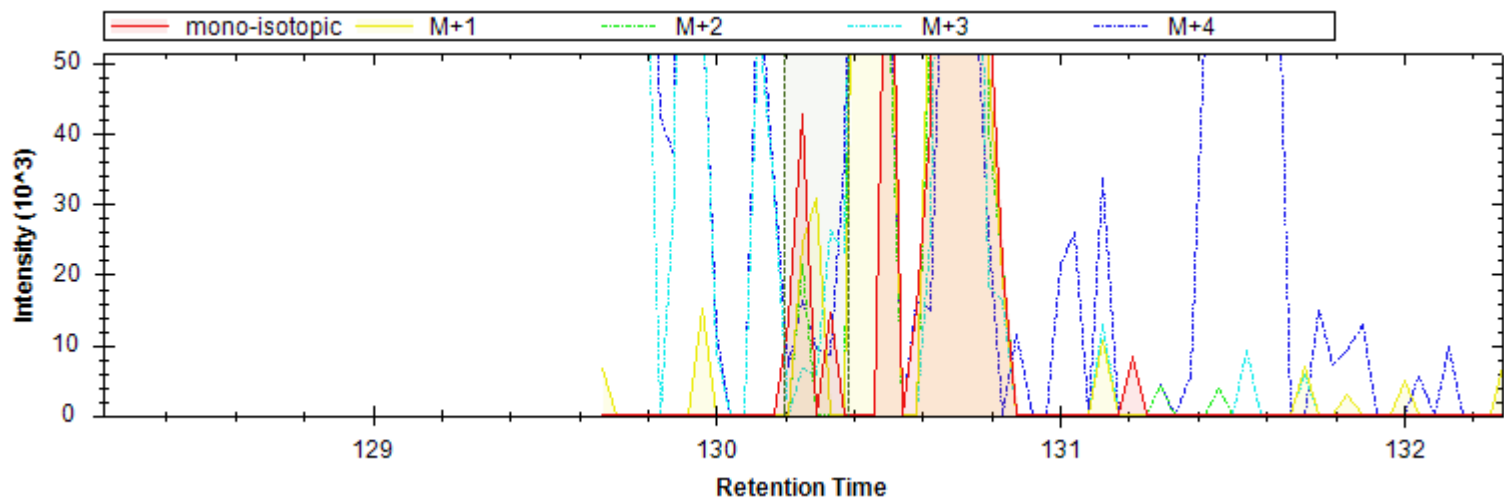

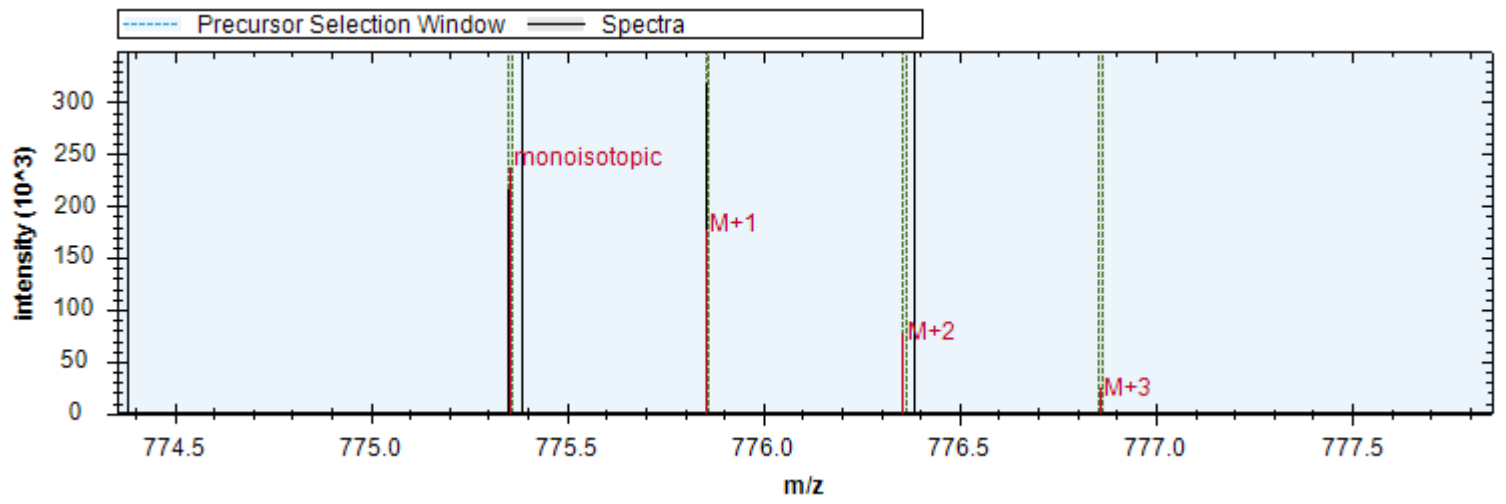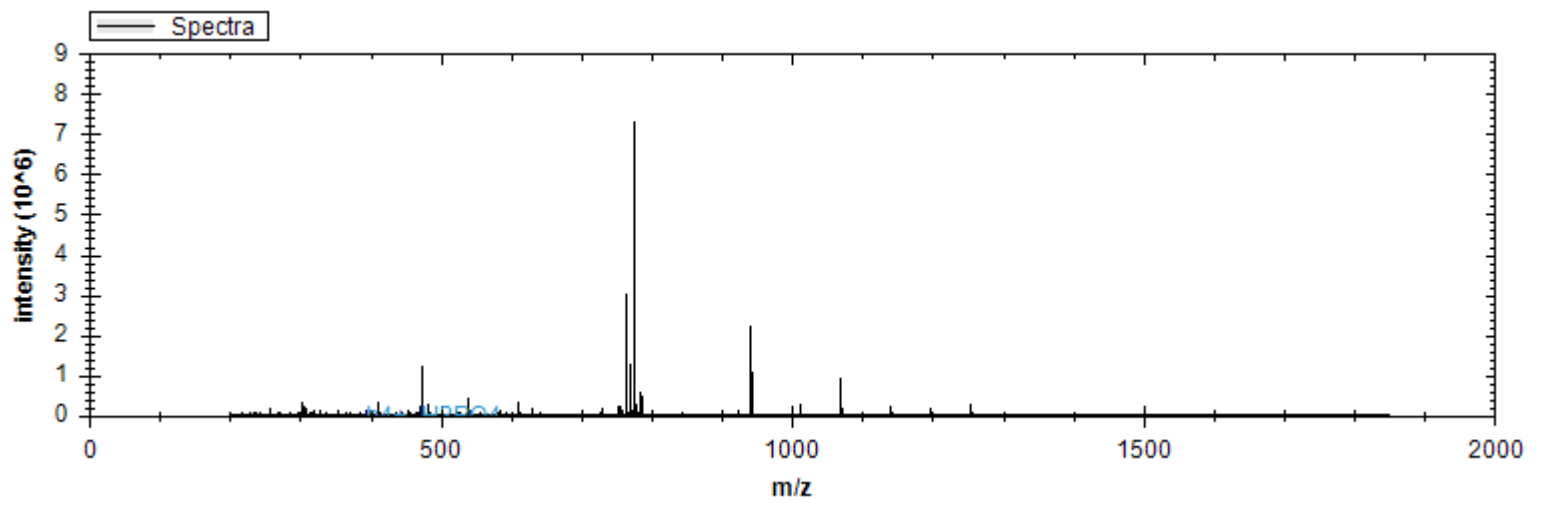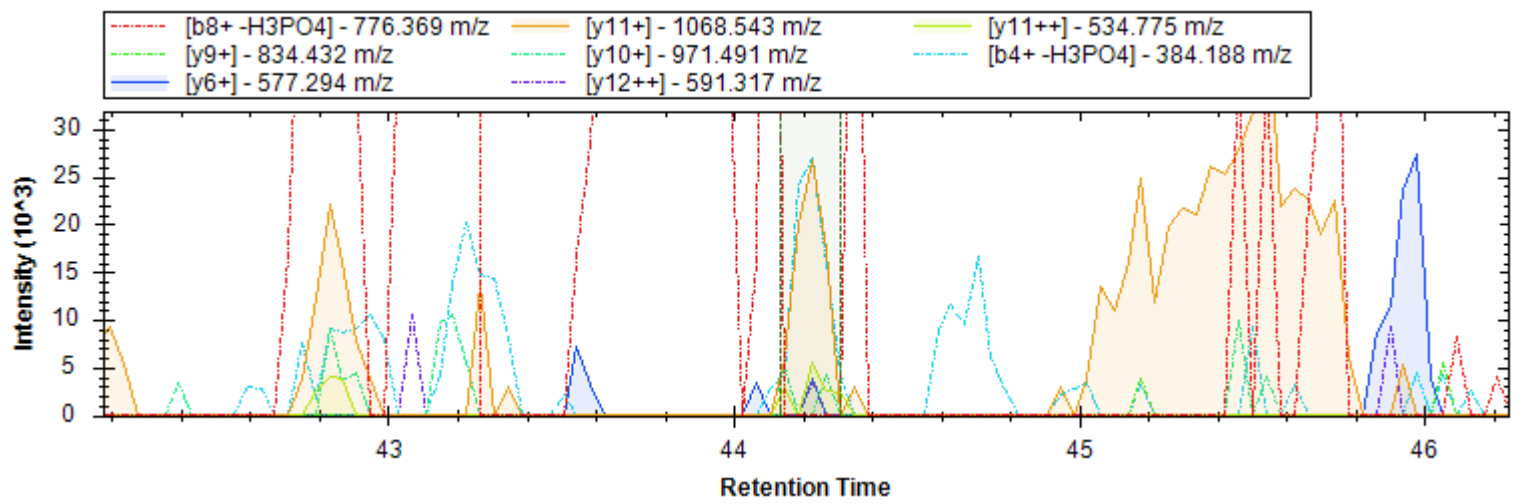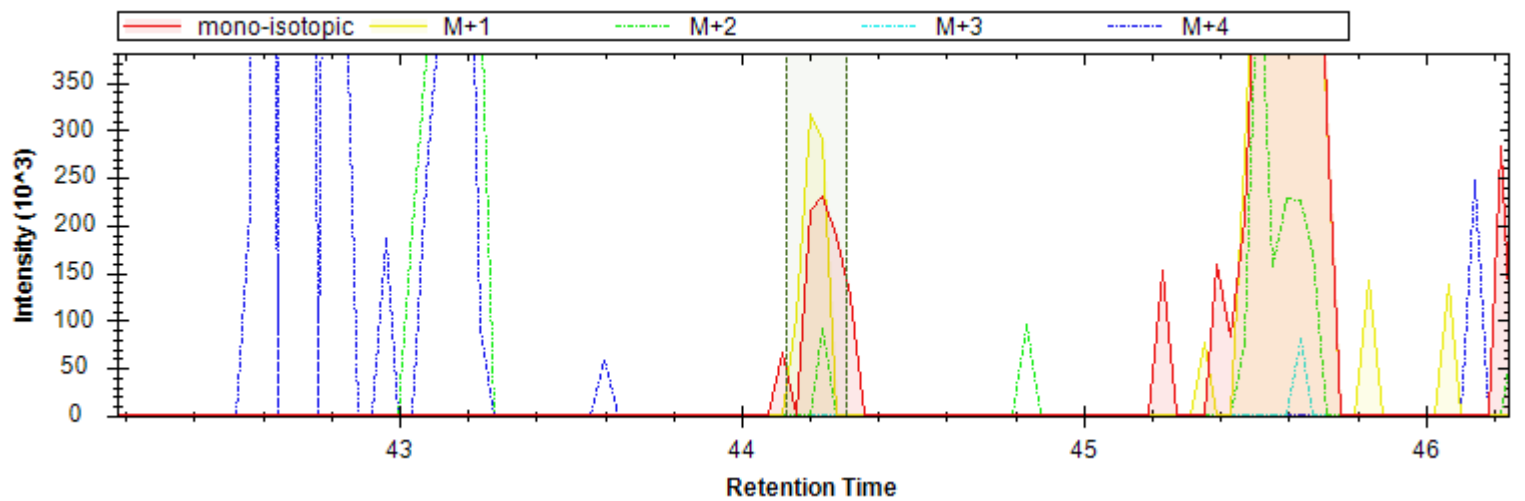



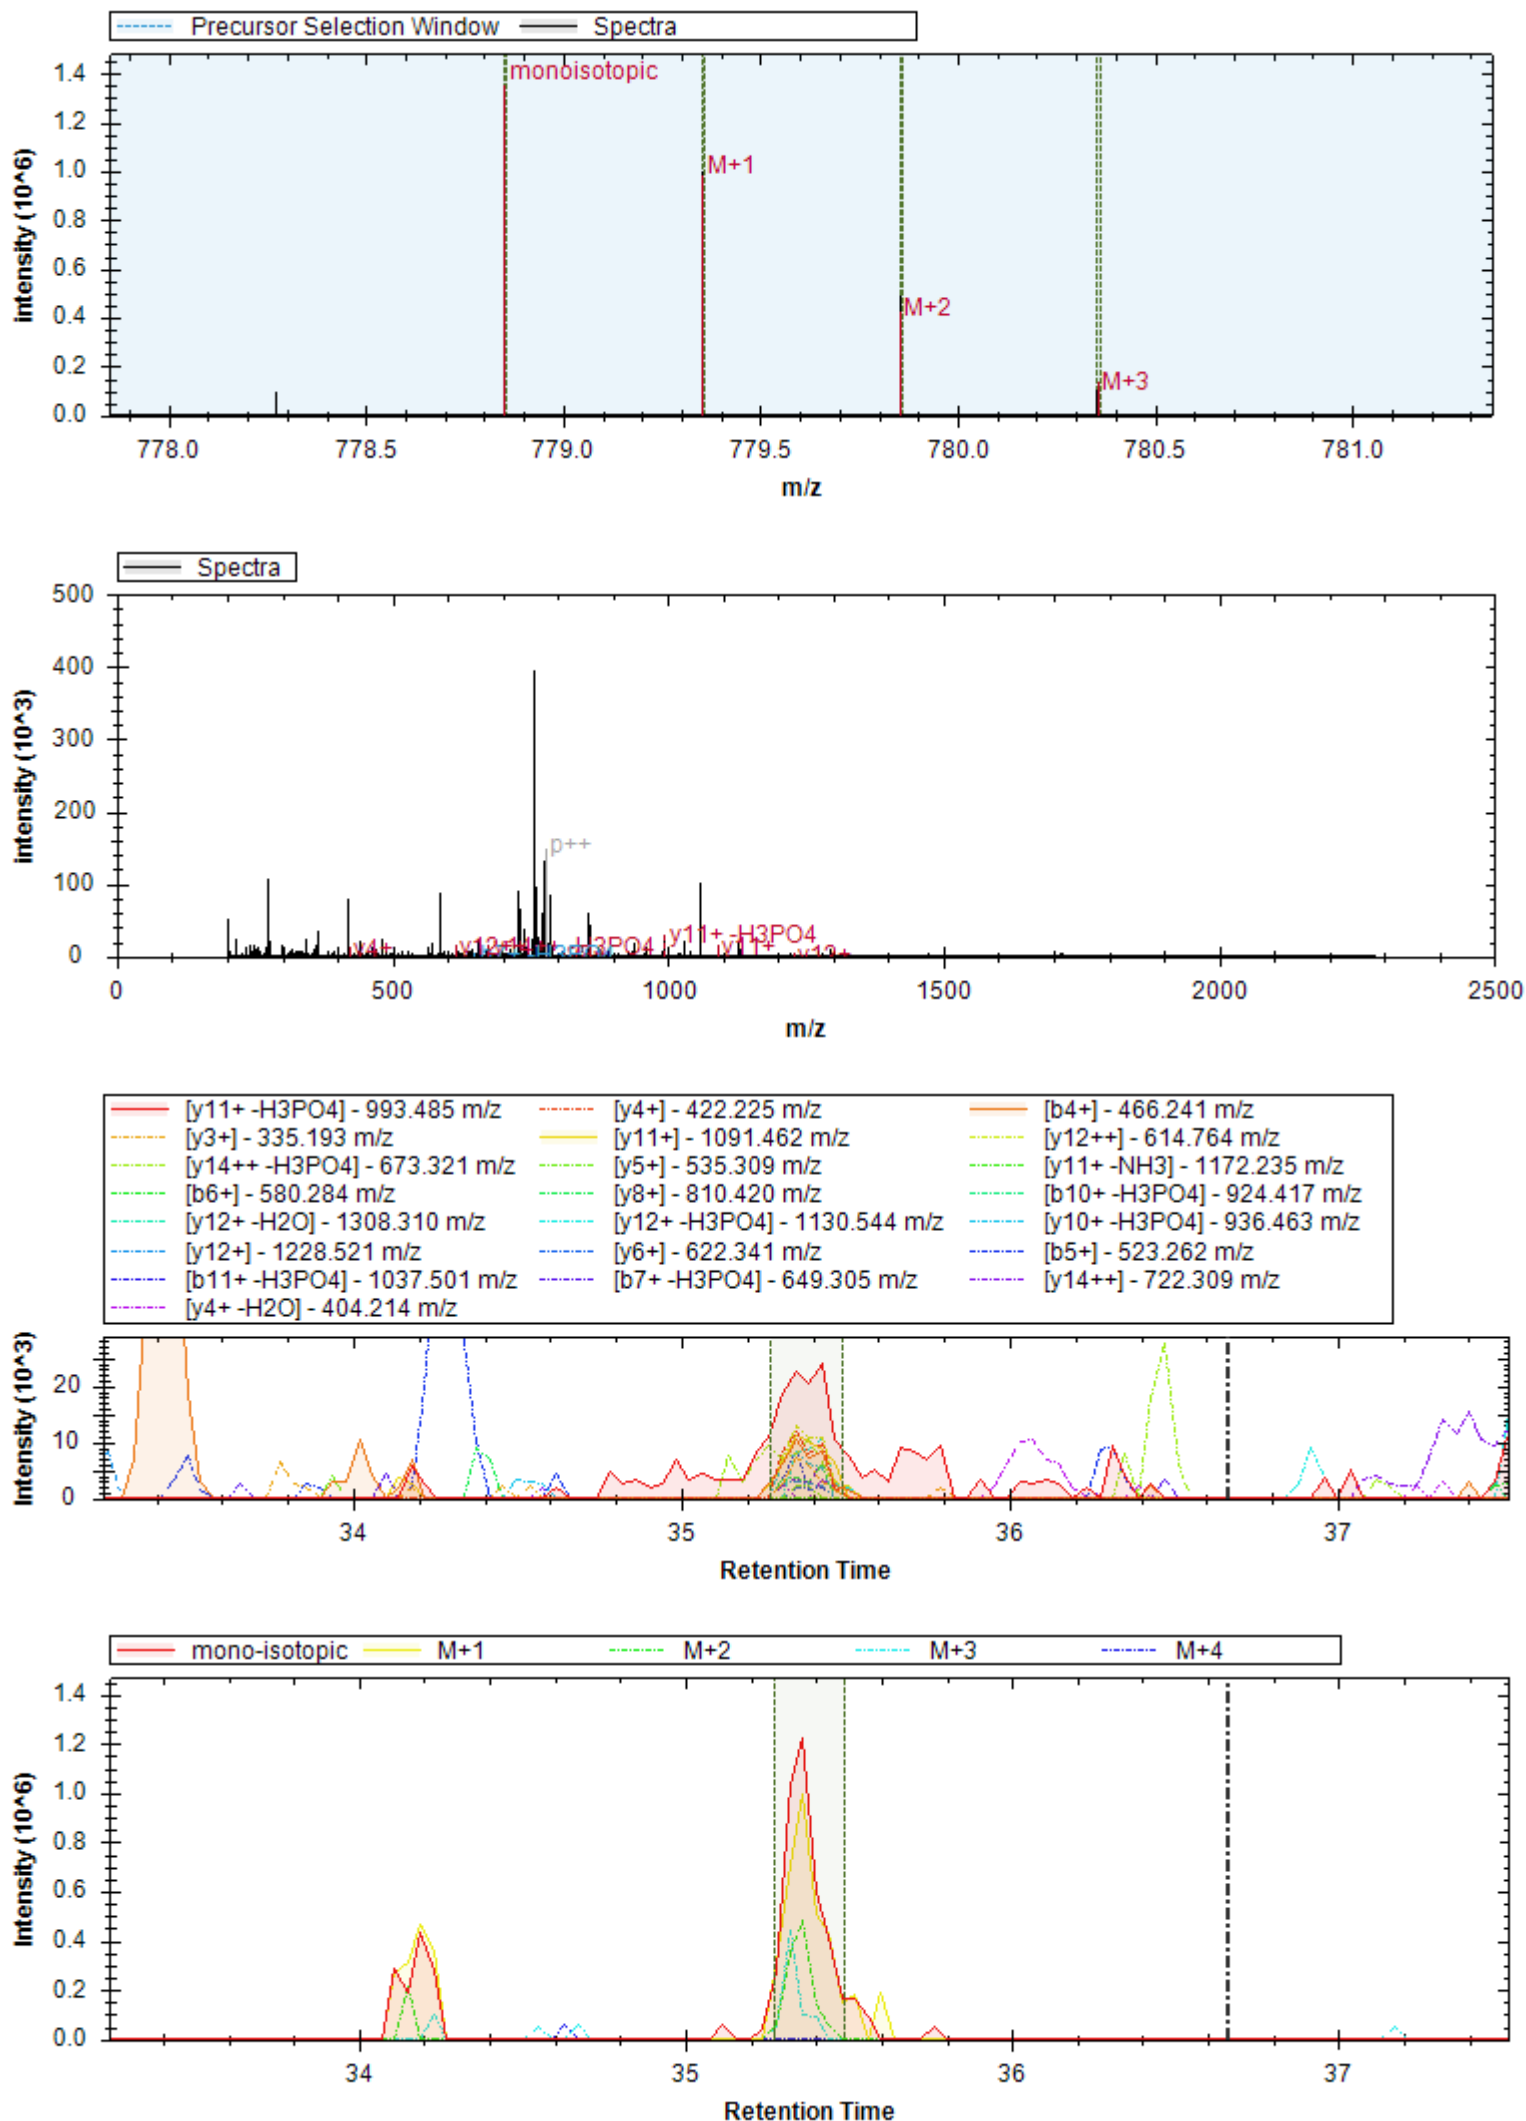

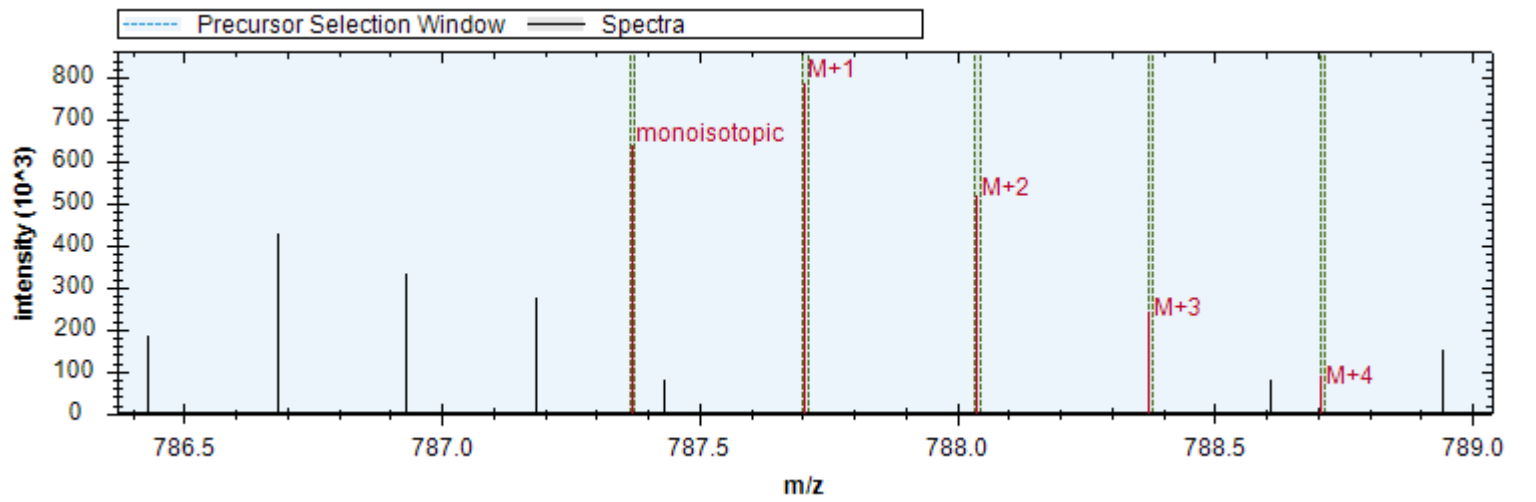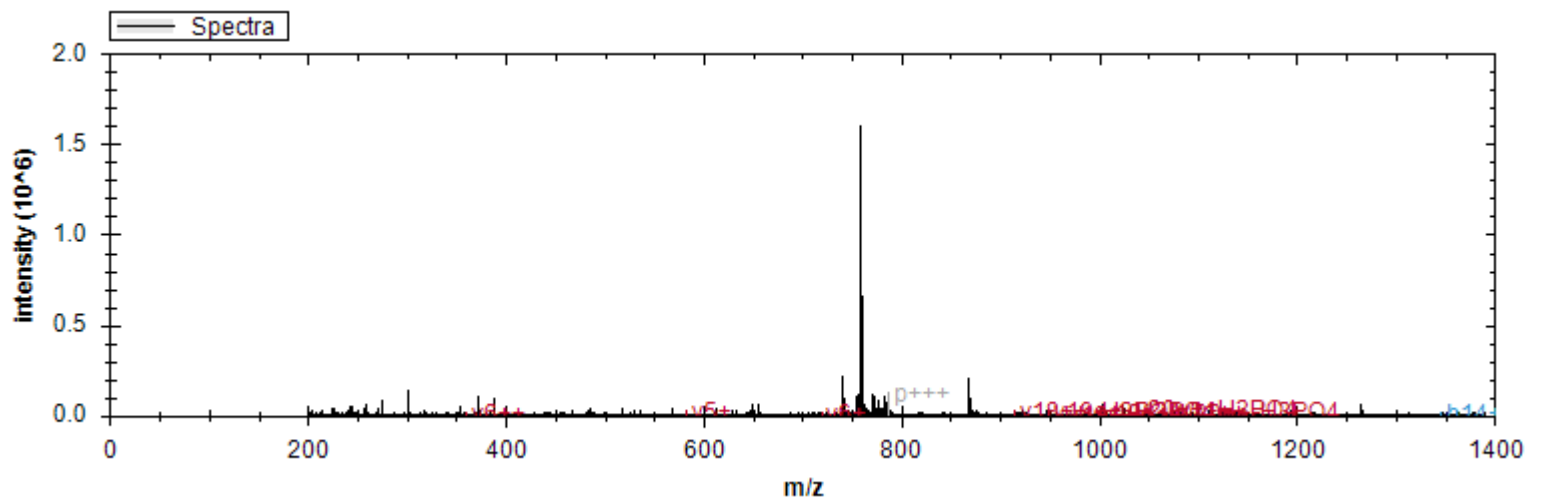

|                              |                               |                               |
|------------------------------|-------------------------------|-------------------------------|
| [y18++ -H3PO4] - 914.454 m/z | [y19++ -H3PO4] - 949.972 m/z  | [y20++ -H3PO4] - 1031.504 m/z |
| [y5+] - 583.295 m/z          | [y21++ -H3PO4] - 1075.020 m/z | [b3+ -H2O] - 346.176 m/z      |
| [b14+ -H3PO4] - 1346.649 m/z | [y6+] - 720.354 m/z           | [y4+] - 446.236 m/z           |
| [b3+] - 364.187 m/z          | [y8+] - 916.475 m/z           | [y6++] - 360.681 m/z          |
| [b7+] - 705.368 m/z          | [y3+] - 375.199 m/z           | [y20++] - 1080.492 m/z        |
| [y17++ -H3PO4] - 885.943 m/z | [y10+ -H3PO4] - 1042.518 m/z  | [b11+] - 1149.569 m/z         |
| [y18++] - 963.442 m/z        | [b12+] - 1220.606 m/z         | [y19++] - 998.961 m/z         |
| [y7+] - 819.422 m/z          | [y21++] - 1124.008 m/z        | [y20+++] - 720.664 m/z        |
| [b13+] - 1277.627 m/z        |                               |                               |

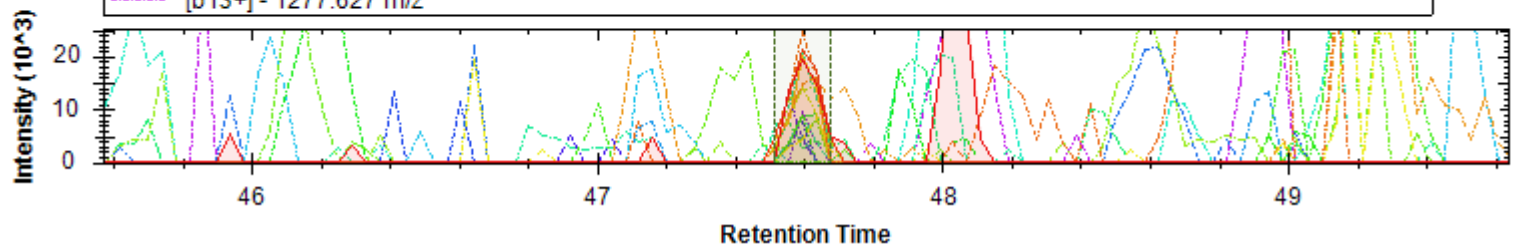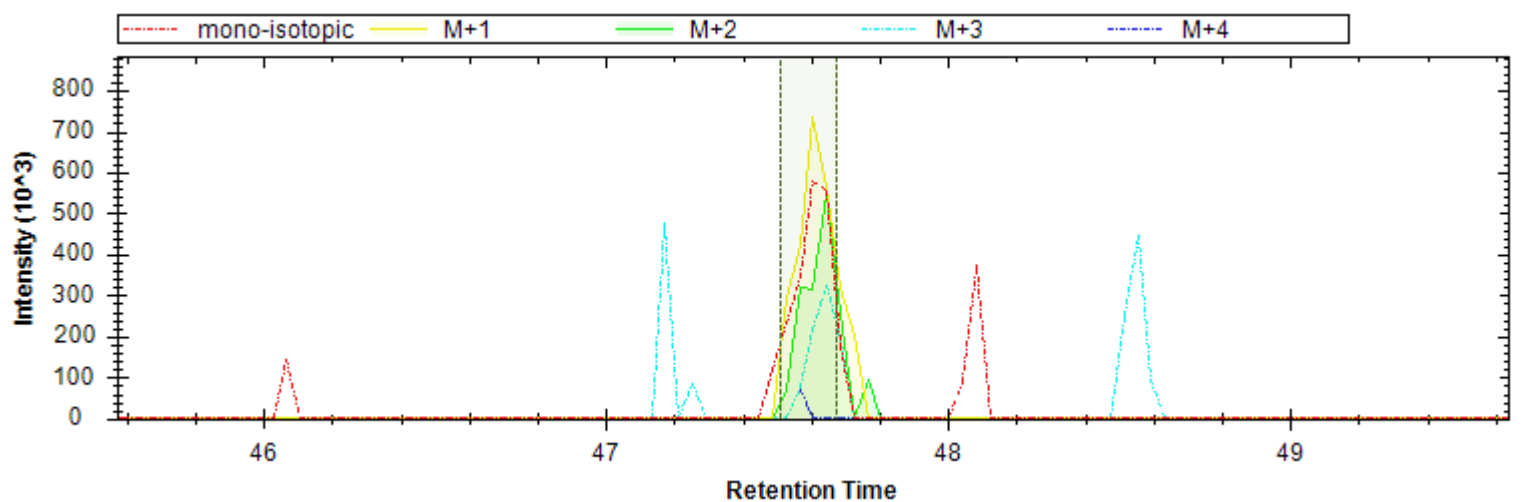

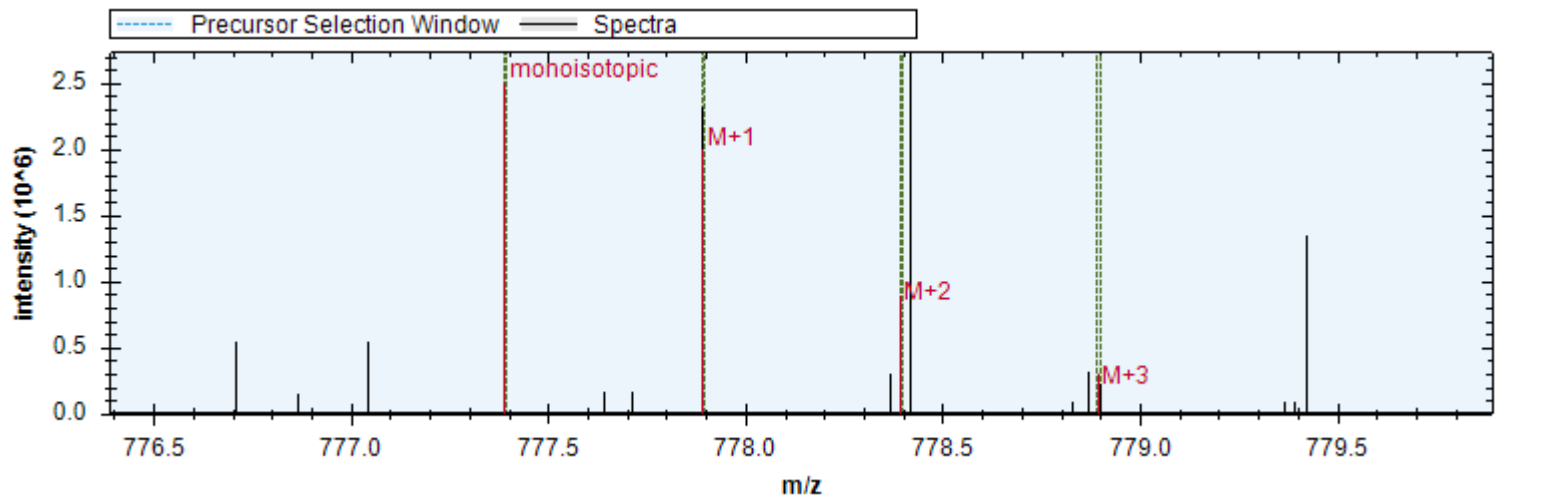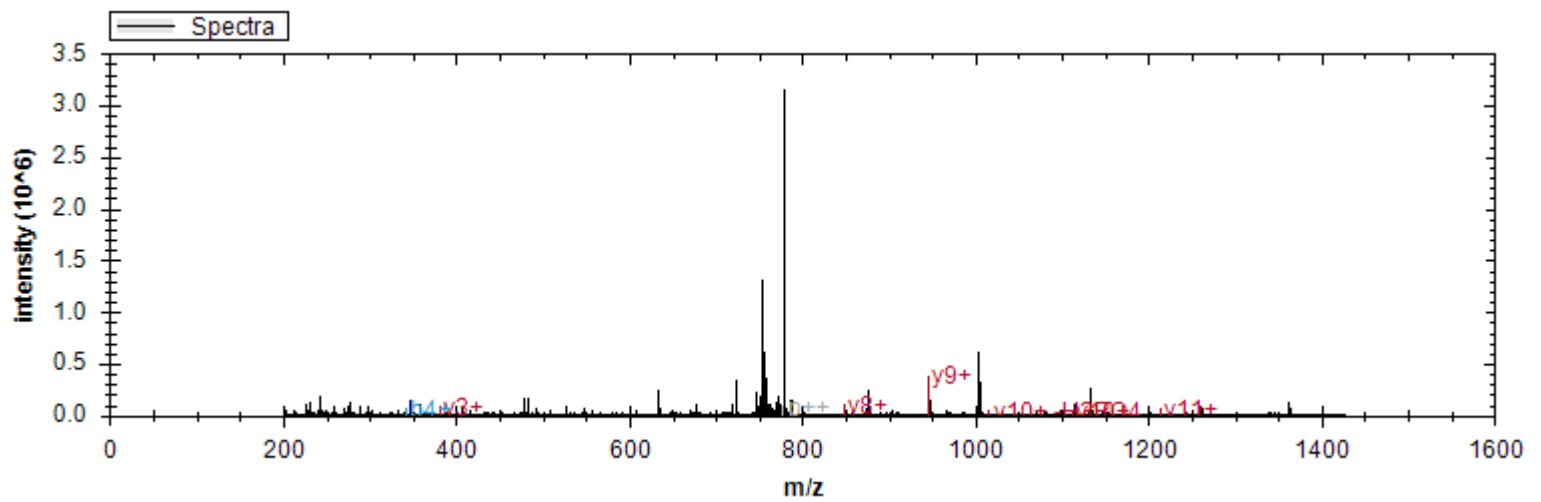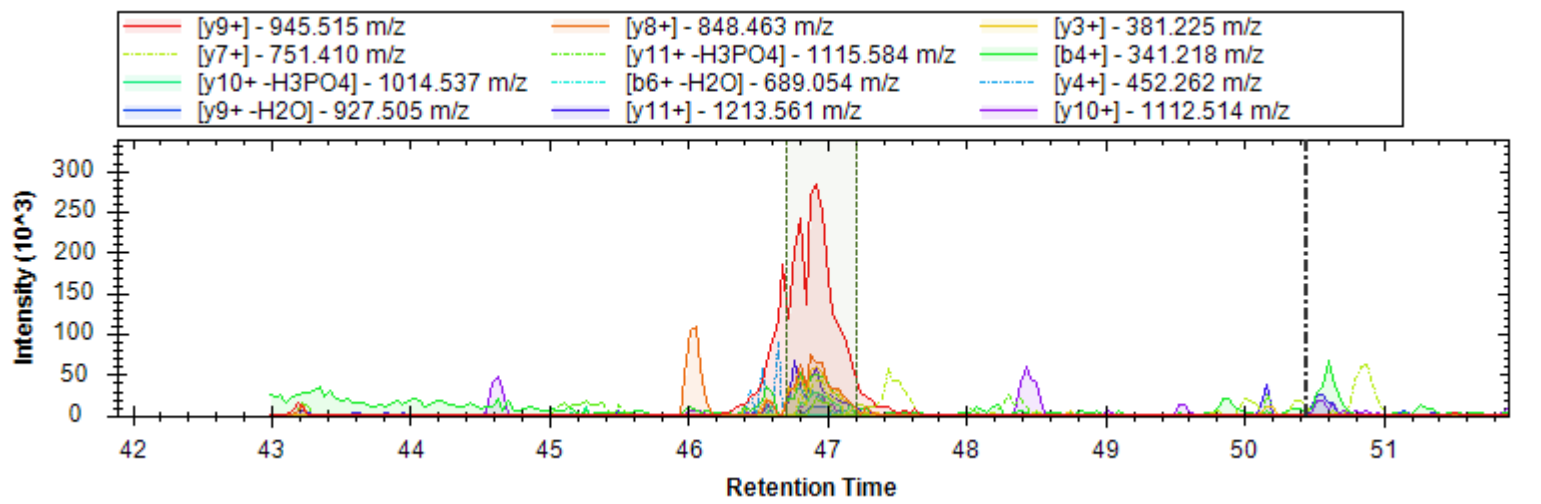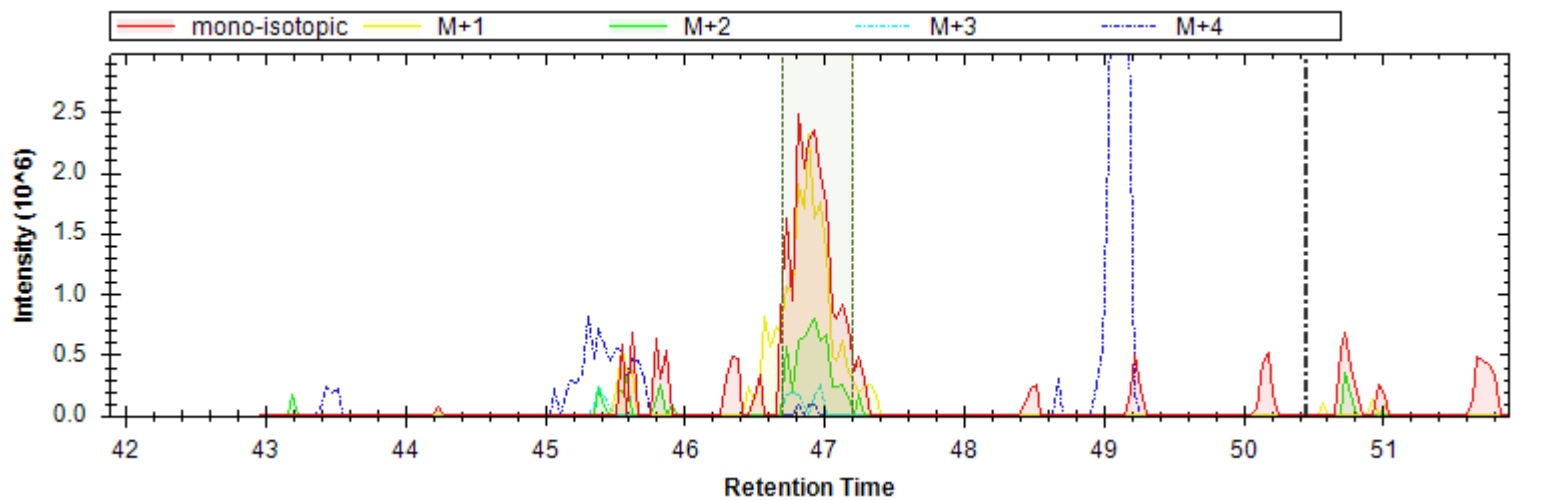

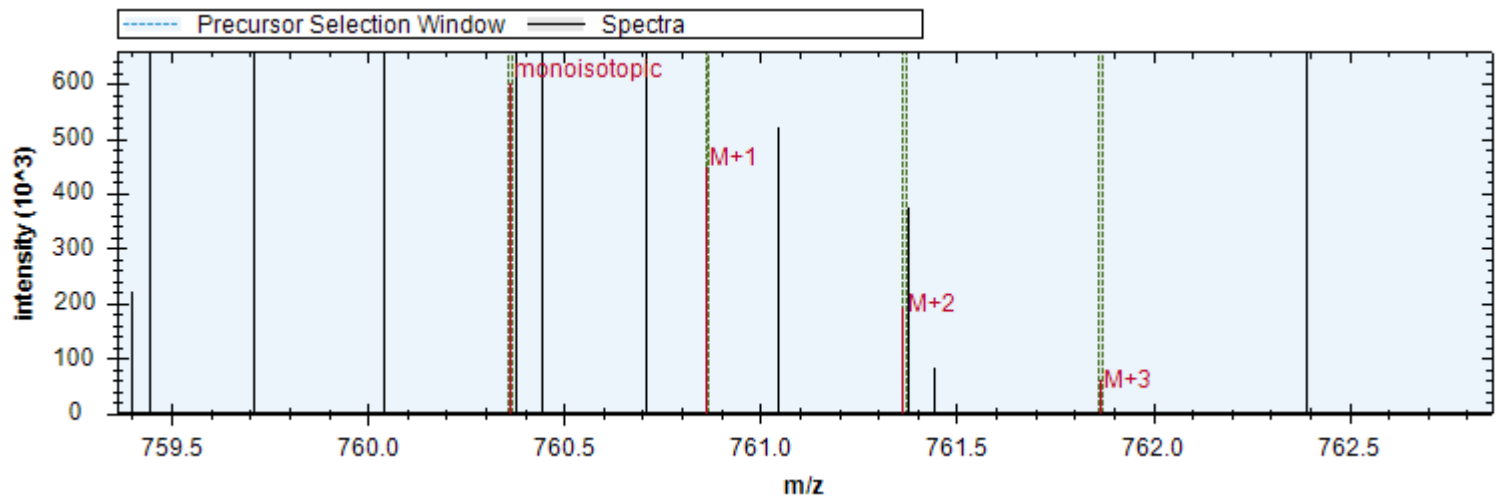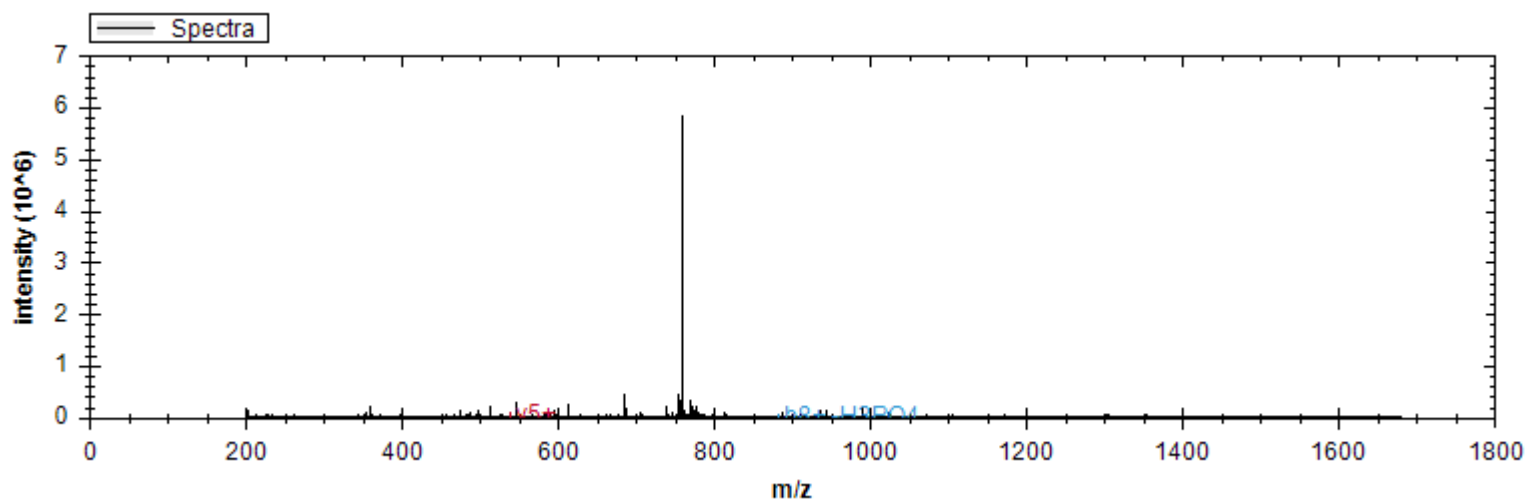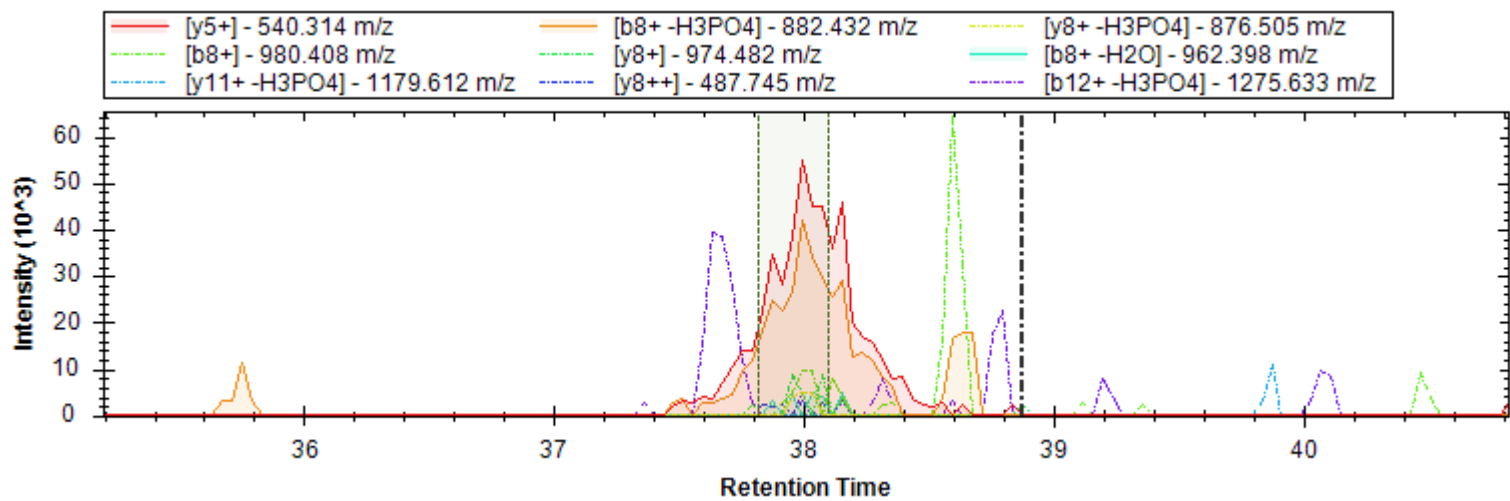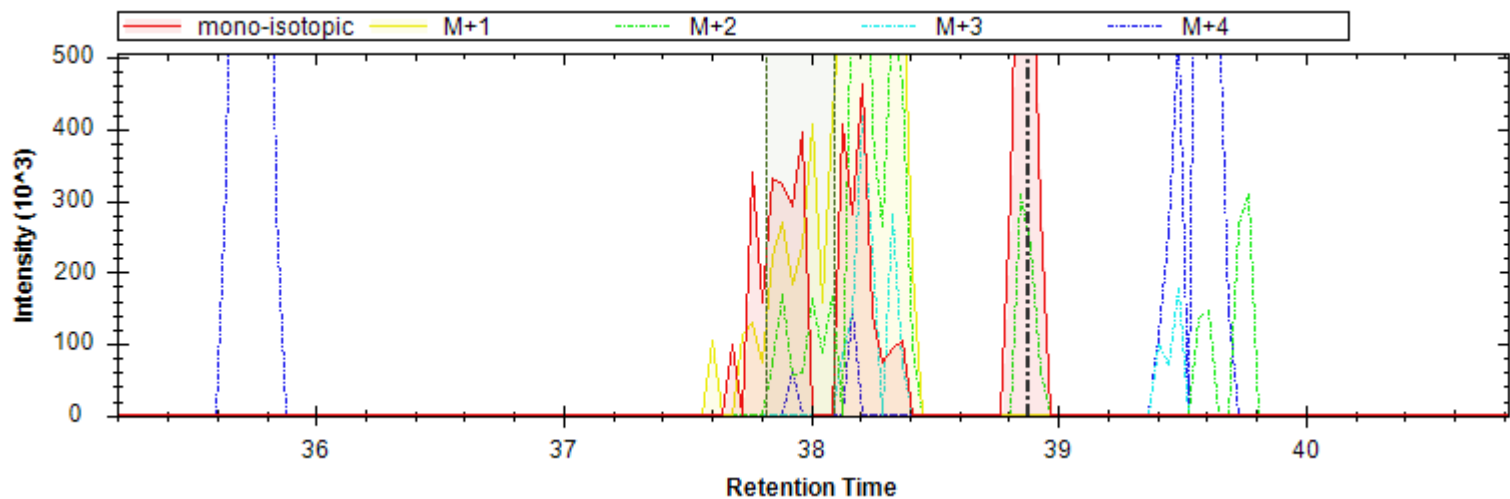

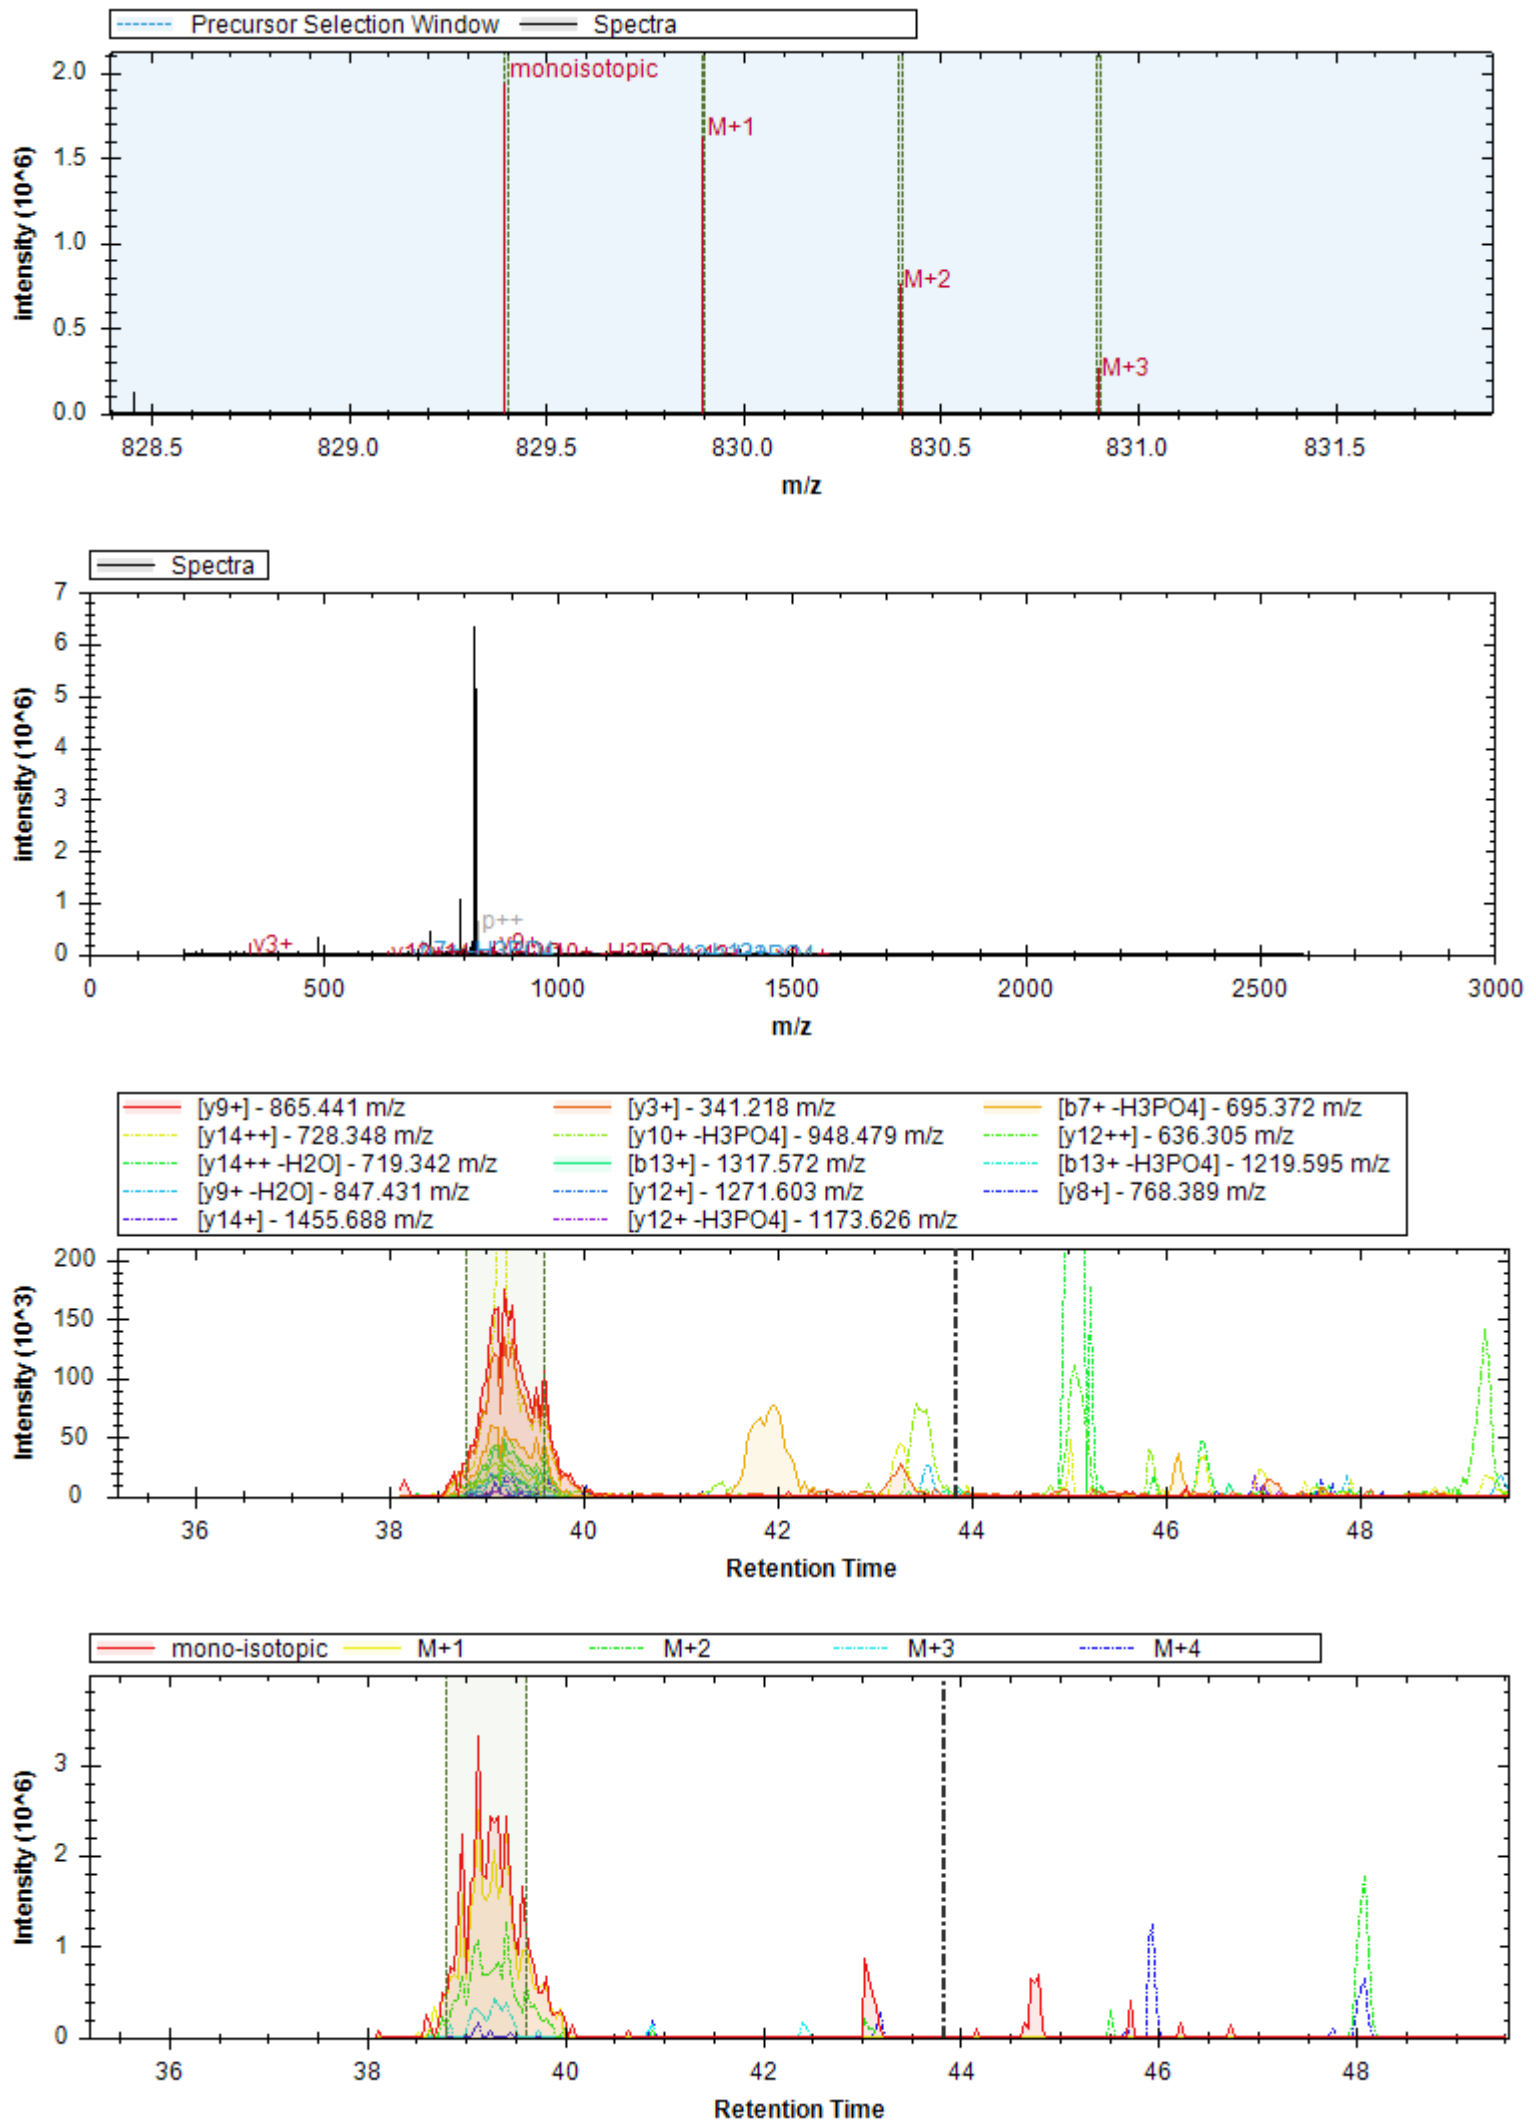

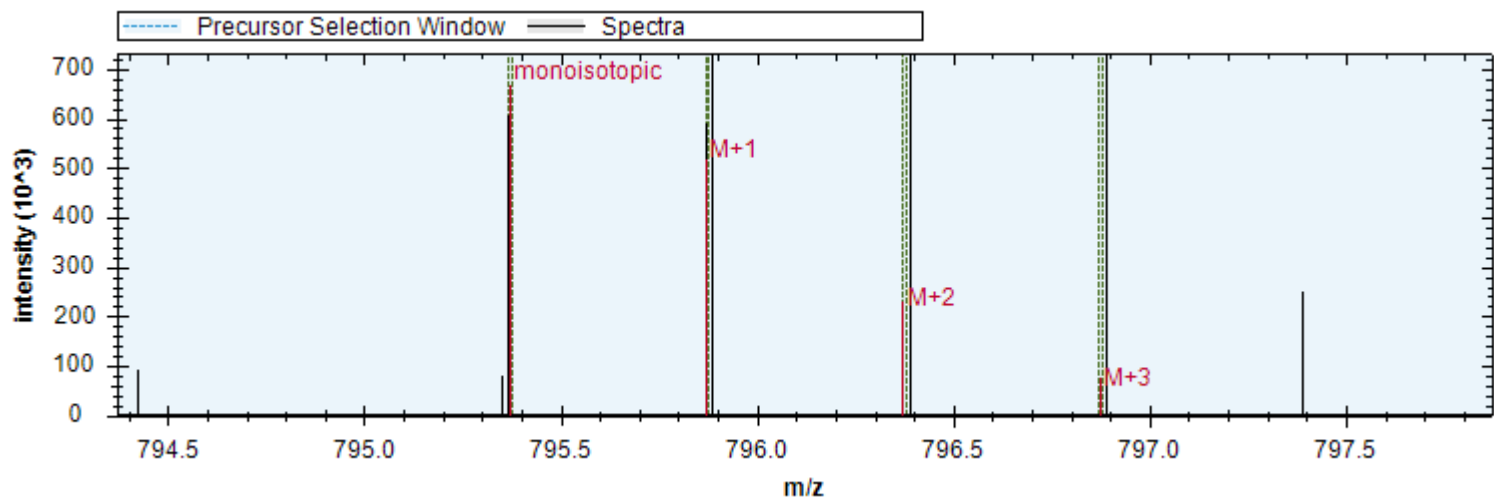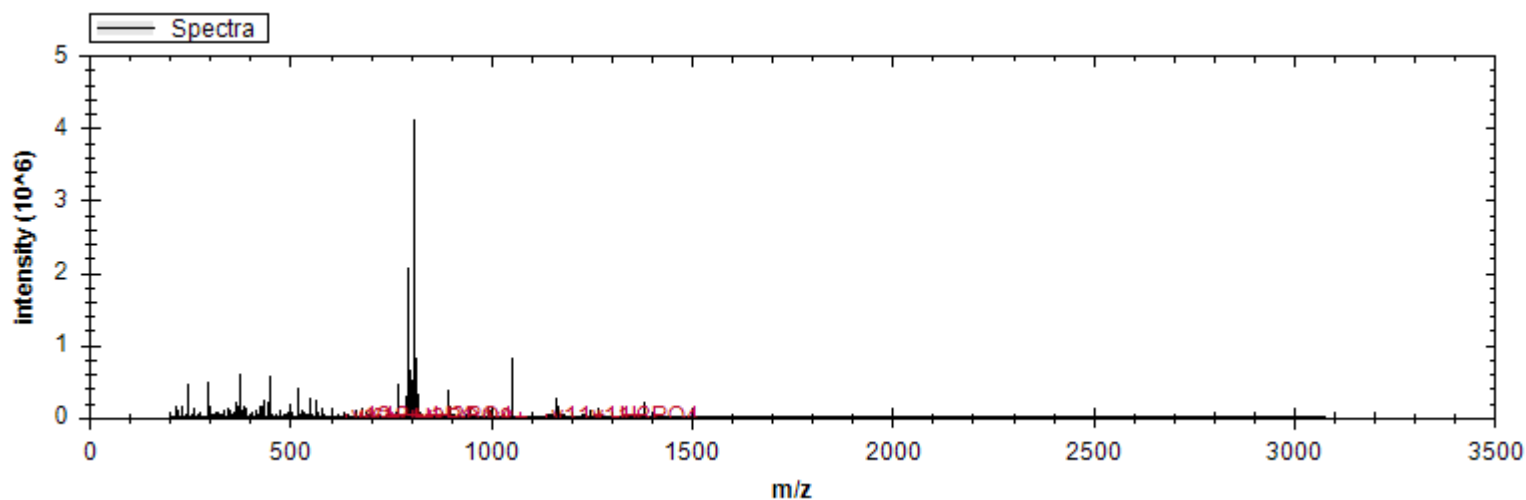

- |                              |                              |                              |
|------------------------------|------------------------------|------------------------------|
| [y11+ -H3PO4] - 1140.601 m/z | [y12++ -H3PO4] - 639.334 m/z | [y3+] - 359.204 m/z          |
| [b3+] - 352.162 m/z          | [y7+ -H3PO4] - 770.416 m/z   | [b7+] - 722.347 m/z          |
| [b6+] - 609.263 m/z          | [y6+ -H3PO4] - 657.332 m/z   | [y9+ -H3PO4] - 1012.542 m/z  |
| [y12++] - 688.322 m/z        | [b5+] - 480.220 m/z          | [y10+ -H3PO4] - 1083.579 m/z |
| [y8+ -H3PO4] - 883.500 m/z   | [b8+] - 835.431 m/z          | [y11+] - 1238.578 m/z        |
| [b4+] - 409.183 m/z          | [y6+] - 755.308 m/z          | [y8+] - 981.477 m/z          |
| [y7+] - 868.392 m/z          | [b3+ -H2O] - 334.151 m/z     | [b11+ -H3PO4] - 1133.559 m/z |
| [y9+] - 1110.519 m/z         | [b5+ -H2O] - 462.210 m/z     |                              |

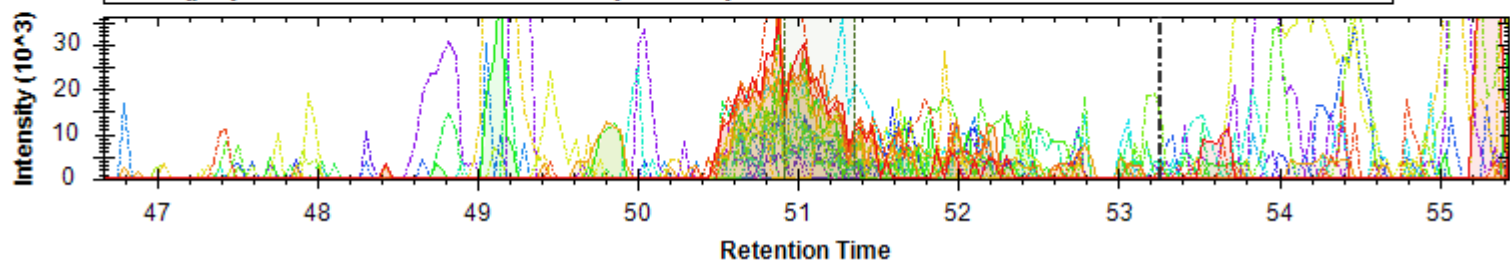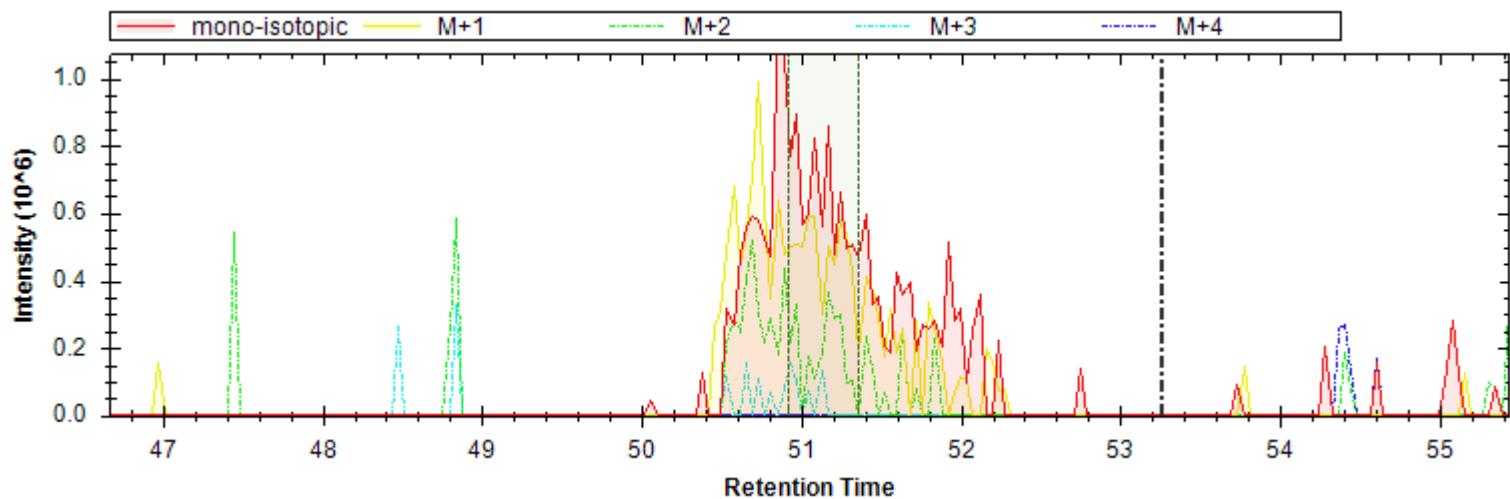

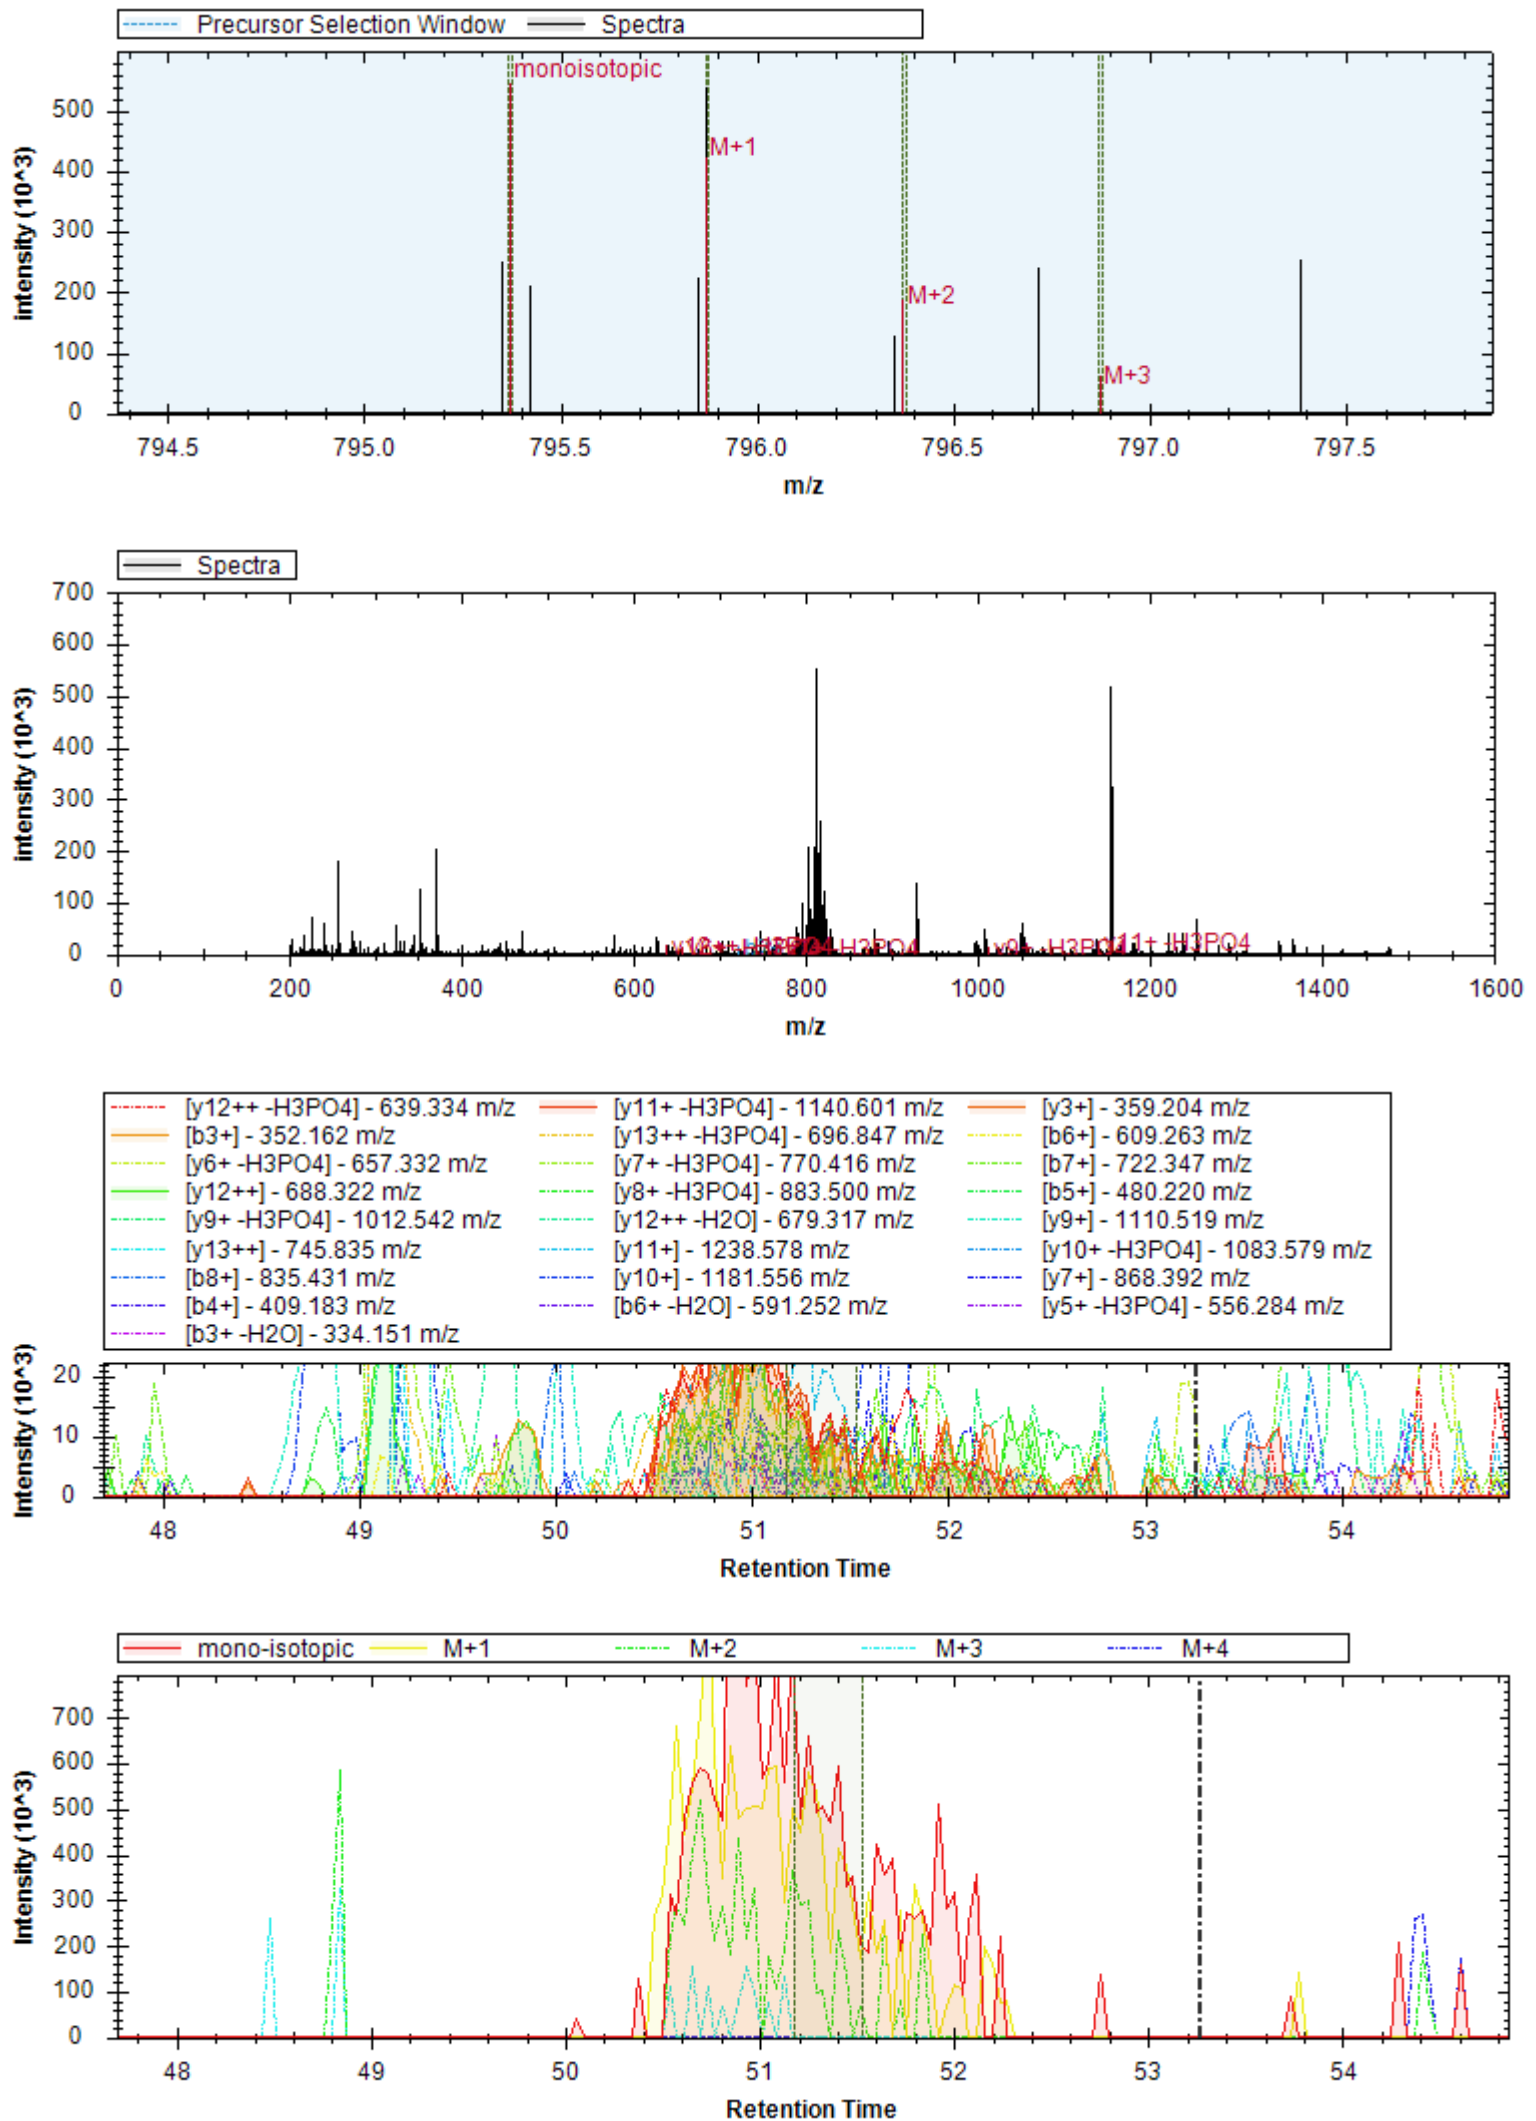

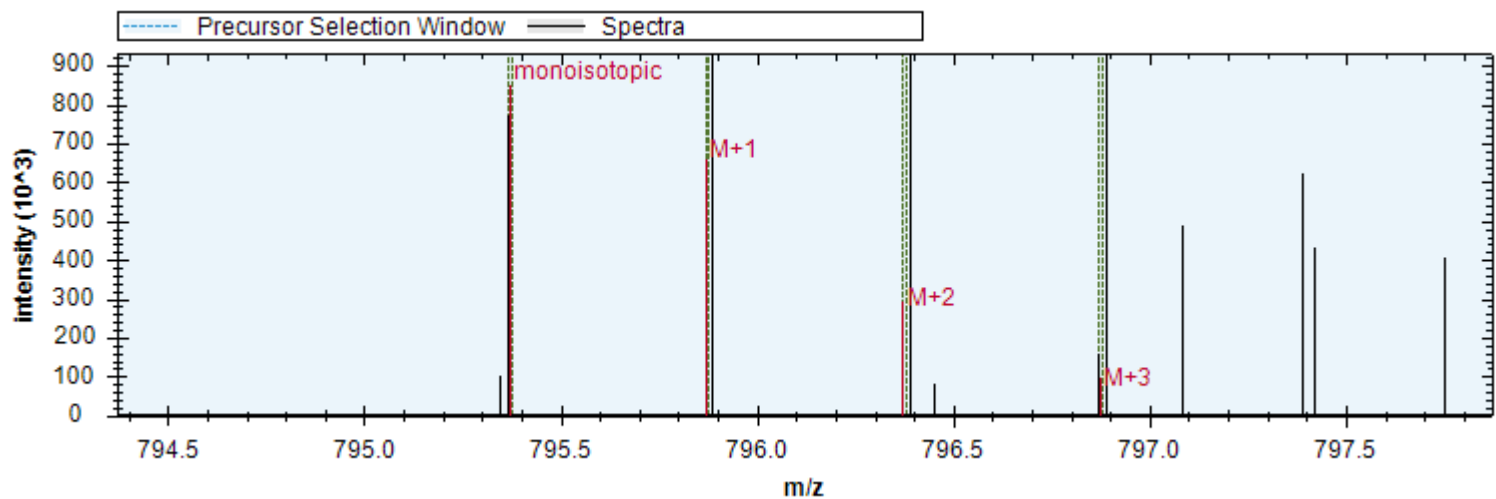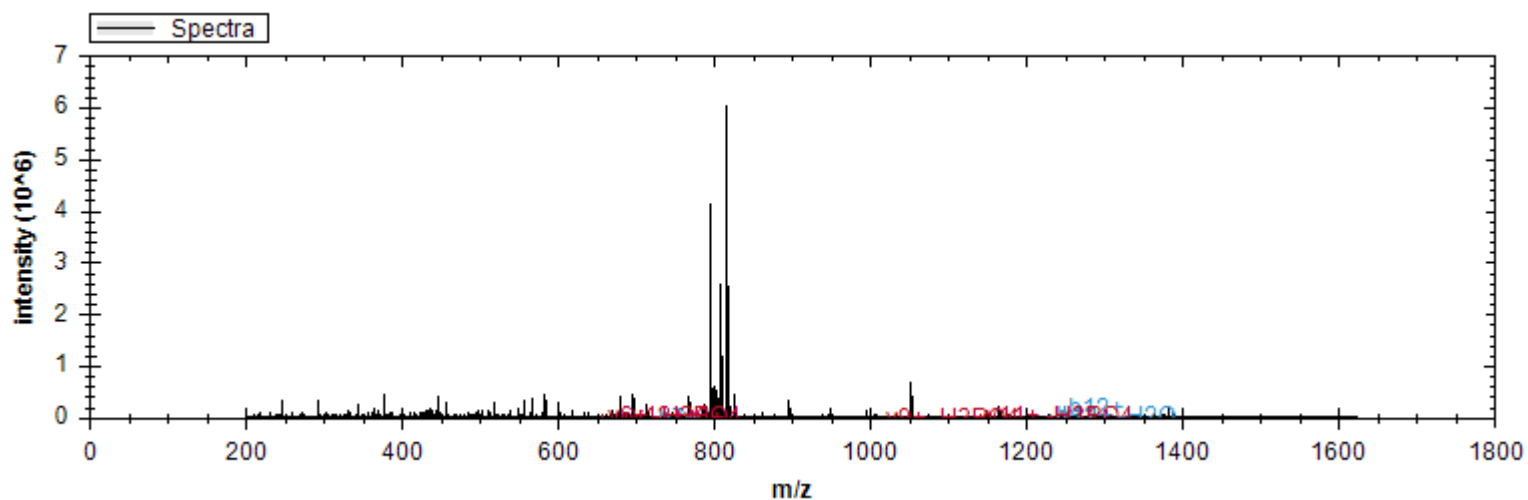

|                            |                              |                              |
|----------------------------|------------------------------|------------------------------|
| [b12+] - 1248.622 m/z      | [y11+ -H3PO4] - 1140.601 m/z | [y12++ -H3PO4] - 639.334 m/z |
| [b3+] - 352.162 m/z        | [b12+ -NH3] - 1231.595 m/z   | [b6+] - 609.263 m/z          |
| [y6+ -H3PO4] - 657.332 m/z | [y10+ -H3PO4] - 1083.579 m/z | [y8+ -H3PO4] - 883.500 m/z   |
| [b7+] - 722.347 m/z        | [y9+ -H3PO4] - 1012.542 m/z  | [y12++] - 688.322 m/z        |
| [y11+] - 1238.578 m/z      | [y7+] - 868.392 m/z          | [b12+ -H2O] - 1230.611 m/z   |
| [b5+] - 480.220 m/z        | [b8+] - 835.431 m/z          | [b4+] - 409.183 m/z          |
| [y6+] - 755.308 m/z        | [b3+ -H2O] - 334.151 m/z     | [b8+ -H2O] - 817.420 m/z     |

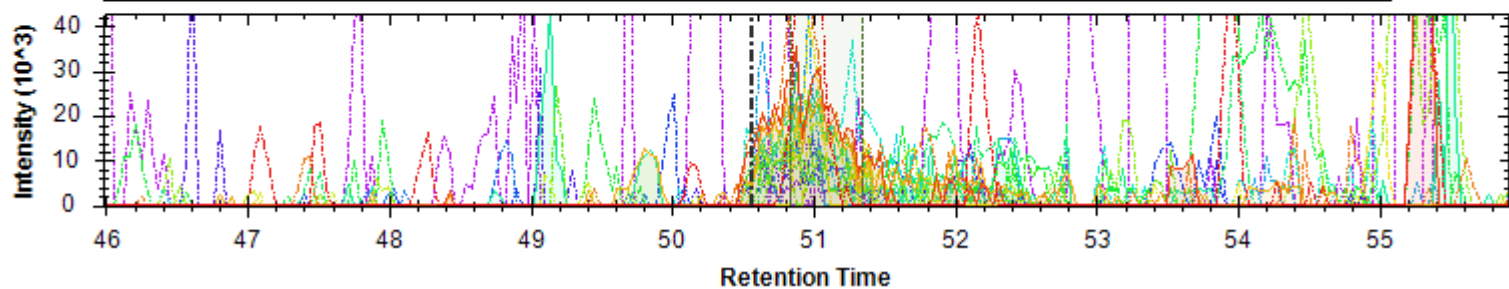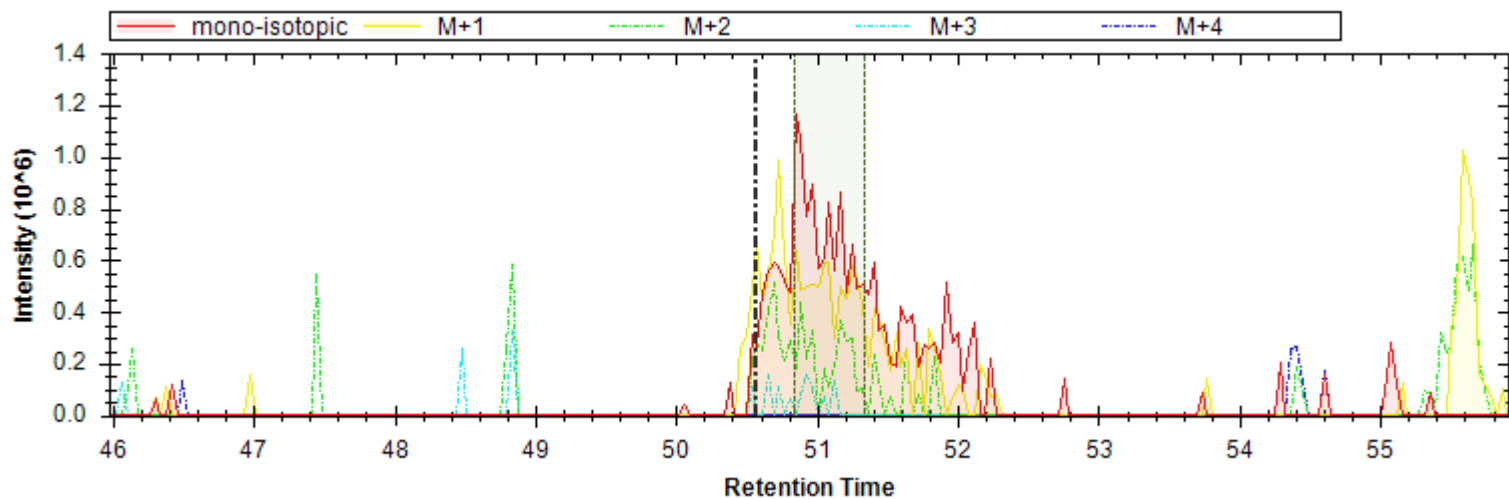



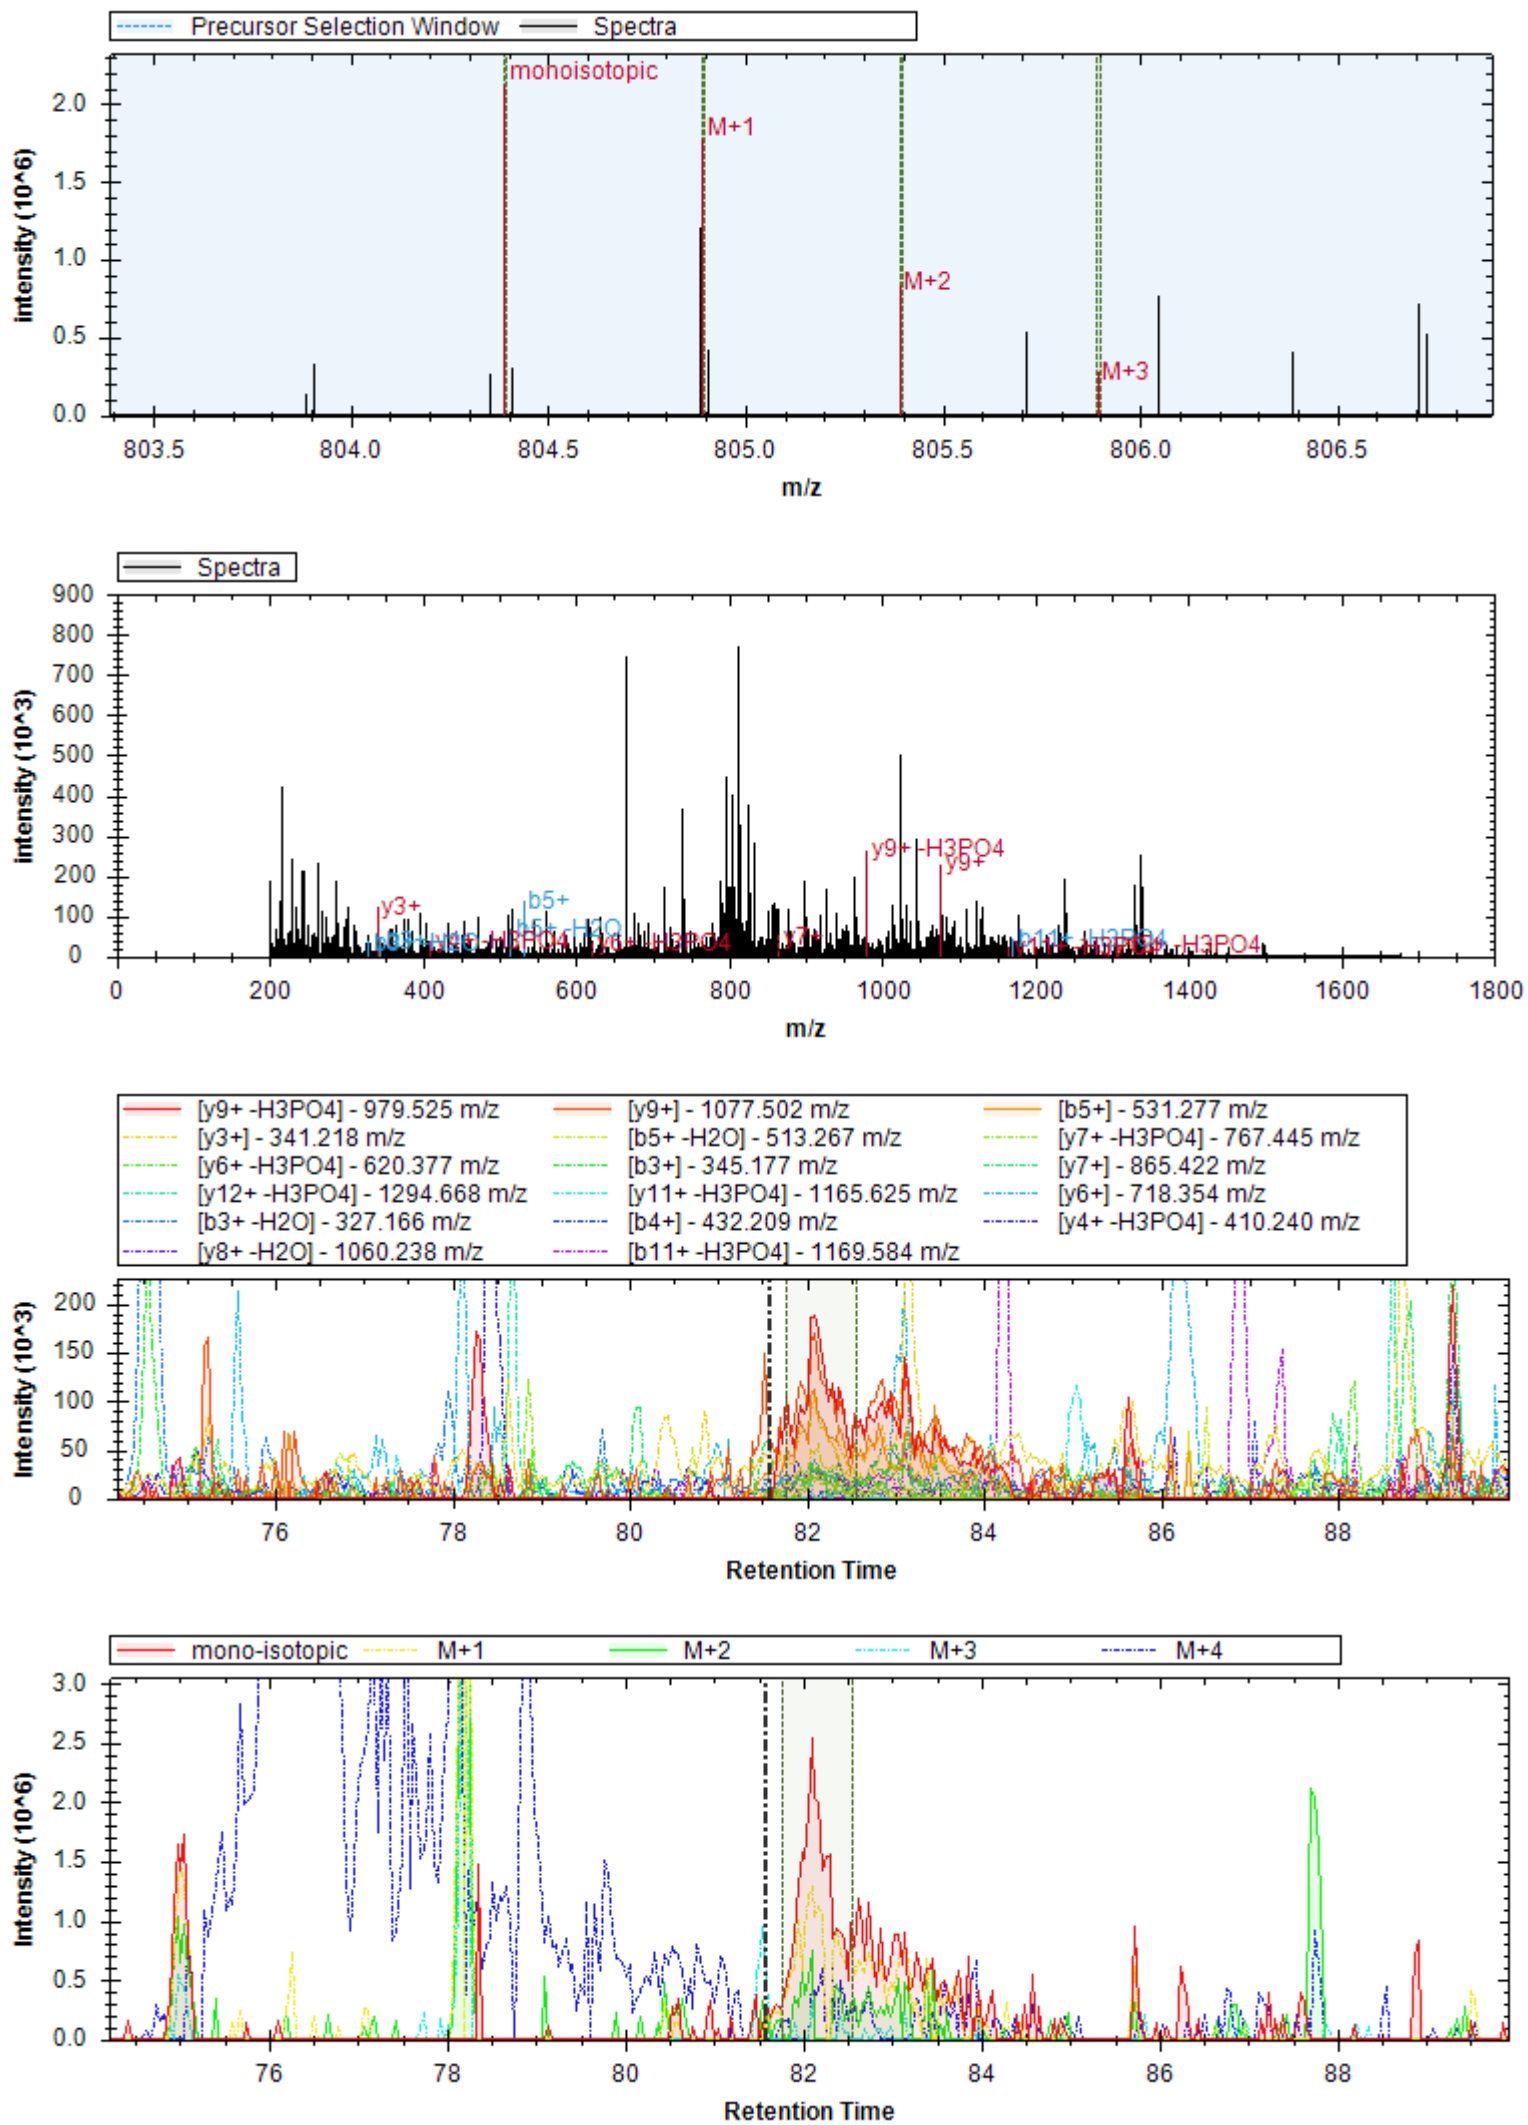

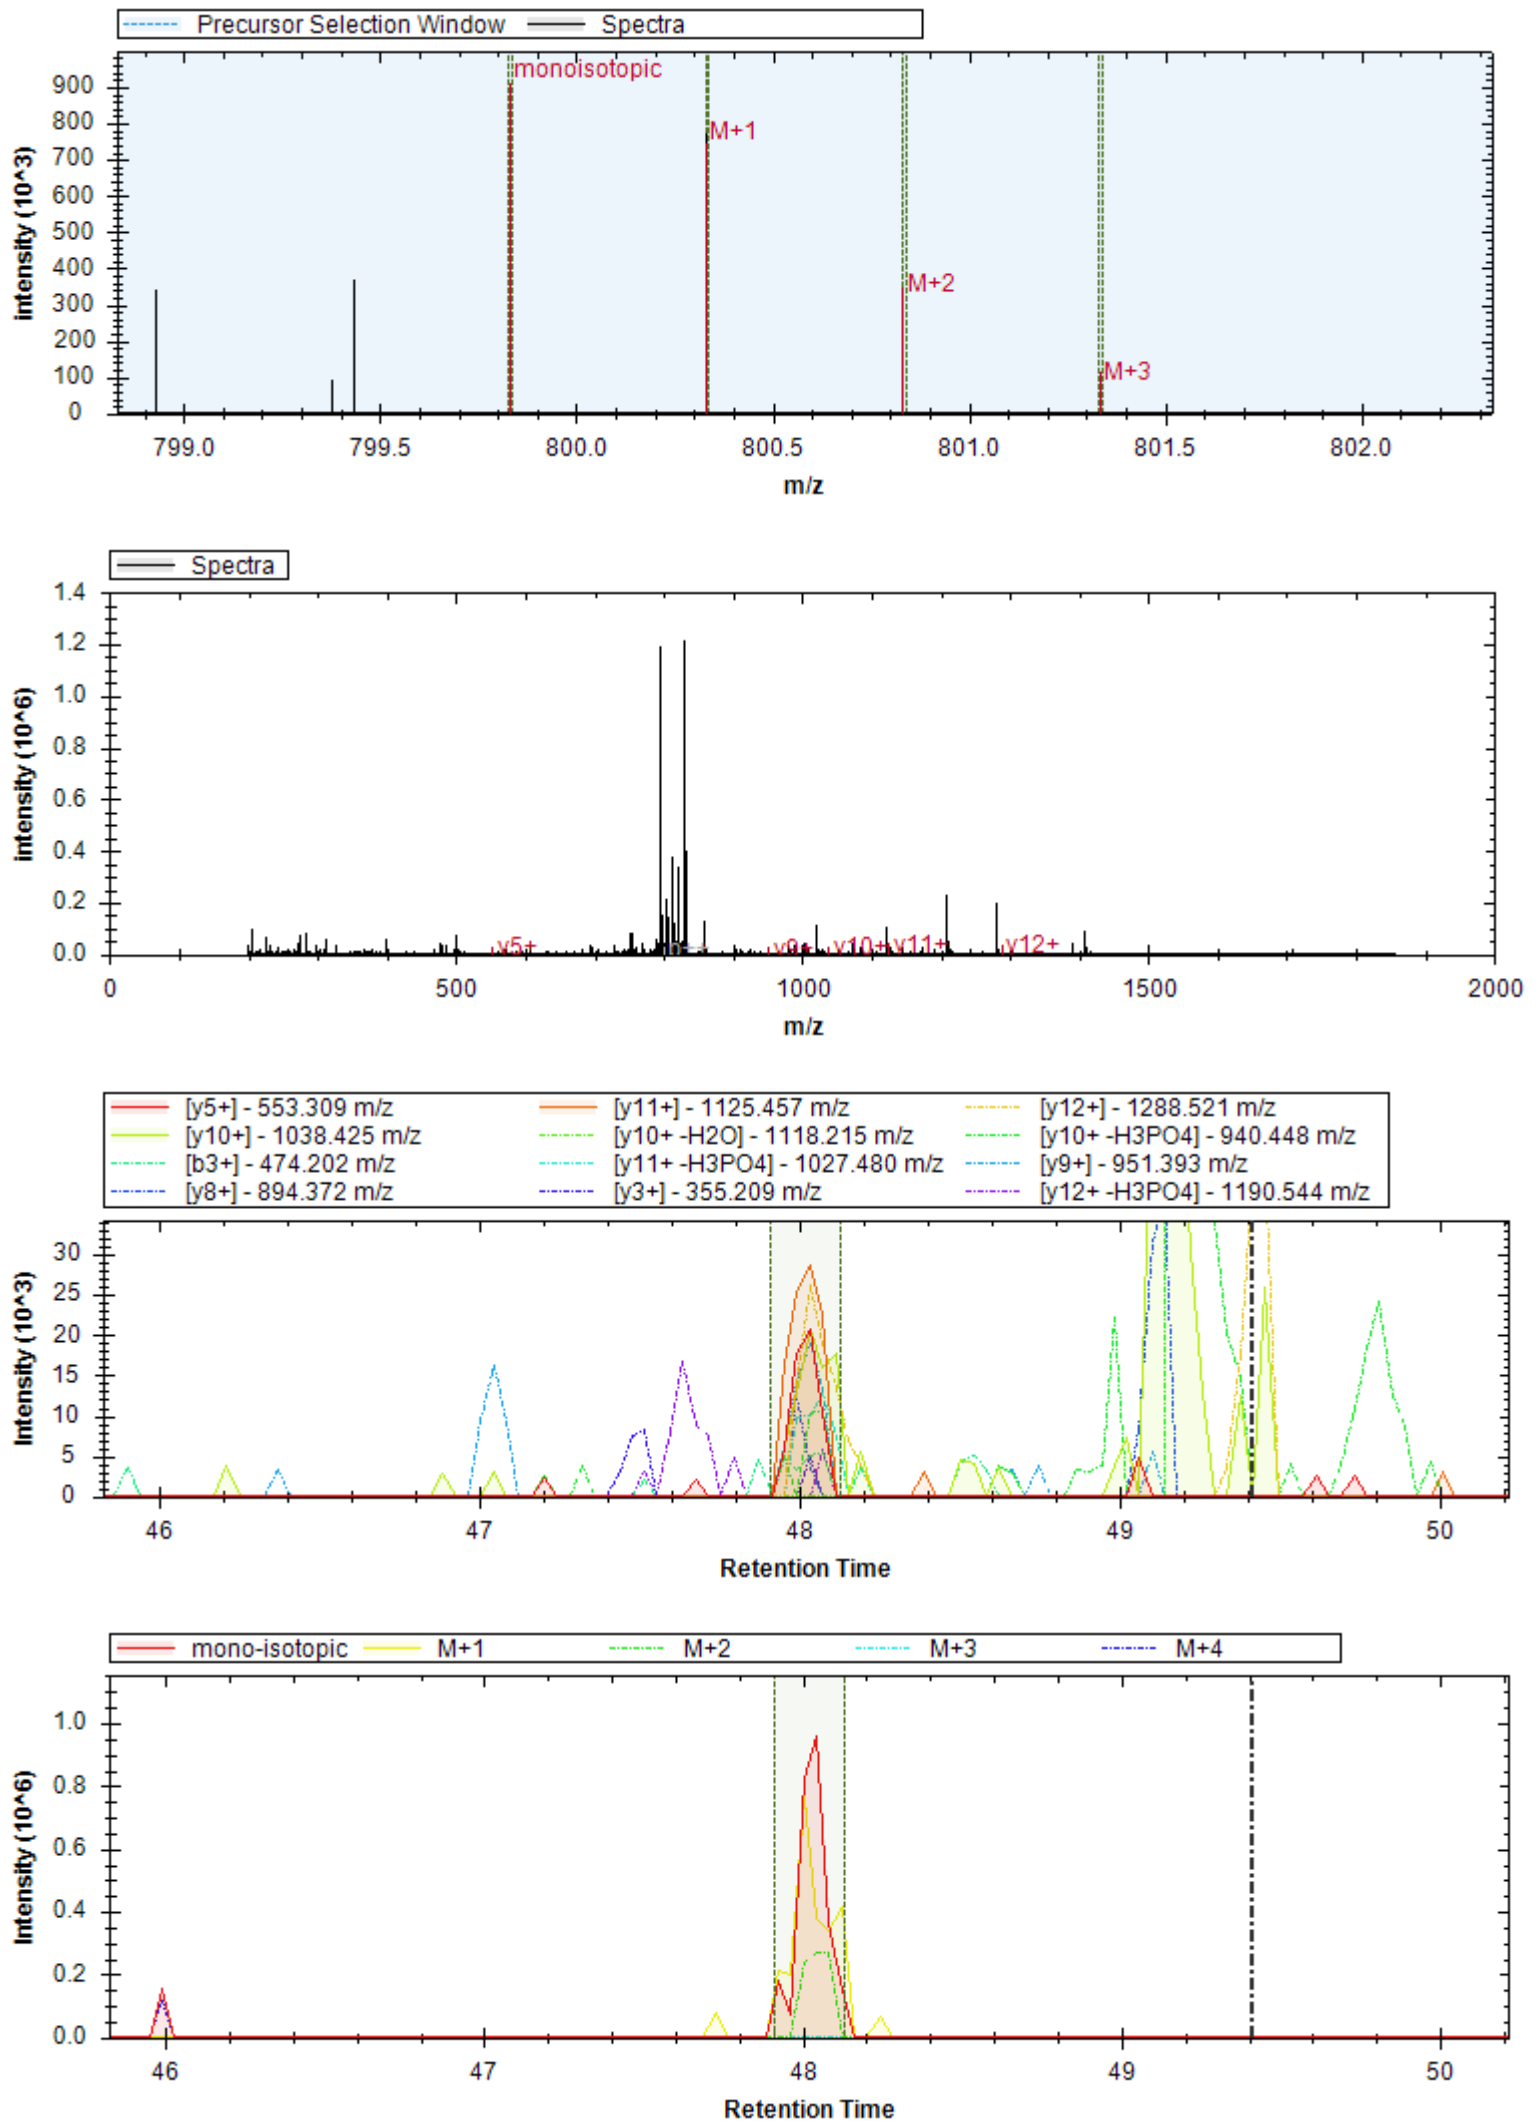

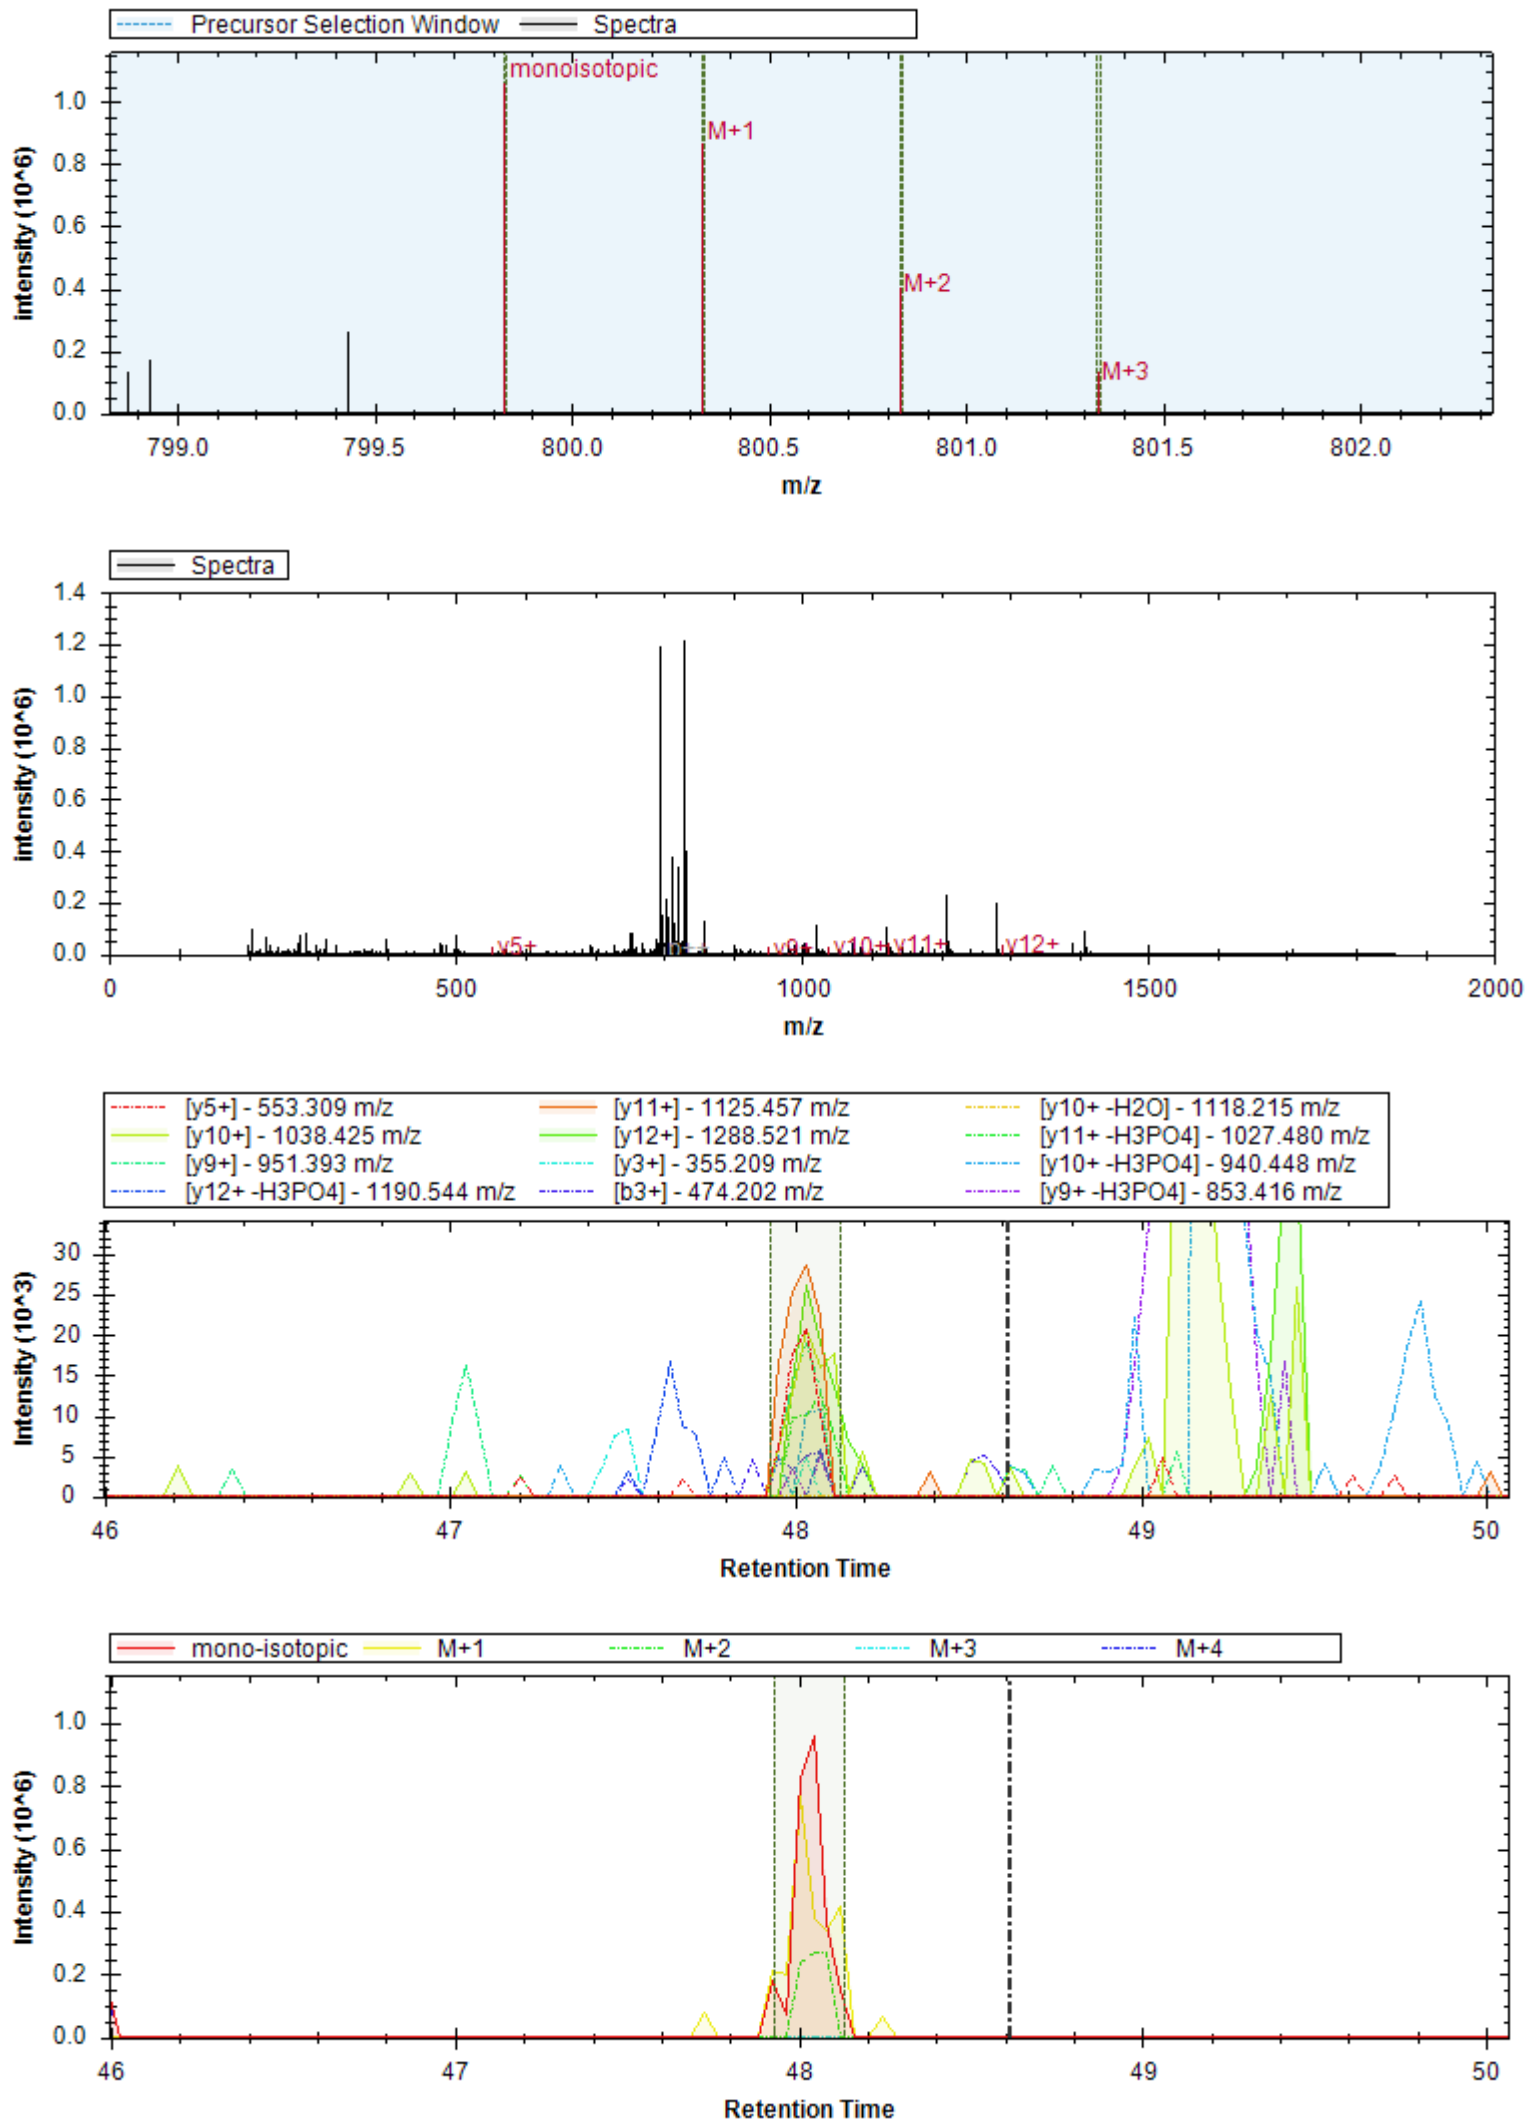

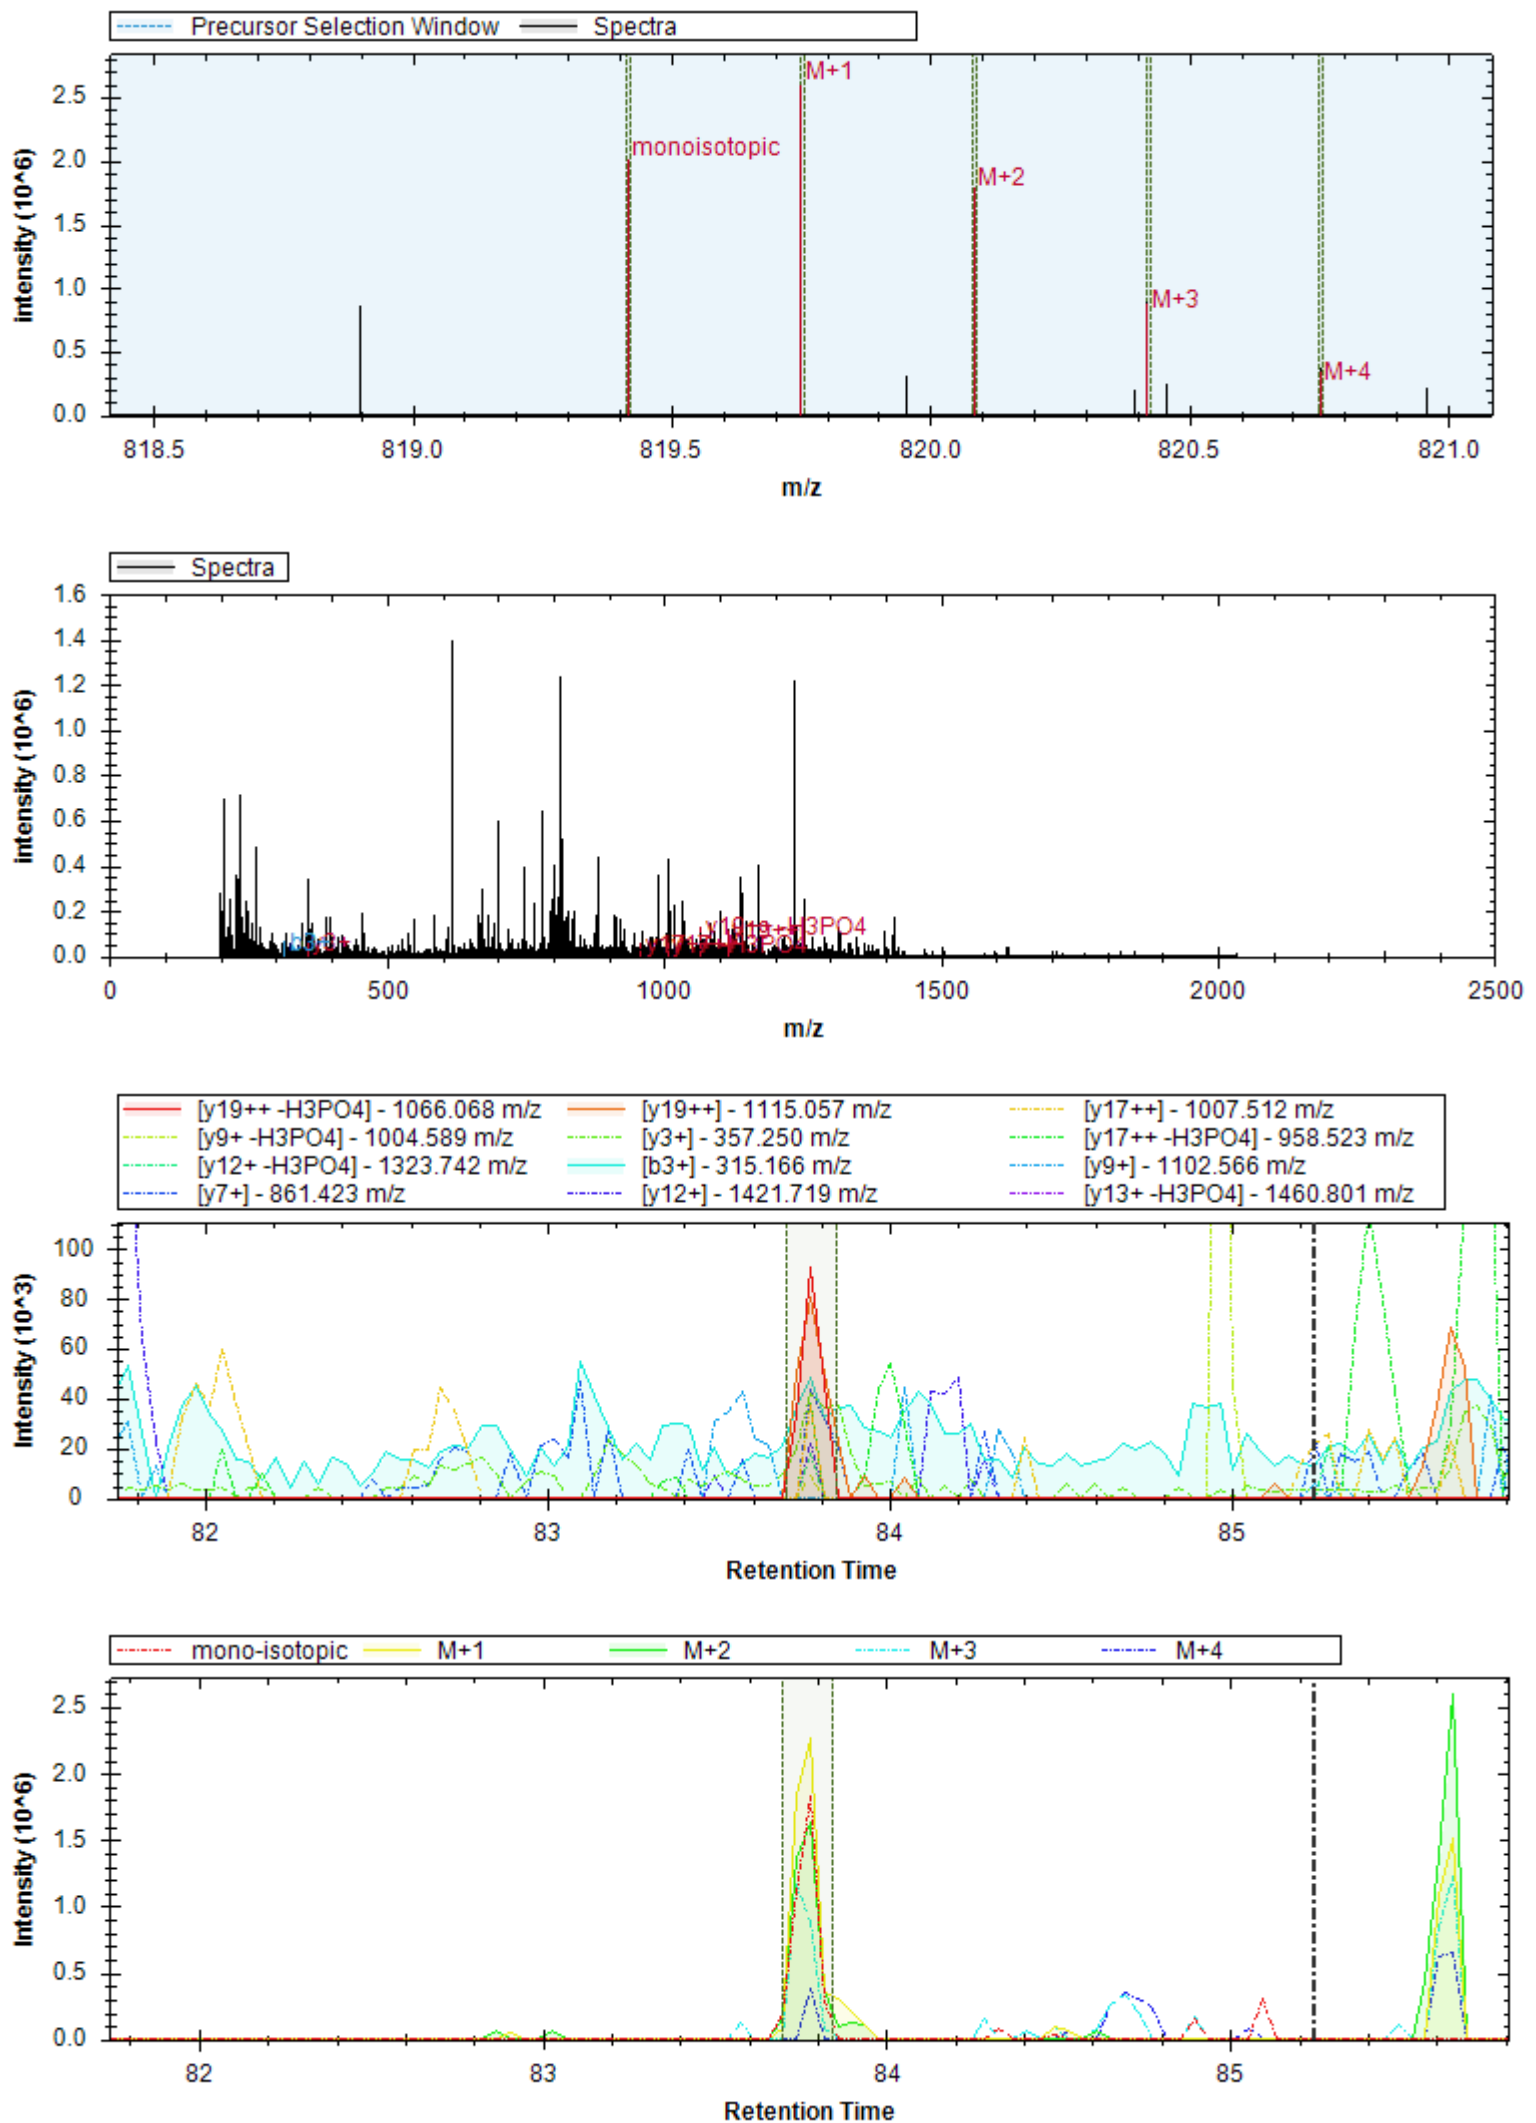

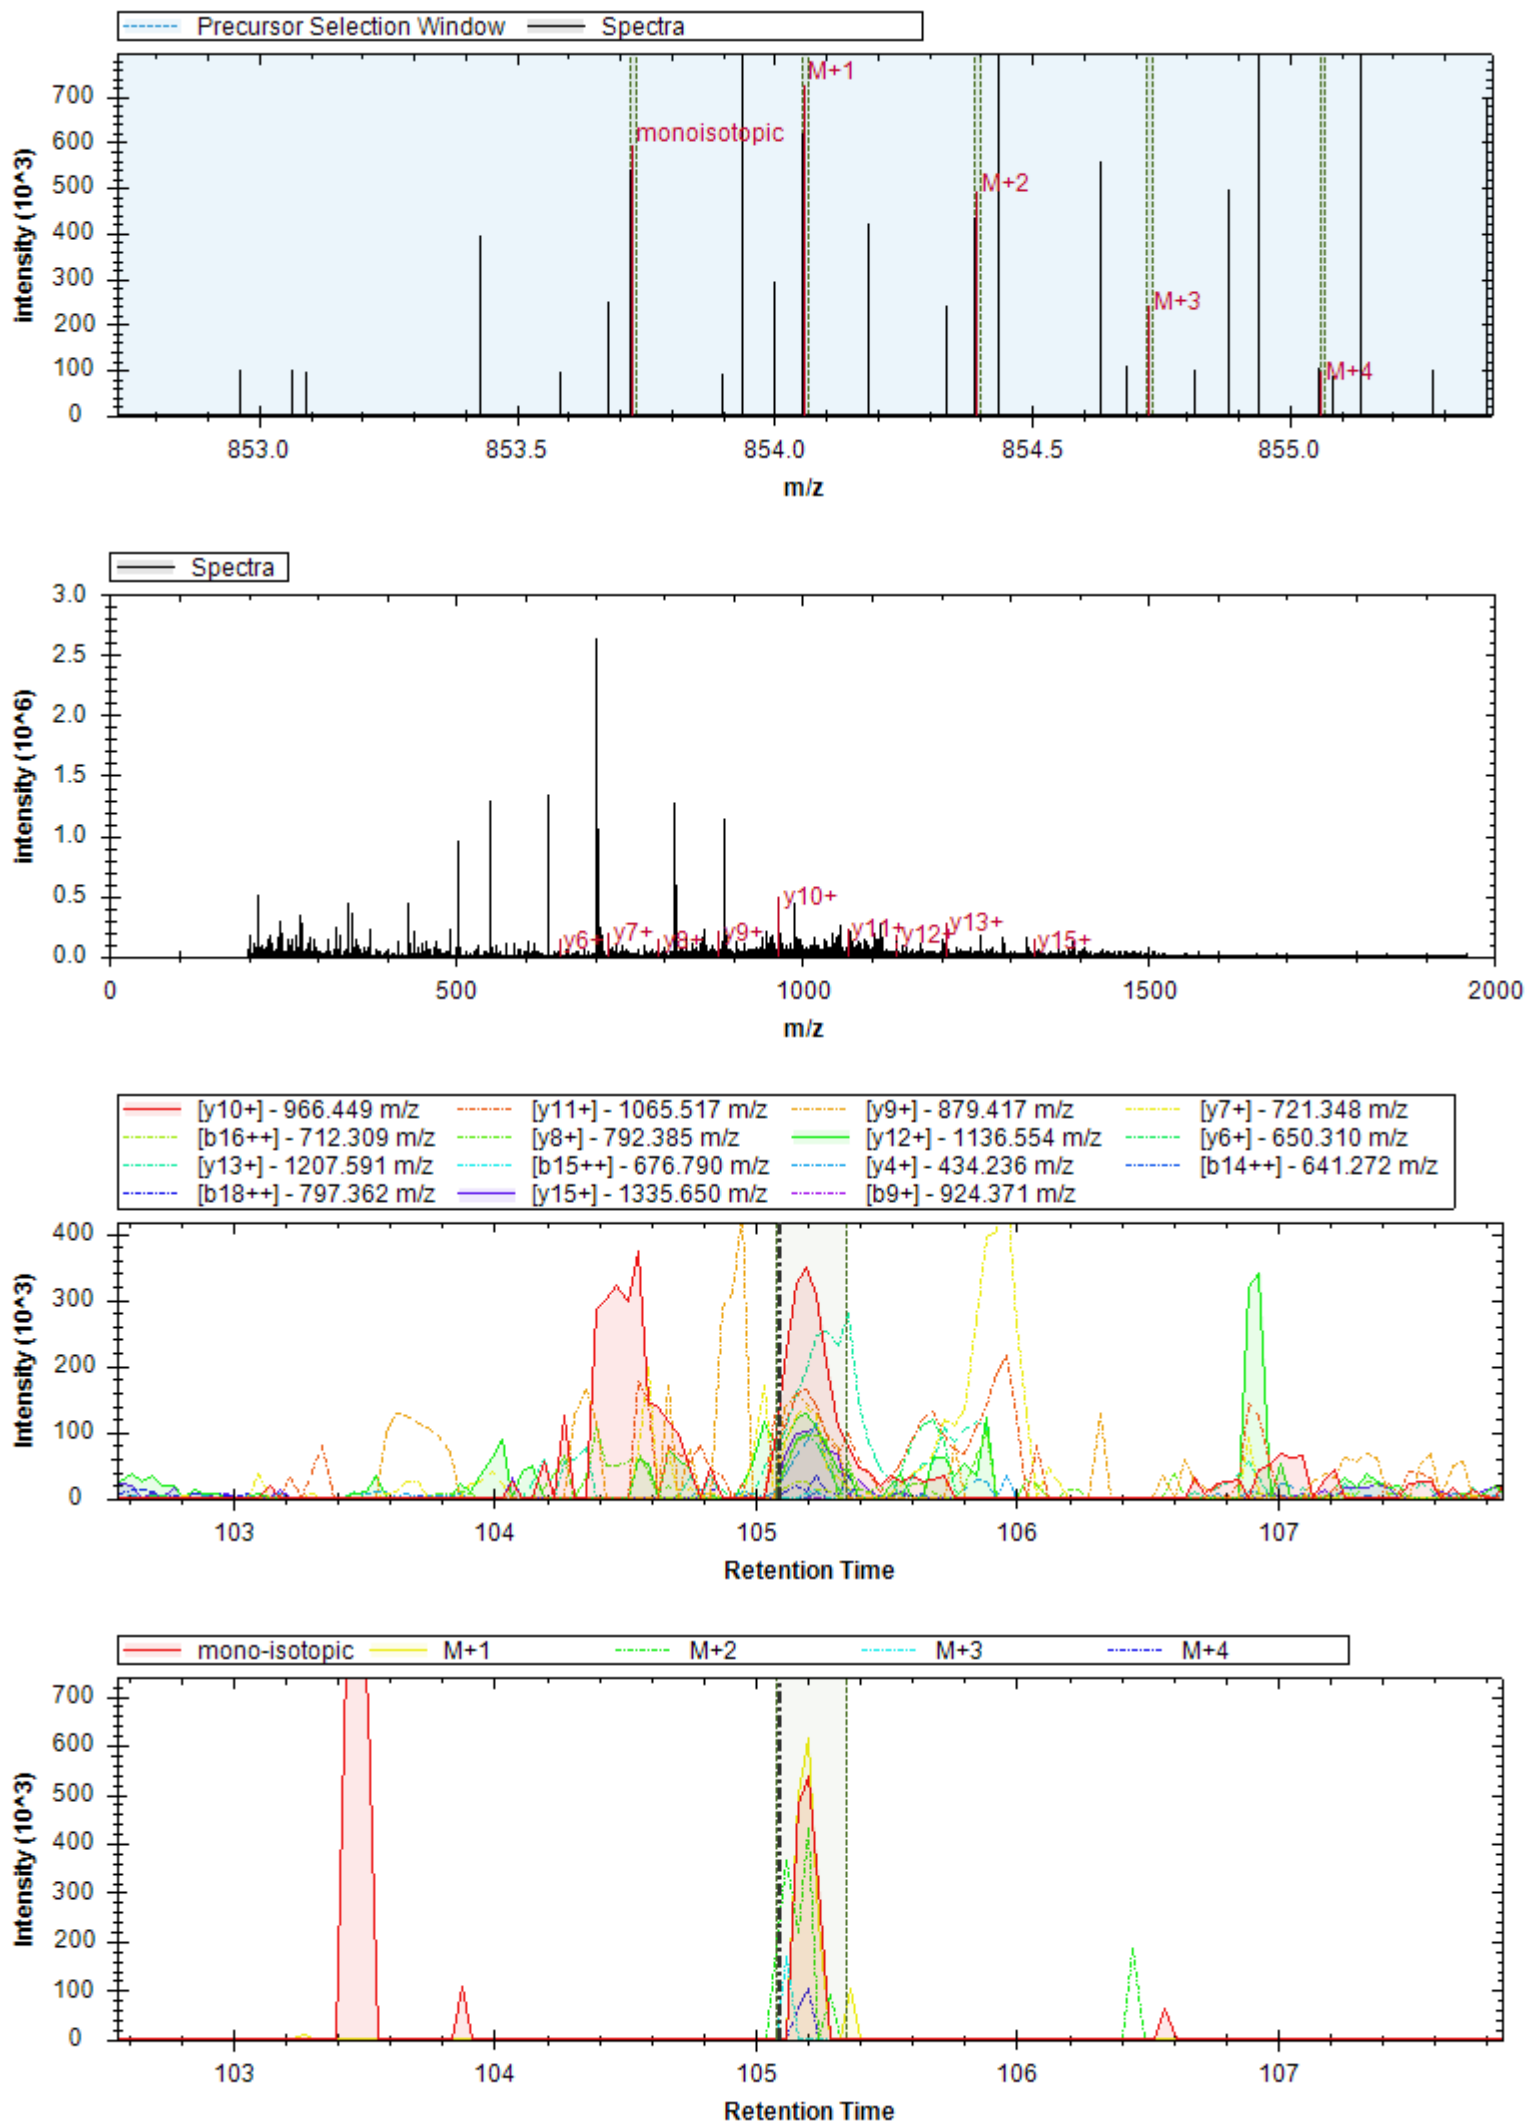

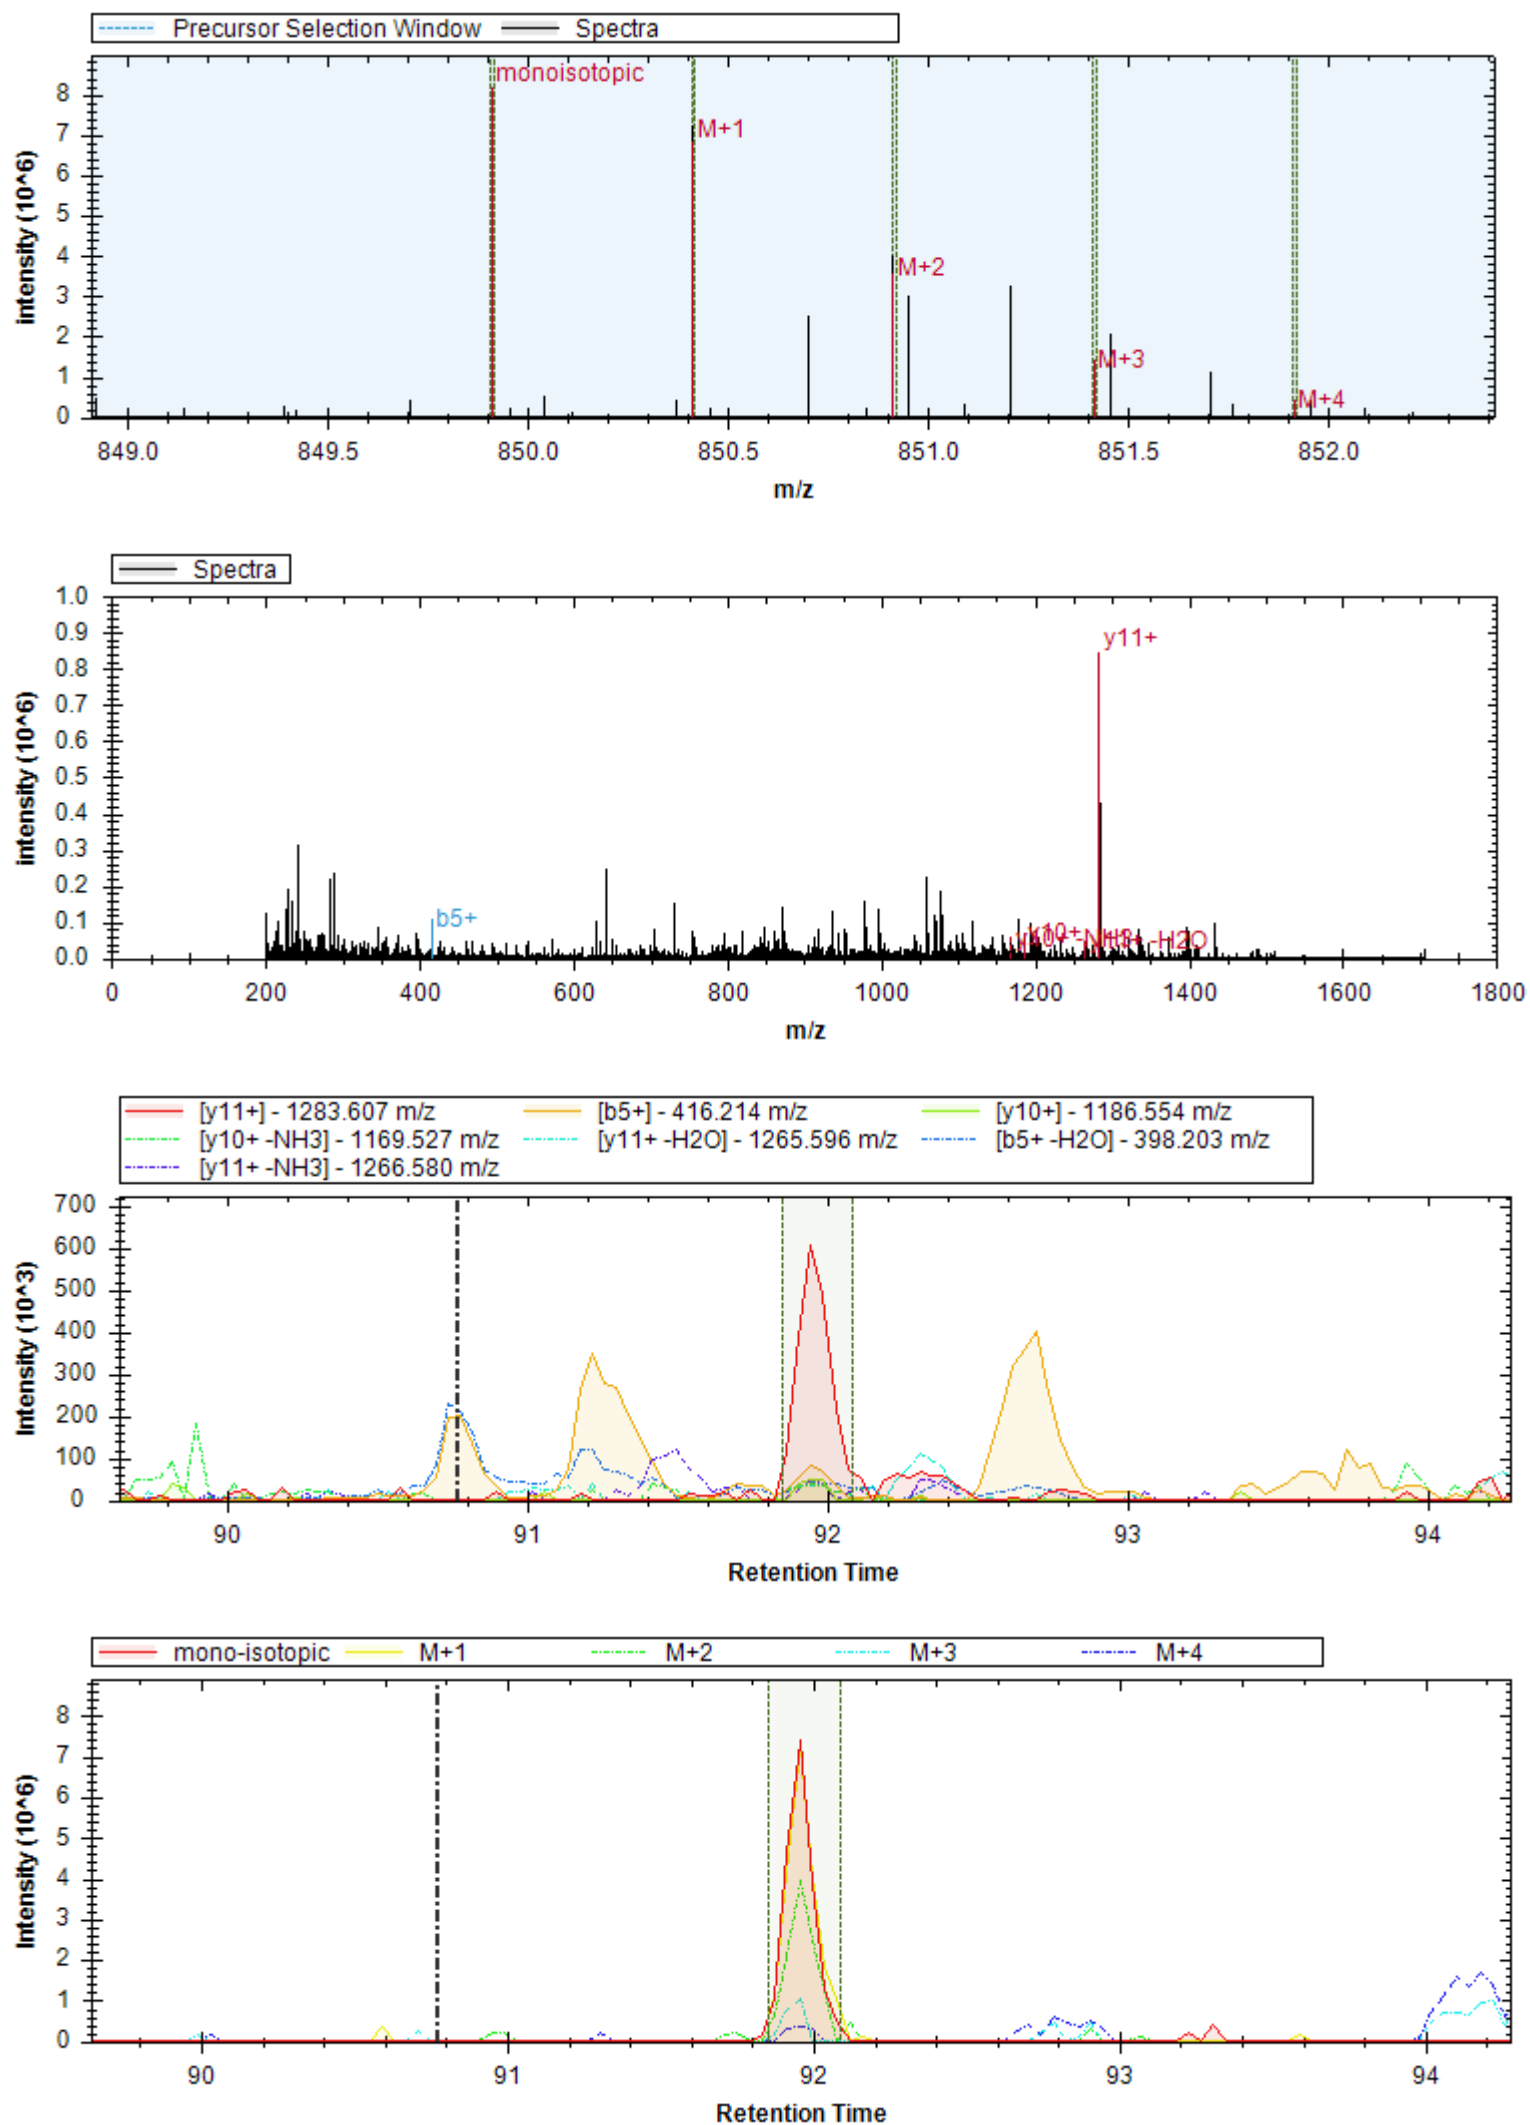

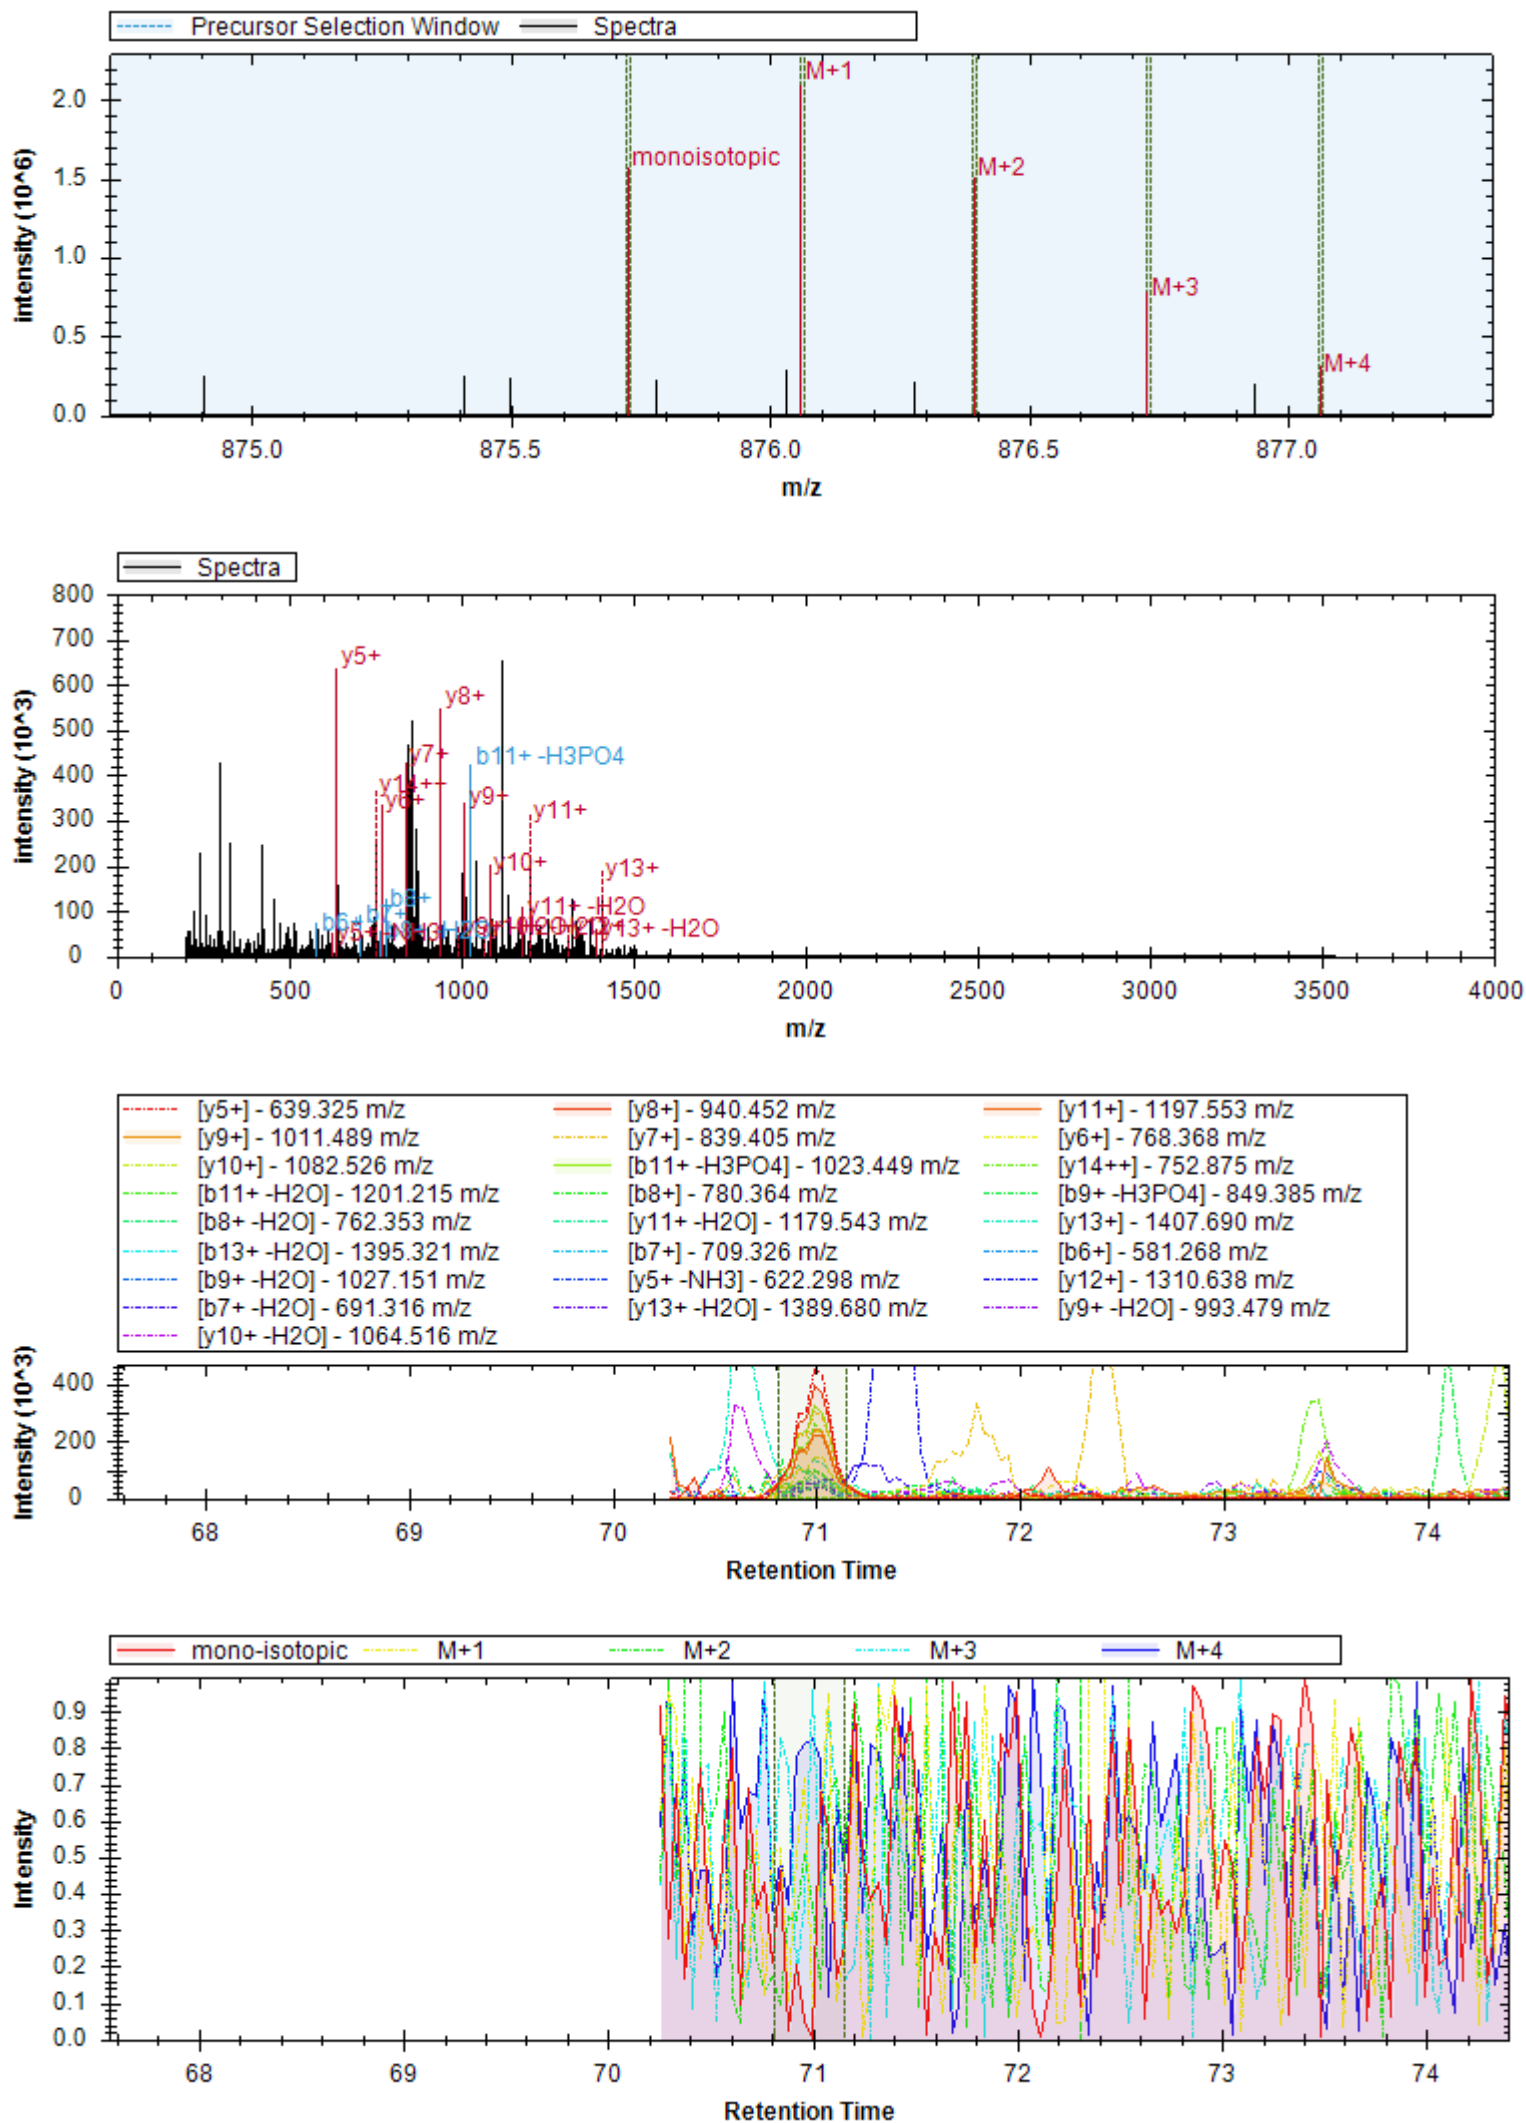

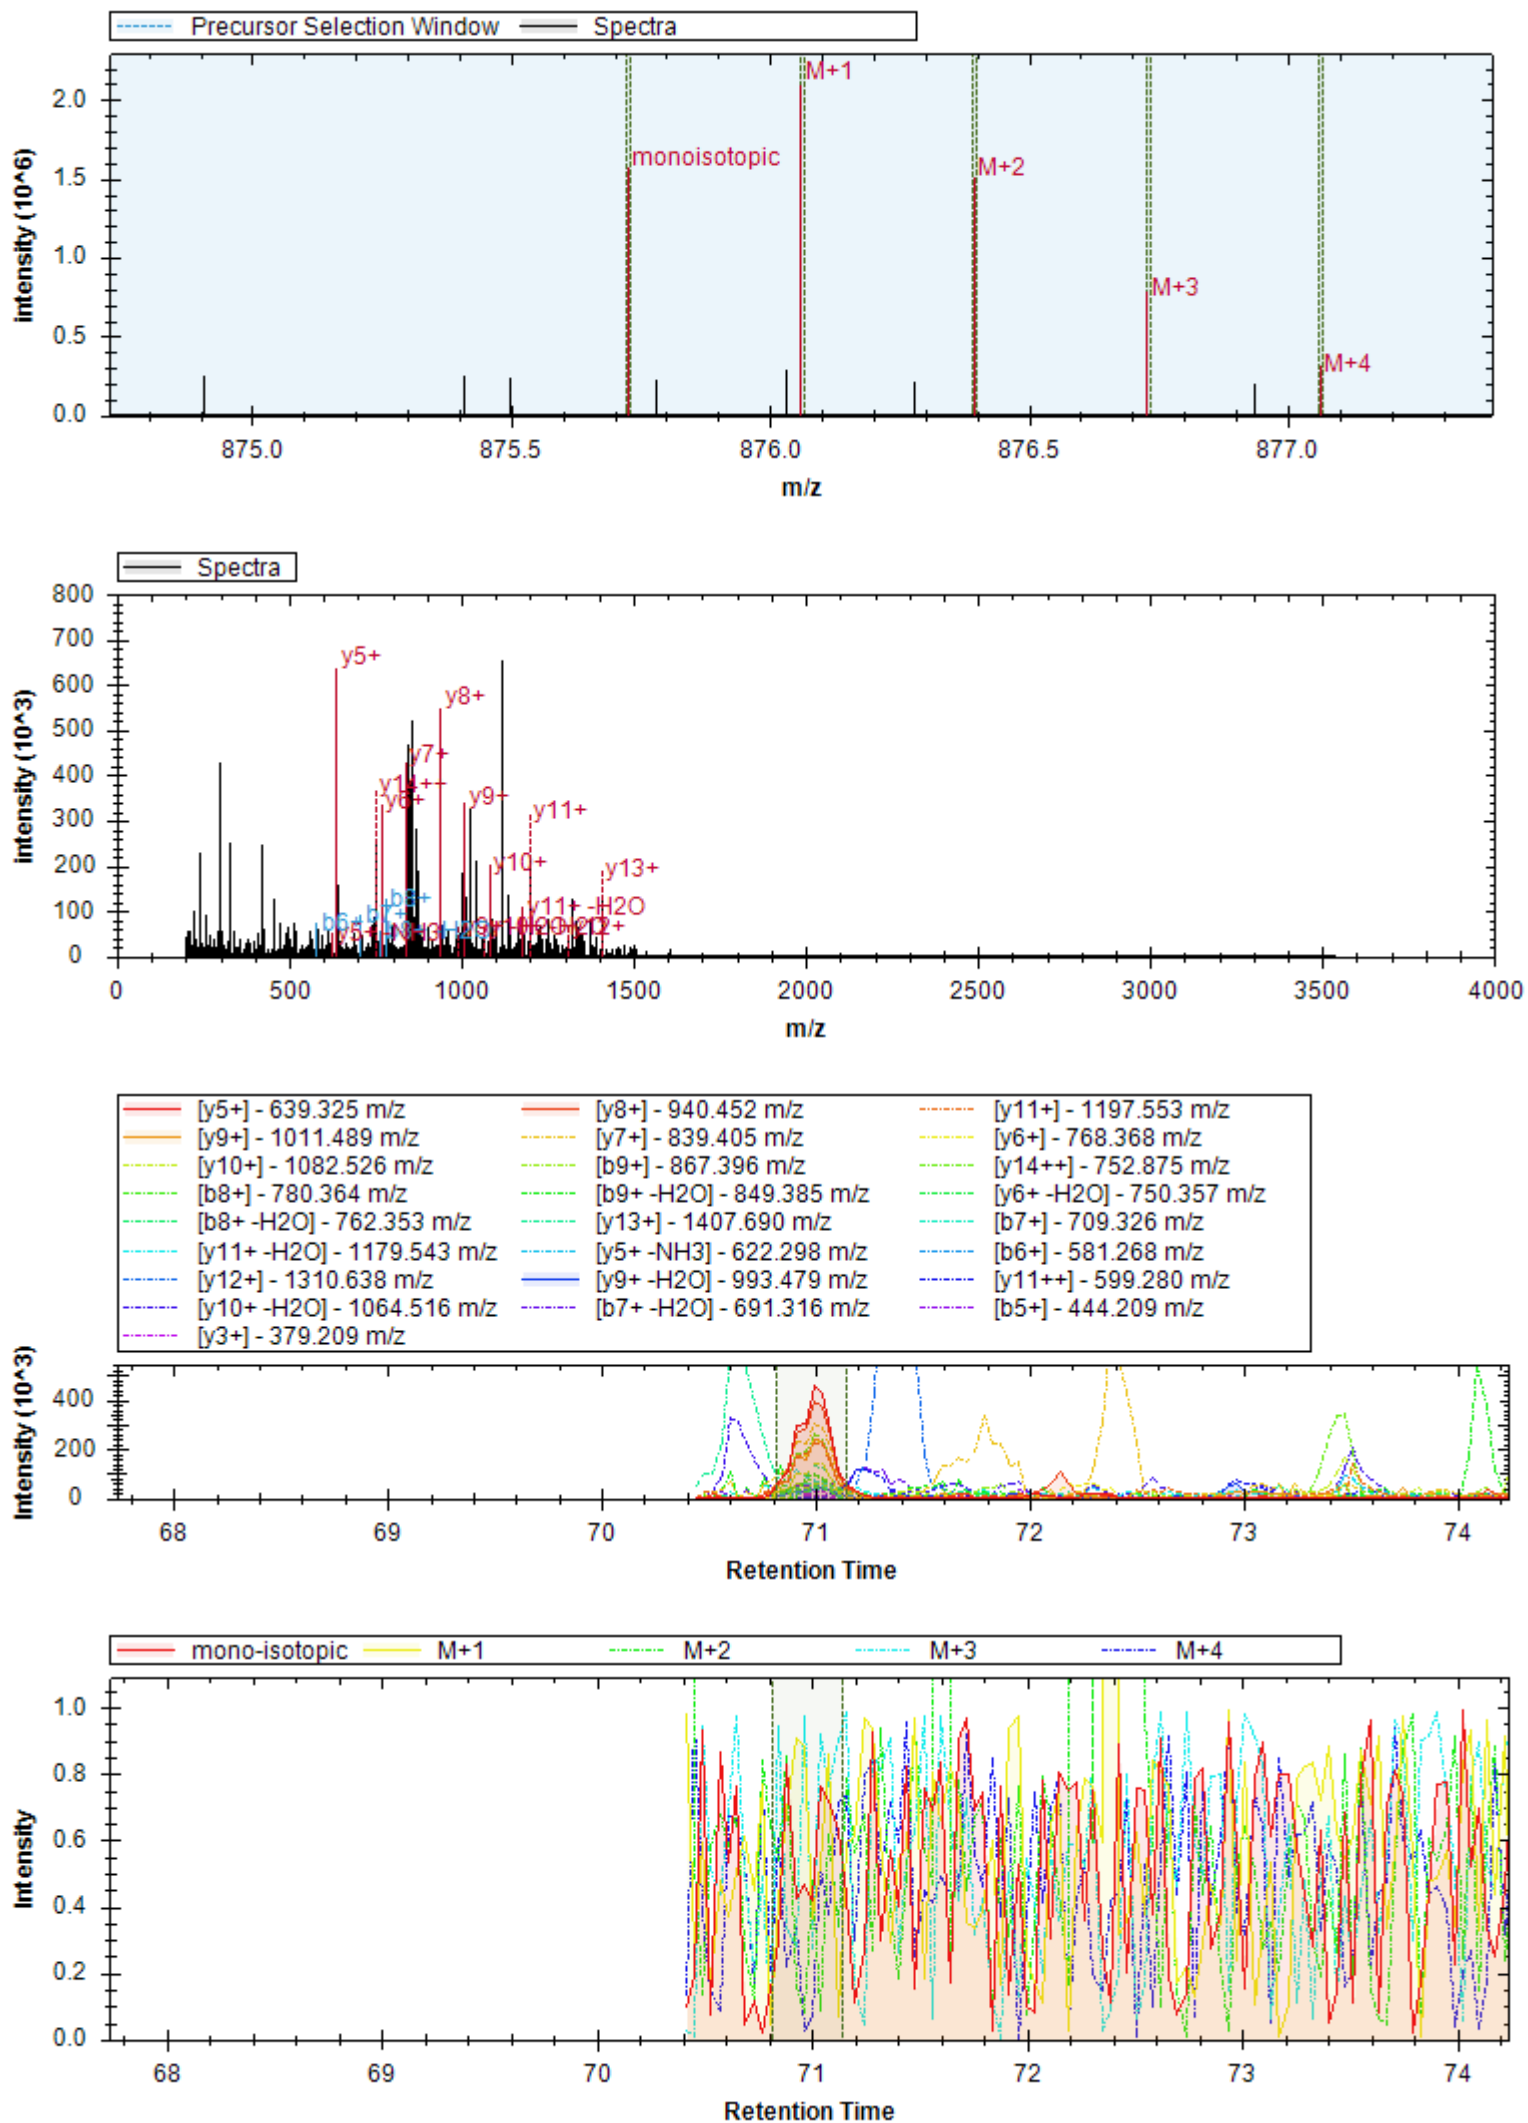



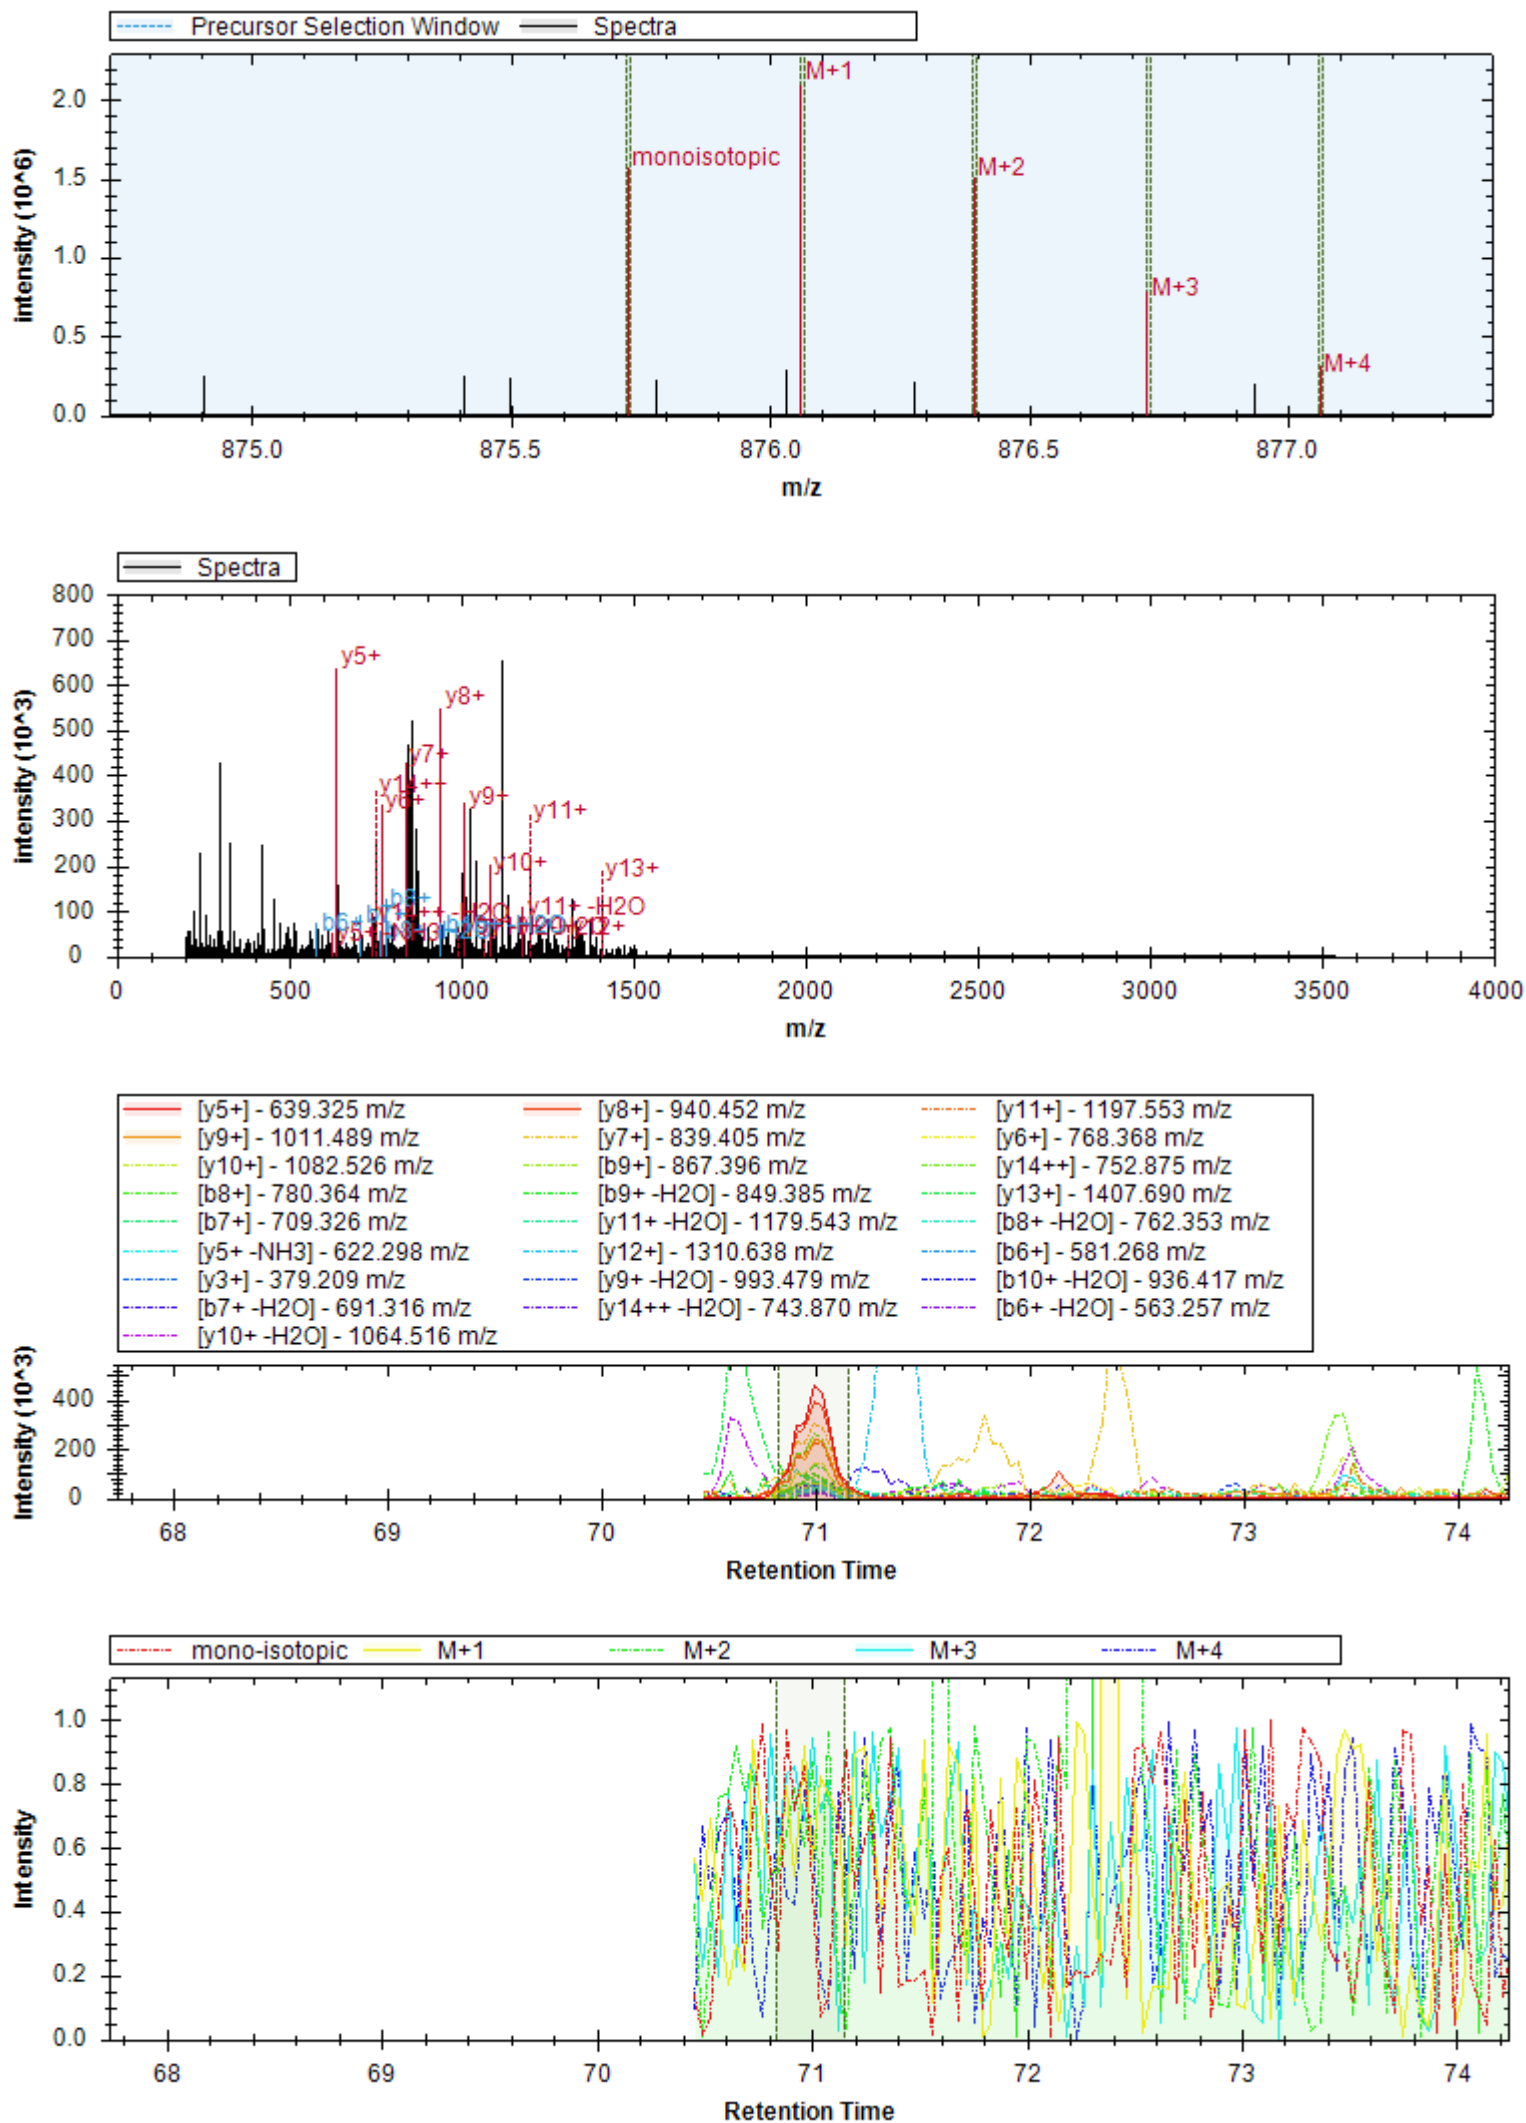

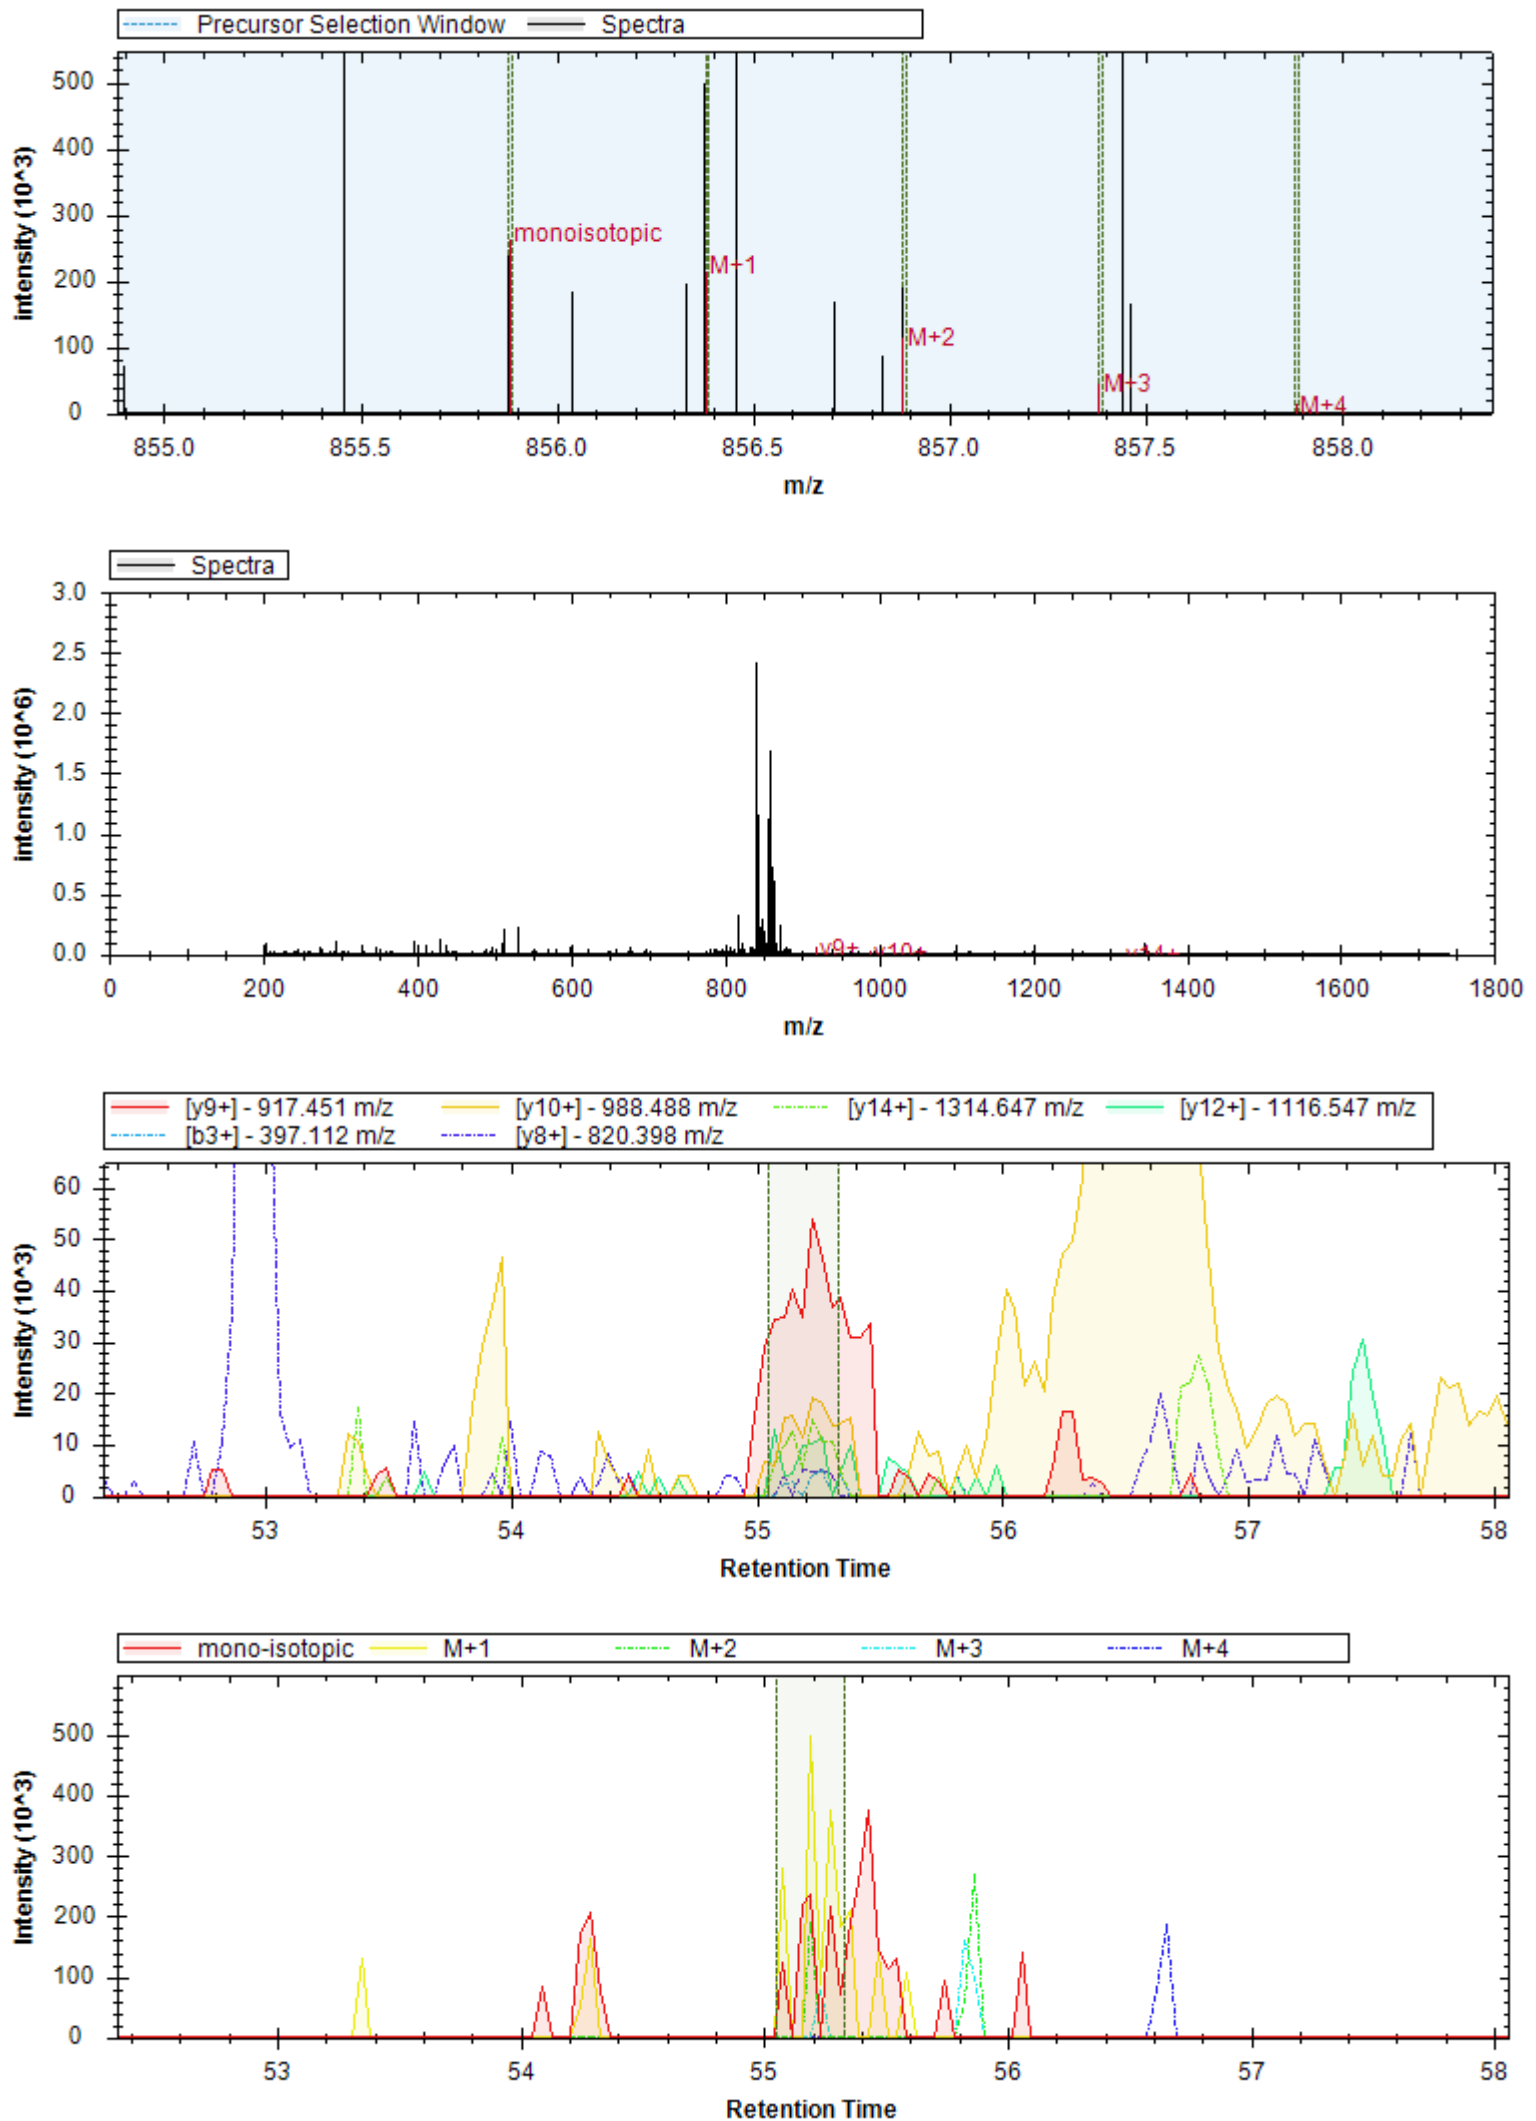

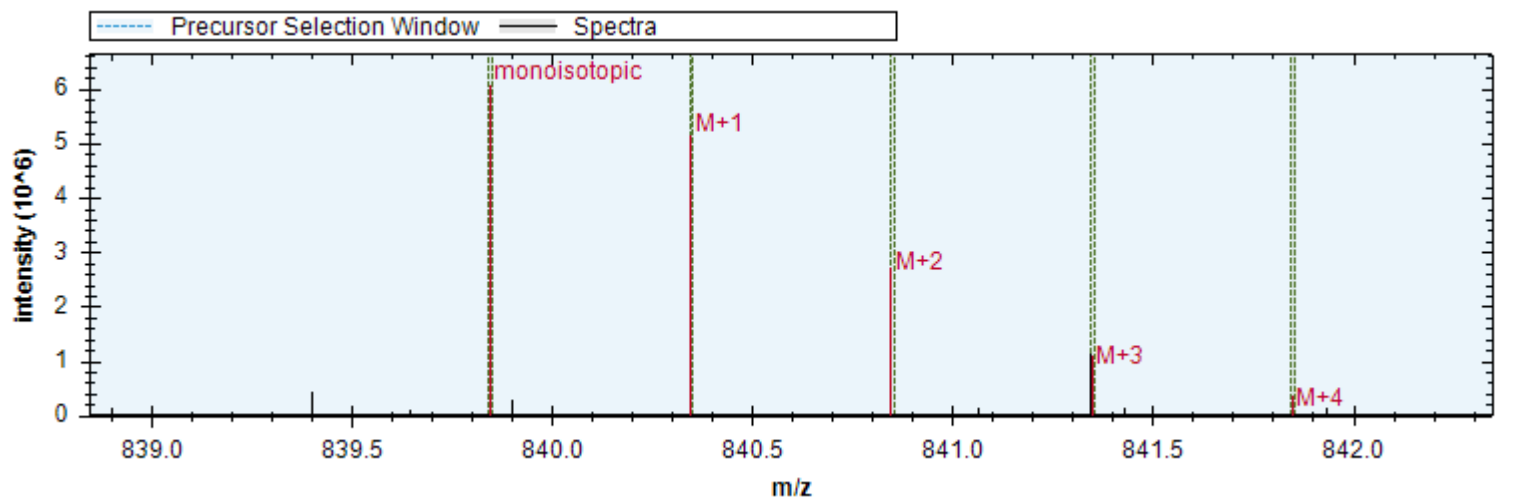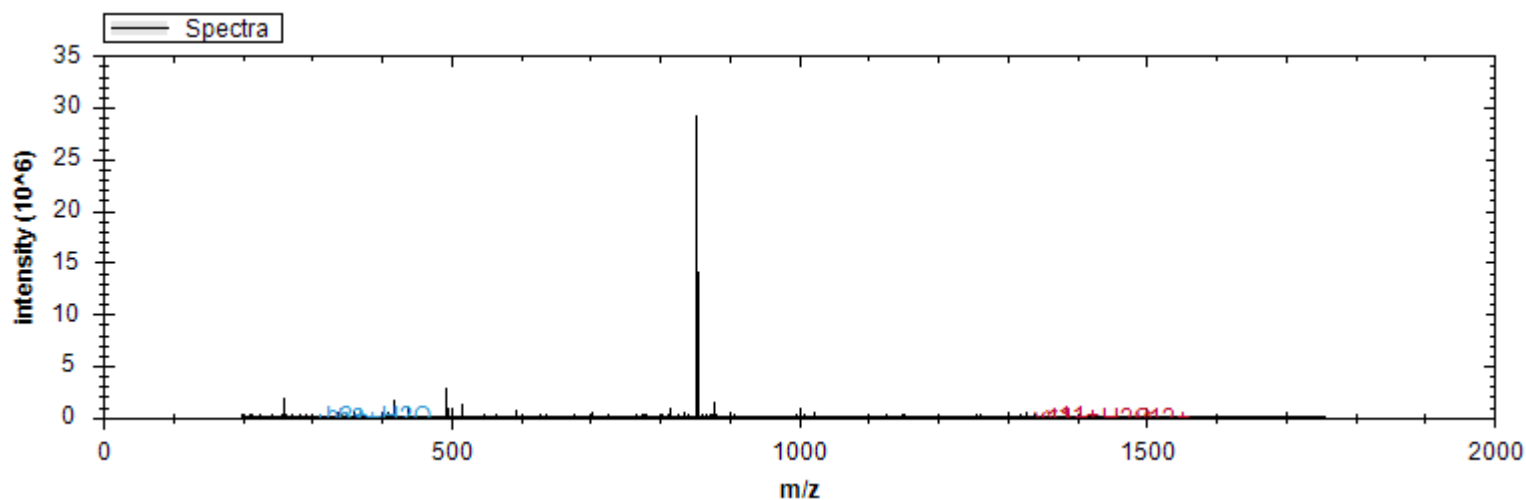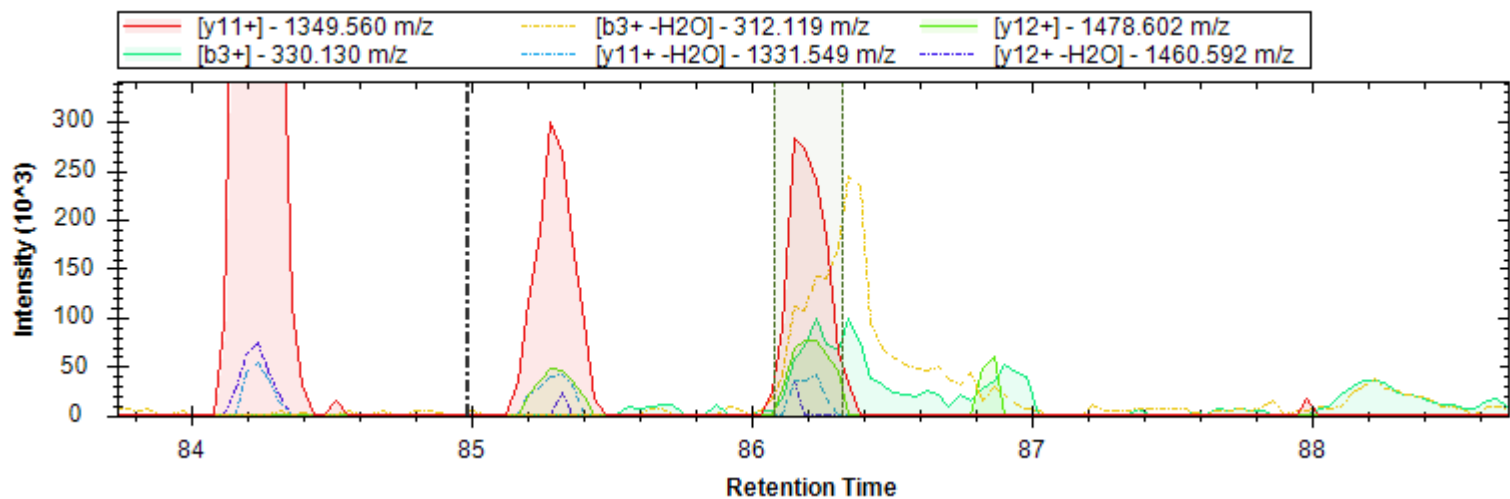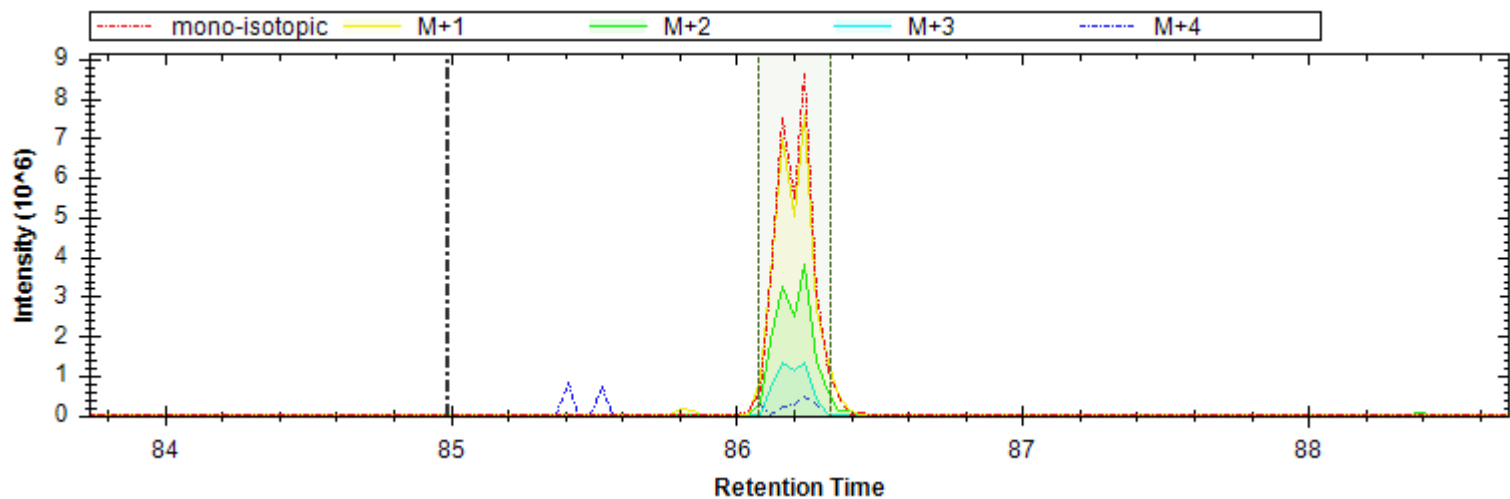

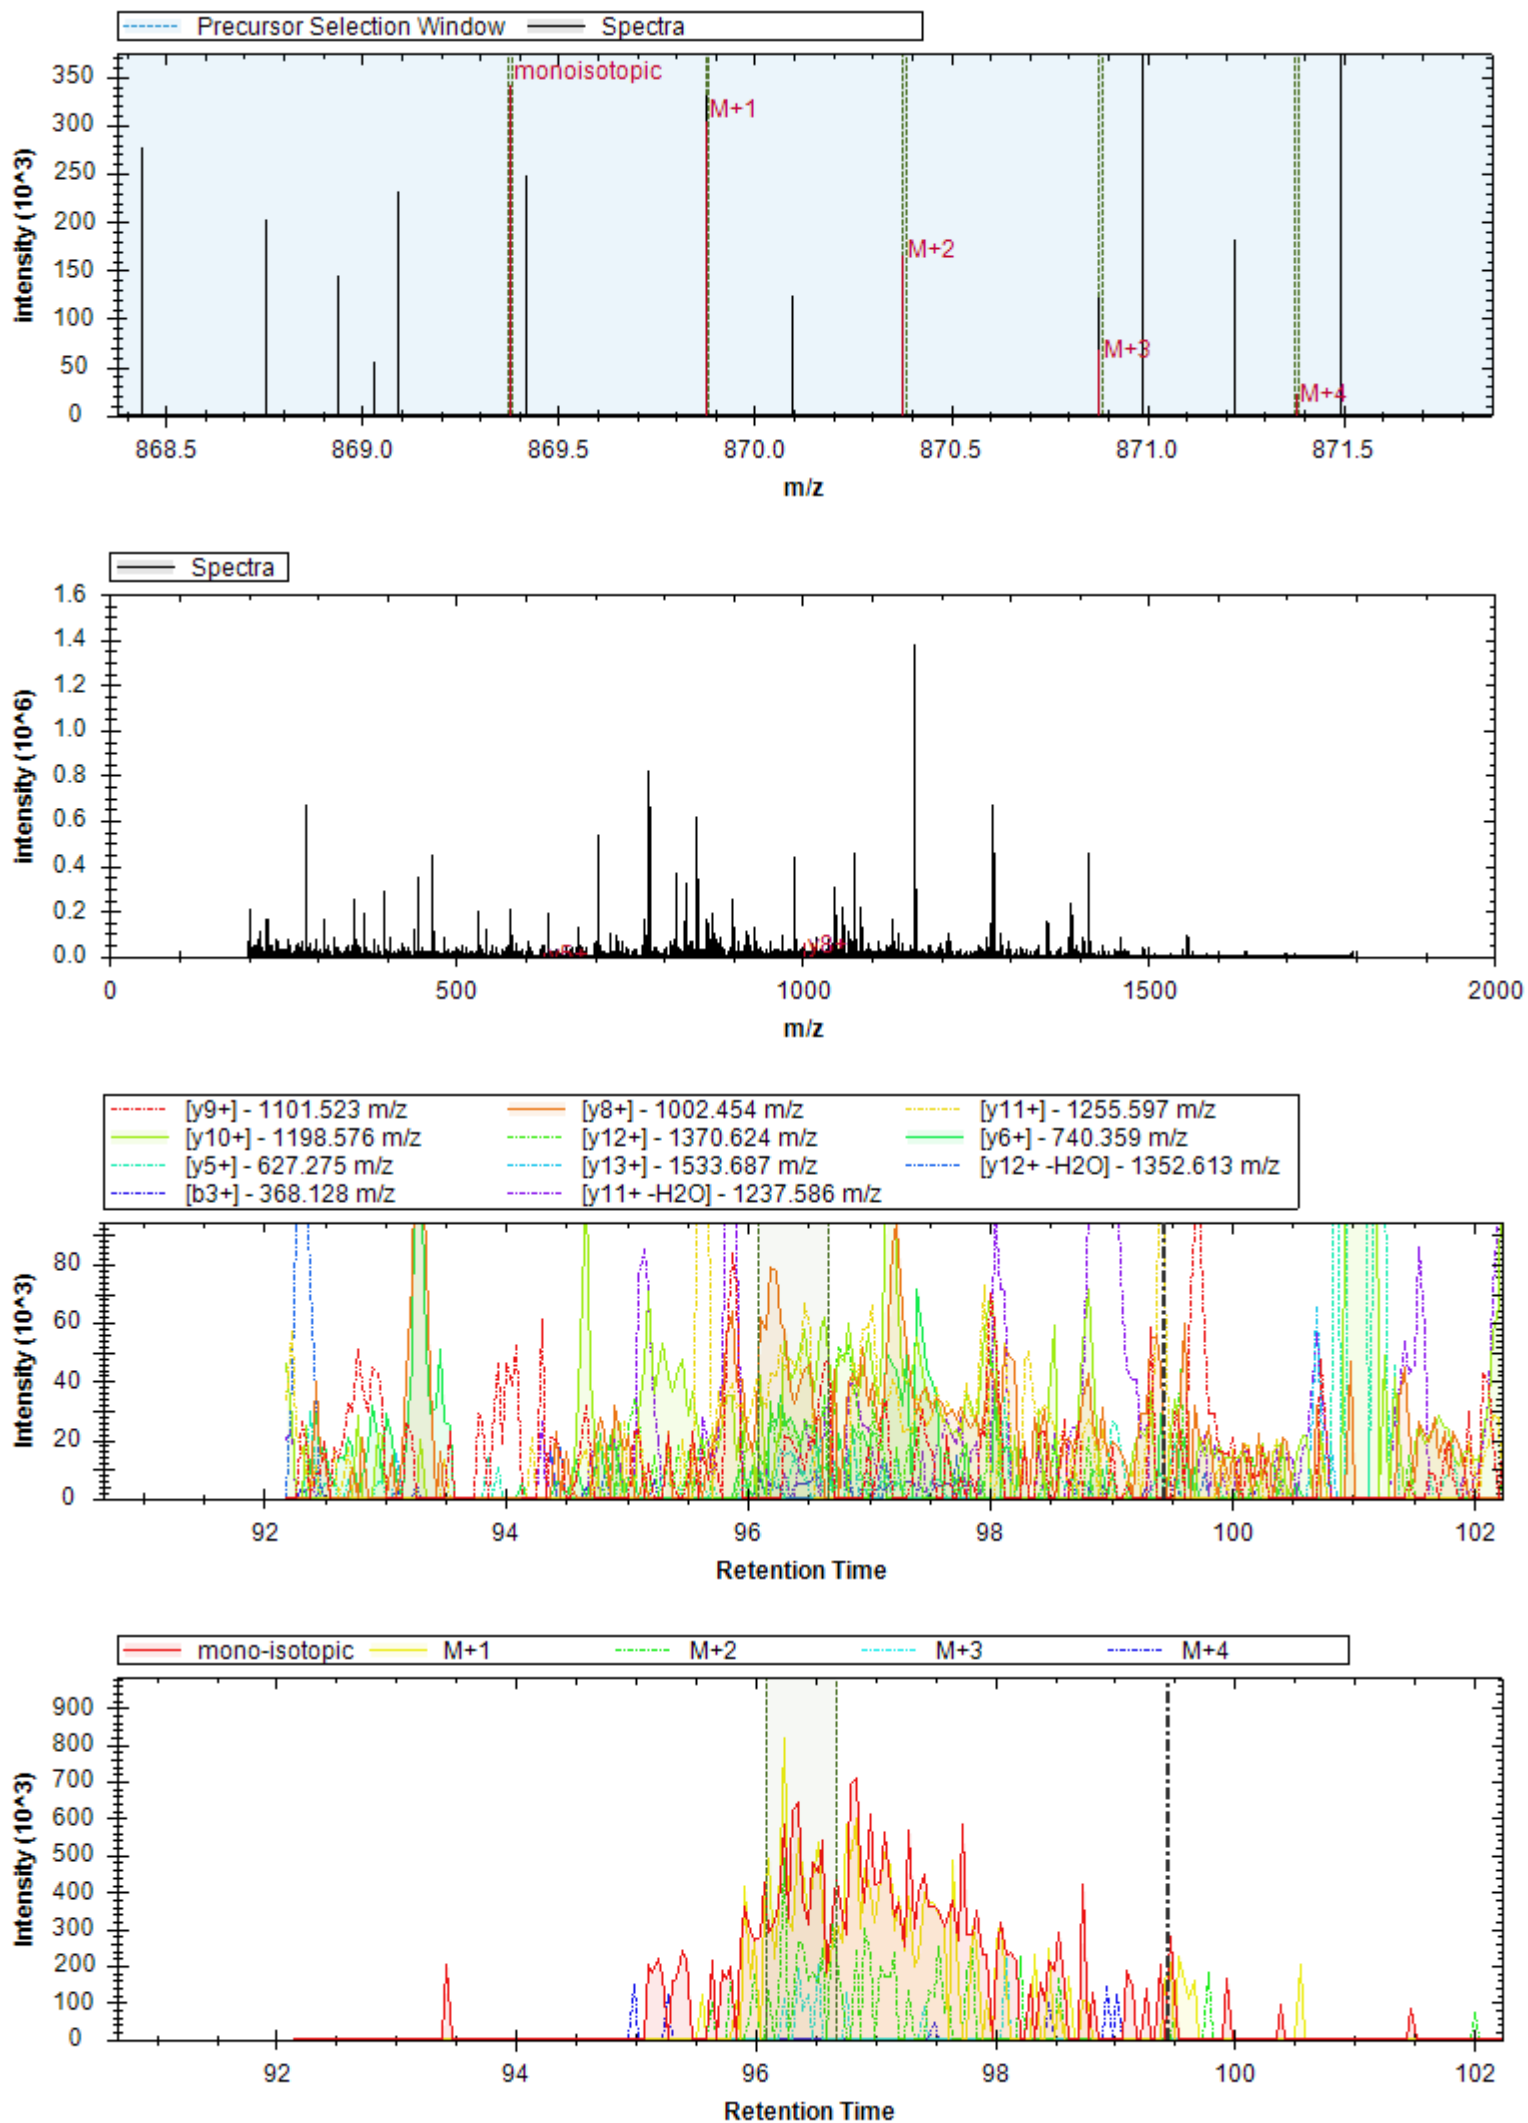

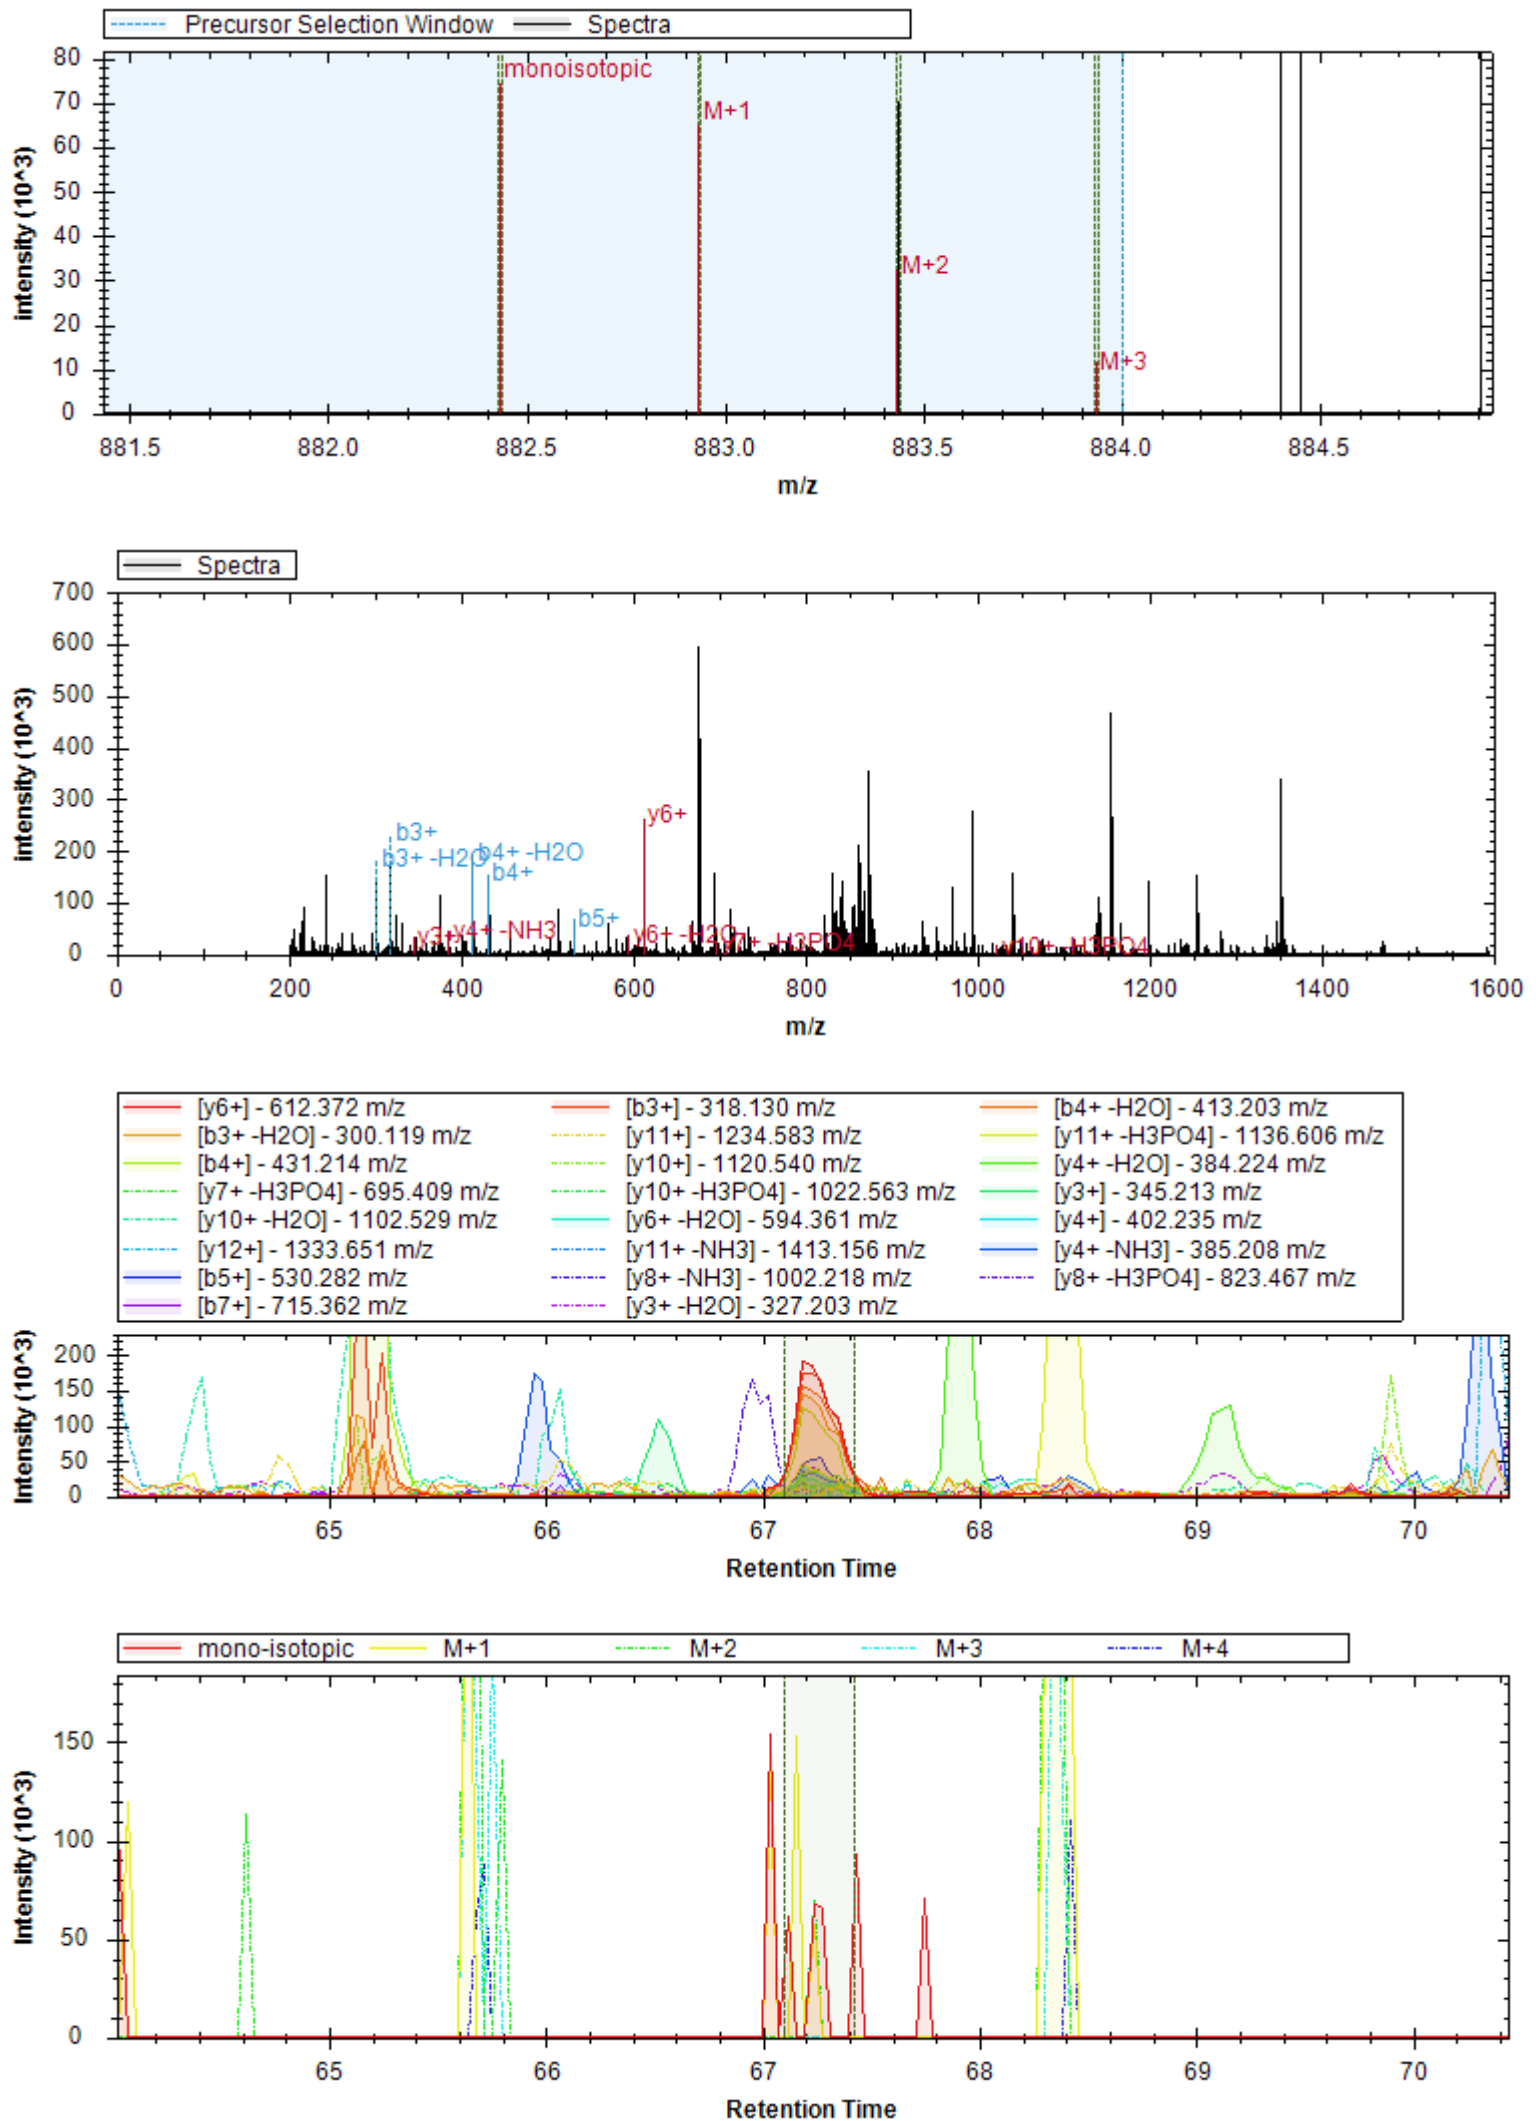

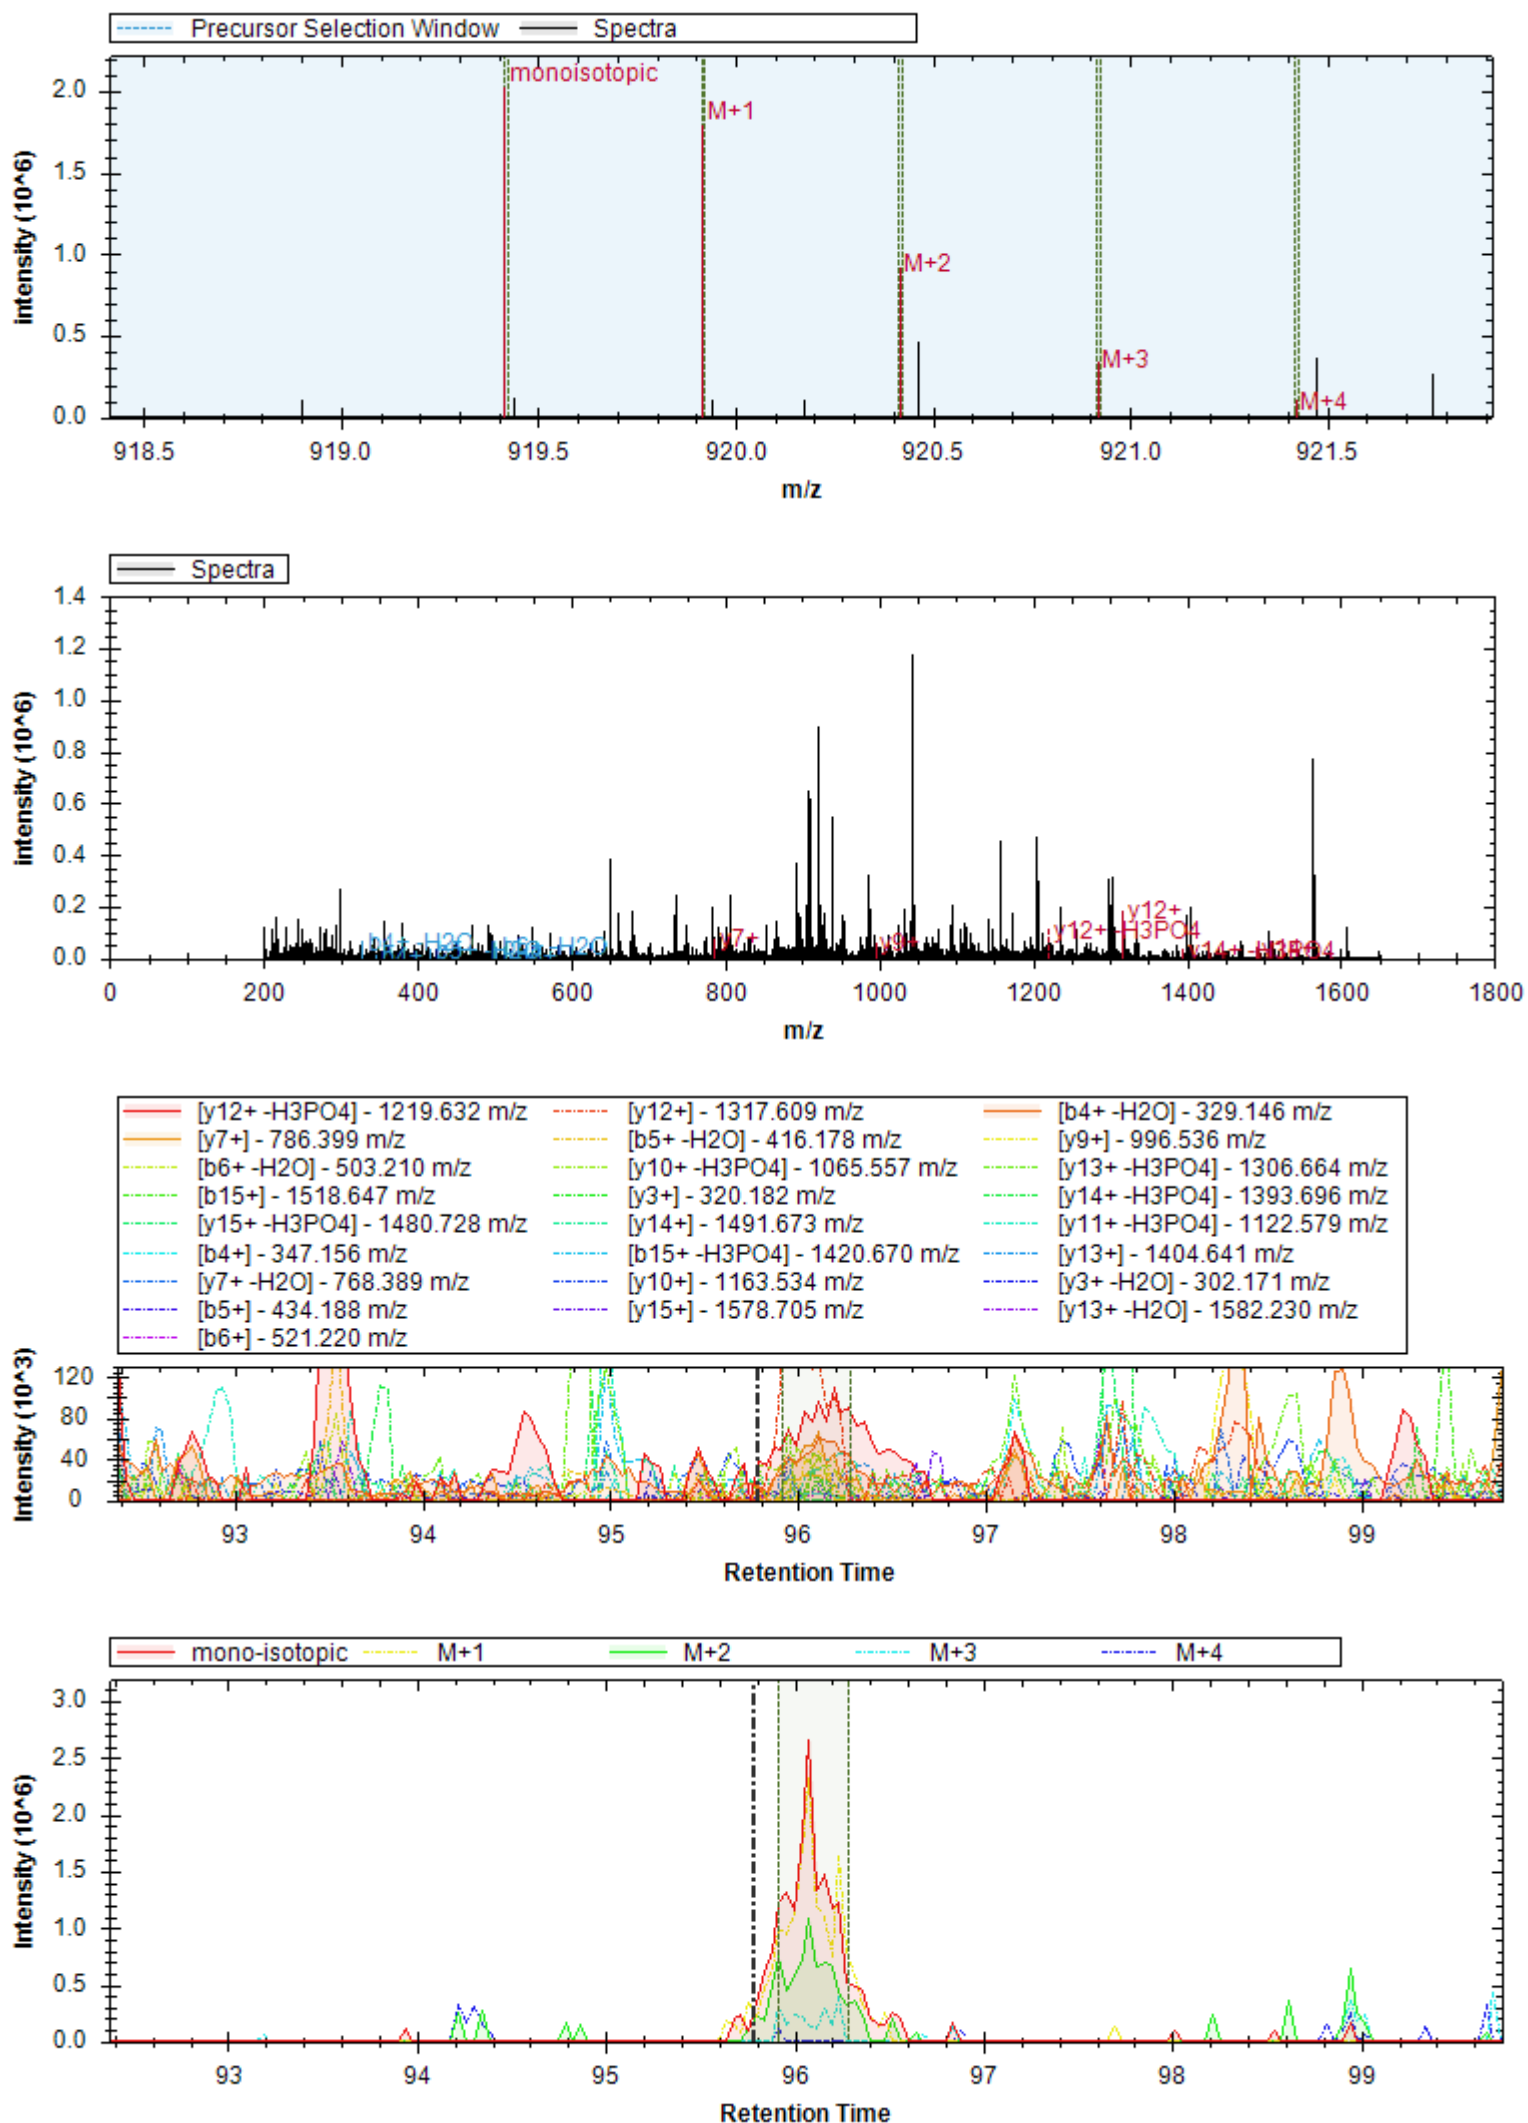

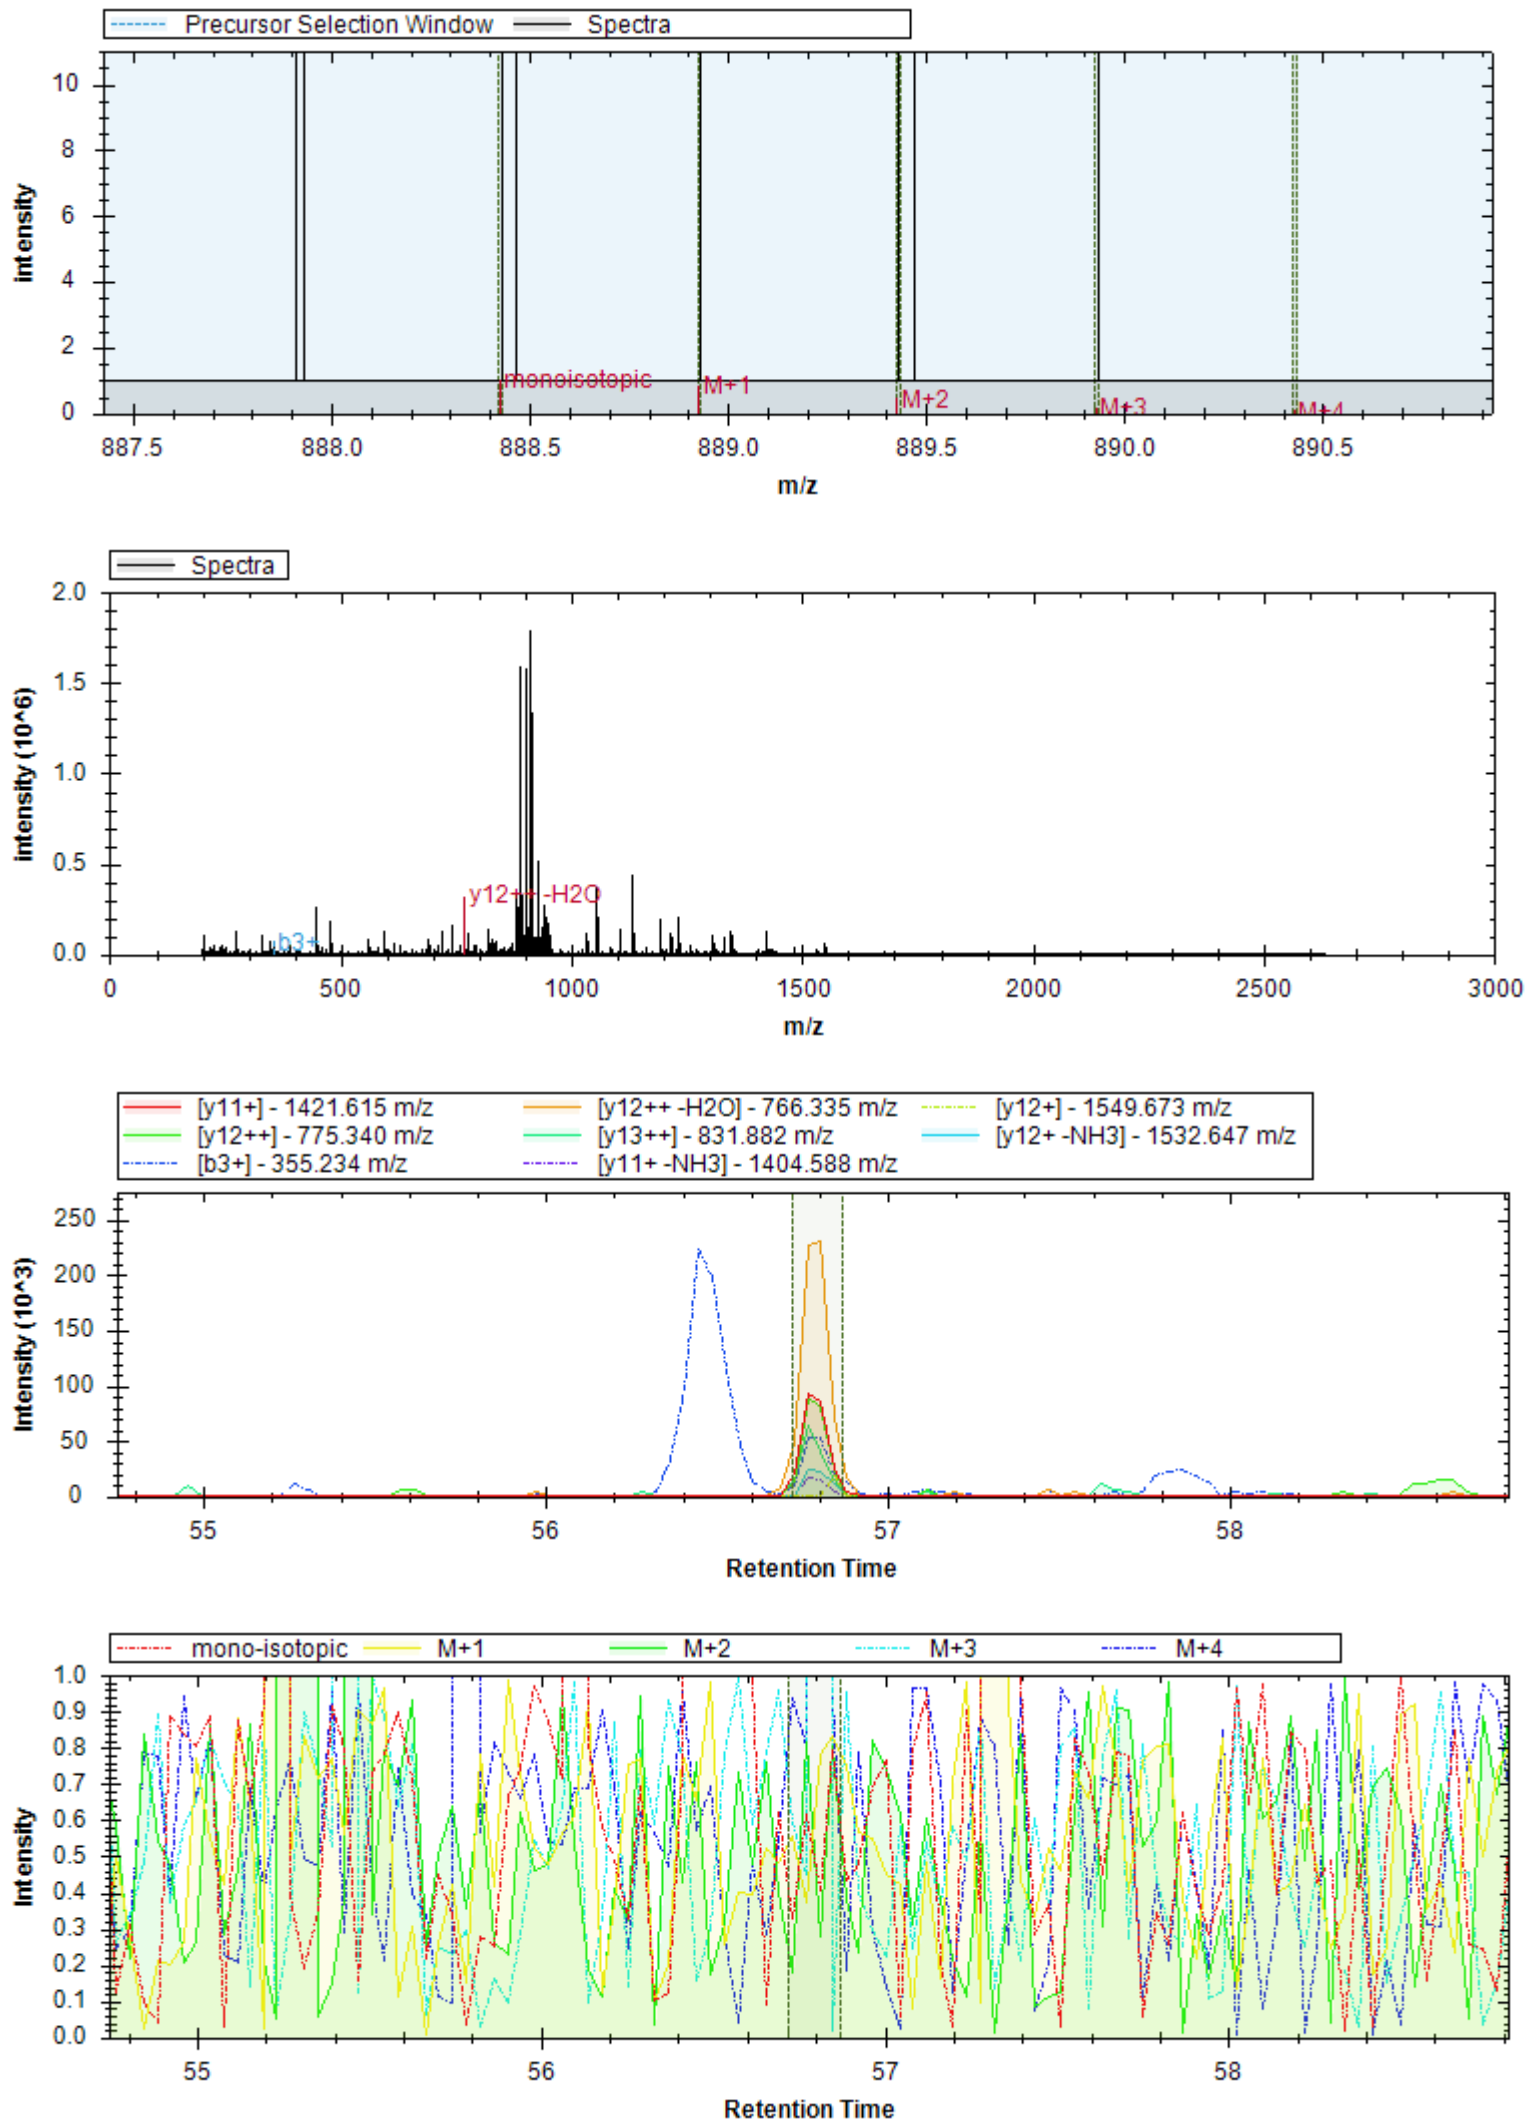

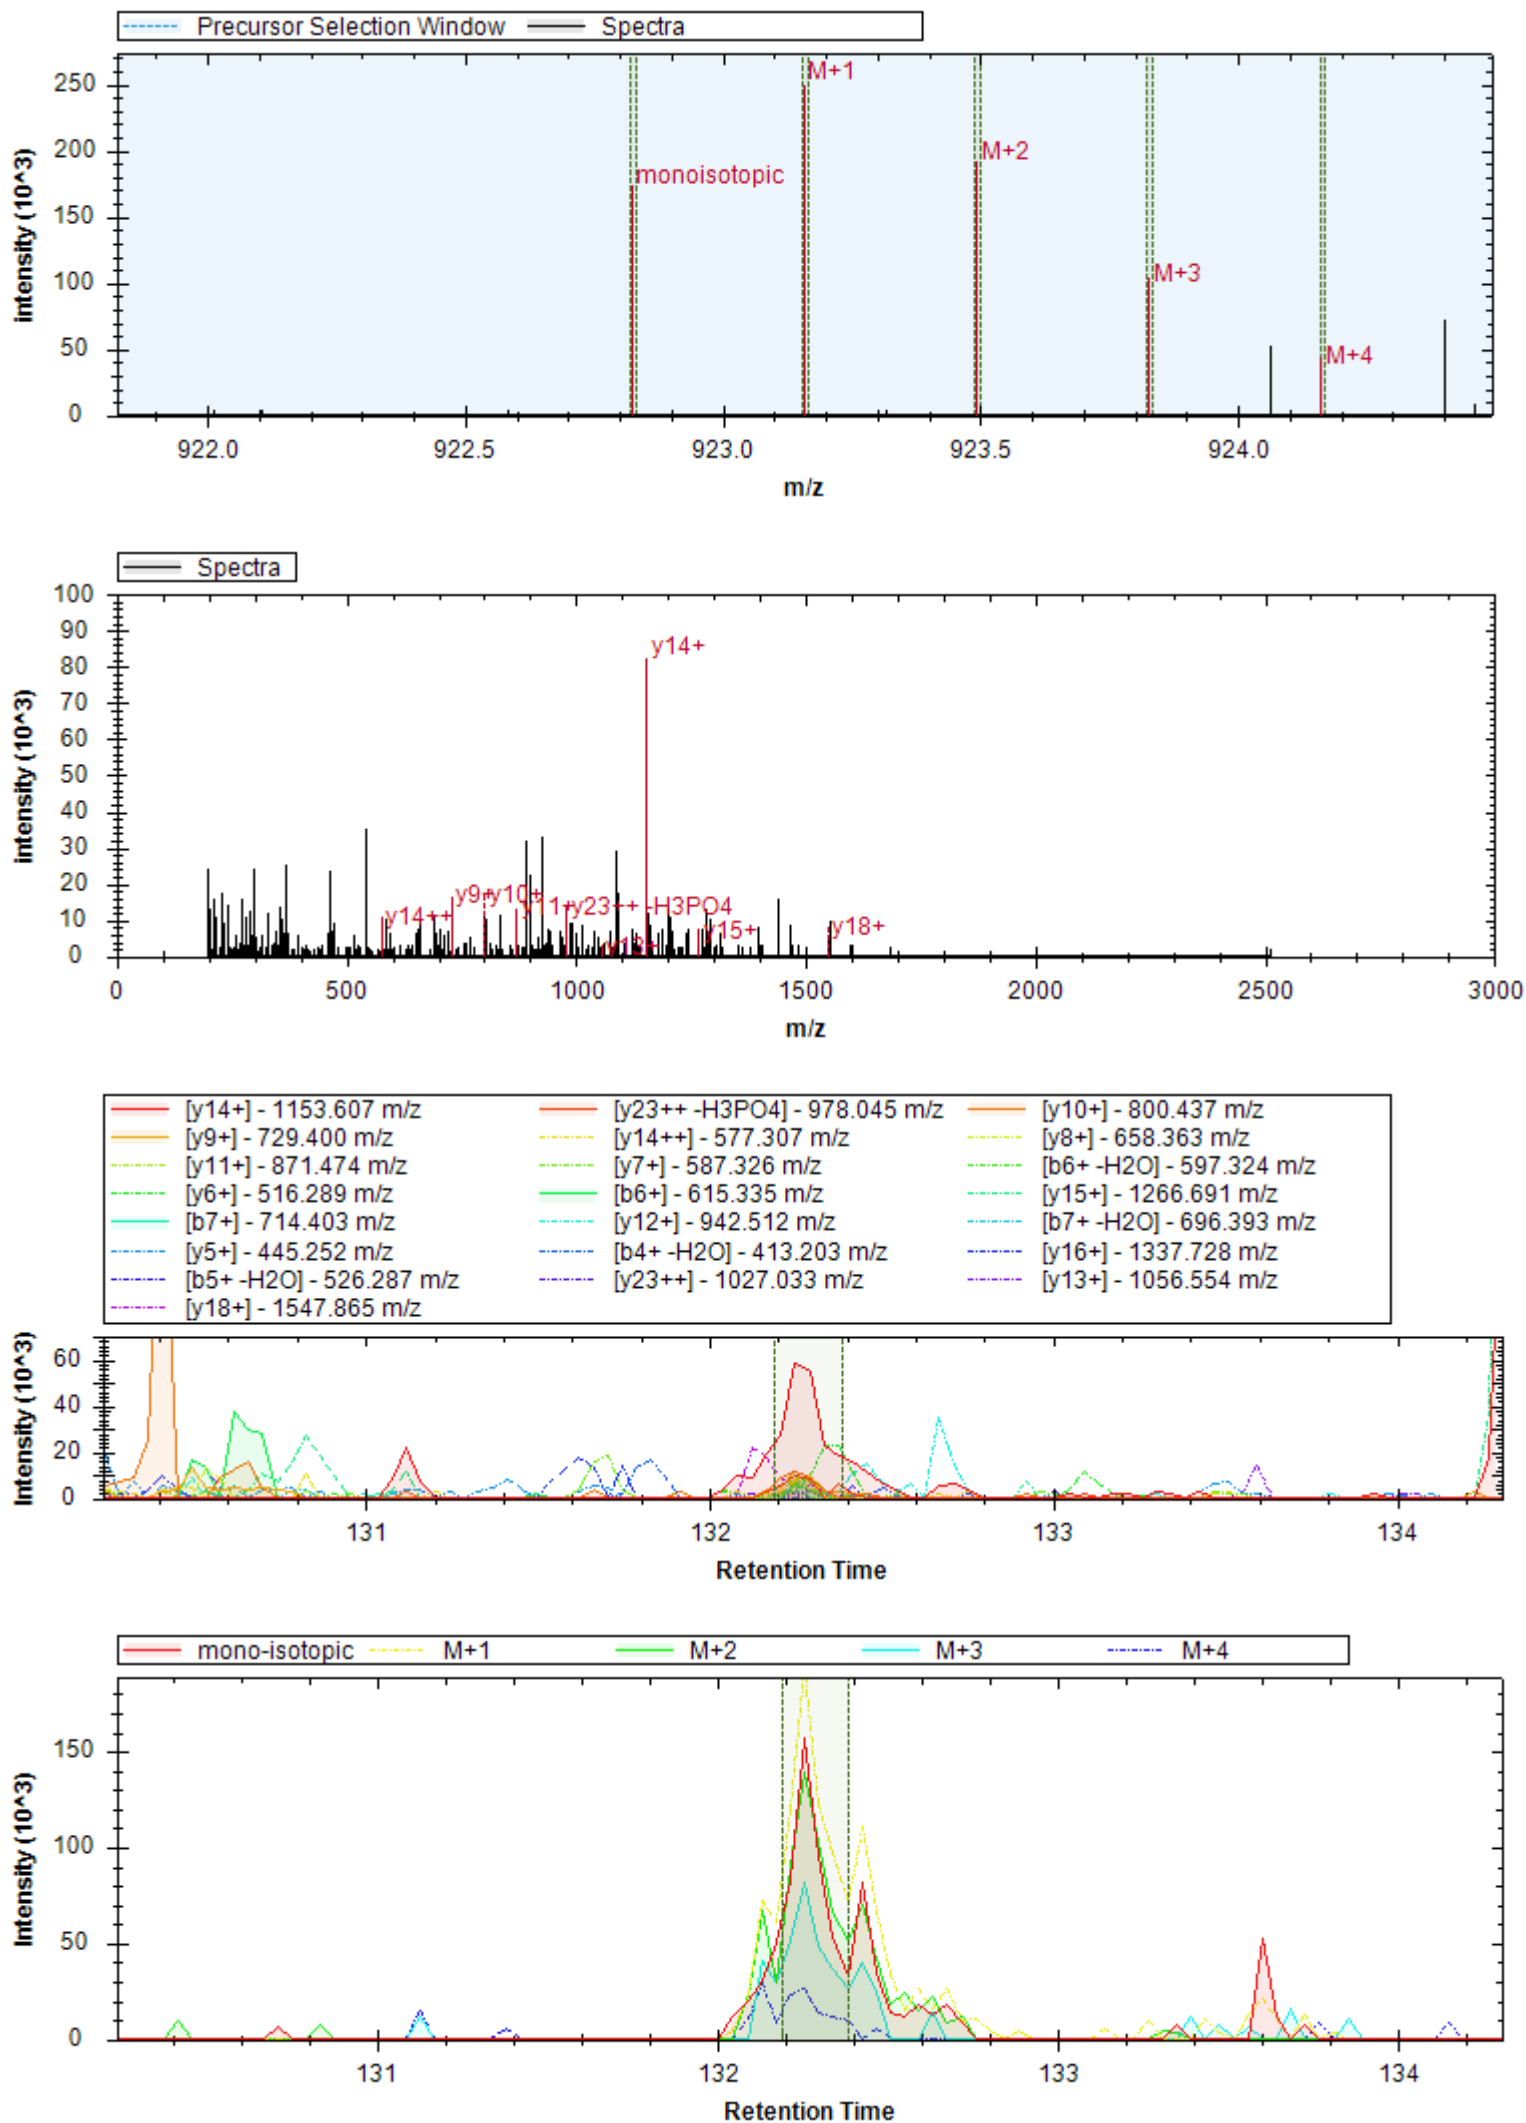



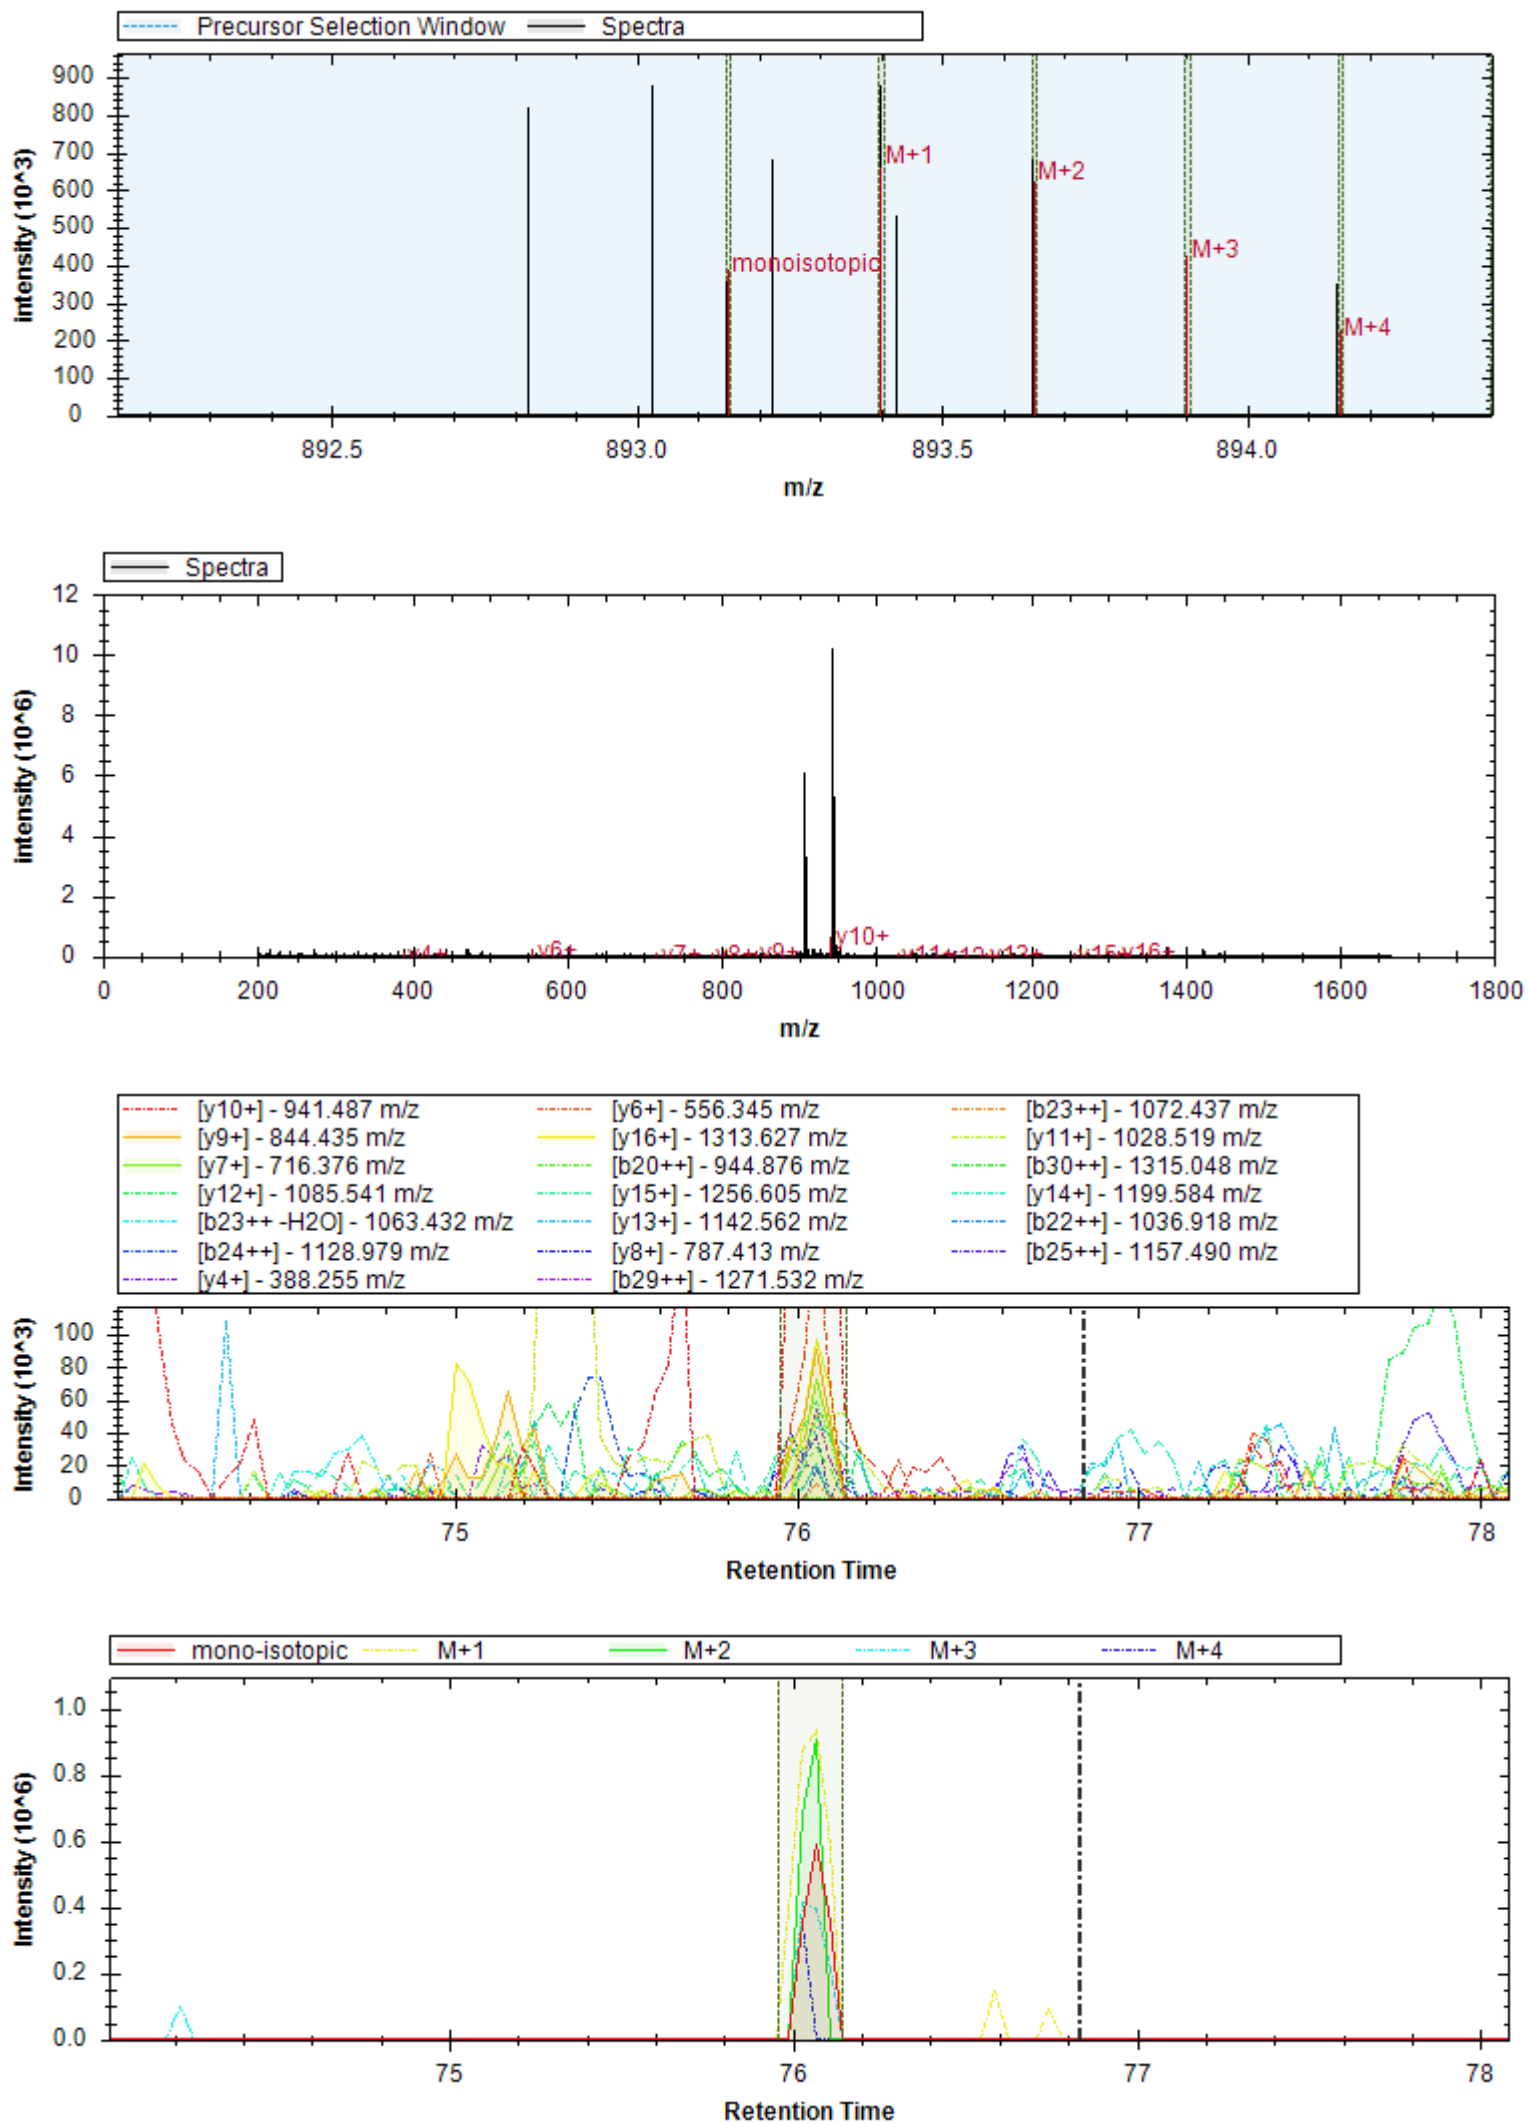

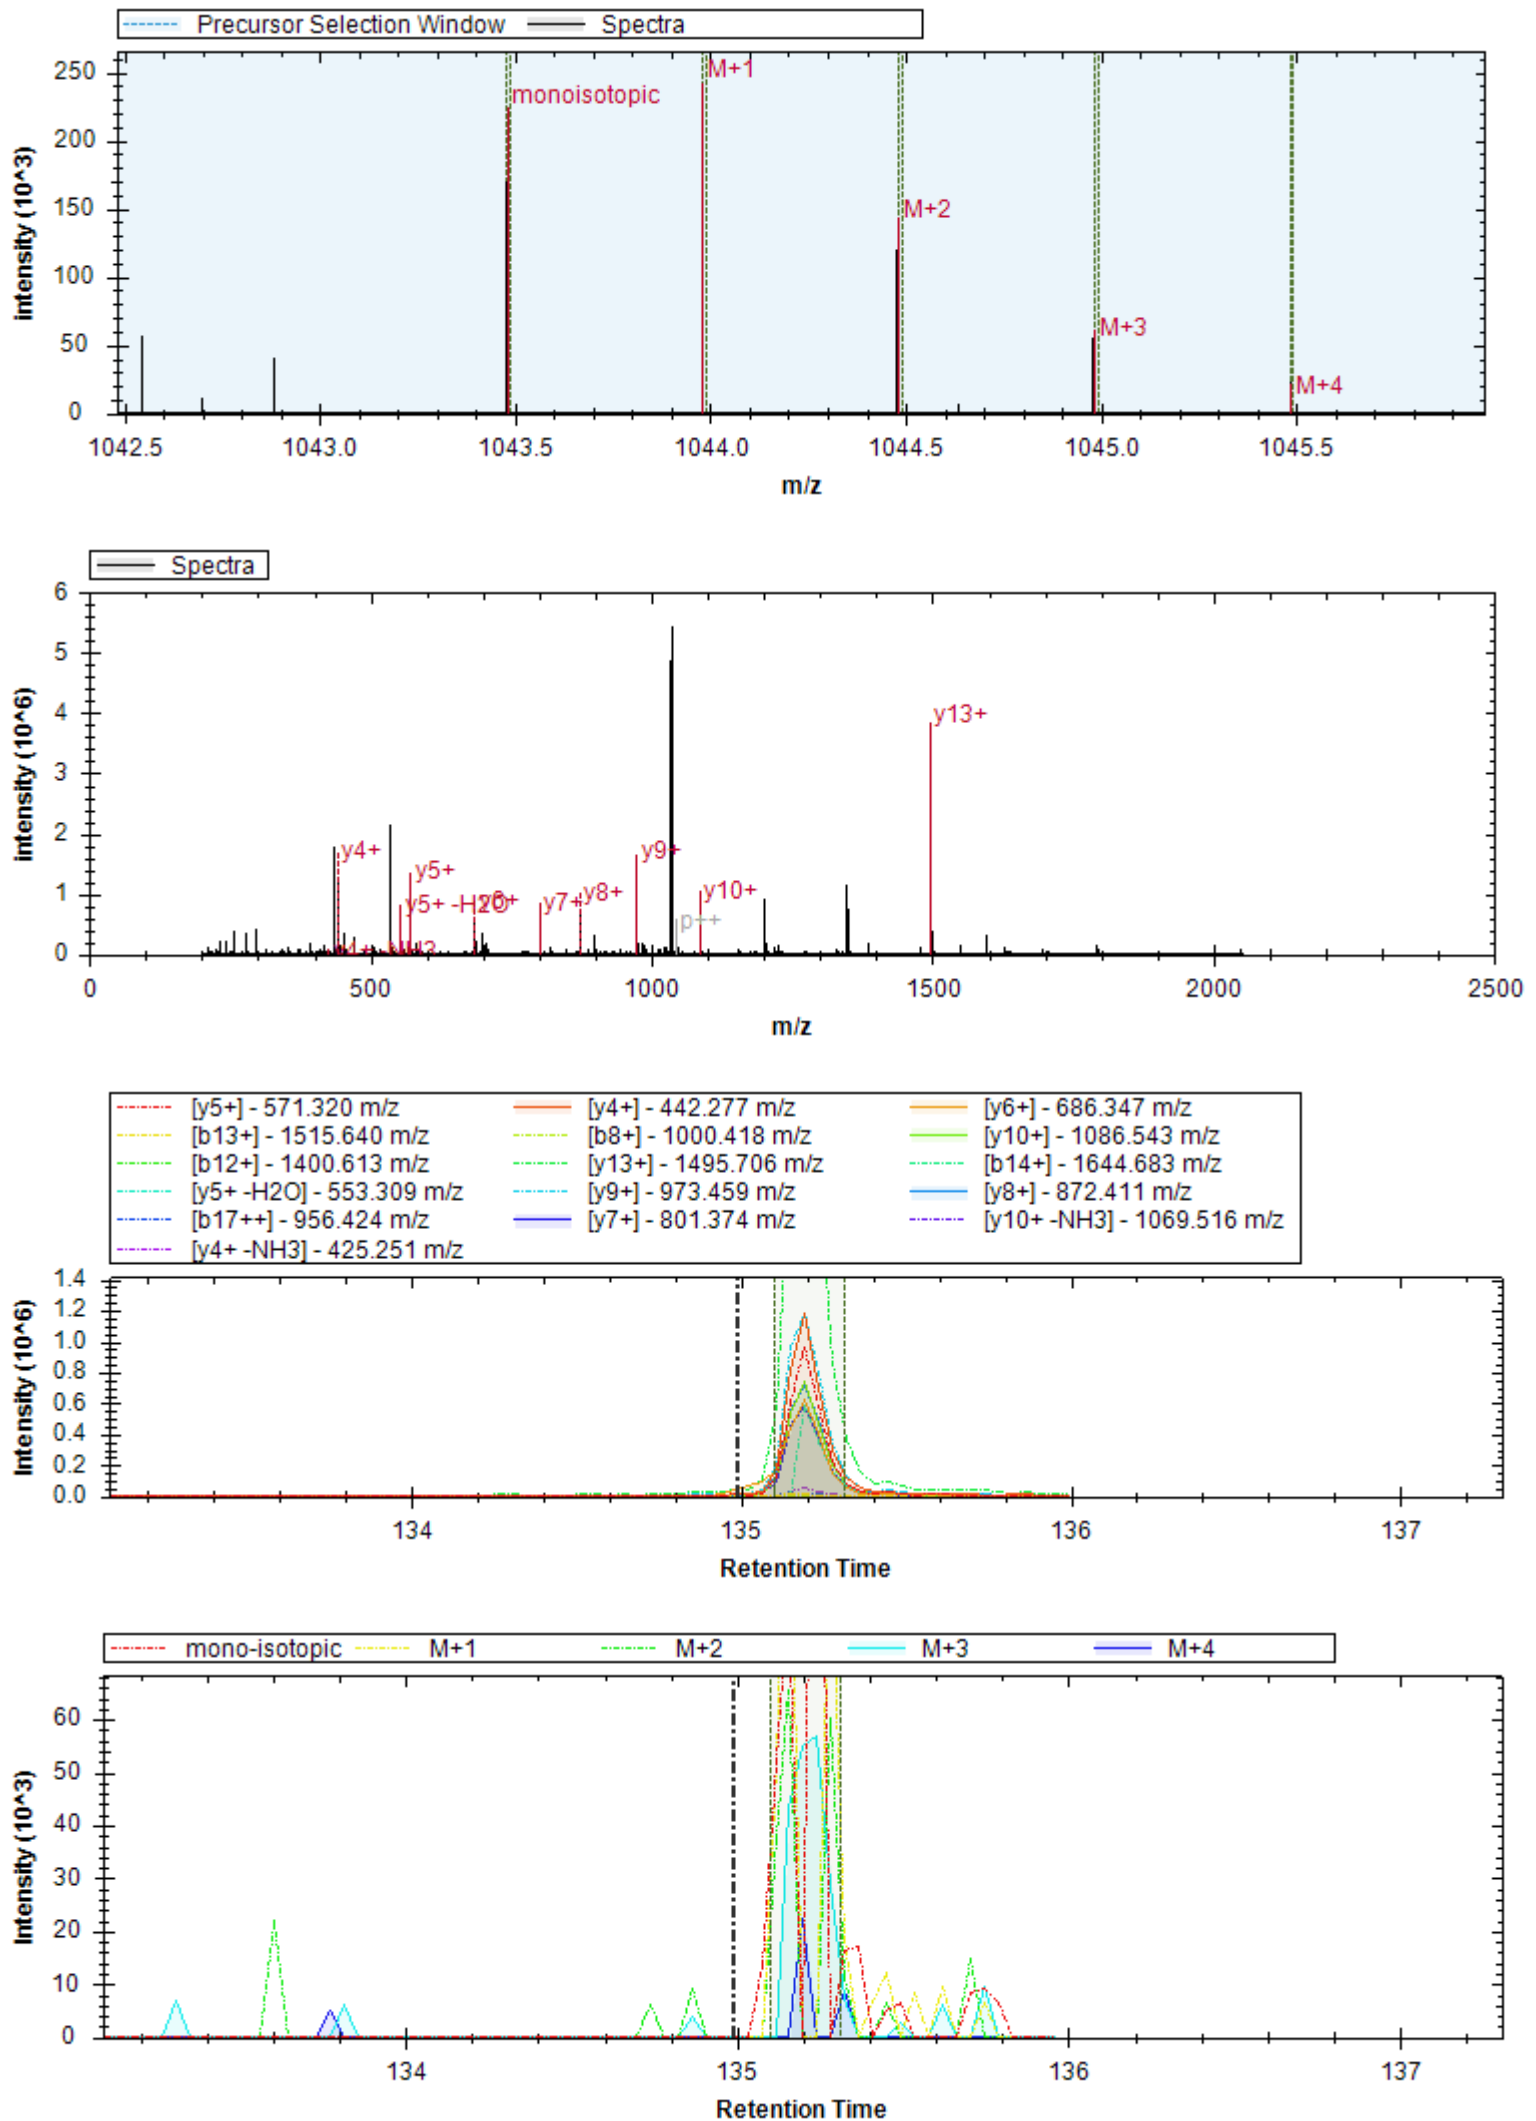

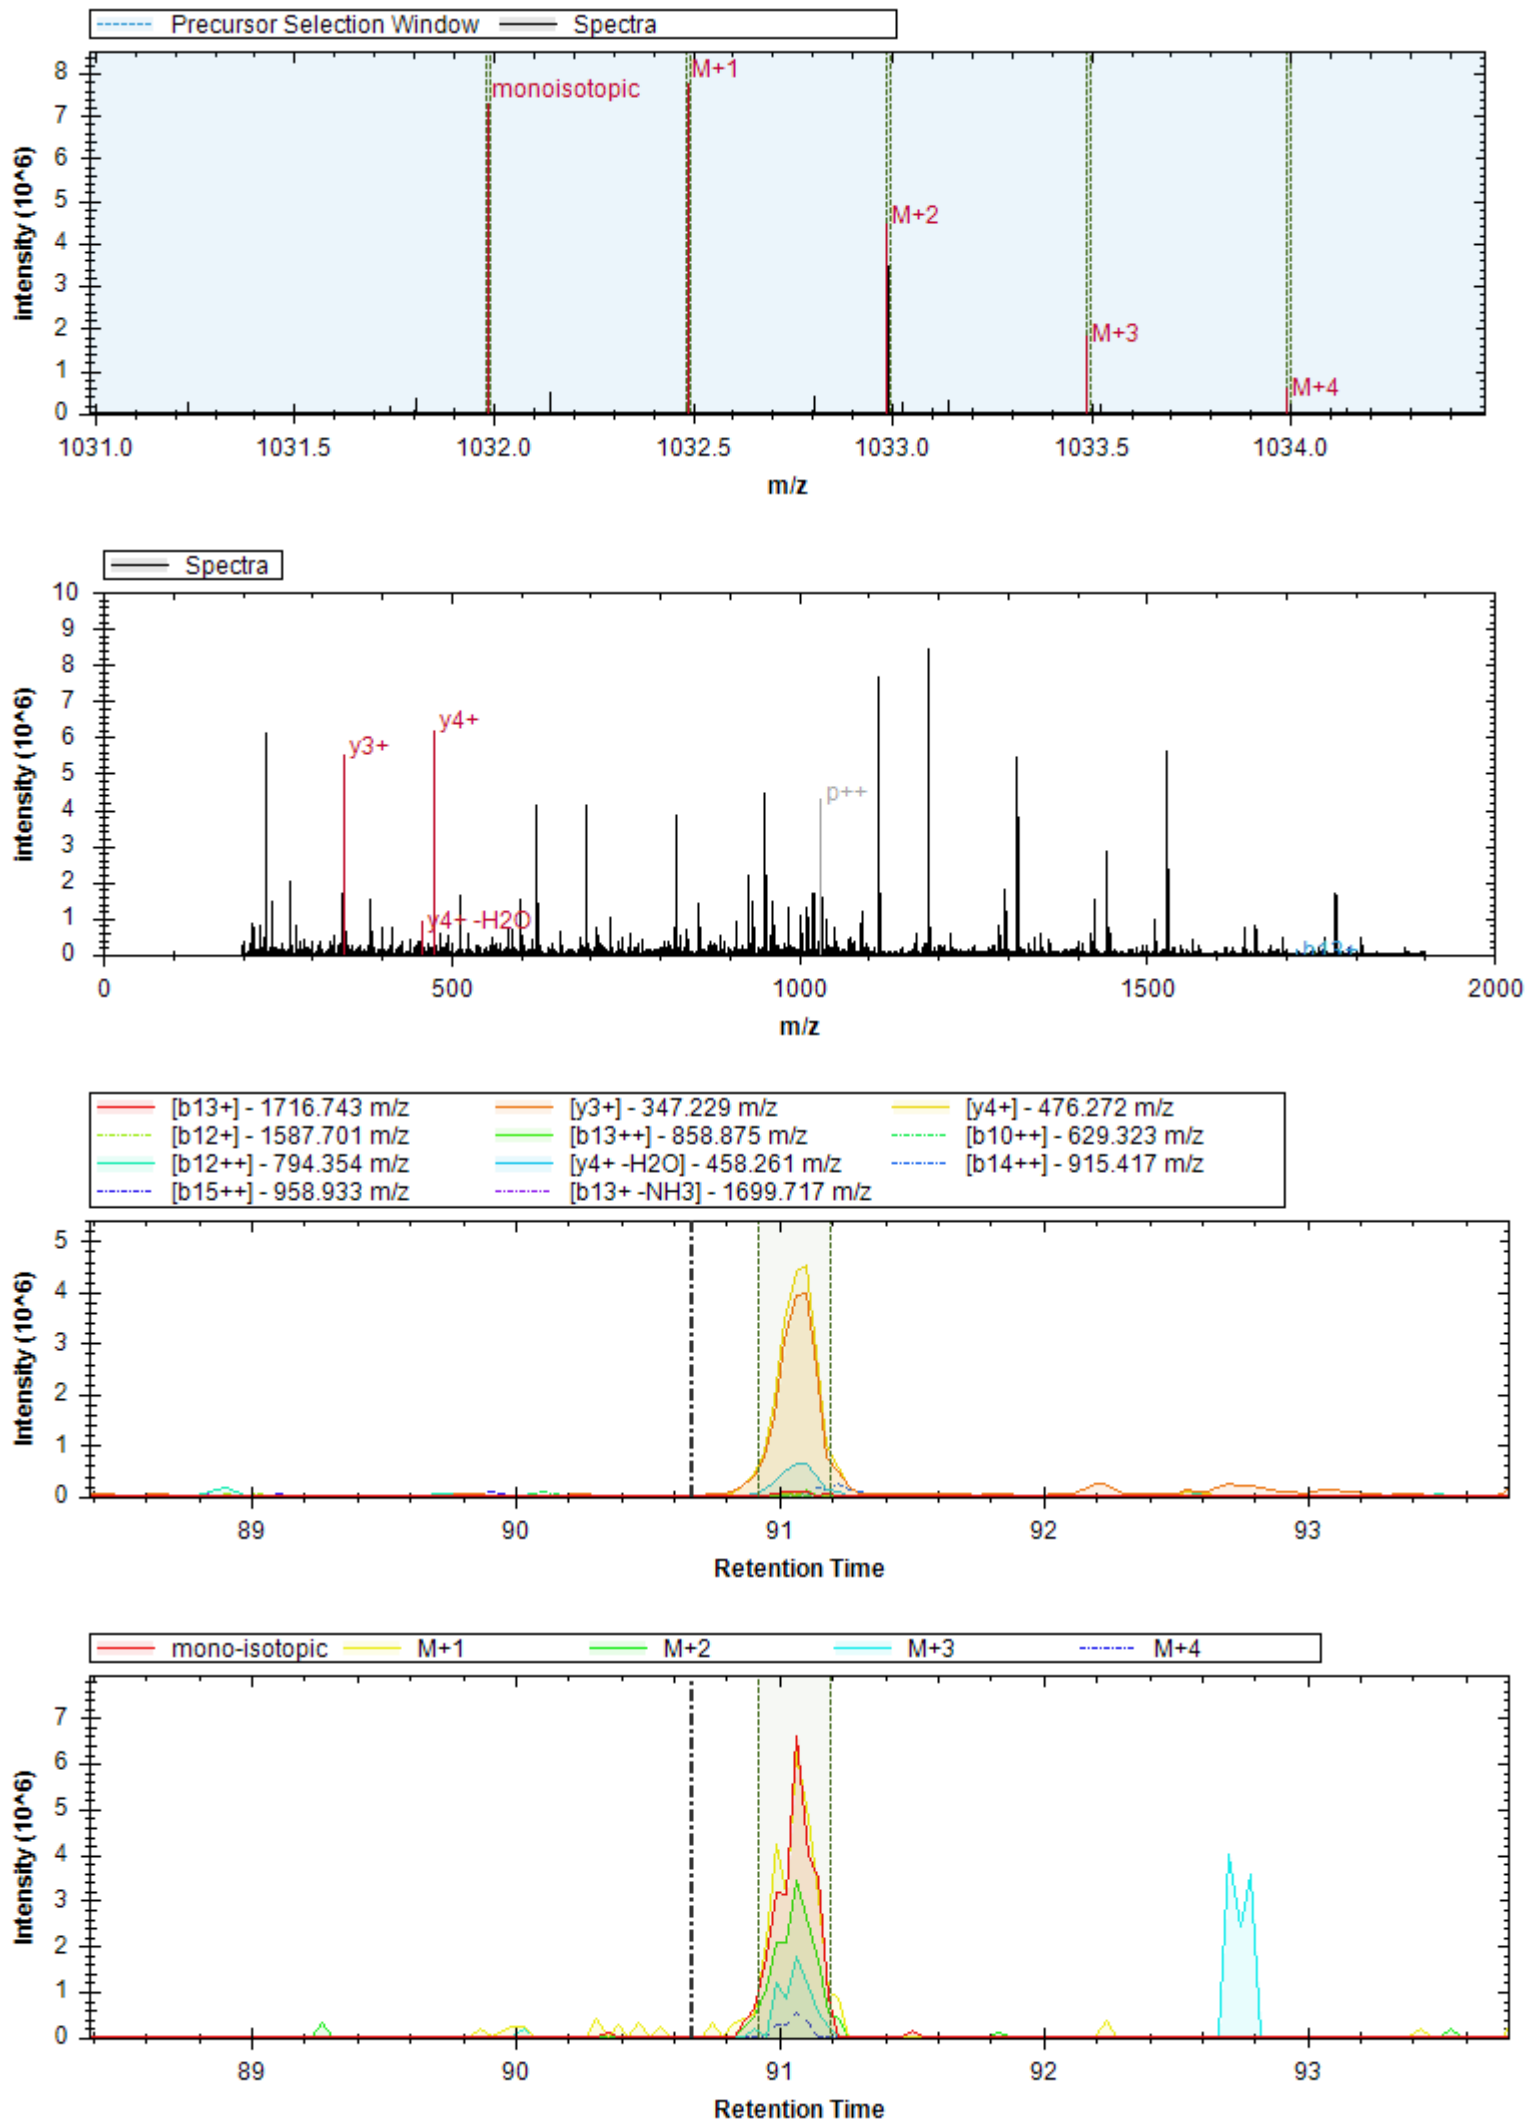

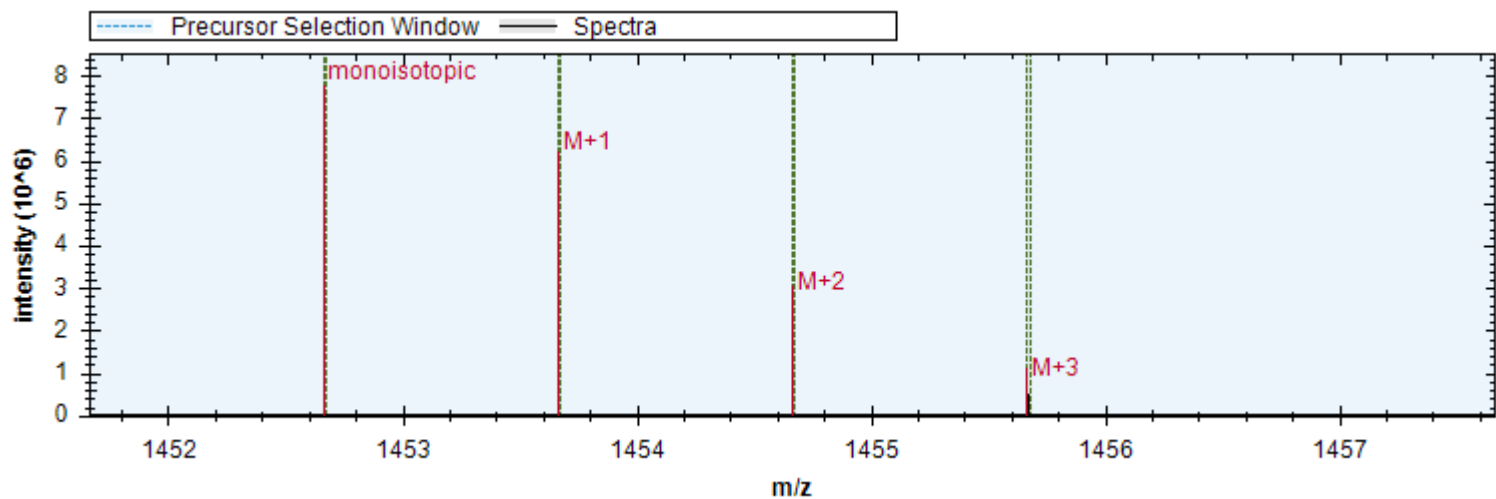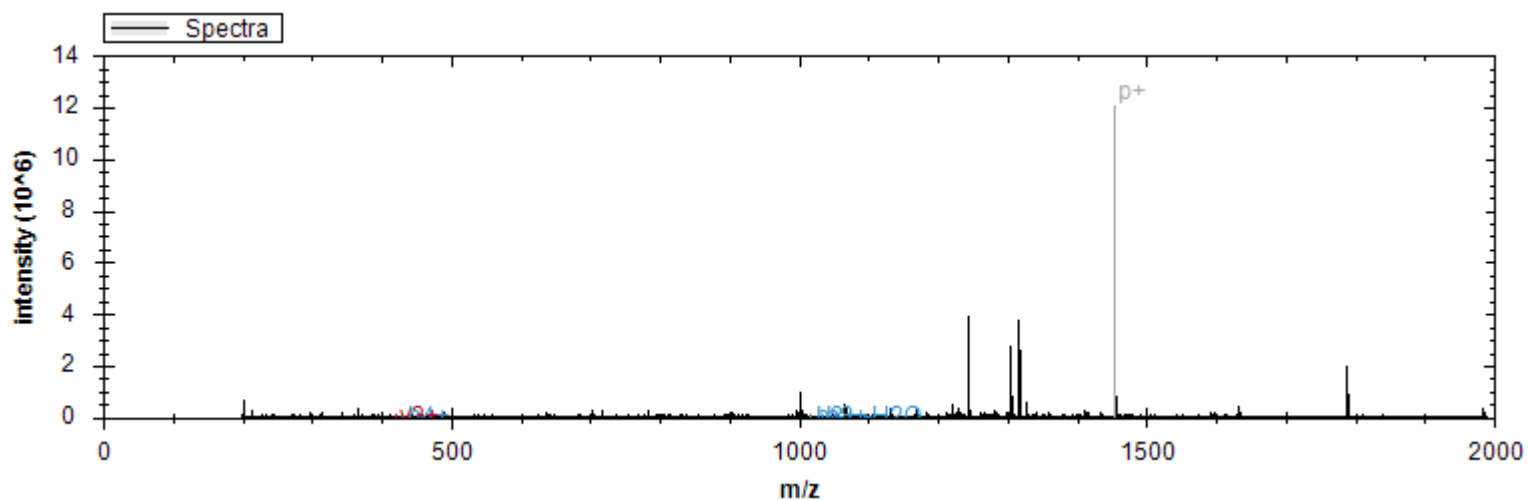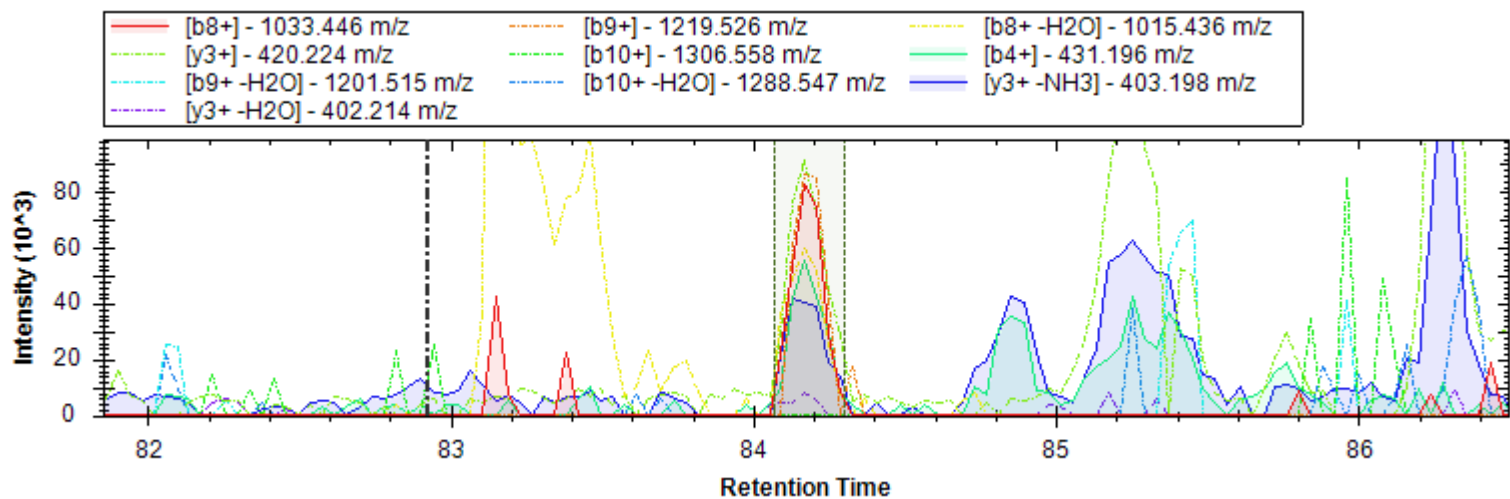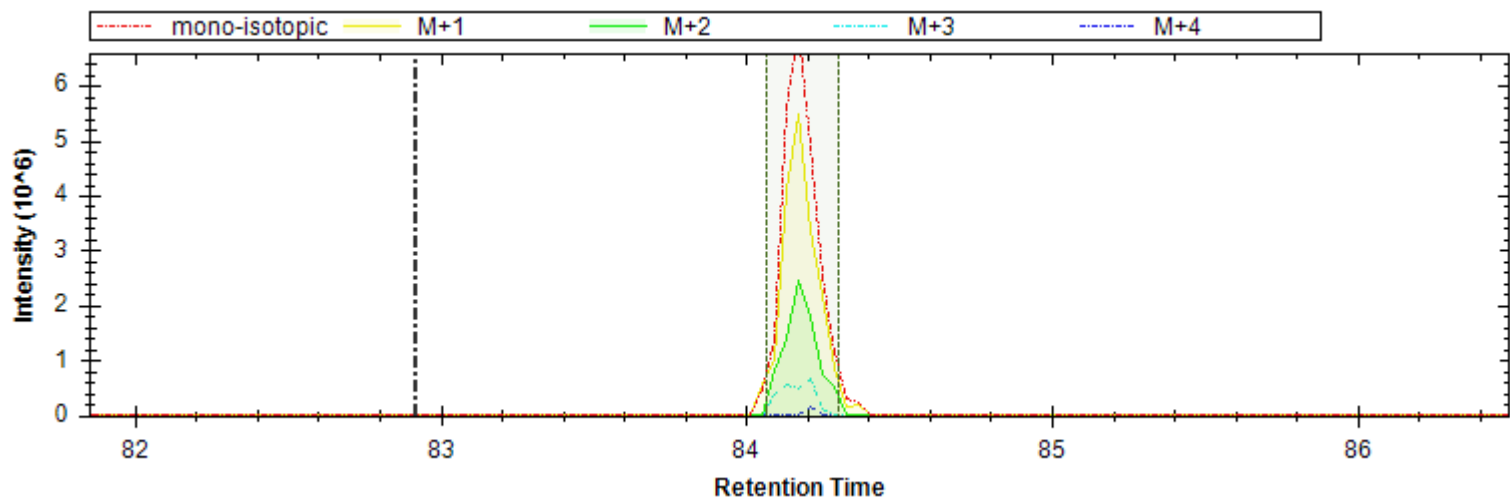

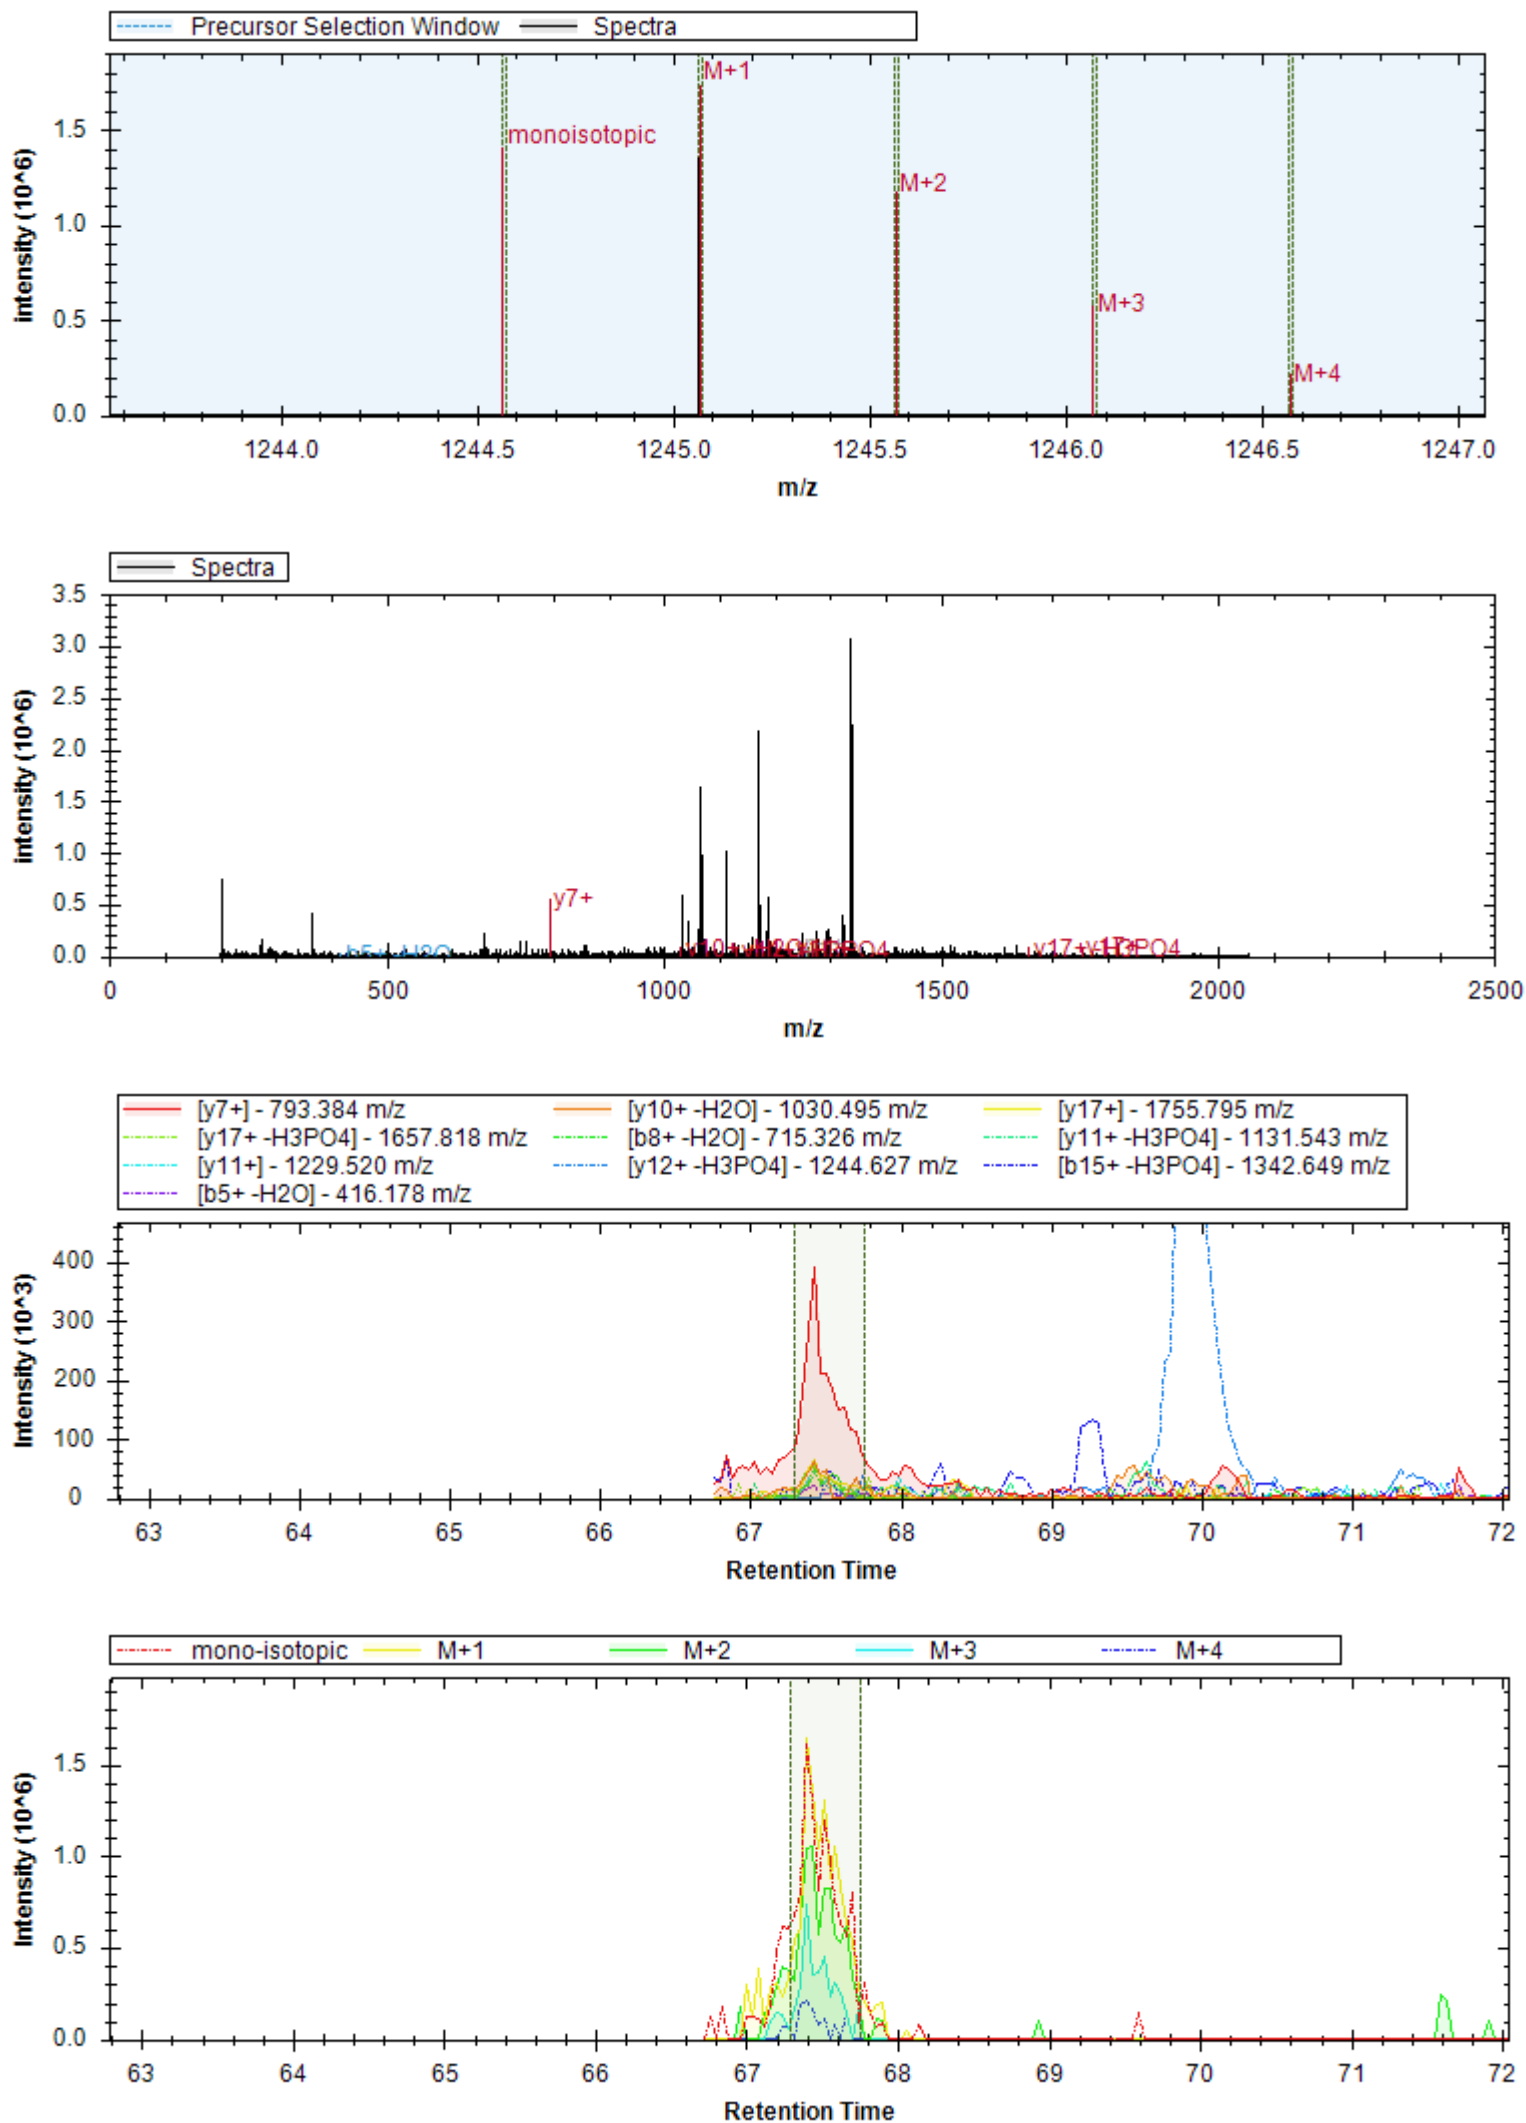

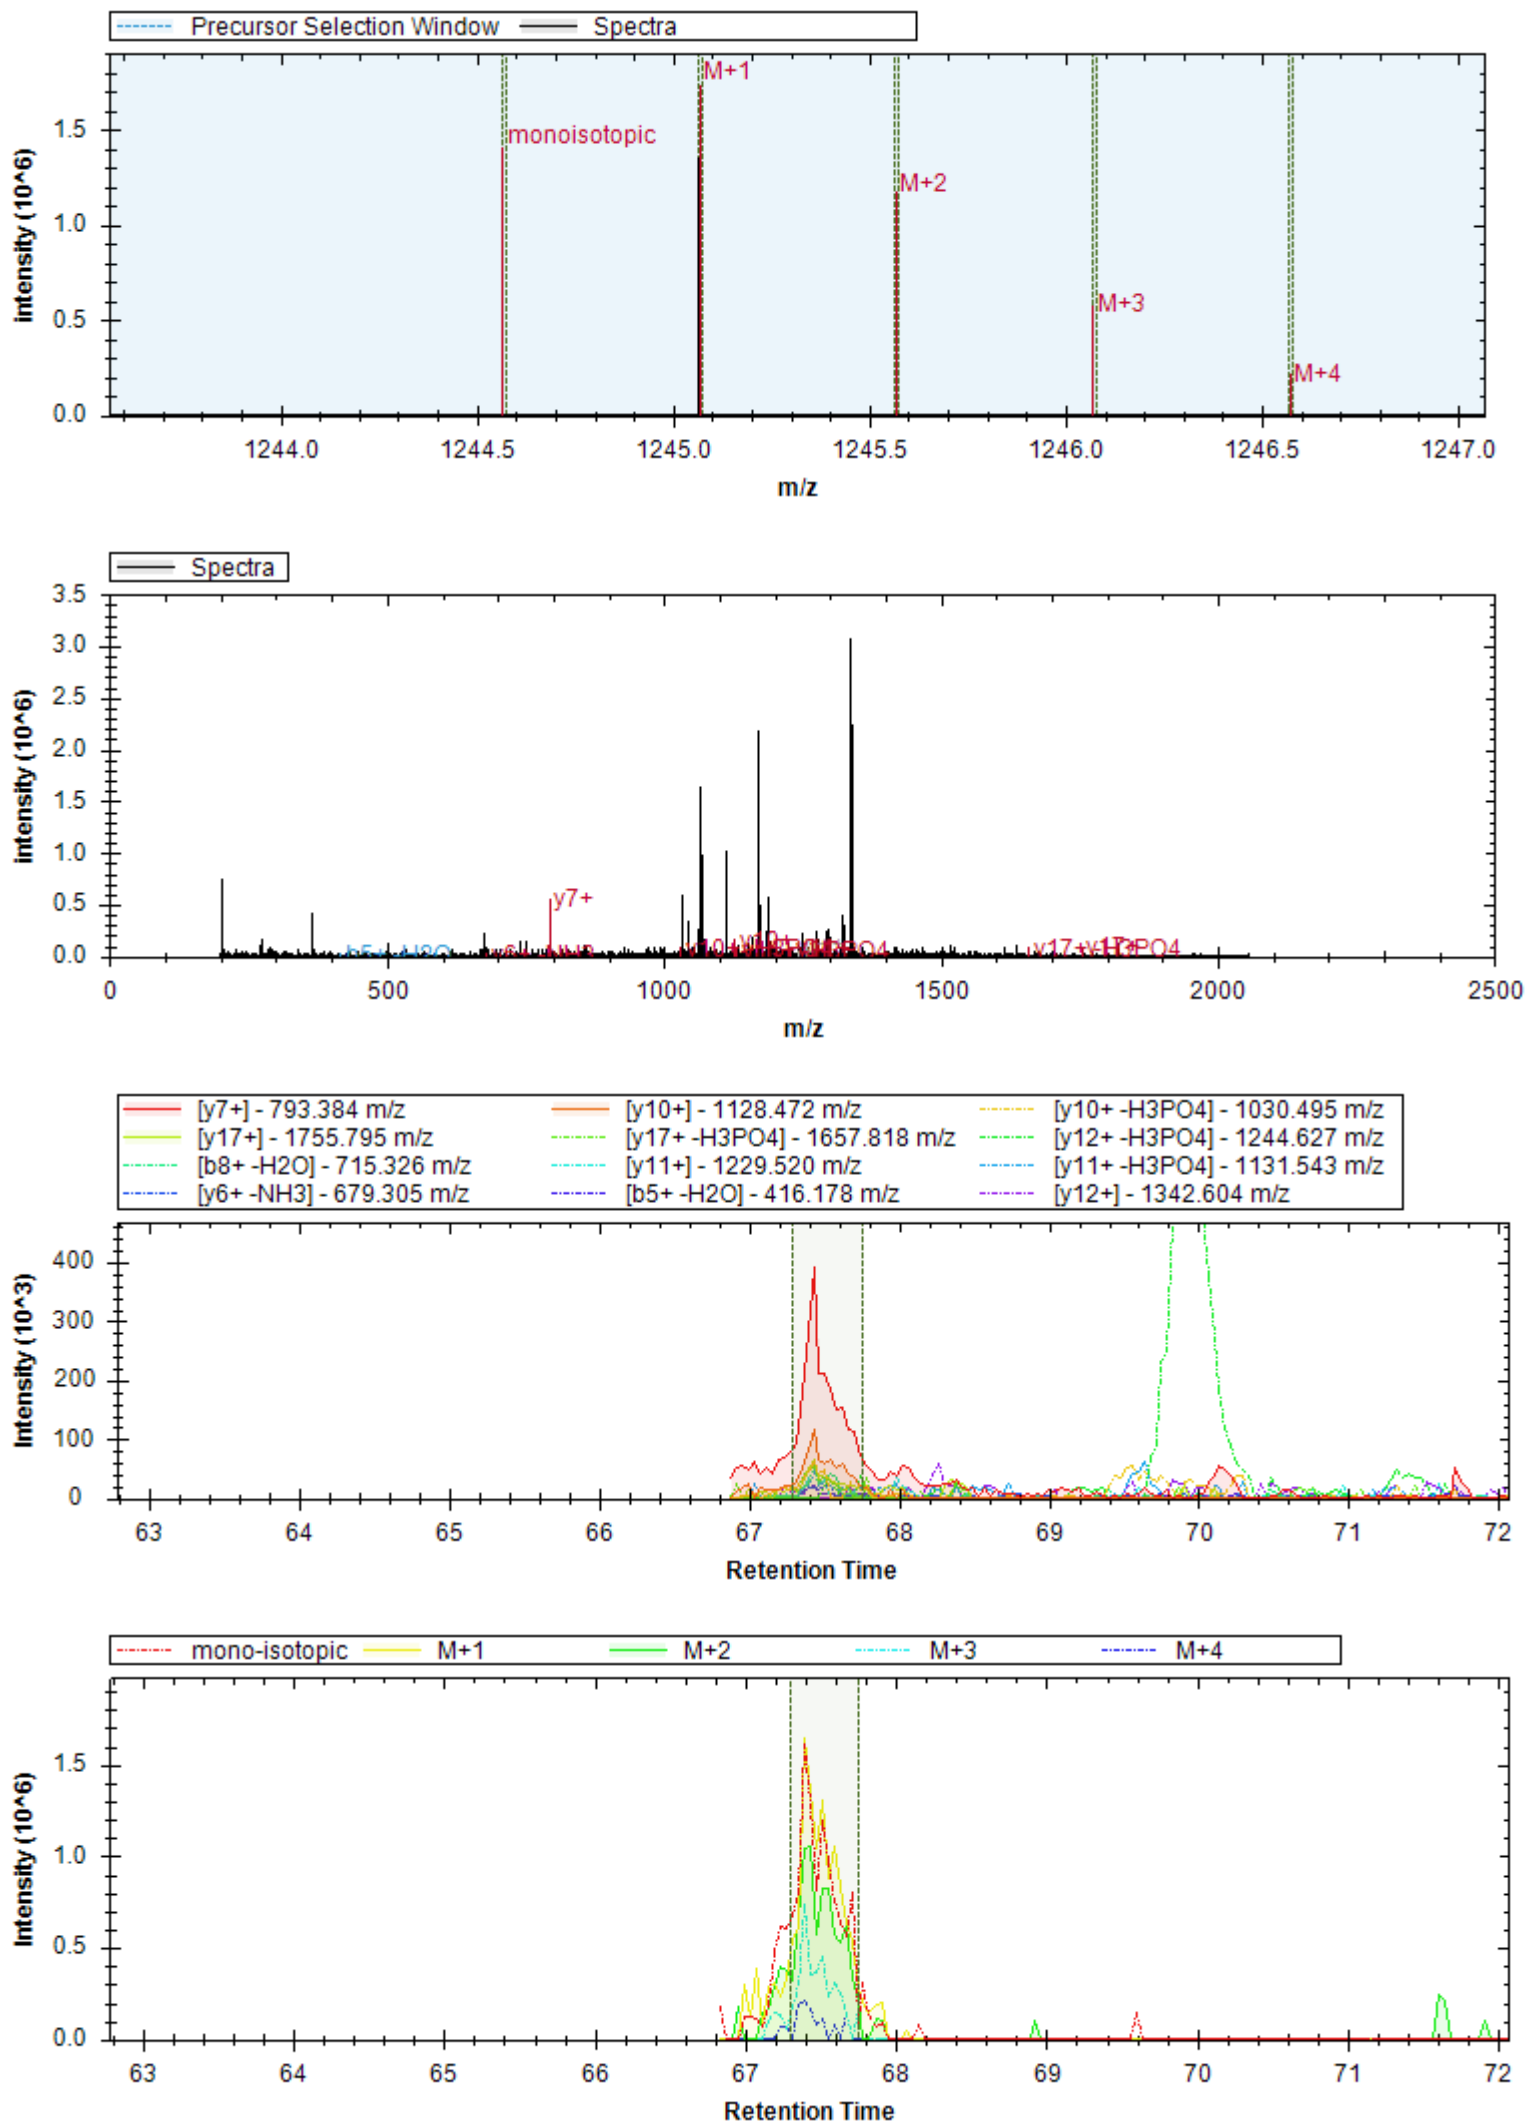

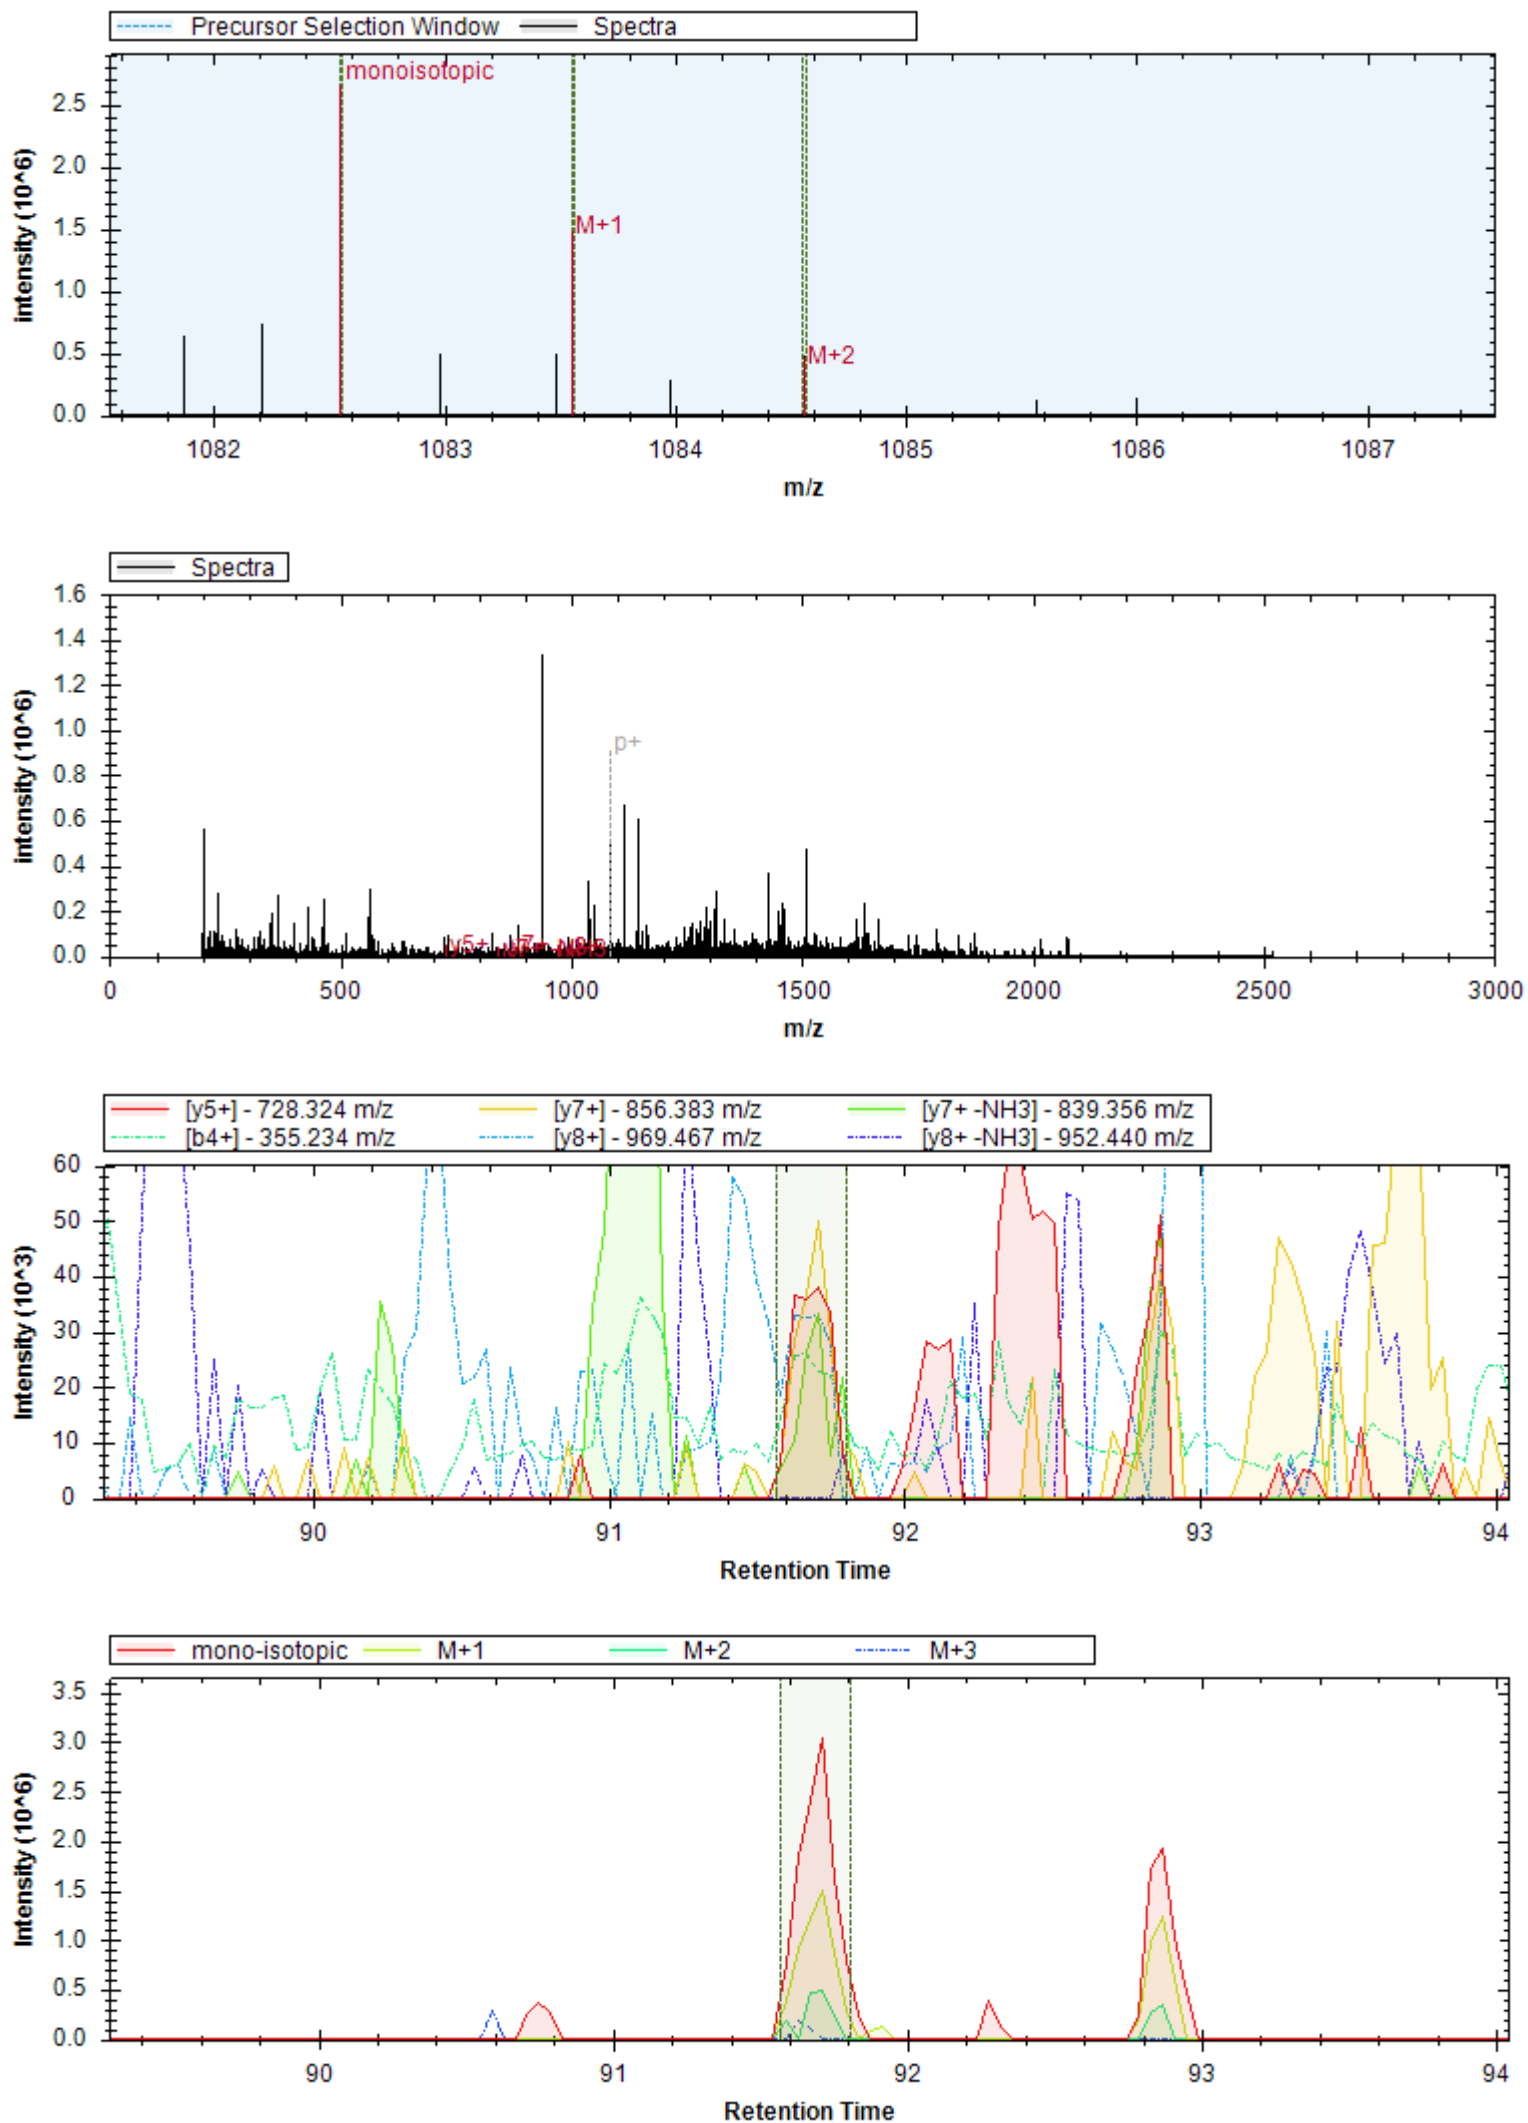

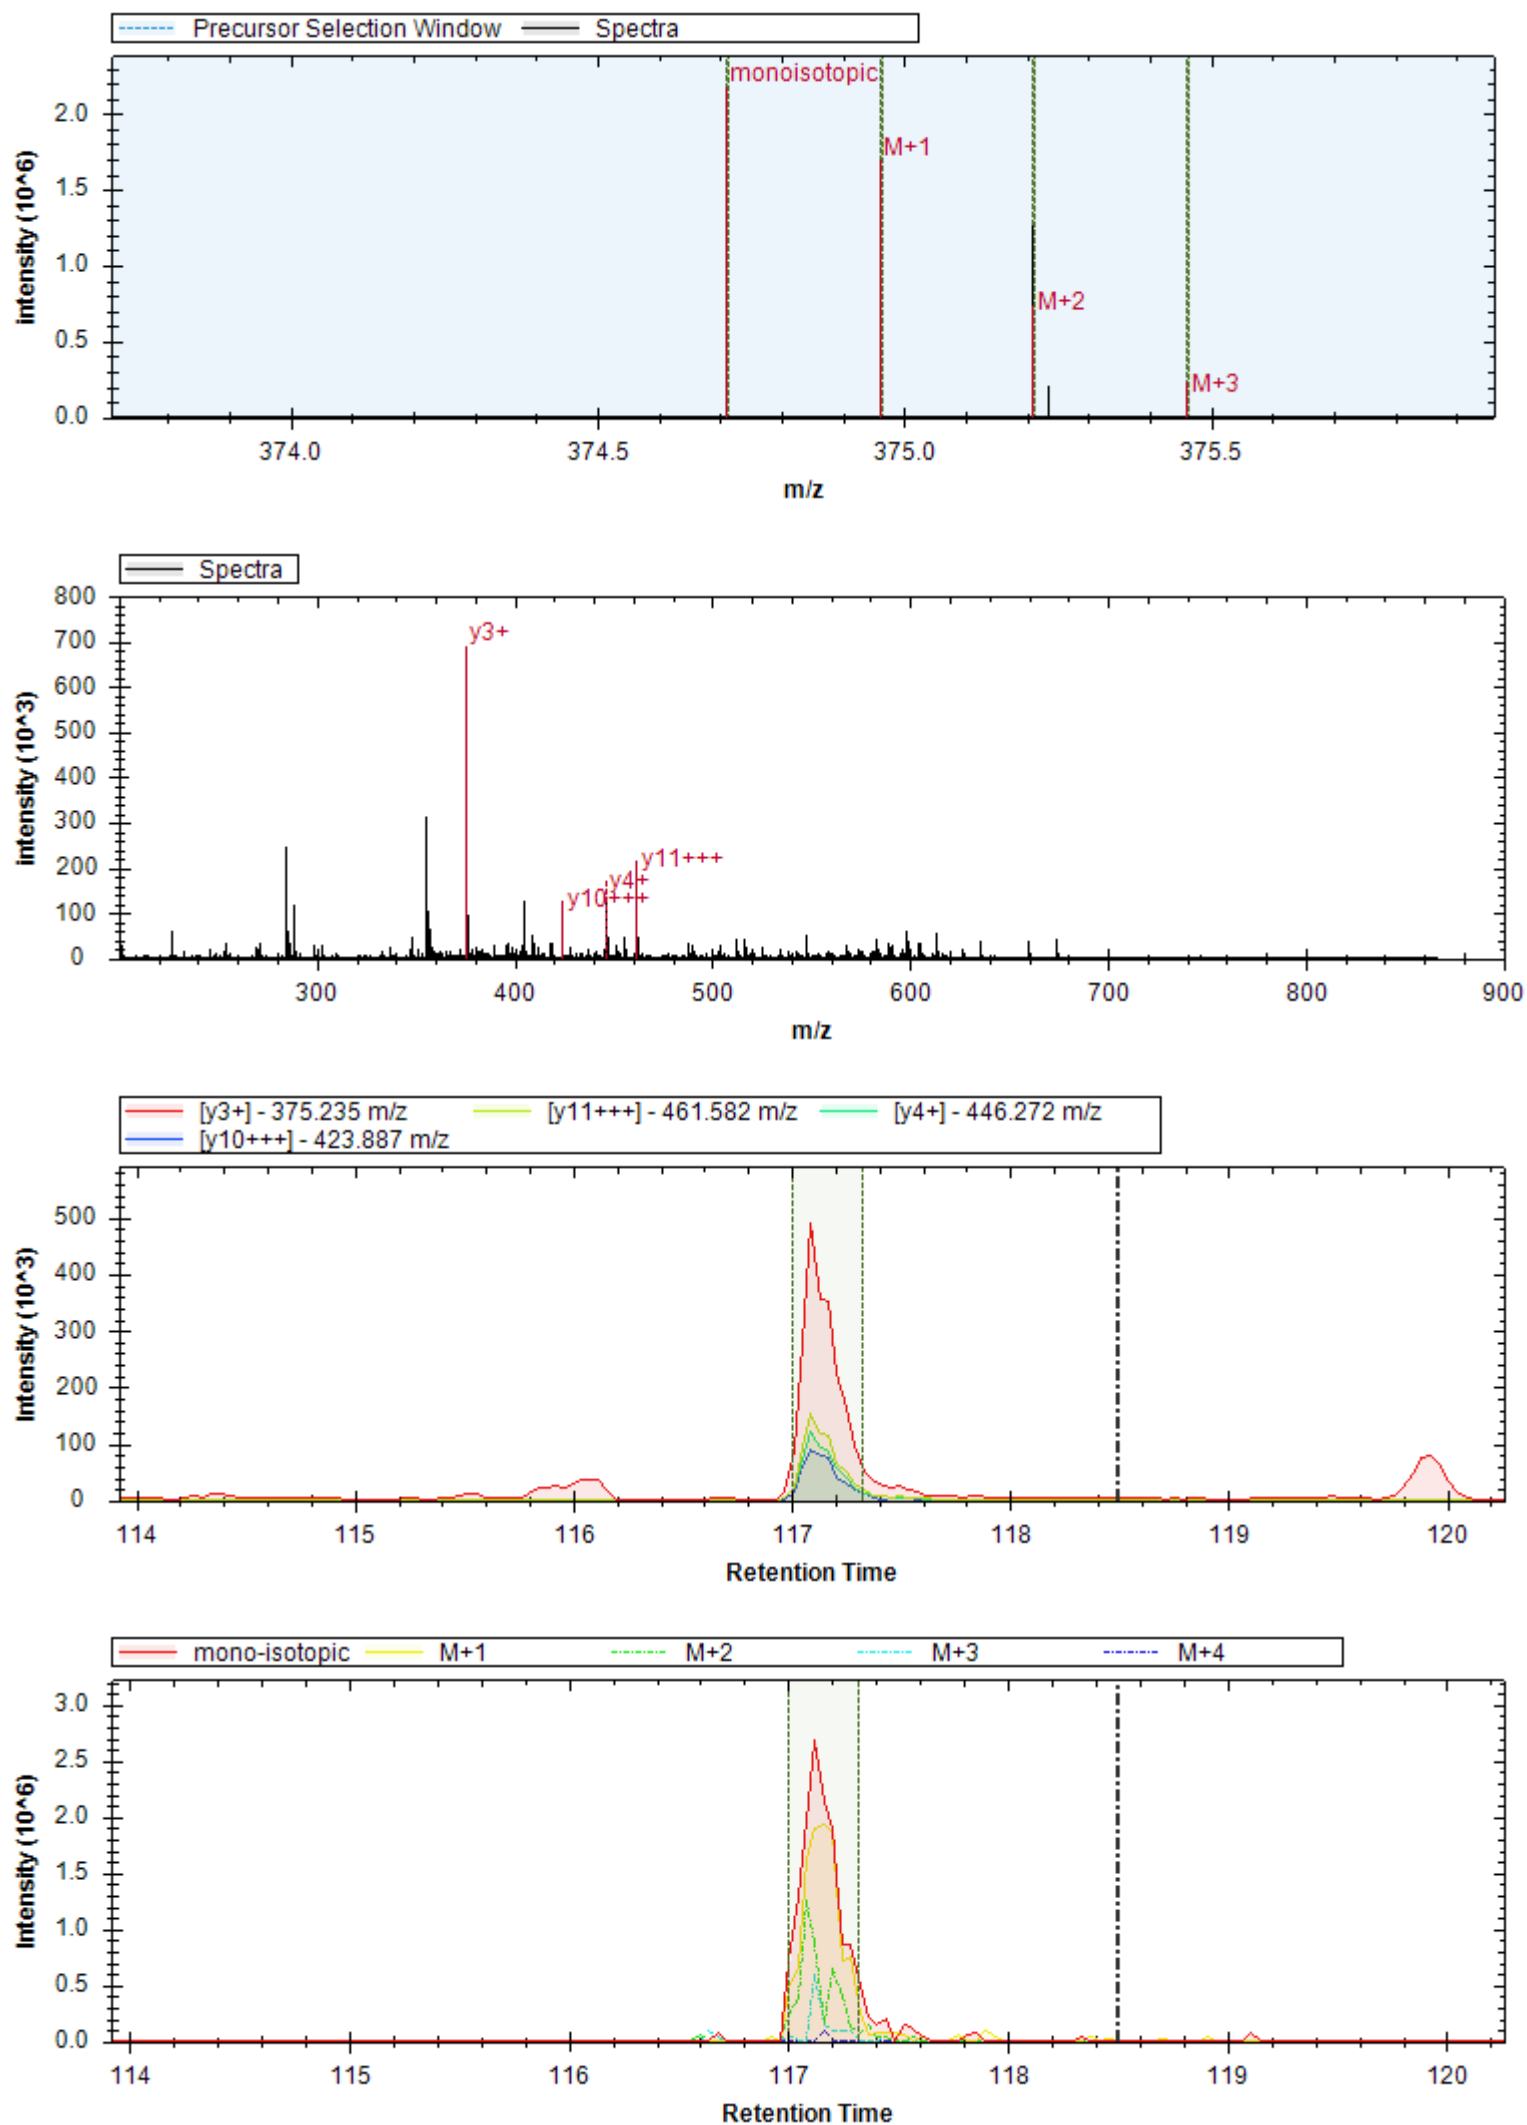



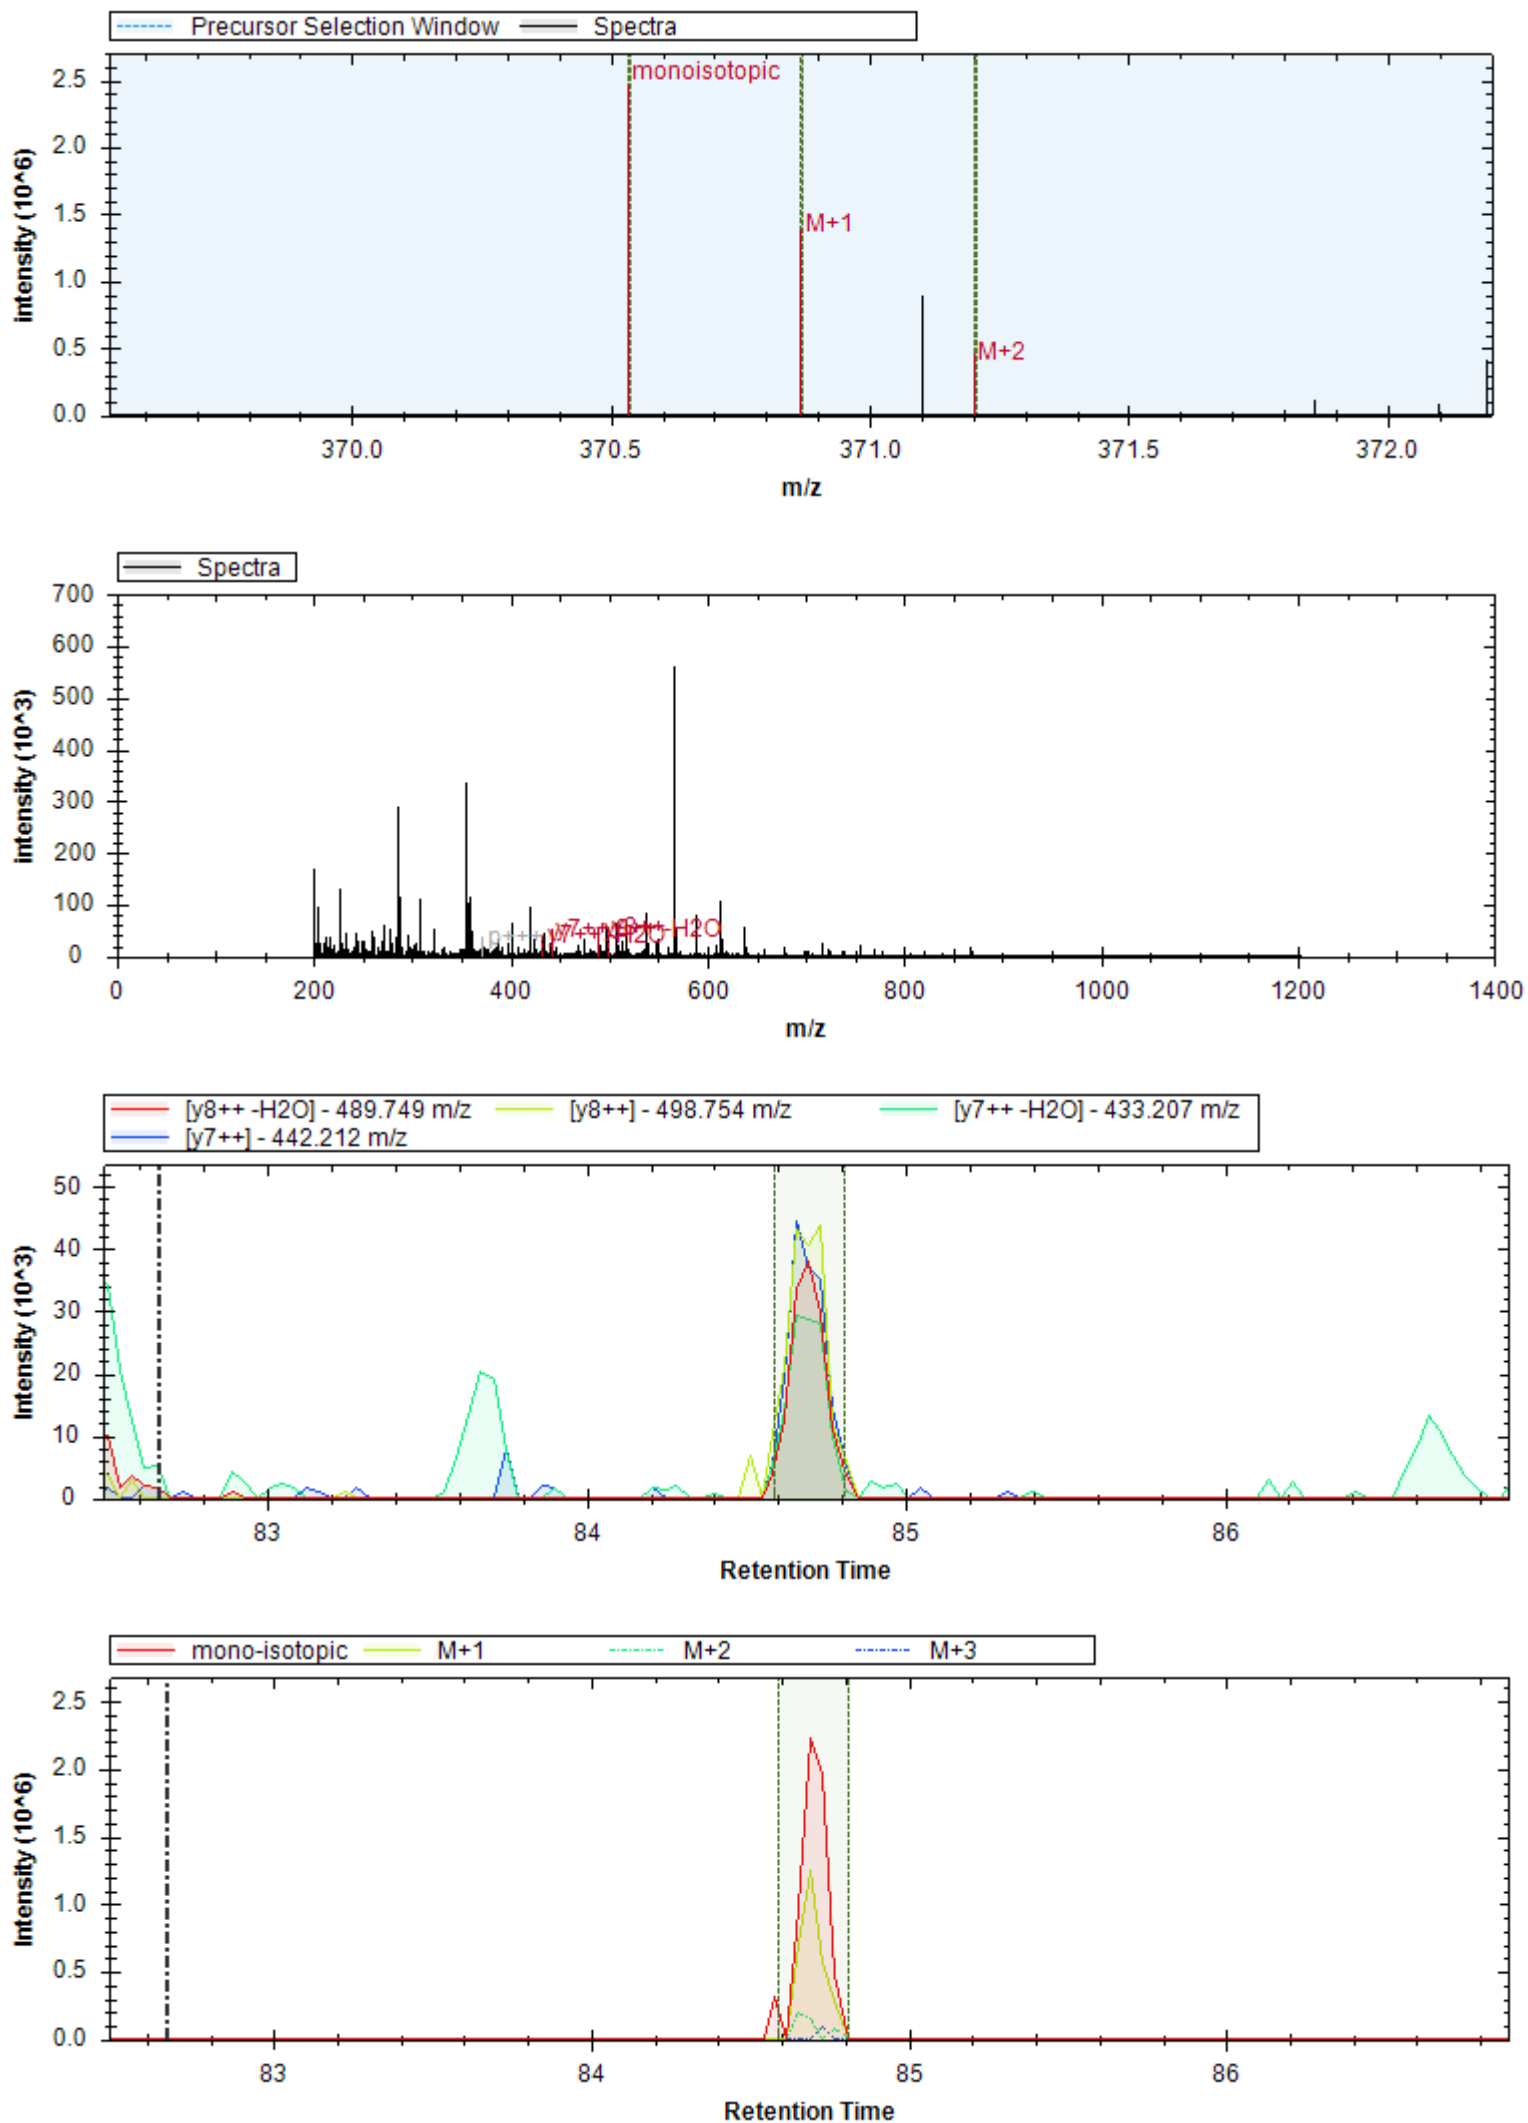

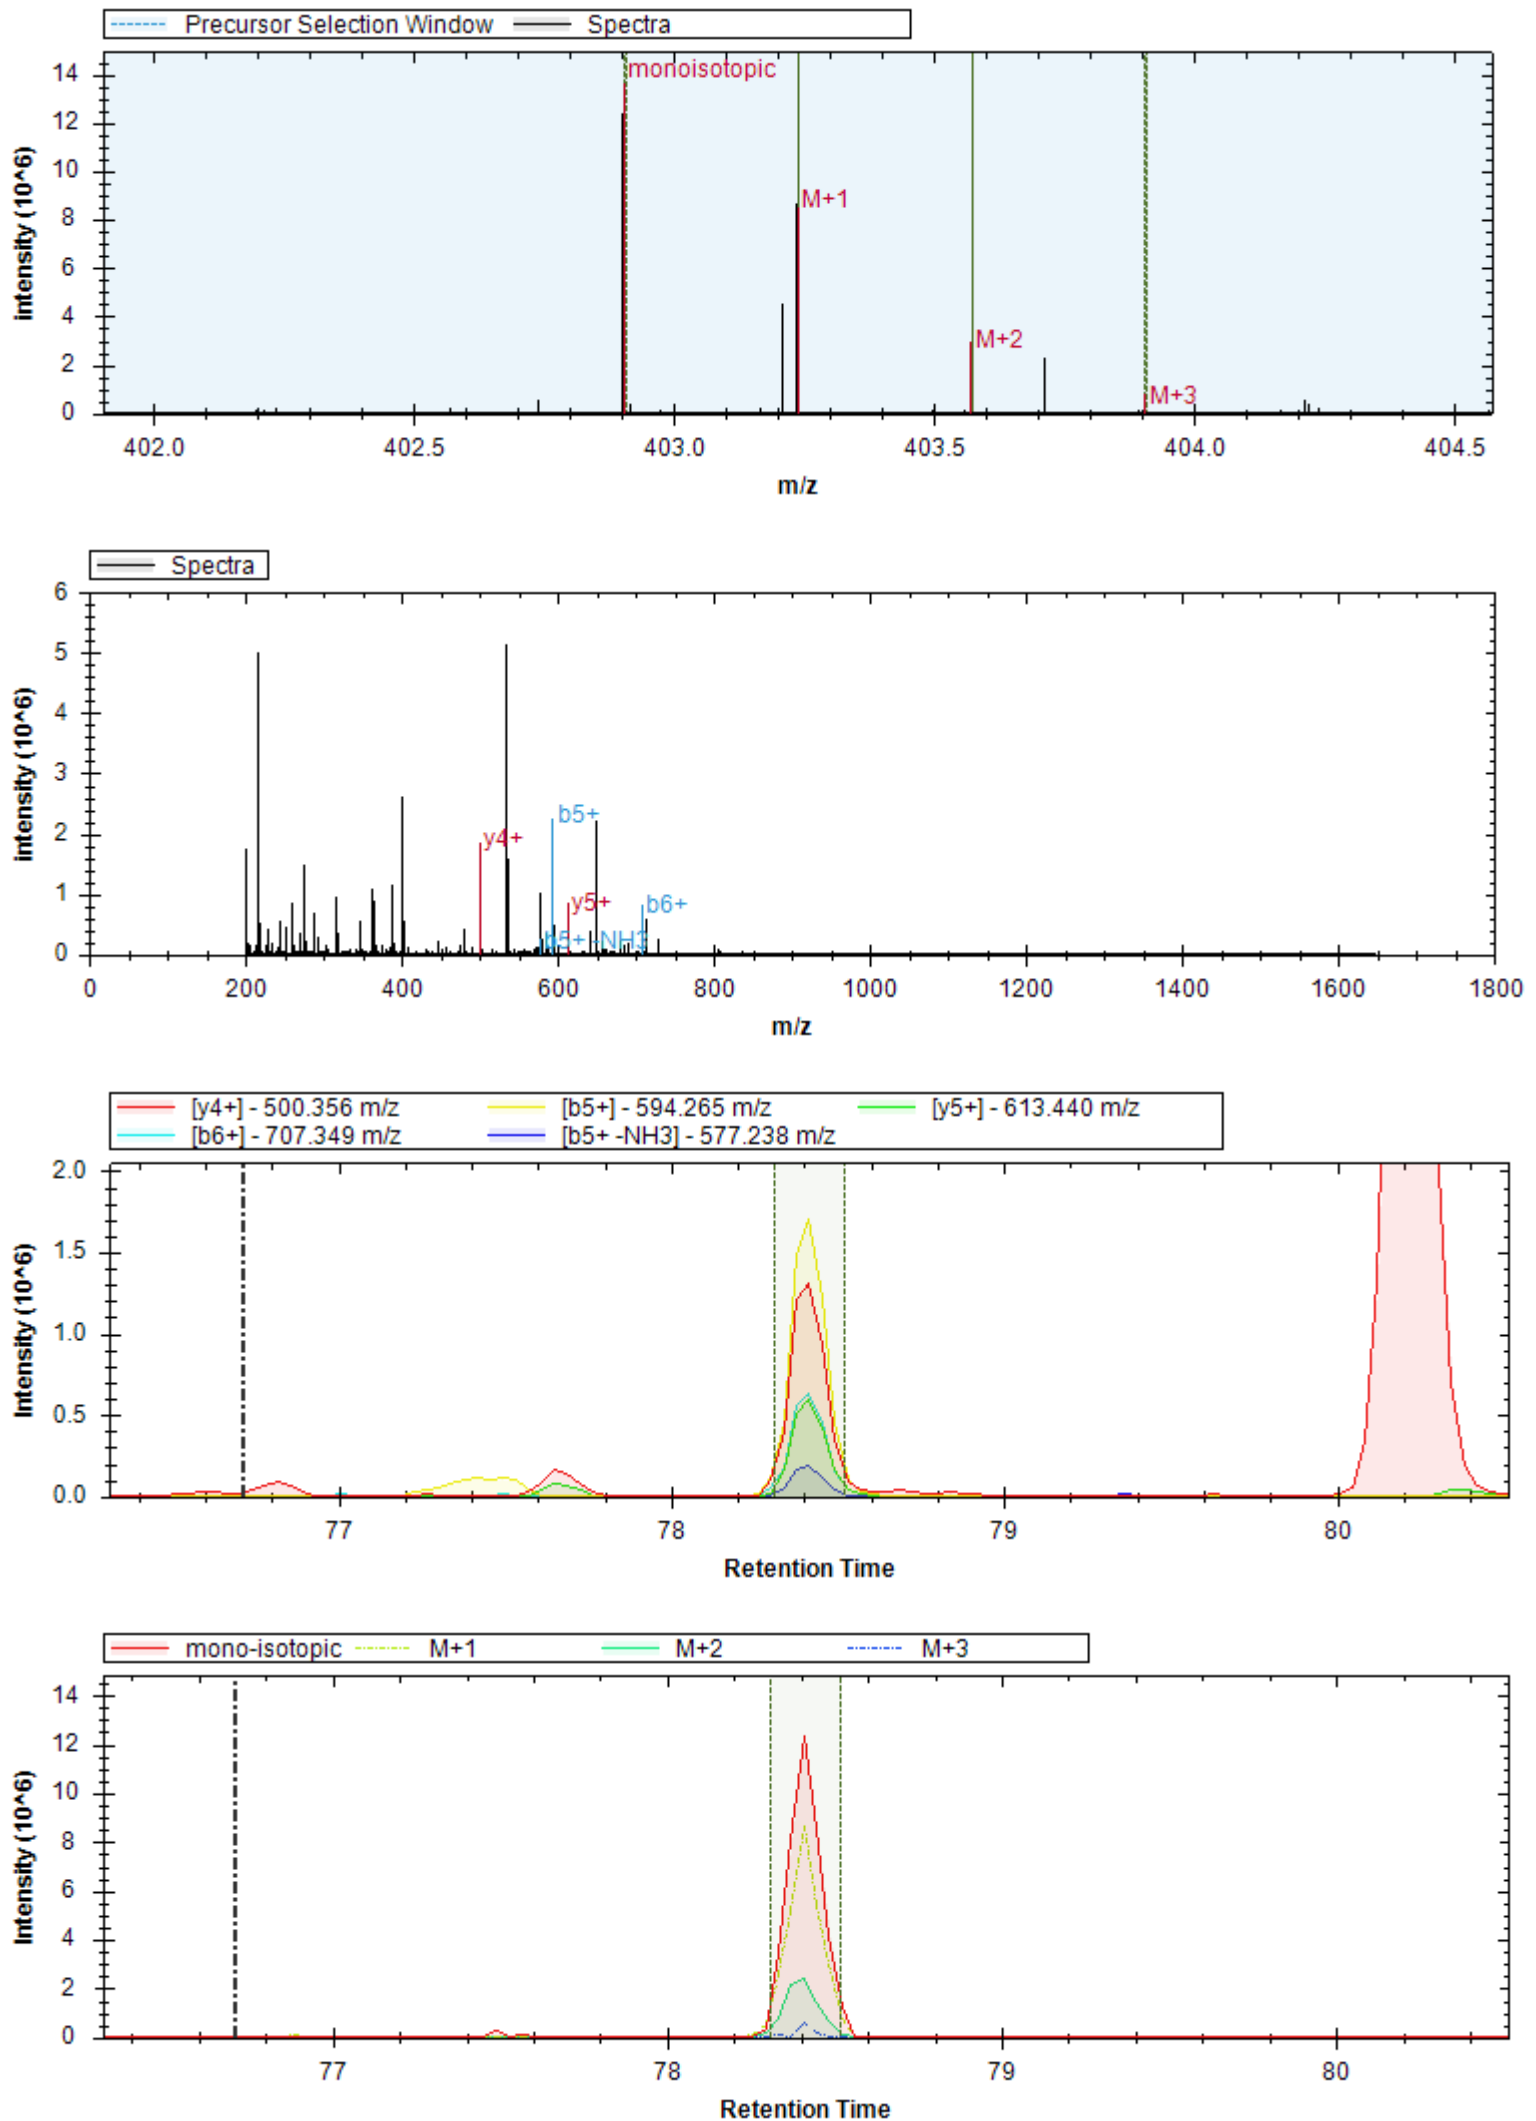

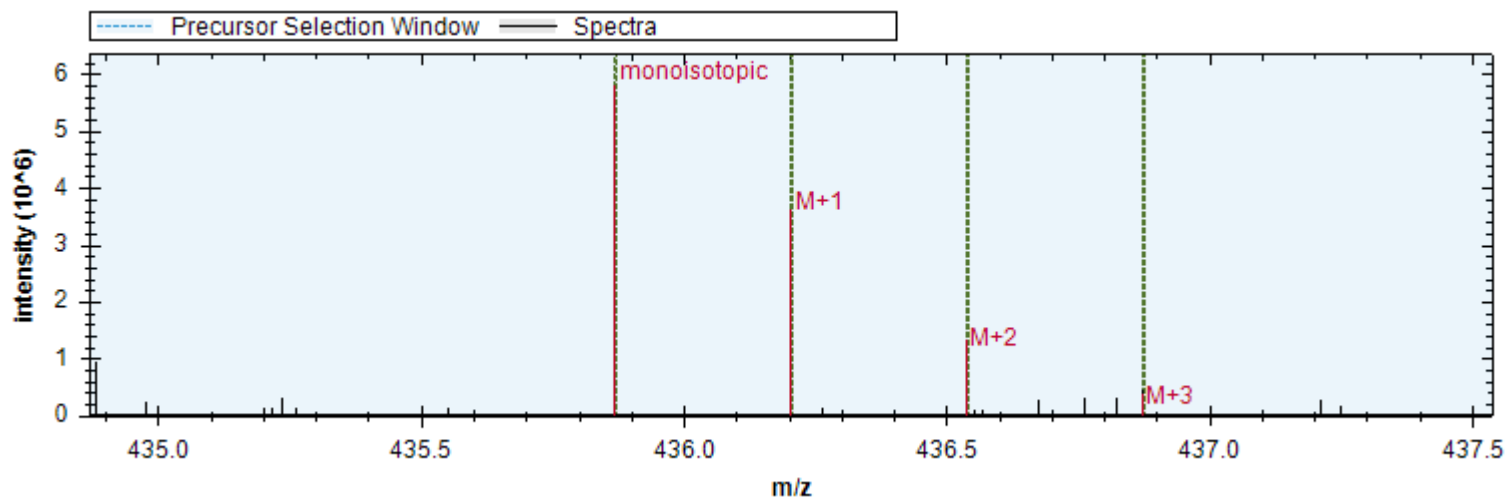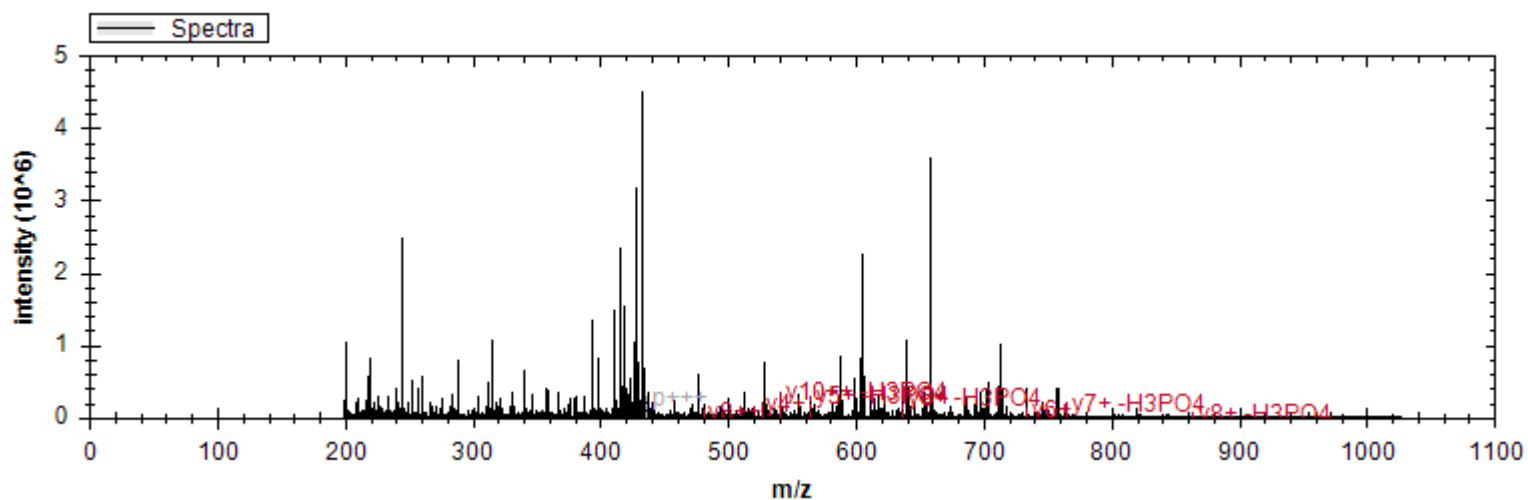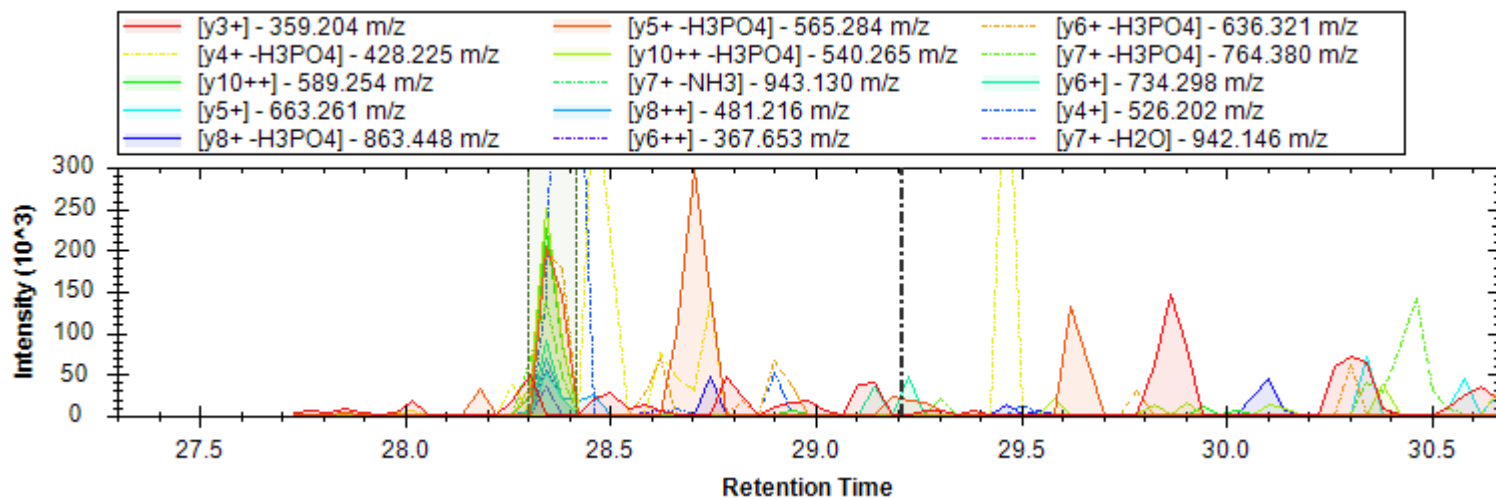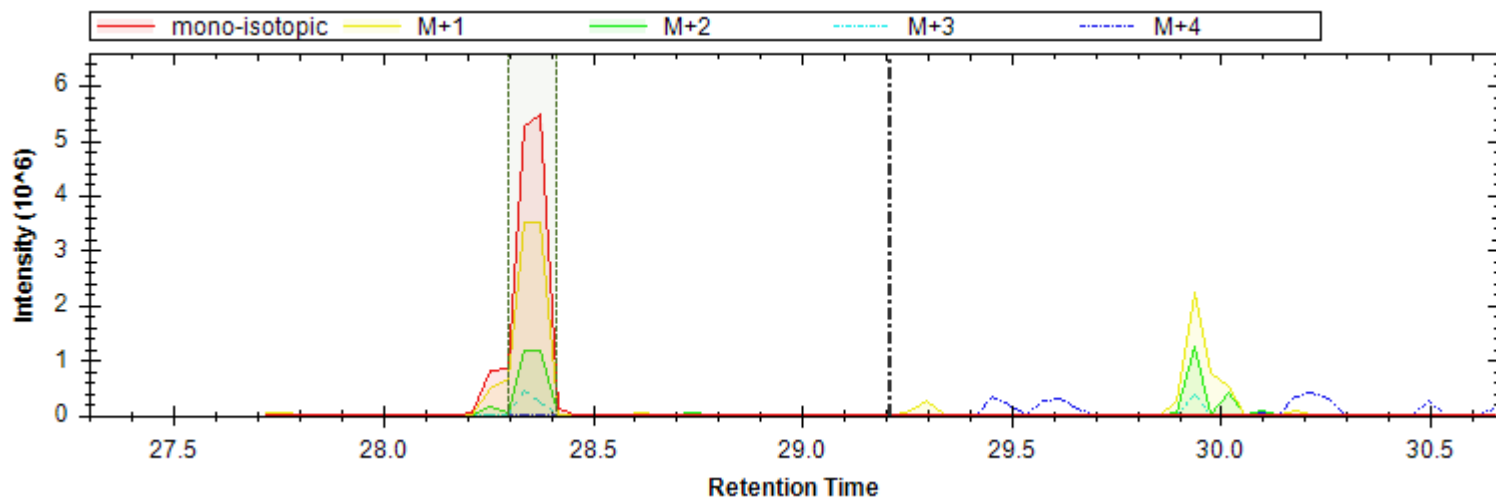

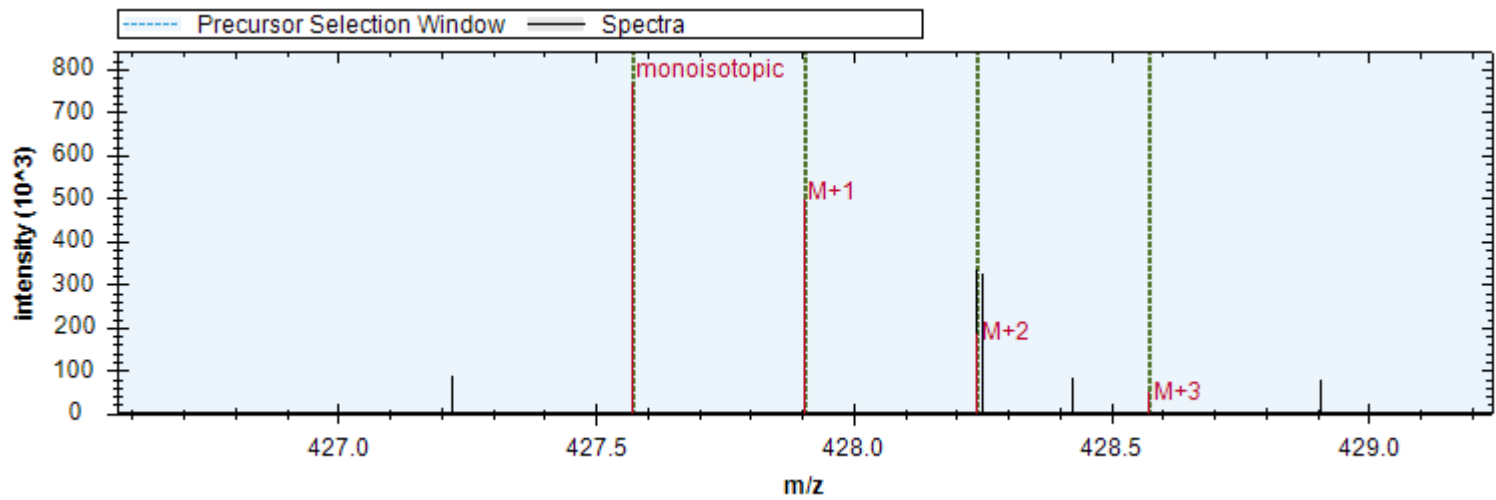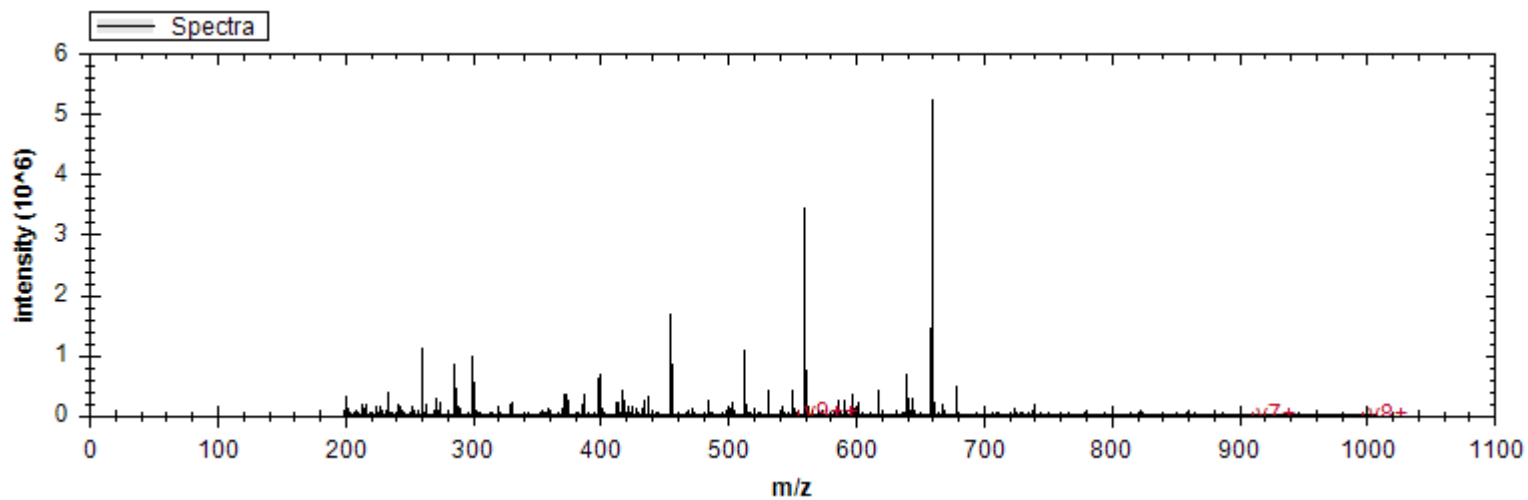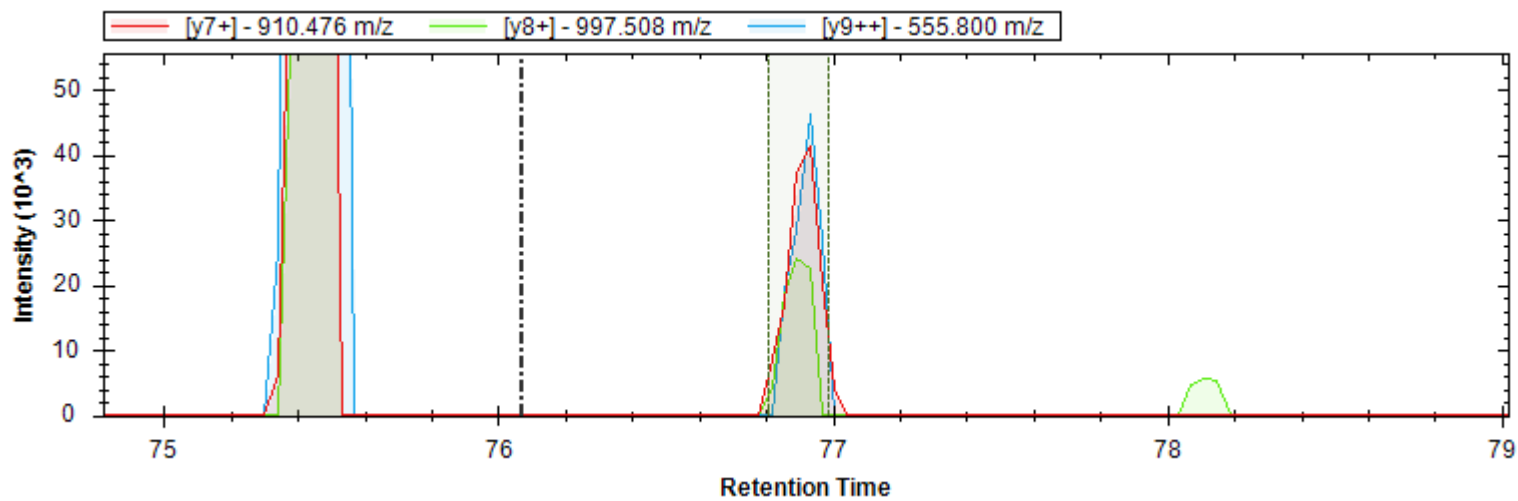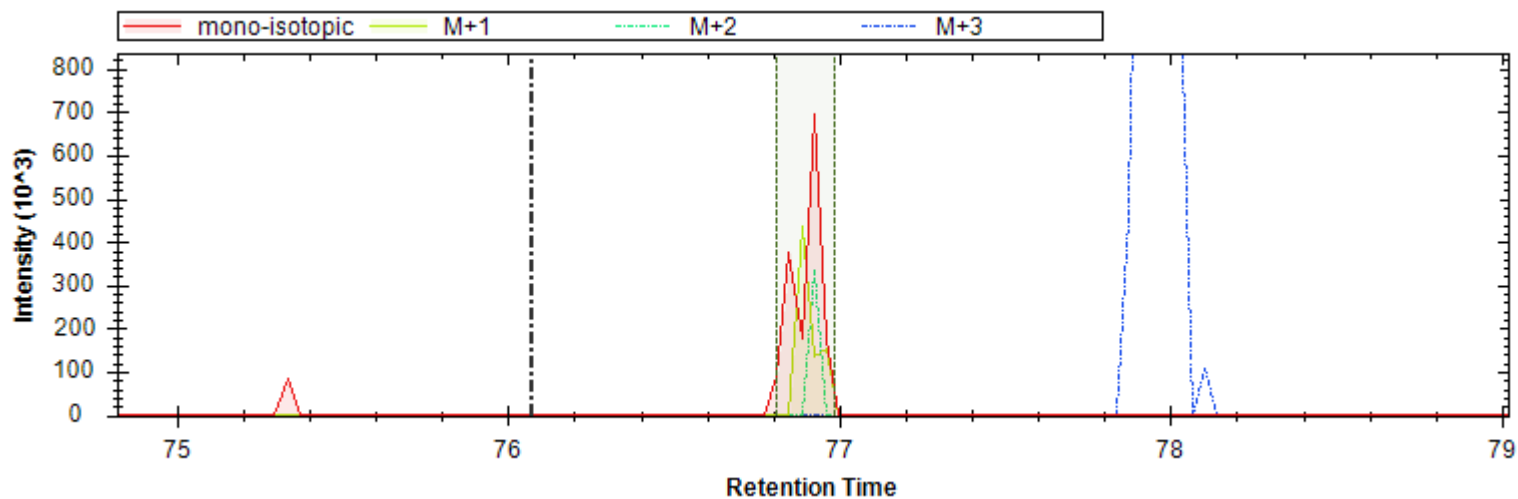

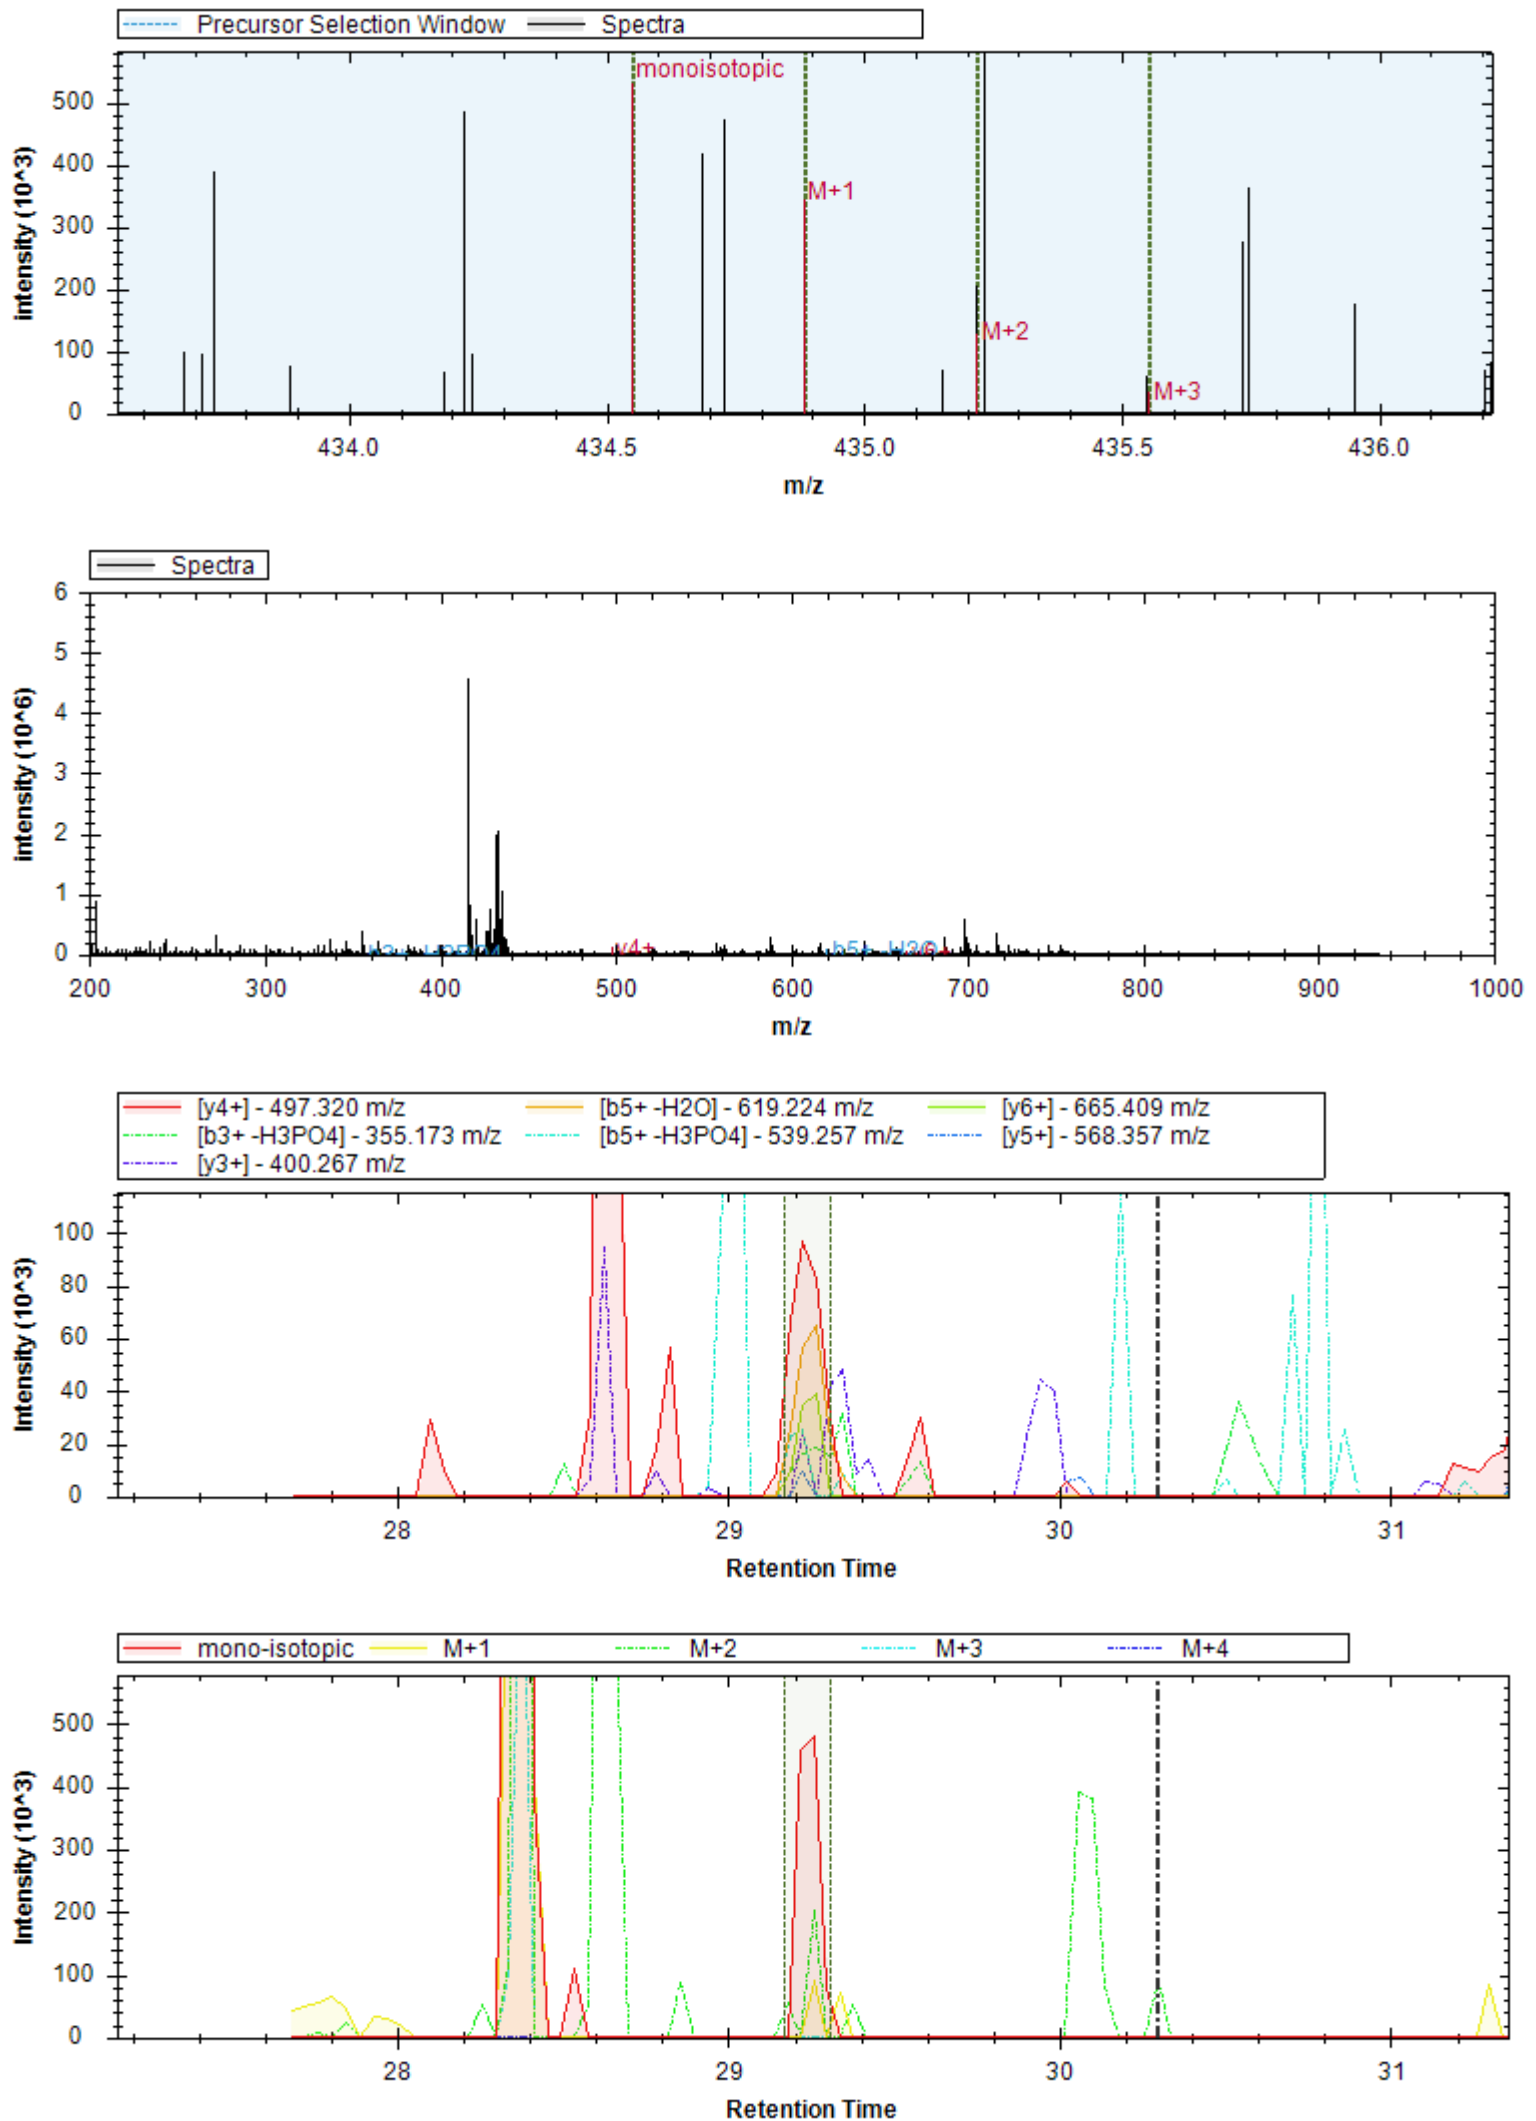

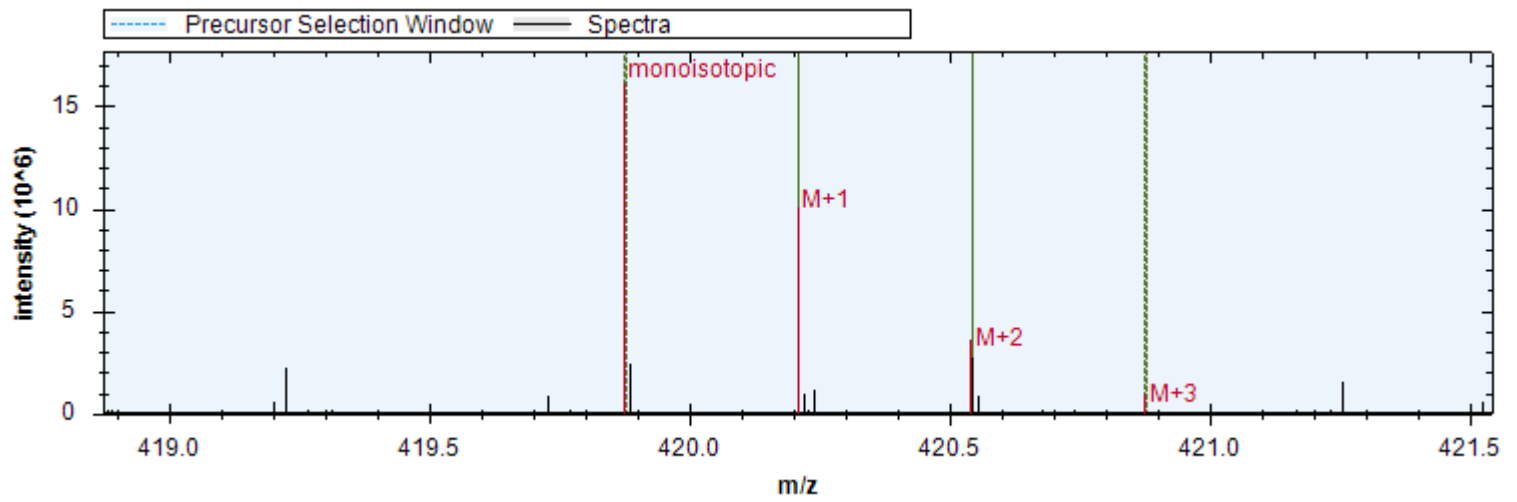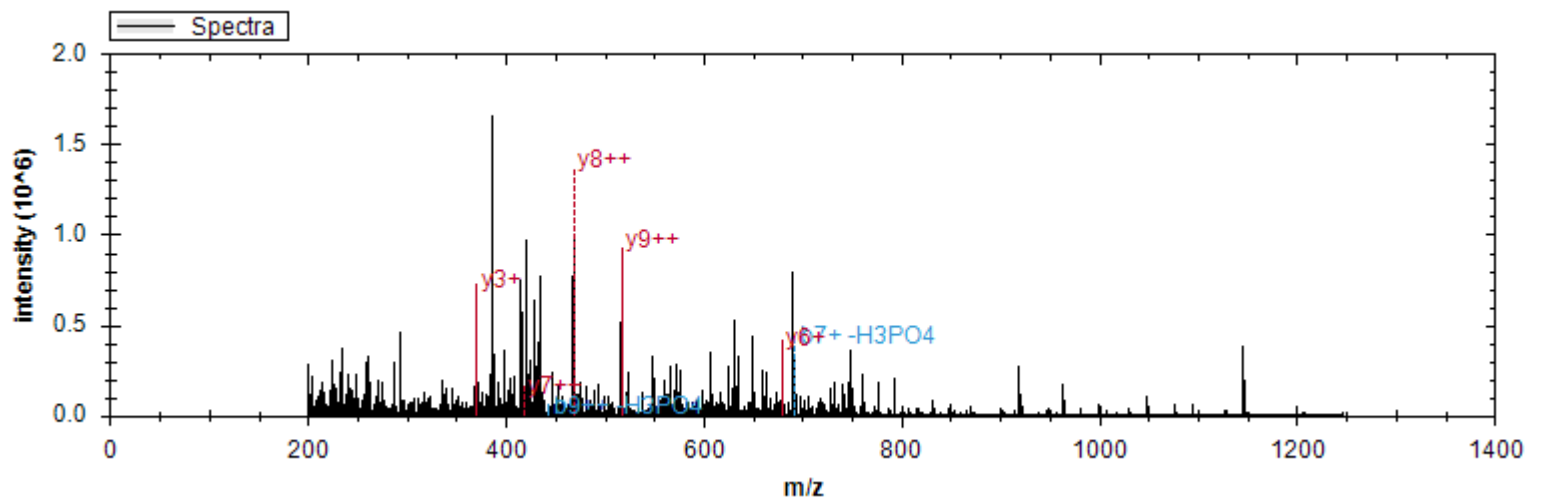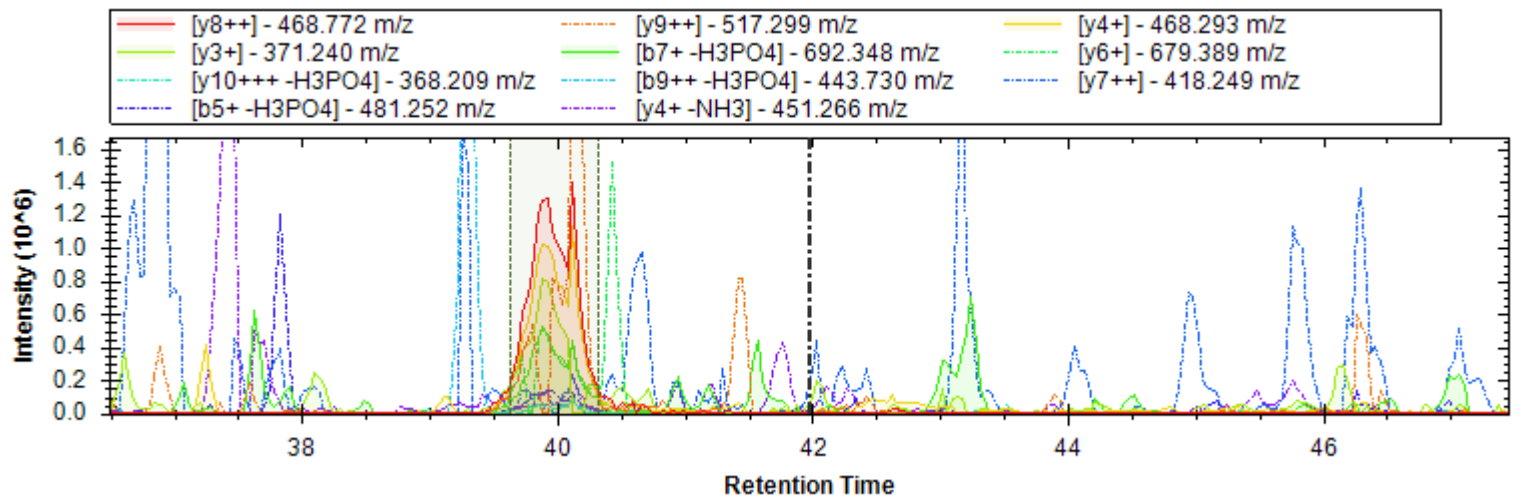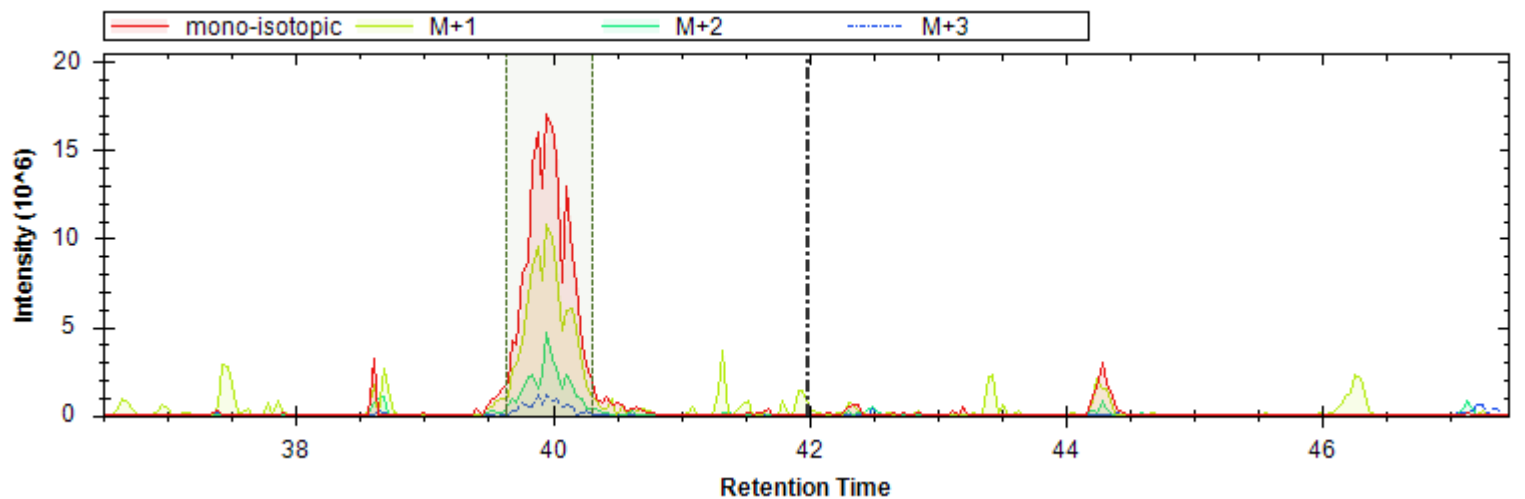

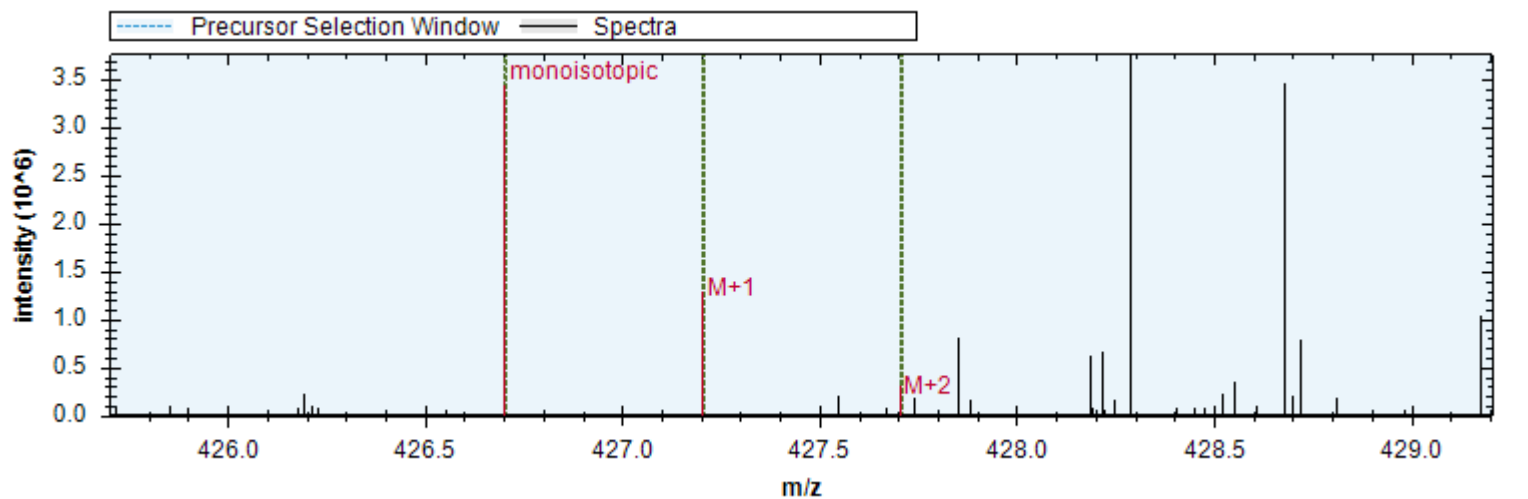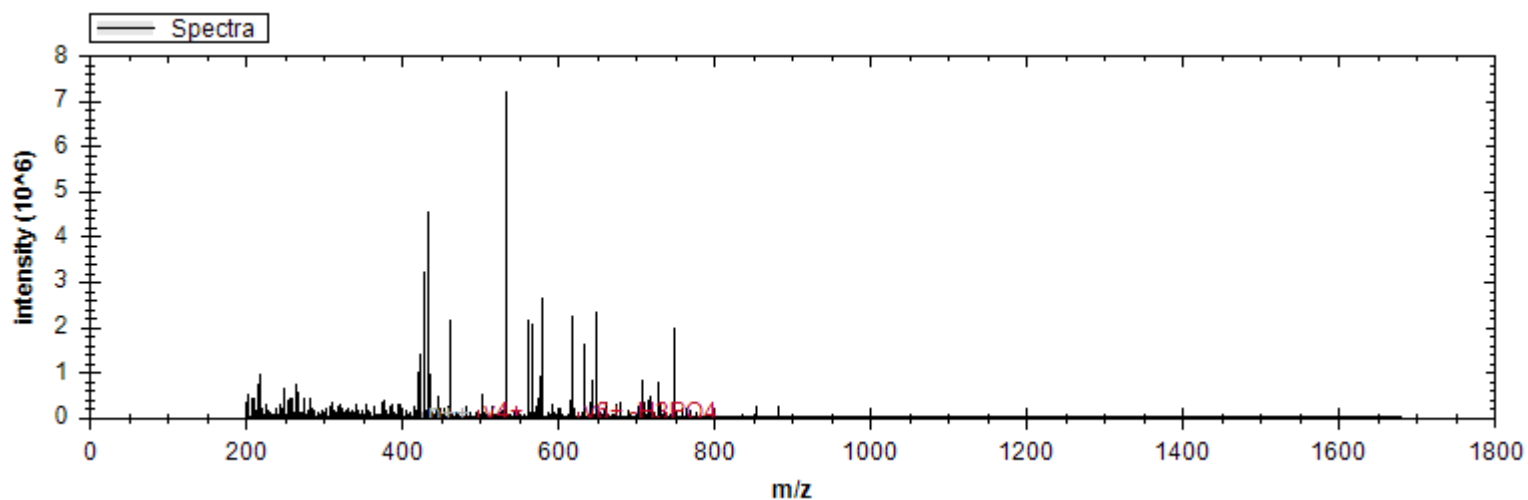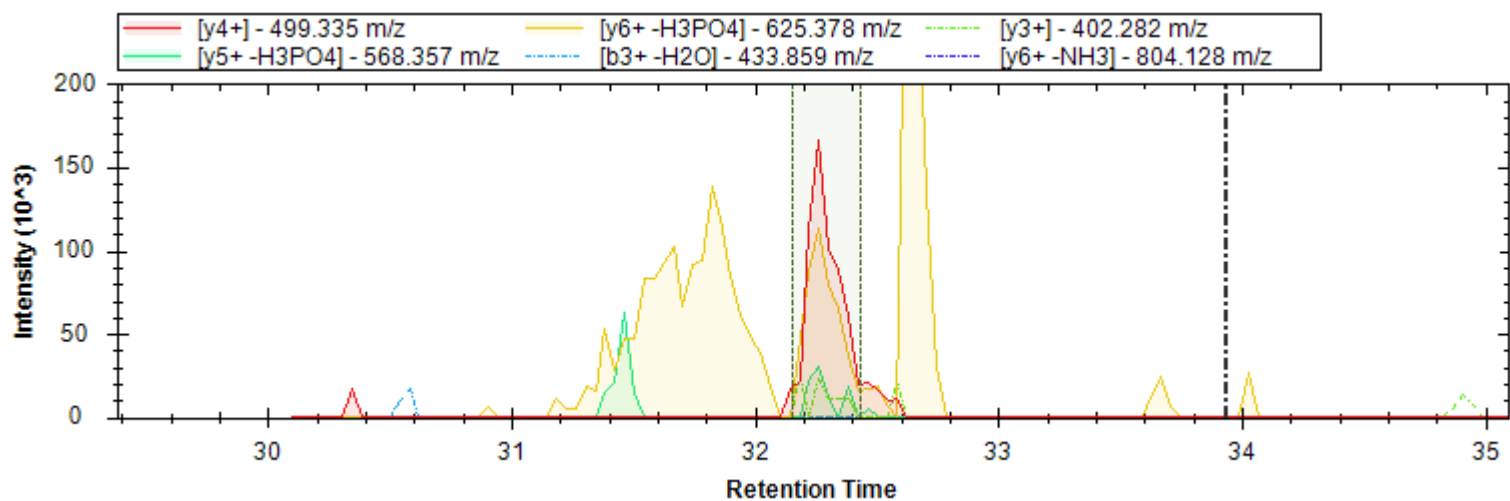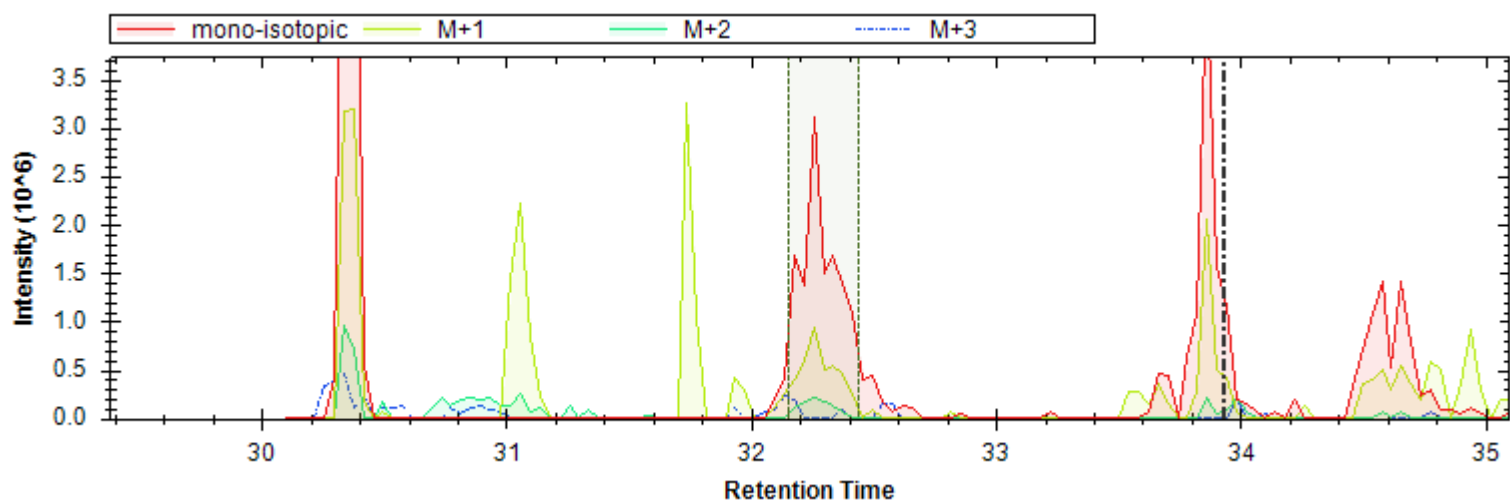

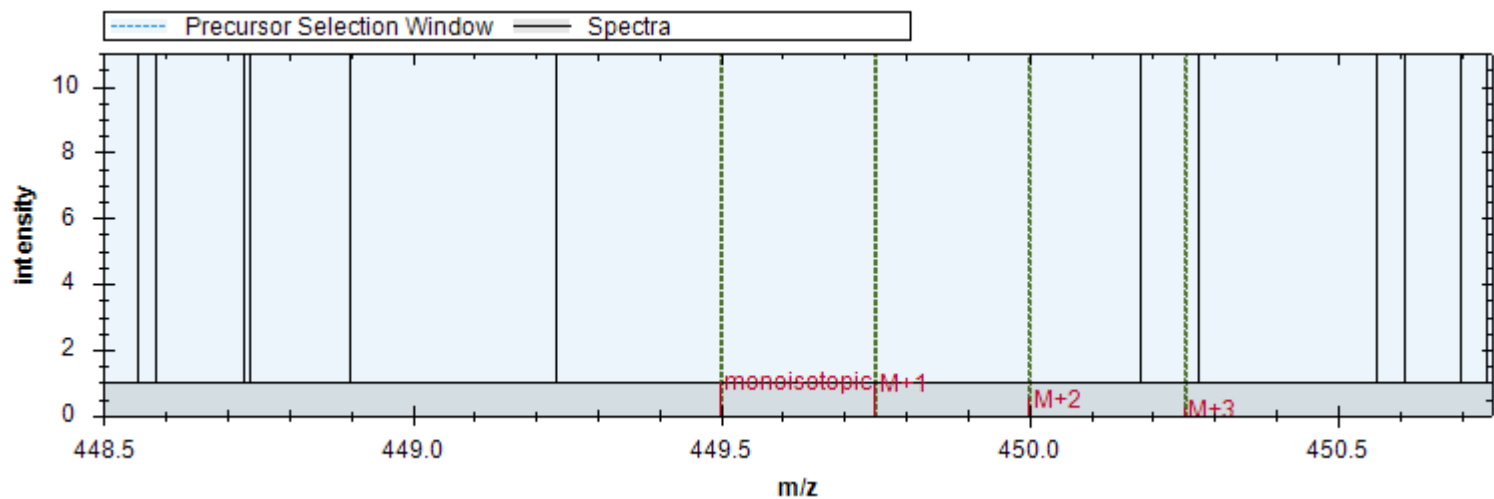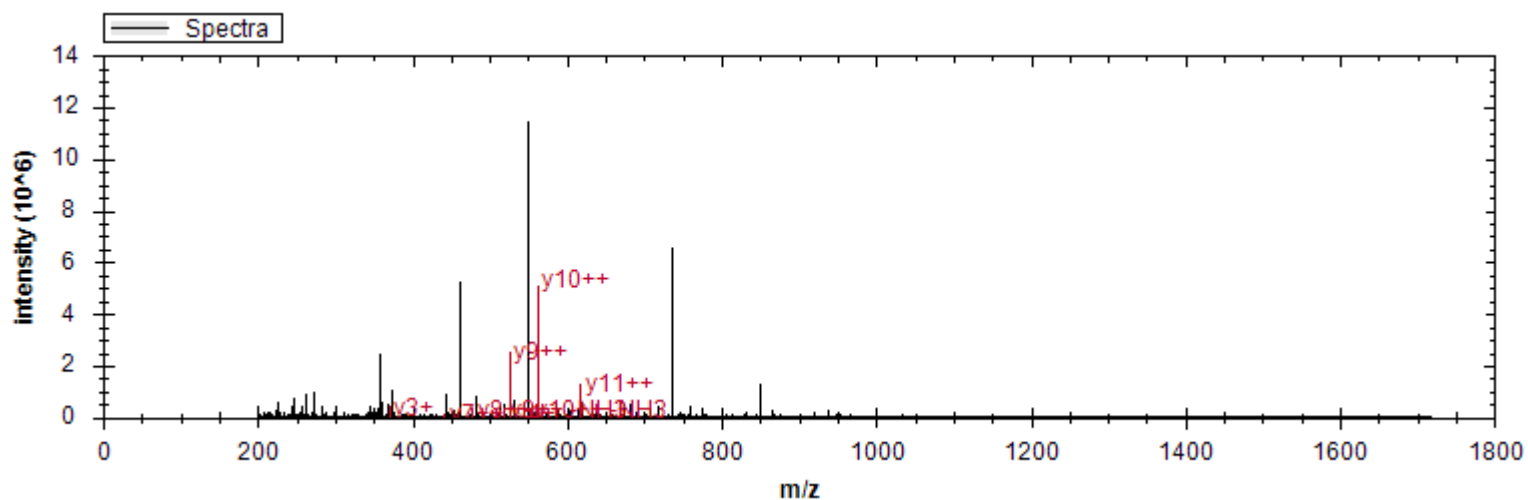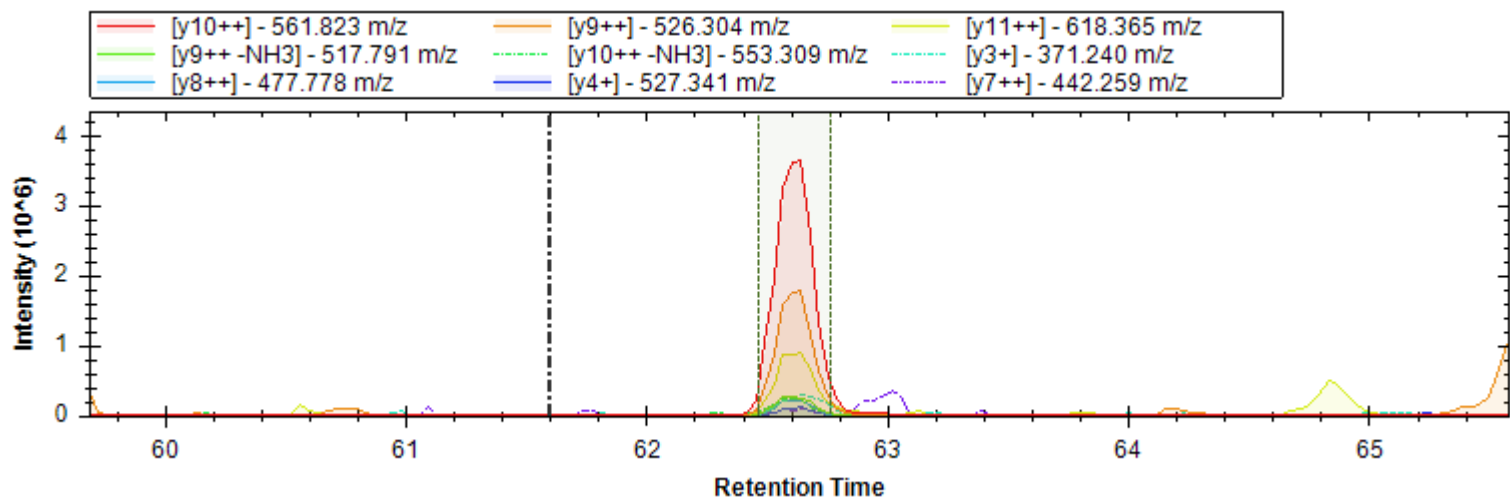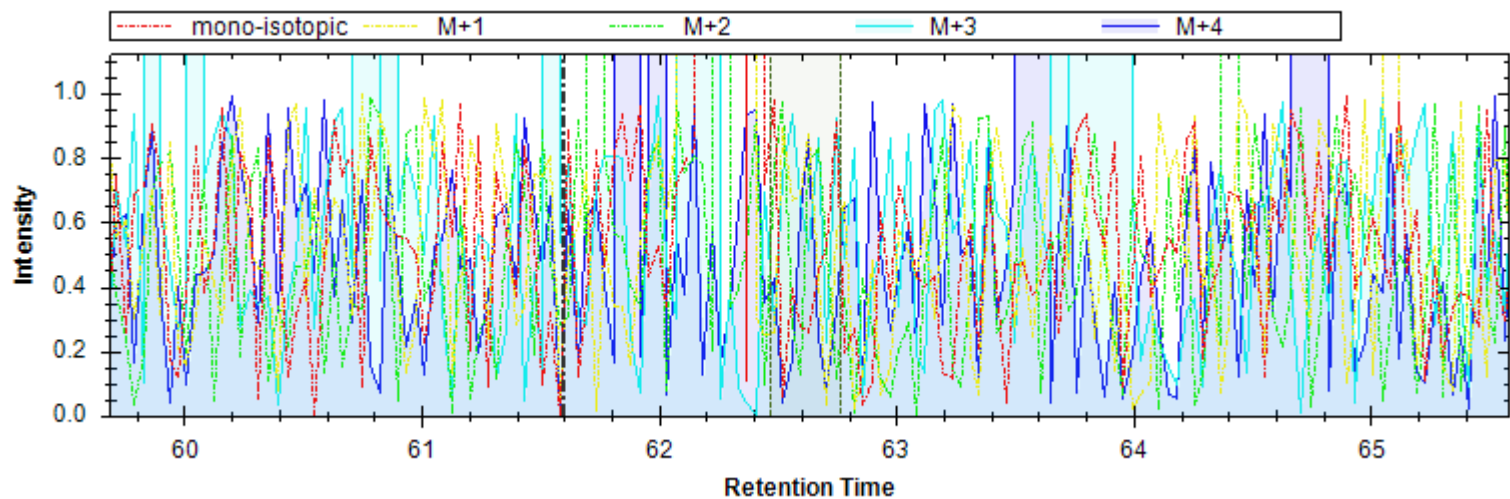



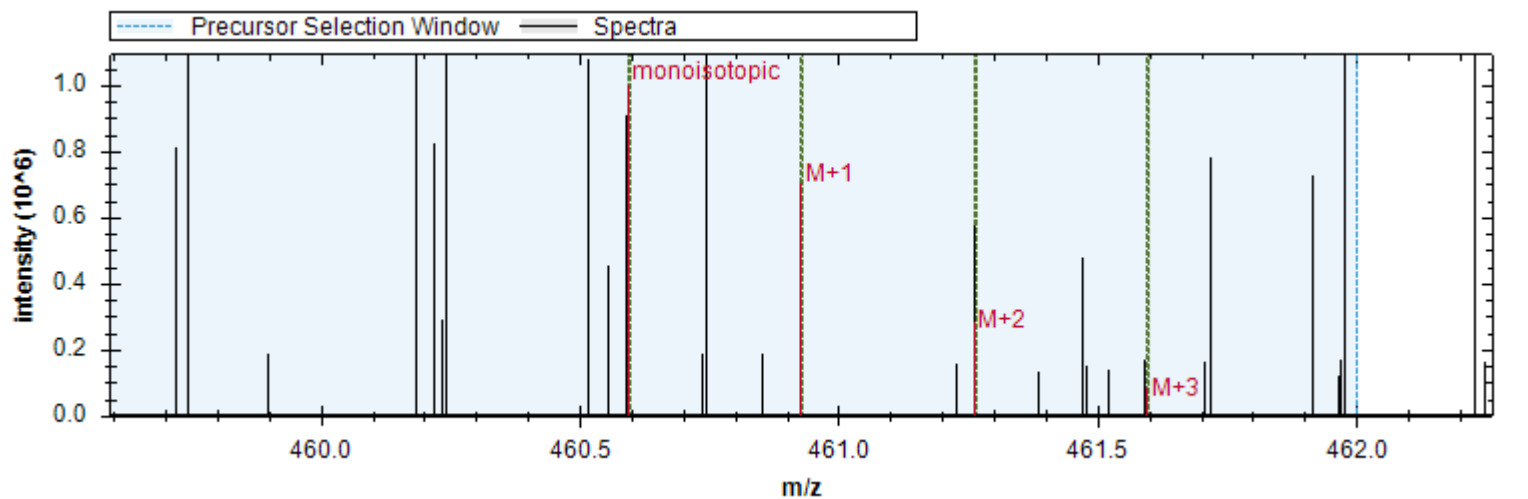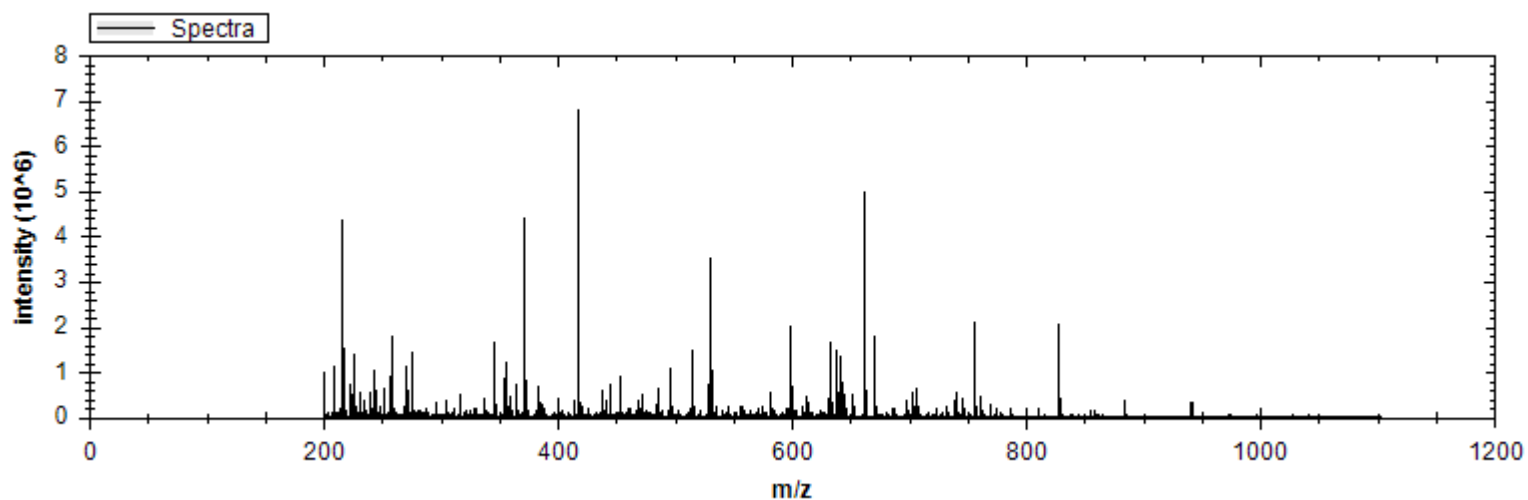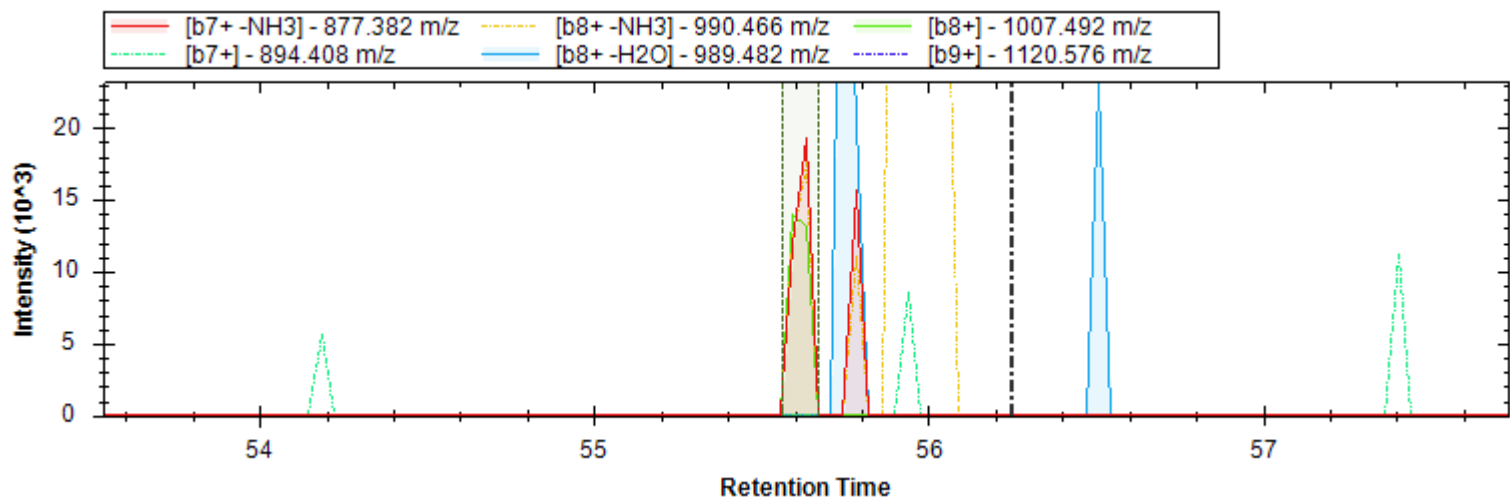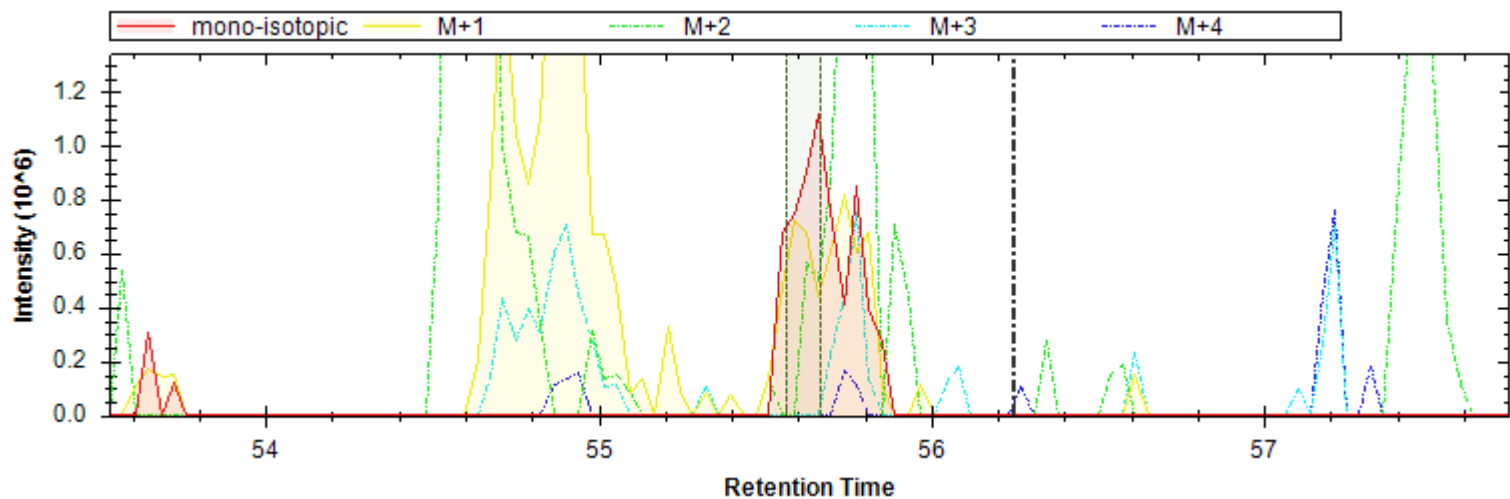

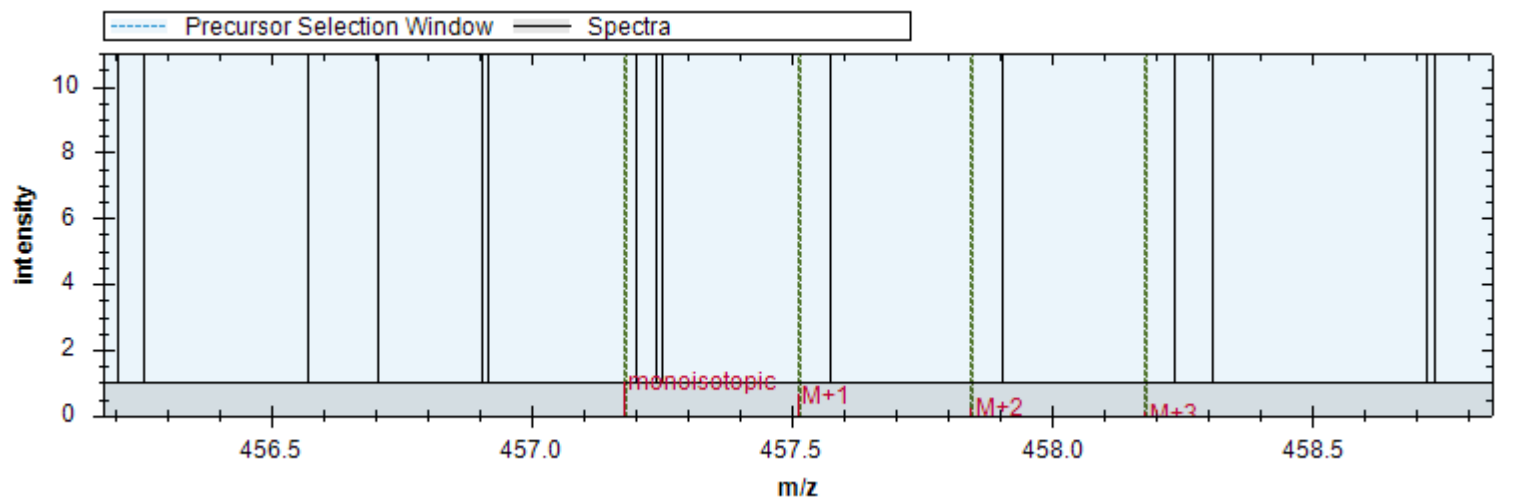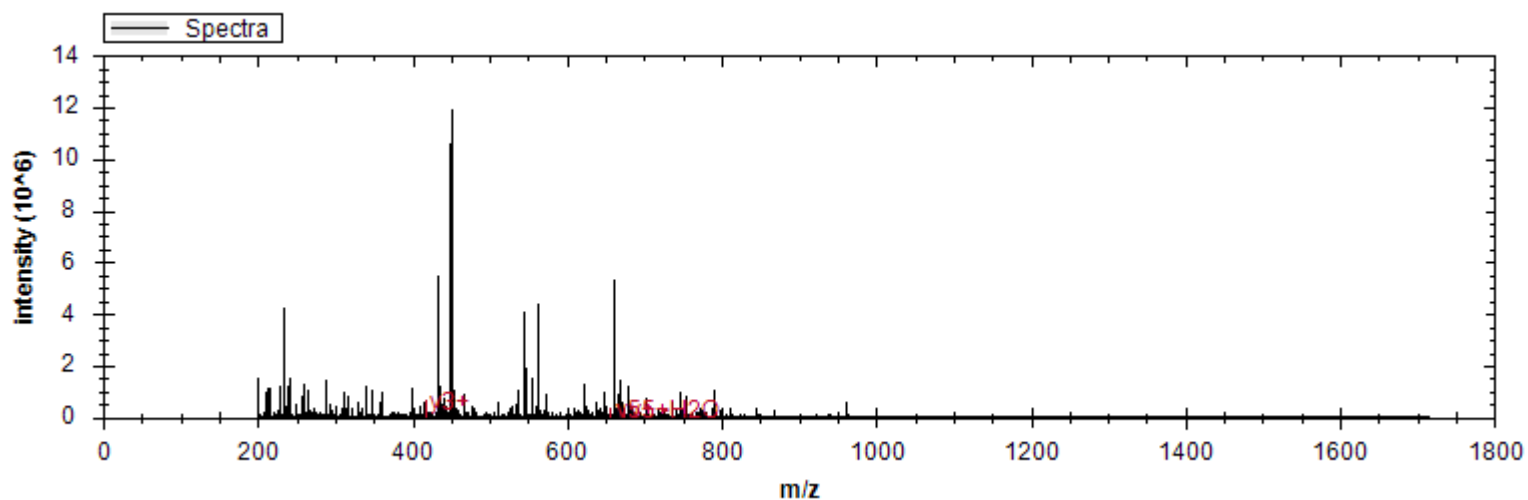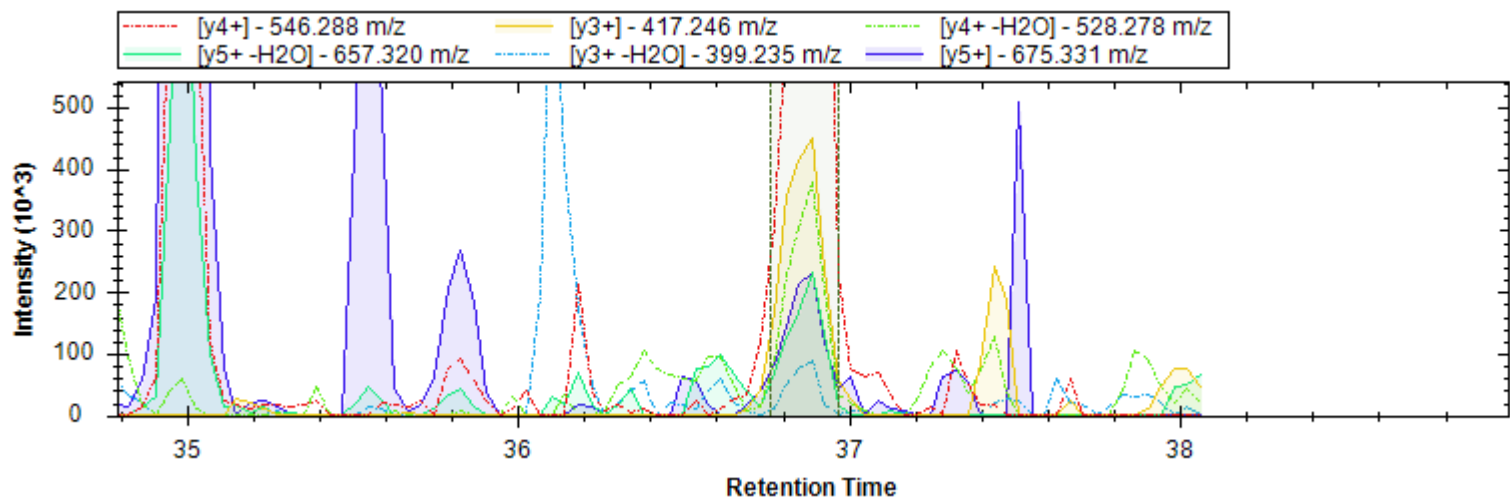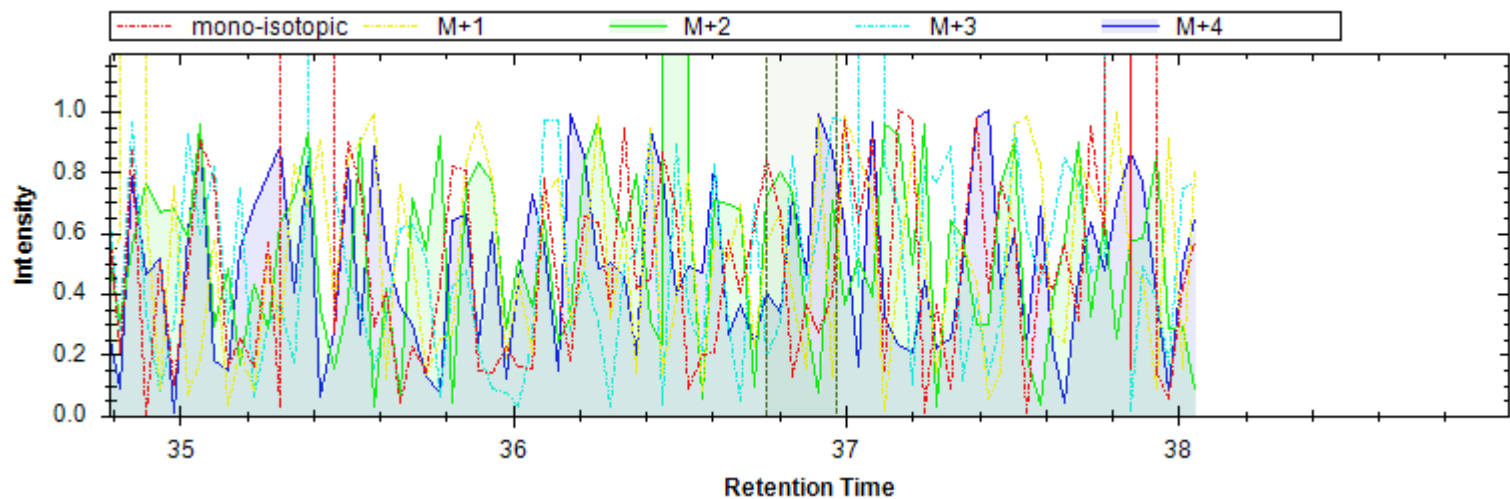

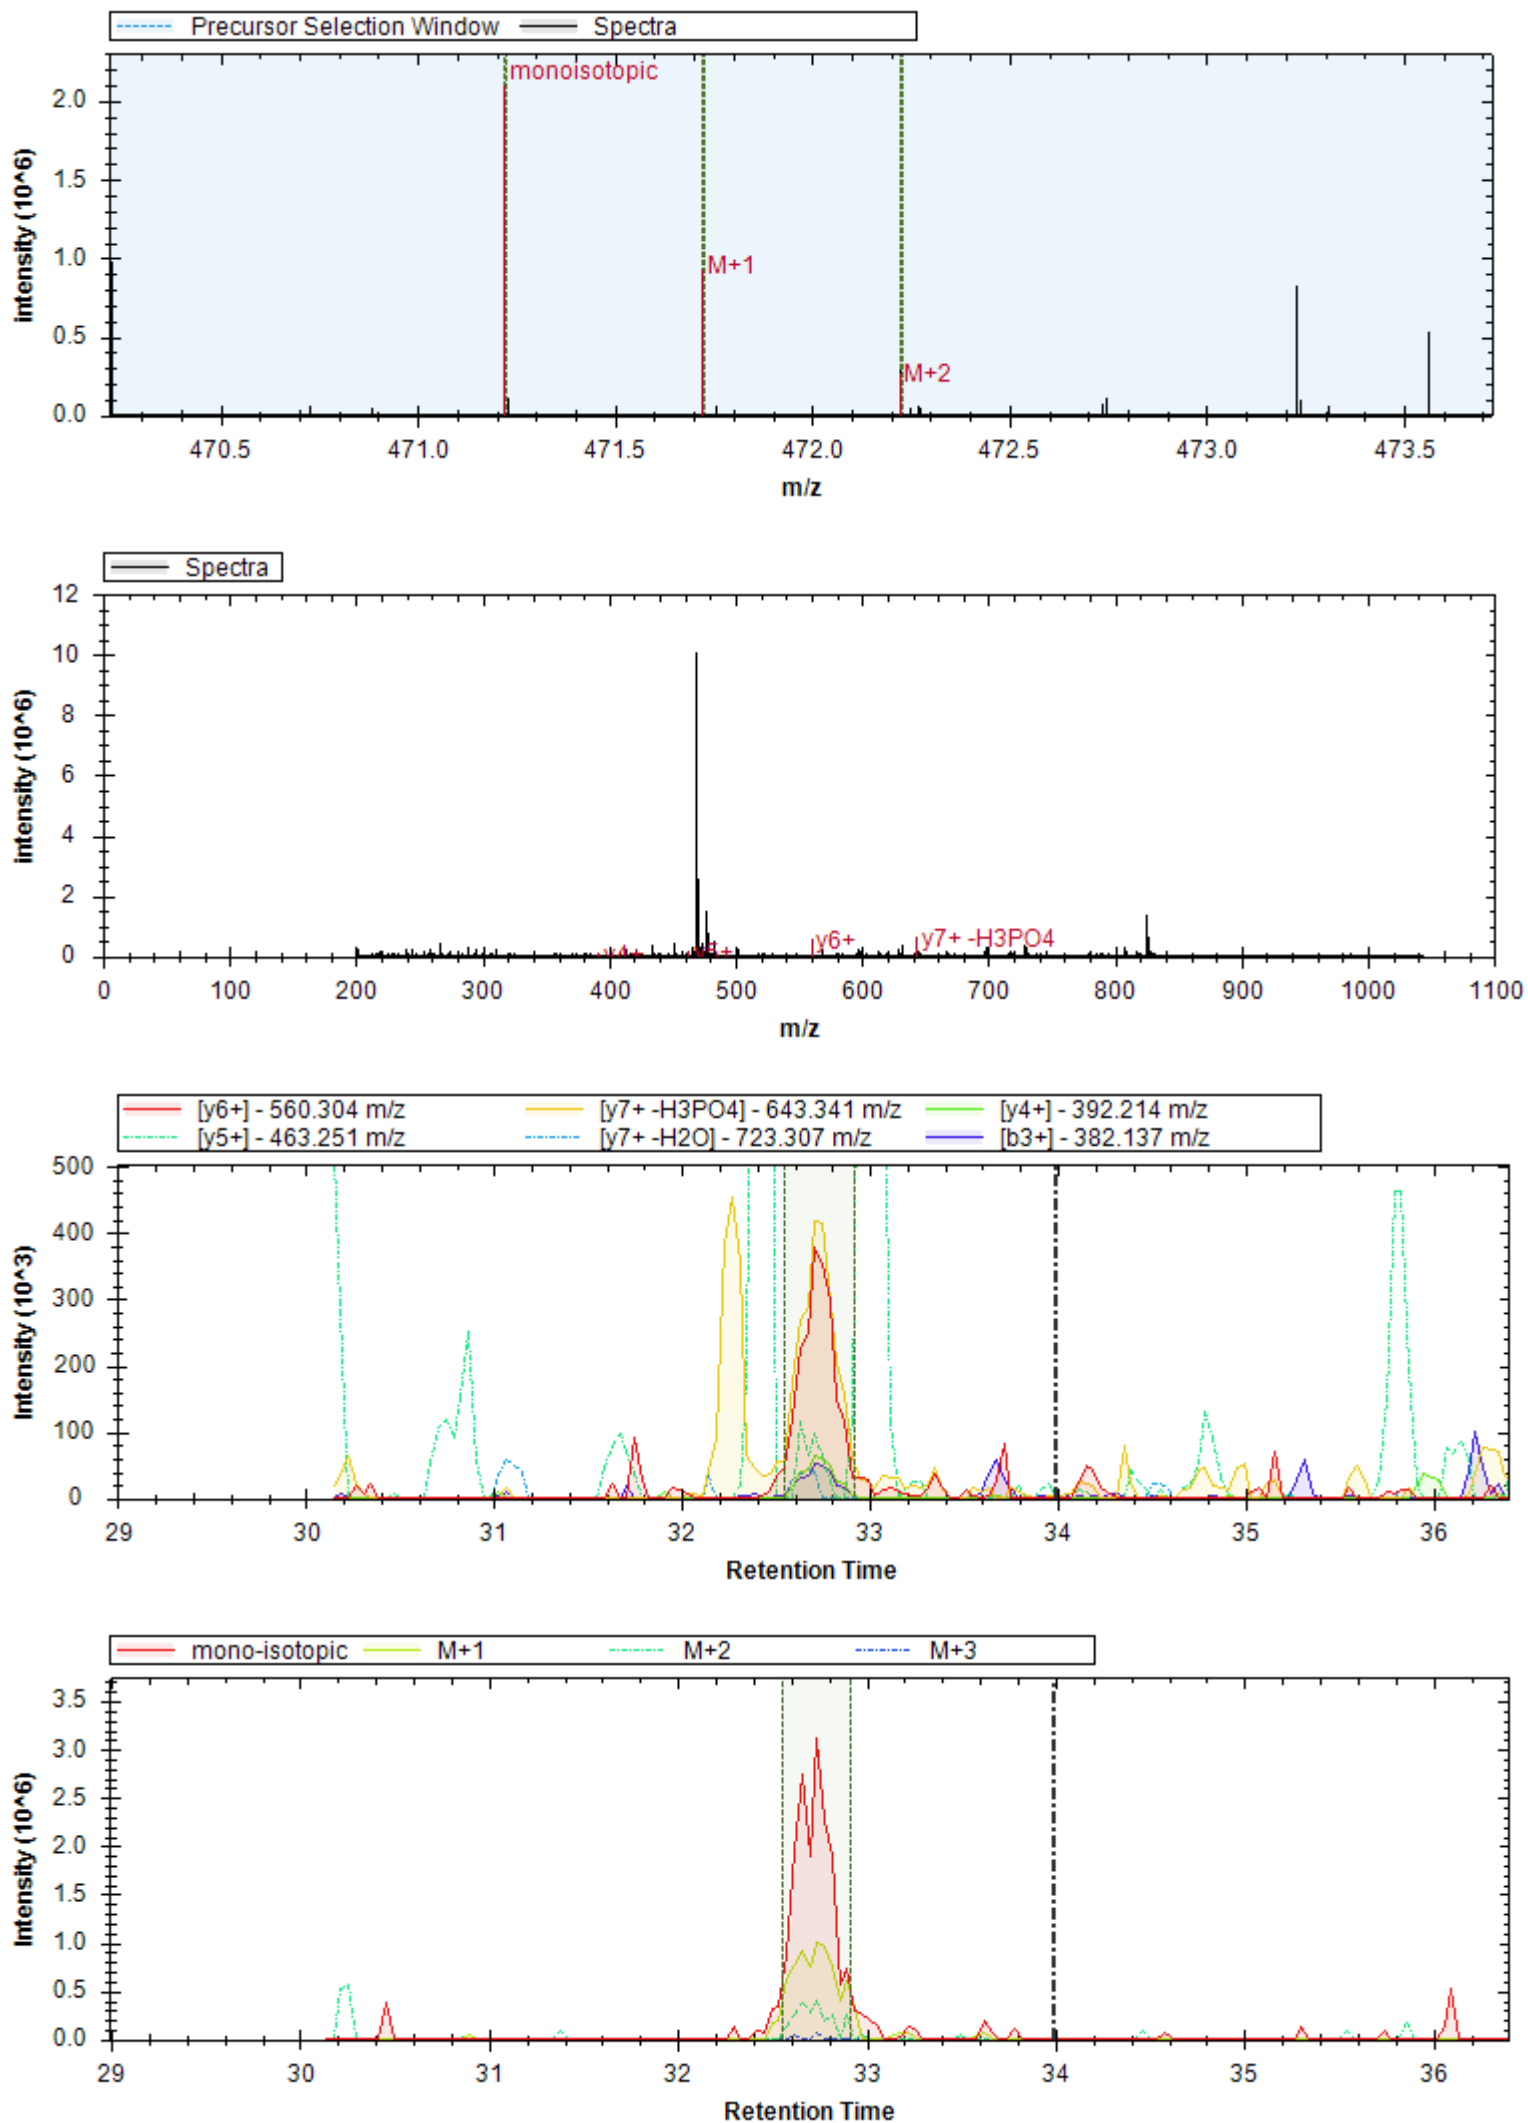

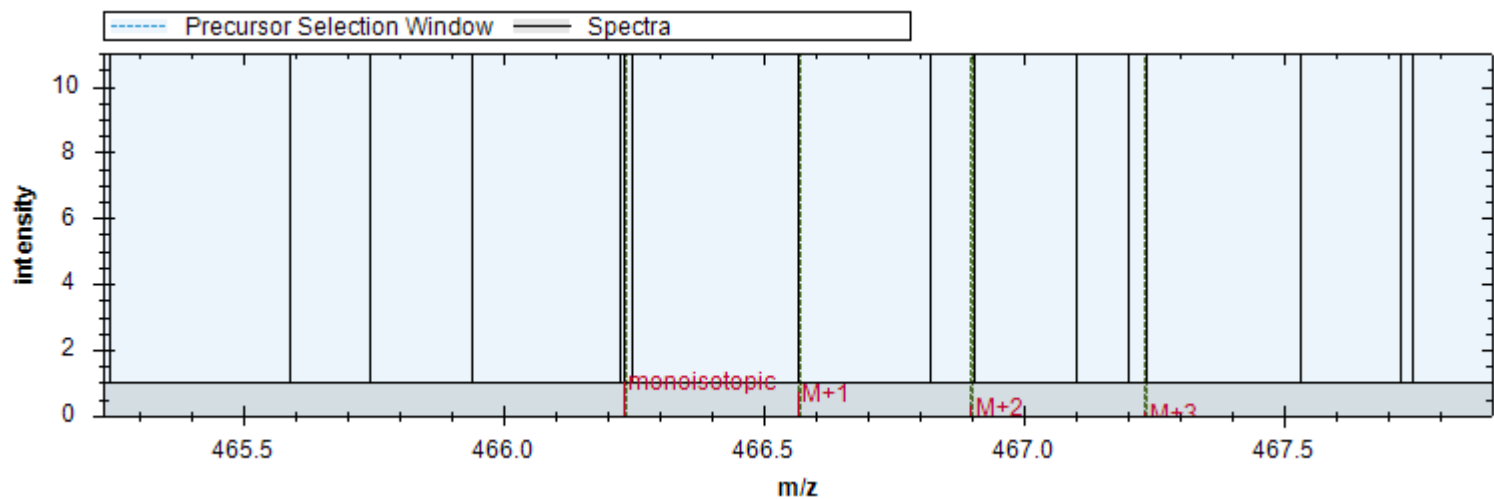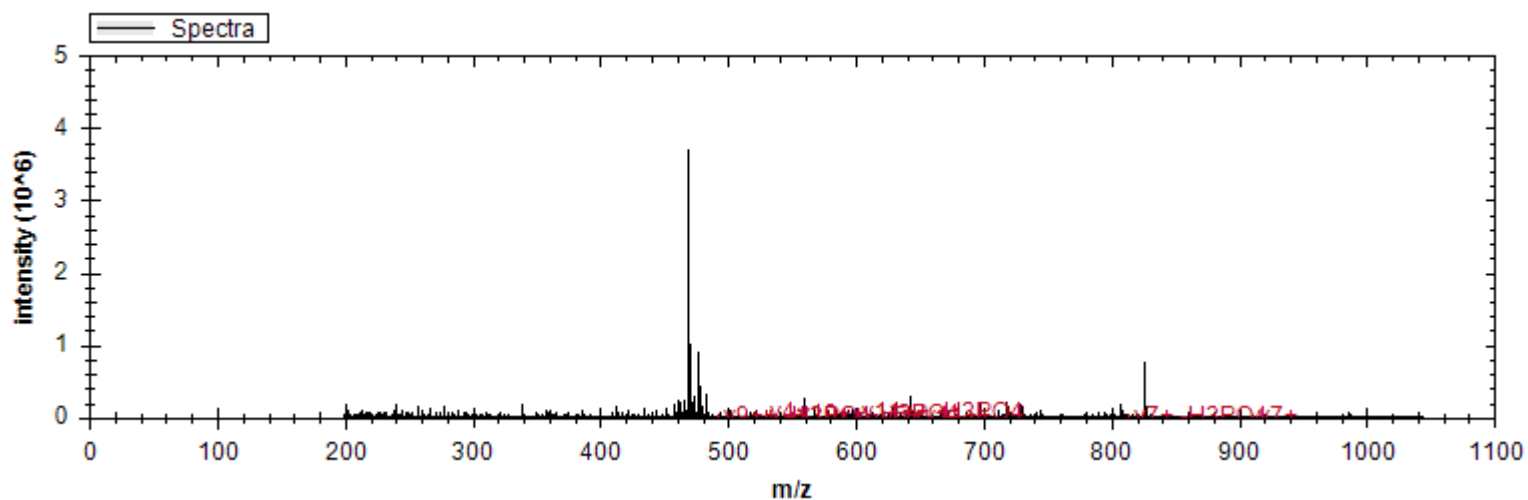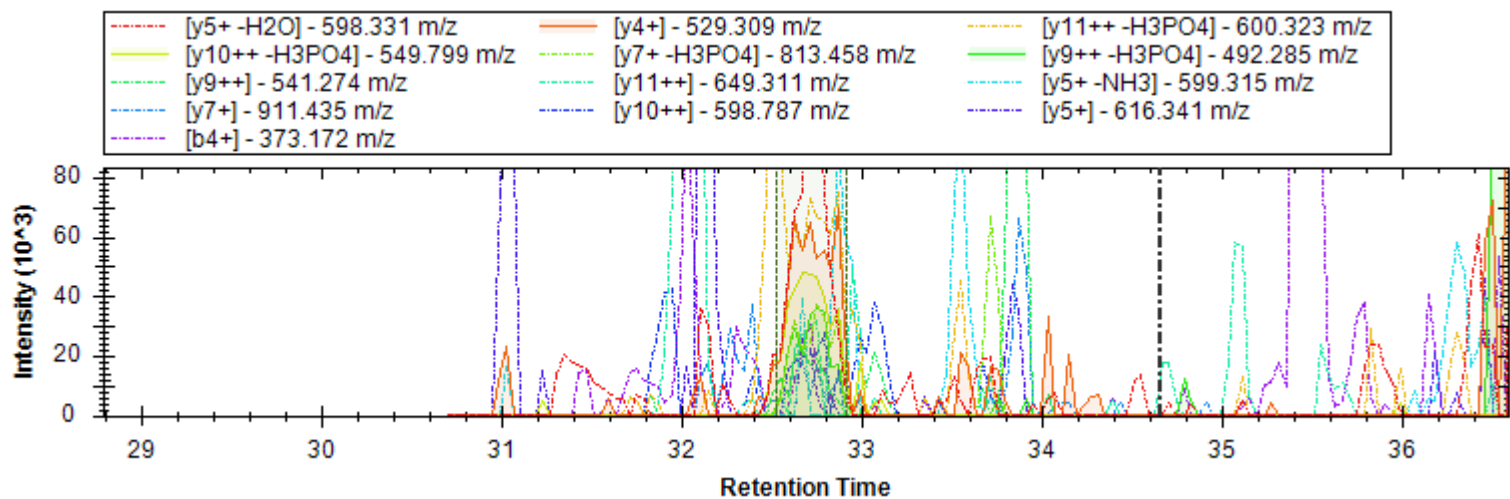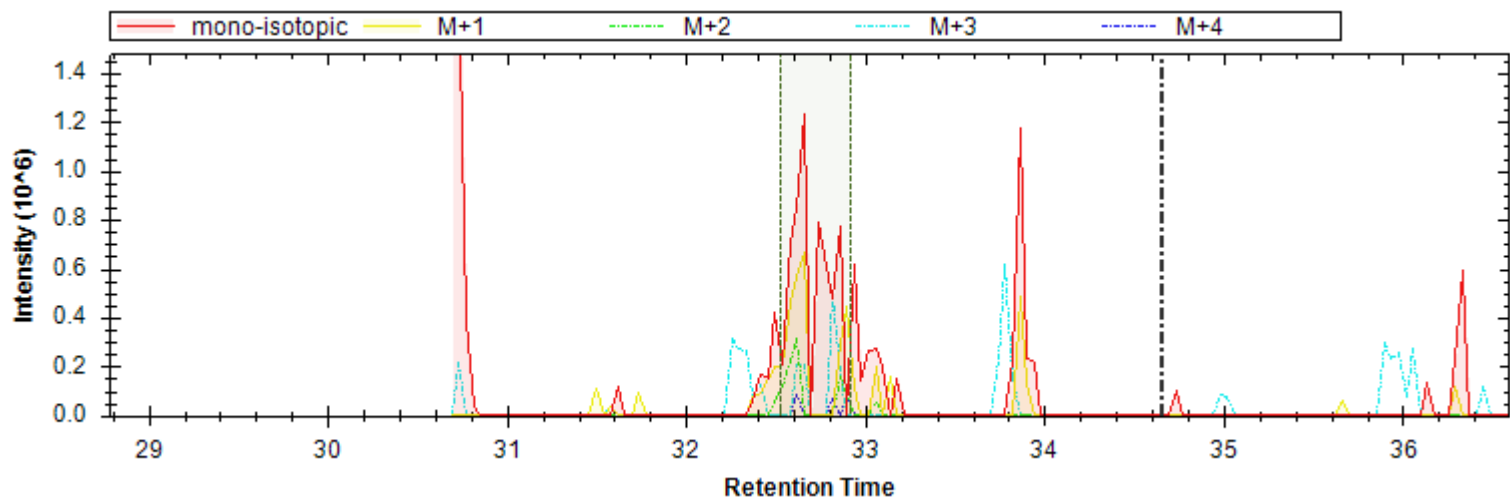

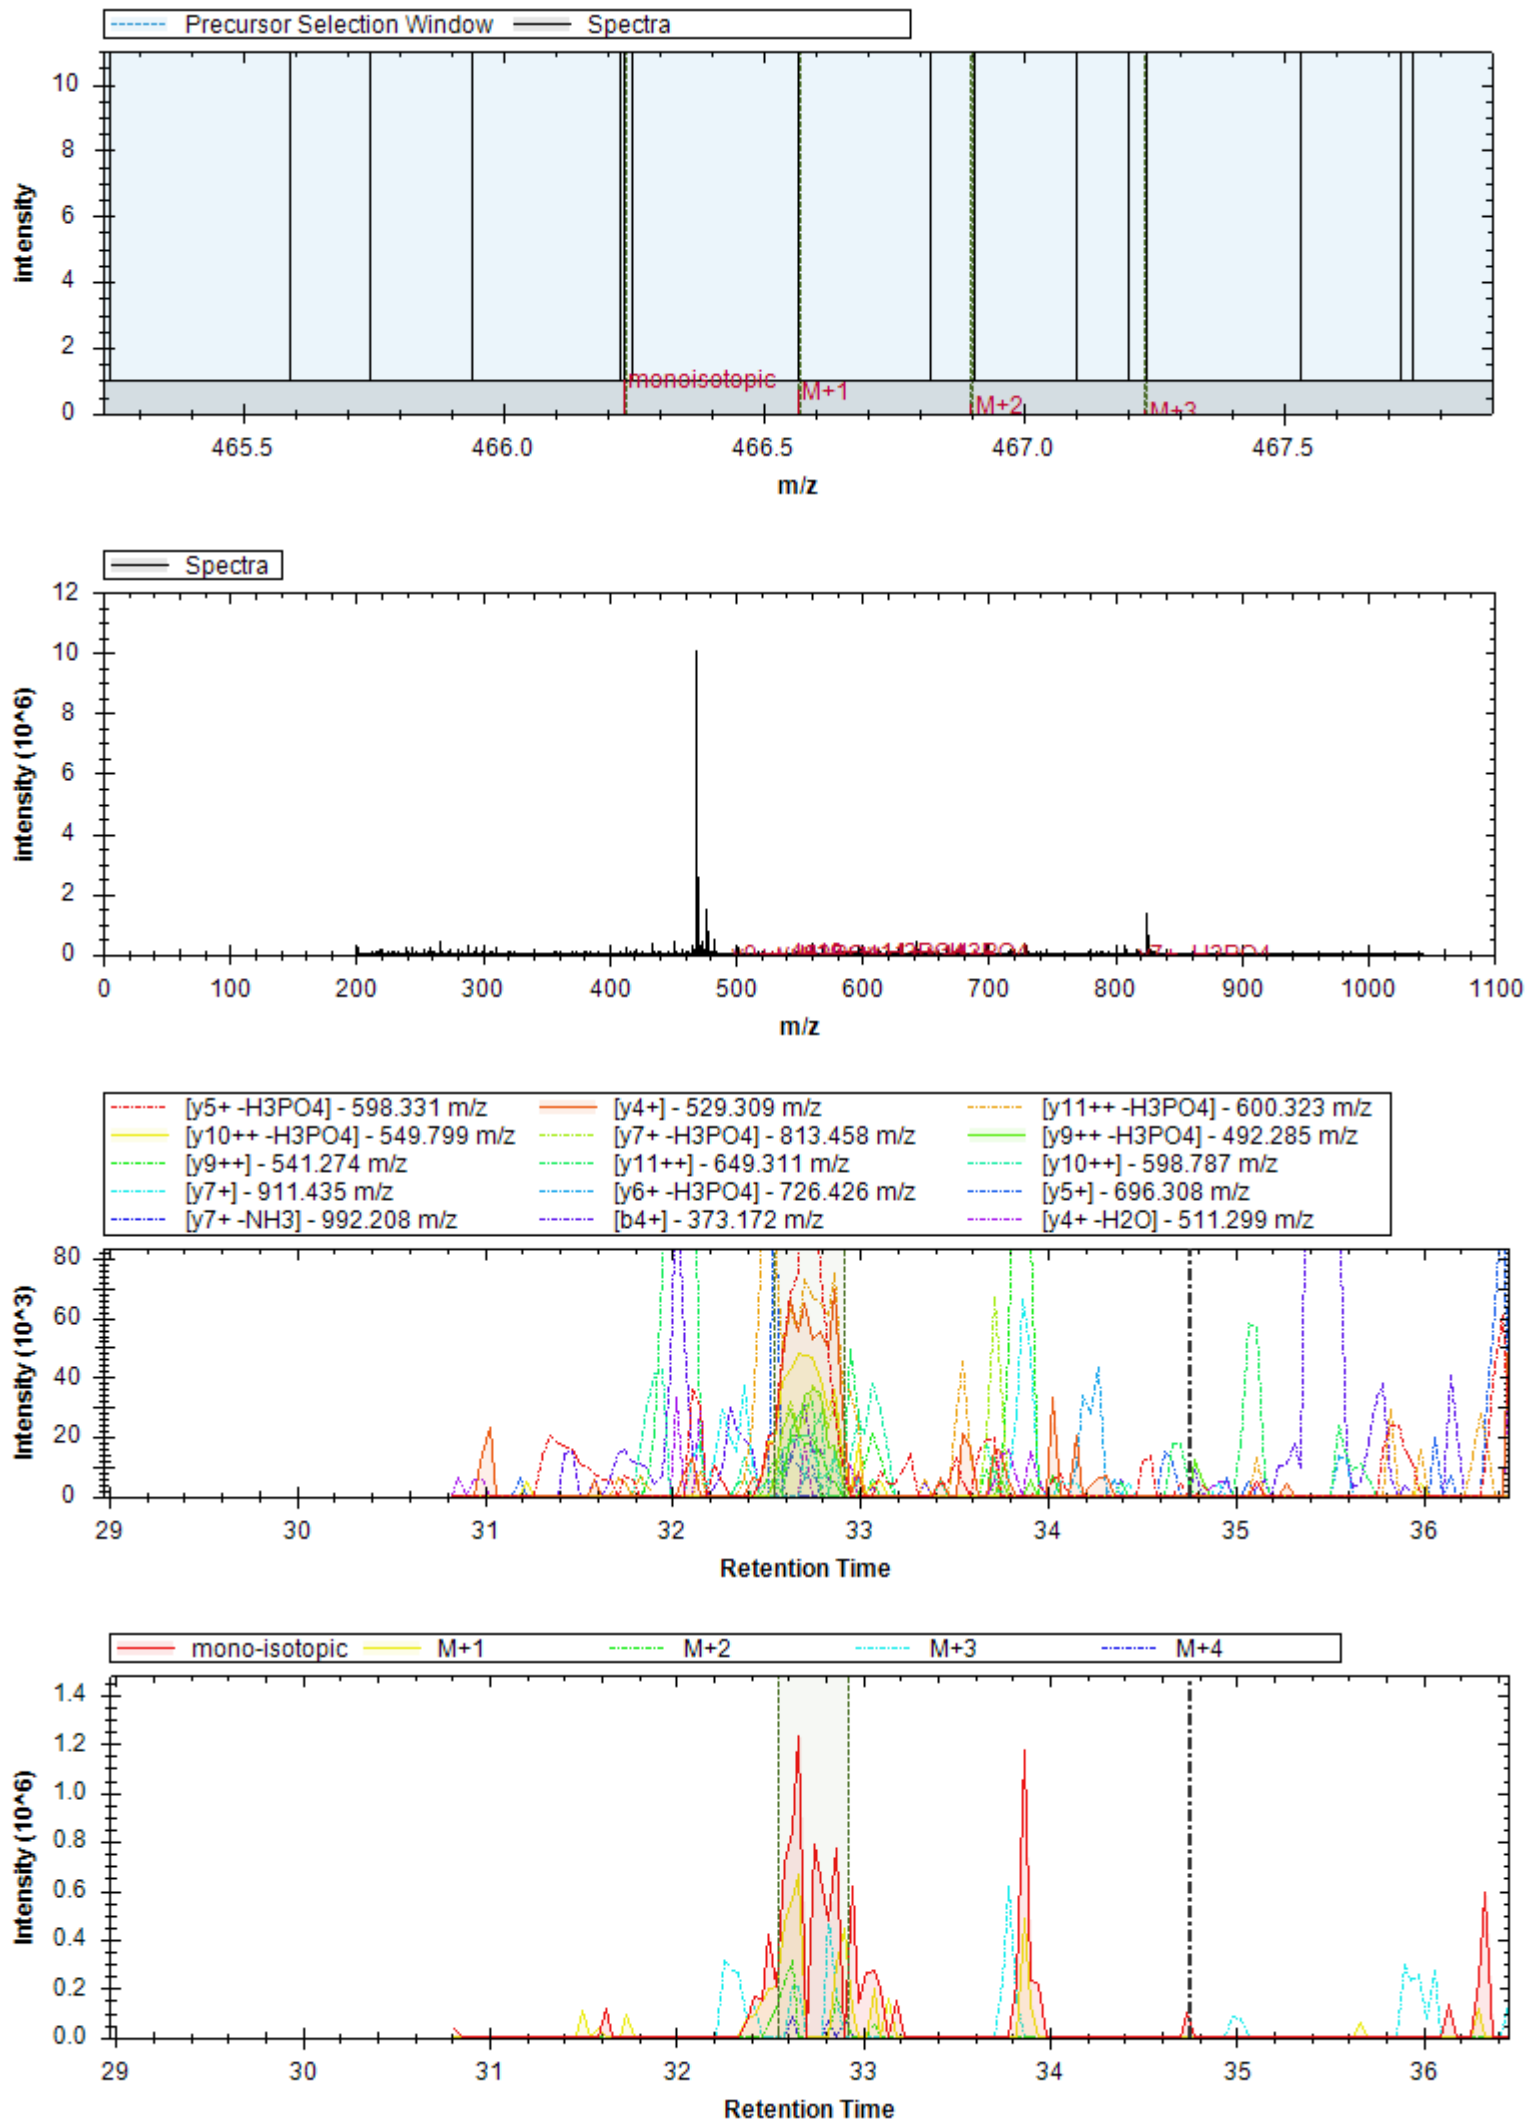

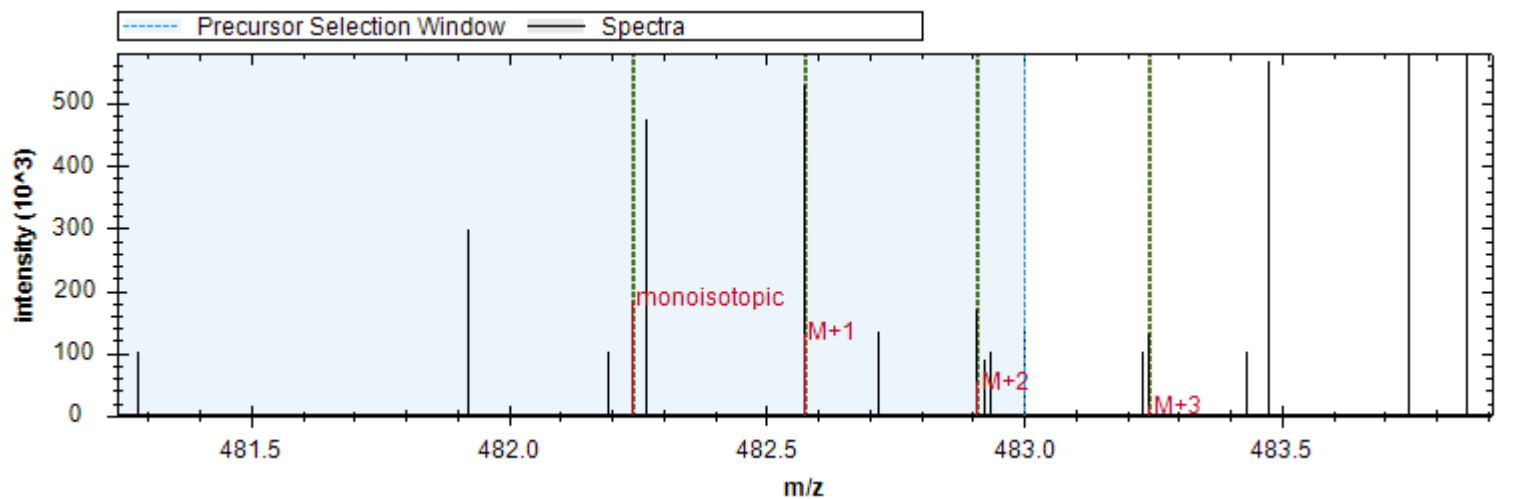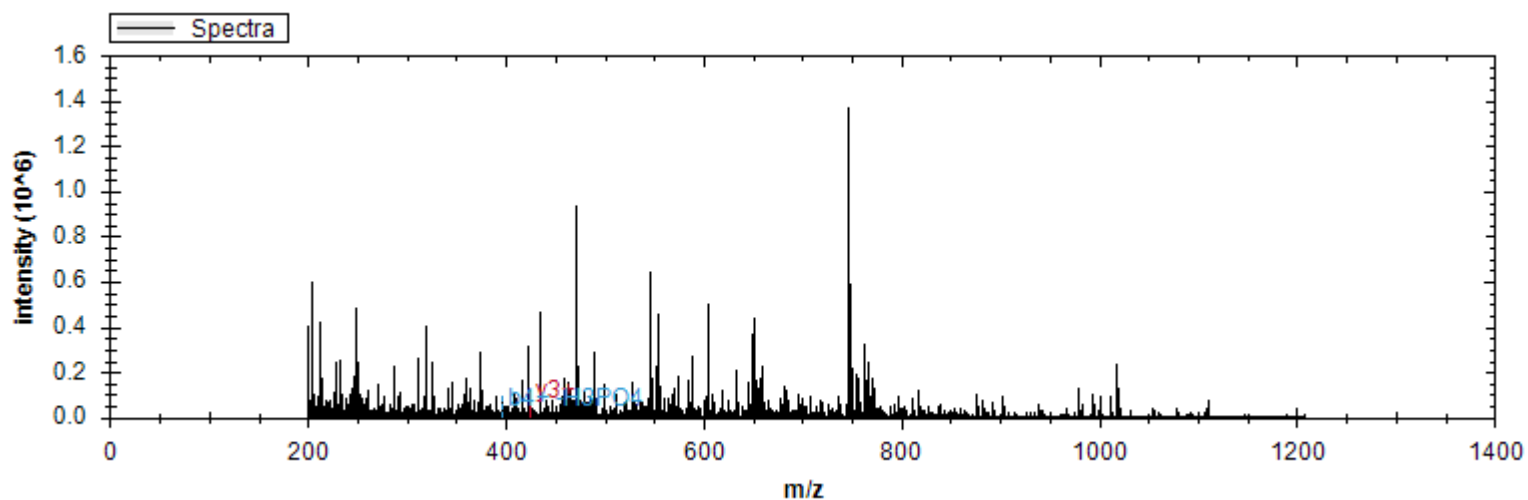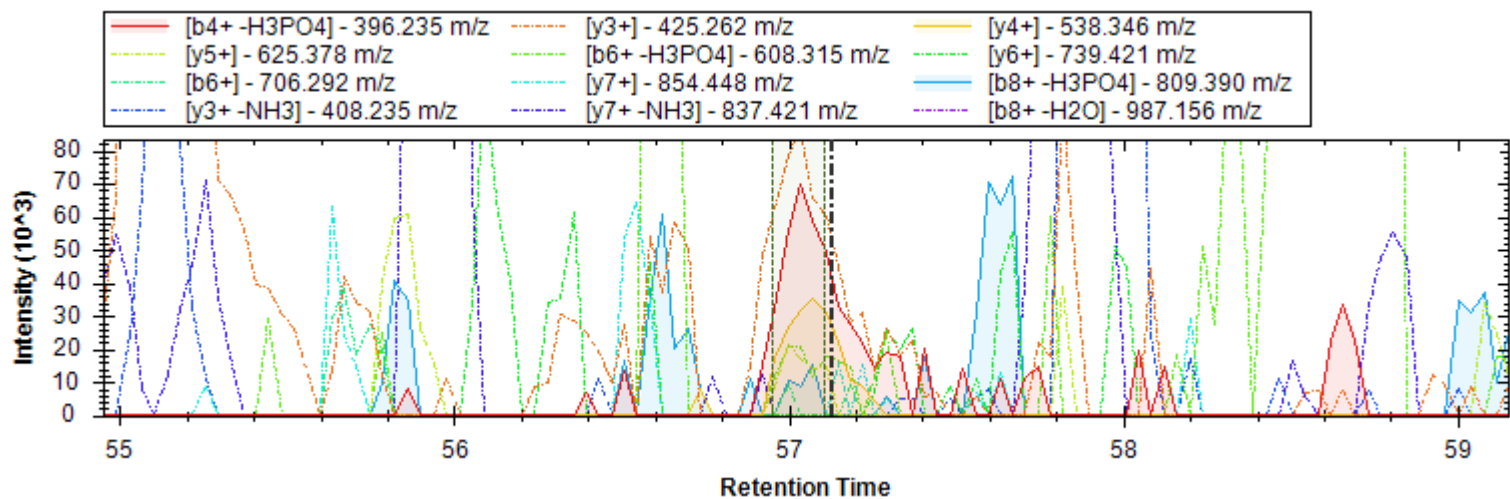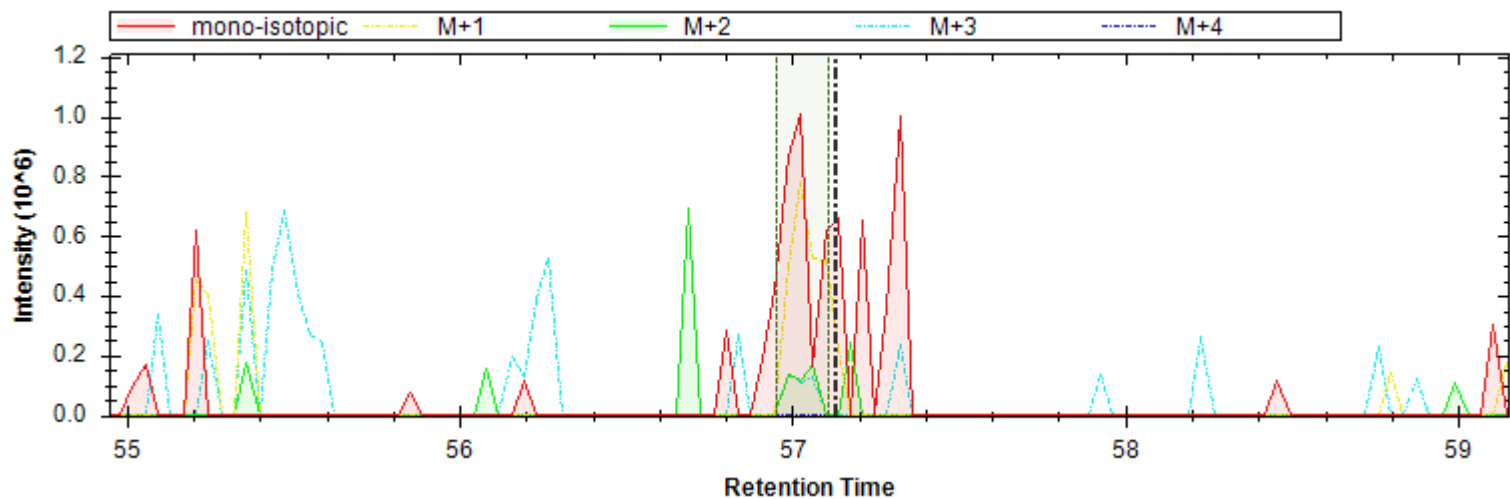

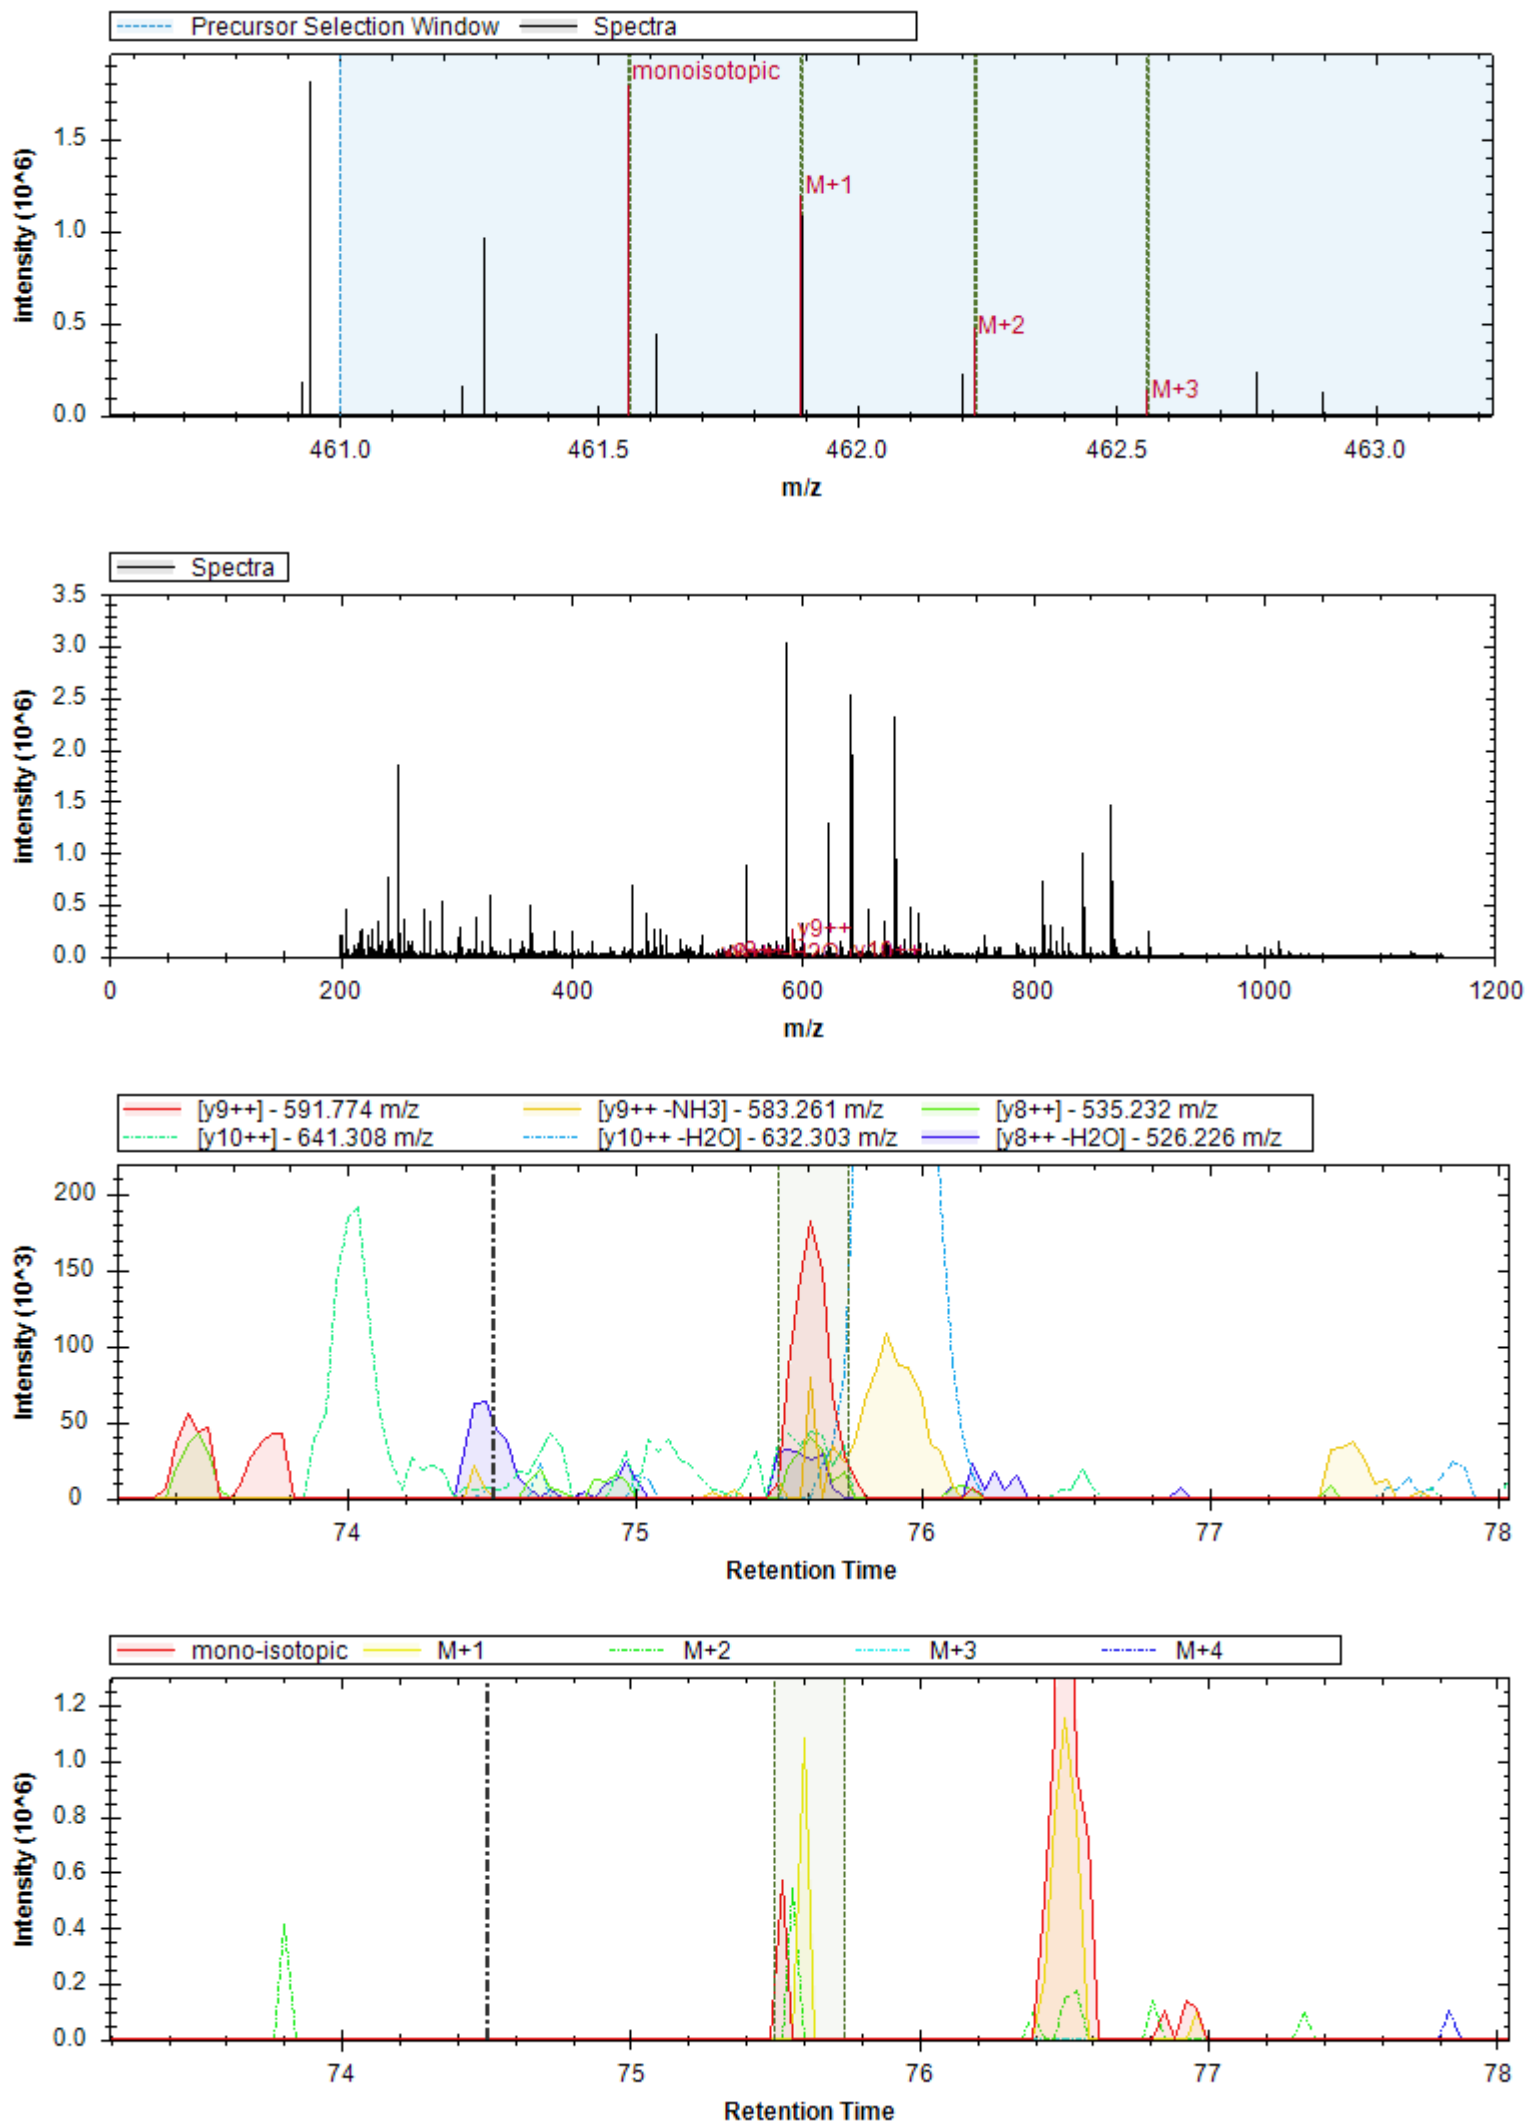

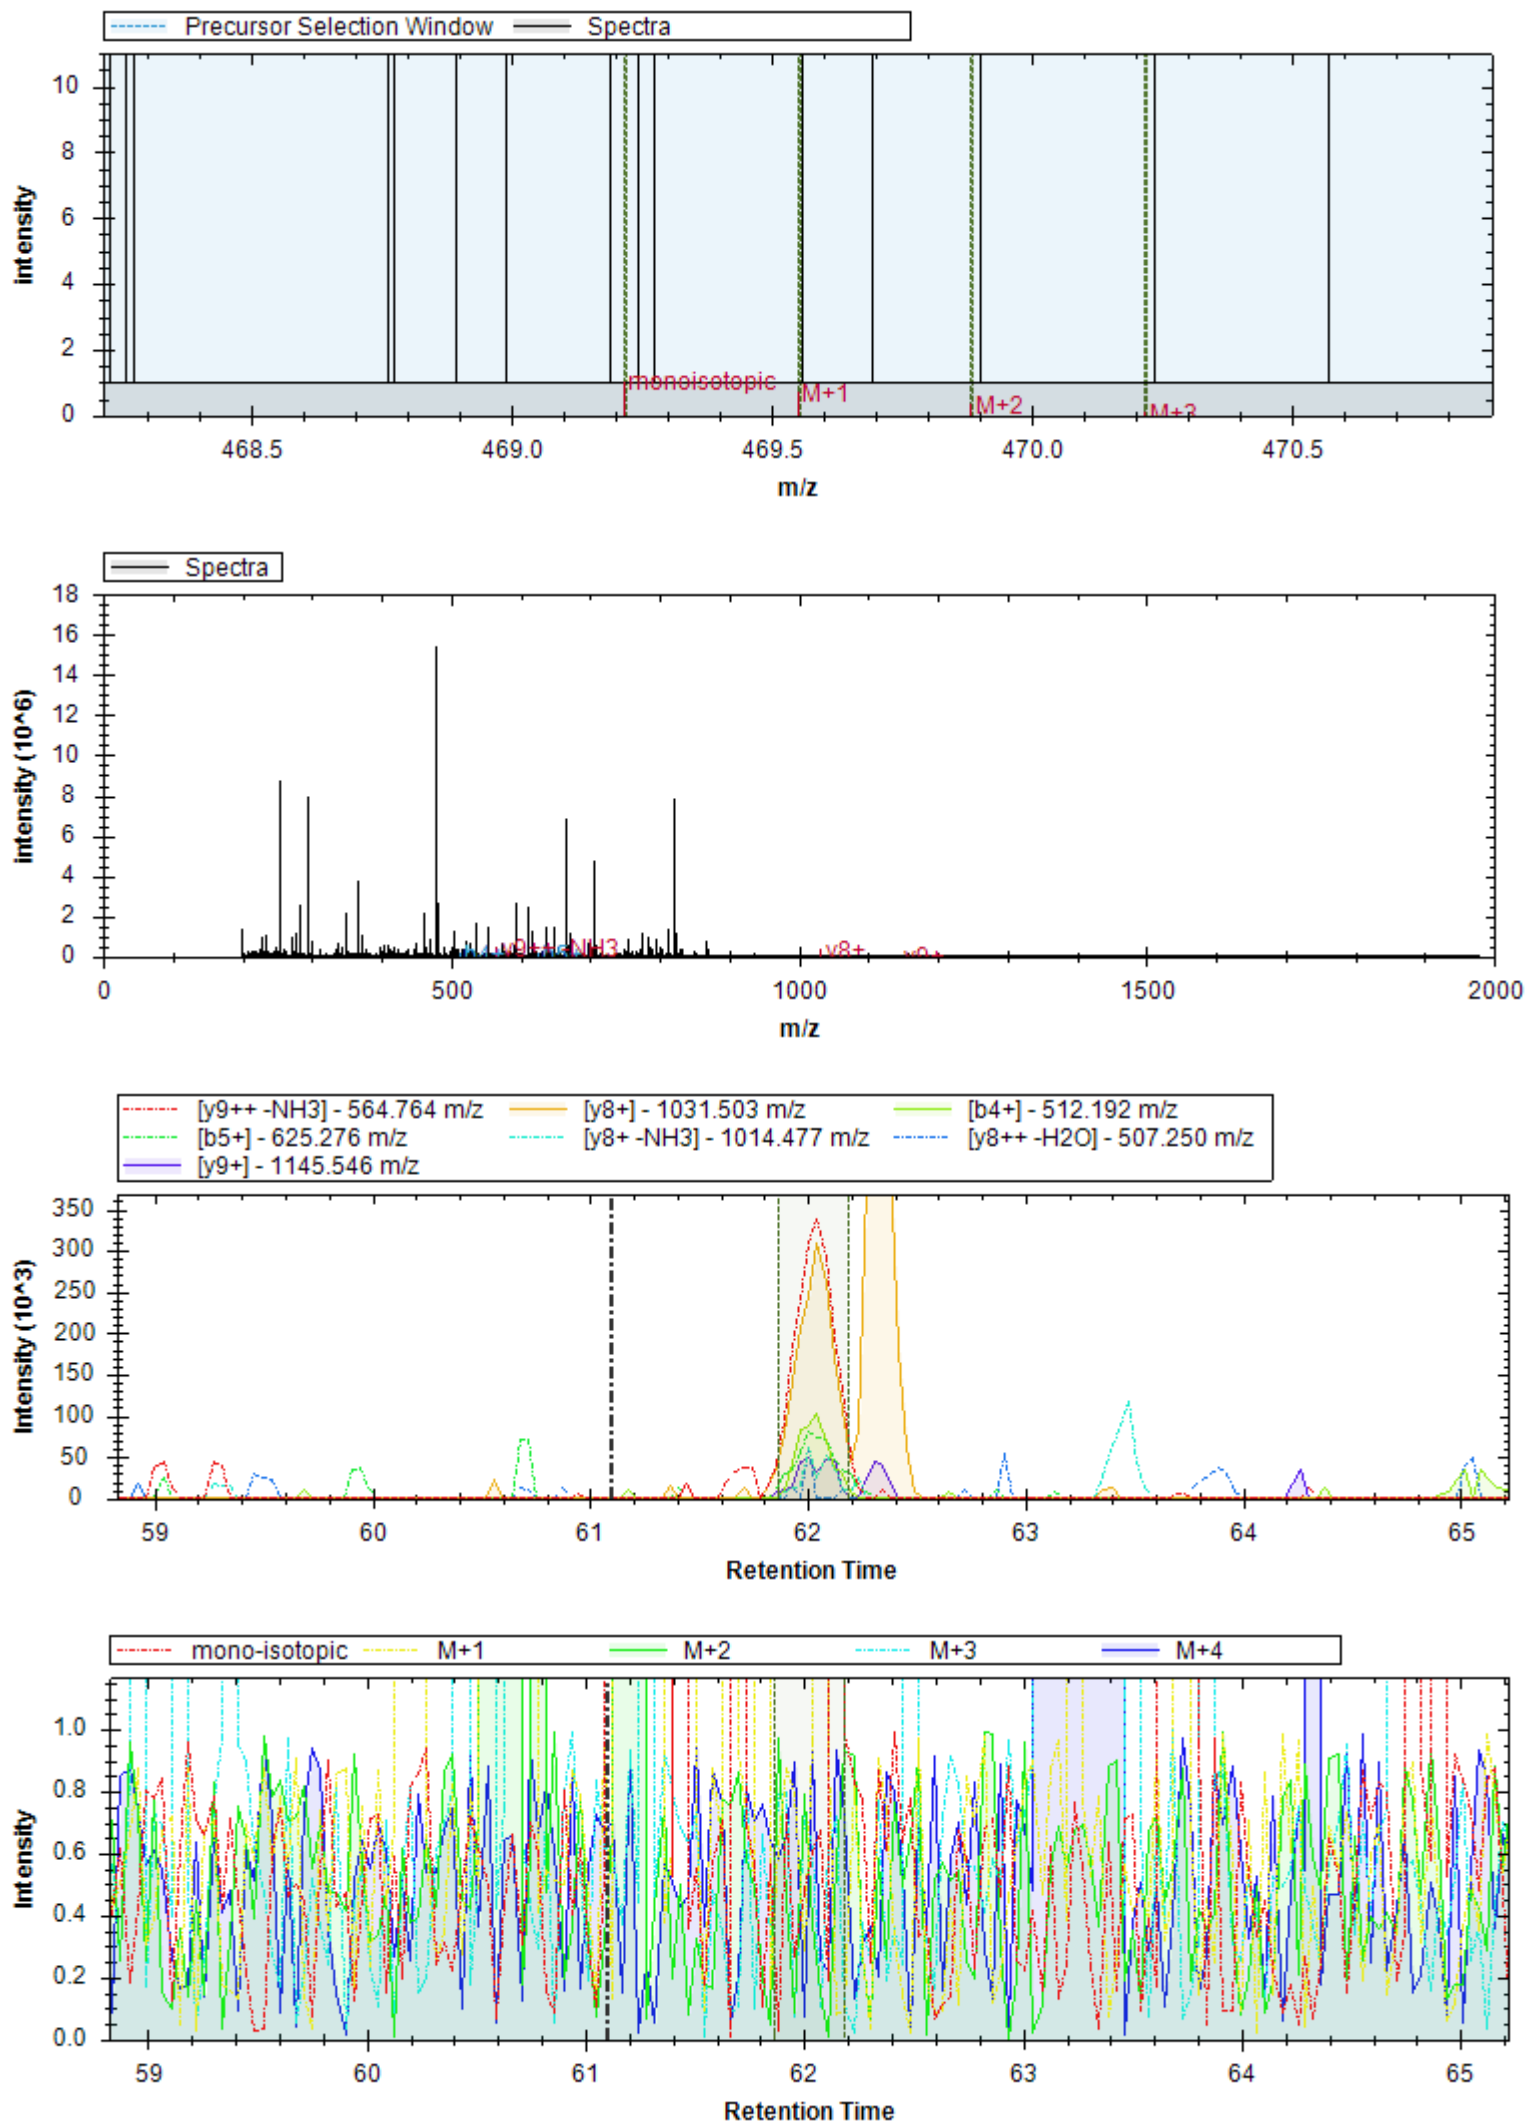



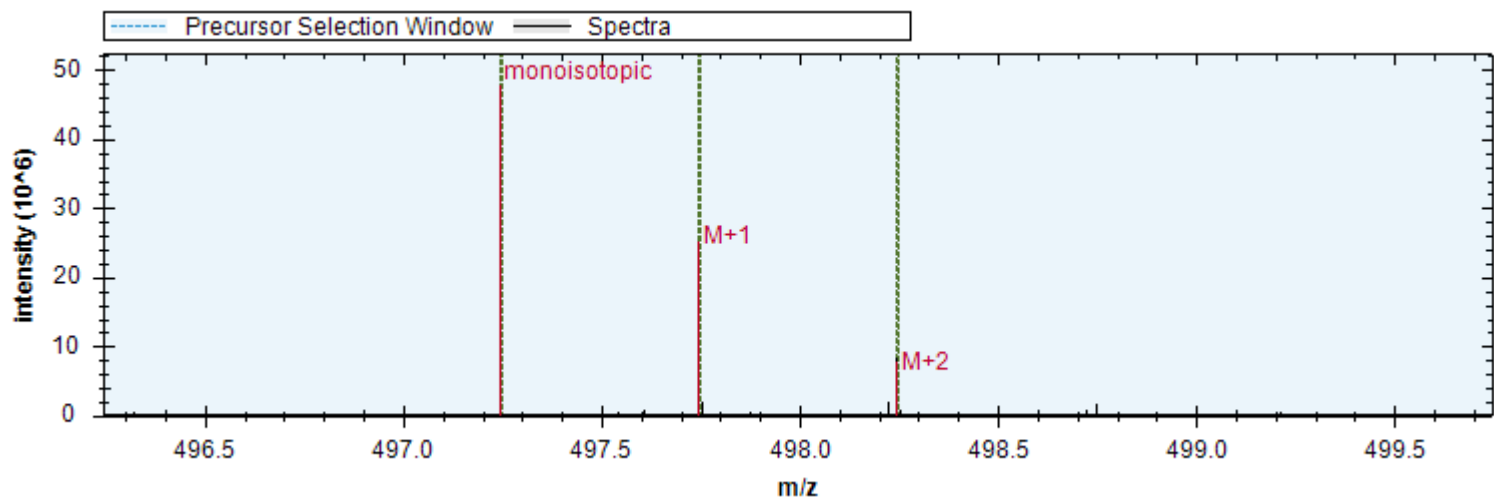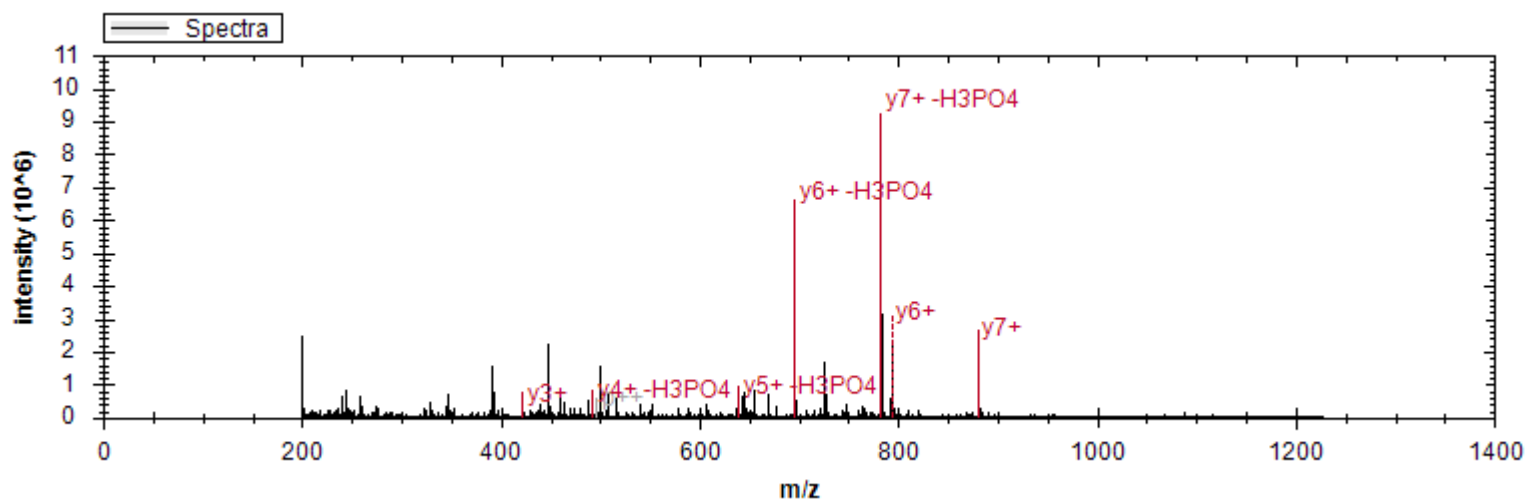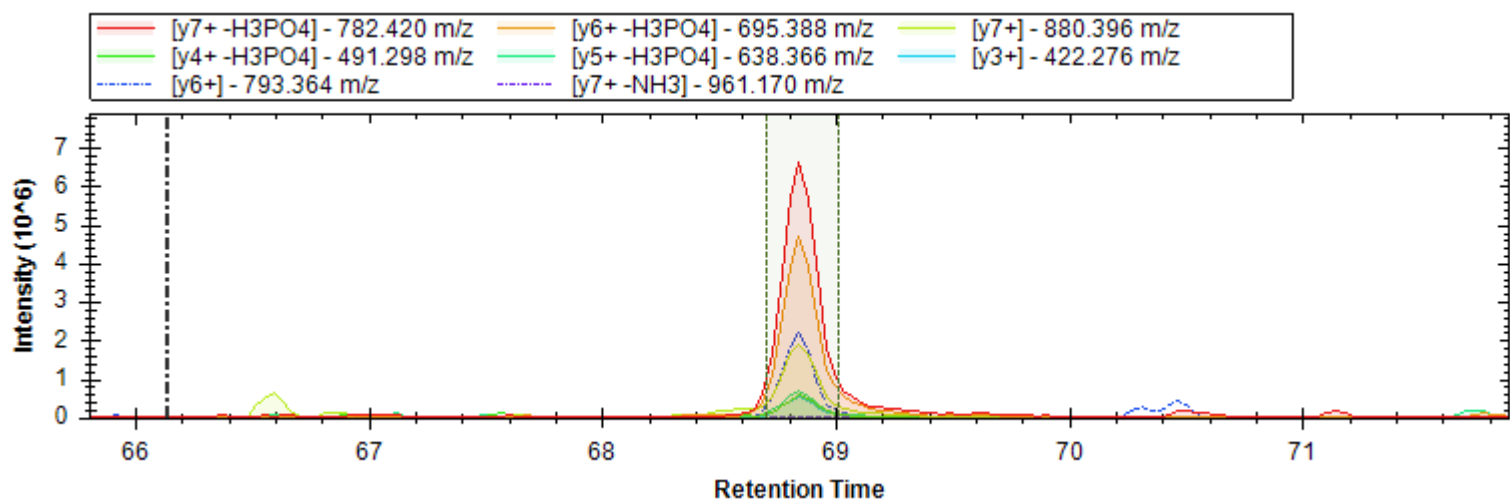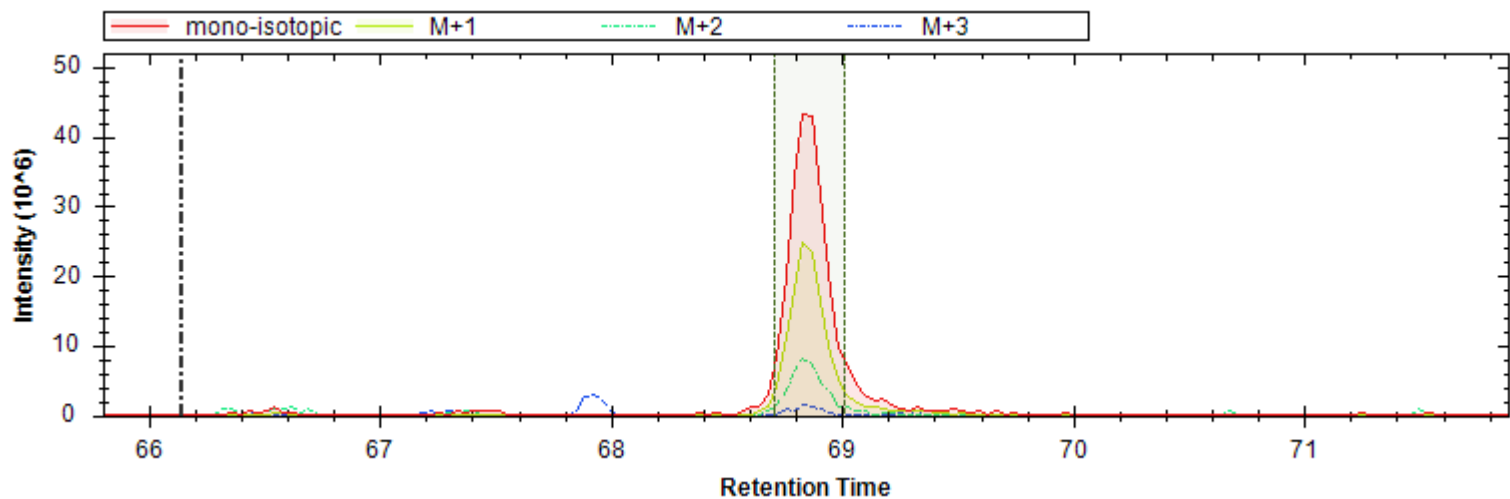

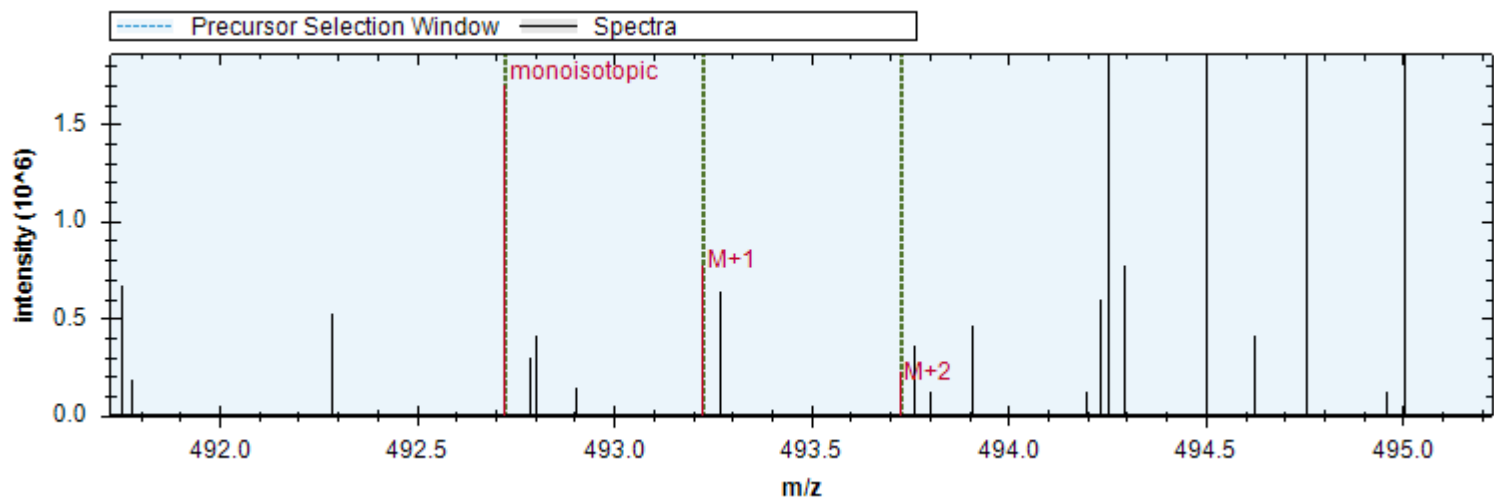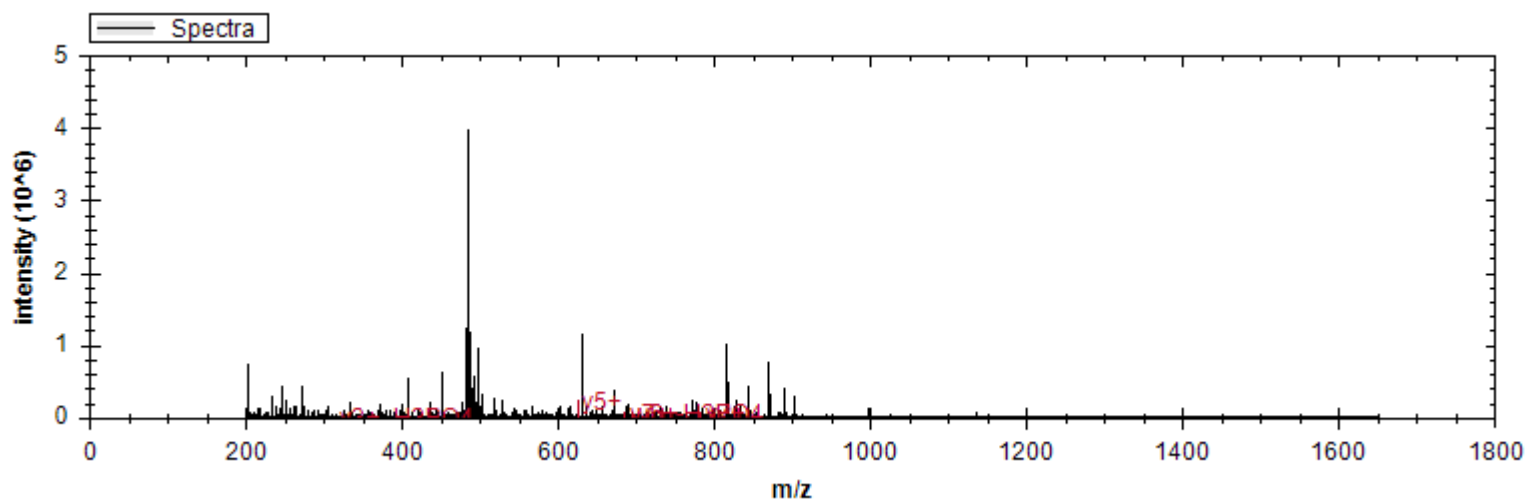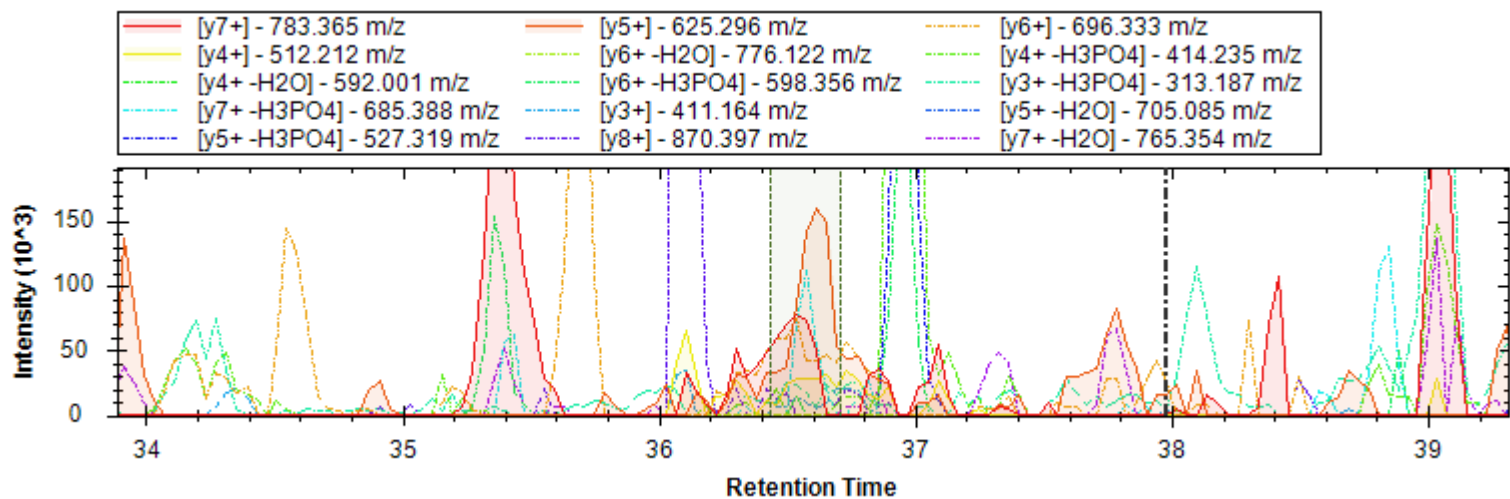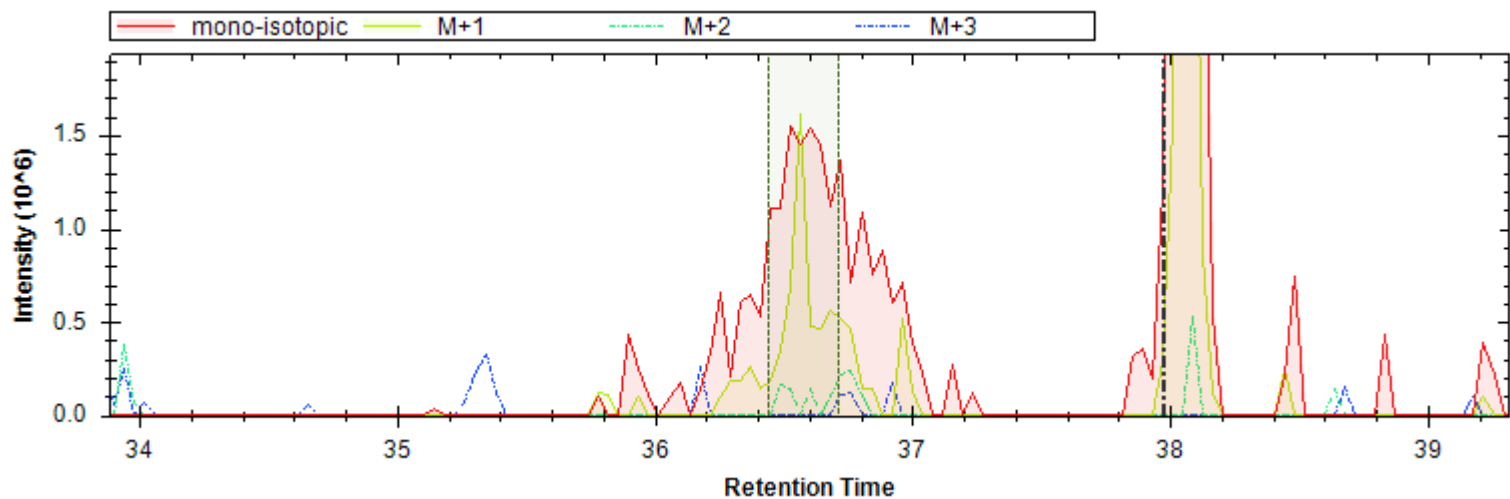

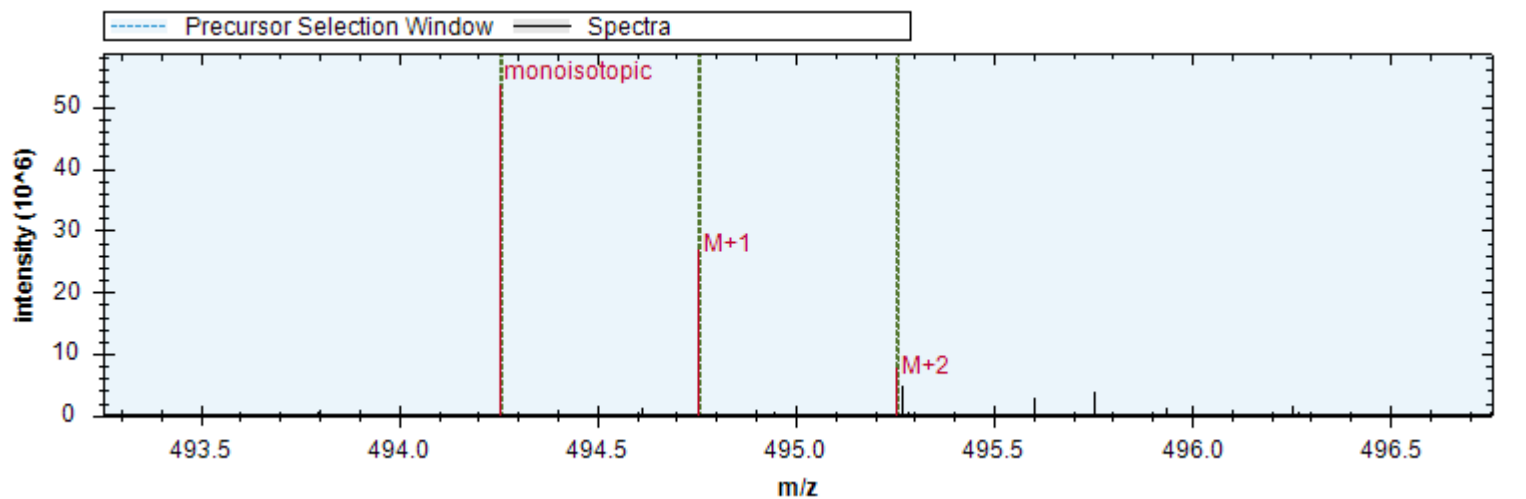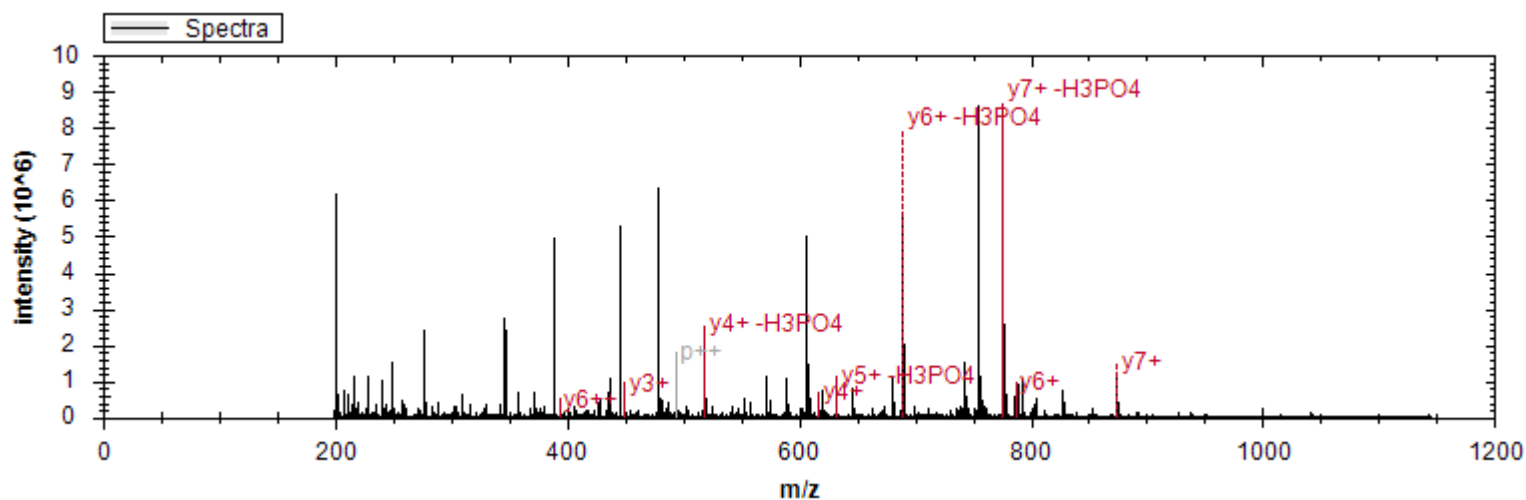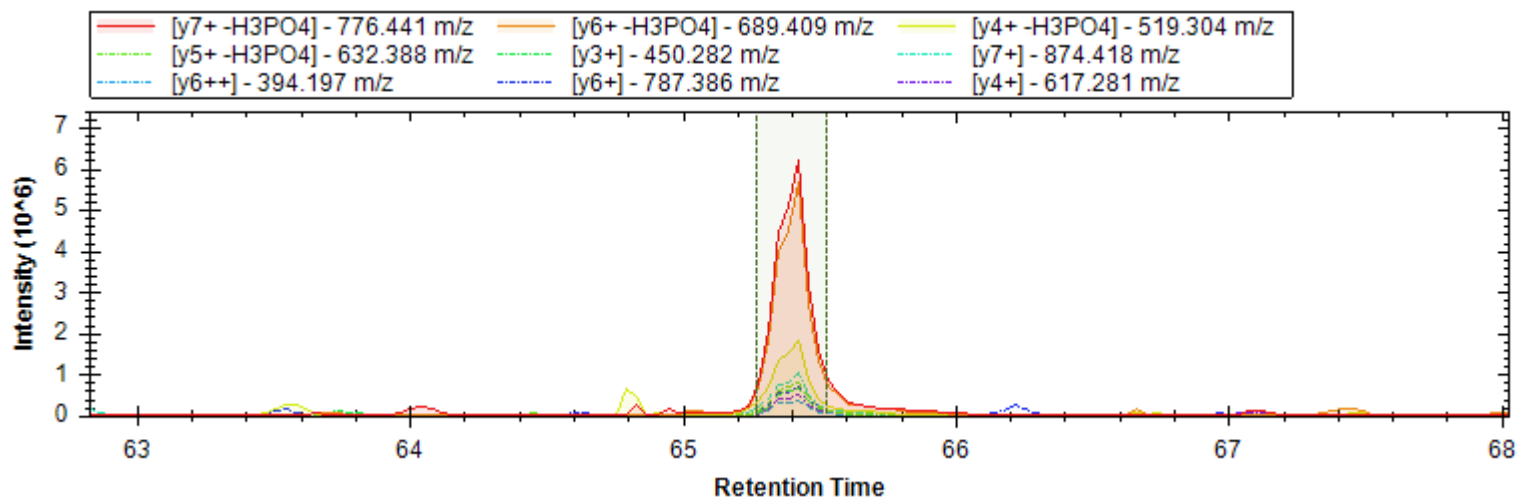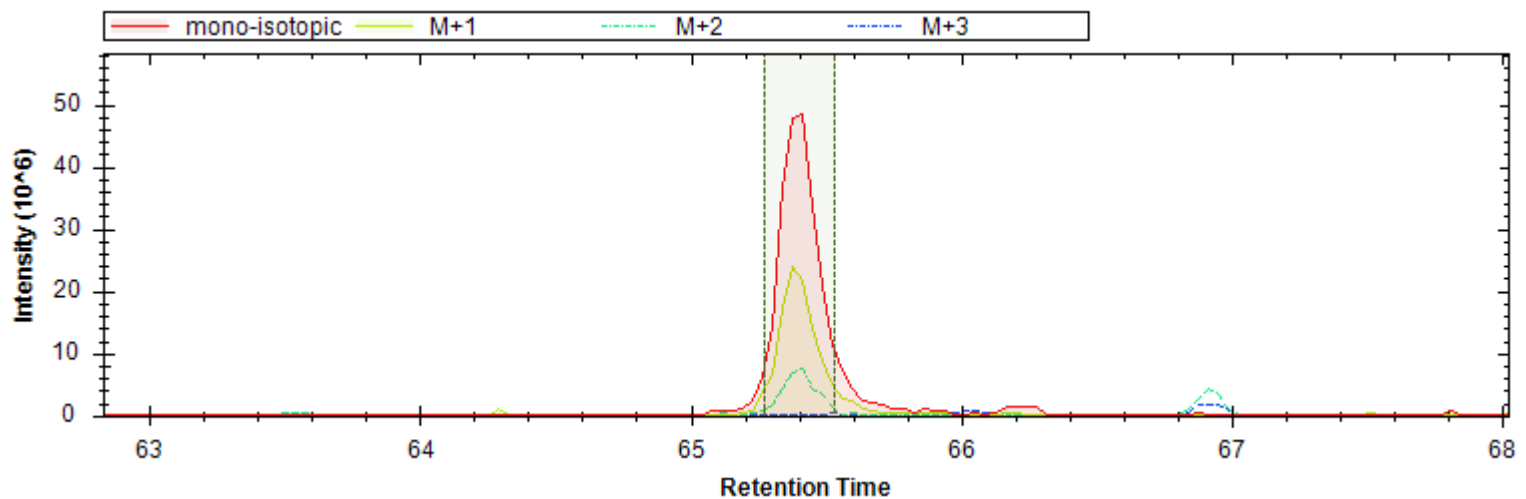

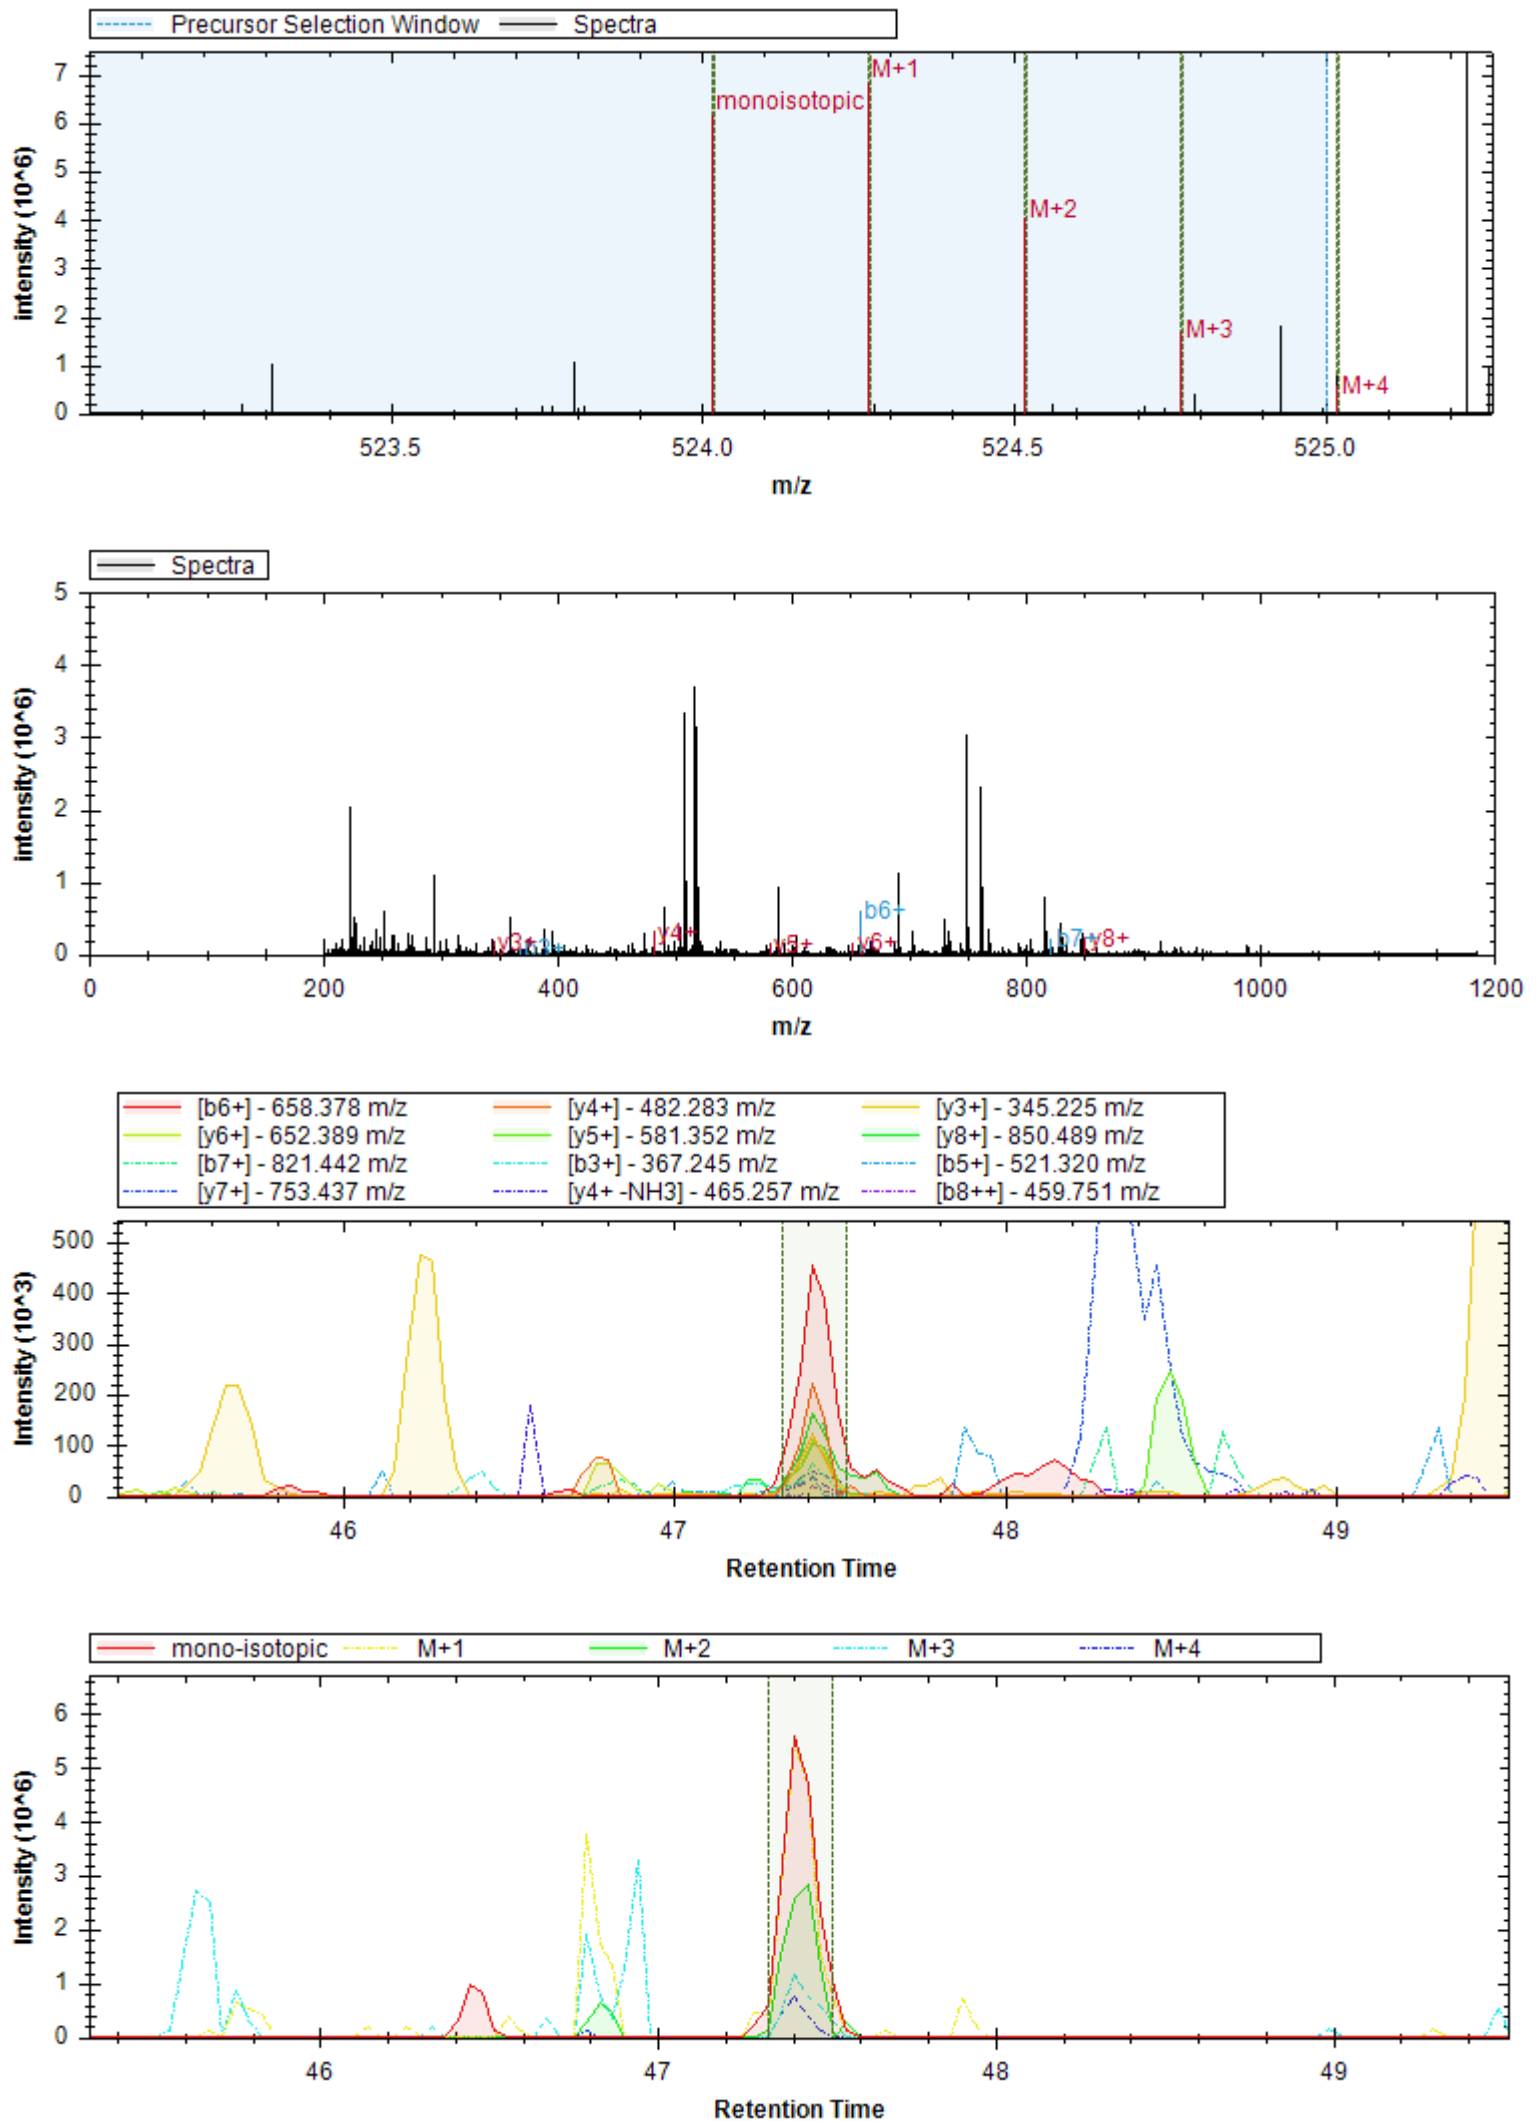

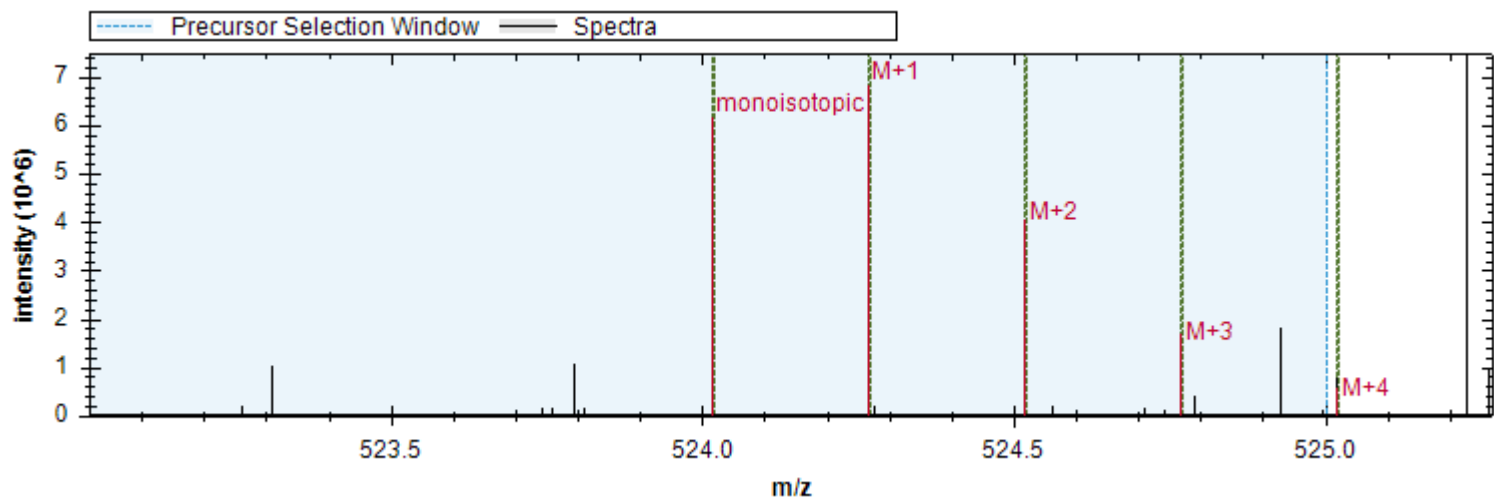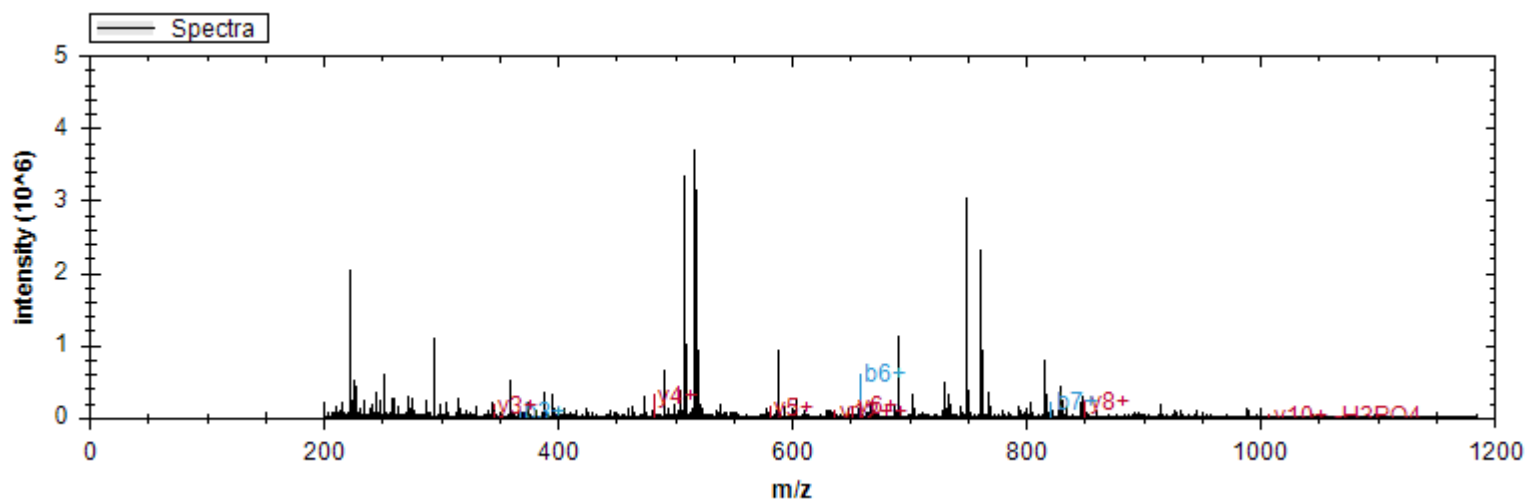

- |                               |                            |                            |
|-------------------------------|----------------------------|----------------------------|
| [b6+] - 658.378 m/z           | [y4+] - 482.283 m/z        | [y3+] - 345.225 m/z        |
| [b7+] - 821.442 m/z           | [y8+] - 850.489 m/z        | [y6+] - 652.389 m/z        |
| [y5+] - 581.352 m/z           | [b5+] - 521.320 m/z        | [y12+++] - 424.875 m/z     |
| [y7+] - 753.437 m/z           | [b9+] - 989.532 m/z        | [b3+] - 367.245 m/z        |
| [b8++] - 459.751 m/z          | [y11+ -H2O] - 1255.346 m/z | [b6+ -NH3] - 641.352 m/z   |
| [b11+++ -H3PO4] - 573.296 m/z | [y12++] - 636.809 m/z      | [y9+ -H3PO4] - 919.511 m/z |
| [y10+ -H3PO4] - 1006.543 m/z  | [y4+ -NH3] - 465.257 m/z   |                            |

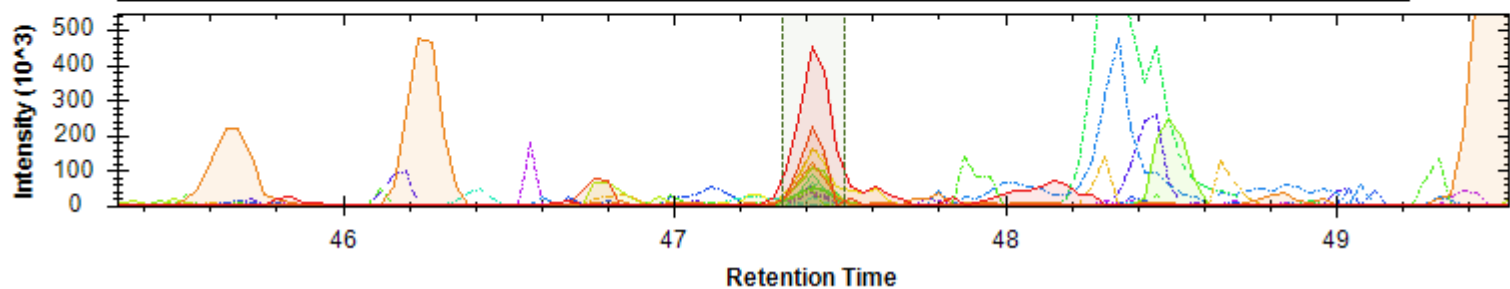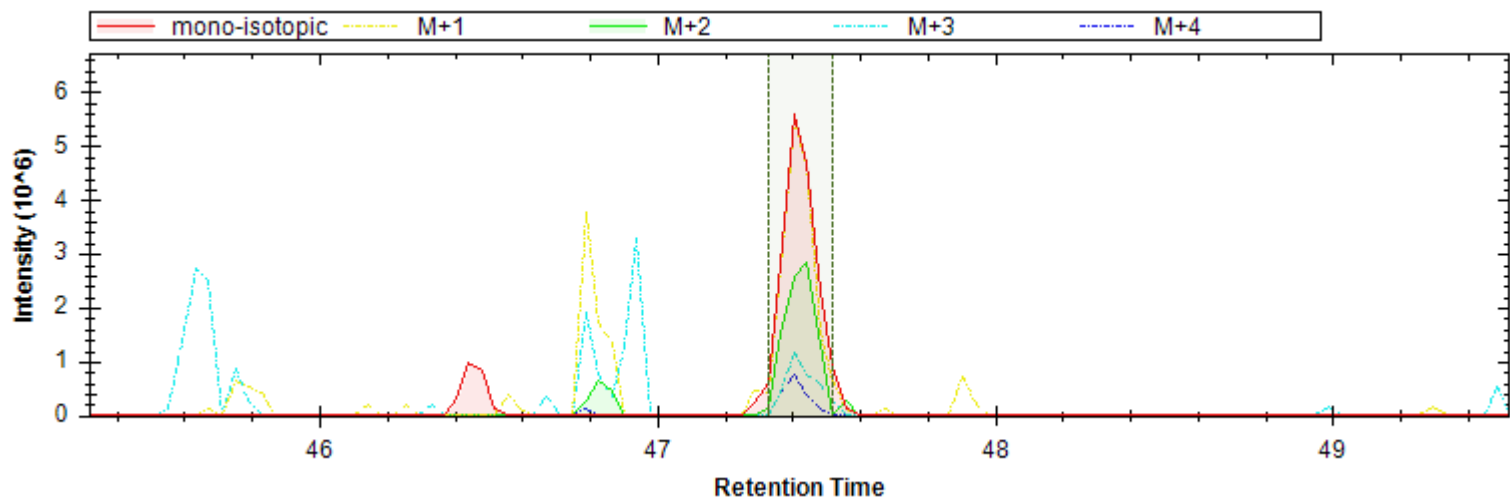

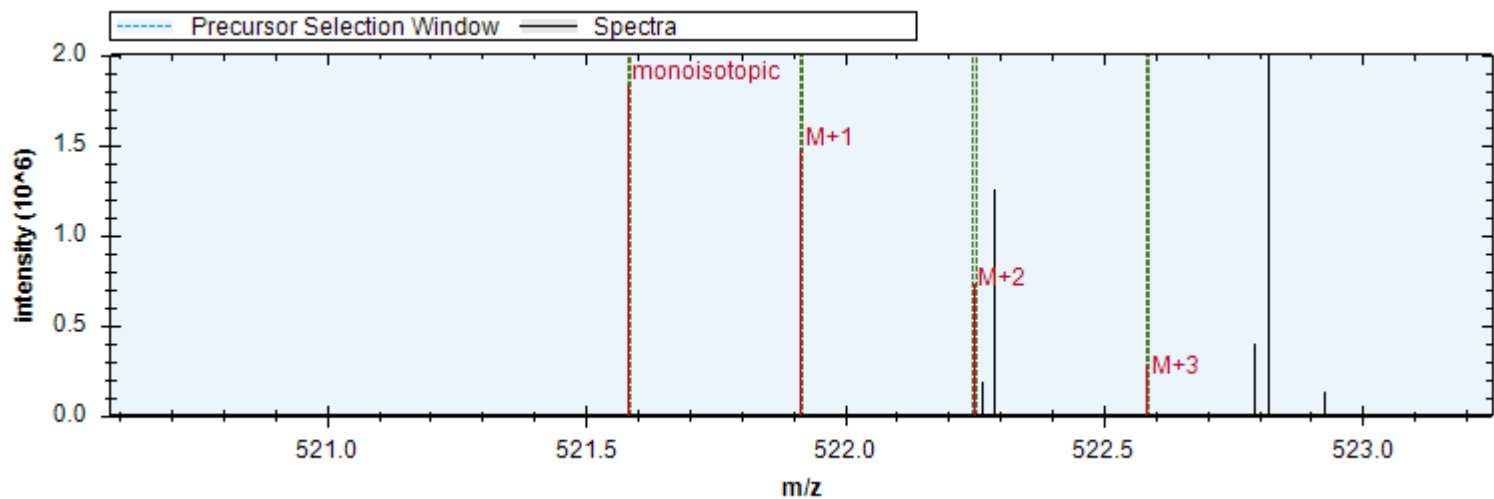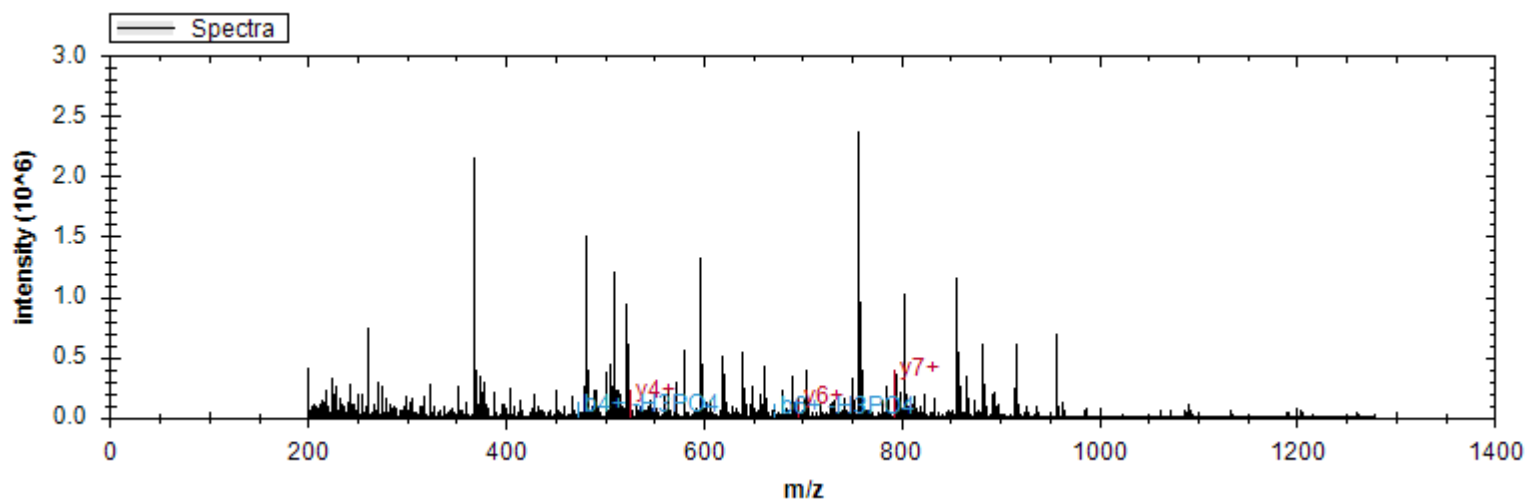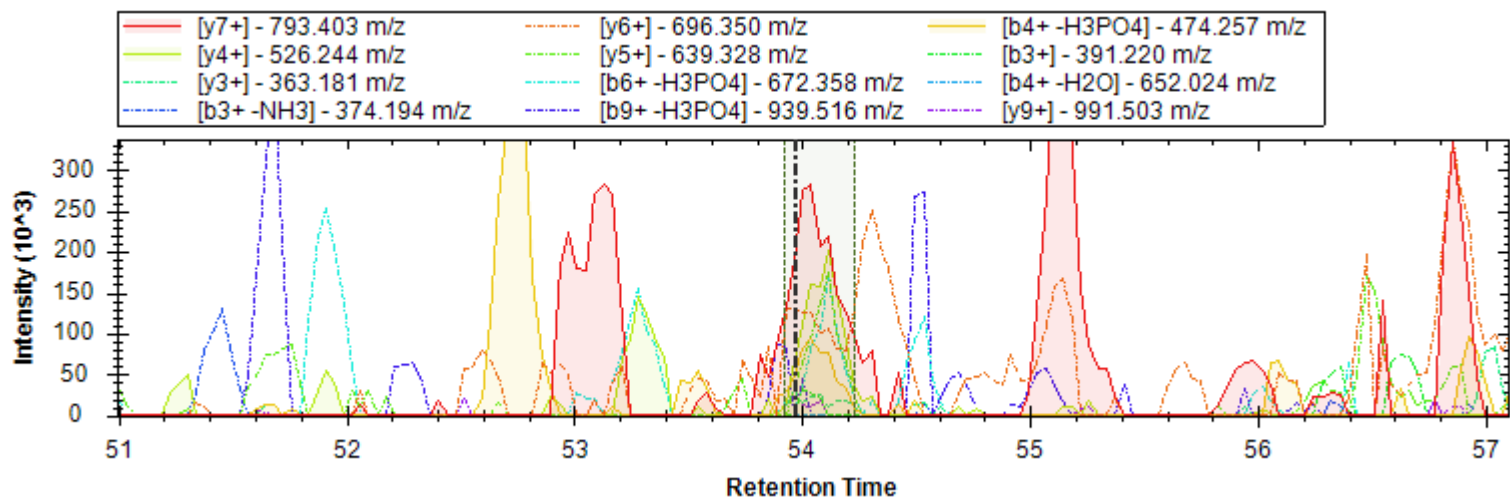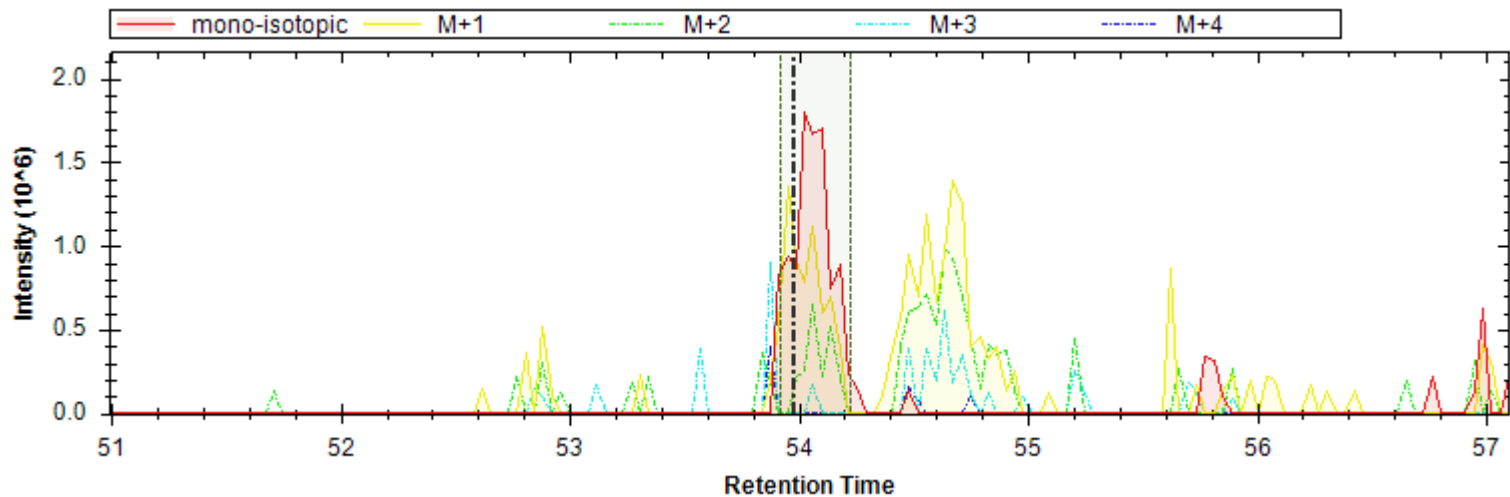



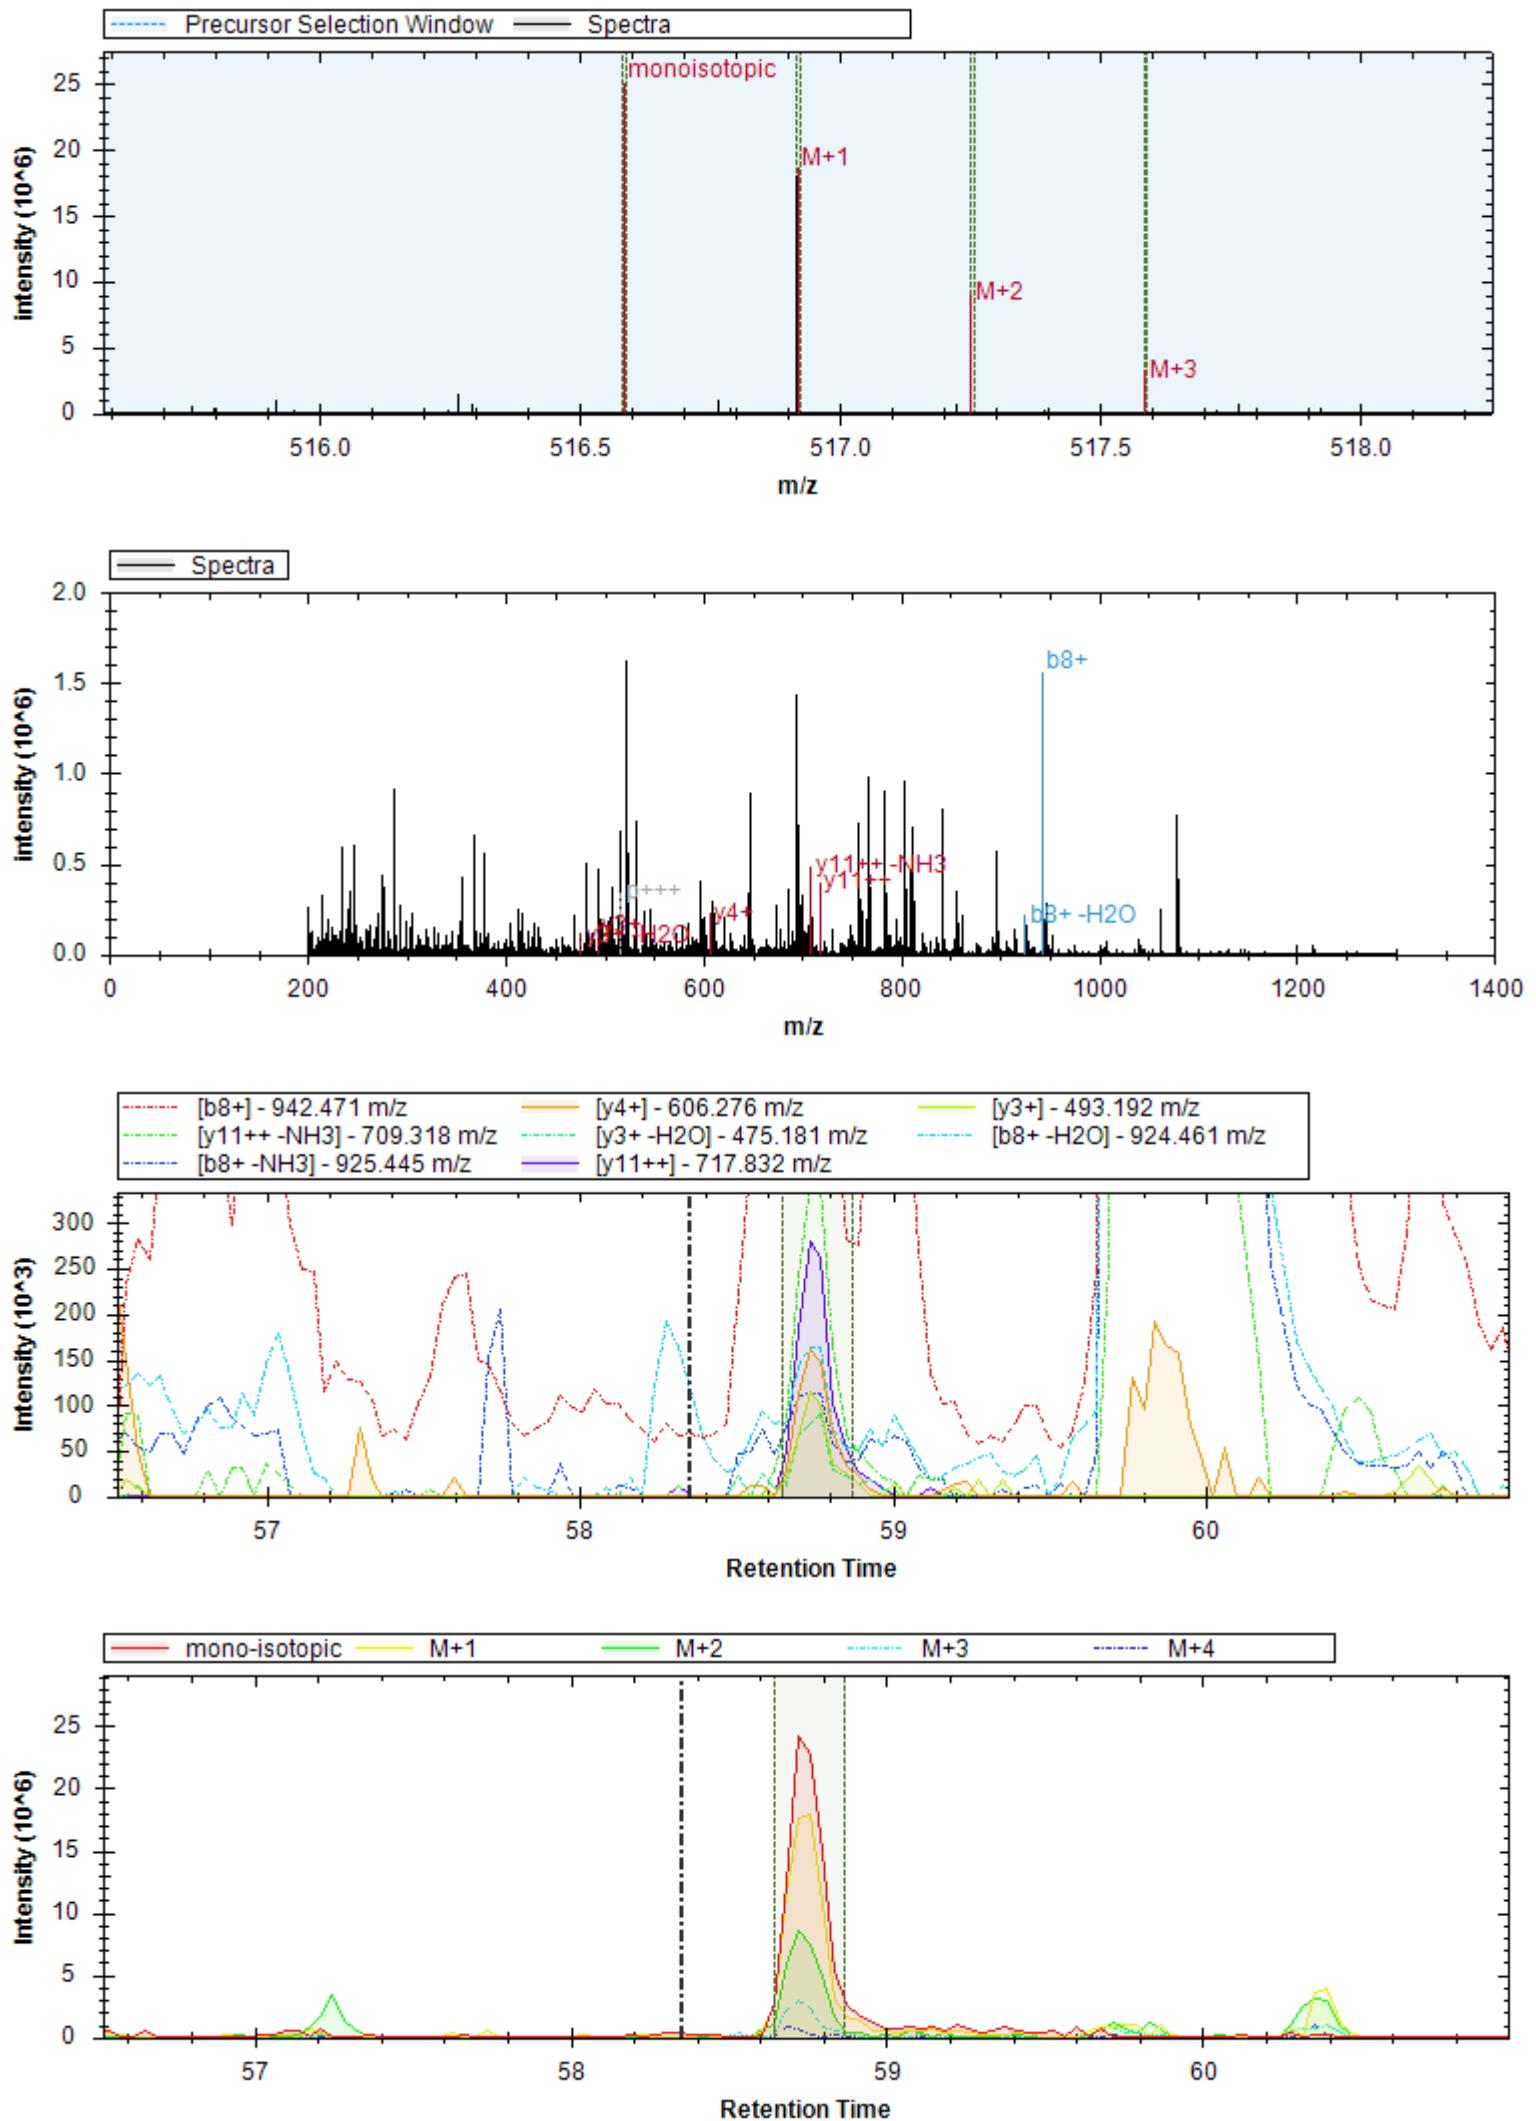



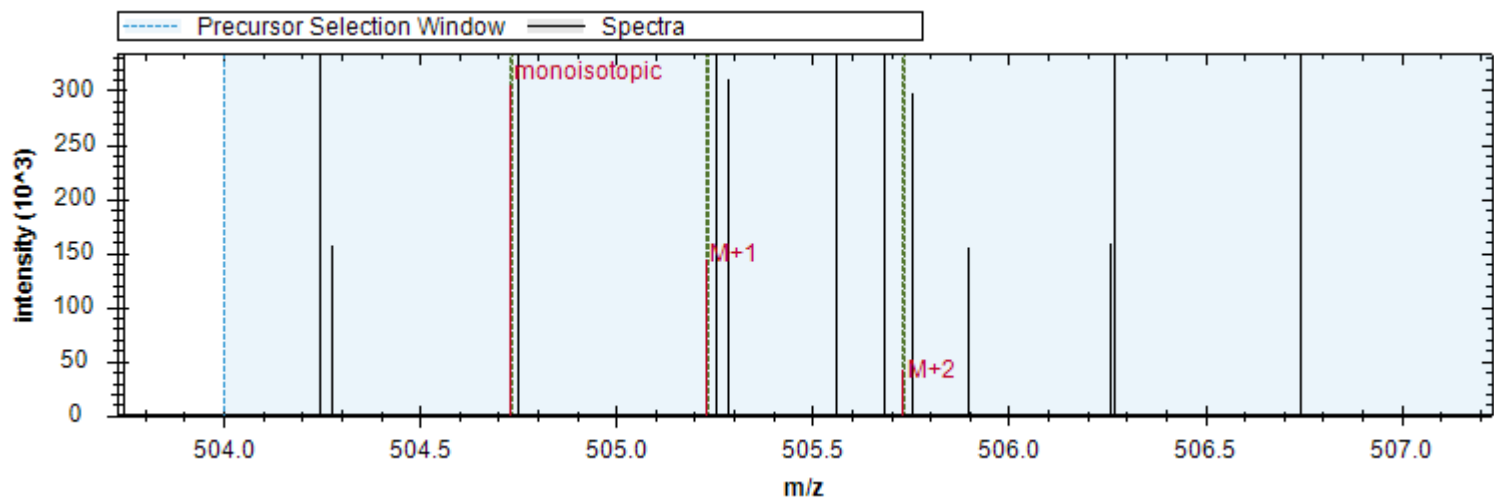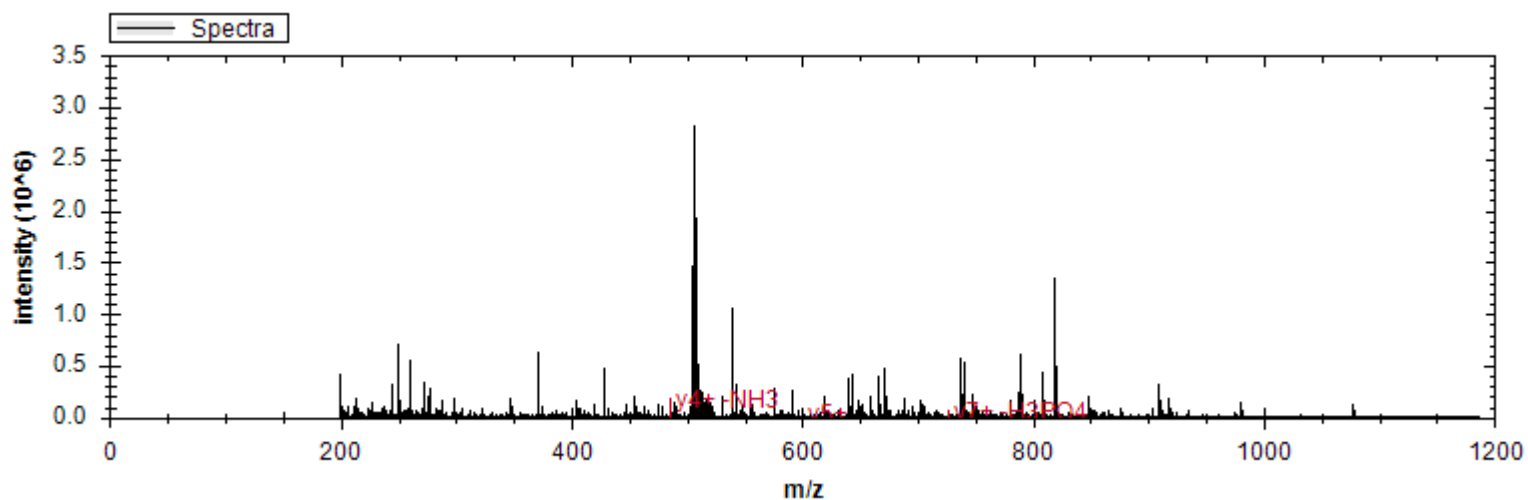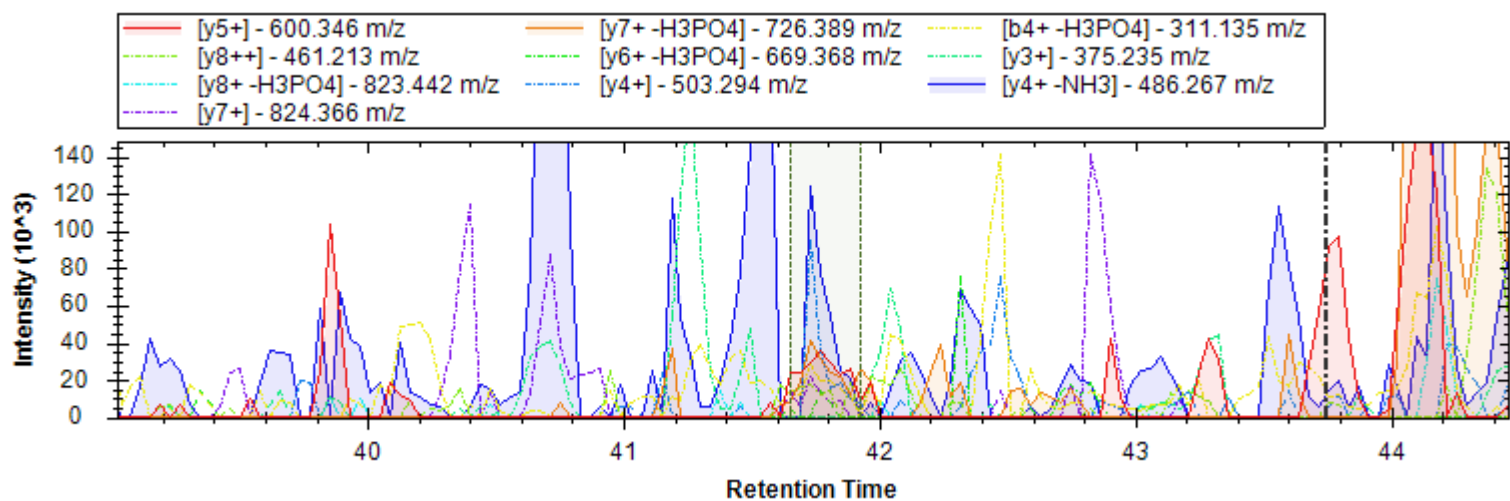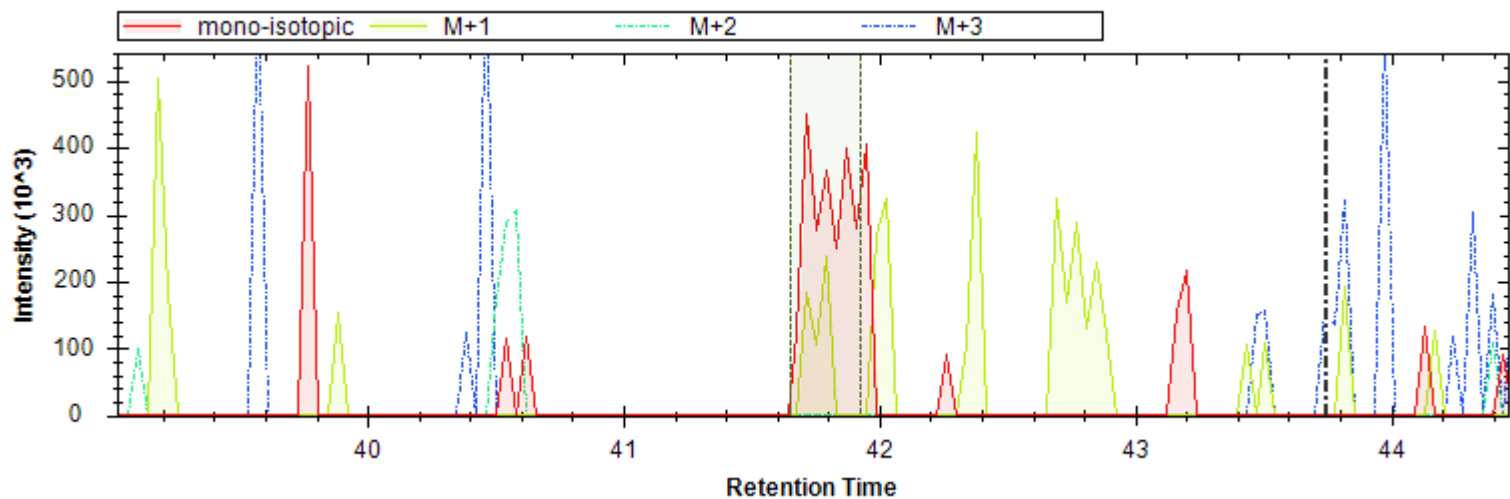

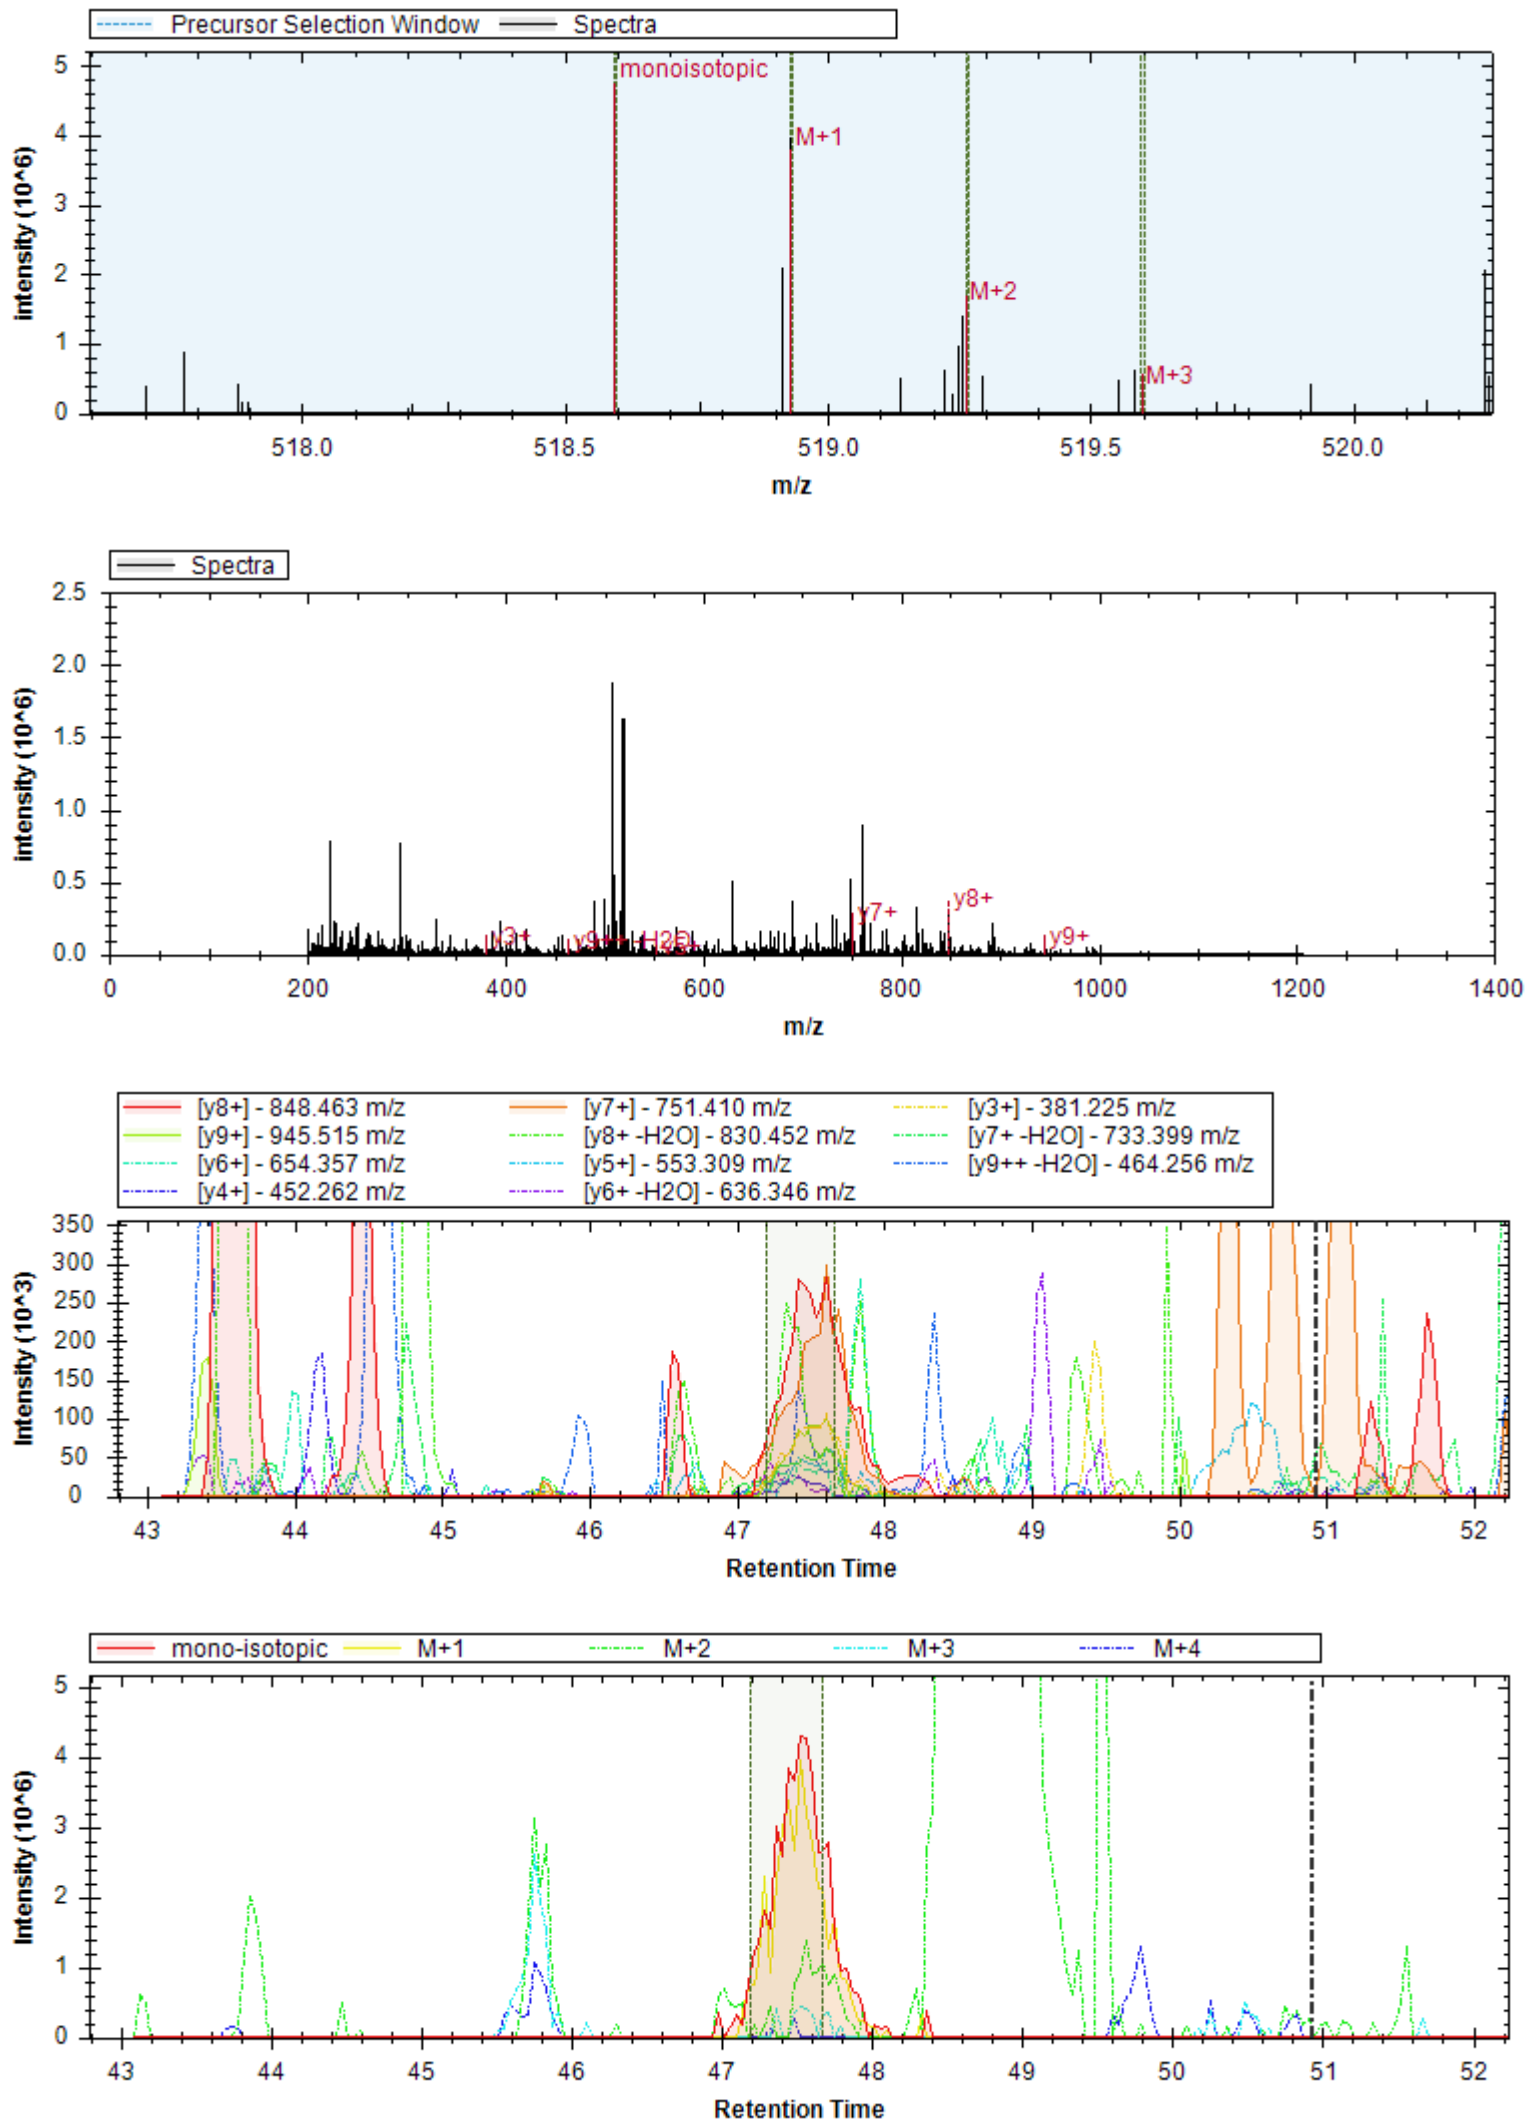

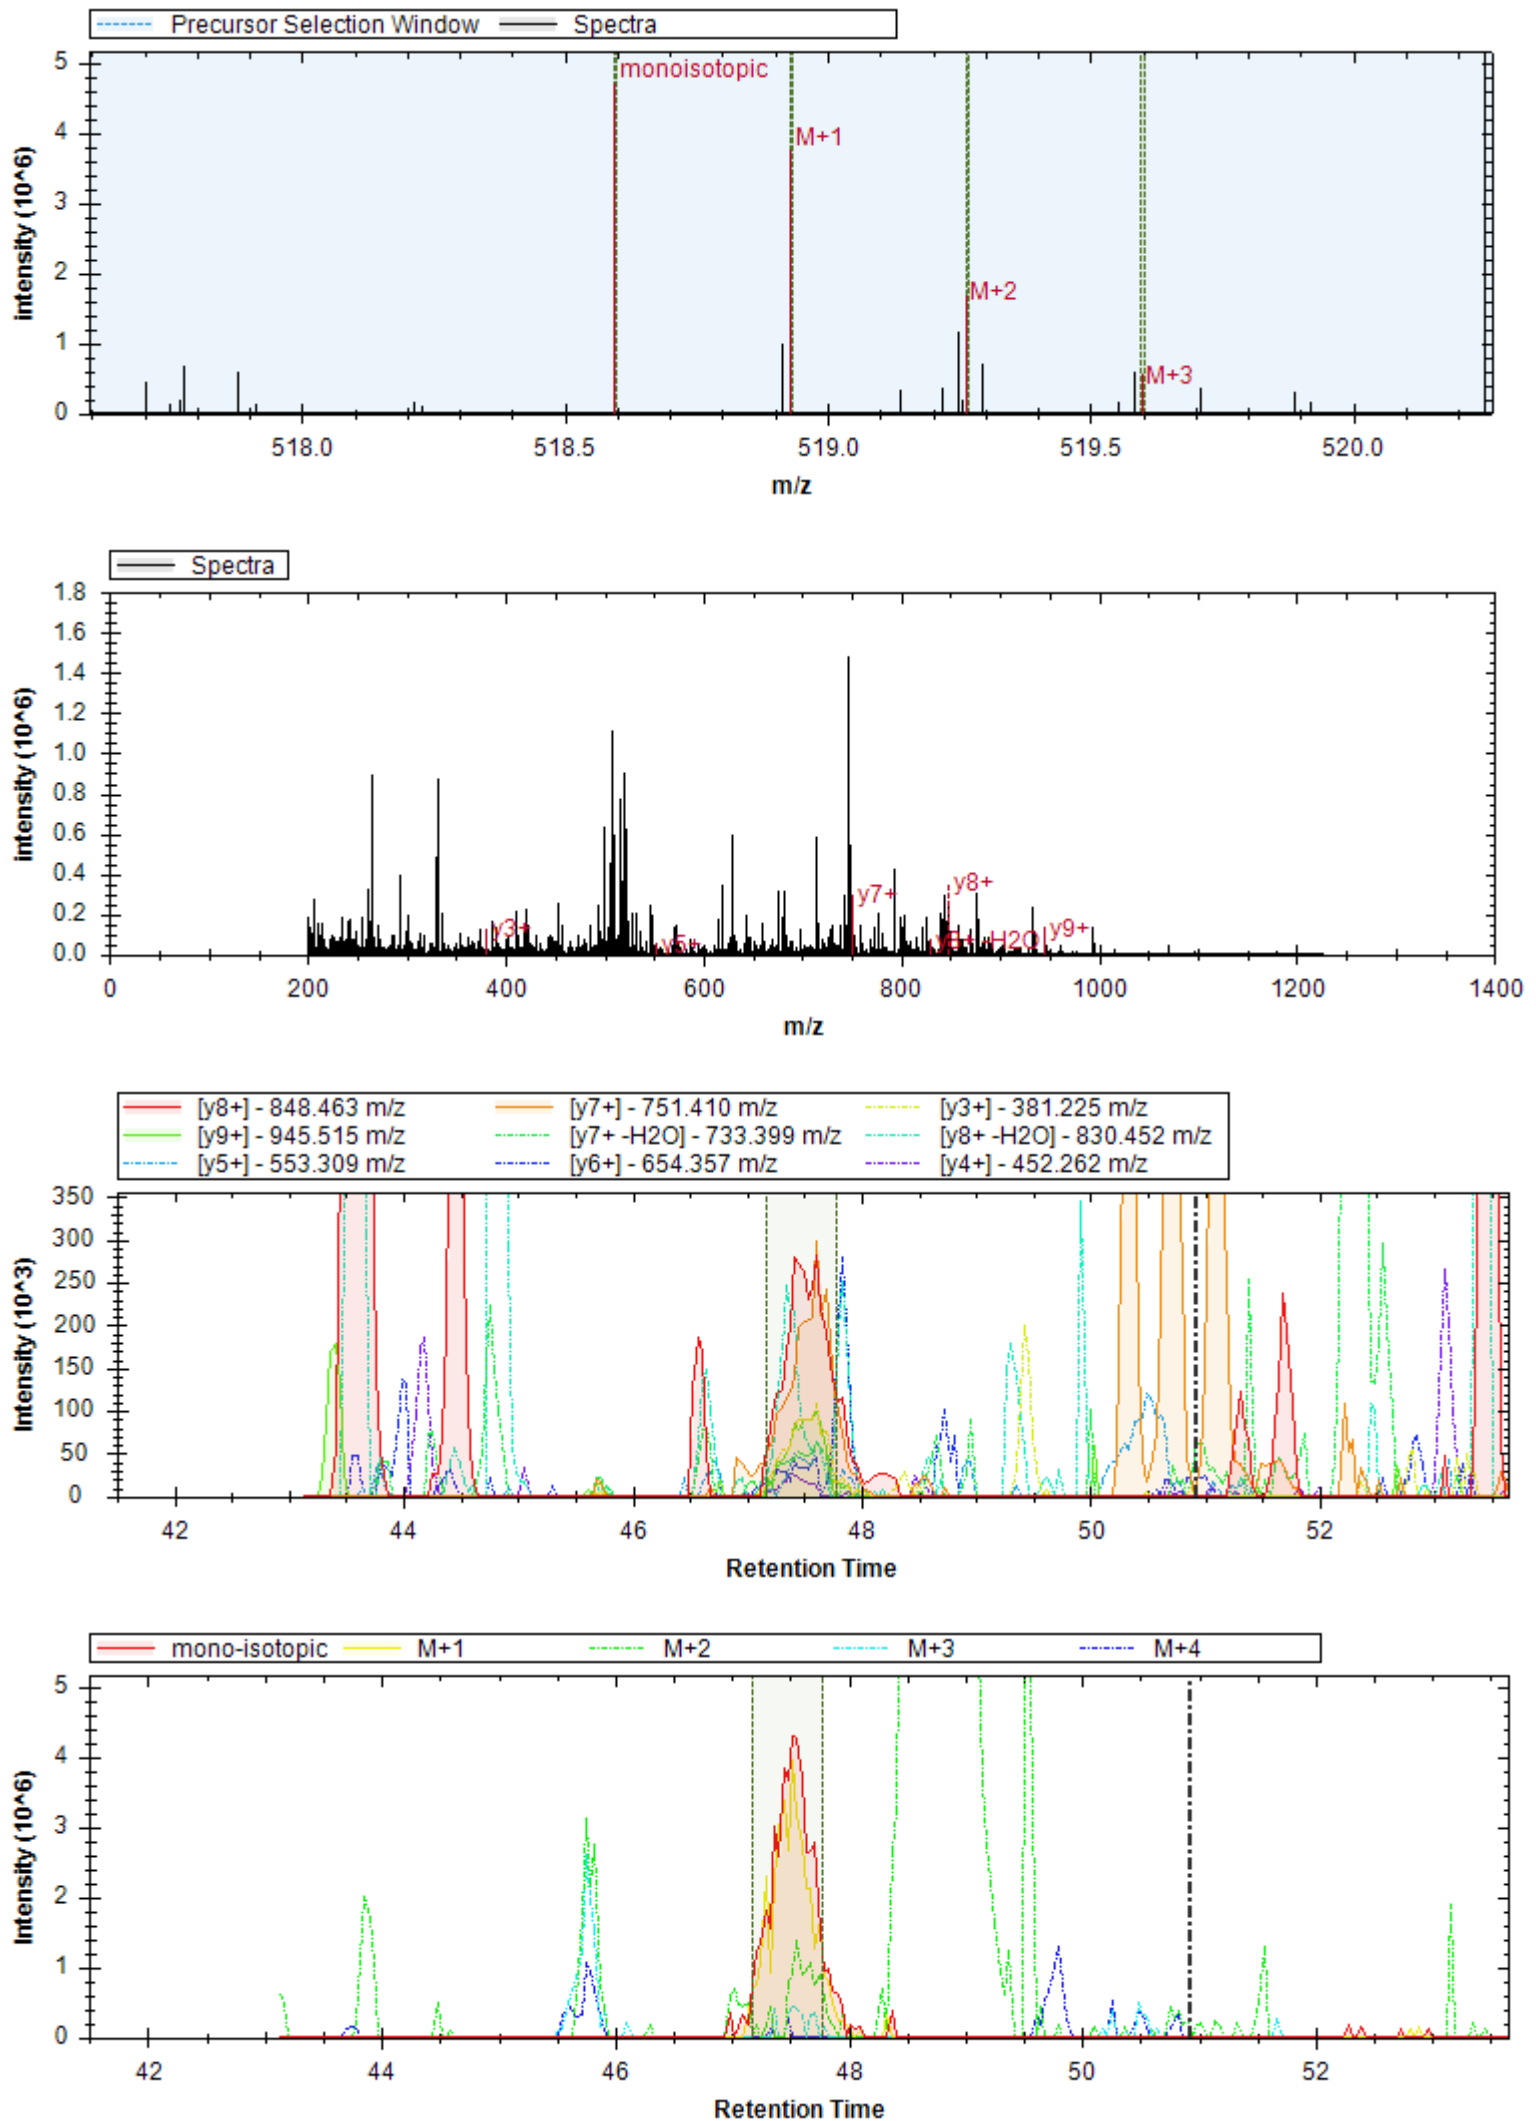

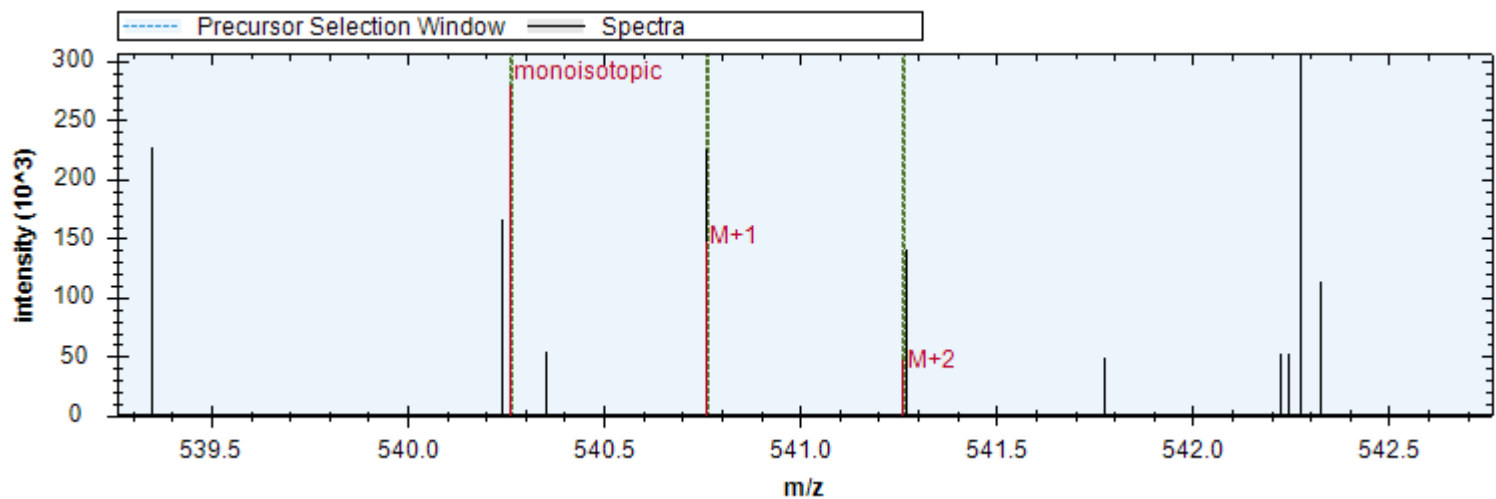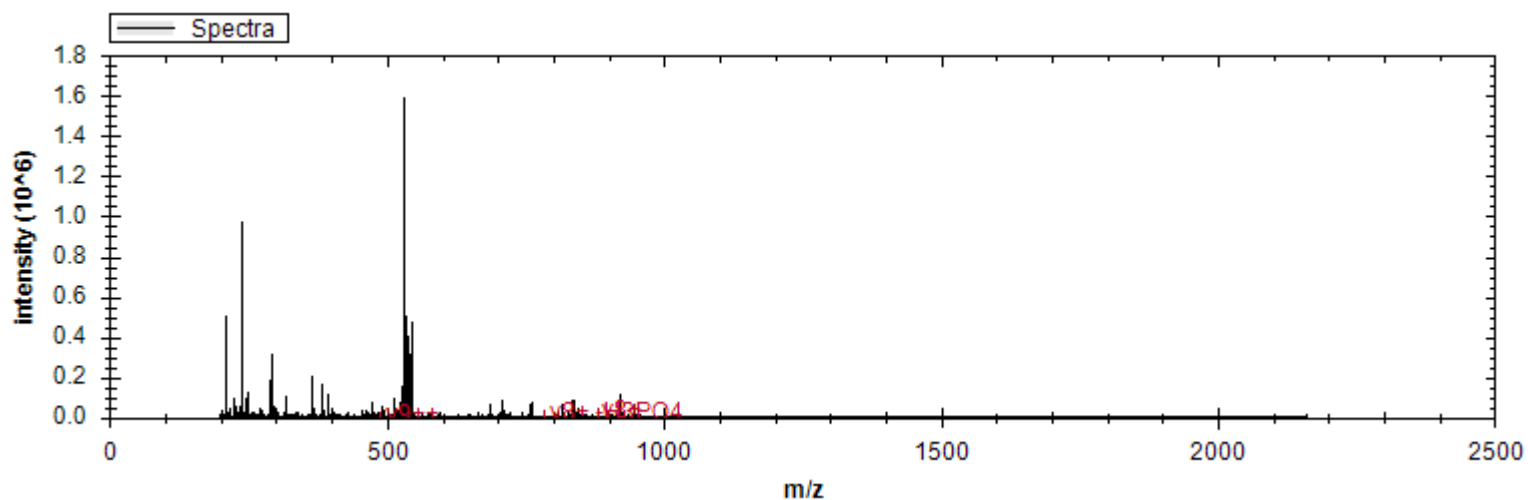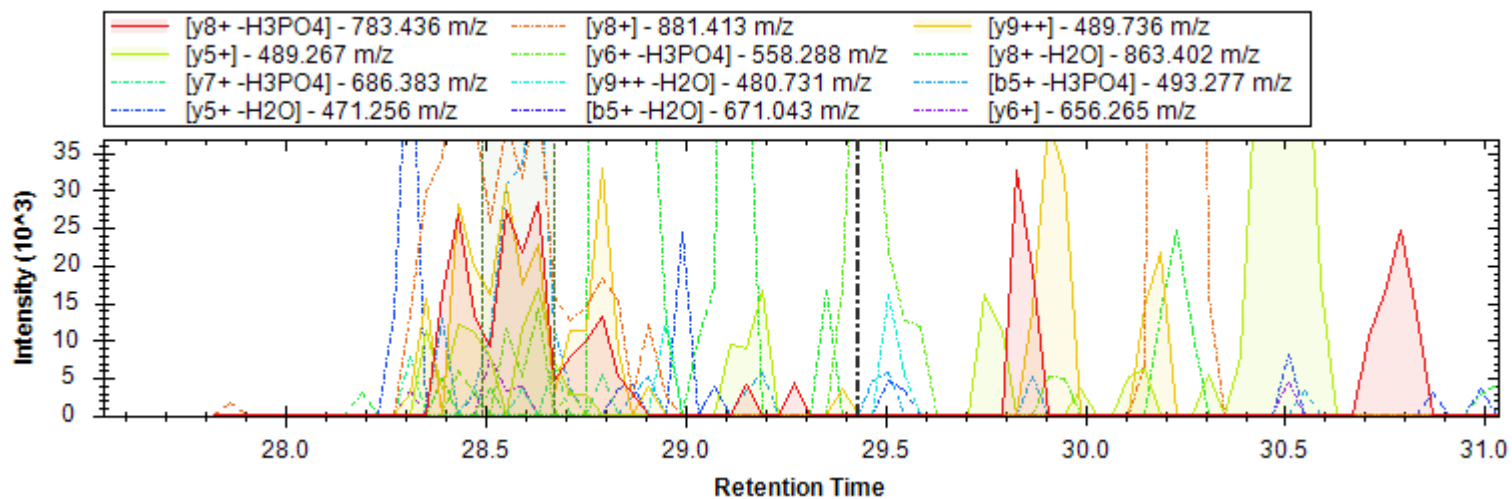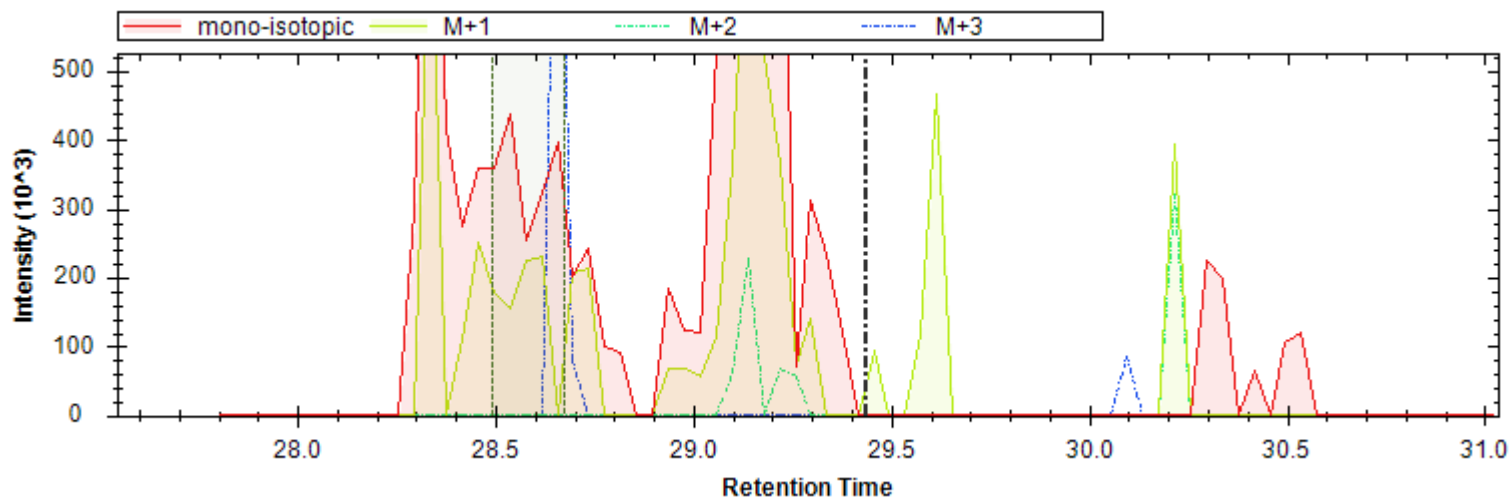

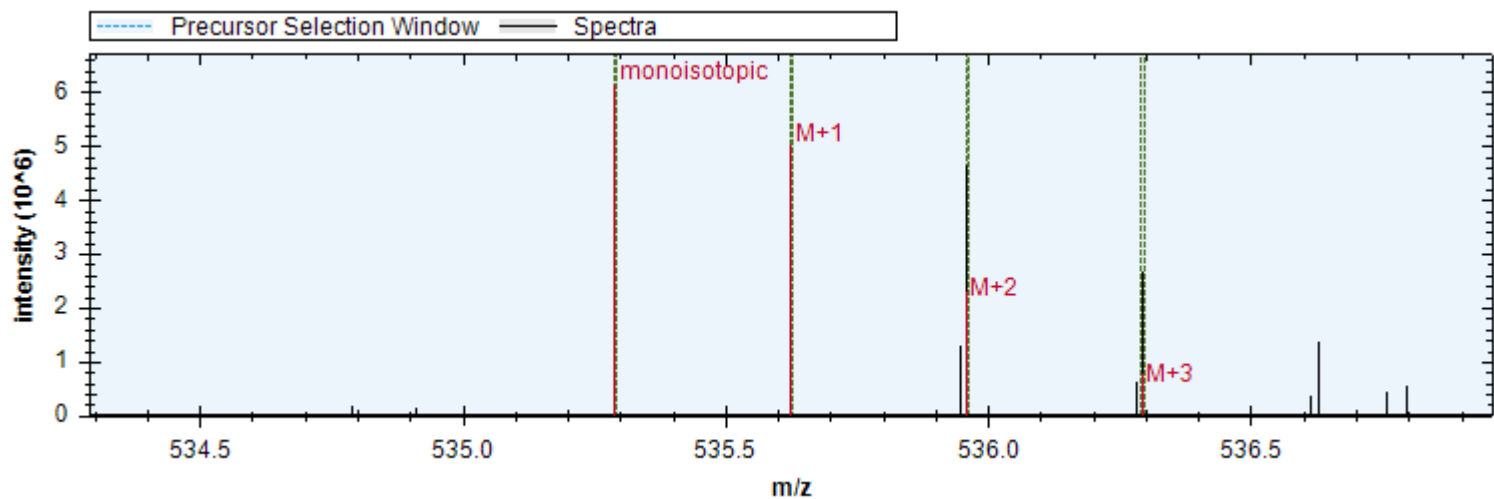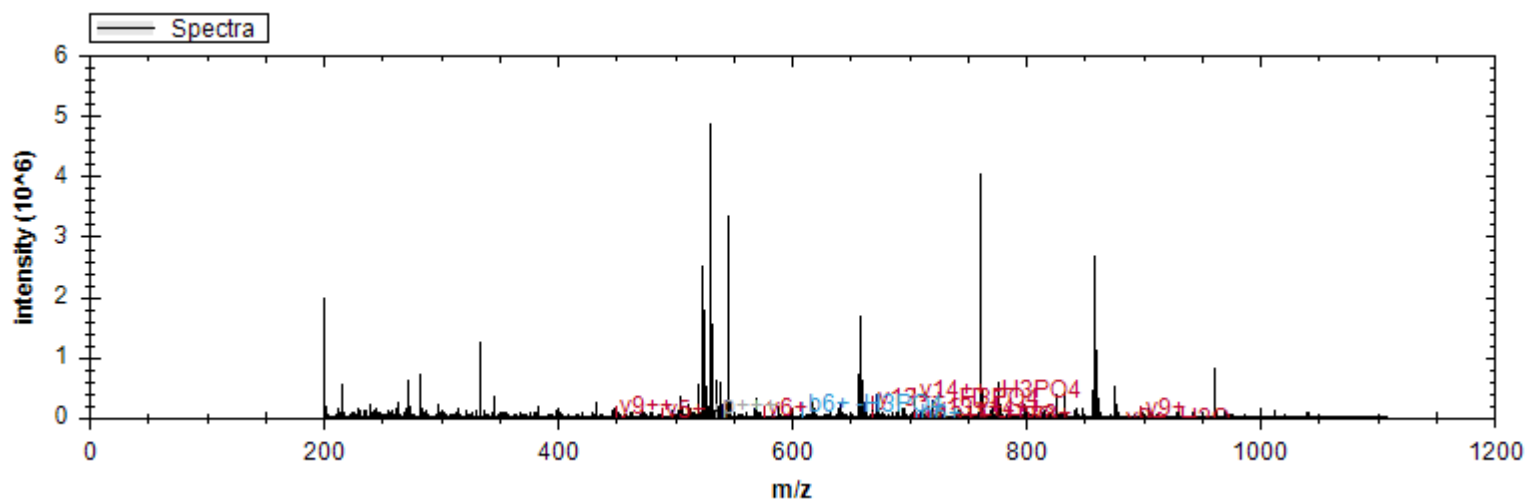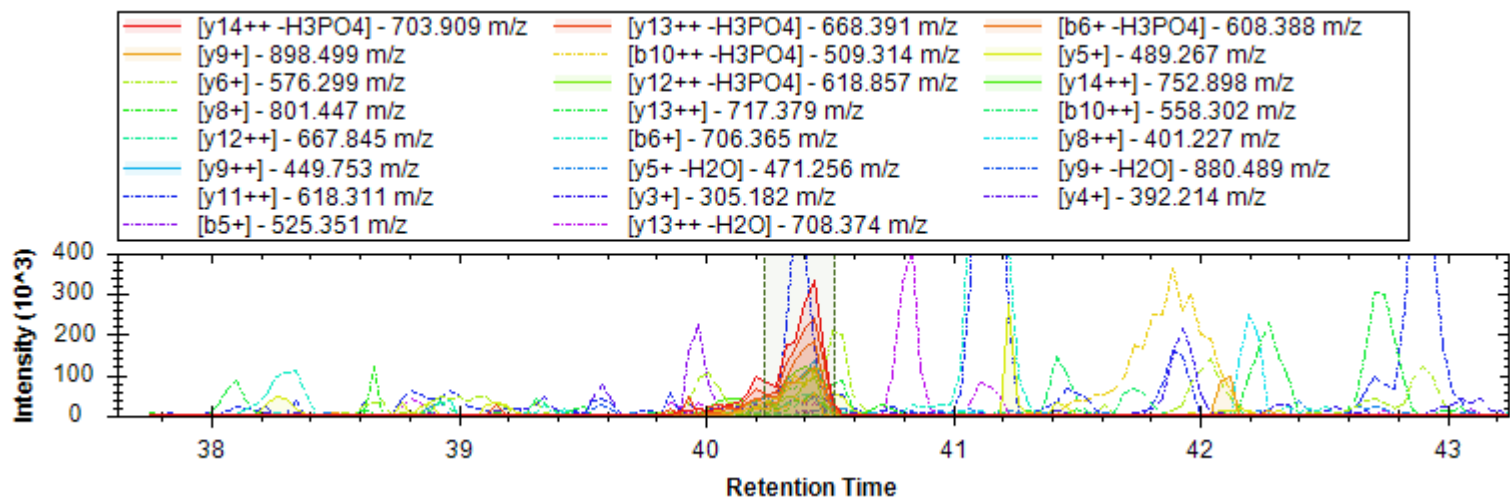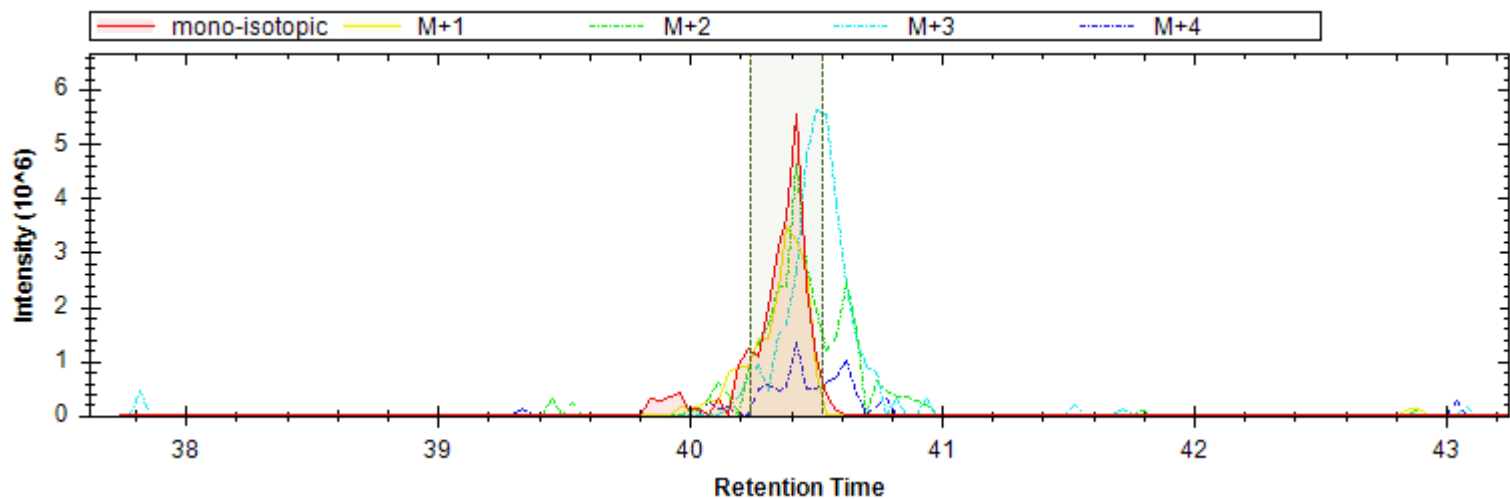

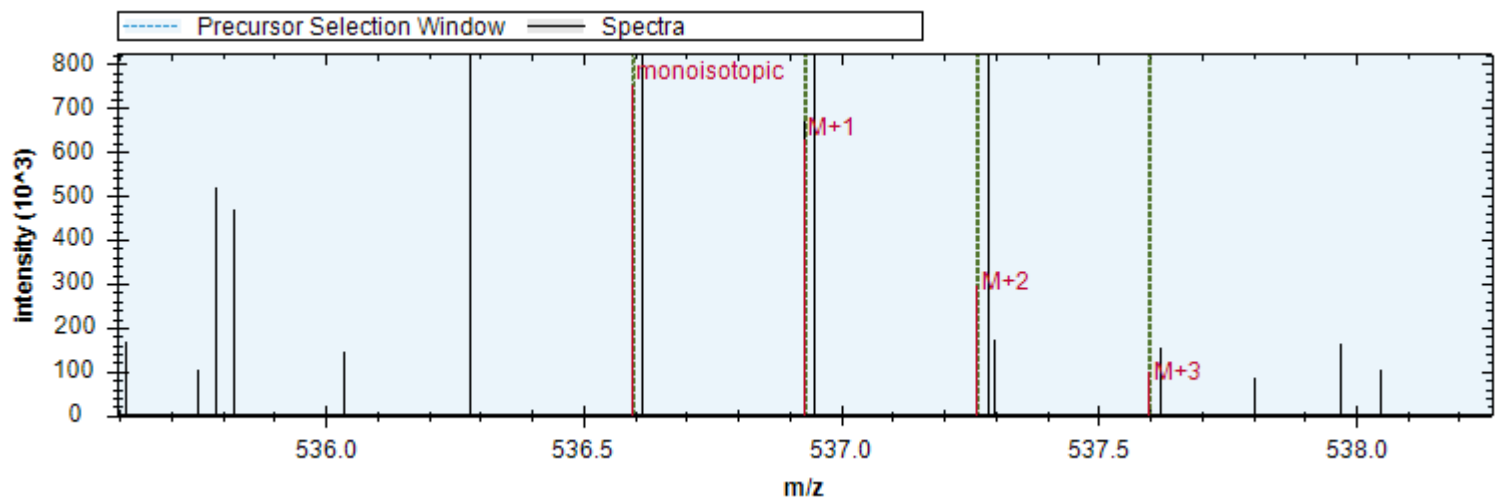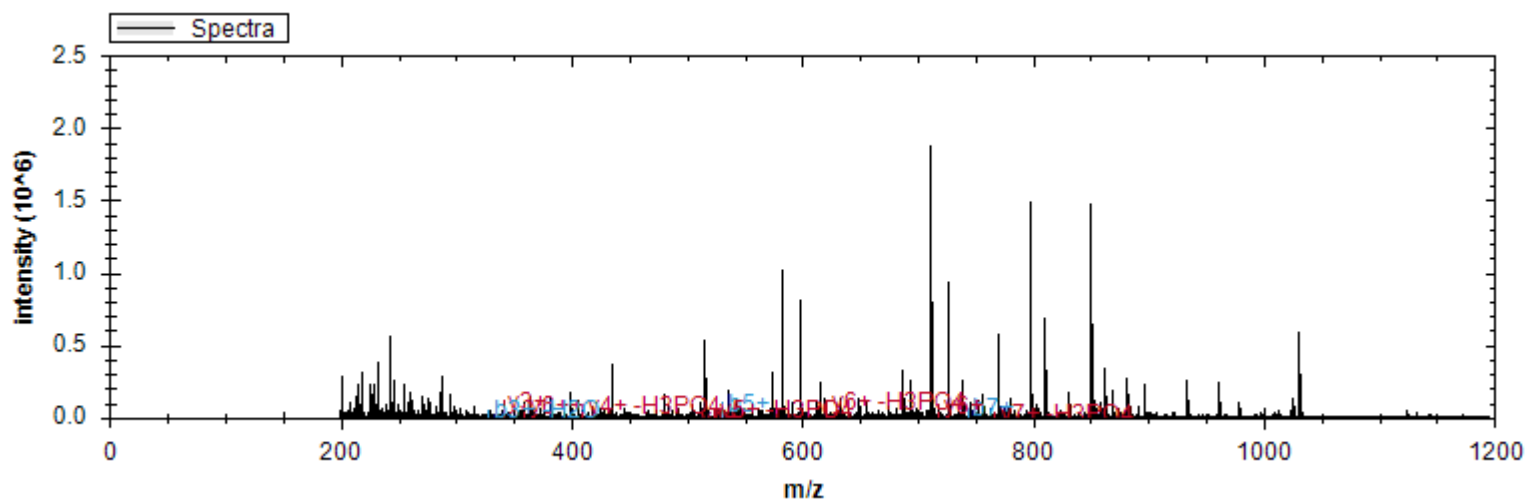

- |                            |                            |                          |
|----------------------------|----------------------------|--------------------------|
| [y6+ -H3PO4] - 620.377 m/z | [y3+] - 341.218 m/z        | [b5+] - 531.277 m/z      |
| [y6++] - 359.680 m/z       | [y5+ -H3PO4] - 523.324 m/z | [y6+] - 718.354 m/z      |
| [y4+ -H3PO4] - 410.240 m/z | [b7+] - 743.357 m/z        | [b5+ -H2O] - 513.267 m/z |
| [y7+ -H3PO4] - 767.445 m/z | [y9++] - 539.255 m/z       | [b3+] - 345.177 m/z      |
| [y7++] - 433.215 m/z       | [y8+ -H3PO4] - 882.472 m/z | [b4+] - 432.209 m/z      |
| [y4+] - 508.217 m/z        | [b3+ -H2O] - 327.166 m/z   | [b8+] - 890.425 m/z      |
| [b4+ -H2O] - 414.198 m/z   | [b7+ -H2O] - 725.346 m/z   | [y7+] - 865.422 m/z      |
| [y9+ -H3PO4] - 979.525 m/z |                            |                          |

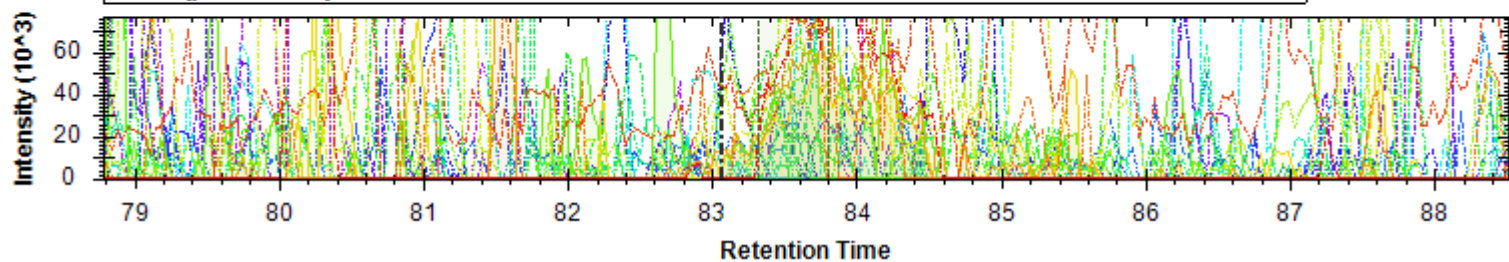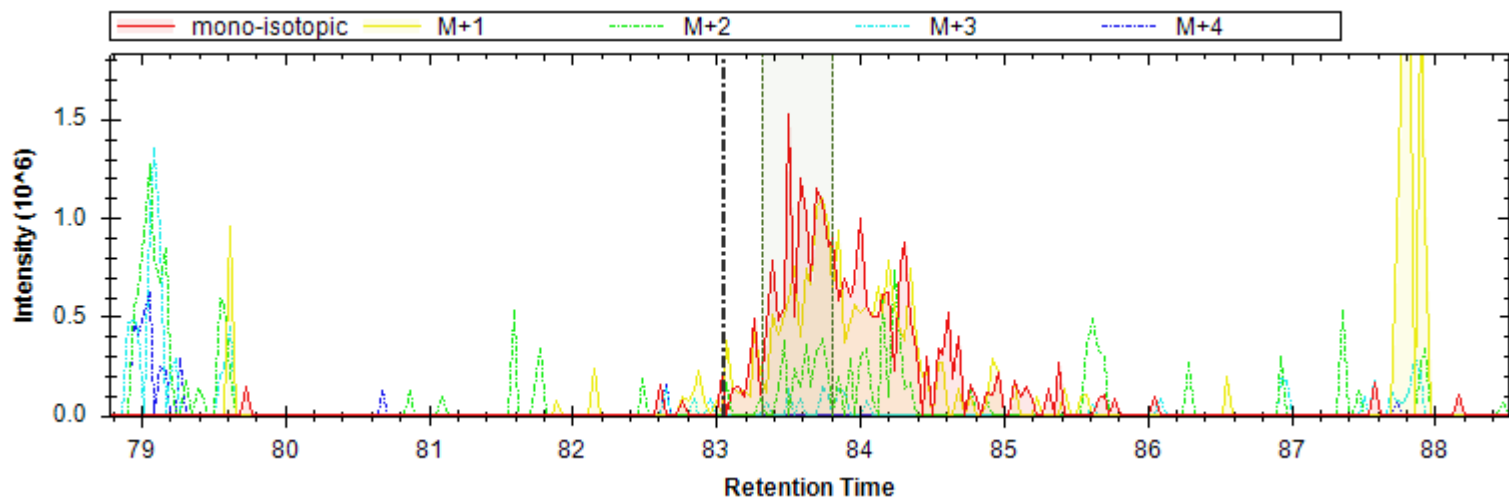

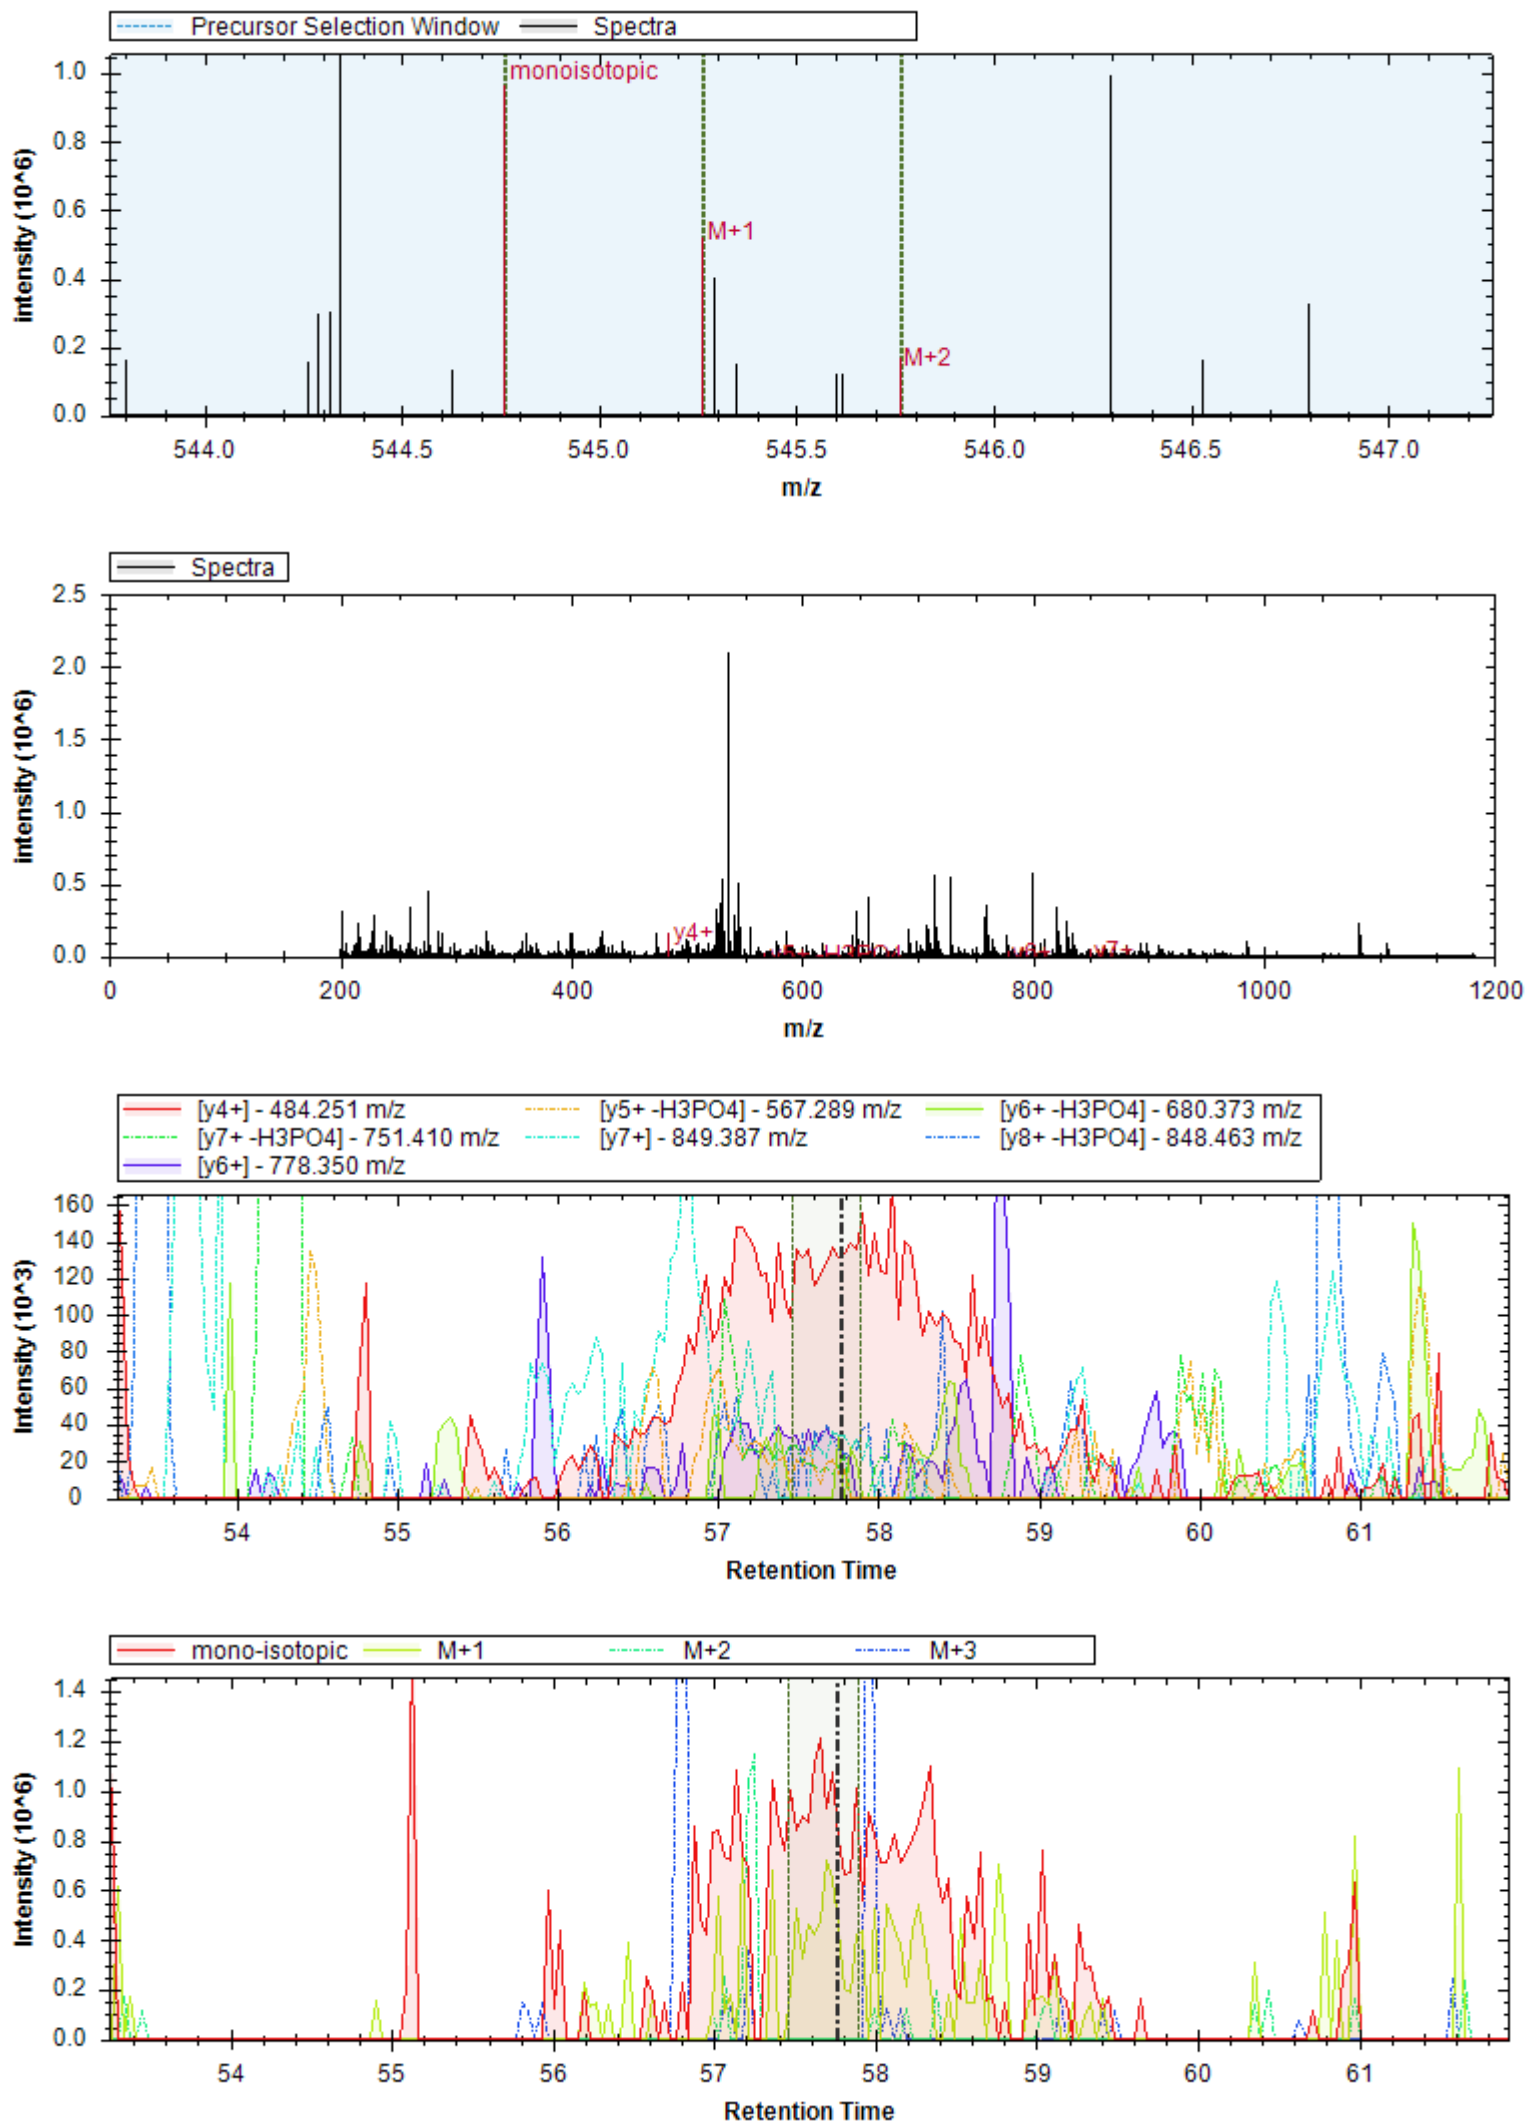

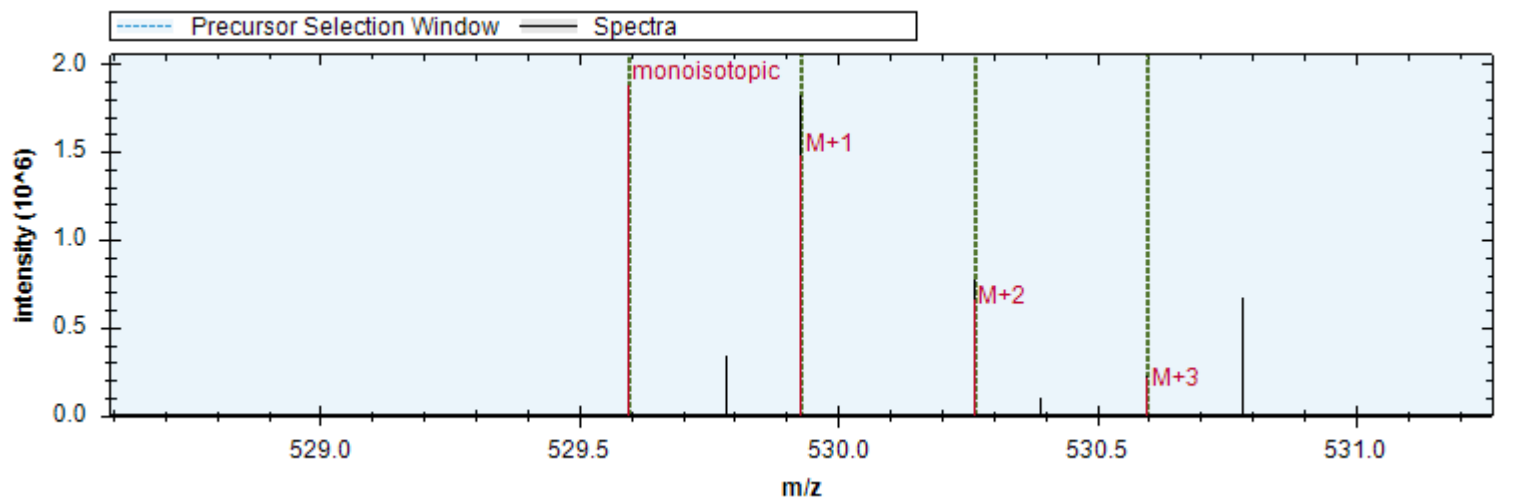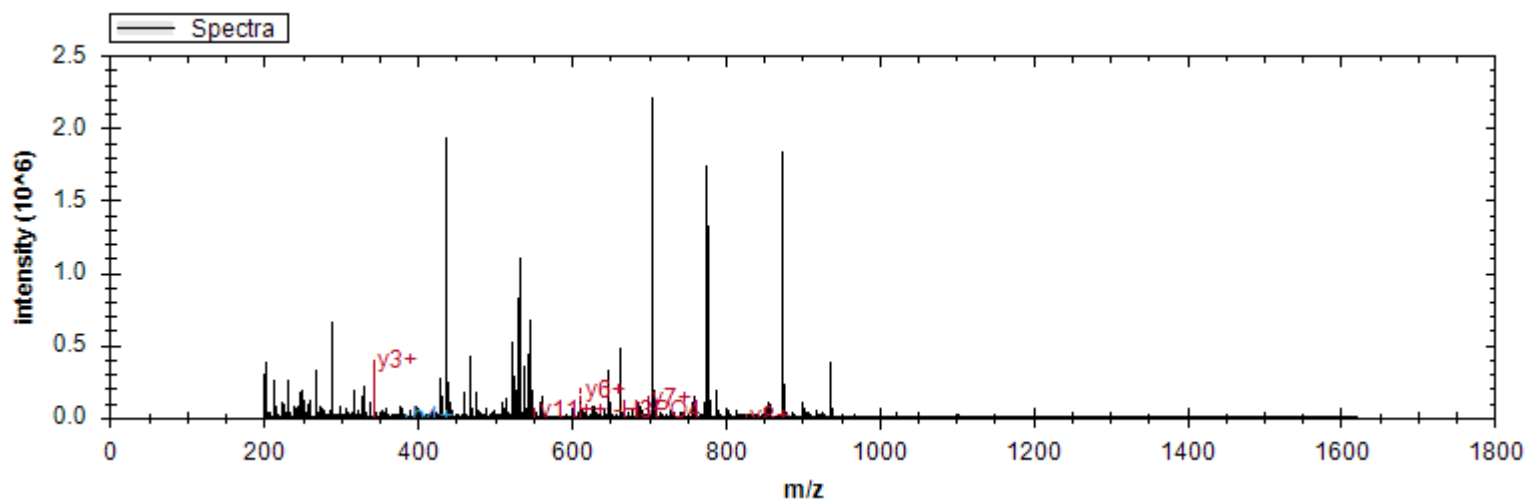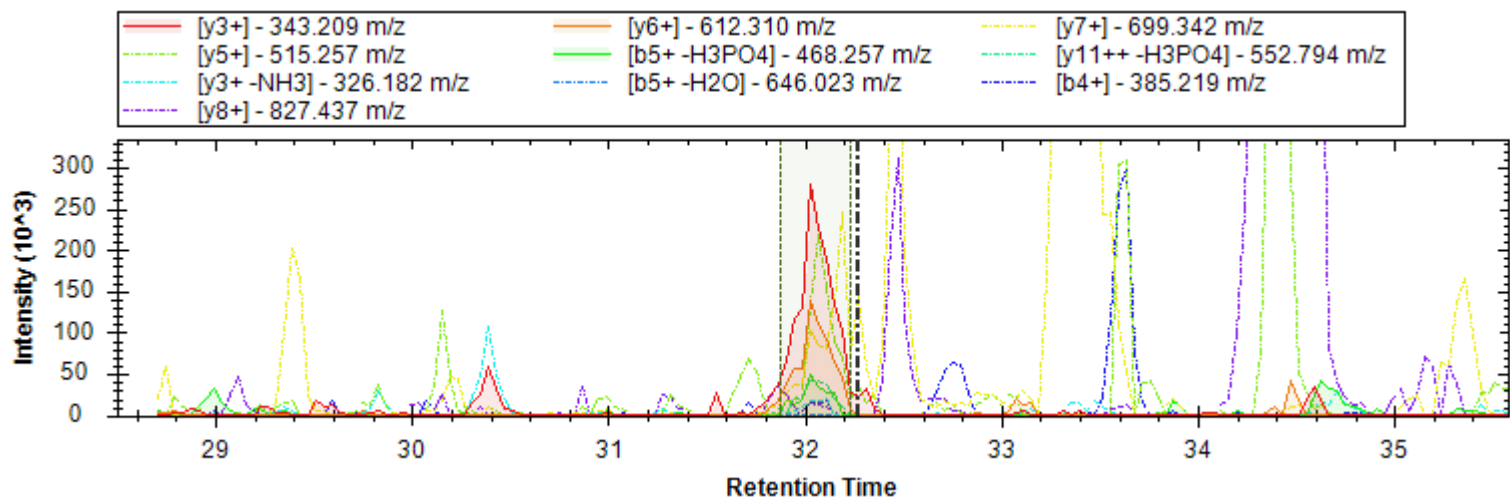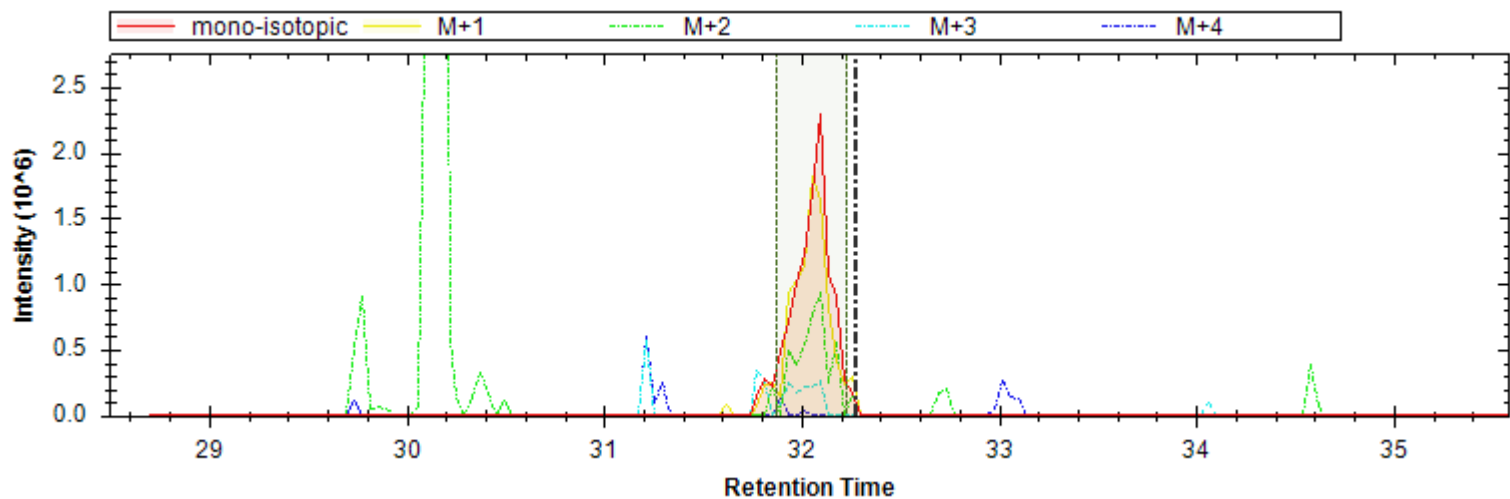



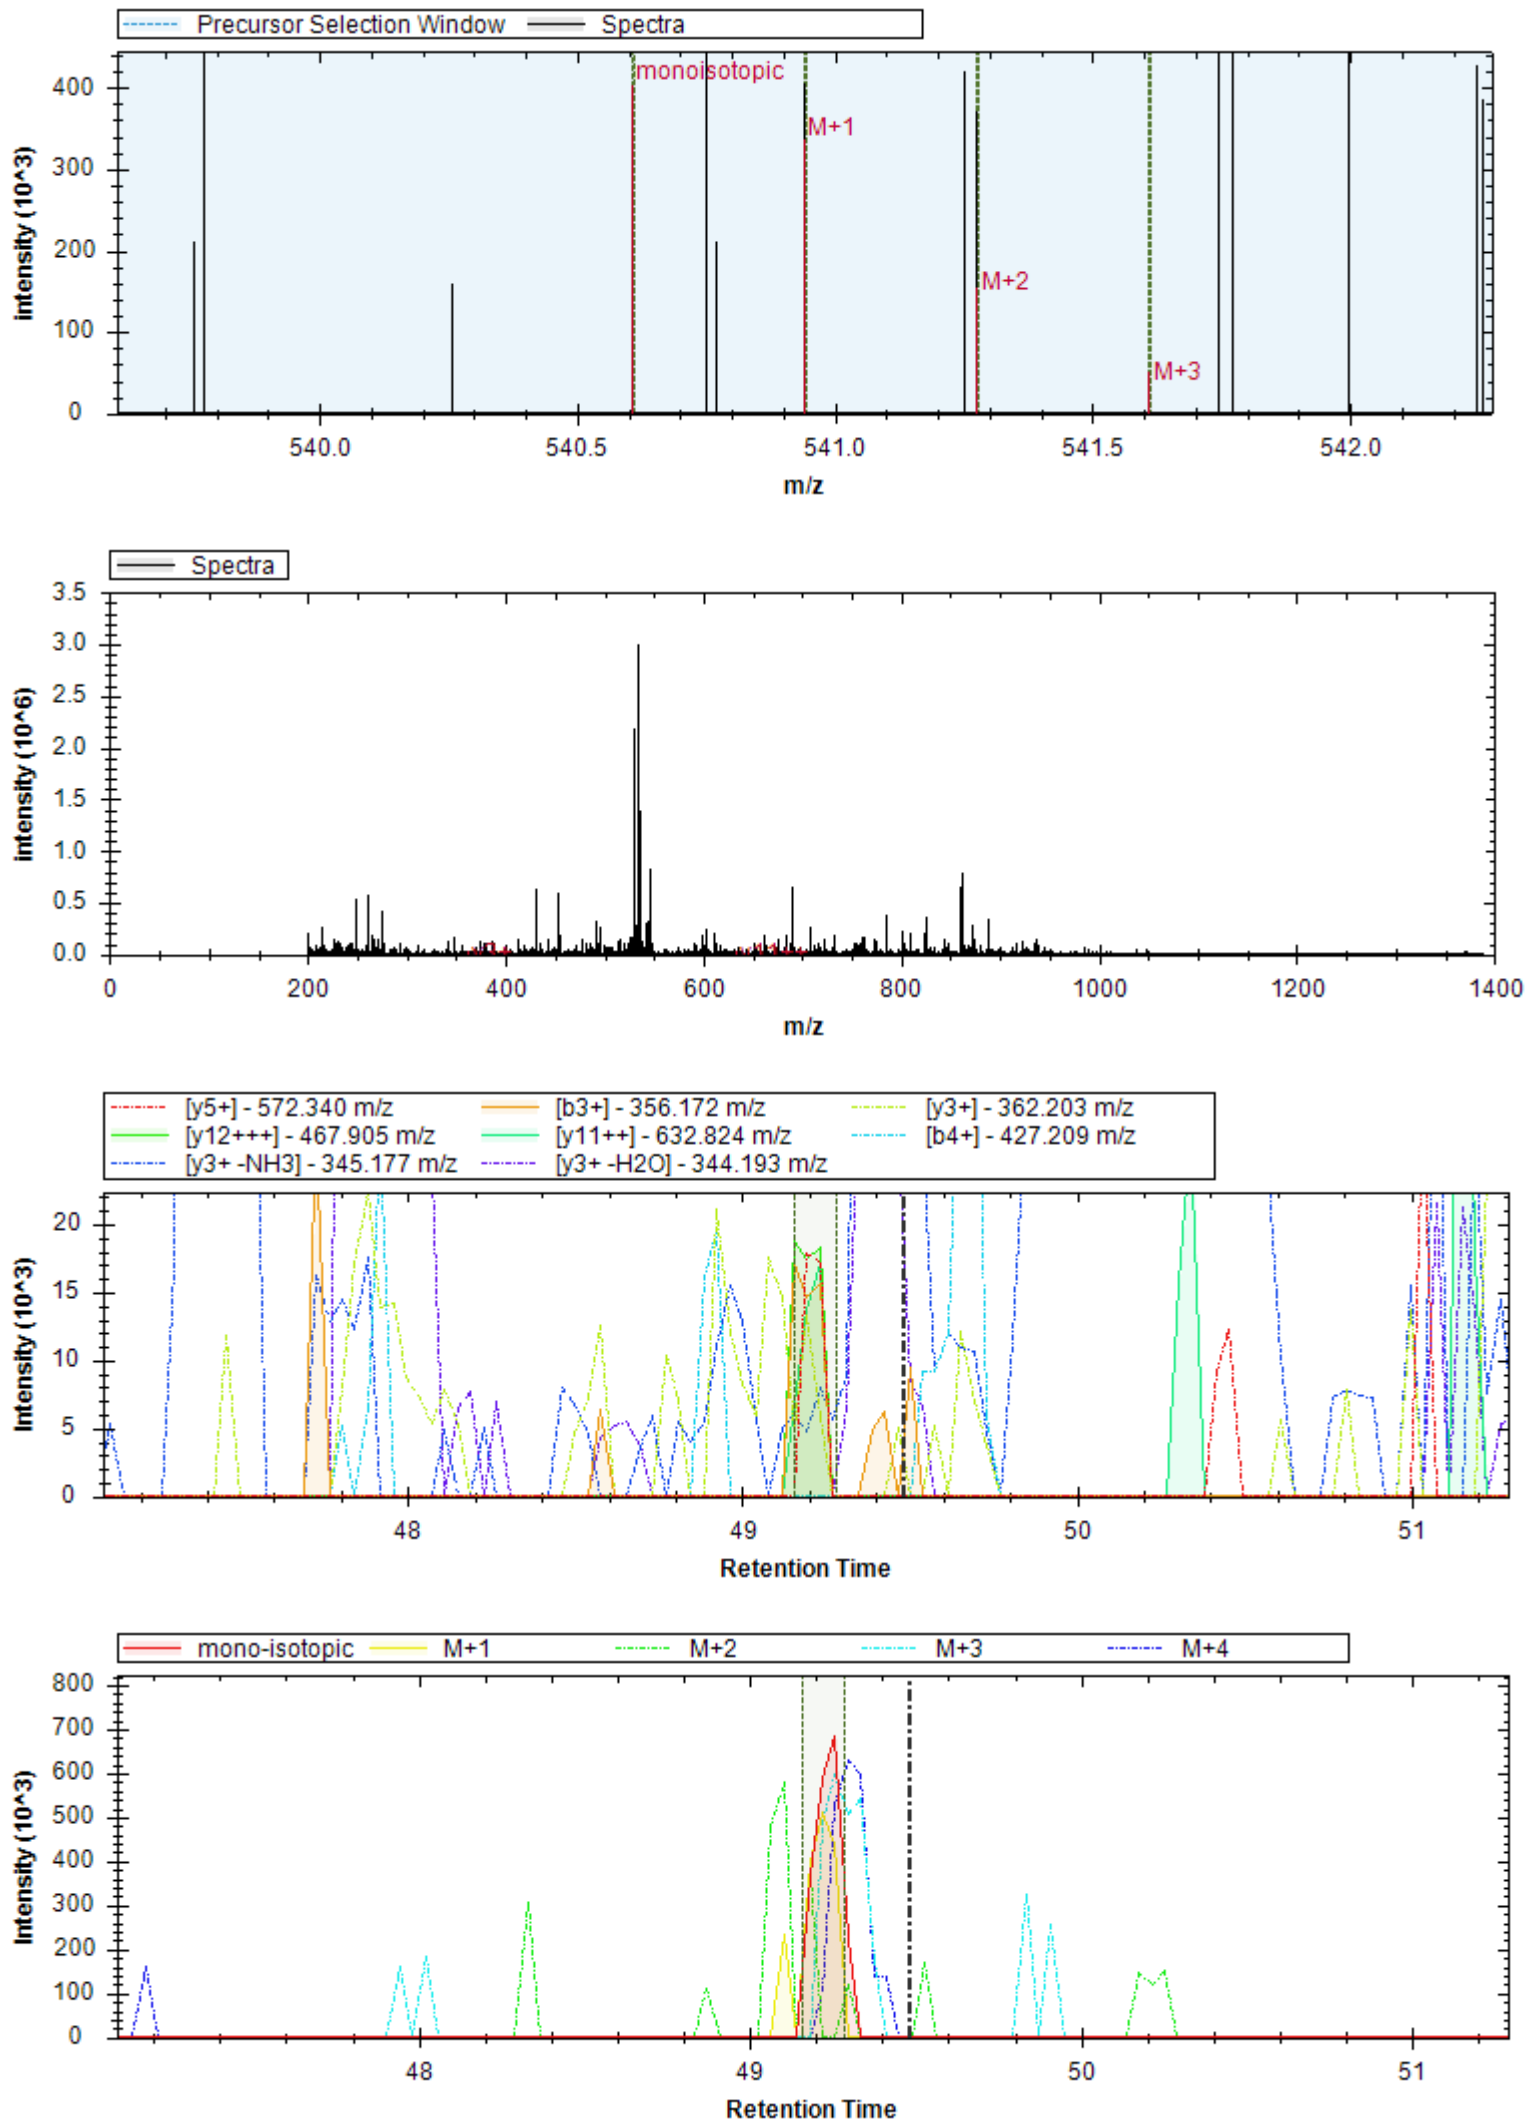

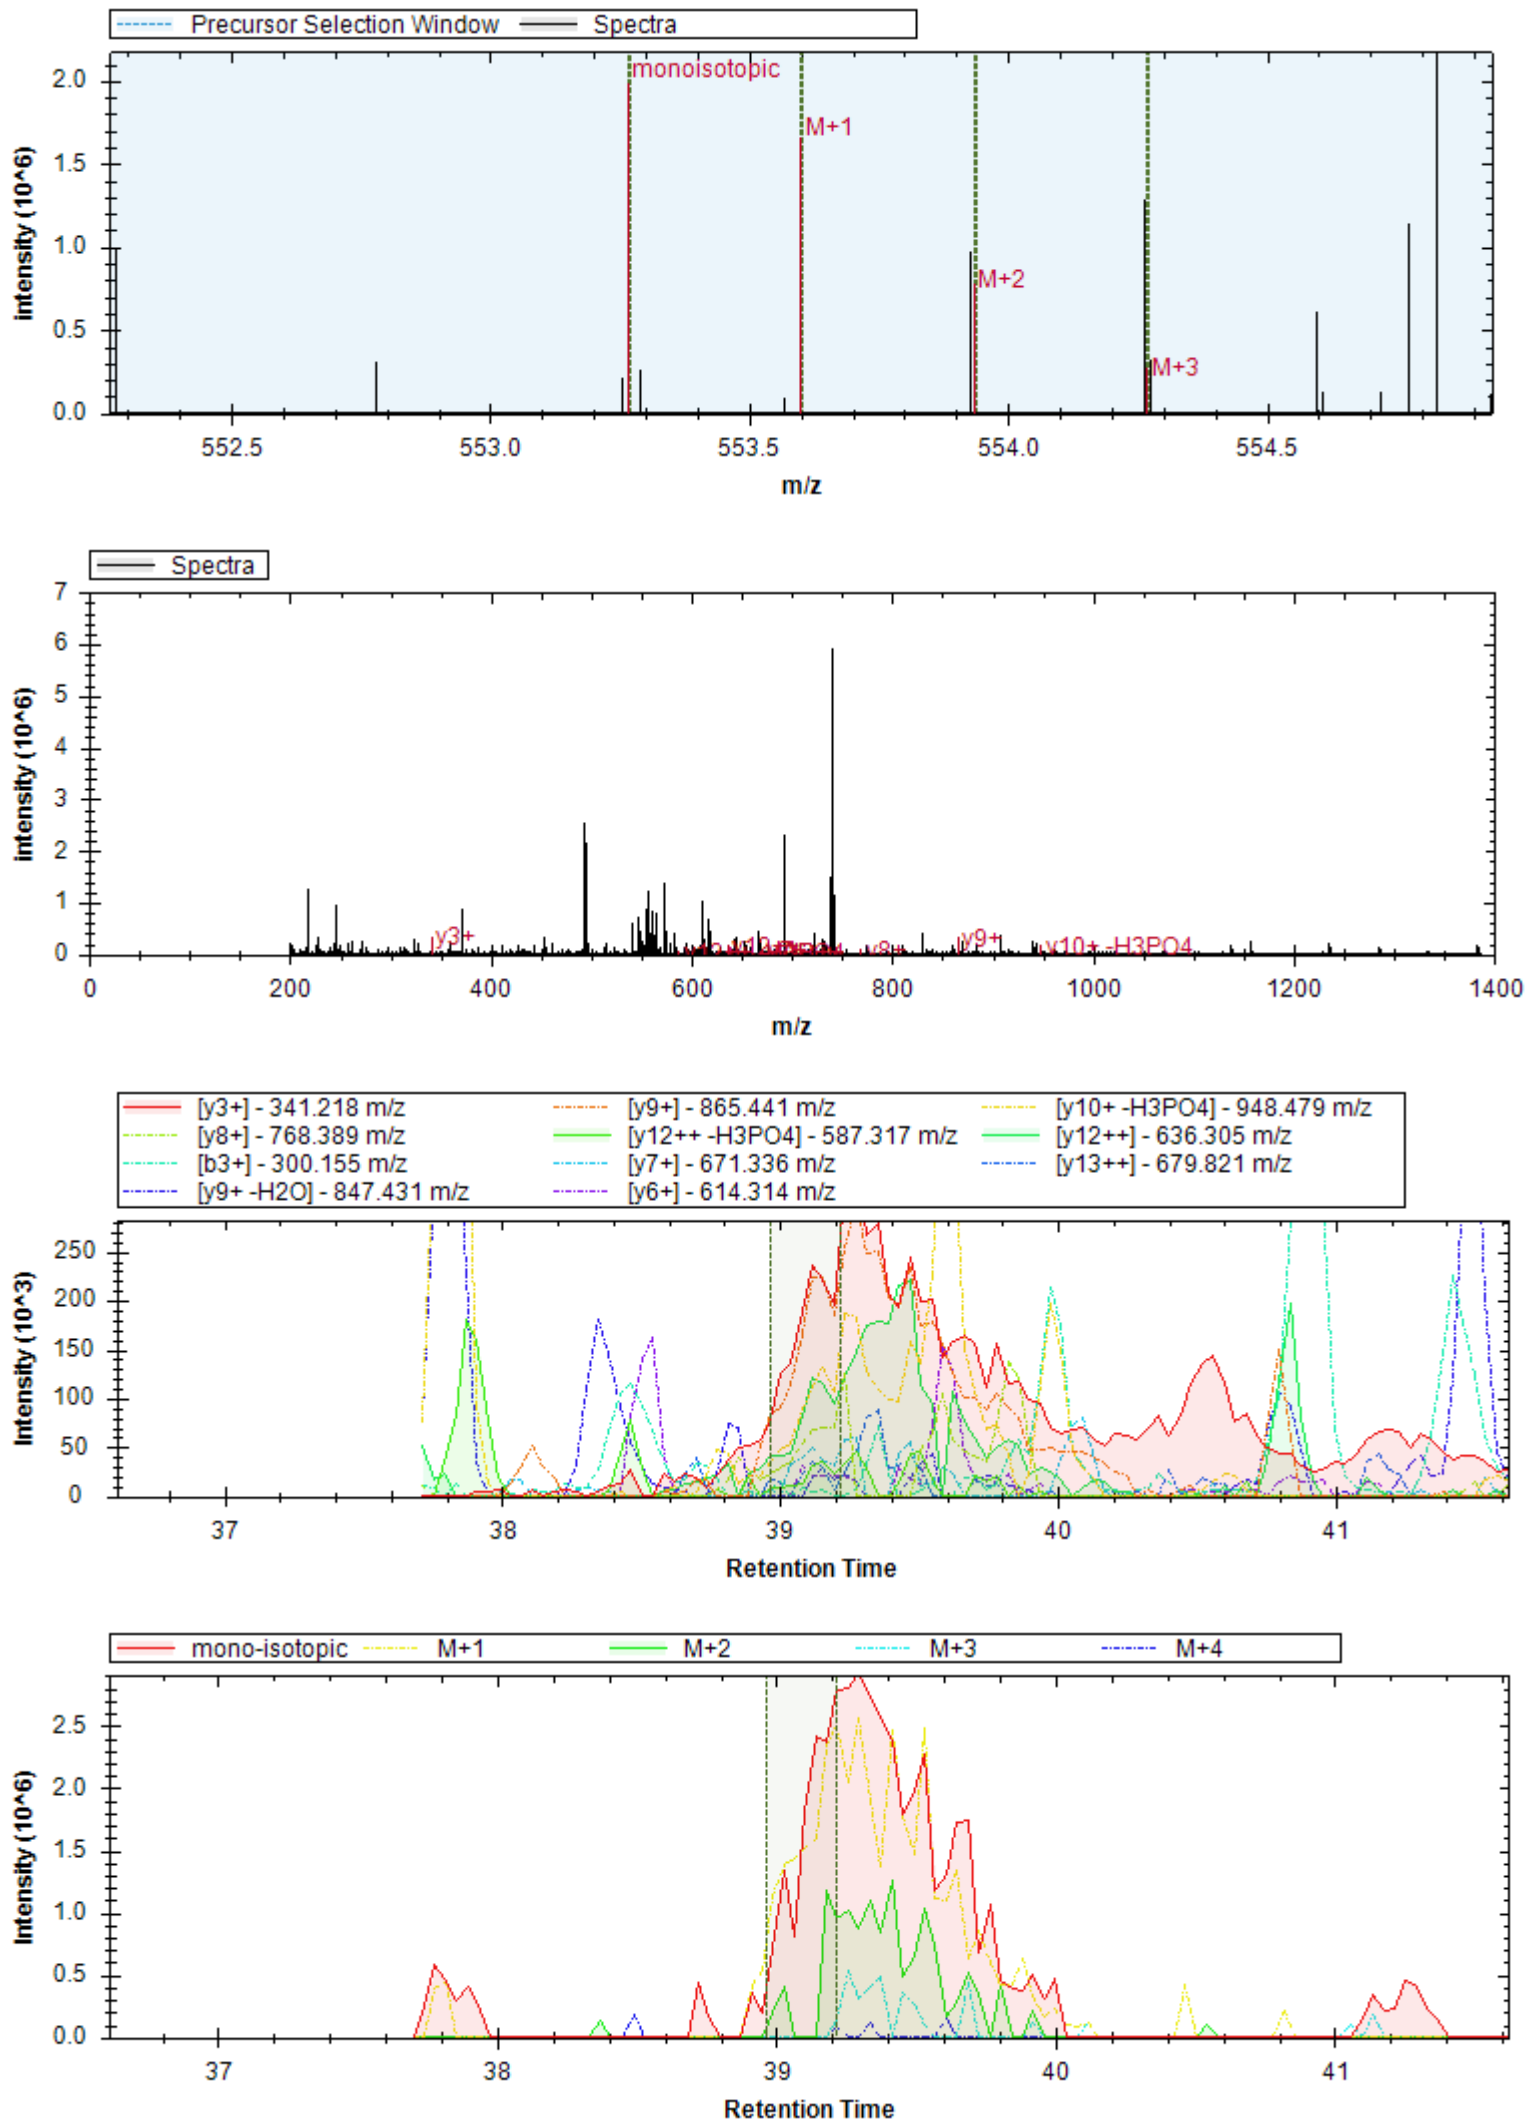

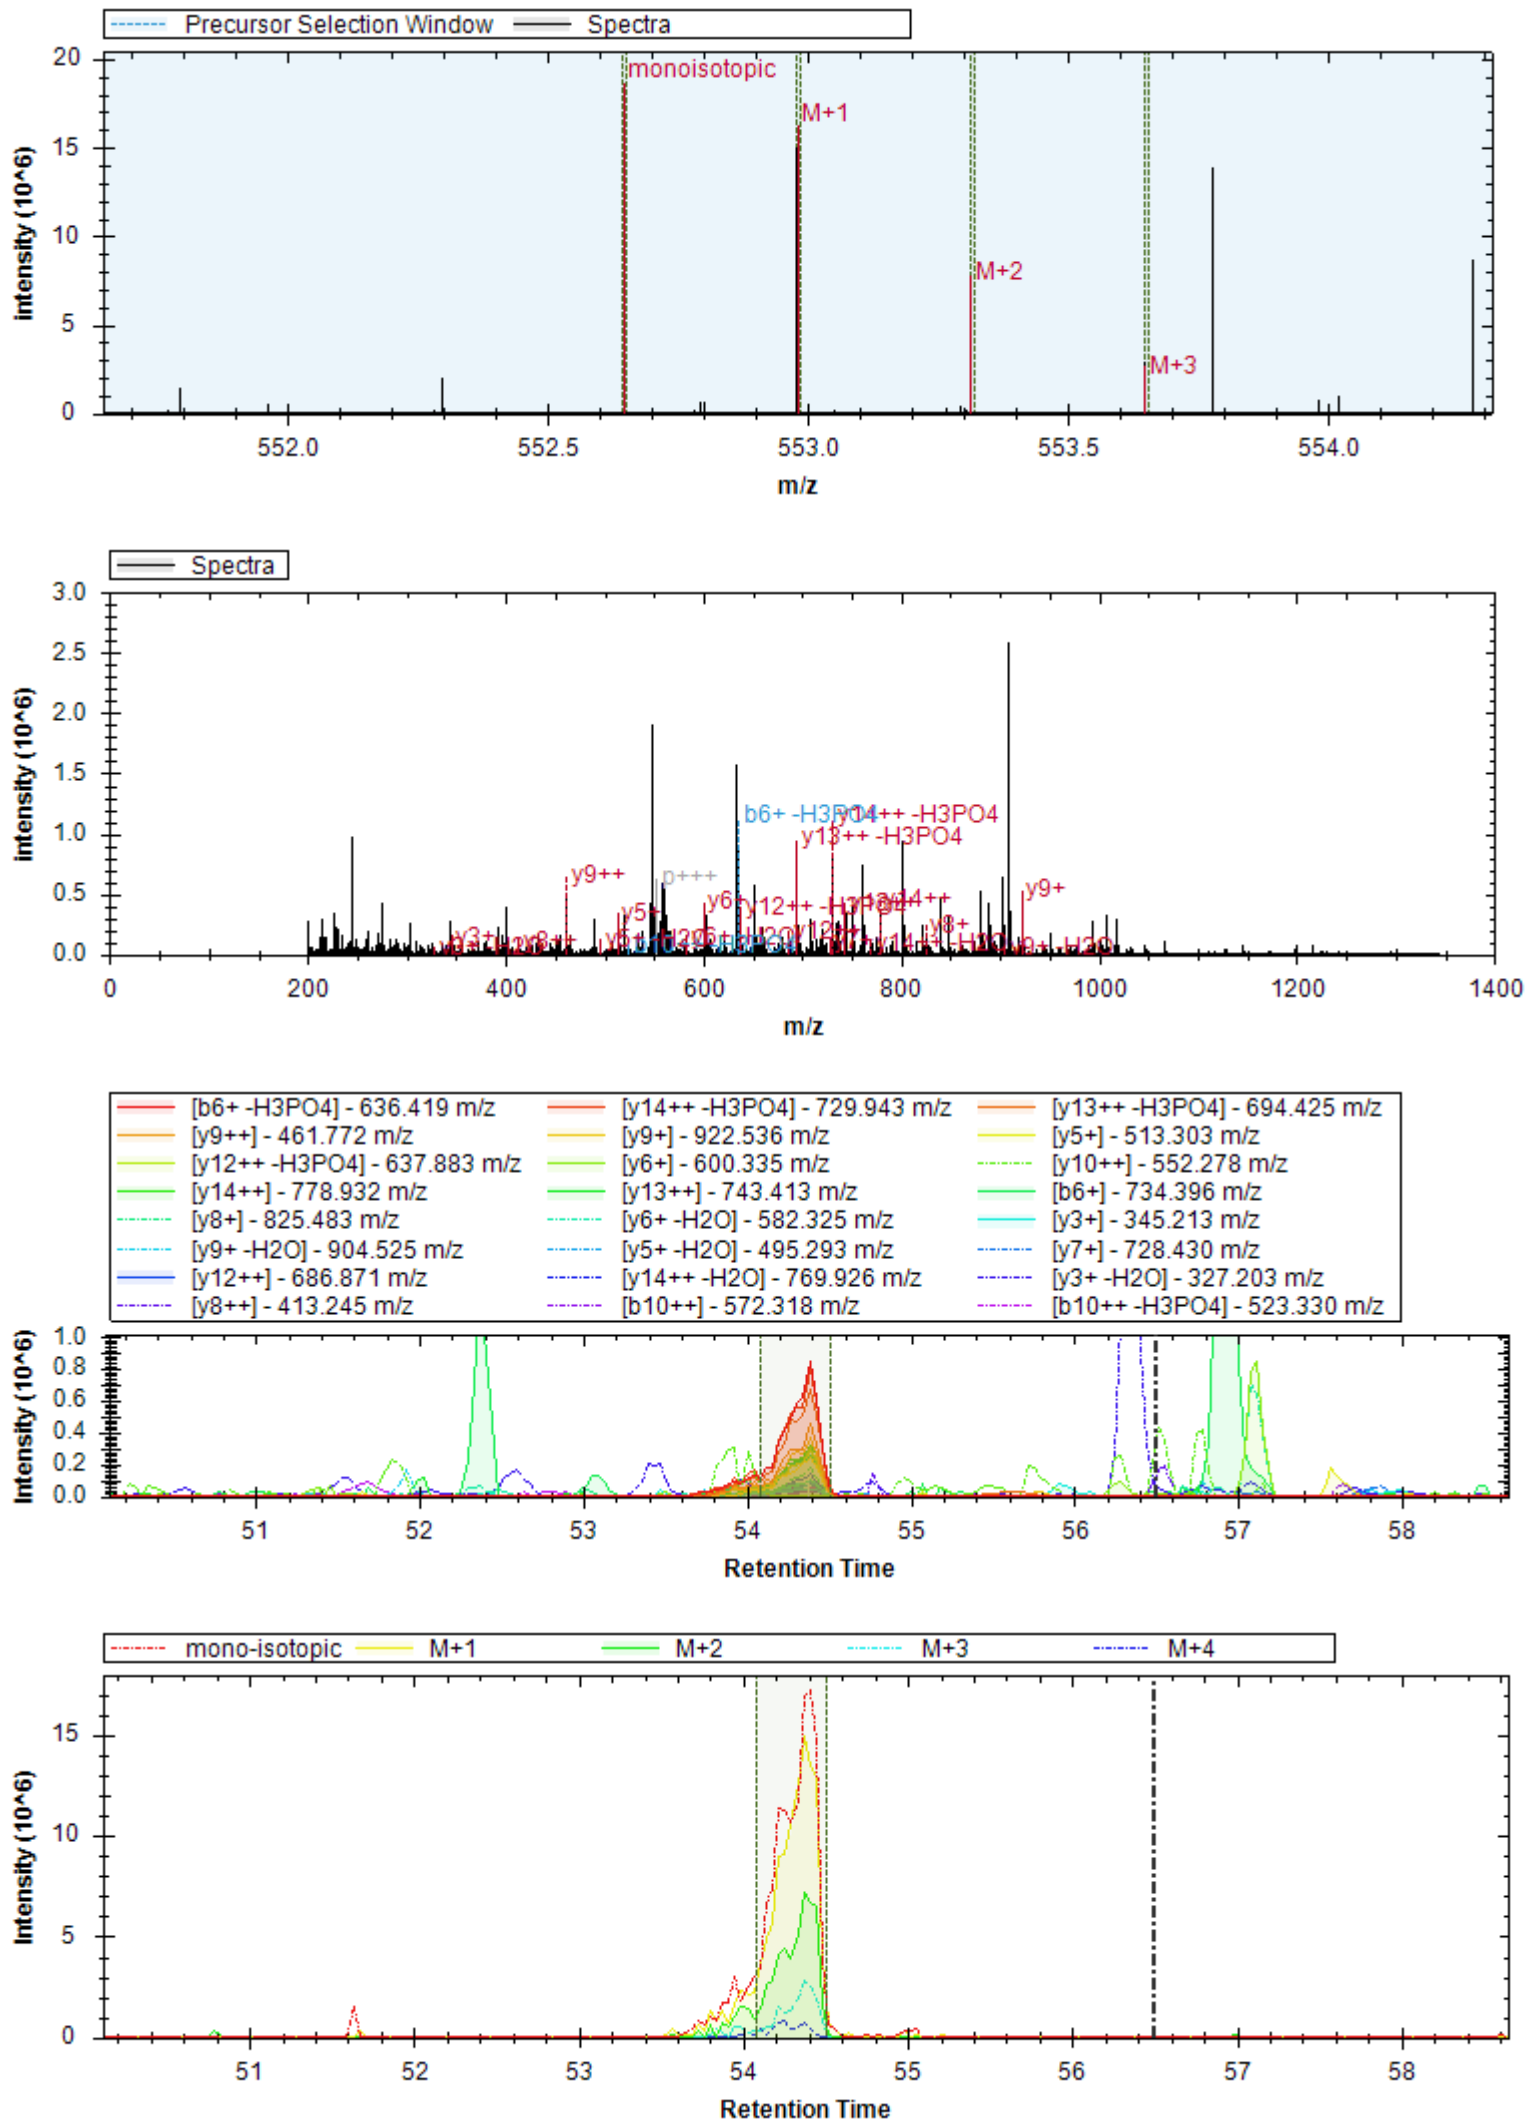

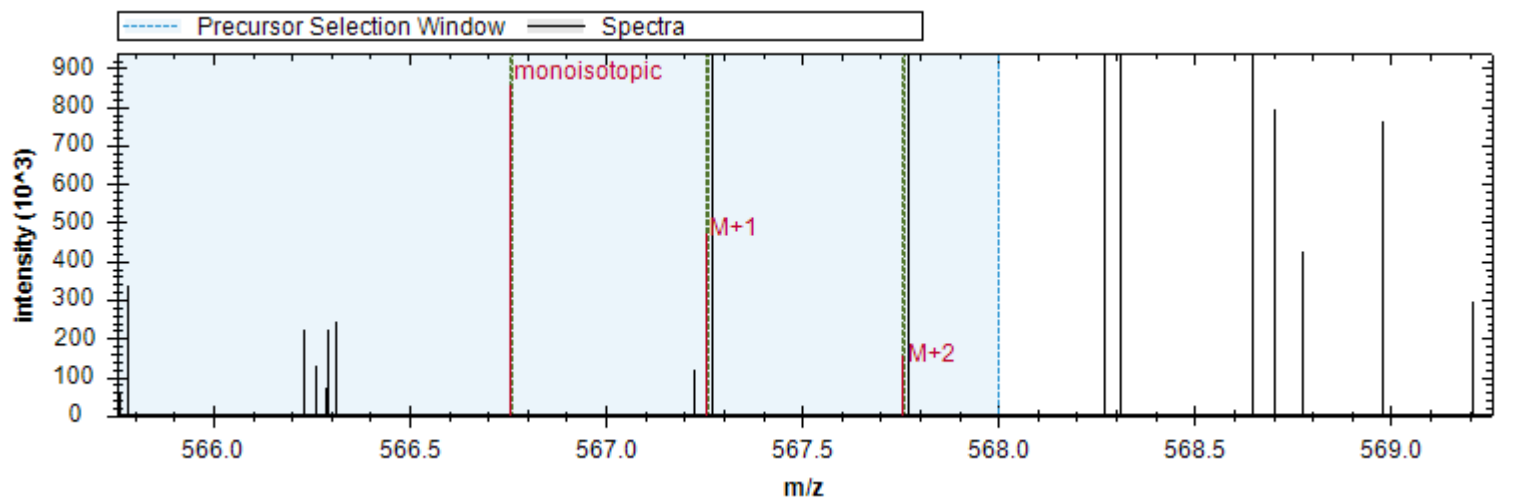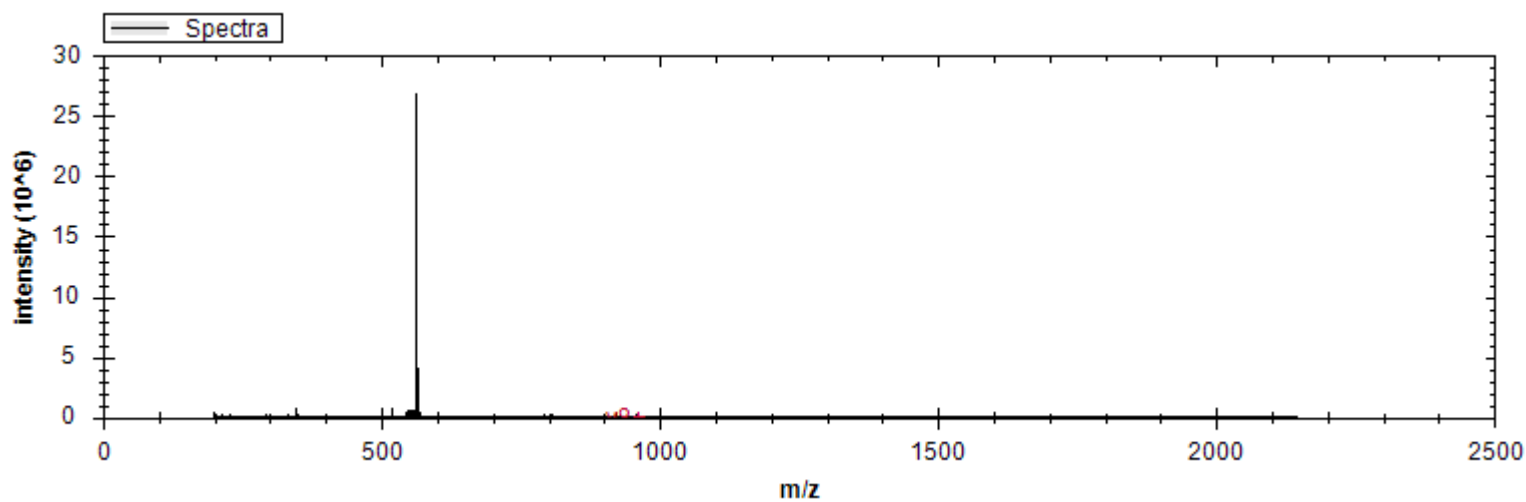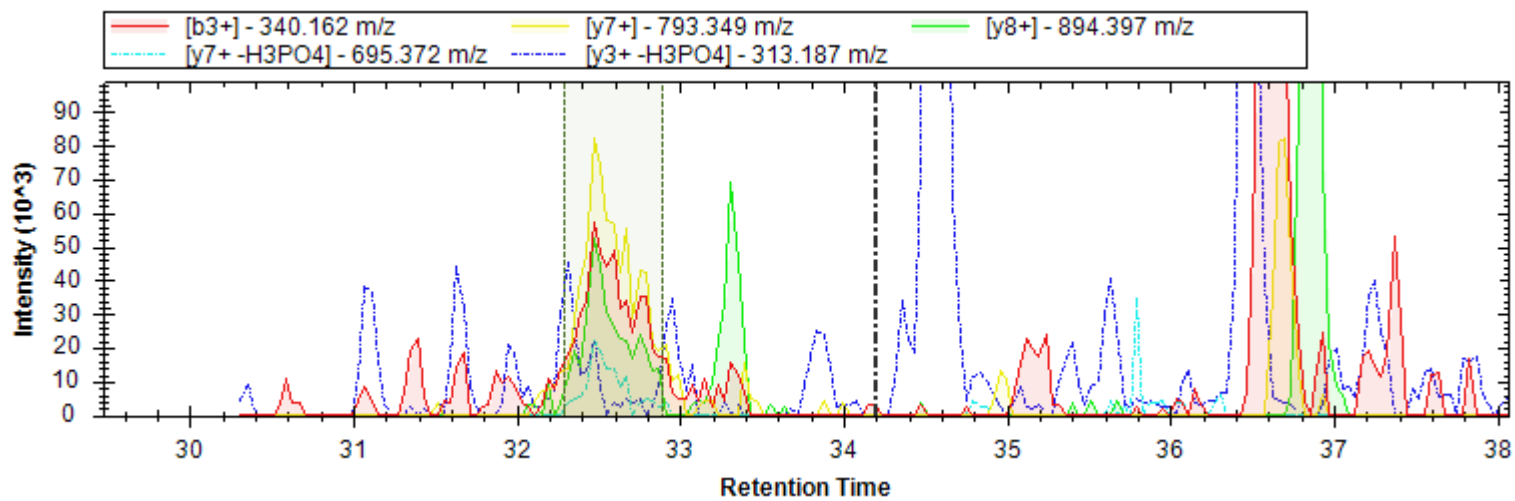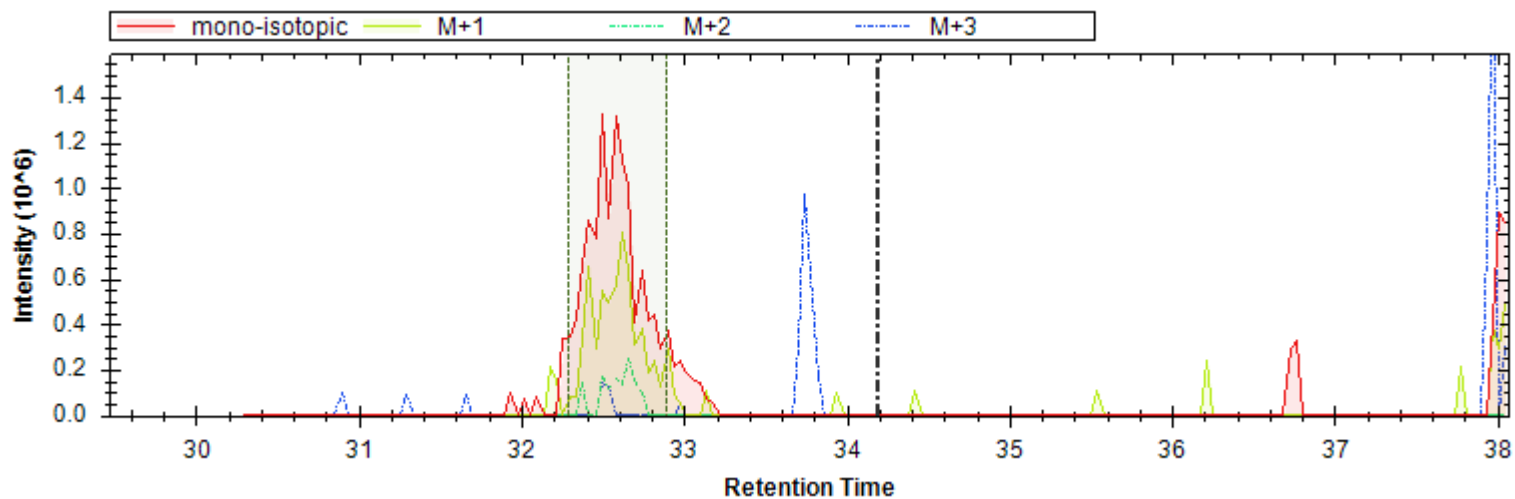

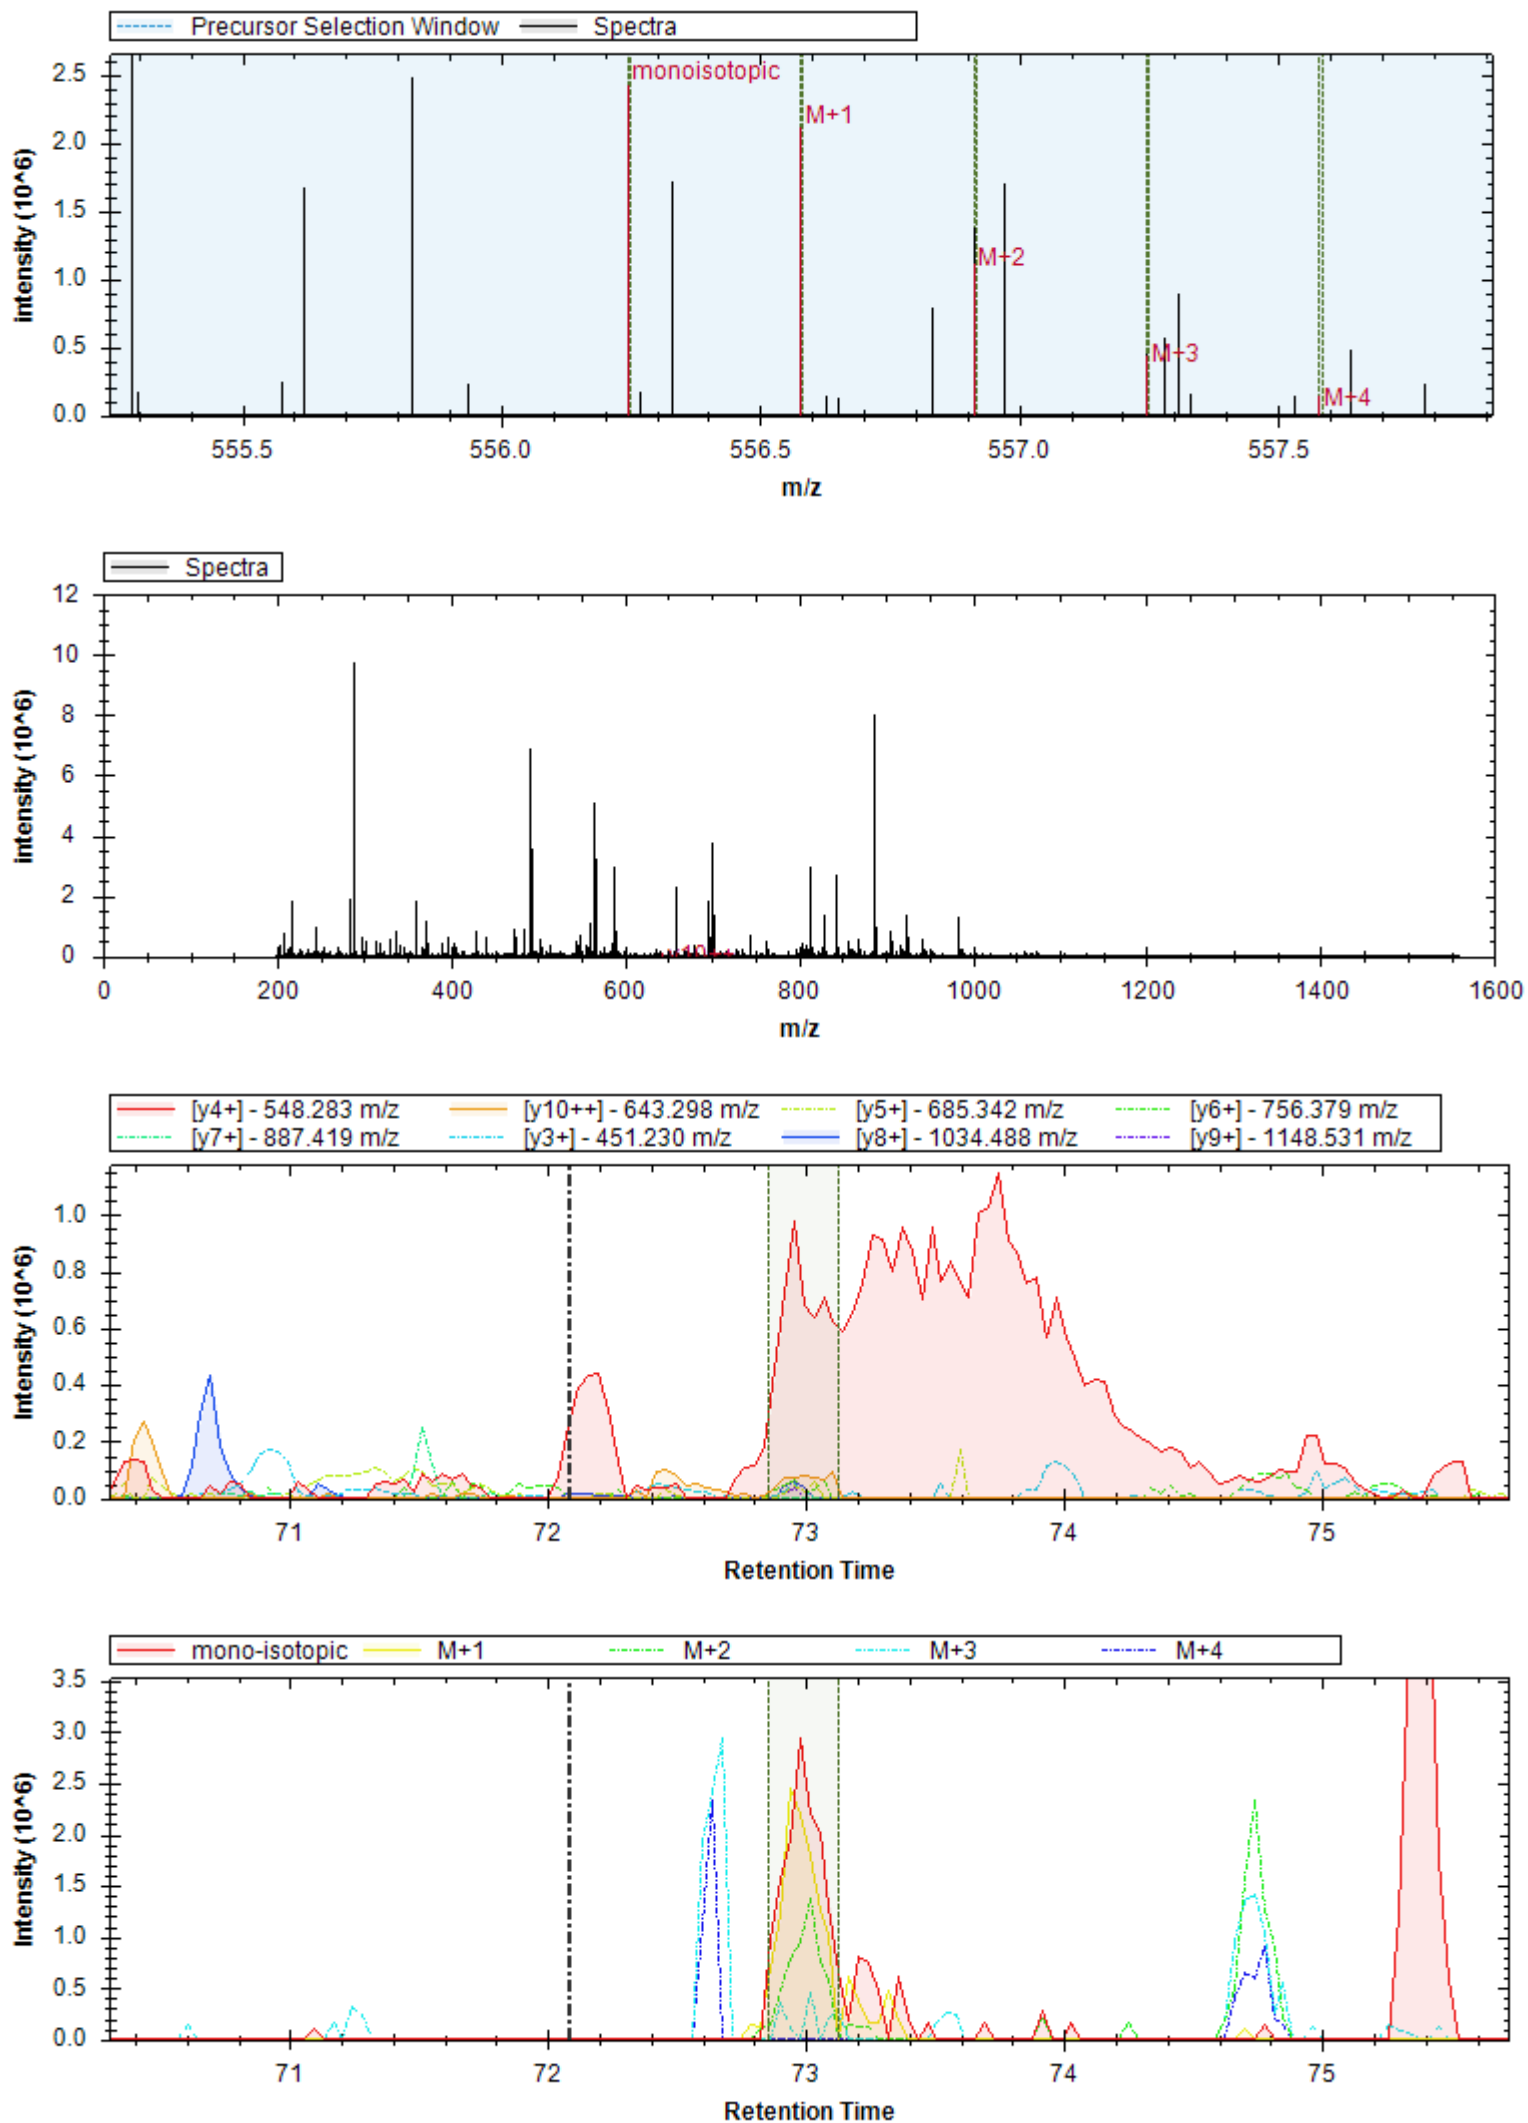

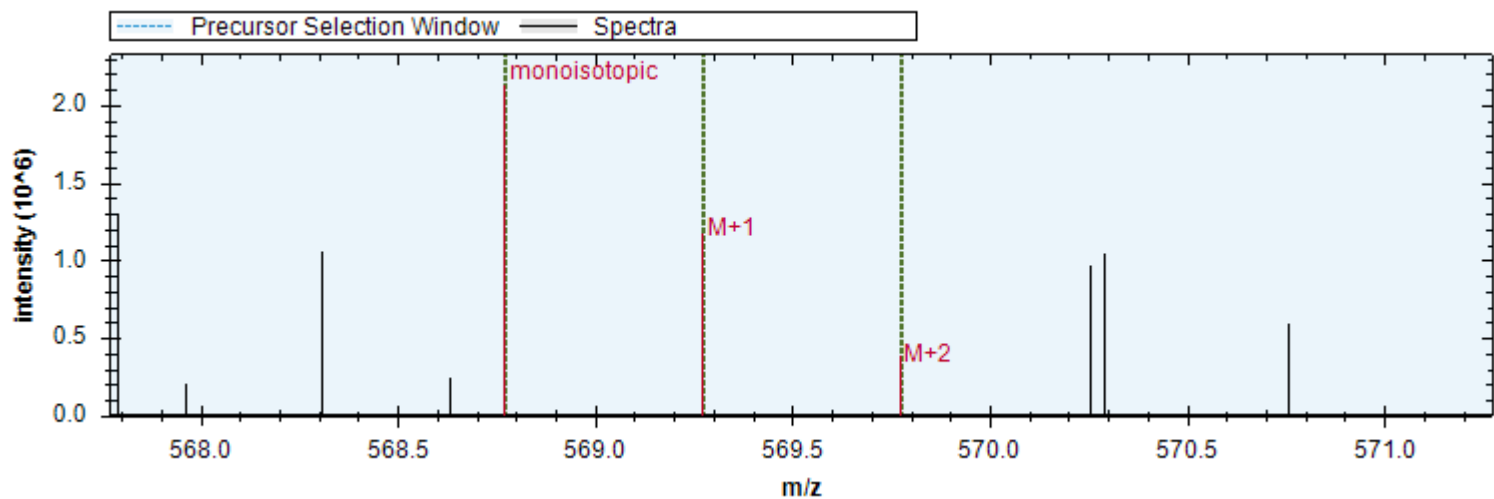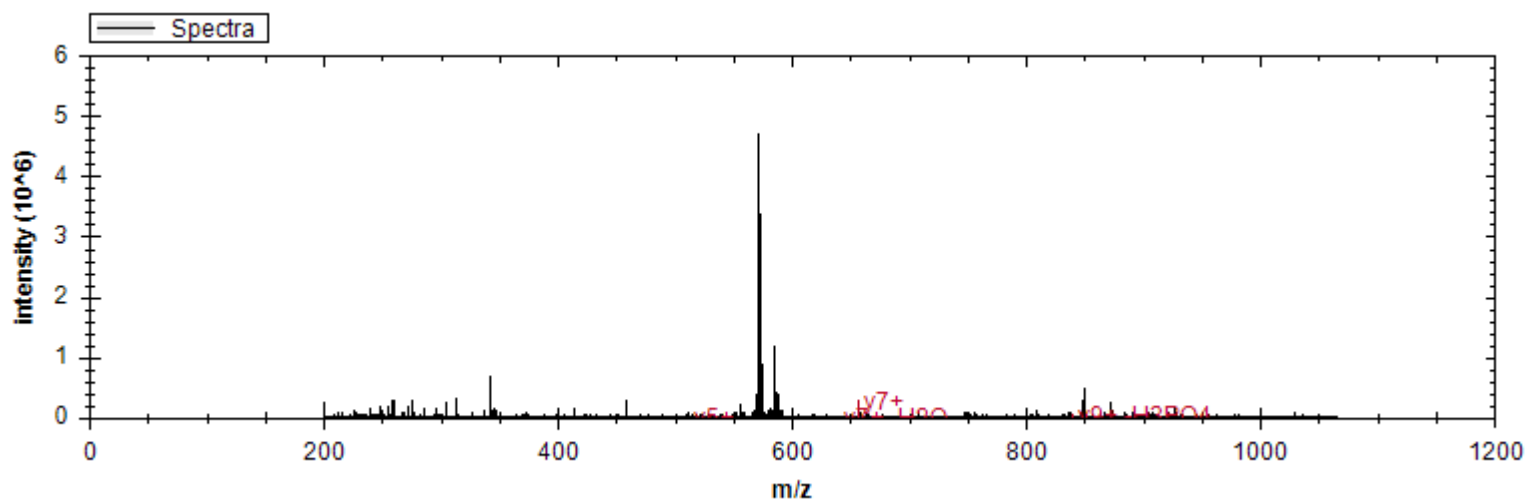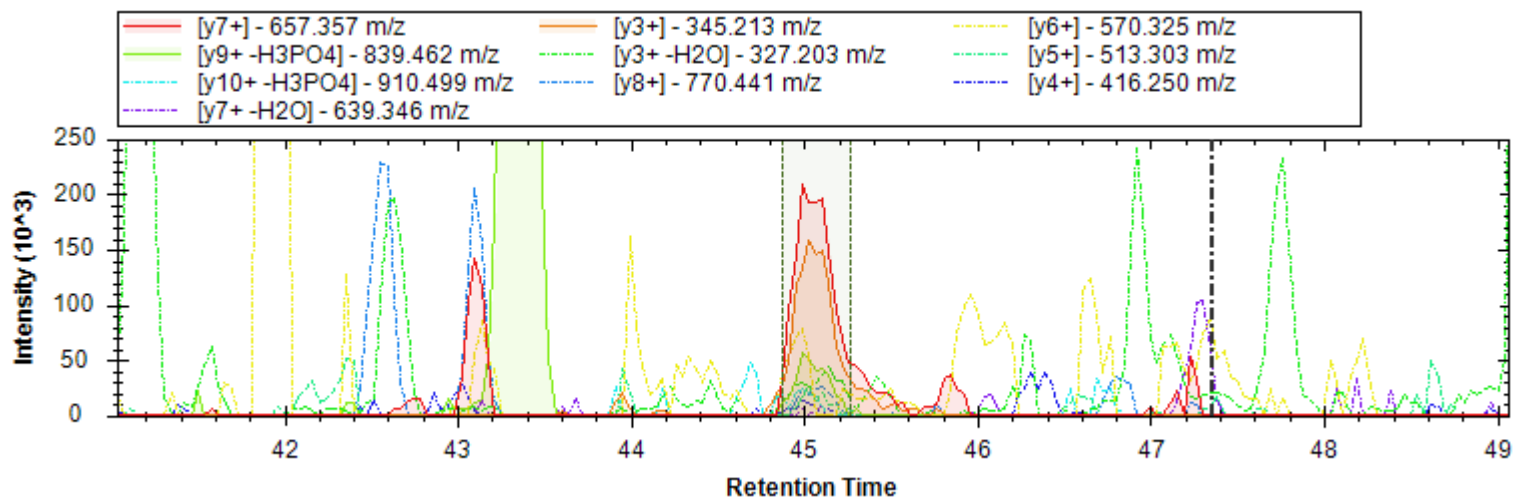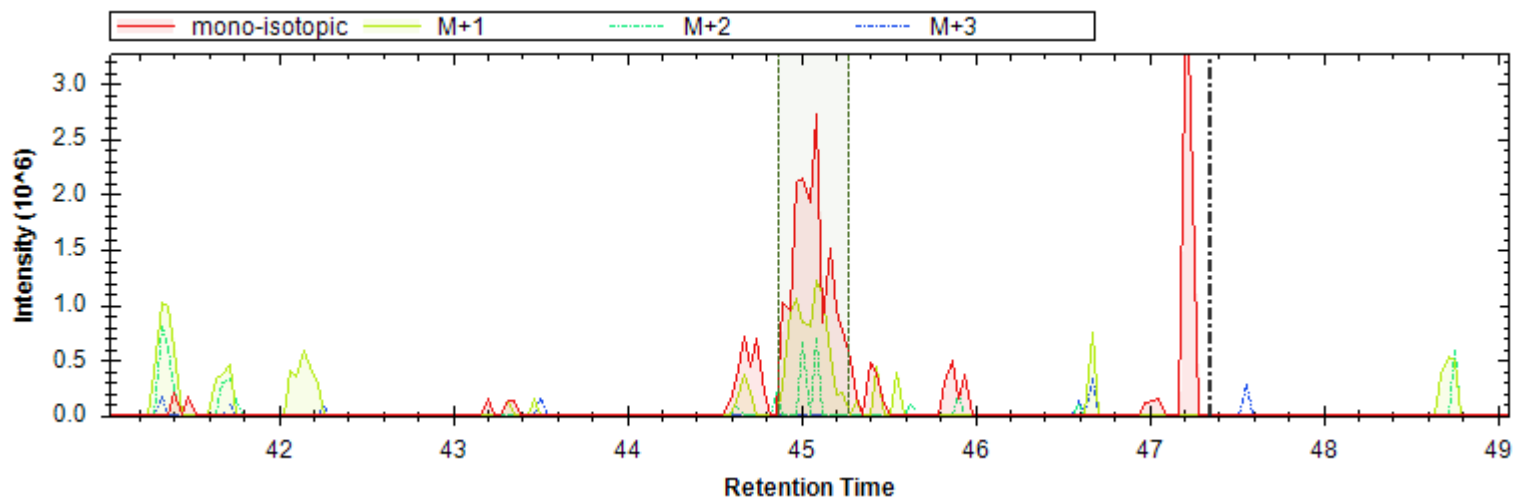

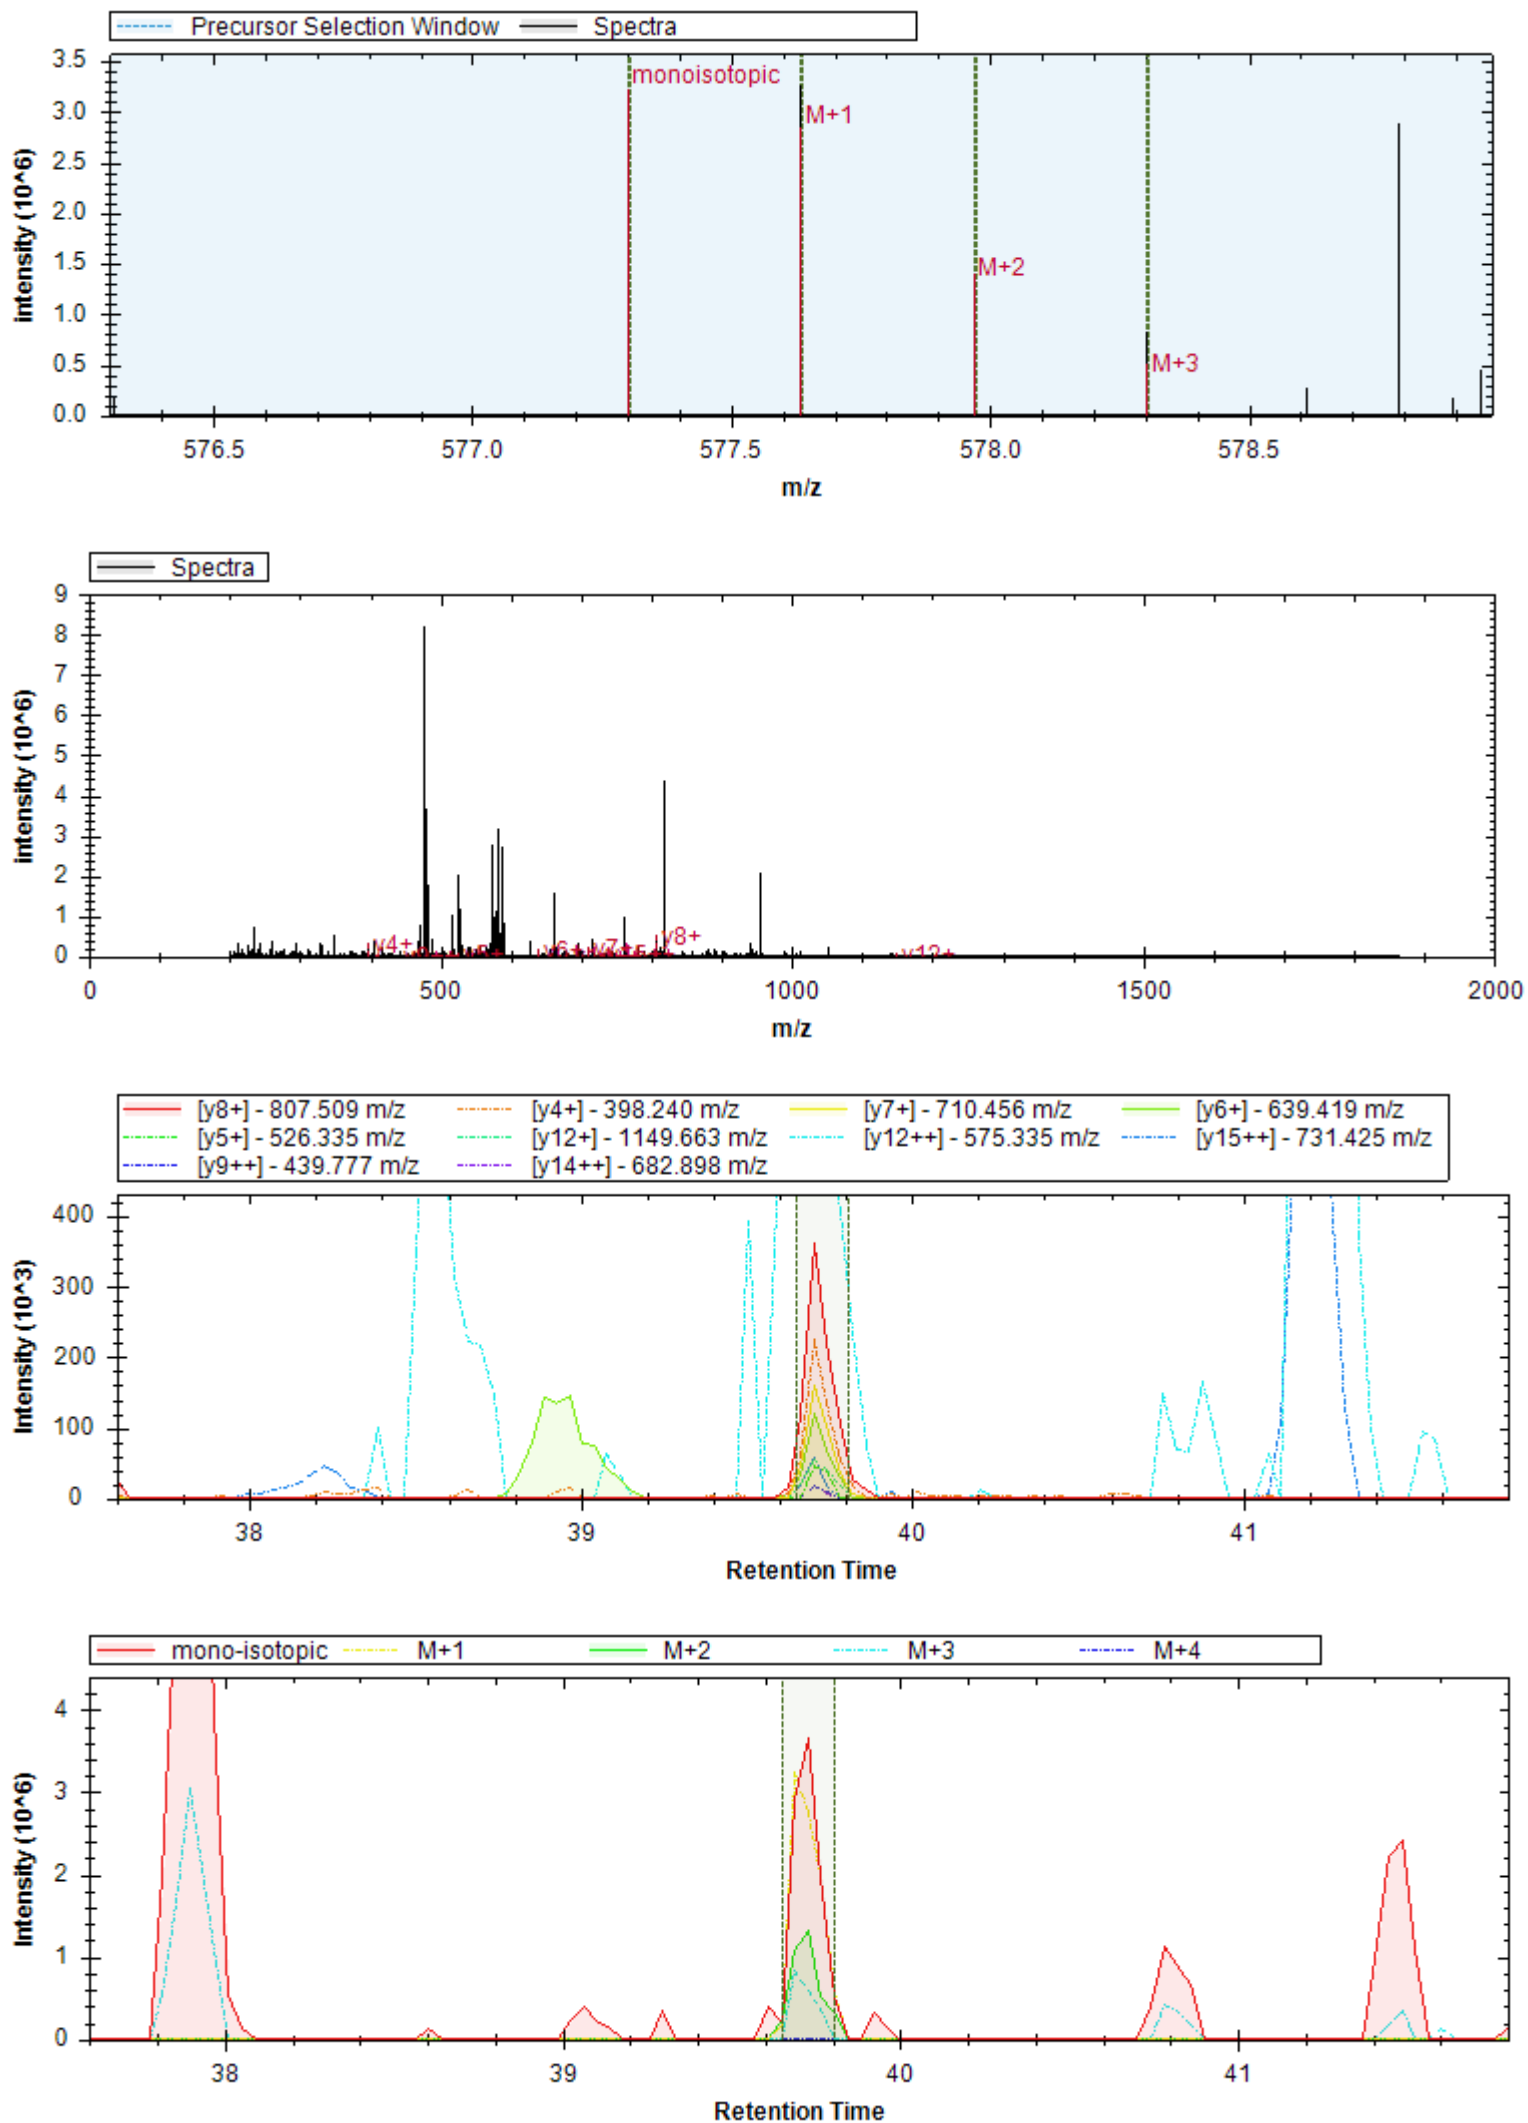

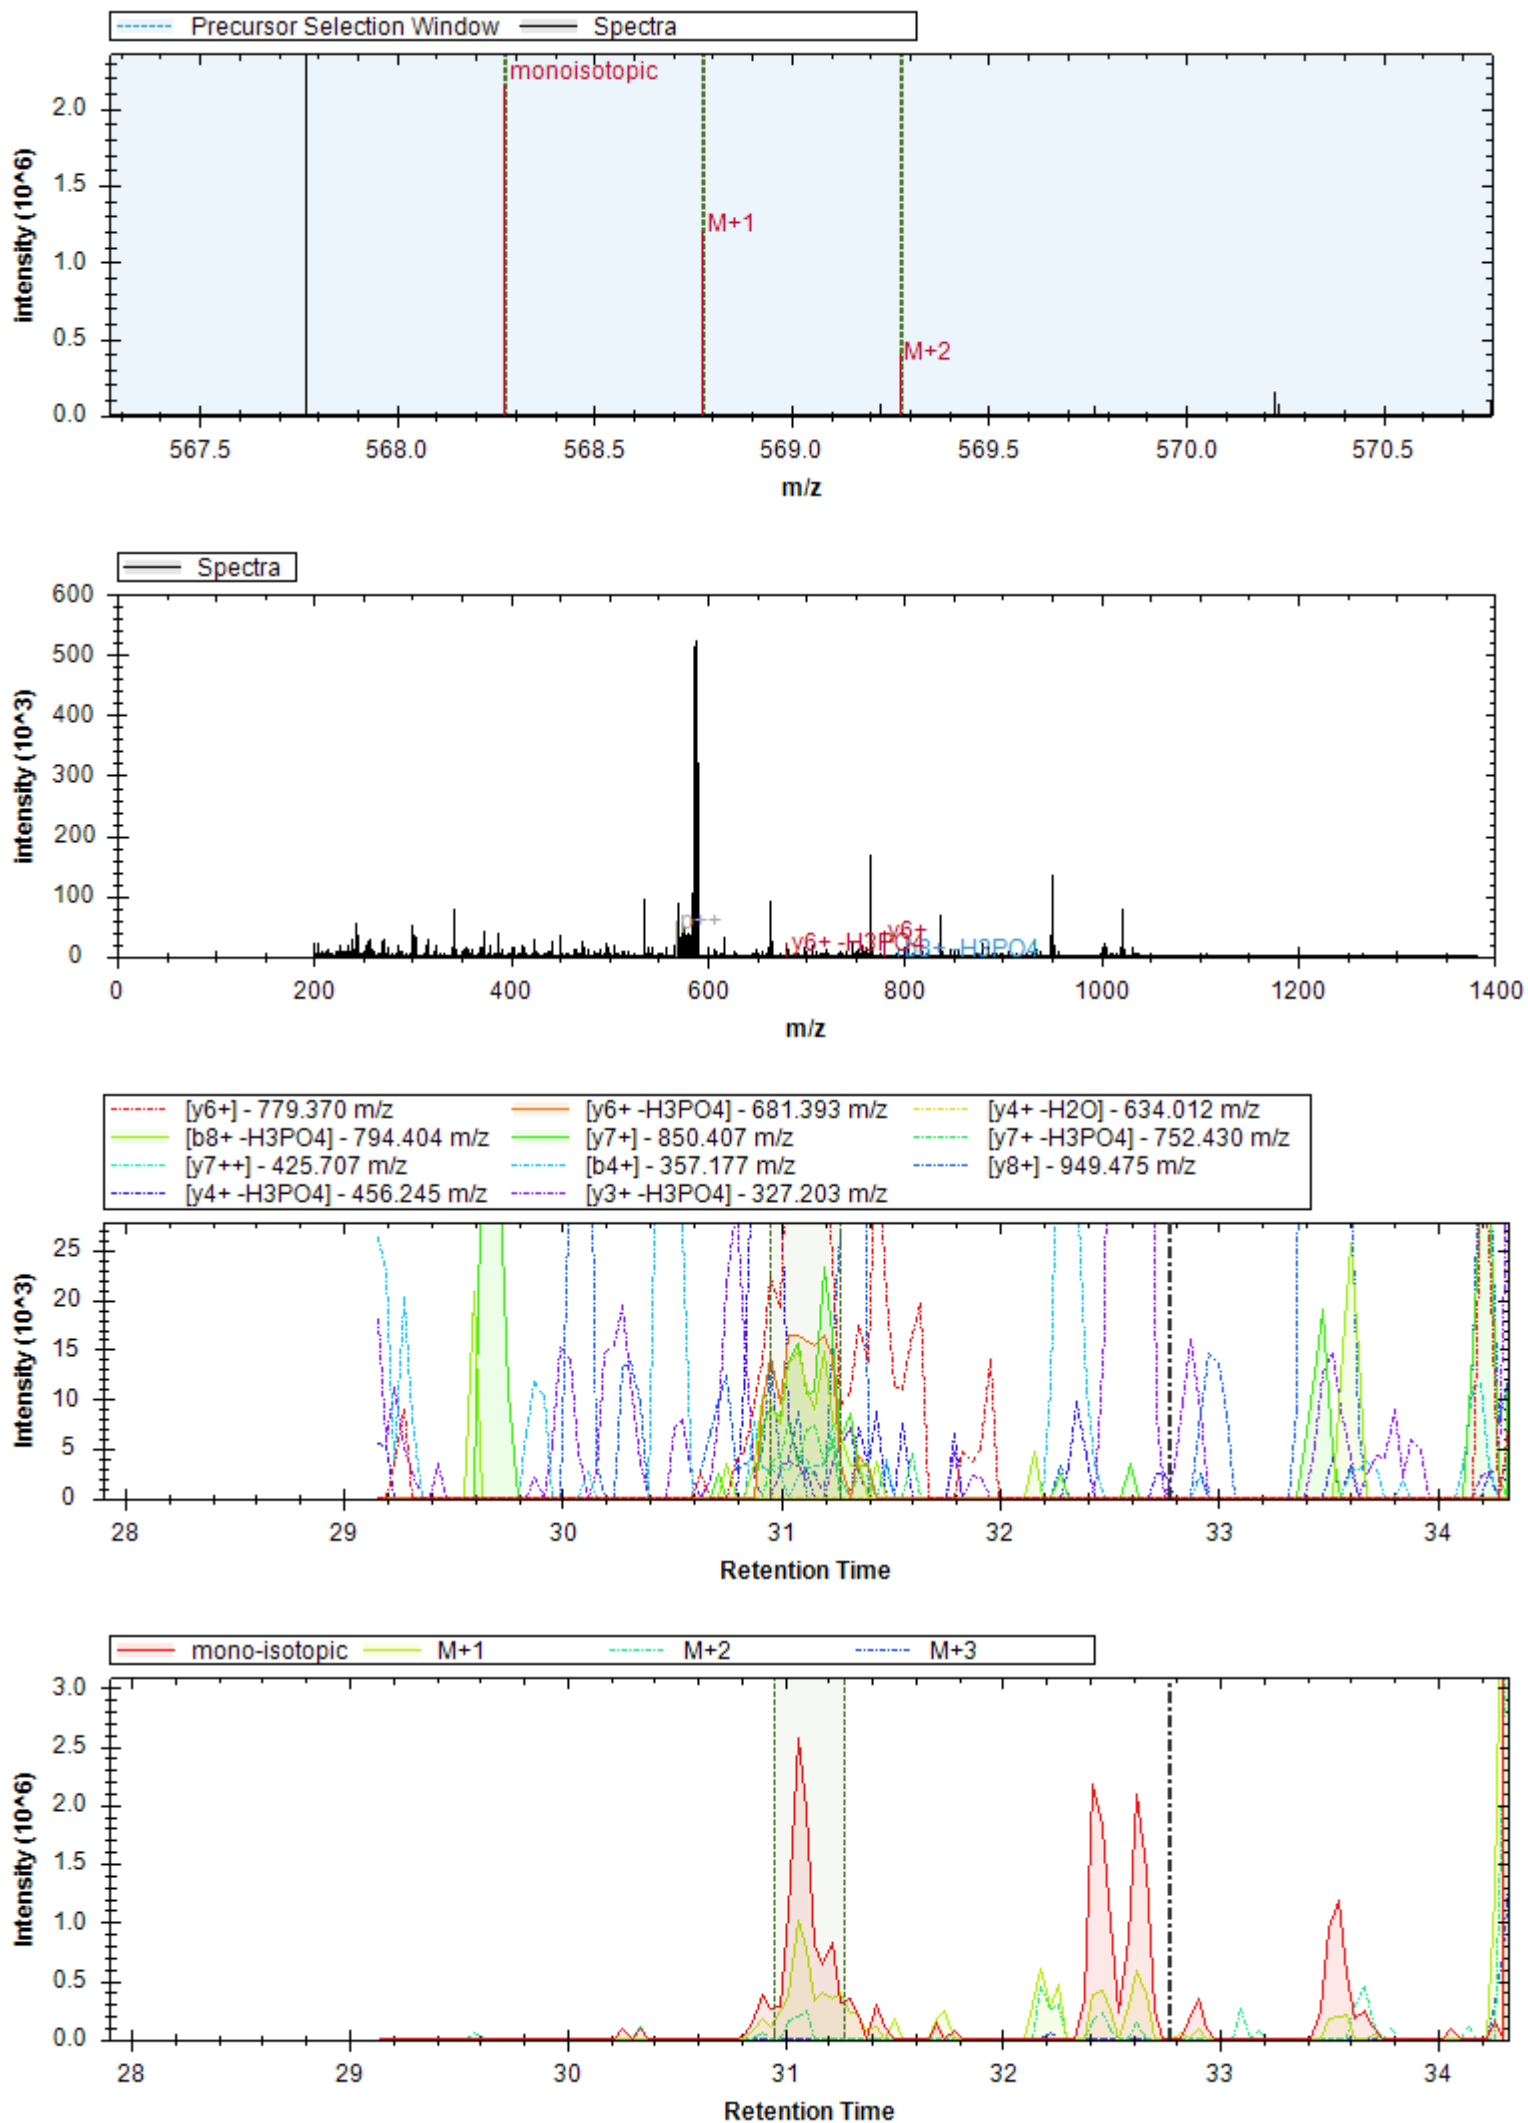



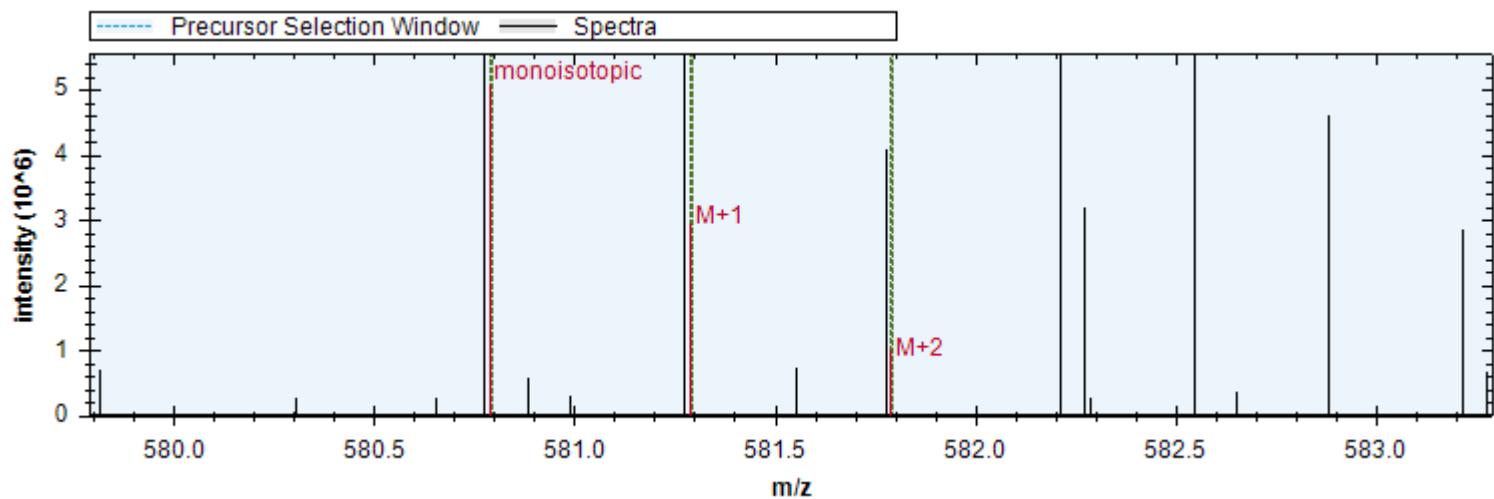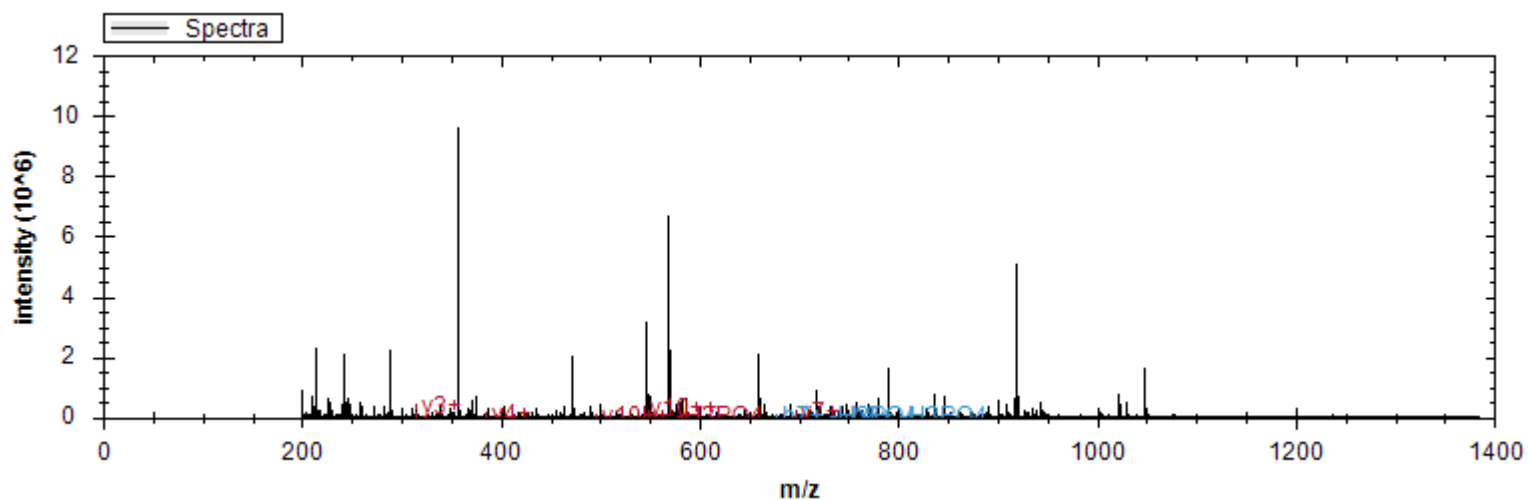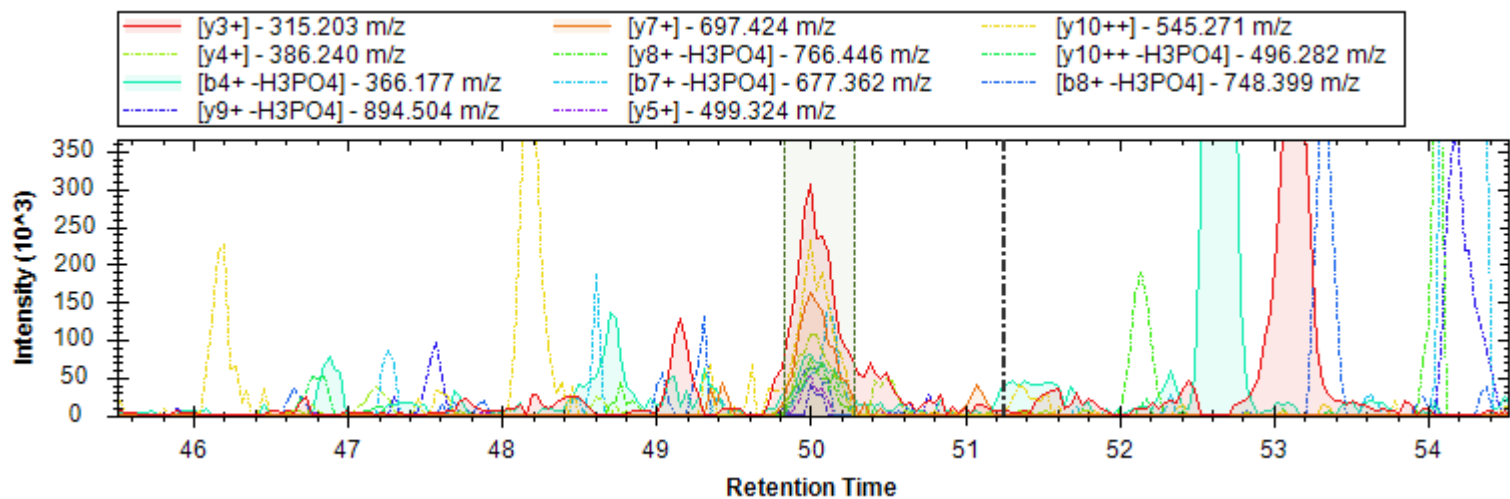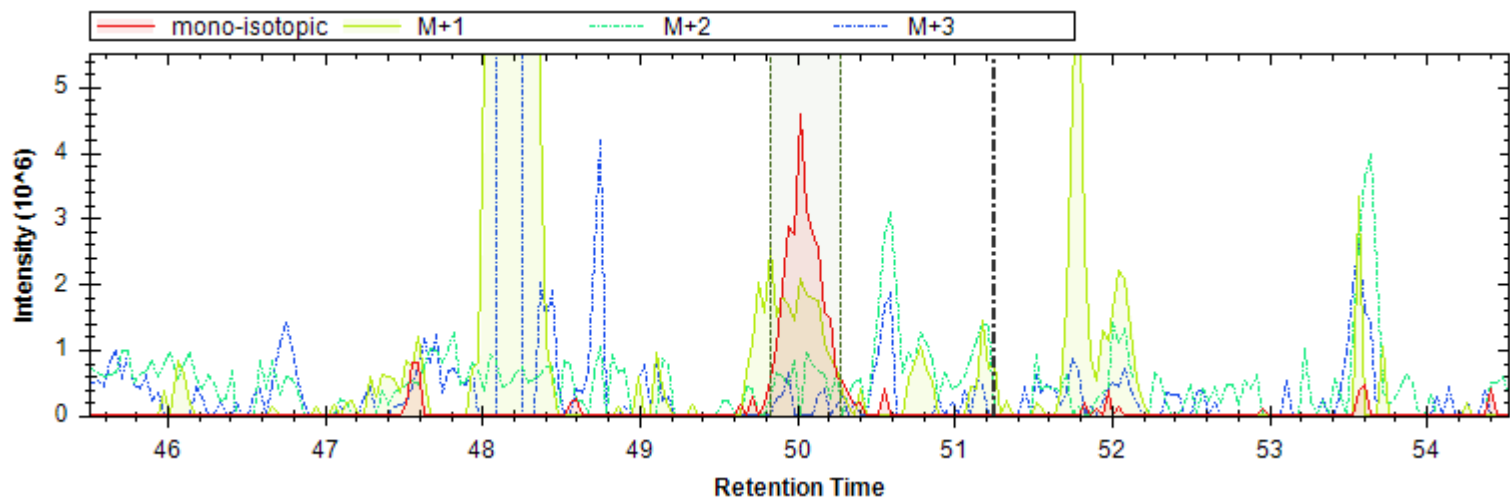

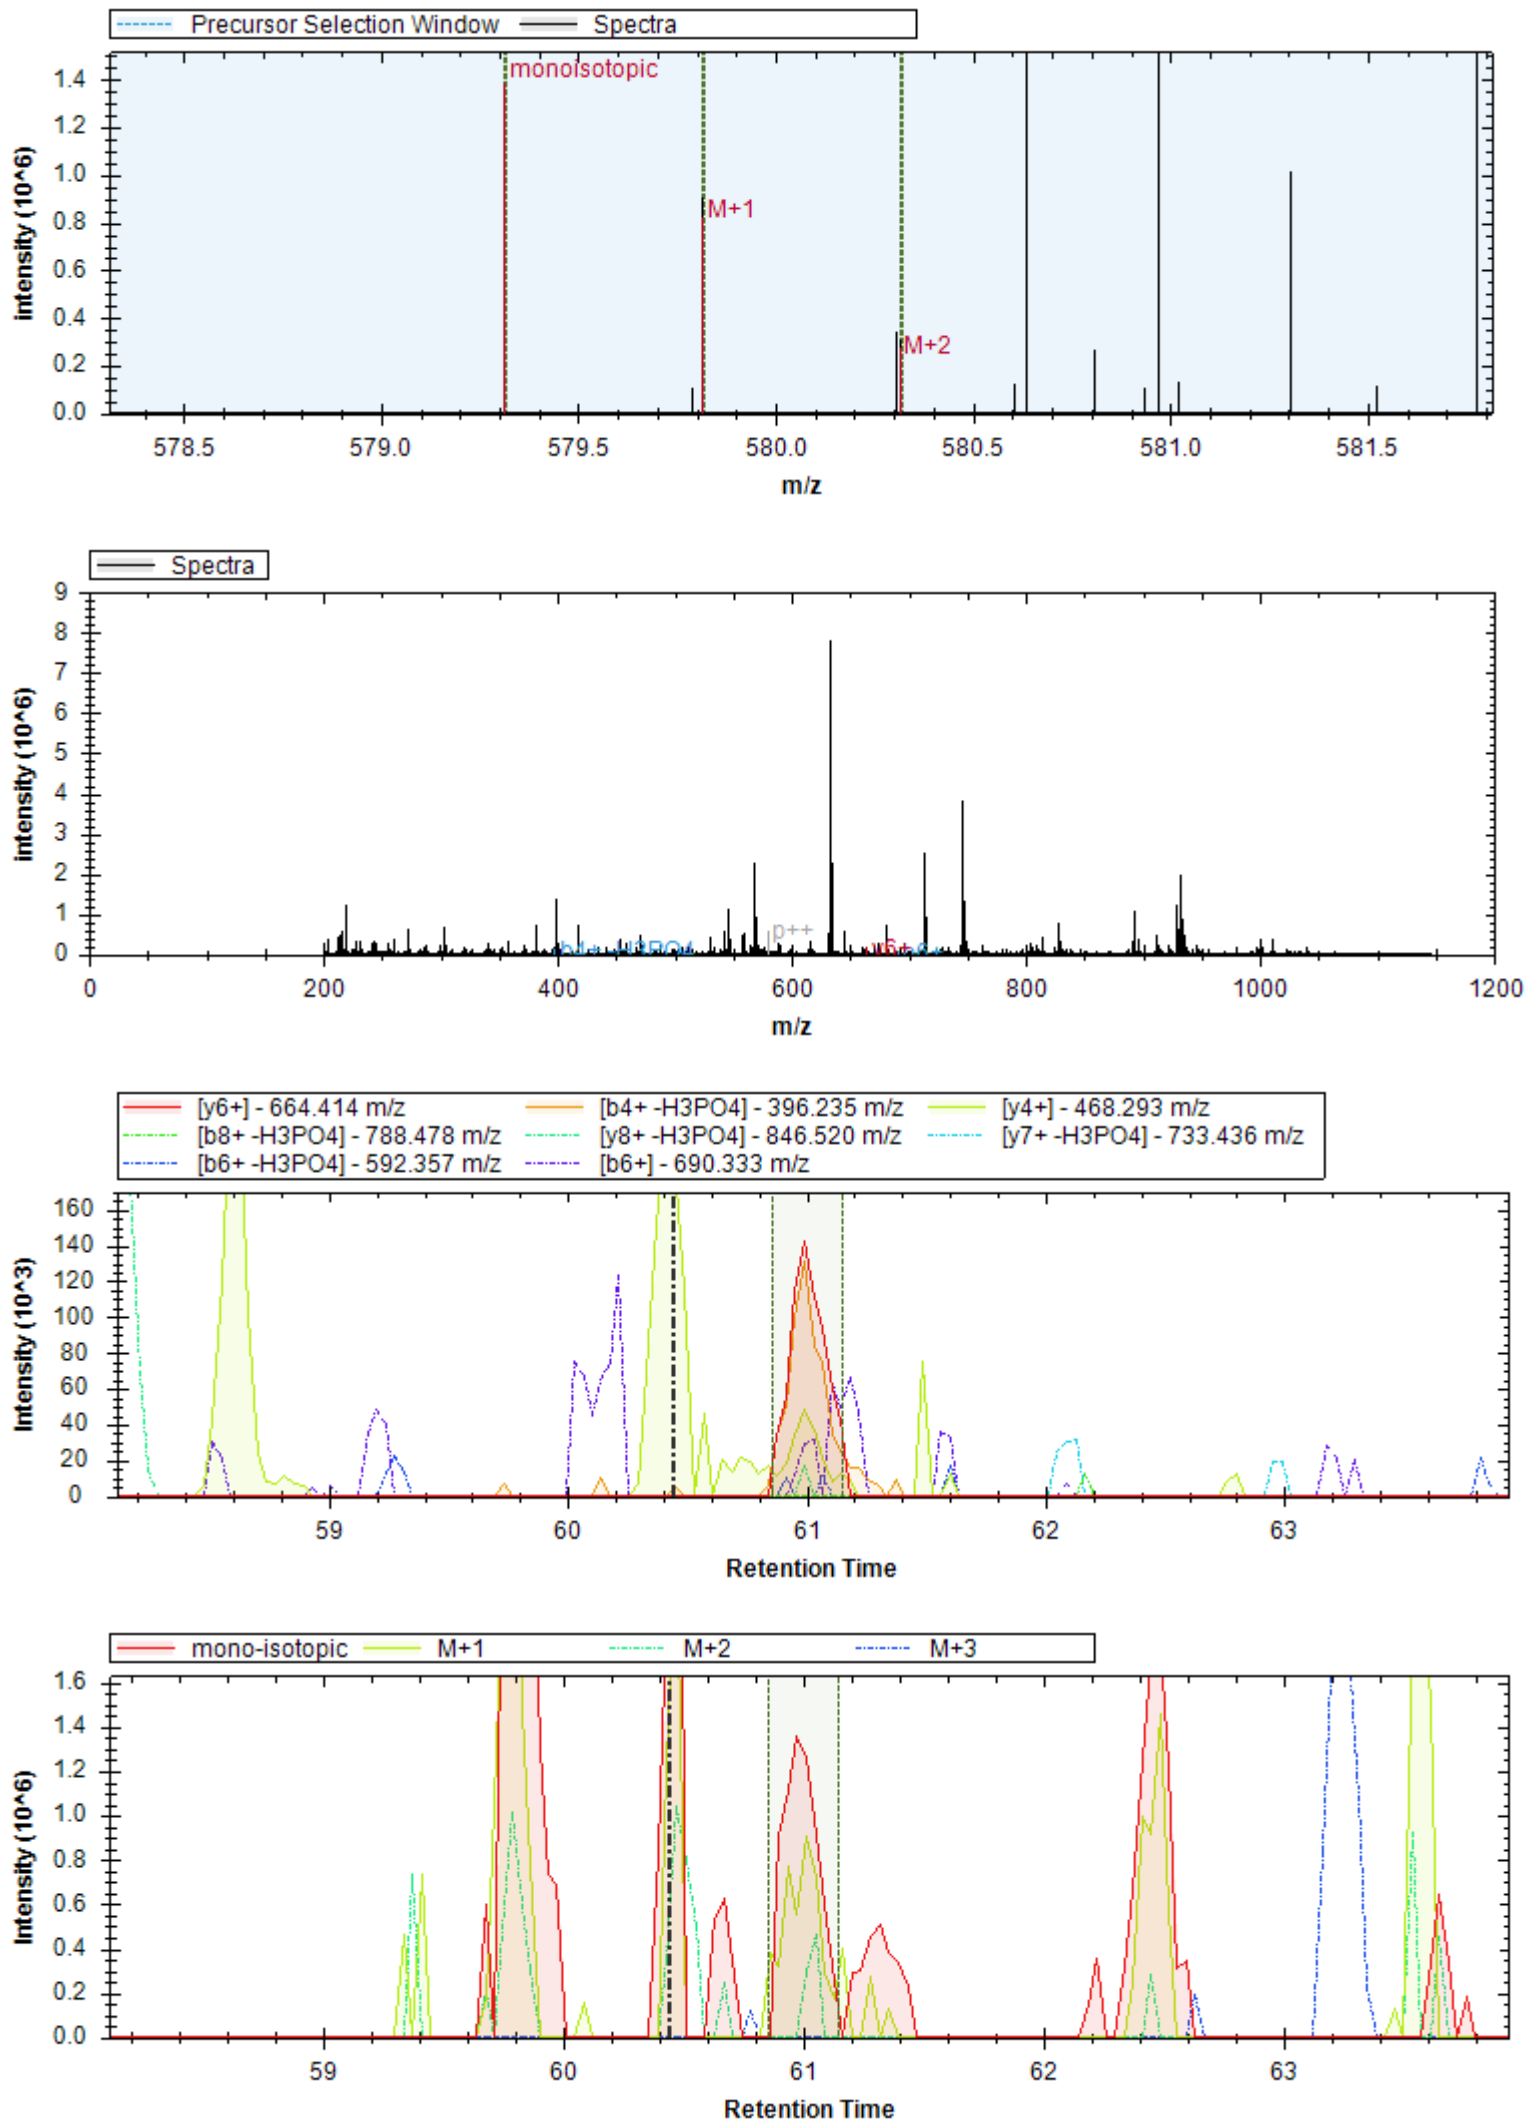

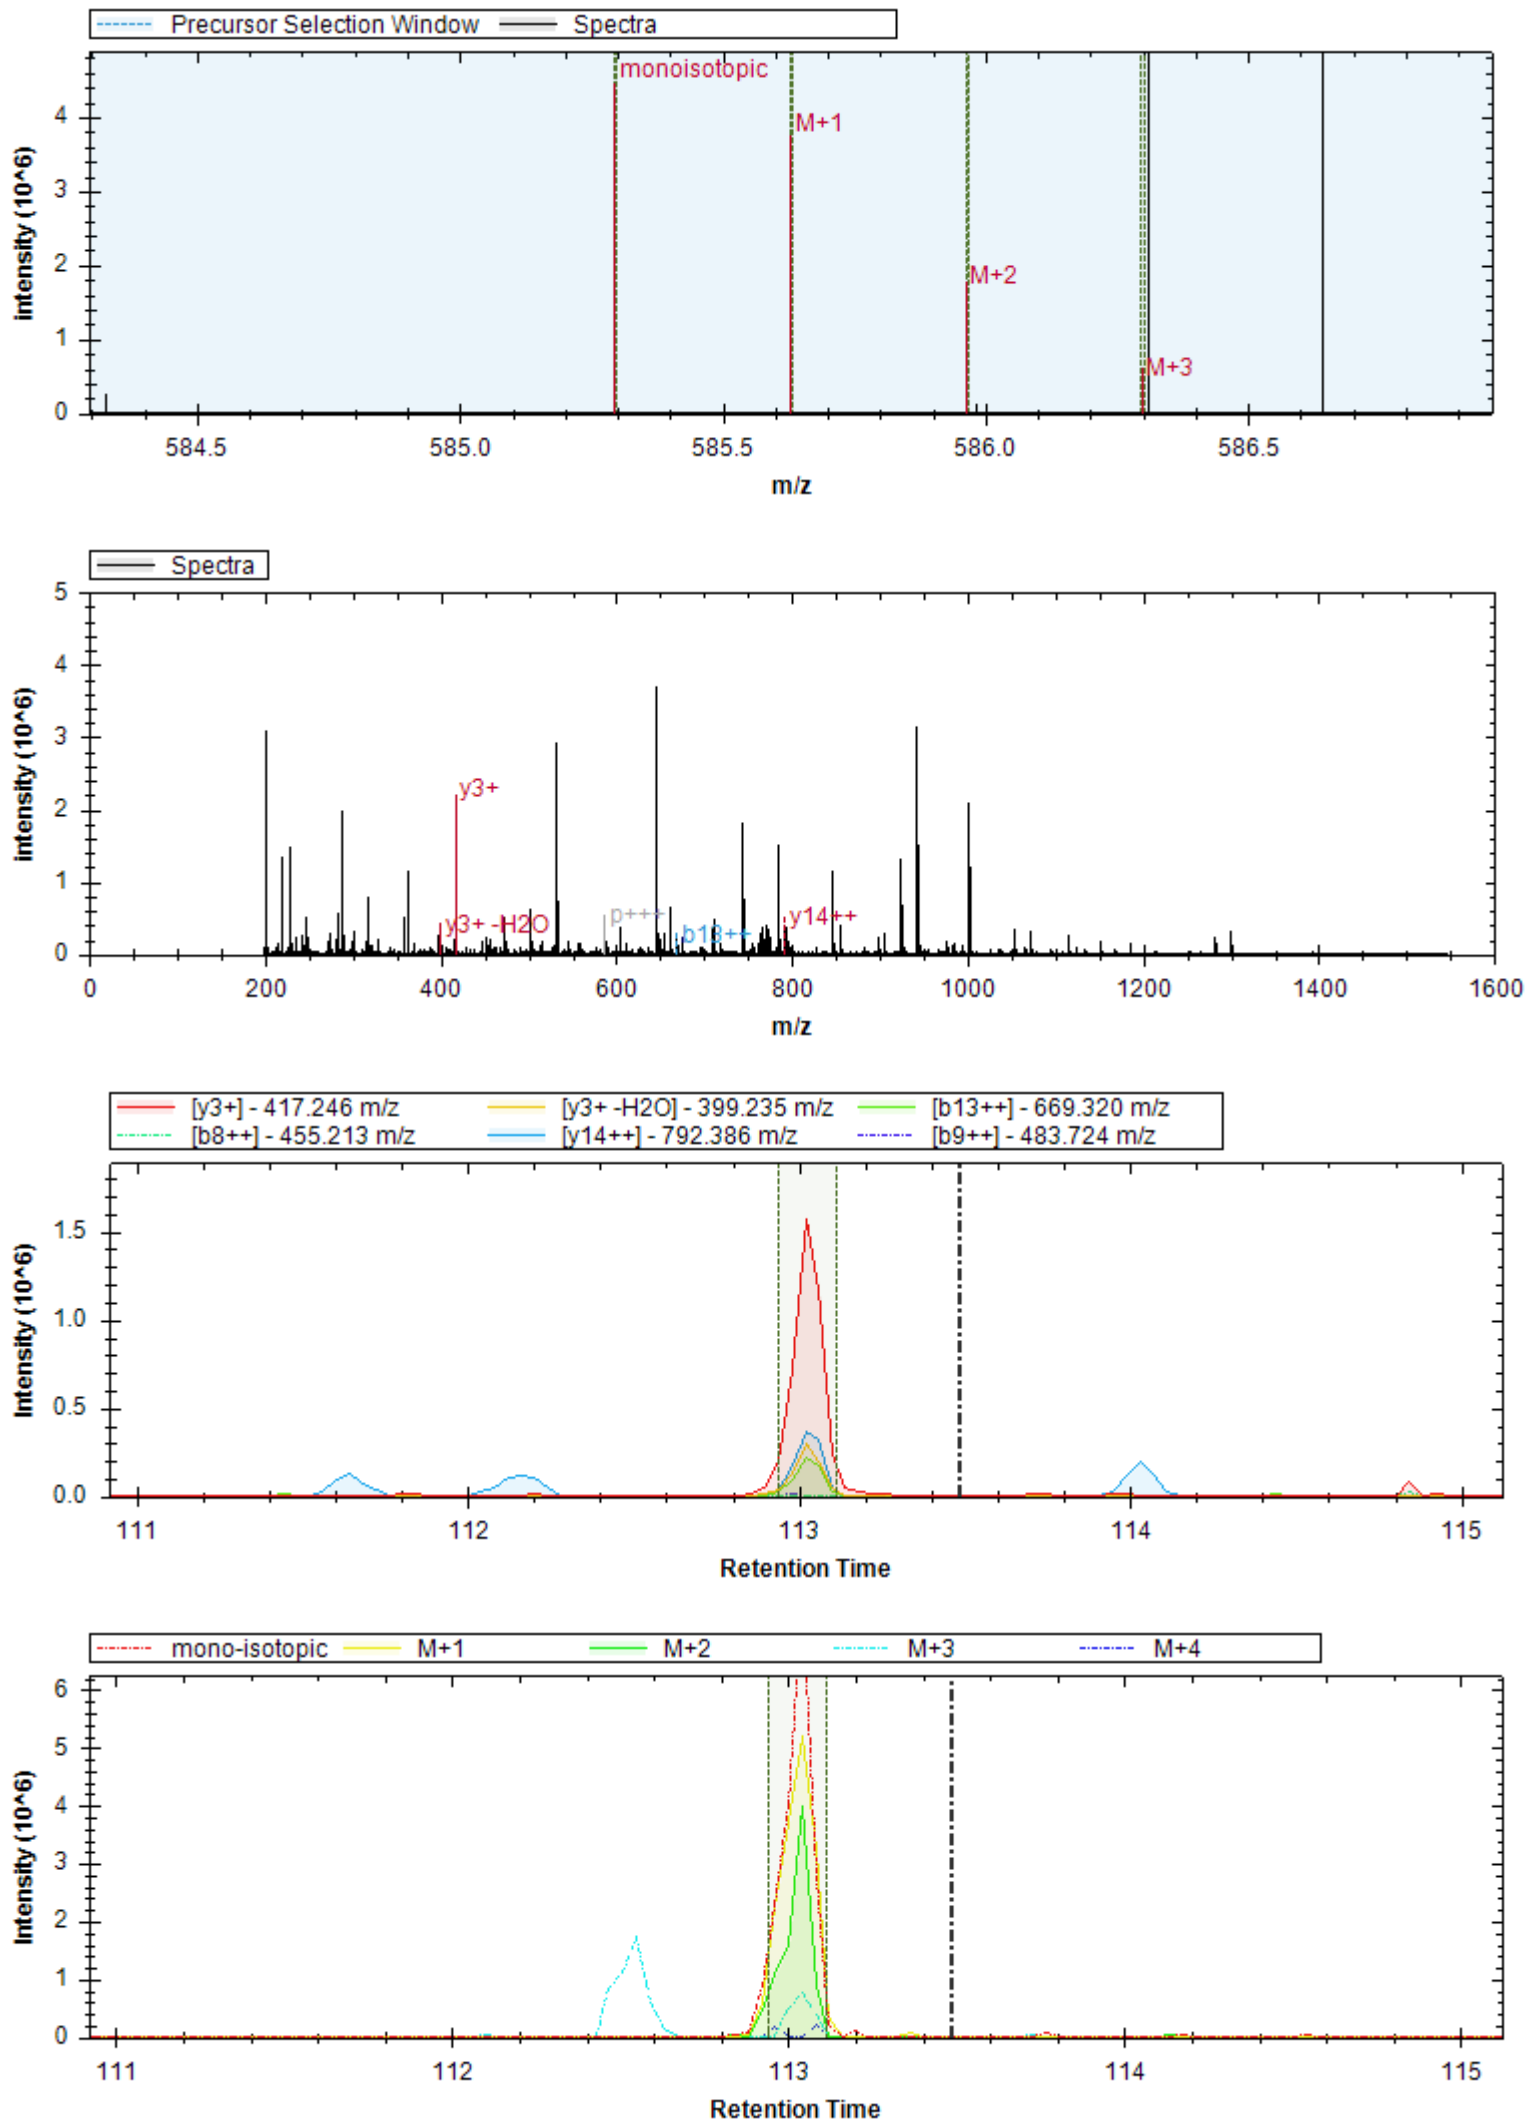

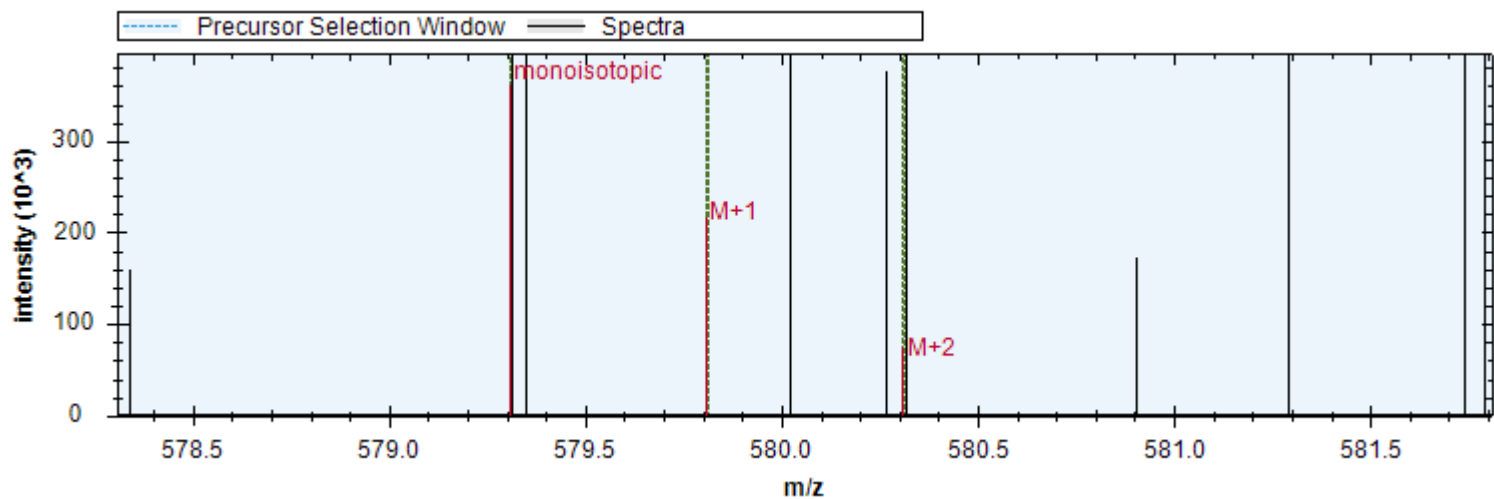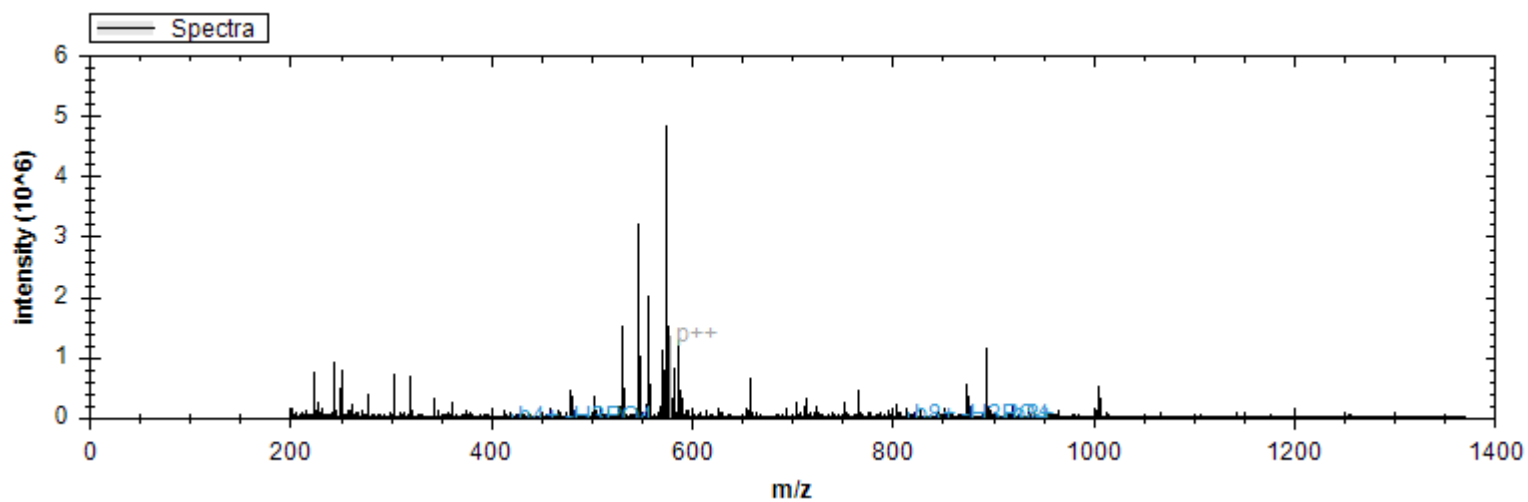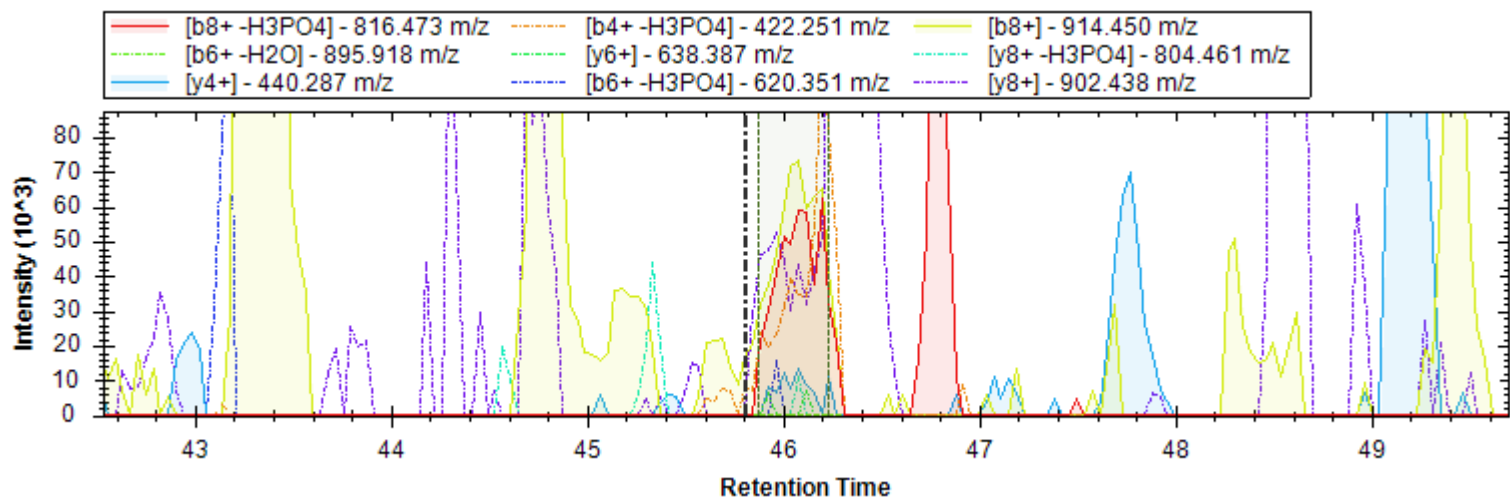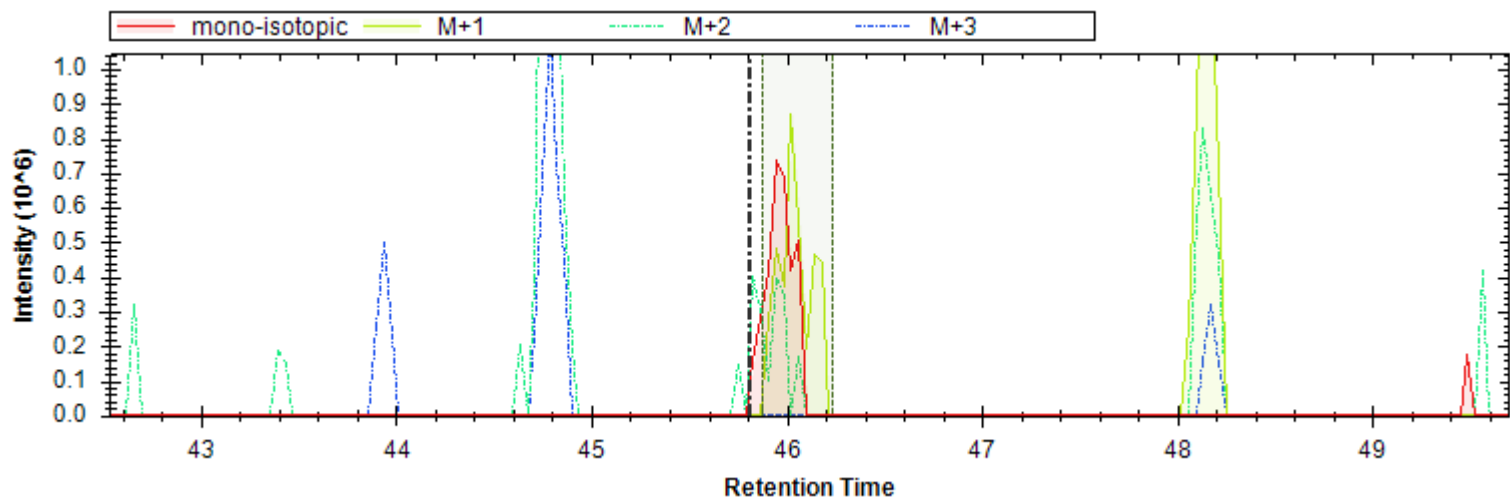

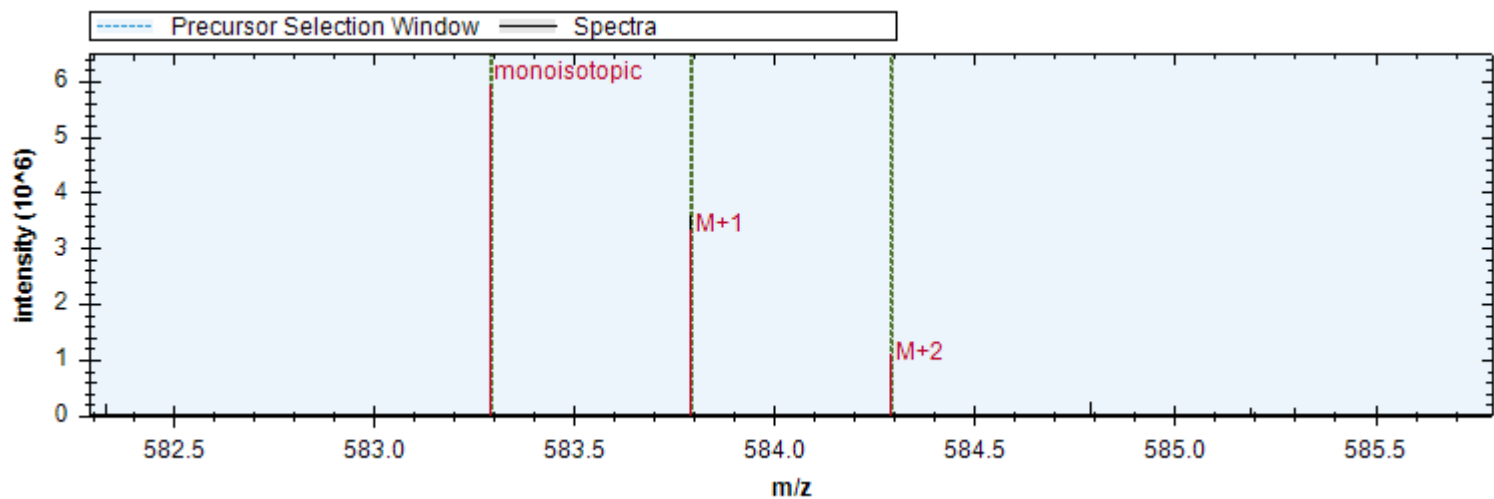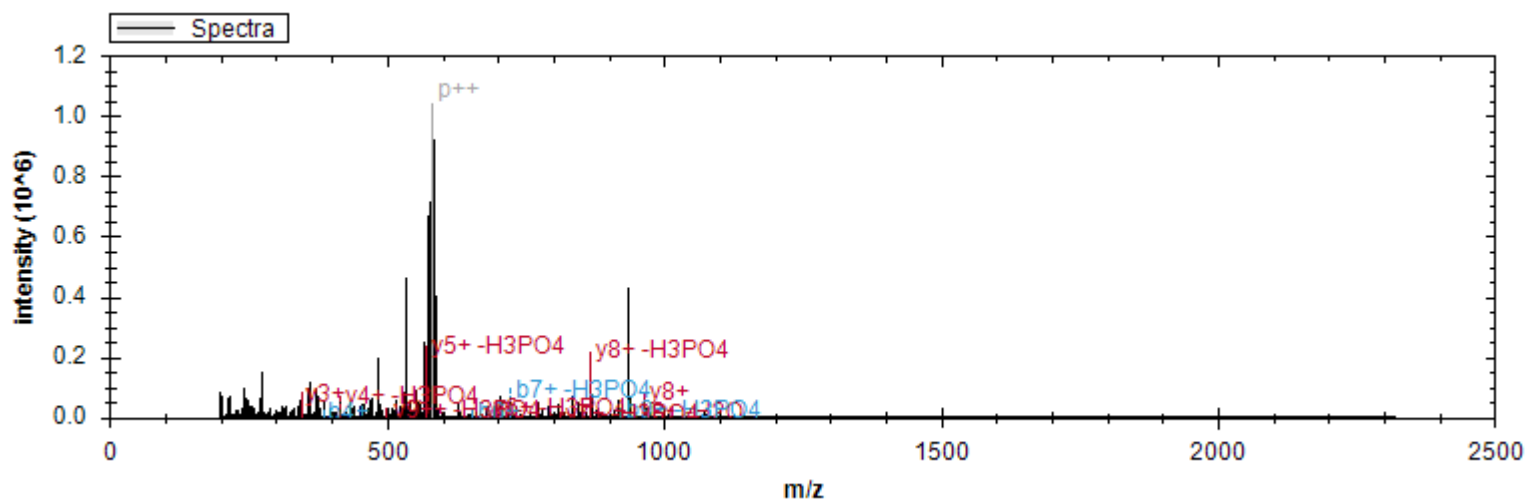

|                             |                            |                            |
|-----------------------------|----------------------------|----------------------------|
| [y8+ -H3PO4] - 868.500 m/z  | [b7+ -H3PO4] - 723.390 m/z | [y3+] - 345.213 m/z        |
| [y8+] - 966.477 m/z         | [y6+ -H3PO4] - 683.420 m/z | [y5+ -H3PO4] - 570.336 m/z |
| [y9++ -H3PO4] - 498.783 m/z | [b4+] - 385.183 m/z        | [b6+] - 654.368 m/z        |
| [y5+] - 668.313 m/z         | [b9+ -H3PO4] - 921.490 m/z | [y8+ -H2O] - 948.466 m/z   |
| [y7+ -H3PO4] - 811.479 m/z  | [b9+ -NH3] - 1100.240 m/z  | [y4+ -H3PO4] - 414.235 m/z |

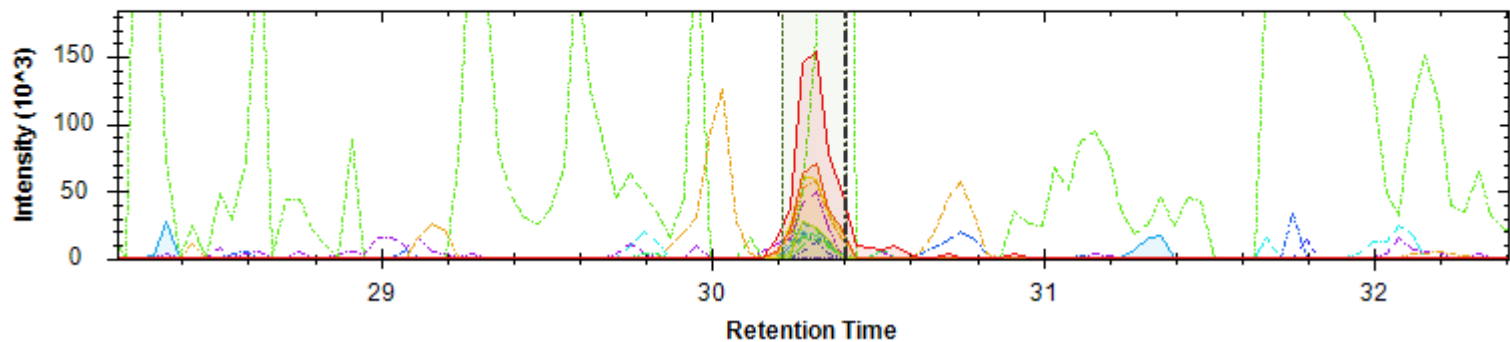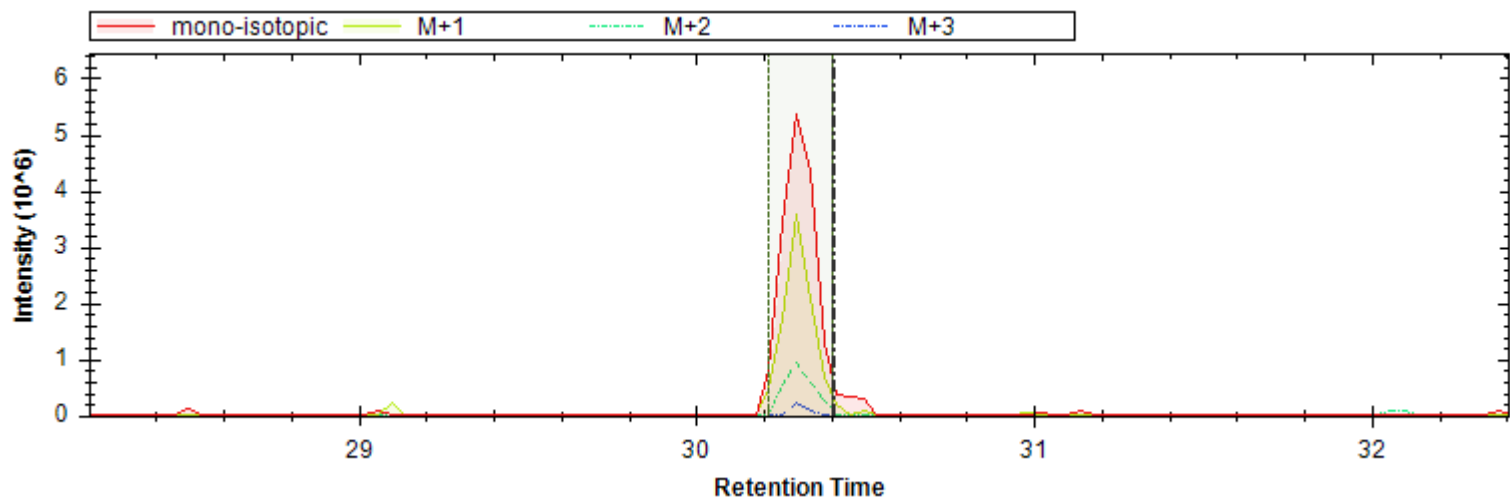

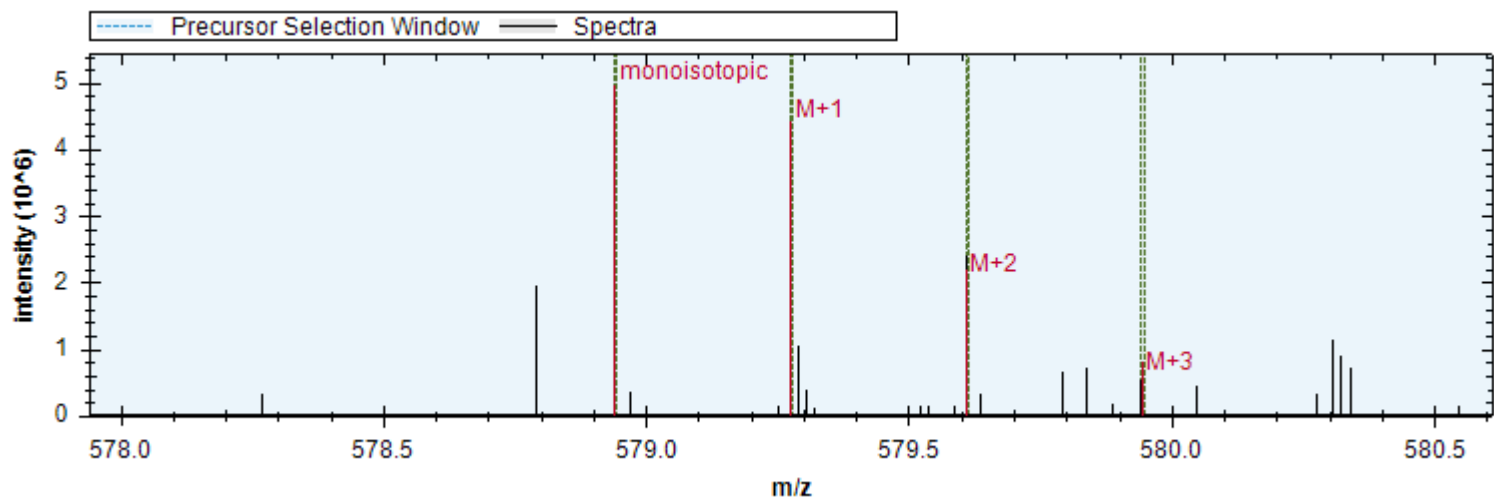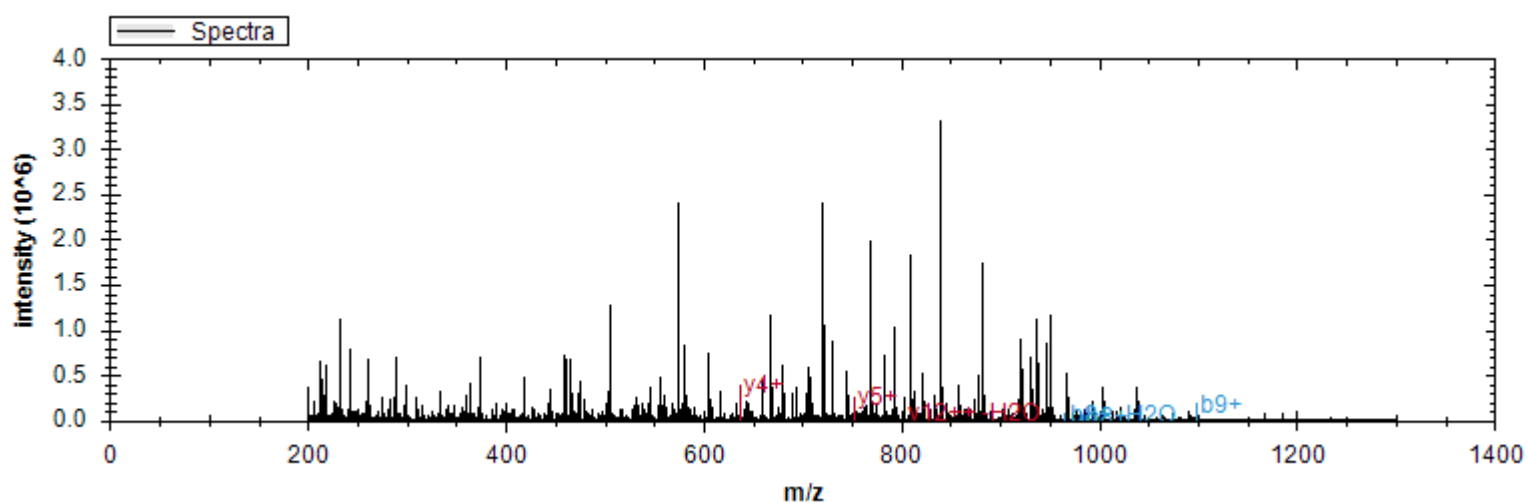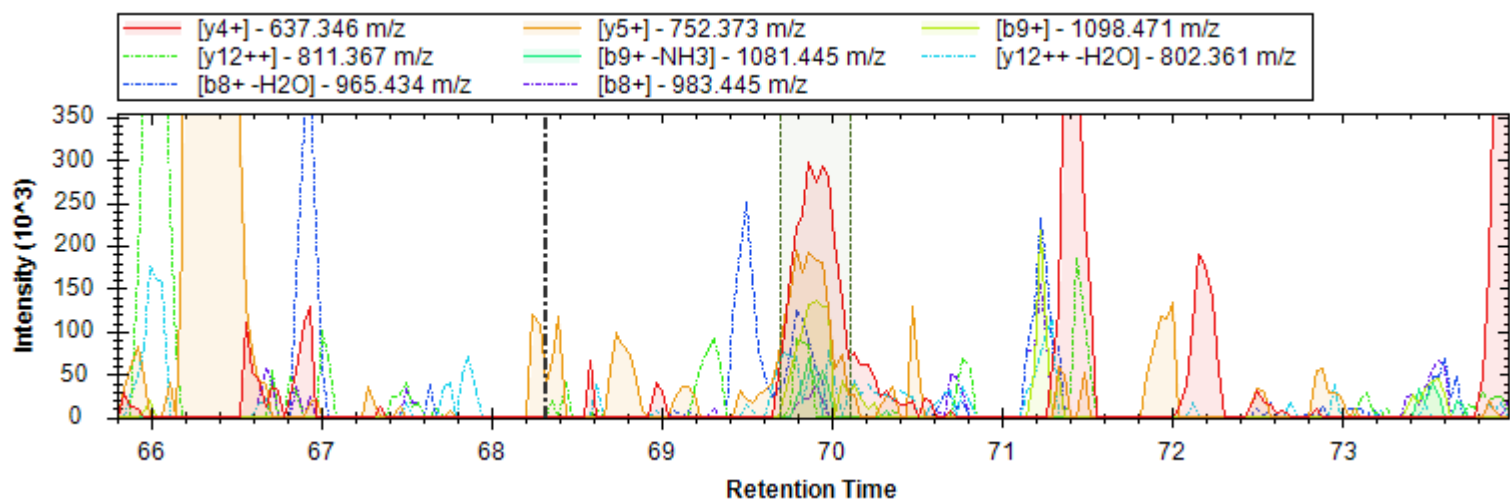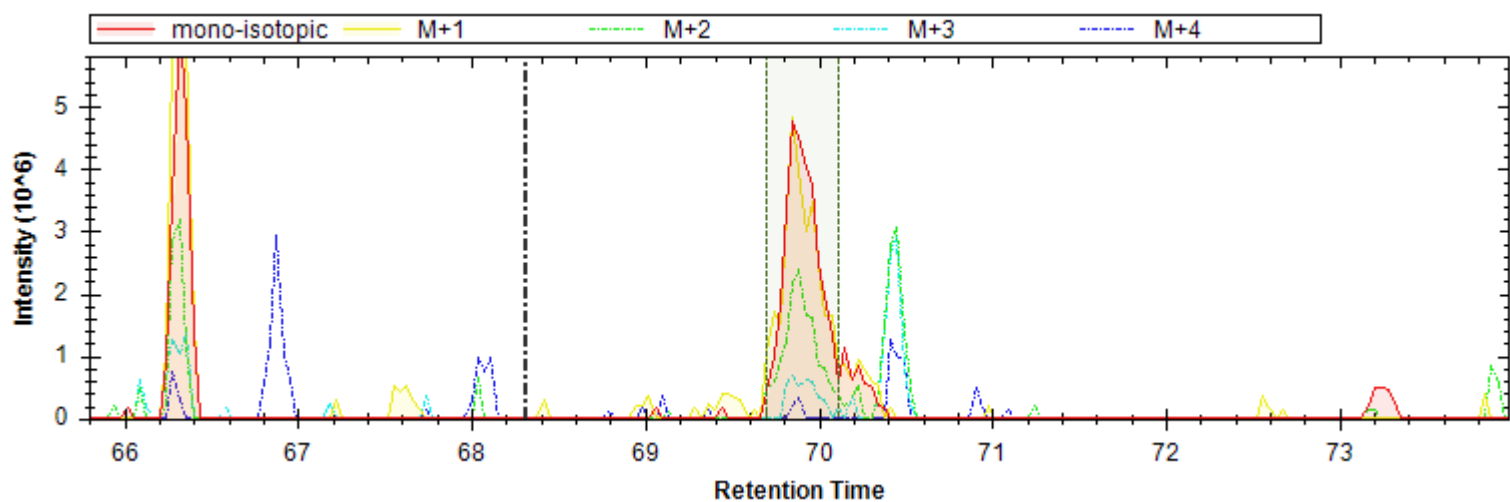

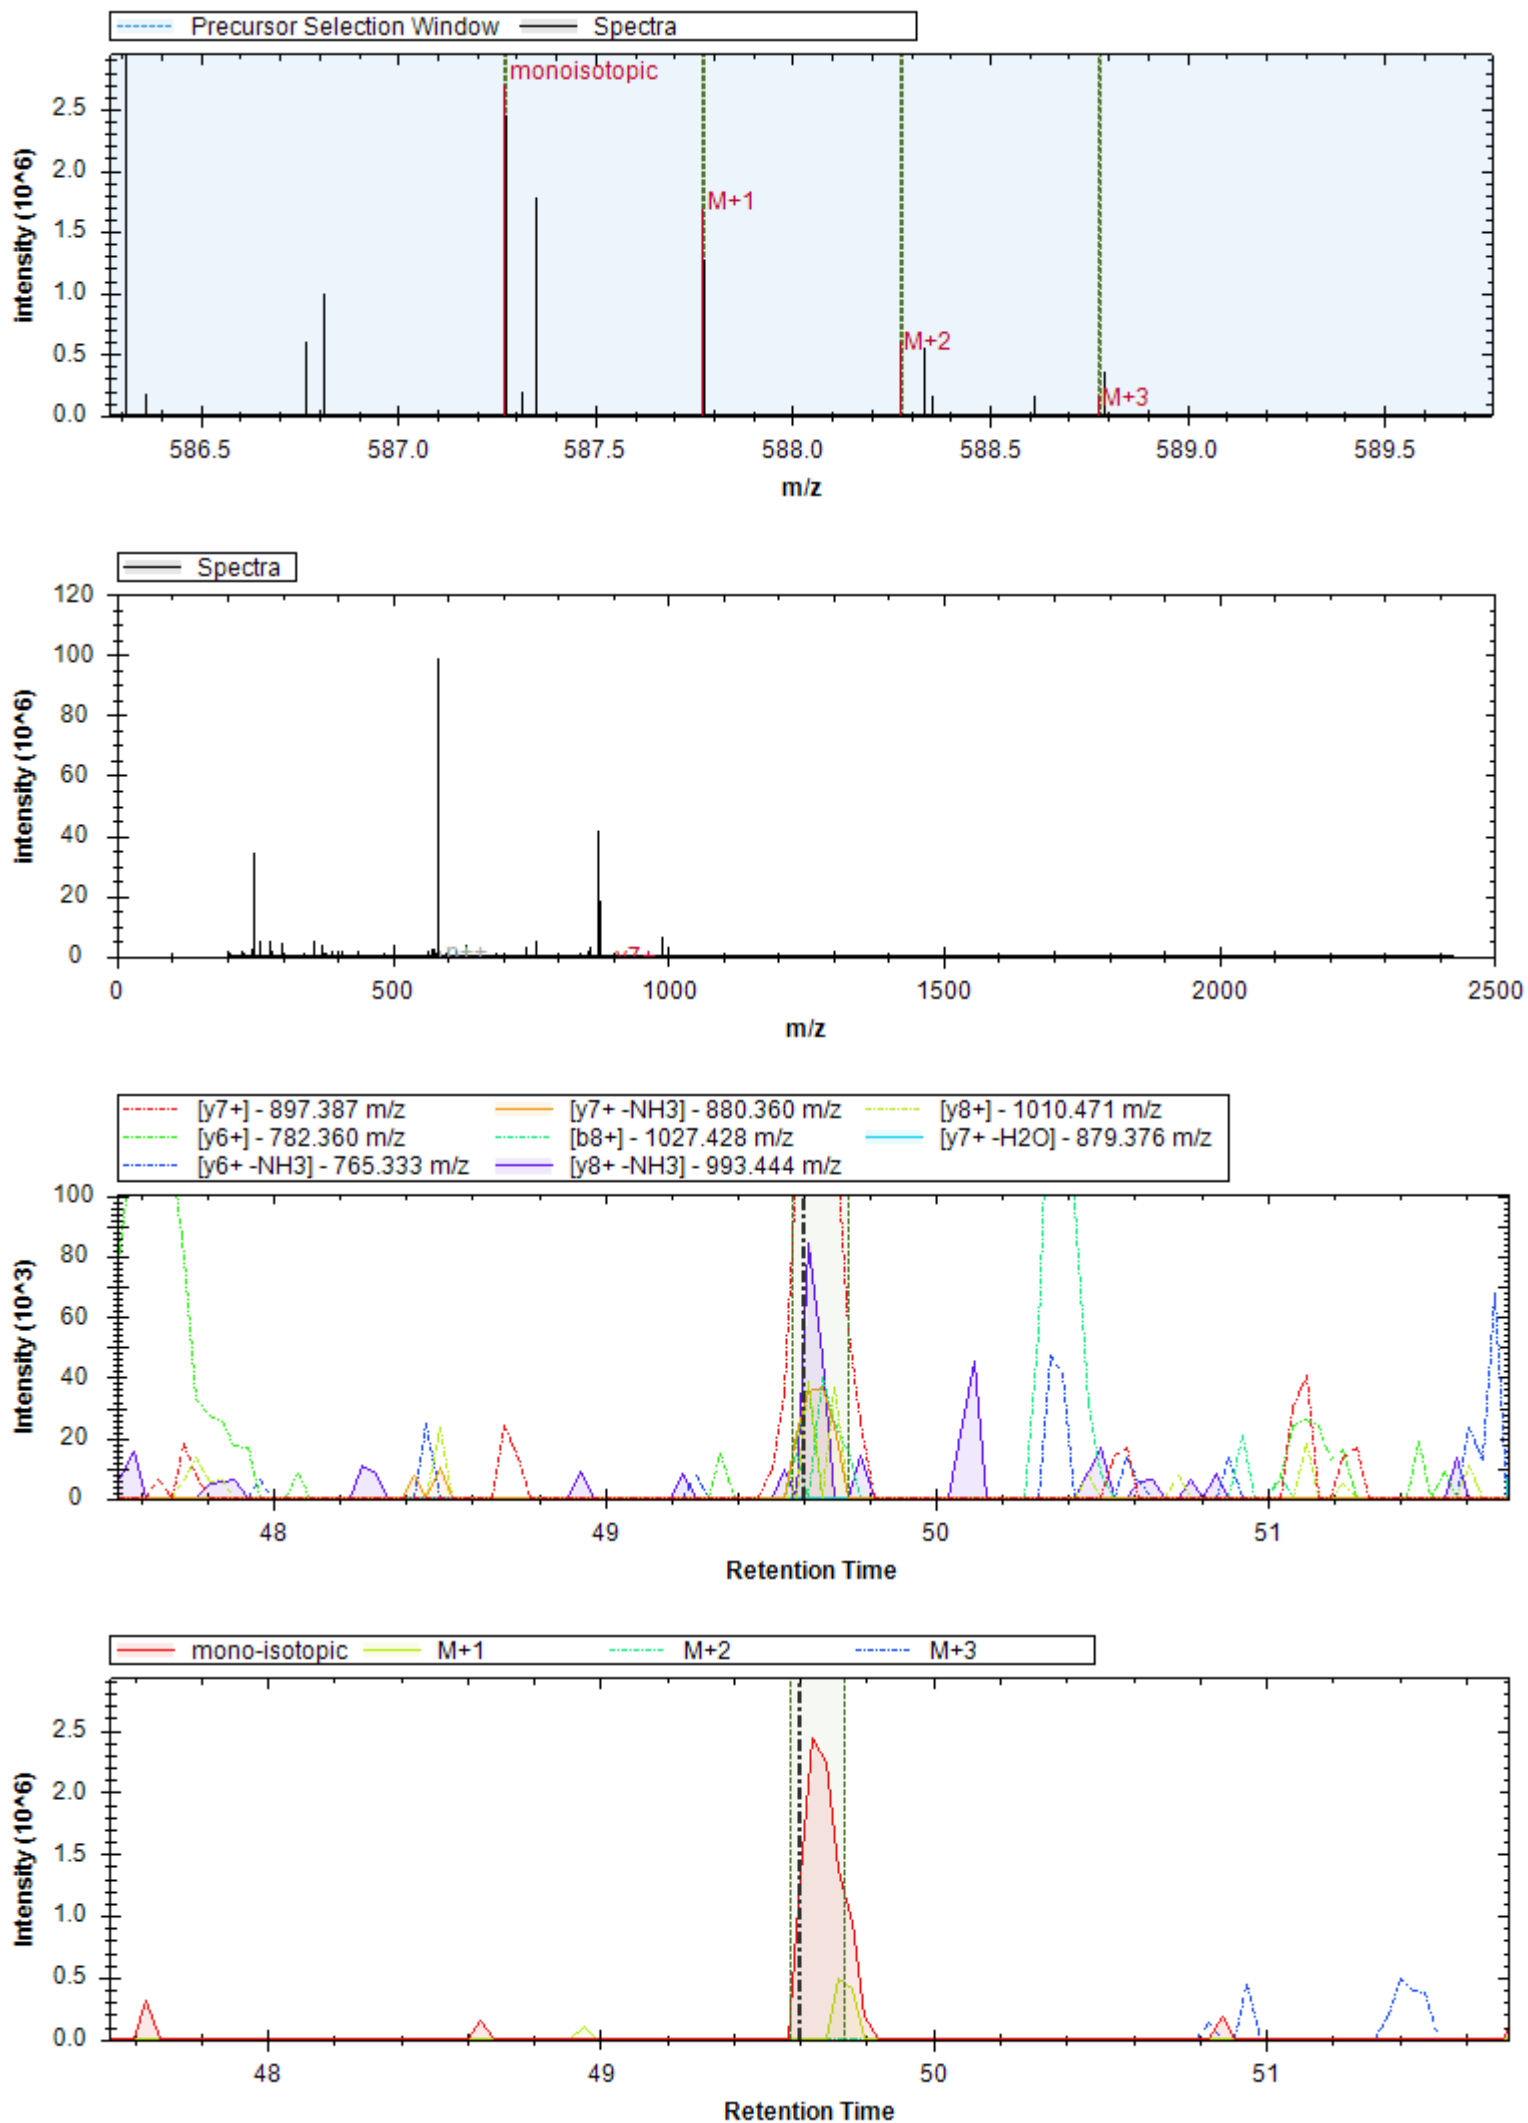

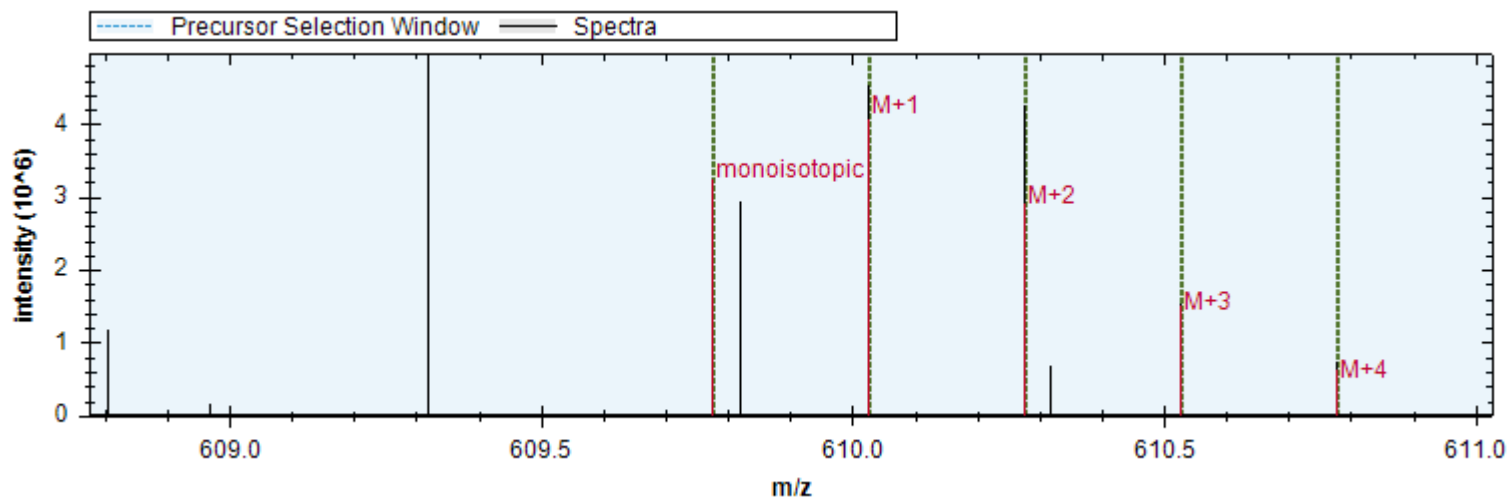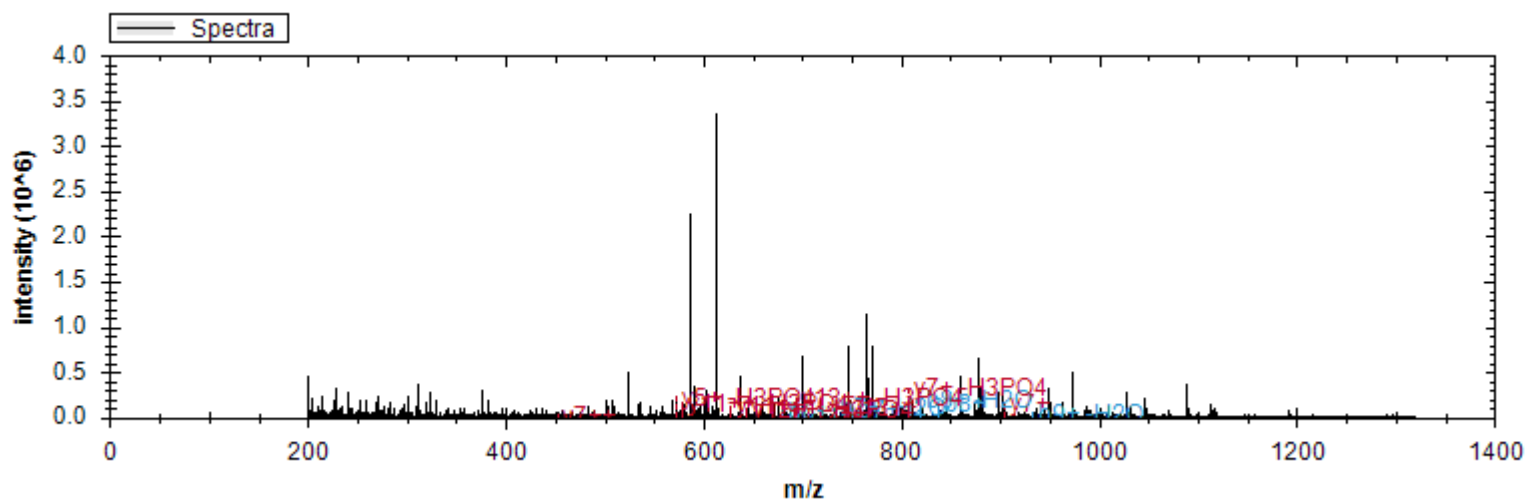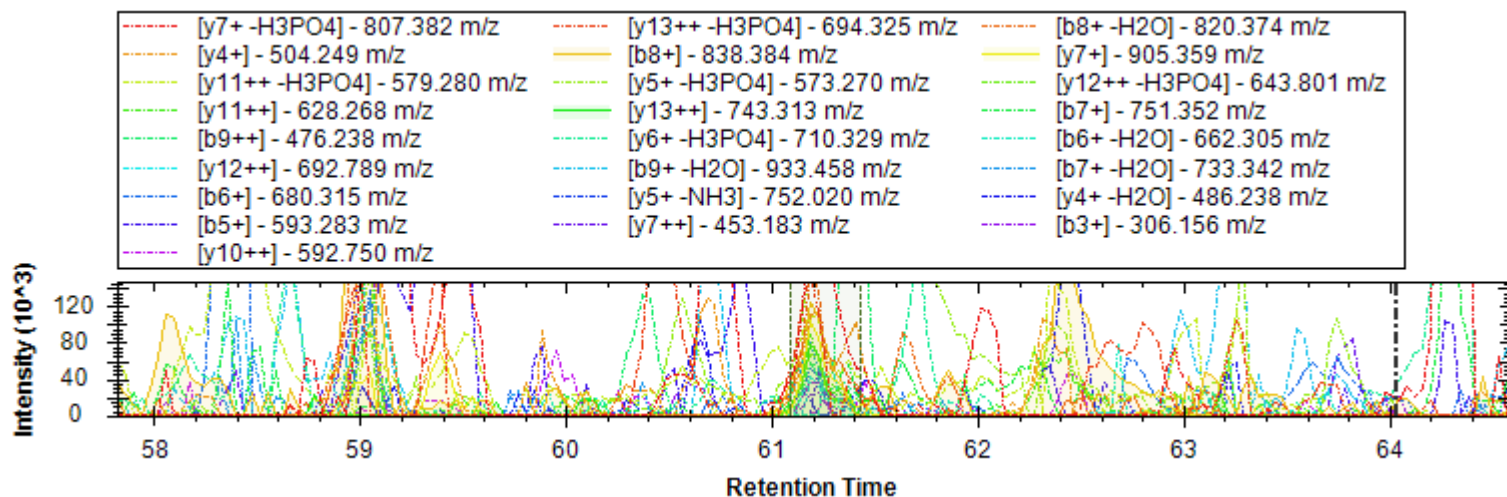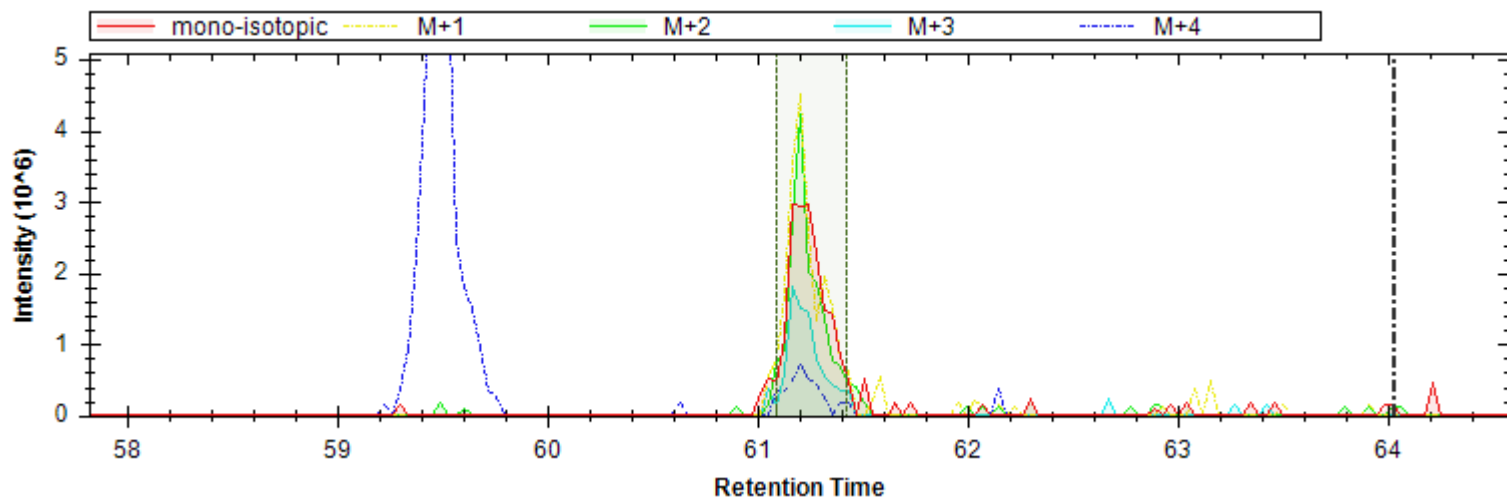



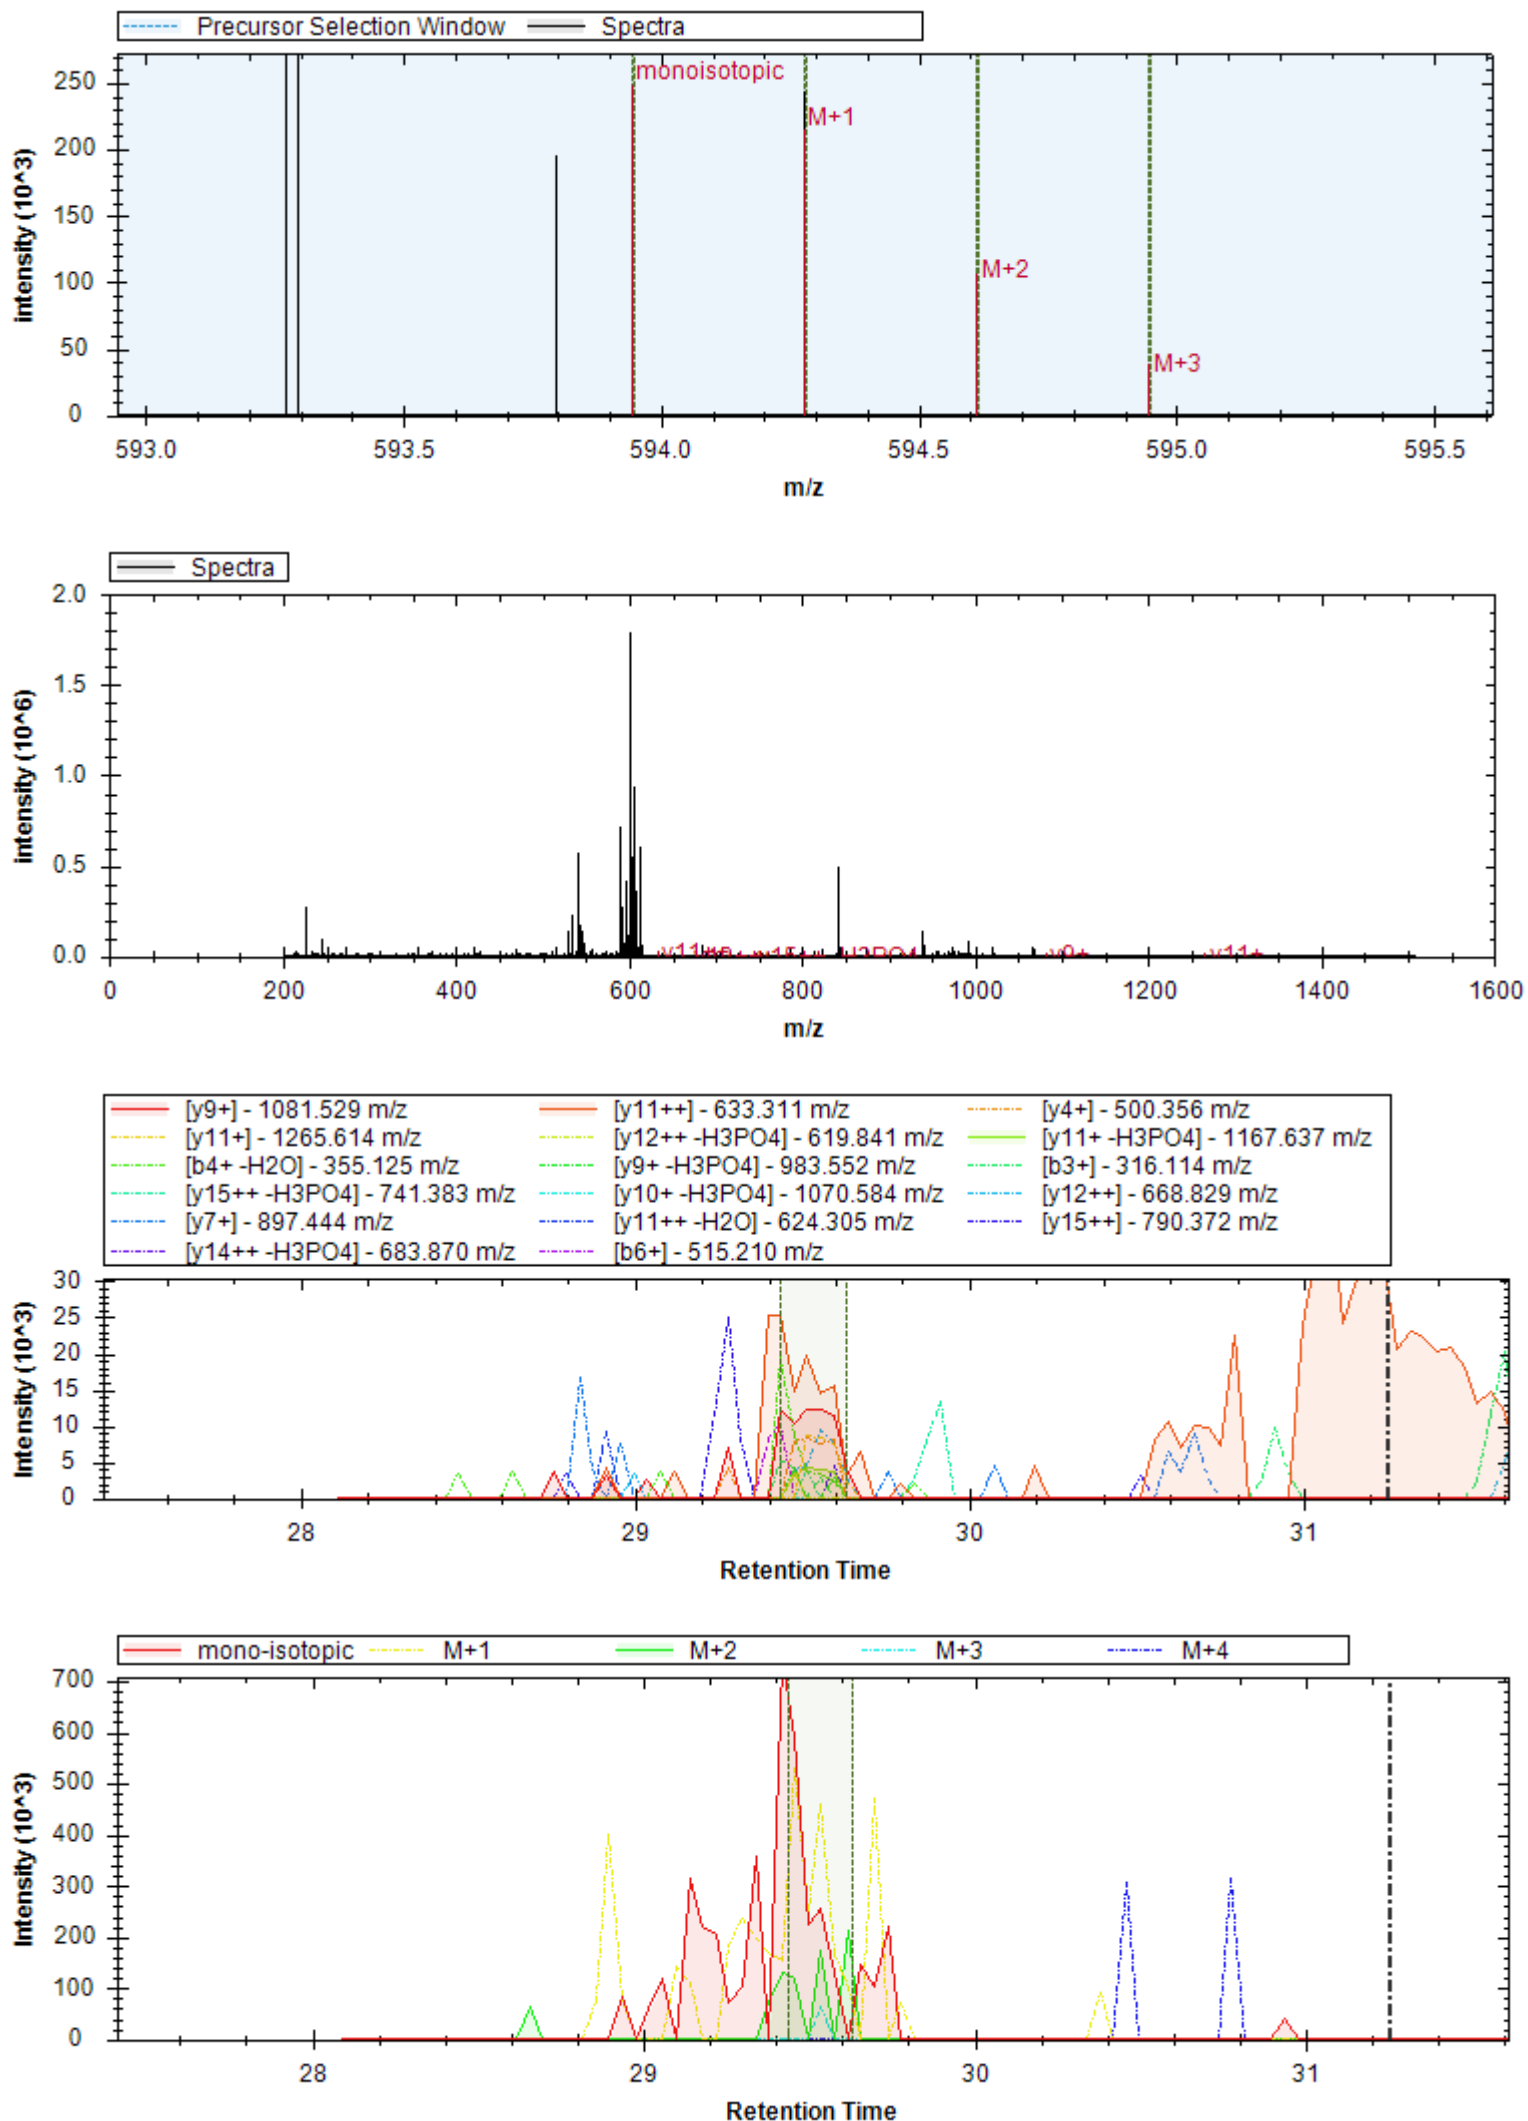

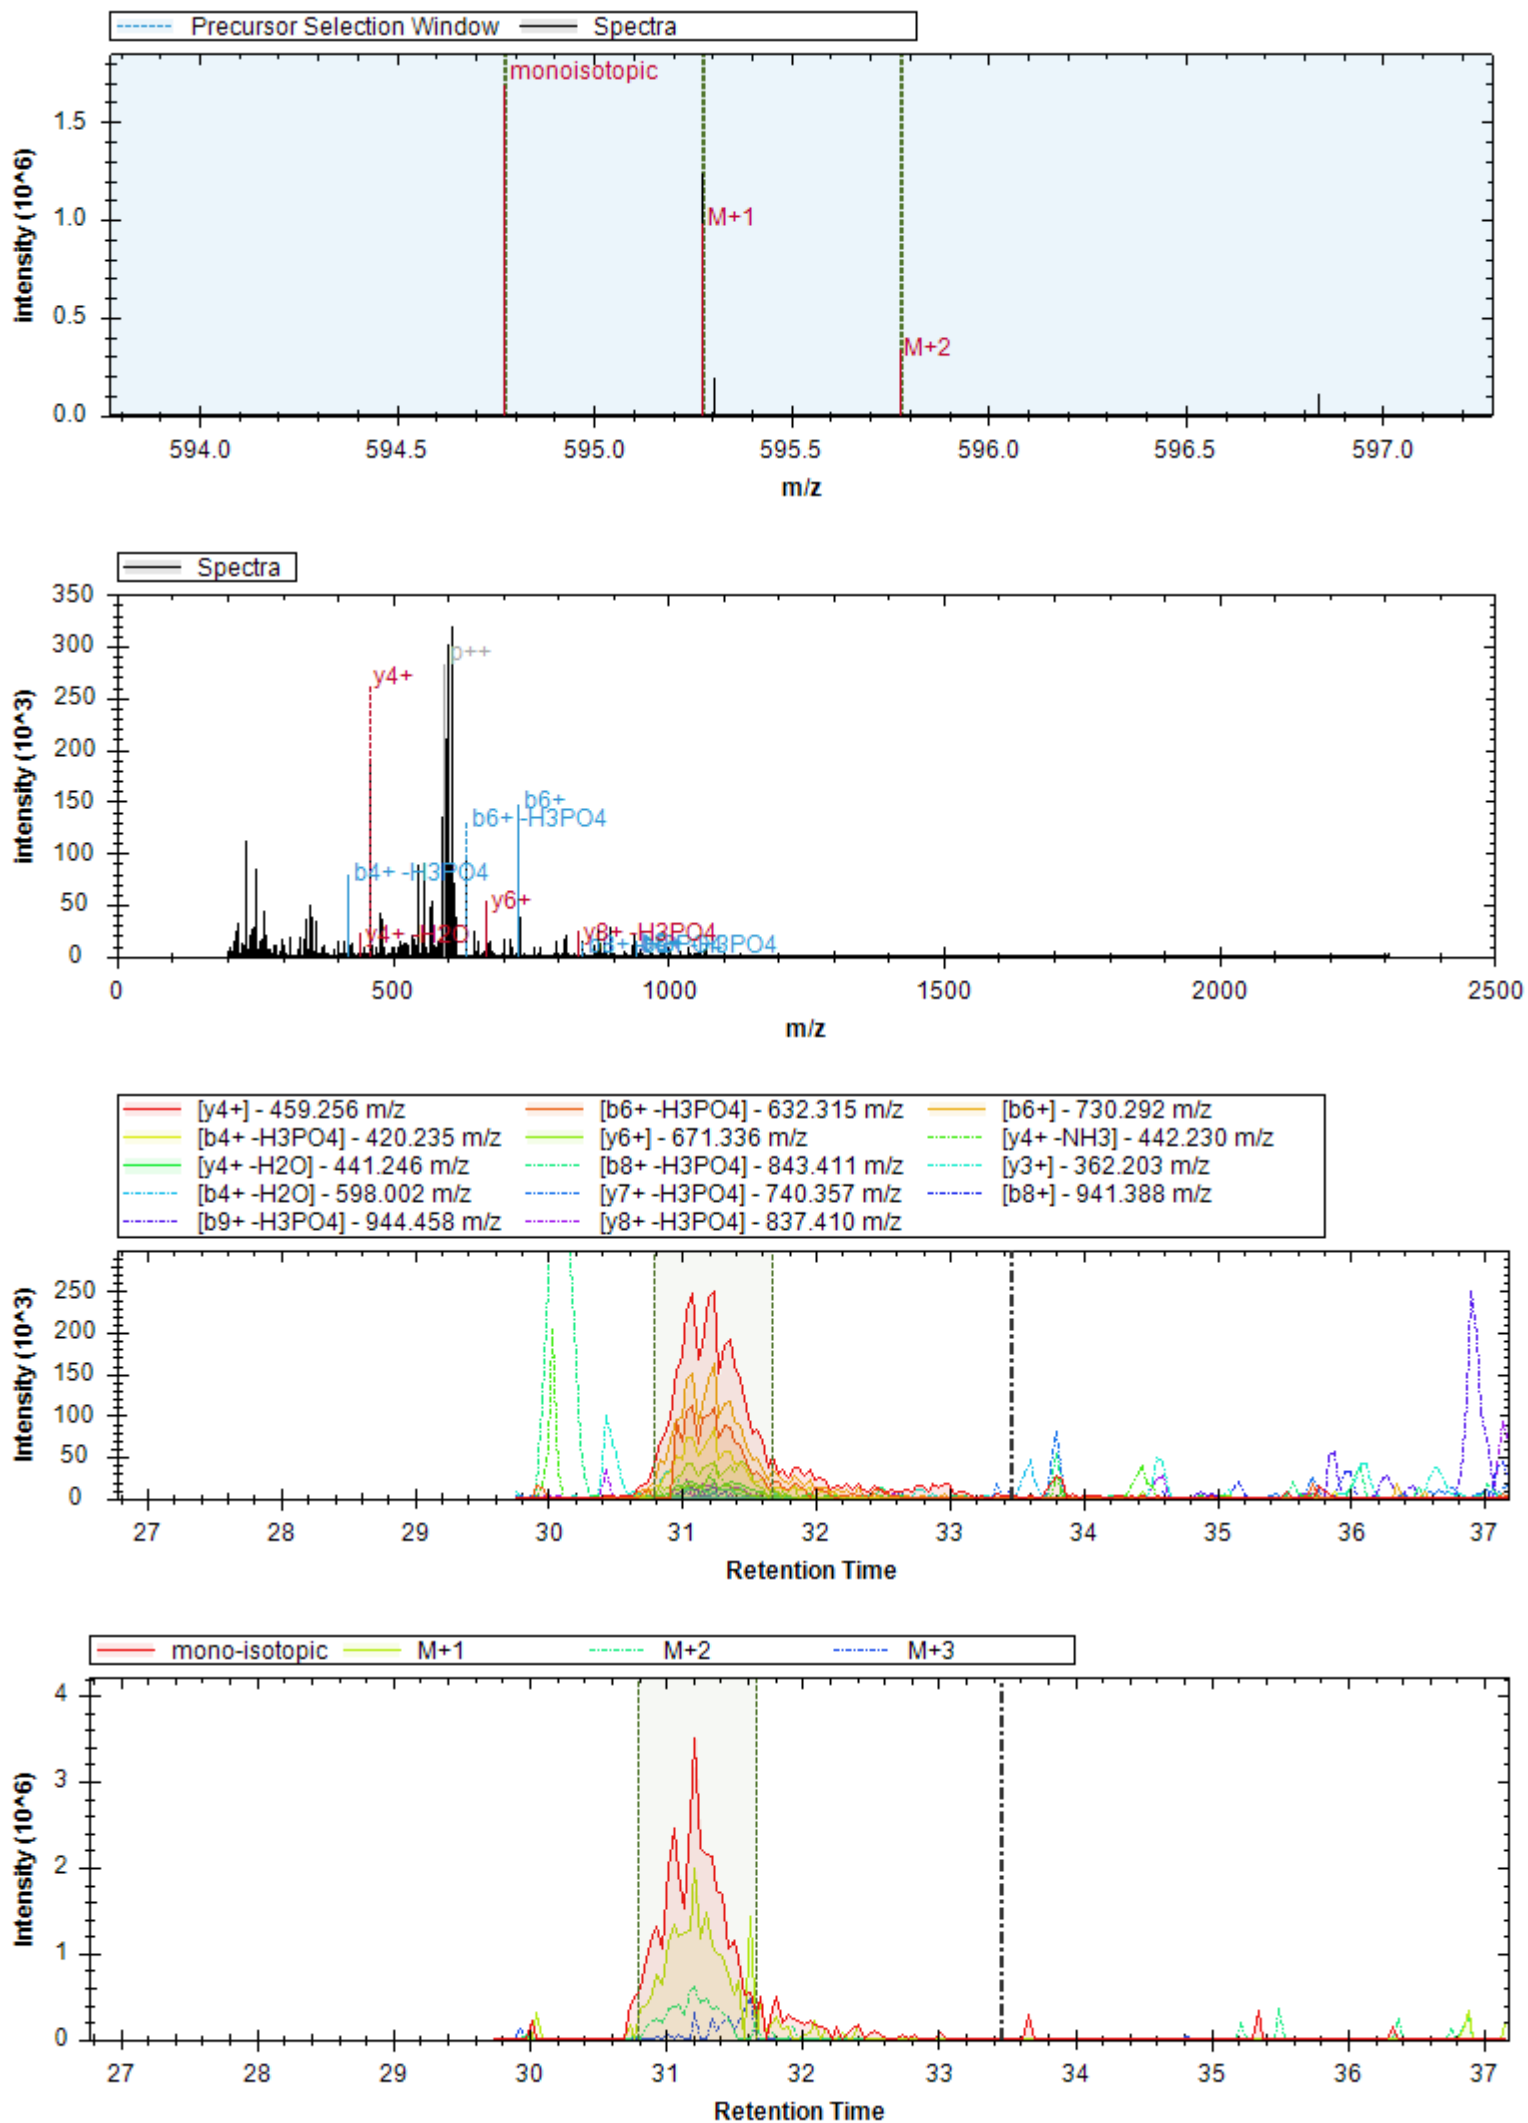

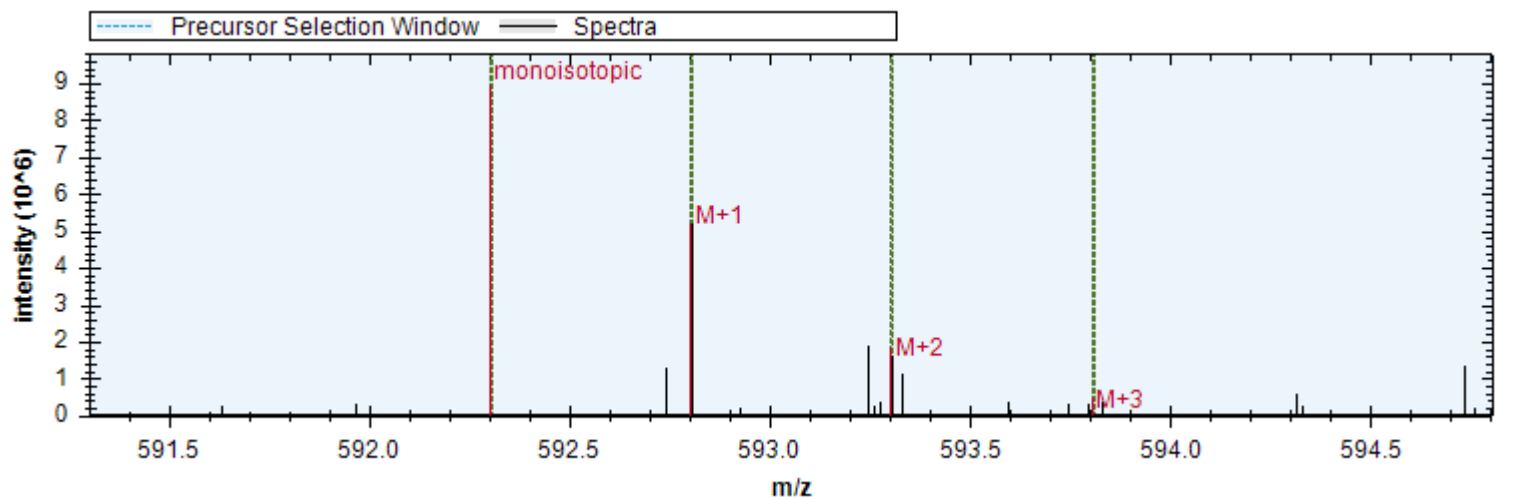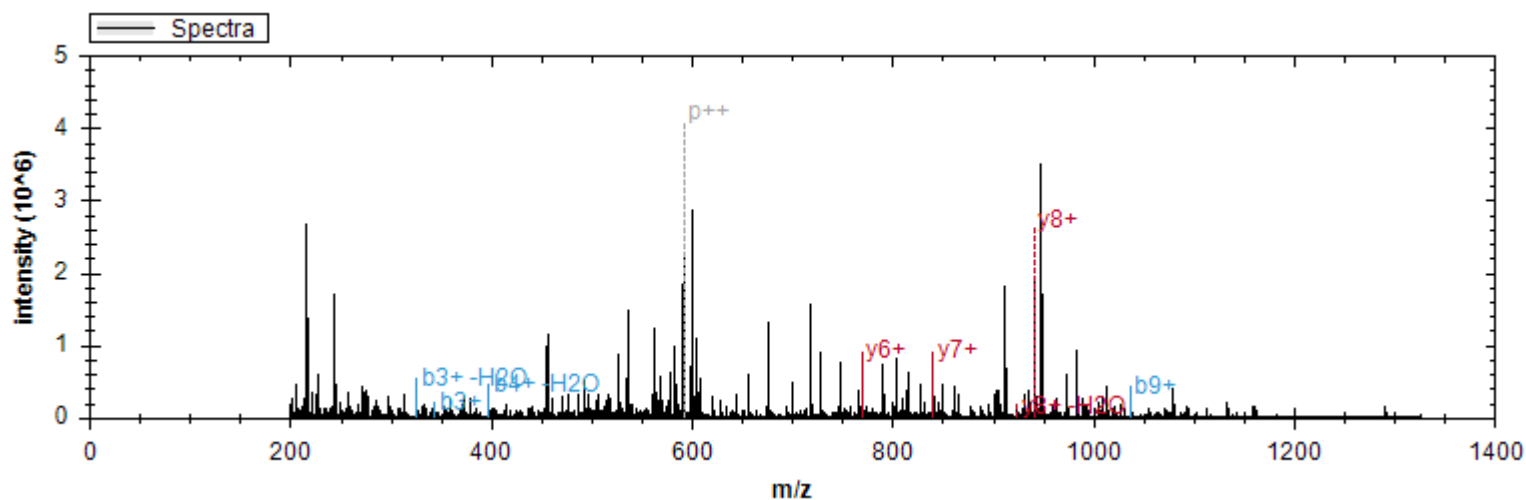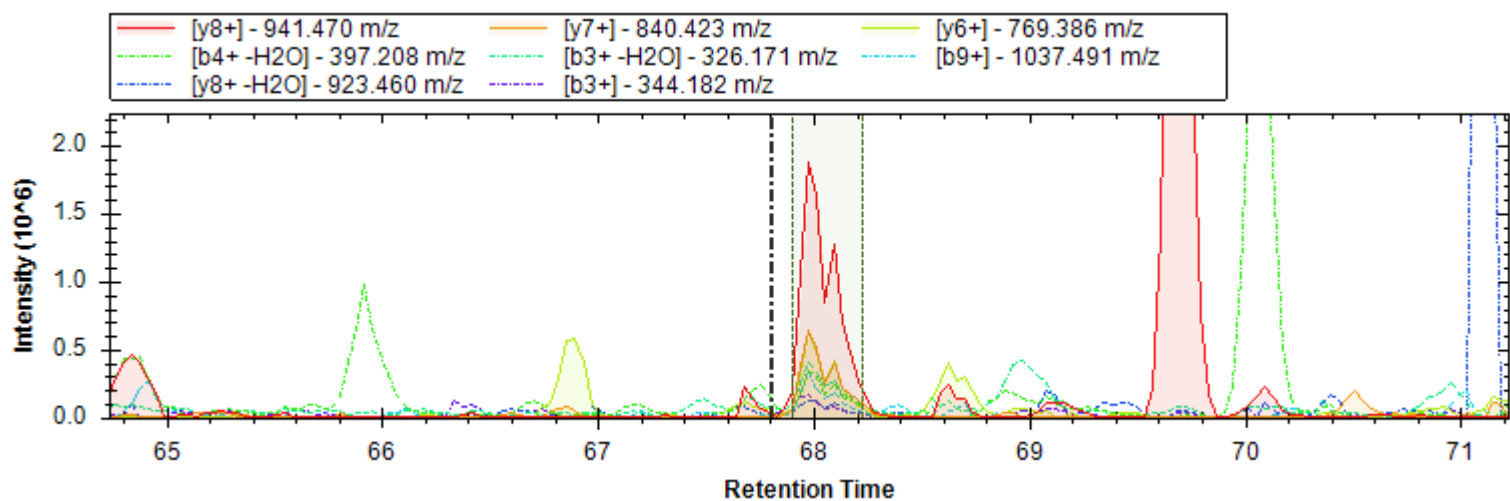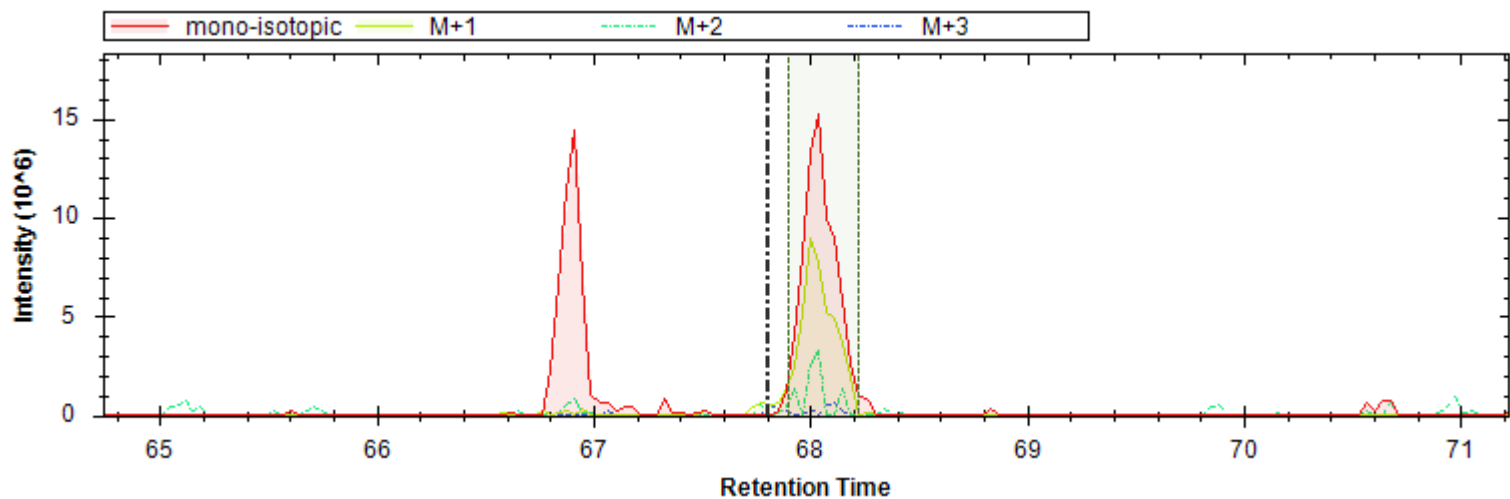

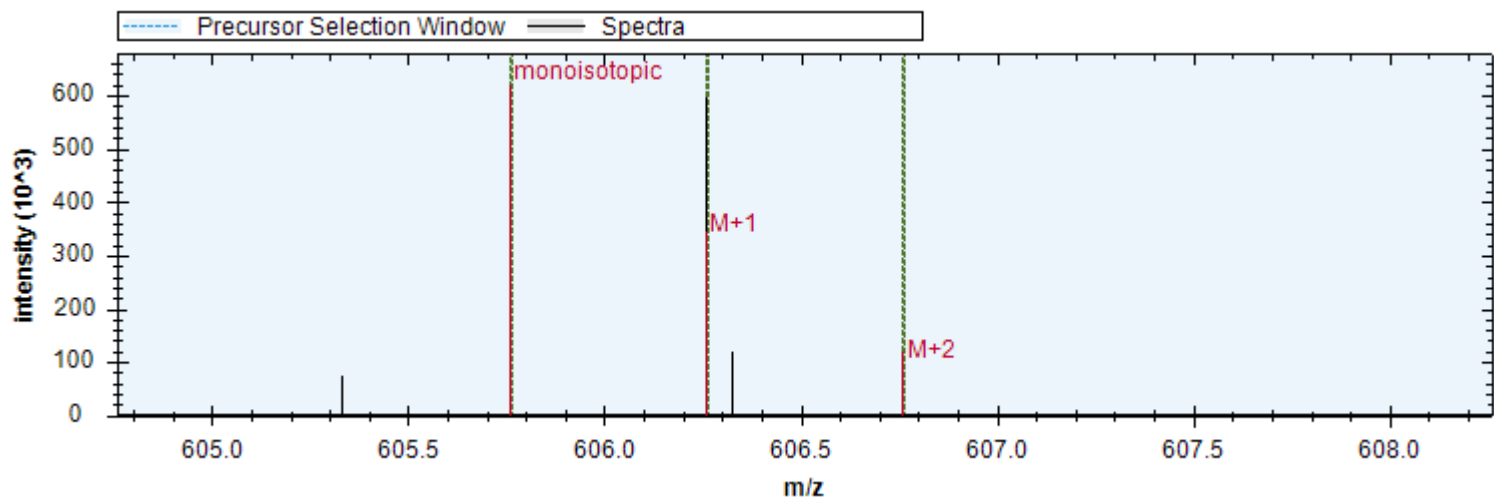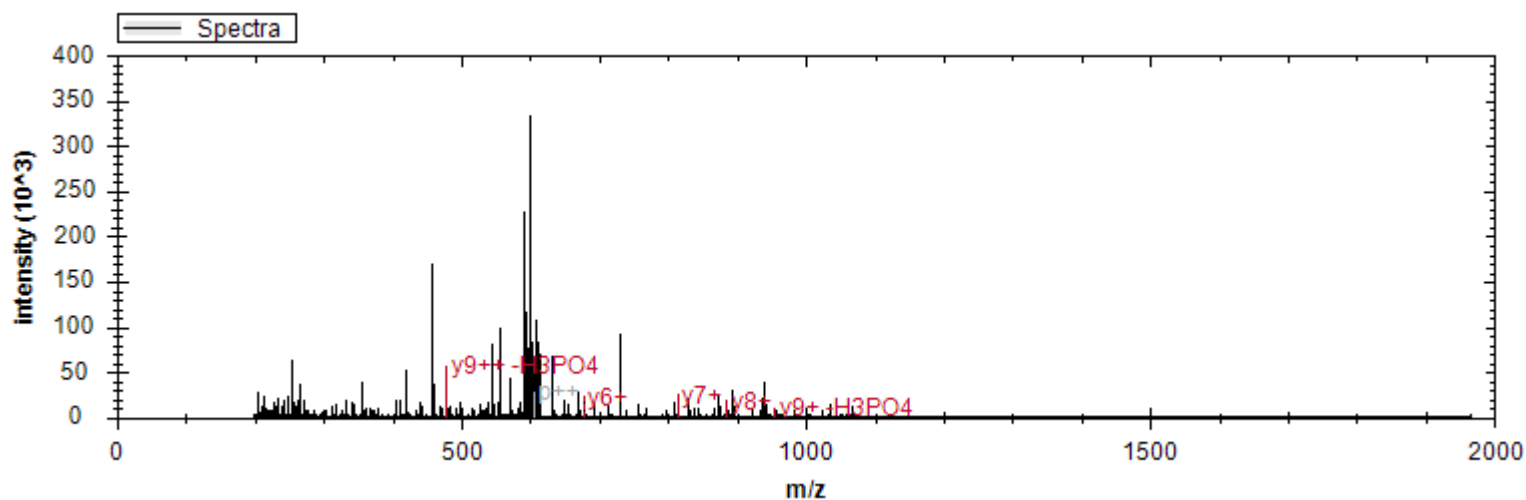

- |                            |                            |                             |
|----------------------------|----------------------------|-----------------------------|
| [y9+-H3PO4] - 477.736 m/z  | [y6+] - 677.346 m/z        | [y7+] - 814.405 m/z         |
| [y8+] - 885.442 m/z        | [y10+-H3PO4] - 513.254 m/z | [y8++] - 443.225 m/z        |
| [y4+] - 450.220 m/z        | [y7++] - 407.706 m/z       | [y3+] - 363.187 m/z         |
| [y5+] - 563.304 m/z        | [b5+ -H3PO4] - 436.194 m/z | [b10+ -H3PO4] - 966.428 m/z |
| [b7+ -H3PO4] - 663.321 m/z | [b10+ -H2O] - 1144.194 m/z | [b8+ -H3PO4] - 750.353 m/z  |
| [b6+ -H3PO4] - 550.237 m/z | [y9+ -H3PO4] - 954.464 m/z | [b5+ -H2O] - 613.960 m/z    |
| [y7+ -NH3] - 797.379 m/z   |                            |                             |

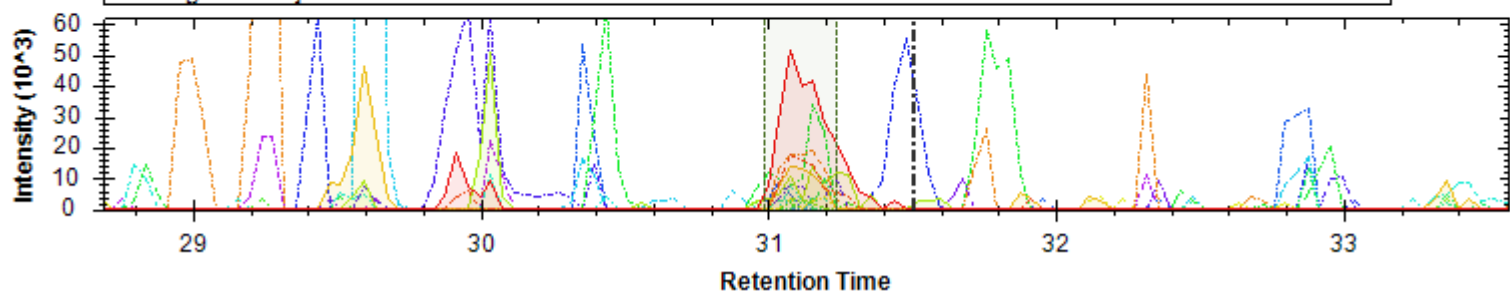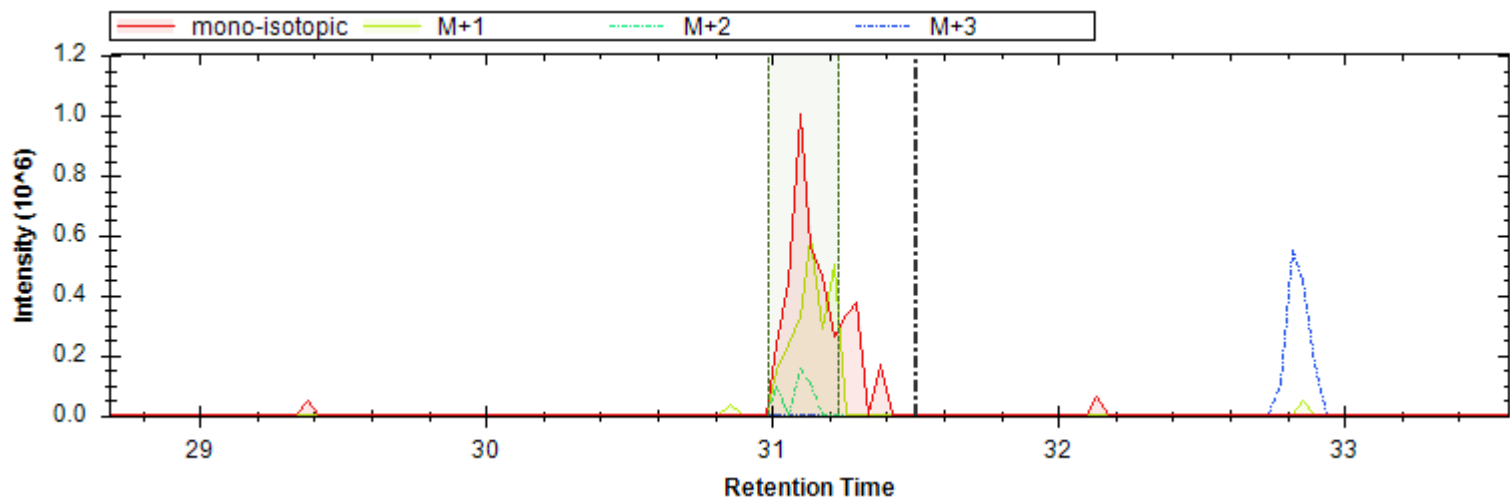

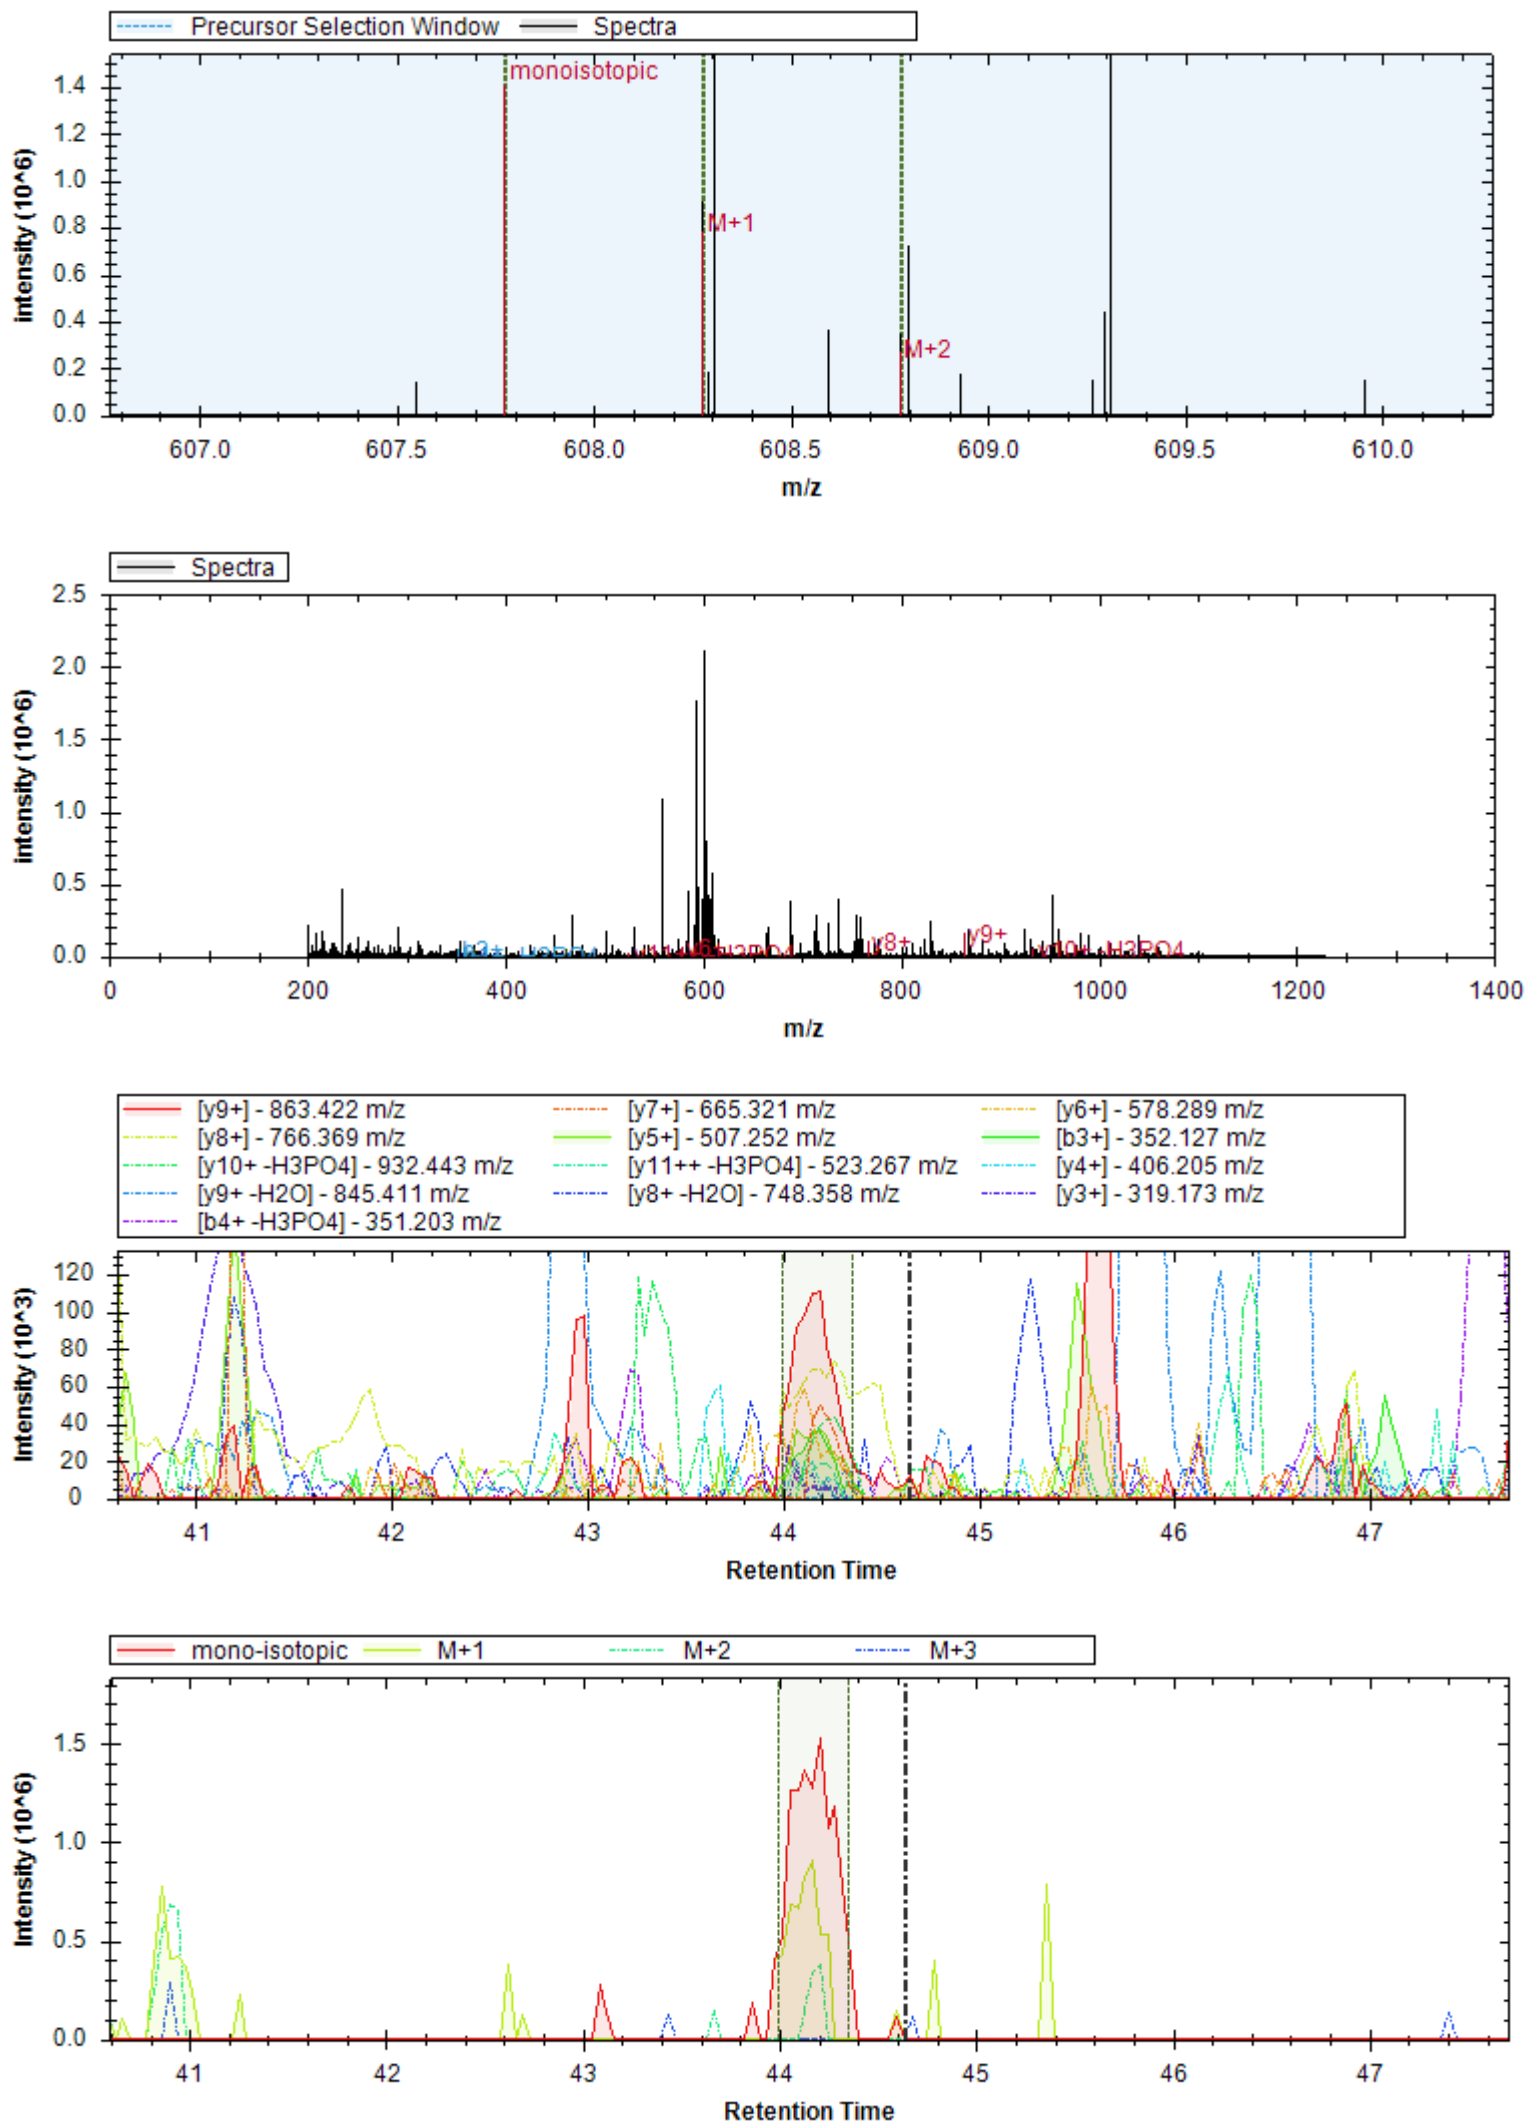

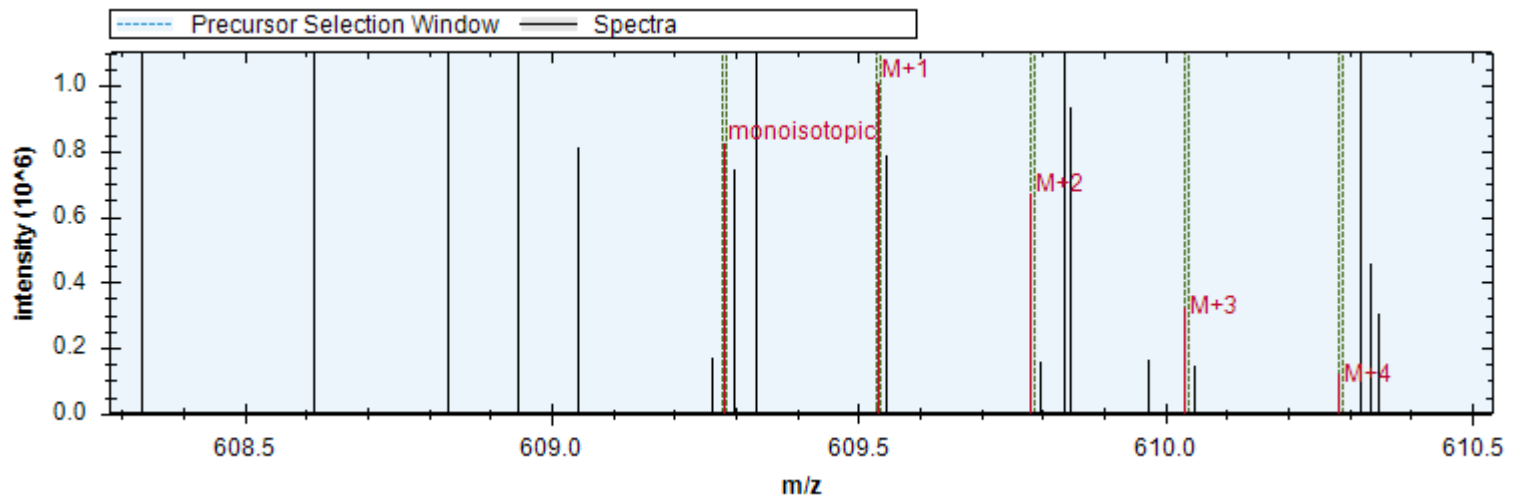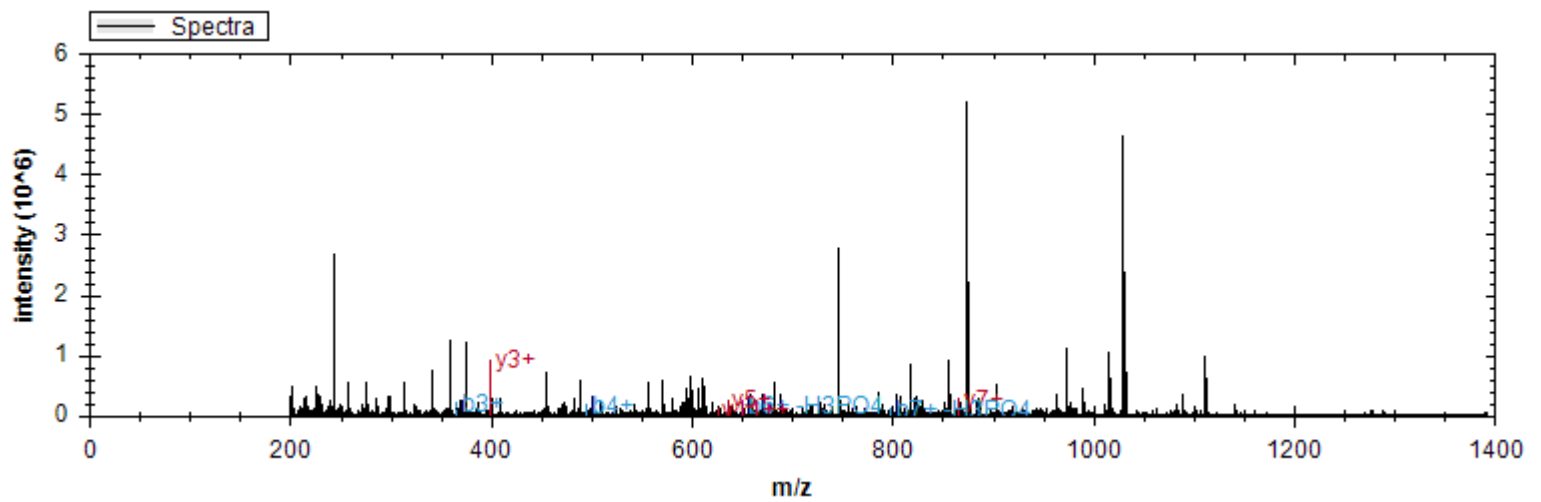

- |                            |                       |                            |
|----------------------------|-----------------------|----------------------------|
| [y12++] - 669.842 m/z      | [y3+] - 400.267 m/z   | [y11++] - 626.326 m/z      |
| [b8+ -H2O] - 1063.140 m/z  | [y7+] - 866.448 m/z   | [y5+] - 636.394 m/z        |
| [b4+] - 495.220 m/z        | [y8+] - 979.532 m/z   | [y6+] - 751.421 m/z        |
| [y8++] - 490.270 m/z       | [y10++] - 597.815 m/z | [b7+ -H3PO4] - 798.342 m/z |
| [b6+ -H2O] - 829.040 m/z   | [b3+] - 366.177 m/z   | [b7+ -H2O] - 976.108 m/z   |
| [b8+ -H3PO4] - 885.374 m/z | [y13++] - 726.384 m/z | [b6+ -H3PO4] - 651.273 m/z |
| [y9++] - 554.299 m/z       | [y6++] - 376.214 m/z  |                            |

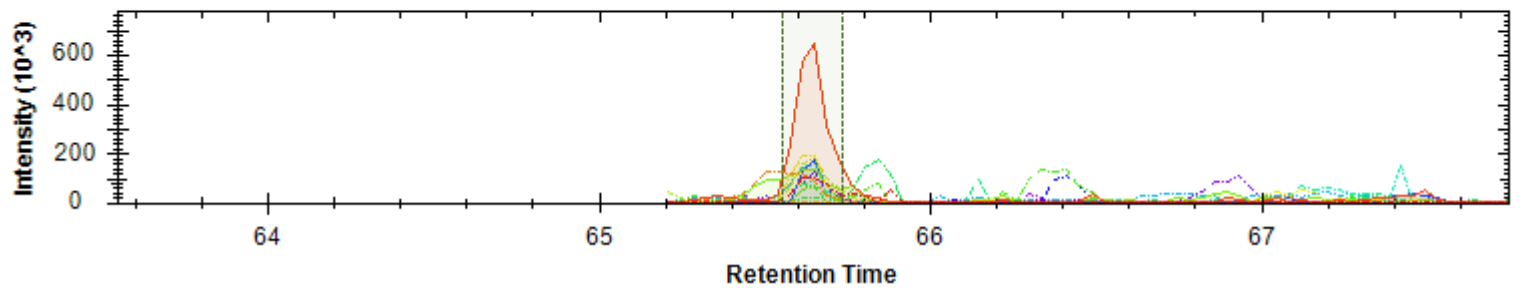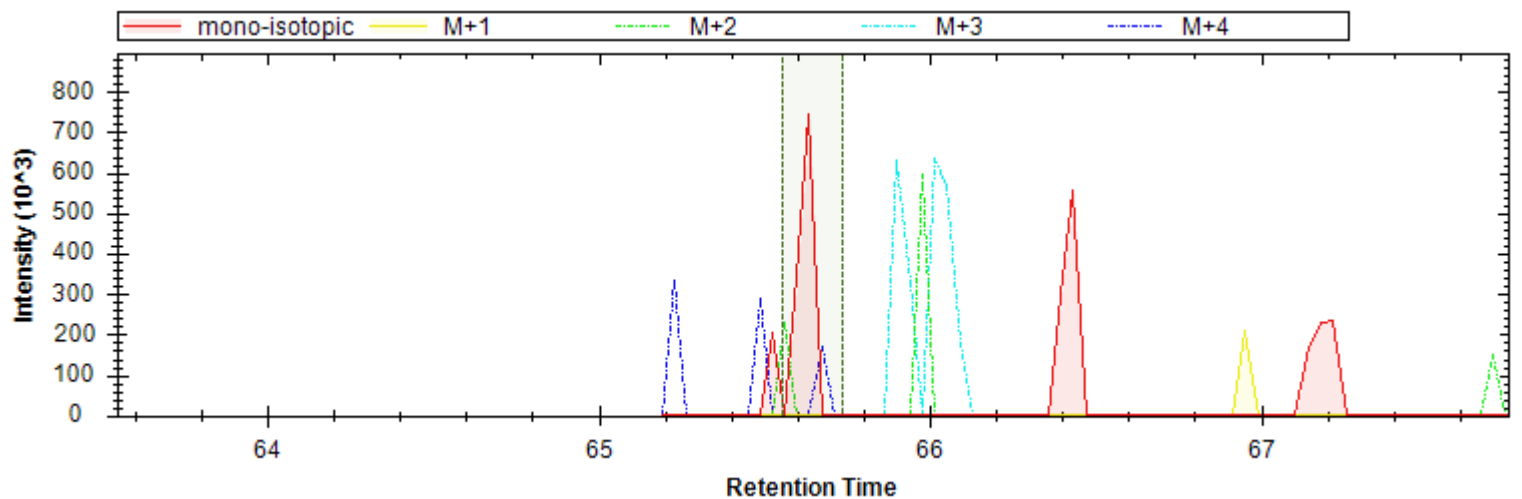

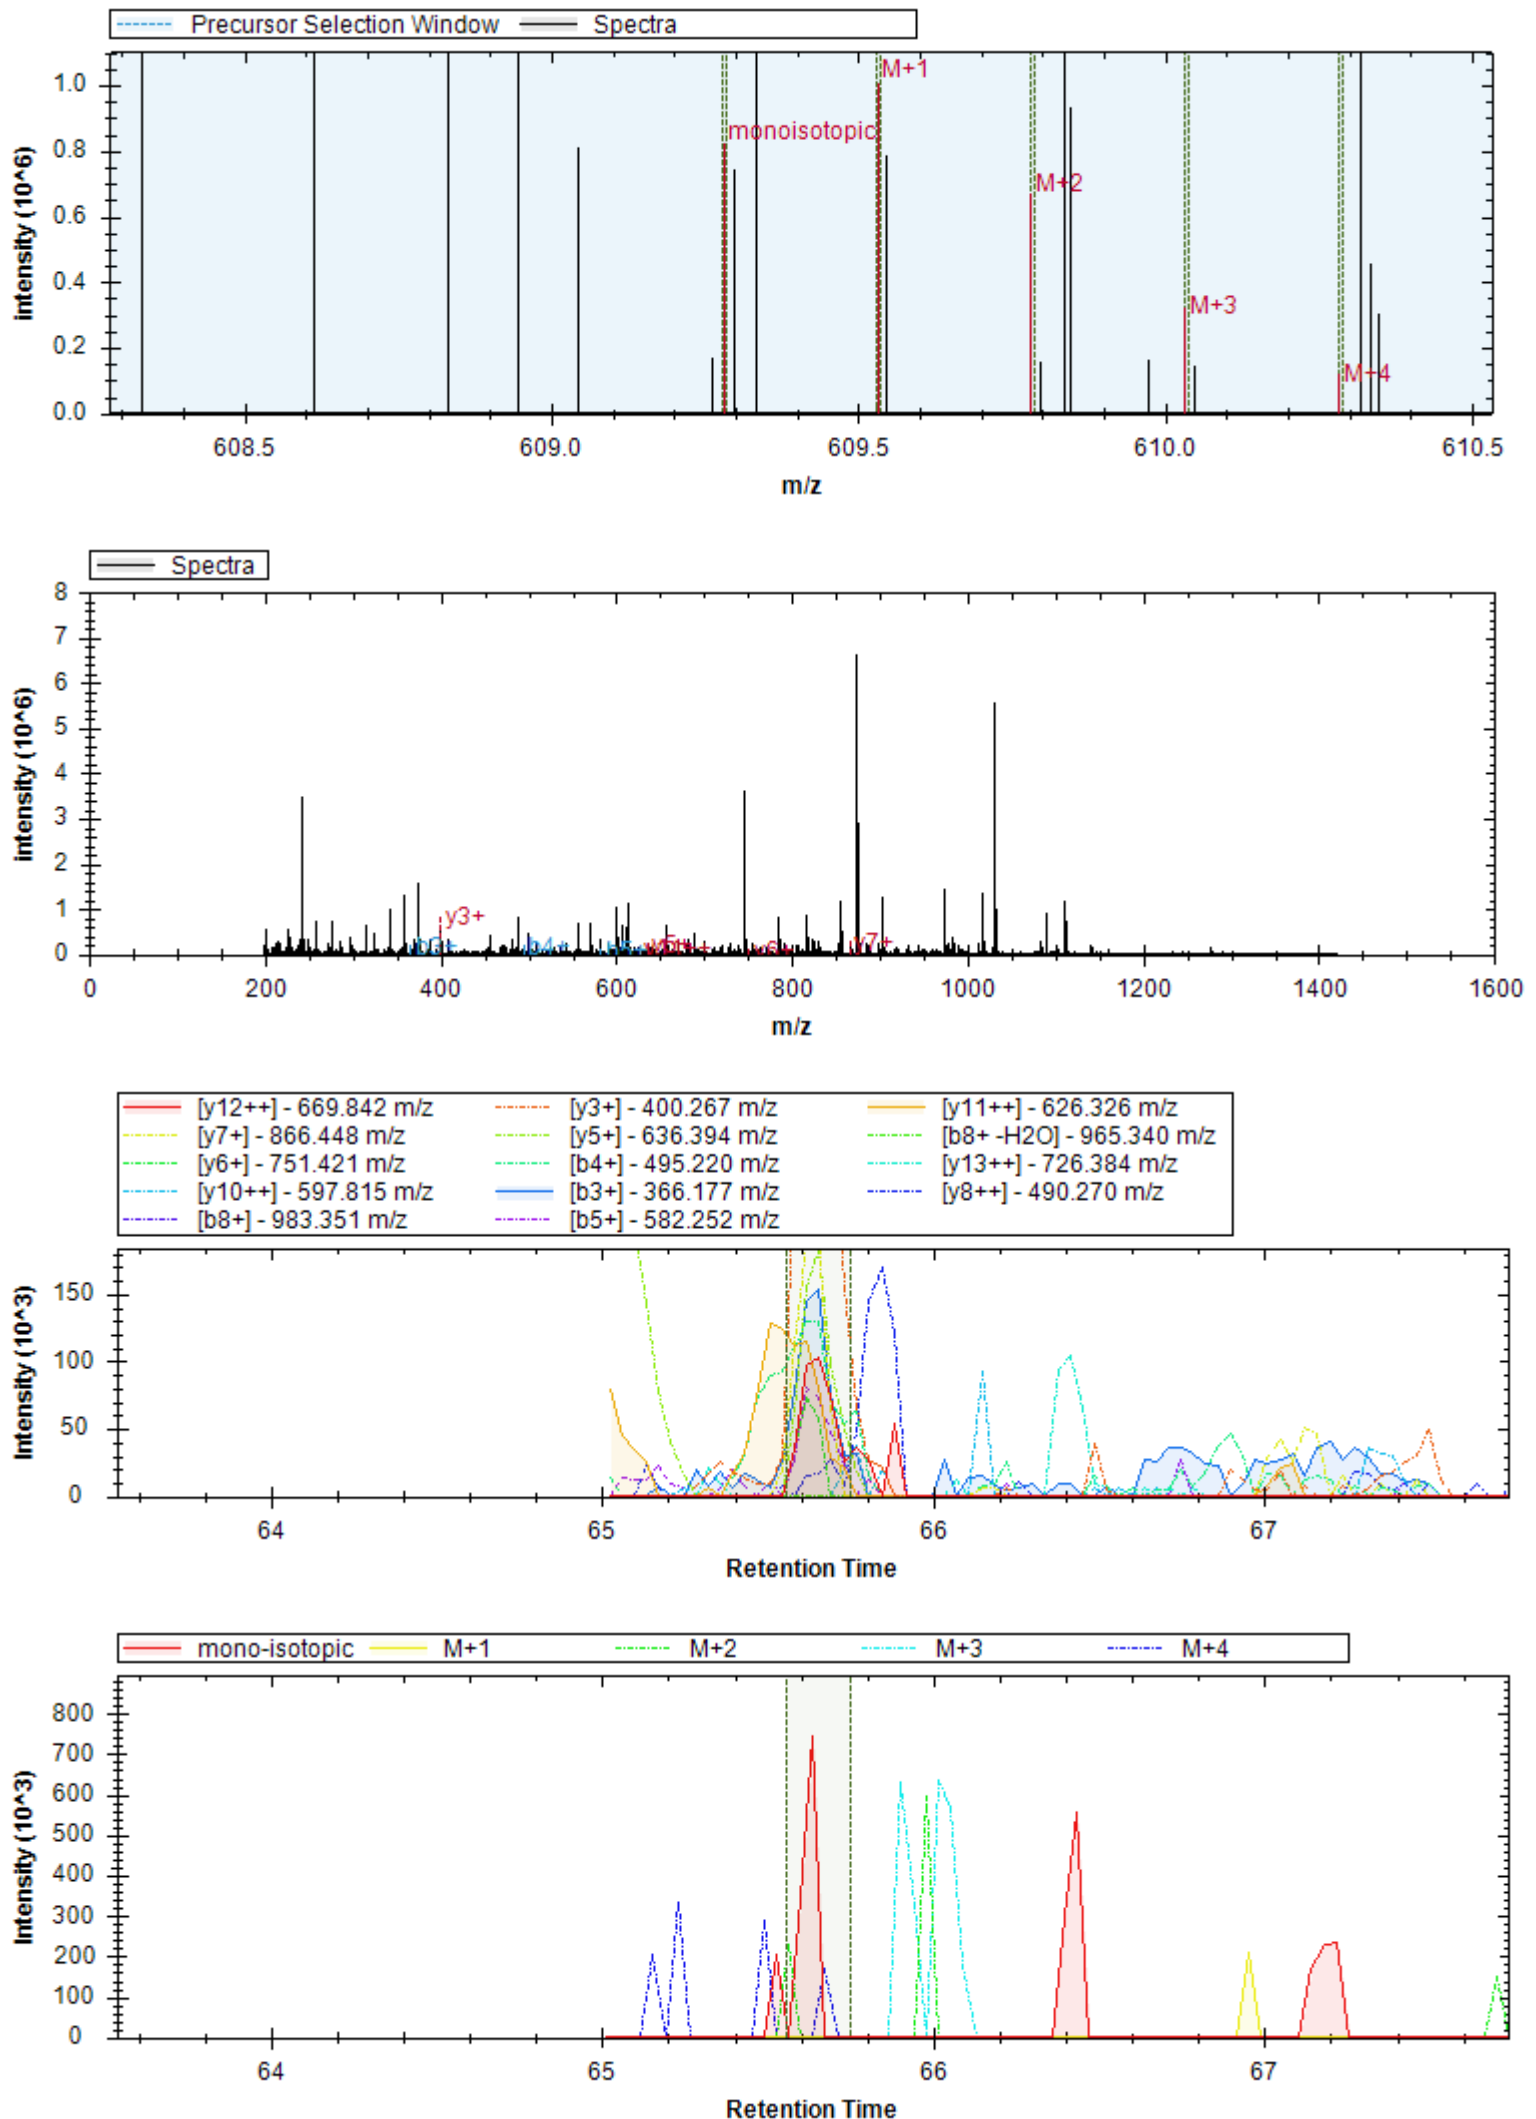

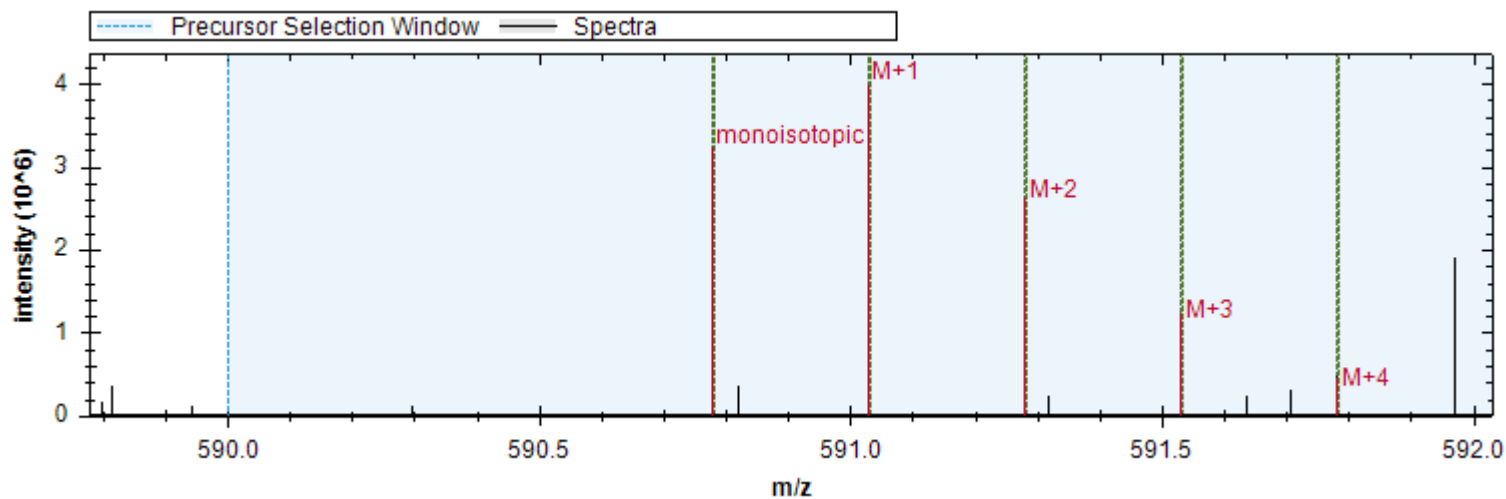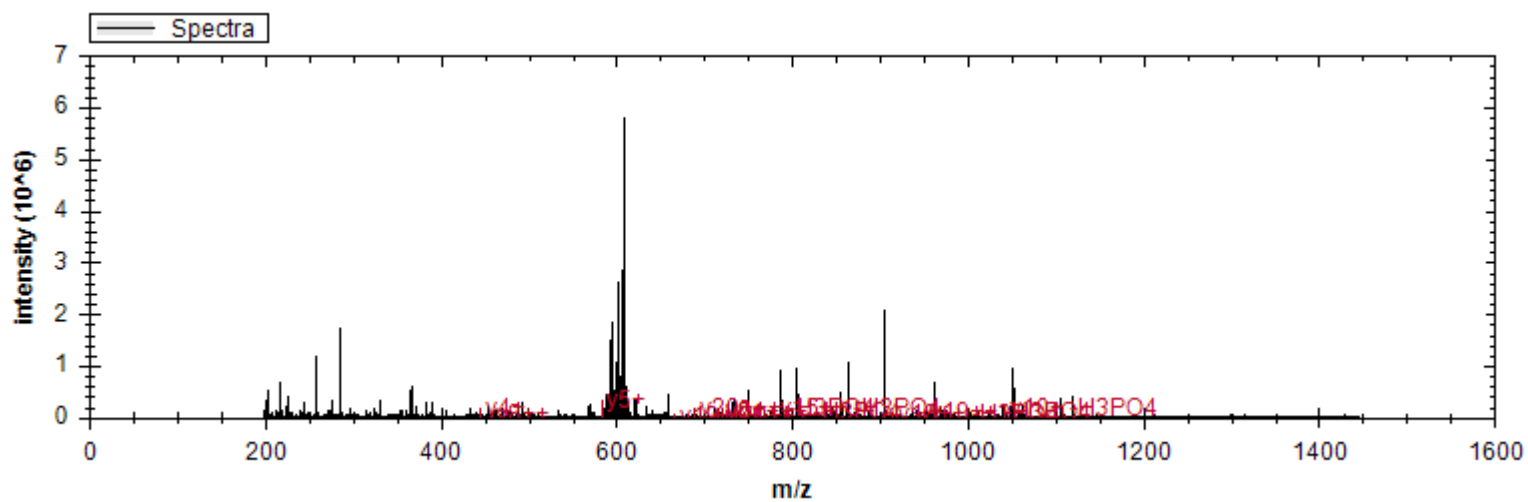

- |                               |                              |                               |
|-------------------------------|------------------------------|-------------------------------|
| [y20+++ -H3PO4] - 688.005 m/z | [y5+] - 583.295 m/z          | [y21+++ -H3PO4] - 717.016 m/z |
| [y6+] - 720.354 m/z           | [y4+] - 446.236 m/z          | [y8++] - 458.741 m/z          |
| [y18++ -H3PO4] - 914.454 m/z  | [y19+++] - 666.309 m/z       | [y18+++] - 642.630 m/z        |
| [y19++ -H3PO4] - 949.972 m/z  | [y15++ -H3PO4] - 779.382 m/z | [y7+] - 819.422 m/z           |
| [y3+] - 375.199 m/z           | [y20+++] - 720.664 m/z       | [y15++] - 828.370 m/z         |
| [y10+ -H3PO4] - 1042.518 m/z  | [b17++] - 889.407 m/z        |                               |

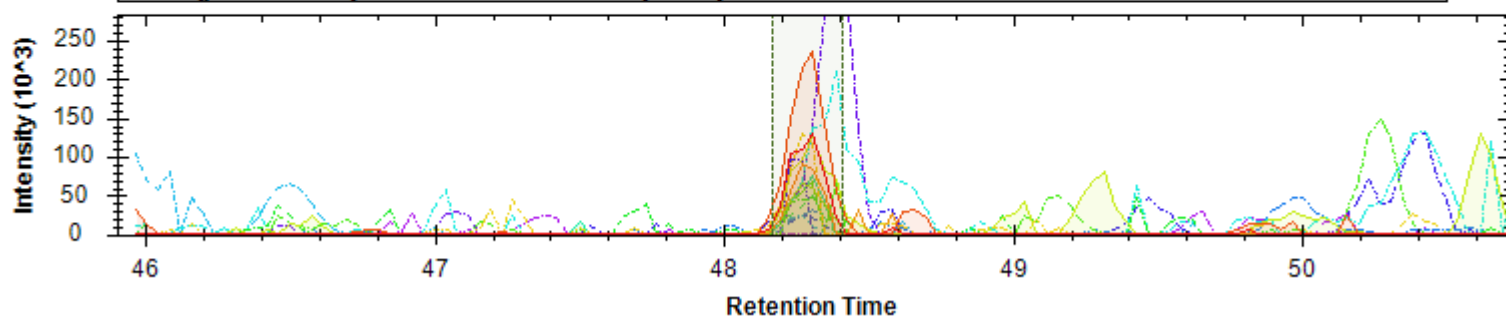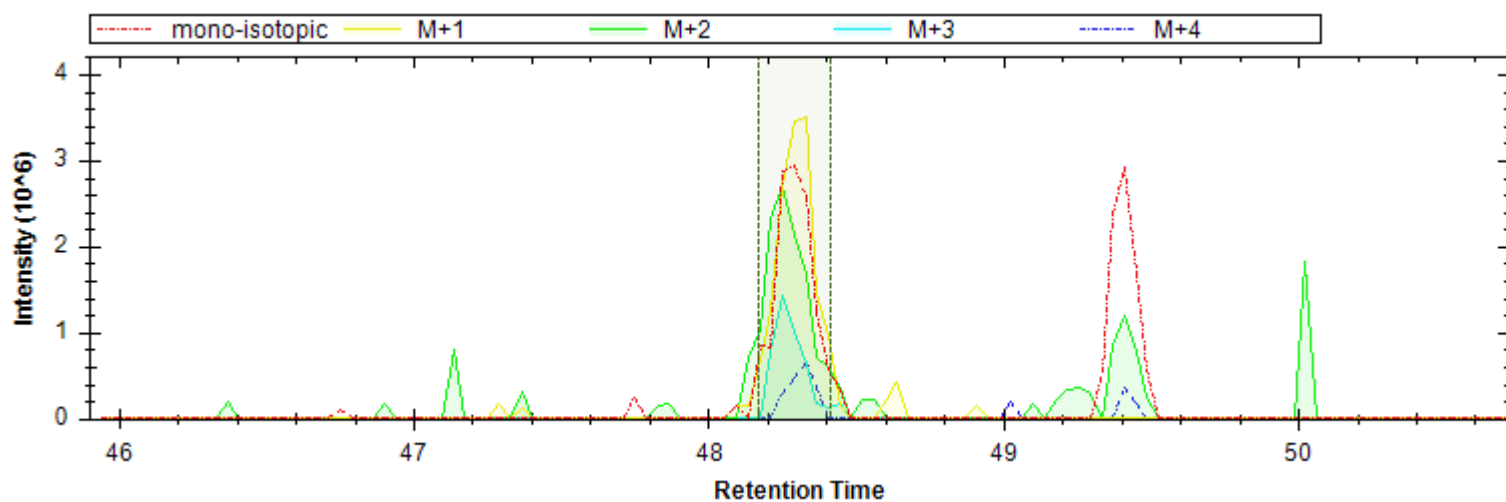



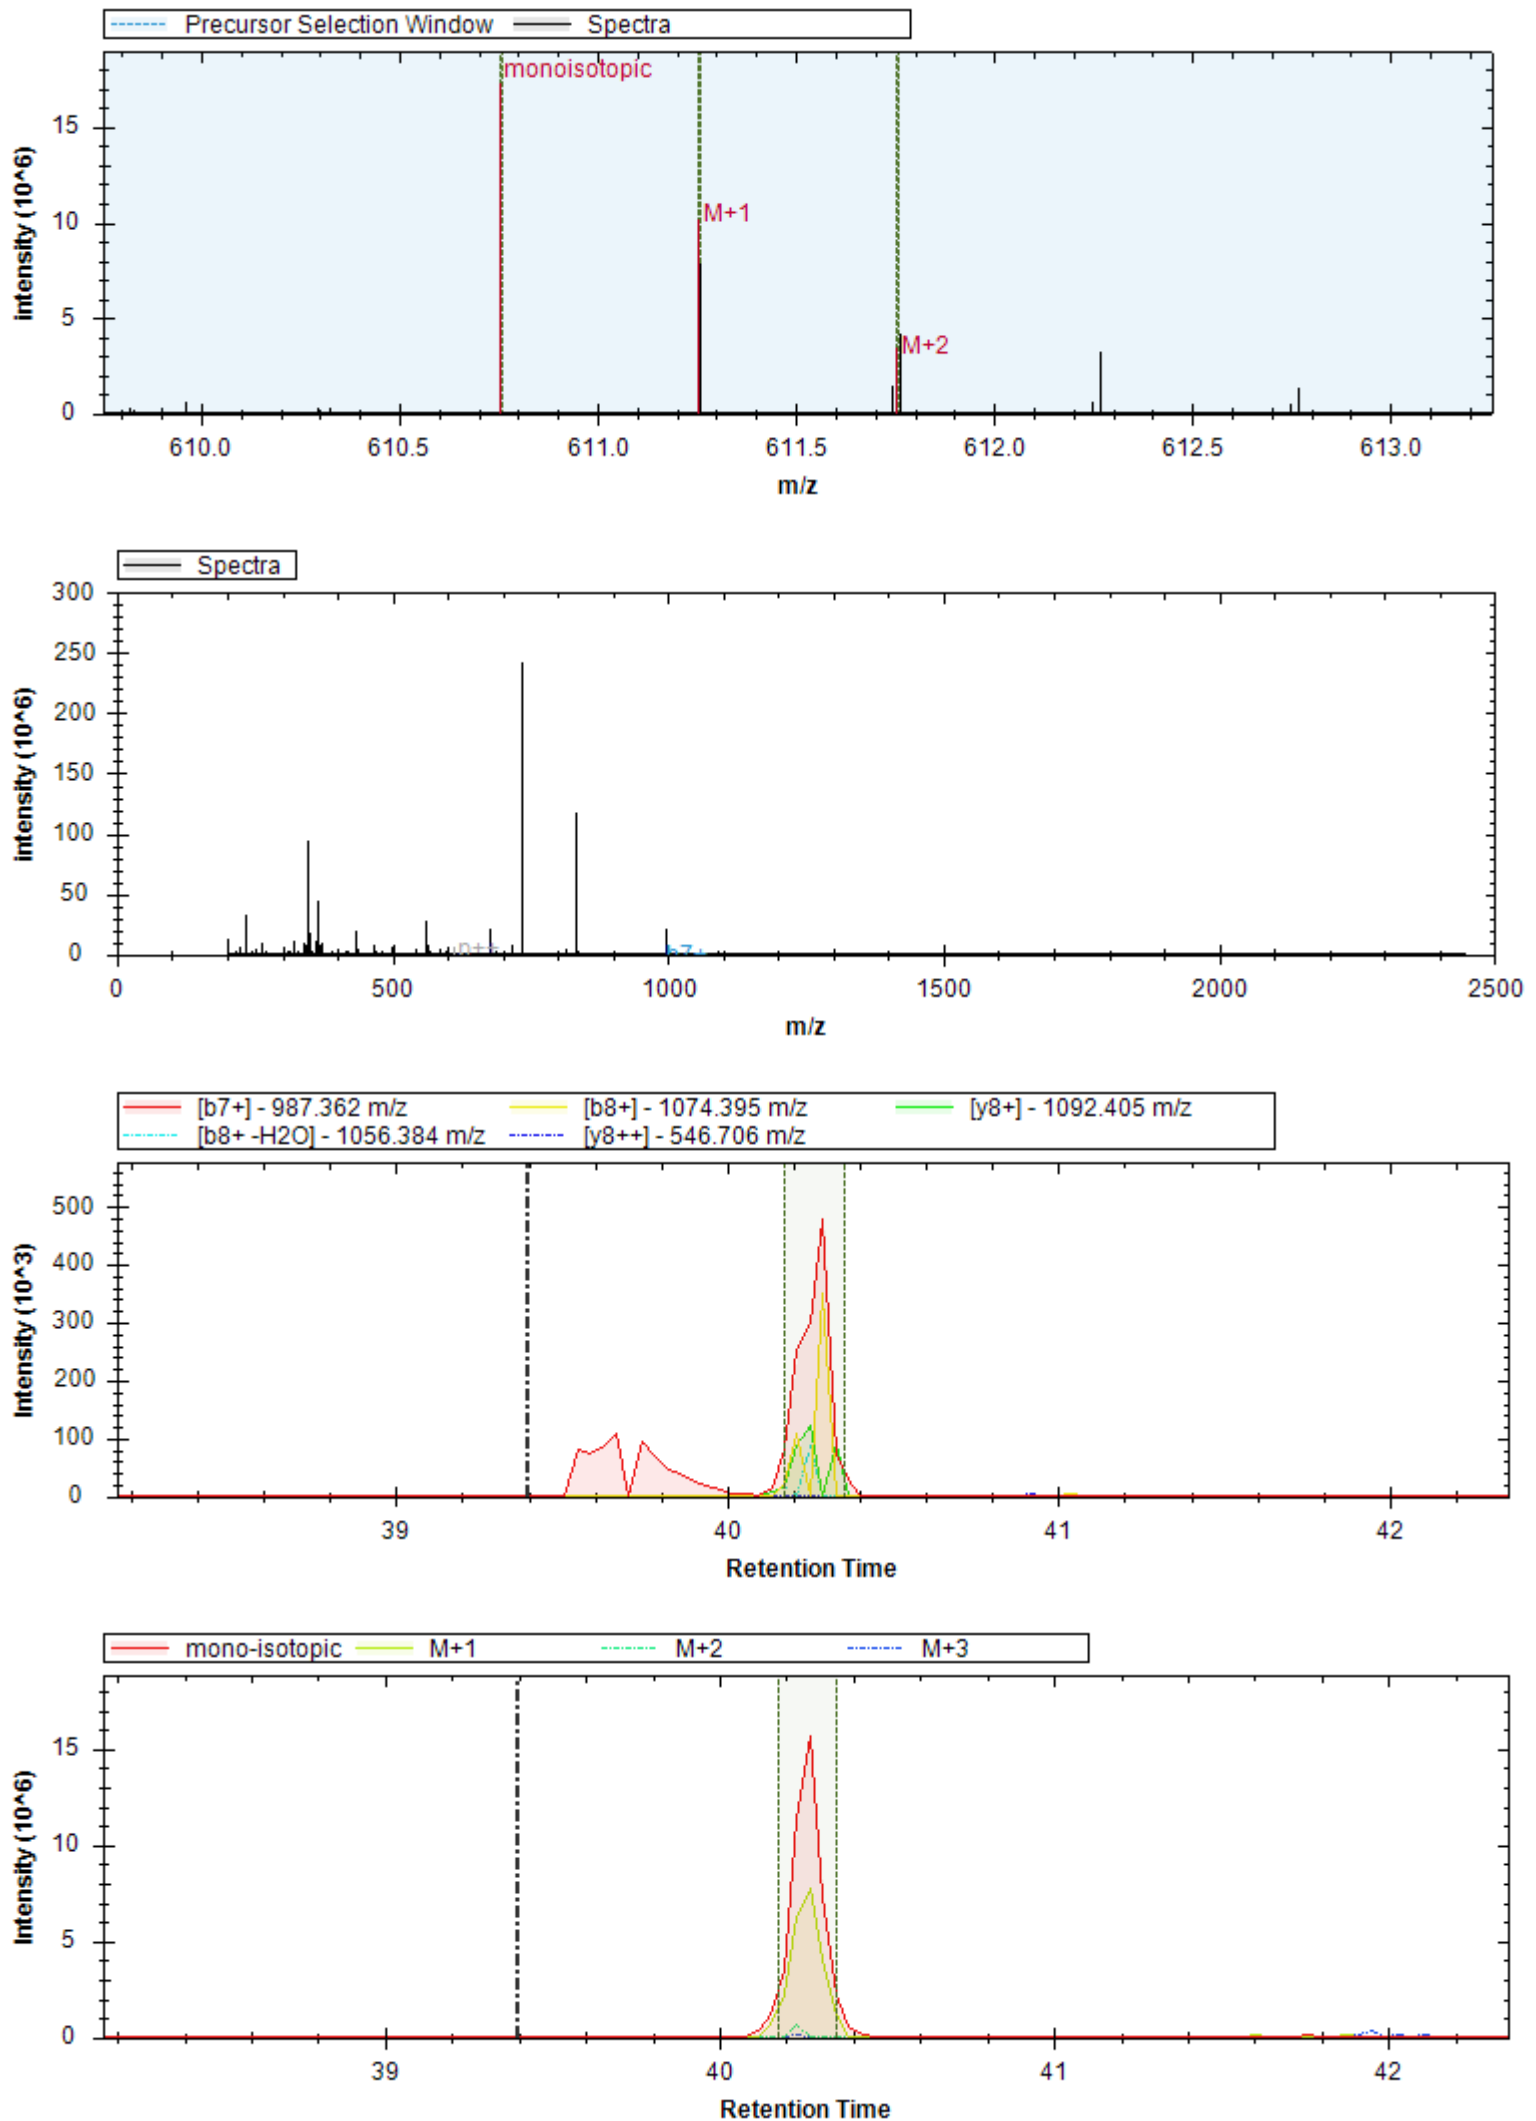

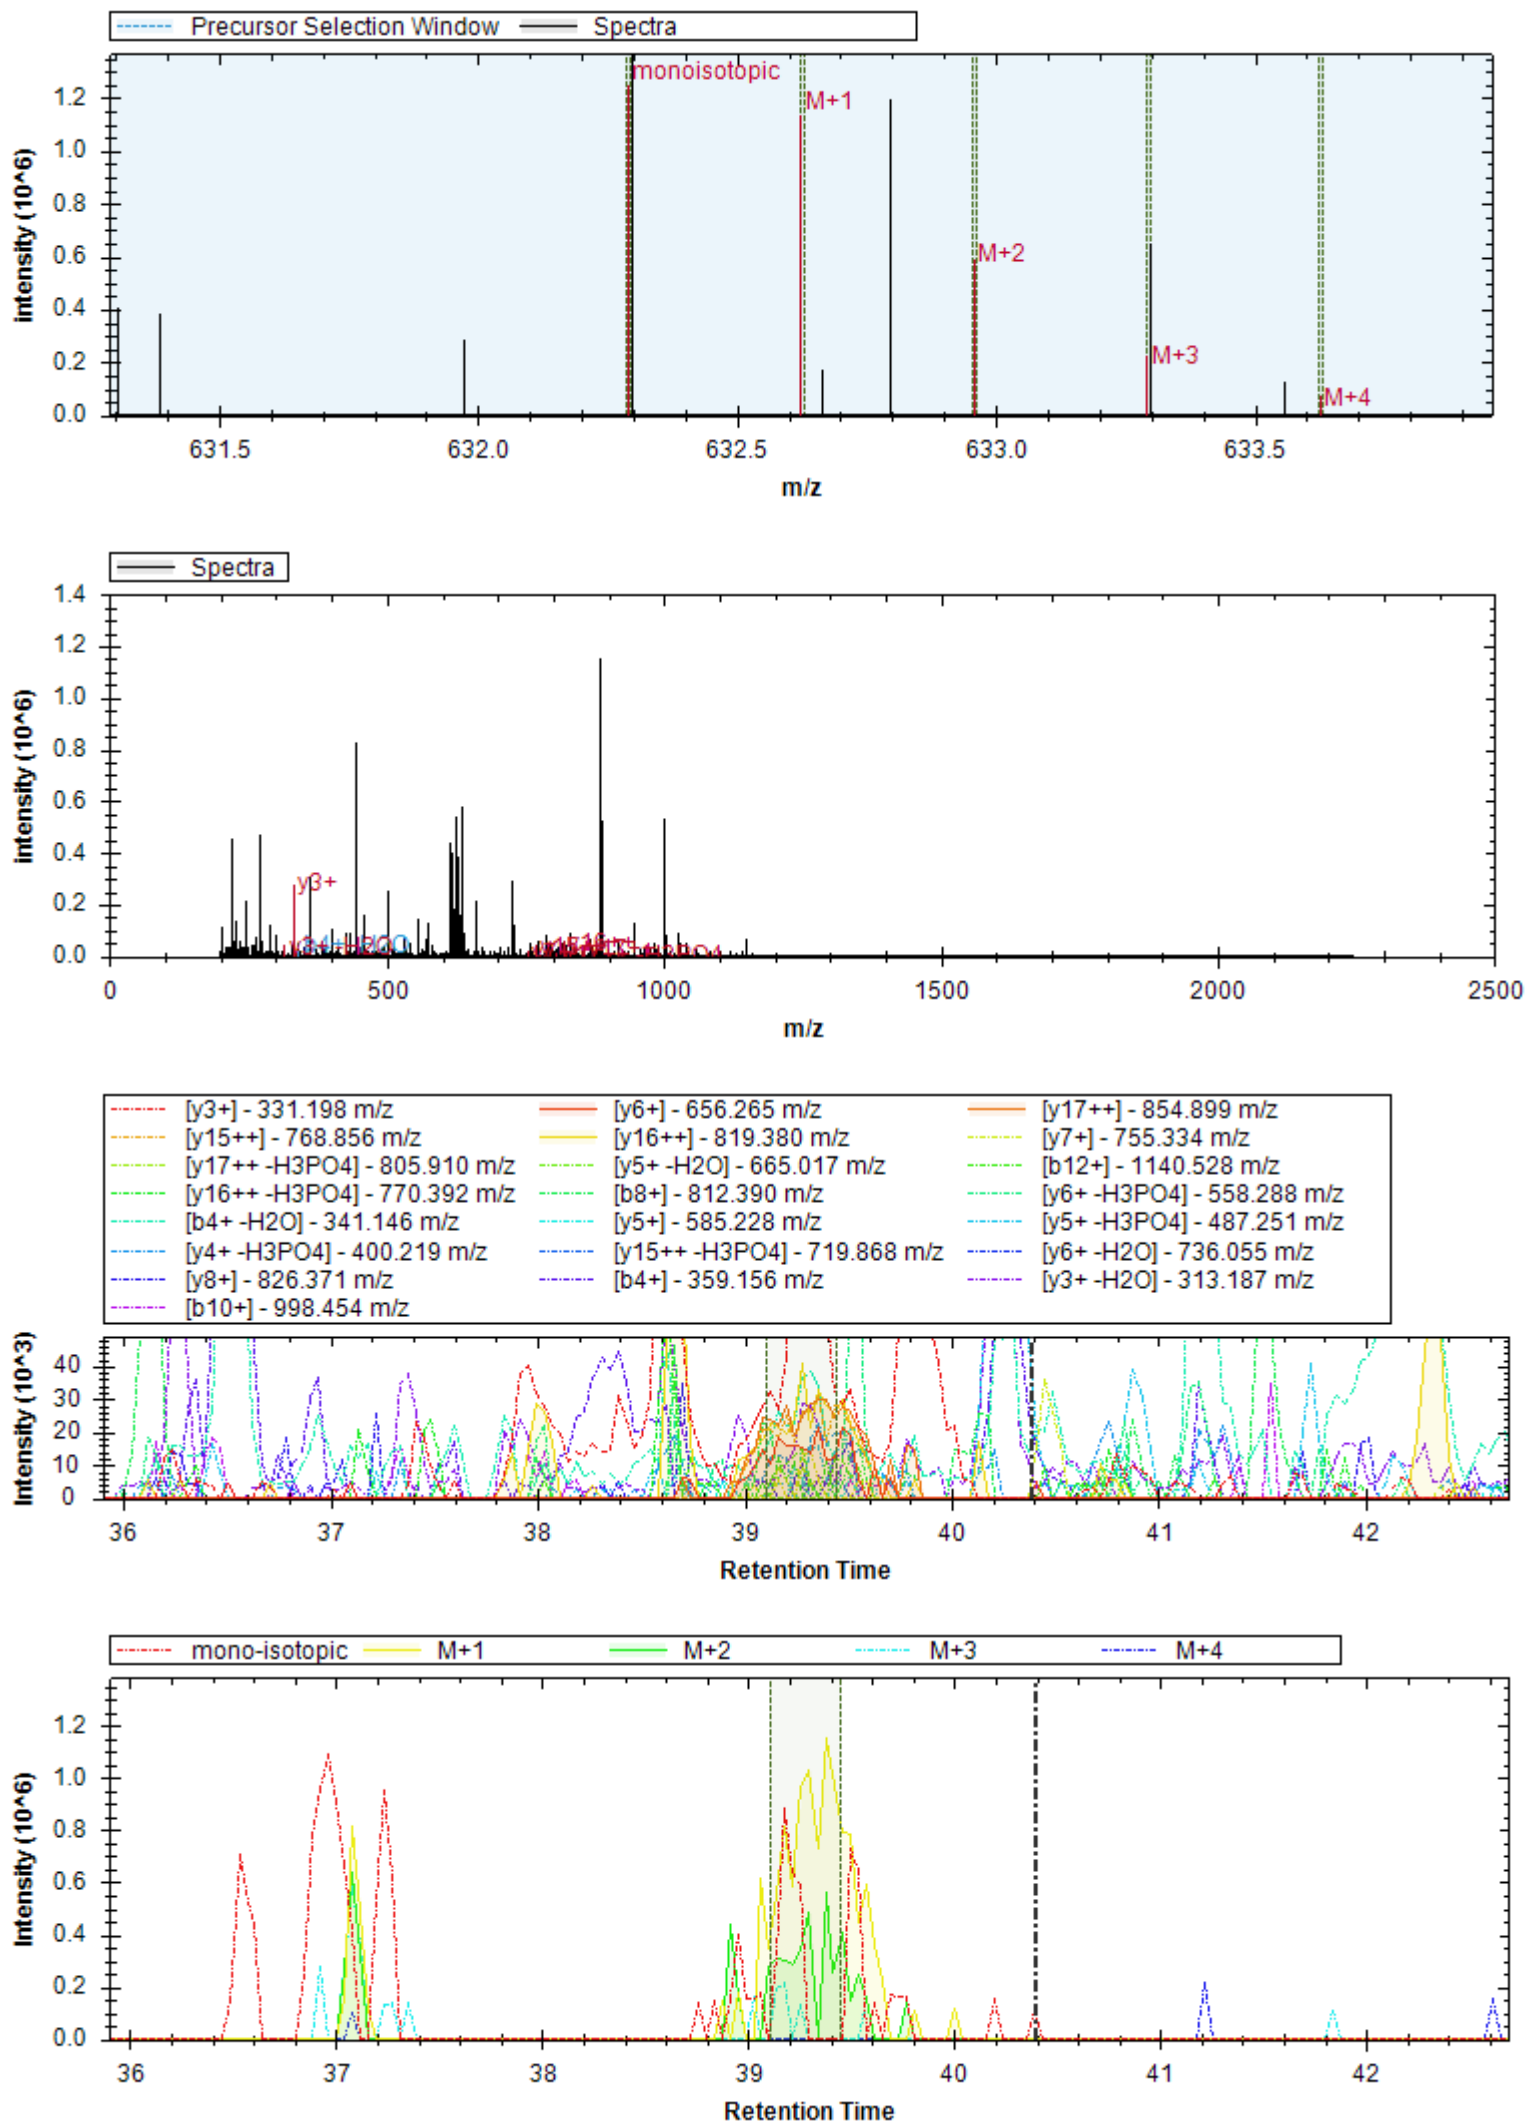

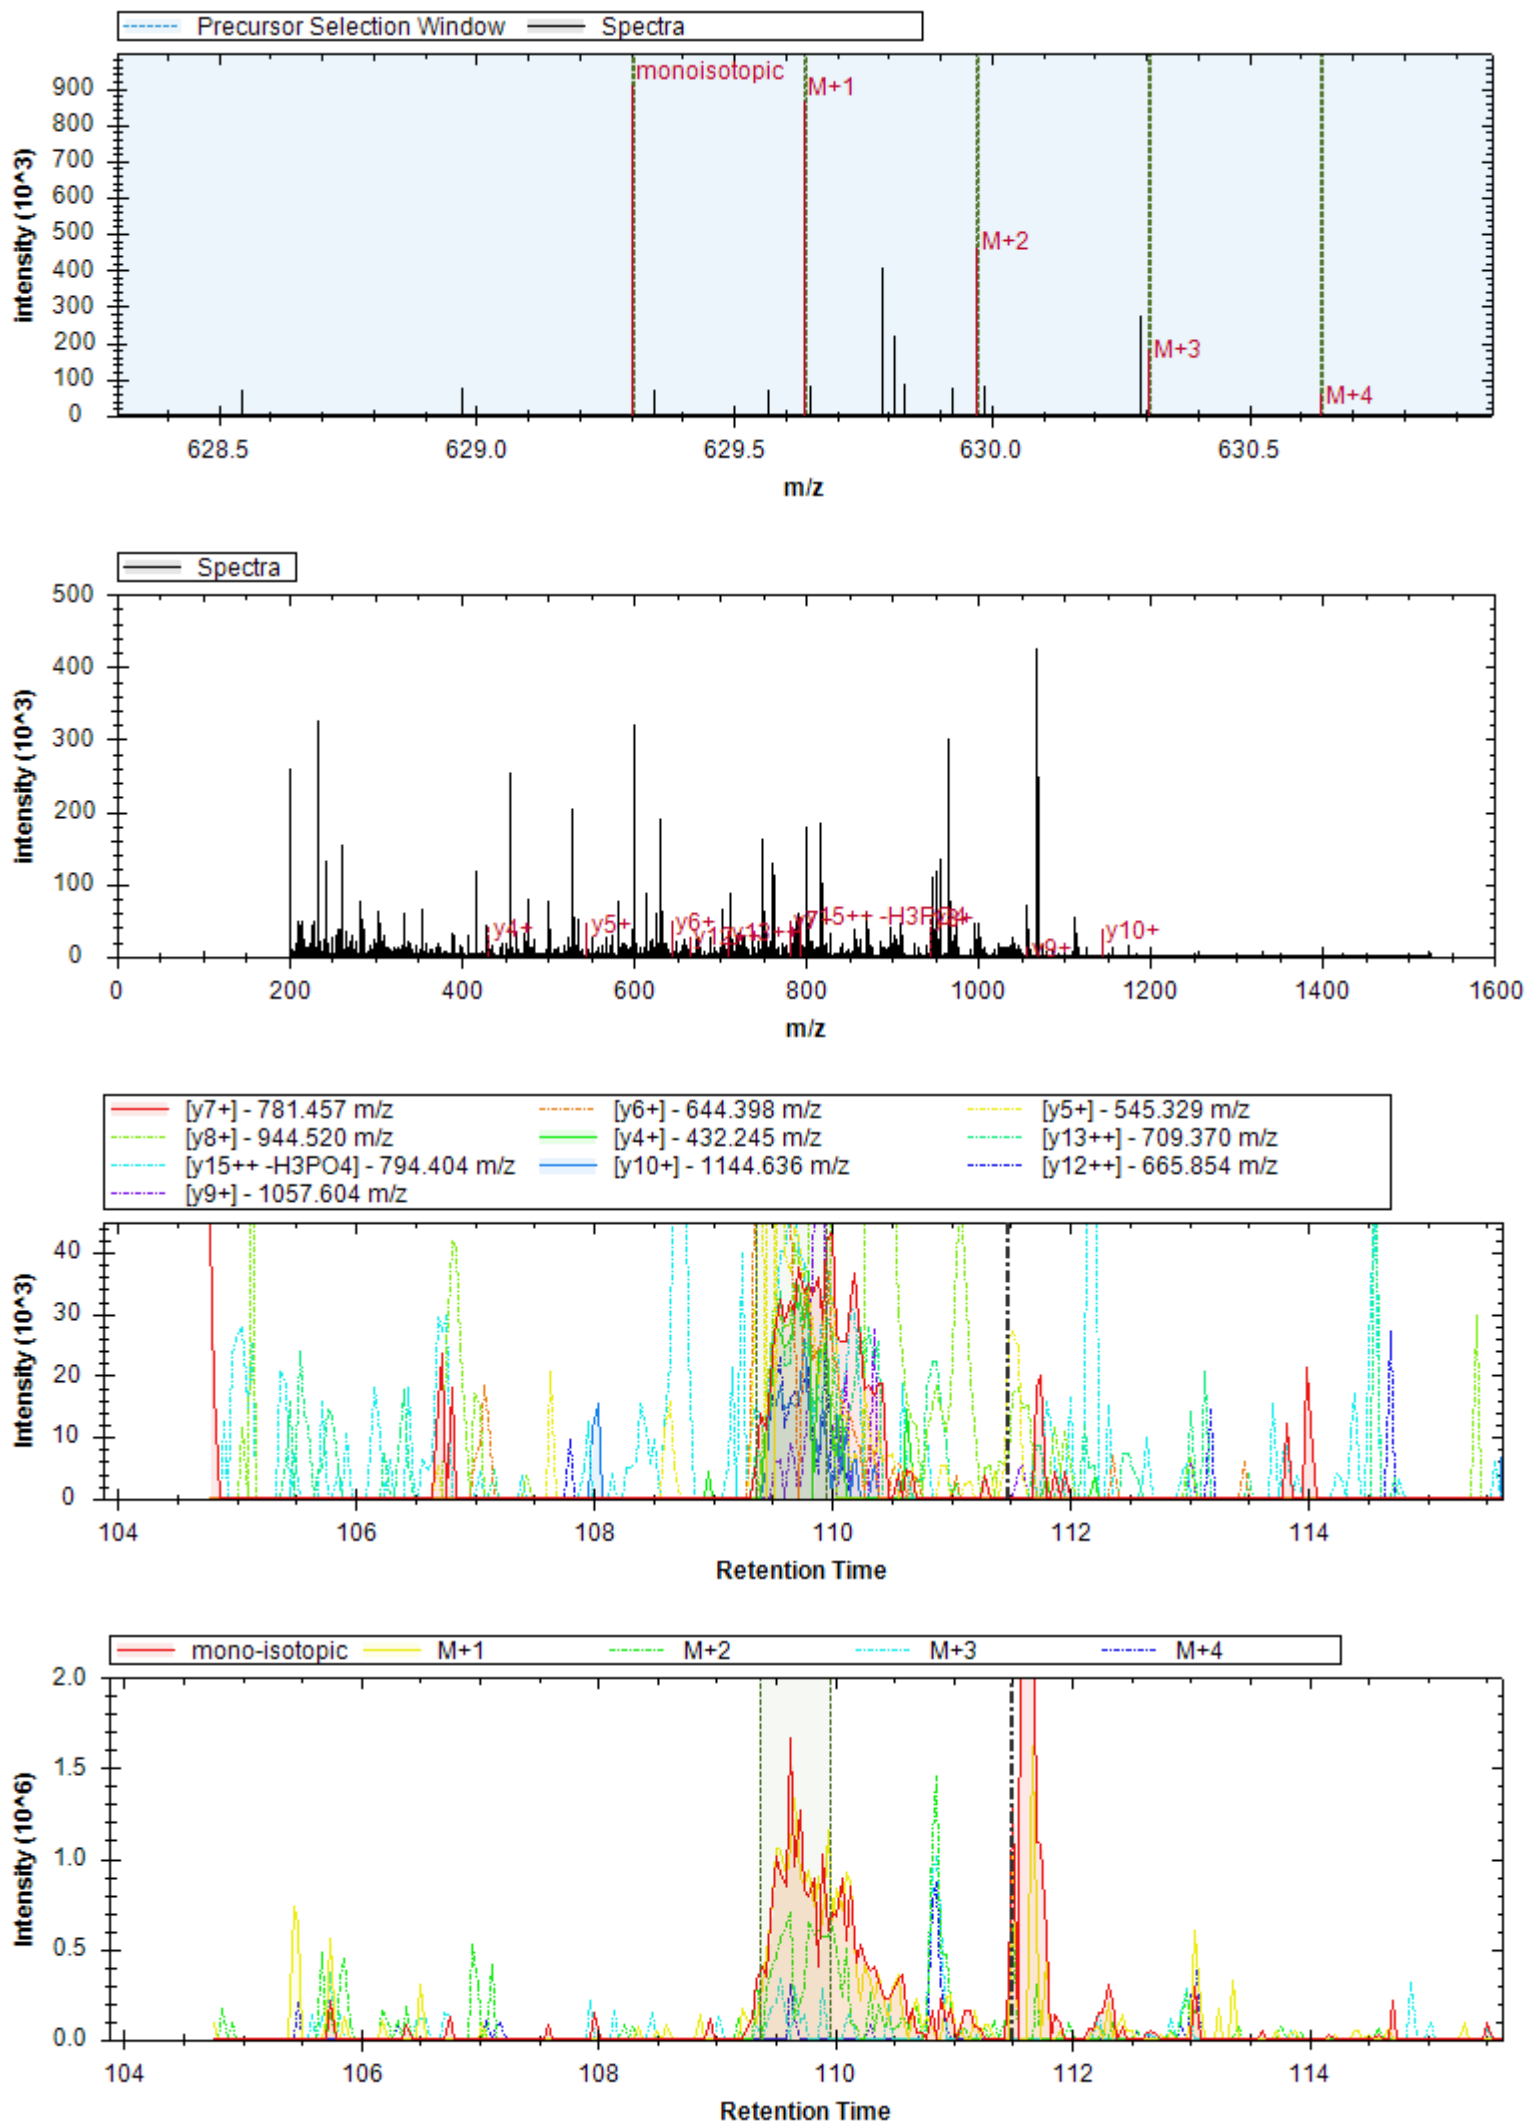

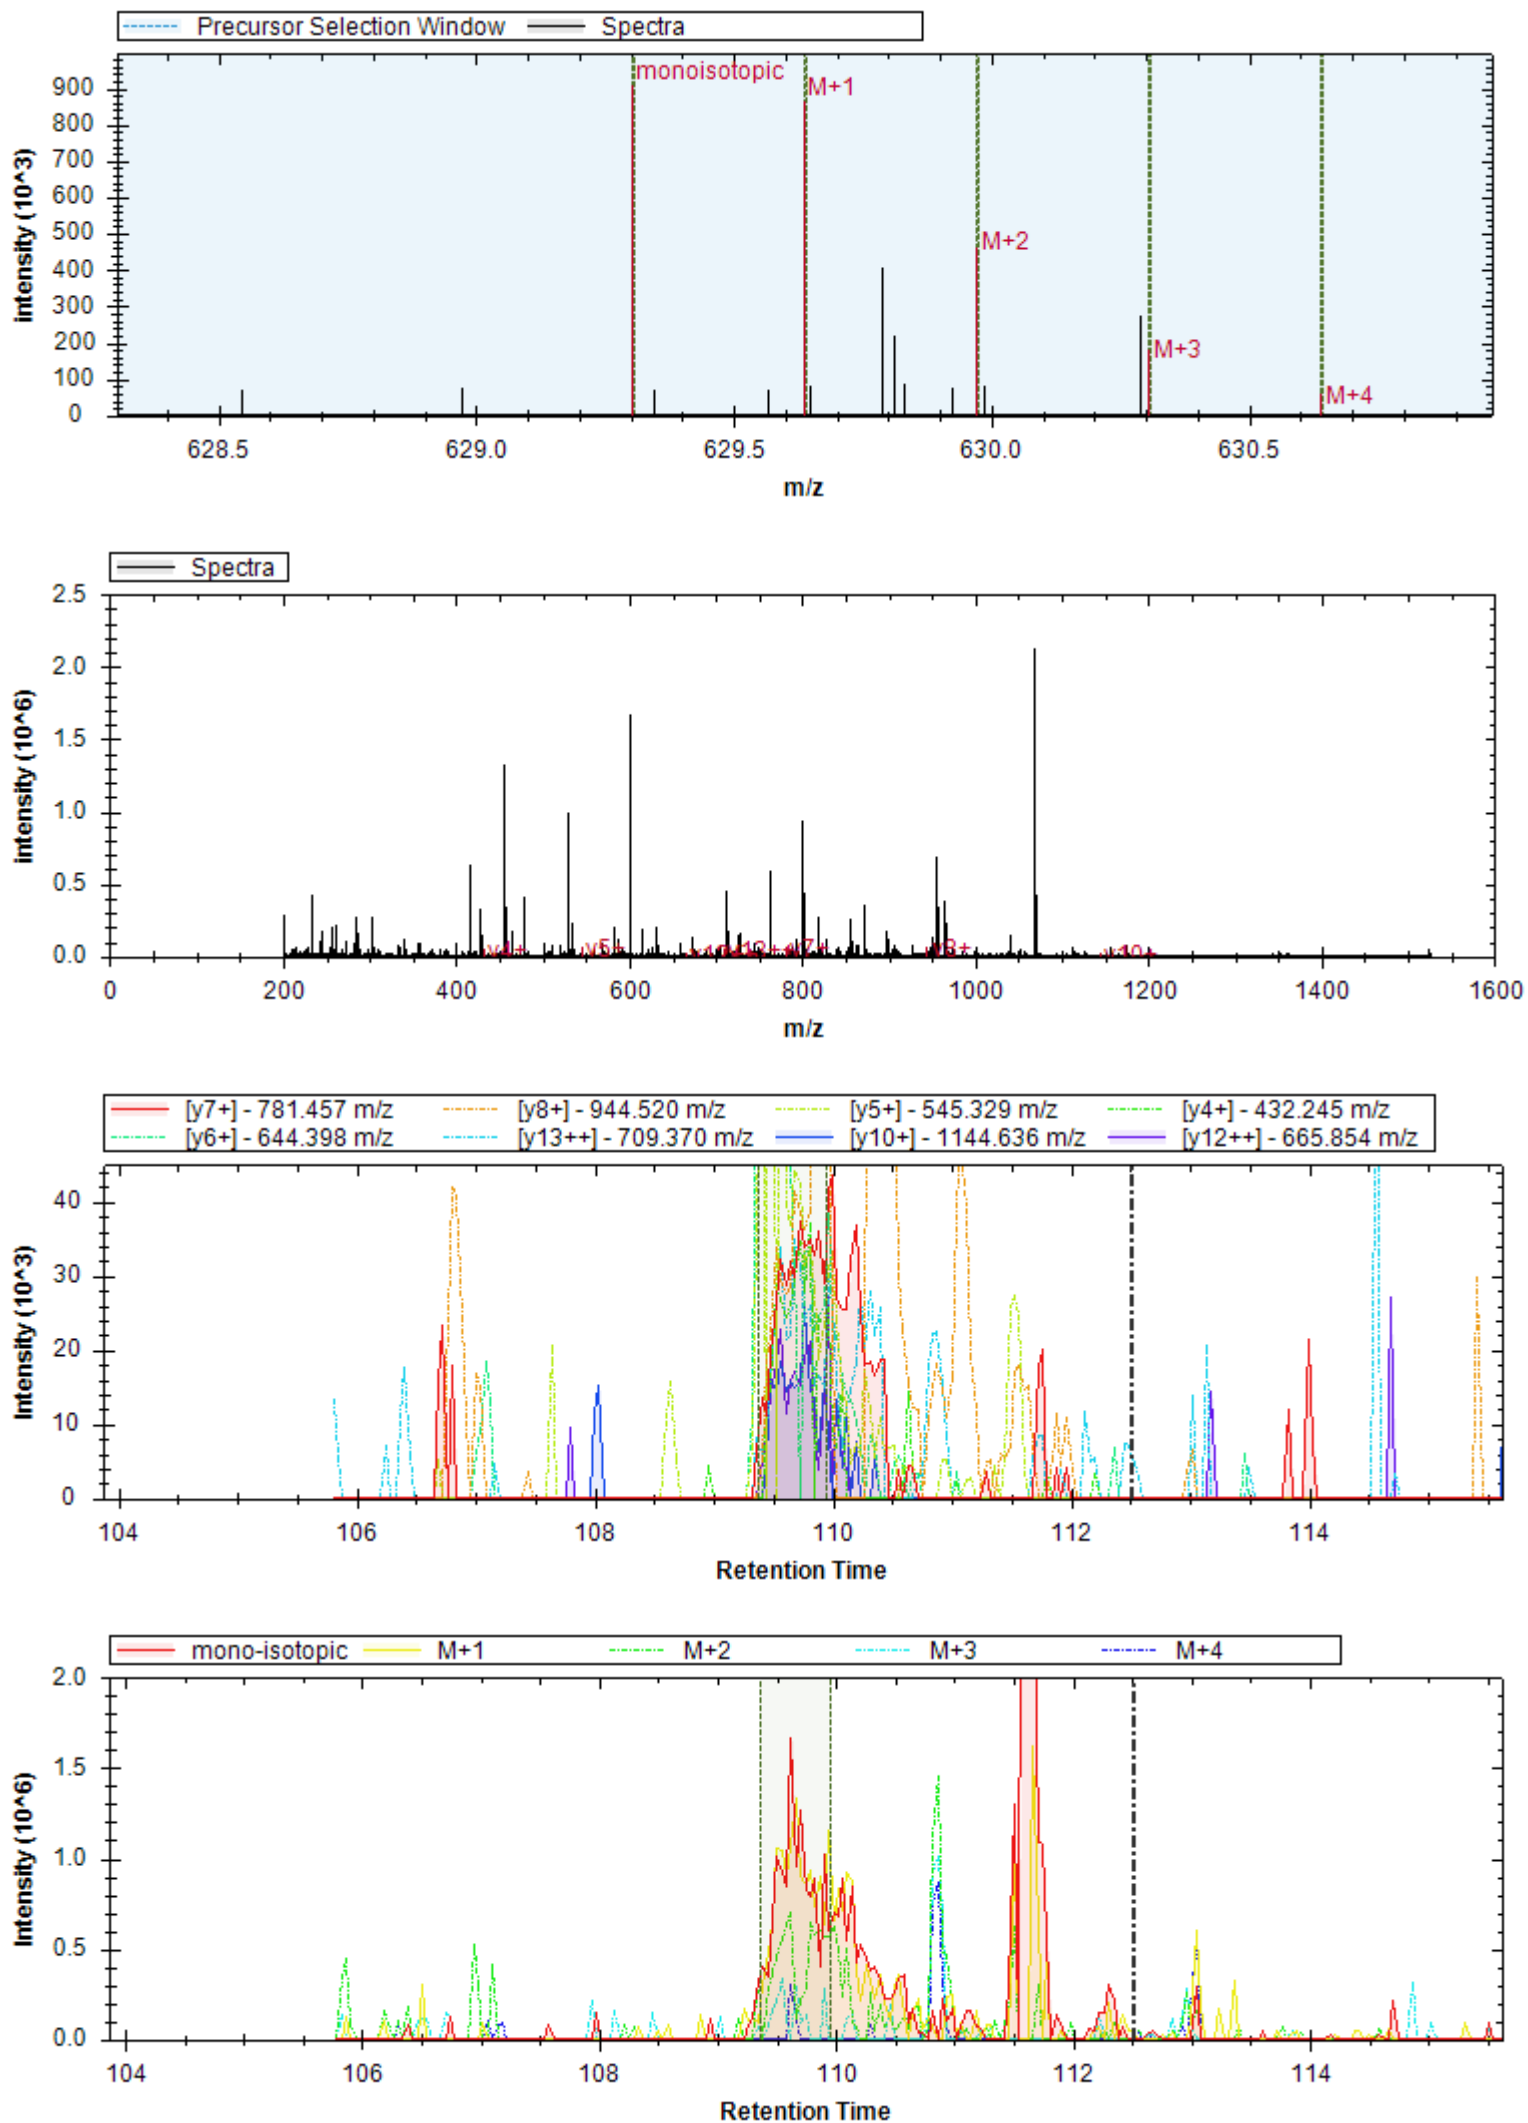

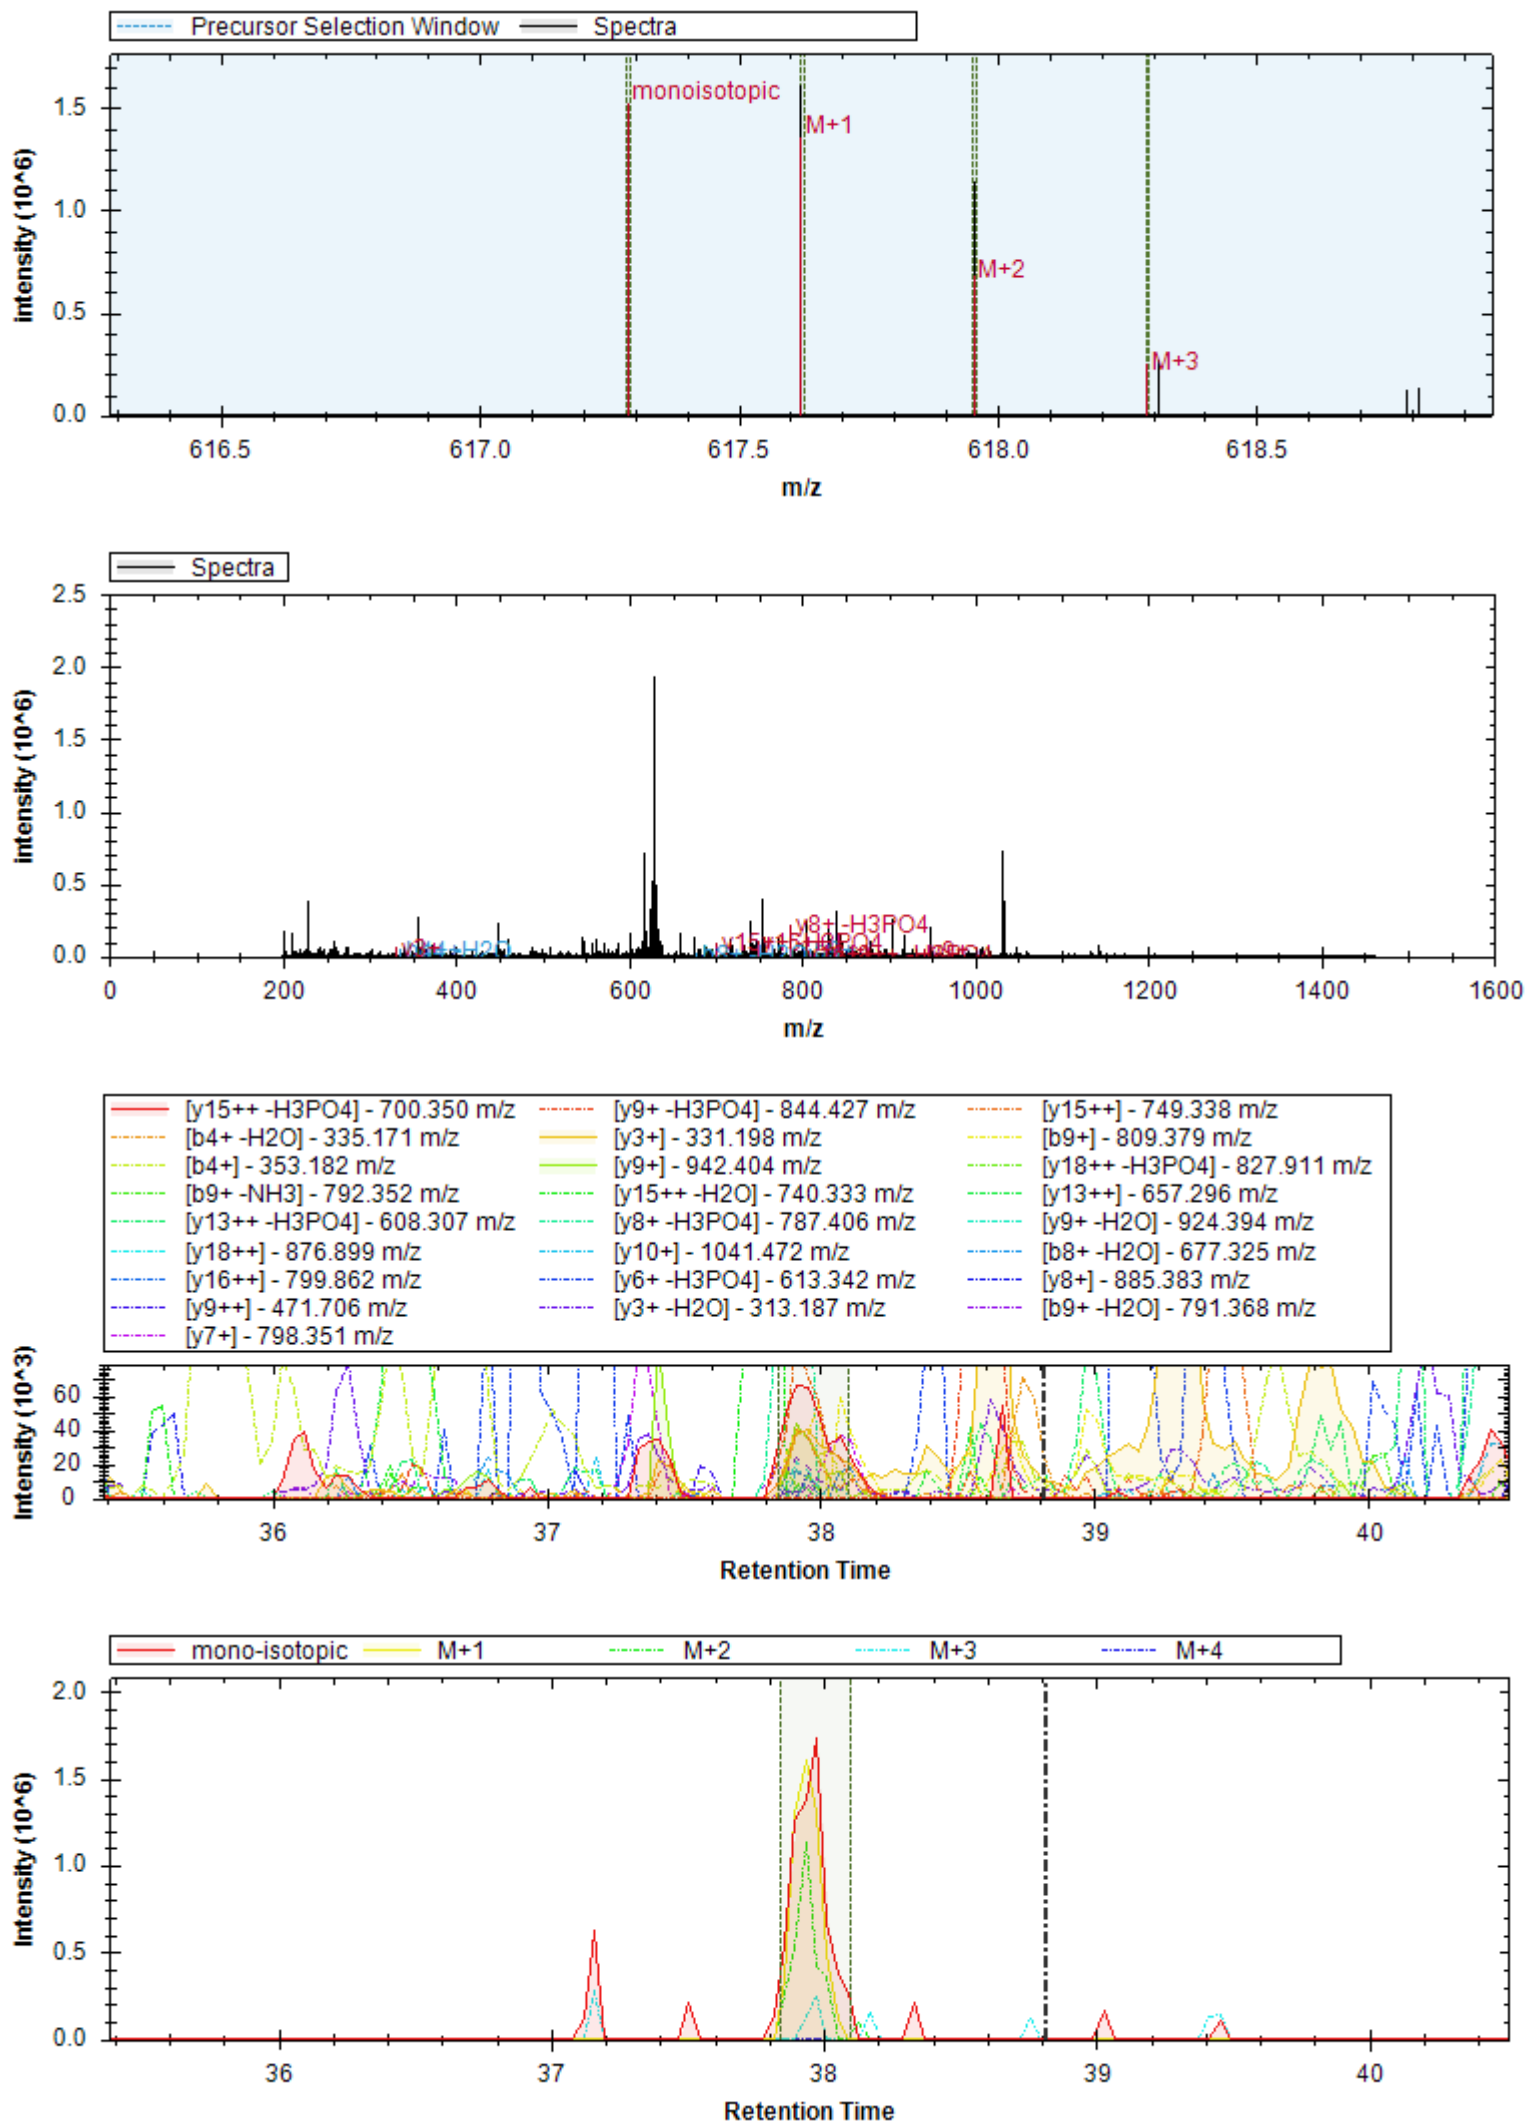

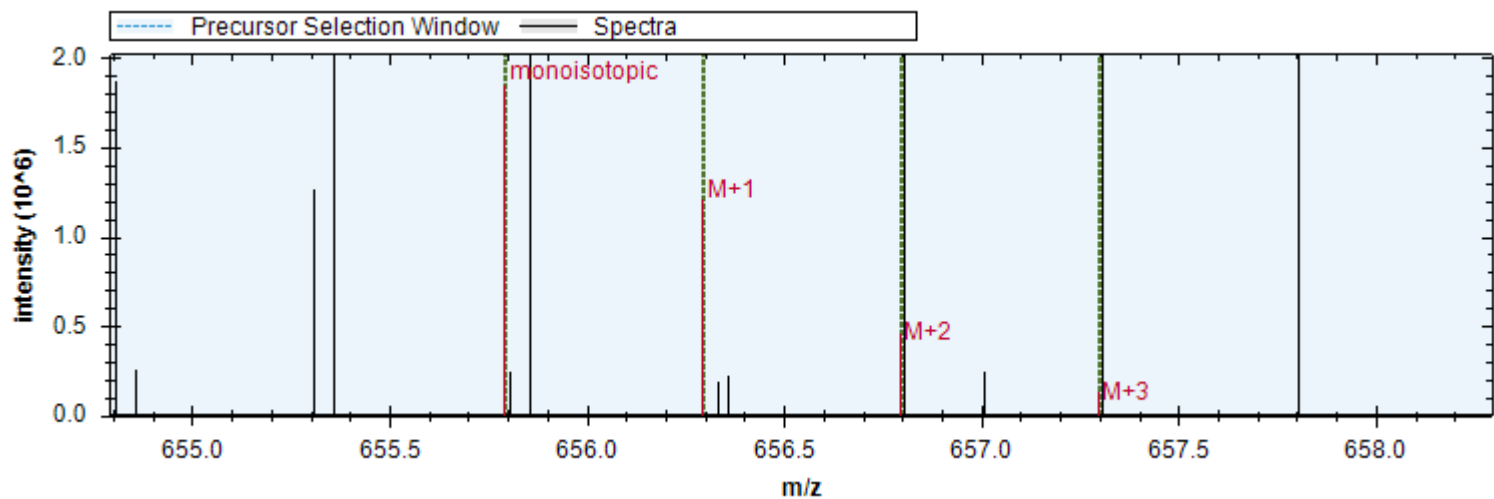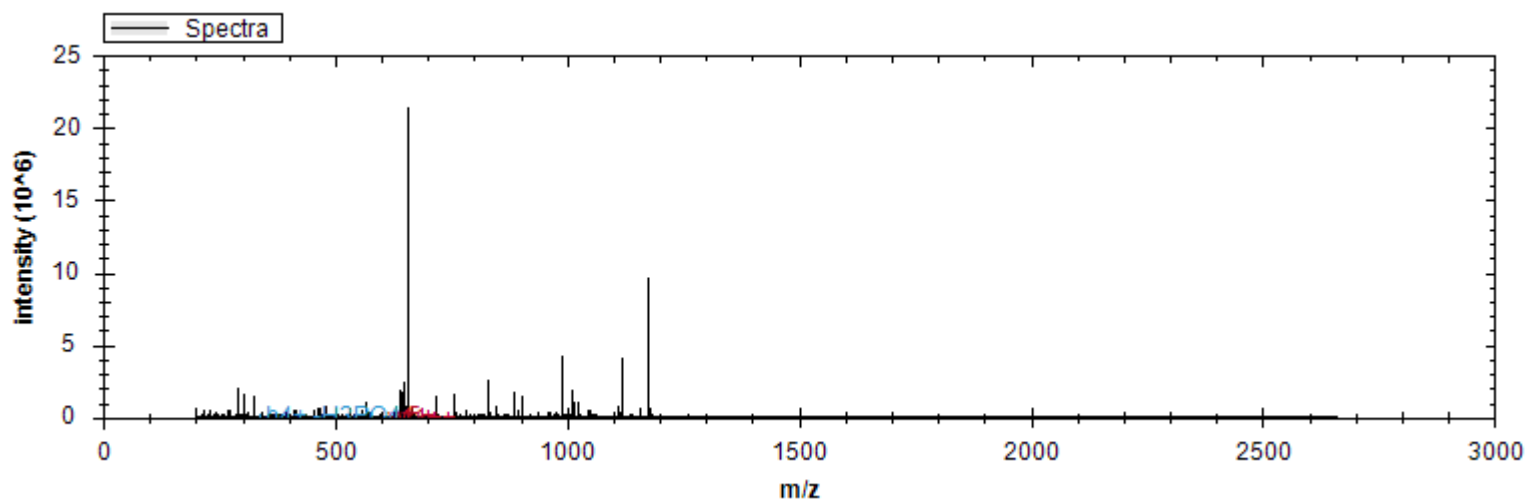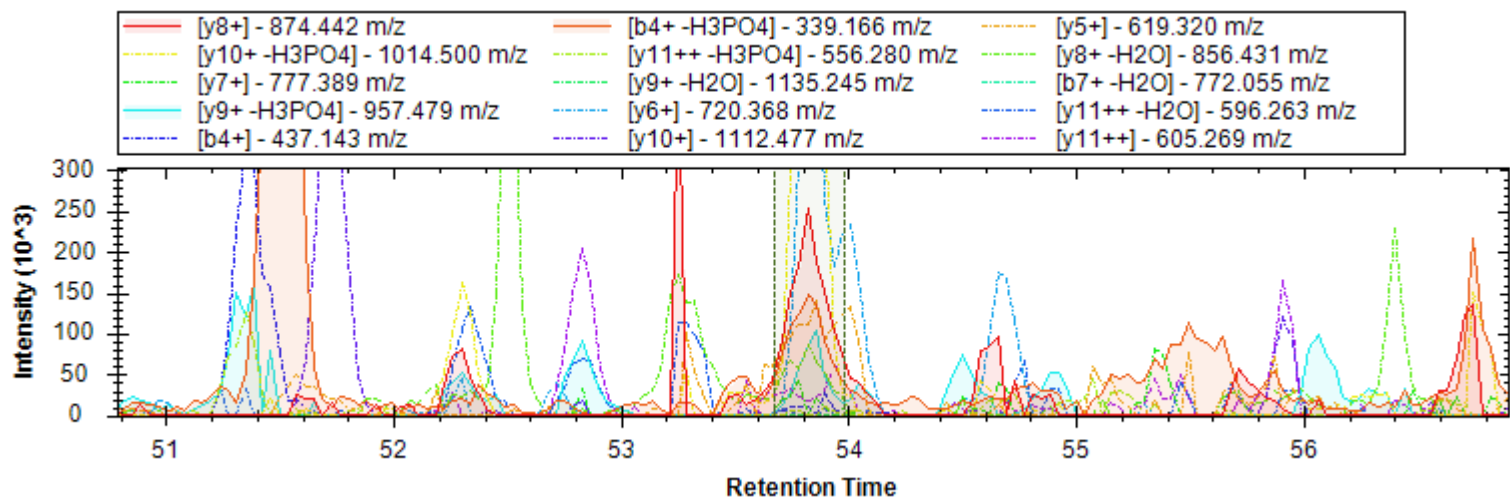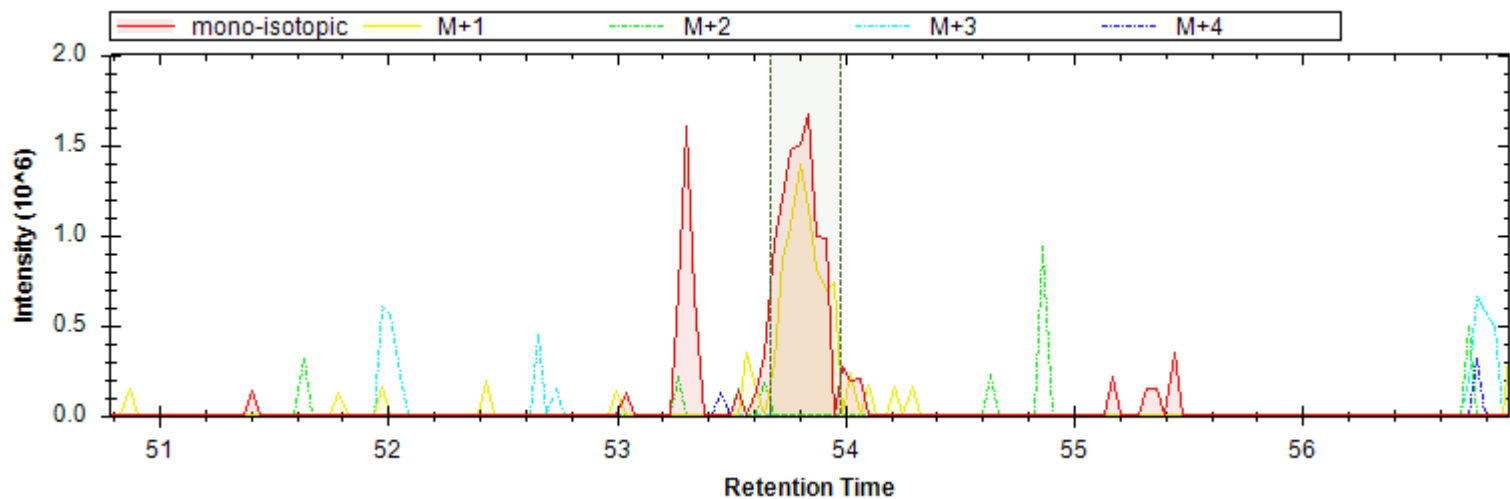

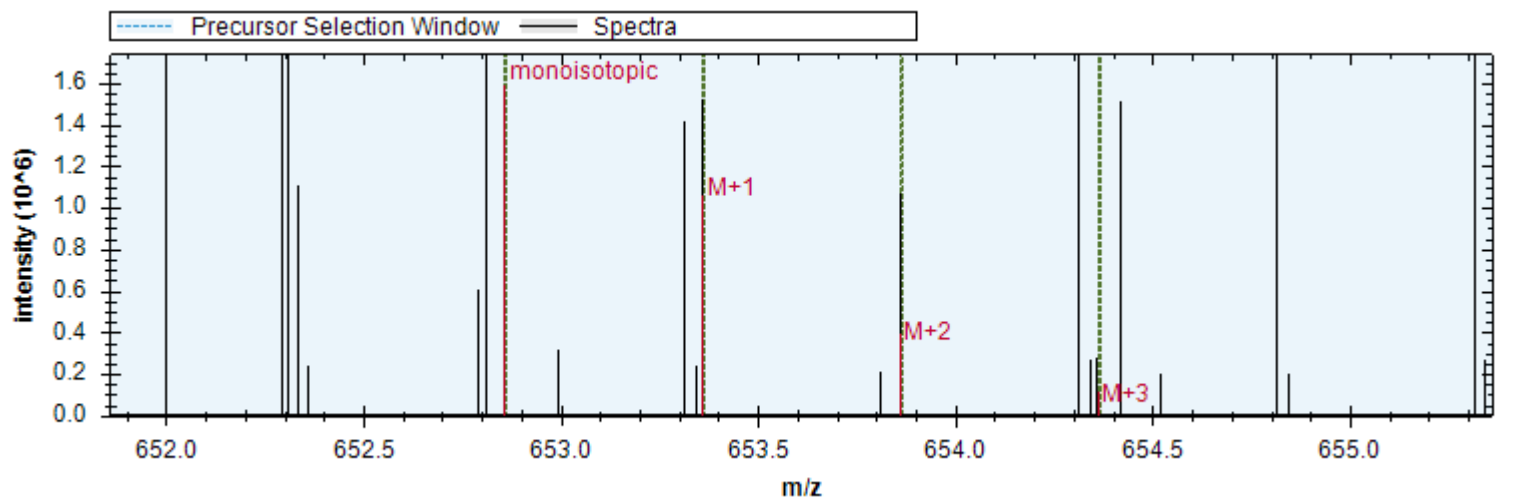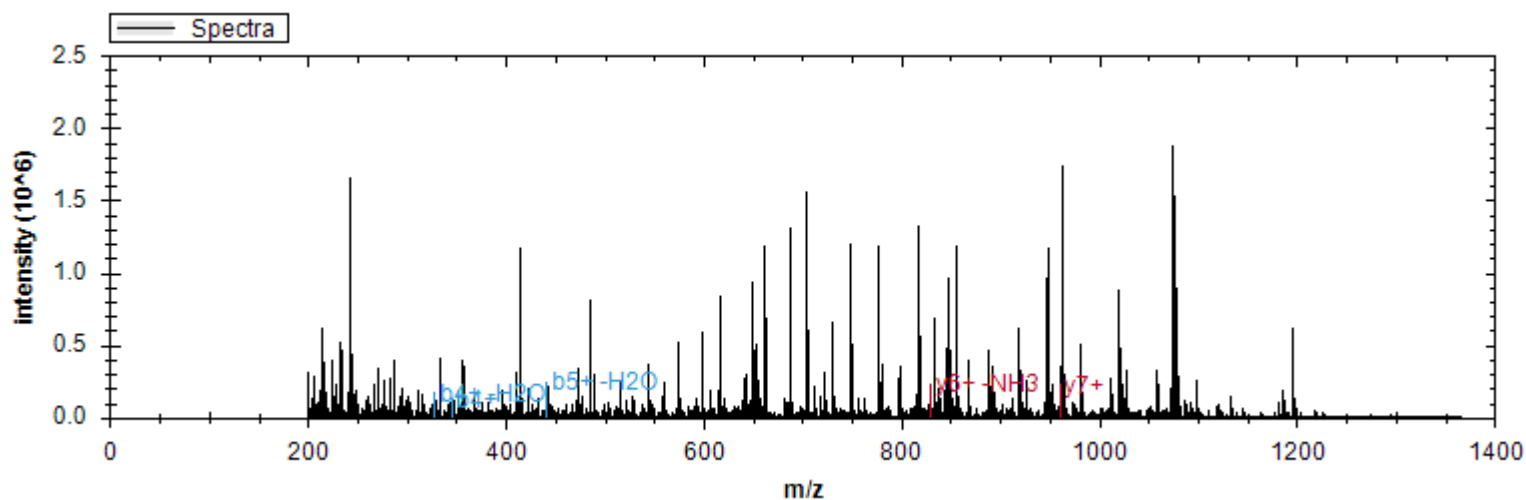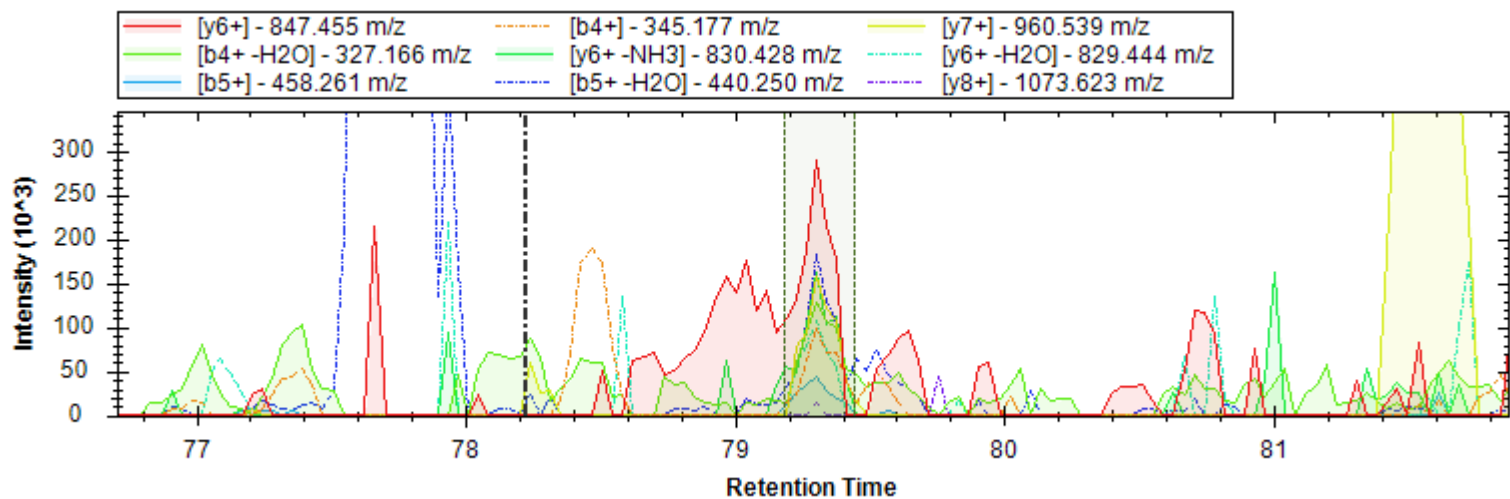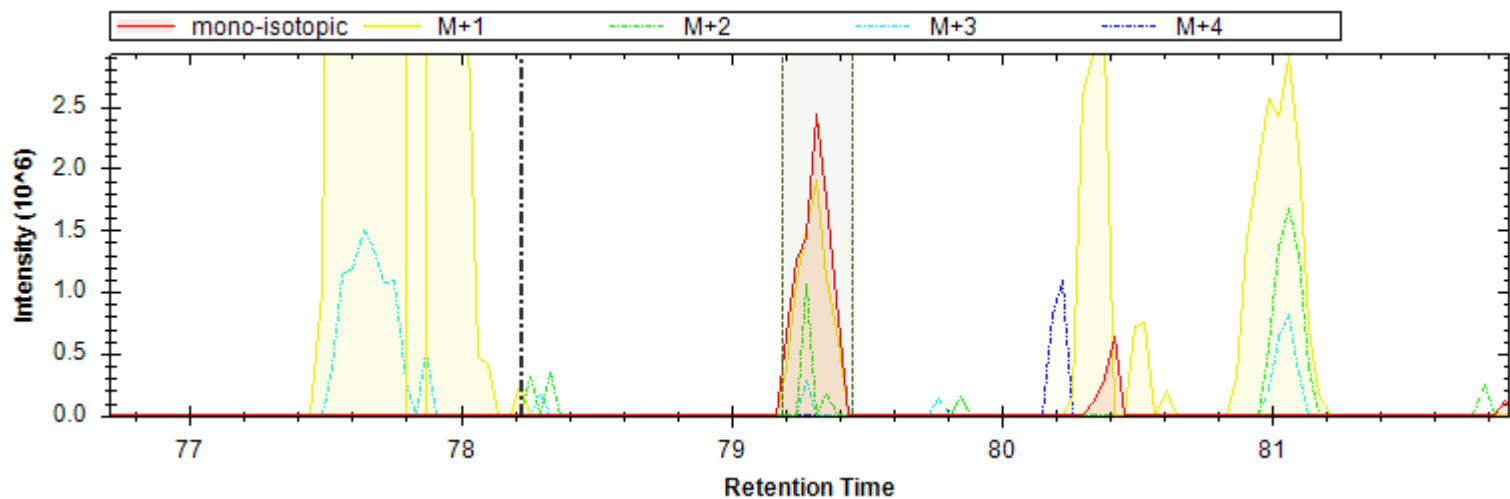

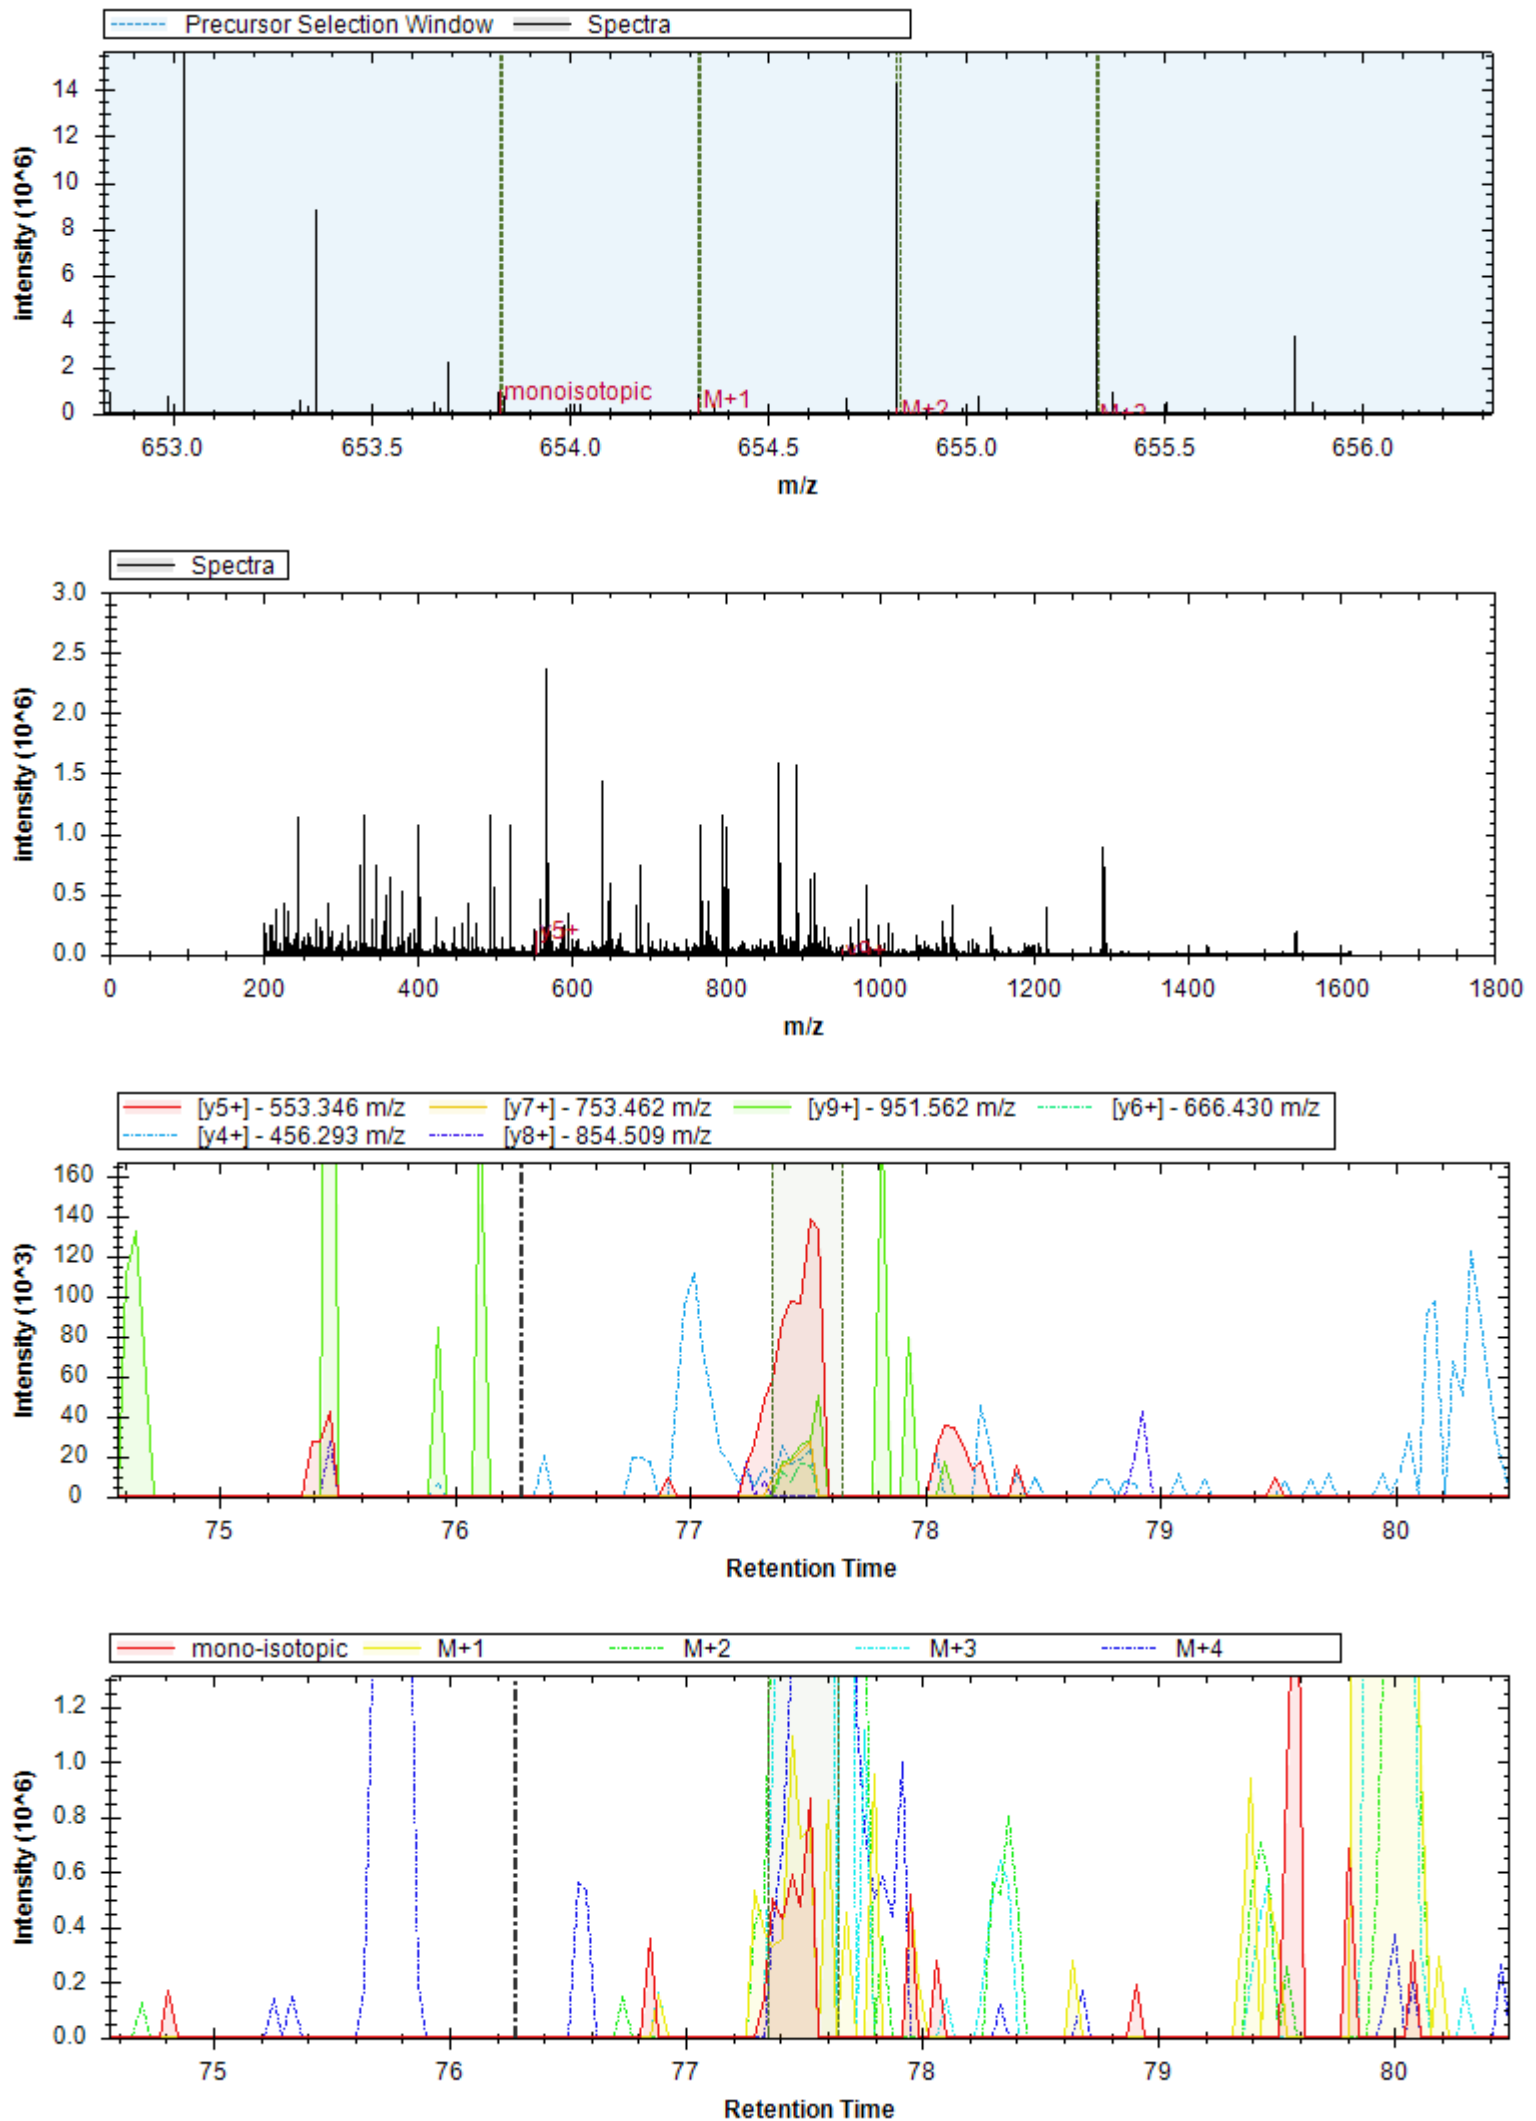



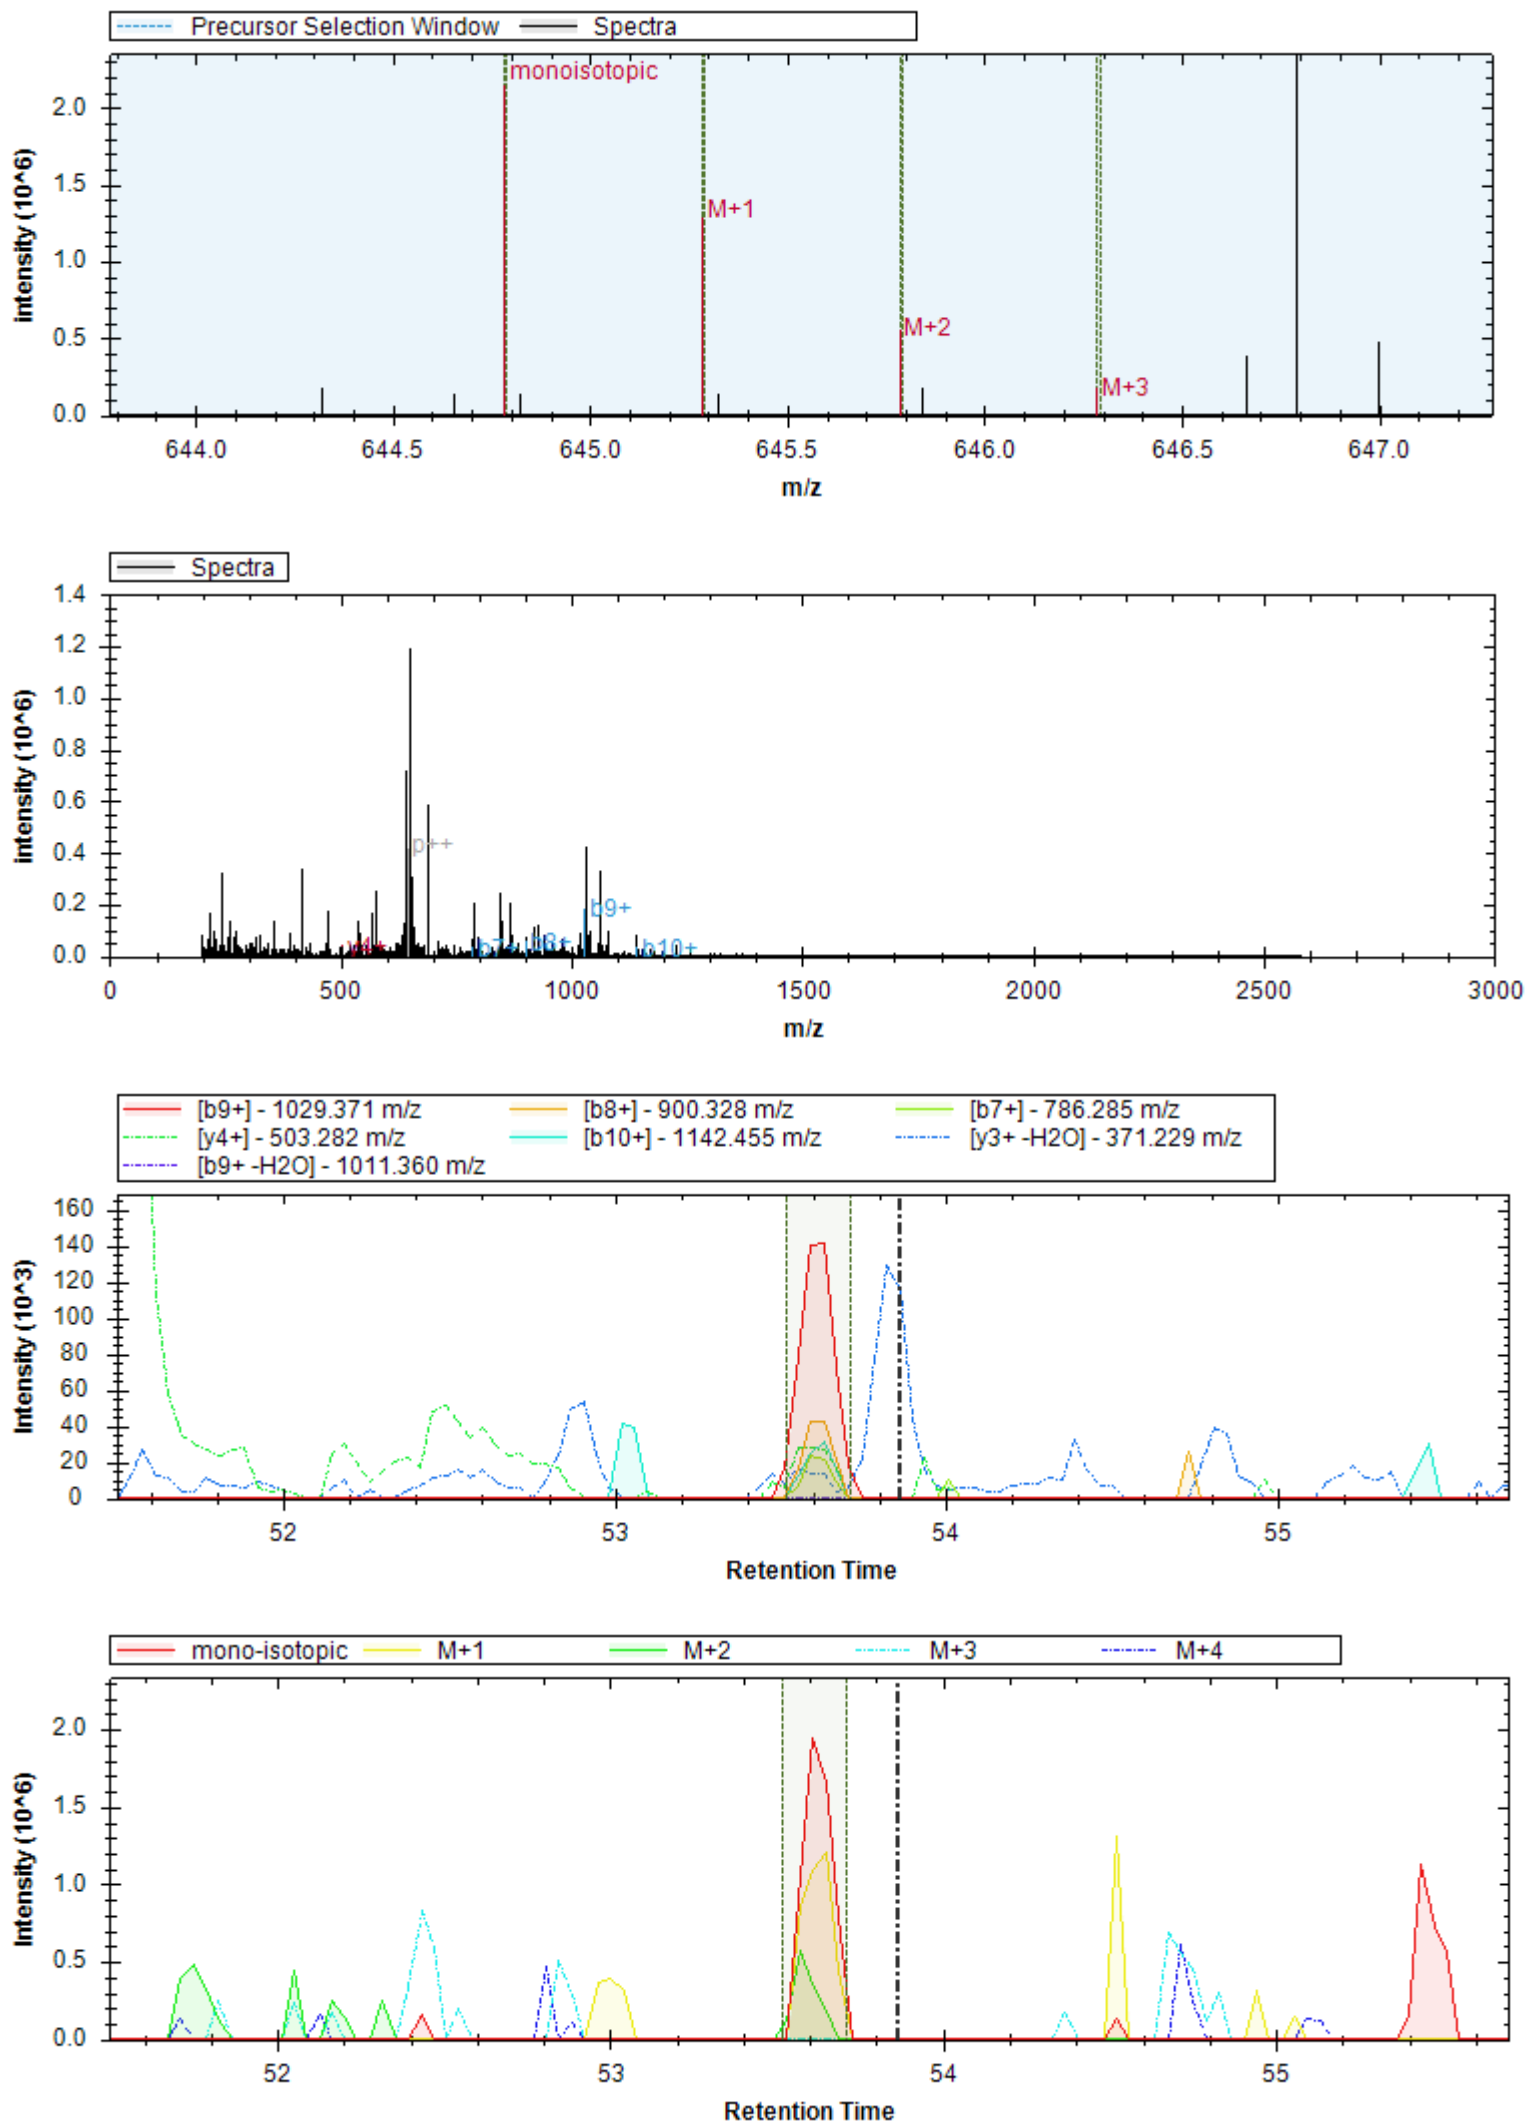

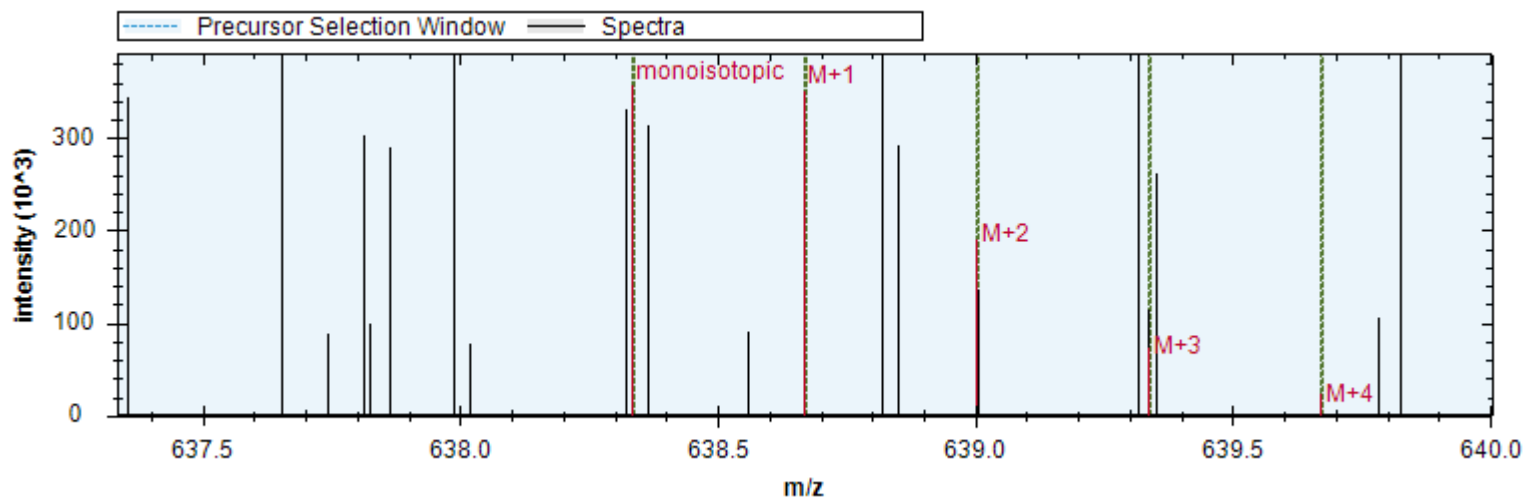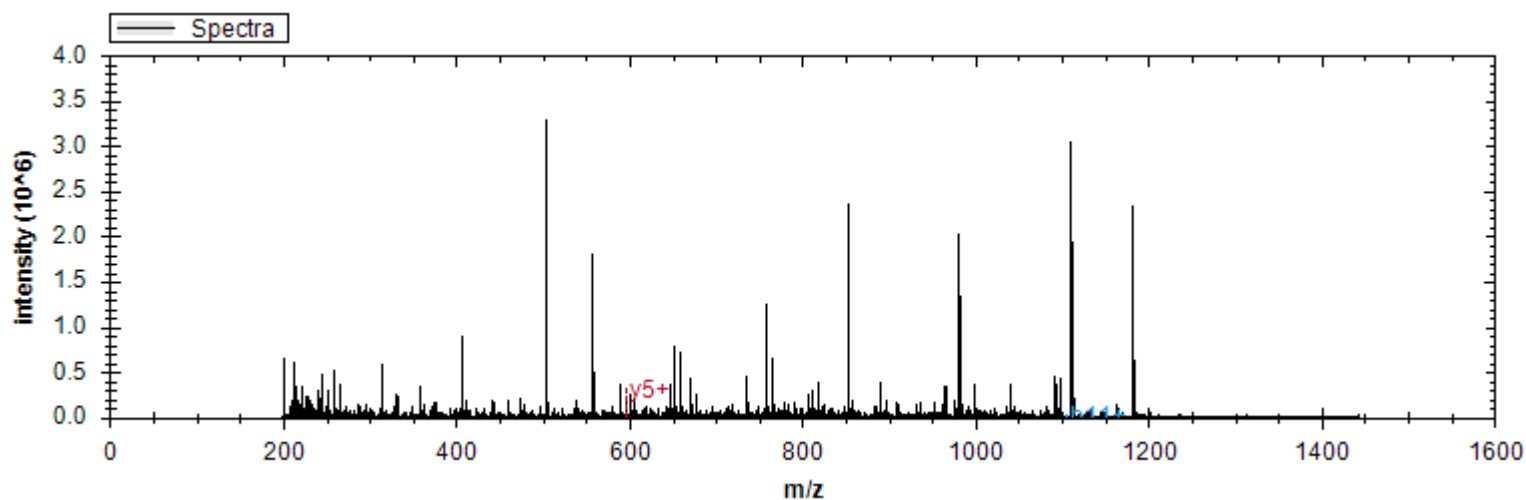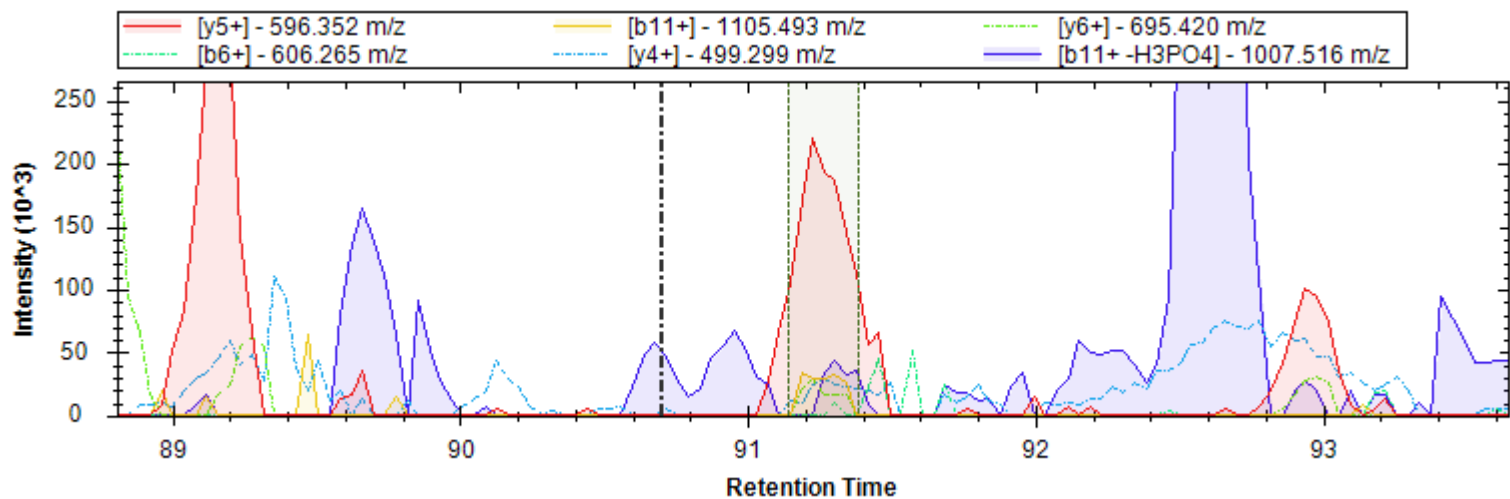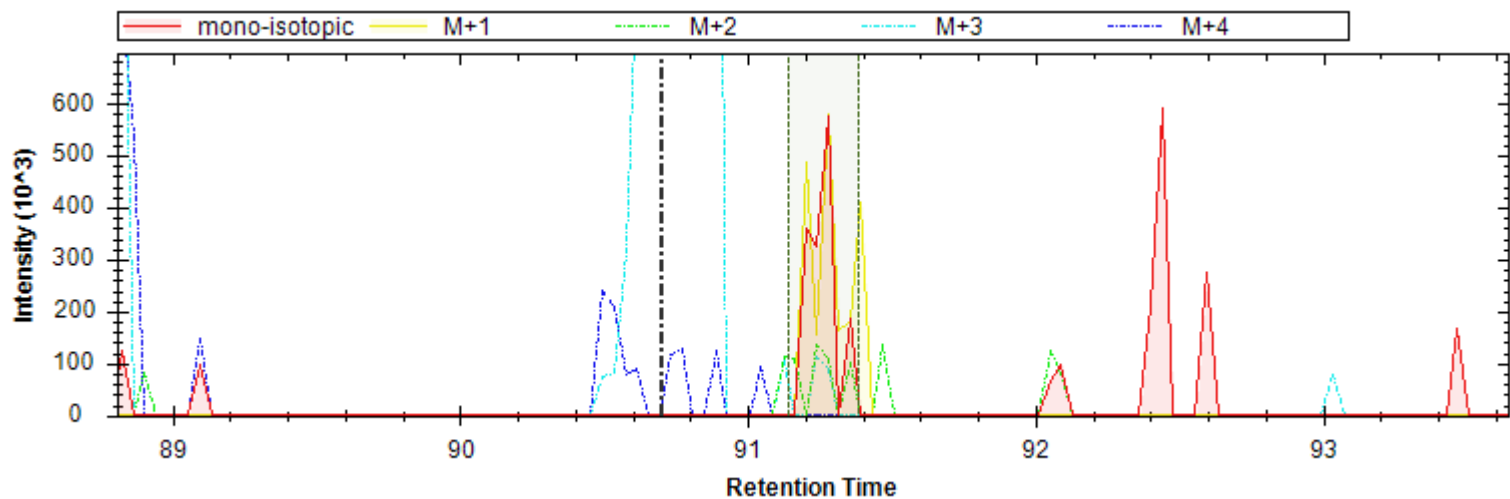

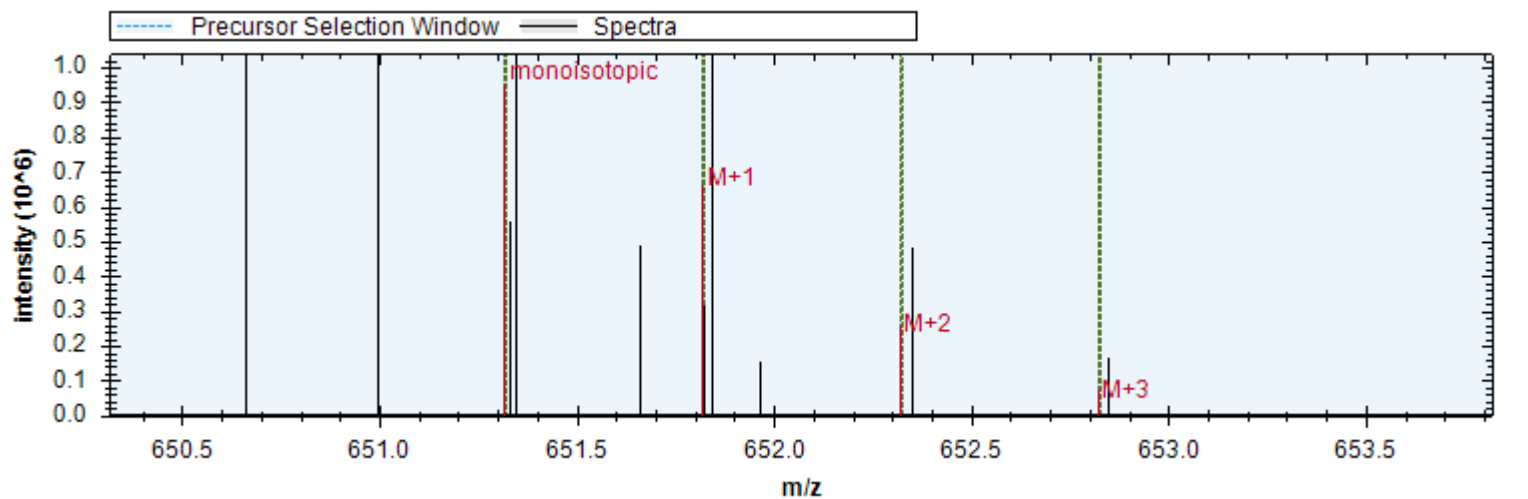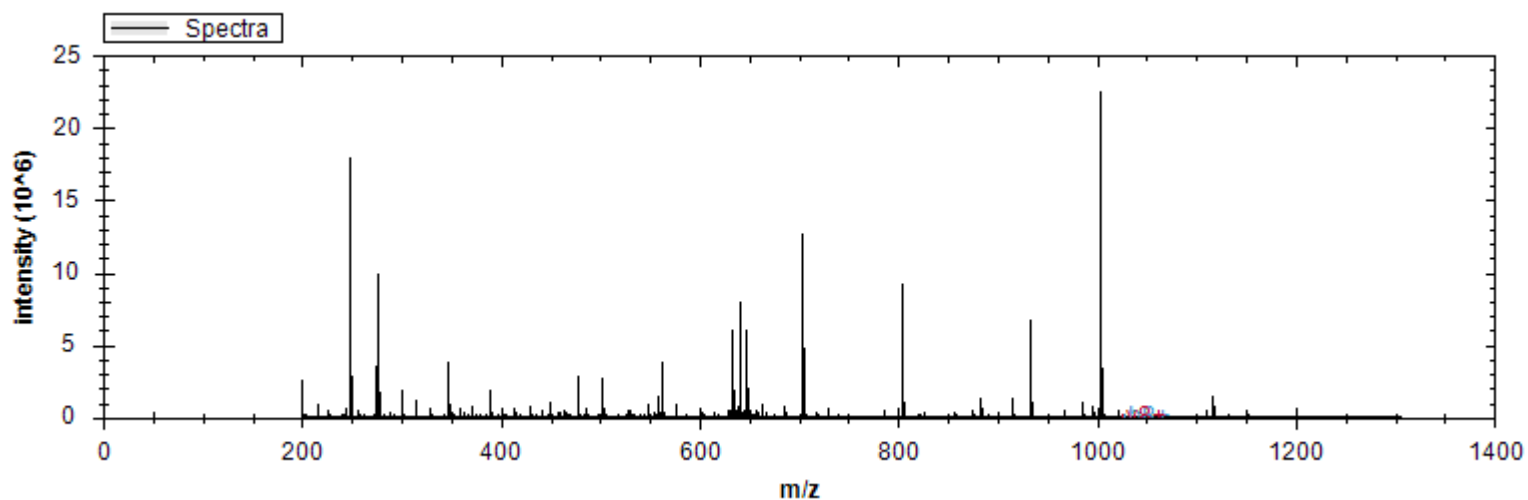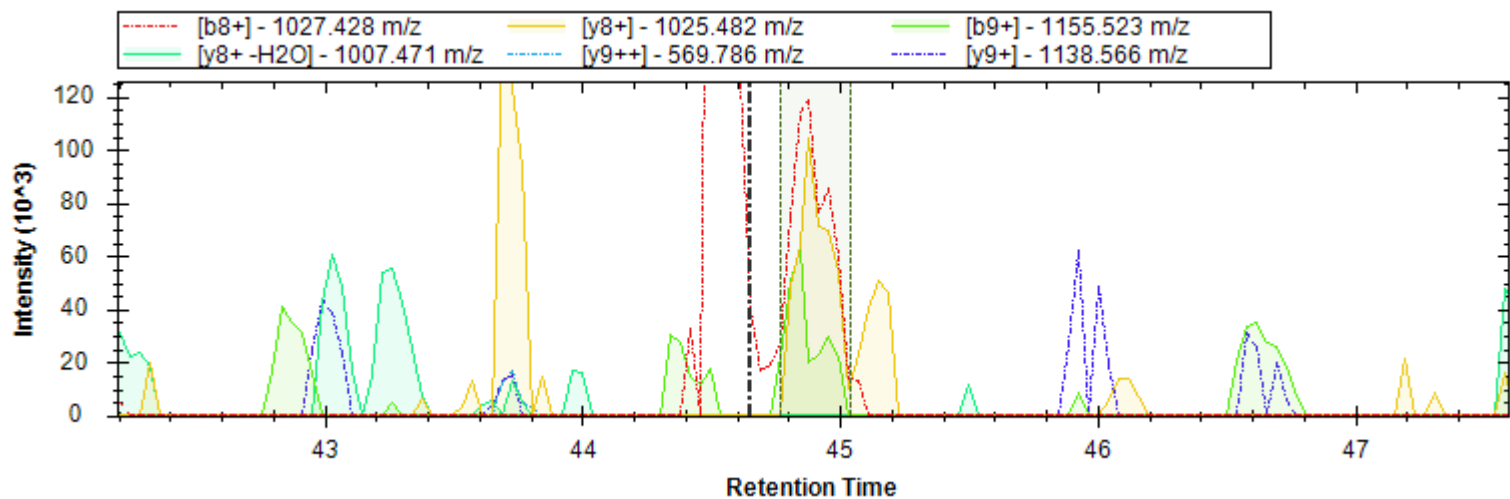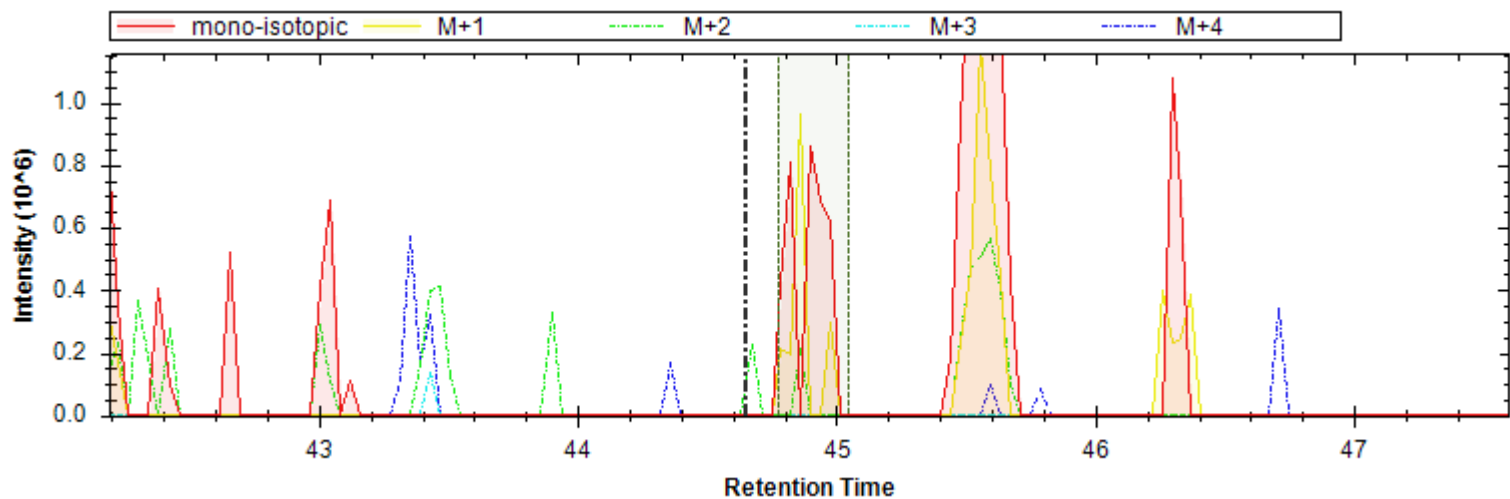

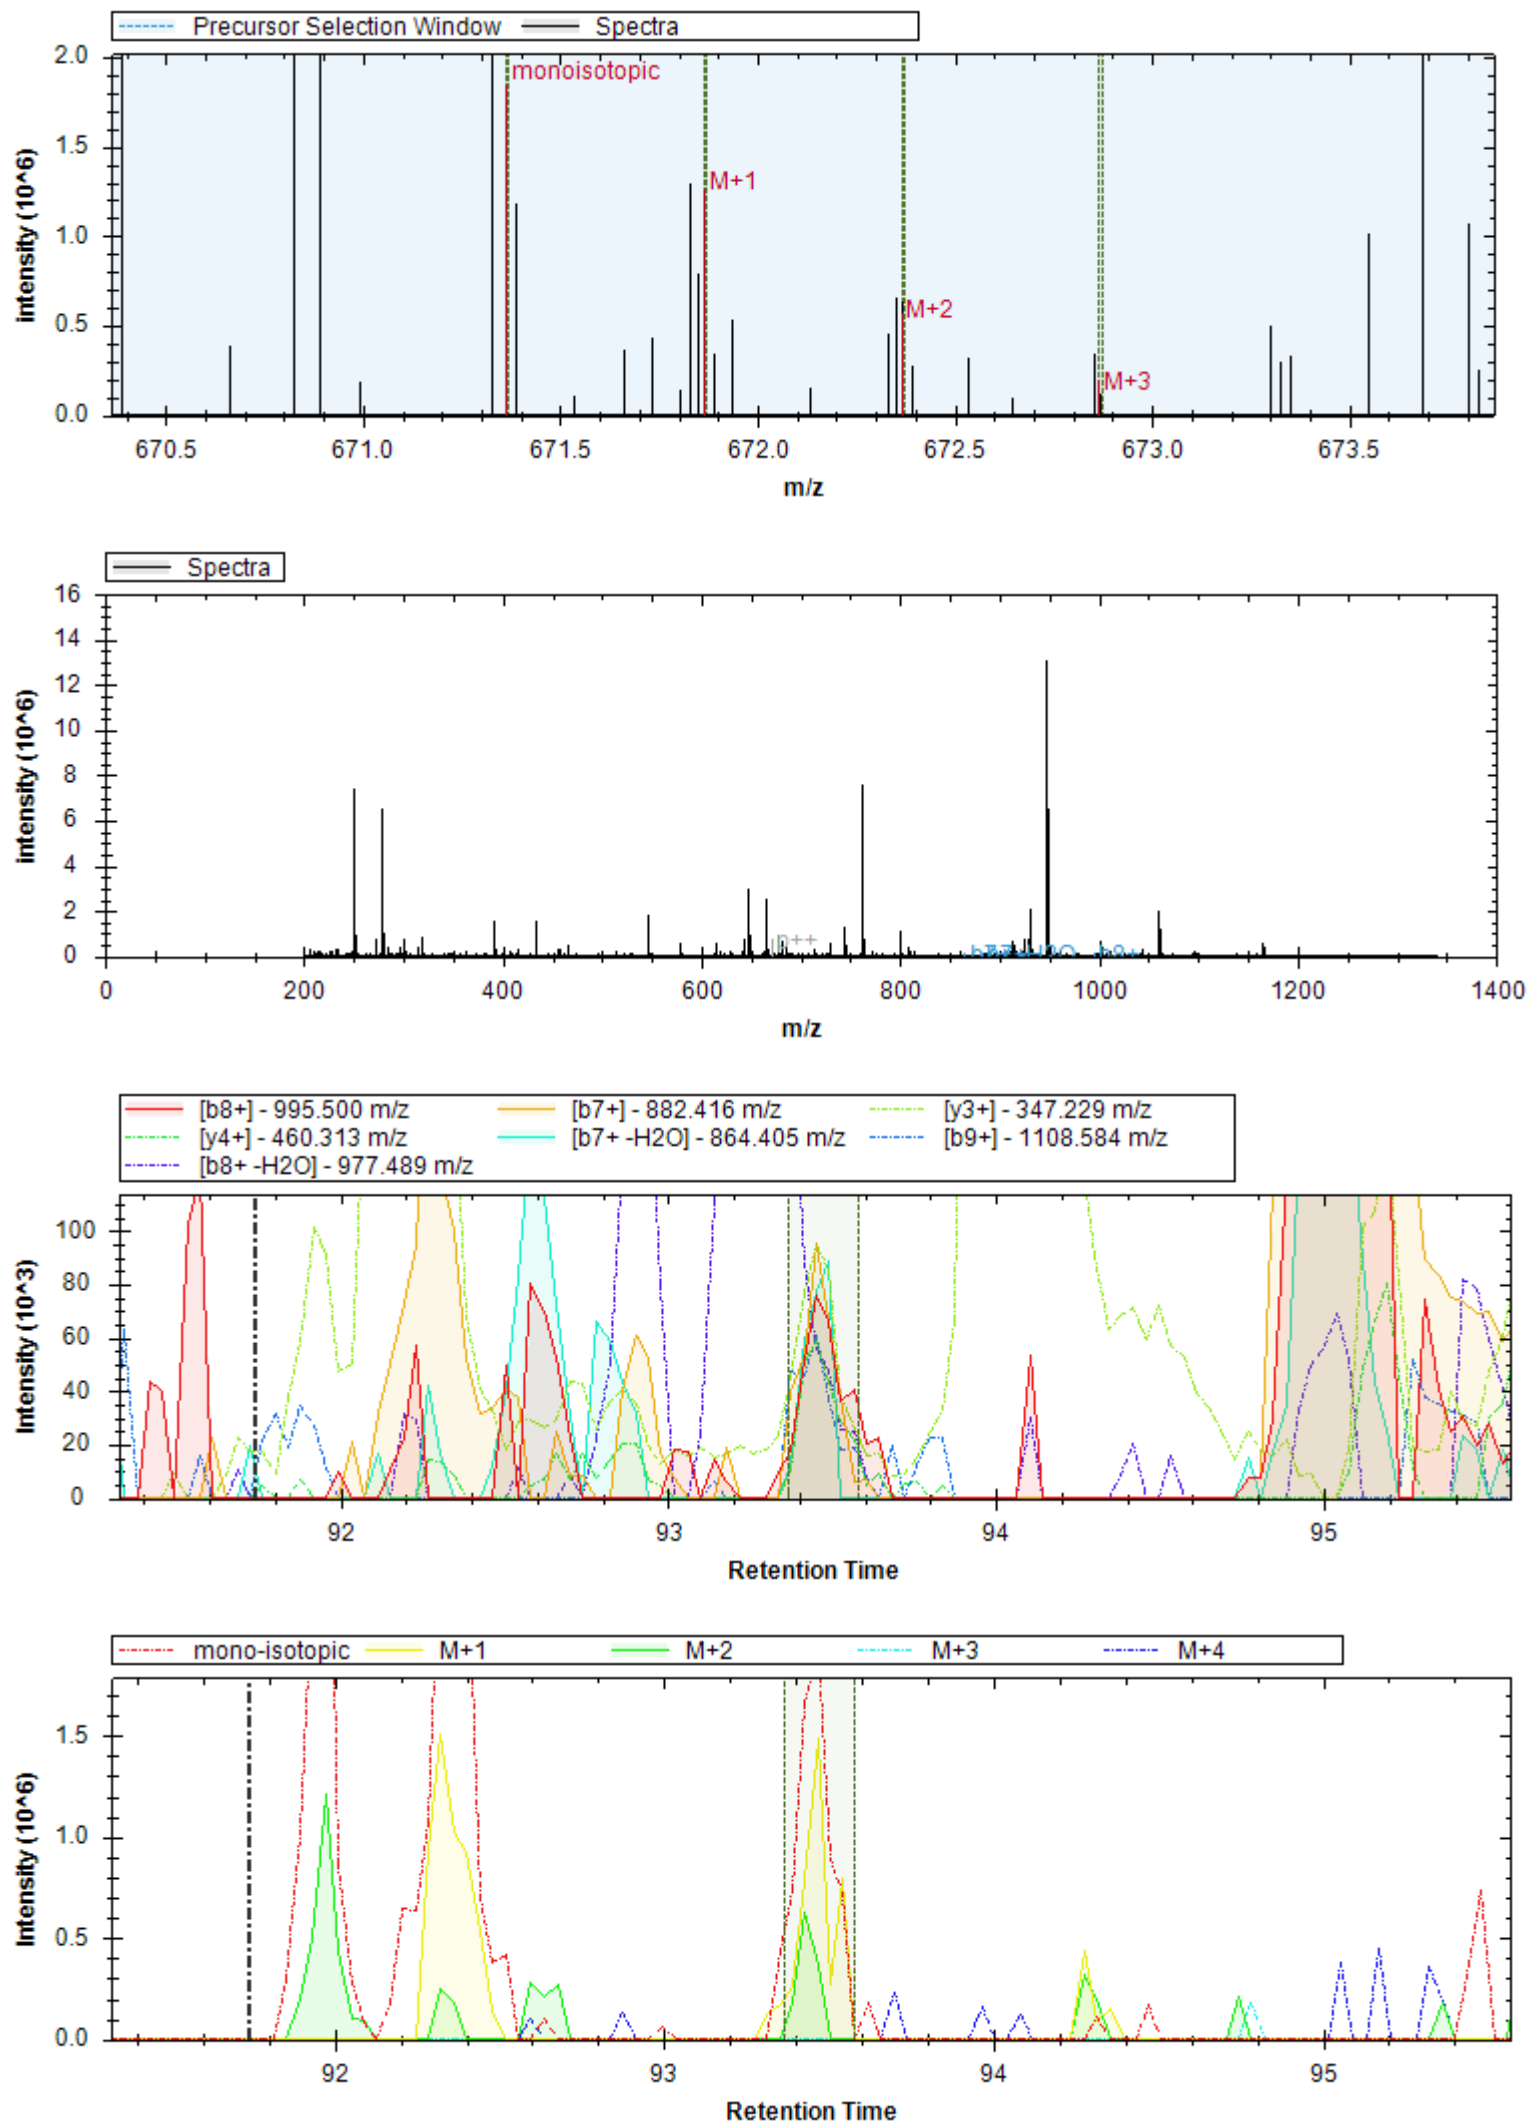

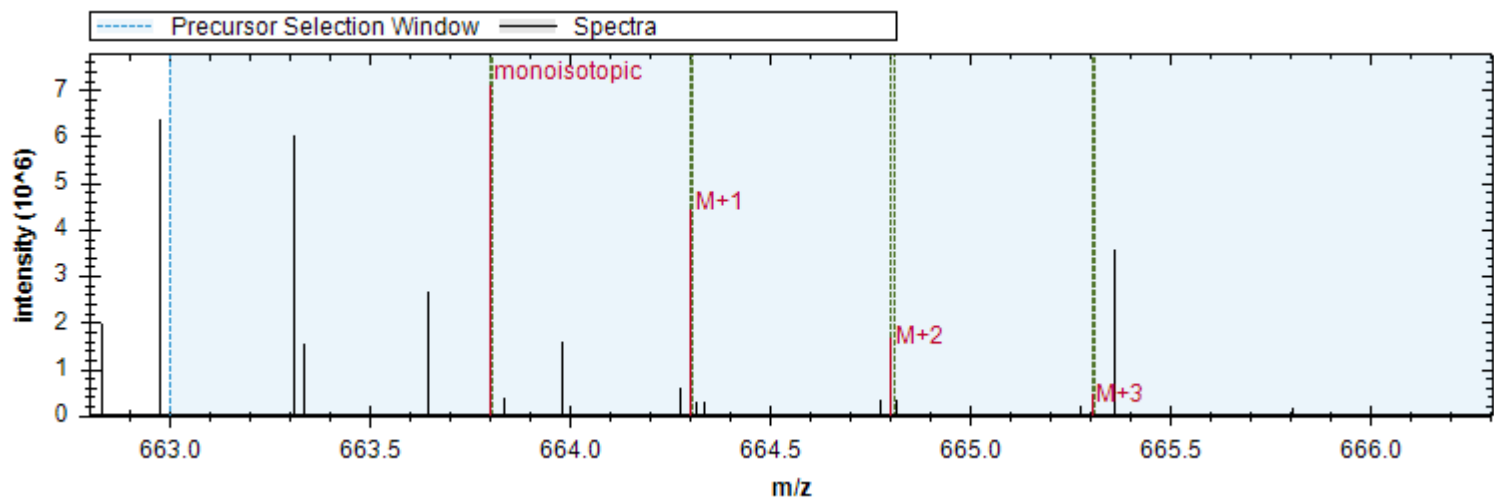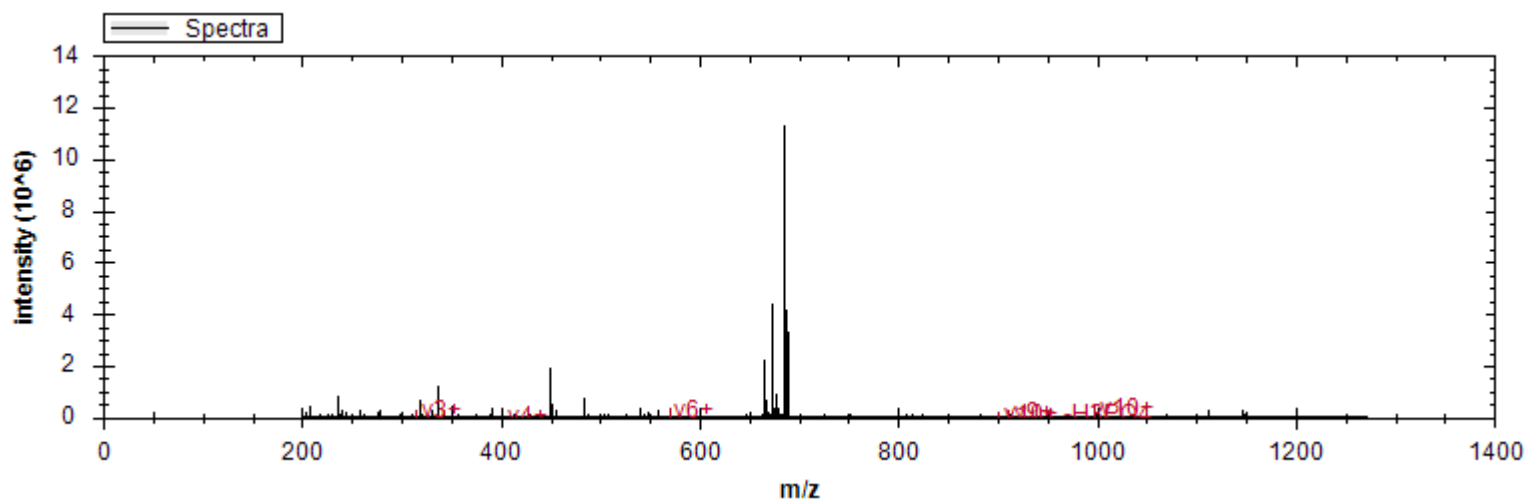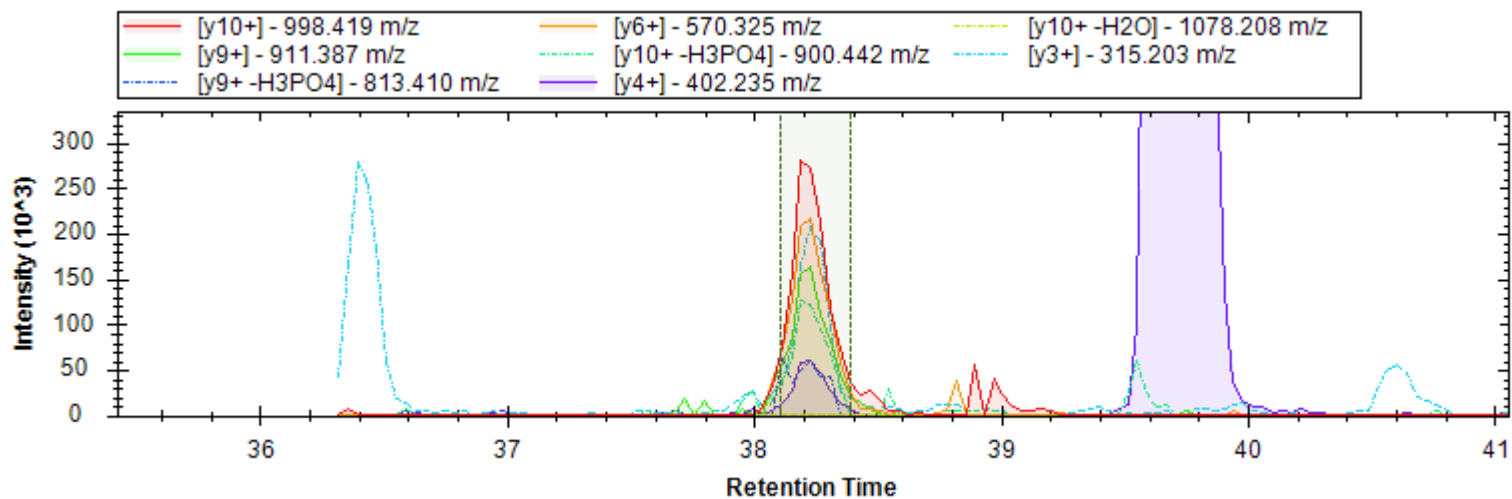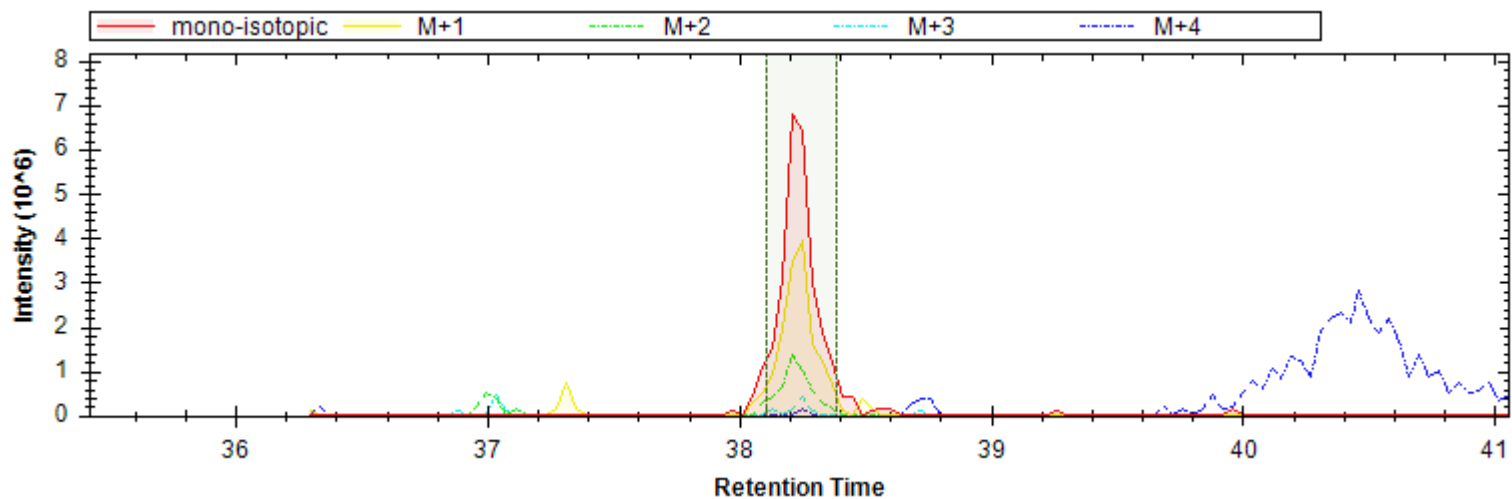

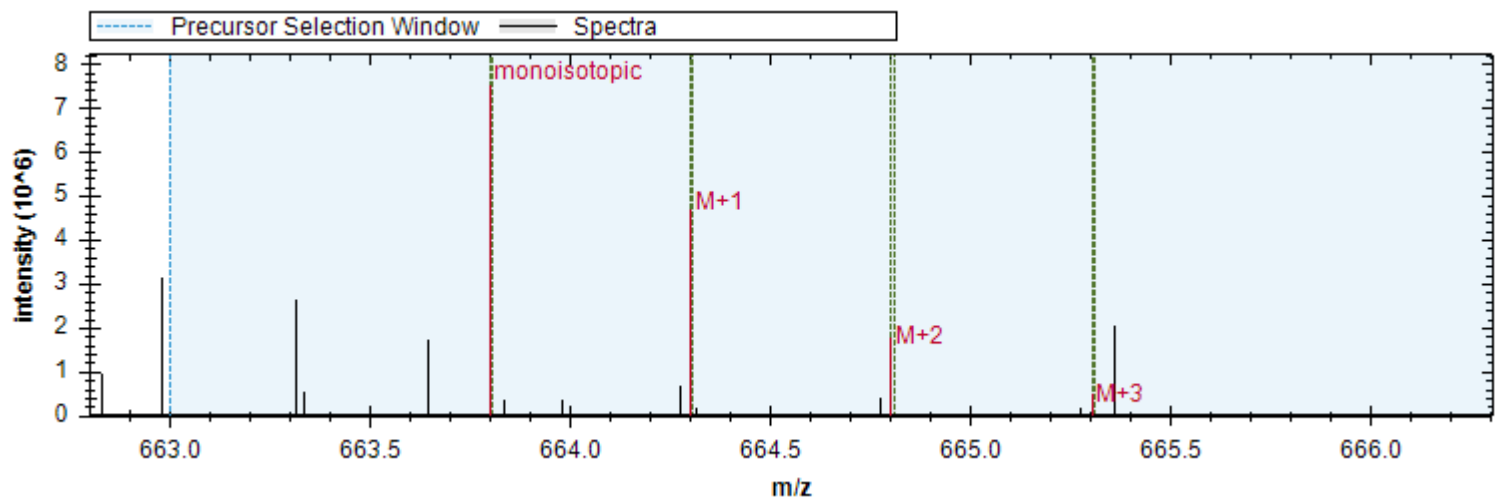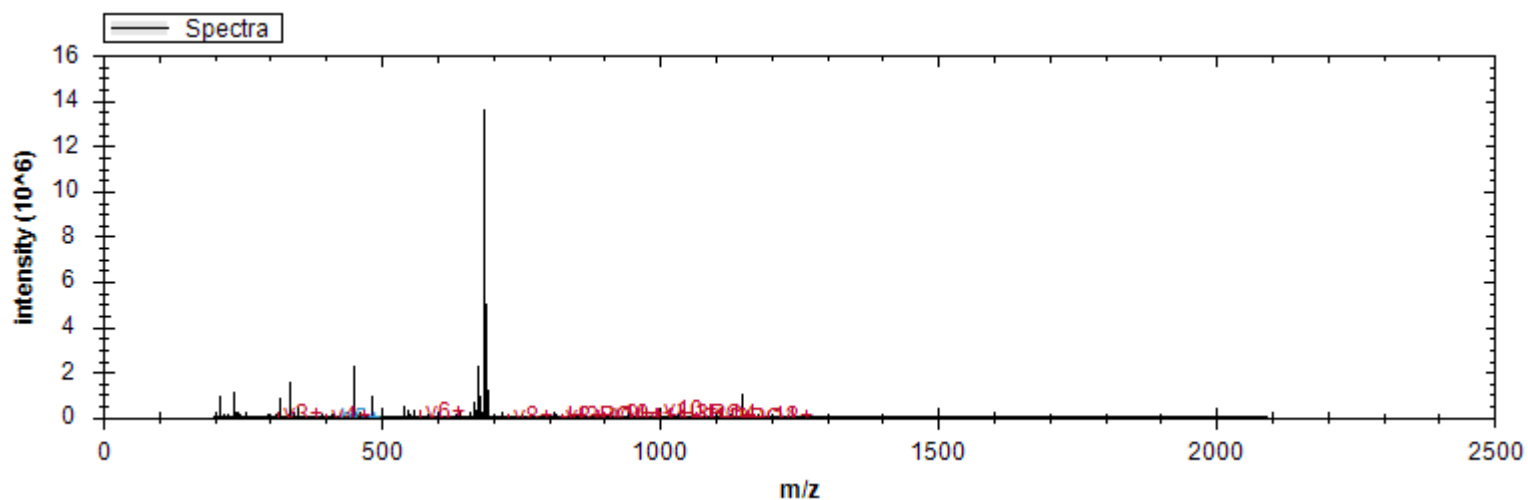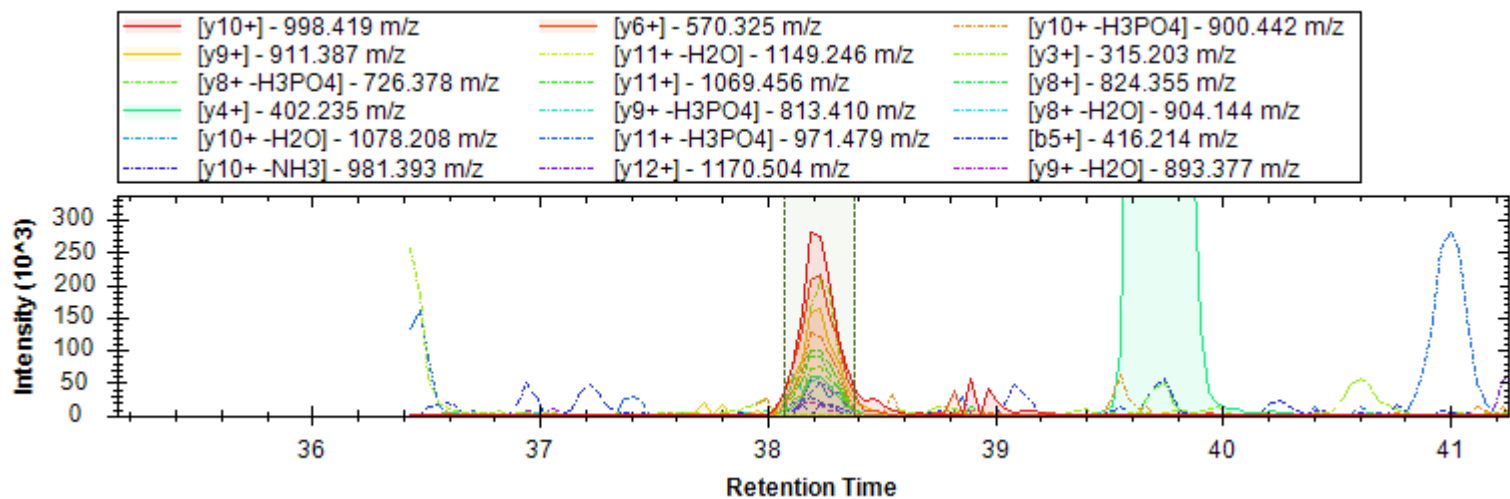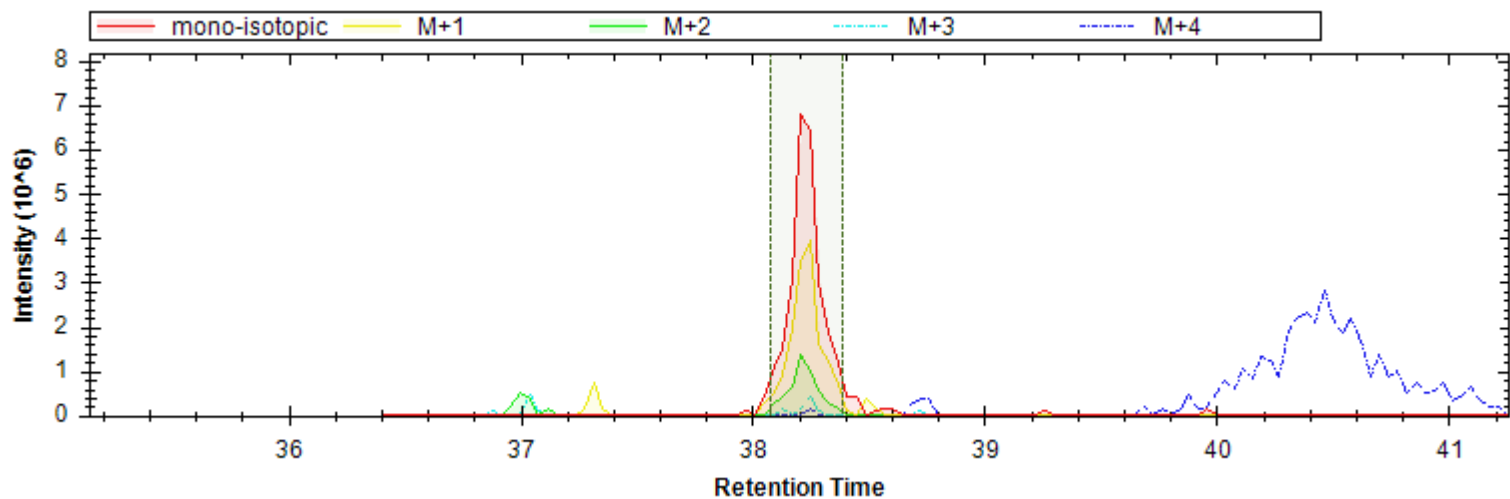

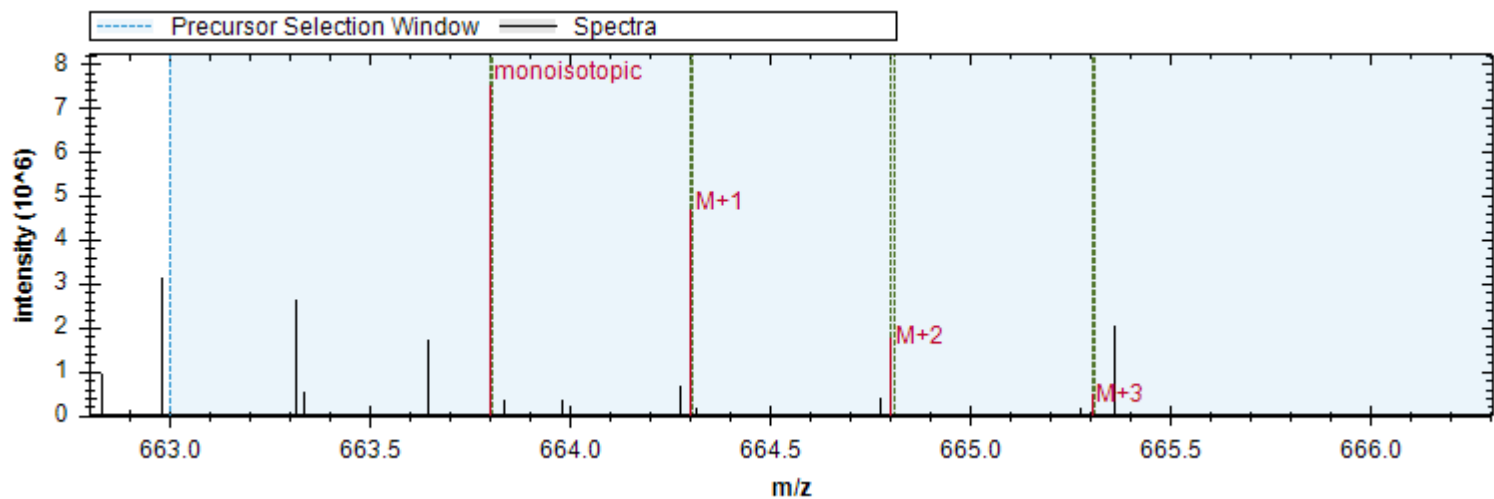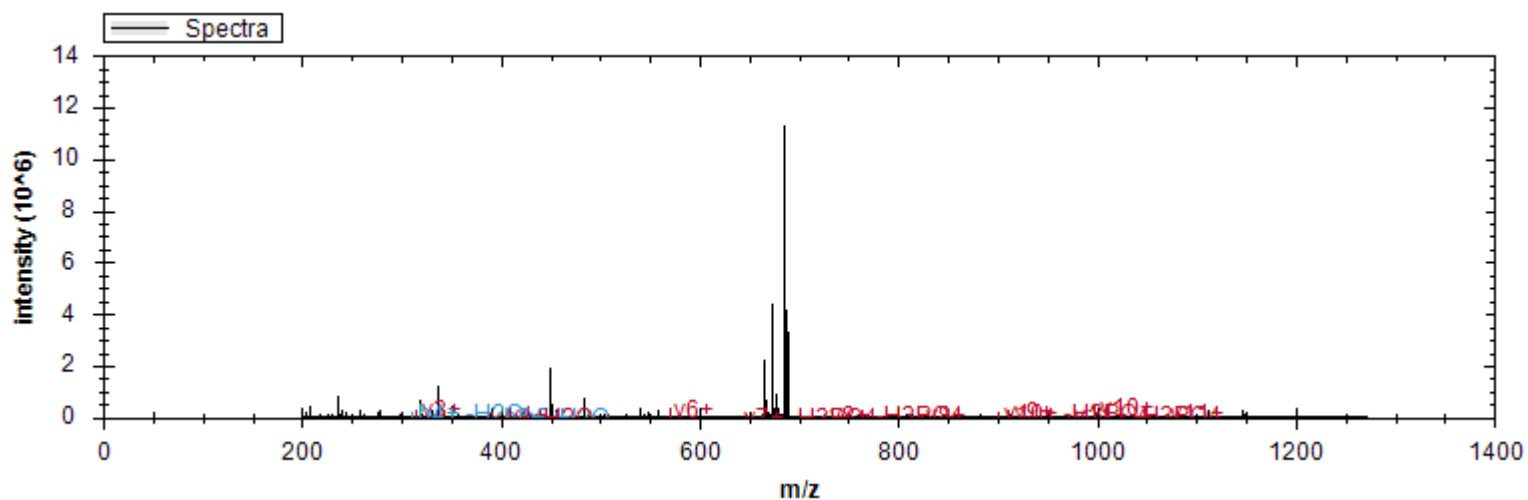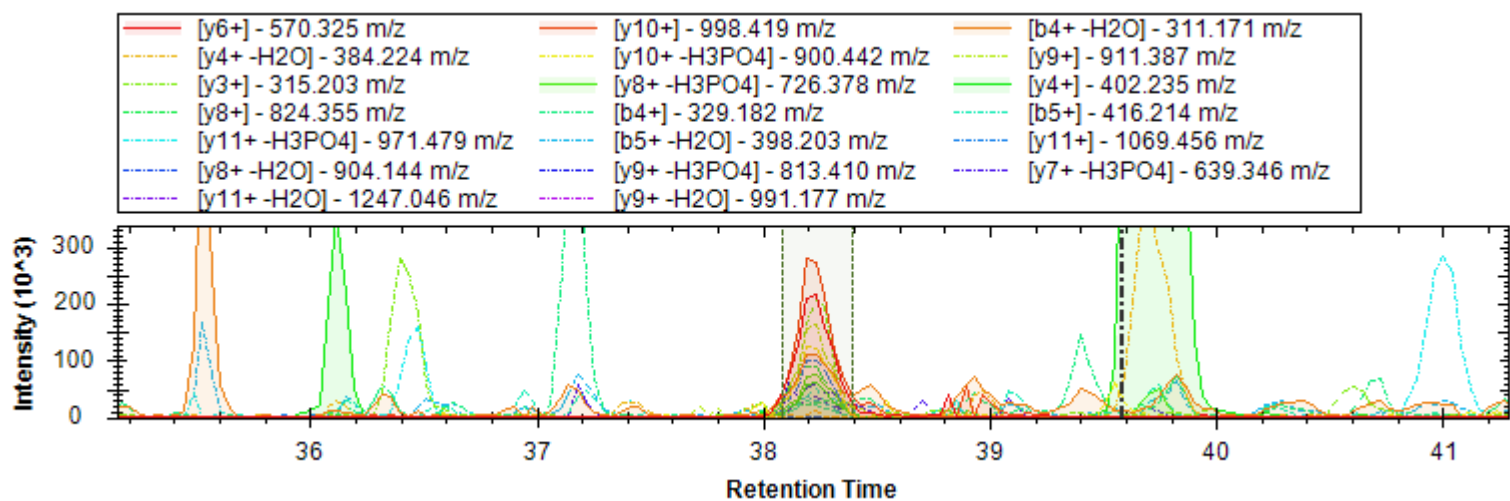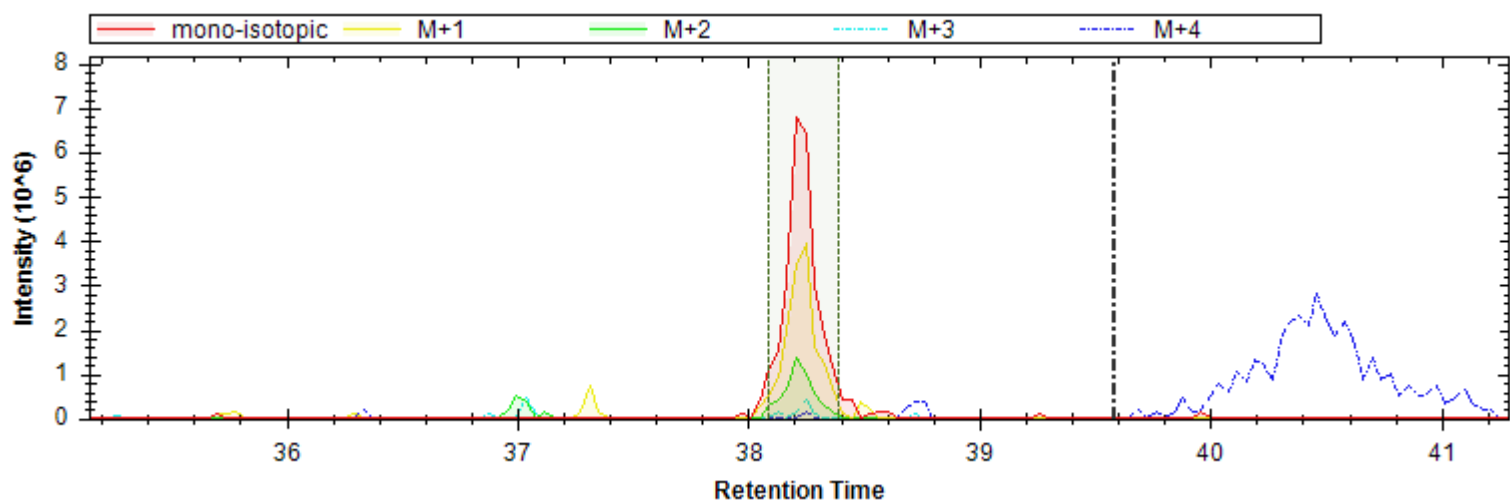

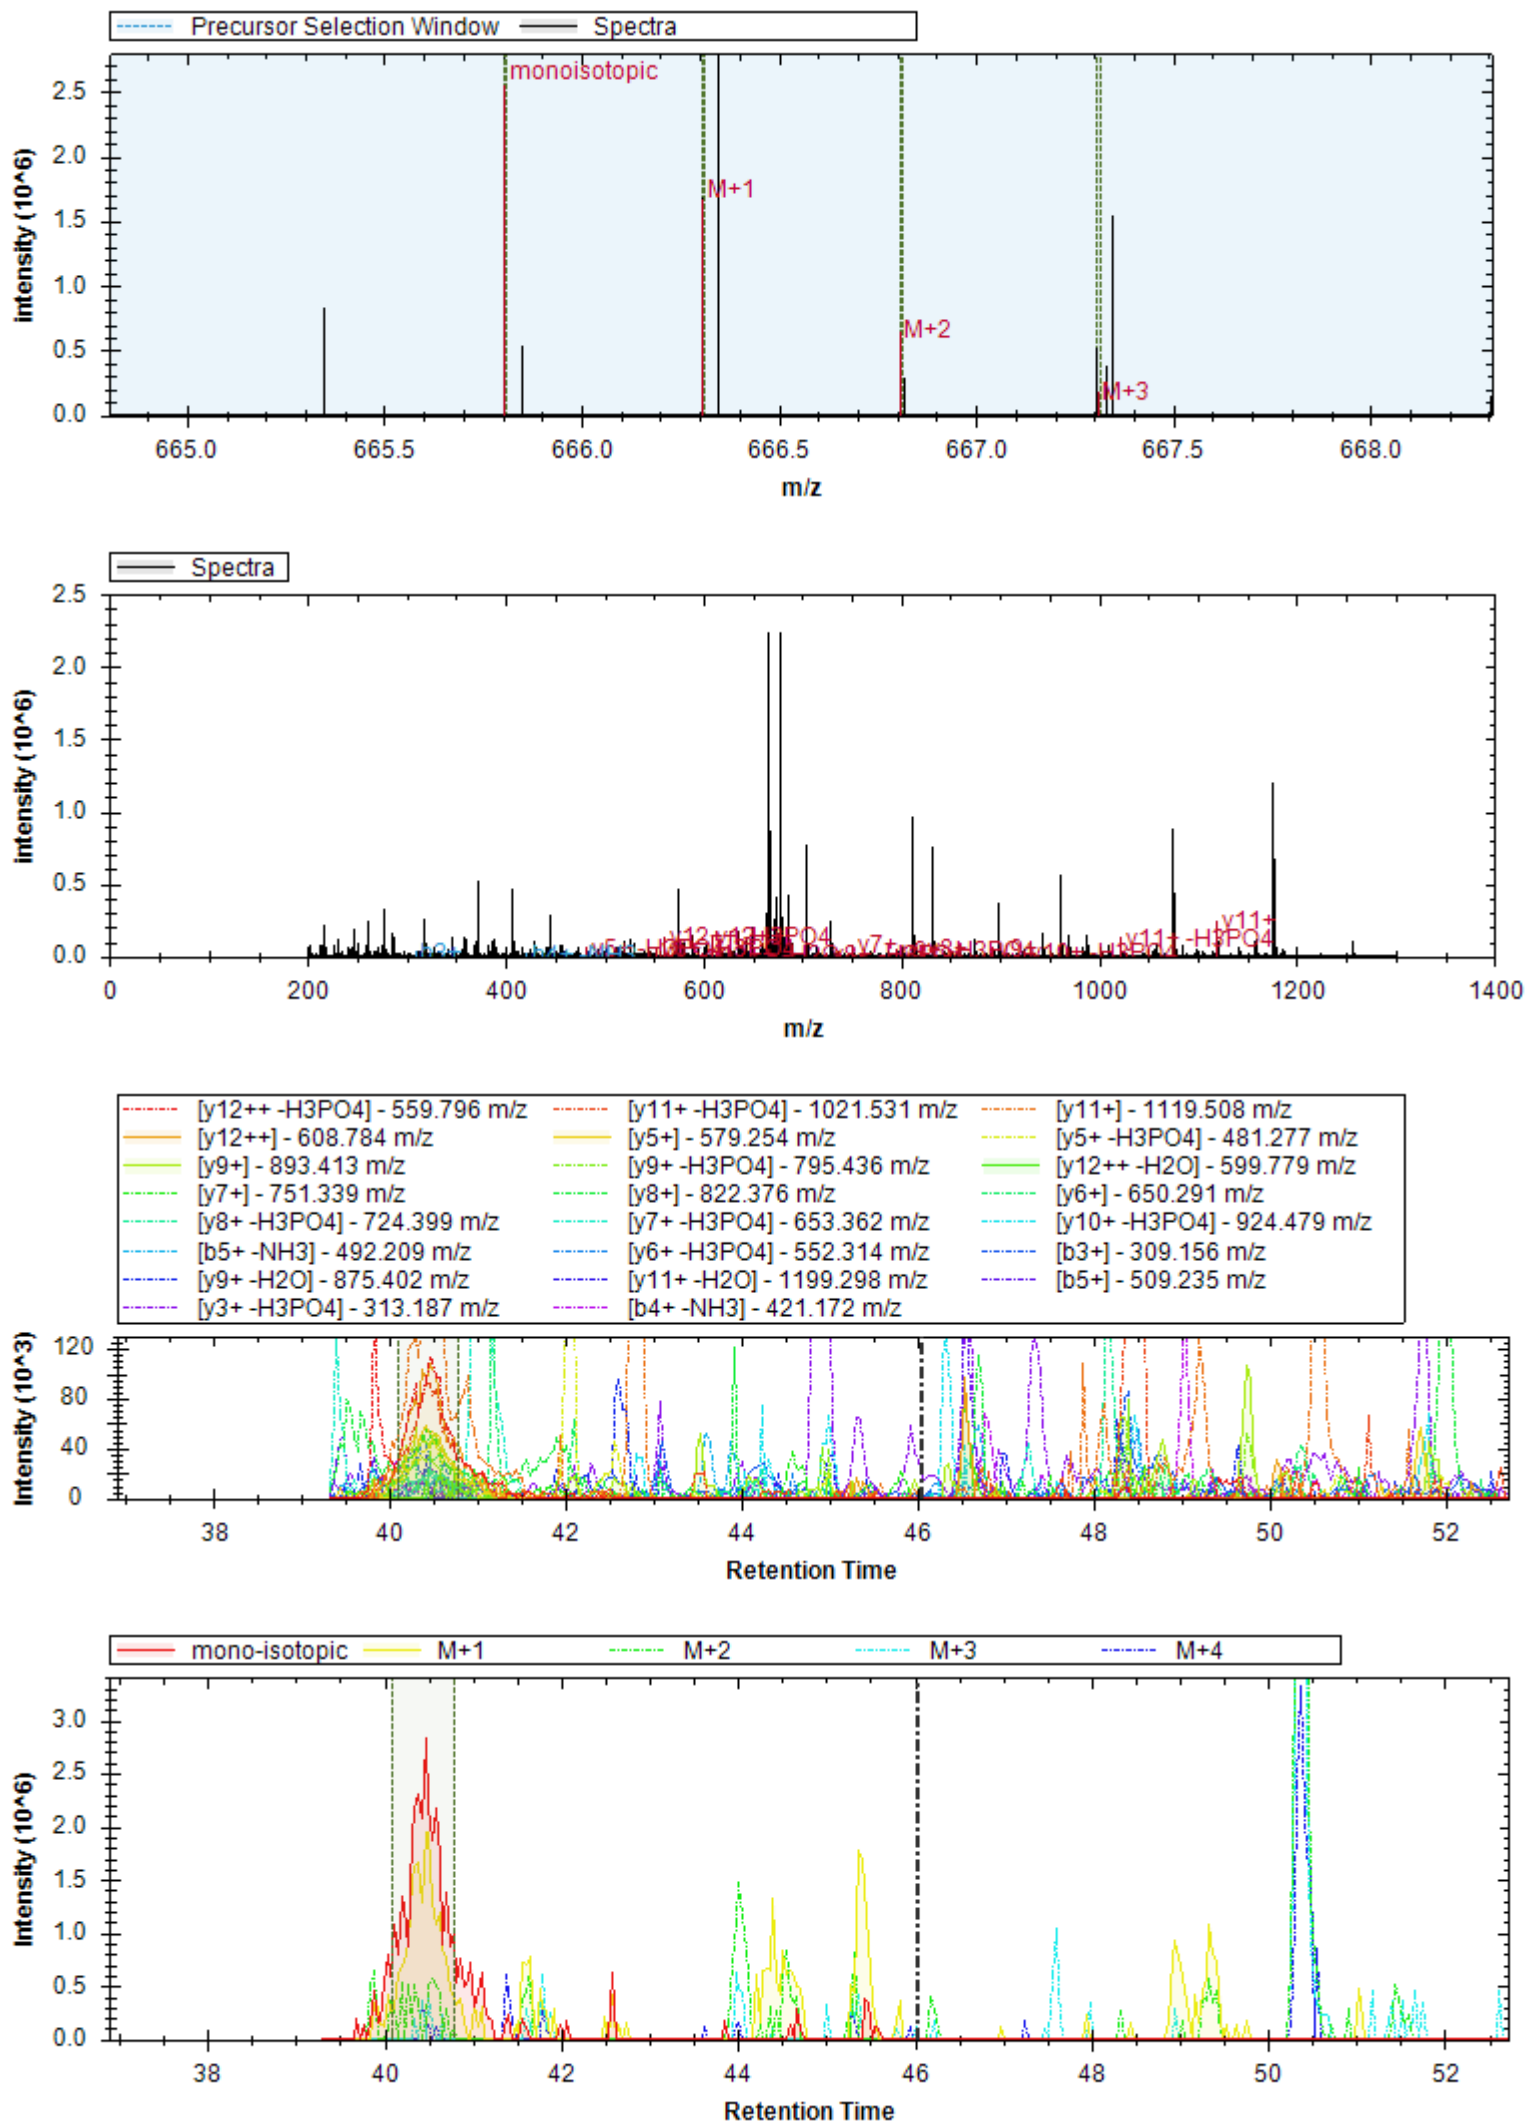



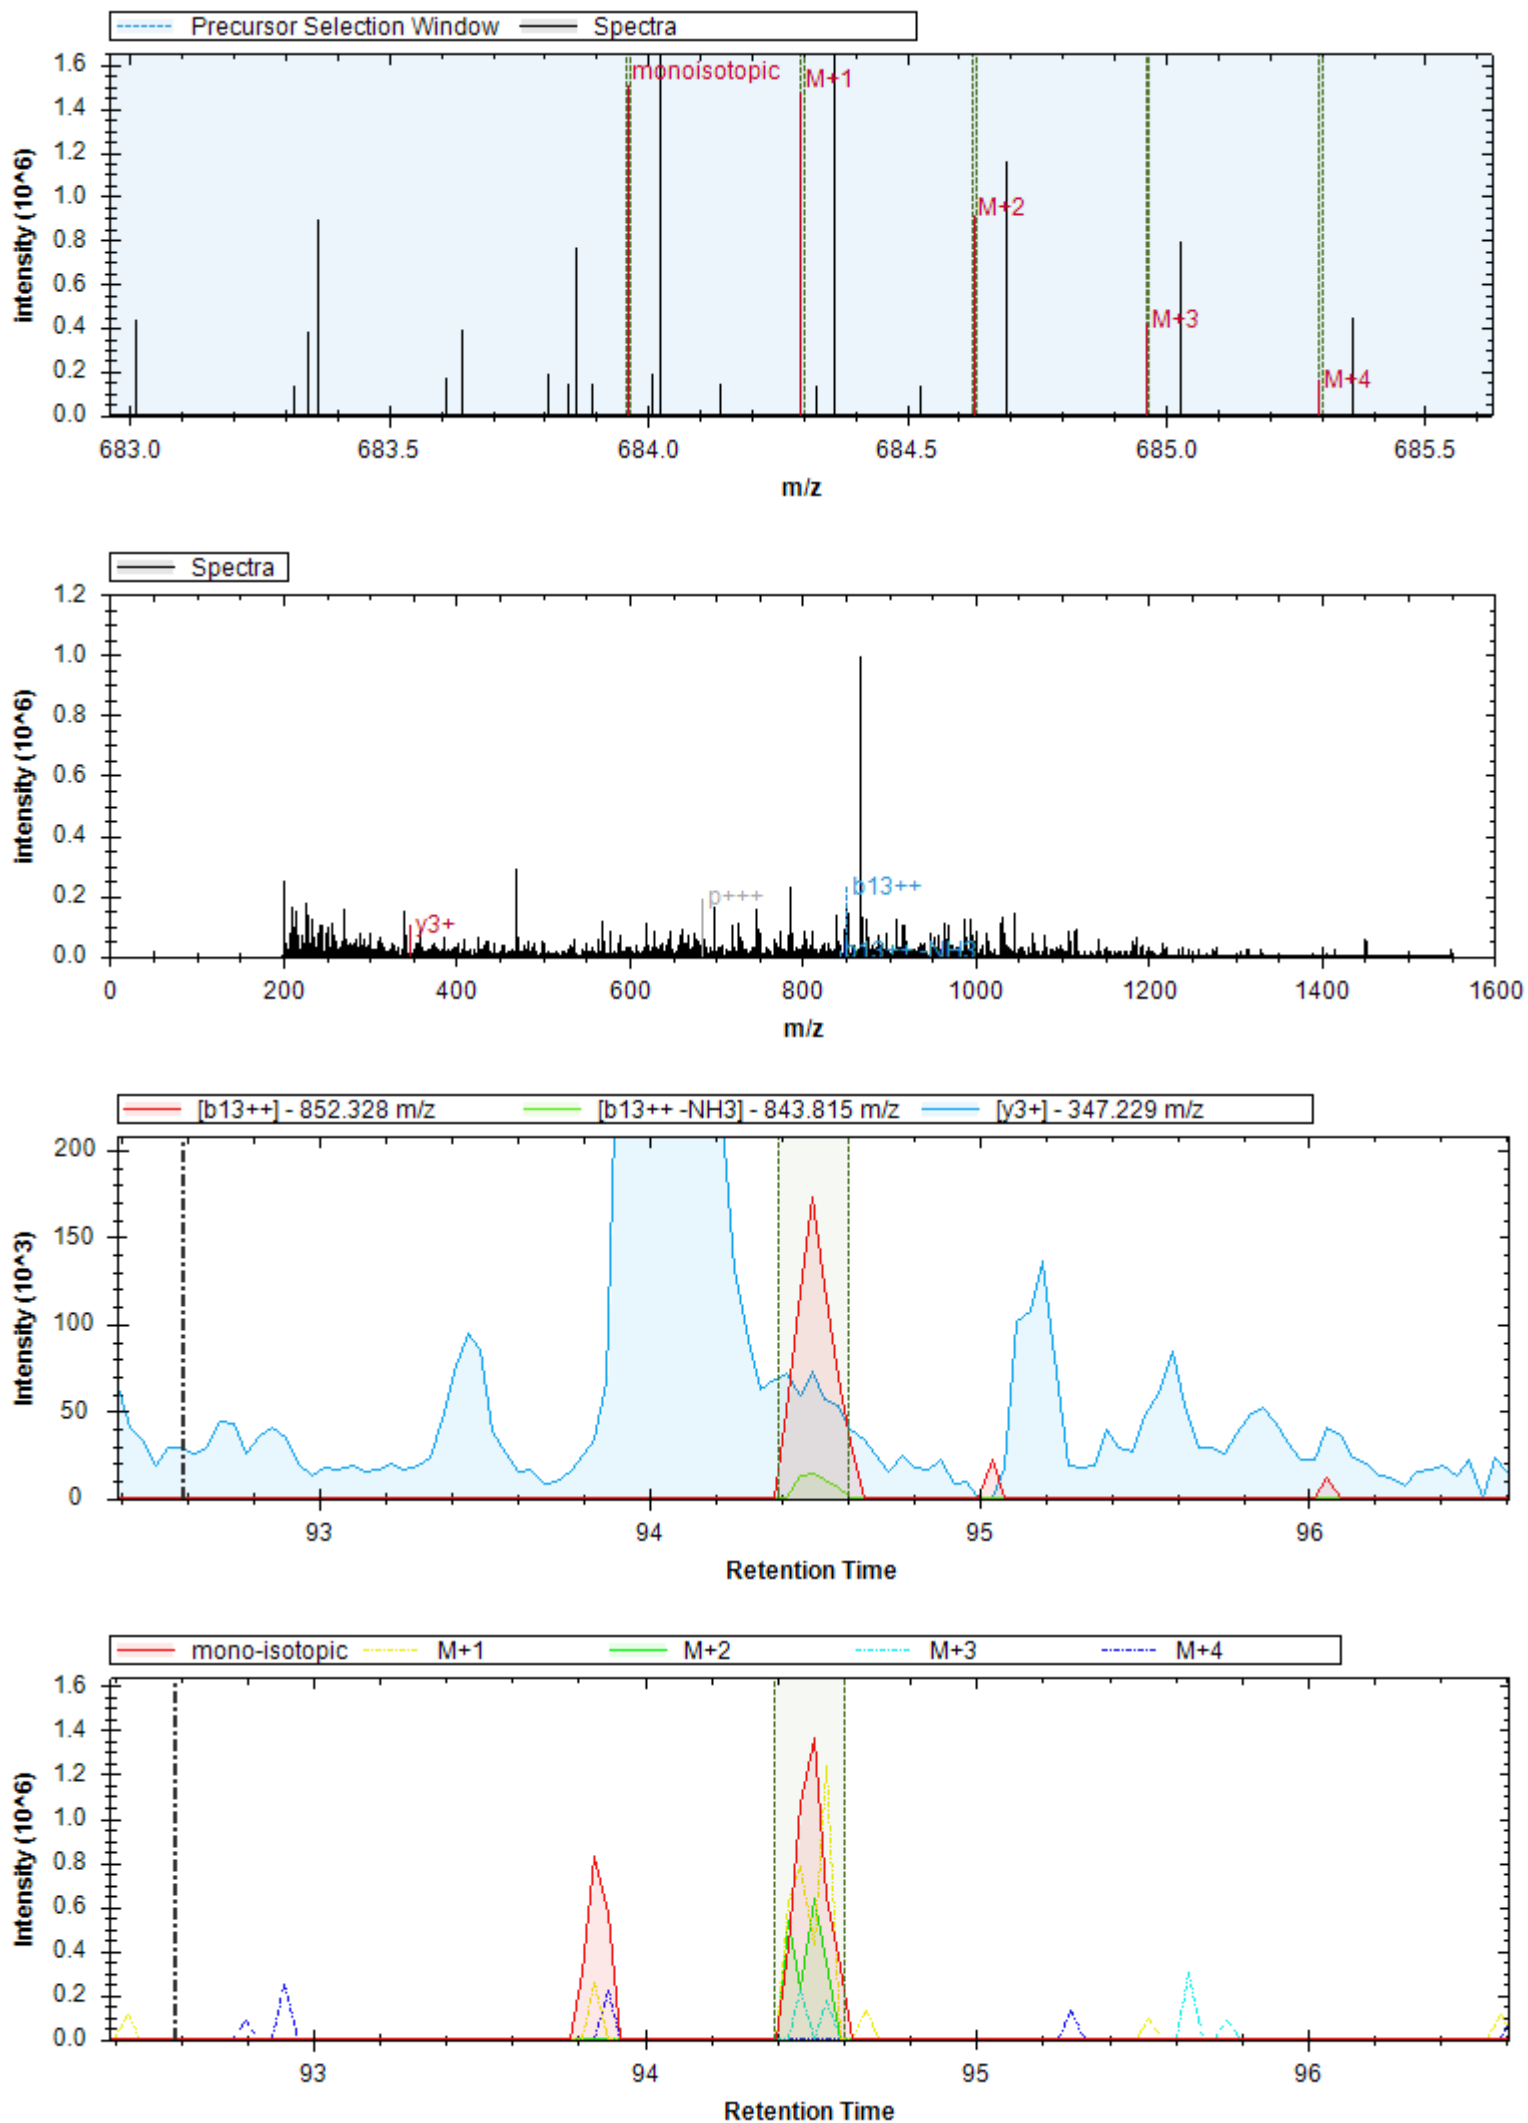

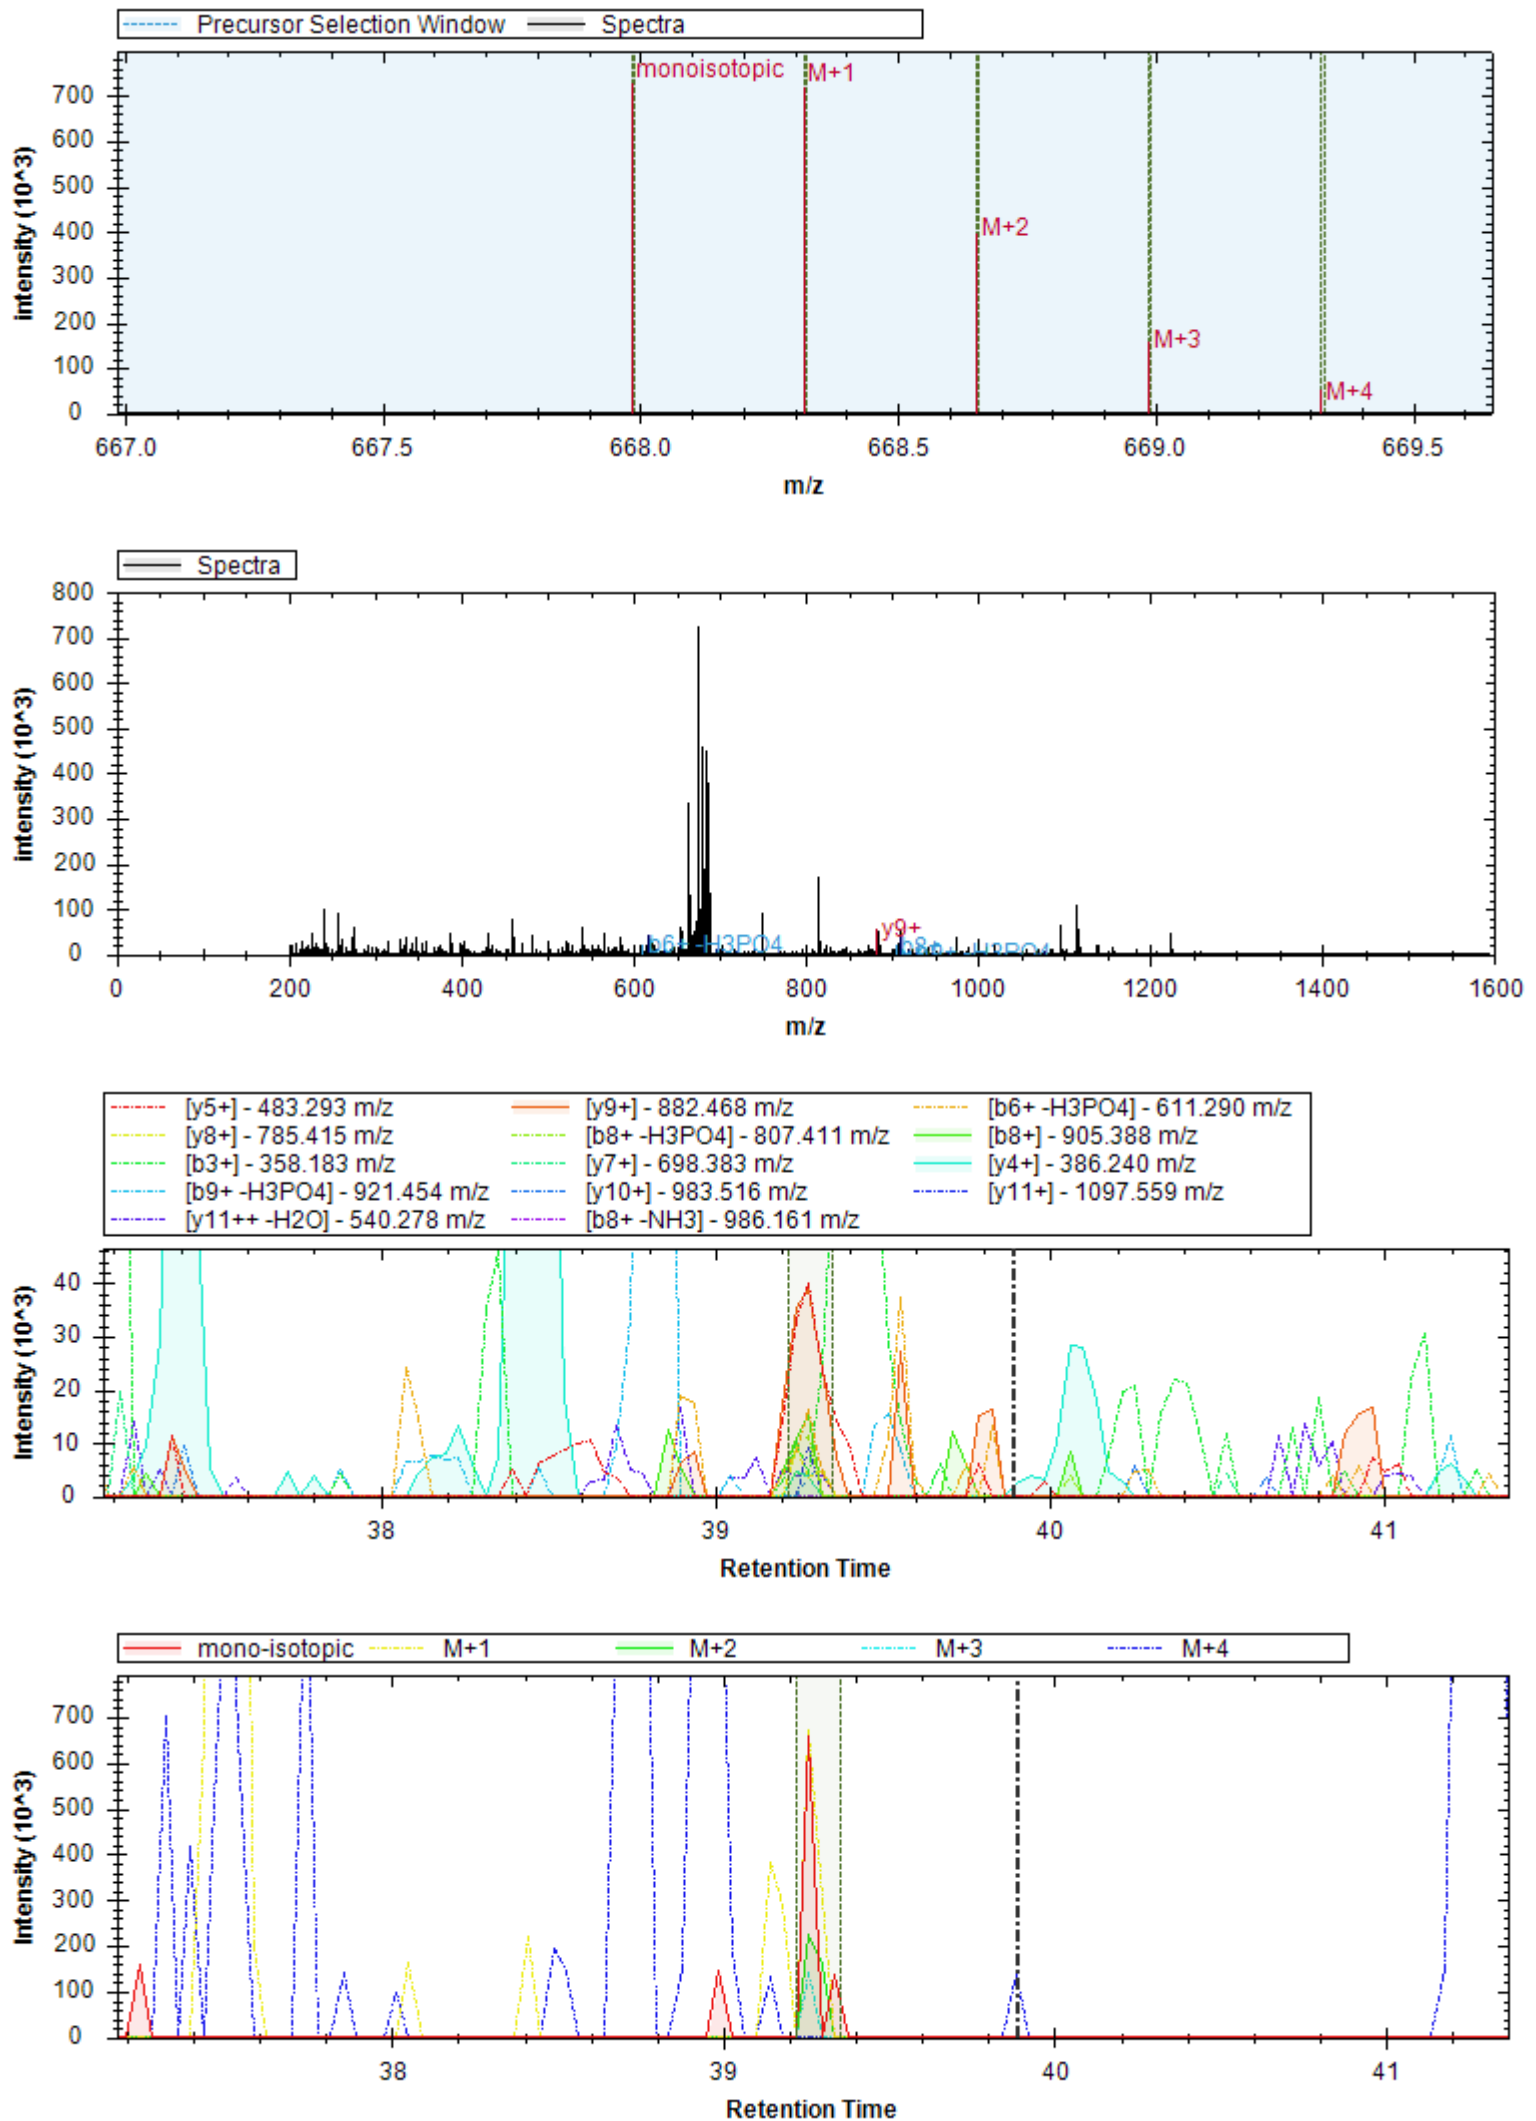

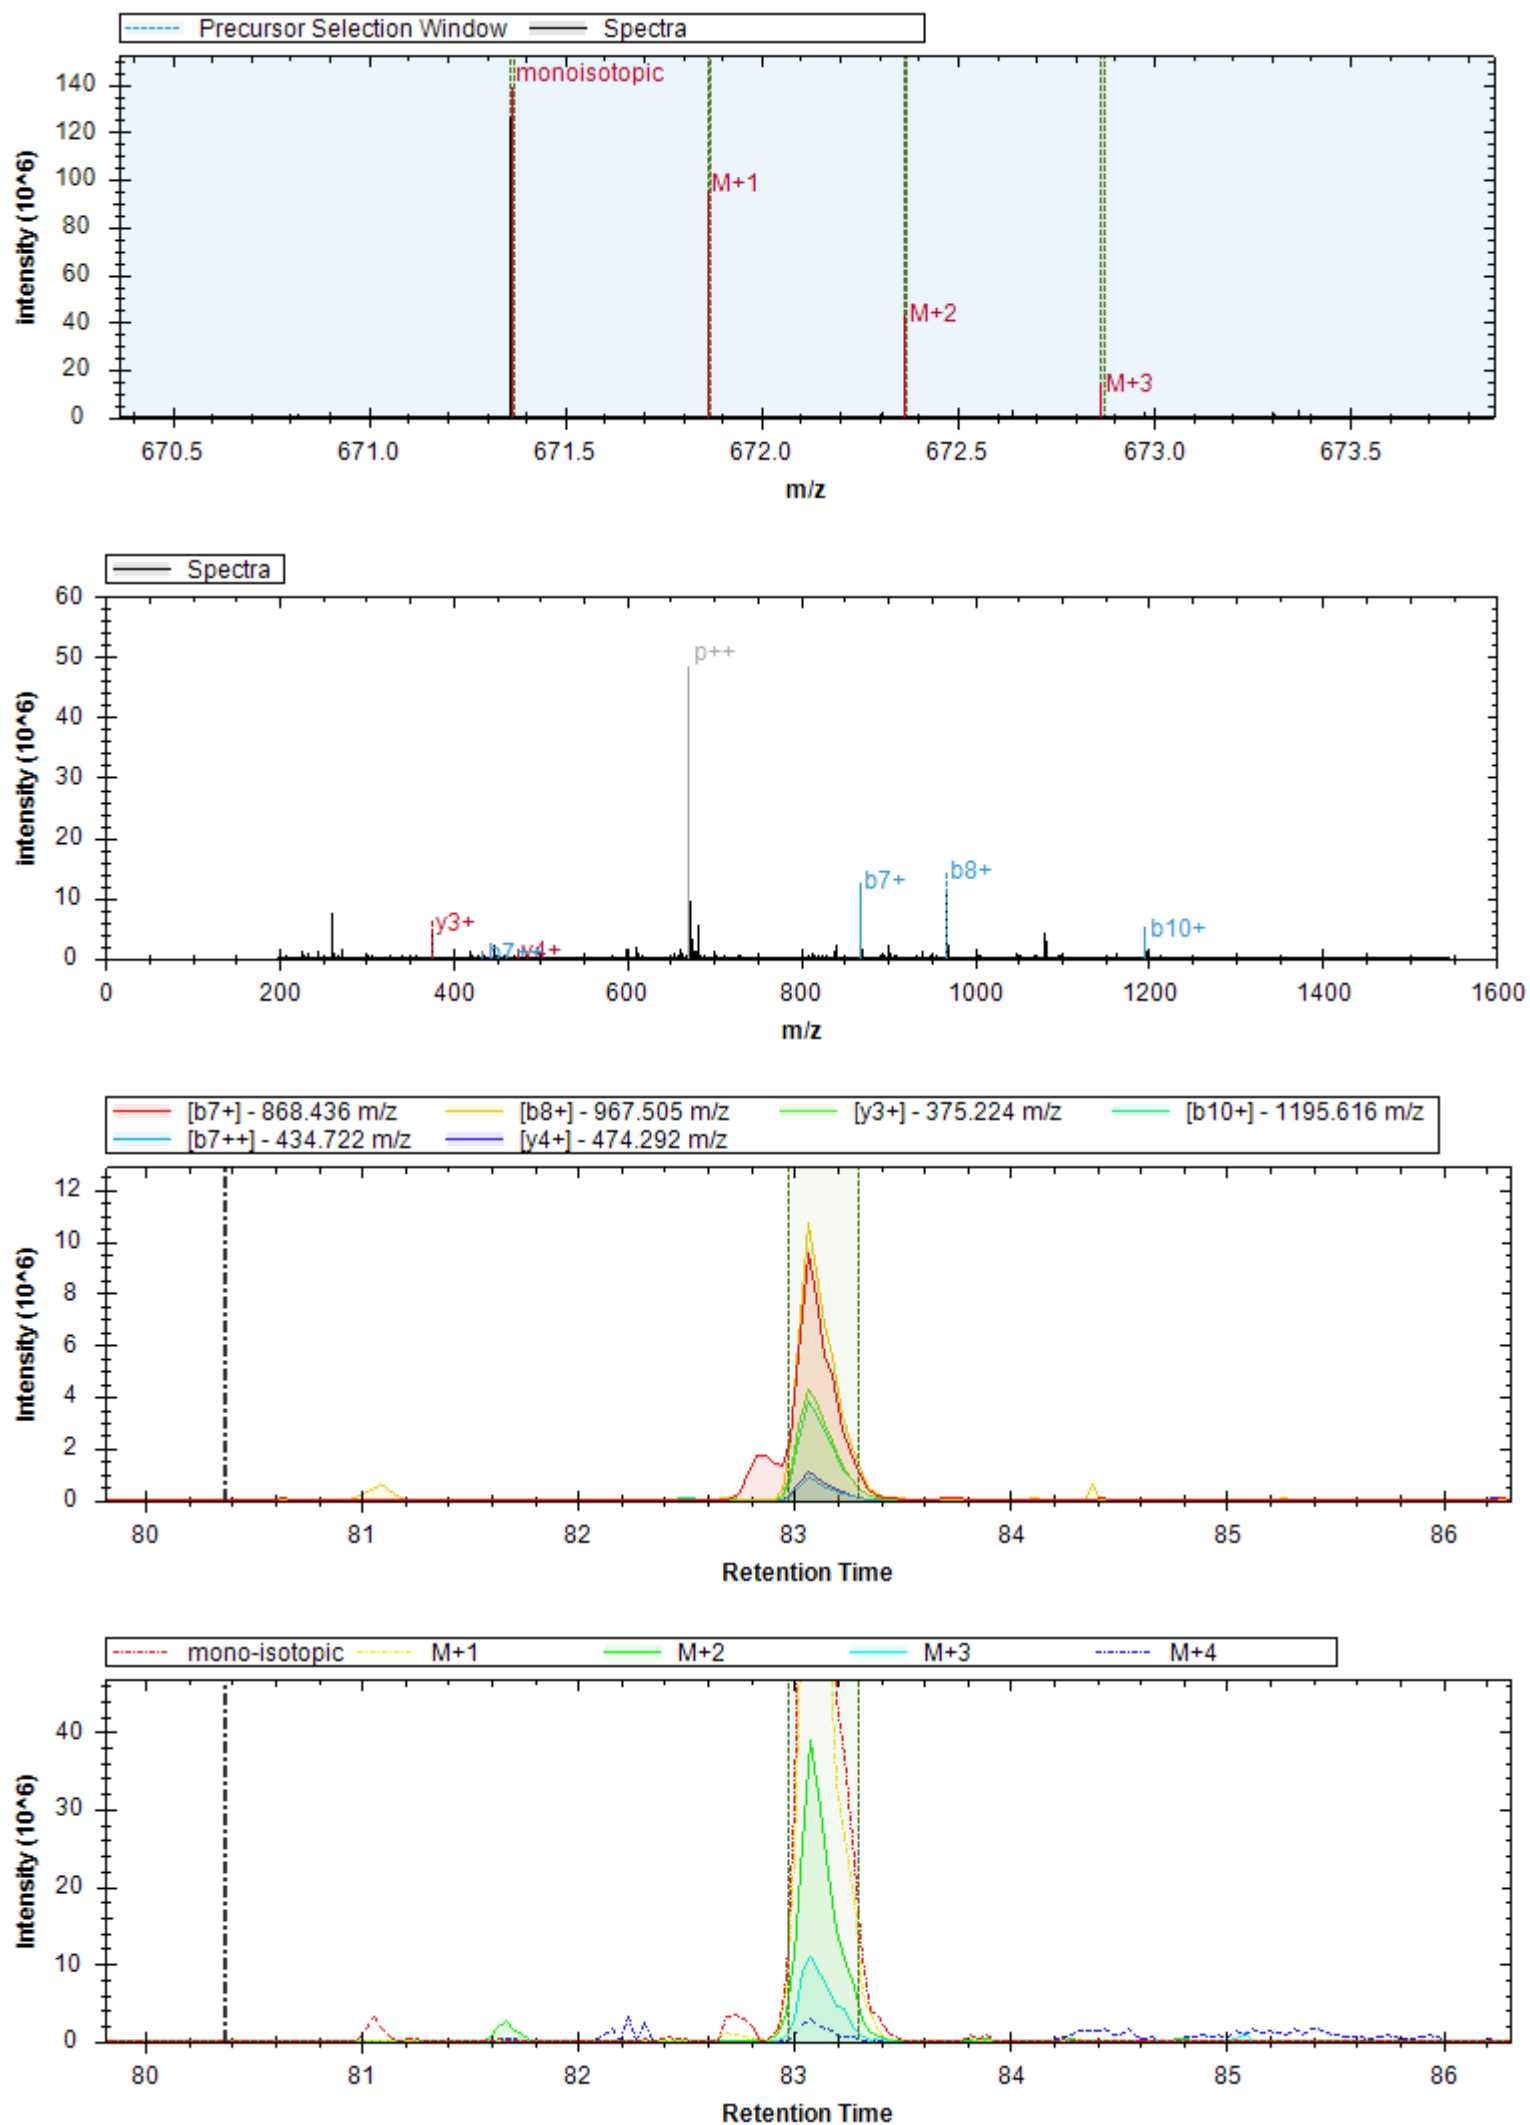

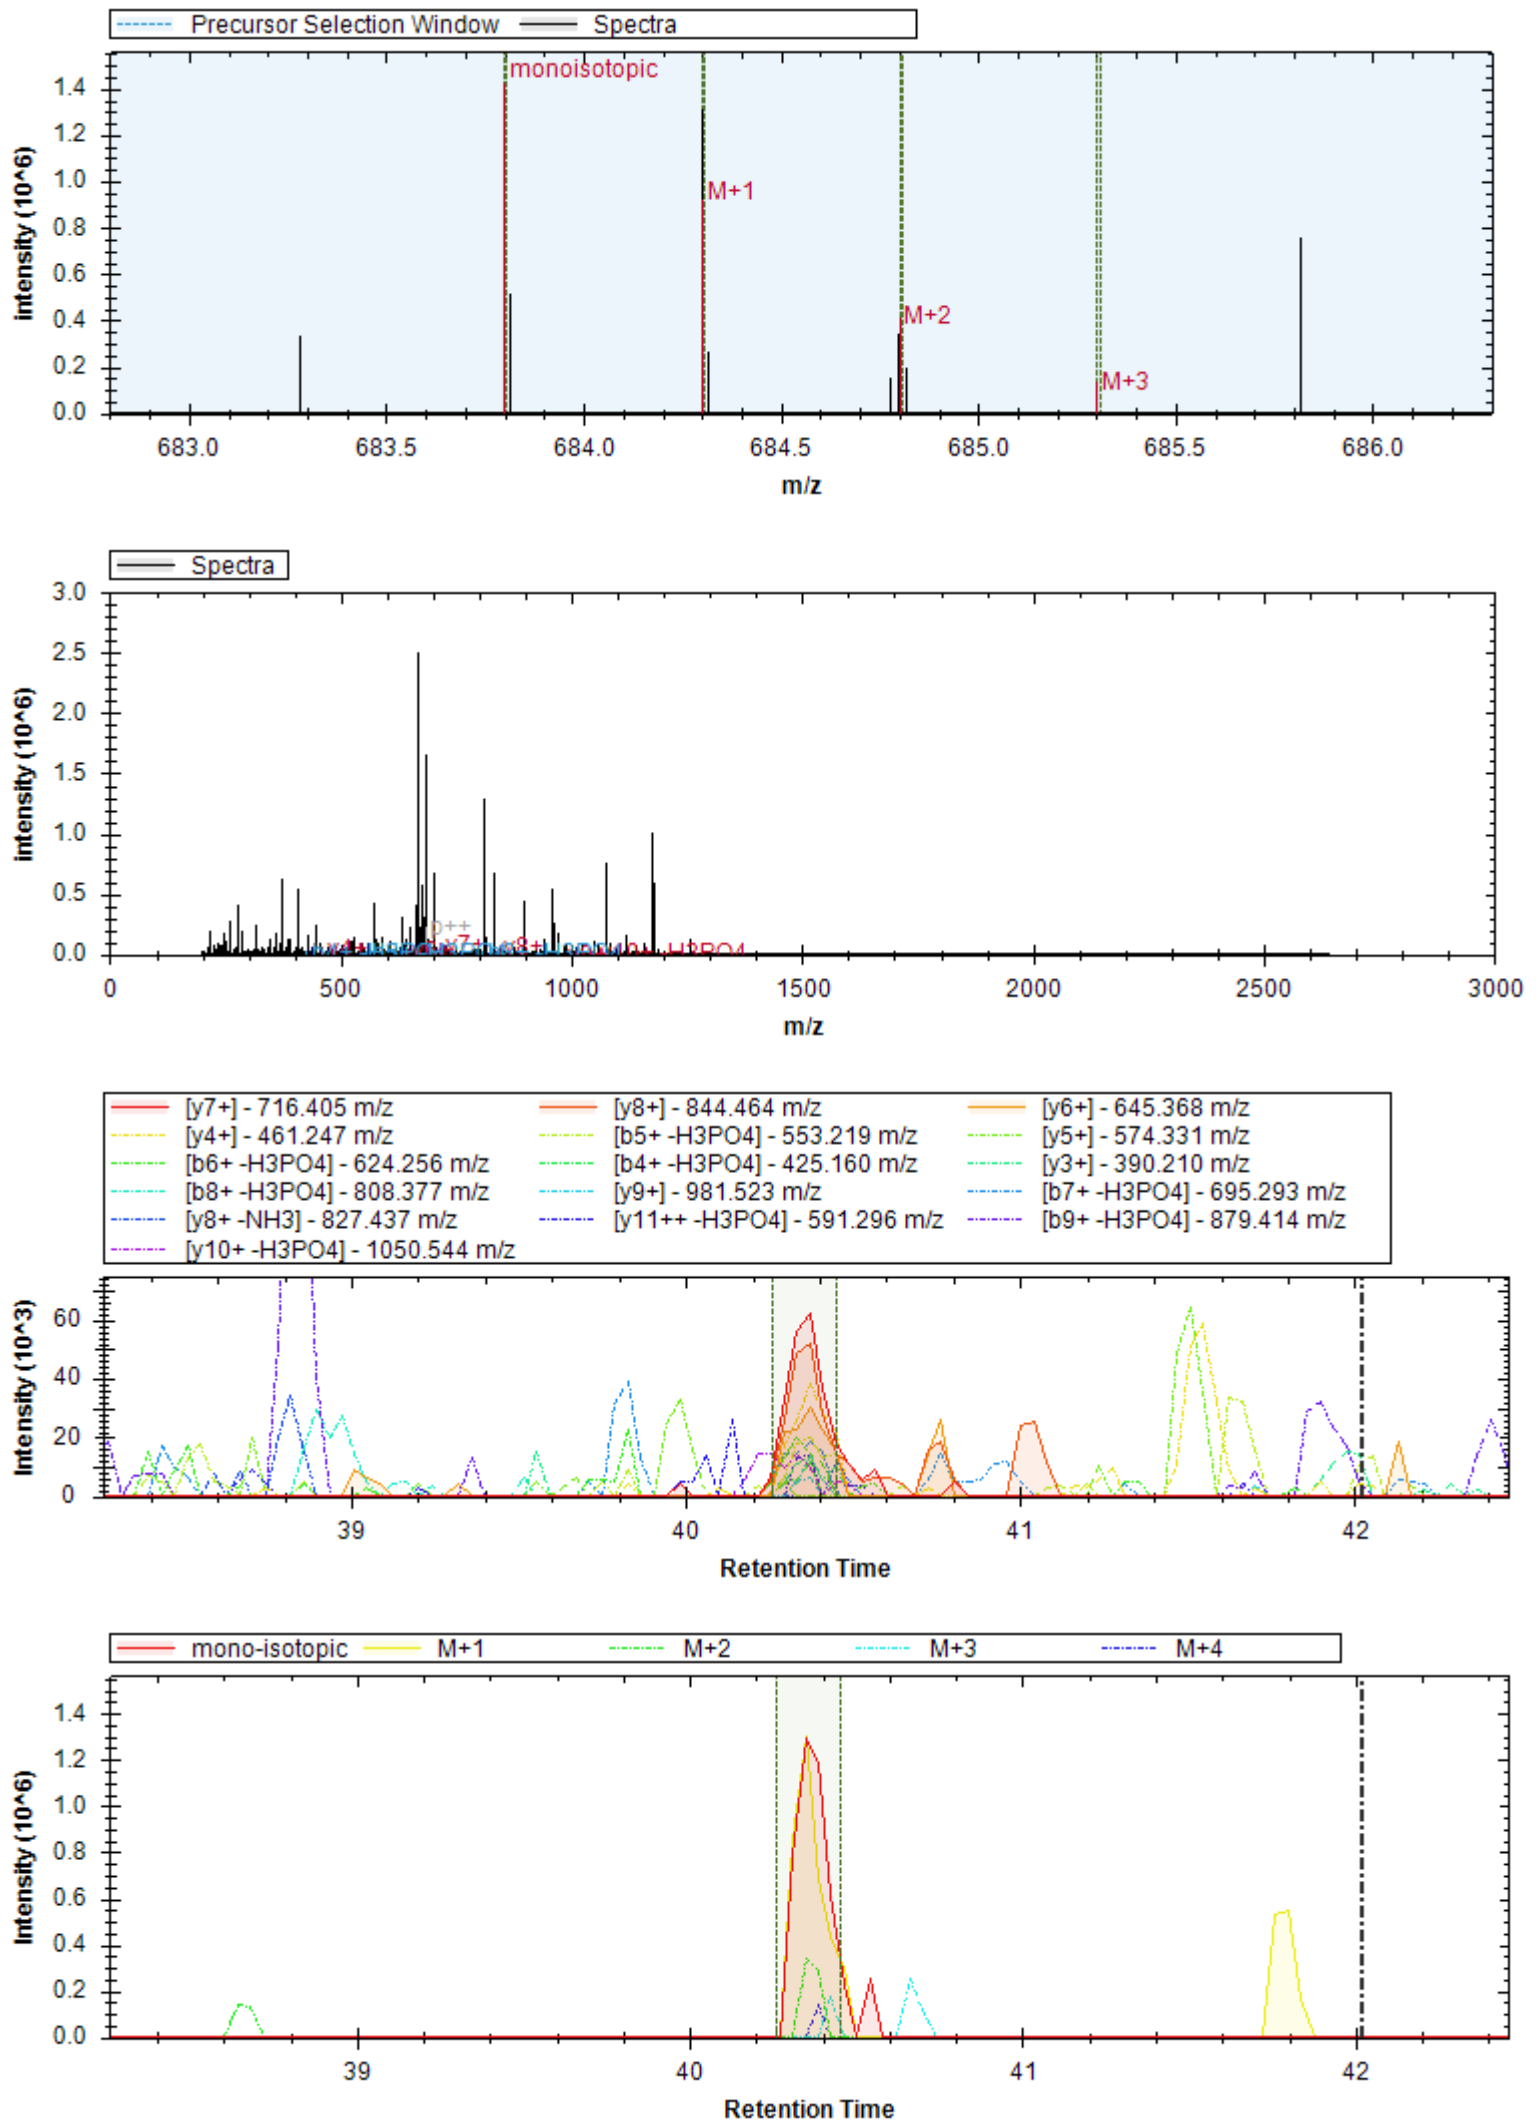

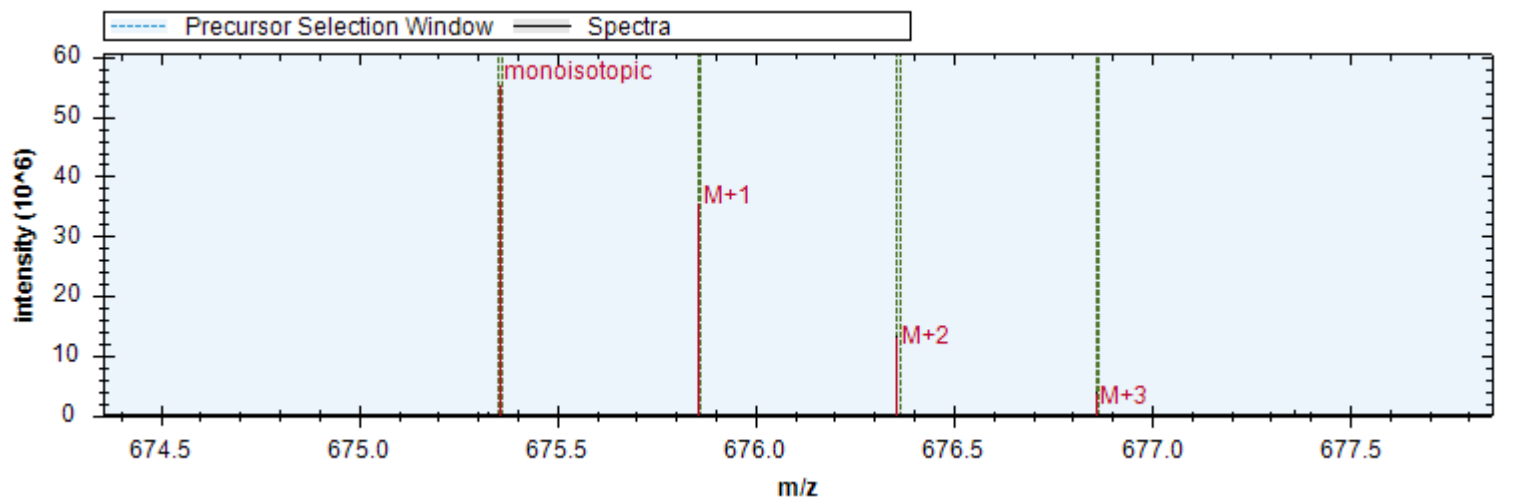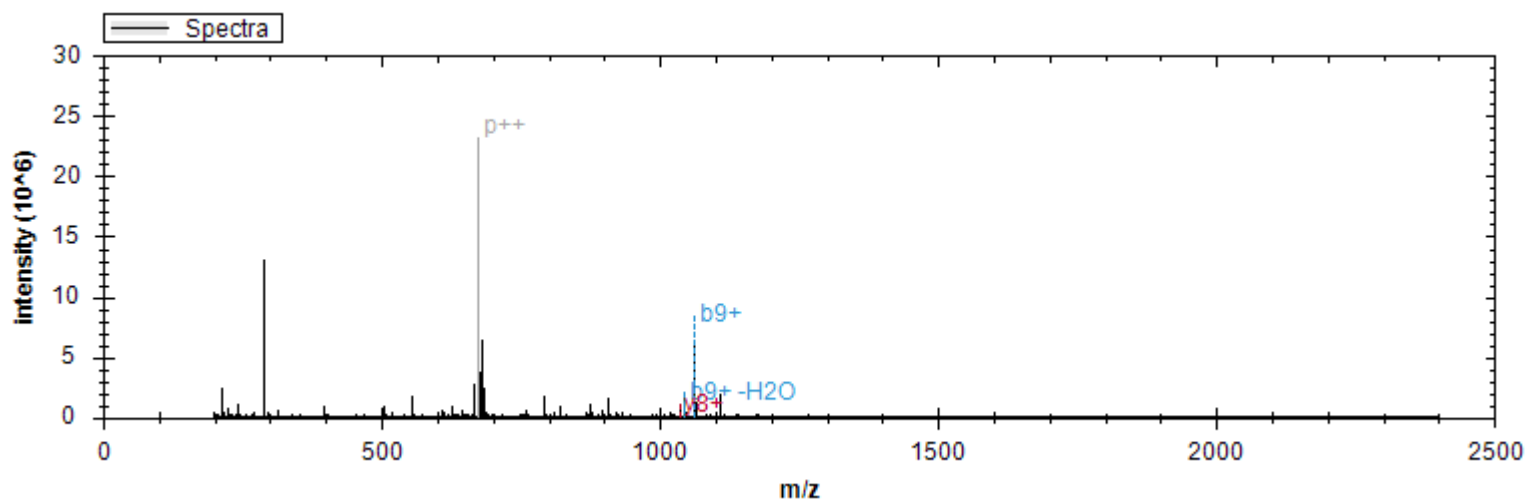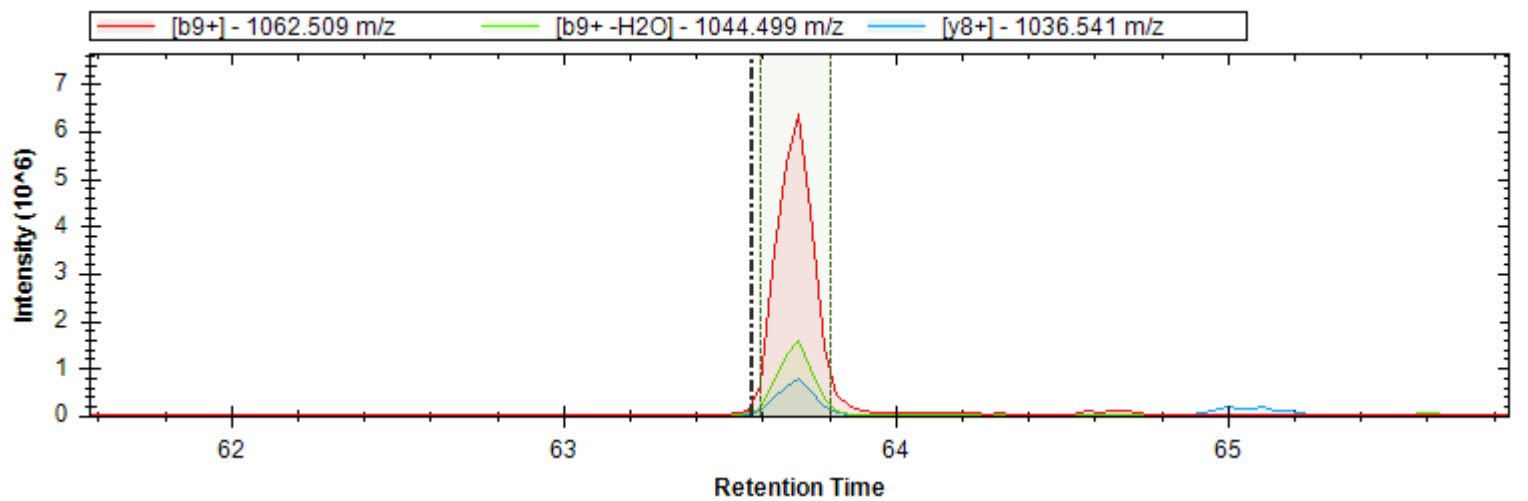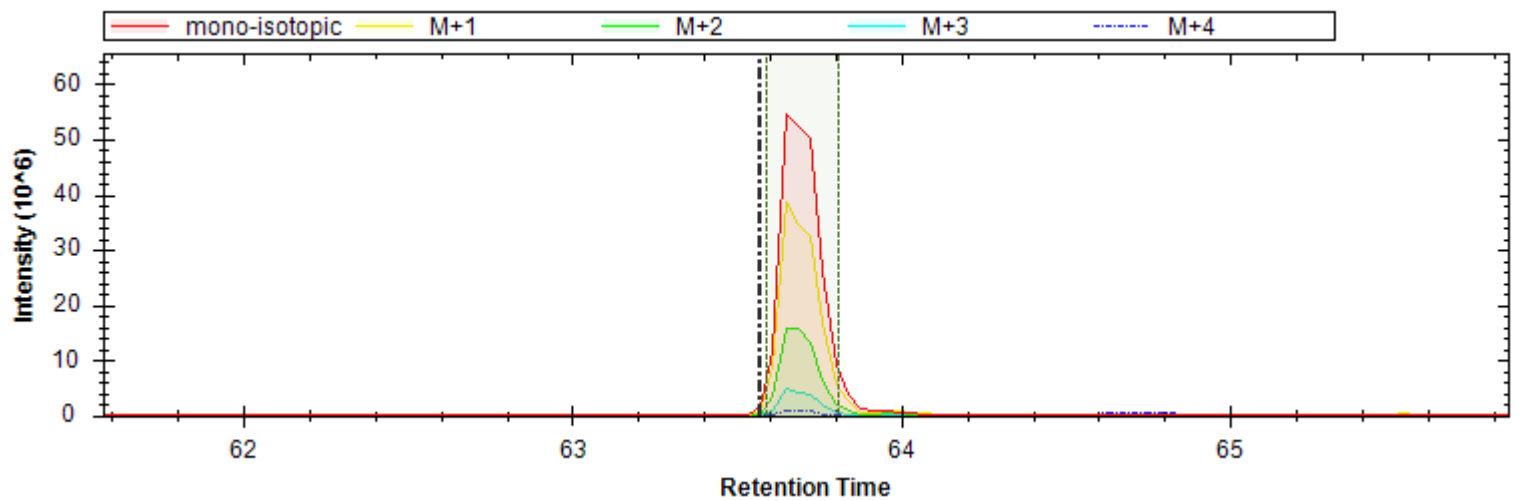

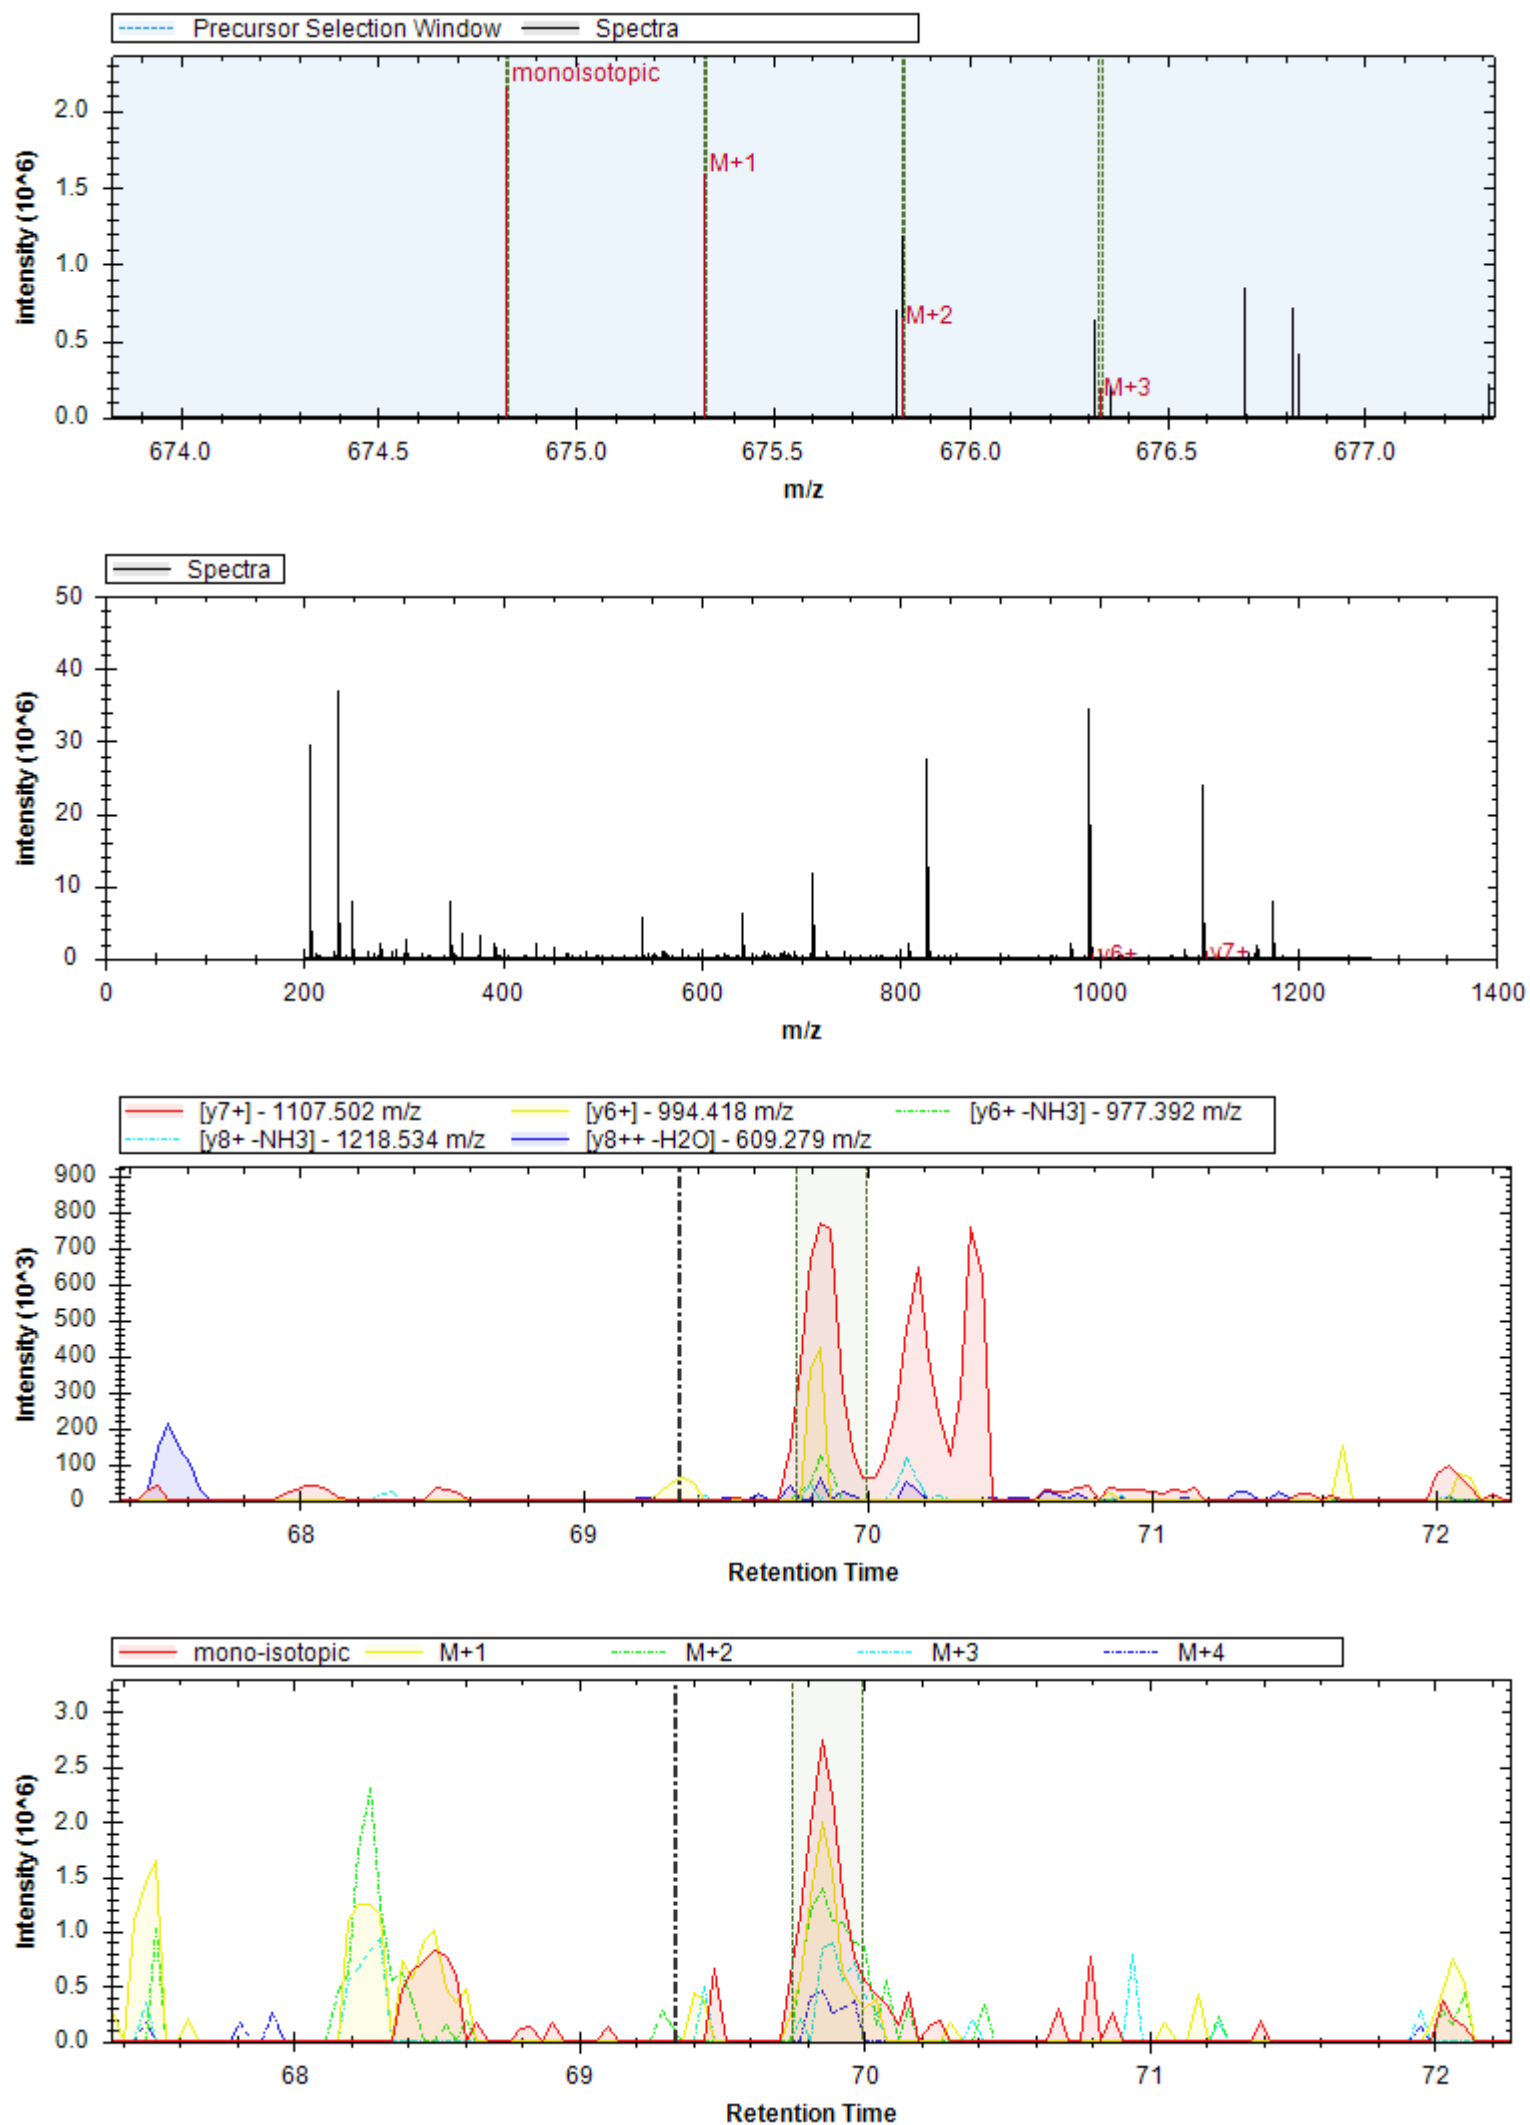

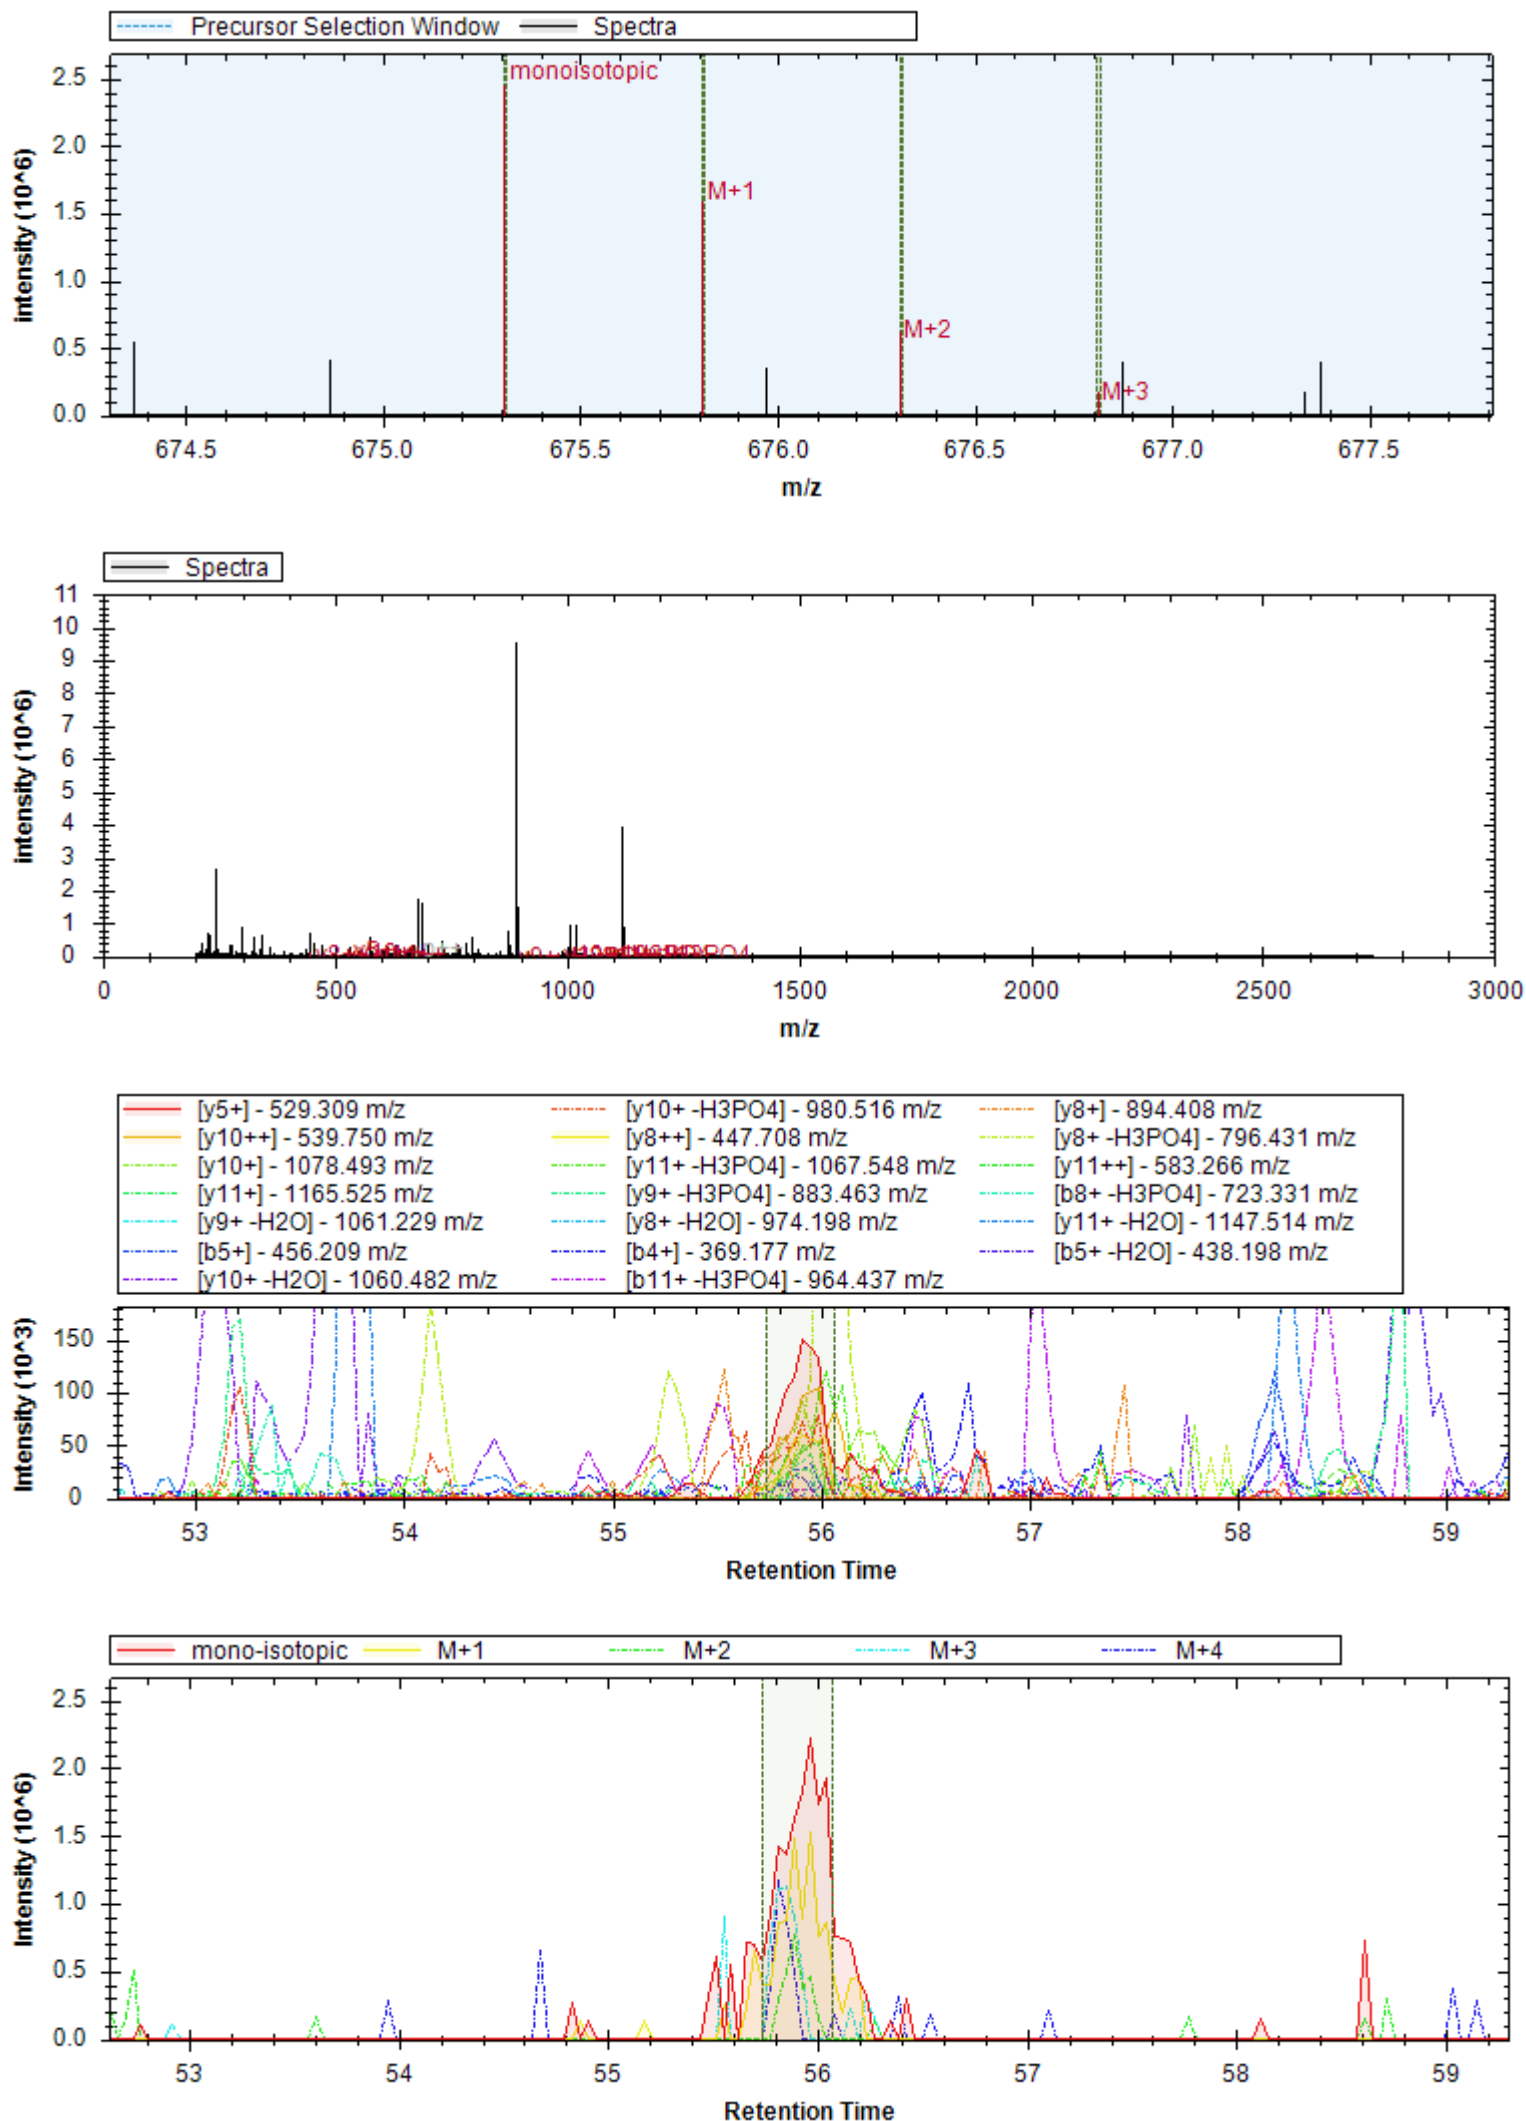

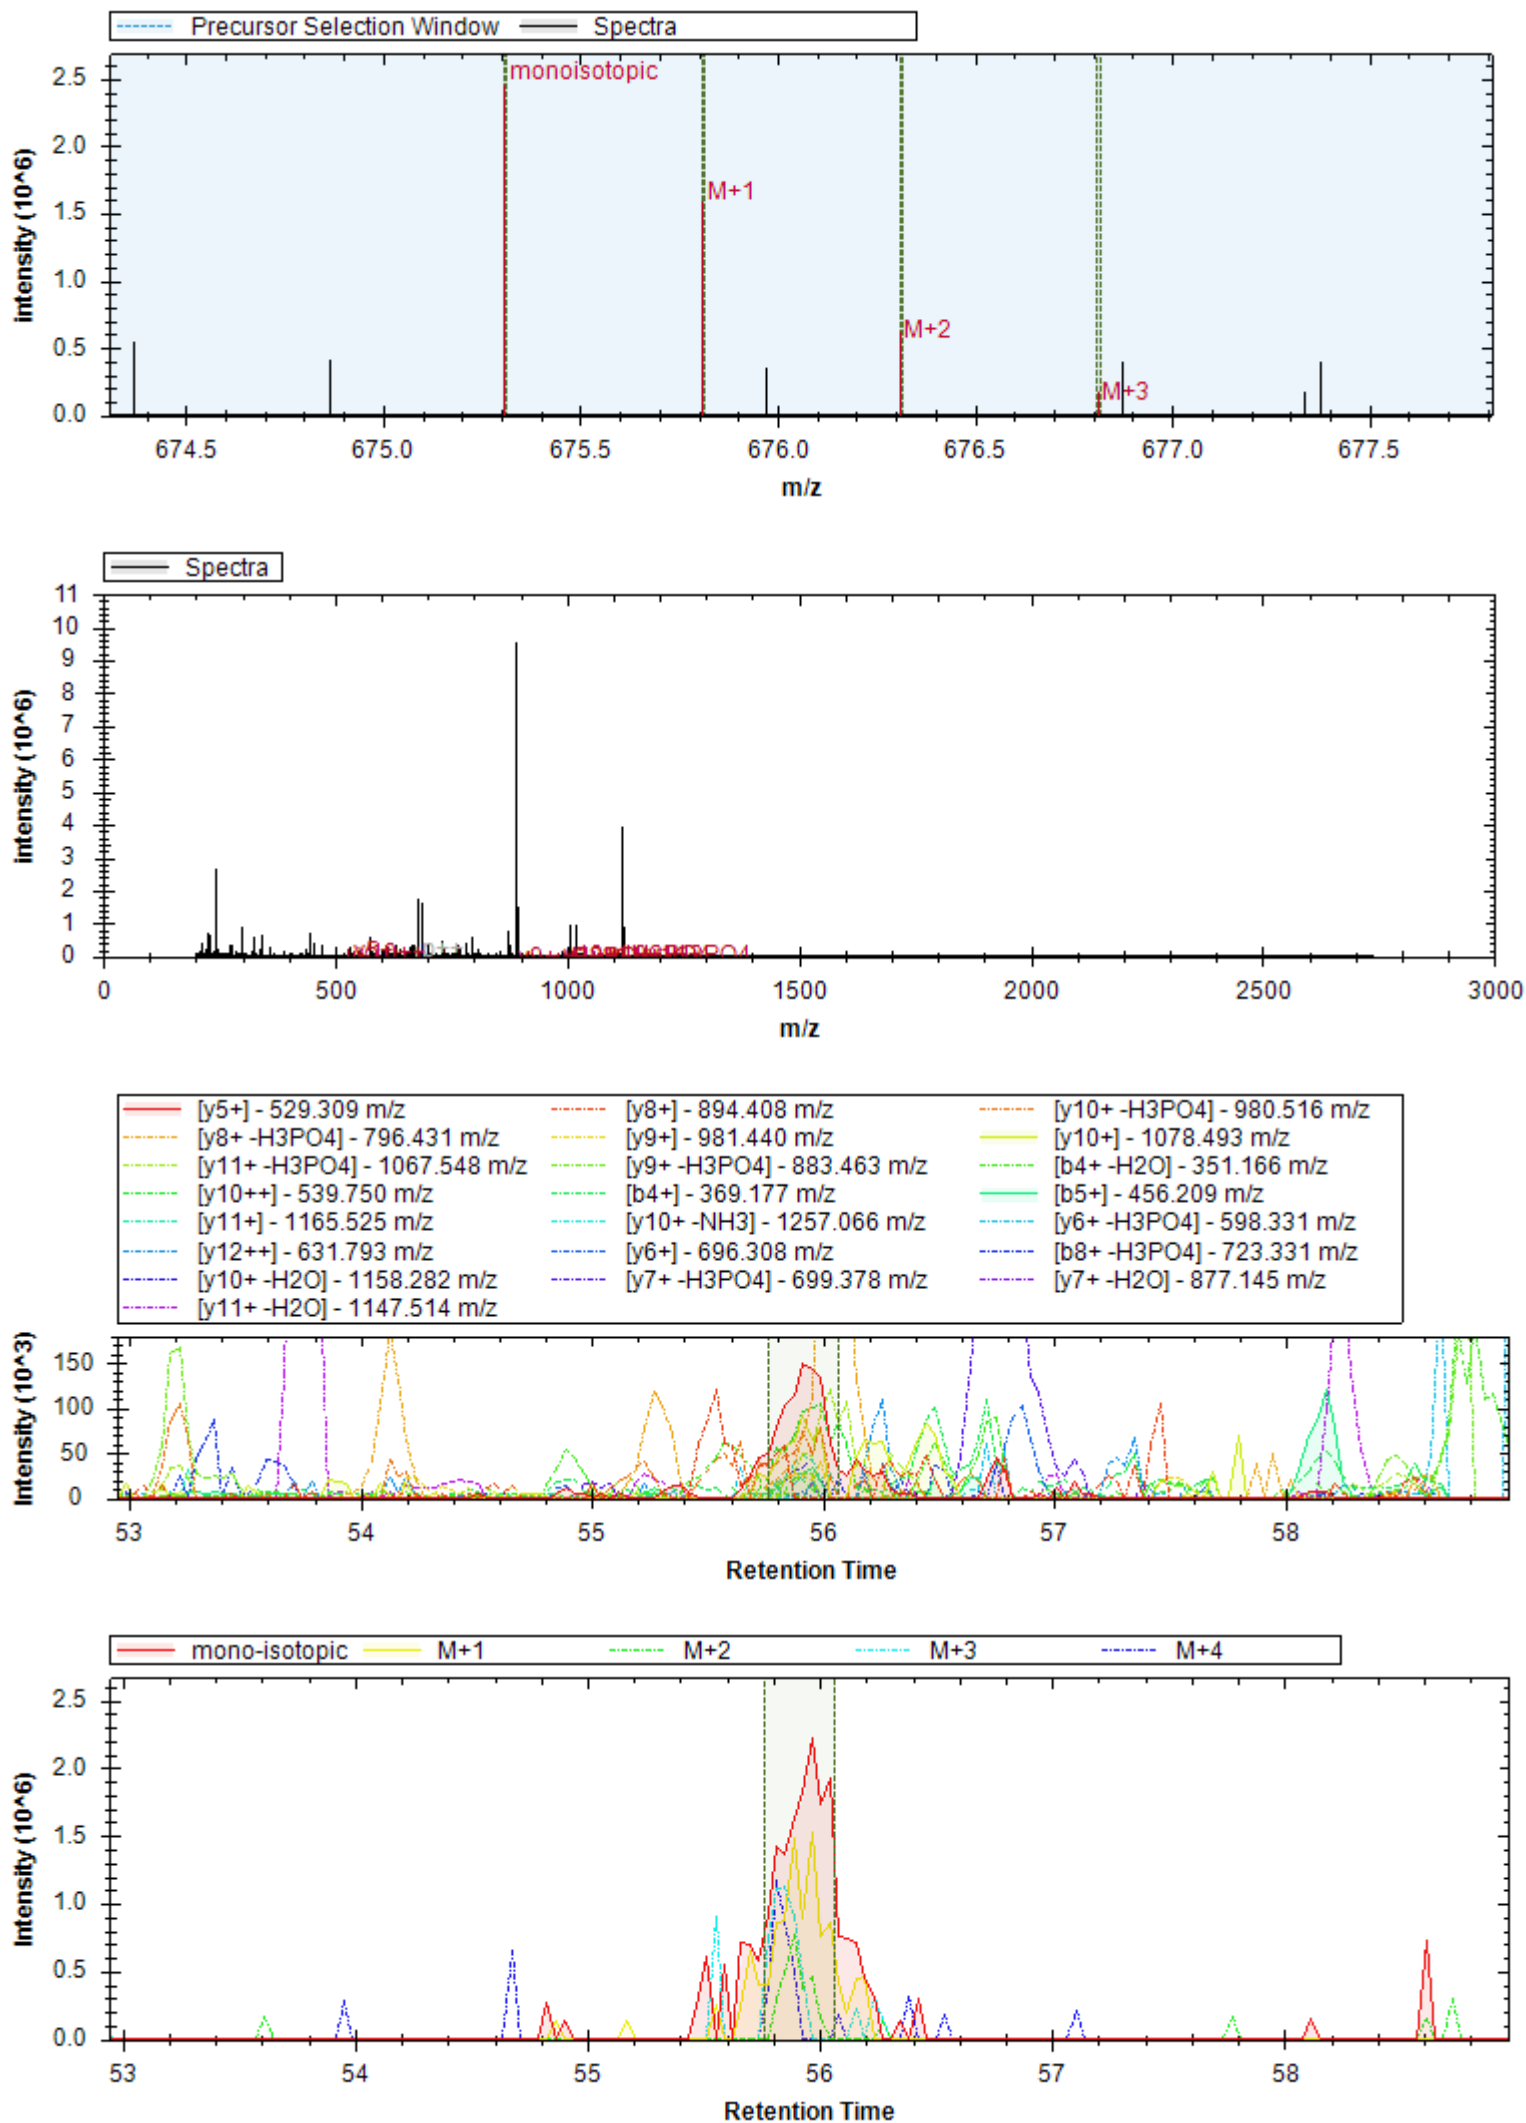



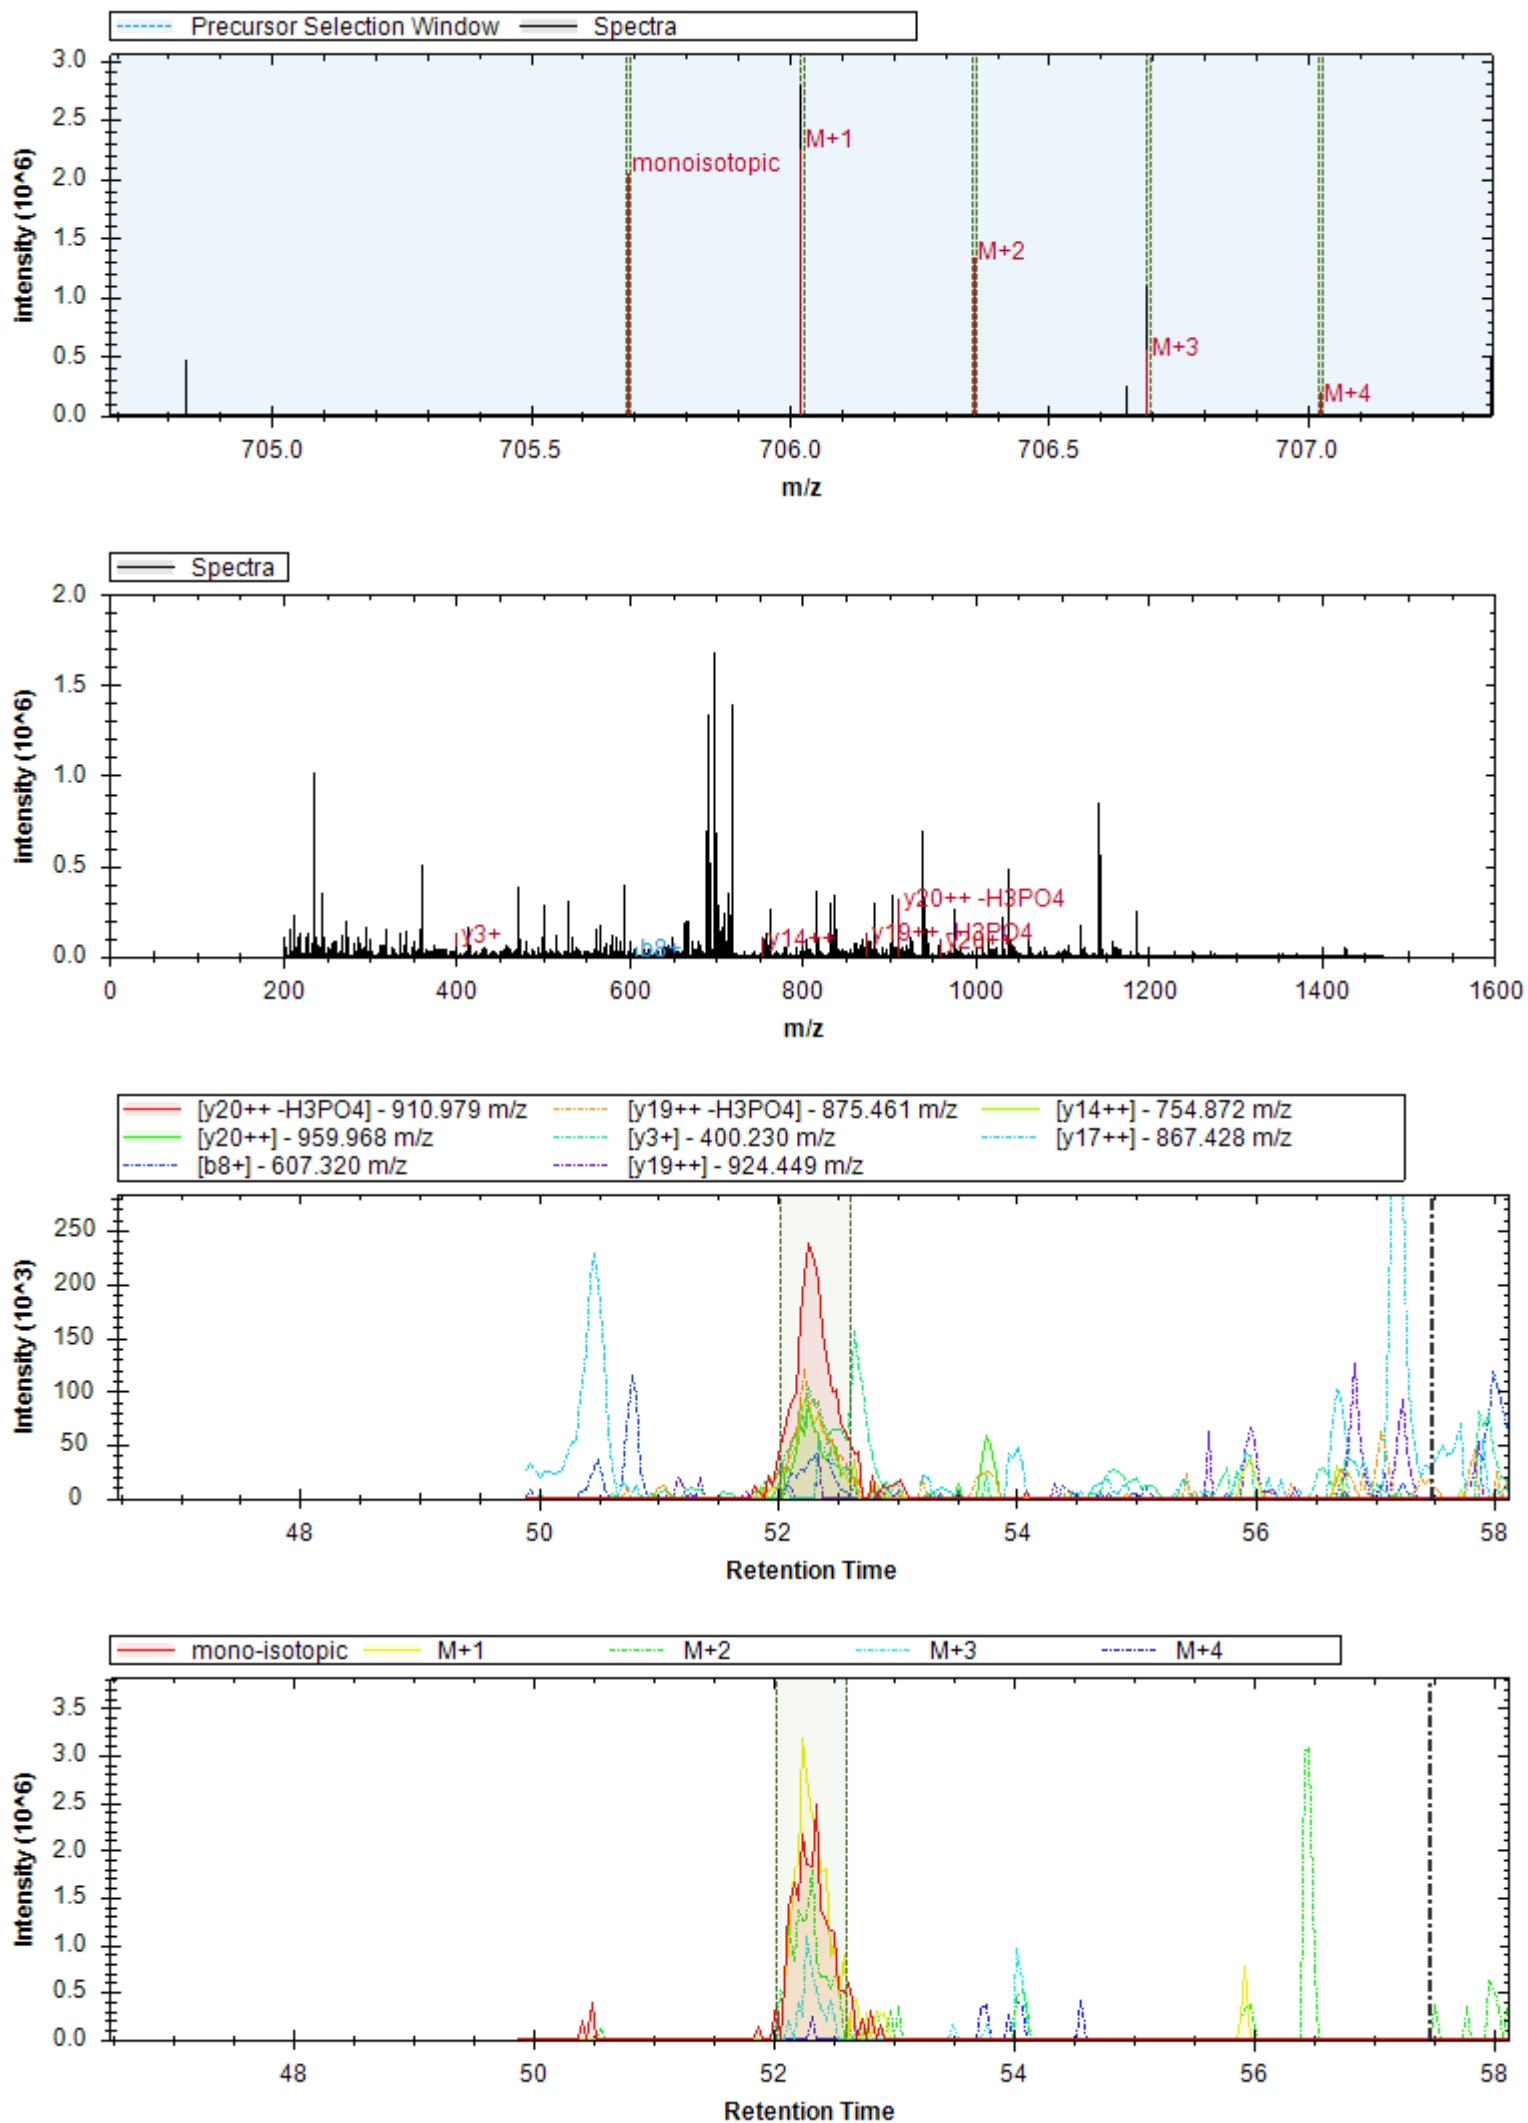

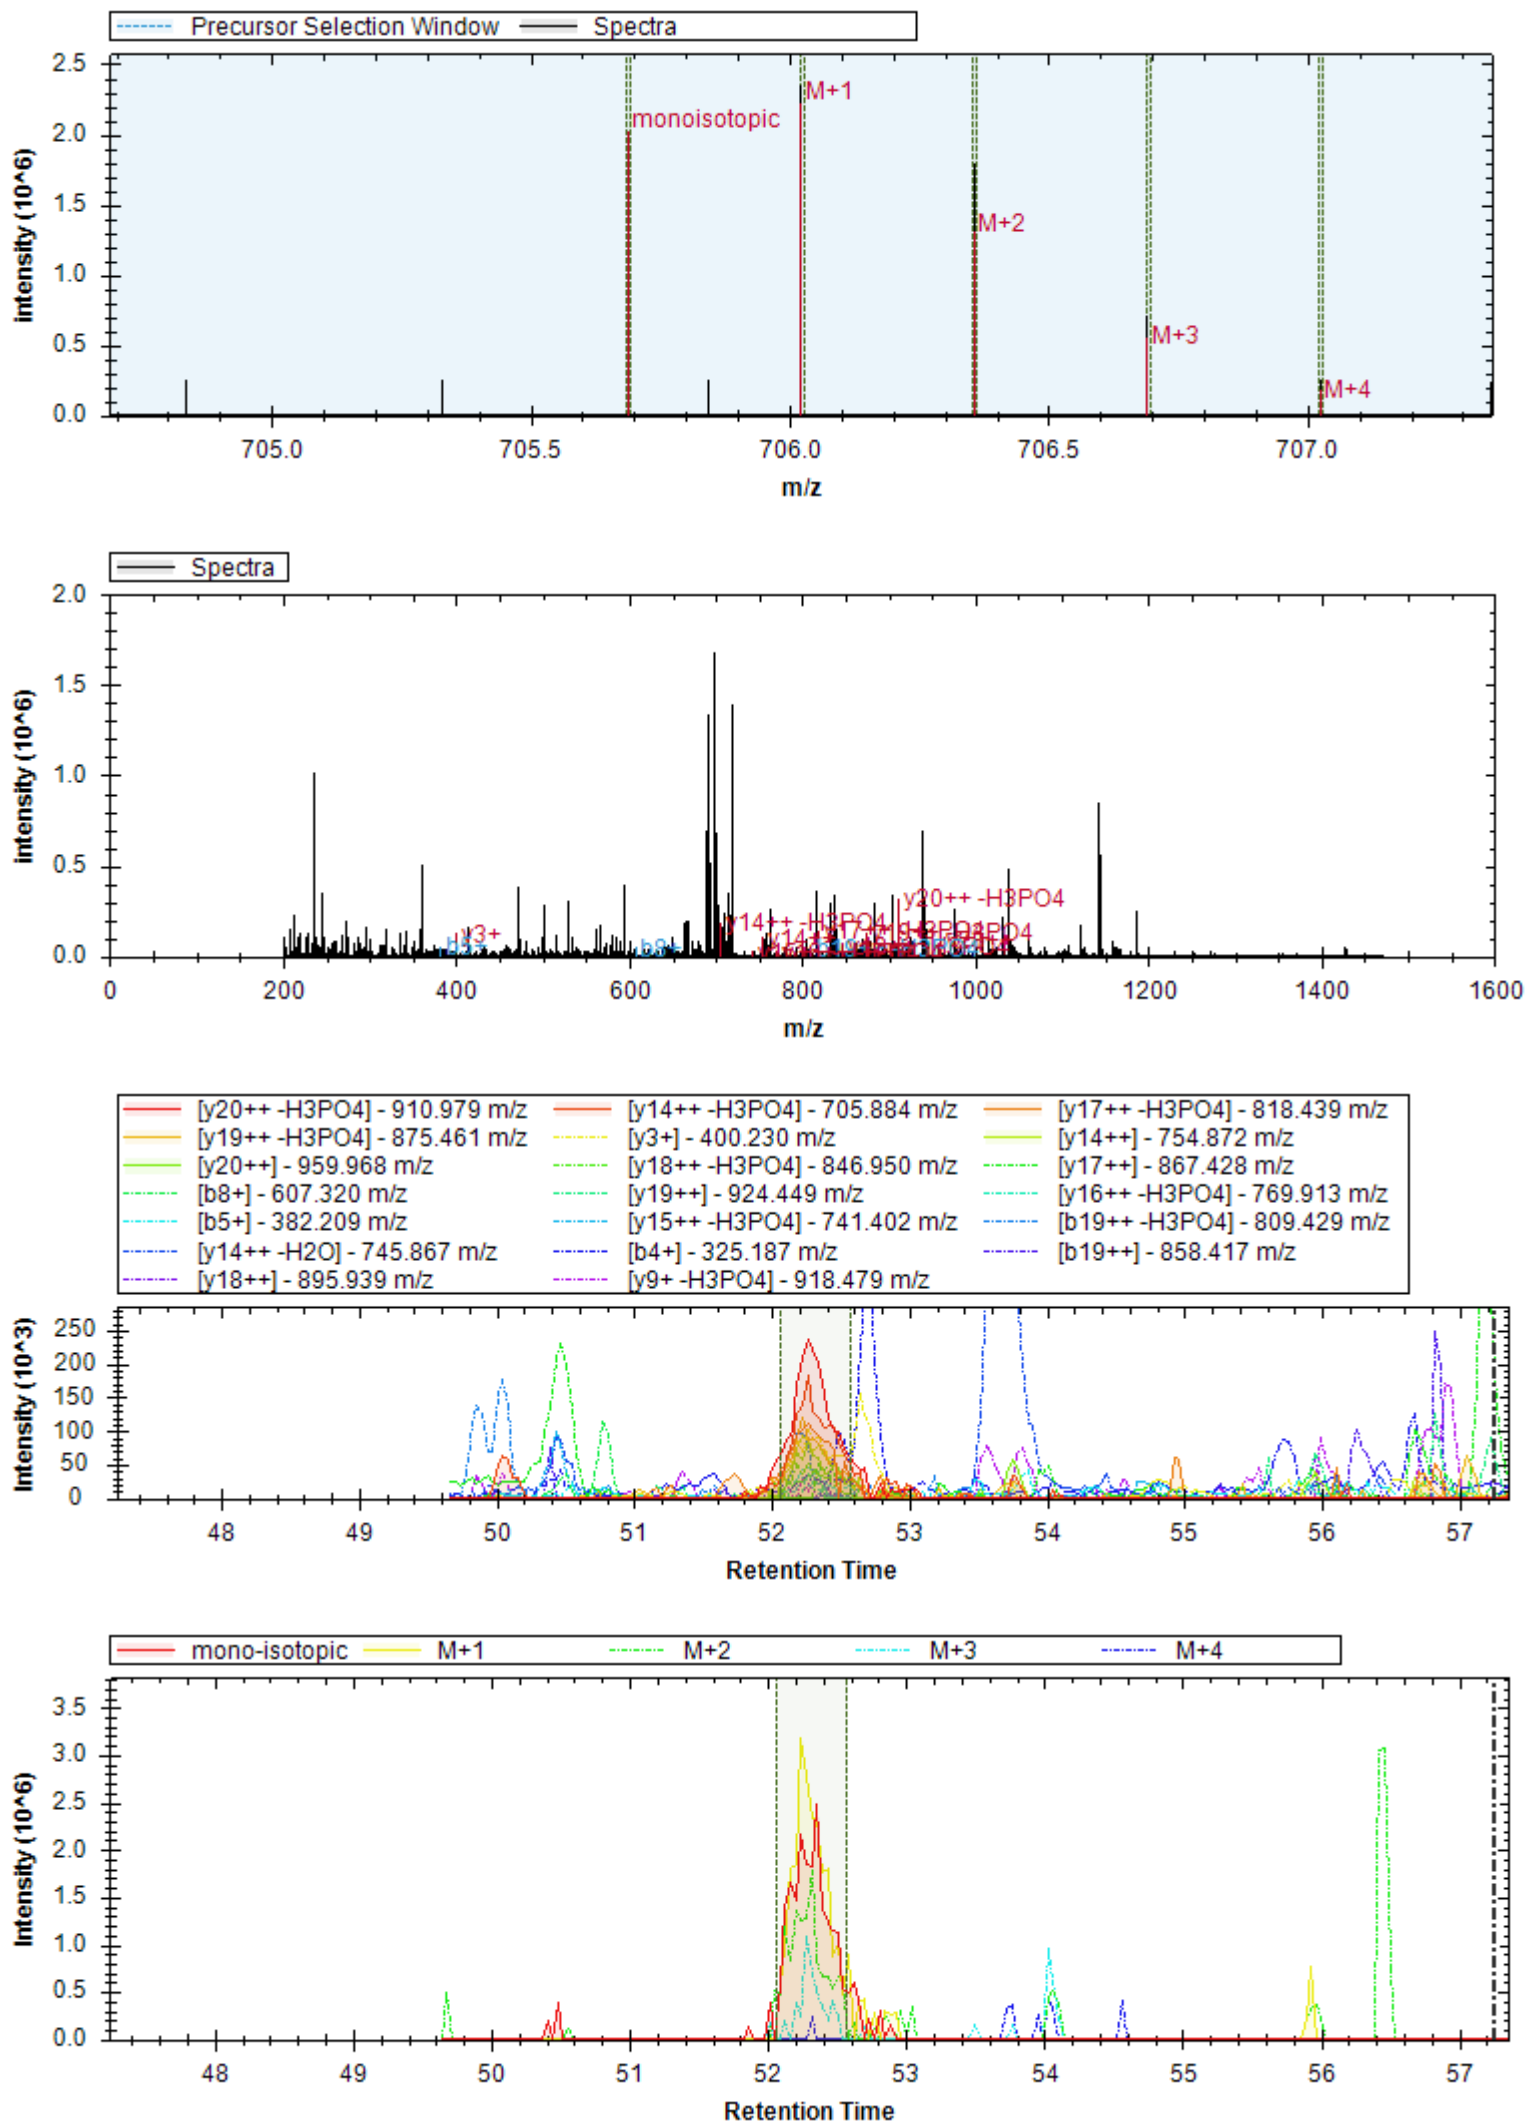

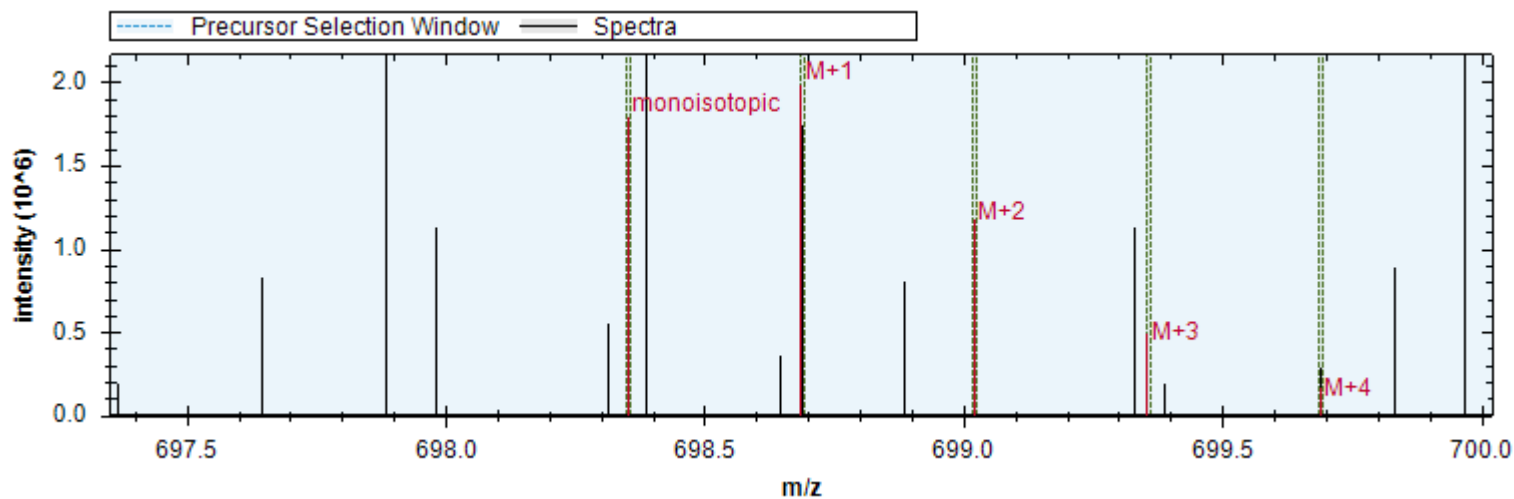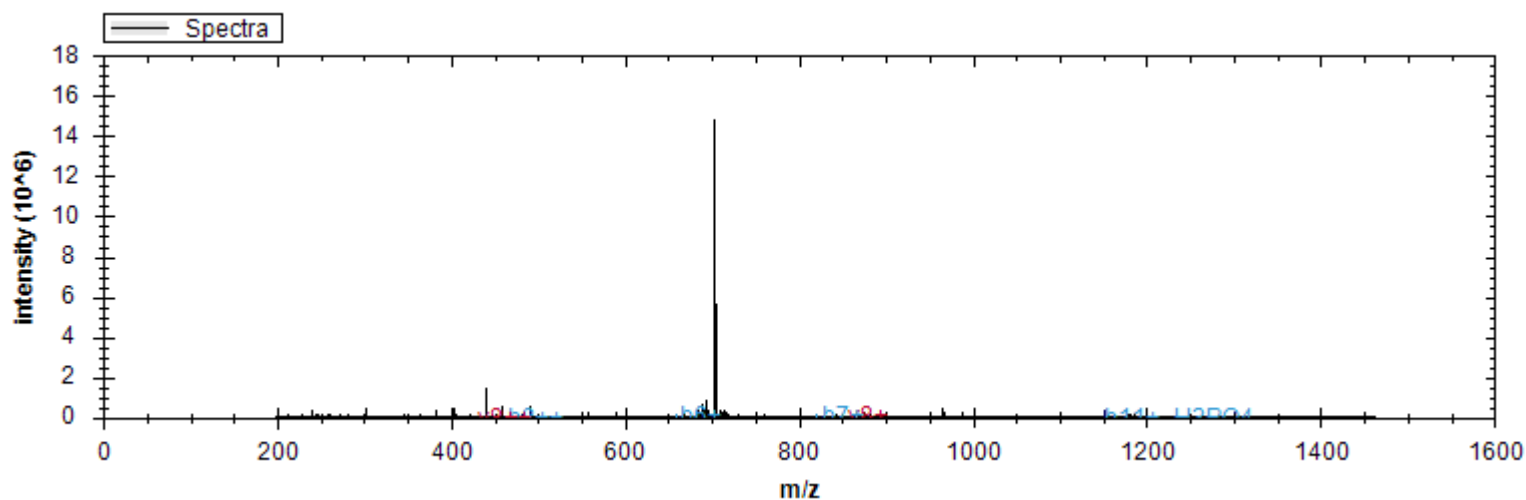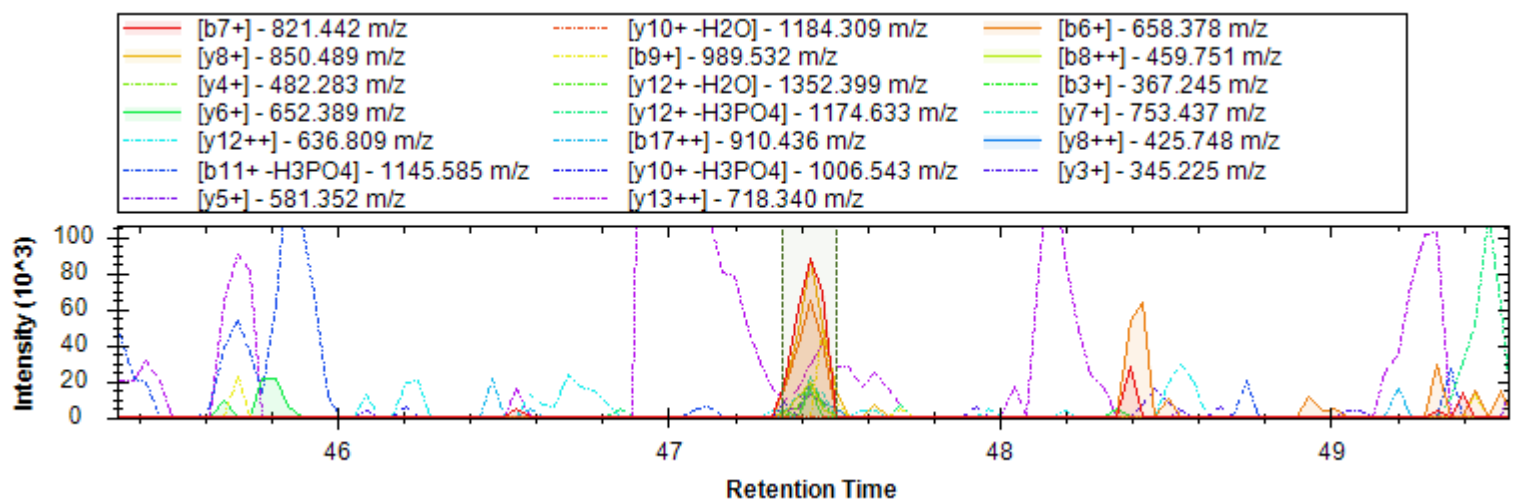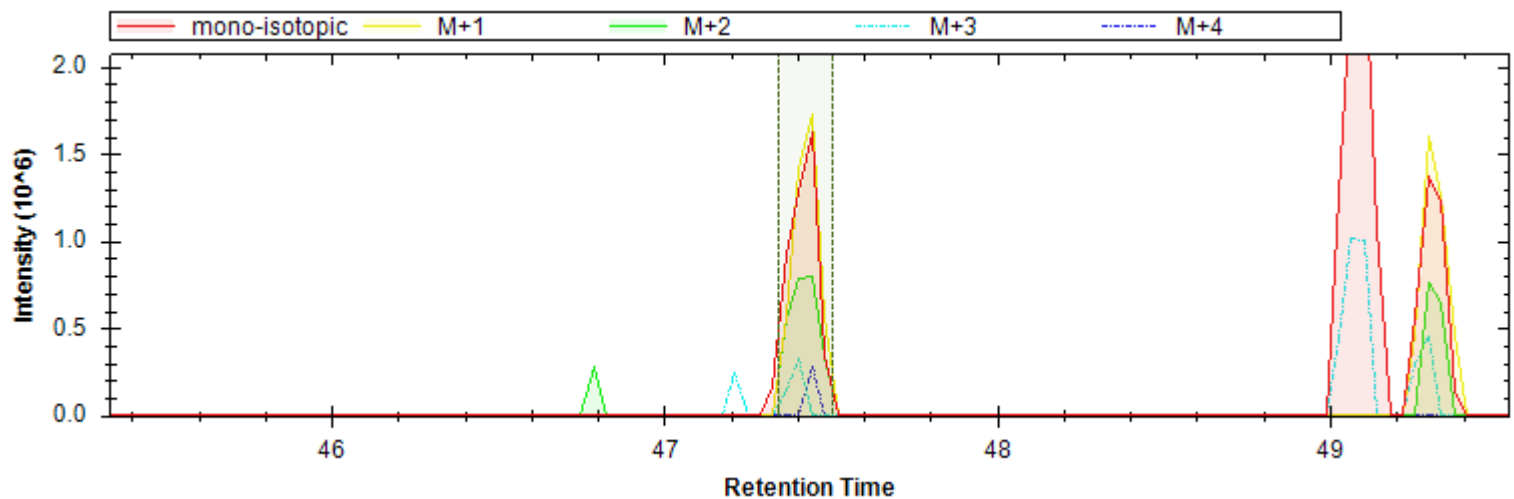

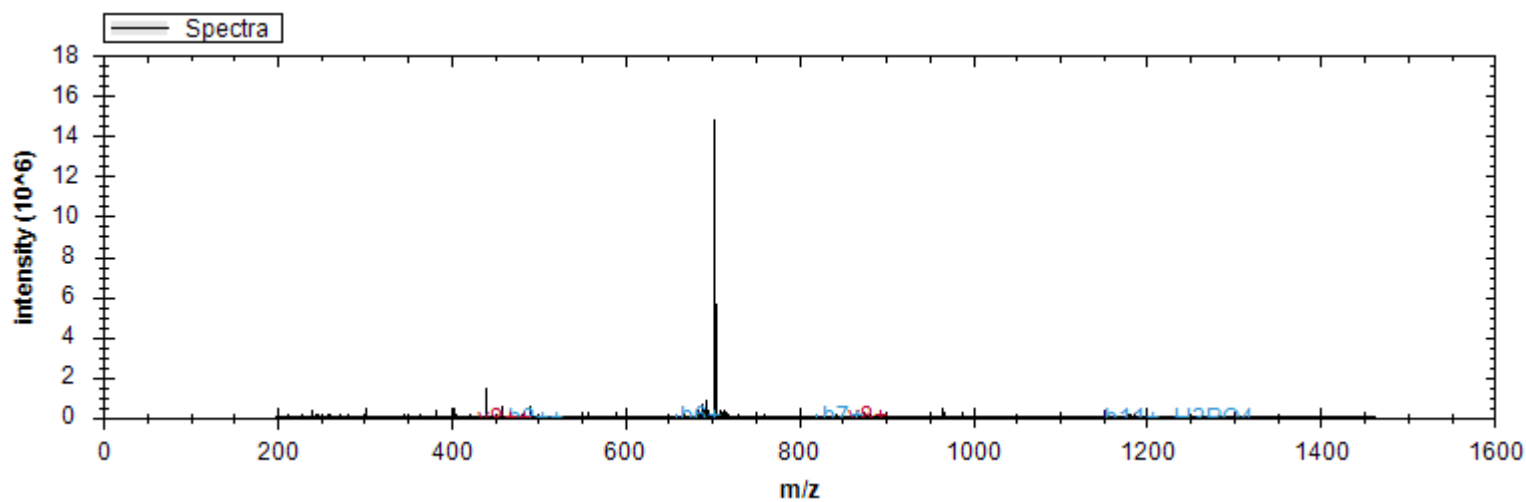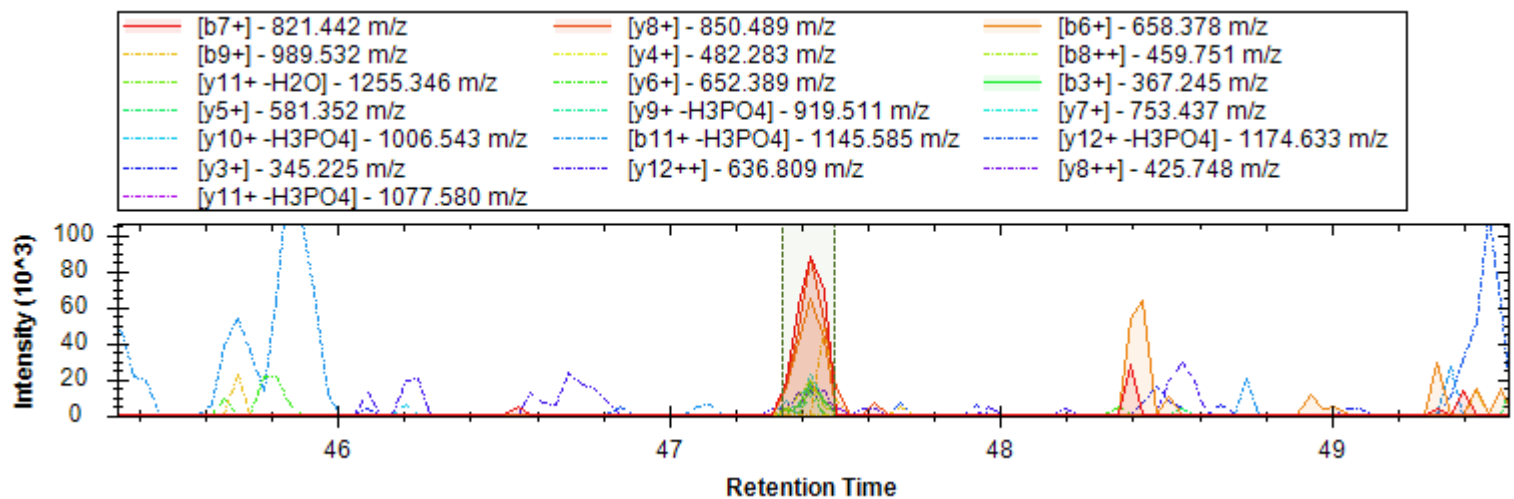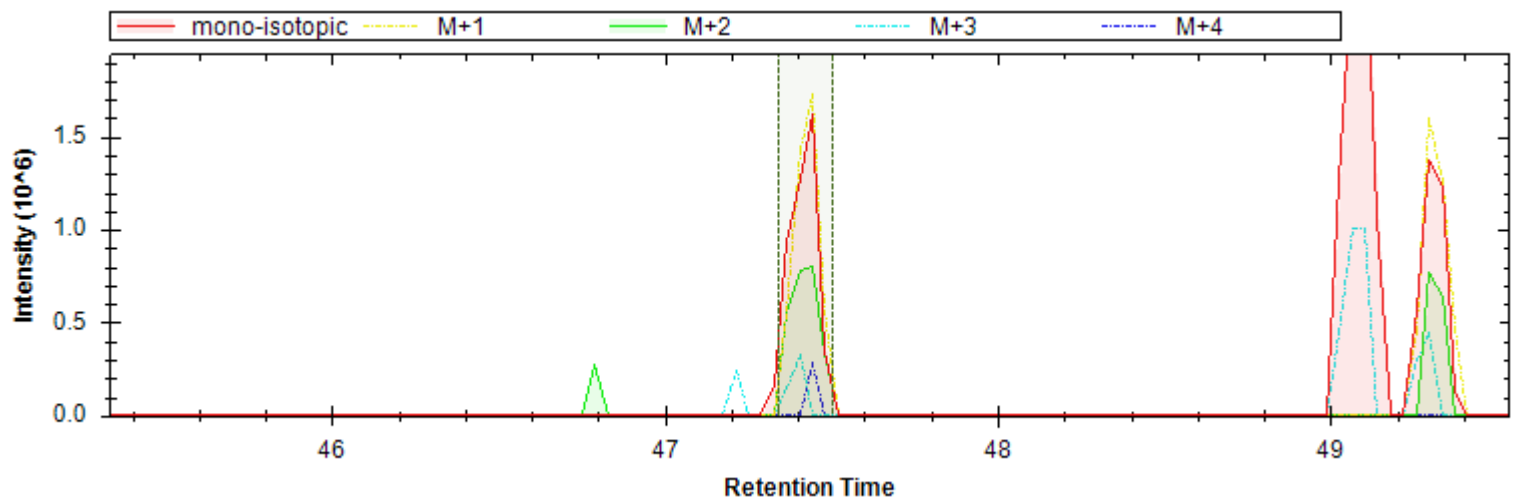

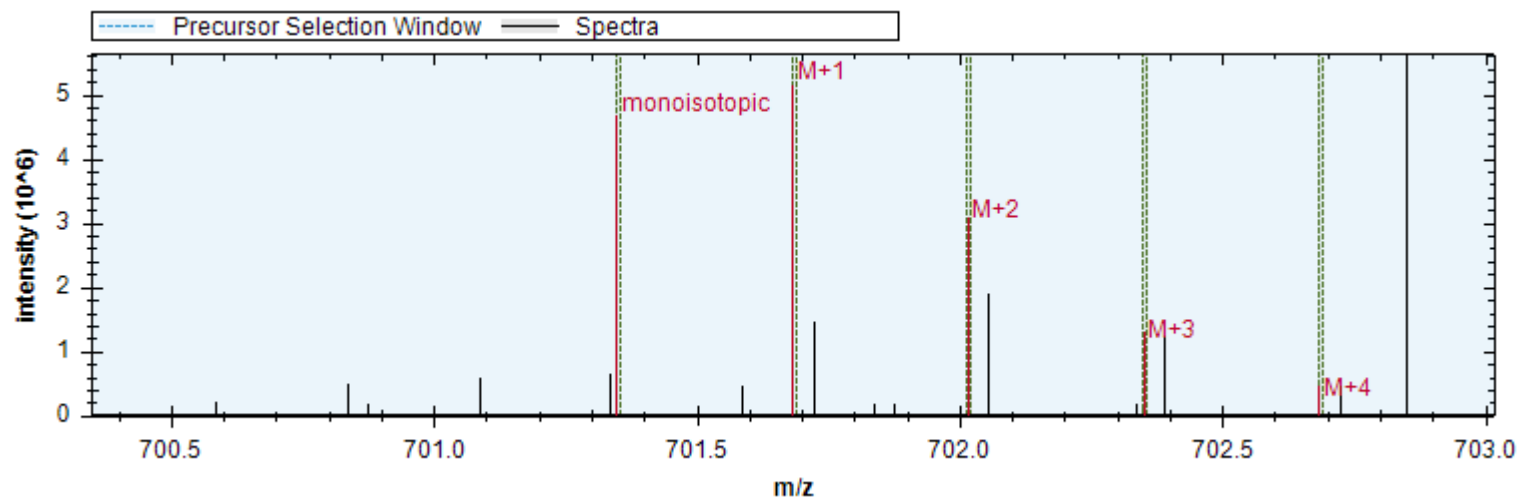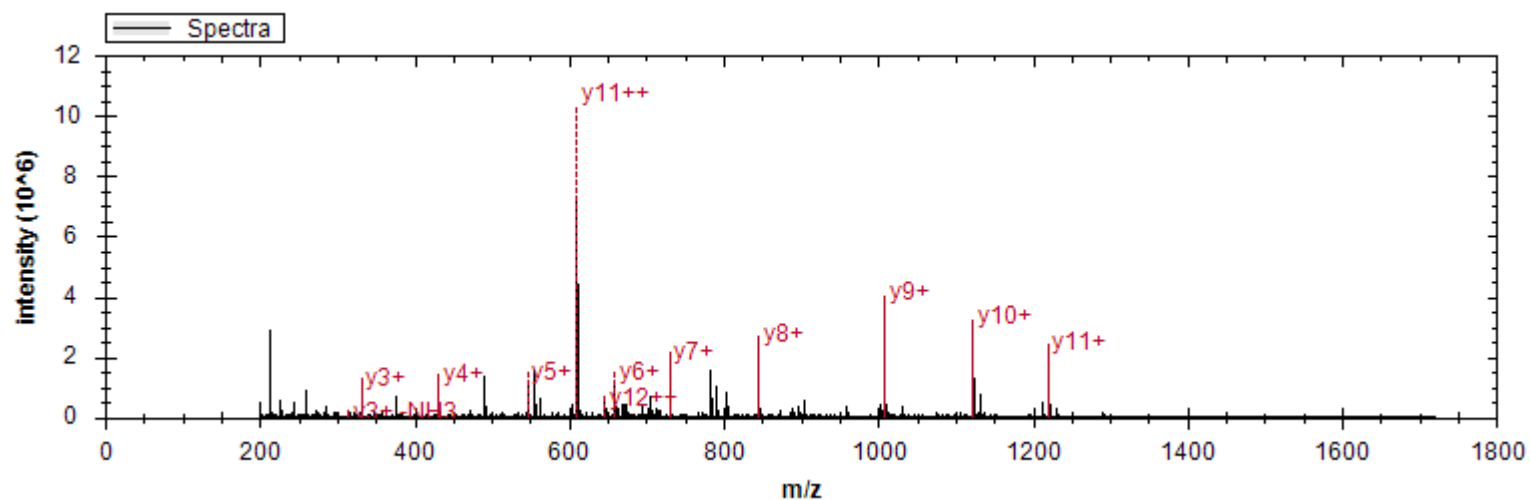

|                          |                       |                       |
|--------------------------|-----------------------|-----------------------|
| [y9+] - 1008.500 m/z     | [y11++] - 610.793 m/z | [y10+] - 1123.527 m/z |
| [y8+] - 845.436 m/z      | [y7+] - 730.409 m/z   | [y11+] - 1220.579 m/z |
| [y4+] - 431.261 m/z      | [y5+] - 546.288 m/z   | [y3+] - 332.193 m/z   |
| [y6+] - 659.372 m/z      | [y12++] - 646.312 m/z | [y13++] - 702.854 m/z |
| [y3+ -NH3] - 315.166 m/z |                       |                       |

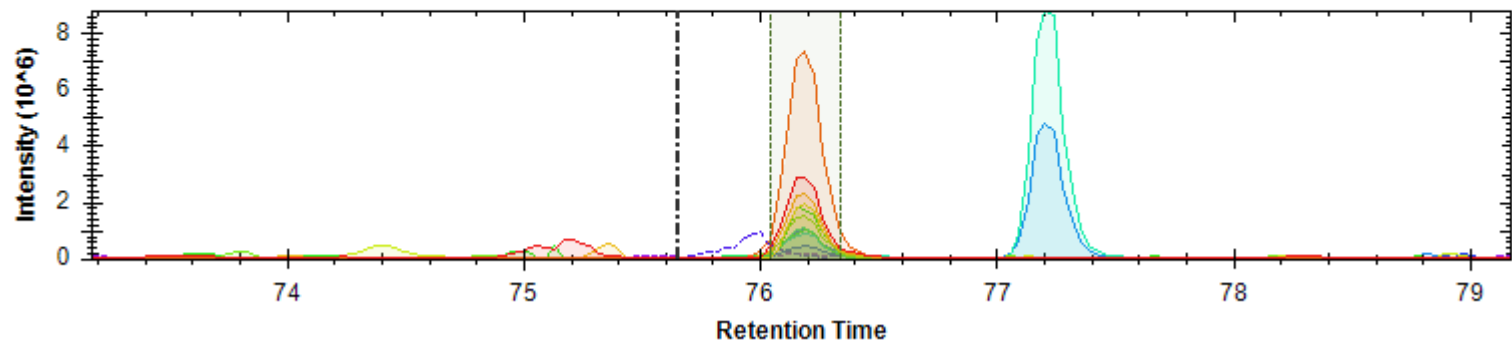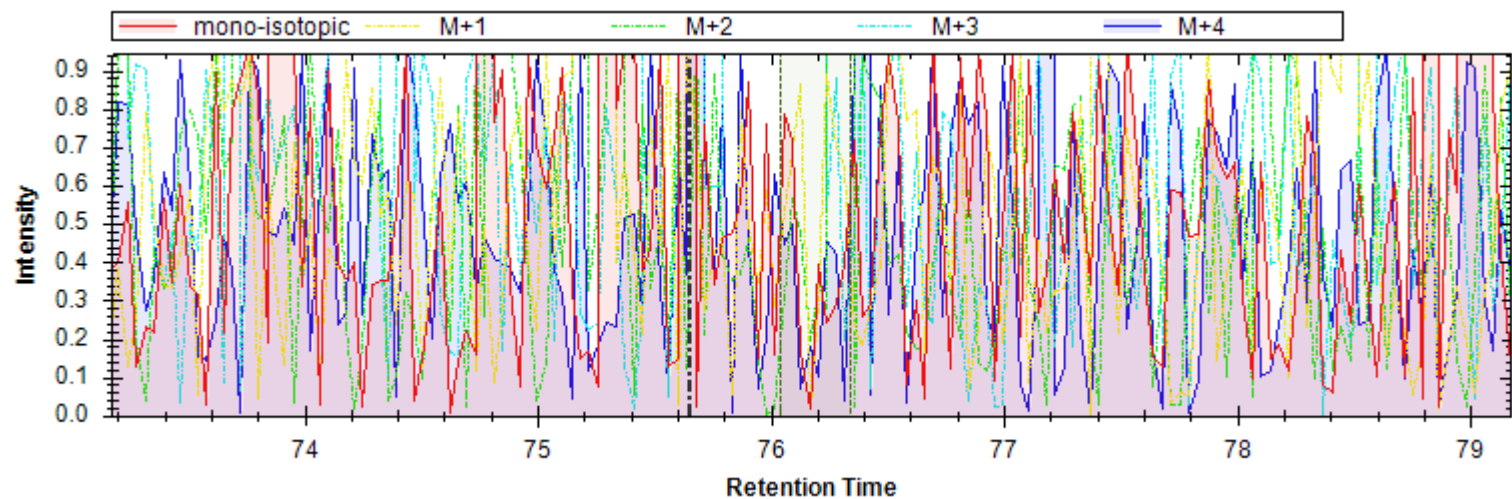

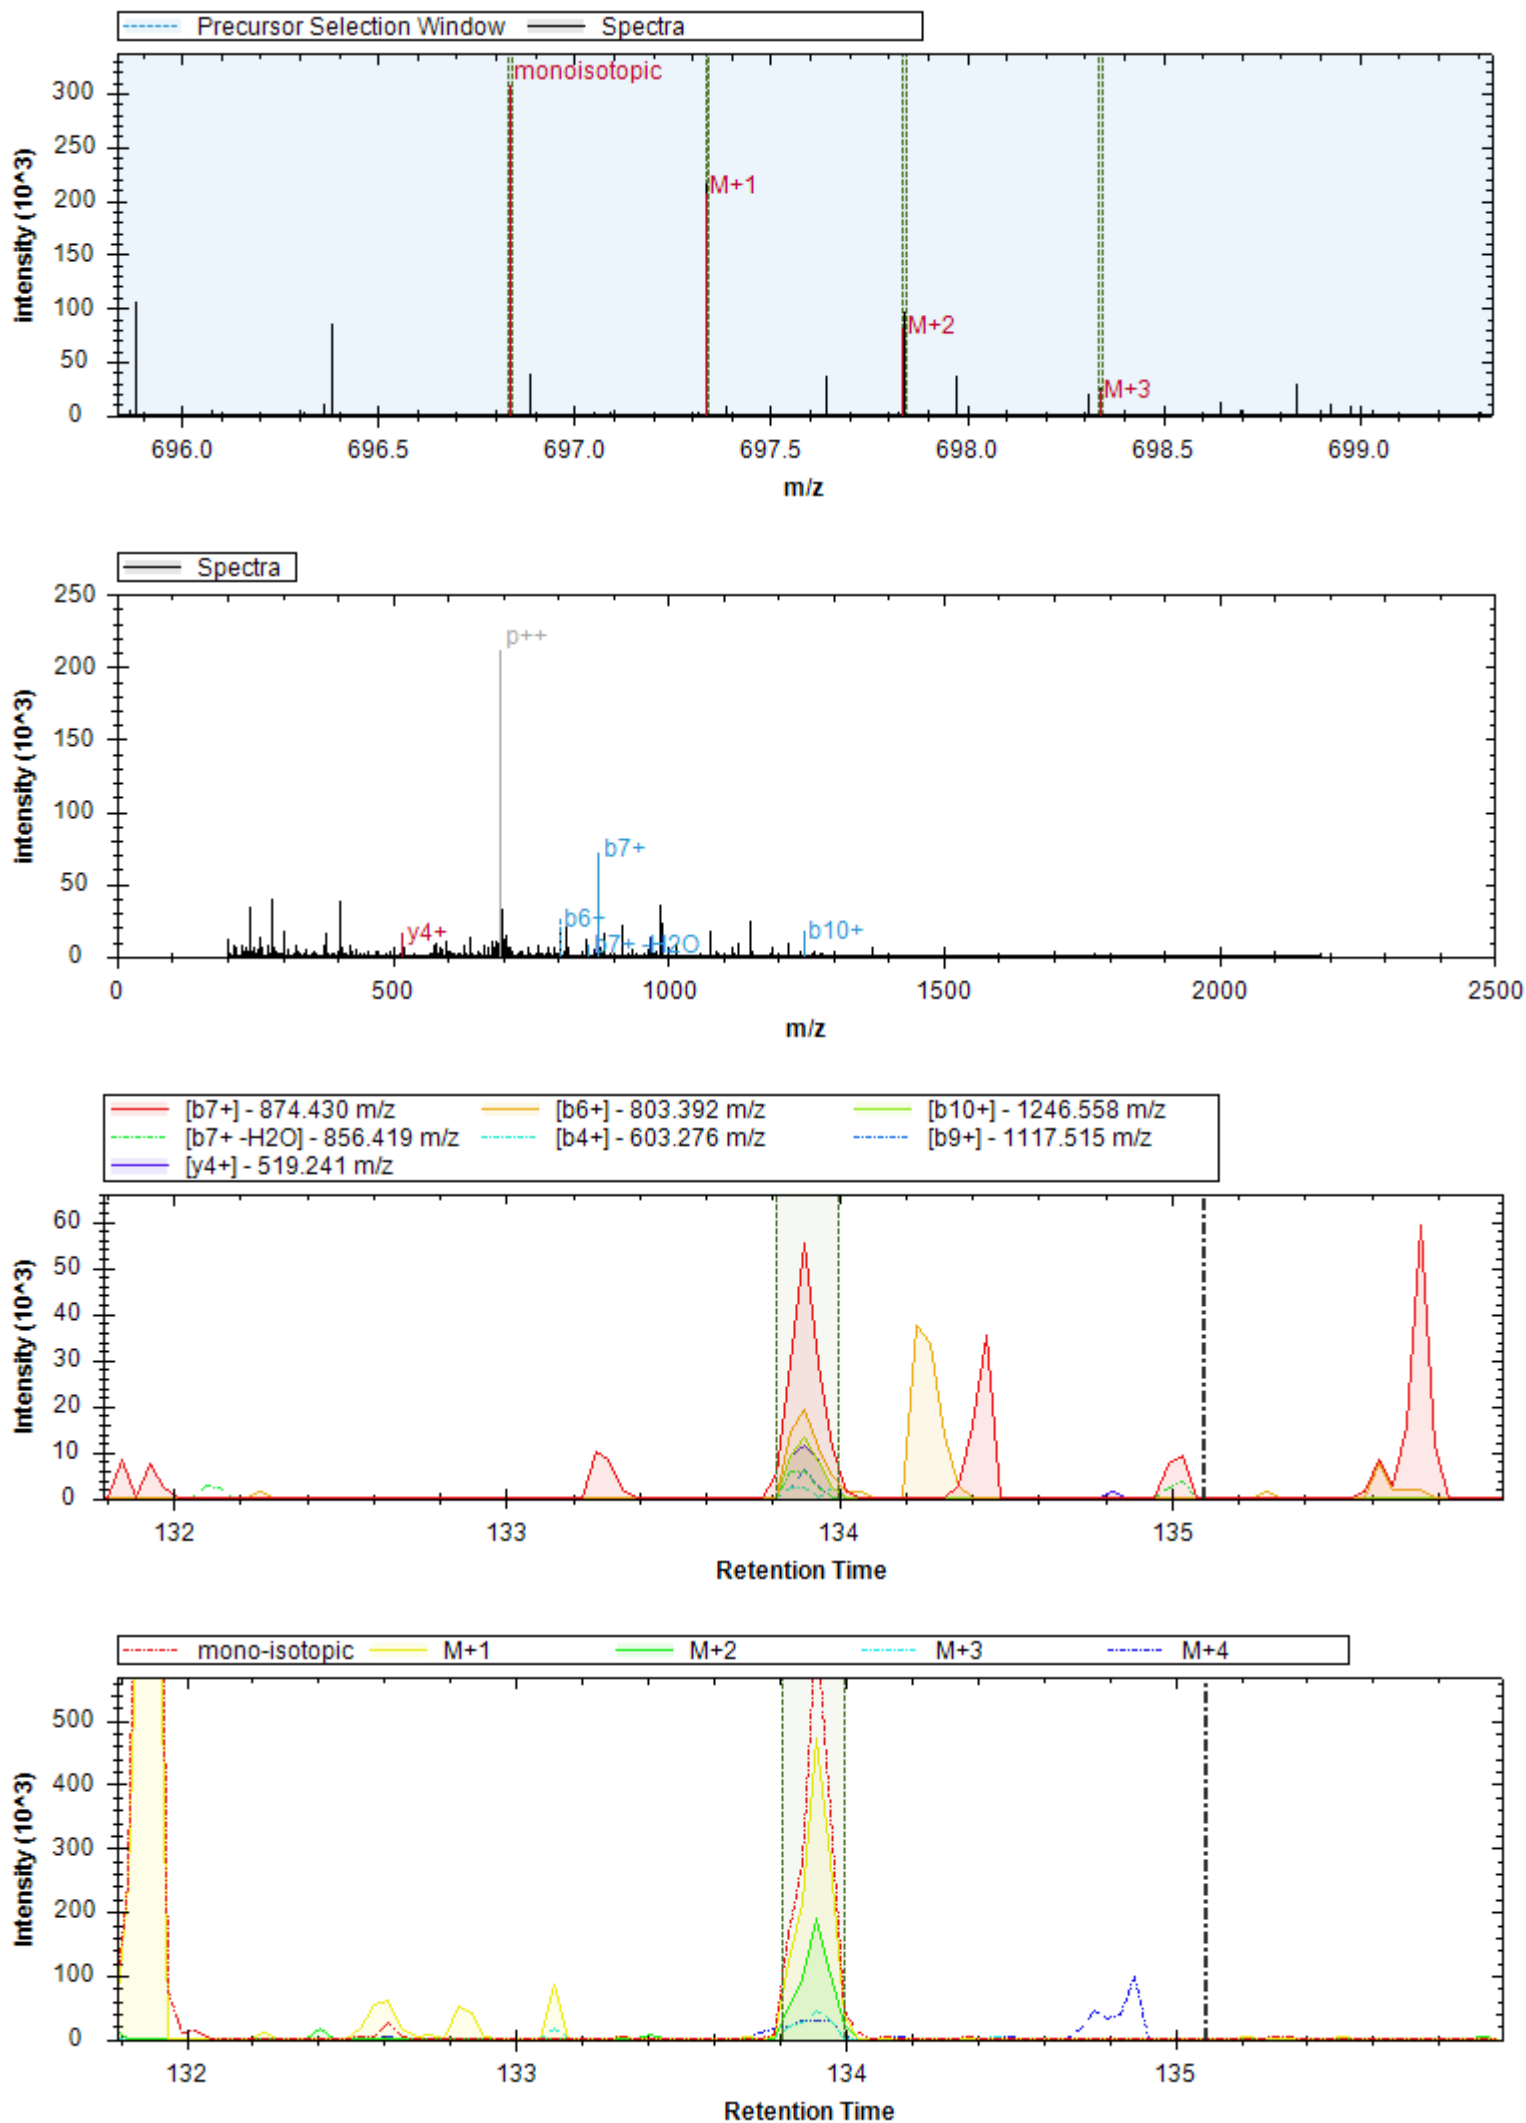

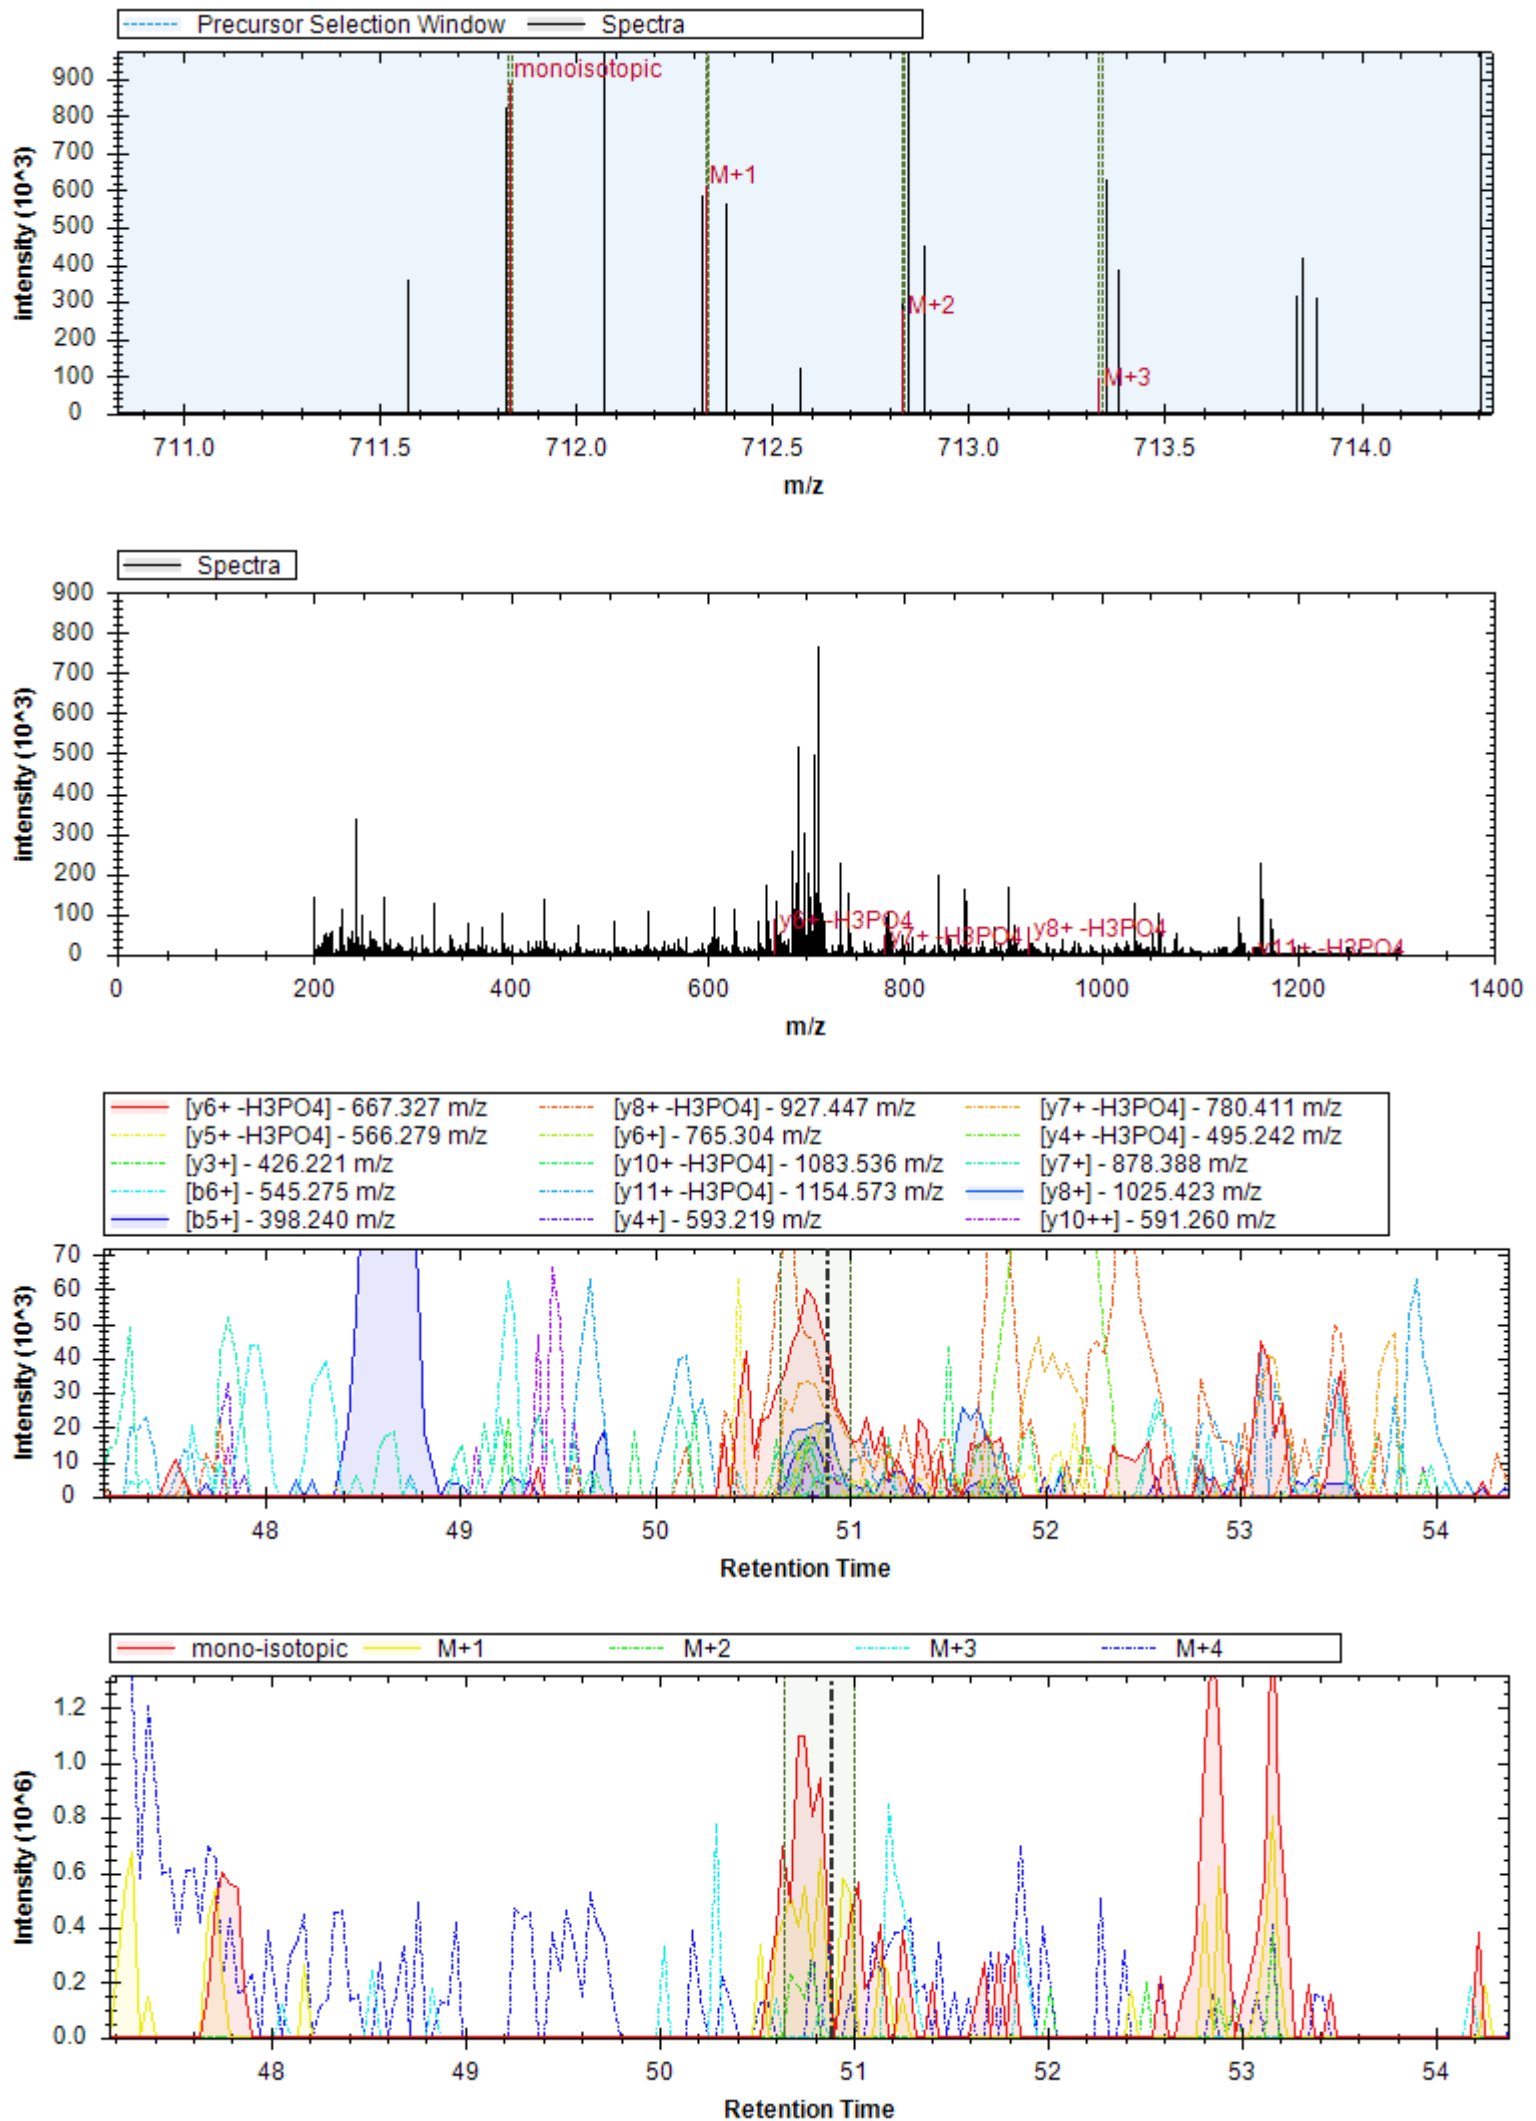

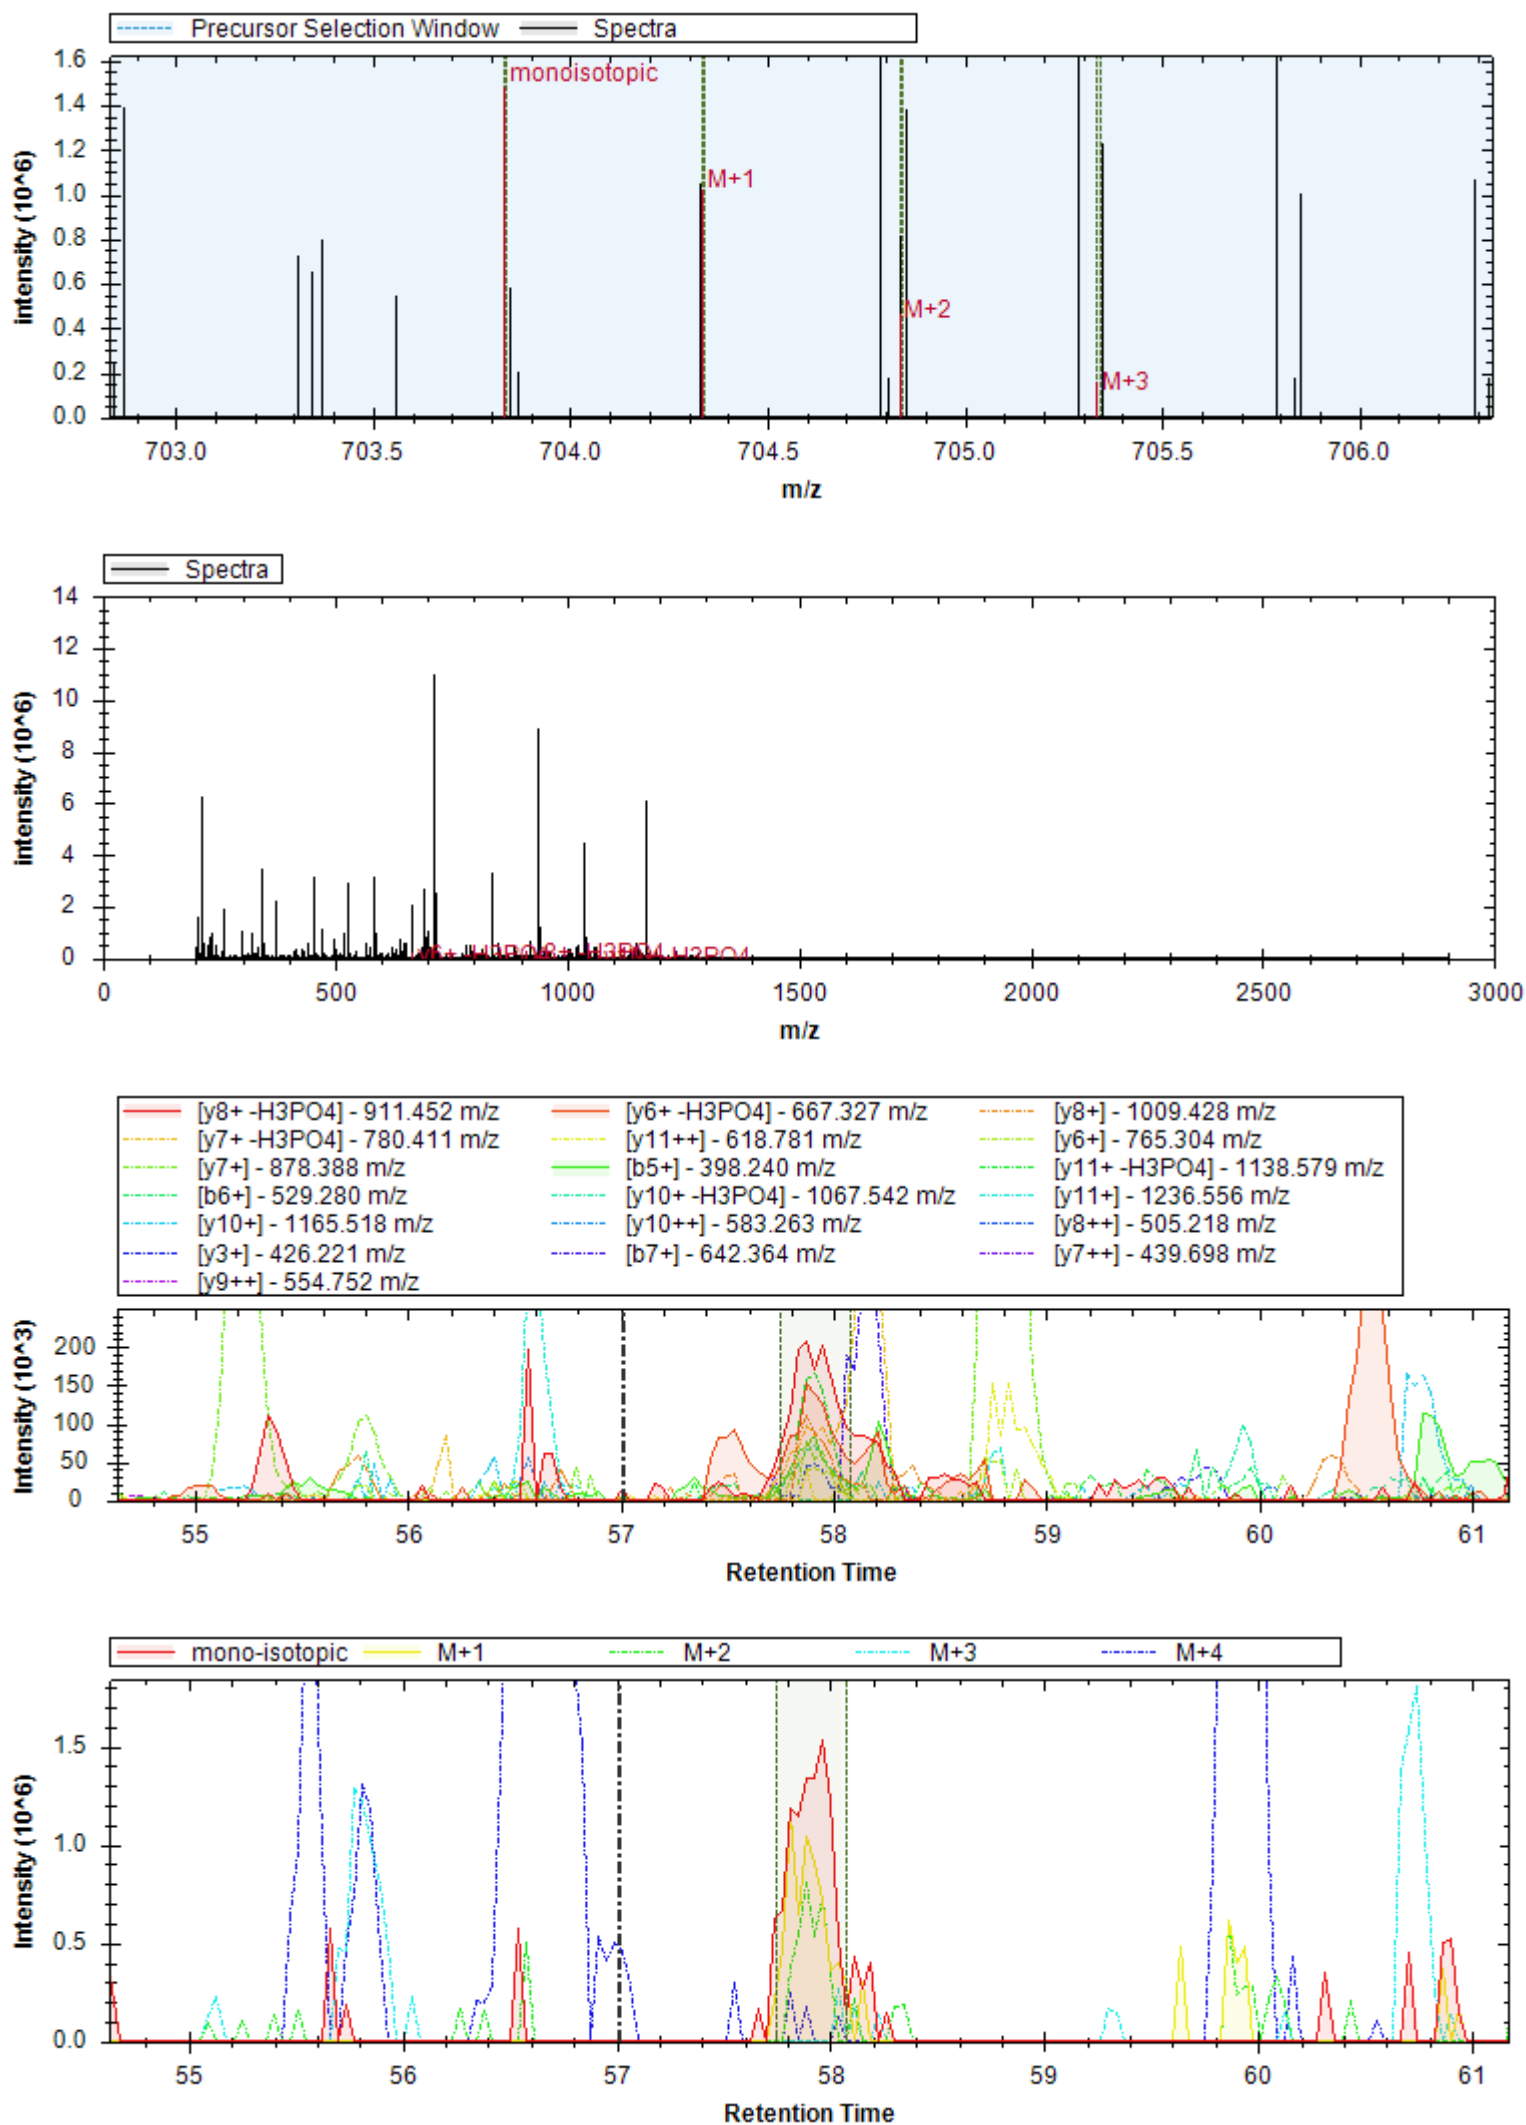



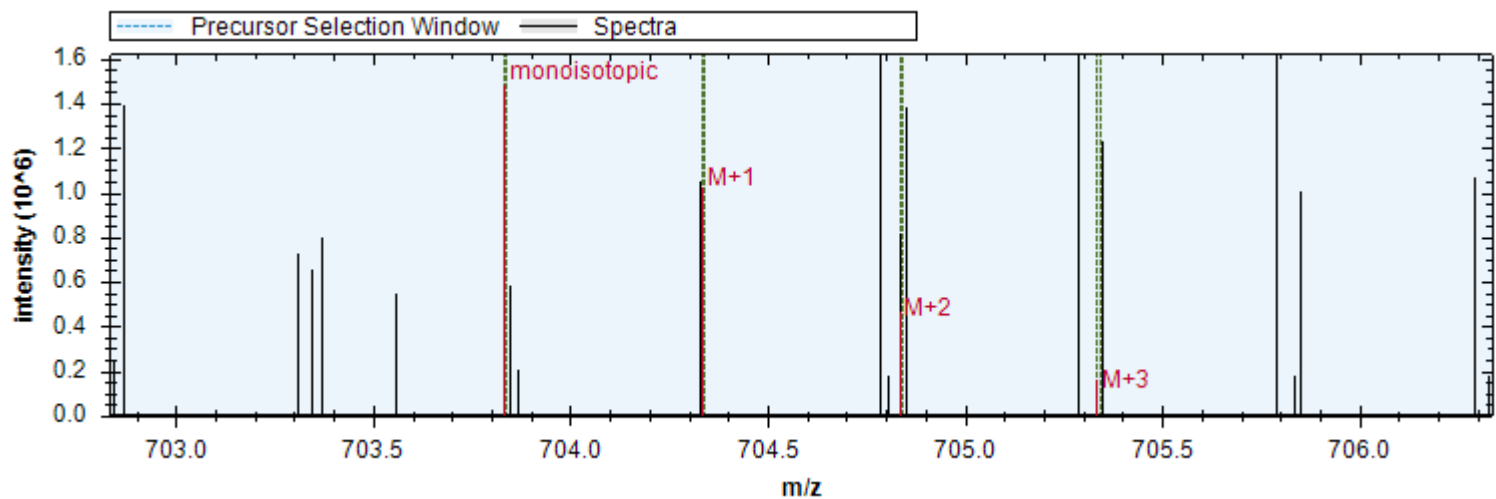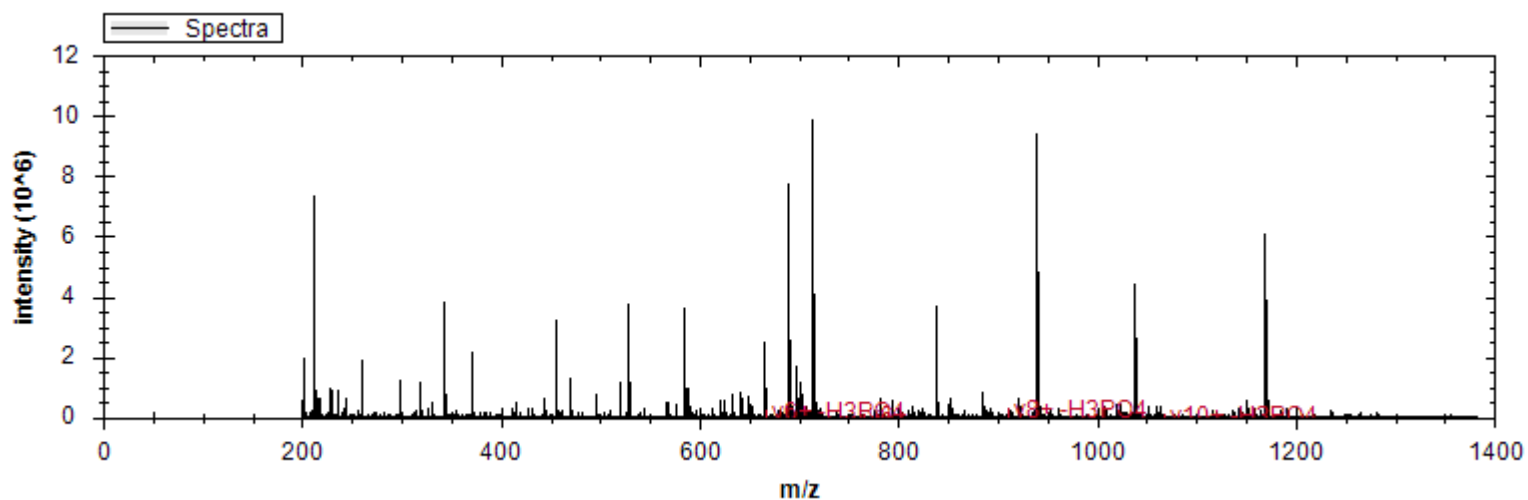

- |                              |                            |                            |
|------------------------------|----------------------------|----------------------------|
| [y8+ -H3PO4] - 911.452 m/z   | [y6+ -H3PO4] - 667.327 m/z | [y7+ -H3PO4] - 780.411 m/z |
| [y11+ -H3PO4] - 1138.579 m/z | [y5+ -H3PO4] - 566.279 m/z | [y8+] - 1009.428 m/z       |
| [y10+ -H3PO4] - 1067.542 m/z | [y6+] - 765.304 m/z        | [b5+] - 398.240 m/z        |
| [y7+] - 878.388 m/z          | [y3+] - 426.221 m/z        | [b6+] - 529.280 m/z        |
| [y4+ -H3PO4] - 495.242 m/z   | [y11++] - 618.781 m/z      | [y8++] - 505.218 m/z       |

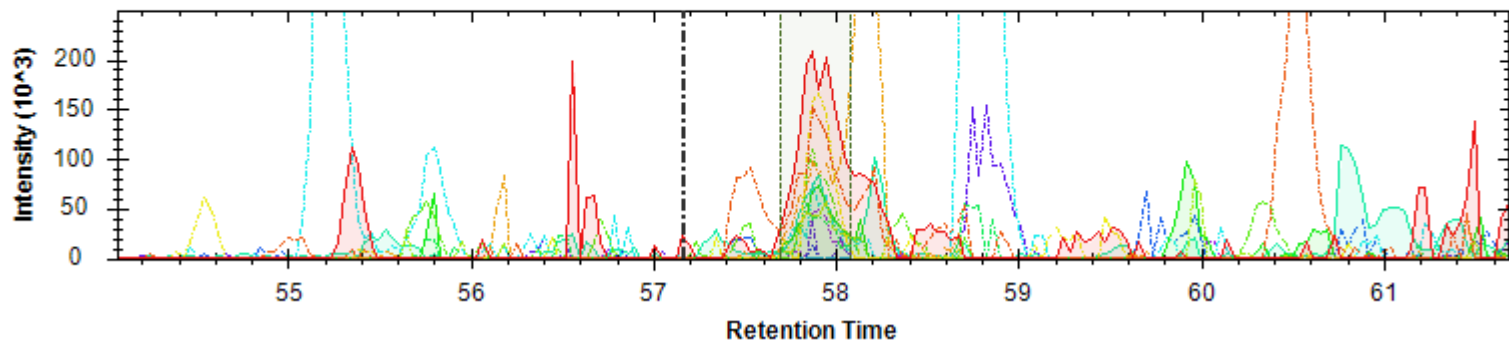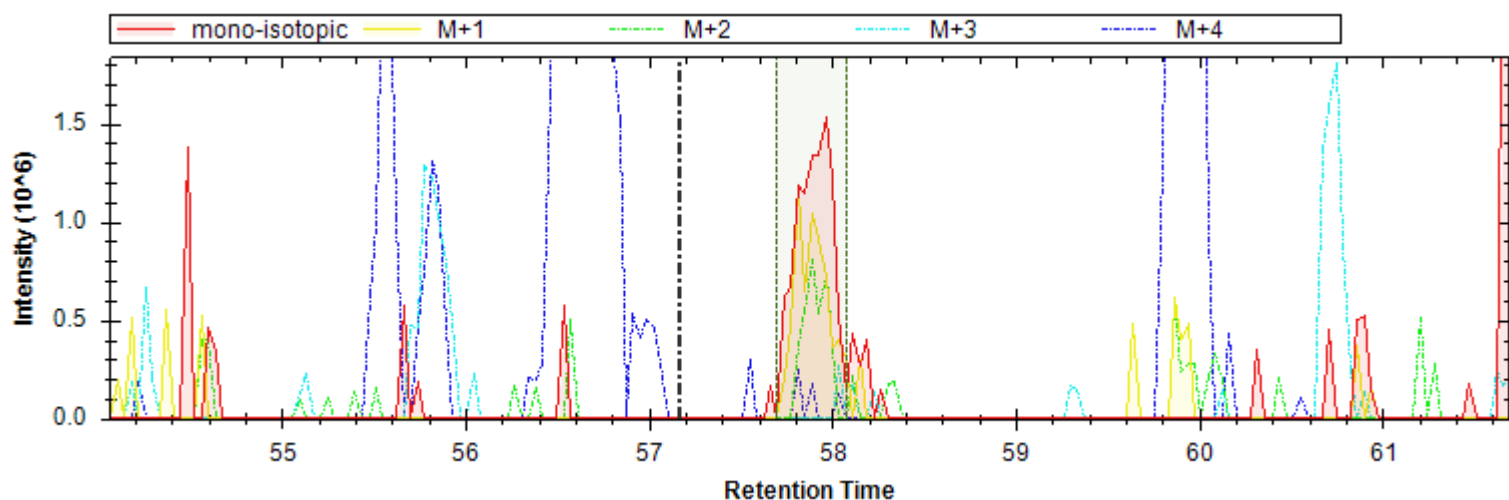

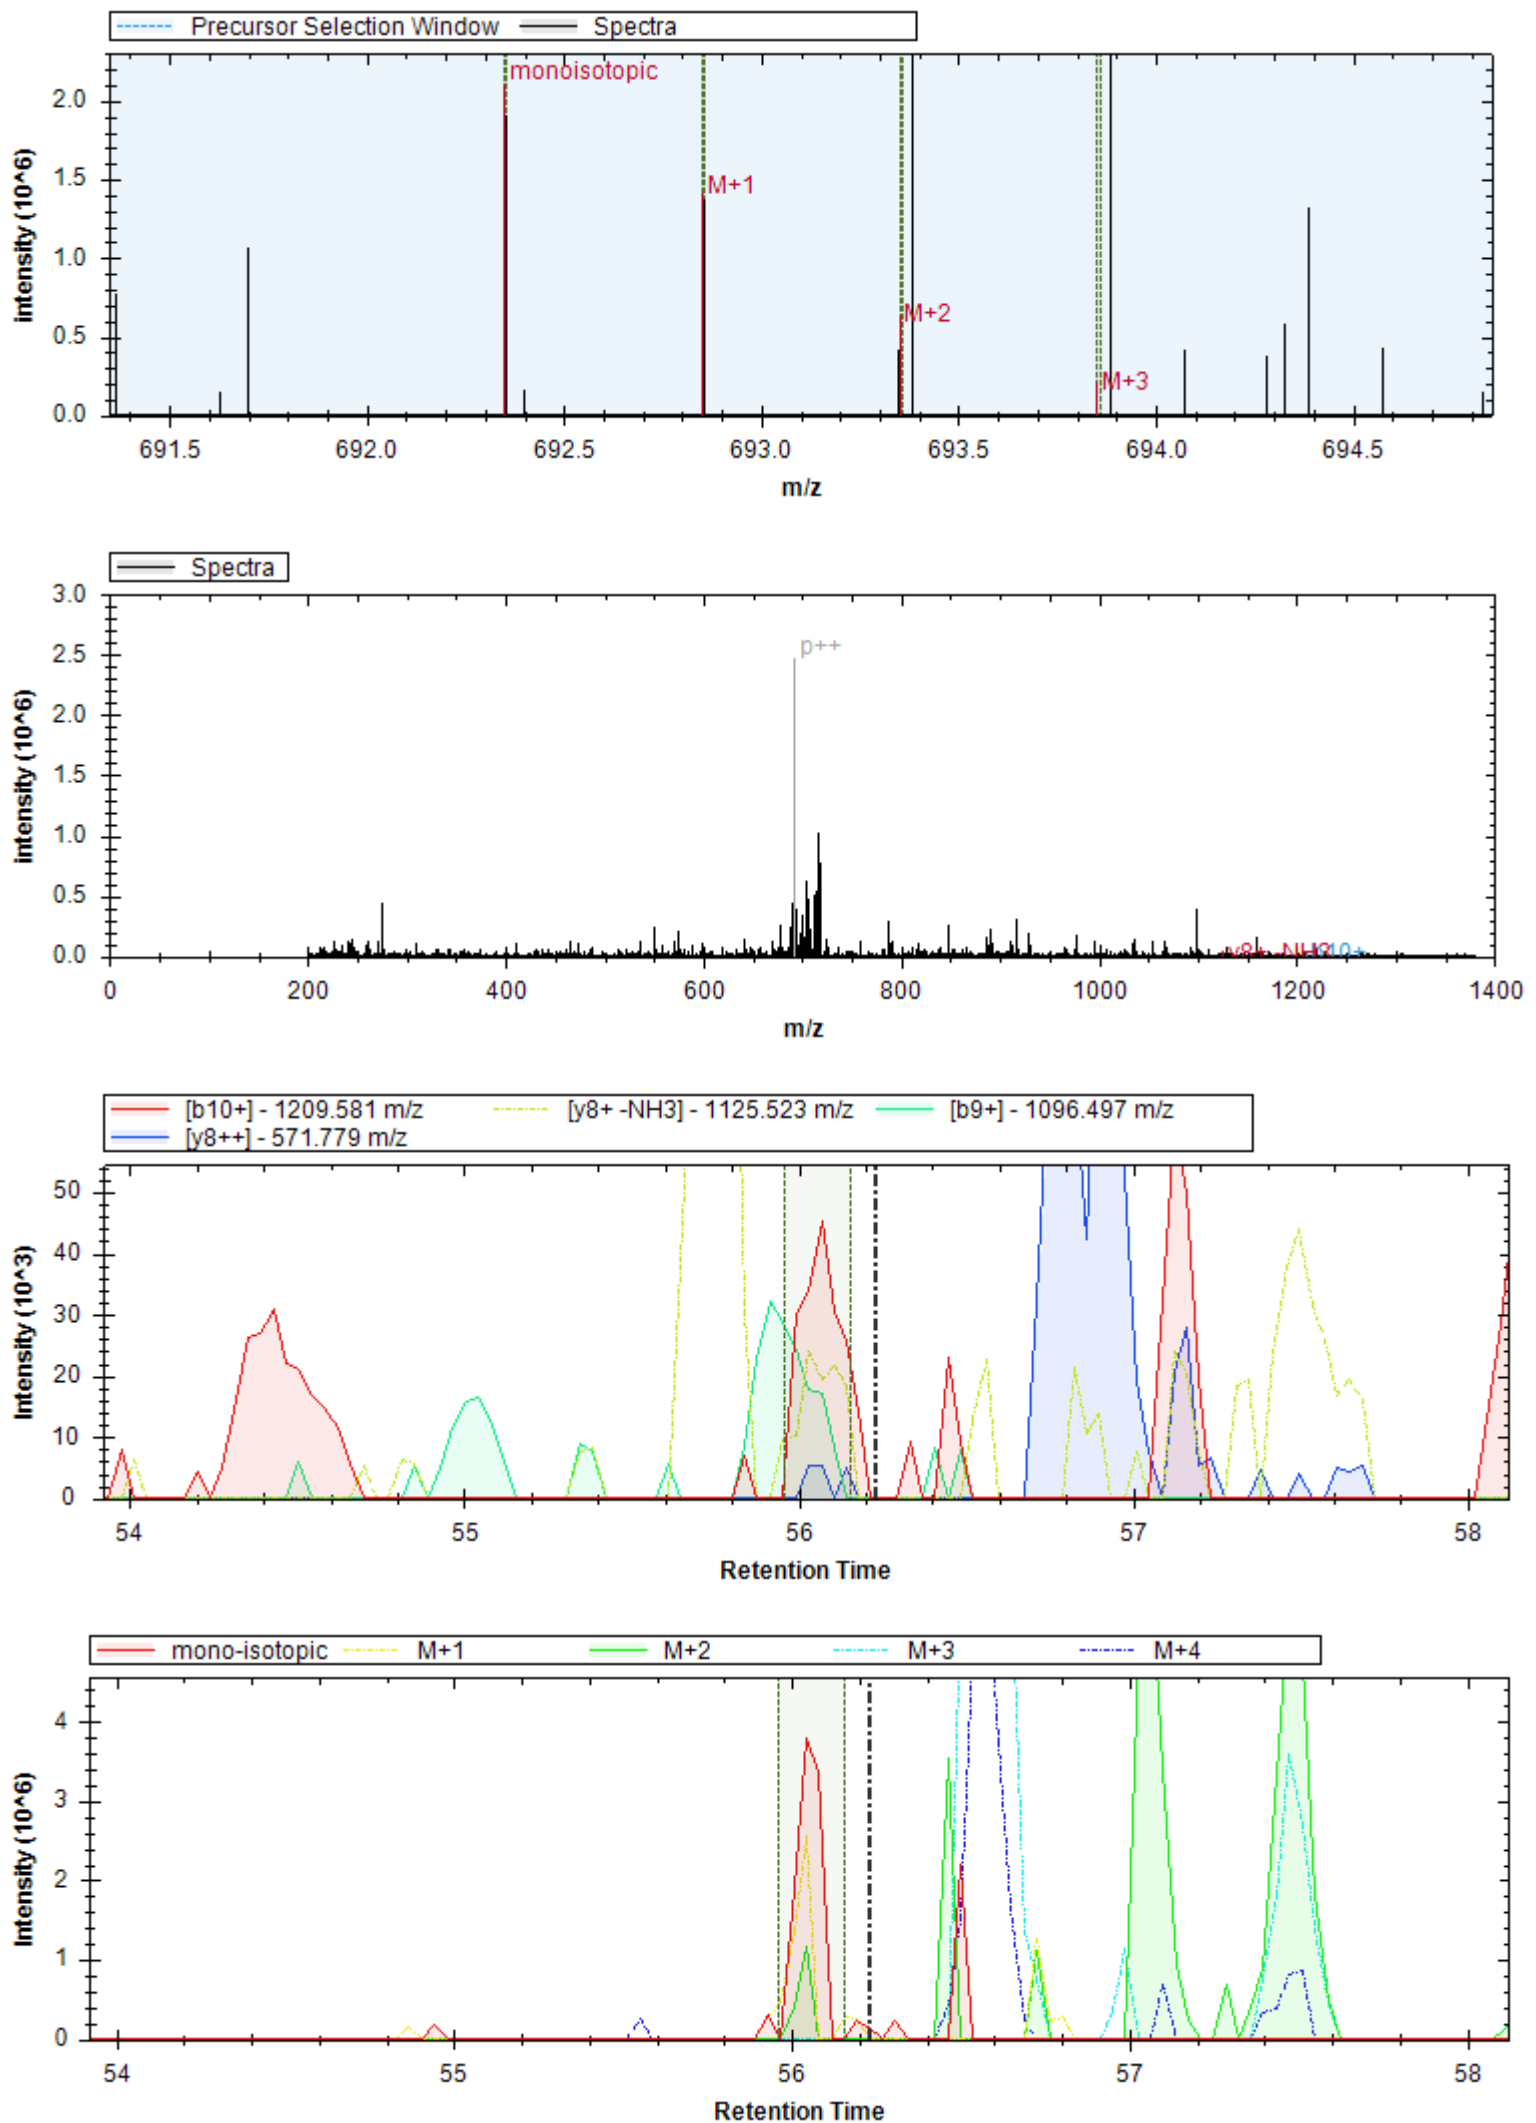

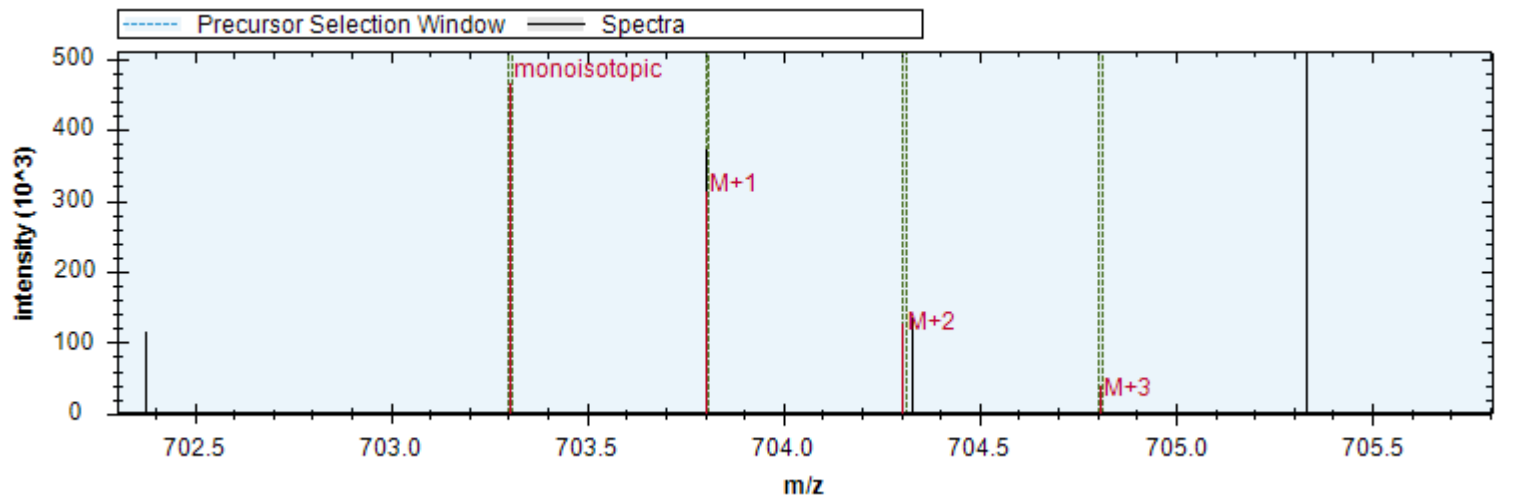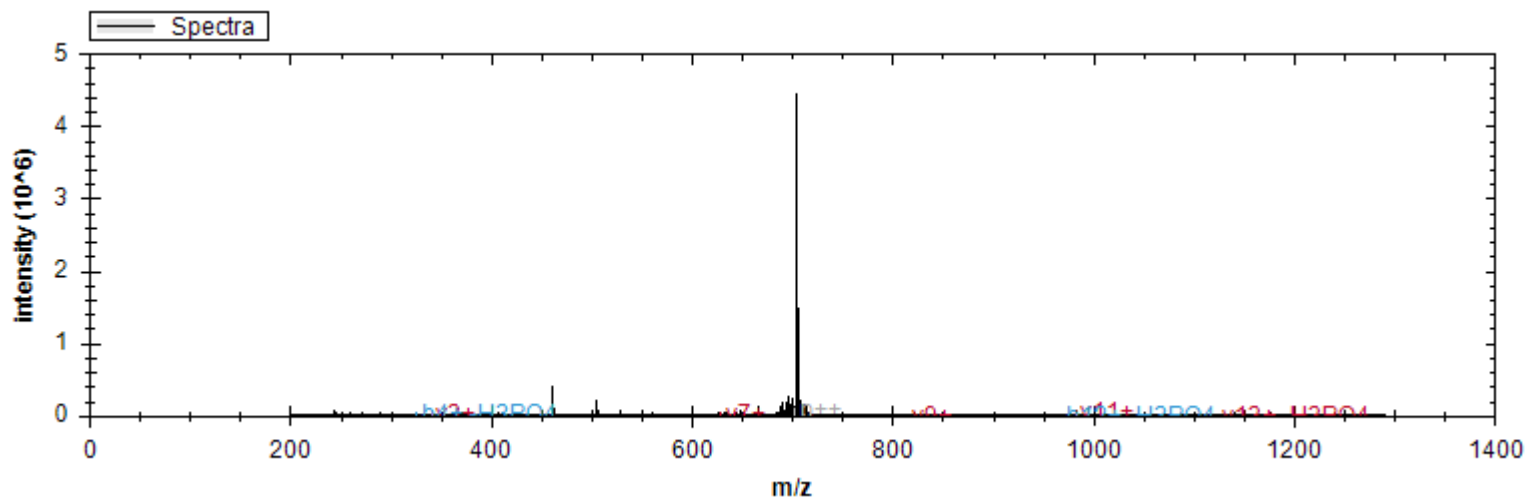

- |                              |                              |                             |
|------------------------------|------------------------------|-----------------------------|
| [y11+] - 983.479 m/z         | [b4+ -H3PO4] - 325.151 m/z   | [y3+] - 341.218 m/z         |
| [y9+] - 815.389 m/z          | [y14++] - 659.787 m/z        | [y7+] - 629.325 m/z         |
| [y13+ -H3PO4] - 1123.538 m/z | [y10+] - 886.427 m/z         | [b12+ -H3PO4] - 967.412 m/z |
| [y12++ -H3PO4] - 533.762 m/z | [y11+ -H2O] - 965.469 m/z    | [y11++] - 492.243 m/z       |
| [y12+ -H3PO4] - 1066.516 m/z | [y14++ -H3PO4] - 610.799 m/z | [b4+] - 423.128 m/z         |
| [b8+ -H3PO4] - 679.305 m/z   |                              |                             |

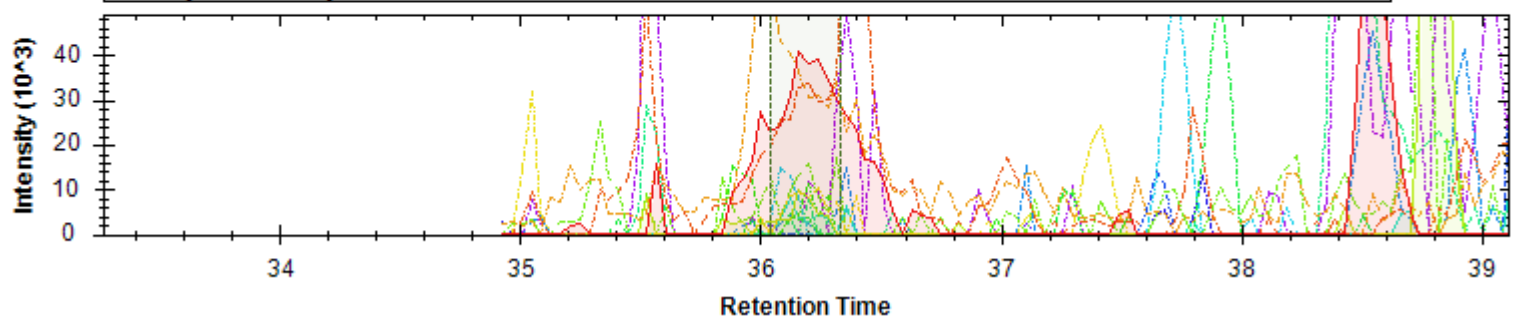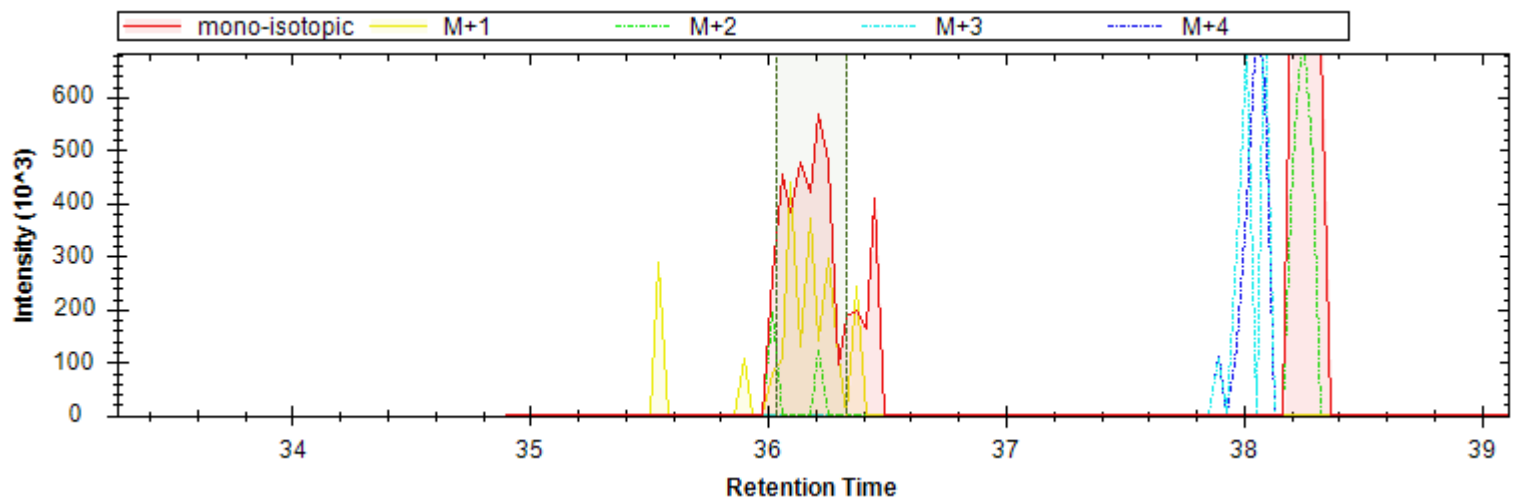

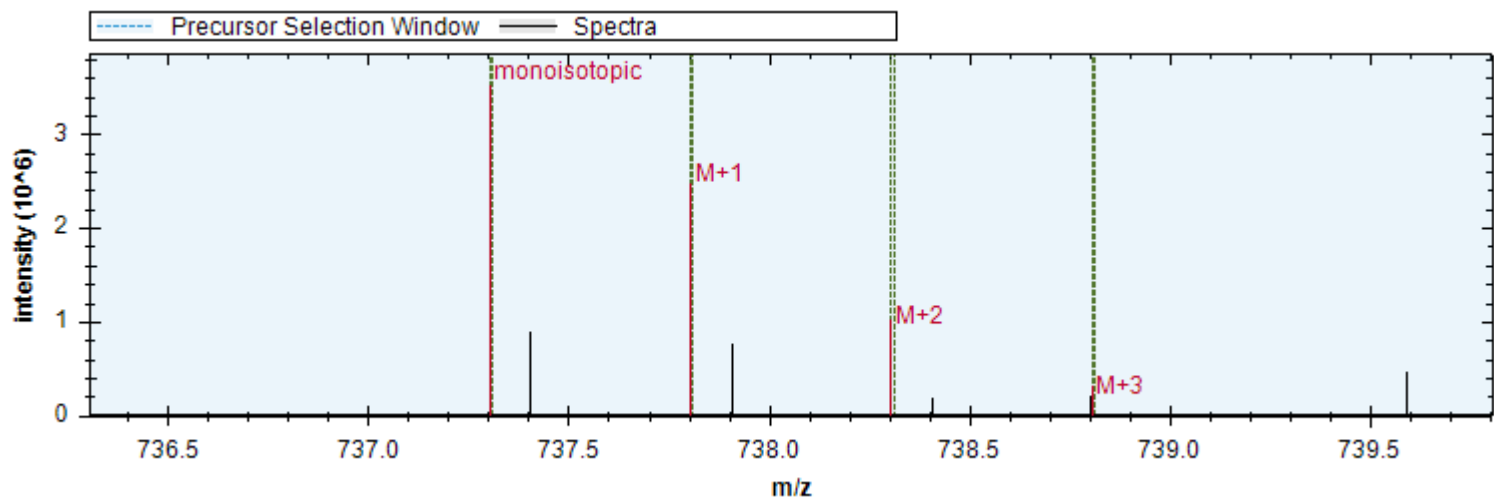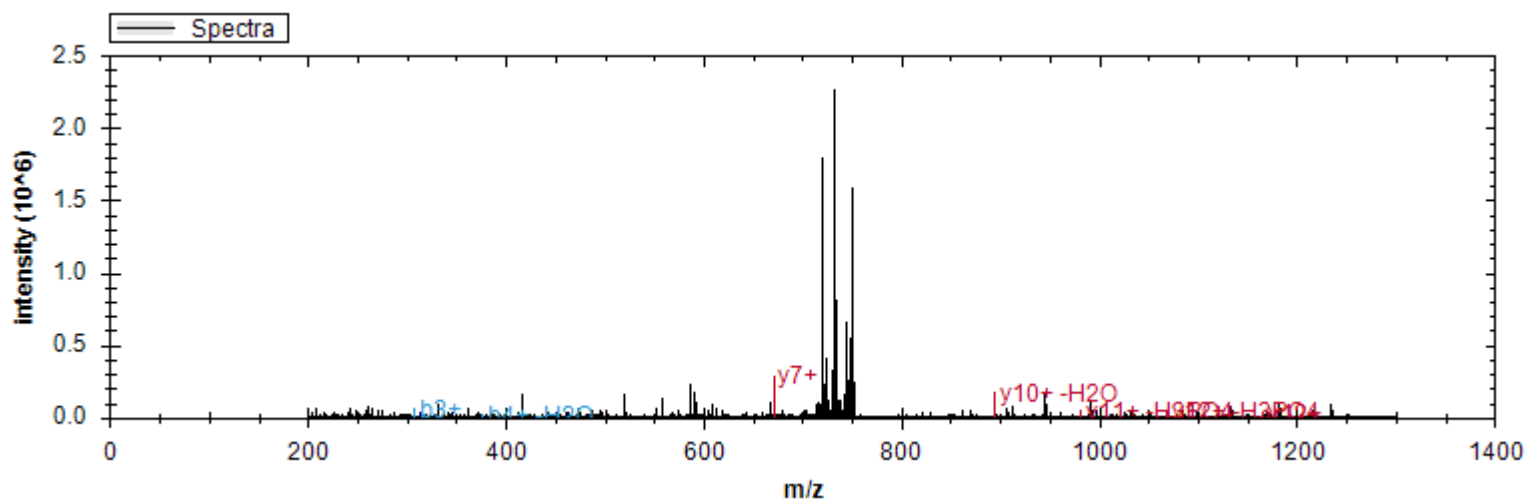

- |                              |                          |                             |
|------------------------------|--------------------------|-----------------------------|
| [y7+] - 671.347 m/z          | [y4+] - 416.225 m/z      | [y10+ -H2O] - 894.443 m/z   |
| [y10+] - 912.453 m/z         | [b3+] - 308.124 m/z      | [y11+ -H3PO4] - 981.475 m/z |
| [y12+ -H3PO4] - 1068.507 m/z | [y9+ -H2O] - 797.390 m/z | [b5+ -H3PO4] - 464.178 m/z  |
| [b5+ -H2O] - 641.944 m/z     | [b4+ -H2O] - 377.146 m/z | [y5+] - 517.273 m/z         |
| [y7+ -H2O] - 653.337 m/z     | [b8+ -H2O] - 883.050 m/z | [y6+] - 574.294 m/z         |
| [y8+ -H2O] - 740.369 m/z     | [y4+ -NH3] - 399.199 m/z | [y12+] - 1166.484 m/z       |
| [b4+] - 395.156 m/z          |                          |                             |

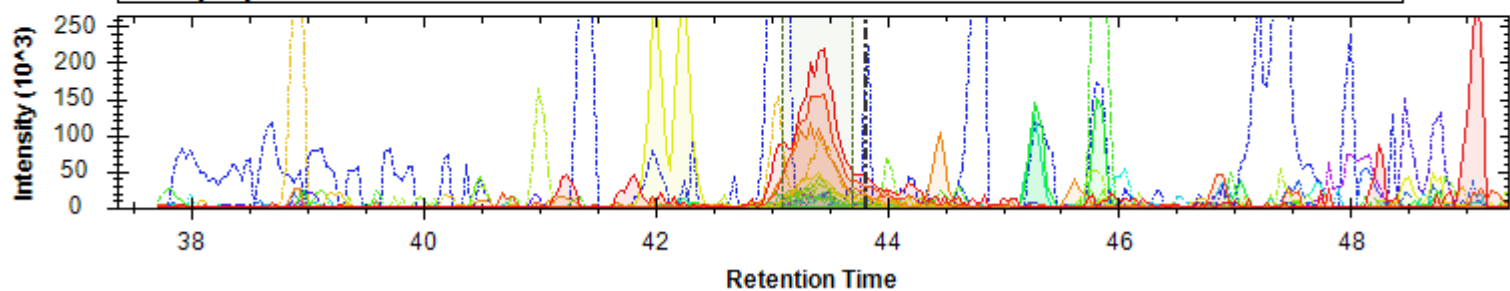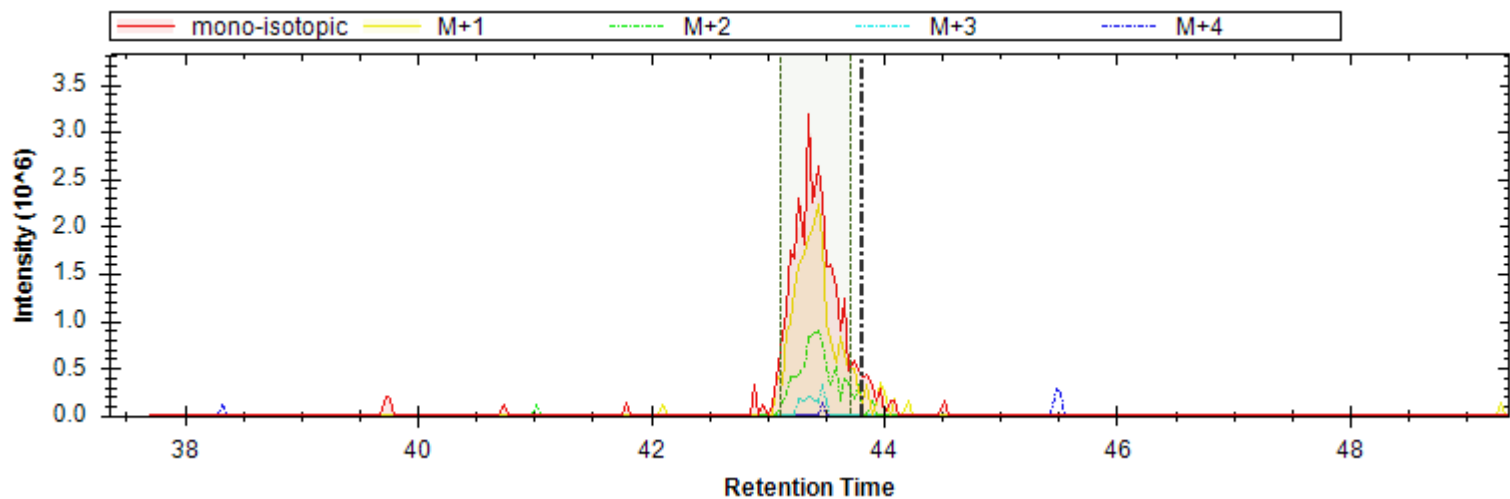

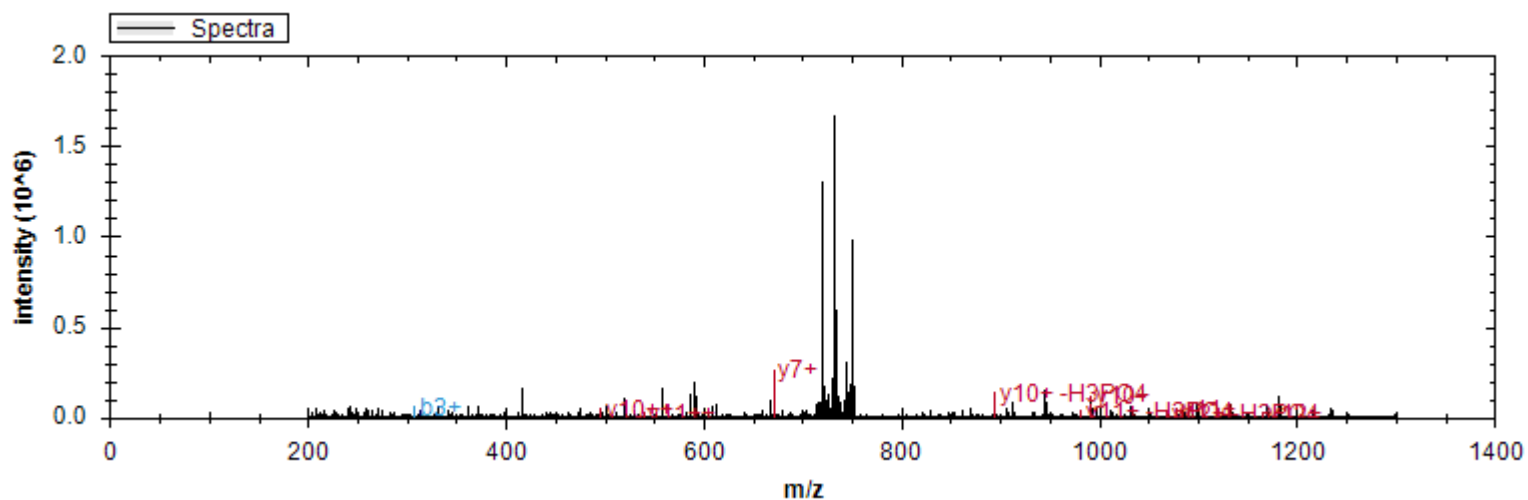

|                             |                              |                            |
|-----------------------------|------------------------------|----------------------------|
| [y7+] - 671.347 m/z         | [y10+ -H3PO4] - 894.443 m/z  | [y4+] - 416.225 m/z        |
| [y10+] - 992.420 m/z        | [y10++] - 496.714 m/z        | [b3+] - 308.124 m/z        |
| [y11+ -H3PO4] - 981.475 m/z | [y12+ -H3PO4] - 1068.507 m/z | [y9+ -H3PO4] - 797.390 m/z |
| [y11++] - 540.230 m/z       | [y11+] - 1079.452 m/z        | [y7+ -H2O] - 653.337 m/z   |
| [y8+ -H3PO4] - 740.369 m/z  | [y12+] - 1166.484 m/z        | [y10+ -H2O] - 1072.209 m/z |
| [b4+ -H2O] - 377.146 m/z    | [y5+] - 517.273 m/z          | [y10+ -NH3] - 975.393 m/z  |
| [b4+] - 395.156 m/z         |                              |                            |

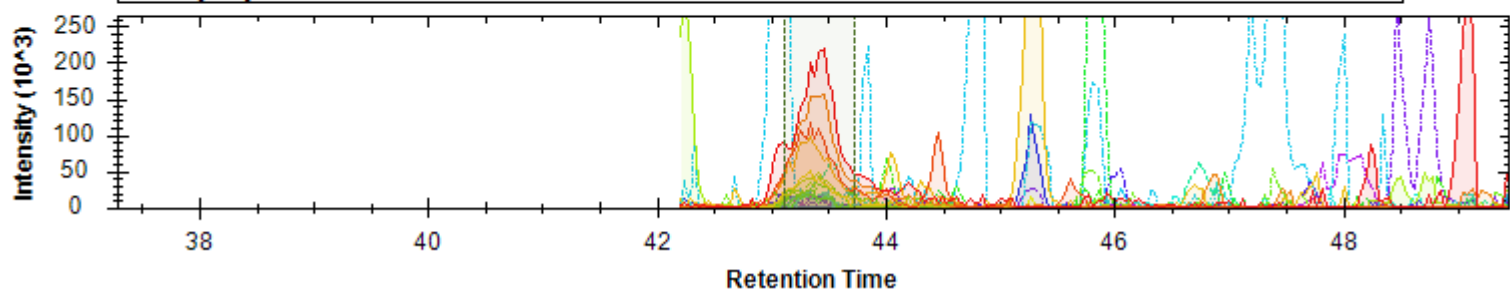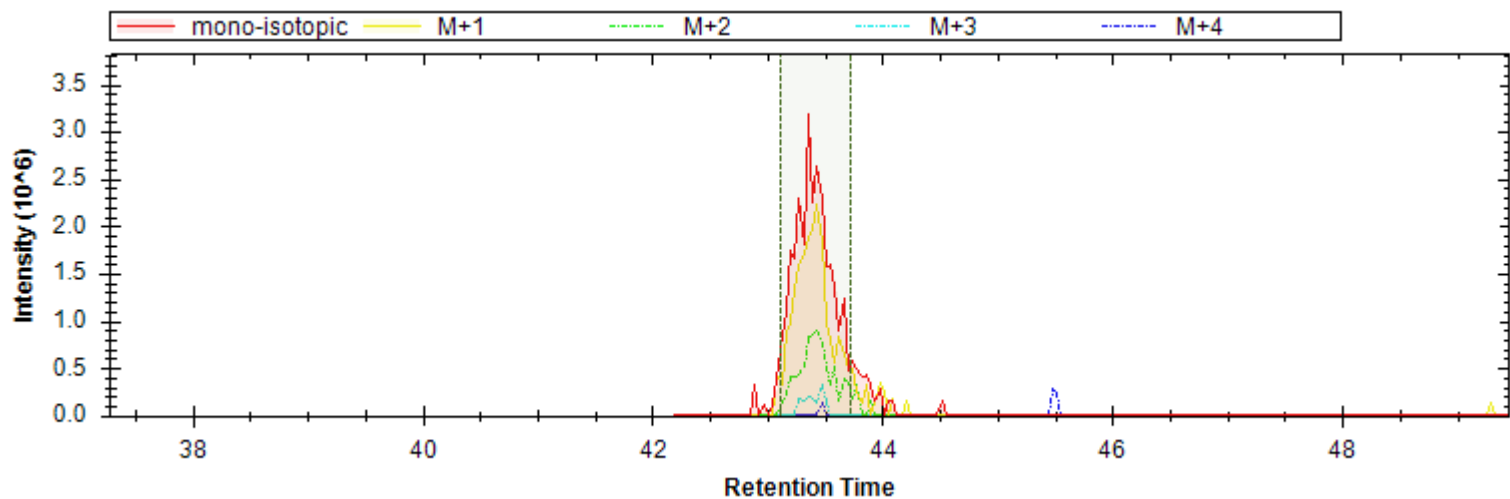

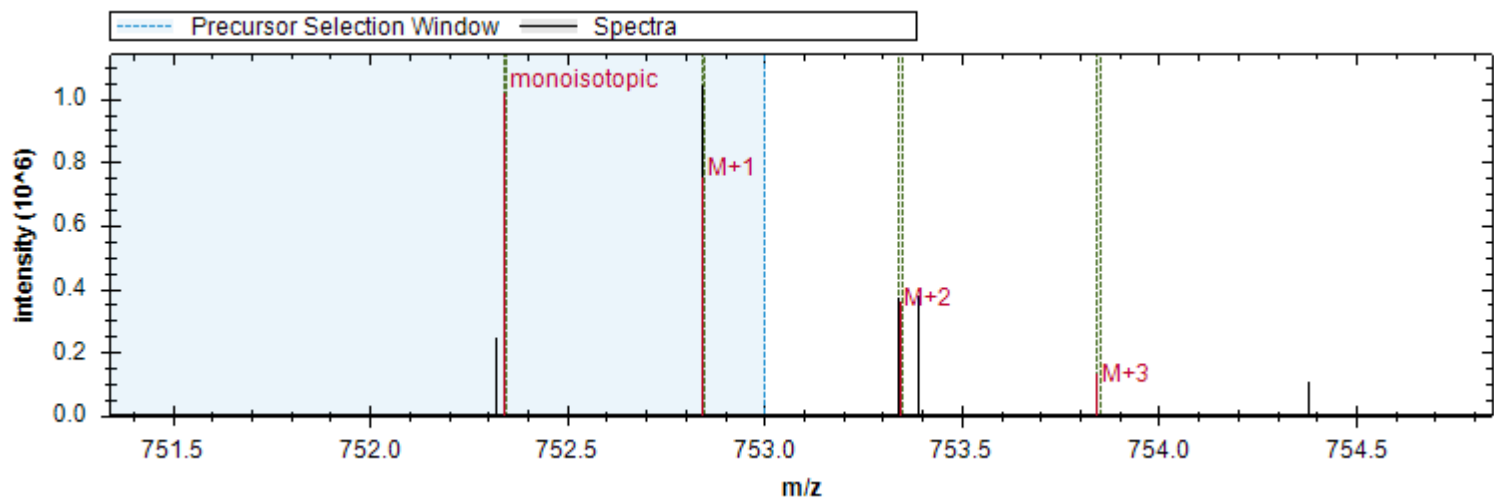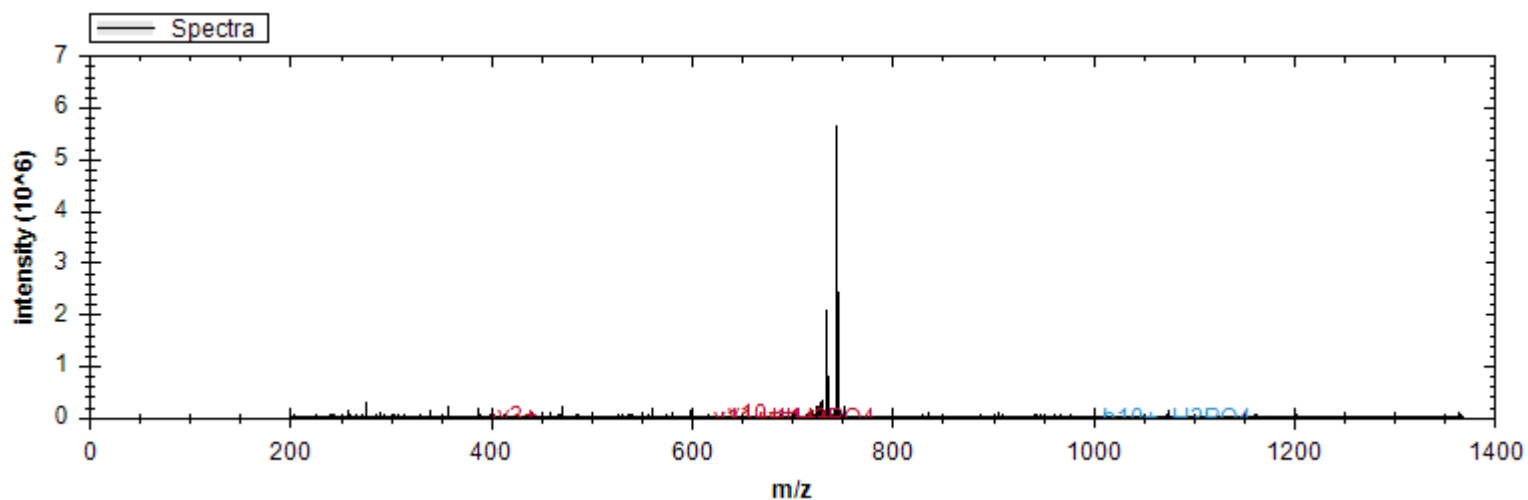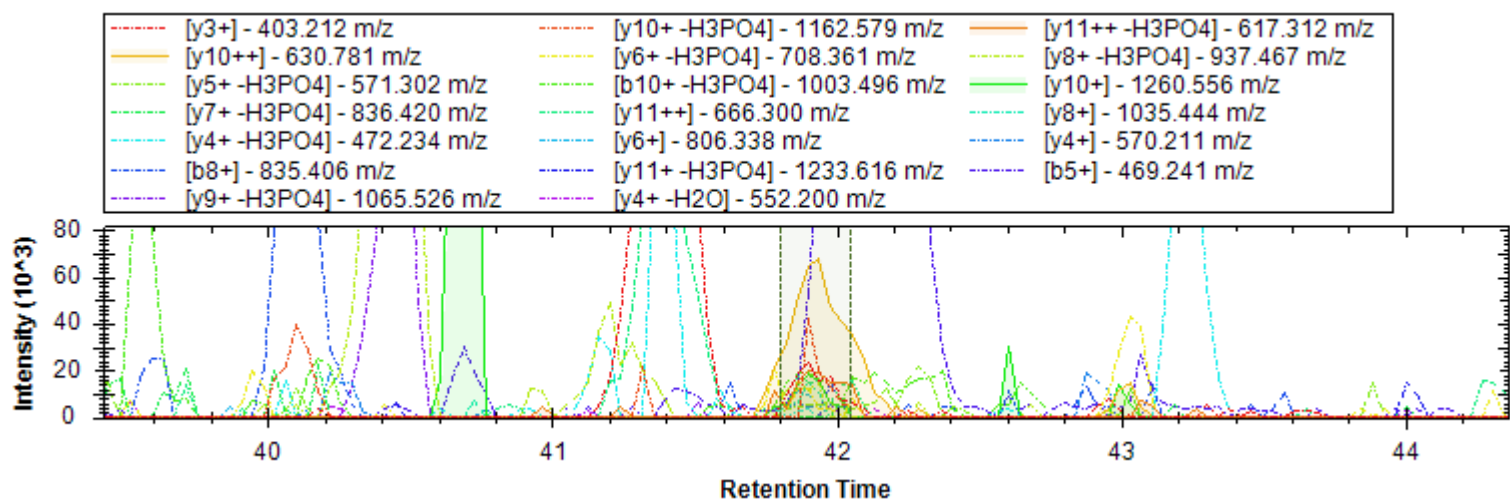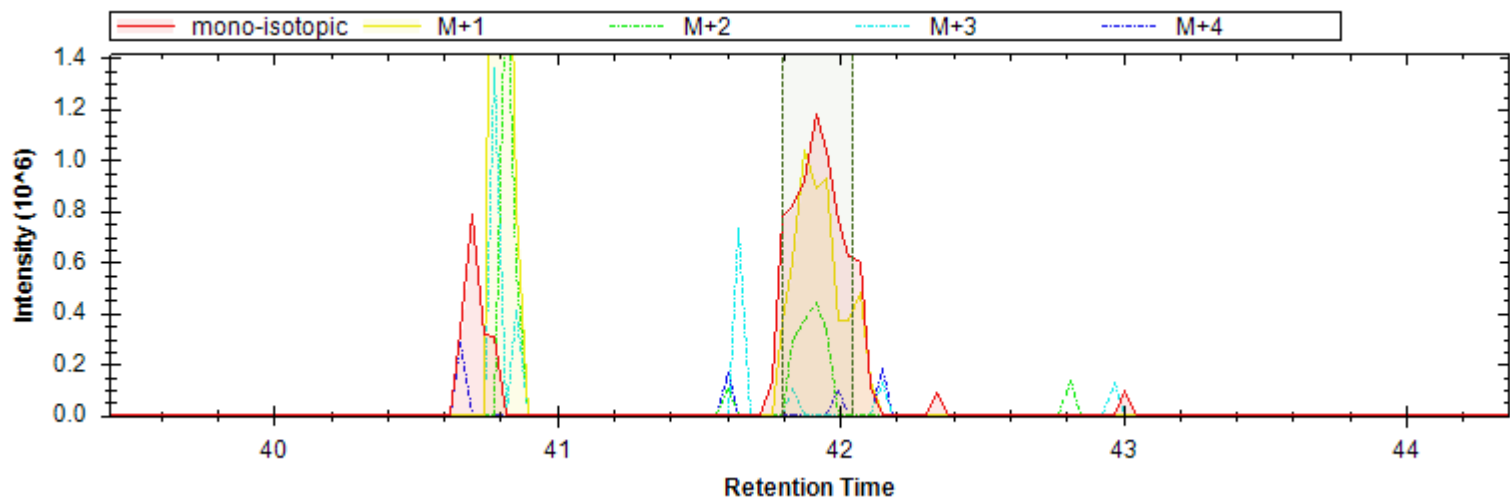

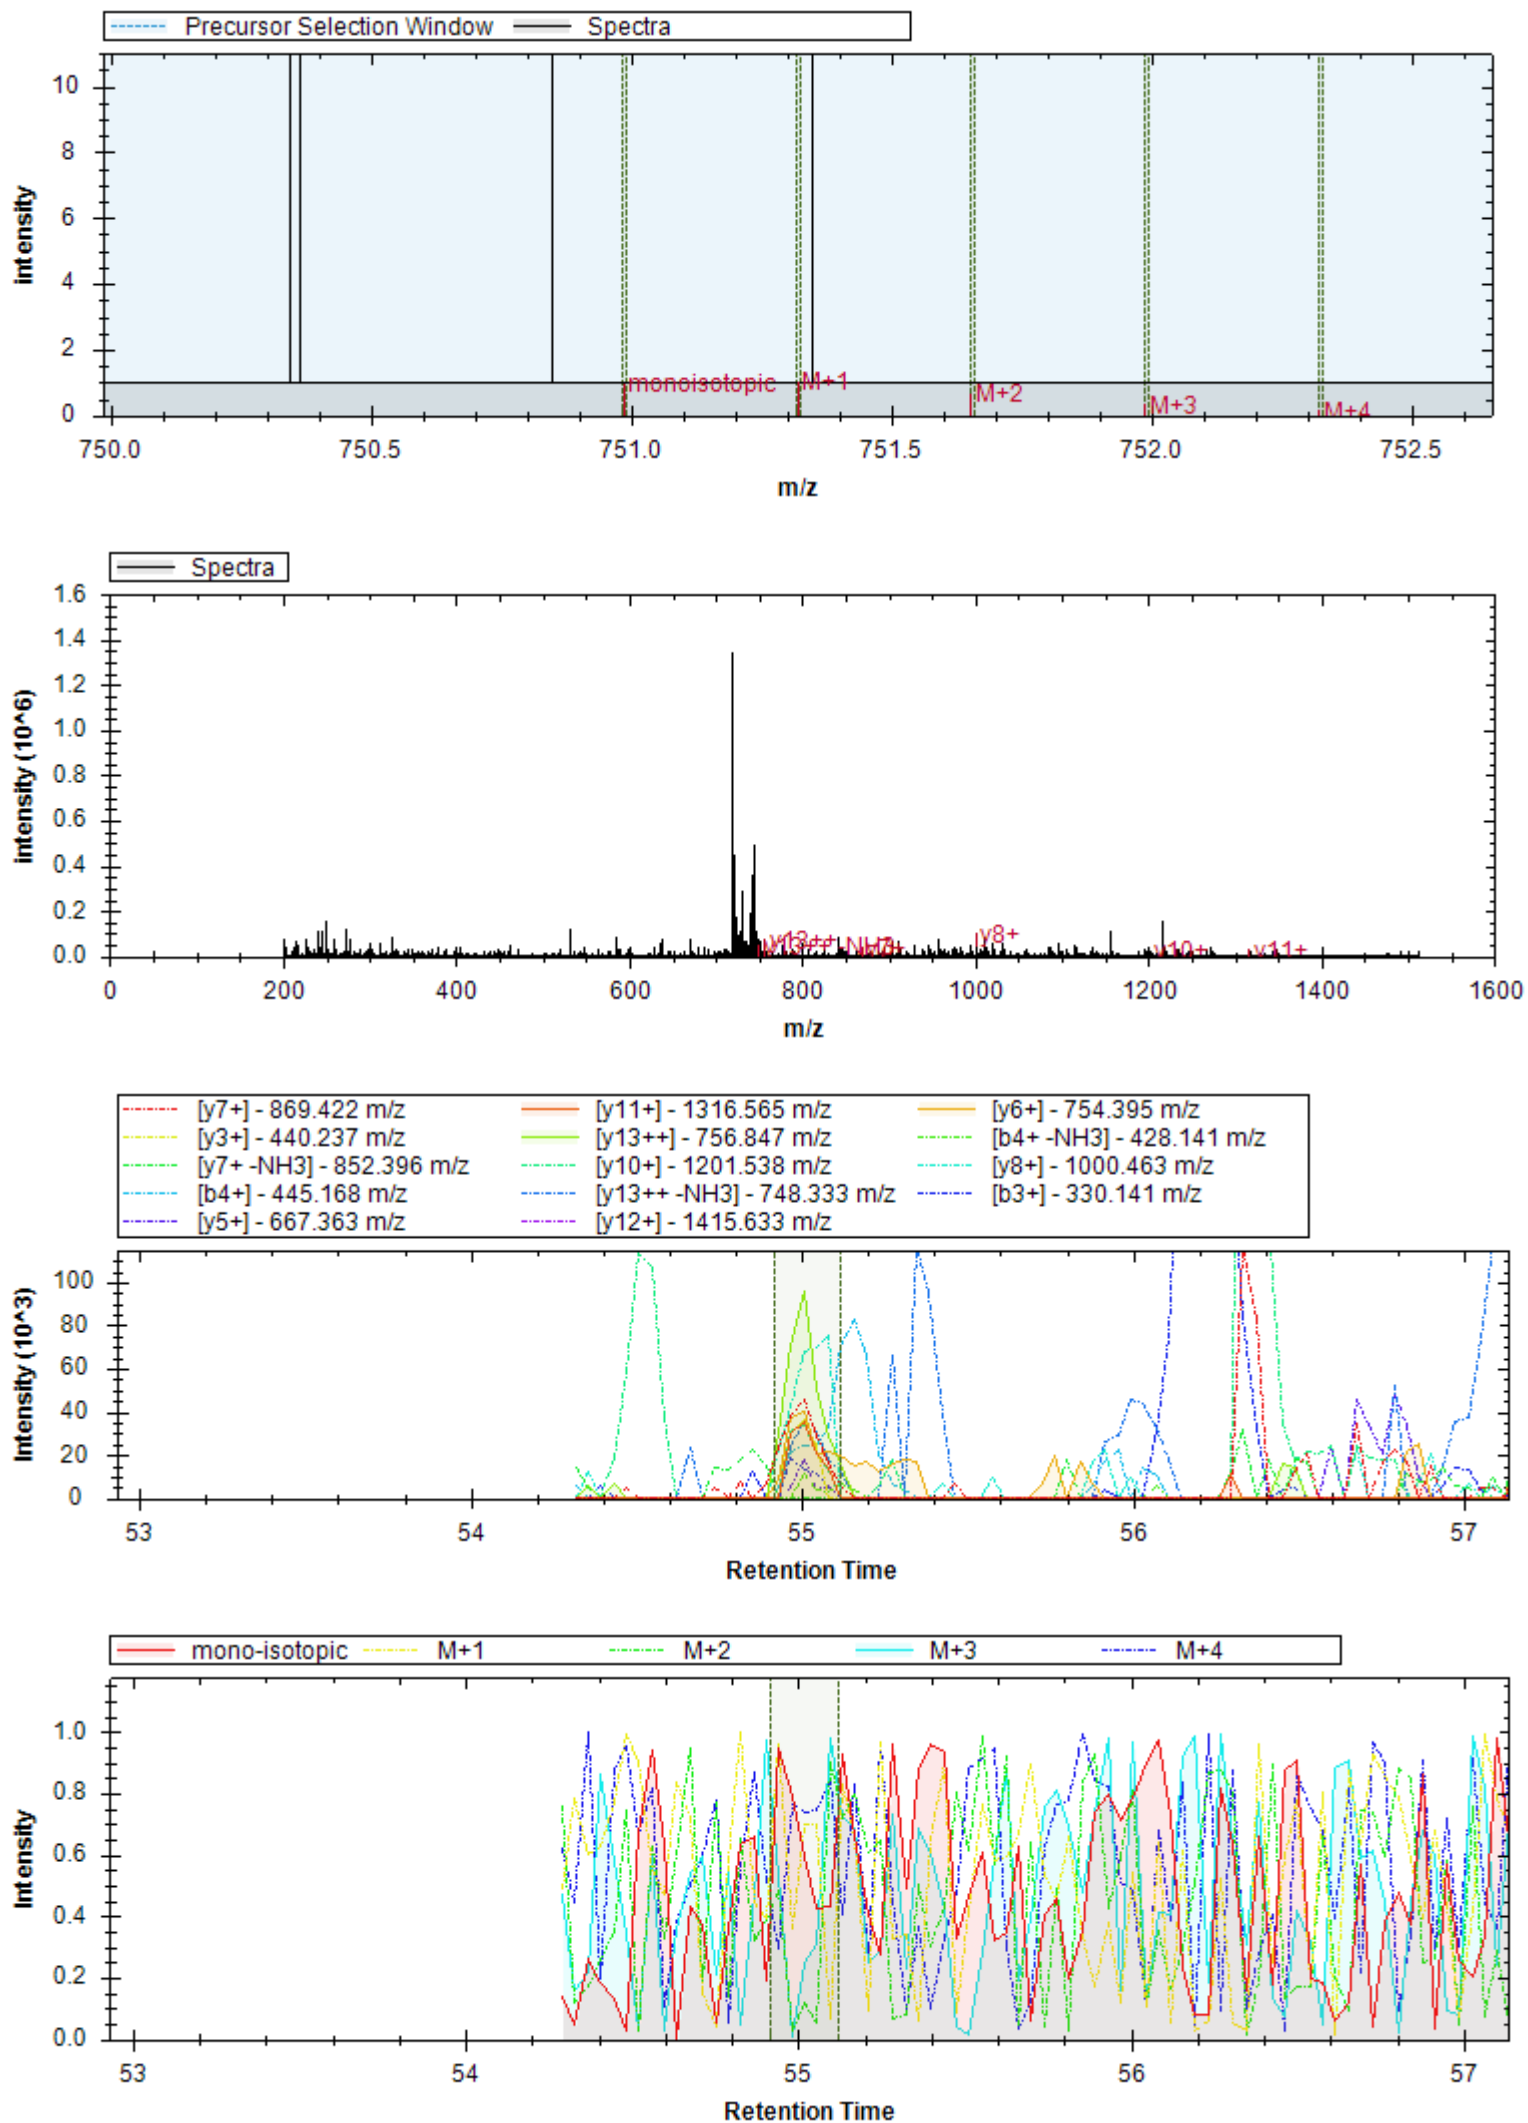

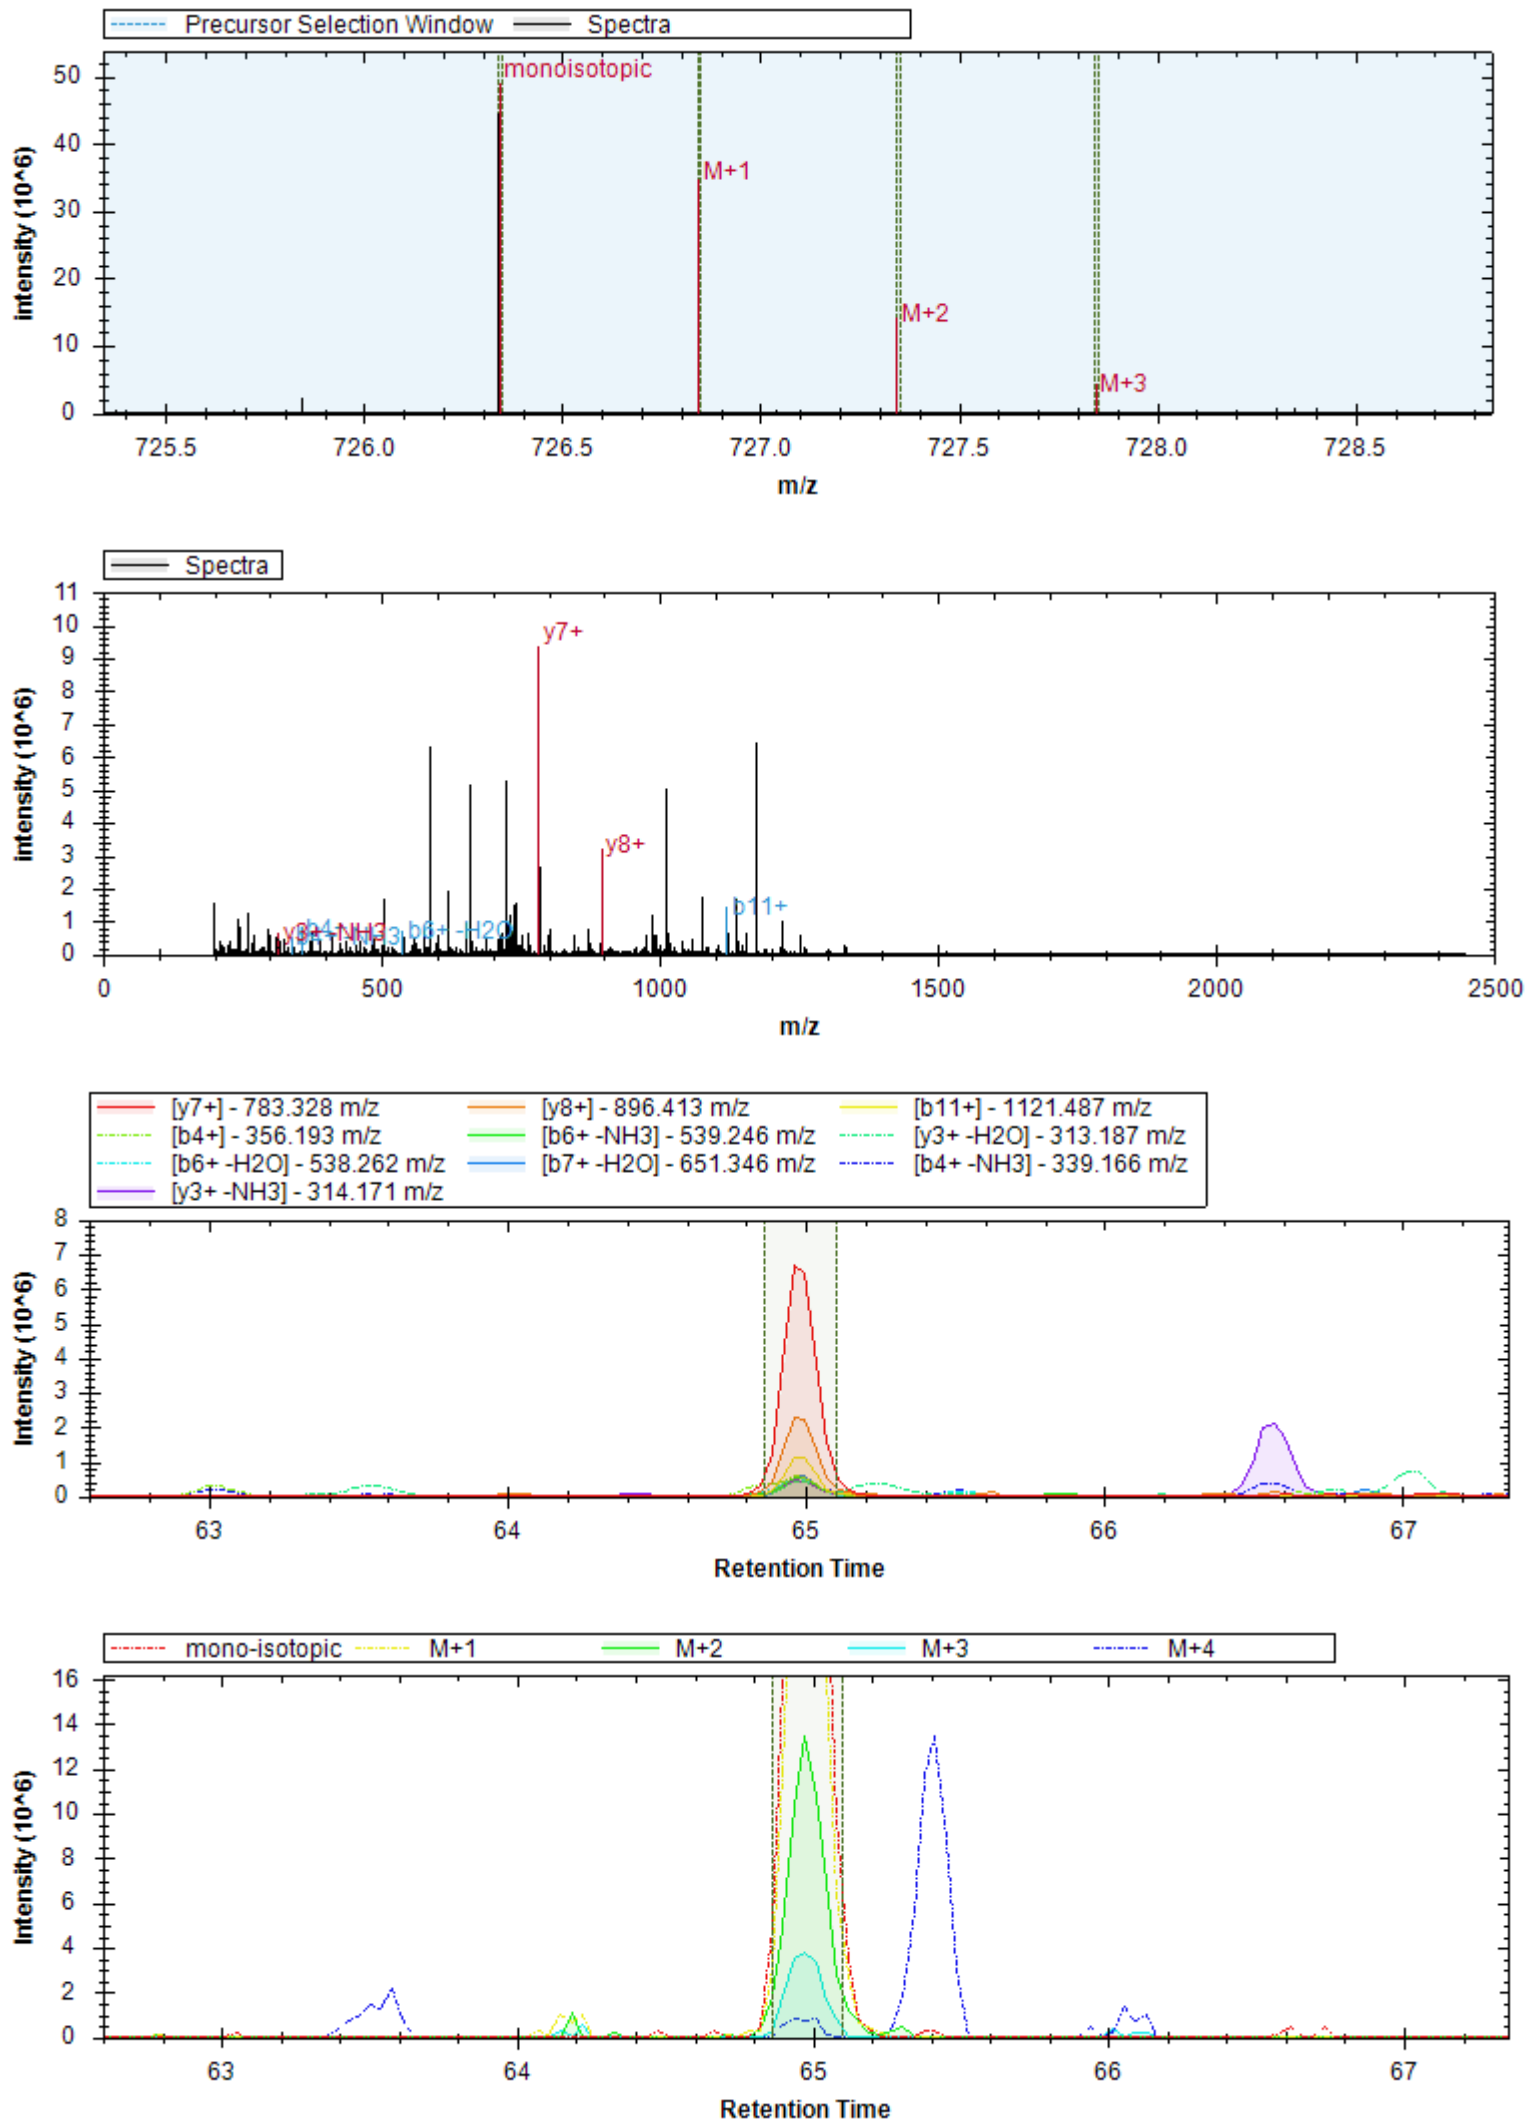



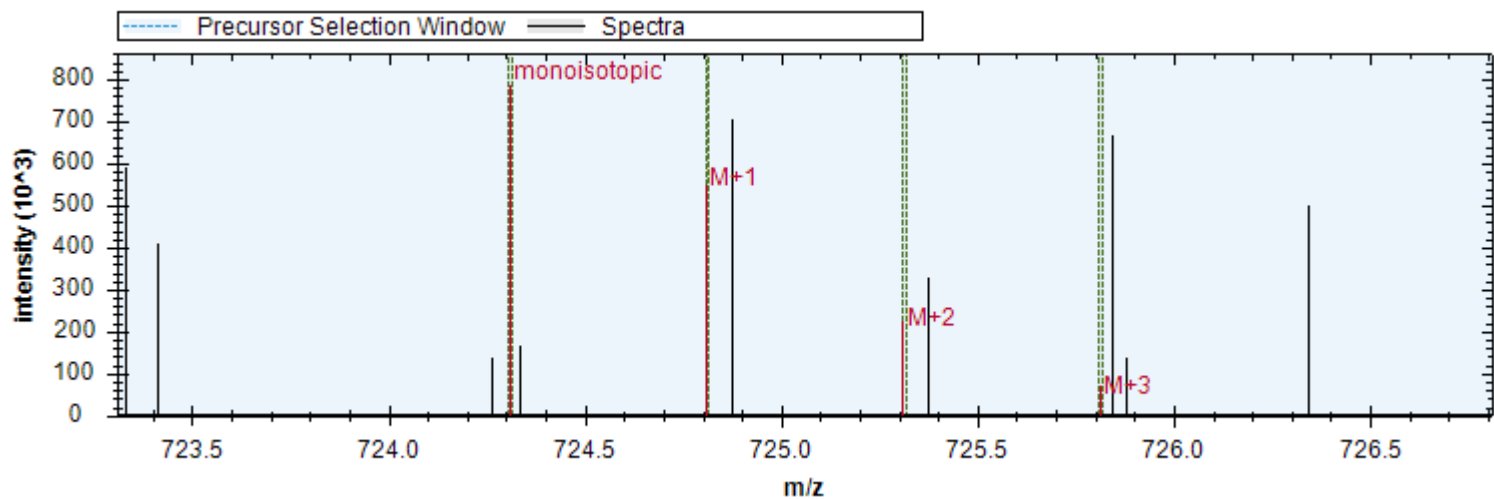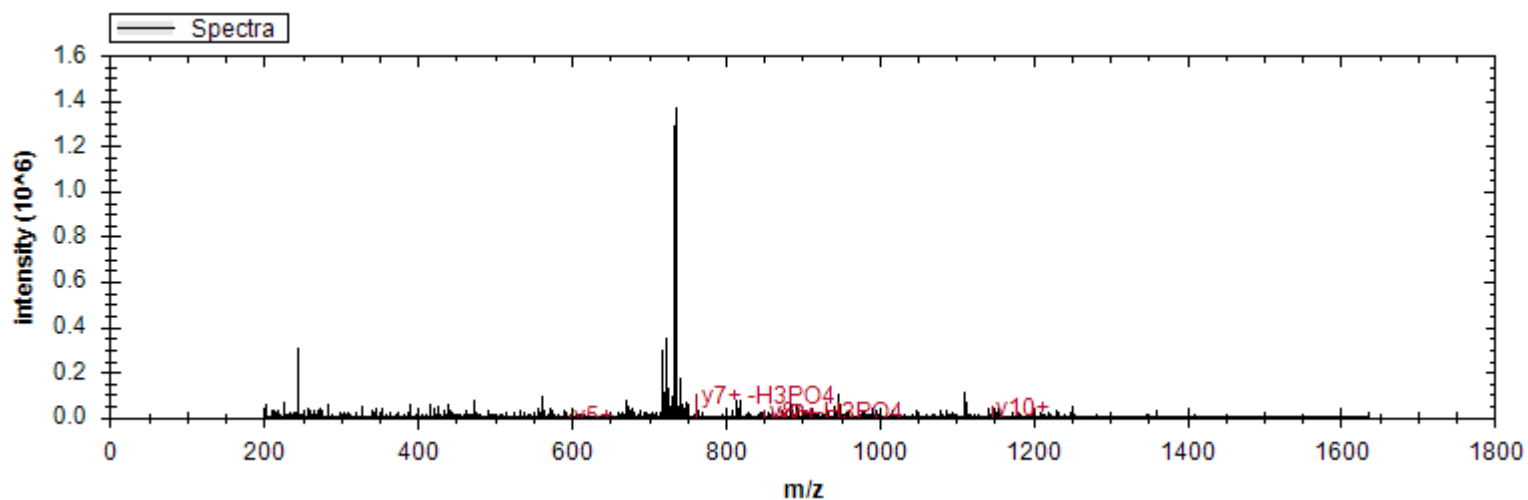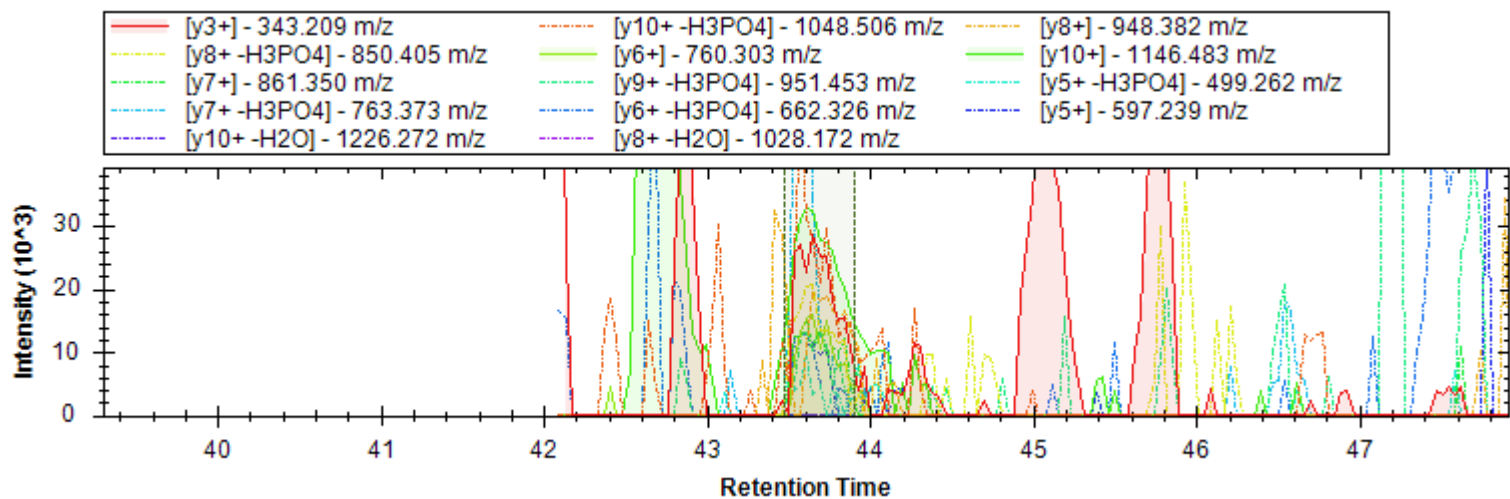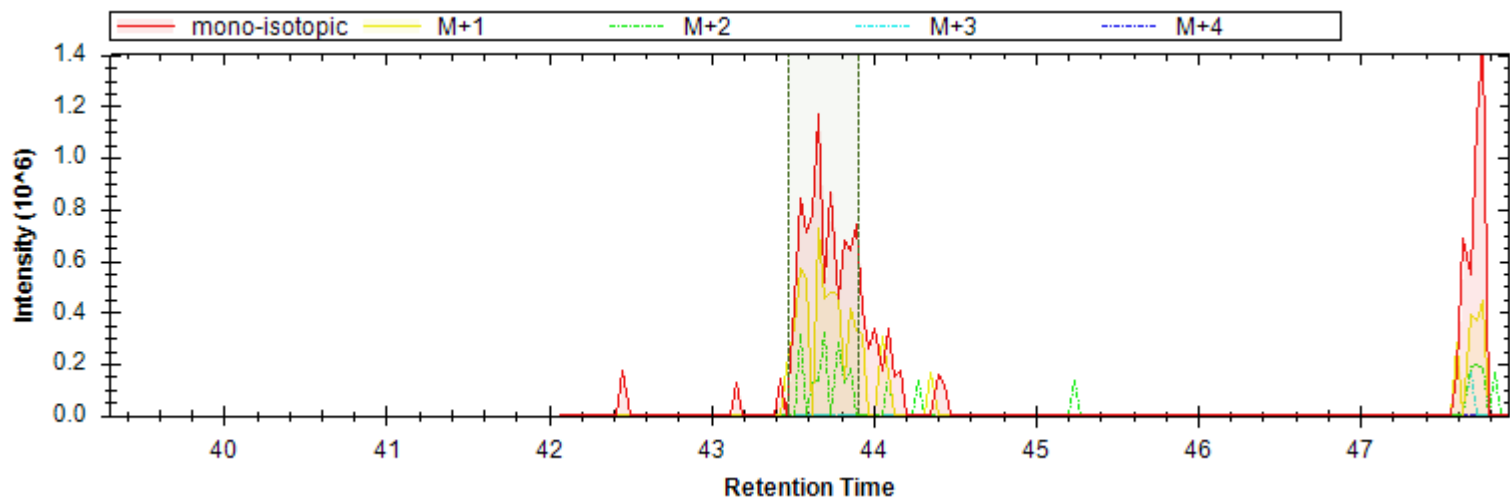

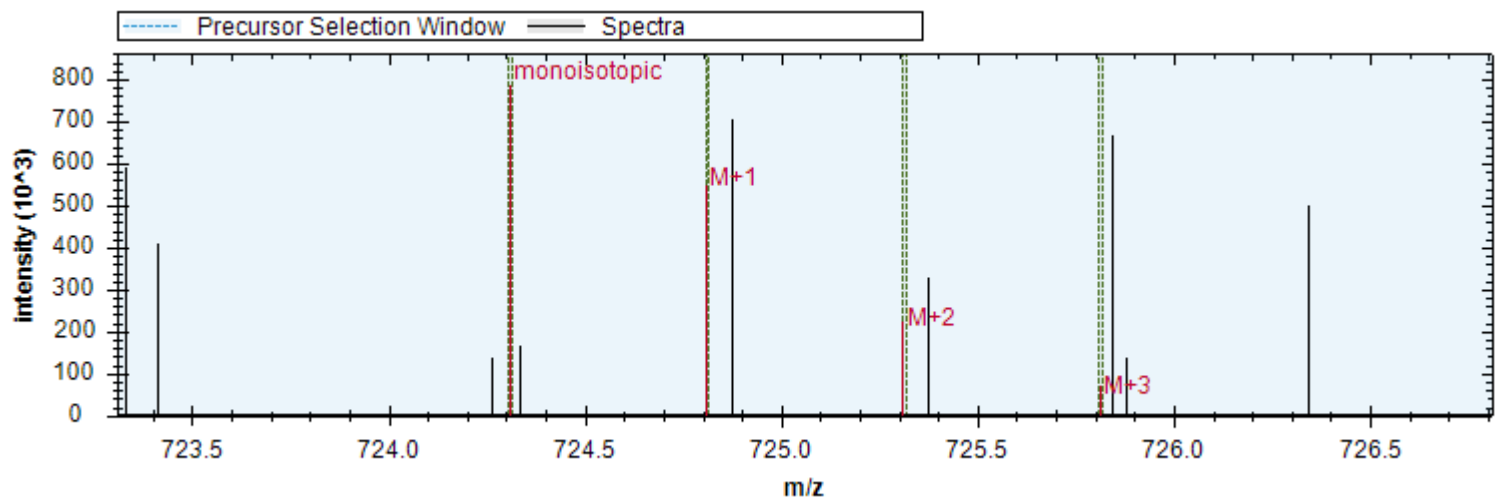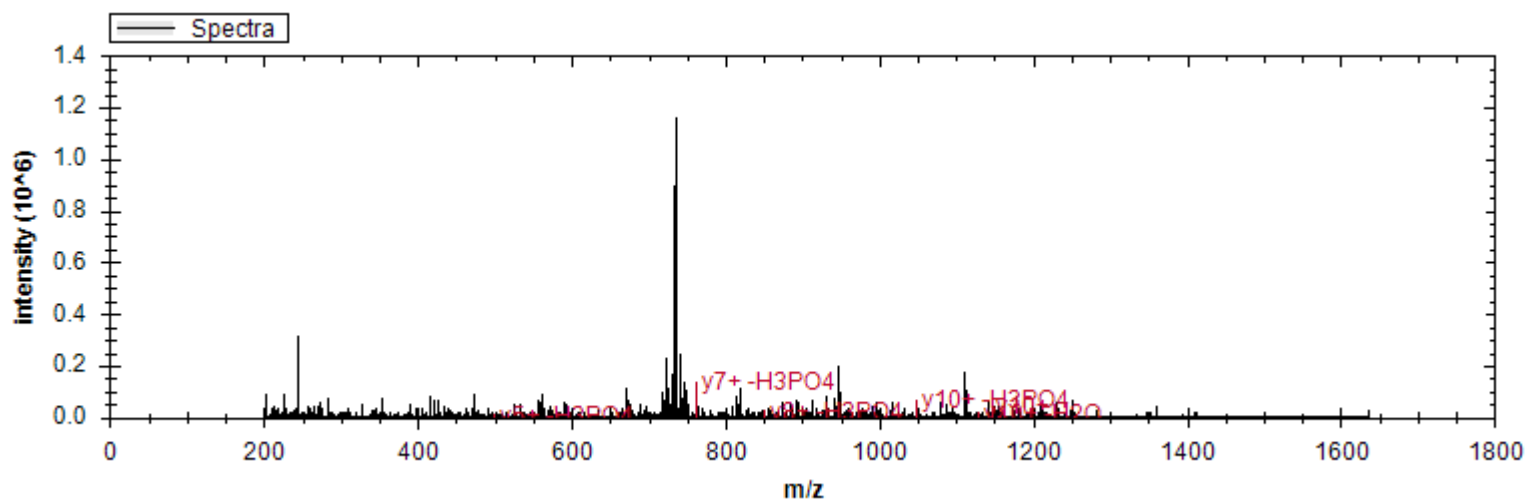

|                            |                              |                            |
|----------------------------|------------------------------|----------------------------|
| [y3+] - 343.209 m/z        | [y10+ -H3PO4] - 1048.506 m/z | [y8+] - 948.382 m/z        |
| [y10+] - 1146.483 m/z      | [y8+ -H3PO4] - 850.405 m/z   | [y7+] - 861.350 m/z        |
| [y9+ -H3PO4] - 951.453 m/z | [y6+] - 760.303 m/z          | [y6+ -H3PO4] - 662.326 m/z |
| [y7+ -H3PO4] - 763.373 m/z | [y5+ -H3PO4] - 499.262 m/z   | [y5+] - 597.239 m/z        |
| [y10+ -H2O] - 1128.472 m/z | [y11+ -H3PO4] - 1119.543 m/z | [y11+] - 609.264 m/z       |
| [y4+] - 510.207 m/z        | [y11+] - 1217.520 m/z        | [y4+ -H3PO4] - 412.230 m/z |

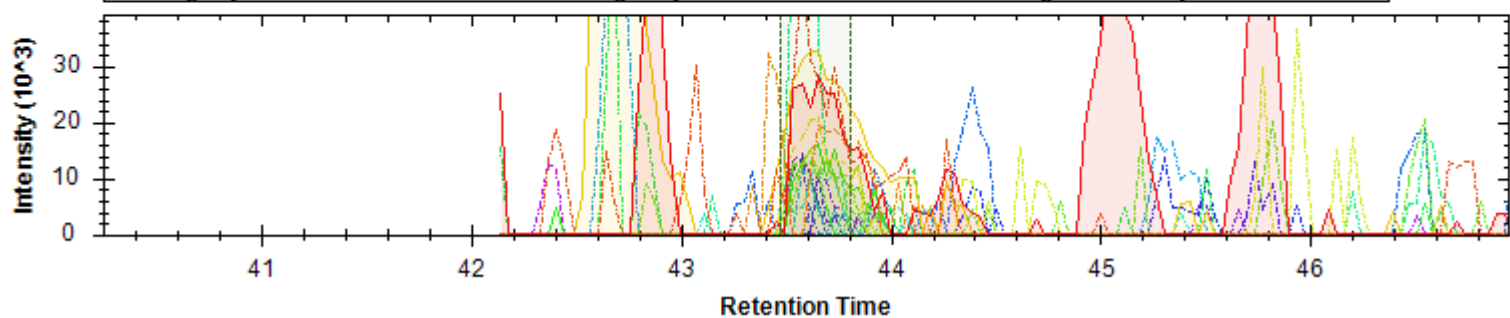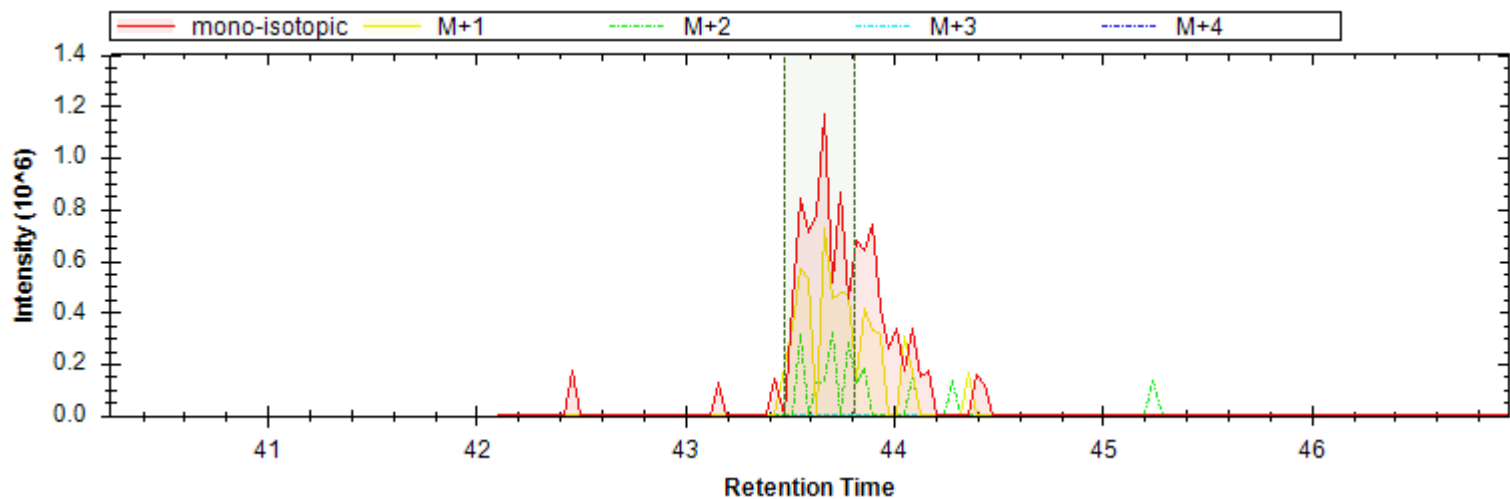

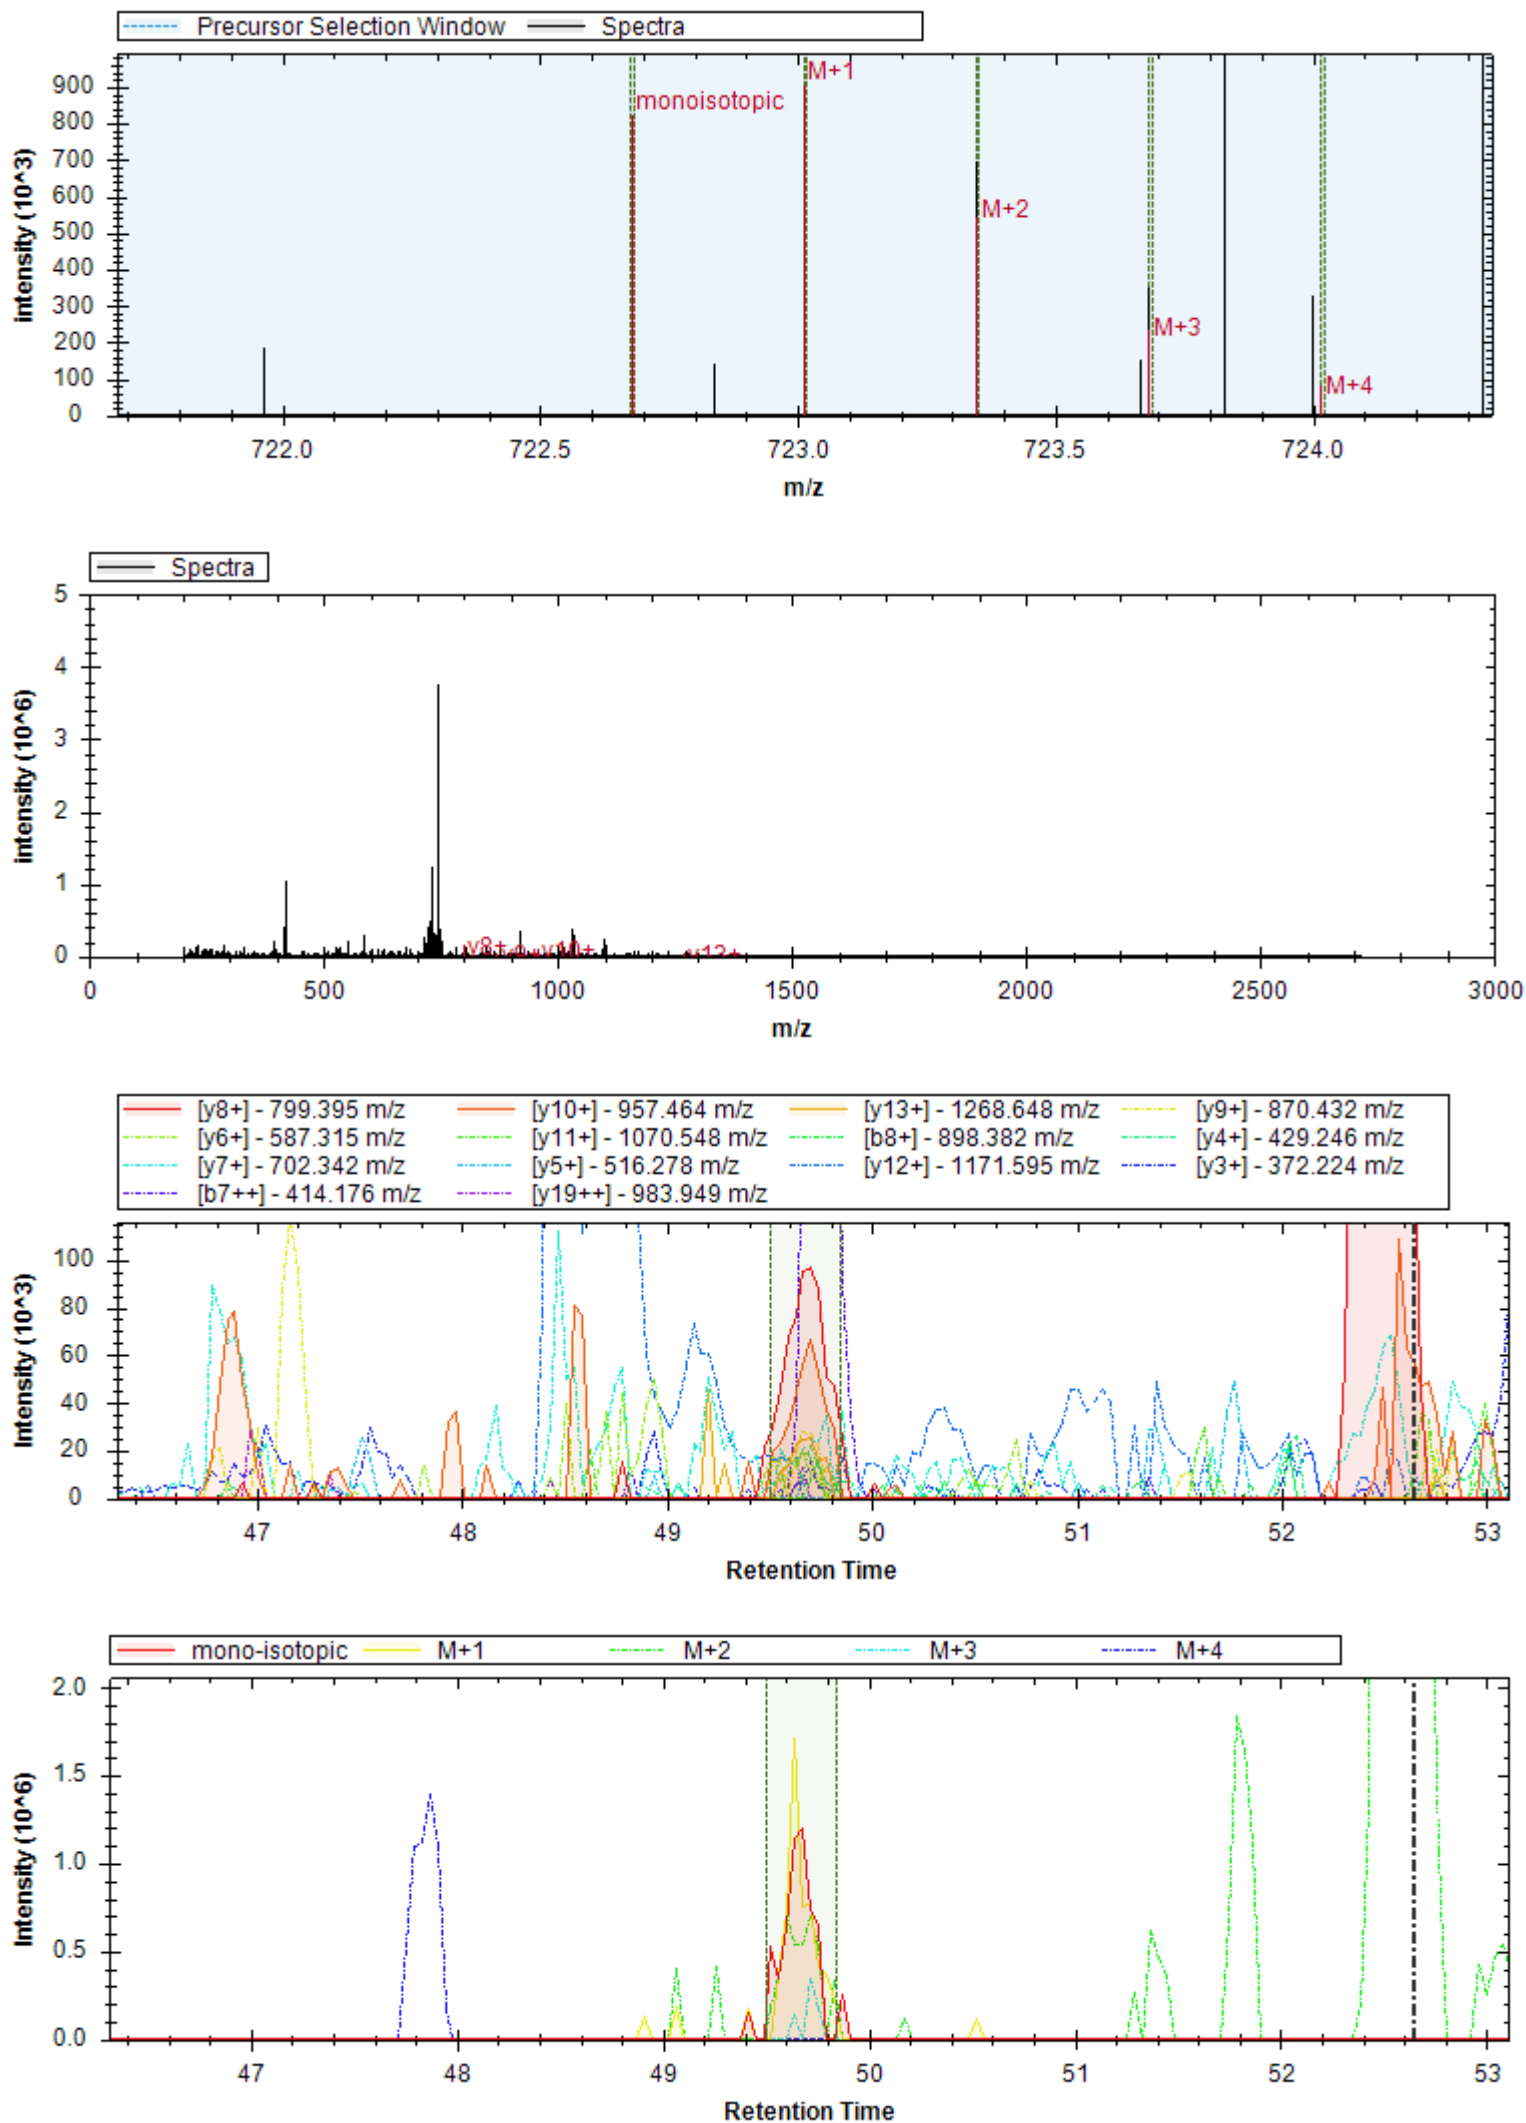

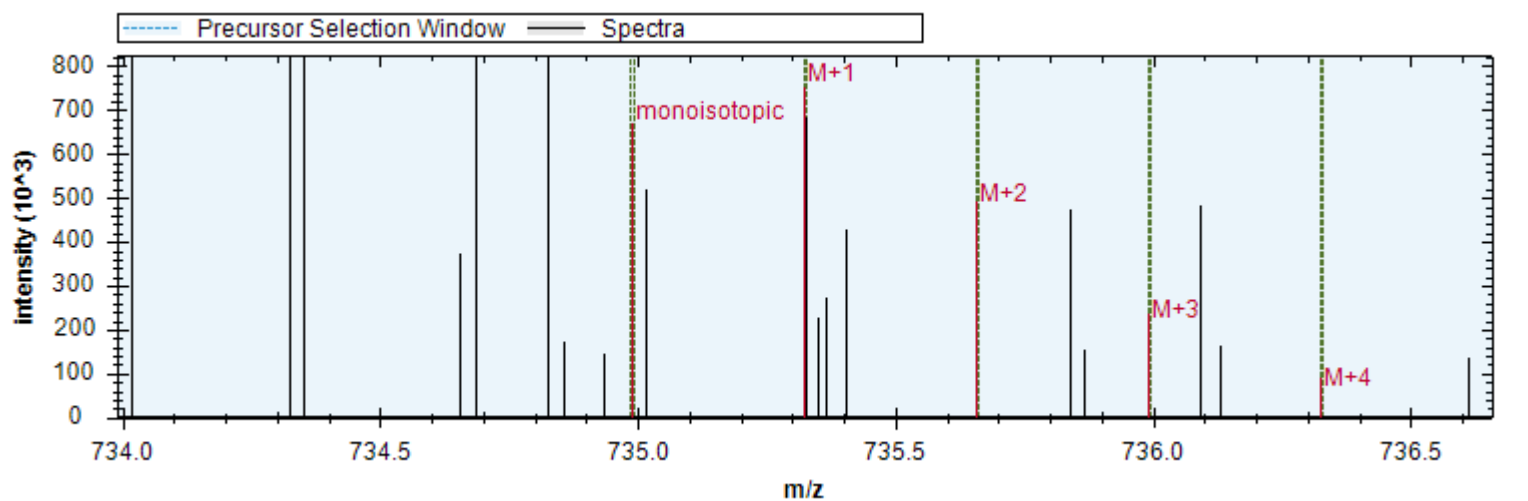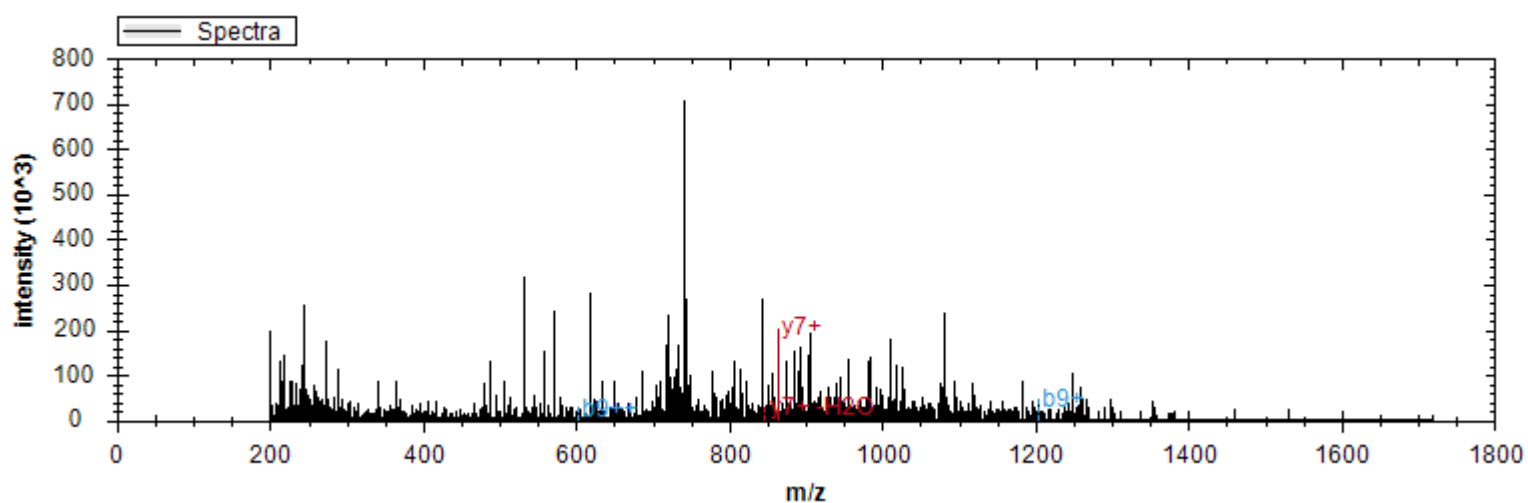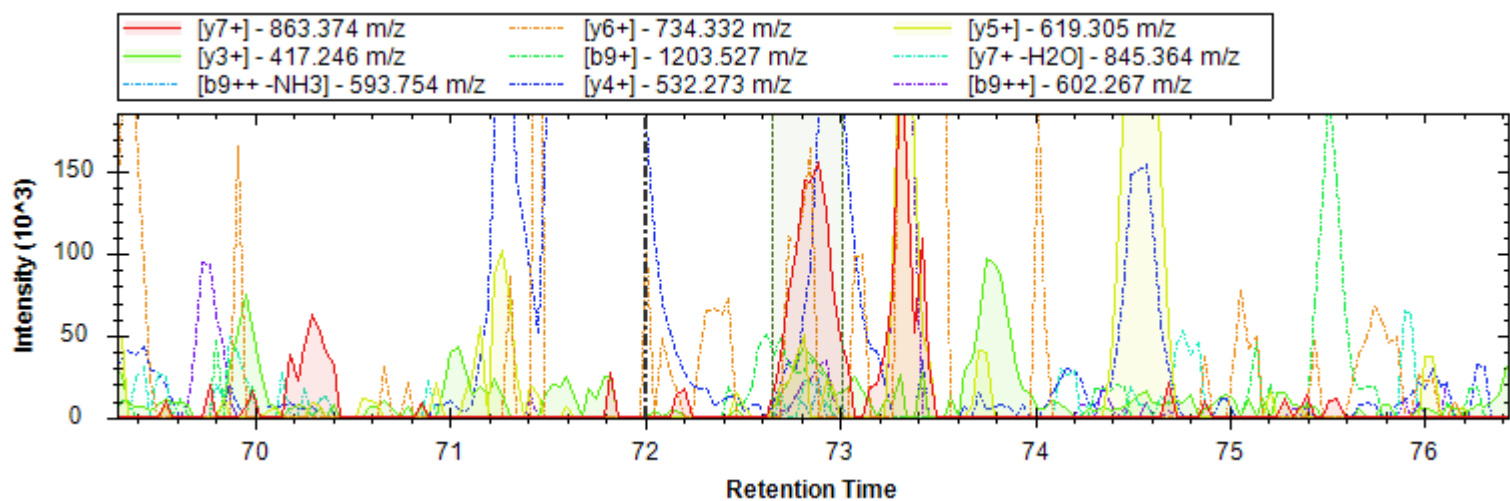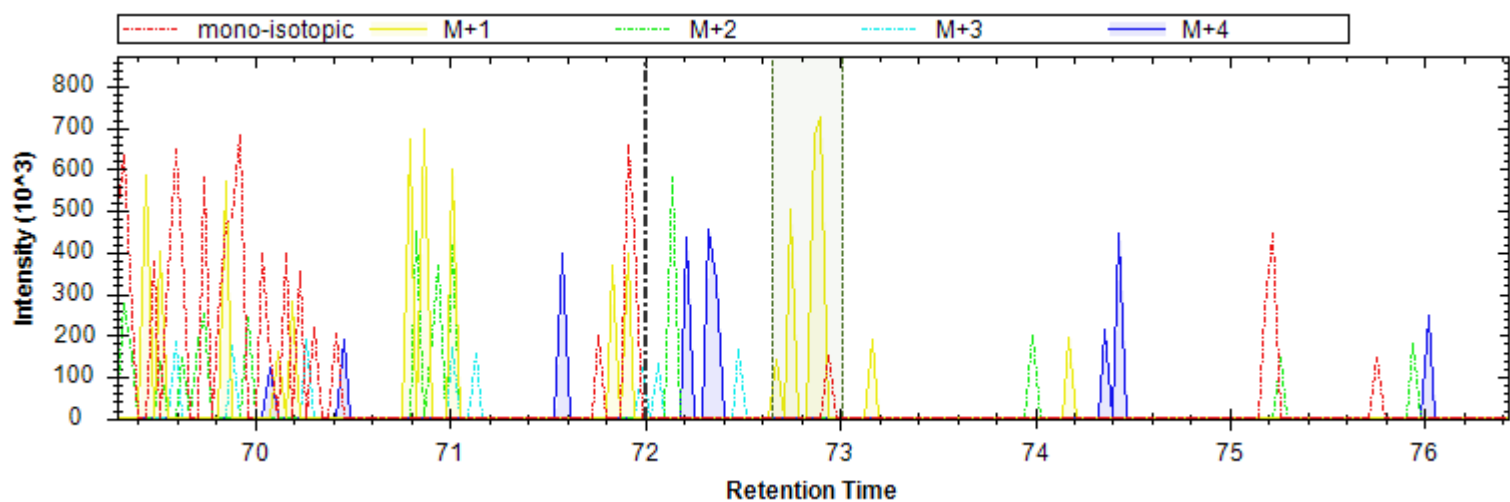

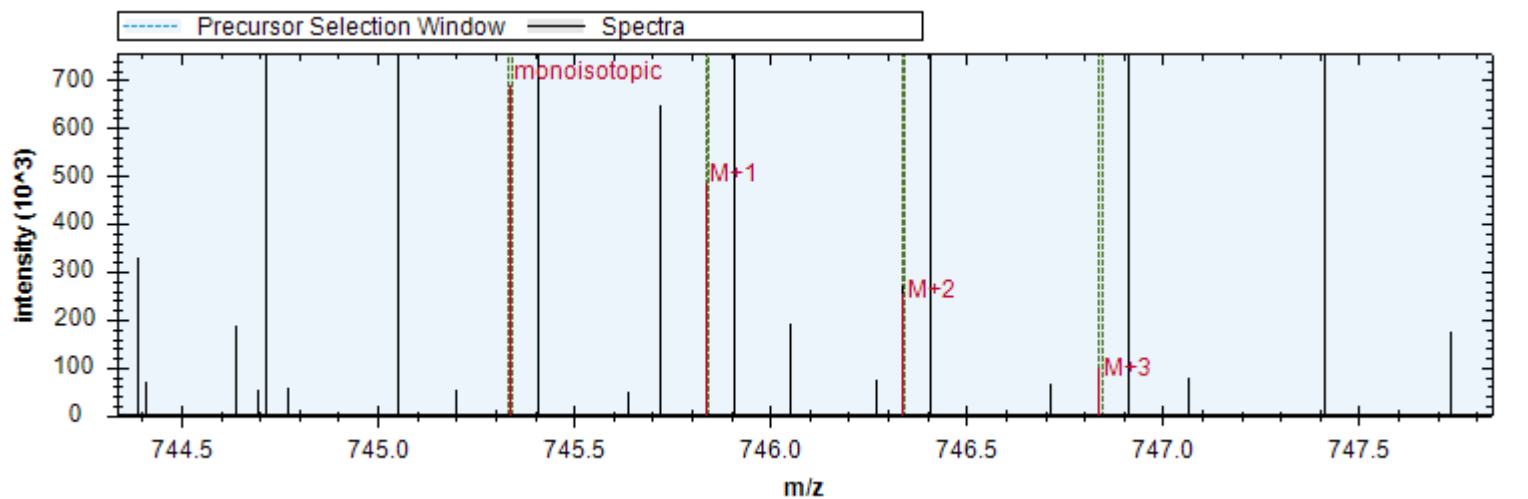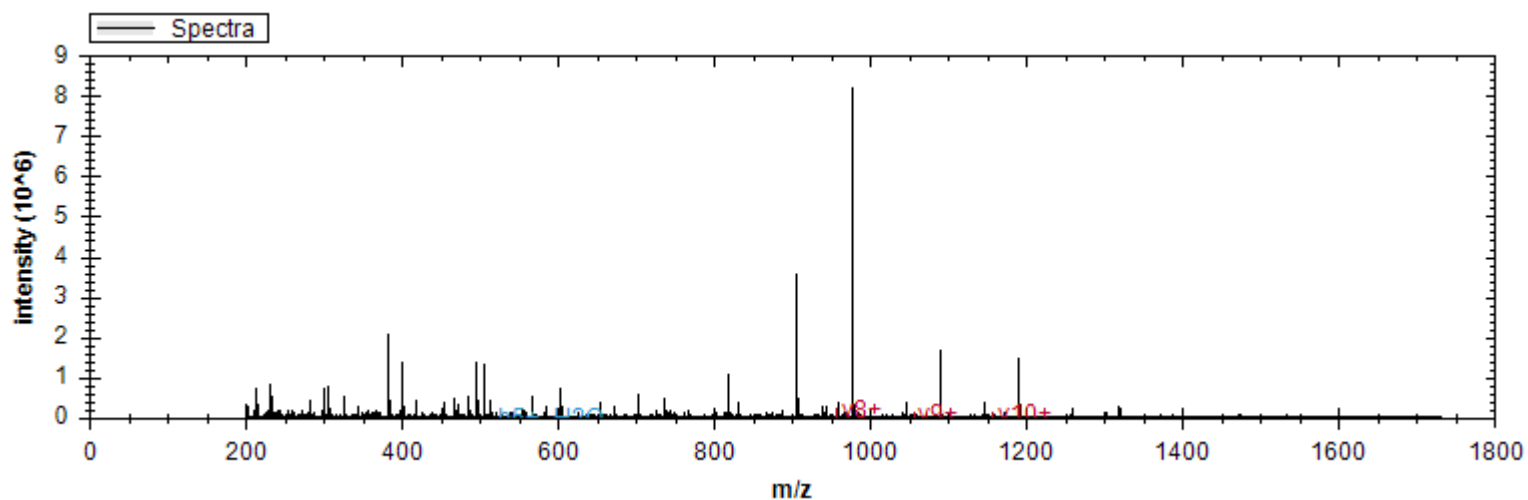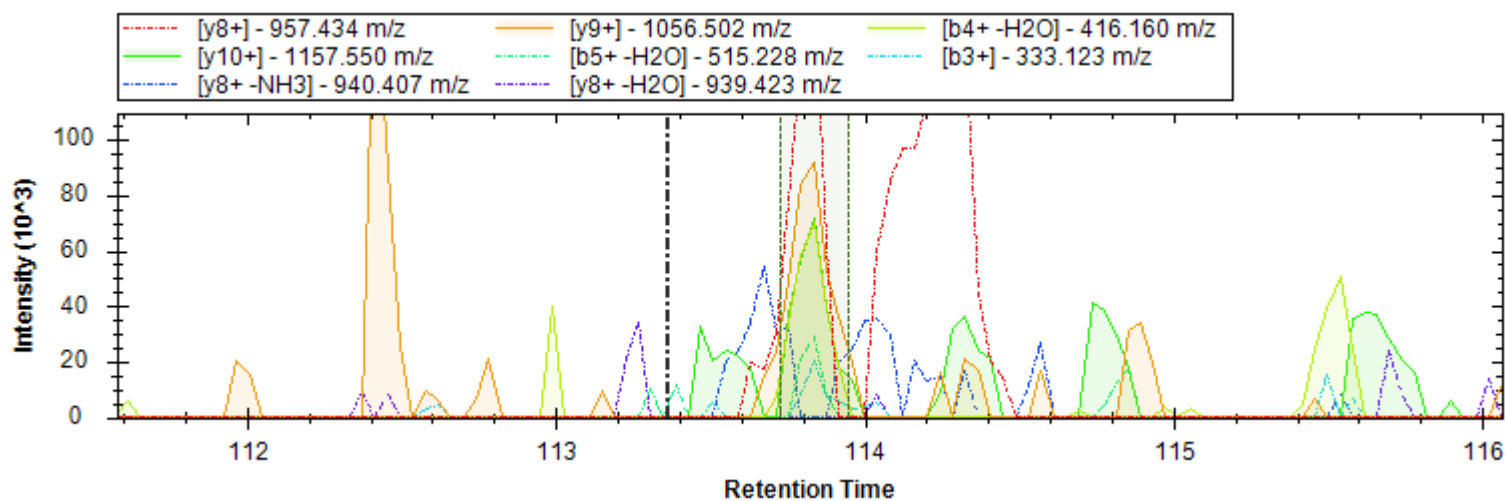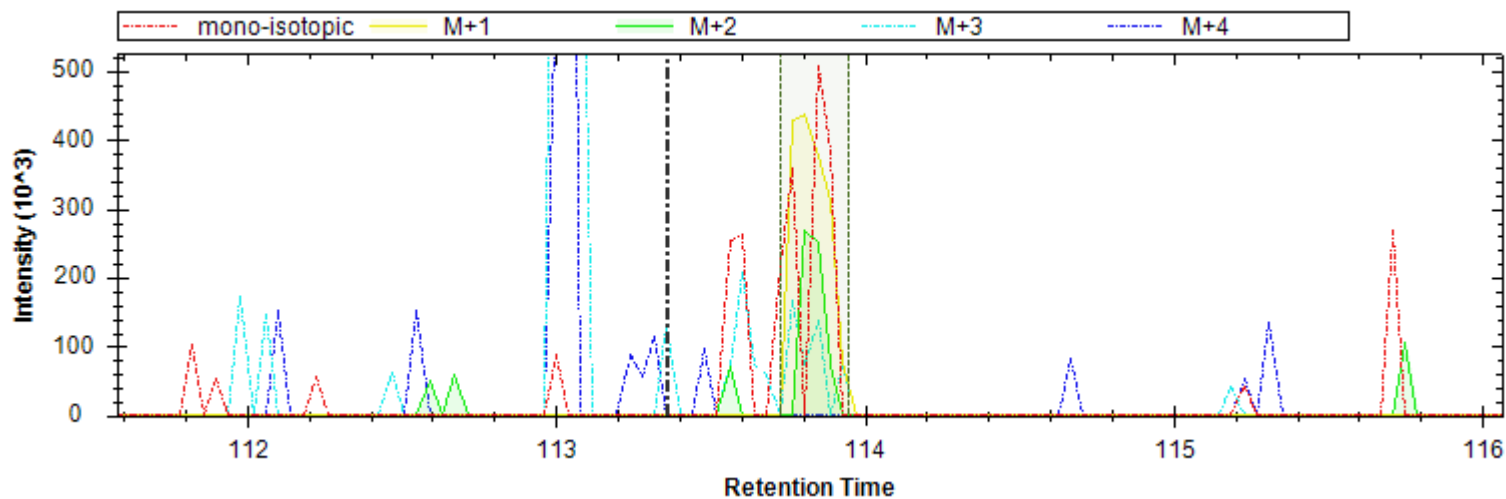

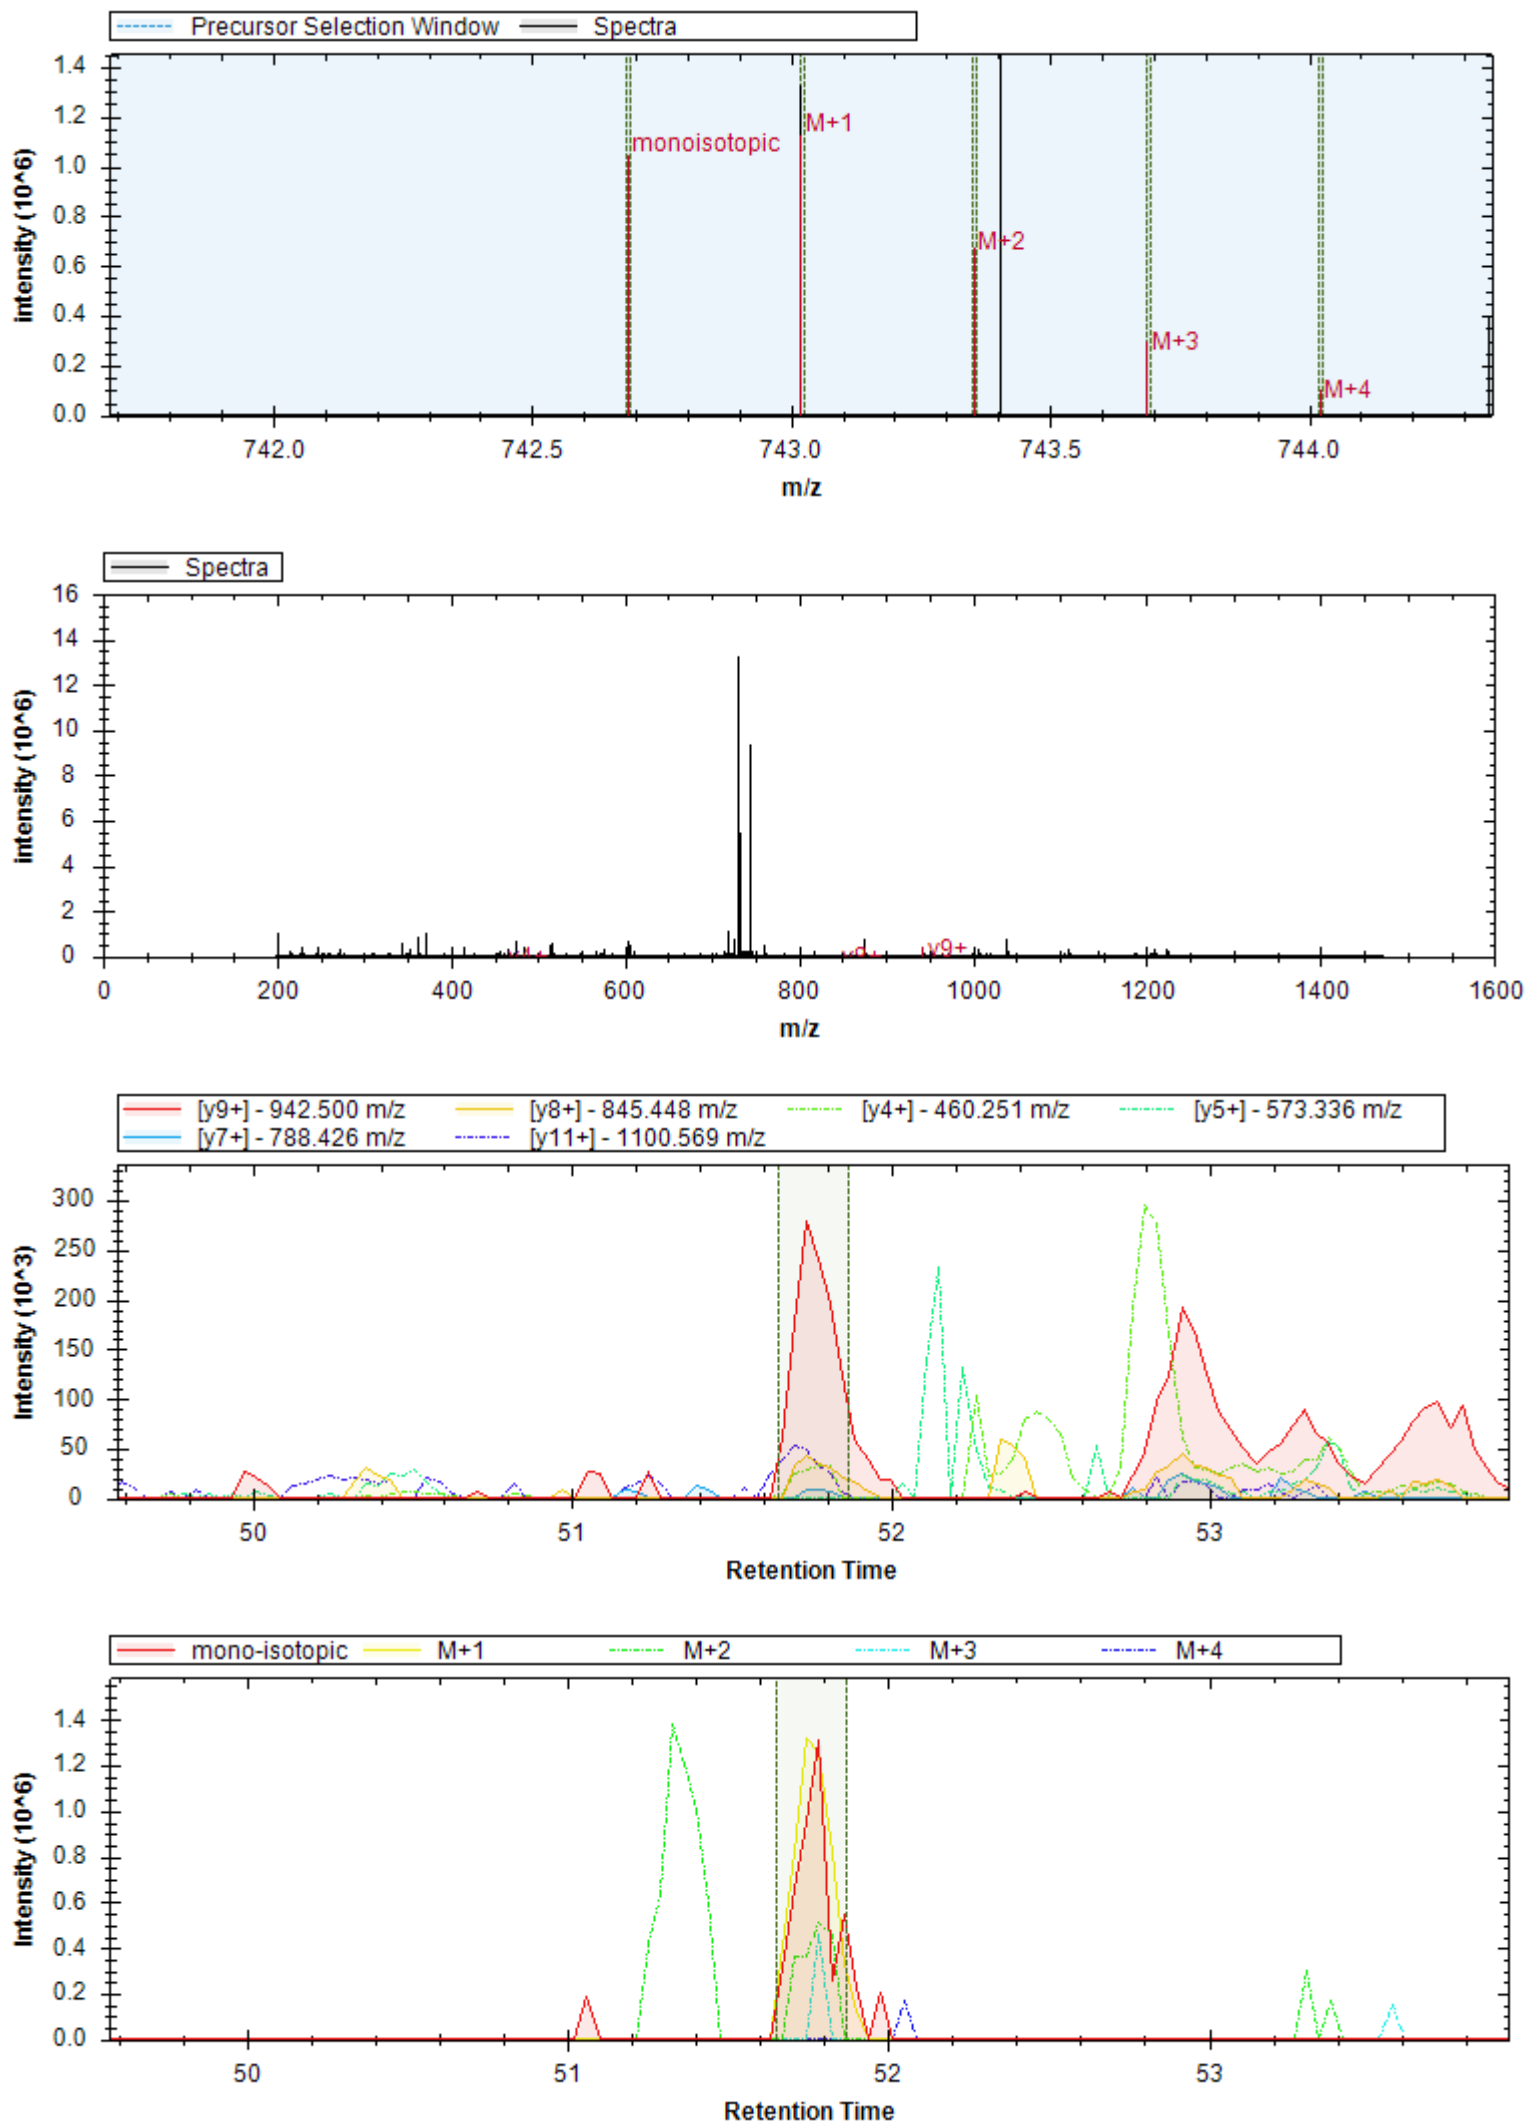

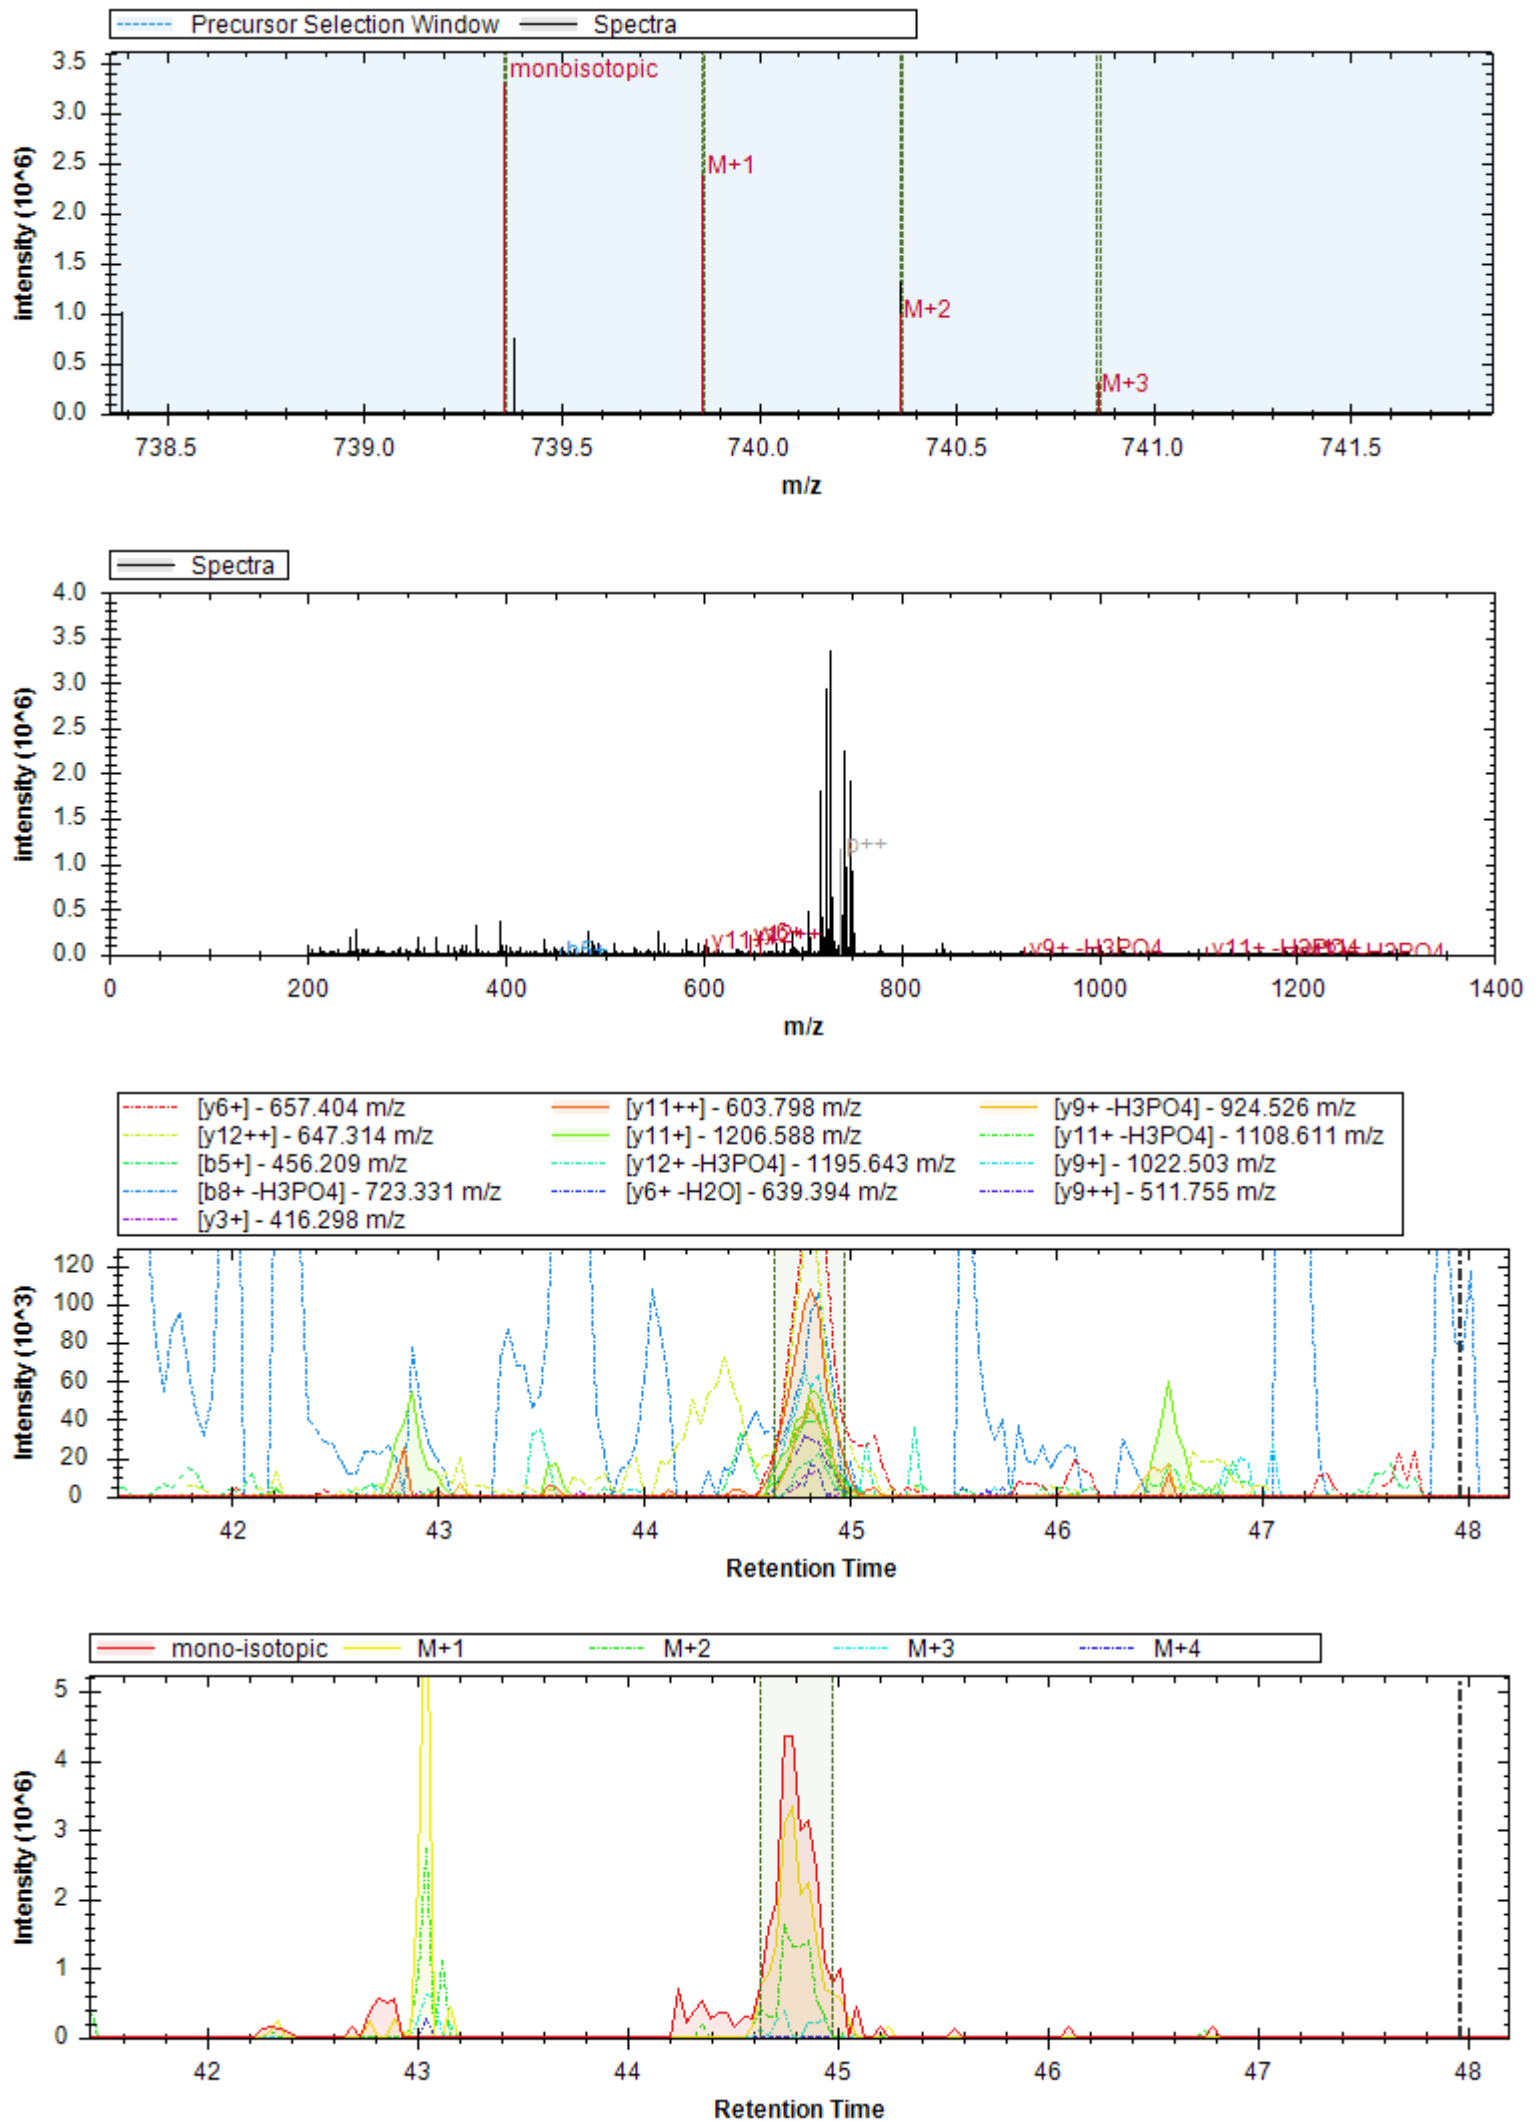

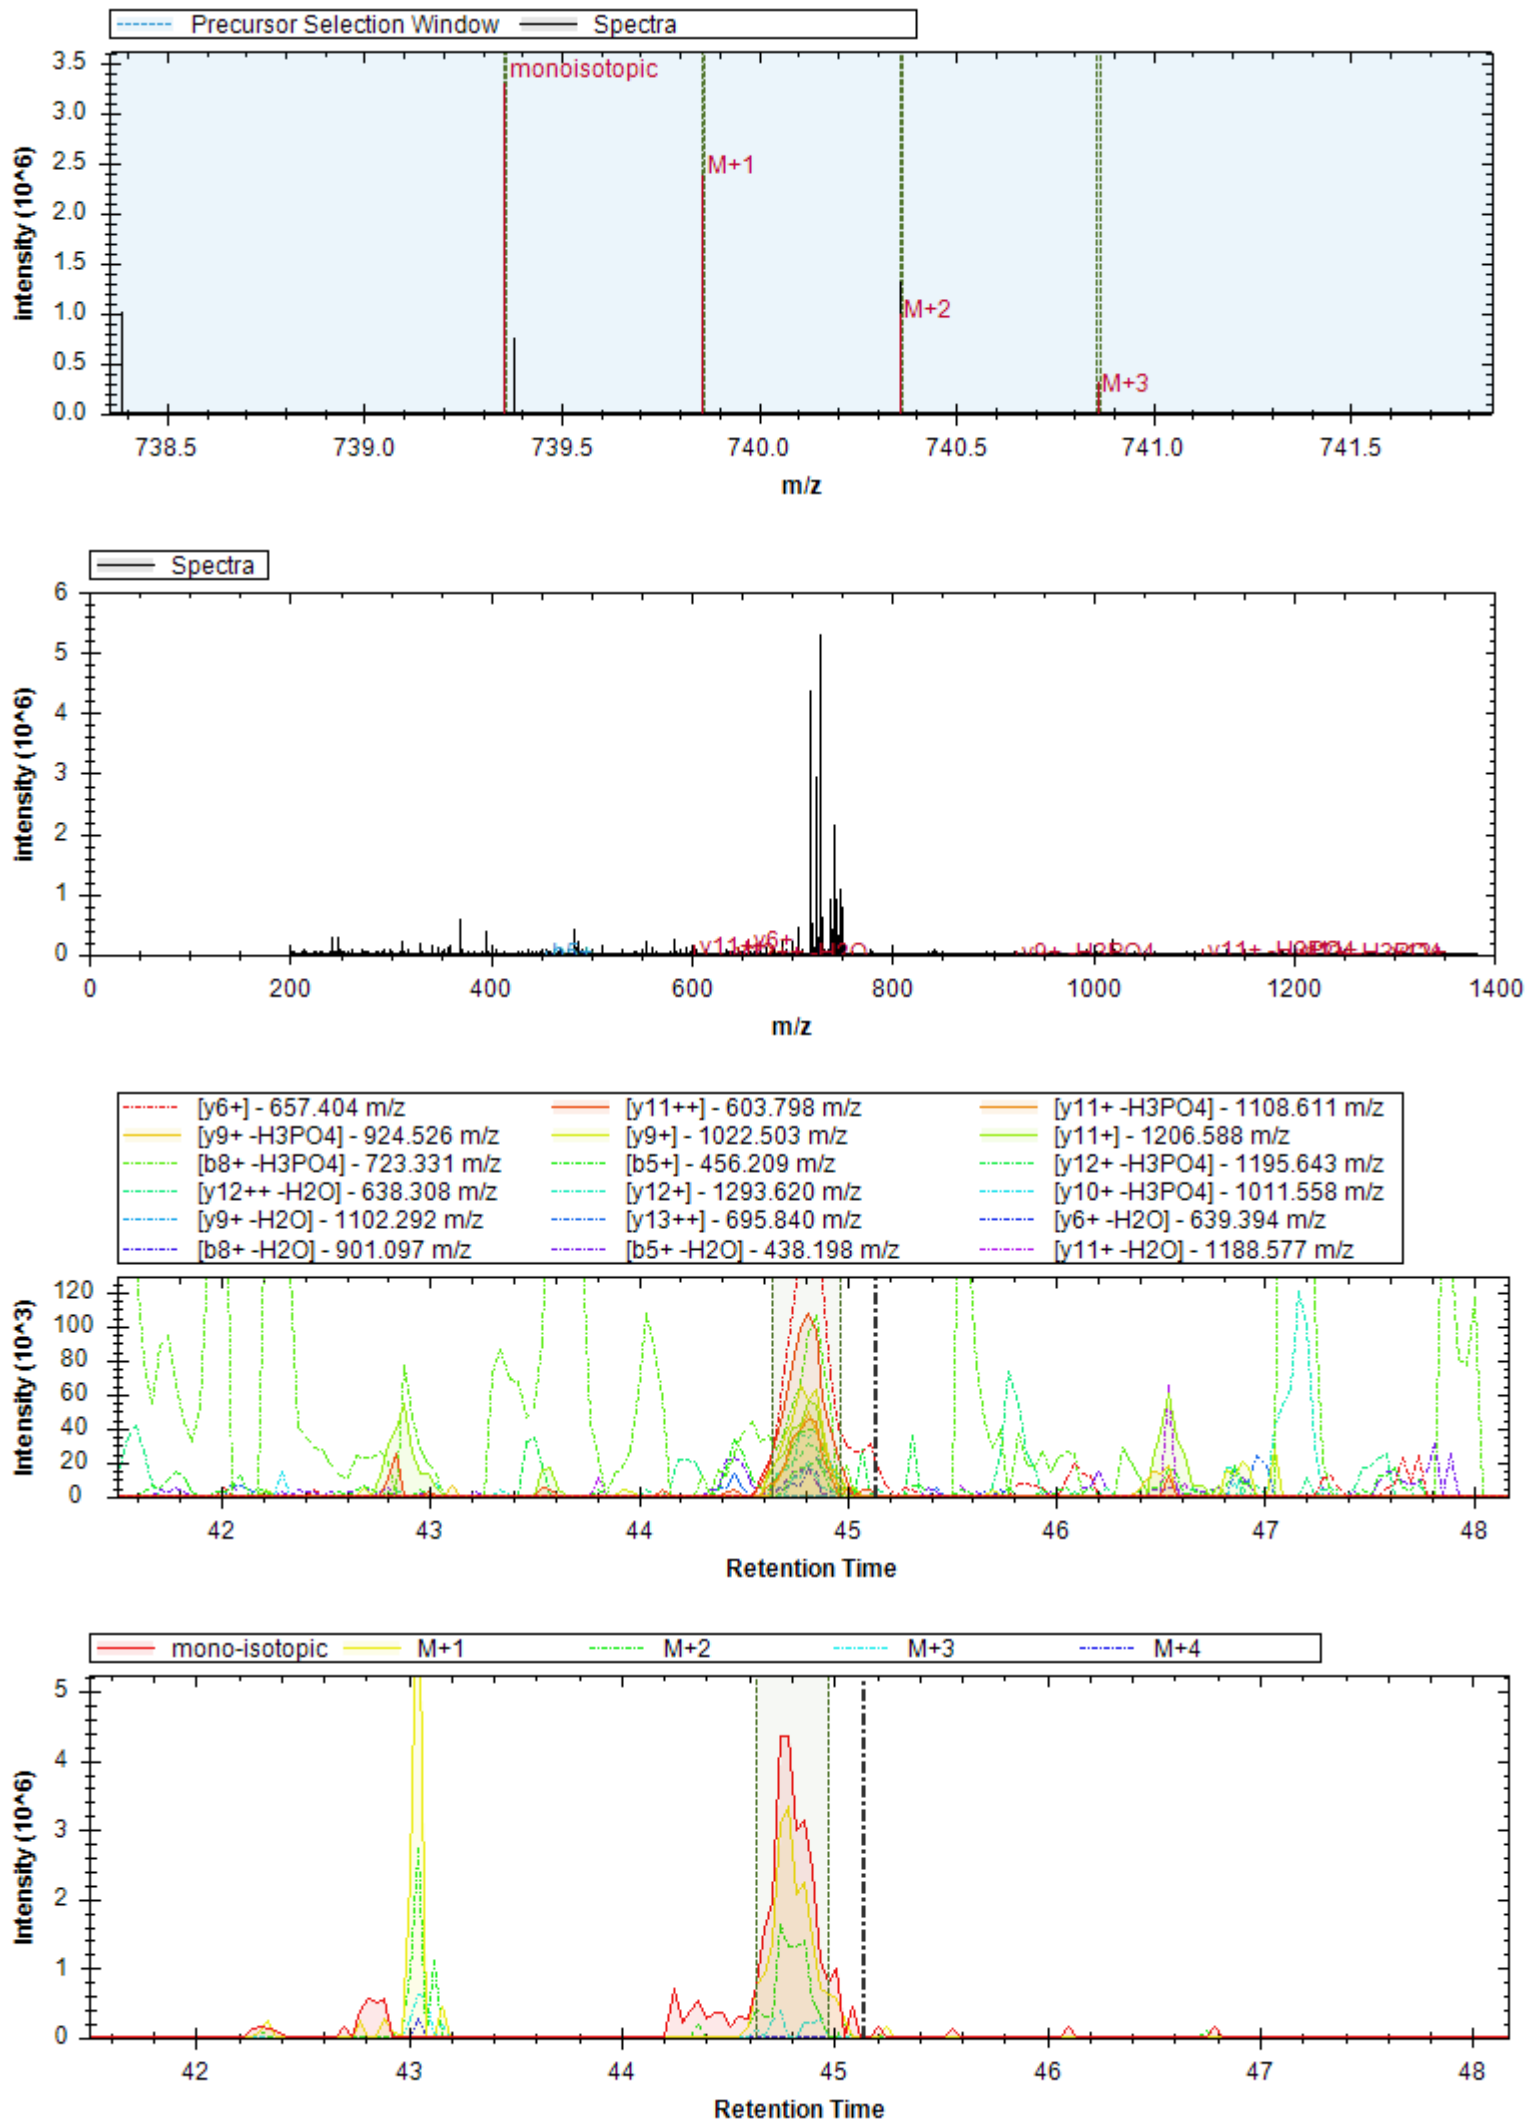



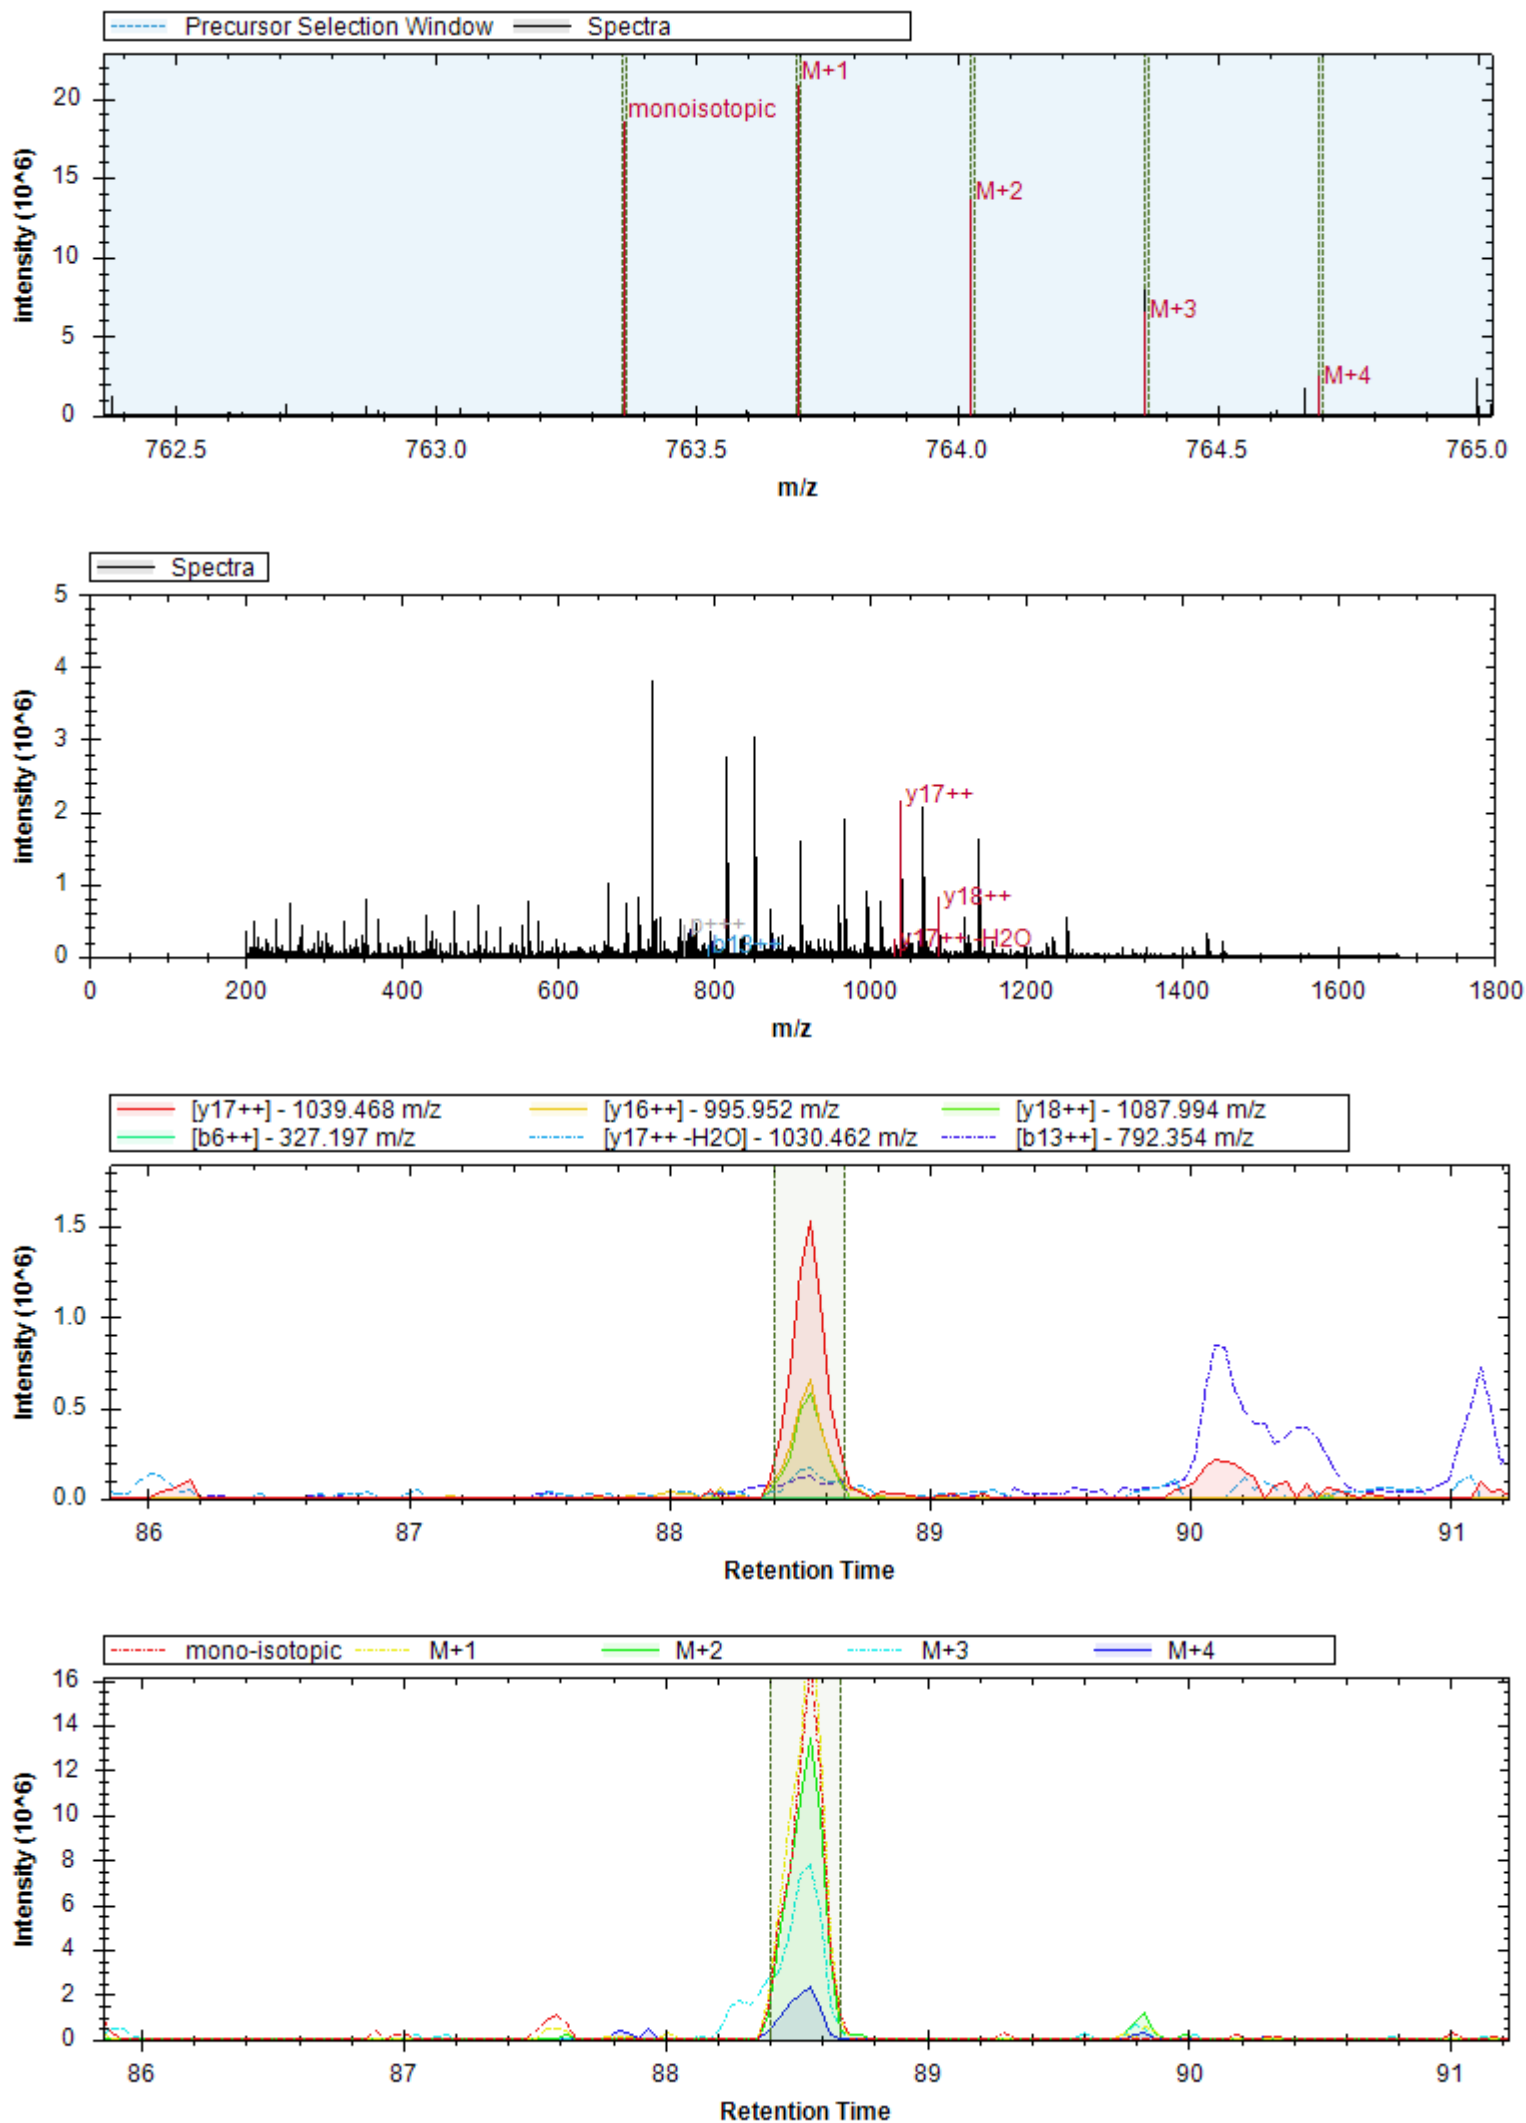

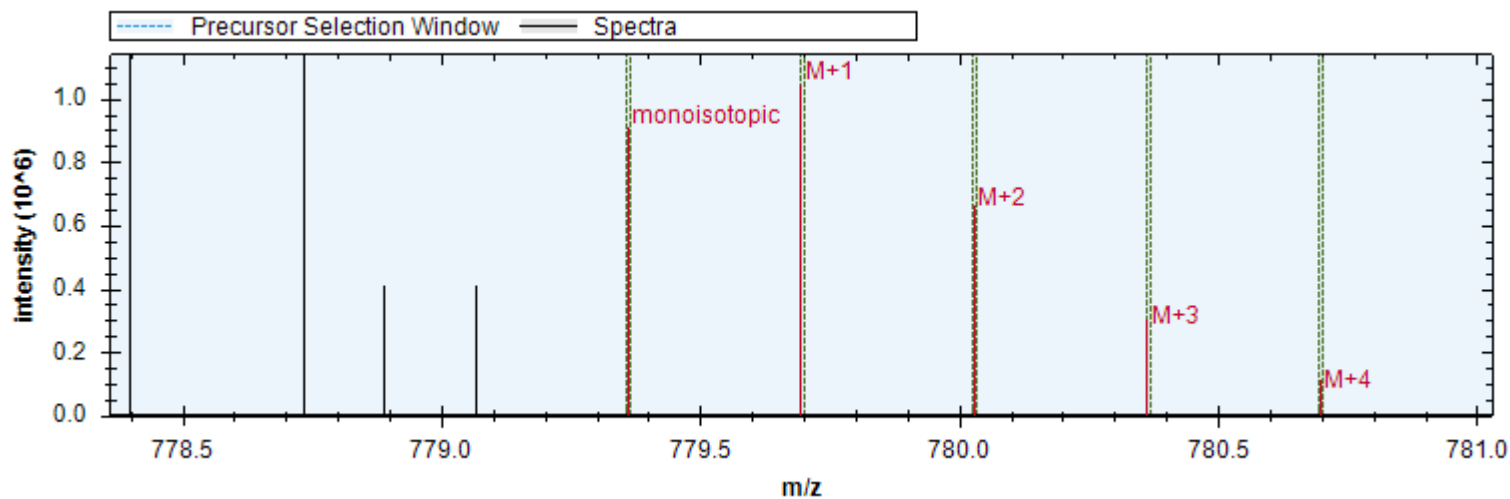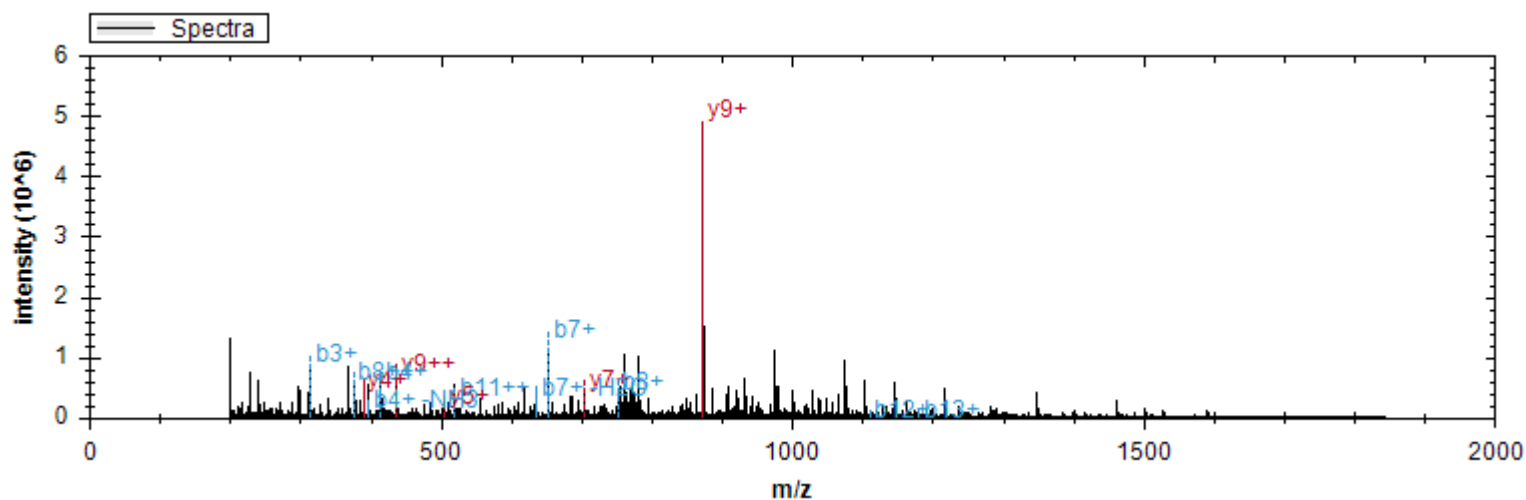

|                          |                          |                            |
|--------------------------|--------------------------|----------------------------|
| [y9+] - 873.431 m/z      | [b7+] - 653.325 m/z      | [b11+] - 1039.505 m/z      |
| [b3+] - 315.130 m/z      | [b8++] - 376.701 m/z     | [y7+] - 705.341 m/z        |
| [b4+] - 414.198 m/z      | [b11++] - 520.256 m/z    | [b7+ -H2O] - 635.315 m/z   |
| [b8+] - 752.394 m/z      | [b4+ -H2O] - 396.188 m/z | [y8+] - 776.379 m/z        |
| [y4+] - 390.235 m/z      | [y11+] - 1155.493 m/z    | [y9++] - 437.219 m/z       |
| [b12+] - 1110.543 m/z    | [y6+] - 634.304 m/z      | [b7+ -NH3] - 636.299 m/z   |
| [y12+] - 1226.530 m/z    | [b5+] - 511.251 m/z      | [b11+ -NH3] - 1022.479 m/z |
| [b4+ -NH3] - 397.172 m/z | [b13+] - 1181.580 m/z    | [b8+ -NH3] - 735.367 m/z   |
| [y5+] - 505.262 m/z      |                          |                            |

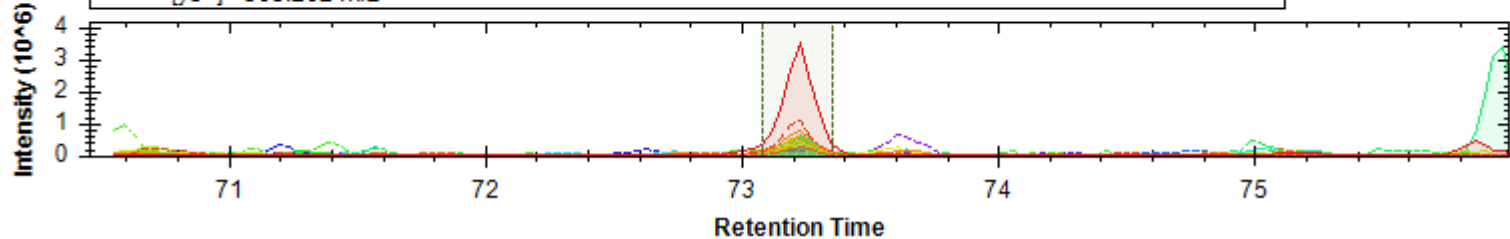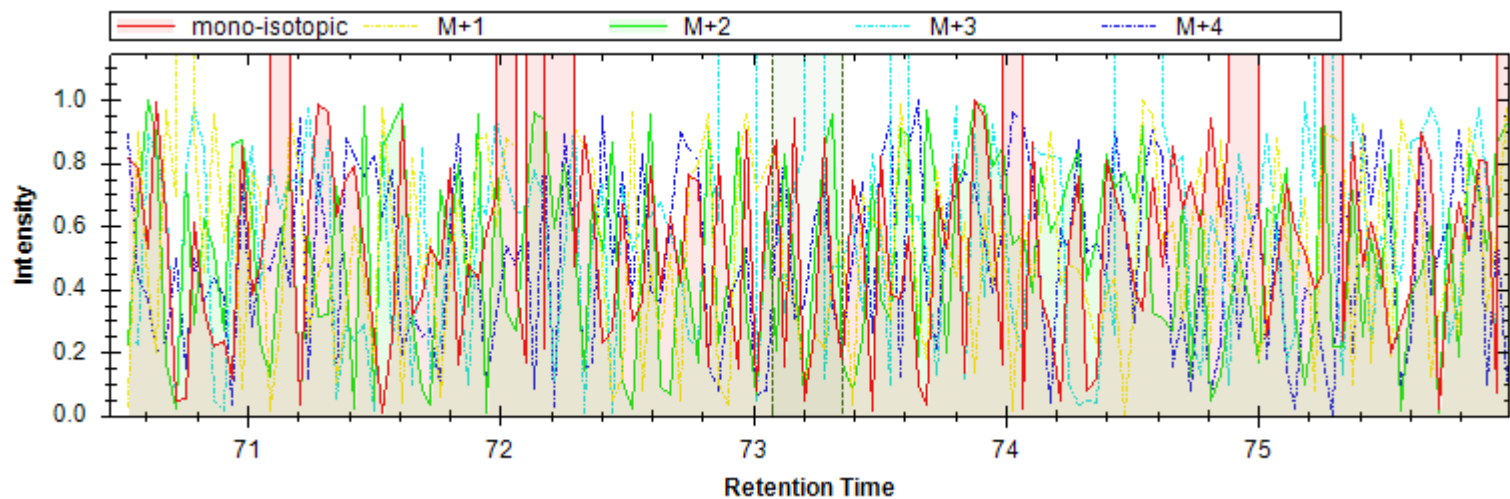

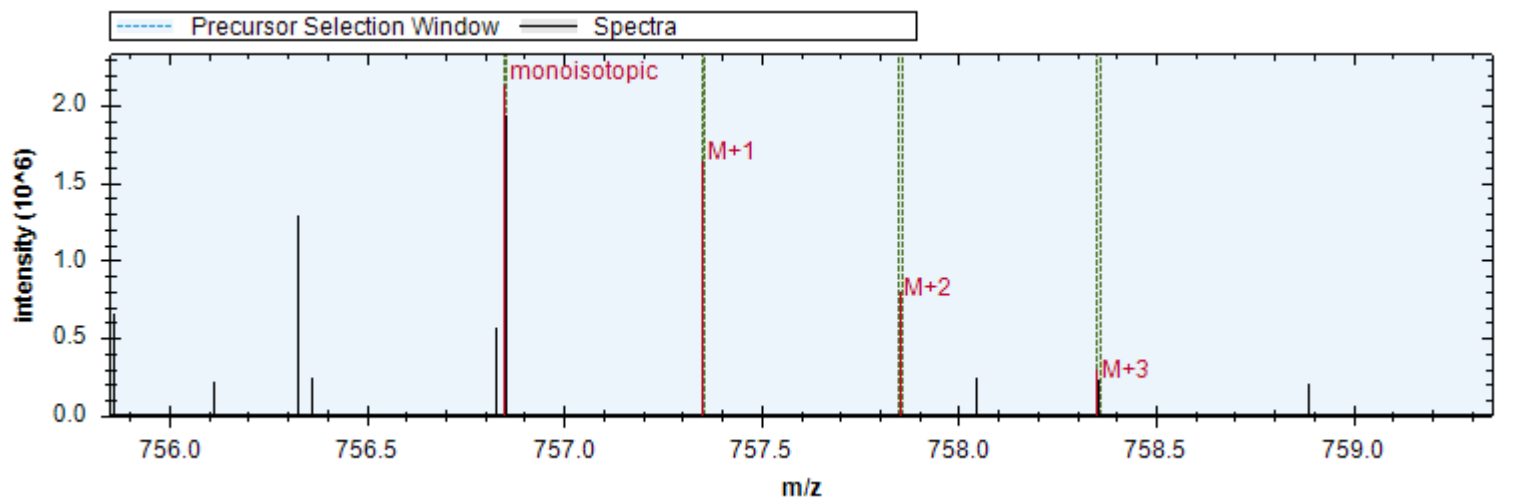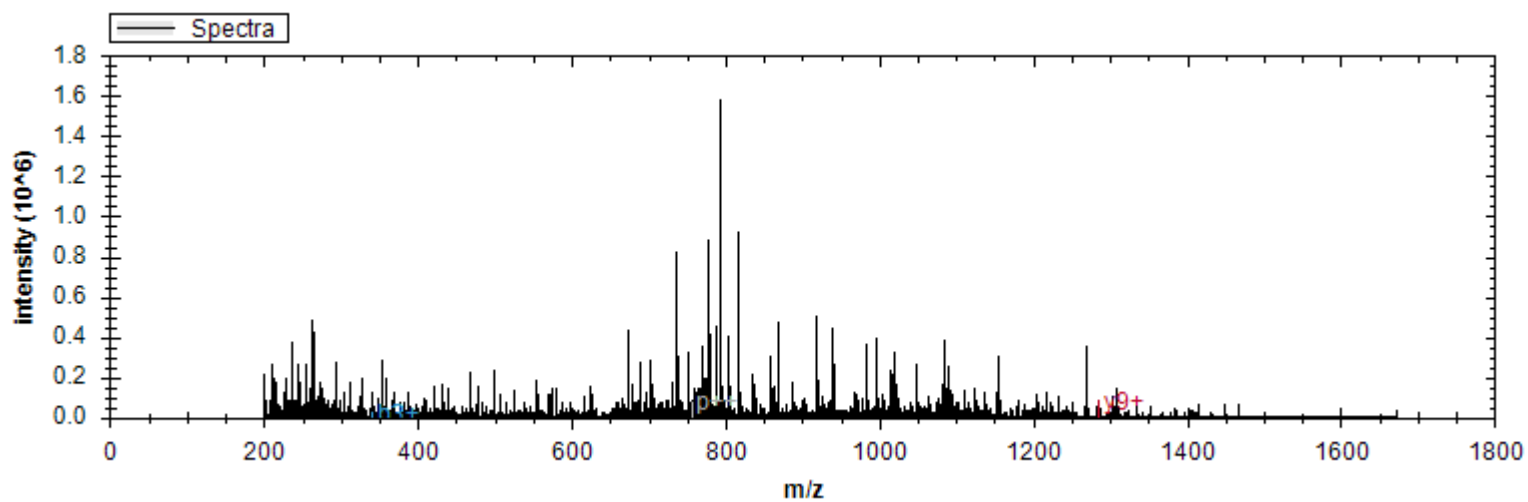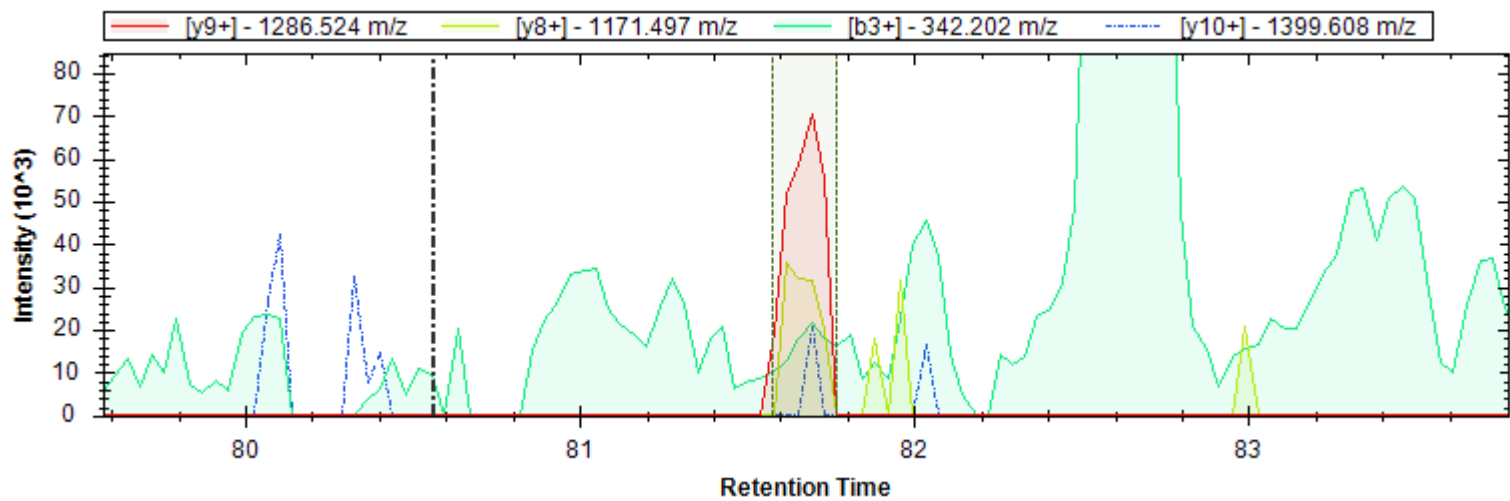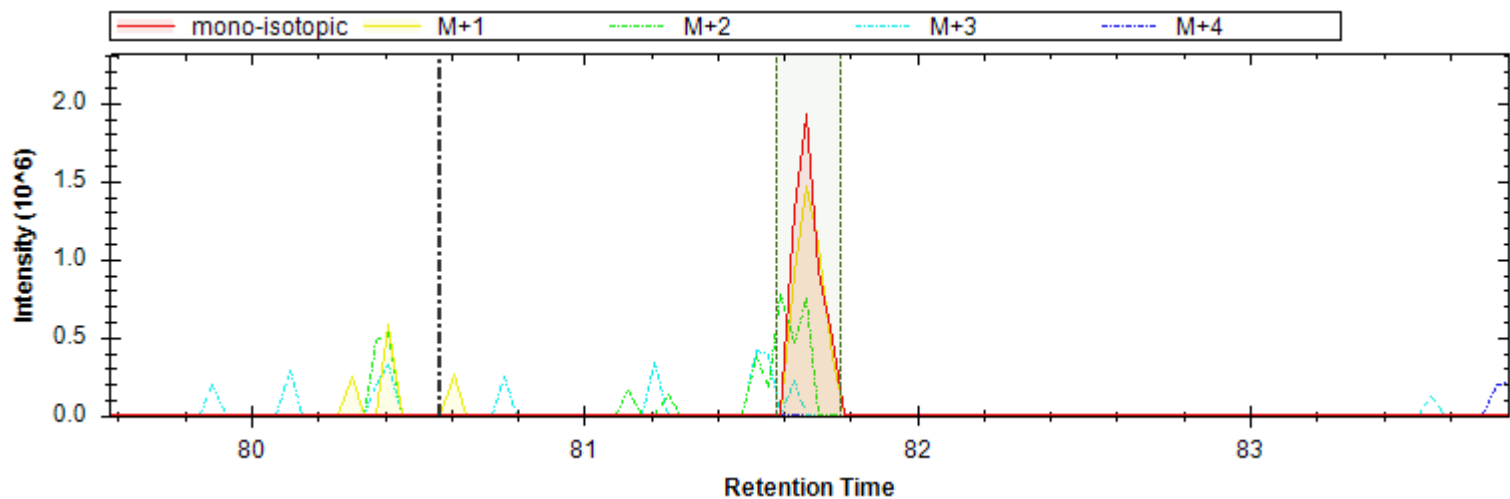

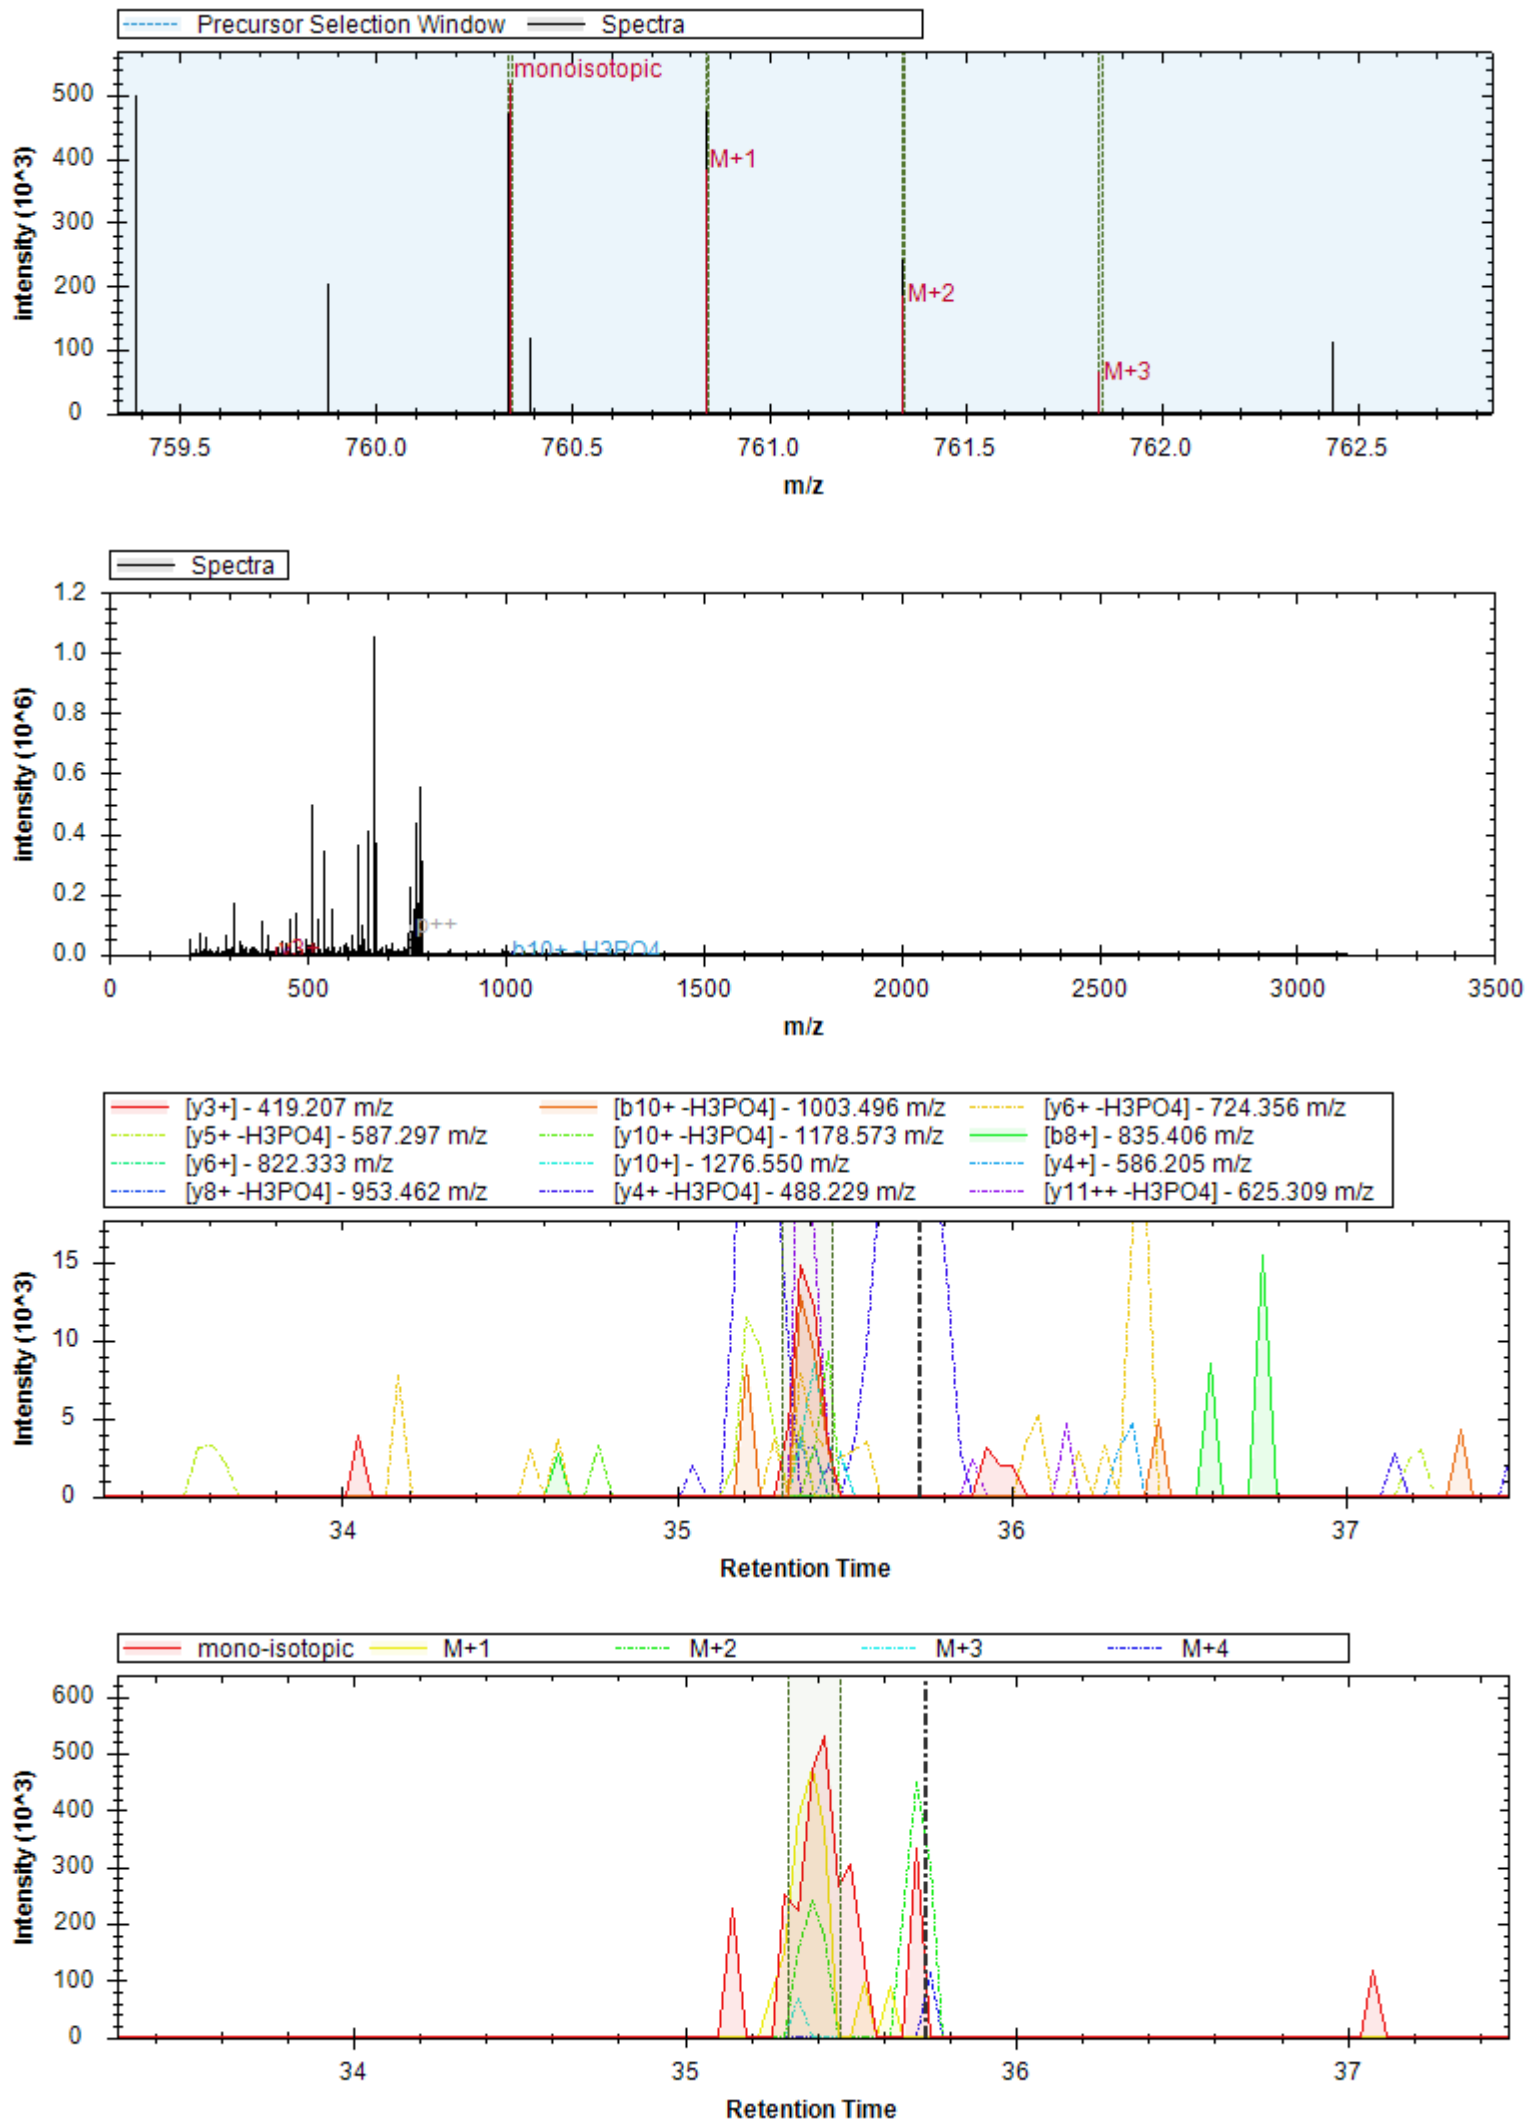

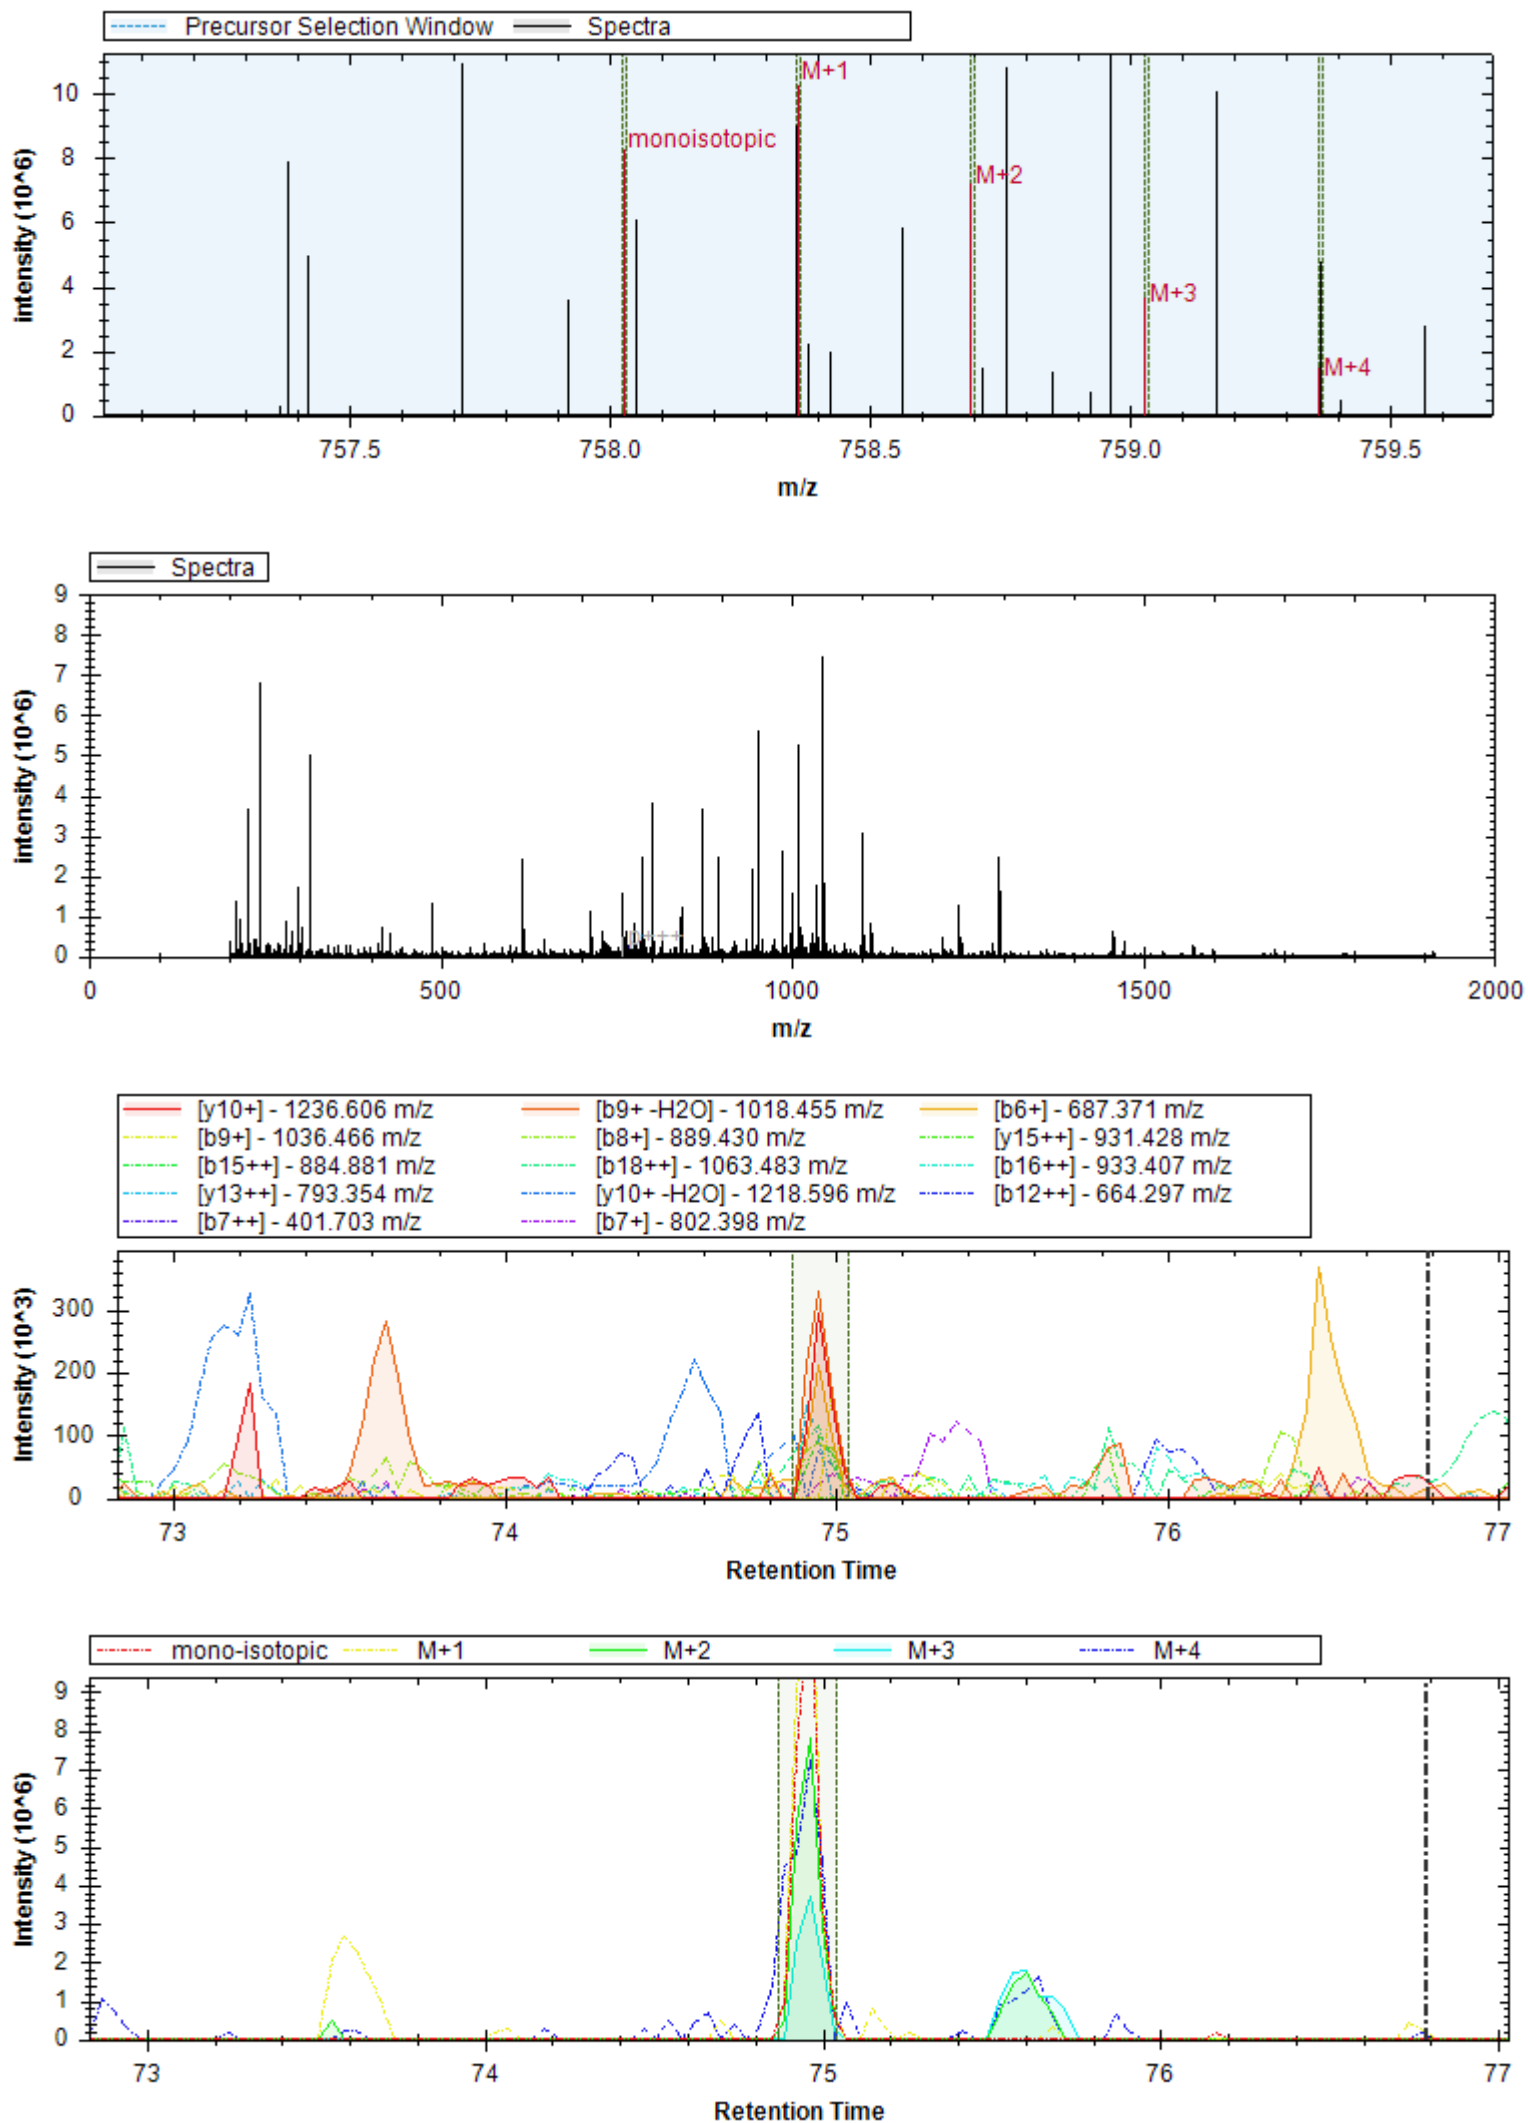

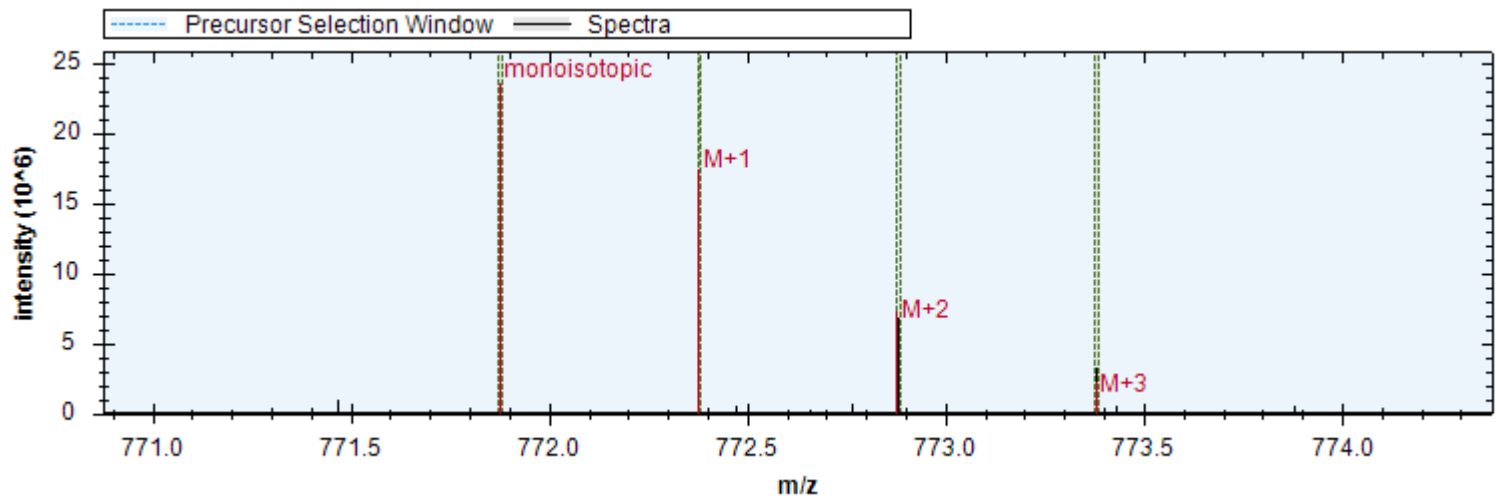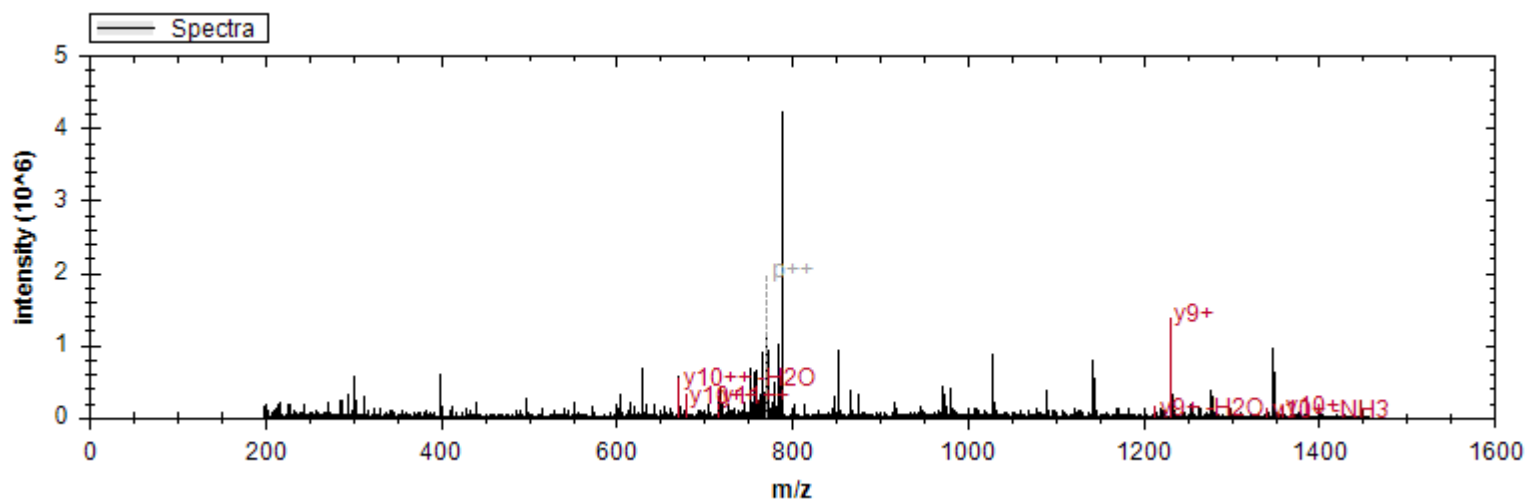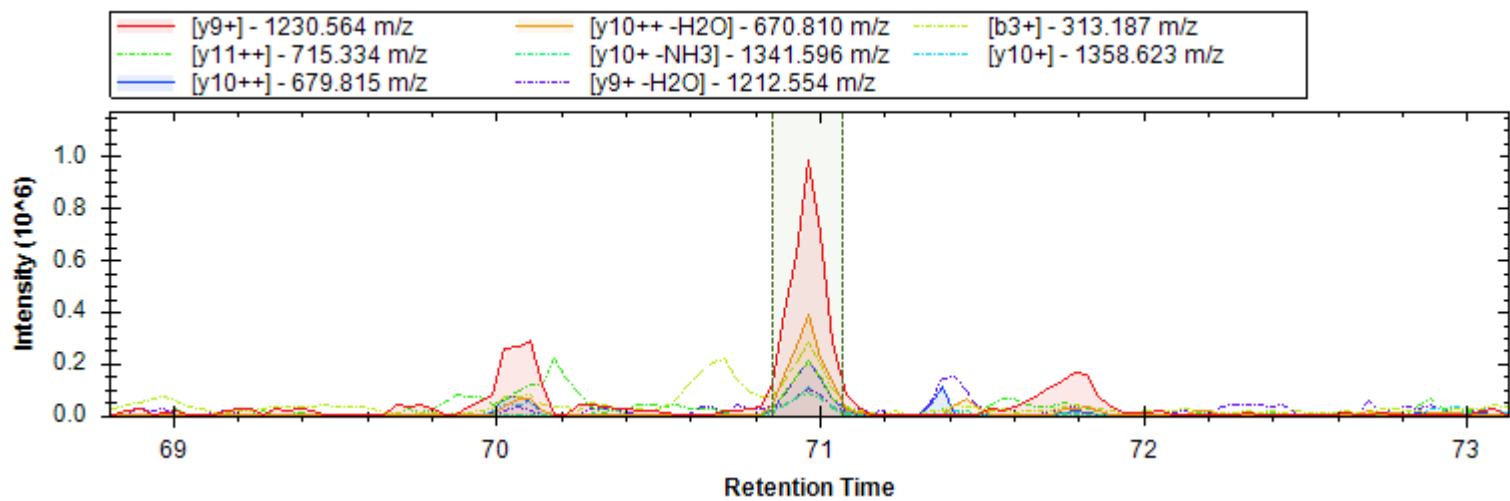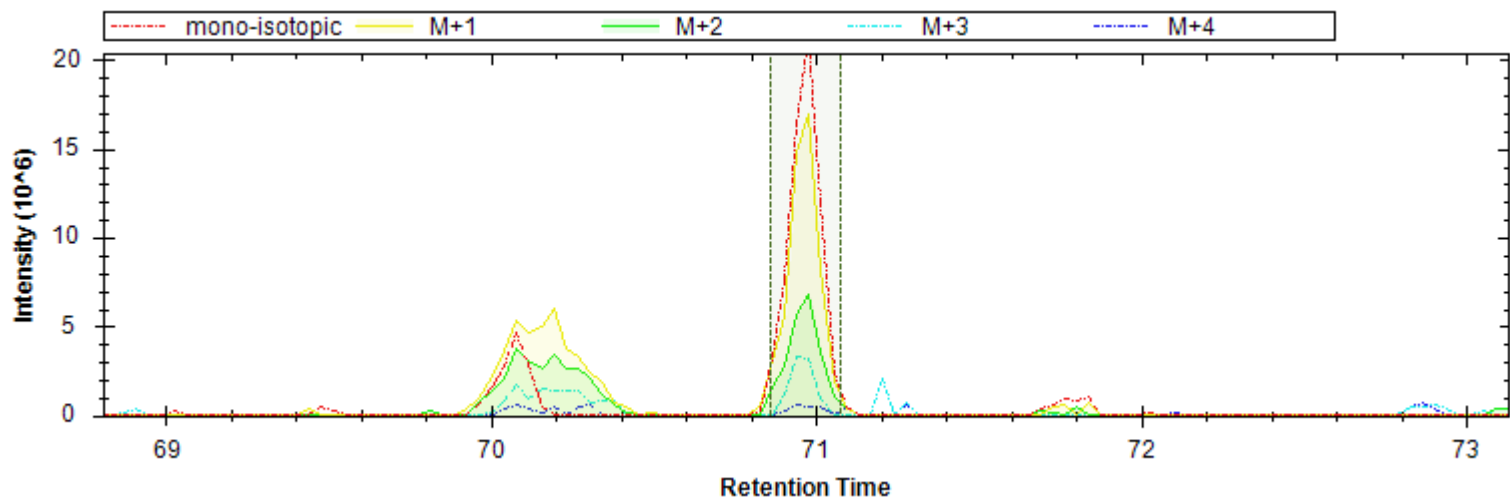

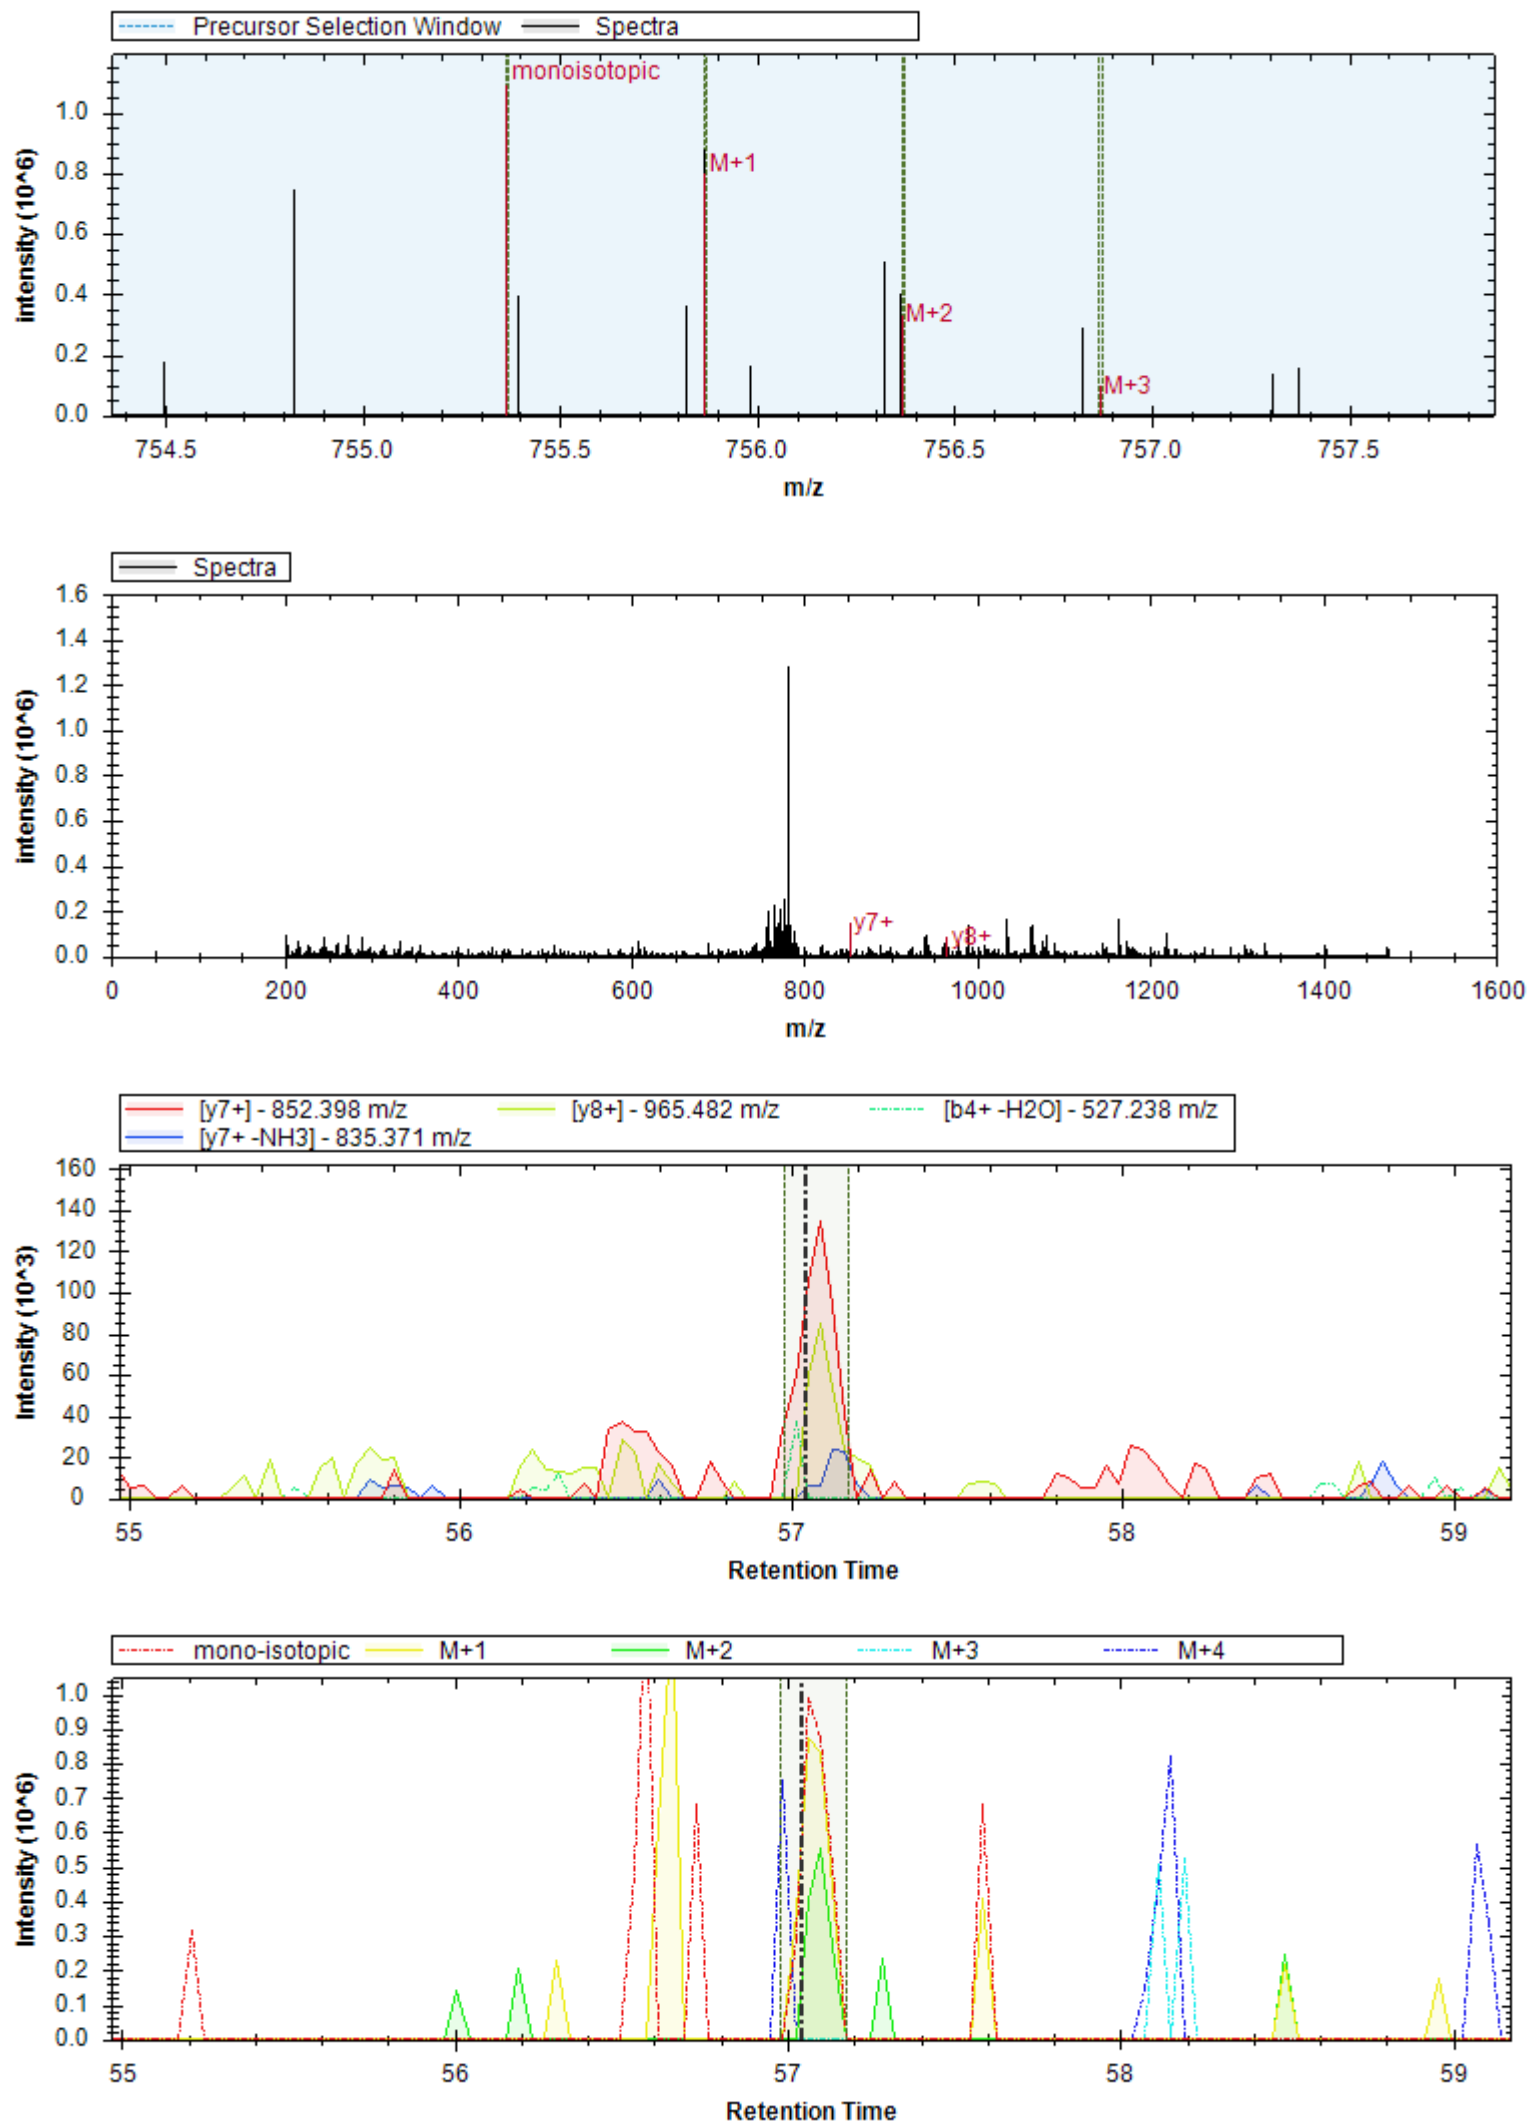

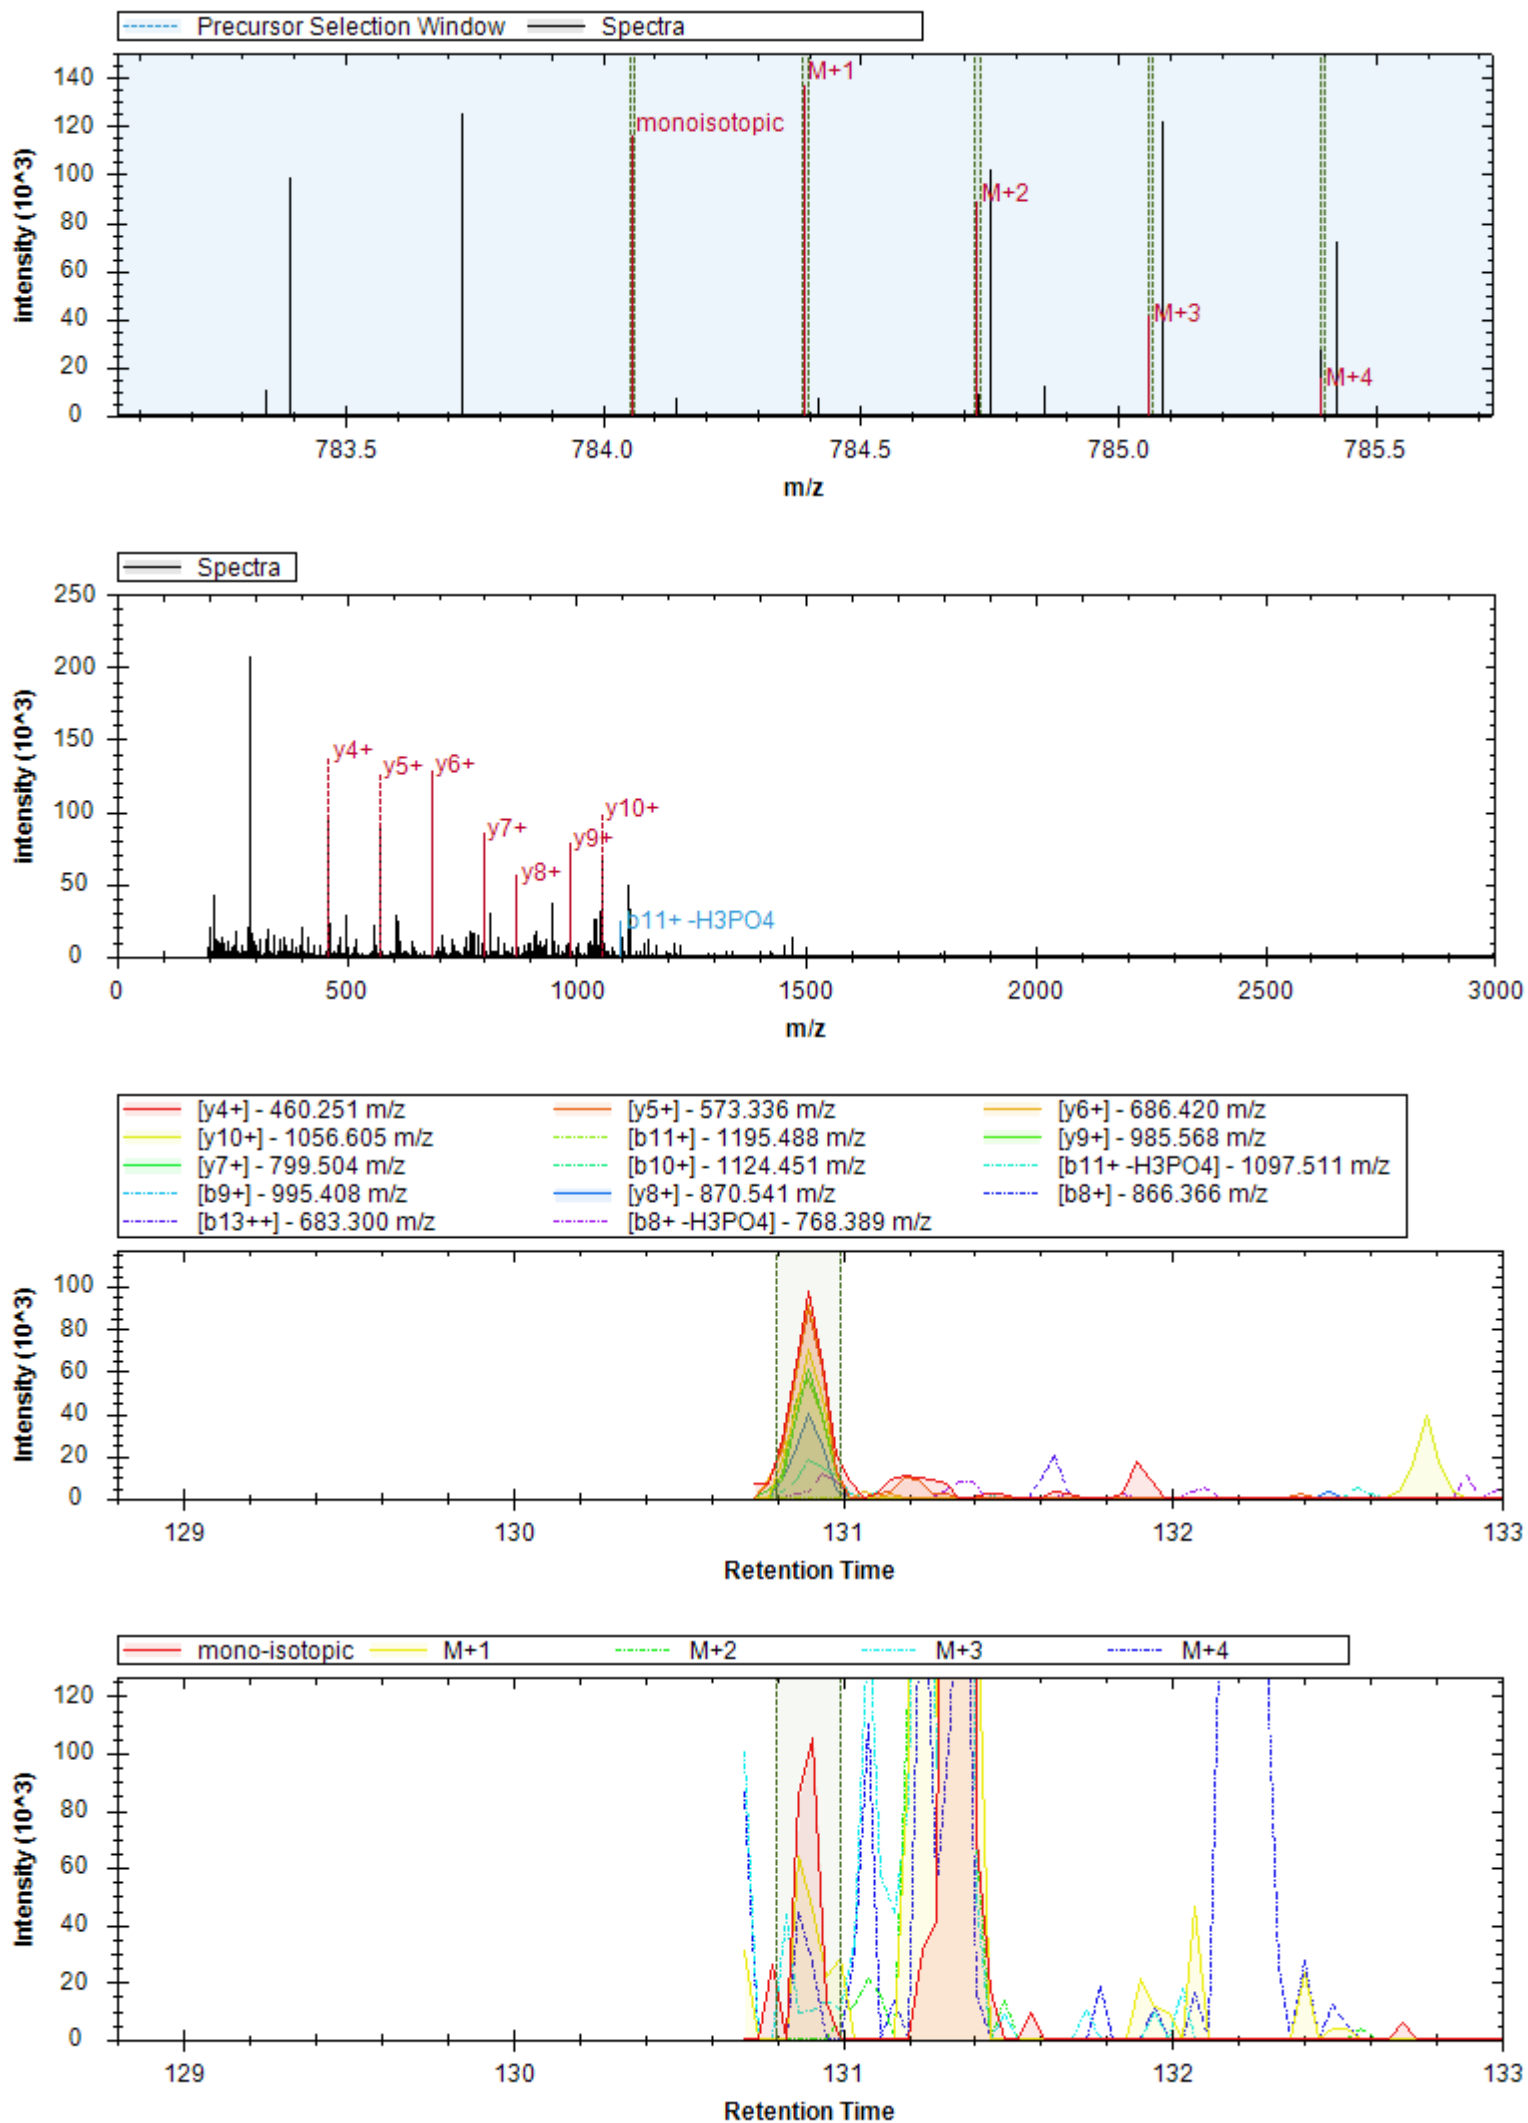



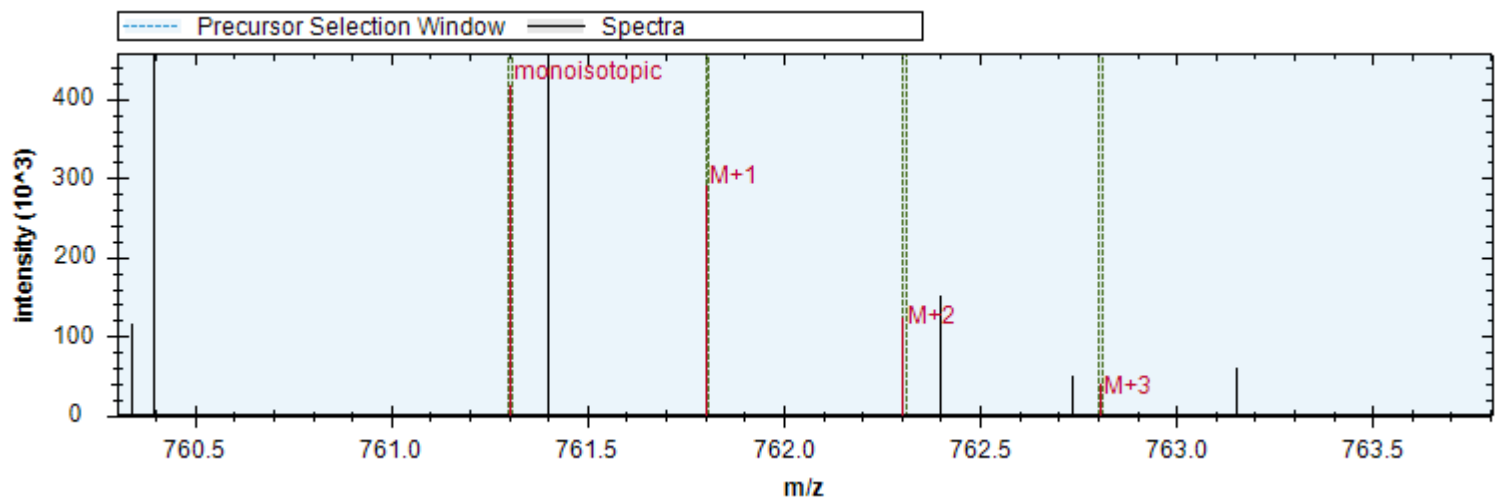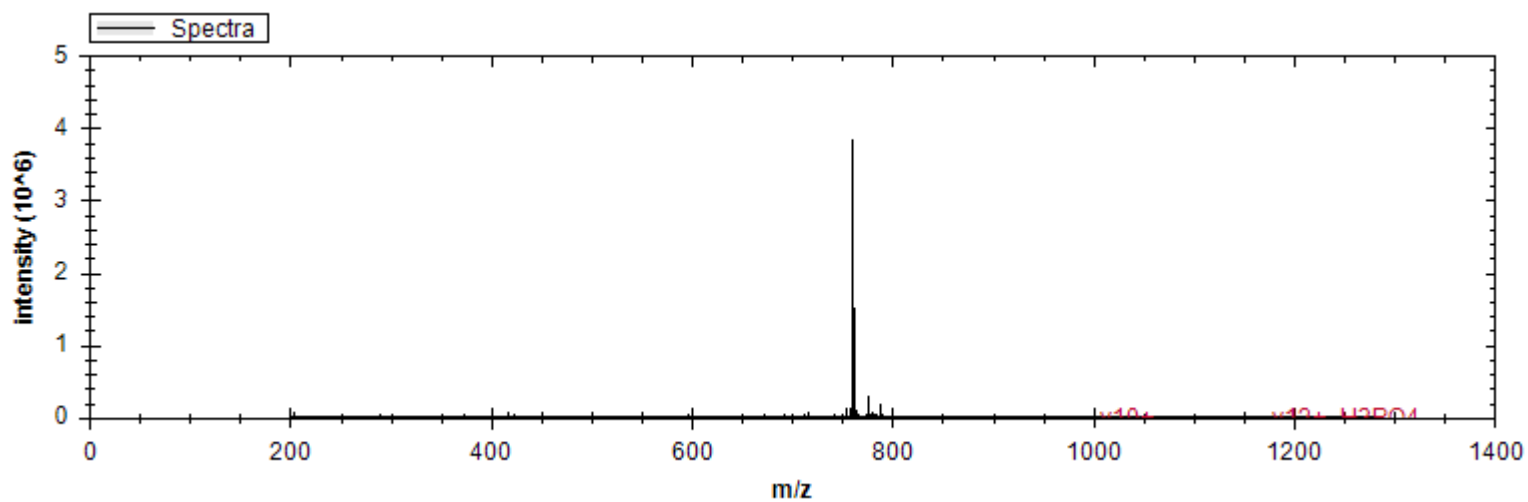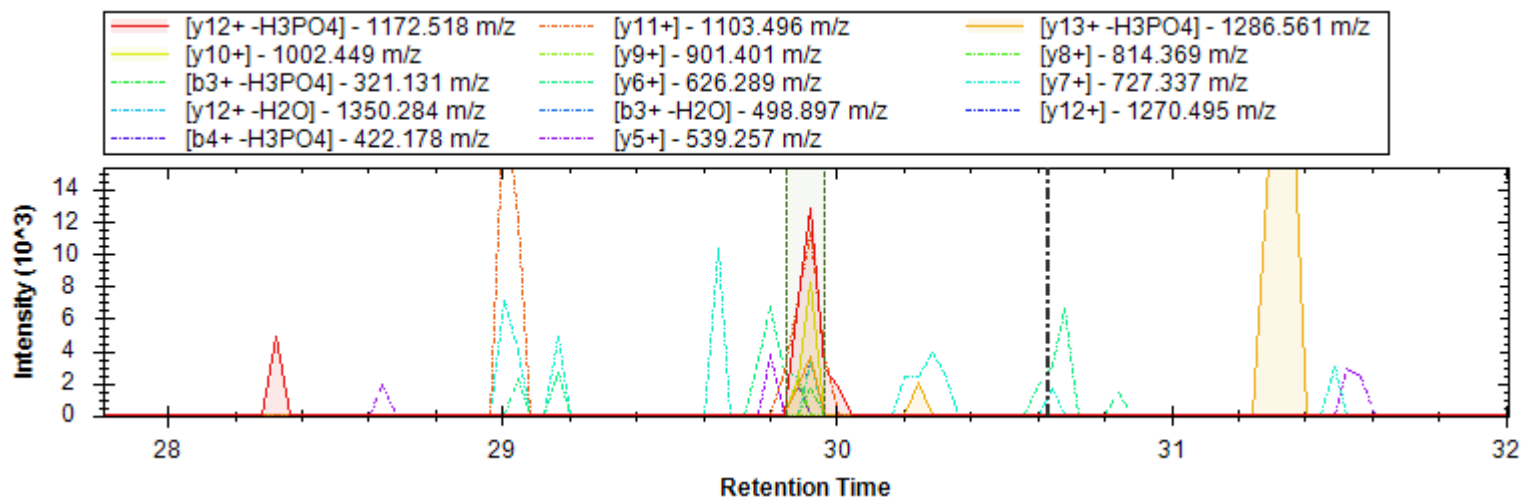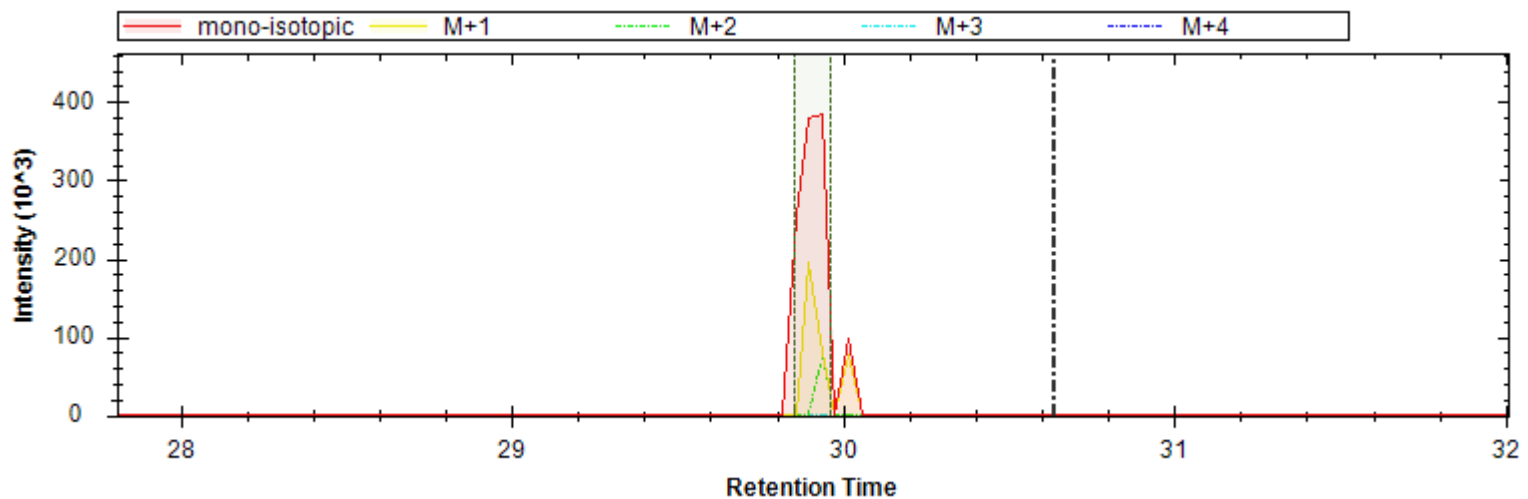

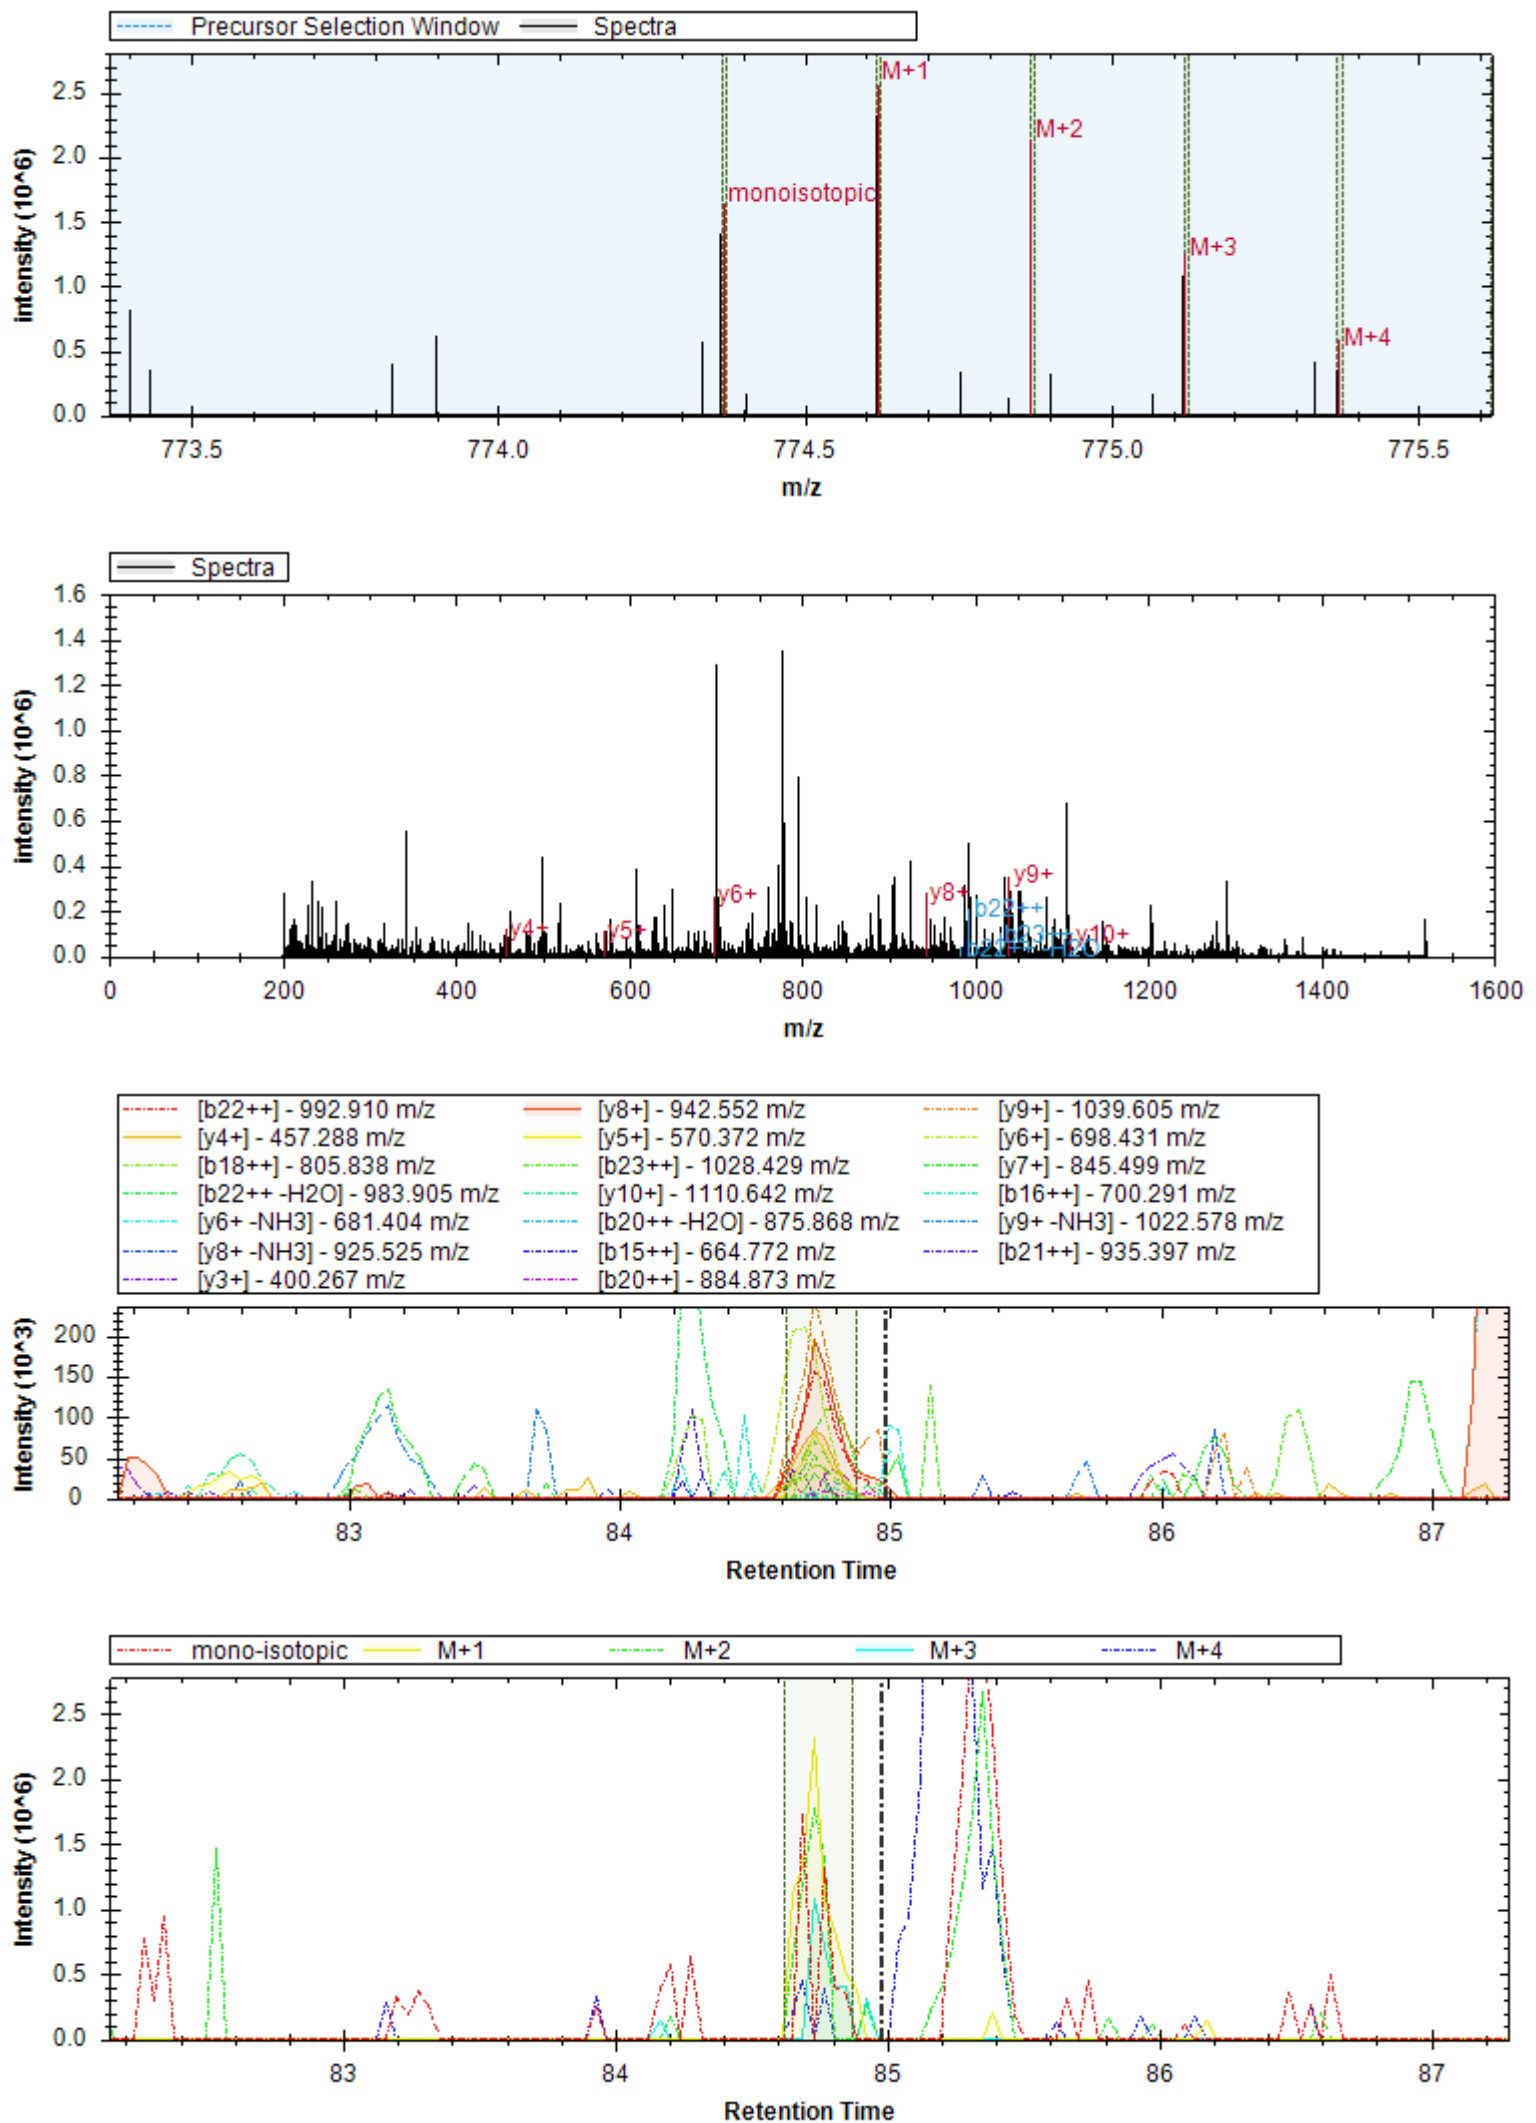

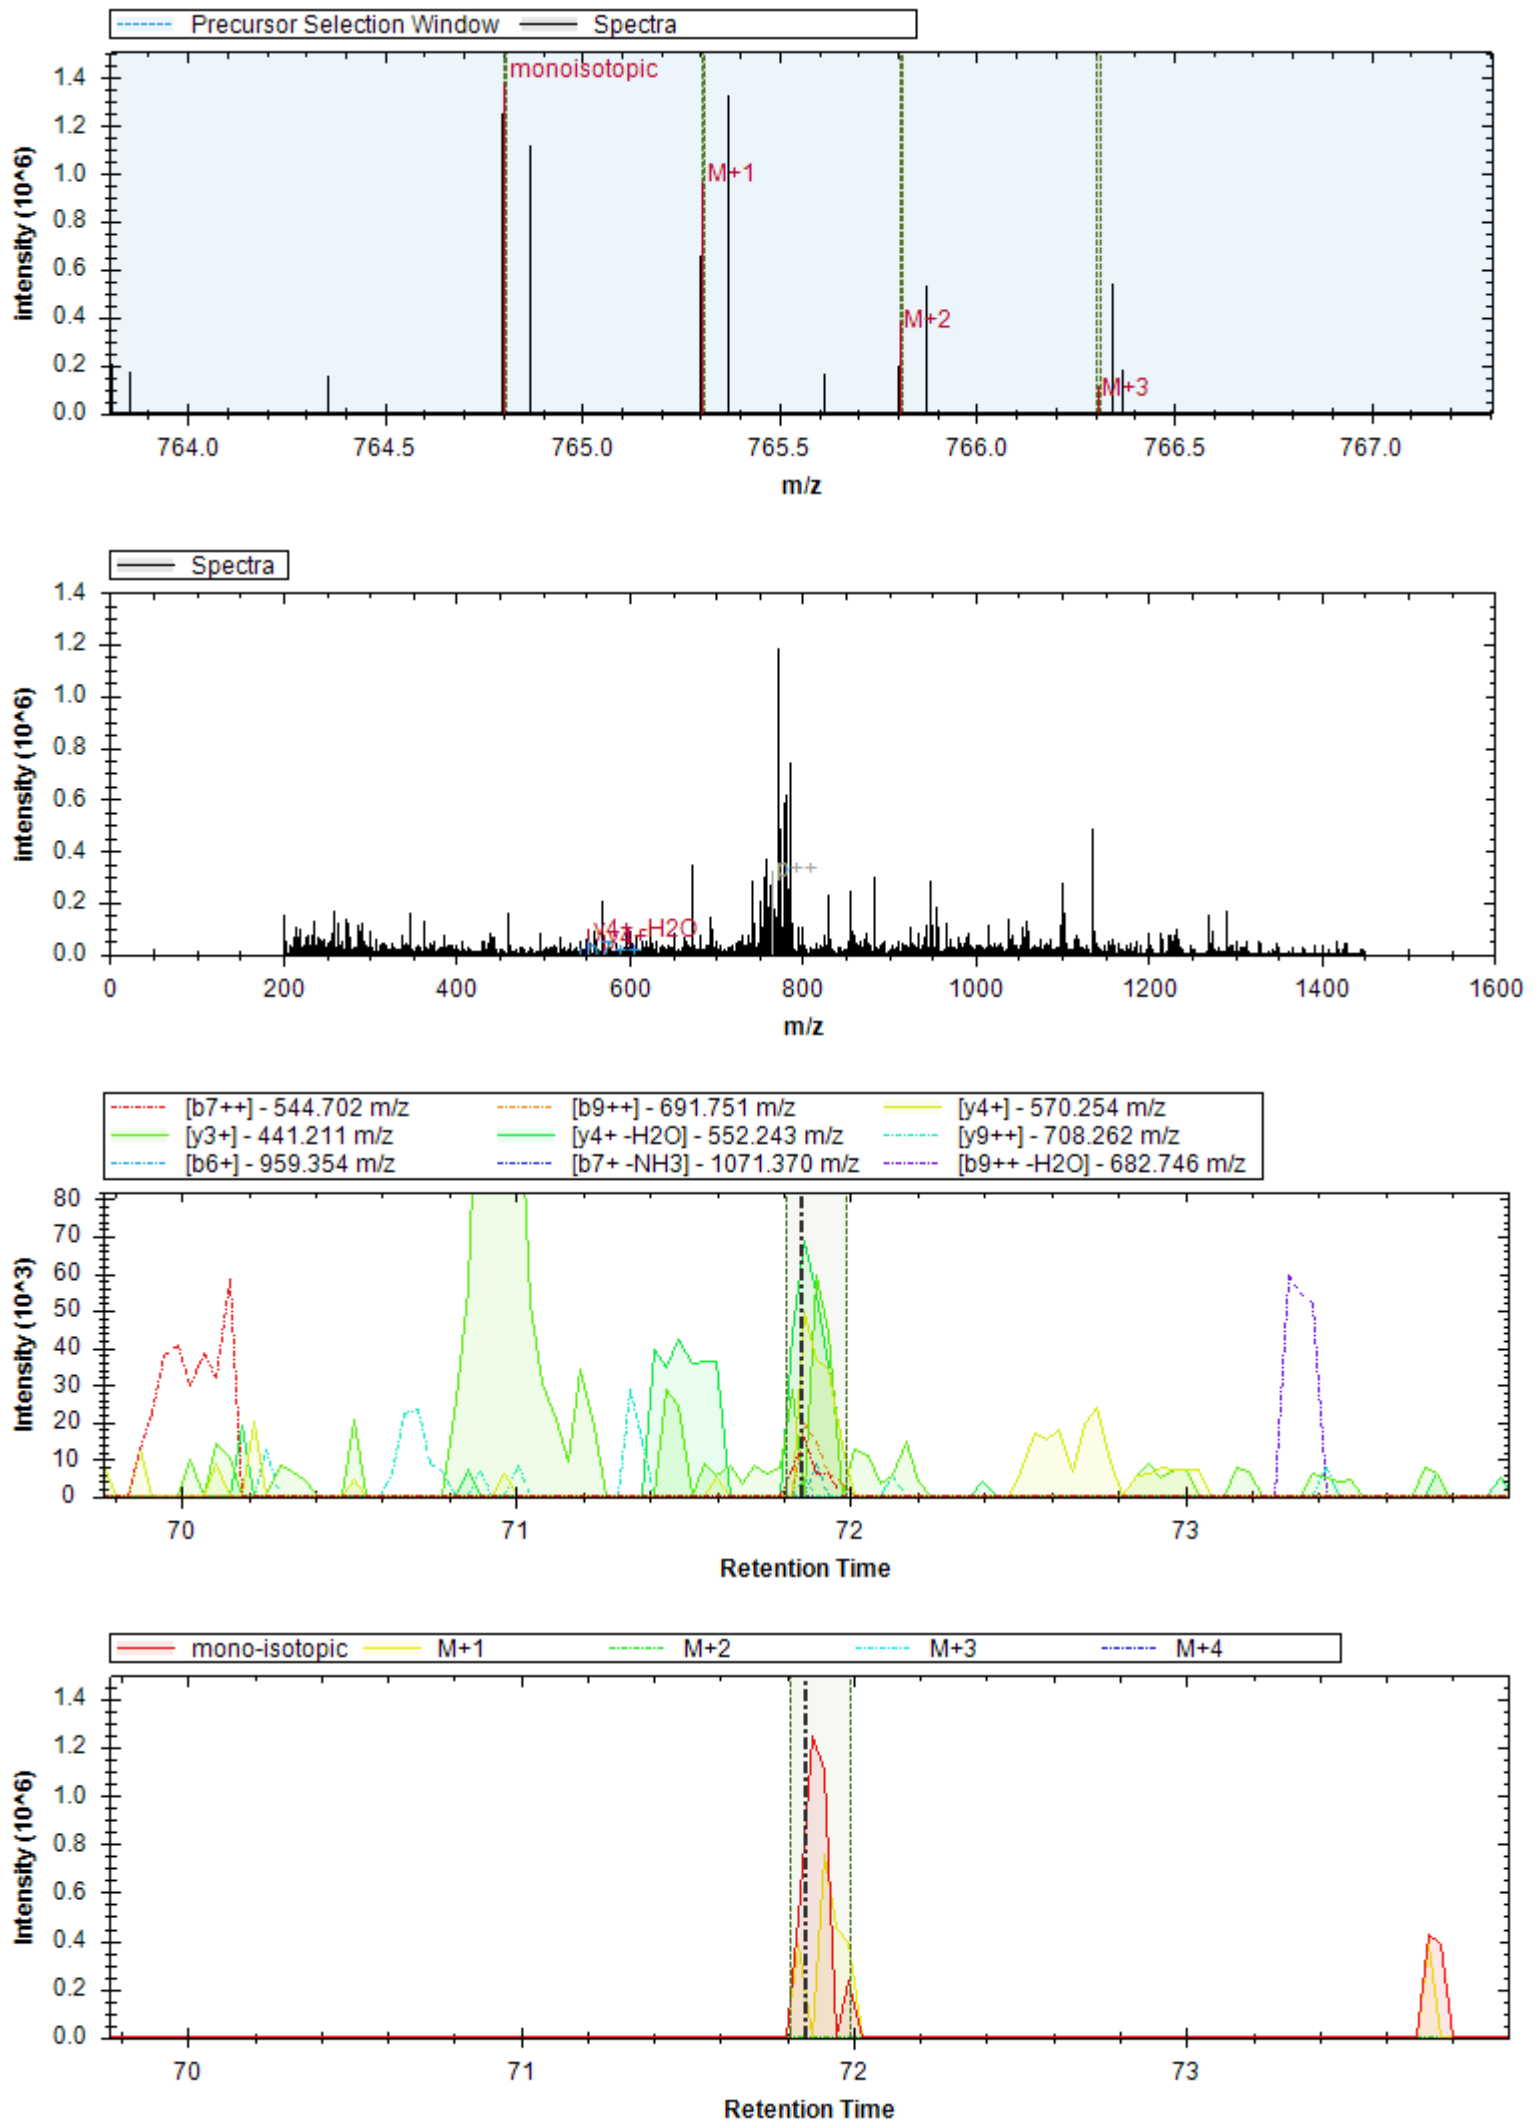

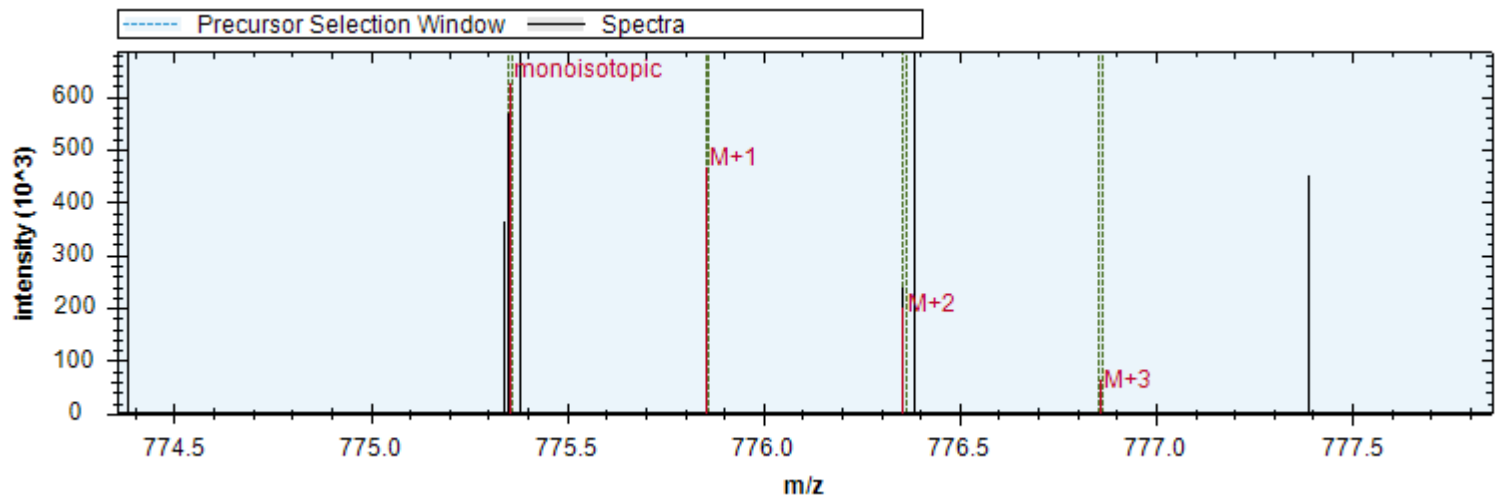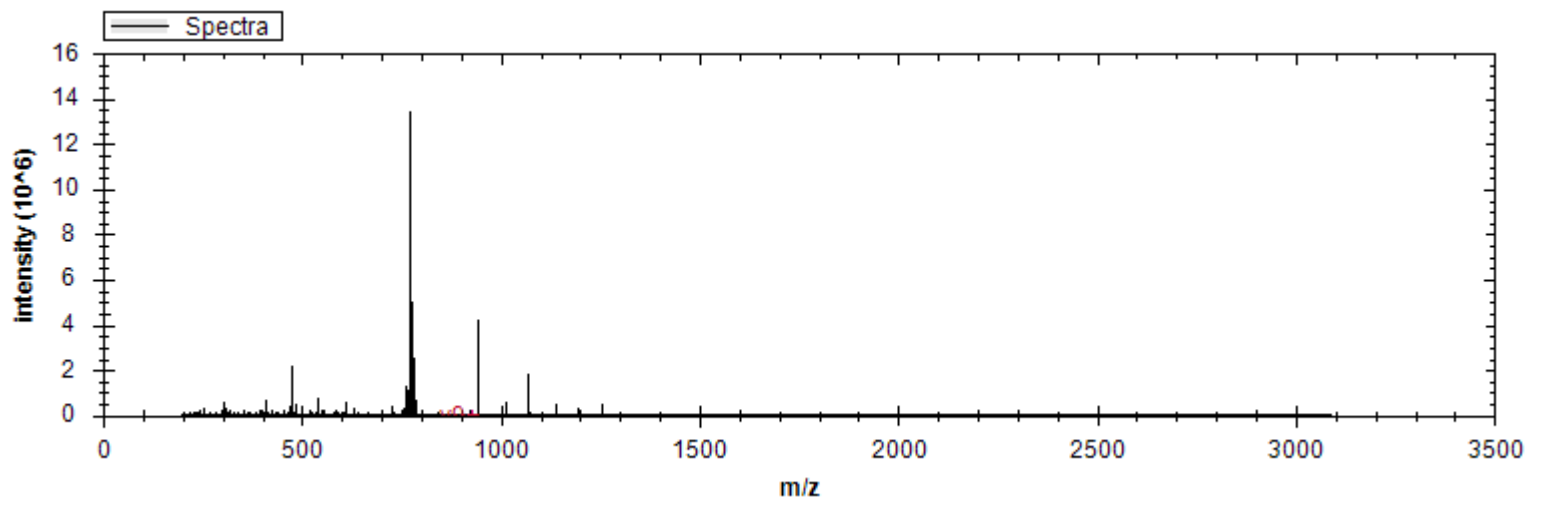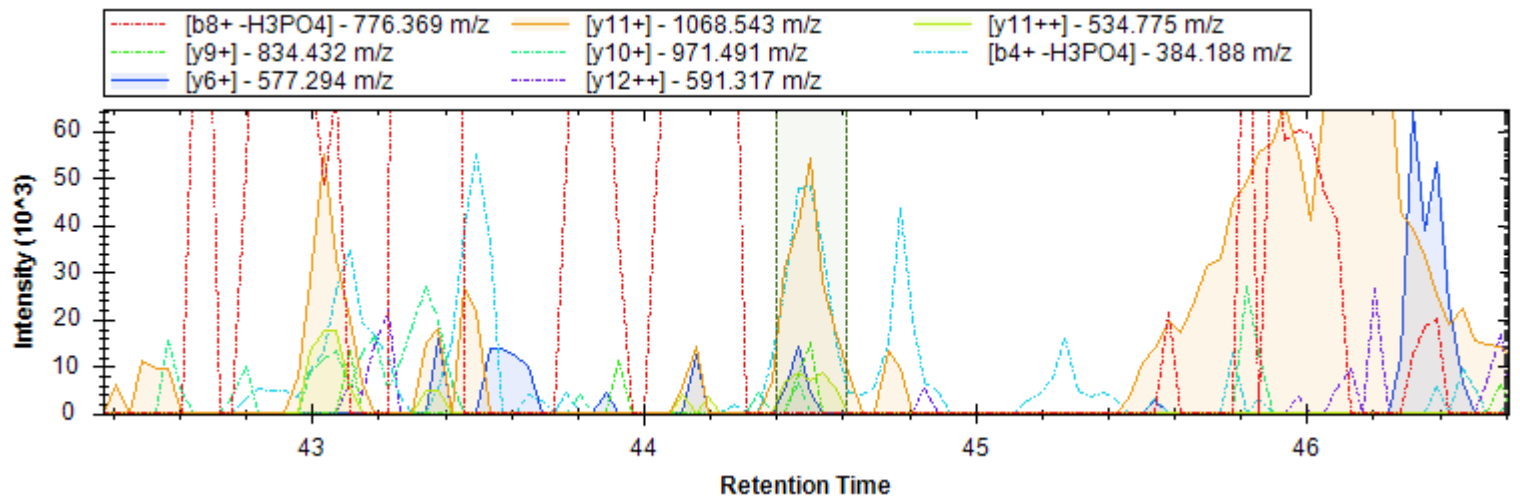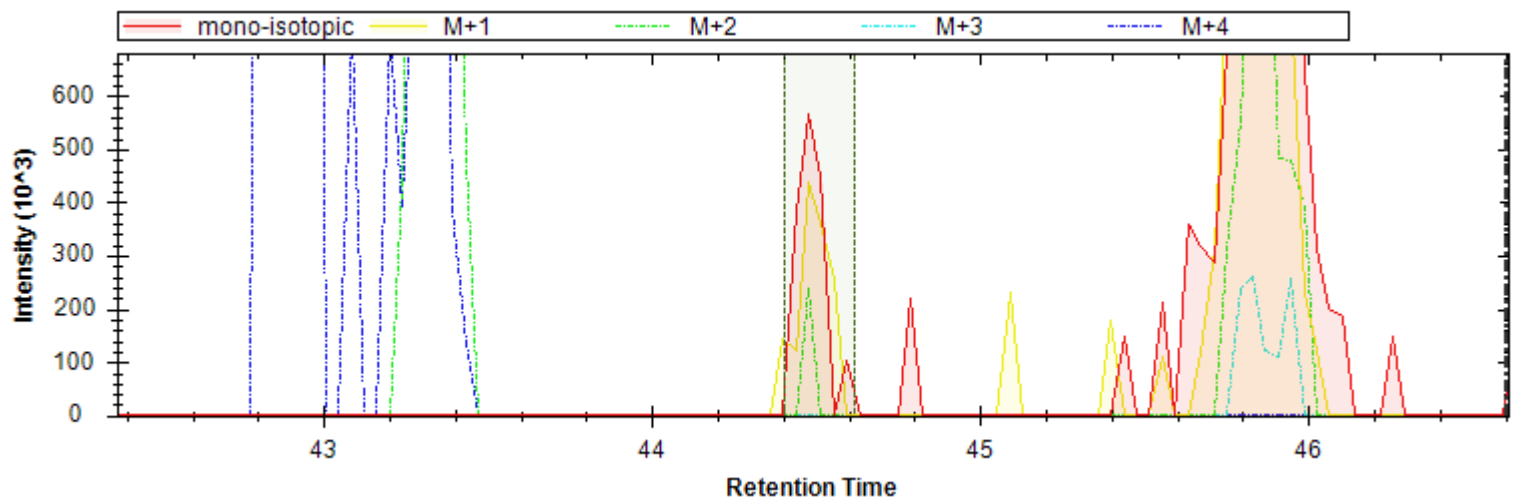

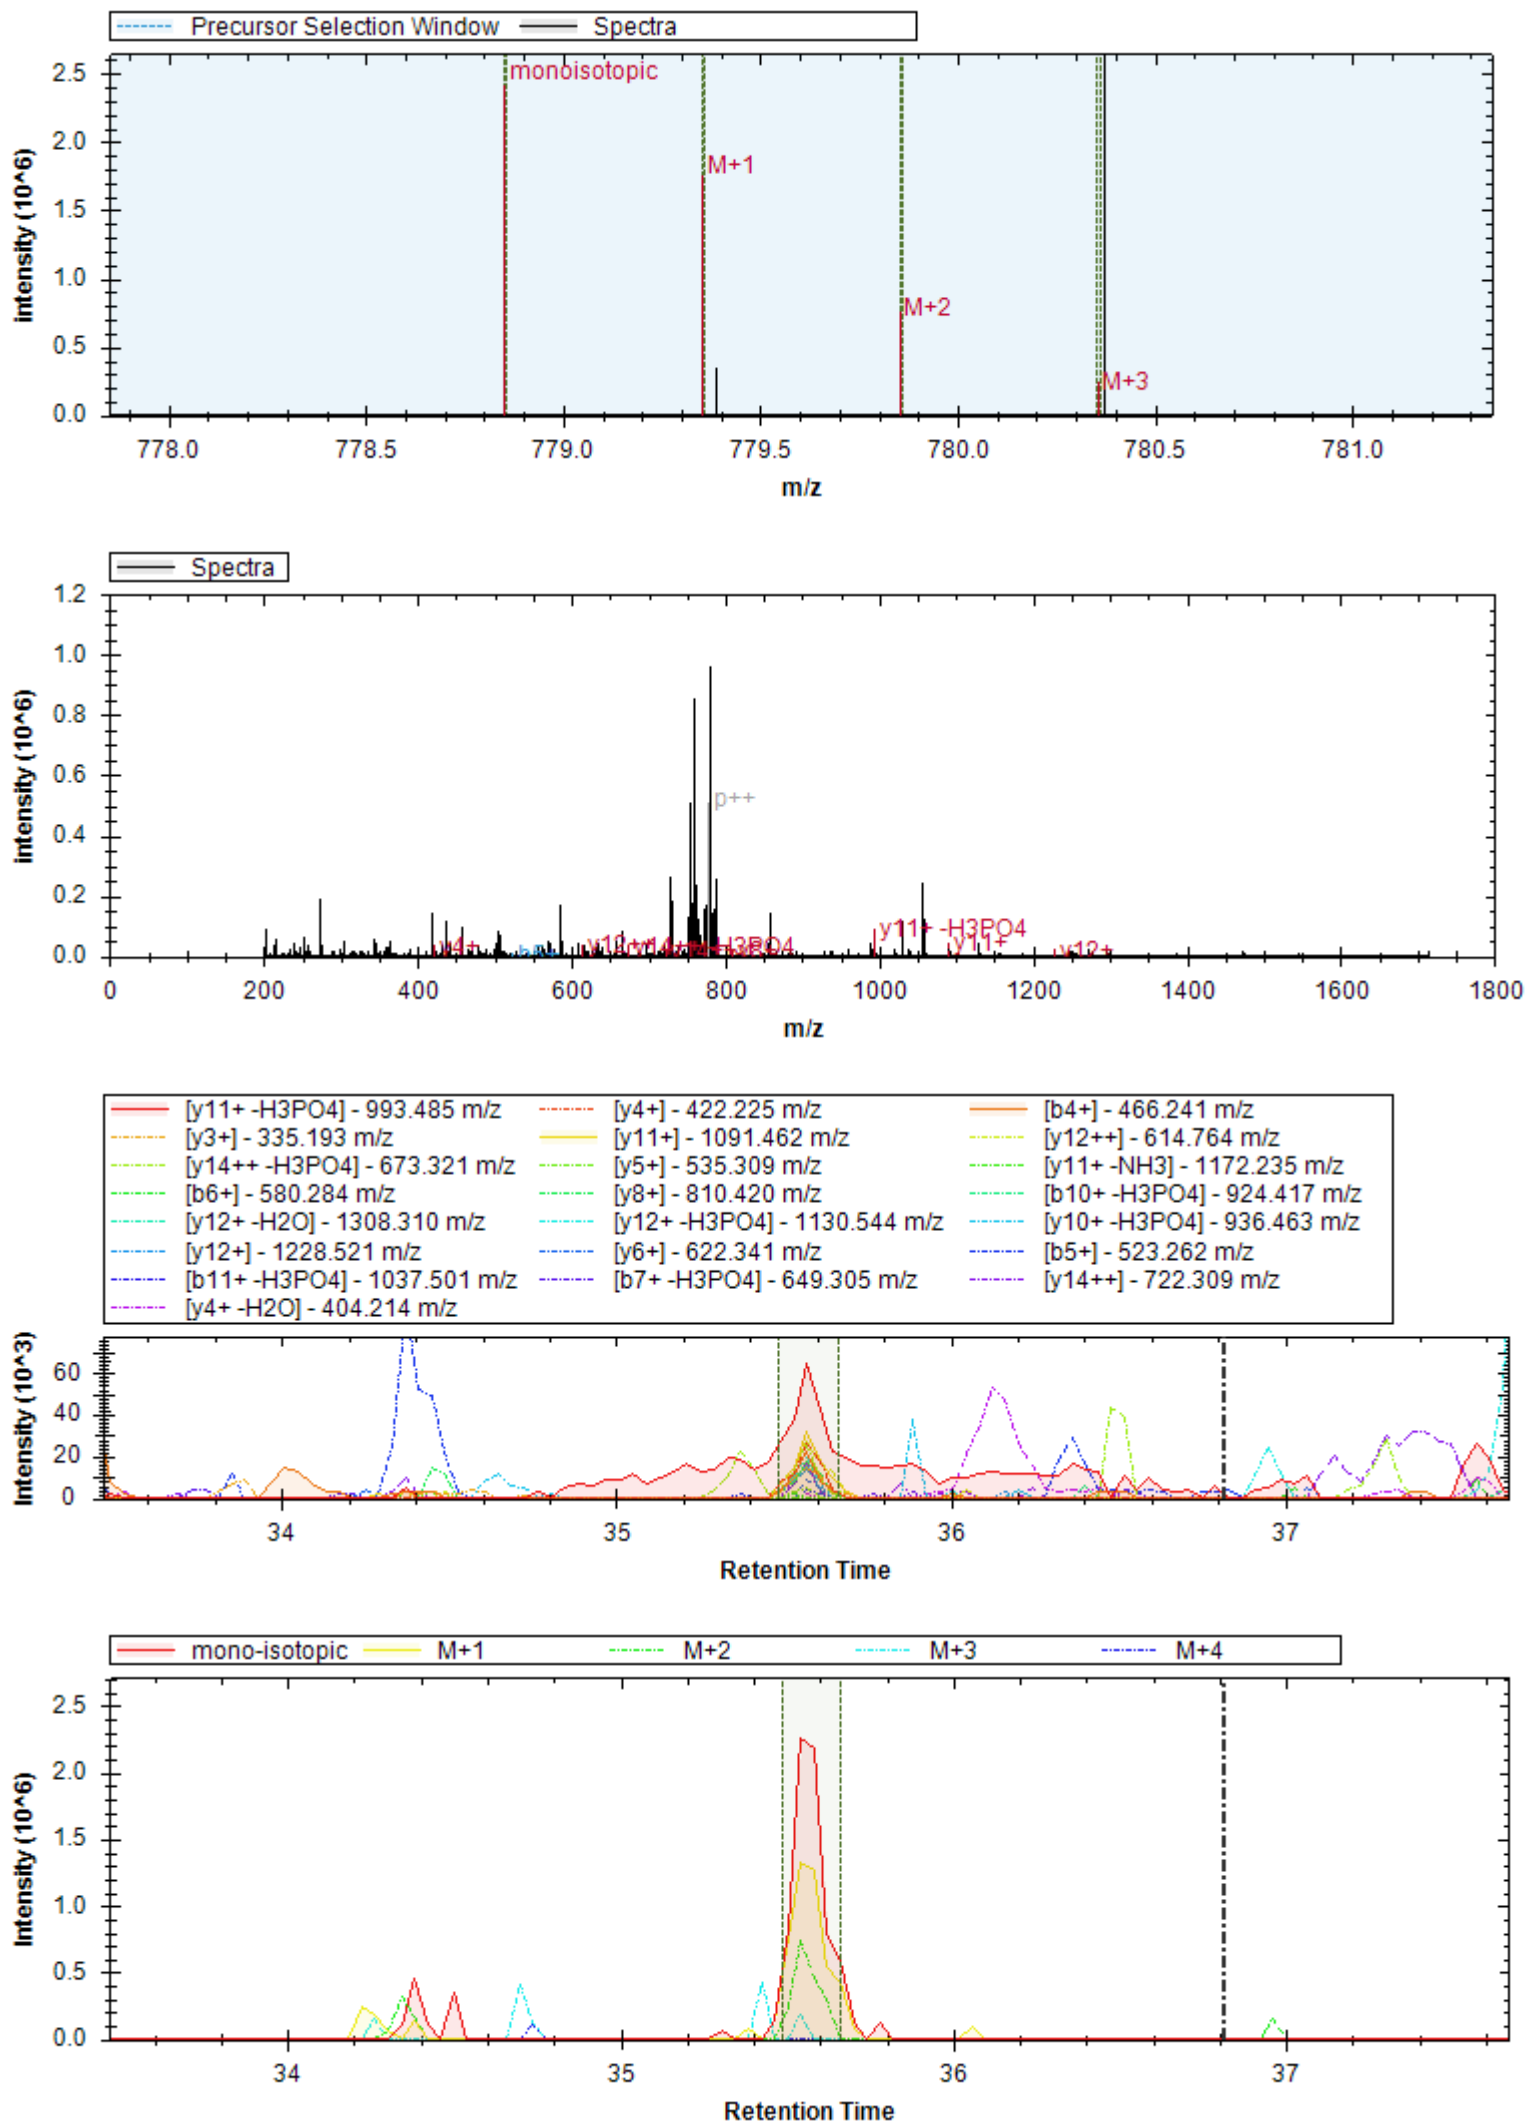



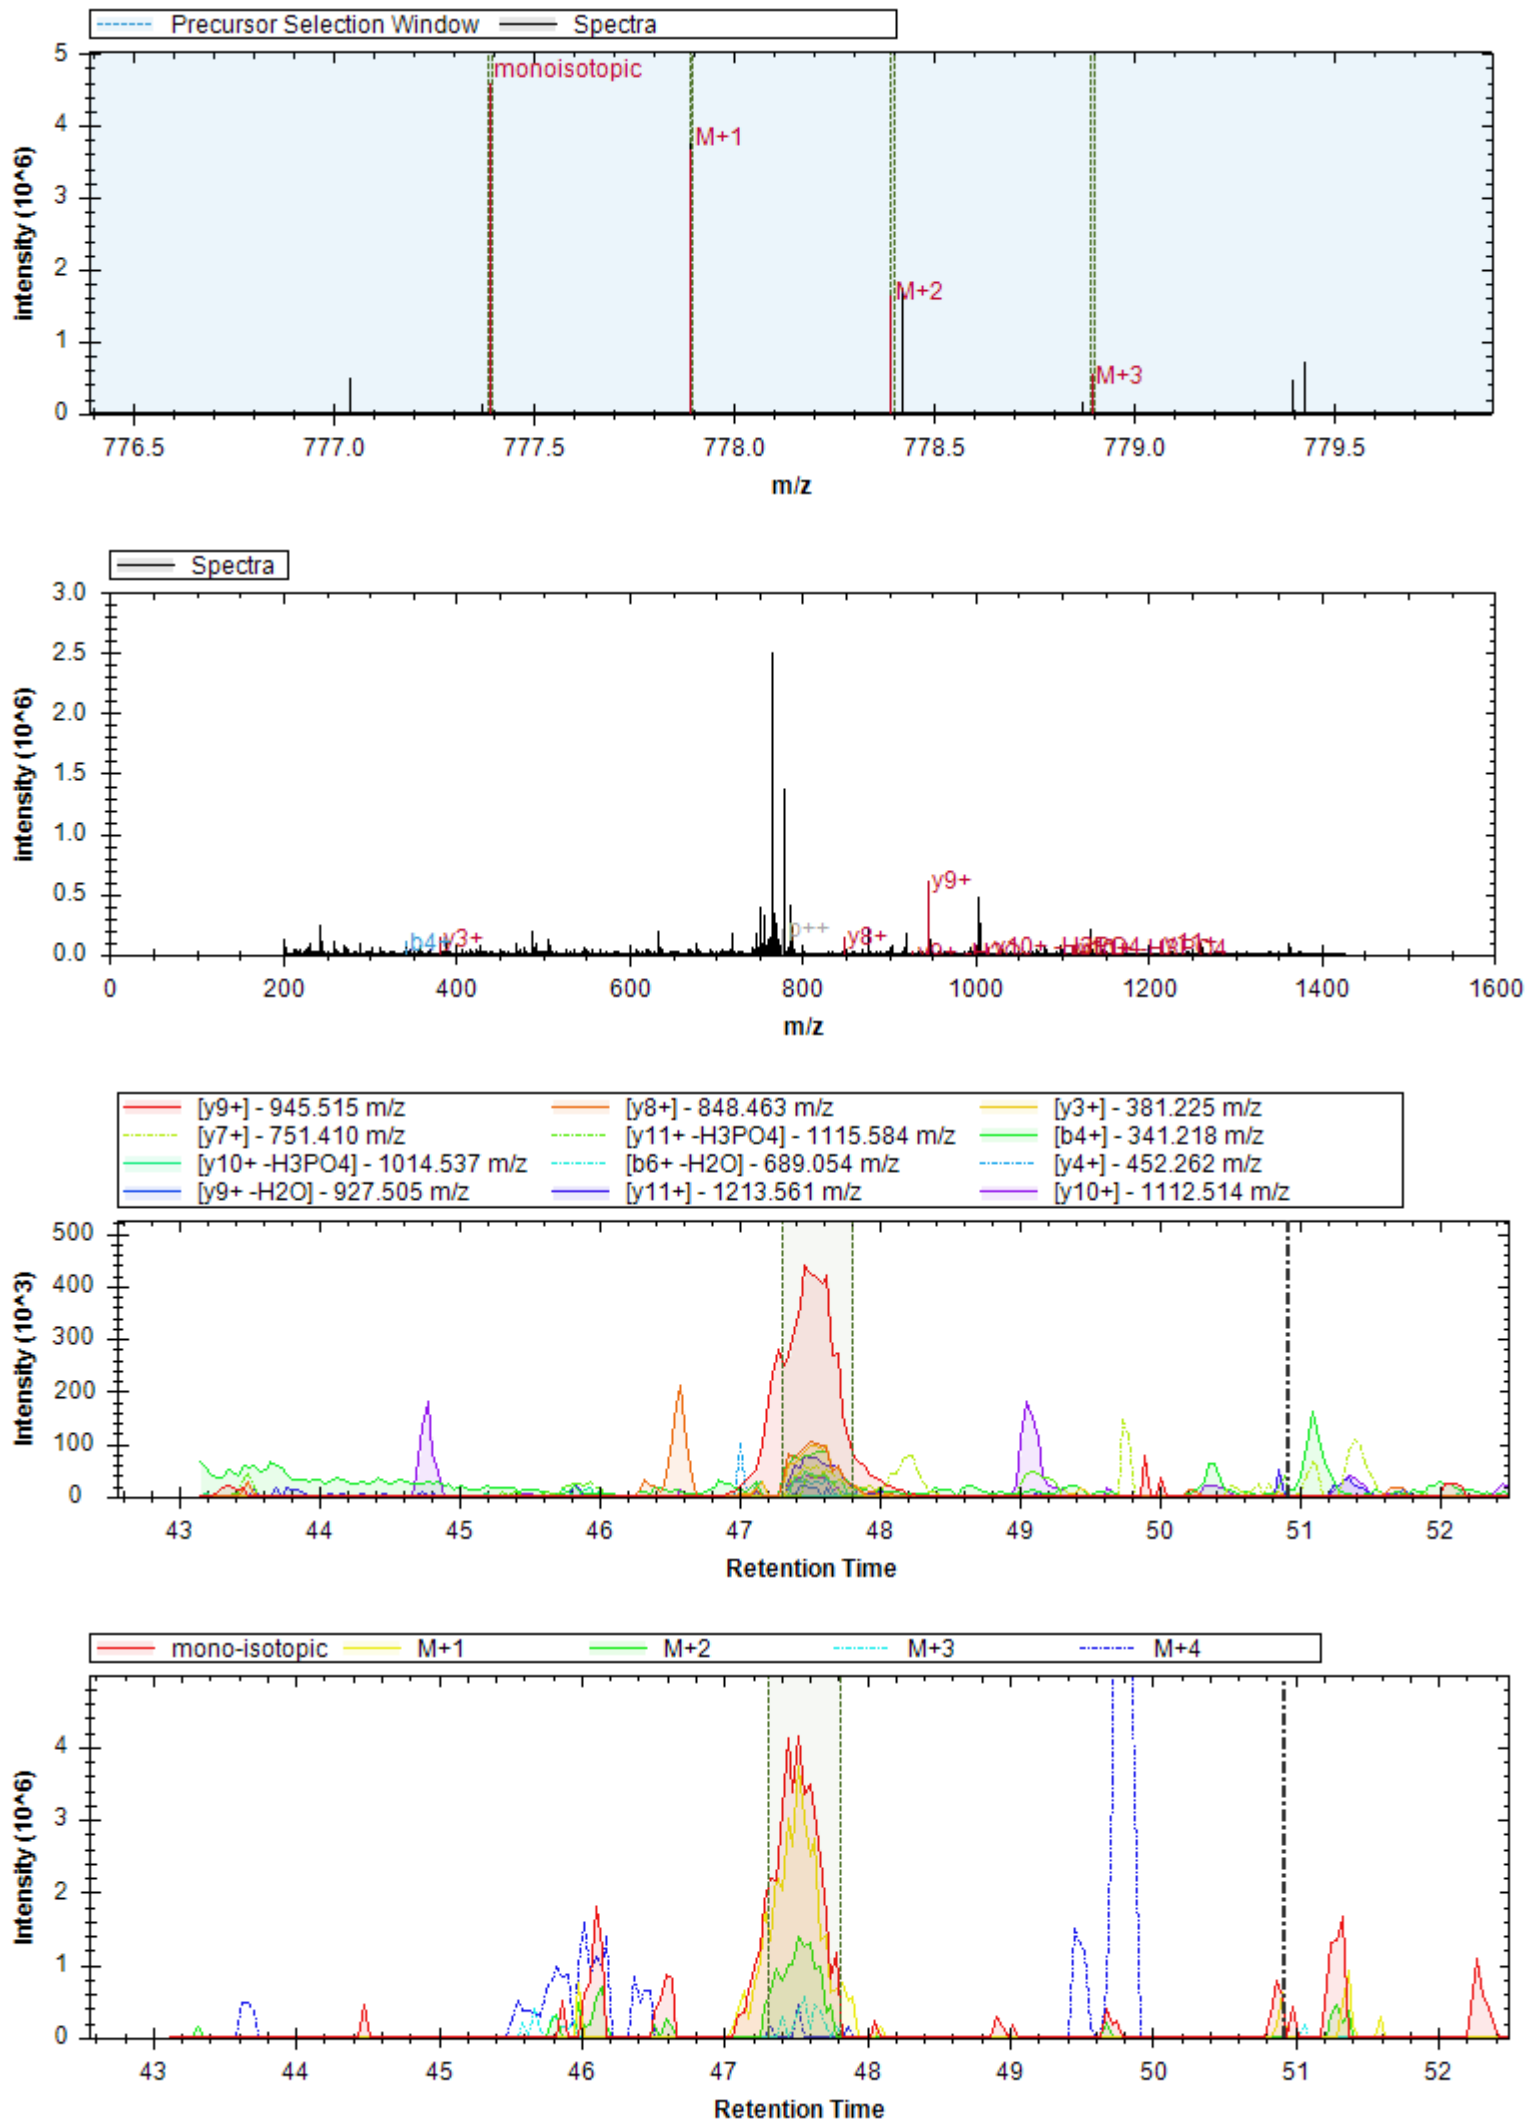

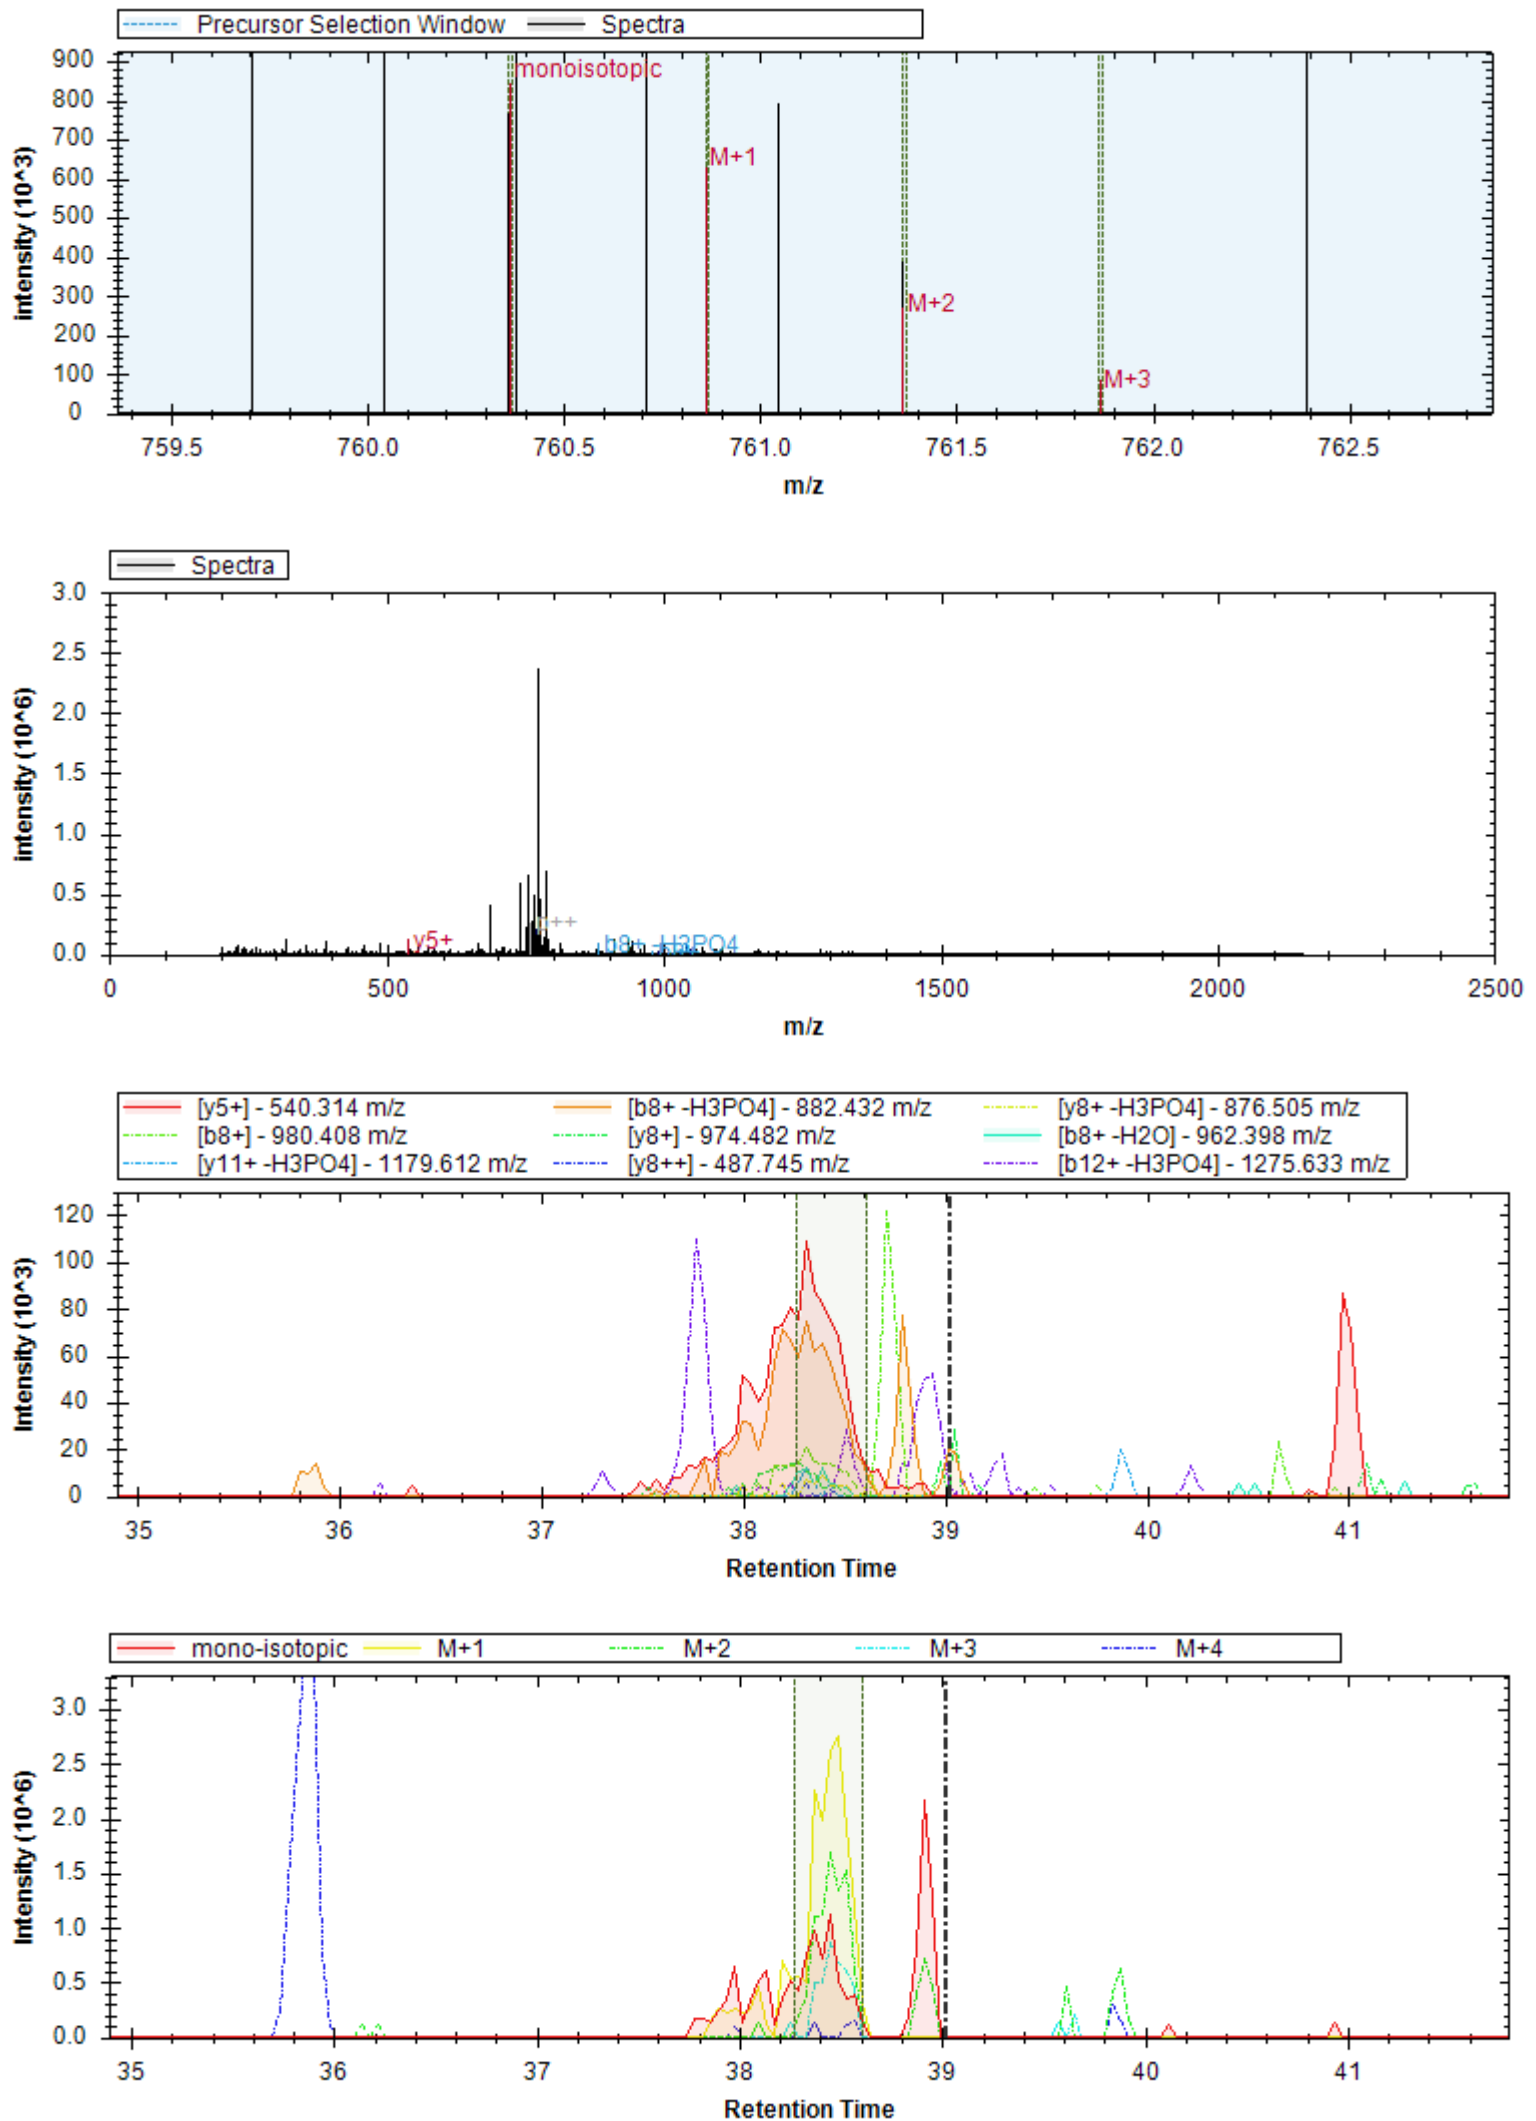



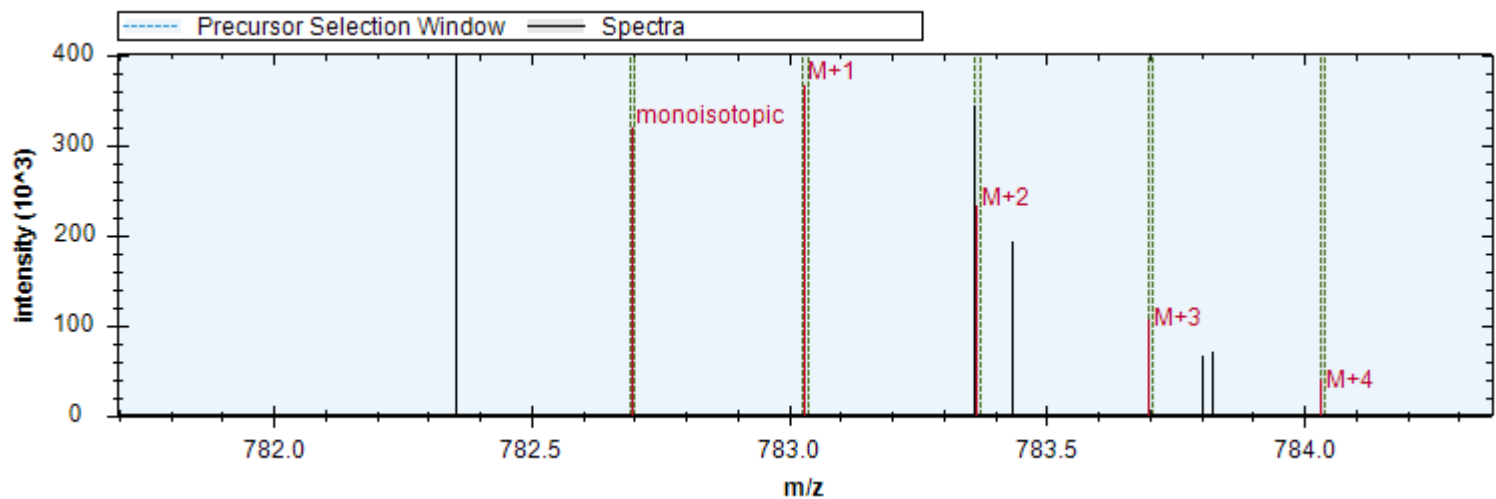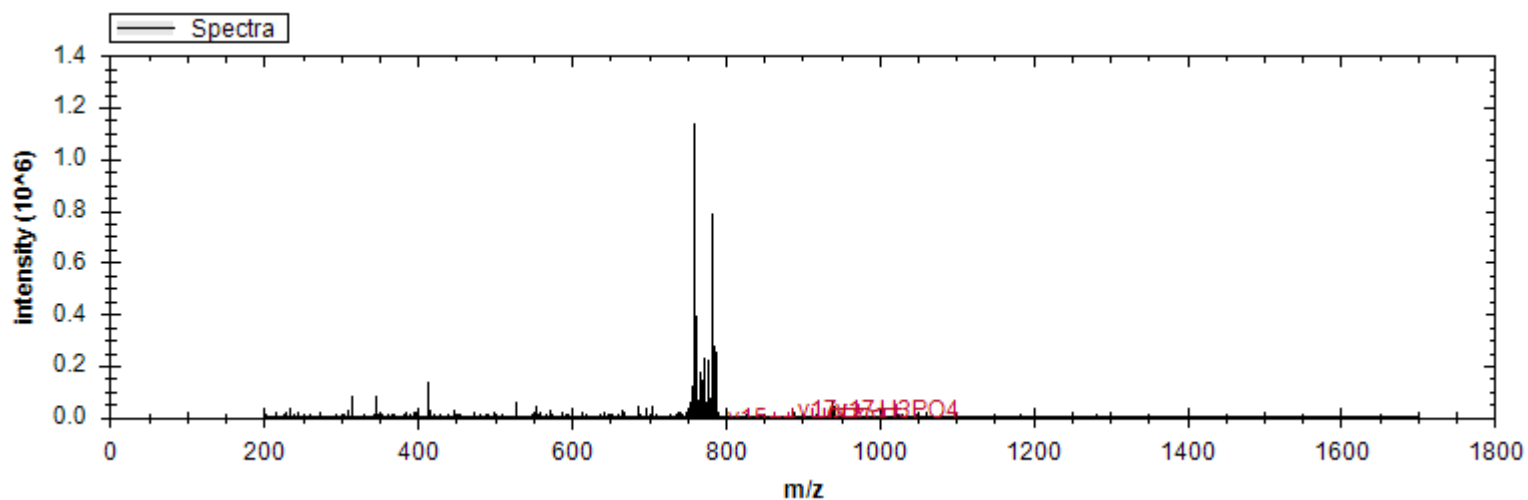

- |                              |                               |                              |
|------------------------------|-------------------------------|------------------------------|
| [y17++ -H3PO4] - 888.455 m/z | [y17++] - 937.444 m/z         | [b4+ -H2O] - 384.151 m/z     |
| [y15++ -H3PO4] - 796.413 m/z | [b3+ -H2O] - 313.114 m/z      | [y7+] - 829.441 m/z          |
| [y18++ -H3PO4] - 923.974 m/z | [y17++ -H2O] - 928.439 m/z    | [y15++] - 845.401 m/z        |
| [y18++] - 972.962 m/z        | [y20++ -H3PO4] - 1003.008 m/z | [y16++ -H3PO4] - 839.929 m/z |
| [b4+] - 402.162 m/z          | [b5+ -H2O] - 455.189 m/z      | [b5+] - 473.199 m/z          |
| [b3+] - 331.125 m/z          | [y4+] - 533.257 m/z           |                              |

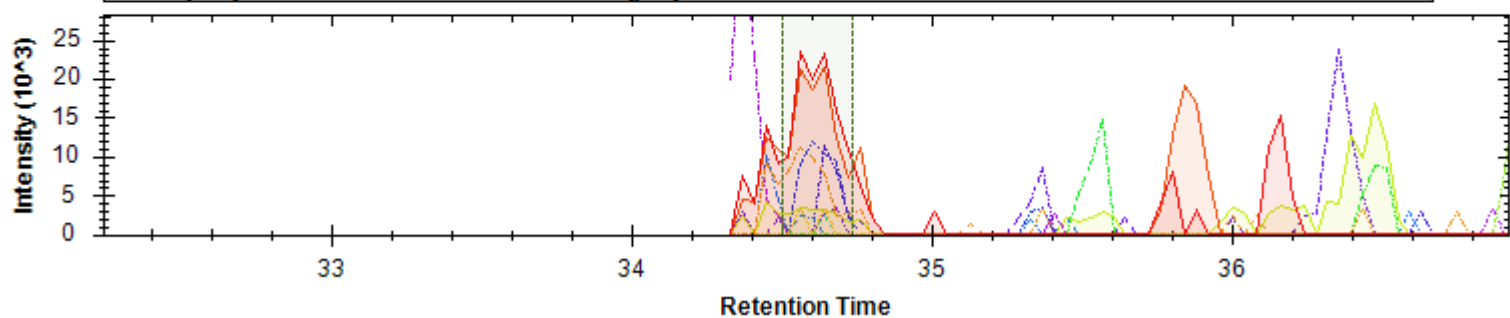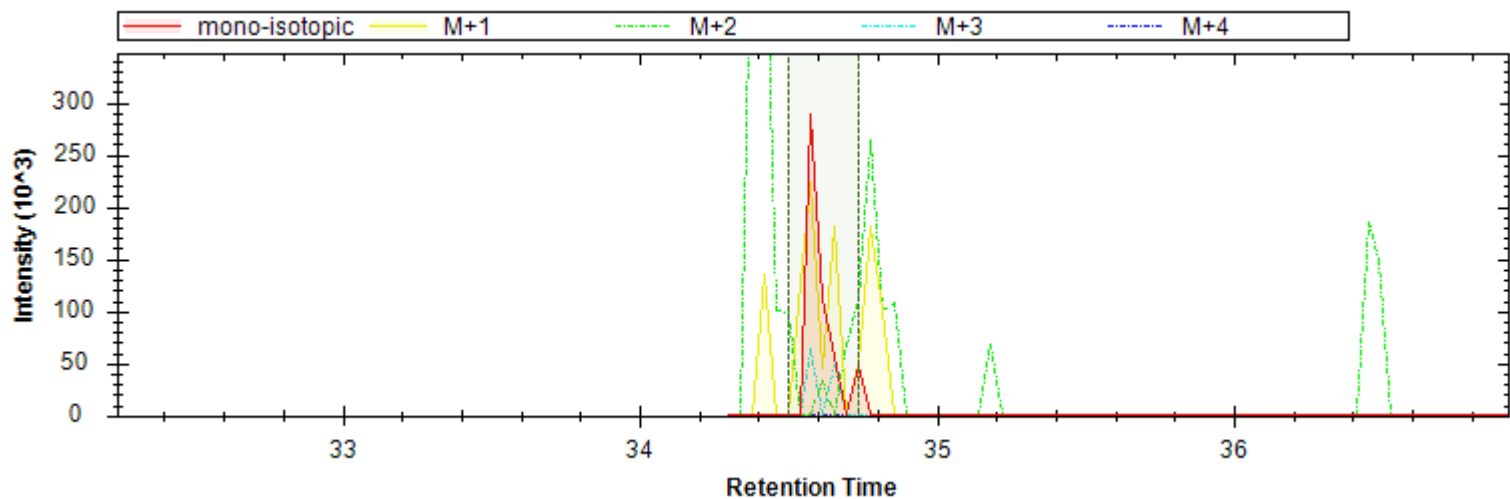

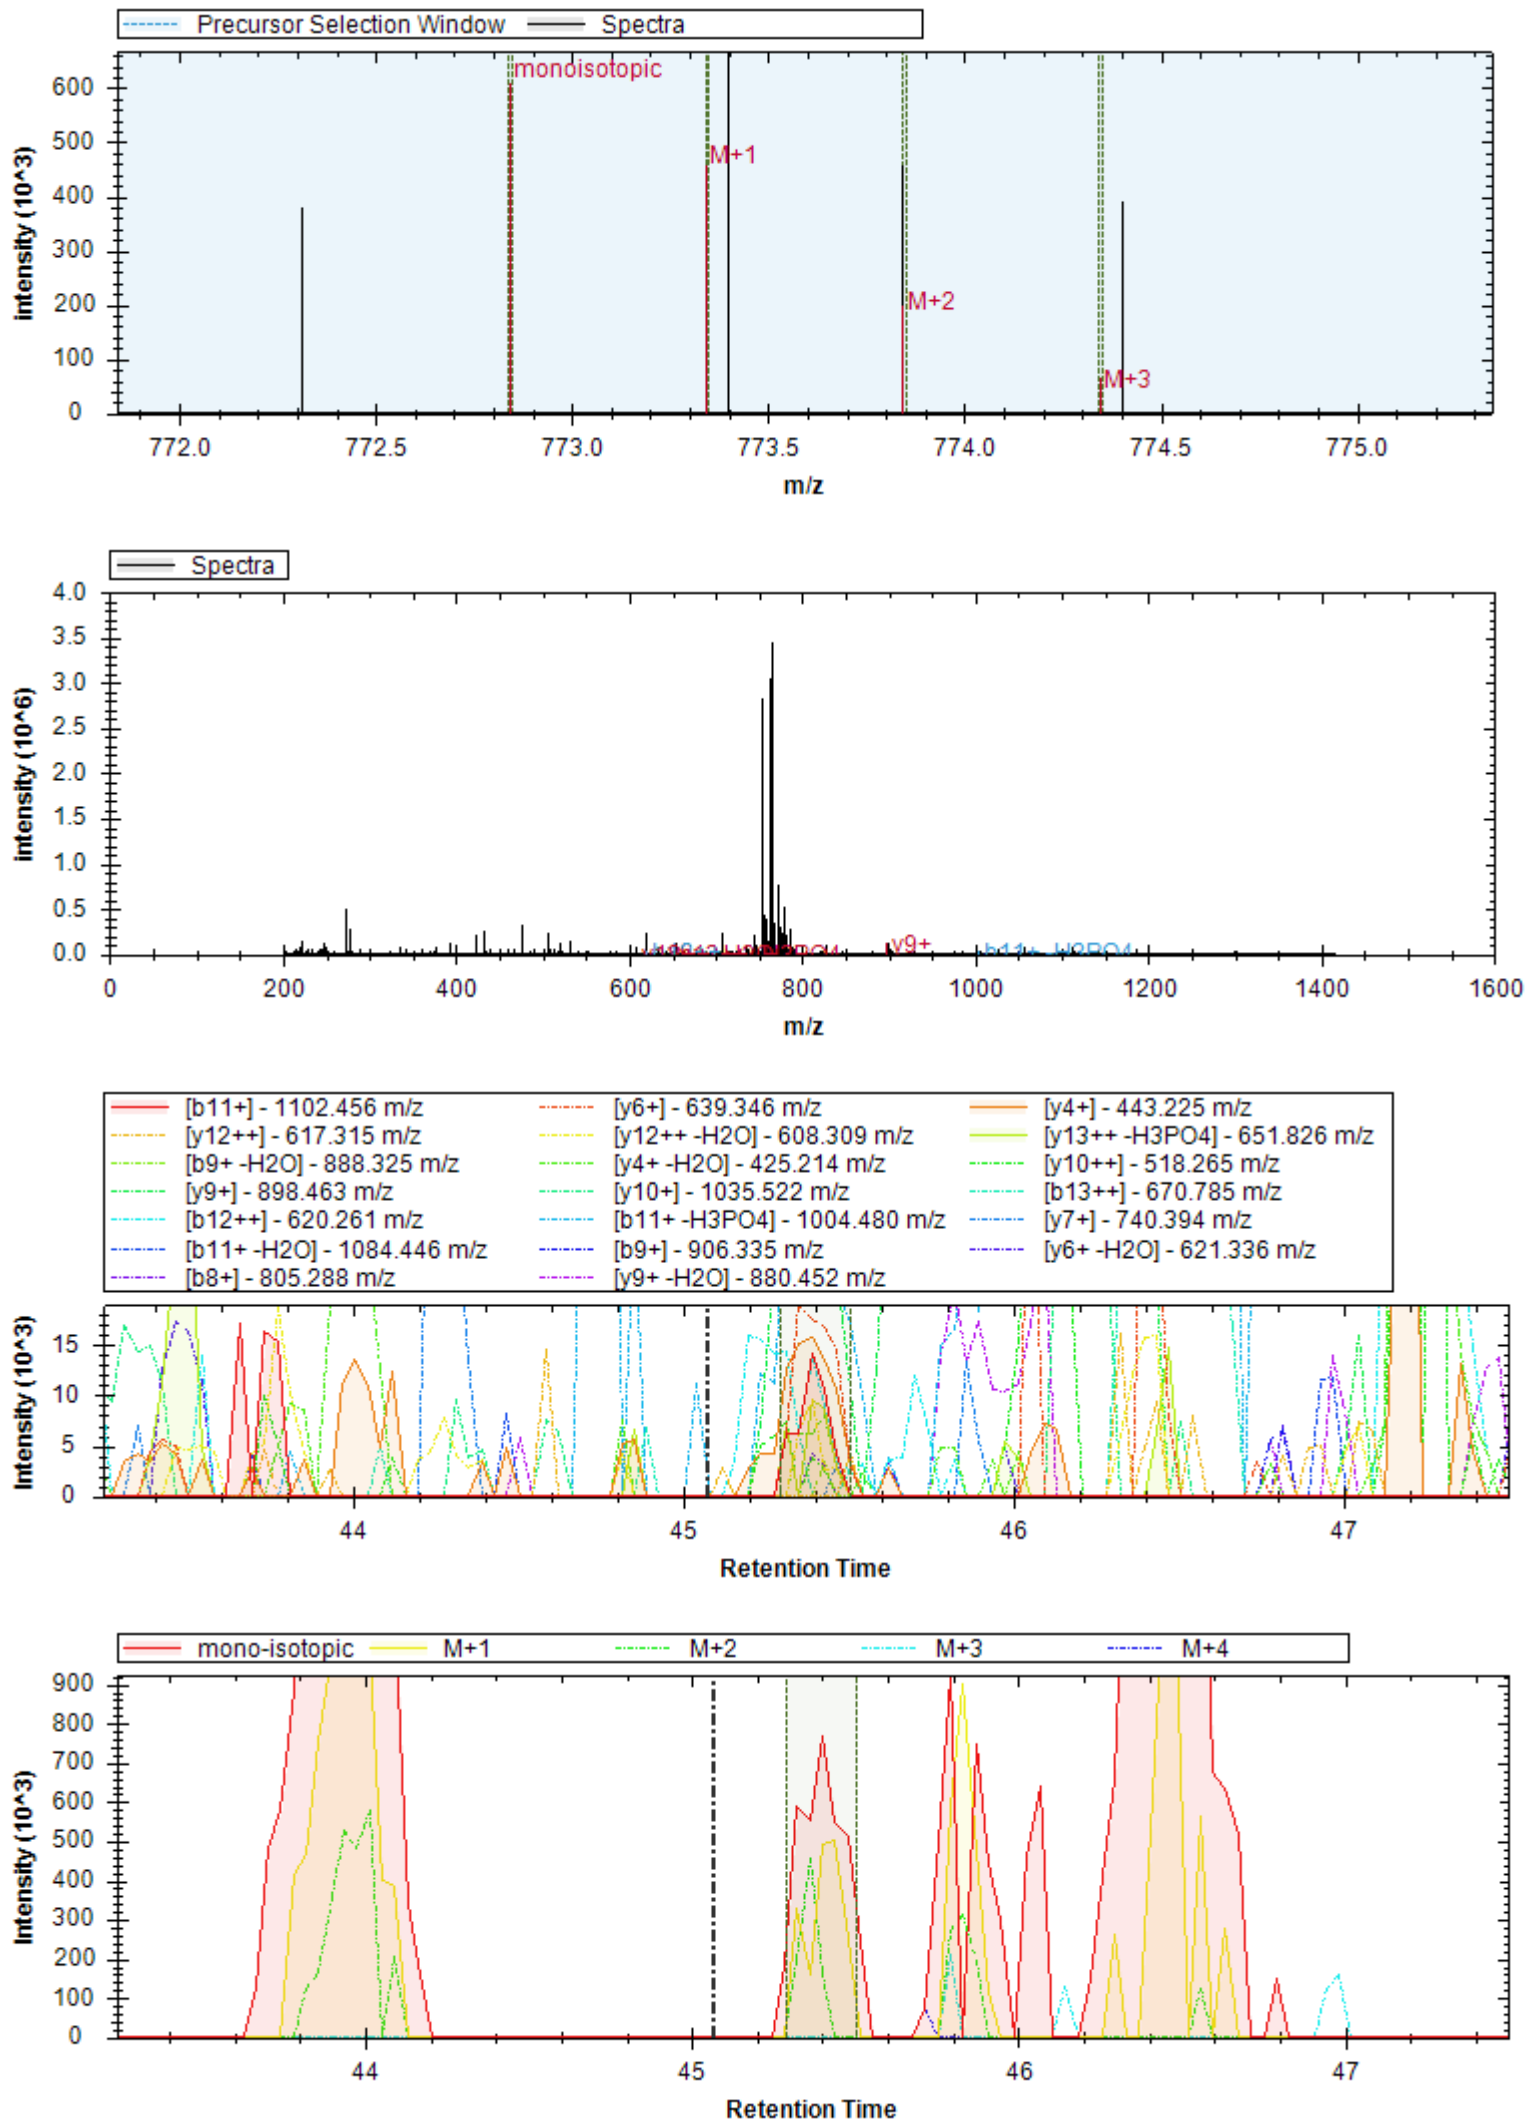

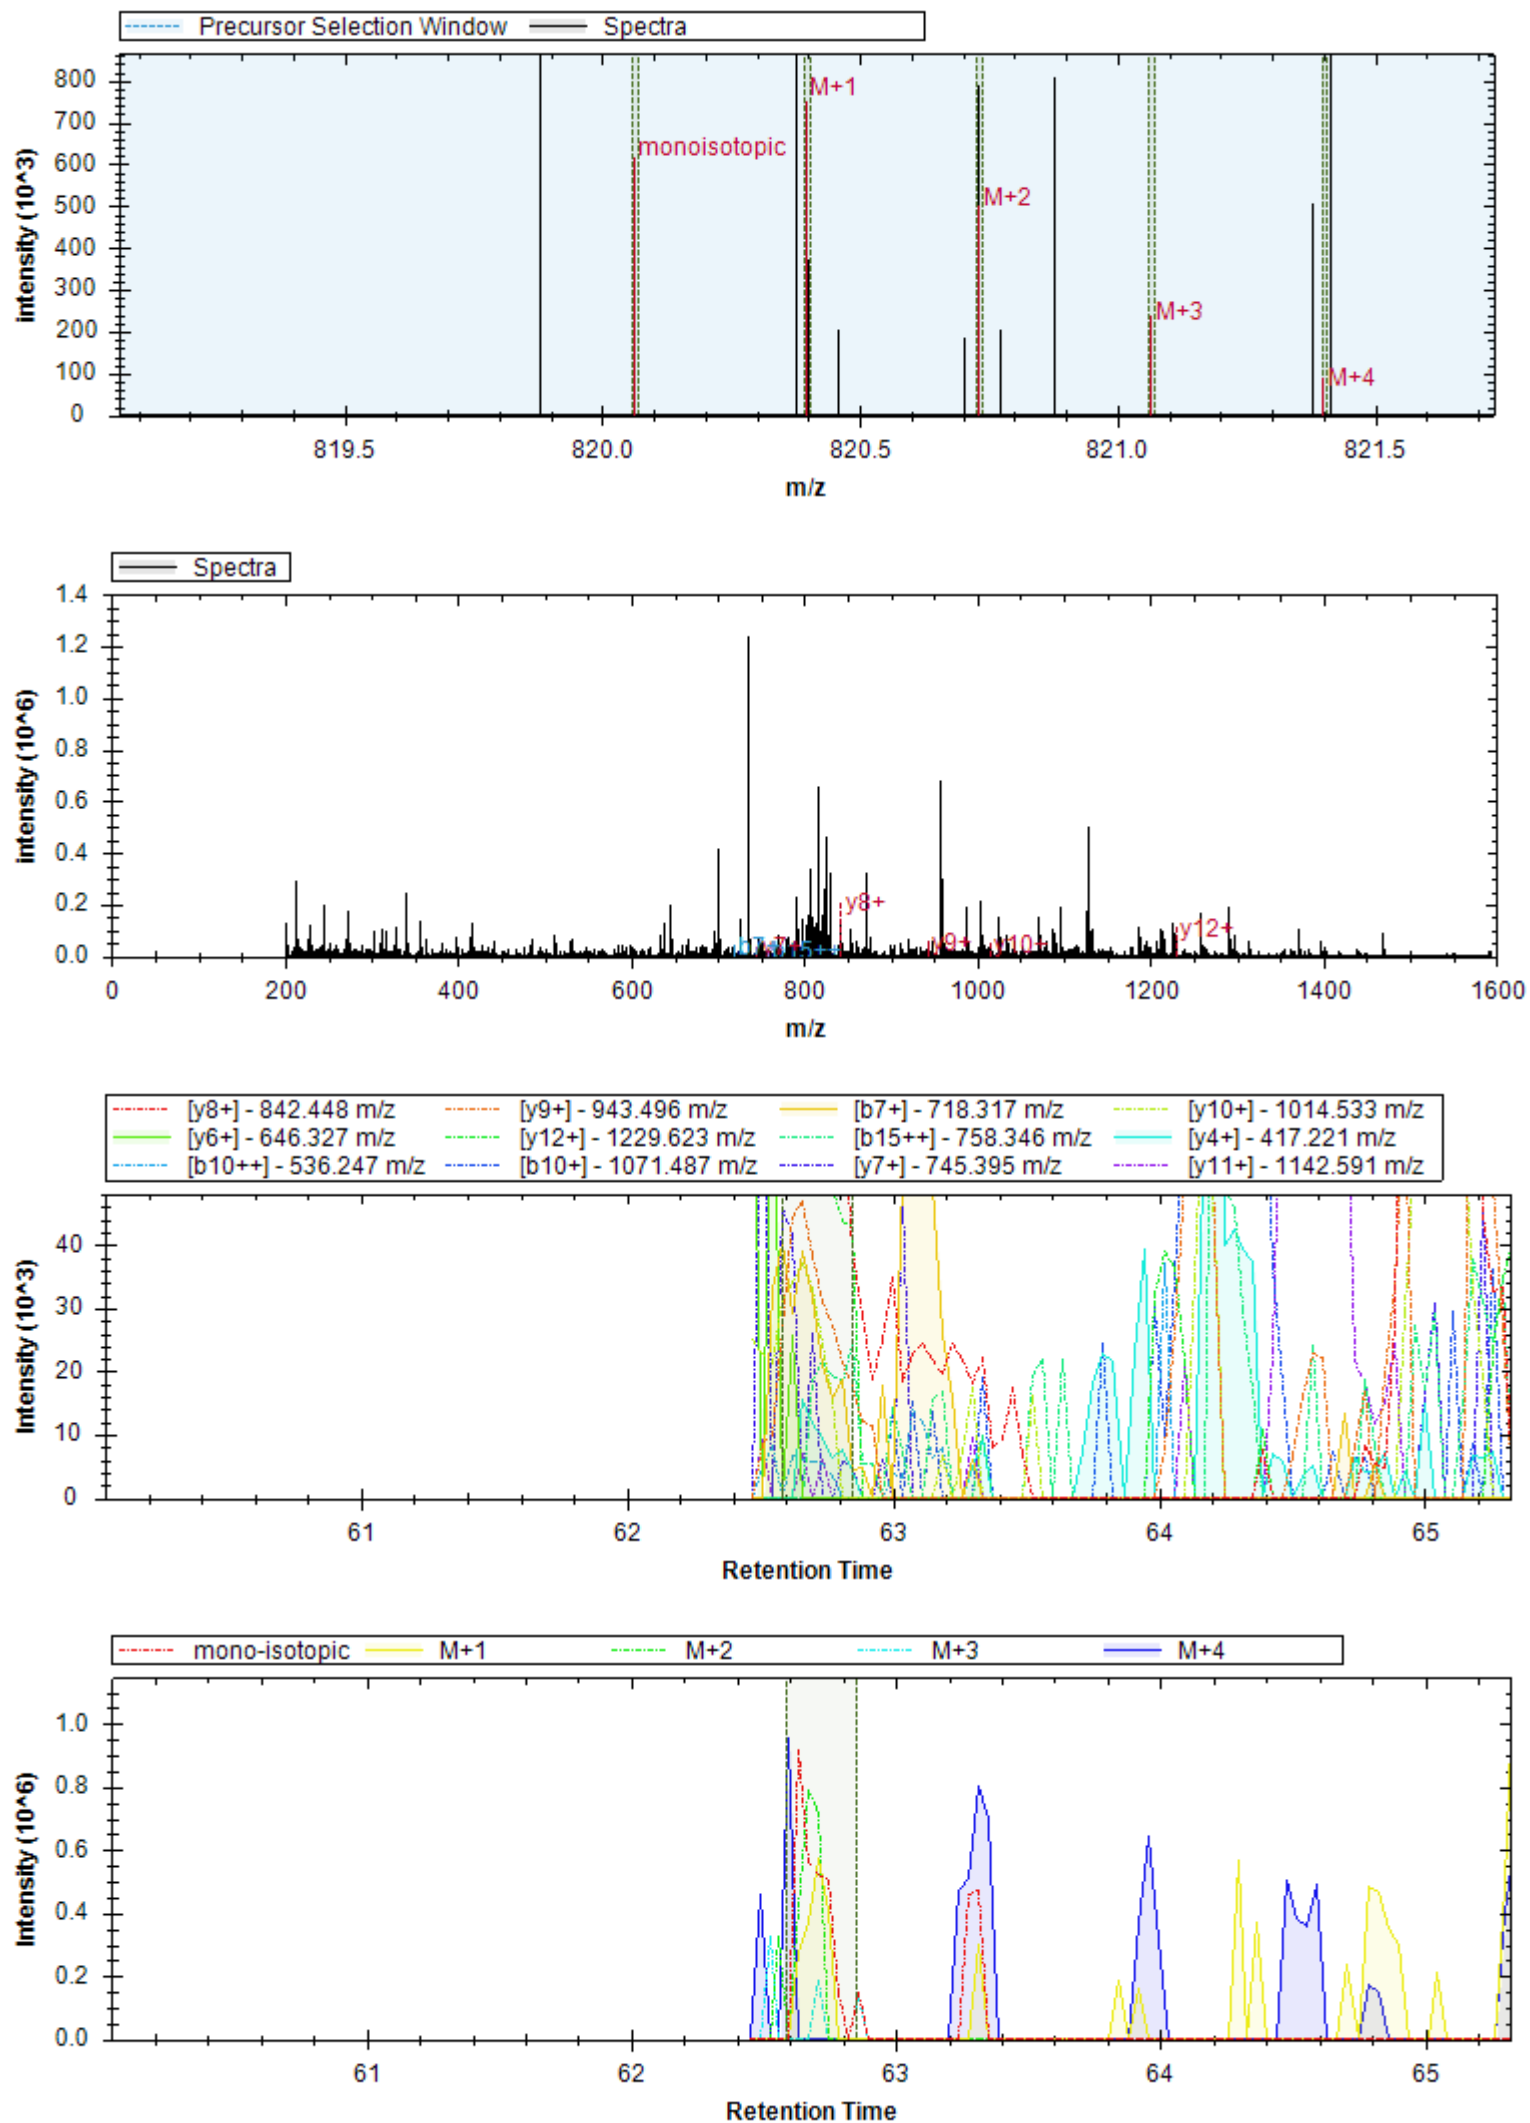

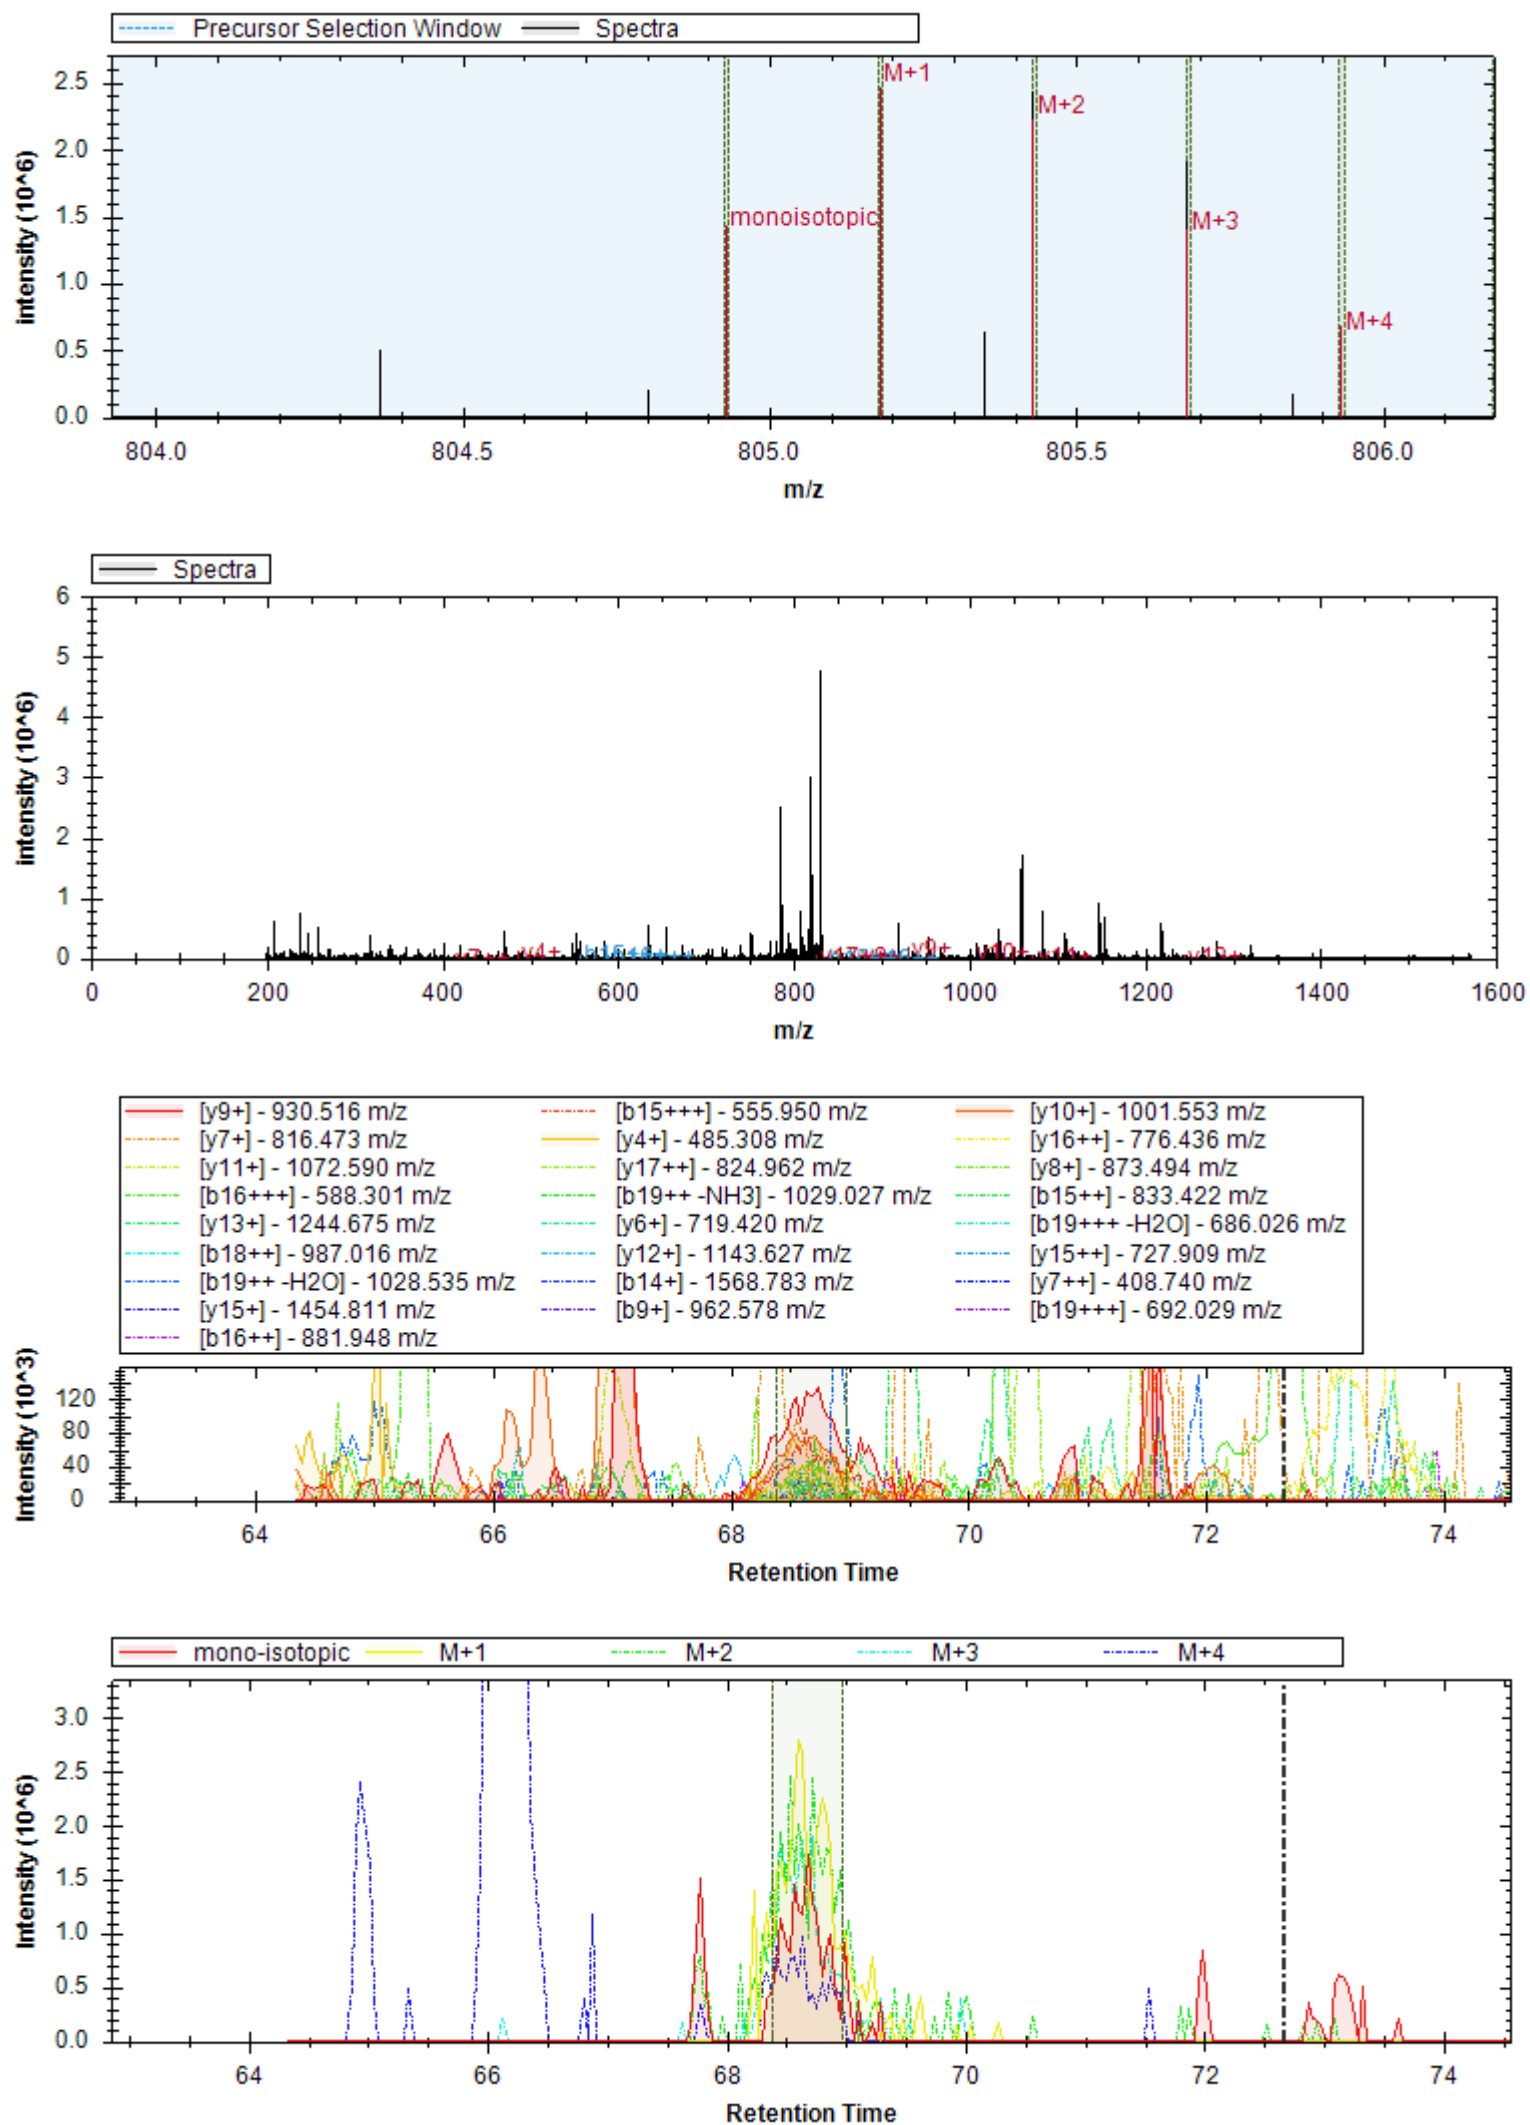

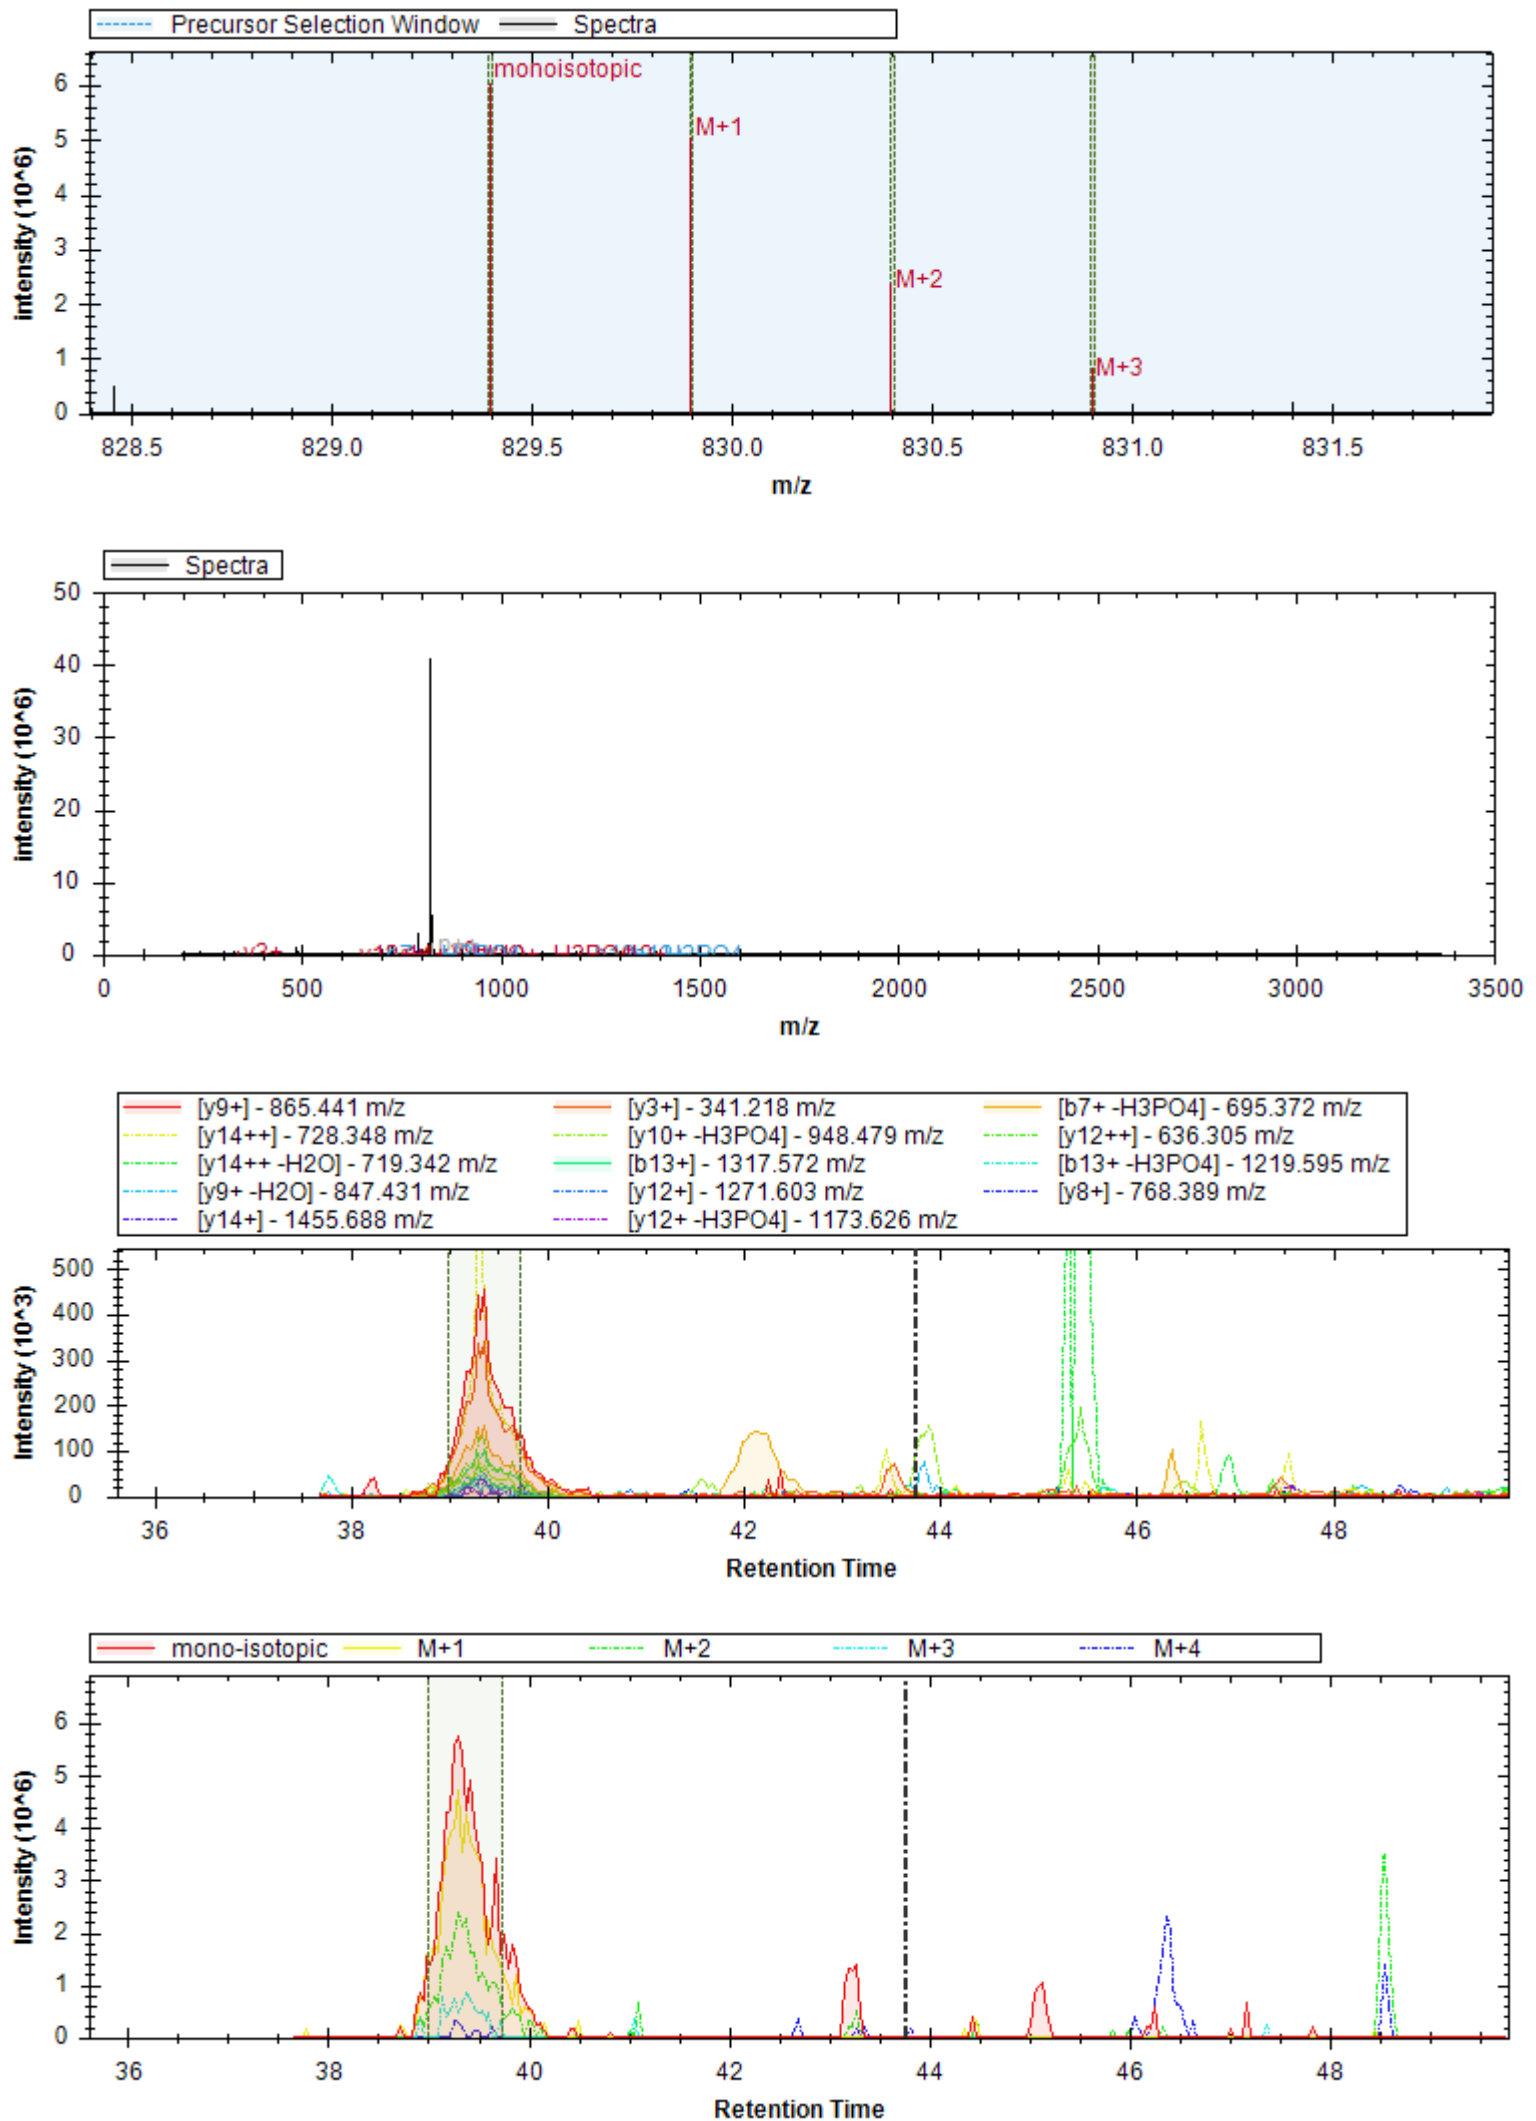

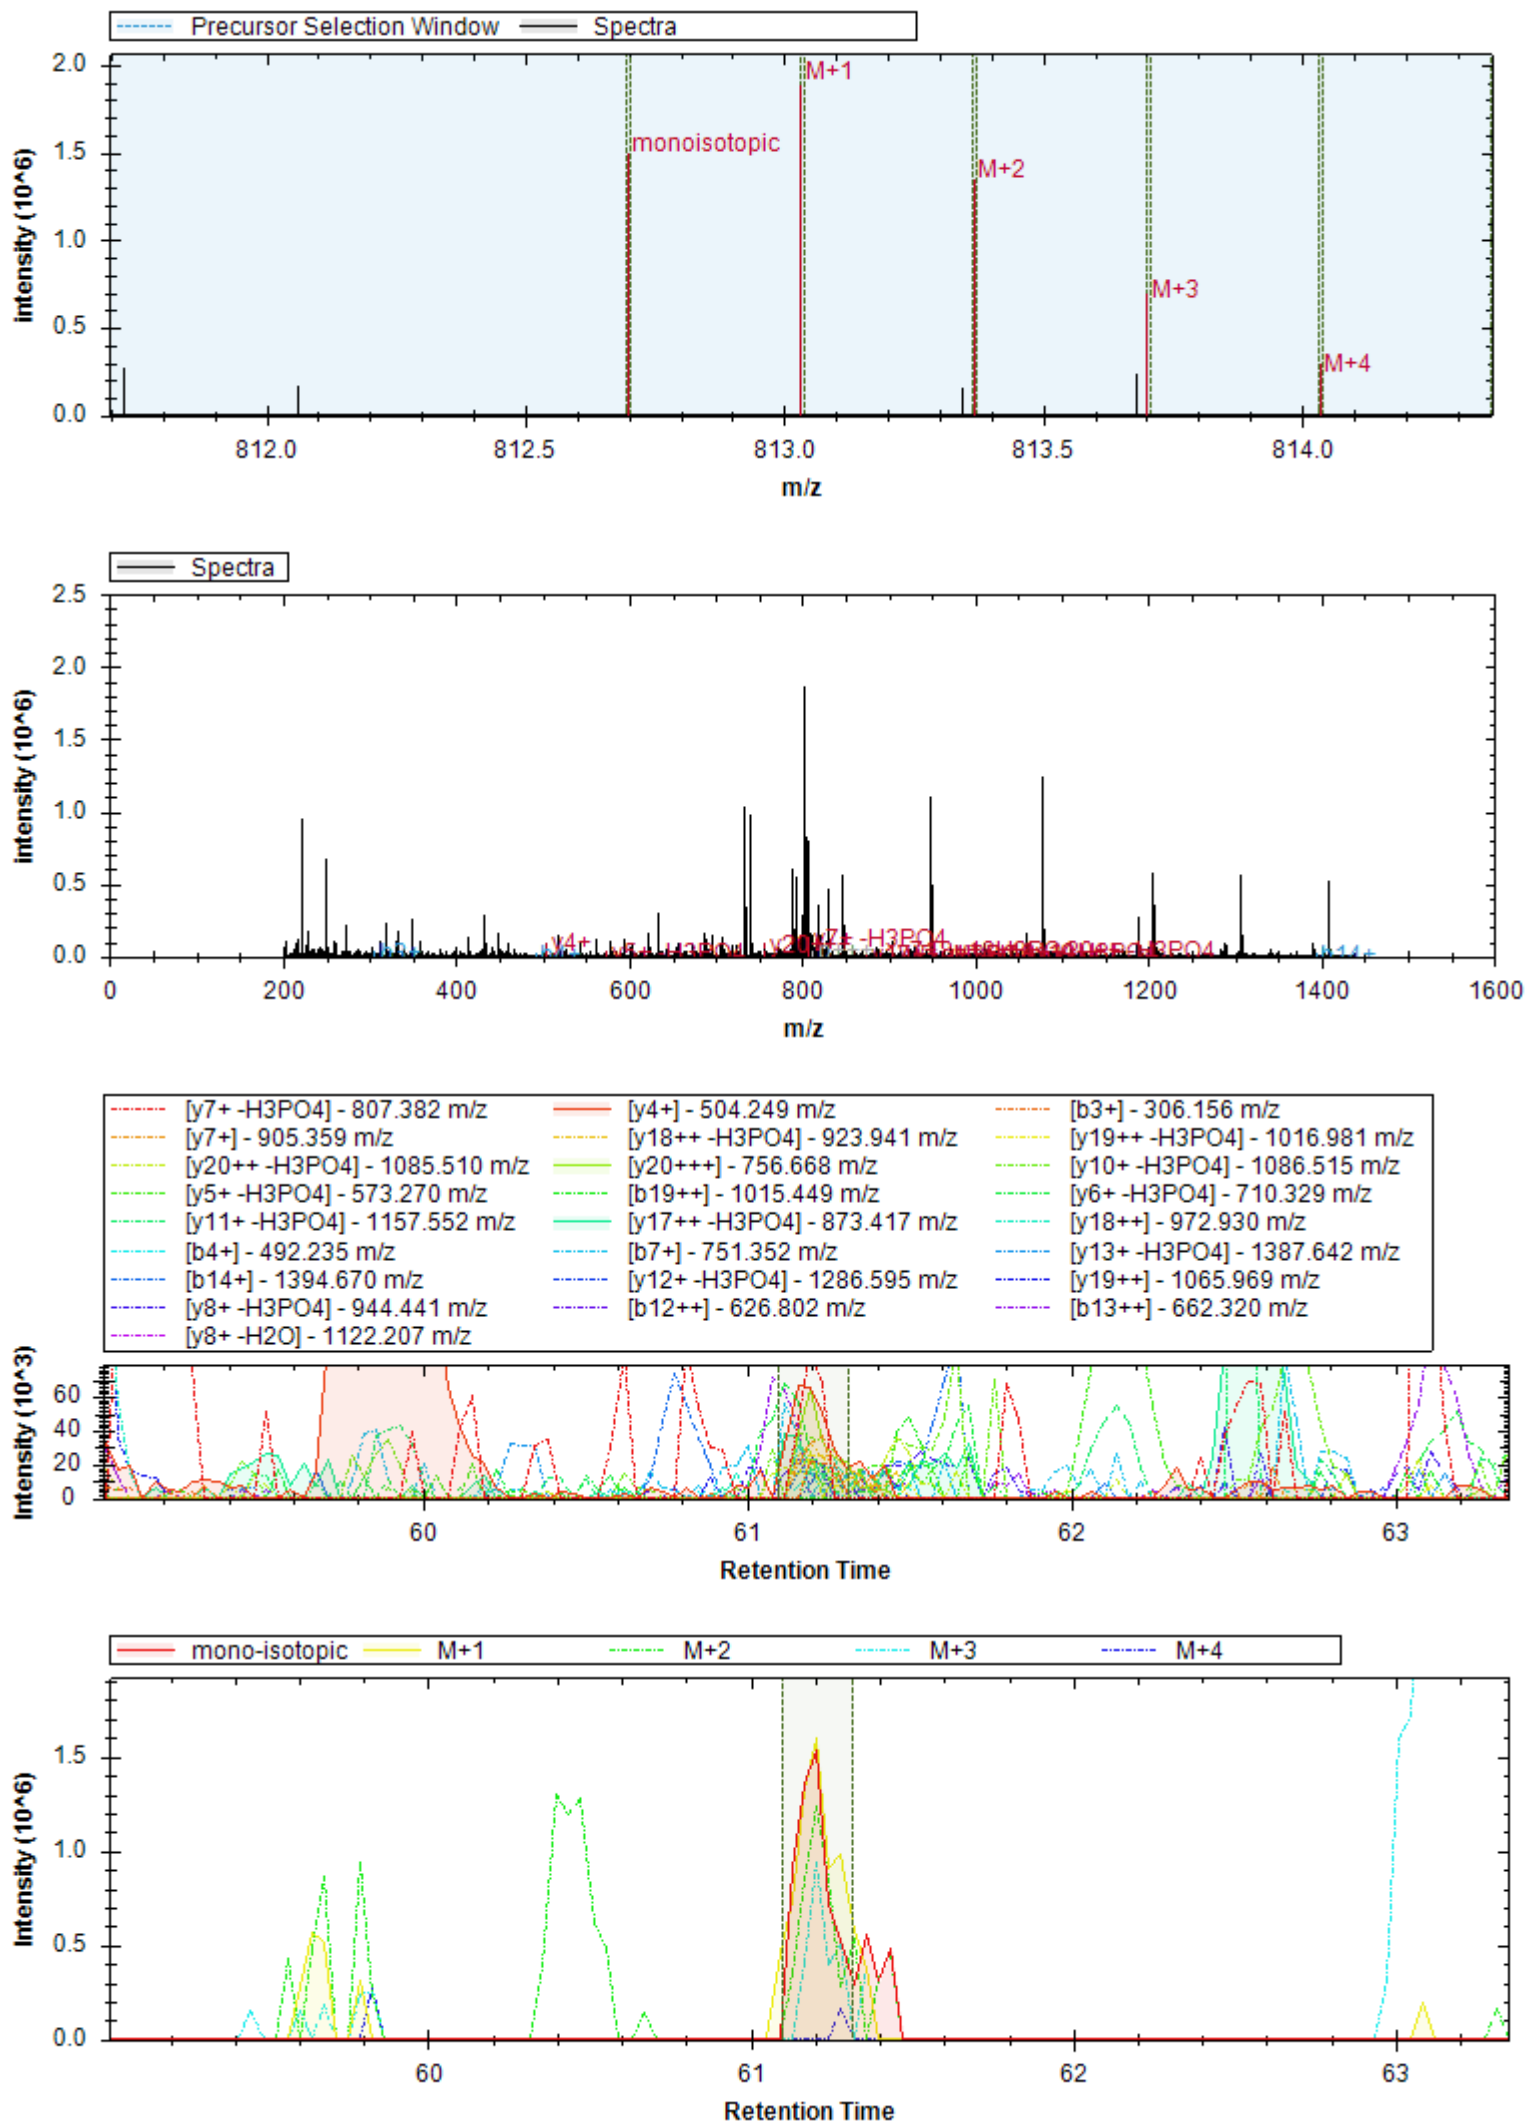

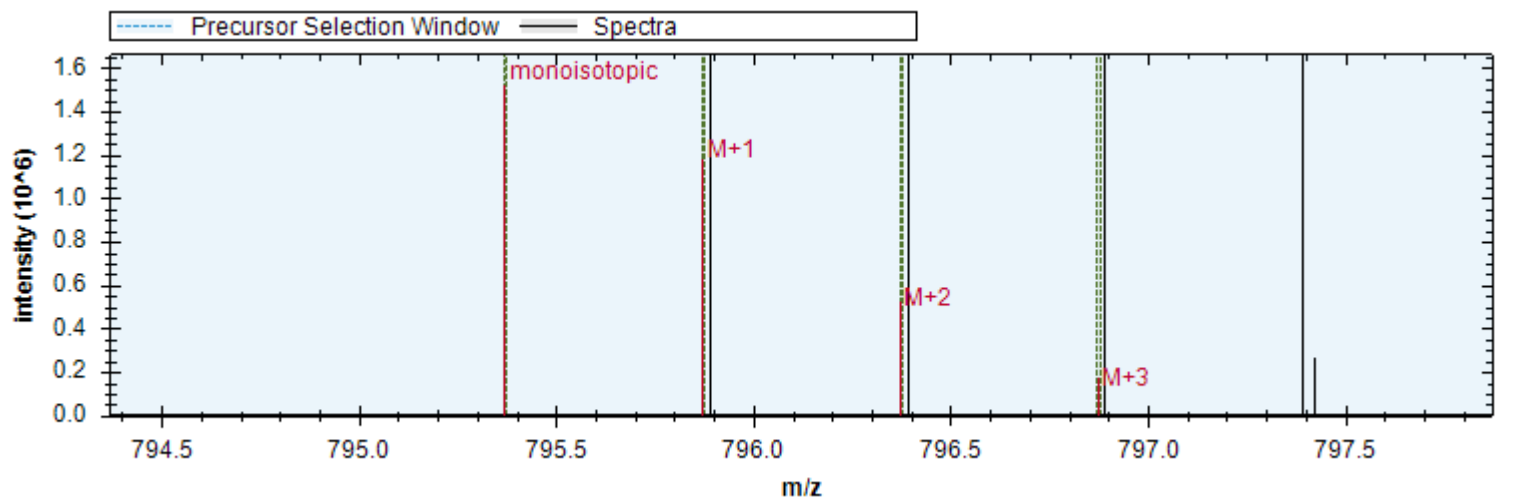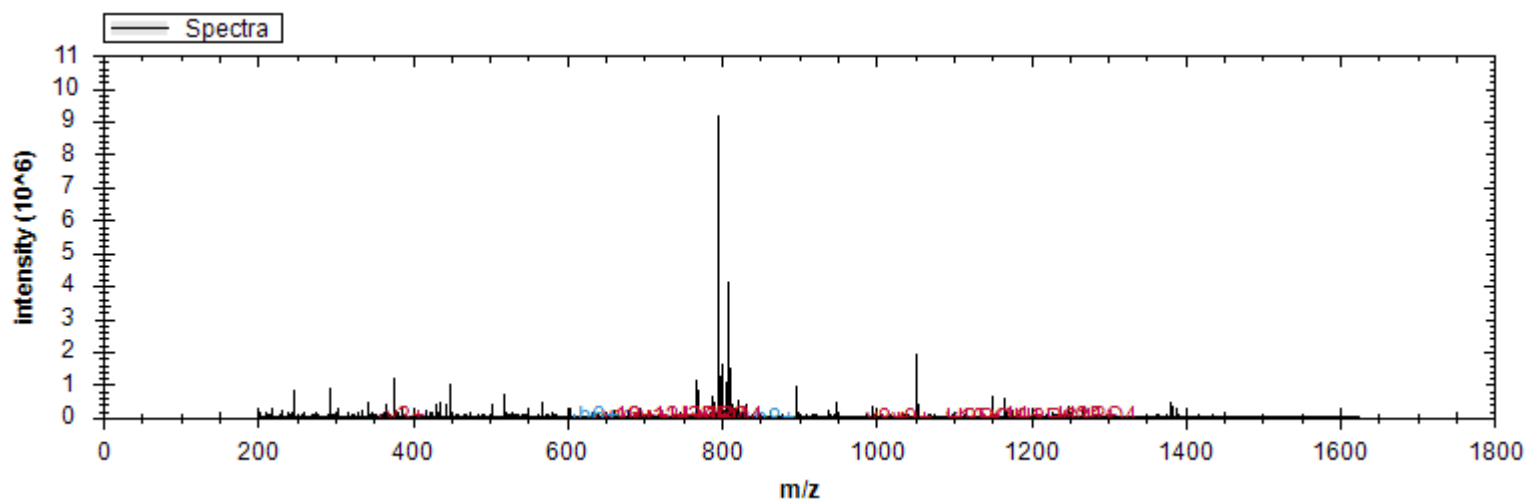

|                              |                              |                              |
|------------------------------|------------------------------|------------------------------|
| [y11+ -H3PO4] - 1140.601 m/z | [y12++ -H3PO4] - 639.334 m/z | [y3+] - 359.204 m/z          |
| [b3+] - 352.162 m/z          | [y7+ -H3PO4] - 770.416 m/z   | [b7+] - 722.347 m/z          |
| [b6+] - 609.263 m/z          | [y6+ -H3PO4] - 657.332 m/z   | [y9+ -H3PO4] - 1012.542 m/z  |
| [y12++]- 688.322 m/z         | [b5+] - 480.220 m/z          | [y10+ -H3PO4] - 1083.579 m/z |
| [y8+ -H3PO4] - 883.500 m/z   | [b8+] - 835.431 m/z          | [y11+] - 1238.578 m/z        |
| [b4+] - 409.183 m/z          | [y6+] - 755.308 m/z          | [y8+] - 981.477 m/z          |
| [y7+] - 868.392 m/z          | [b3+ -H2O] - 334.151 m/z     | [b11+ -H3PO4] - 1133.559 m/z |
| [y9+] - 1110.519 m/z         | [b5+ -H2O] - 462.210 m/z     |                              |

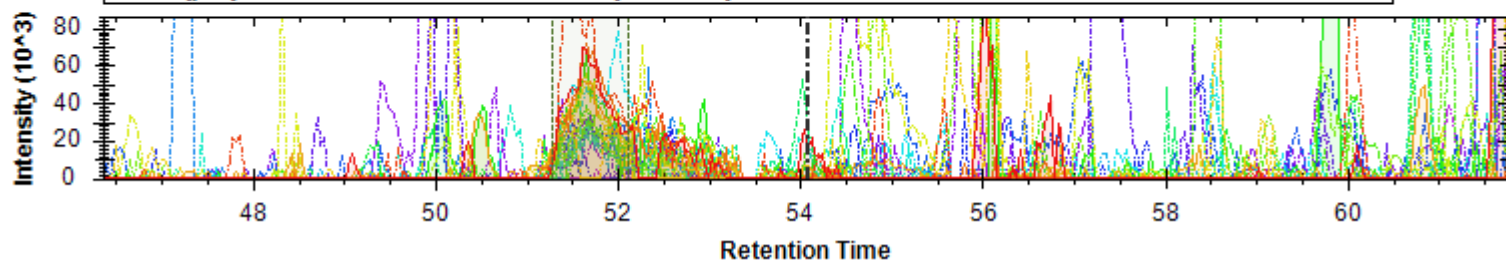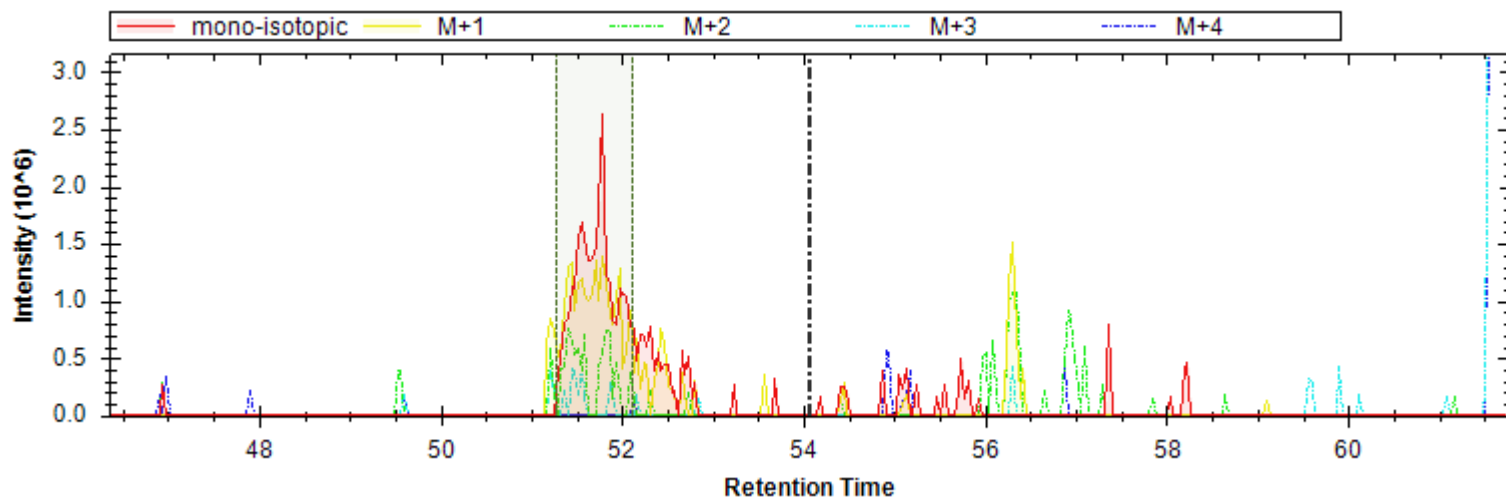

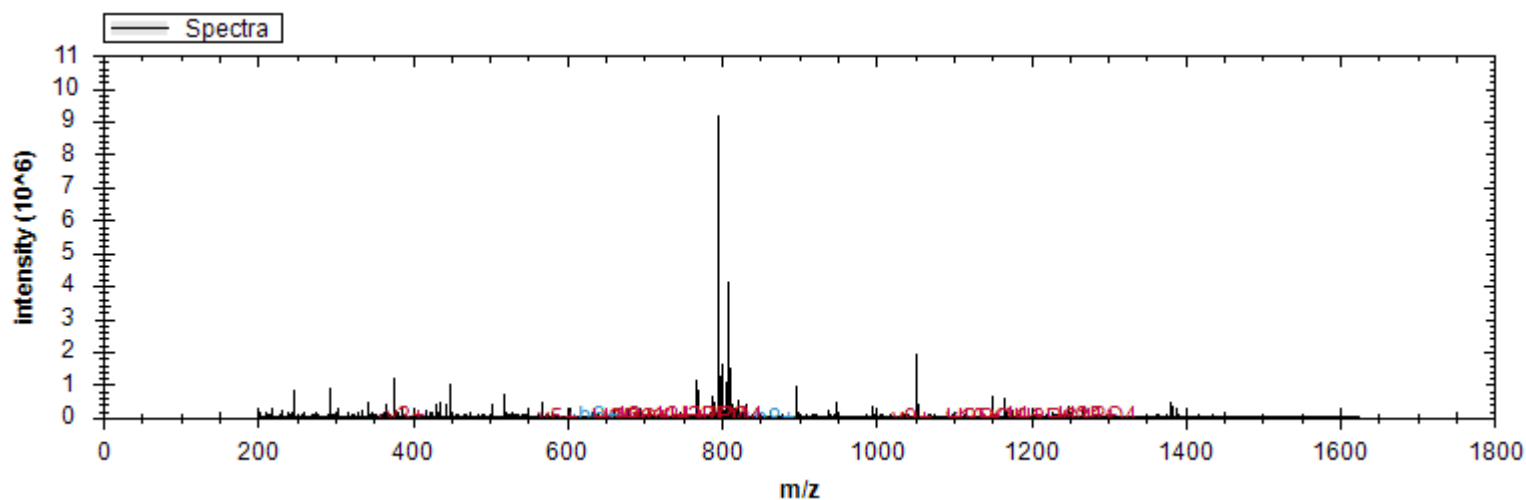

|                              |                              |                              |
|------------------------------|------------------------------|------------------------------|
| [y12++ -H3PO4] - 639.334 m/z | [y11+ -H3PO4] - 1140.601 m/z | [y3+] - 359.204 m/z          |
| [b3+] - 352.162 m/z          | [y13++ -H3PO4] - 696.847 m/z | [b6+] - 609.263 m/z          |
| [y6+ -H3PO4] - 657.332 m/z   | [y7+ -H3PO4] - 770.416 m/z   | [b7+] - 722.347 m/z          |
| [y12++]- 688.322 m/z         | [y8+ -H3PO4] - 883.500 m/z   | [b5+] - 480.220 m/z          |
| [y9+ -H3PO4] - 1012.542 m/z  | [y12++ -H2O] - 679.317 m/z   | [y9+] - 1110.519 m/z         |
| [y13++]- 745.835 m/z         | [y11+] - 1238.578 m/z        | [y10+ -H3PO4] - 1083.579 m/z |
| [b8+] - 835.431 m/z          | [y10+] - 1181.556 m/z        | [y7+] - 868.392 m/z          |
| [b4+] - 409.183 m/z          | [b6+ -H2O] - 591.252 m/z     | [y5+ -H3PO4] - 556.284 m/z   |
| [b3+ -H2O] - 334.151 m/z     |                              |                              |

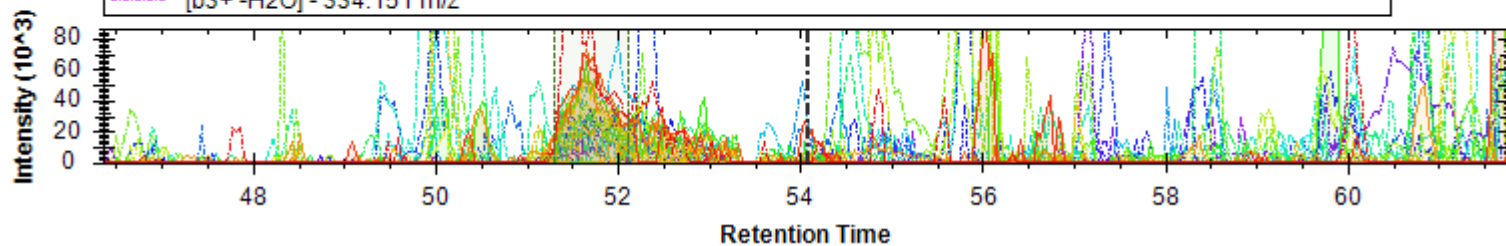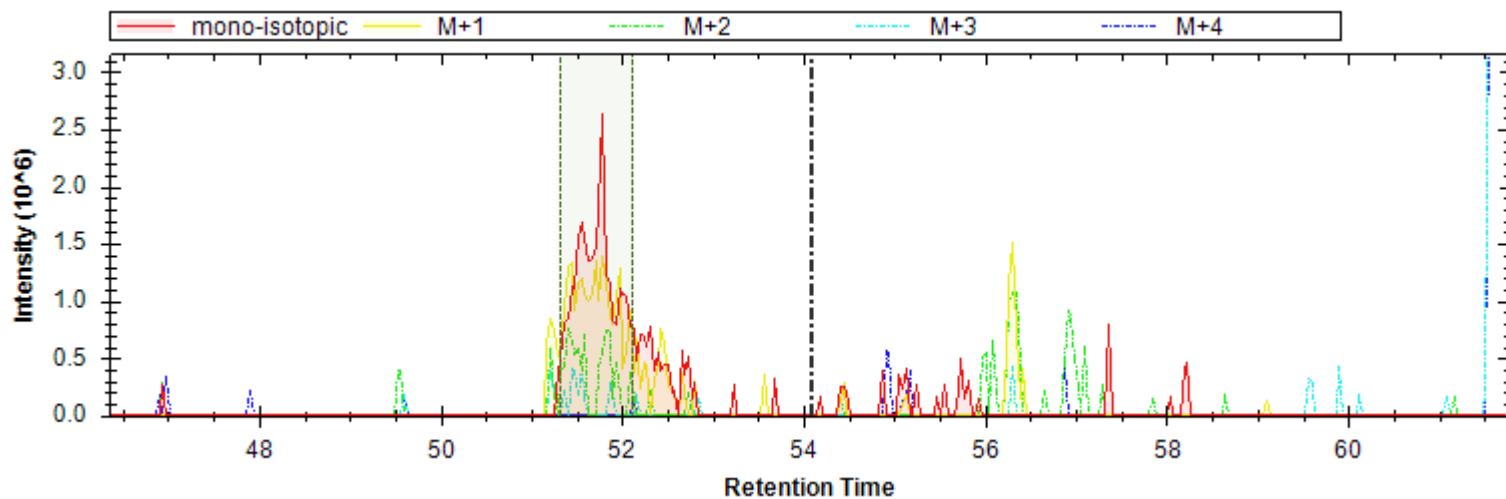



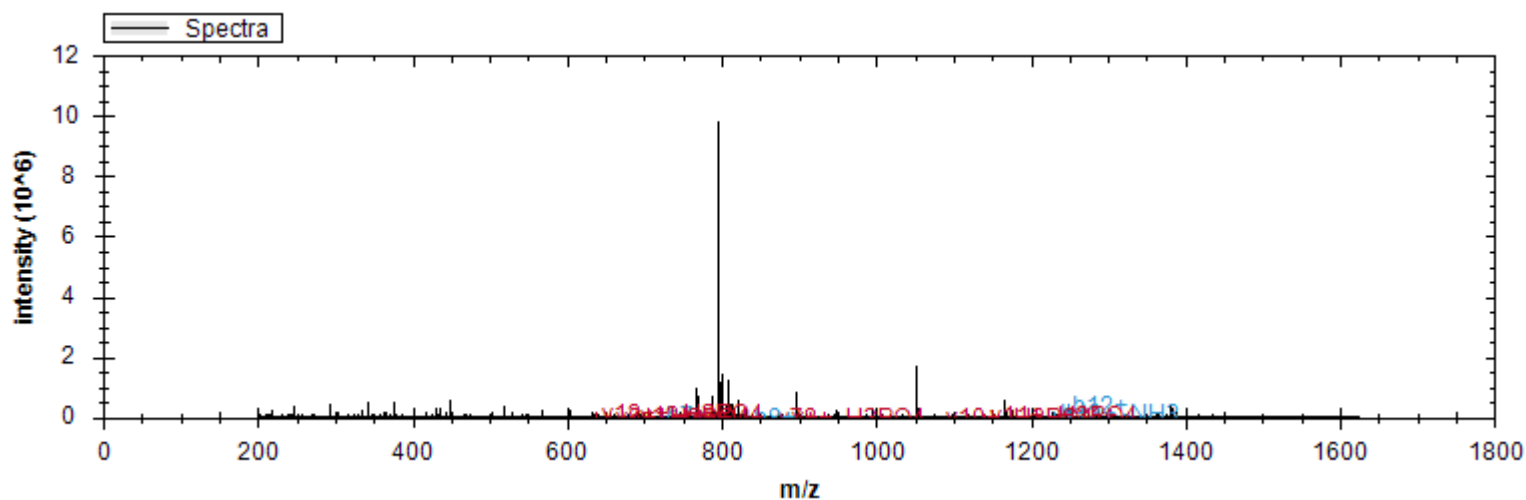

|                            |                              |                              |
|----------------------------|------------------------------|------------------------------|
| [b12+] - 1248.622 m/z      | [y11+ -H3PO4] - 1140.601 m/z | [y12++ -H3PO4] - 639.334 m/z |
| [b3+] - 352.162 m/z        | [b12+ -NH3] - 1231.595 m/z   | [b6+] - 609.263 m/z          |
| [y6+ -H3PO4] - 657.332 m/z | [y10+ -H3PO4] - 1083.579 m/z | [y8+ -H3PO4] - 883.500 m/z   |
| [b7+] - 722.347 m/z        | [y9+ -H3PO4] - 1012.542 m/z  | [y12++] - 688.322 m/z        |
| [y11+] - 1238.578 m/z      | [y7+] - 868.392 m/z          | [b12+ -H2O] - 1230.611 m/z   |
| [b5+] - 480.220 m/z        | [b8+] - 835.431 m/z          | [b4+] - 409.183 m/z          |
| [y6+] - 755.308 m/z        | [b3+ -H2O] - 334.151 m/z     | [b8+ -H2O] - 817.420 m/z     |

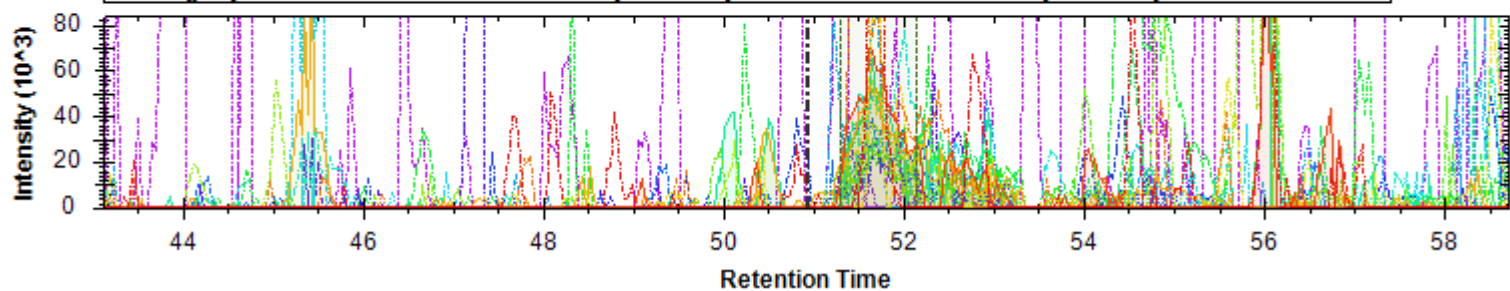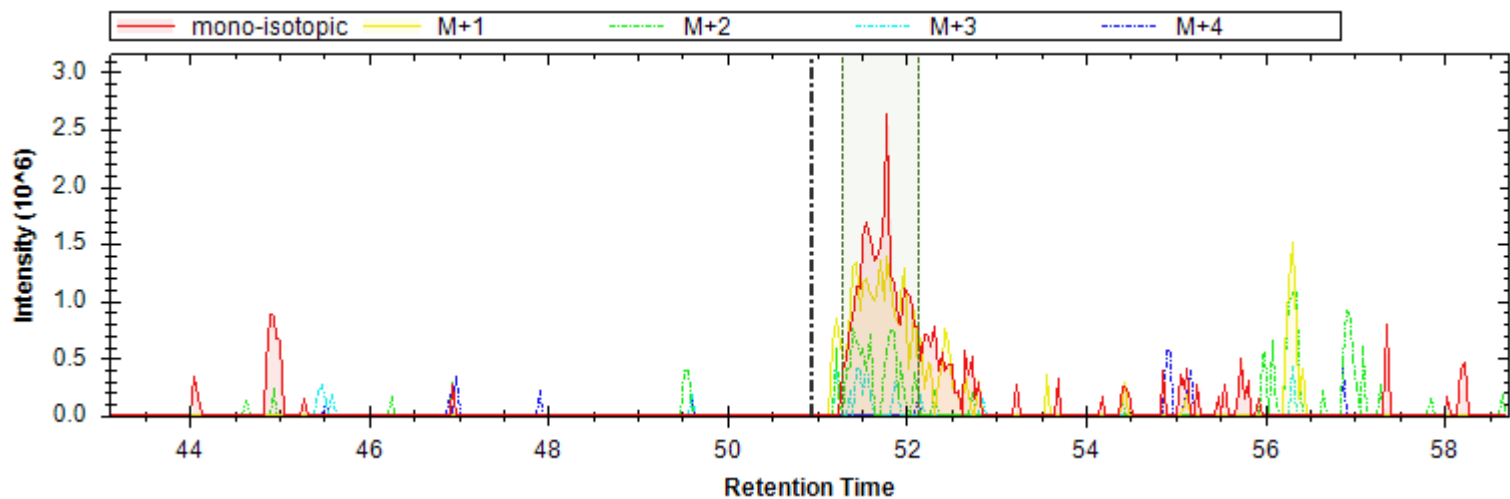

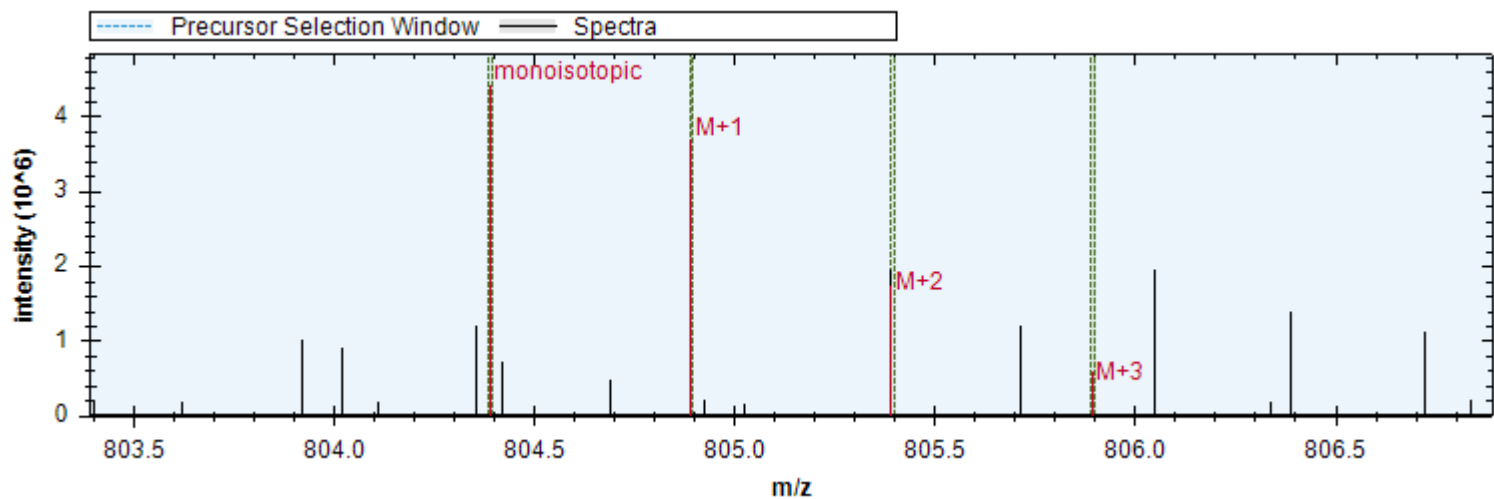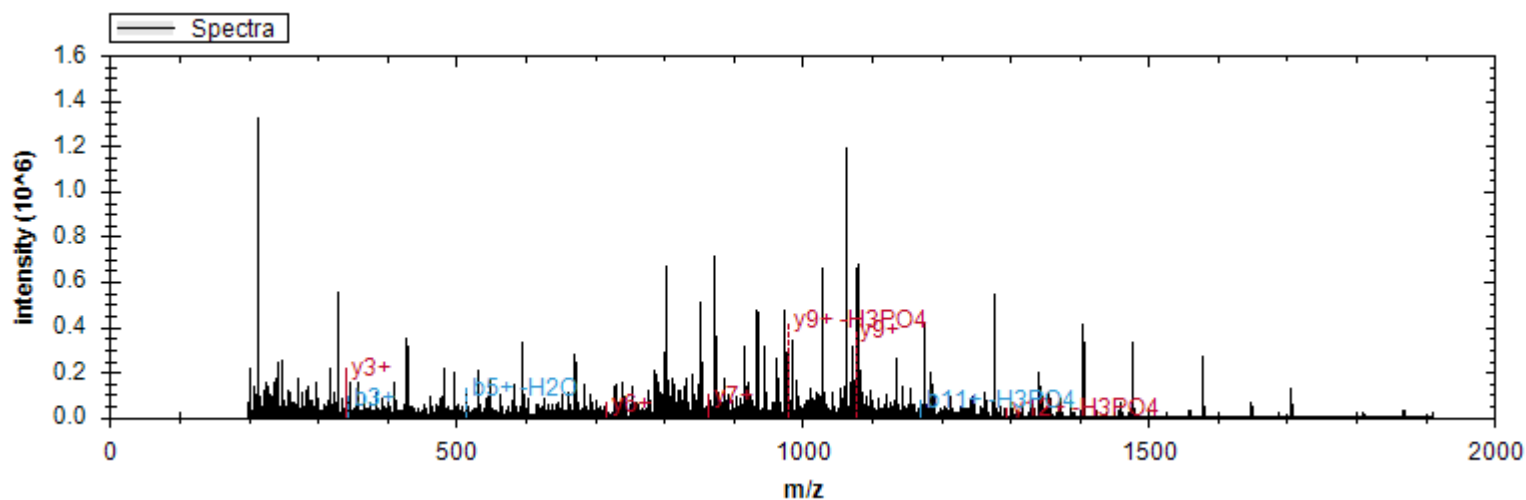

|                              |                              |                            |
|------------------------------|------------------------------|----------------------------|
| [y9+ -H3PO4] - 979.525 m/z   | [y9+] - 1077.502 m/z         | [b5+] - 531.277 m/z        |
| [y3+] - 341.218 m/z          | [b5+ -H2O] - 513.267 m/z     | [y7+ -H3PO4] - 767.445 m/z |
| [y6+ -H3PO4] - 620.377 m/z   | [b3+] - 345.177 m/z          | [y7+] - 865.422 m/z        |
| [y12+ -H3PO4] - 1294.668 m/z | [y11+ -H3PO4] - 1165.625 m/z | [y6+] - 718.354 m/z        |
| [b3+ -H2O] - 327.166 m/z     | [b4+] - 432.209 m/z          | [y4+ -H3PO4] - 410.240 m/z |
| [y8+ -H2O] - 1060.238 m/z    | [b11+ -H3PO4] - 1169.584 m/z |                            |

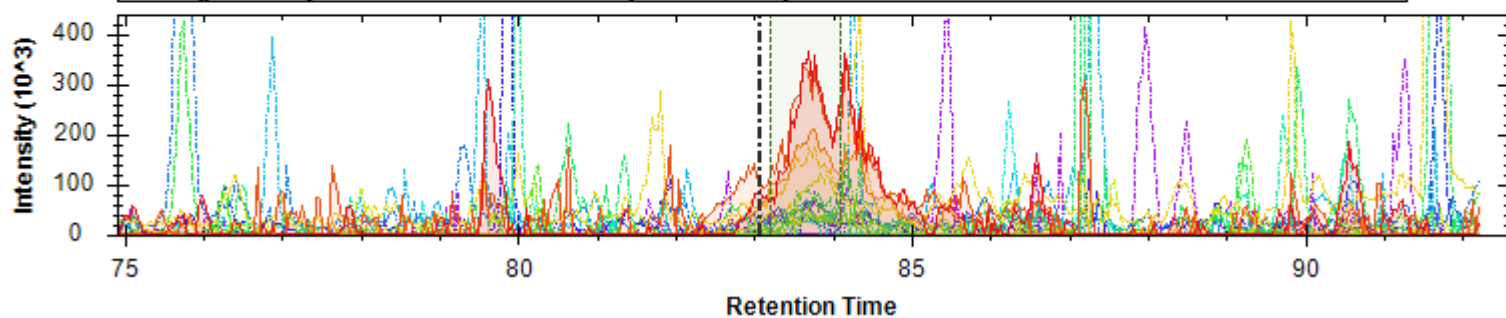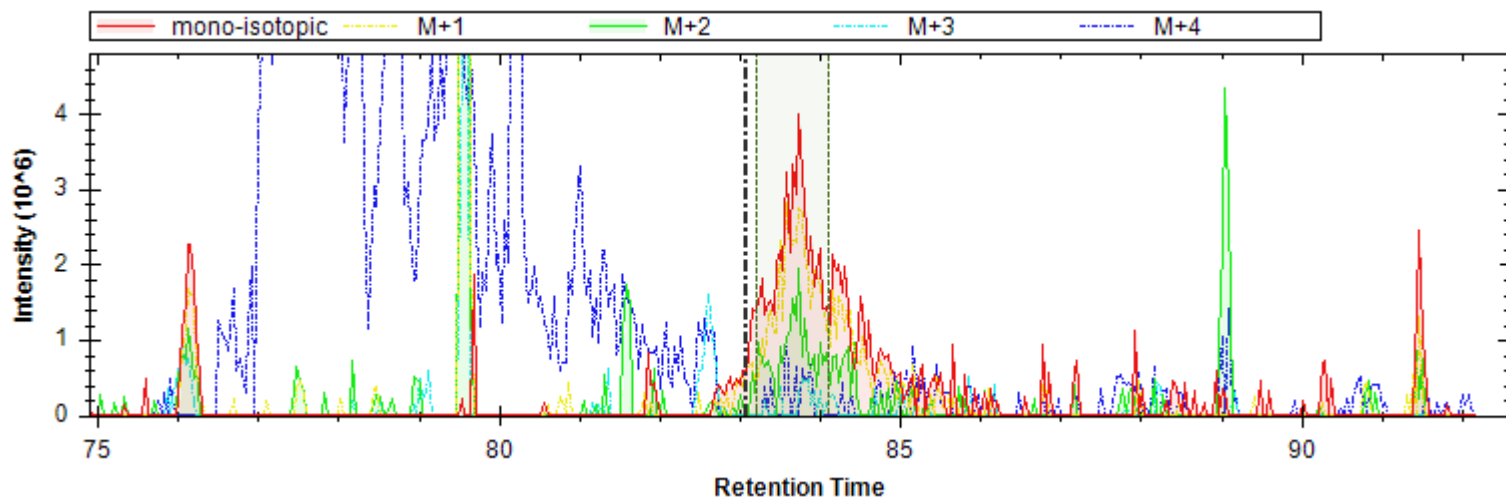

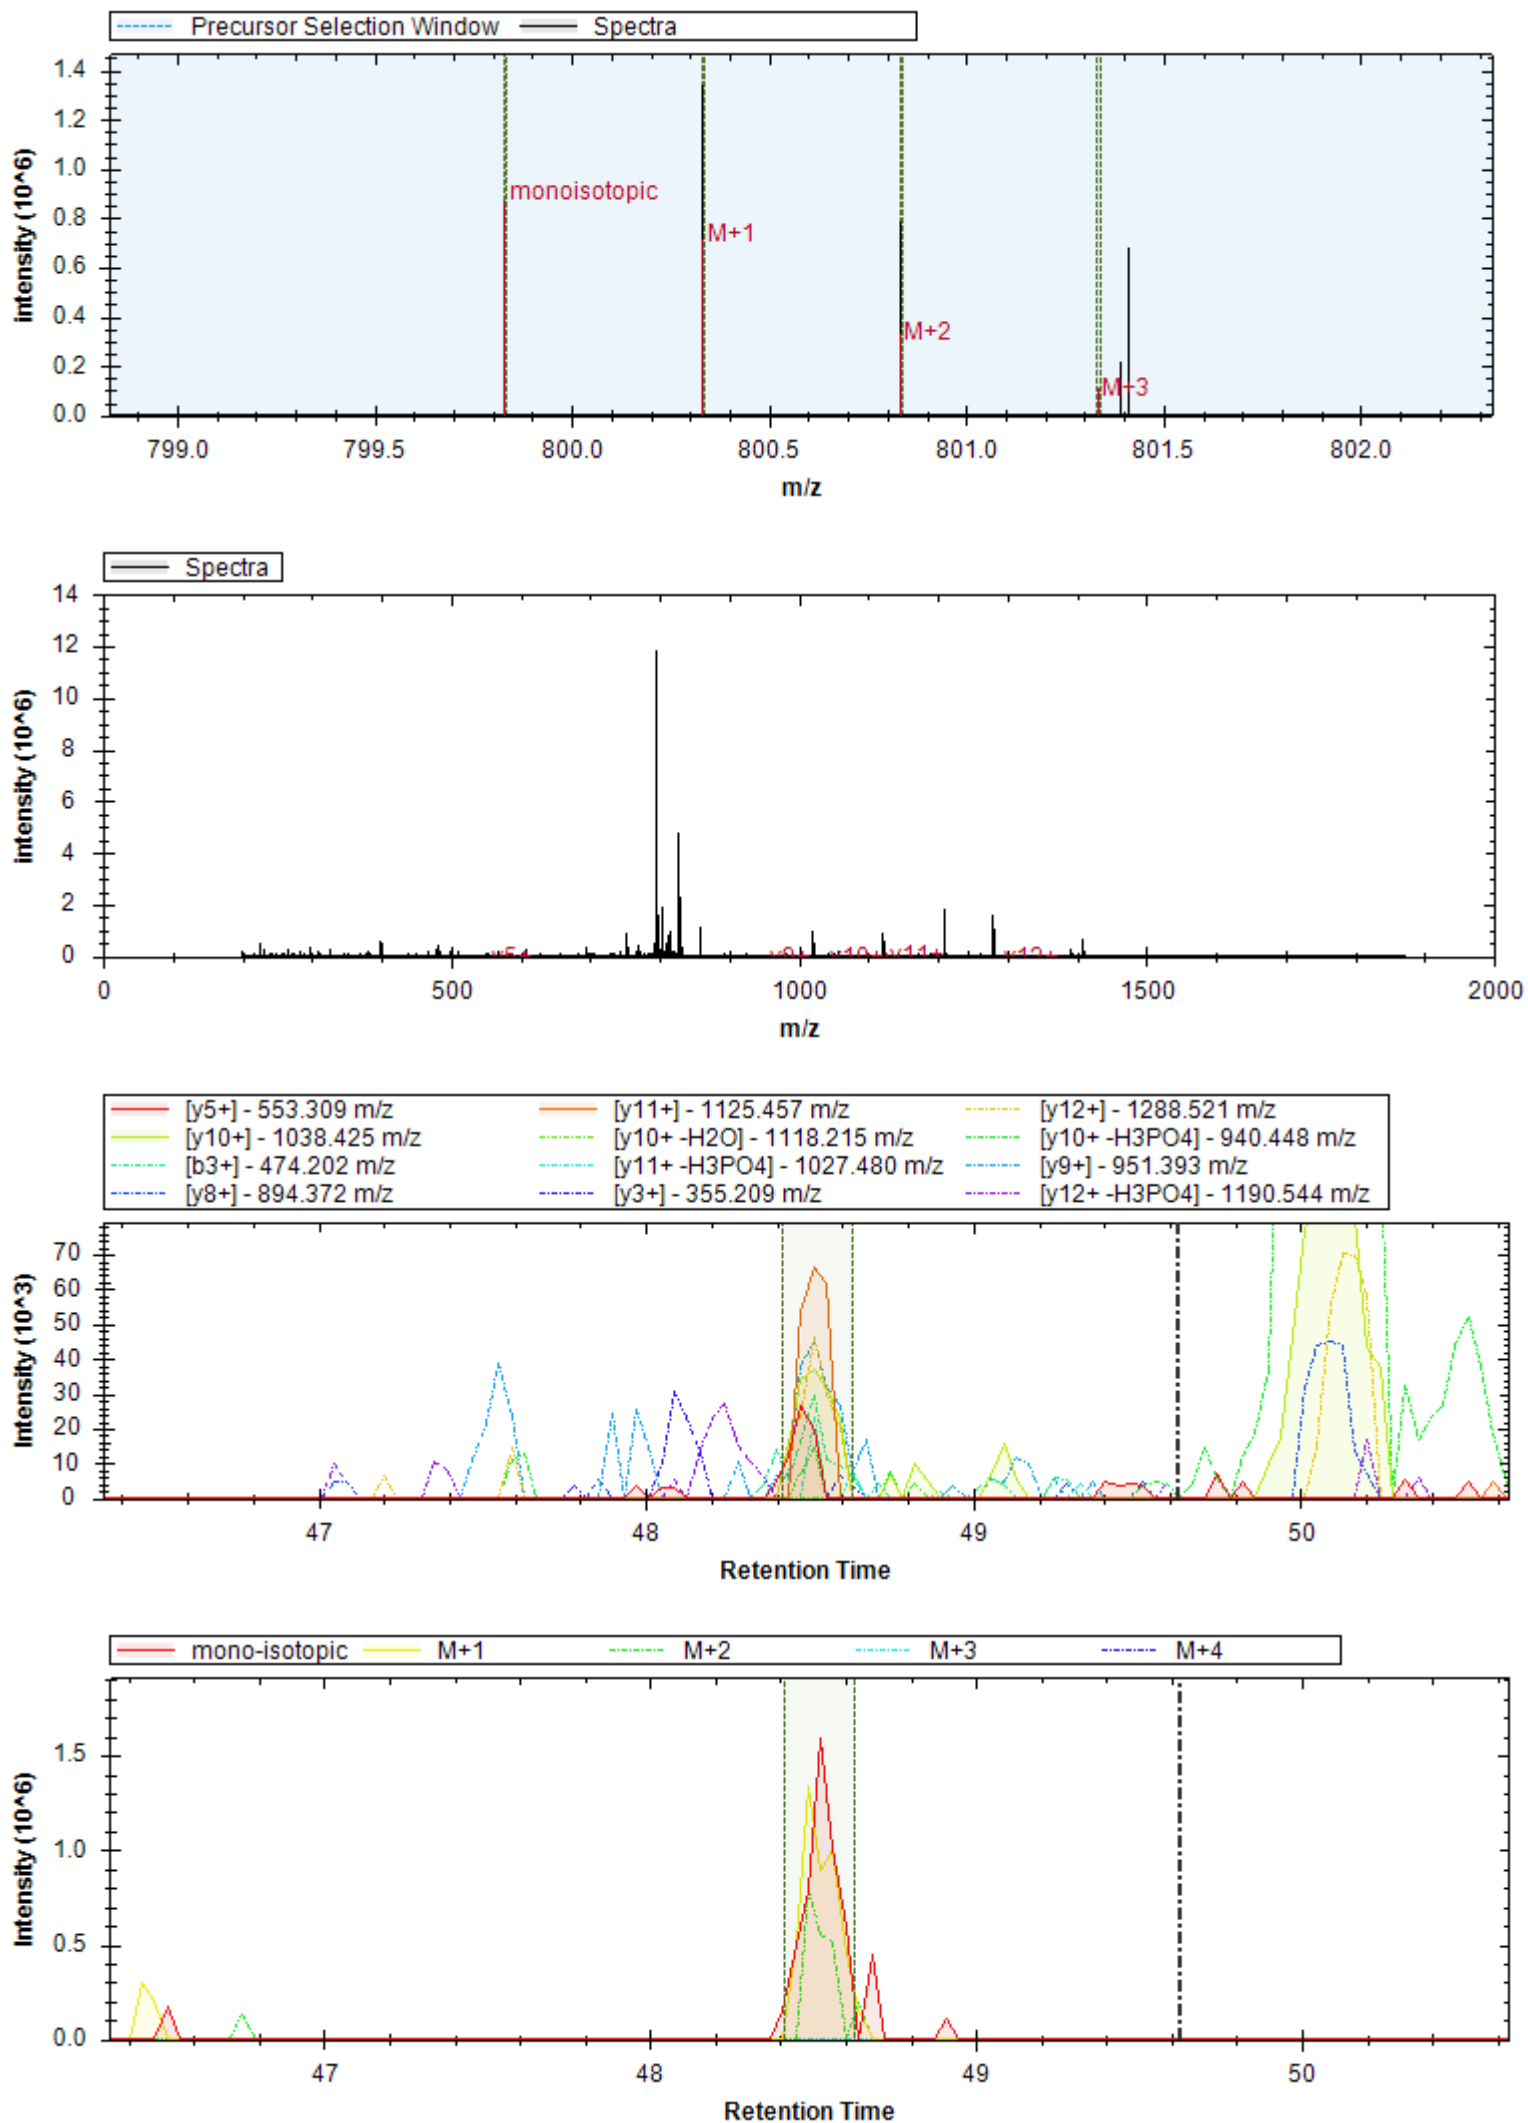

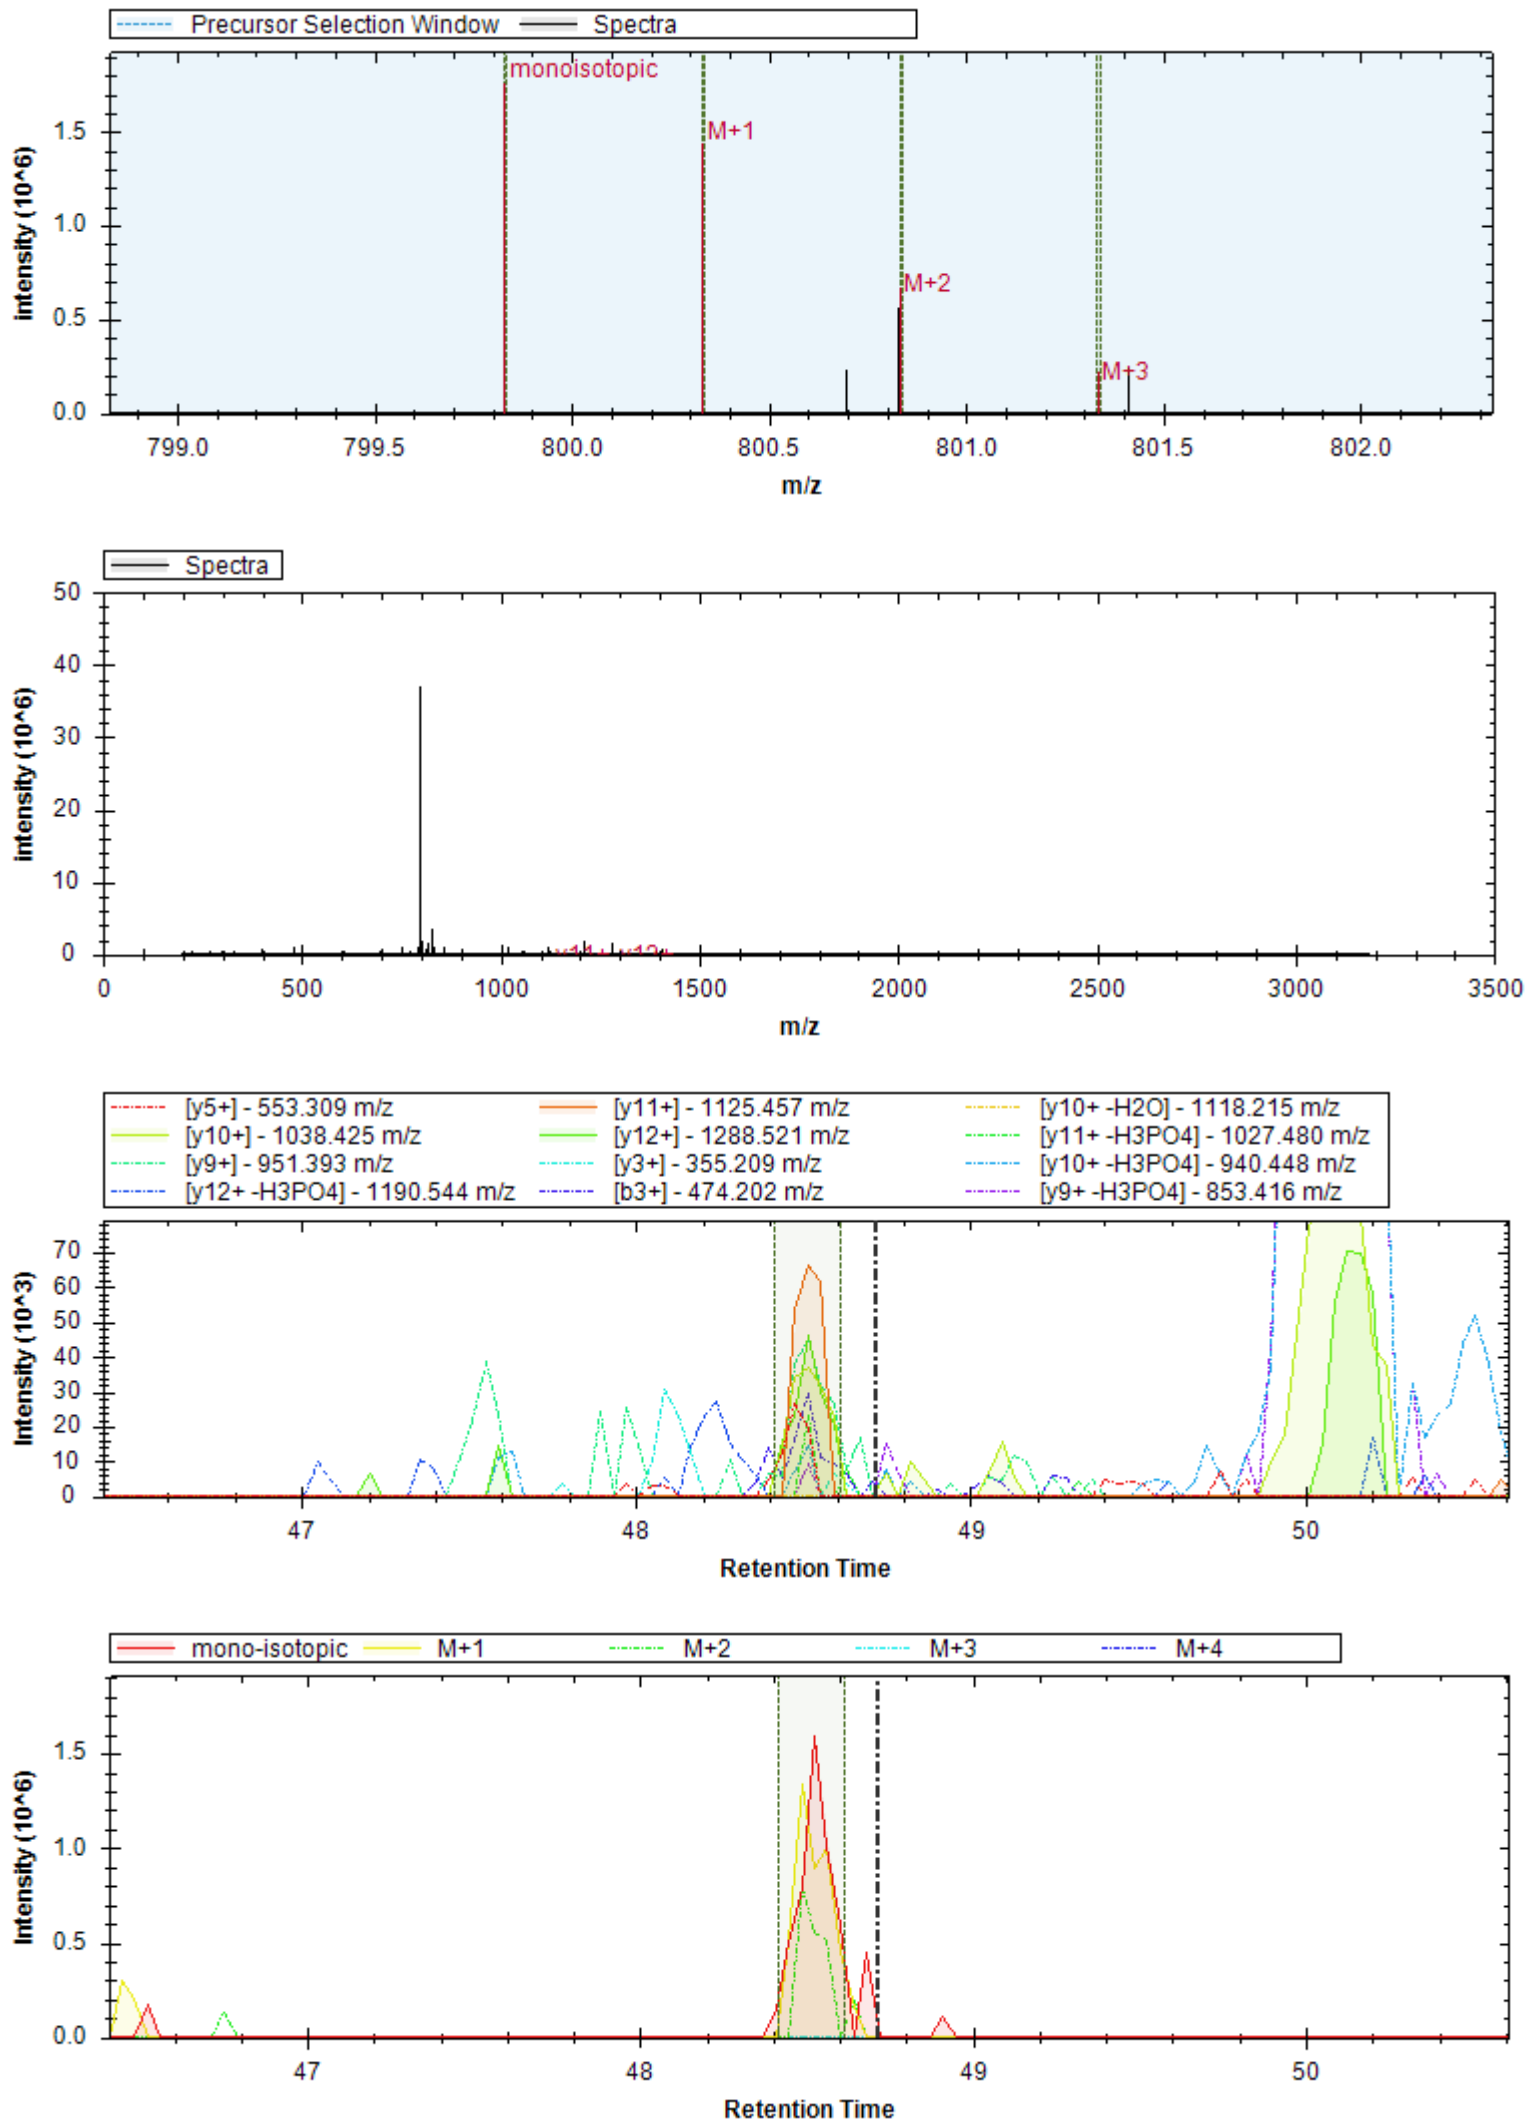

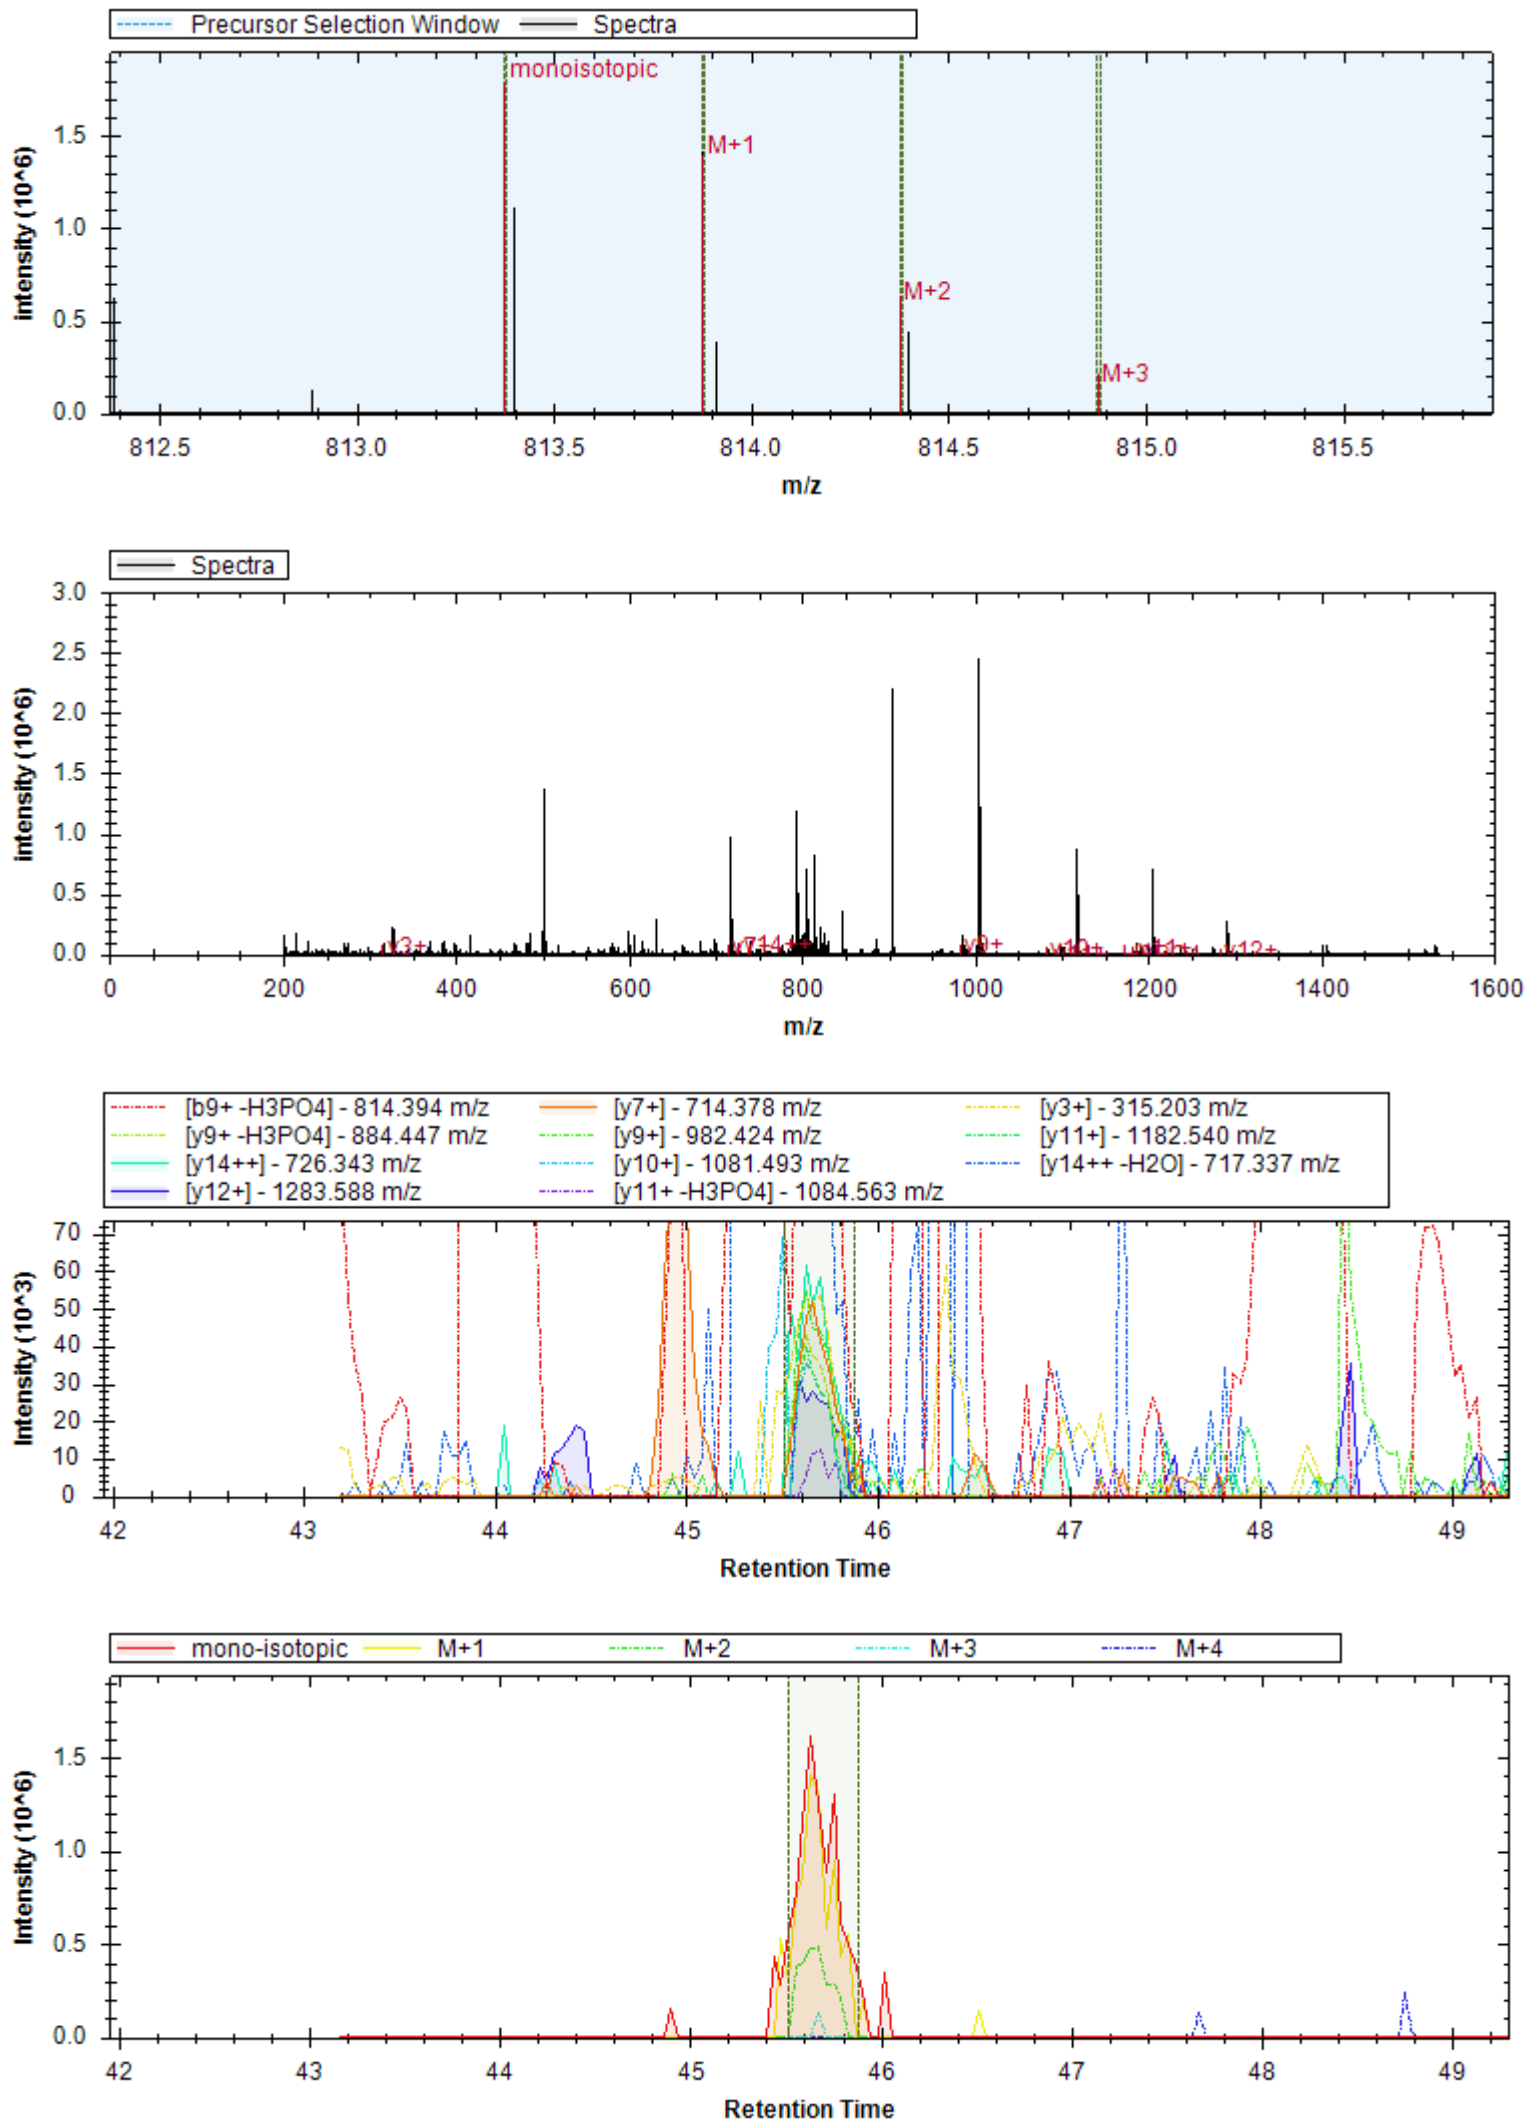

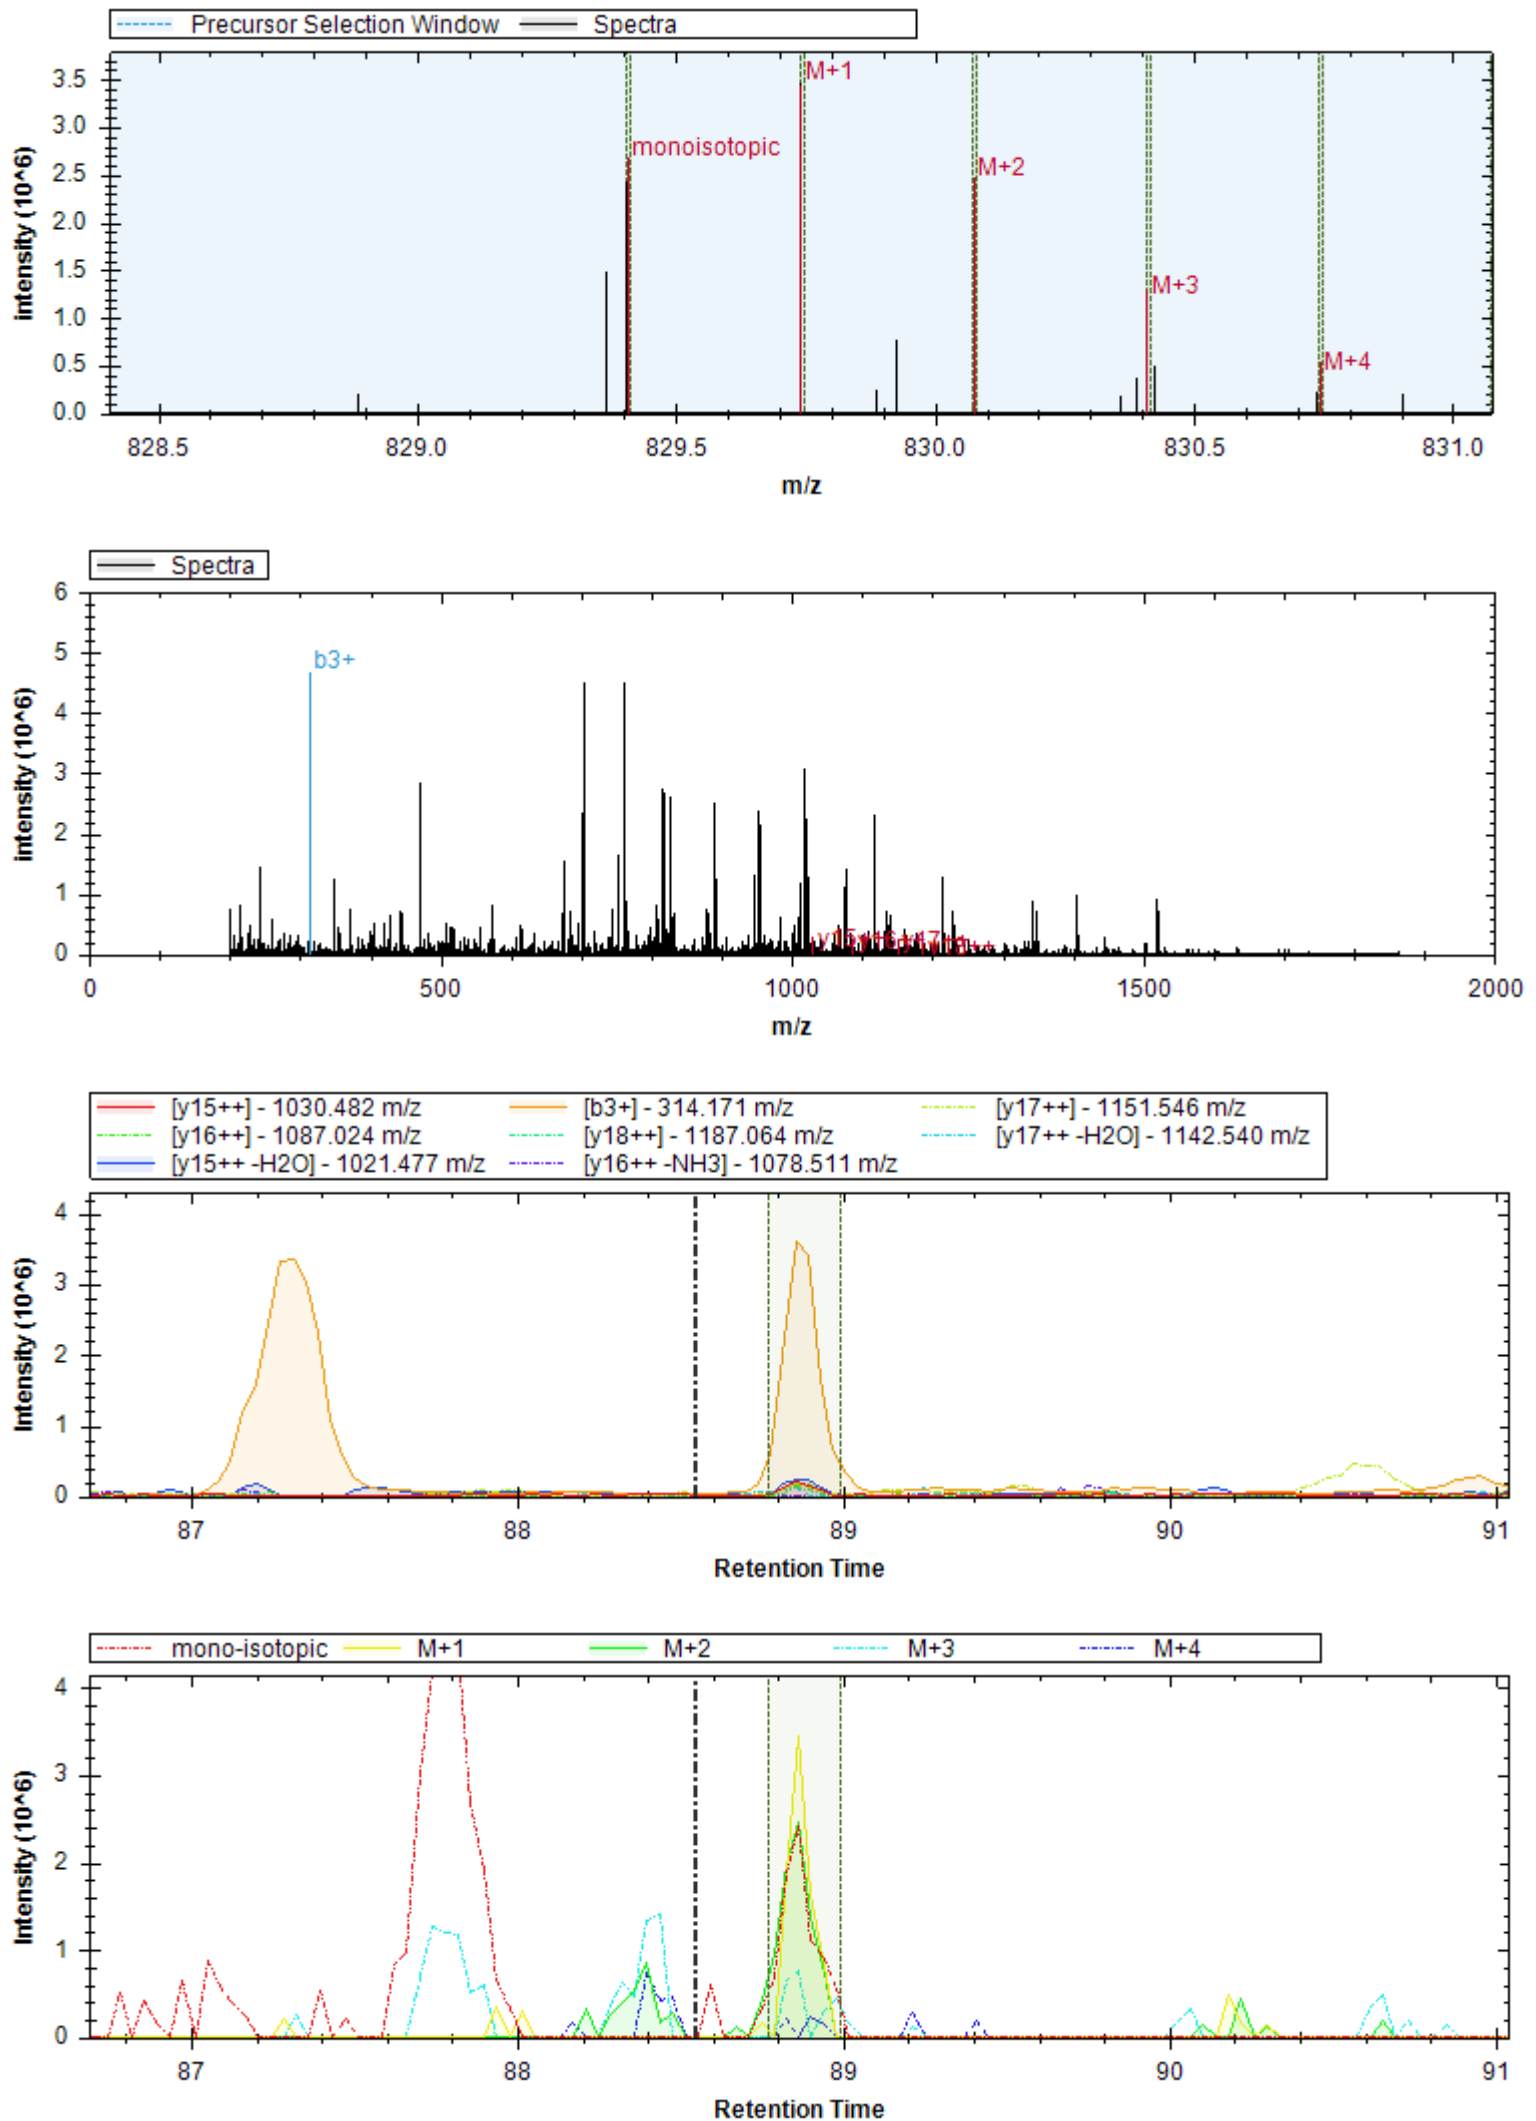

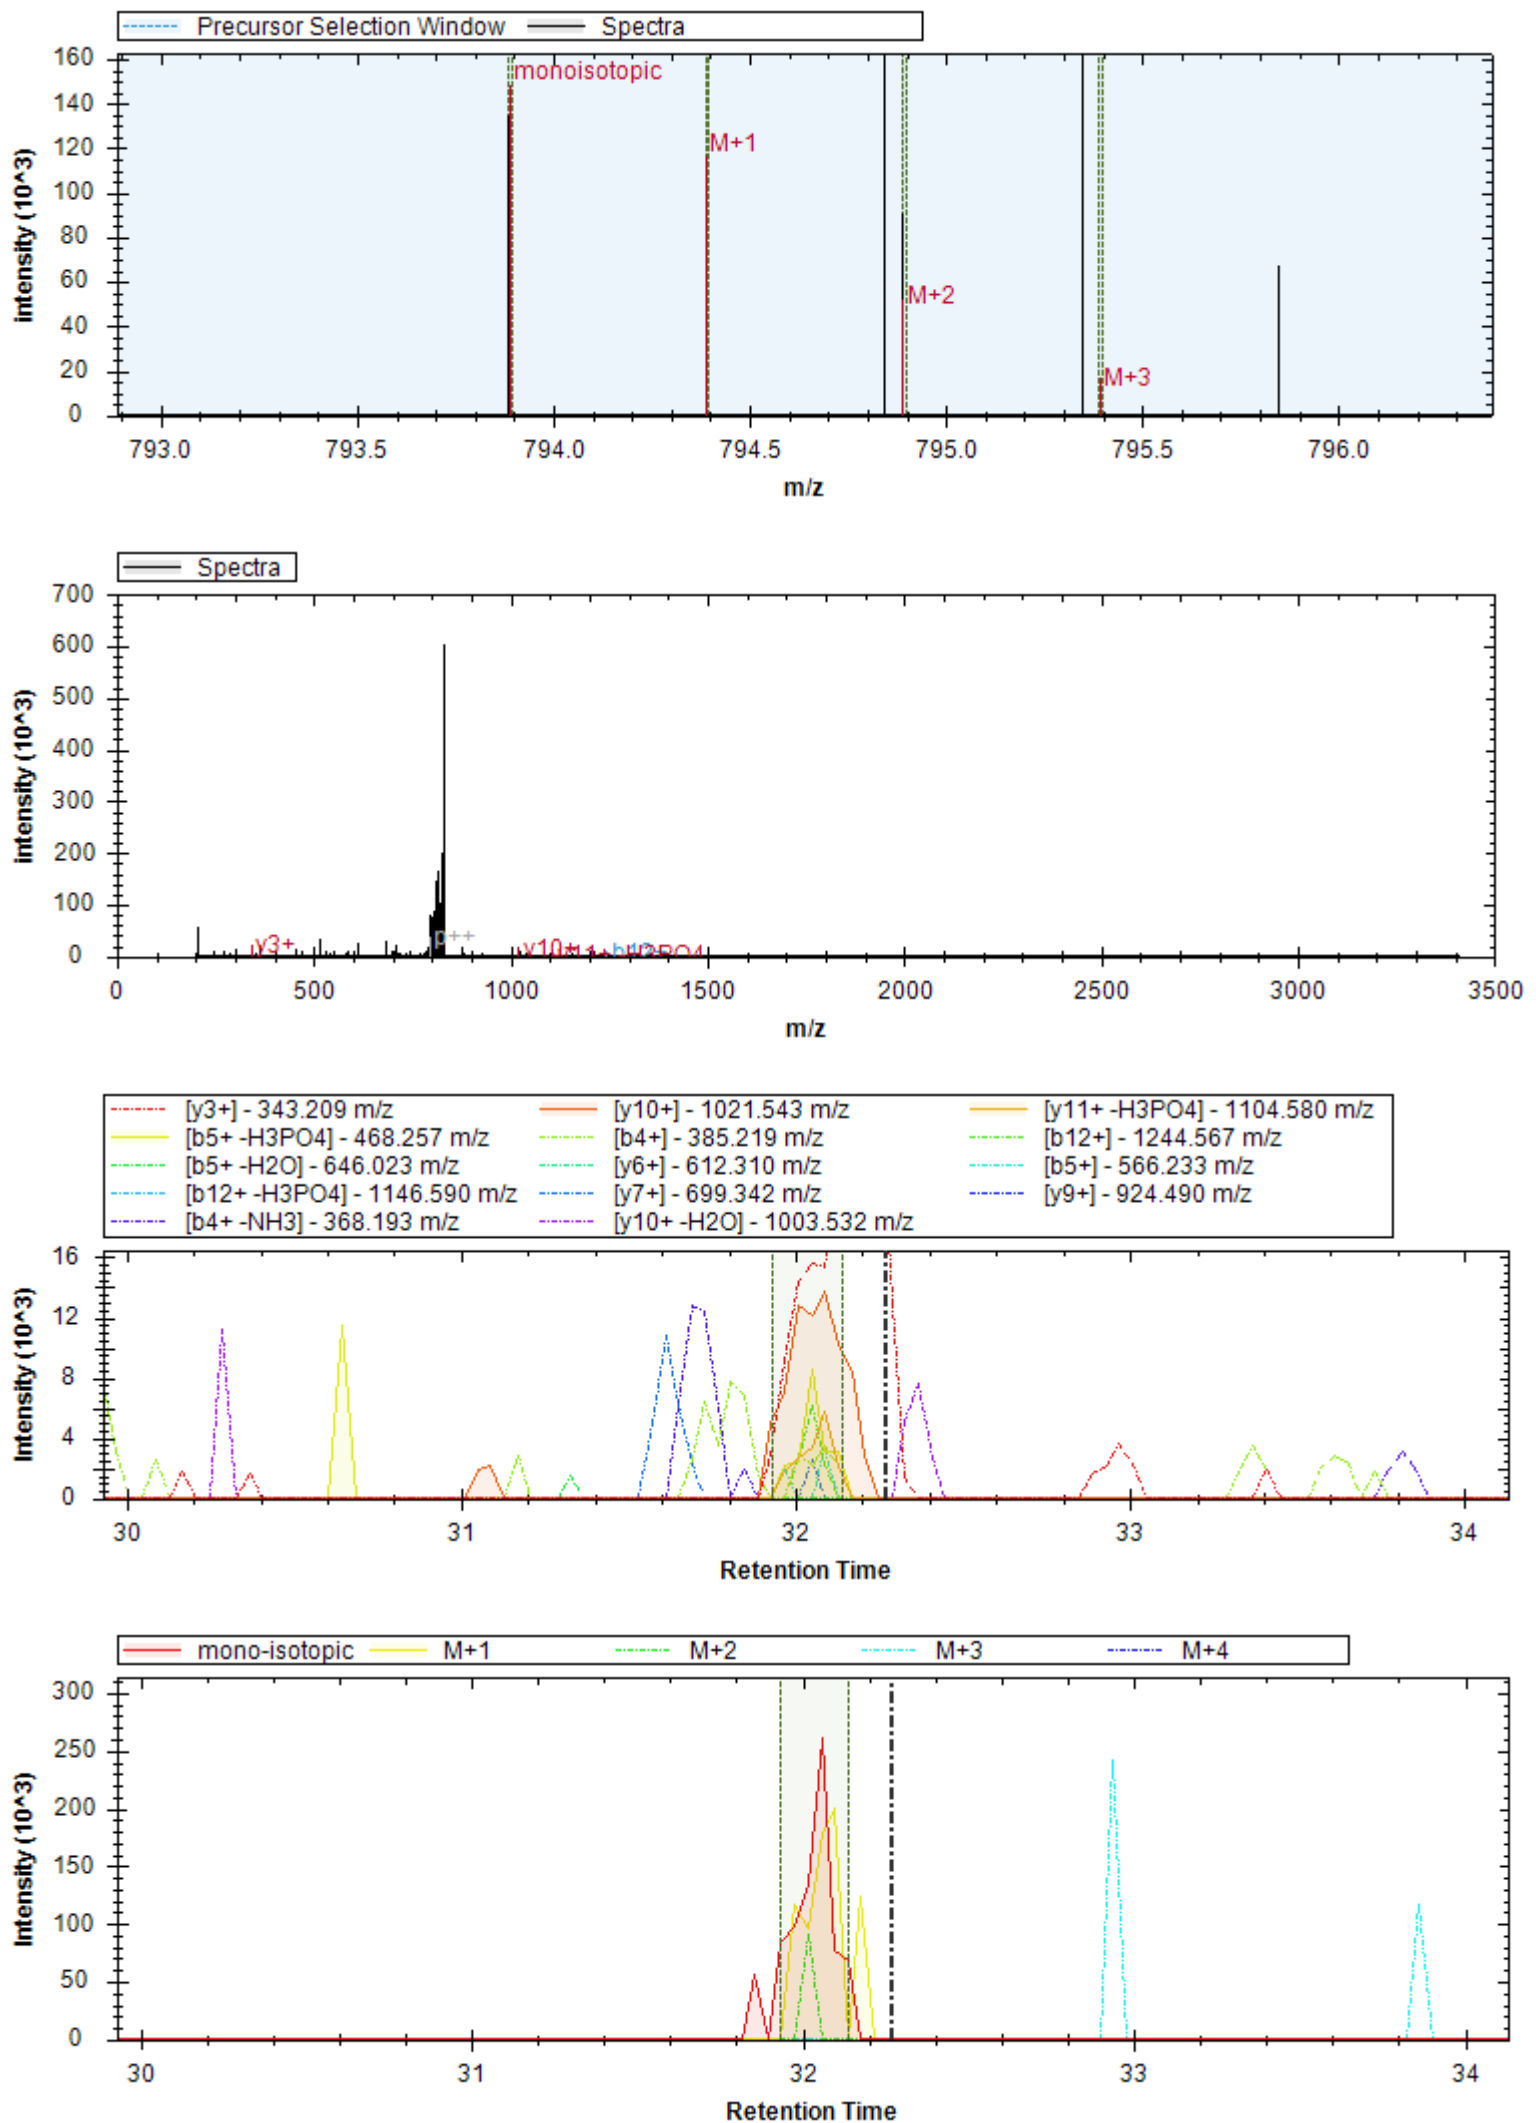

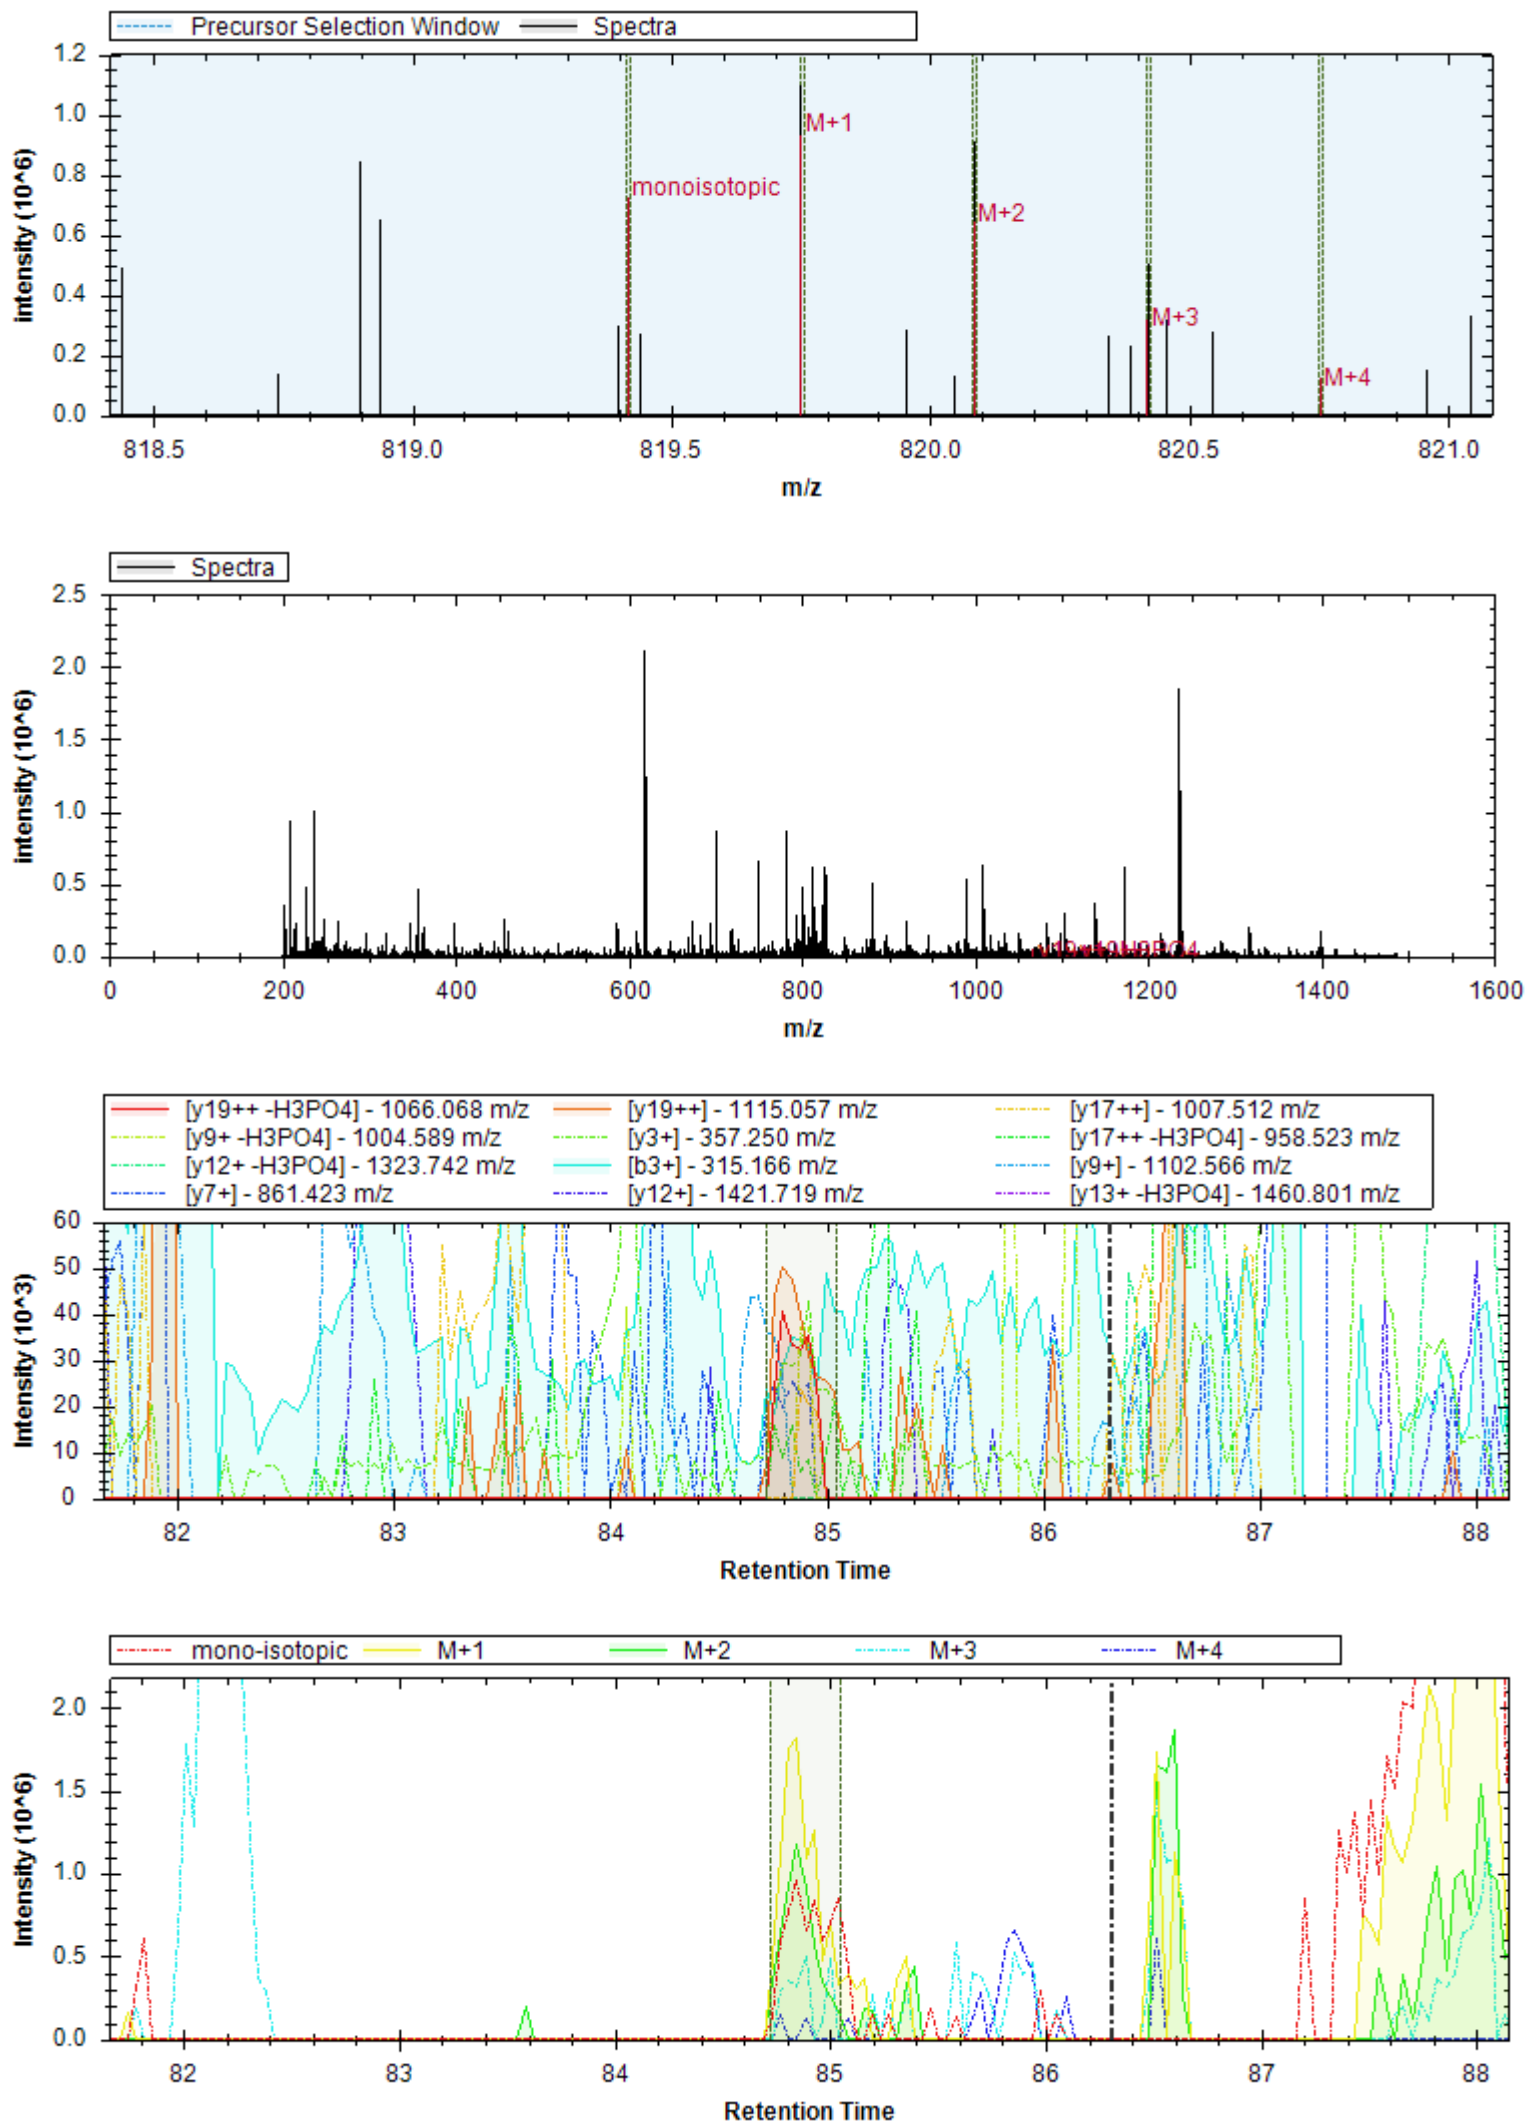



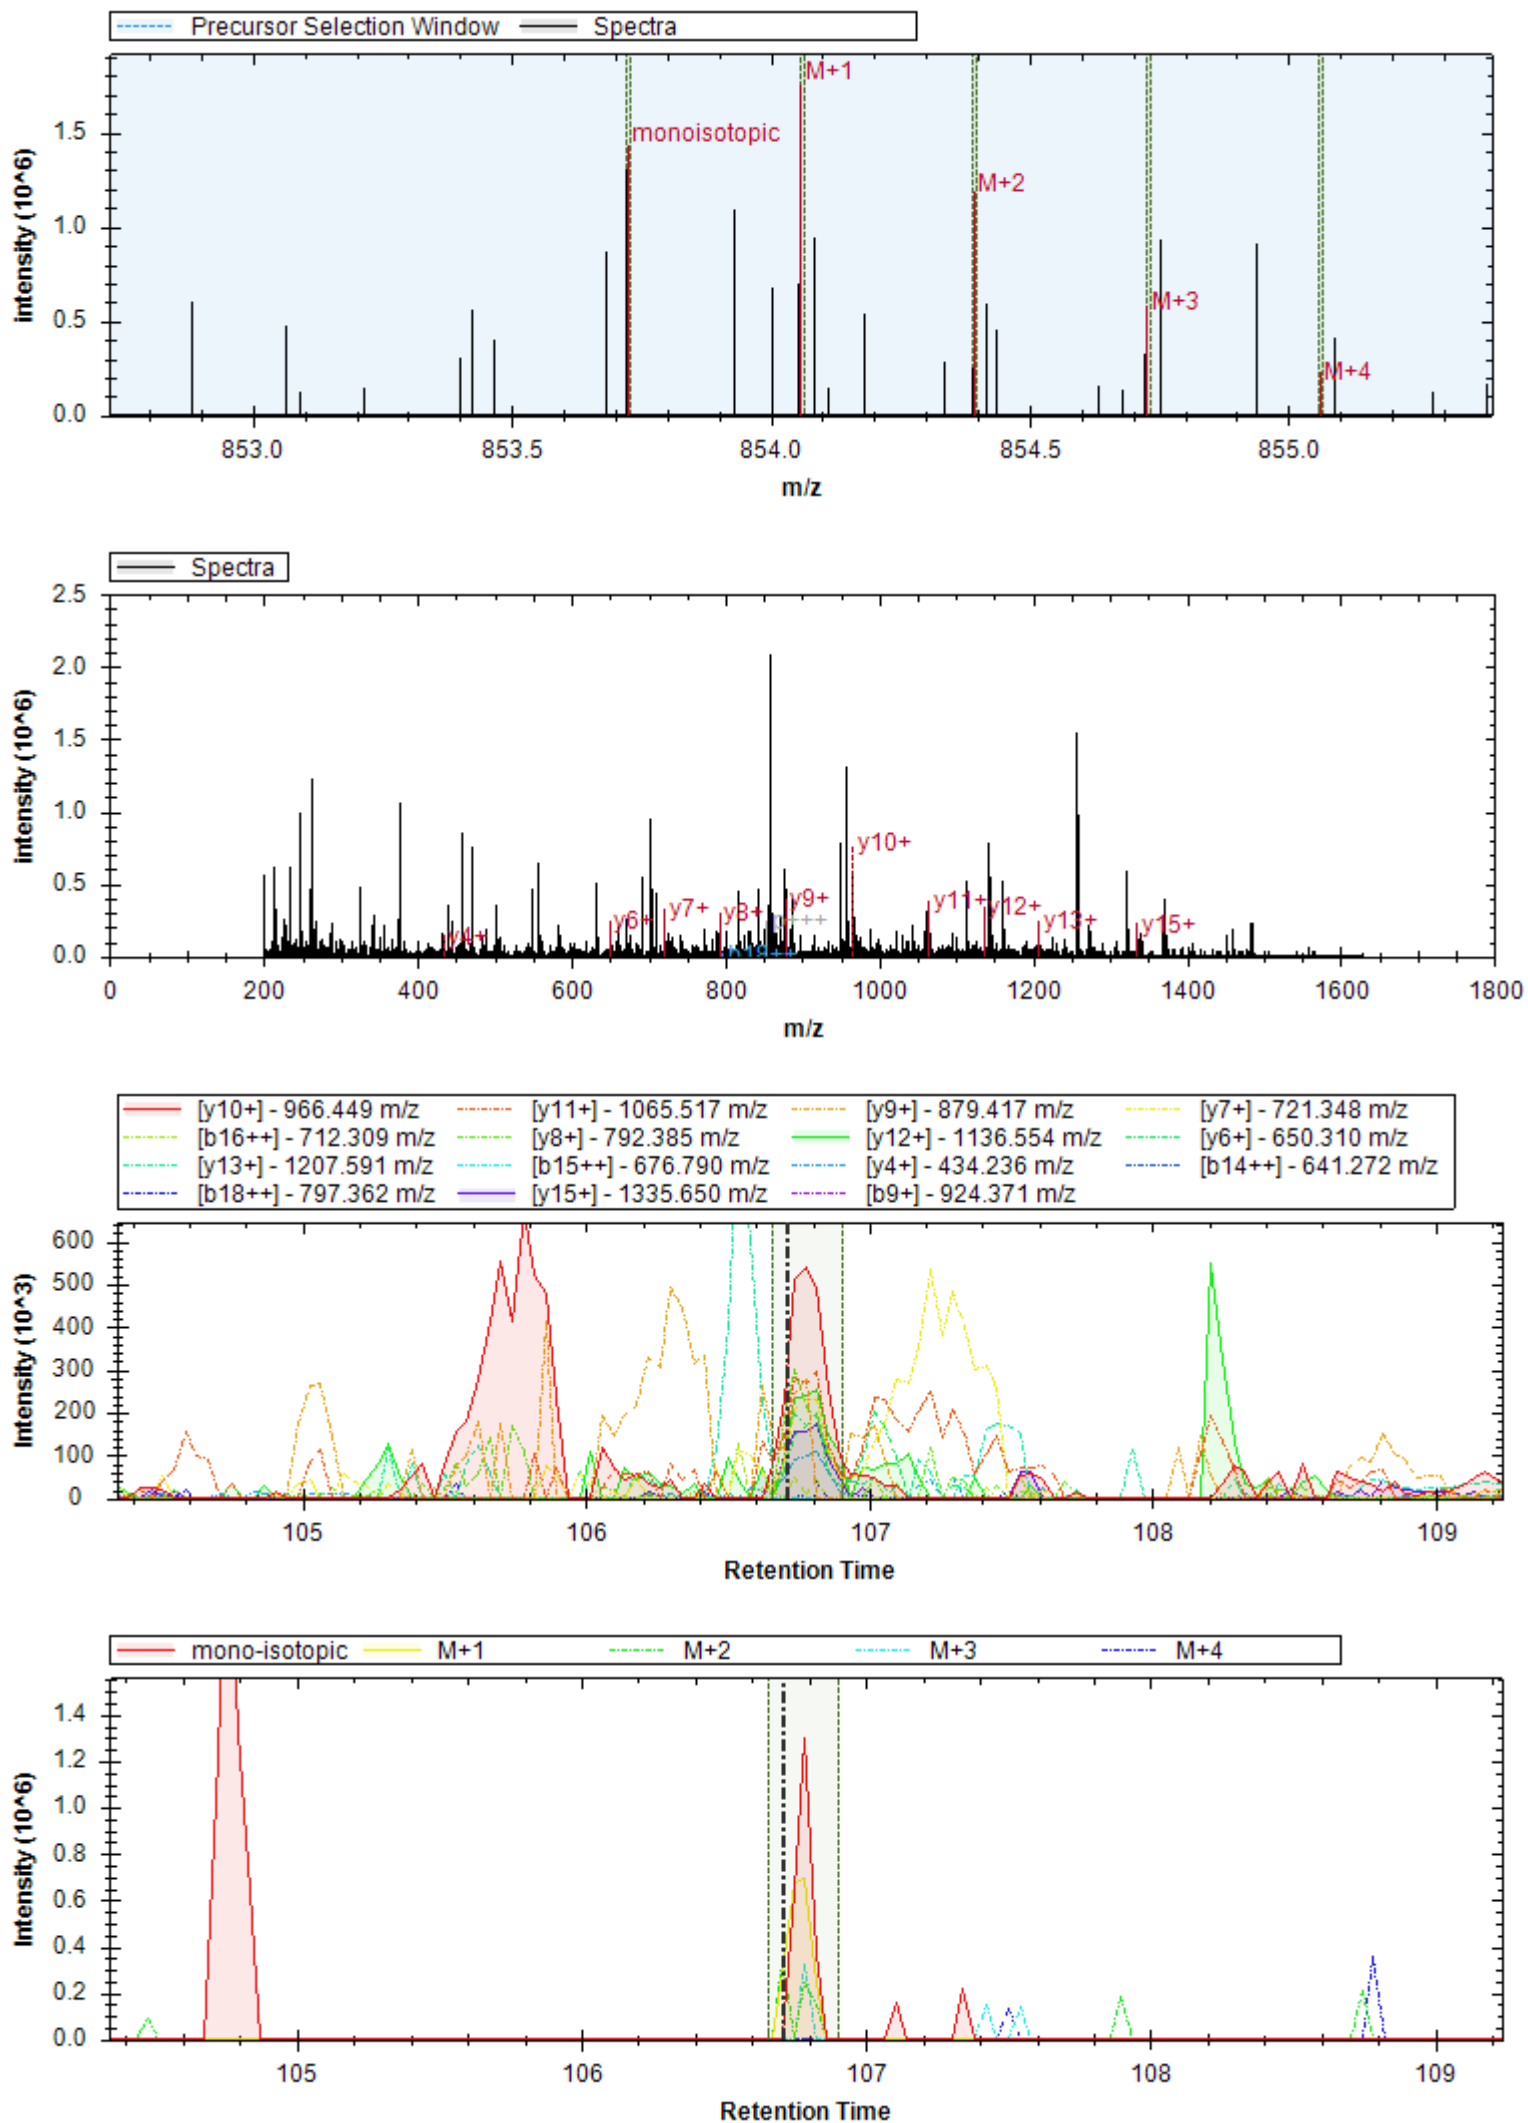

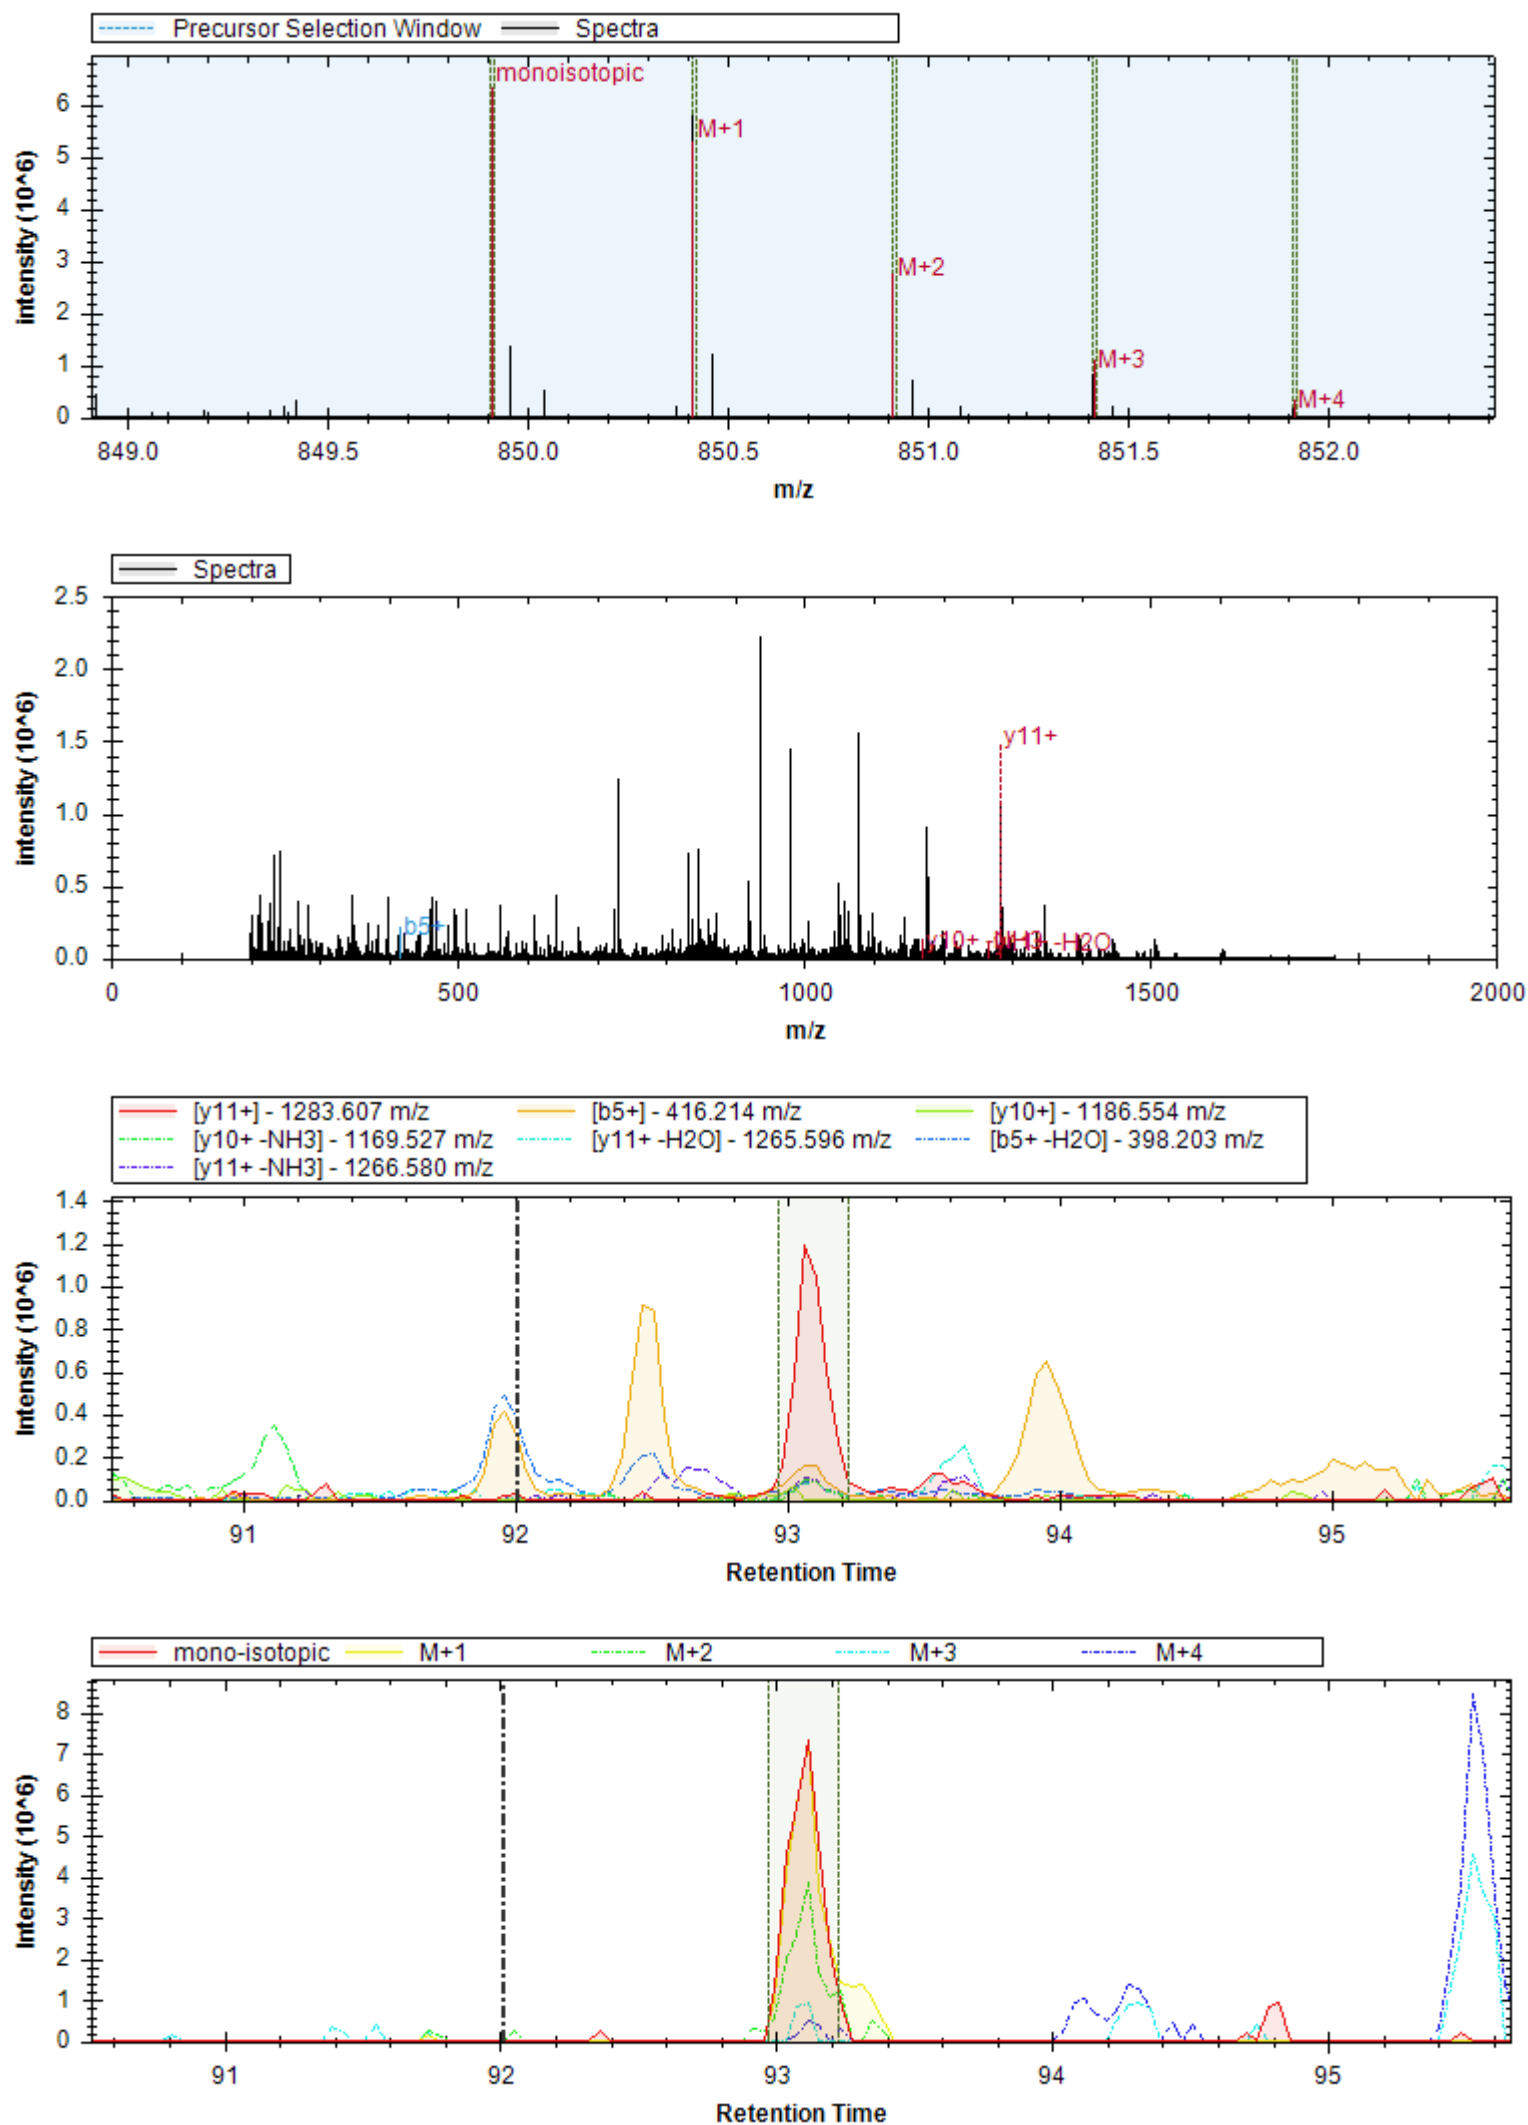

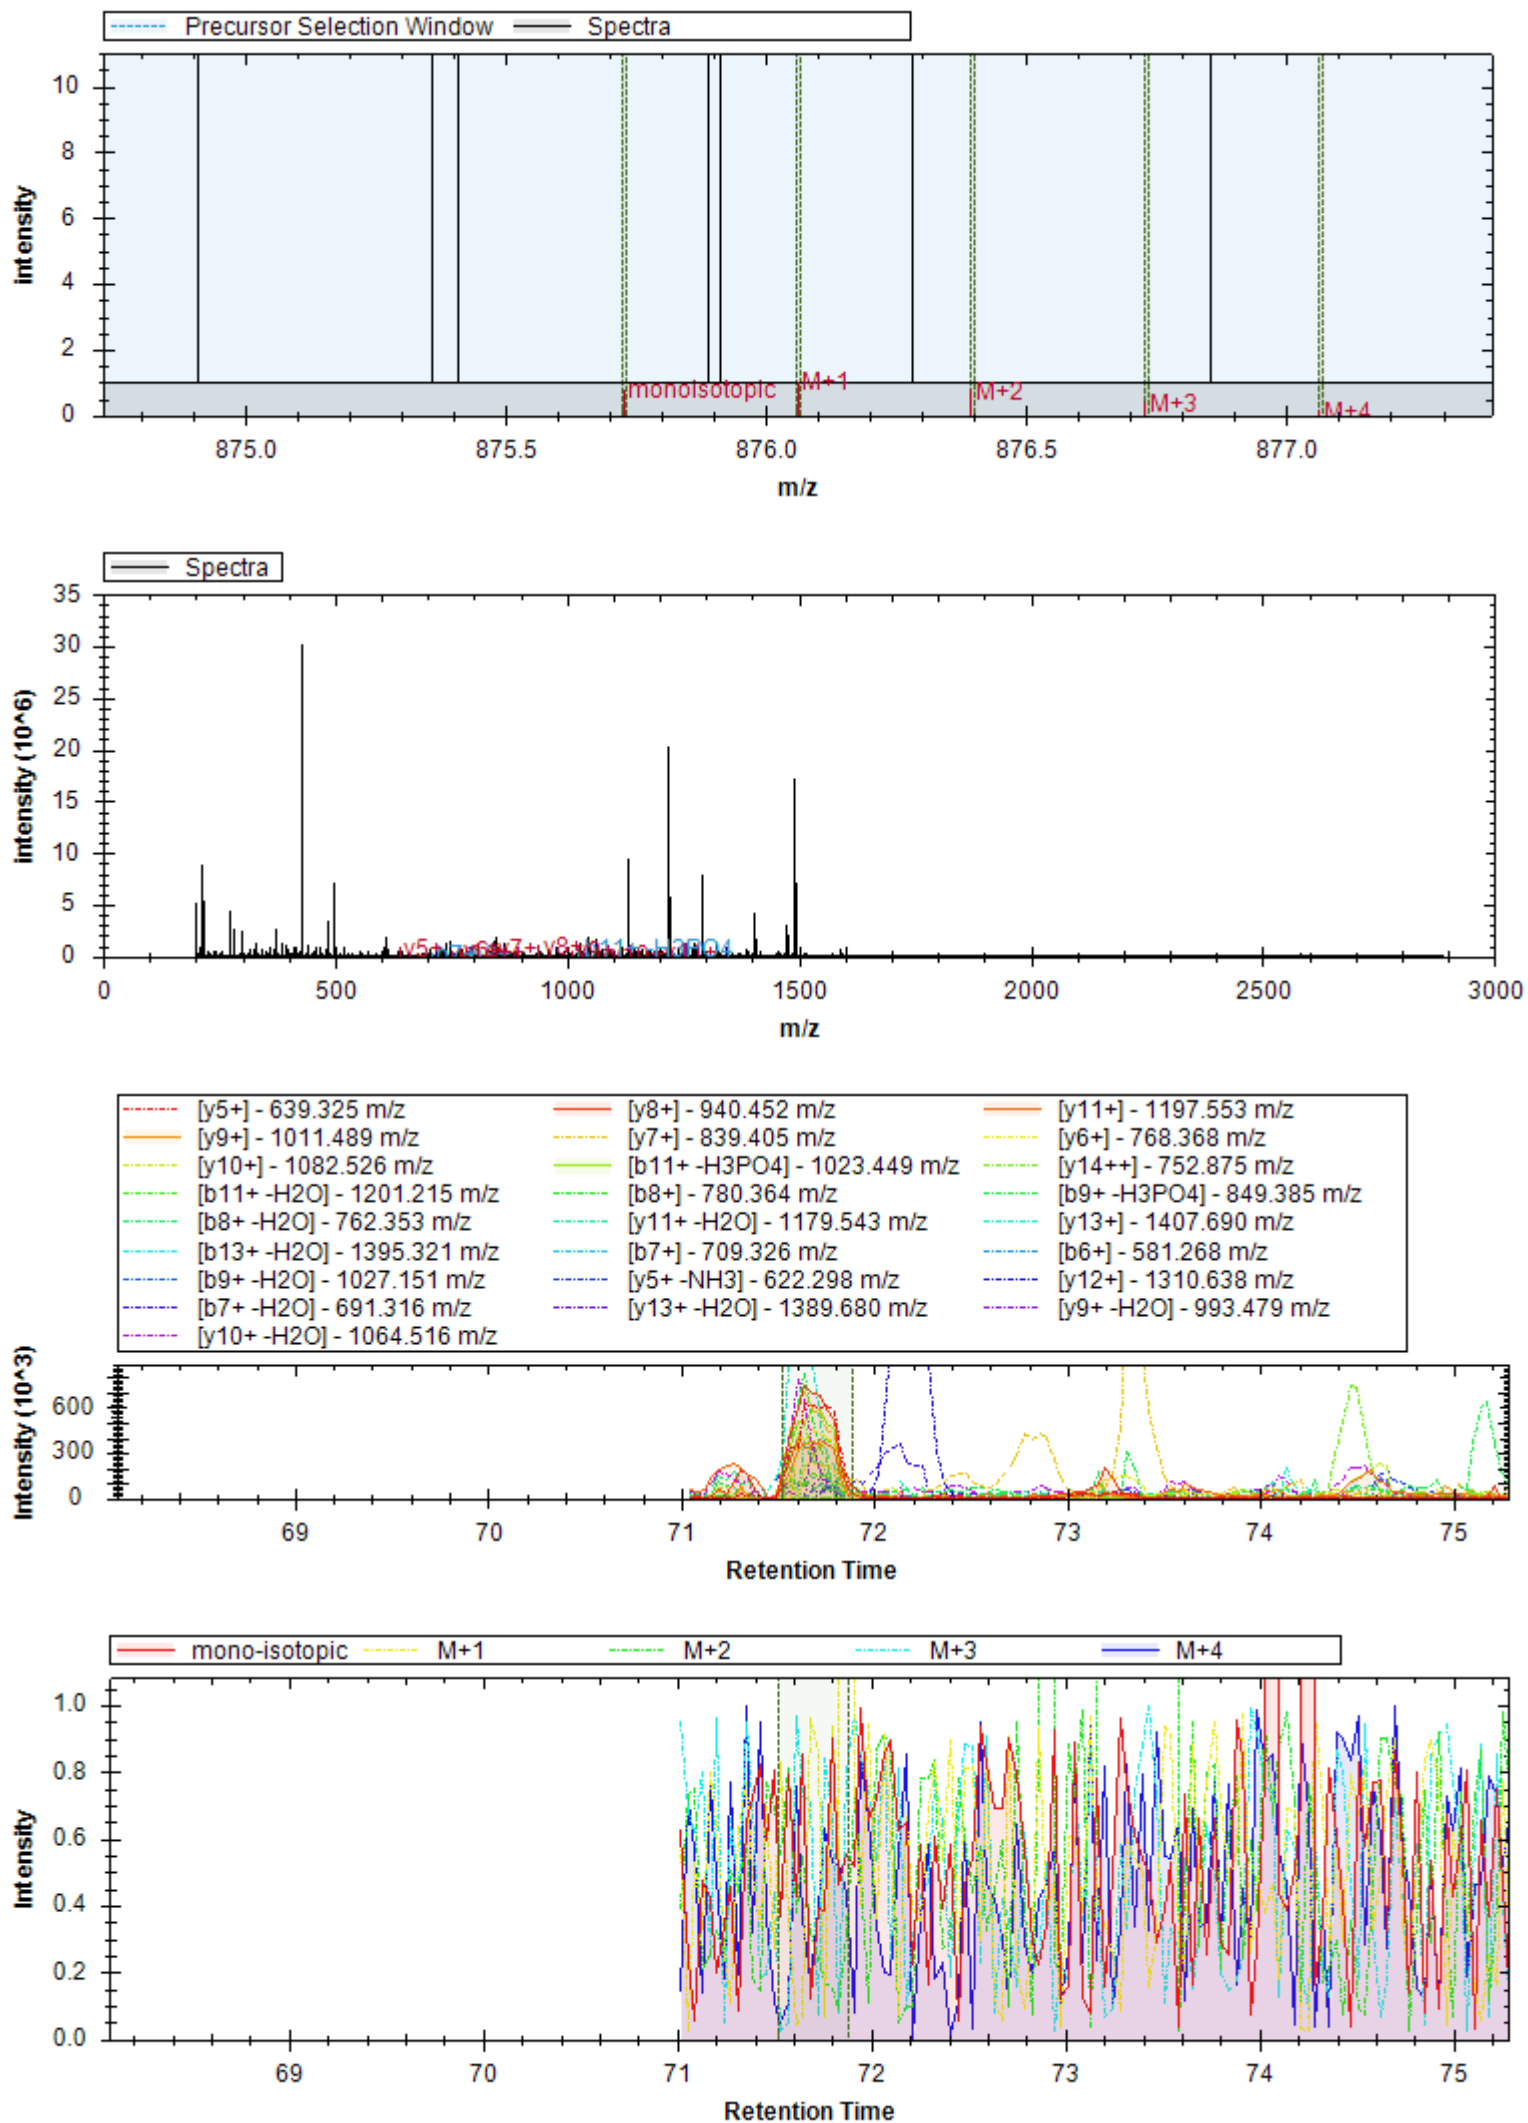

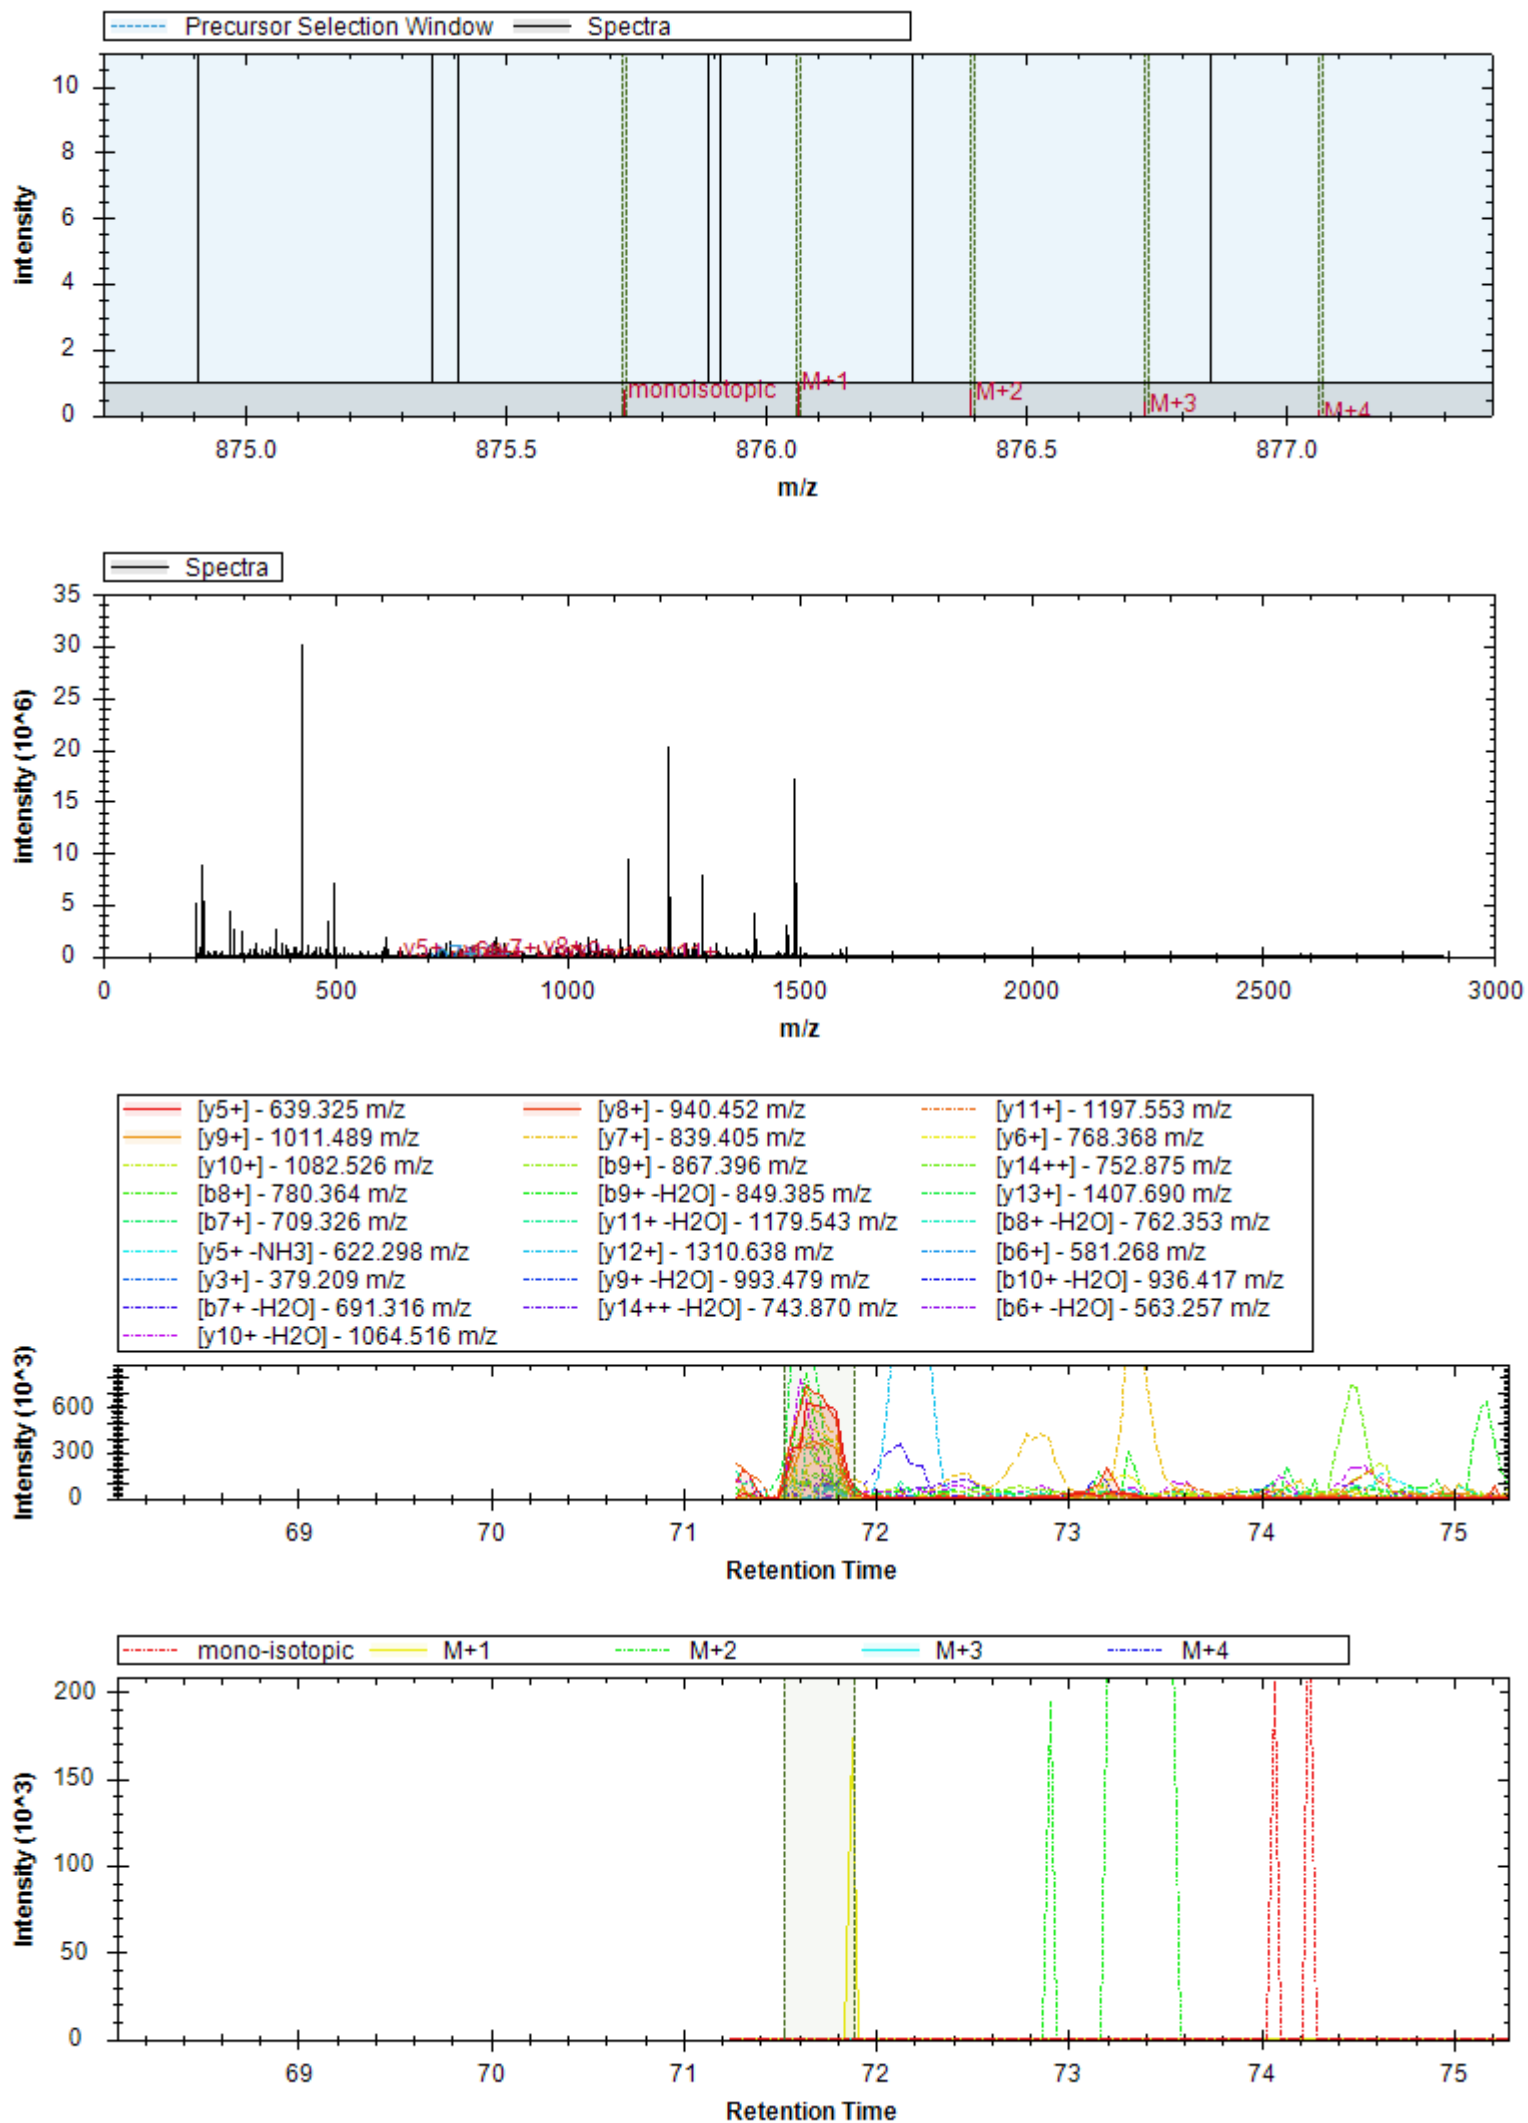

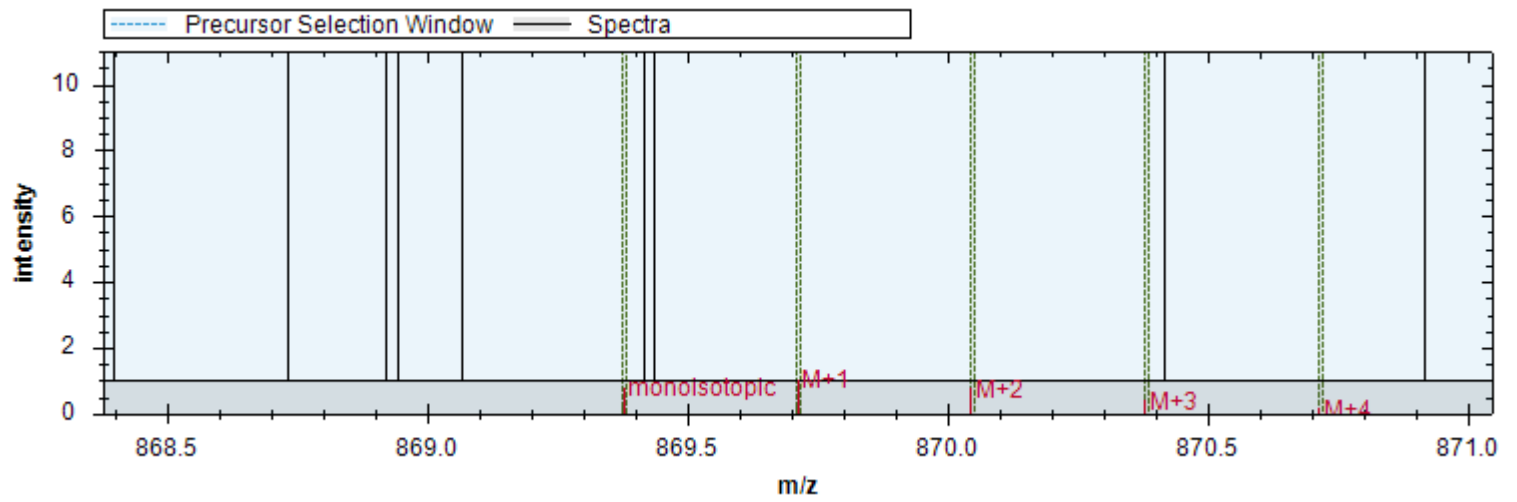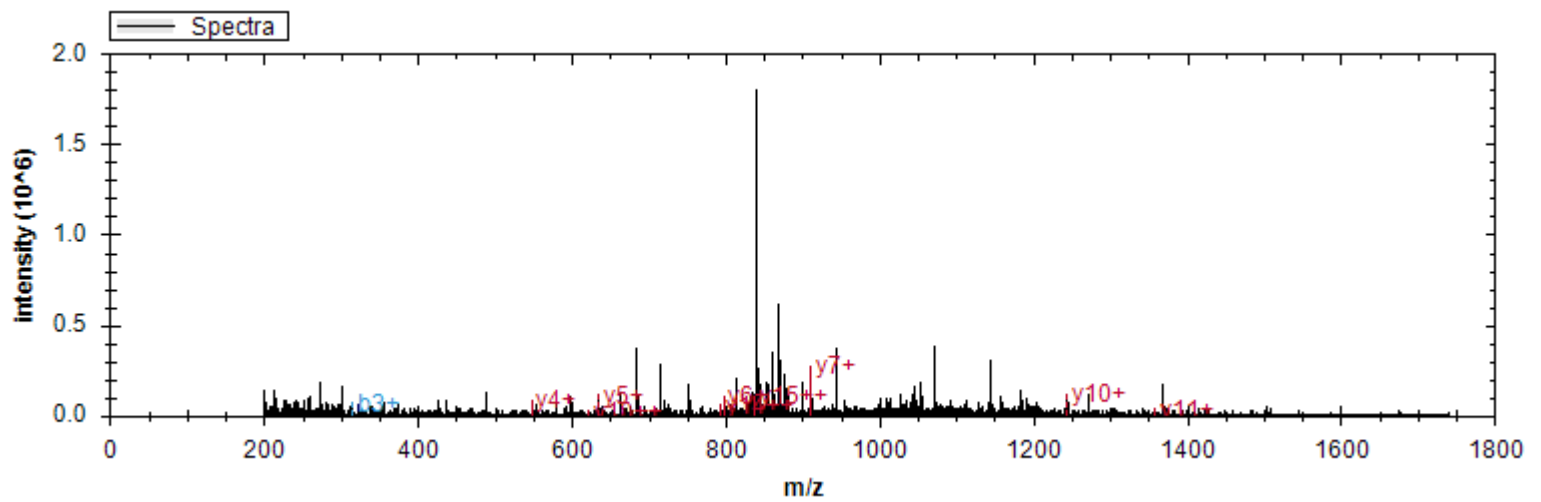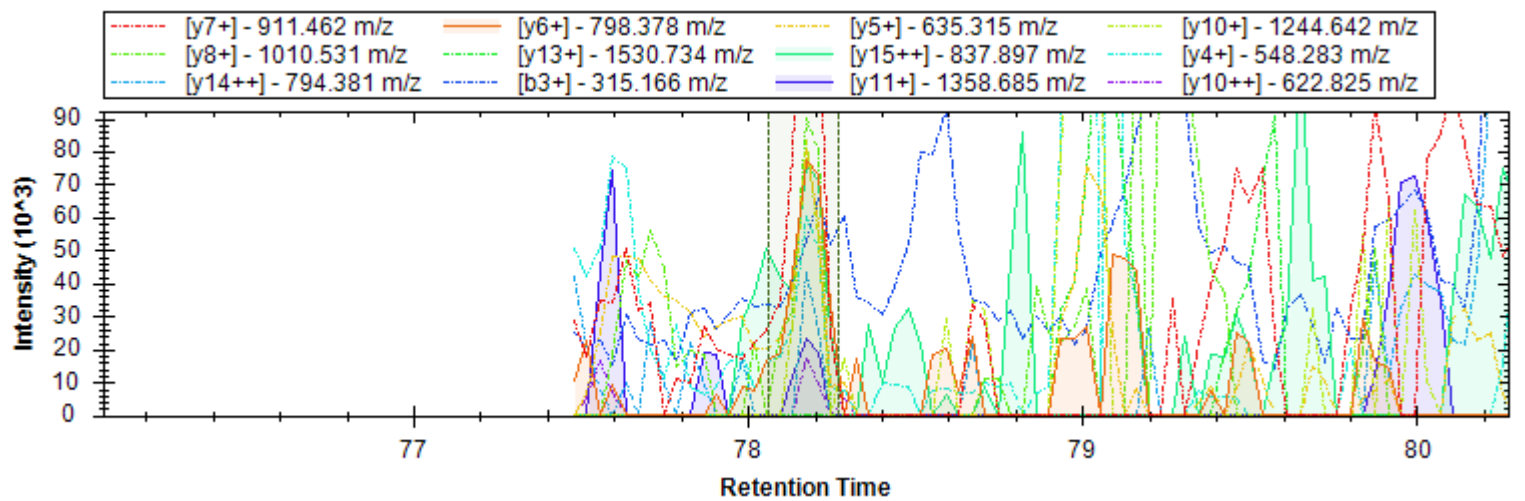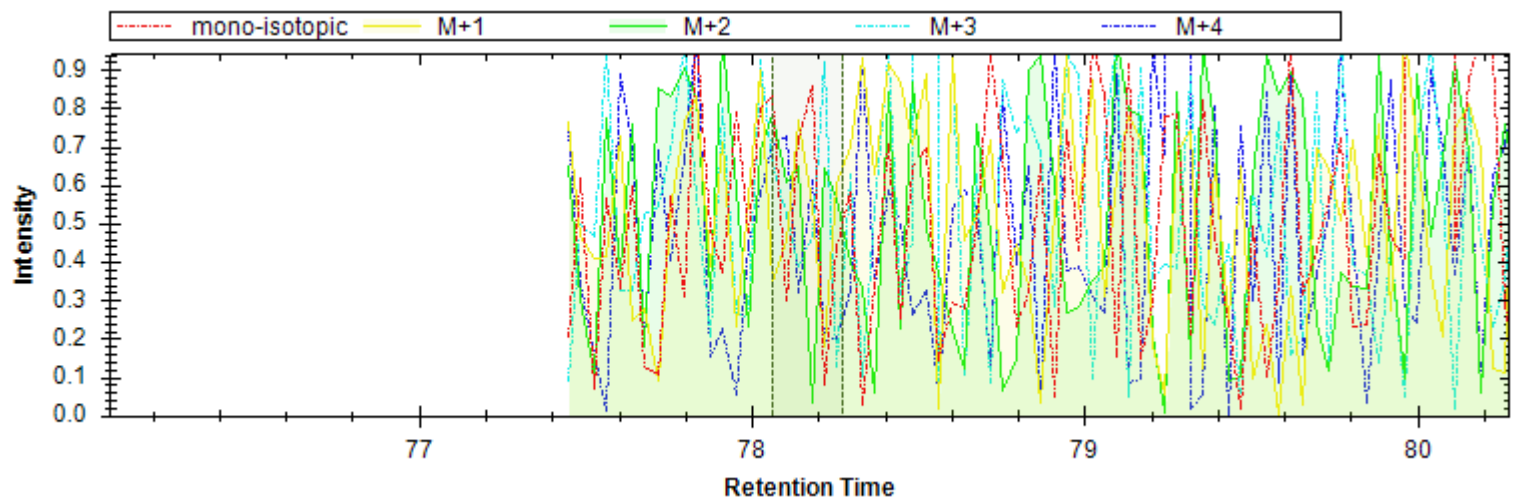

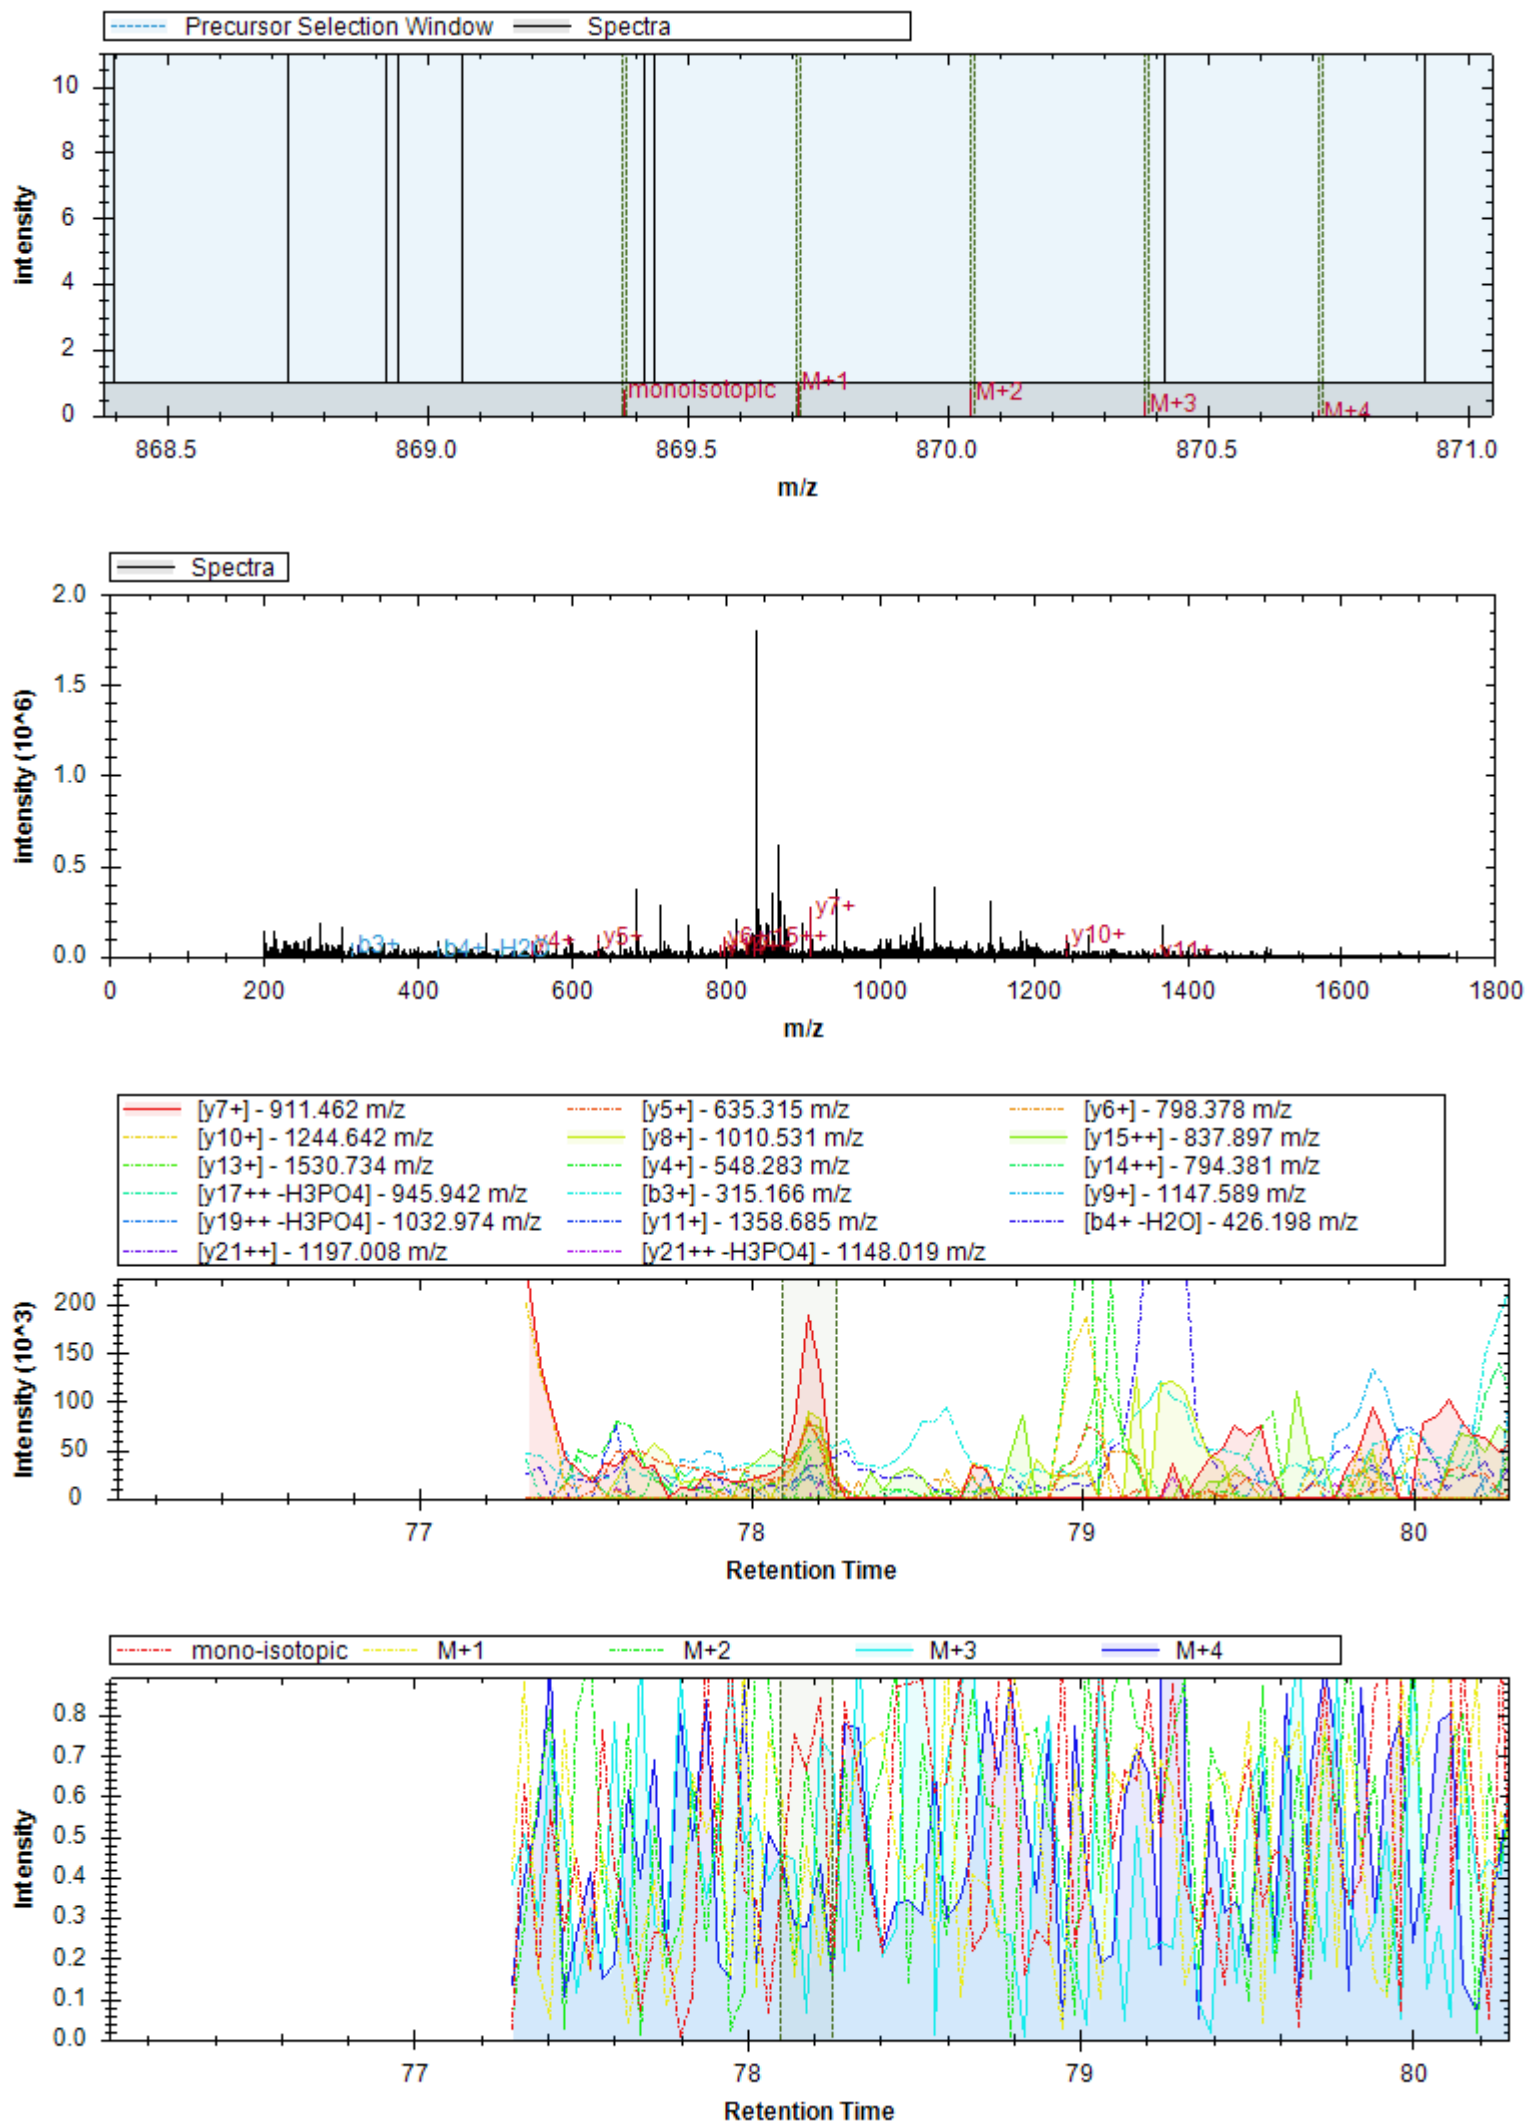

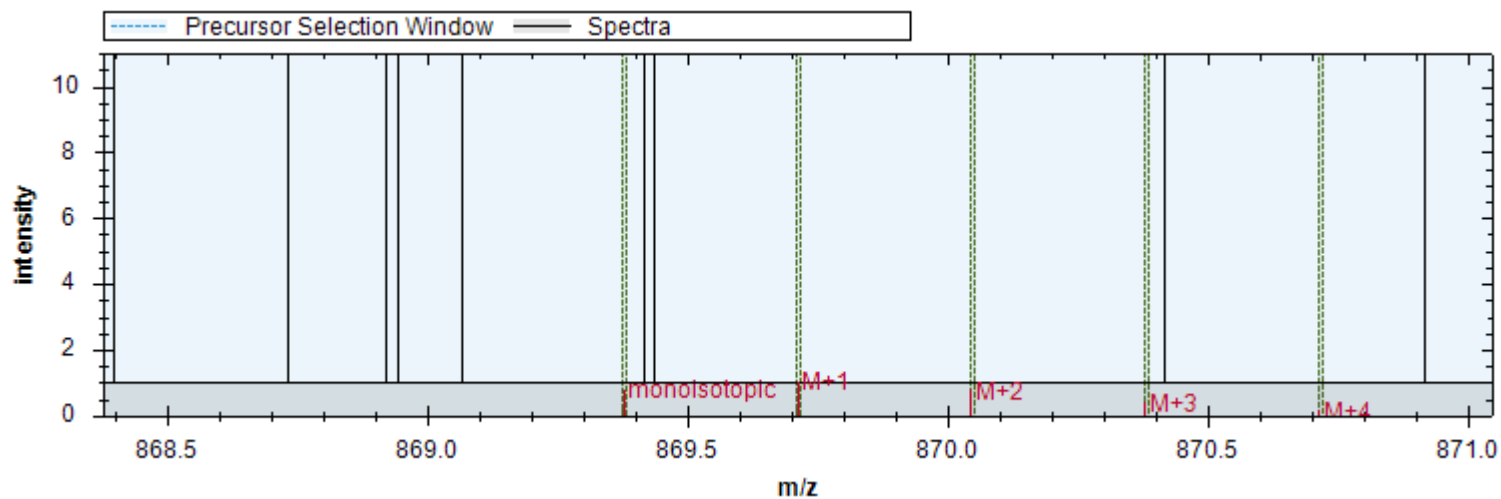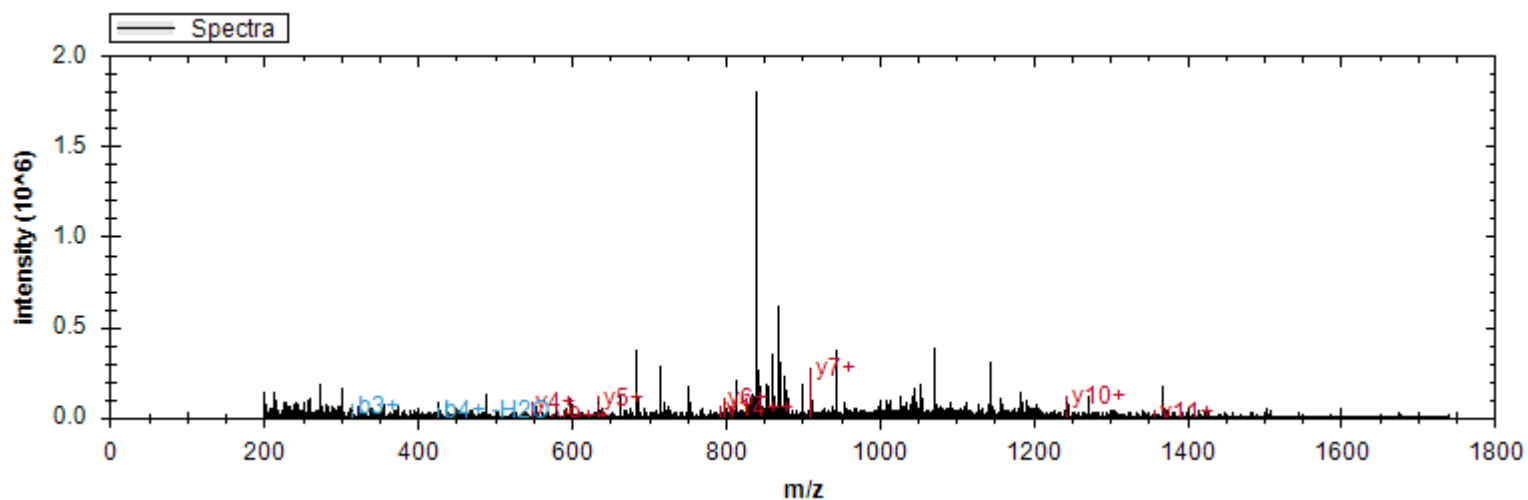

- |                               |                       |                                |
|-------------------------------|-----------------------|--------------------------------|
| [y7+] - 911.462 m/z           | [b8+] - 852.373 m/z   | [y5+] - 635.315 m/z            |
| [y6+] - 798.378 m/z           | [y10+] - 1244.642 m/z | [y8+] - 1010.531 m/z           |
| [y17++ - H3PO4] - 945.942 m/z | [y14++] - 794.381 m/z | [y4+] - 548.283 m/z            |
| [y18++ - H3PO4] - 989.458 m/z | [y13+] - 1530.734 m/z | [y11+] - 1358.685 m/z          |
| [b4+ - H2O] - 426.198 m/z     | [y13++] - 765.870 m/z | [y19++ - H3PO4] - 1032.974 m/z |
| [y9+] - 1147.589 m/z          | [b3+] - 315.166 m/z   | [y9++] - 574.298 m/z           |
| [y17++] - 994.931 m/z         | [b4+] - 444.209 m/z   |                                |

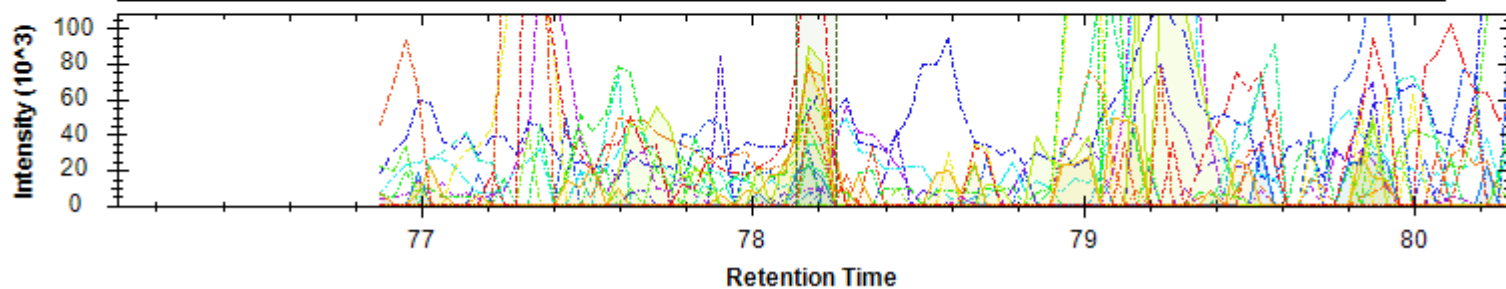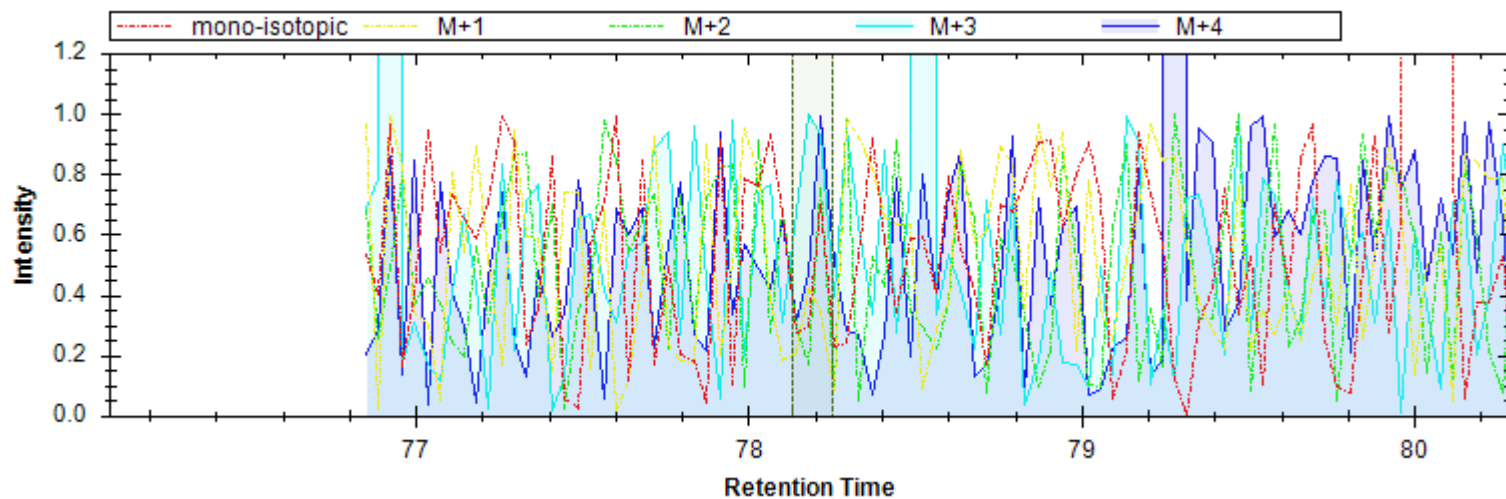

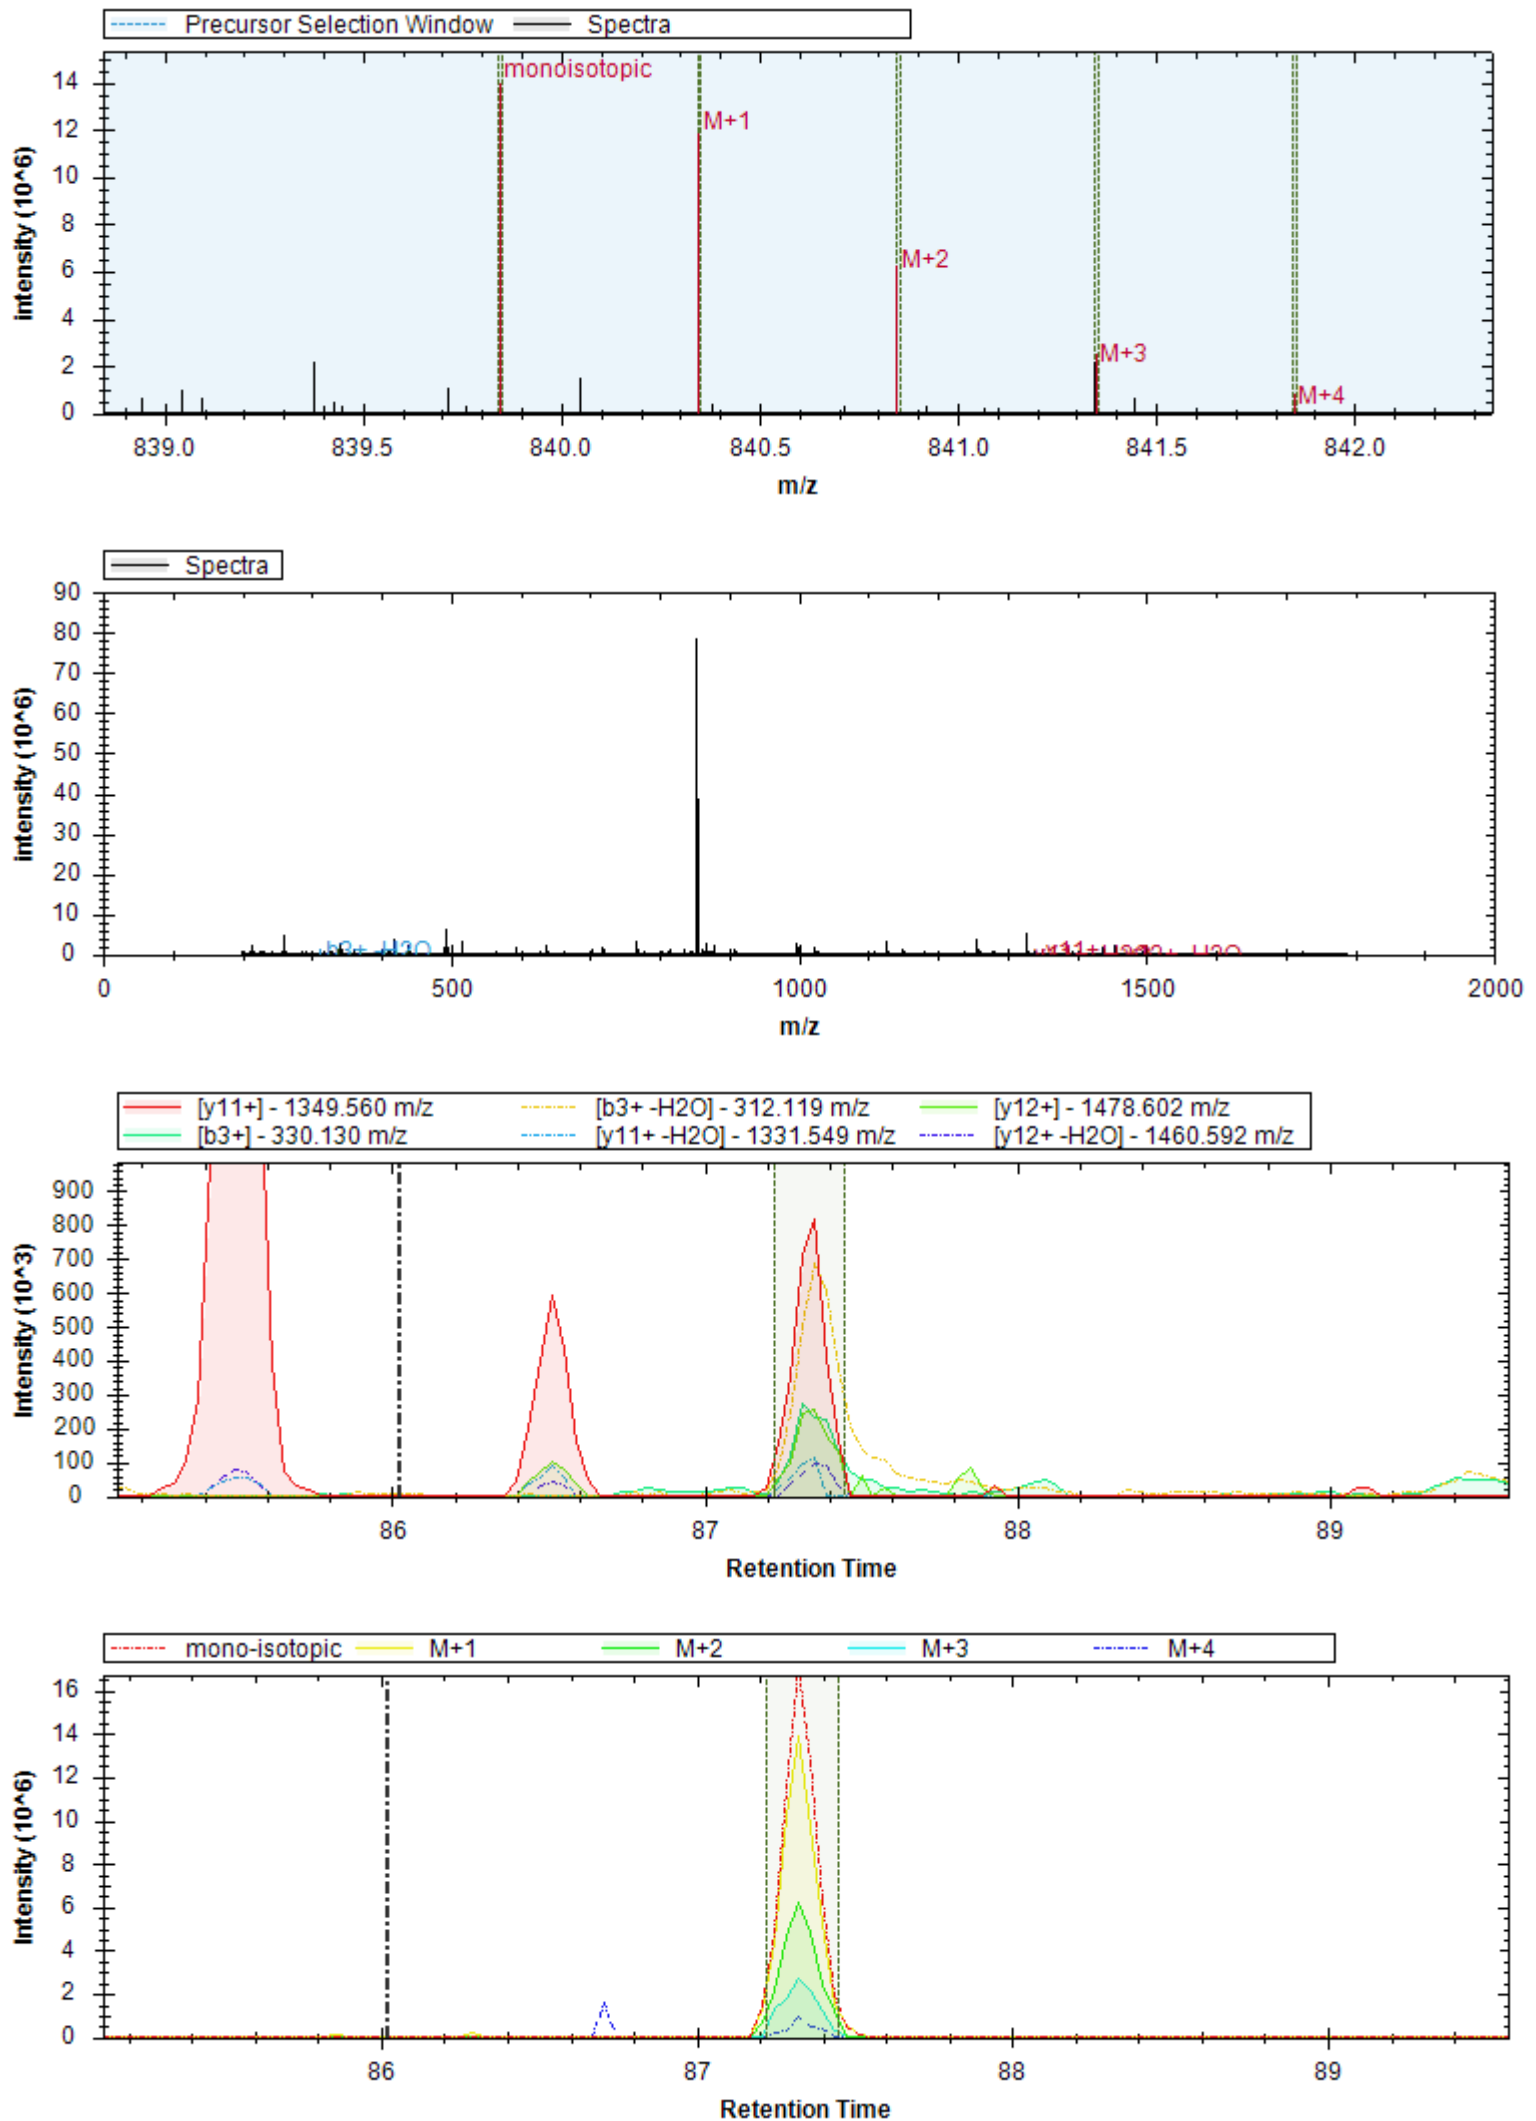



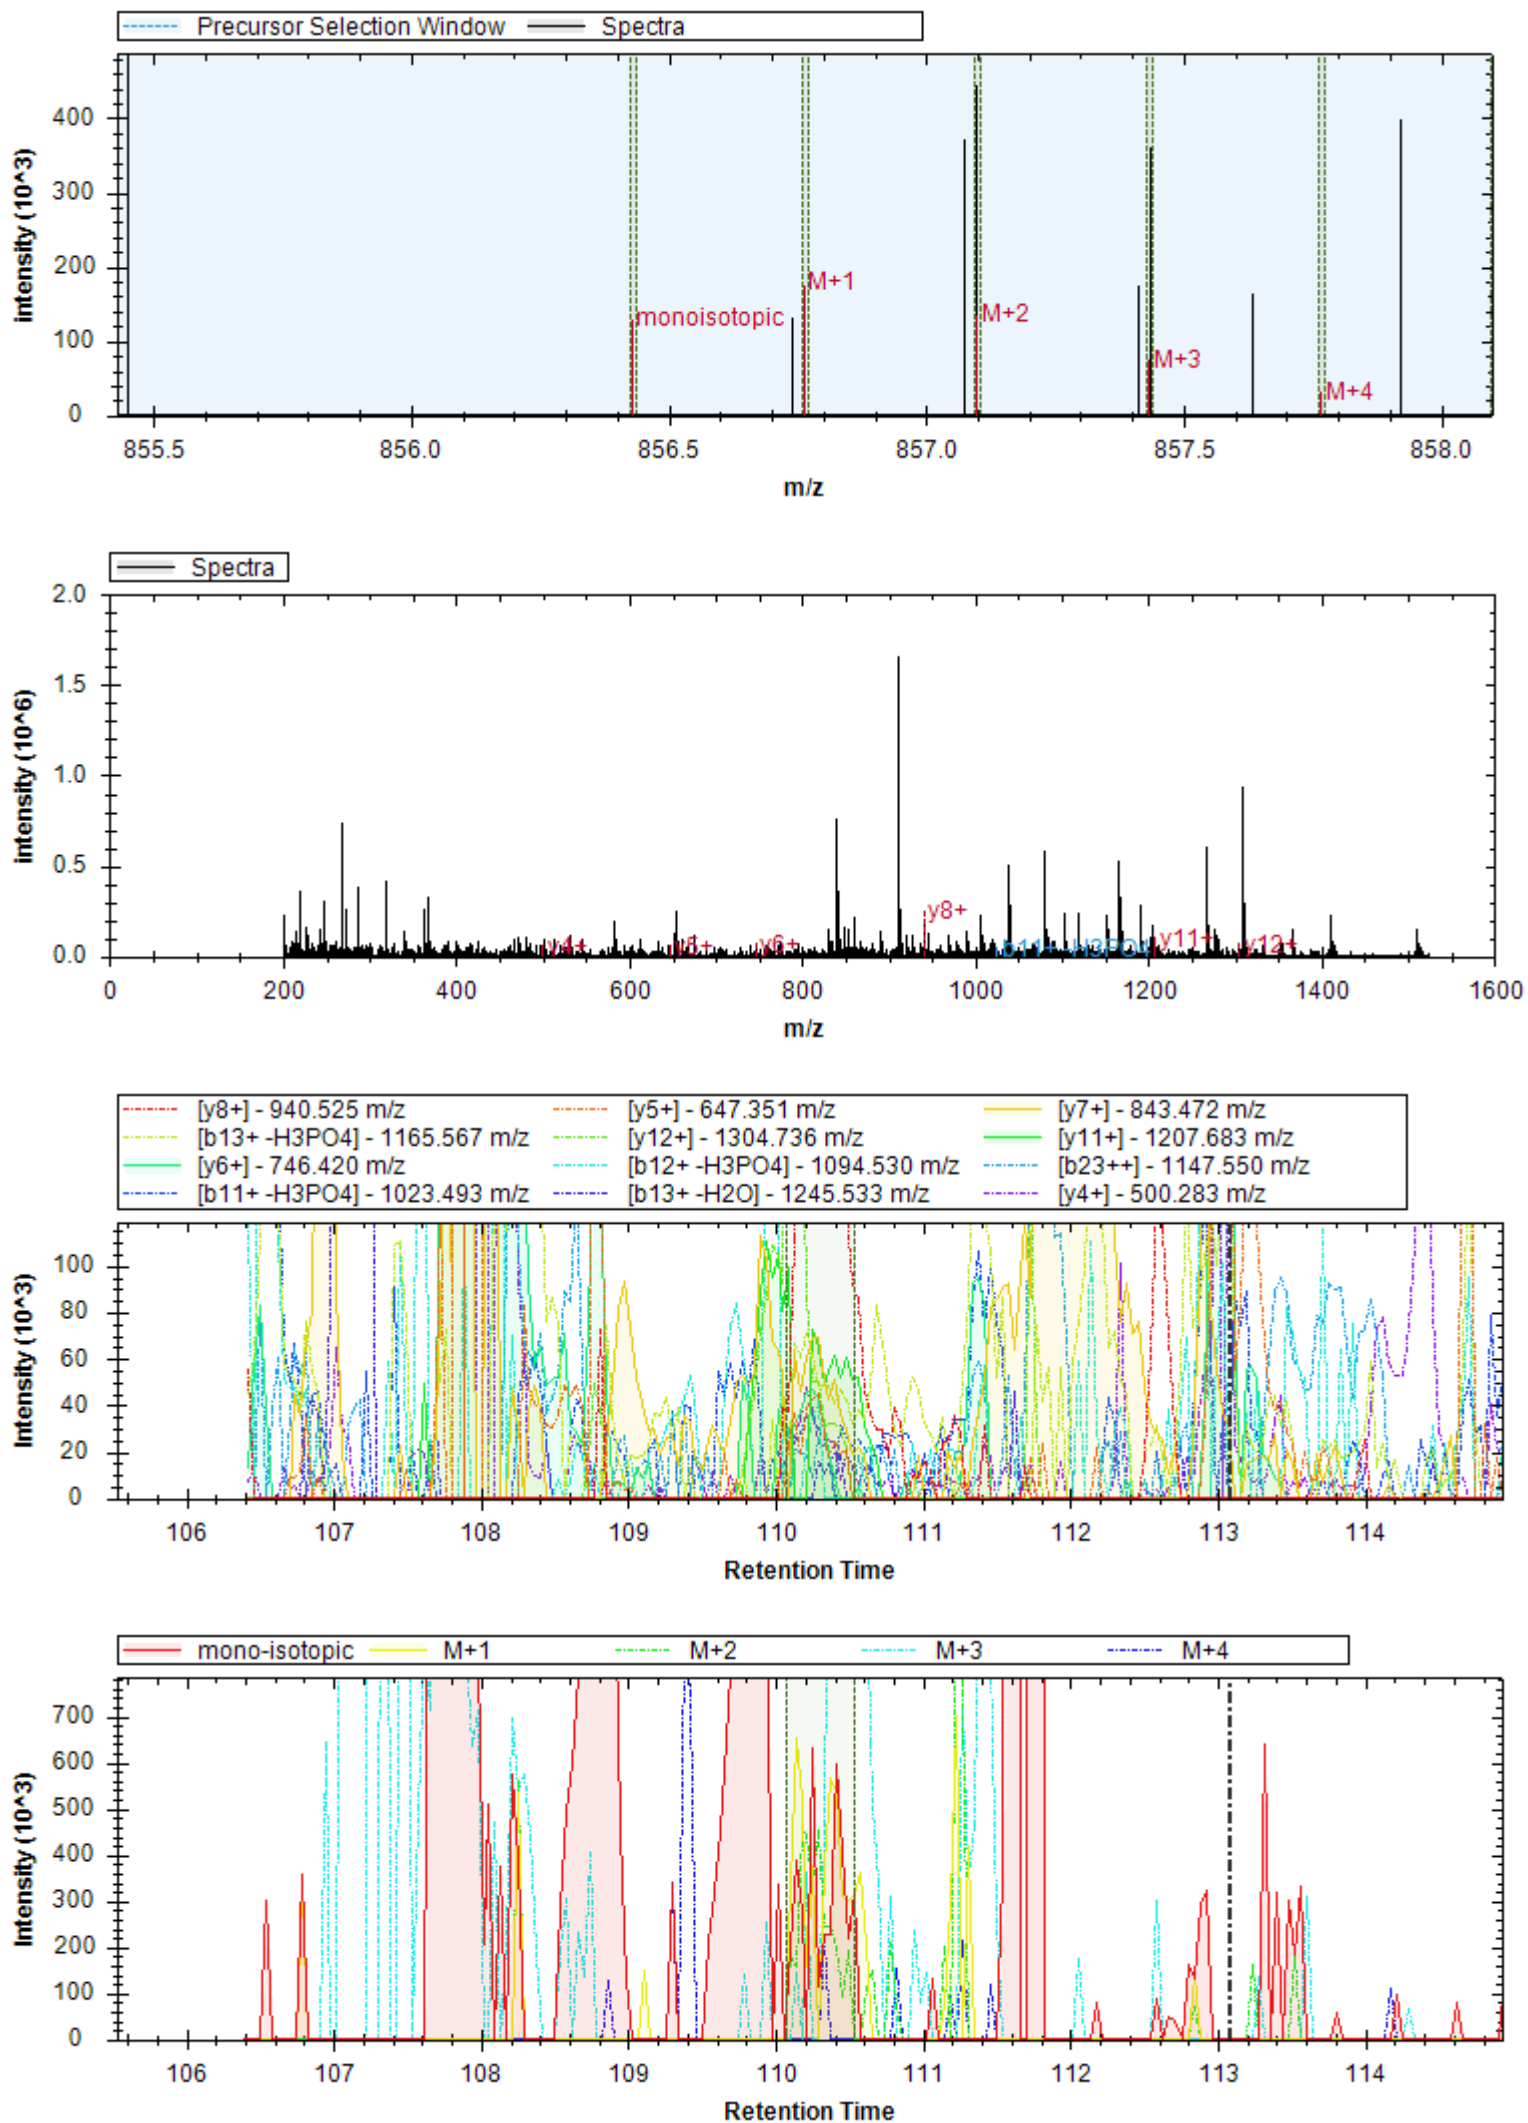

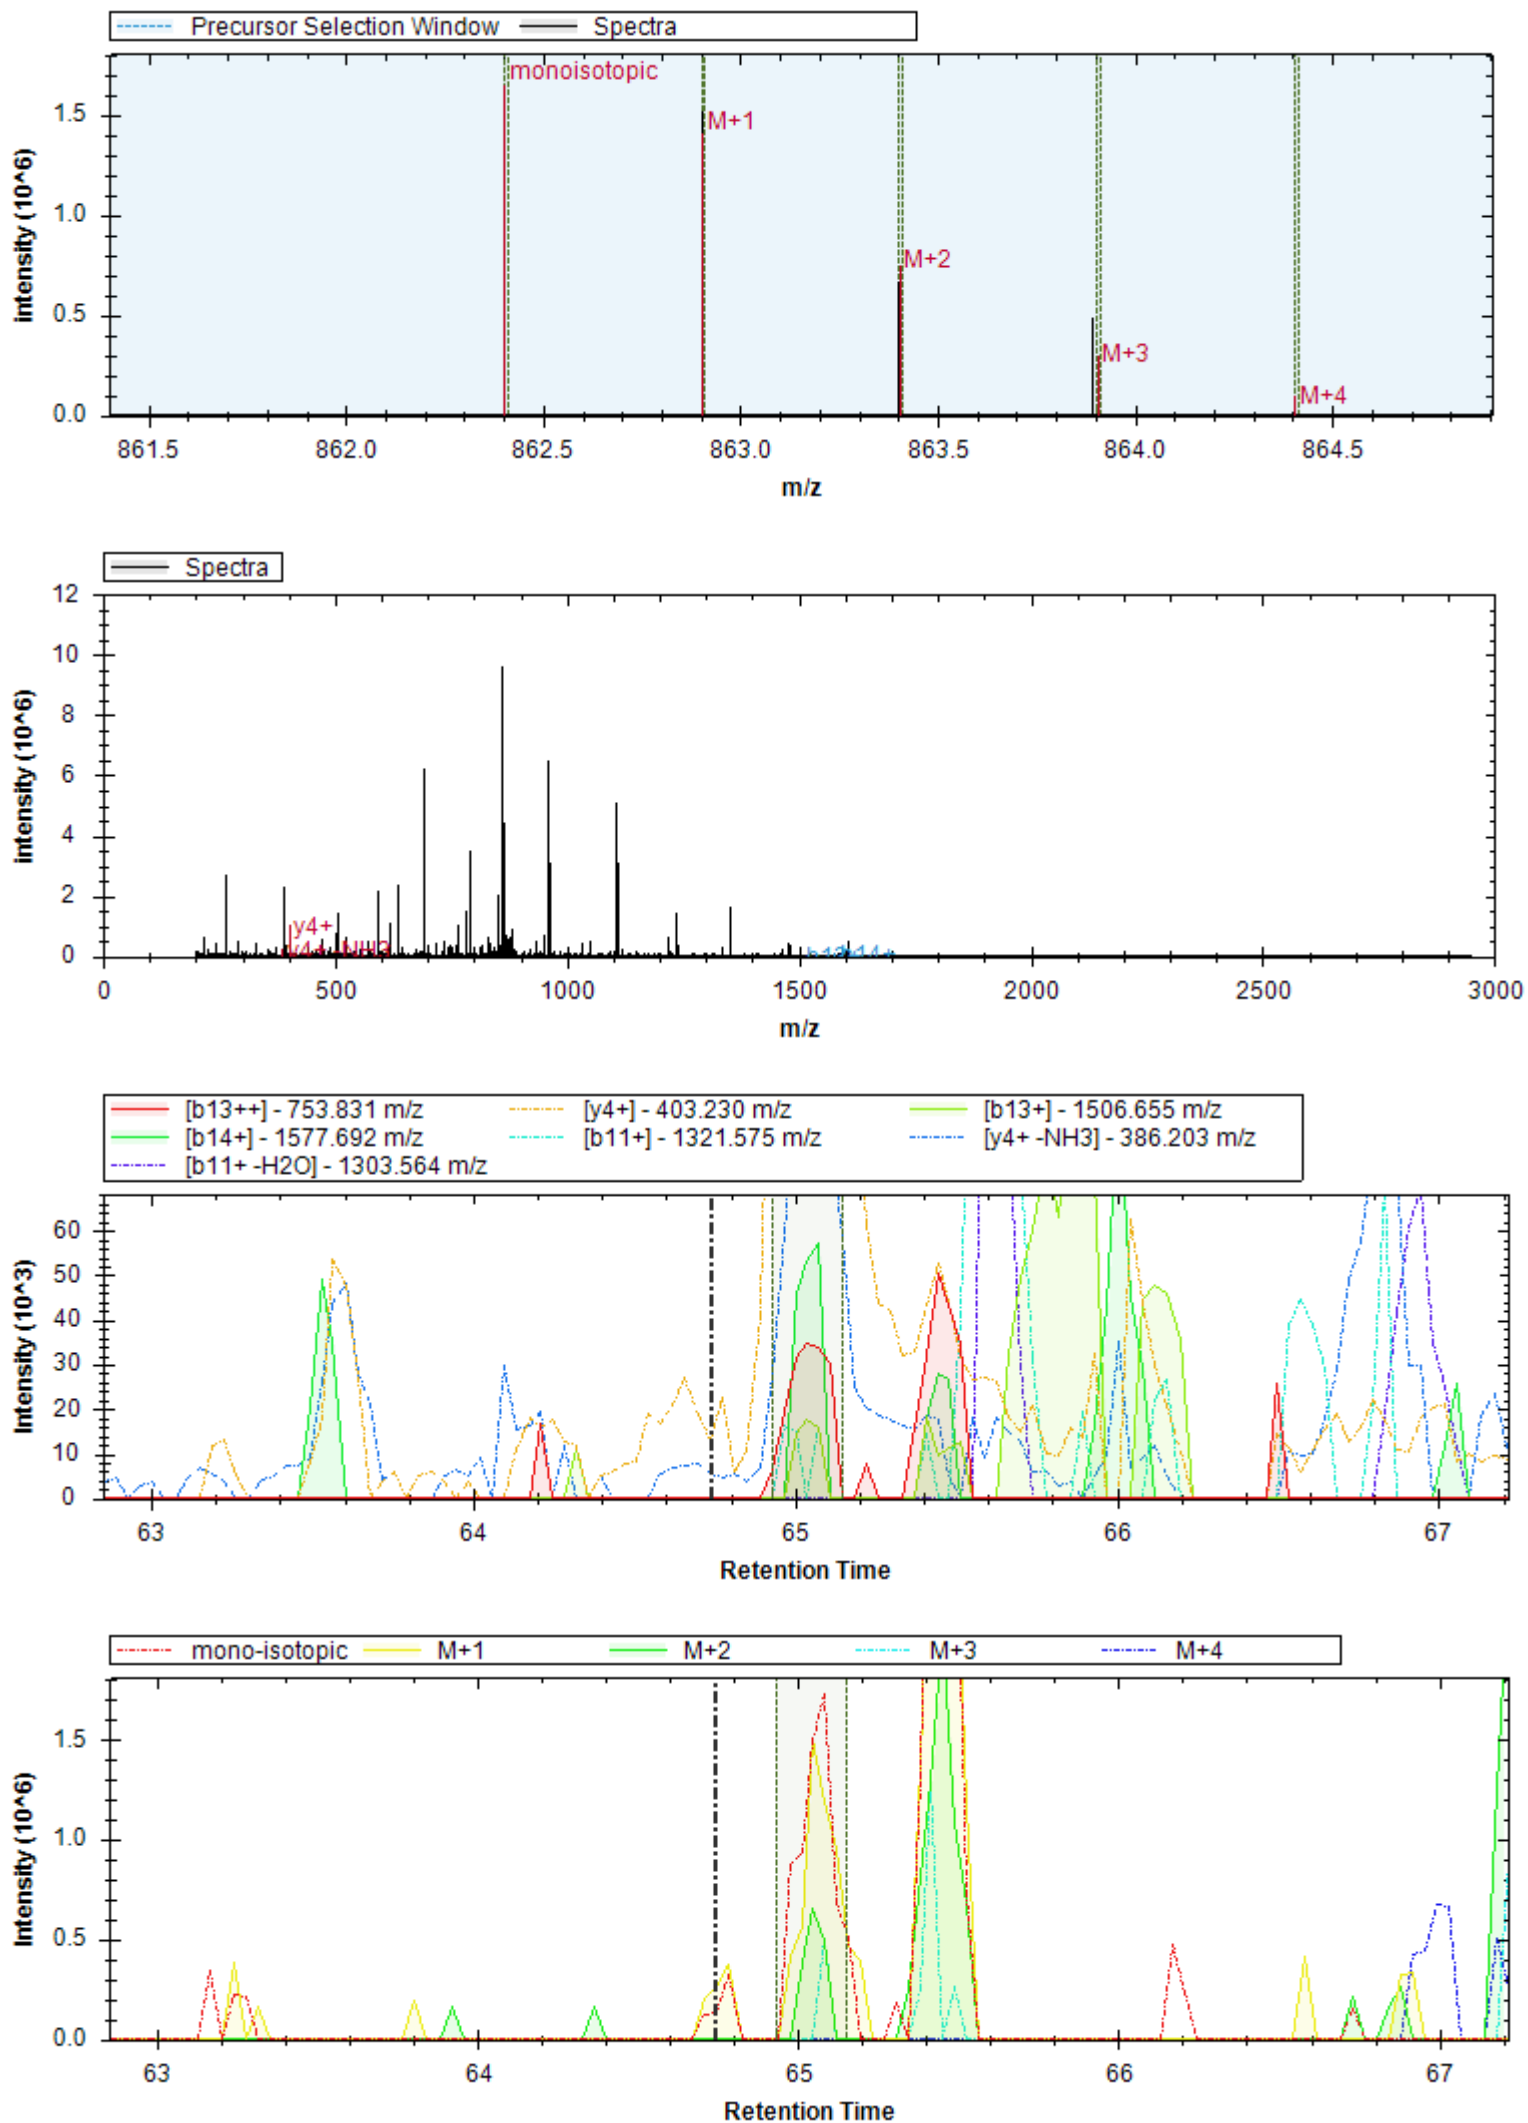

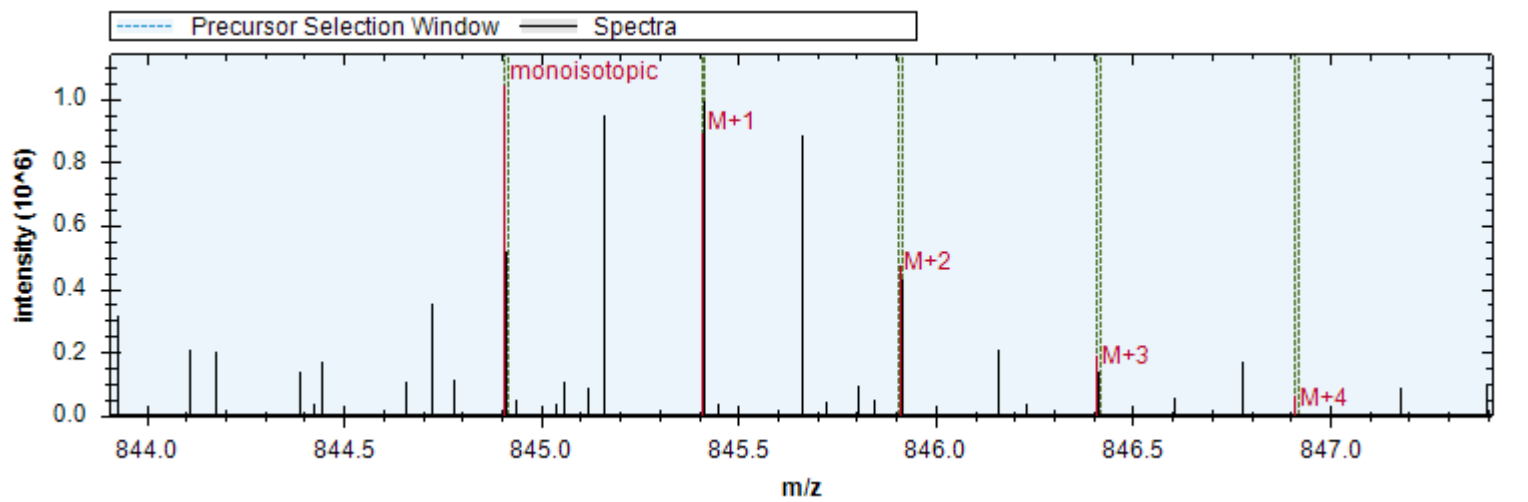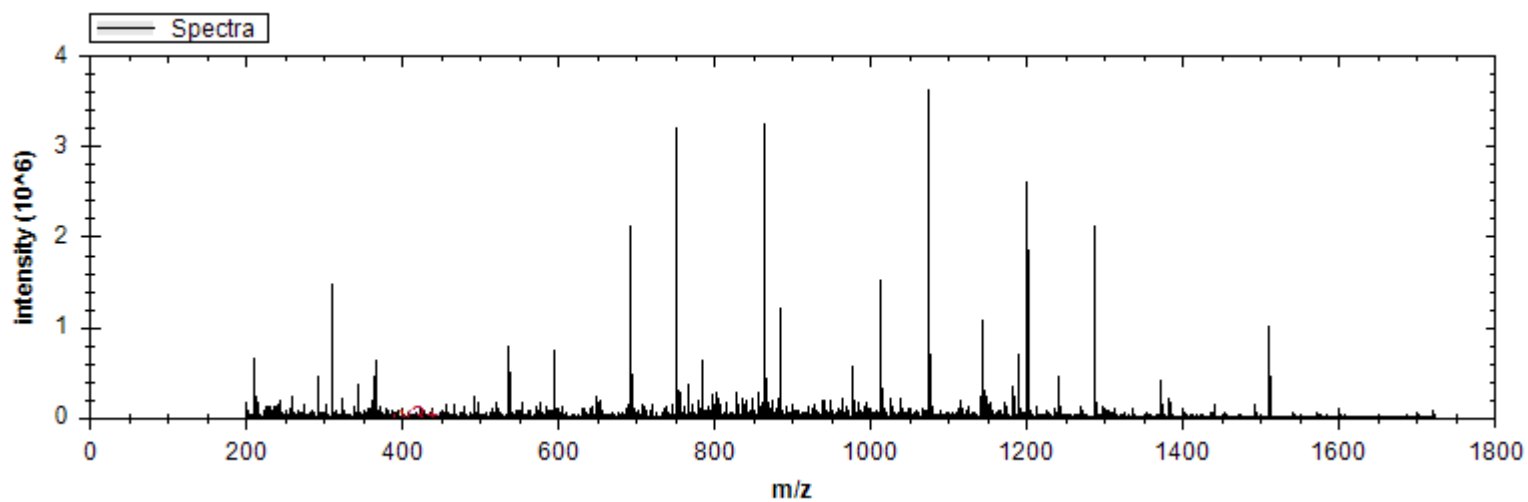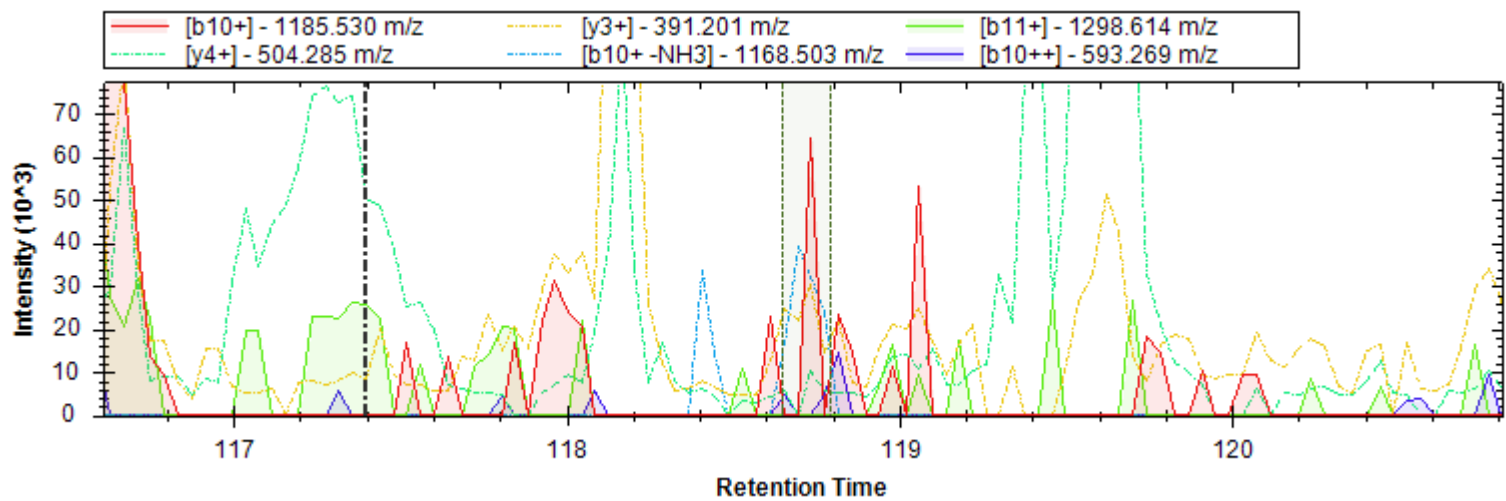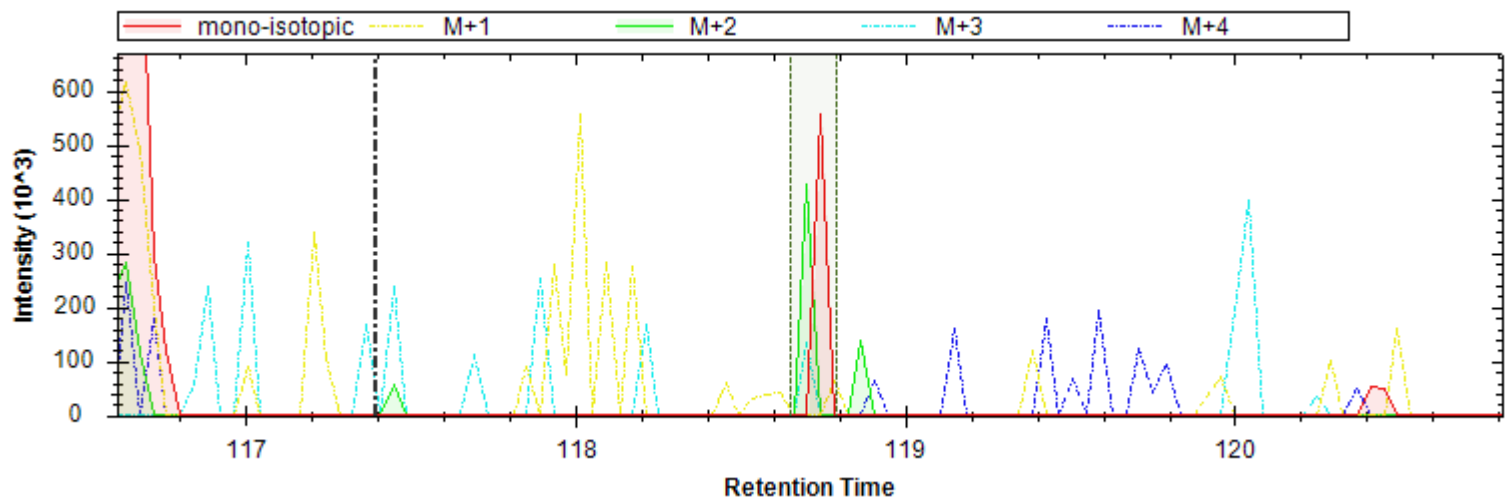

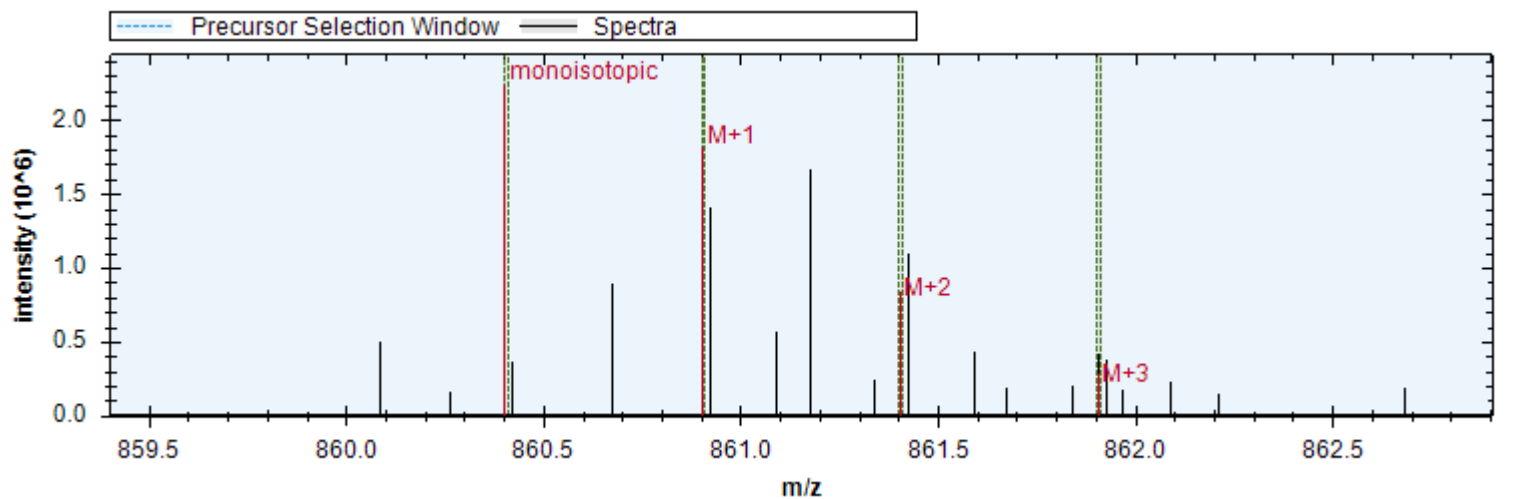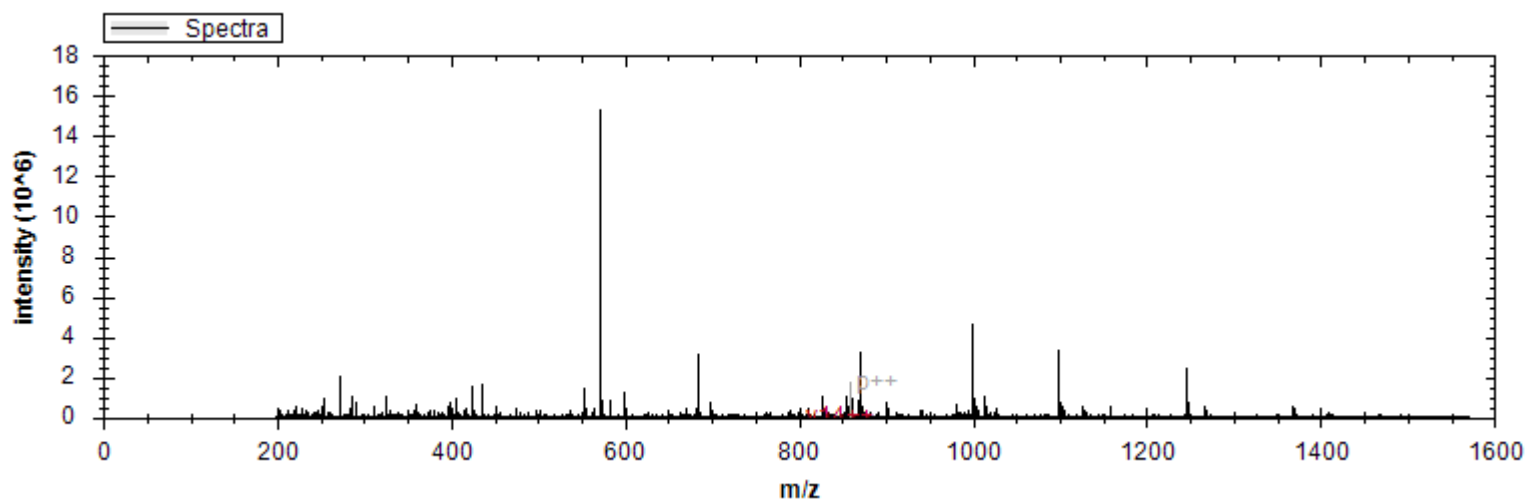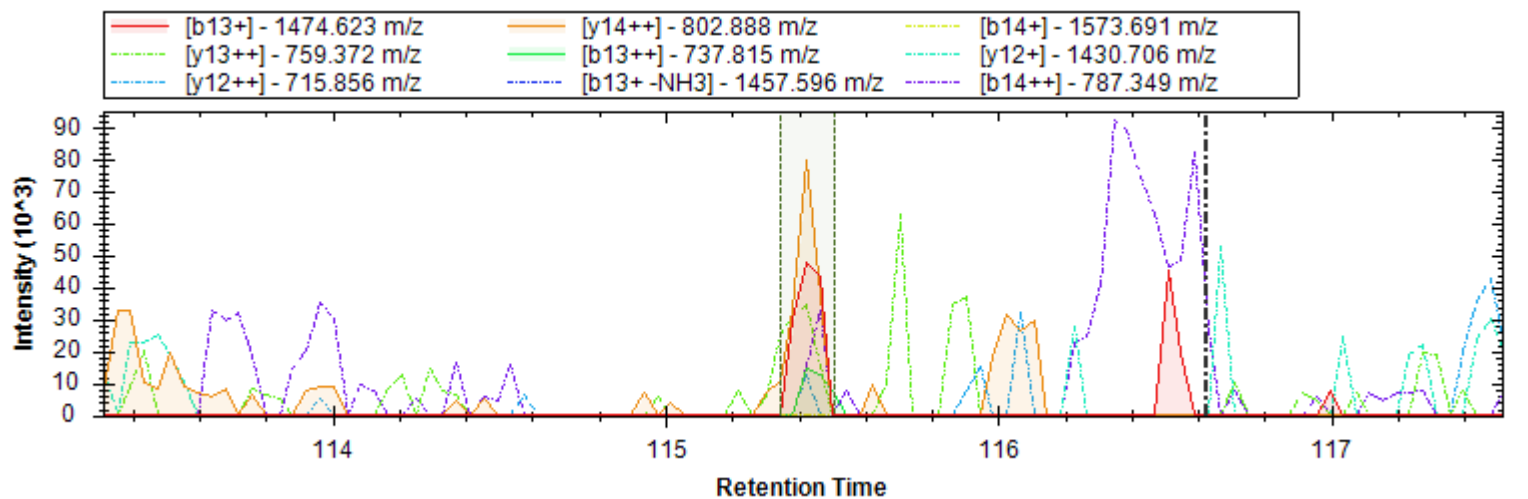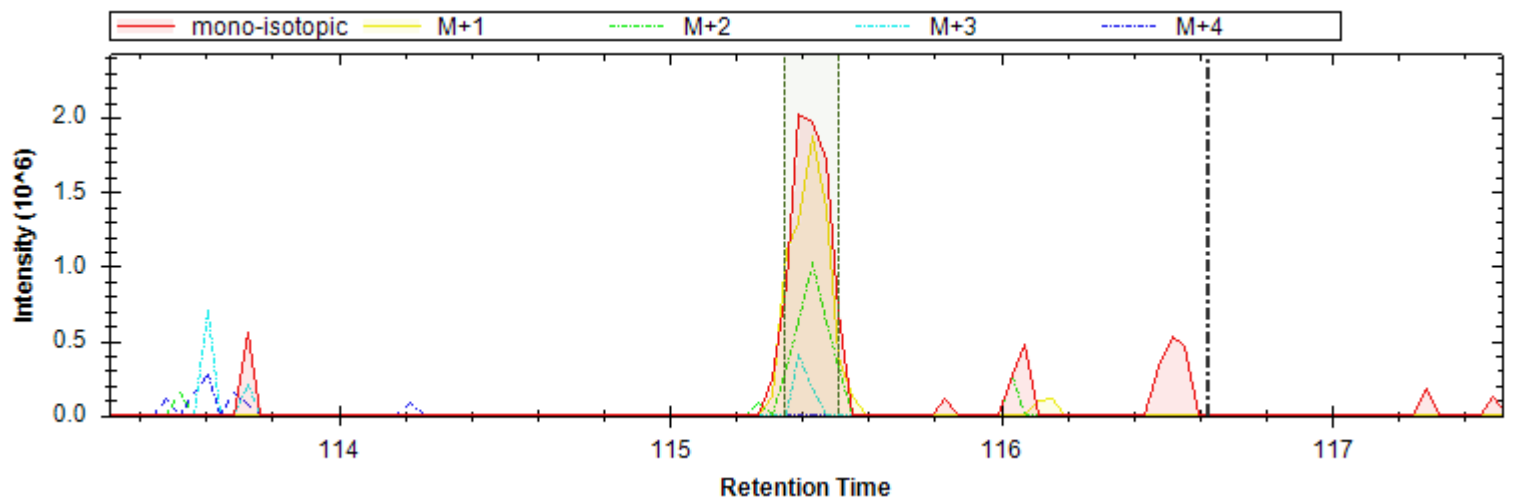

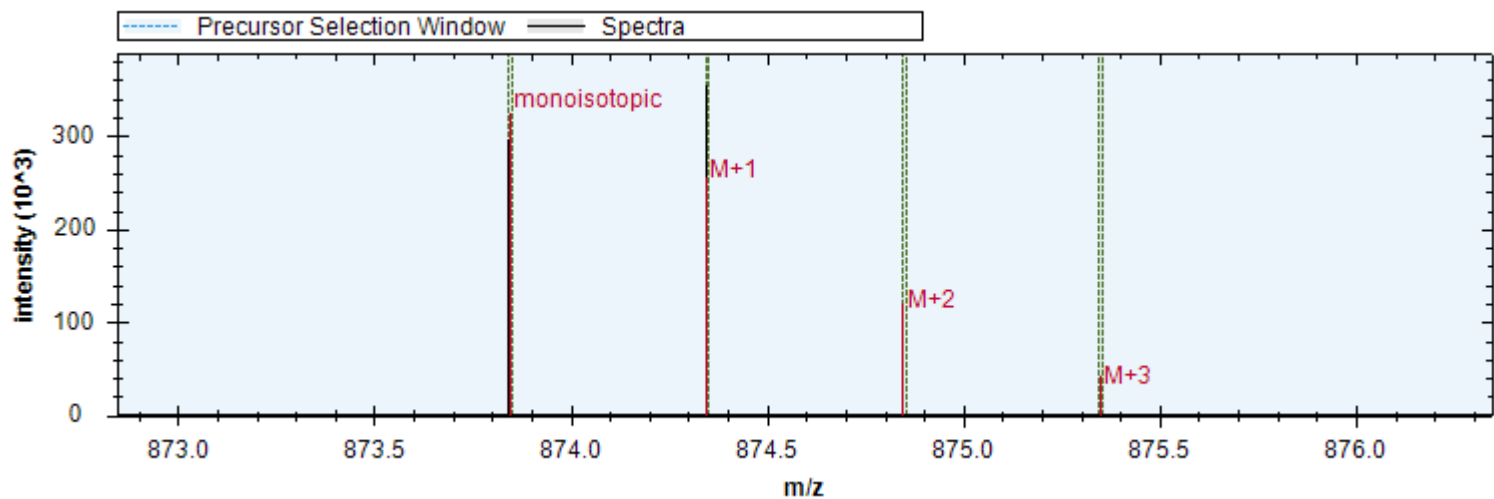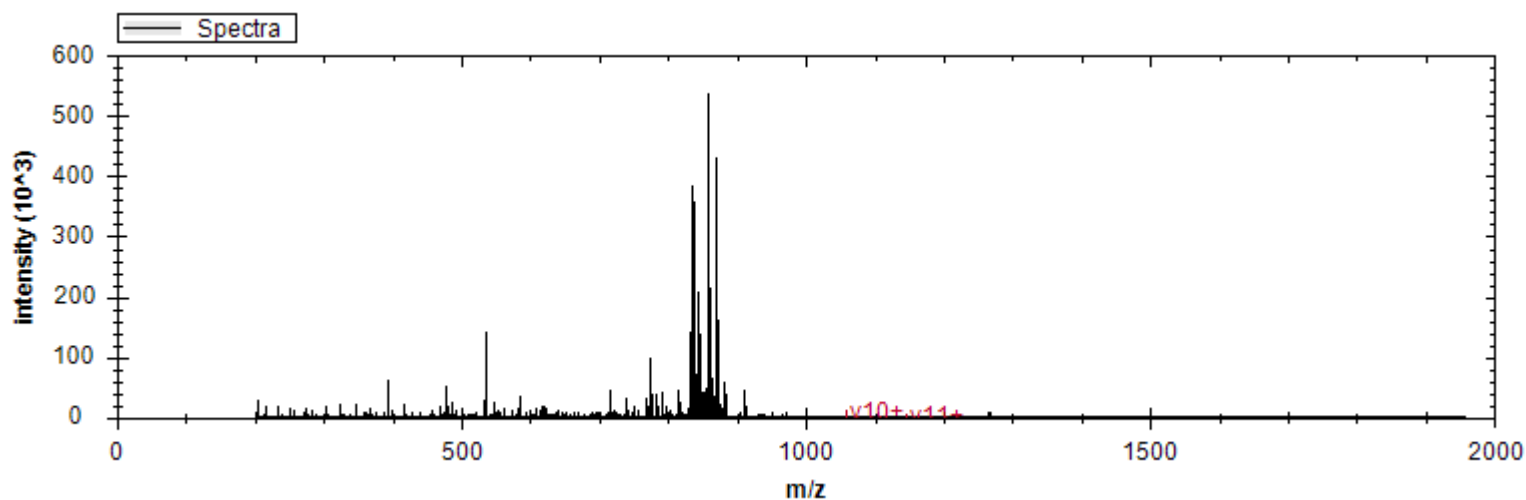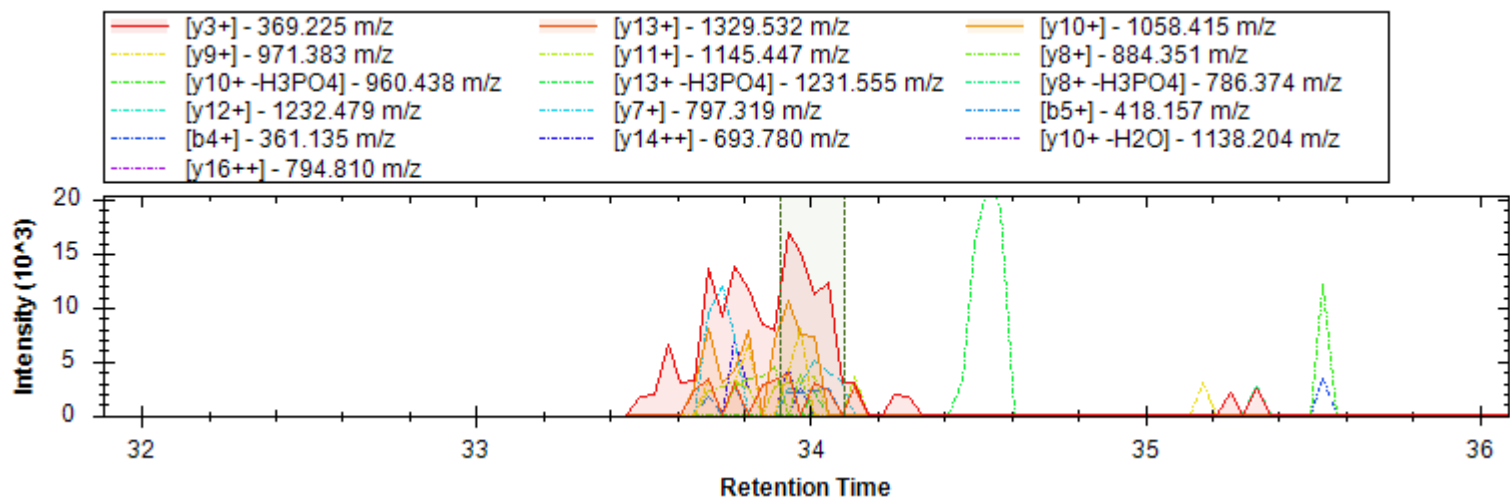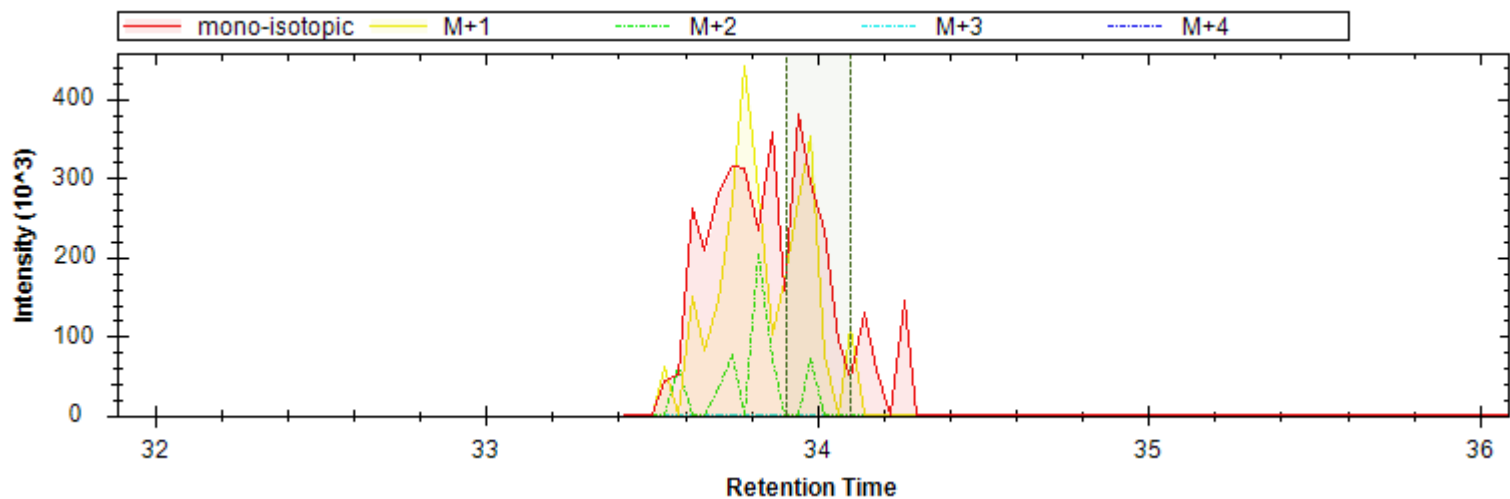

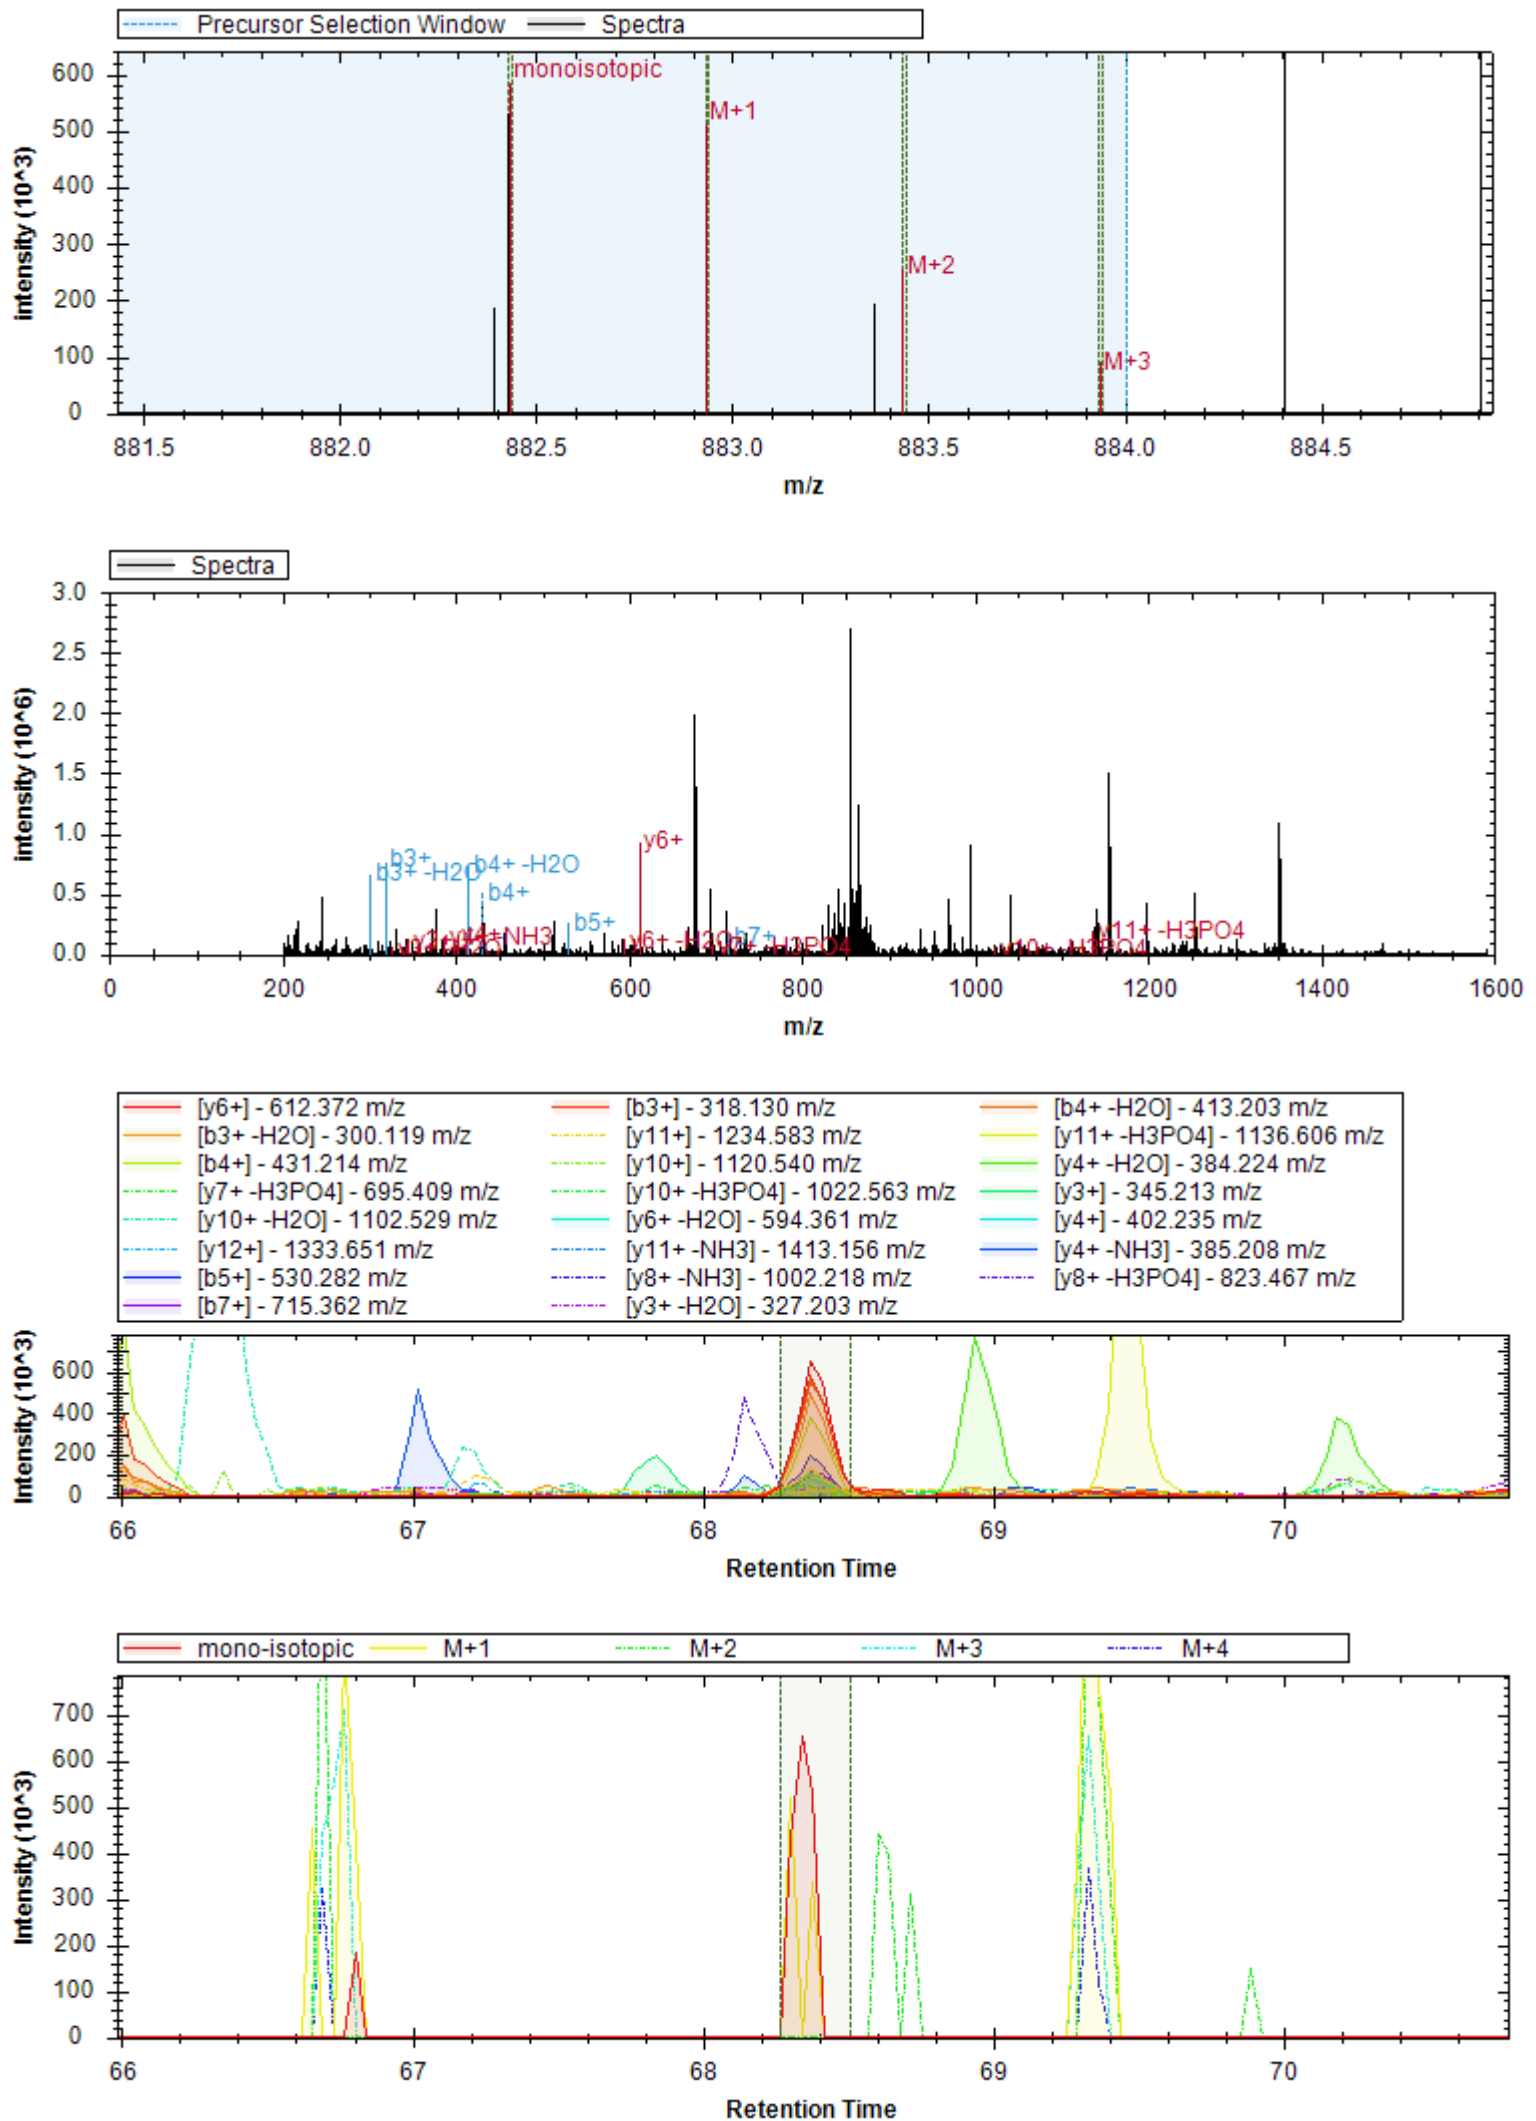

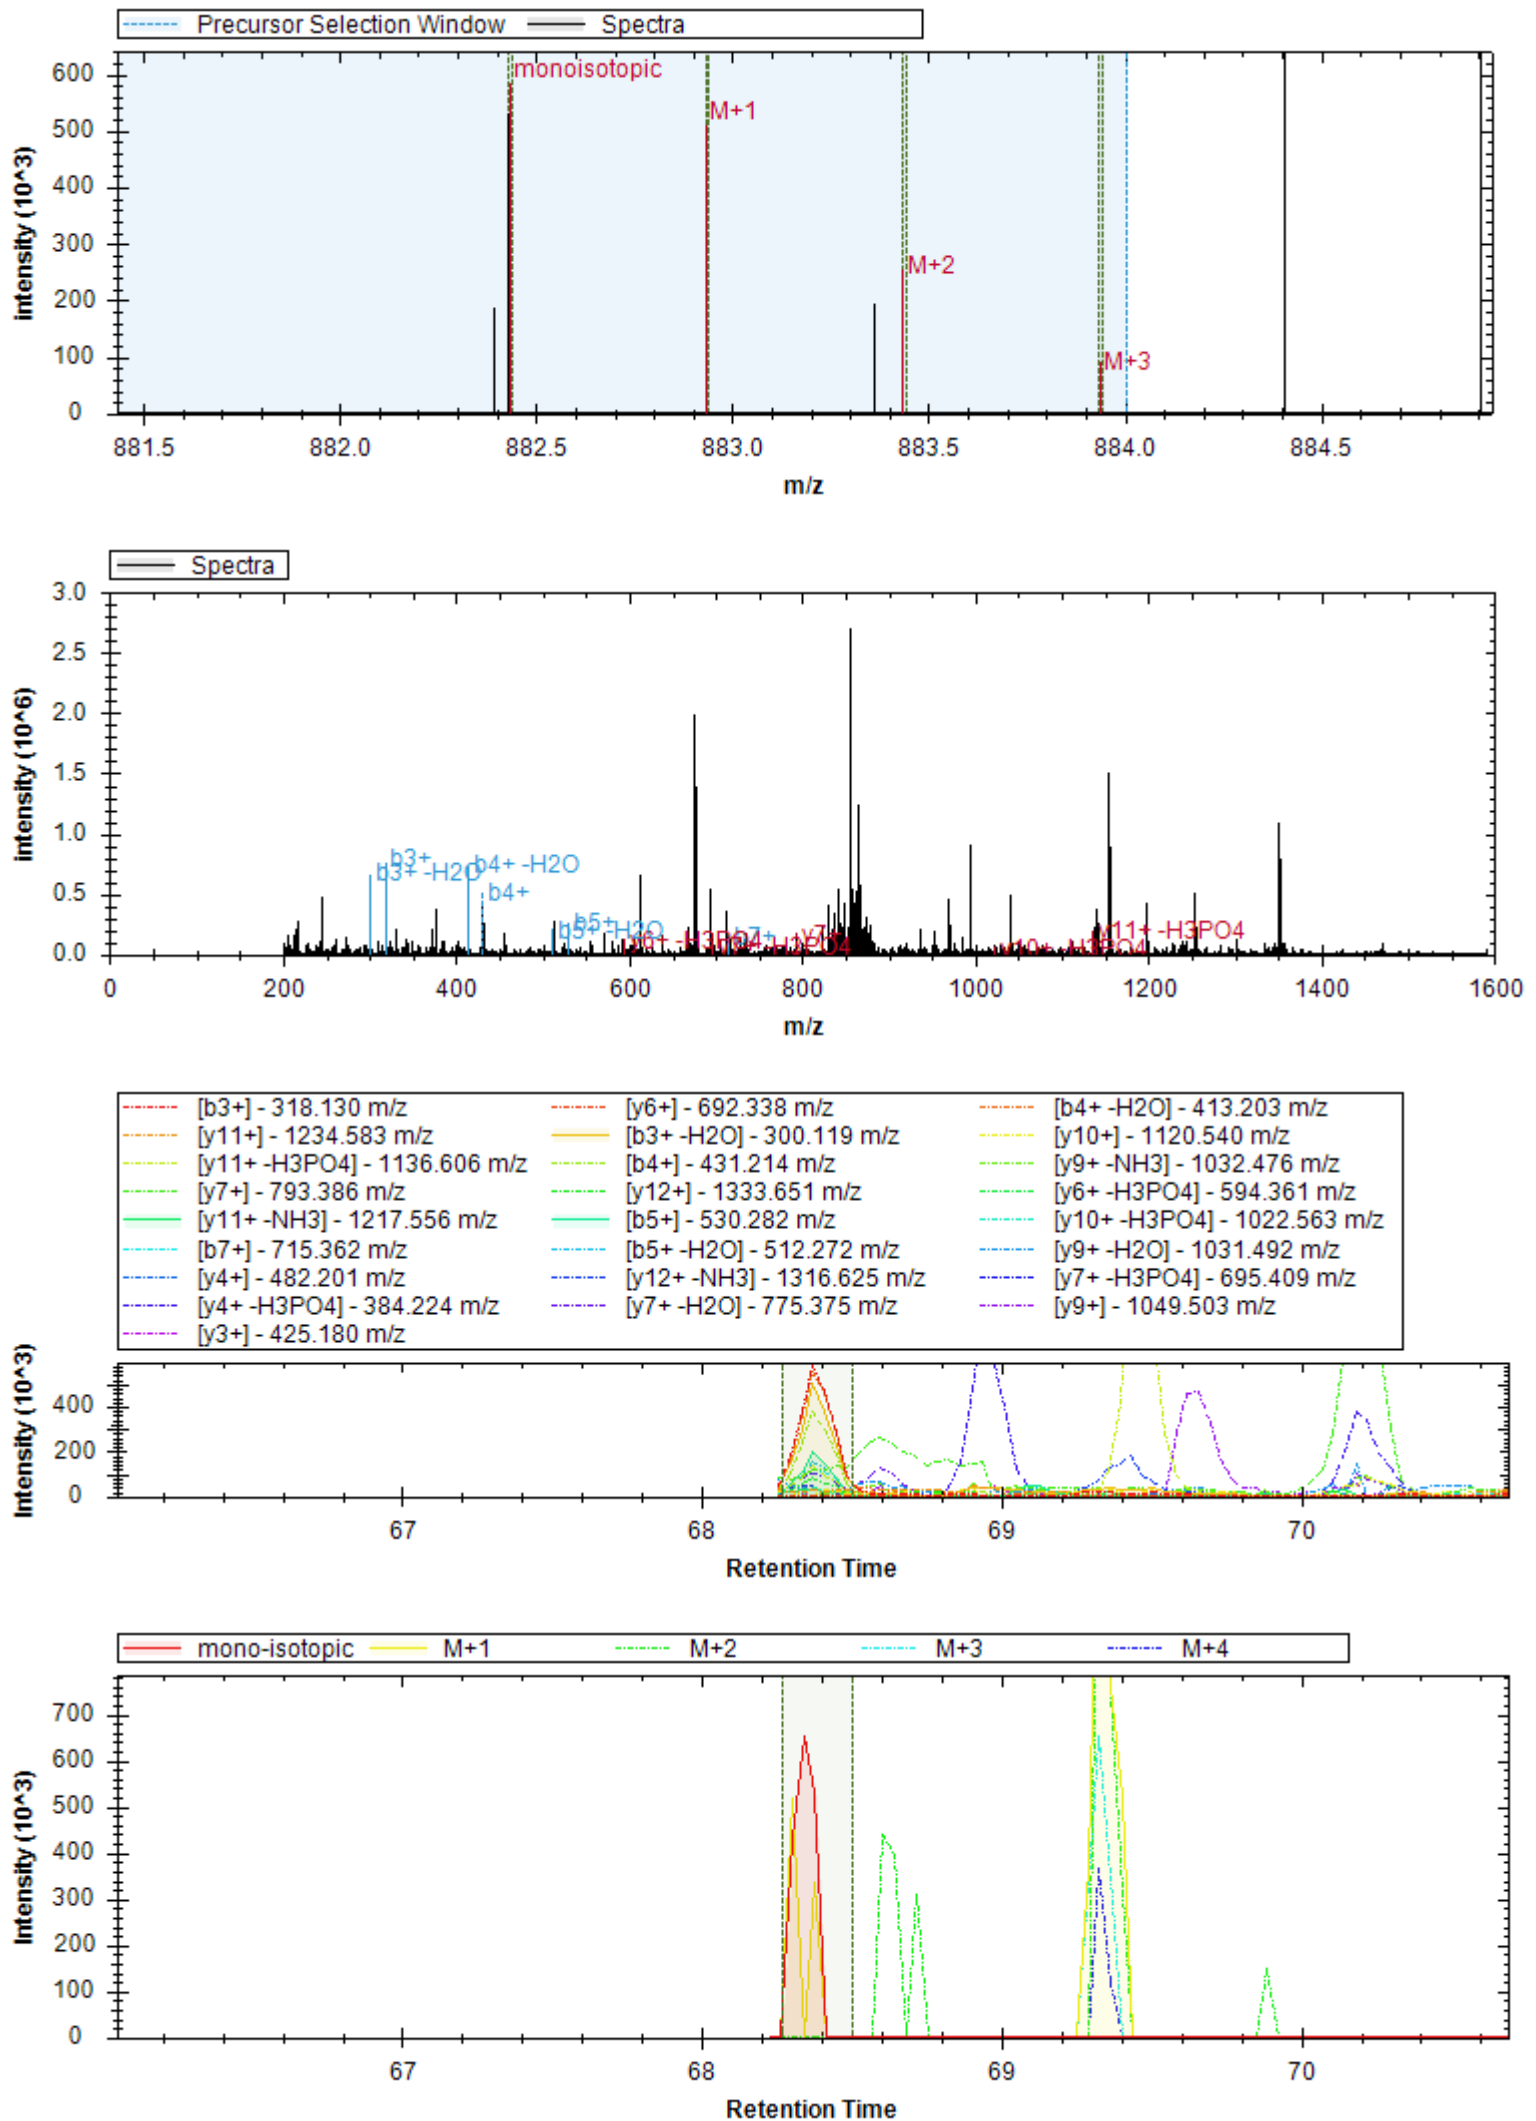

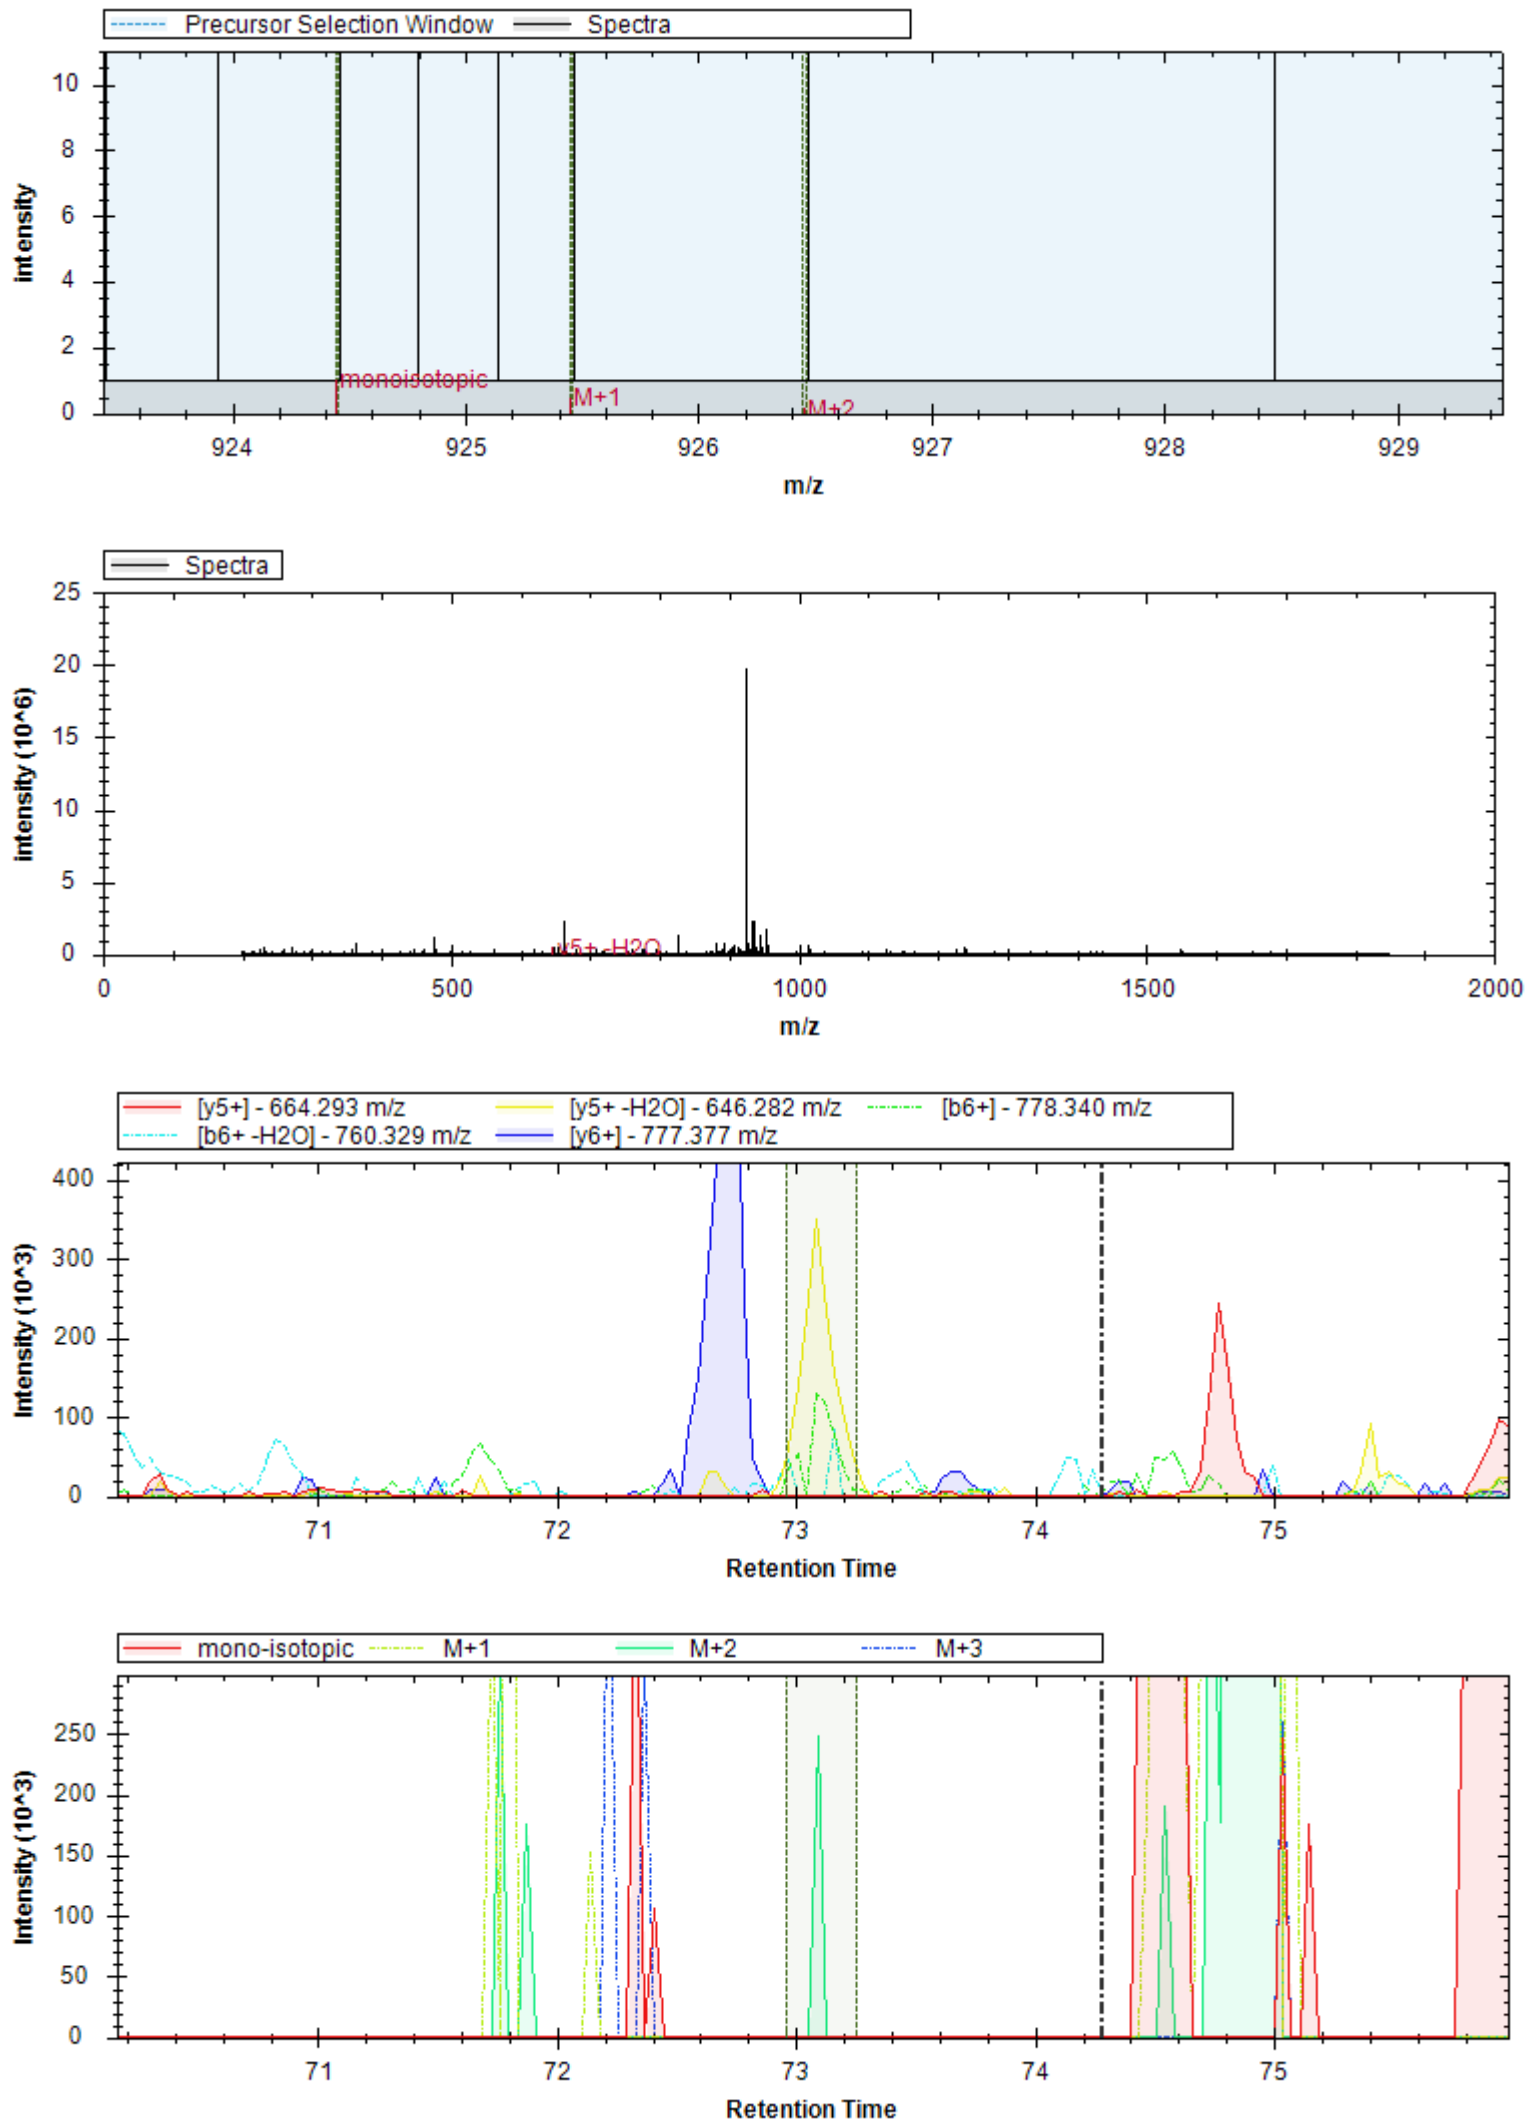



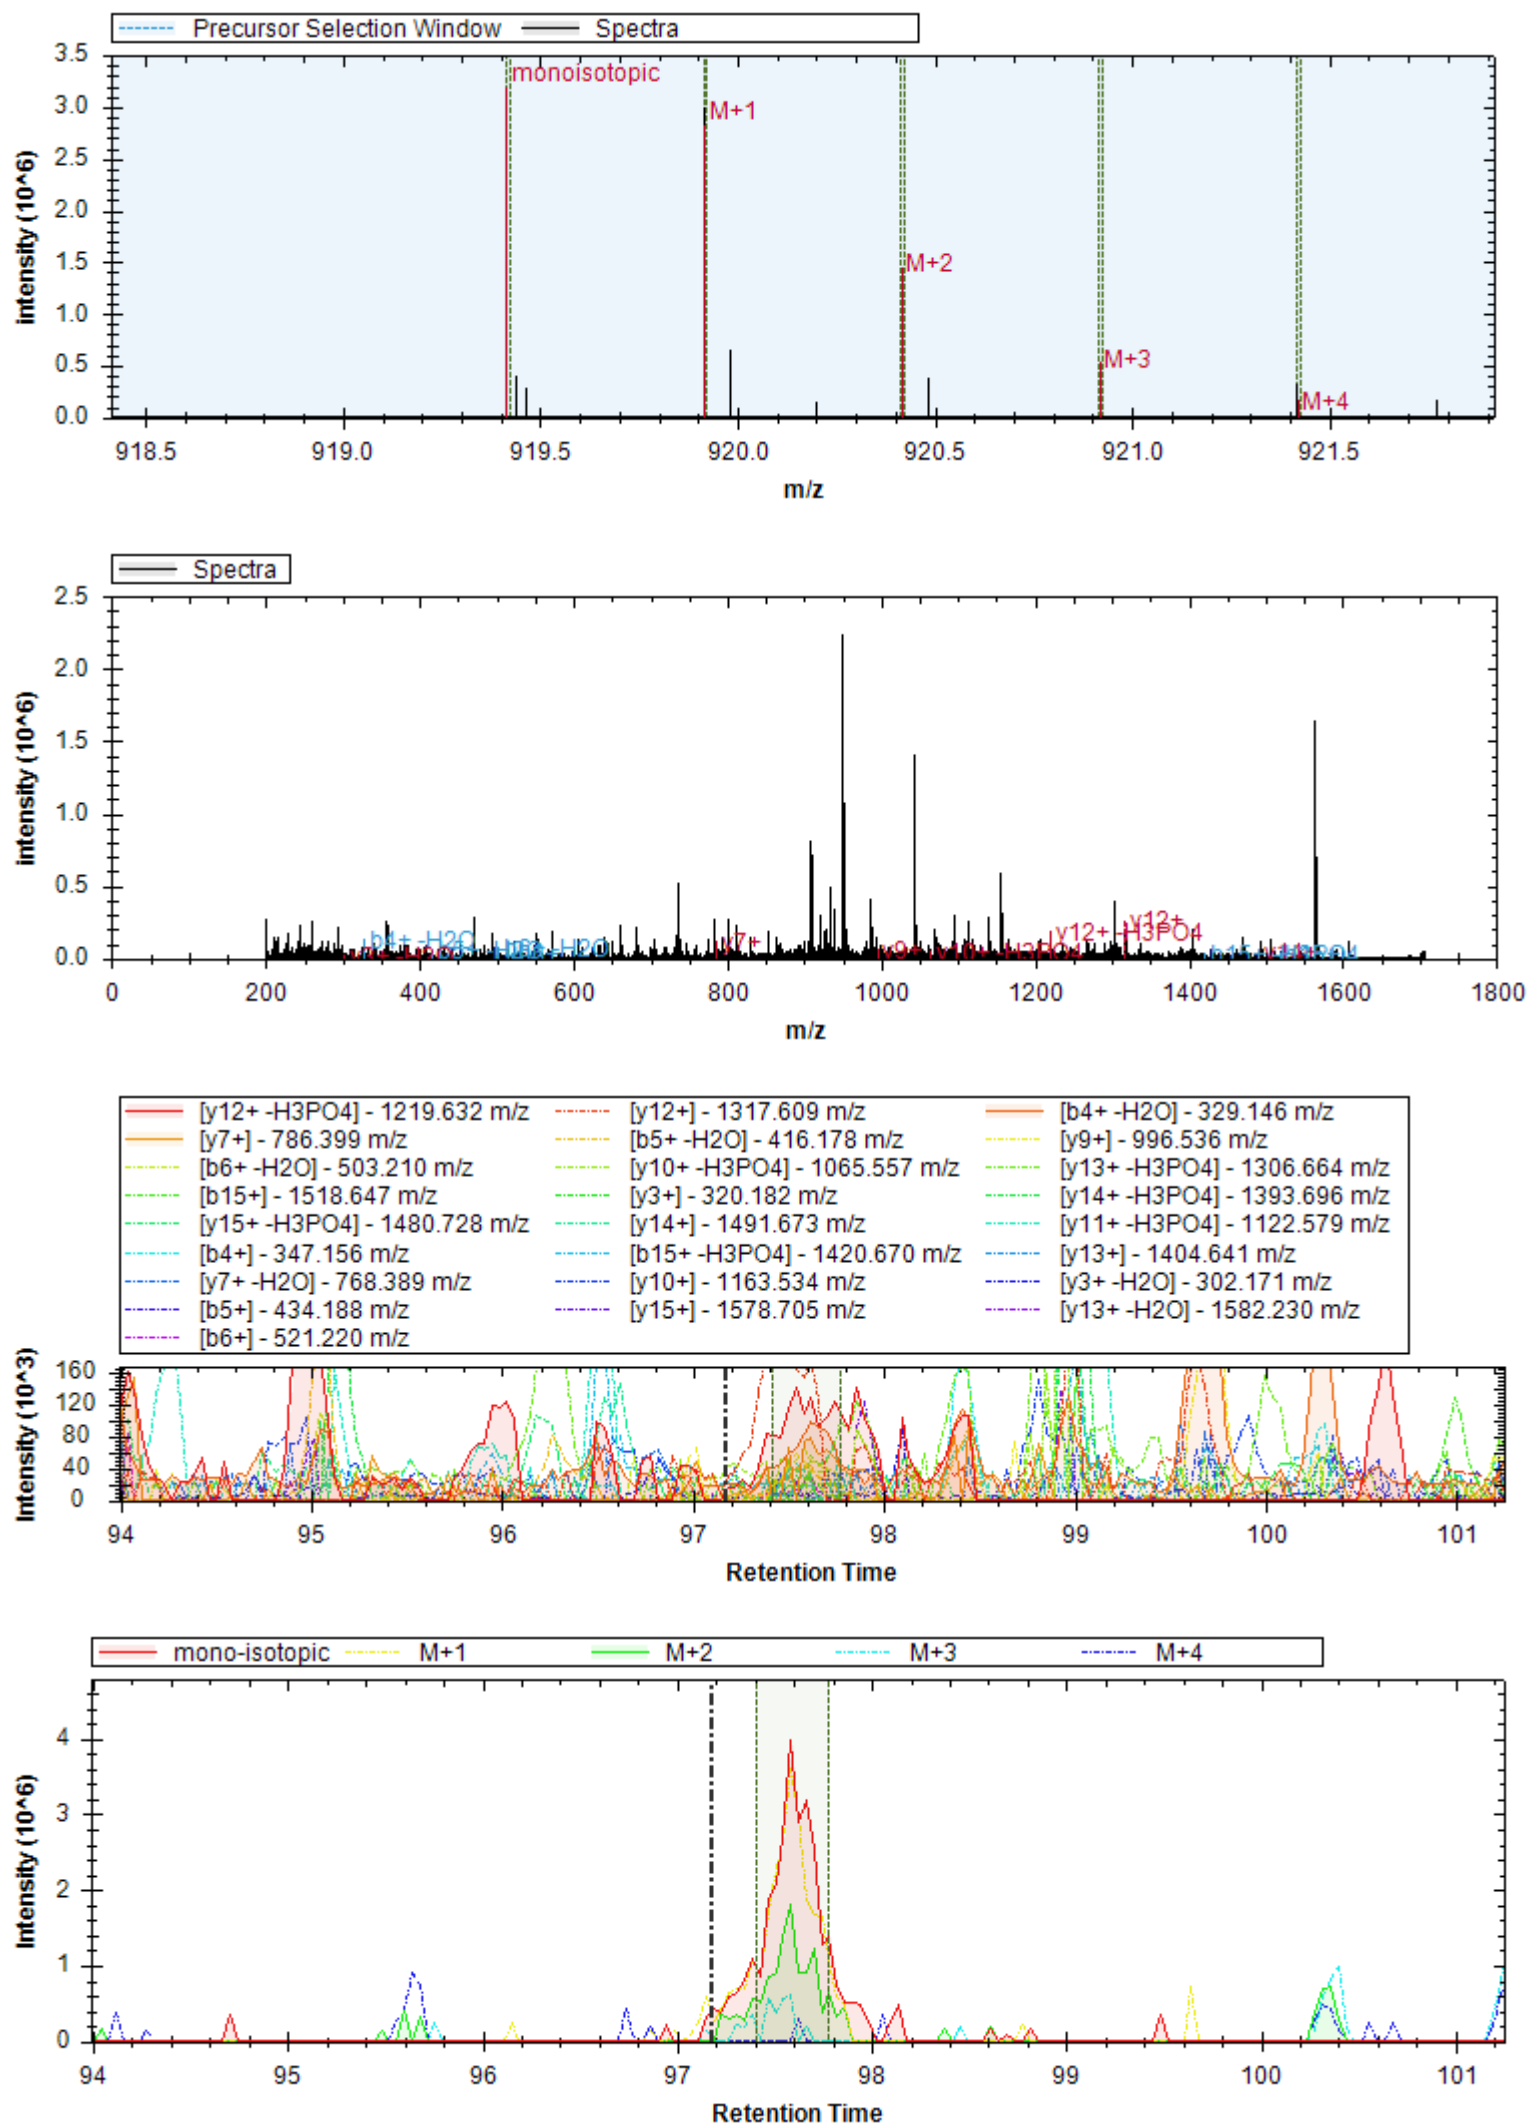

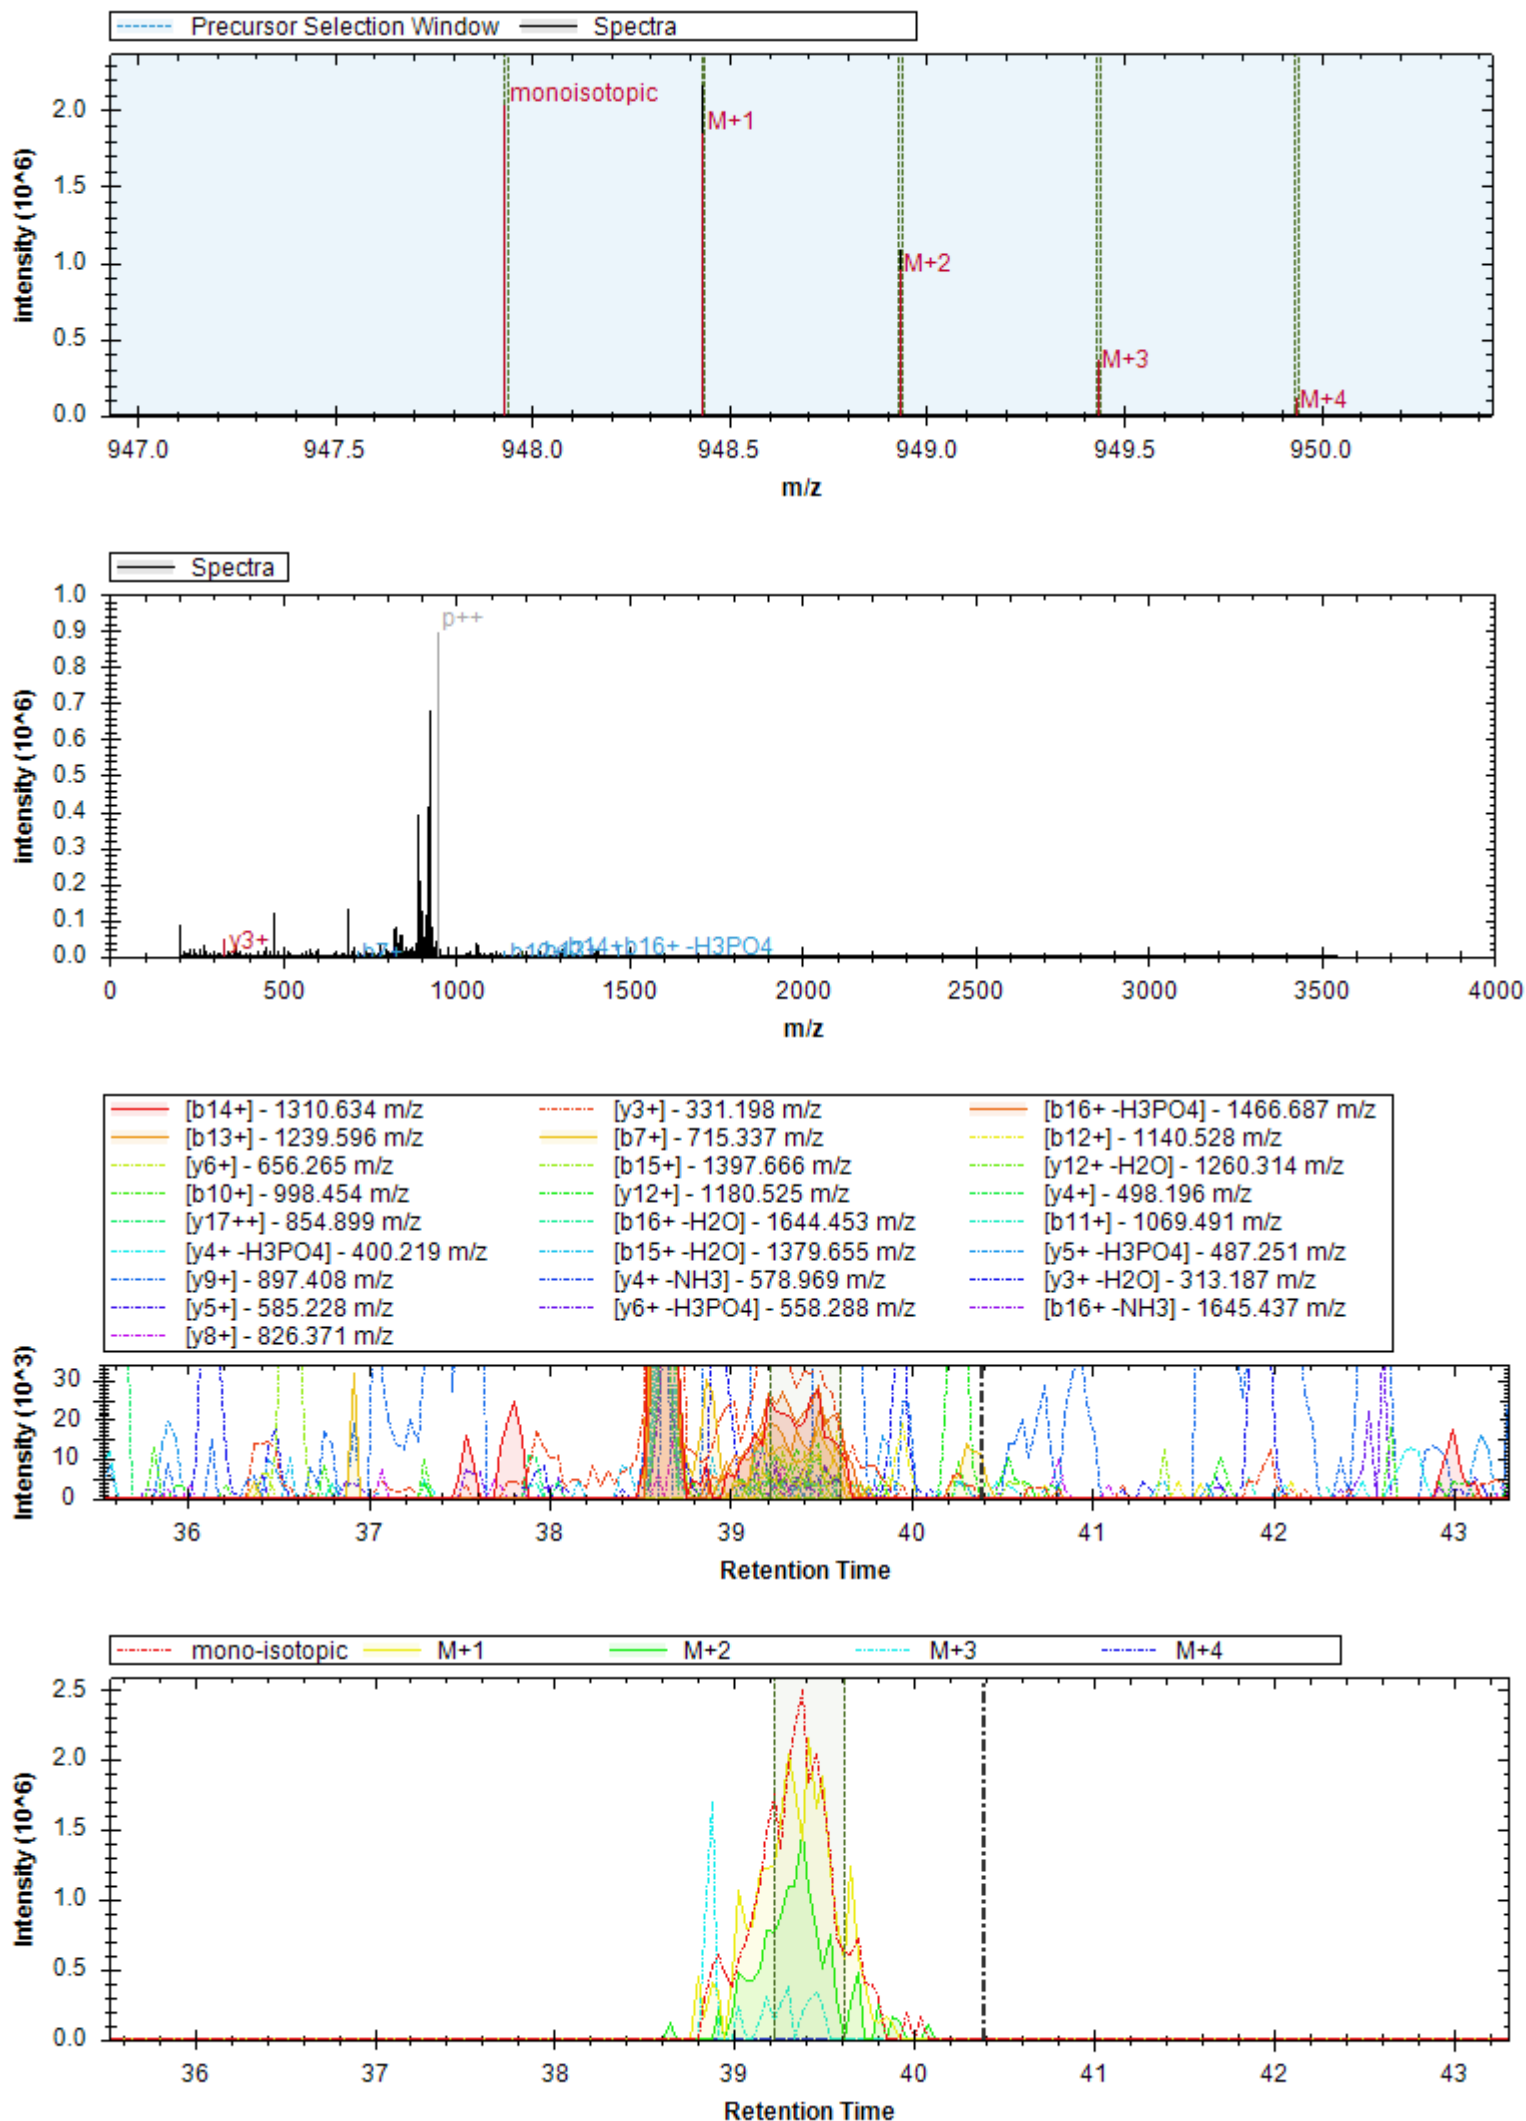

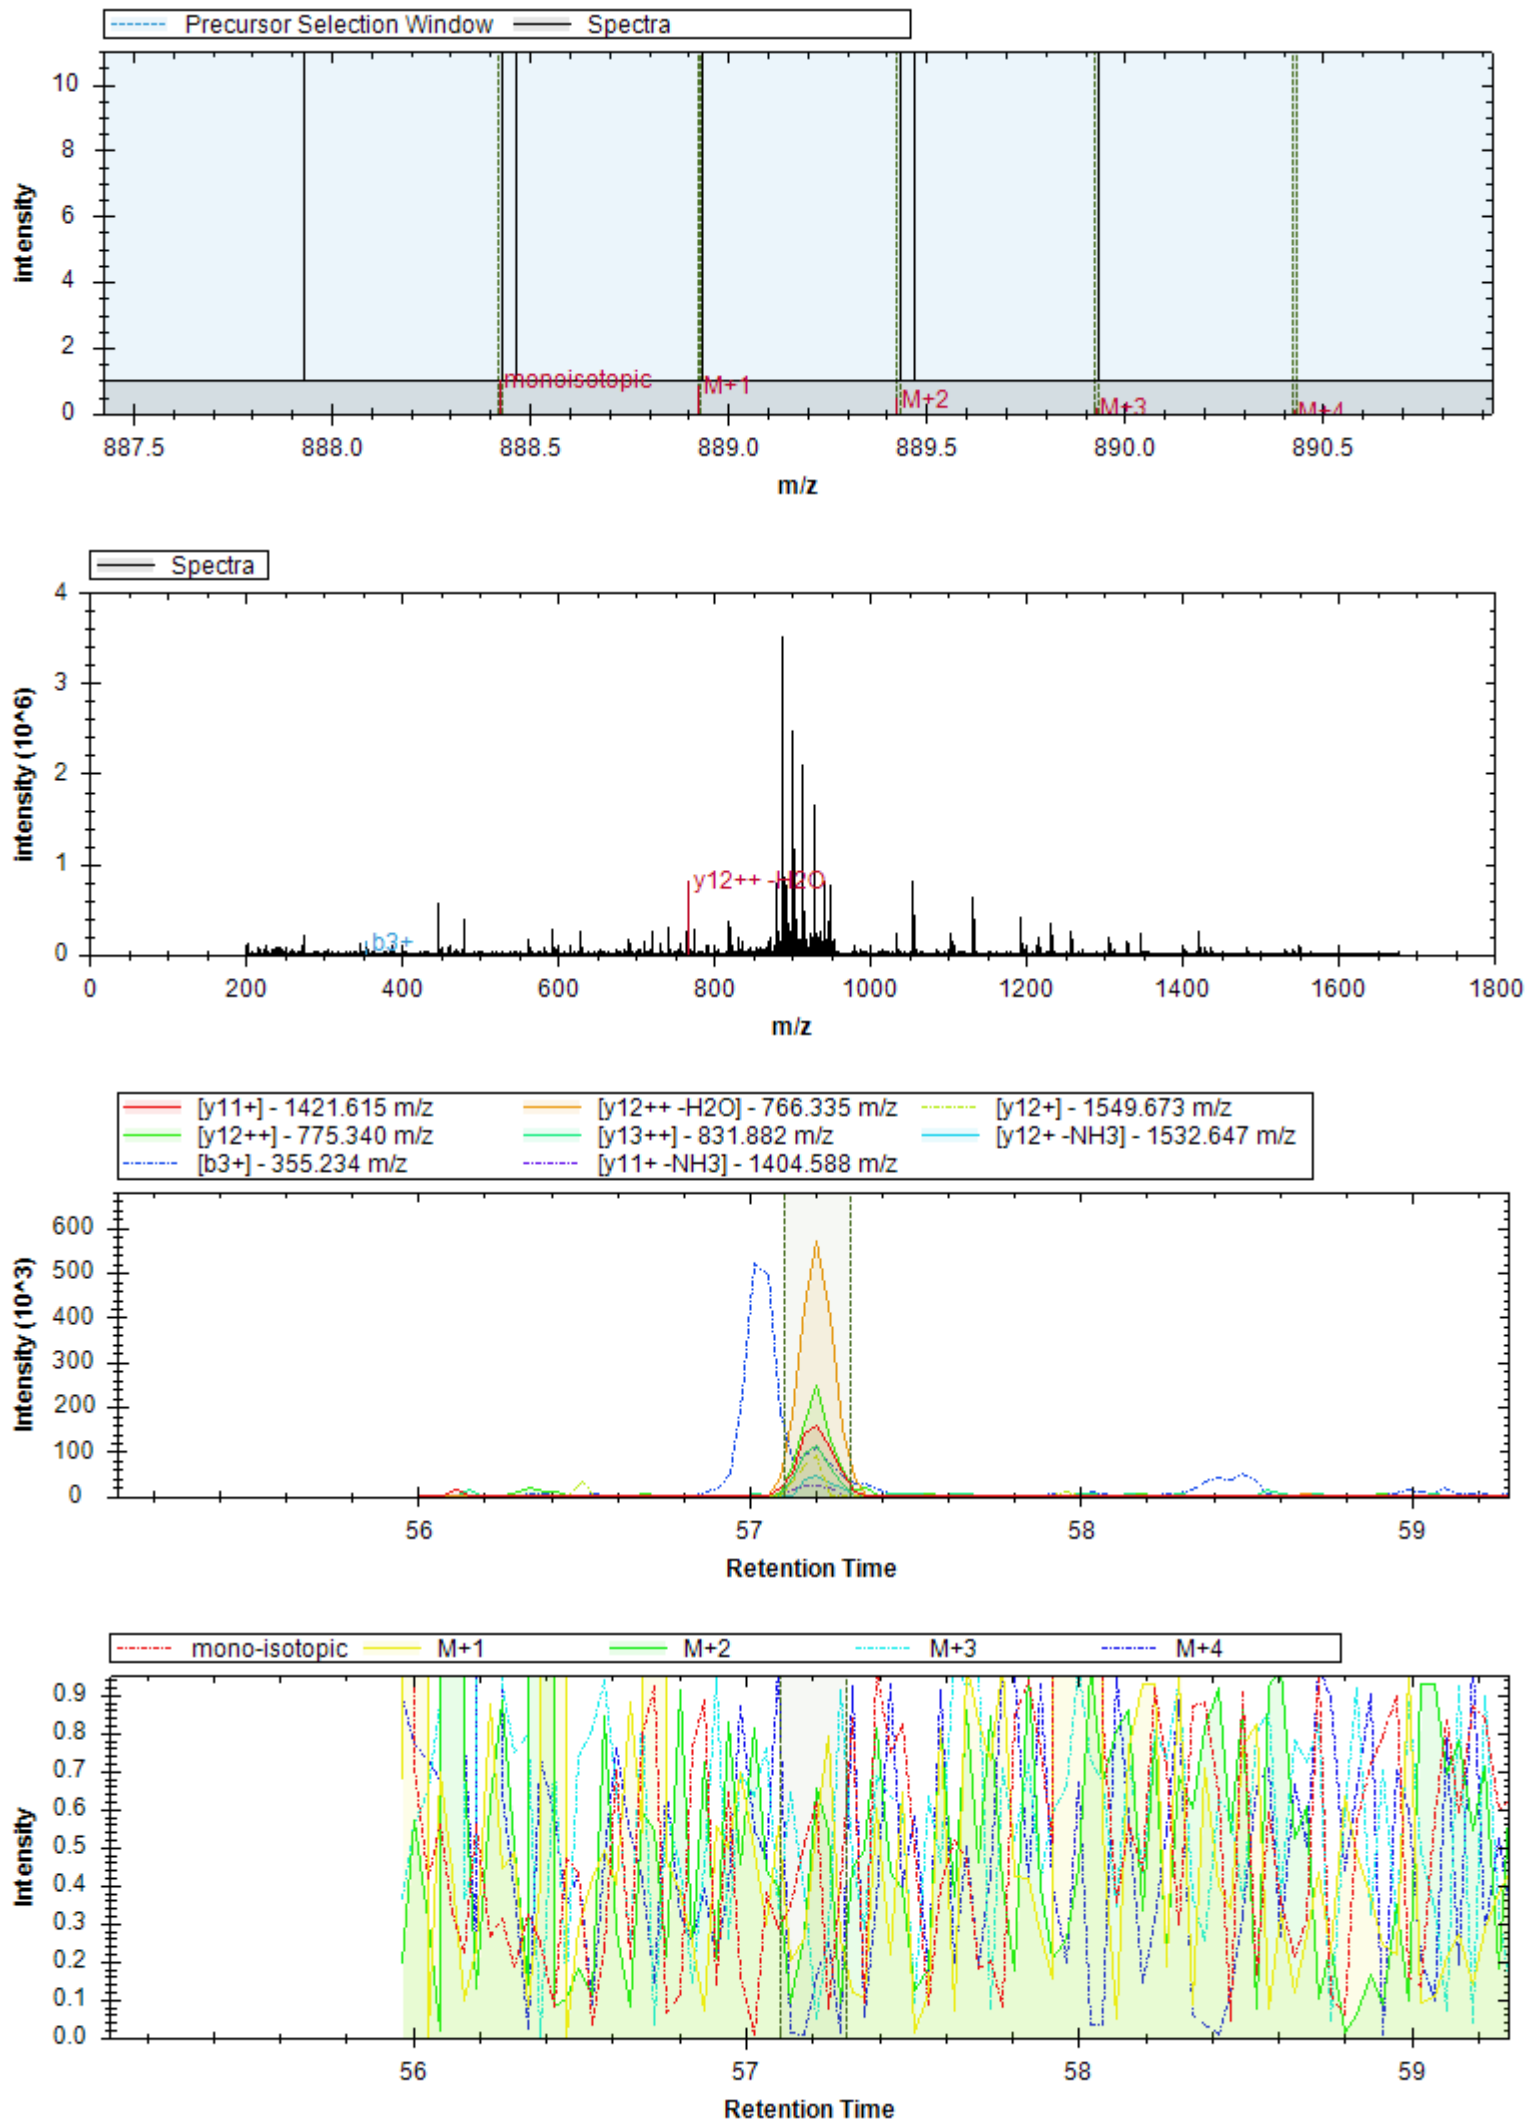

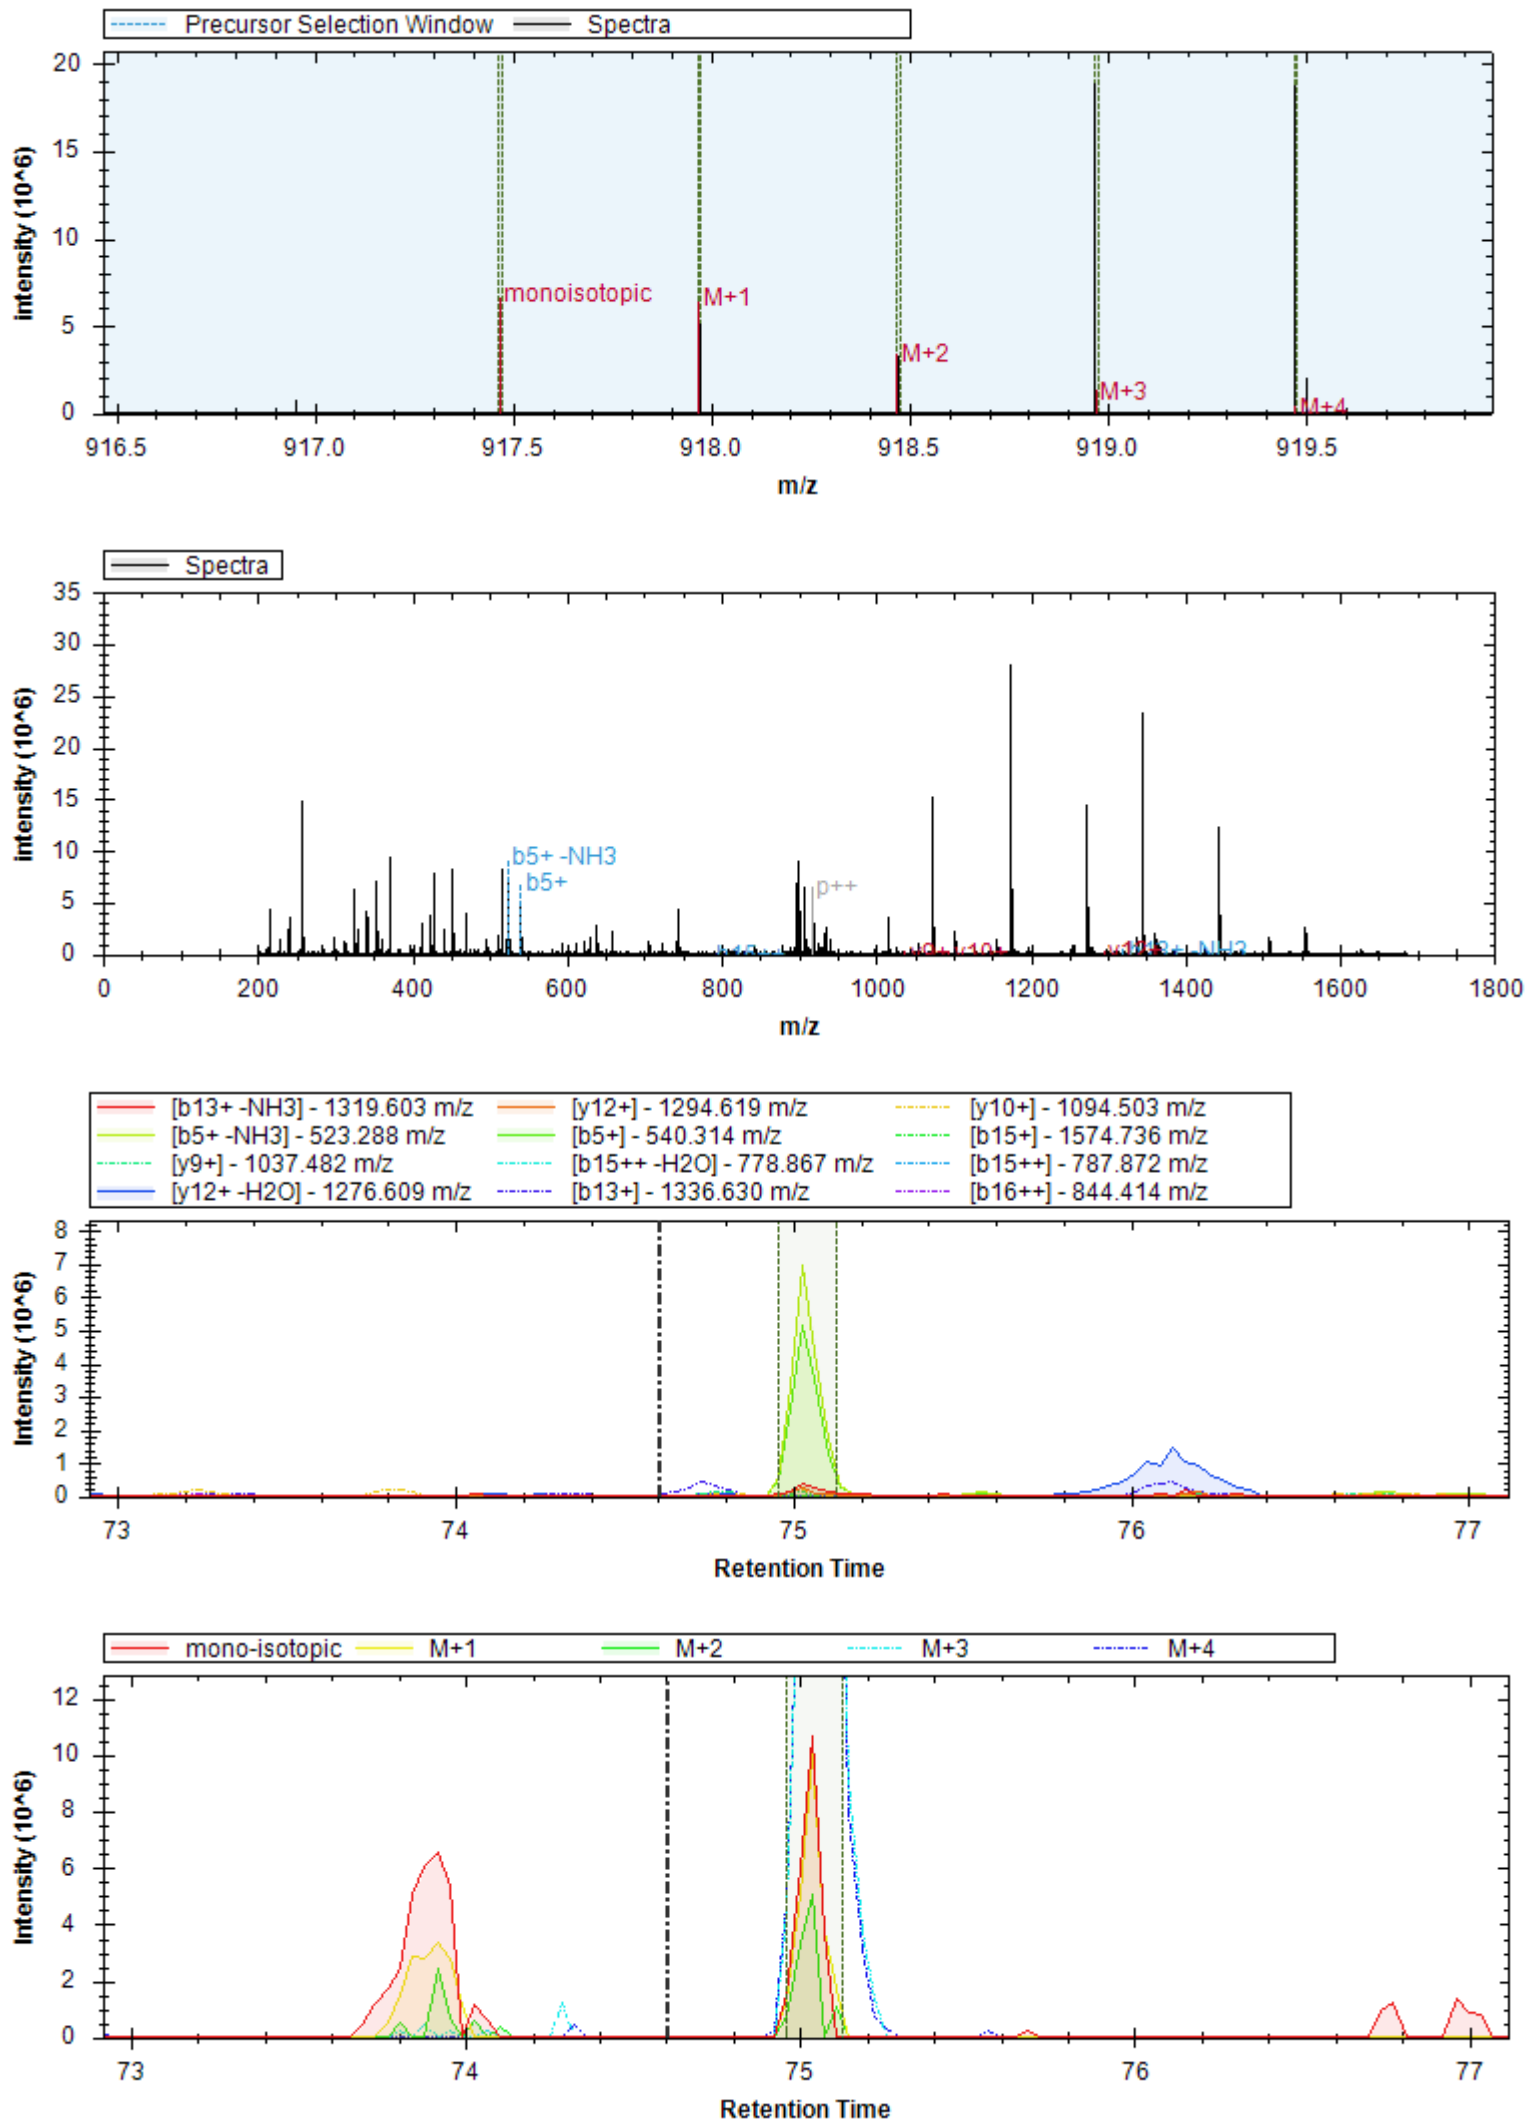

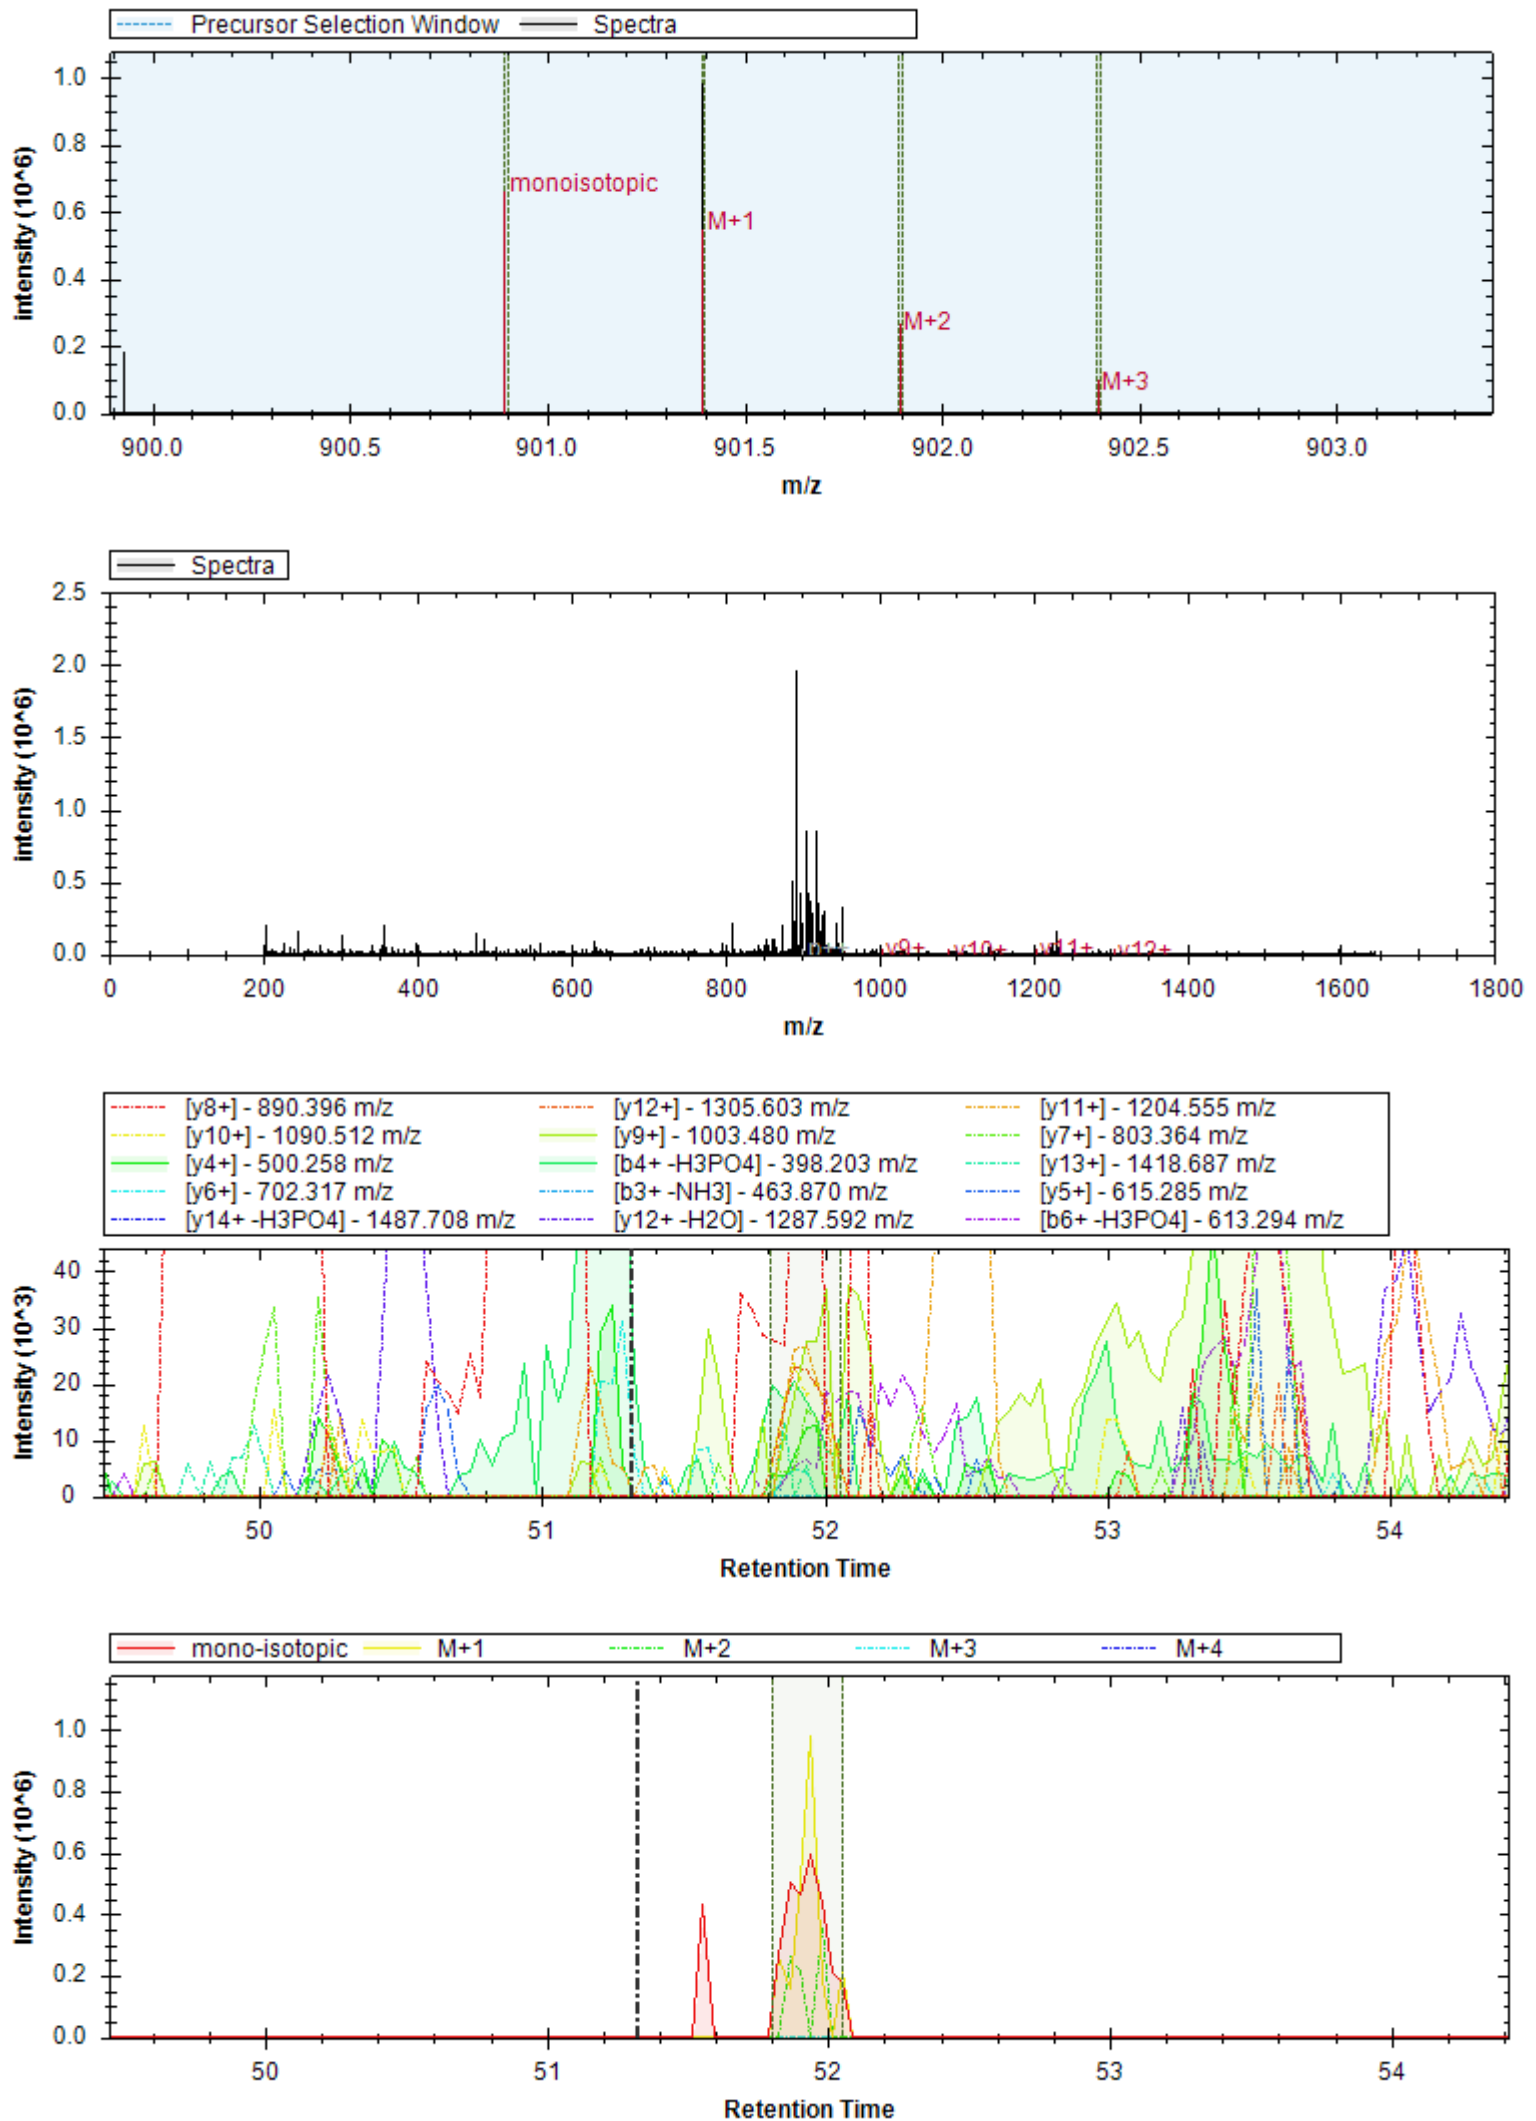

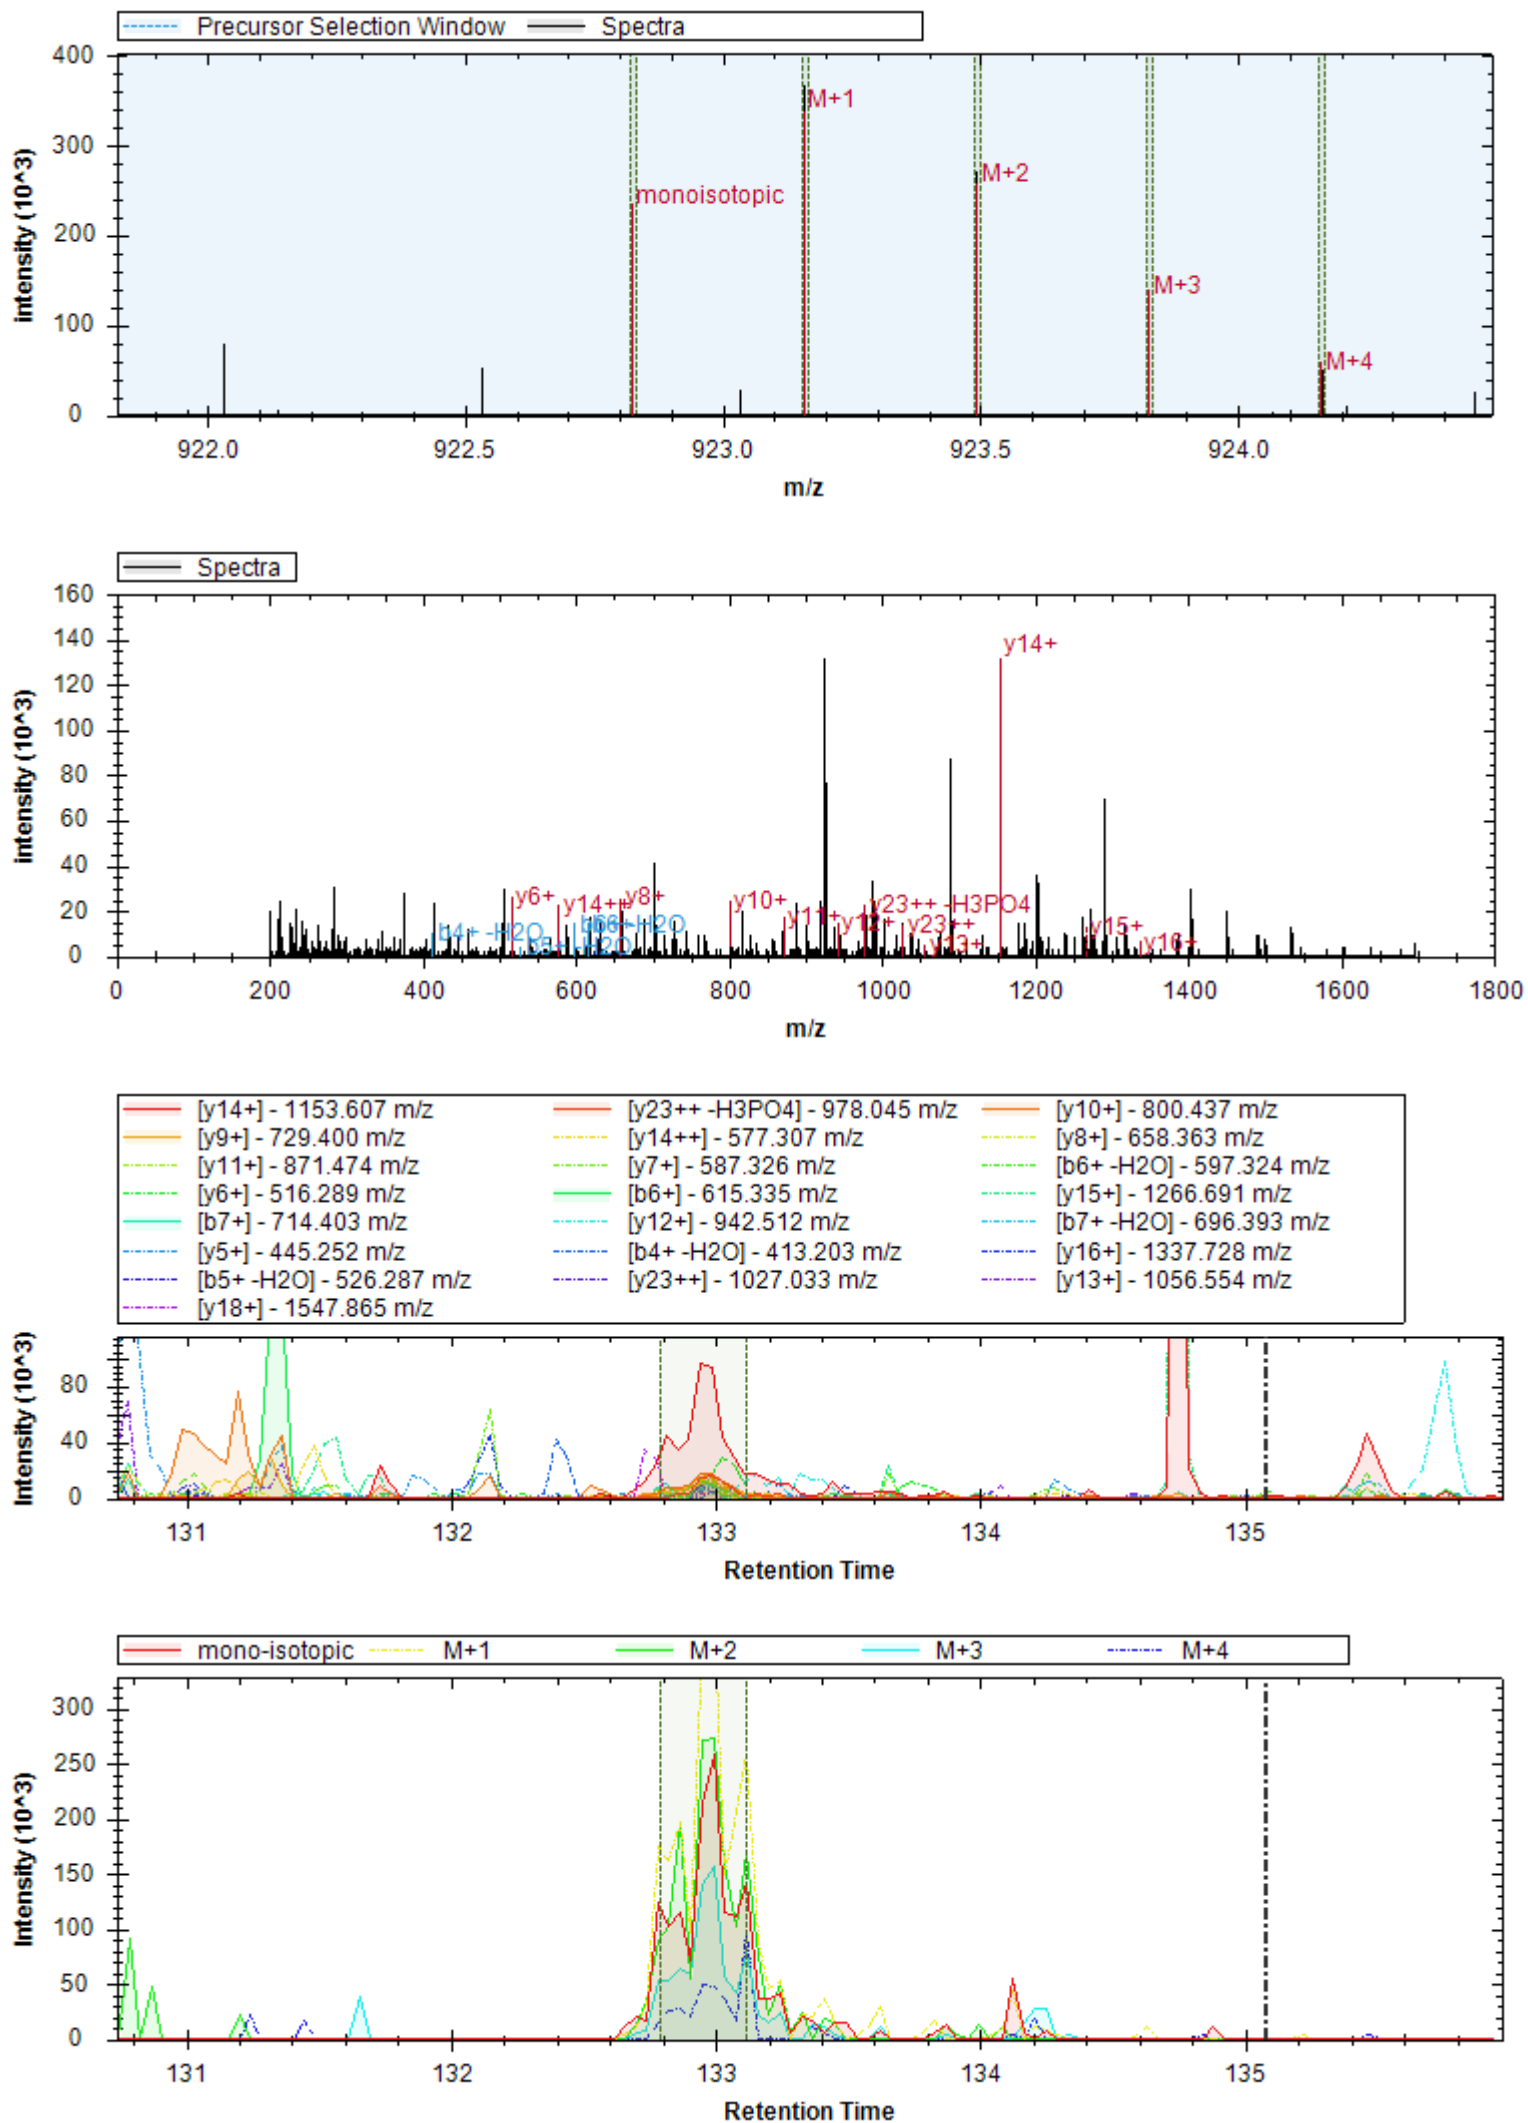

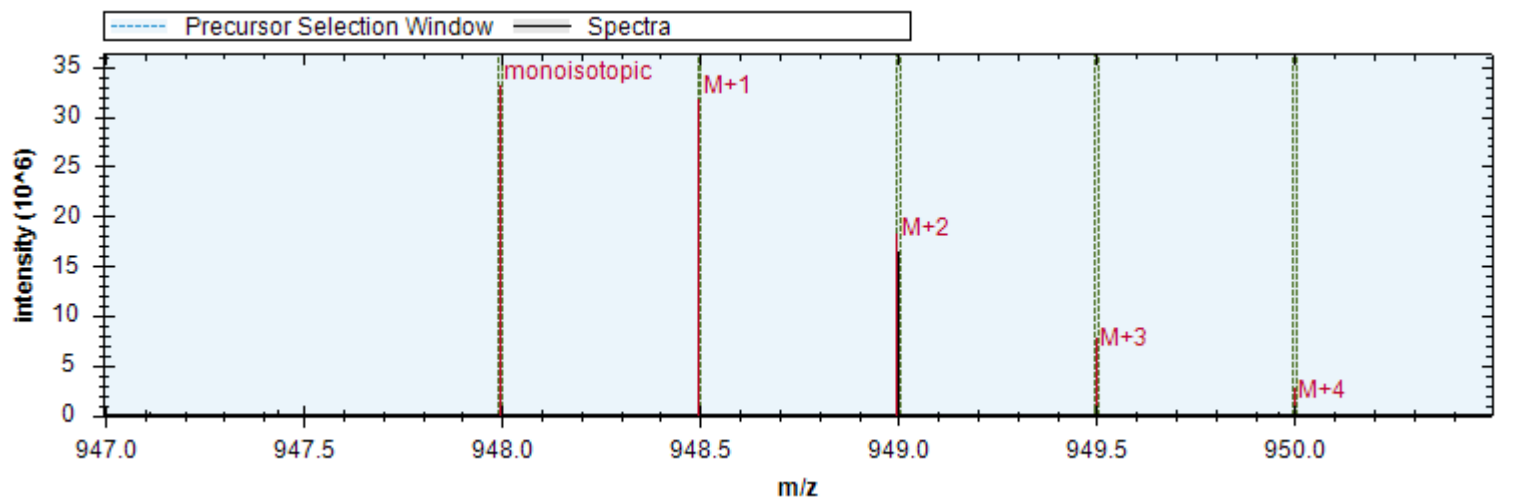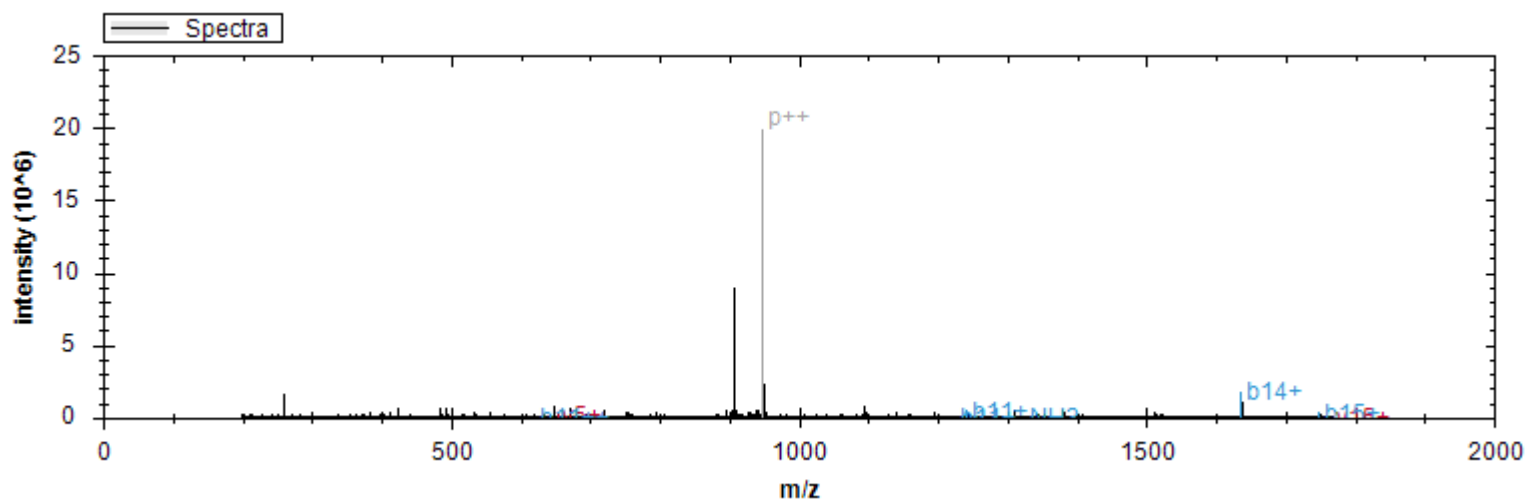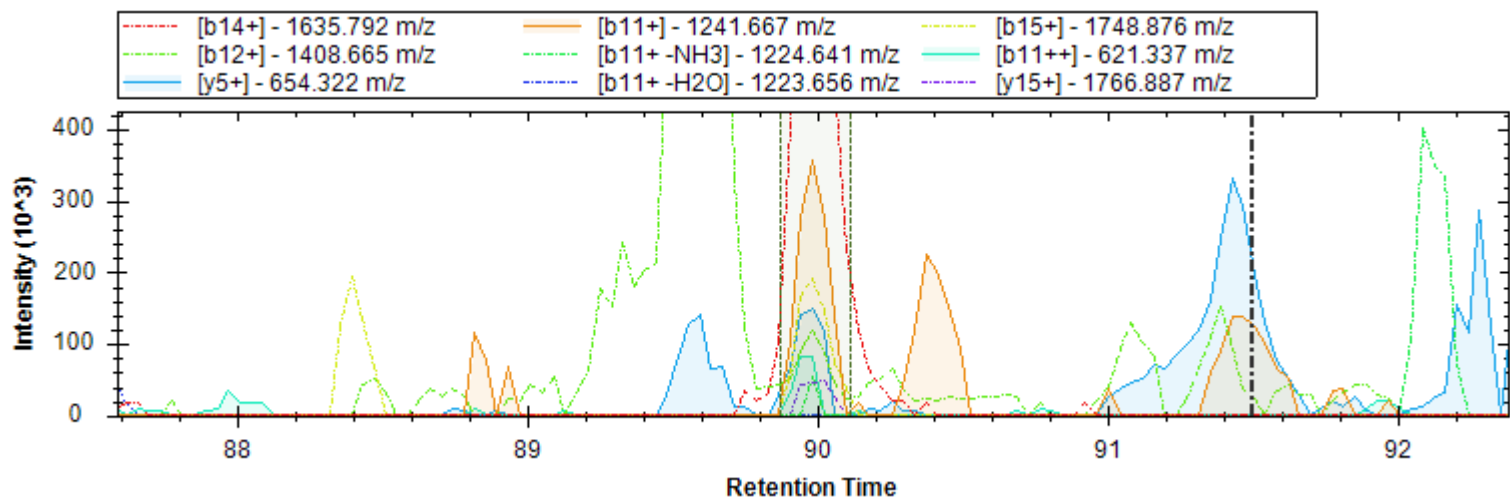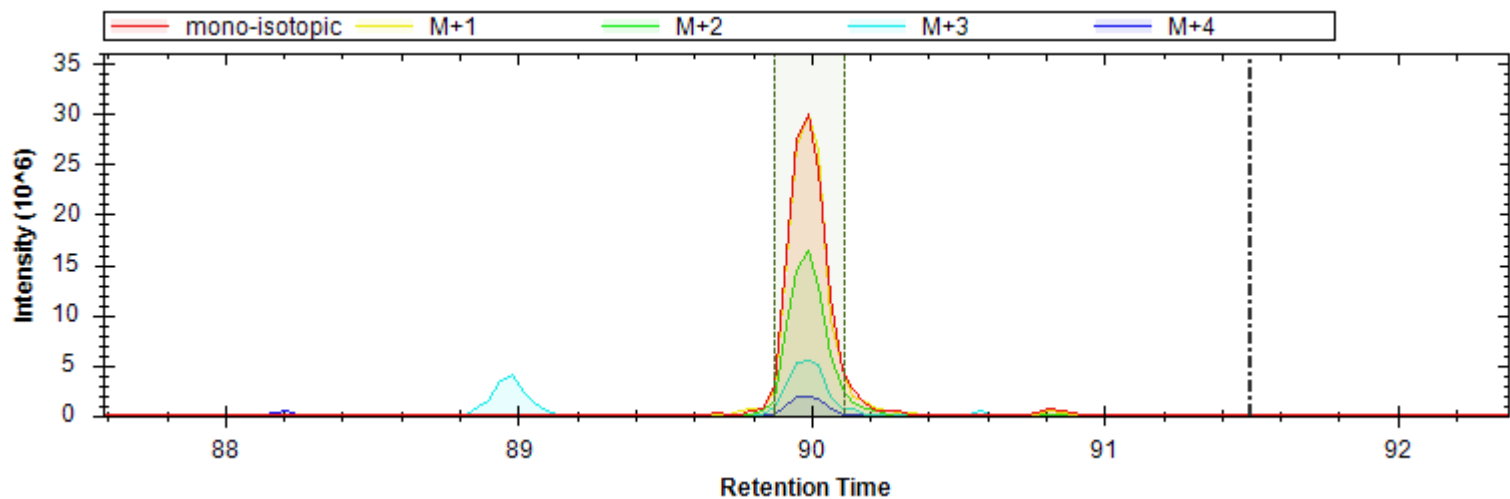

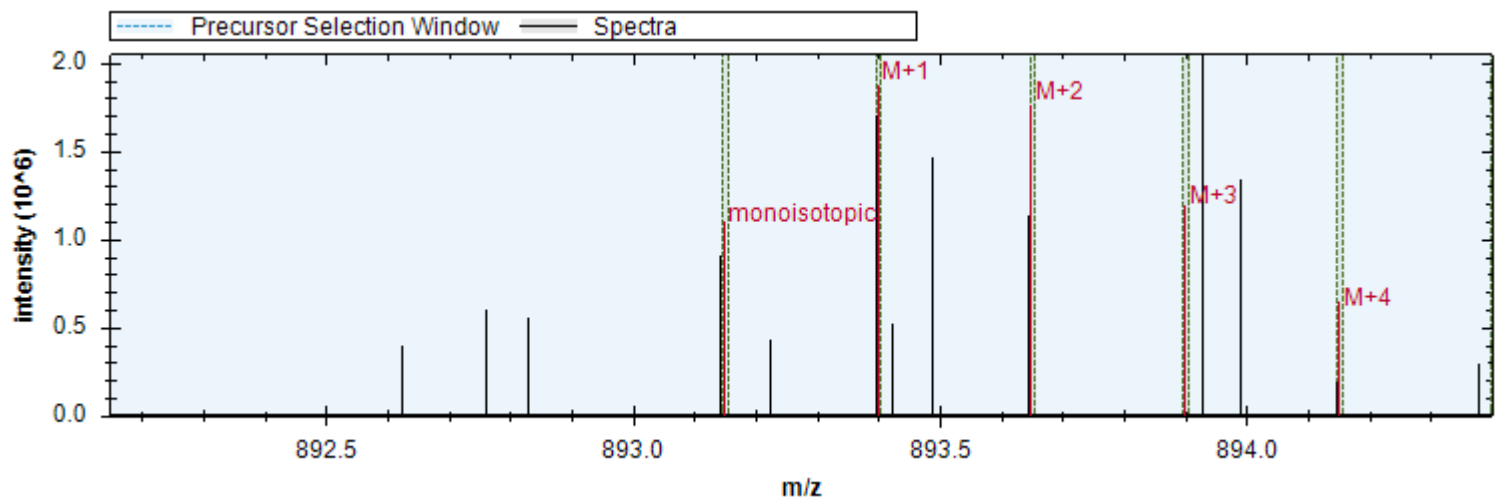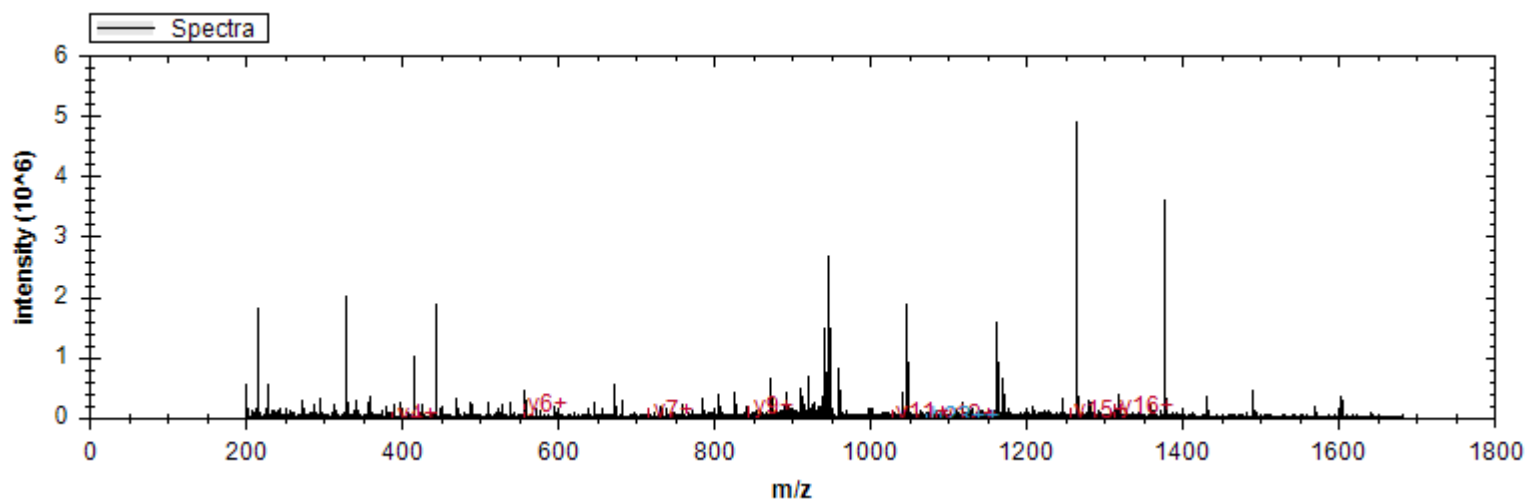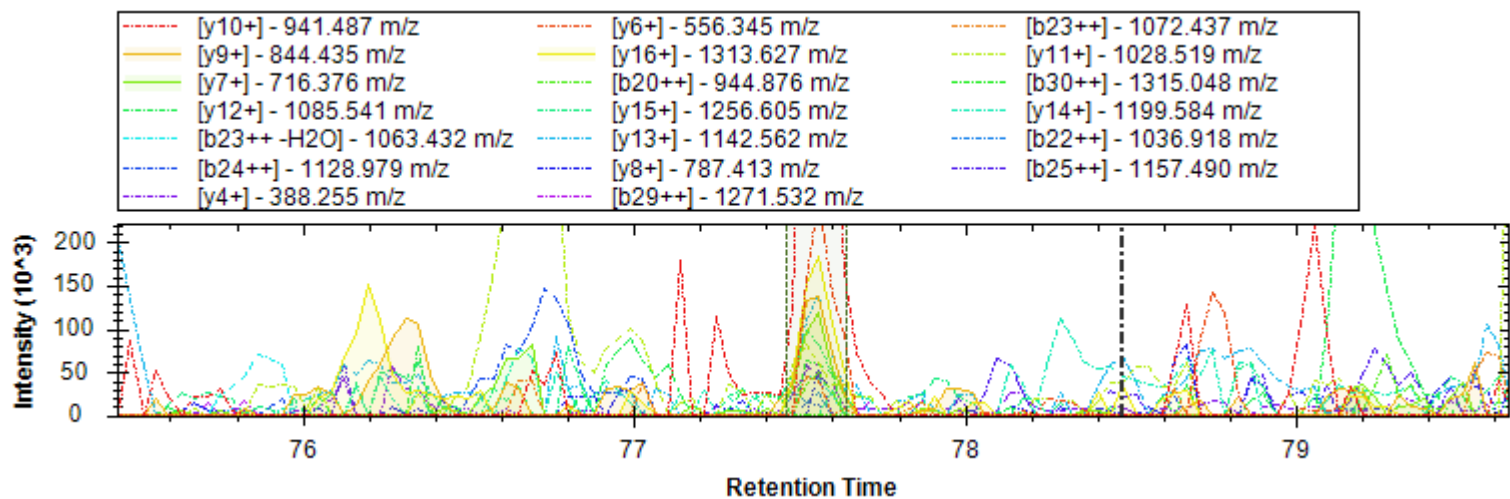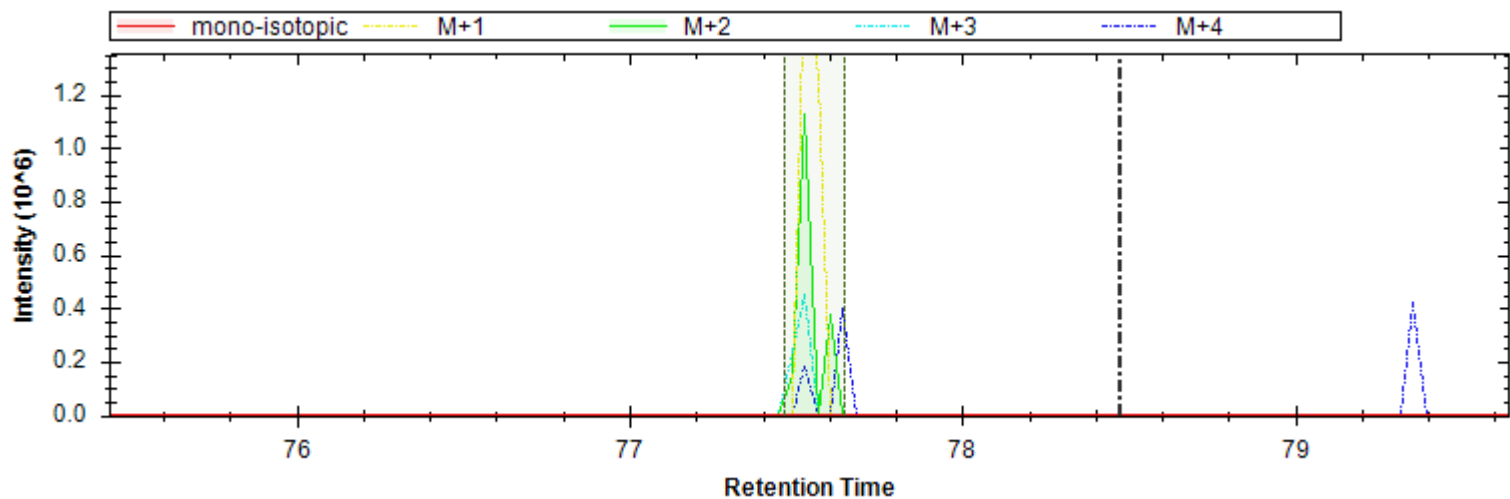



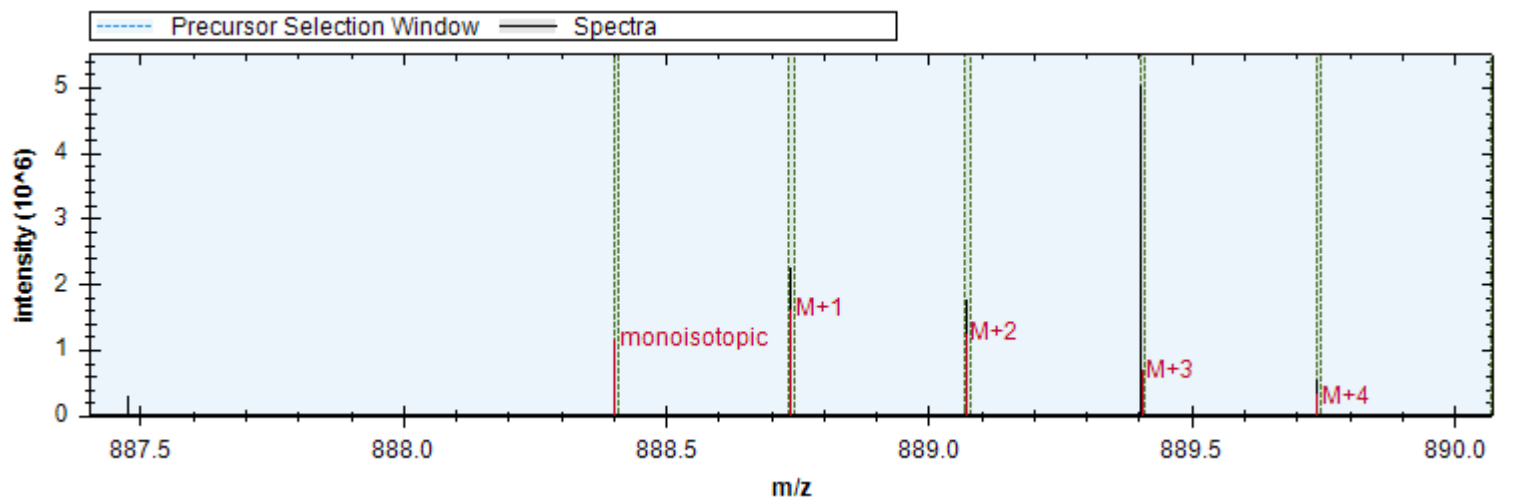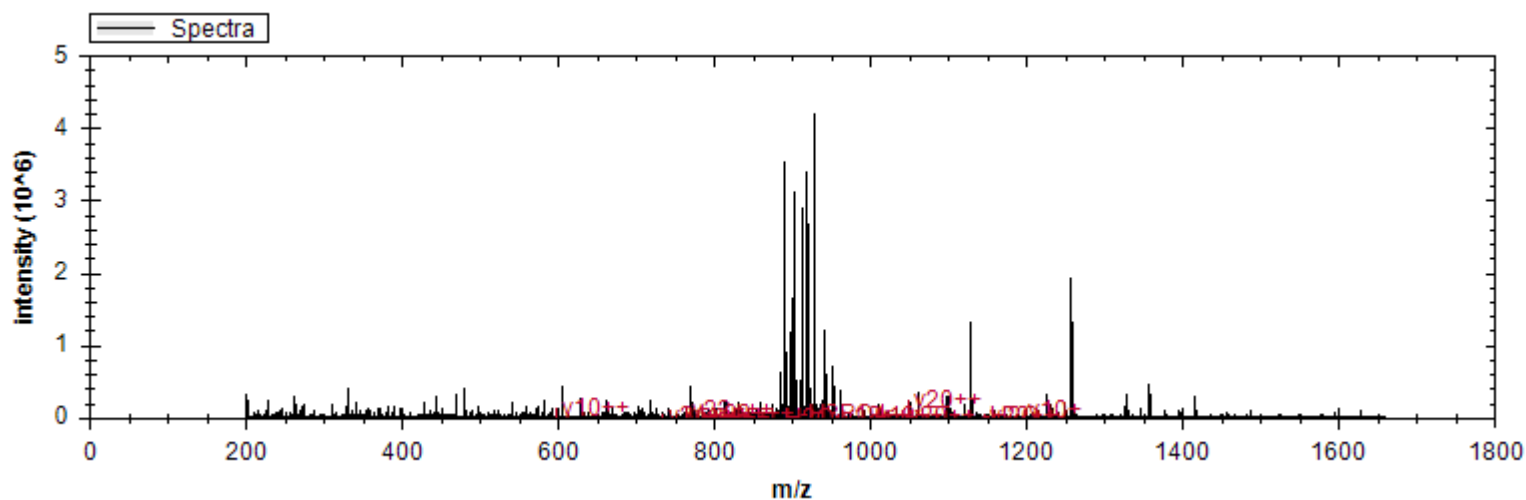

|                             |                             |                               |
|-----------------------------|-----------------------------|-------------------------------|
| [y20++] - 1050.511 m/z      | [y21++] - 1099.037 m/z      | [y22+++] - 765.378 m/z        |
| [y10+] - 1197.590 m/z       | [y20++ -H2O] - 1041.506 m/z | [y9+] - 1100.537 m/z          |
| [y21+++] - 733.027 m/z      | [y17++] - 929.958 m/z       | [y23+++ -H3PO4] - 788.385 m/z |
| [y20++ -NH3] - 1041.998 m/z | [y5+] - 601.319 m/z         | [y22++] - 1147.564 m/z        |
| [b3+] - 370.083 m/z         | [y18++] - 958.469 m/z       | [y6+] - 688.351 m/z           |
| [y21++ -H2O] - 1090.032 m/z | [y11+] - 1298.638 m/z       | [b4+ -H3PO4] - 369.159 m/z    |
| [y19++] - 1001.984 m/z      | [y8+] - 953.469 m/z         | [y22+++ -H2O] - 759.375 m/z   |
| [y10++] - 599.299 m/z       | [y11++] - 649.822 m/z       | [y19++ -H2O] - 992.979 m/z    |

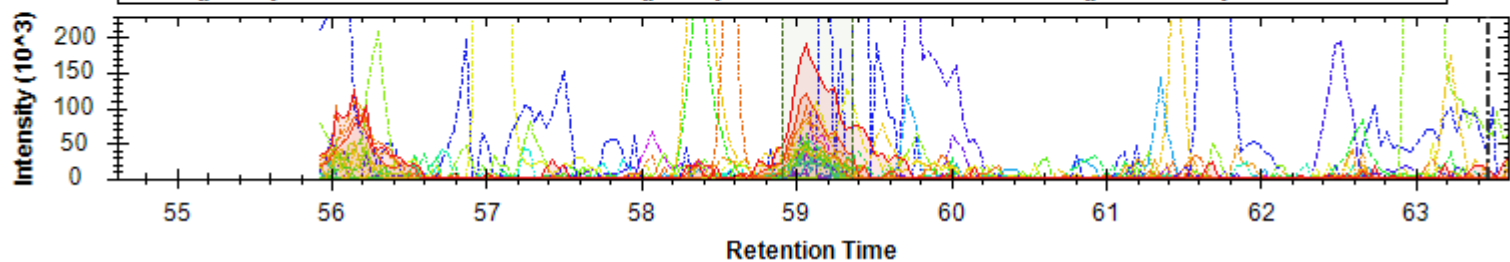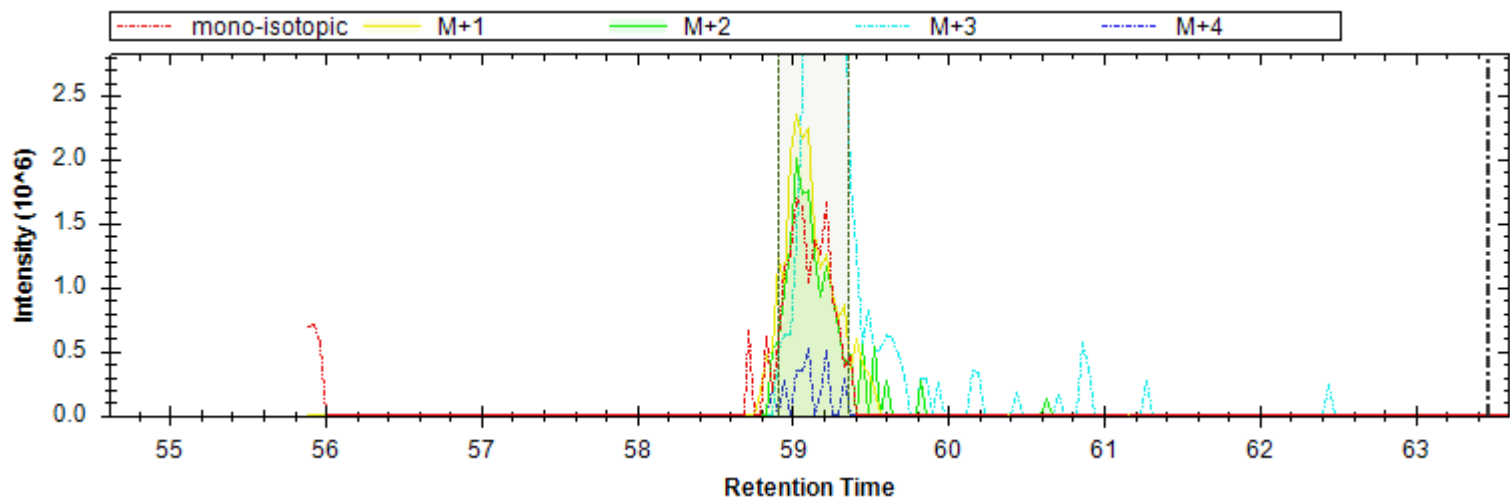

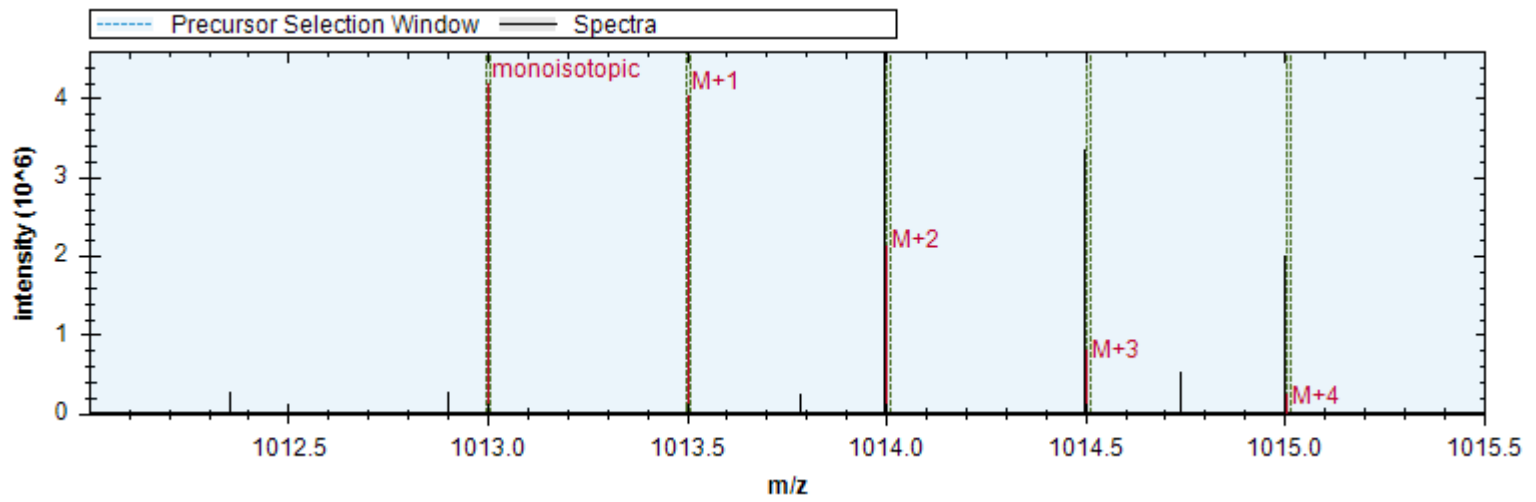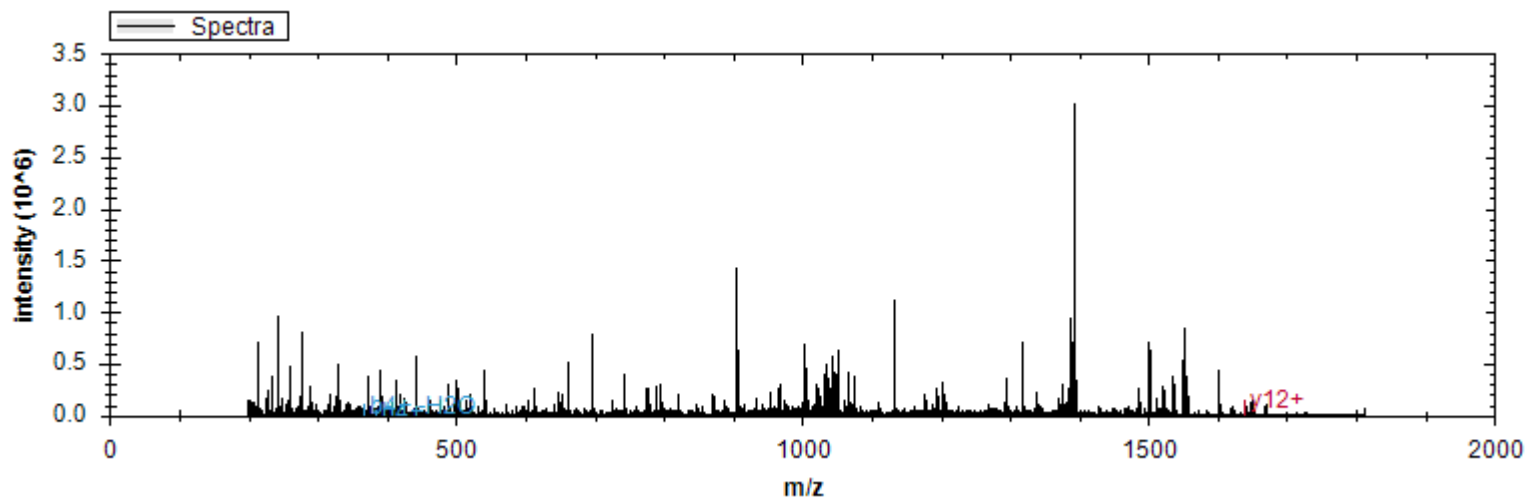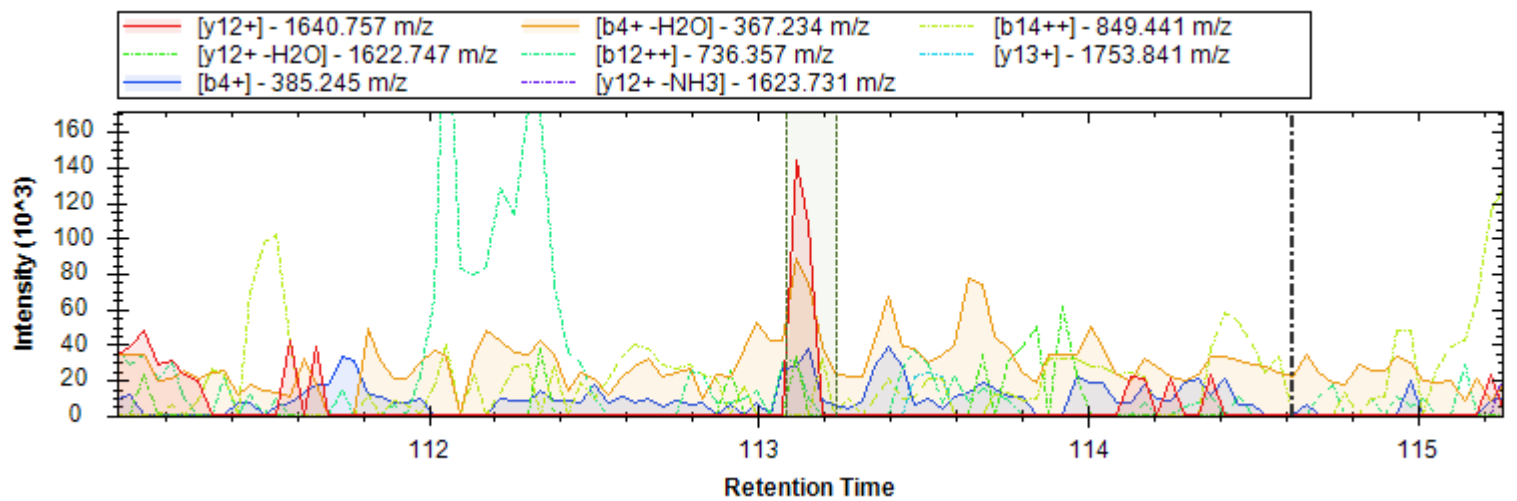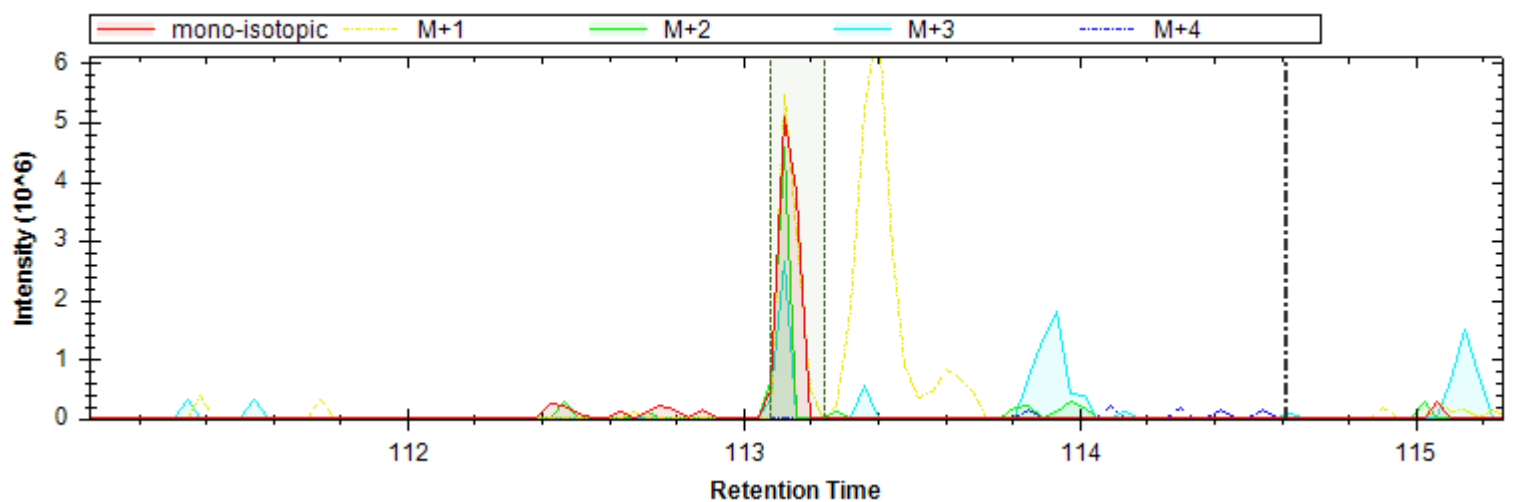

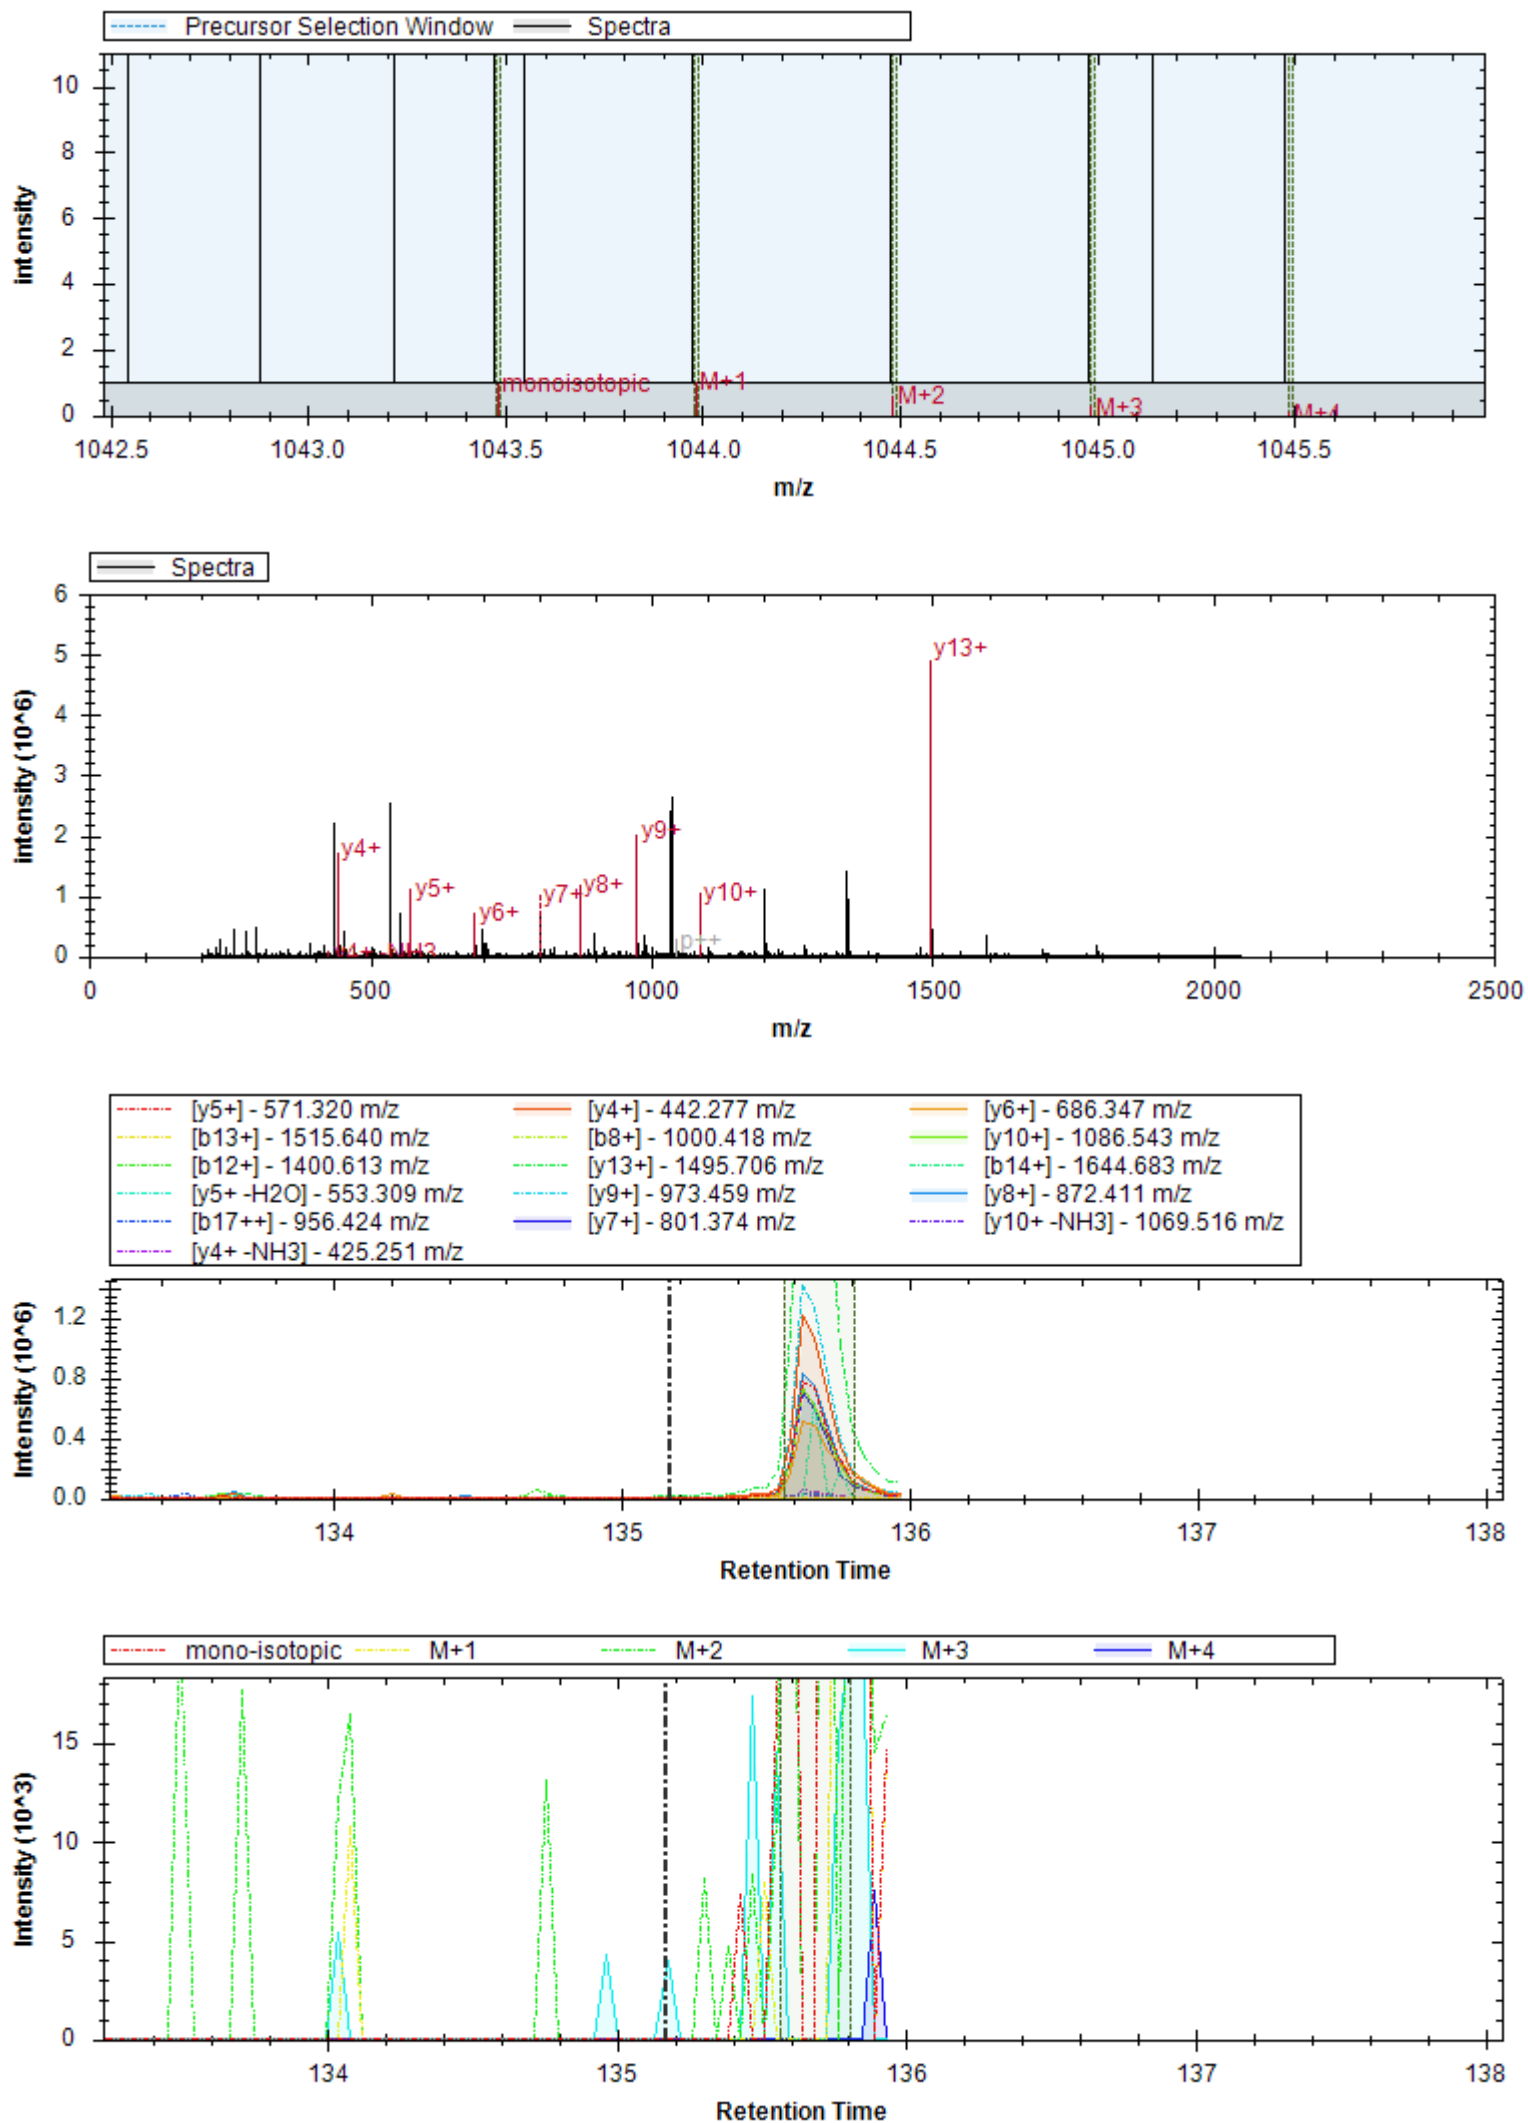

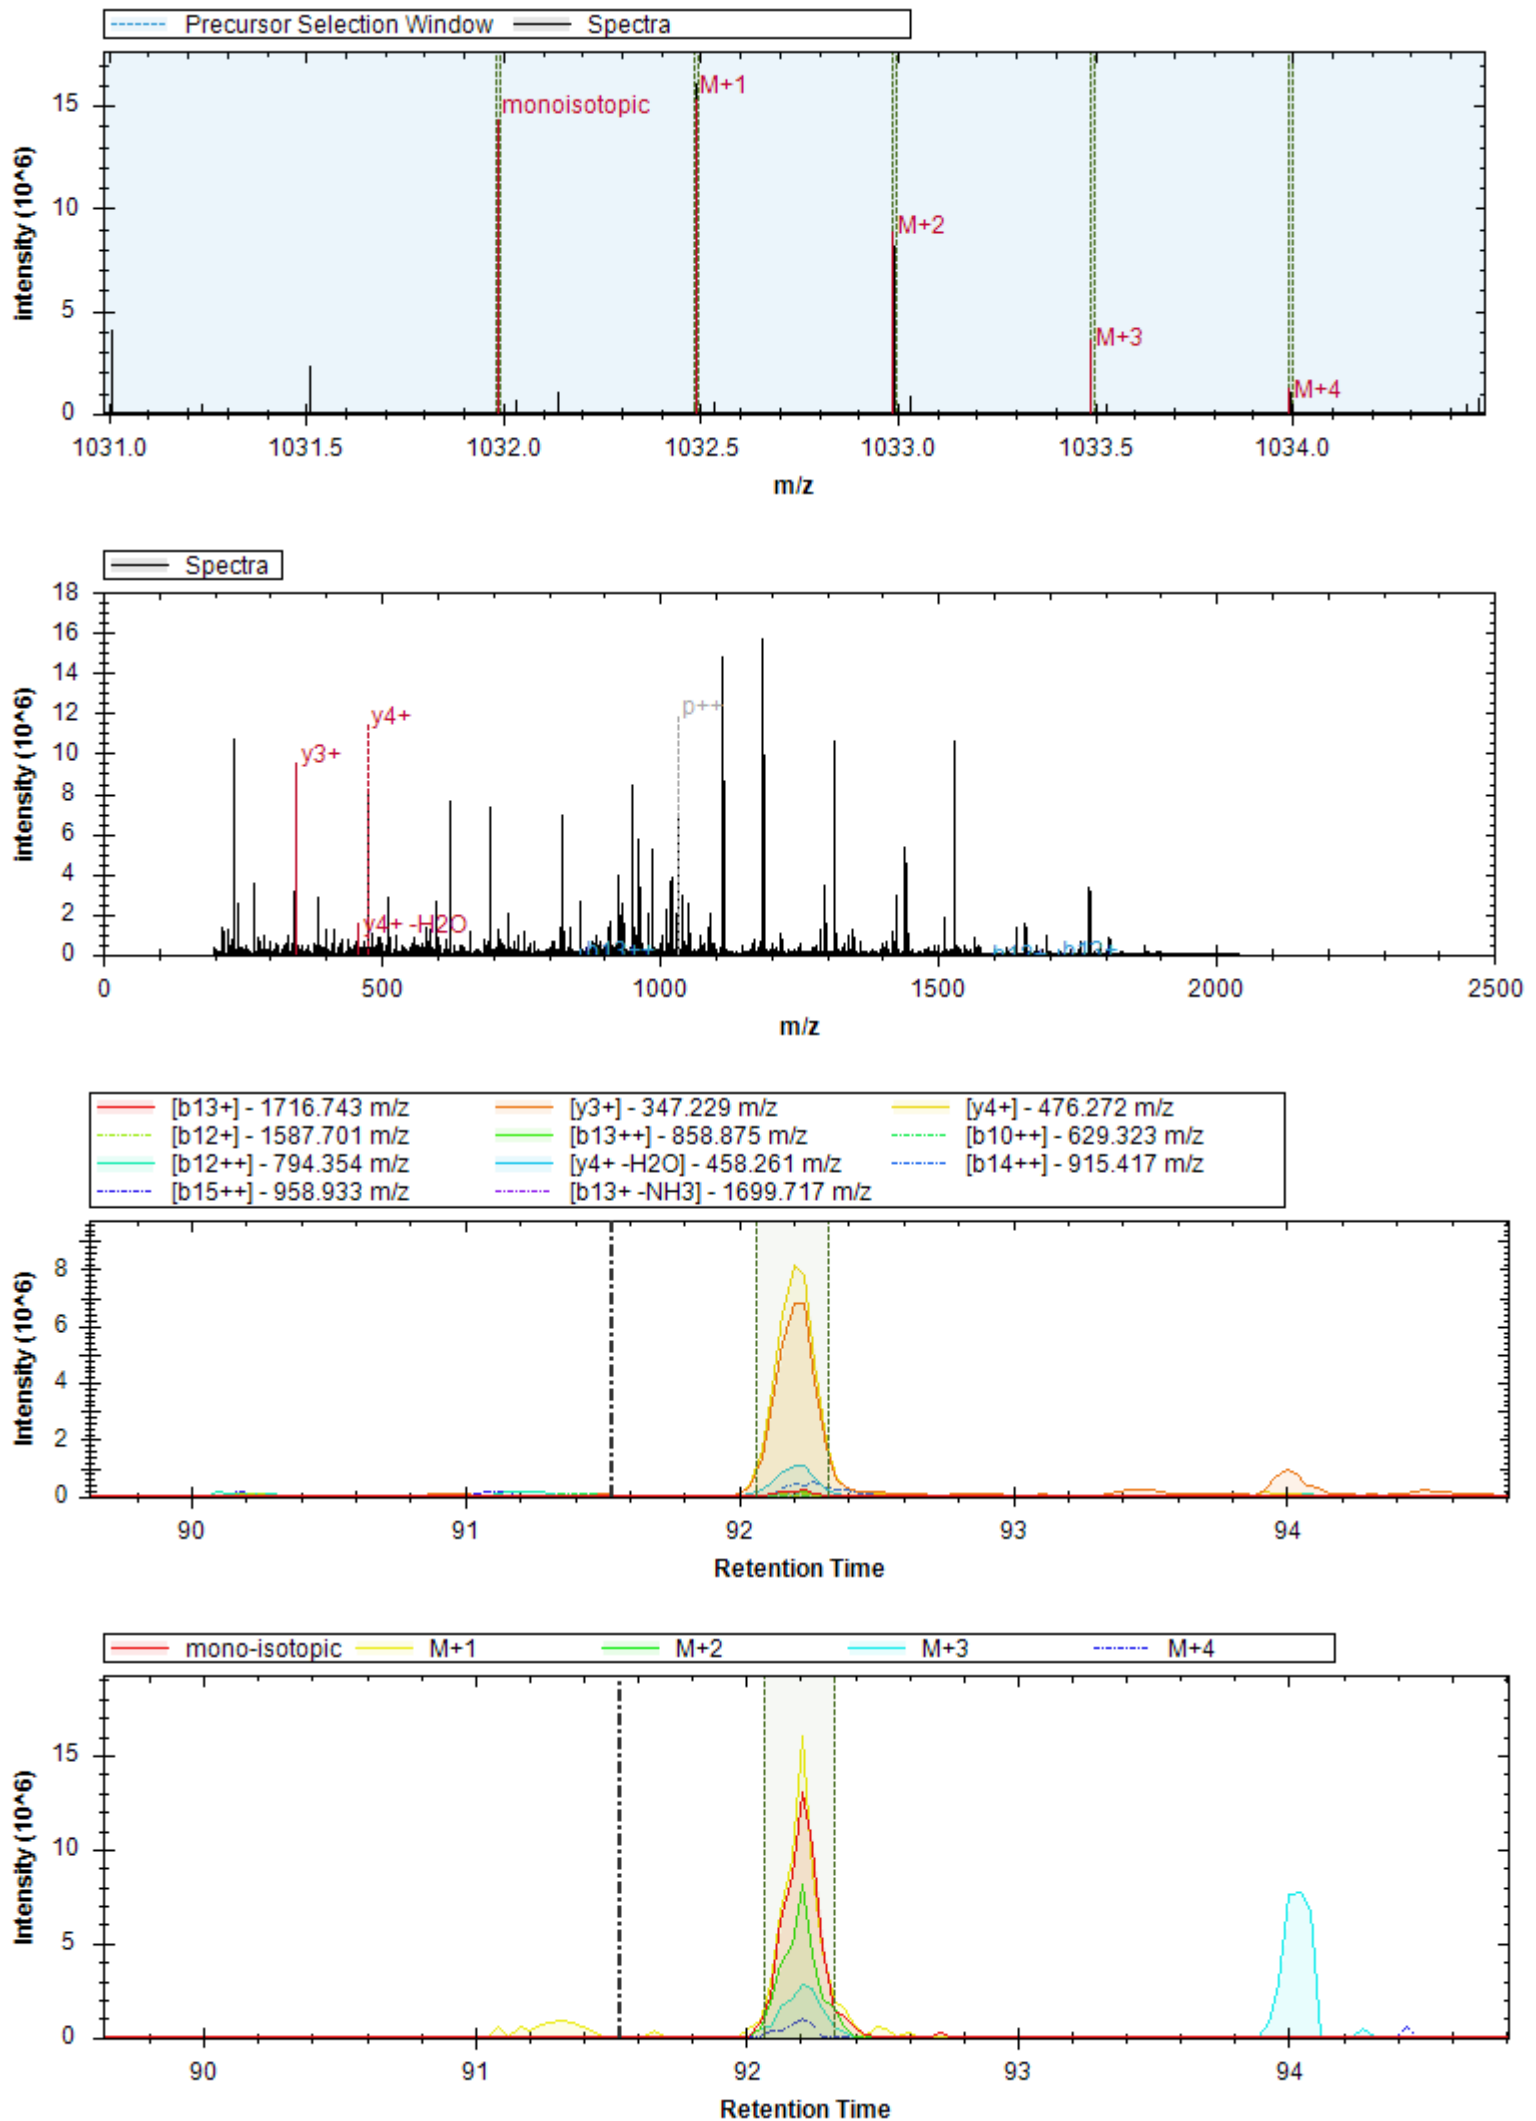

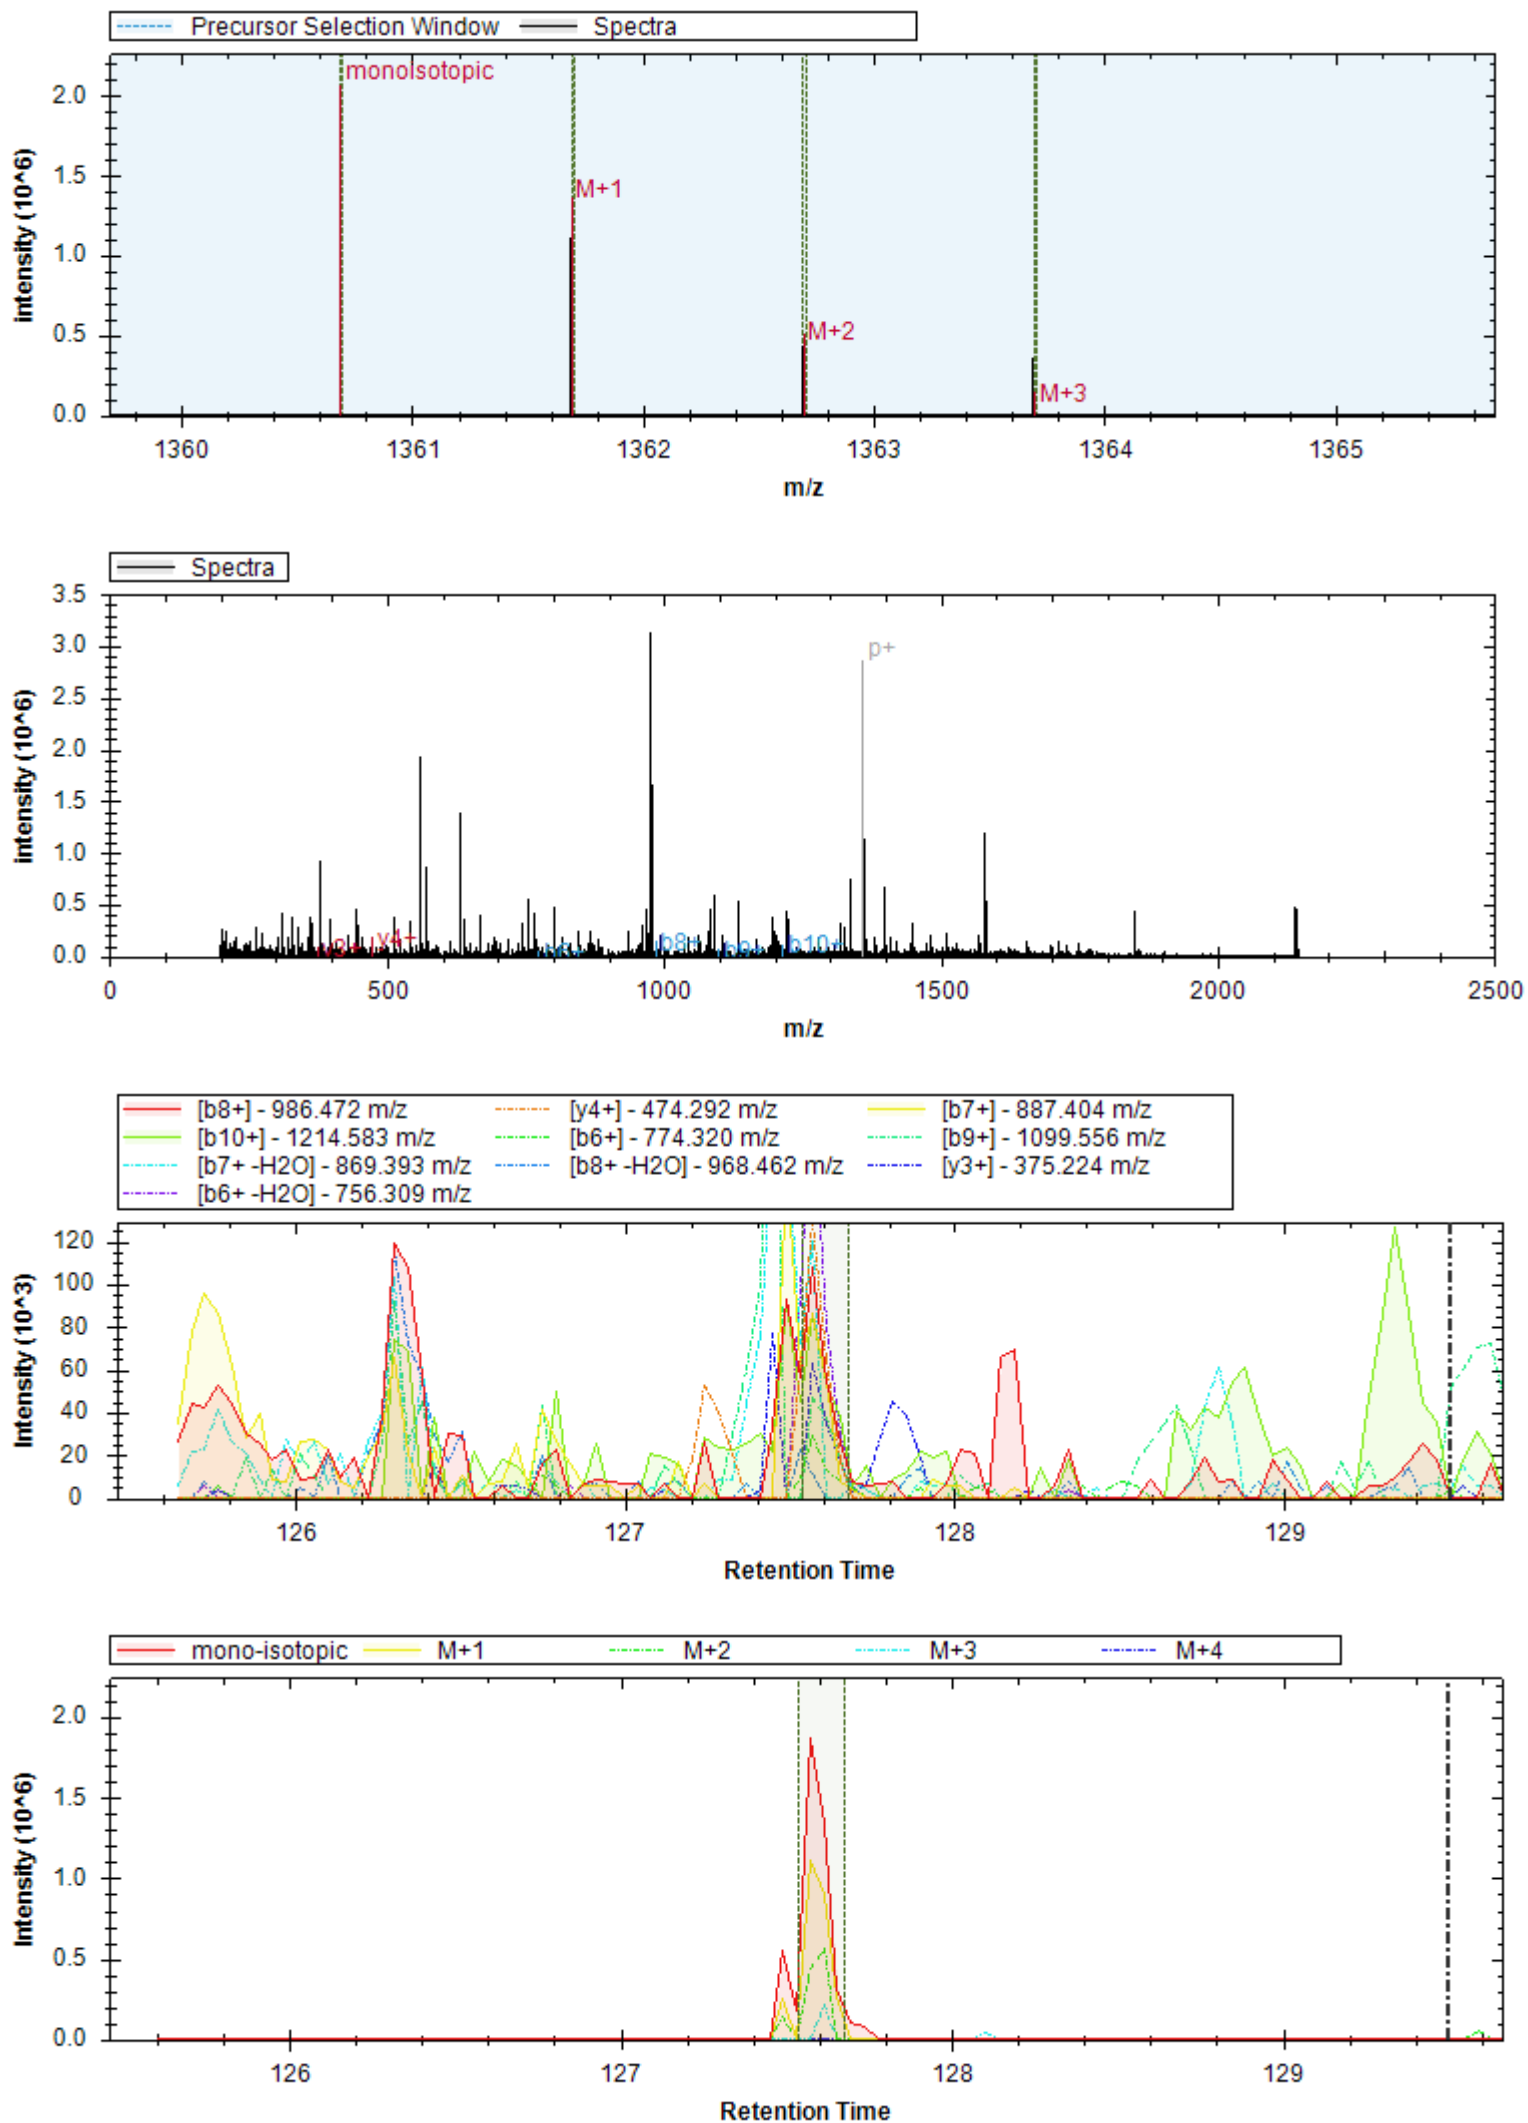

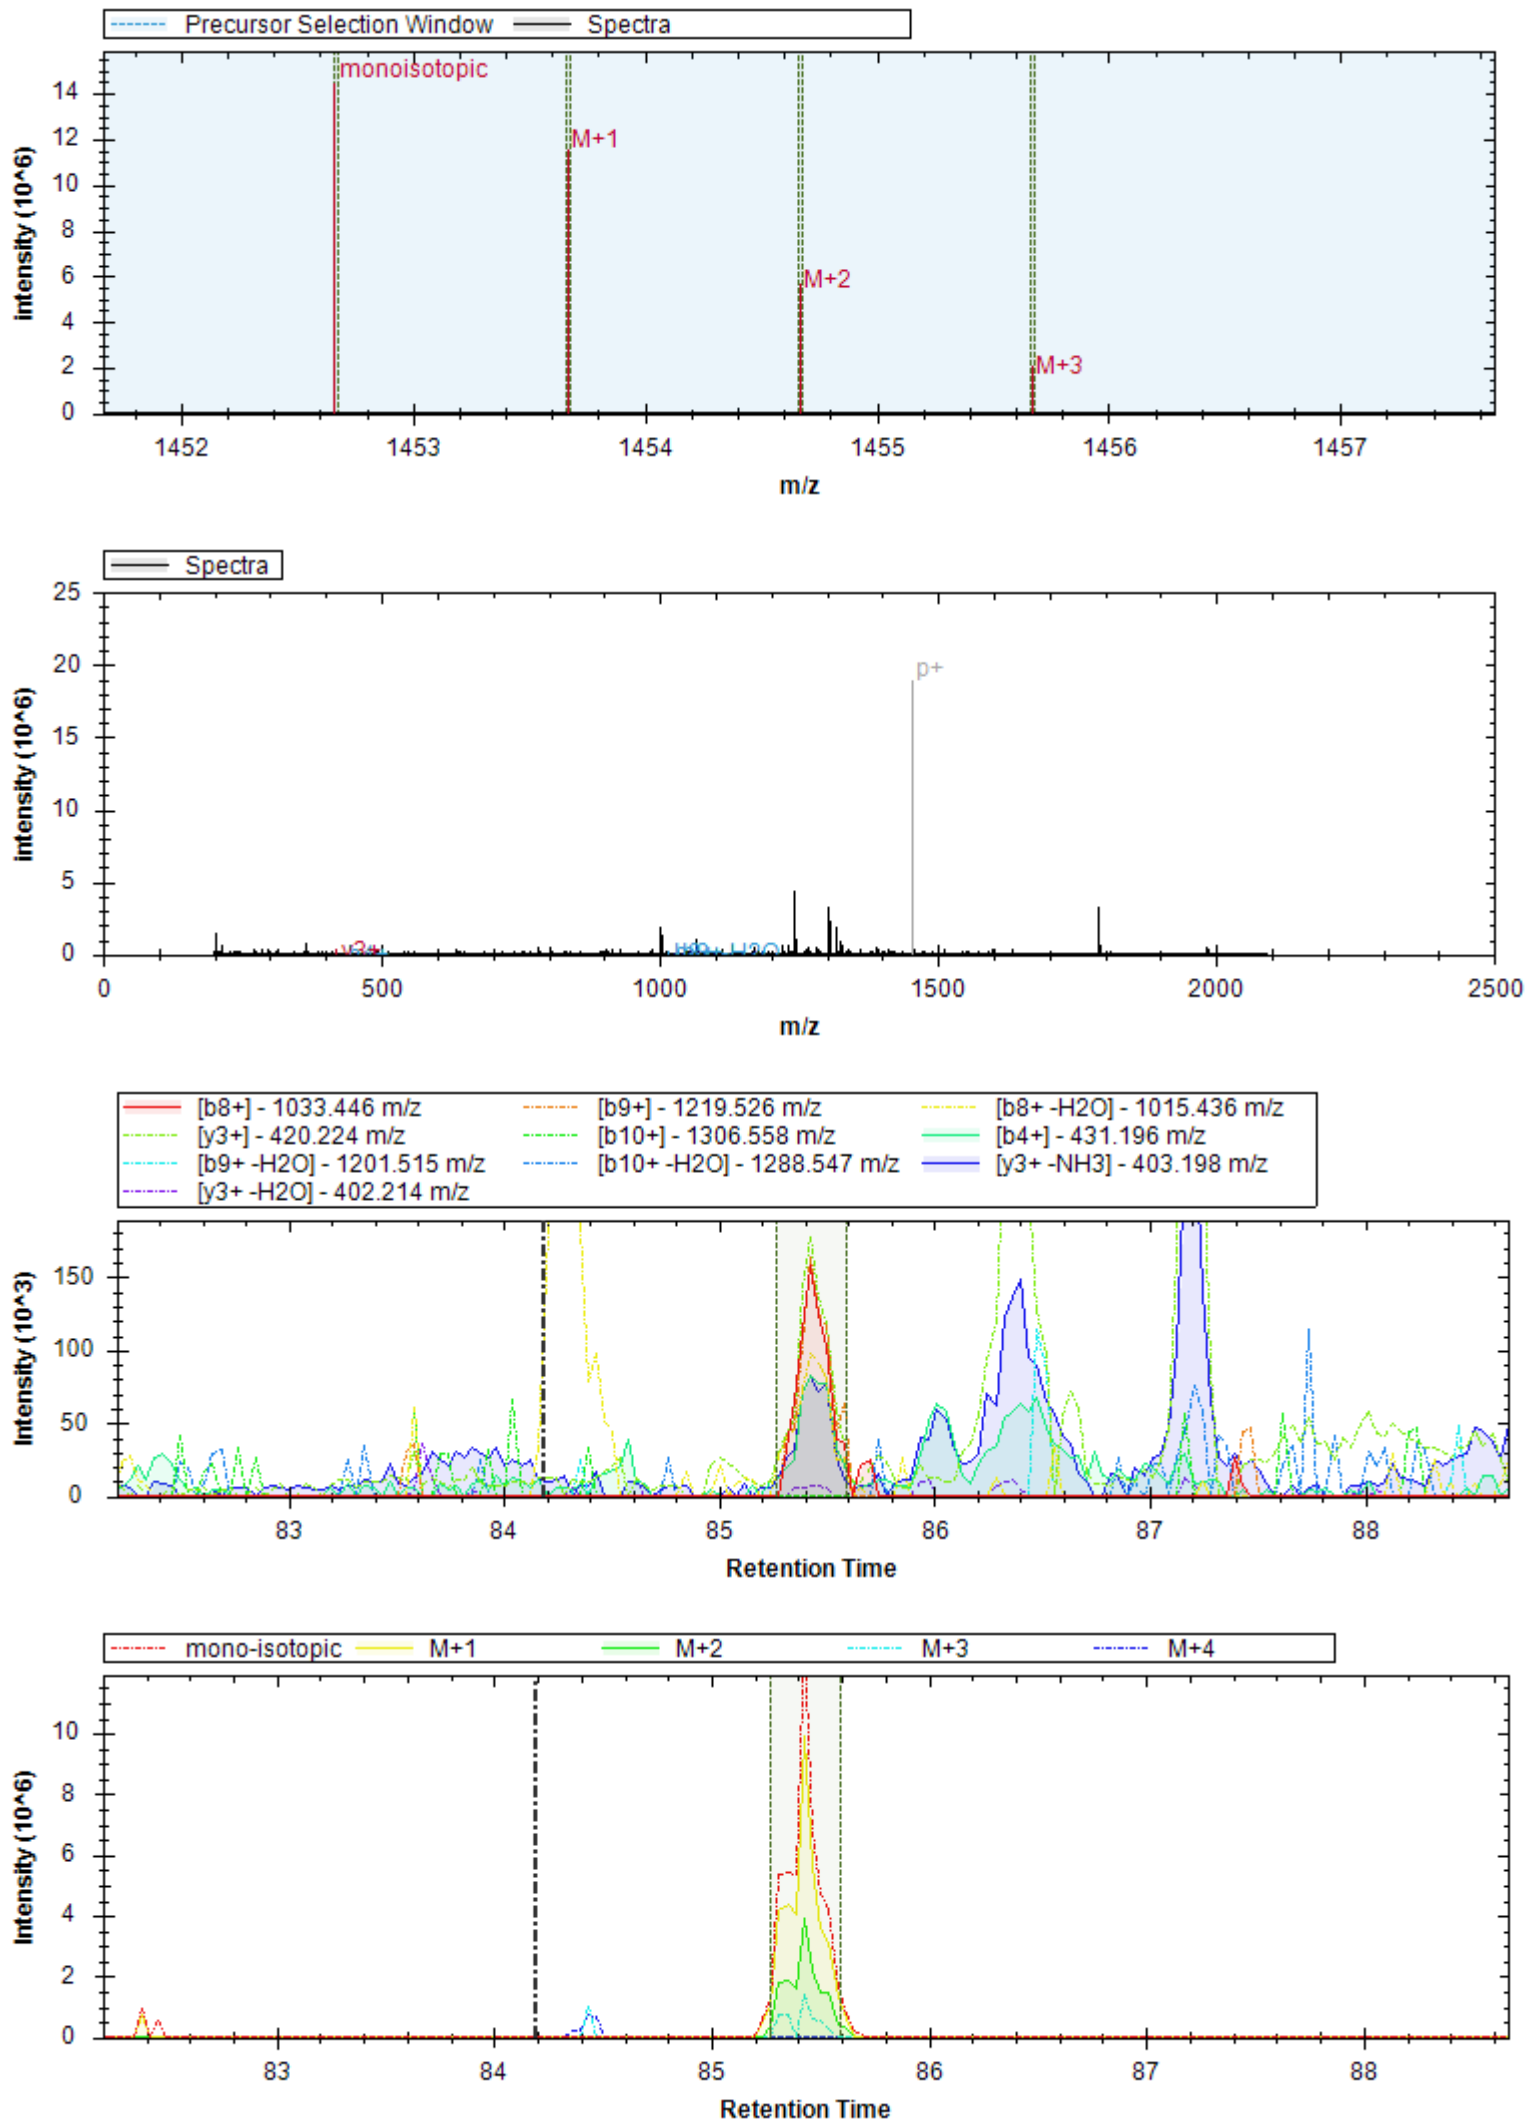

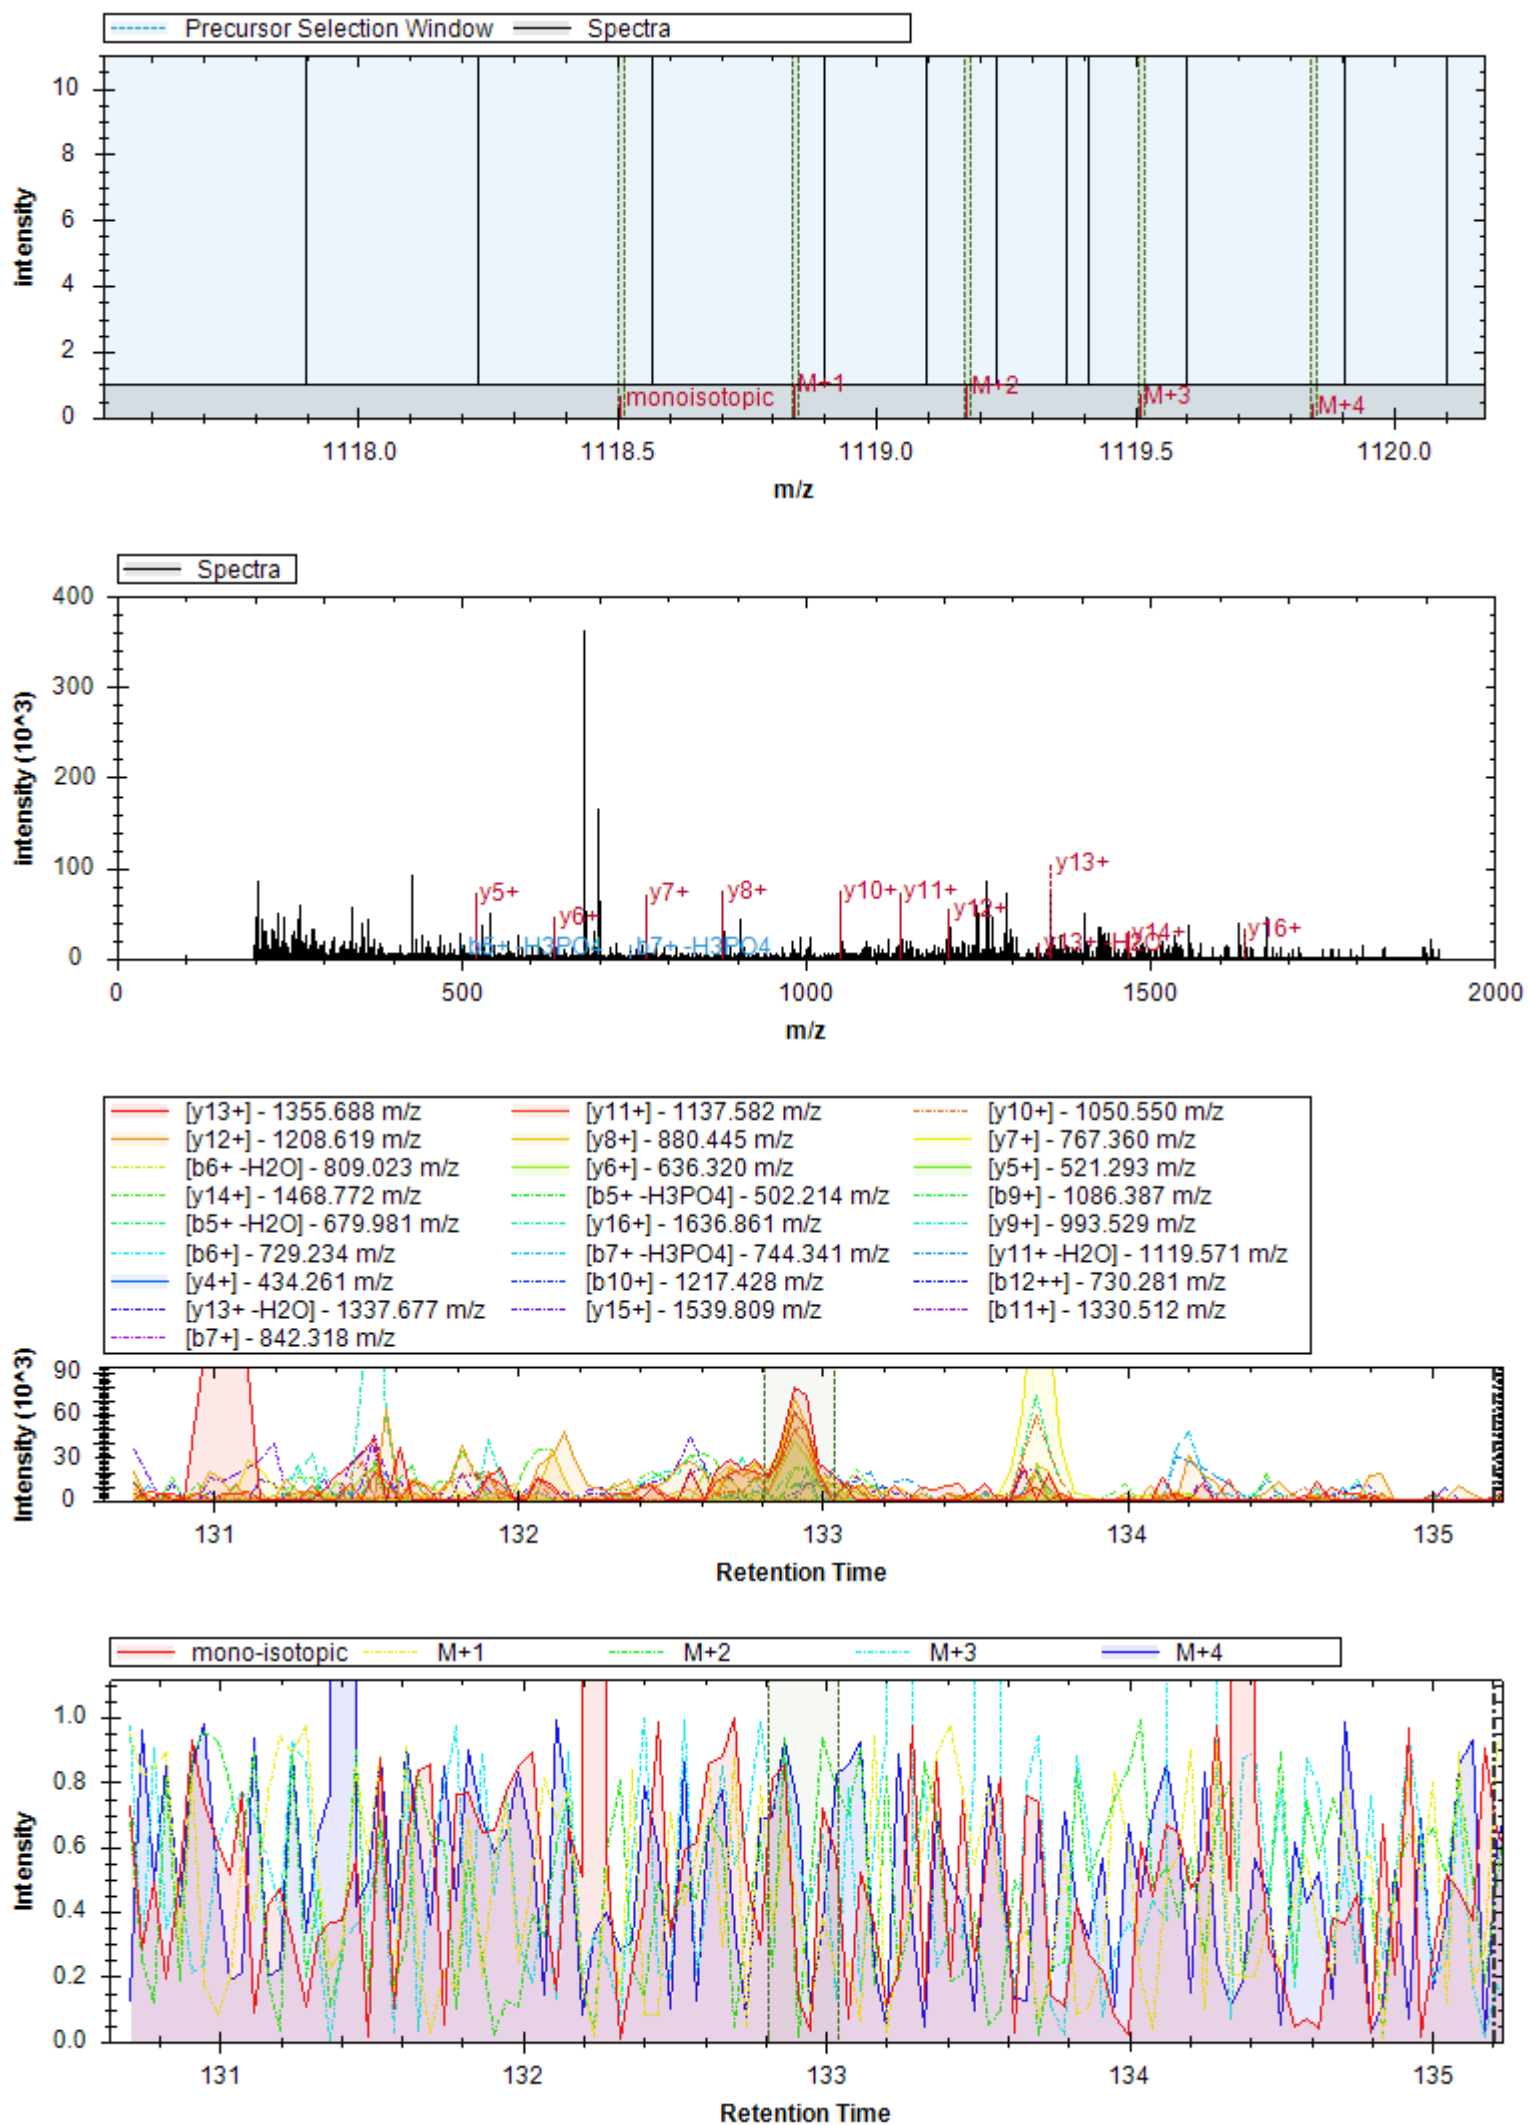

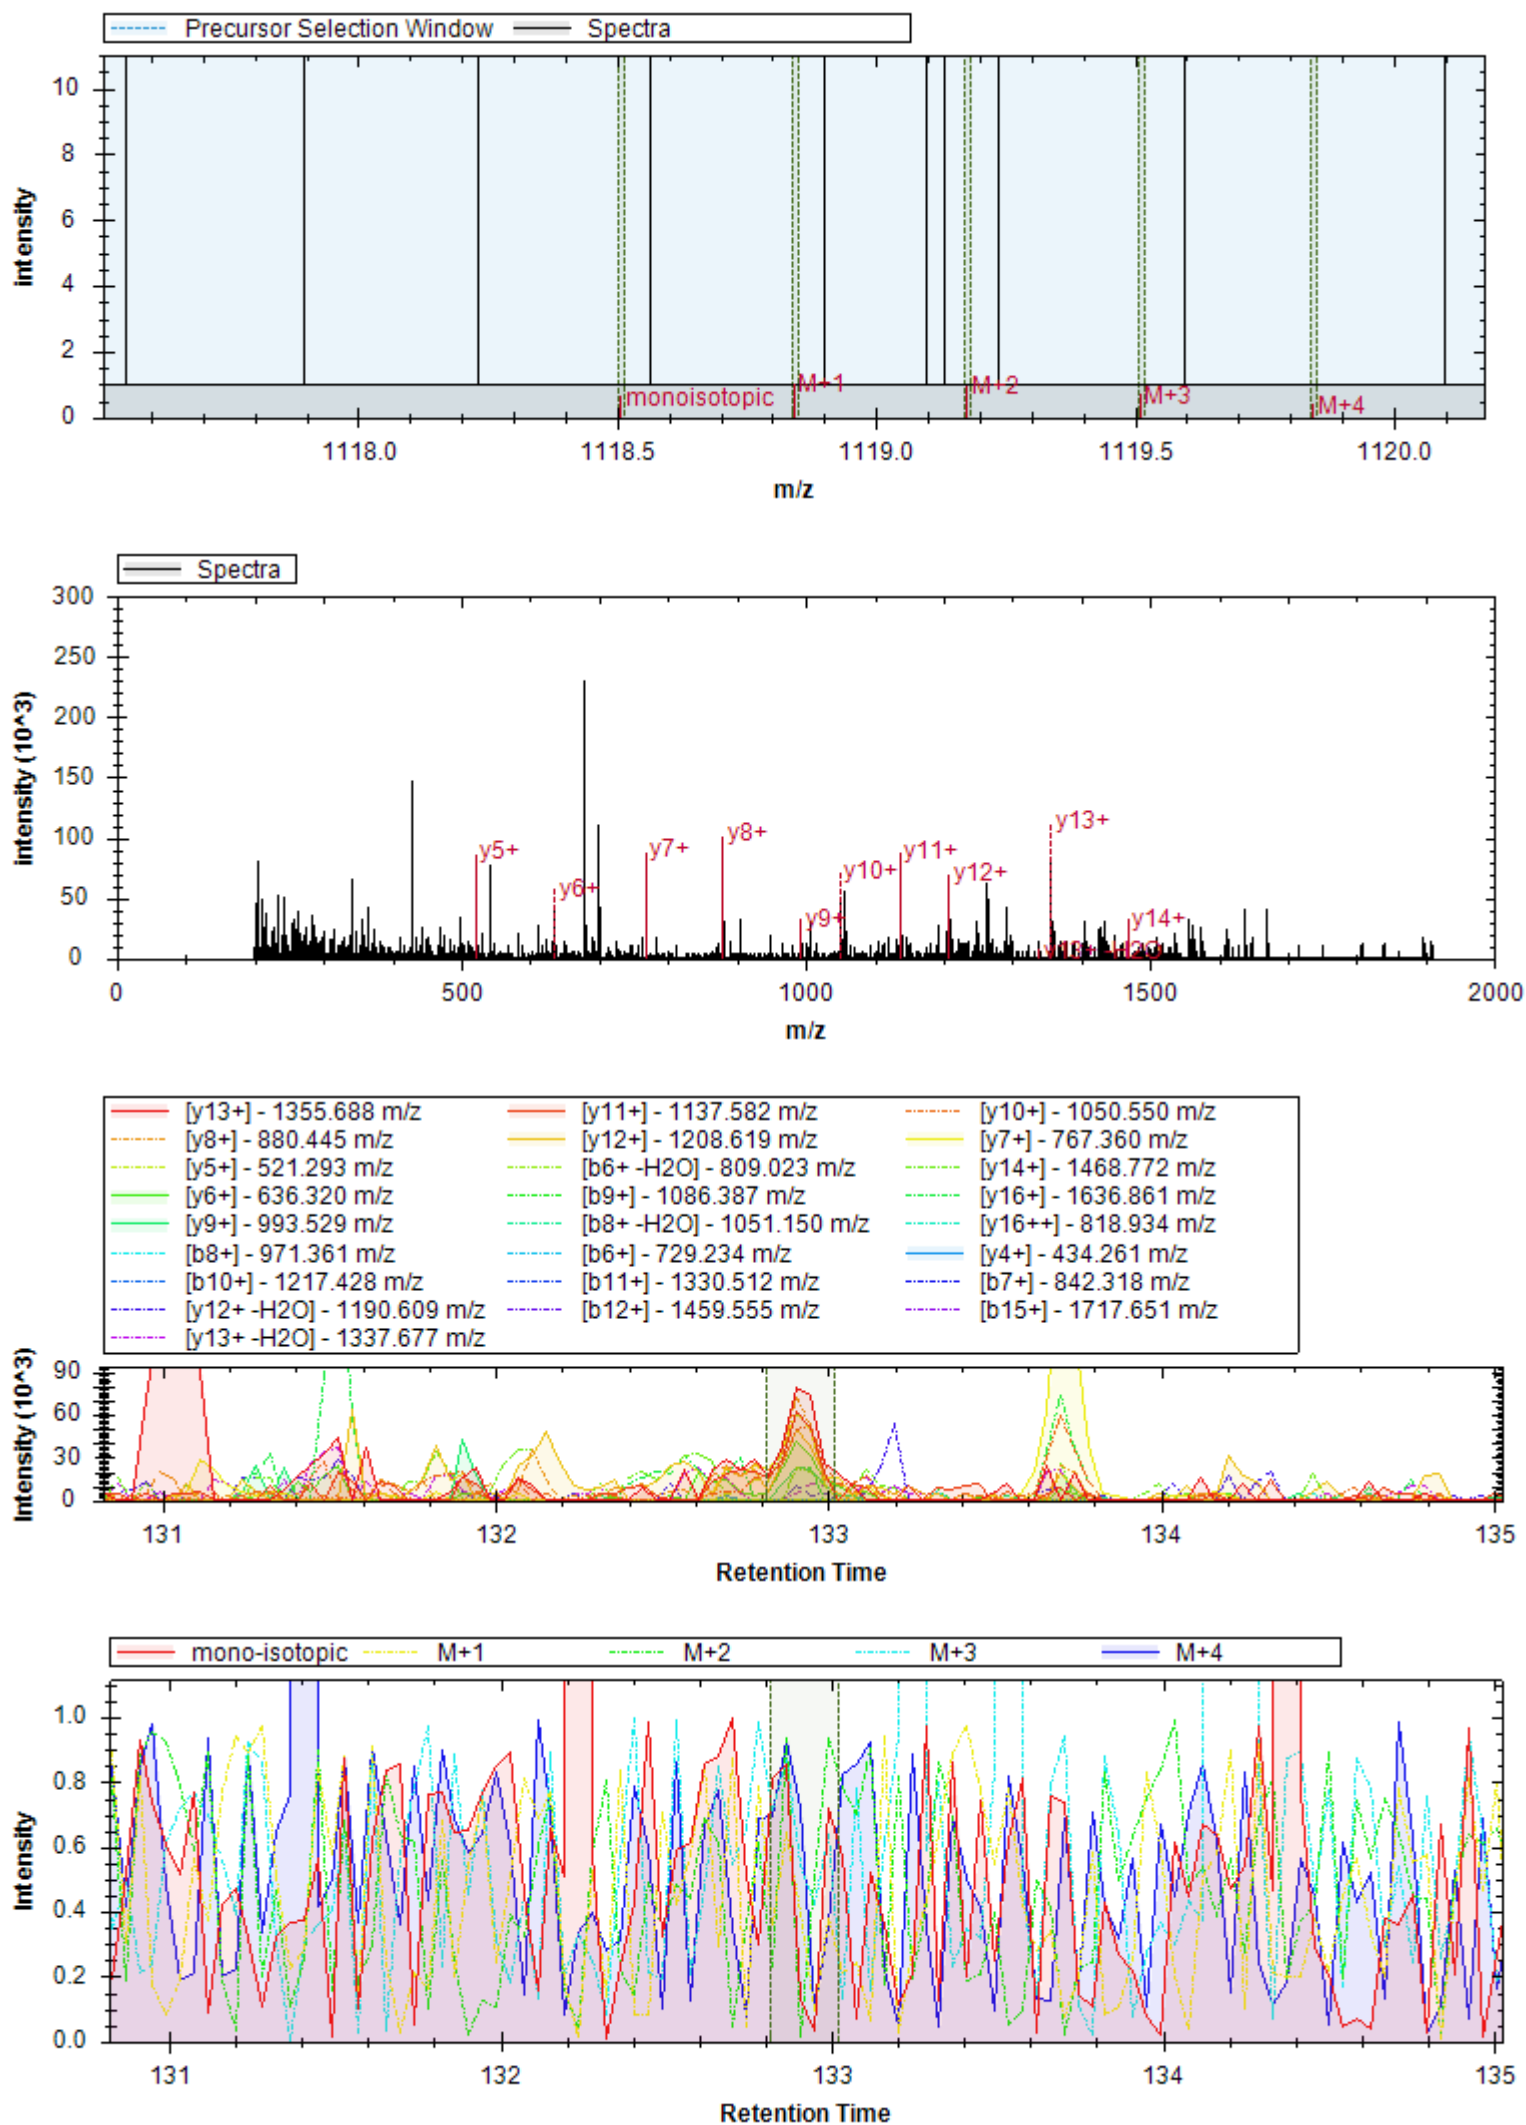



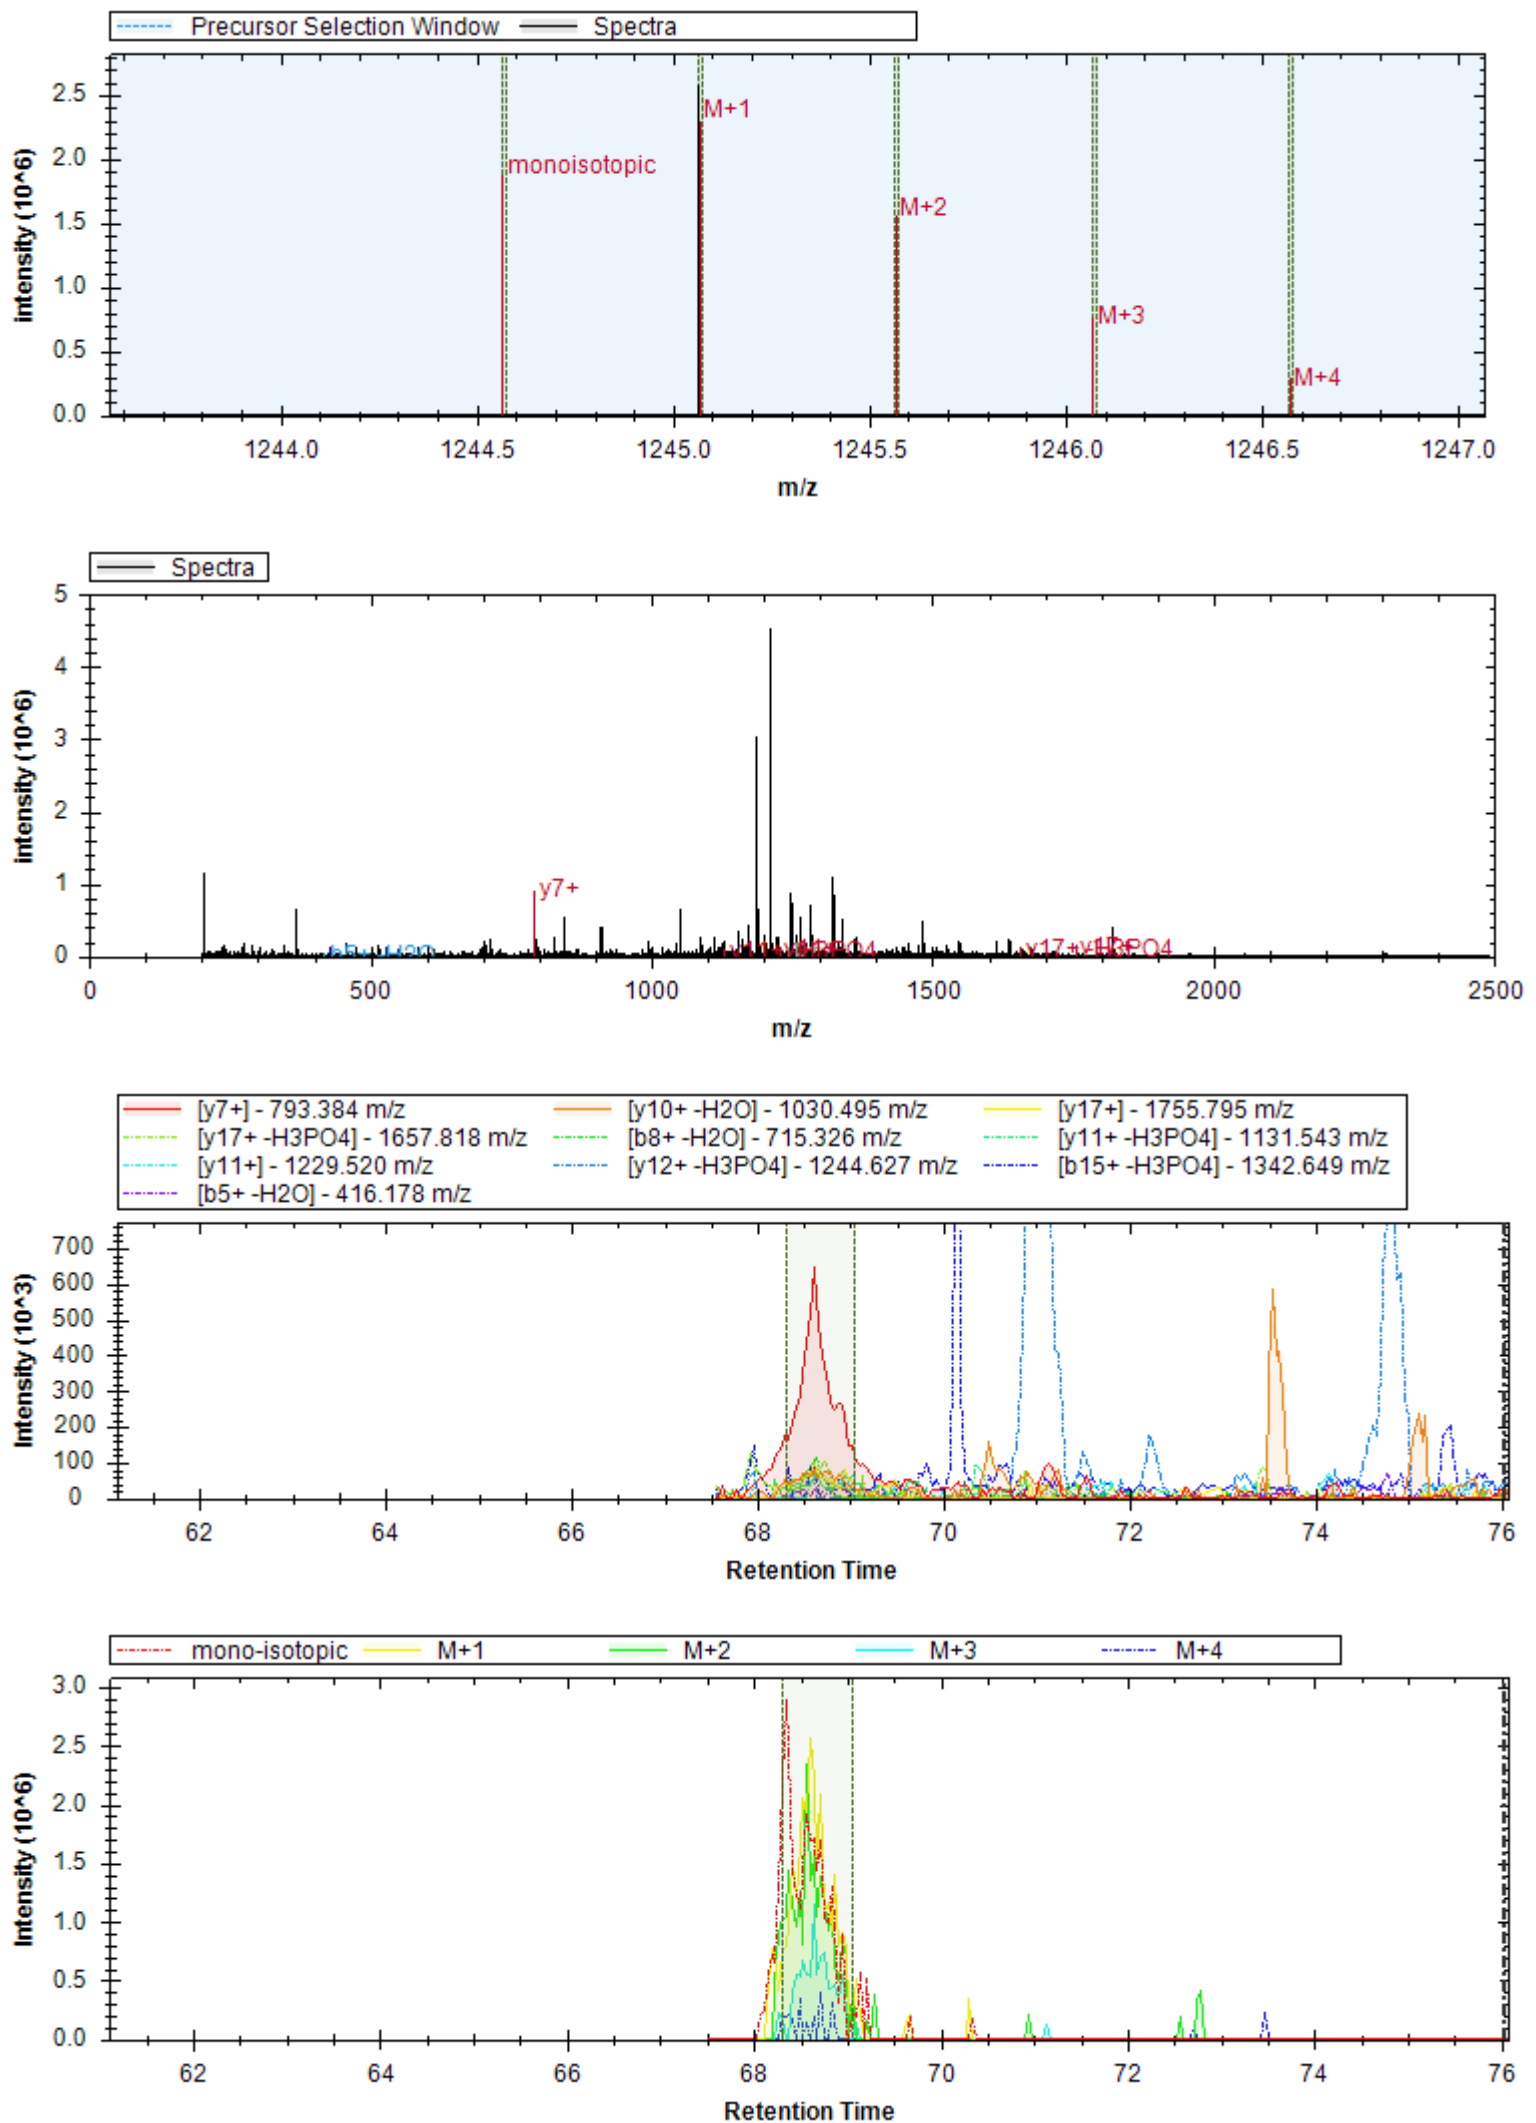

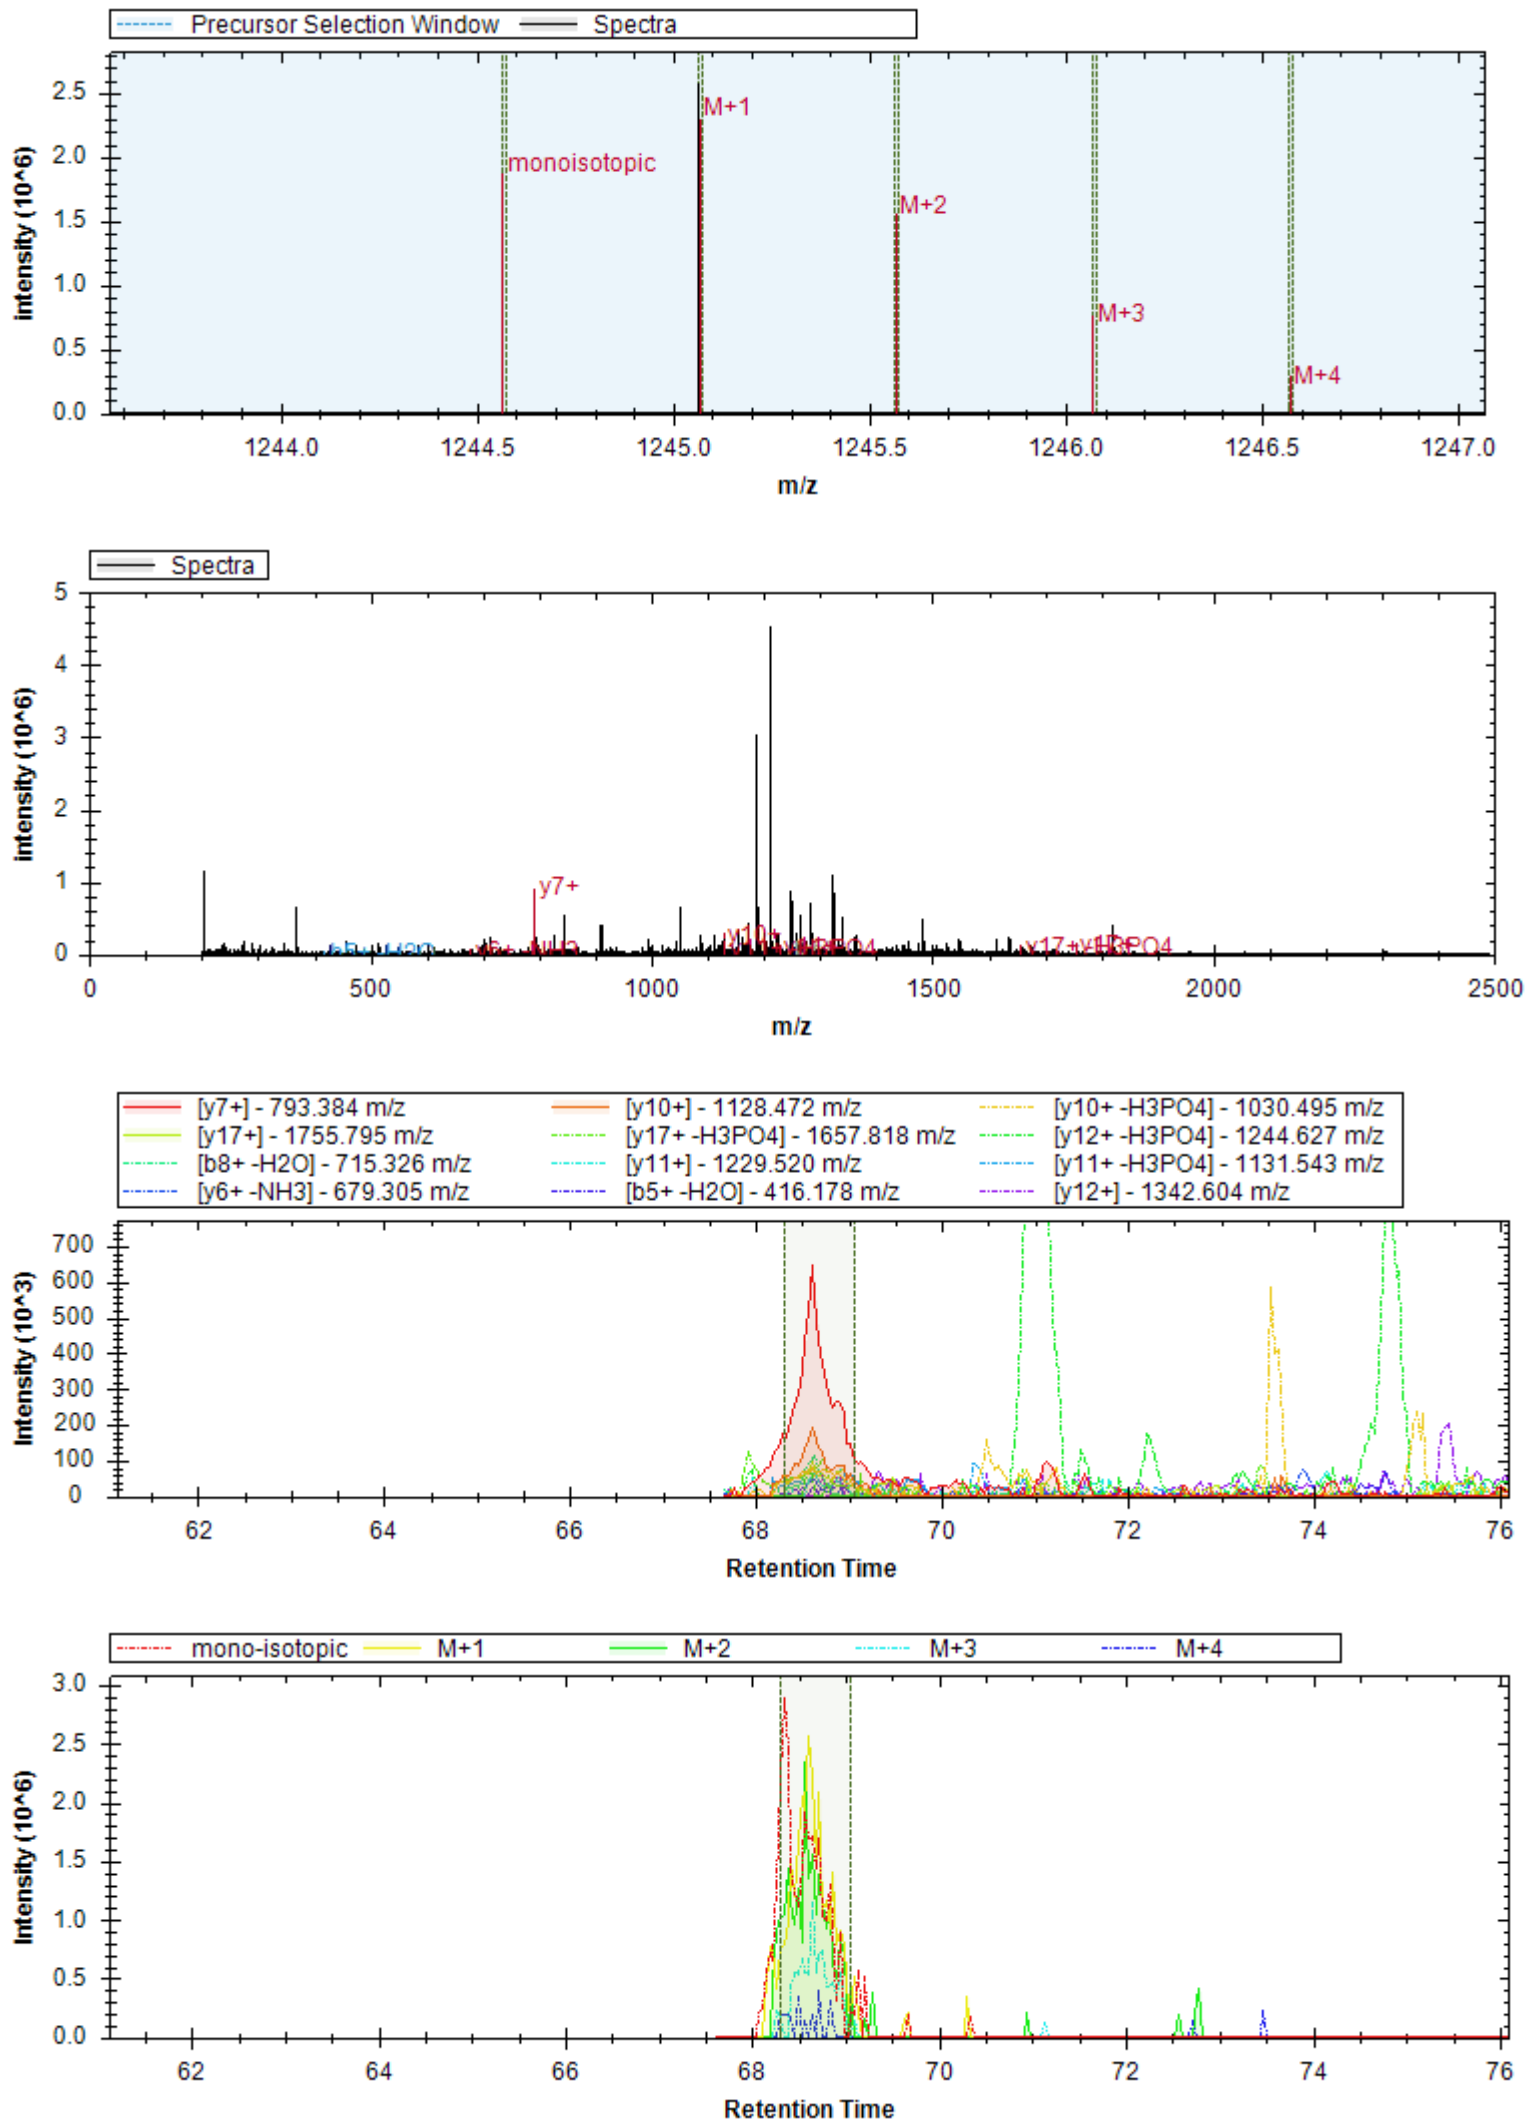

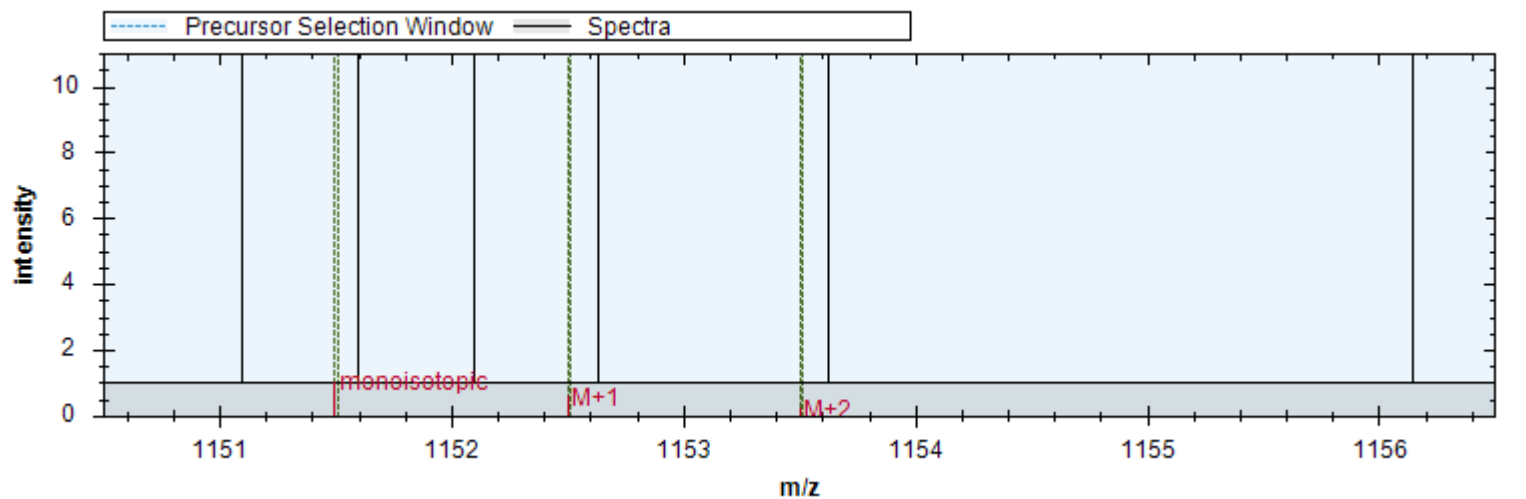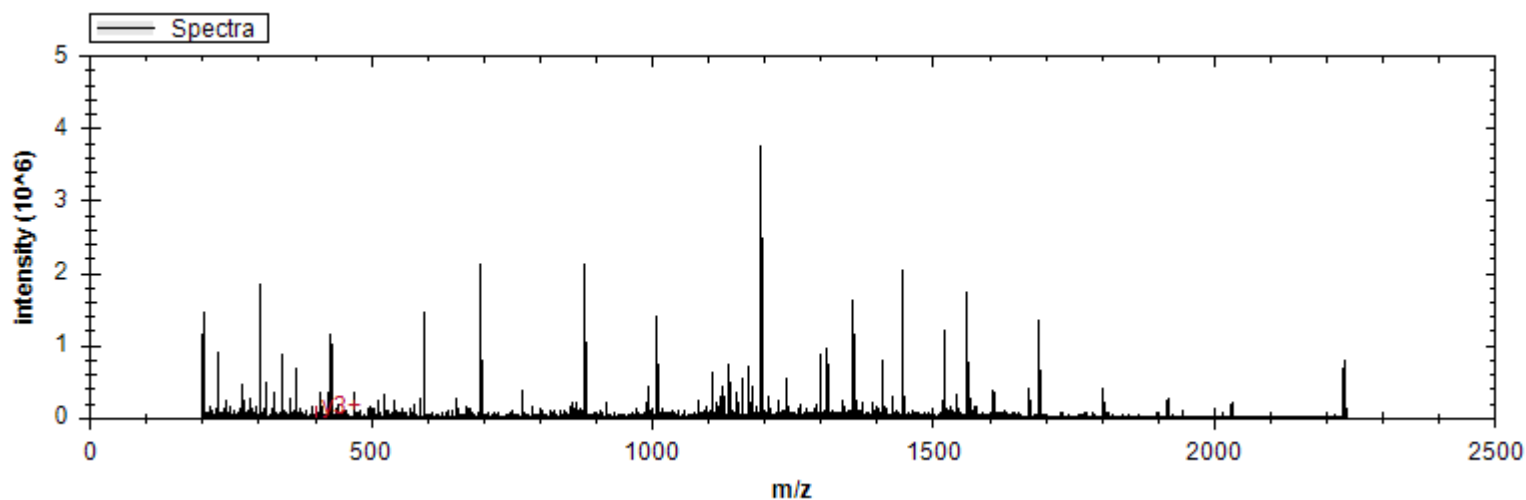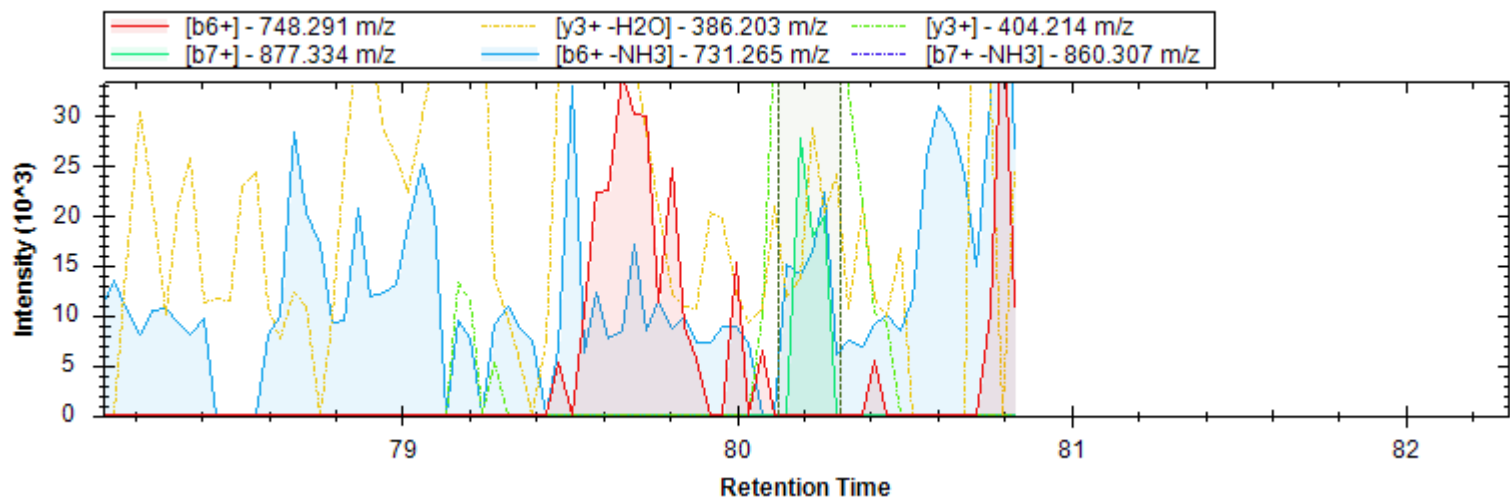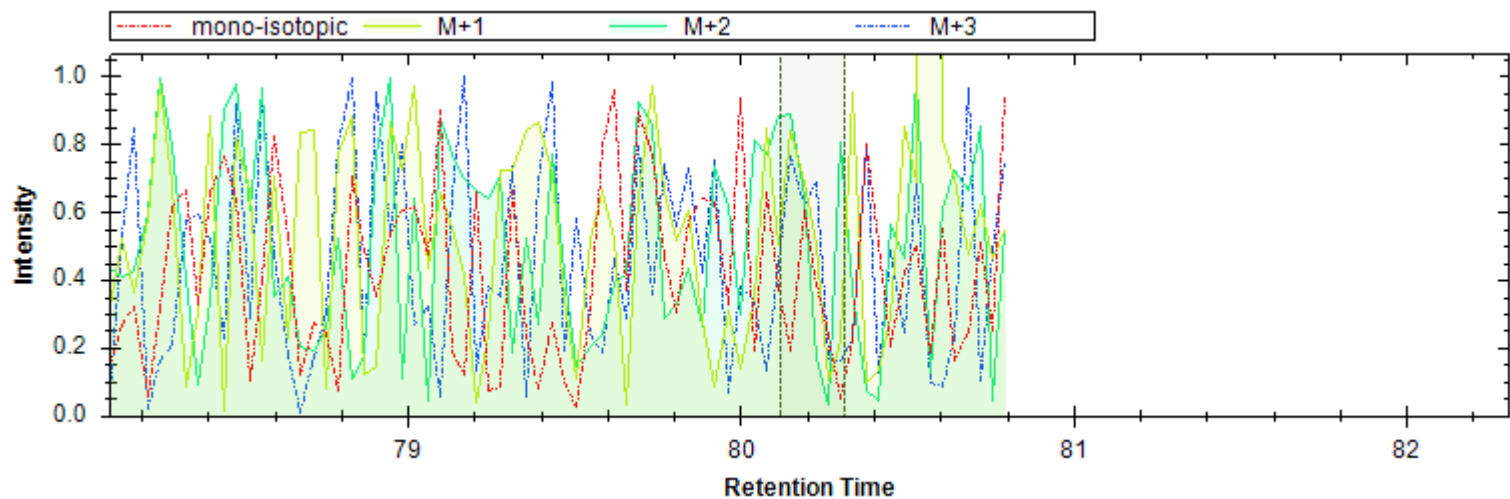

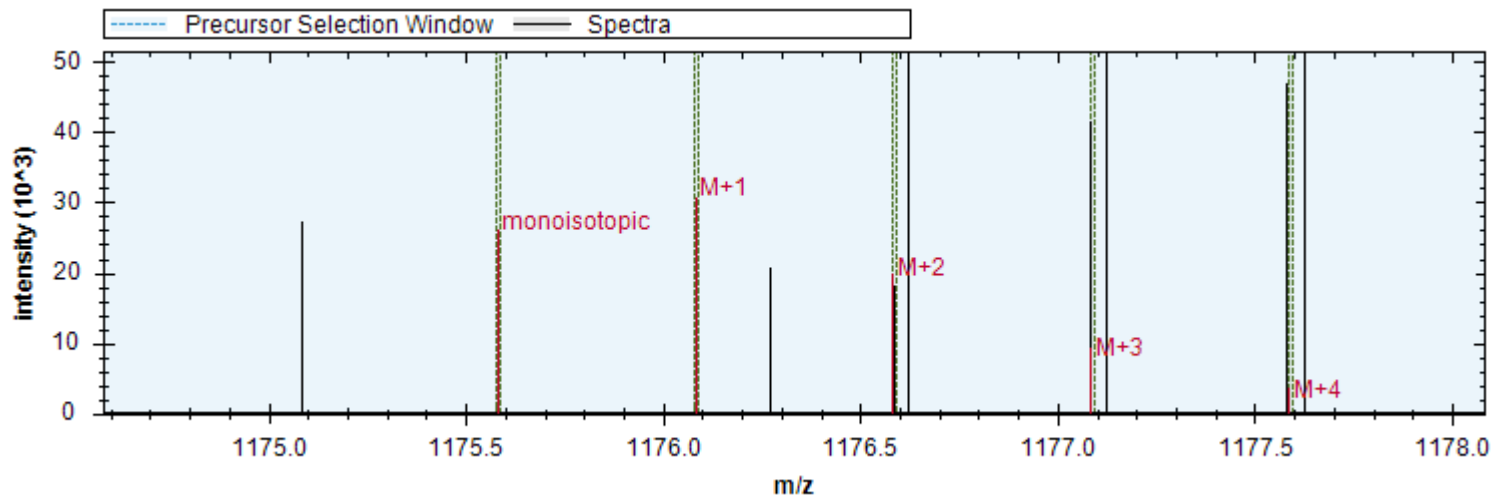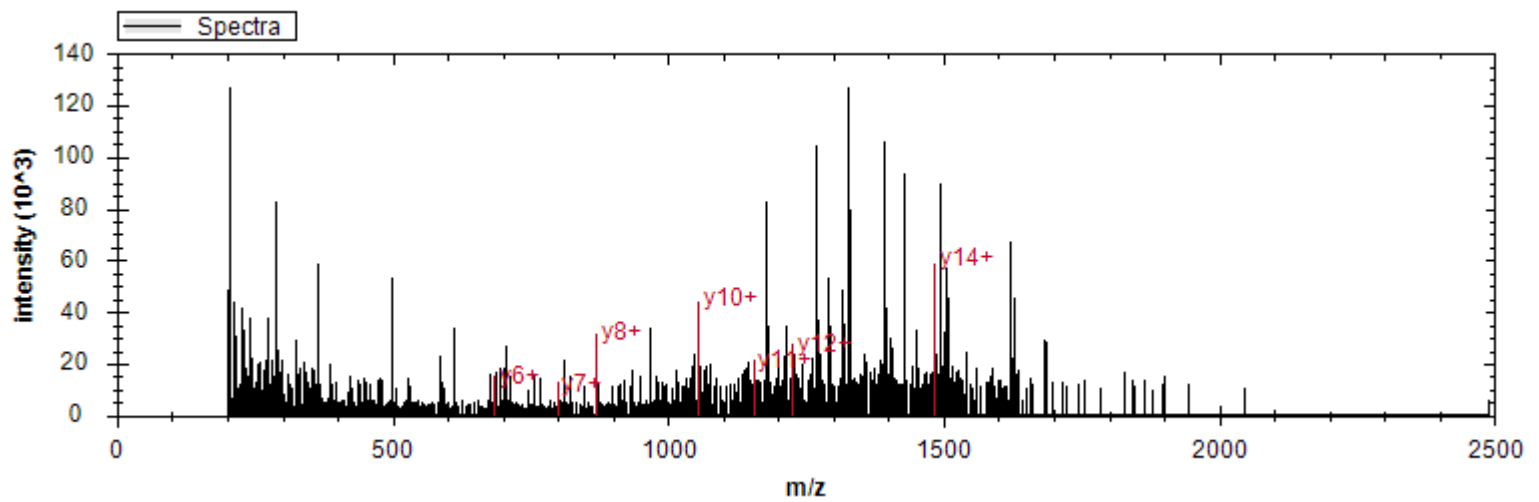

|                       |                       |                       |                       |
|-----------------------|-----------------------|-----------------------|-----------------------|
| [y10+] - 1056.605 m/z | [y12+] - 1226.710 m/z | [y14+] - 1484.796 m/z | [y11+] - 1155.673 m/z |
| [y4+] - 460.251 m/z   | [y5+] - 573.336 m/z   | [y9+] - 985.568 m/z   | [y13+] - 1355.753 m/z |
| [y6+] - 686.420 m/z   | [y8+] - 870.541 m/z   | [y7+] - 799.504 m/z   | [b7+] - 767.297 m/z   |
| [b3+] - 327.203 m/z   |                       |                       |                       |

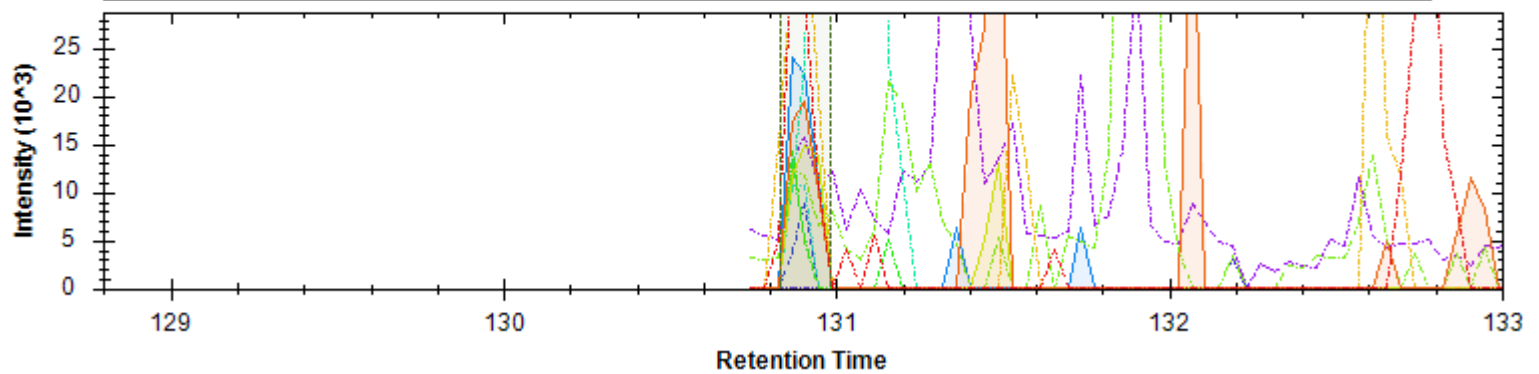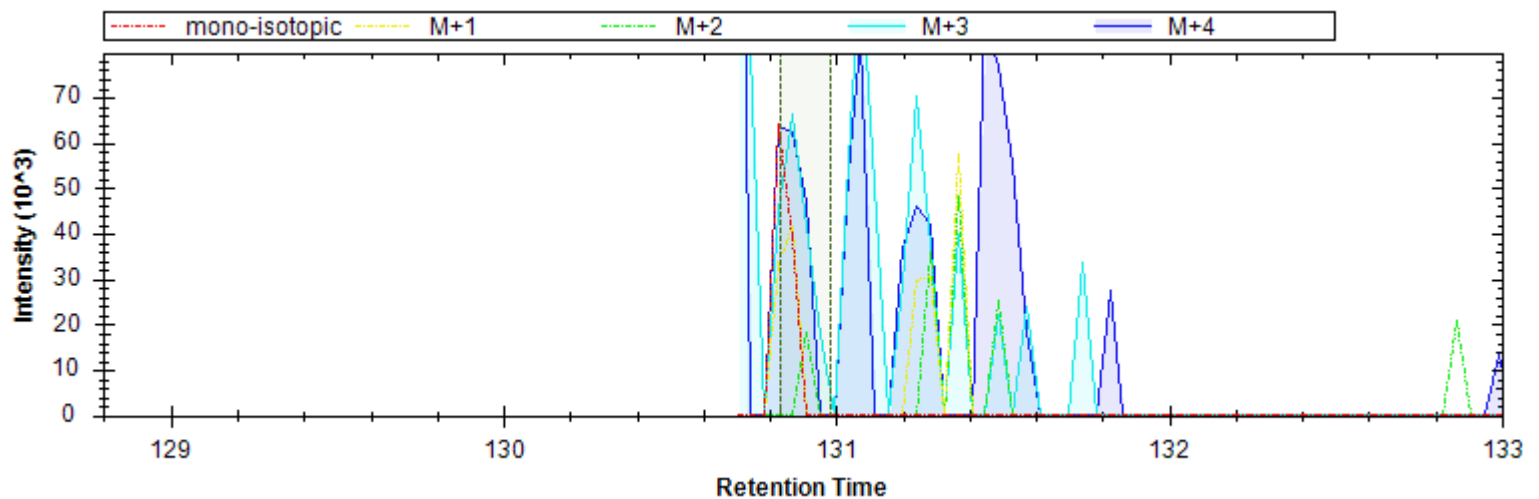

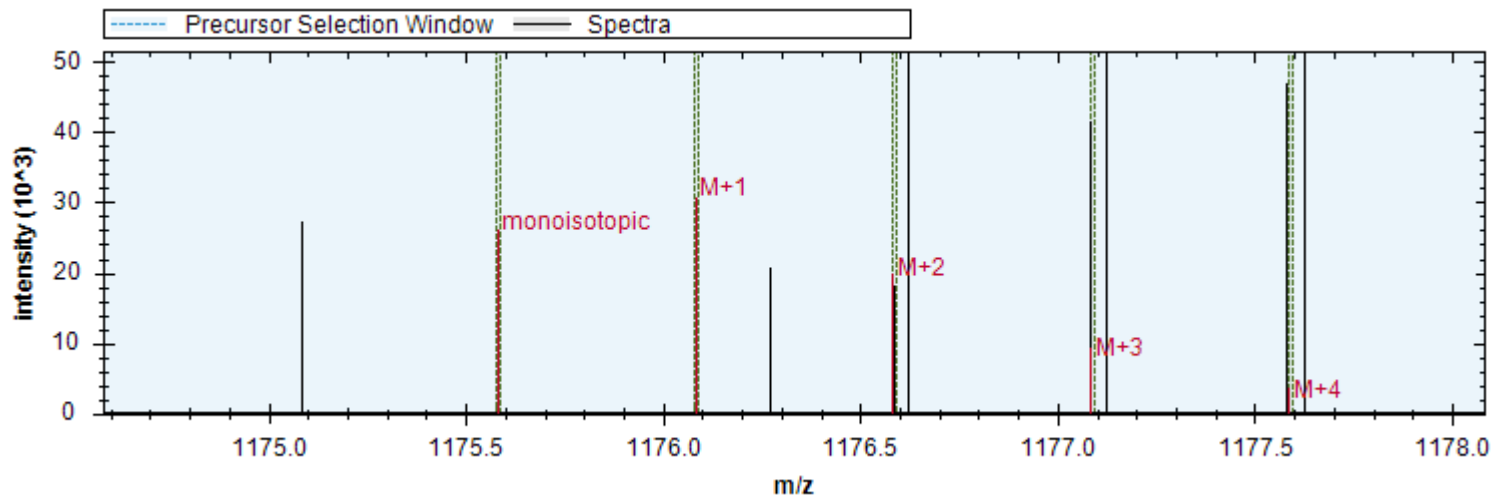

|                              |                           |                              |
|------------------------------|---------------------------|------------------------------|
| [y10+] - 1056.605 m/z        | [y14+] - 1484.796 m/z     | [y12+] - 1226.710 m/z        |
| [y11+] - 1155.673 m/z        | [y4+] - 460.251 m/z       | [y6+] - 686.420 m/z          |
| [y8+] - 870.541 m/z          | [y13+] - 1355.753 m/z     | [y5+] - 573.336 m/z          |
| [y9+] - 985.568 m/z          | [y7+] - 799.504 m/z       | [y15+] - 1583.864 m/z        |
| [b11+ -NH3] - 1276.261 m/z   | [b9+ -NH3] - 1076.182 m/z | [y14+ -NH3] - 1467.769 m/z   |
| [b8+ -H3PO4] - 768.389 m/z   | [b7+ -NH3] - 848.071 m/z  | [b3+] - 327.203 m/z          |
| [b11+ -H3PO4] - 1097.511 m/z | [b7+] - 767.297 m/z       | [b13+ -H3PO4] - 1267.616 m/z |
| [b9+ -H3PO4] - 897.431 m/z   | [b4+] - 428.250 m/z       | [y14+ -H2O] - 1466.785 m/z   |
| [b12+ -H3PO4] - 1196.579 m/z |                           |                              |

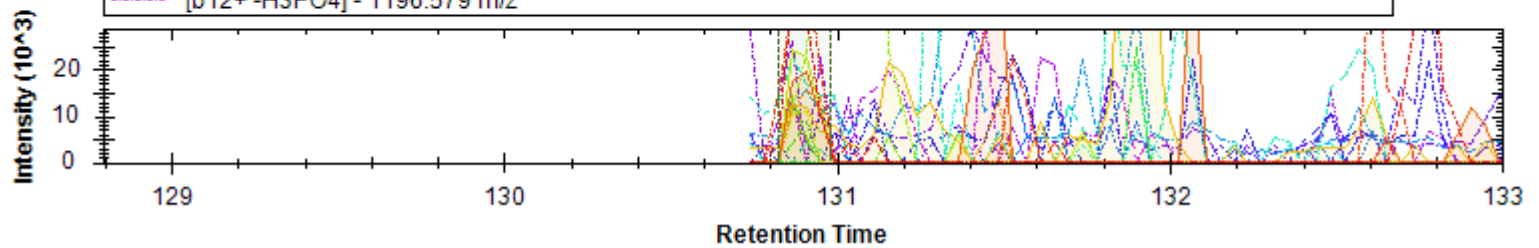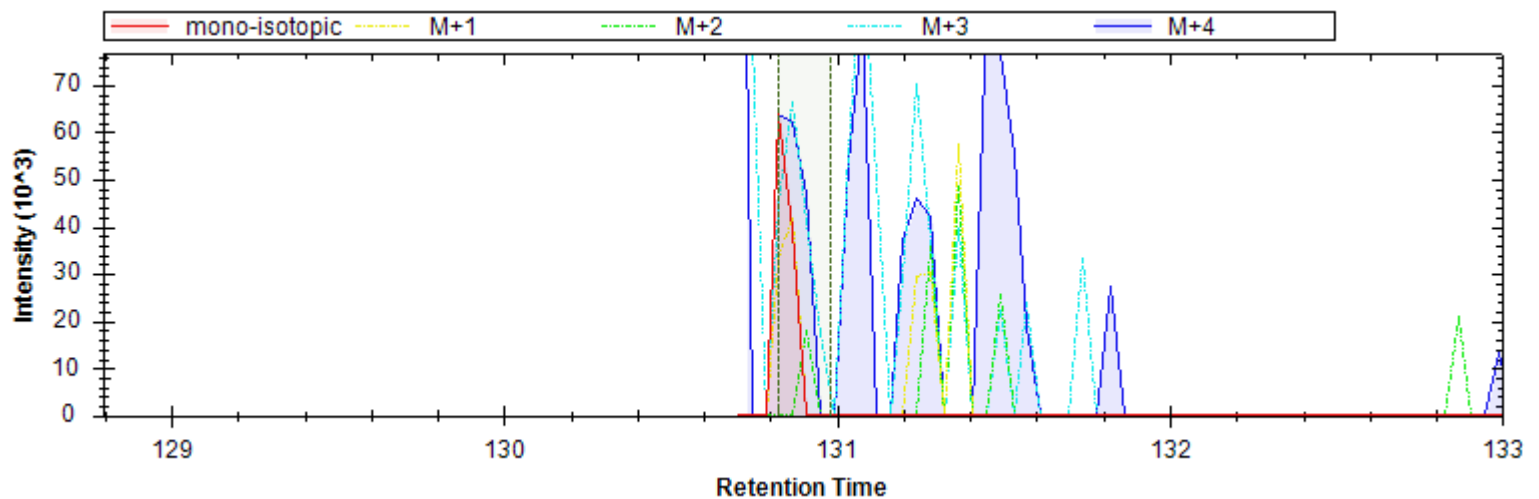

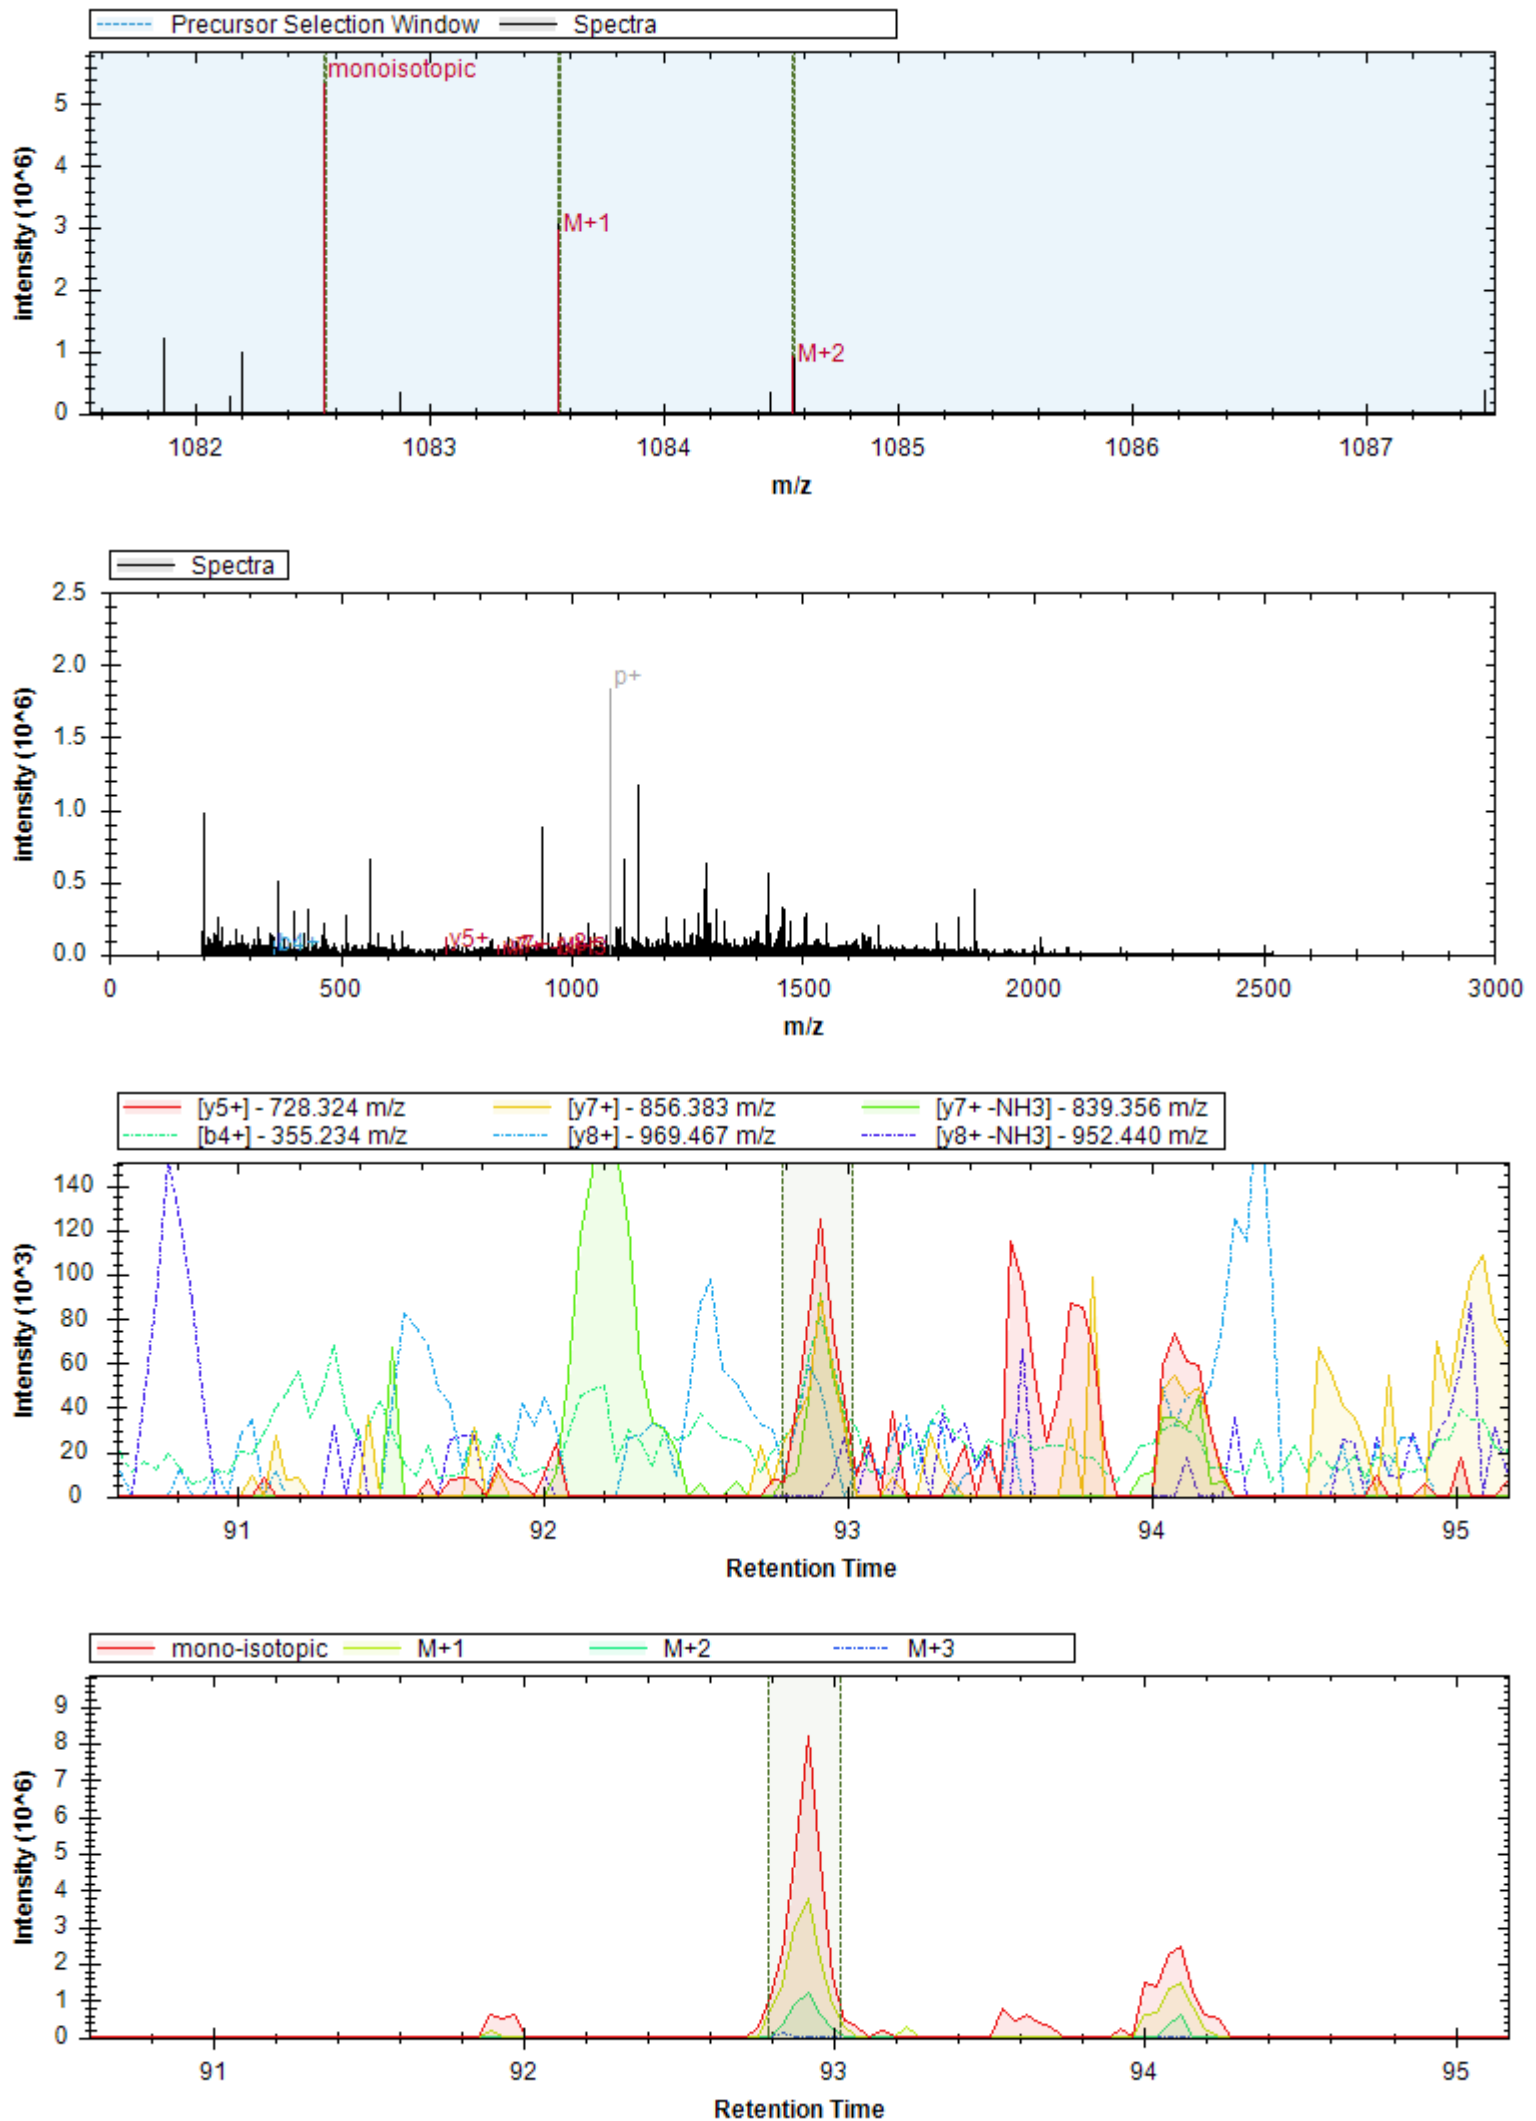

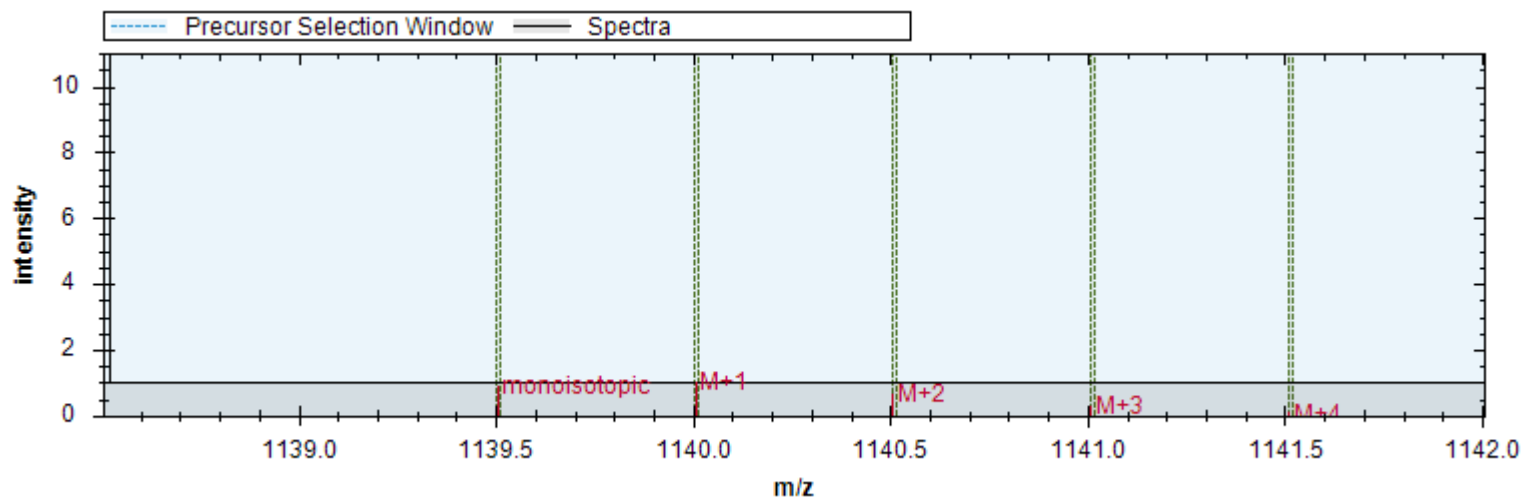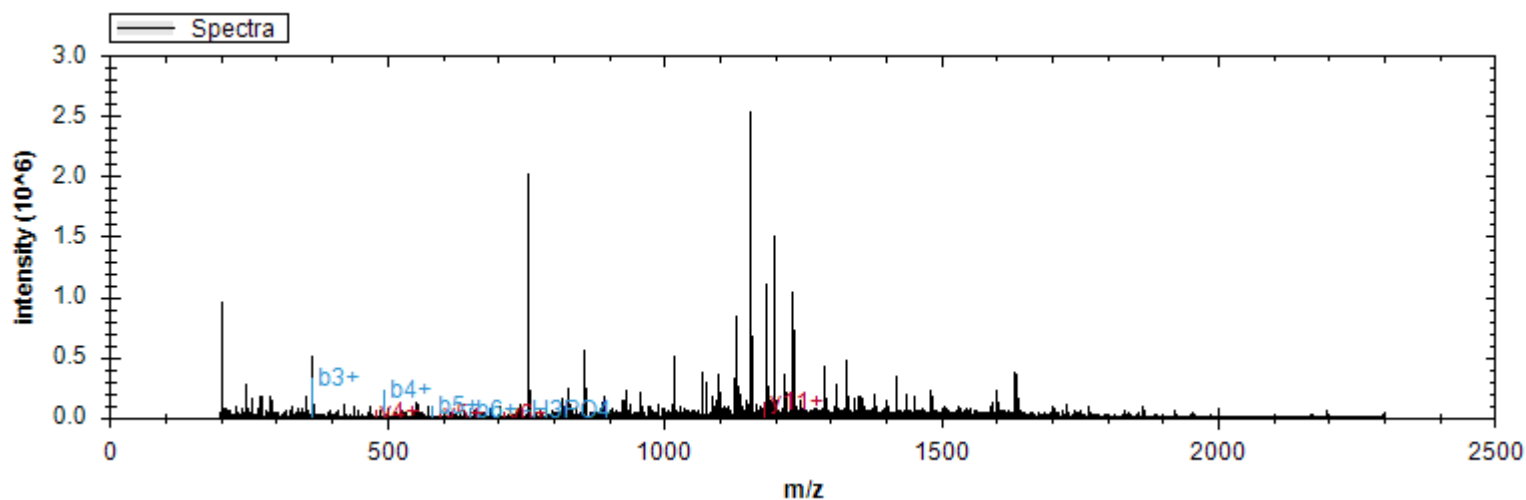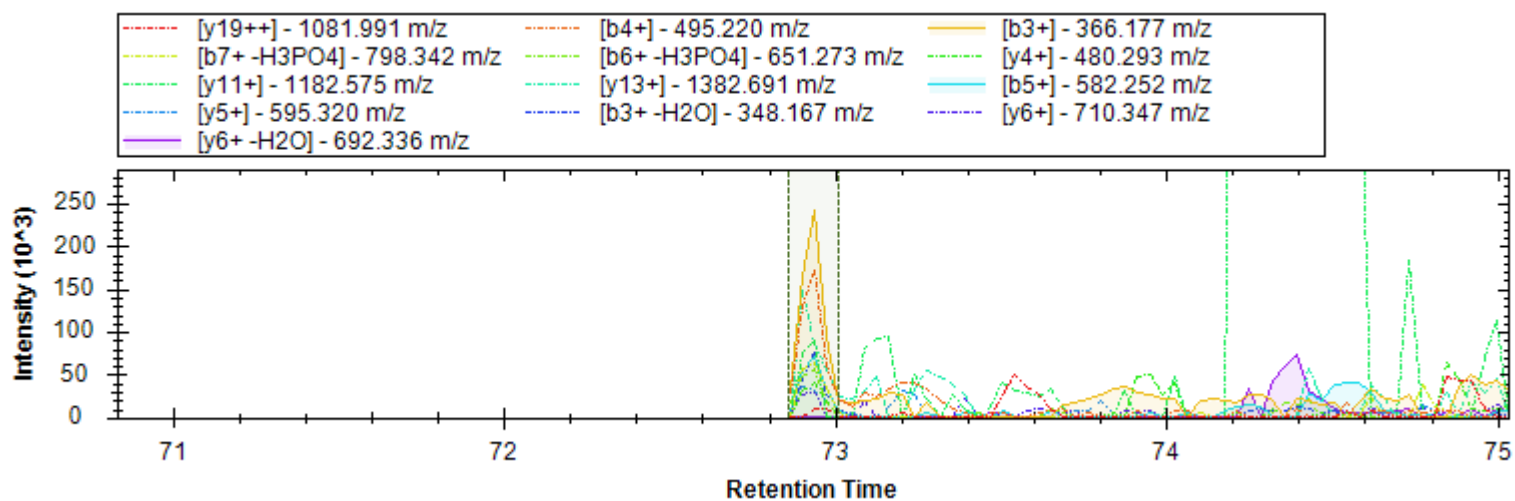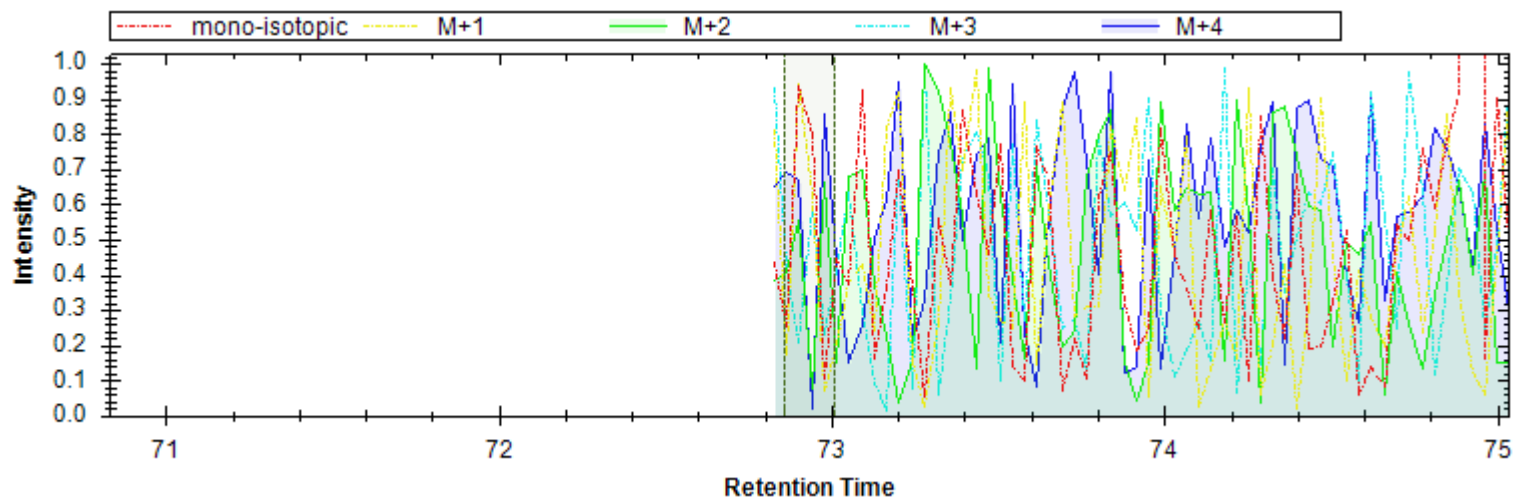

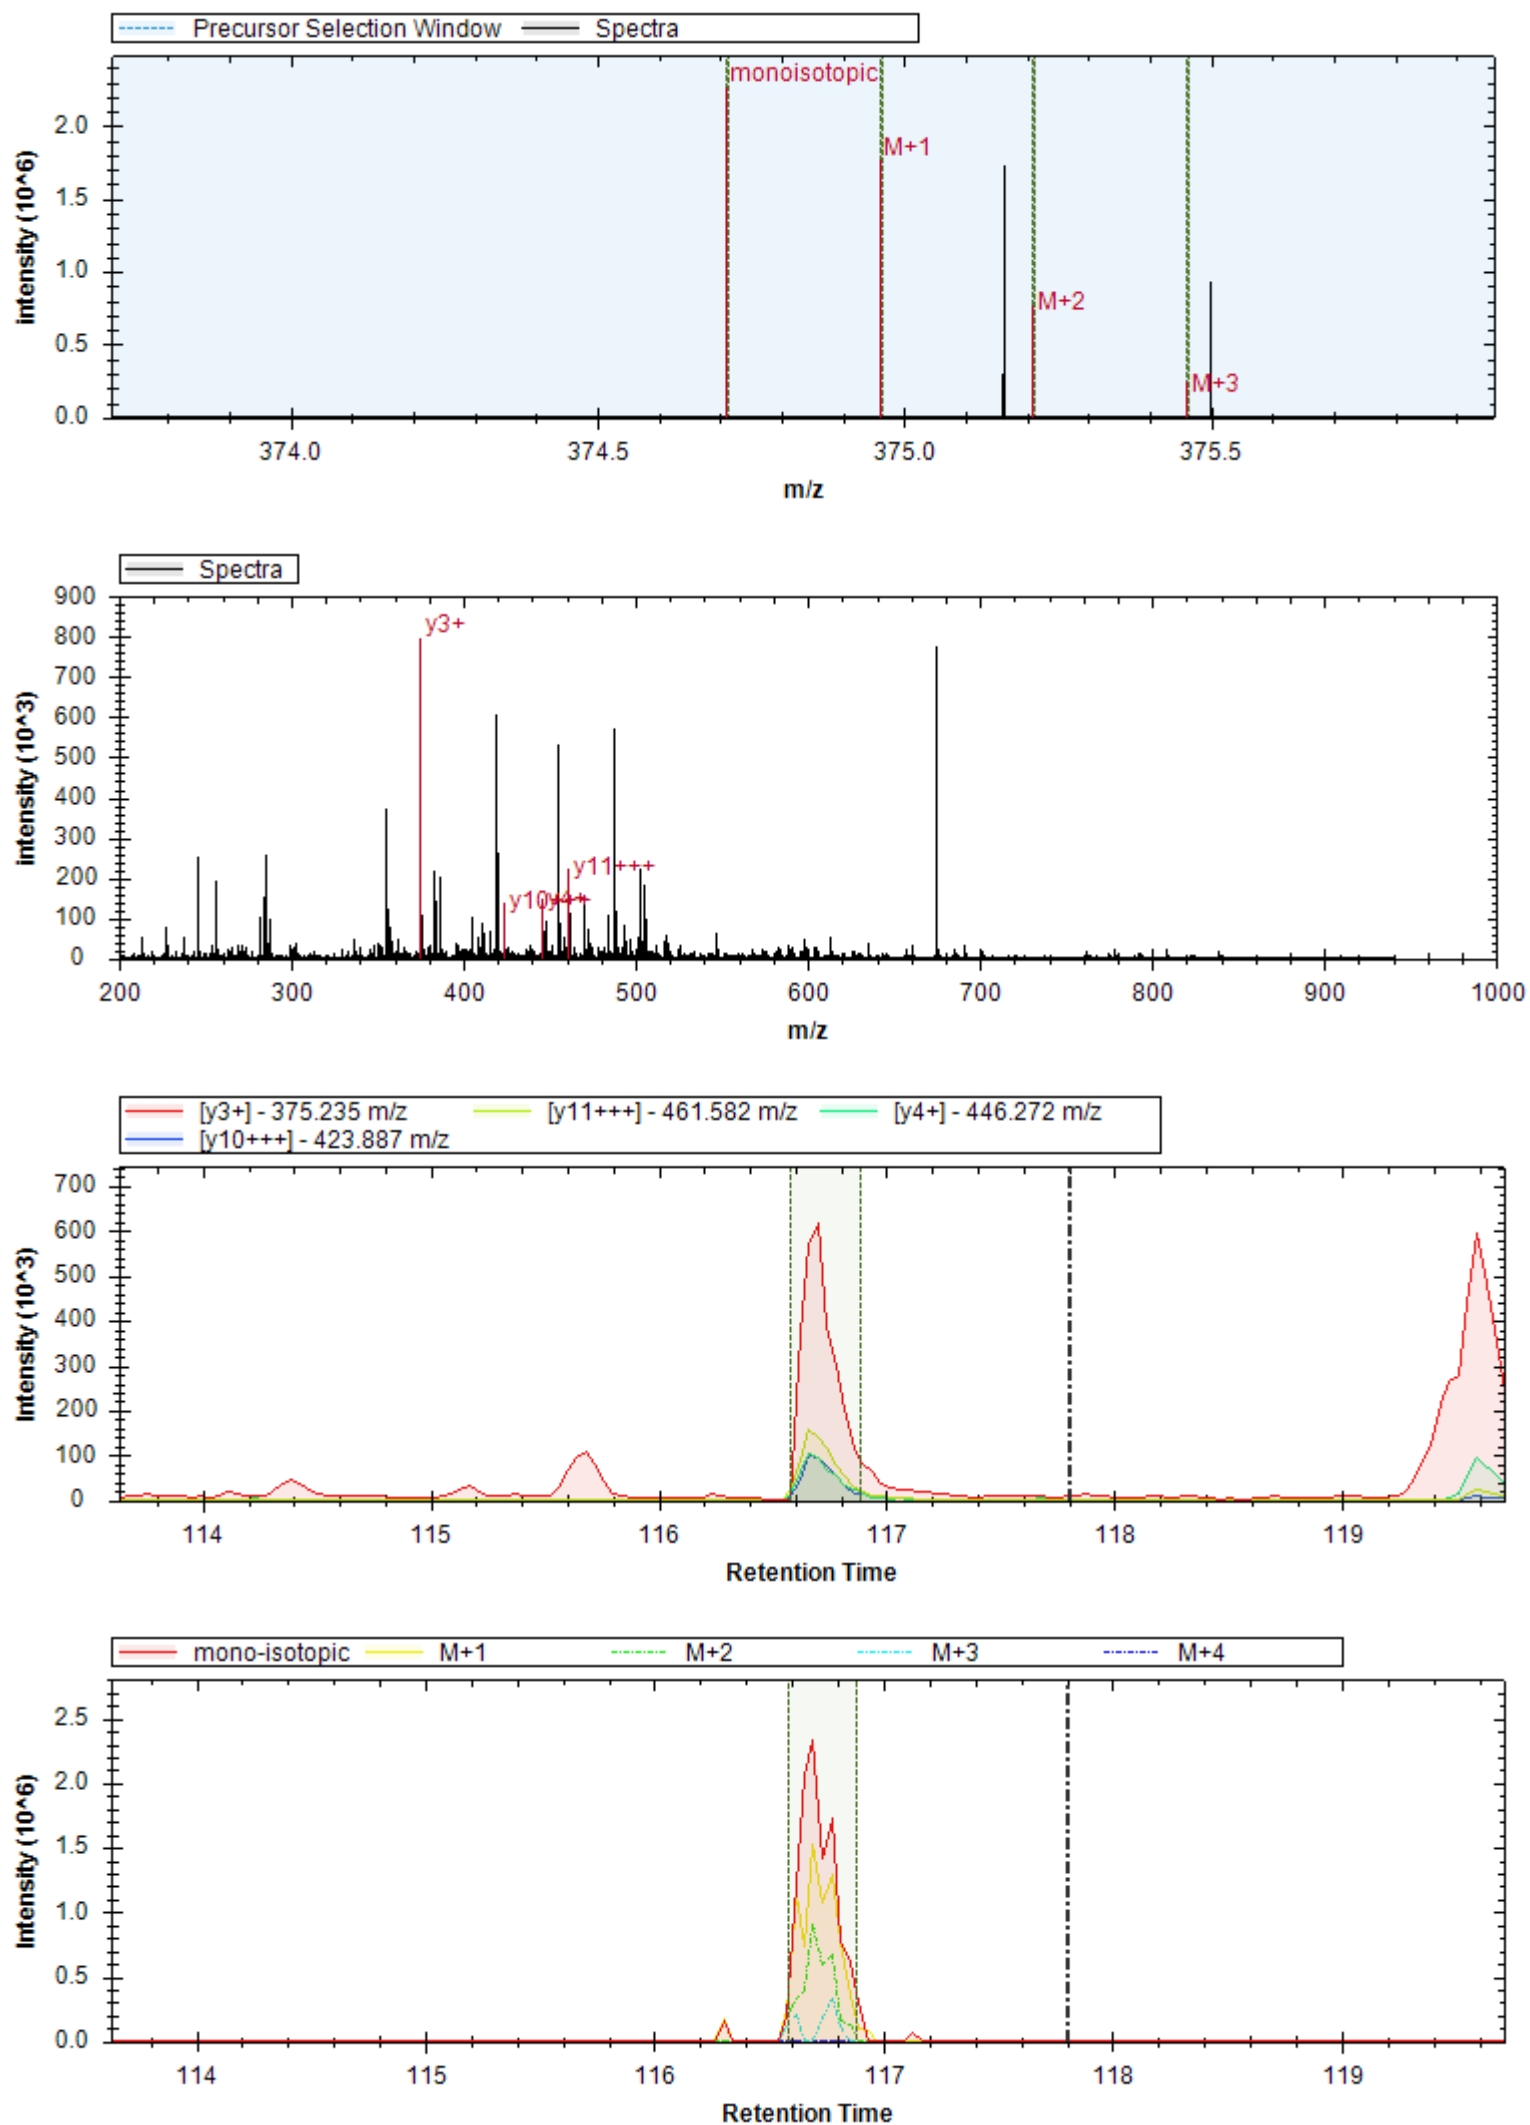



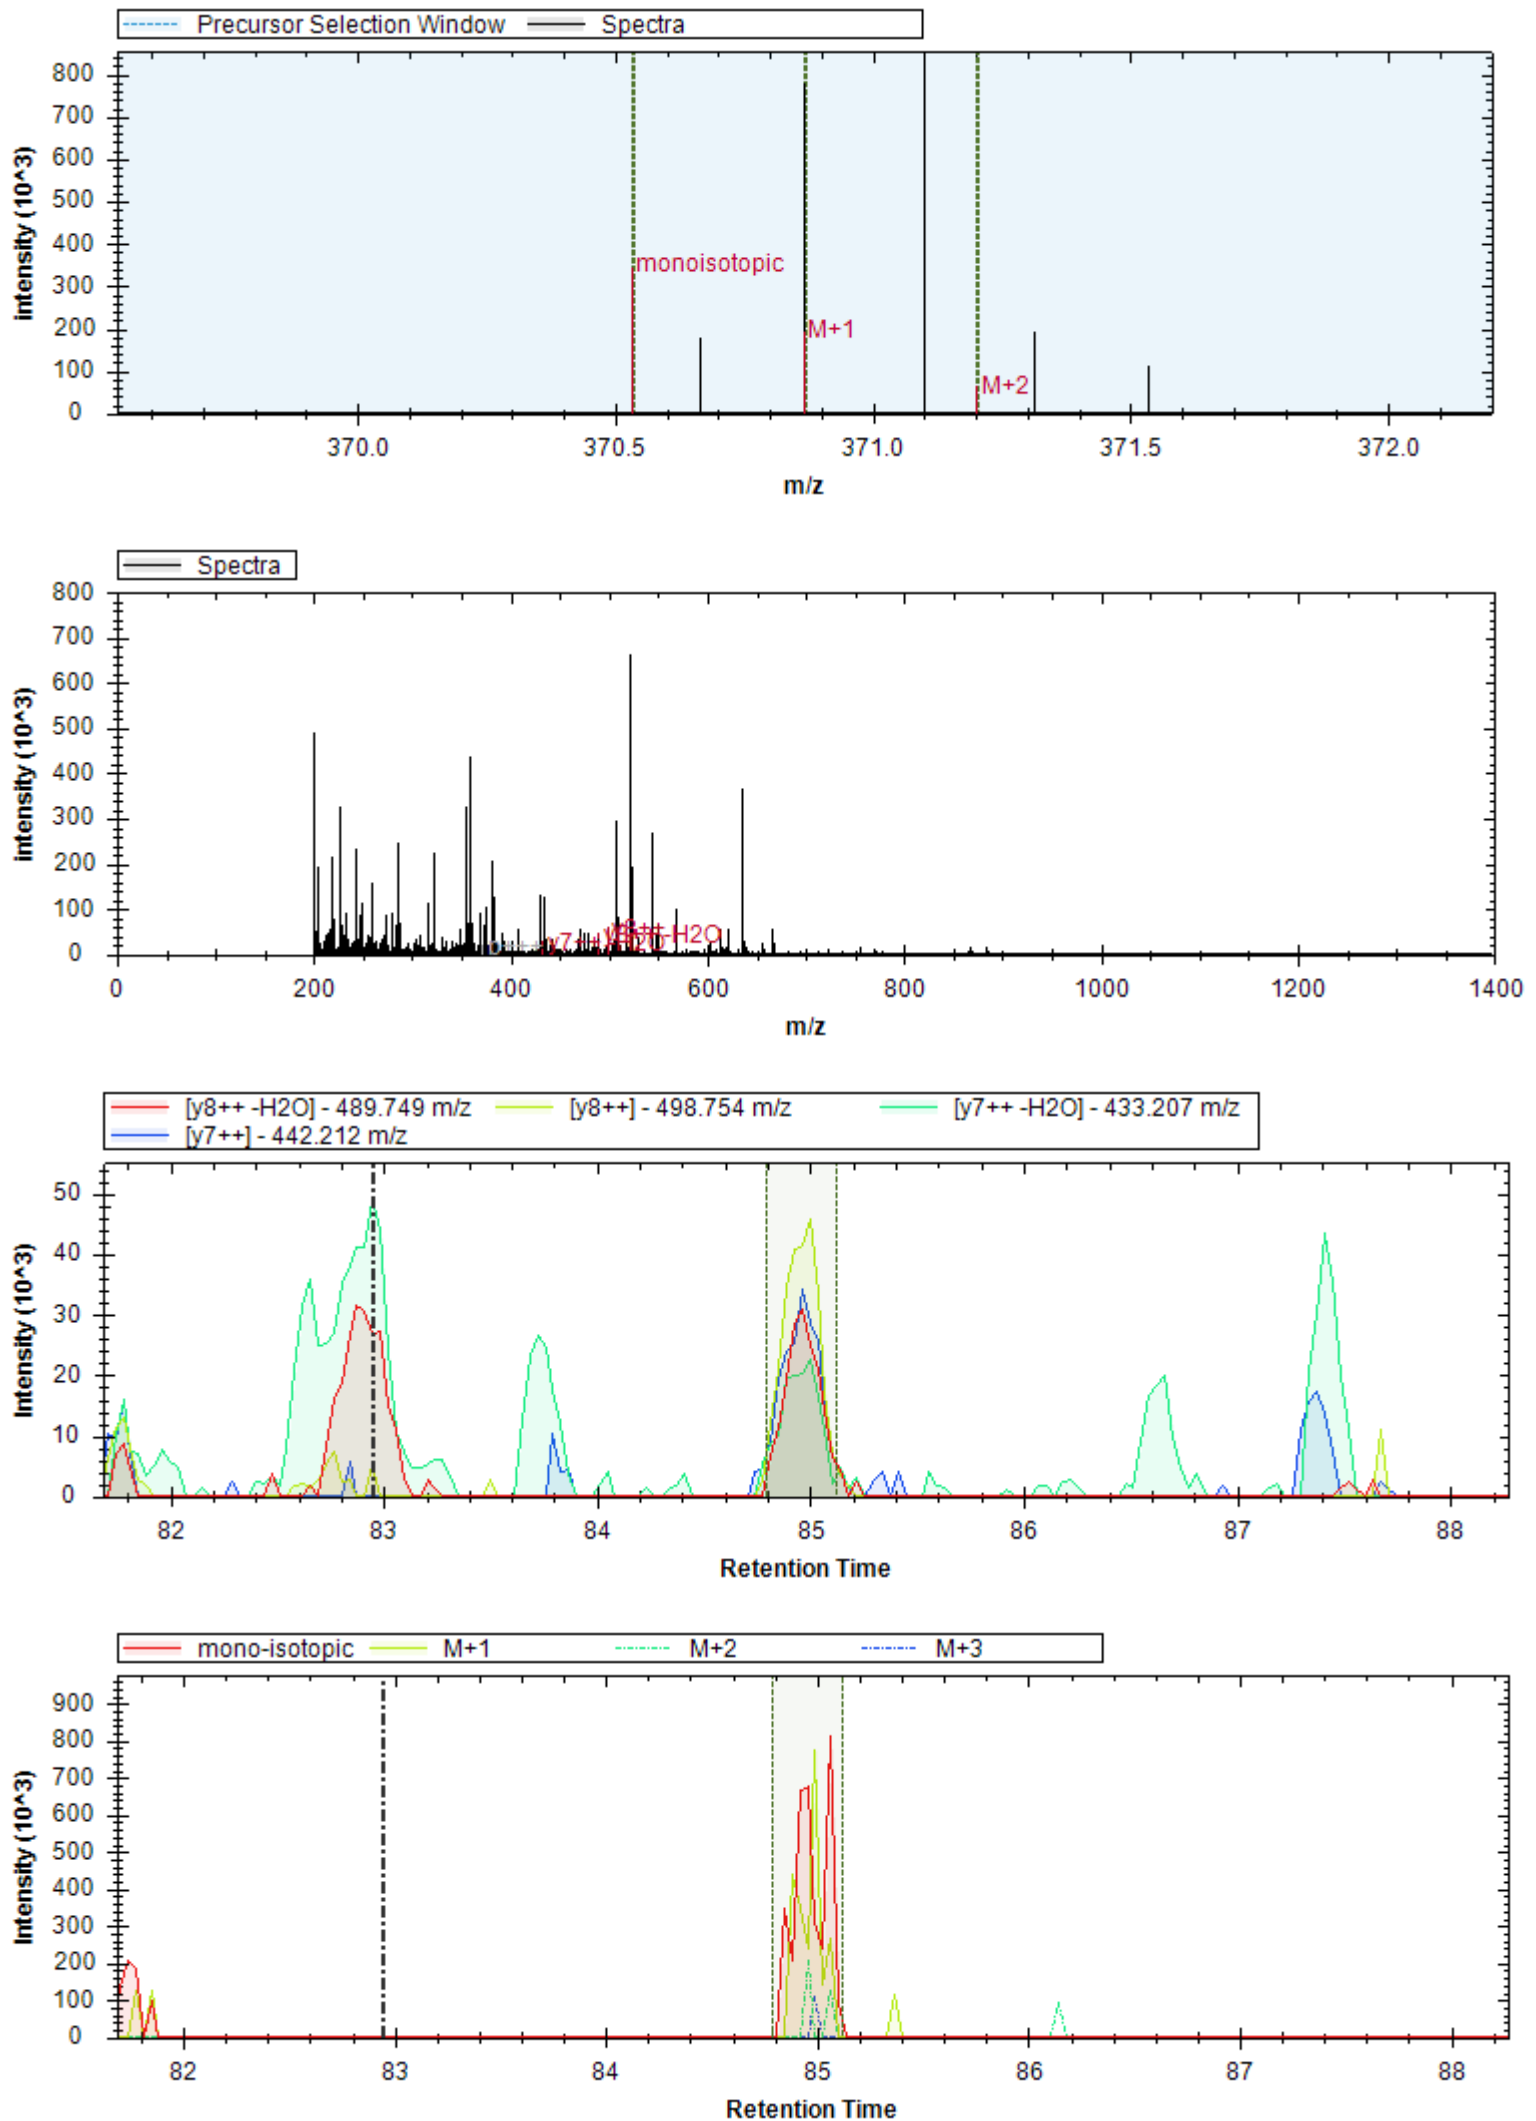

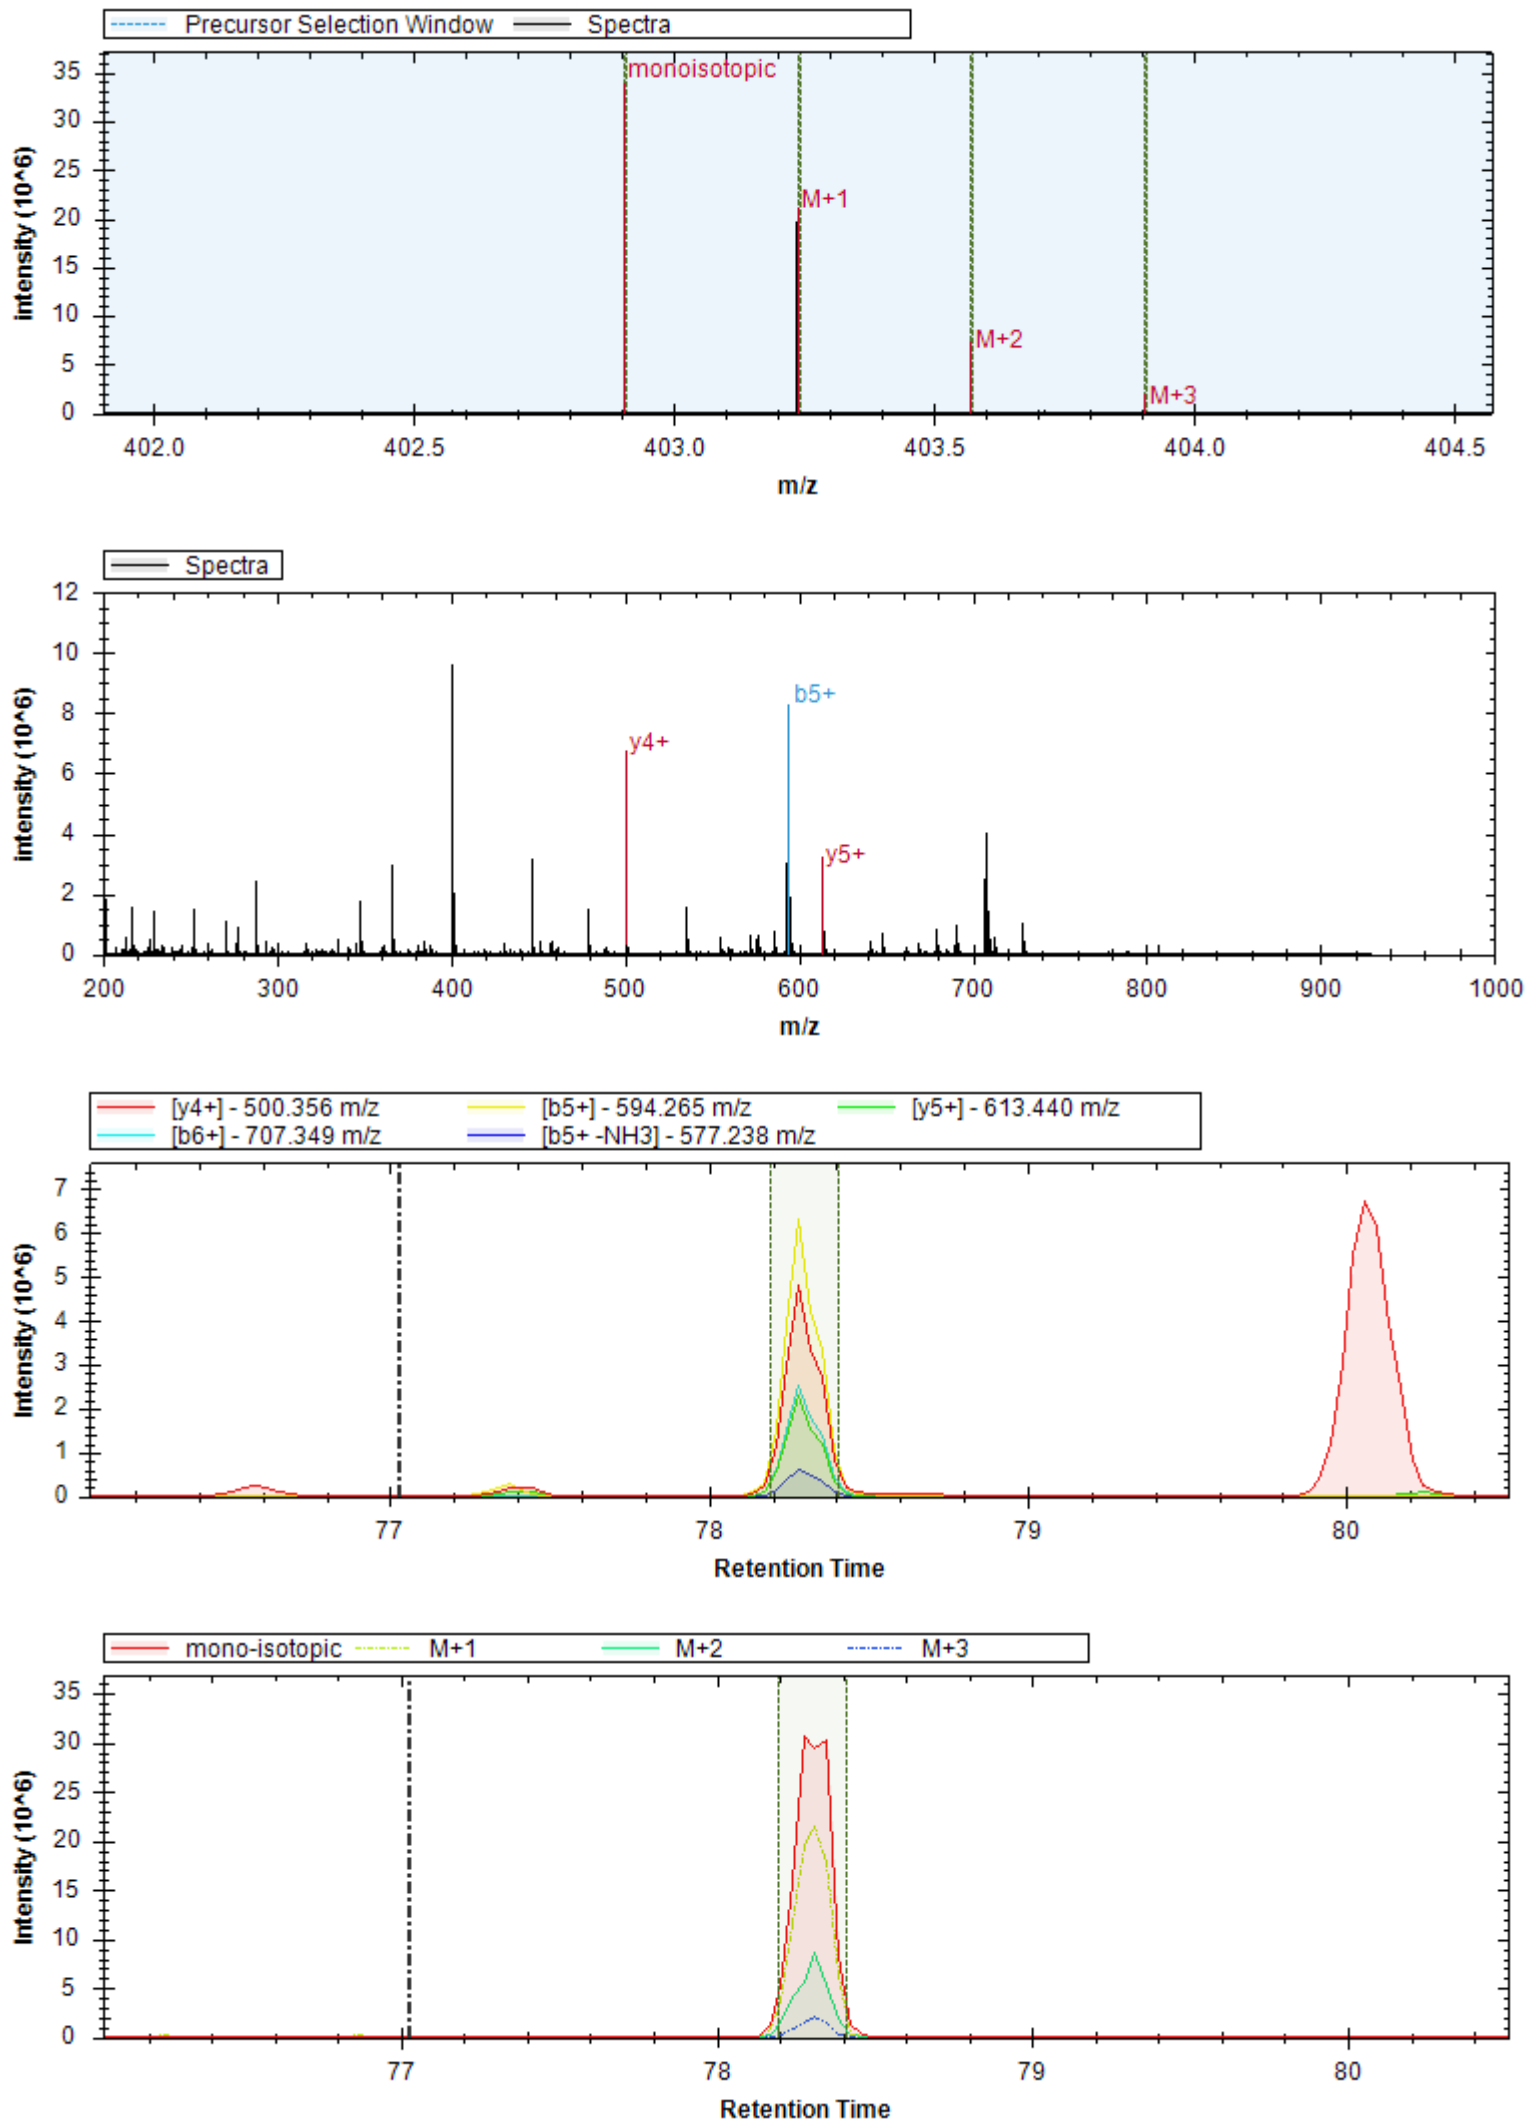

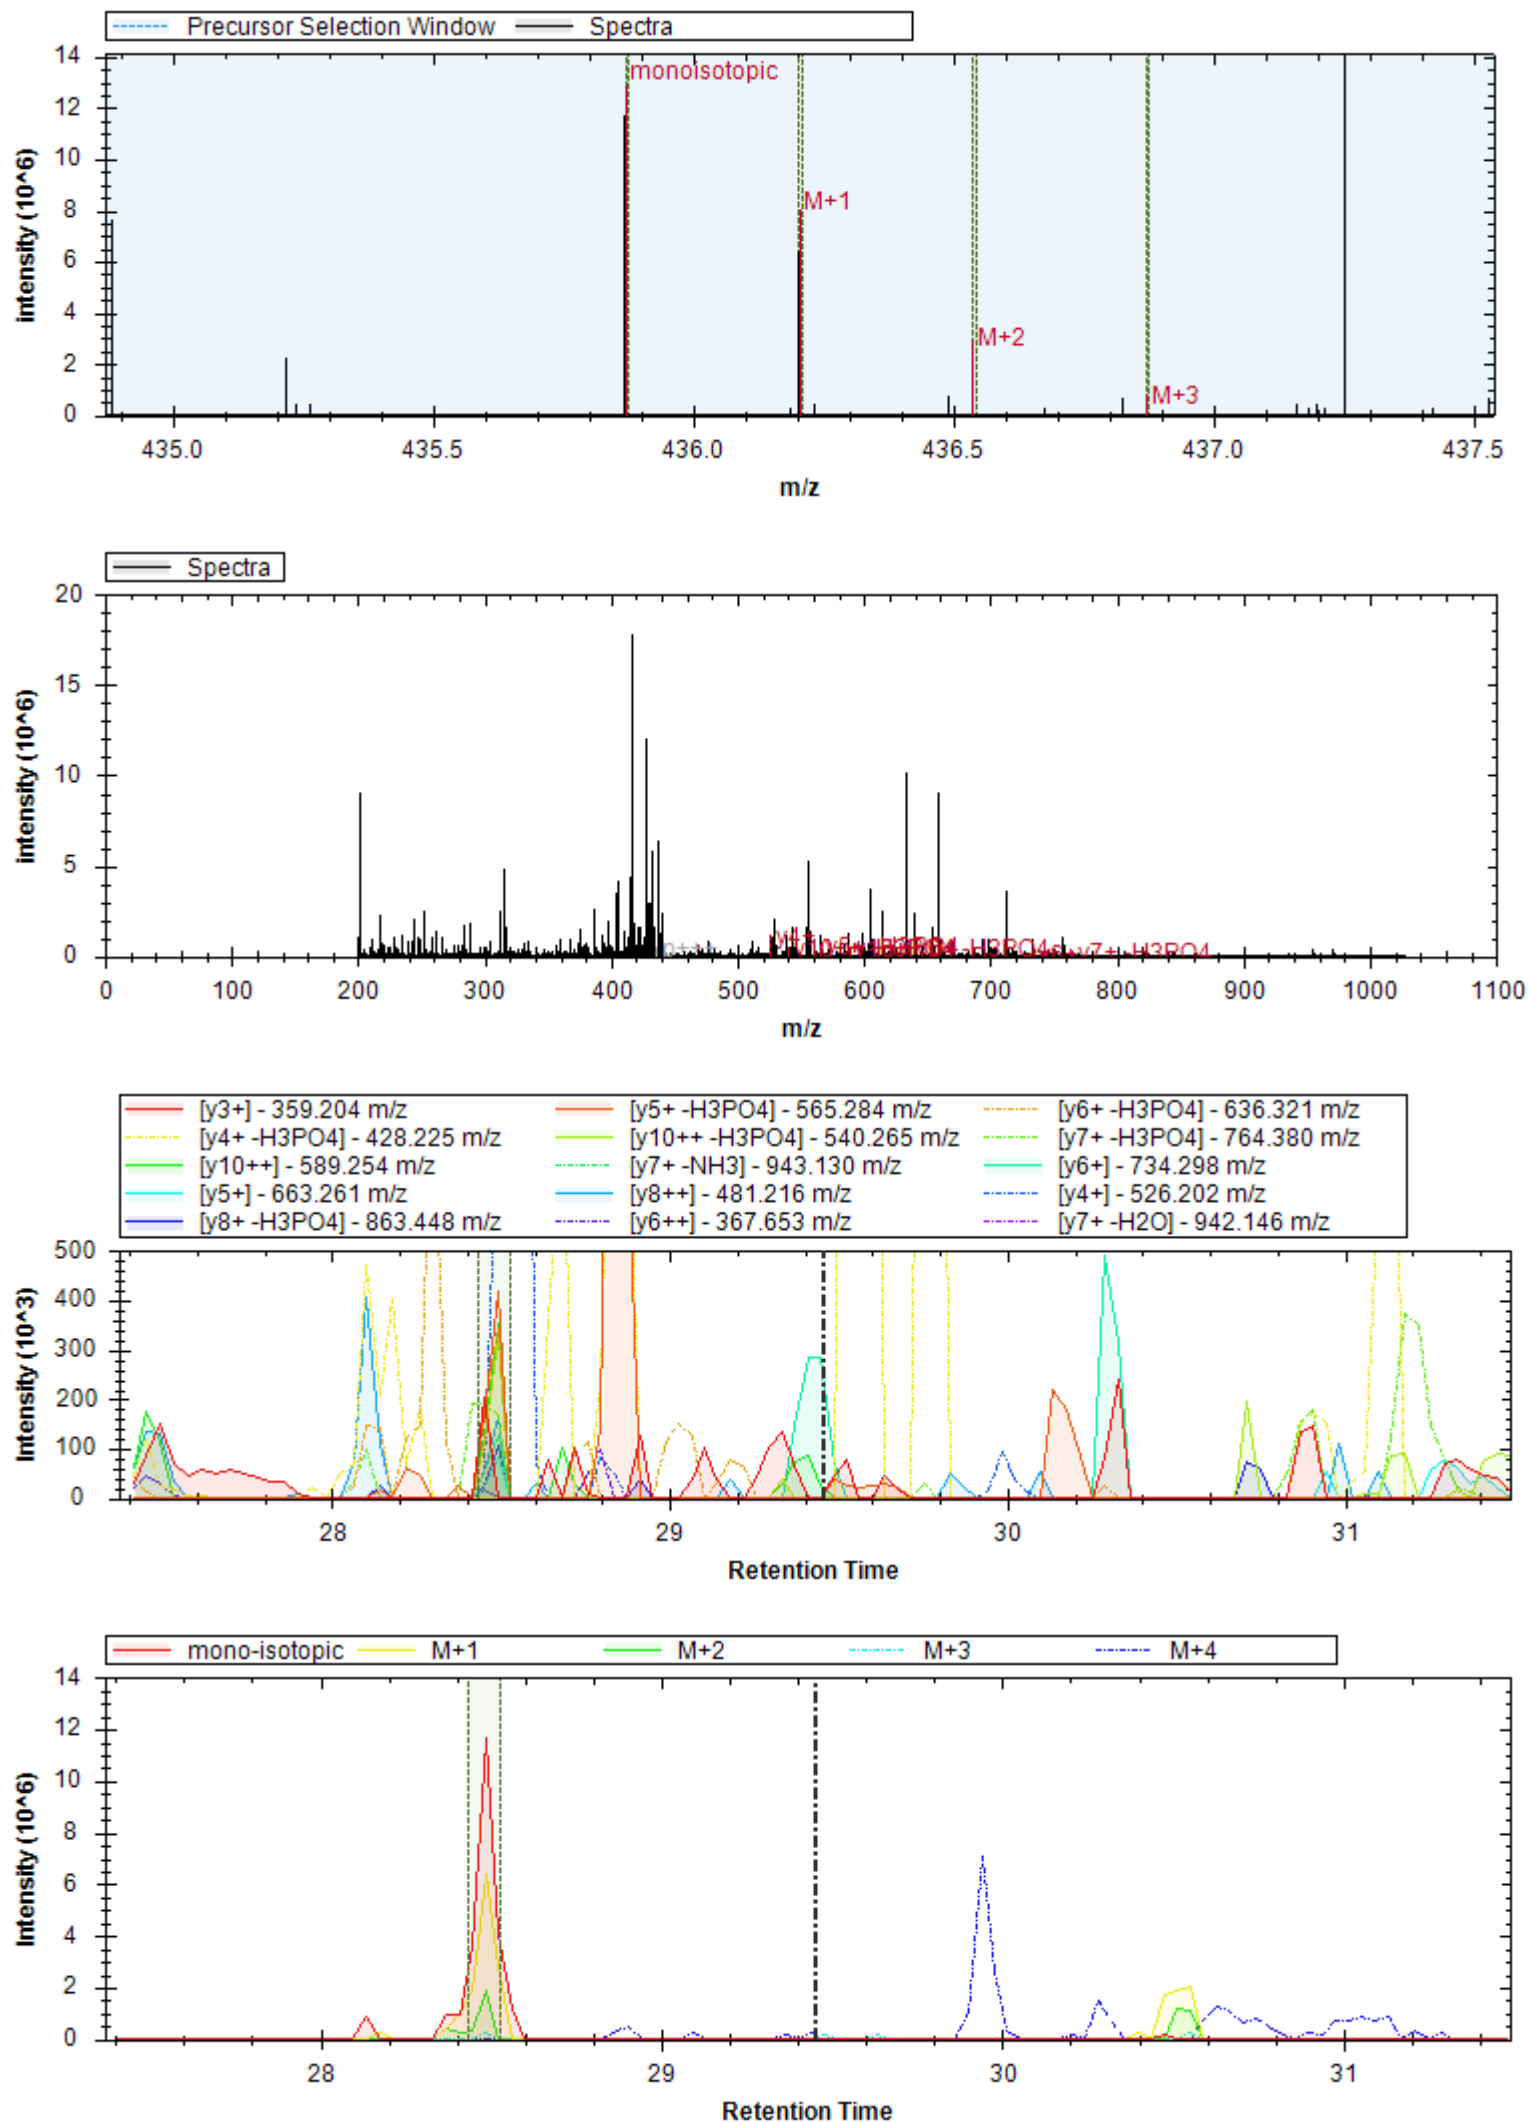

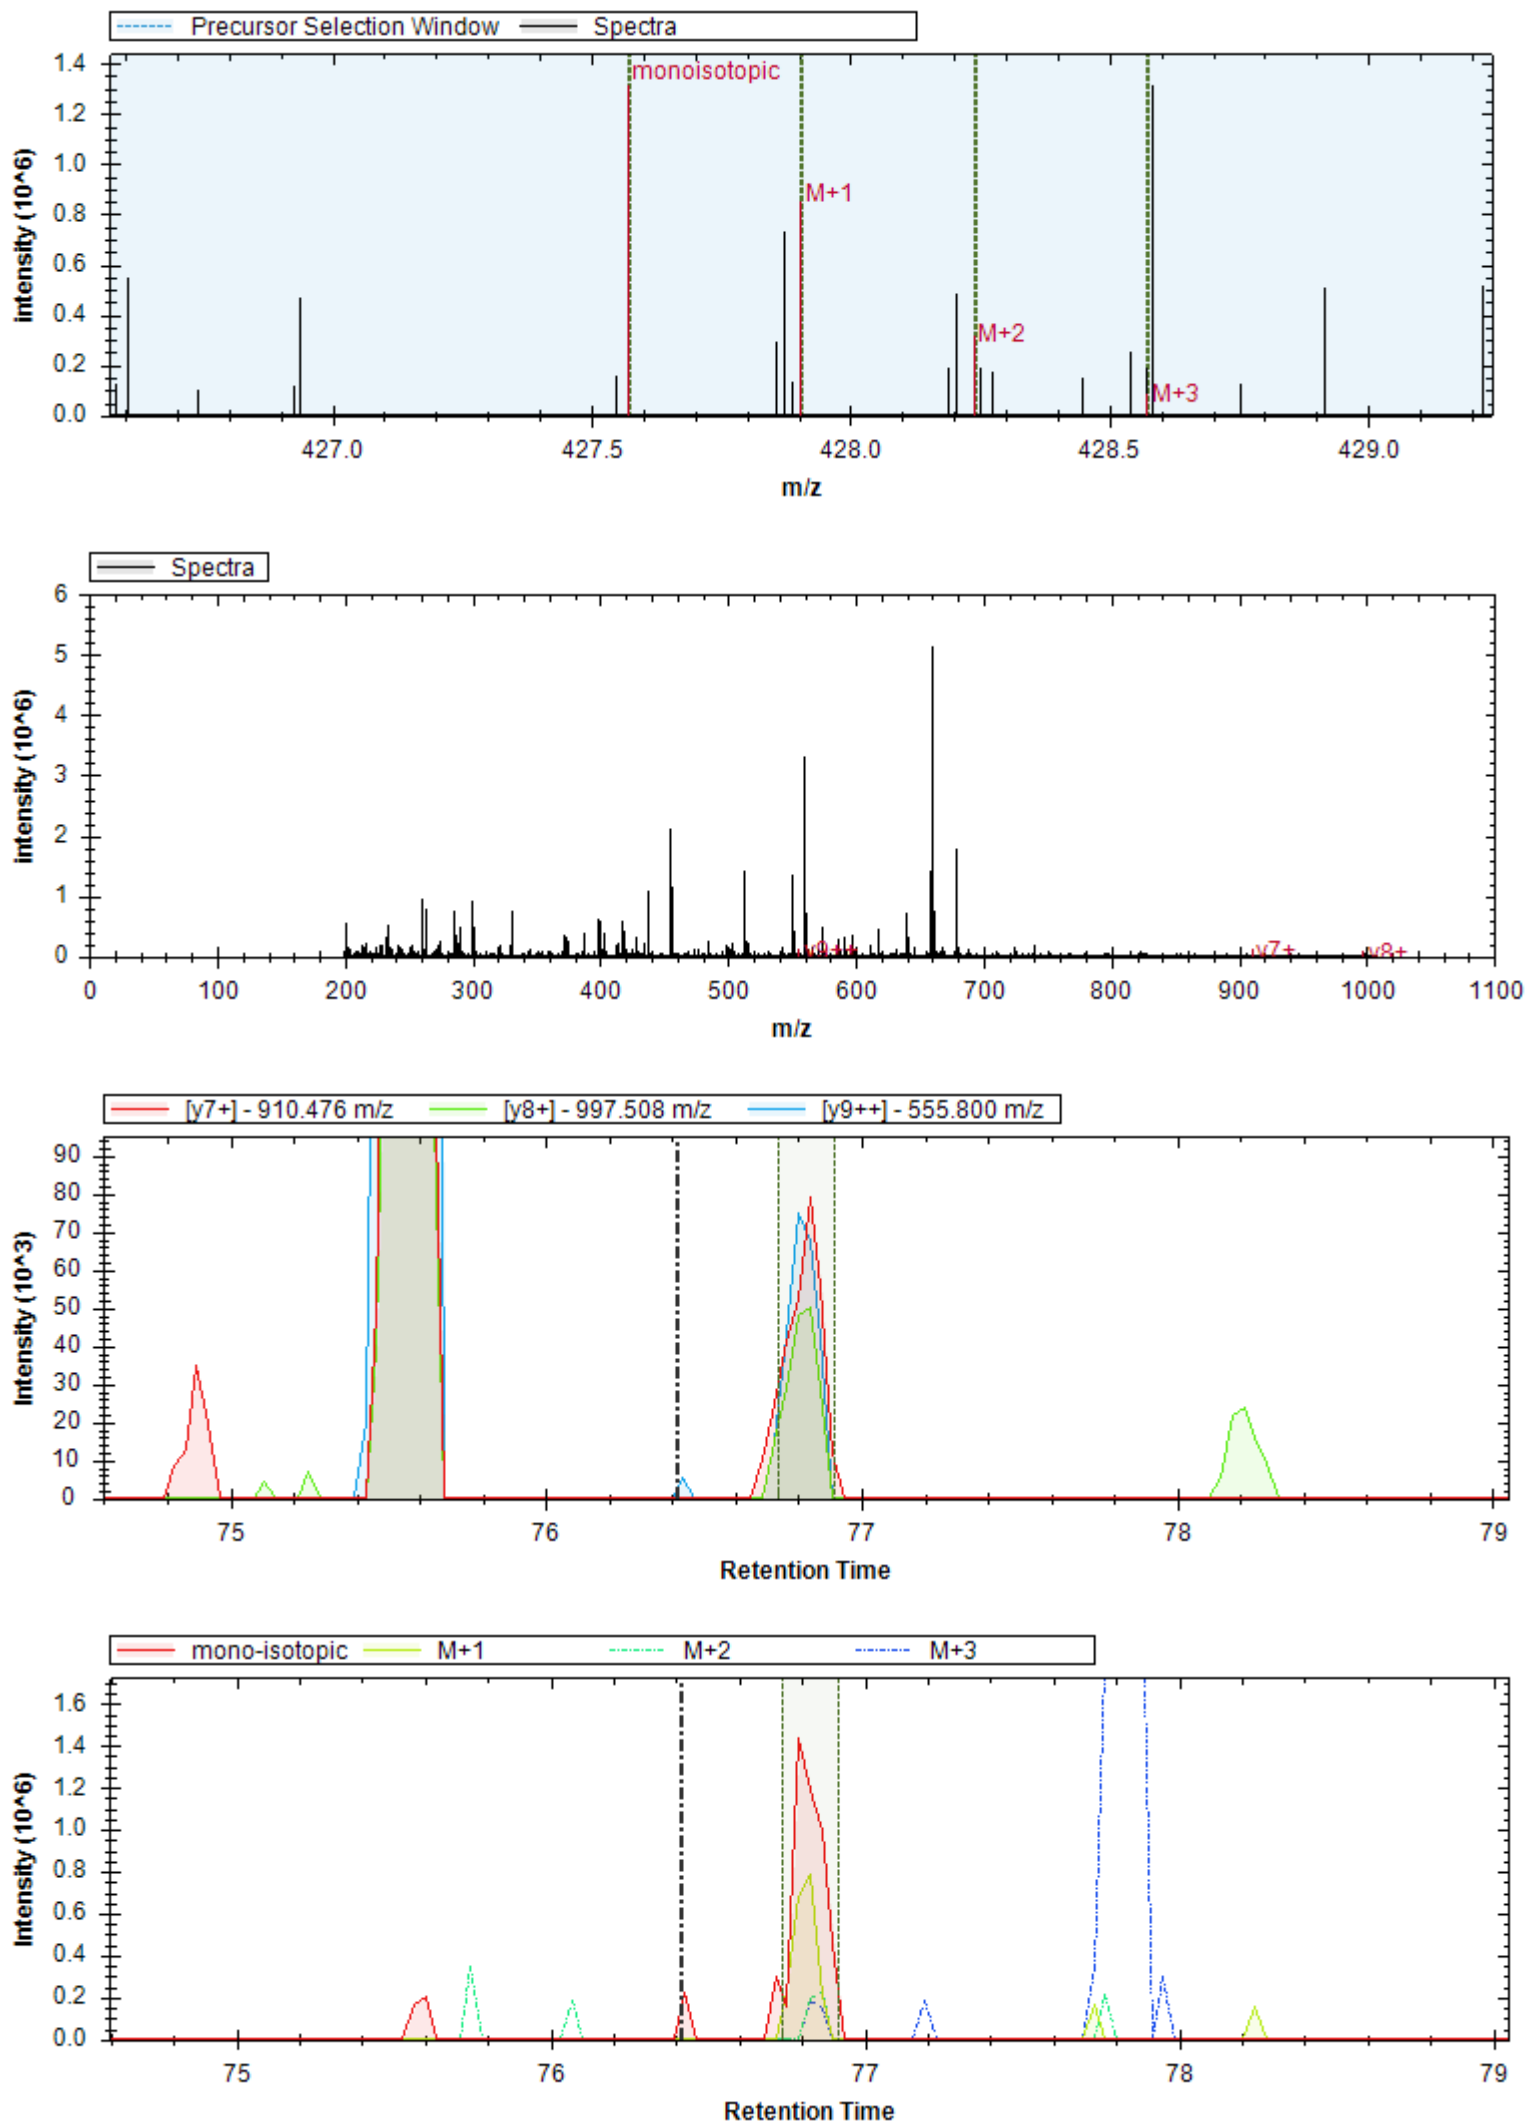

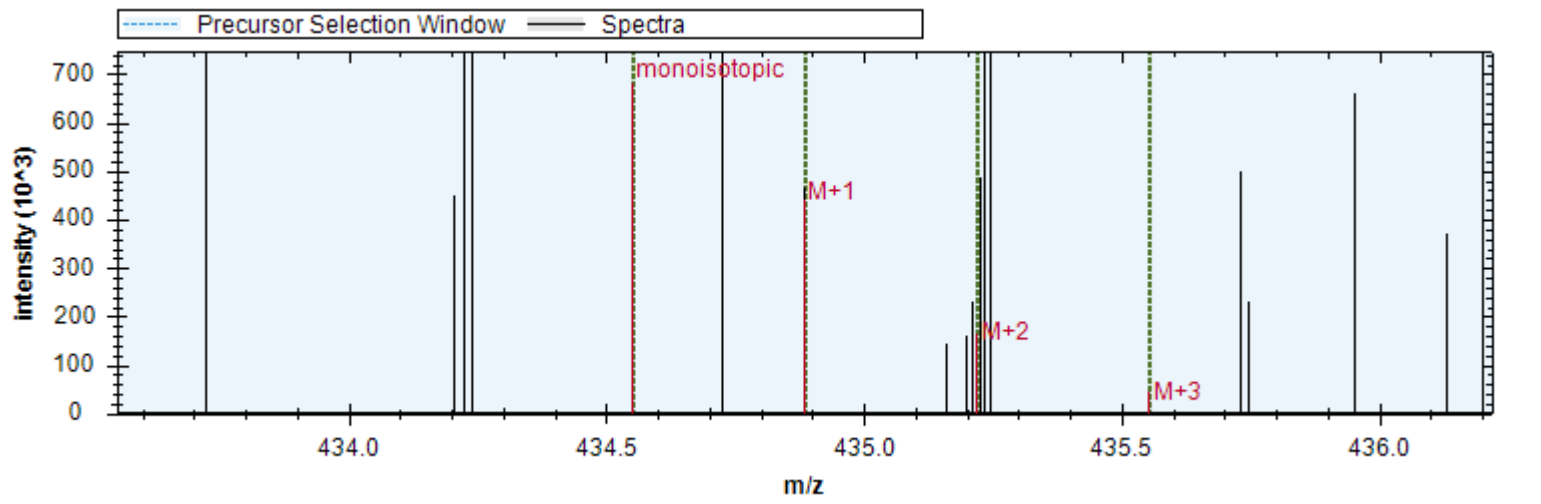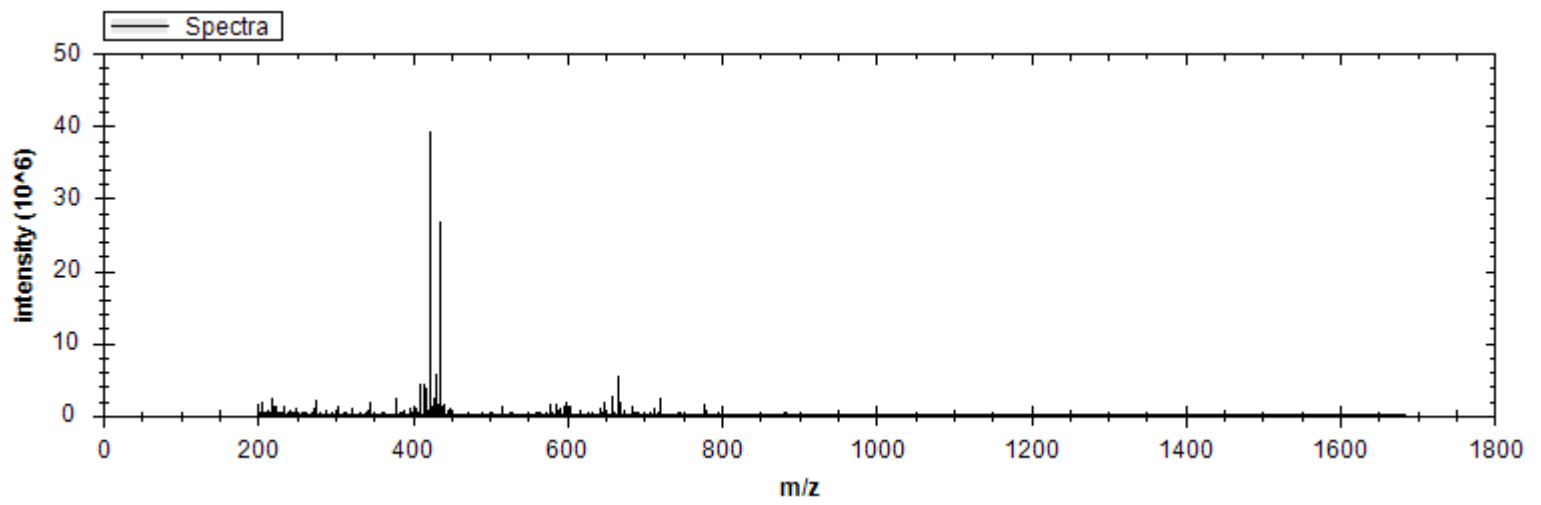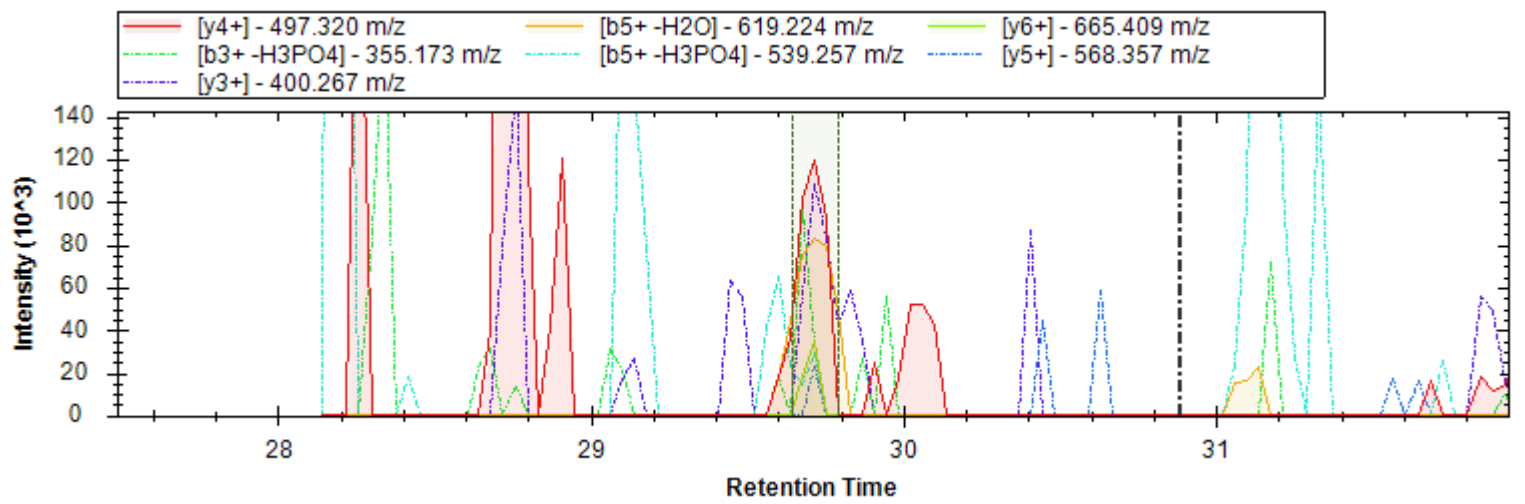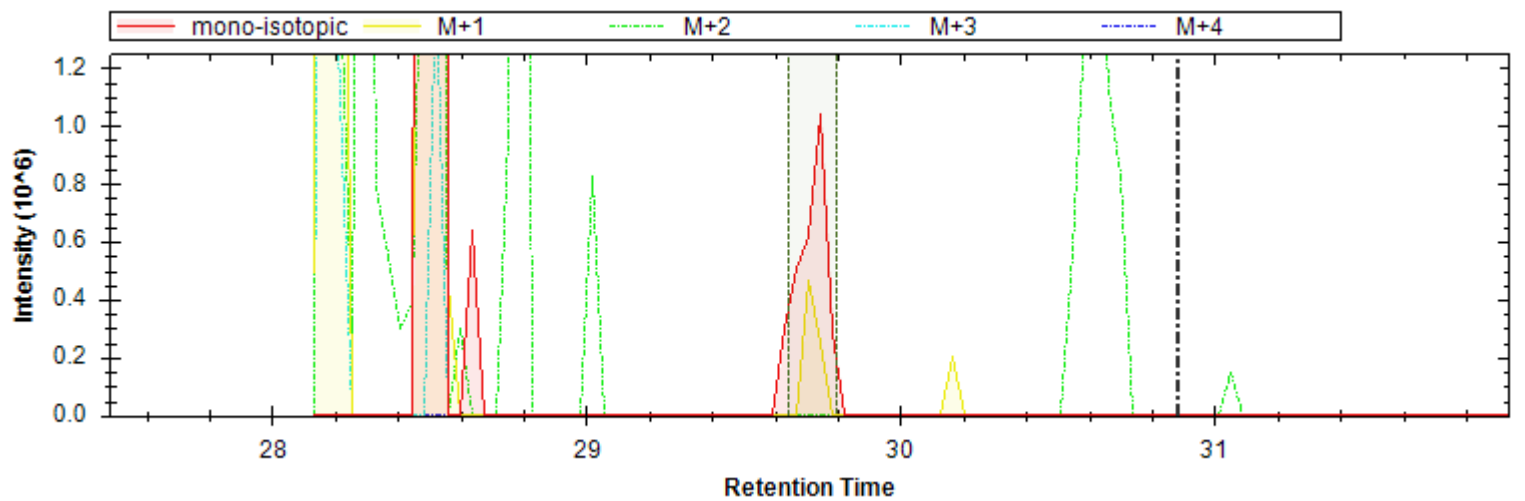

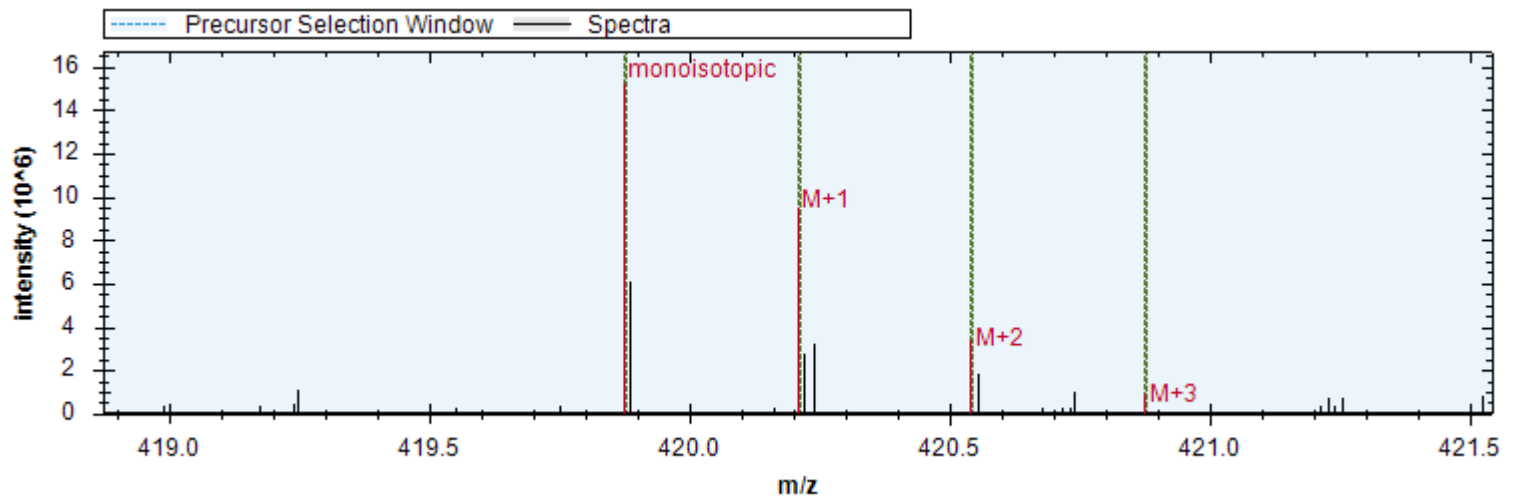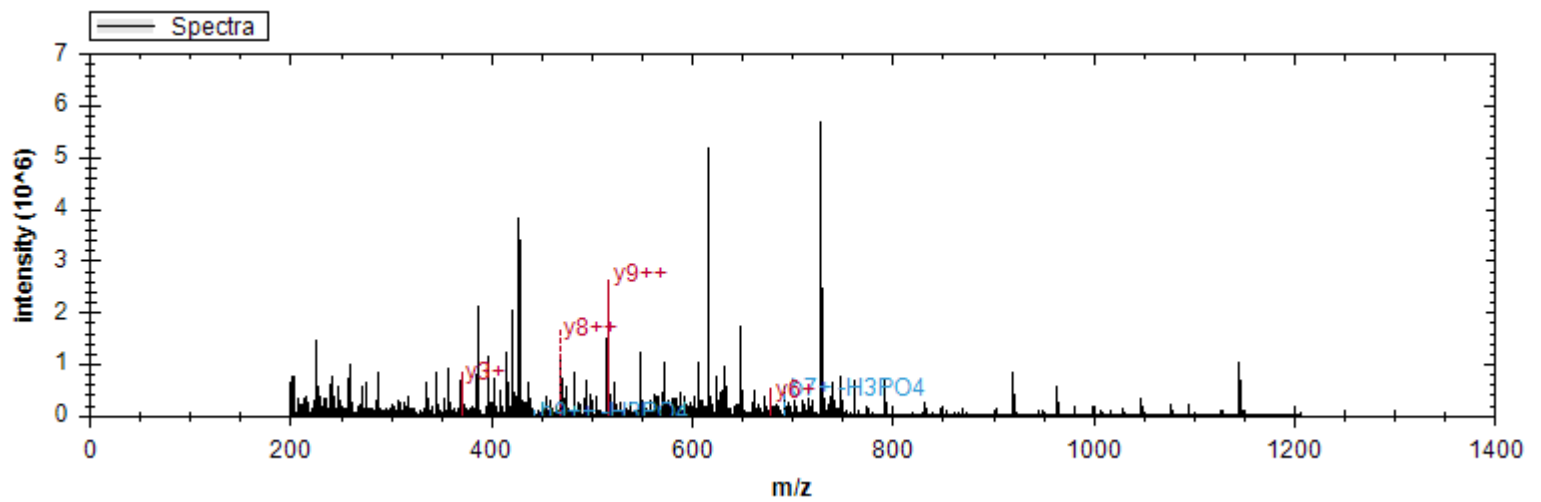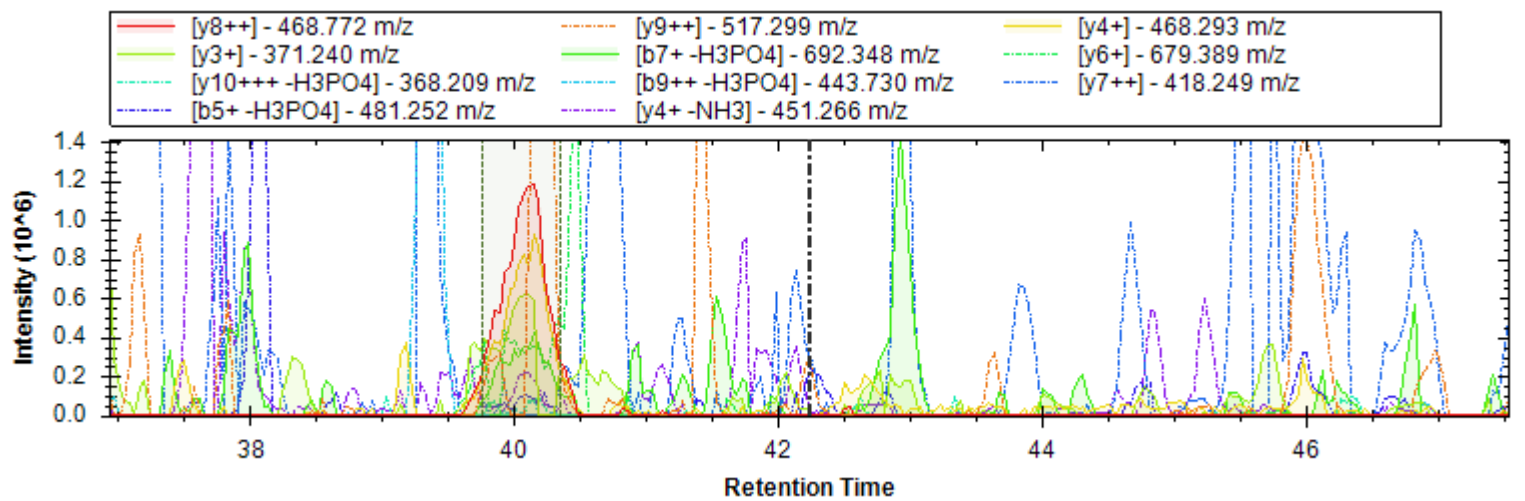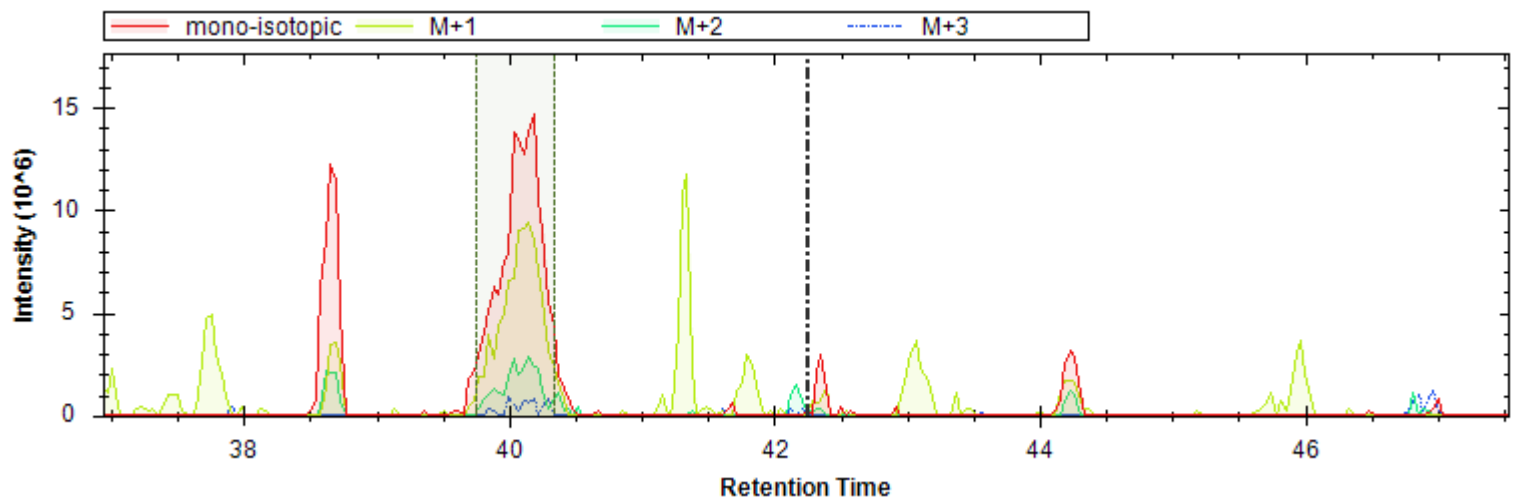

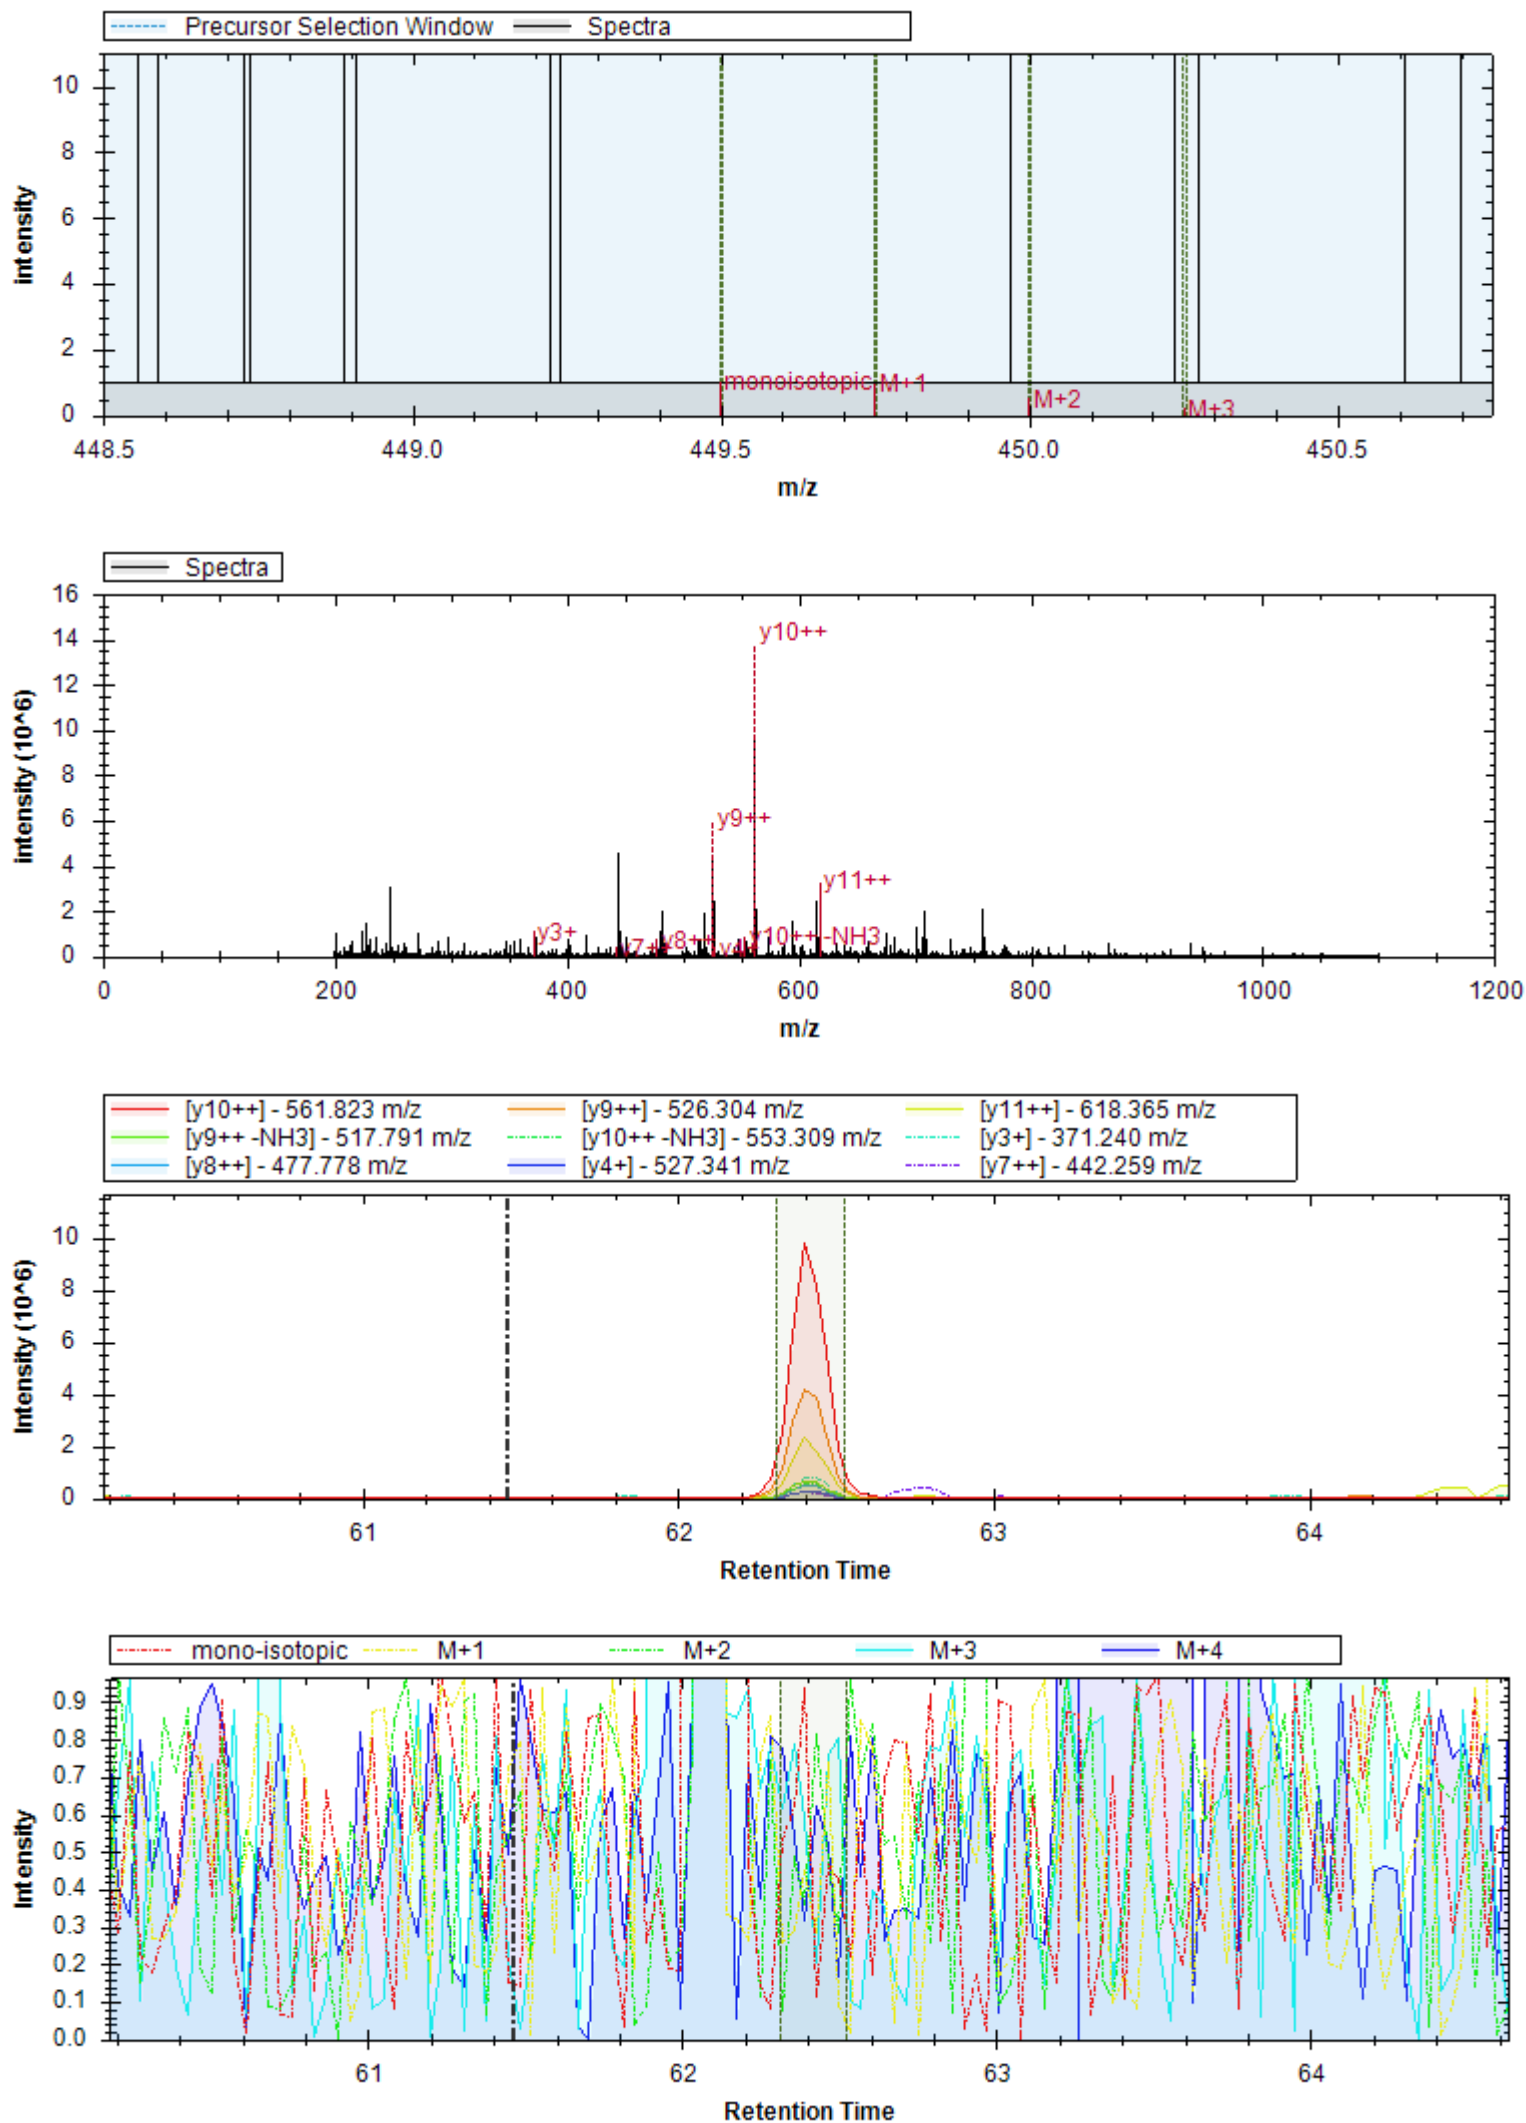

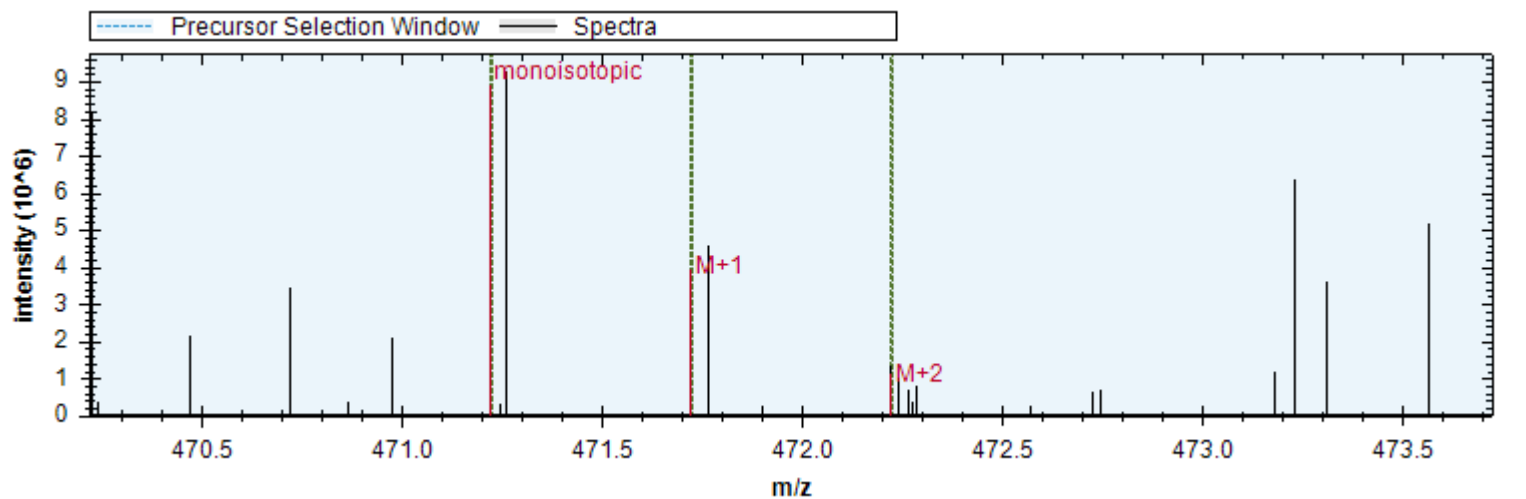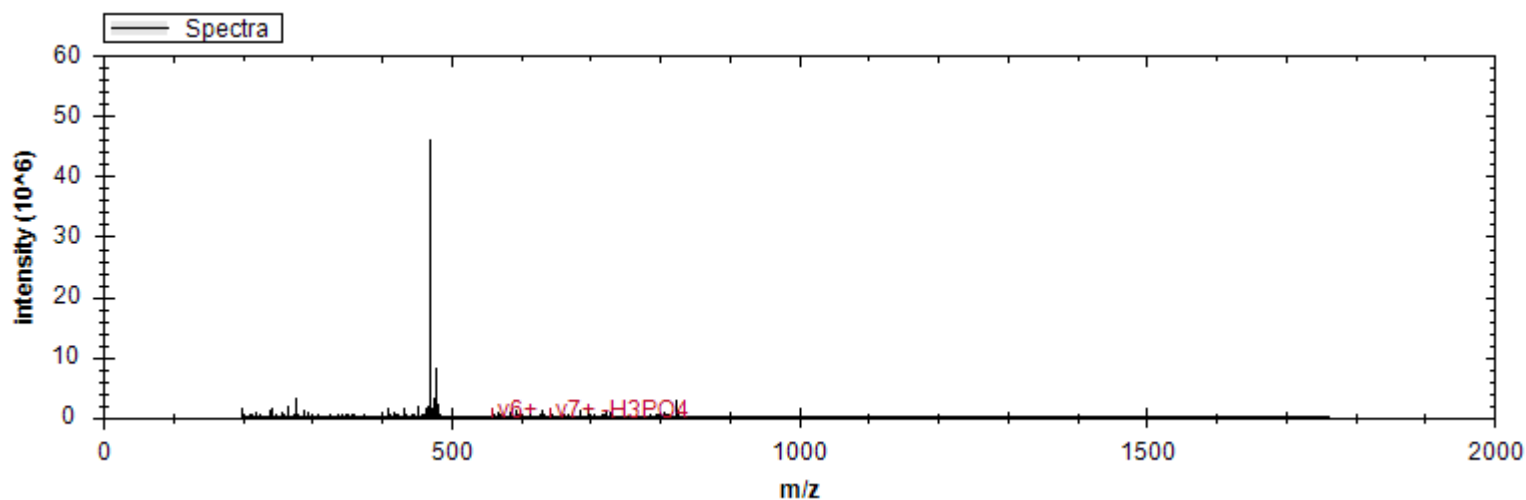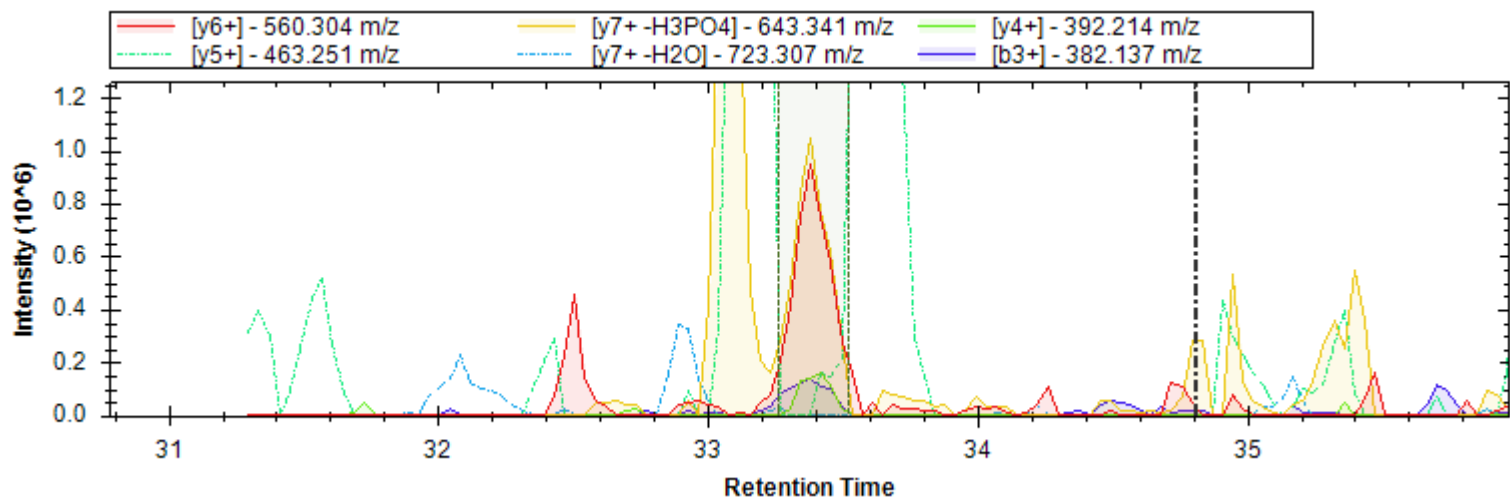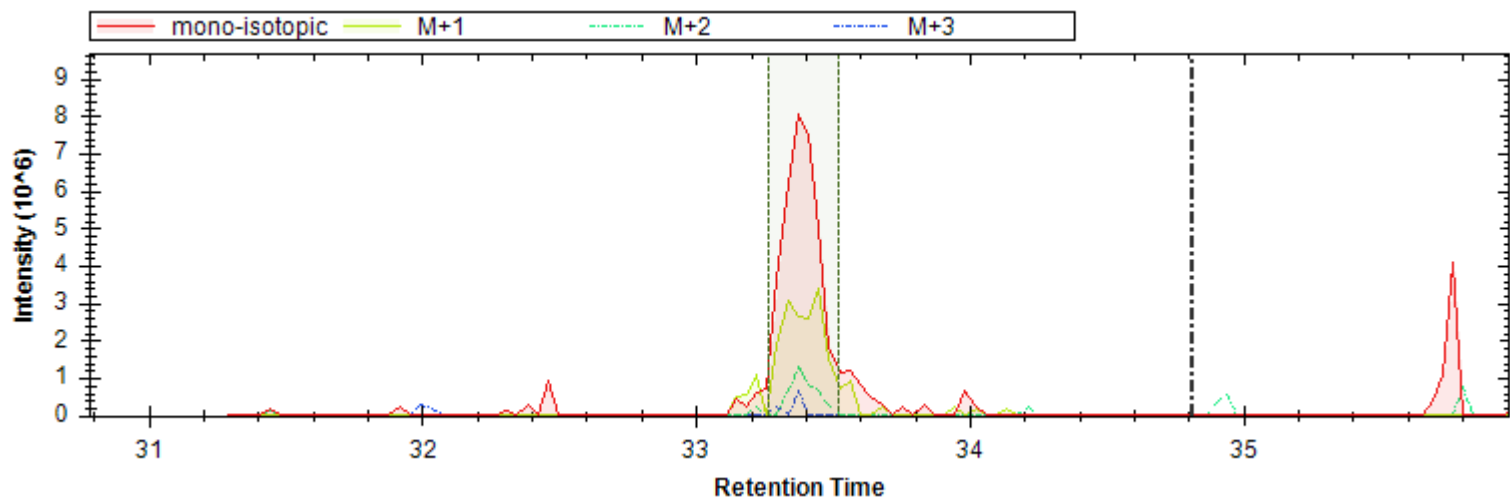



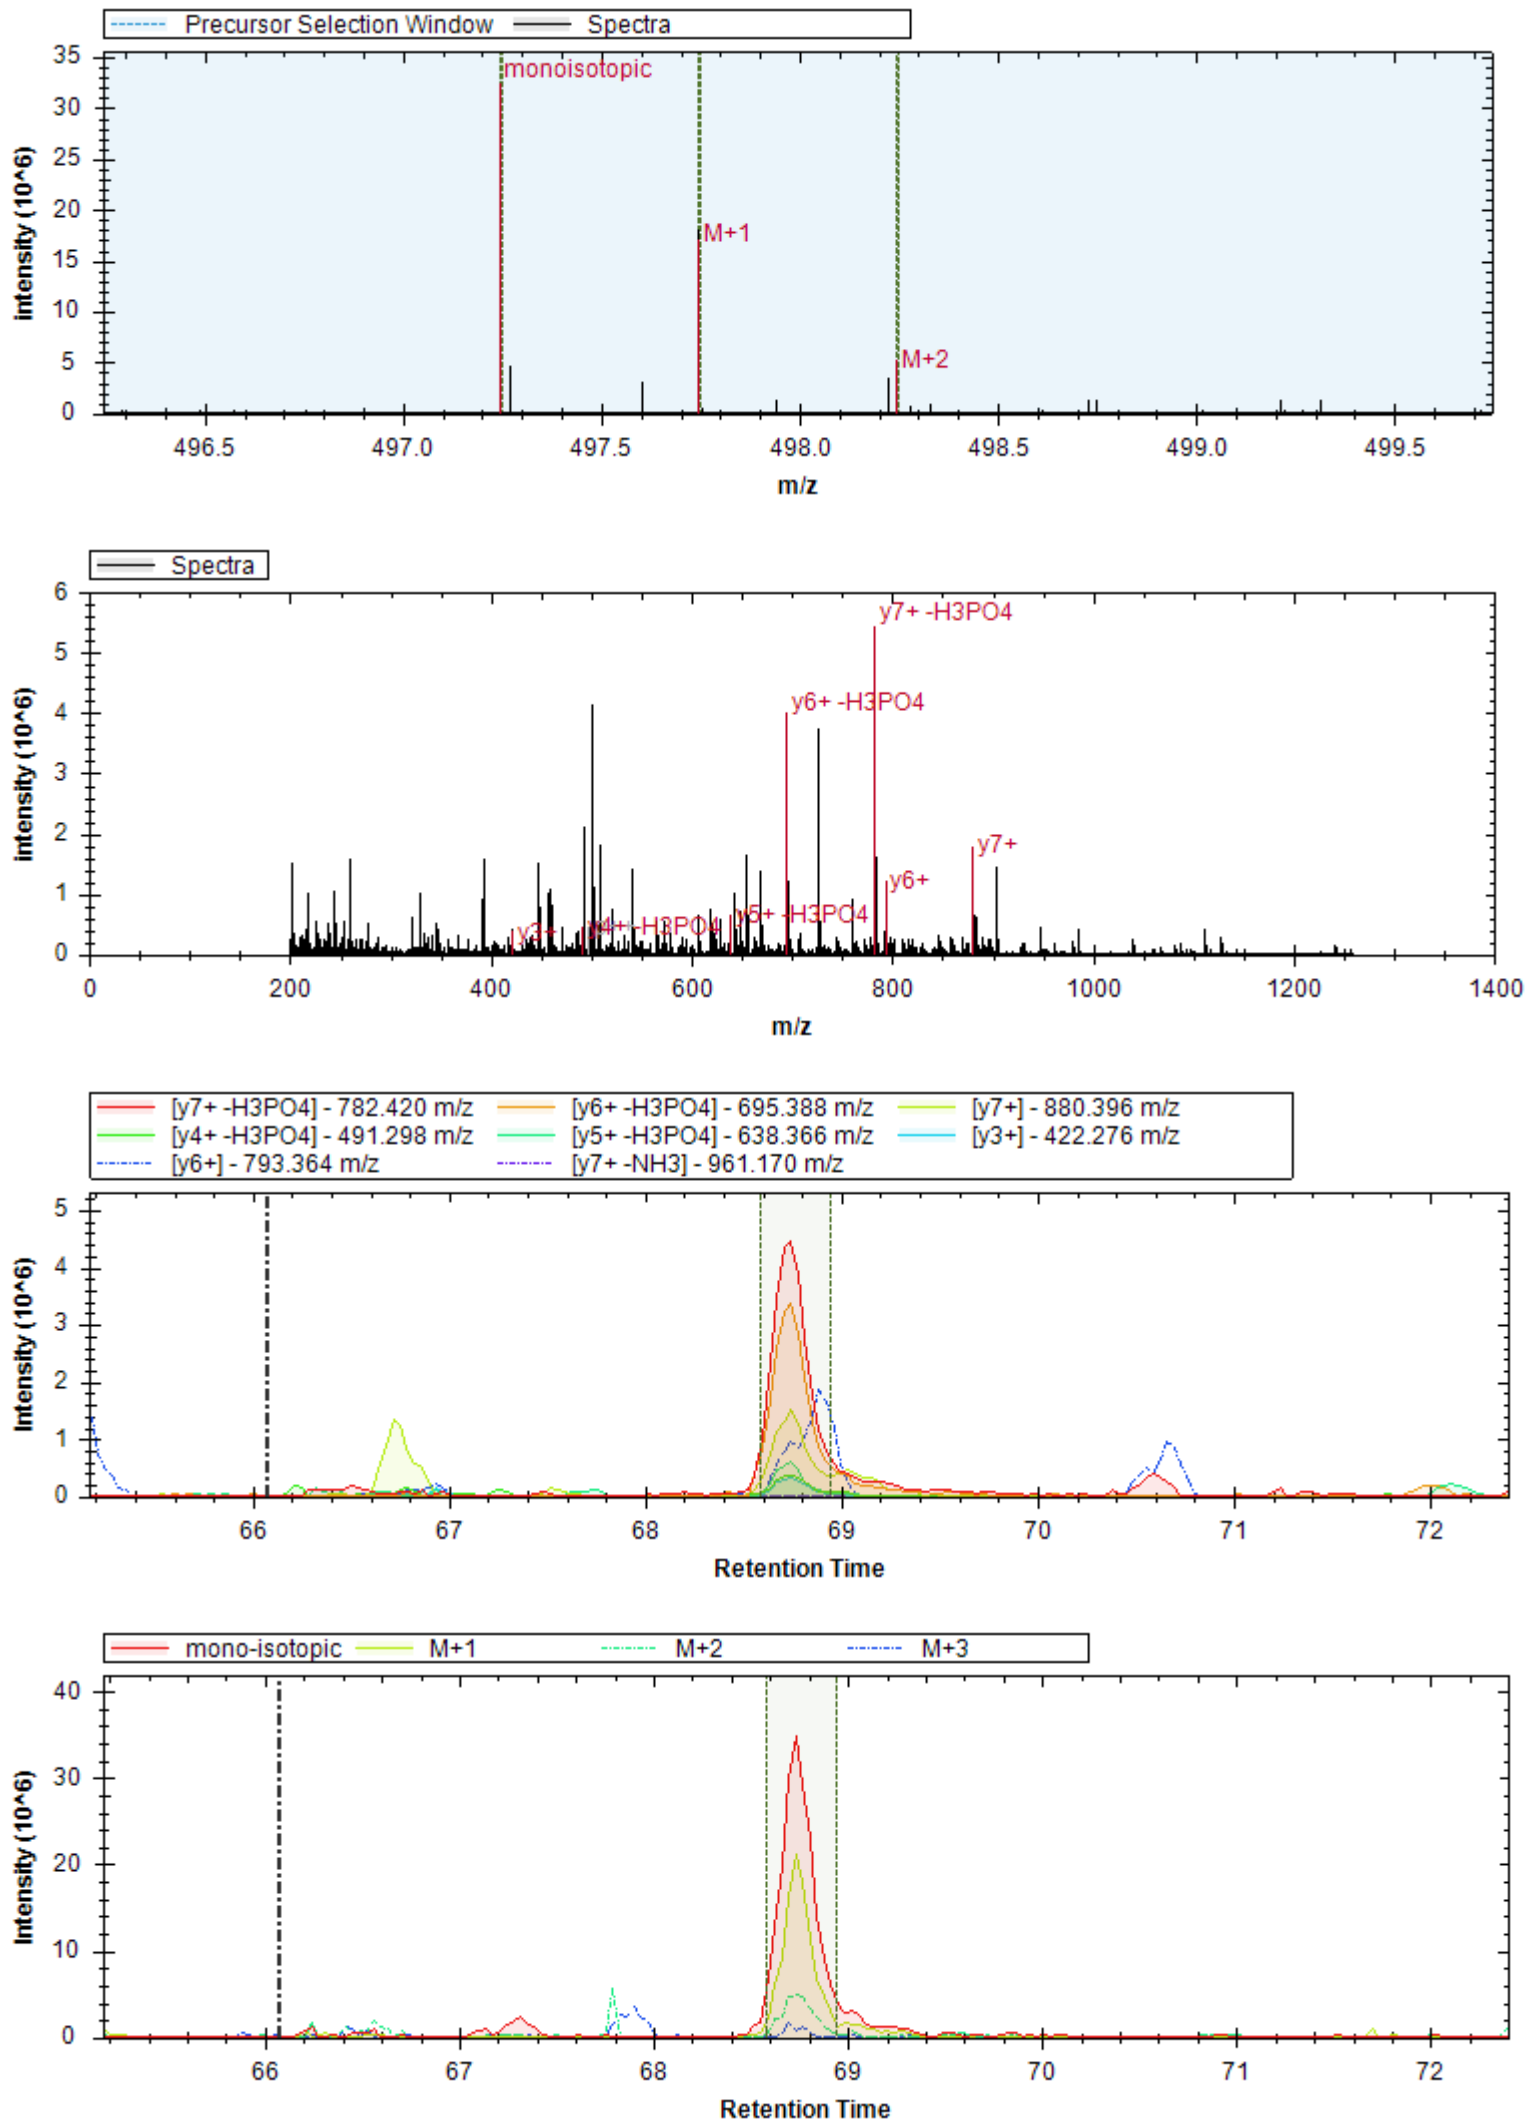

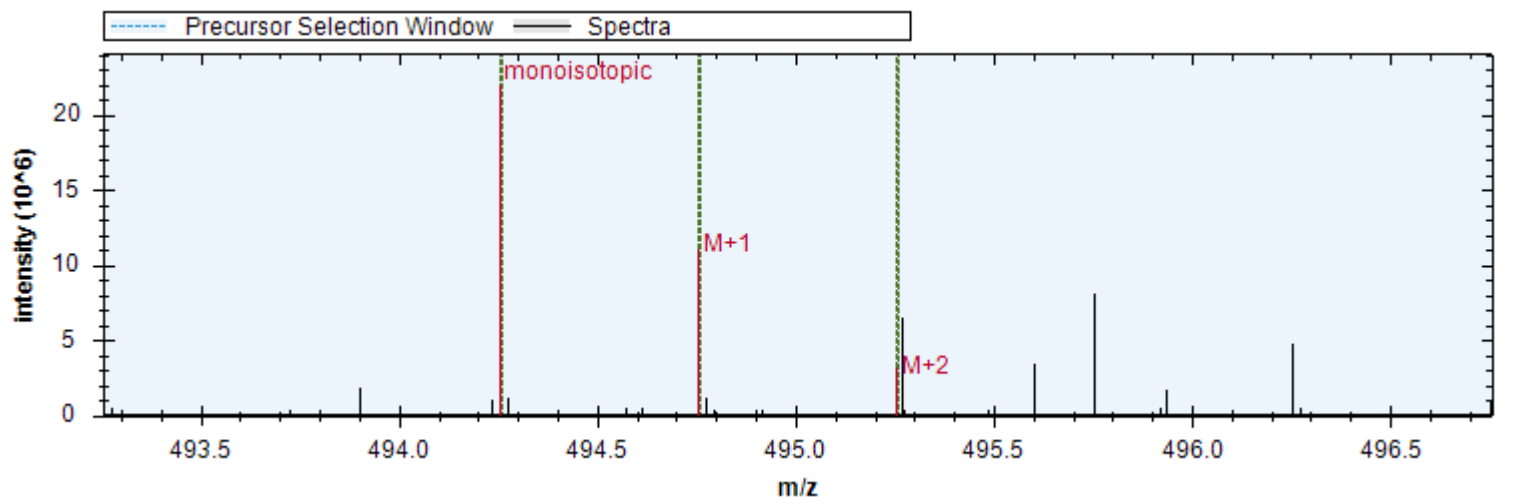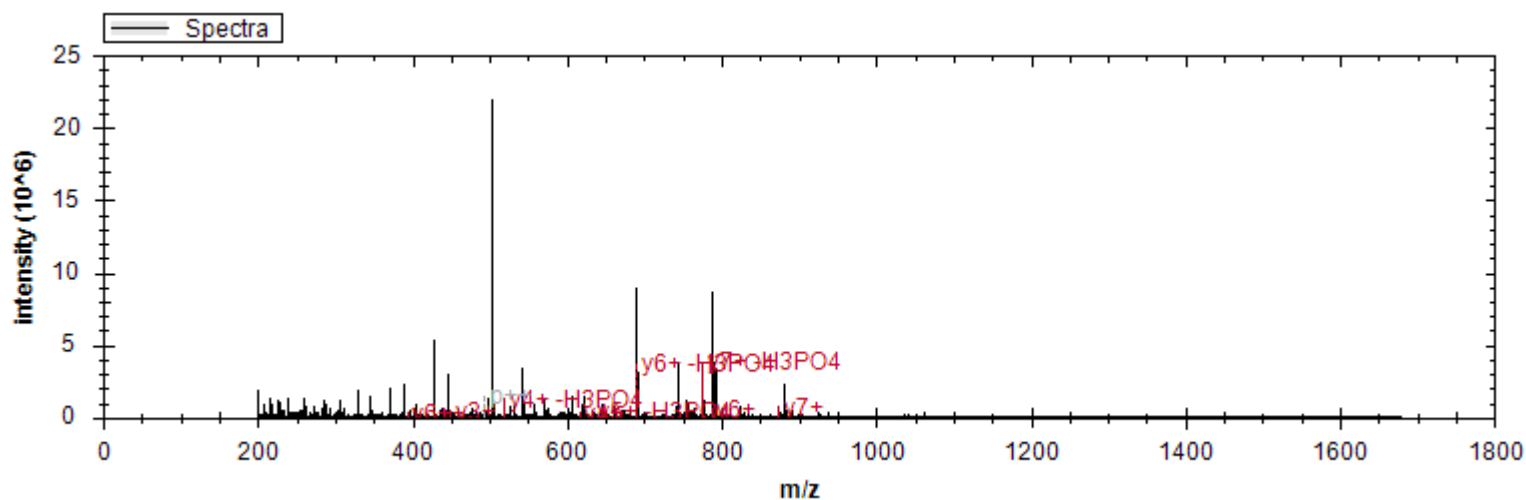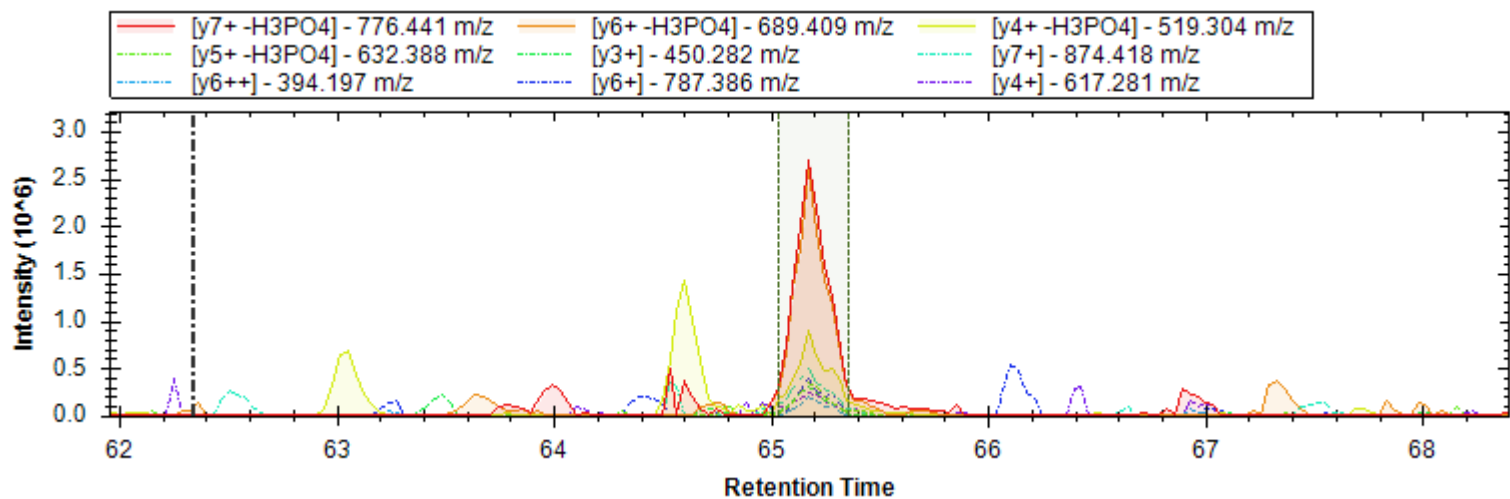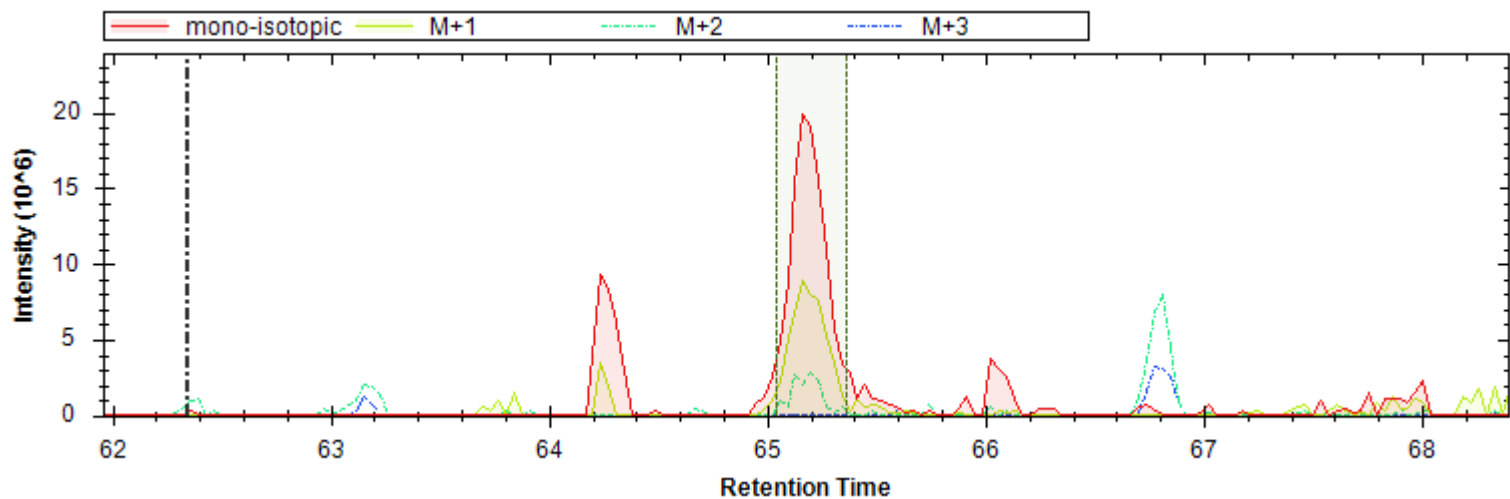

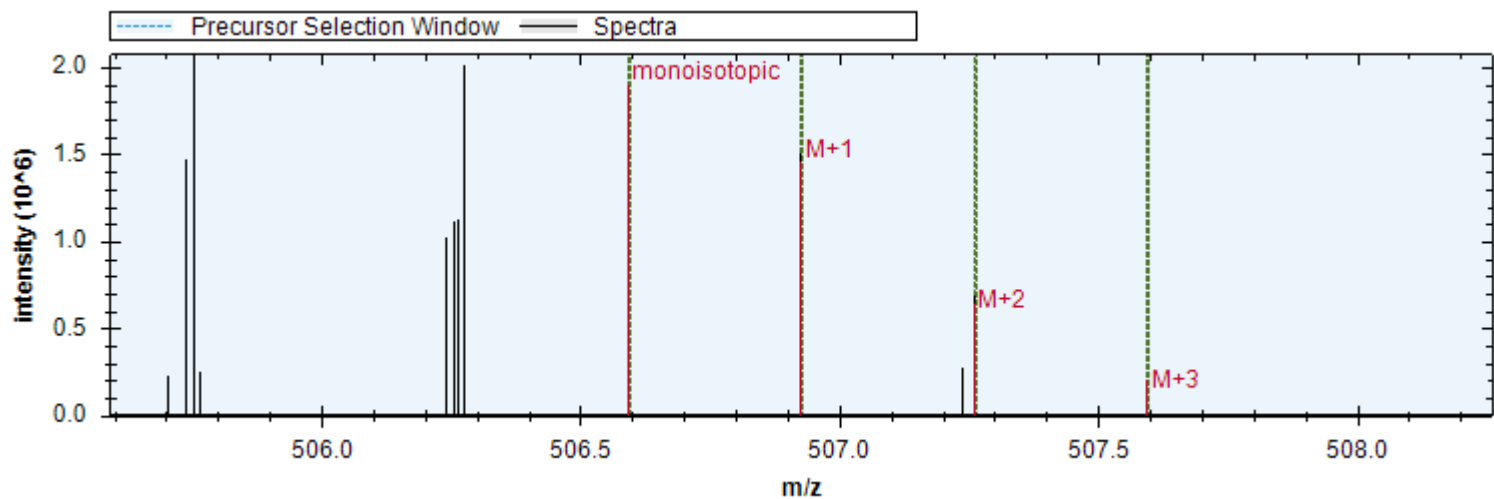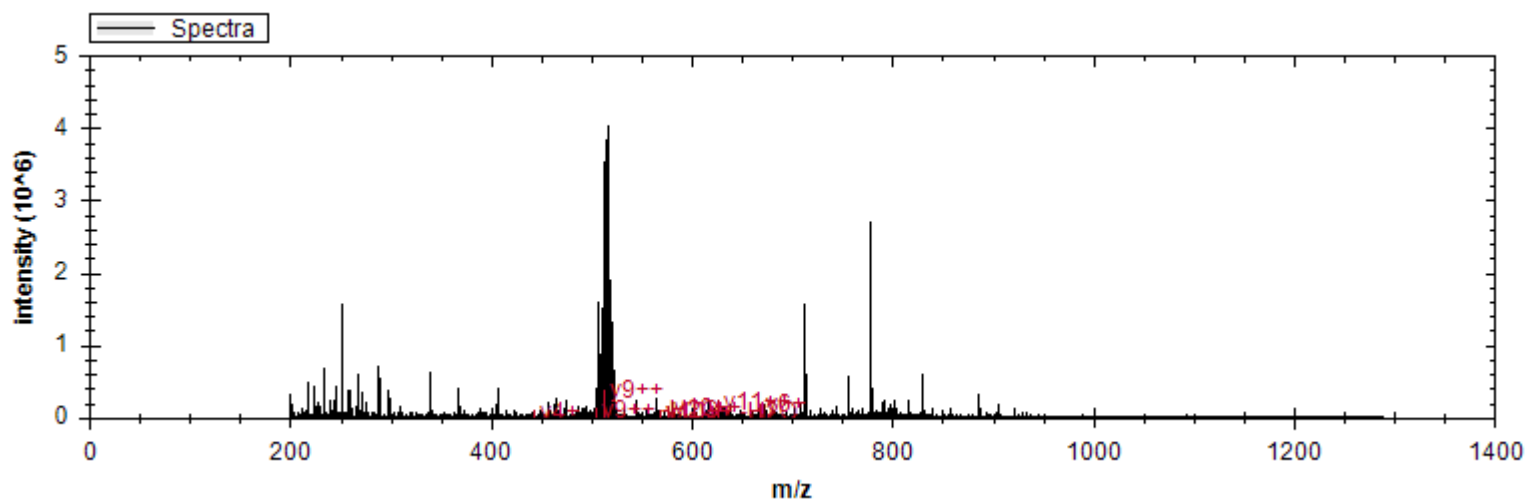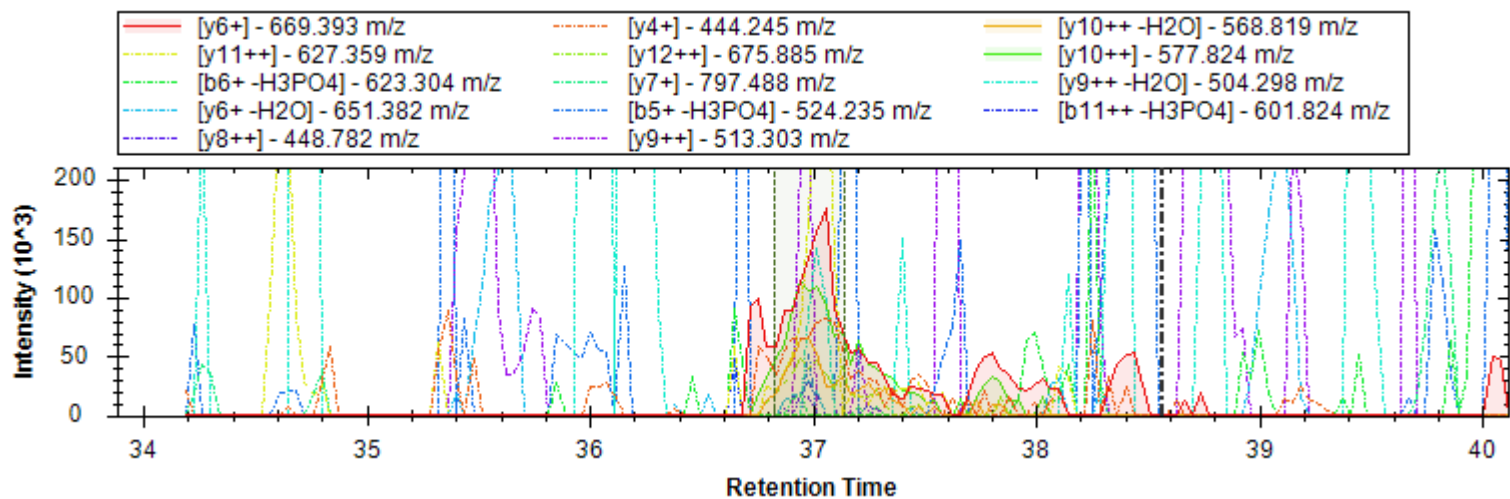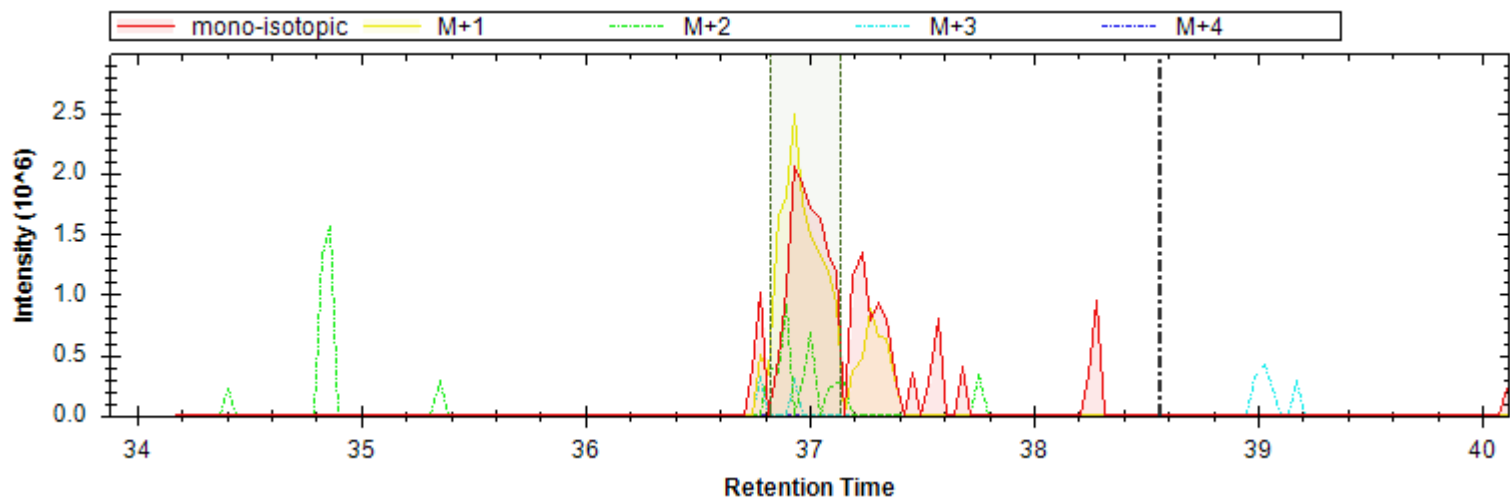

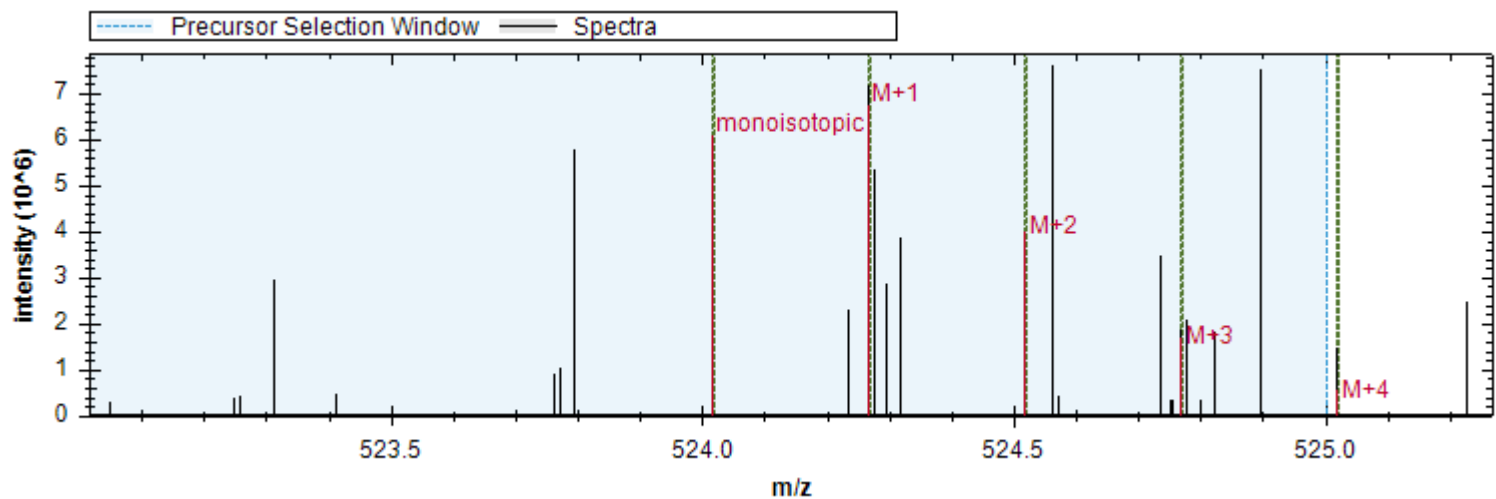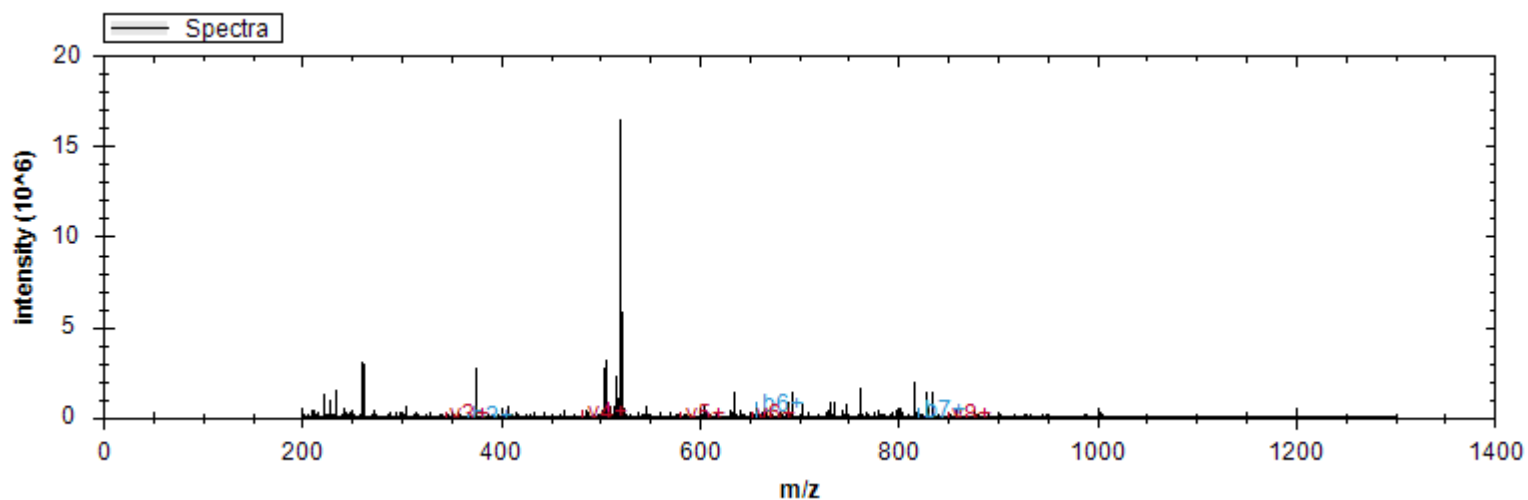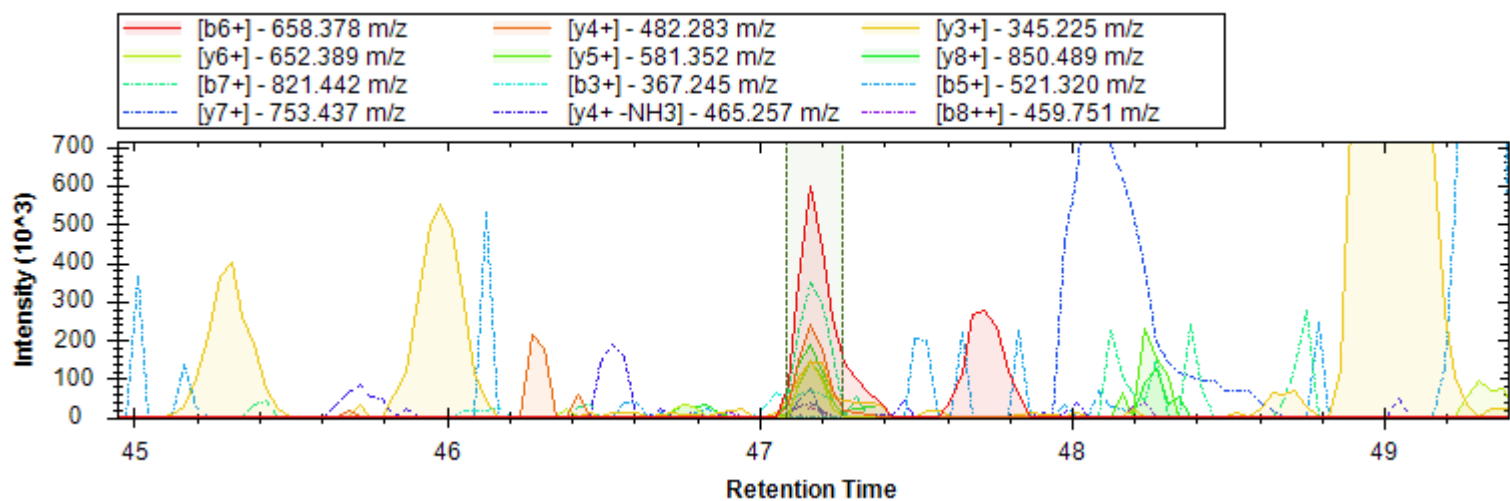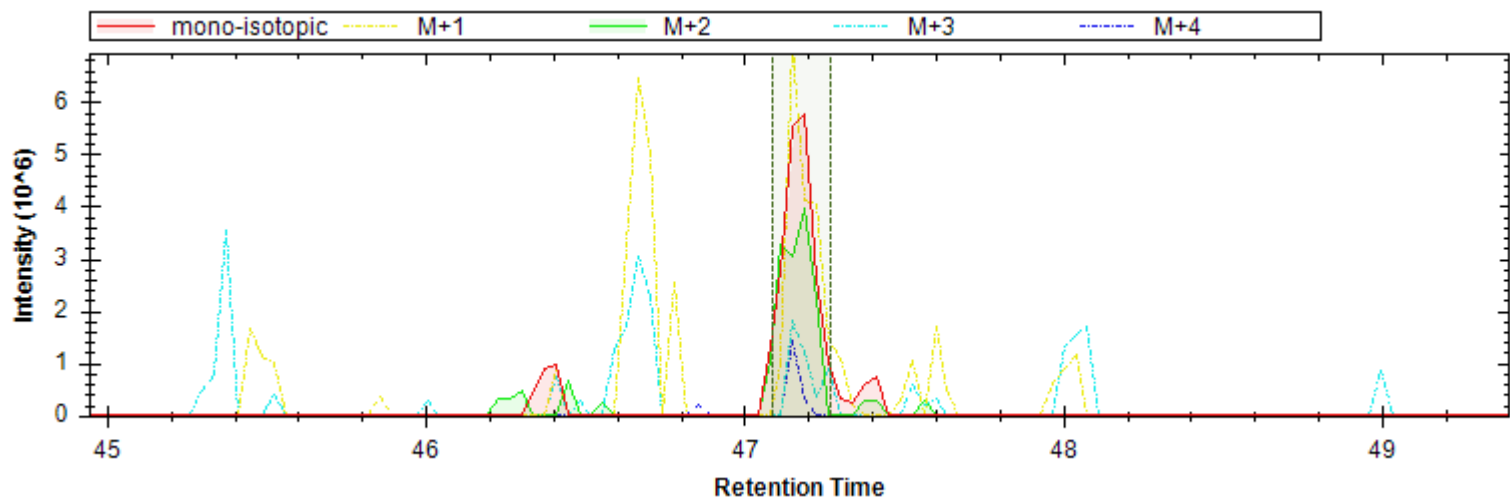

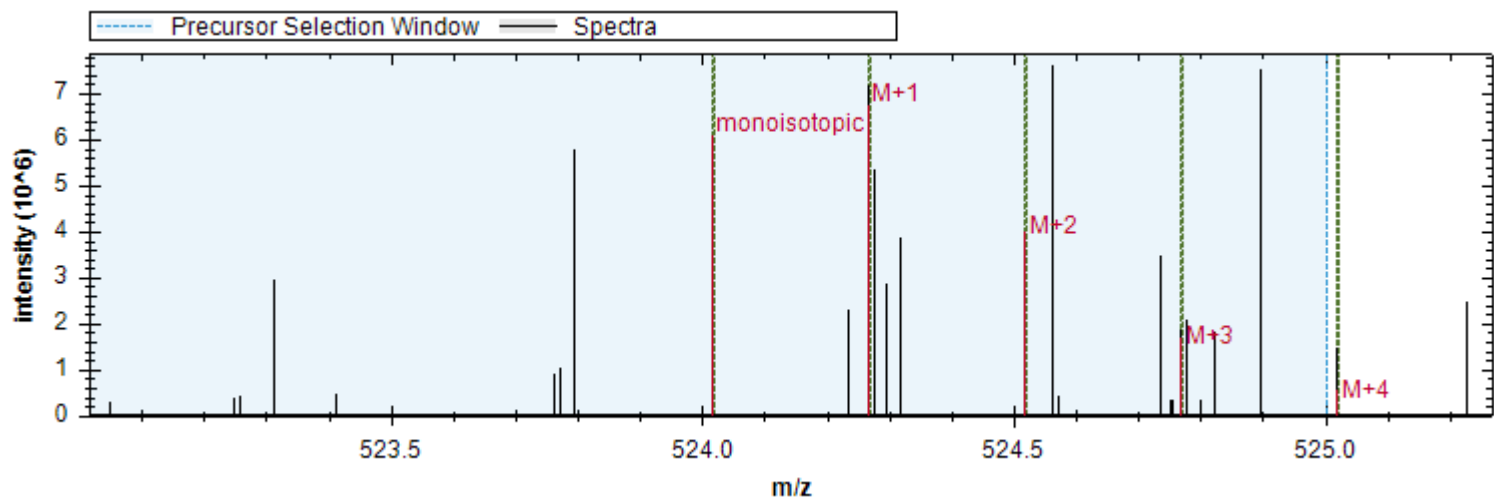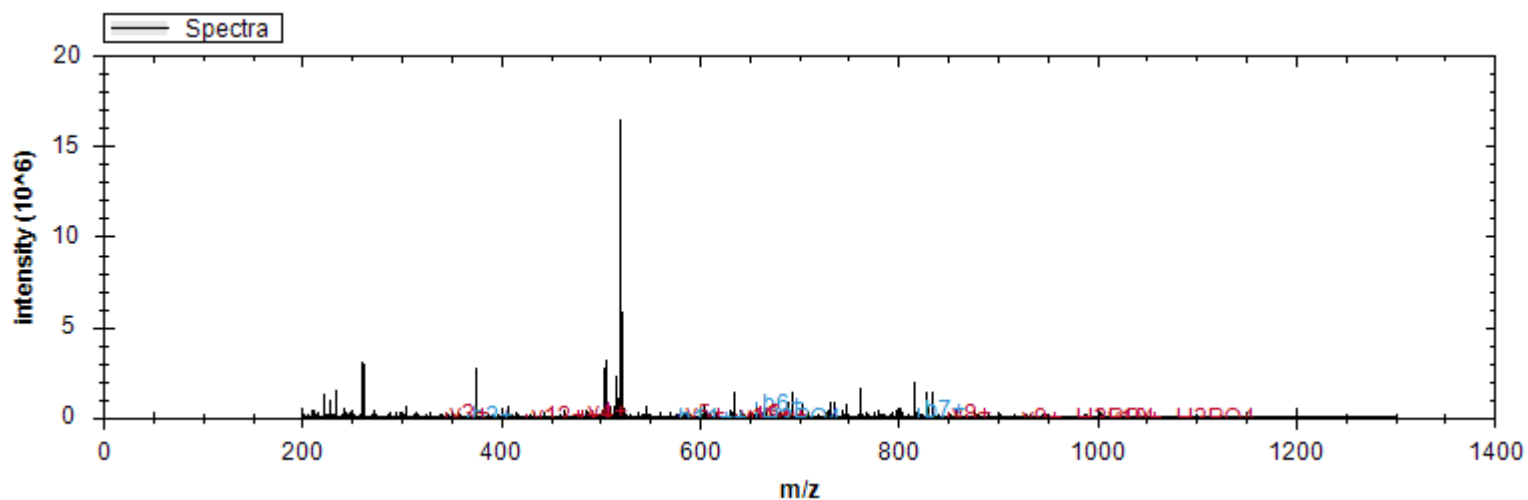

- |                              |                            |                            |
|------------------------------|----------------------------|----------------------------|
| [b6+] - 658.378 m/z          | [y4+] - 482.283 m/z        | [y3+] - 345.225 m/z        |
| [b7+] - 821.442 m/z          | [y8+] - 850.489 m/z        | [y6+] - 652.389 m/z        |
| [y5+] - 581.352 m/z          | [b5+] - 521.320 m/z        | [y12+++] - 424.875 m/z     |
| [y7+] - 753.437 m/z          | [b9+] - 989.532 m/z        | [b3+] - 367.245 m/z        |
| [b8++] - 459.751 m/z         | [y11+ -H2O] - 1255.346 m/z | [b6+ -NH3] - 641.352 m/z   |
| [b11++ -H3PO4] - 573.296 m/z | [y12++] - 636.809 m/z      | [y9+ -H3PO4] - 919.511 m/z |
| [y10+ -H3PO4] - 1006.543 m/z | [y4+ -NH3] - 465.257 m/z   |                            |

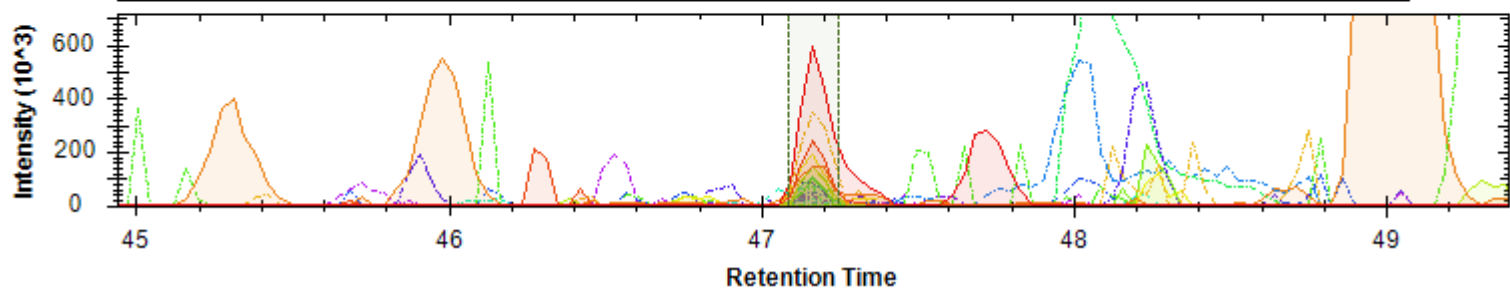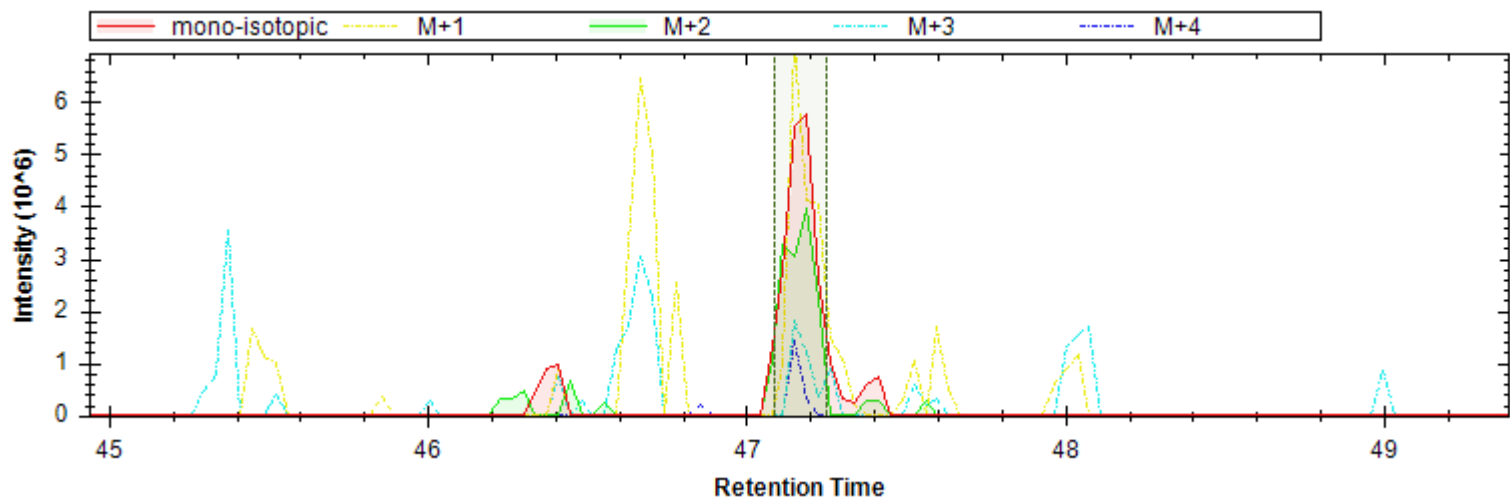

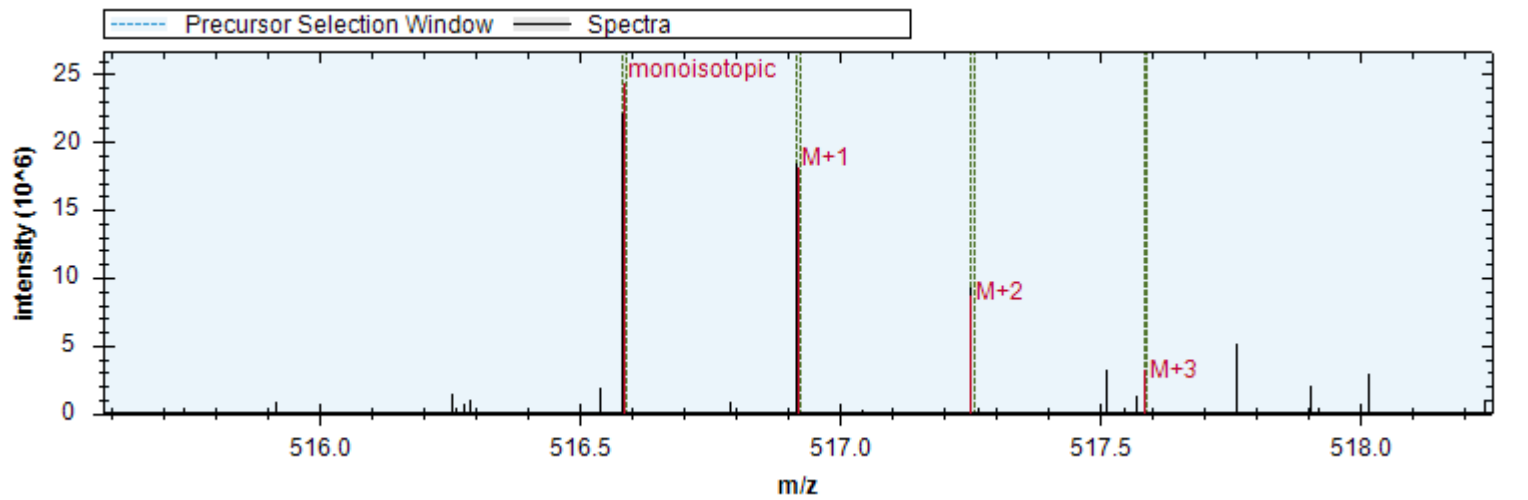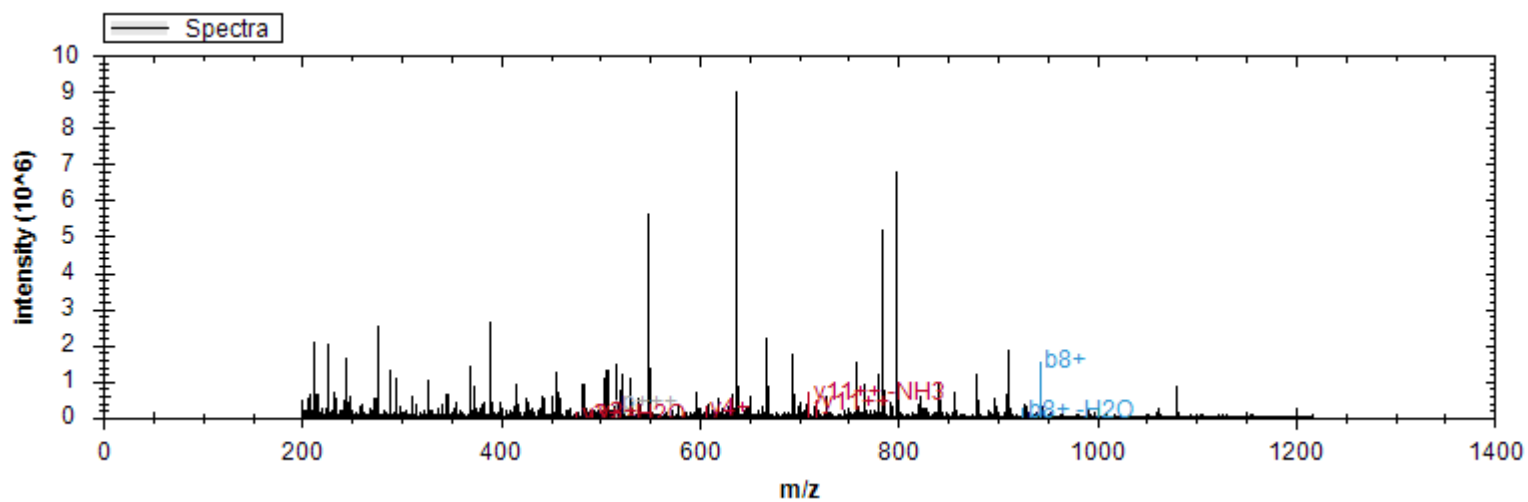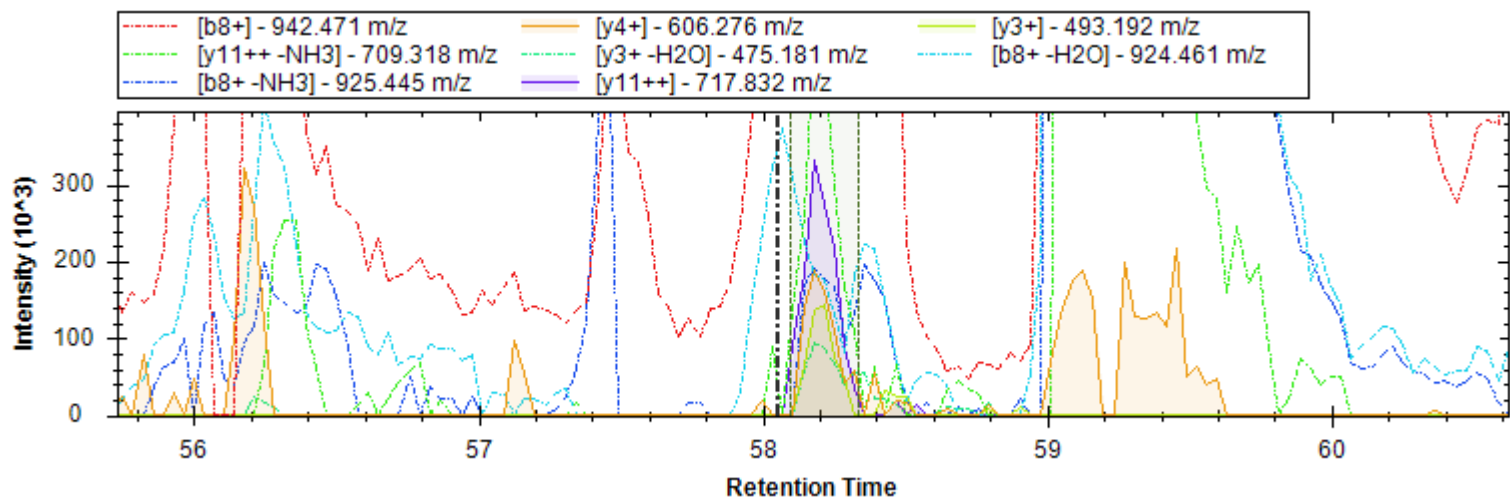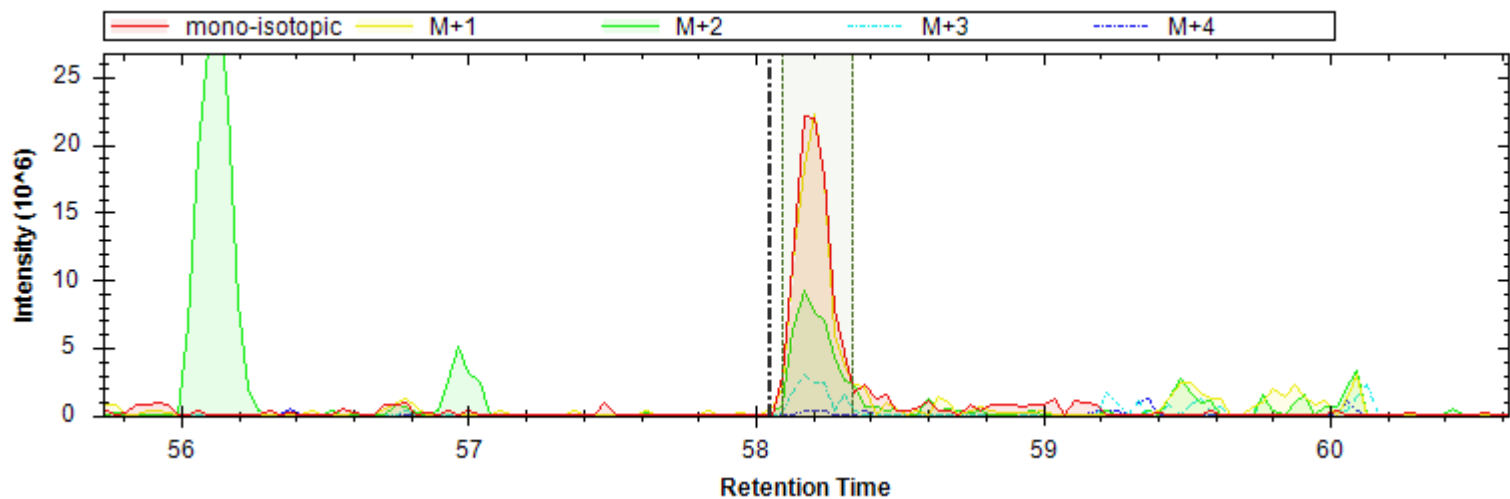

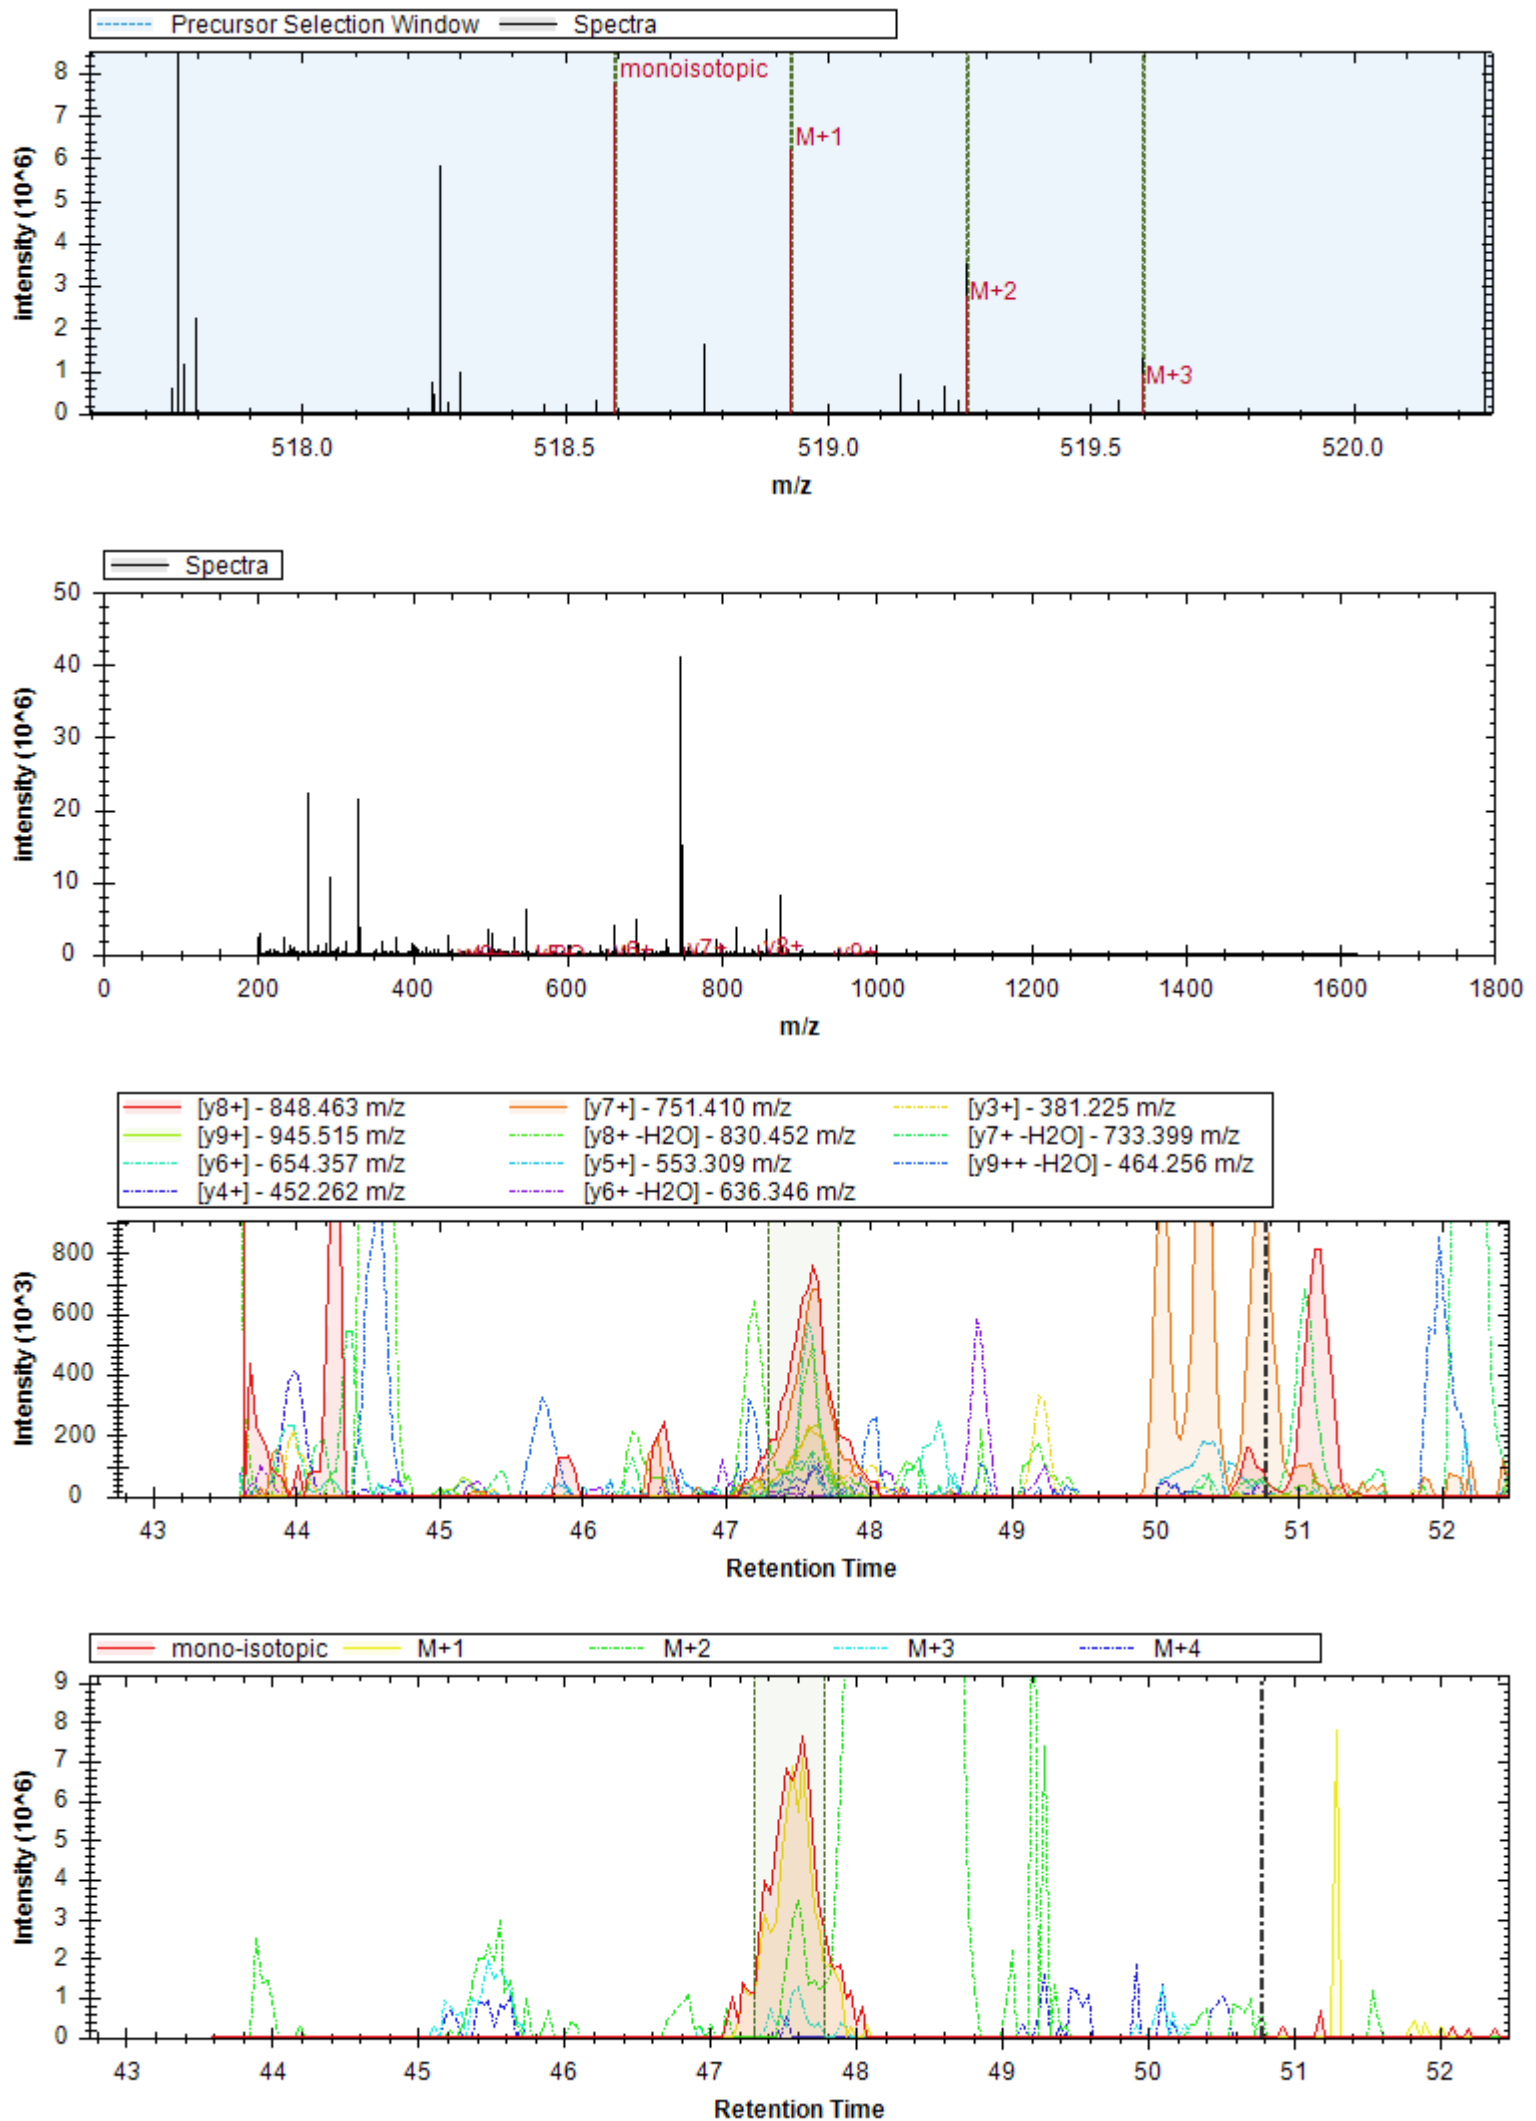

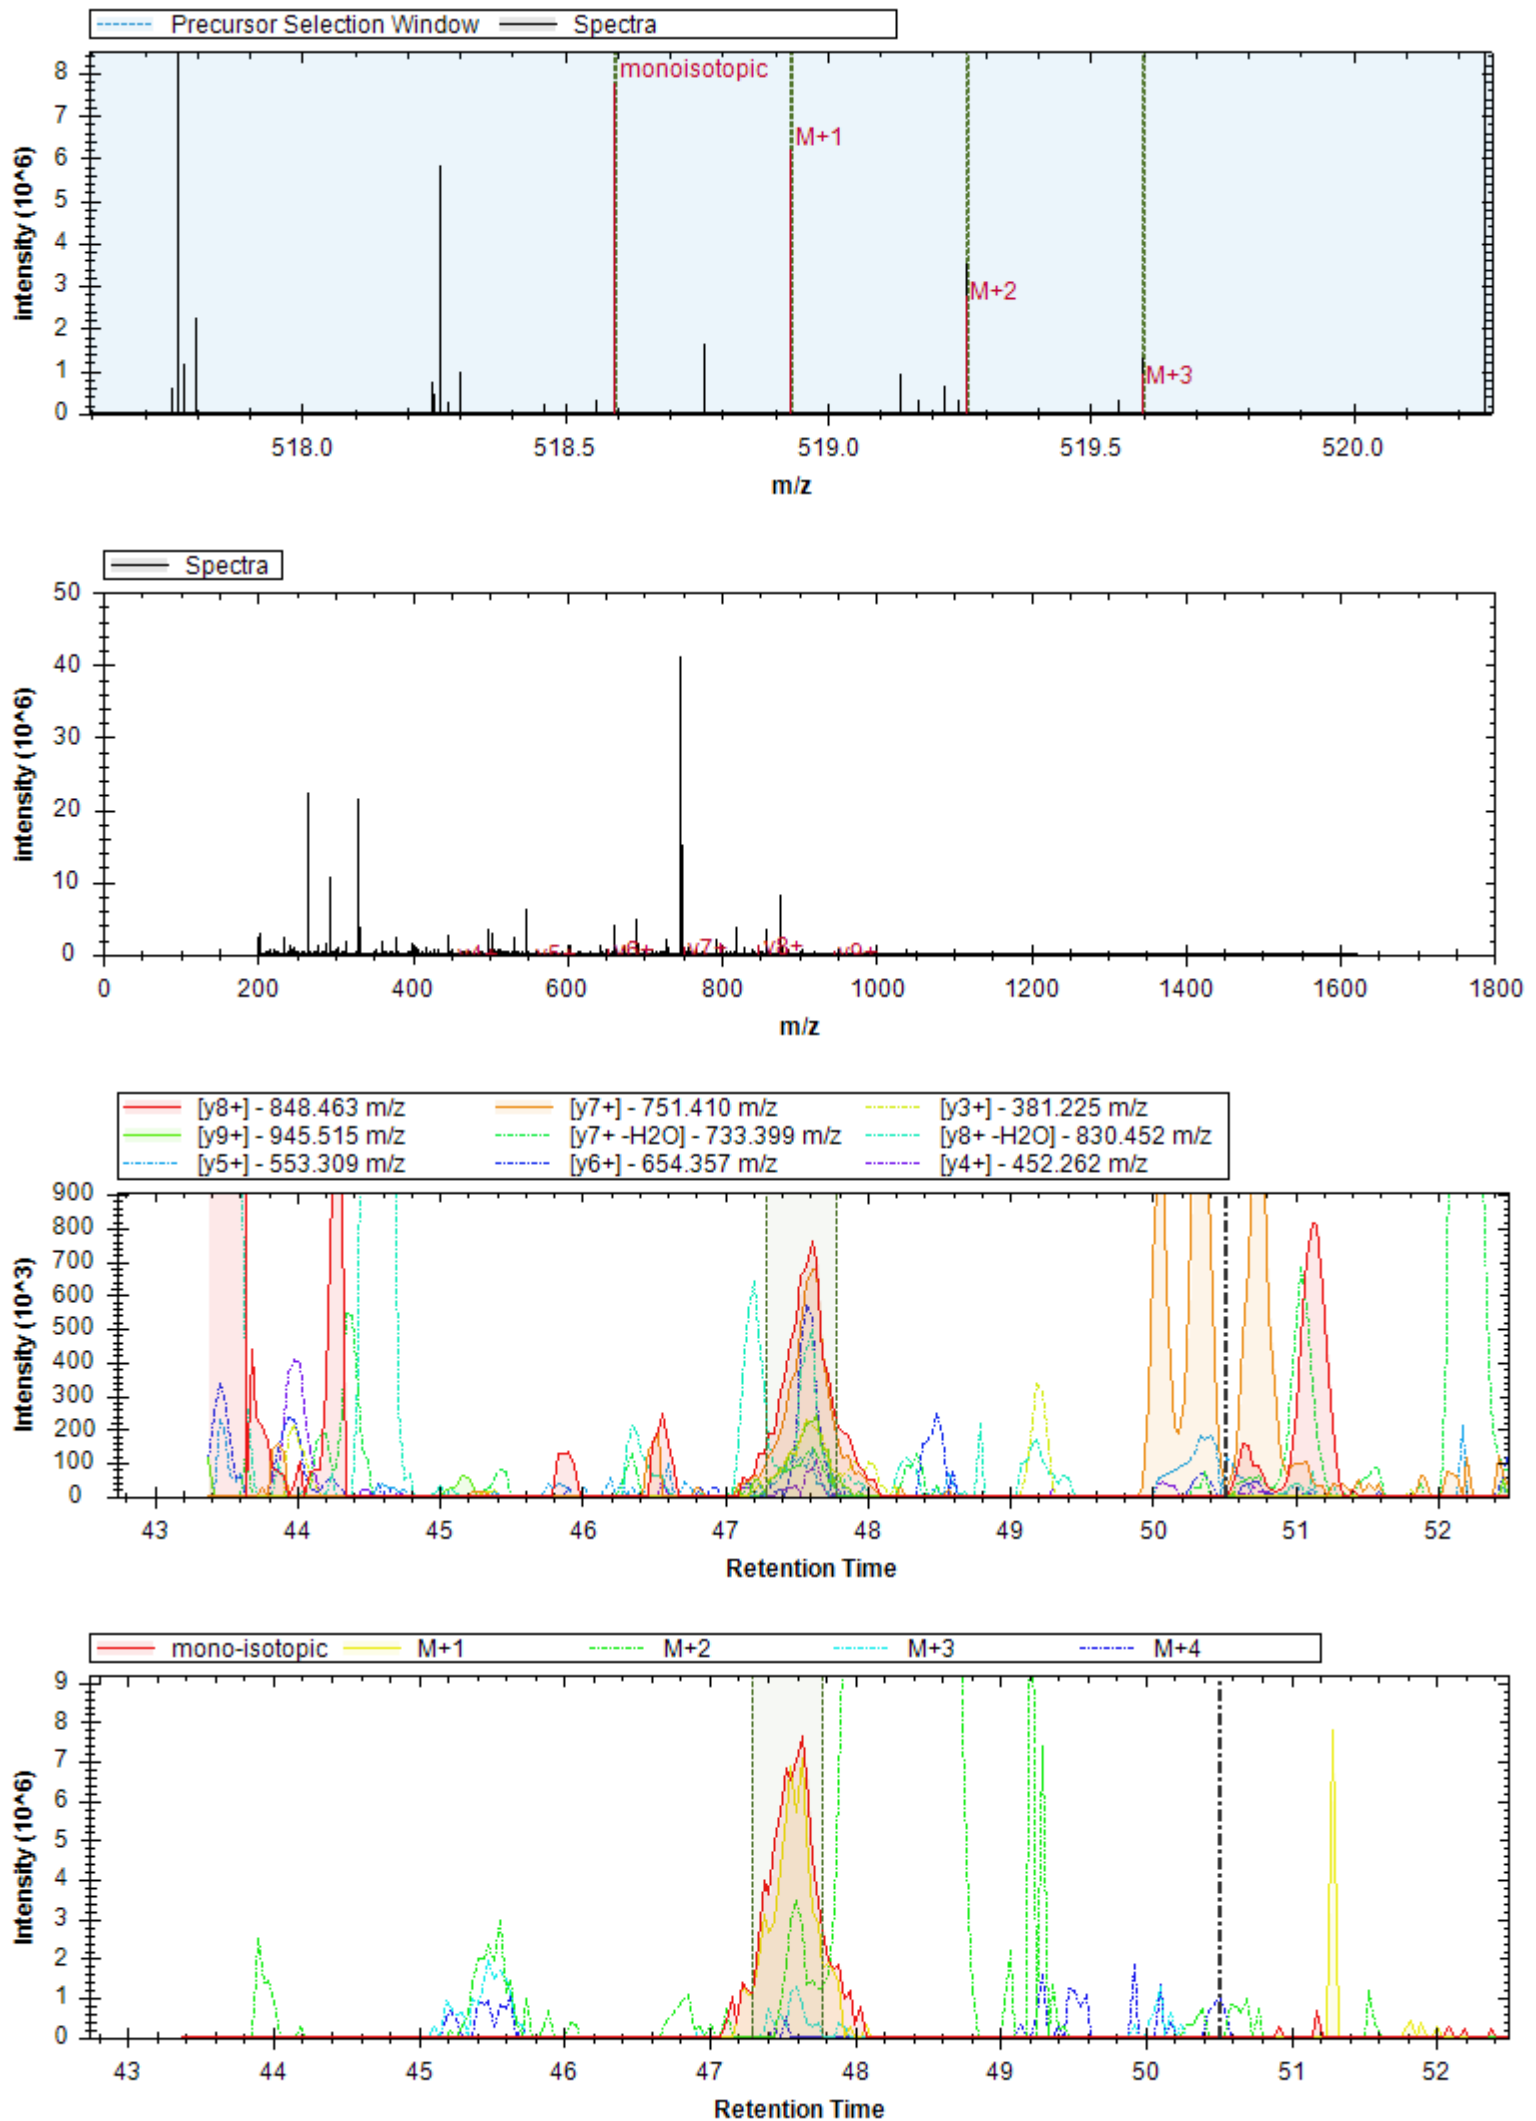



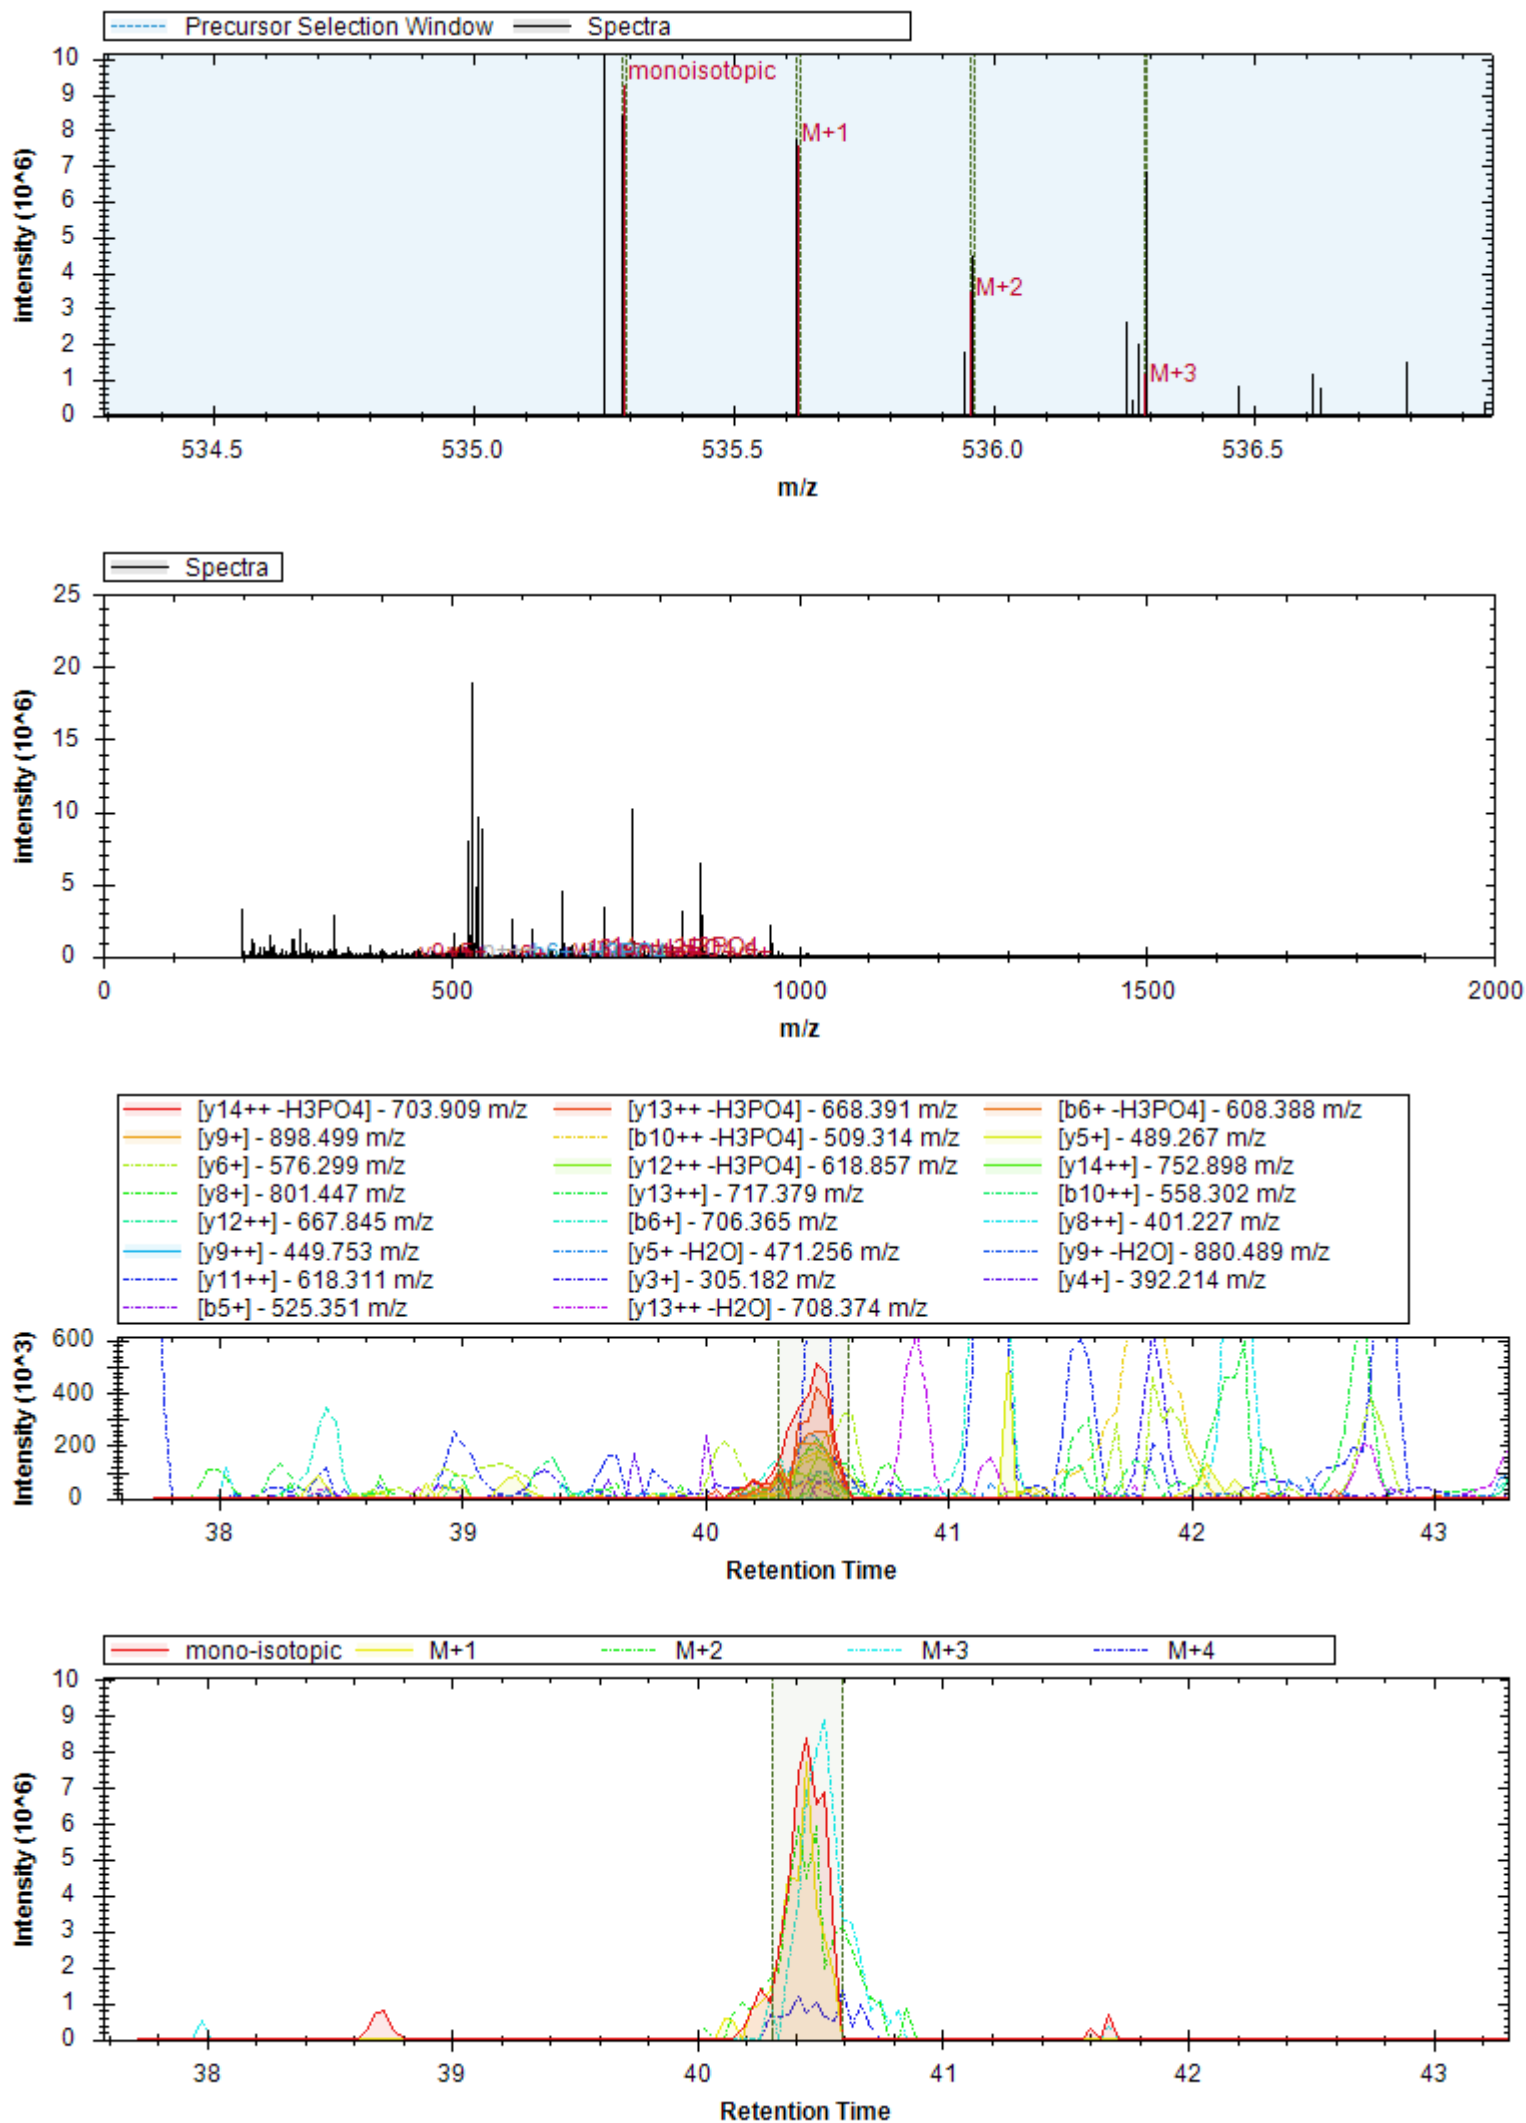

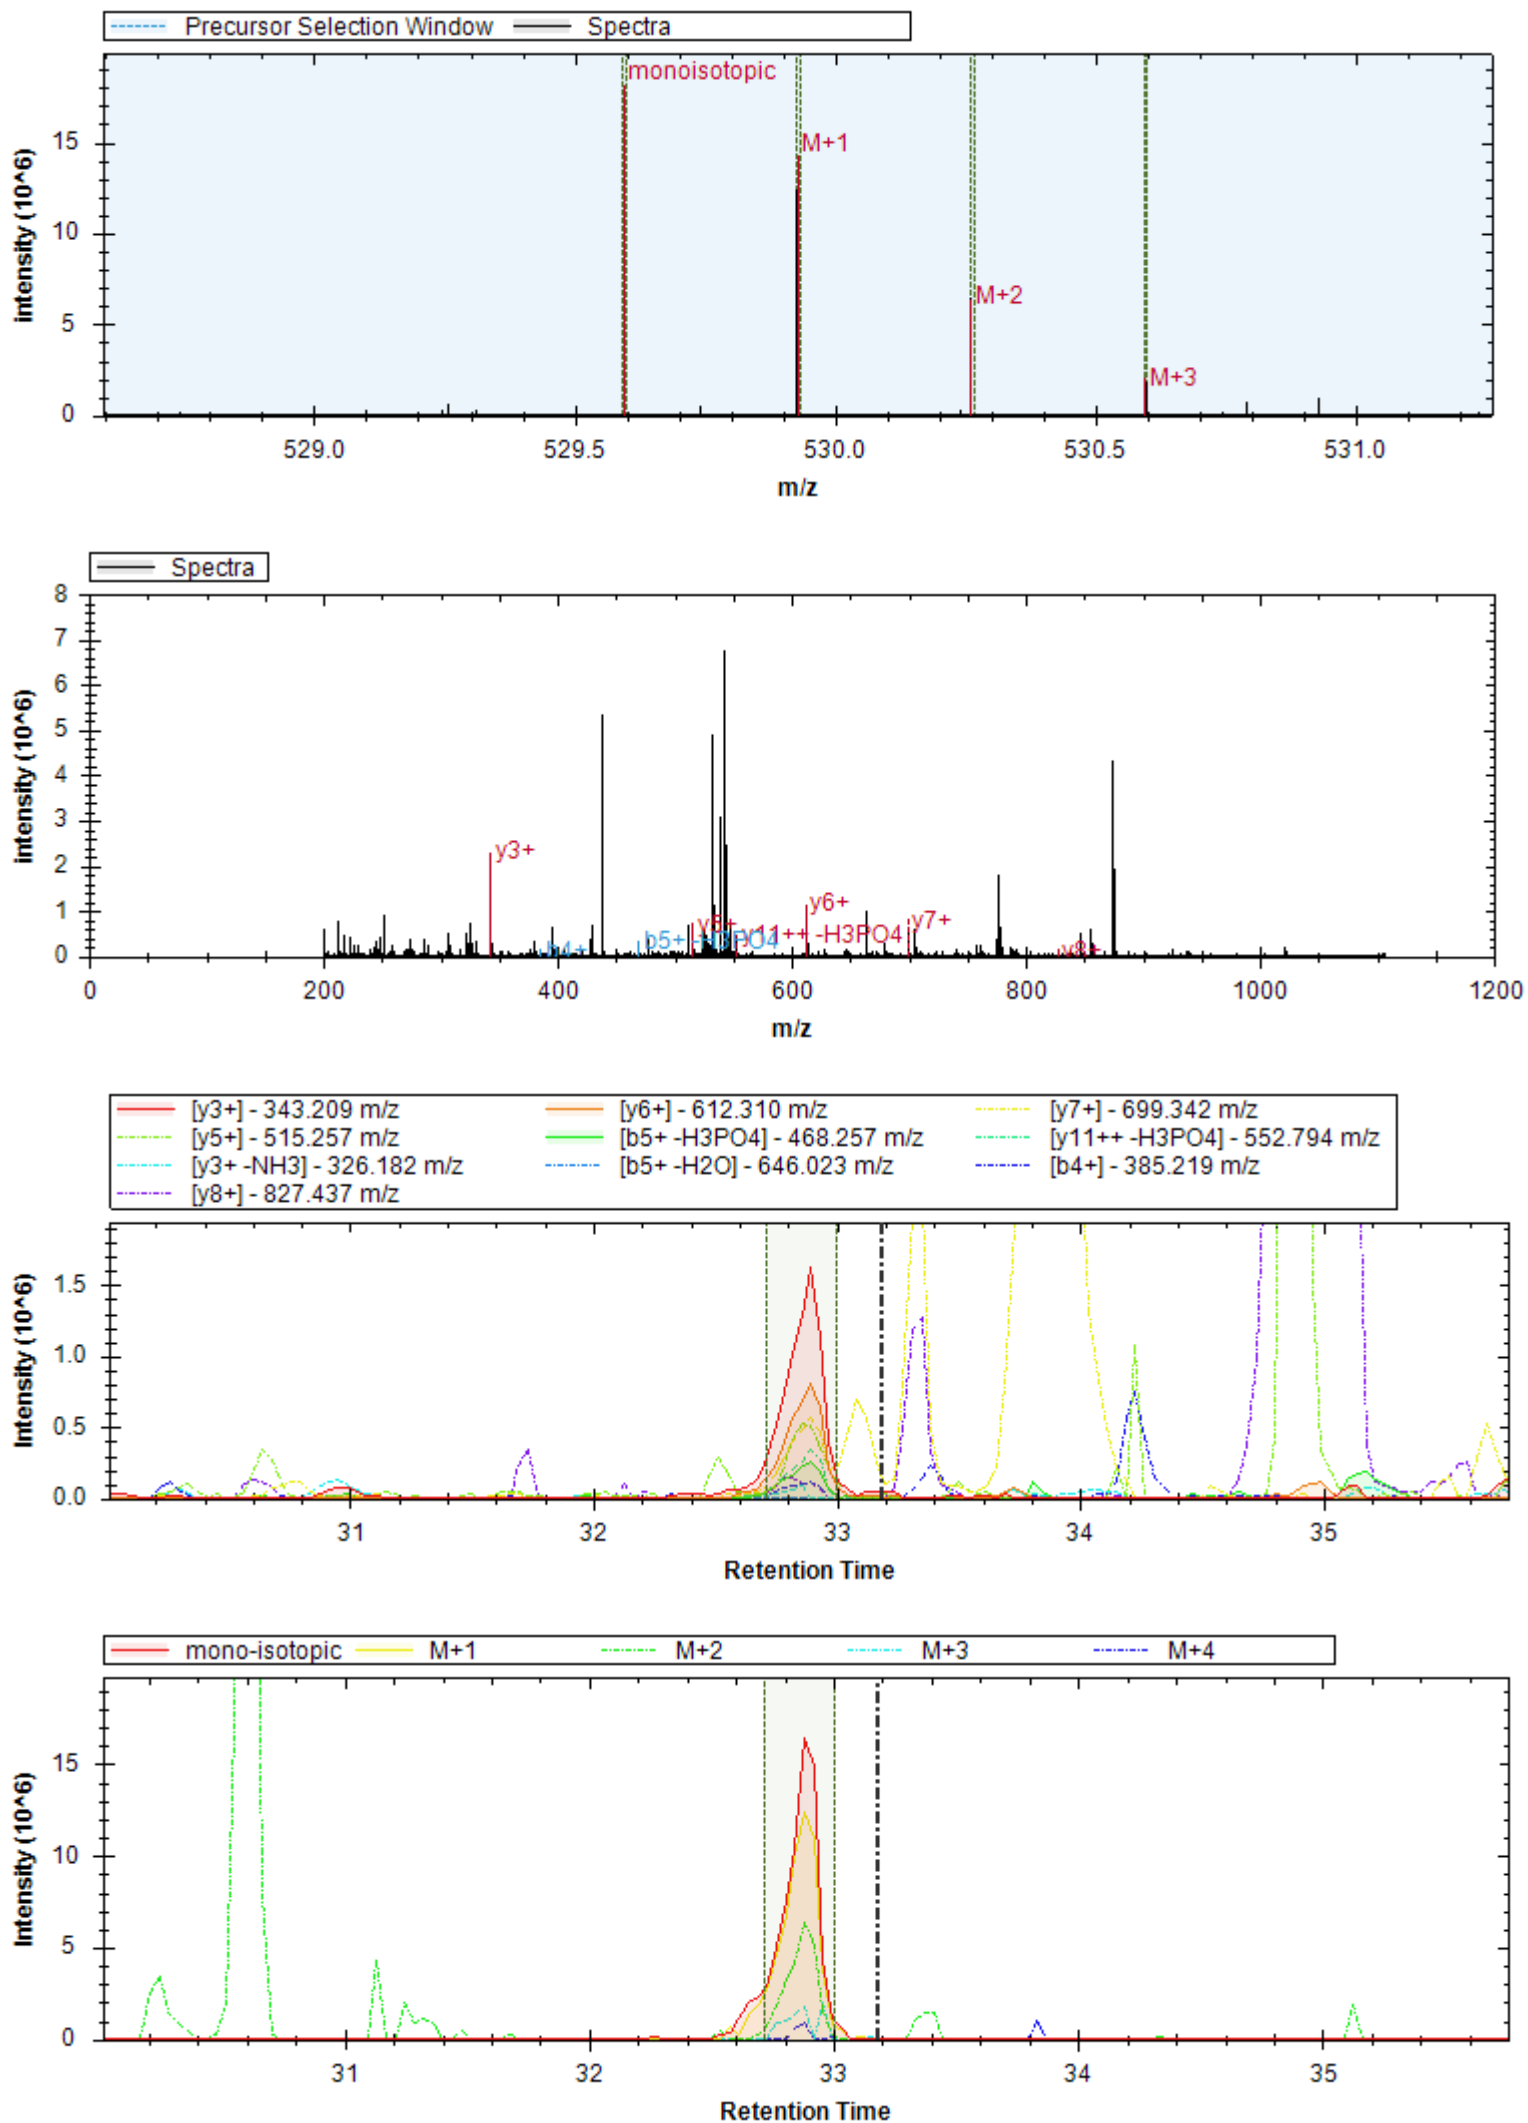

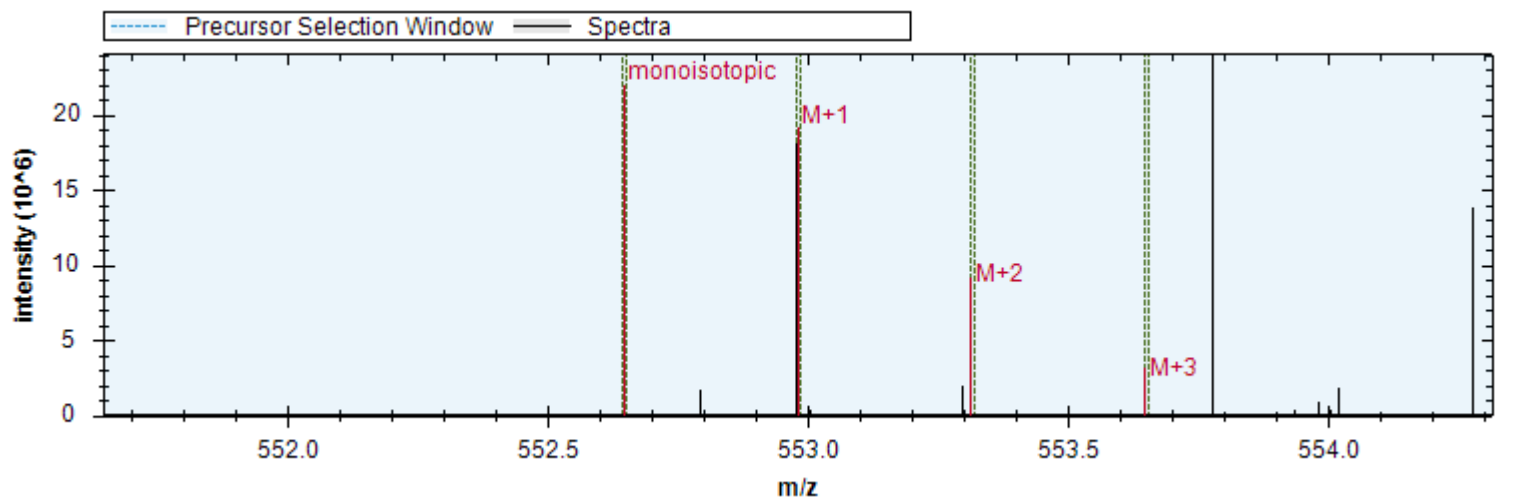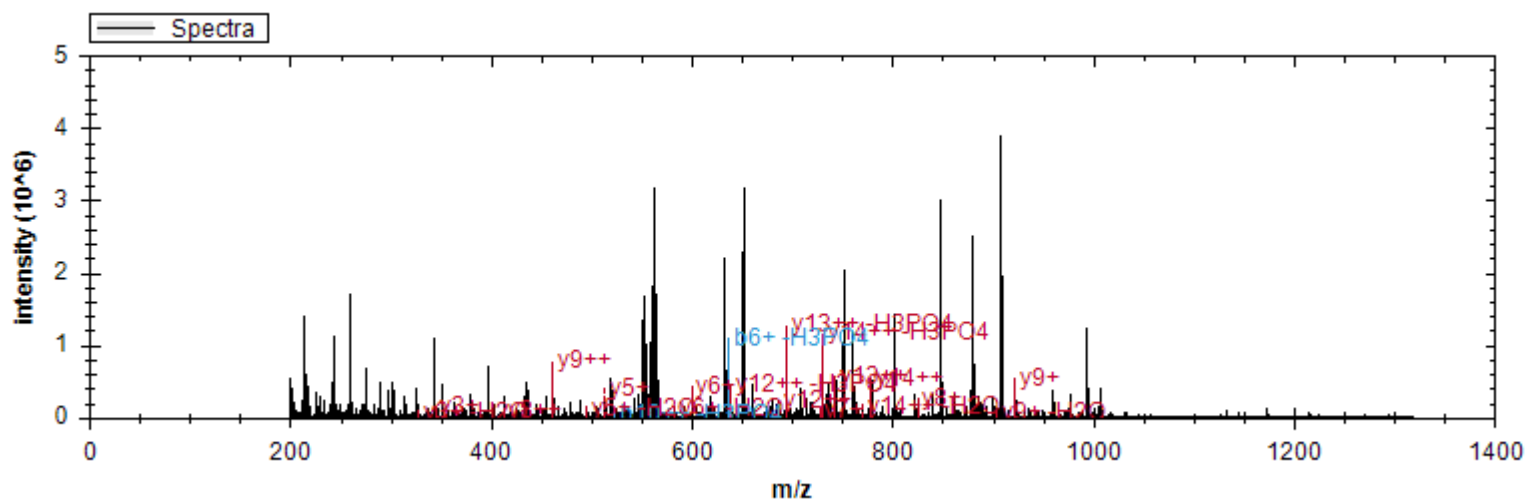

- |                              |                              |                              |
|------------------------------|------------------------------|------------------------------|
| [b6+ -H3PO4] - 636.419 m/z   | [y14++ -H3PO4] - 729.943 m/z | [y13++ -H3PO4] - 694.425 m/z |
| [y9++] - 461.772 m/z         | [y9+] - 922.536 m/z          | [y5+] - 513.303 m/z          |
| [y12++ -H3PO4] - 637.883 m/z | [y6+] - 600.335 m/z          | [y10++] - 552.278 m/z        |
| [y14++] - 778.932 m/z        | [y13++] - 743.413 m/z        | [b6+] - 734.396 m/z          |
| [y8+] - 825.483 m/z          | [y6+ -H2O] - 582.325 m/z     | [y3+] - 345.213 m/z          |
| [y9+ -H2O] - 904.525 m/z     | [y5+ -H2O] - 495.293 m/z     | [y7+] - 728.430 m/z          |
| [y12++] - 686.871 m/z        | [y14++ -H2O] - 769.926 m/z   | [y3+ -H2O] - 327.203 m/z     |
| [y8++] - 413.245 m/z         | [b10++] - 572.318 m/z        | [b10++ -H3PO4] - 523.330 m/z |

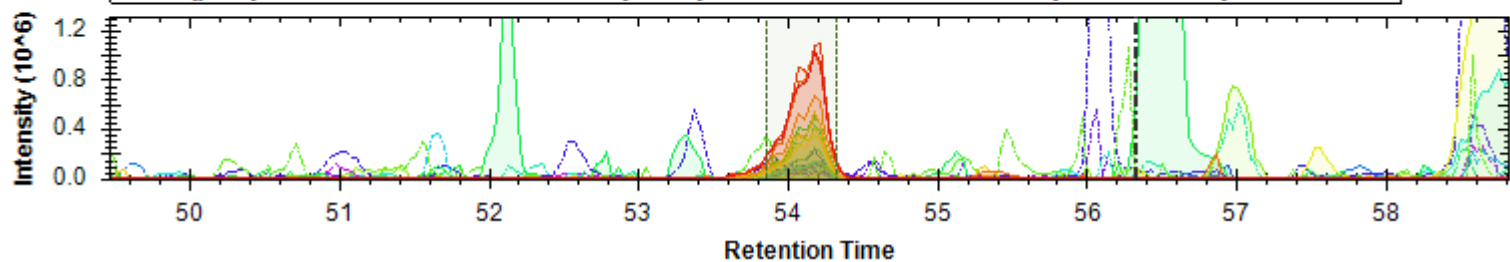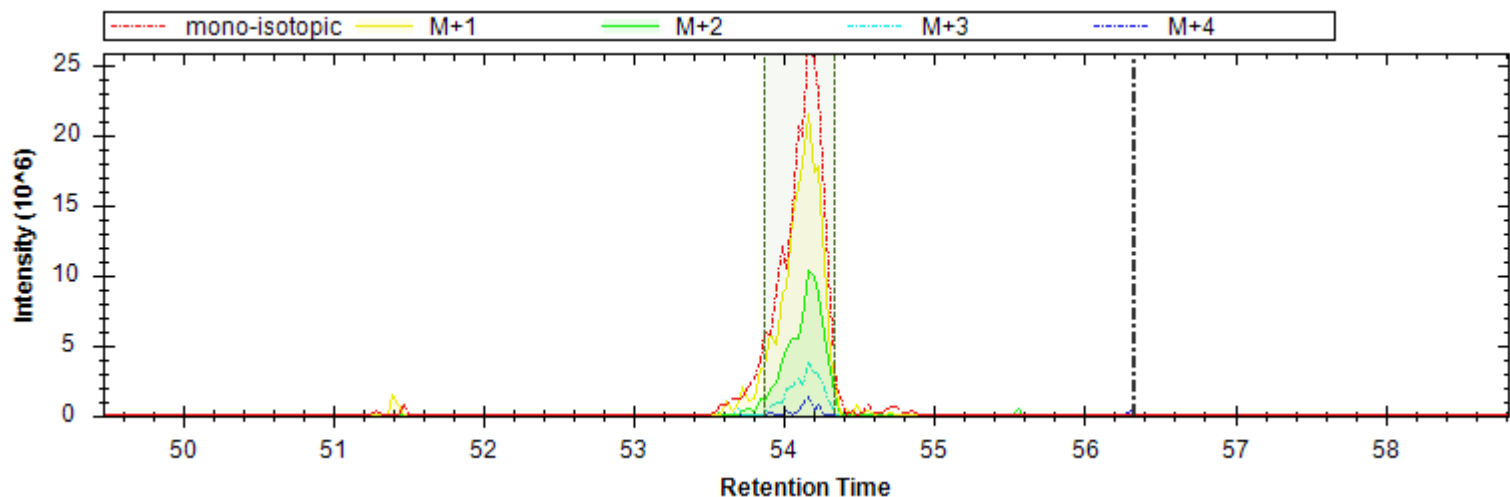

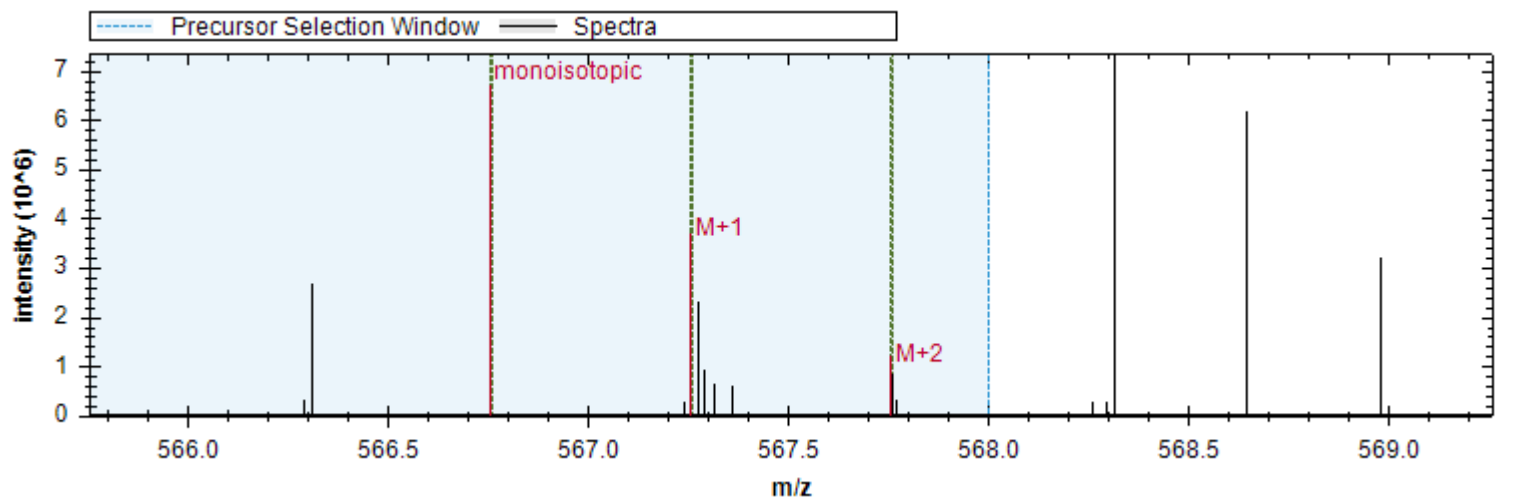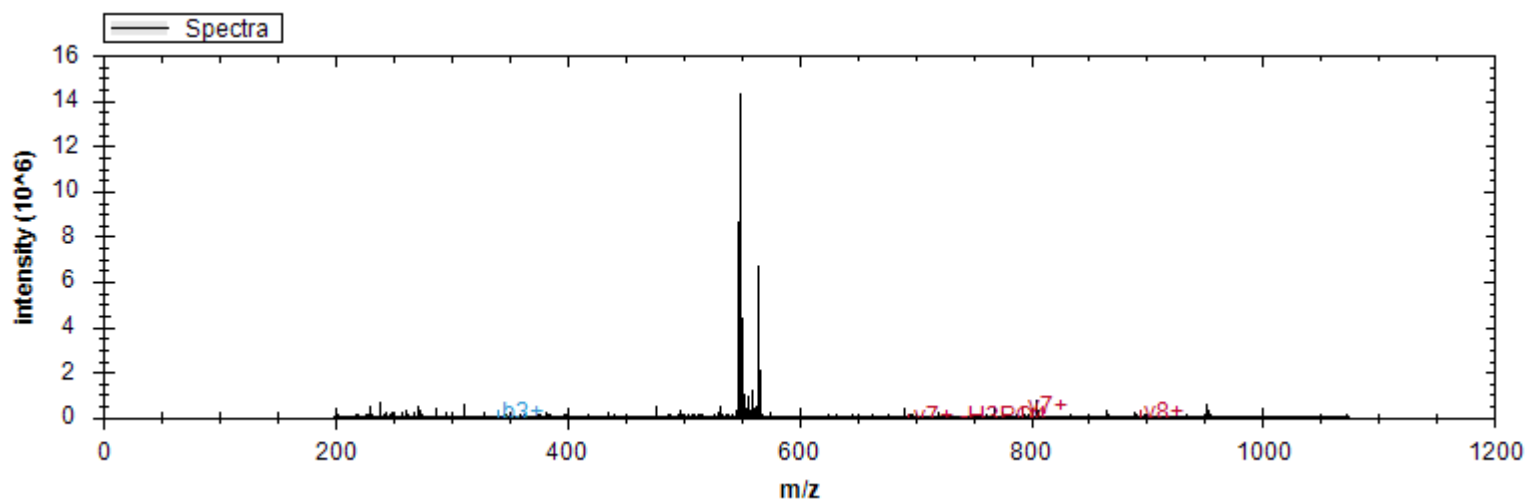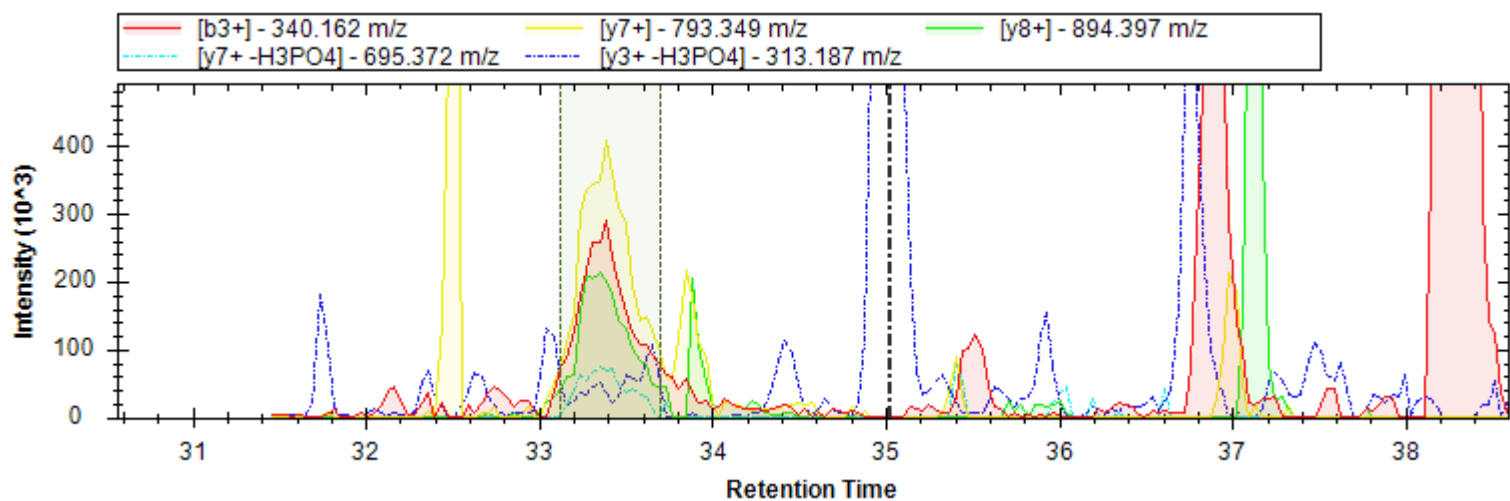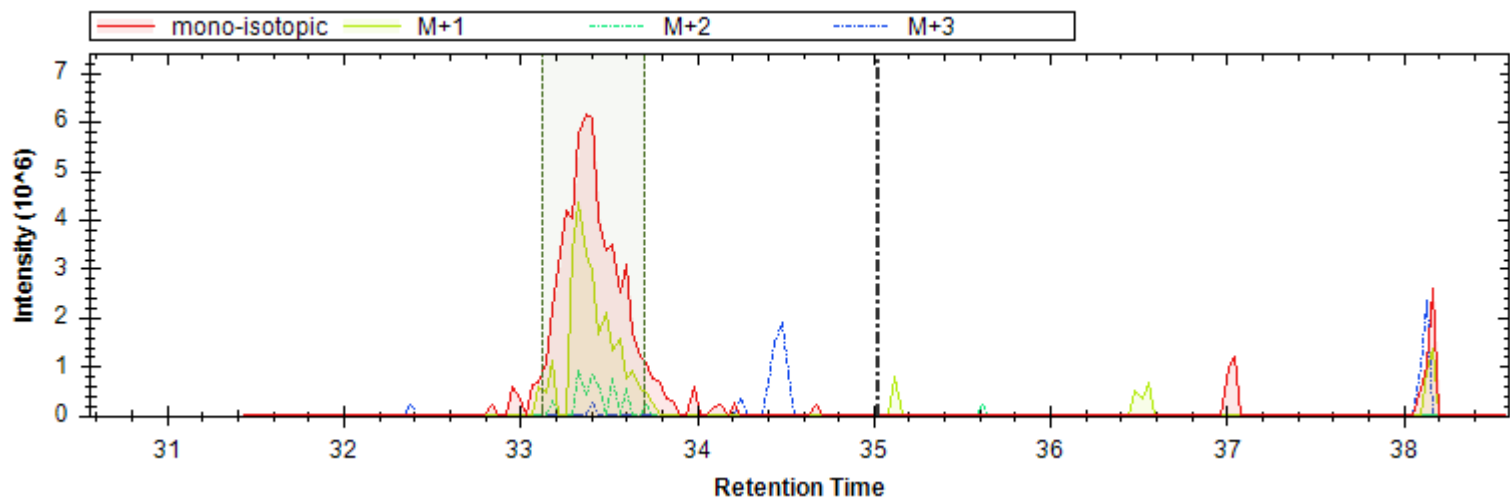

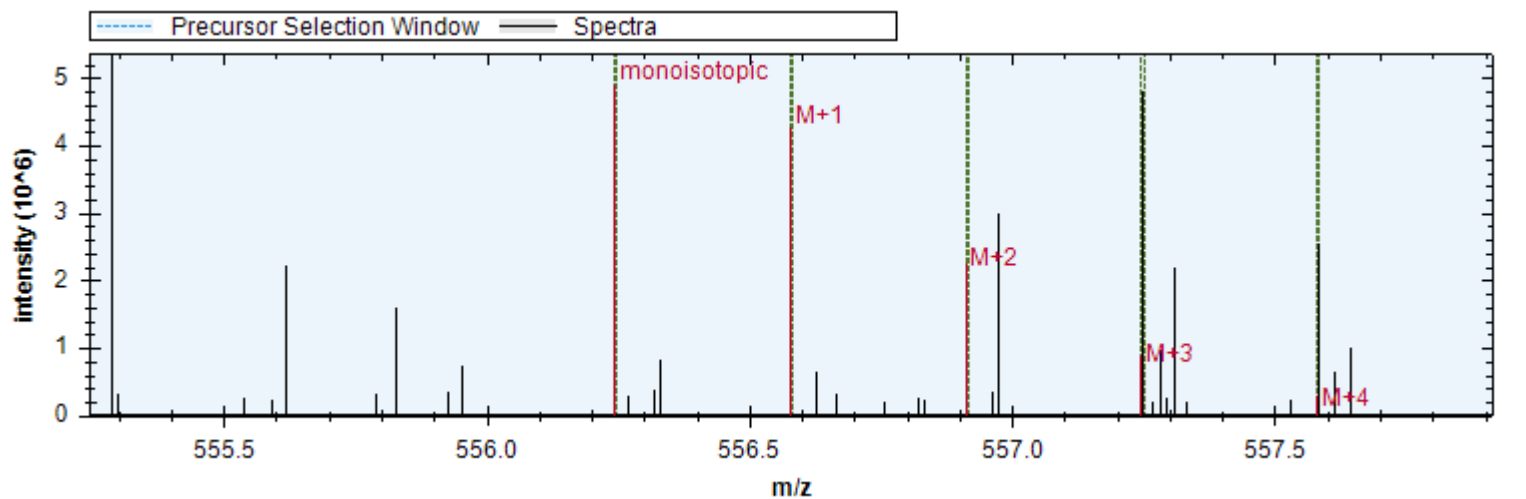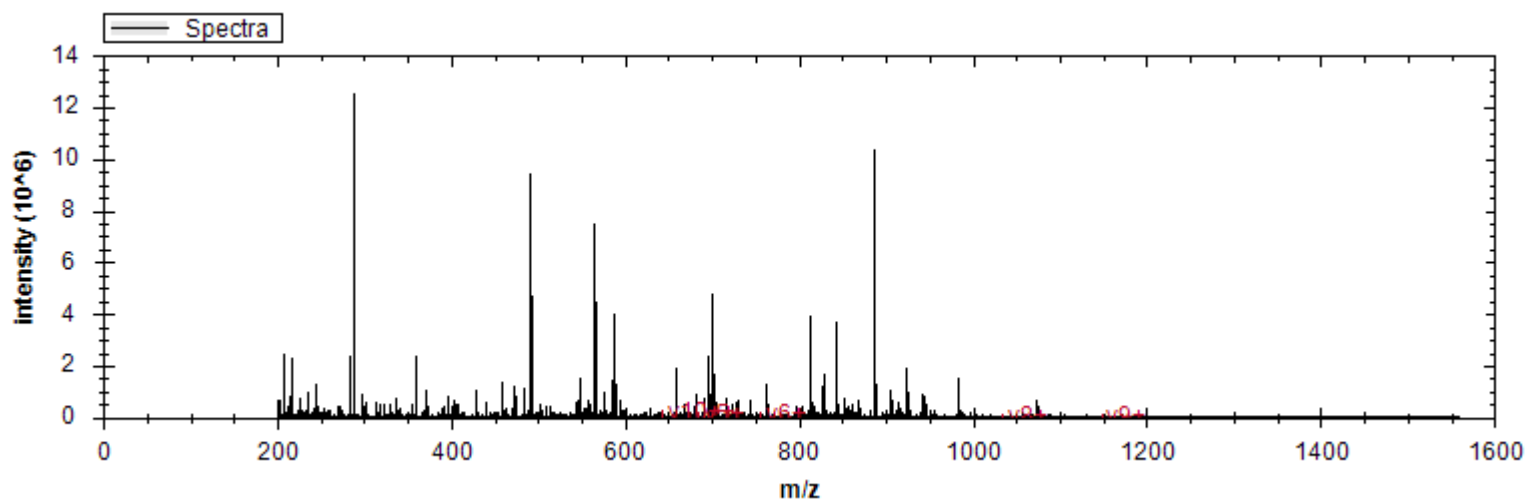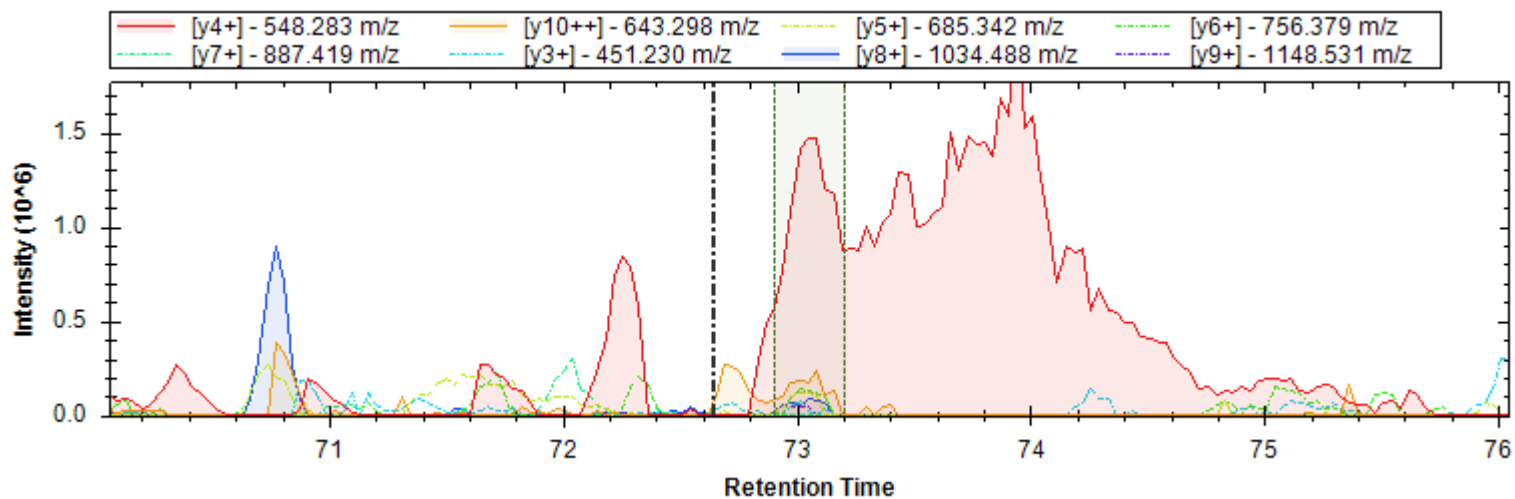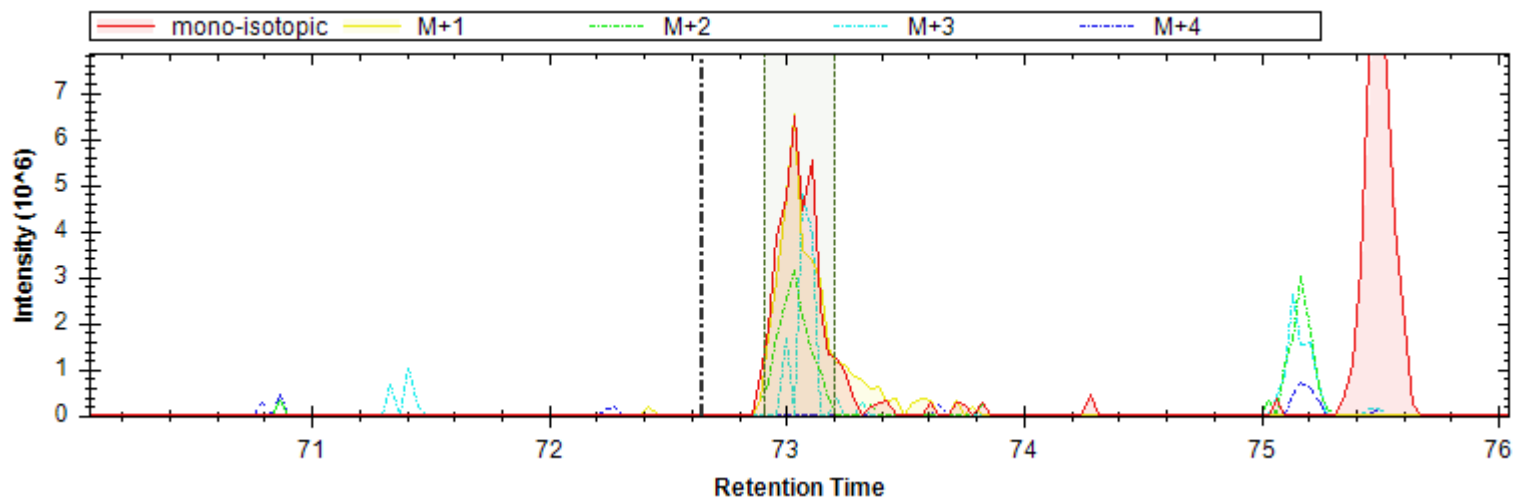

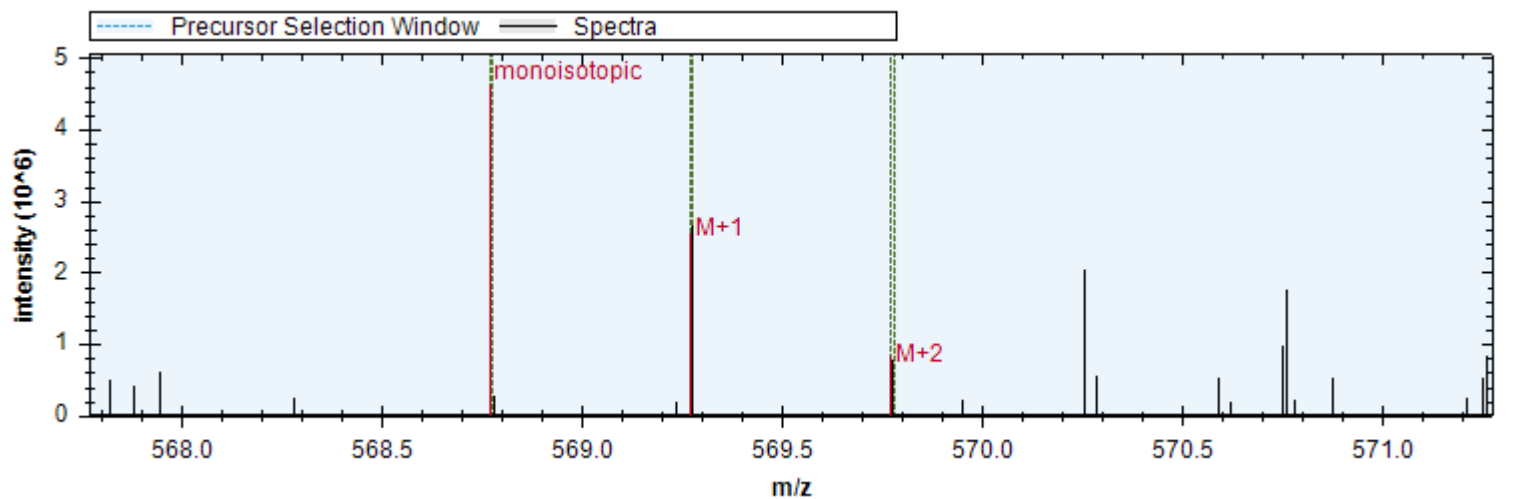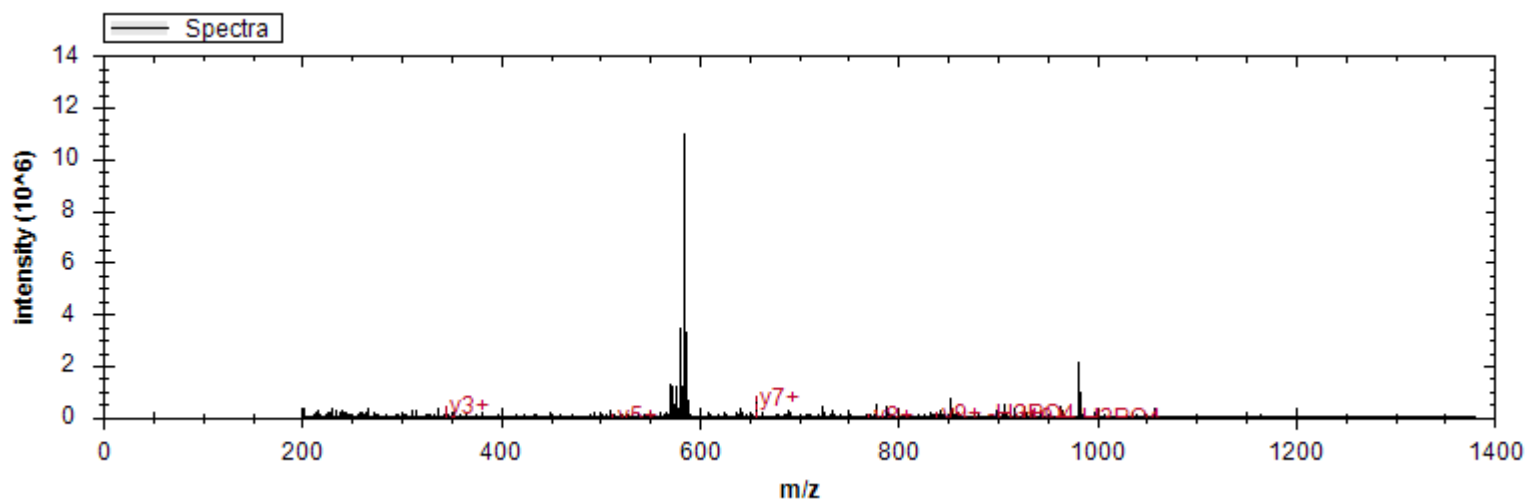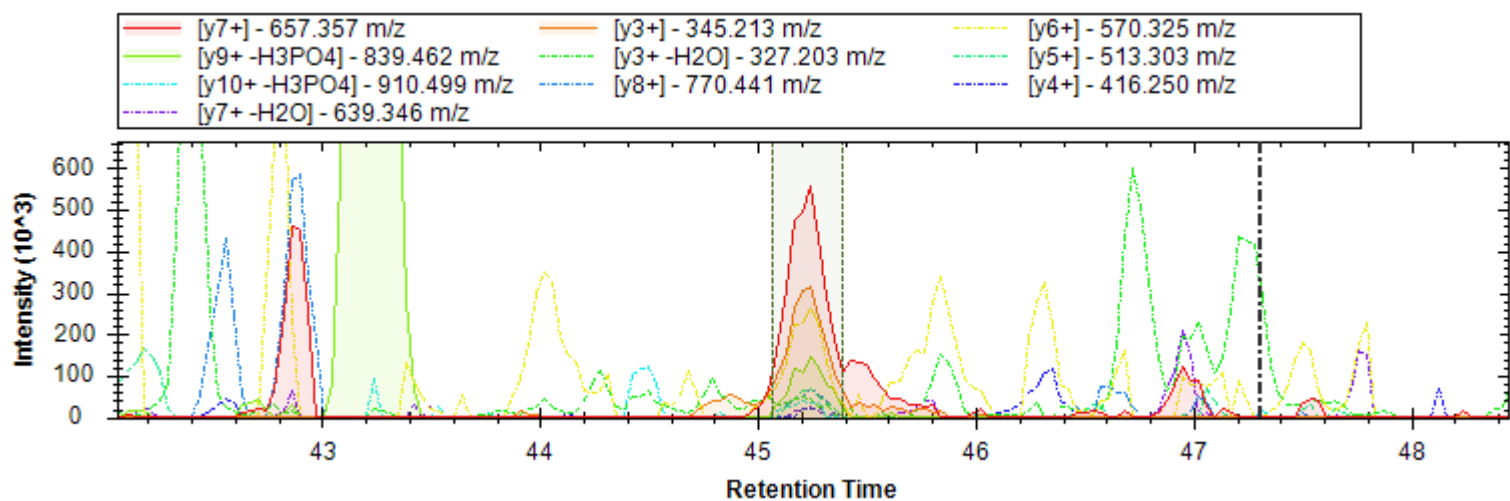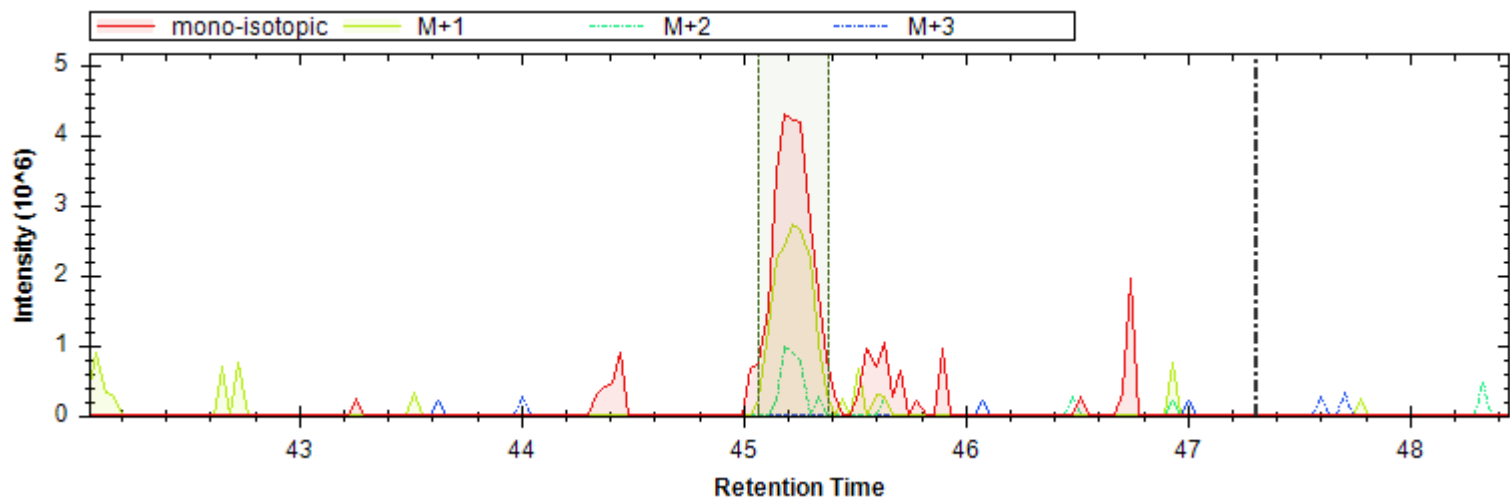

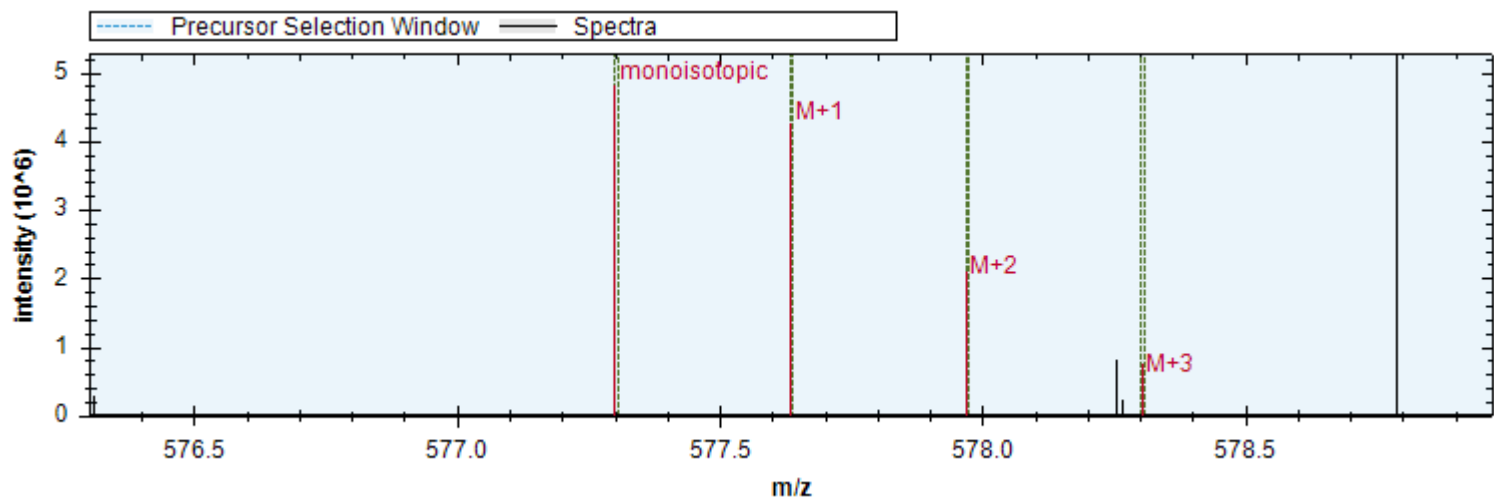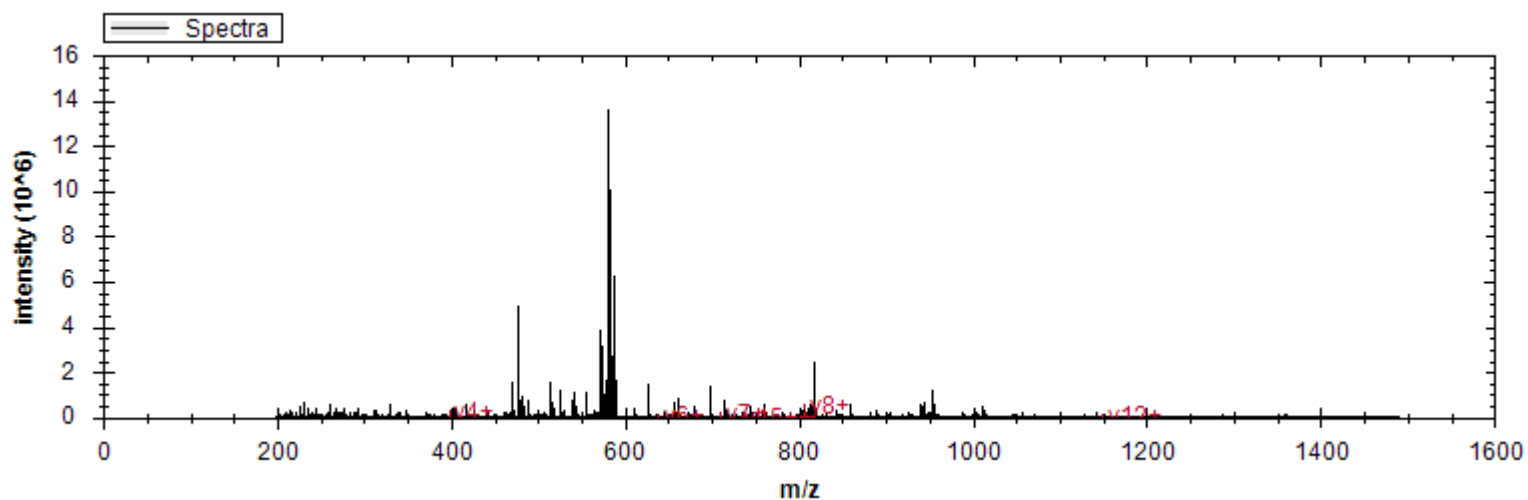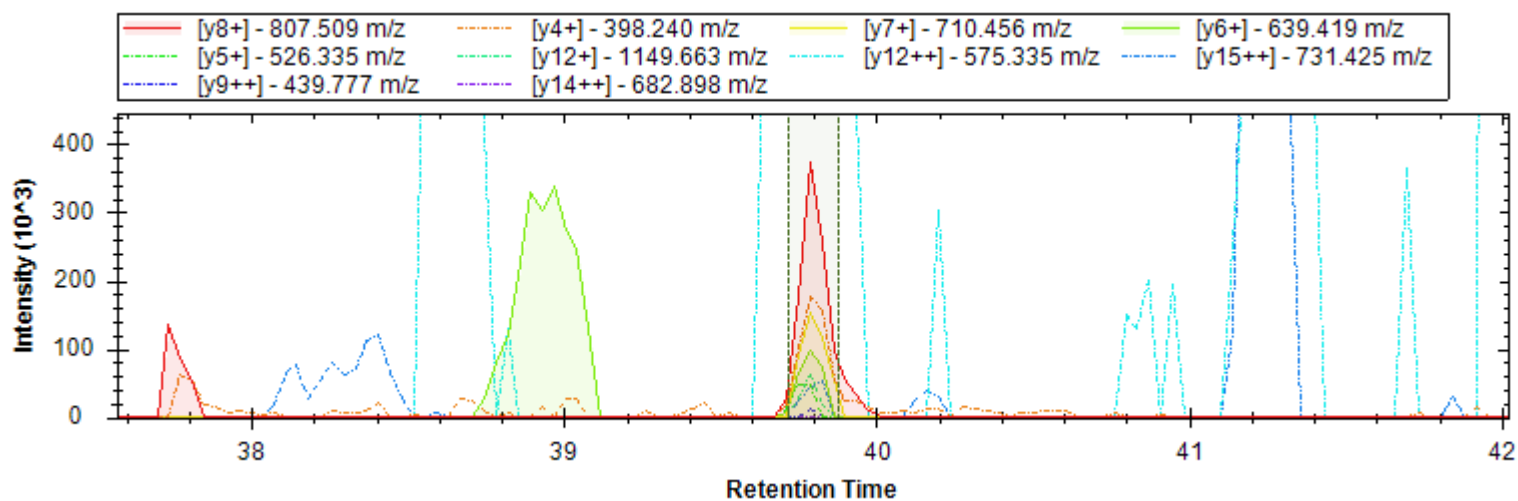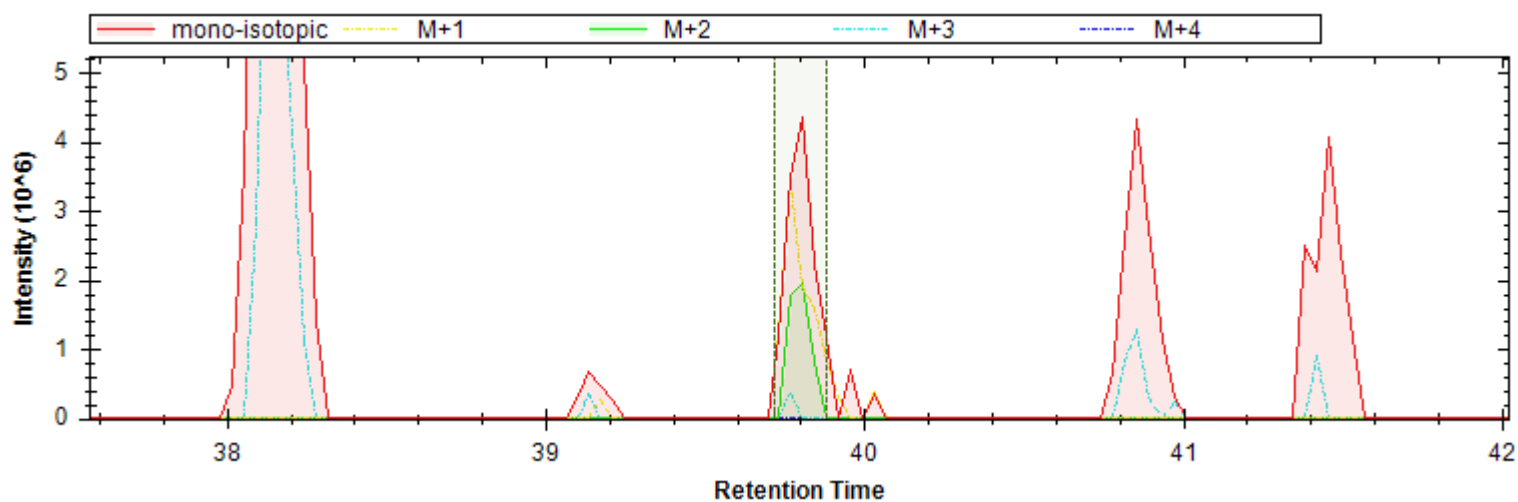

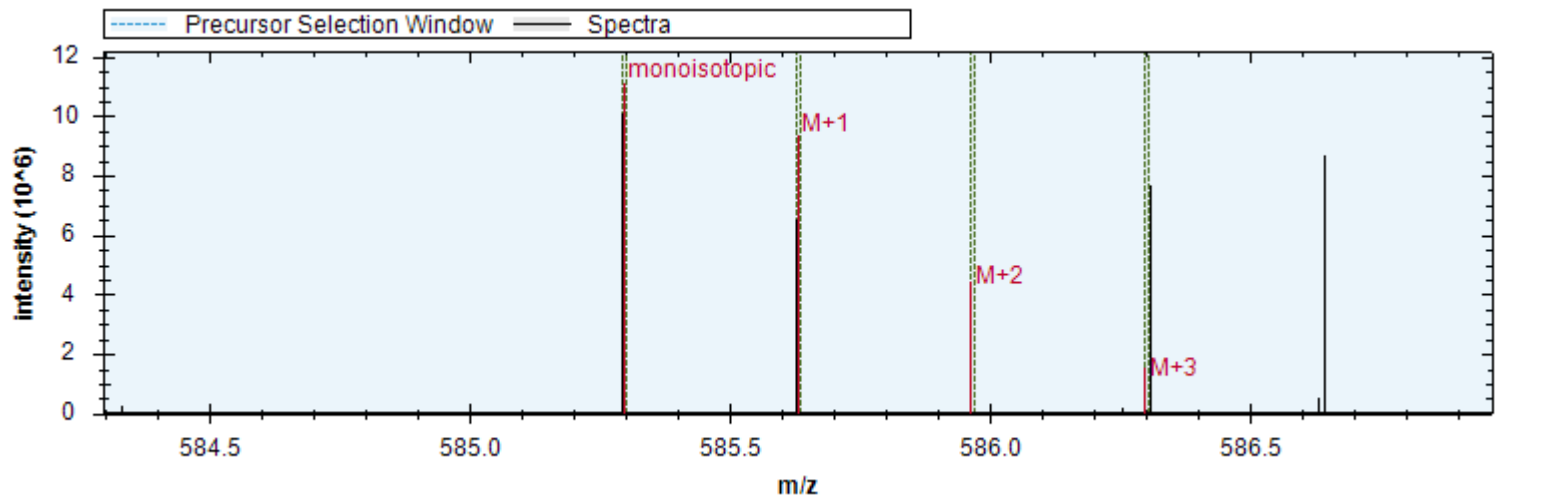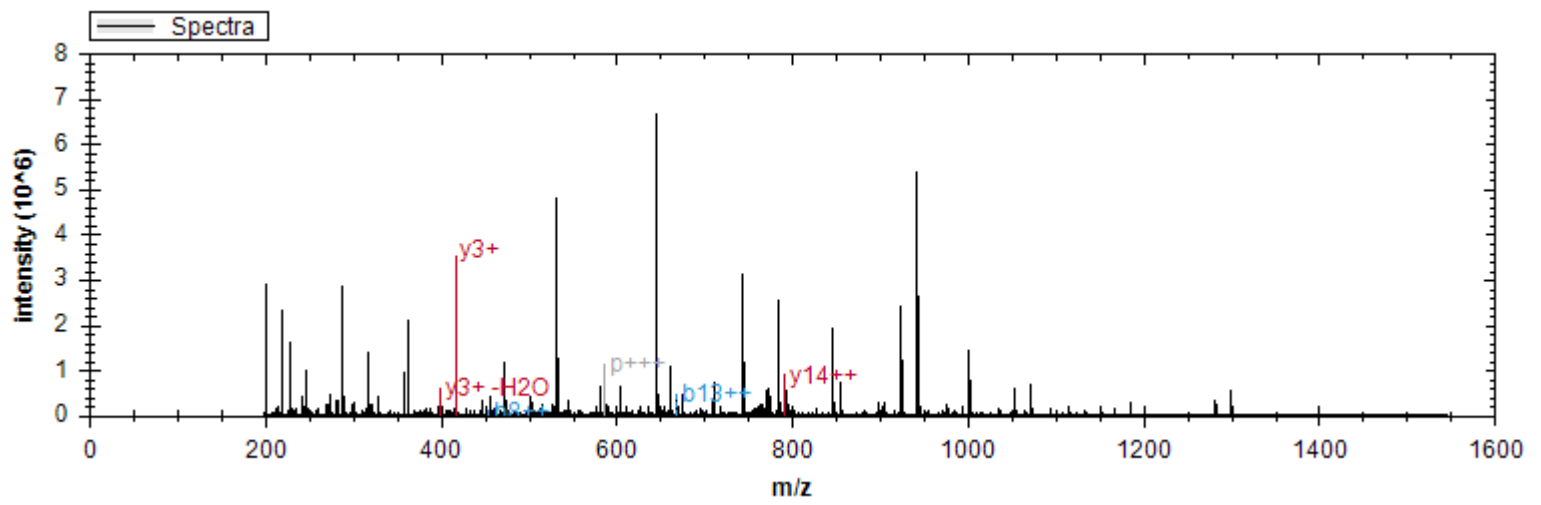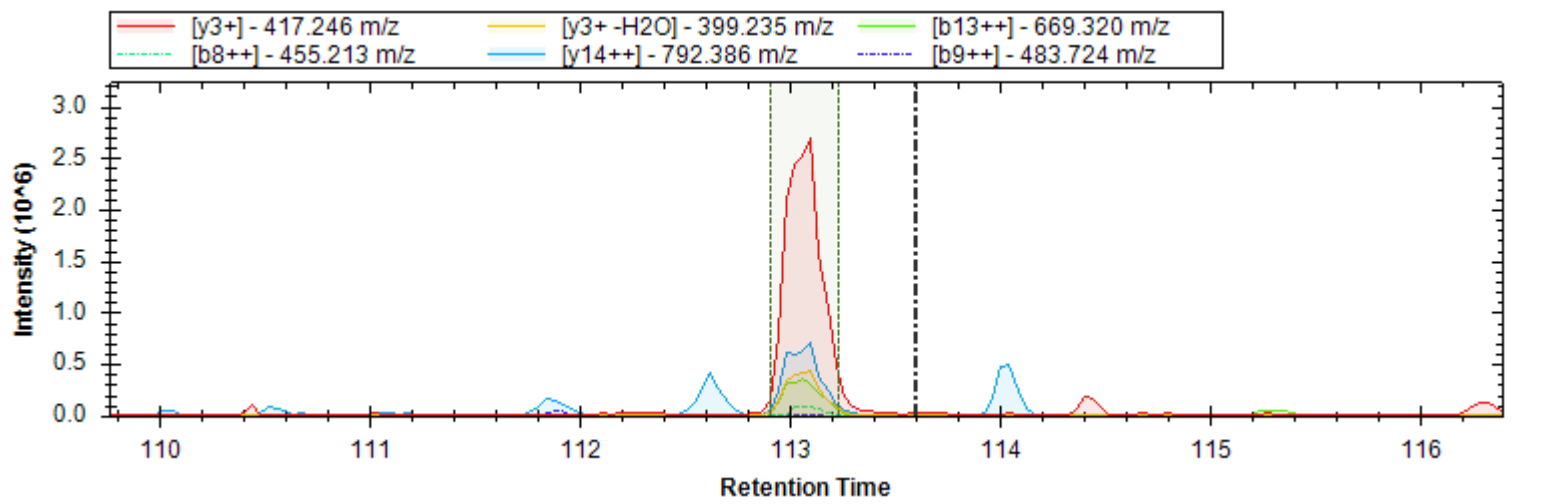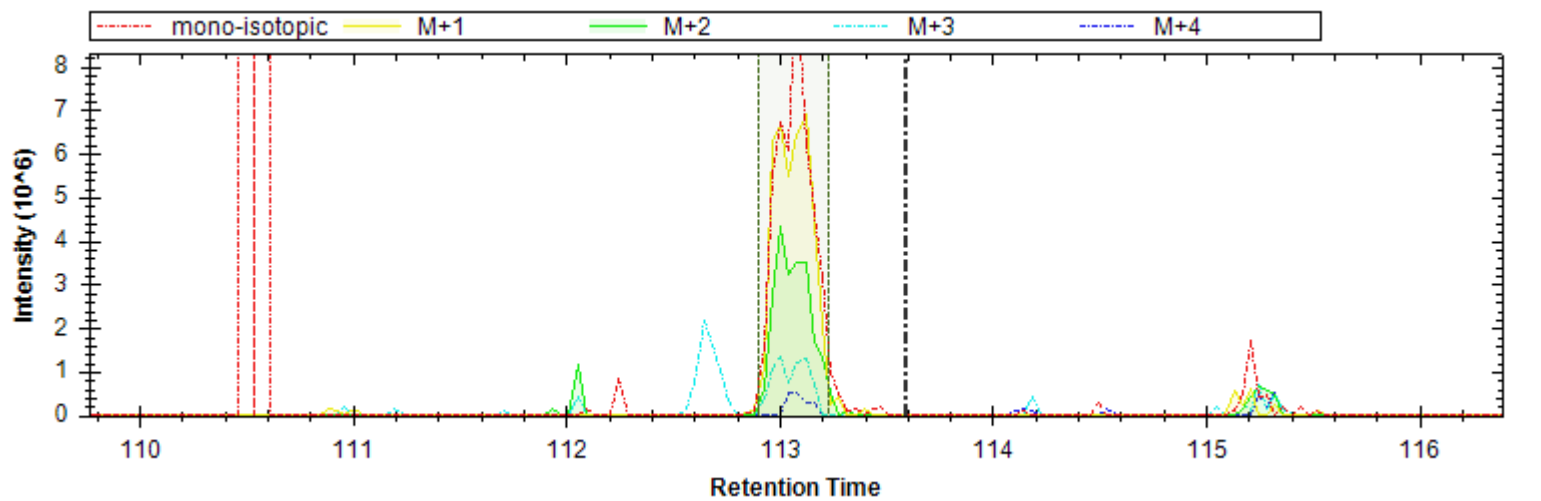



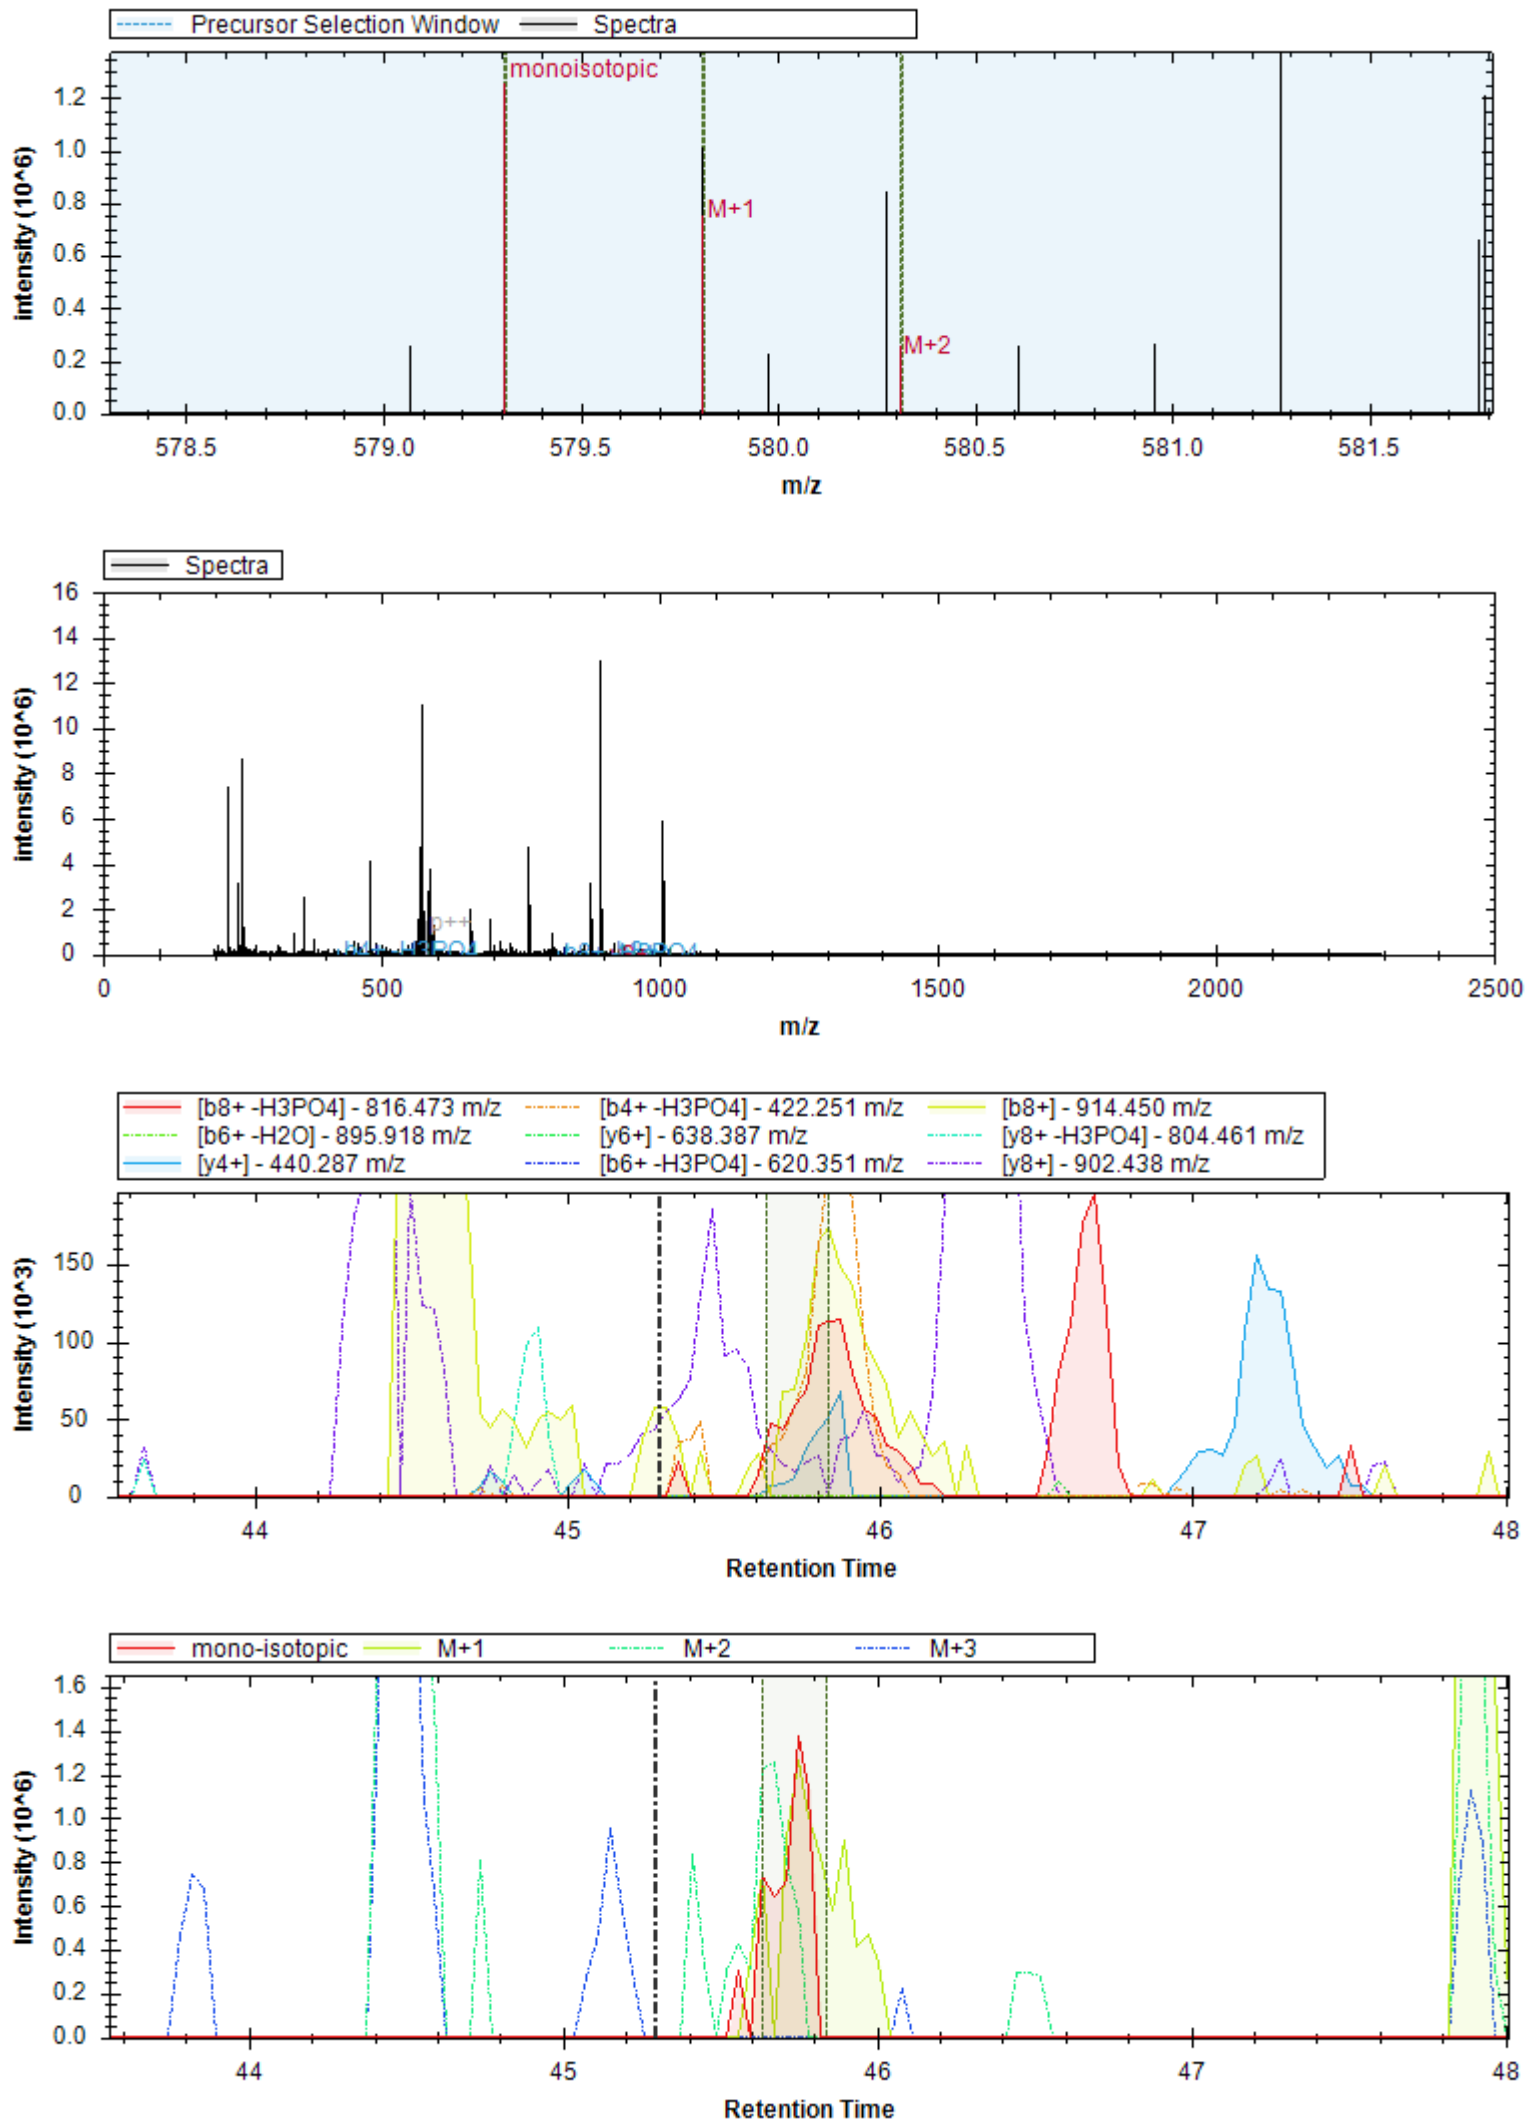

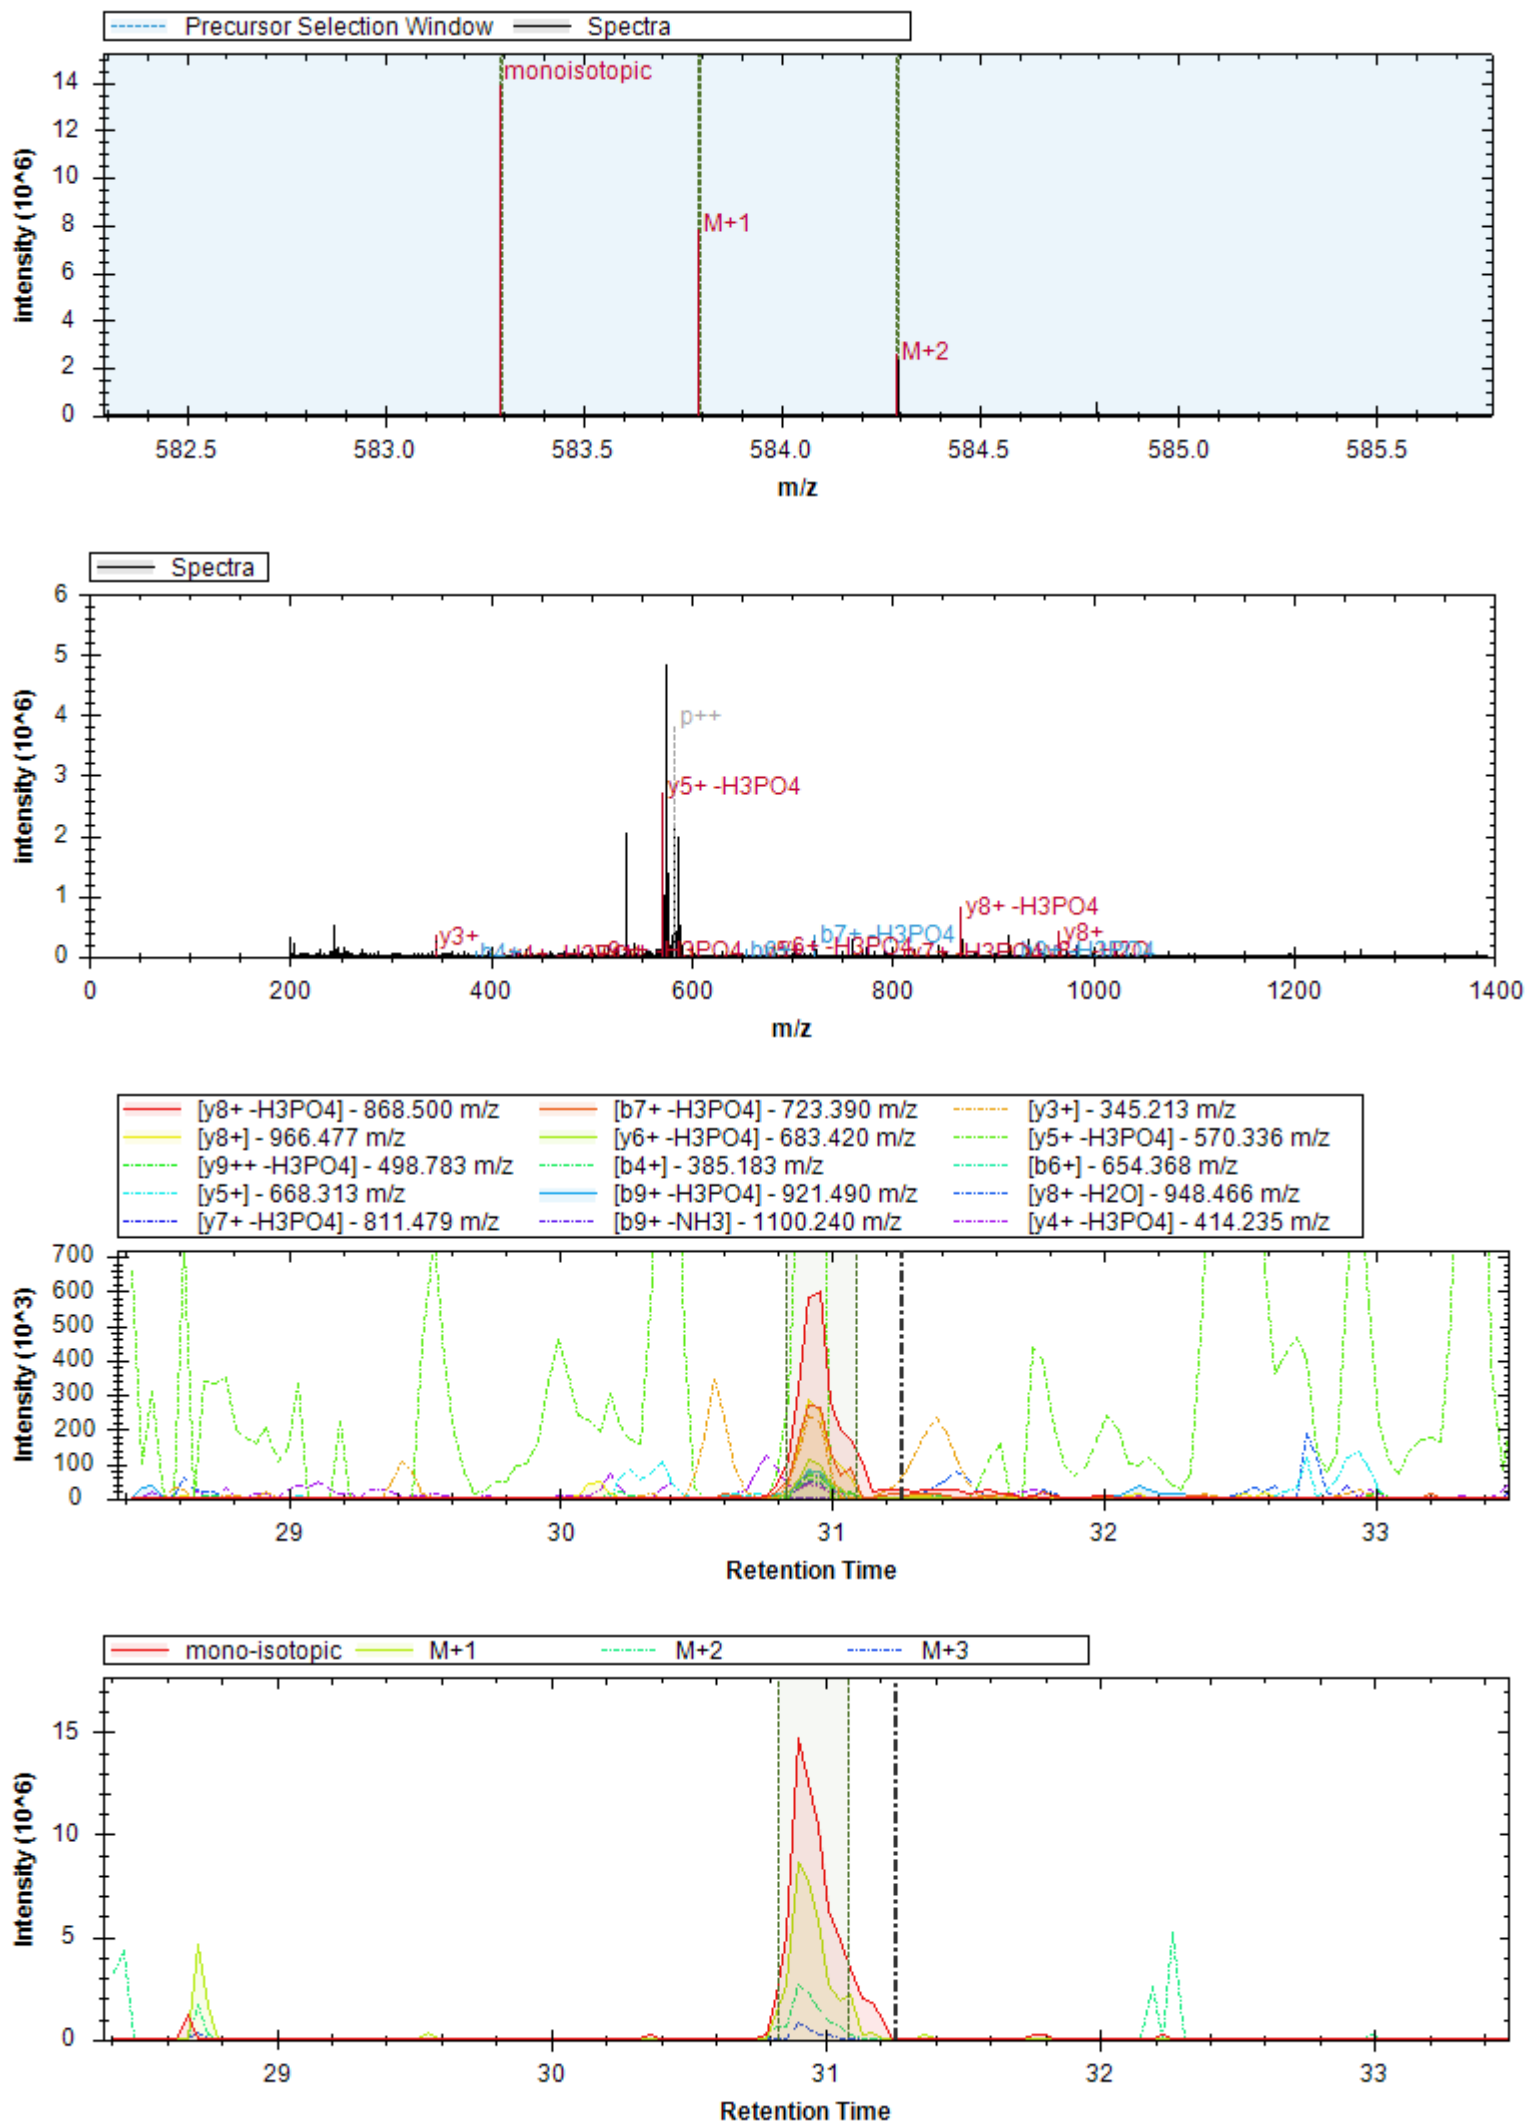

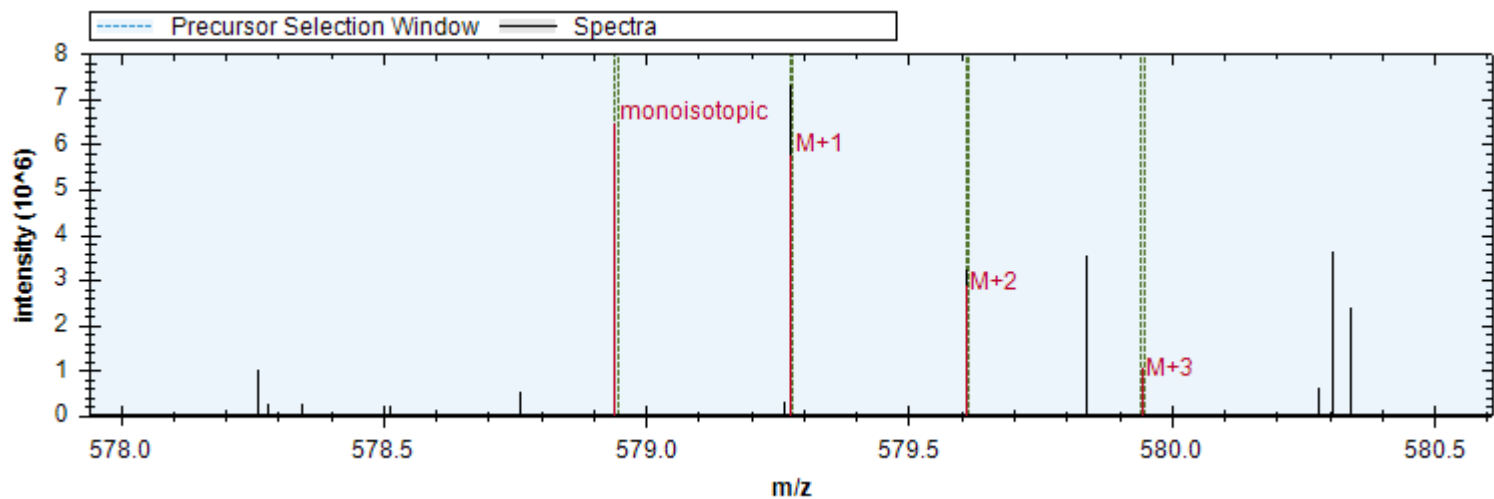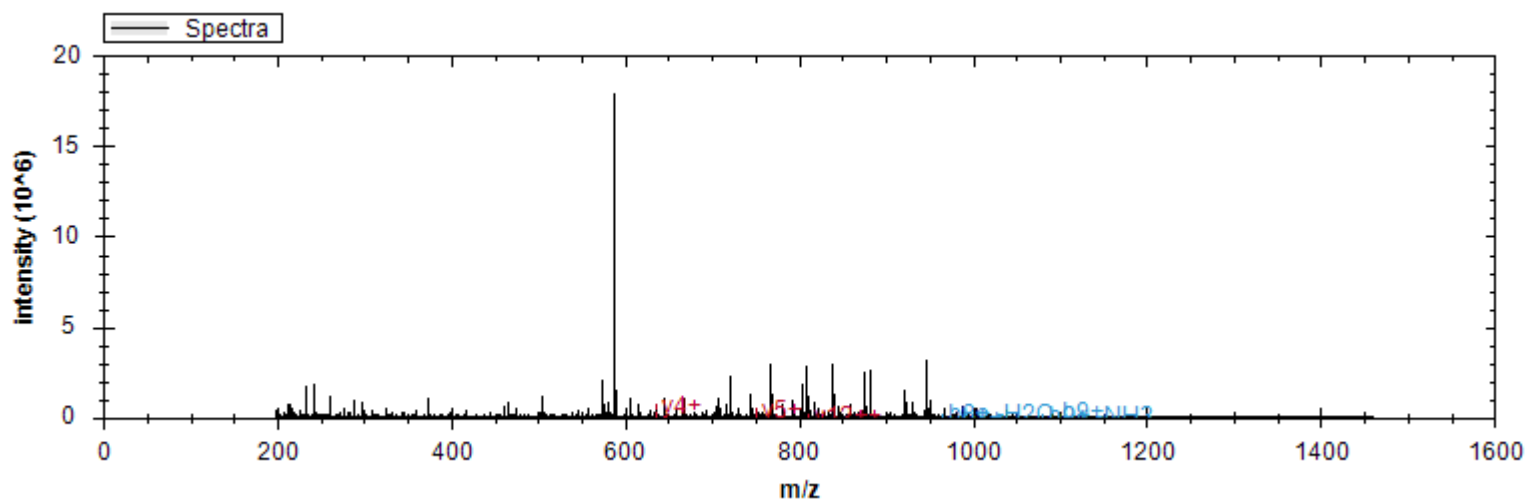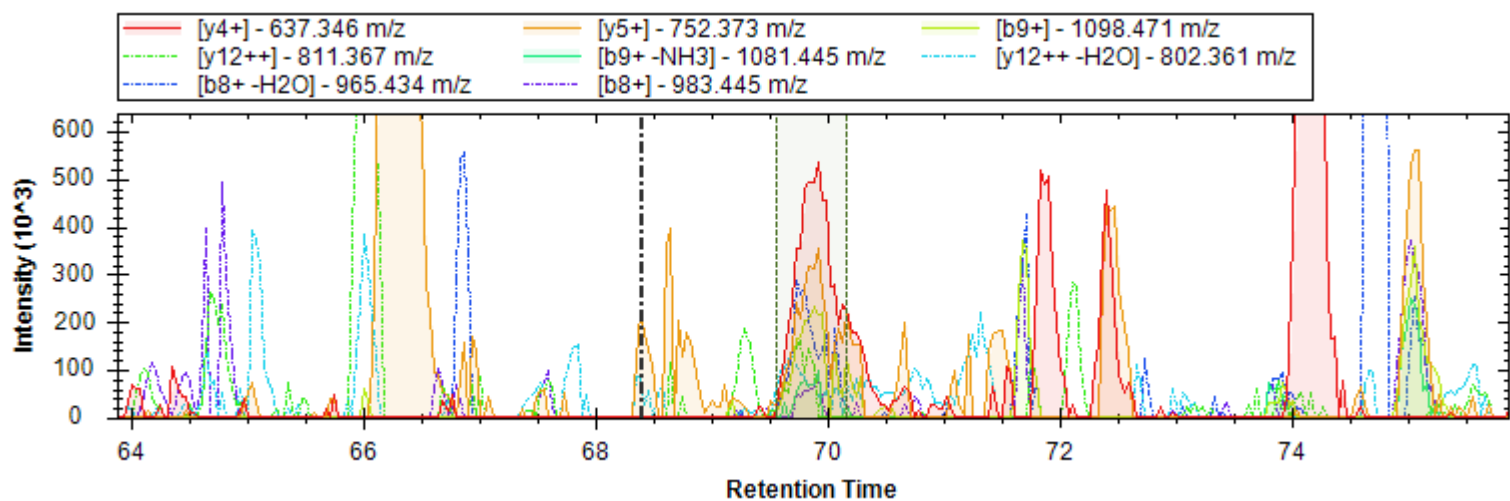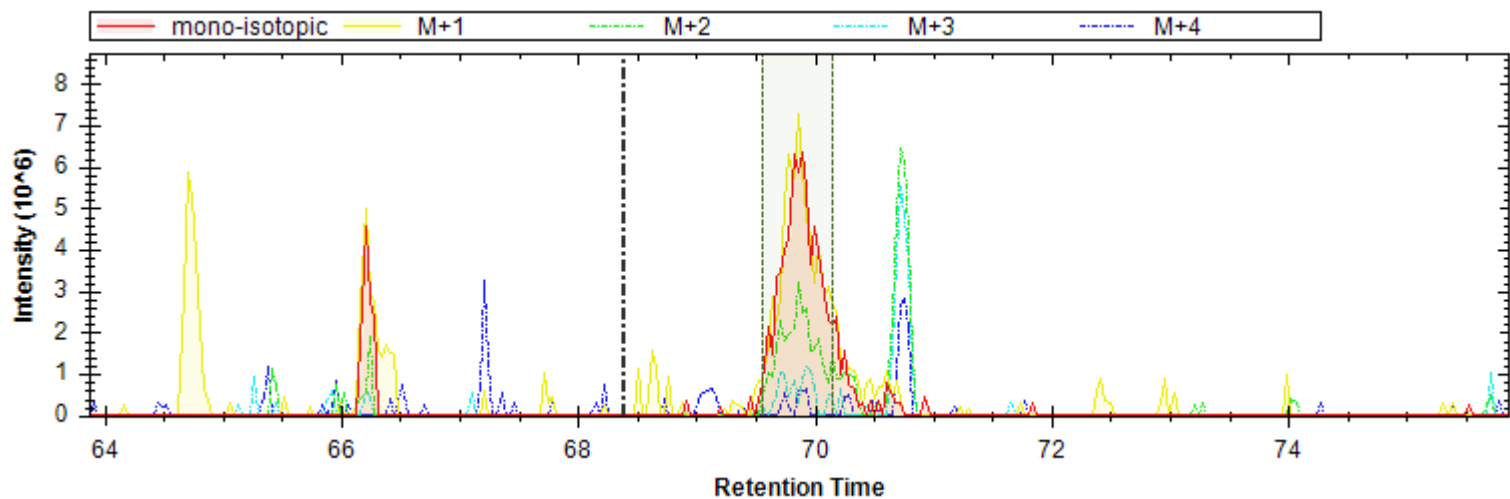



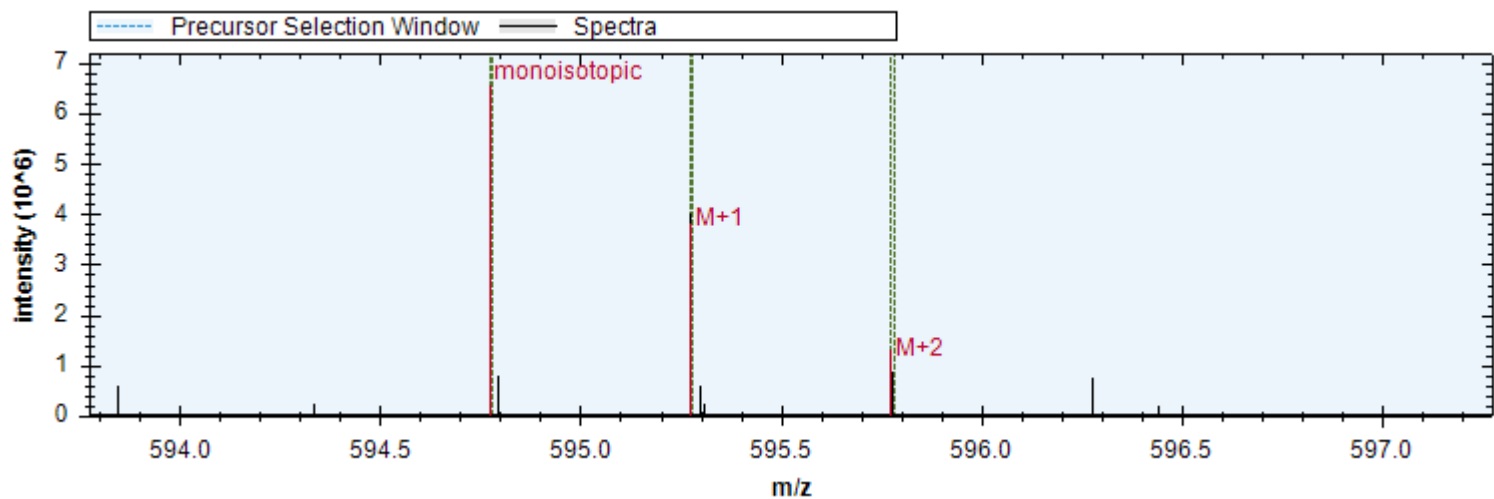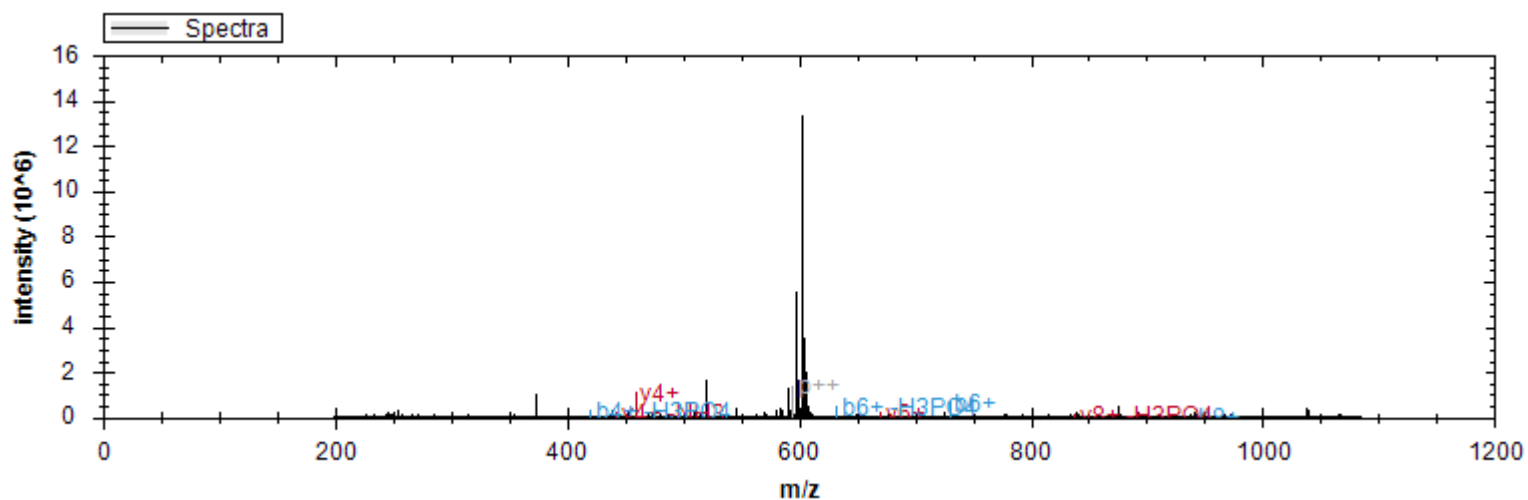

- |                            |                            |                          |
|----------------------------|----------------------------|--------------------------|
| [y4+] - 459.256 m/z        | [b6+ -H3PO4] - 632.315 m/z | [b6+] - 730.292 m/z      |
| [b4+ -H3PO4] - 420.235 m/z | [y6+] - 671.336 m/z        | [y4+ -NH3] - 442.230 m/z |
| [y4+ -H2O] - 441.246 m/z   | [b8+ -H3PO4] - 843.411 m/z | [y3+] - 362.203 m/z      |
| [b4+ -H2O] - 598.002 m/z   | [y7+ -H3PO4] - 740.357 m/z | [b8+] - 941.388 m/z      |
| [b9+ -H3PO4] - 944.458 m/z | [y8+ -H3PO4] - 837.410 m/z |                          |

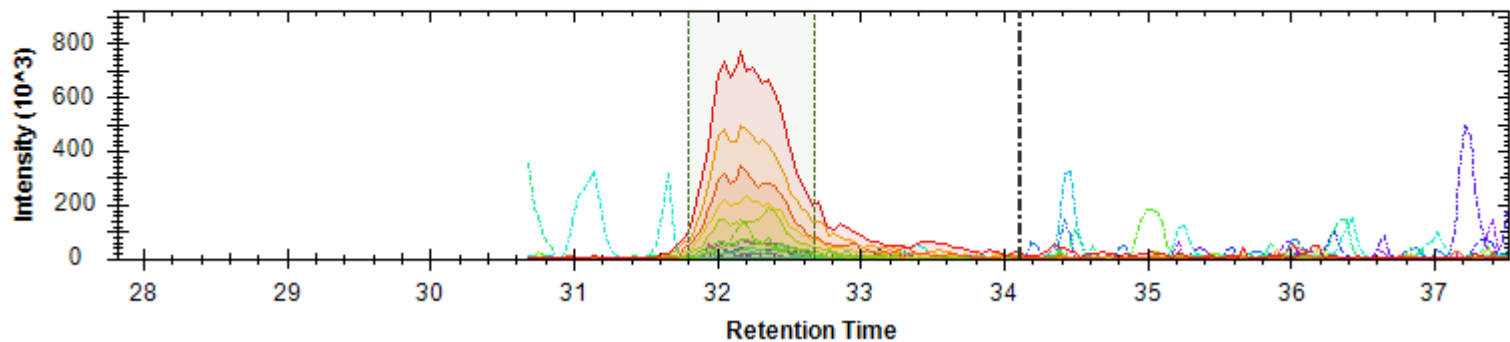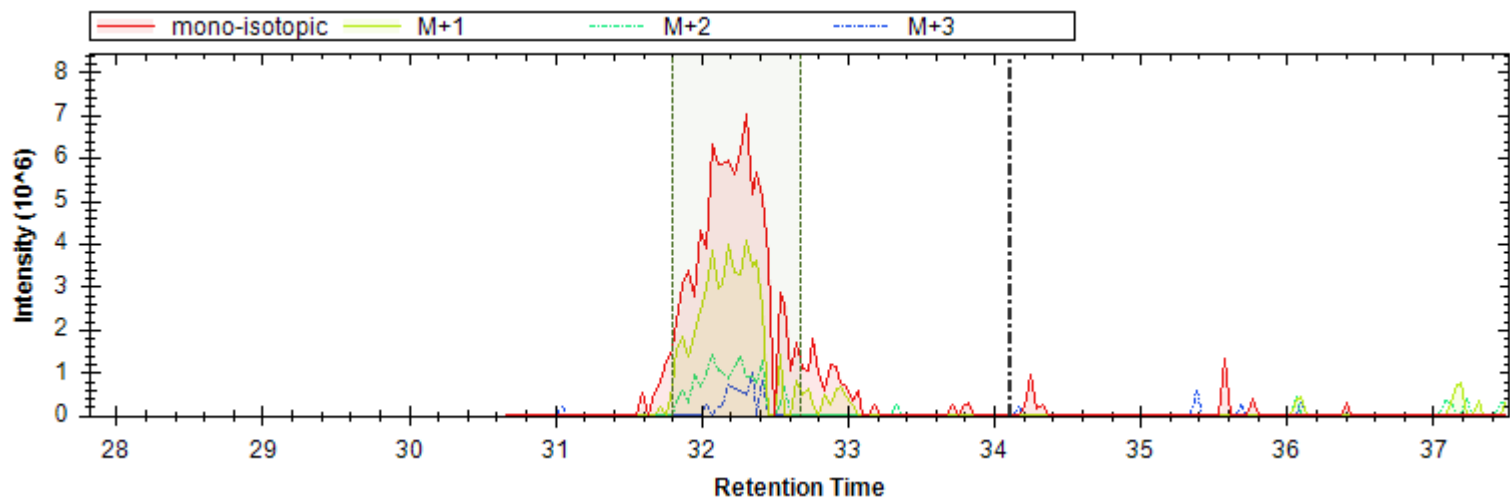

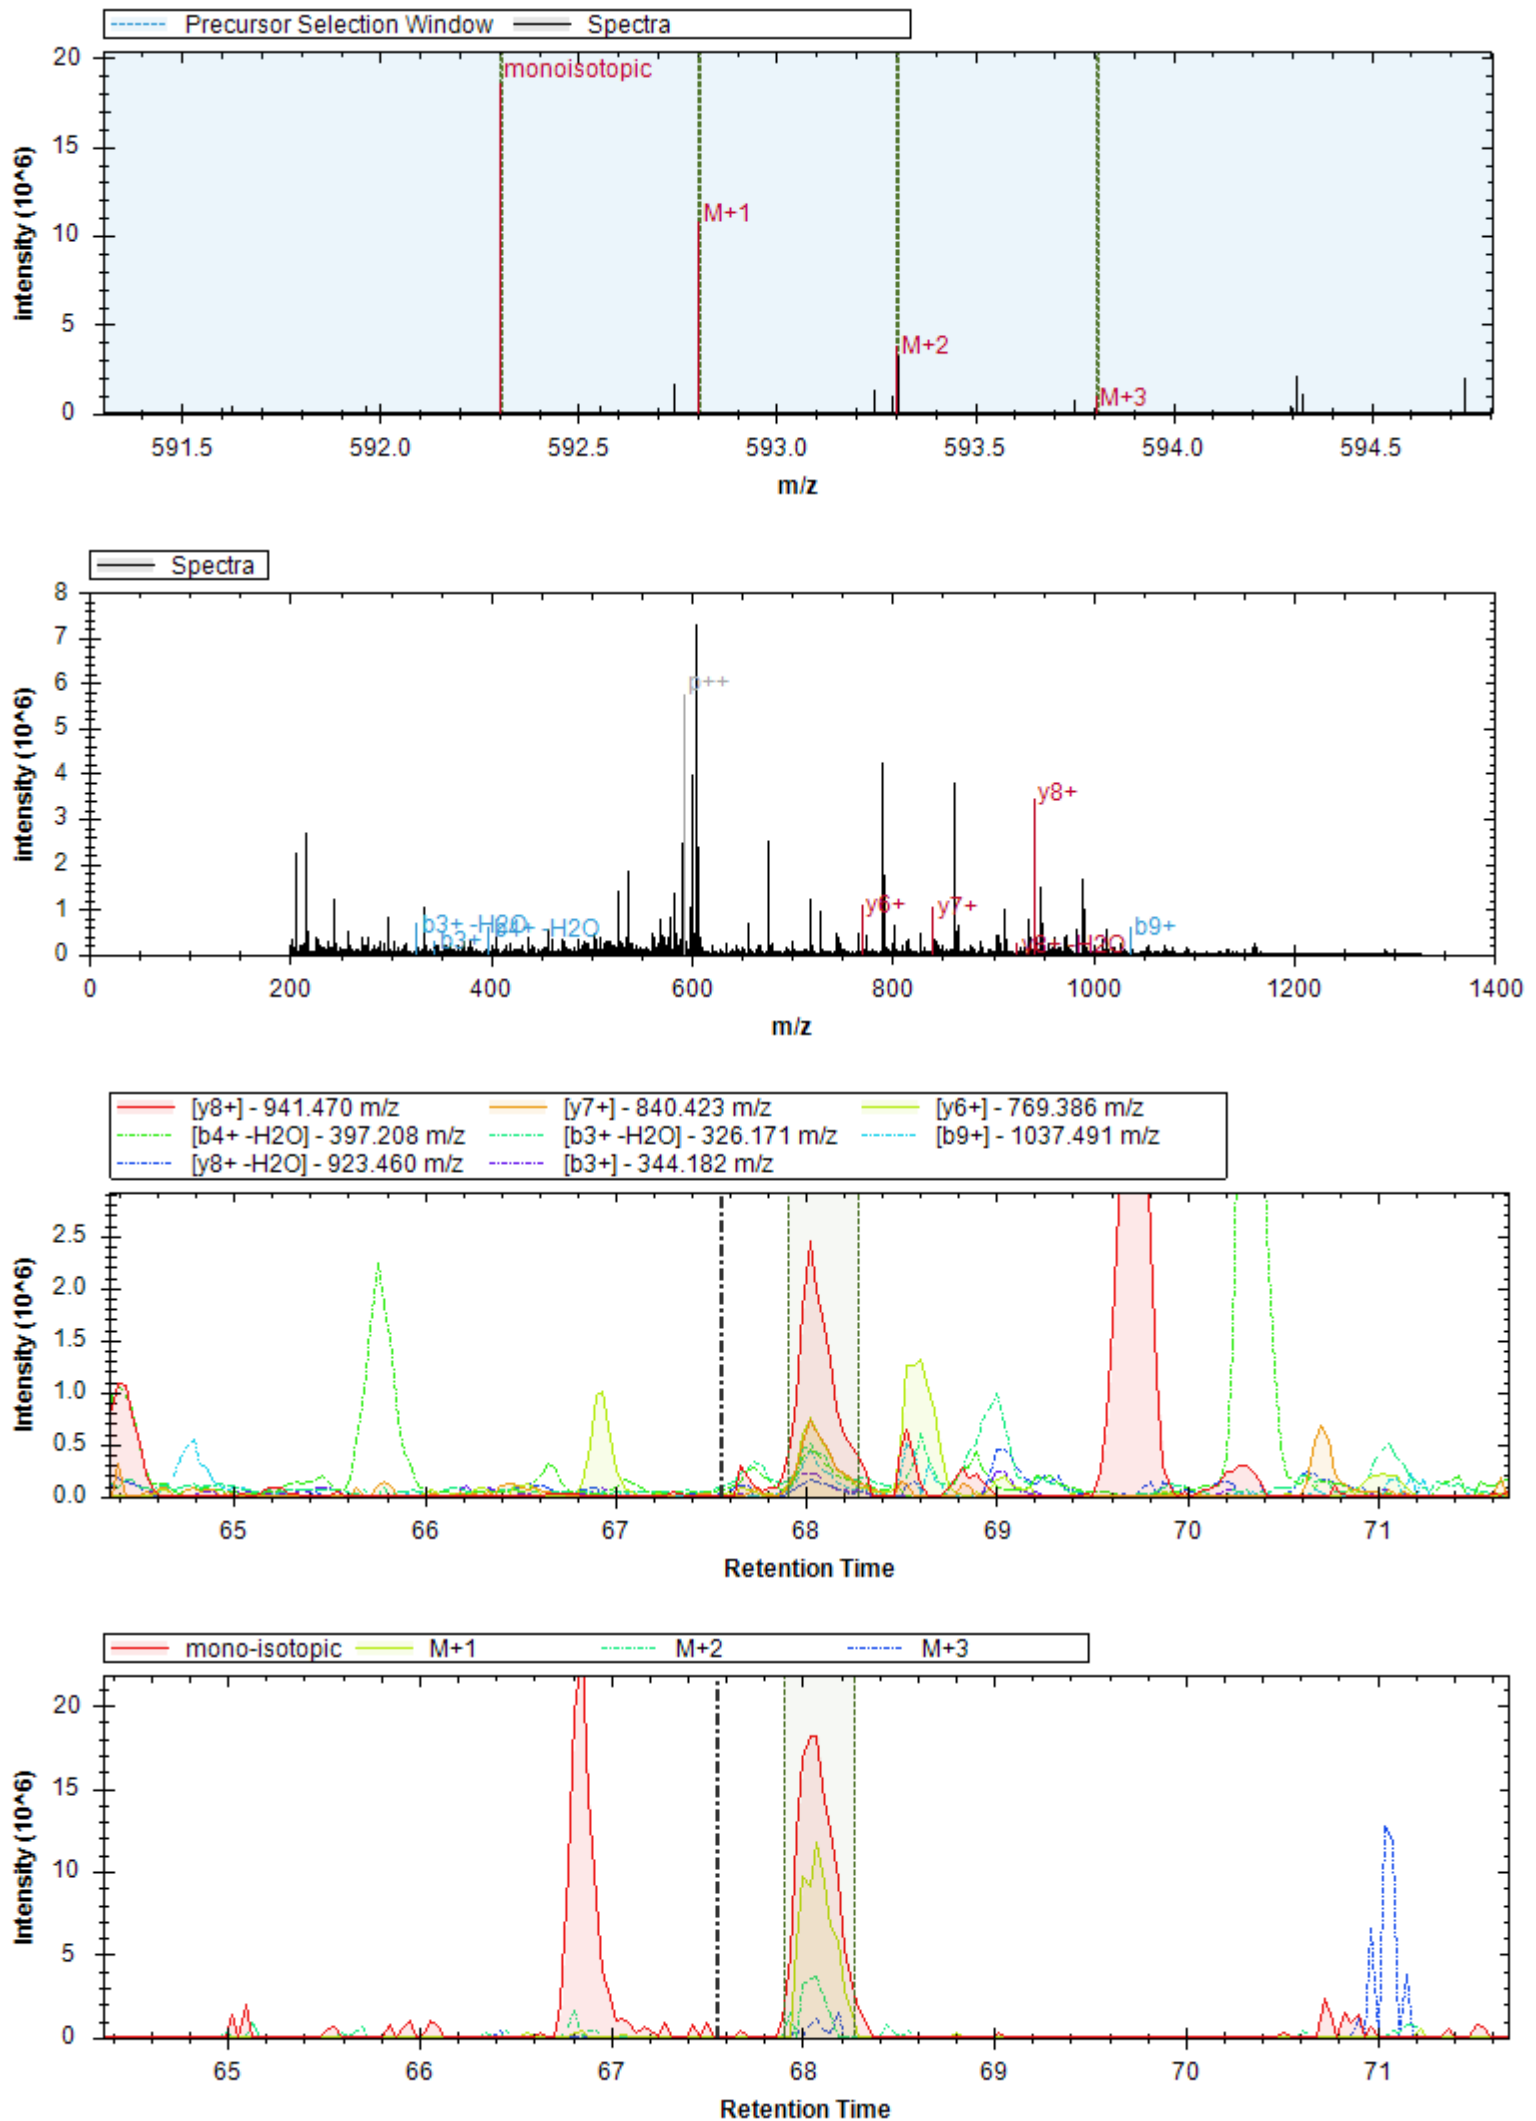

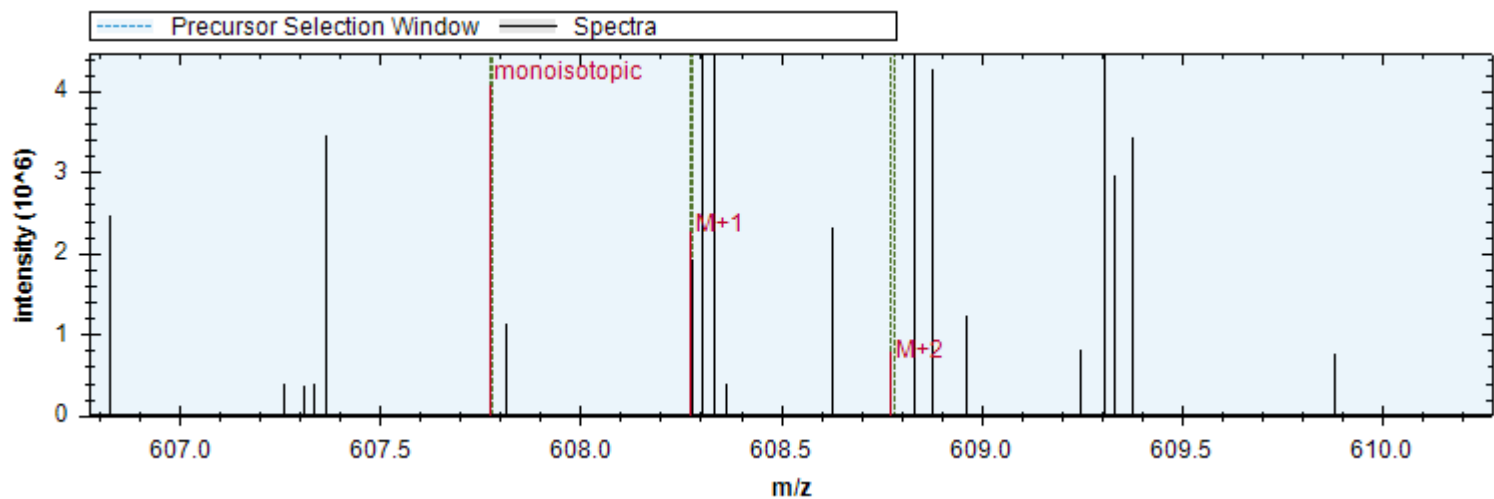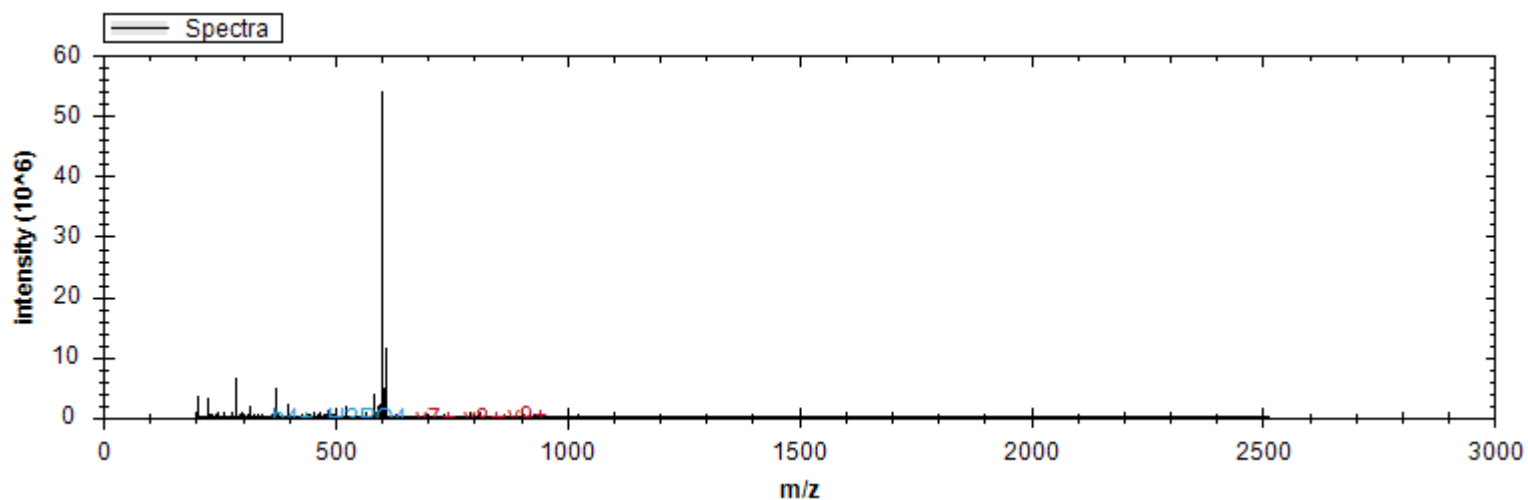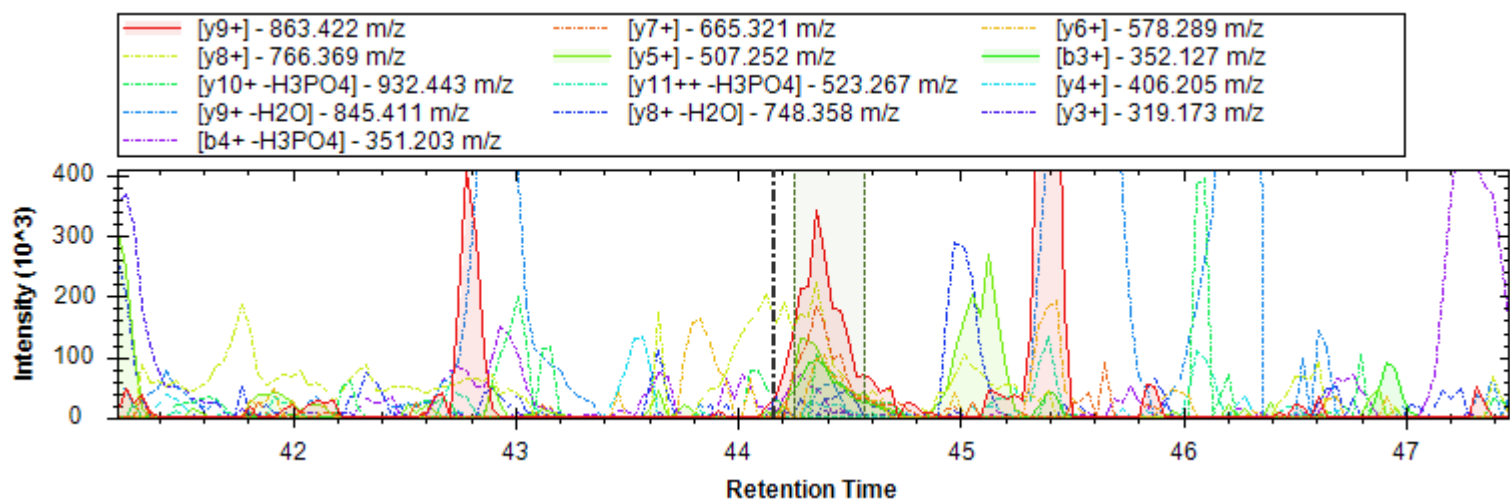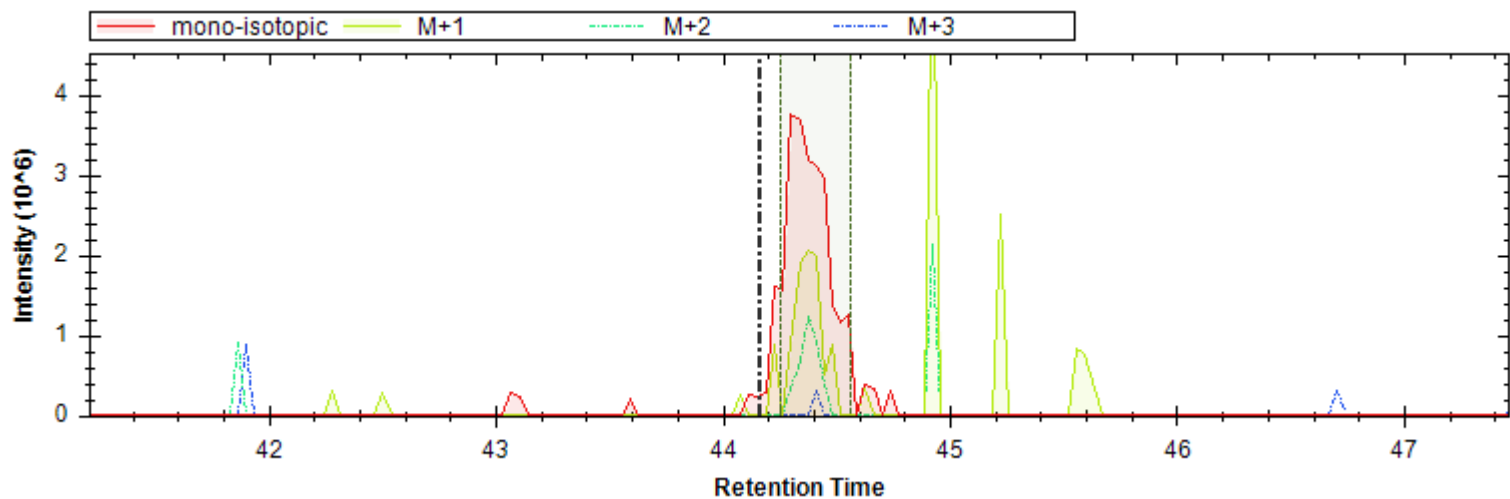

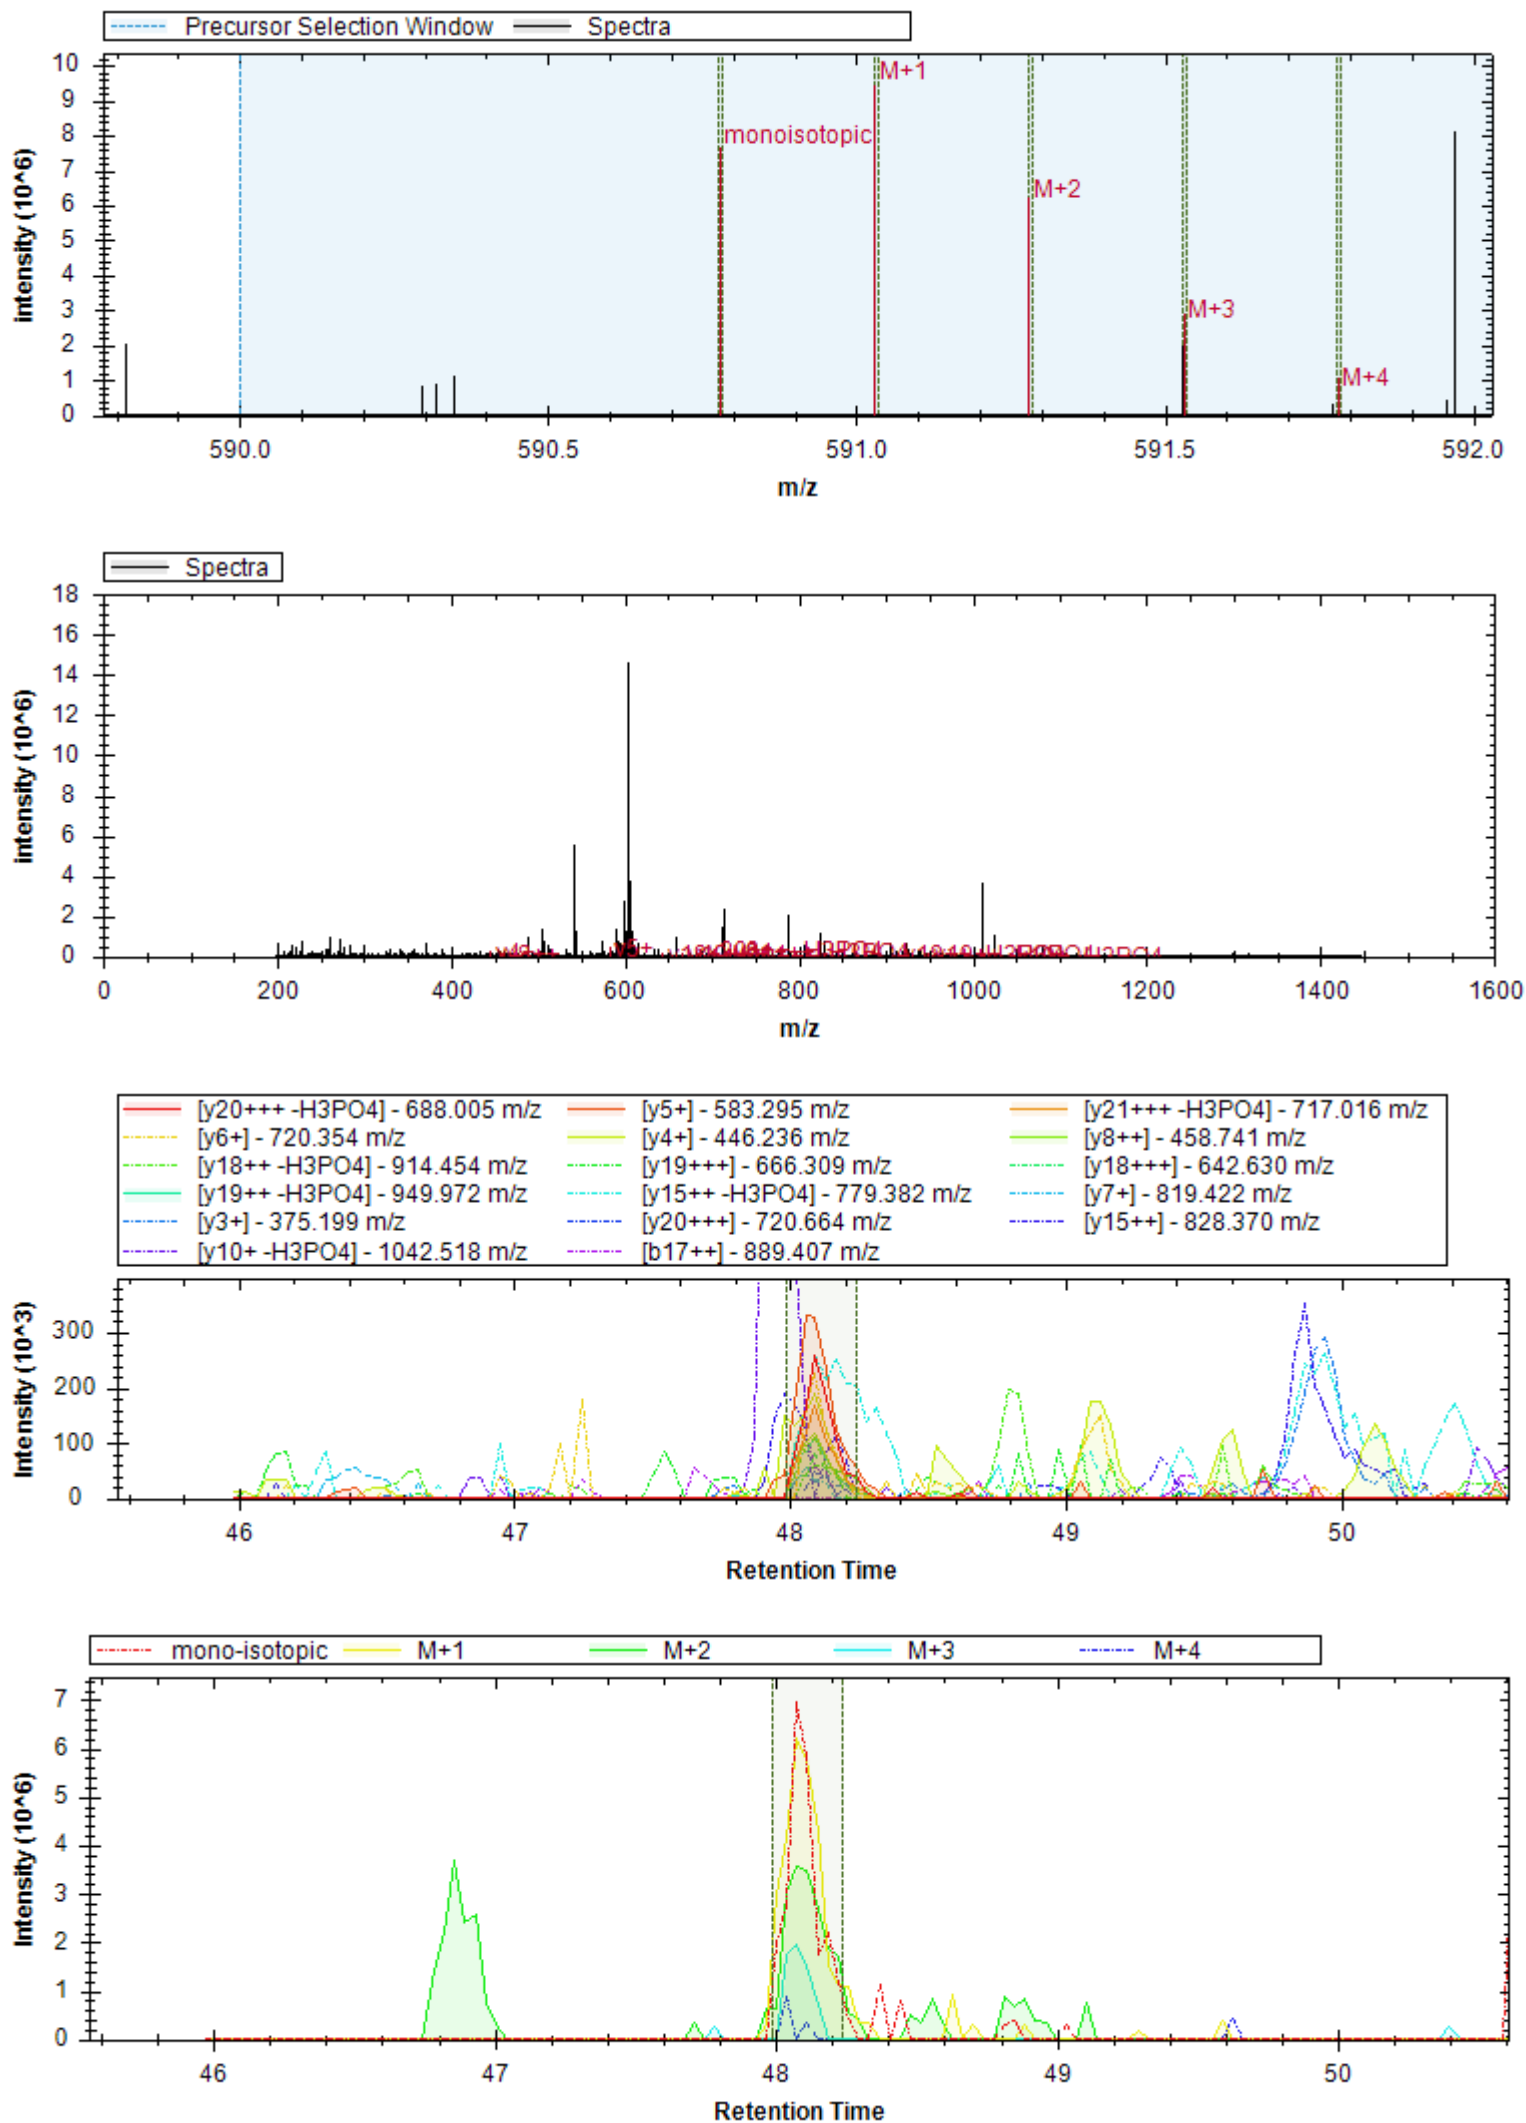



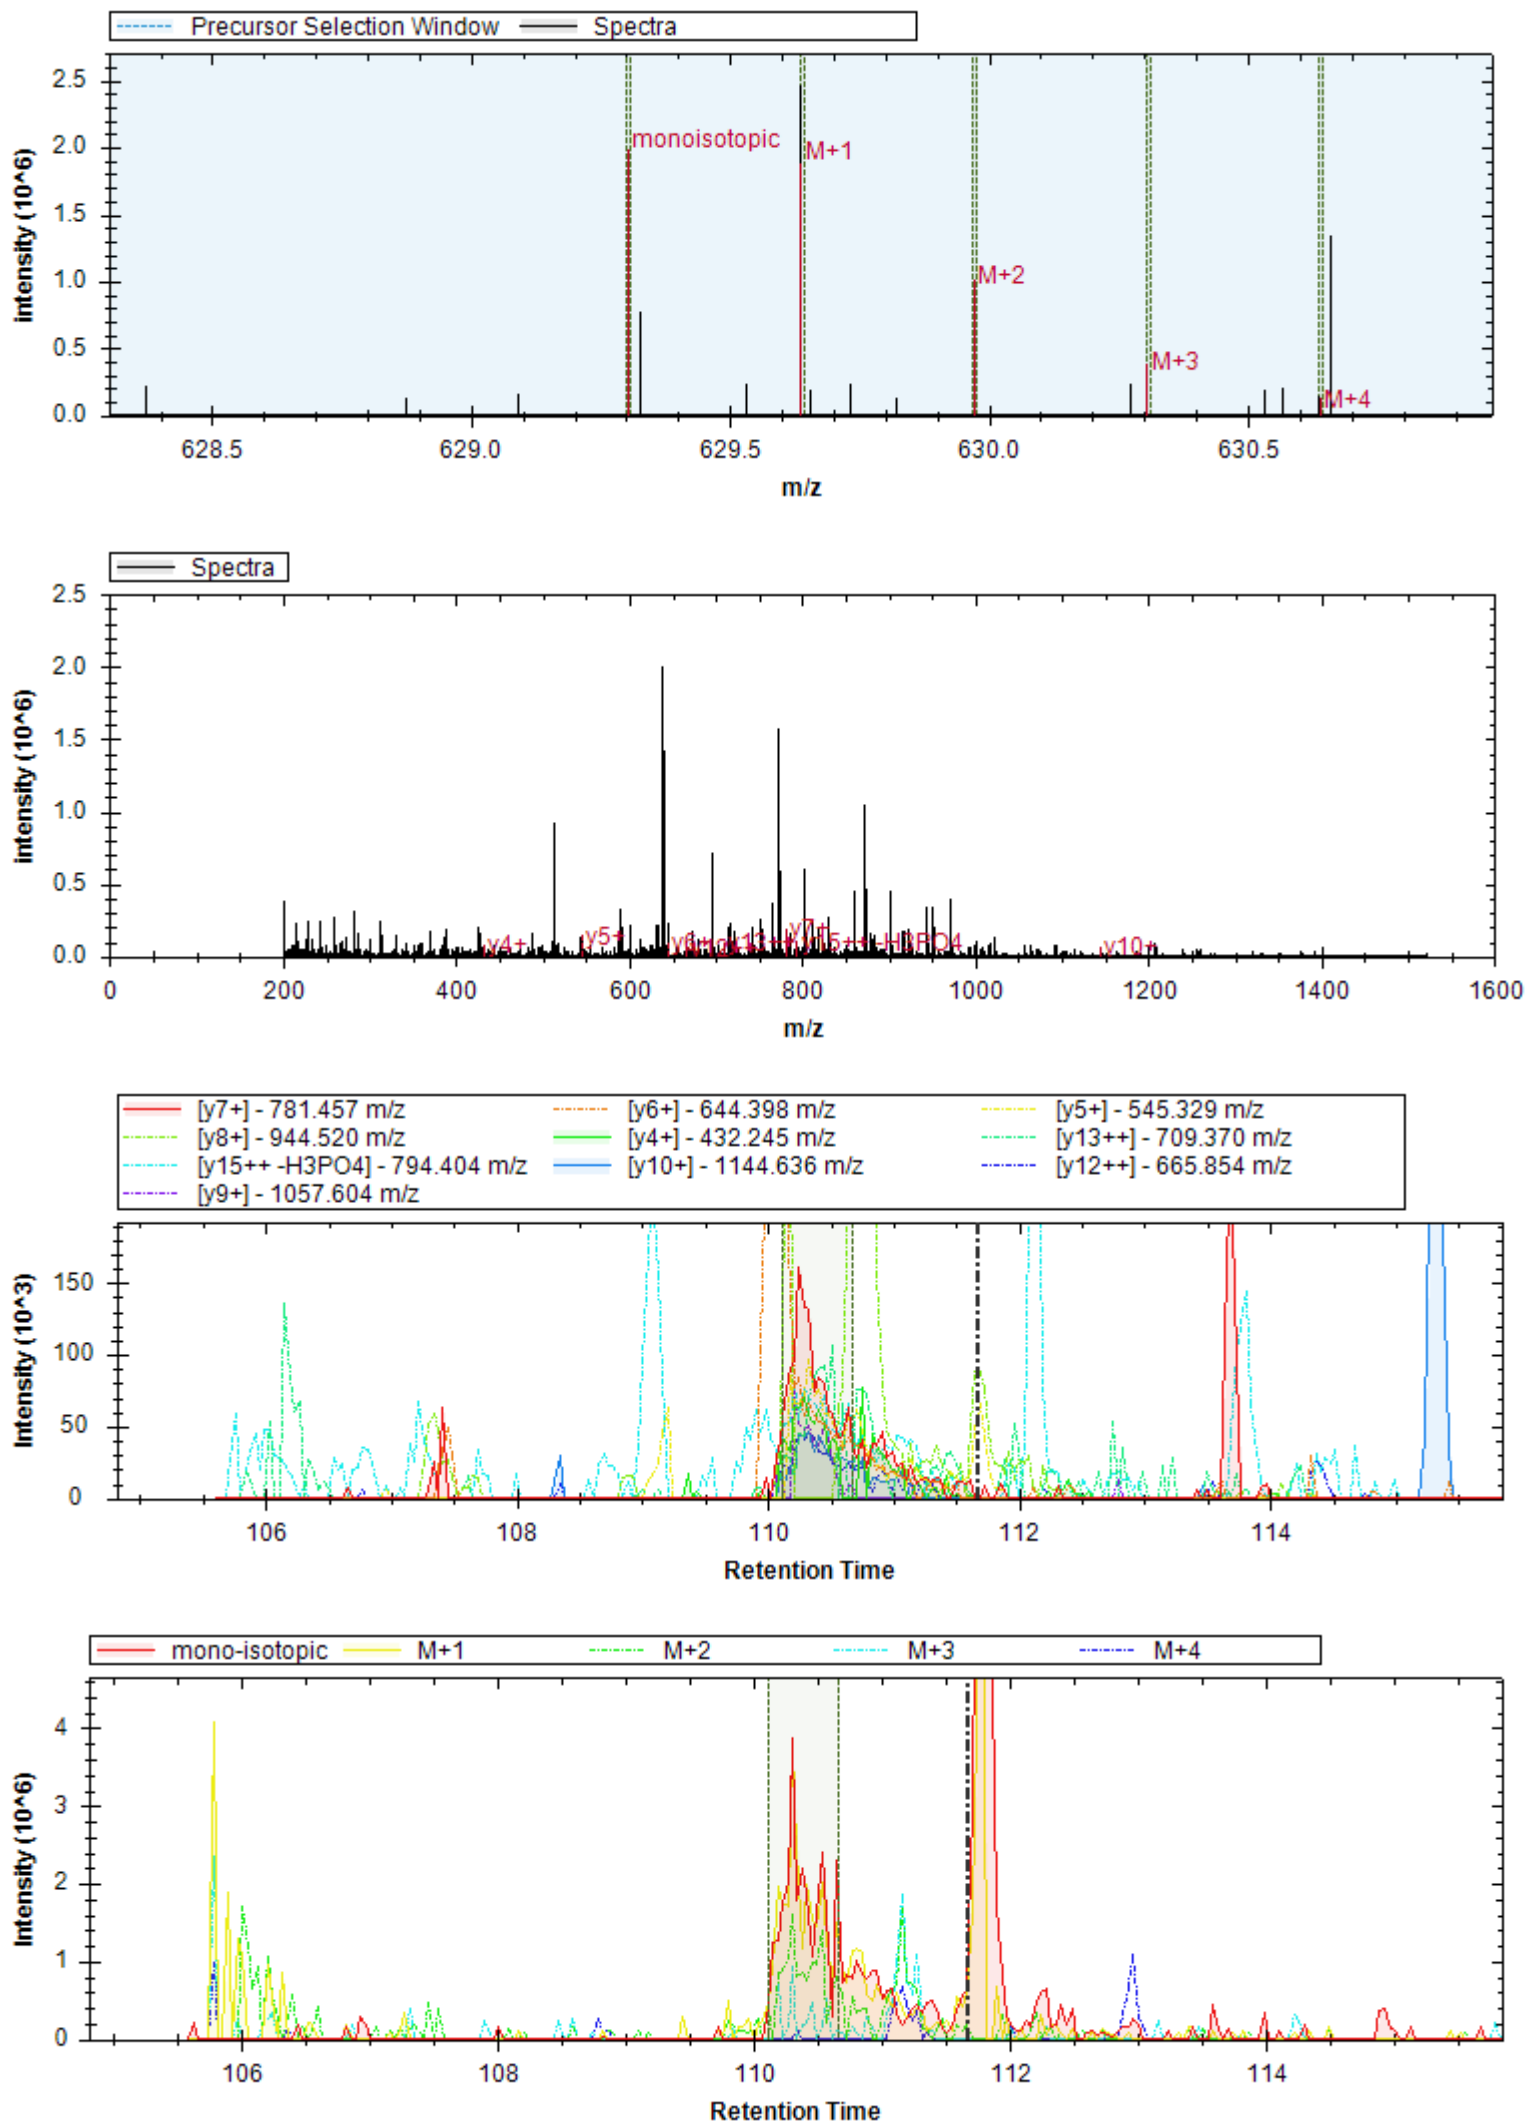

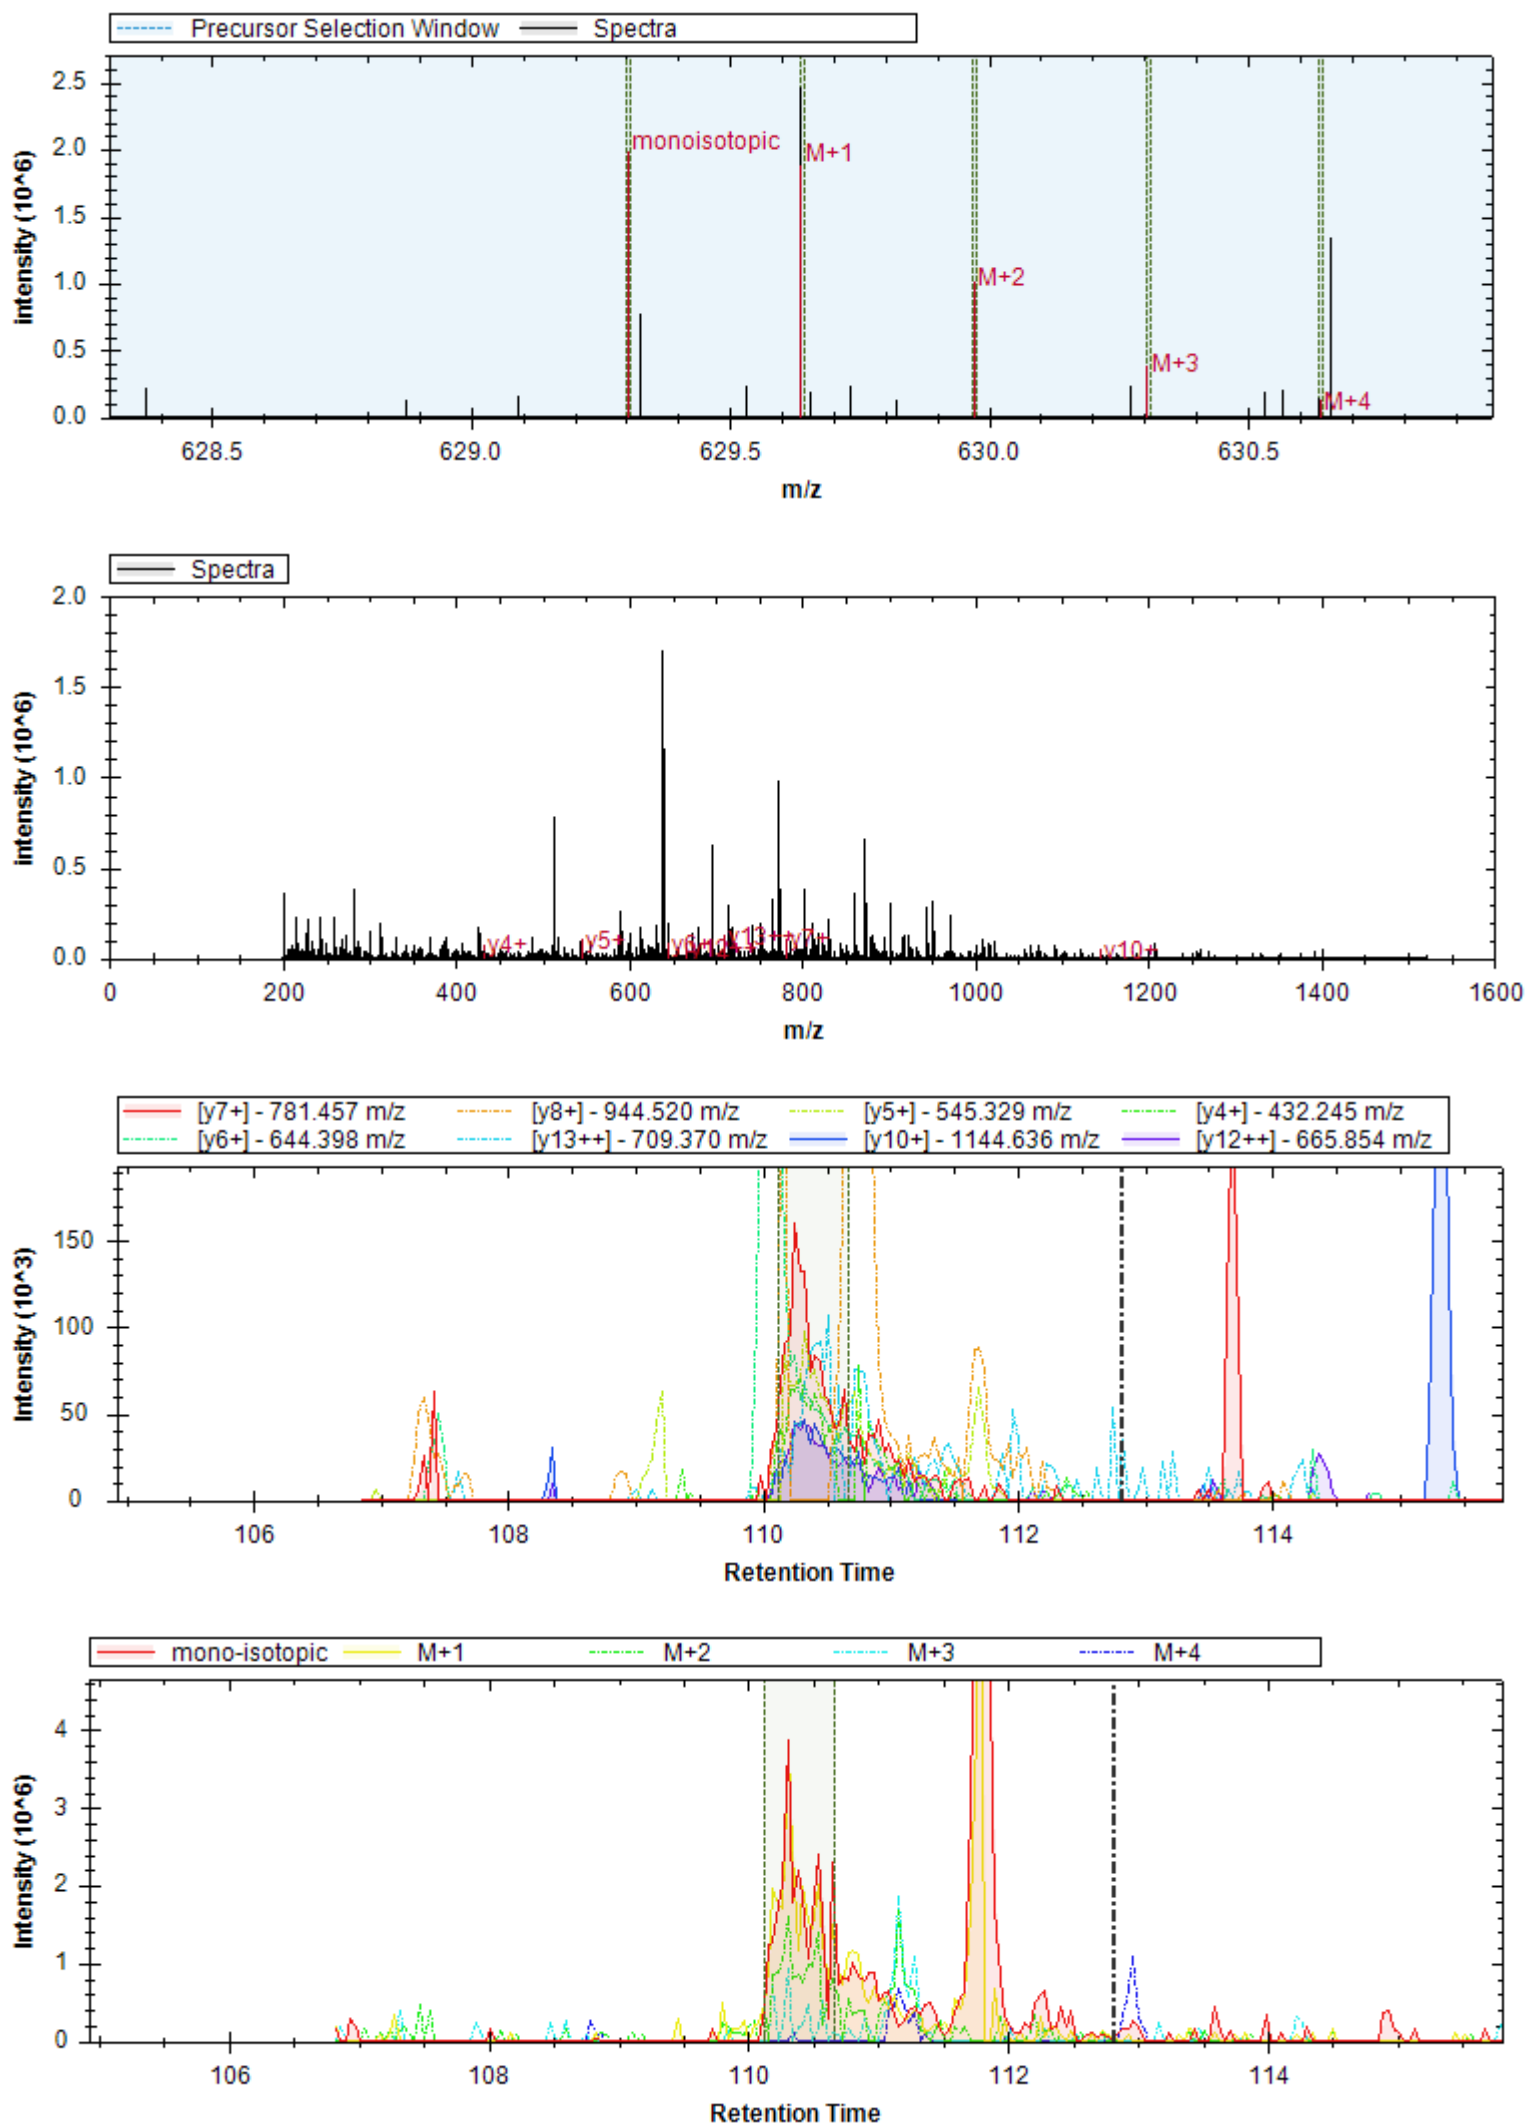

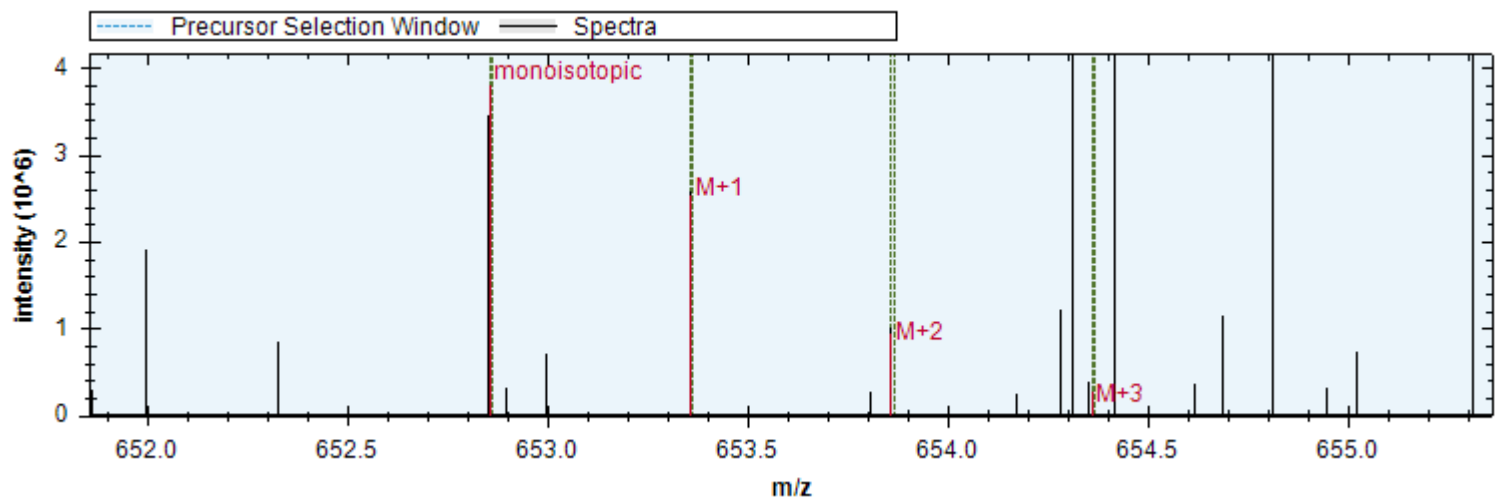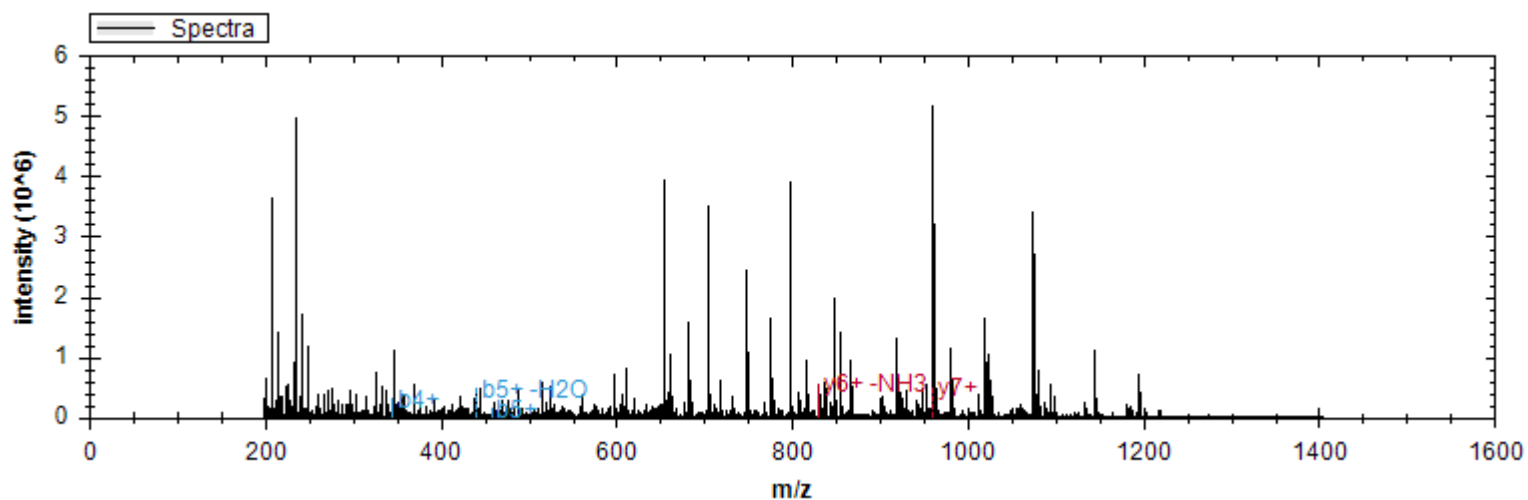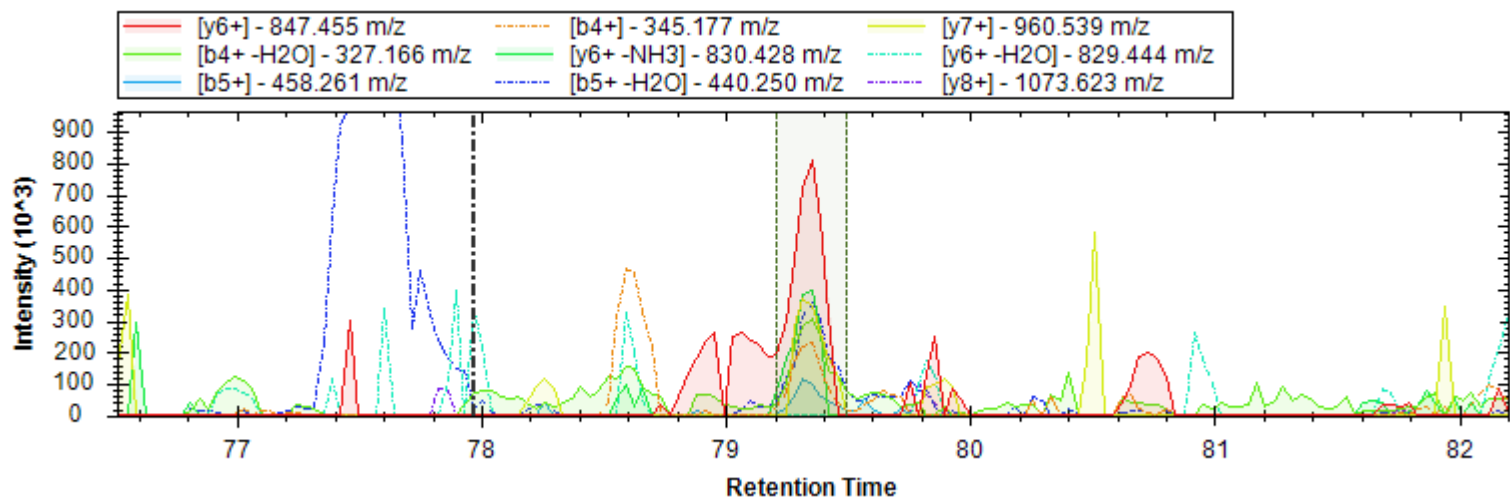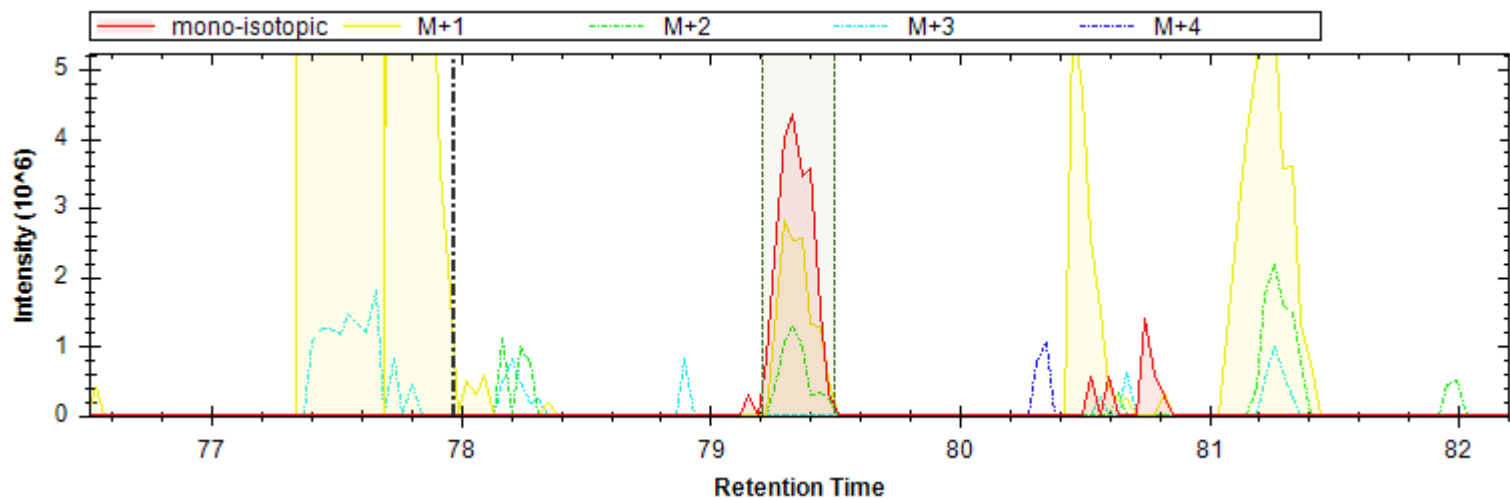

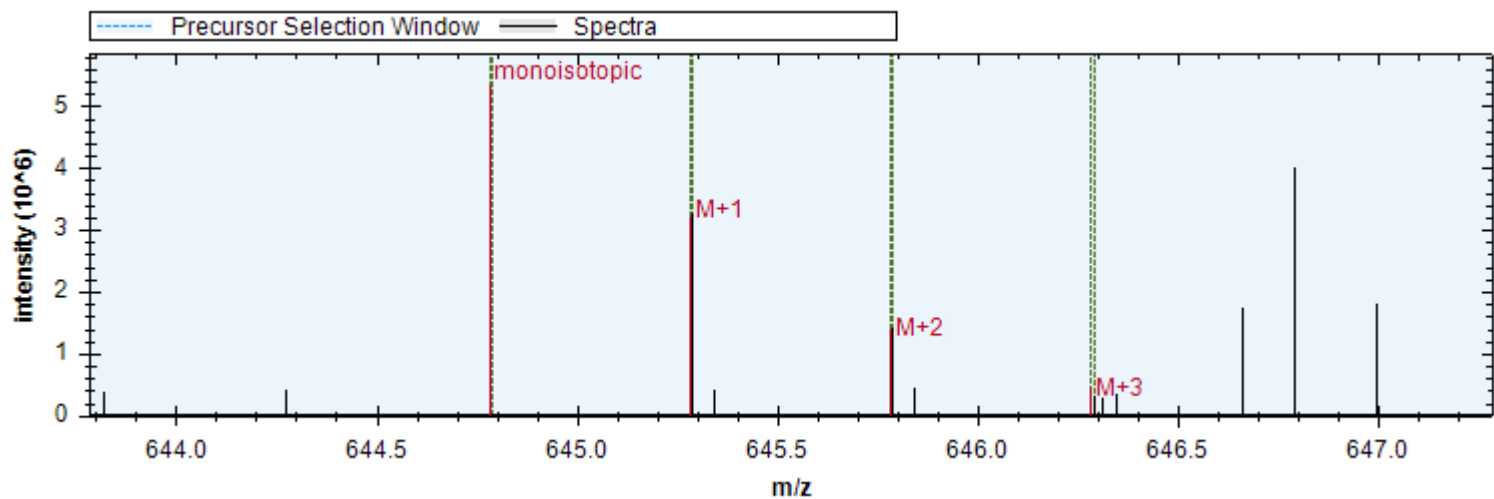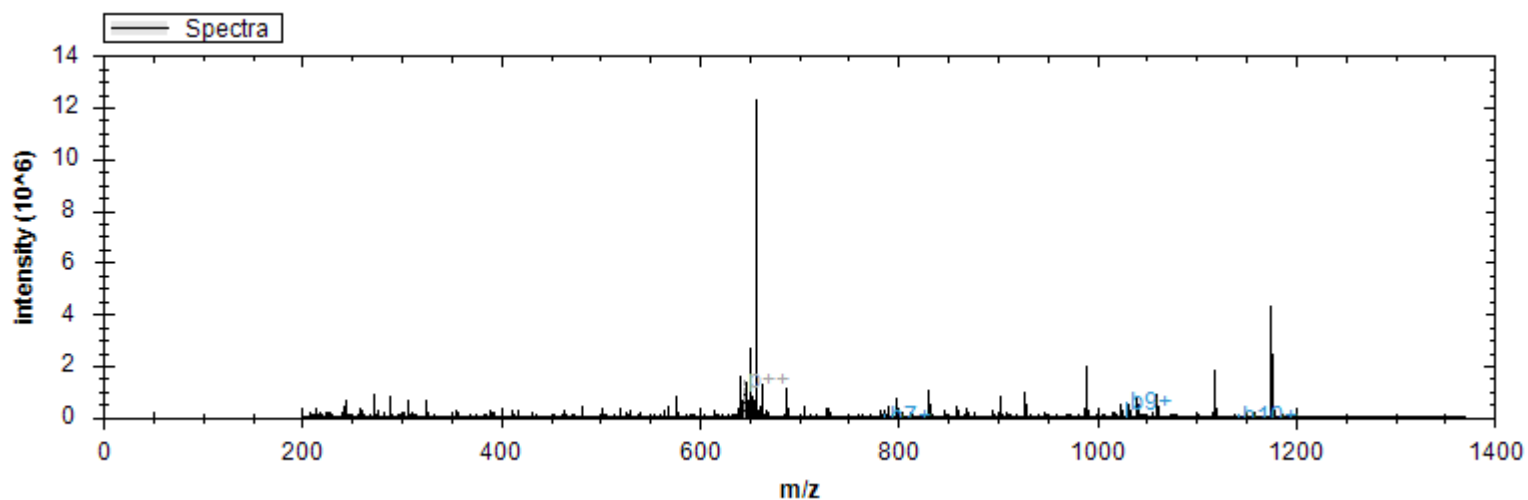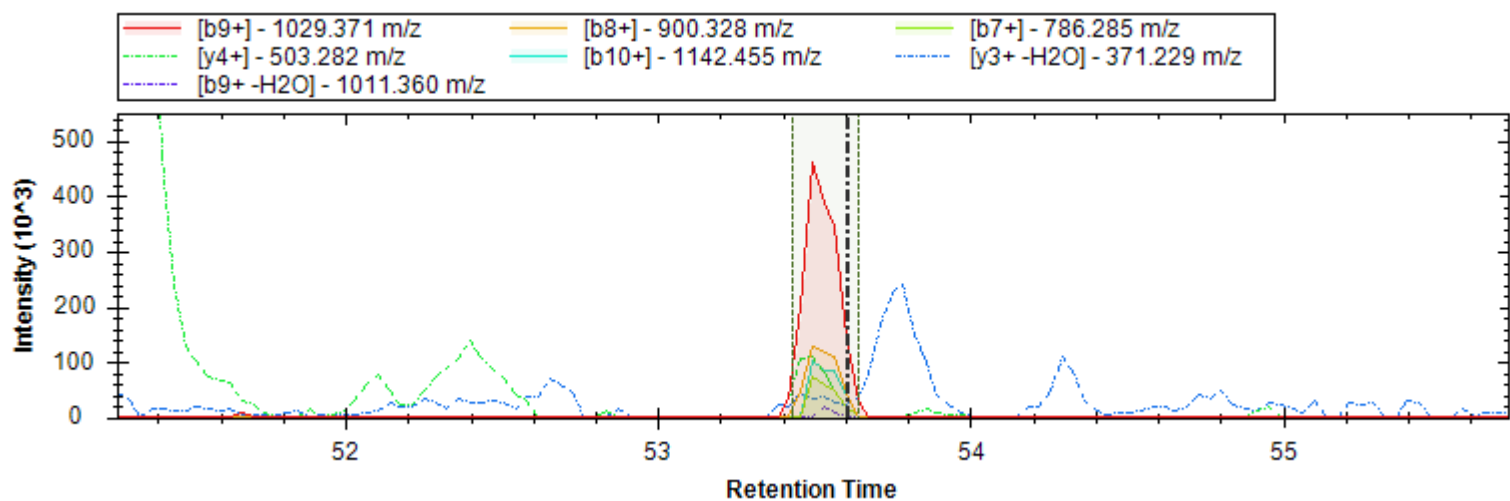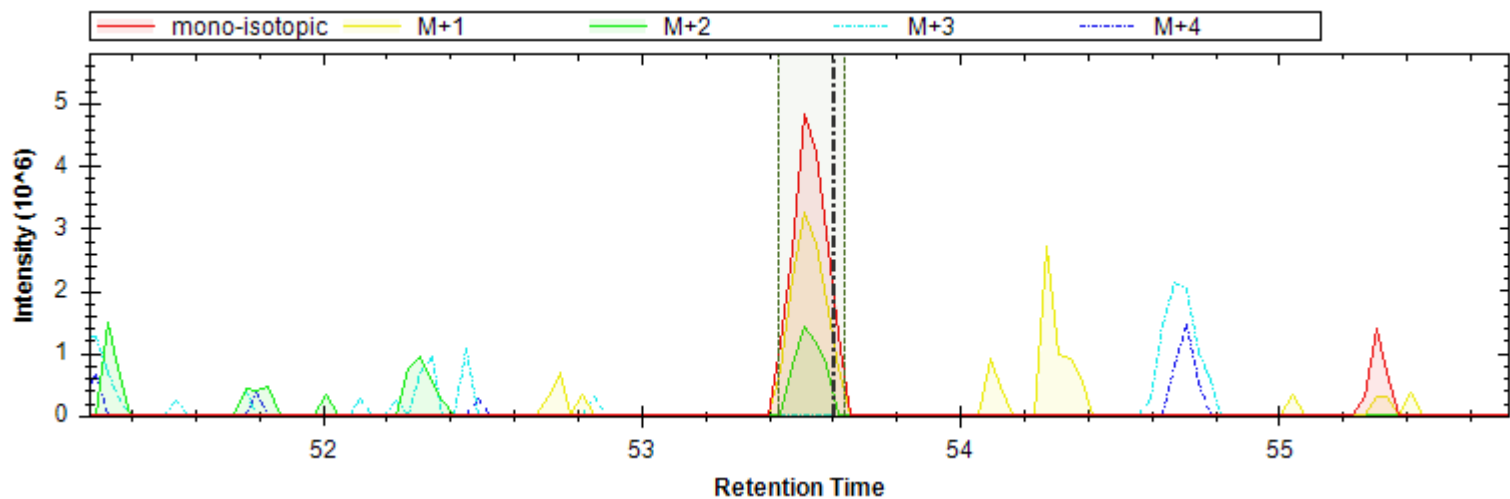

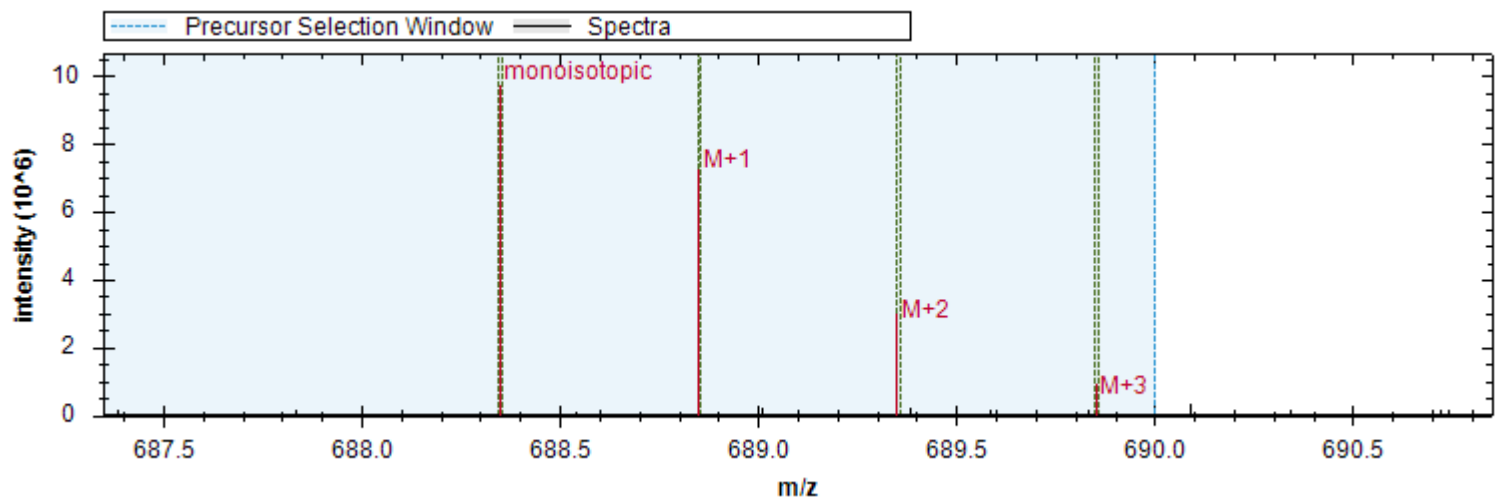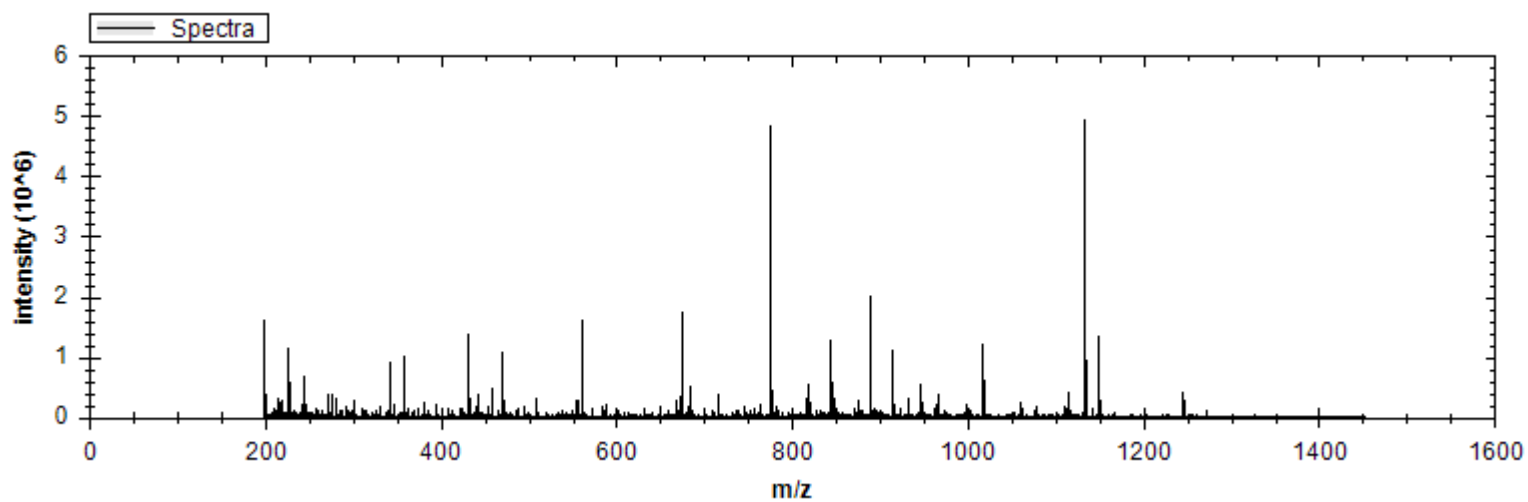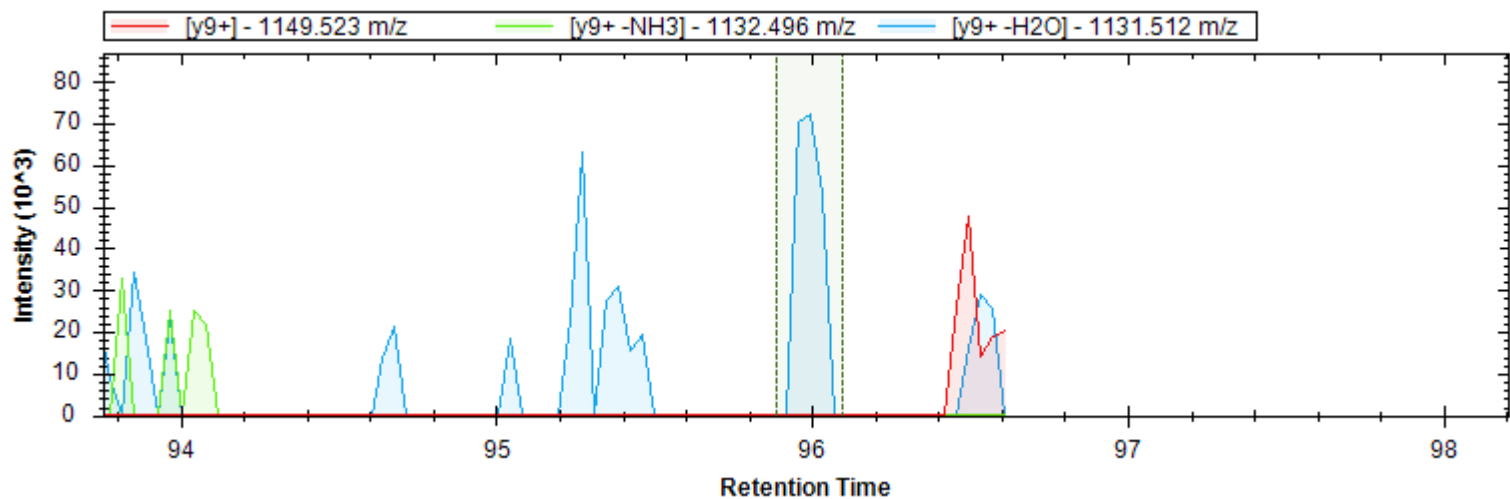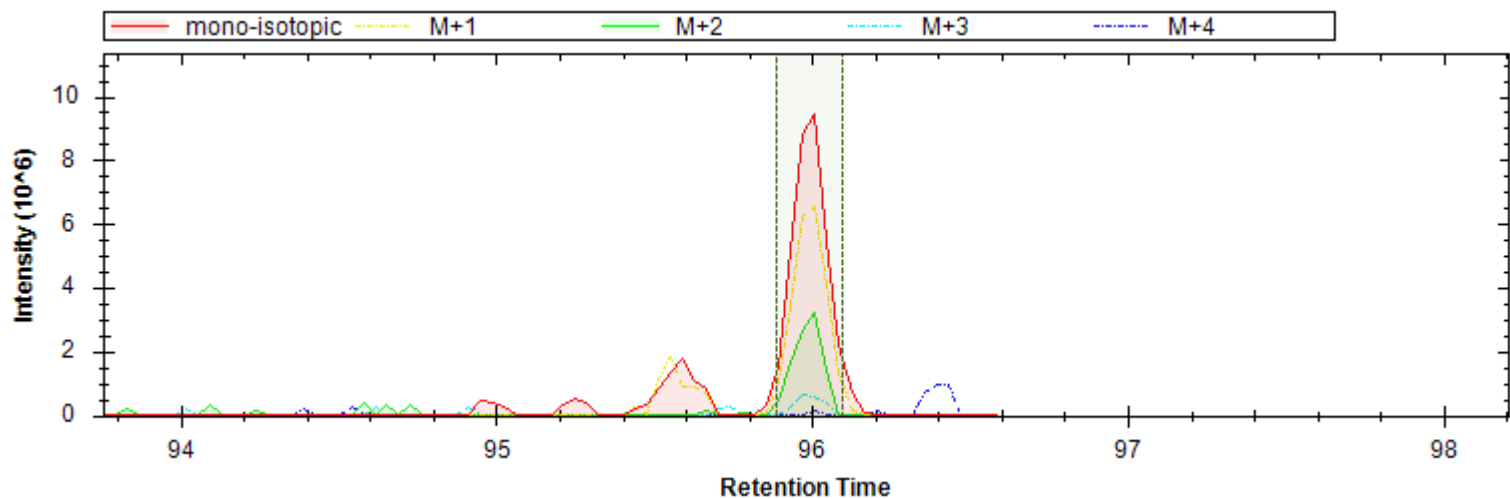

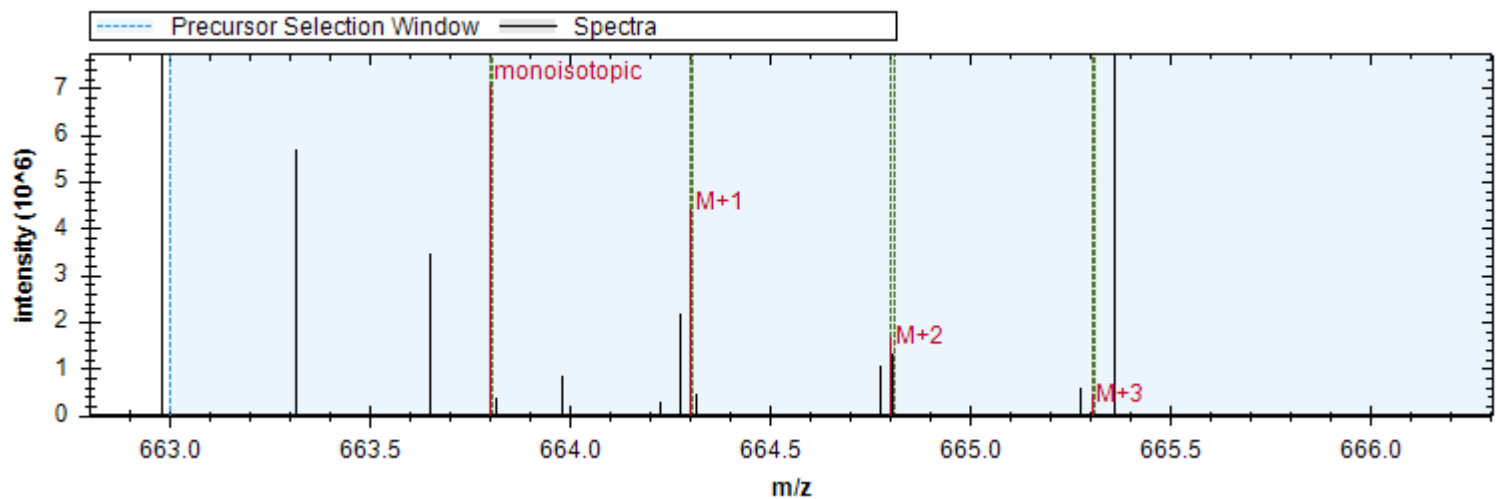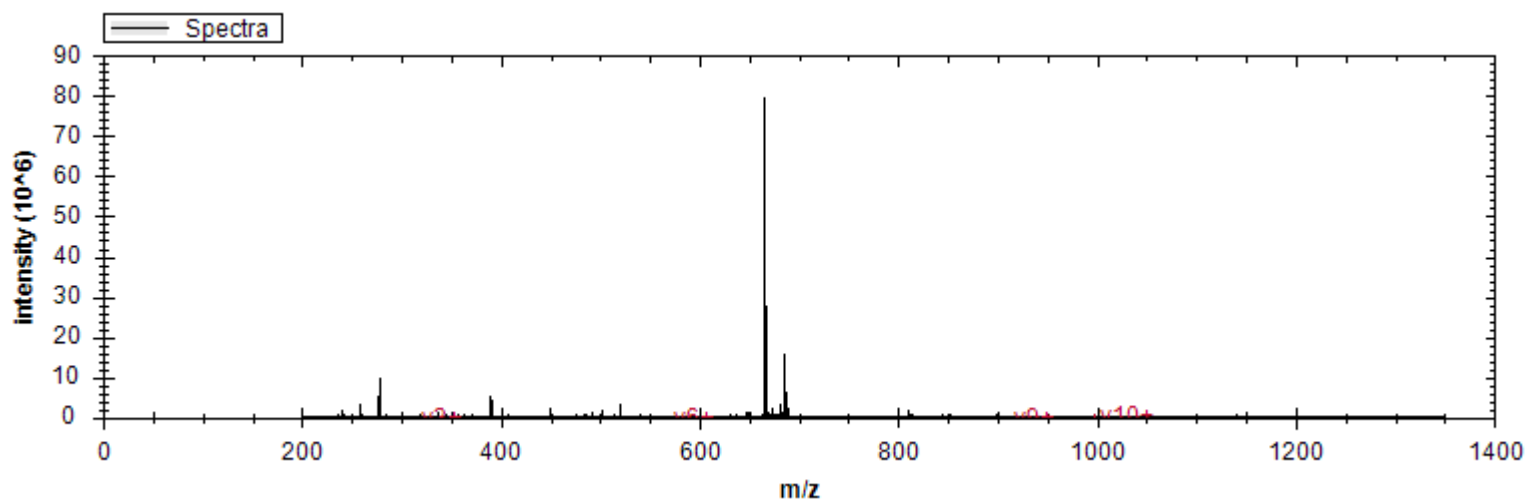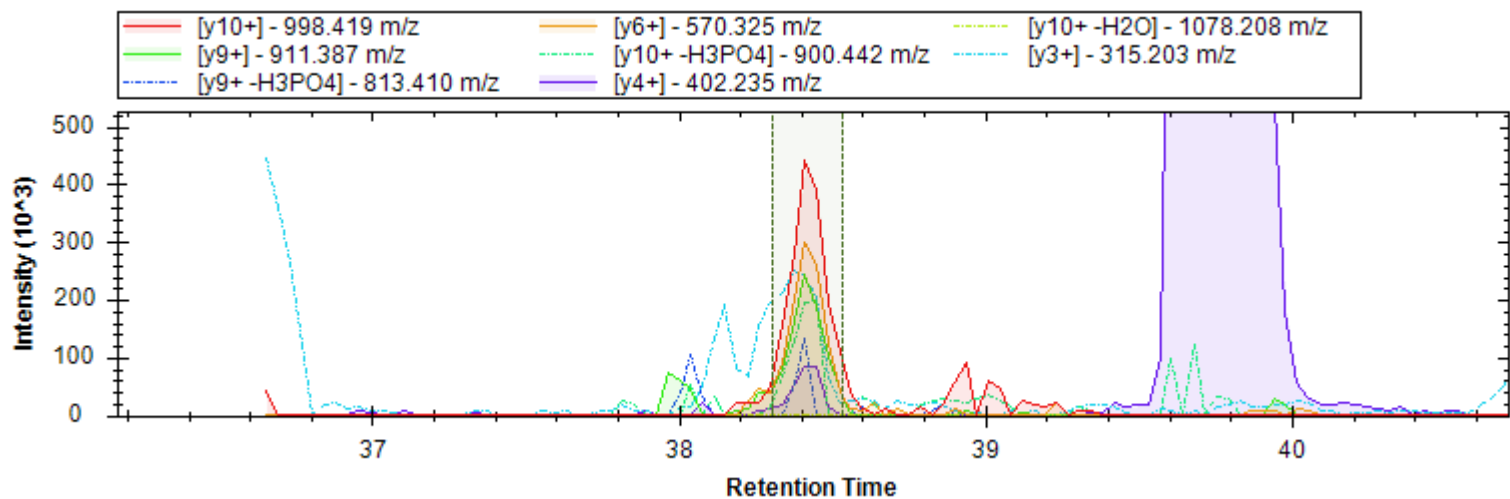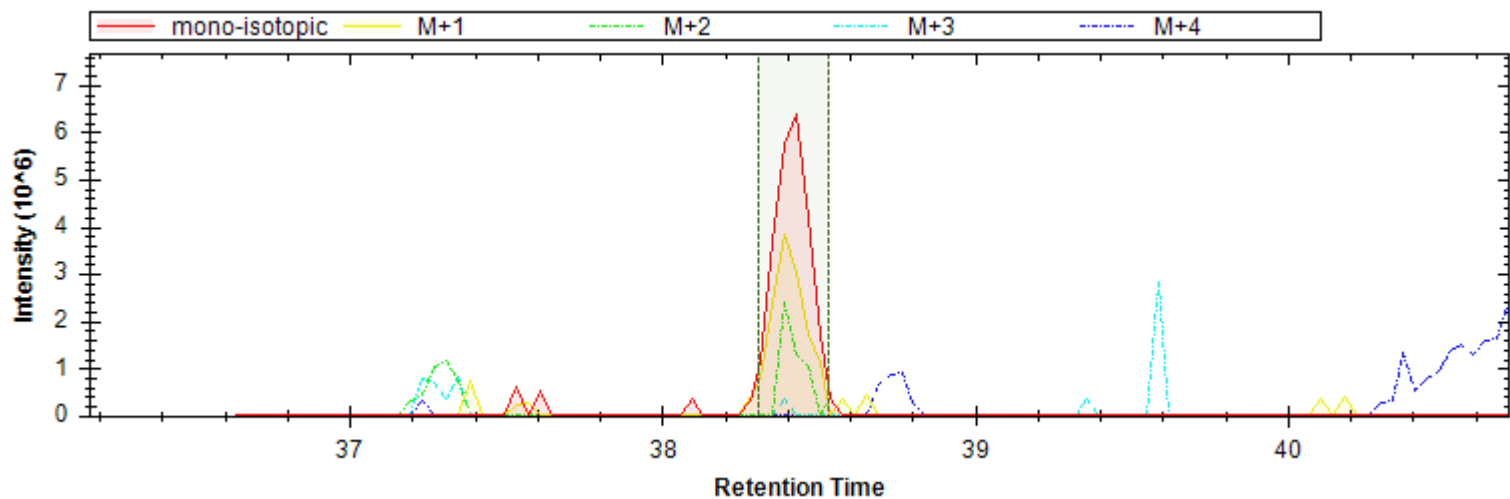

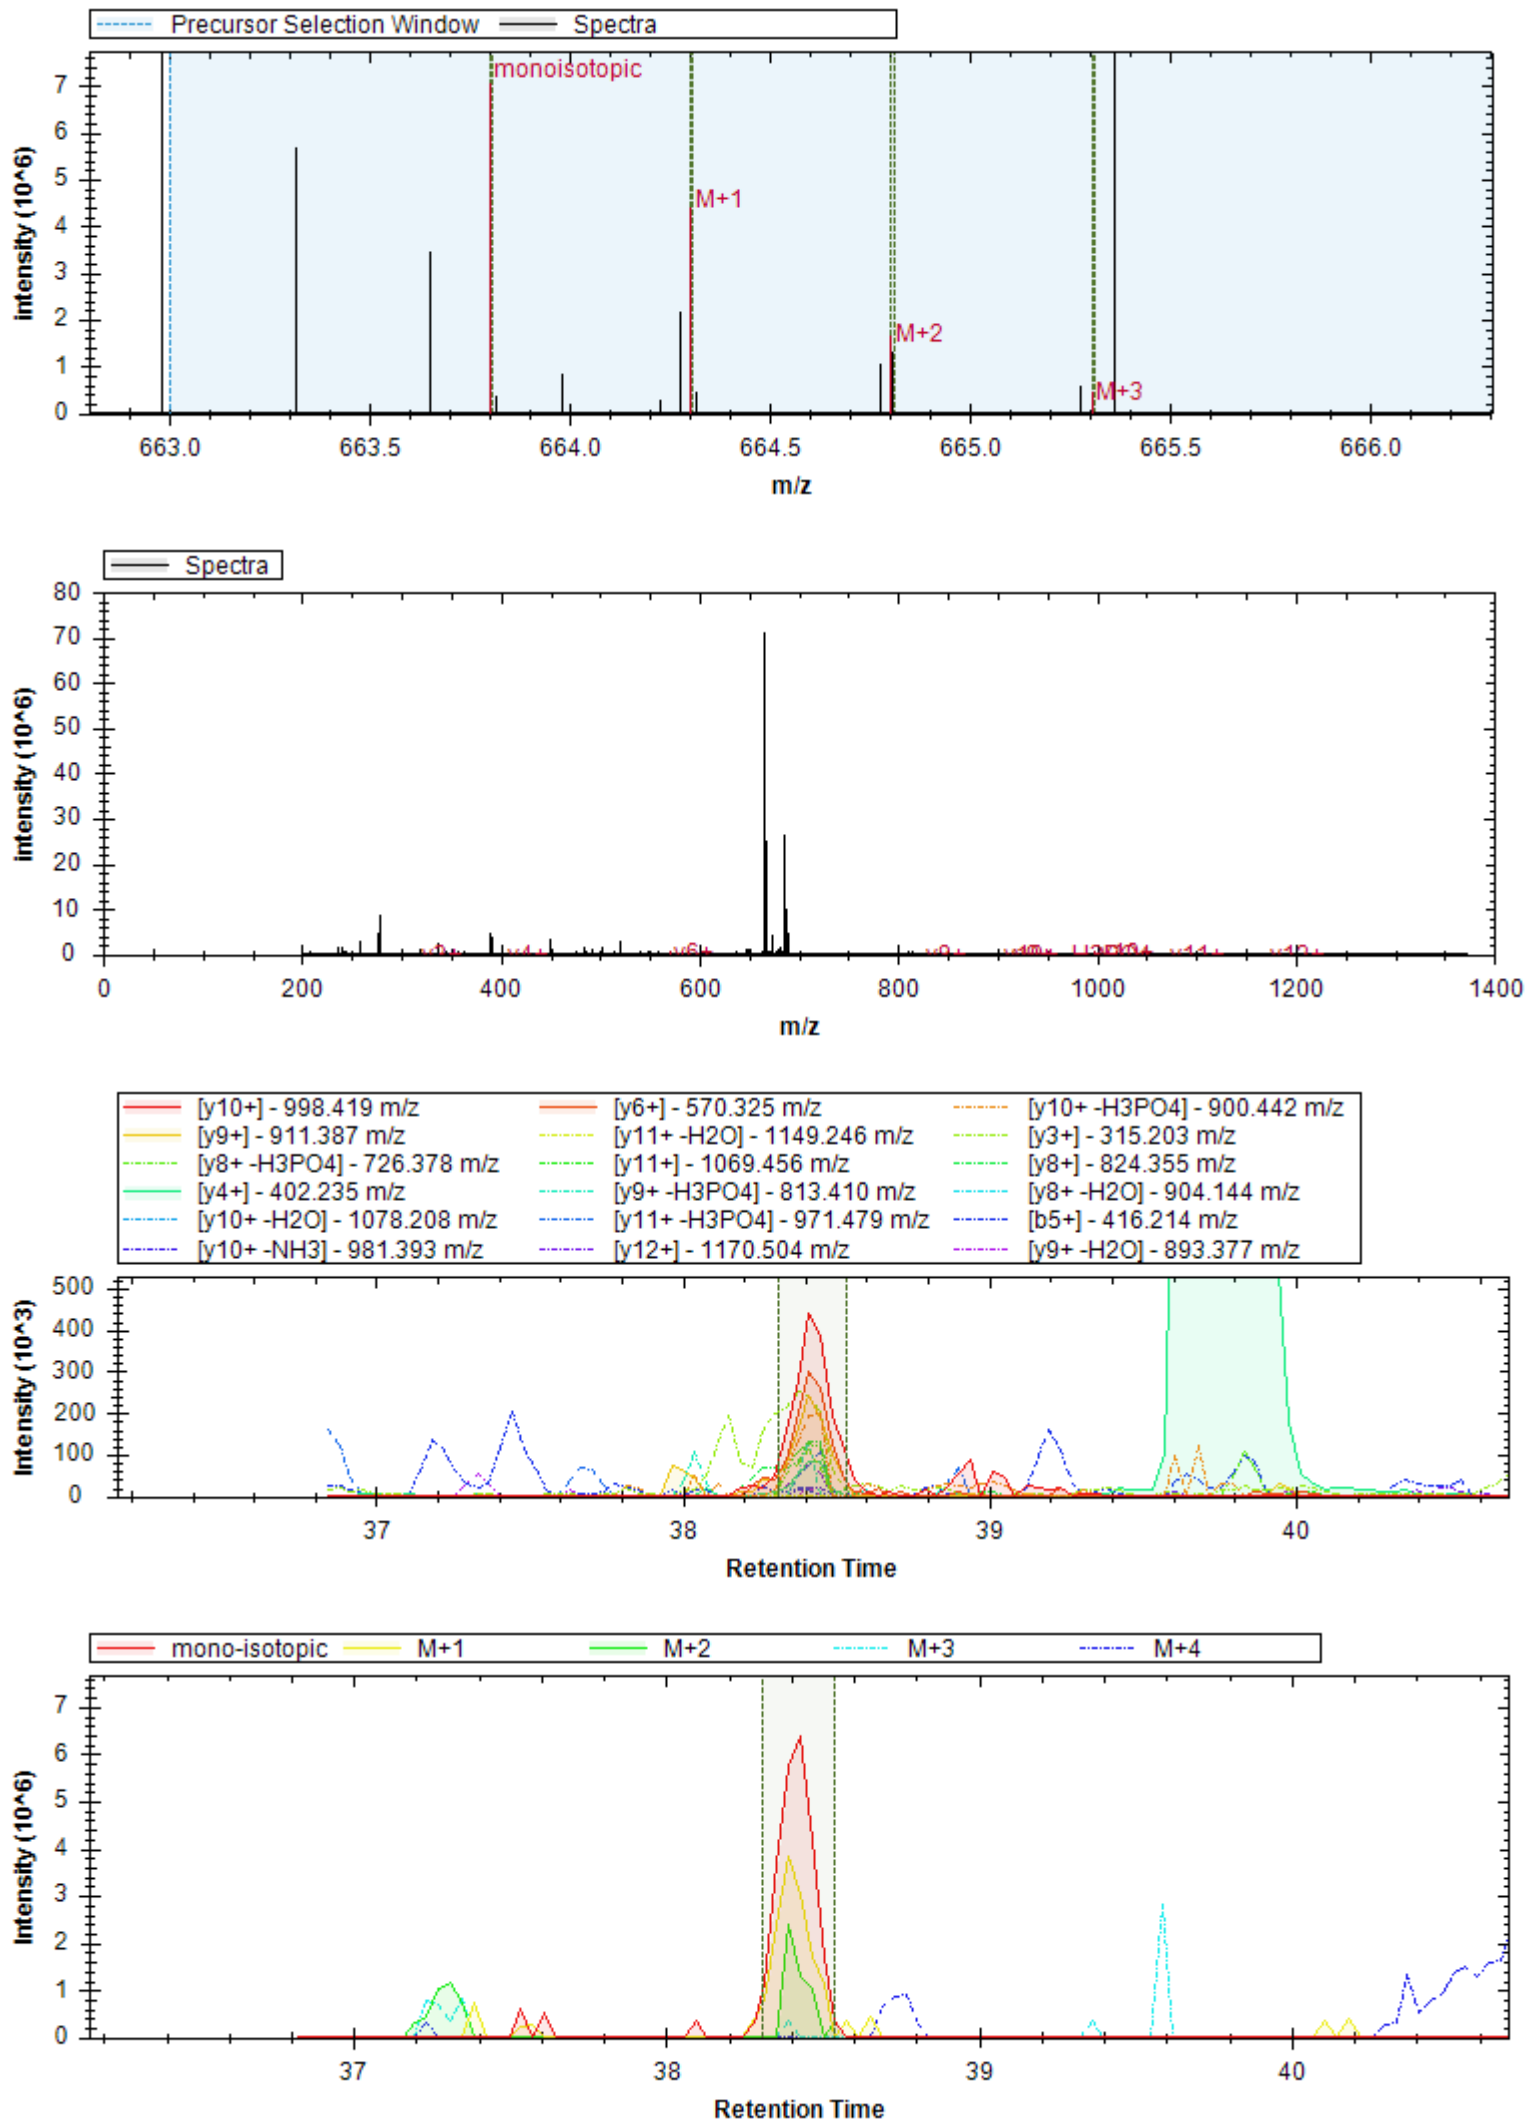

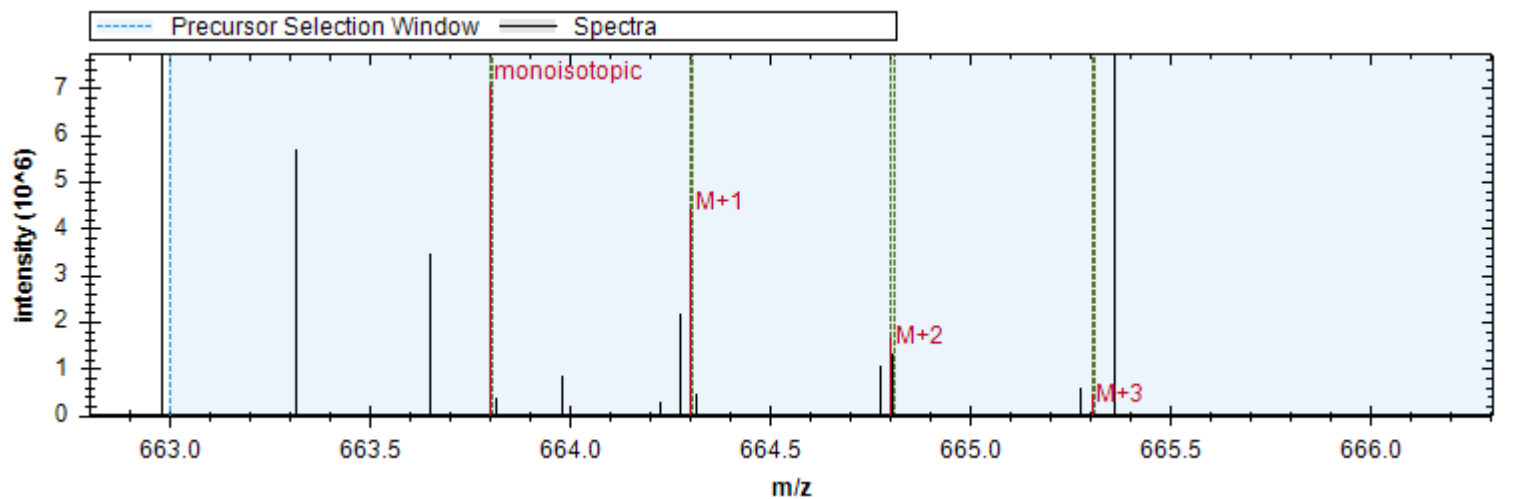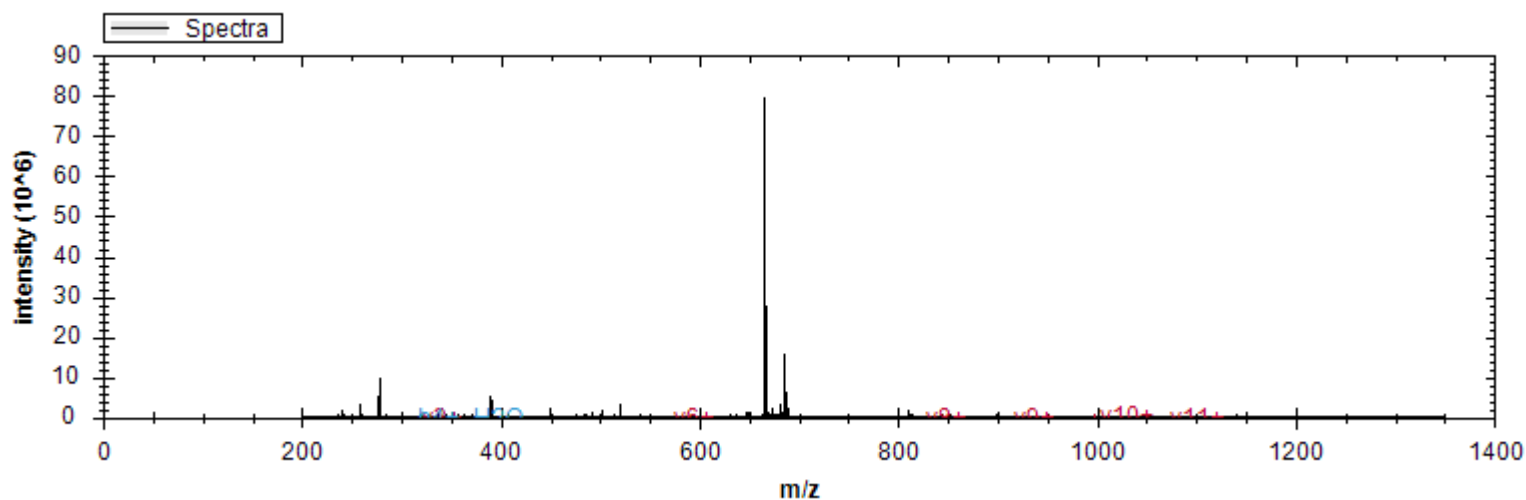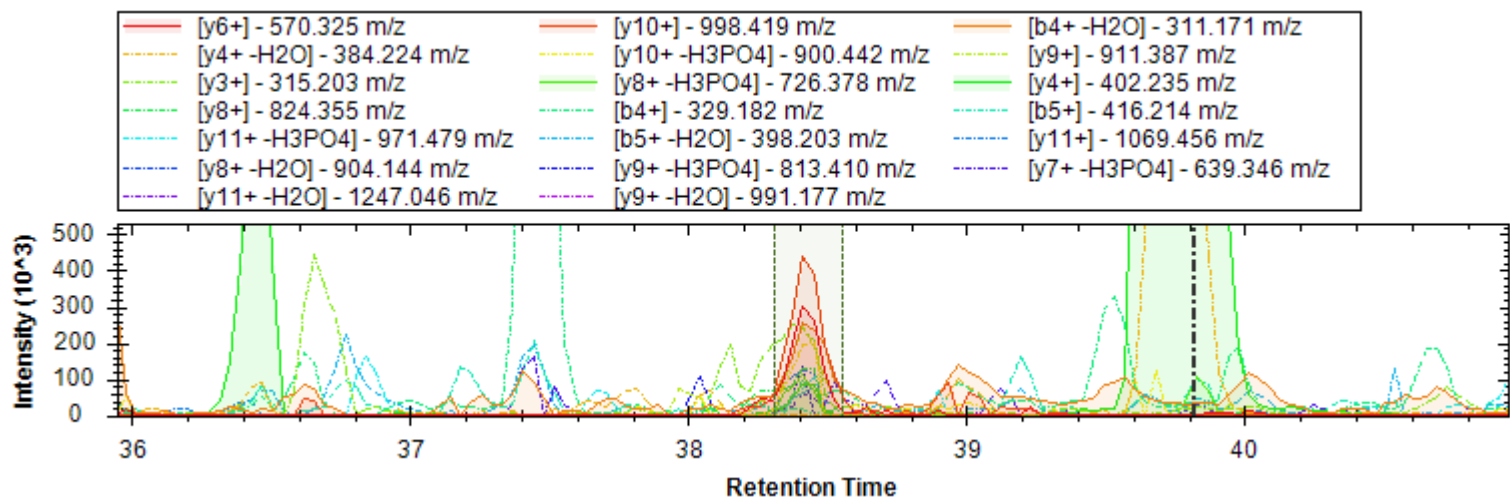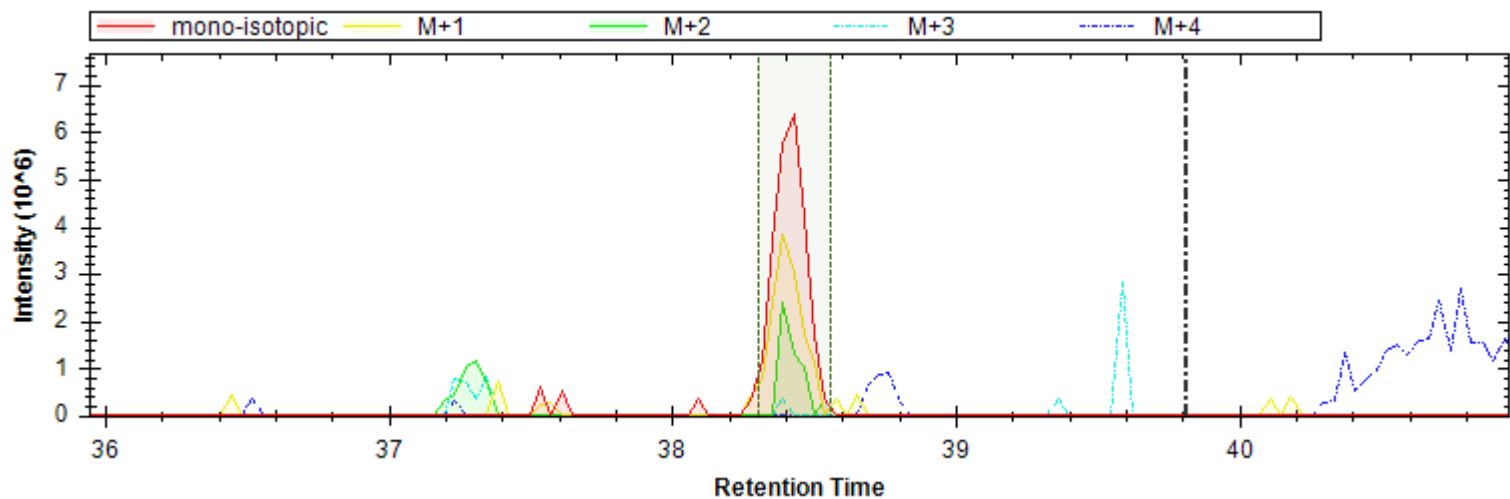



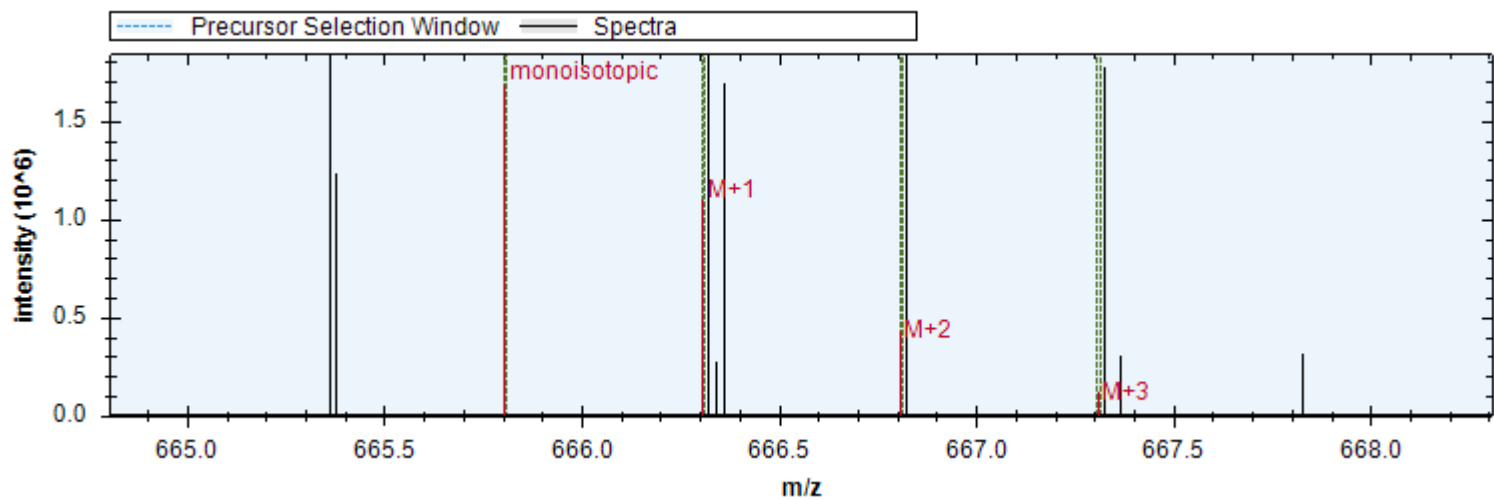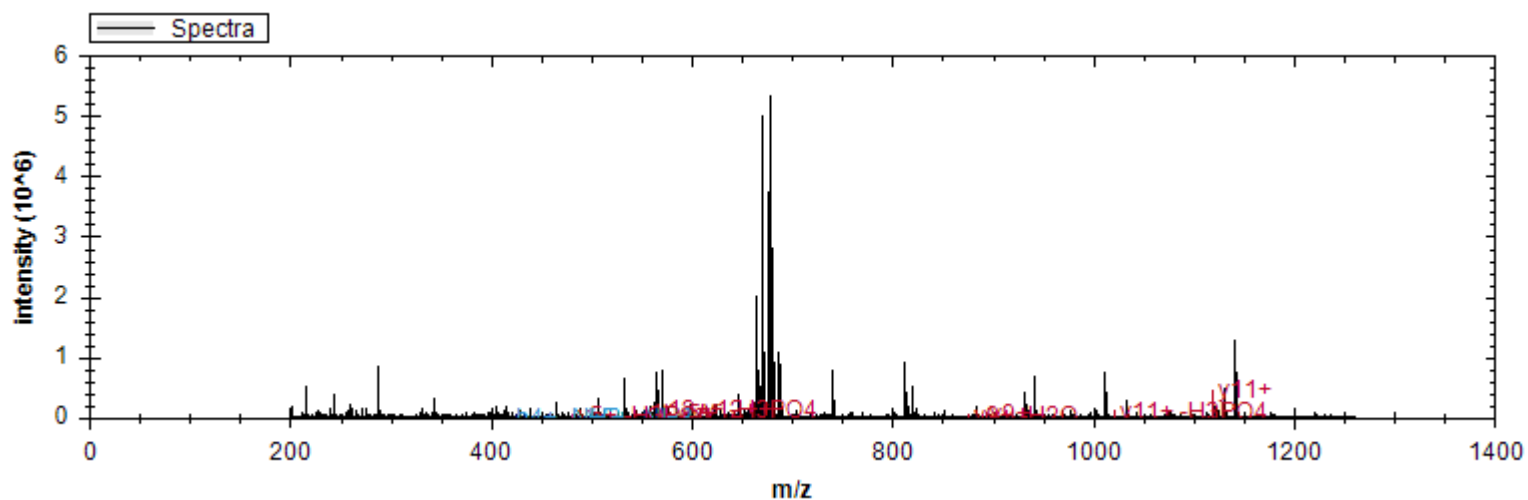

- |                              |                              |                             |
|------------------------------|------------------------------|-----------------------------|
| [y12++ -H3PO4] - 559.796 m/z | [y11+ -H3PO4] - 1021.531 m/z | [y11+] - 1119.508 m/z       |
| [y12++] - 608.784 m/z        | [y5+] - 579.254 m/z          | [y5+ -H3PO4] - 481.277 m/z  |
| [y9+] - 893.413 m/z          | [y9+ -H3PO4] - 795.436 m/z   | [y12++ -H2O] - 599.779 m/z  |
| [y7+] - 751.339 m/z          | [y8+] - 822.376 m/z          | [y6+] - 650.291 m/z         |
| [y8+ -H3PO4] - 724.399 m/z   | [y7+ -H3PO4] - 653.362 m/z   | [y10+ -H3PO4] - 924.479 m/z |
| [b5+ -NH3] - 492.209 m/z     | [y6+ -H3PO4] - 552.314 m/z   | [b3+] - 309.156 m/z         |
| [y9+ -H2O] - 875.402 m/z     | [y11+ -H2O] - 1199.298 m/z   | [b5+] - 509.235 m/z         |
| [y3+ -H3PO4] - 313.187 m/z   | [b4+ -NH3] - 421.172 m/z     |                             |

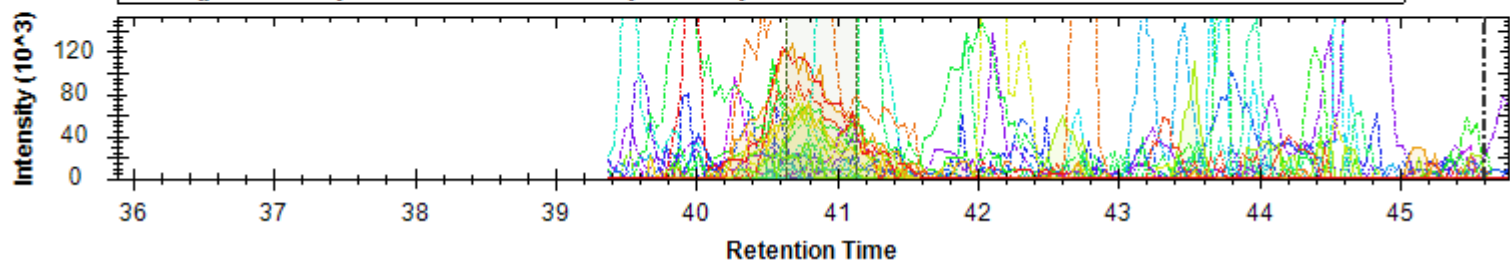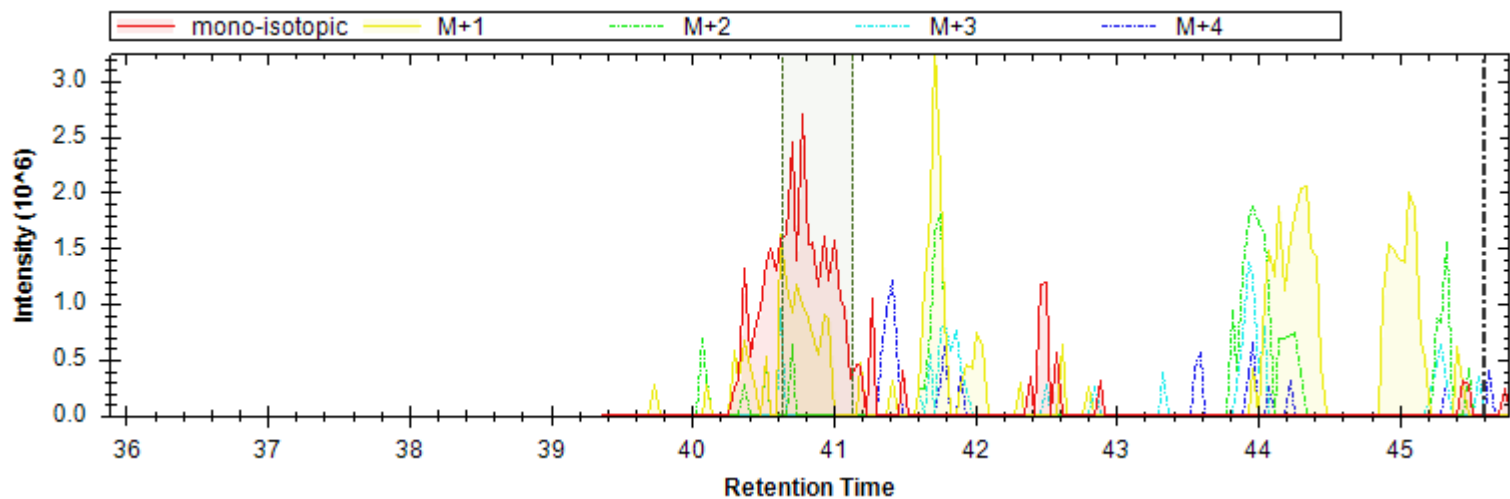

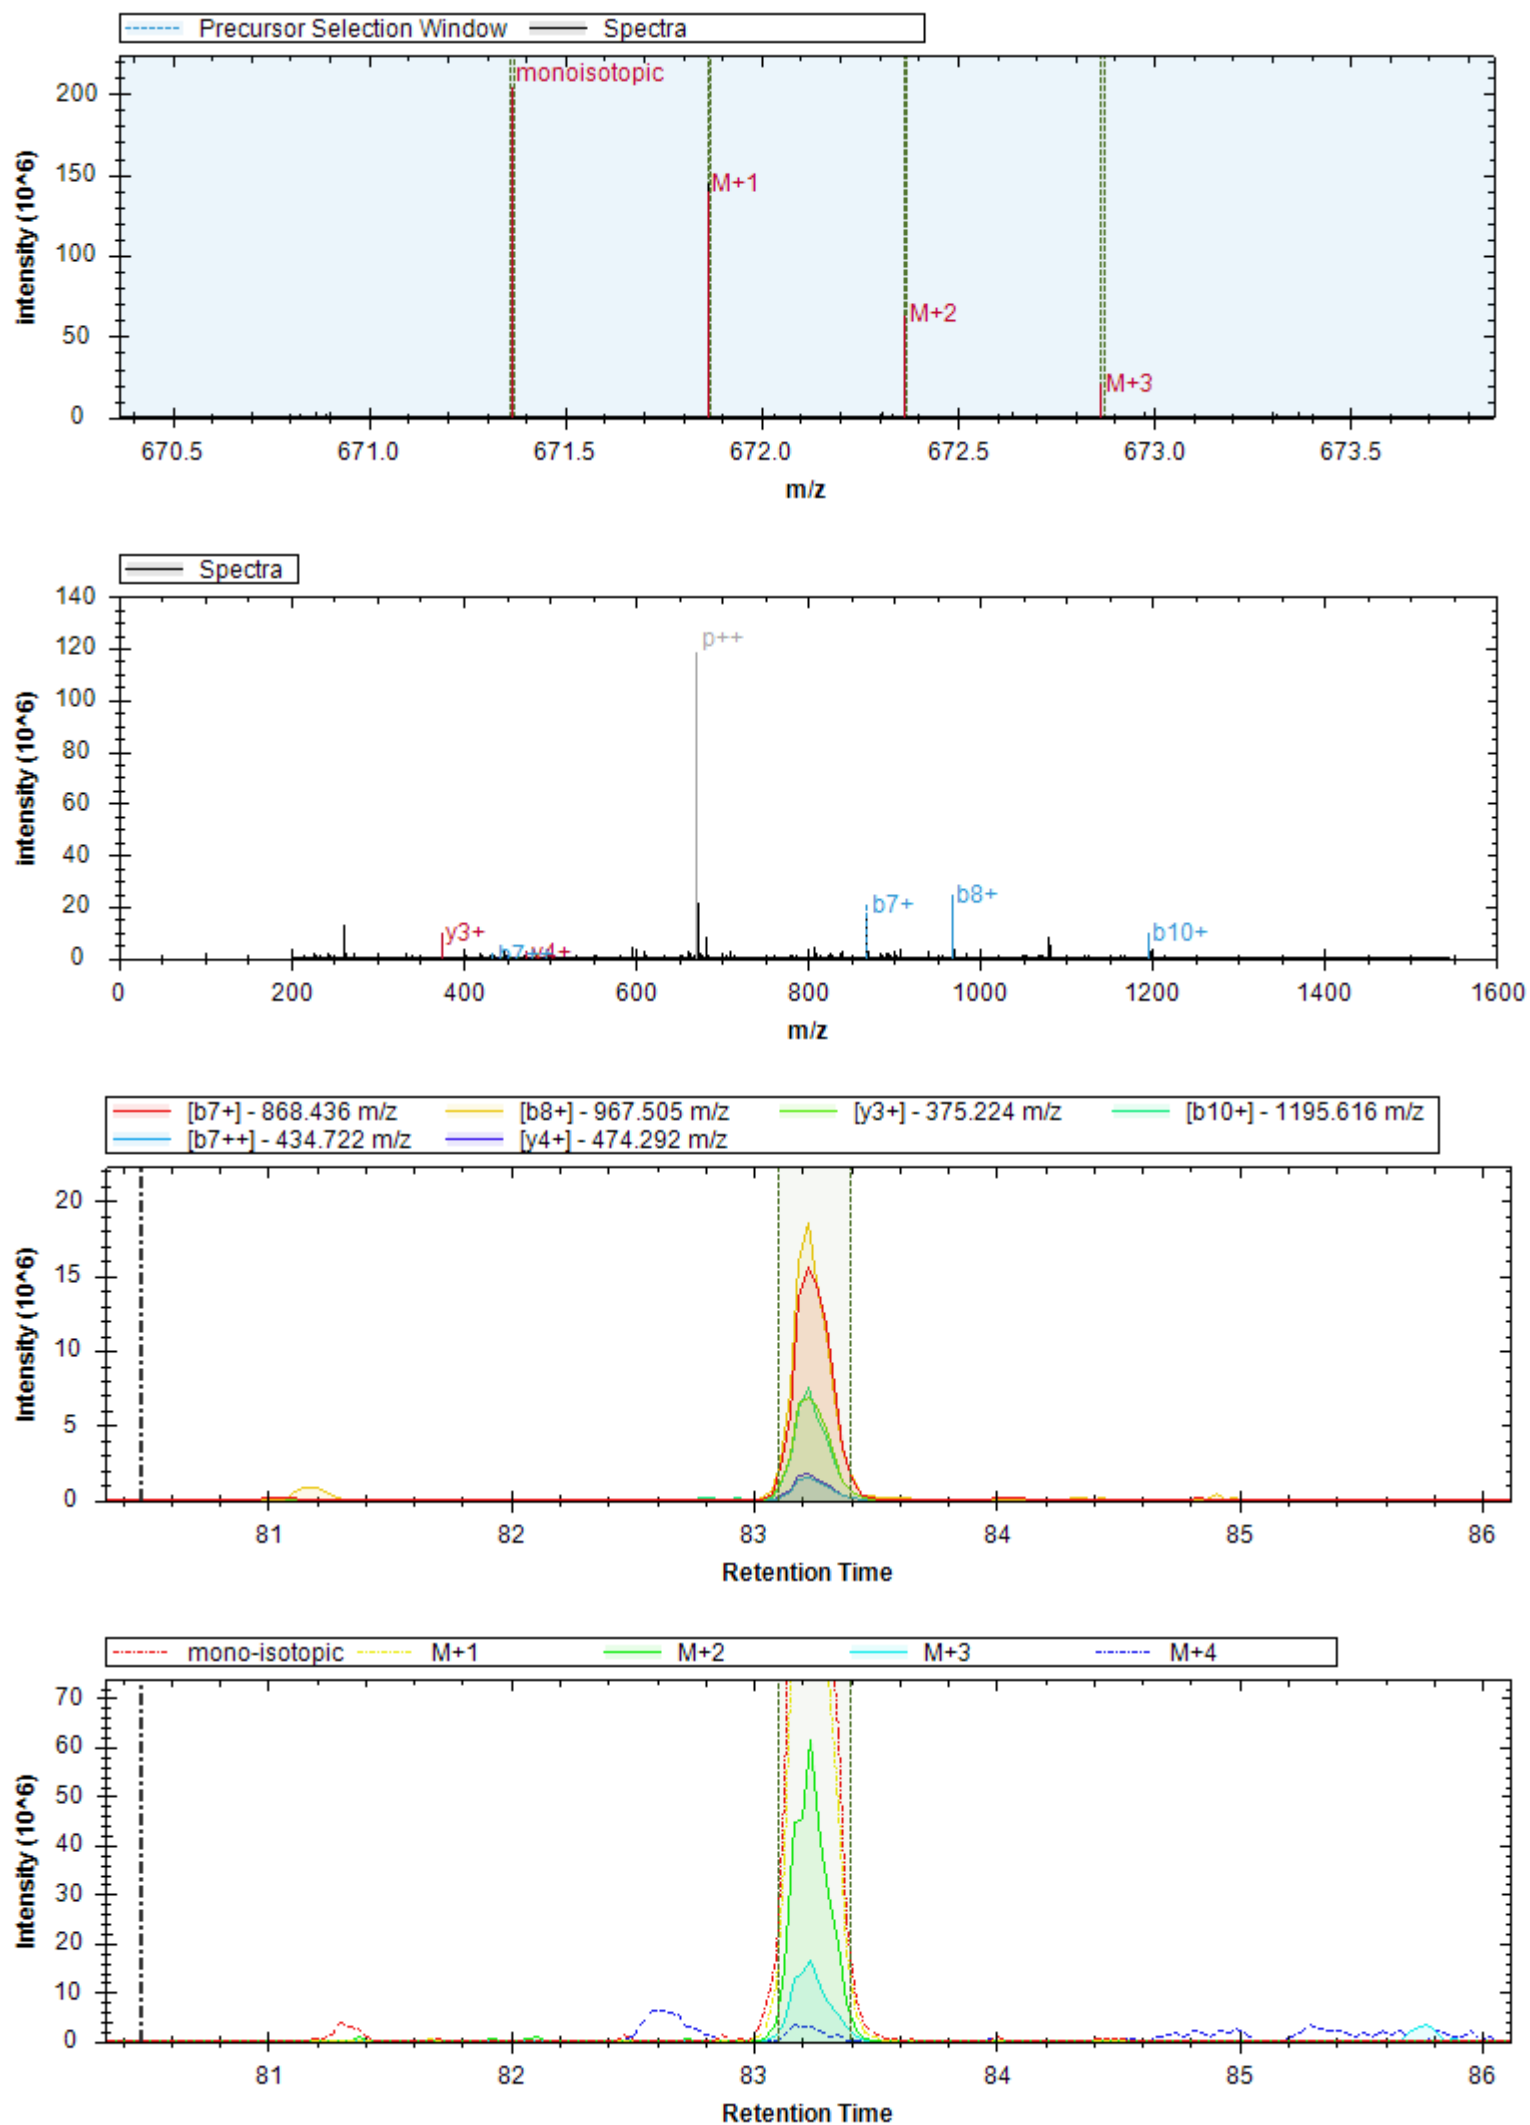

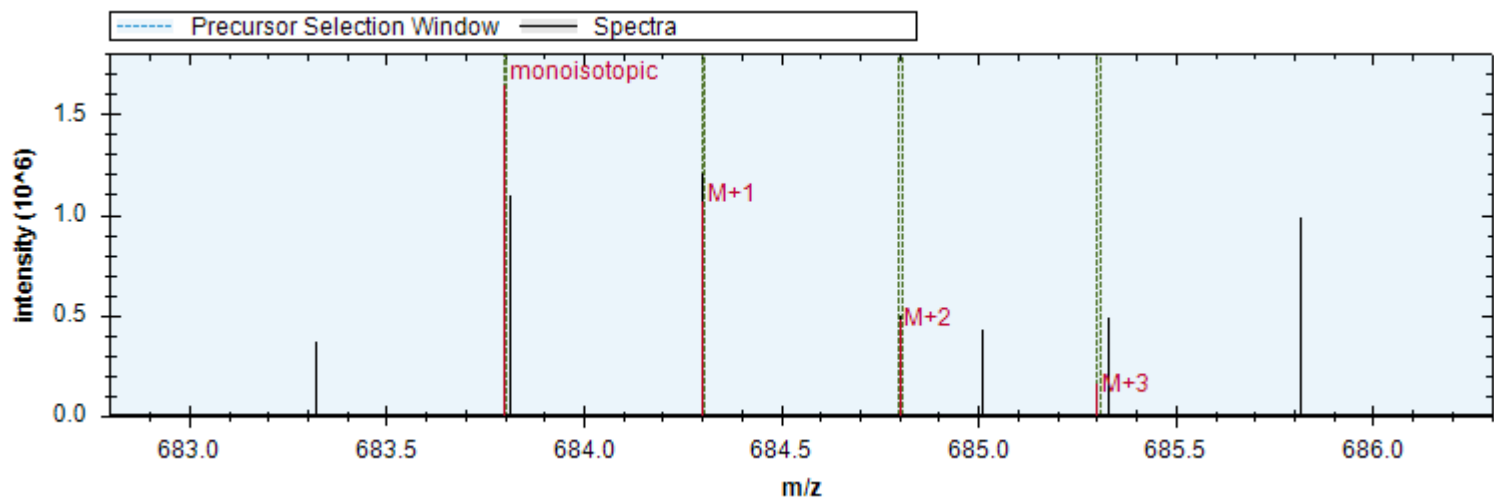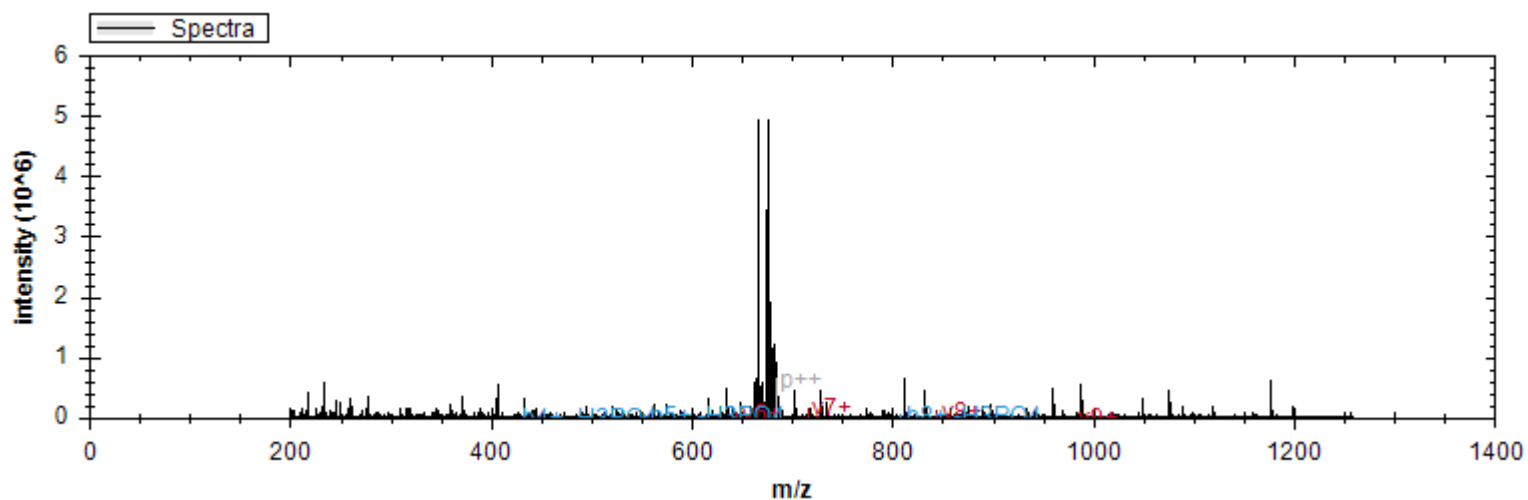

|                              |                              |                            |
|------------------------------|------------------------------|----------------------------|
| [y7+] - 716.405 m/z          | [y8+] - 844.464 m/z          | [y6+] - 645.368 m/z        |
| [y4+] - 461.247 m/z          | [b5+ -H3PO4] - 553.219 m/z   | [y5+] - 574.331 m/z        |
| [b6+ -H3PO4] - 624.256 m/z   | [b4+ -H3PO4] - 425.160 m/z   | [y3+] - 390.210 m/z        |
| [b8+ -H3PO4] - 808.377 m/z   | [y9+] - 981.523 m/z          | [b7+ -H3PO4] - 695.293 m/z |
| [y8+ -NH3] - 827.437 m/z     | [y11++ -H3PO4] - 591.296 m/z | [b9+ -H3PO4] - 879.414 m/z |
| [y10+ -H3PO4] - 1050.544 m/z |                              |                            |

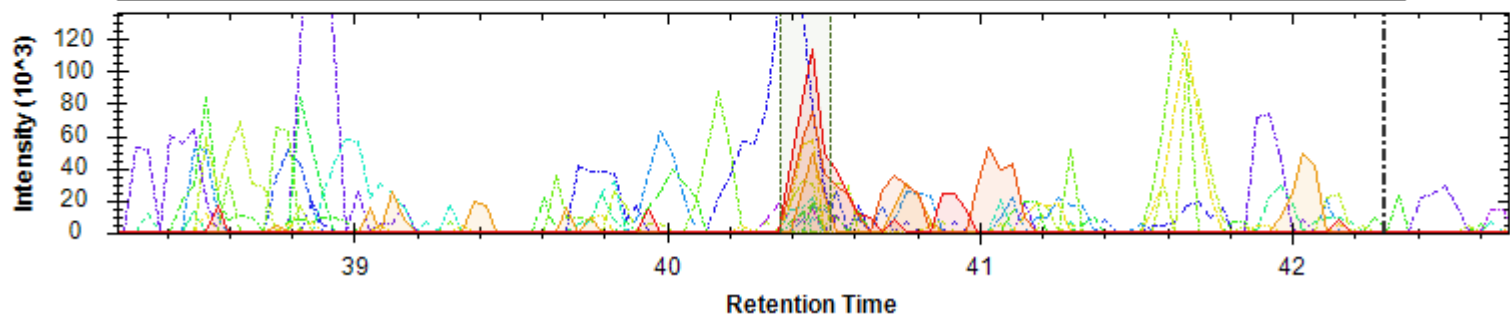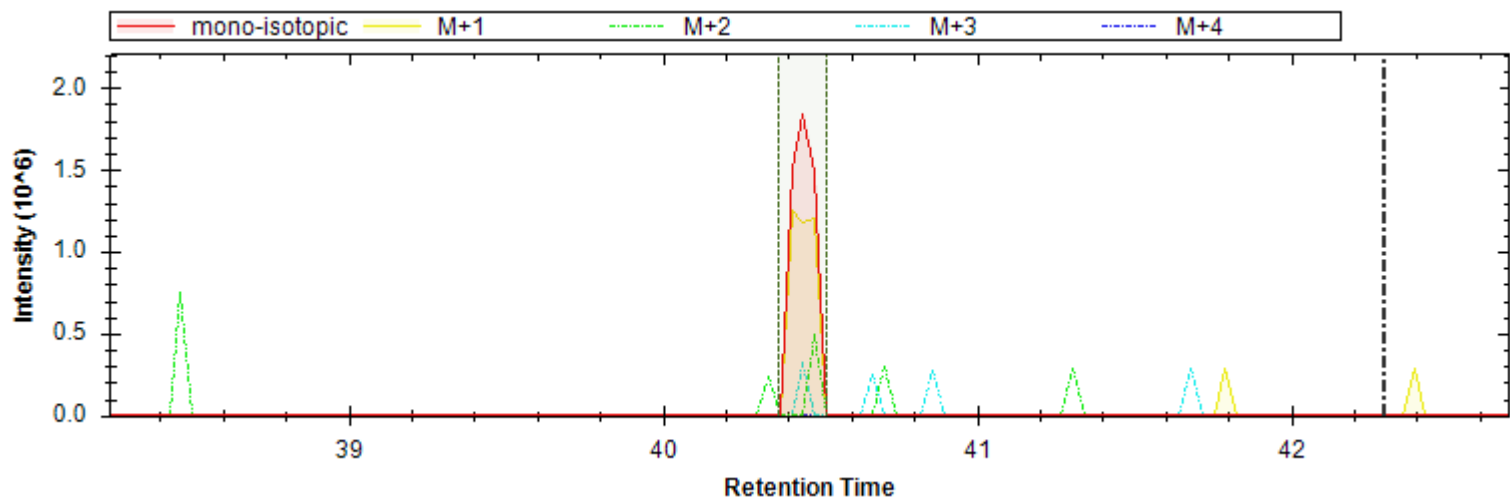

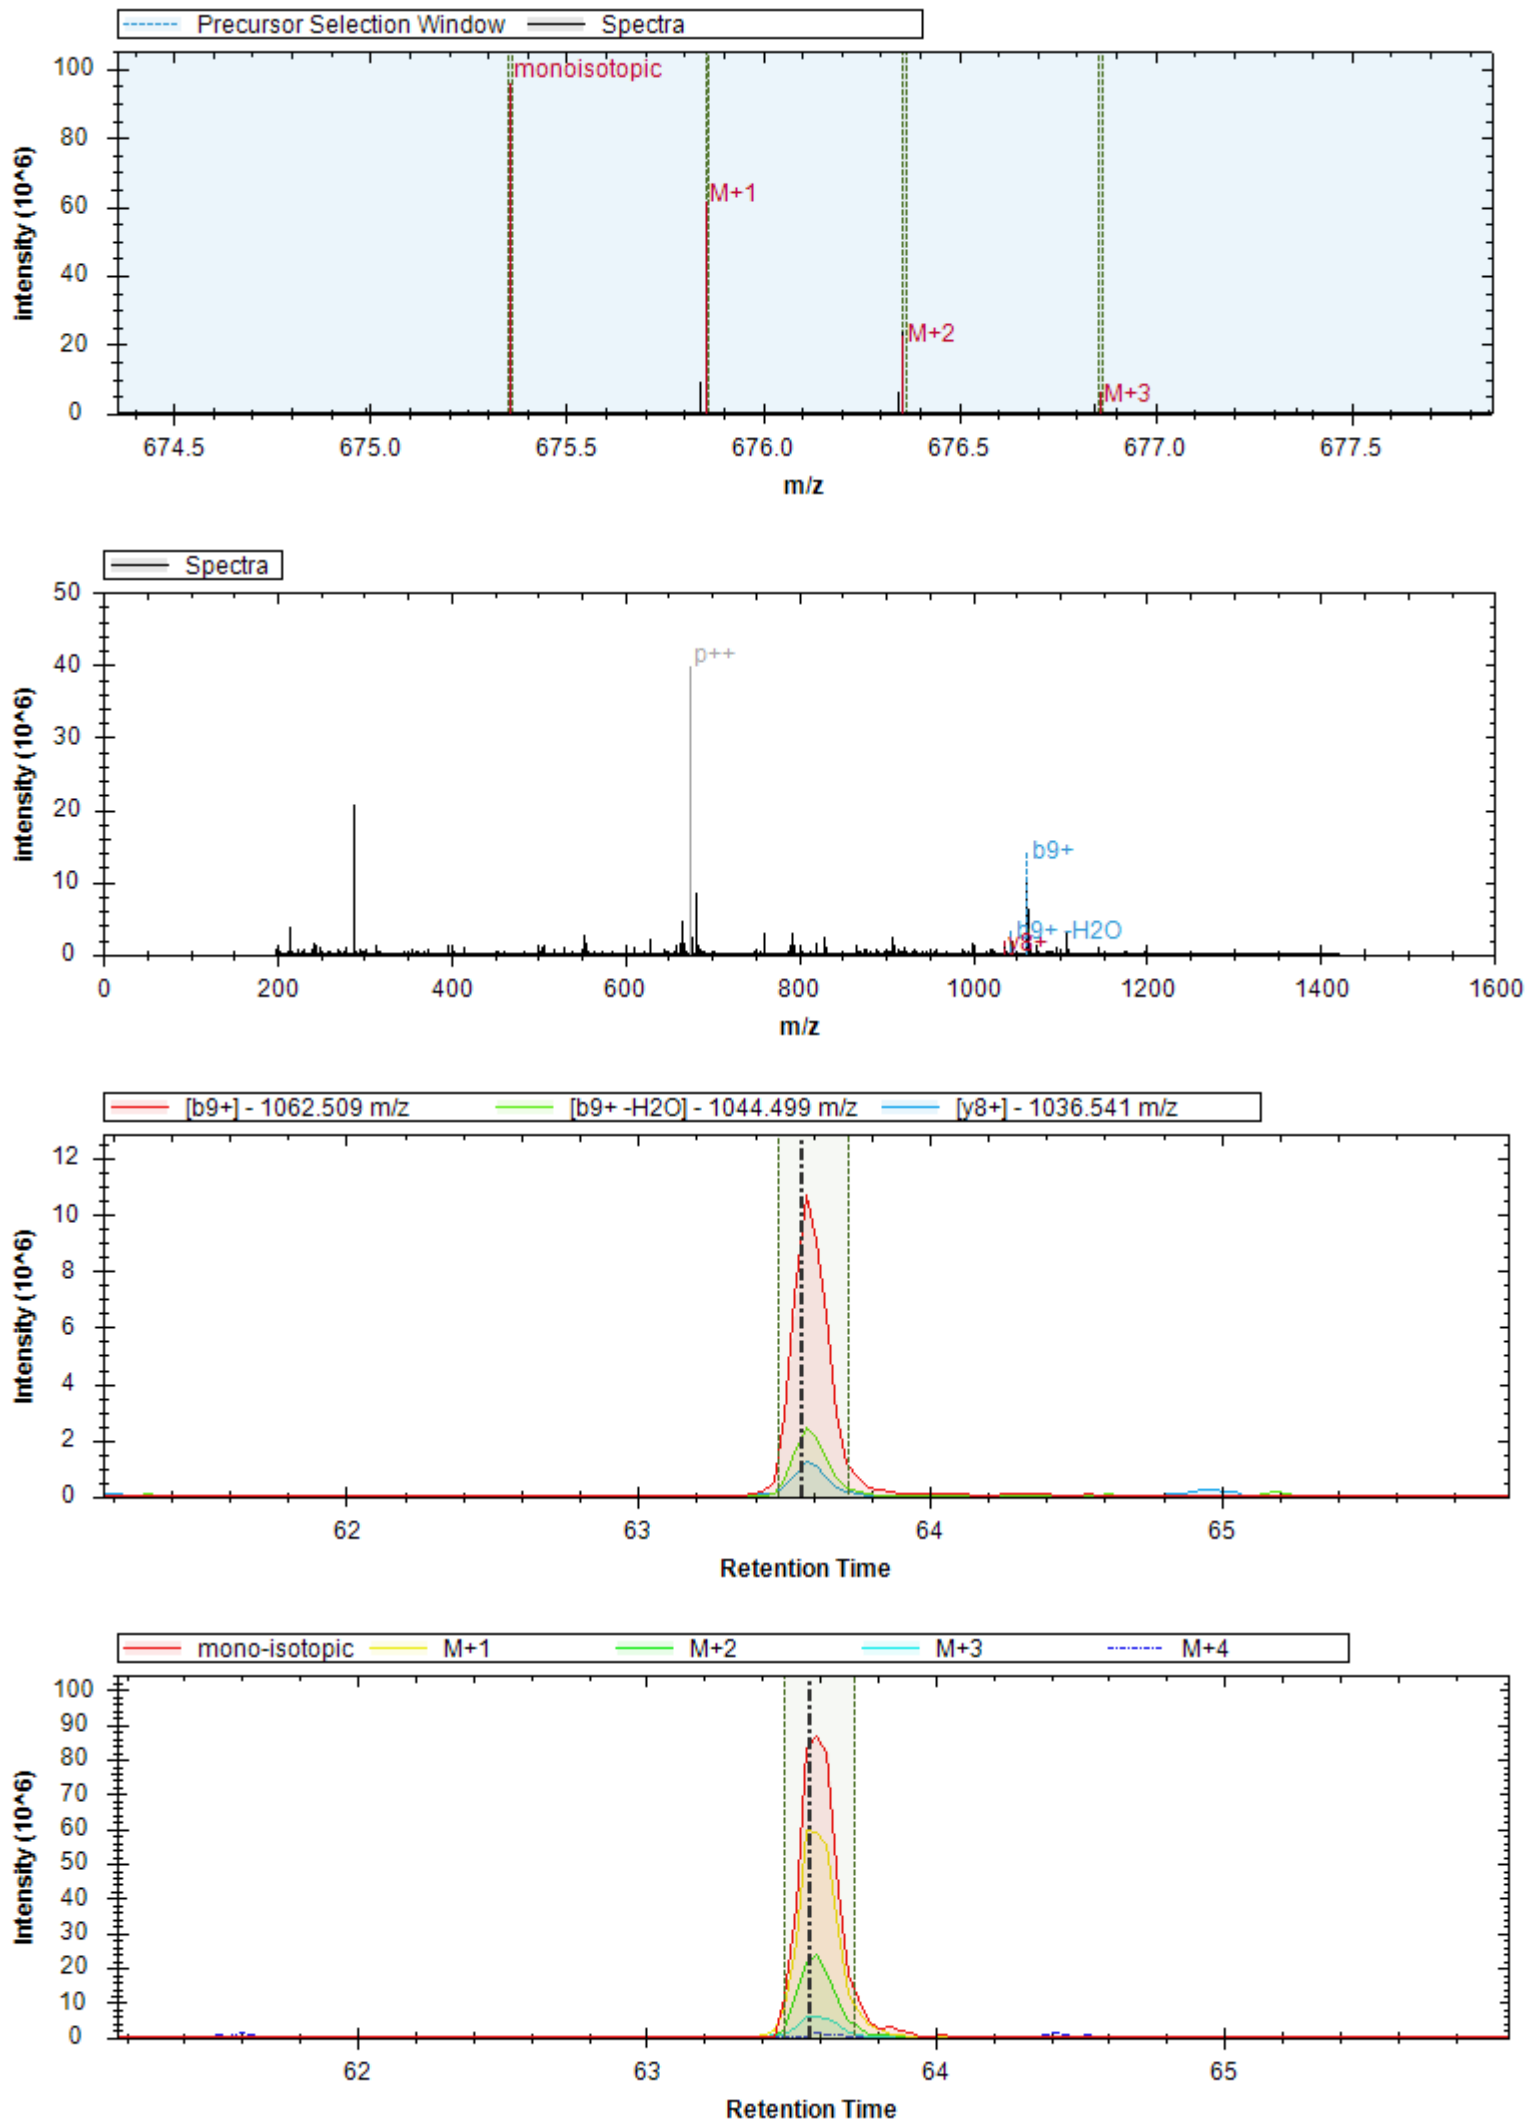

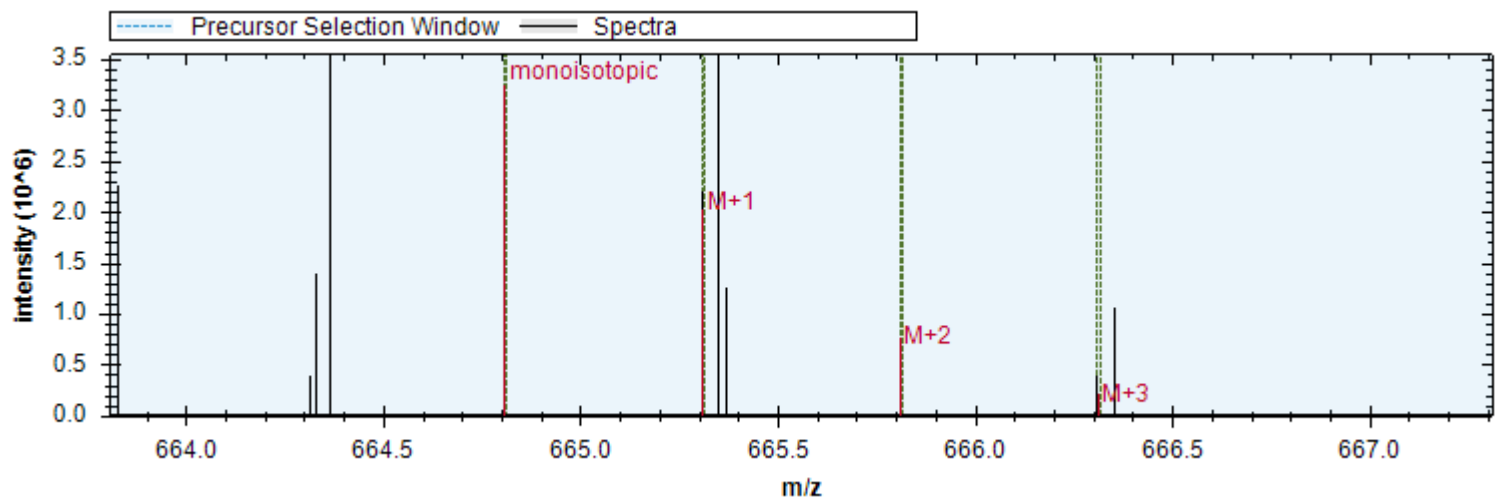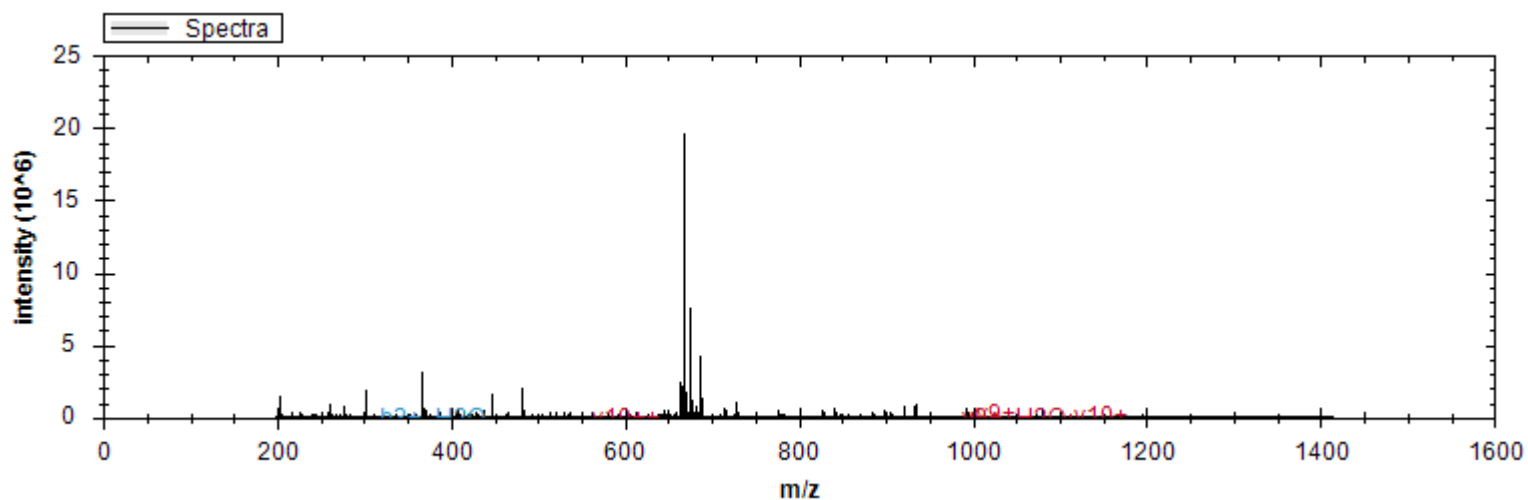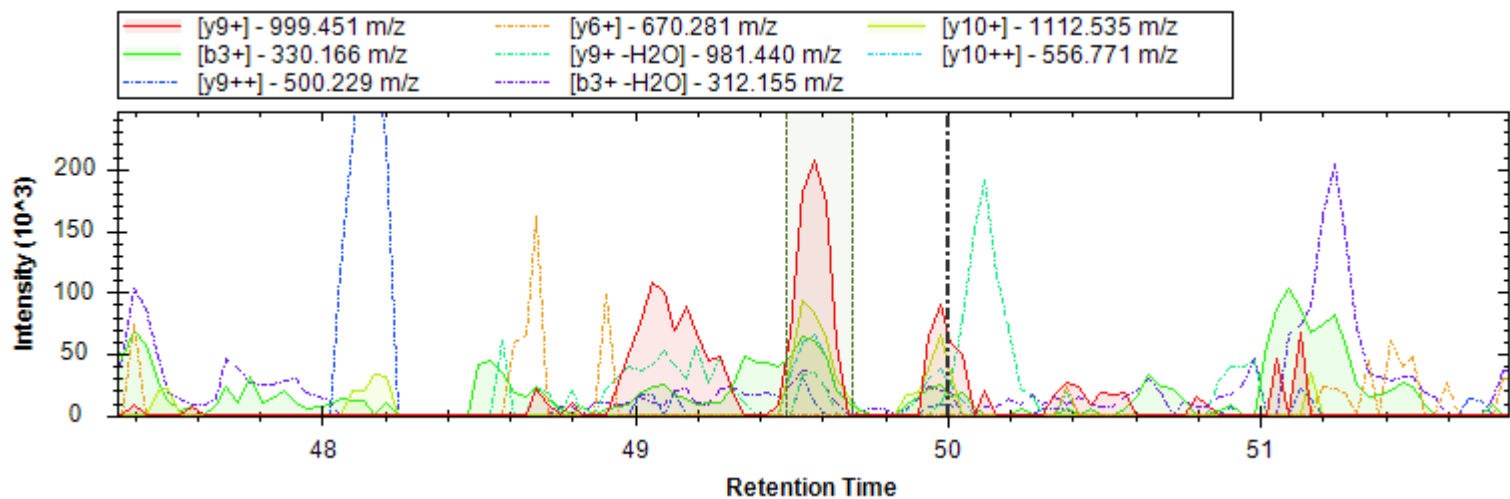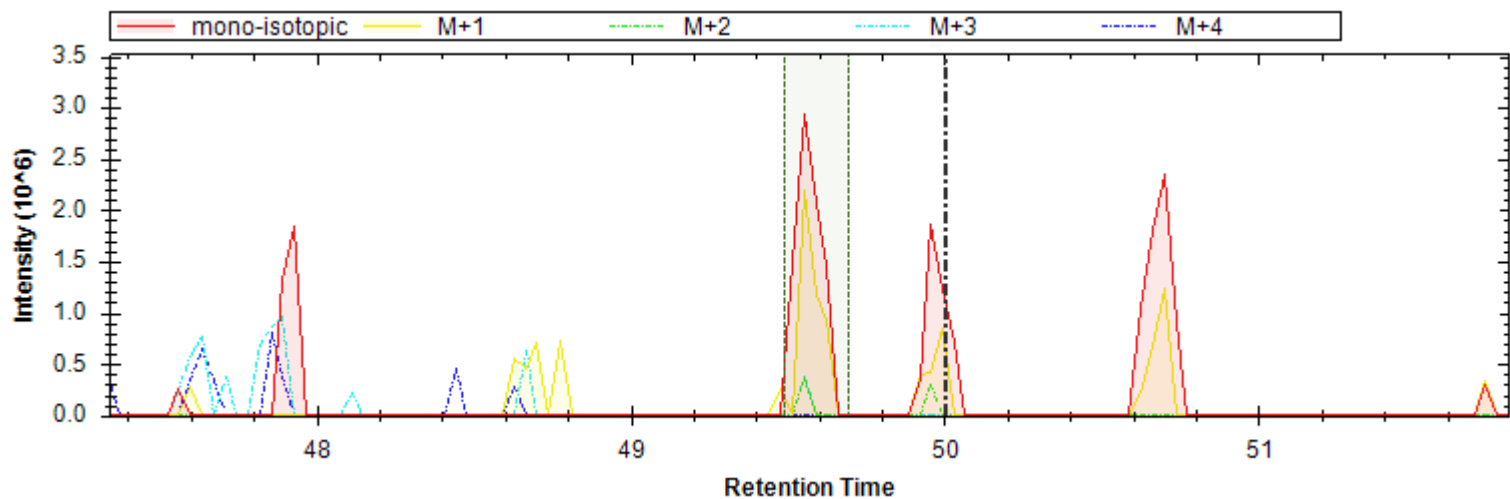

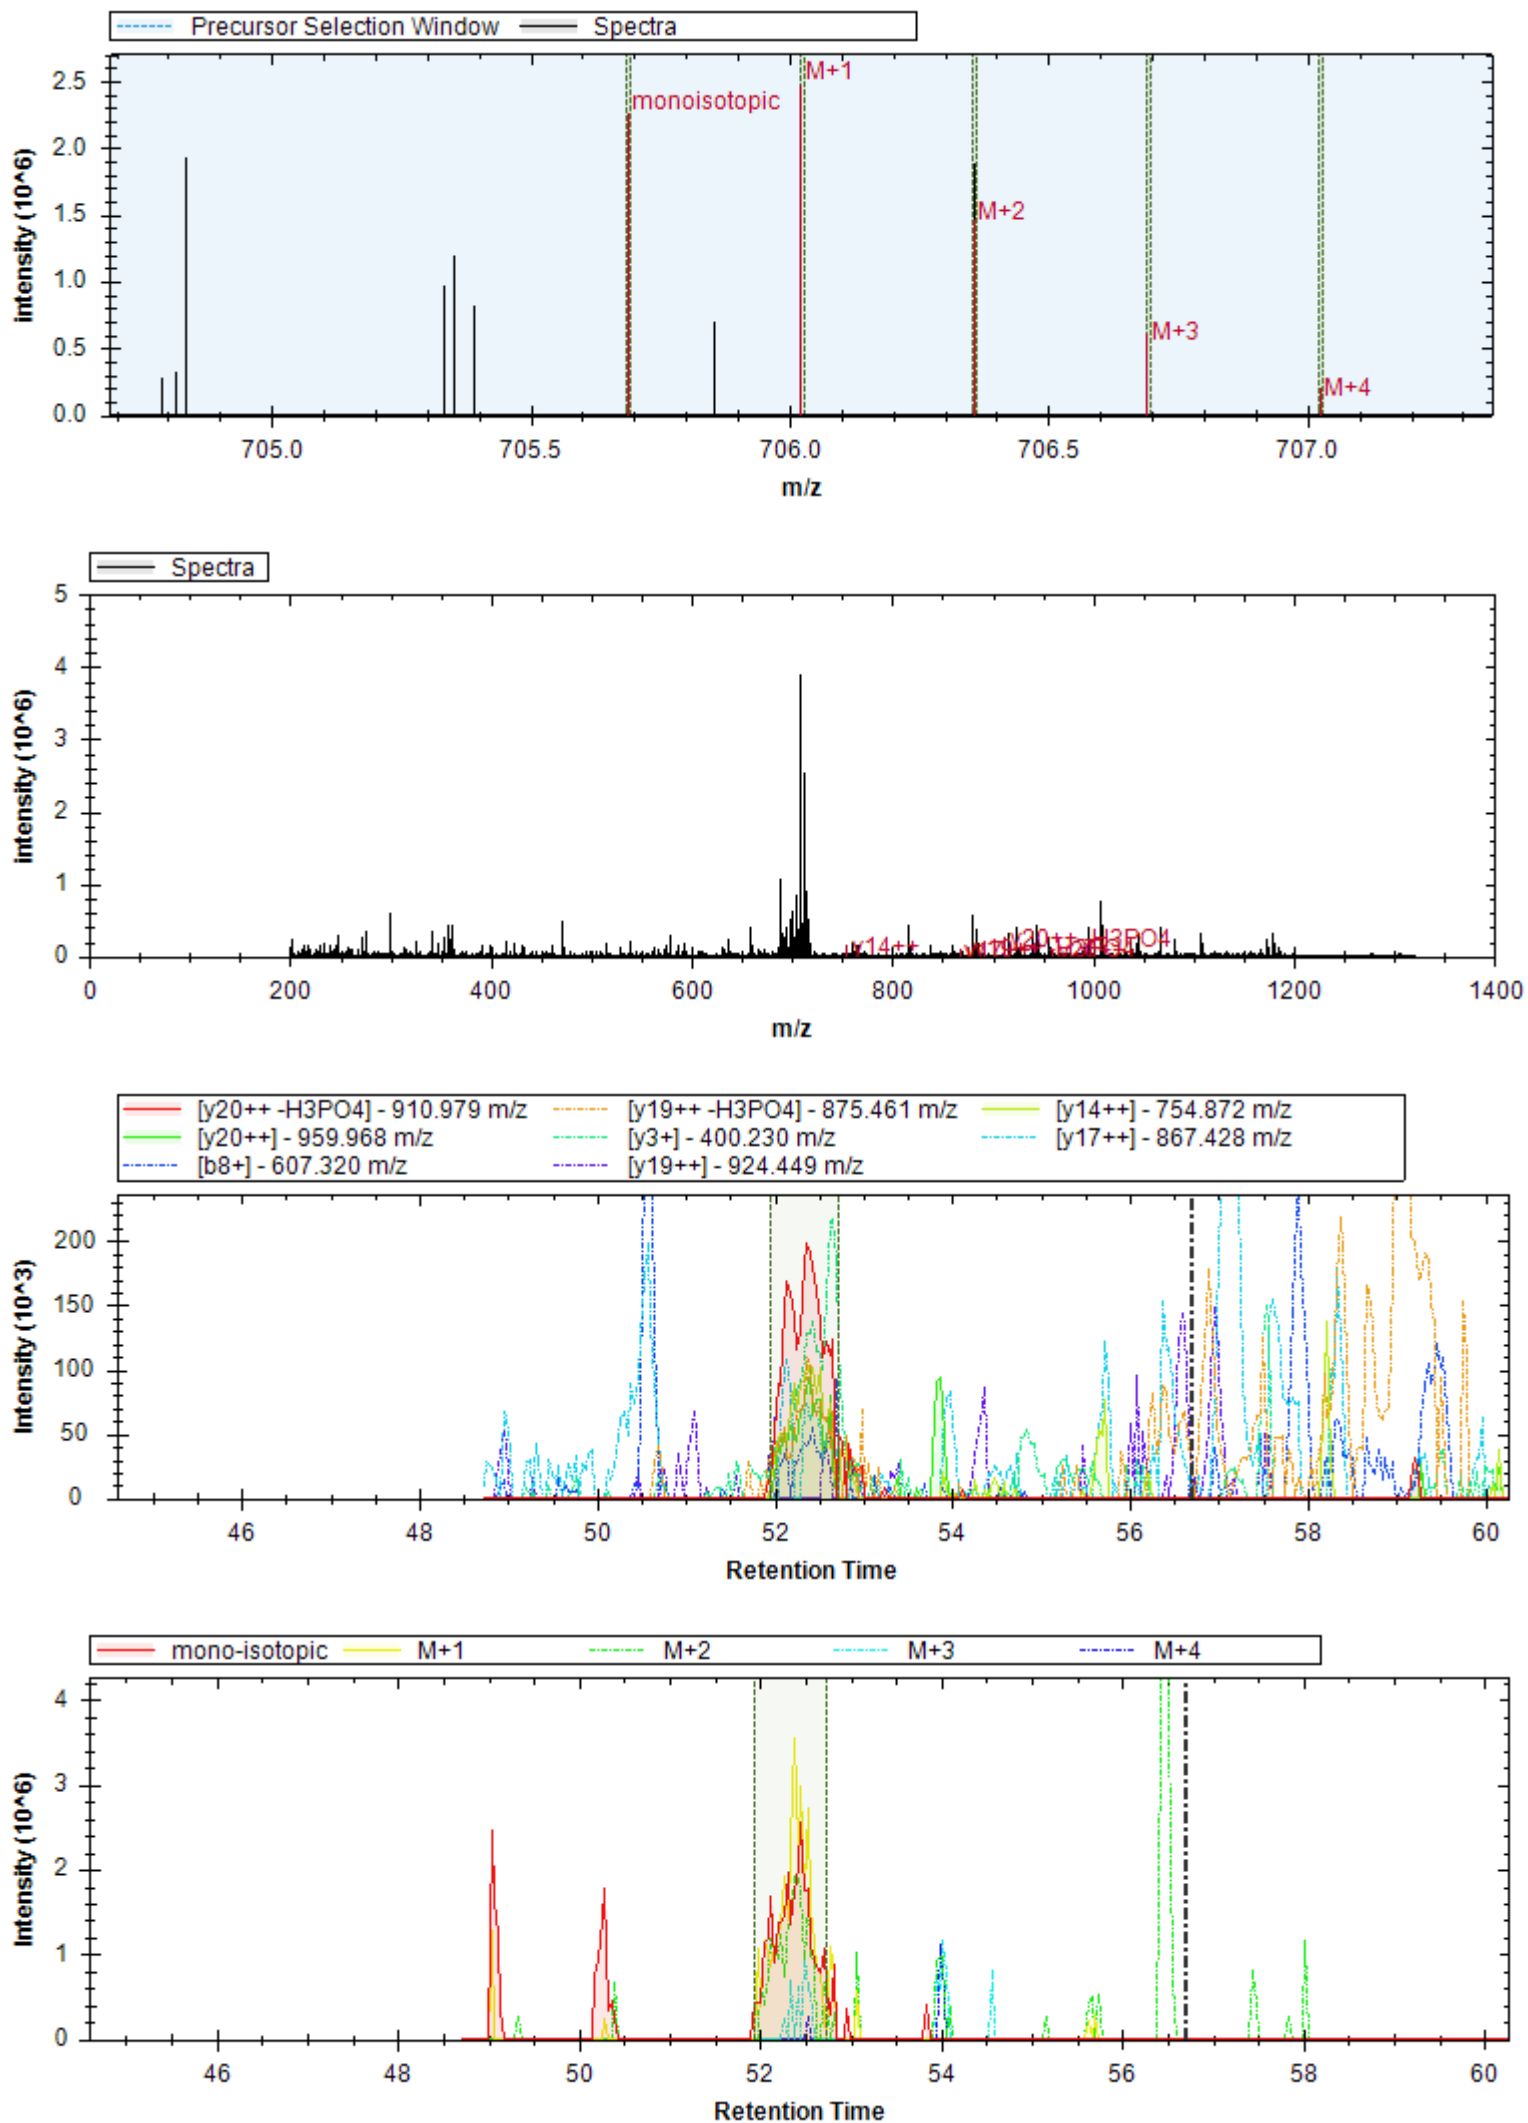

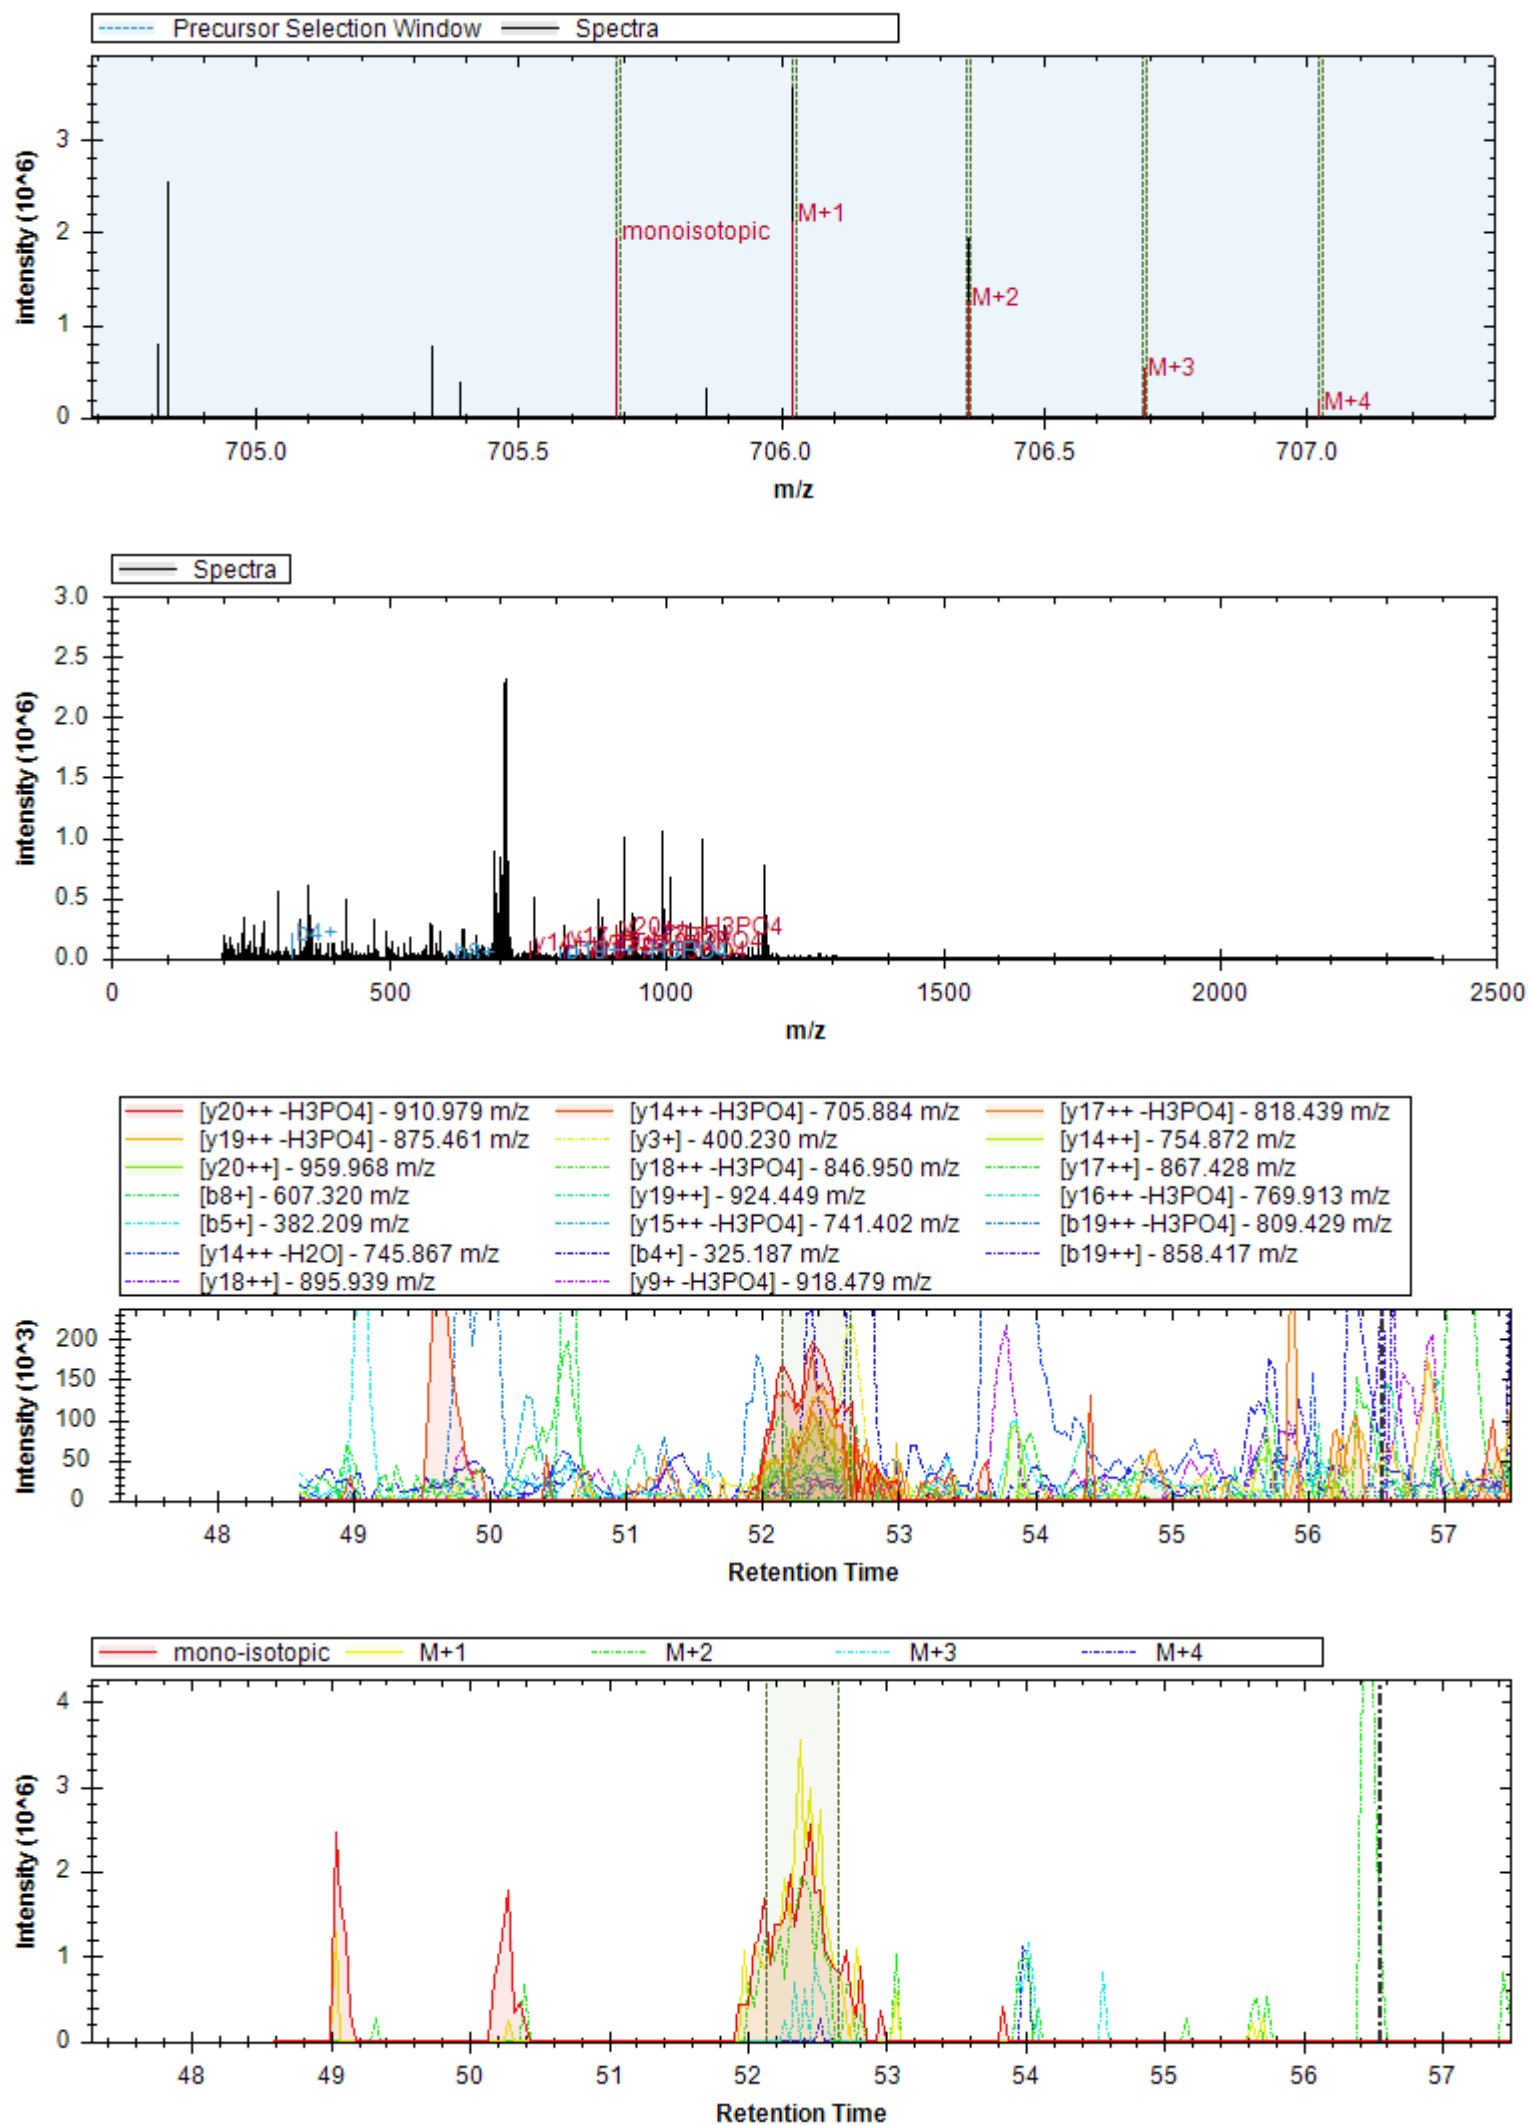

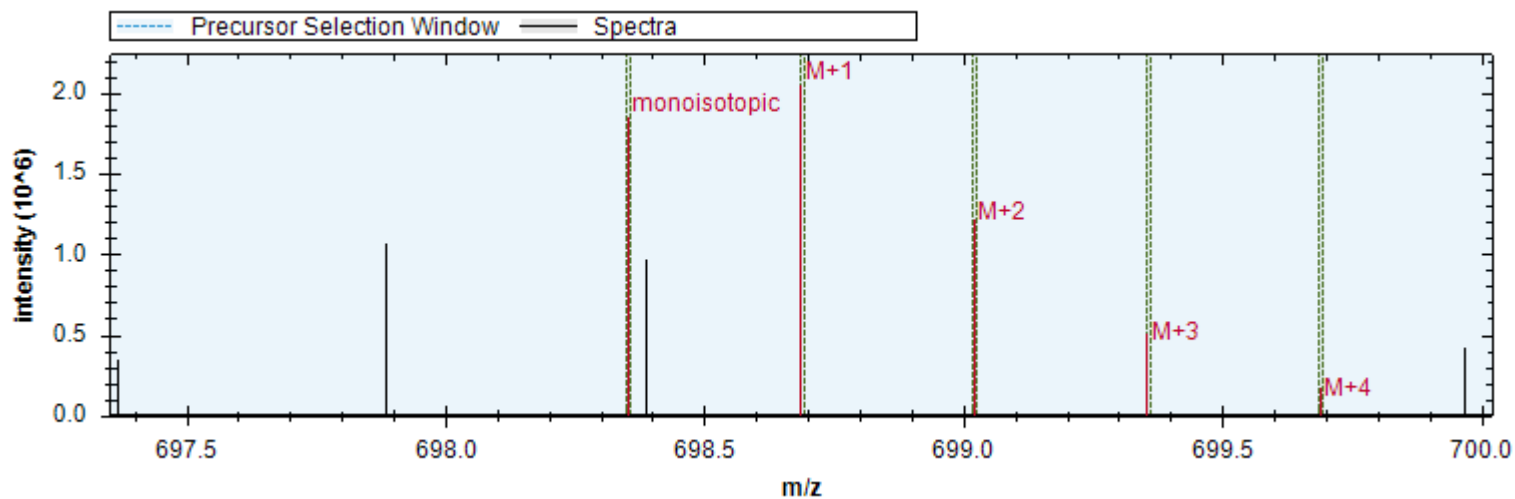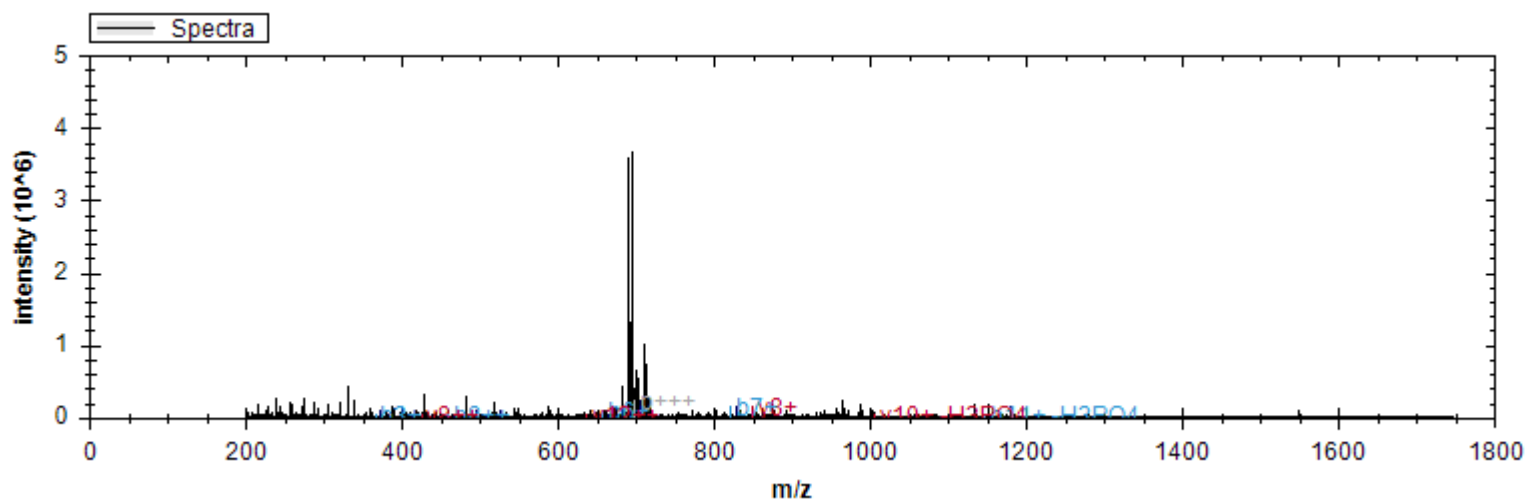

|                              |                              |                      |
|------------------------------|------------------------------|----------------------|
| [b7+] - 821.442 m/z          | [y10+ -H2O] - 1184.309 m/z   | [b6+] - 658.378 m/z  |
| [y8+] - 850.489 m/z          | [b9+] - 989.532 m/z          | [b8++] - 459.751 m/z |
| [y4+] - 482.283 m/z          | [y12+ -H2O] - 1352.399 m/z   | [b3+] - 367.245 m/z  |
| [y6+] - 652.389 m/z          | [y12+ -H3PO4] - 1174.633 m/z | [y7+] - 753.437 m/z  |
| [y12++] - 636.809 m/z        | [b17++] - 910.436 m/z        | [y8++] - 425.748 m/z |
| [b11+ -H3PO4] - 1145.585 m/z | [y10+ -H3PO4] - 1006.543 m/z | [y3+] - 345.225 m/z  |
| [y5+] - 581.352 m/z          | [y13++] - 718.340 m/z        |                      |

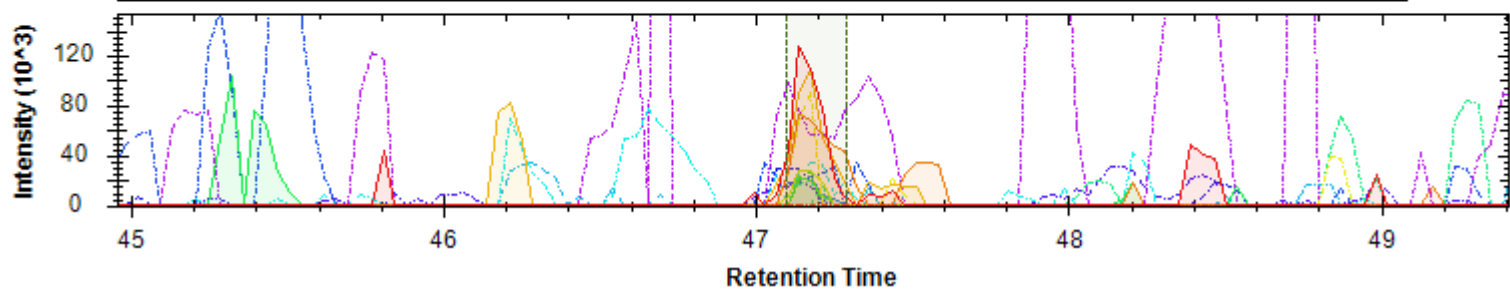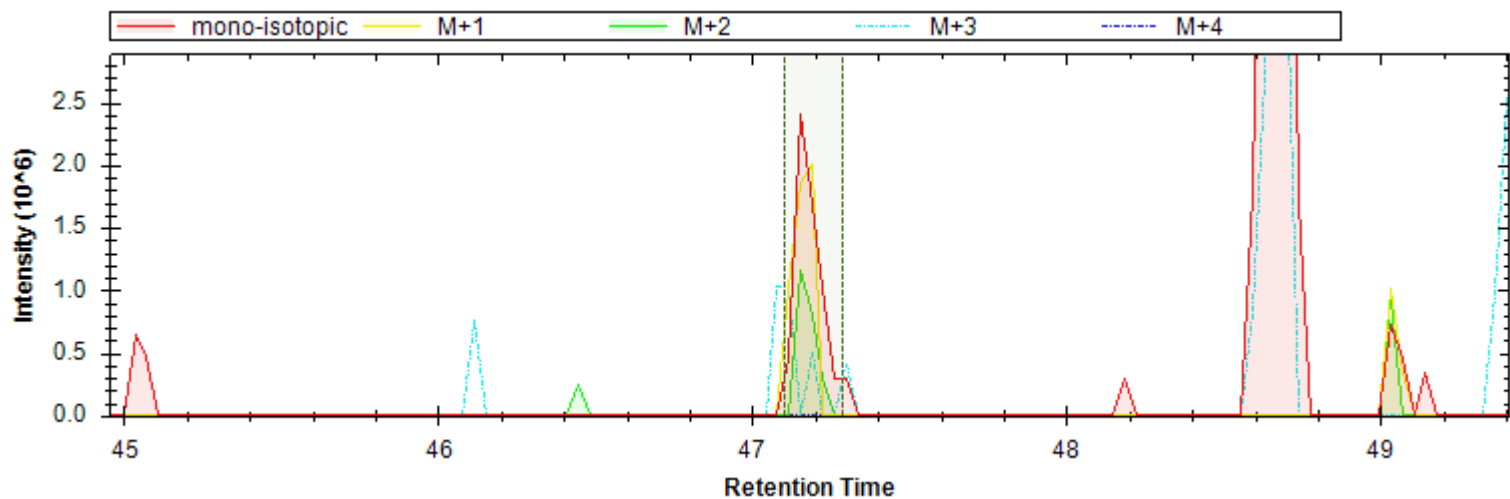



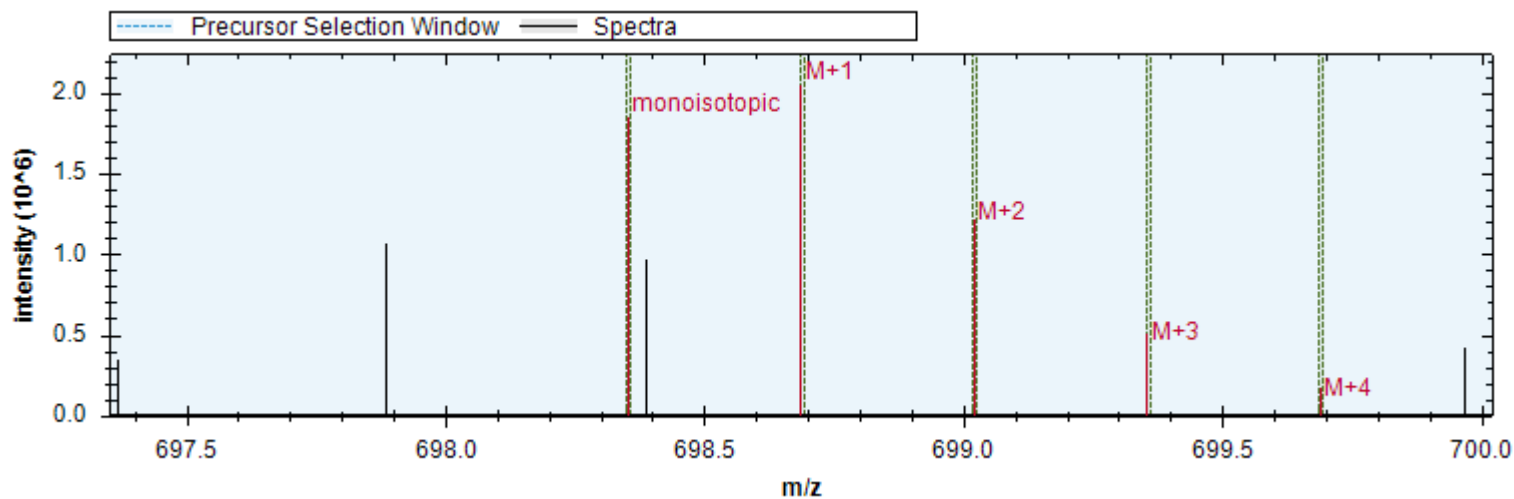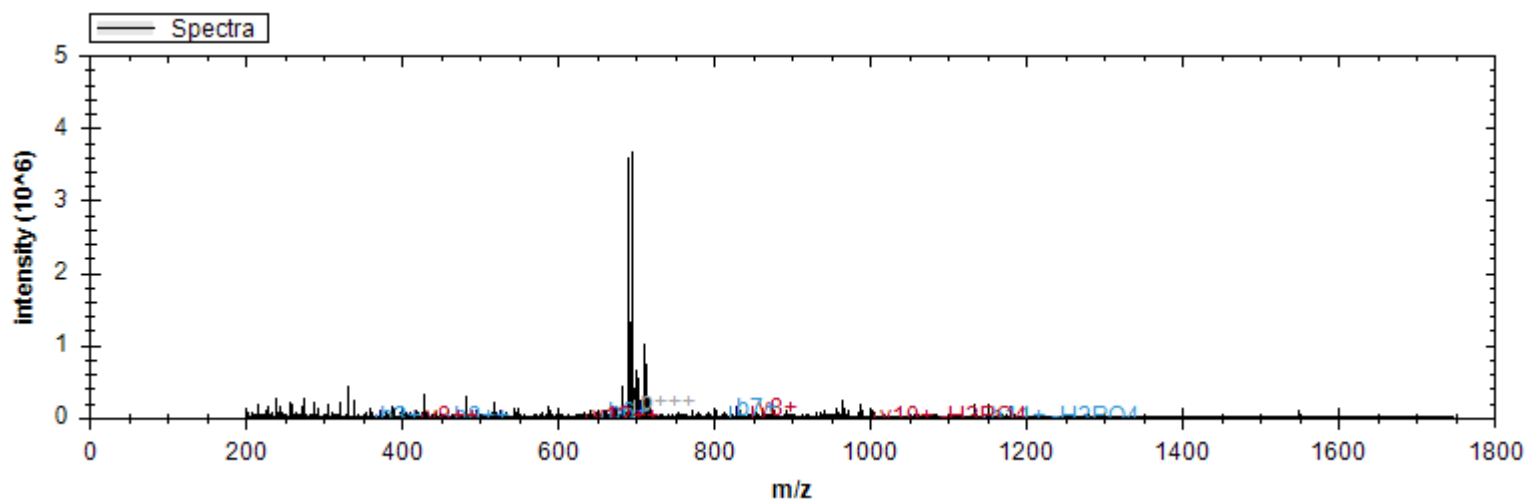

|                              |                              |                              |
|------------------------------|------------------------------|------------------------------|
| [b7+] - 821.442 m/z          | [y8+] - 850.489 m/z          | [b6+] - 658.378 m/z          |
| [b9+] - 989.532 m/z          | [y4+] - 482.283 m/z          | [b8++] - 459.751 m/z         |
| [y11+ -H2O] - 1255.346 m/z   | [y6+] - 652.389 m/z          | [b3+] - 367.245 m/z          |
| [y5+] - 581.352 m/z          | [y9+ -H3PO4] - 919.511 m/z   | [y7+] - 753.437 m/z          |
| [y10+ -H3PO4] - 1006.543 m/z | [b11+ -H3PO4] - 1145.585 m/z | [y12+ -H3PO4] - 1174.633 m/z |
| [y3+] - 345.225 m/z          | [y12++] - 636.809 m/z        | [y8++] - 425.748 m/z         |
| [y11+ -H3PO4] - 1077.580 m/z |                              |                              |

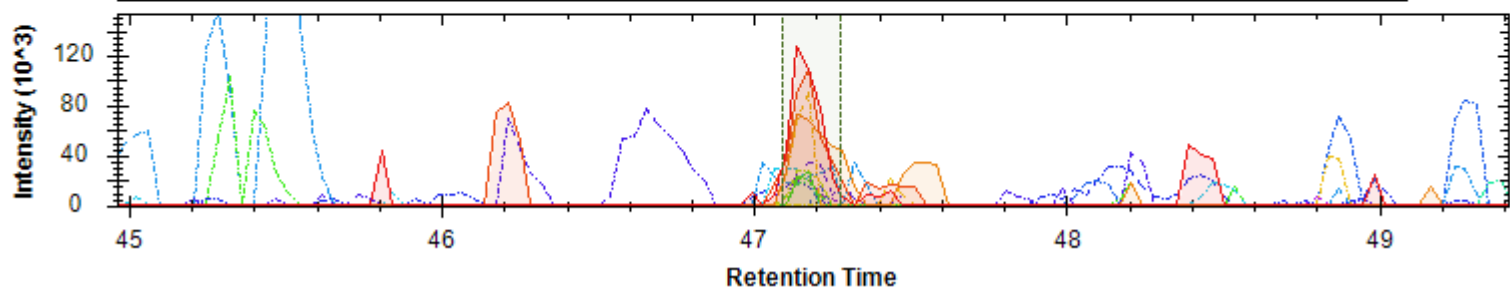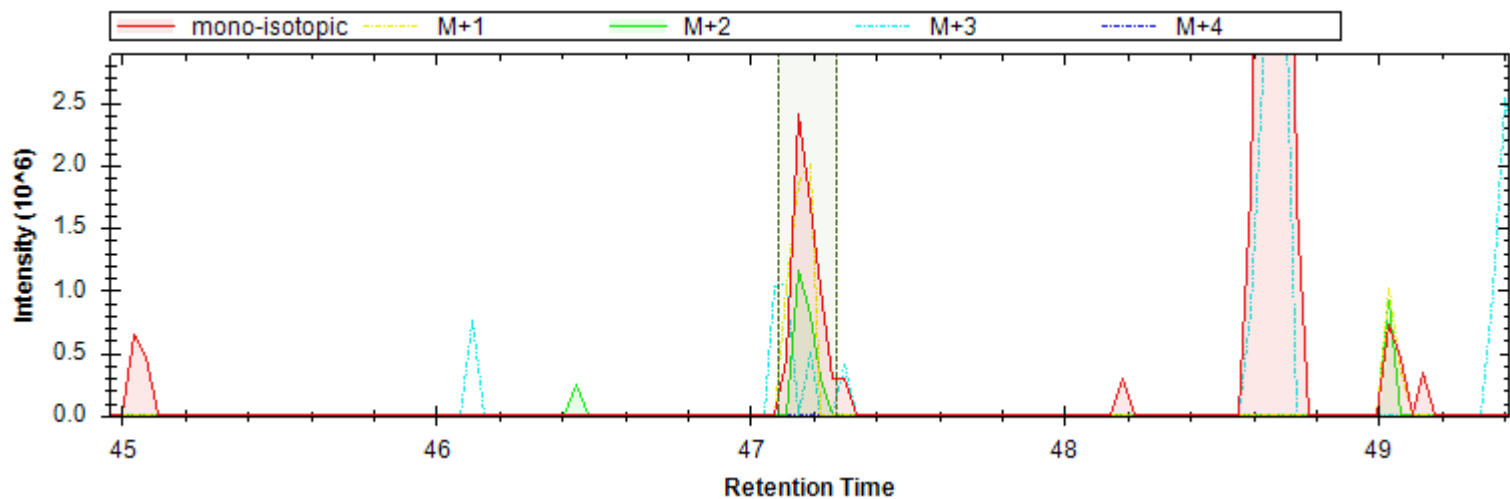

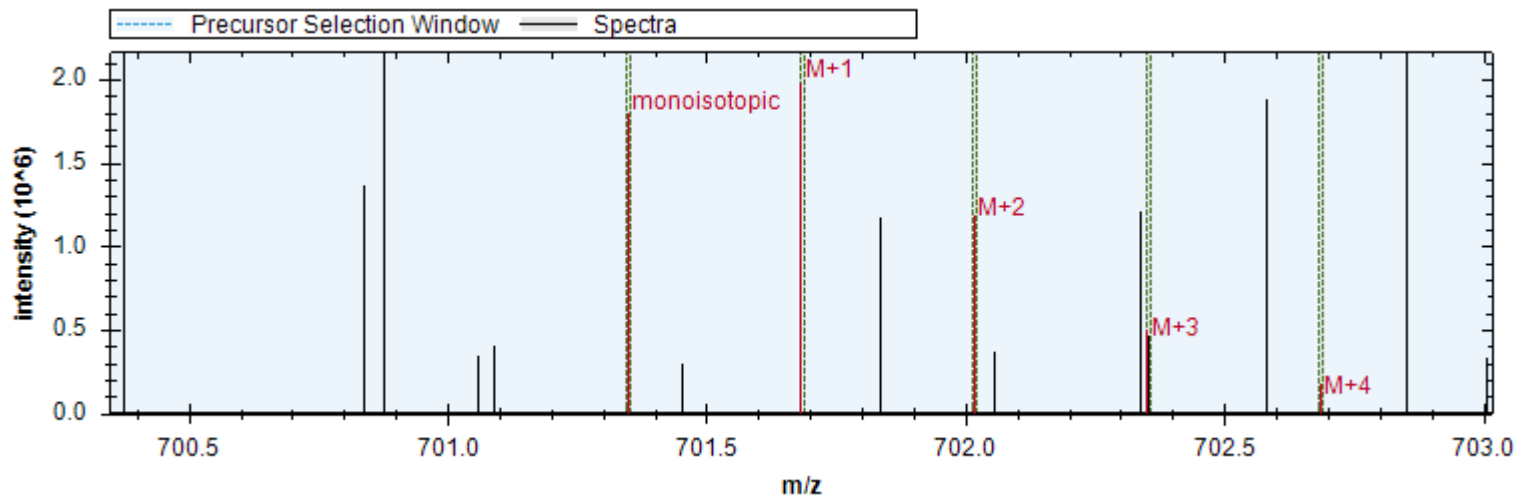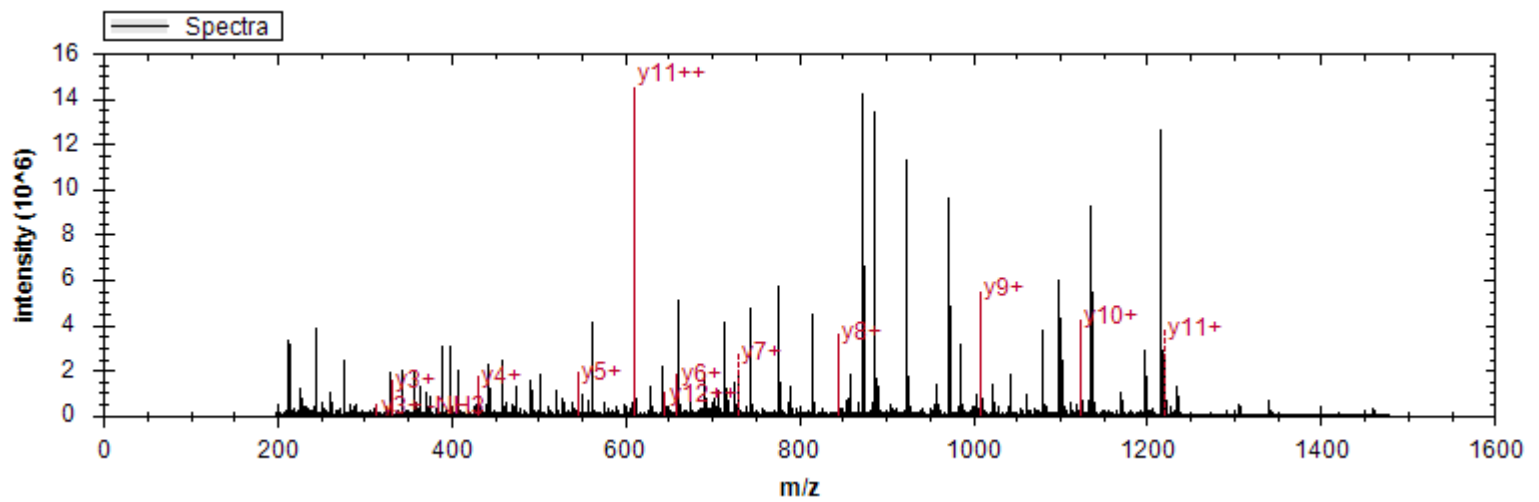

|                          |                       |                       |
|--------------------------|-----------------------|-----------------------|
| [y9+] - 1008.500 m/z     | [y11++] - 610.793 m/z | [y10+] - 1123.527 m/z |
| [y8+] - 845.436 m/z      | [y7+] - 730.409 m/z   | [y11+] - 1220.579 m/z |
| [y4+] - 431.261 m/z      | [y5+] - 546.288 m/z   | [y3+] - 332.193 m/z   |
| [y6+] - 659.372 m/z      | [y12++] - 646.312 m/z | [y13++] - 702.854 m/z |
| [y3+ -NH3] - 315.166 m/z |                       |                       |

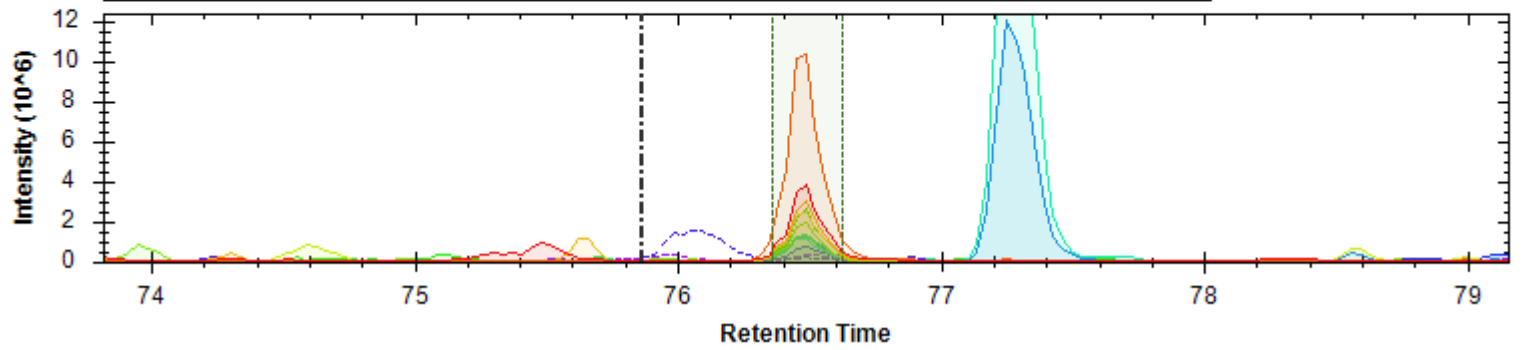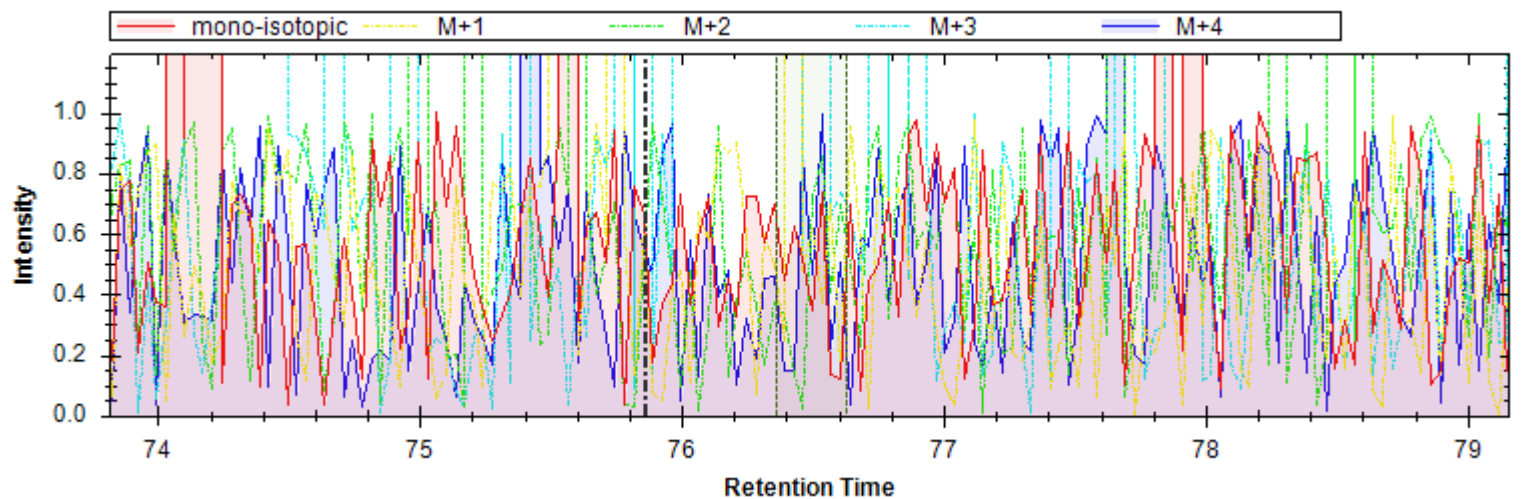

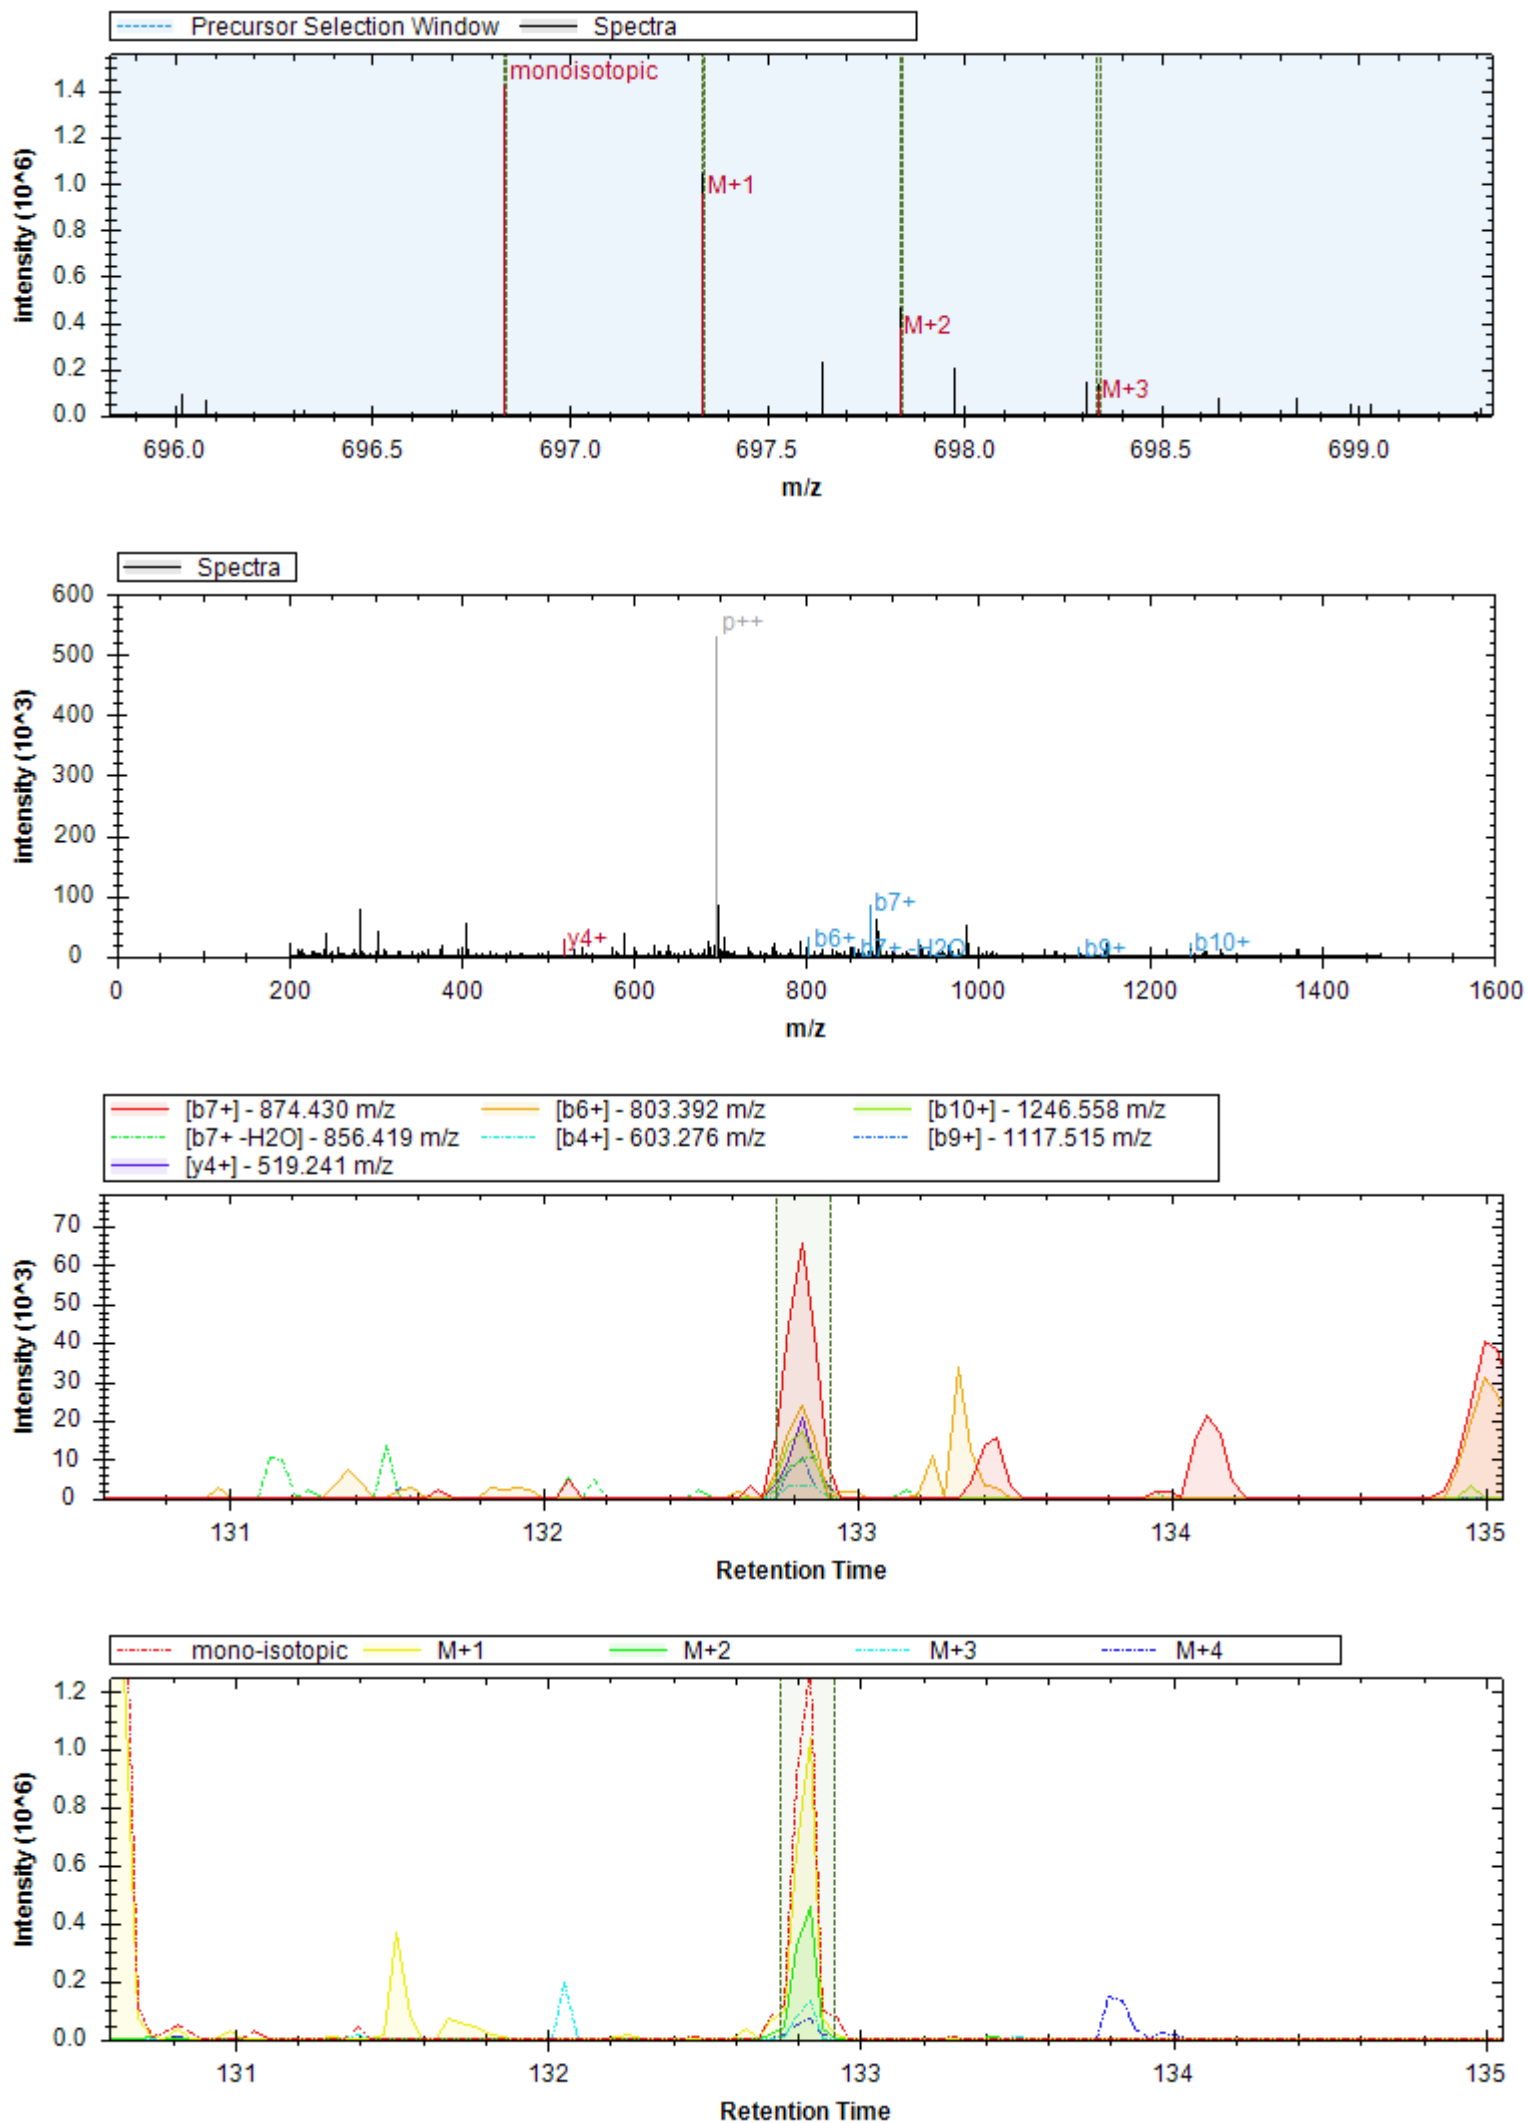

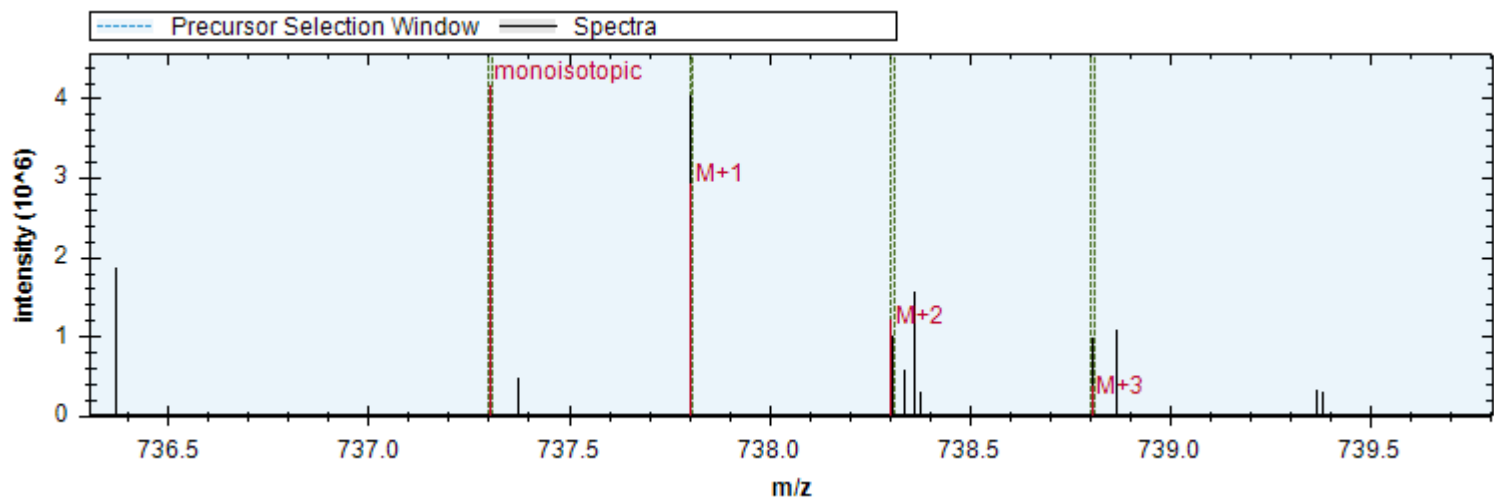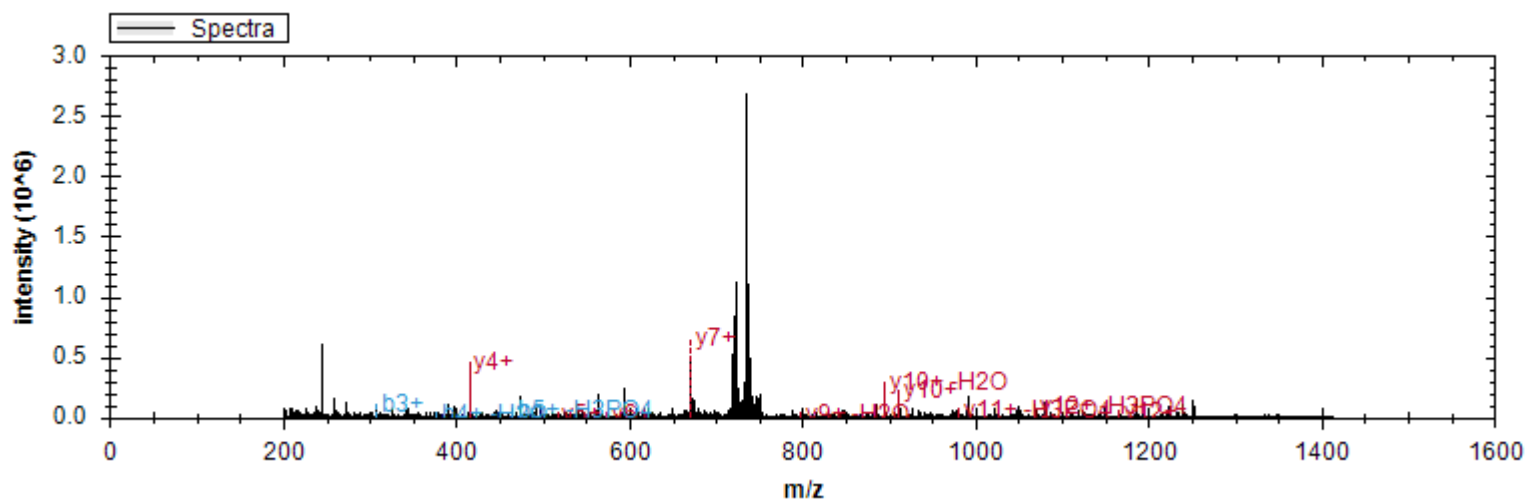

- |                              |                          |                             |
|------------------------------|--------------------------|-----------------------------|
| [y7+] - 671.347 m/z          | [y4+] - 416.225 m/z      | [y10+ -H2O] - 894.443 m/z   |
| [y10+] - 912.453 m/z         | [b3+] - 308.124 m/z      | [y11+ -H3PO4] - 981.475 m/z |
| [y12+ -H3PO4] - 1068.507 m/z | [y9+ -H2O] - 797.390 m/z | [b5+ -H3PO4] - 464.178 m/z  |
| [b5+ -H2O] - 641.944 m/z     | [b4+ -H2O] - 377.146 m/z | [y5+] - 517.273 m/z         |
| [y7+ -H2O] - 653.337 m/z     | [b8+ -H2O] - 883.050 m/z | [y6+] - 574.294 m/z         |
| [y8+ -H2O] - 740.369 m/z     | [y4+ -NH3] - 399.199 m/z | [y12+] - 1166.484 m/z       |
| [b4+] - 395.156 m/z          |                          |                             |

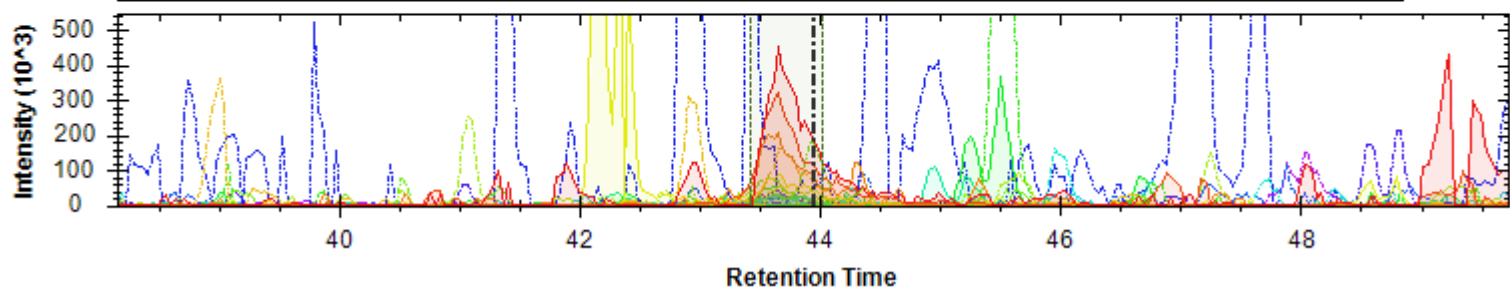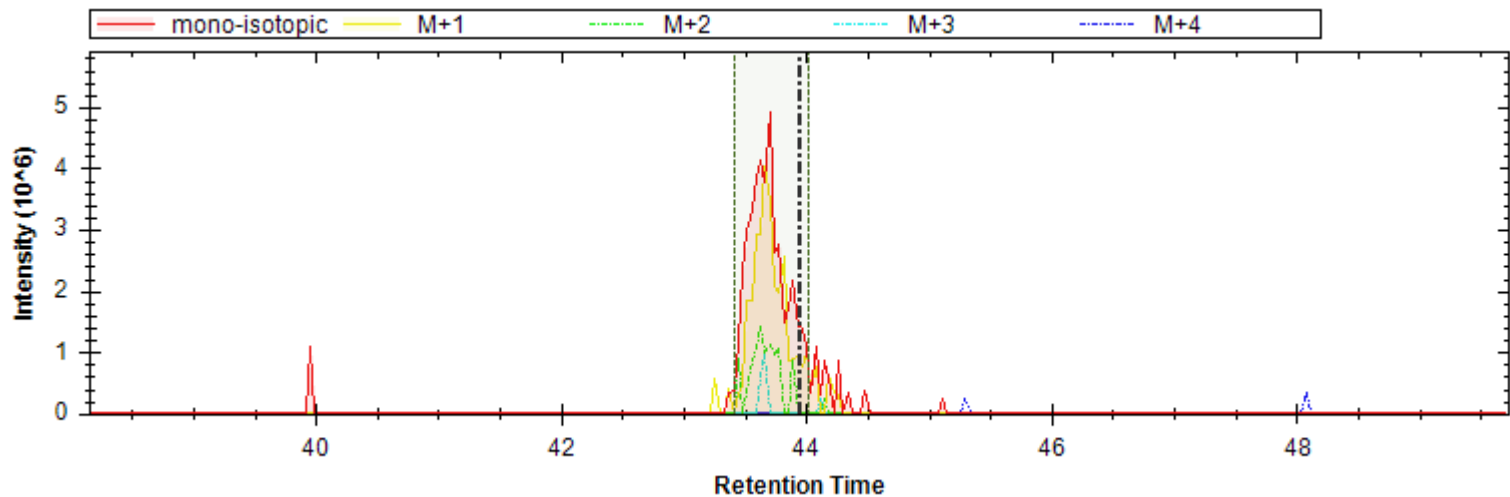

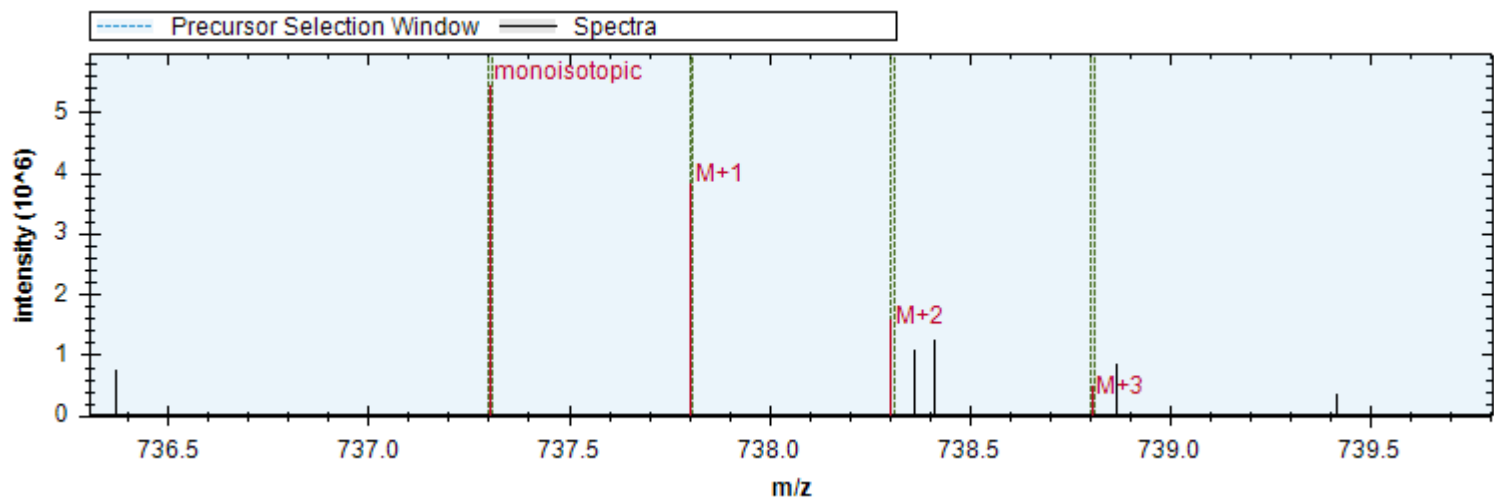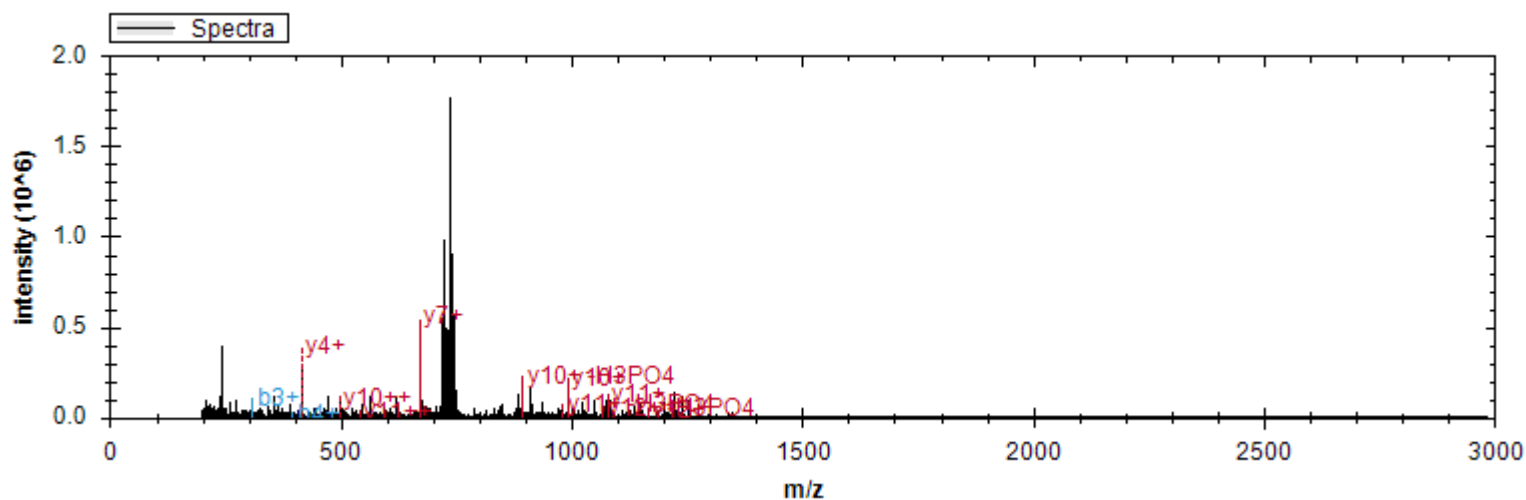

- |                             |                              |                            |
|-----------------------------|------------------------------|----------------------------|
| [y7+] - 671.347 m/z         | [y10+ -H3PO4] - 894.443 m/z  | [y4+] - 416.225 m/z        |
| [y10+] - 992.420 m/z        | [y10++] - 496.714 m/z        | [b3+] - 308.124 m/z        |
| [y11+ -H3PO4] - 981.475 m/z | [y12+ -H3PO4] - 1068.507 m/z | [y9+ -H3PO4] - 797.390 m/z |
| [y11++] - 540.230 m/z       | [y11+] - 1079.452 m/z        | [y7+ -H2O] - 653.337 m/z   |
| [y8+ -H3PO4] - 740.369 m/z  | [y12+] - 1166.484 m/z        | [y10+ -H2O] - 1072.209 m/z |
| [b4+ -H2O] - 377.146 m/z    | [y5+] - 517.273 m/z          | [y10+ -NH3] - 975.393 m/z  |
| [b4+] - 395.156 m/z         |                              |                            |

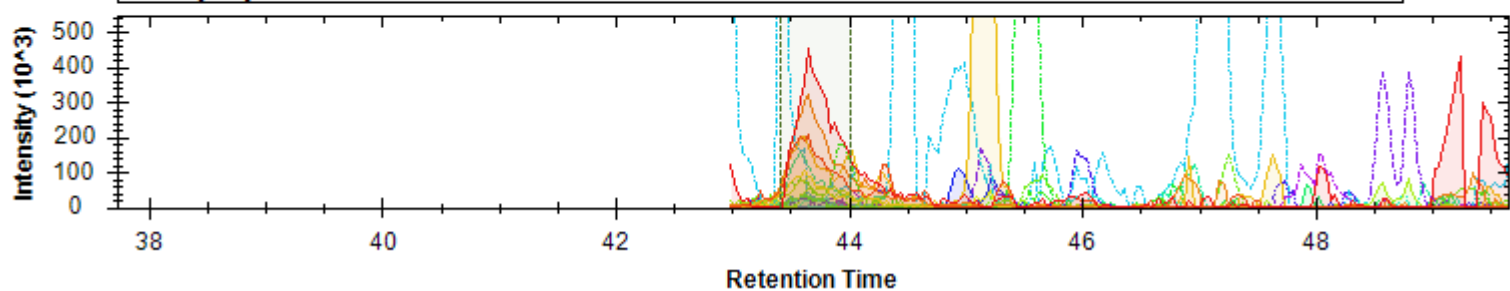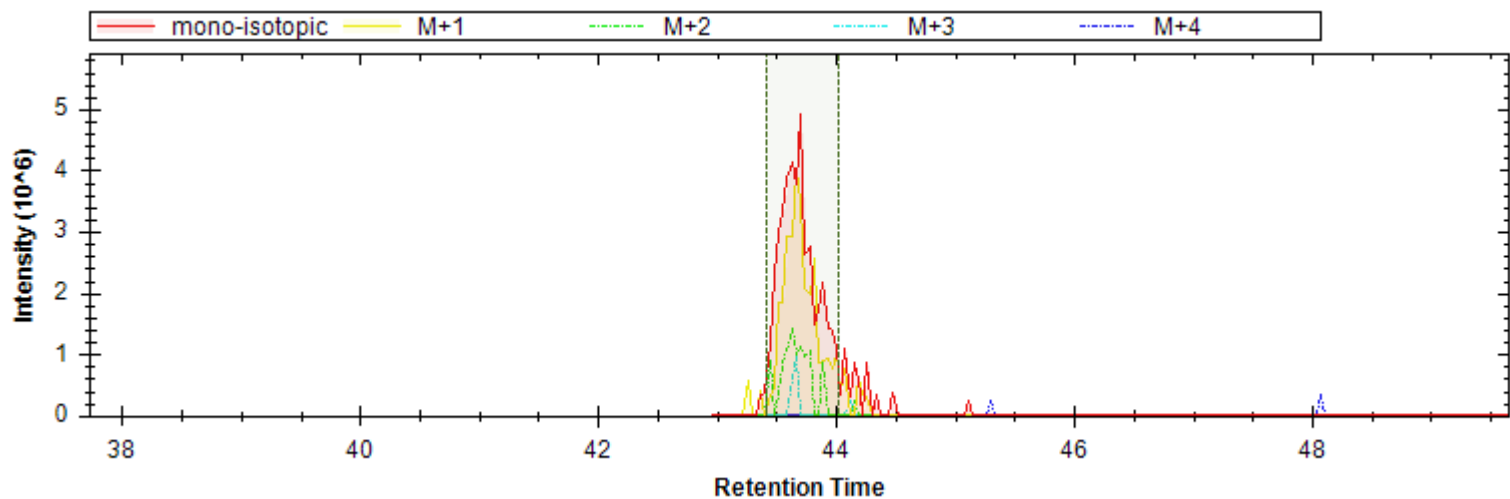

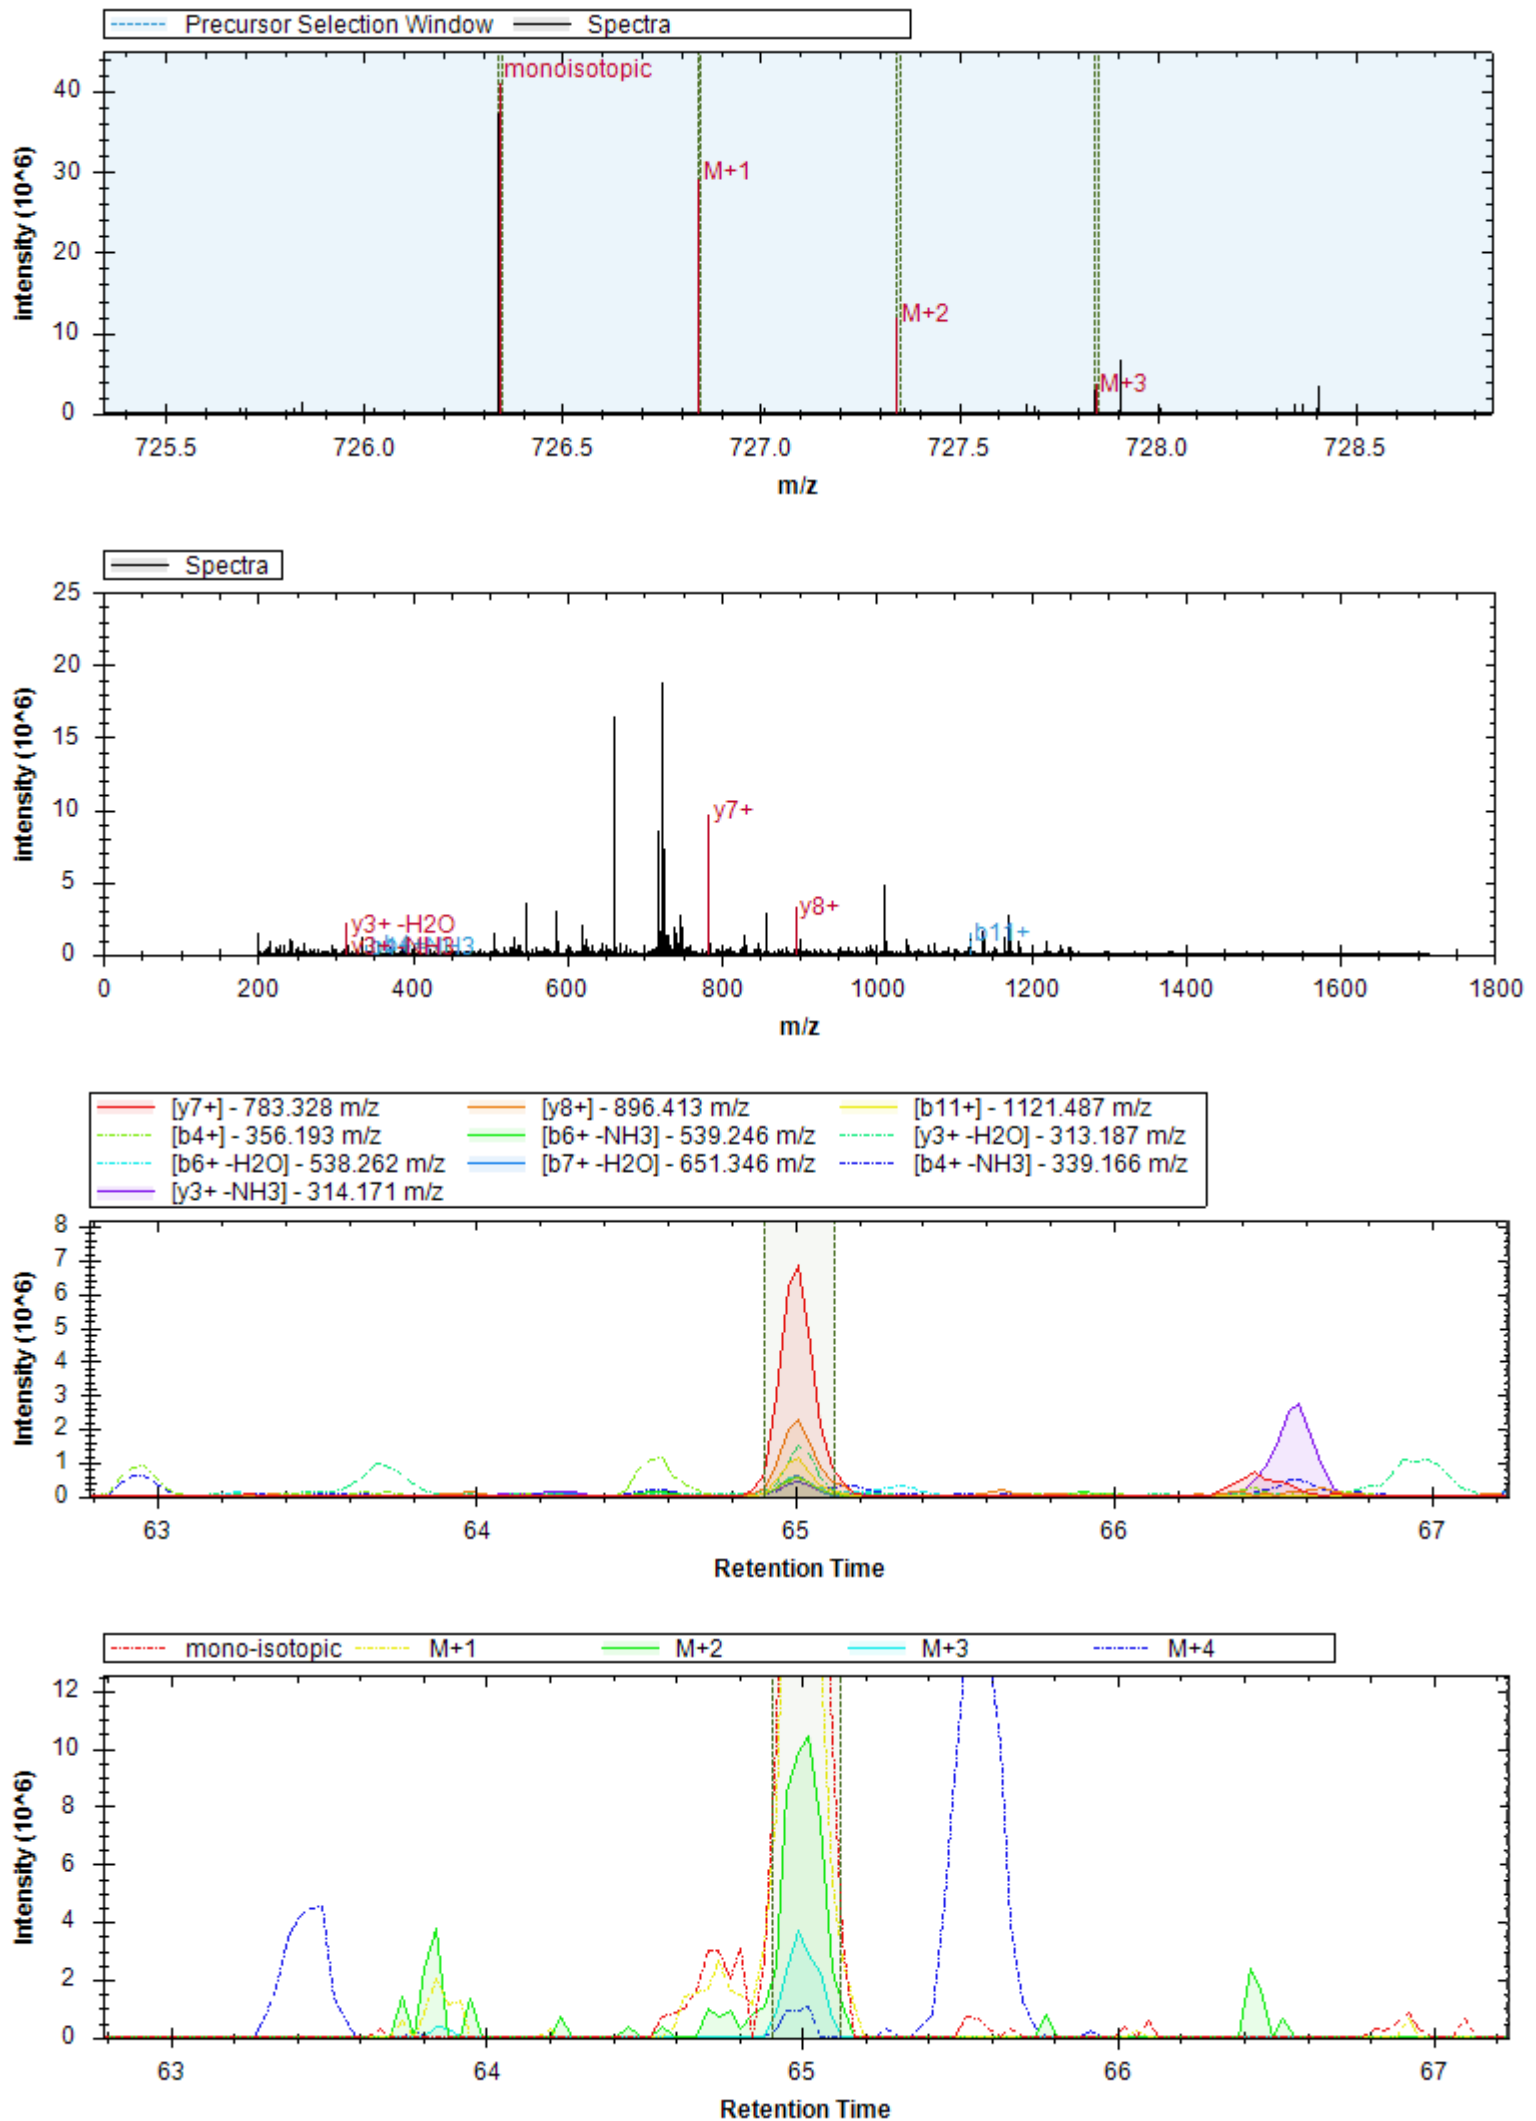

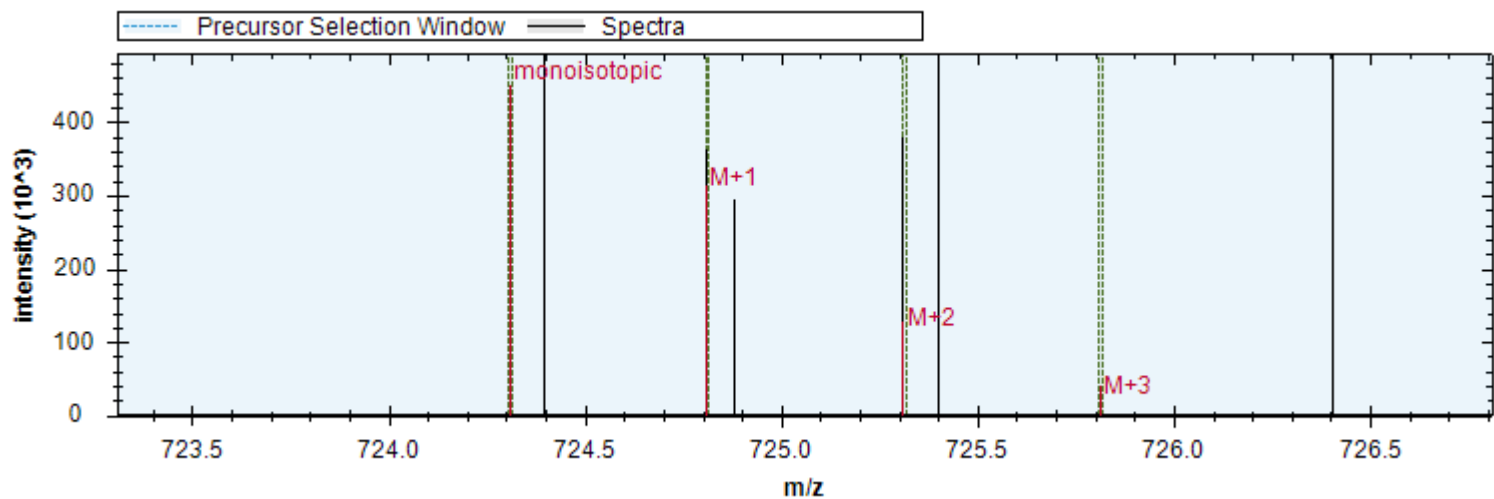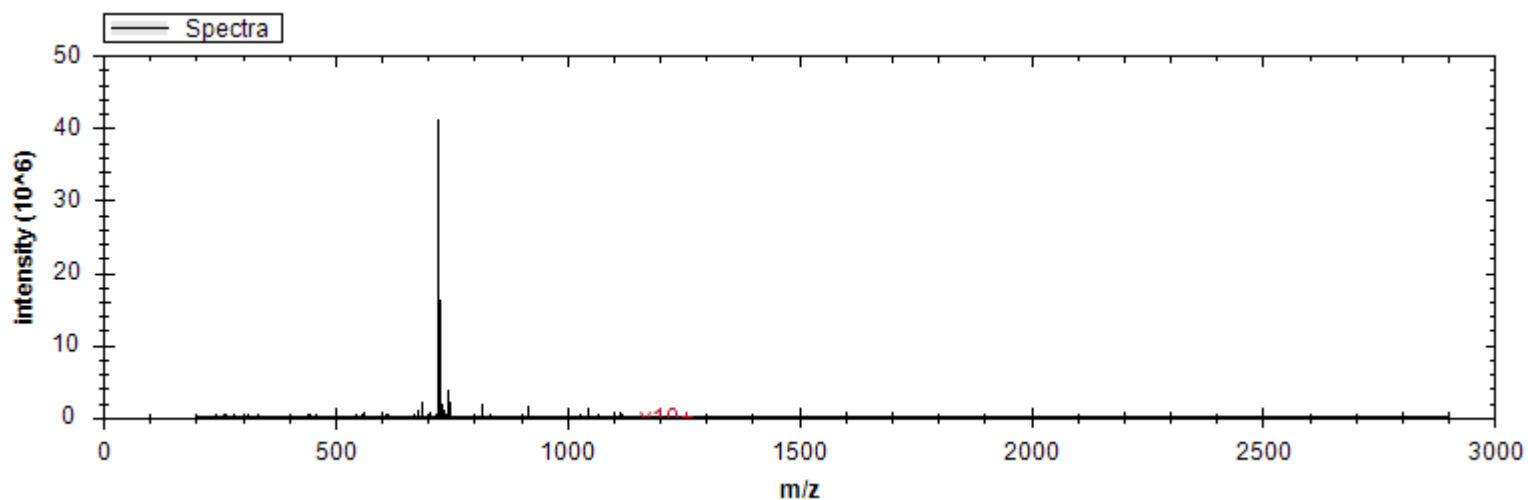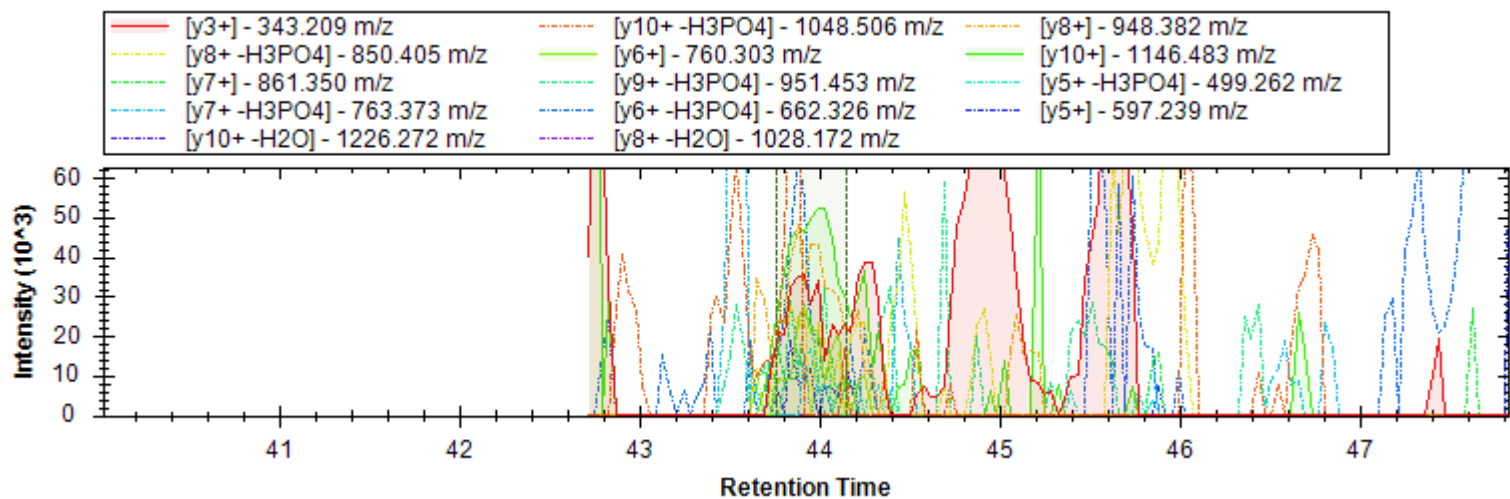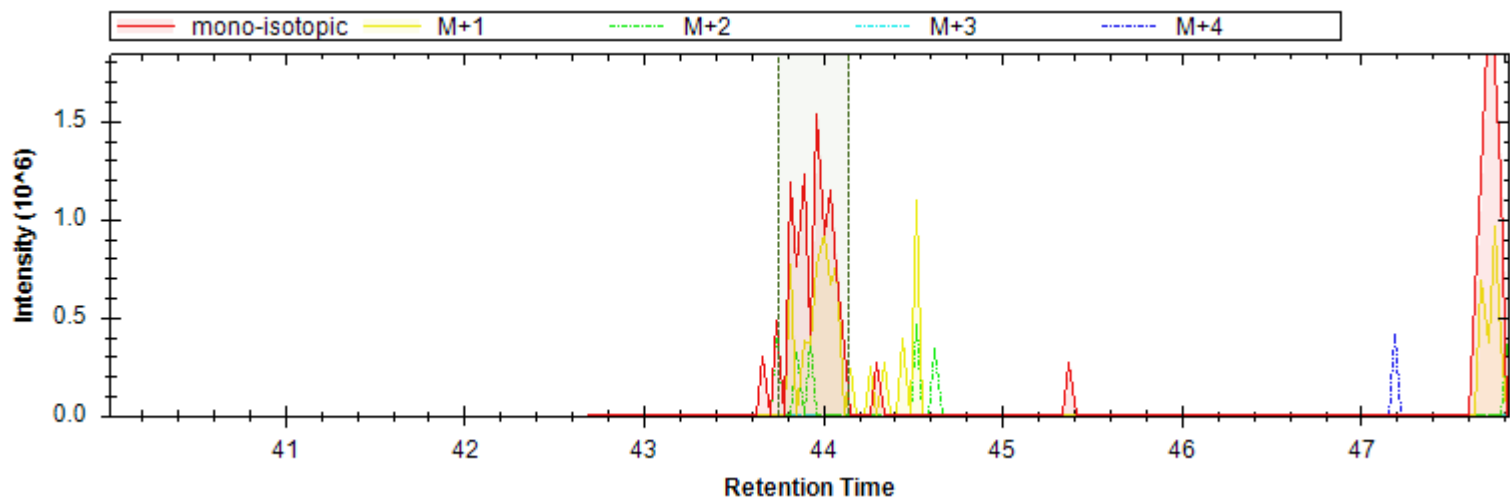

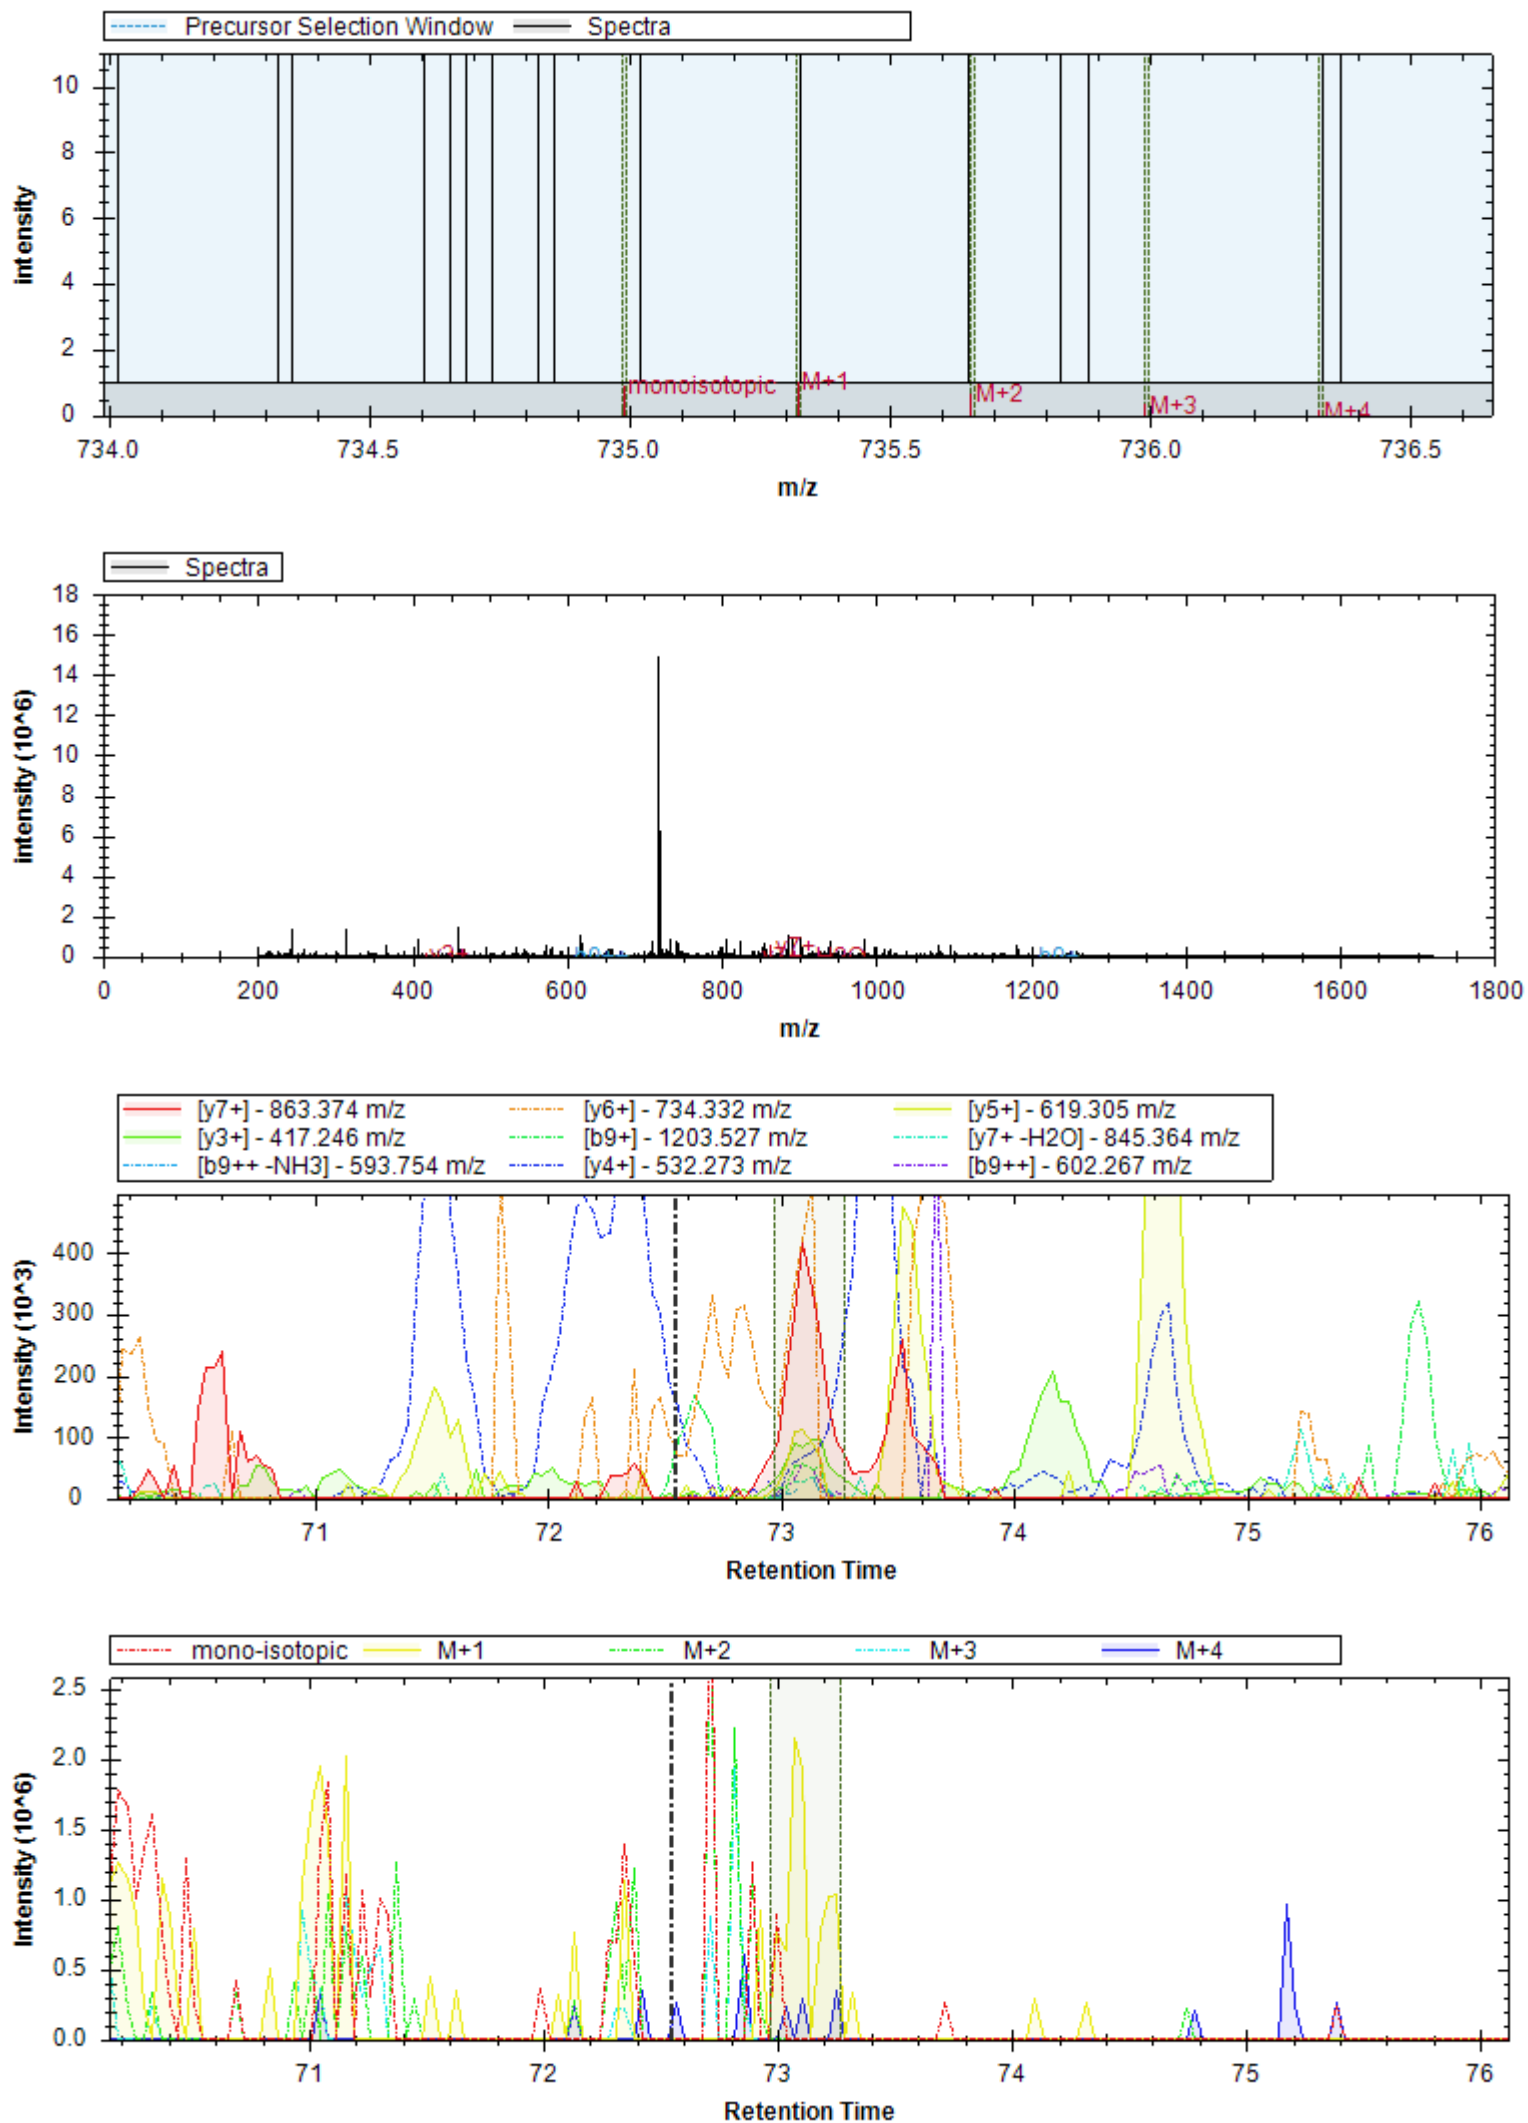



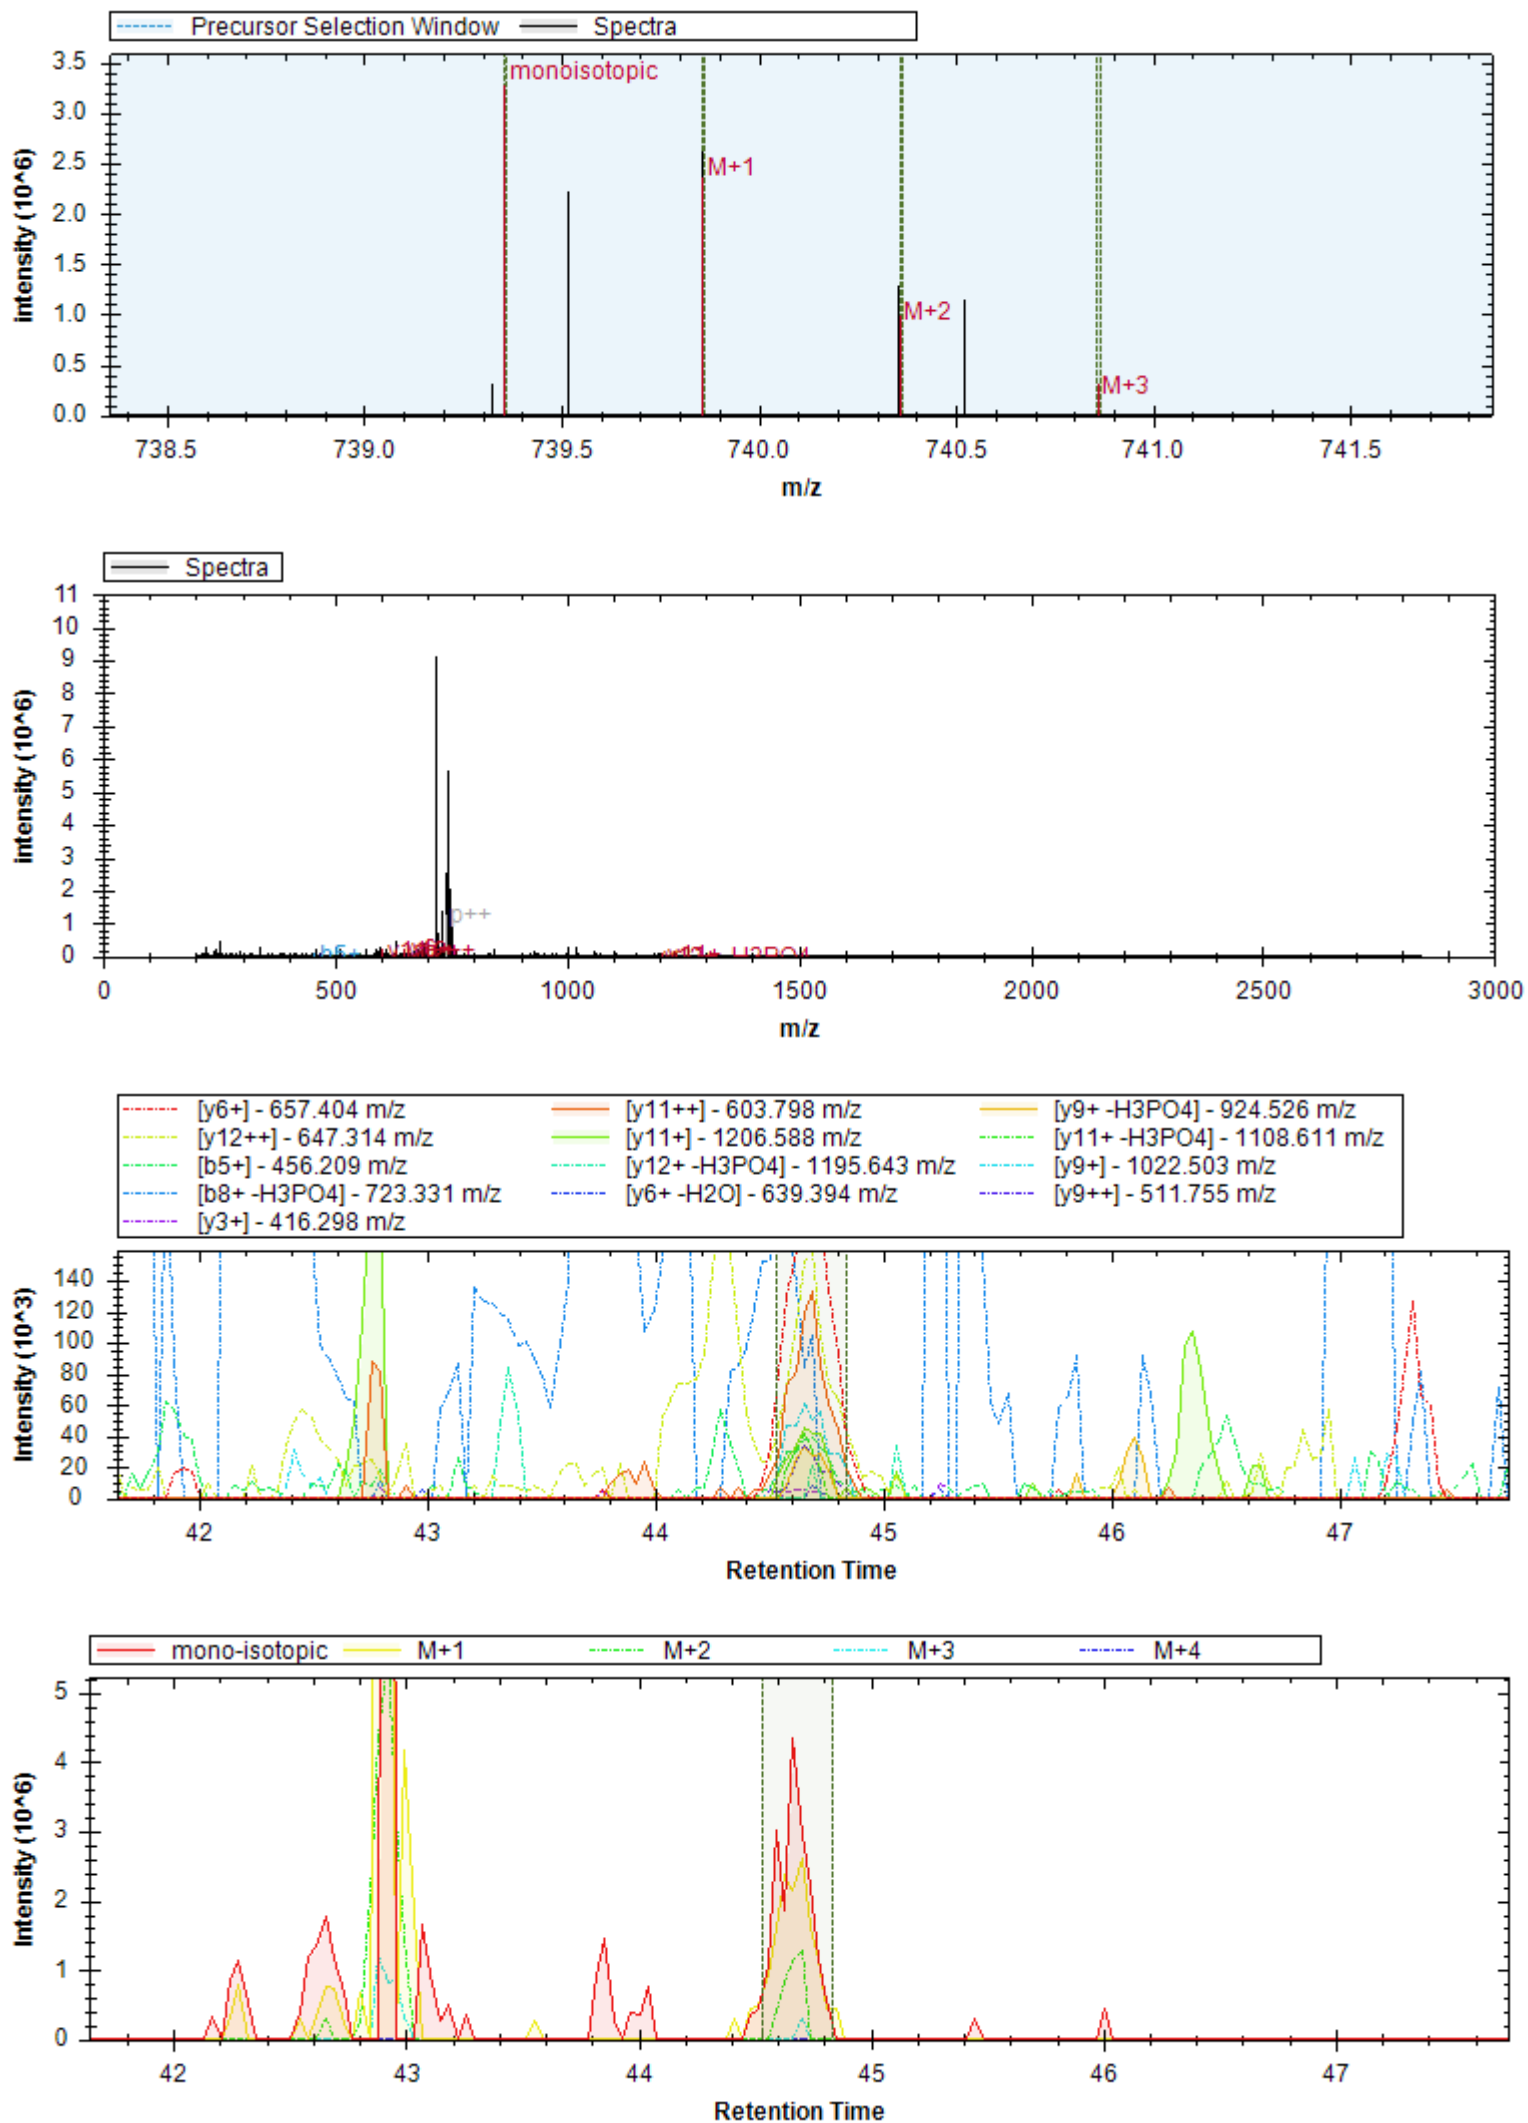

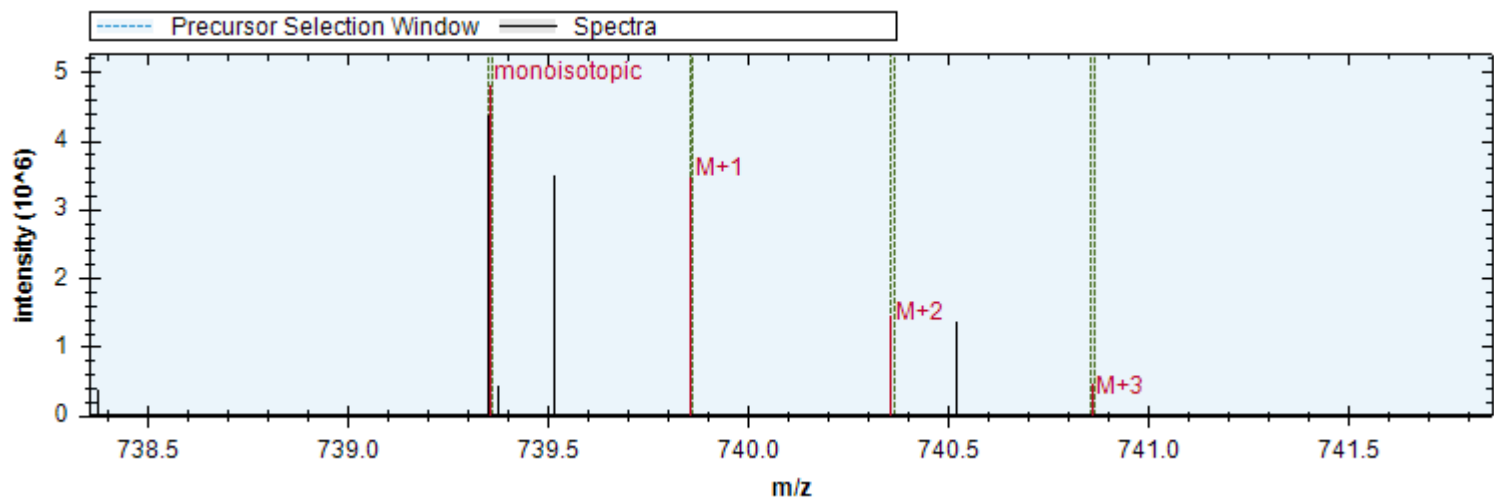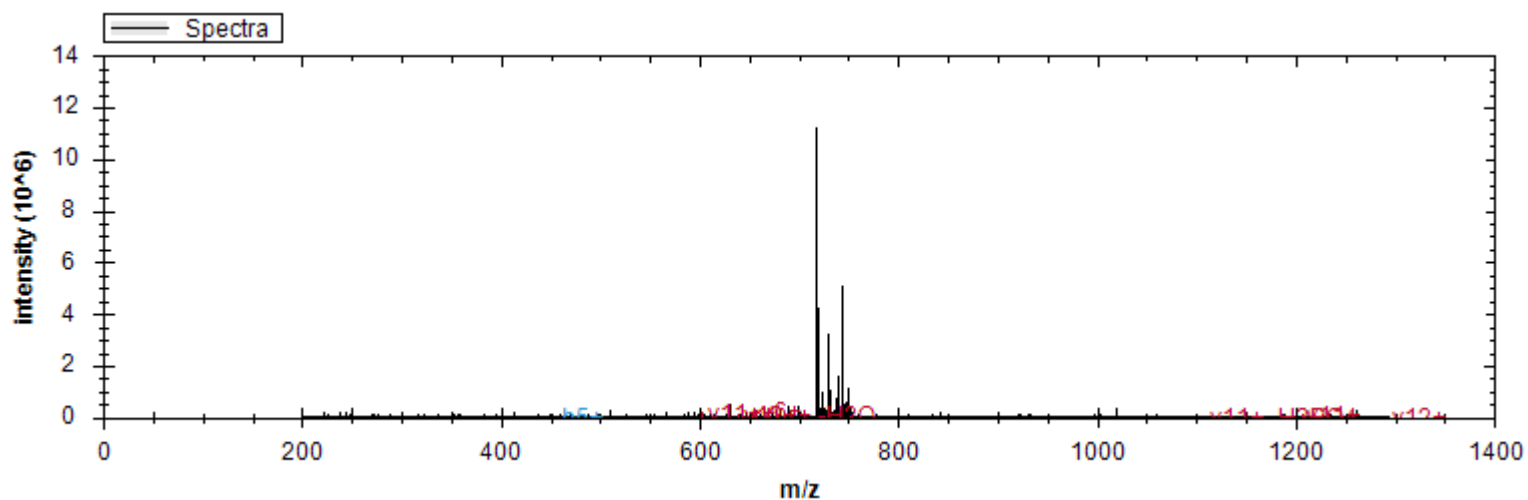

- |                            |                          |                              |
|----------------------------|--------------------------|------------------------------|
| [y6+] - 657.404 m/z        | [y11++] - 603.798 m/z    | [y11+ -H3PO4] - 1108.611 m/z |
| [y9+ -H3PO4] - 924.526 m/z | [y9+] - 1022.503 m/z     | [y11+] - 1206.588 m/z        |
| [b8+ -H3PO4] - 723.331 m/z | [b5+] - 456.209 m/z      | [y12+ -H3PO4] - 1195.643 m/z |
| [y12++ -H2O] - 638.308 m/z | [y12+] - 1293.620 m/z    | [y10+ -H3PO4] - 1011.558 m/z |
| [y9+ -H2O] - 1102.292 m/z  | [y13++] - 695.840 m/z    | [y6+ -H2O] - 639.394 m/z     |
| [b8+ -H2O] - 901.097 m/z   | [b5+ -H2O] - 438.198 m/z | [y11+ -H2O] - 1188.577 m/z   |

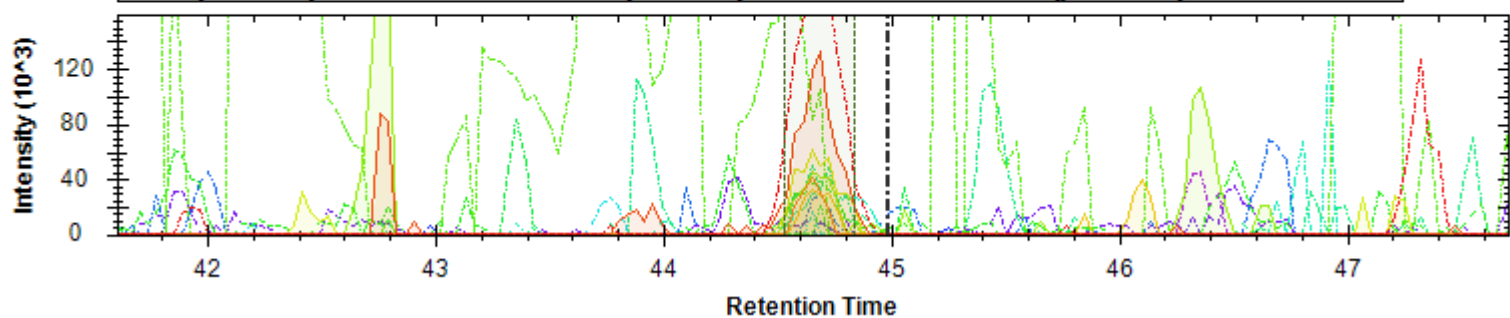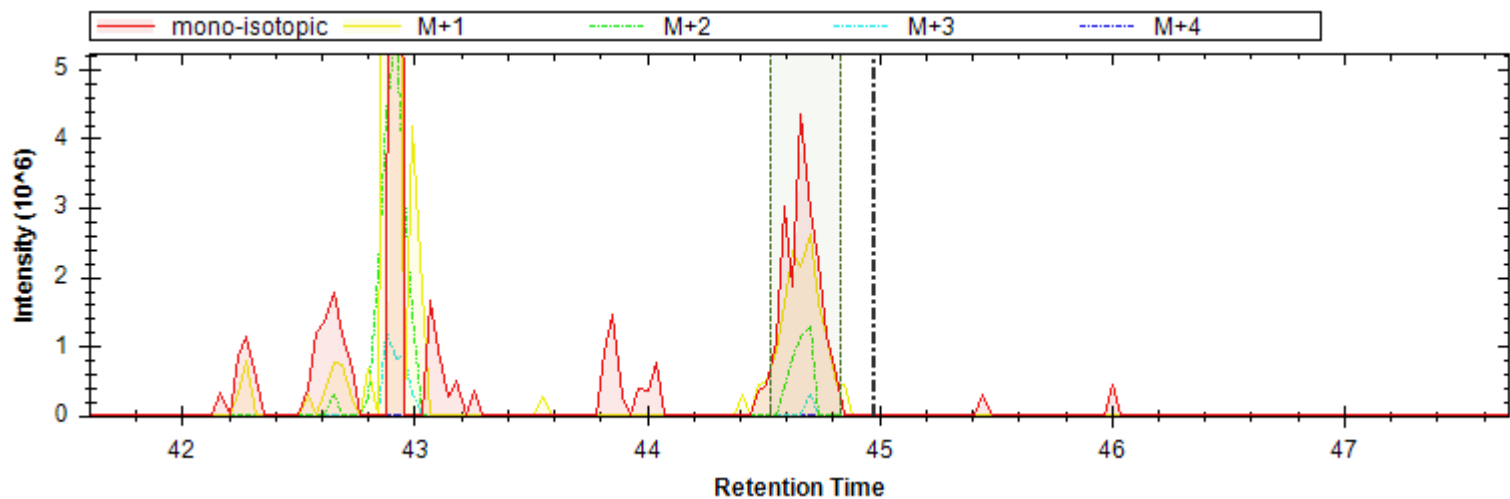

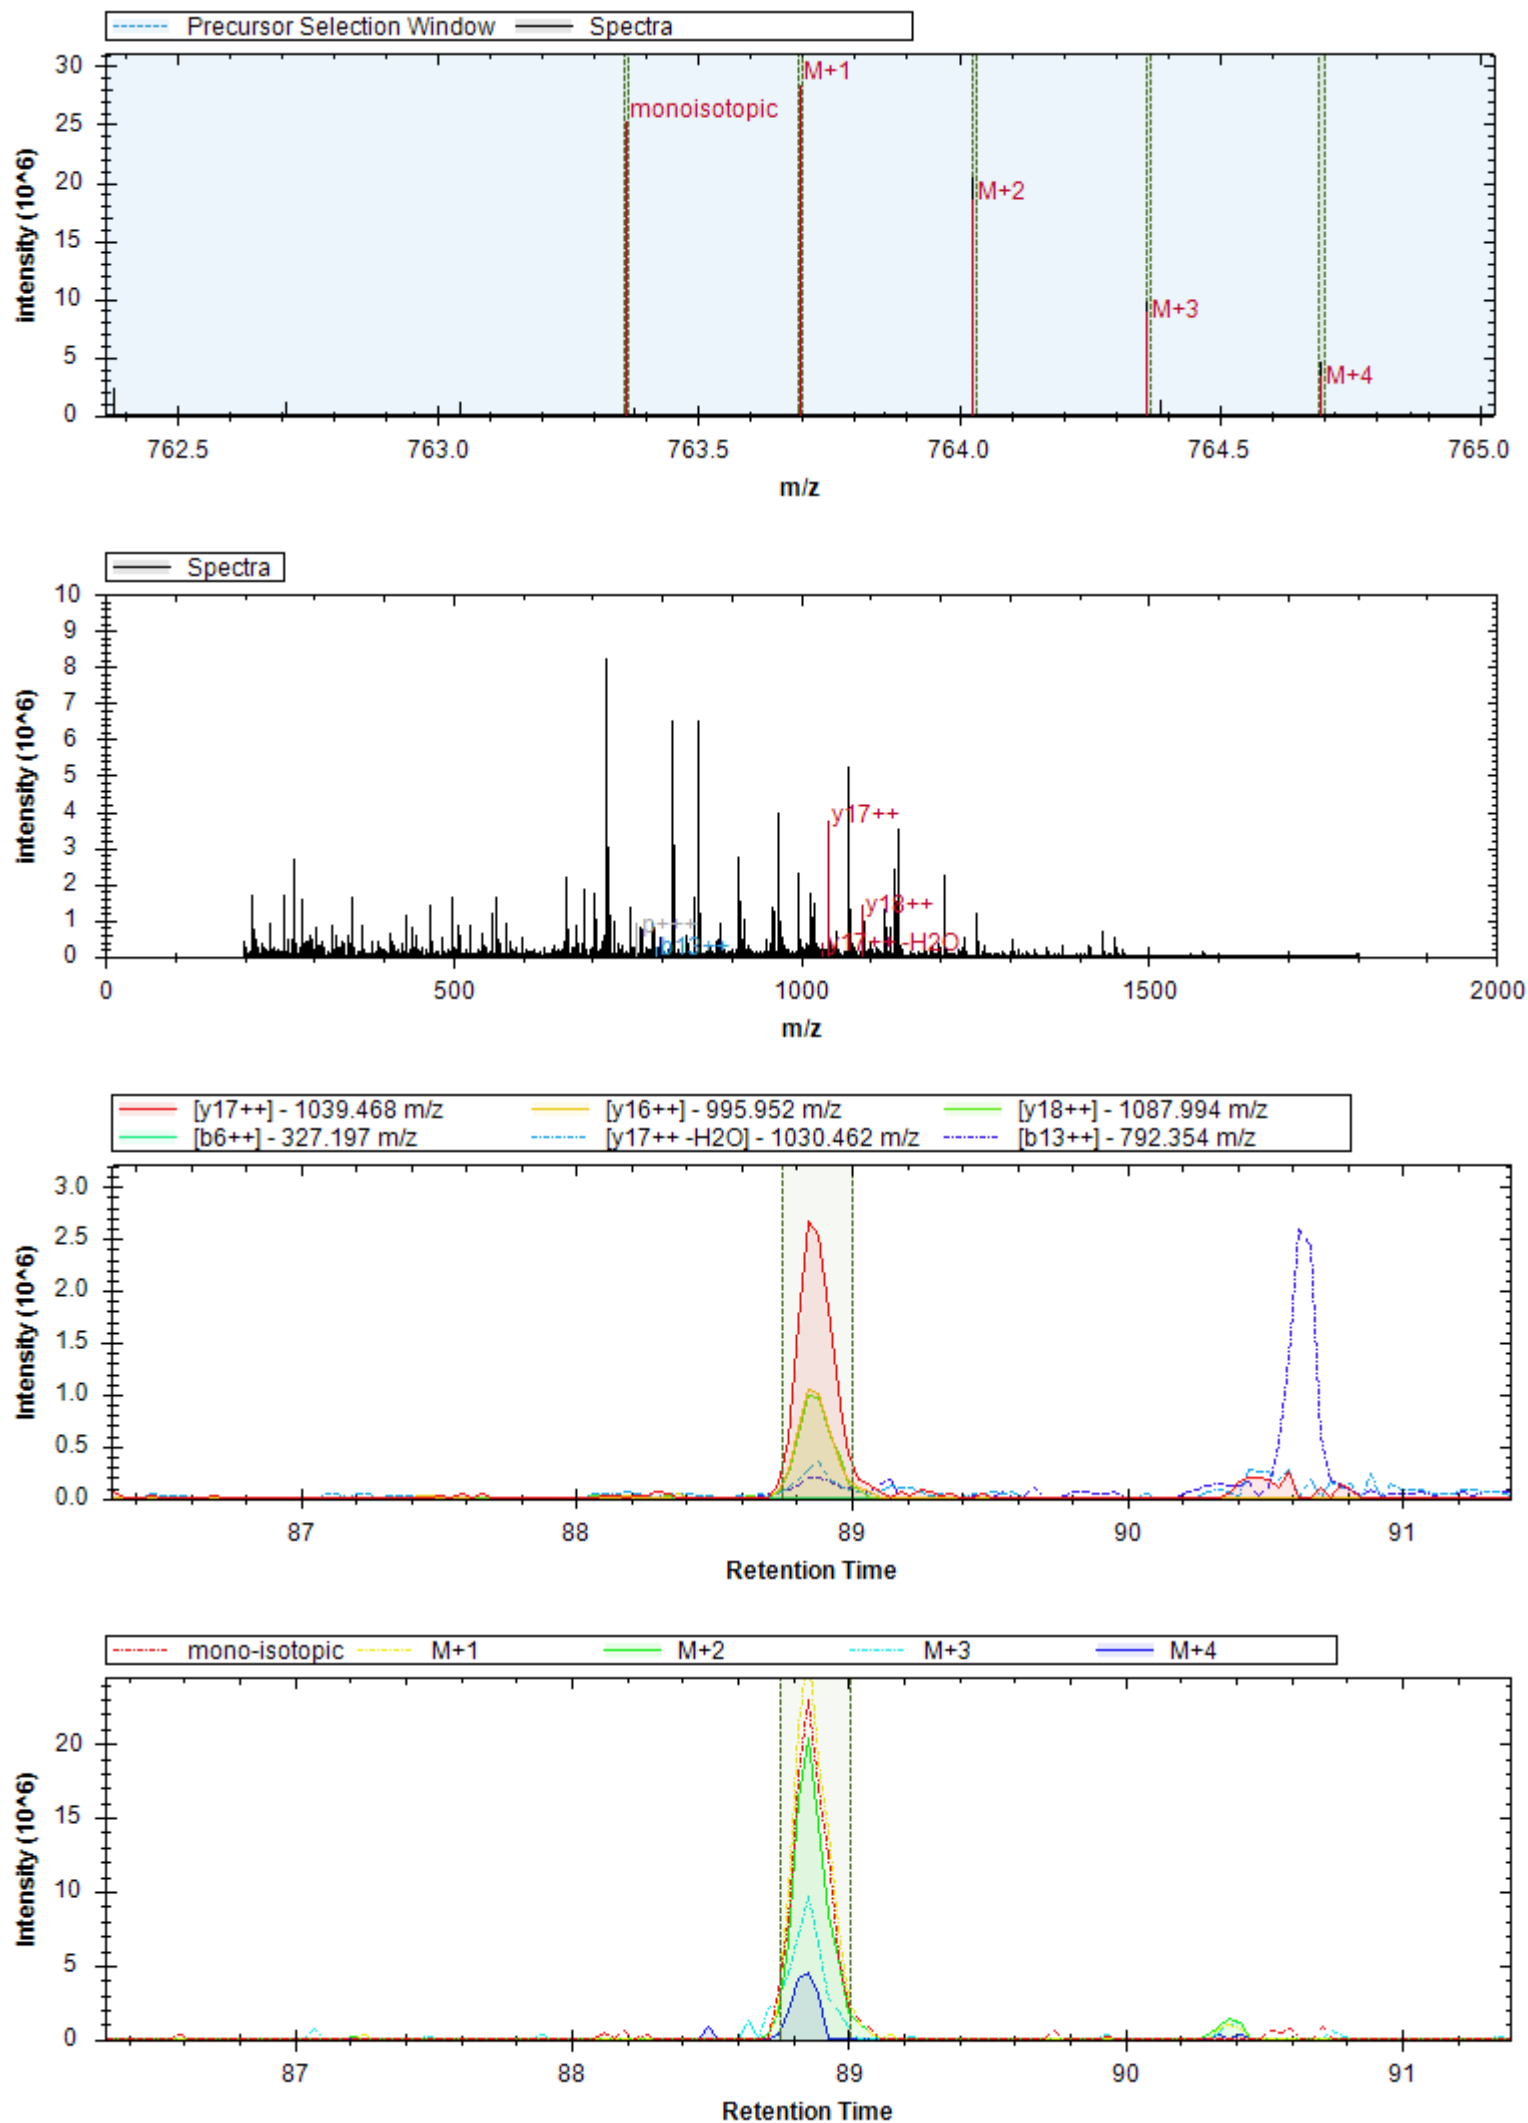

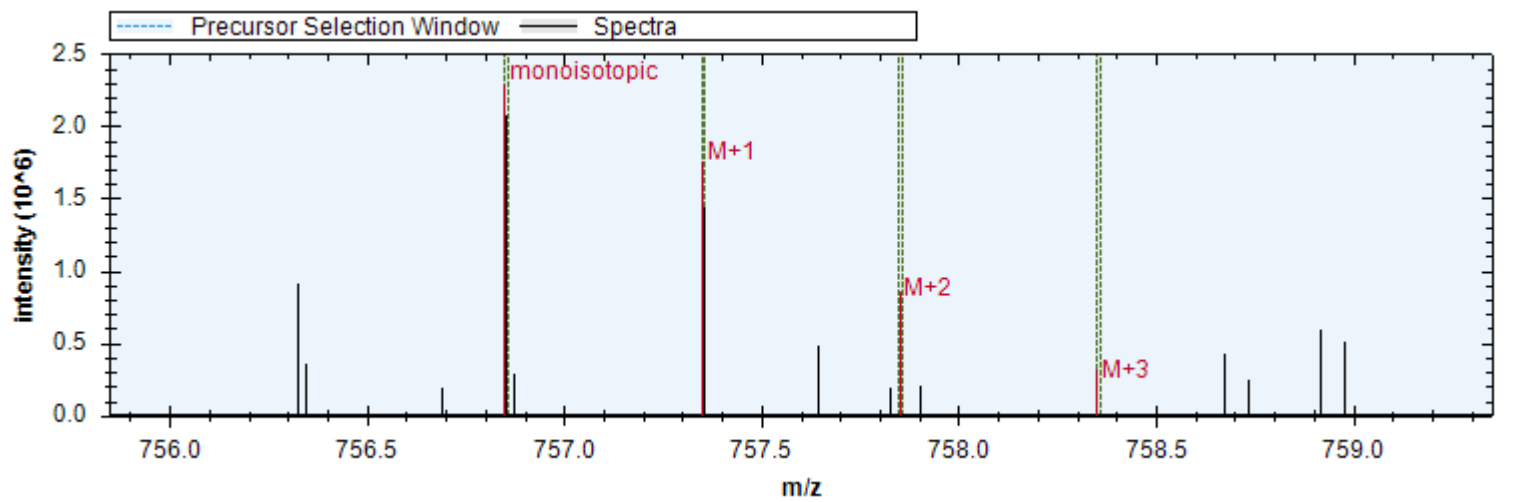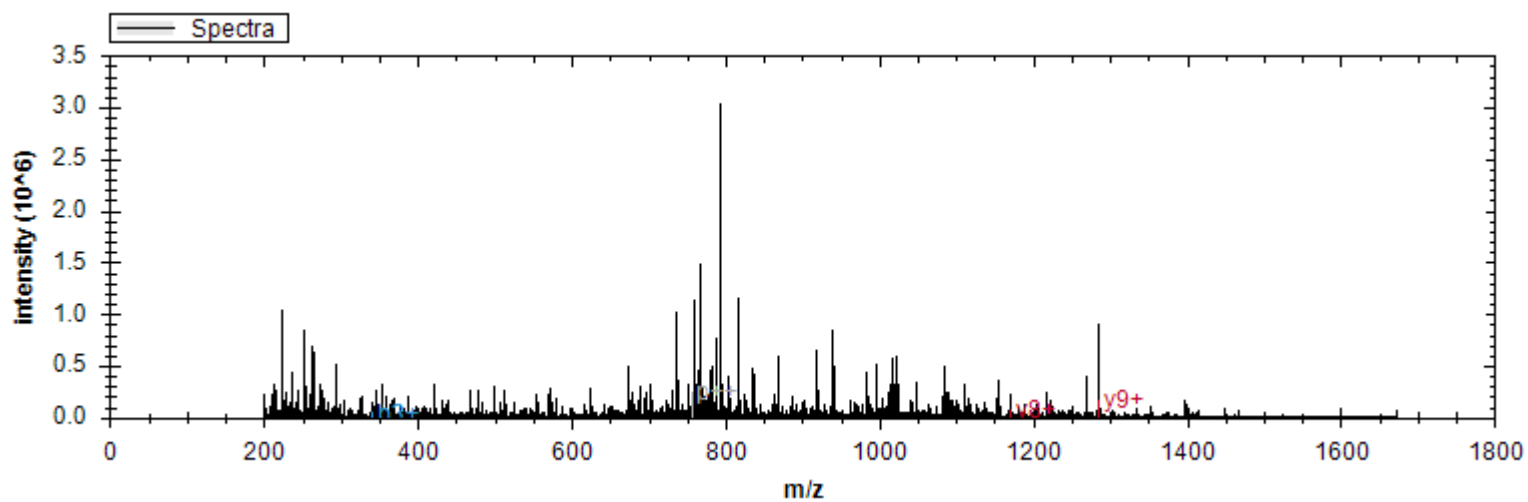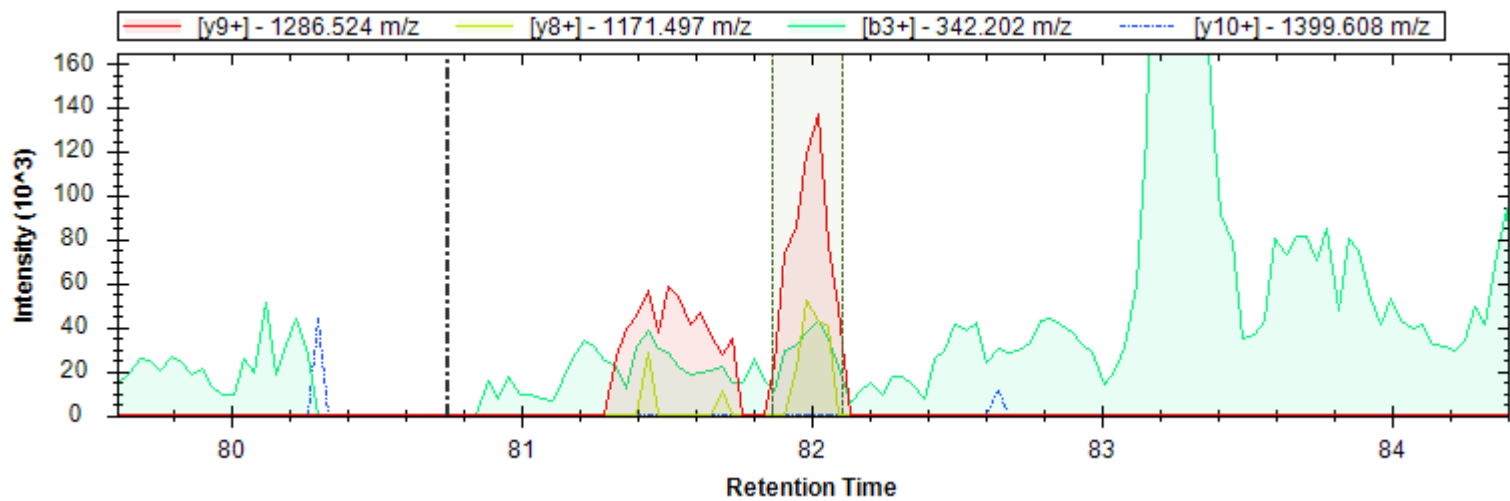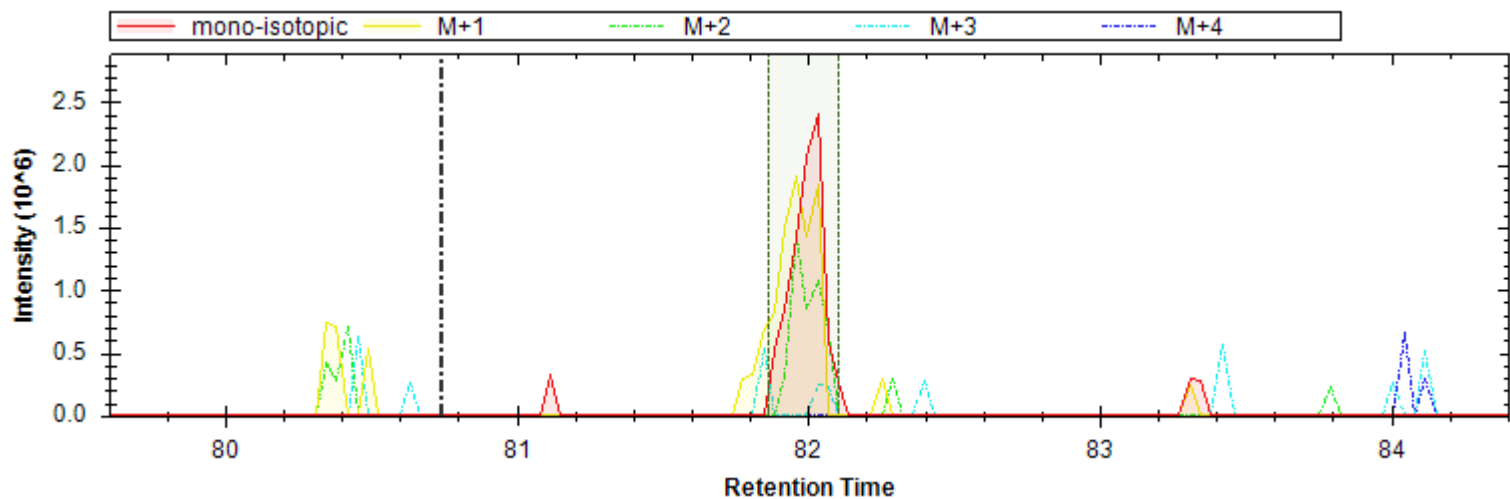

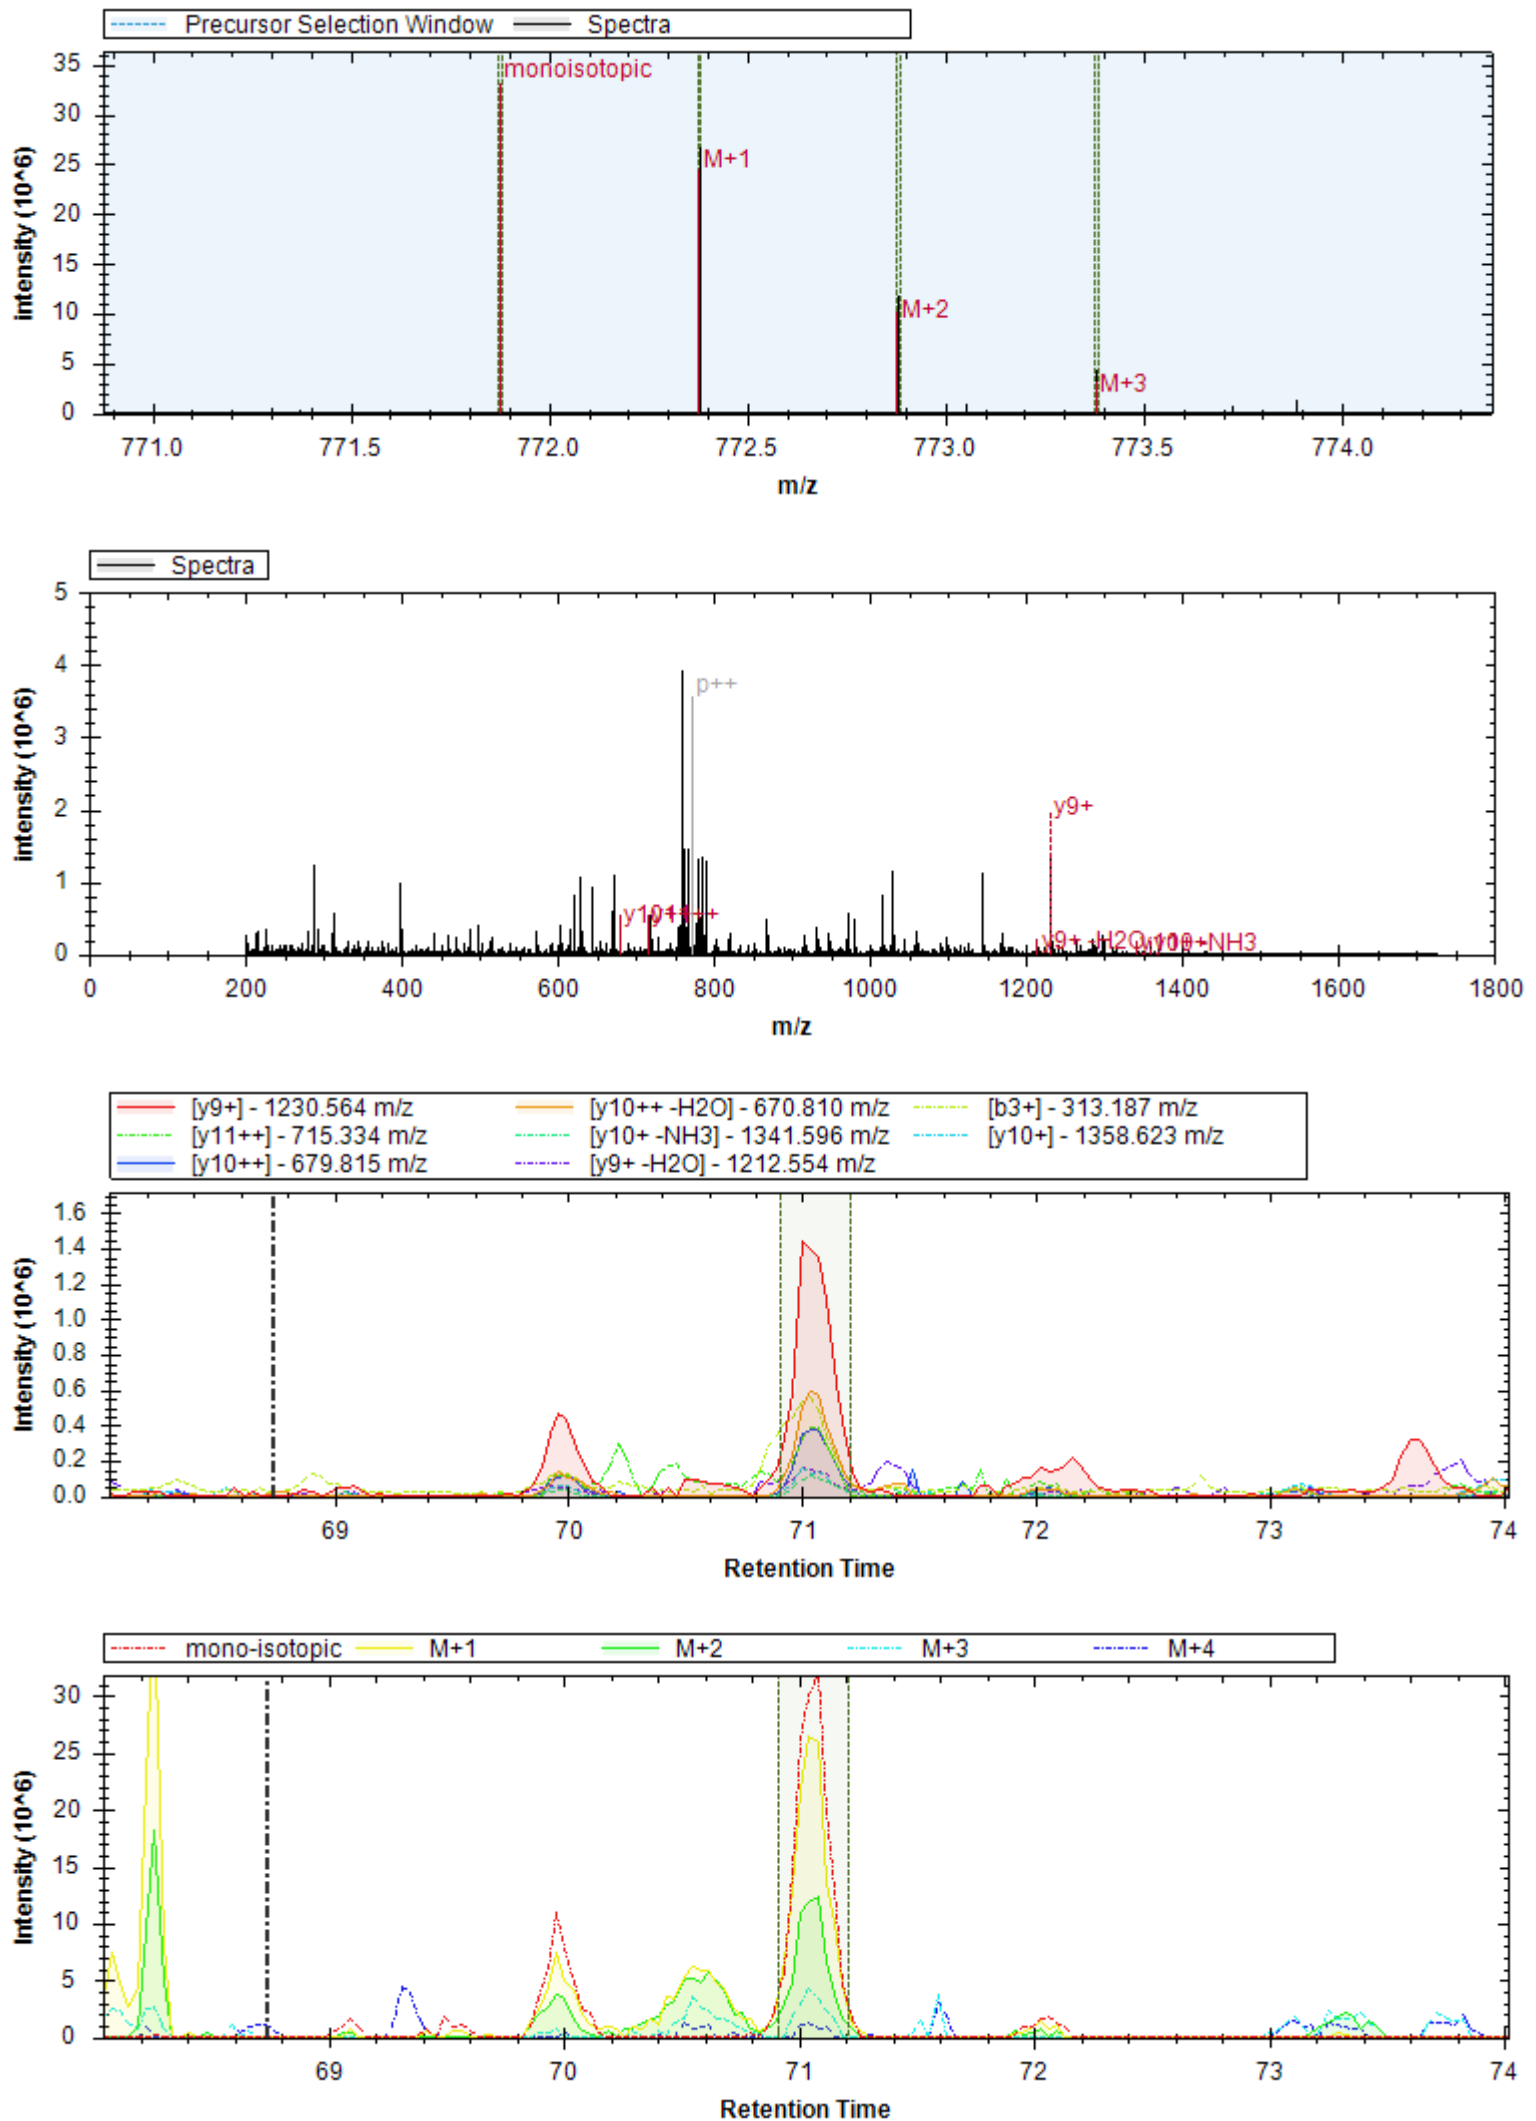

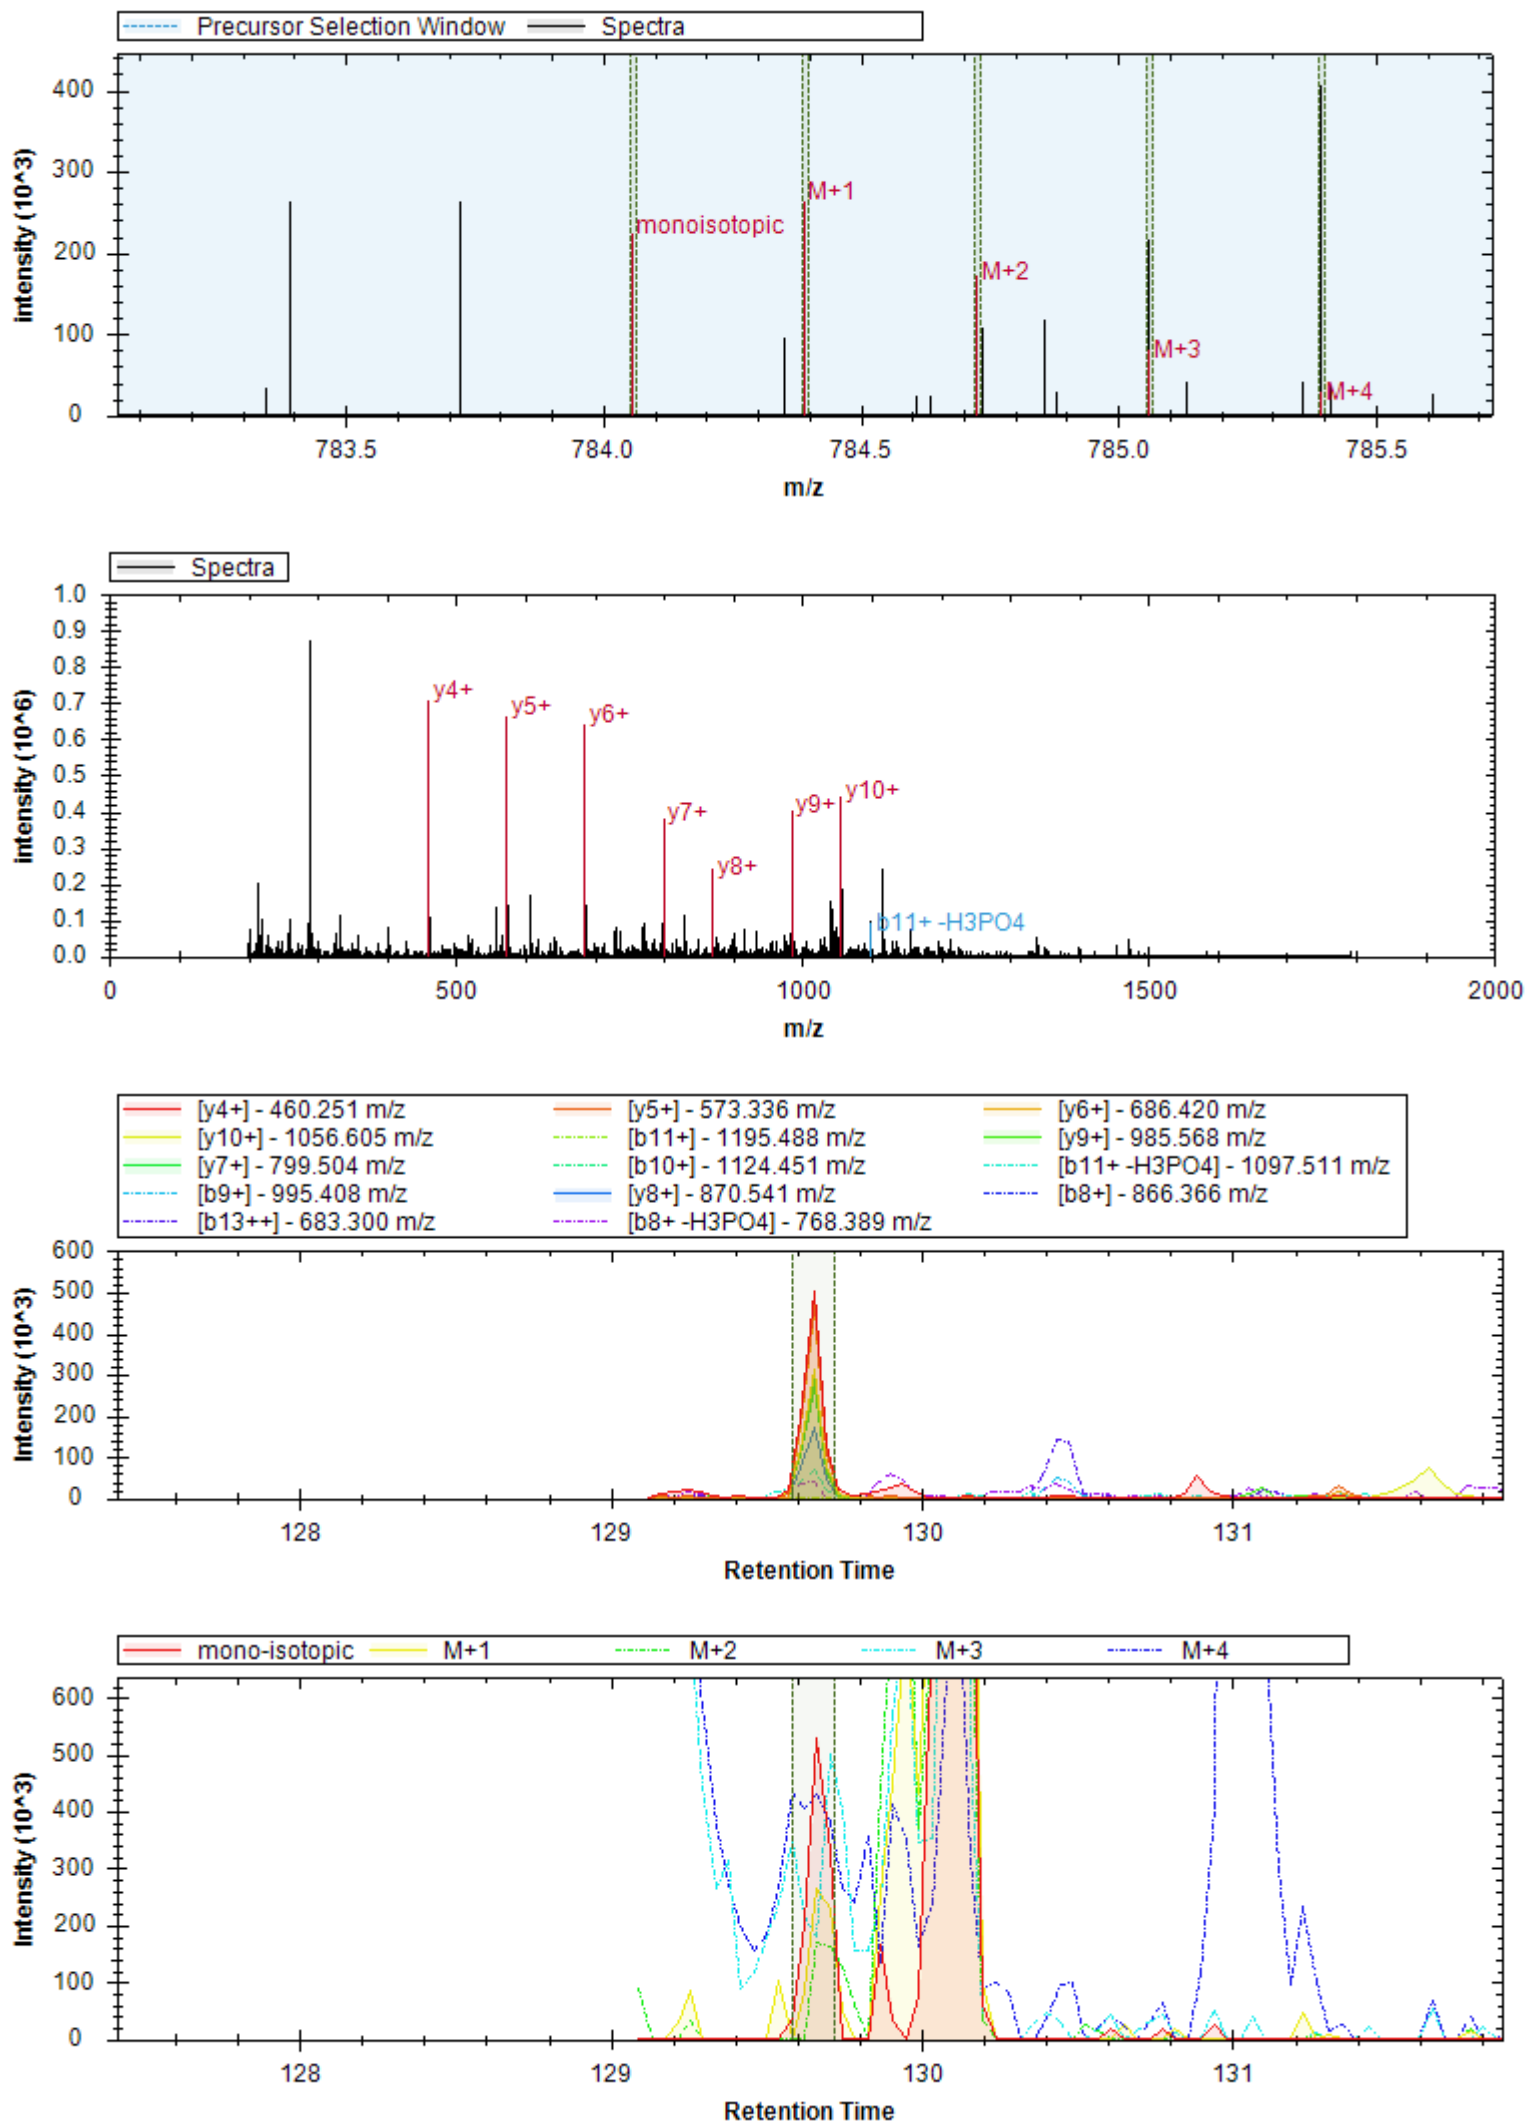

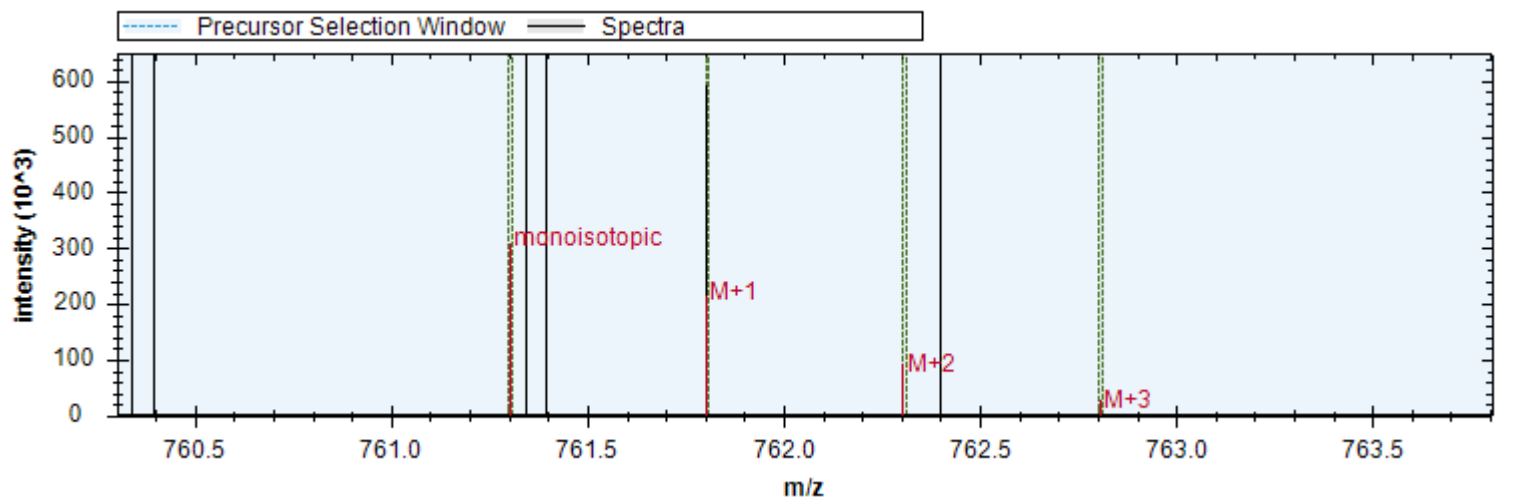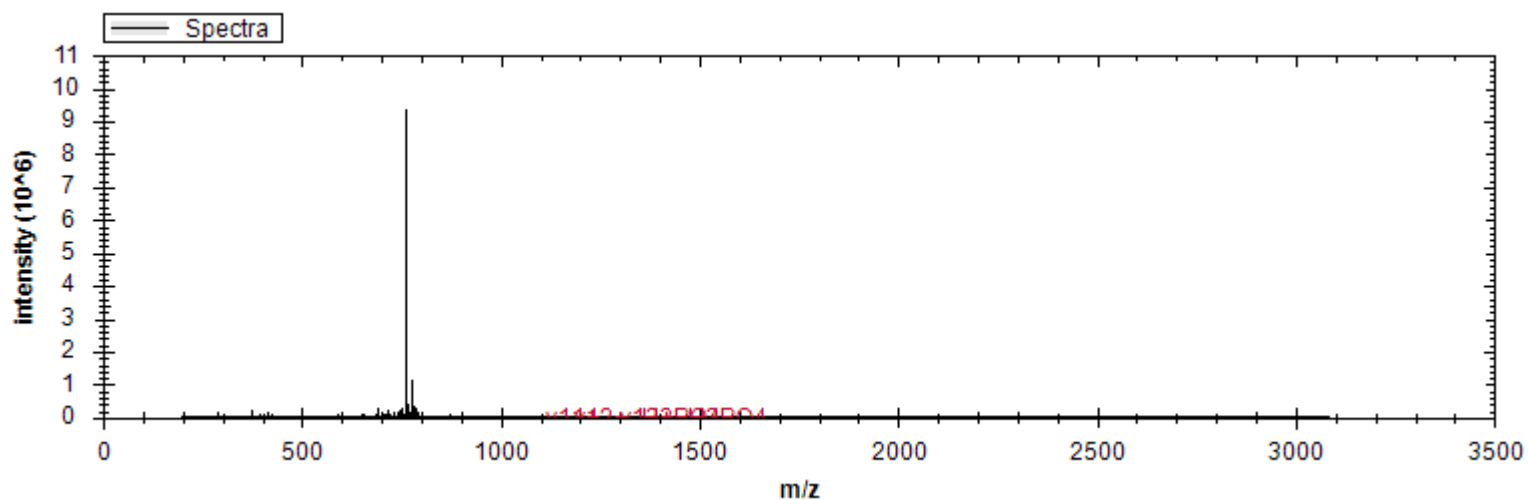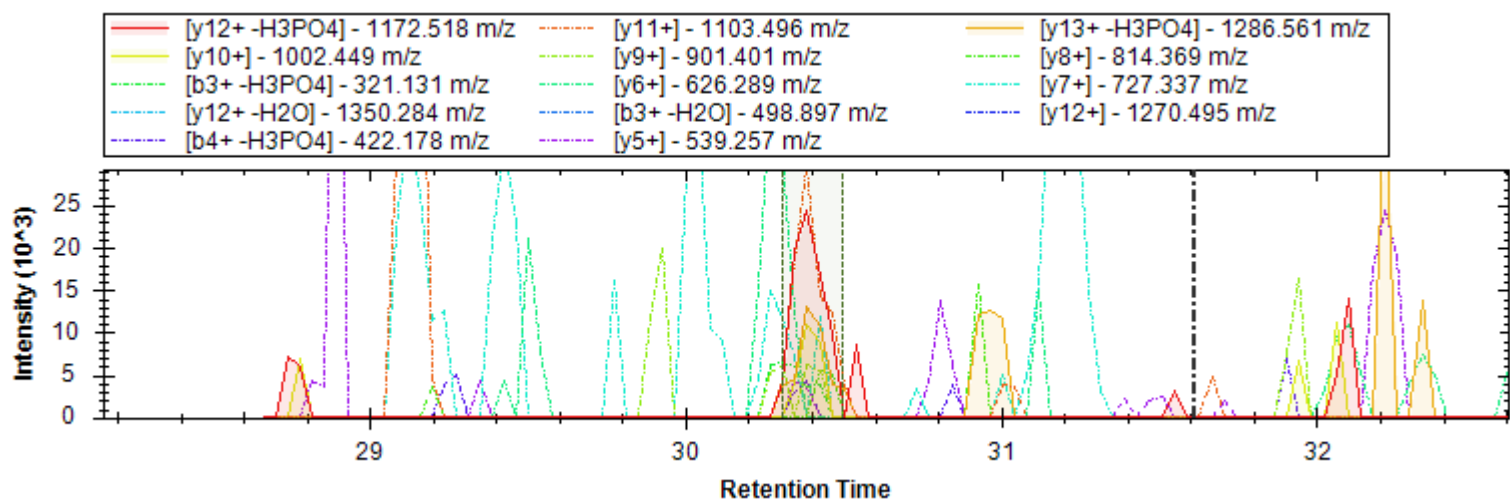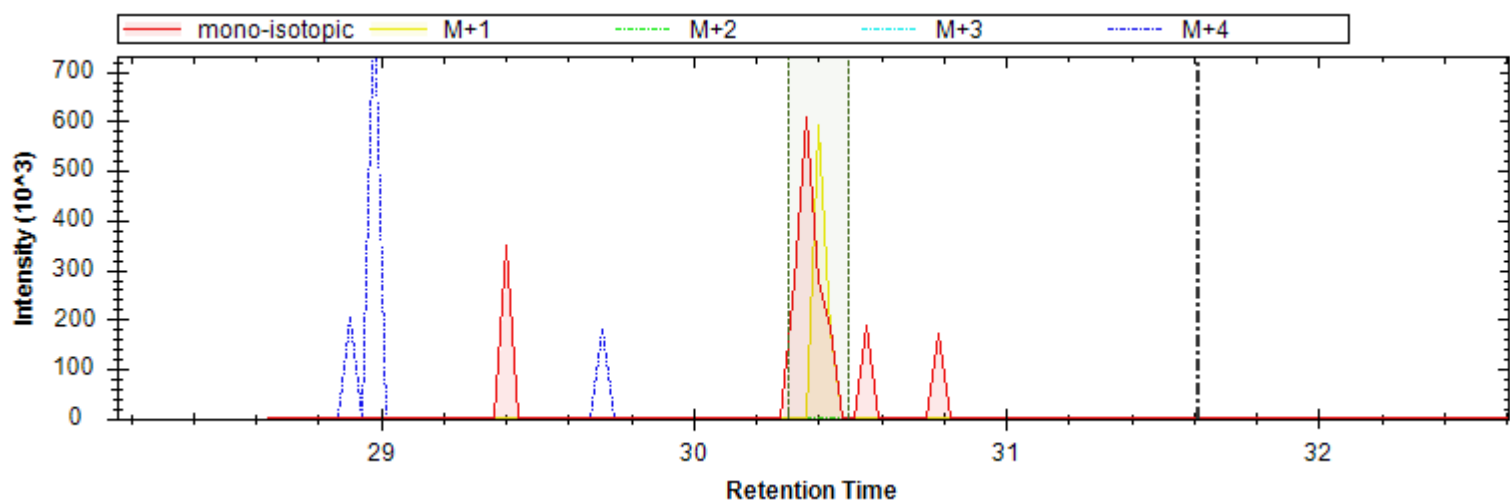





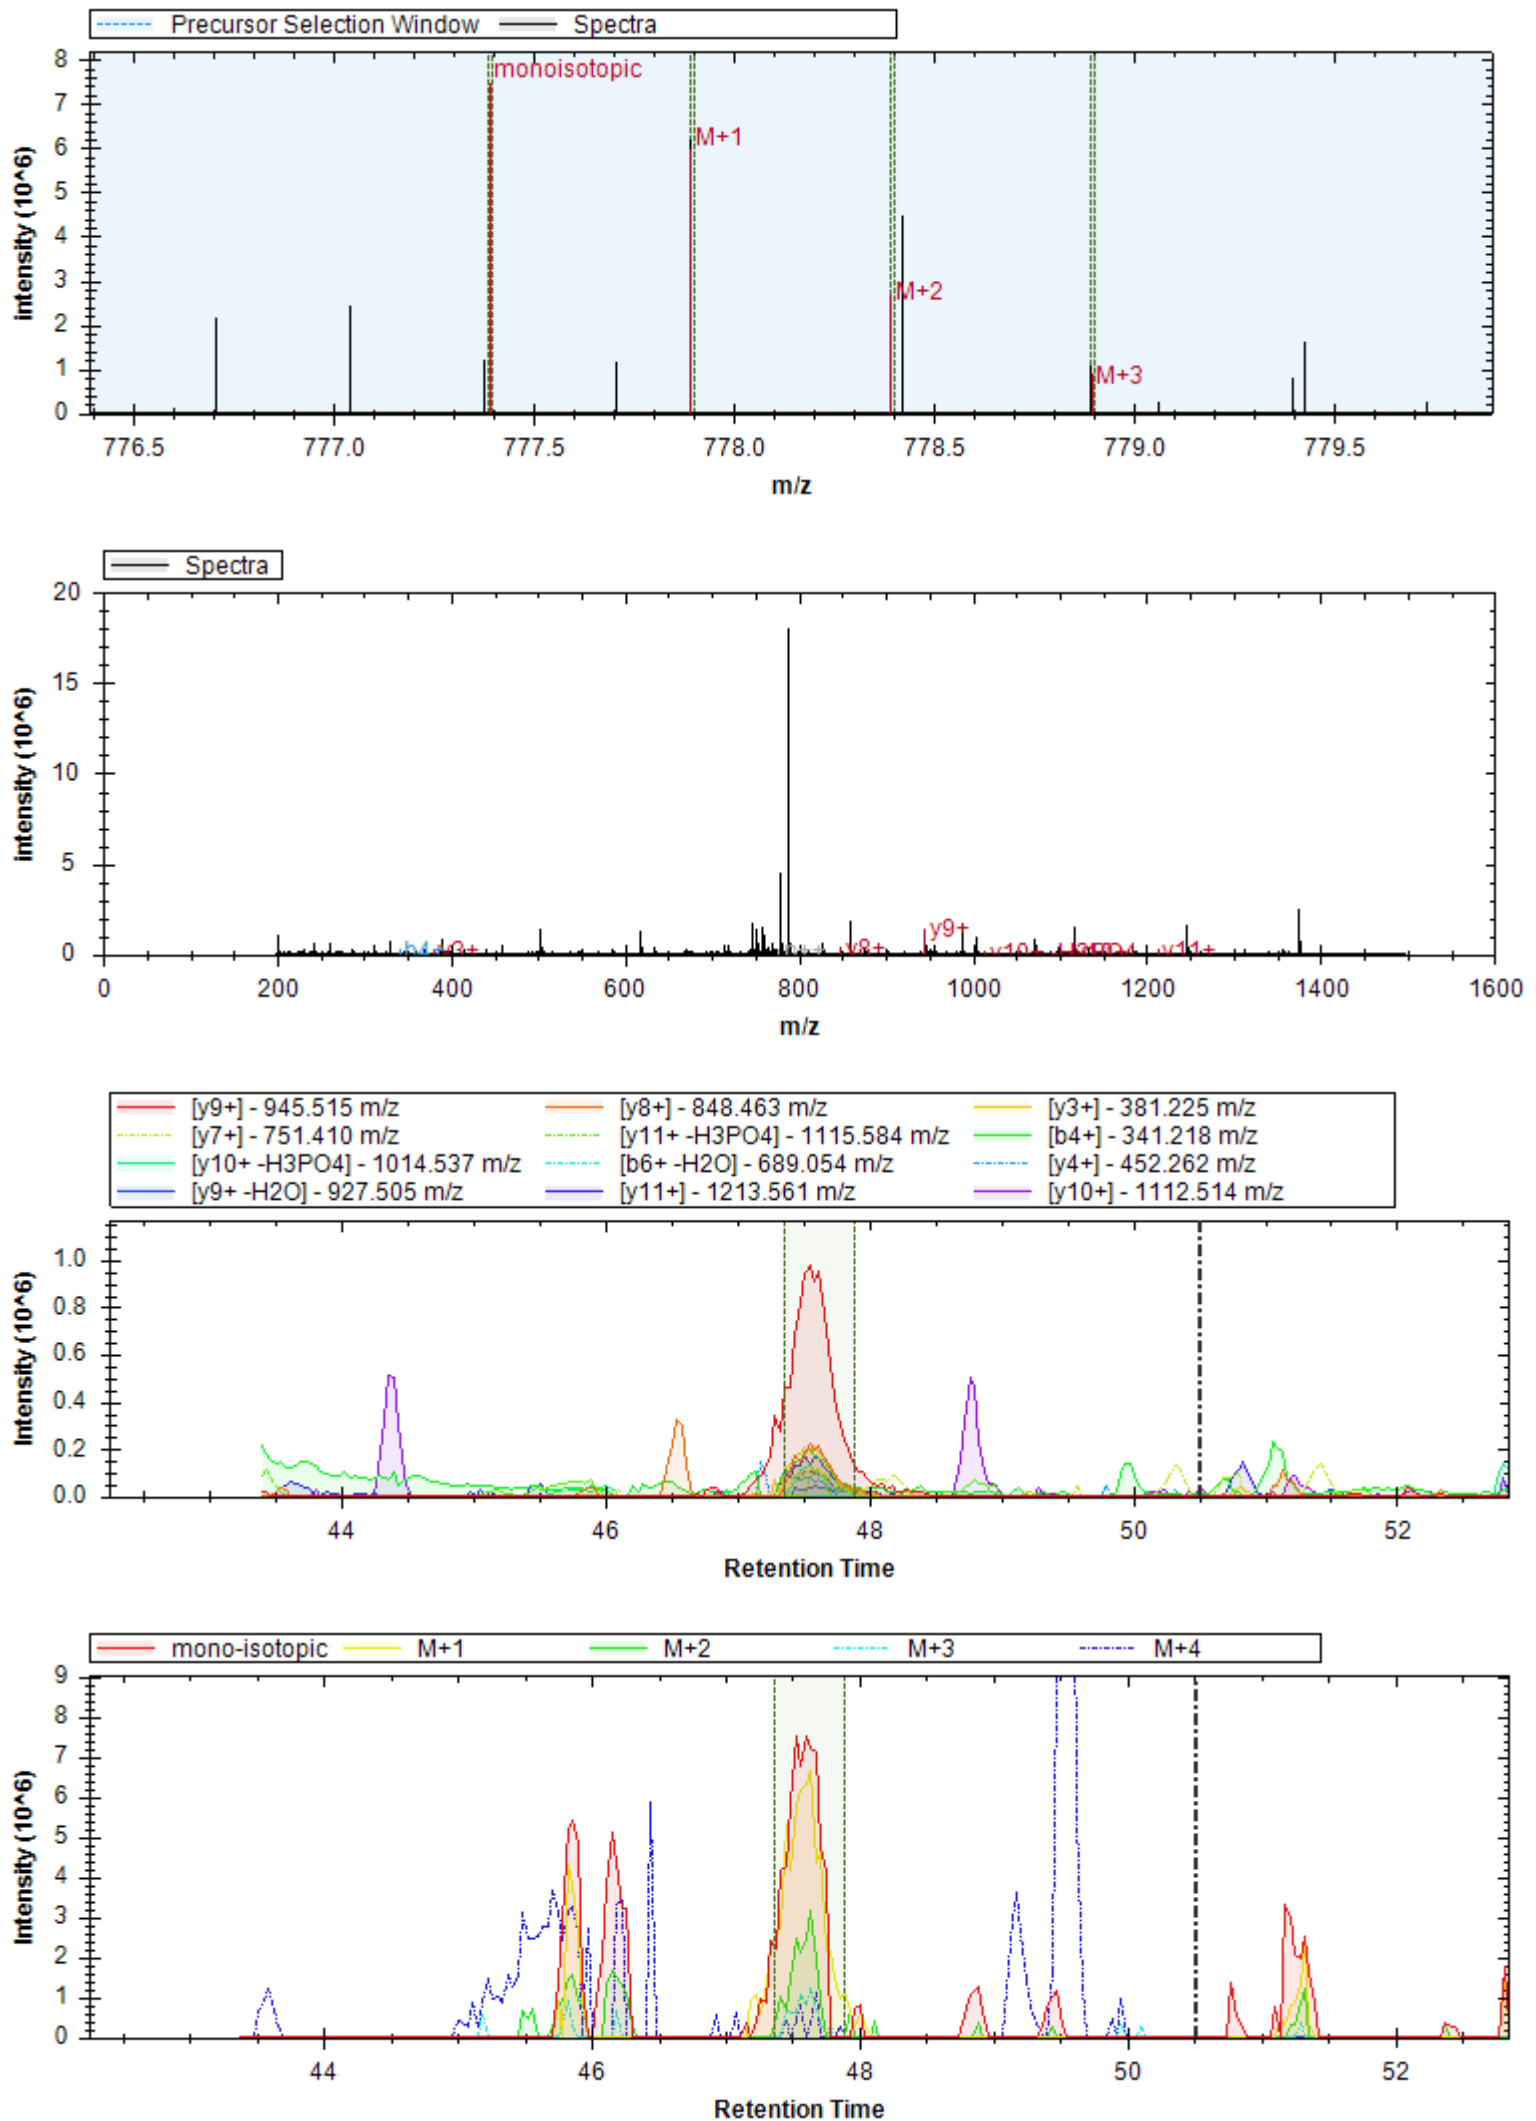

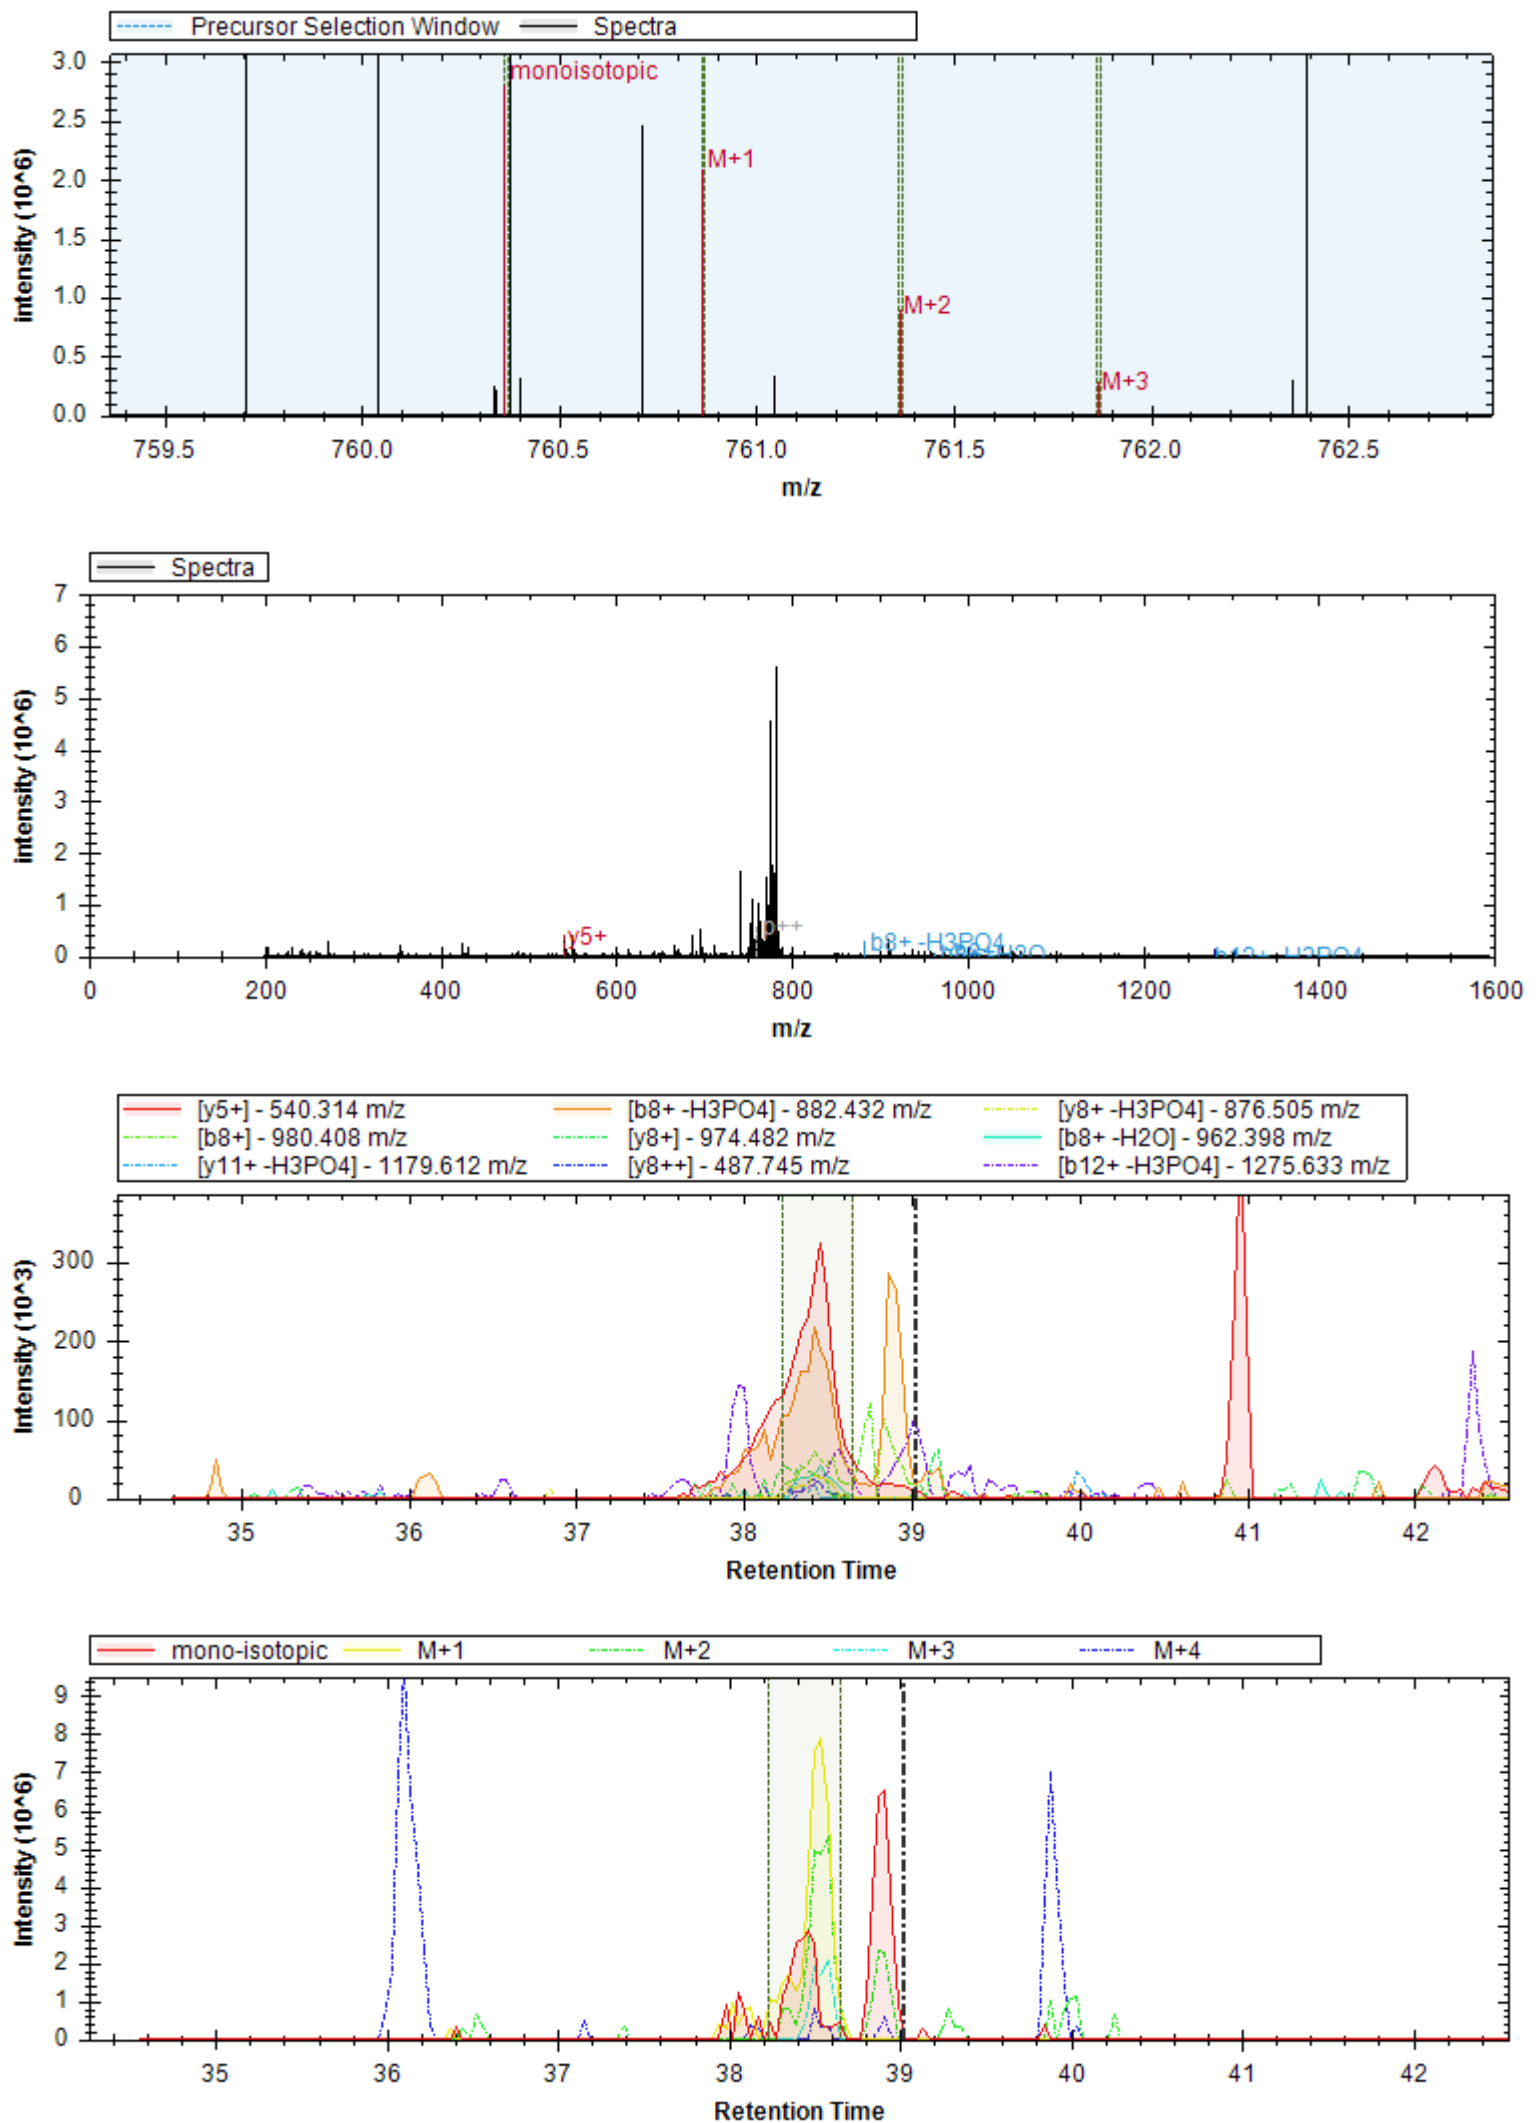

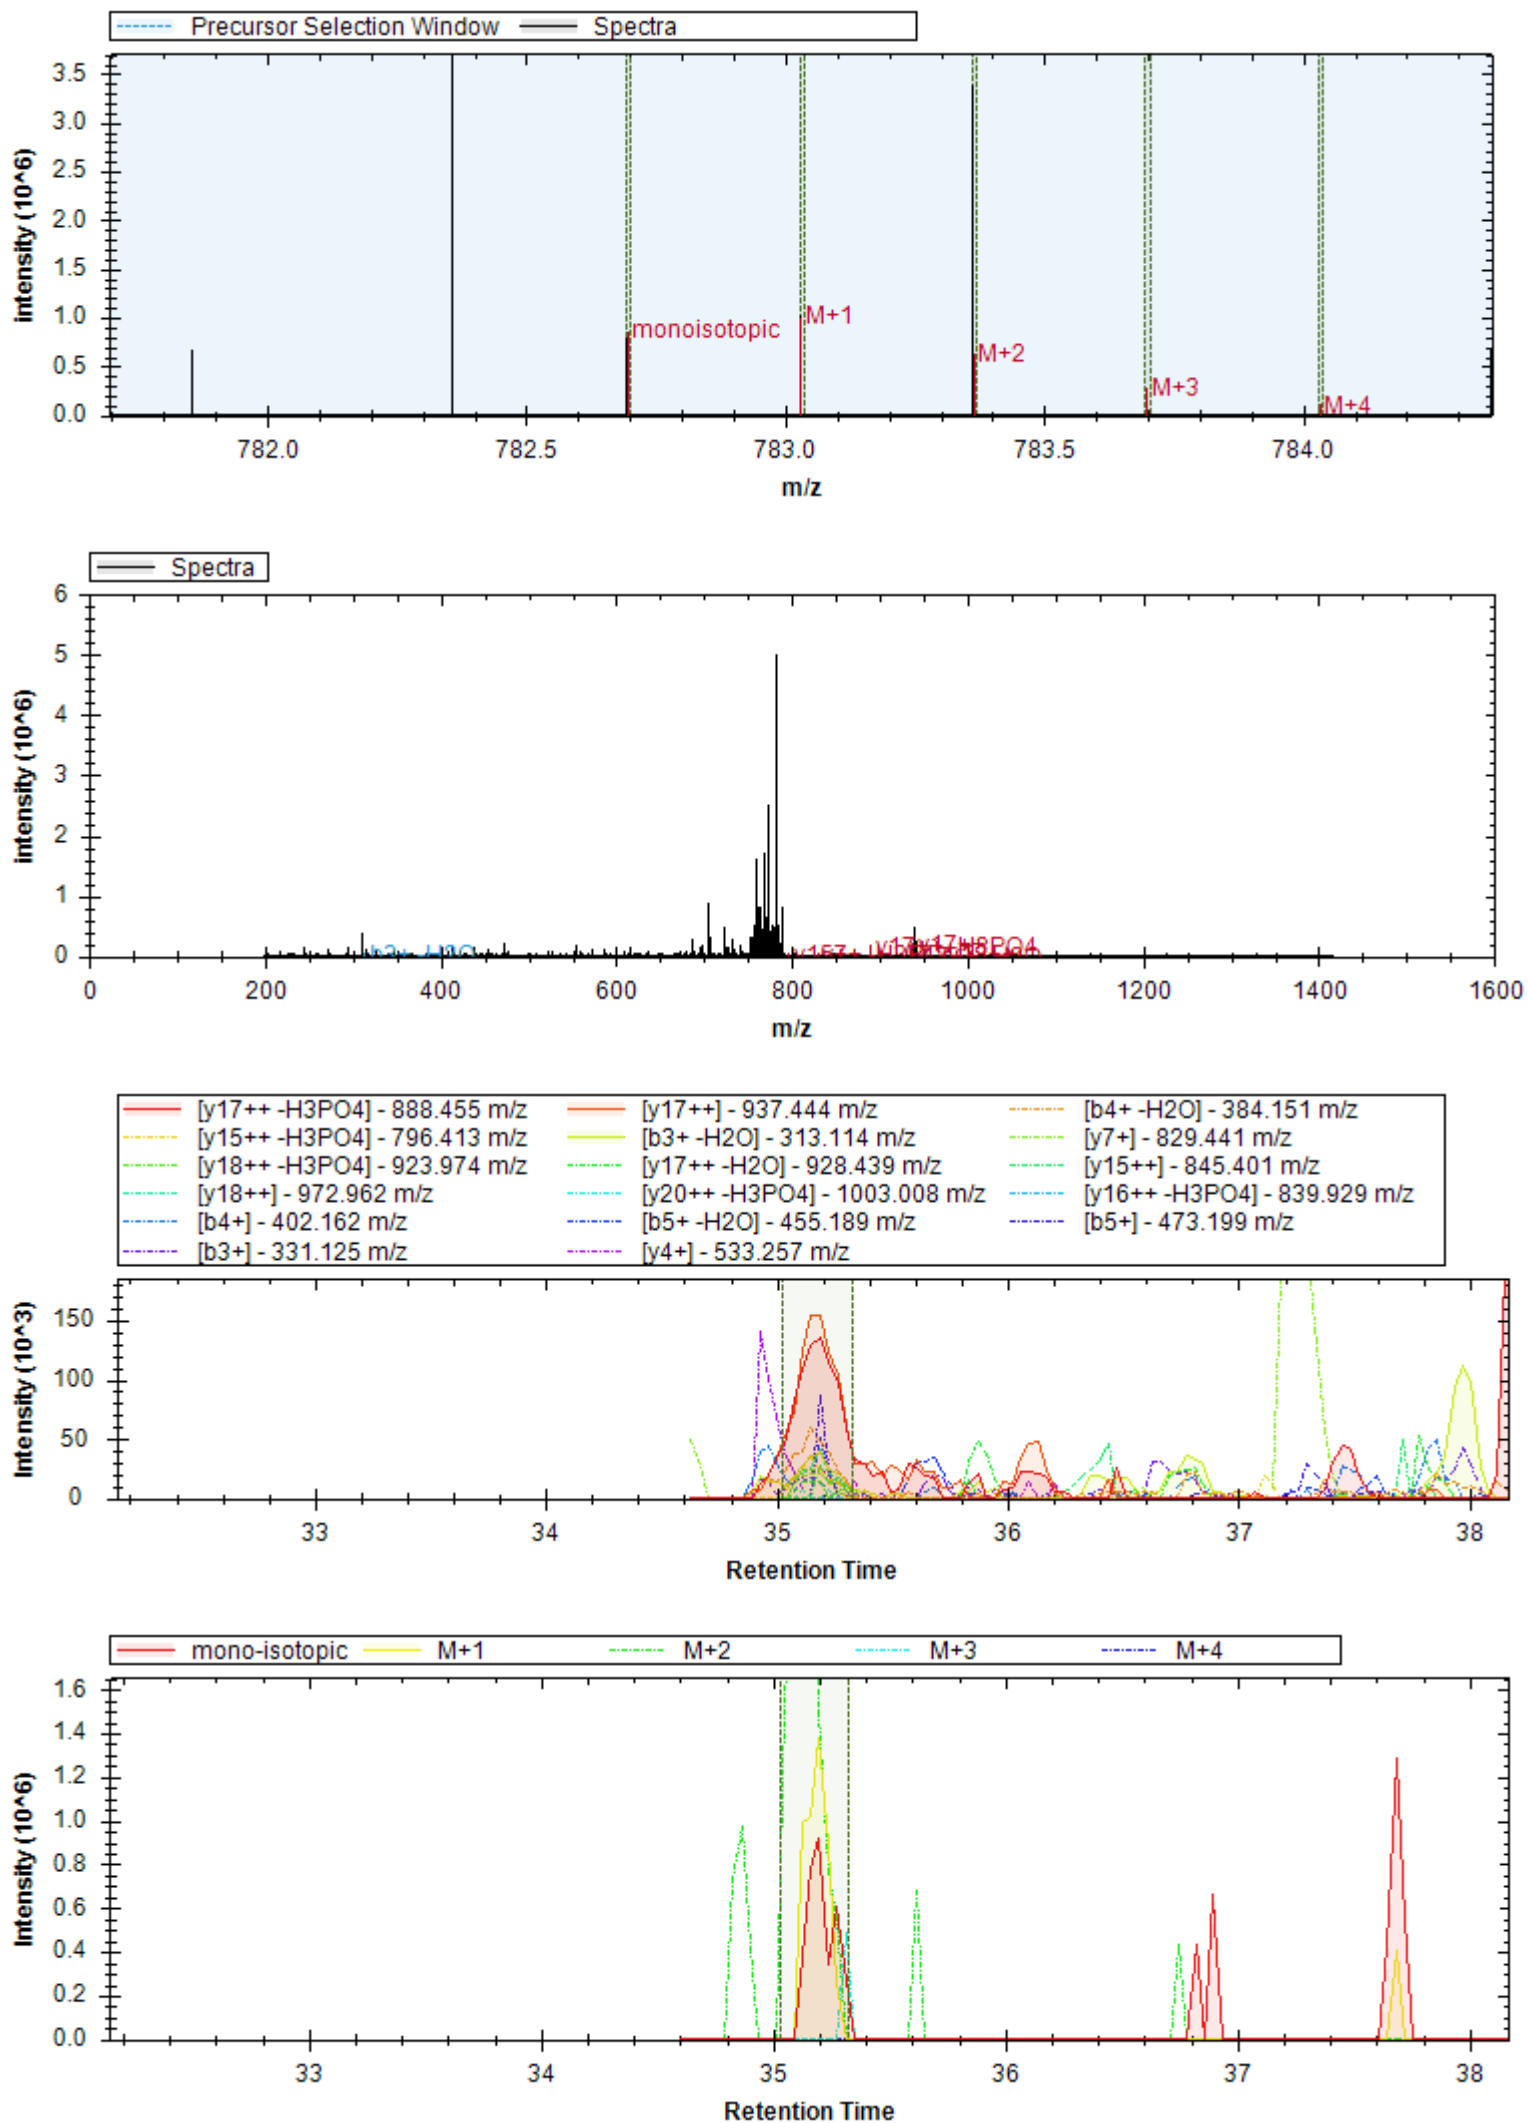

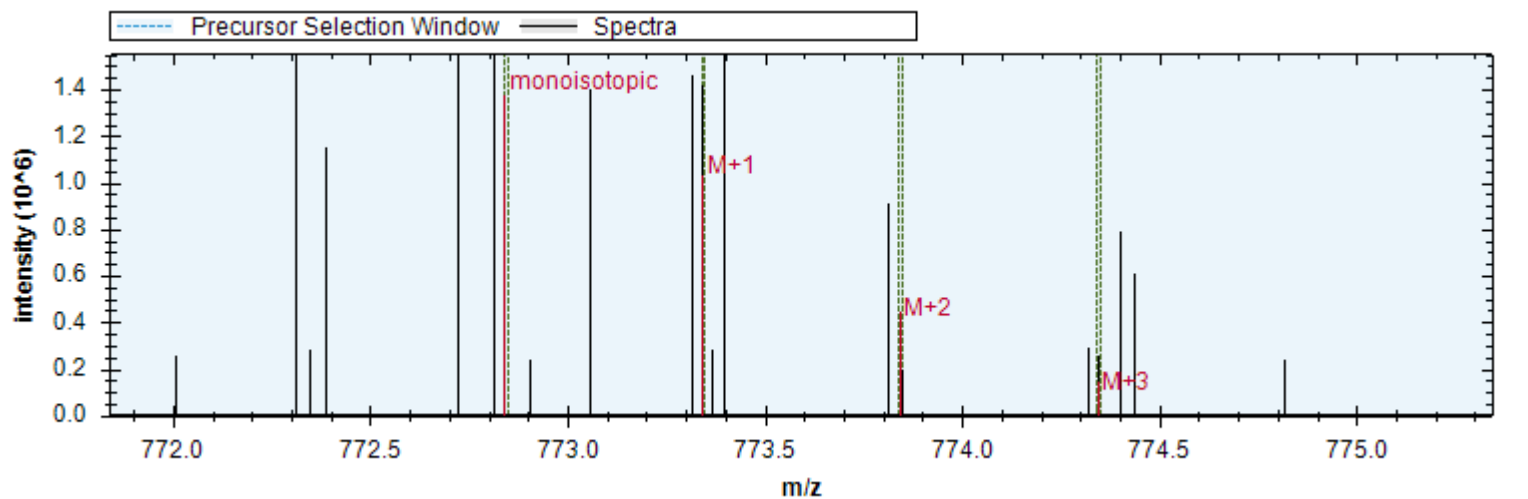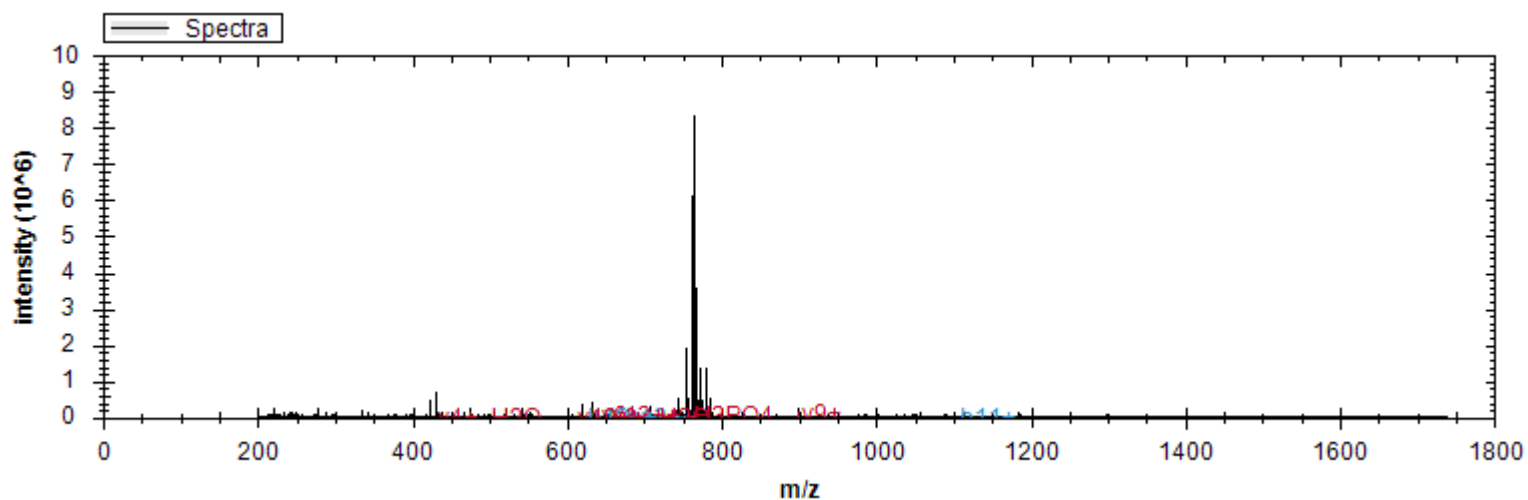

- |                            |                              |                              |
|----------------------------|------------------------------|------------------------------|
| [b11+] - 1102.456 m/z      | [y6+] - 639.346 m/z          | [y4+] - 443.225 m/z          |
| [y12++] - 617.315 m/z      | [y12++ -H2O] - 608.309 m/z   | [y13++ -H3PO4] - 651.826 m/z |
| [b9+ -H2O] - 888.325 m/z   | [y4+ -H2O] - 425.214 m/z     | [y10++] - 518.265 m/z        |
| [y9+] - 898.463 m/z        | [y10+] - 1035.522 m/z        | [b13++] - 670.785 m/z        |
| [b12++] - 620.261 m/z      | [b11+ -H3PO4] - 1004.480 m/z | [y7+] - 740.394 m/z          |
| [b11+ -H2O] - 1084.446 m/z | [b9+] - 906.335 m/z          | [y6+ -H2O] - 621.336 m/z     |
| [b8+] - 805.288 m/z        | [y9+ -H2O] - 880.452 m/z     |                              |

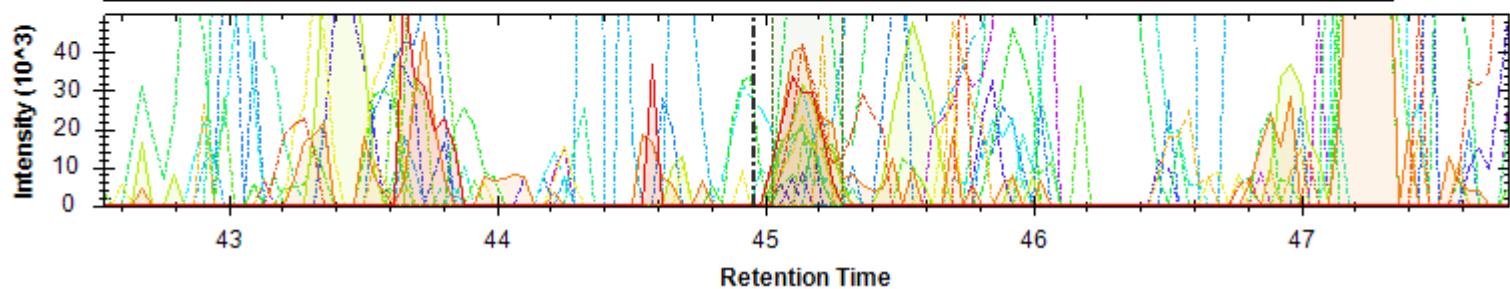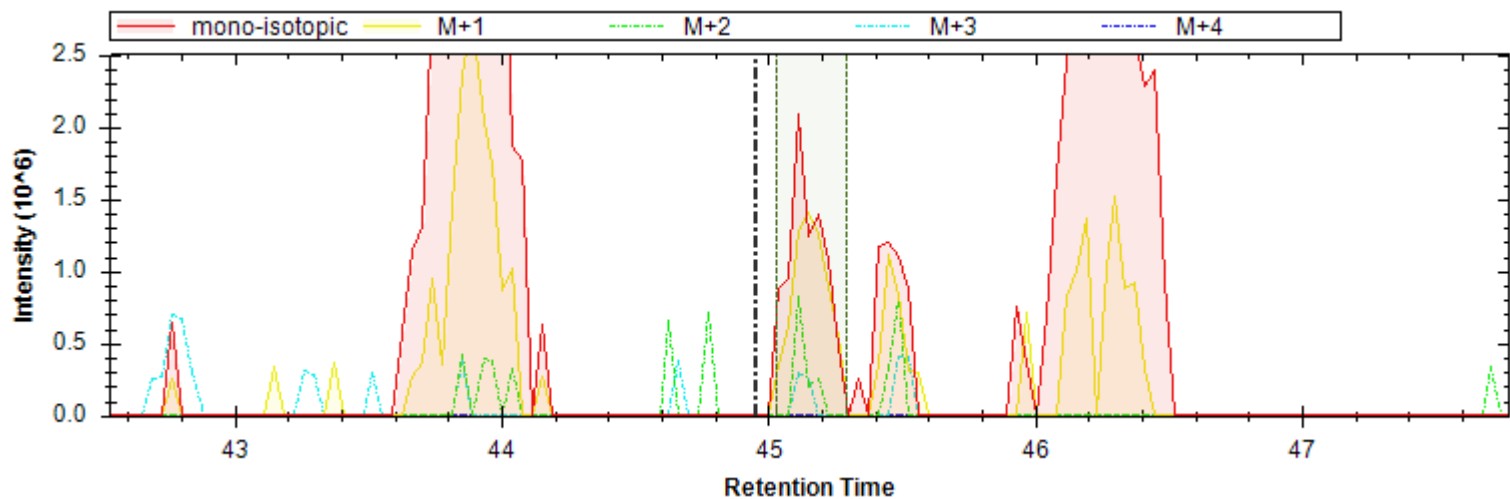

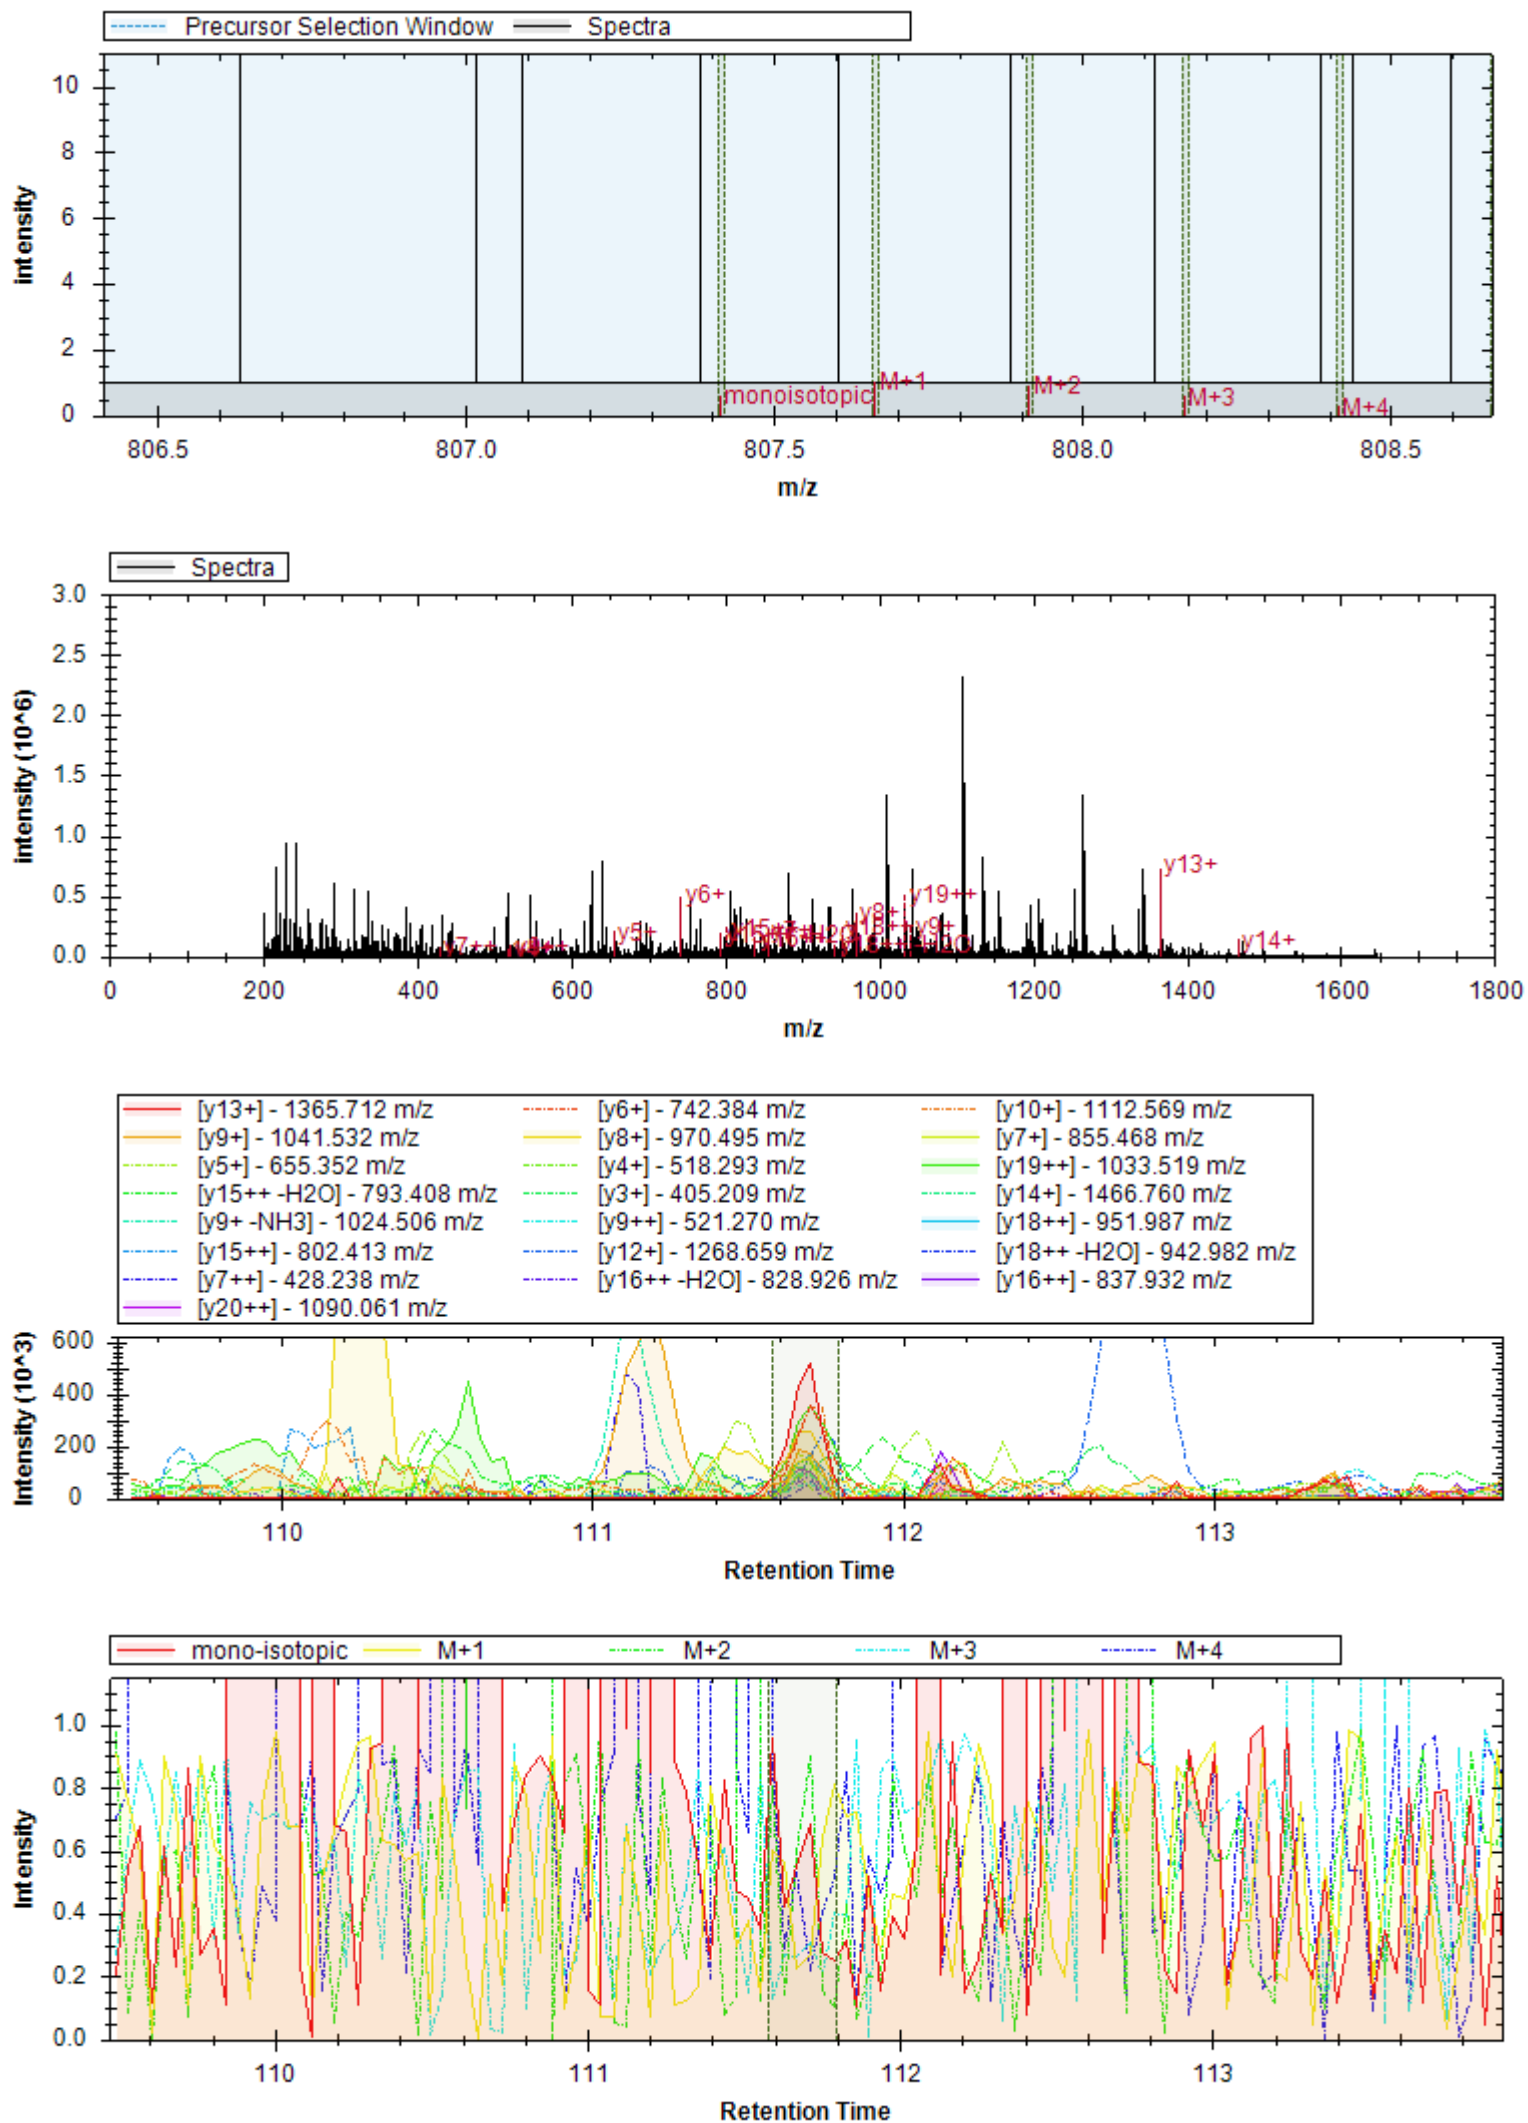

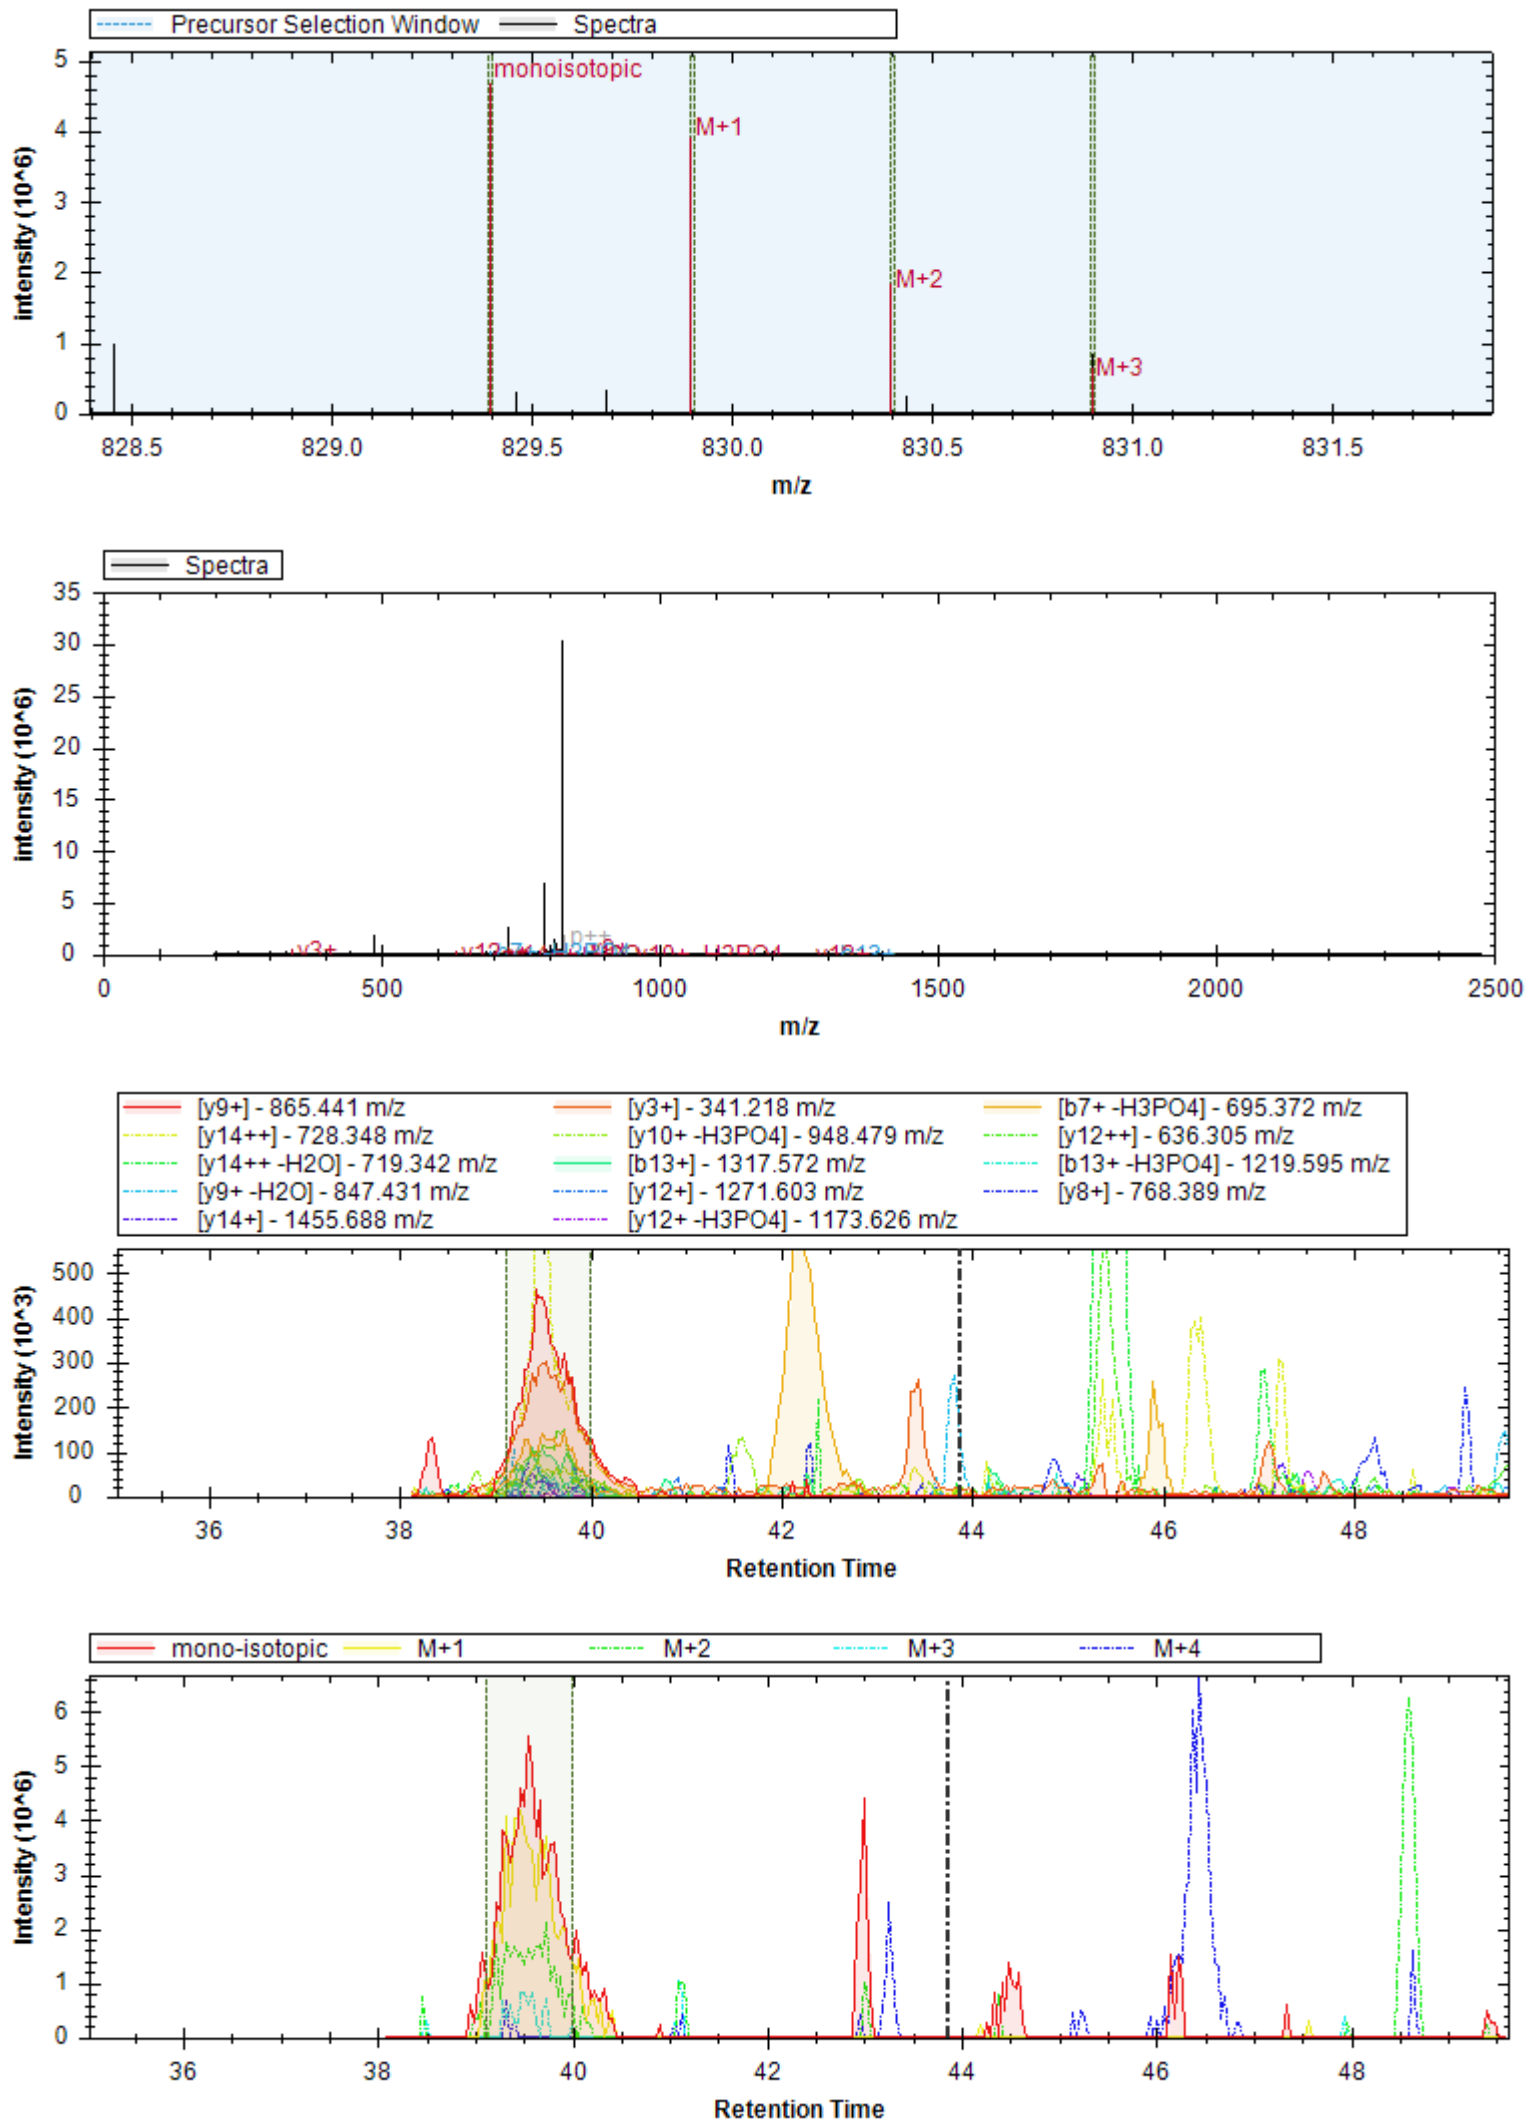

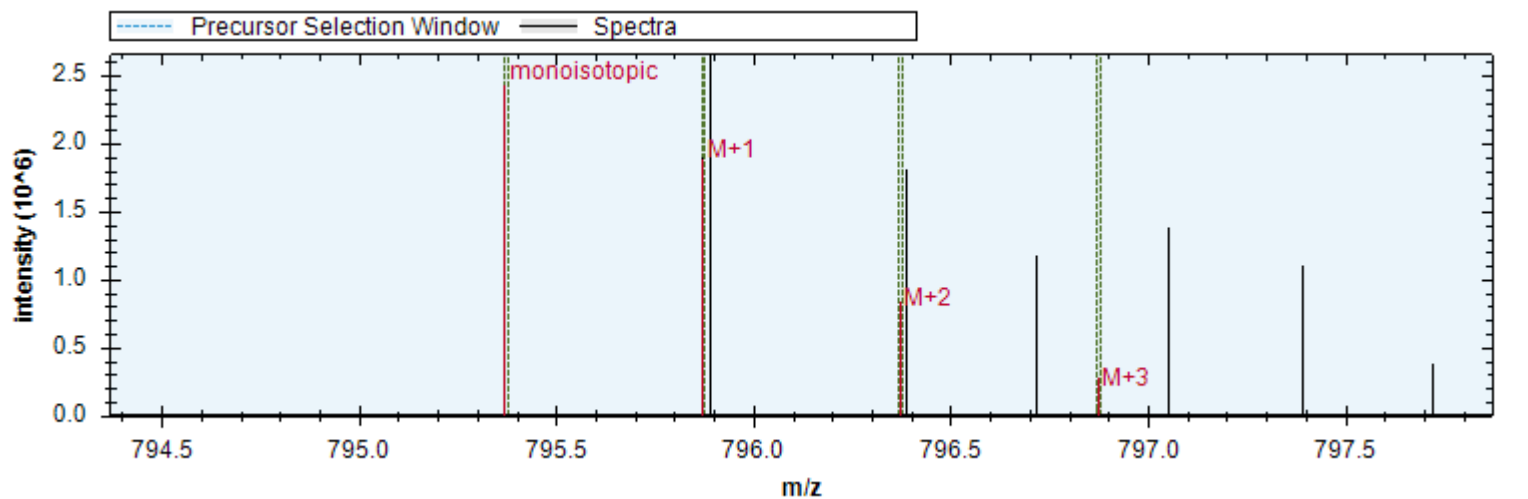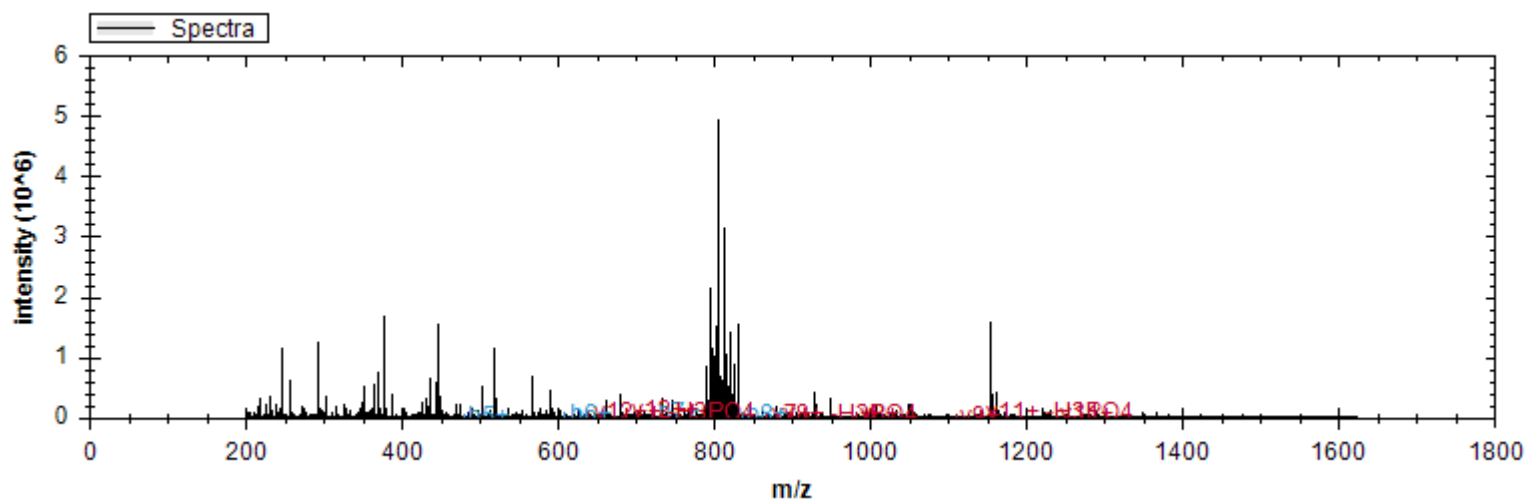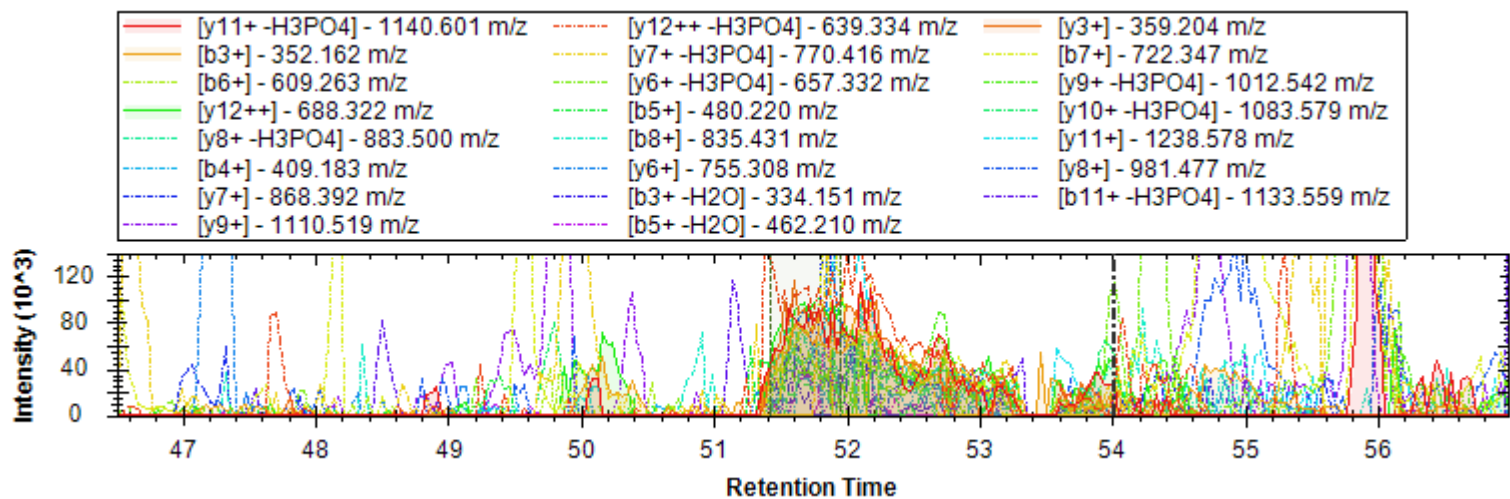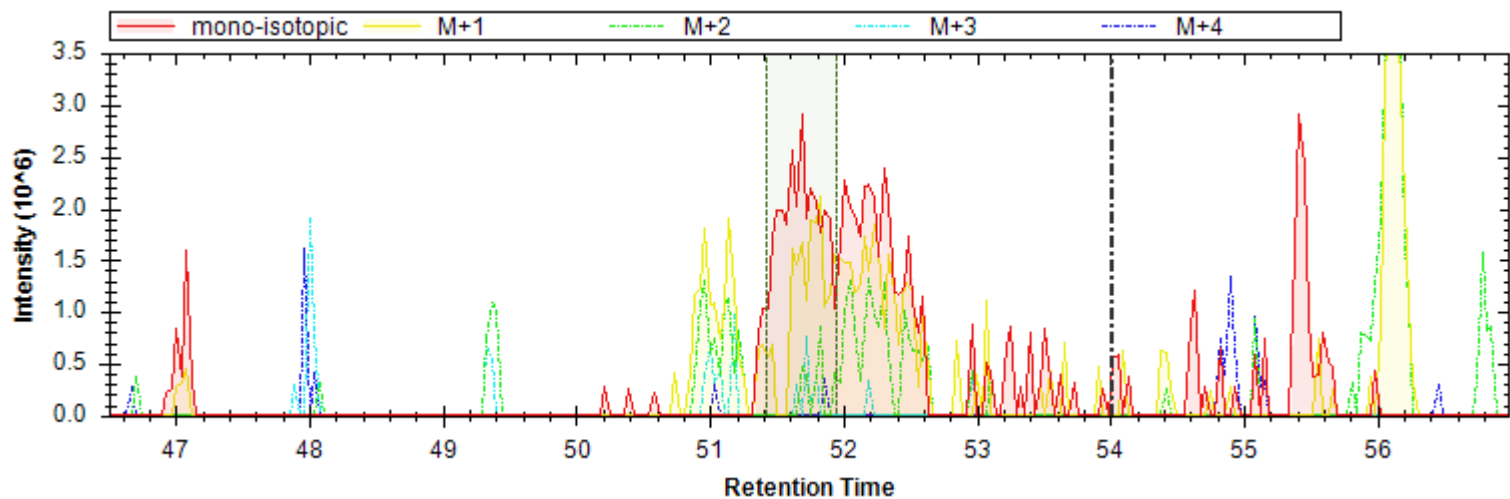

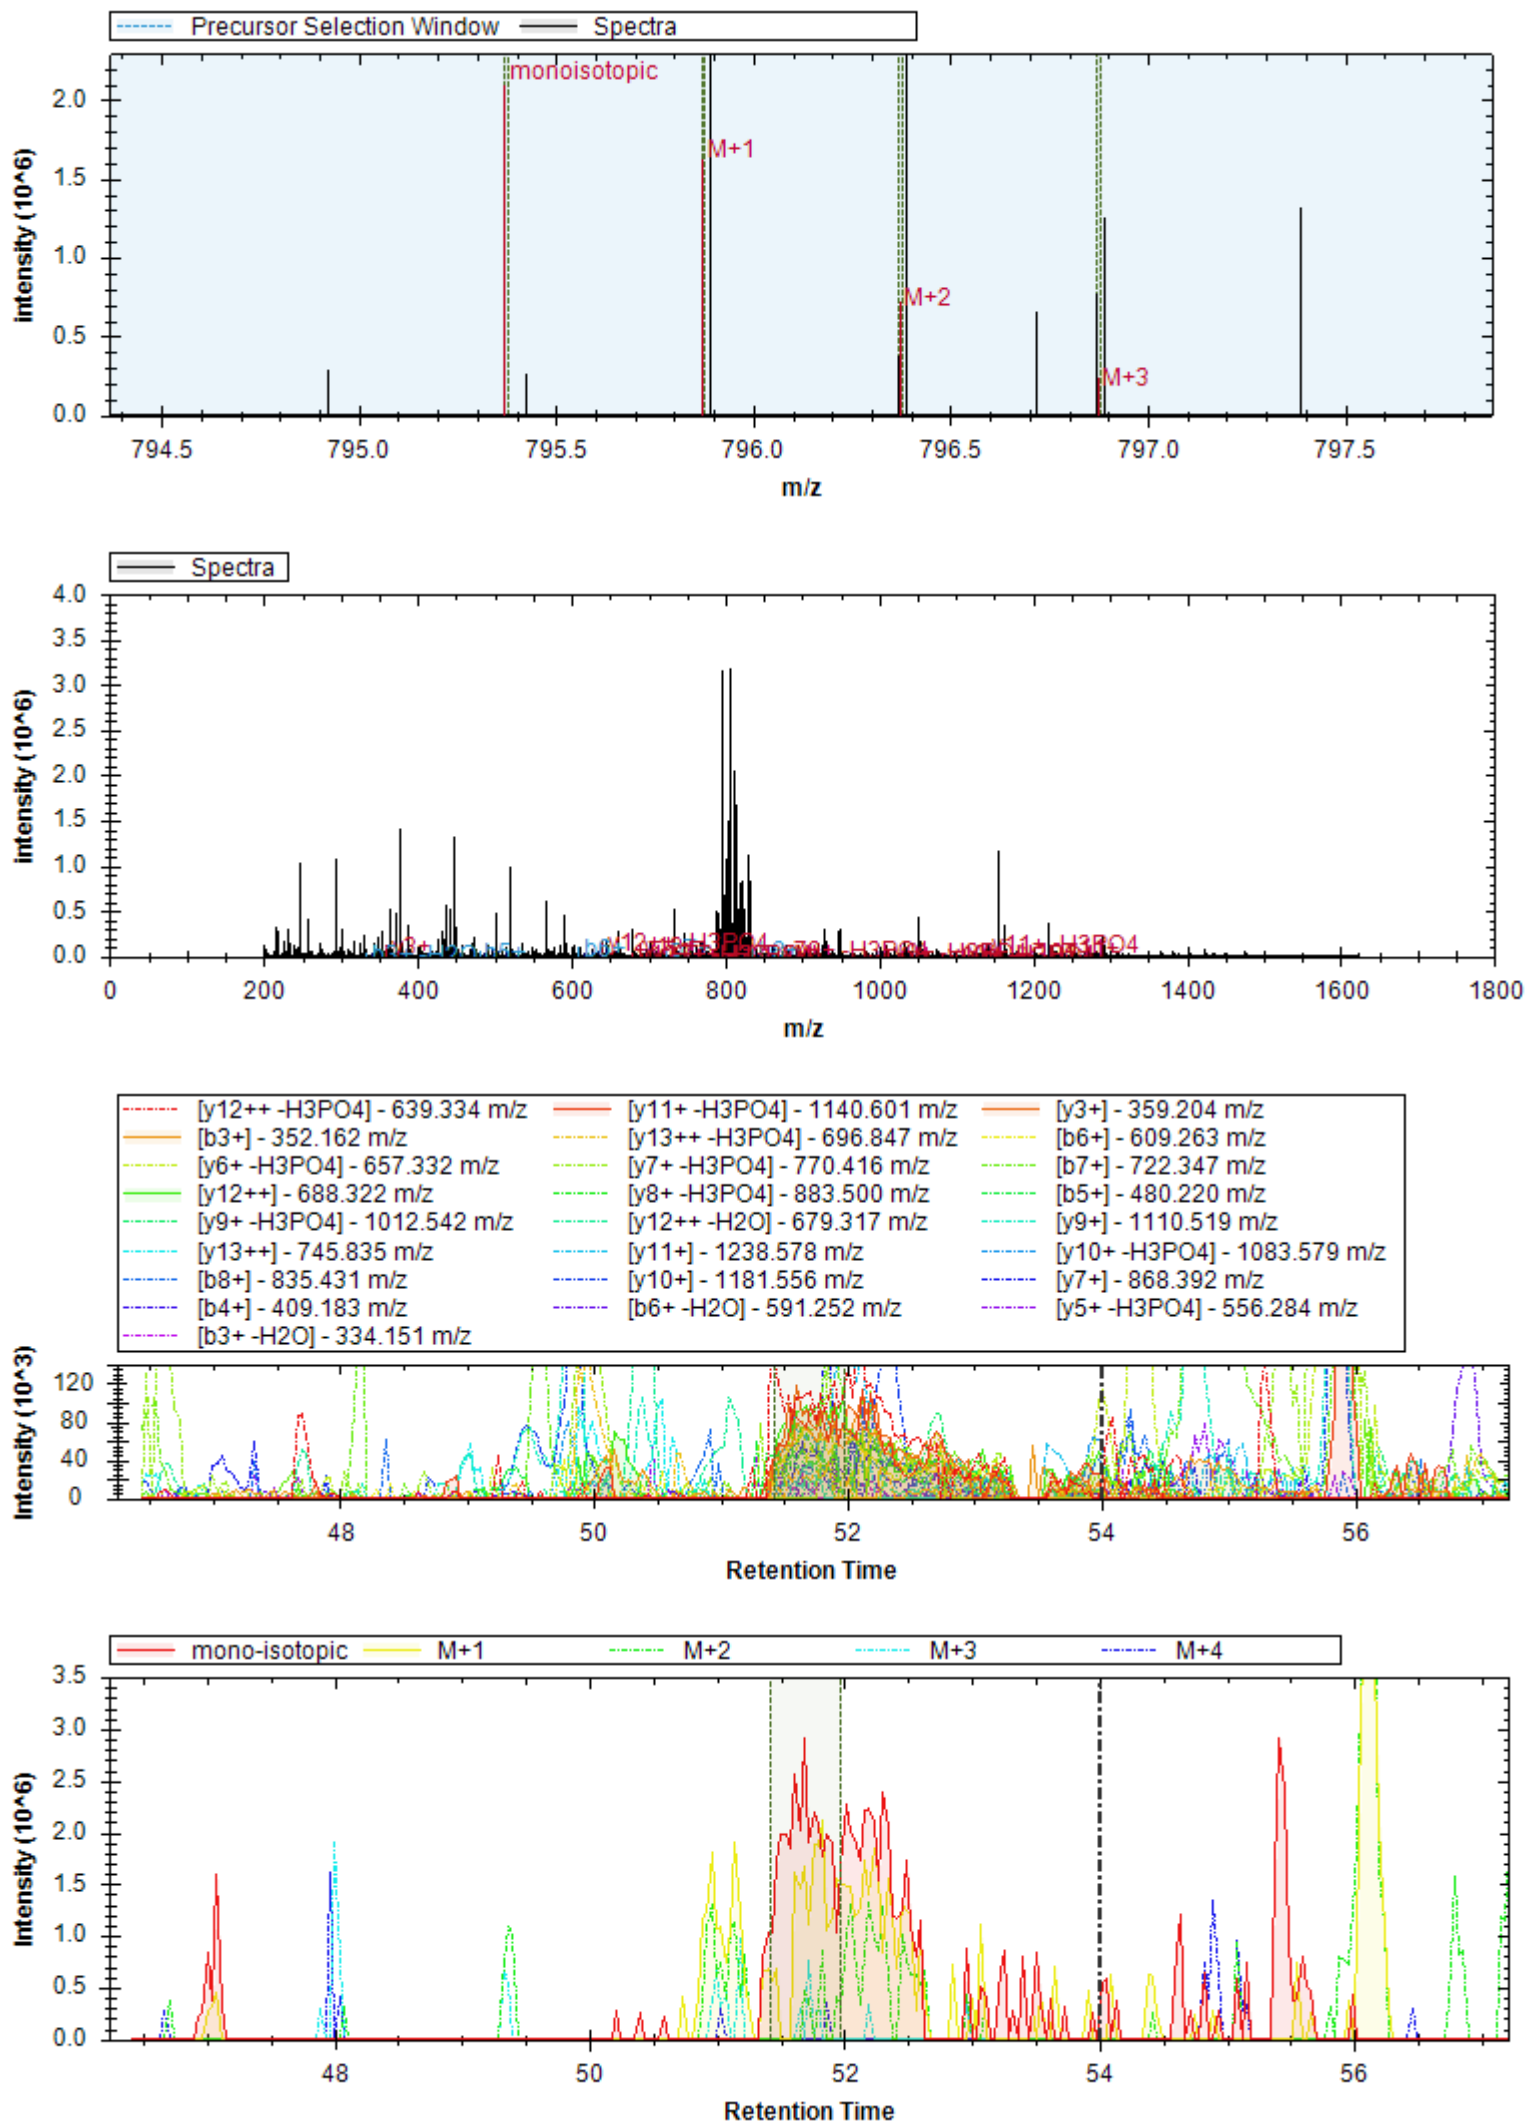



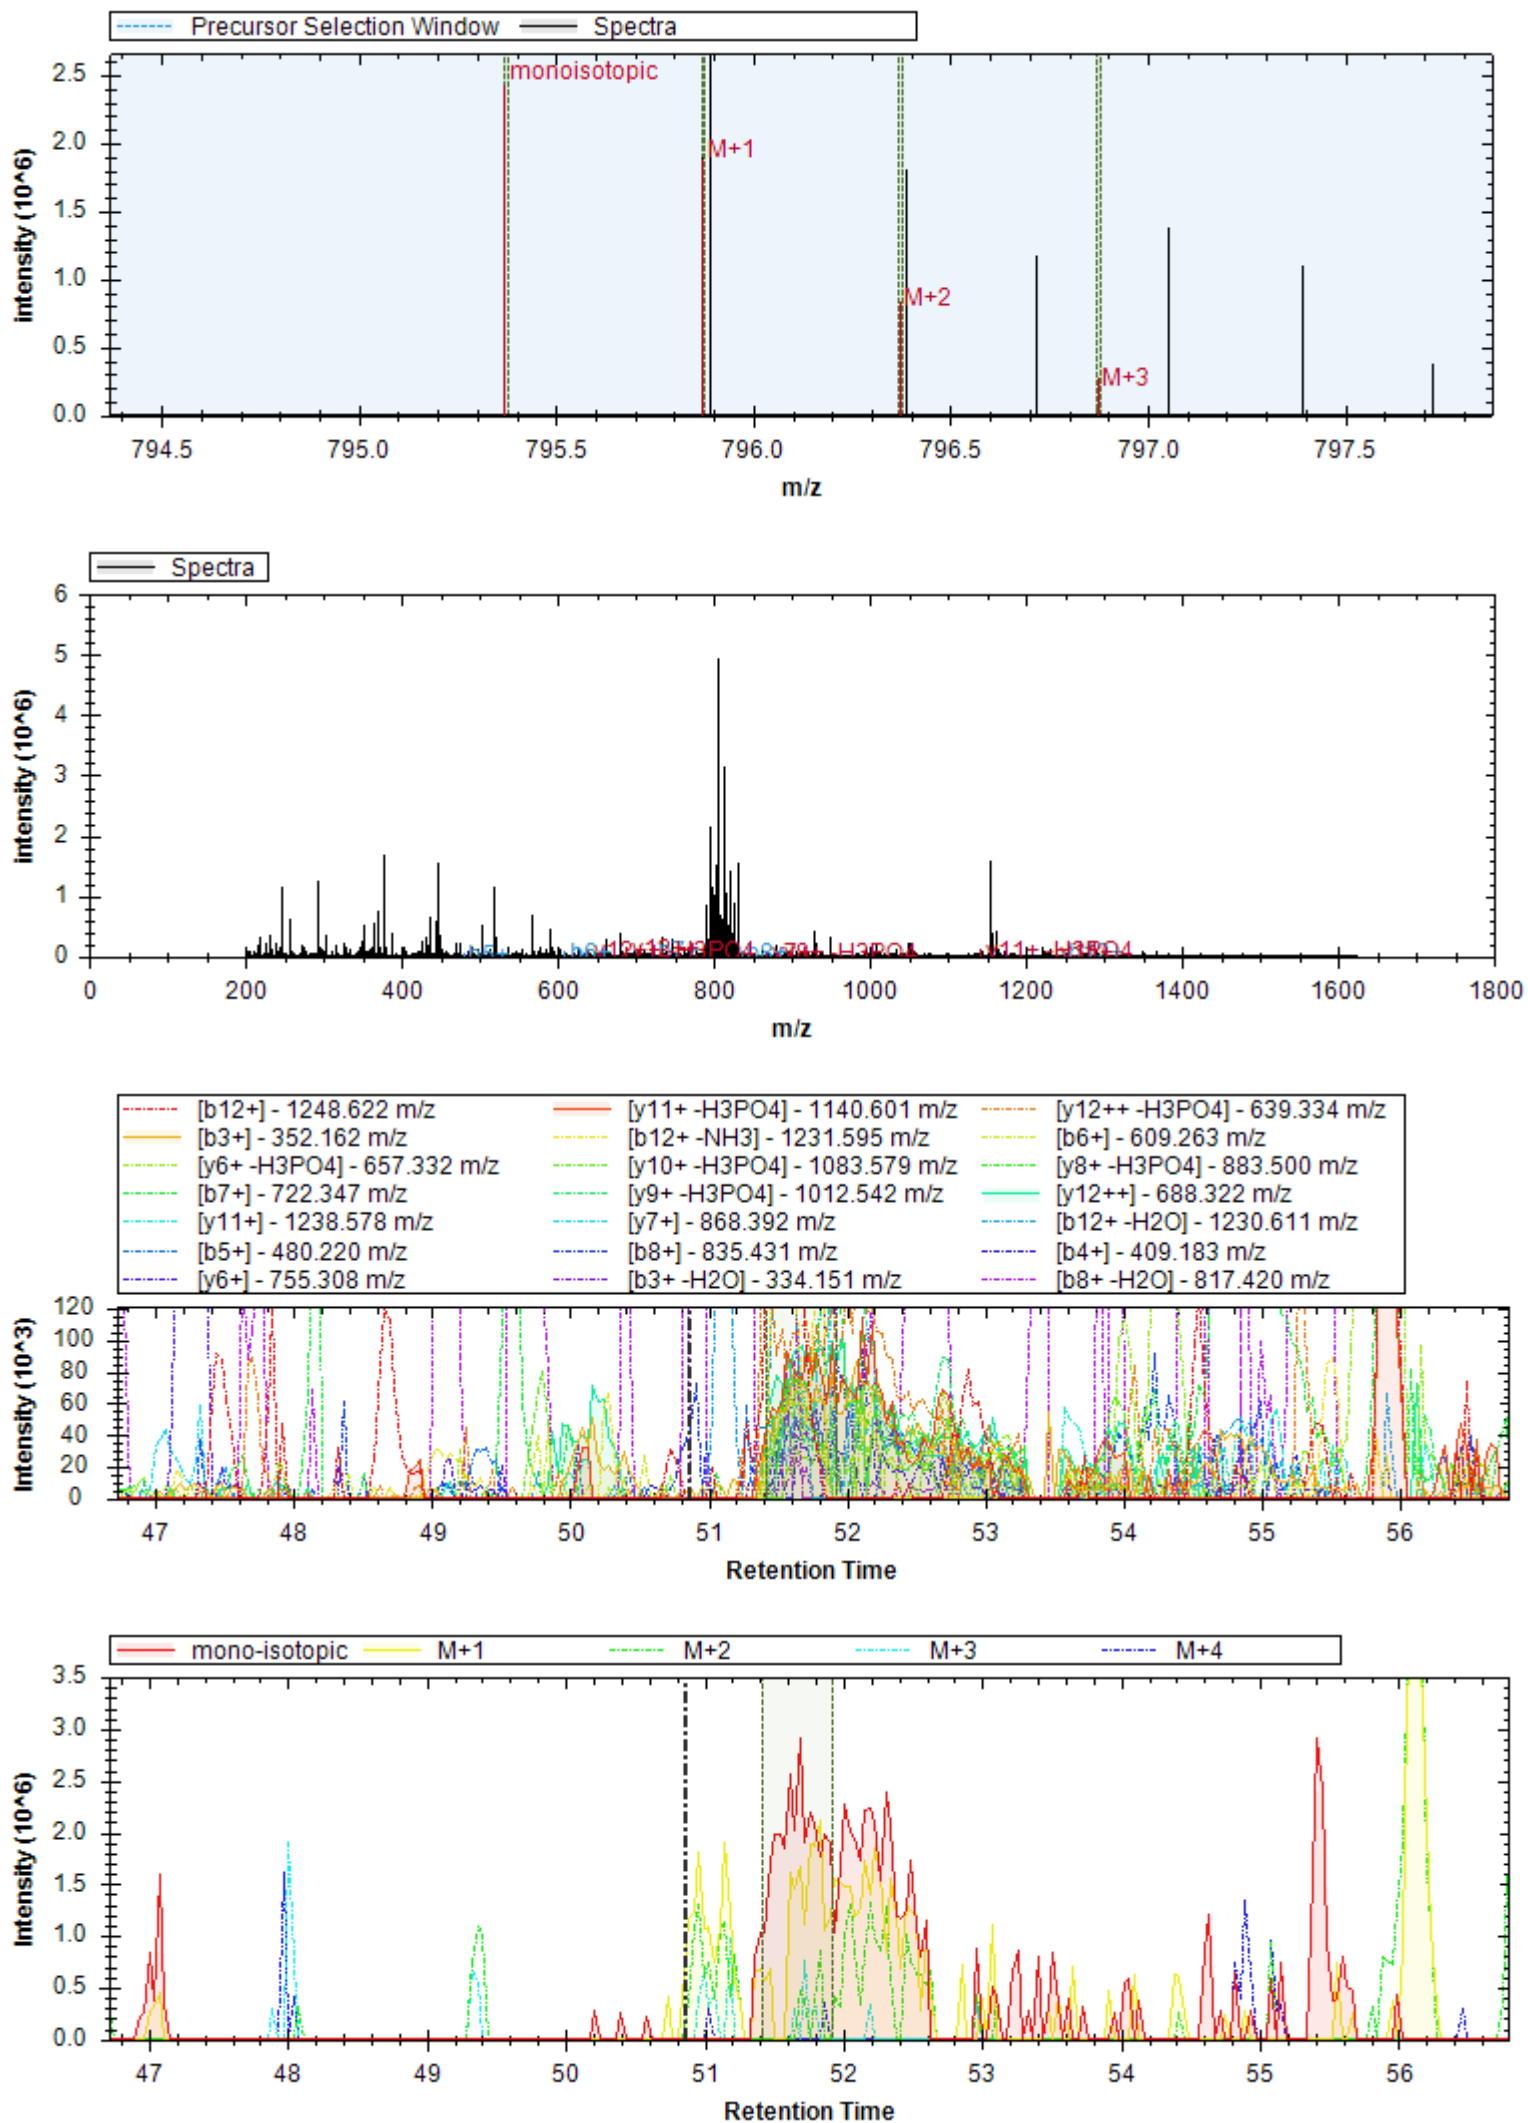

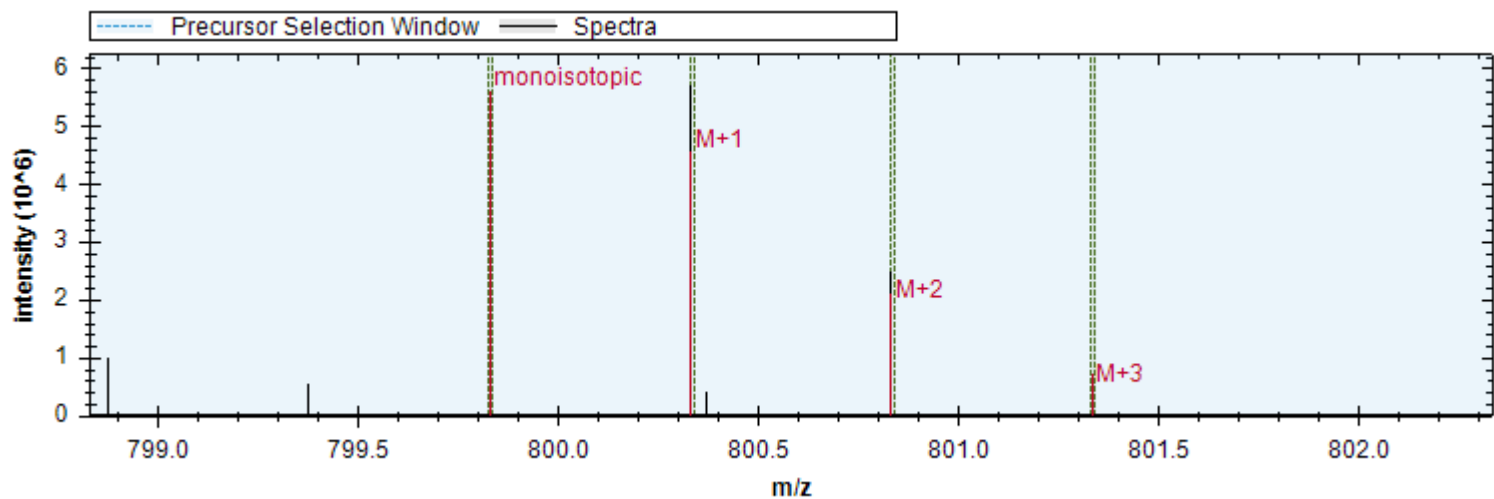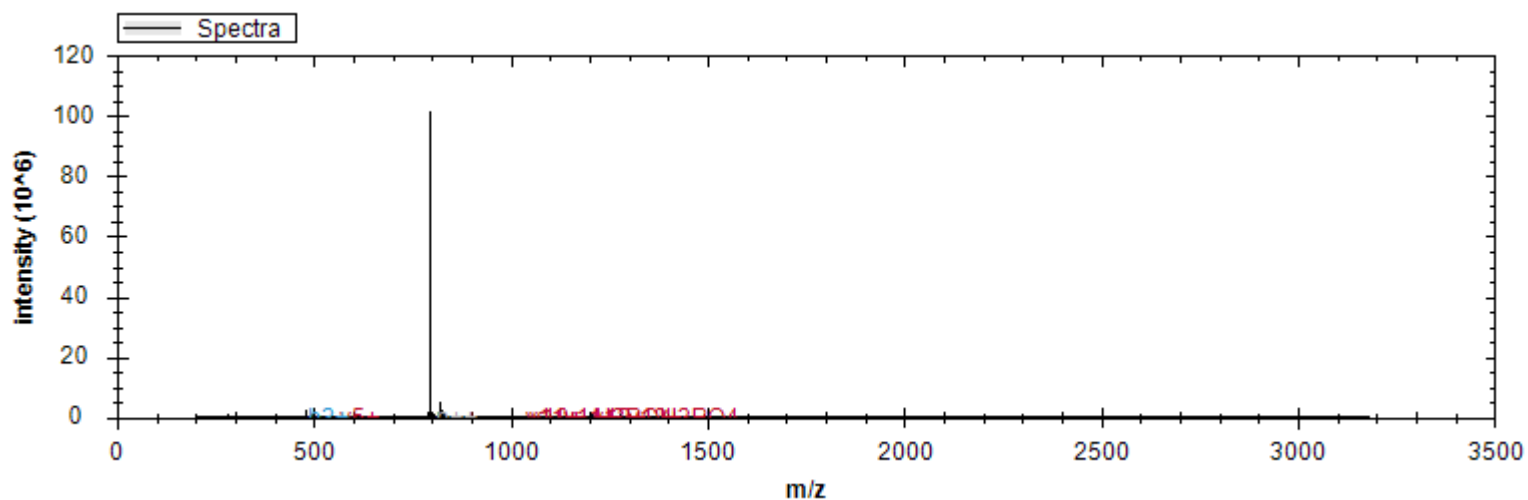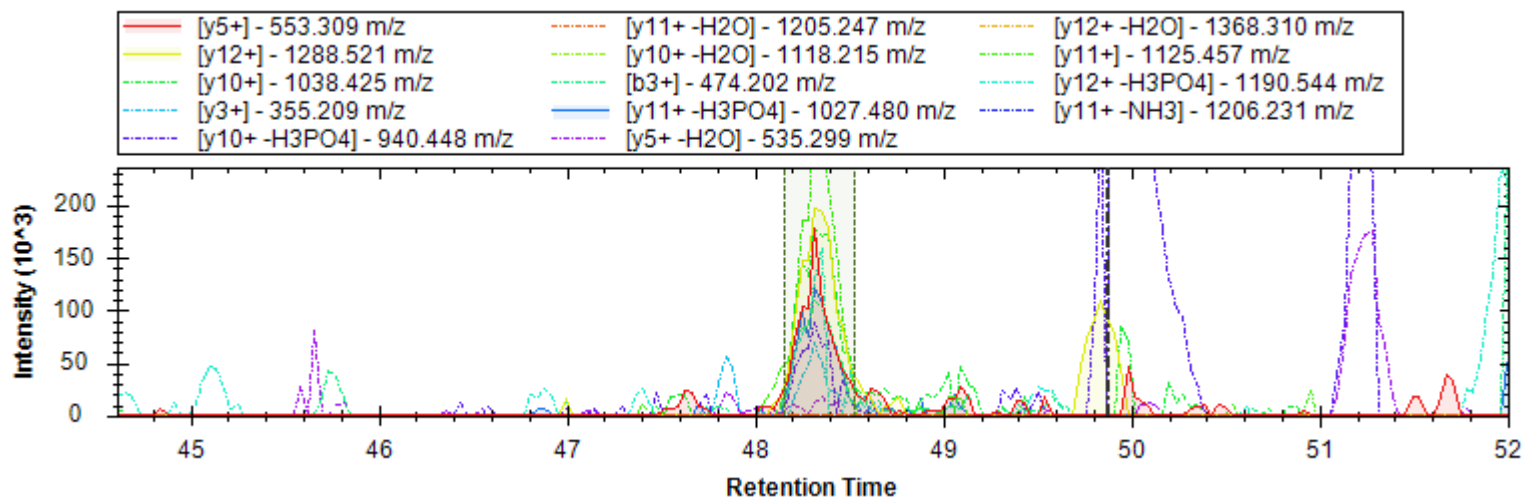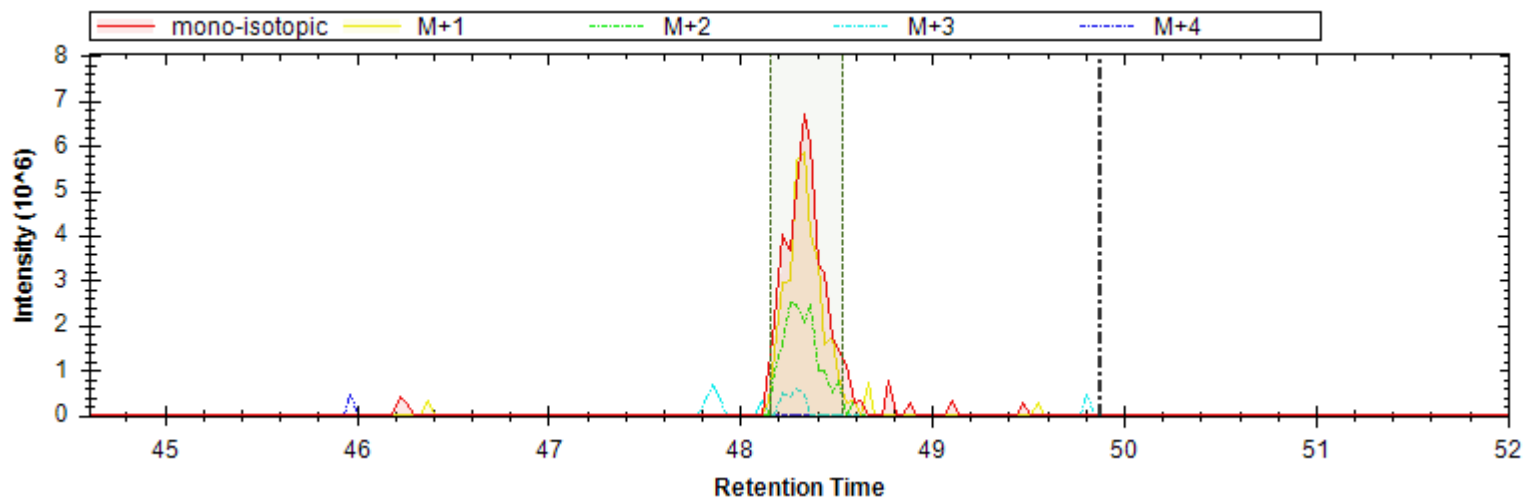

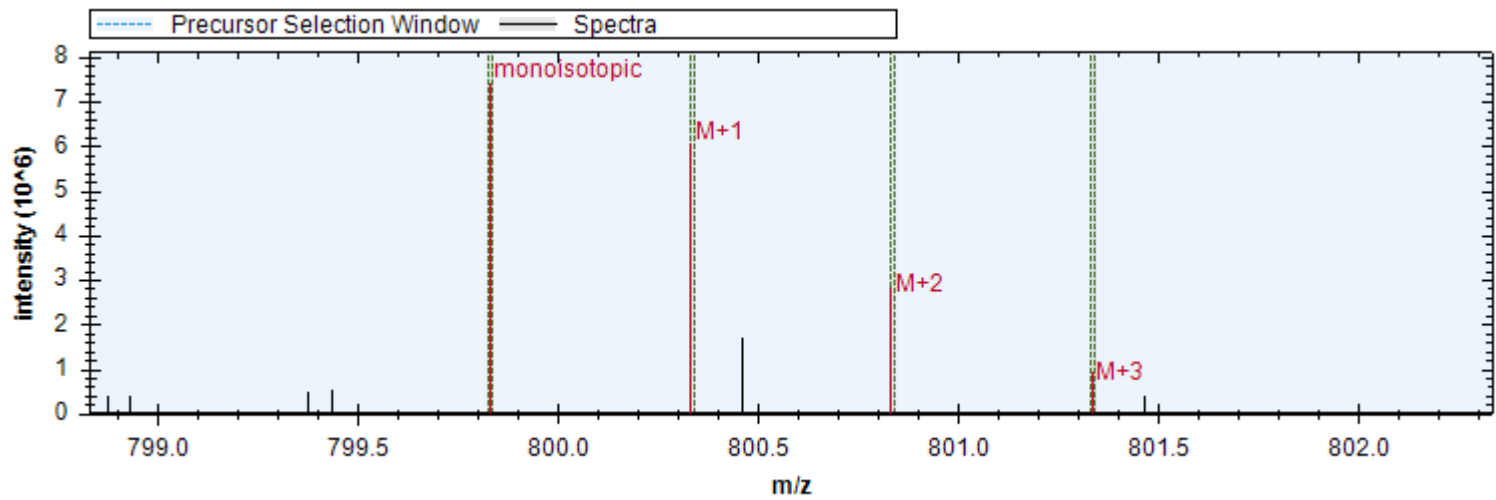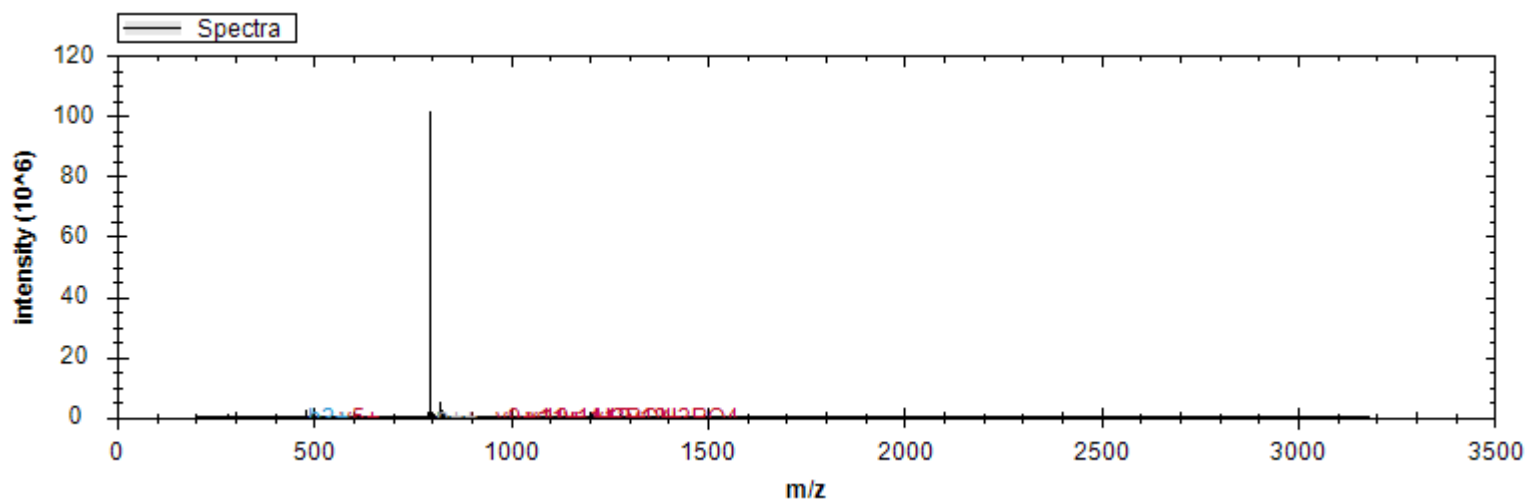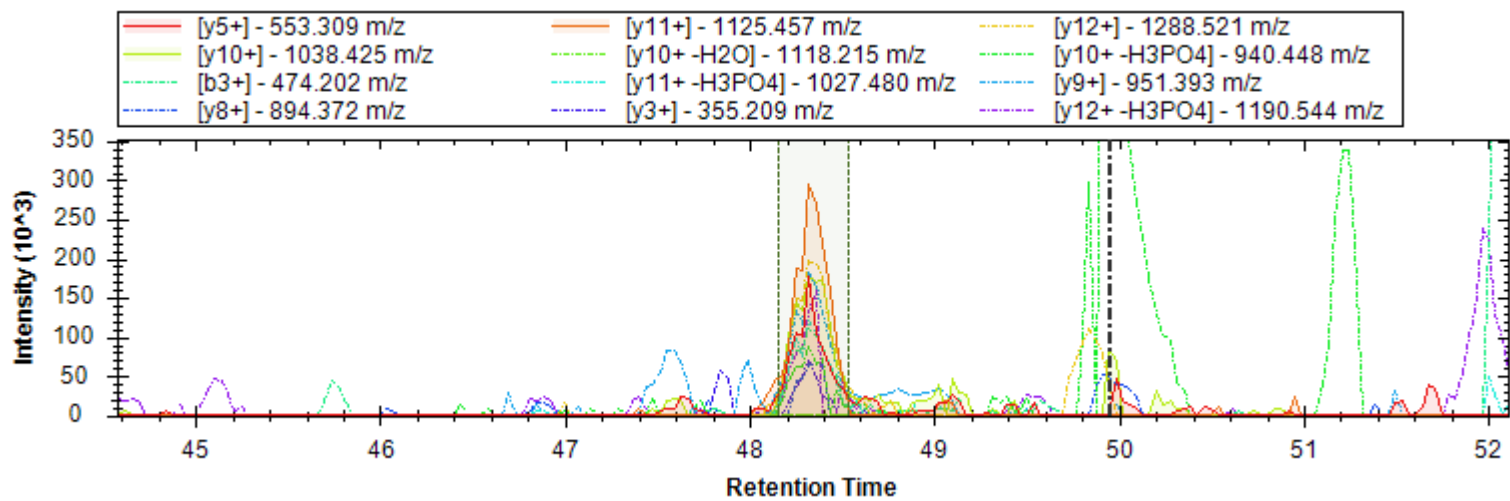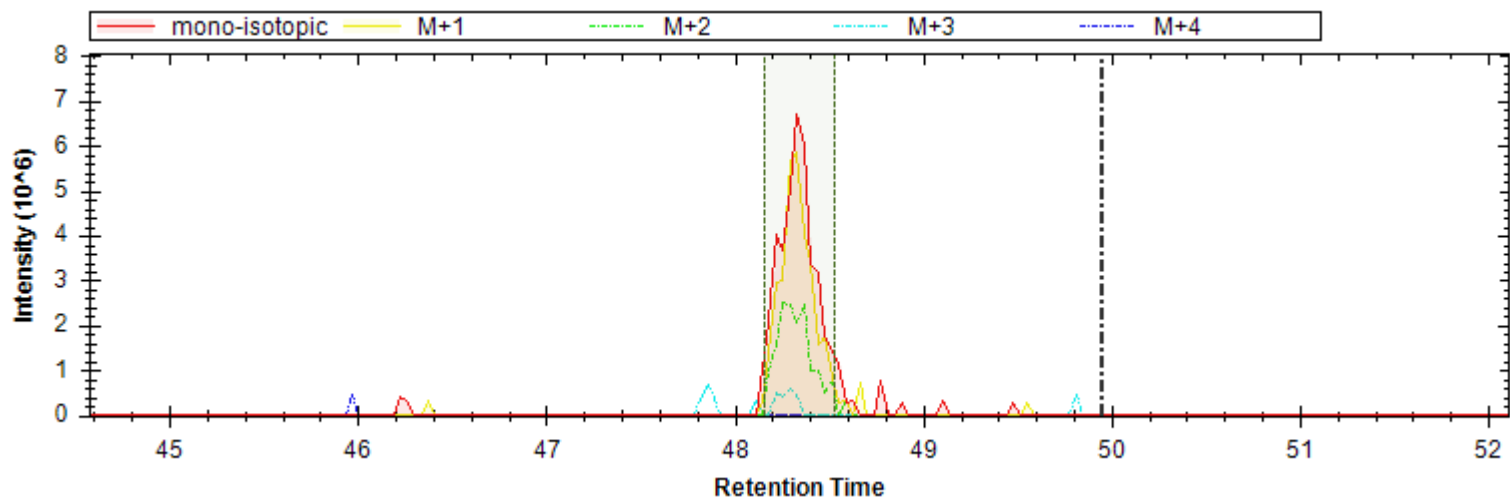

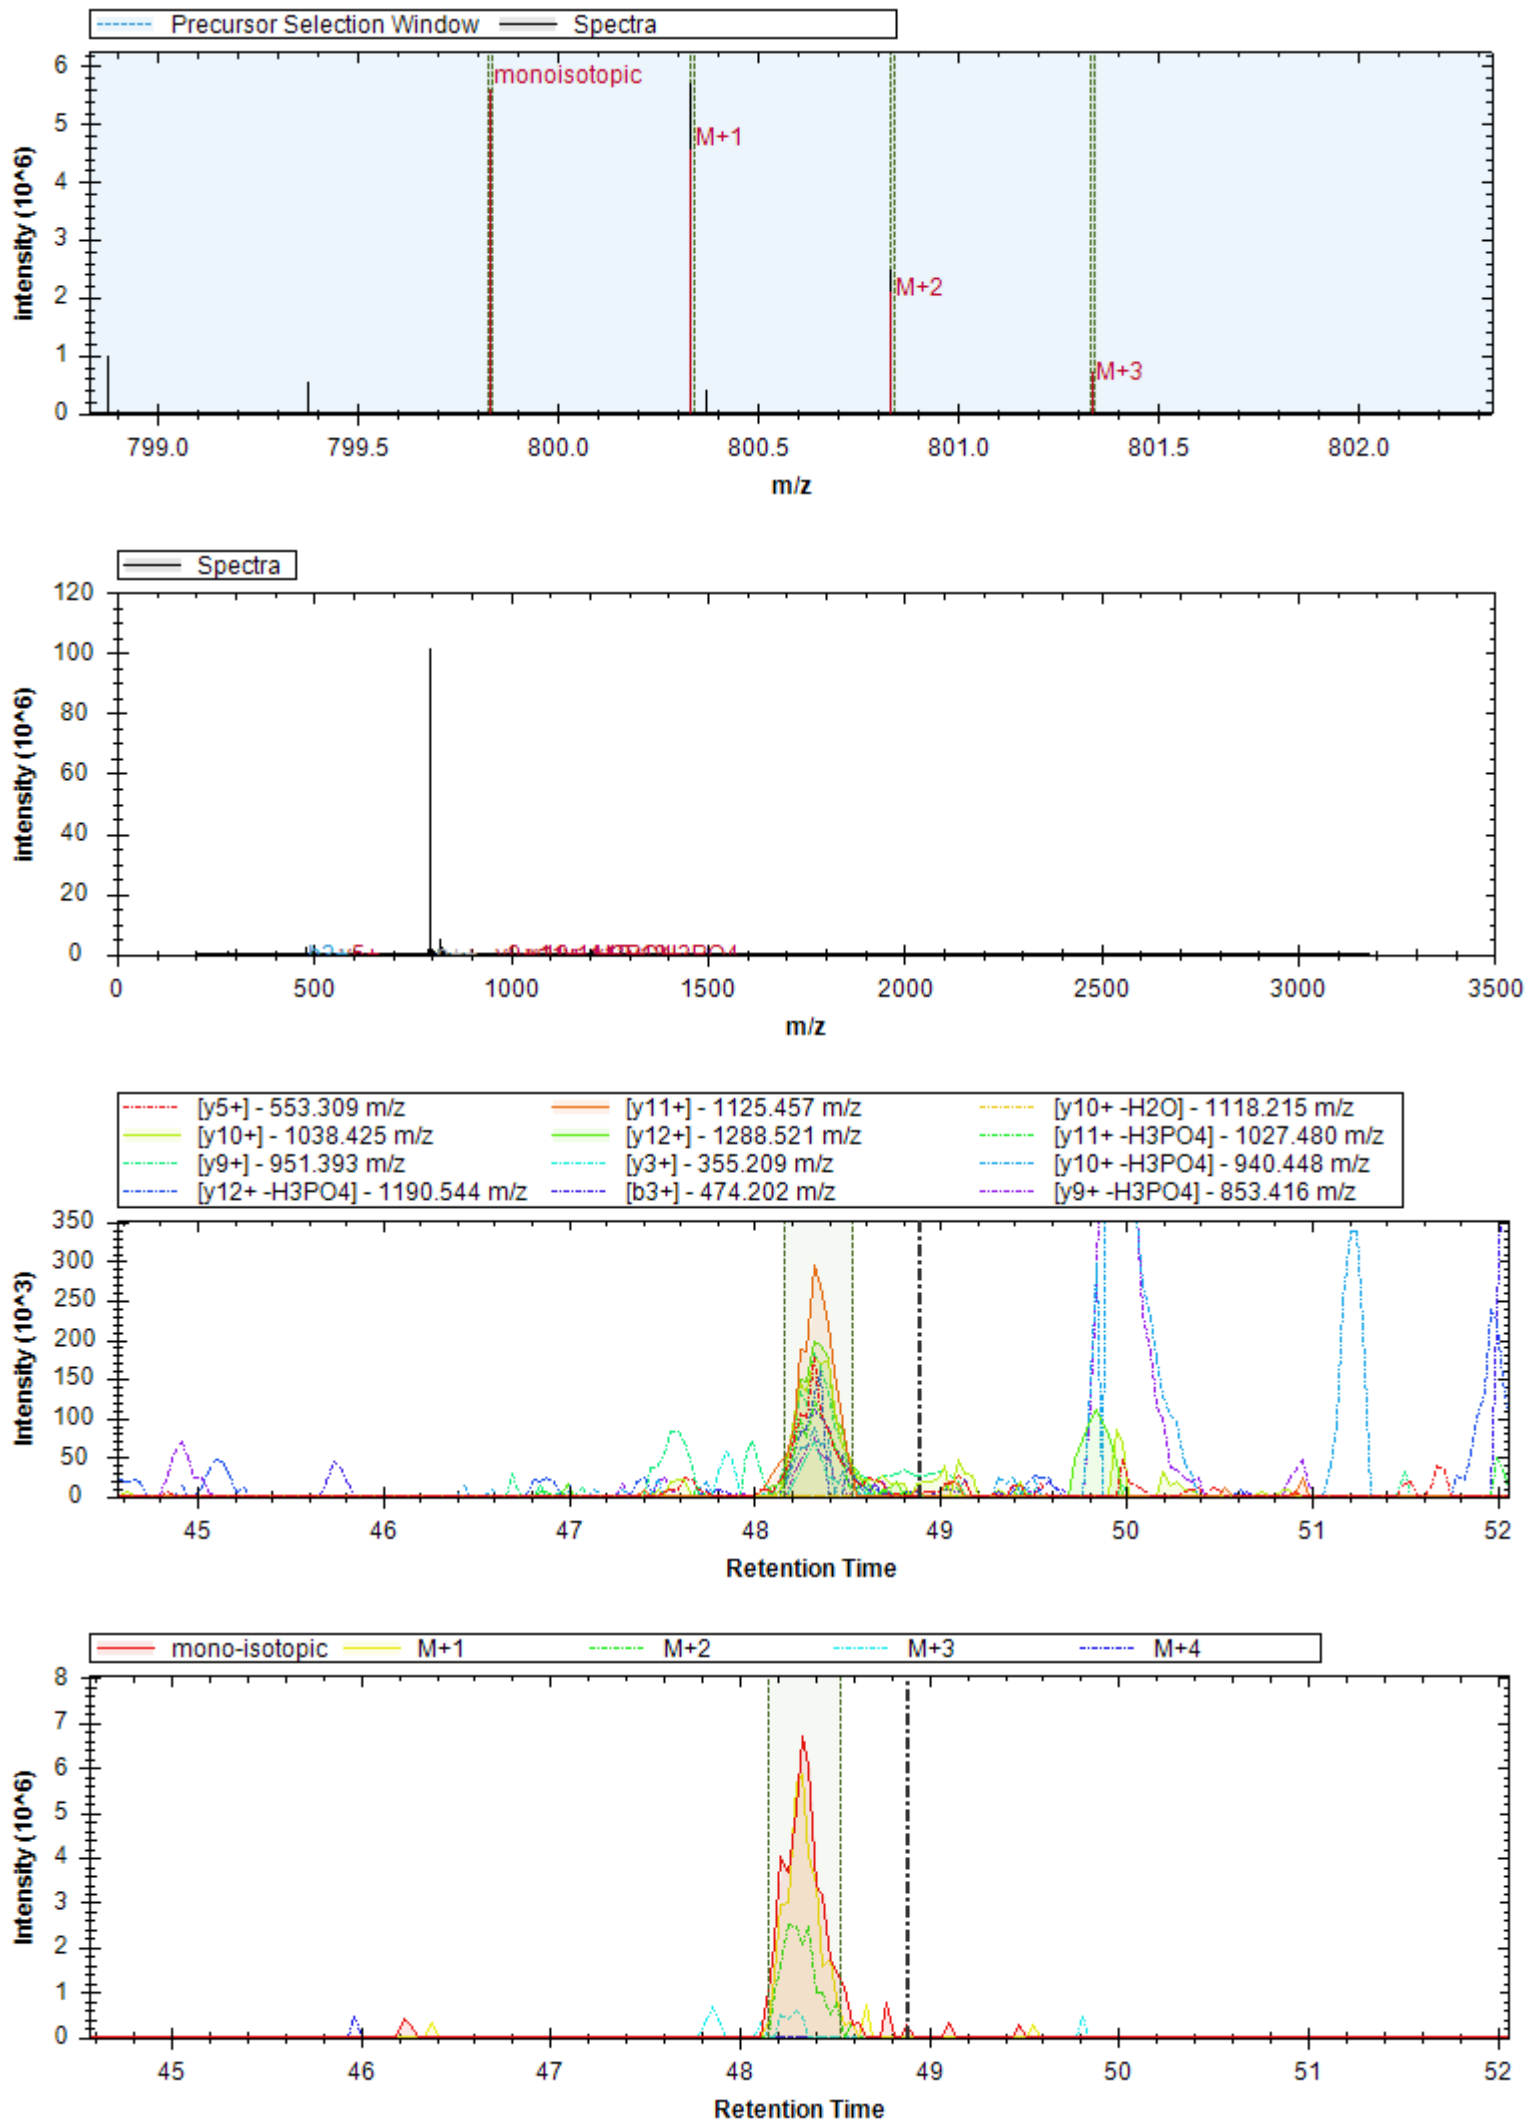

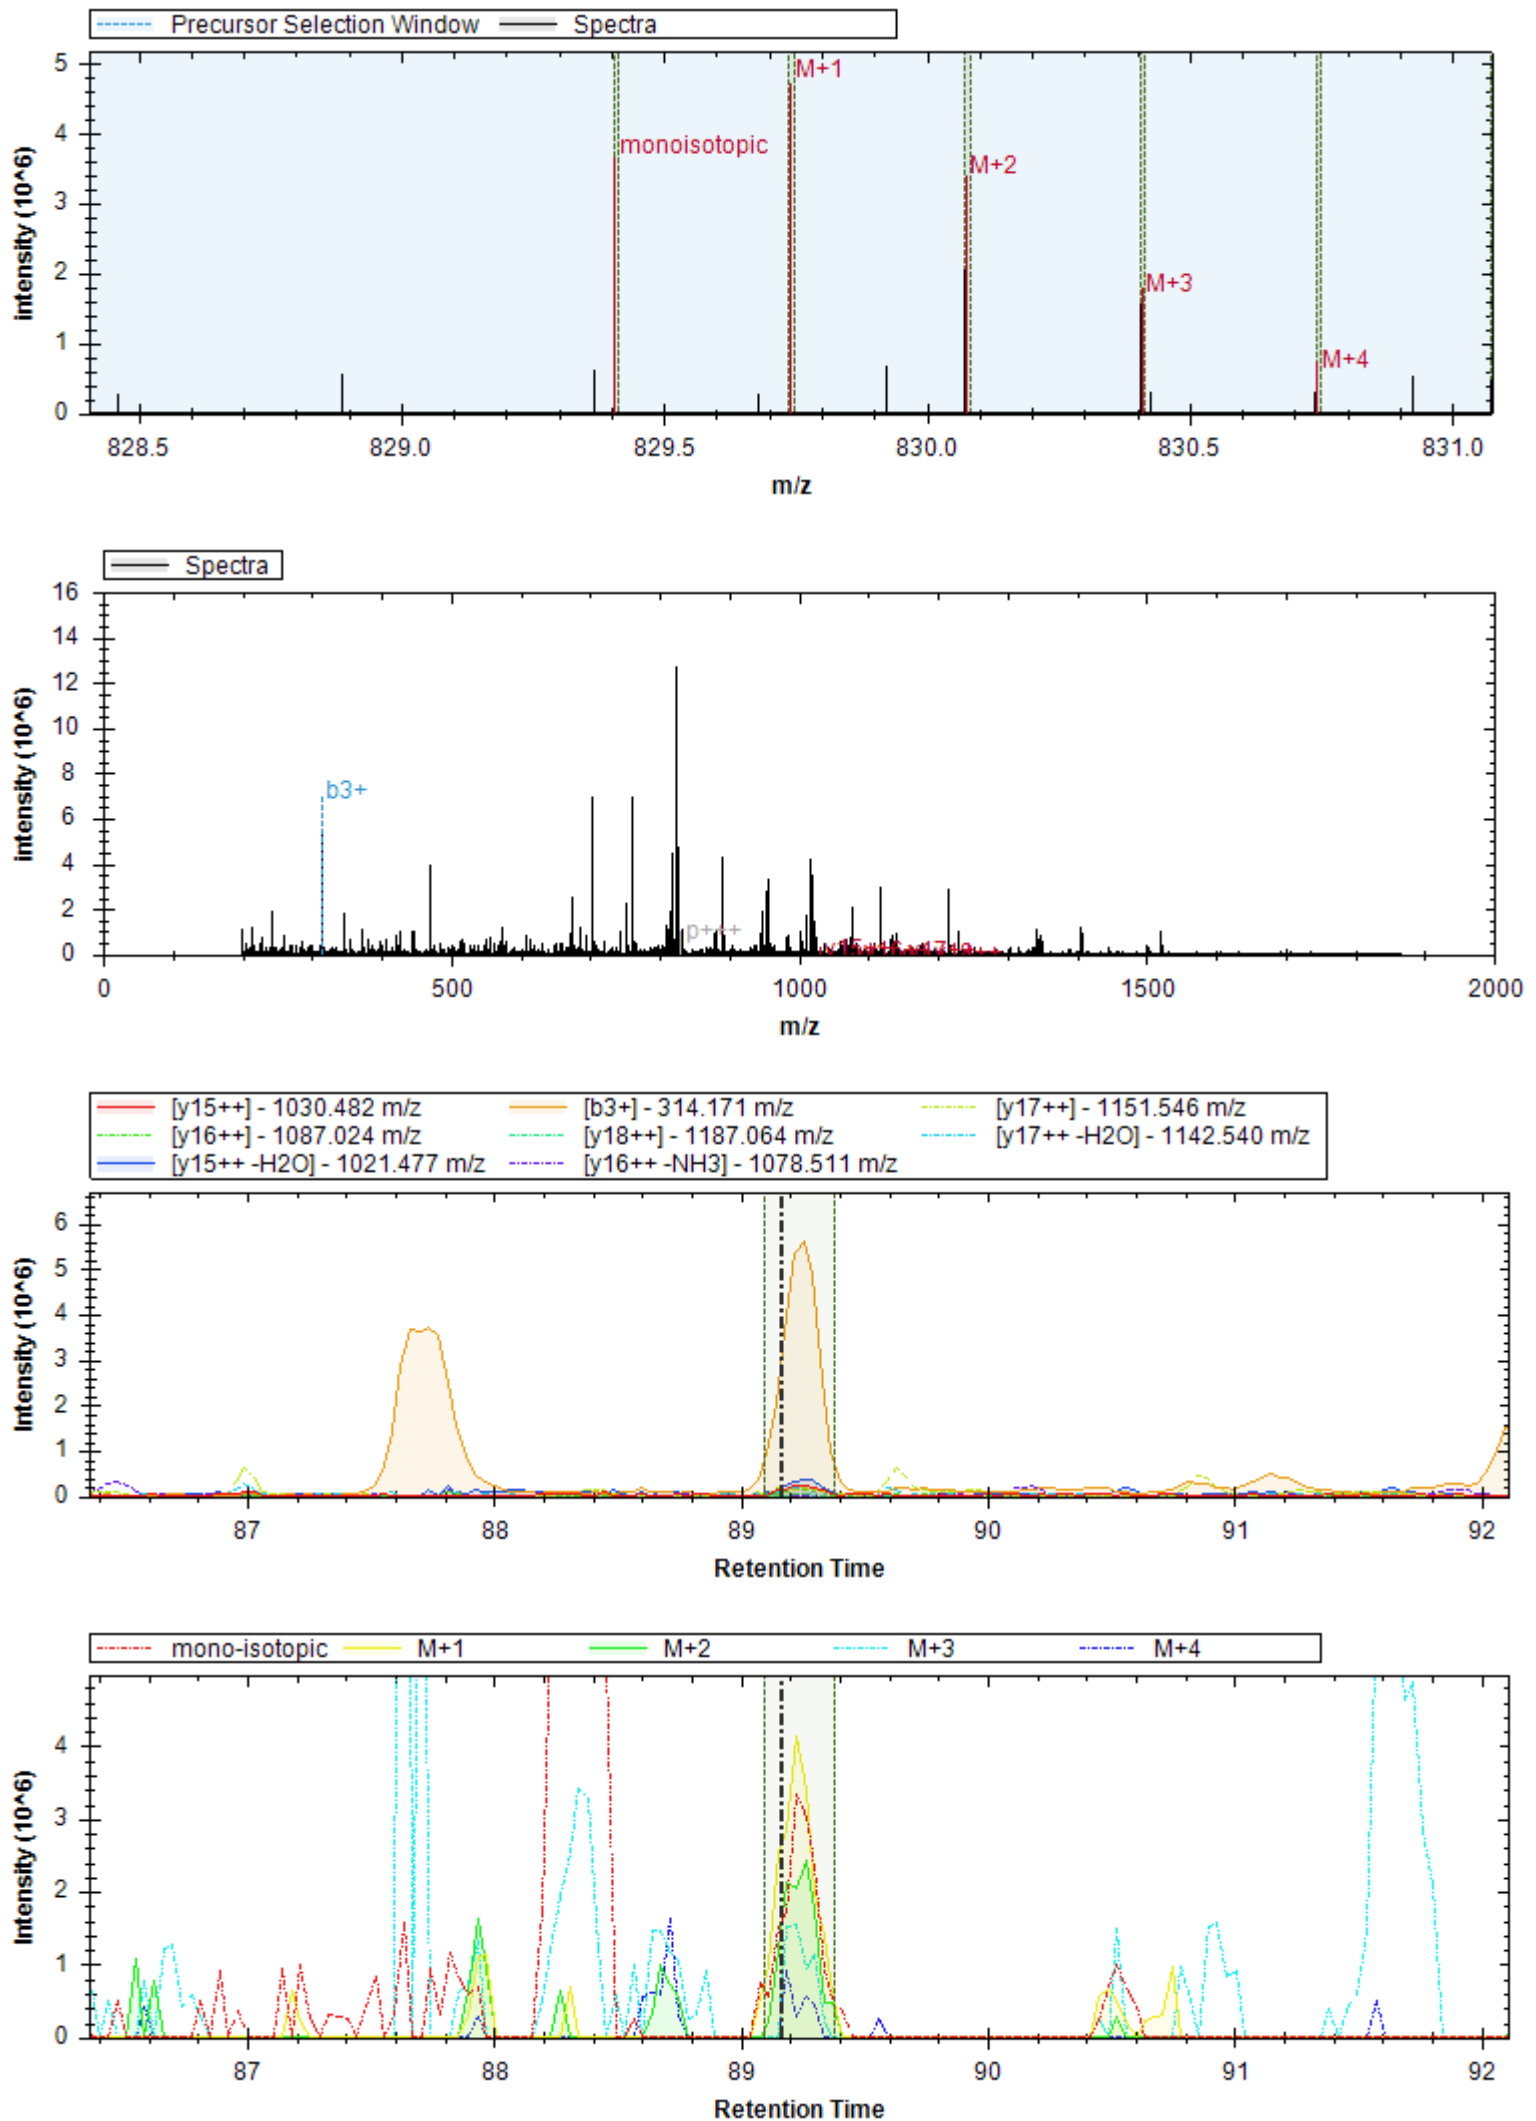

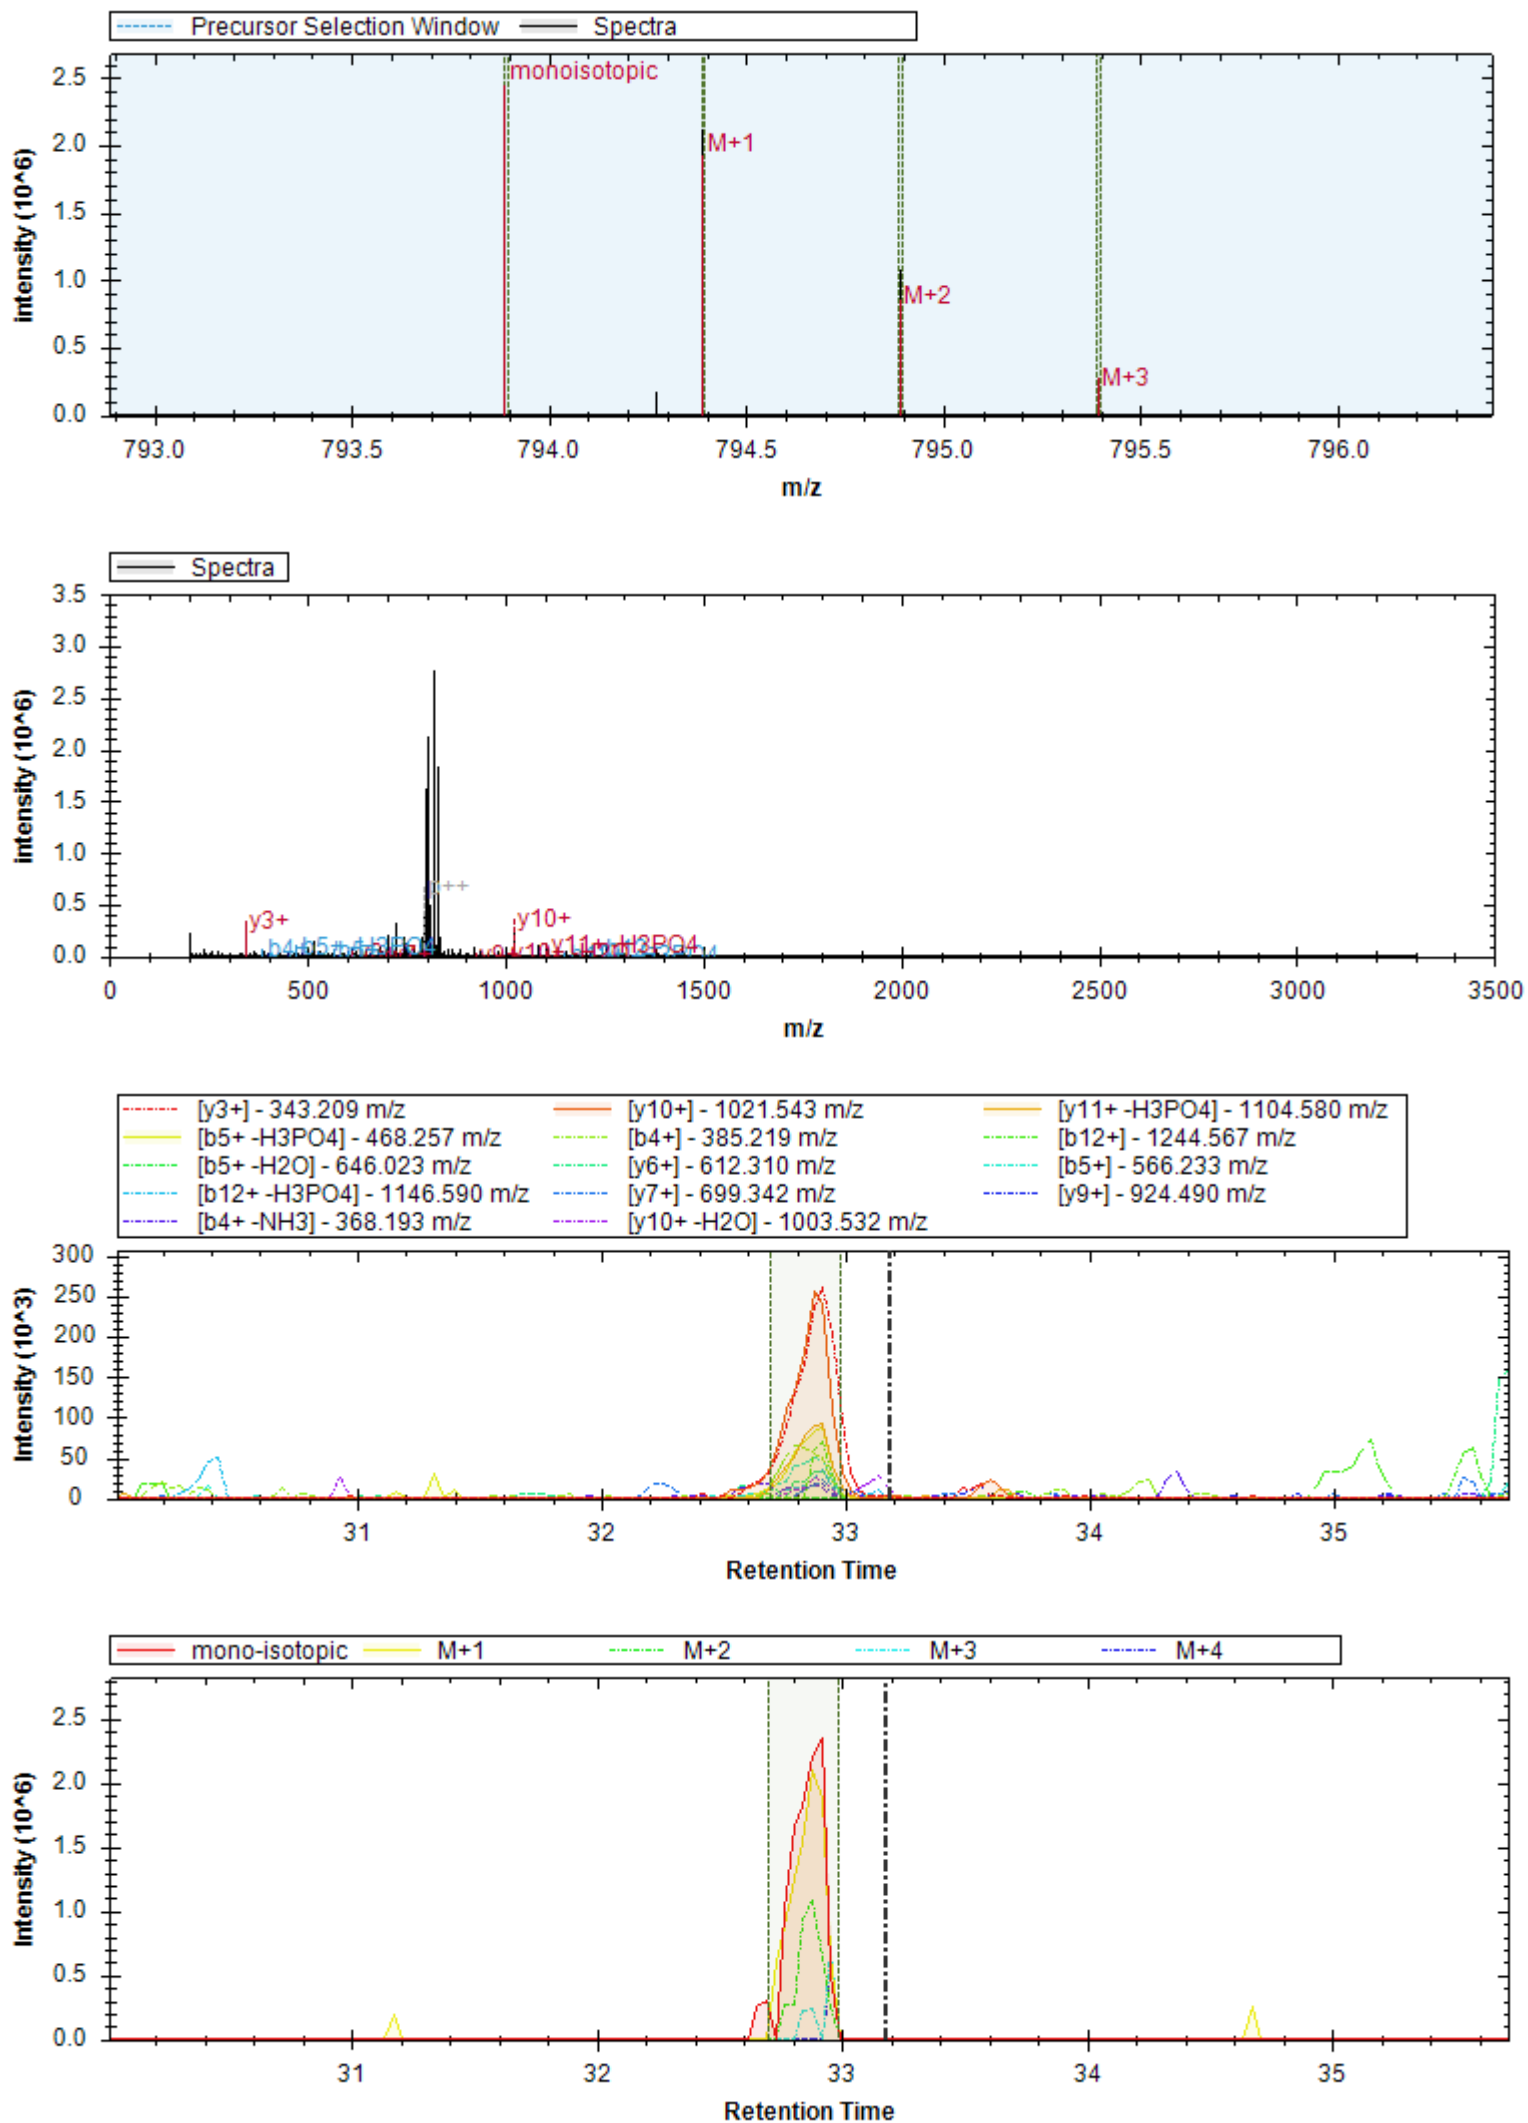

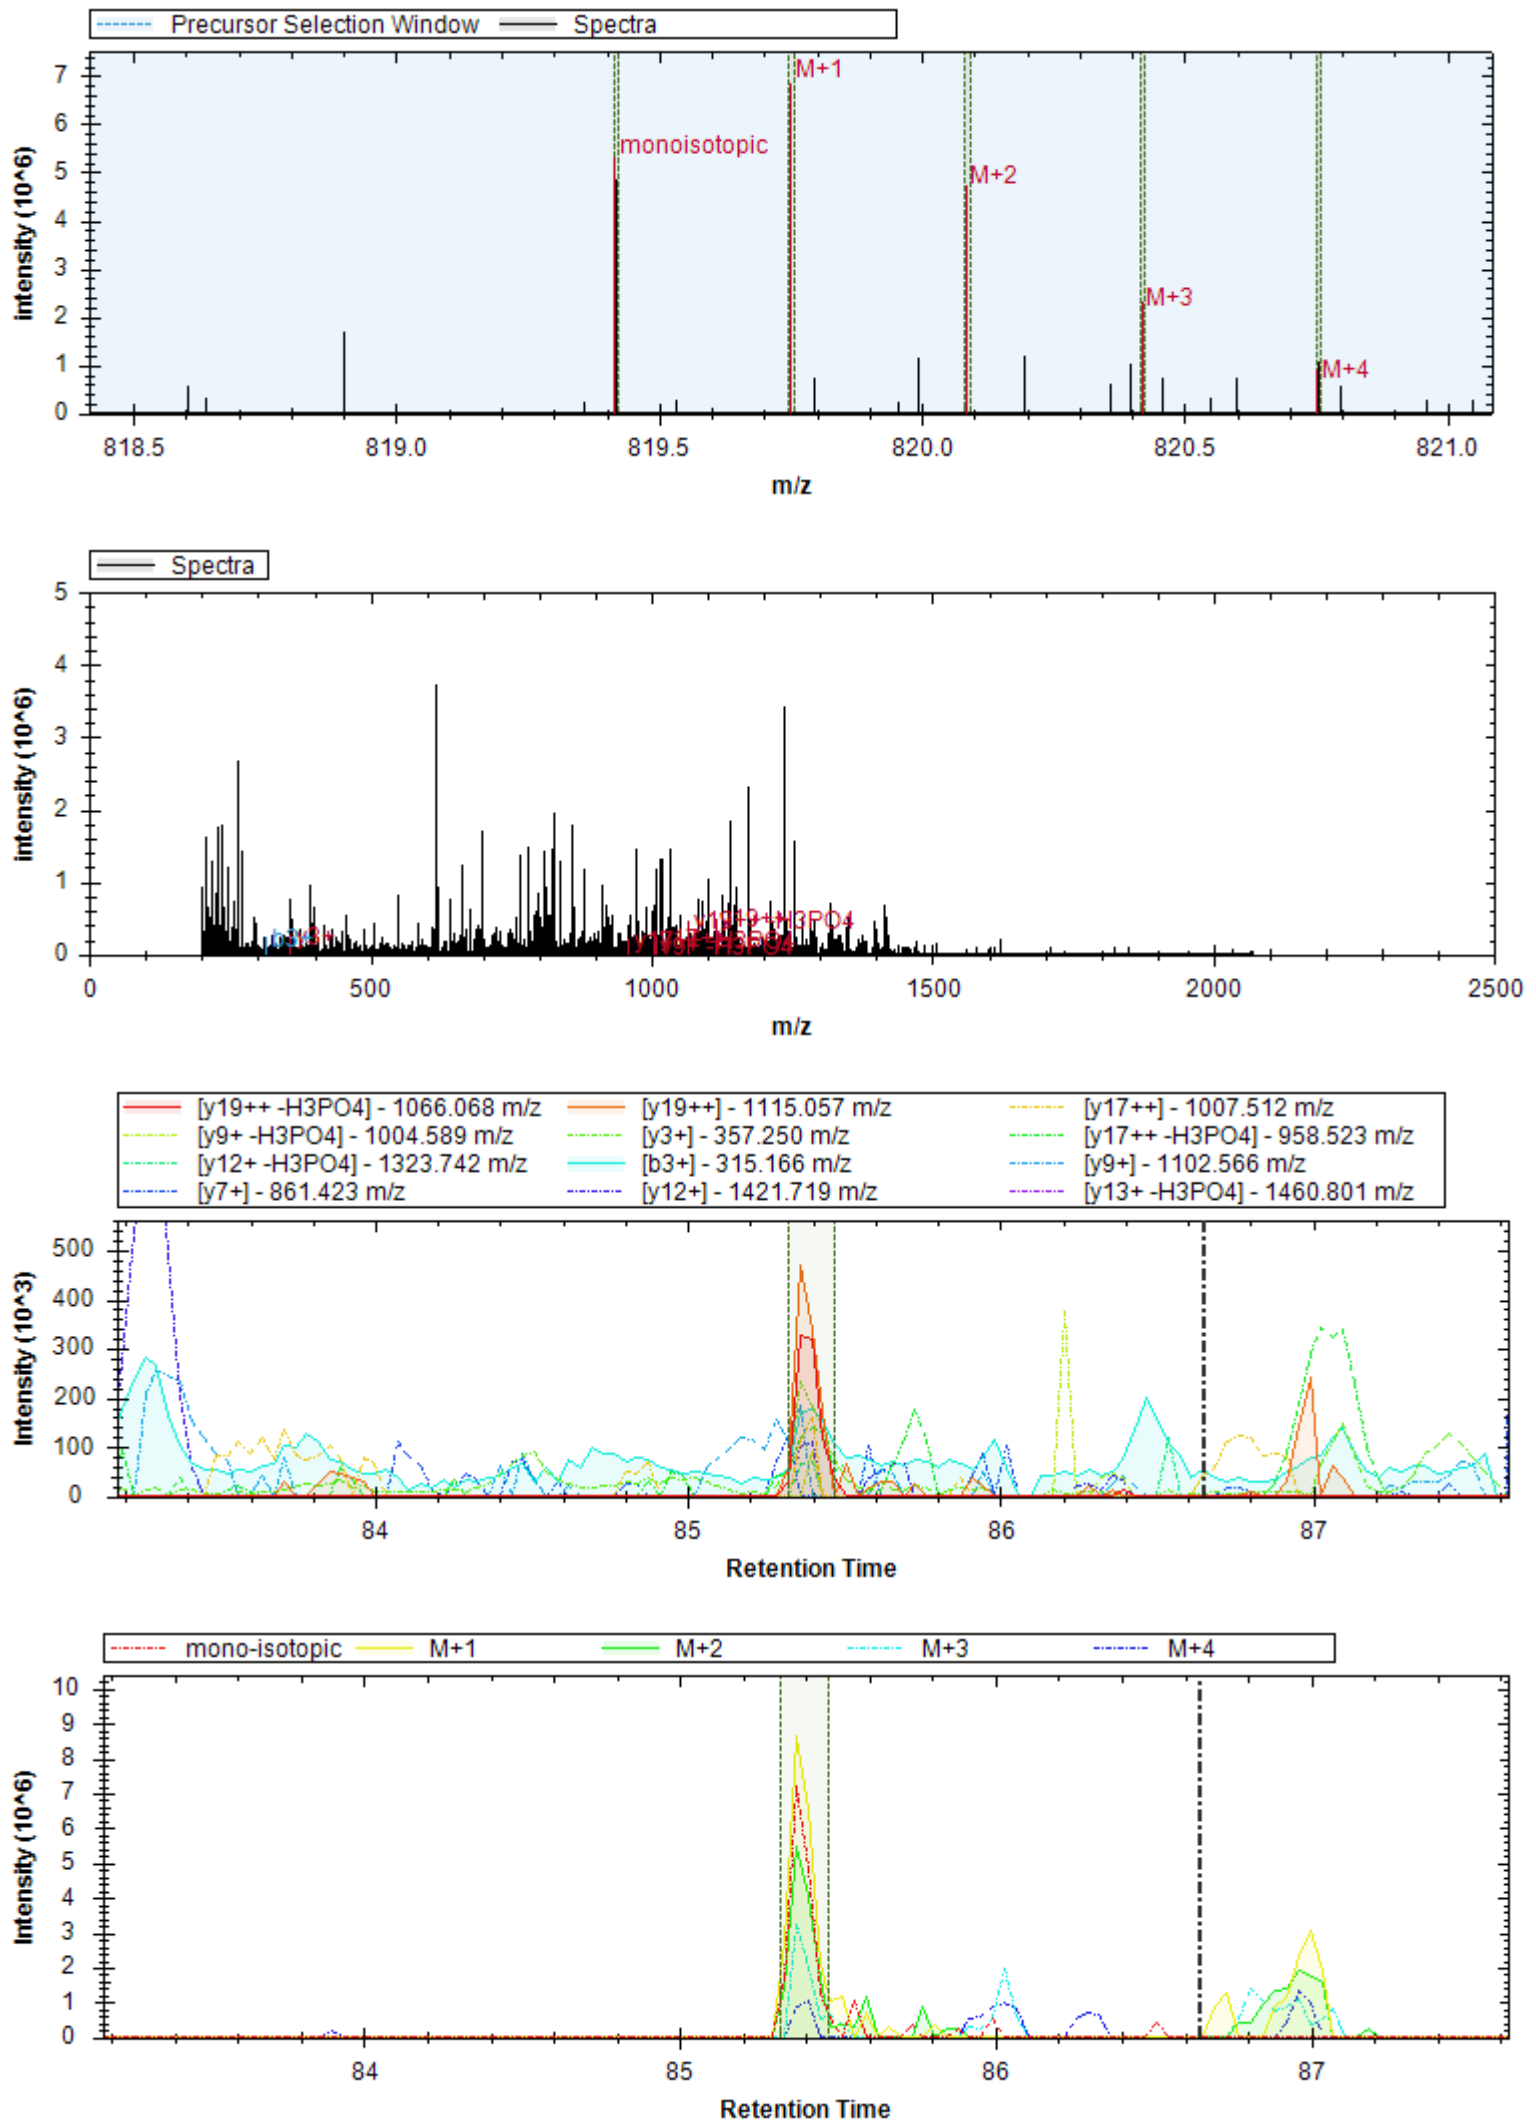

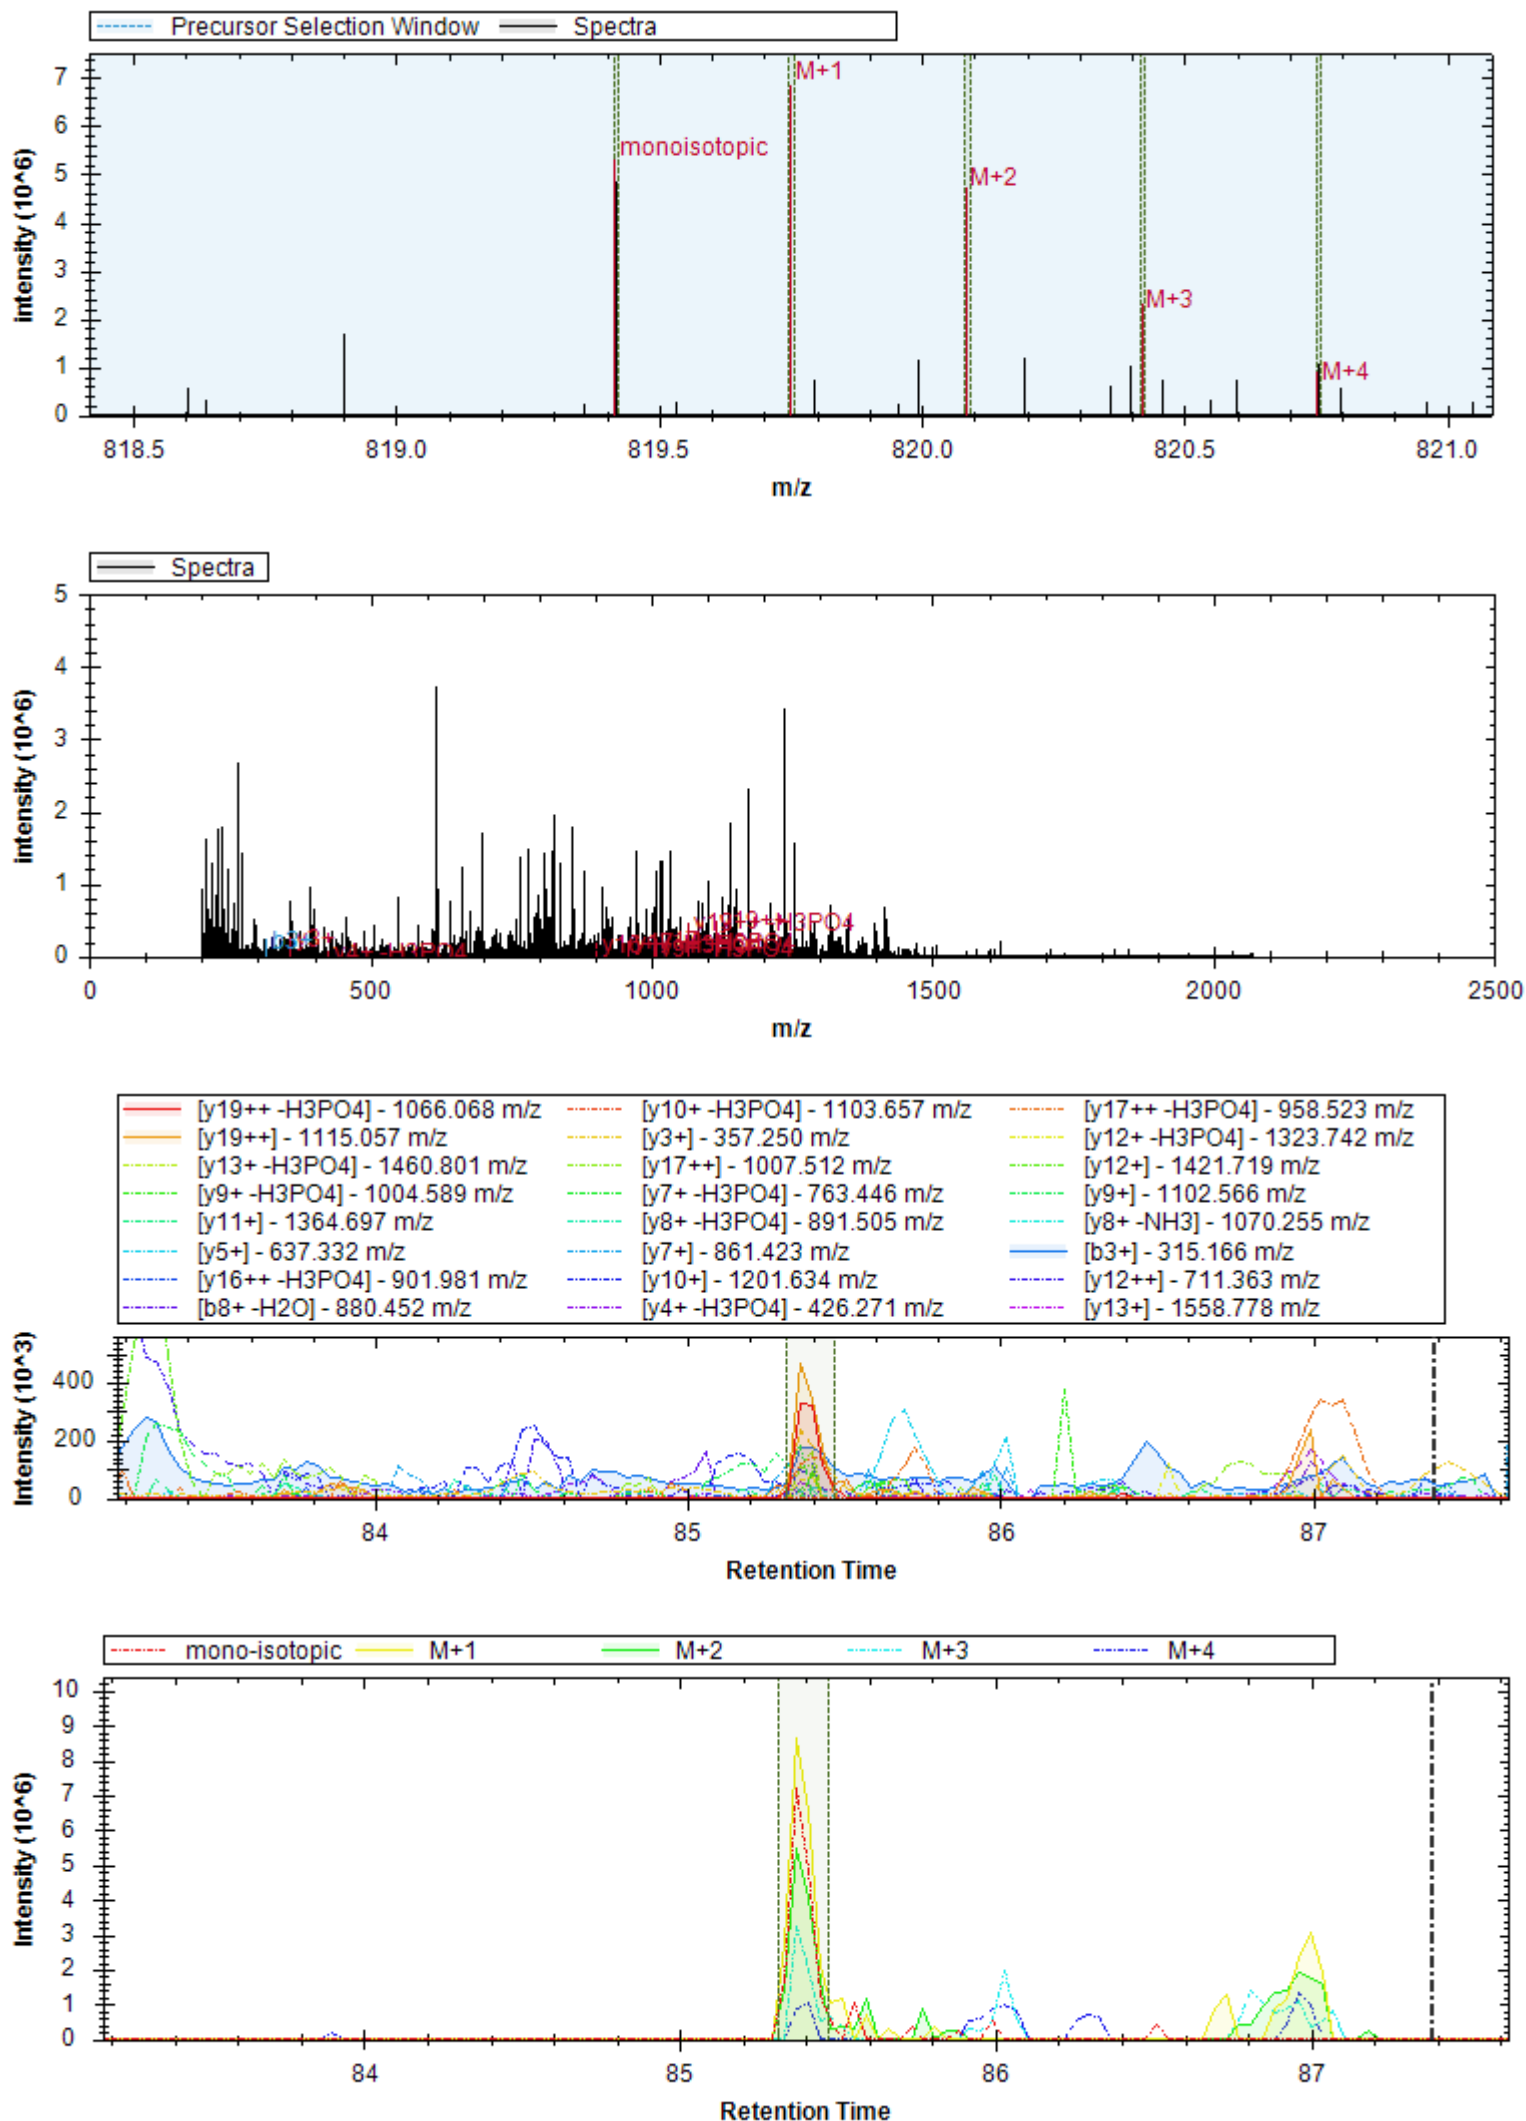



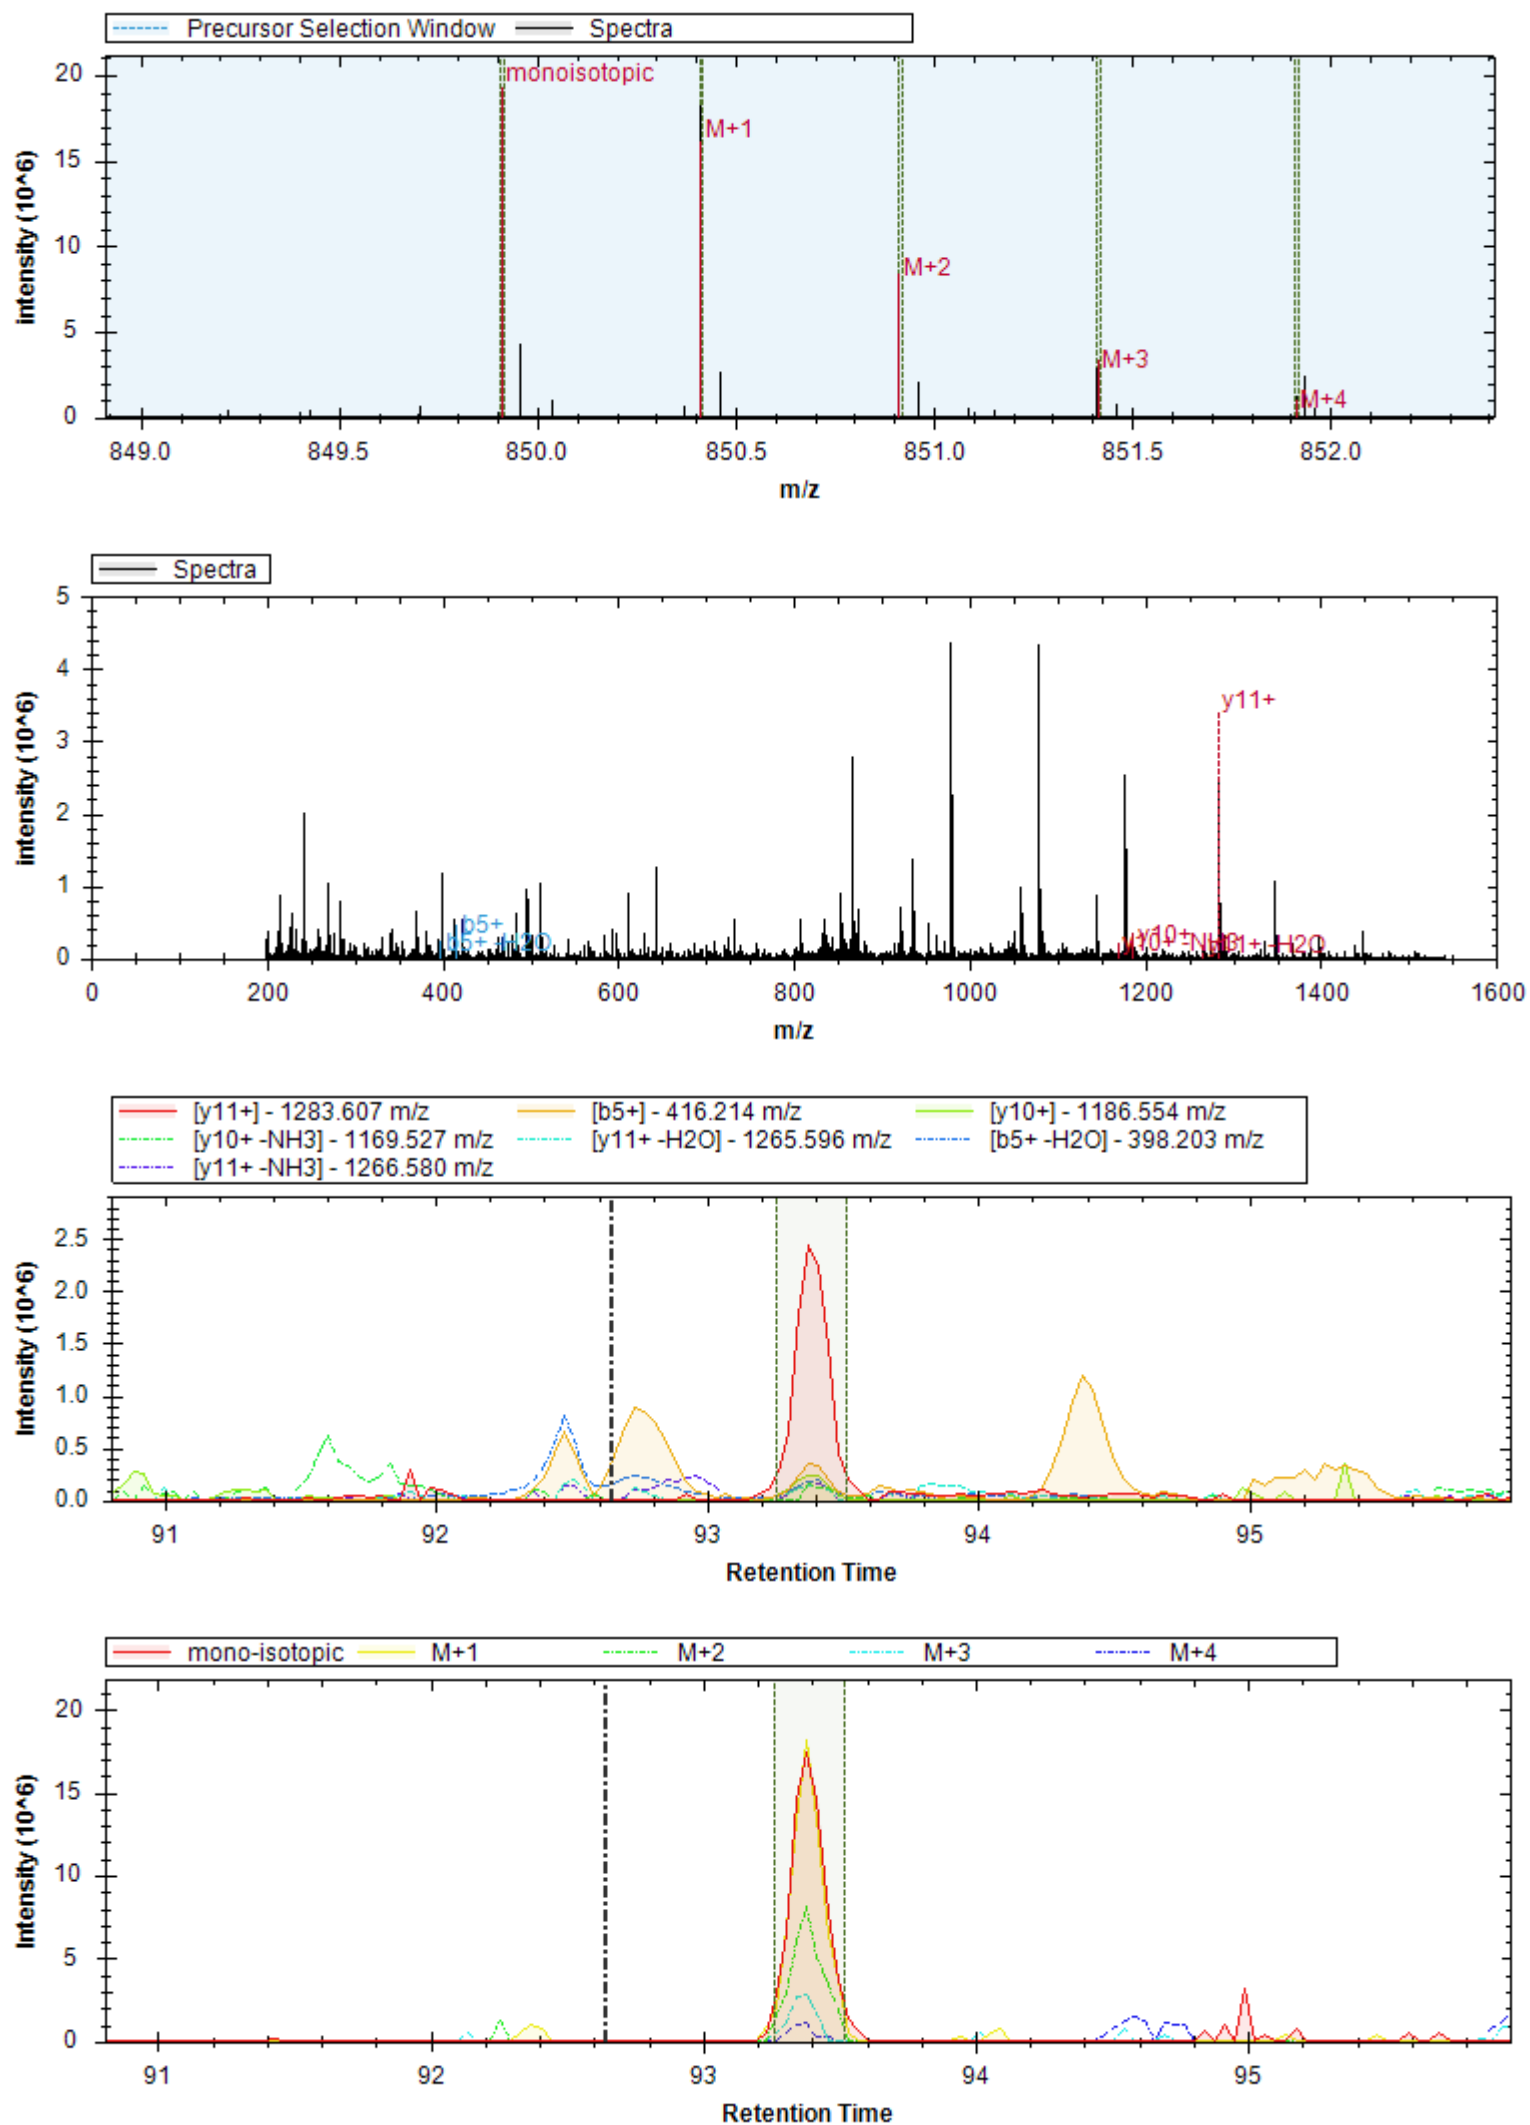

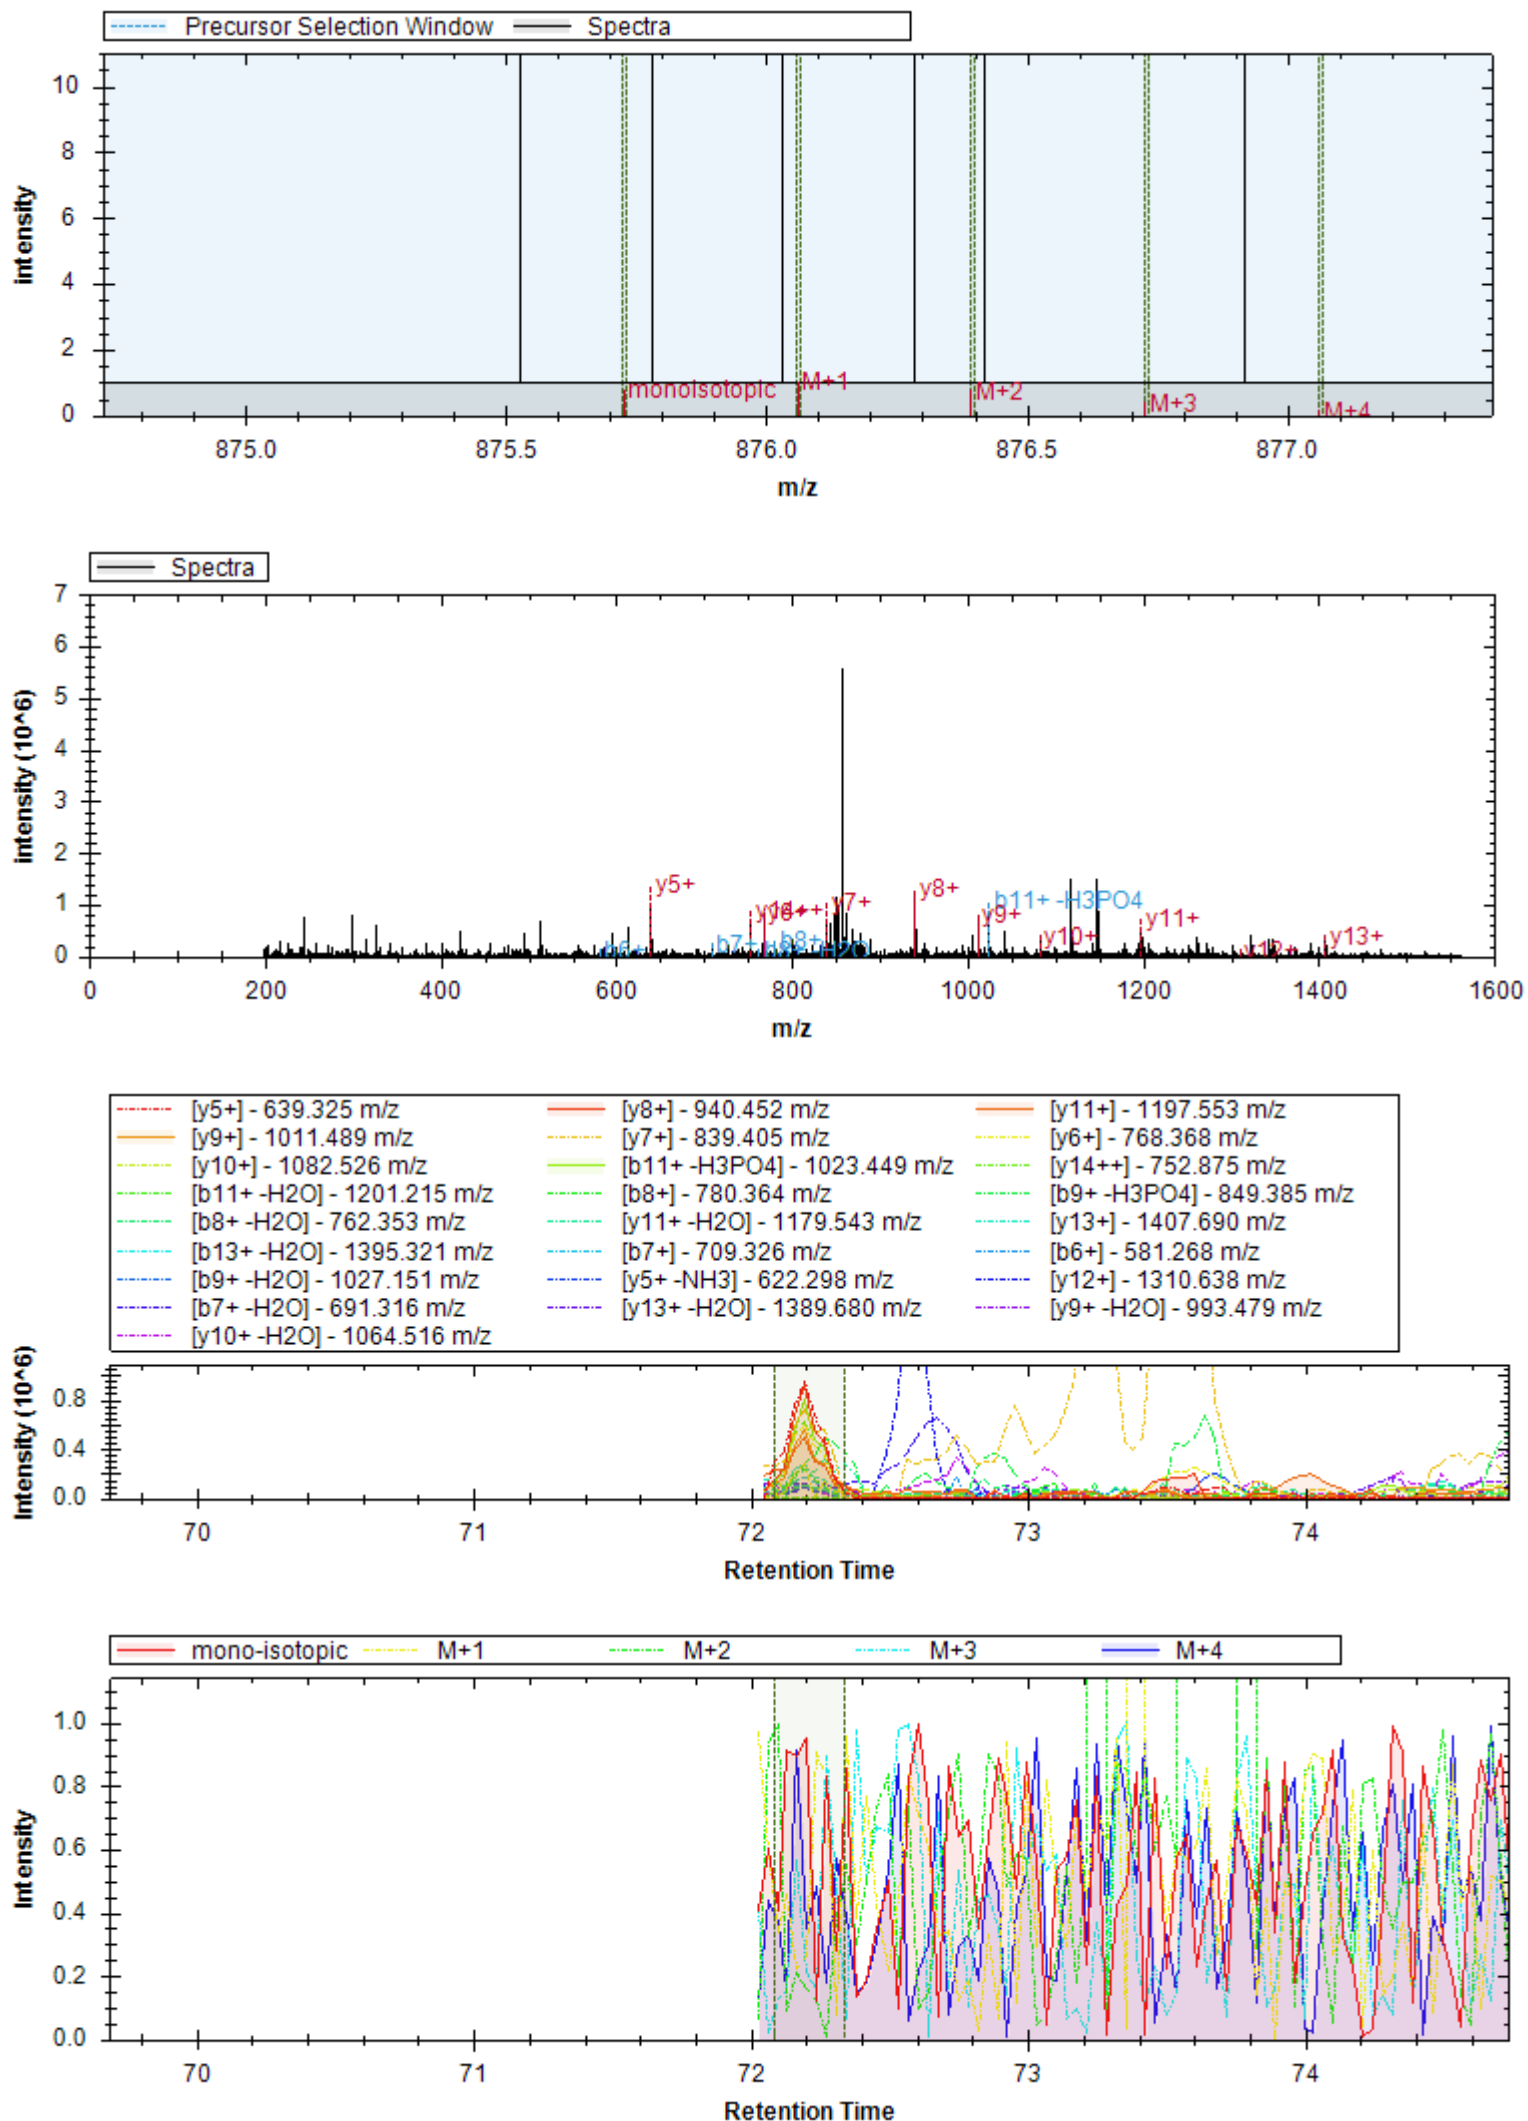

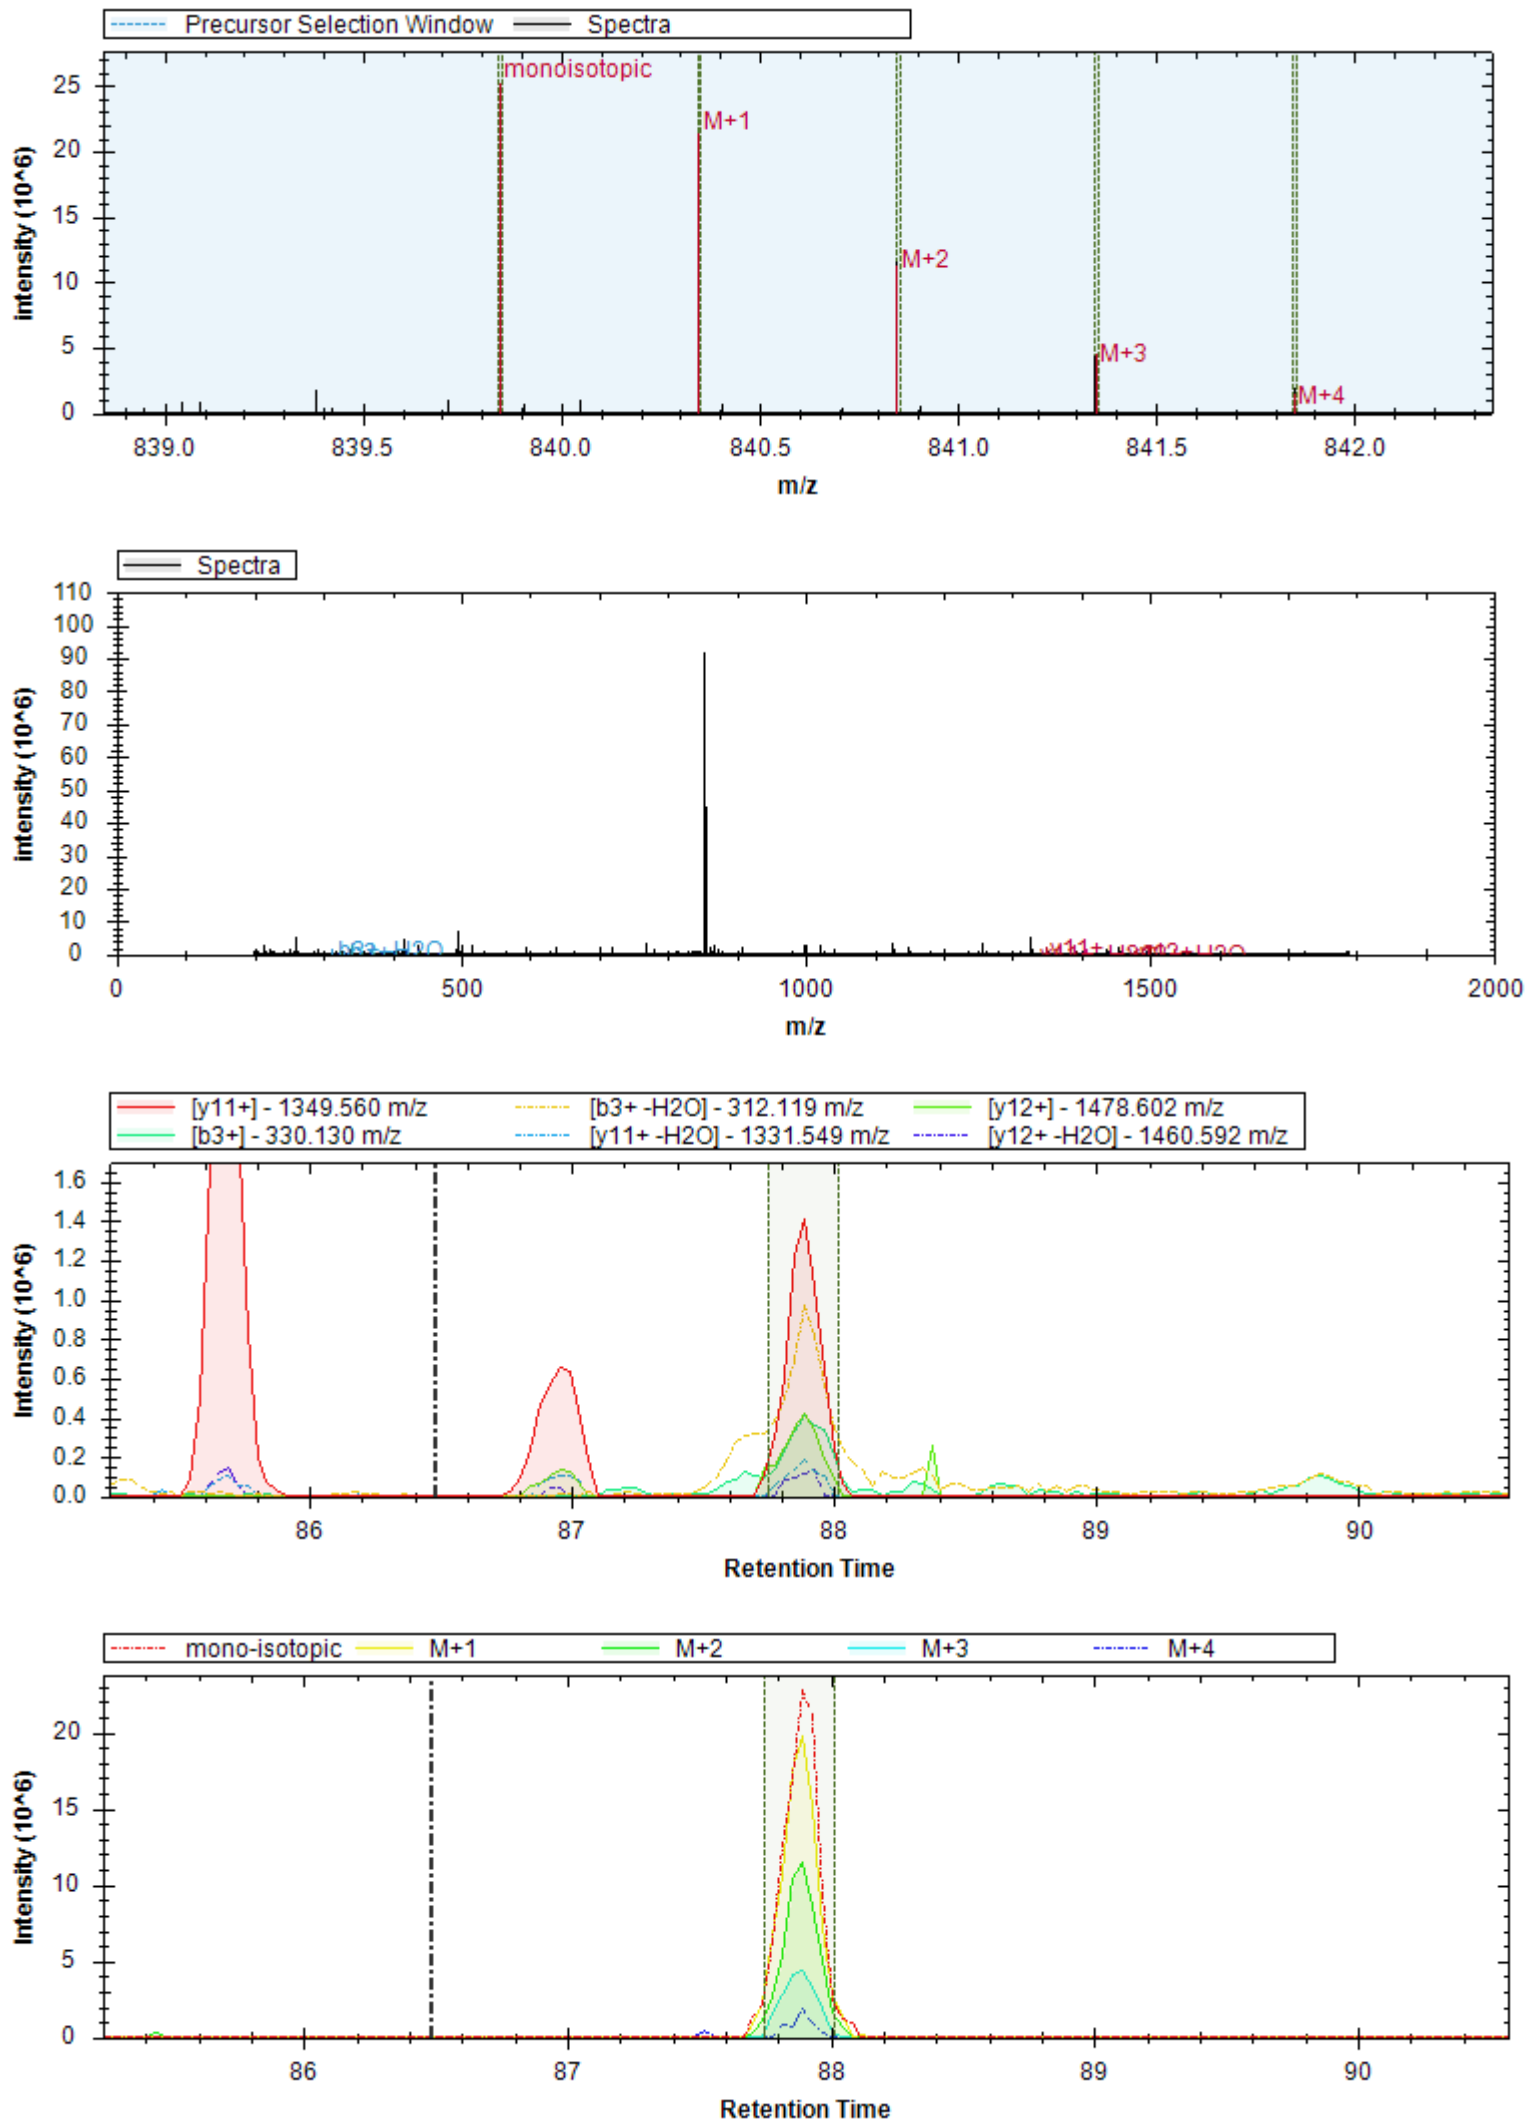

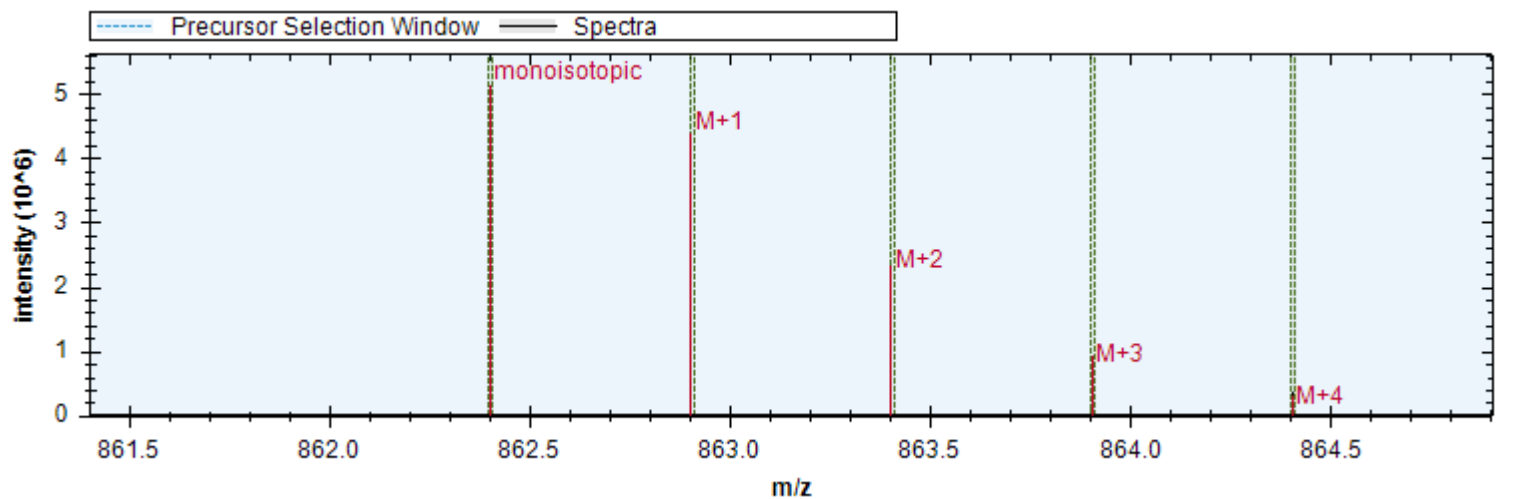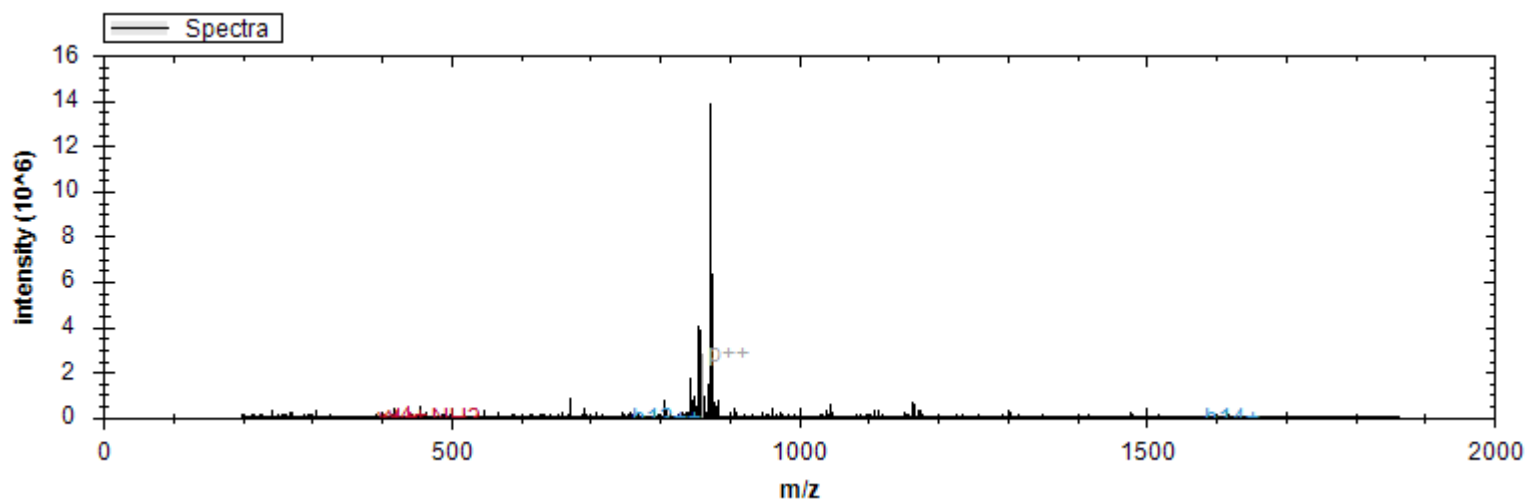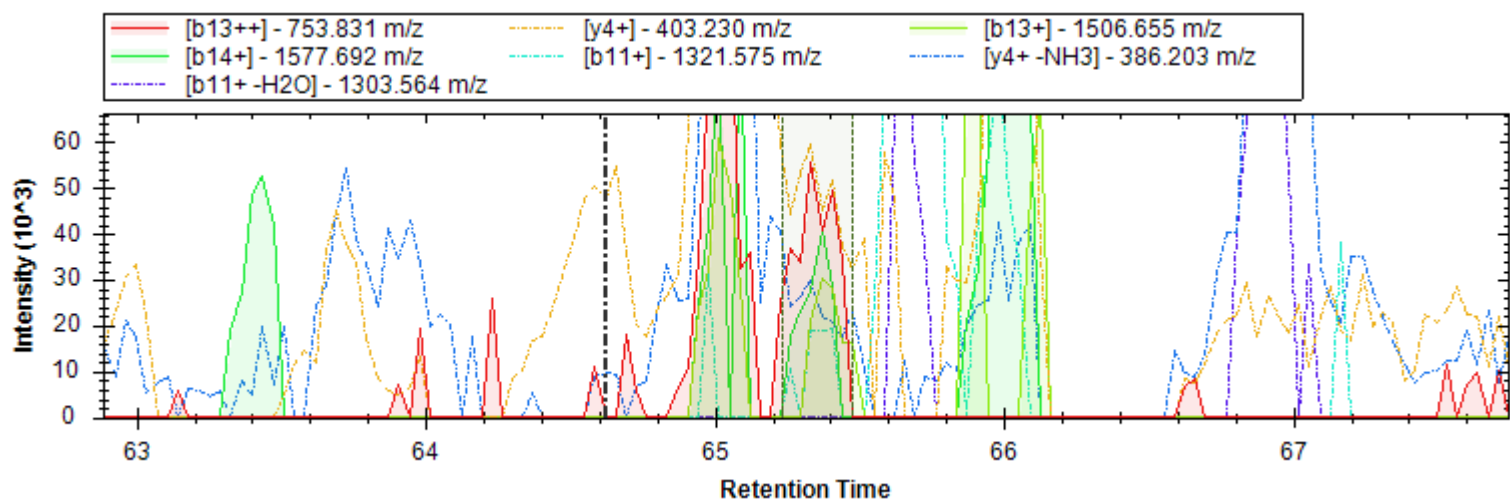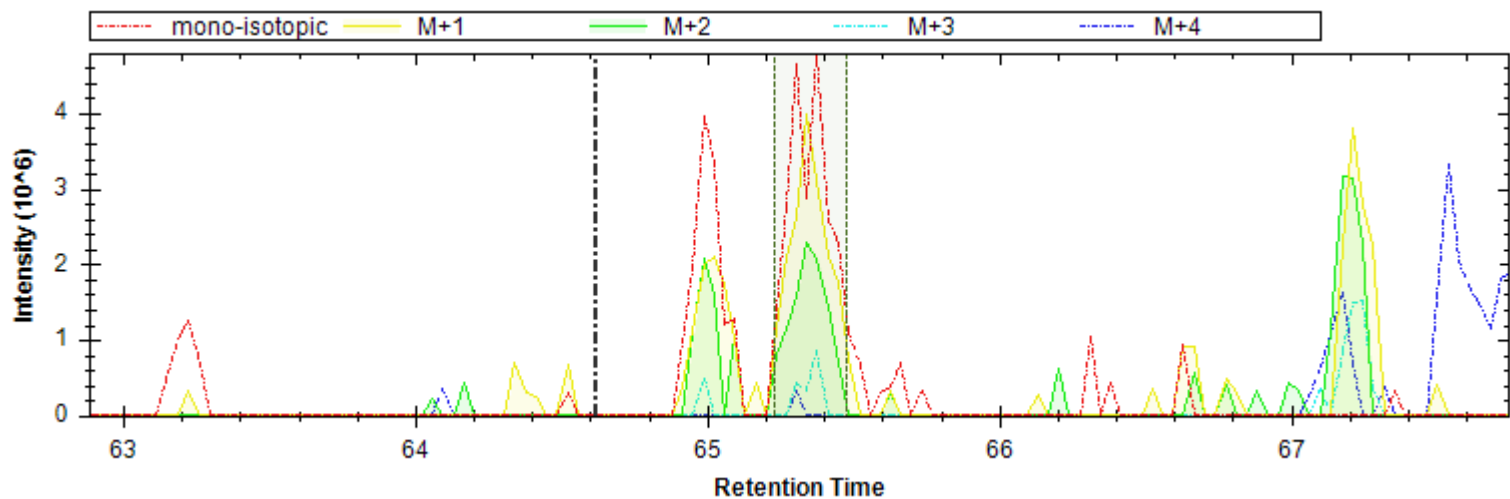

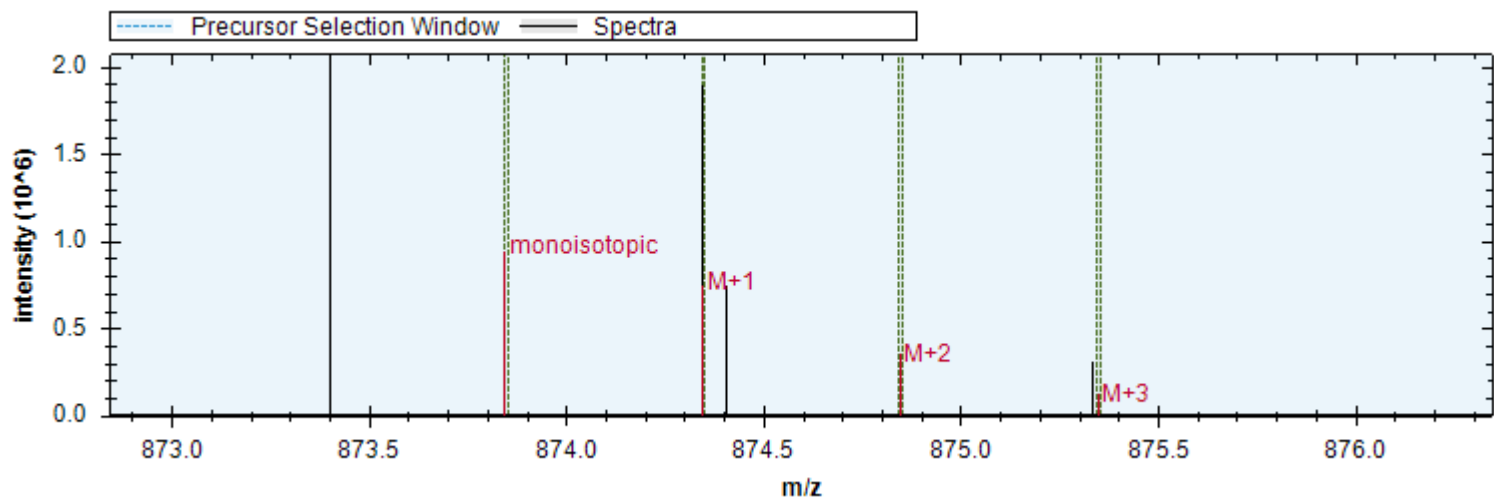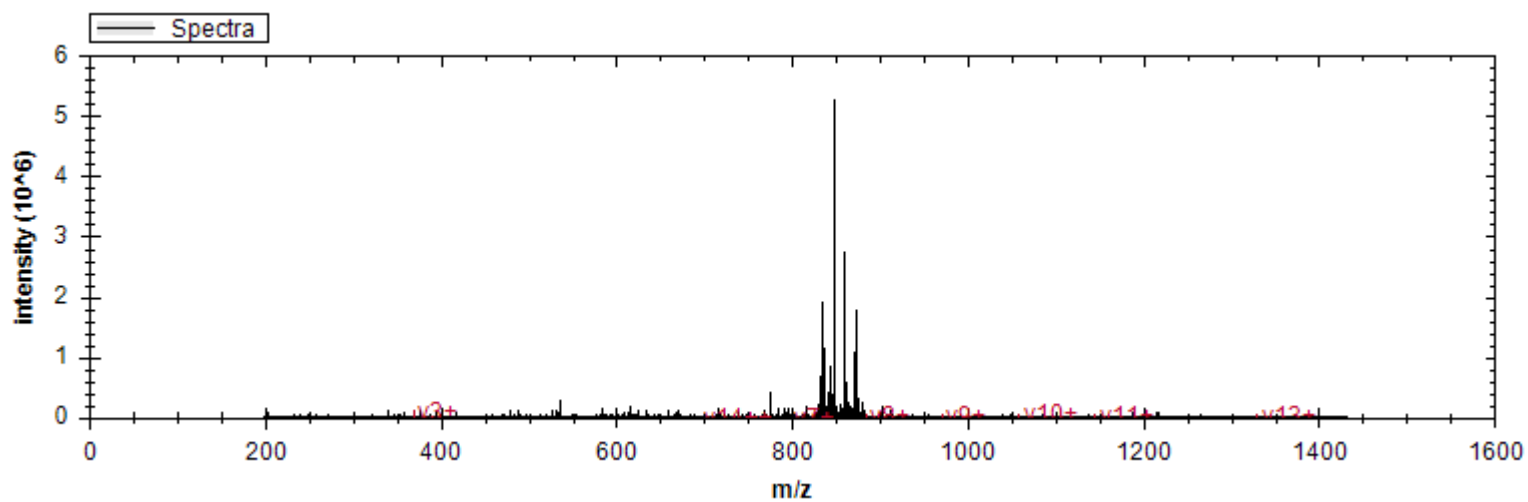

|                             |                              |                            |
|-----------------------------|------------------------------|----------------------------|
| [y3+] - 369.225 m/z         | [y13+] - 1329.532 m/z        | [y10+] - 1058.415 m/z      |
| [y9+] - 971.383 m/z         | [y11+] - 1145.447 m/z        | [y8+] - 884.351 m/z        |
| [y10+ -H3PO4] - 960.438 m/z | [y13+ -H3PO4] - 1231.555 m/z | [y8+ -H3PO4] - 786.374 m/z |
| [y12+] - 1232.479 m/z       | [y7+] - 797.319 m/z          | [b5+] - 418.157 m/z        |
| [b4+] - 361.135 m/z         | [y14++] - 693.780 m/z        | [y10+ -H2O] - 1138.204 m/z |
| [y16++] - 794.810 m/z       |                              |                            |

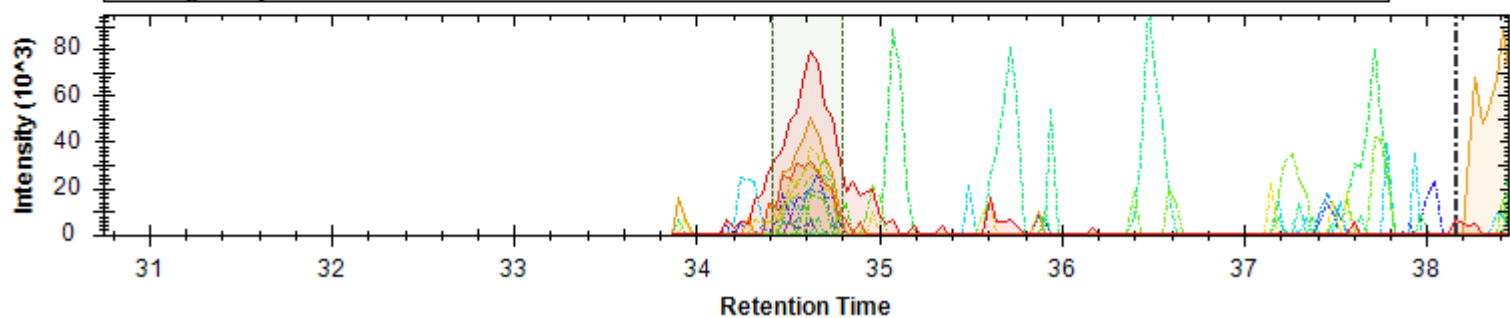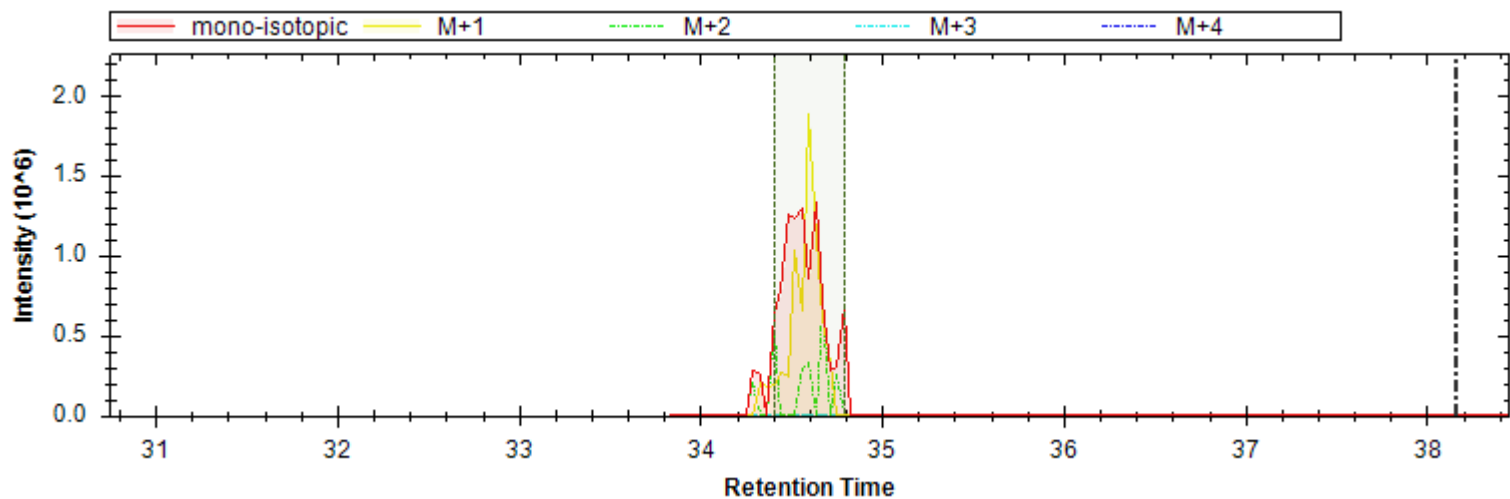

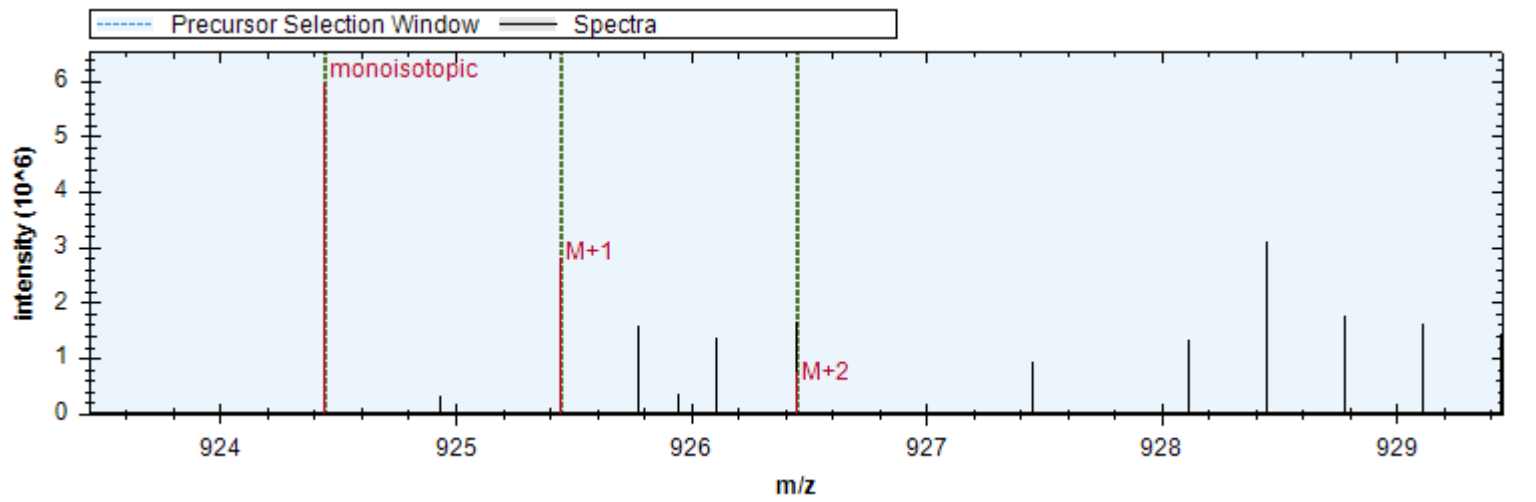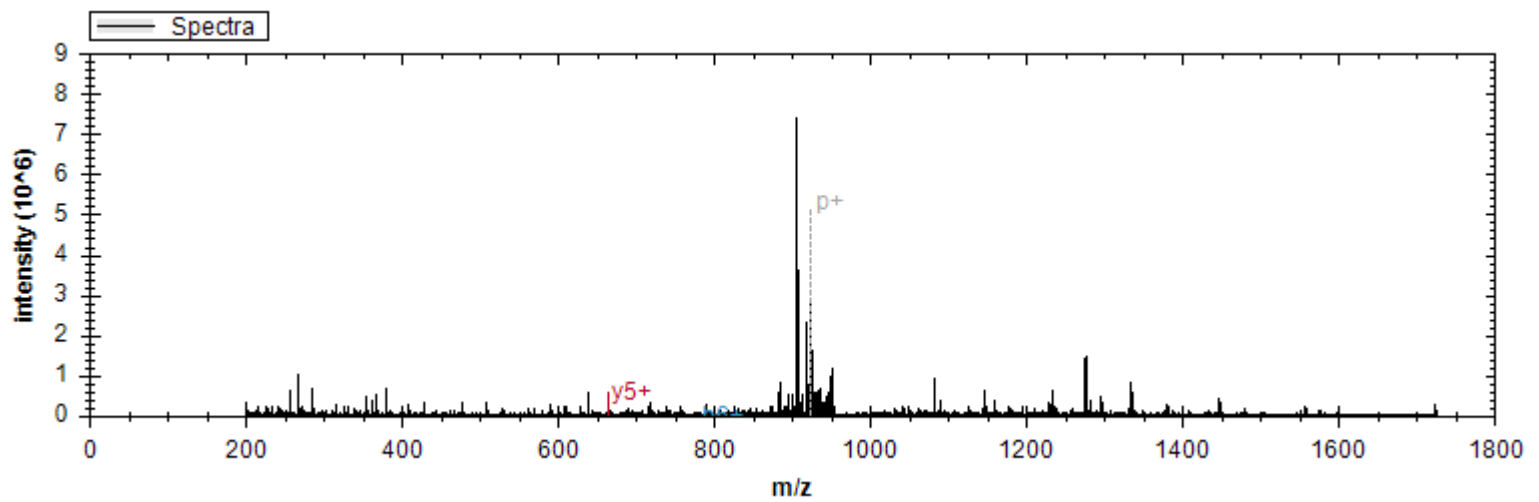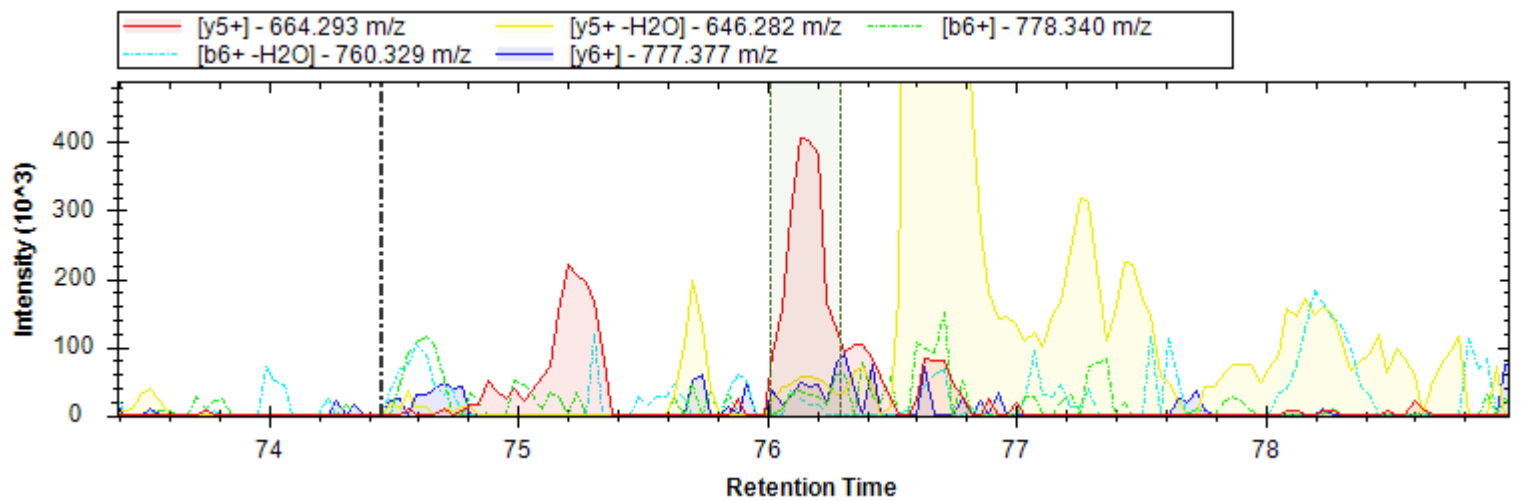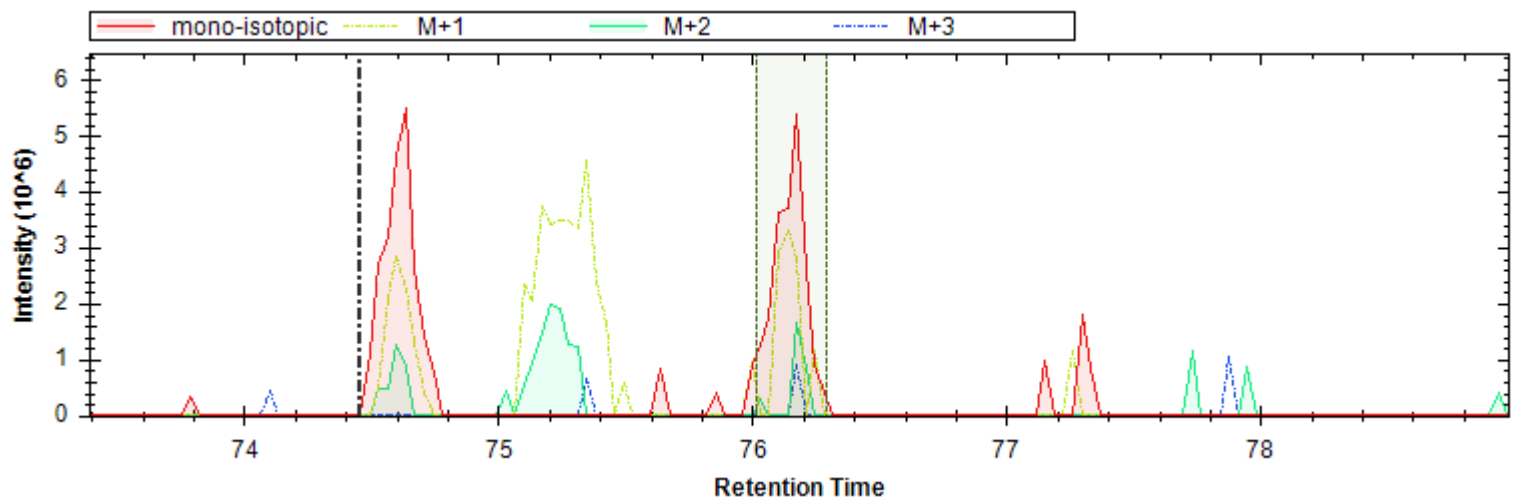

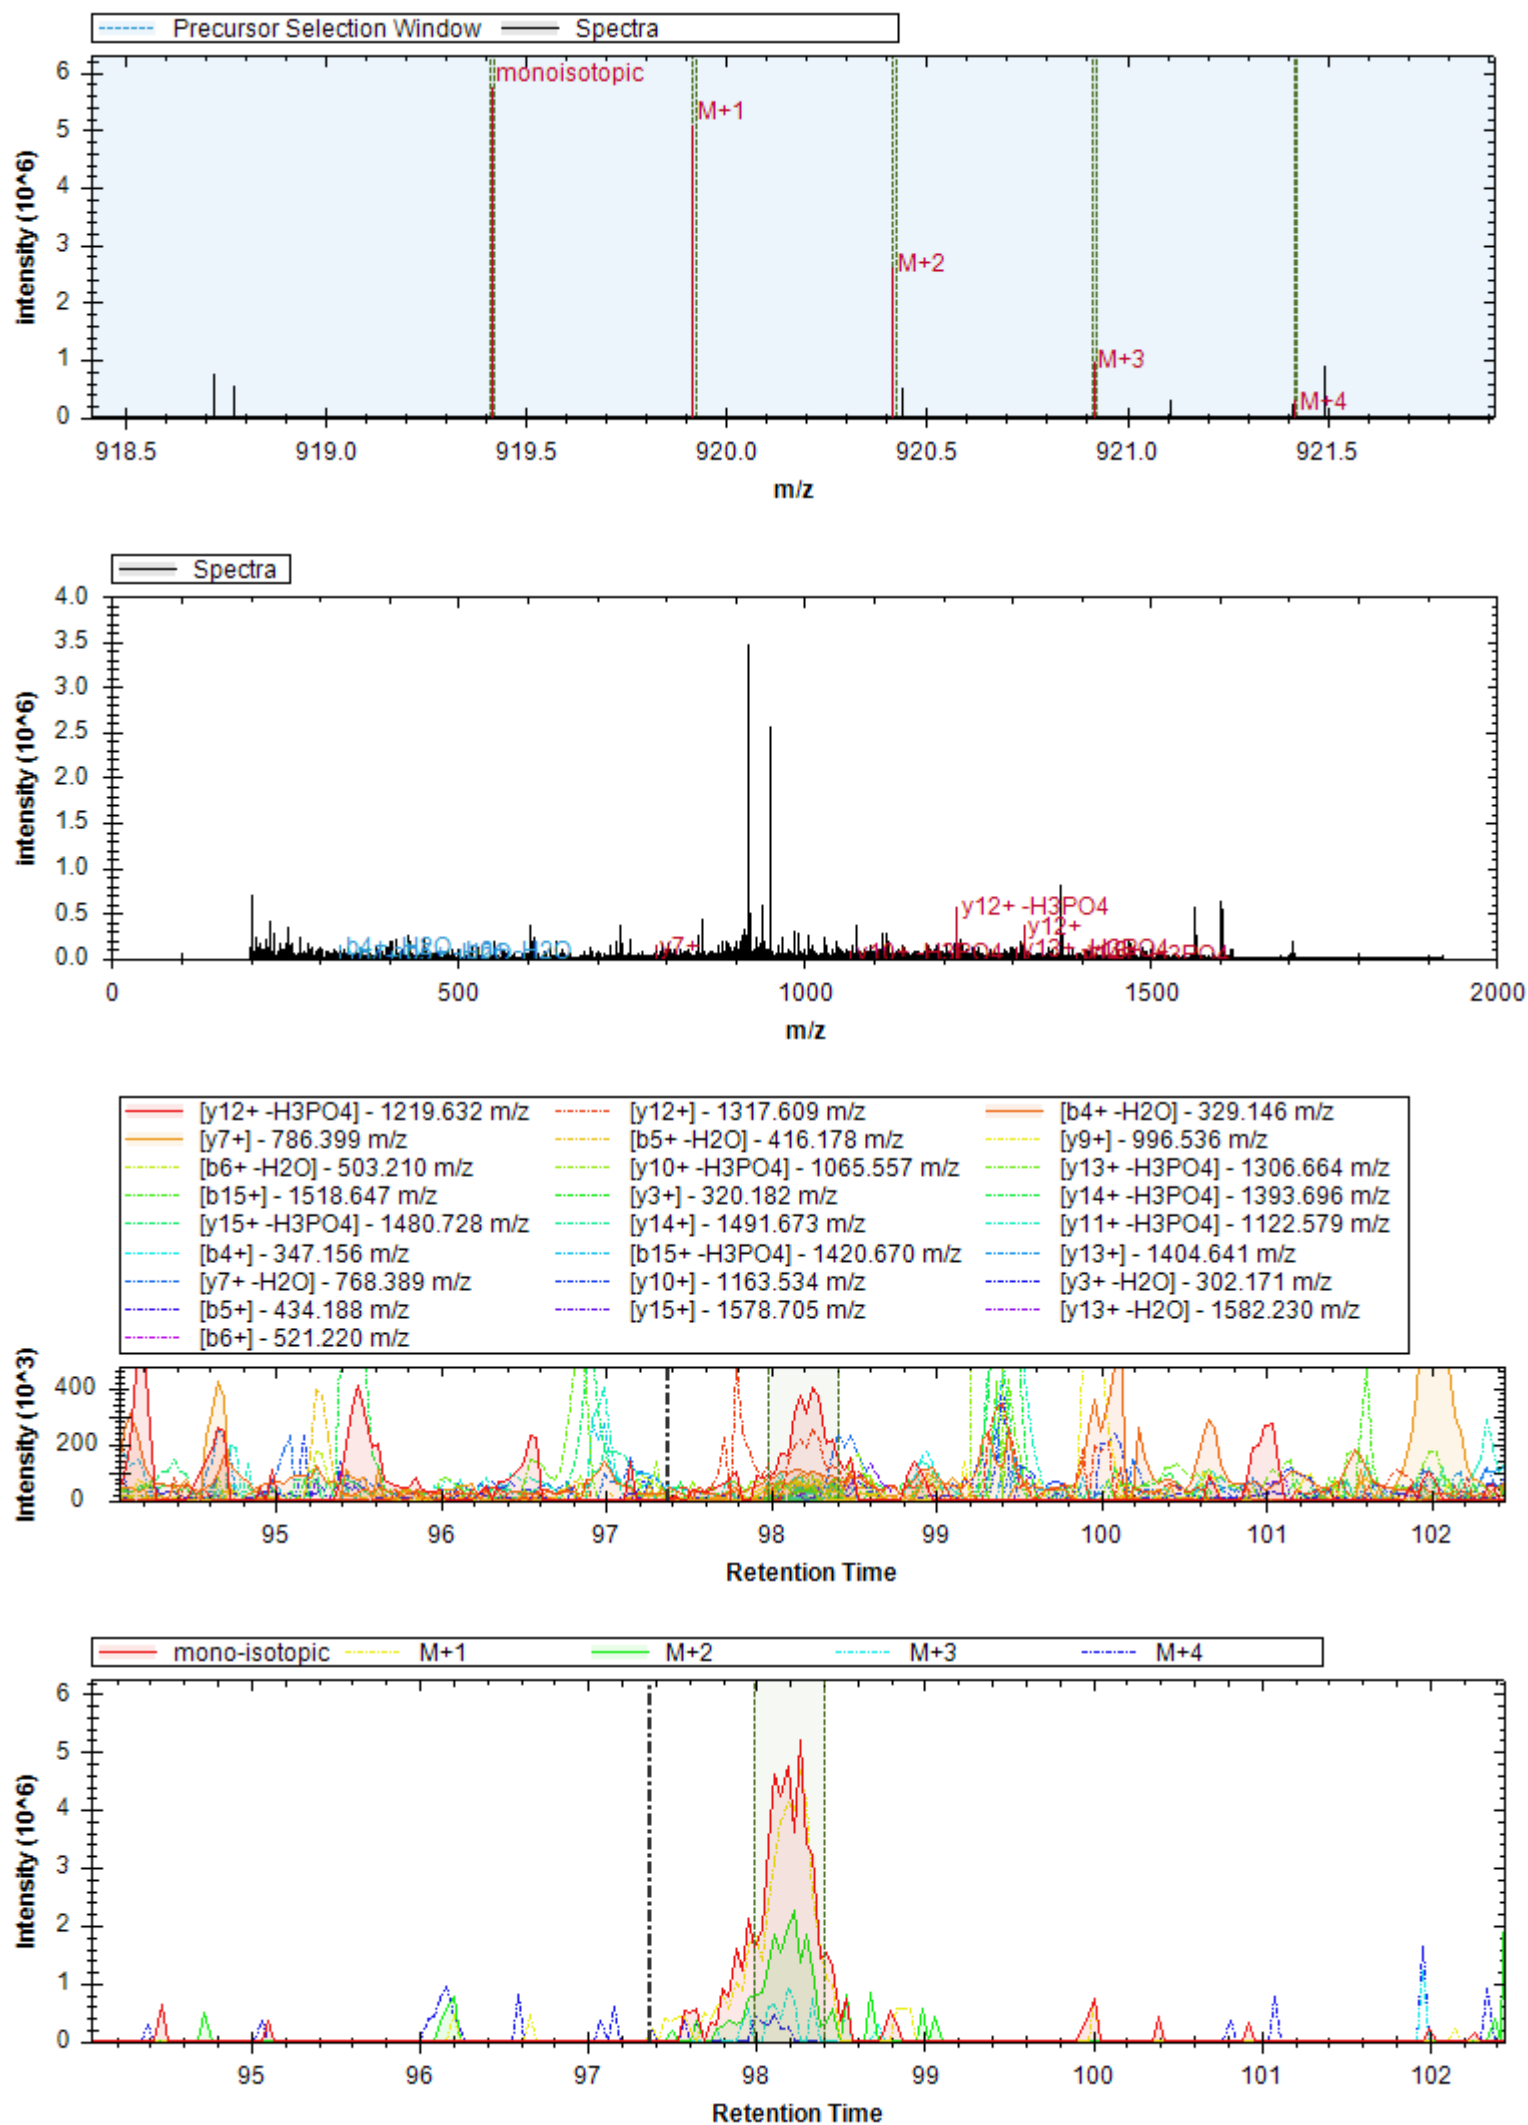

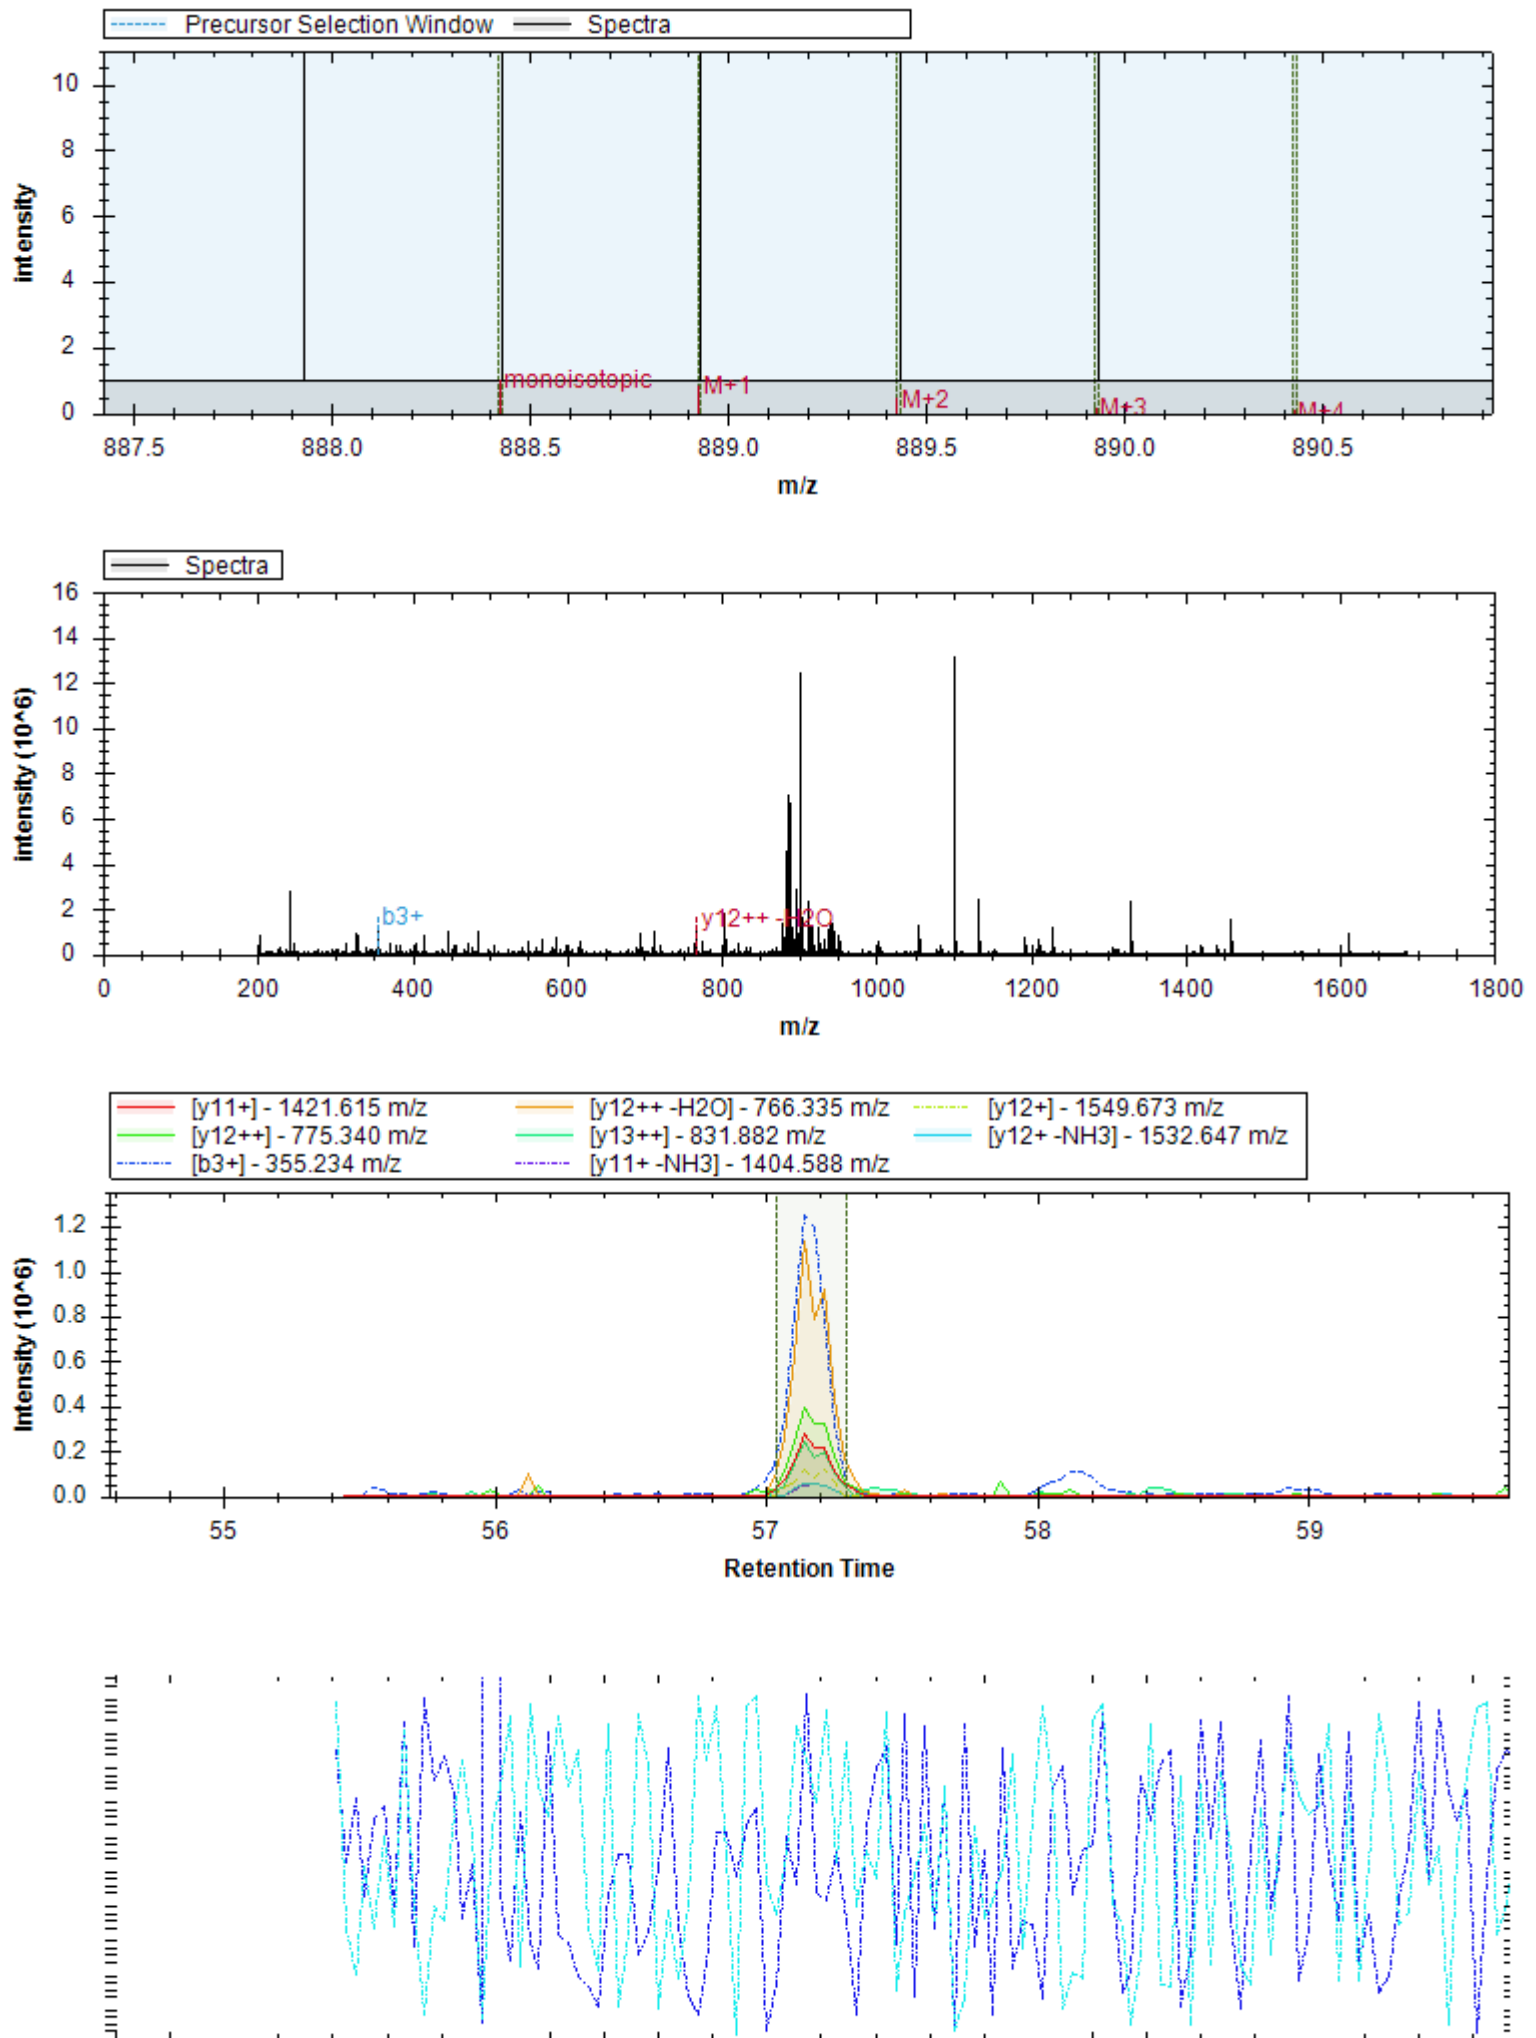



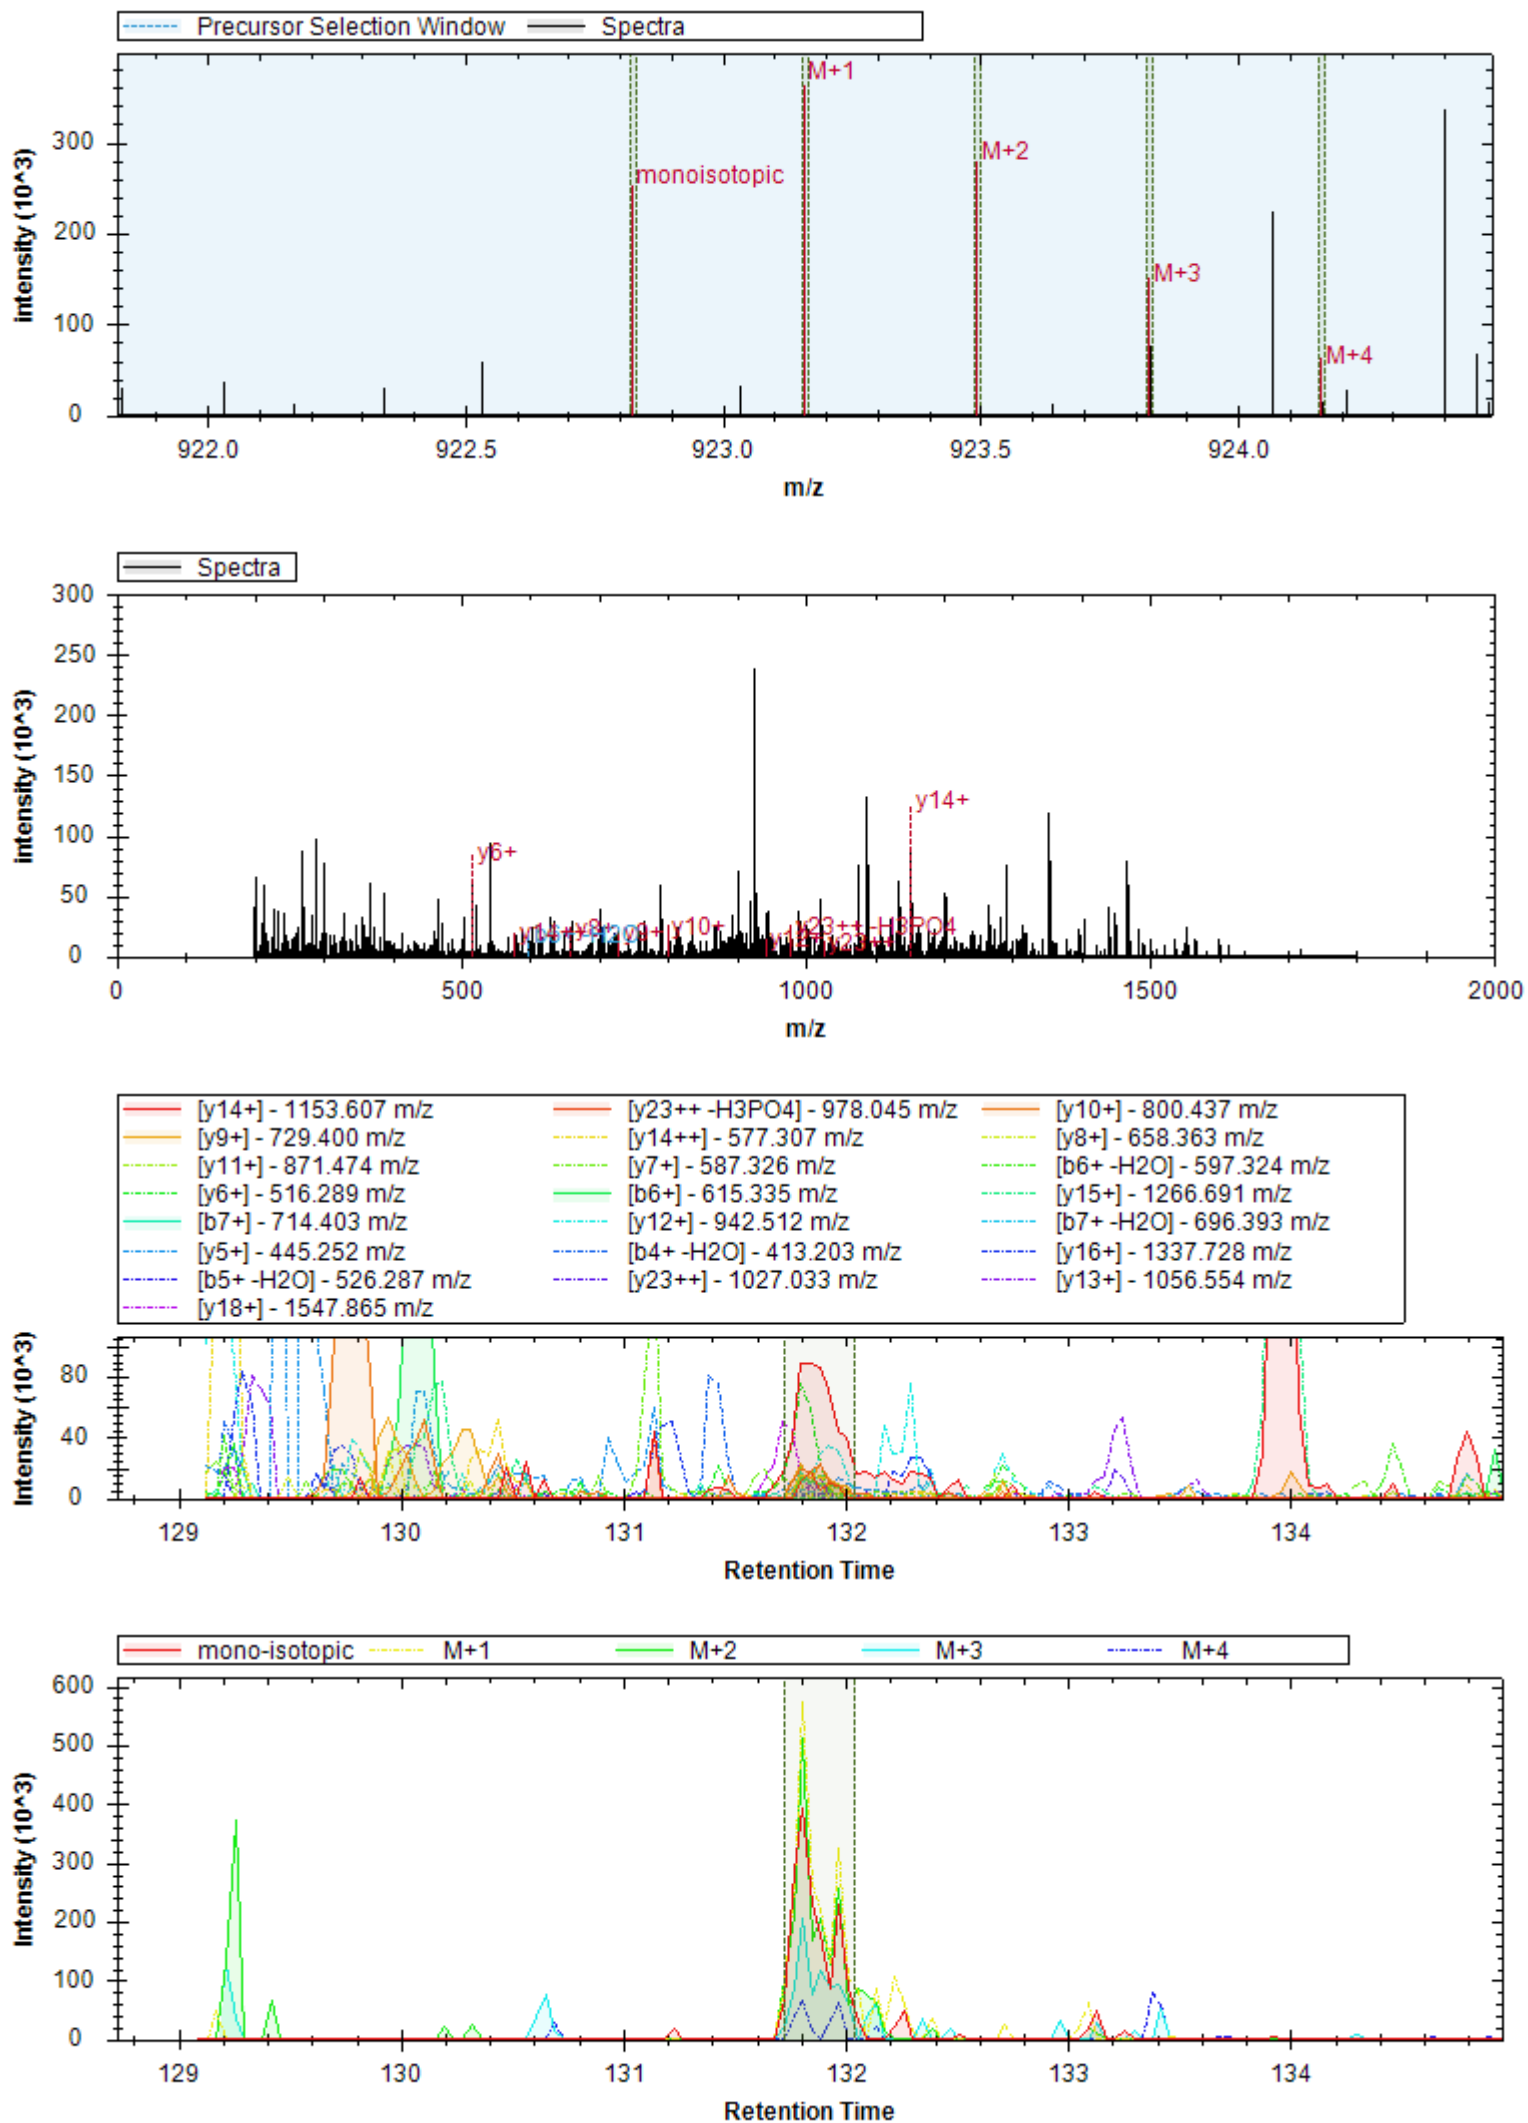

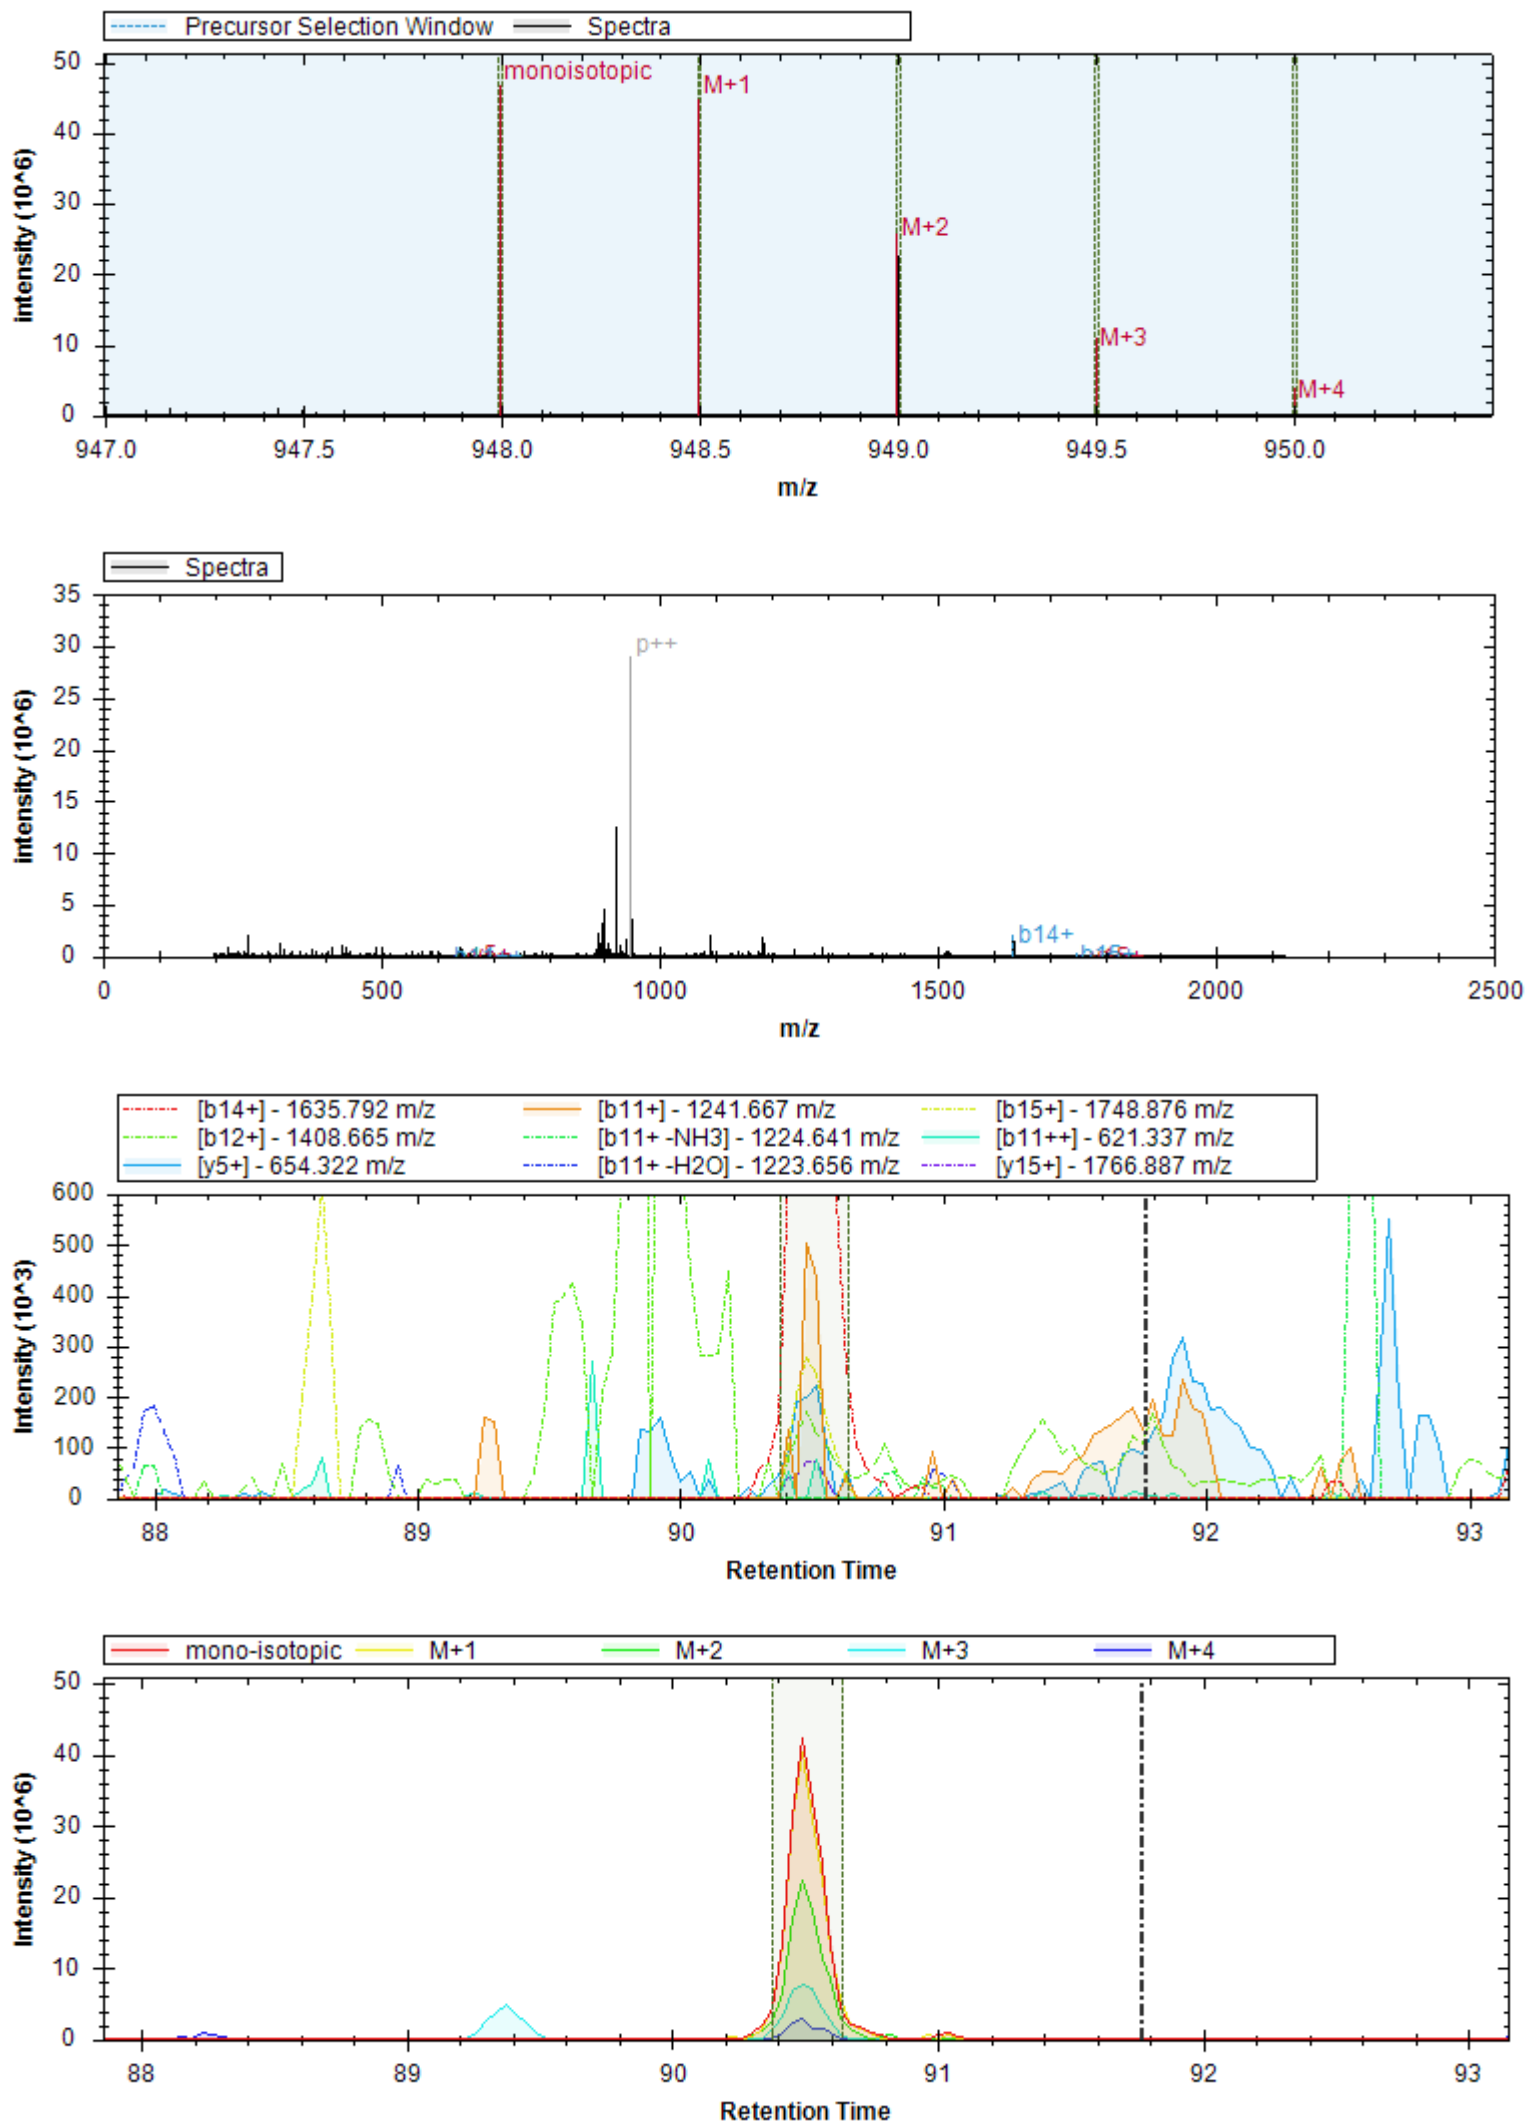

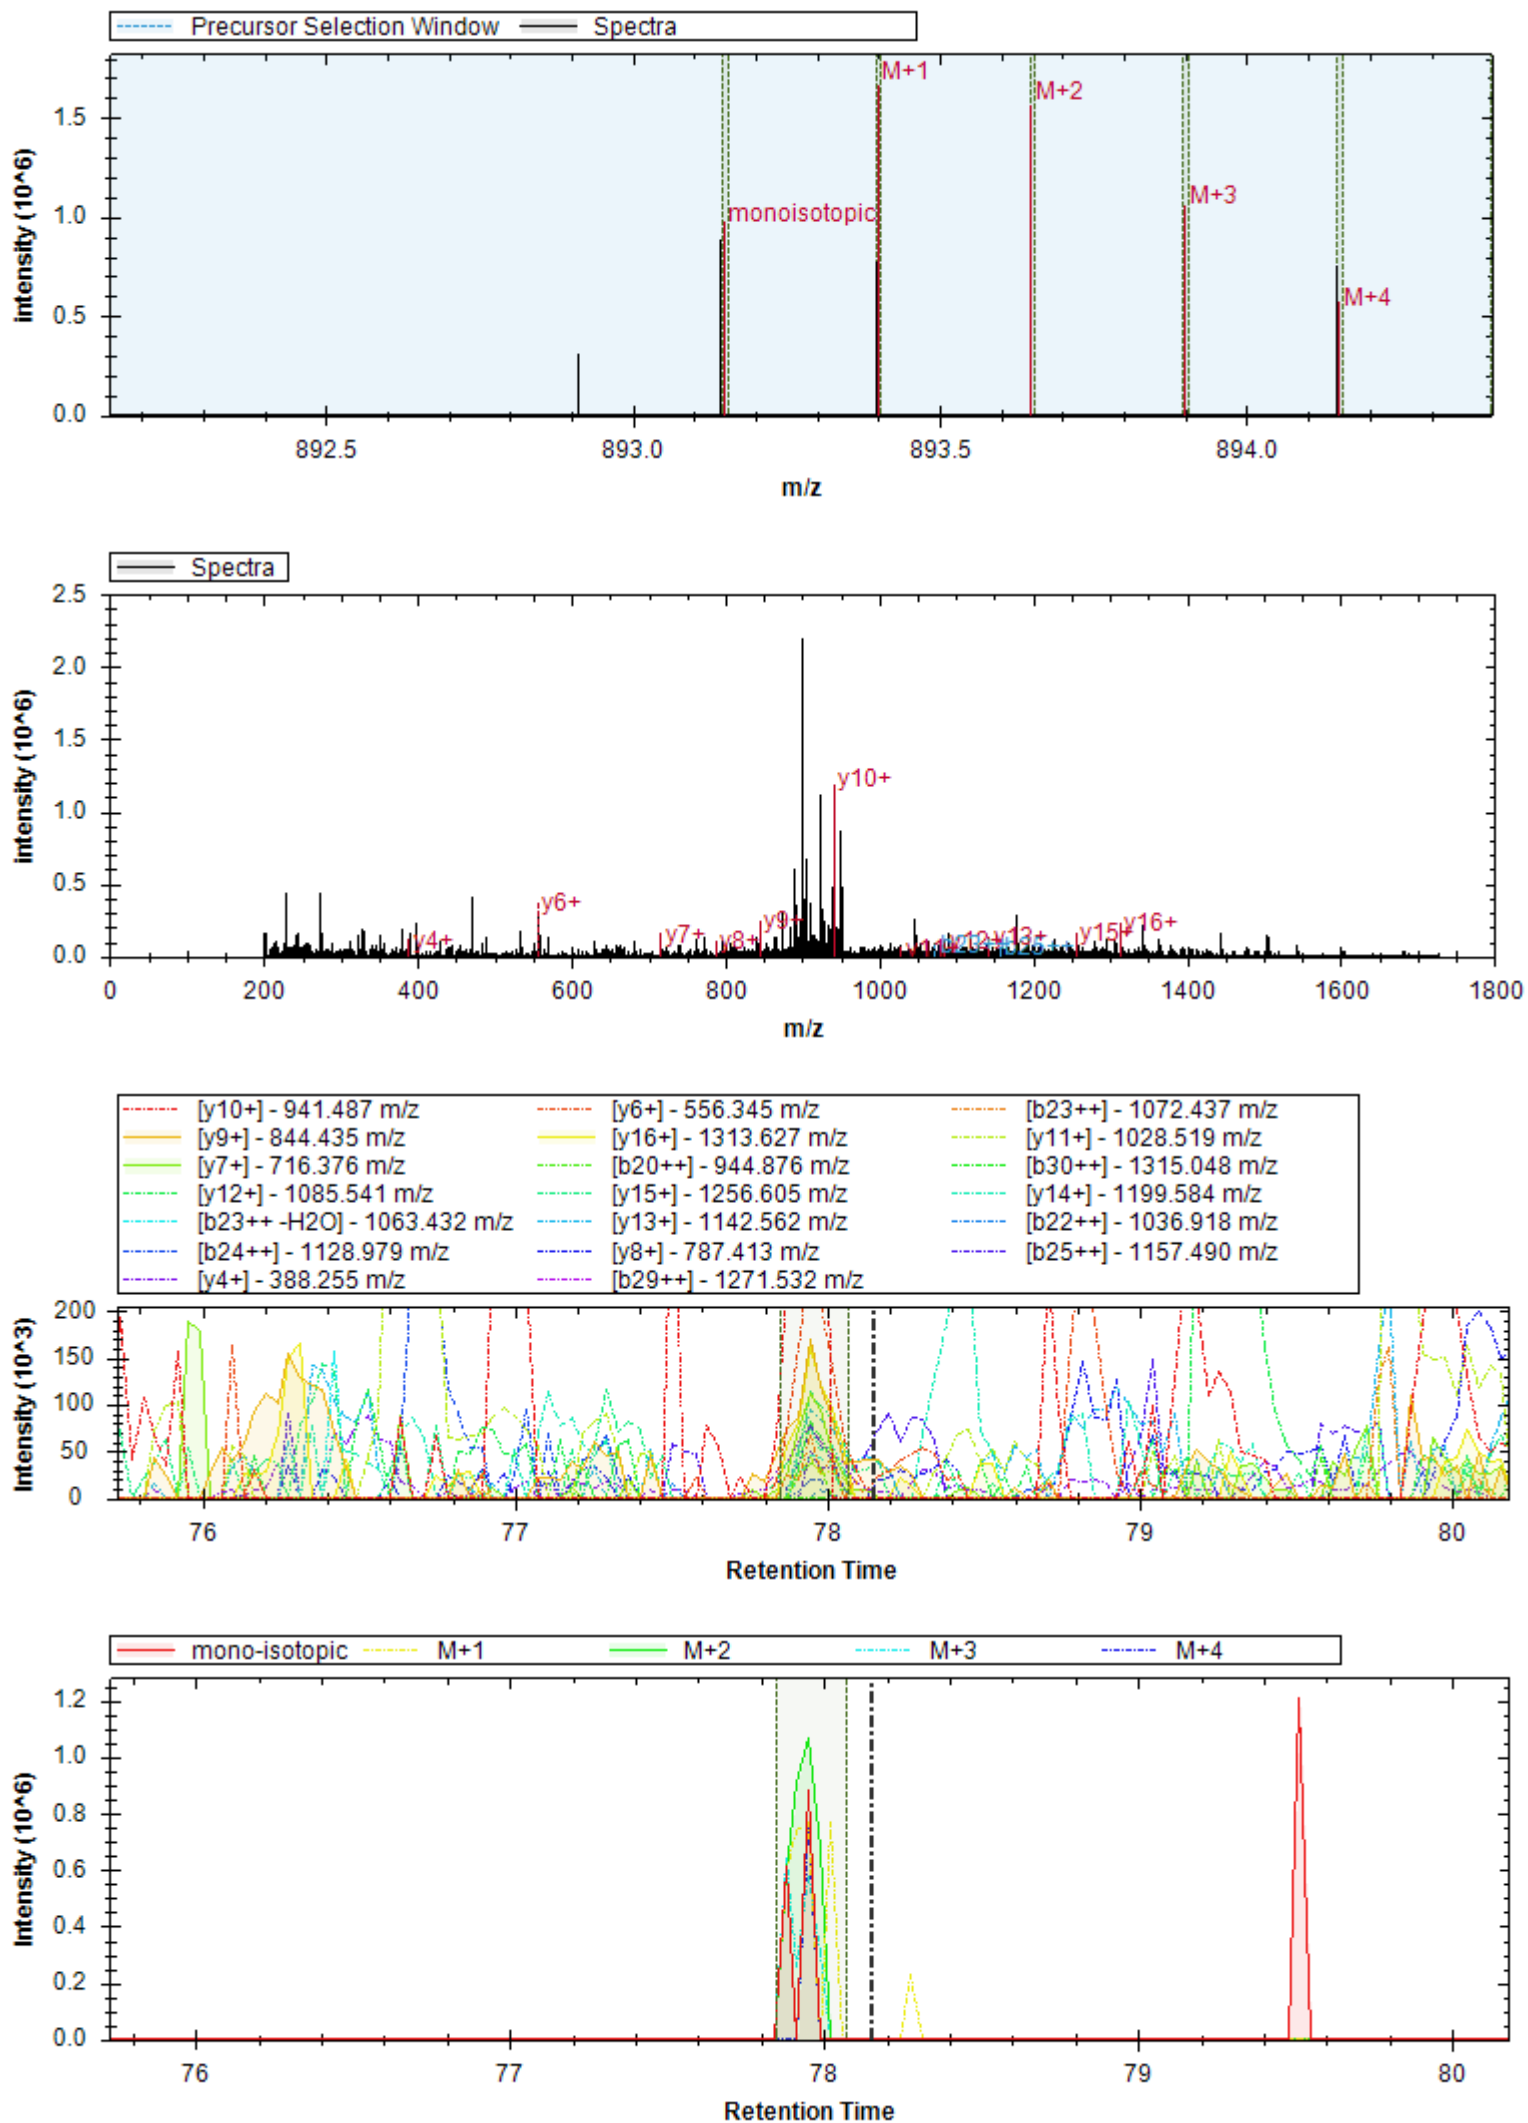

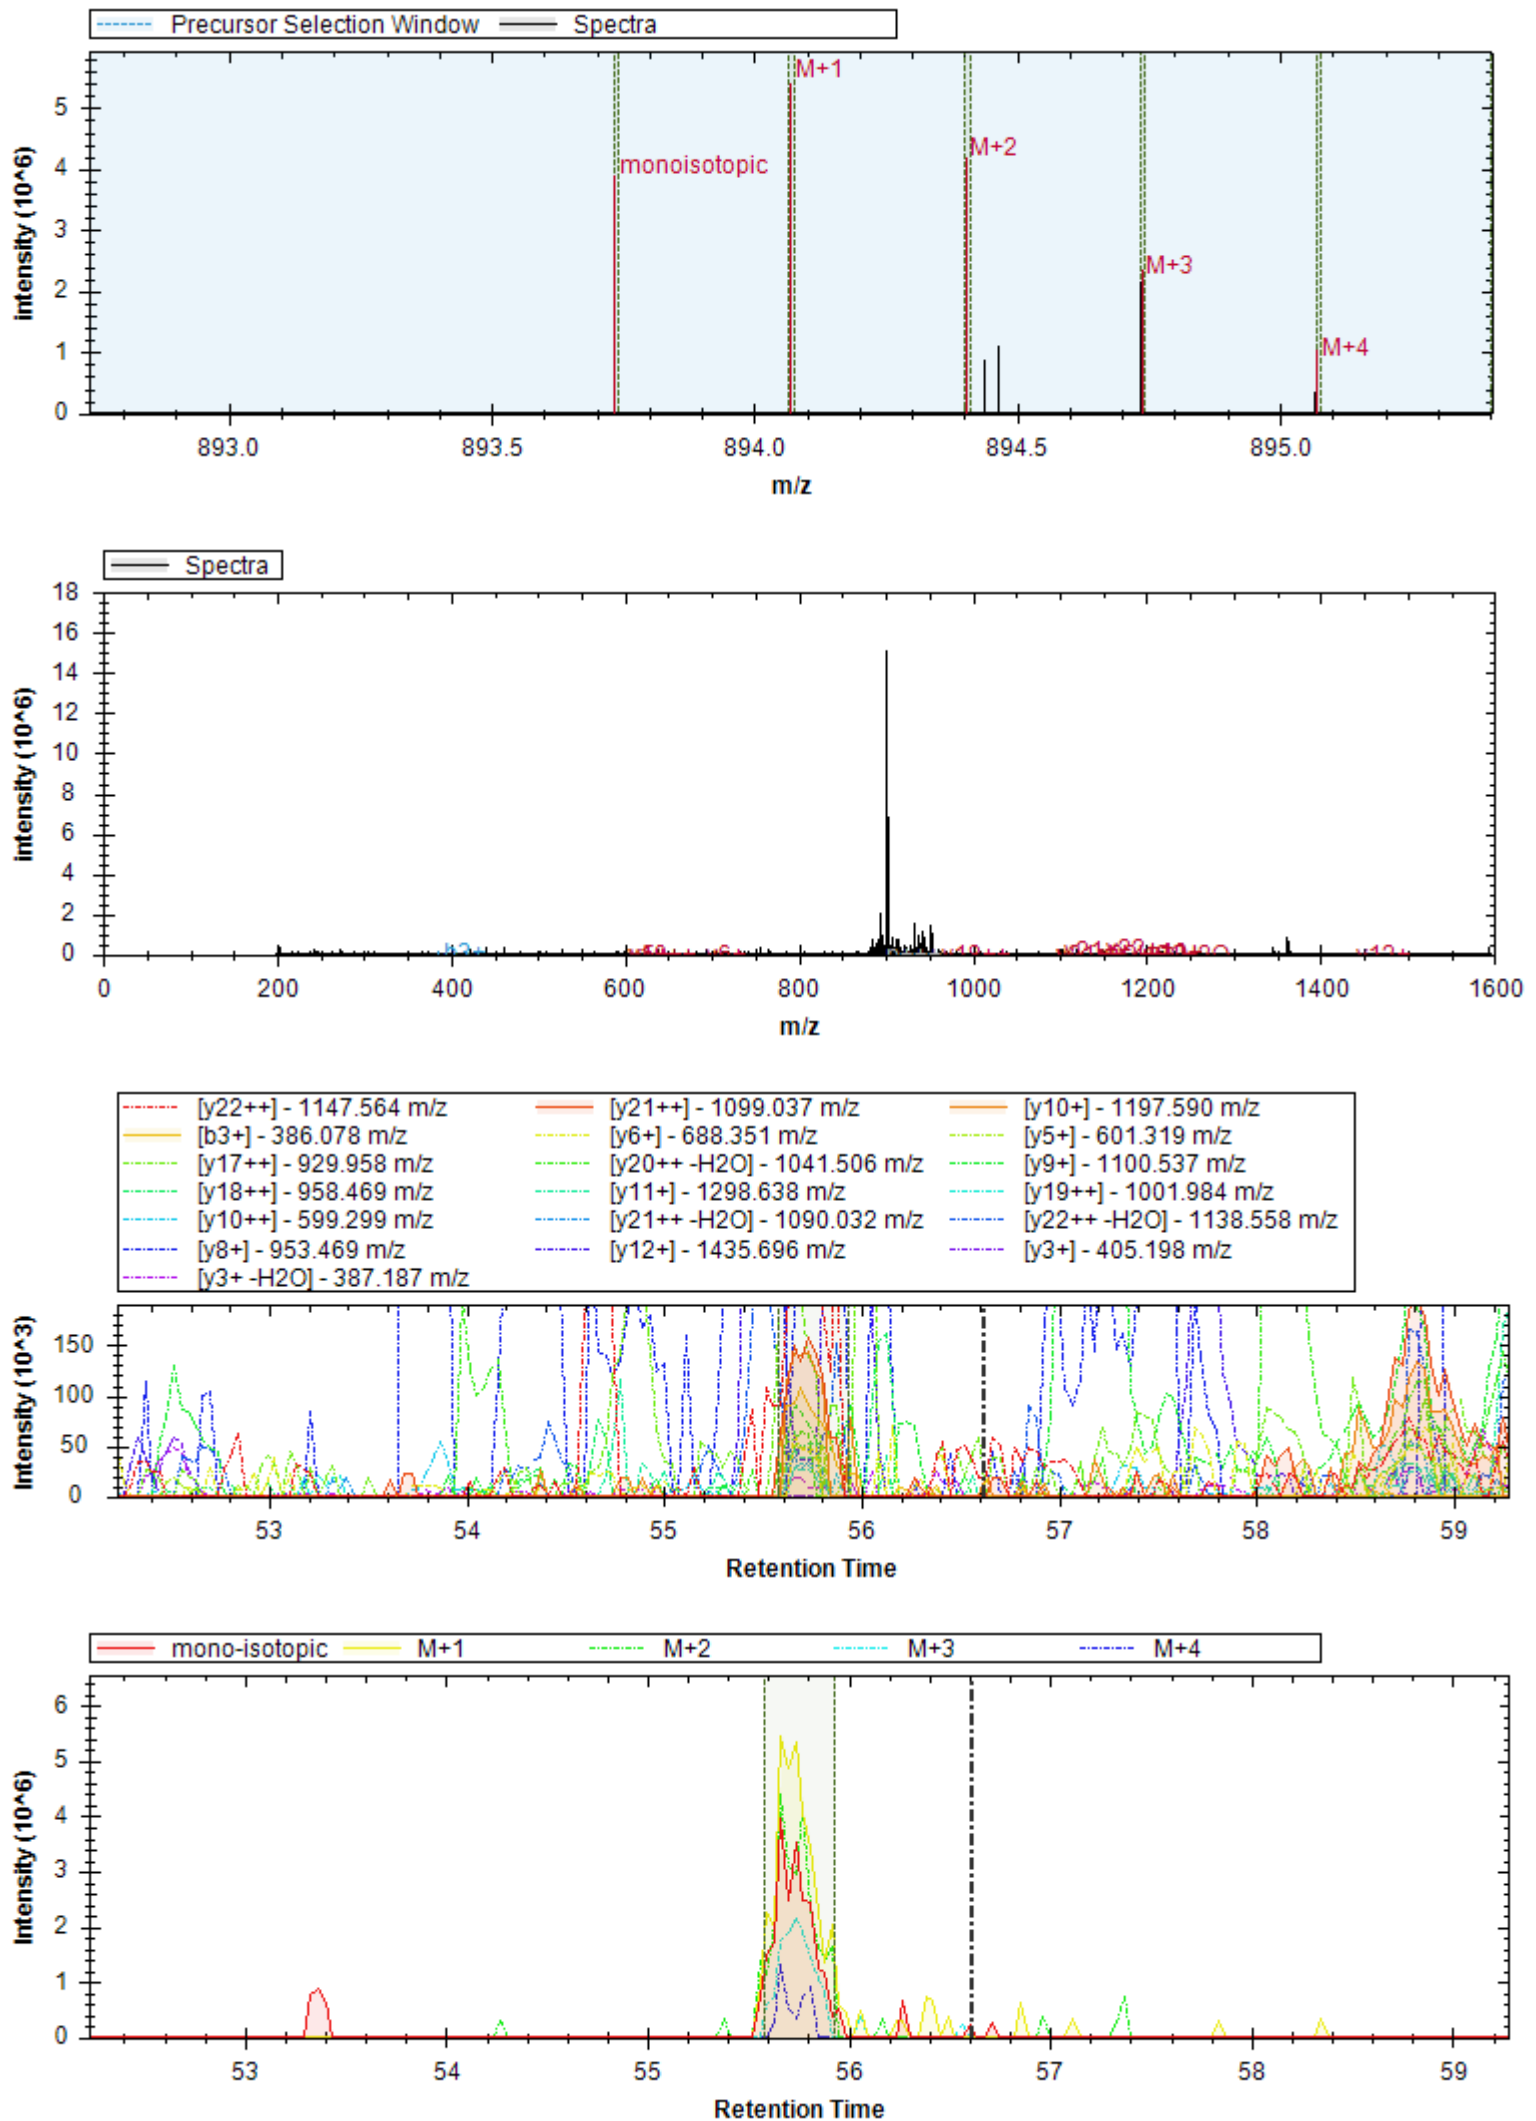

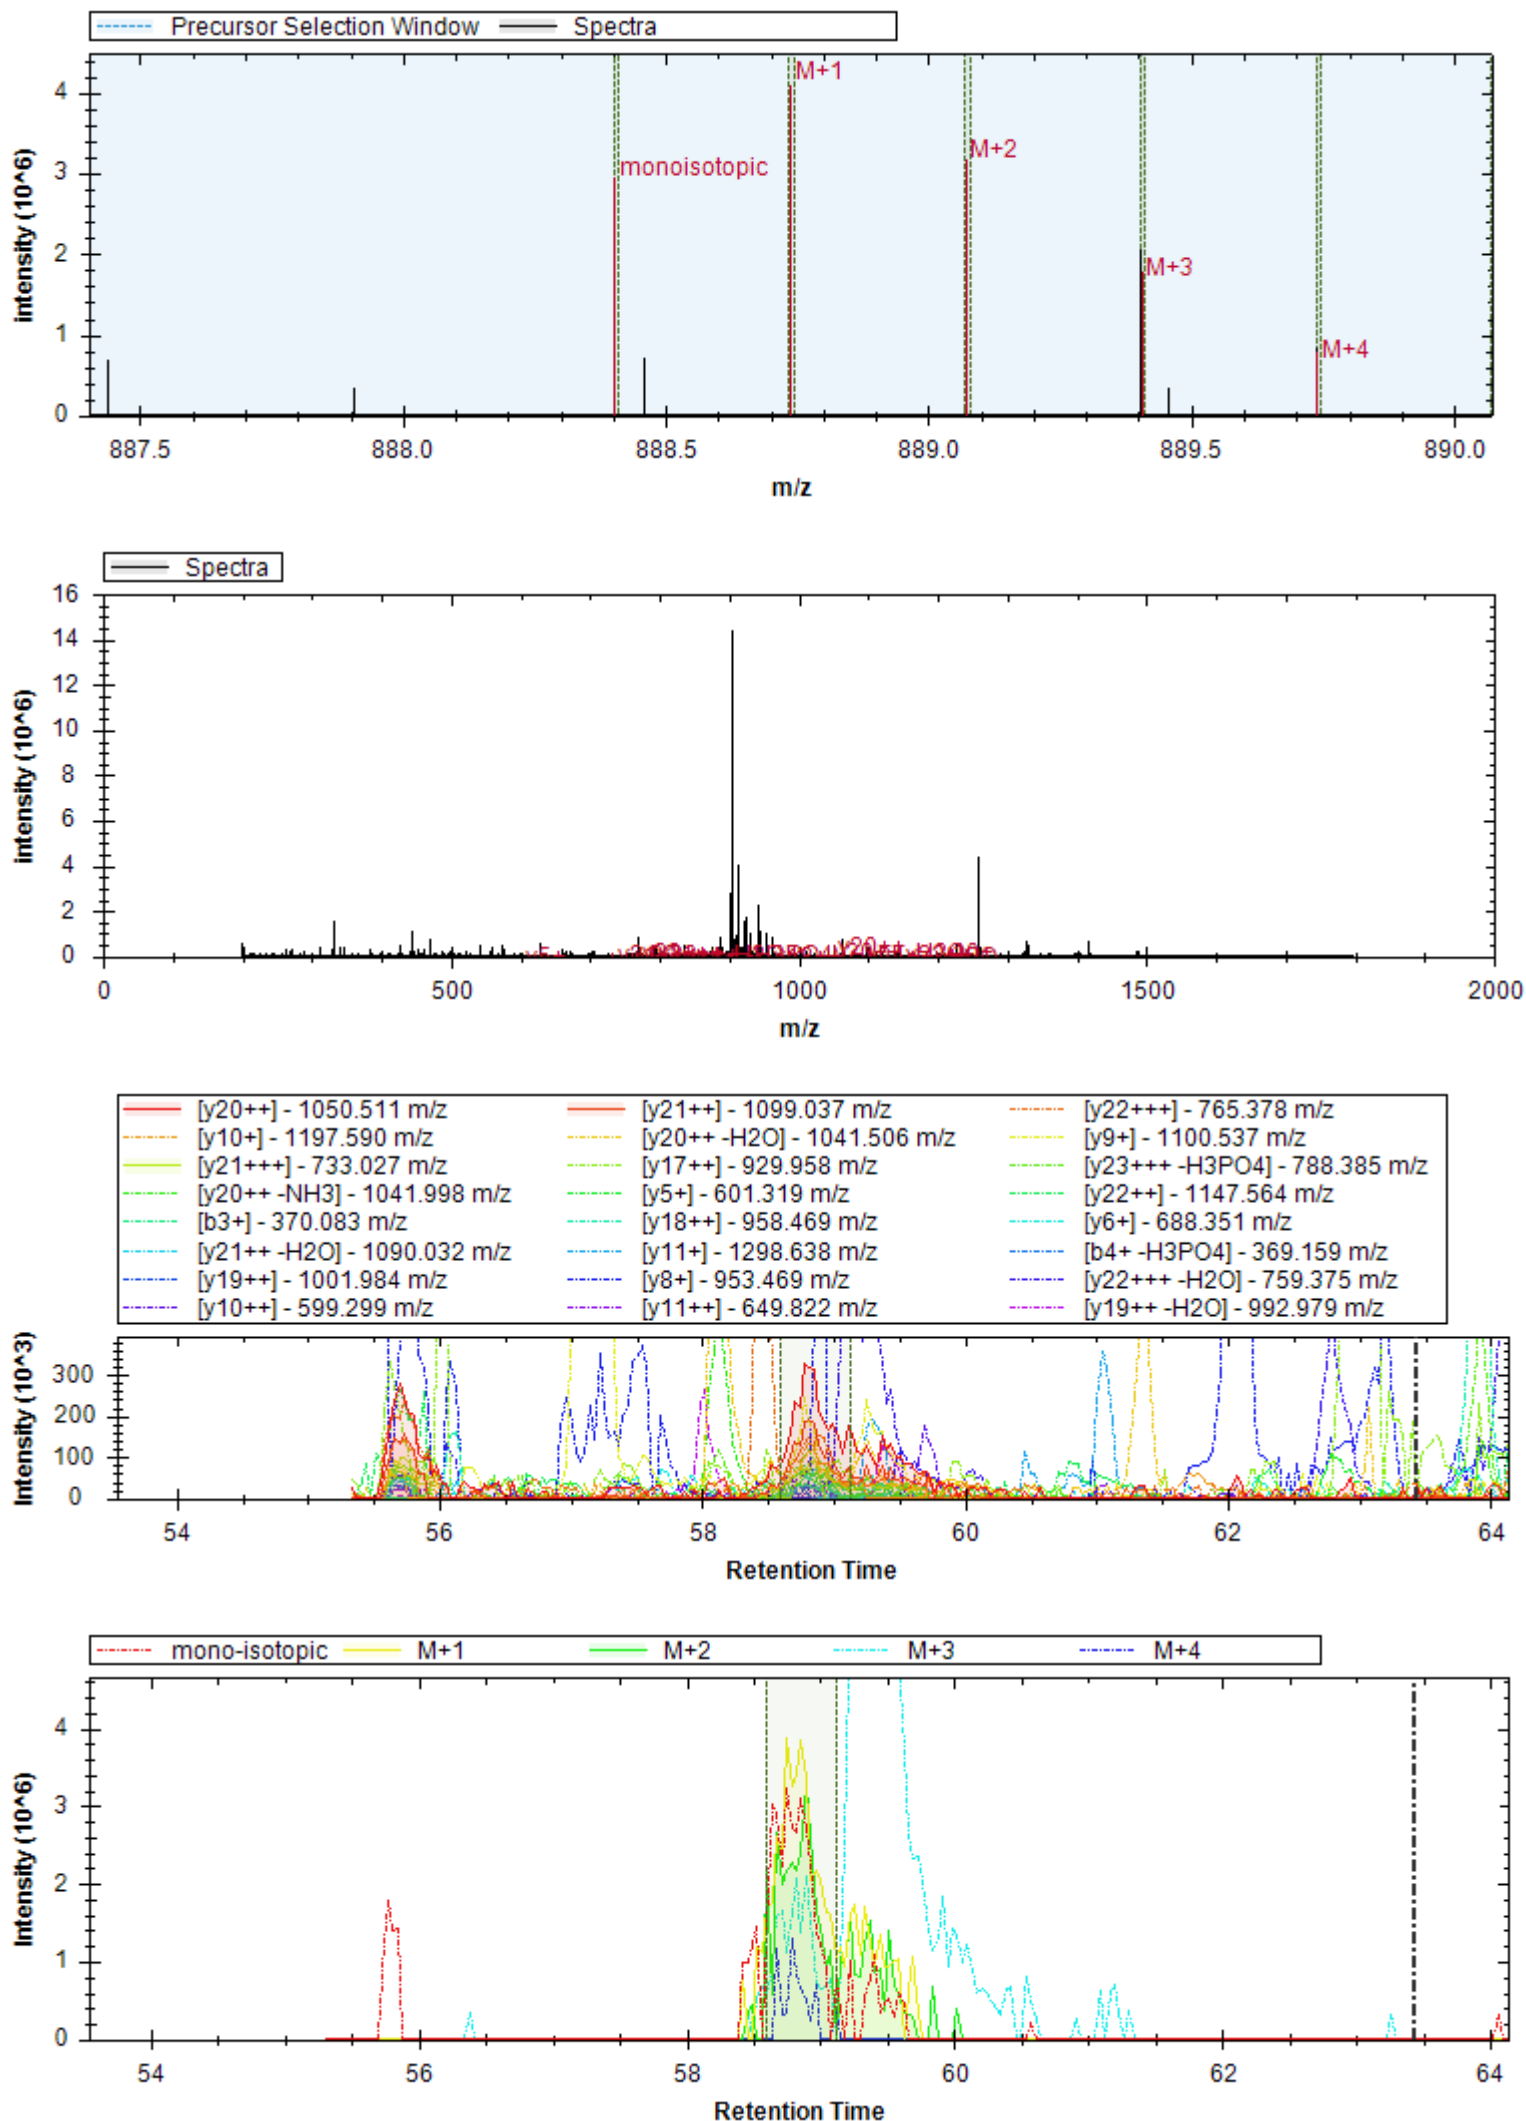

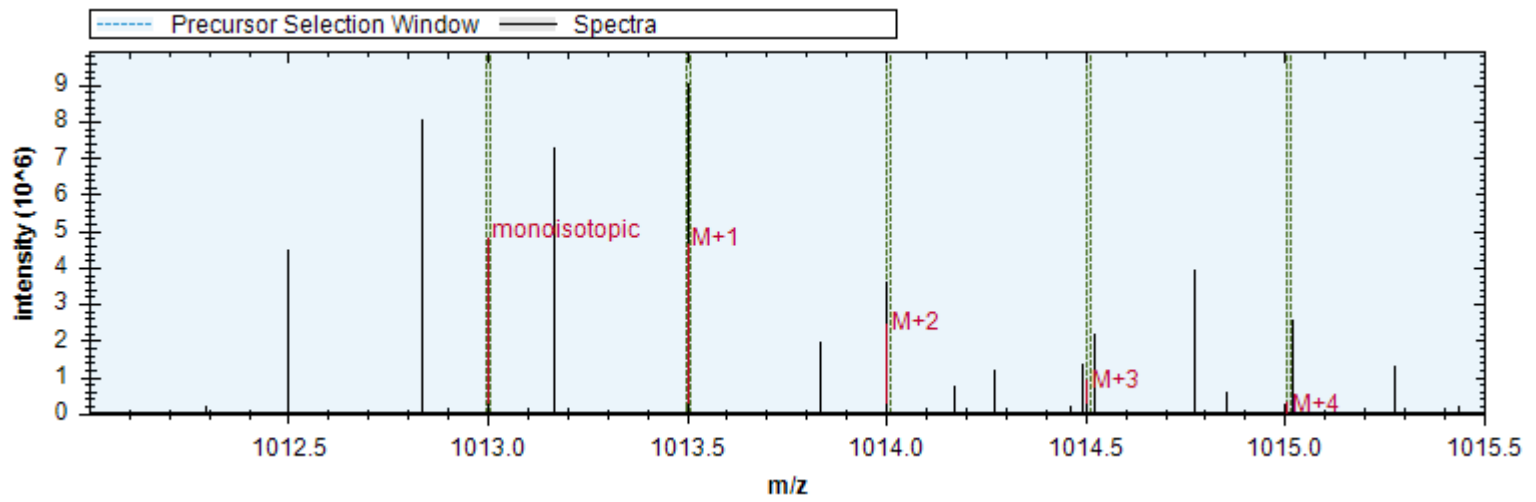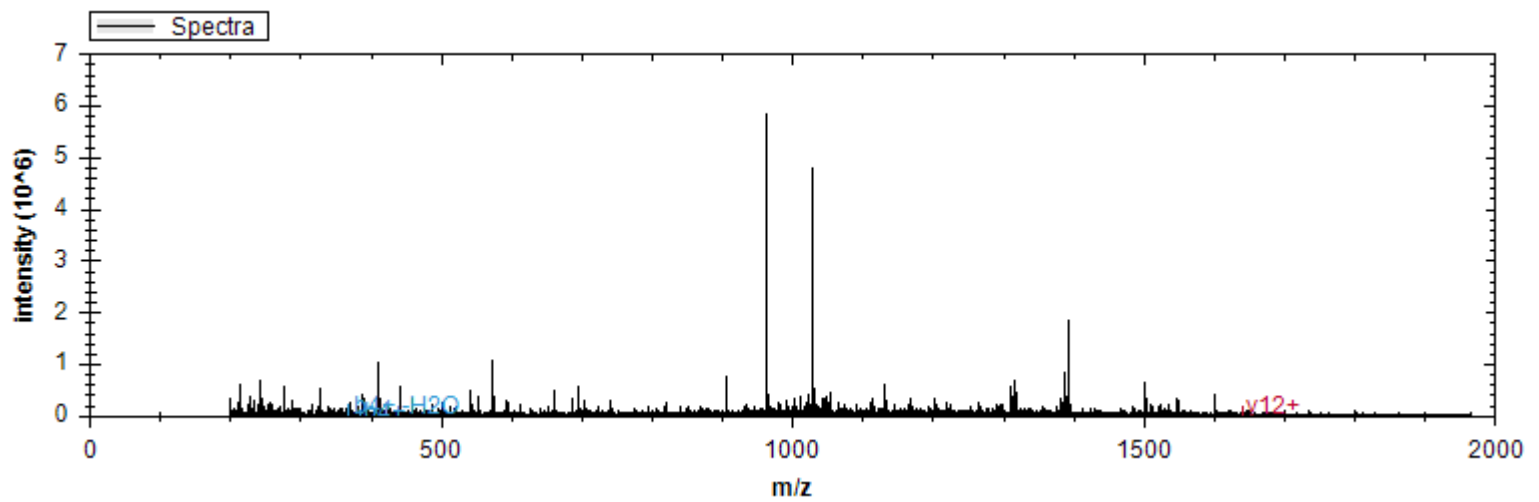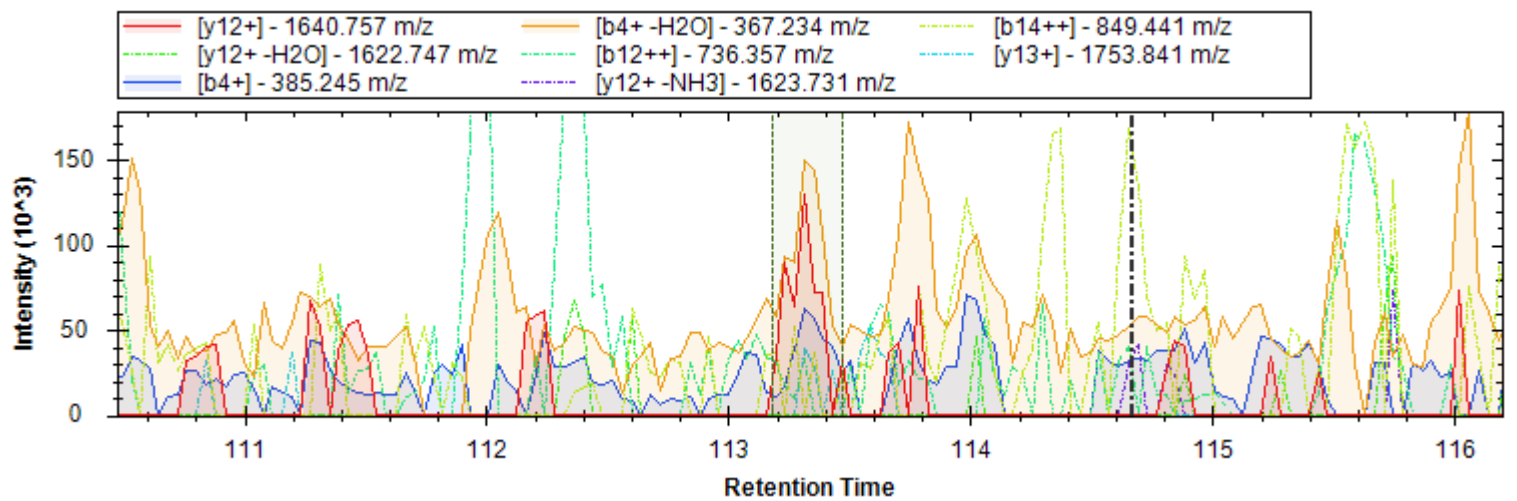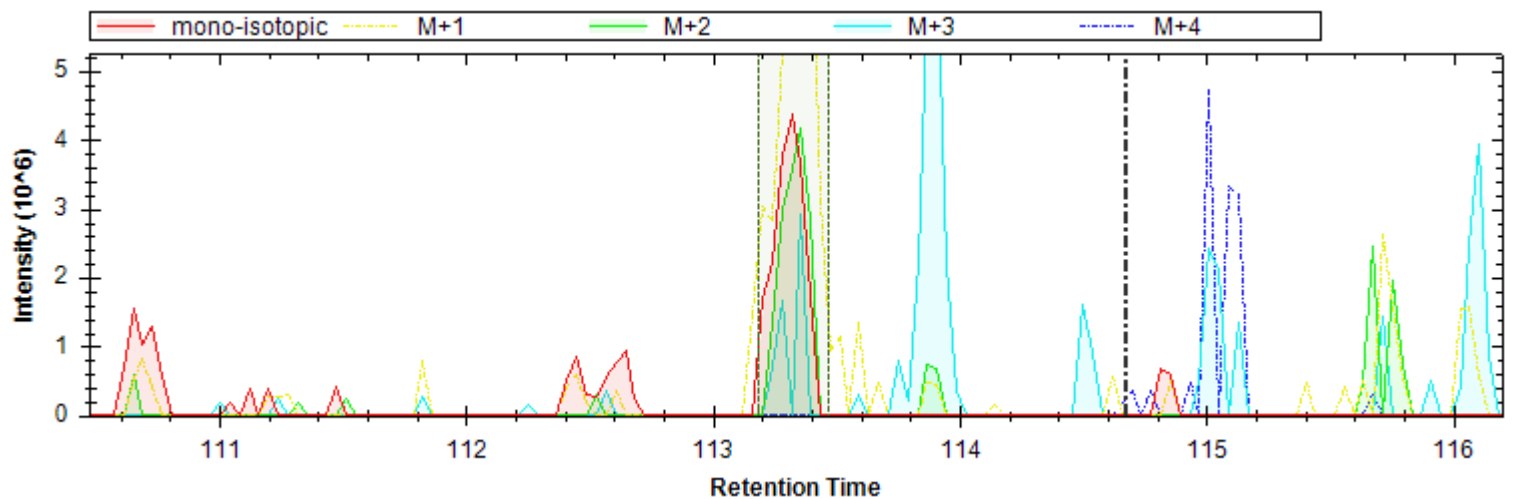

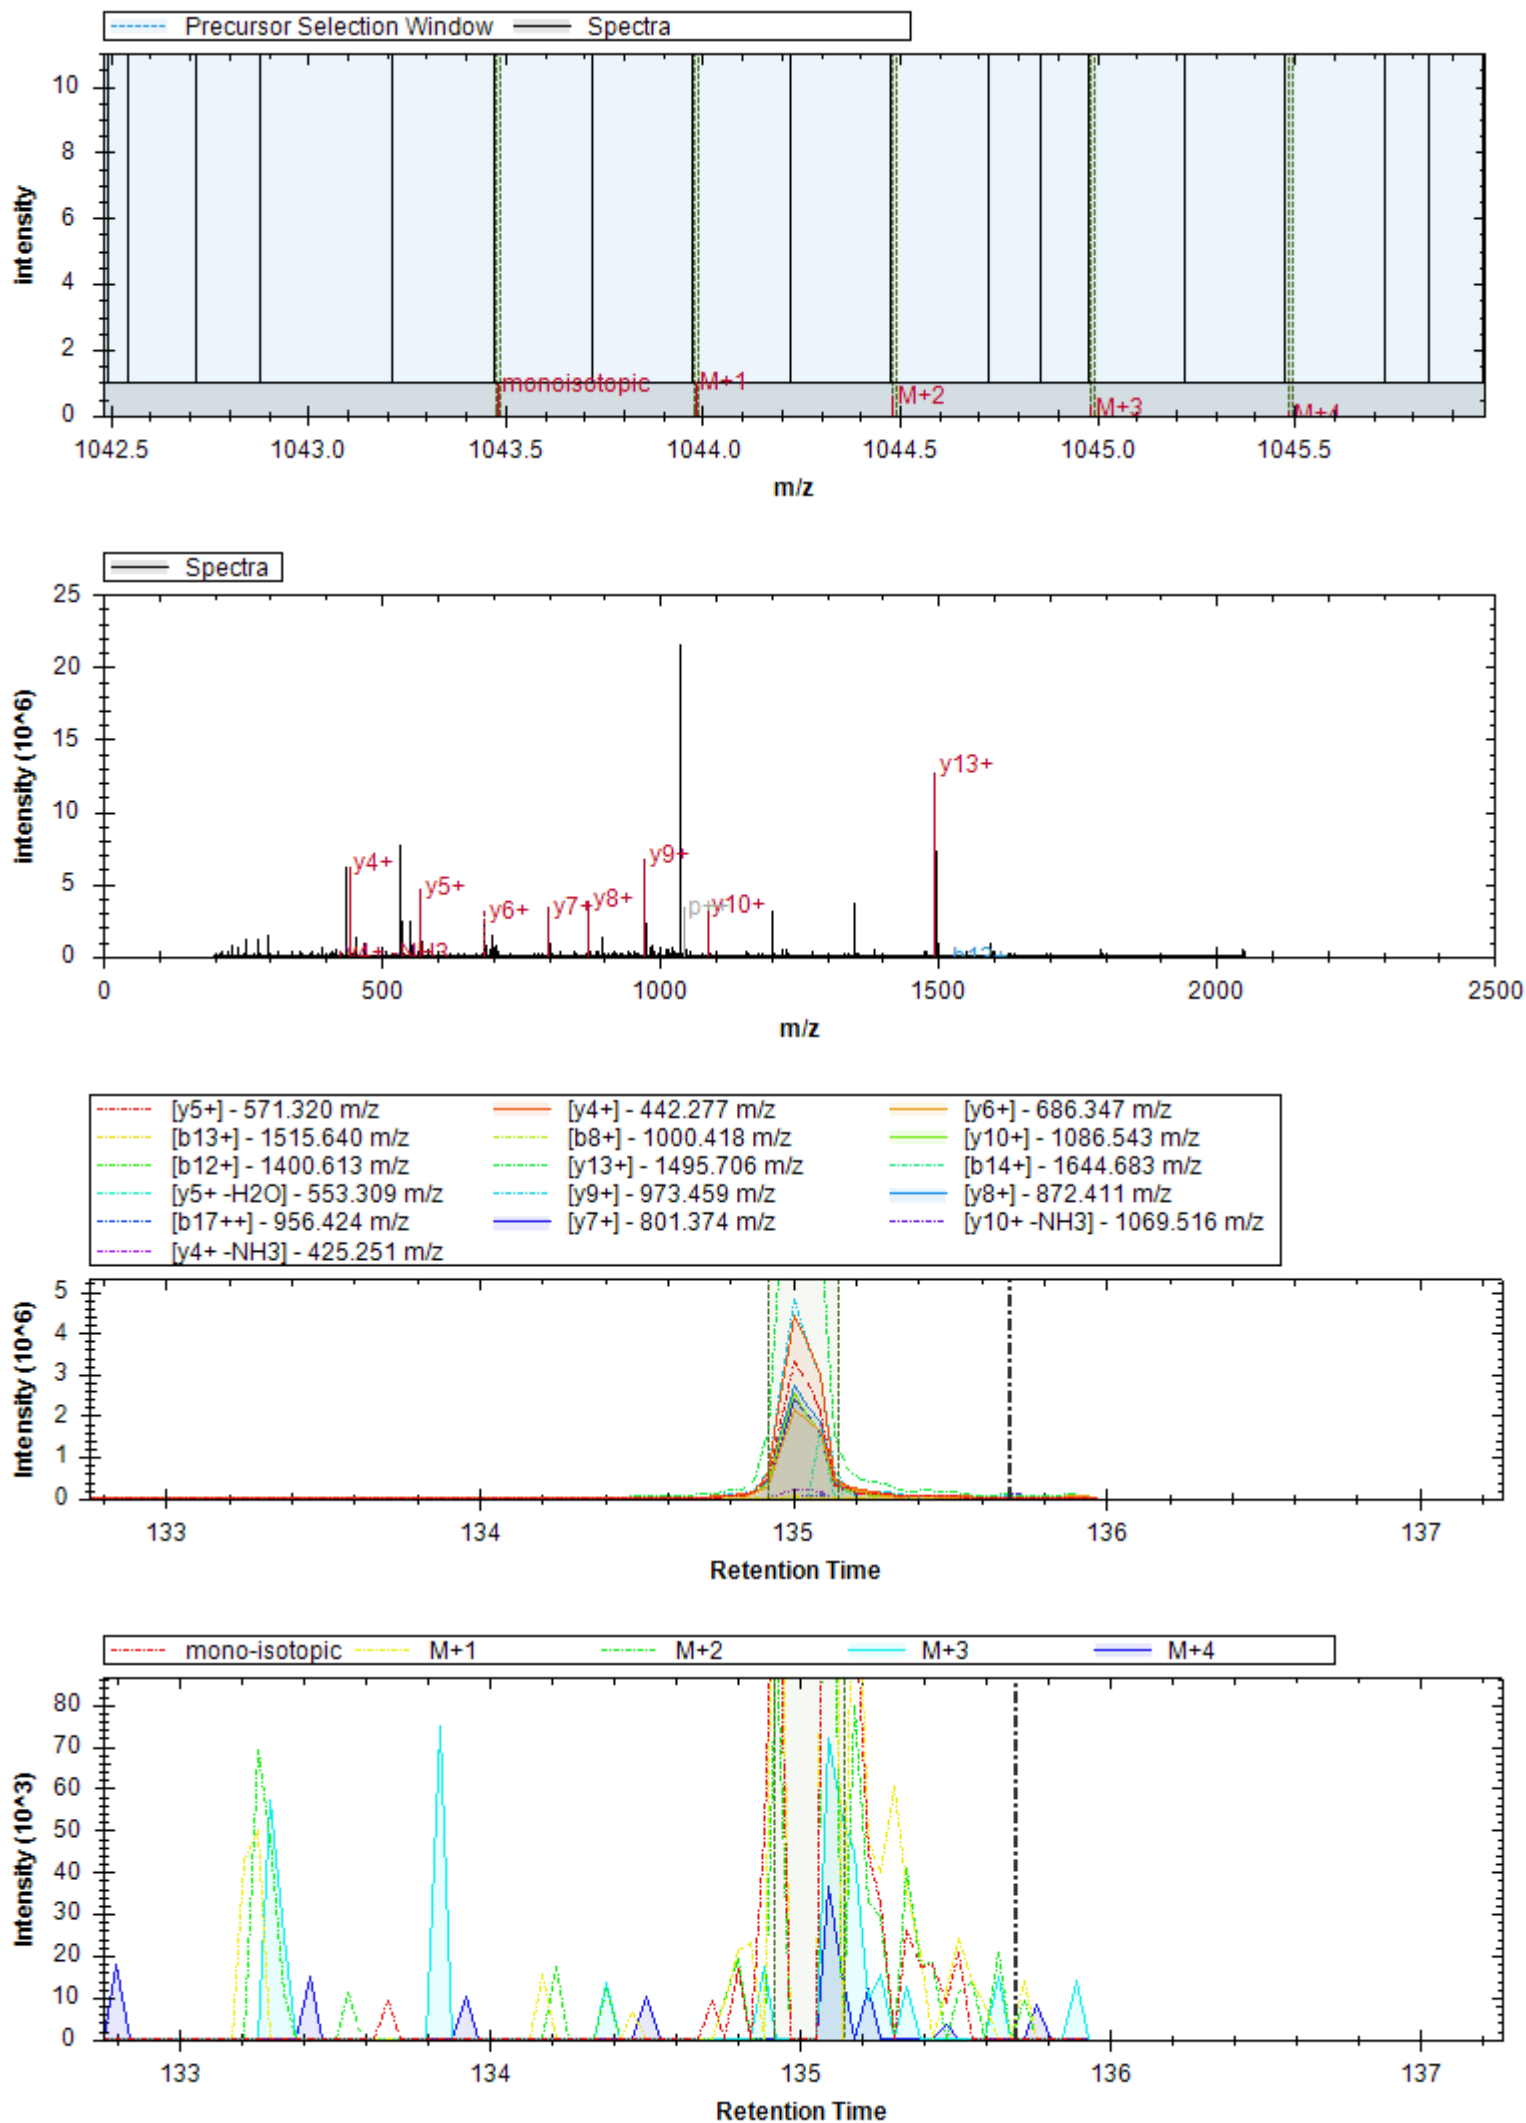

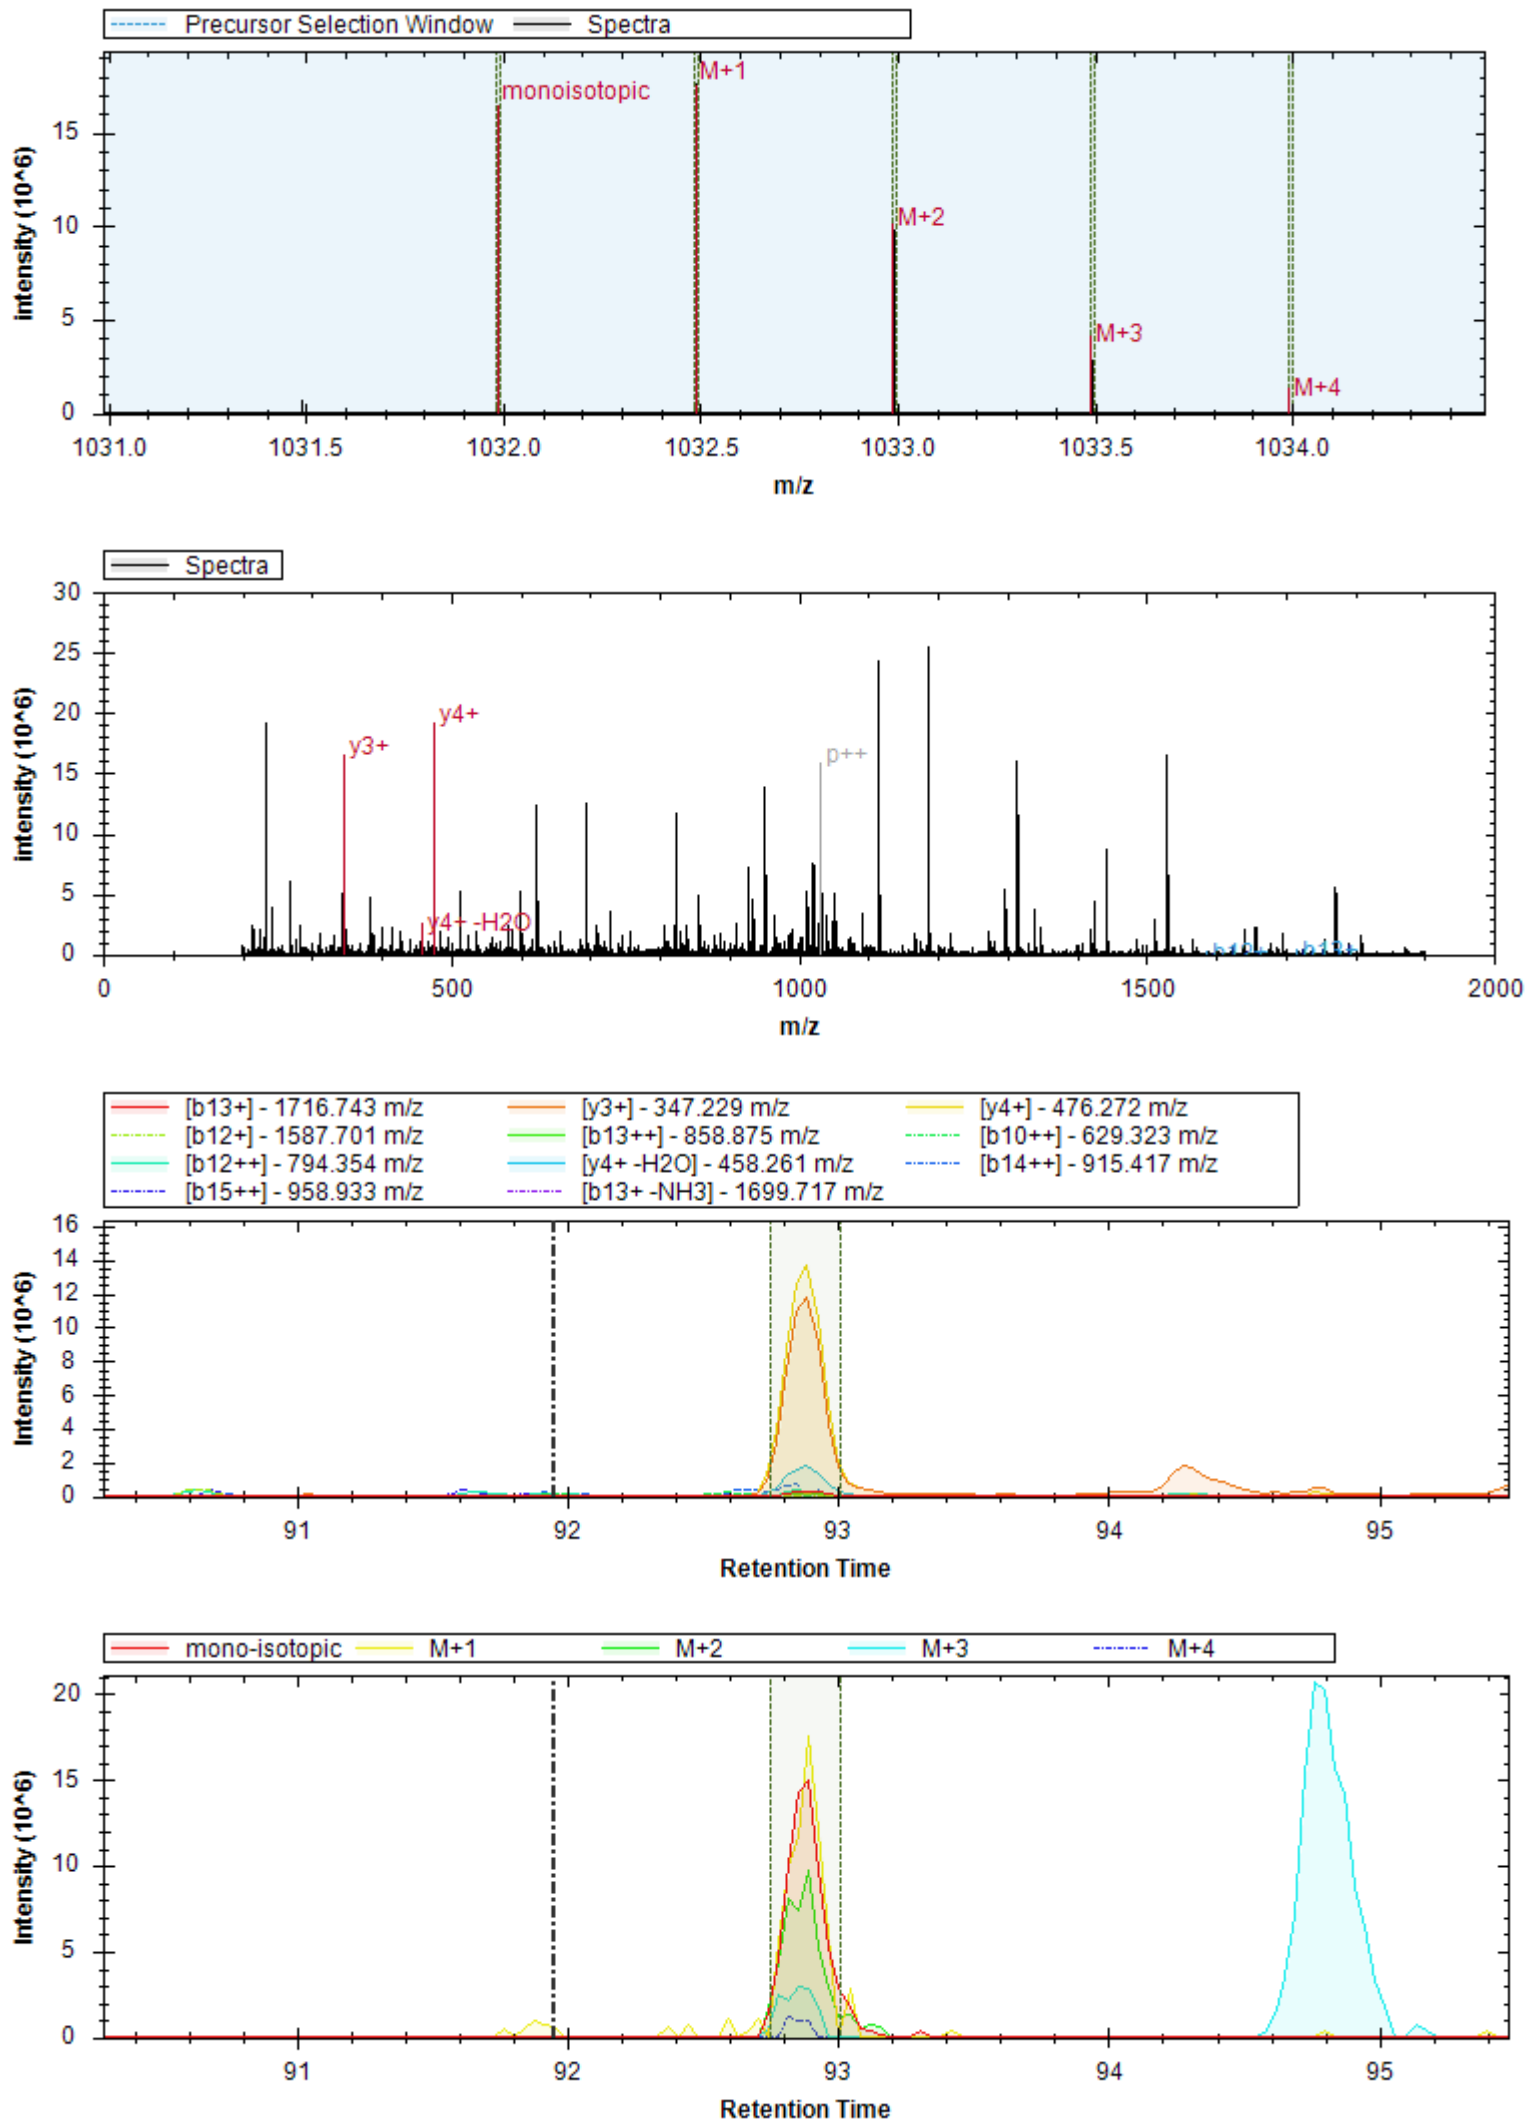



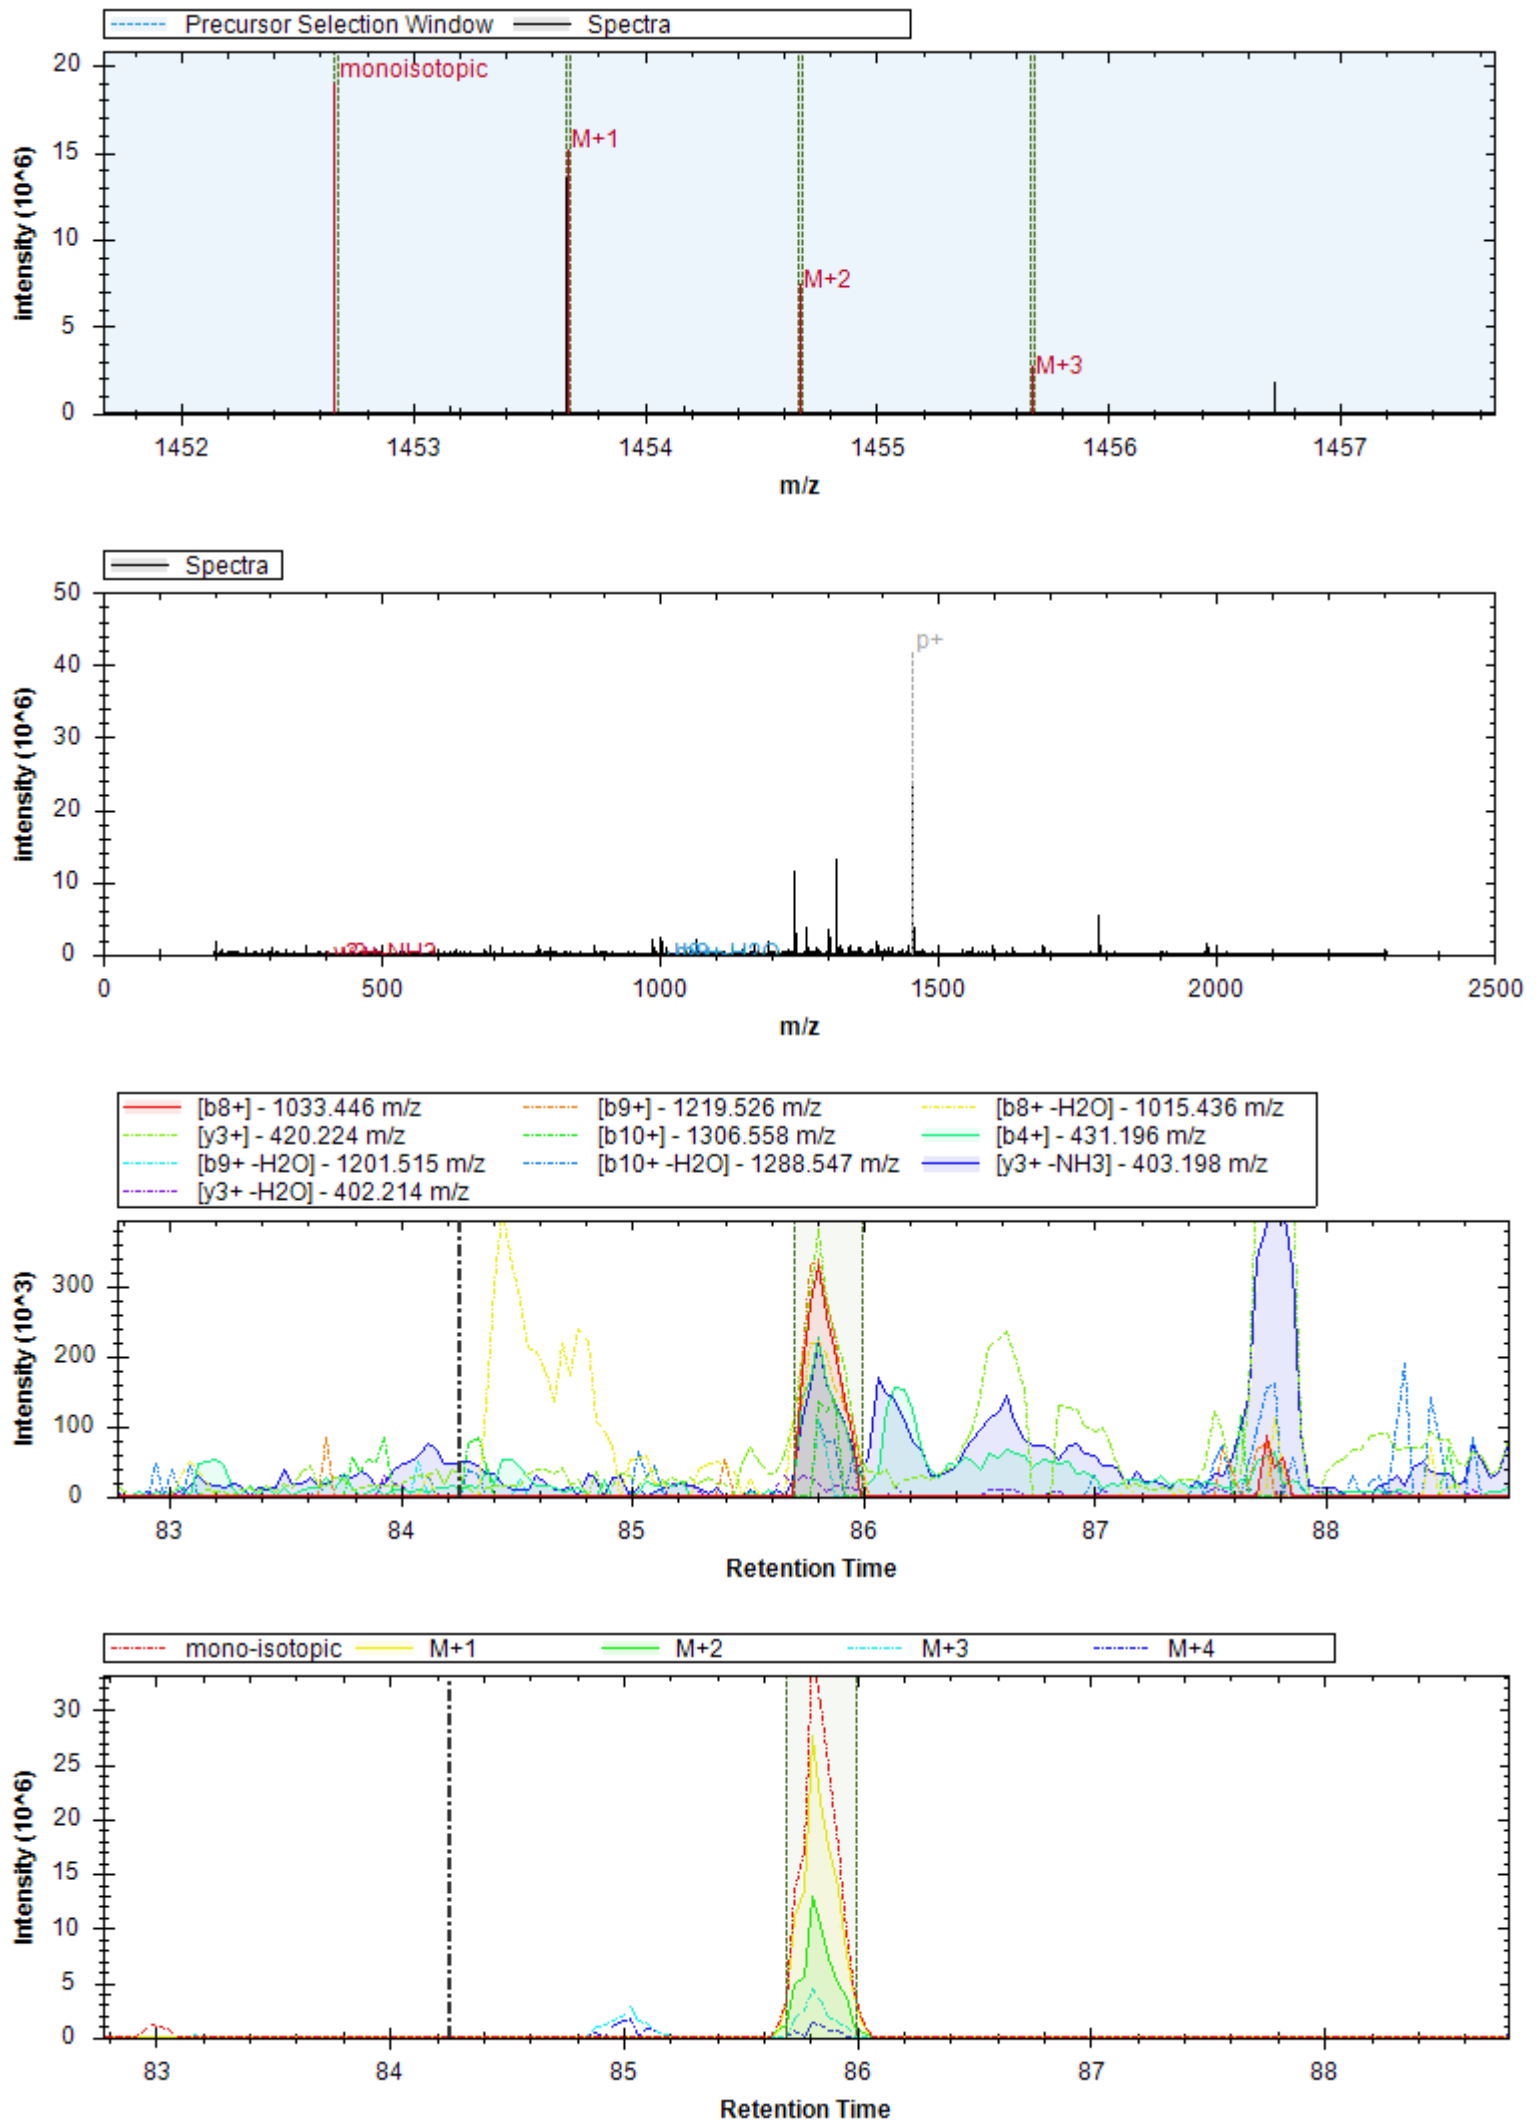

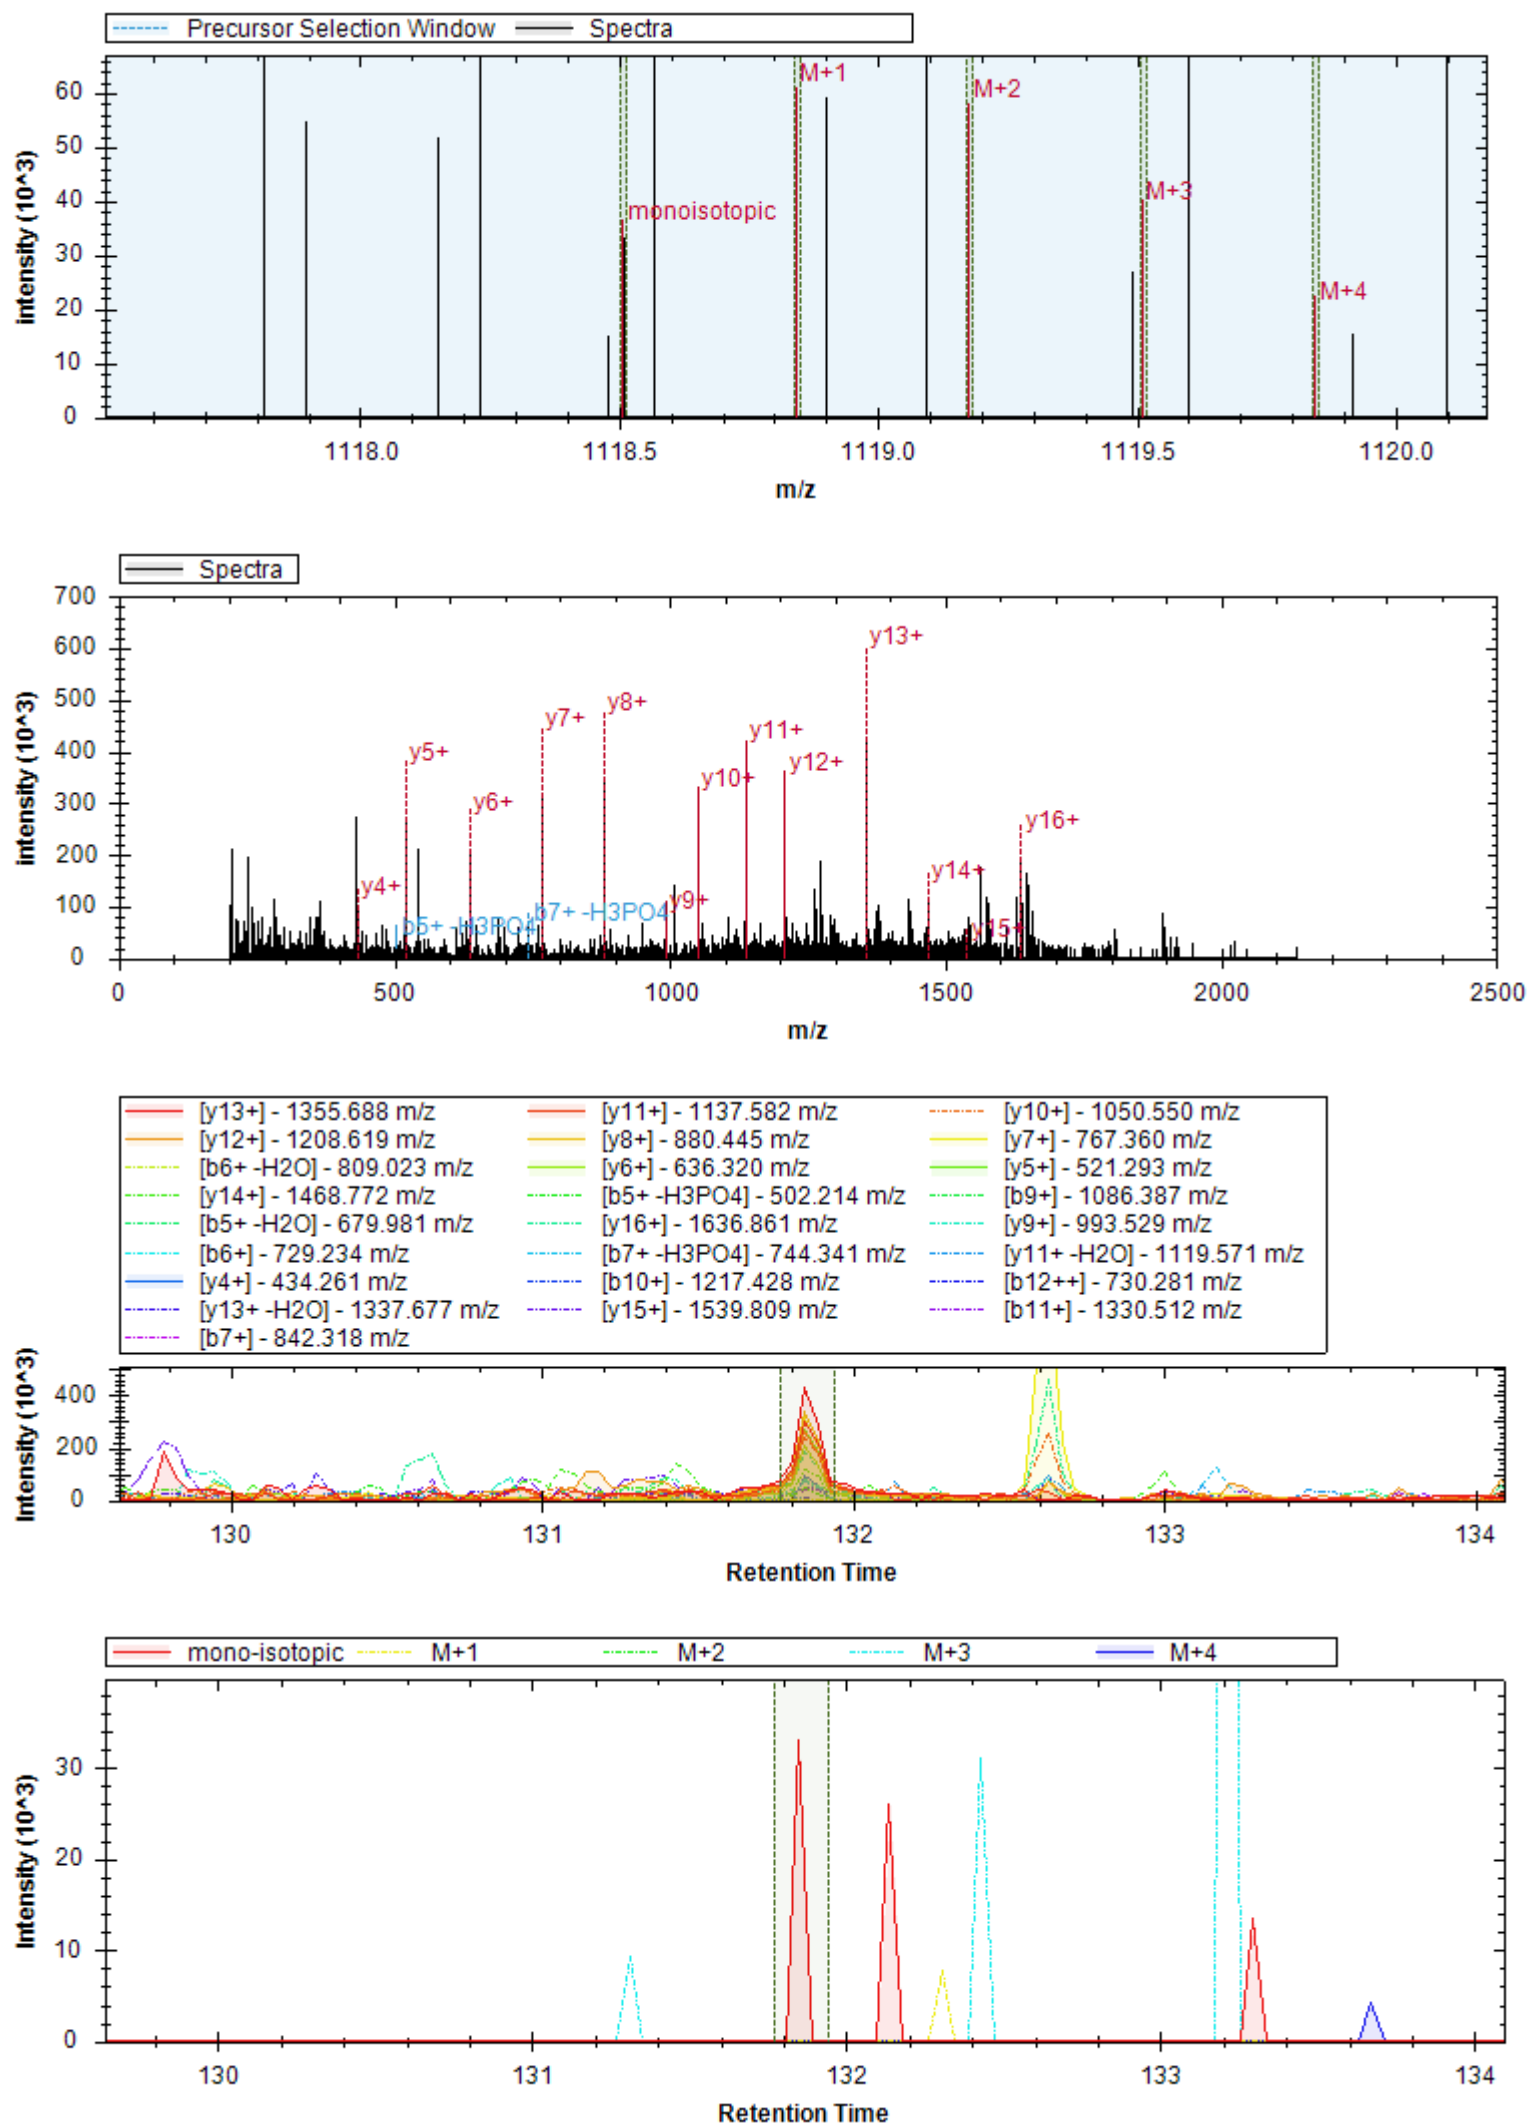

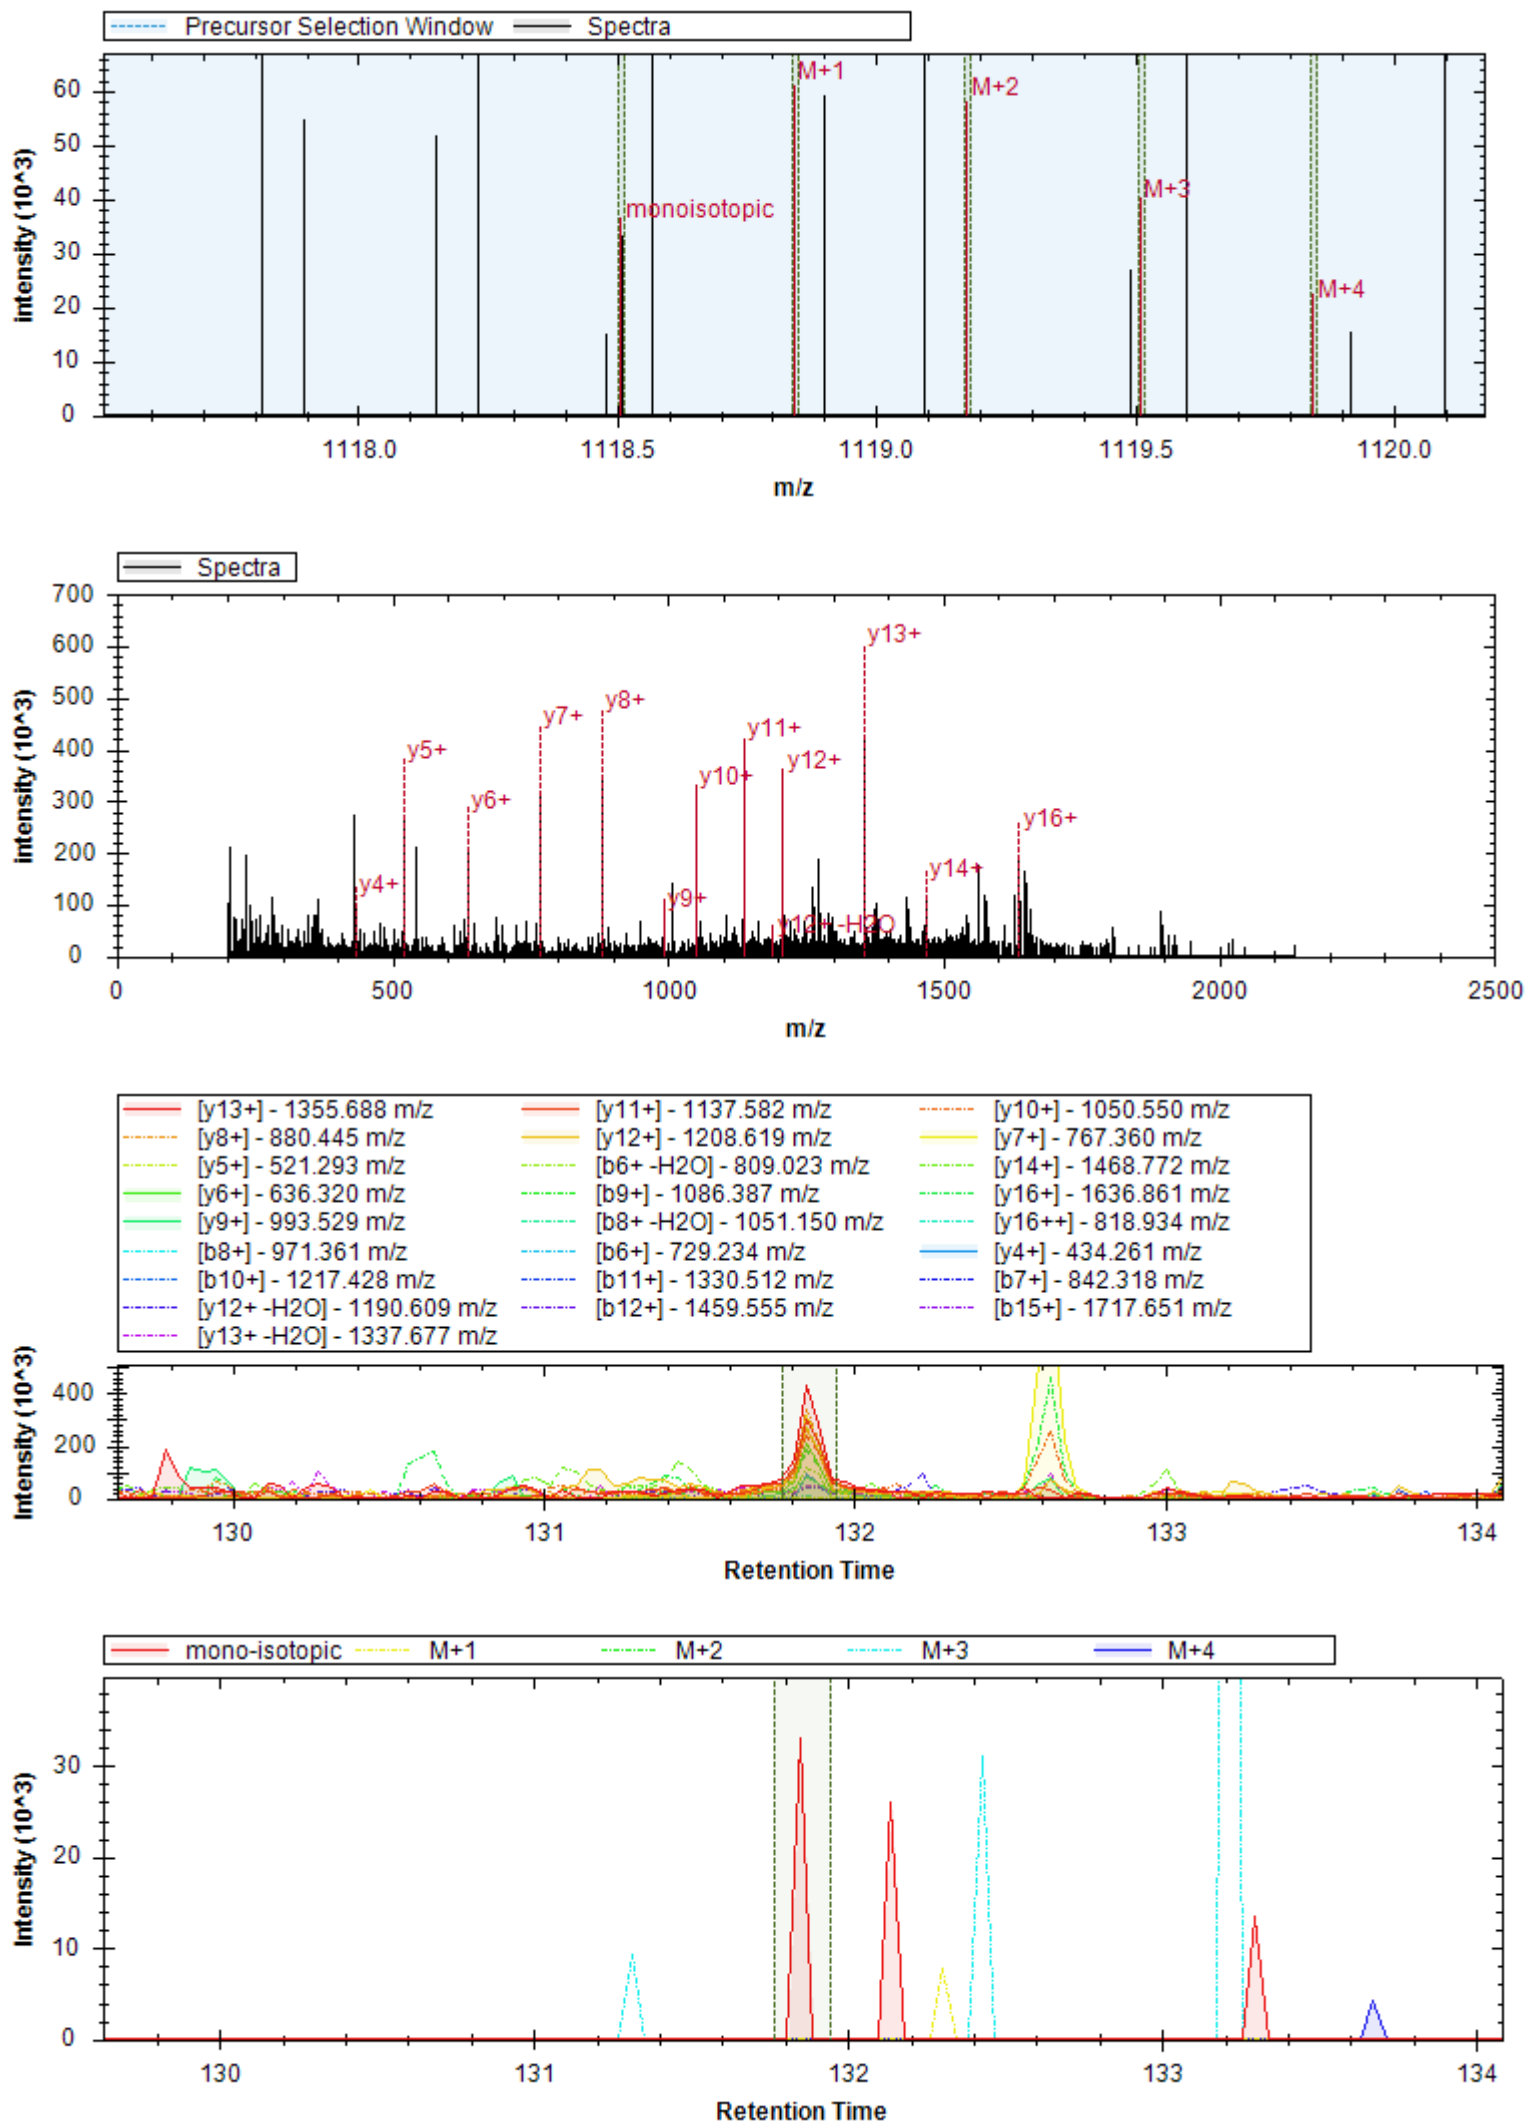

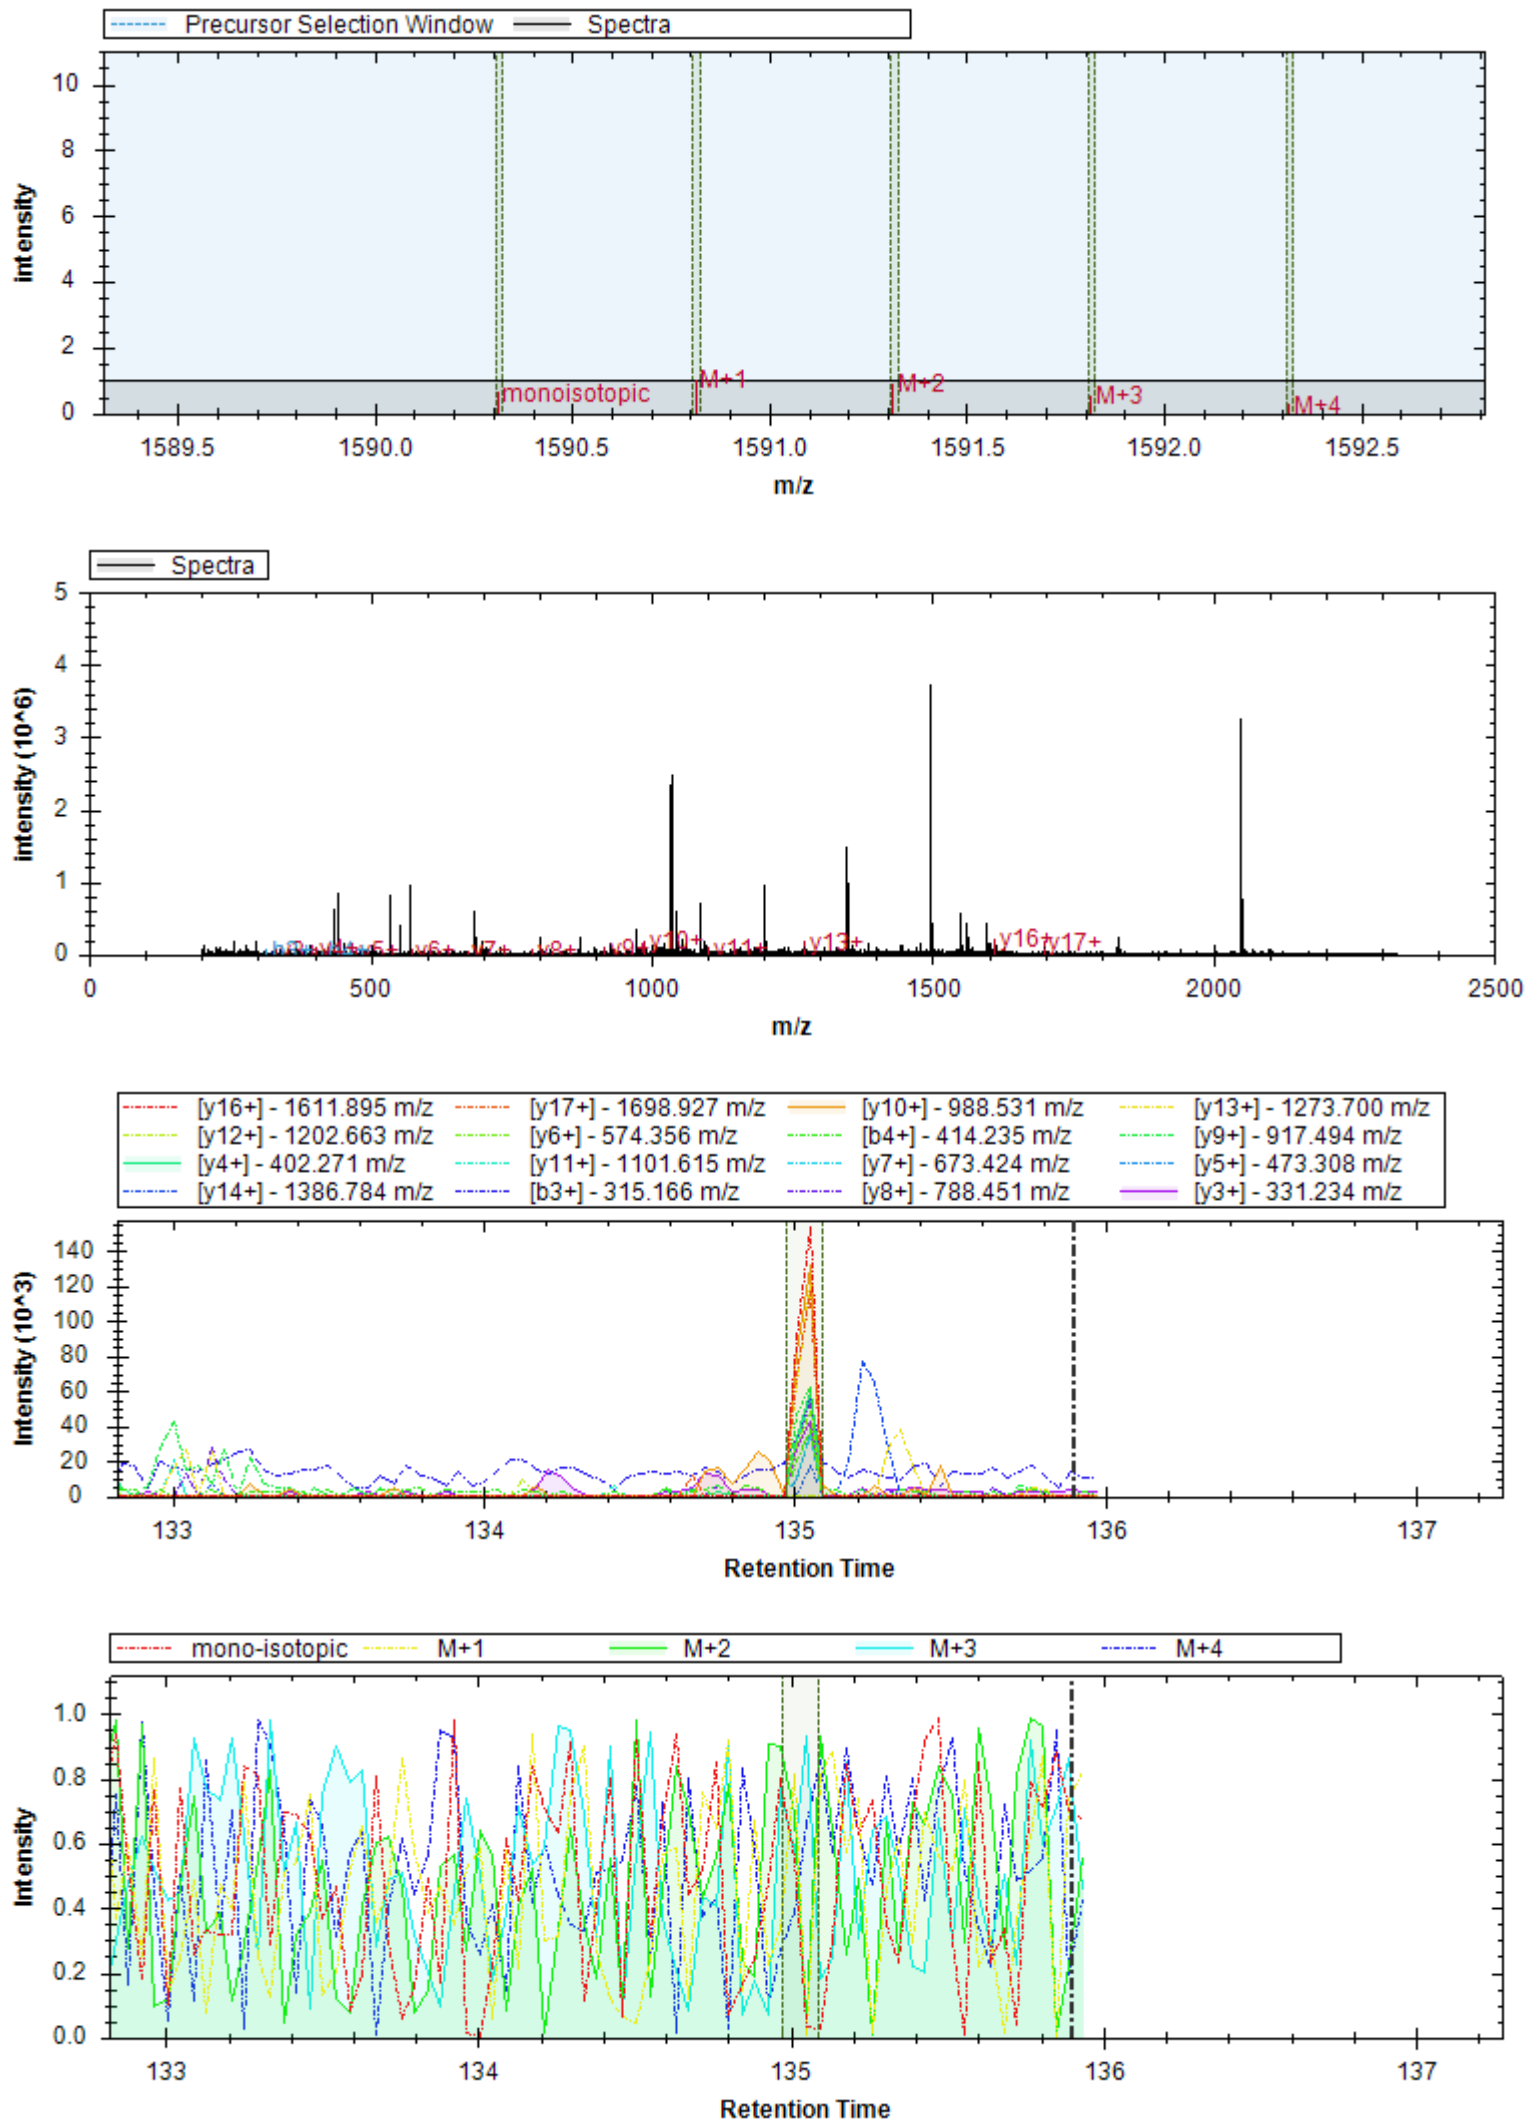

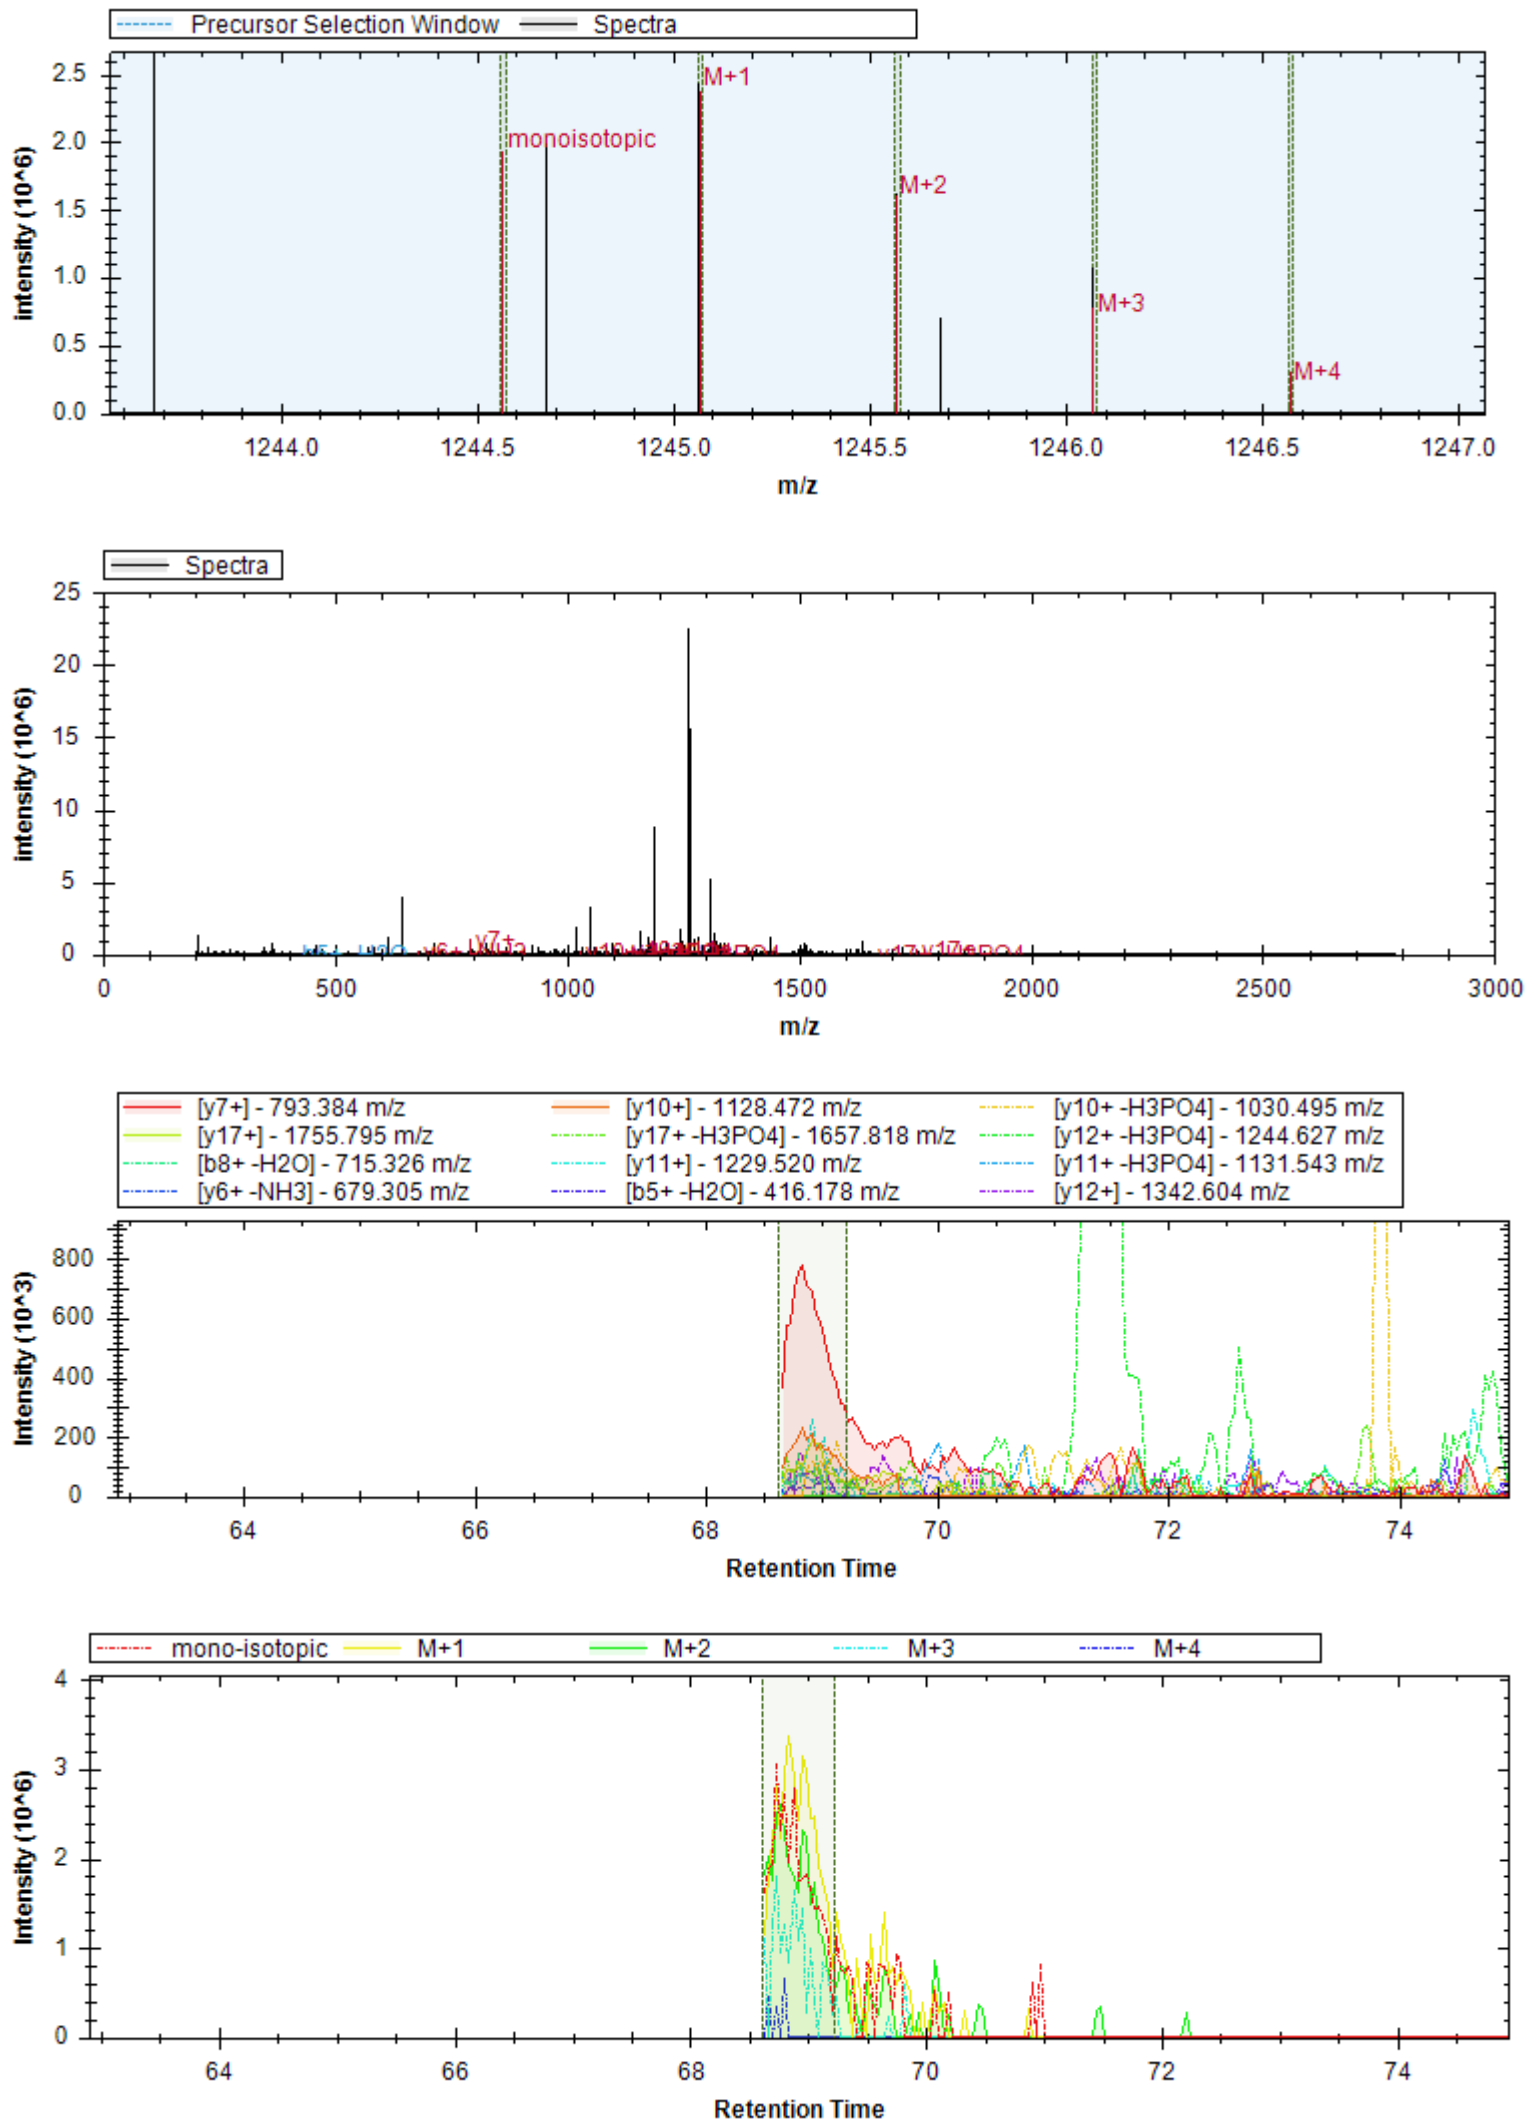

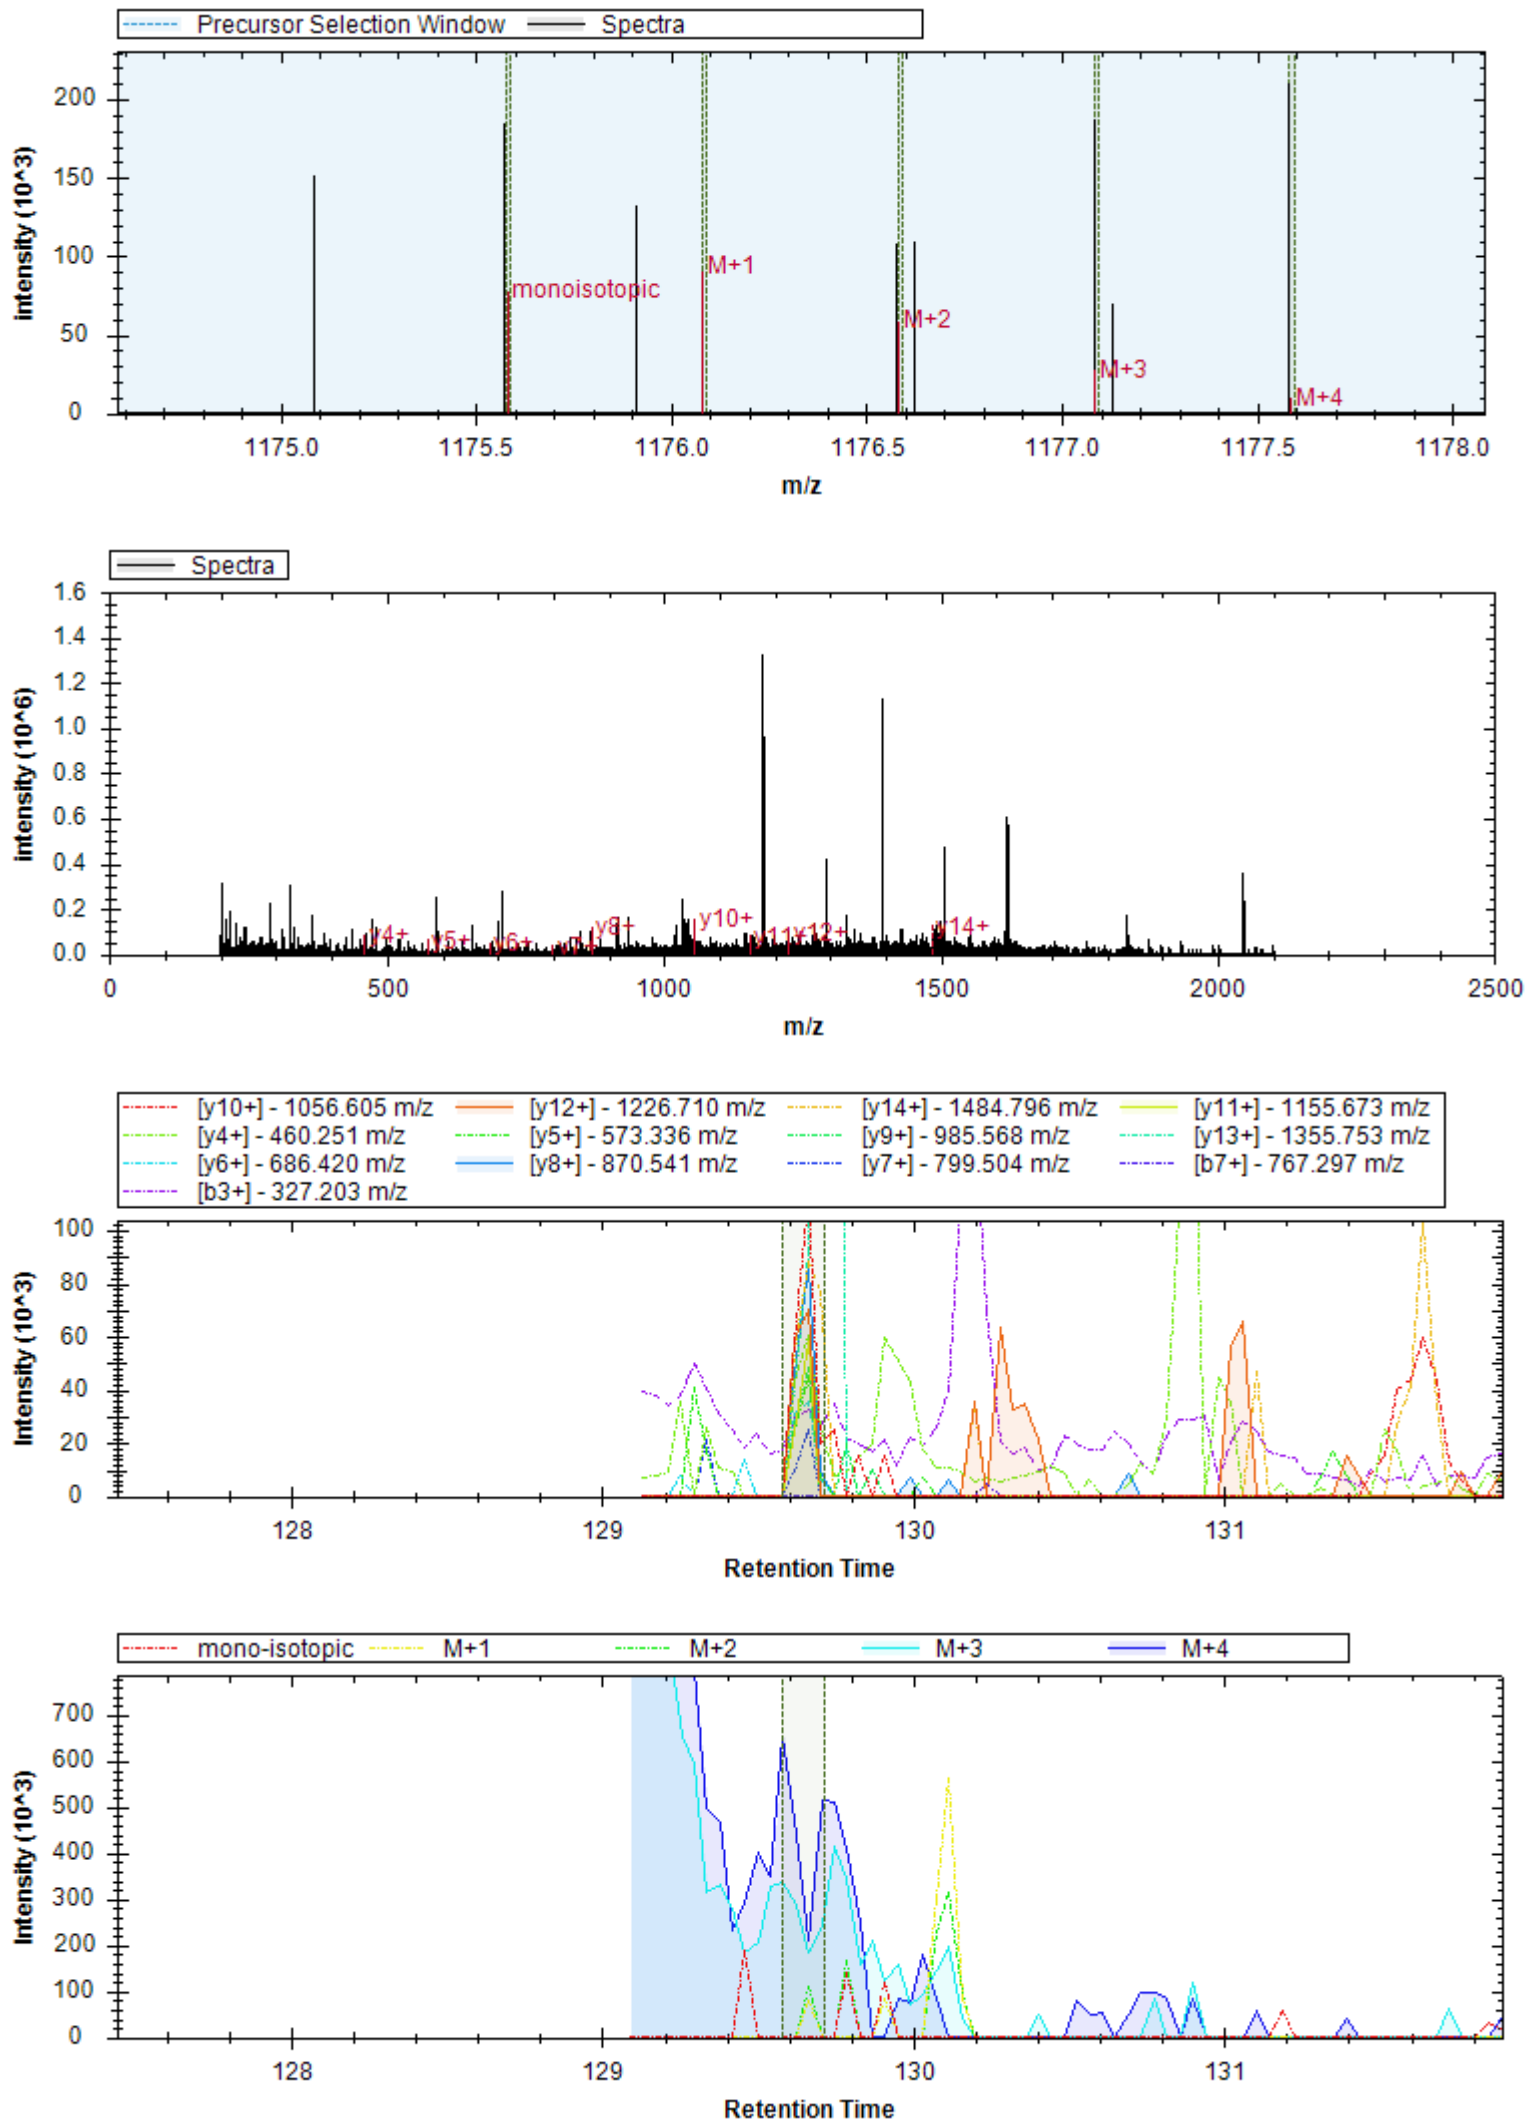

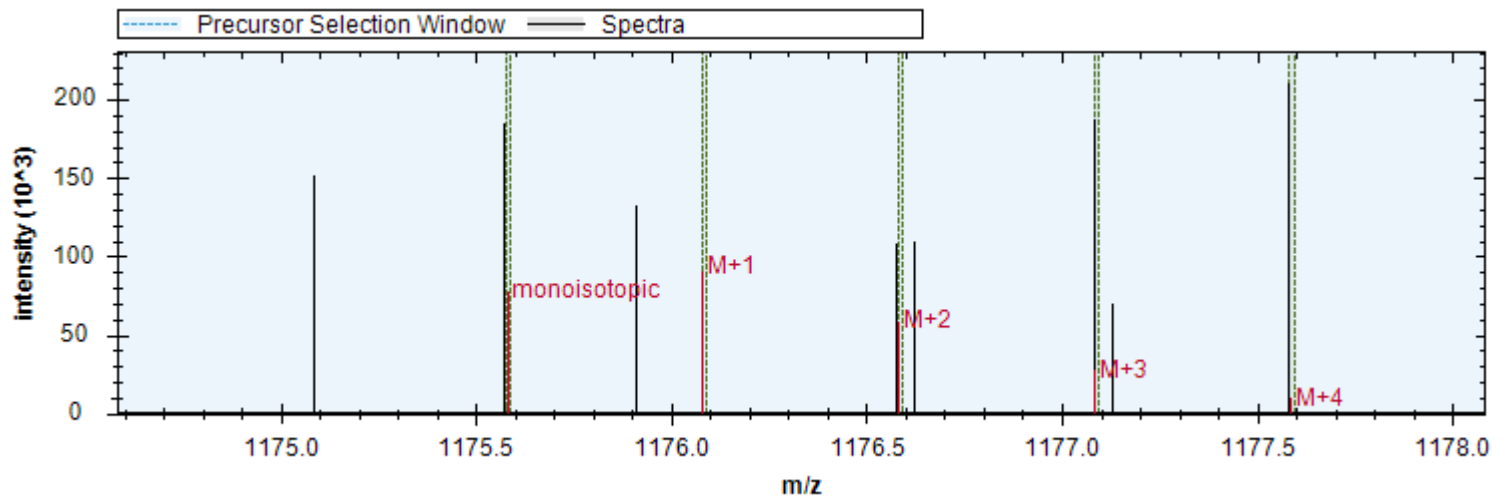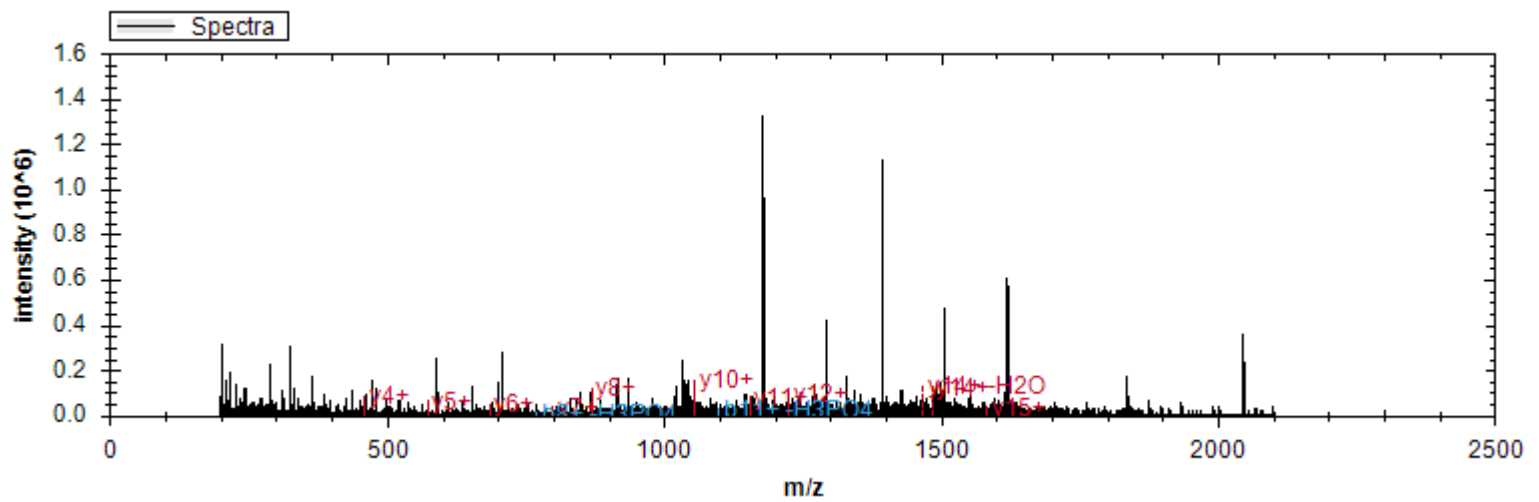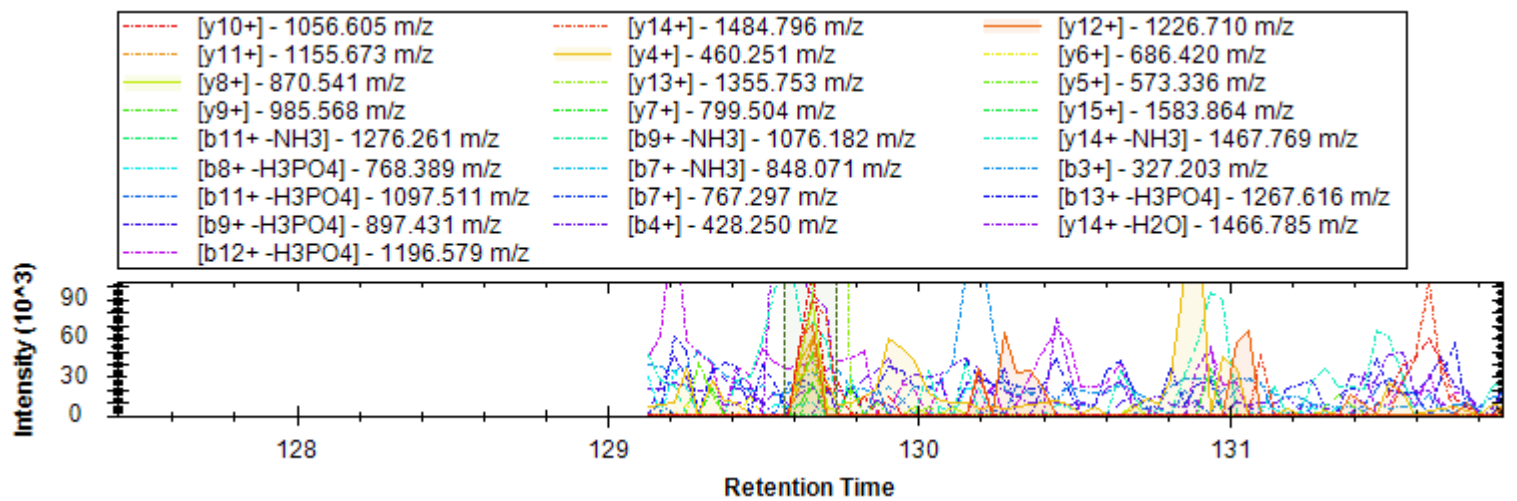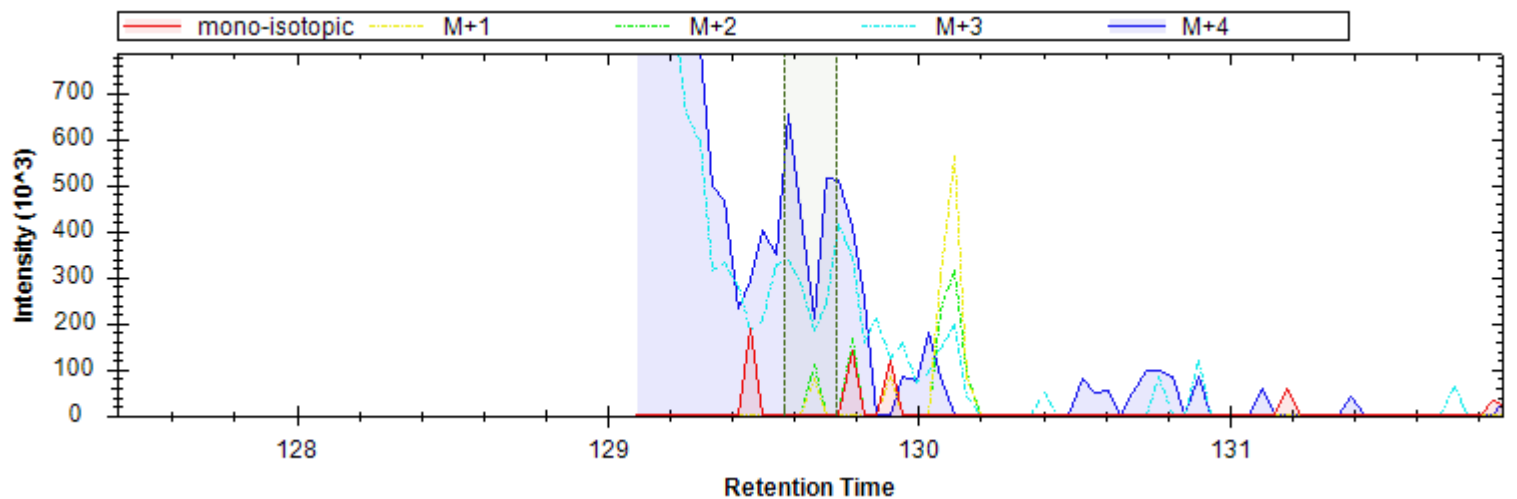

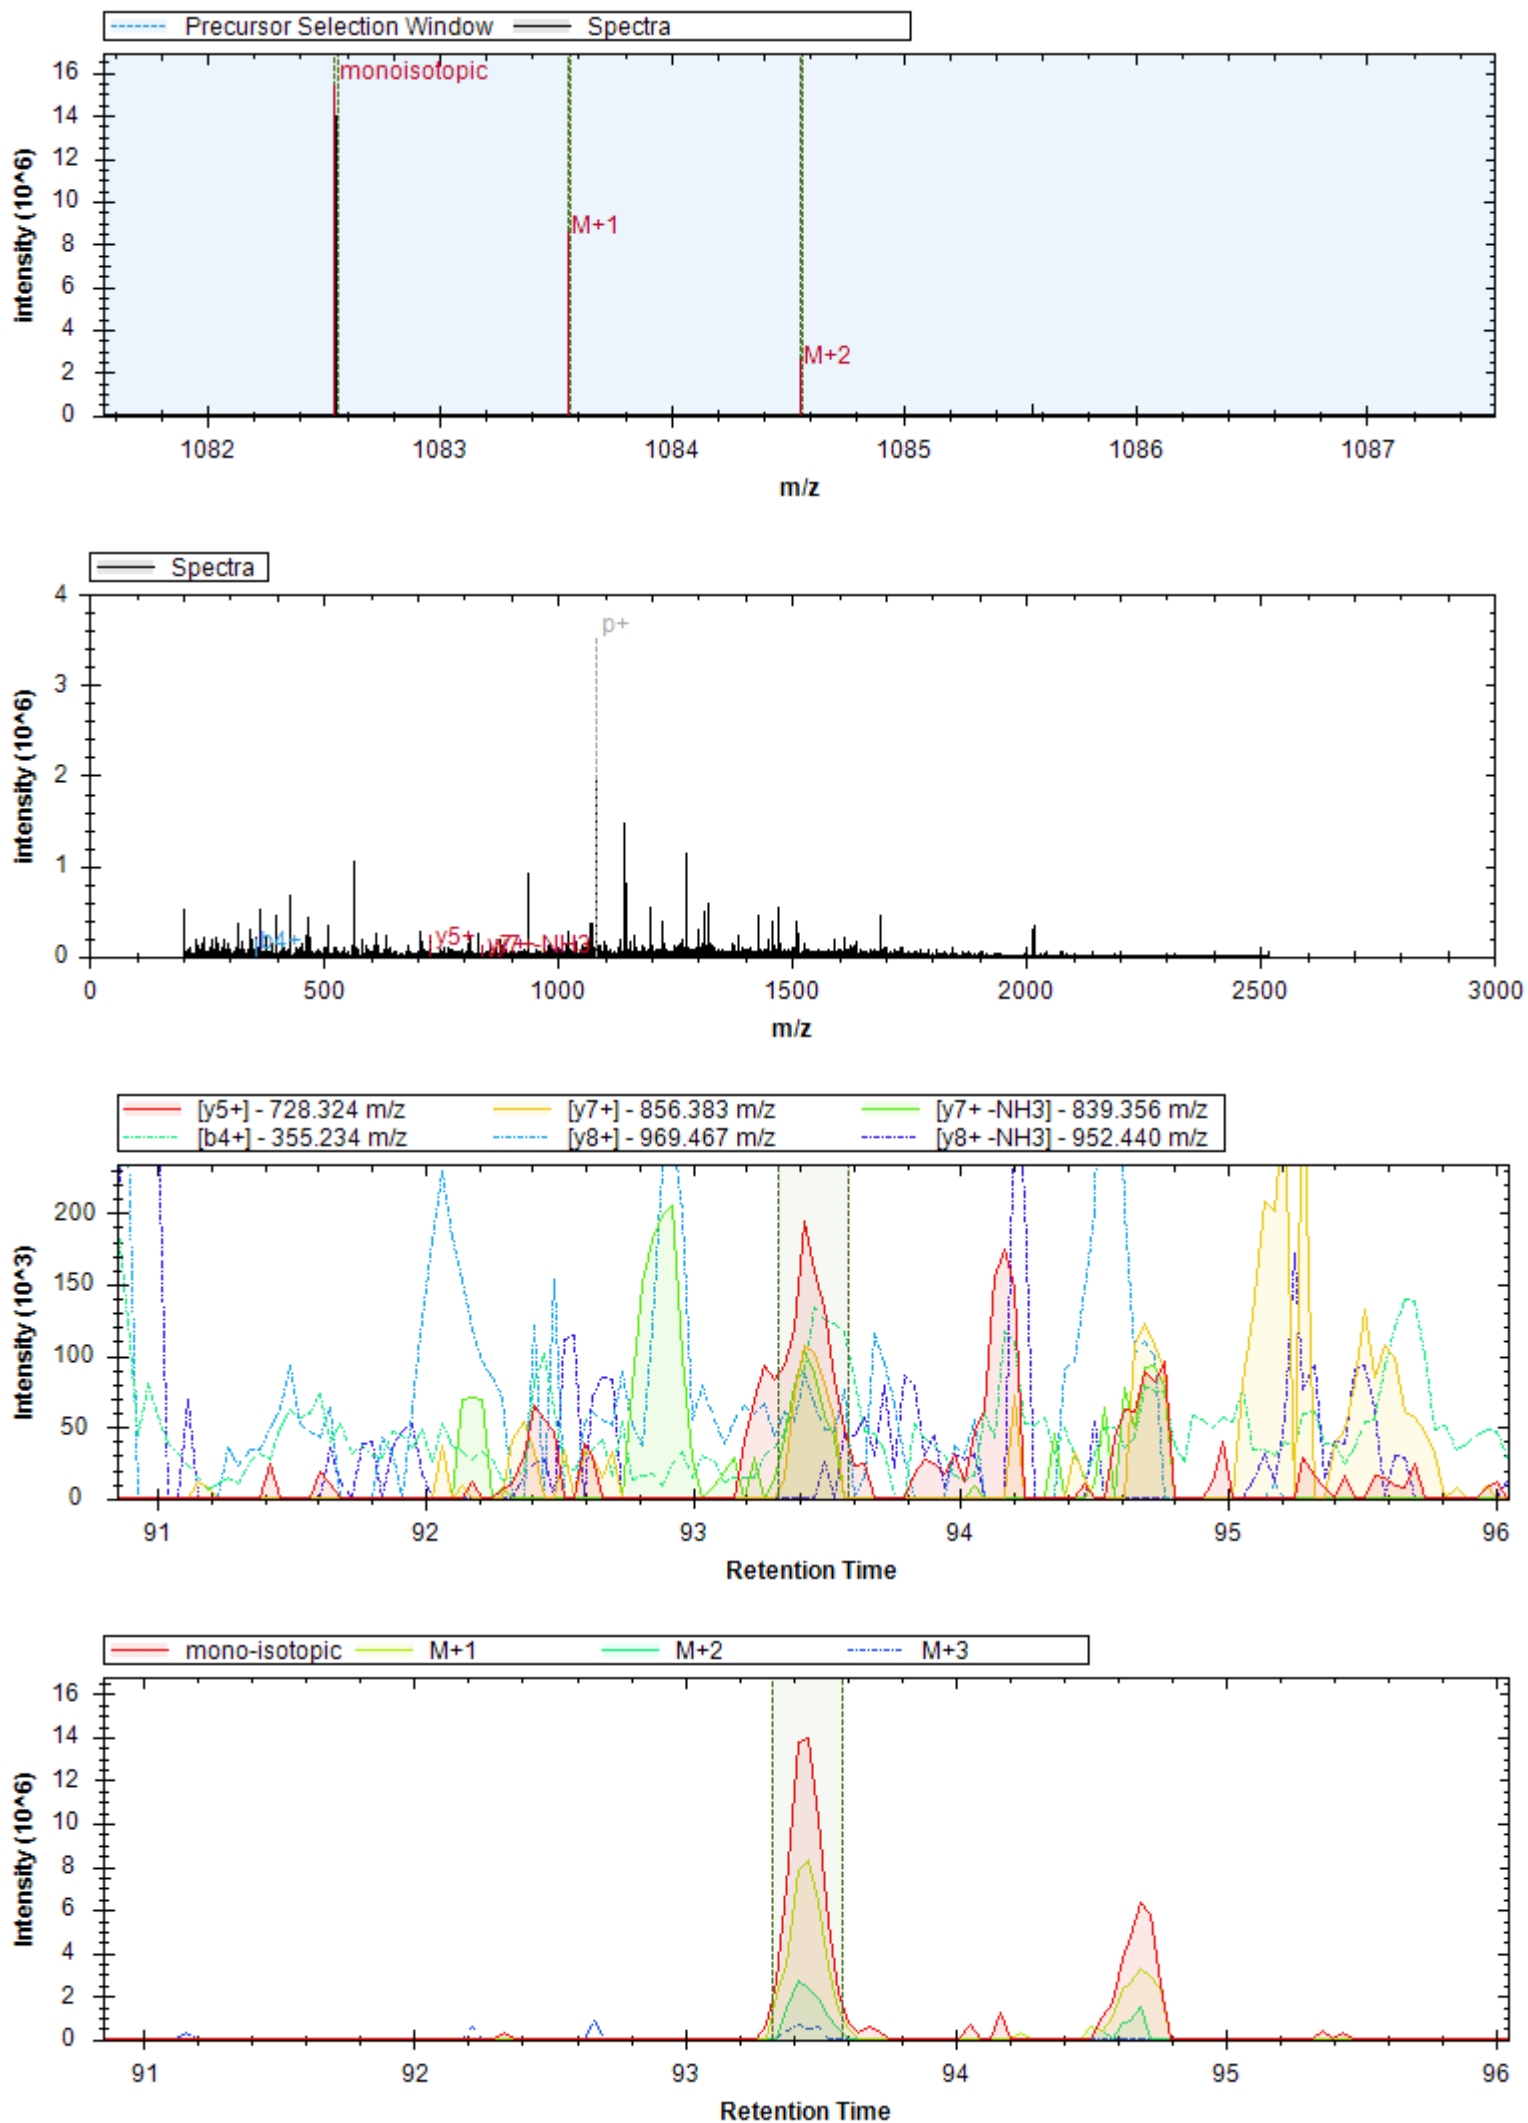



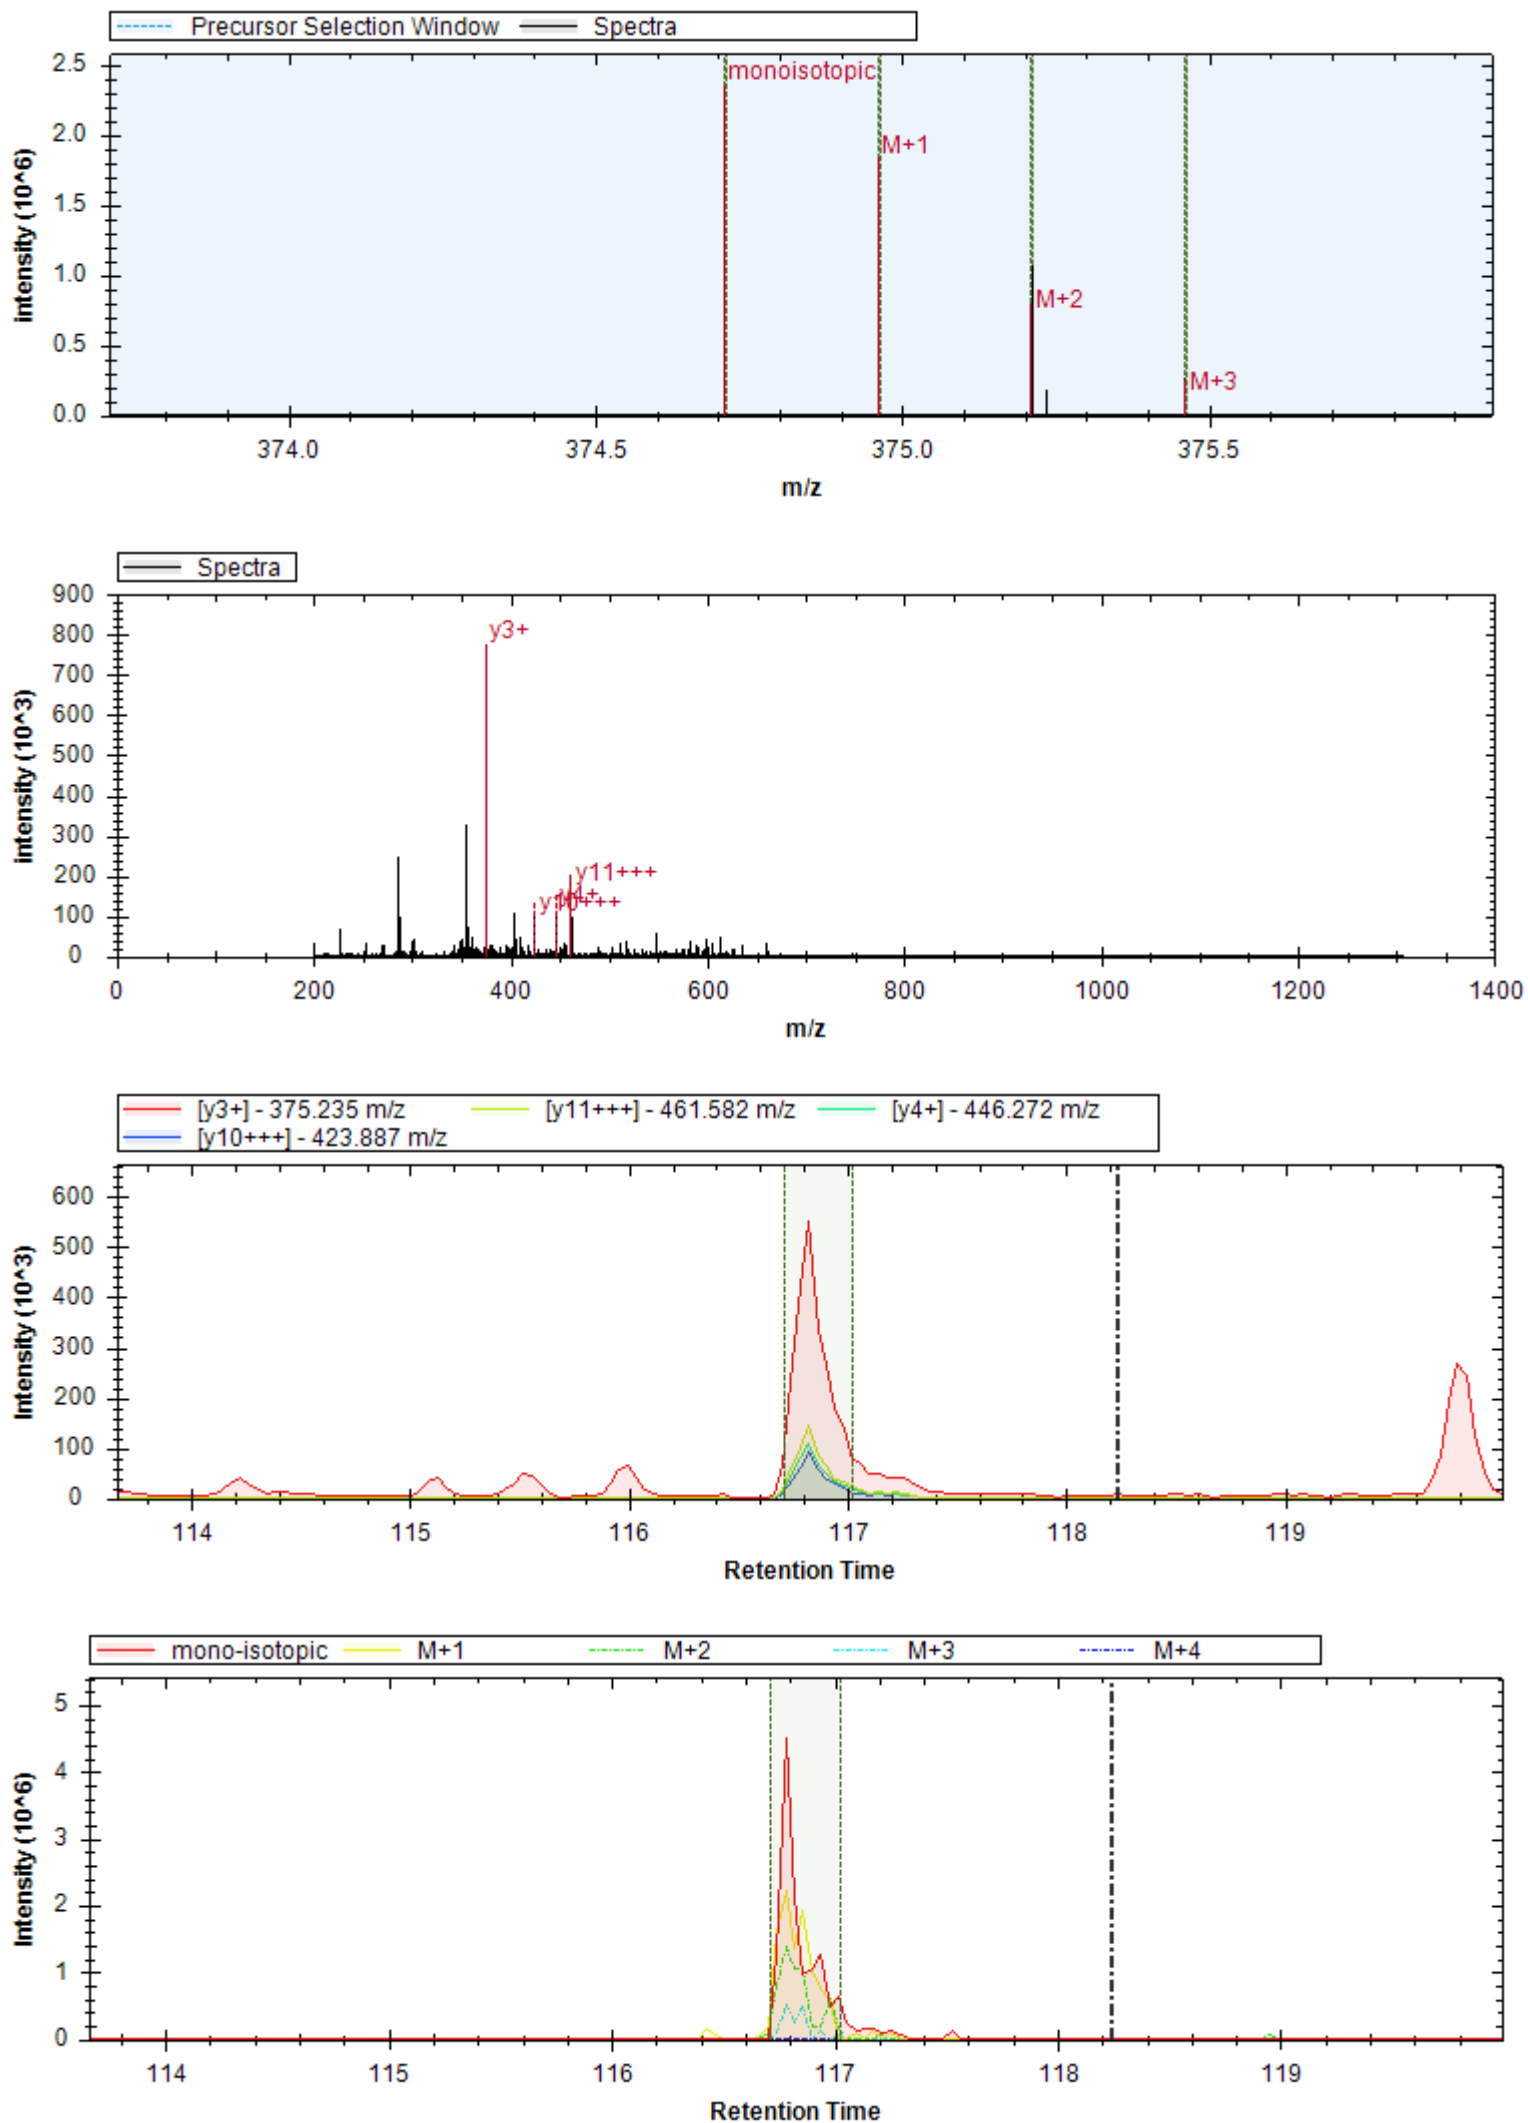

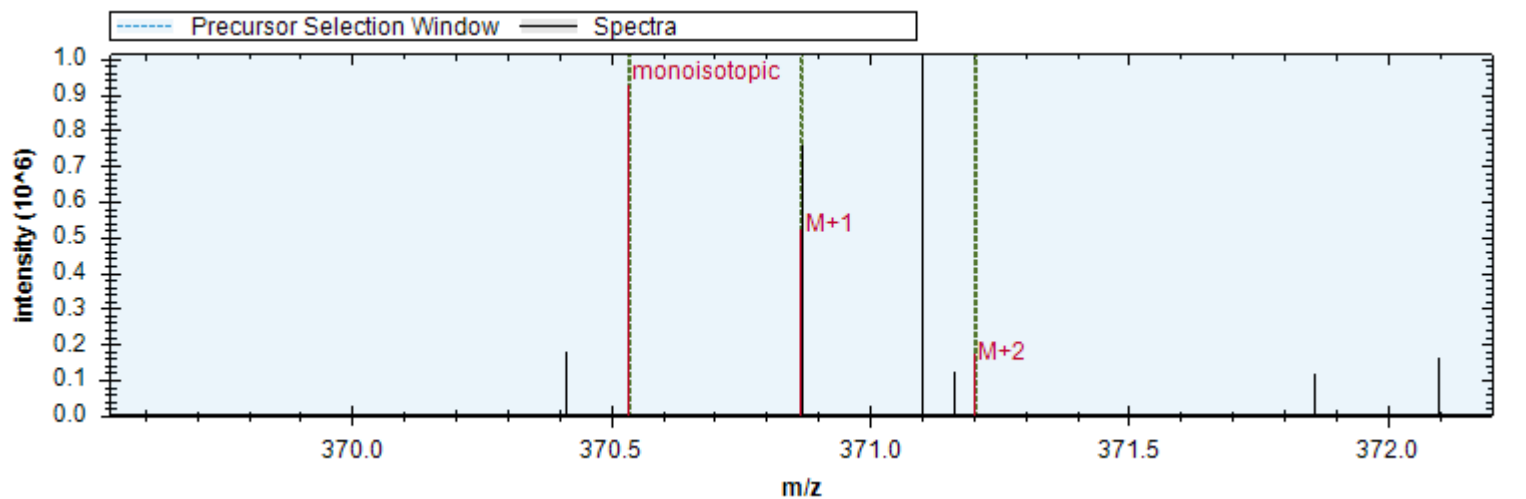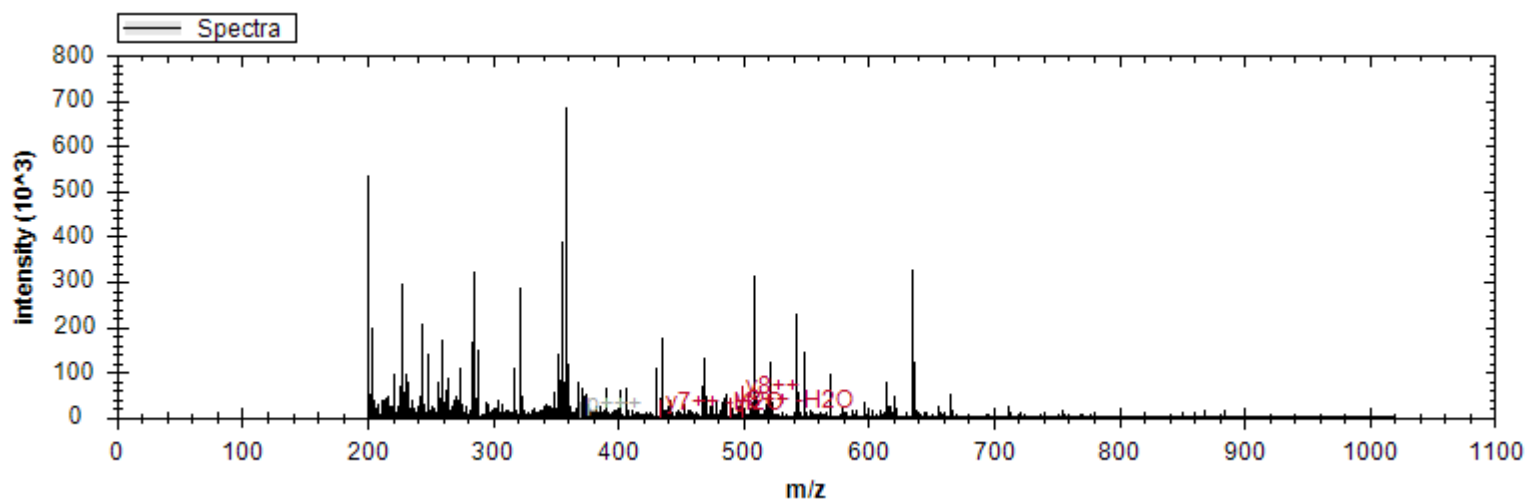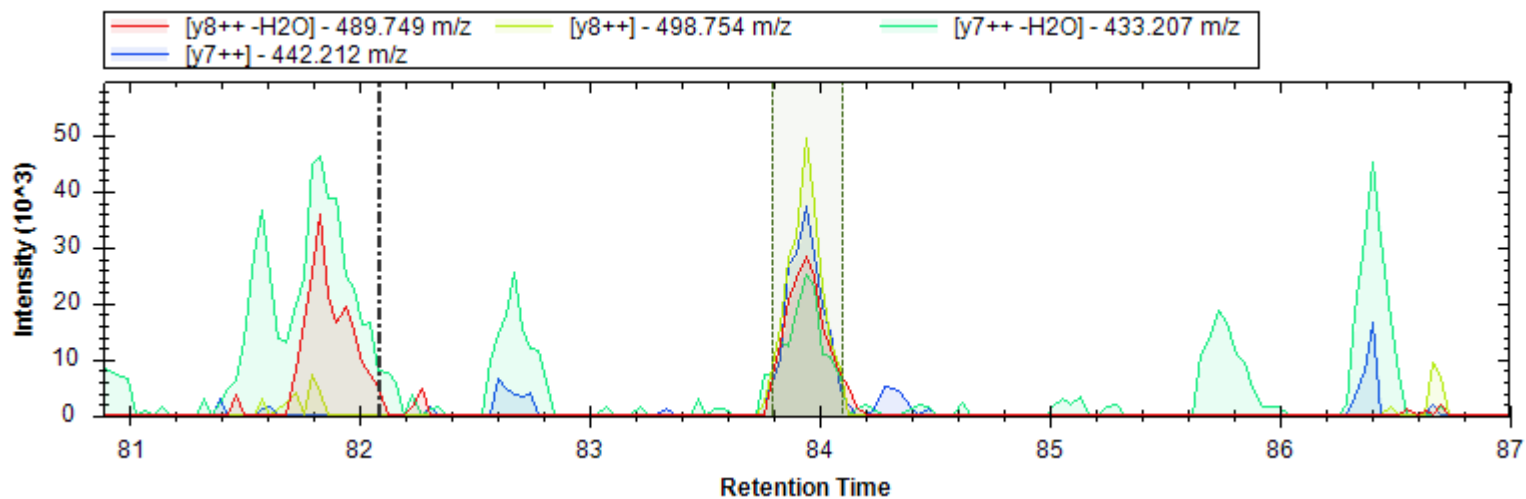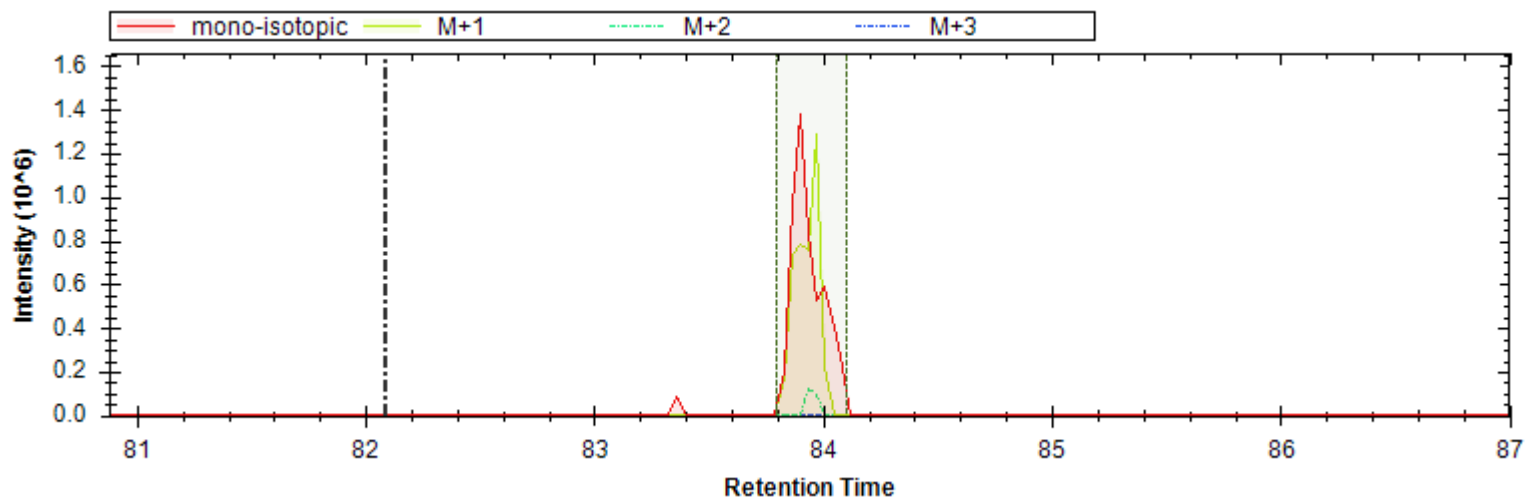

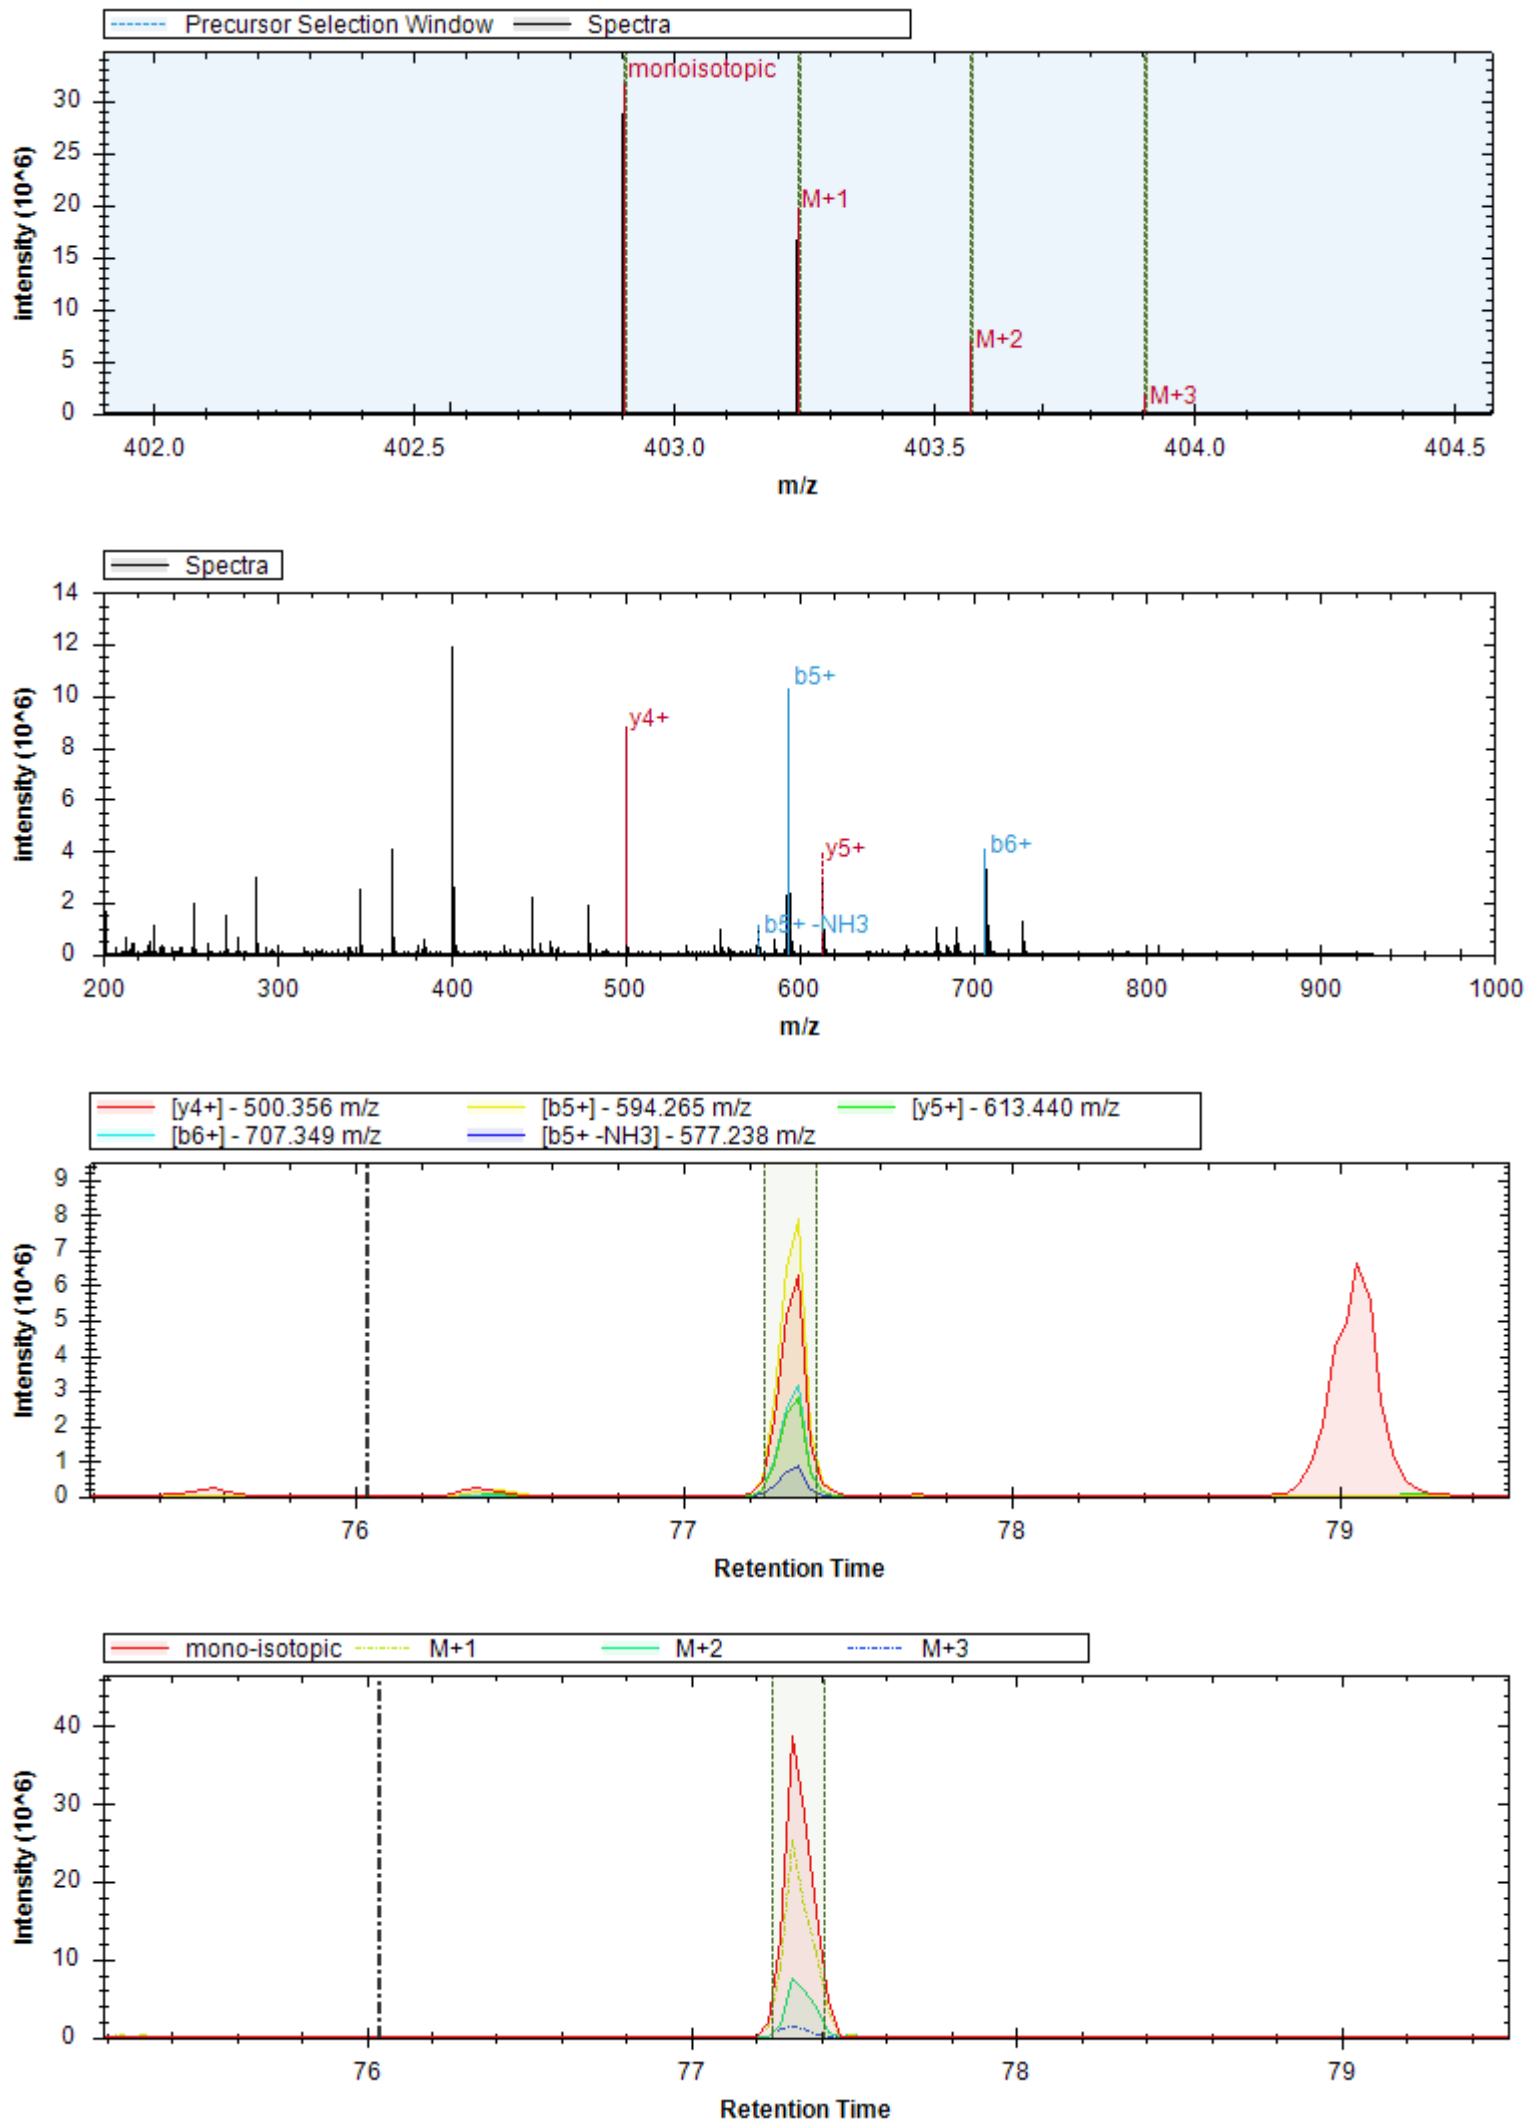

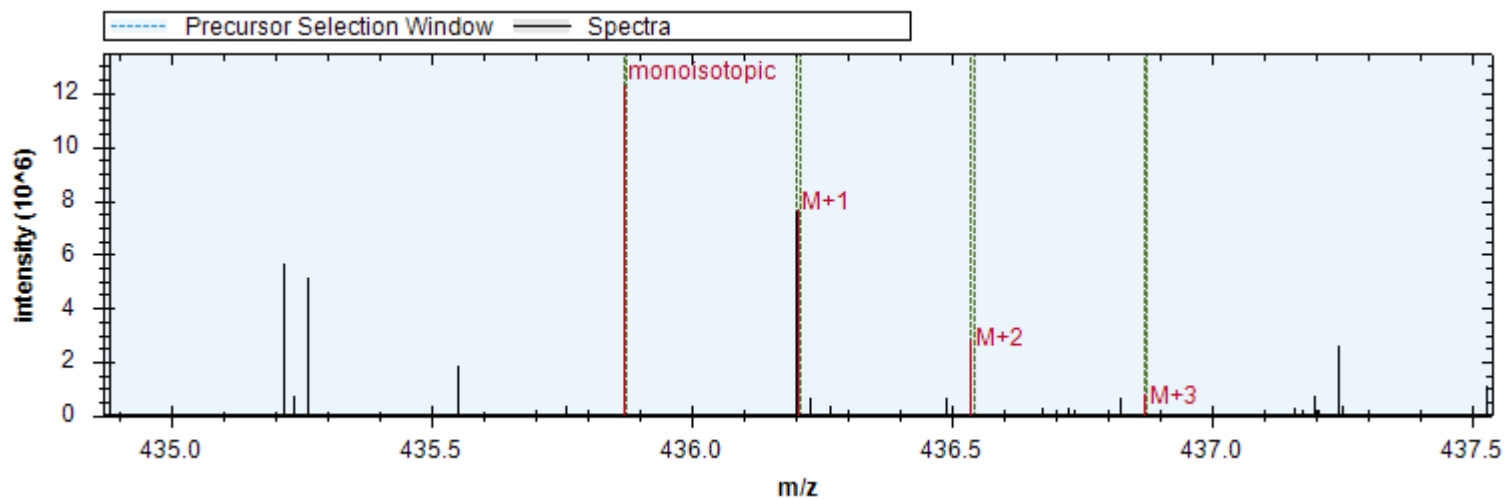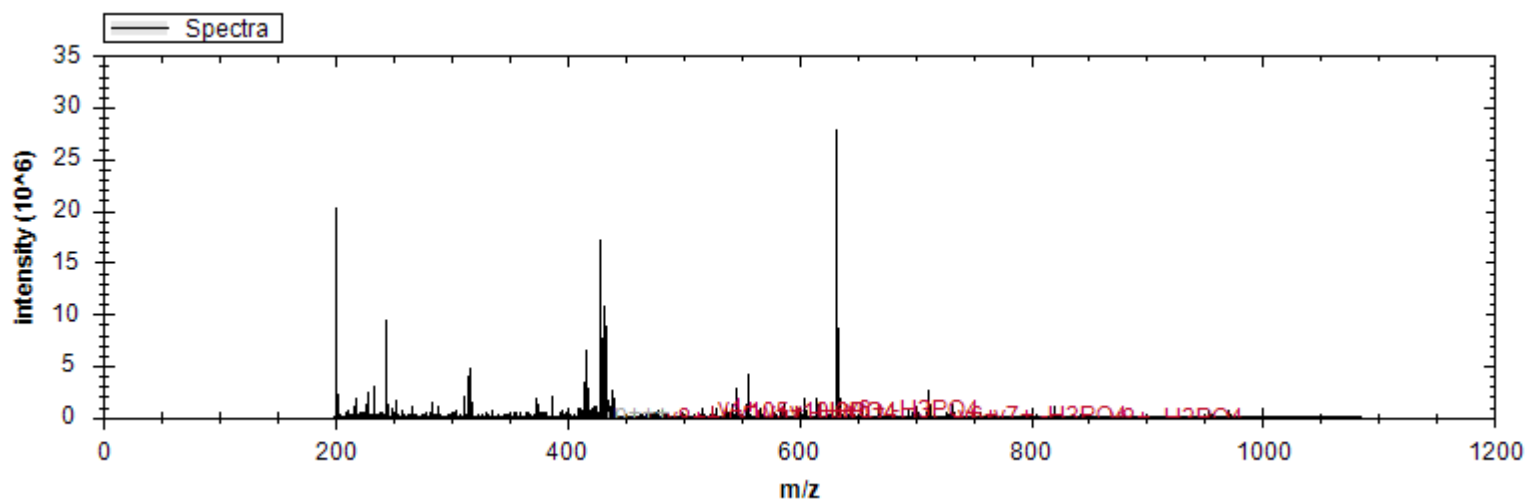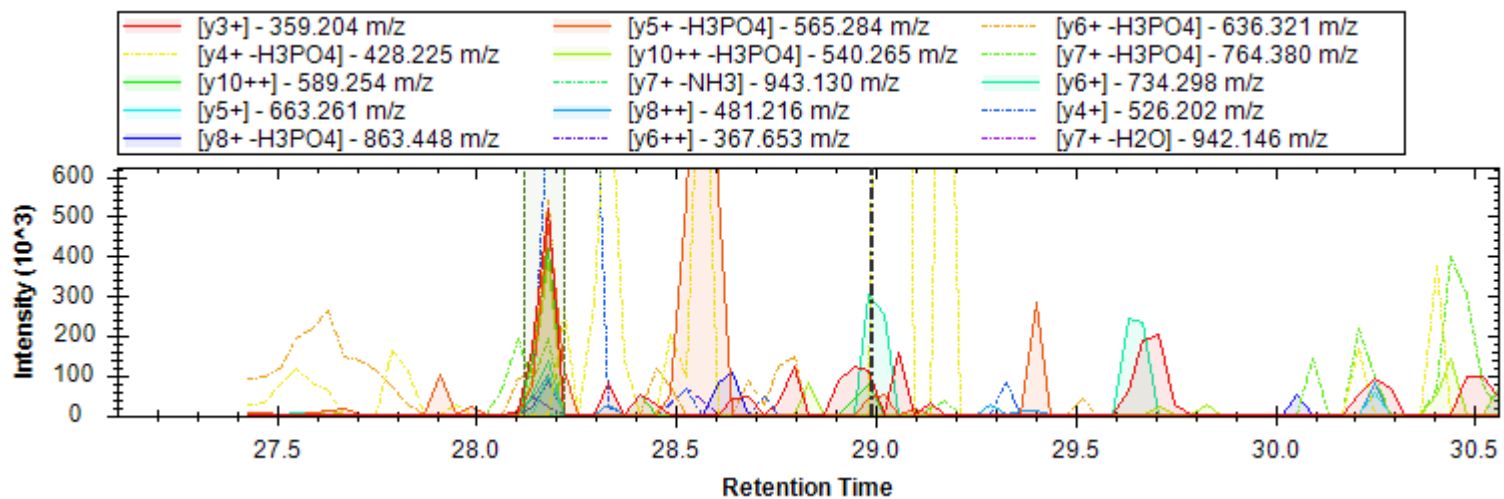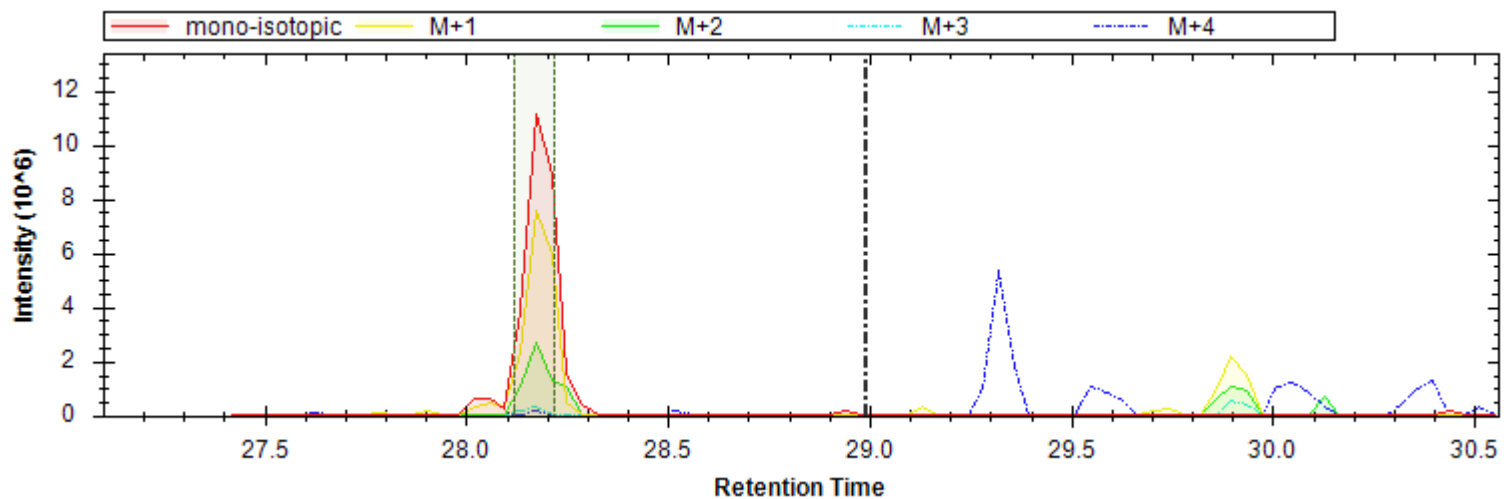

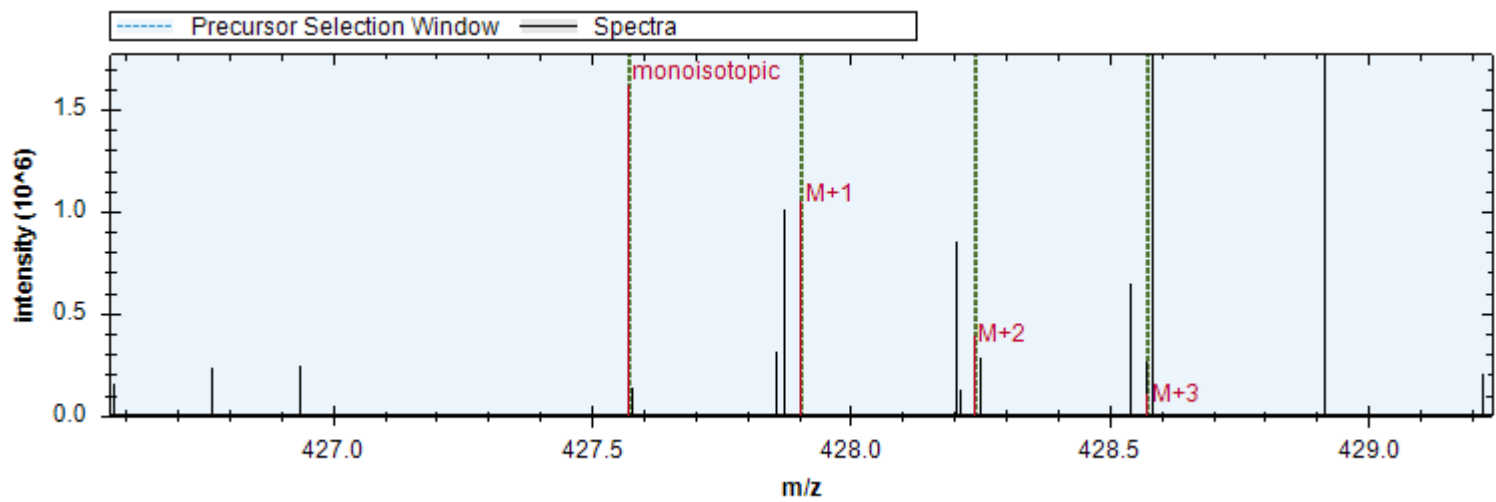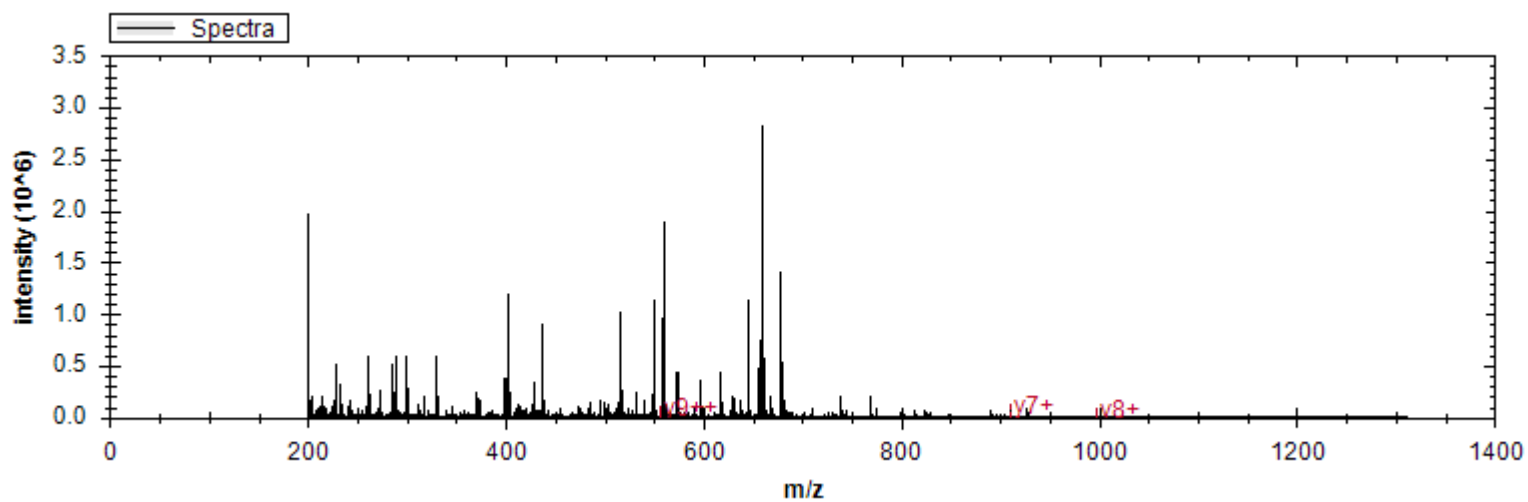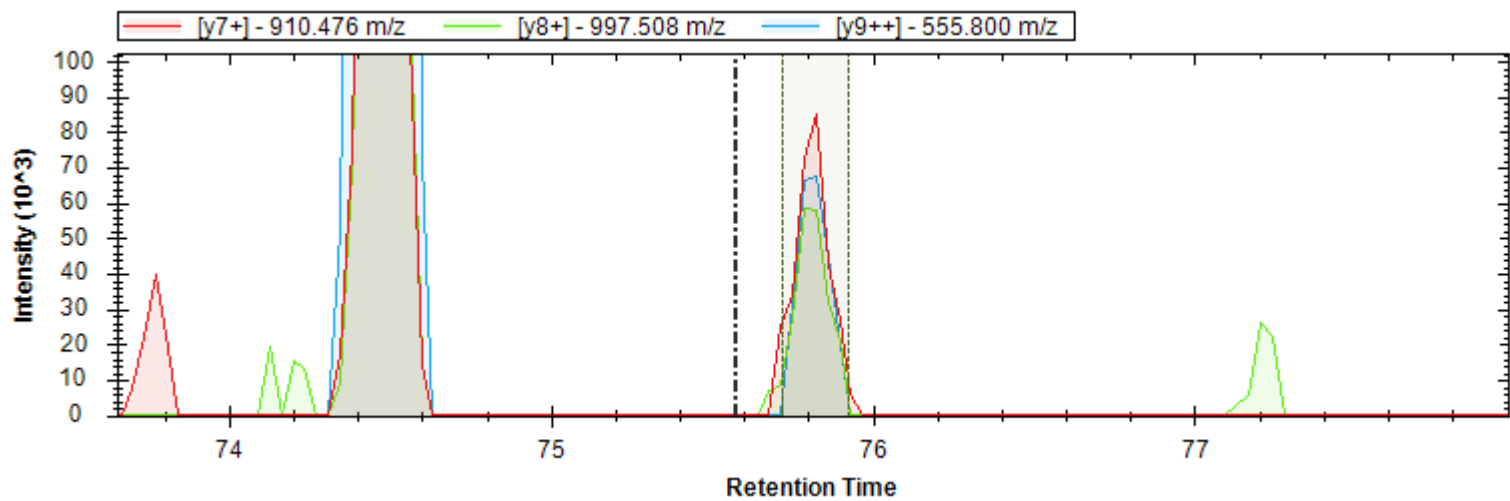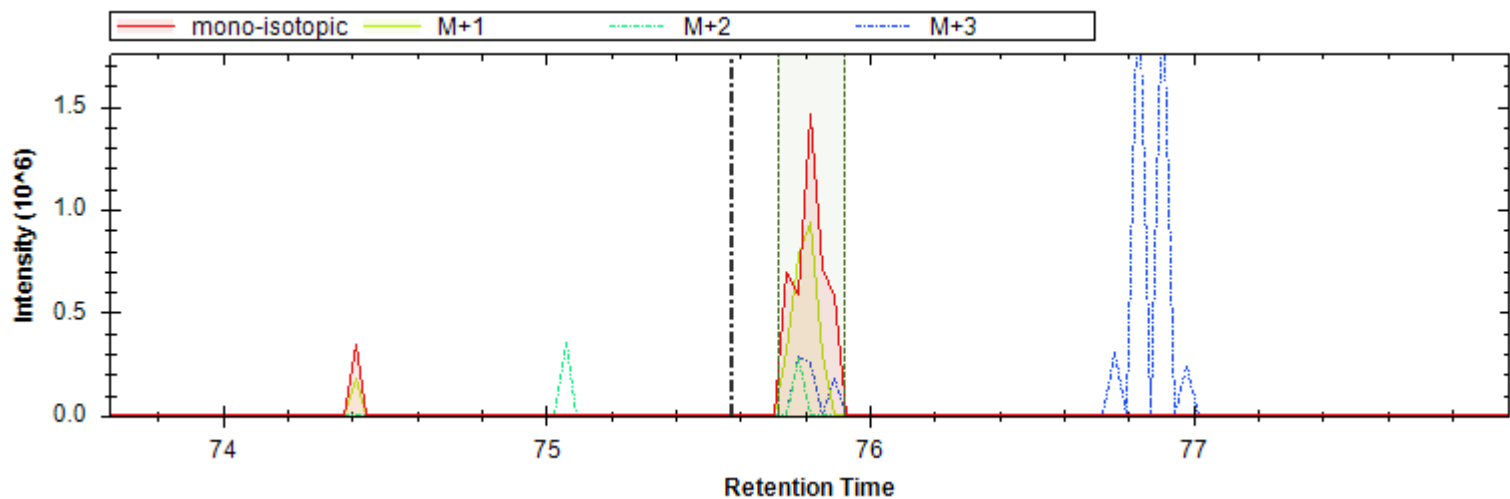

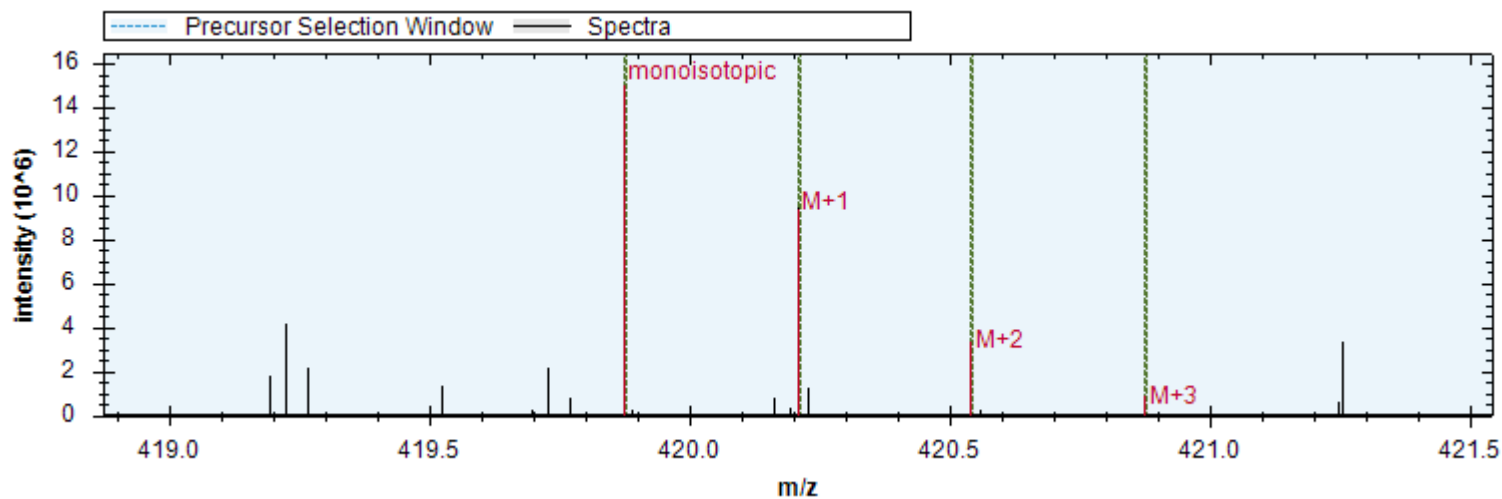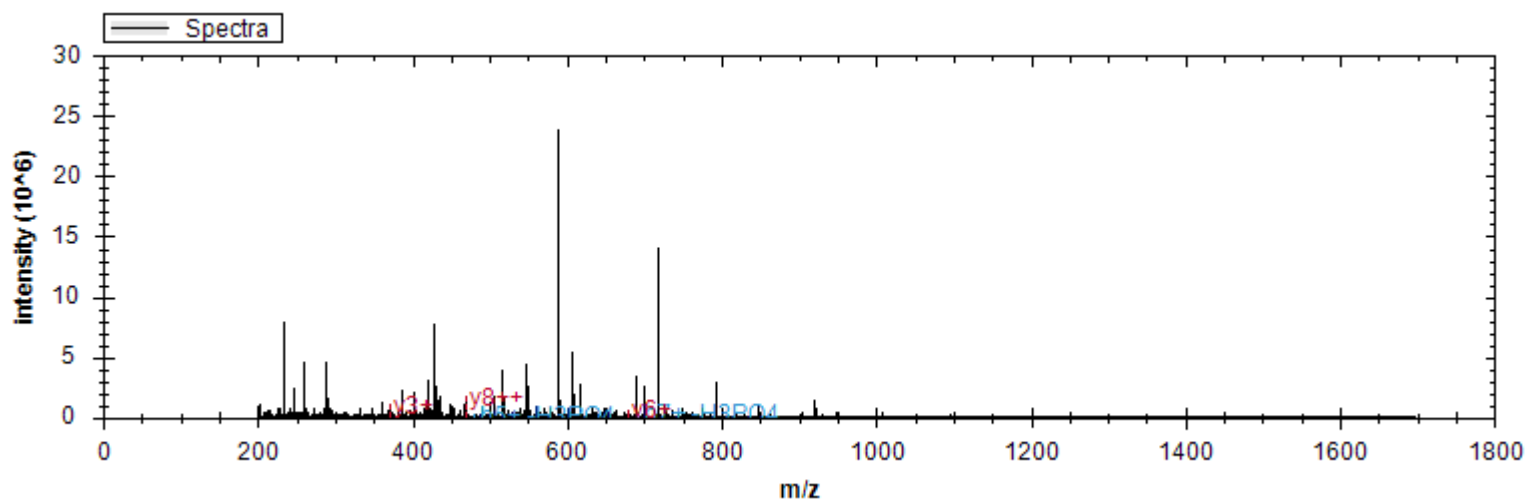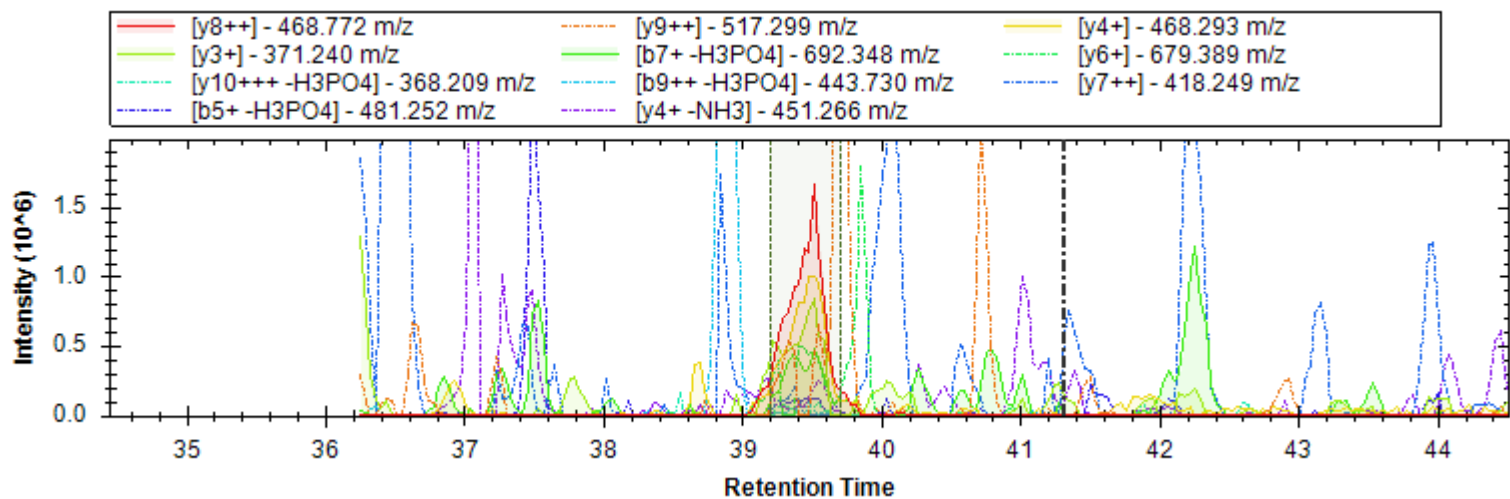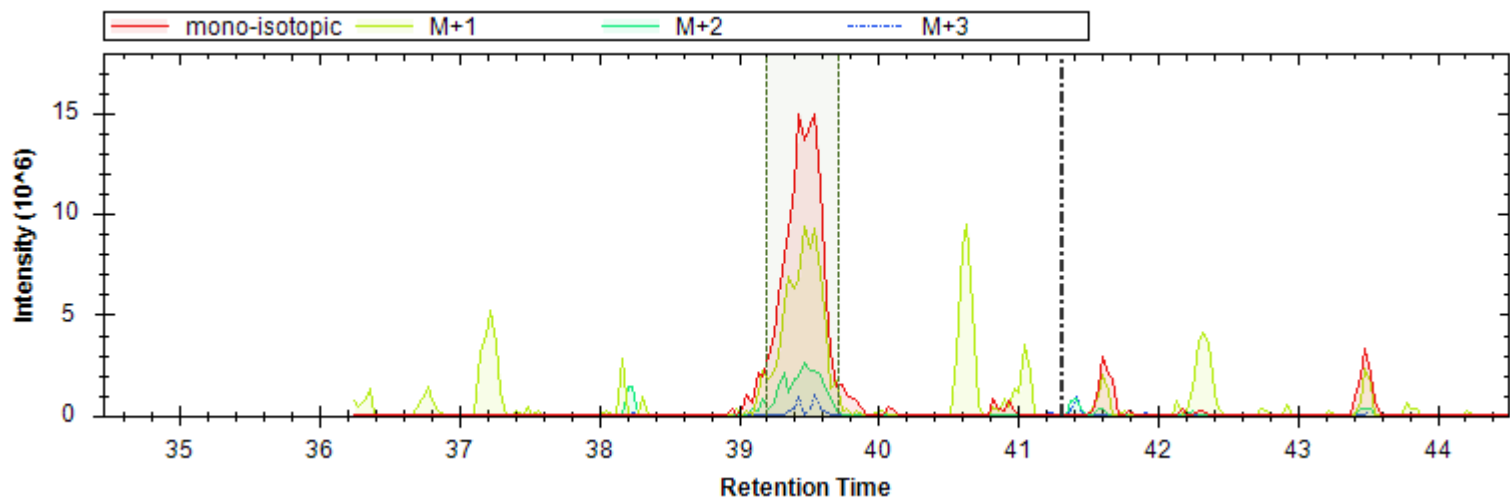

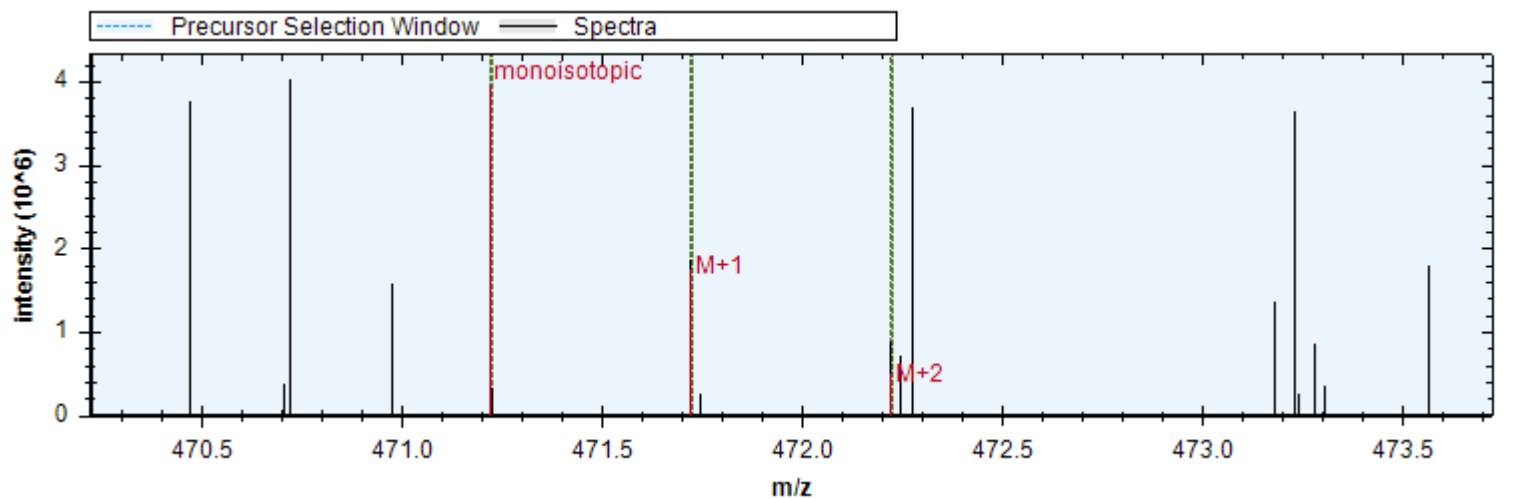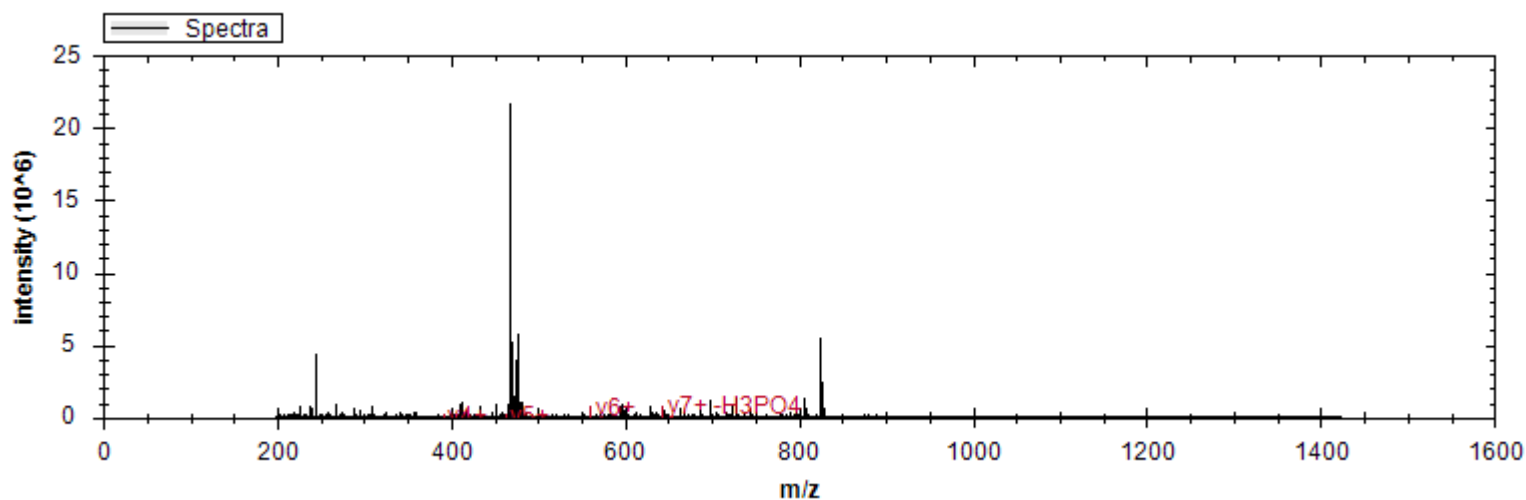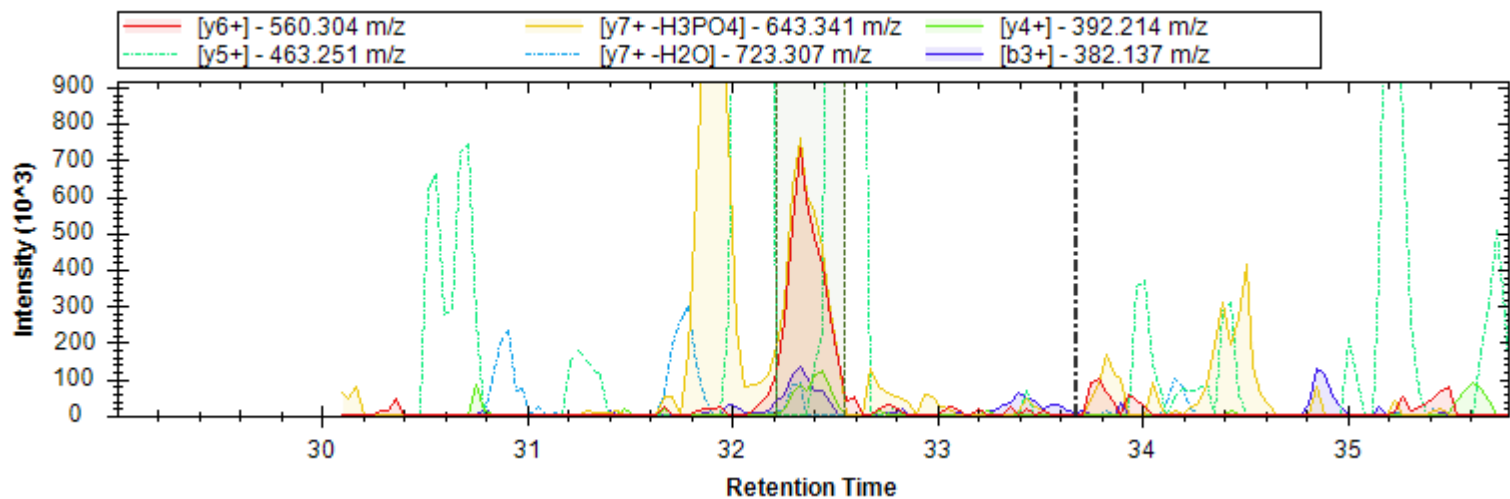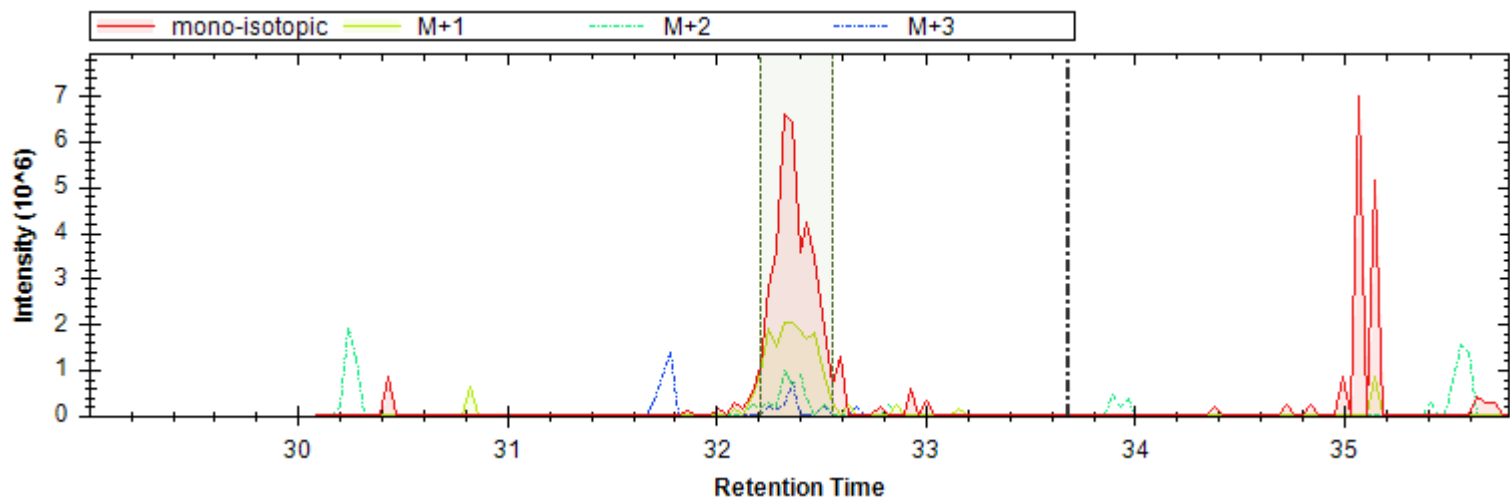

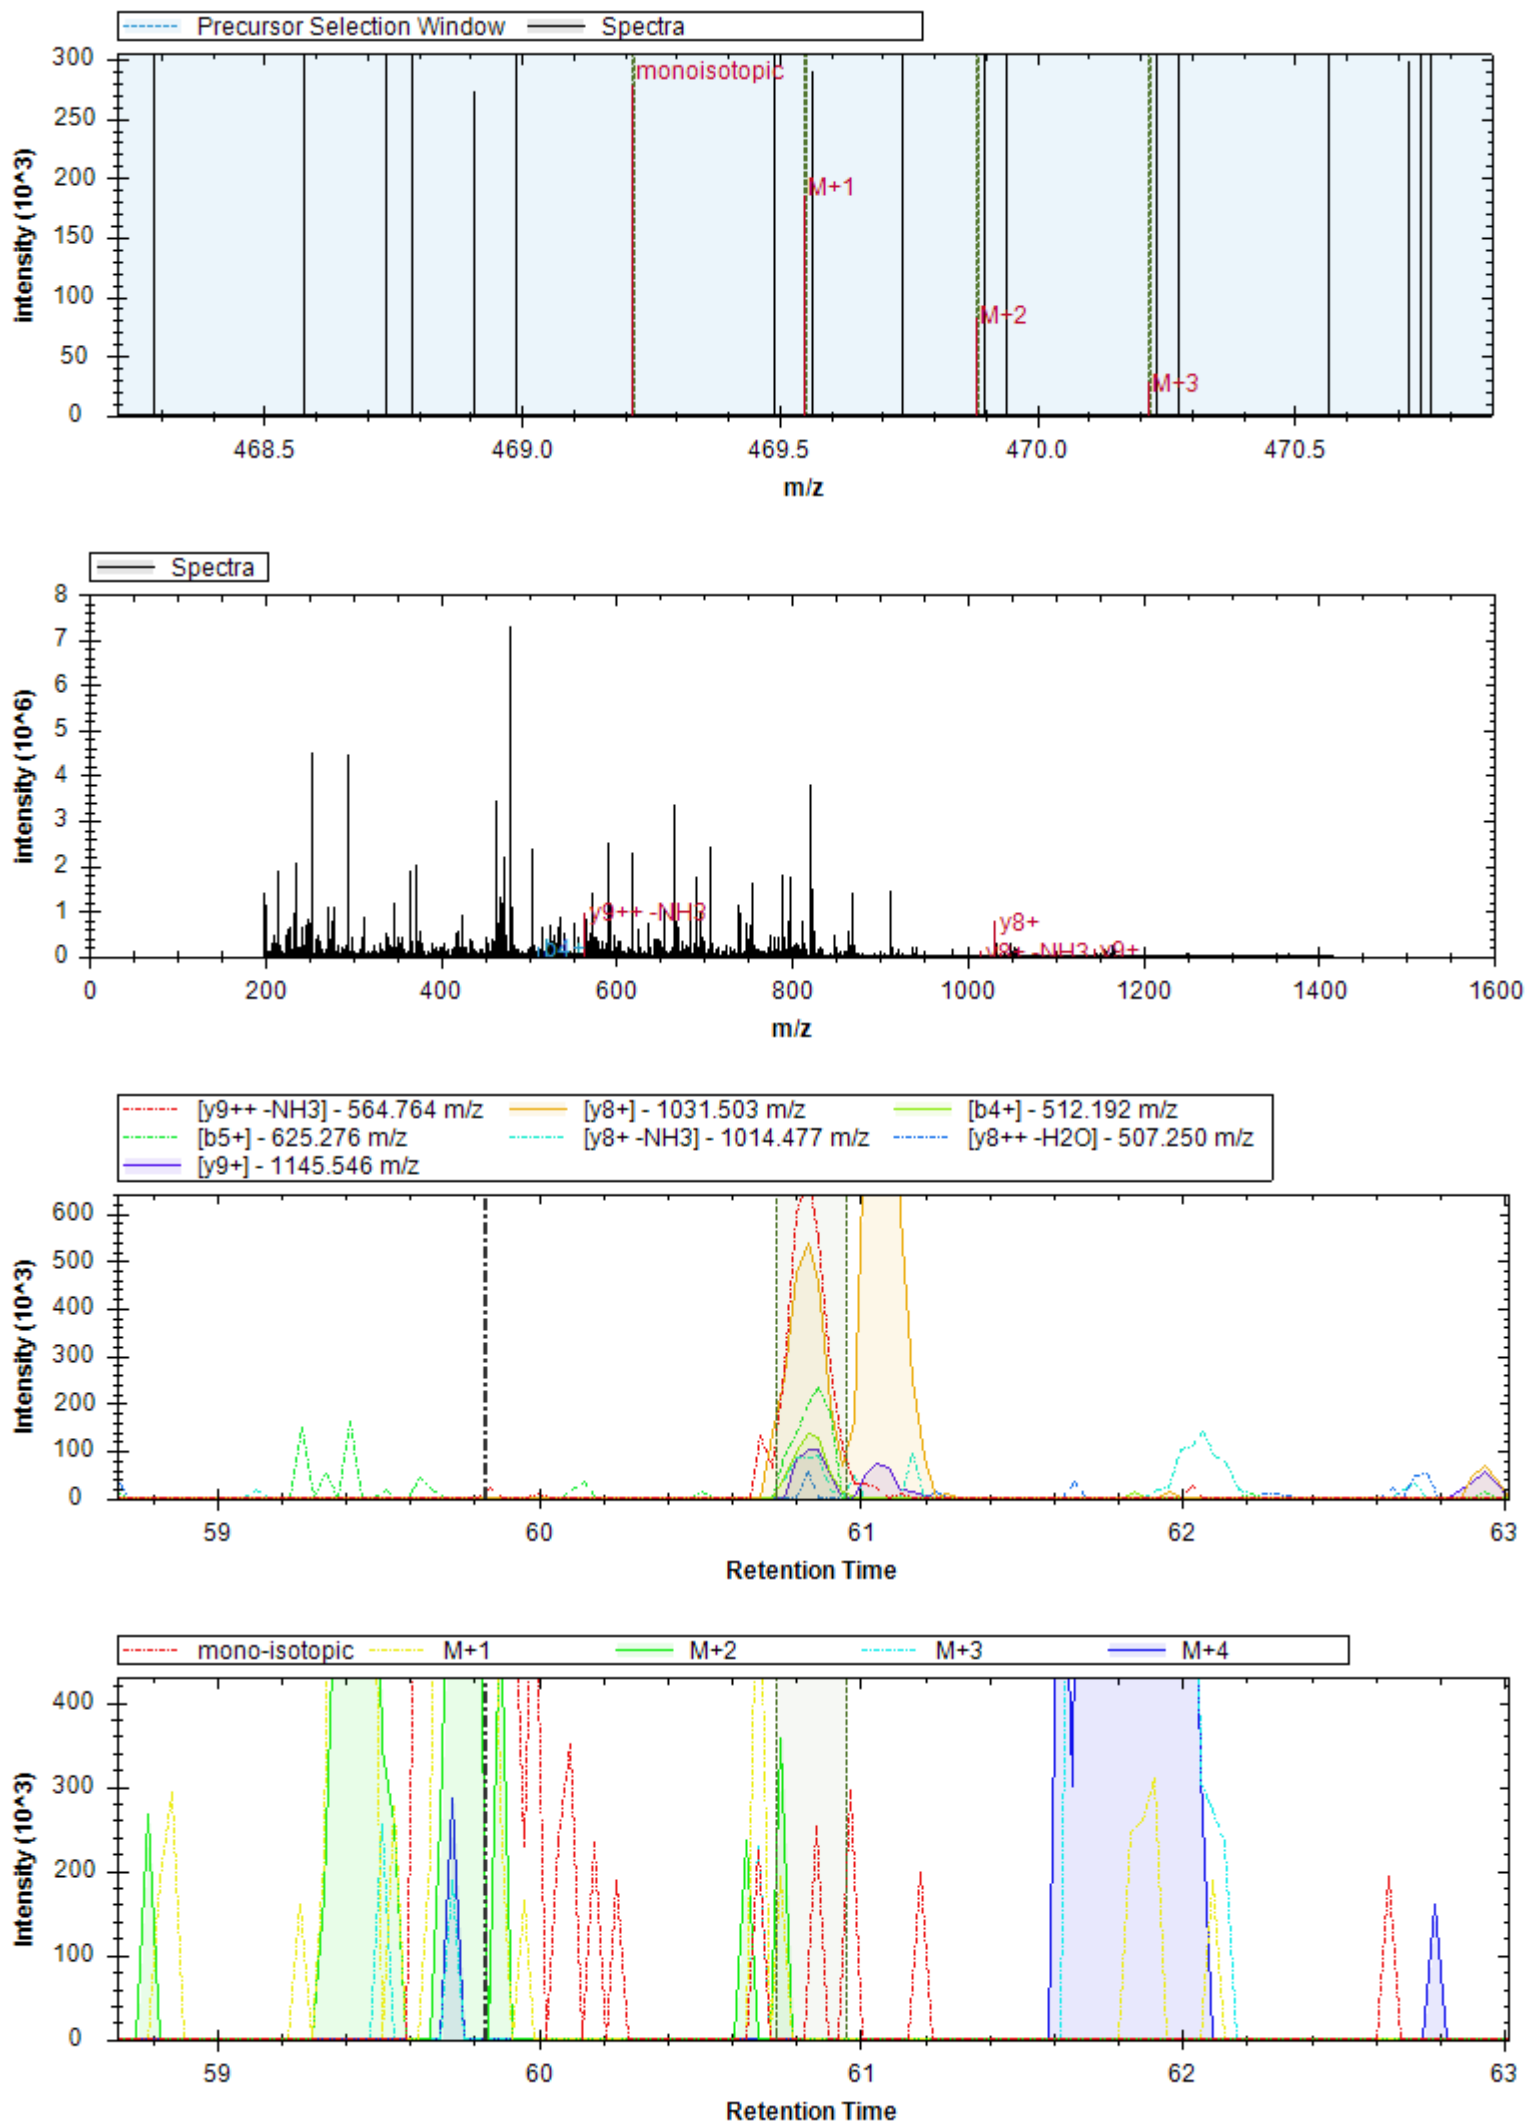



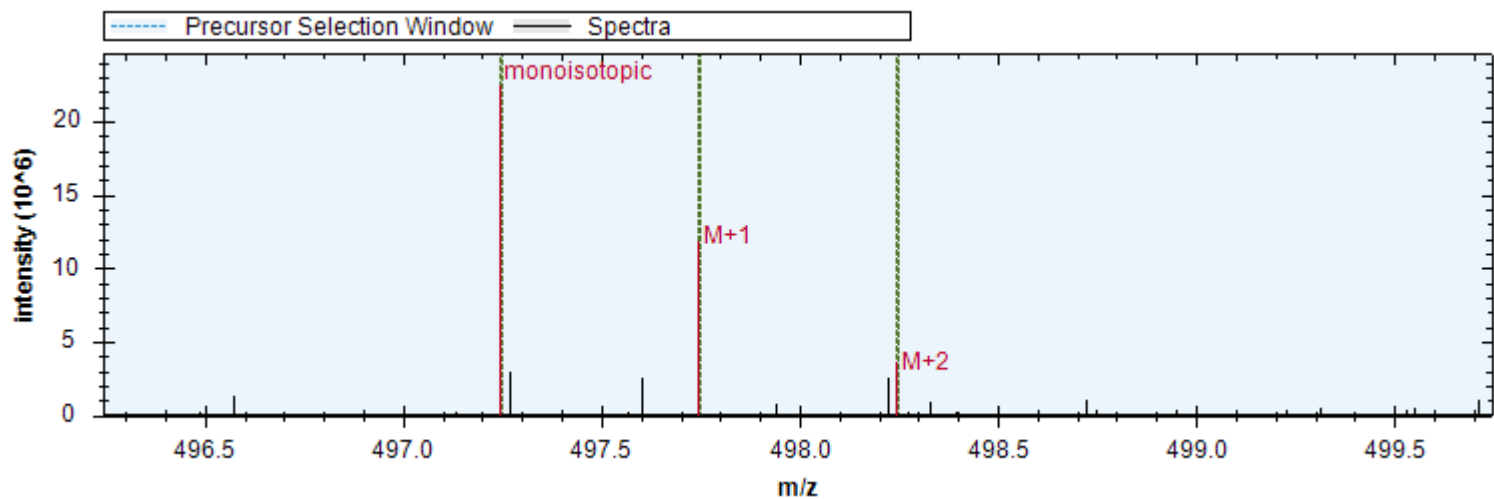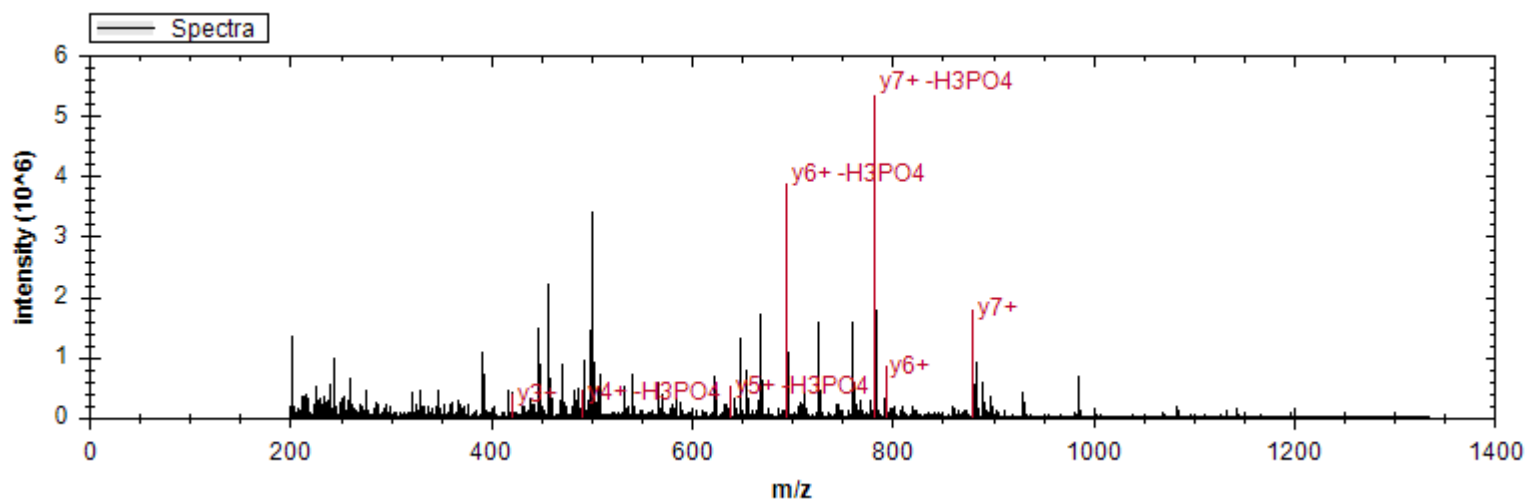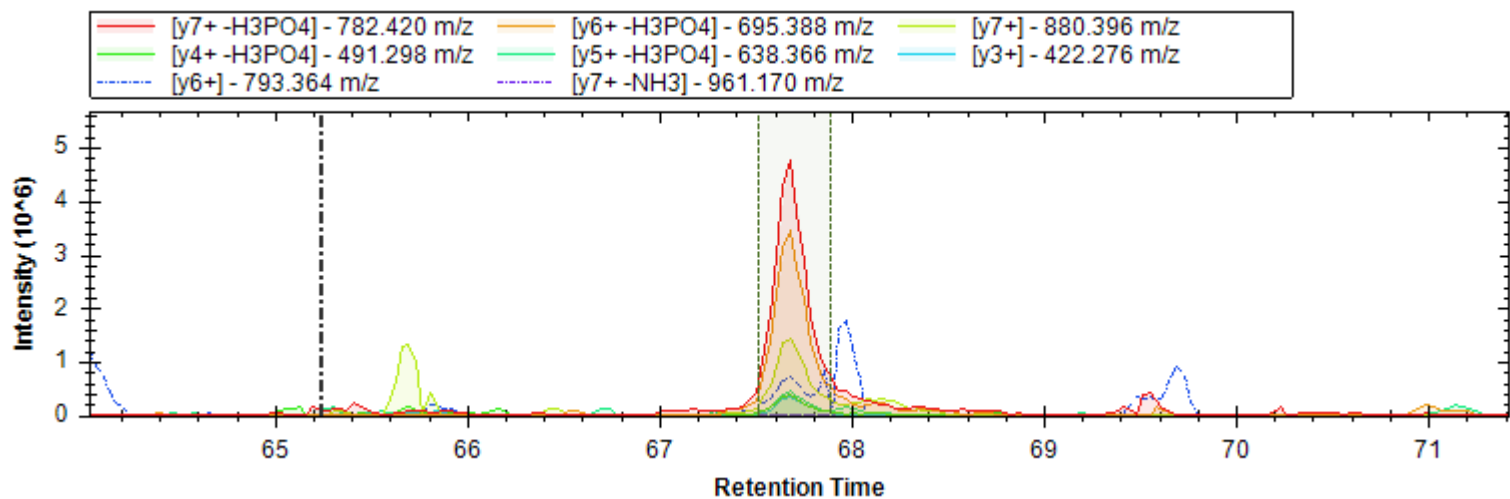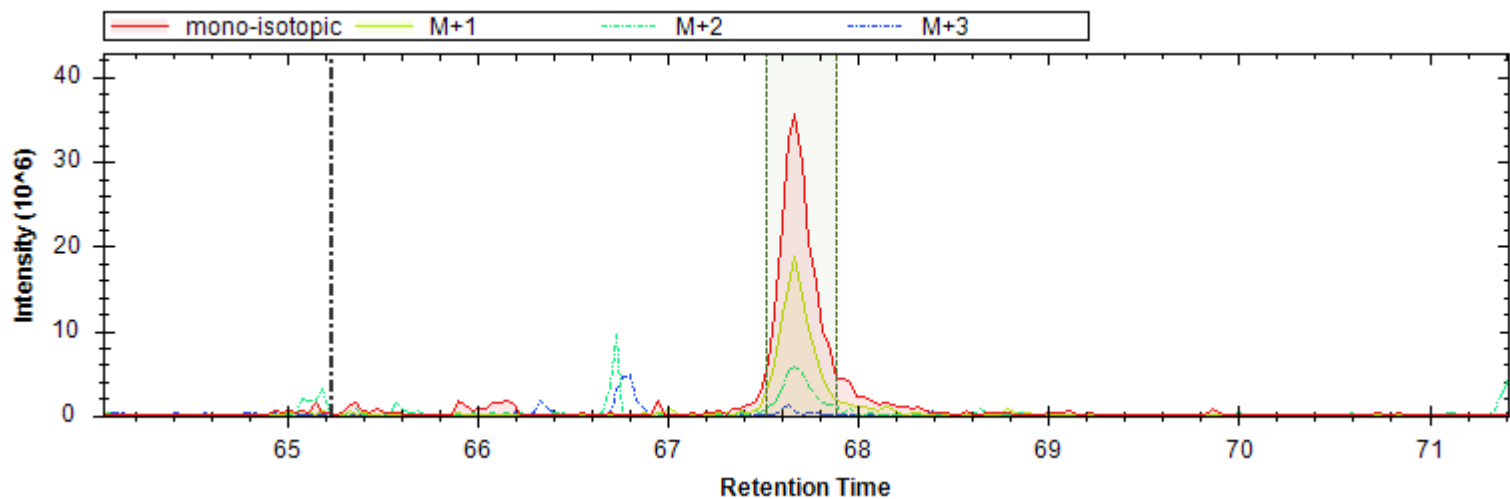

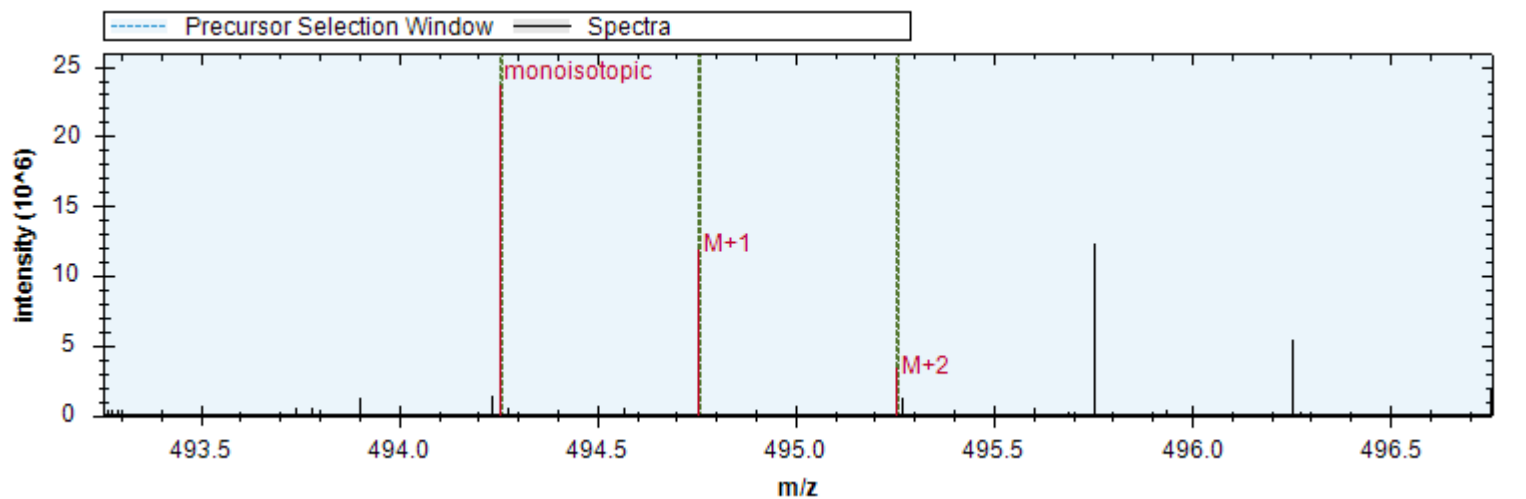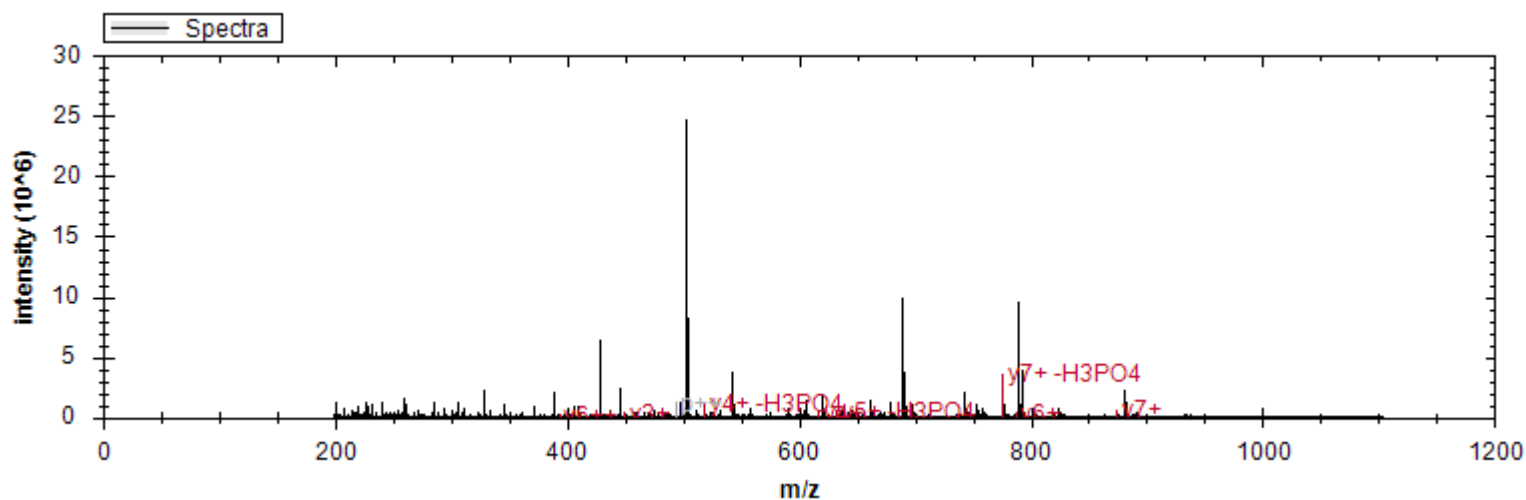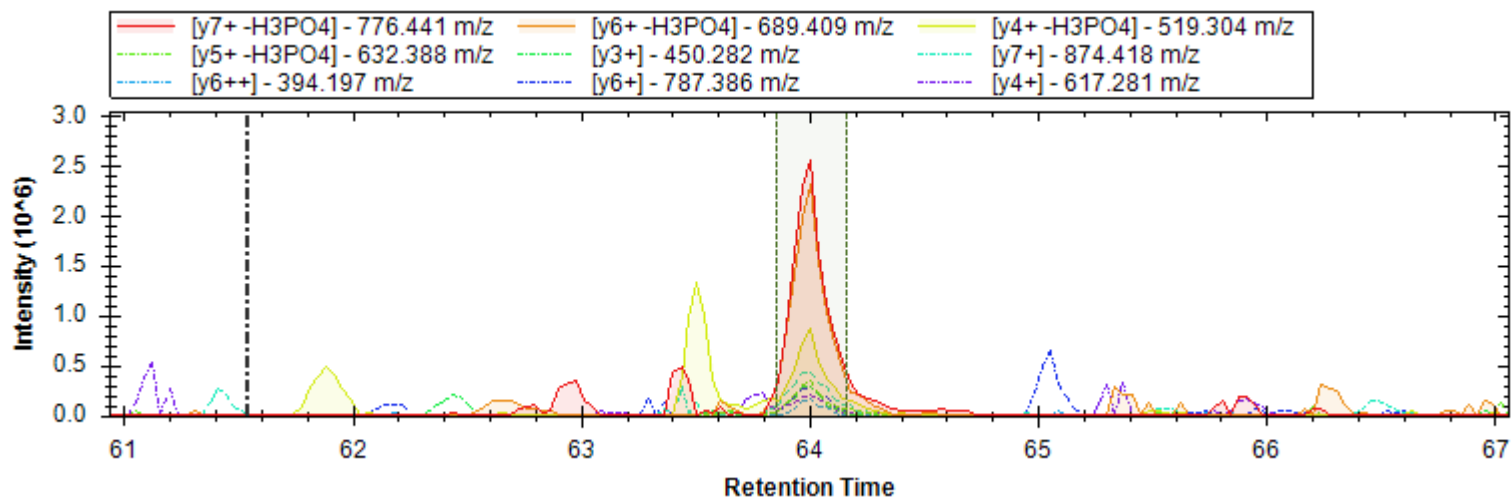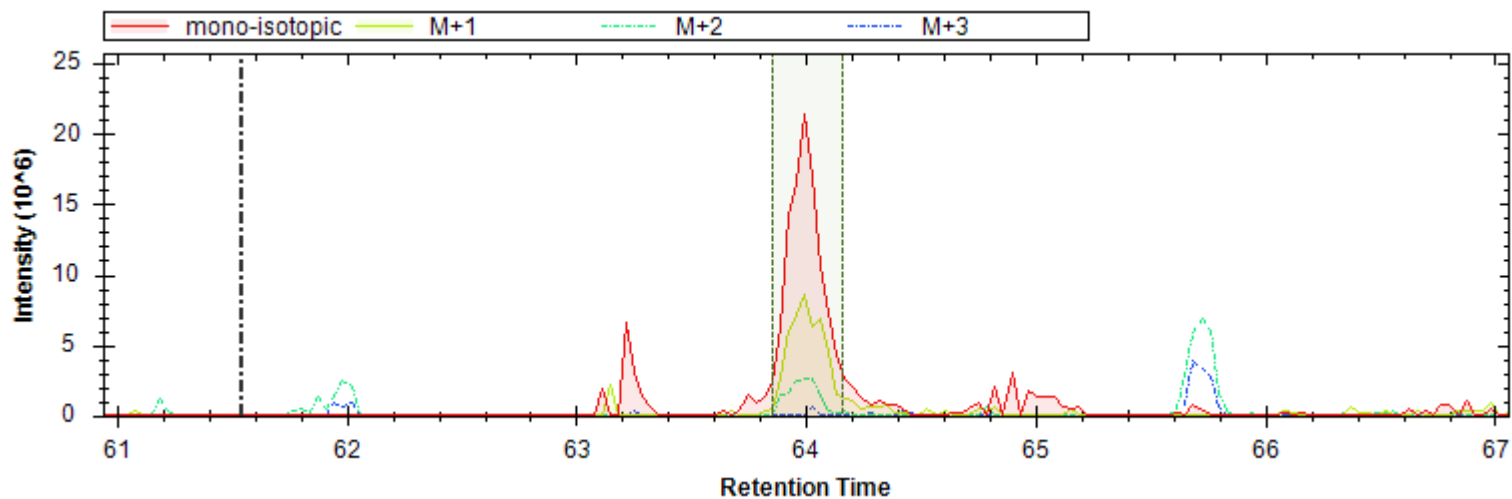

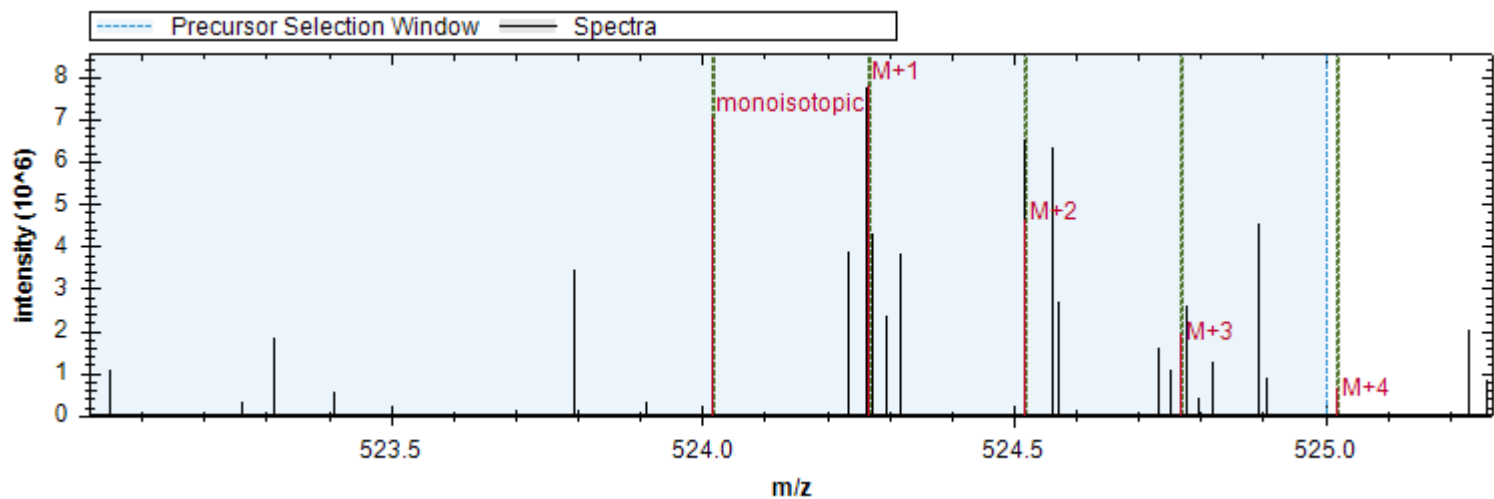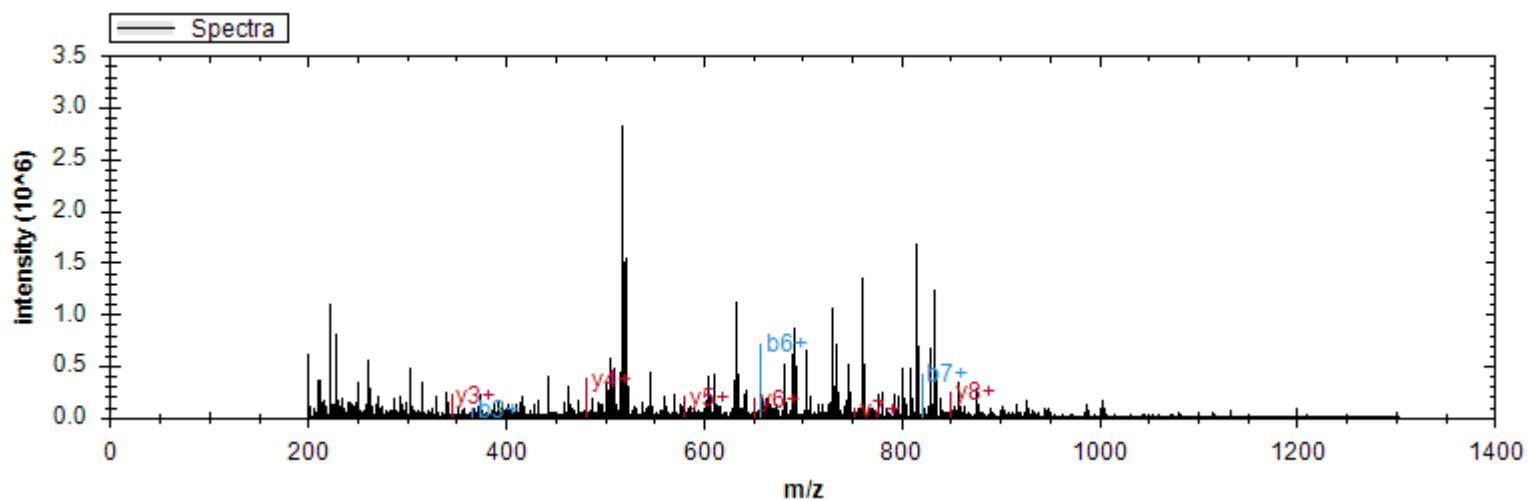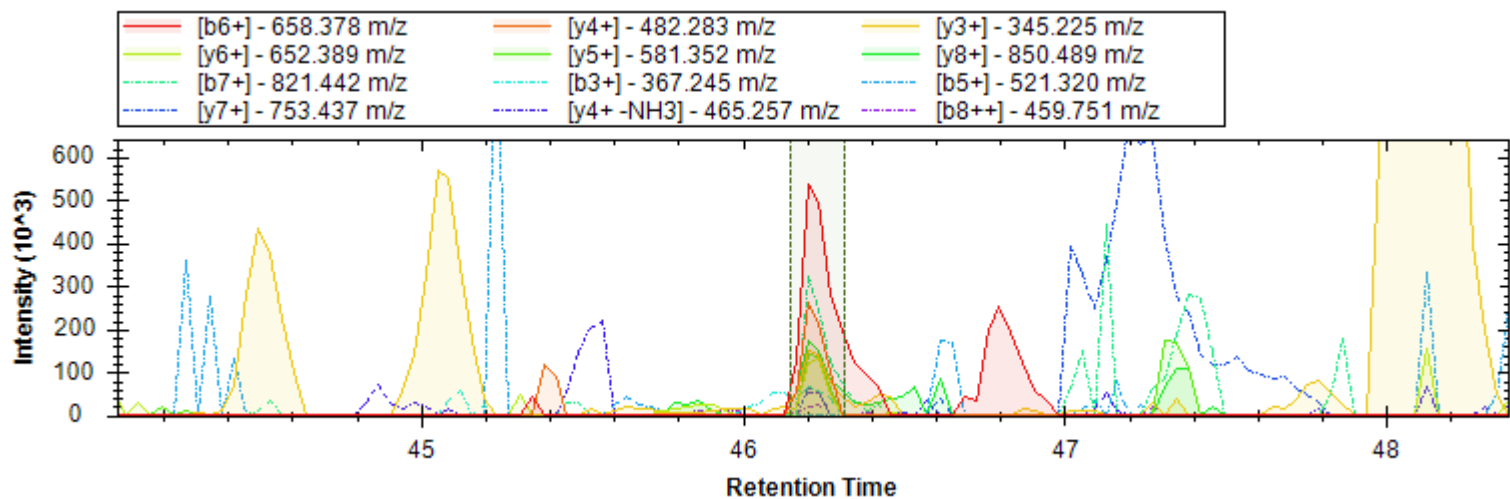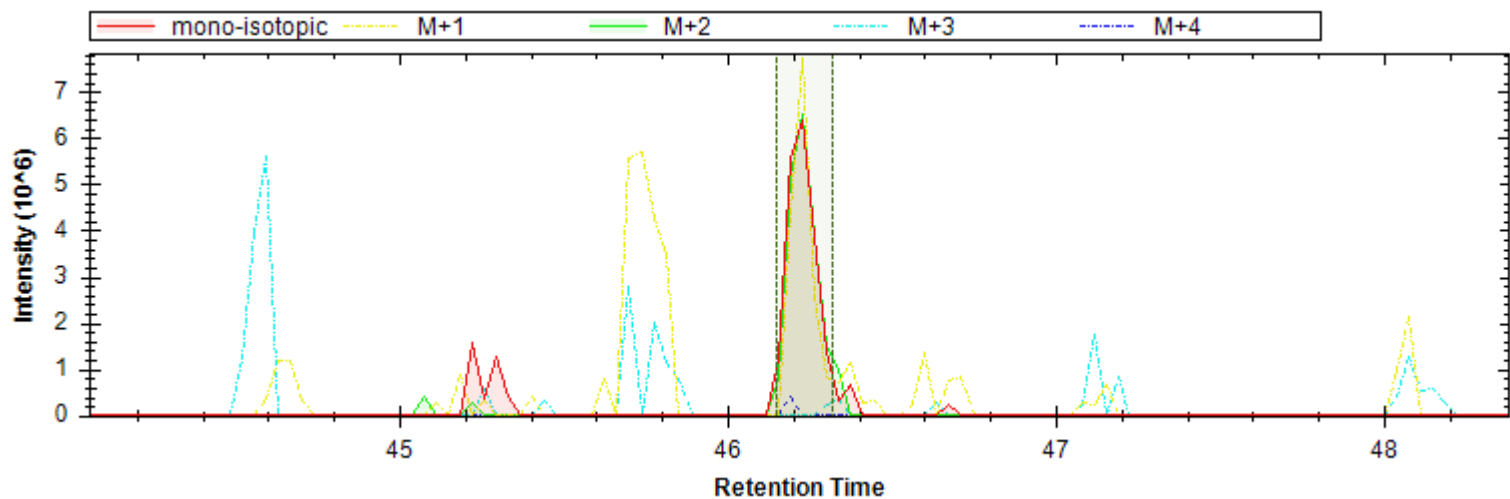

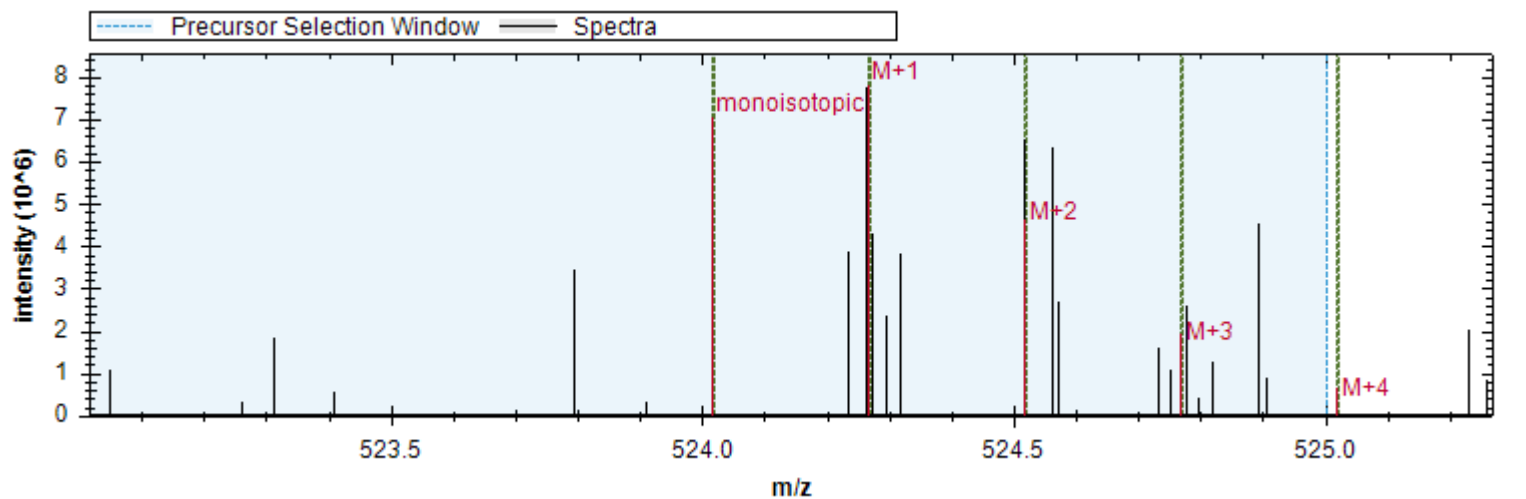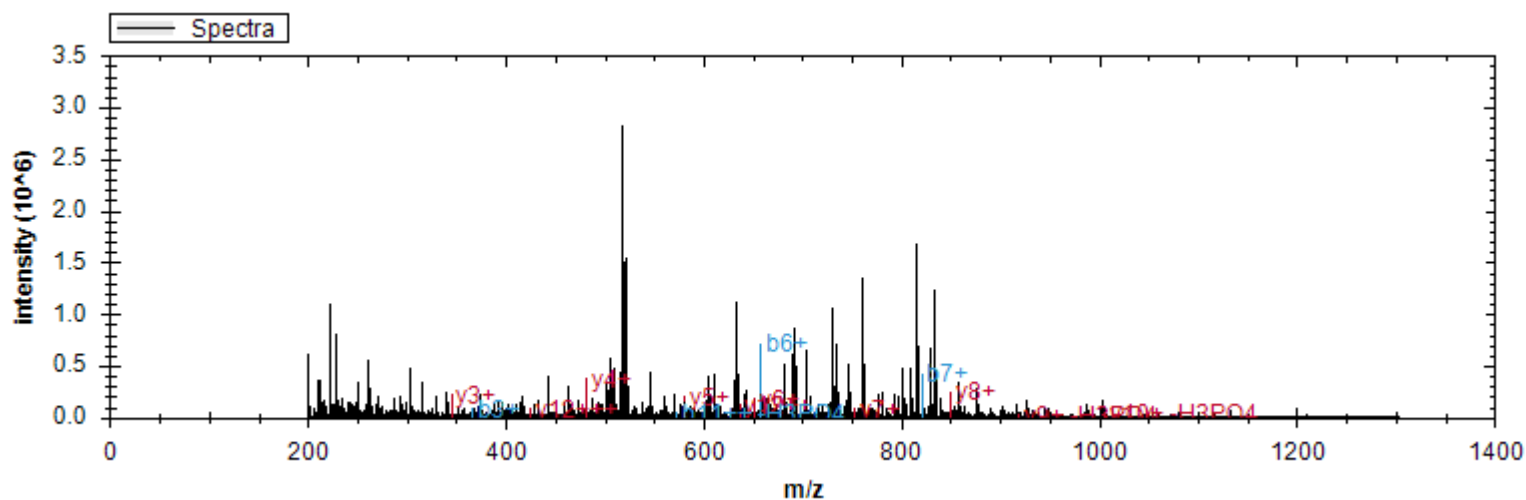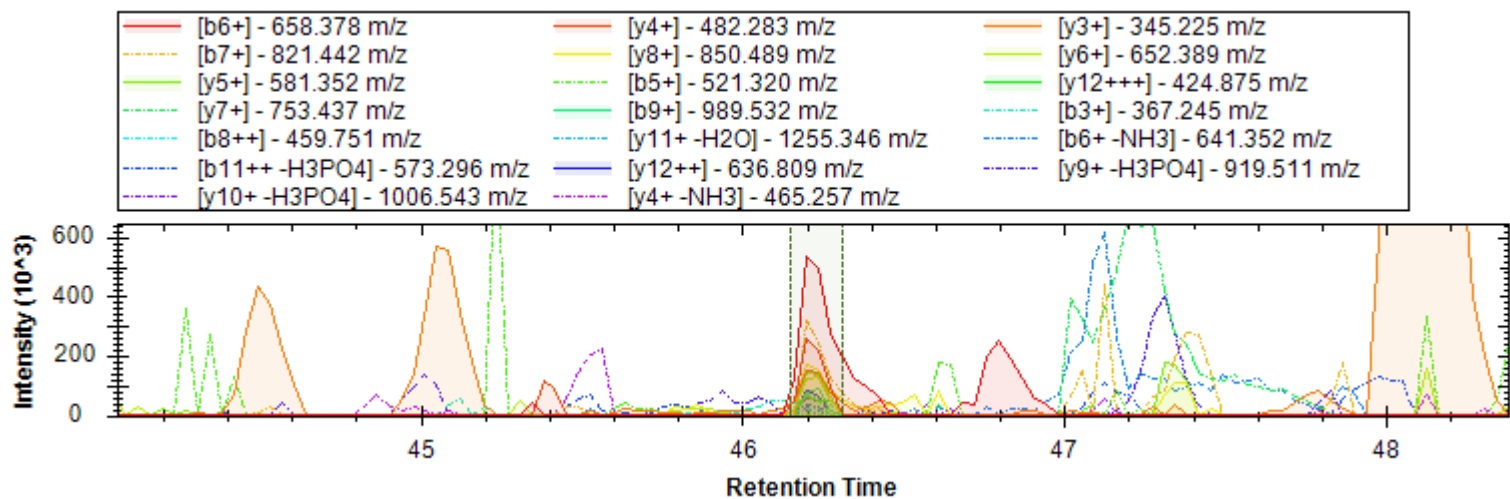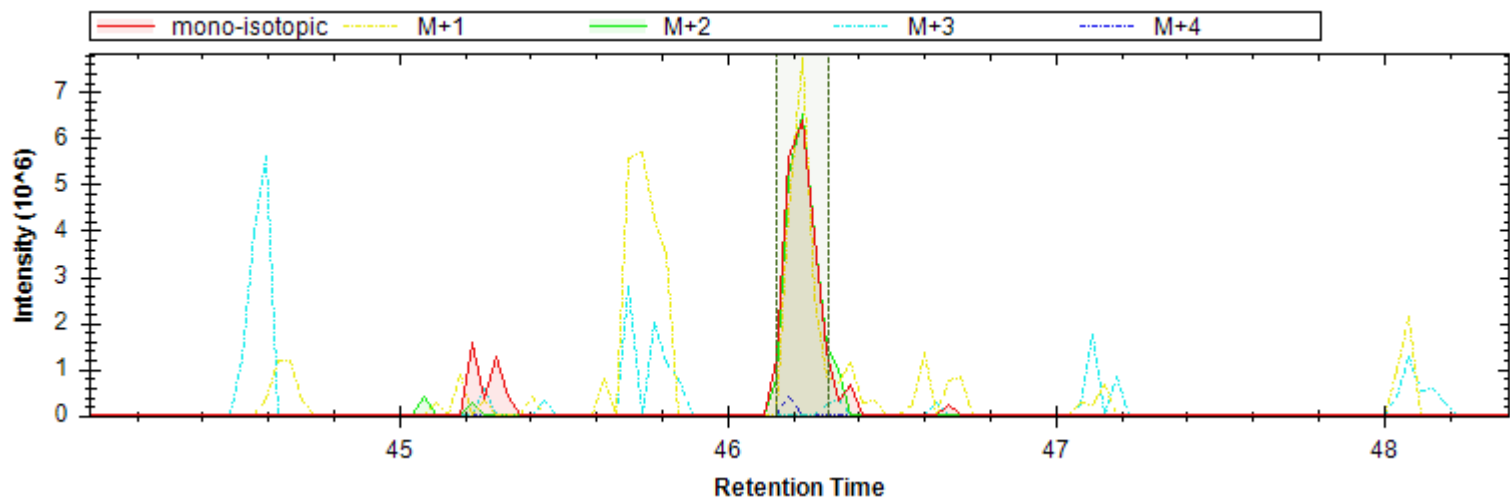

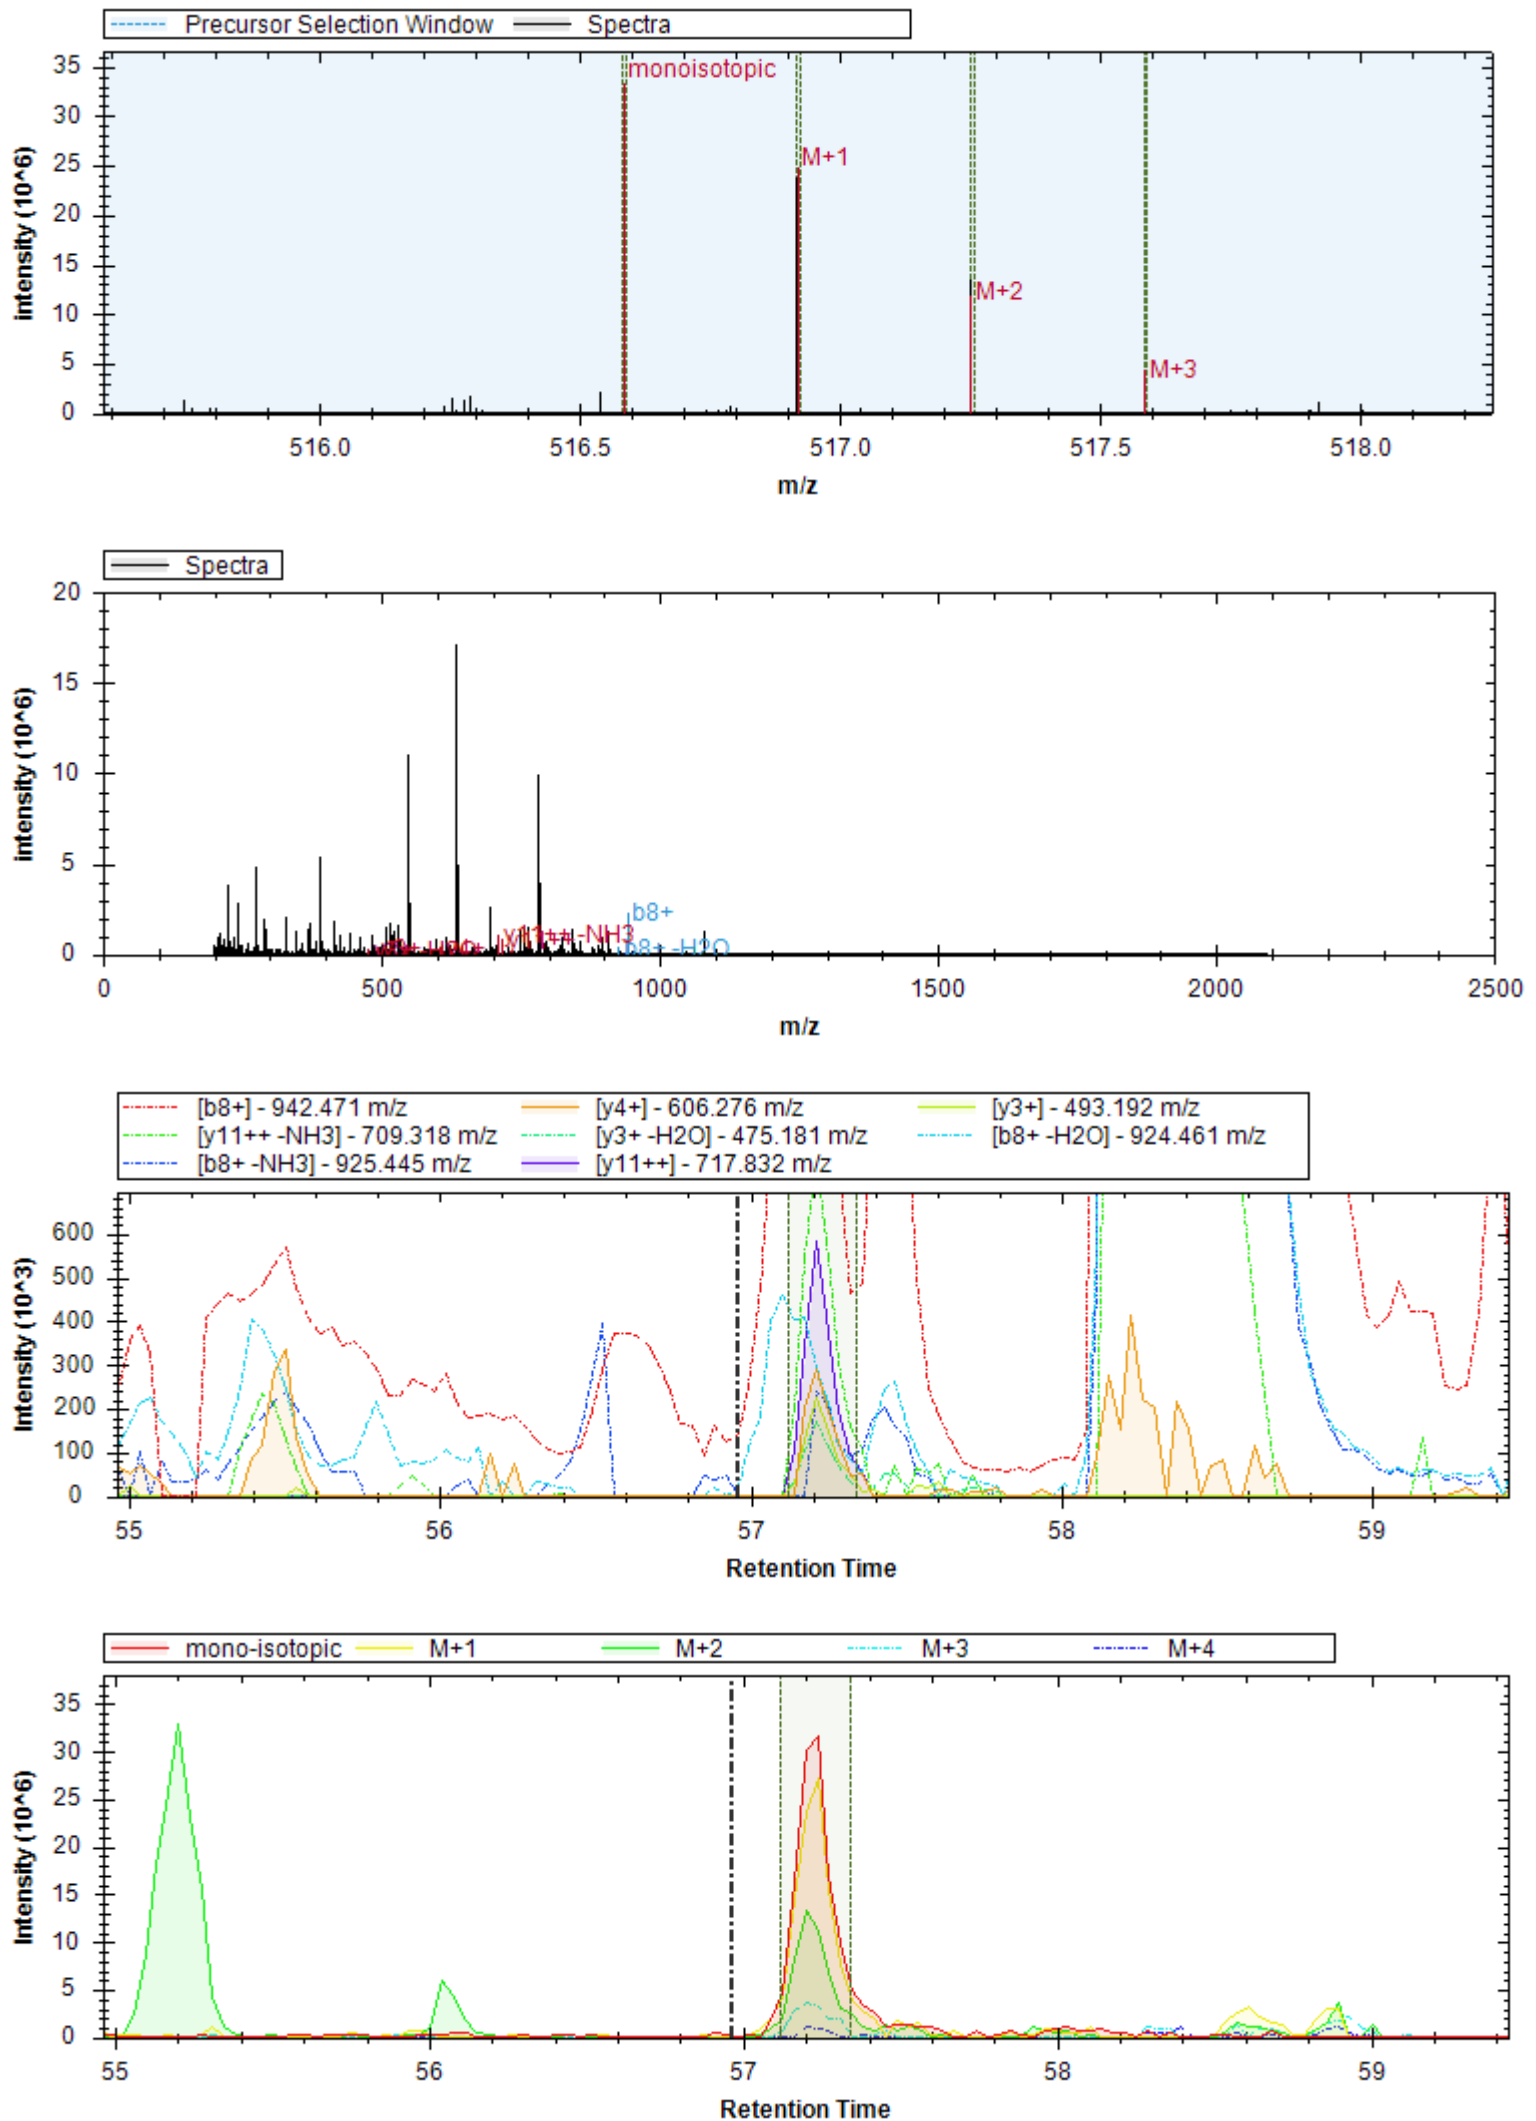

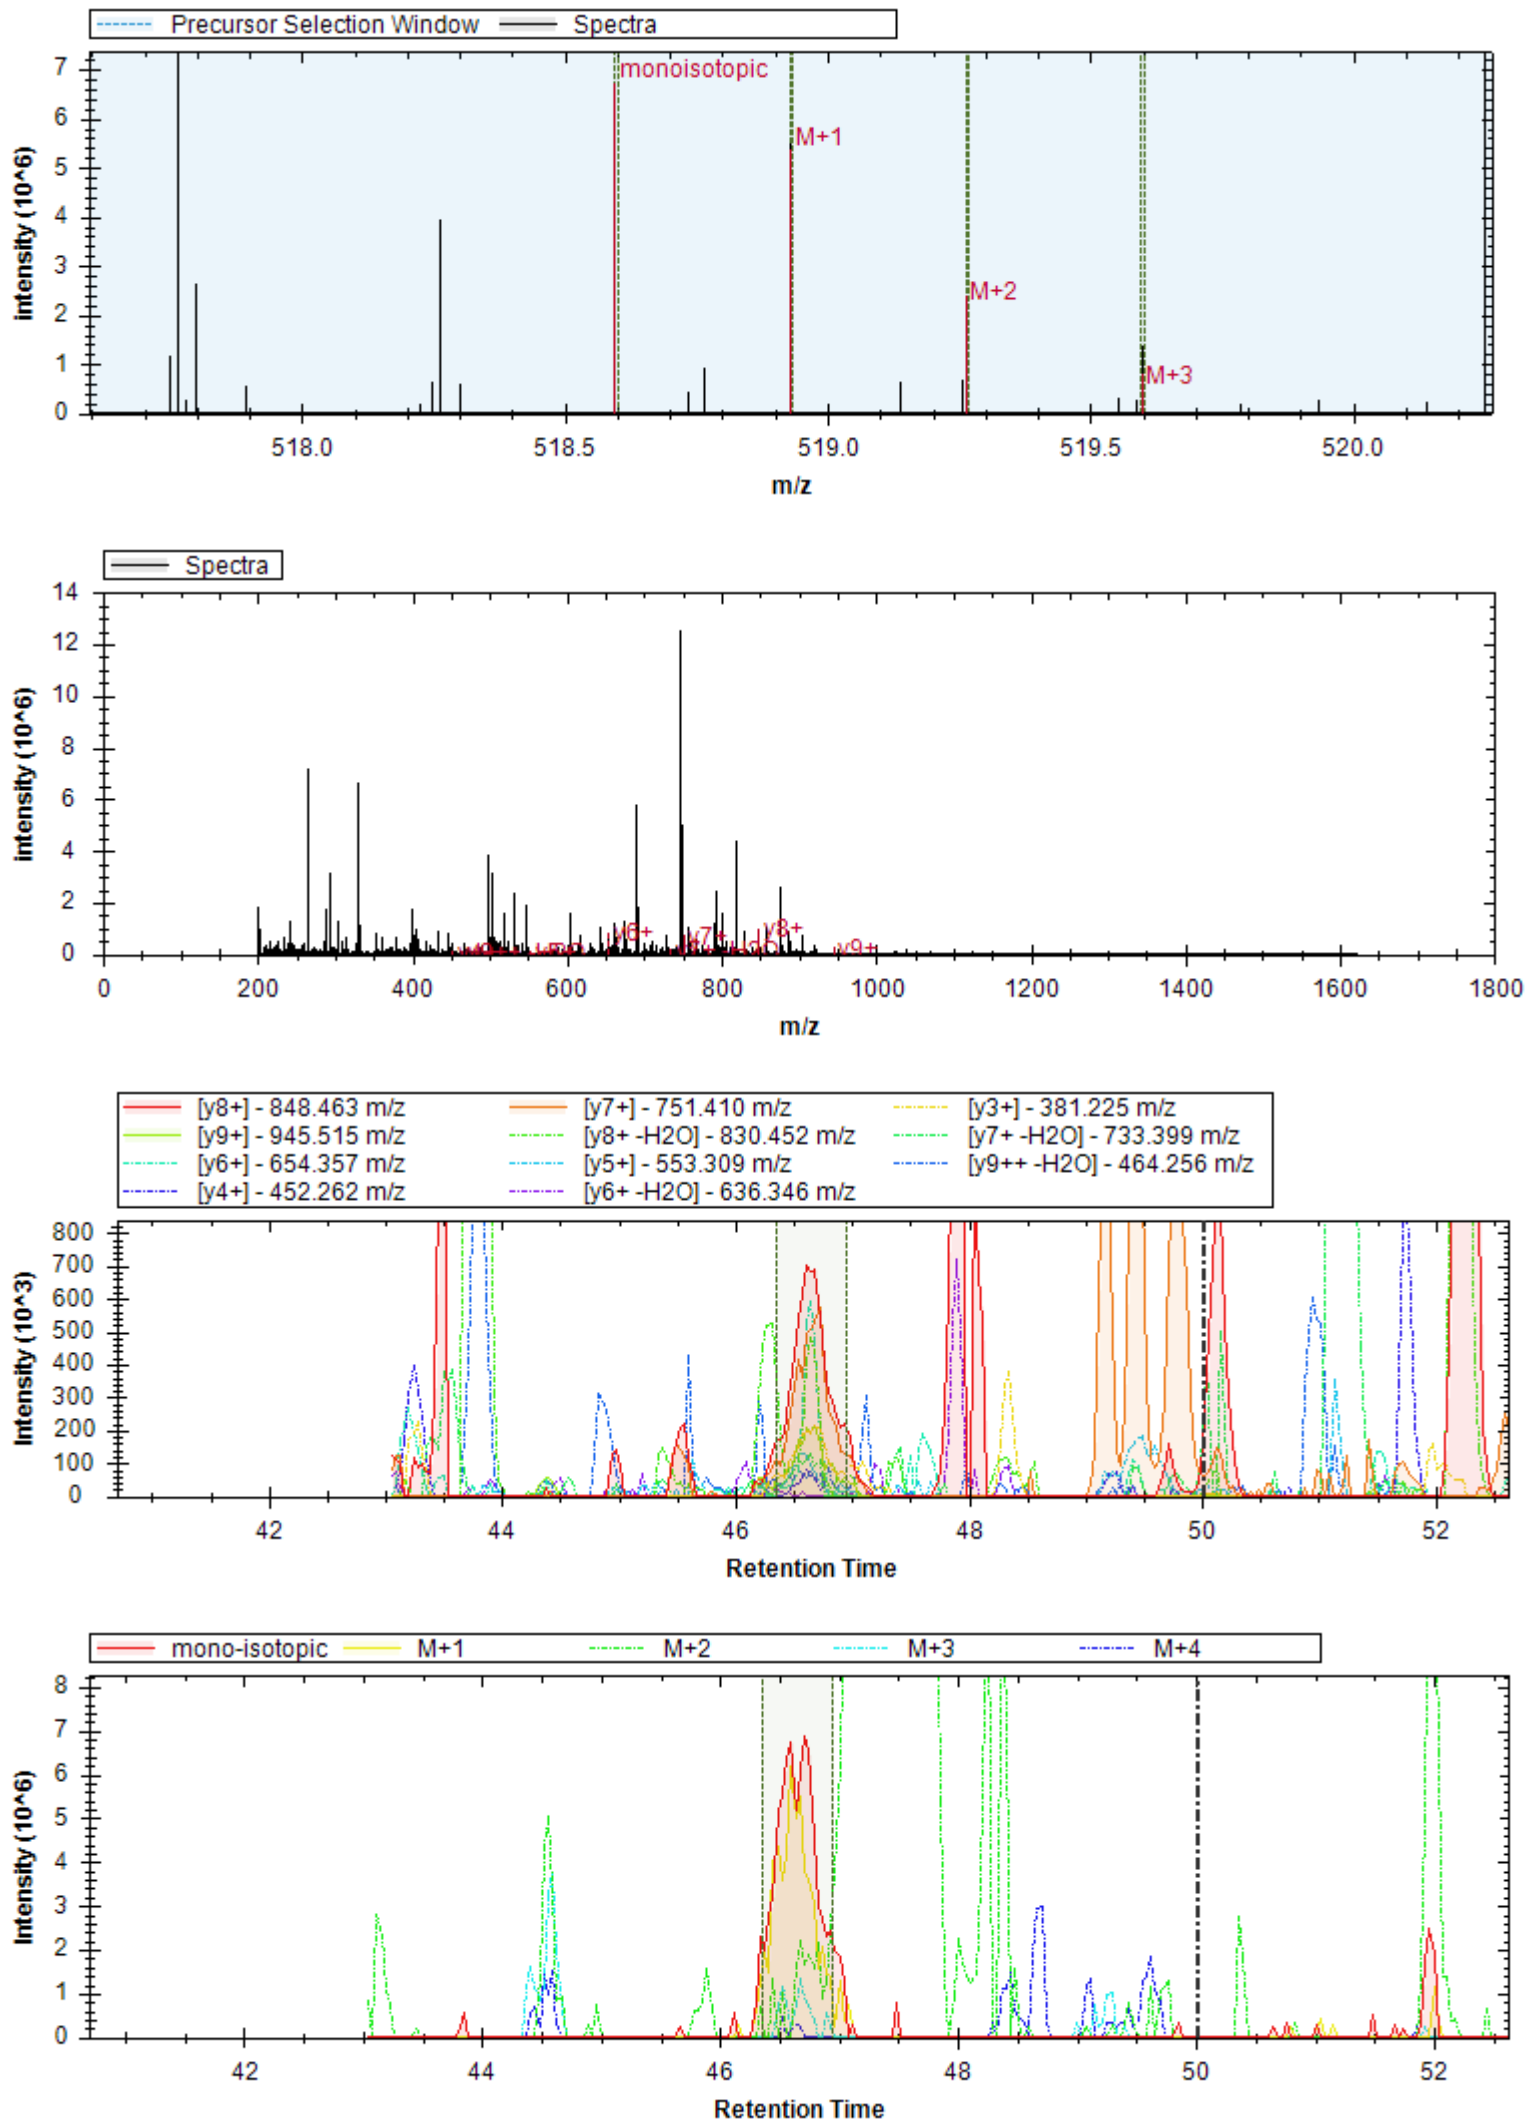

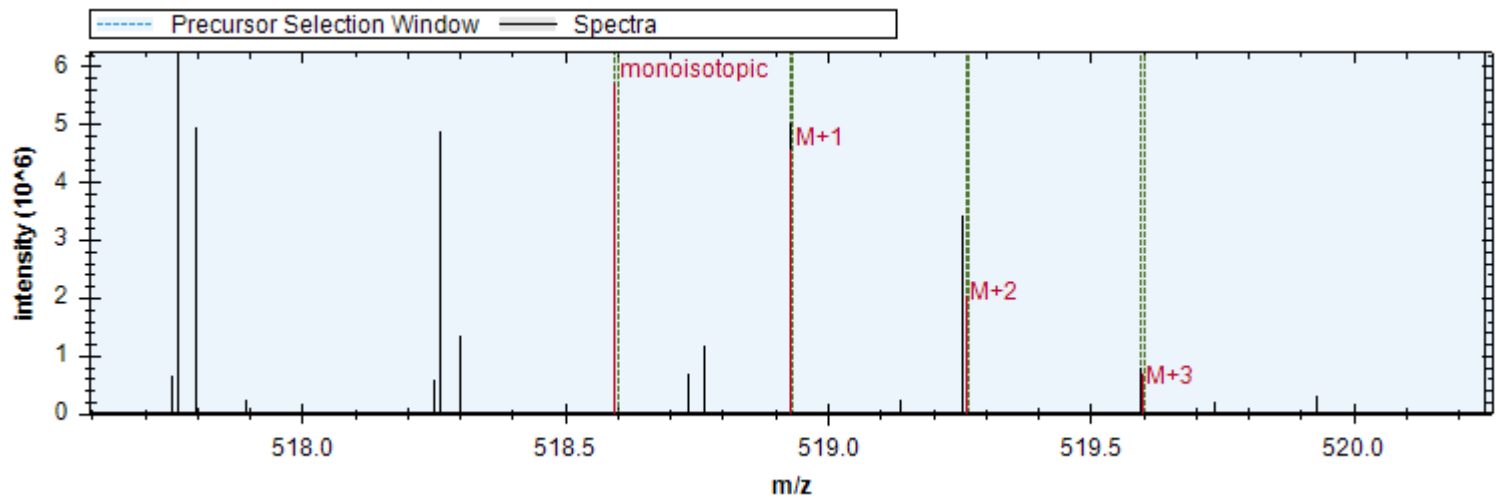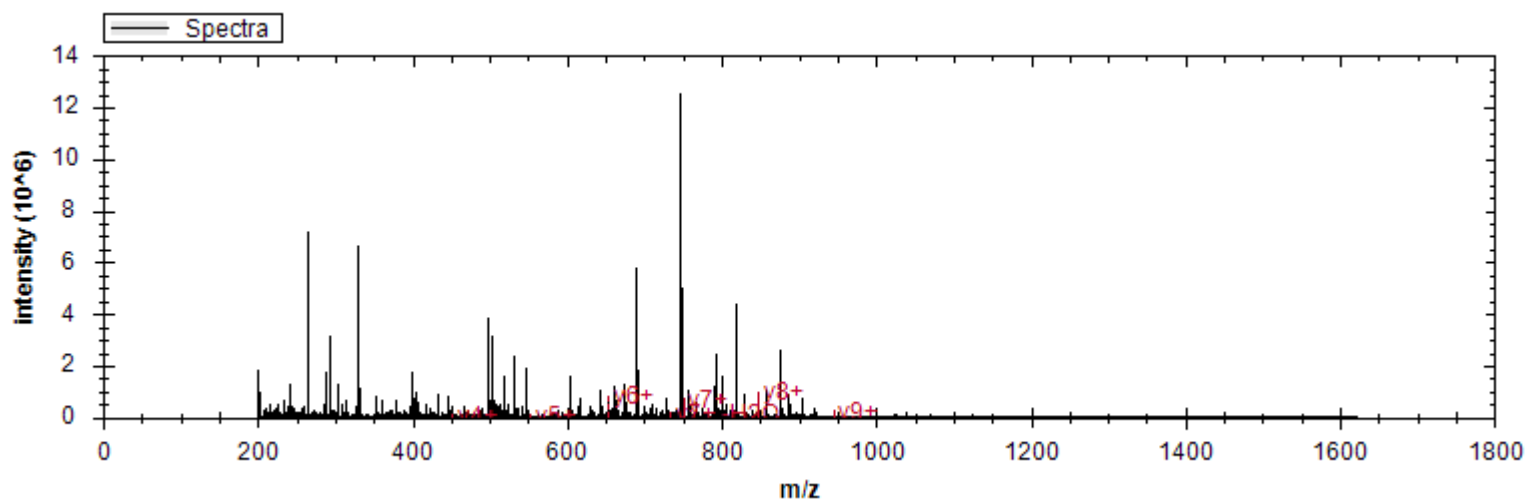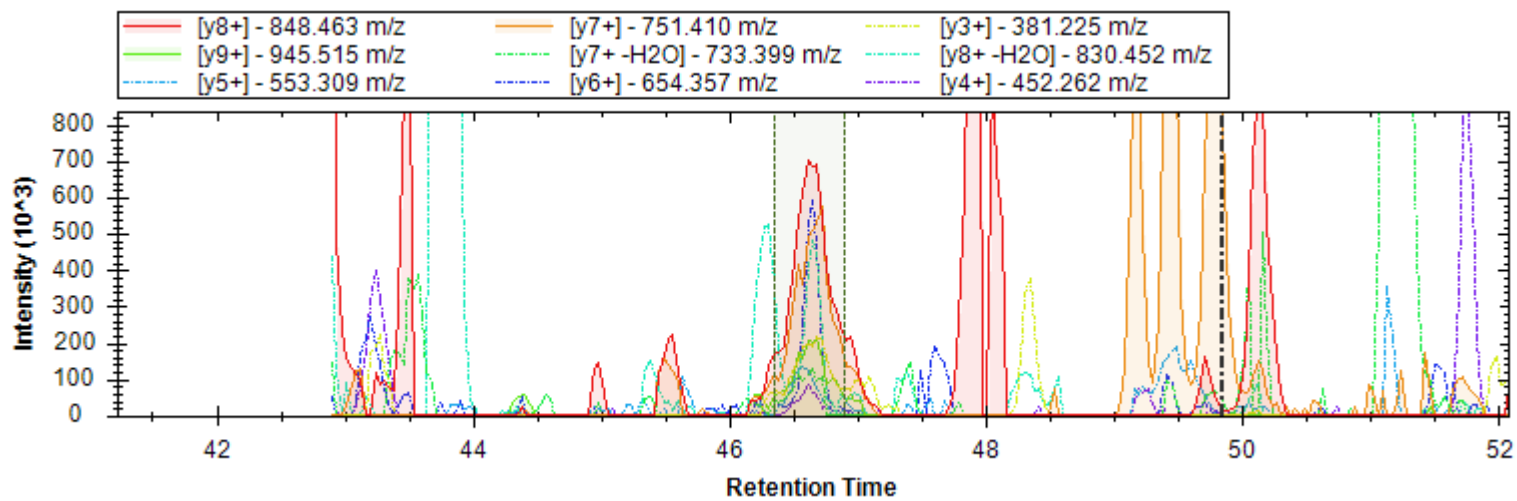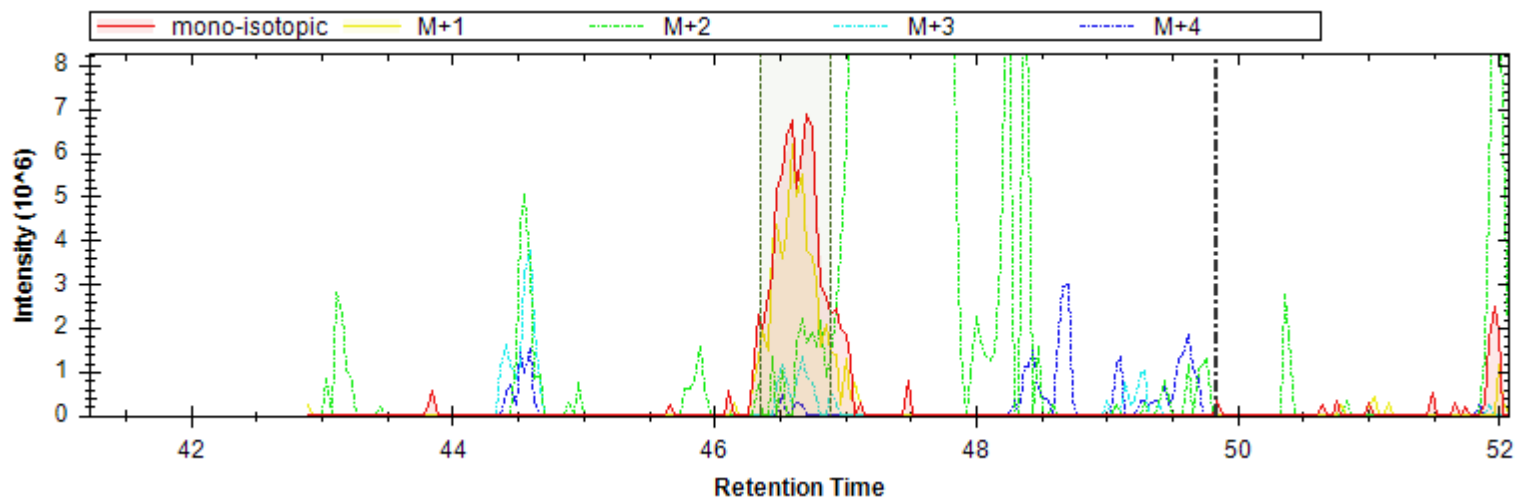

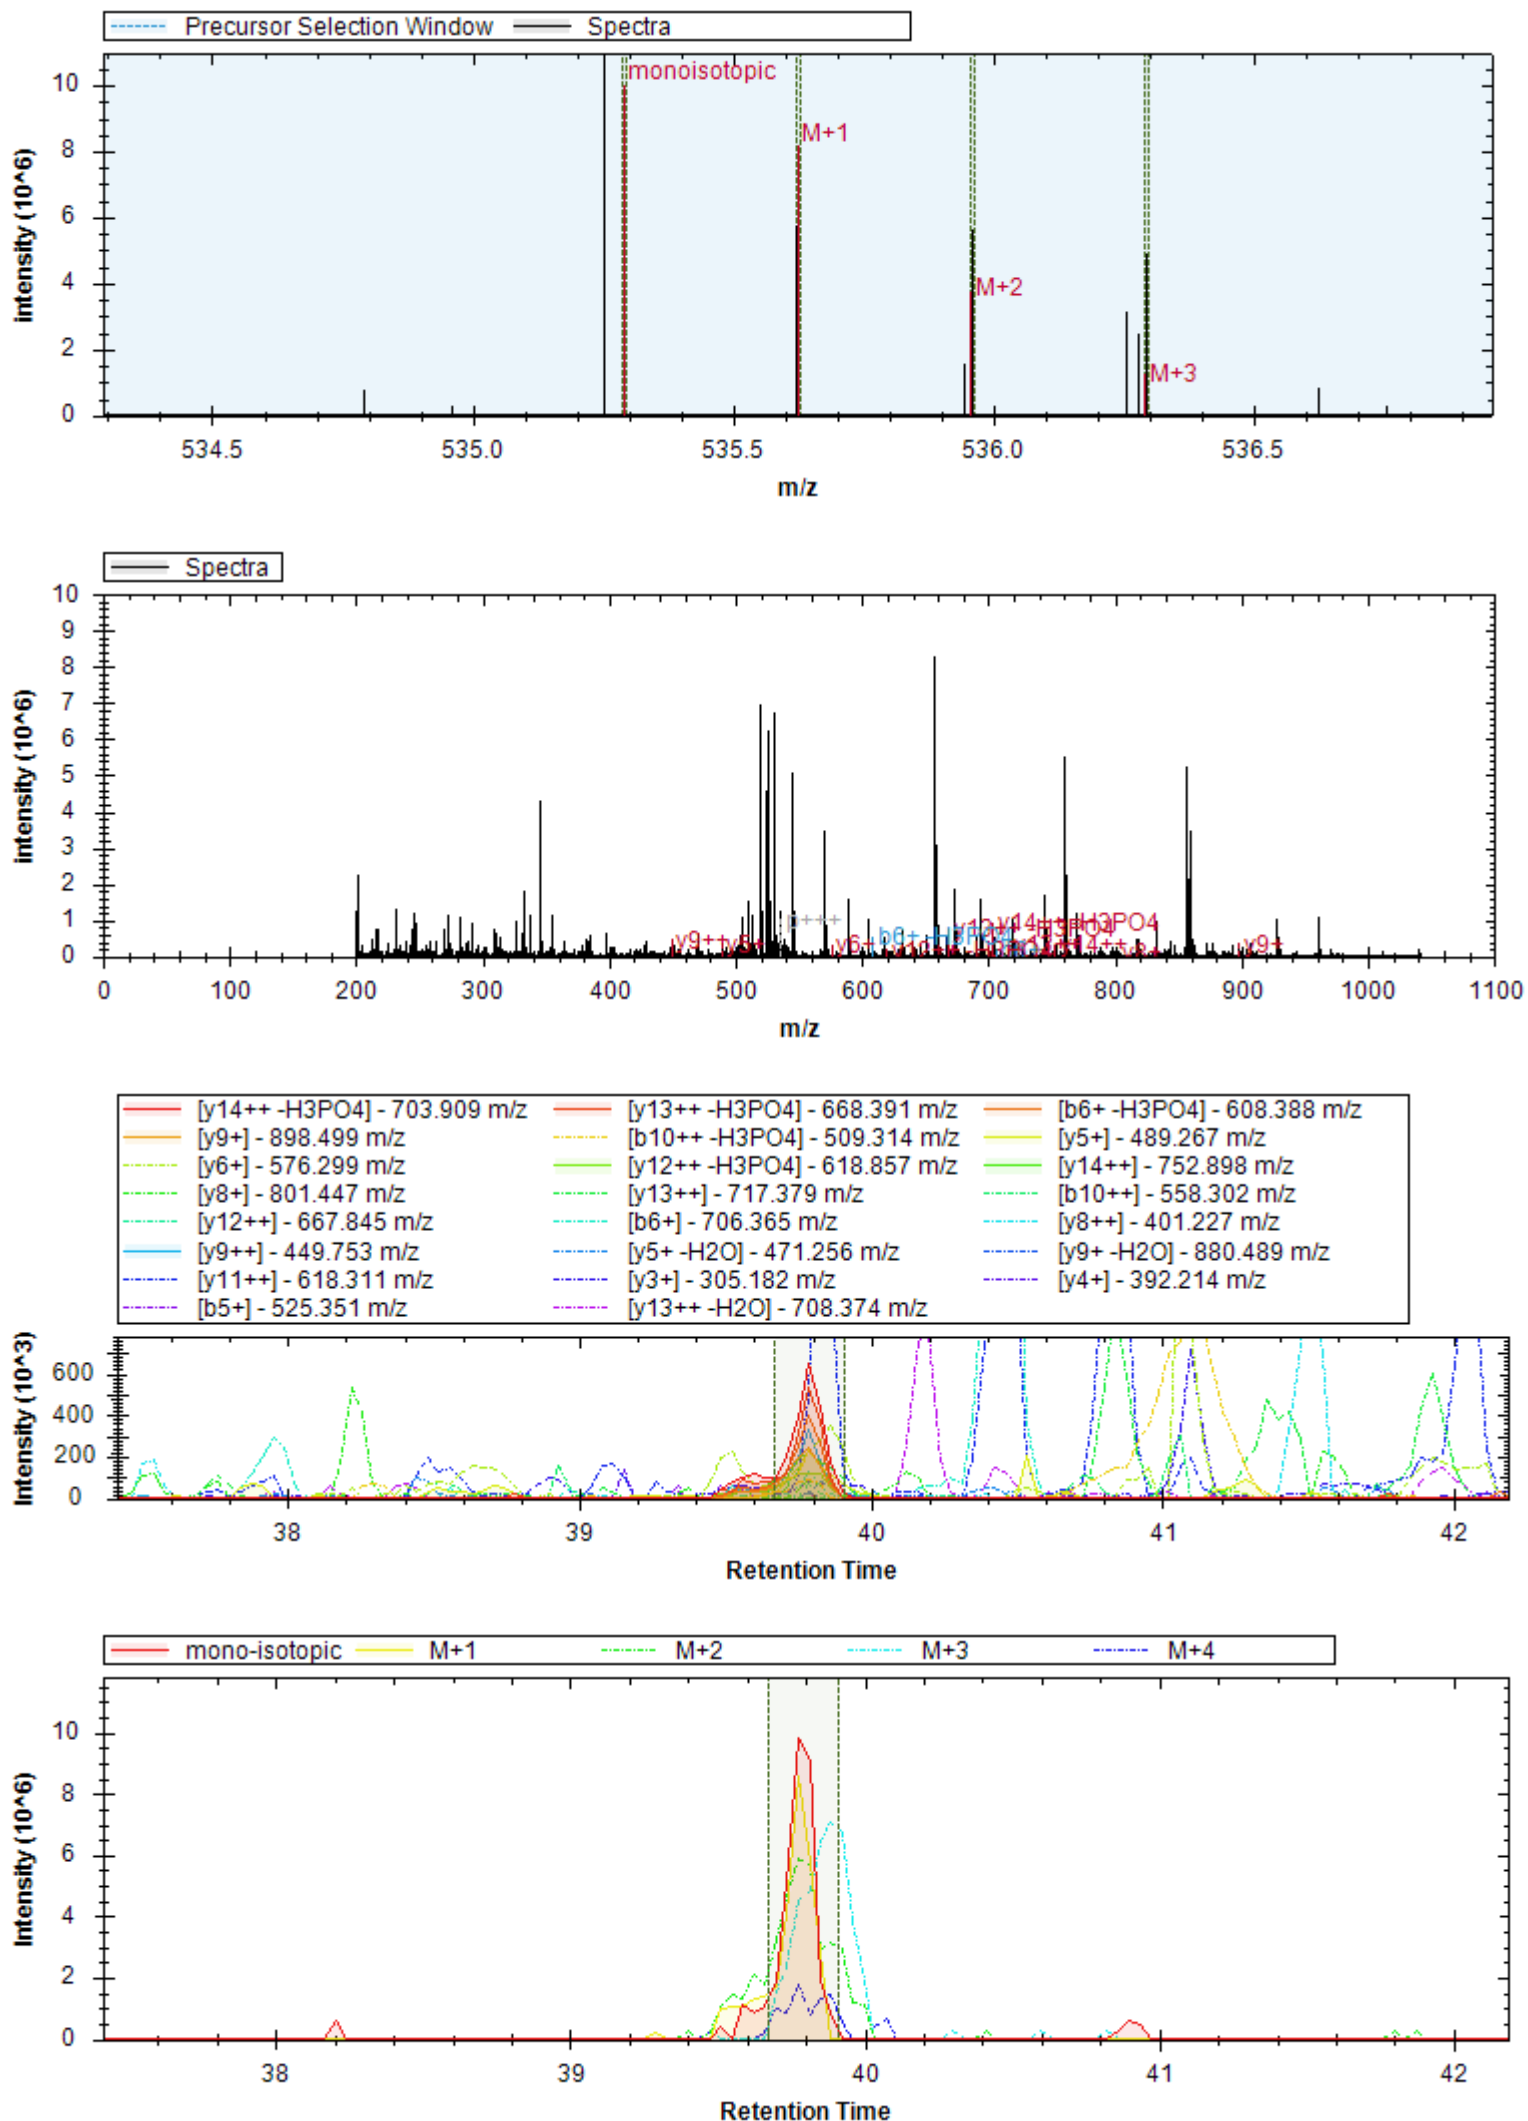



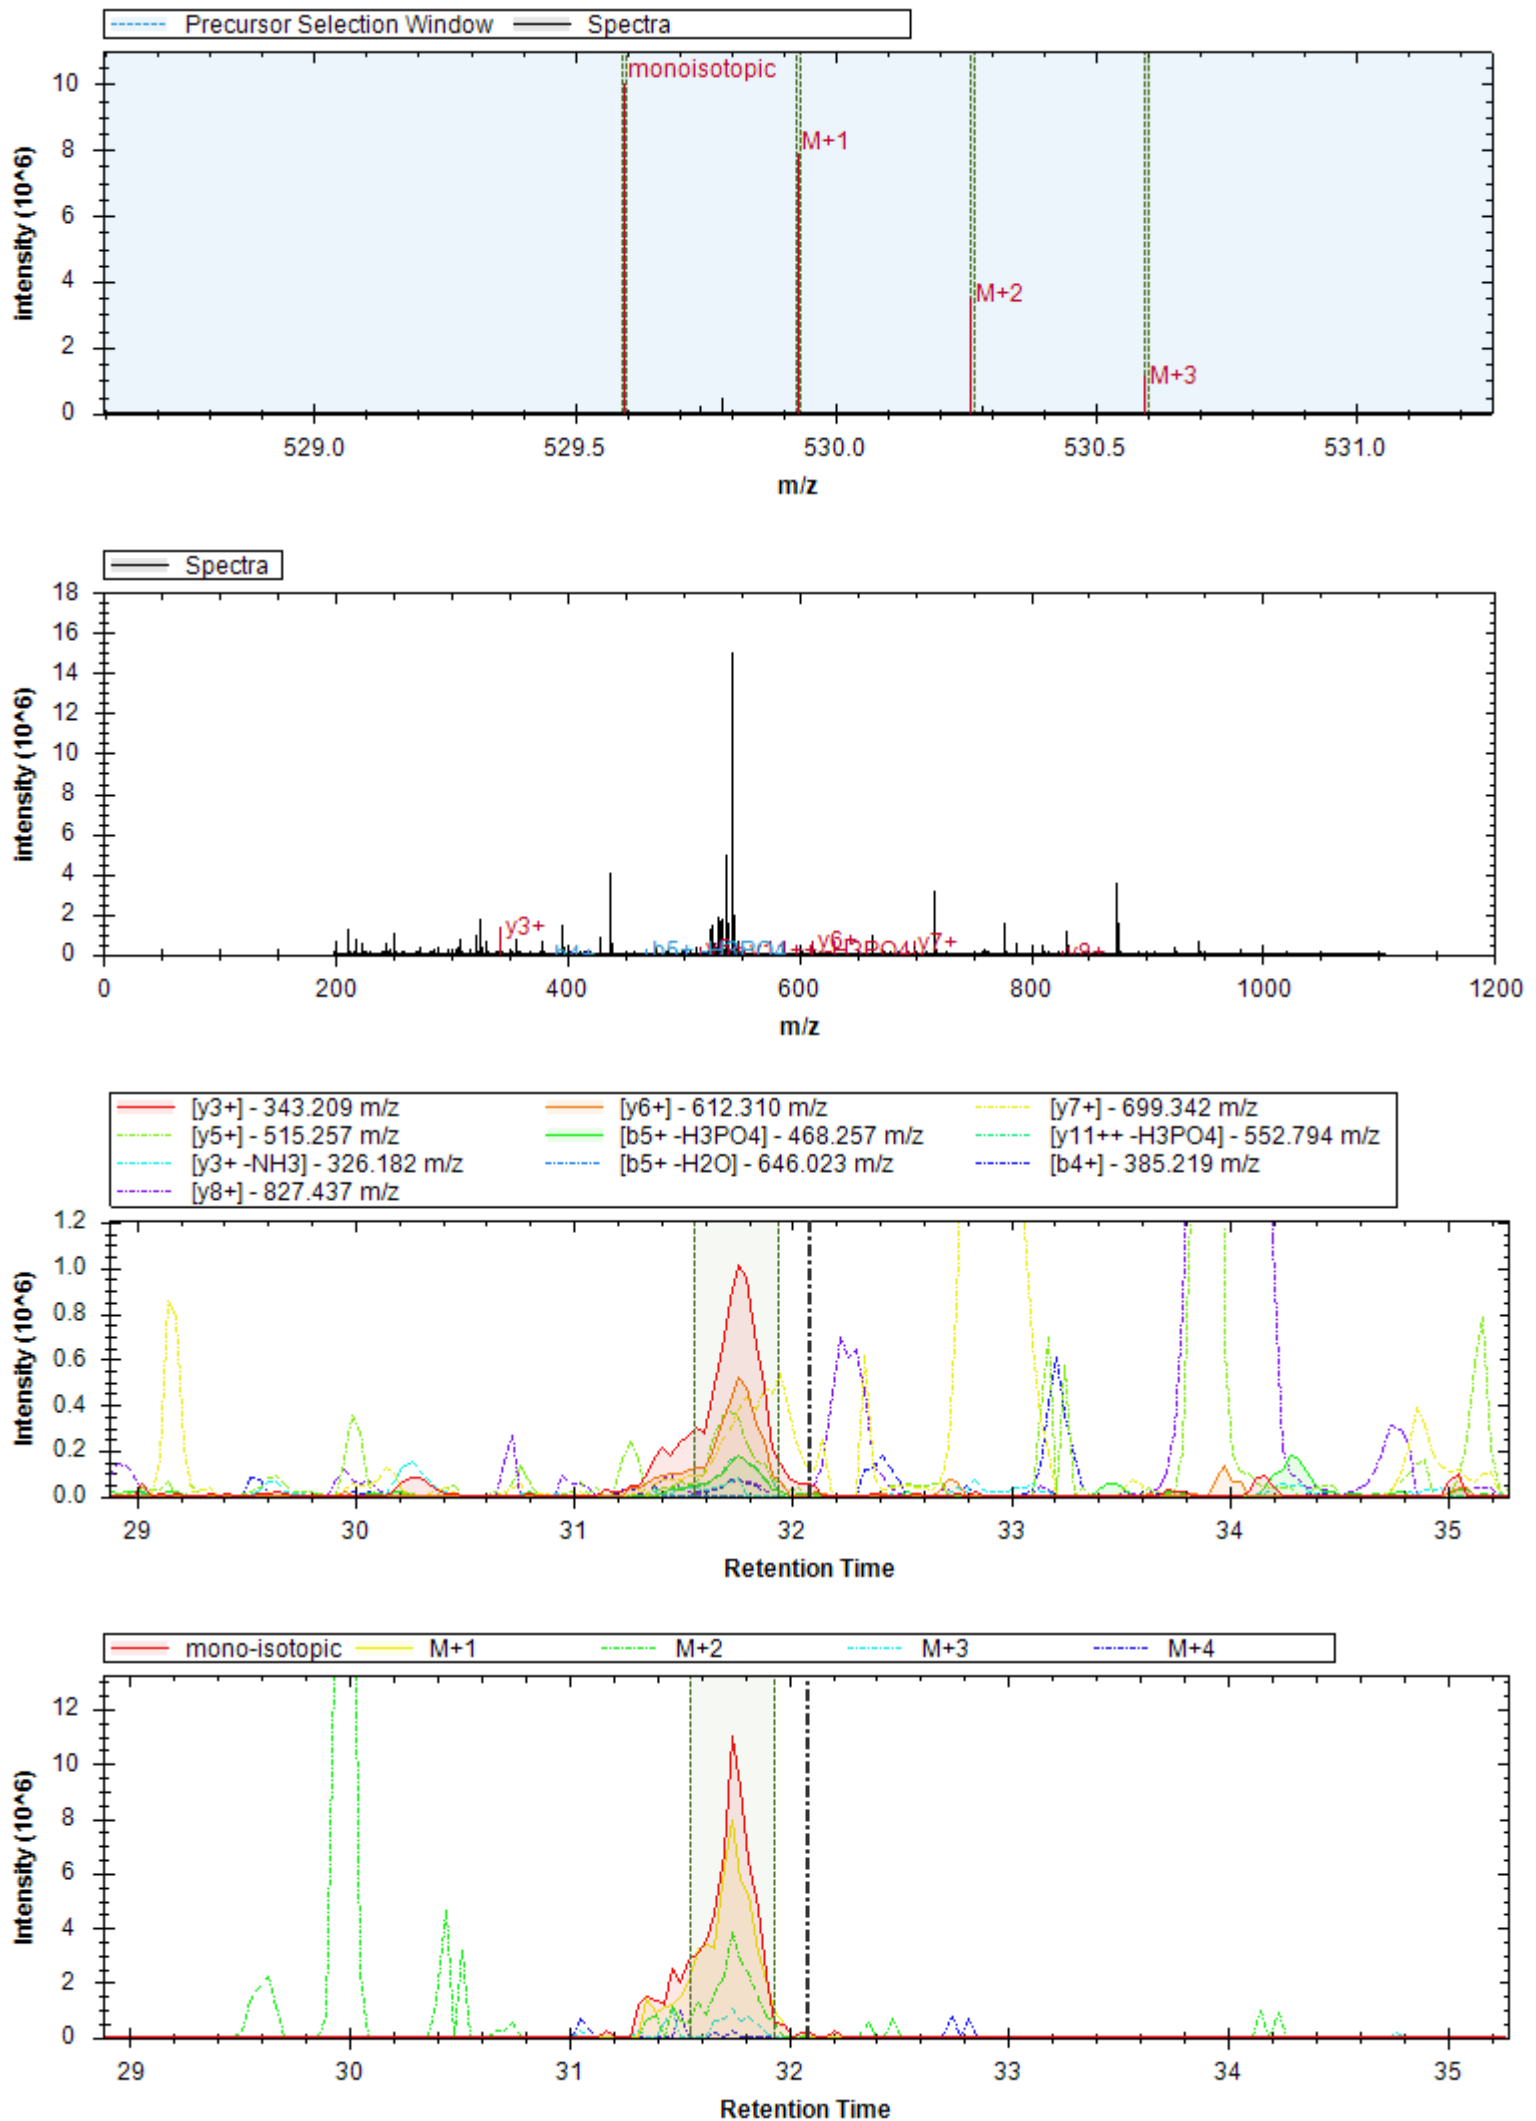

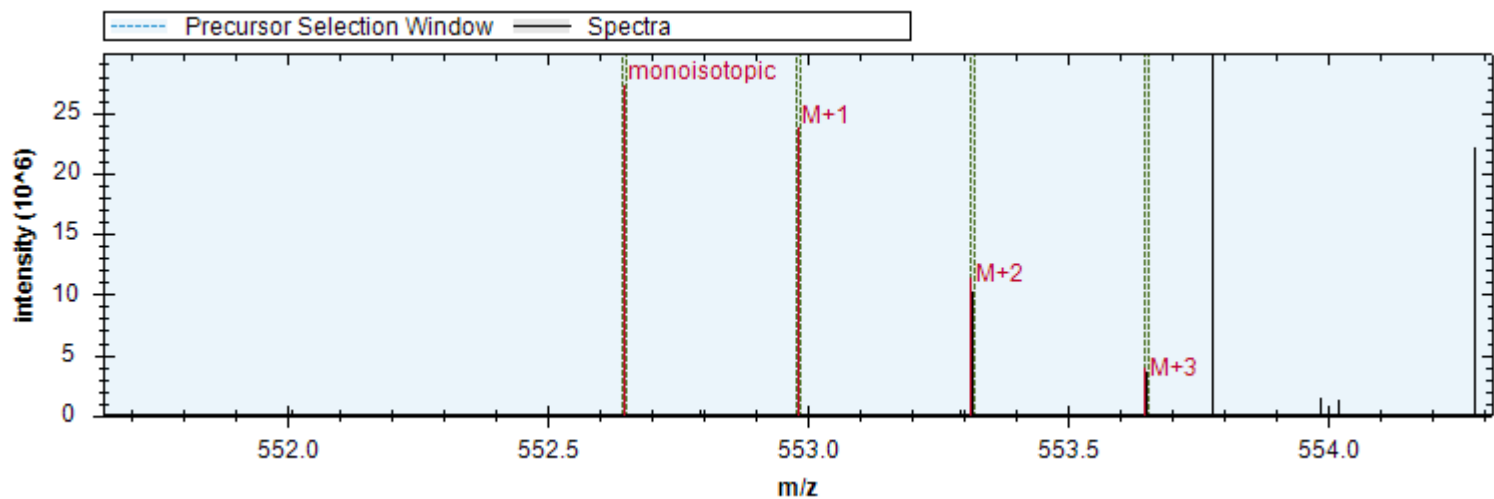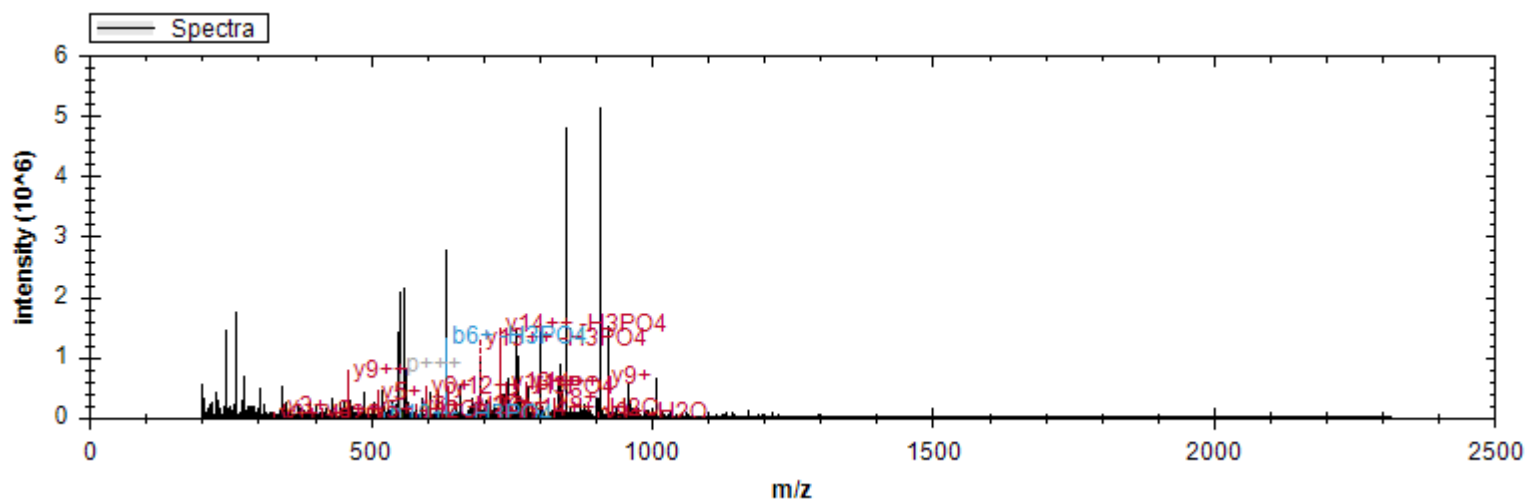

|                              |                              |                              |
|------------------------------|------------------------------|------------------------------|
| [b6+ -H3PO4] - 636.419 m/z   | [y14++ -H3PO4] - 729.943 m/z | [y13++ -H3PO4] - 694.425 m/z |
| [y9++] - 461.772 m/z         | [y9+] - 922.536 m/z          | [y5+] - 513.303 m/z          |
| [y12++ -H3PO4] - 637.883 m/z | [y6+] - 600.335 m/z          | [y10++] - 552.278 m/z        |
| [y14++] - 778.932 m/z        | [y13++] - 743.413 m/z        | [b6+] - 734.396 m/z          |
| [y8+] - 825.483 m/z          | [y6+ -H2O] - 582.325 m/z     | [y3+] - 345.213 m/z          |
| [y9+ -H2O] - 904.525 m/z     | [y5+ -H2O] - 495.293 m/z     | [y7+] - 728.430 m/z          |
| [y12++] - 686.871 m/z        | [y14++ -H2O] - 769.926 m/z   | [y3+ -H2O] - 327.203 m/z     |
| [y8++] - 413.245 m/z         | [b10++] - 572.318 m/z        | [b10++ -H3PO4] - 523.330 m/z |

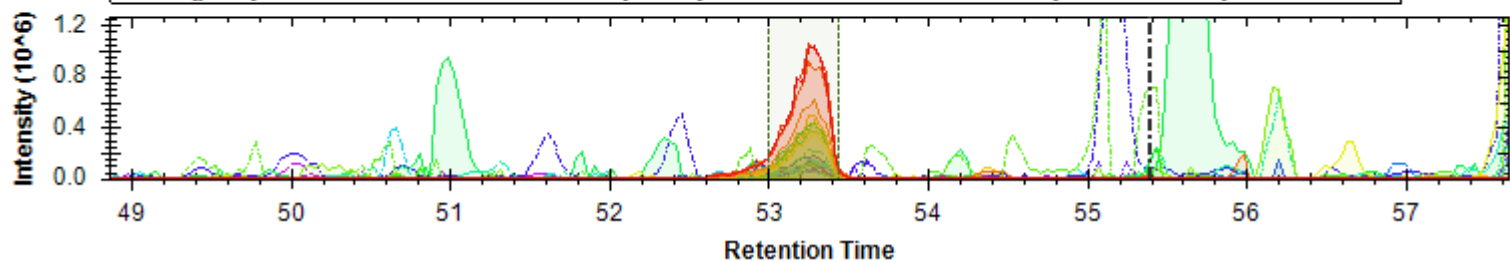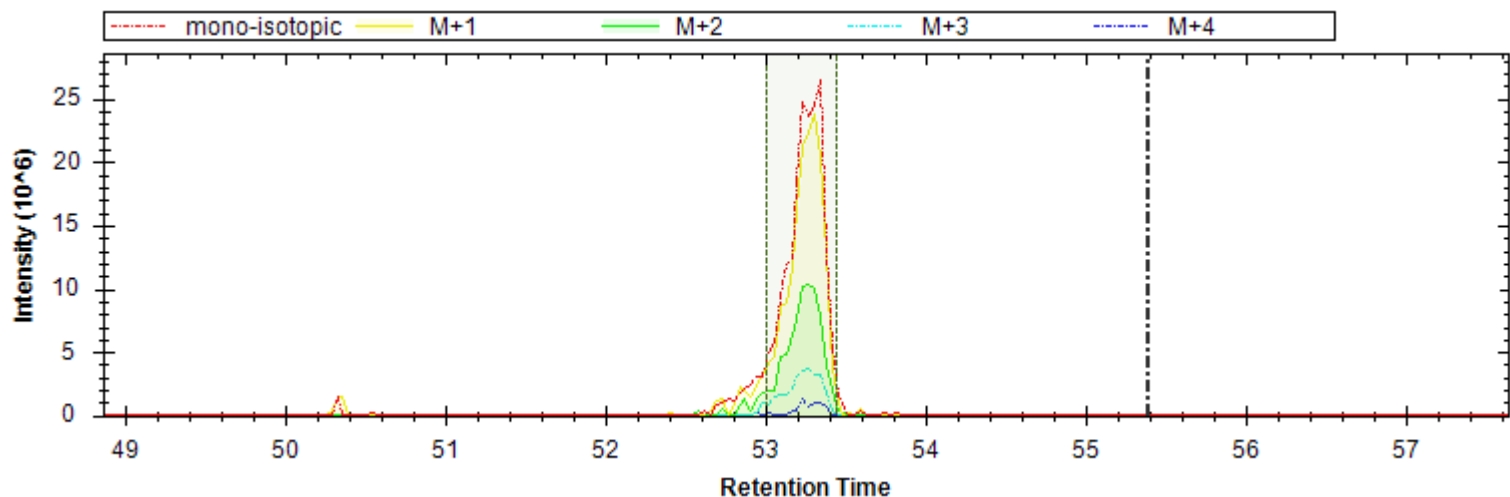

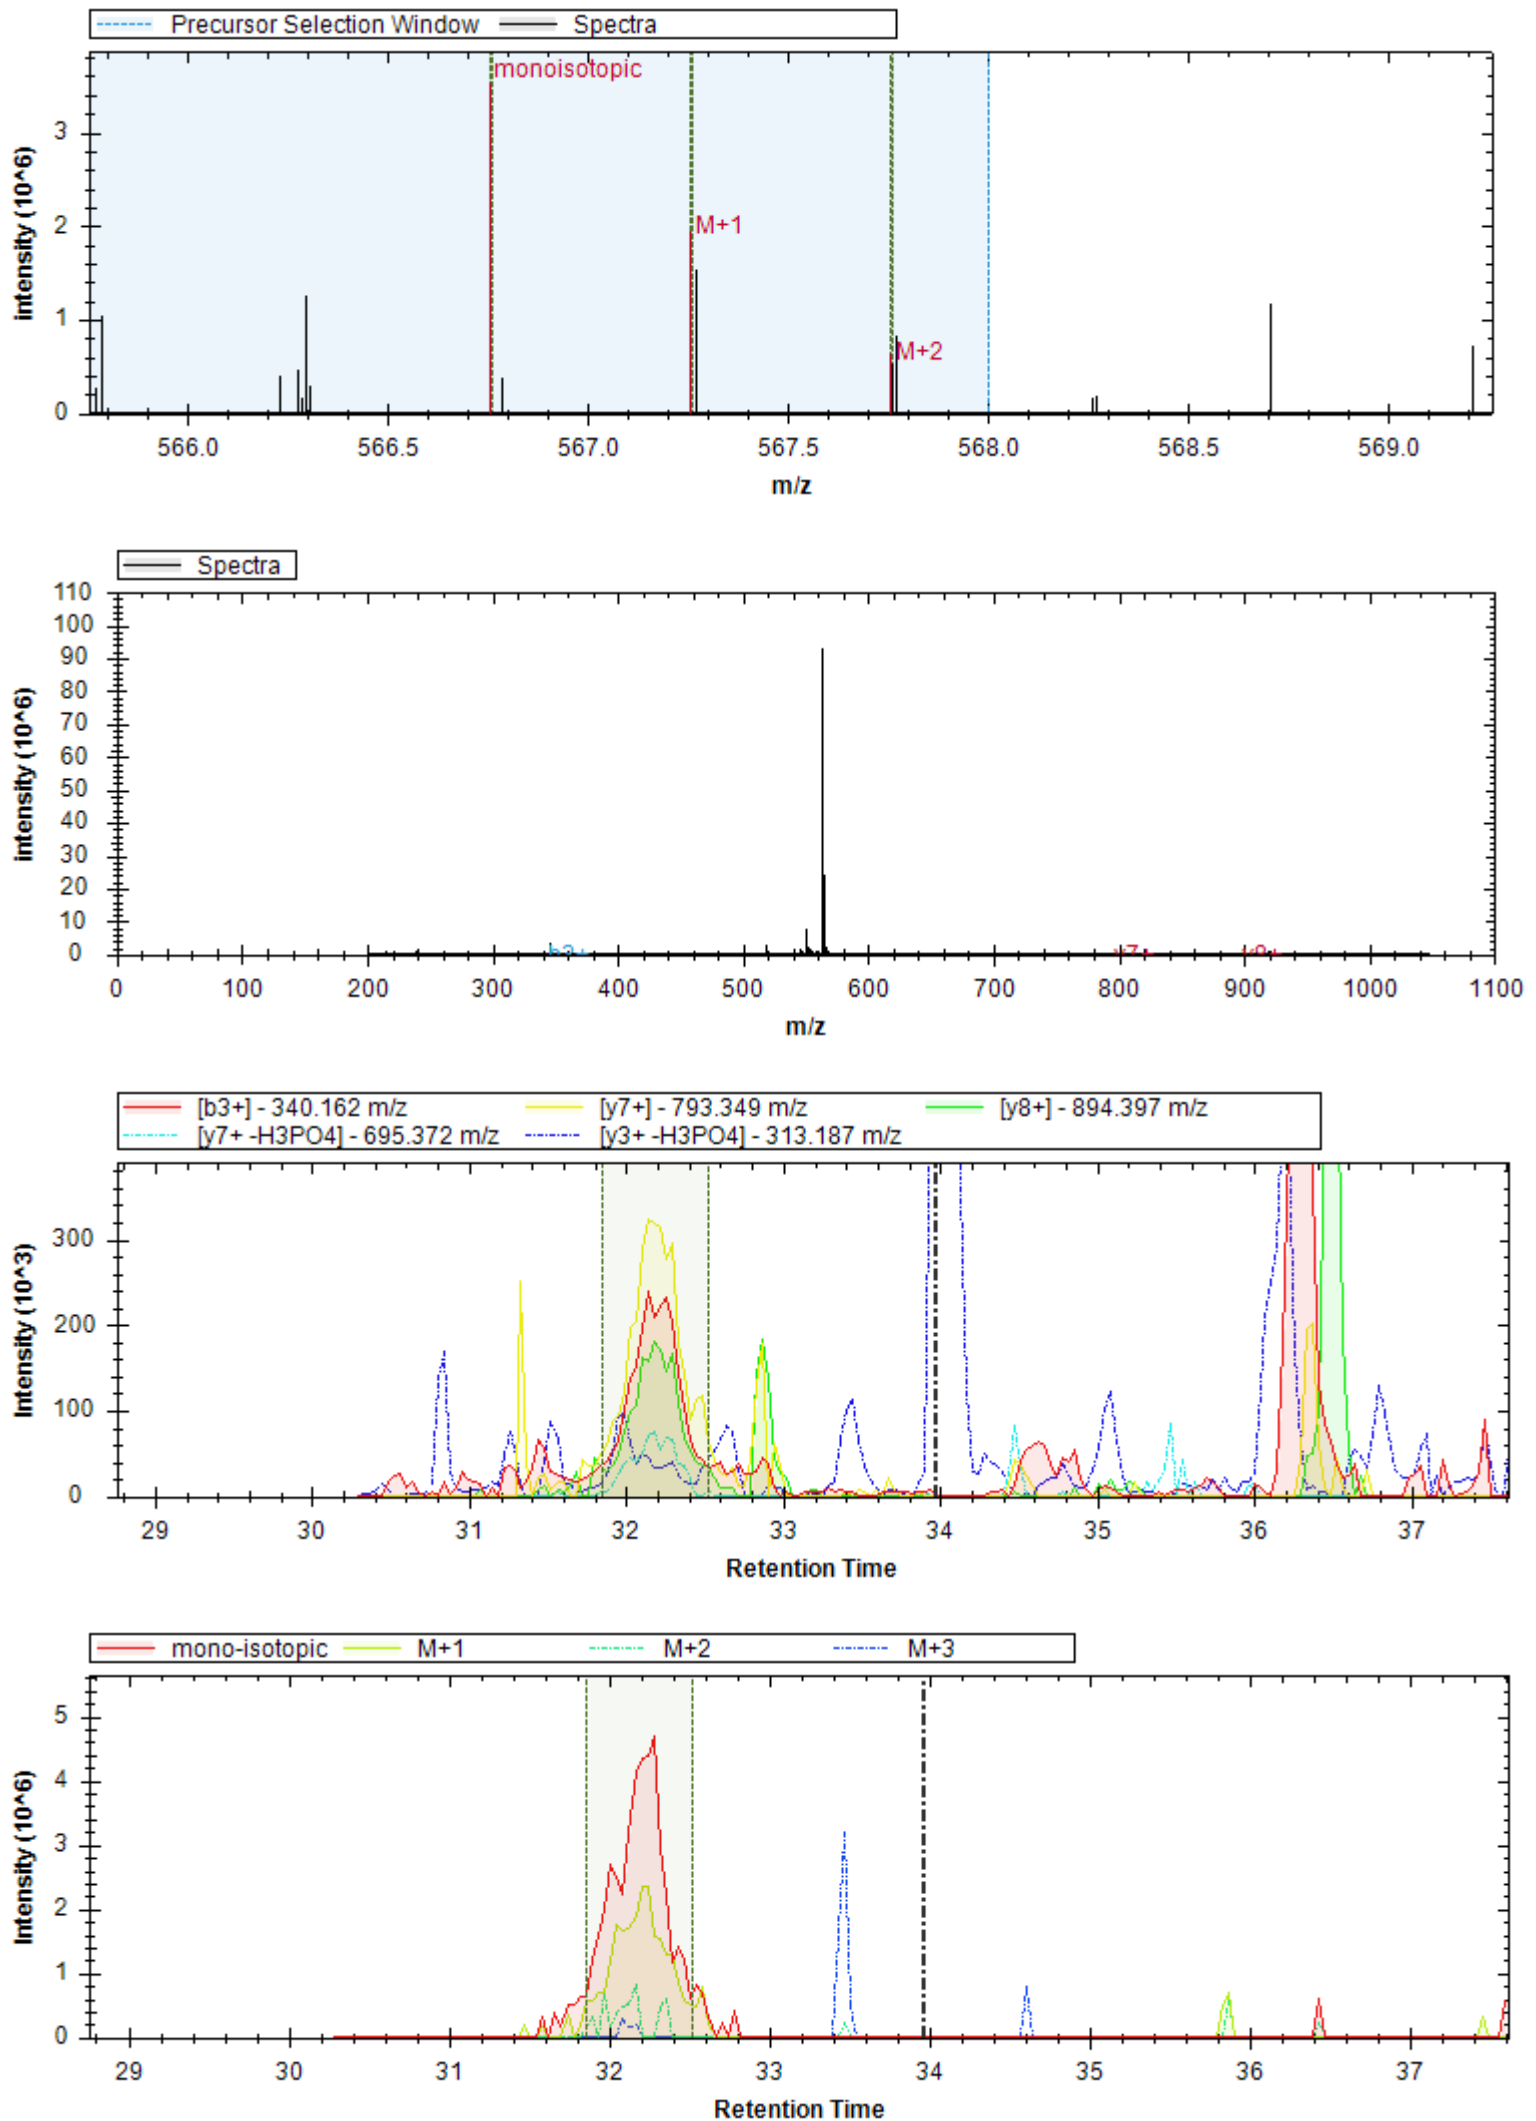

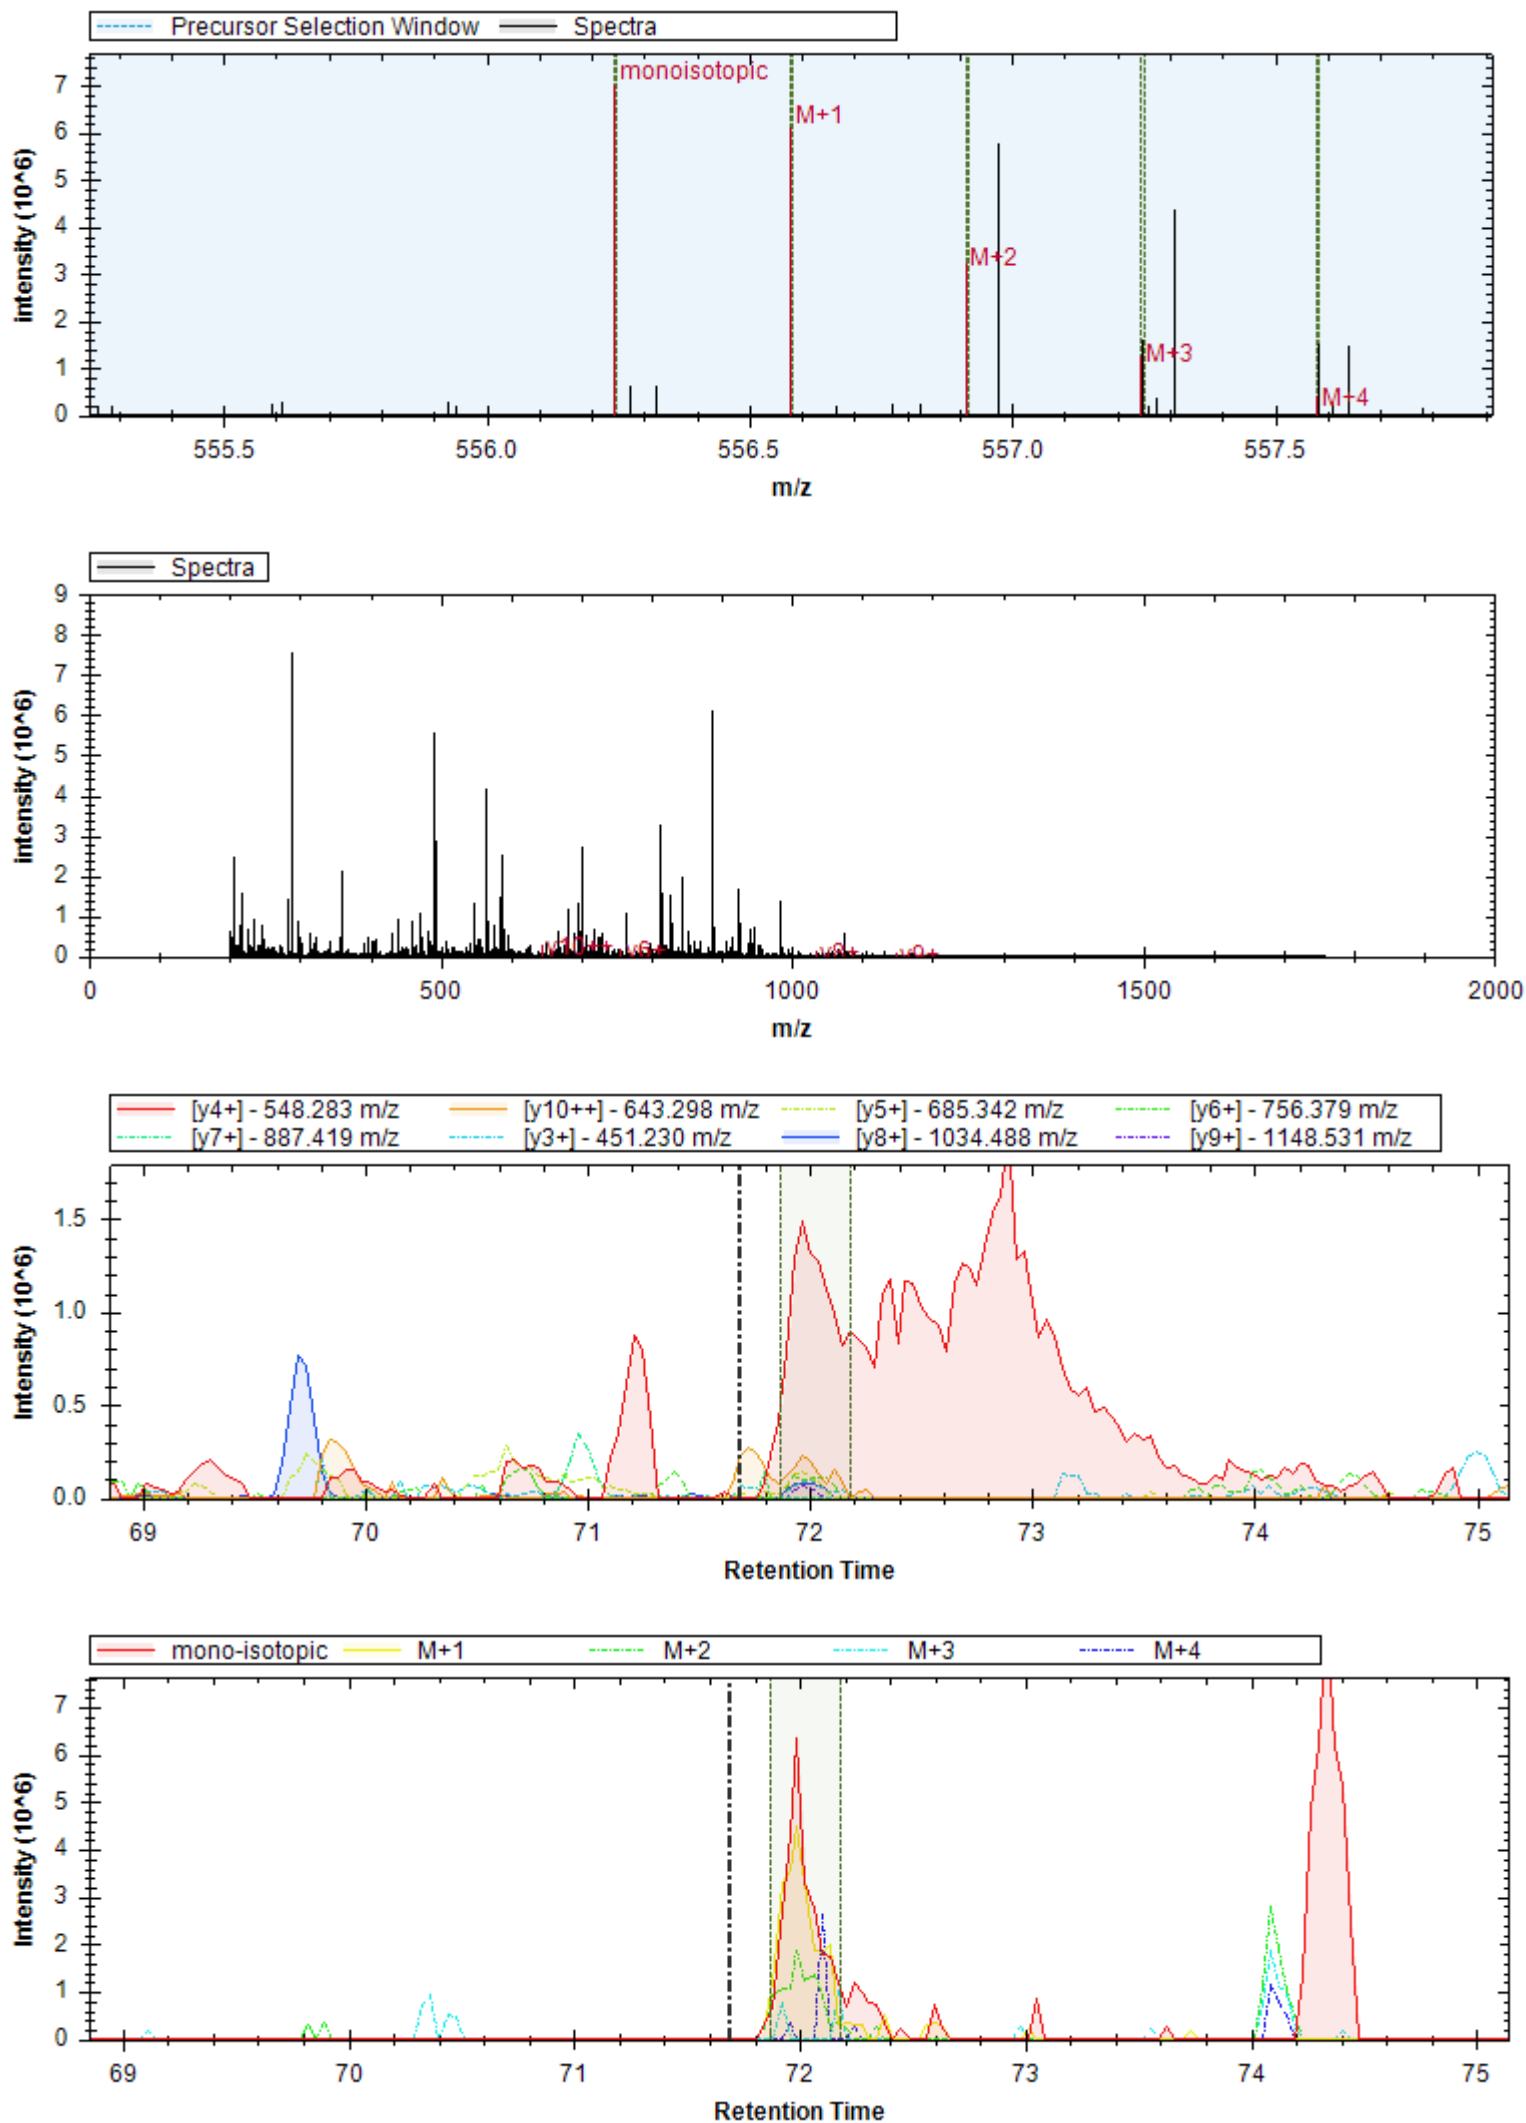

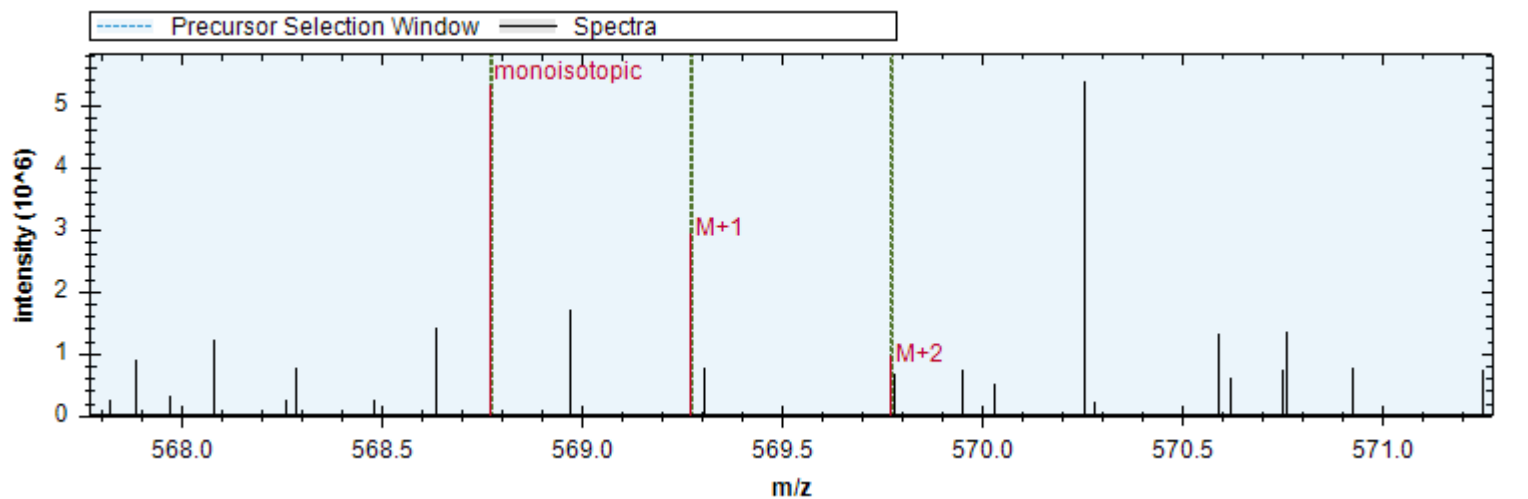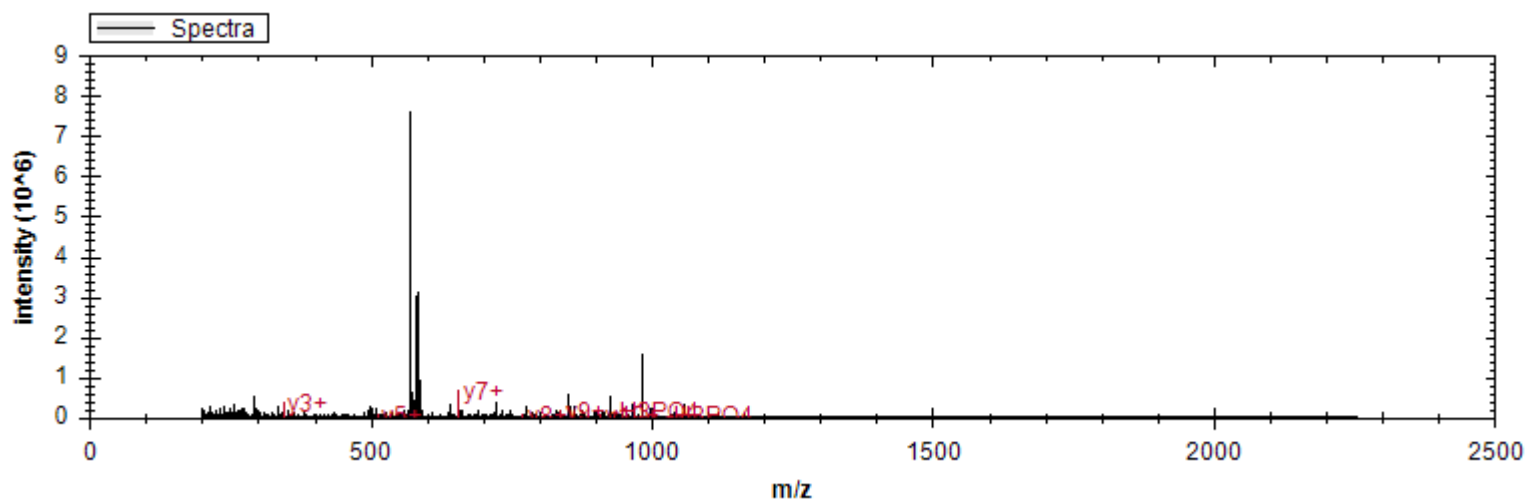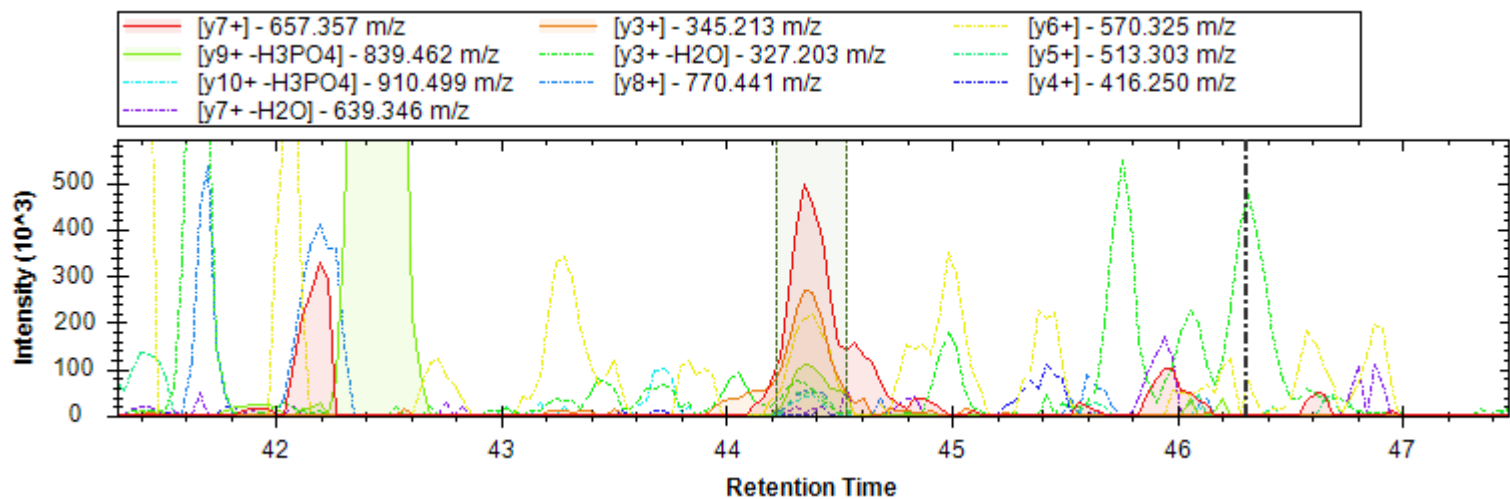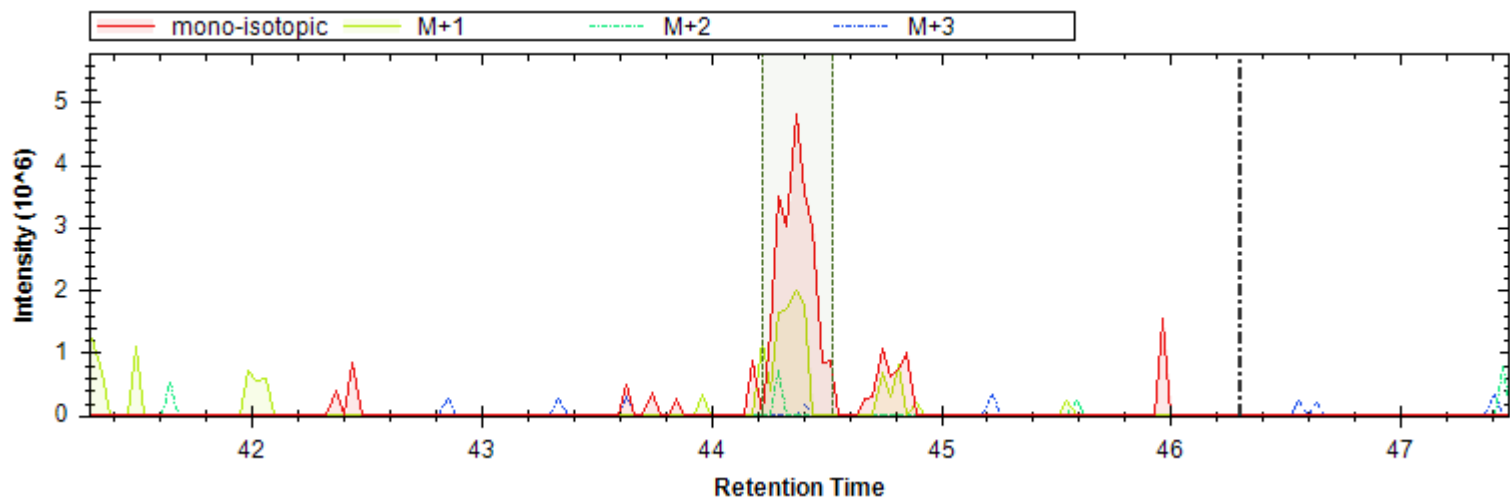

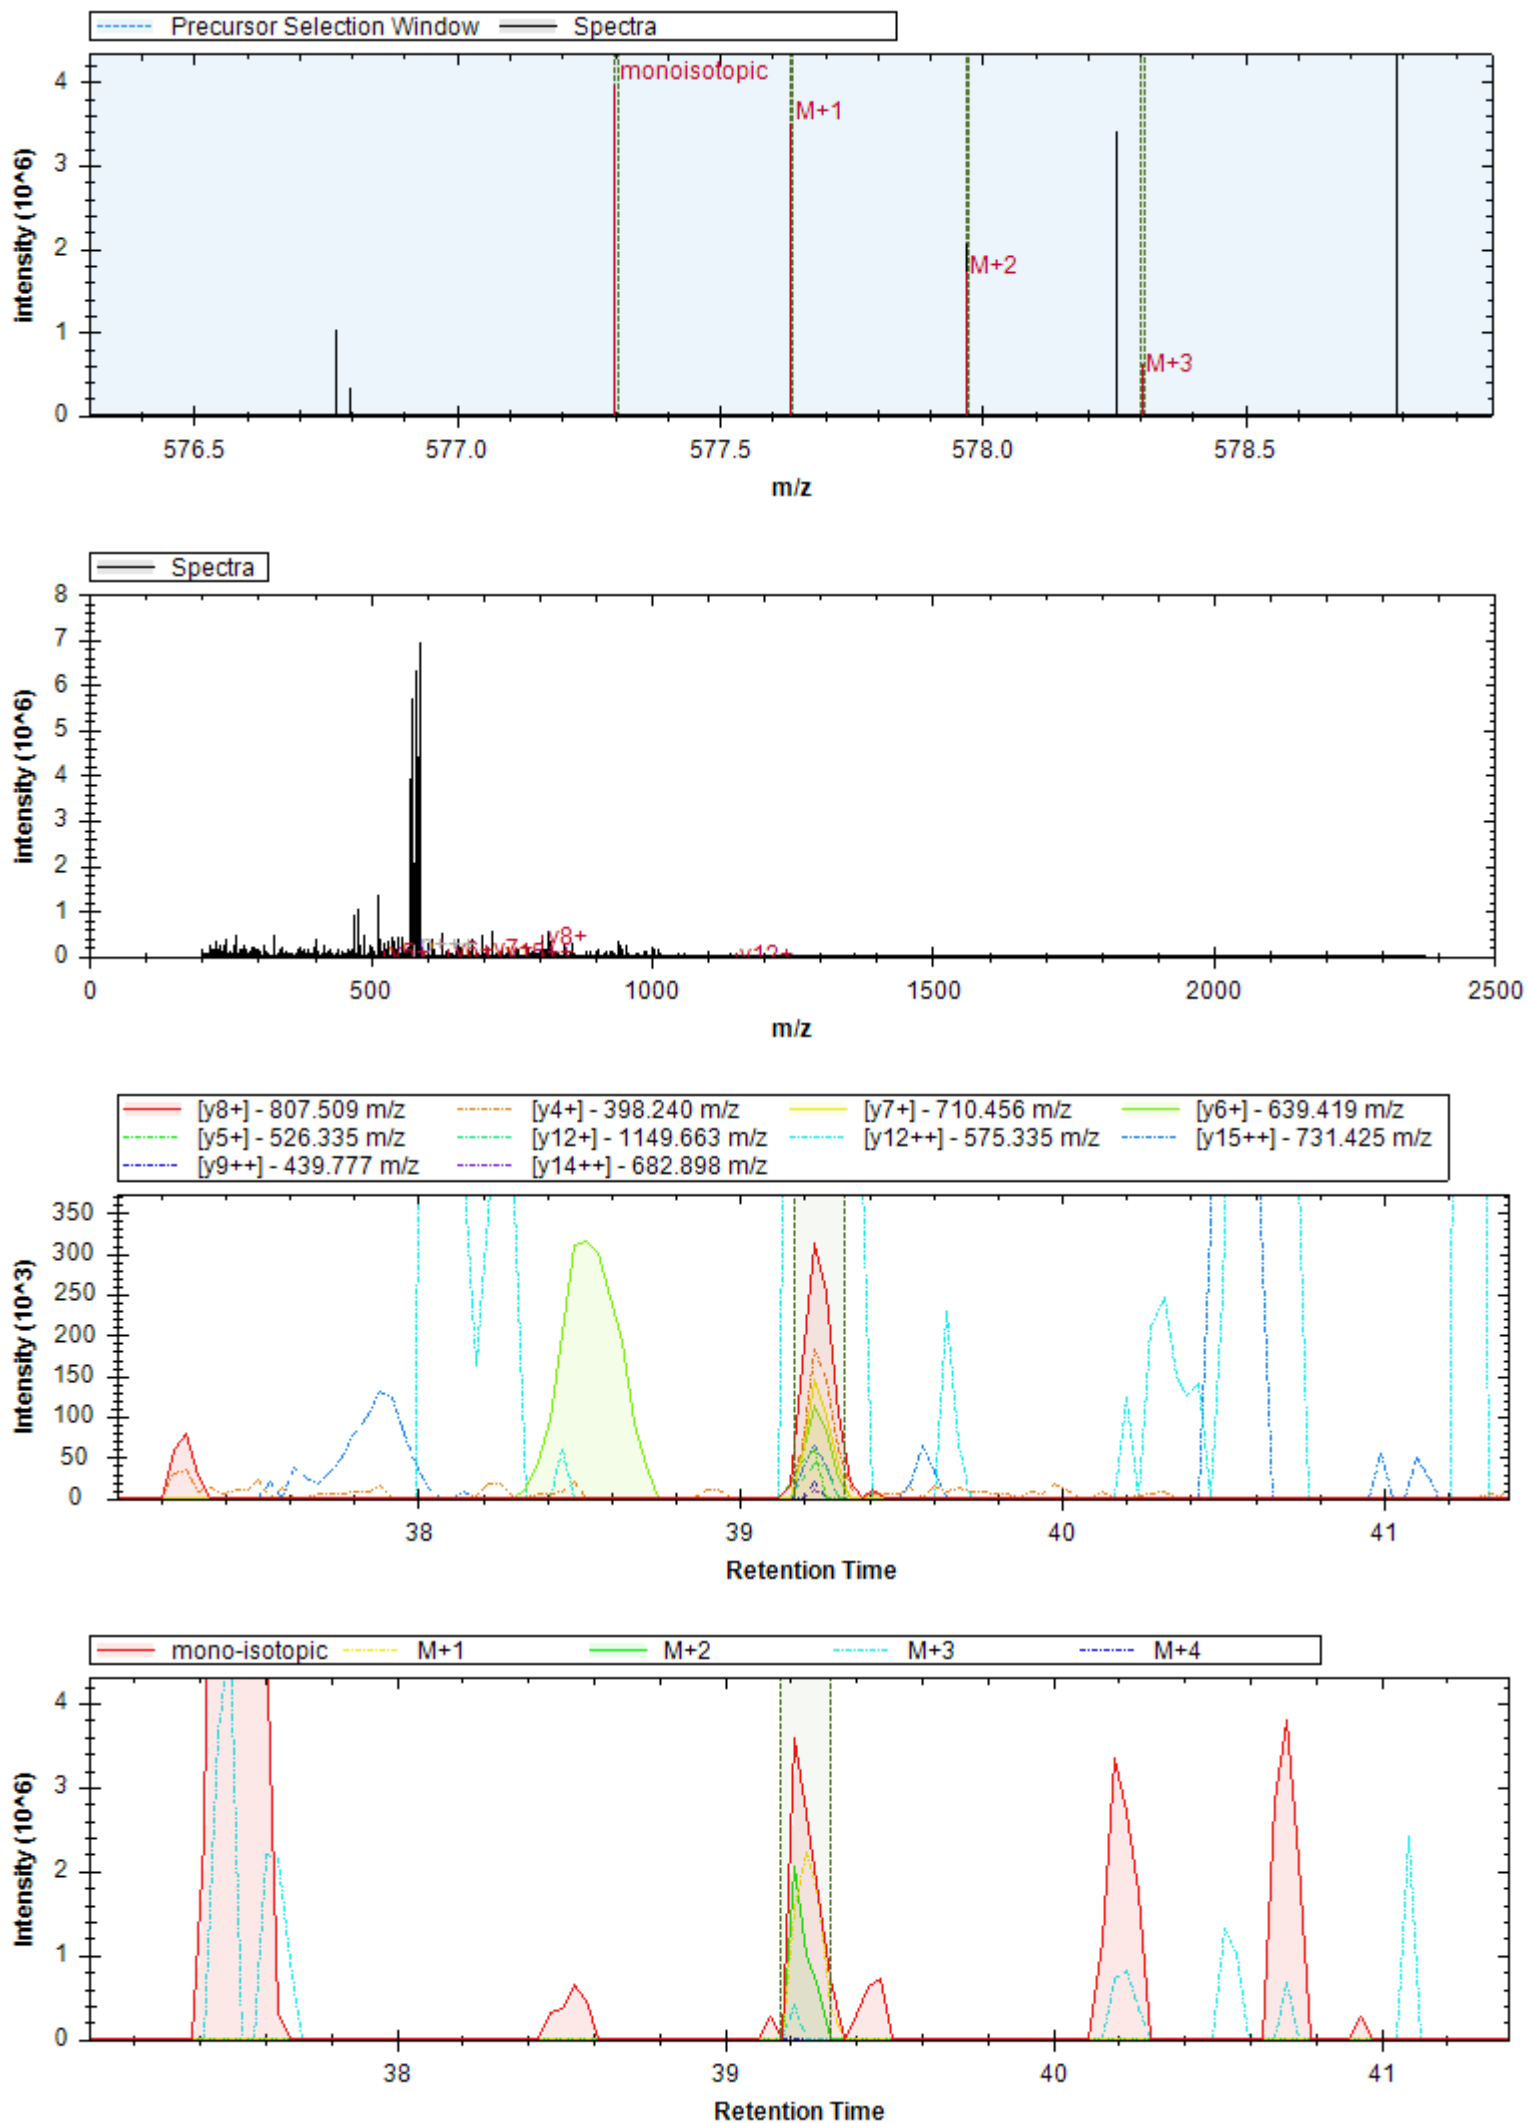

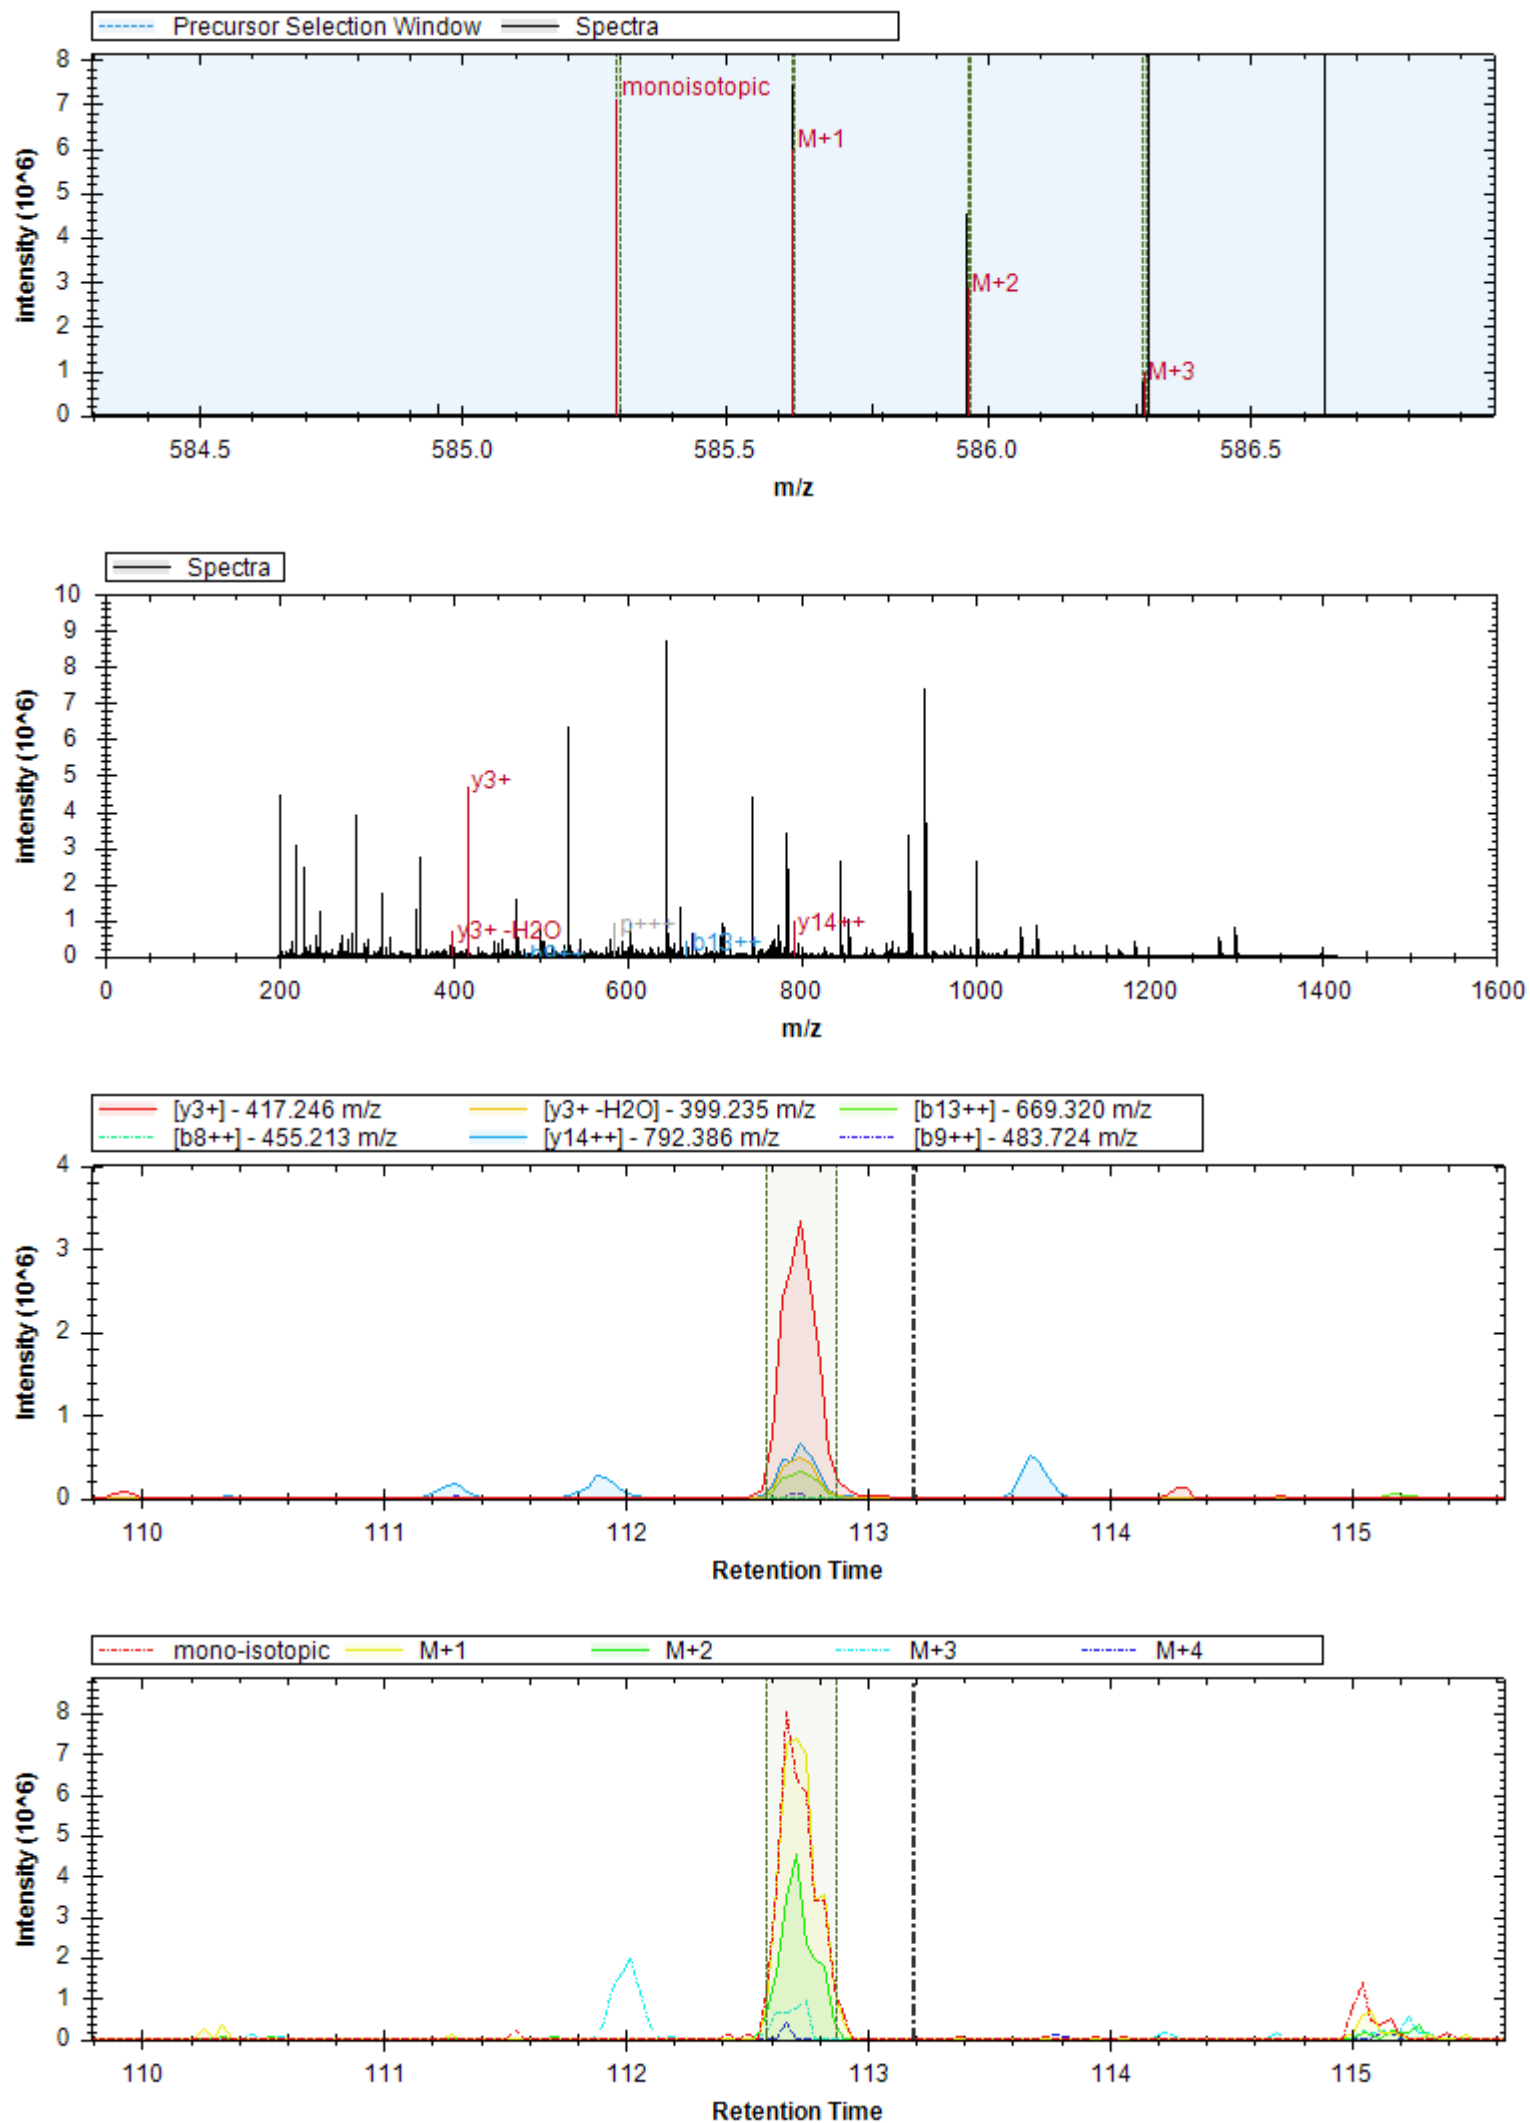

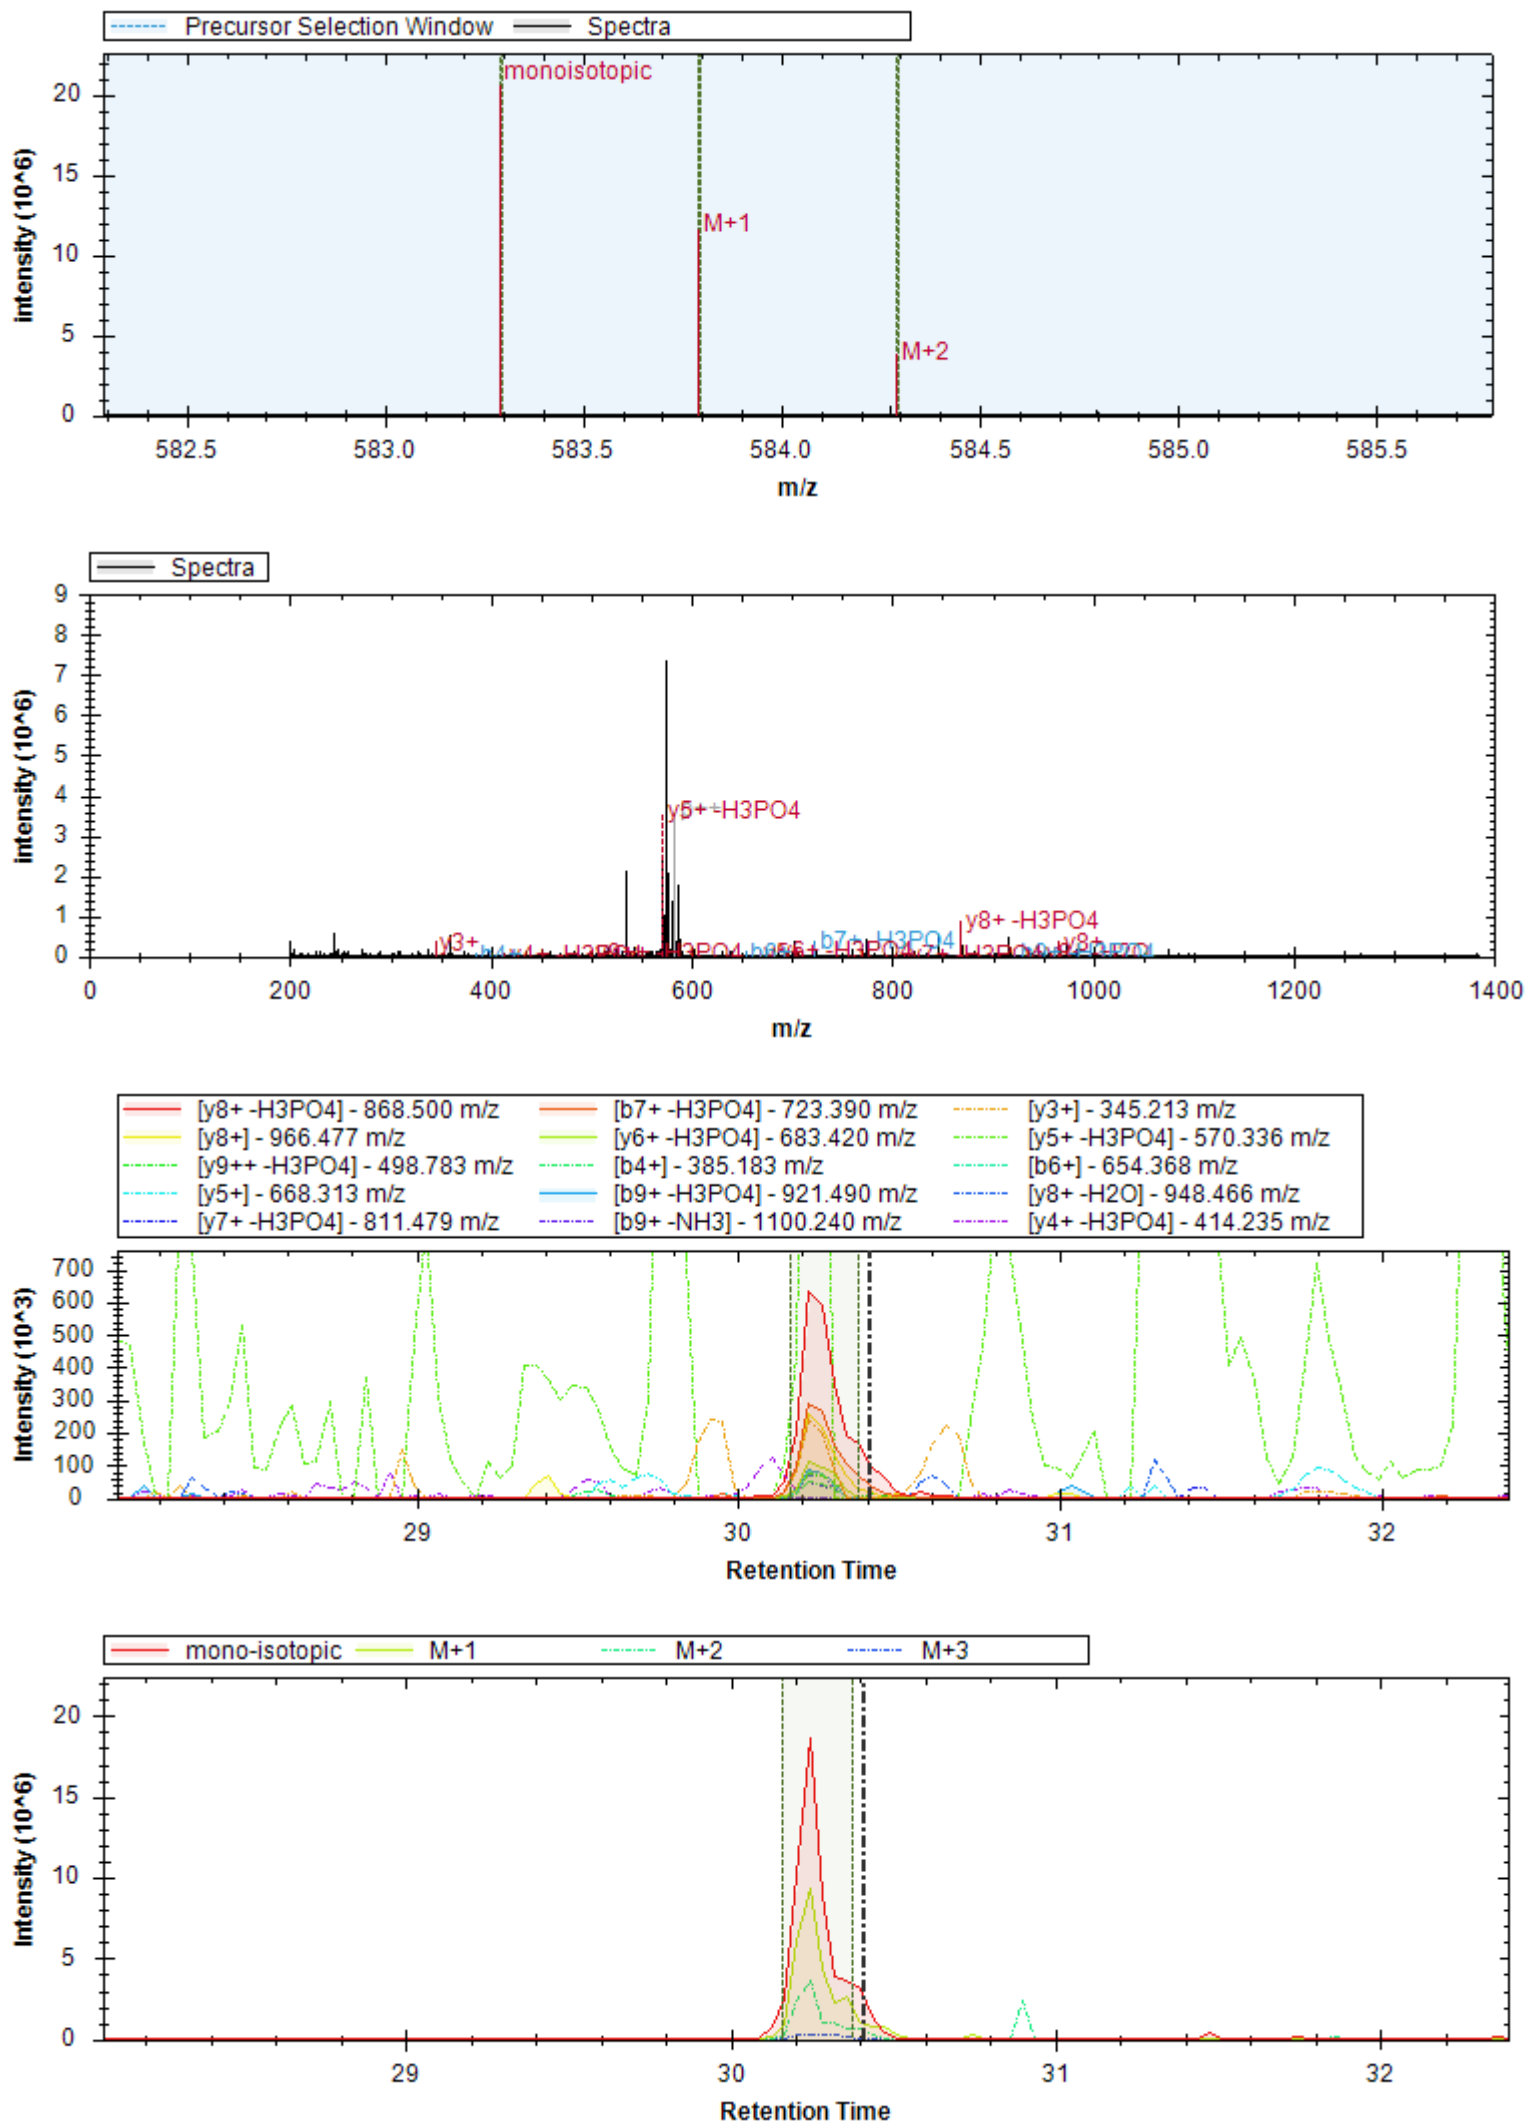



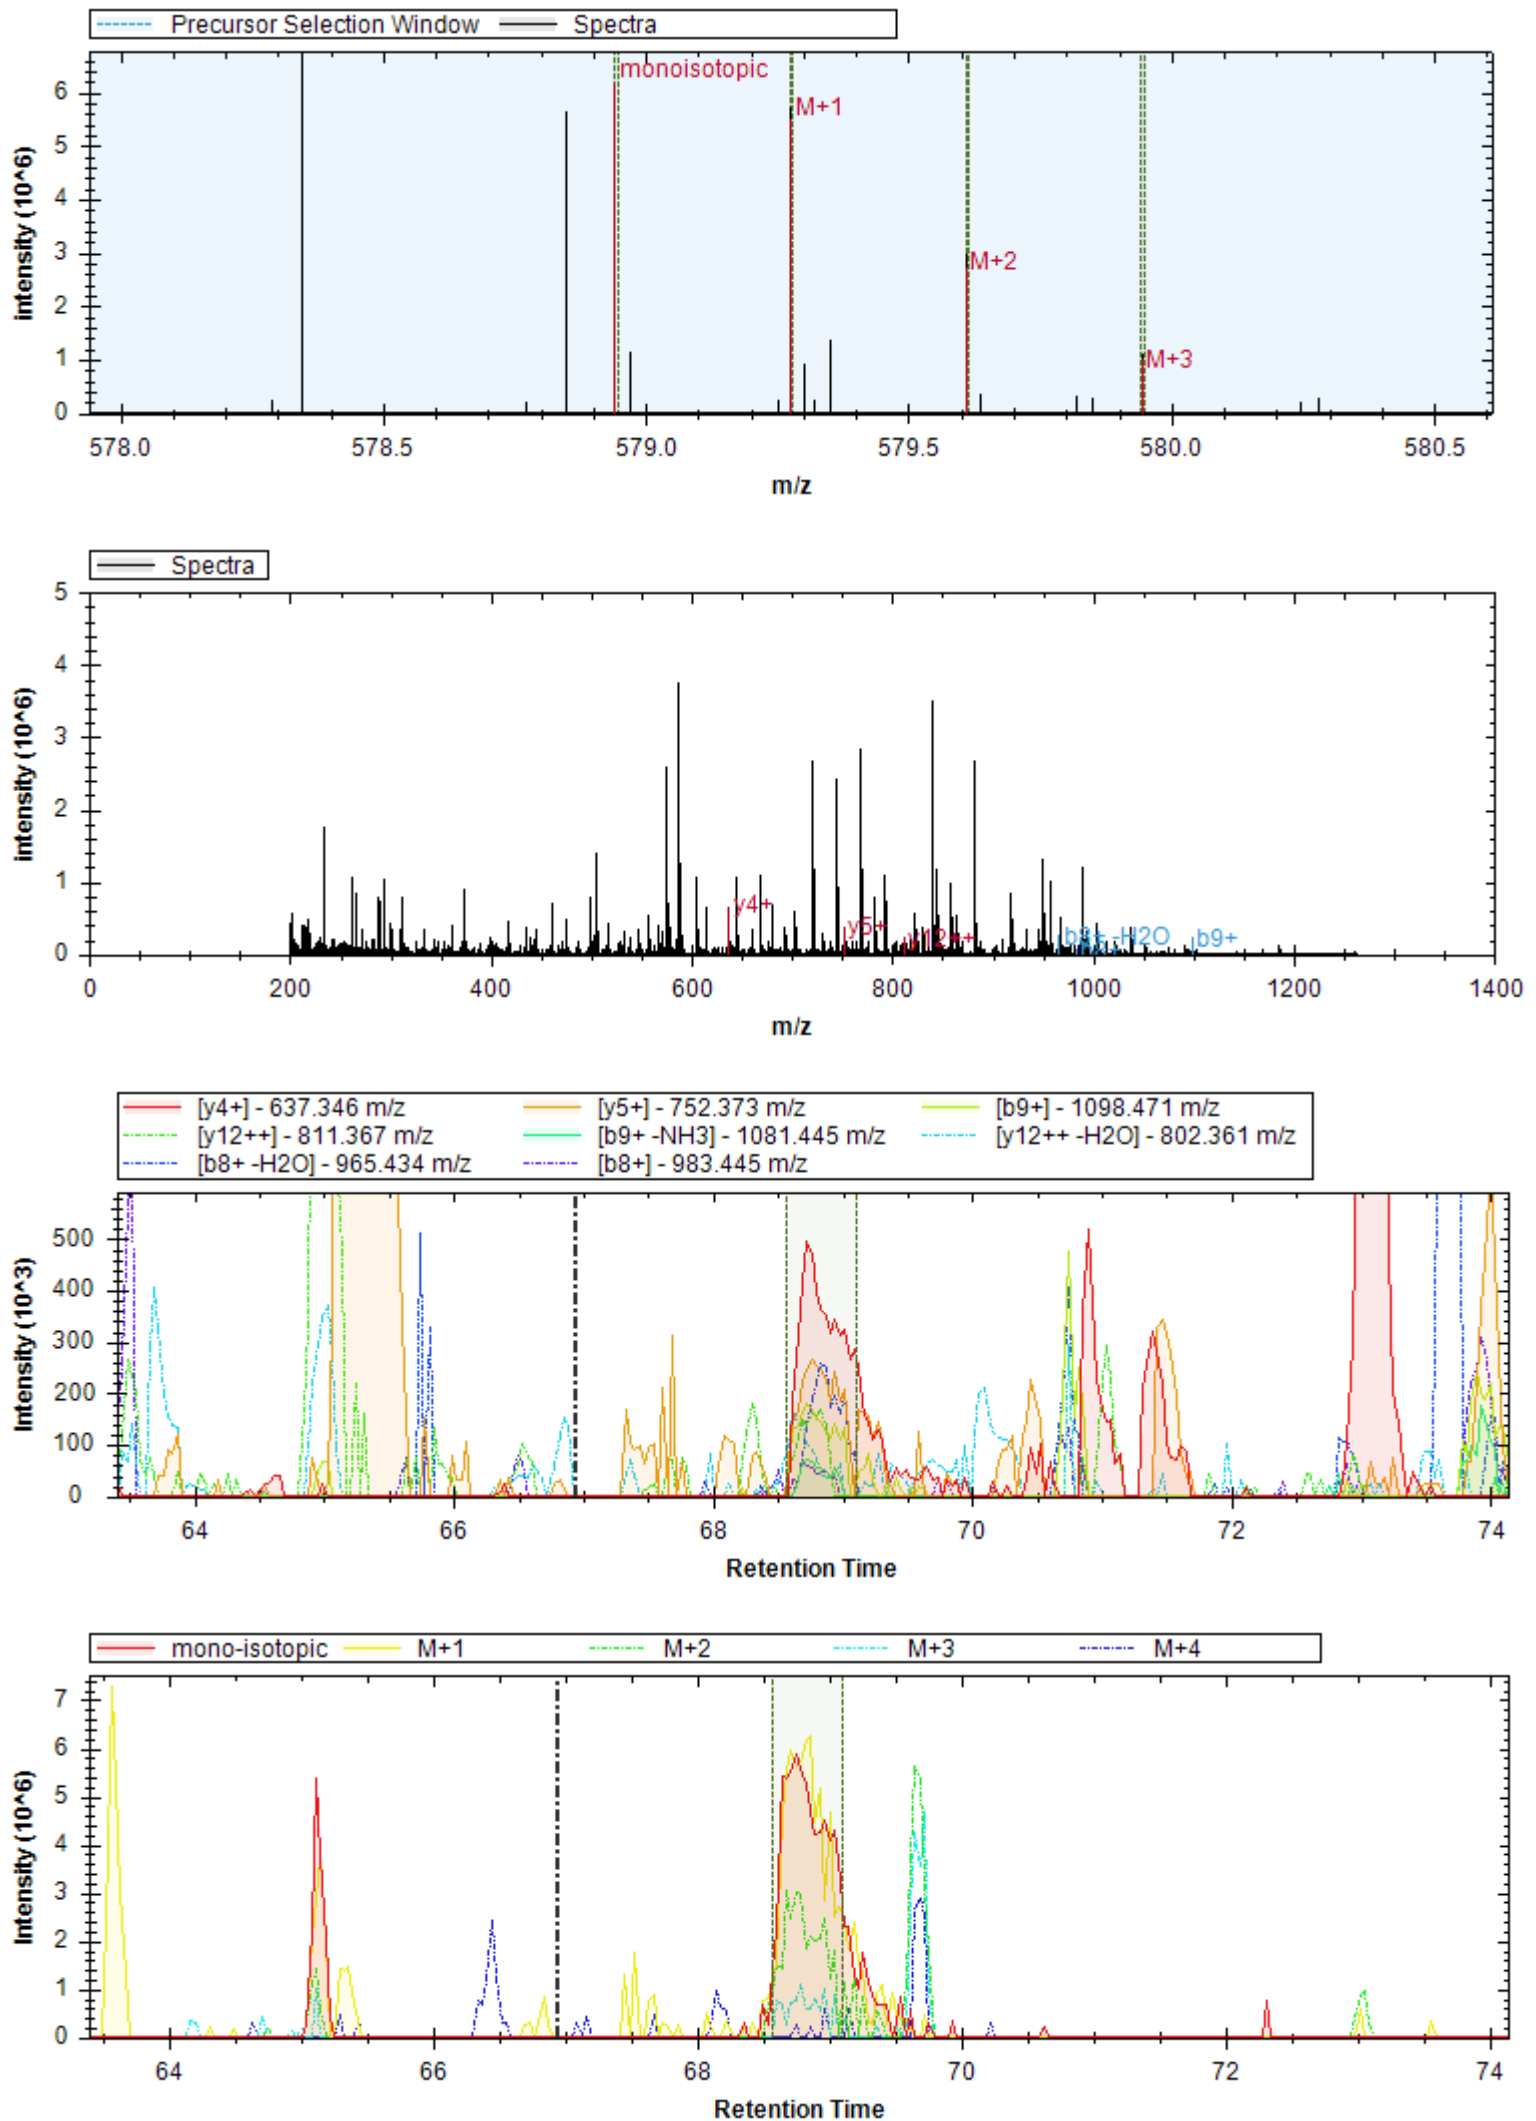

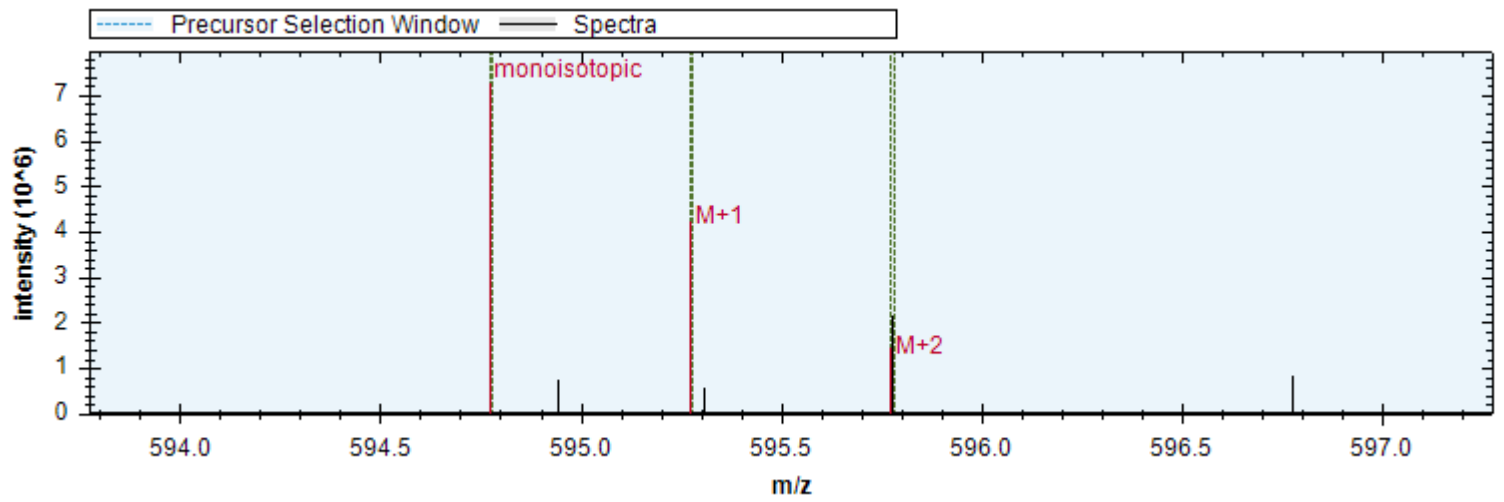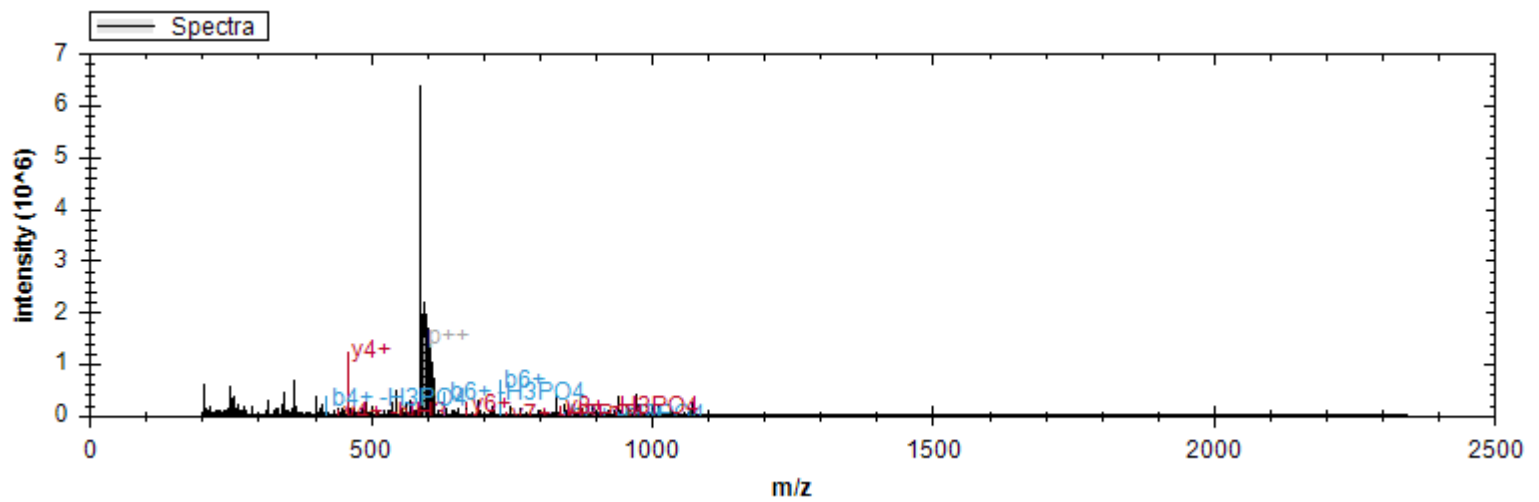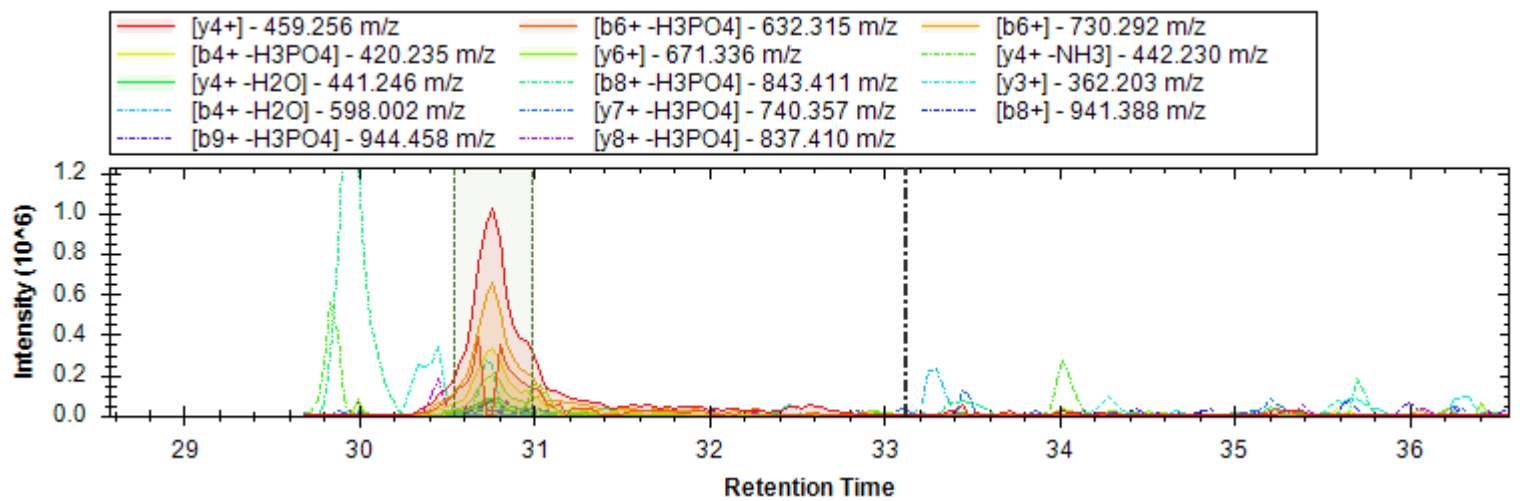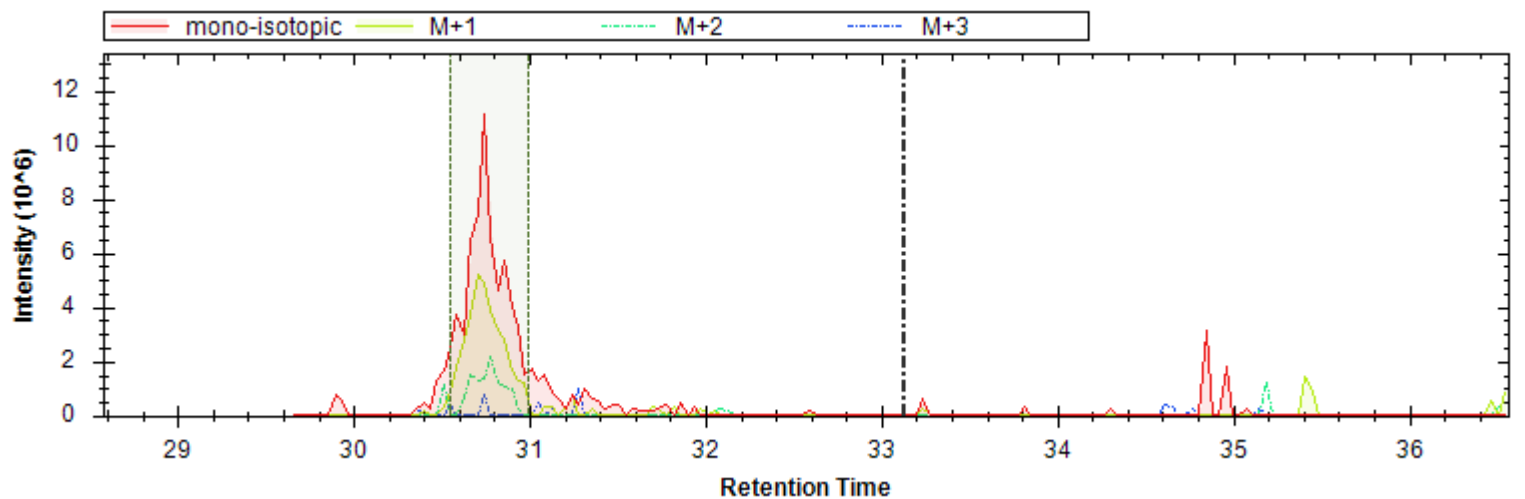

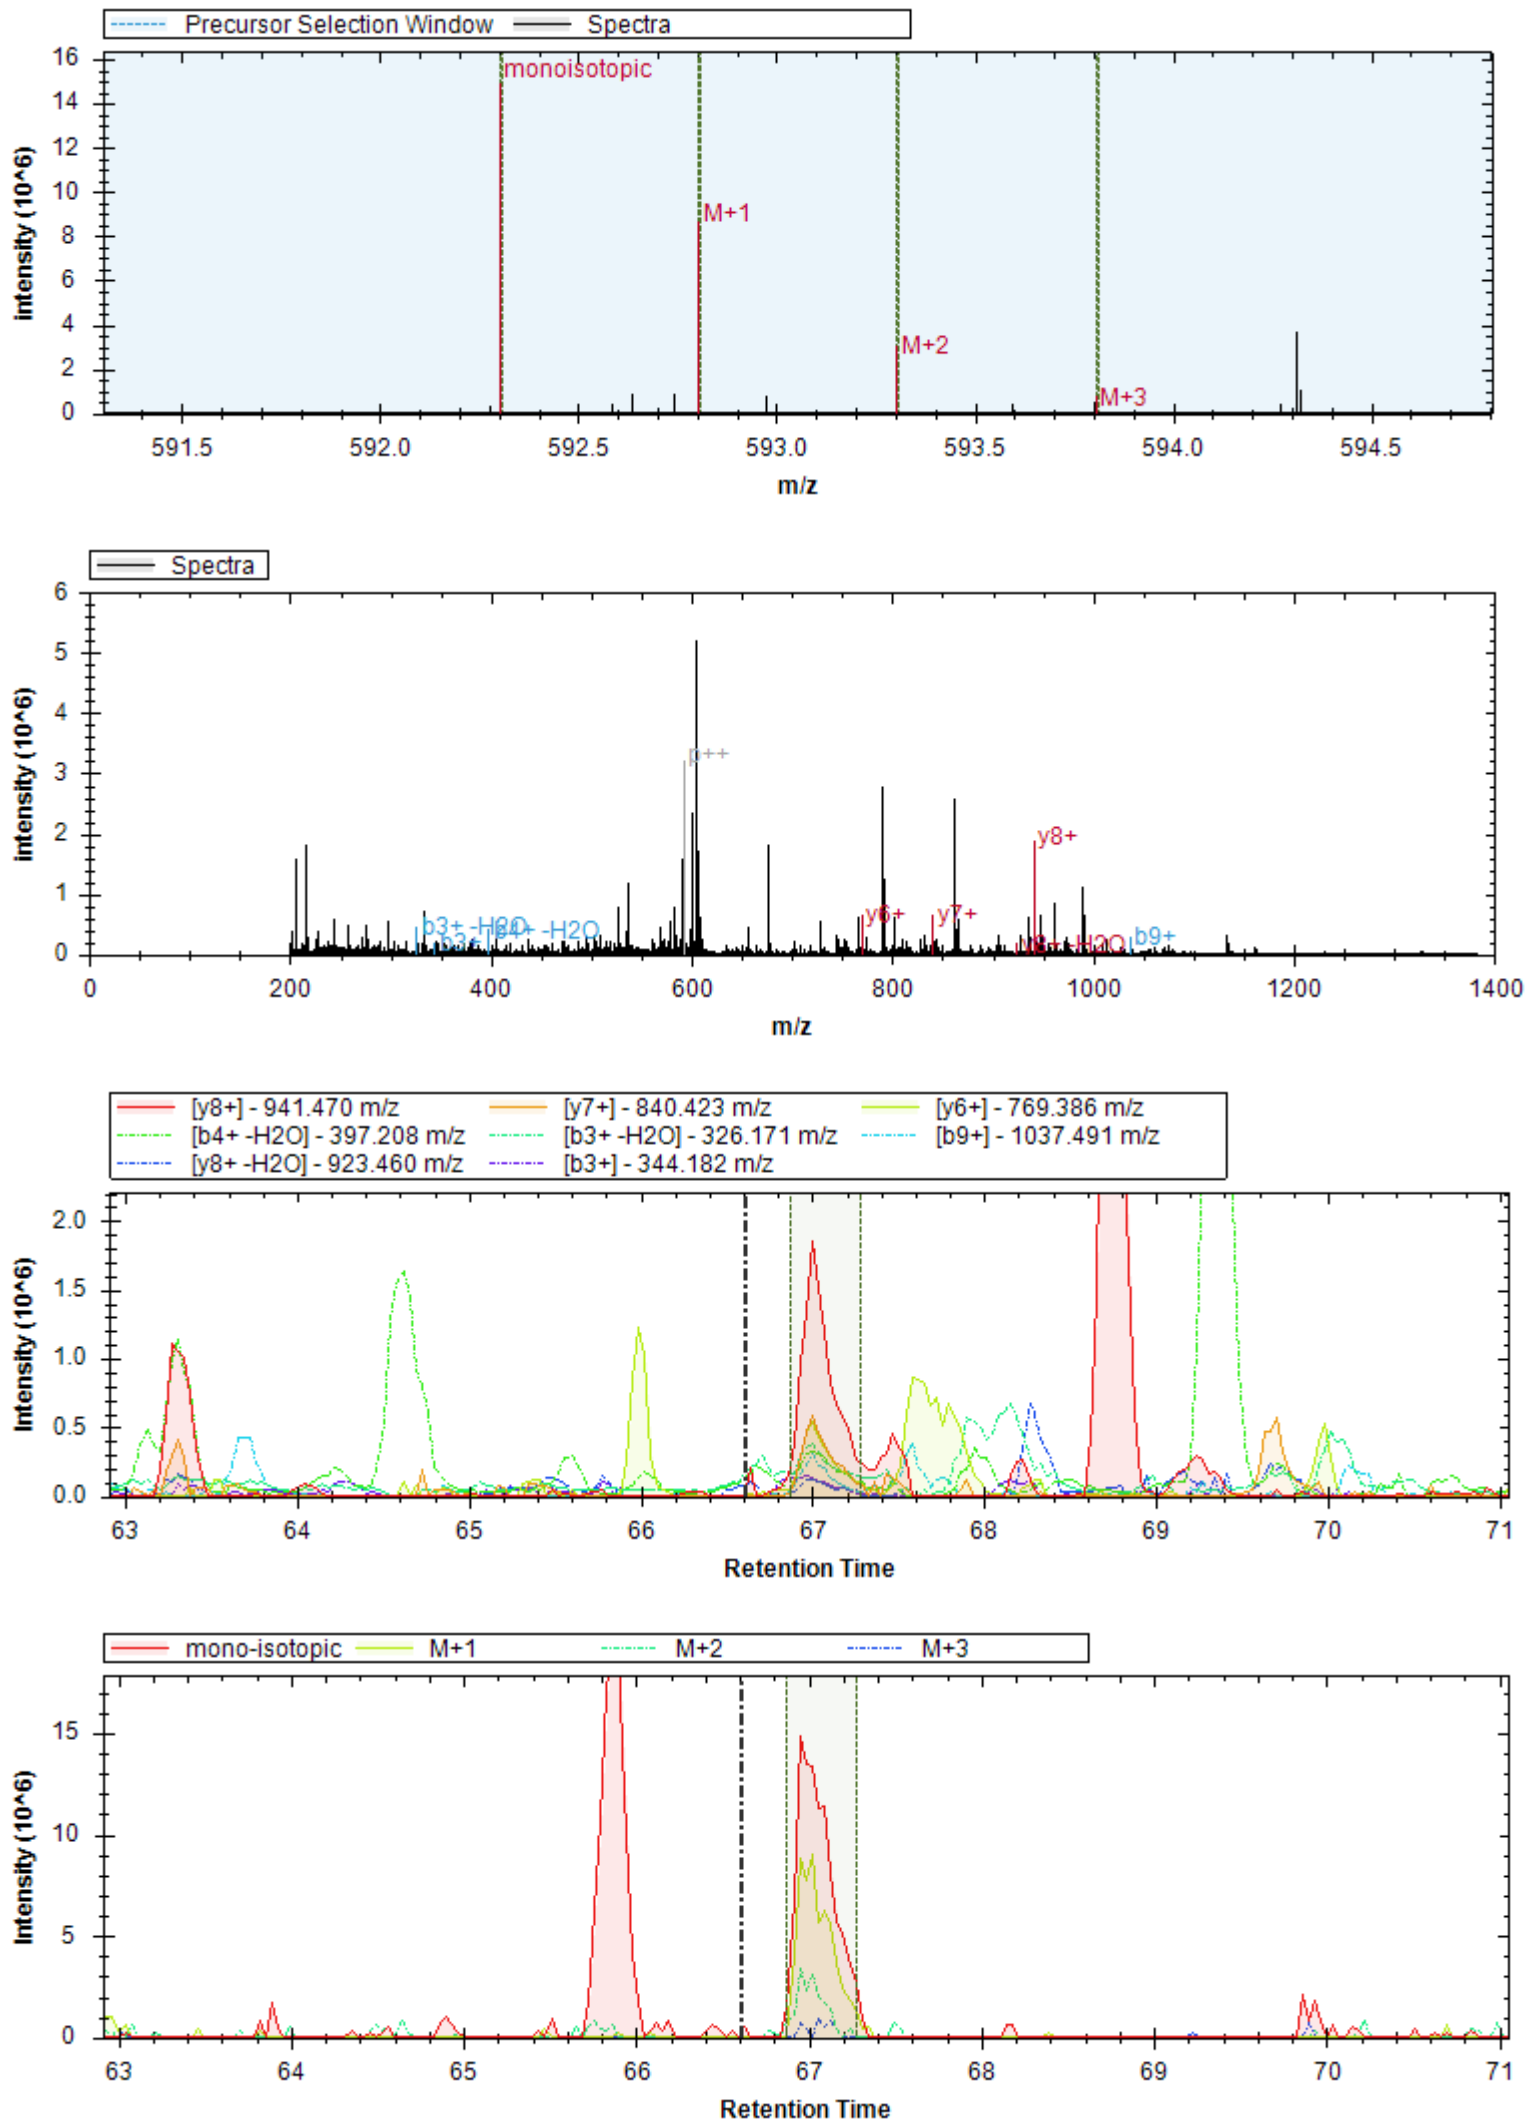

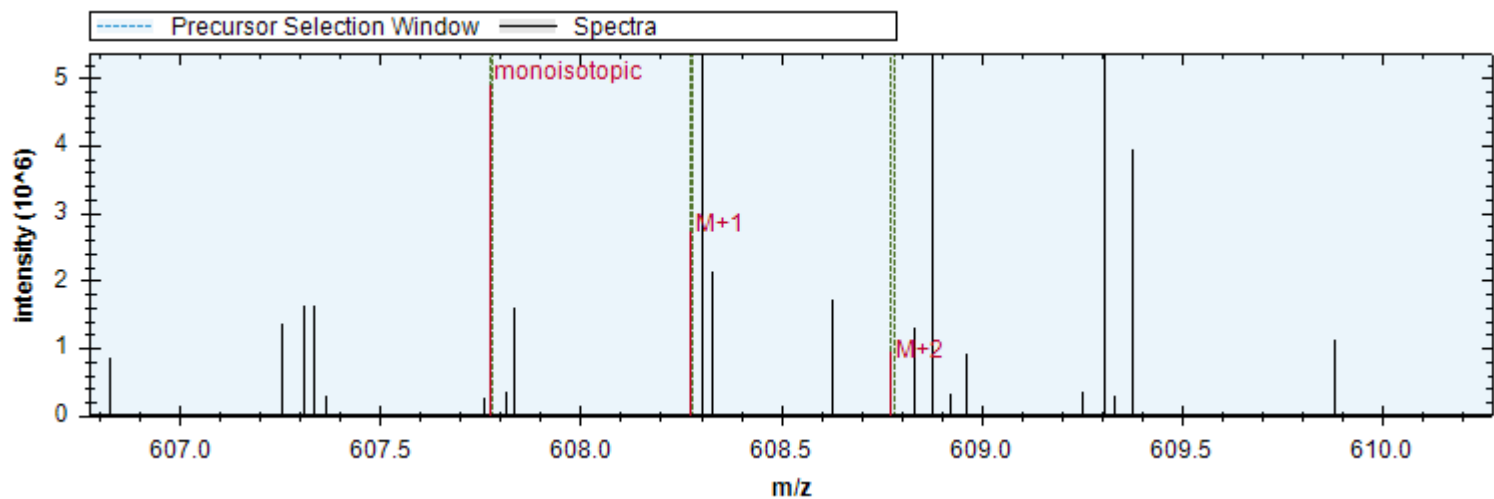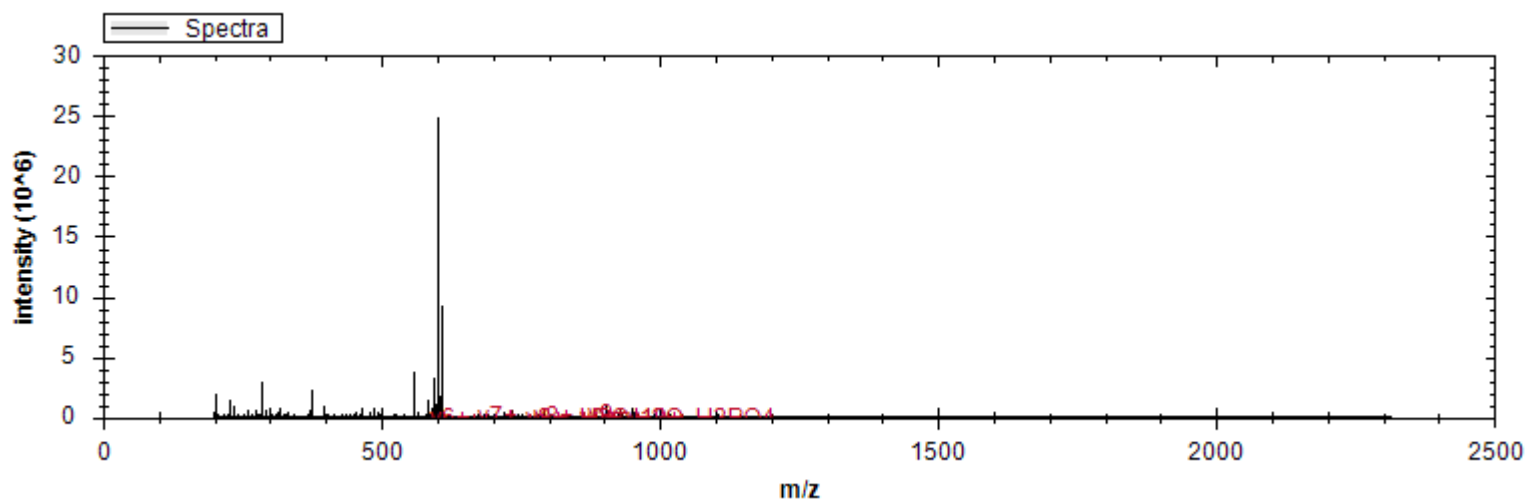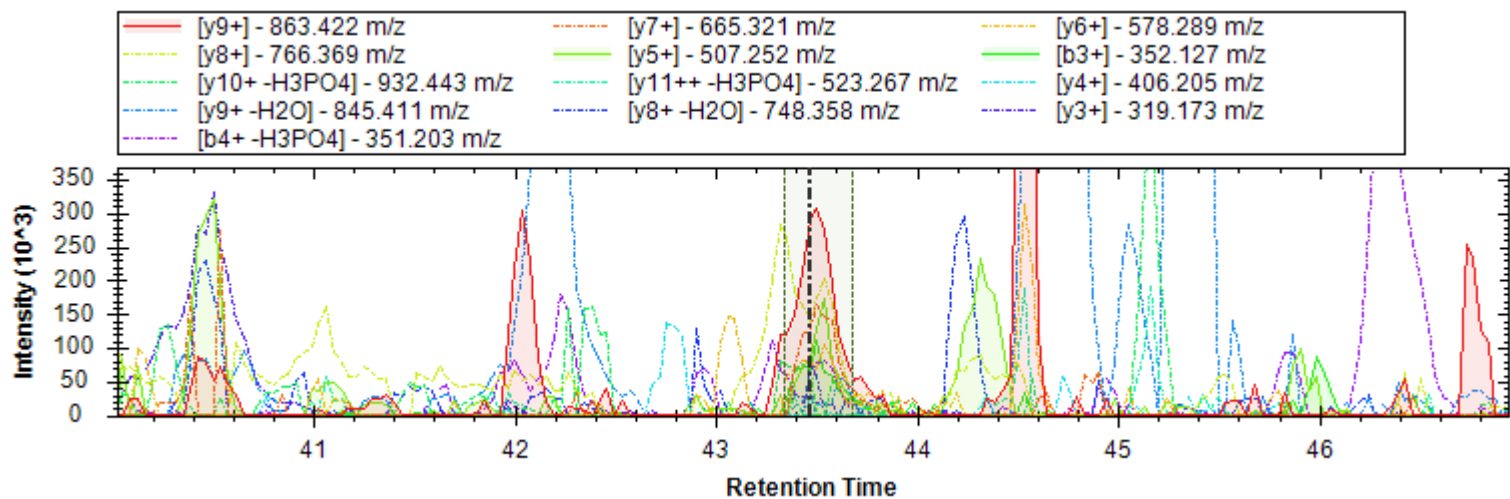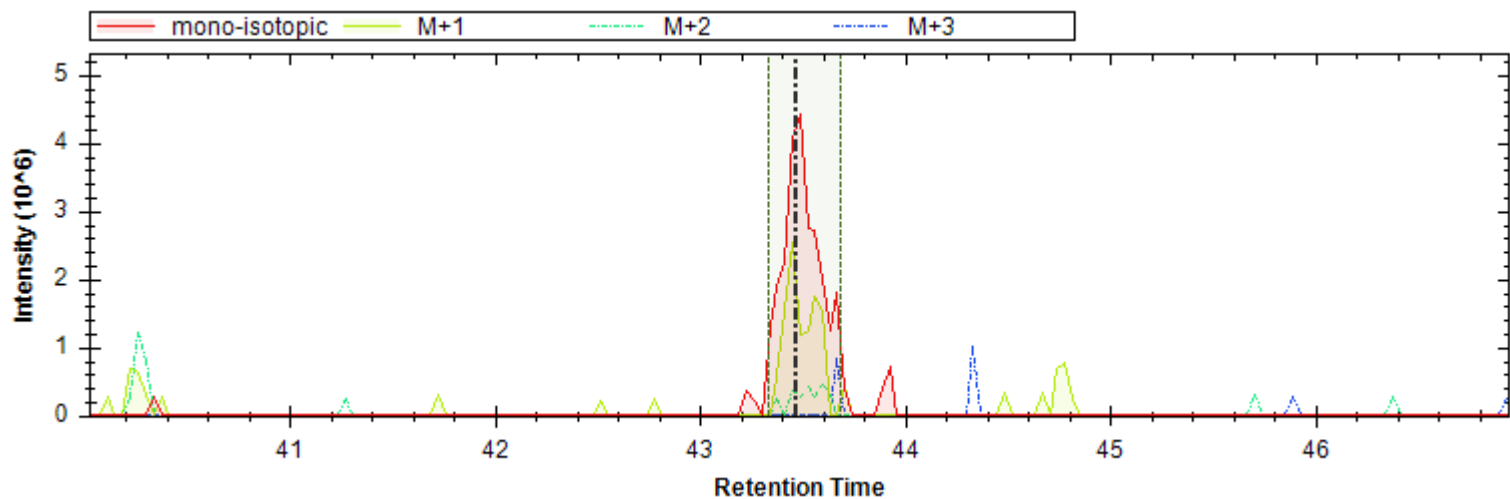

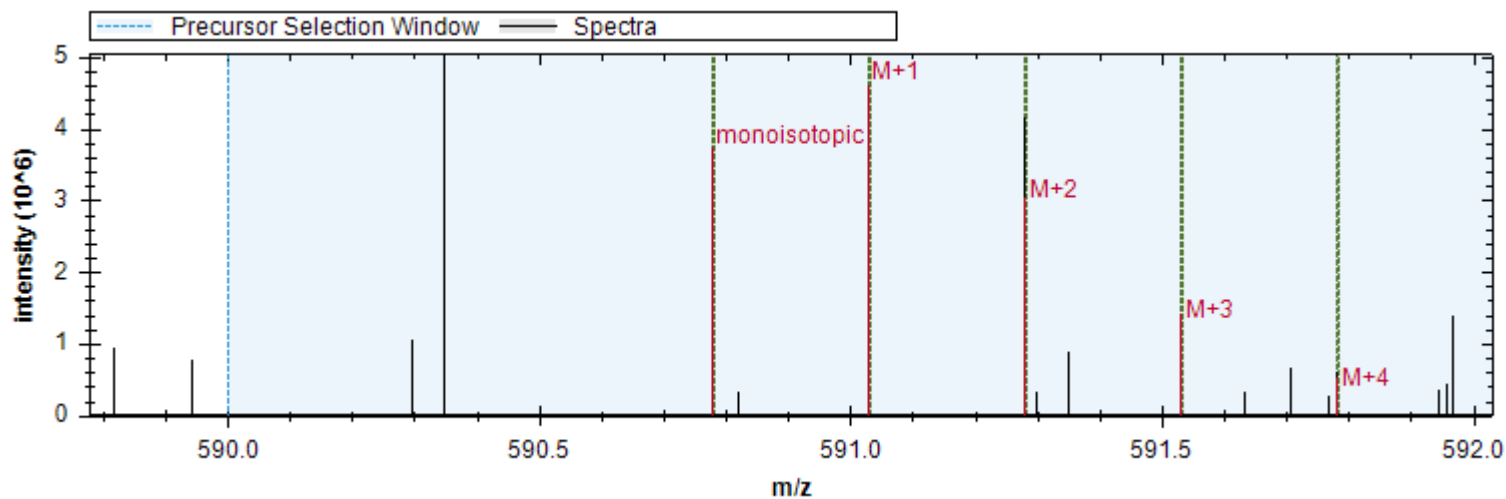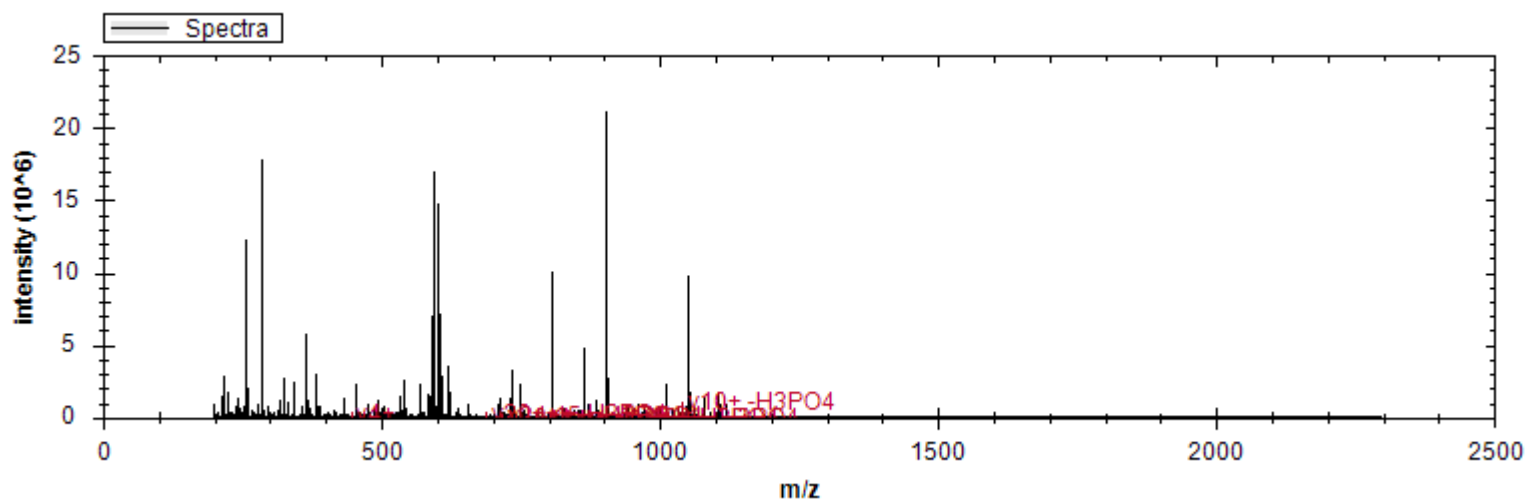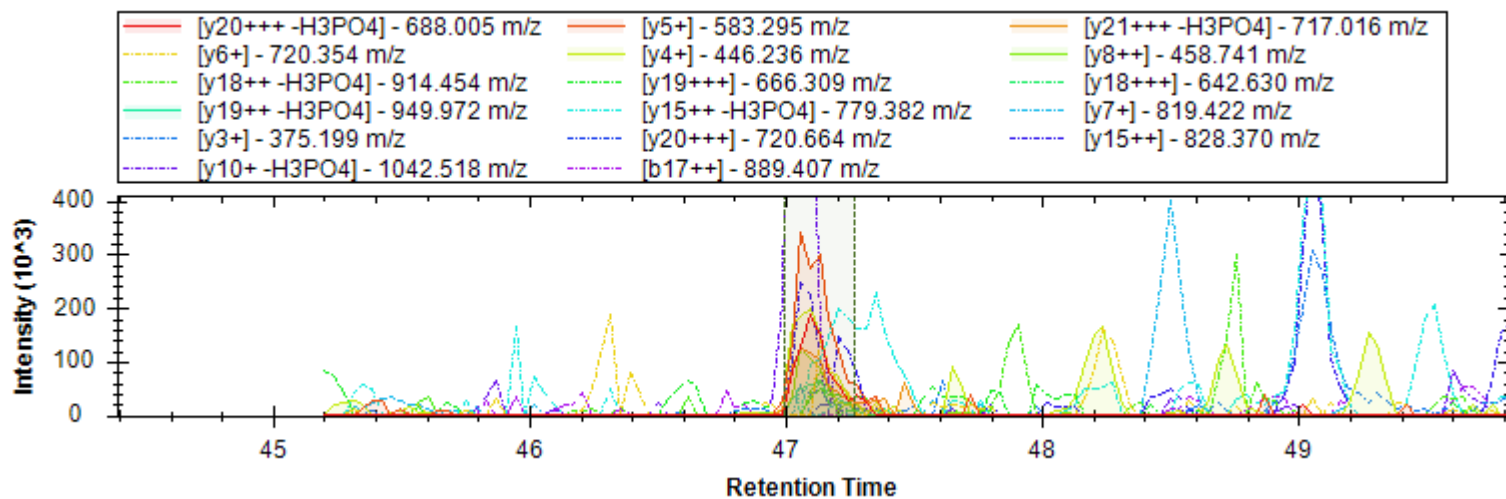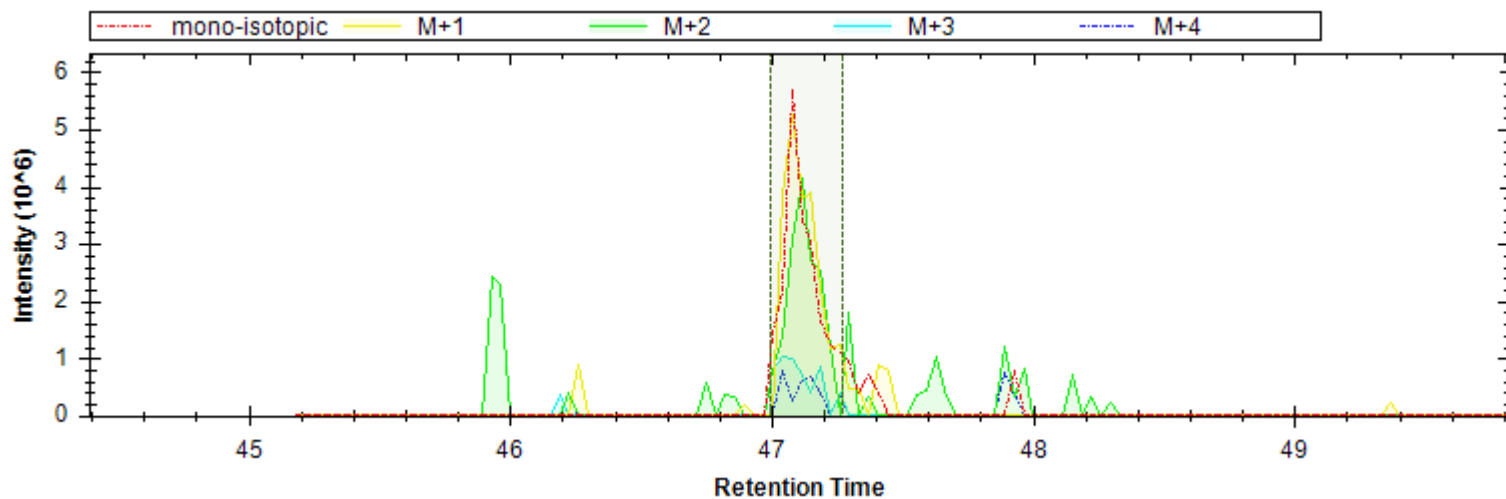

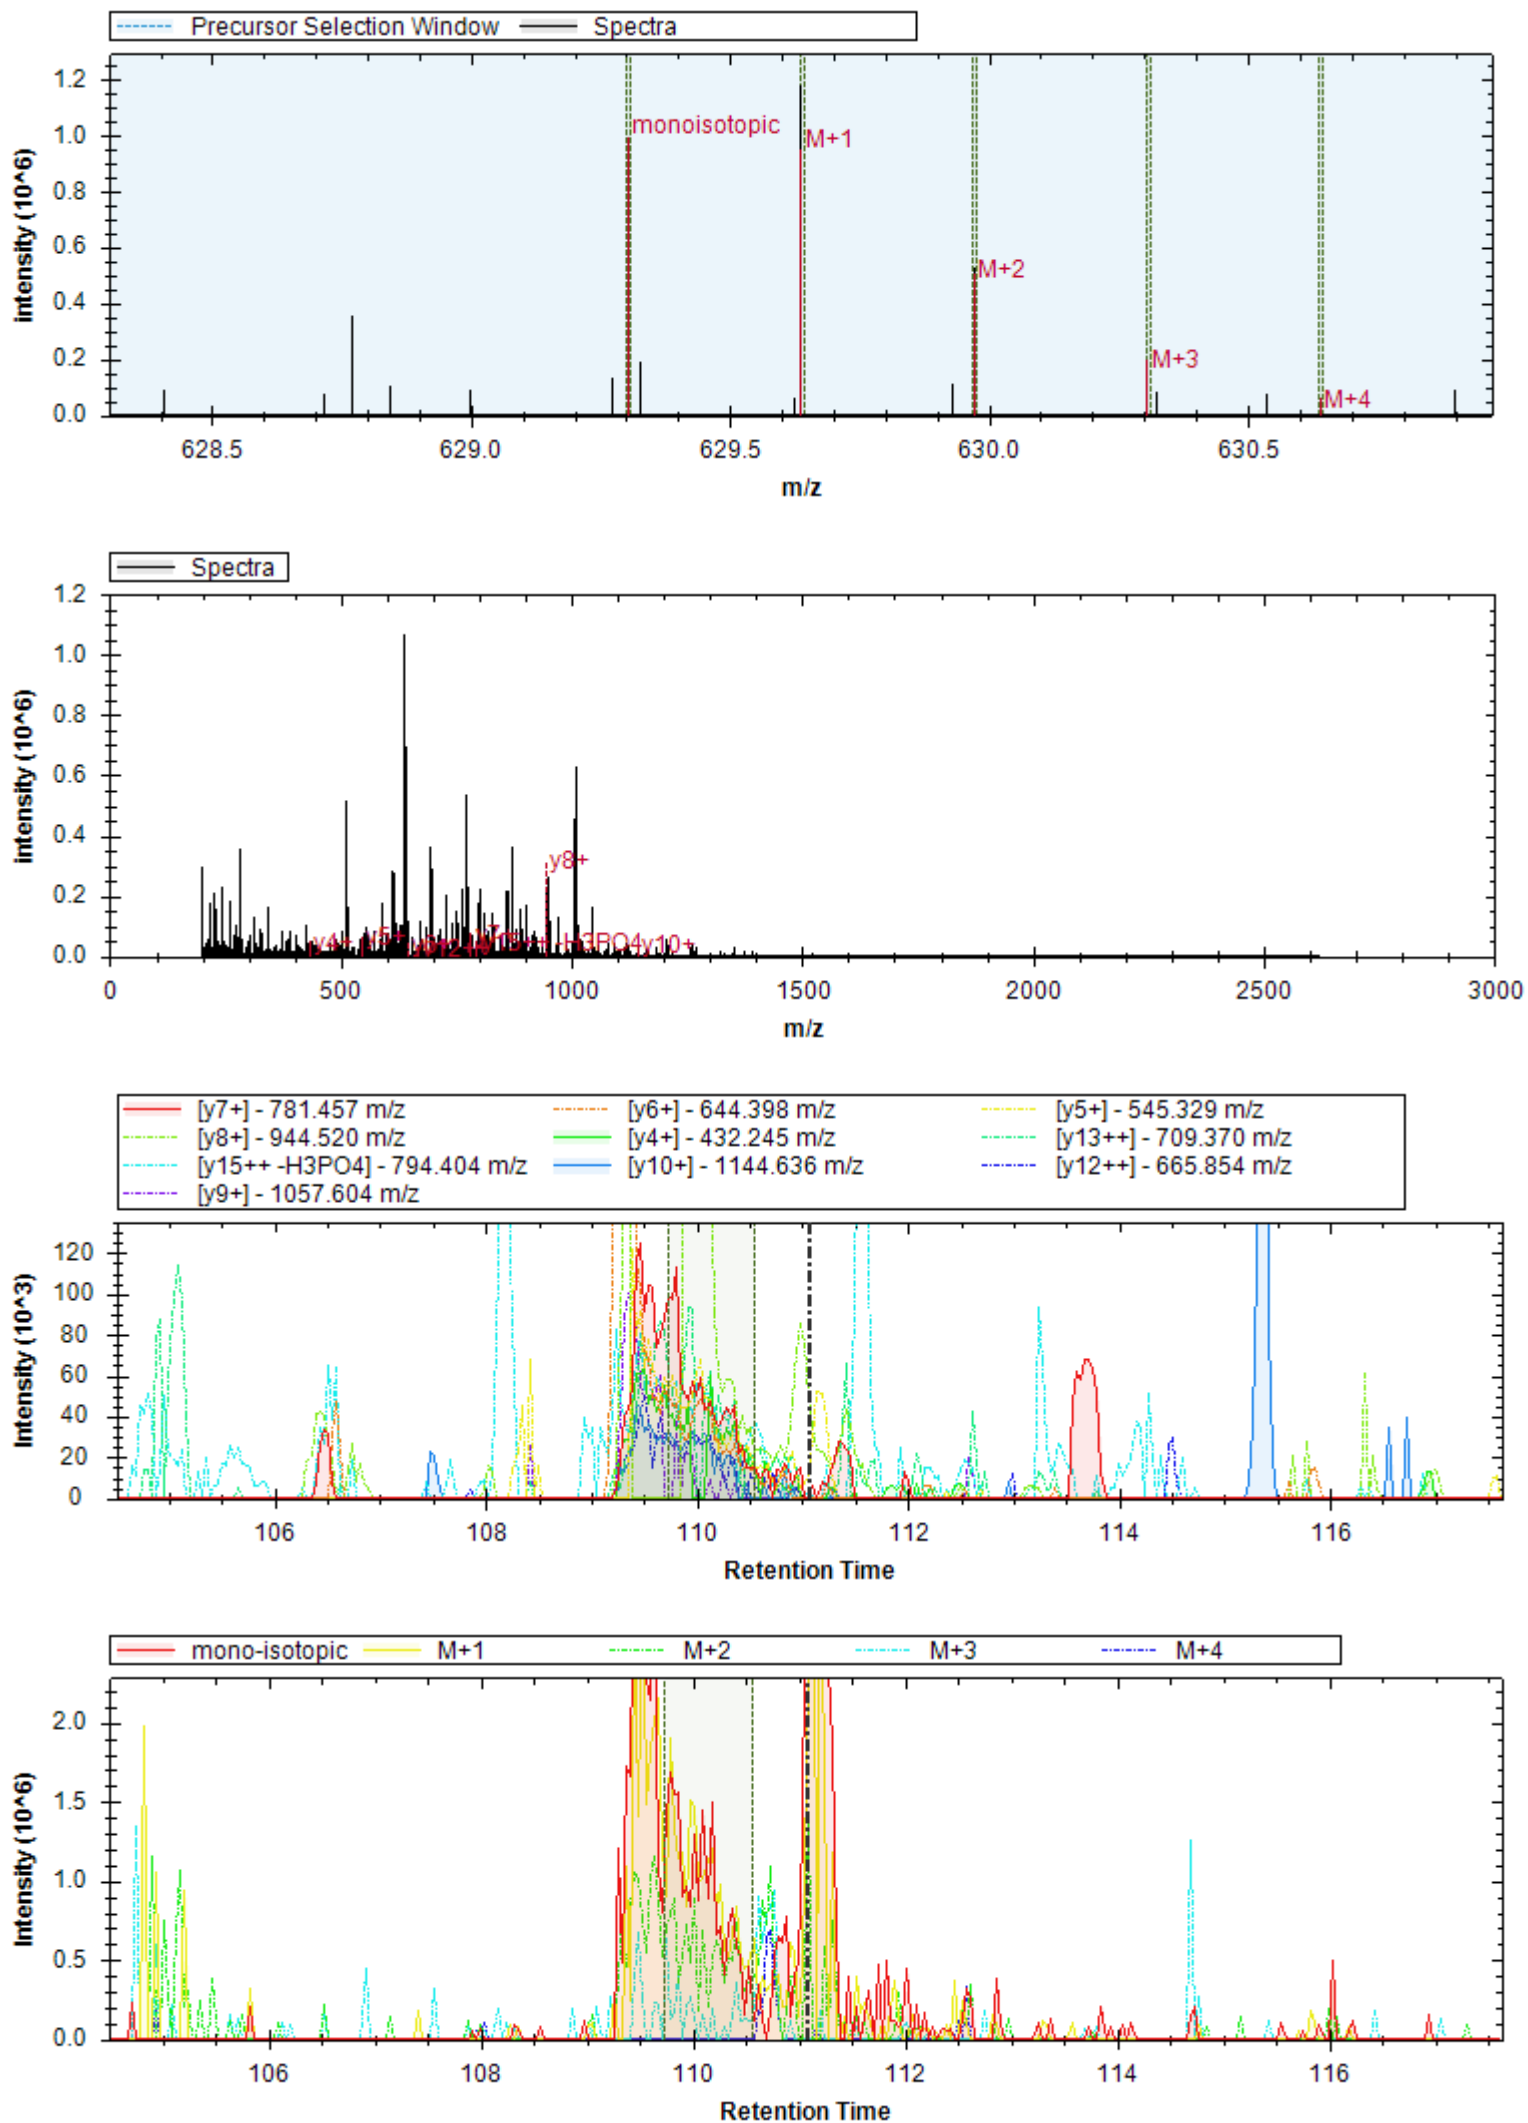

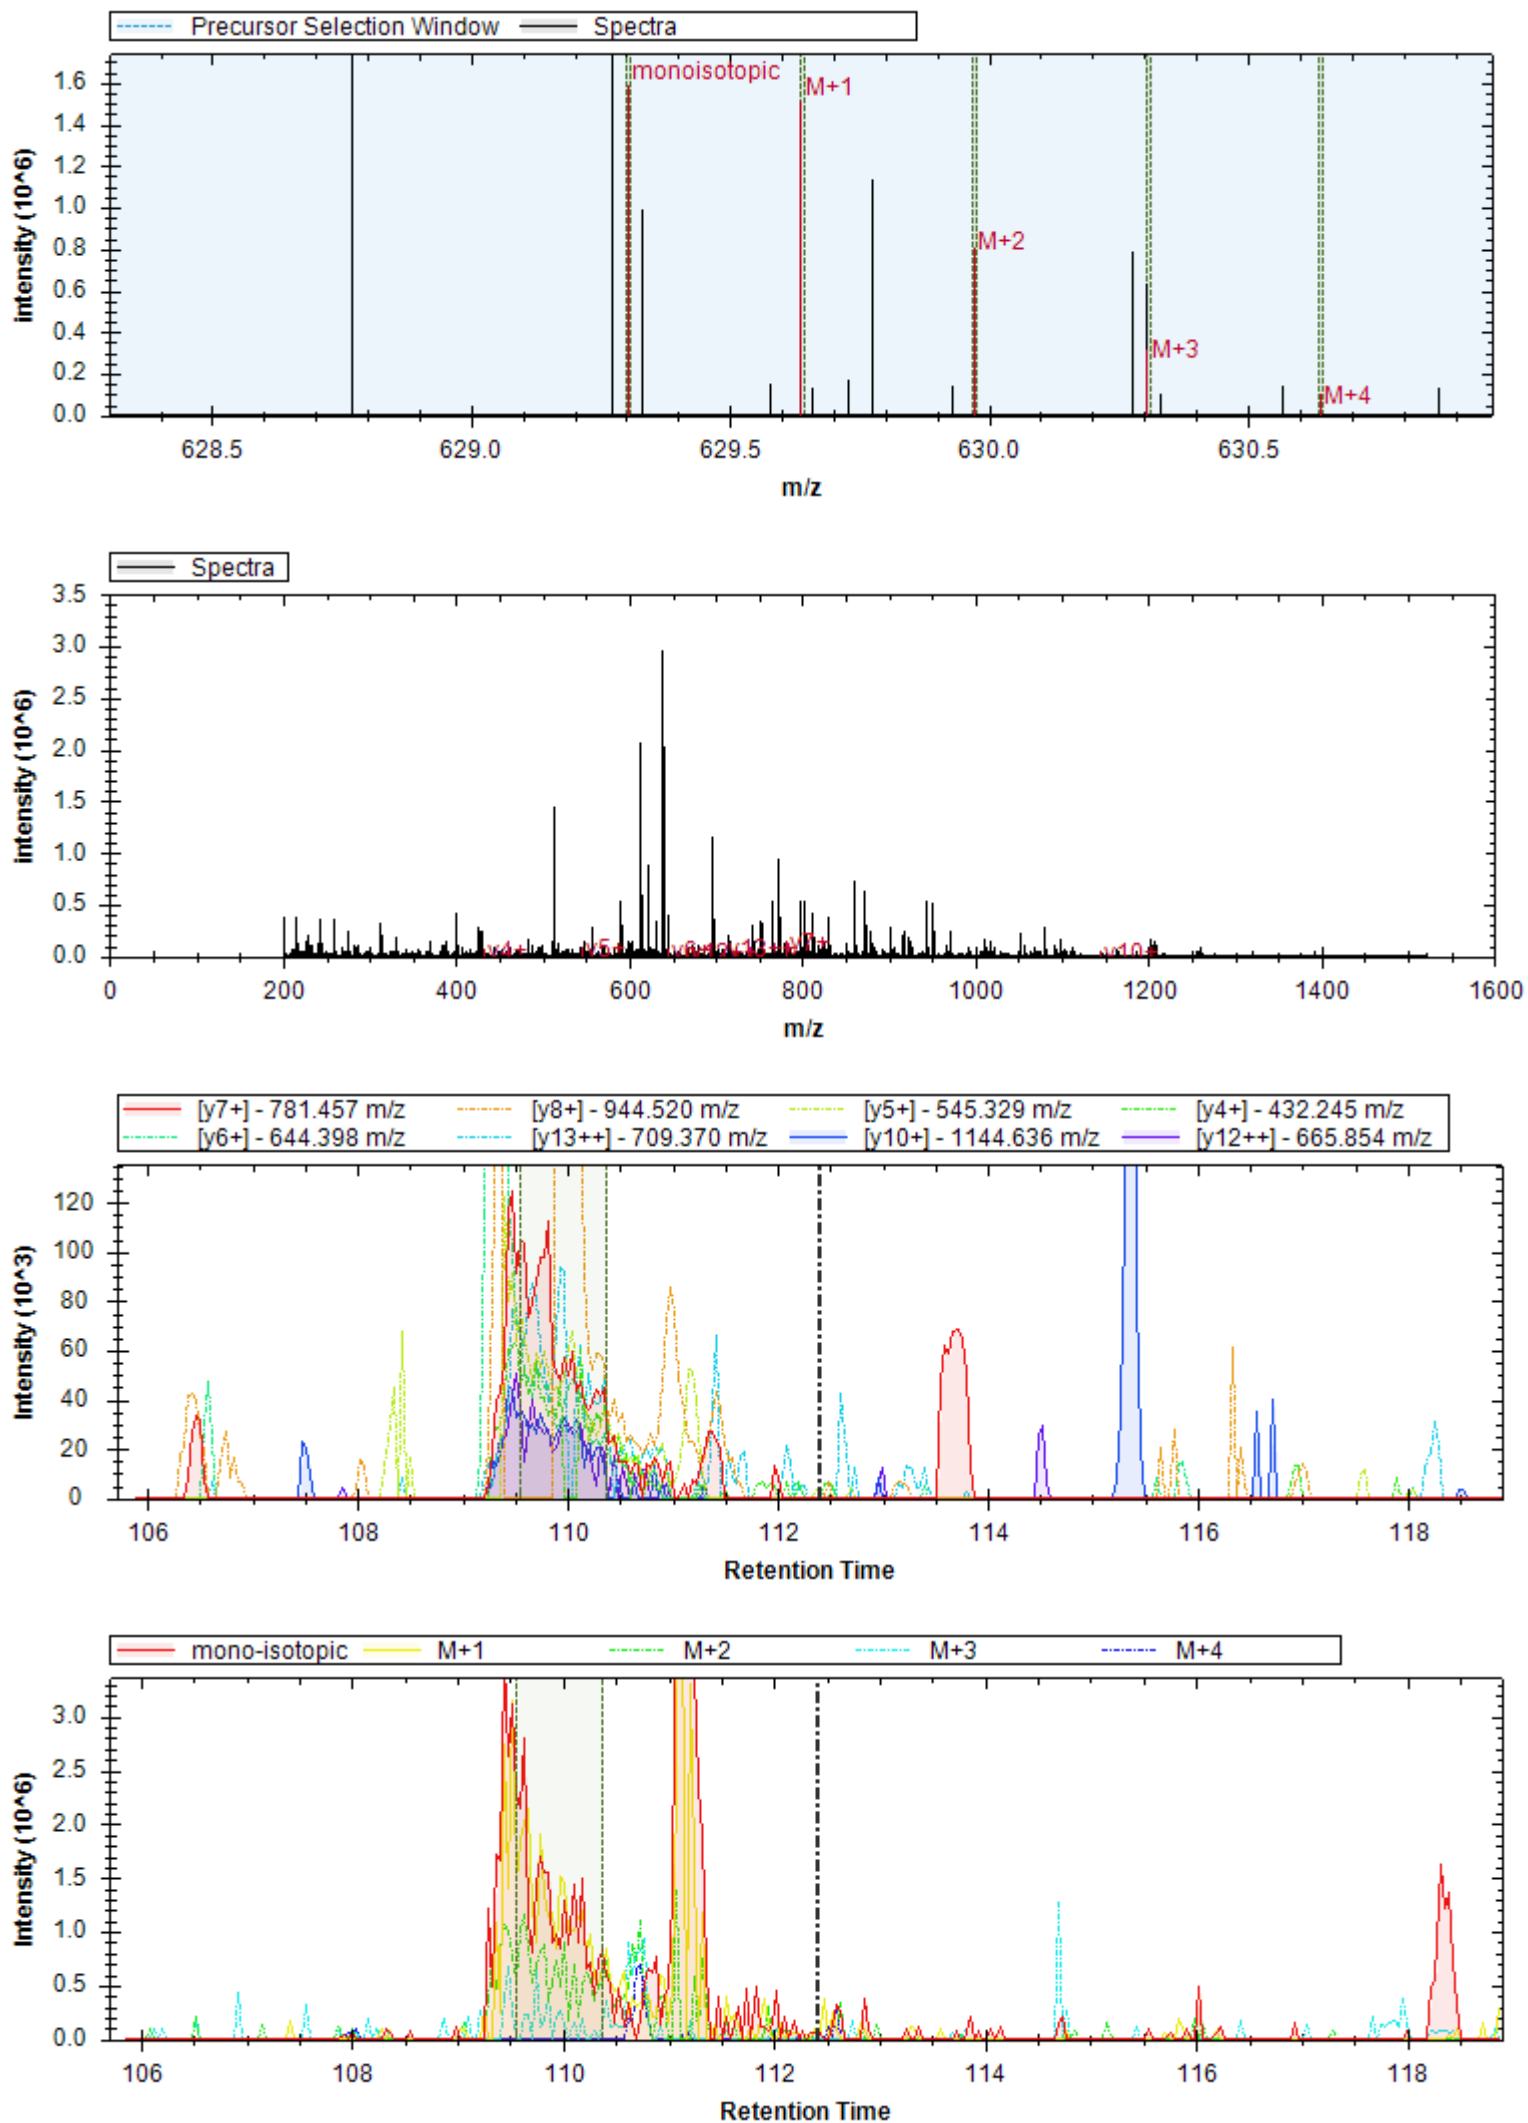

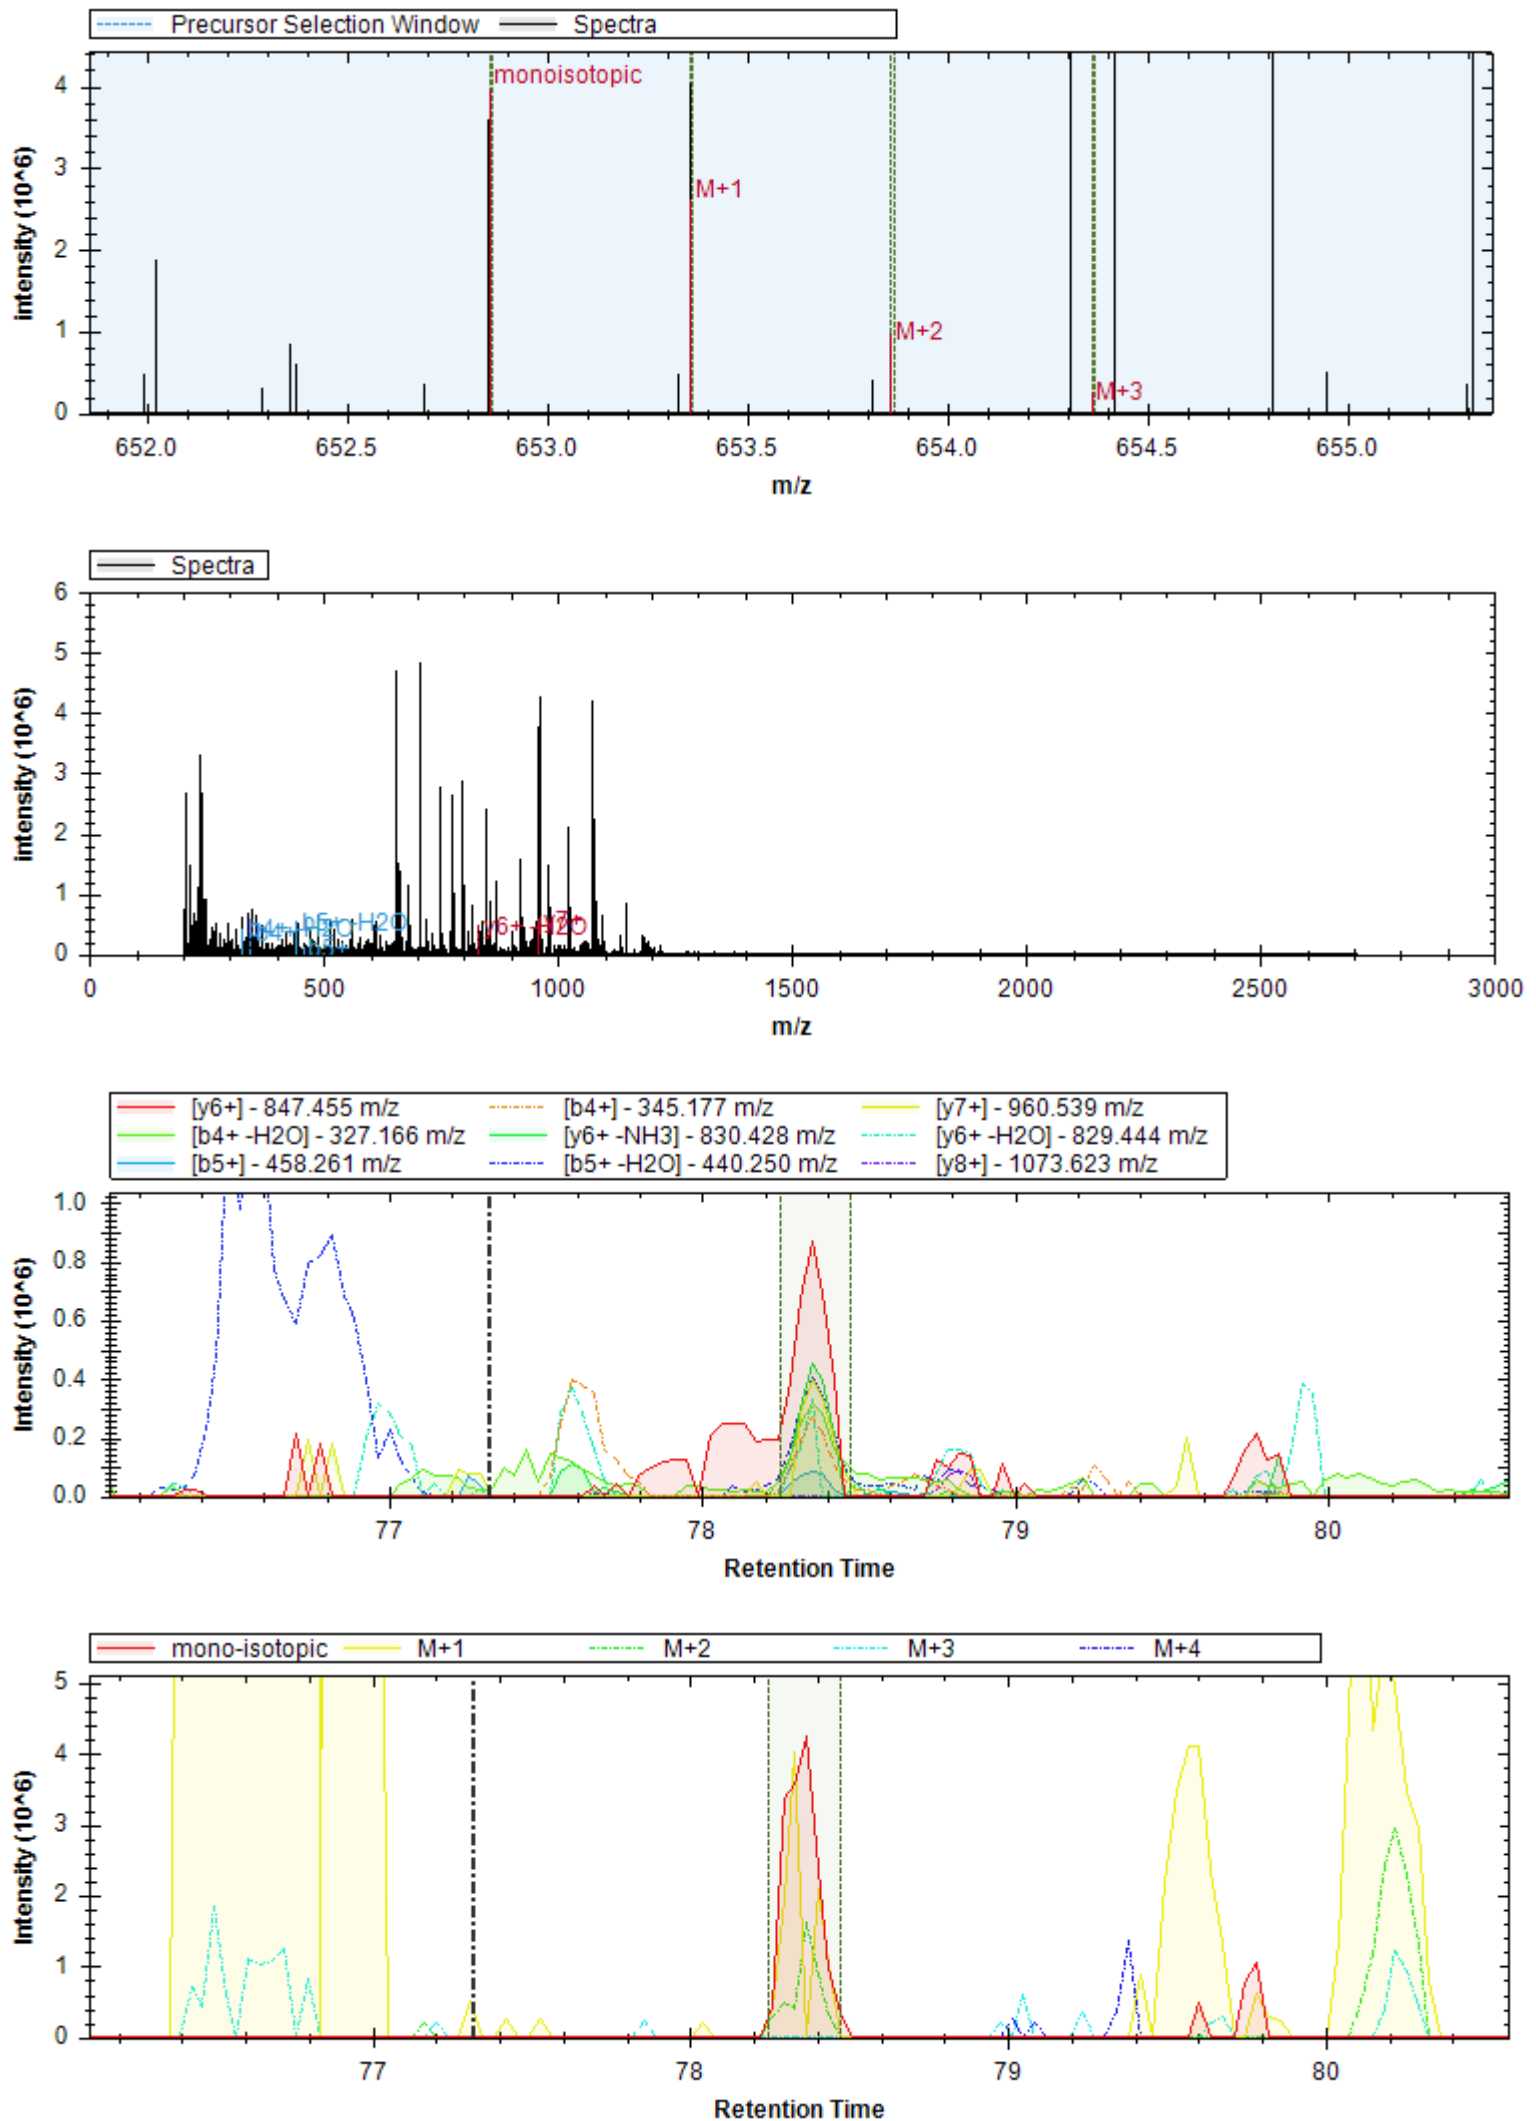



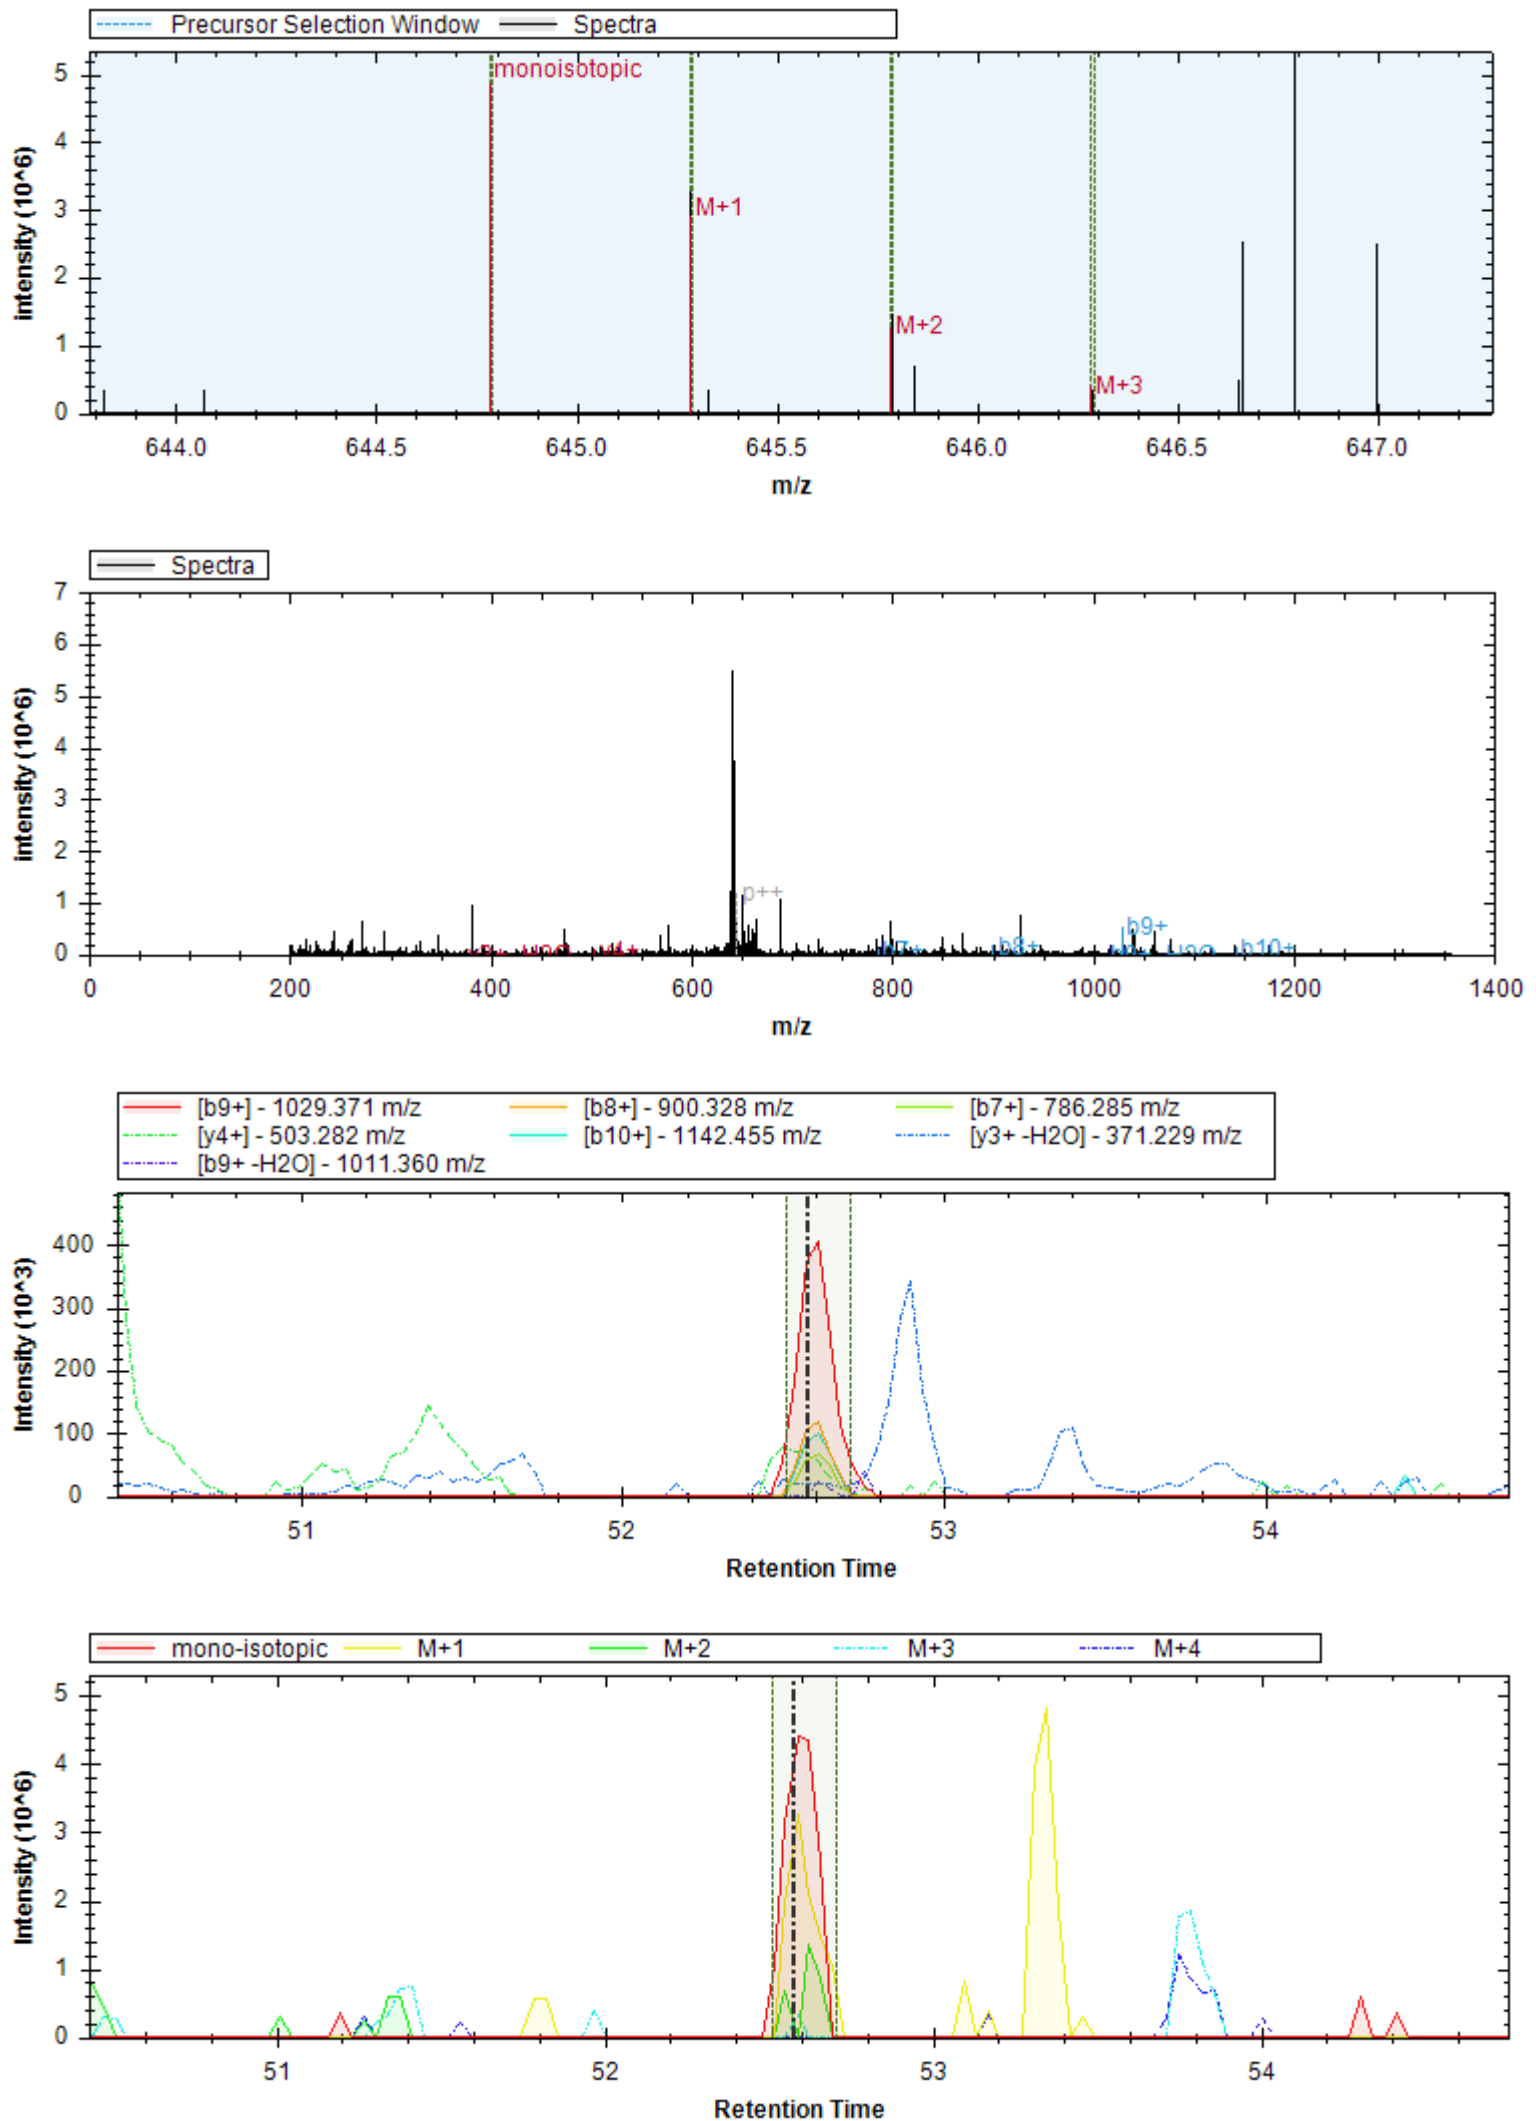

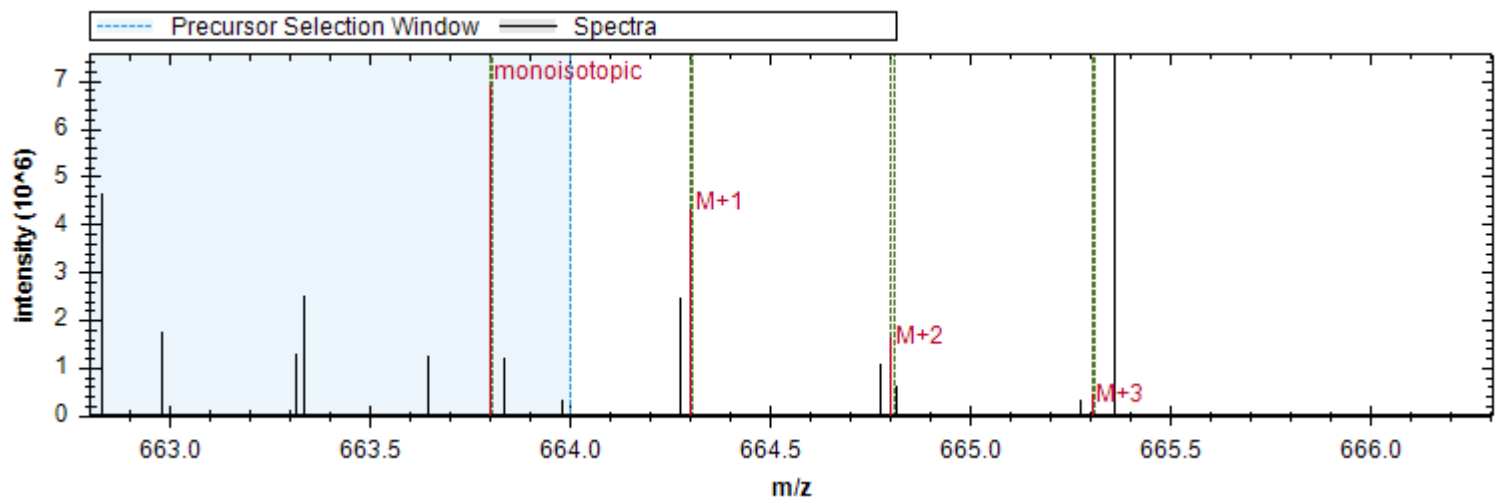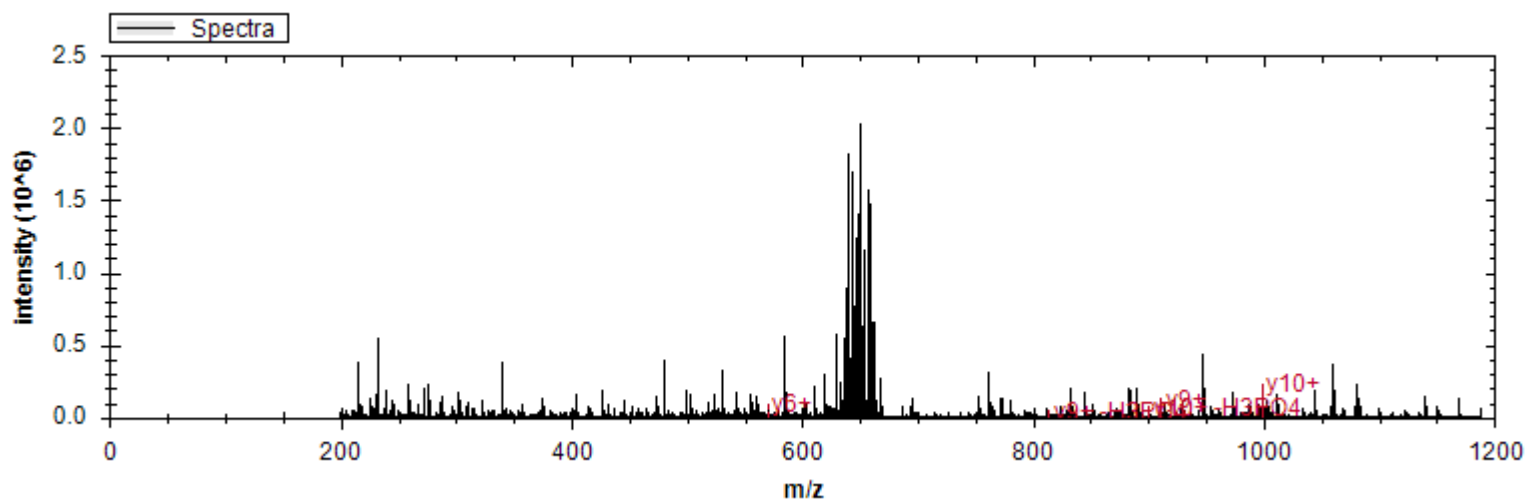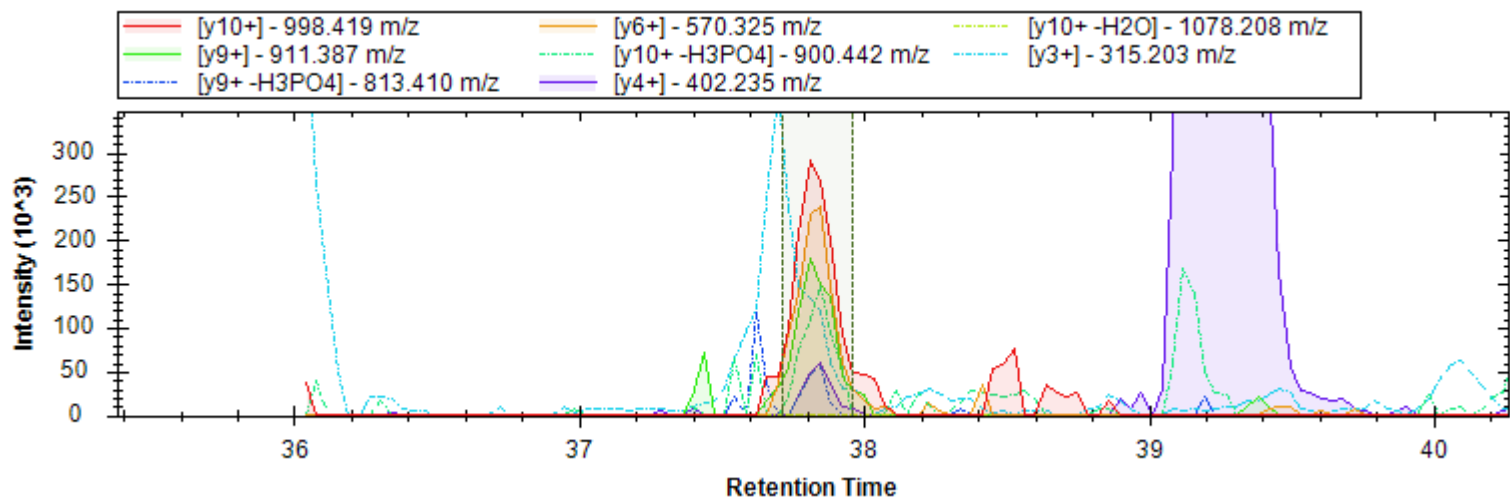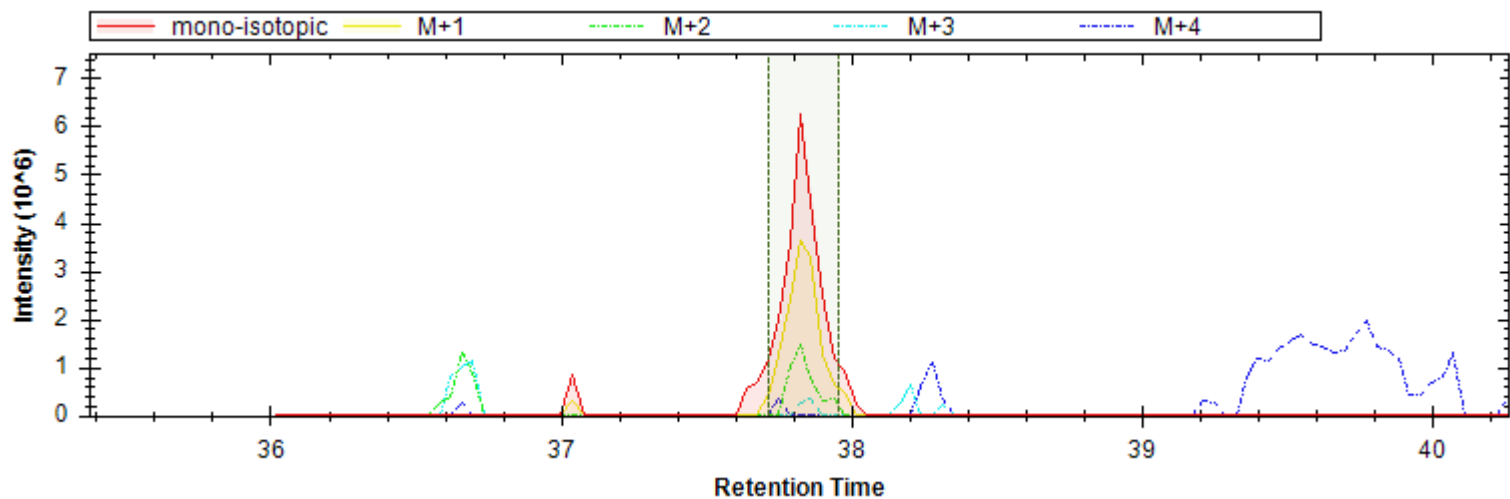

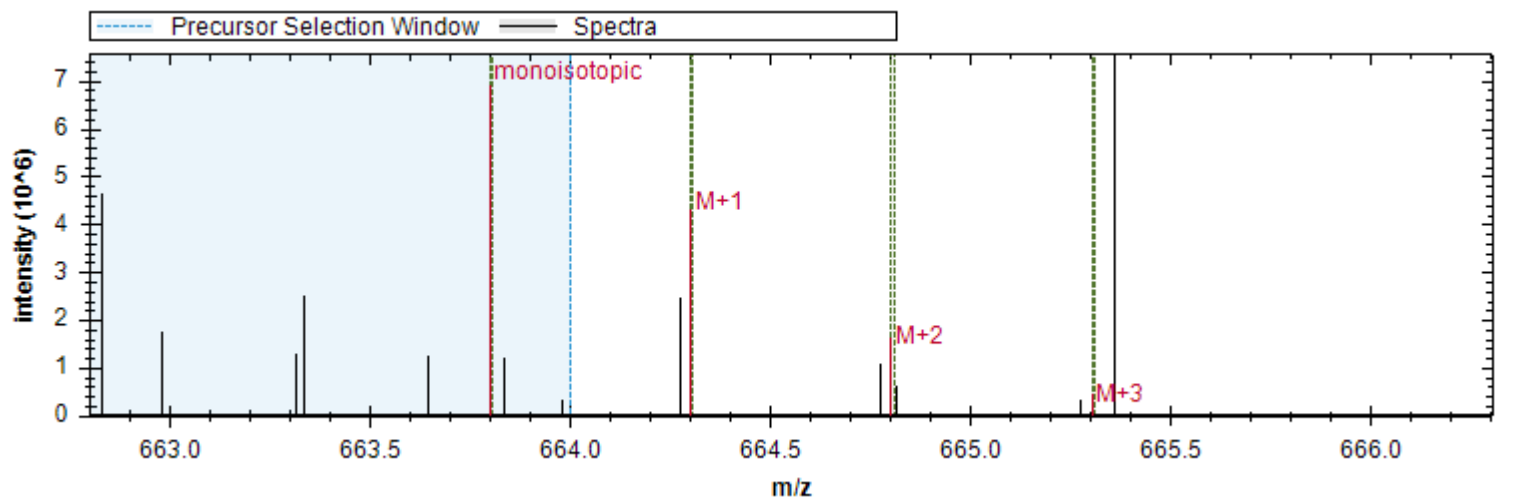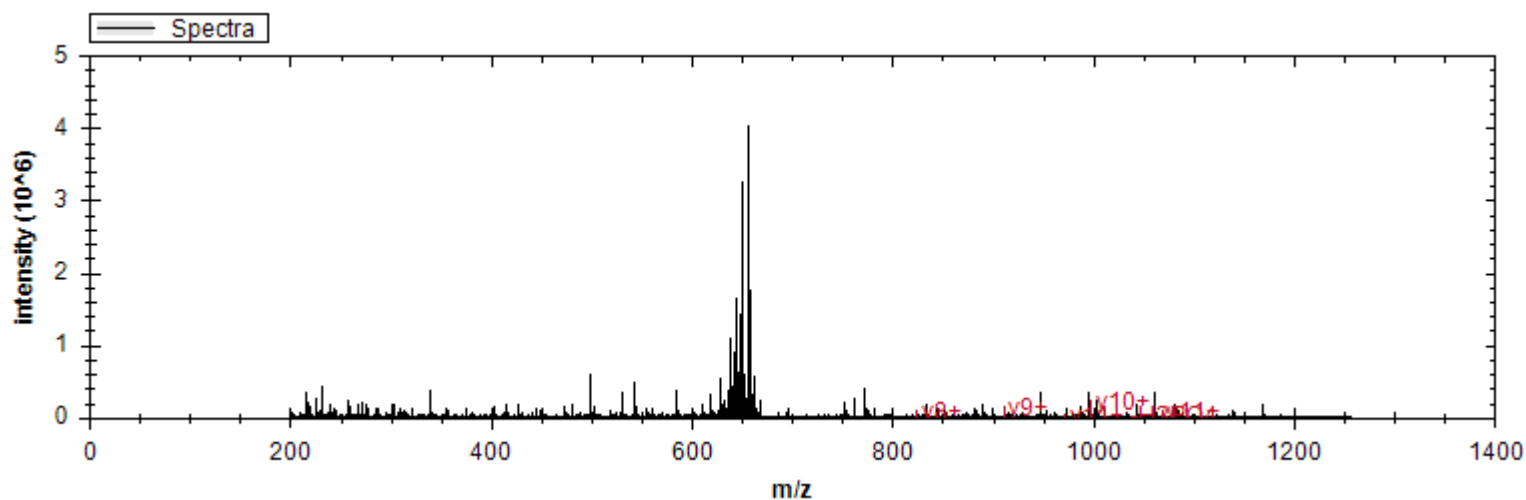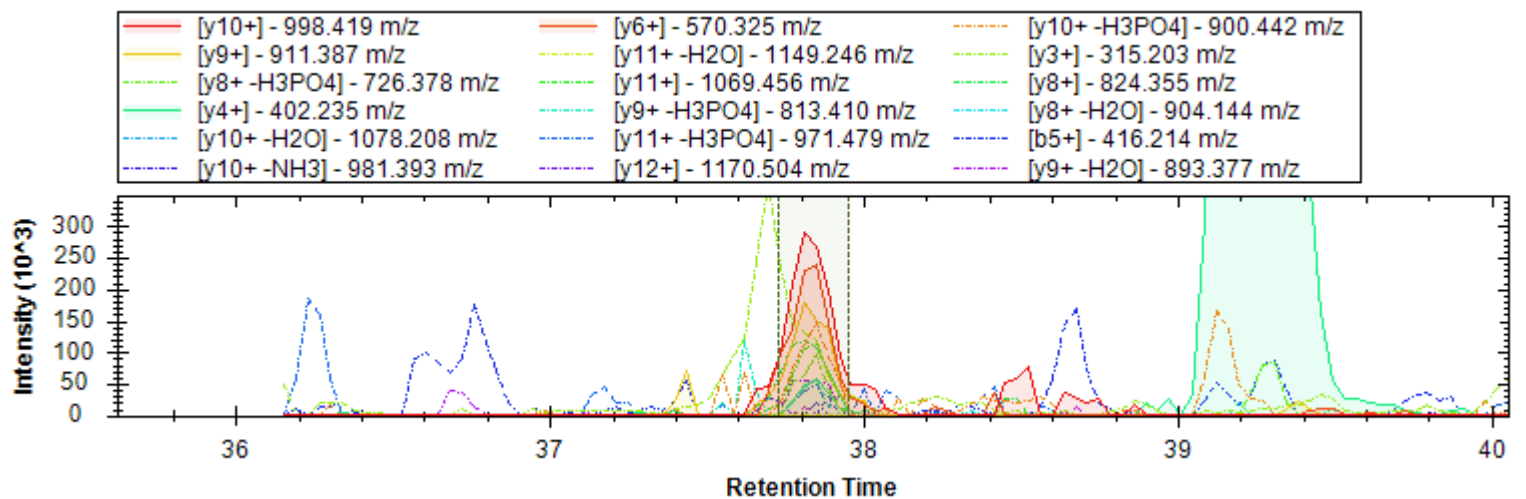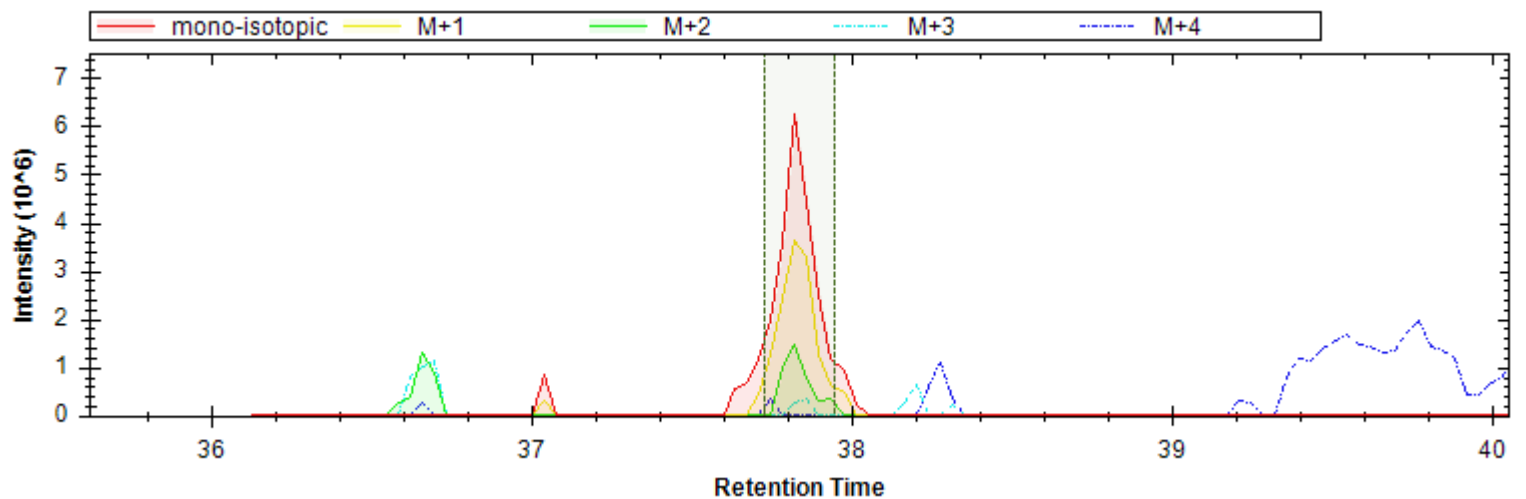

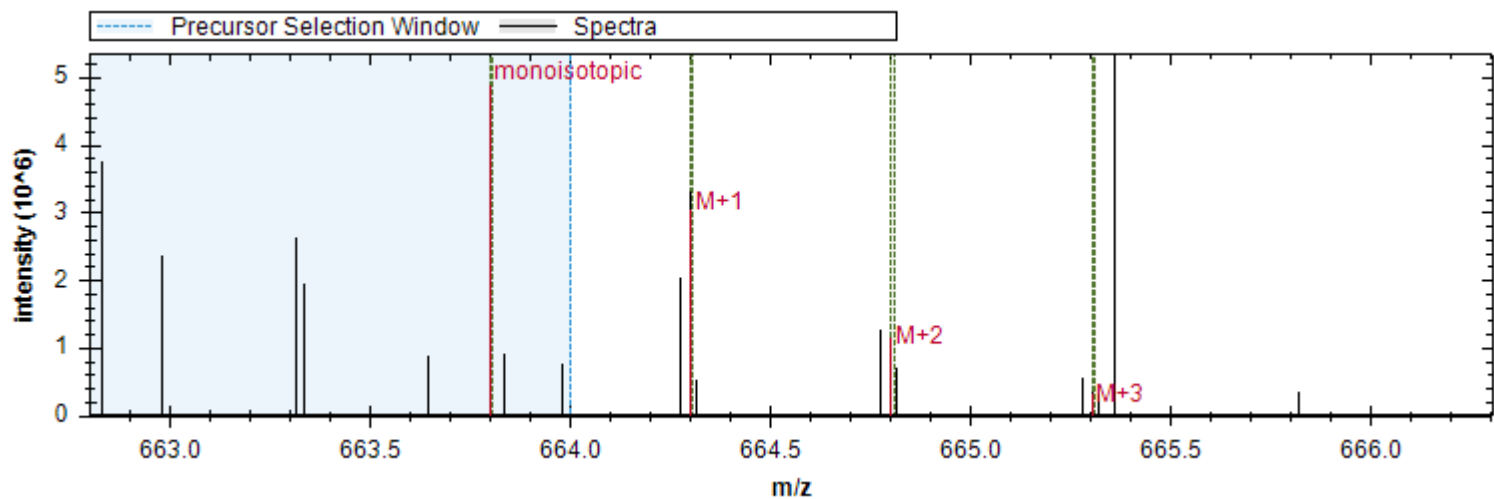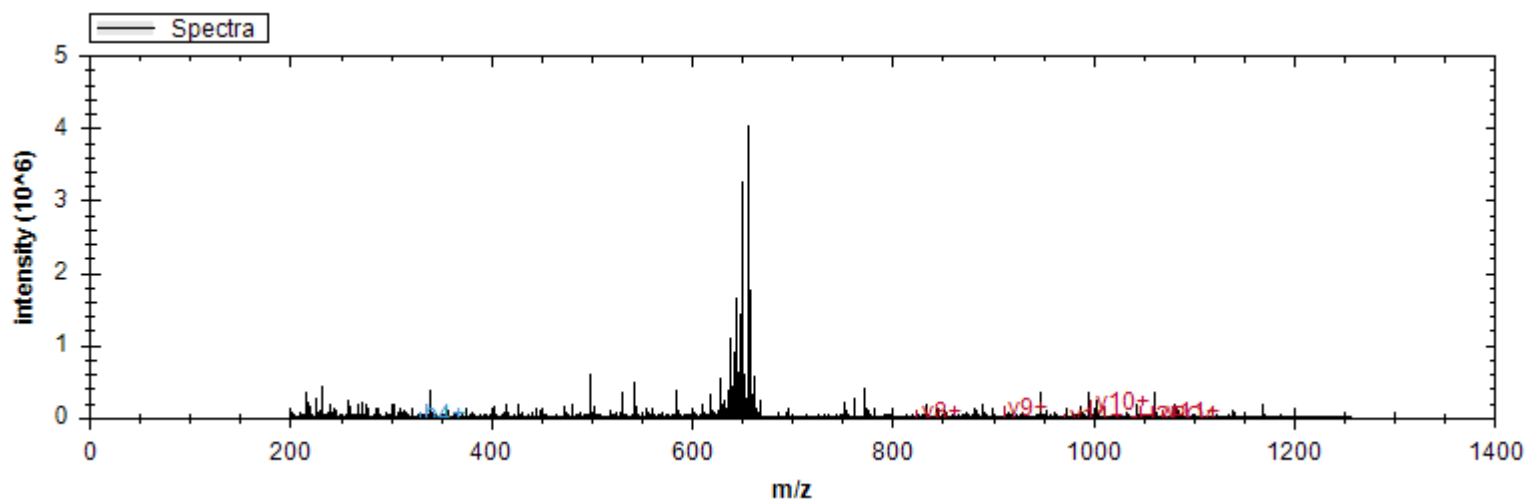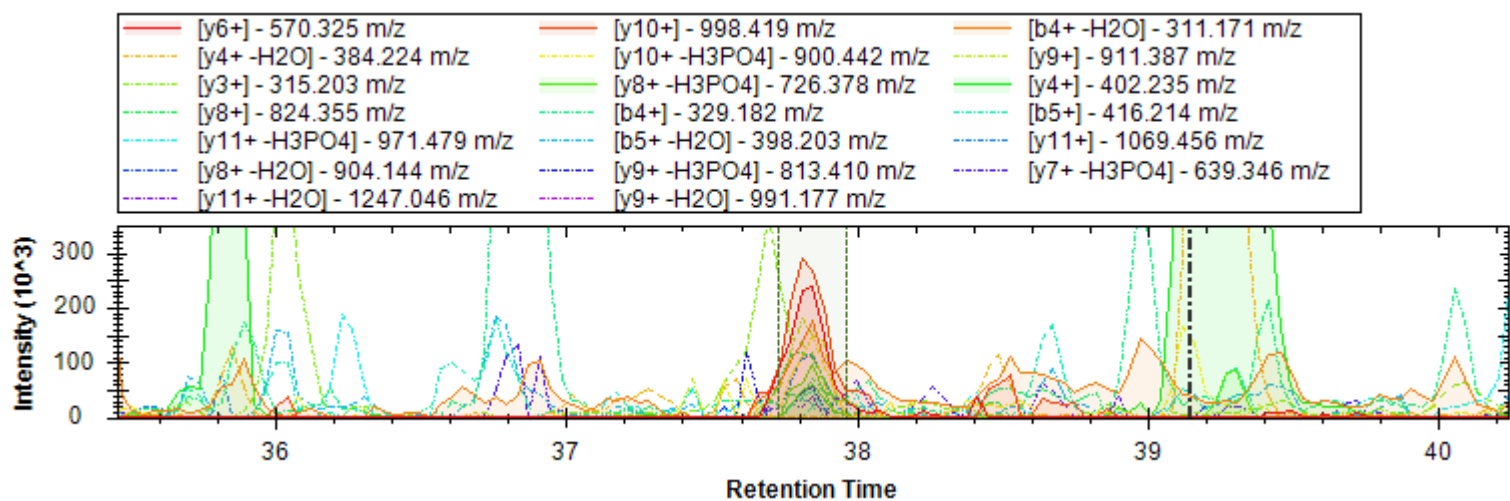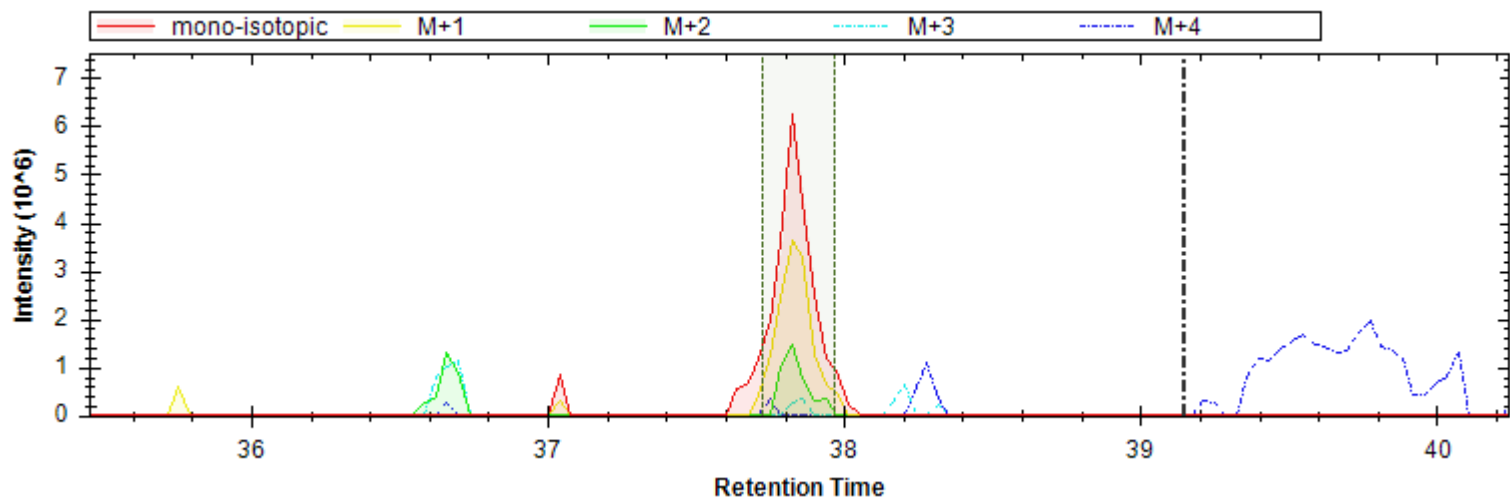

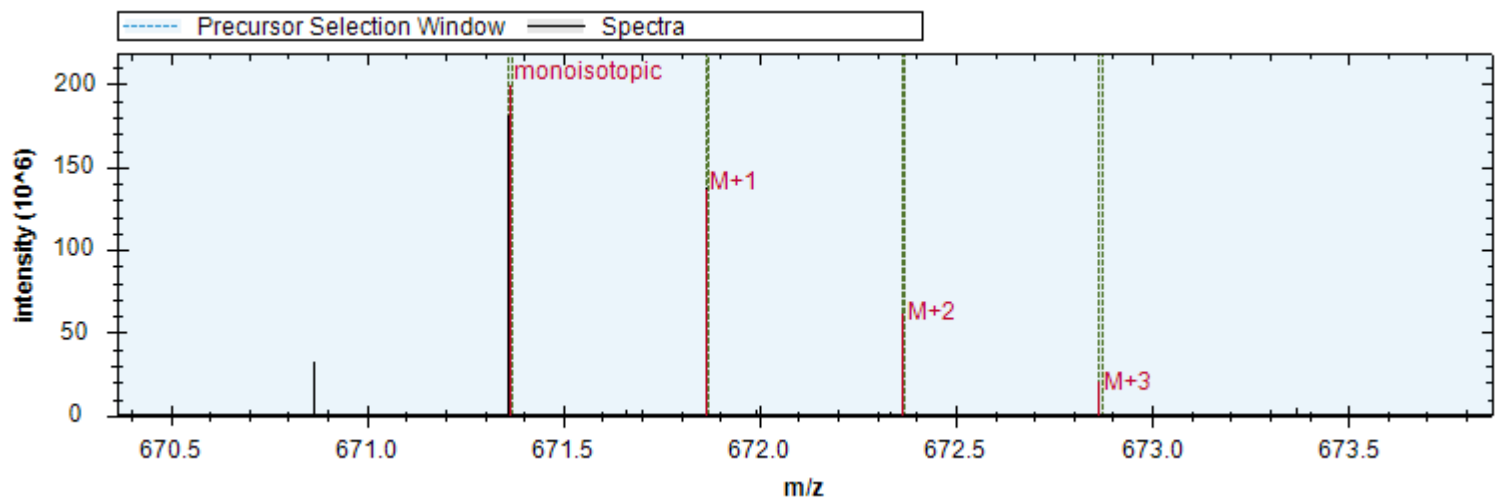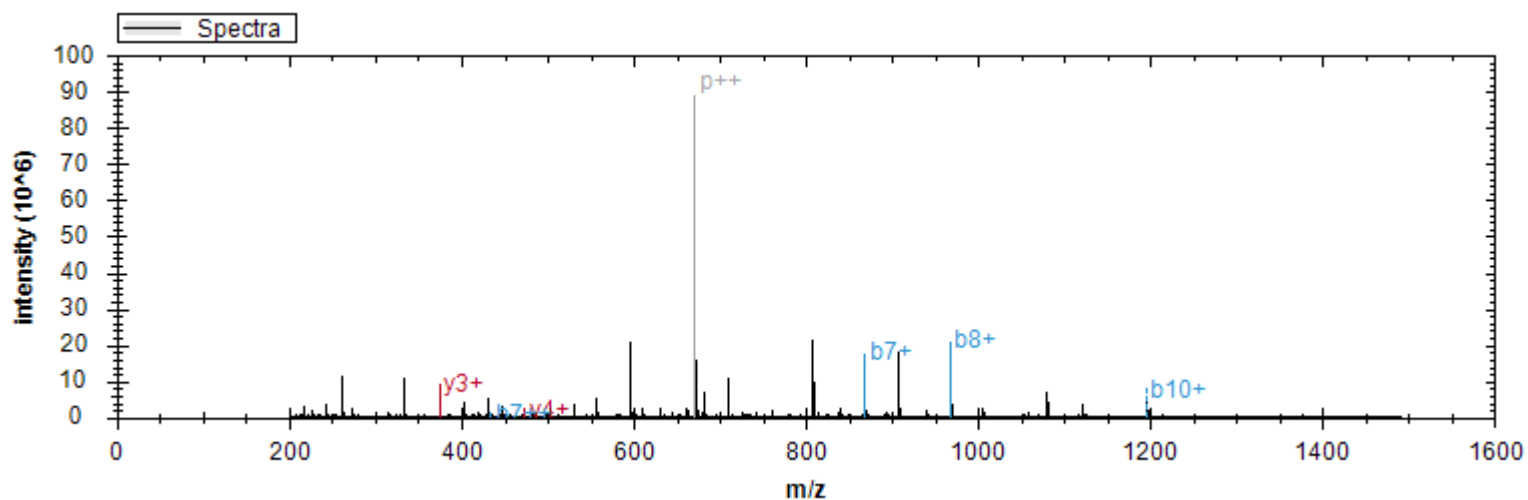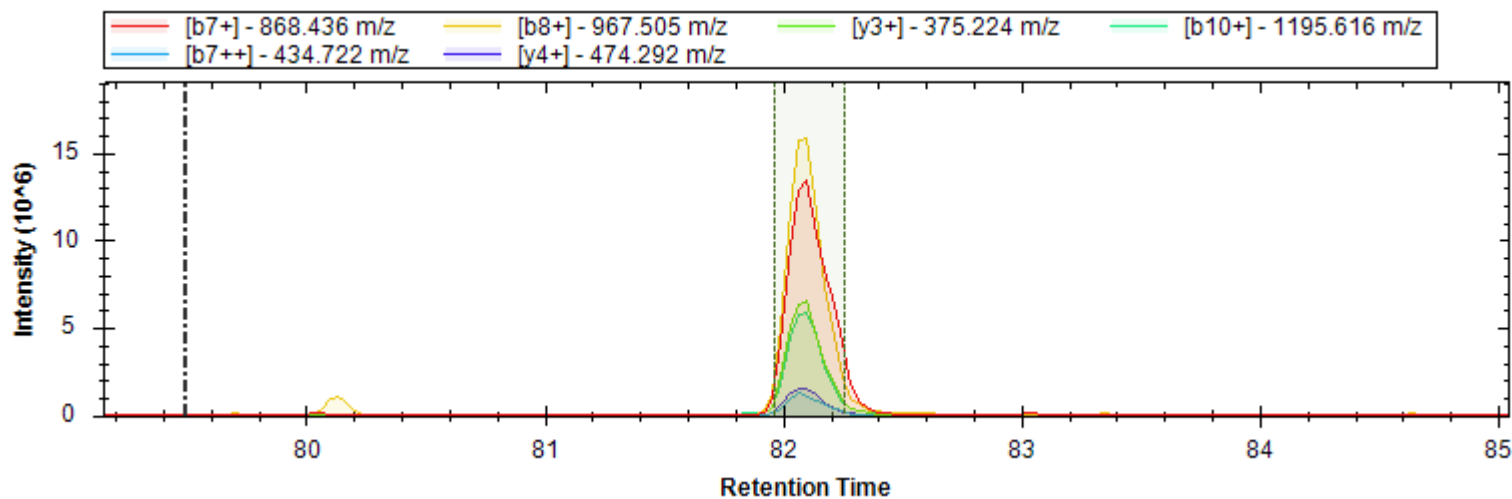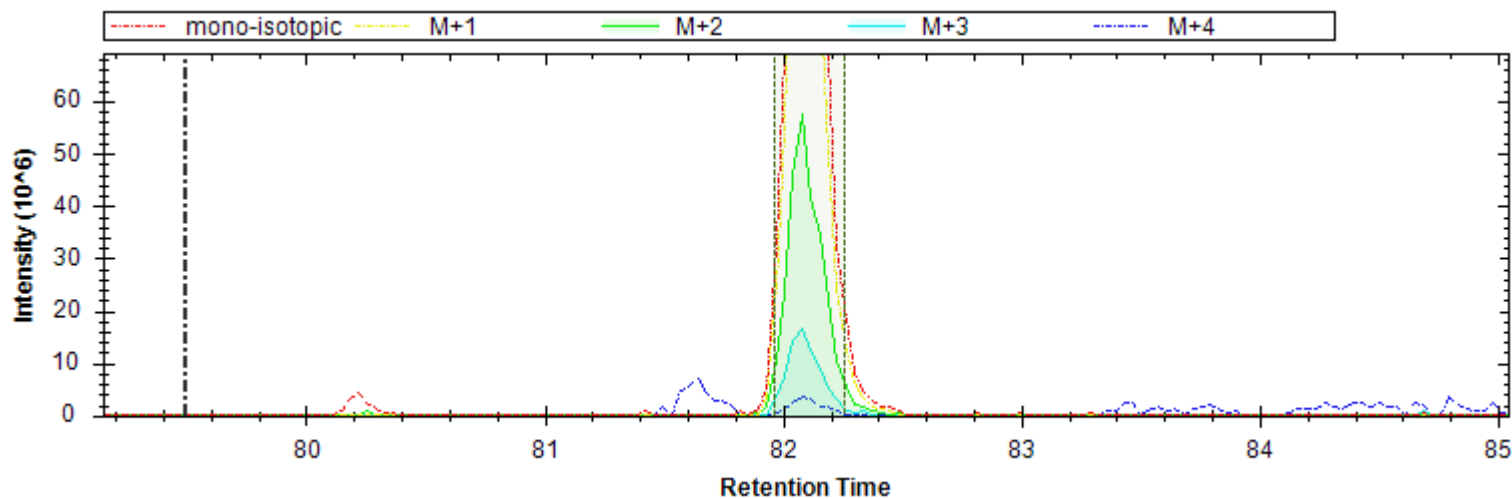

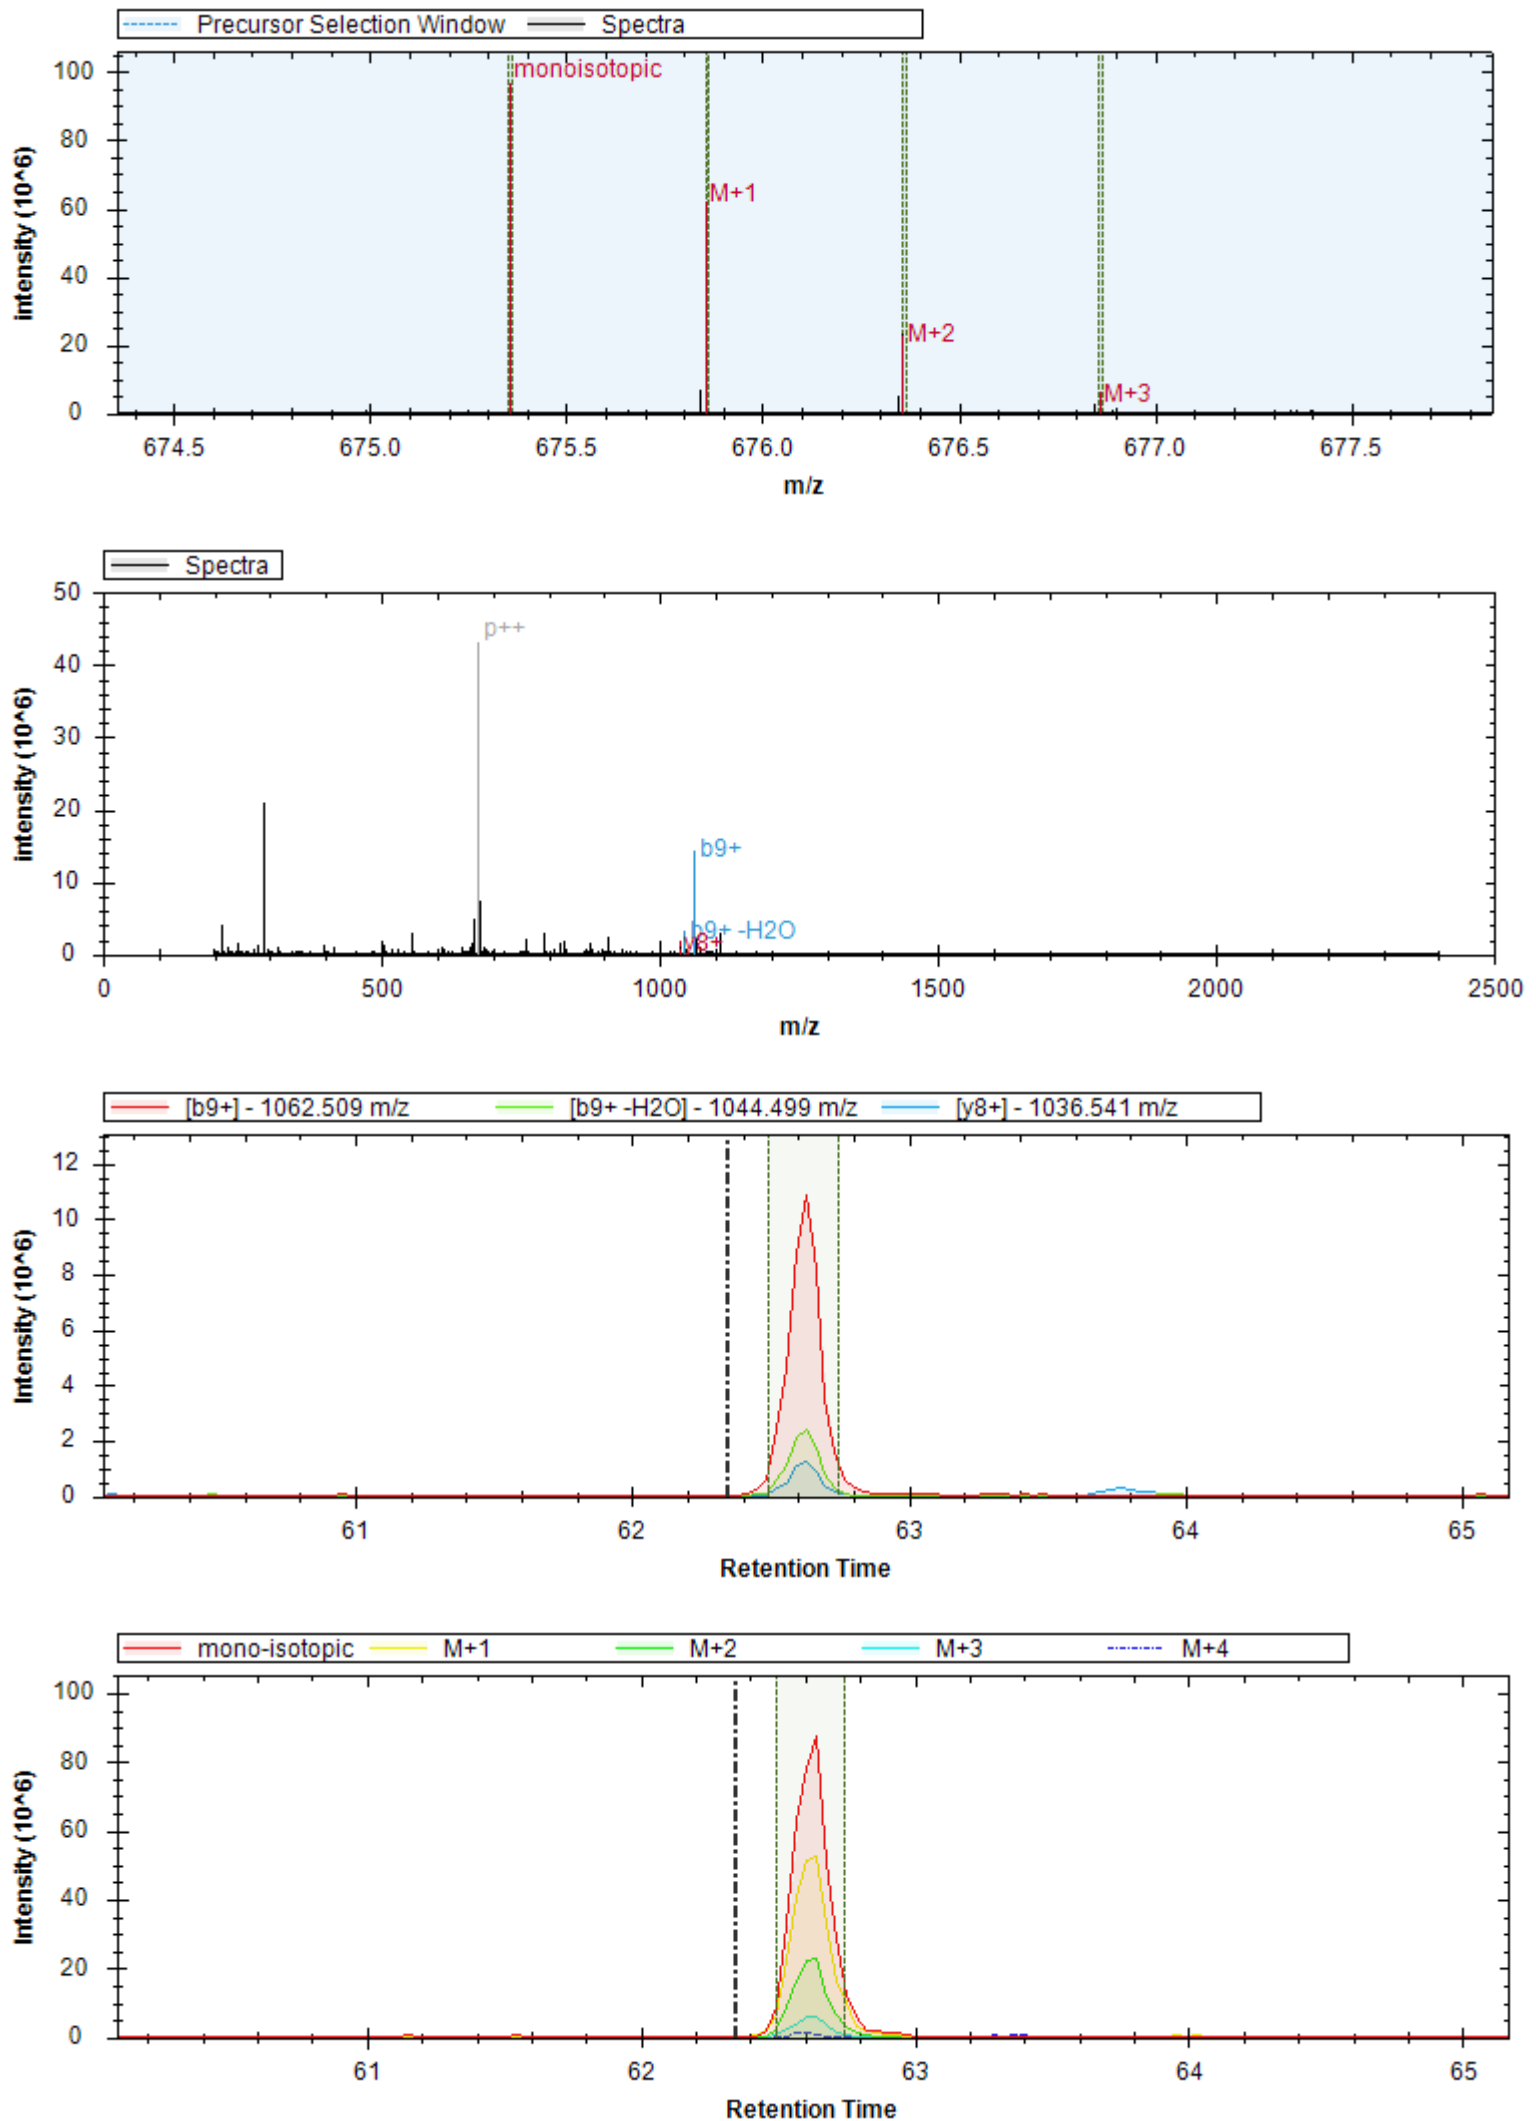

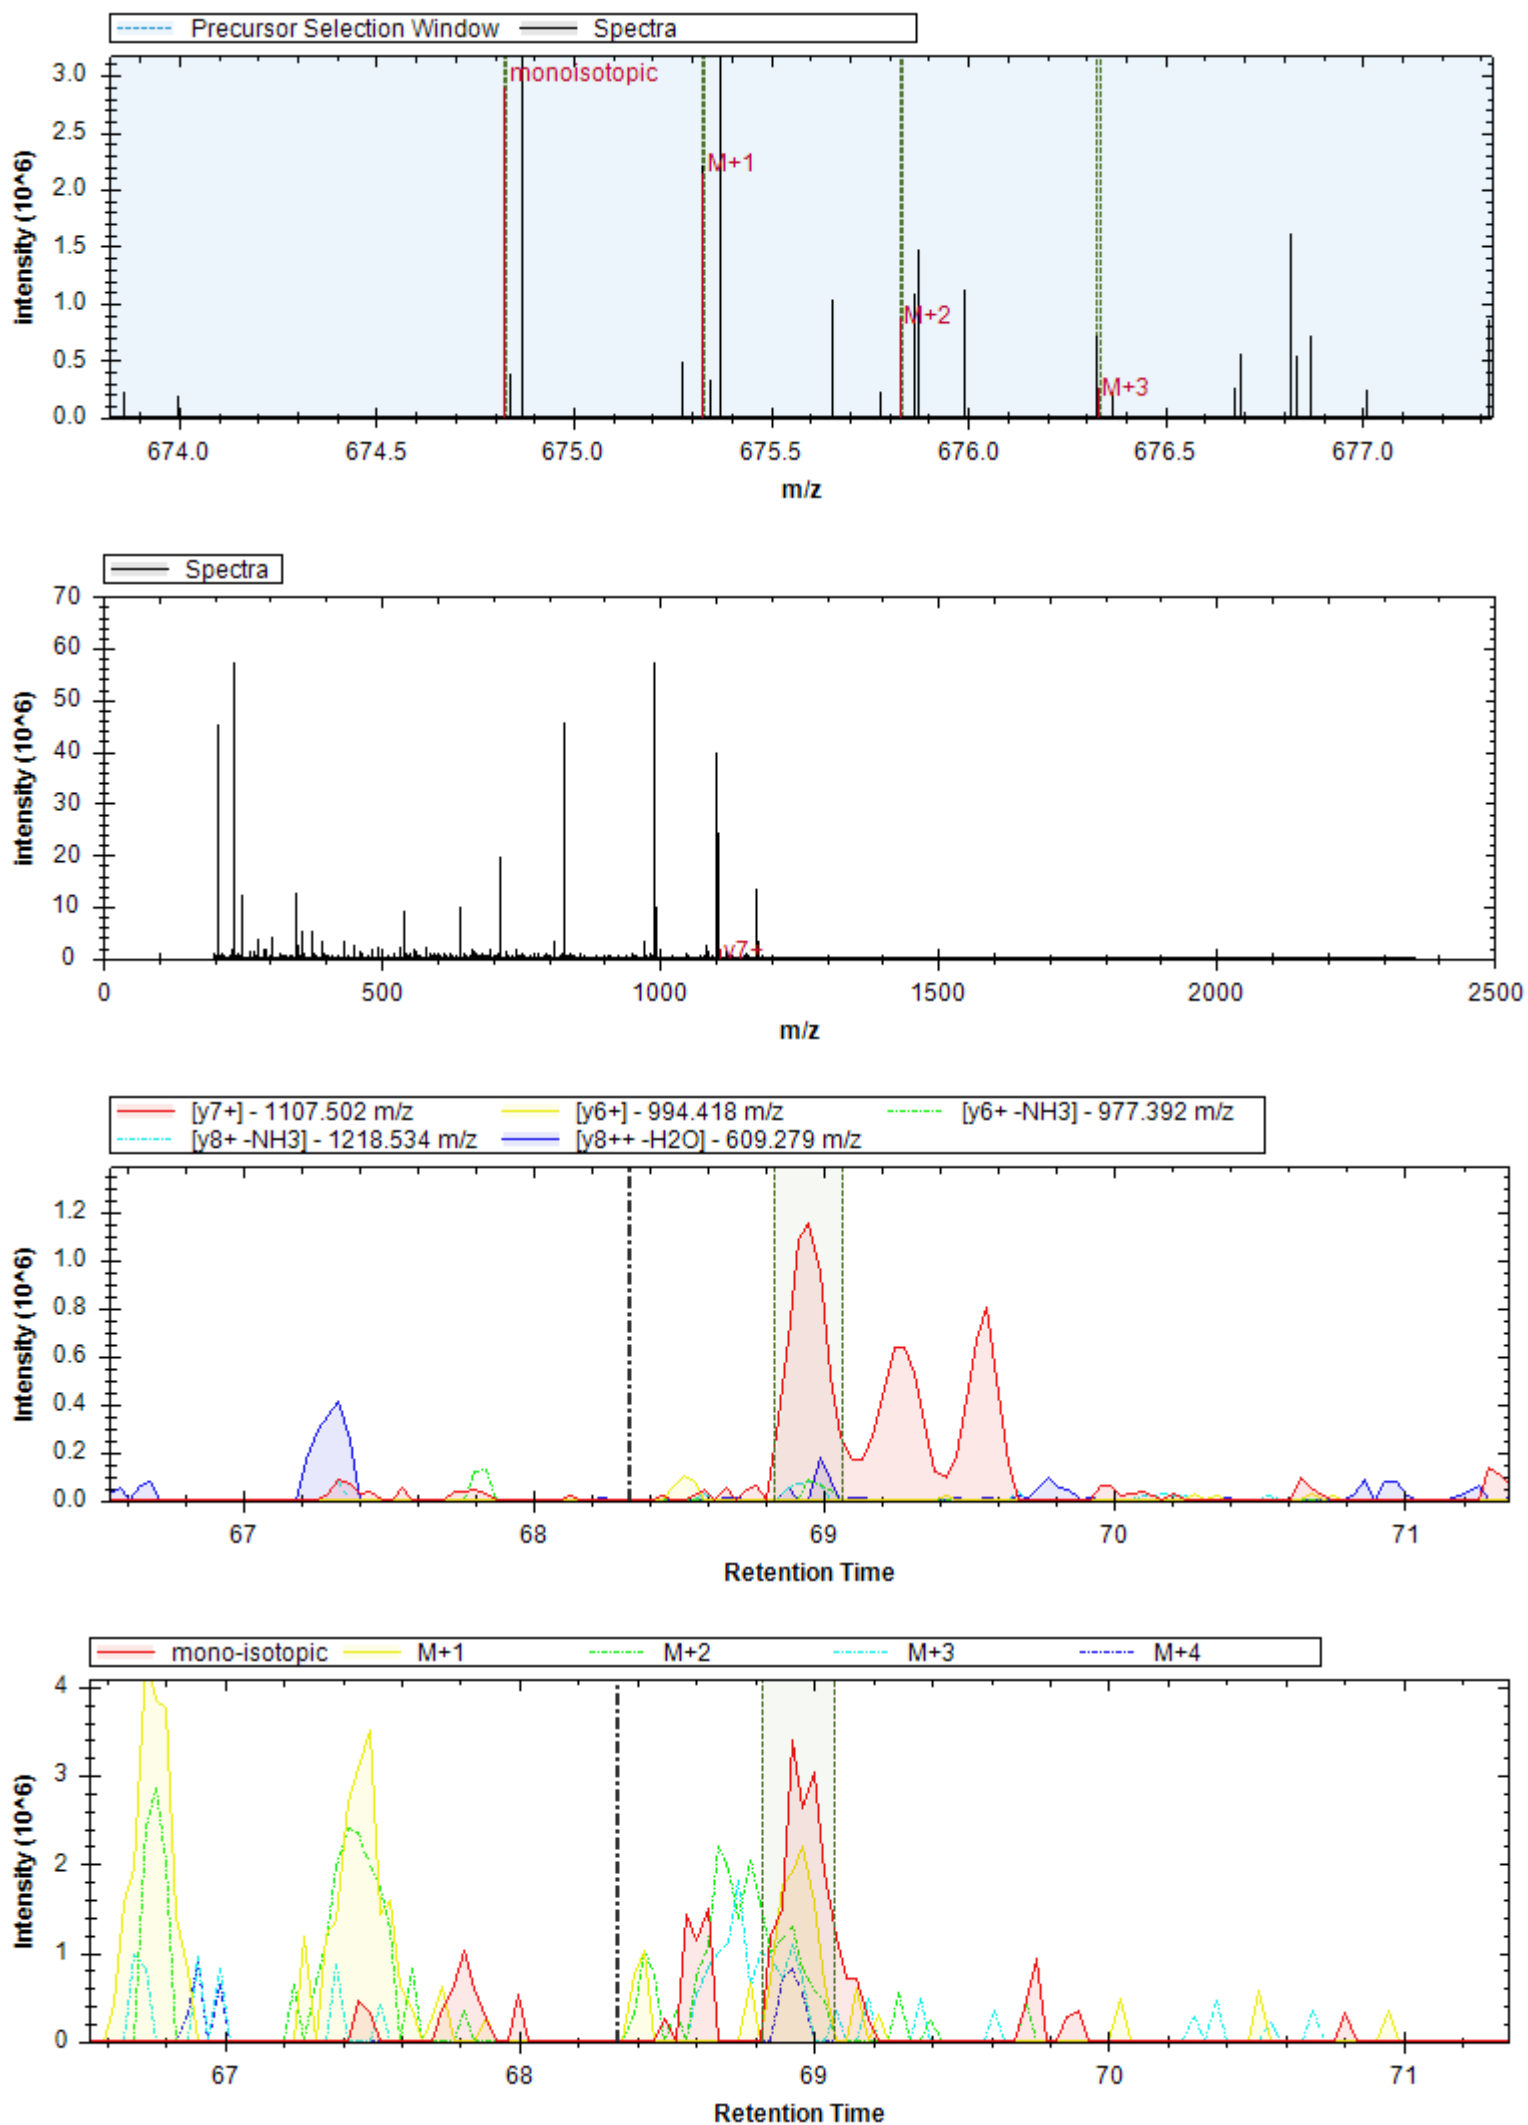

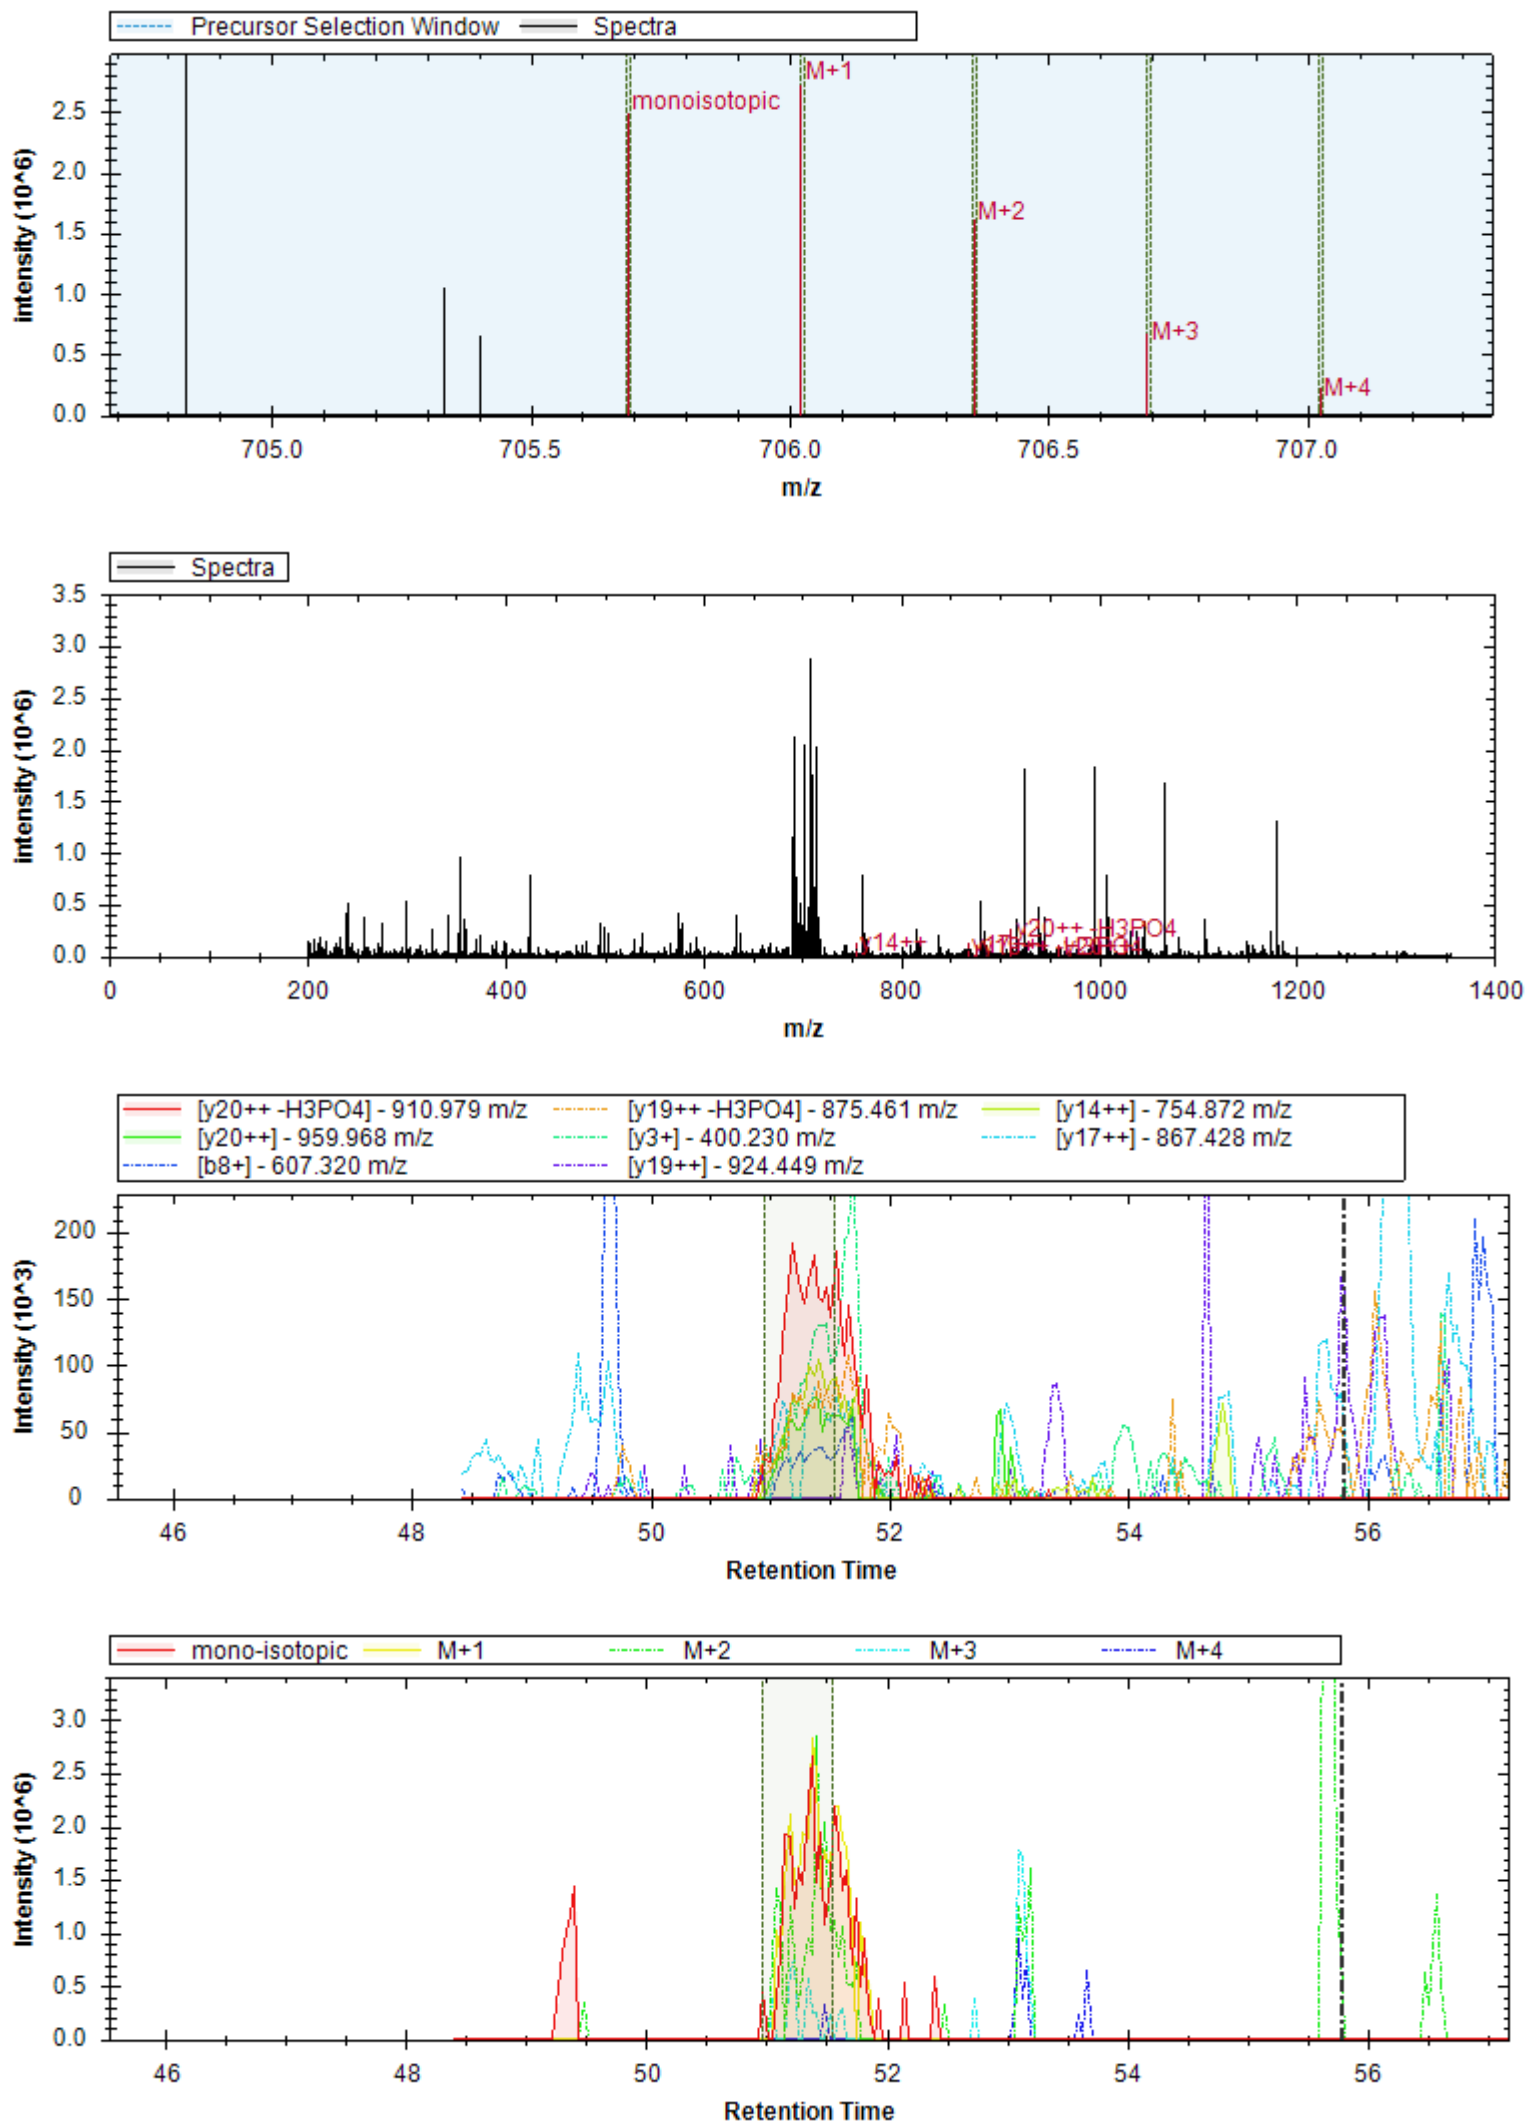



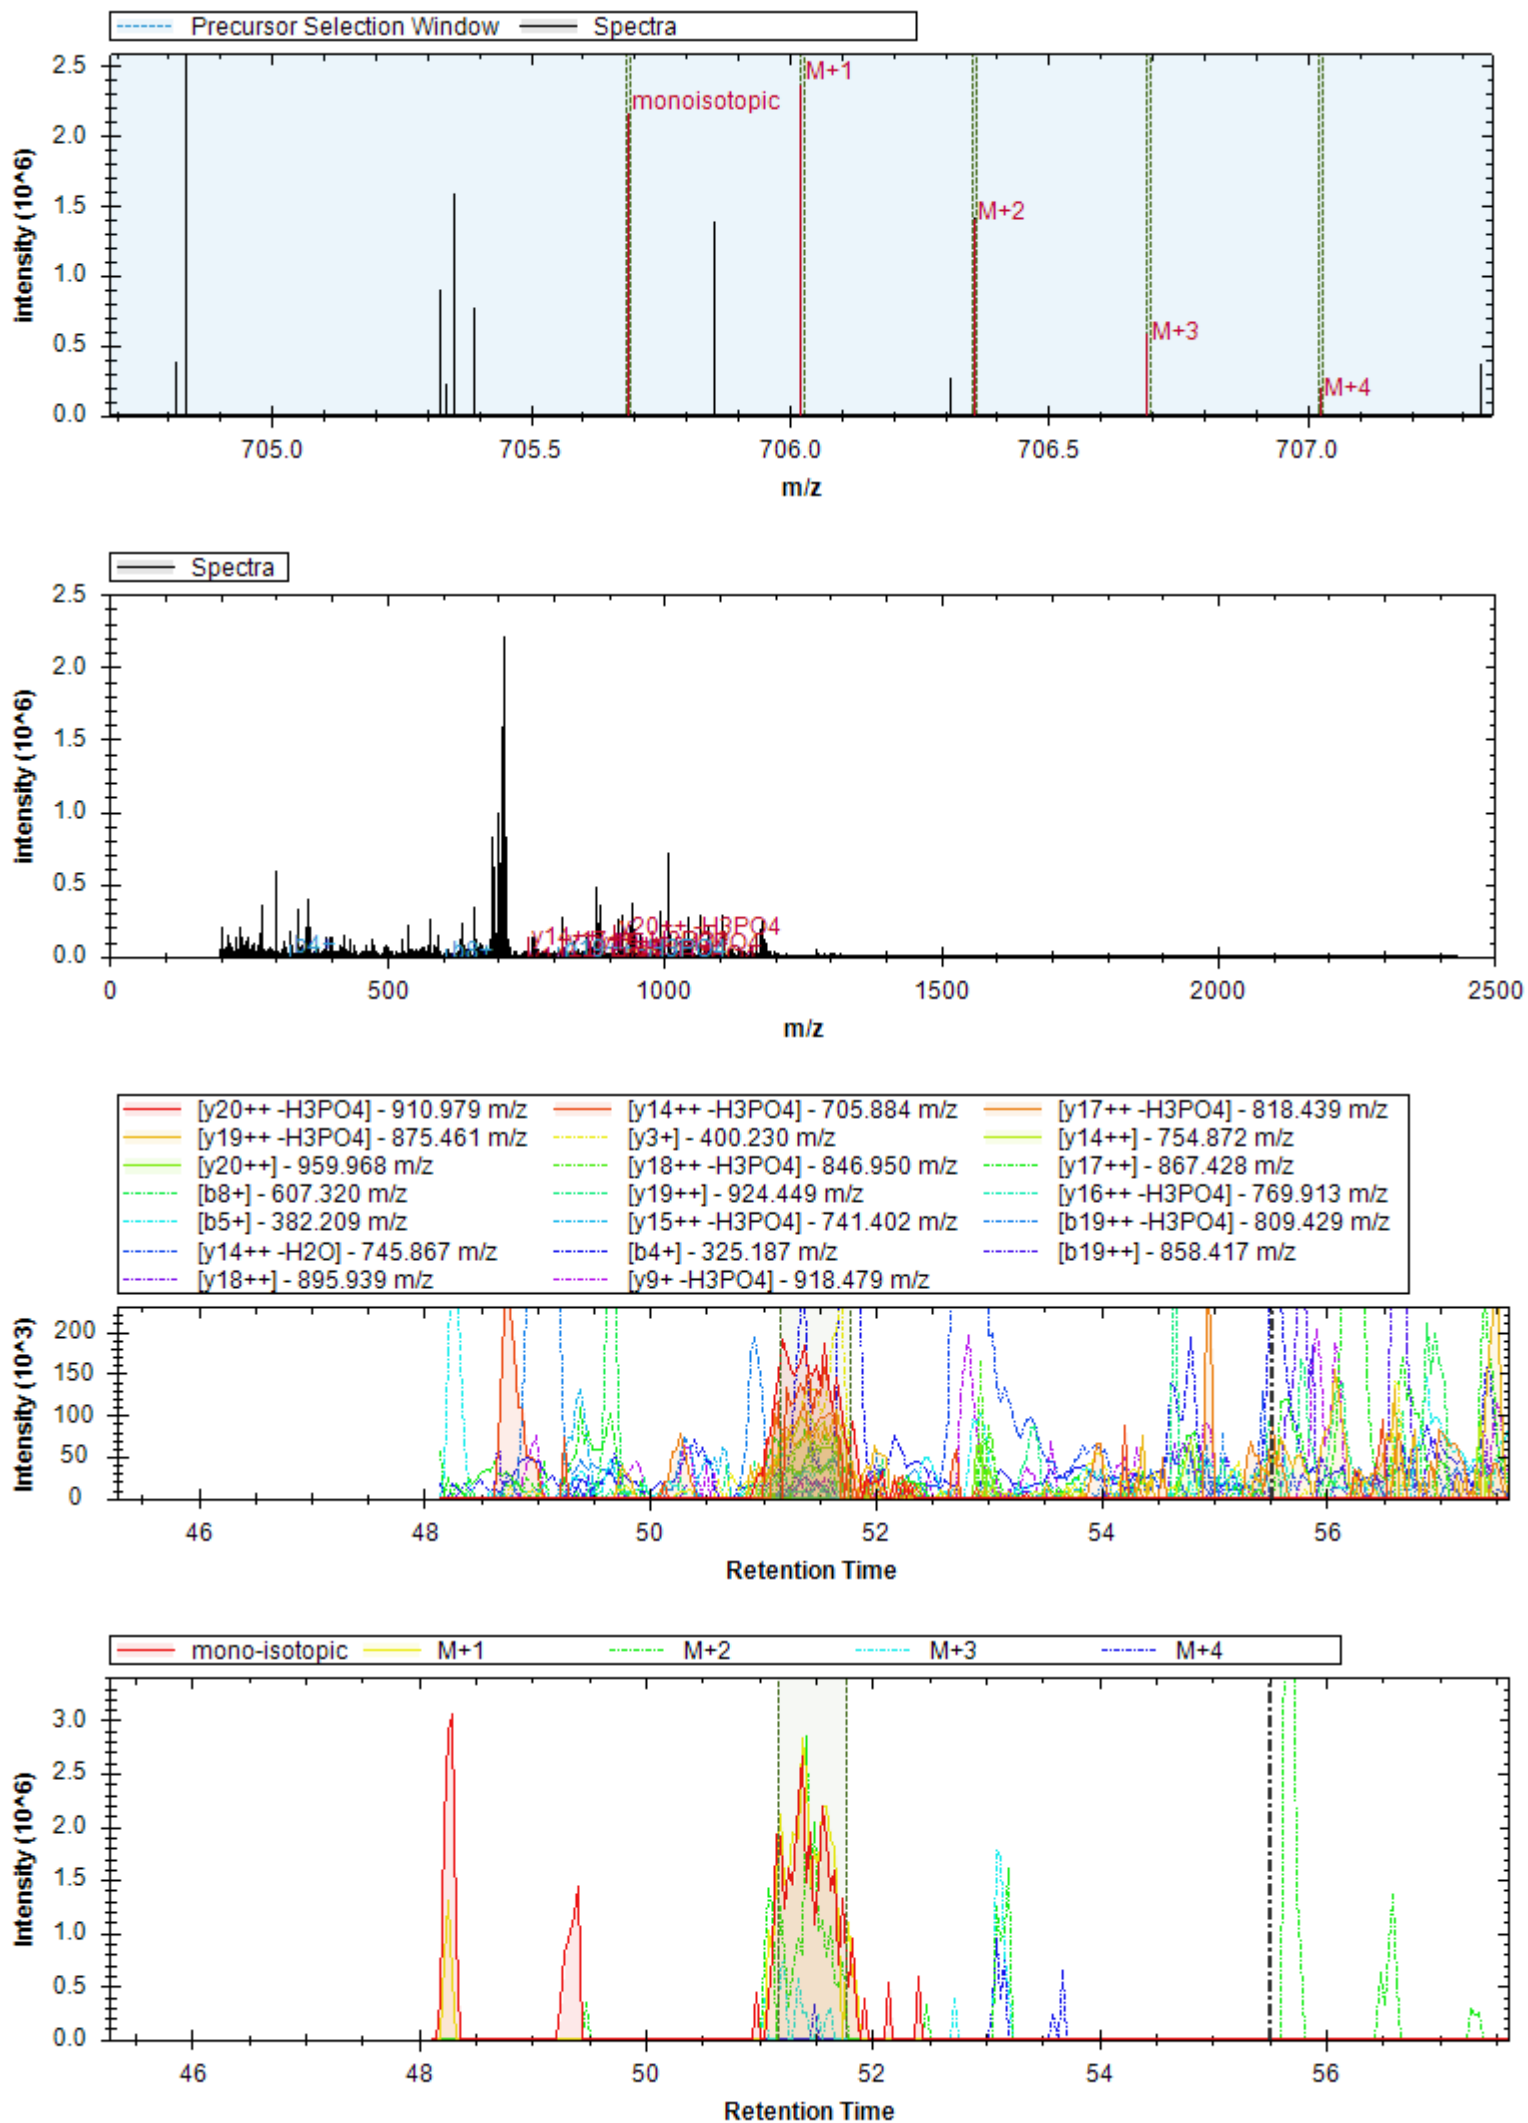

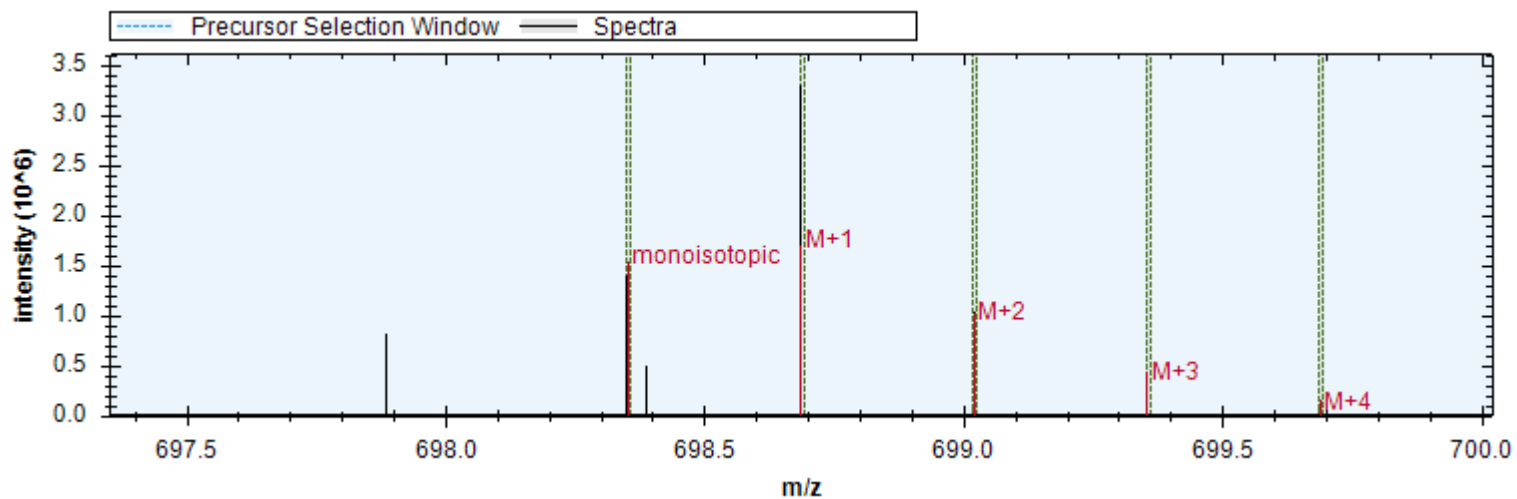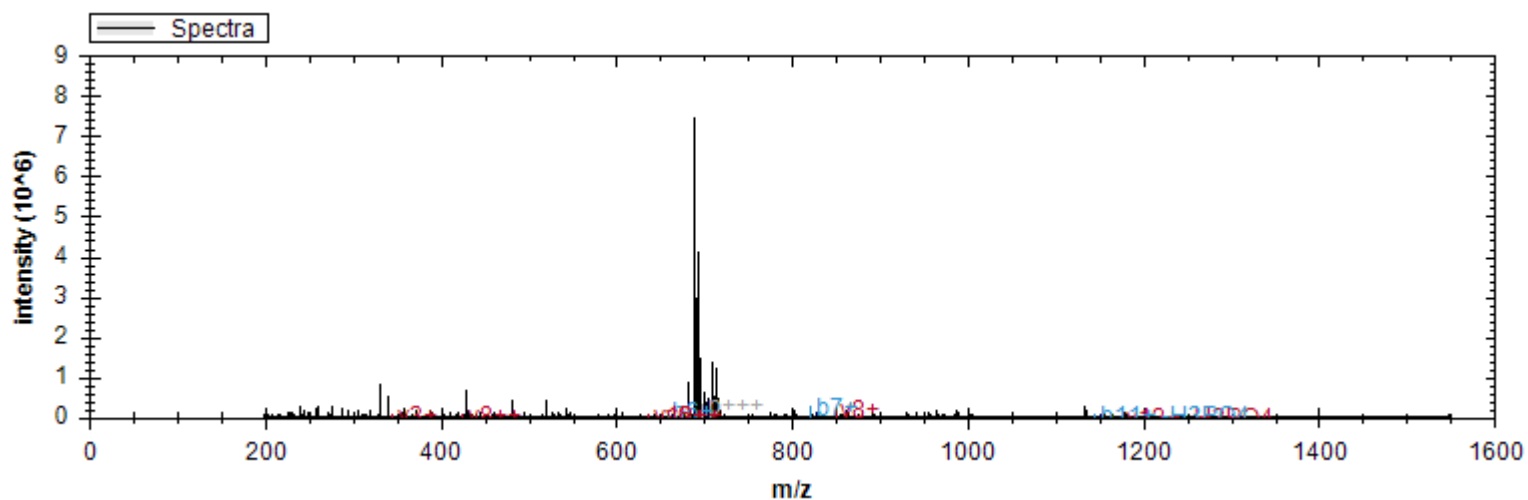

- |                              |                              |                      |
|------------------------------|------------------------------|----------------------|
| [b7+] - 821.442 m/z          | [y10+ -H2O] - 1184.309 m/z   | [b6+] - 658.378 m/z  |
| [y8+] - 850.489 m/z          | [b9+] - 989.532 m/z          | [b8++] - 459.751 m/z |
| [y4+] - 482.283 m/z          | [y12+ -H2O] - 1352.399 m/z   | [b3+] - 367.245 m/z  |
| [y6+] - 652.389 m/z          | [y12+ -H3PO4] - 1174.633 m/z | [y7+] - 753.437 m/z  |
| [y12++] - 636.809 m/z        | [b17++] - 910.436 m/z        | [y8++] - 425.748 m/z |
| [b11+ -H3PO4] - 1145.585 m/z | [y10+ -H3PO4] - 1006.543 m/z | [y3+] - 345.225 m/z  |
| [y5+] - 581.352 m/z          | [y13++] - 718.340 m/z        |                      |

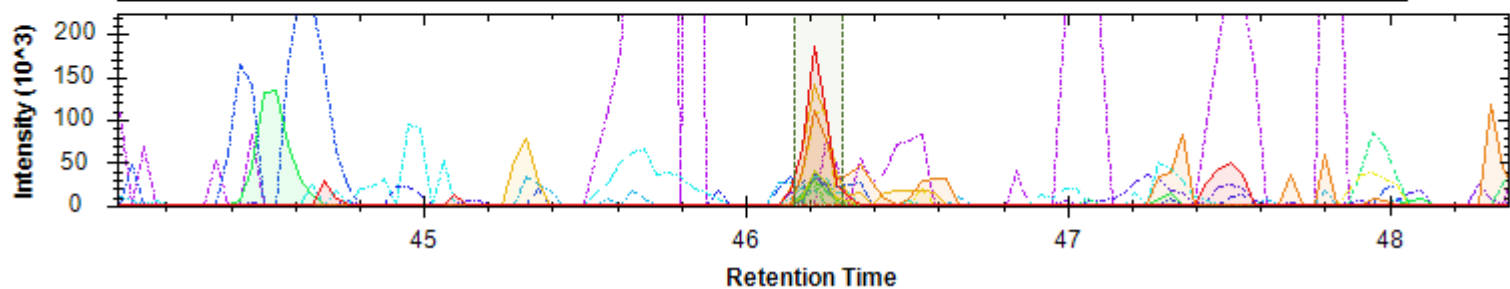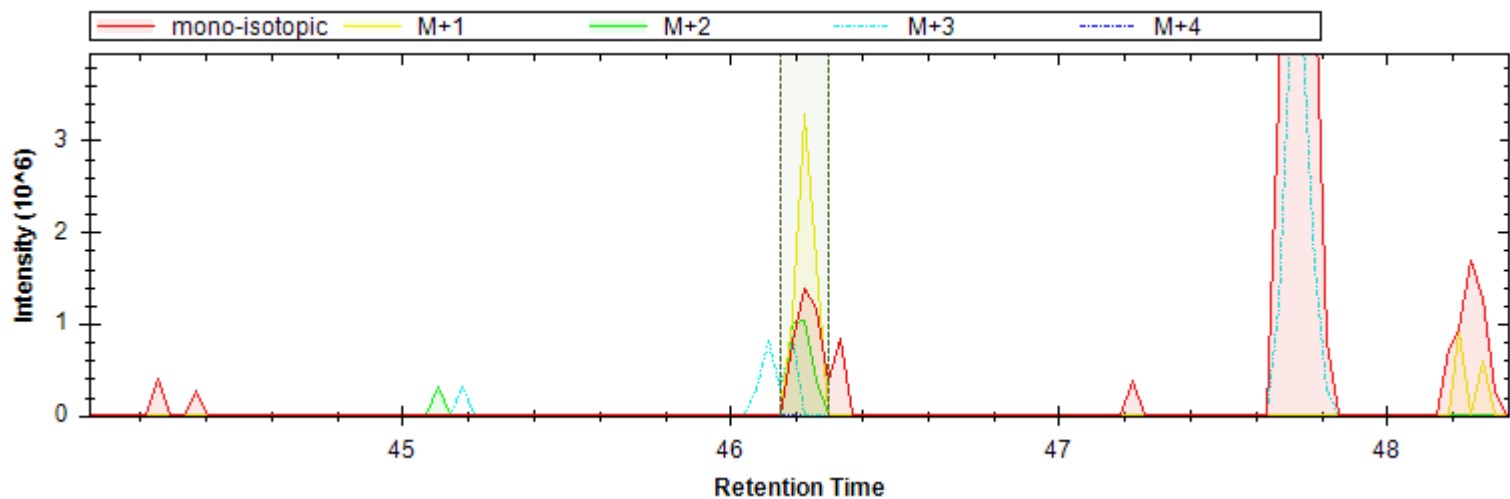

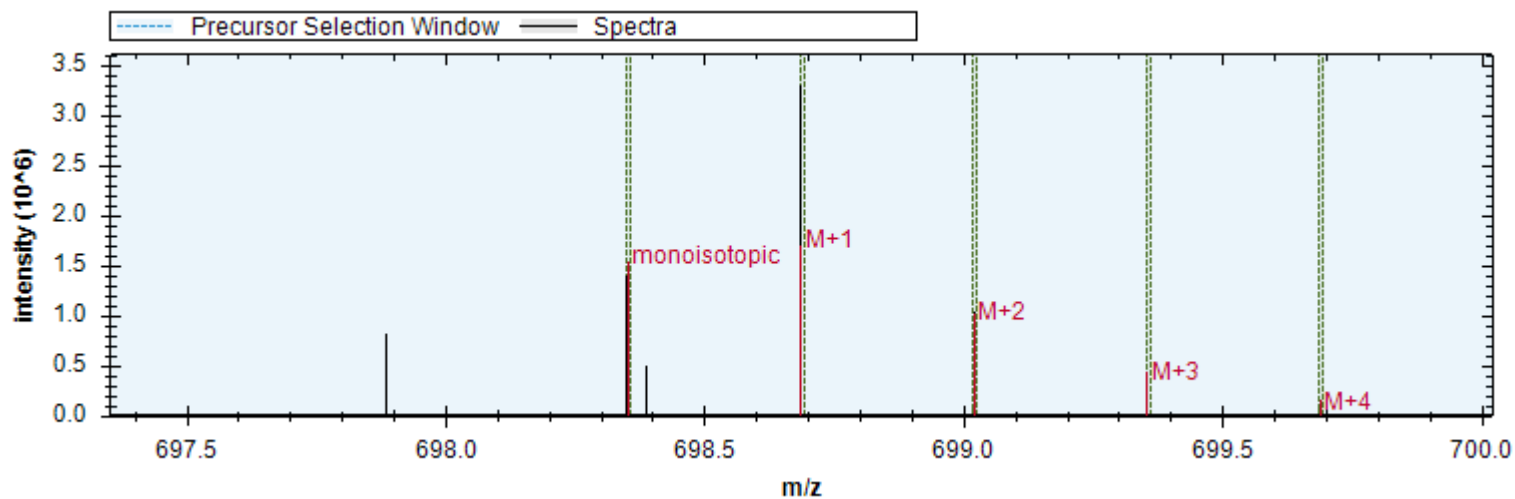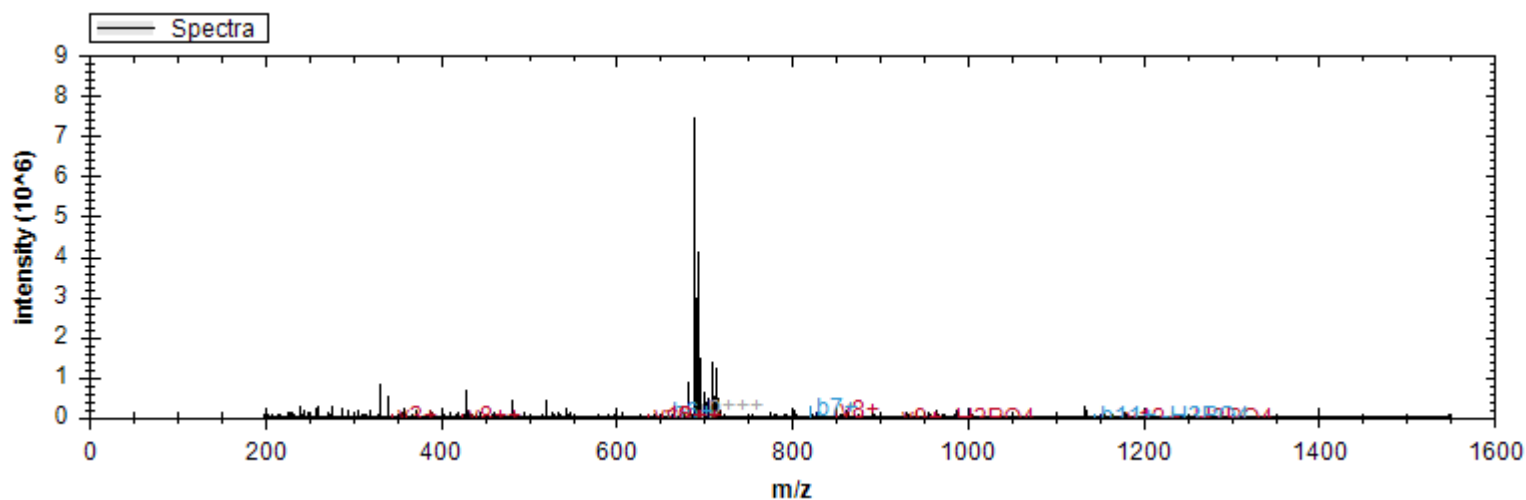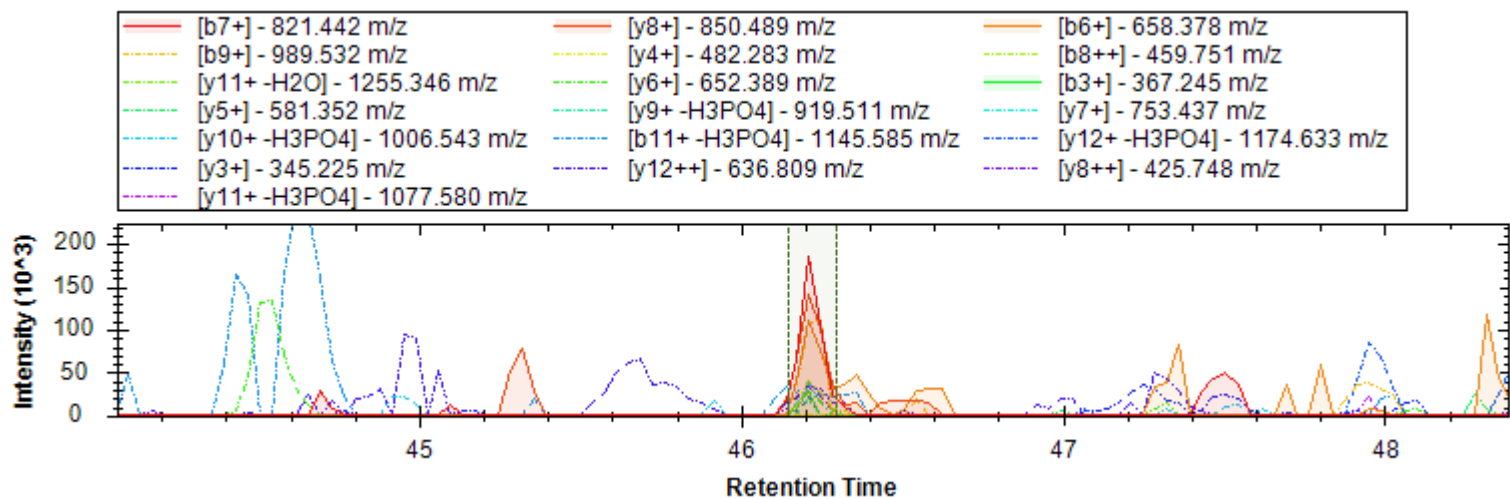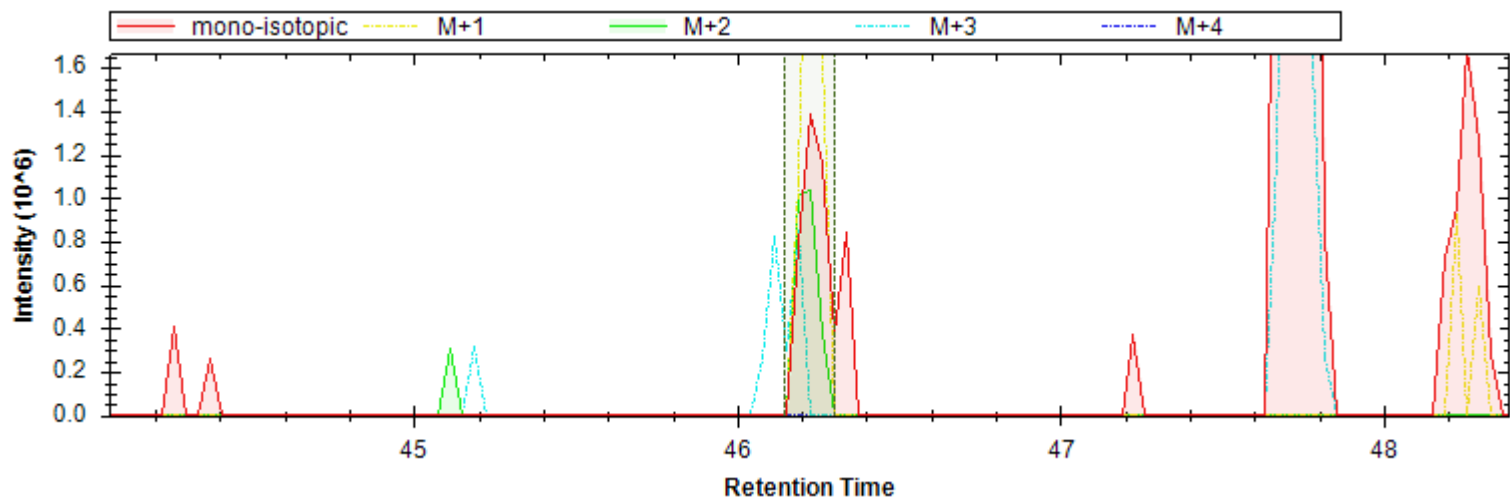

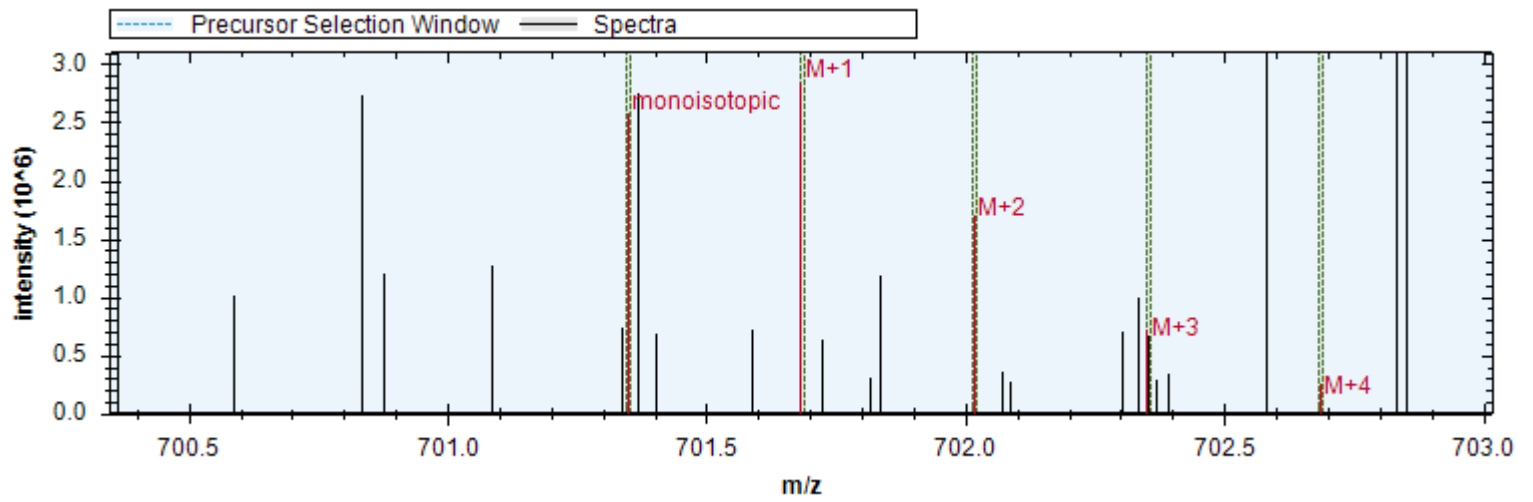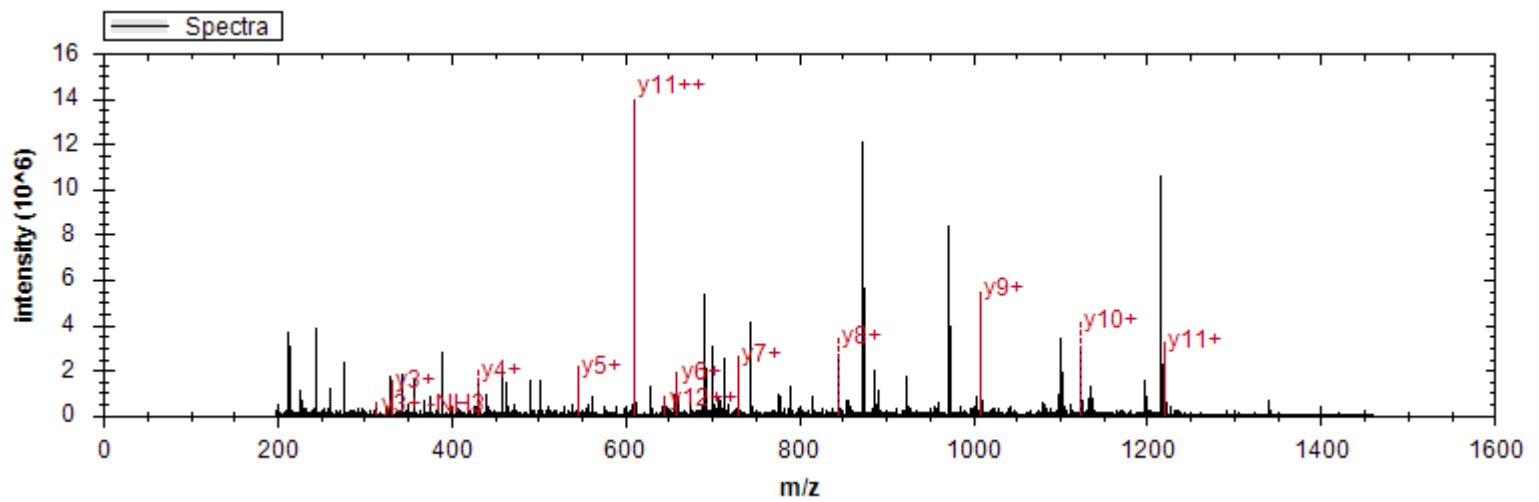

|                          |                       |                       |
|--------------------------|-----------------------|-----------------------|
| [y9+] - 1008.500 m/z     | [y11++] - 610.793 m/z | [y10+] - 1123.527 m/z |
| [y8+] - 845.436 m/z      | [y7+] - 730.409 m/z   | [y11+] - 1220.579 m/z |
| [y4+] - 431.261 m/z      | [y5+] - 546.288 m/z   | [y3+] - 332.193 m/z   |
| [y6+] - 659.372 m/z      | [y12++] - 646.312 m/z | [y13++] - 702.854 m/z |
| [y3+ -NH3] - 315.166 m/z |                       |                       |

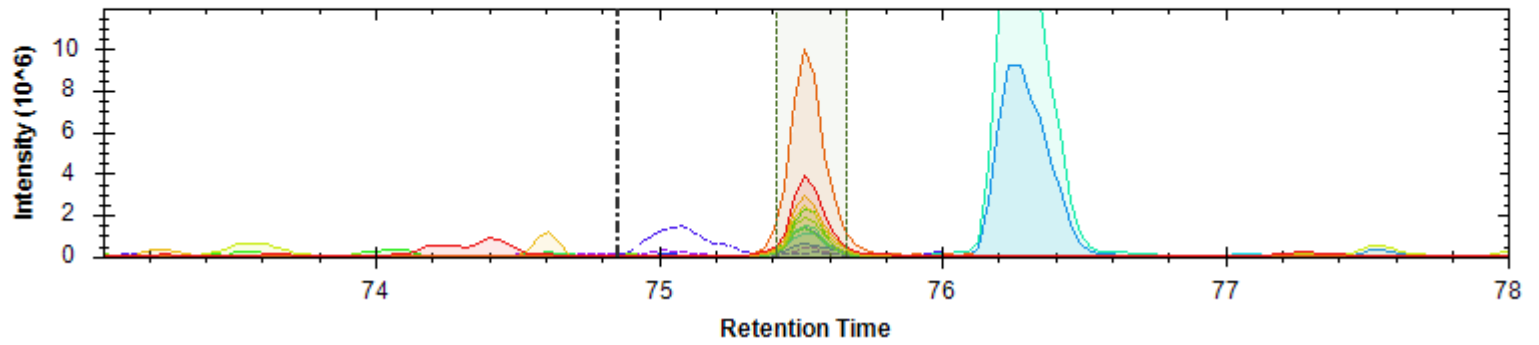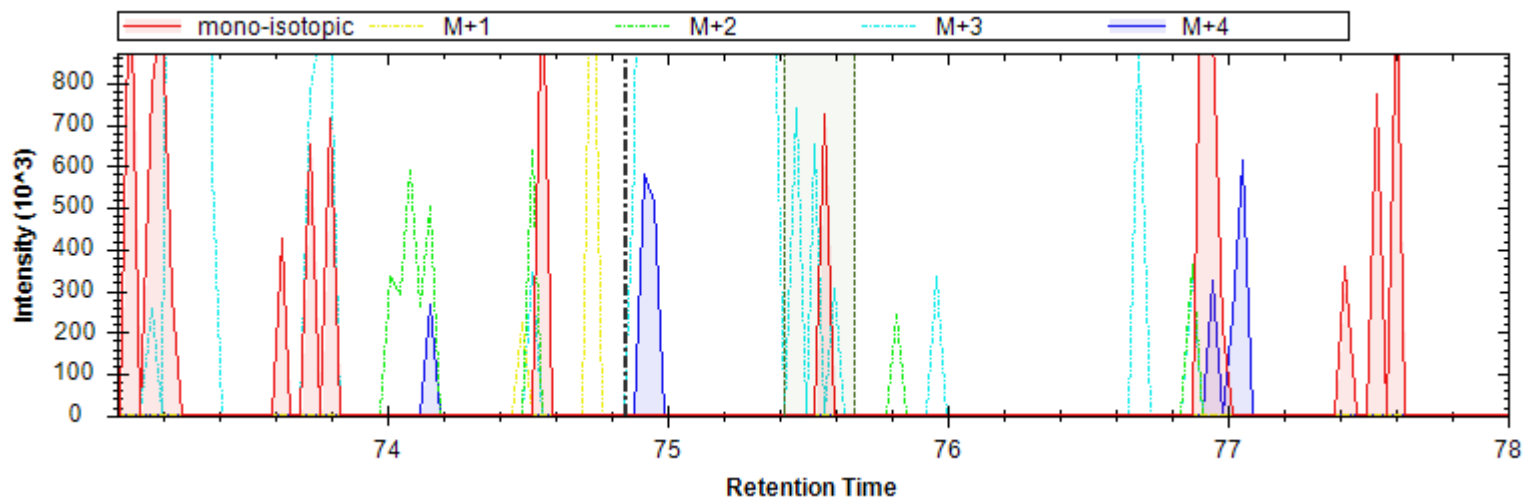

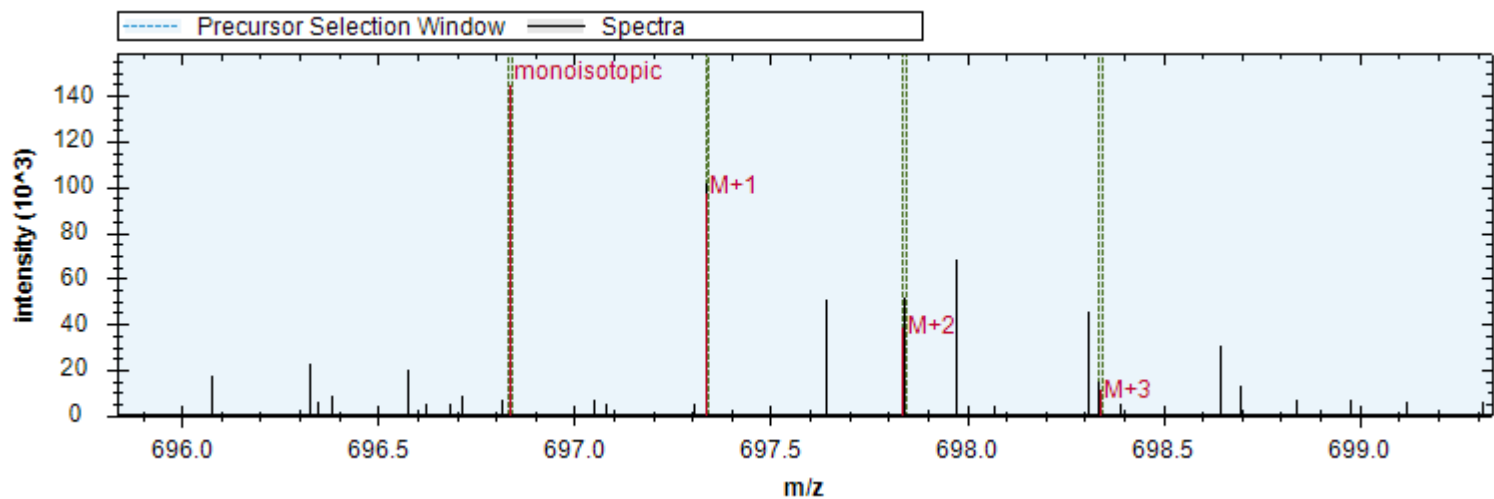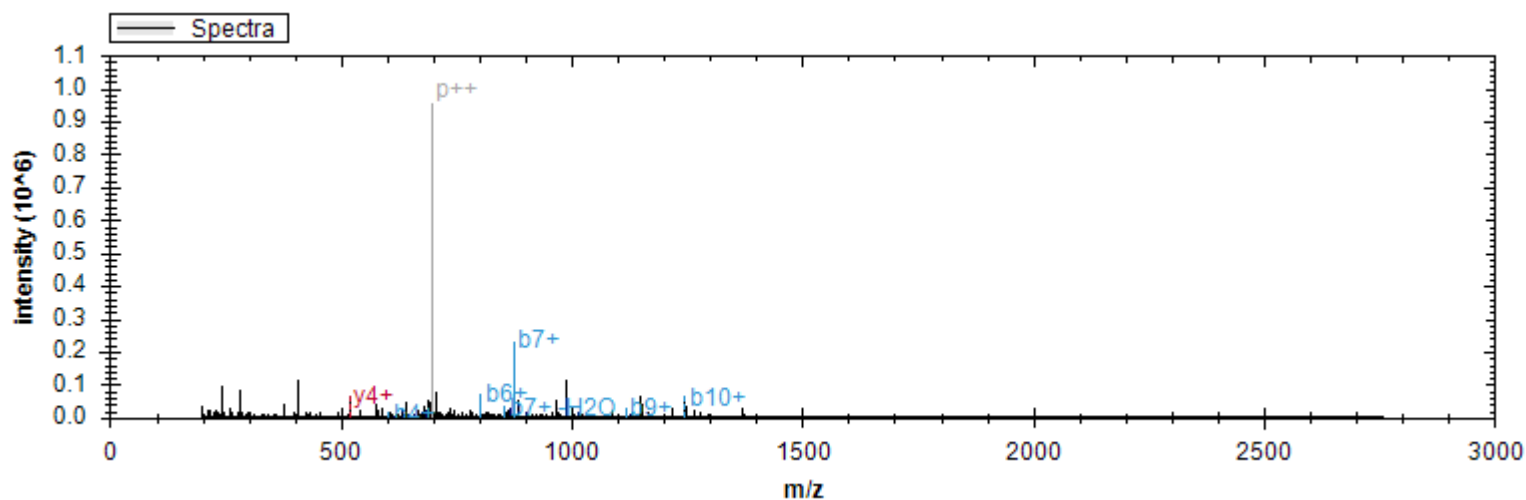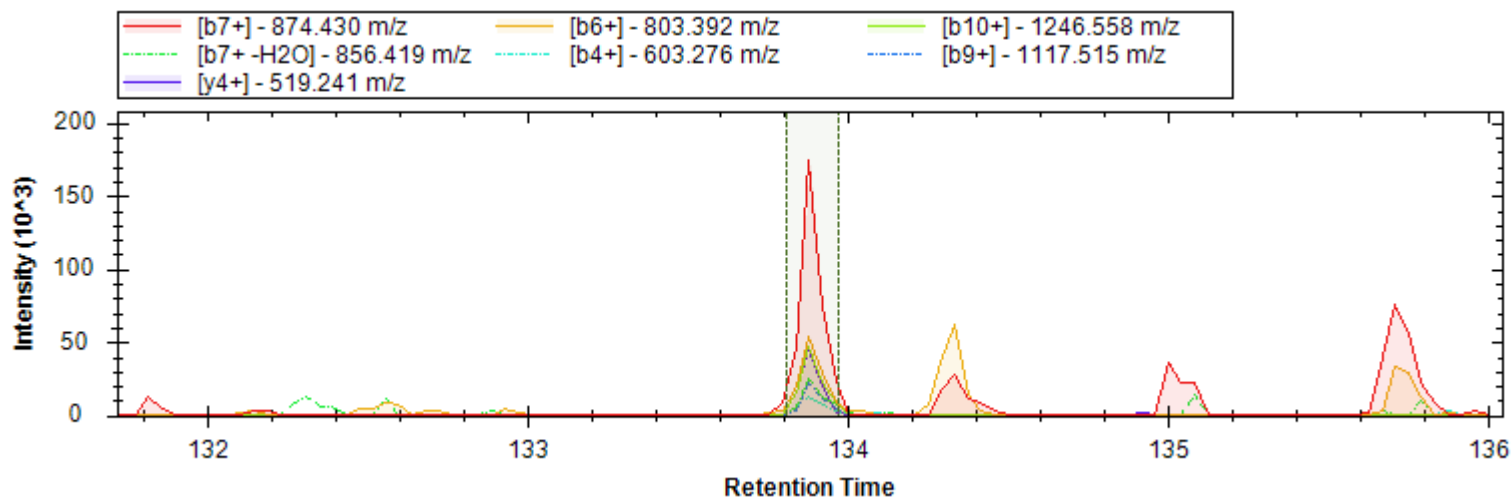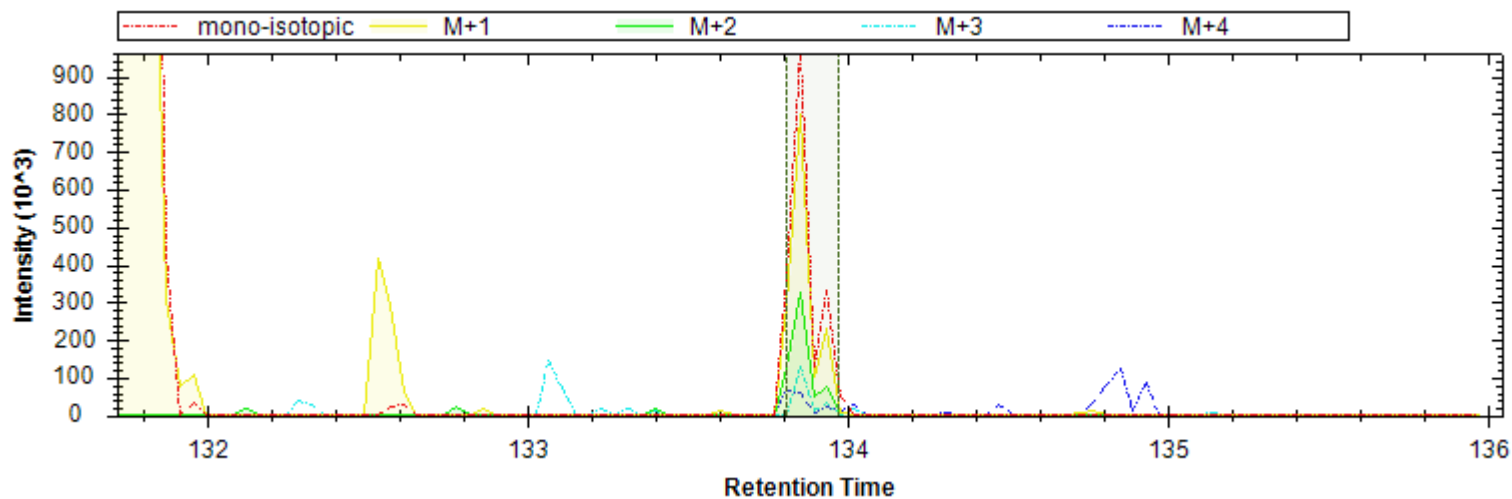

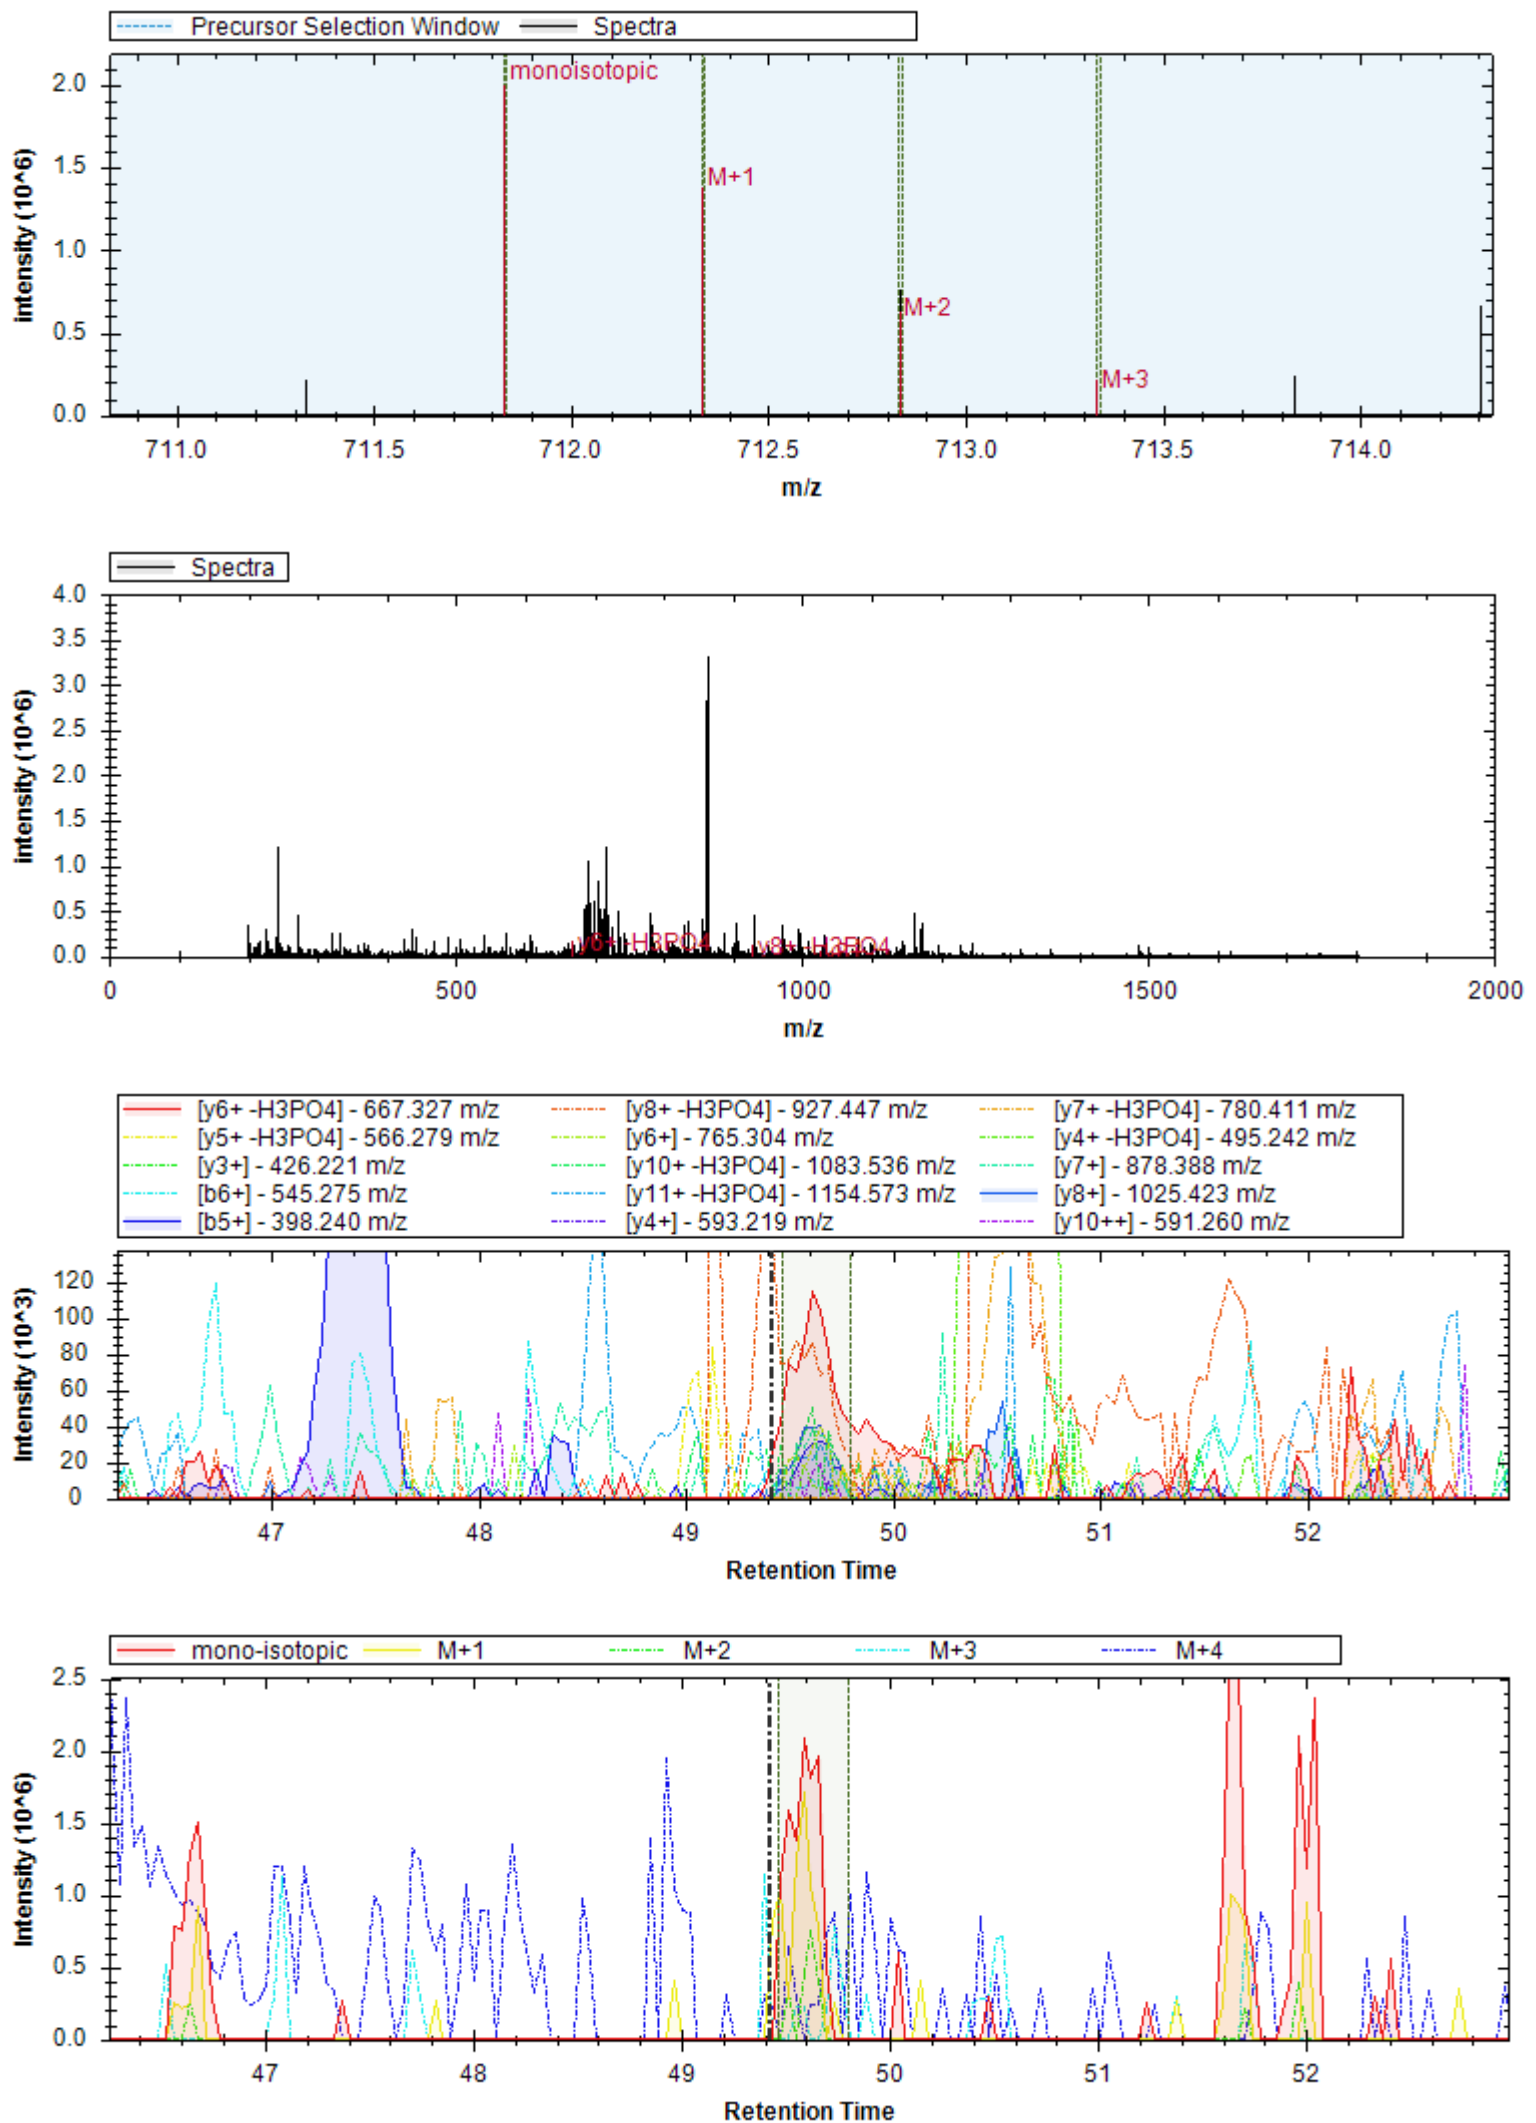

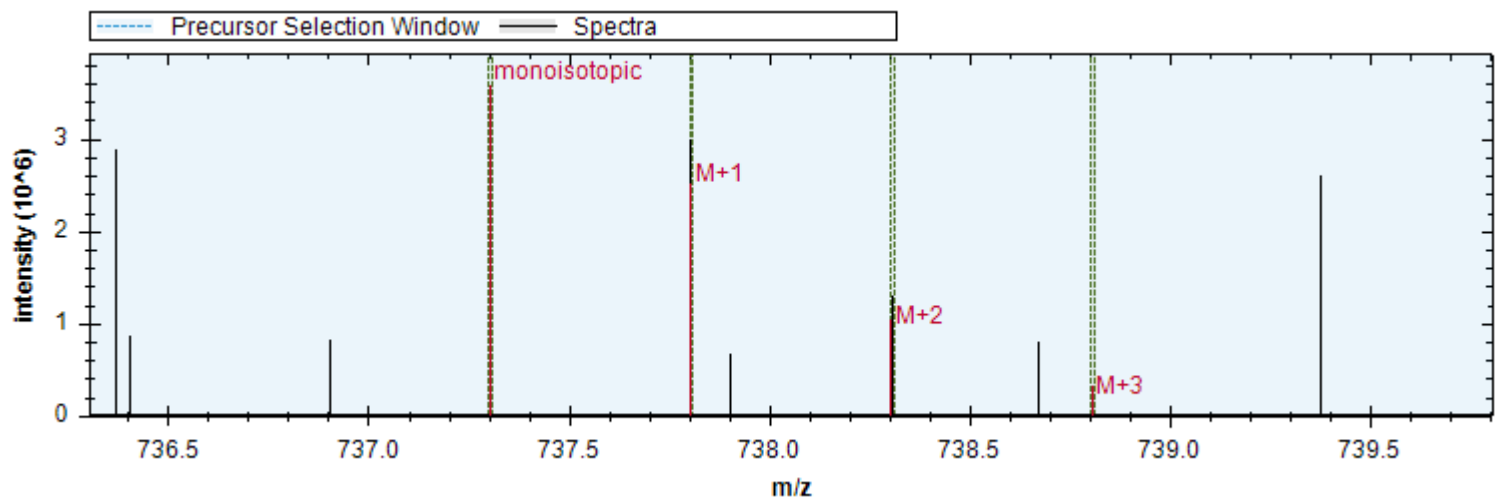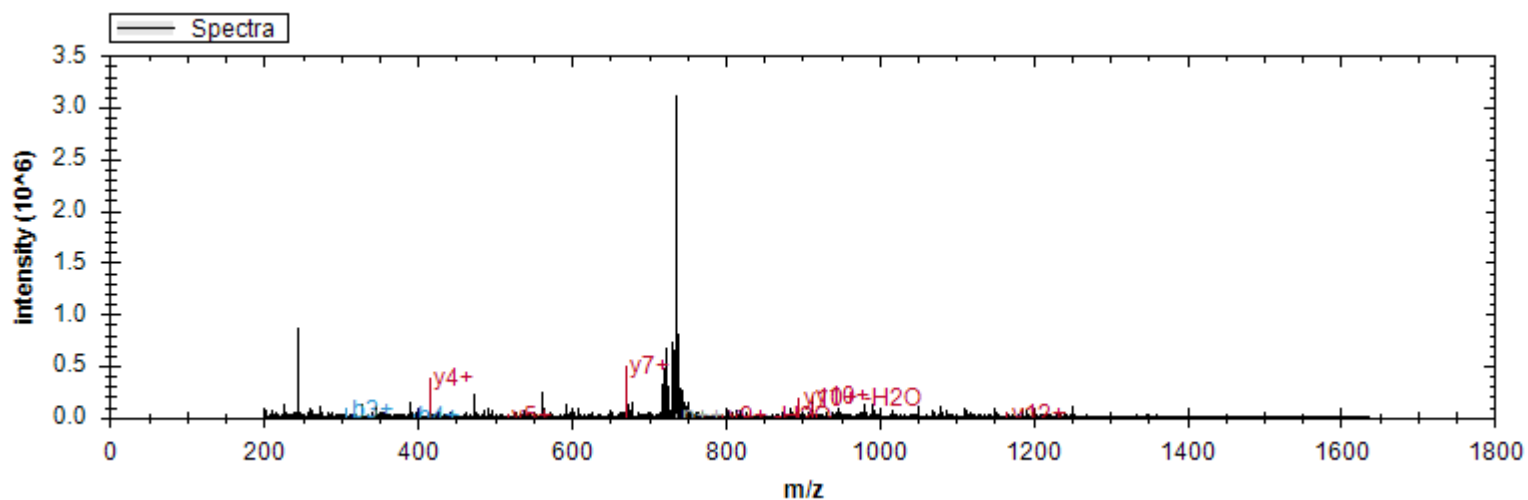

|                              |                          |                             |
|------------------------------|--------------------------|-----------------------------|
| [y7+] - 671.347 m/z          | [y4+] - 416.225 m/z      | [y10+ -H2O] - 894.443 m/z   |
| [y10+] - 912.453 m/z         | [b3+] - 308.124 m/z      | [y11+ -H3PO4] - 981.475 m/z |
| [y12+ -H3PO4] - 1068.507 m/z | [y9+ -H2O] - 797.390 m/z | [b5+ -H3PO4] - 464.178 m/z  |
| [b5+ -H2O] - 641.944 m/z     | [b4+ -H2O] - 377.146 m/z | [y5+] - 517.273 m/z         |
| [y7+ -H2O] - 653.337 m/z     | [b8+ -H2O] - 883.050 m/z | [y6+] - 574.294 m/z         |
| [y8+ -H2O] - 740.369 m/z     | [y4+ -NH3] - 399.199 m/z | [y12+] - 1166.484 m/z       |
| [b4+] - 395.156 m/z          |                          |                             |

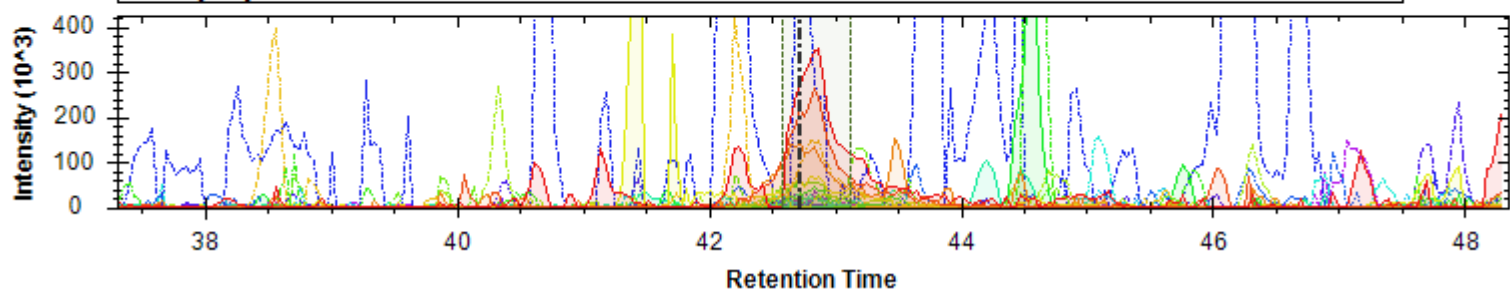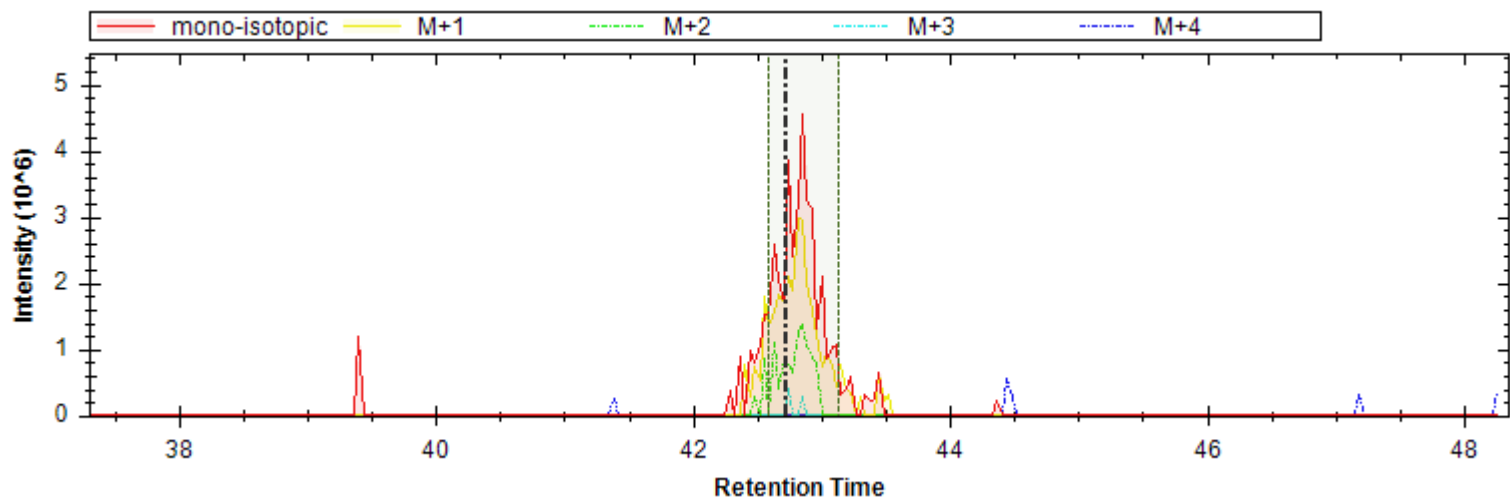

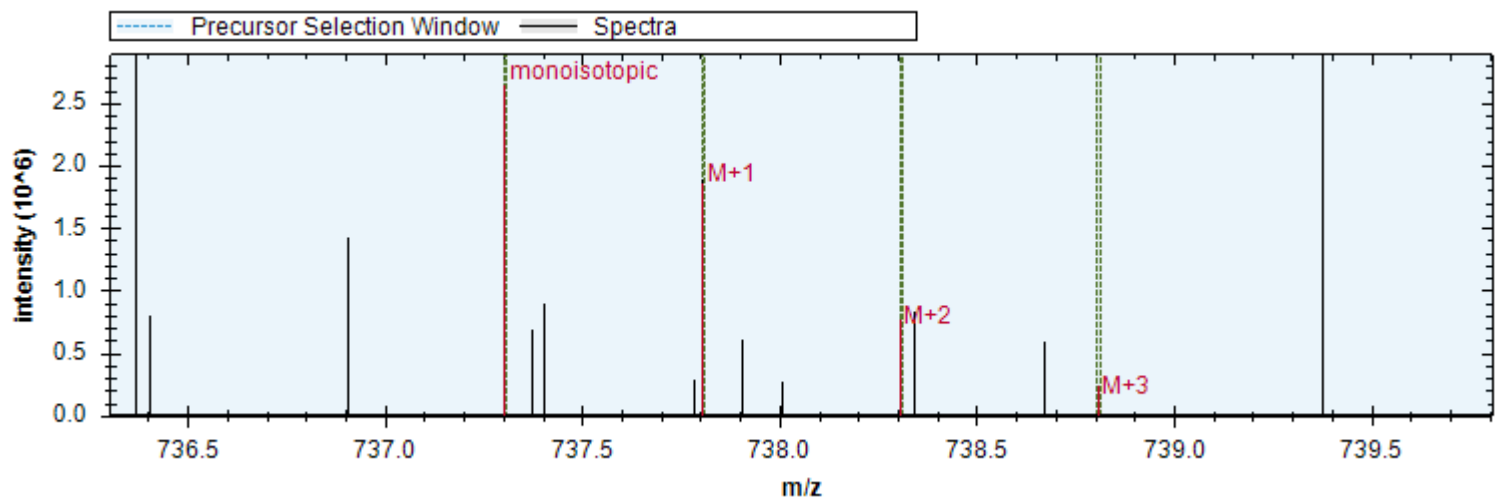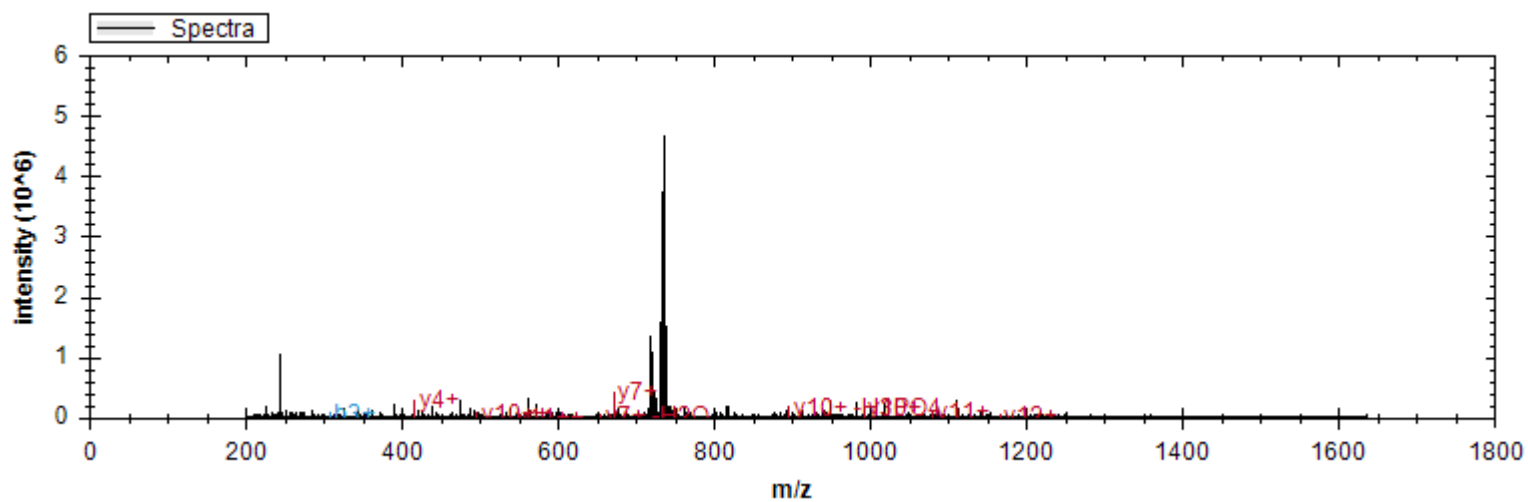

- |                             |                              |                            |
|-----------------------------|------------------------------|----------------------------|
| [y7+] - 671.347 m/z         | [y10+ -H3PO4] - 894.443 m/z  | [y4+] - 416.225 m/z        |
| [y10+] - 992.420 m/z        | [y10++] - 496.714 m/z        | [b3+] - 308.124 m/z        |
| [y11+ -H3PO4] - 981.475 m/z | [y12+ -H3PO4] - 1068.507 m/z | [y9+ -H3PO4] - 797.390 m/z |
| [y11++] - 540.230 m/z       | [y11+] - 1079.452 m/z        | [y7+ -H2O] - 653.337 m/z   |
| [y8+ -H3PO4] - 740.369 m/z  | [y12+] - 1166.484 m/z        | [y10+ -H2O] - 1072.209 m/z |
| [b4+ -H2O] - 377.146 m/z    | [y5+] - 517.273 m/z          | [y10+ -NH3] - 975.393 m/z  |
| [b4+] - 395.156 m/z         |                              |                            |

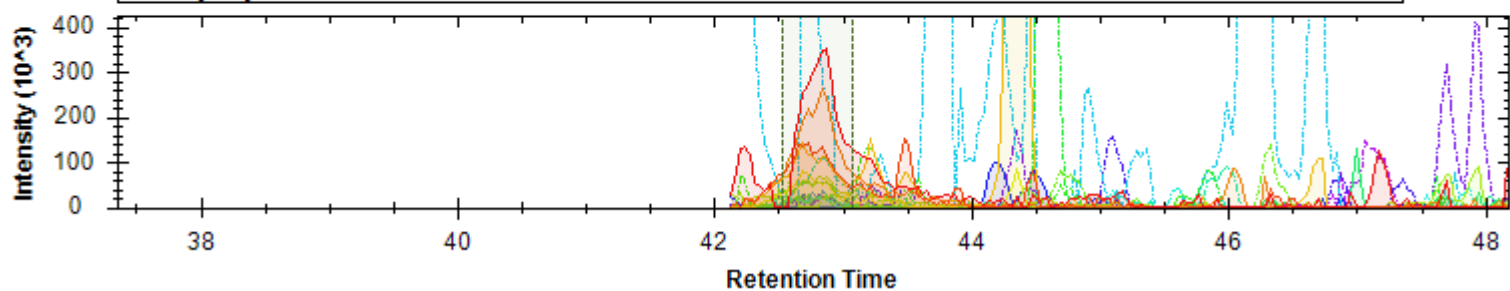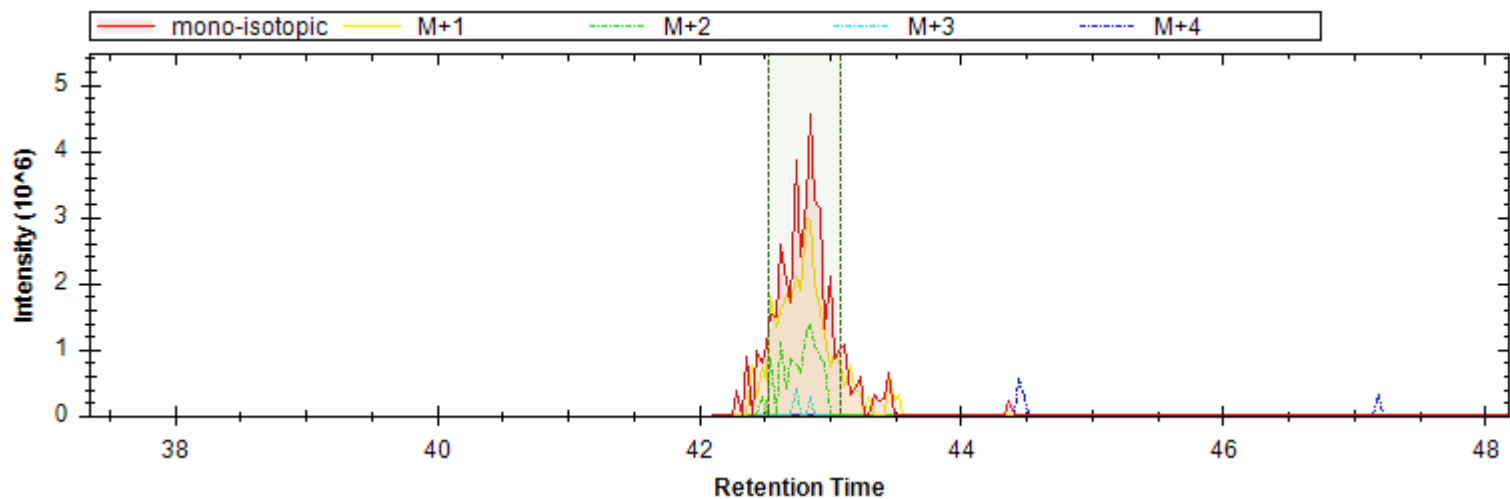



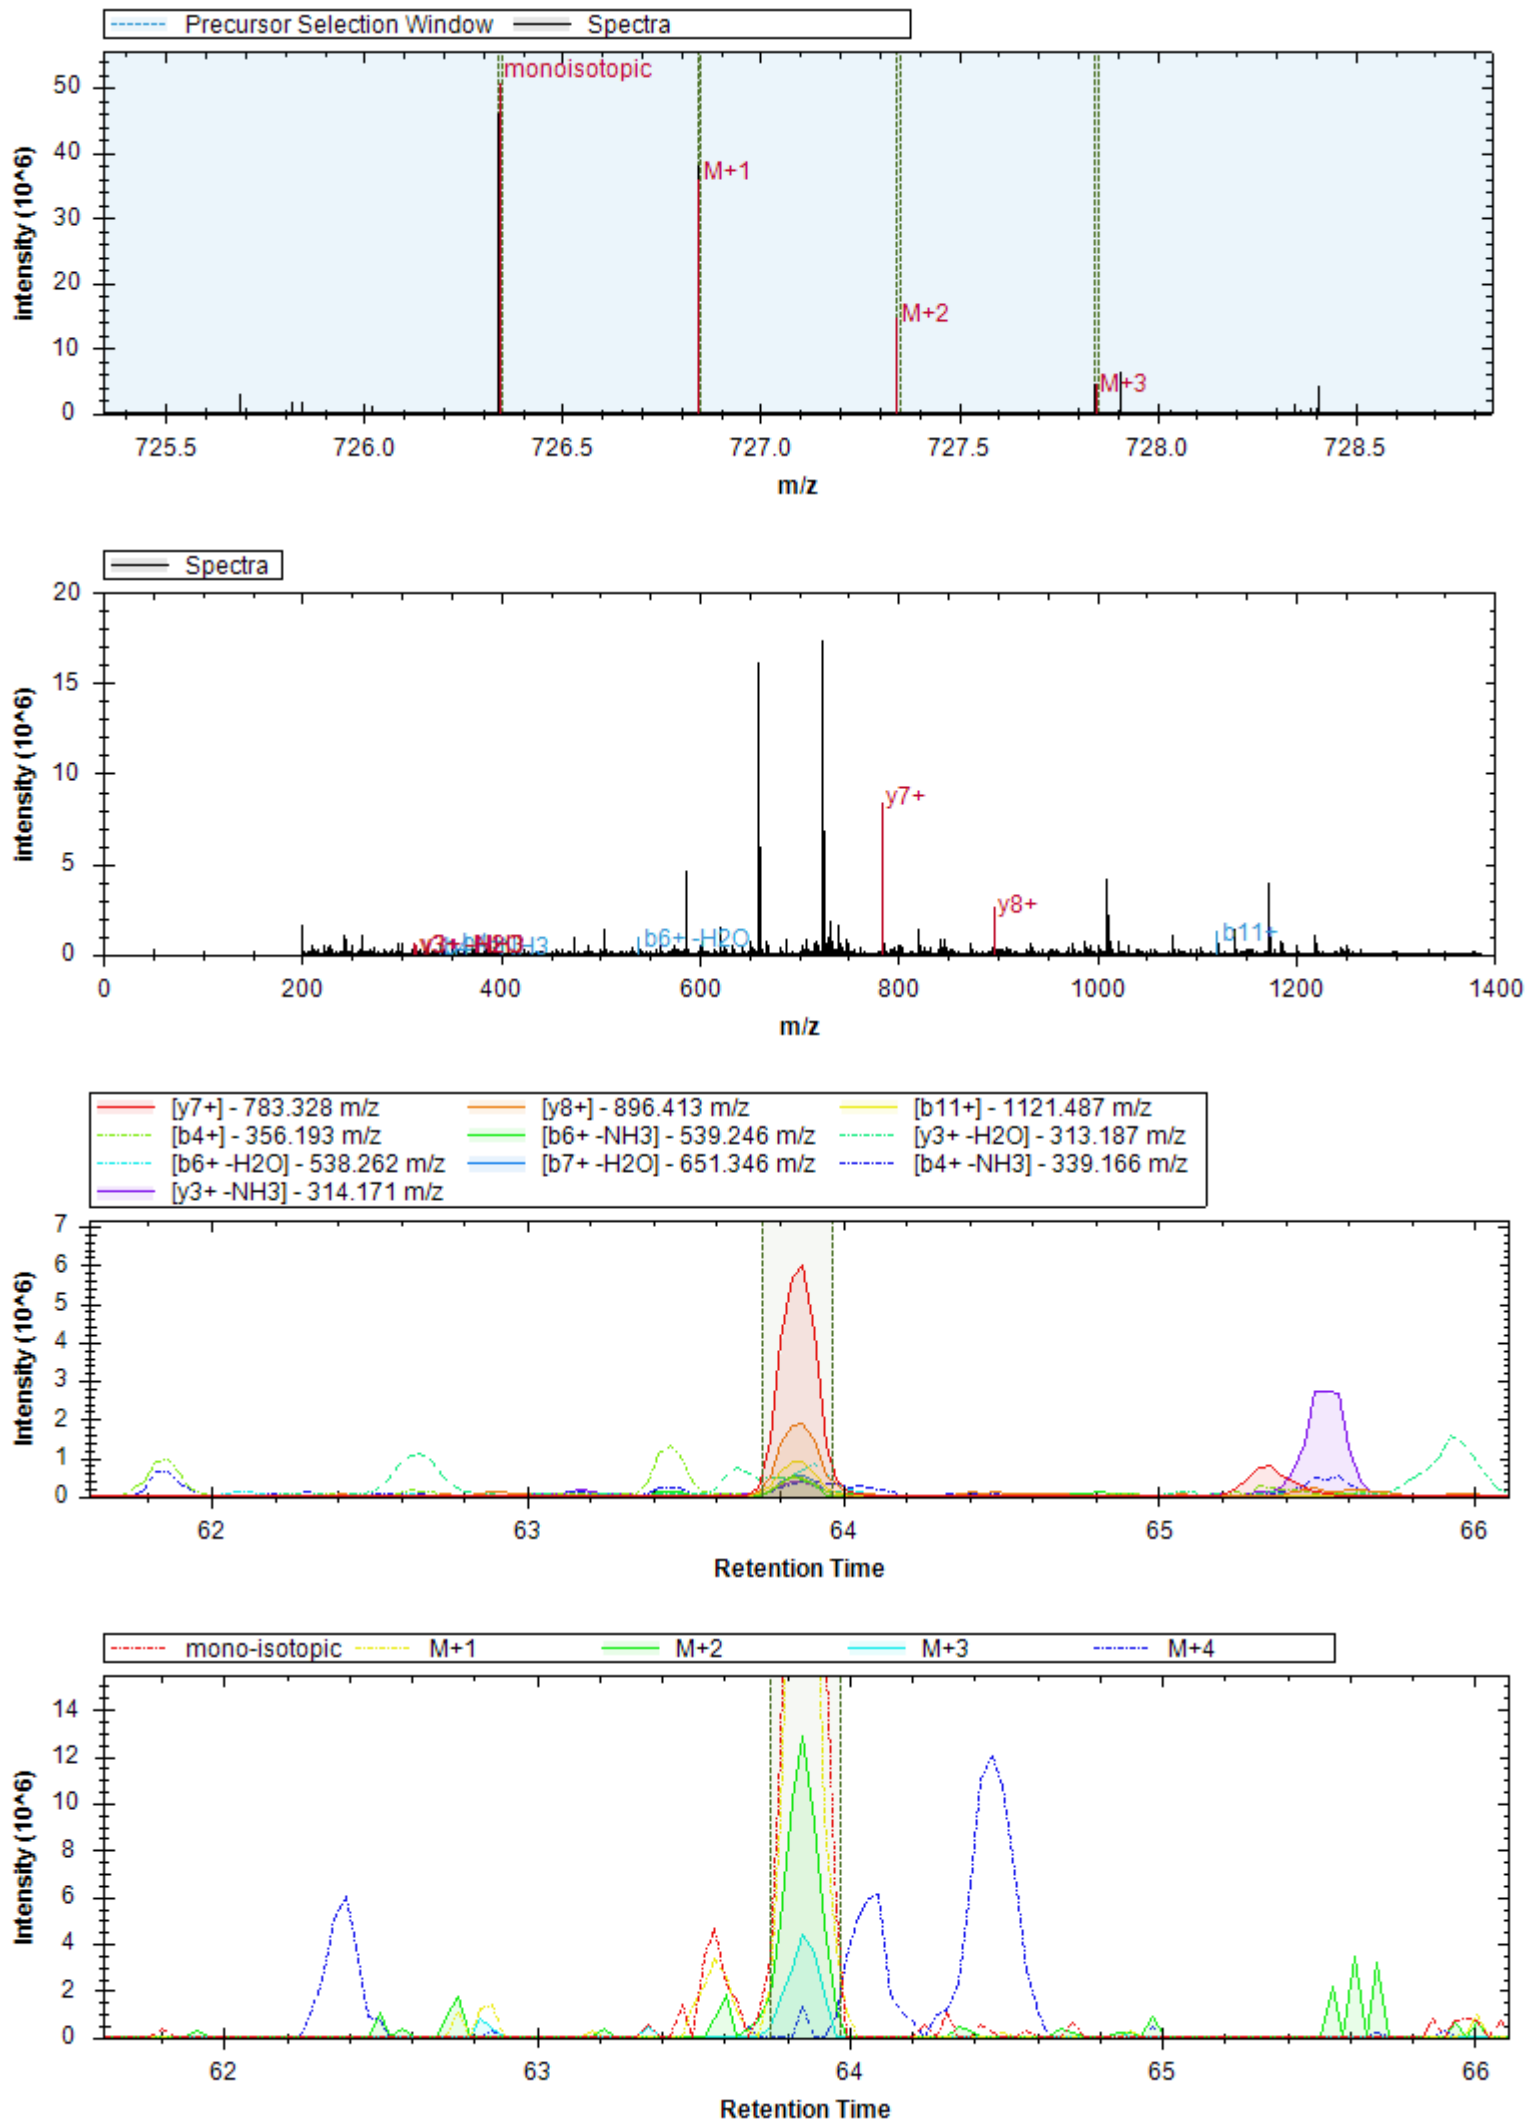

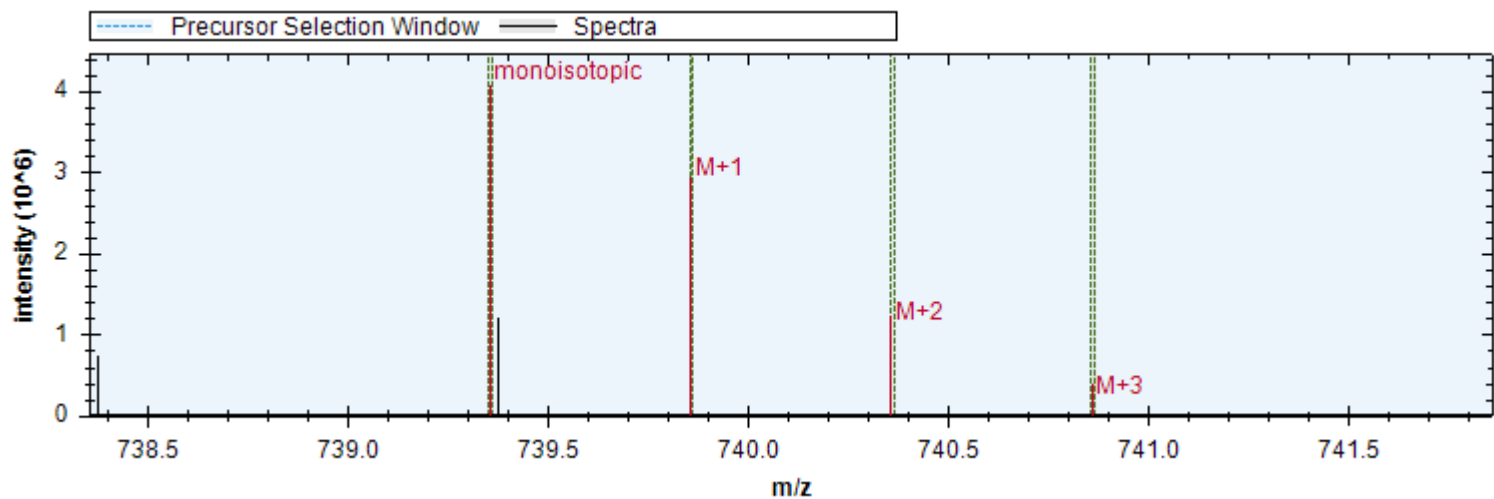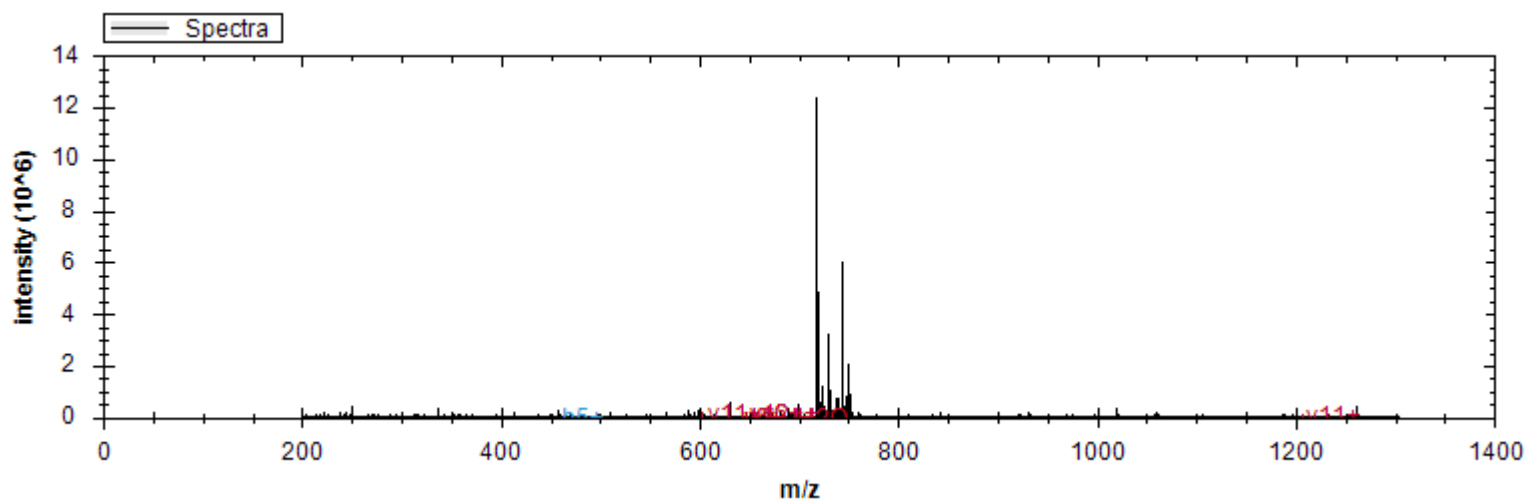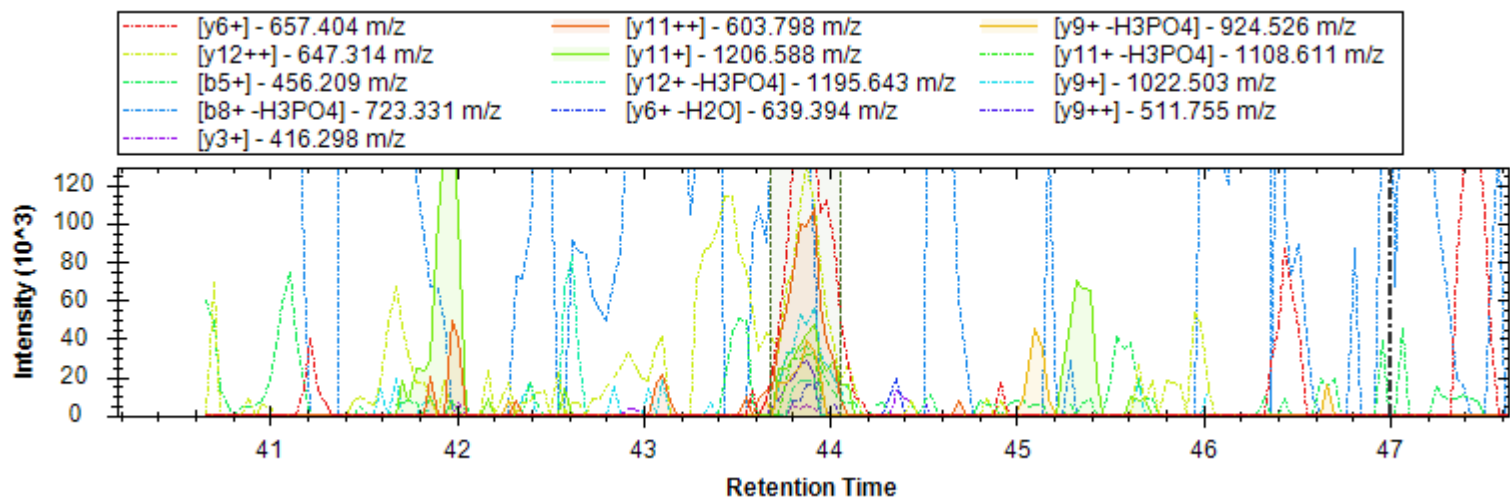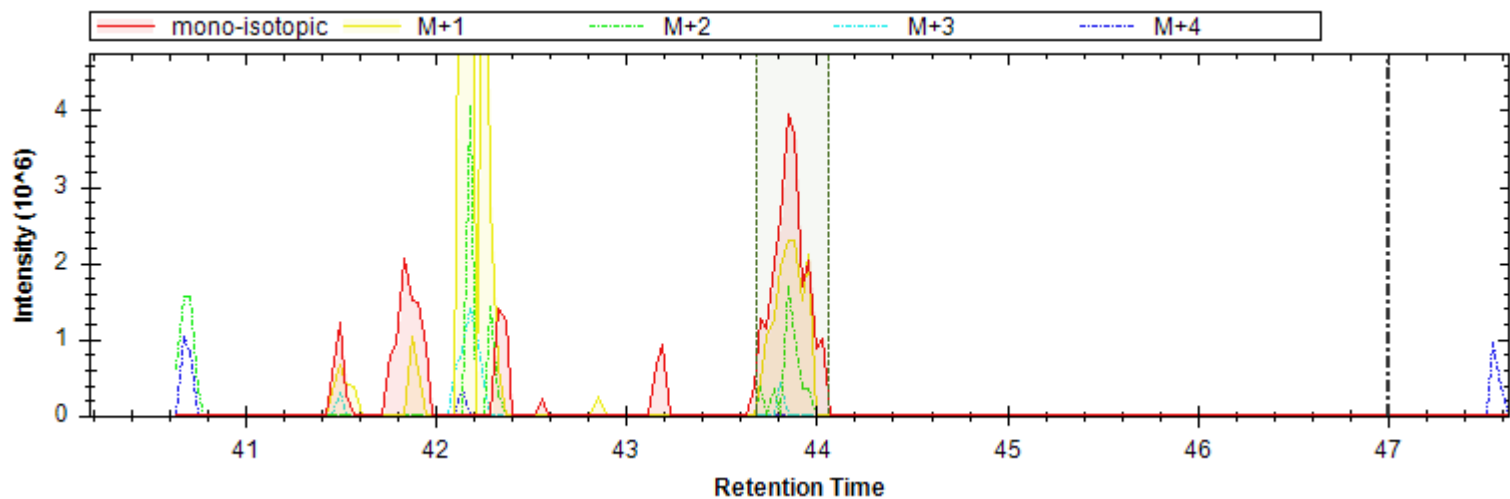

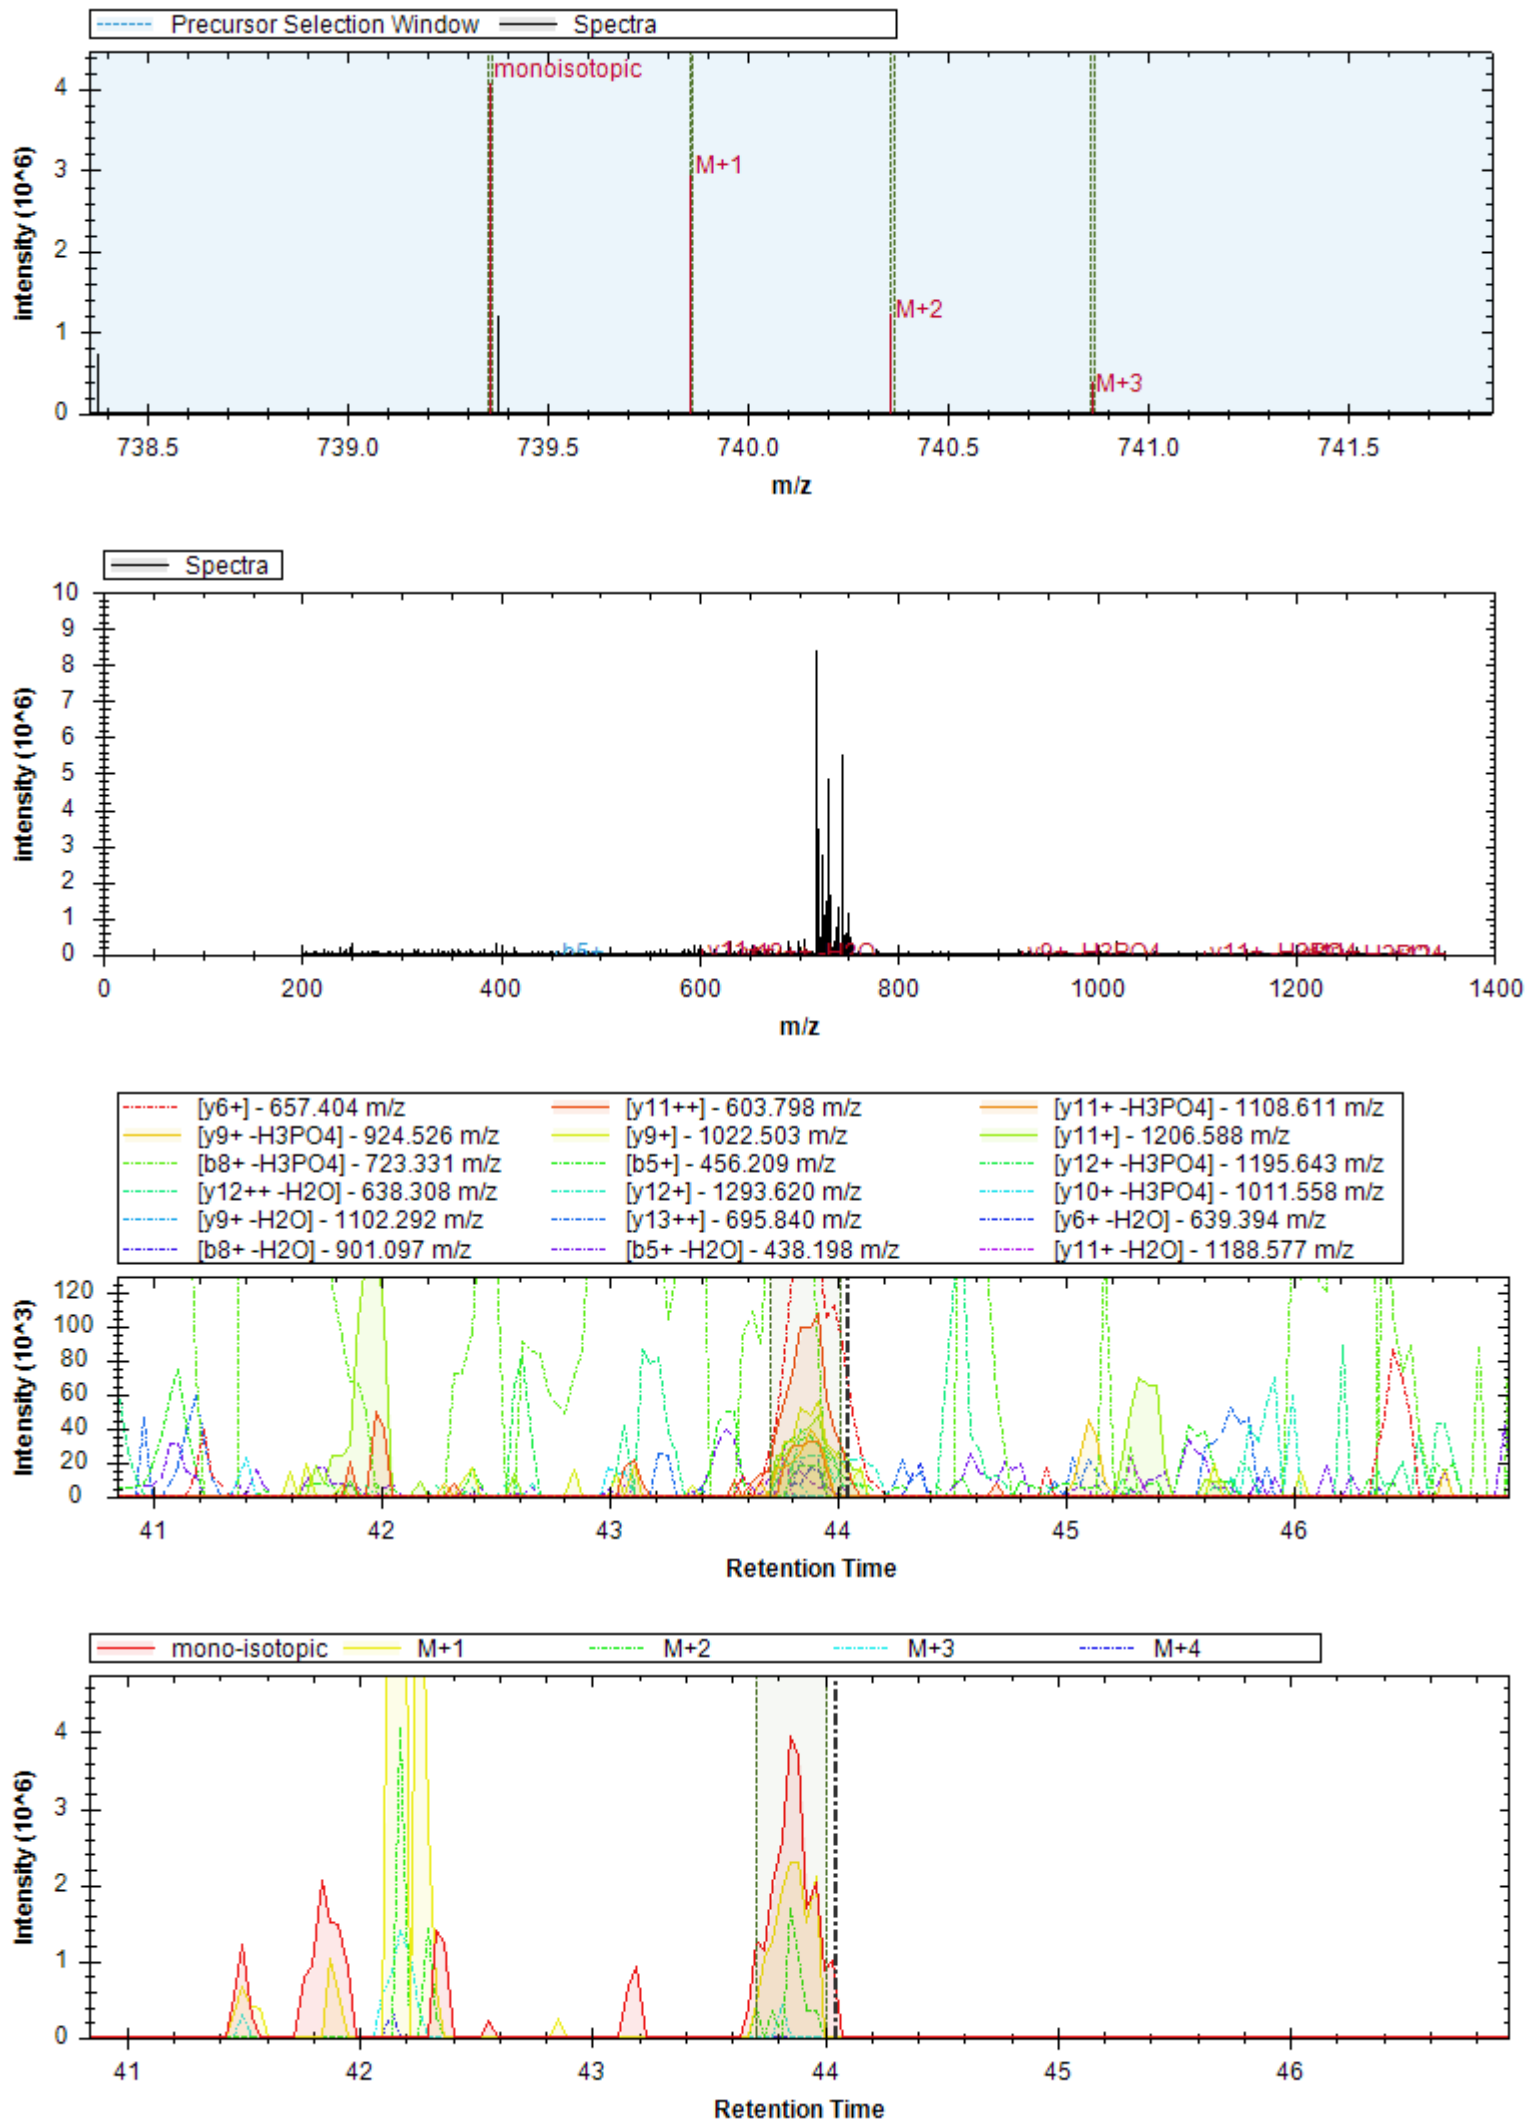

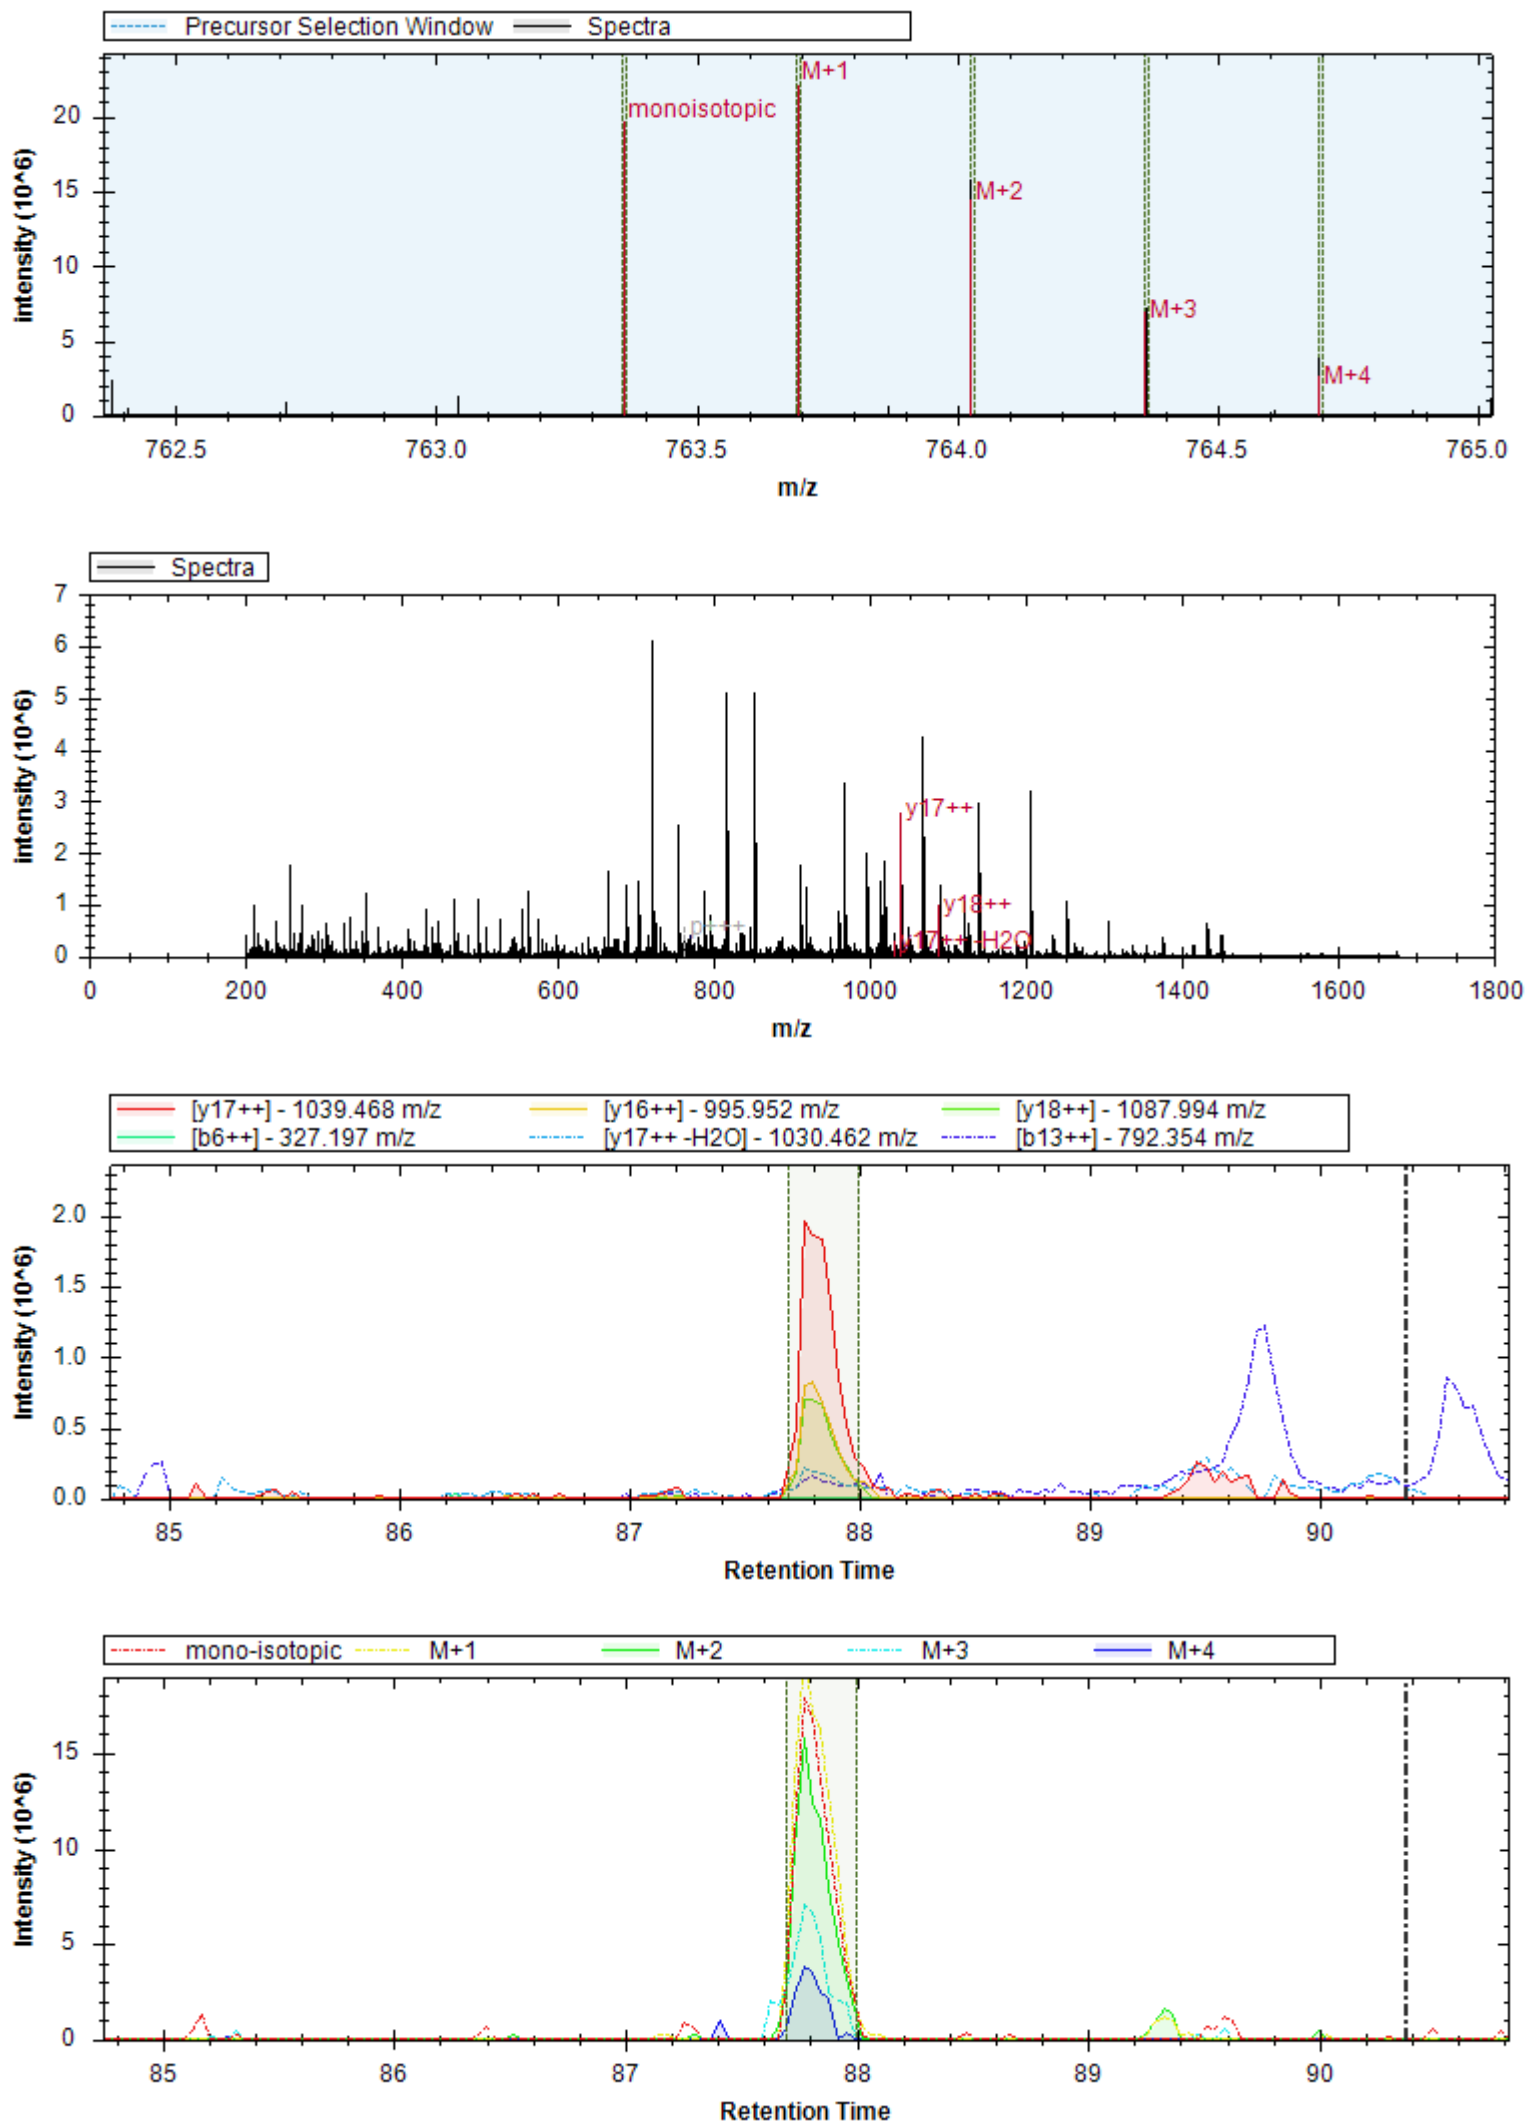

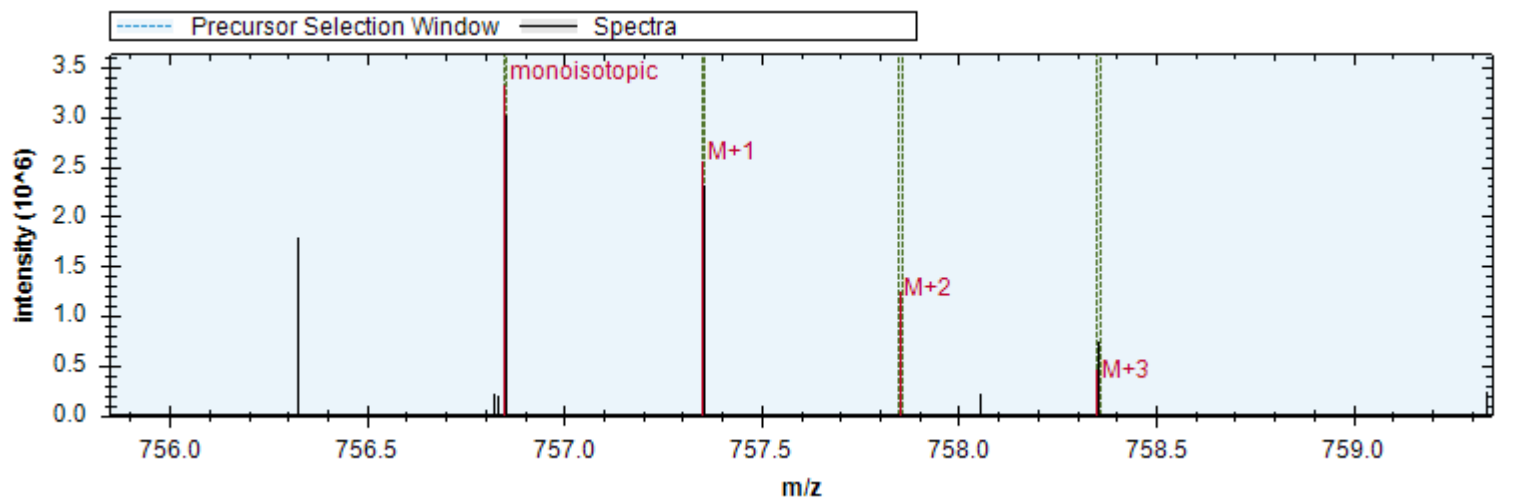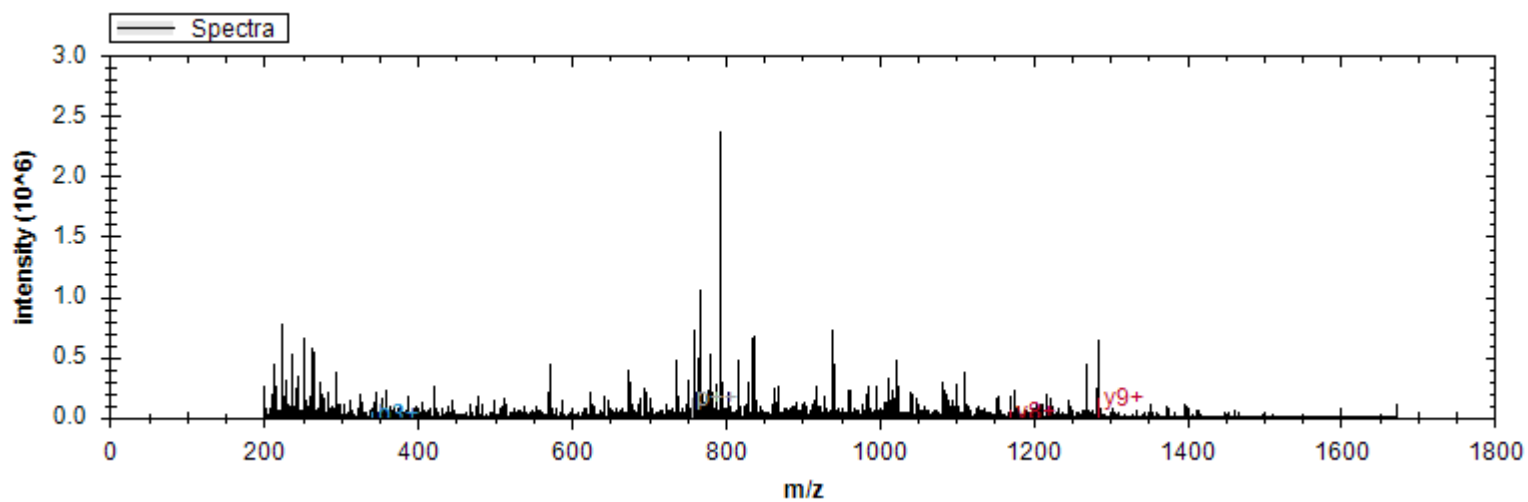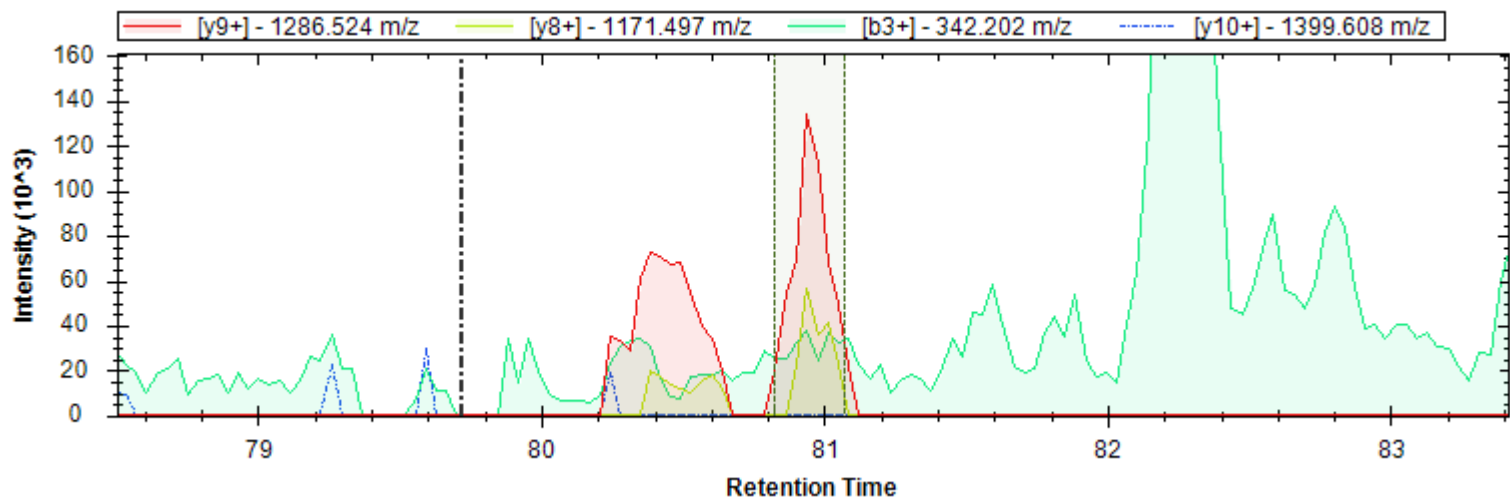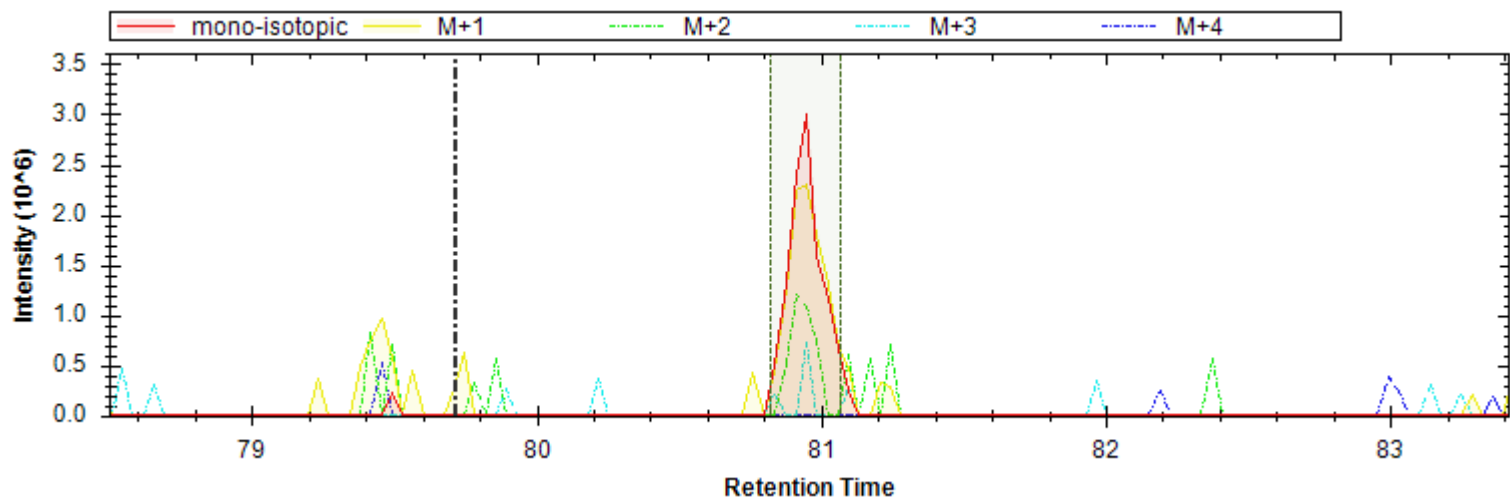

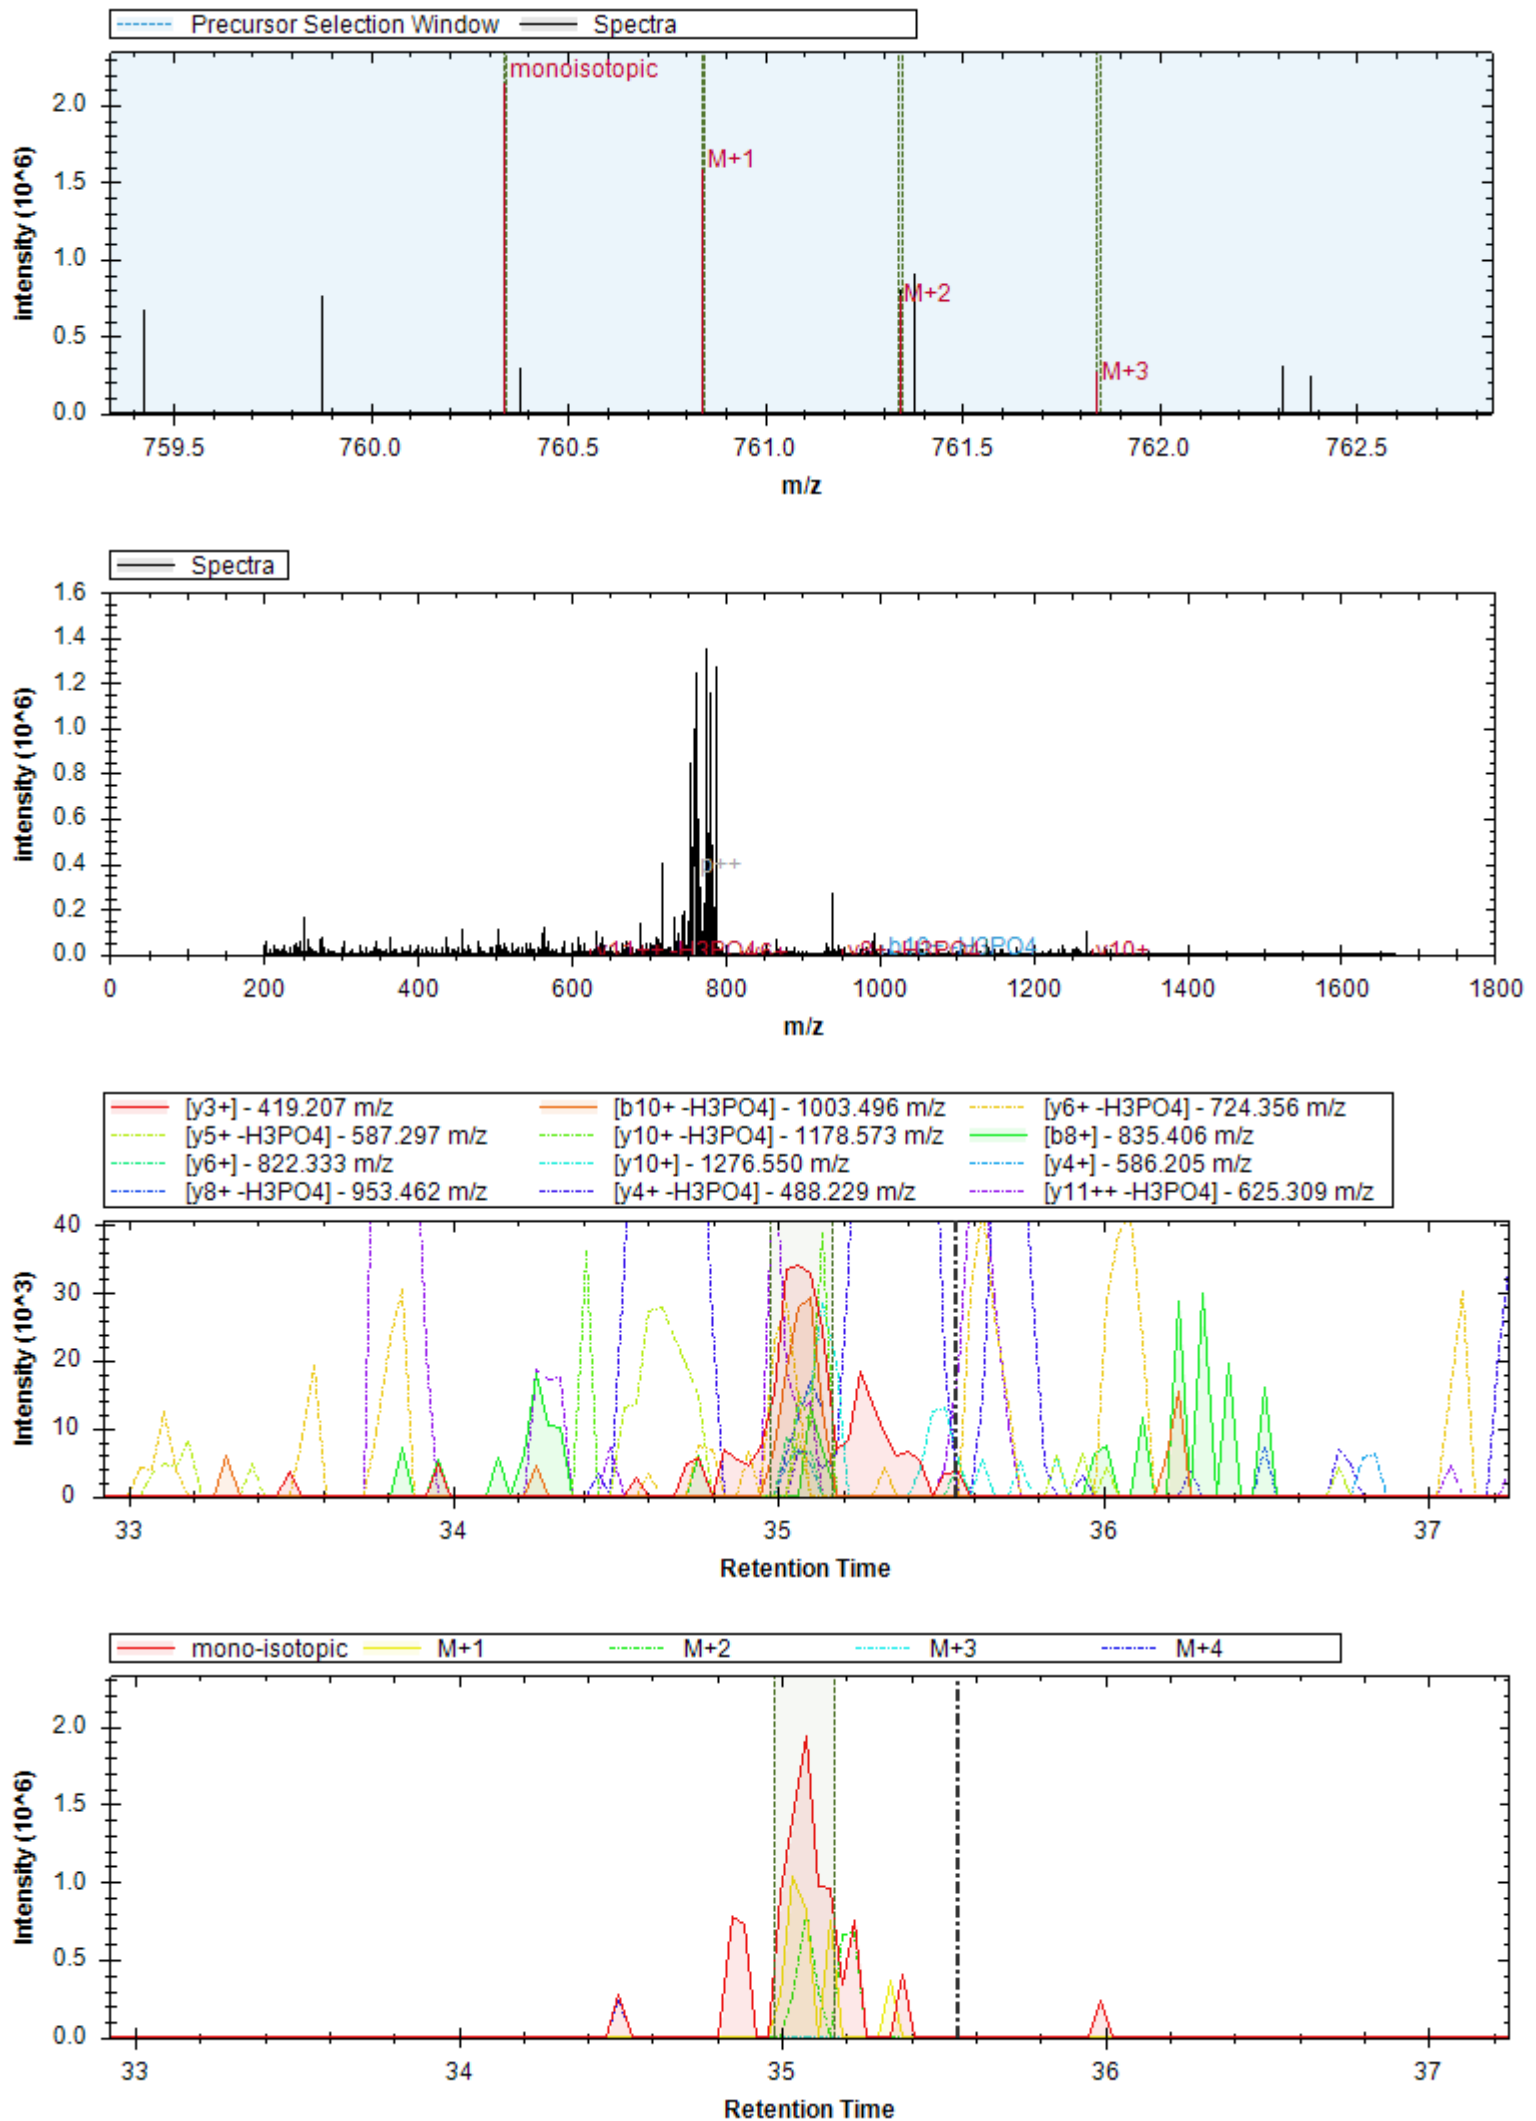

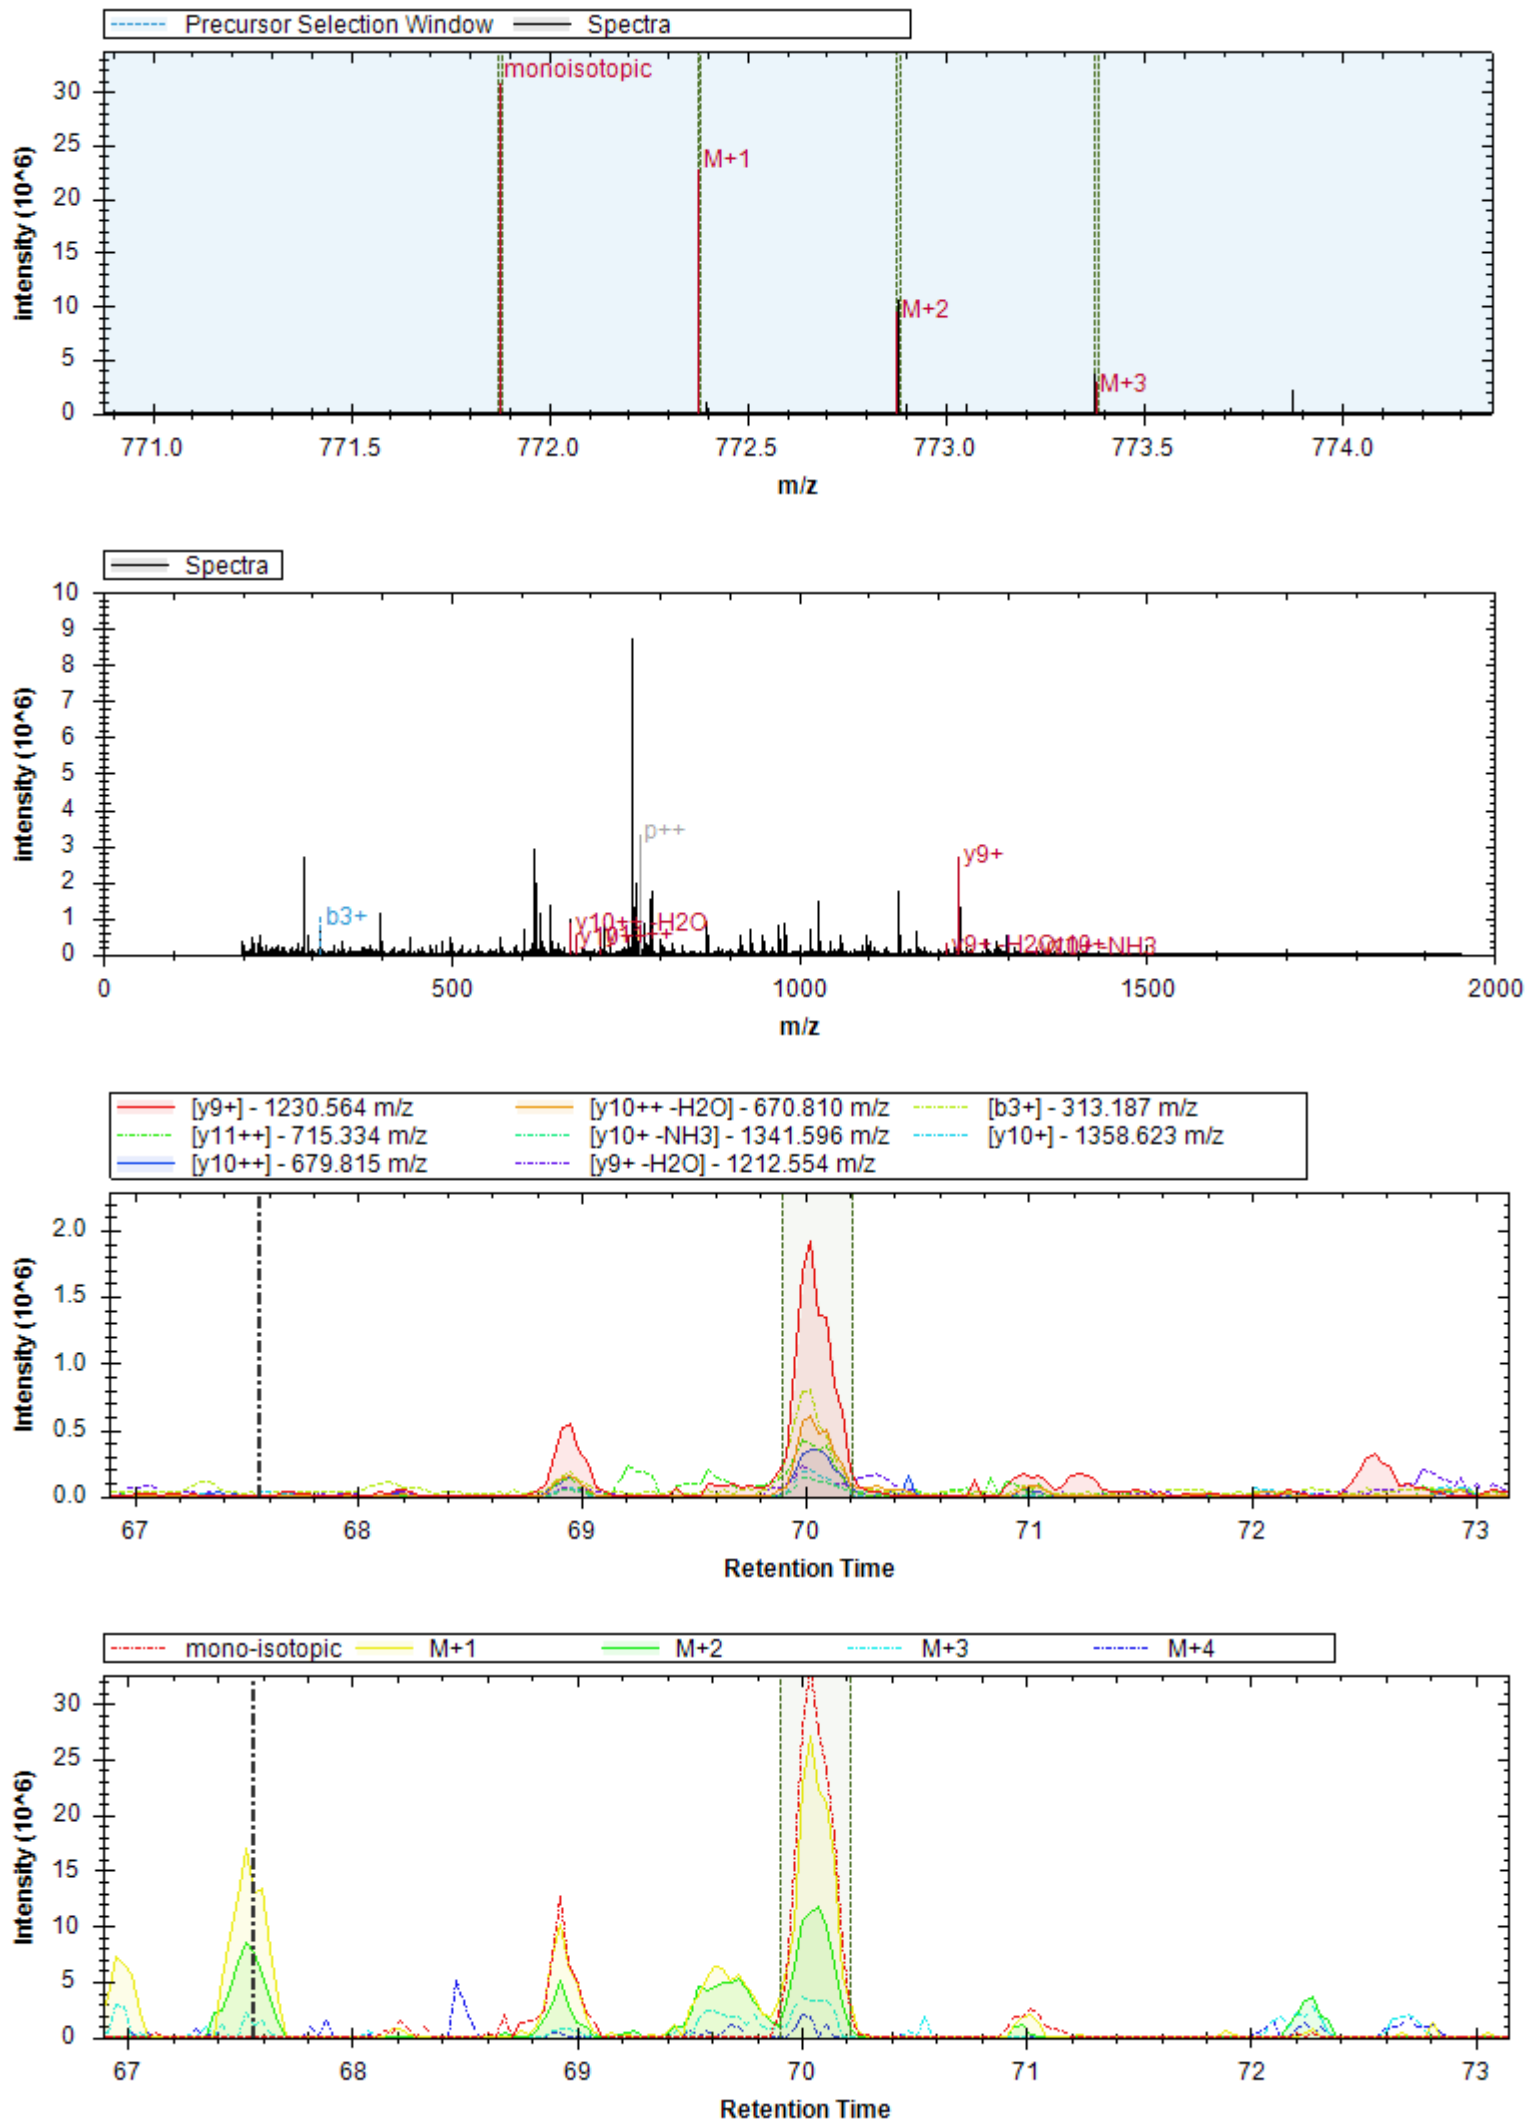

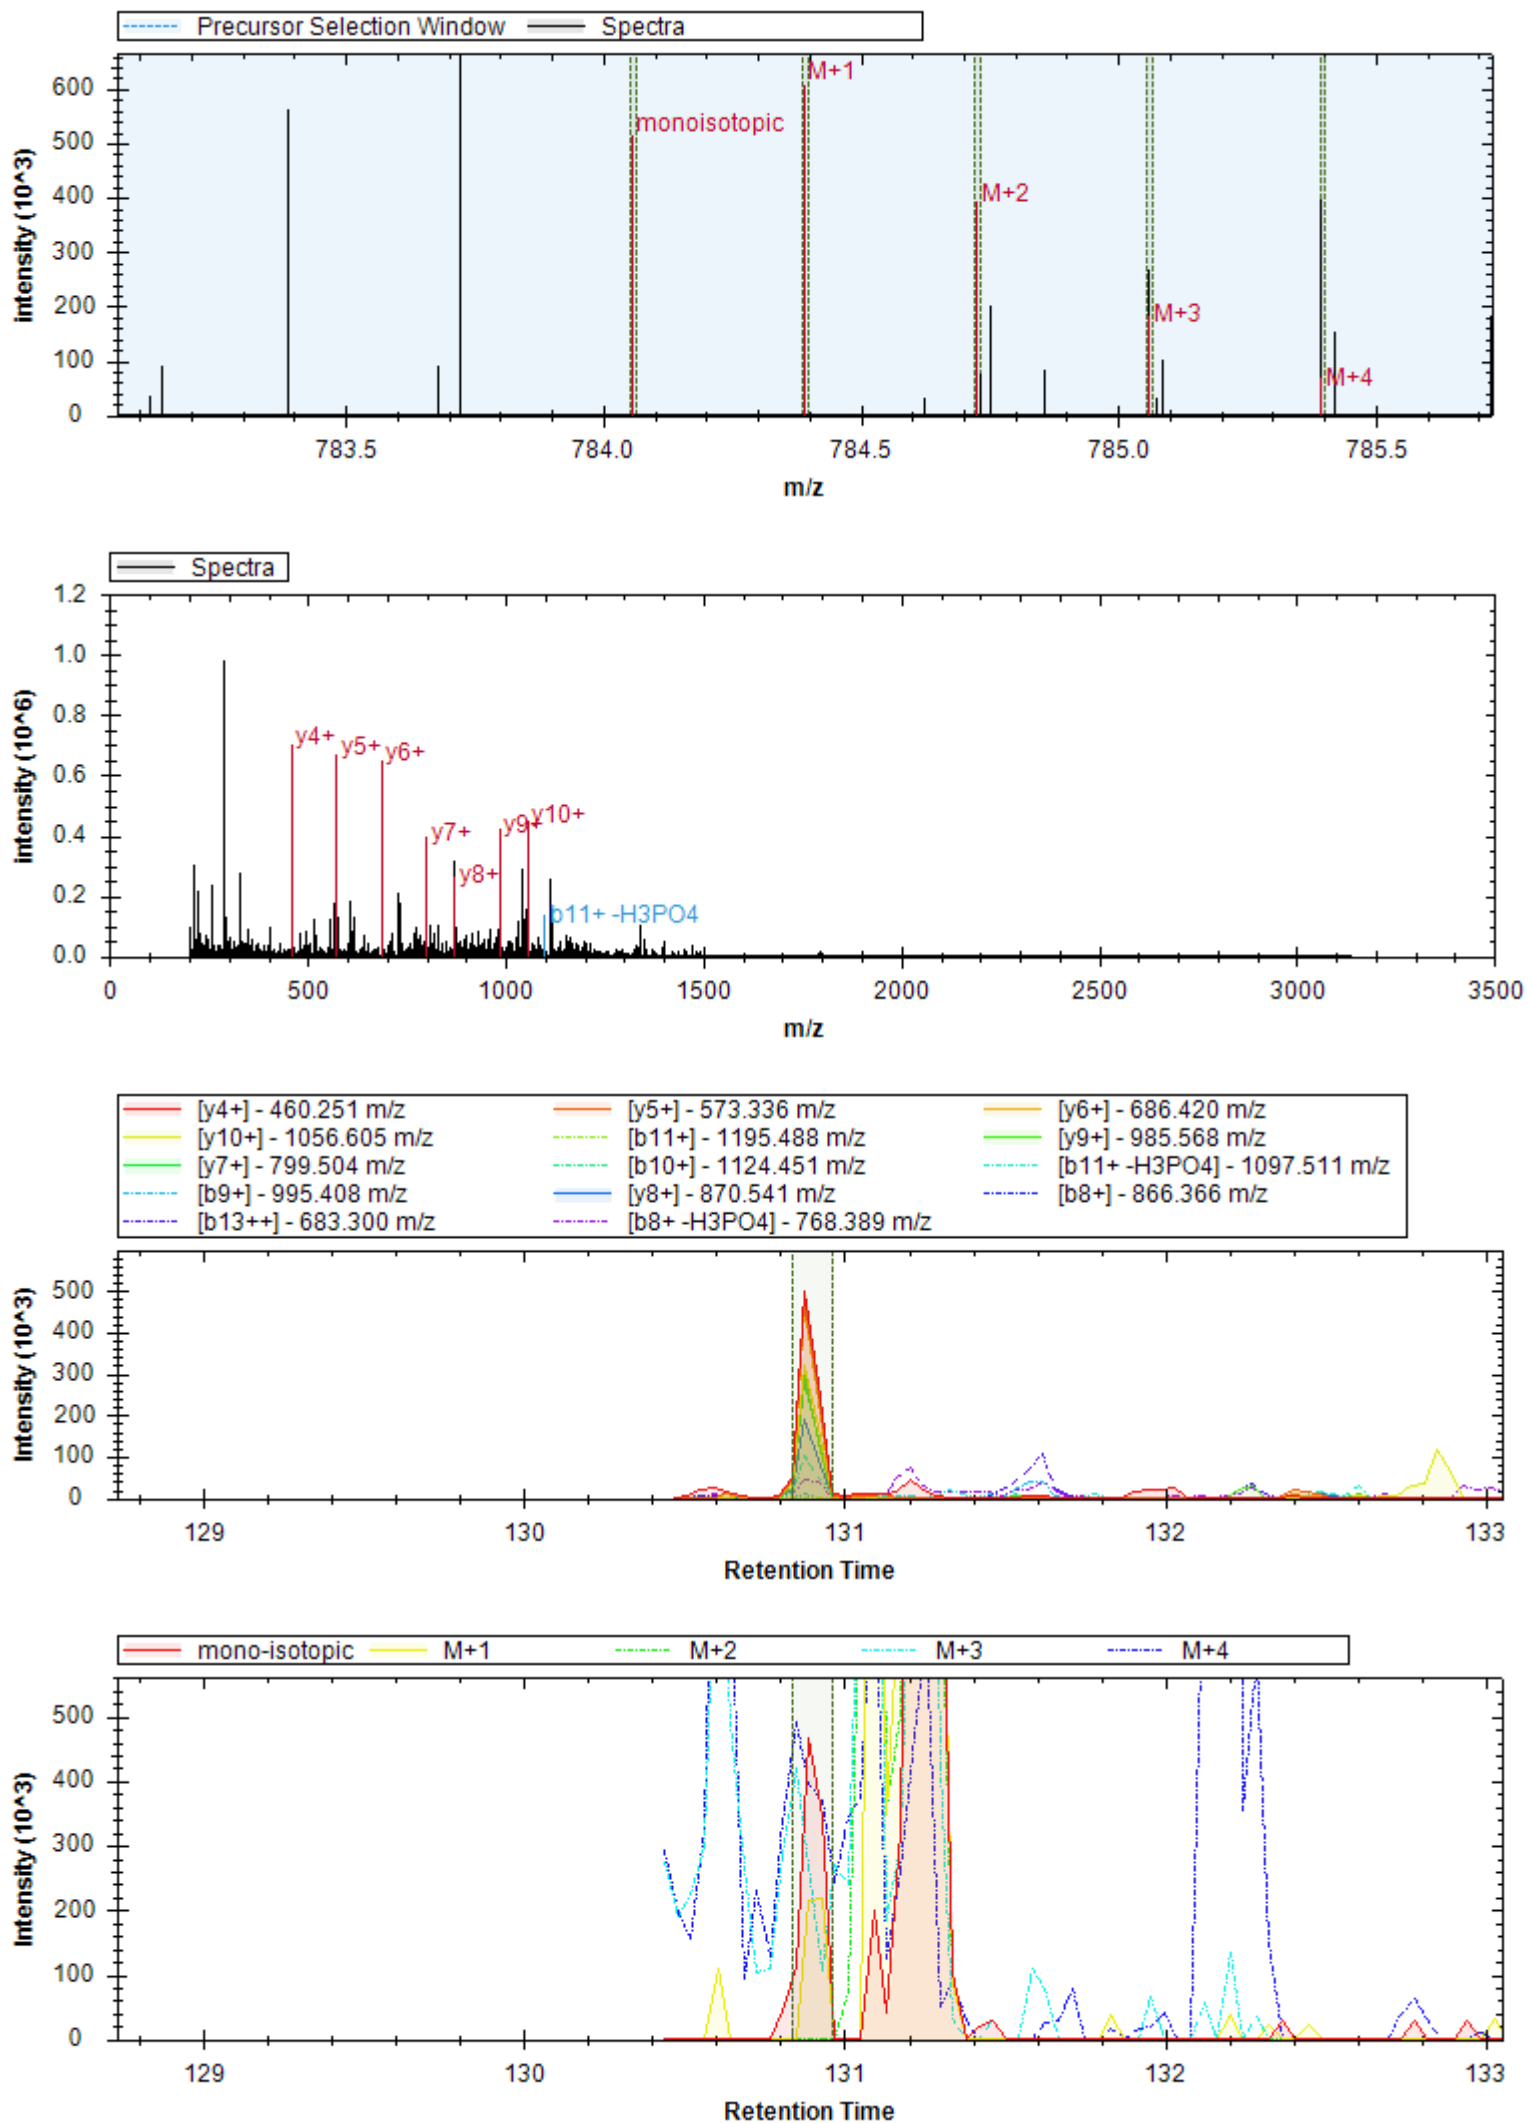



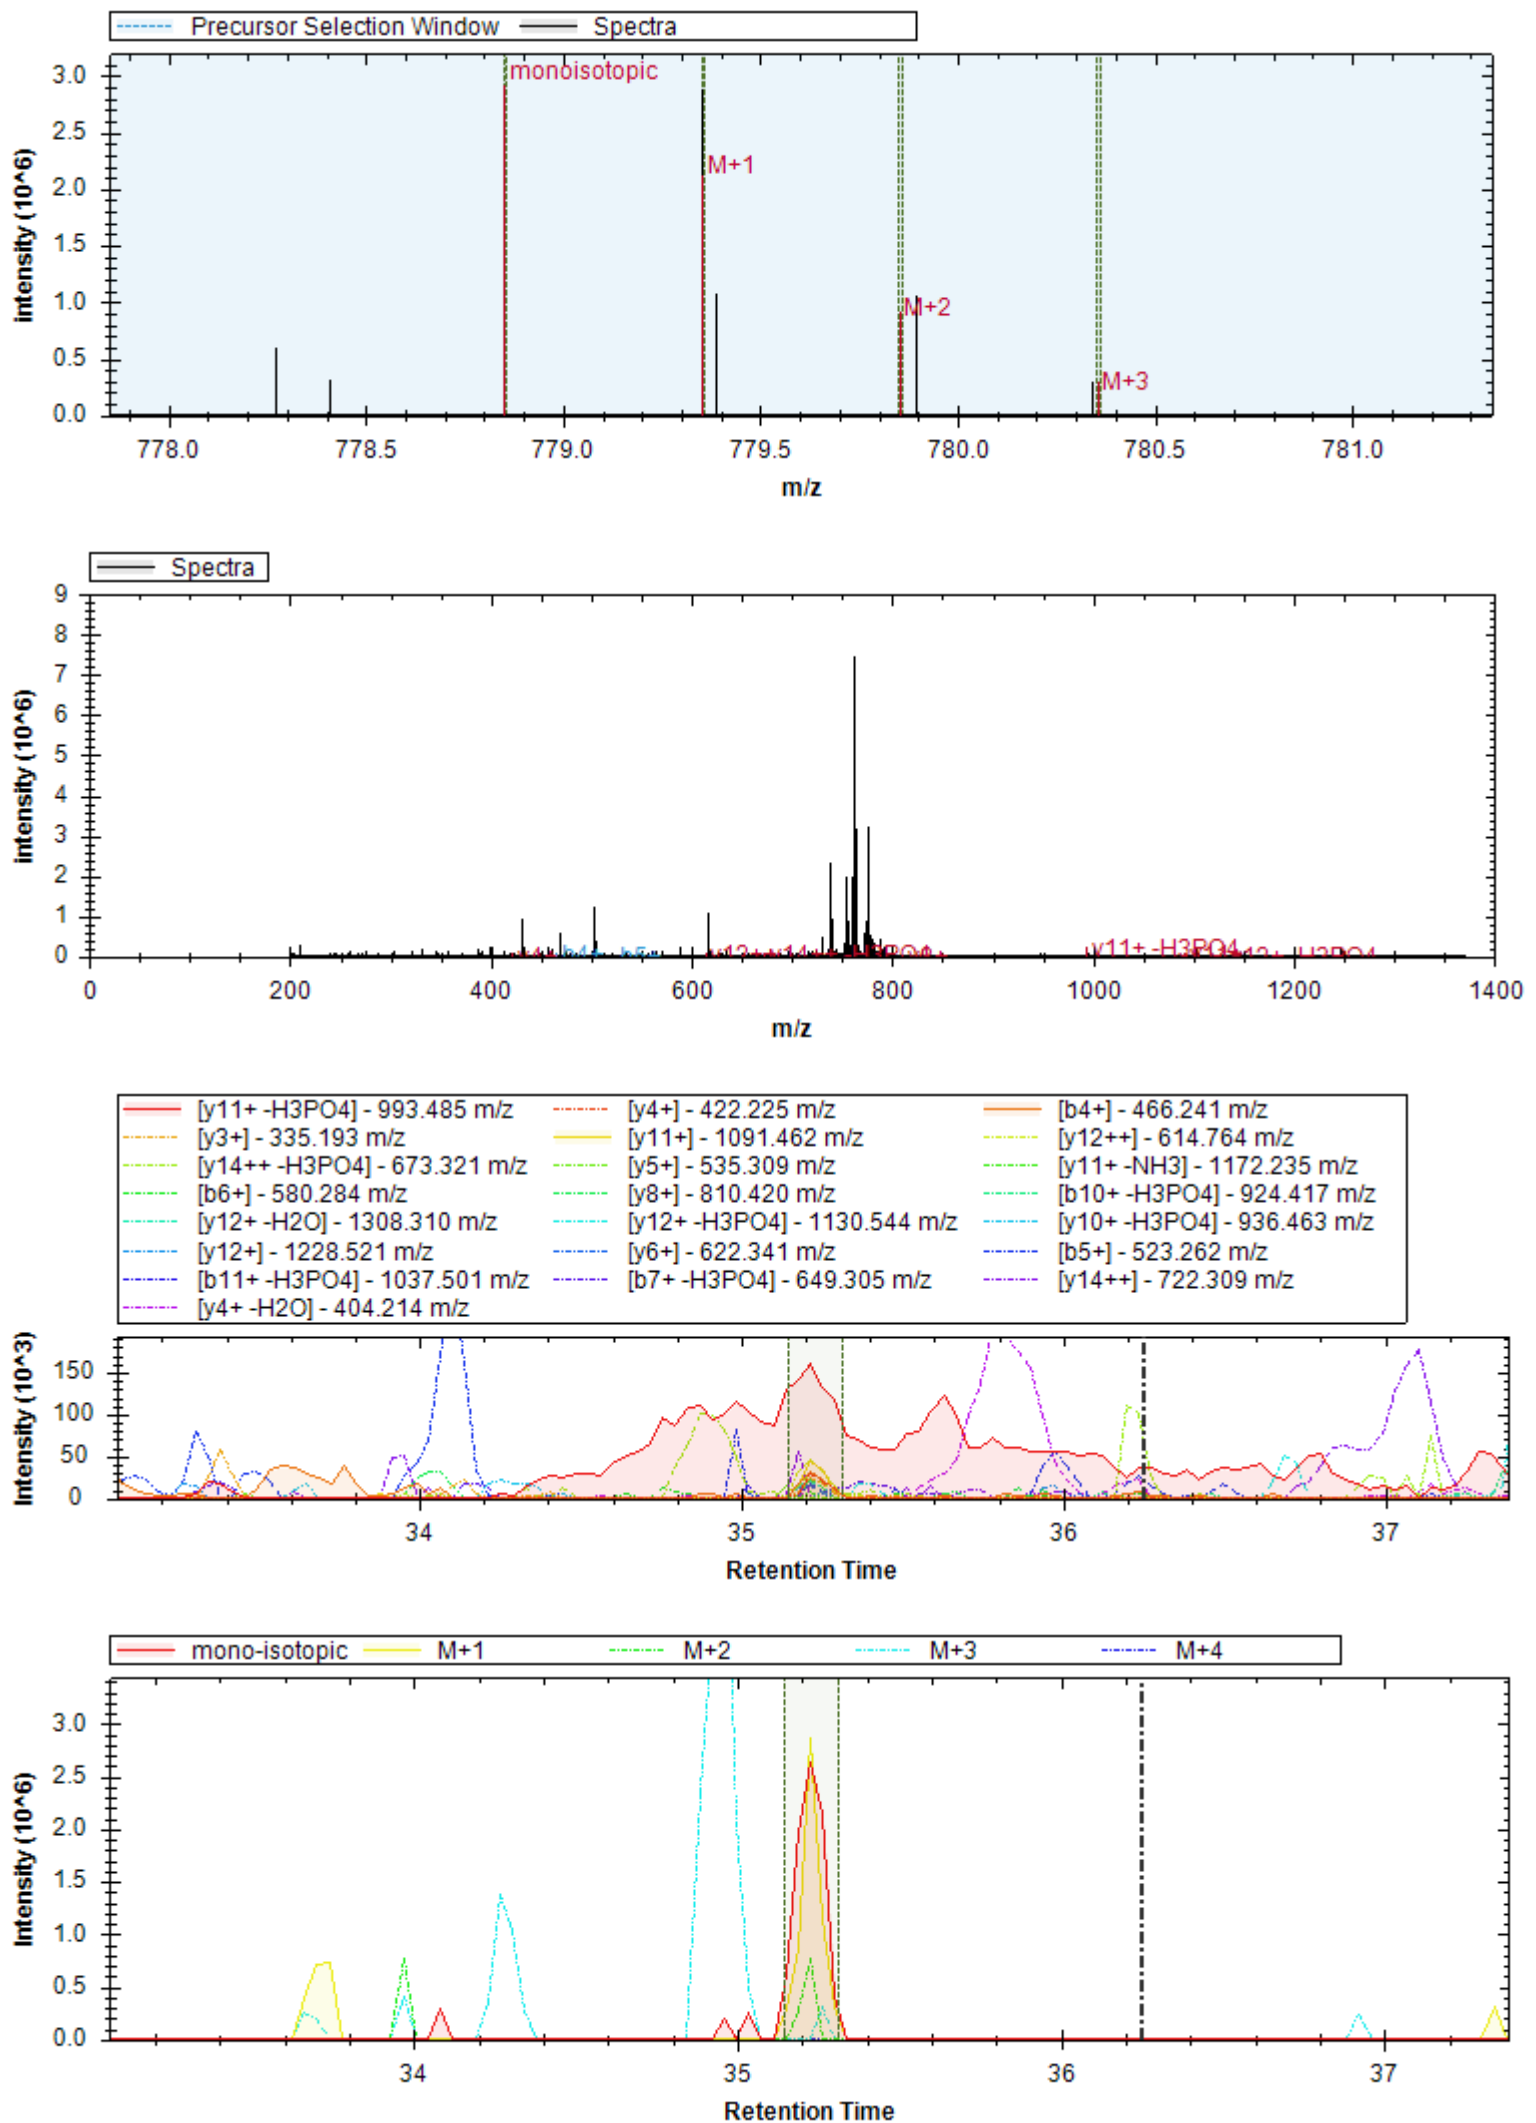

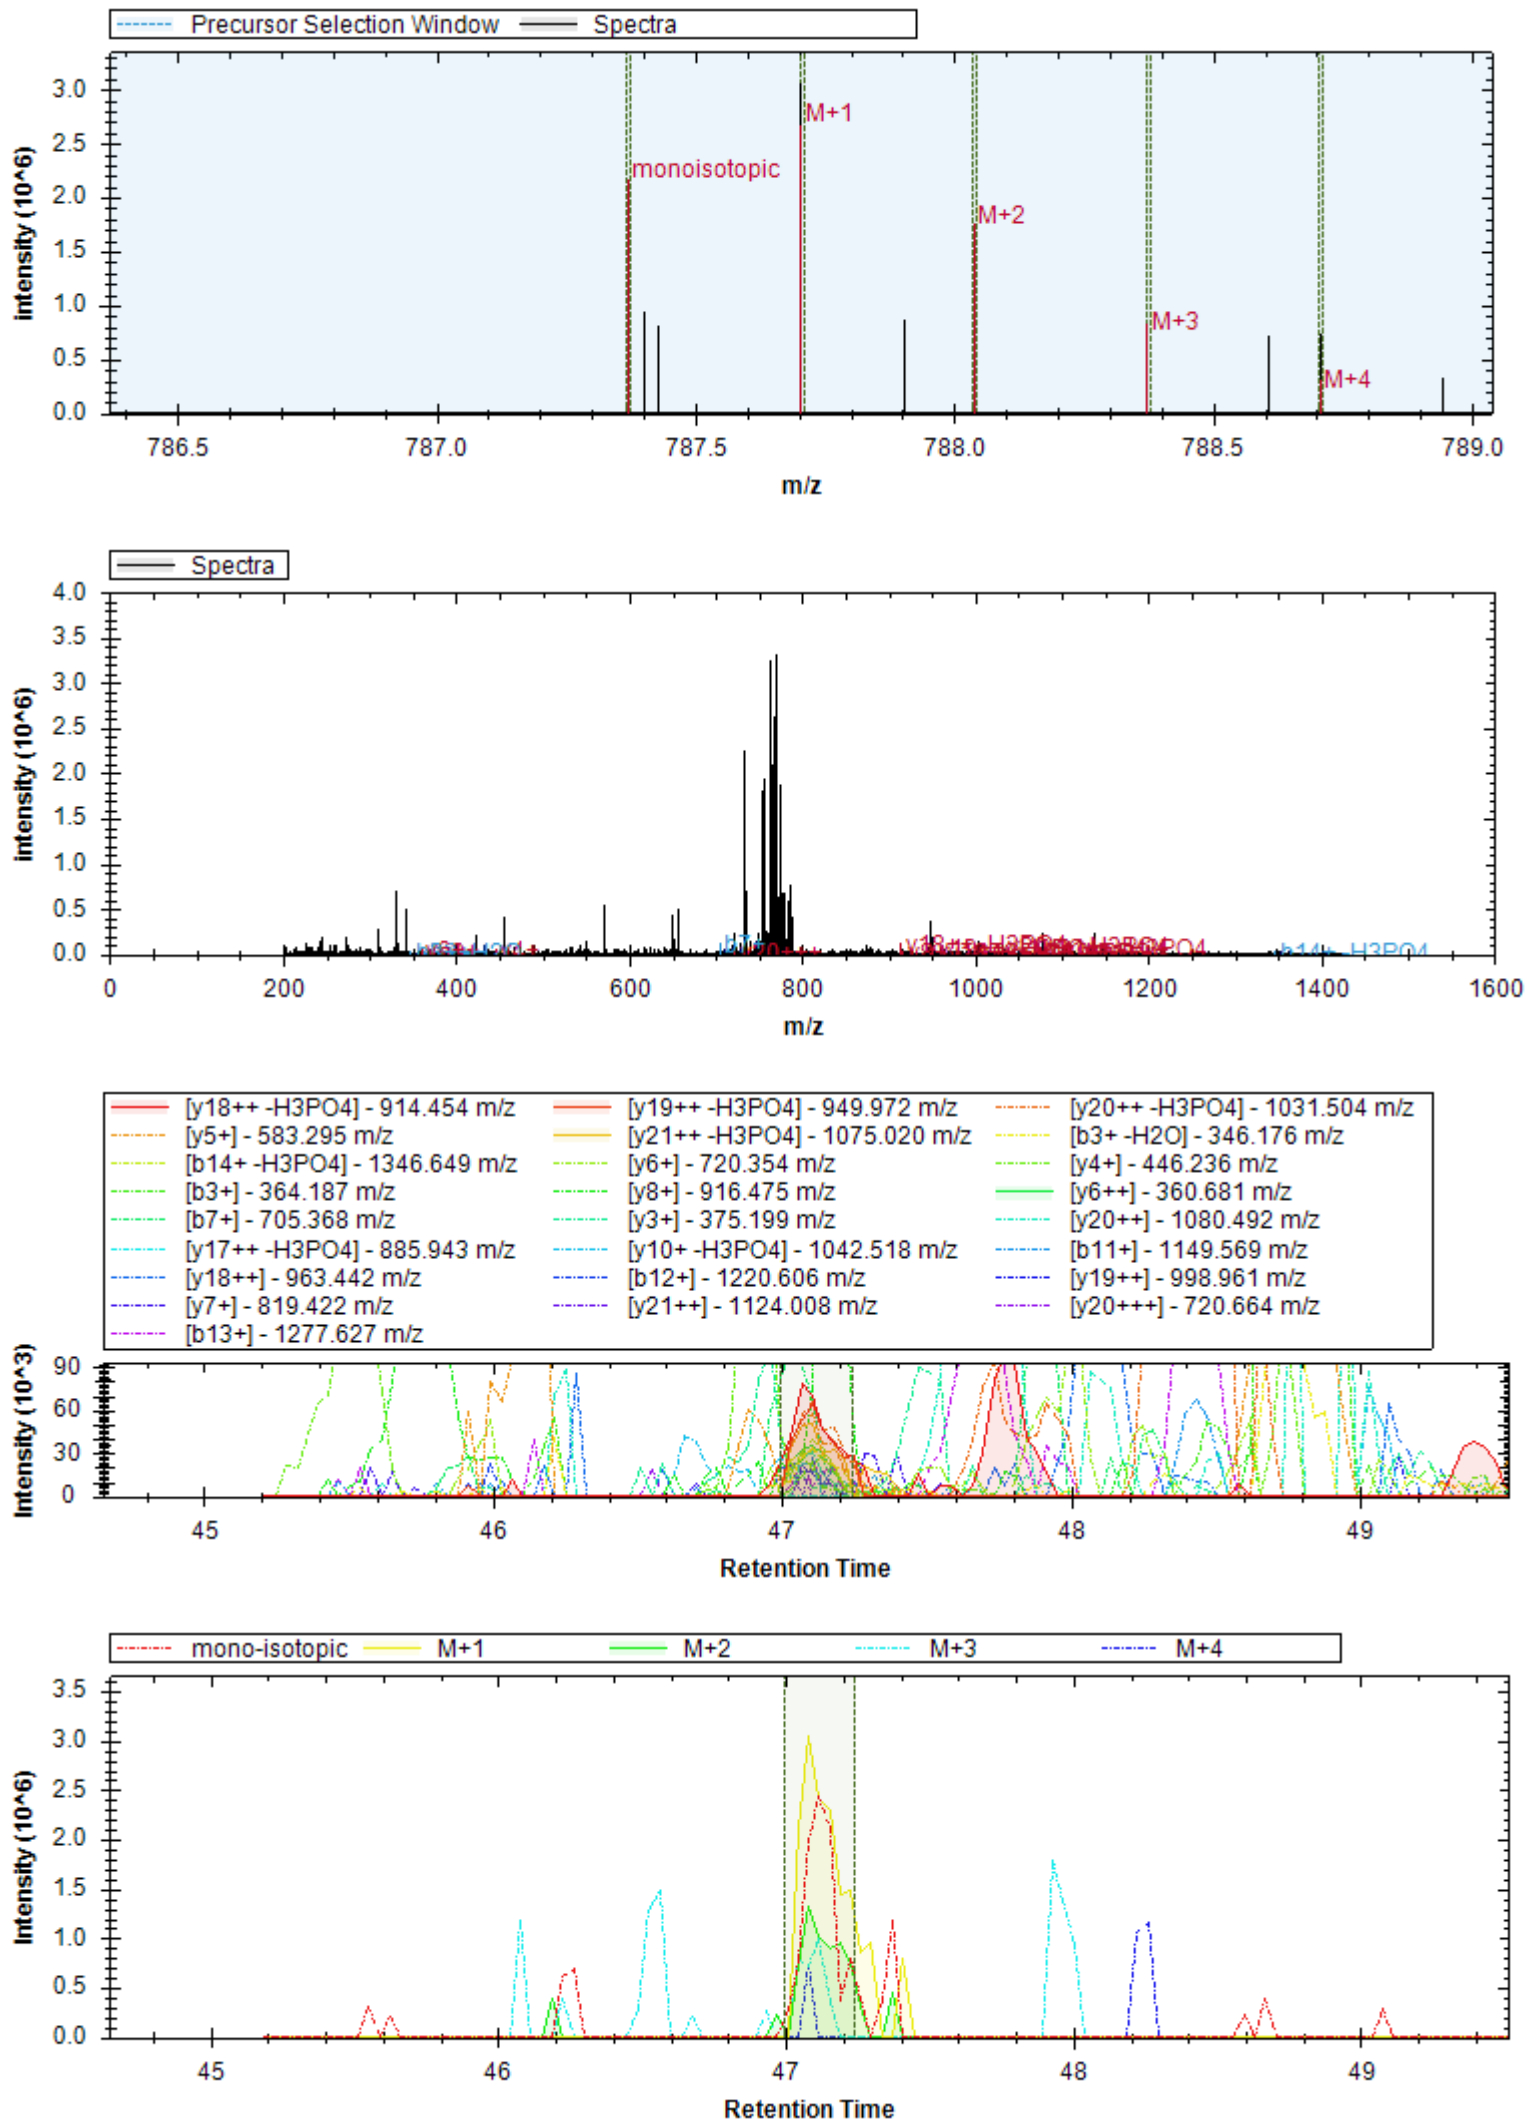

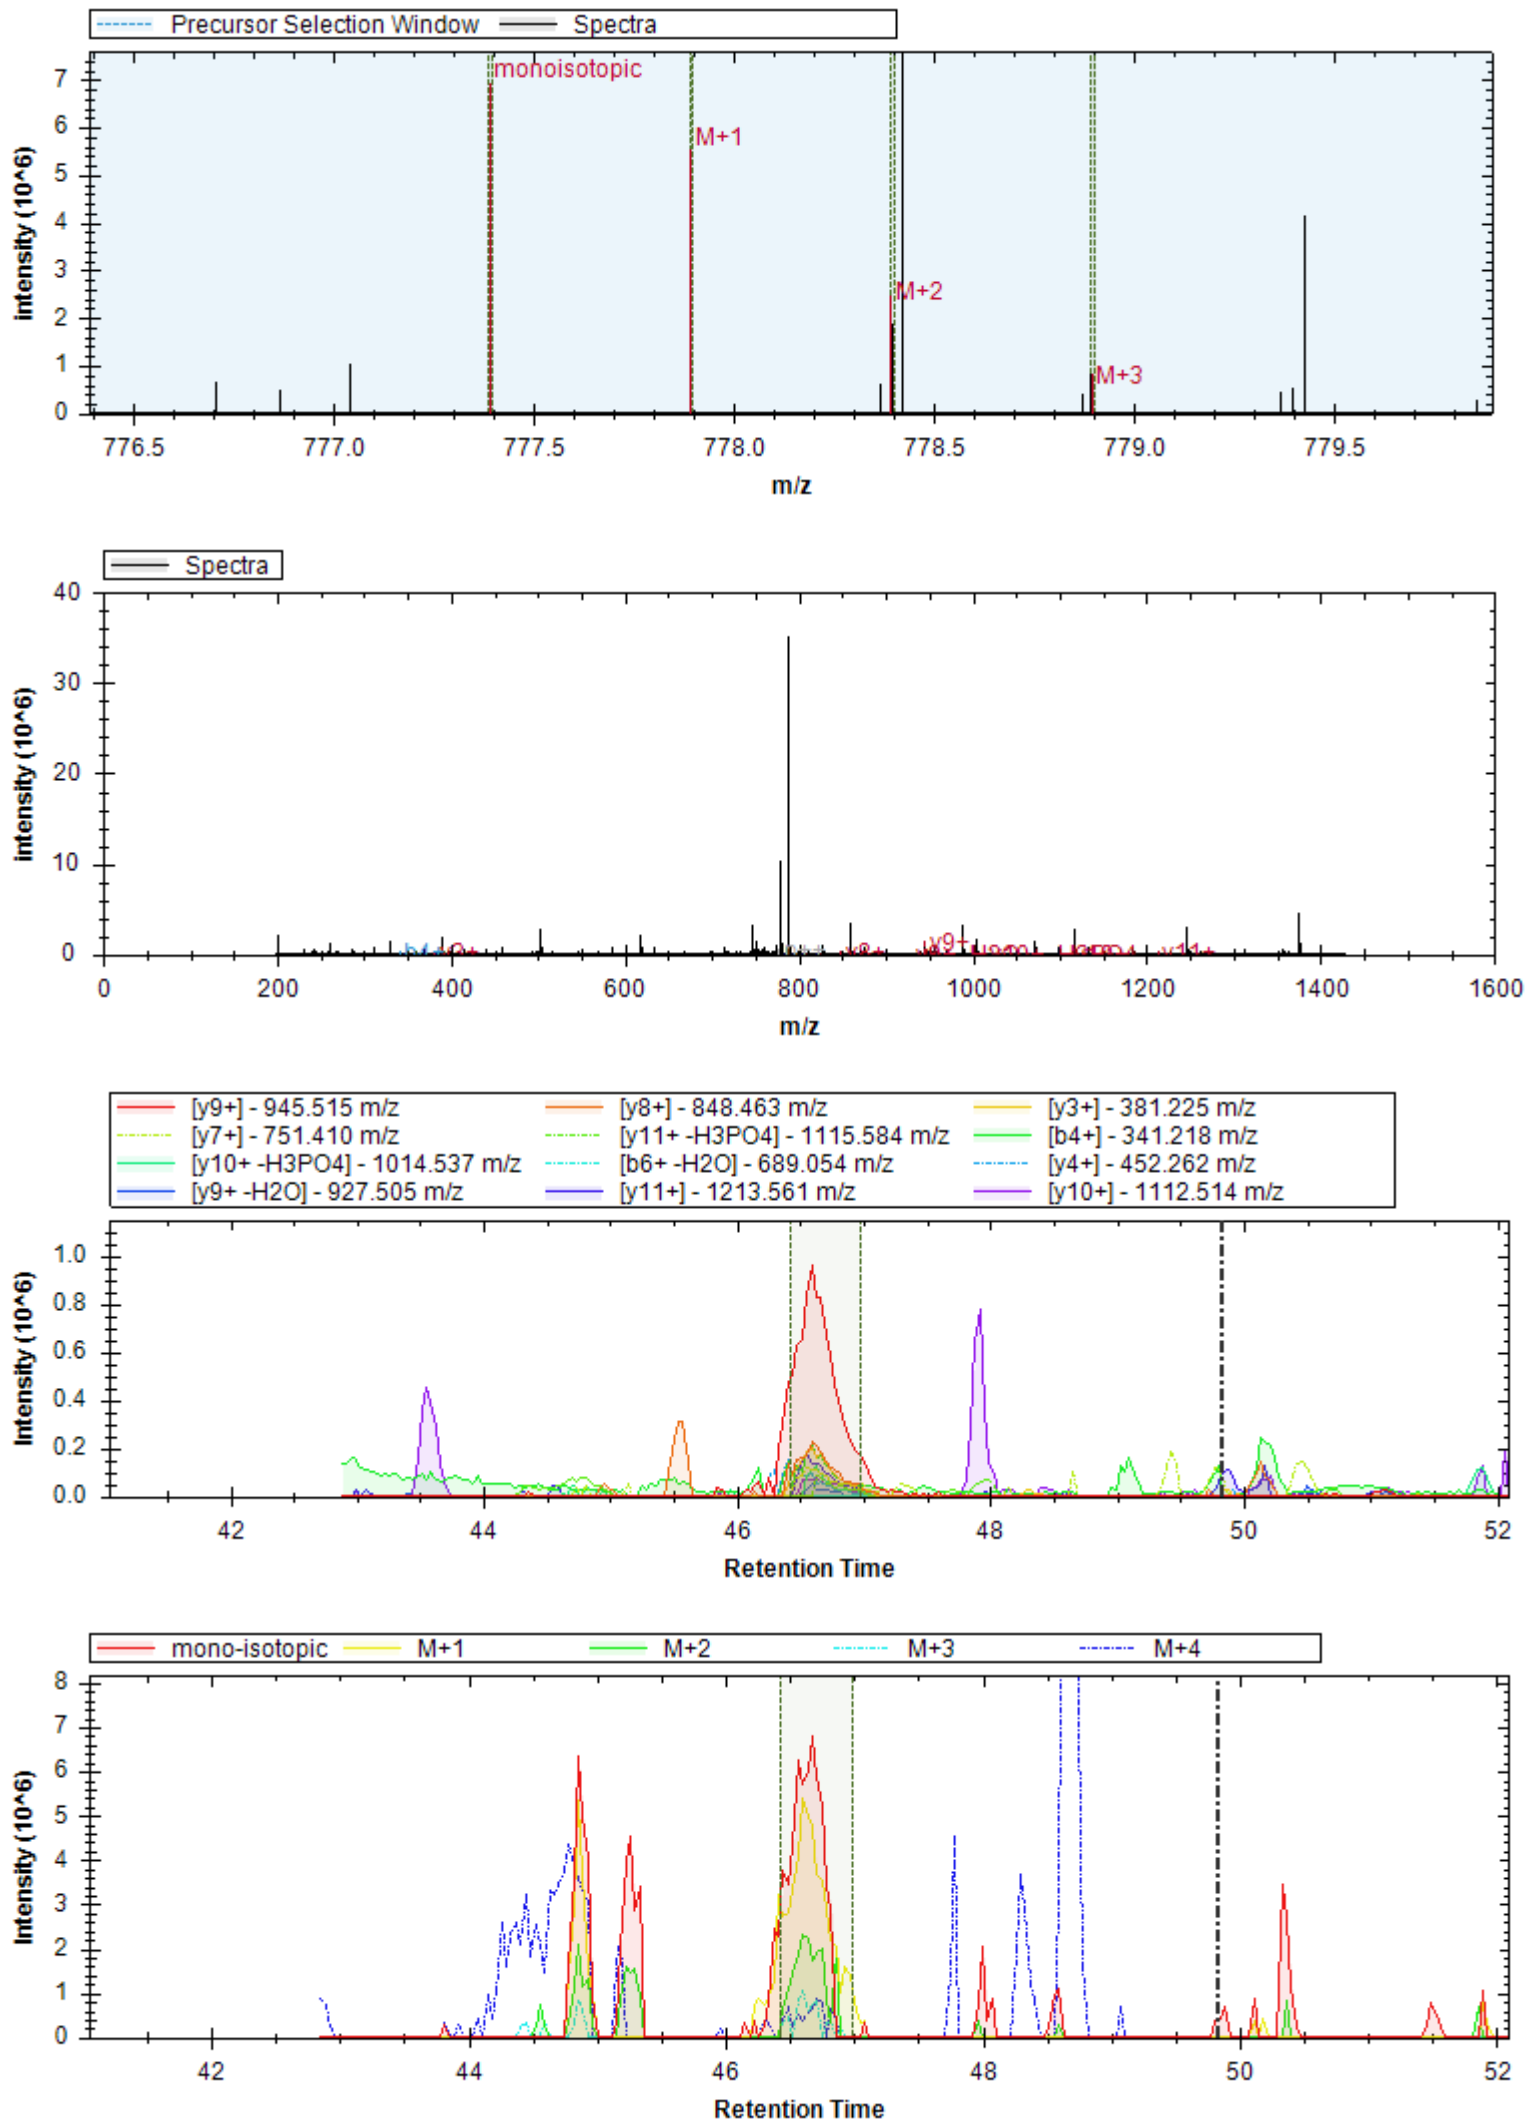

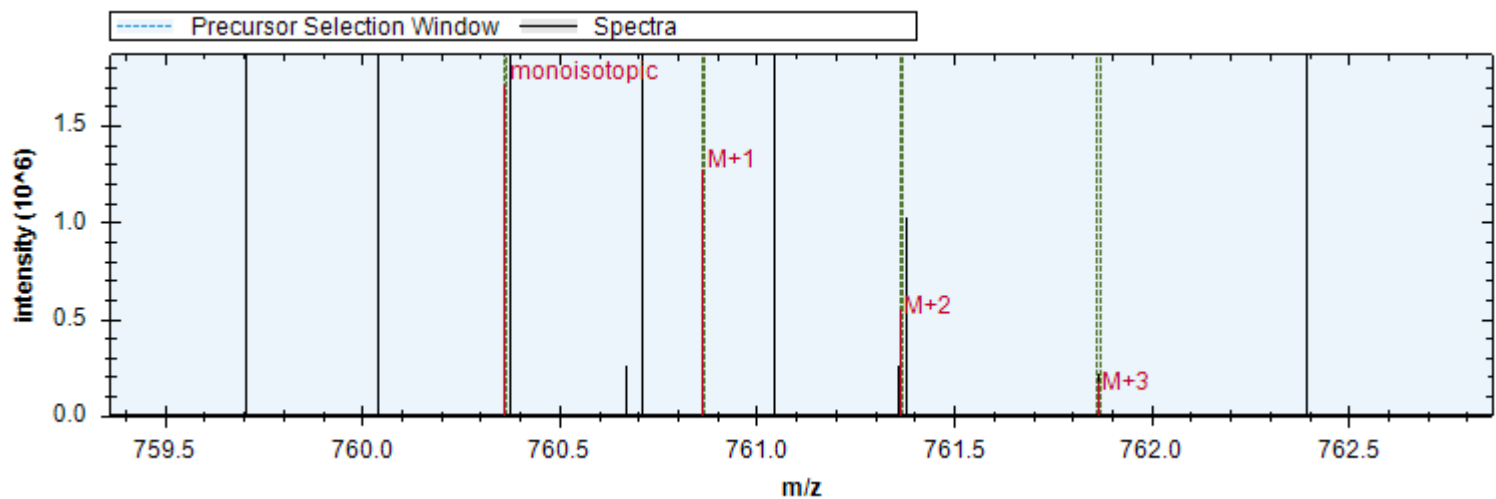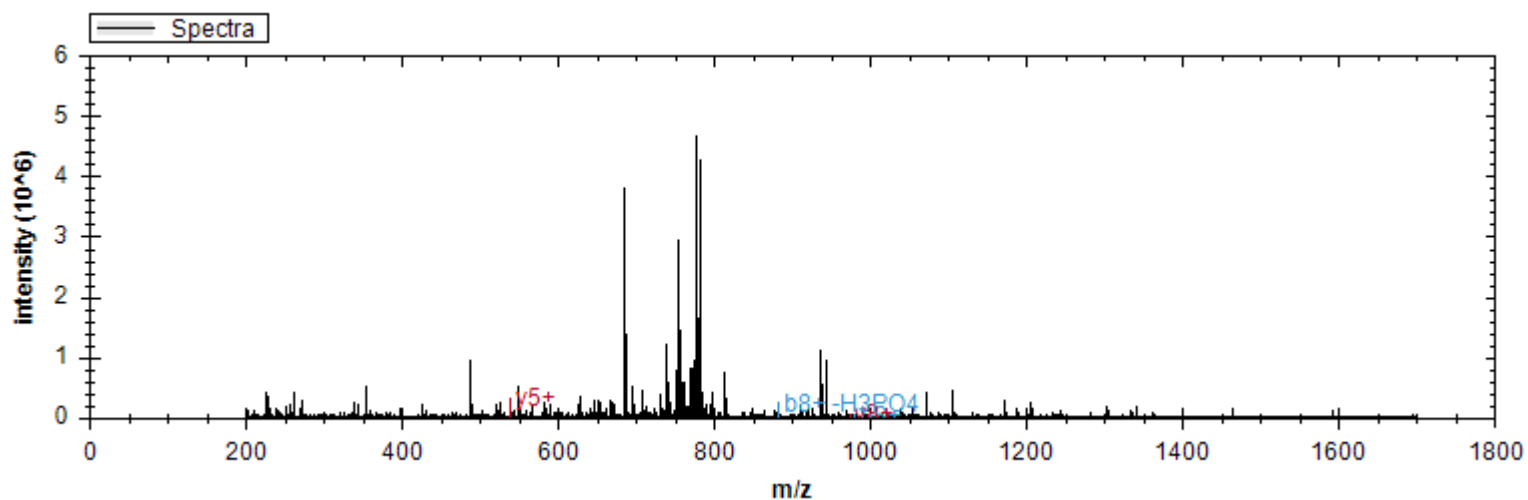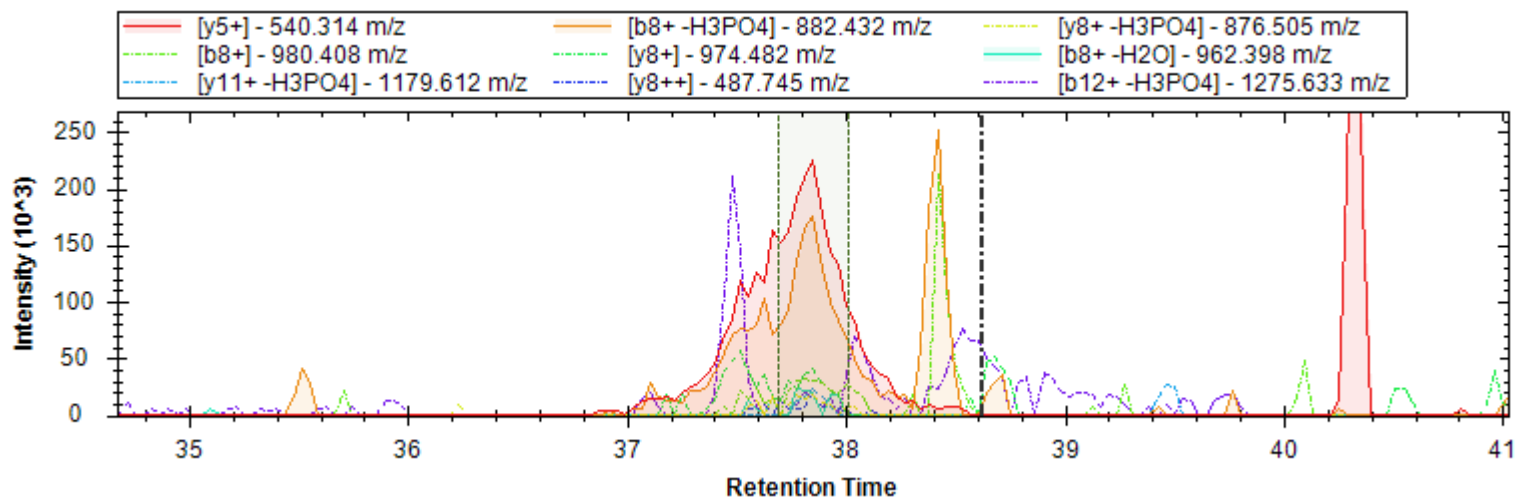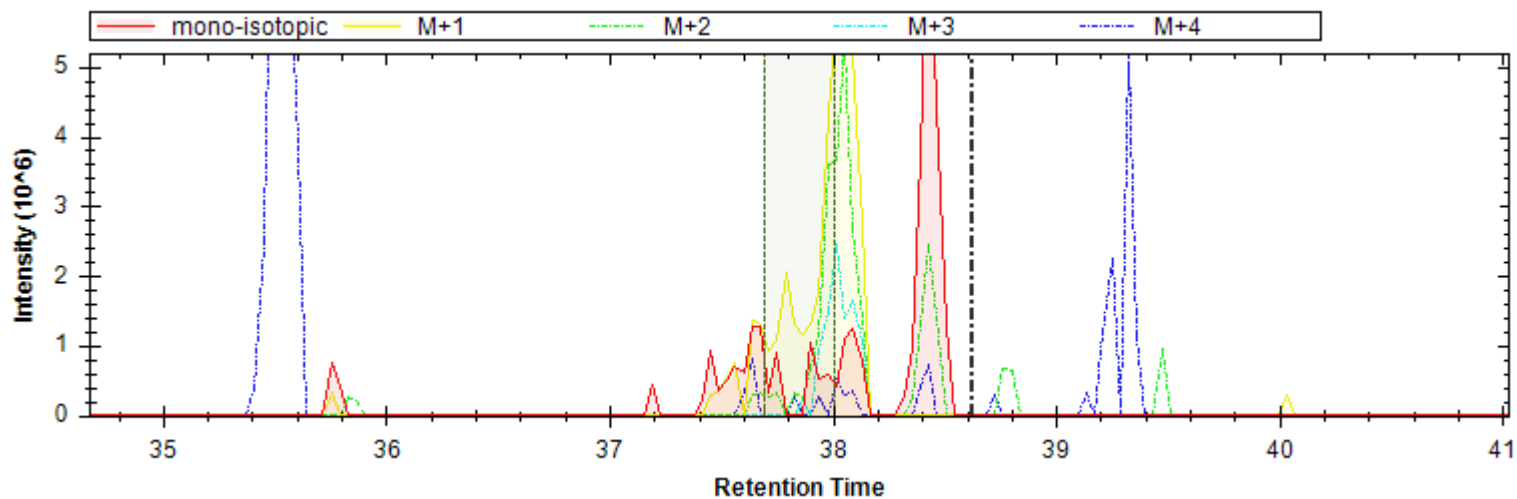

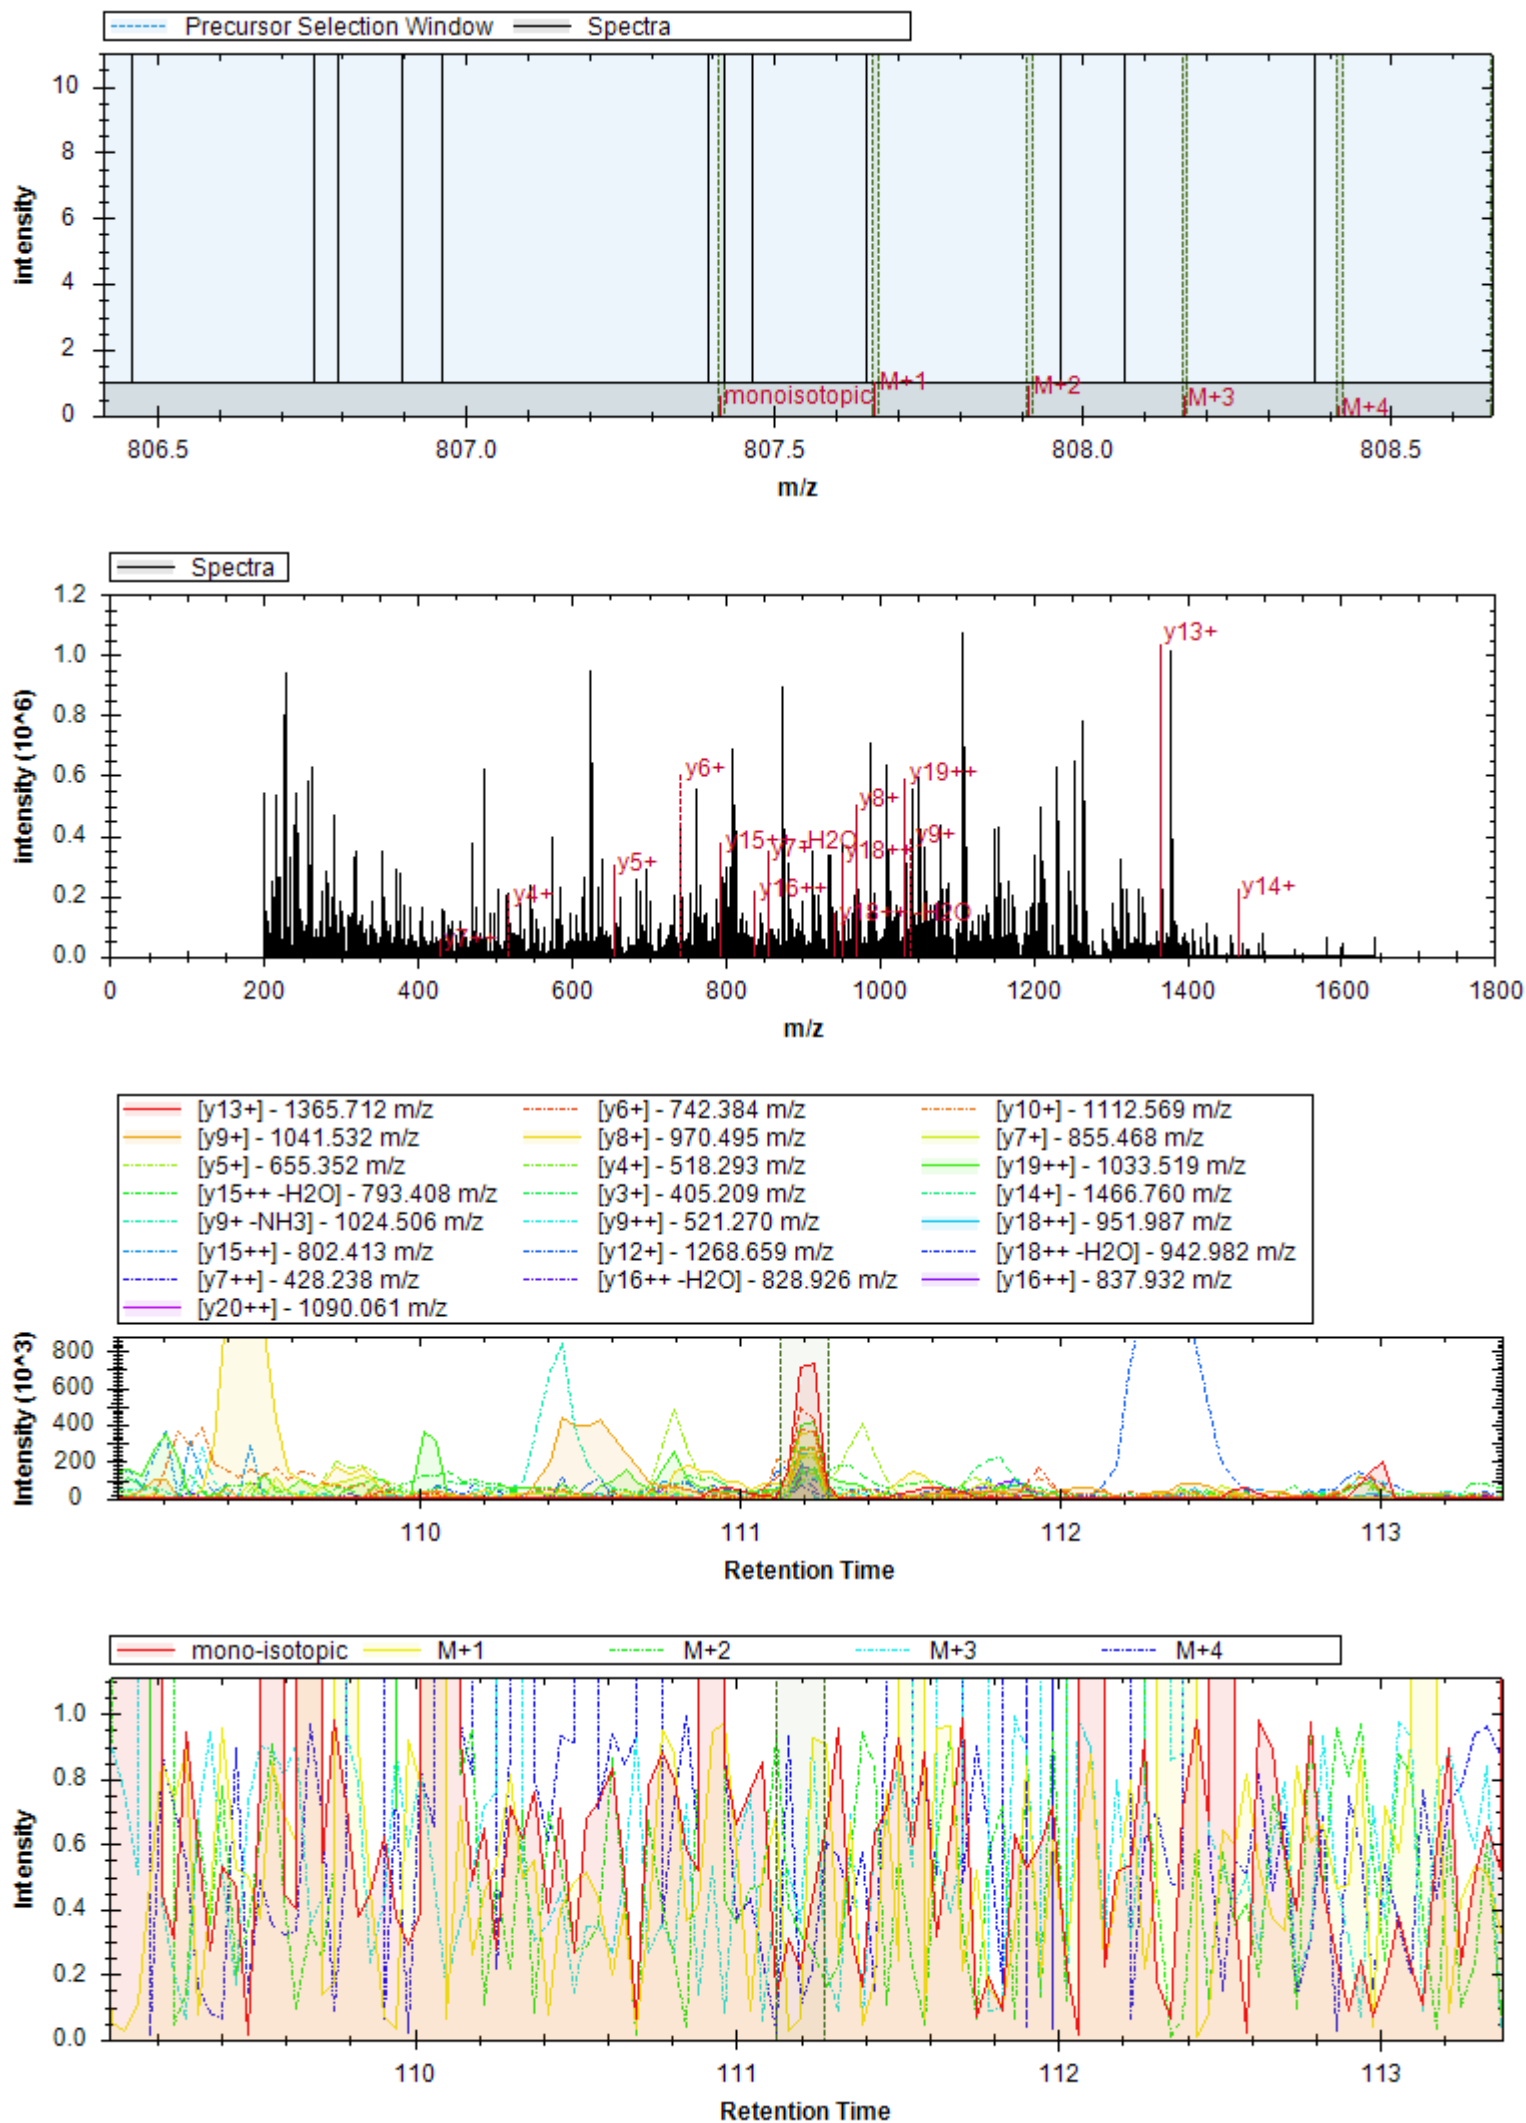

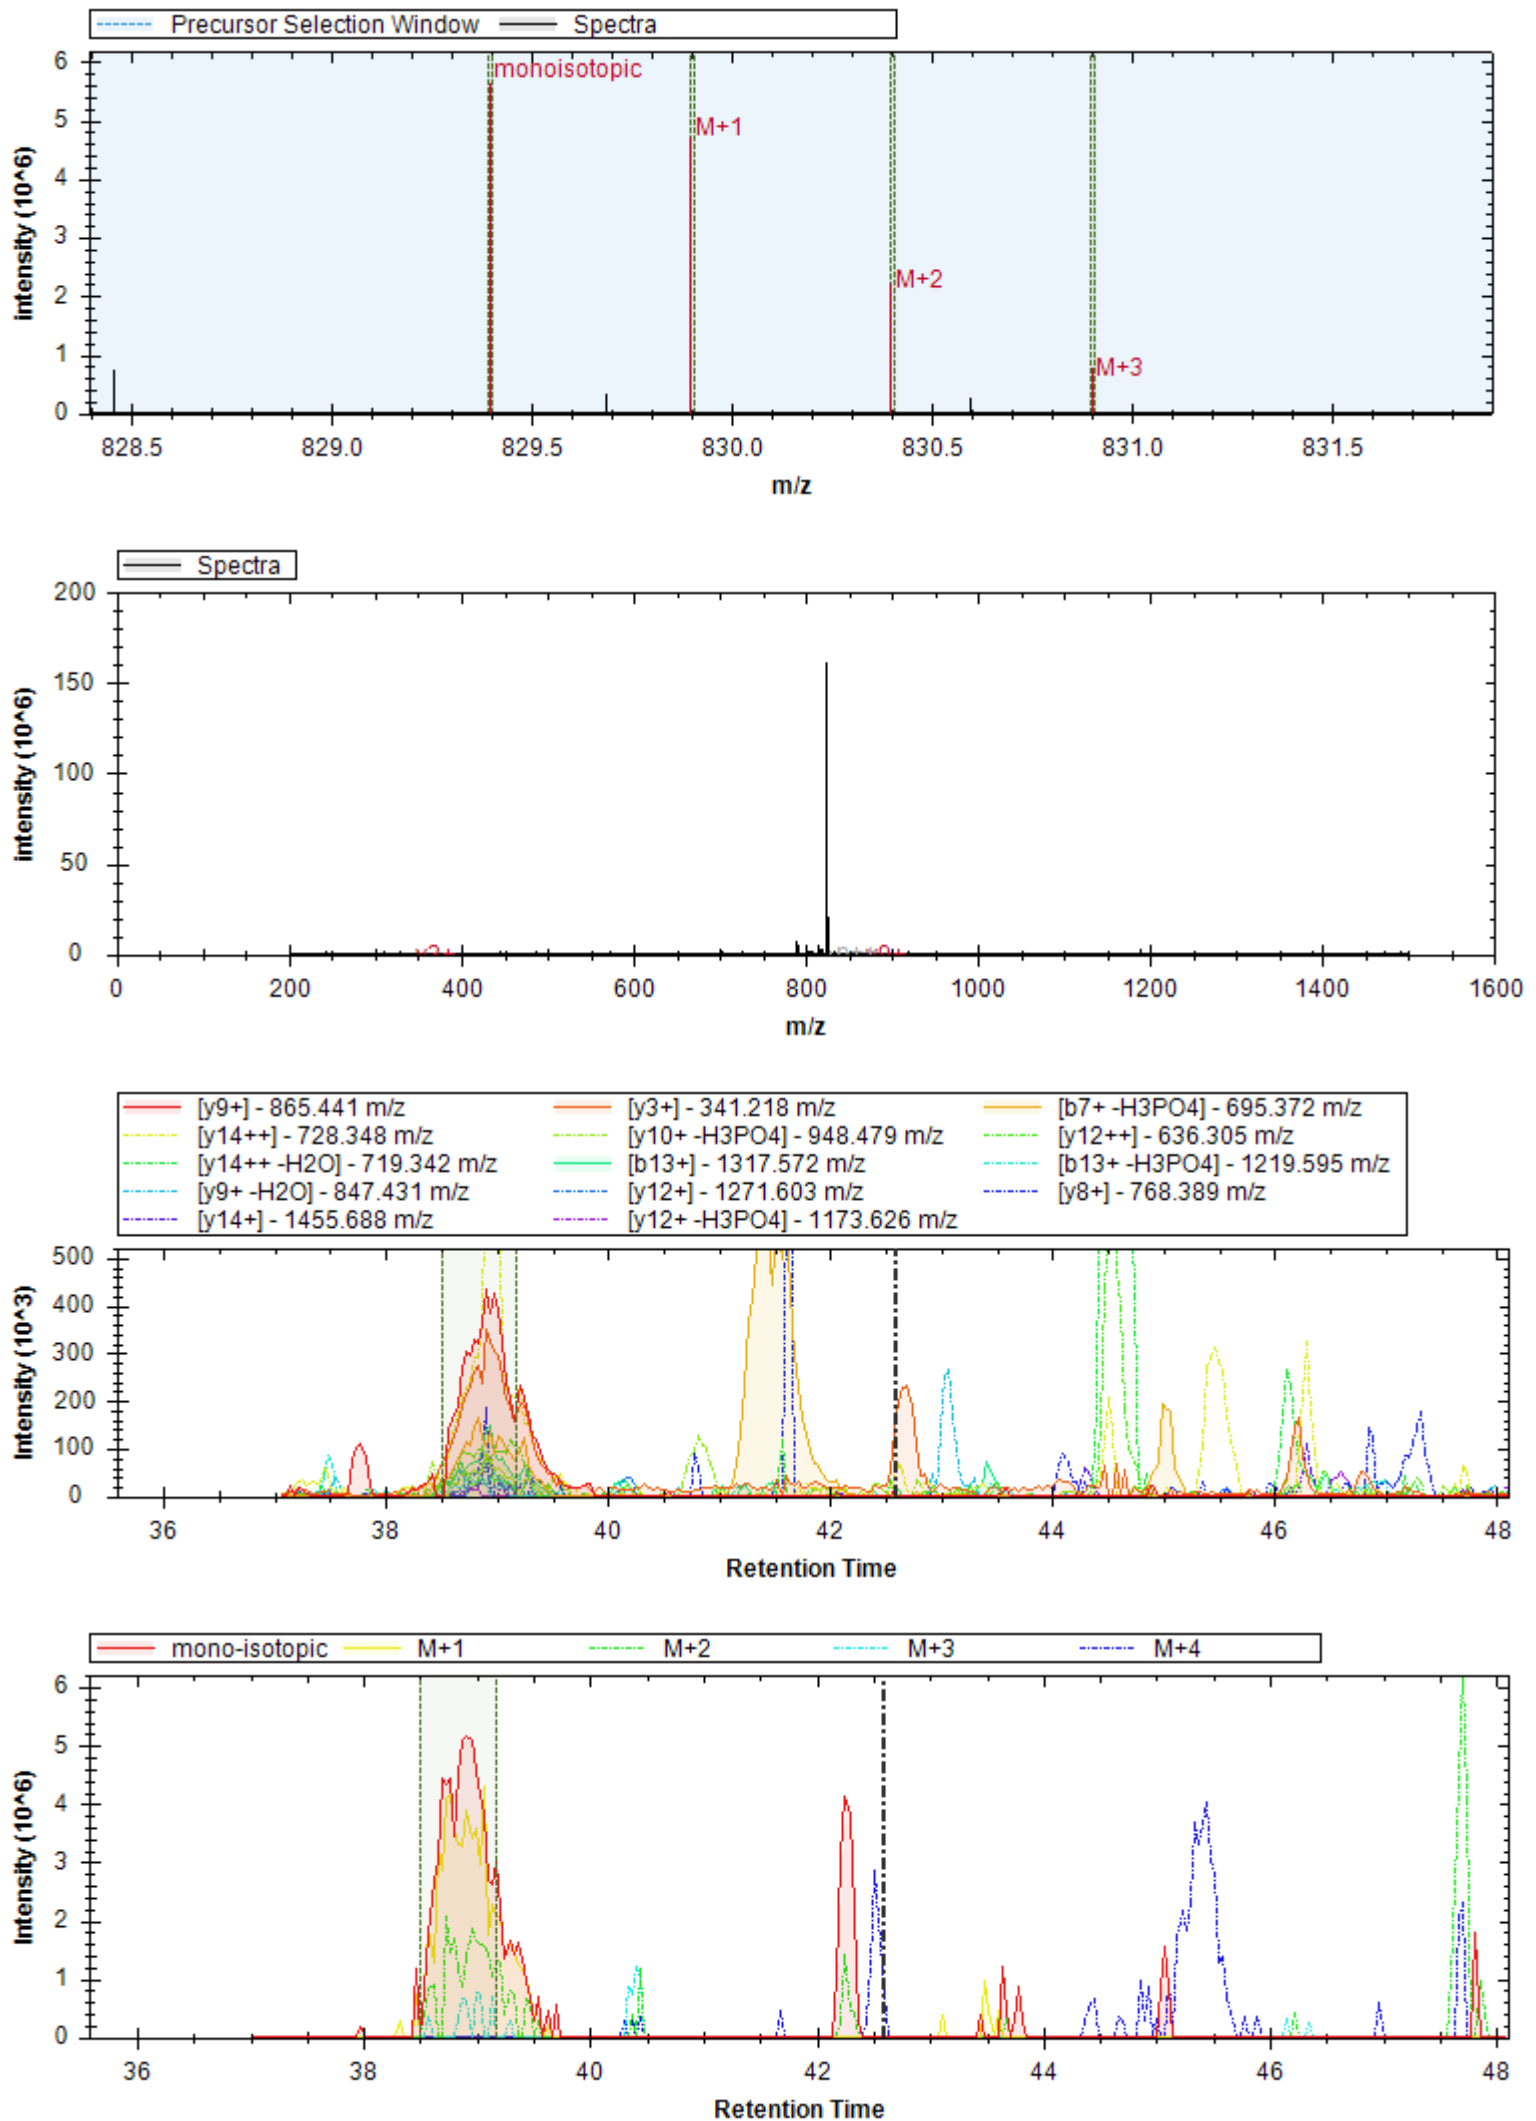

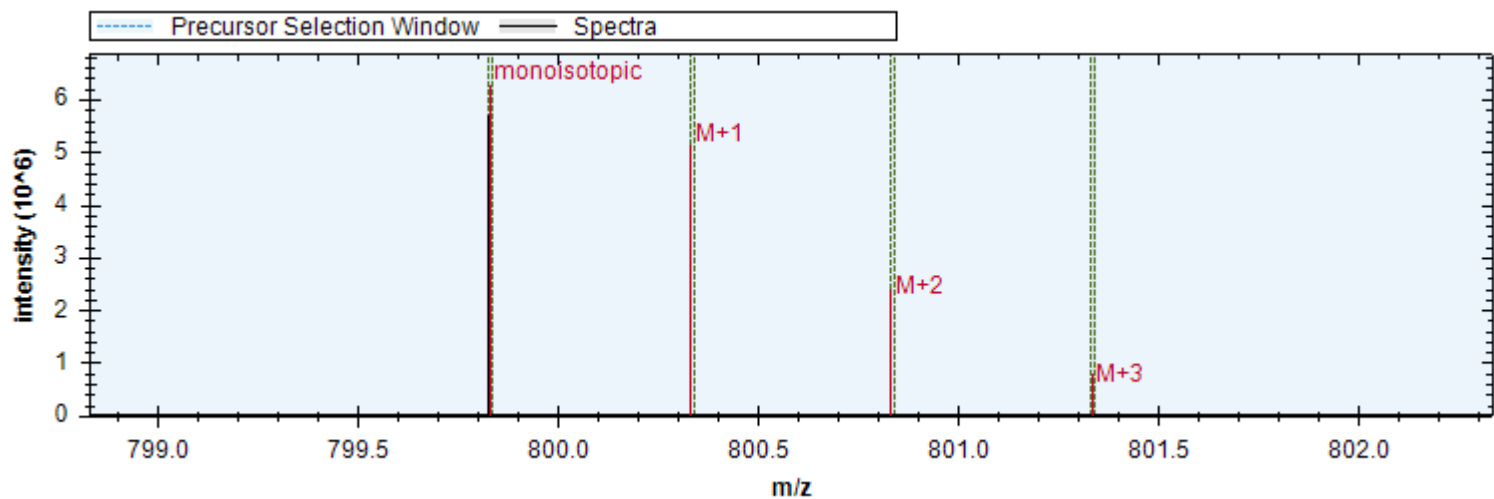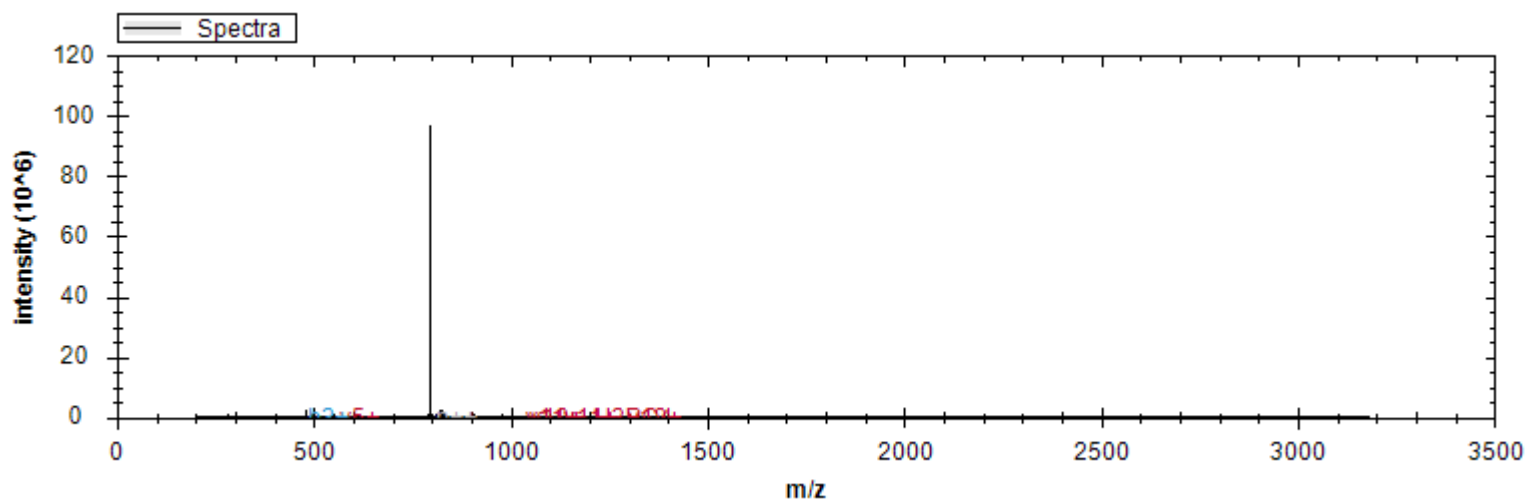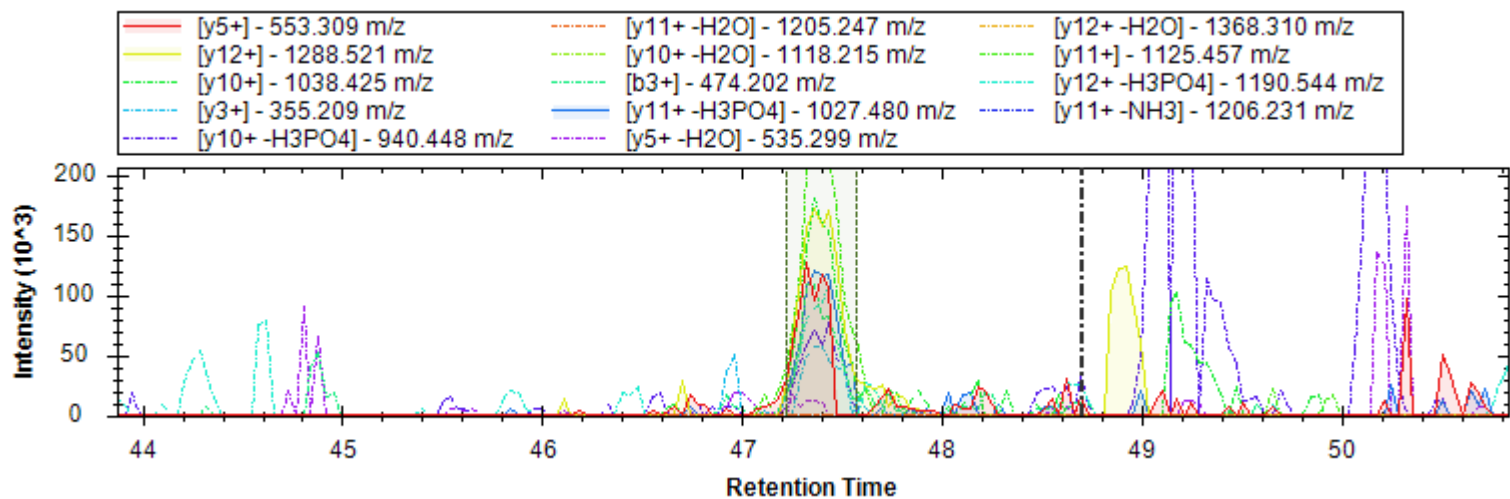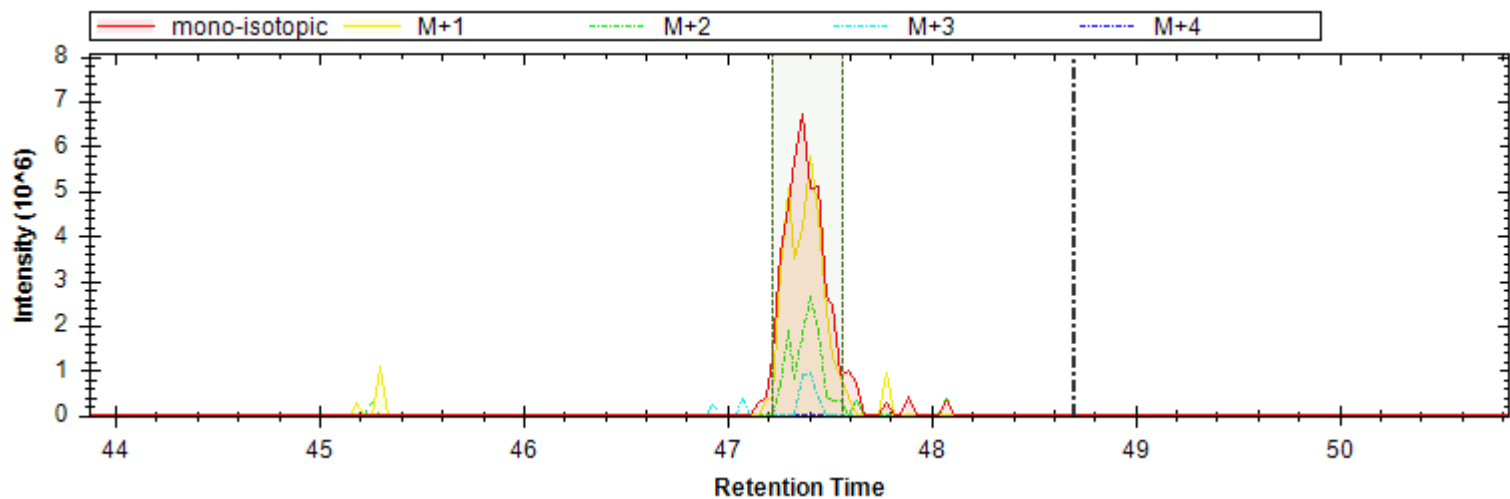

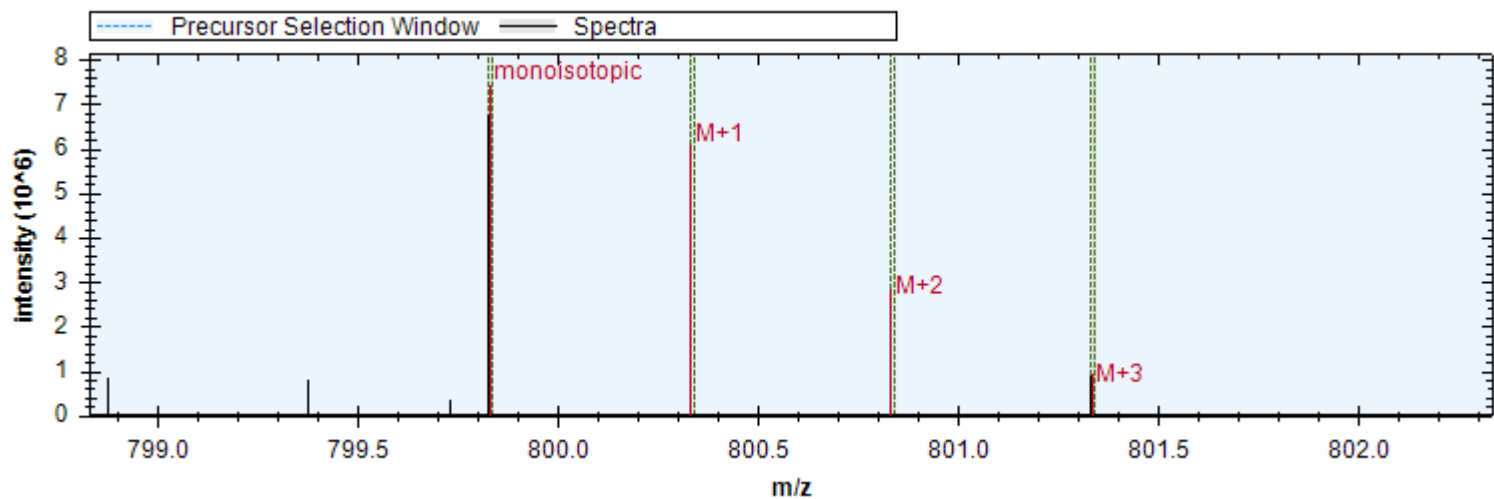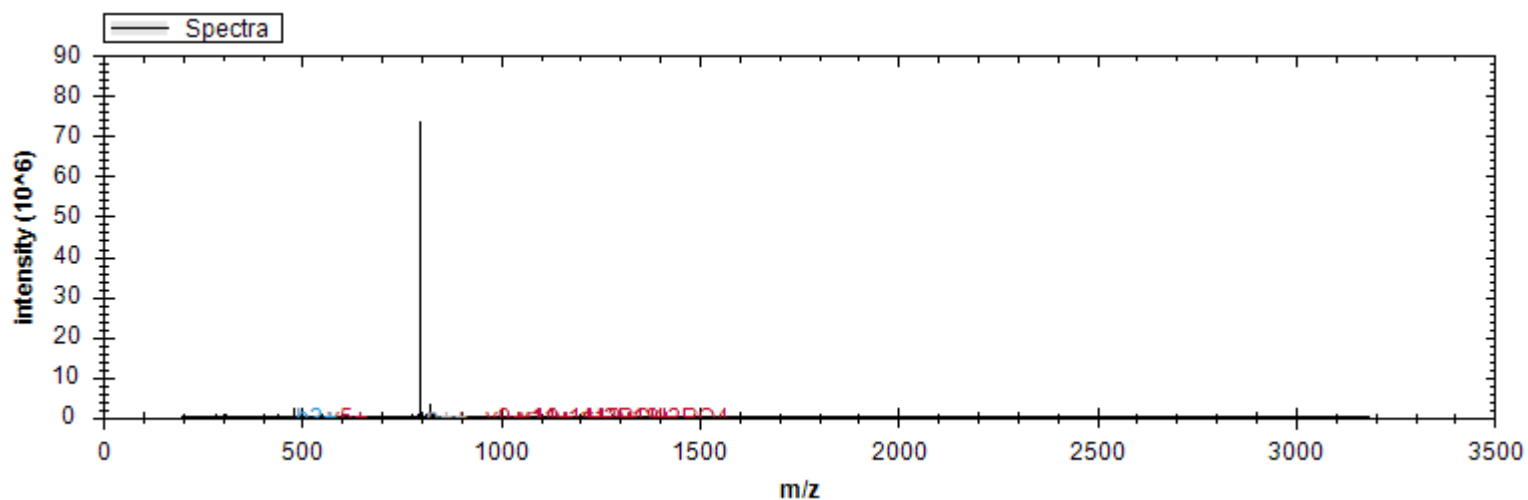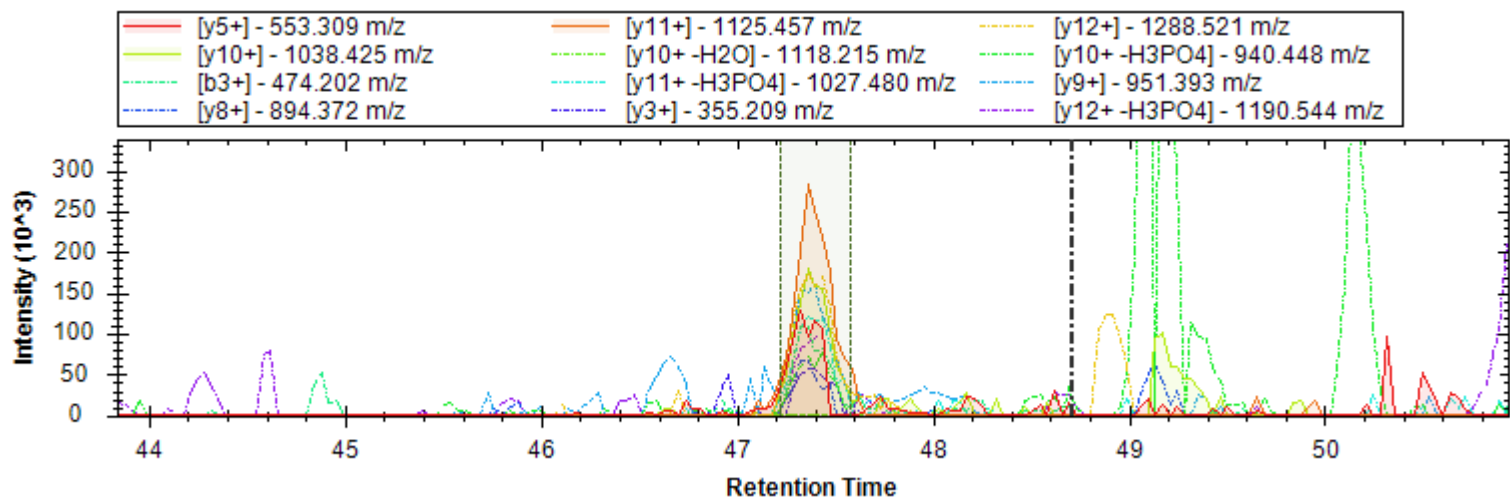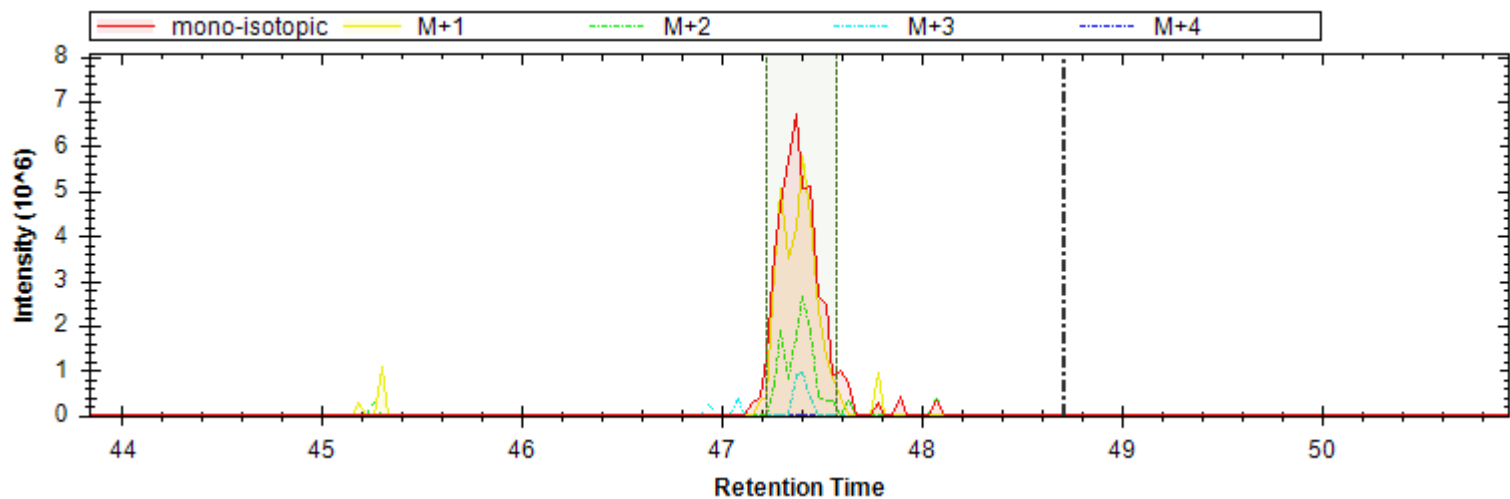



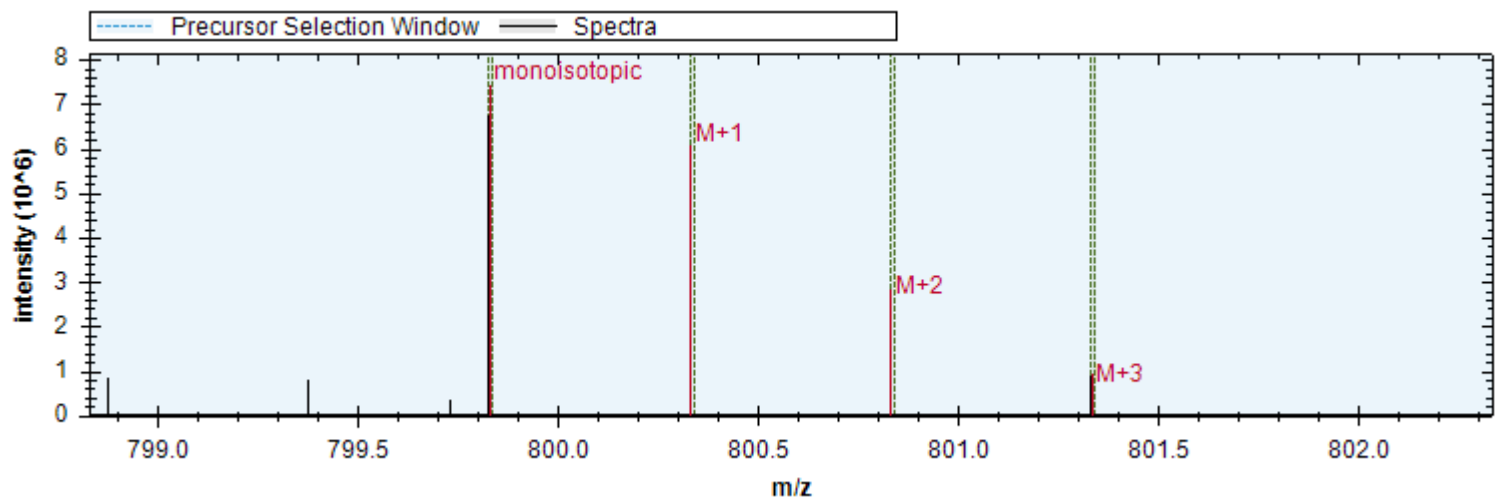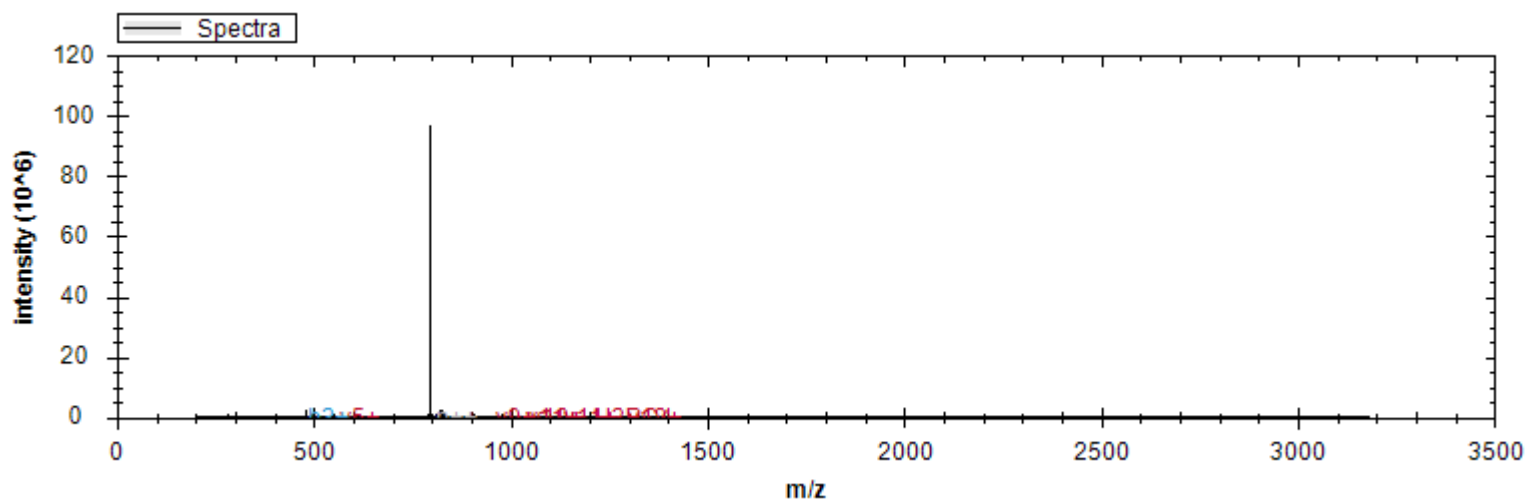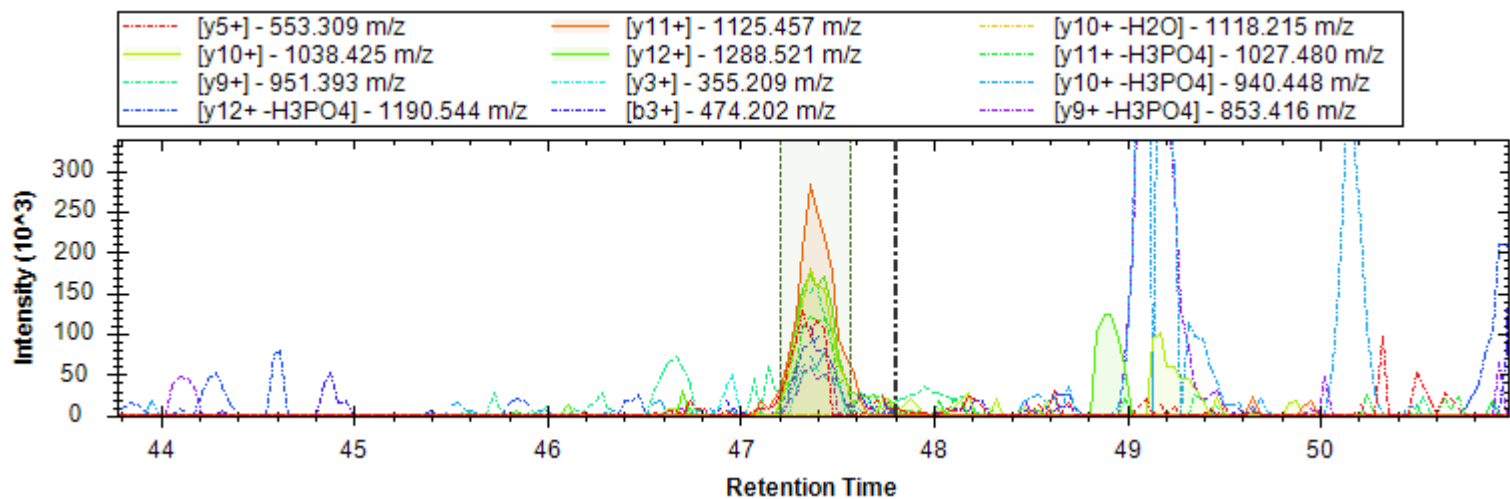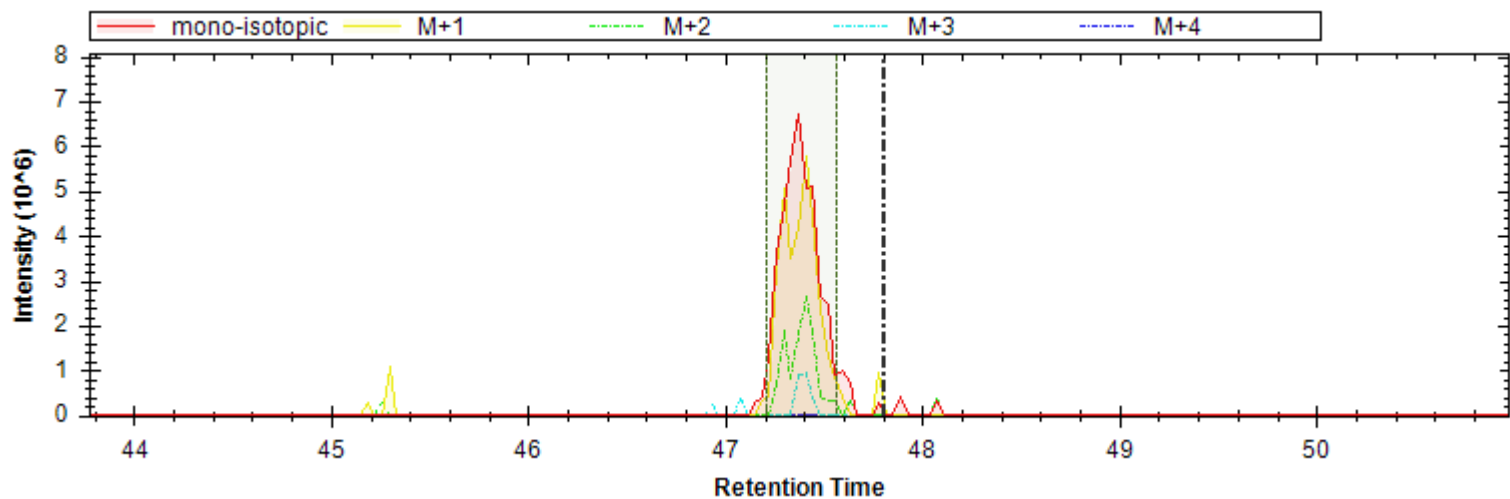

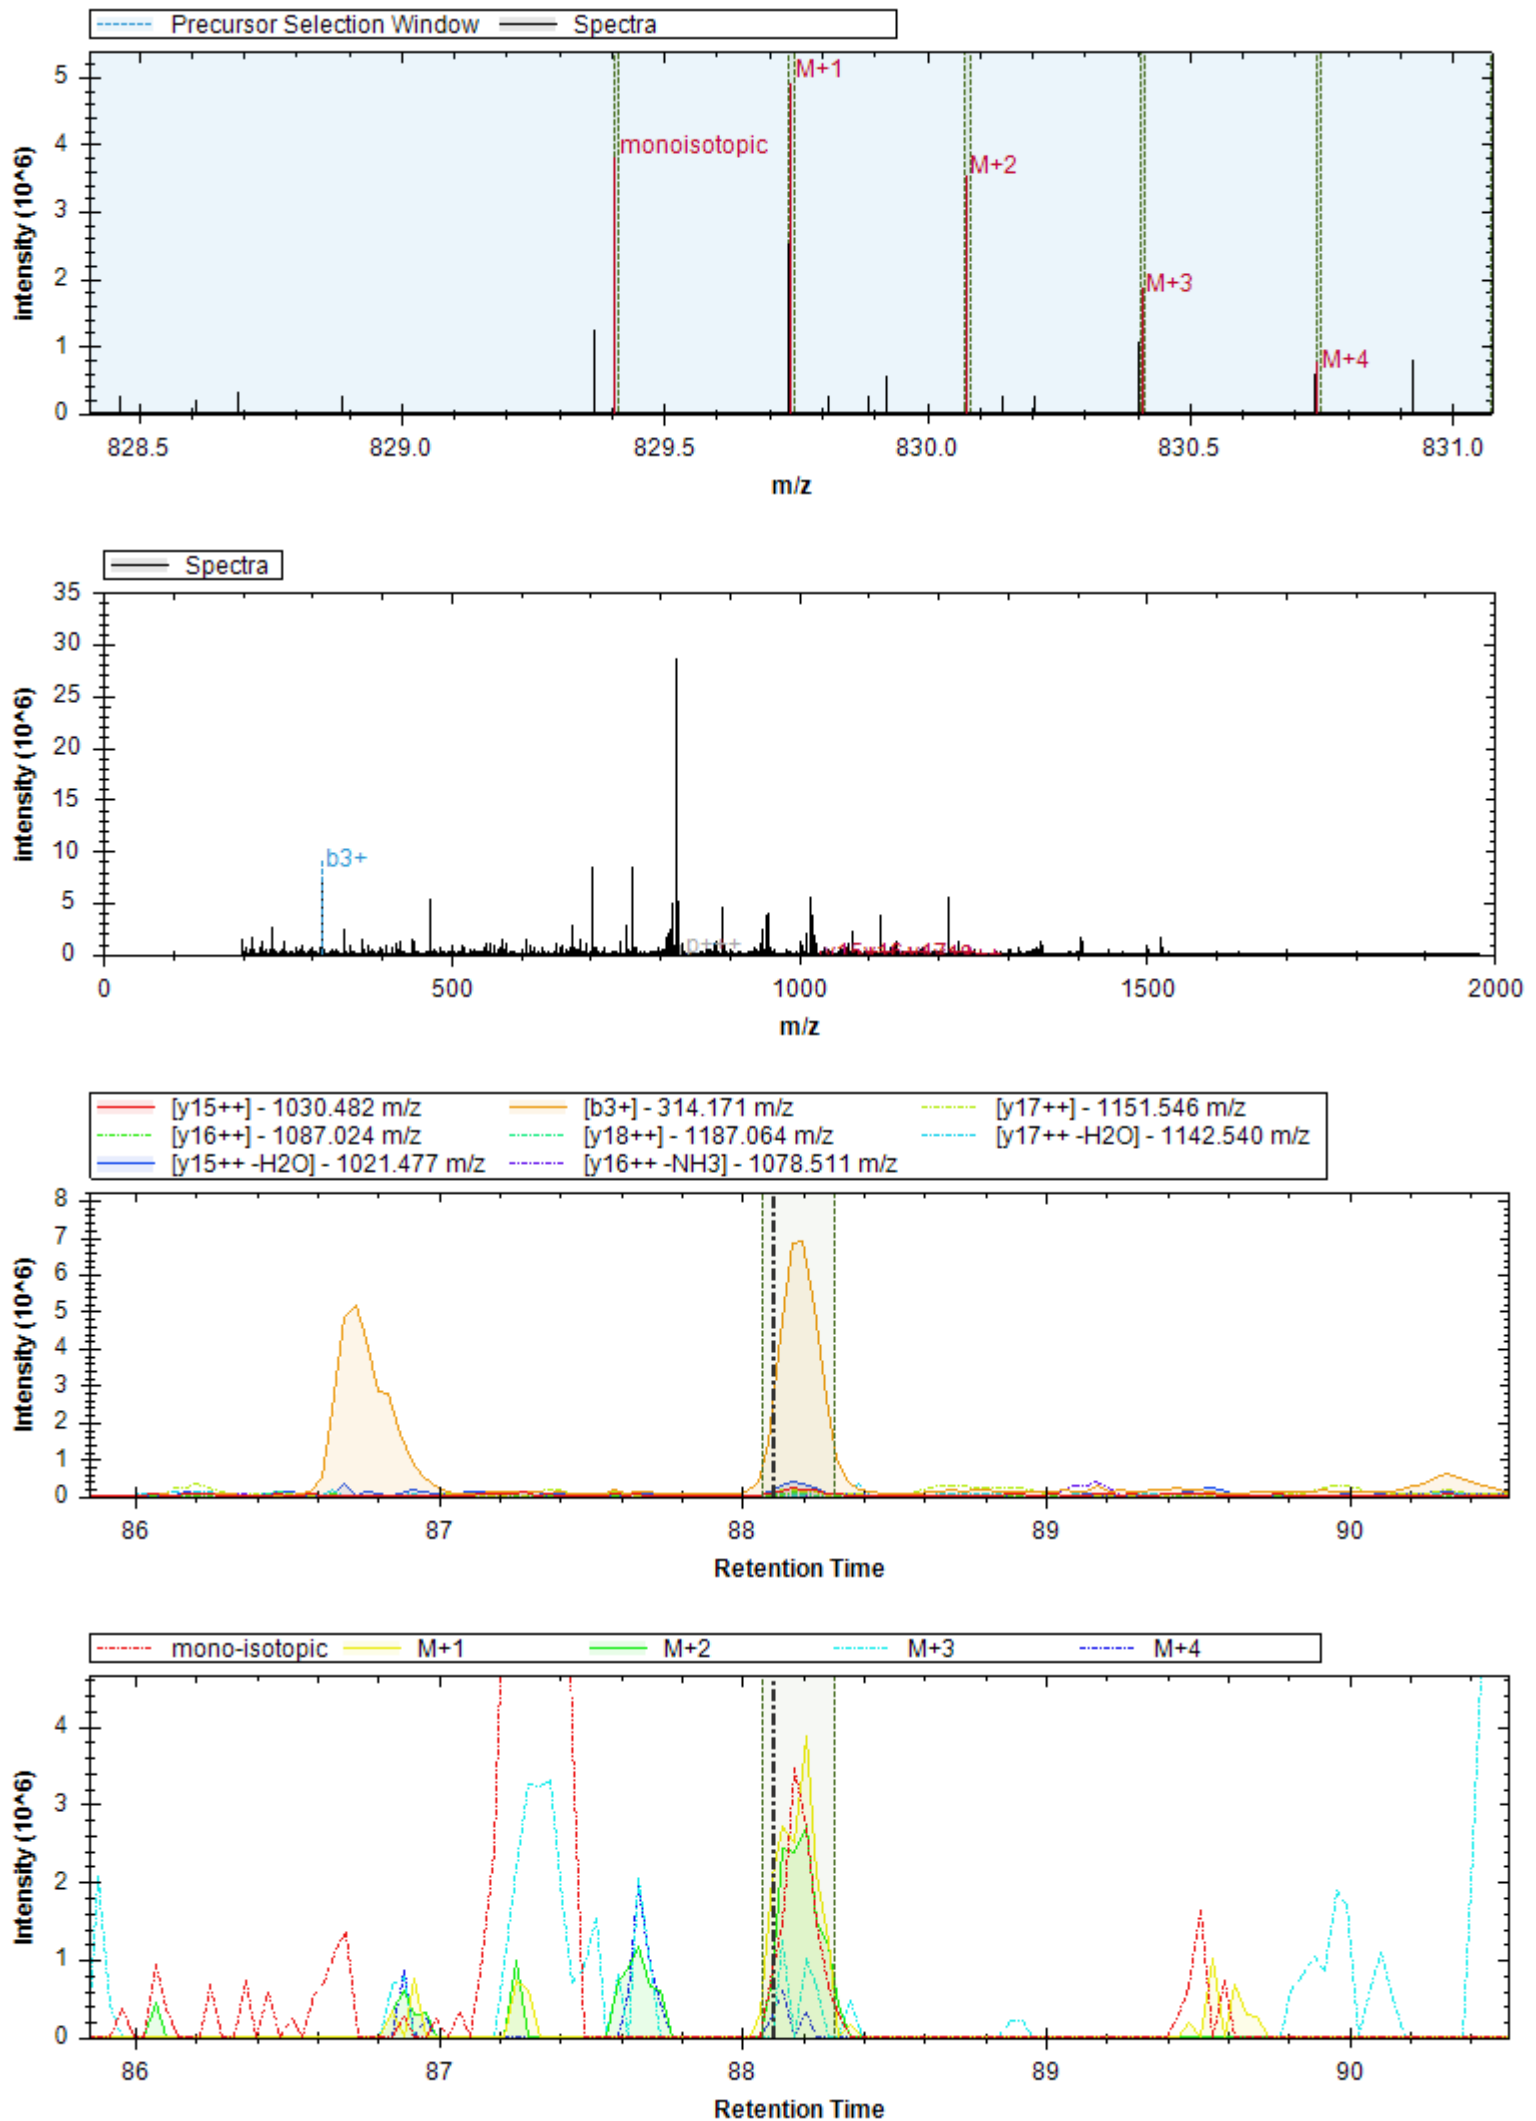

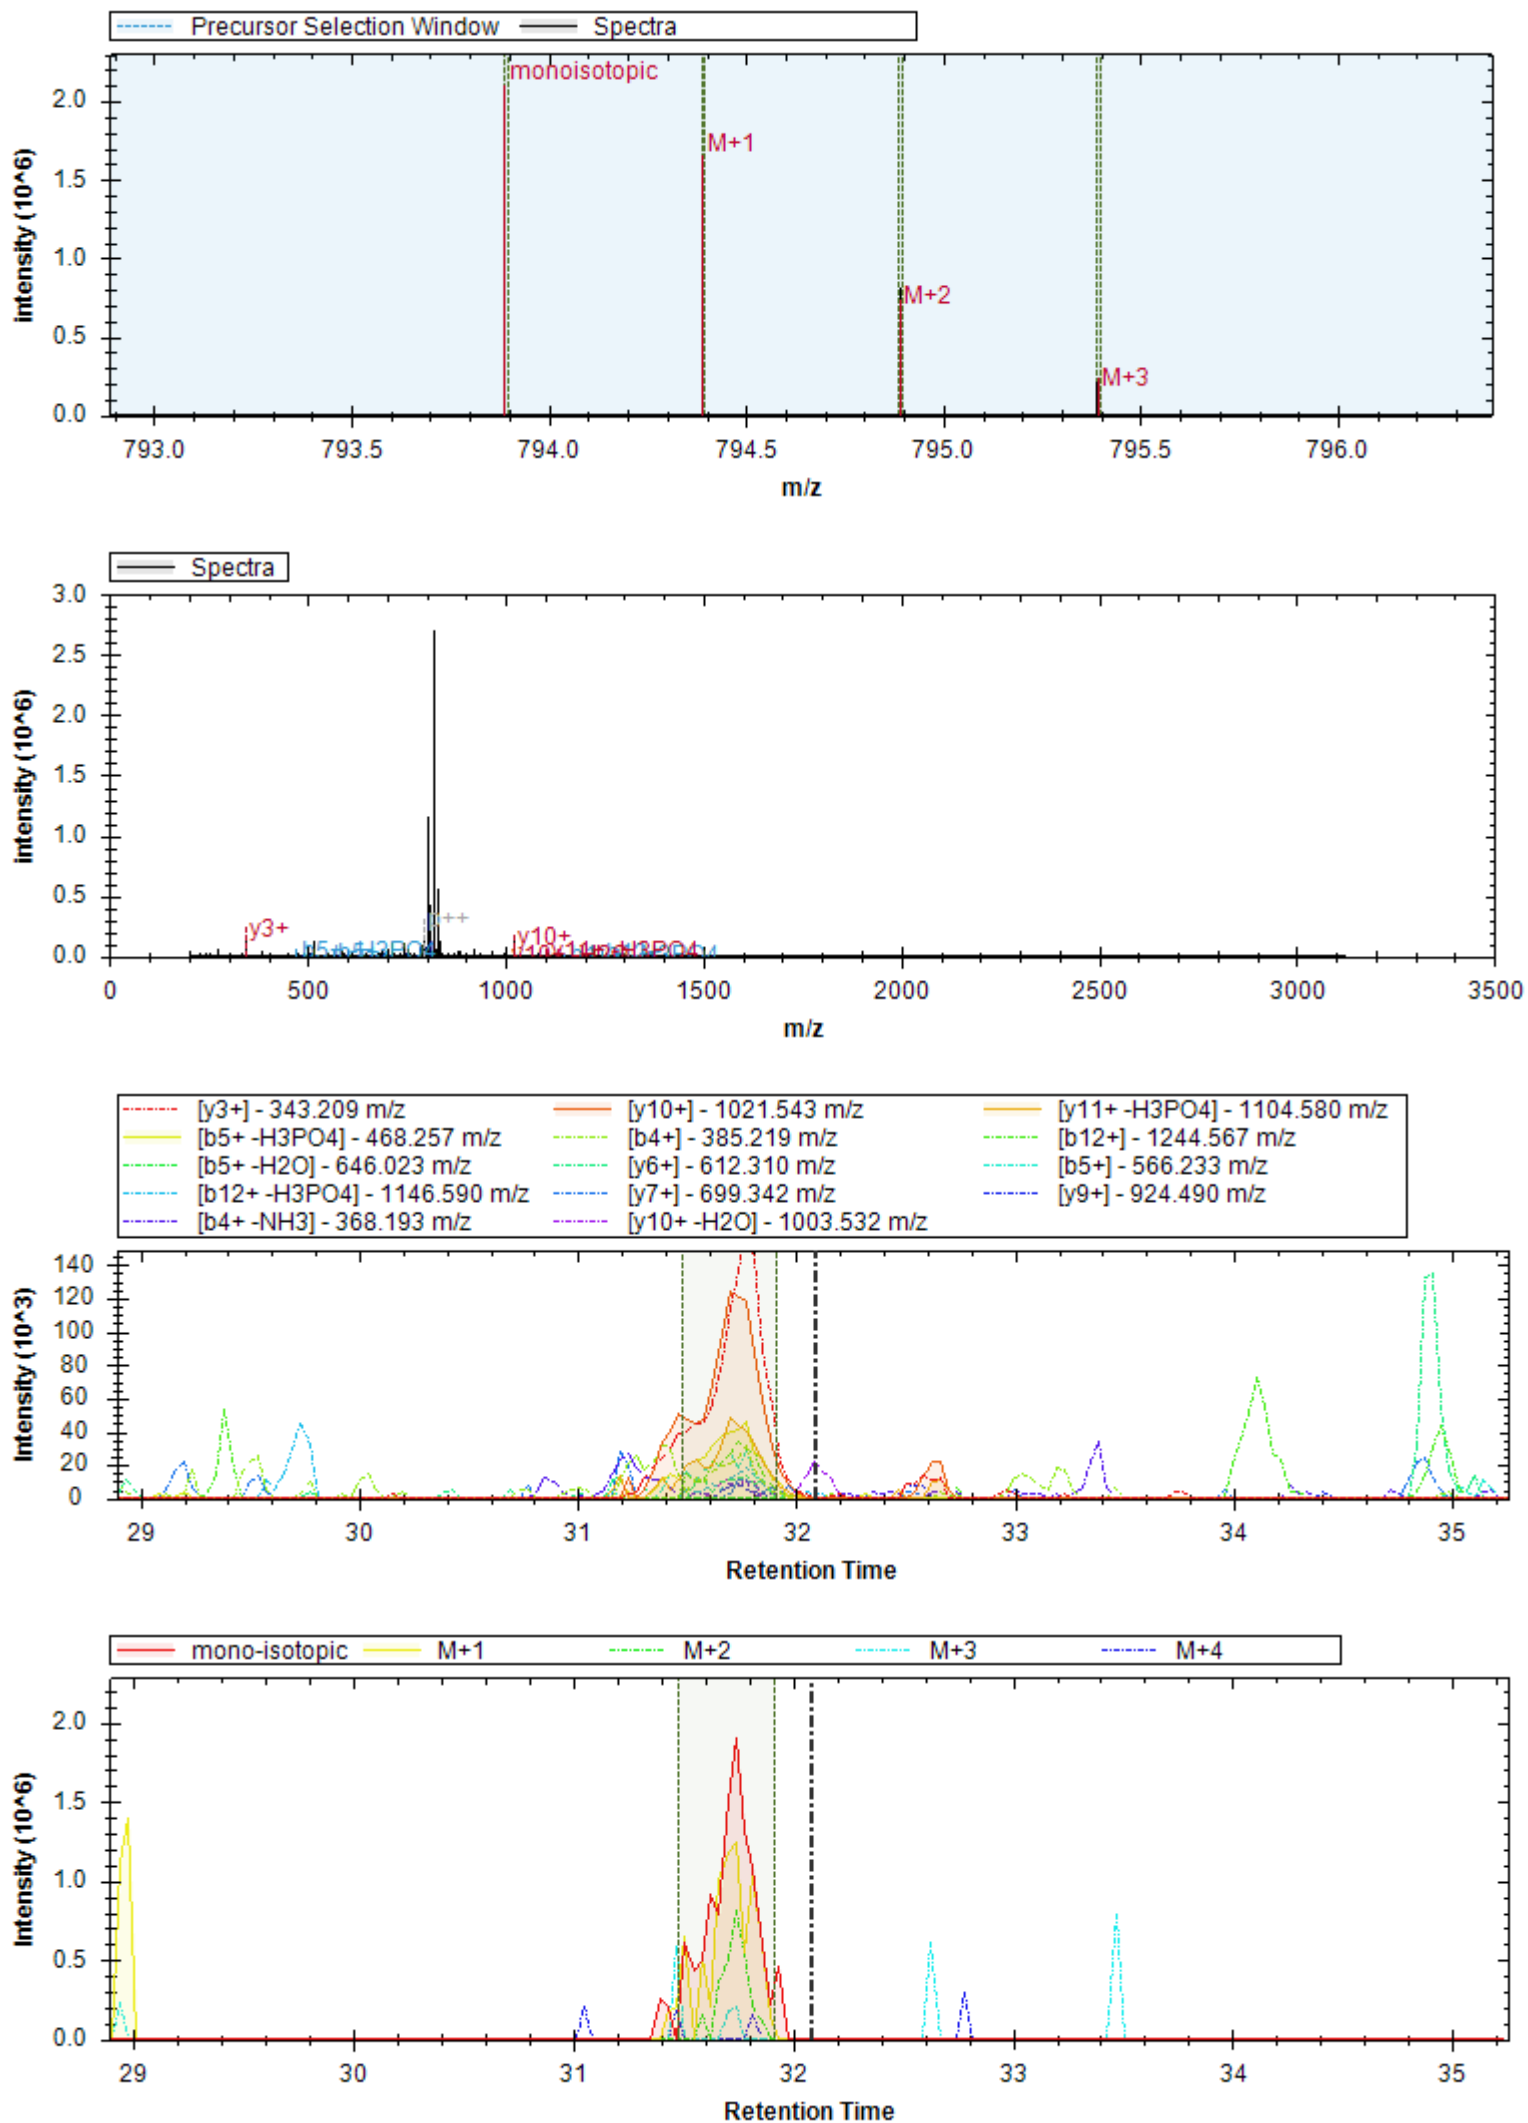

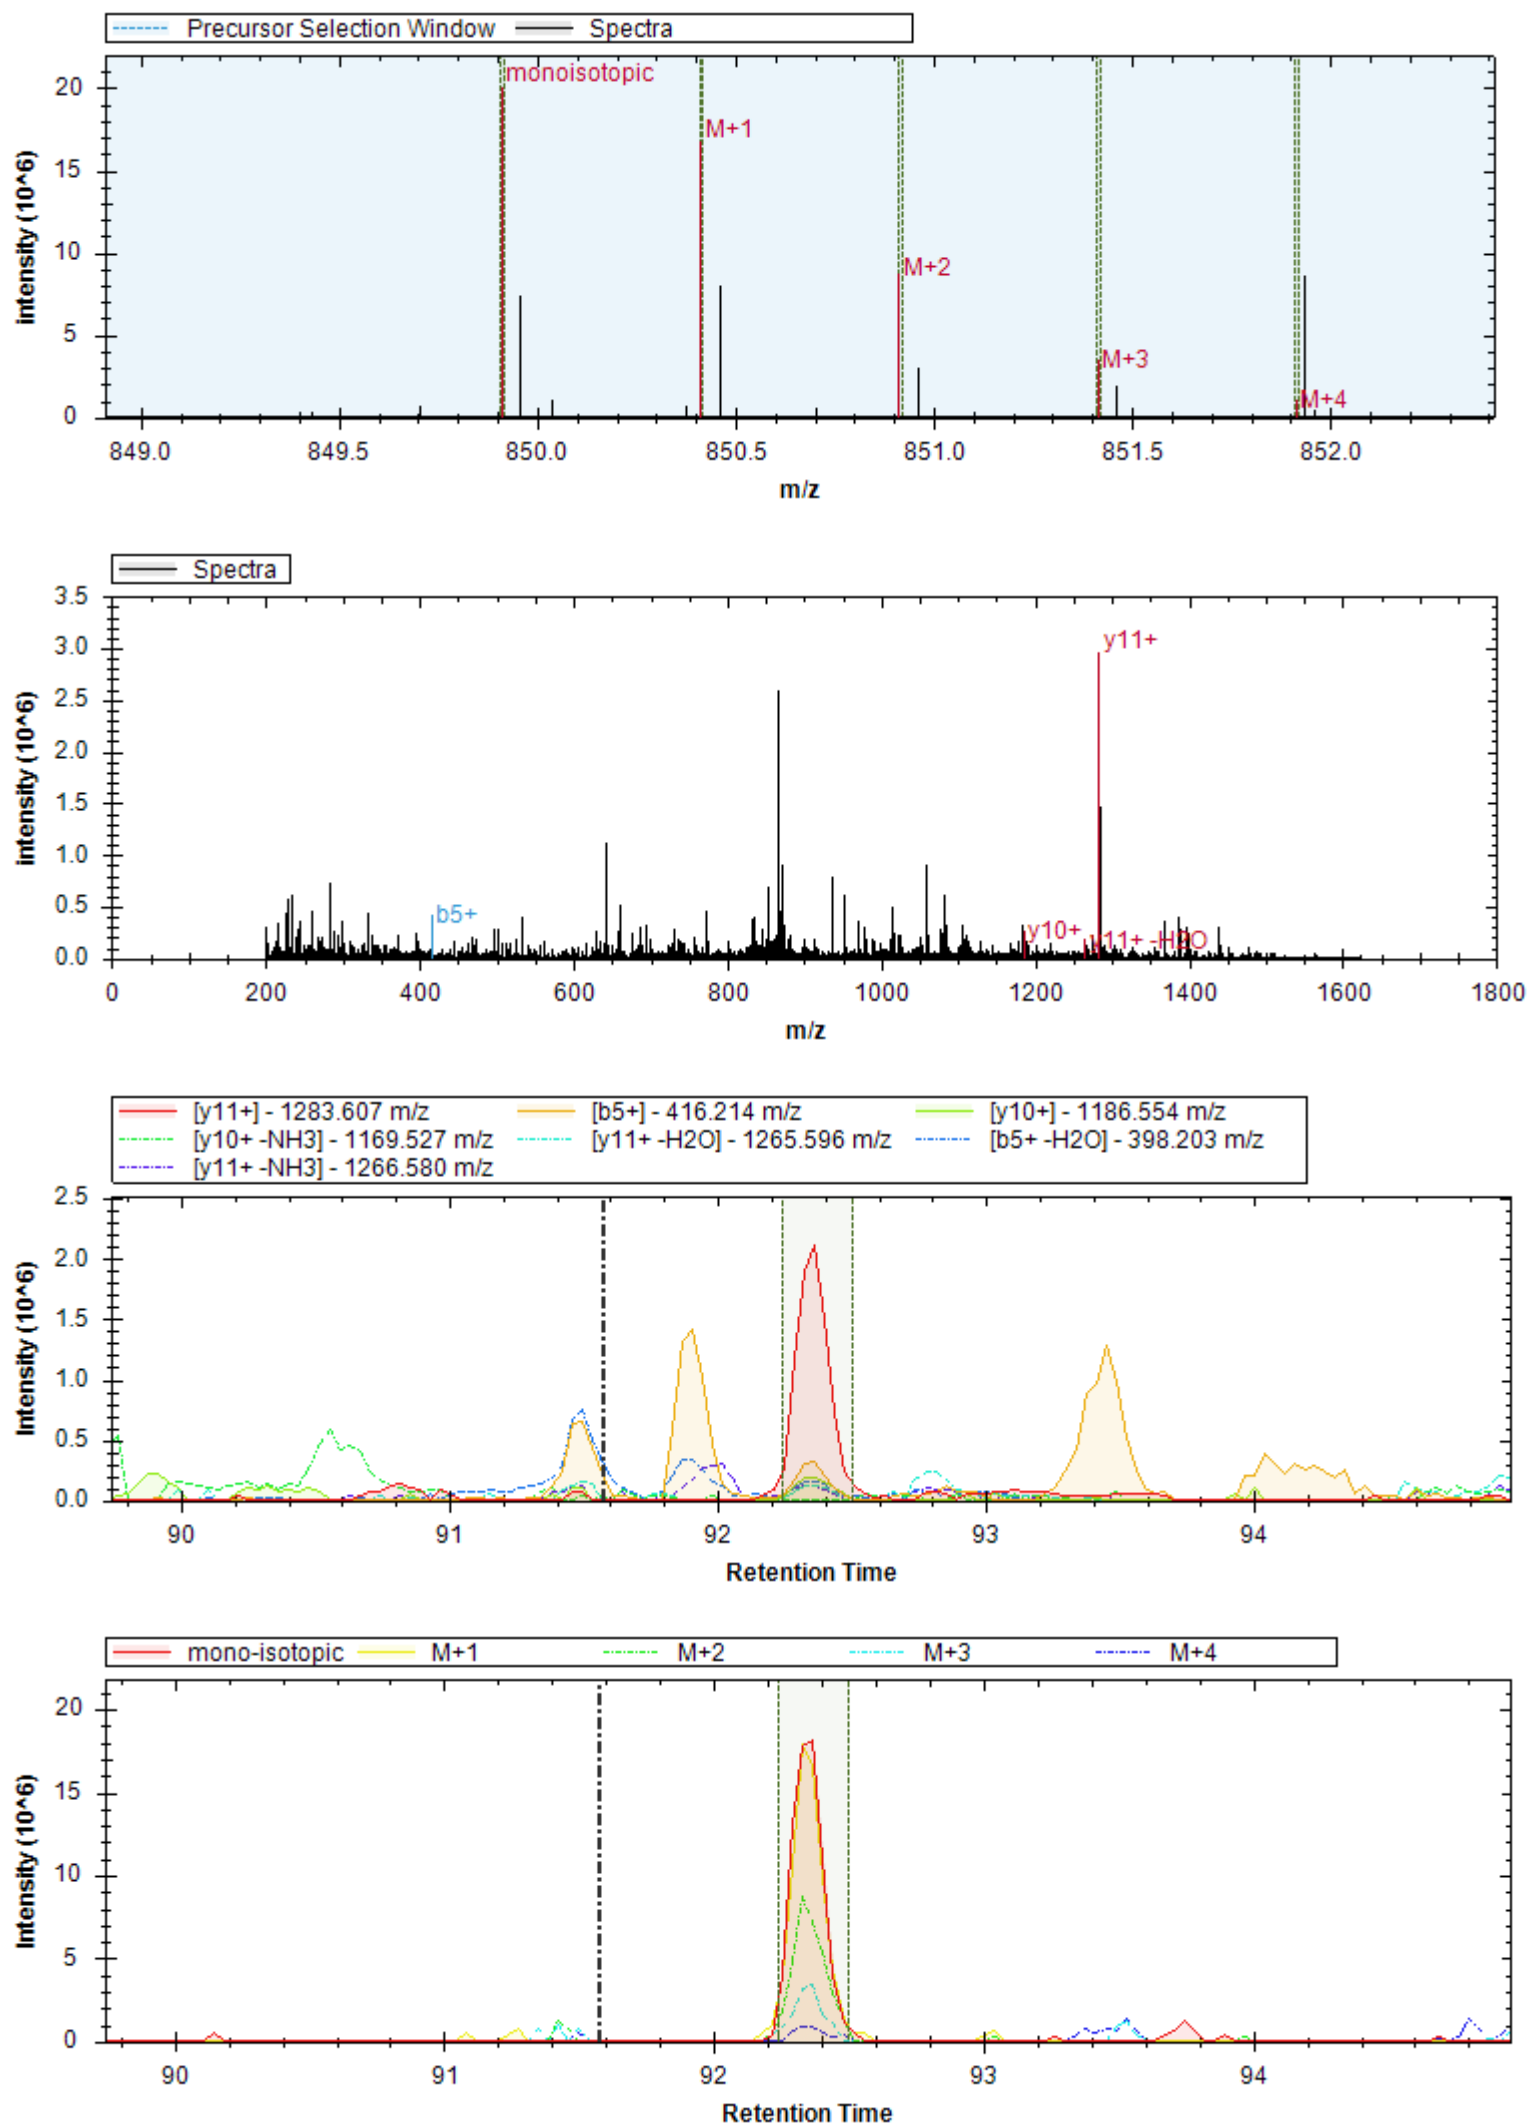

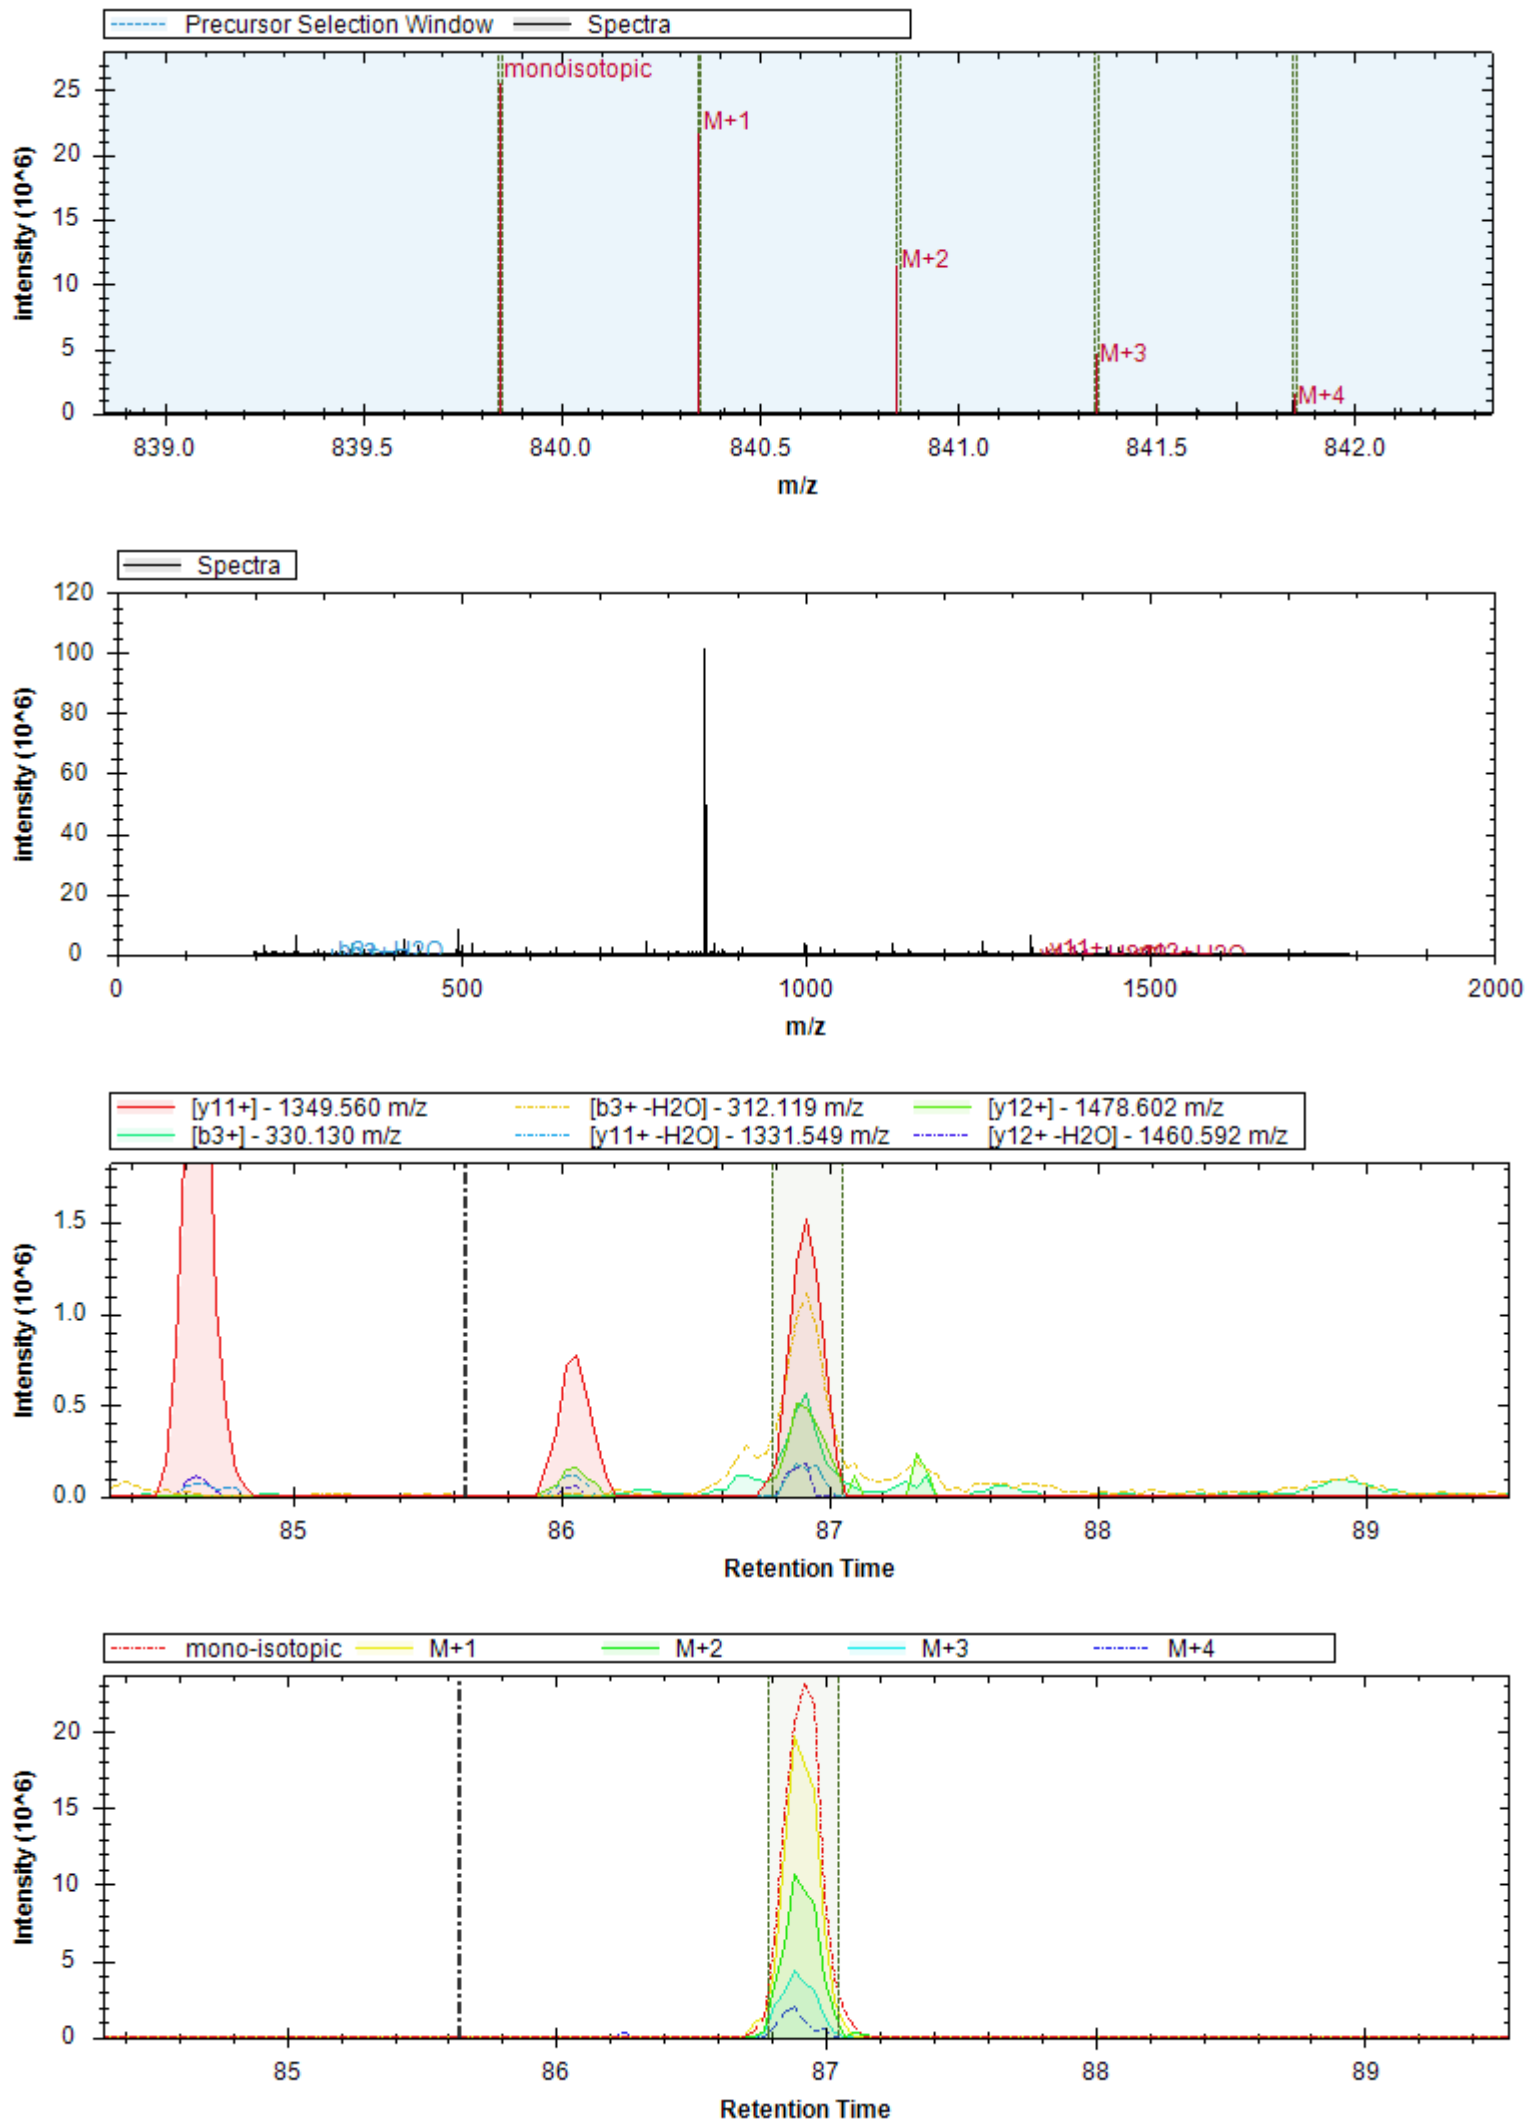

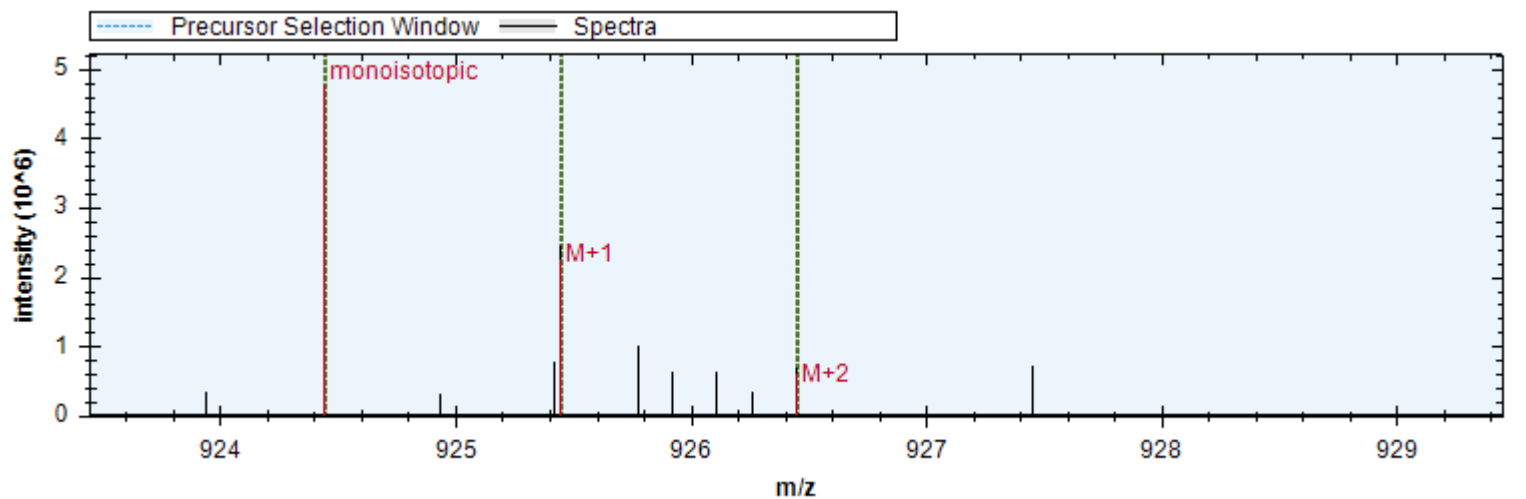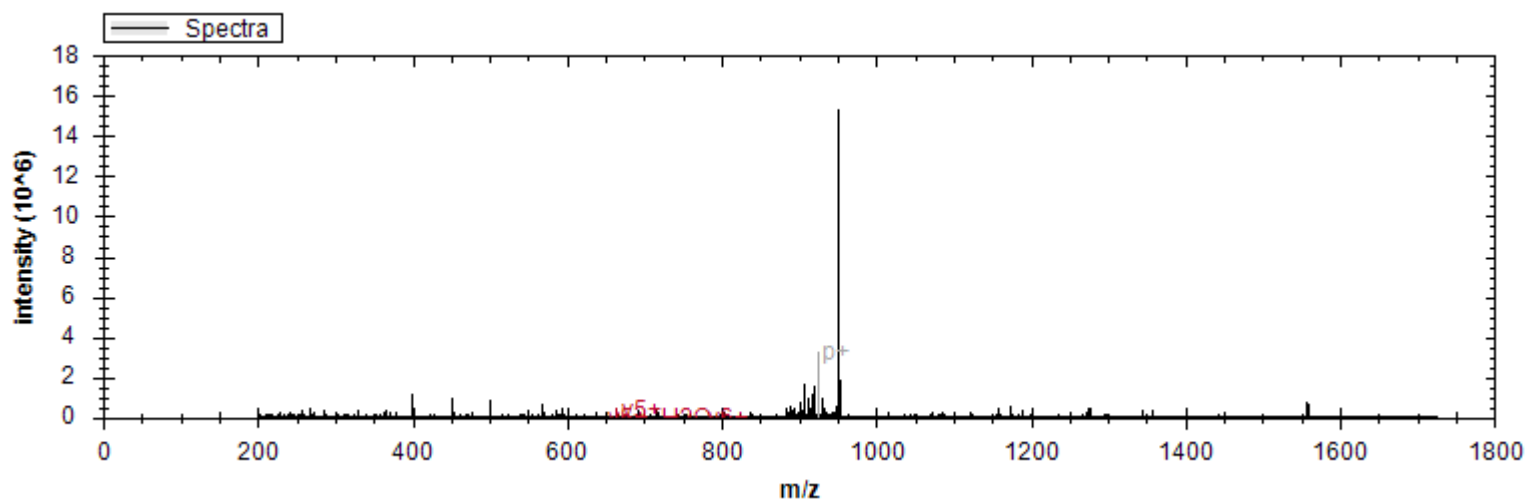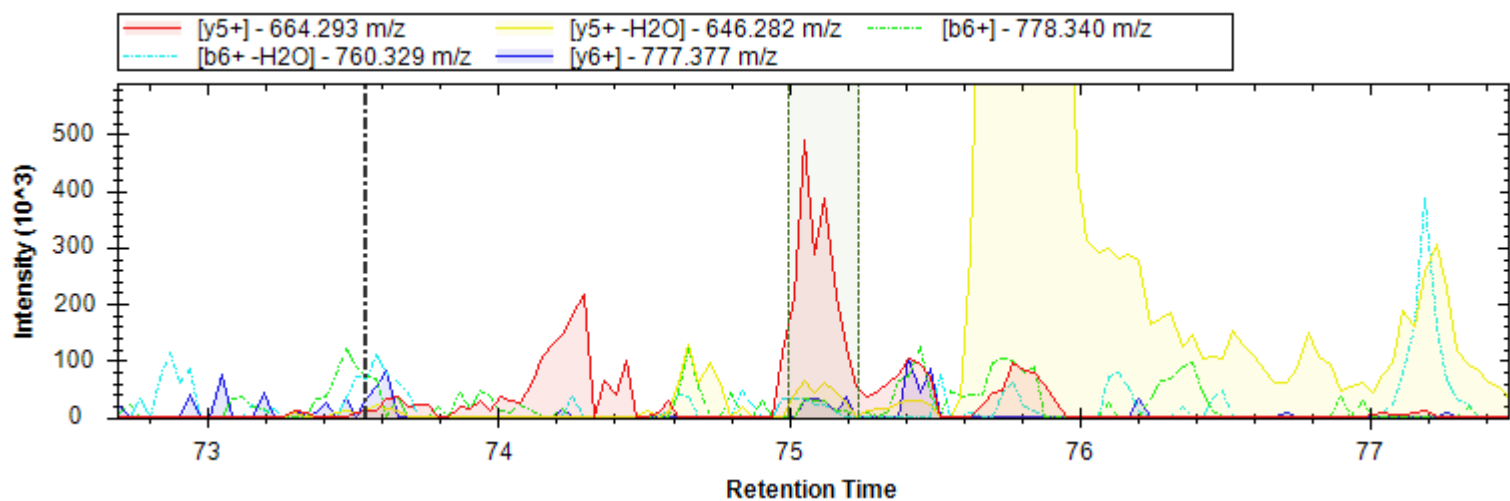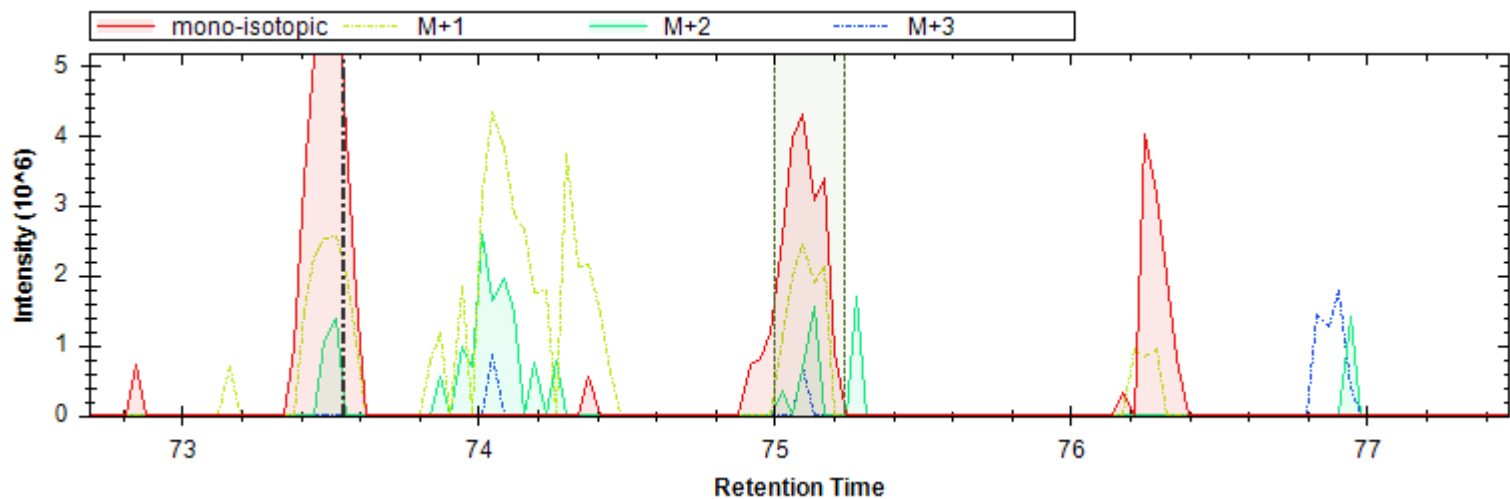

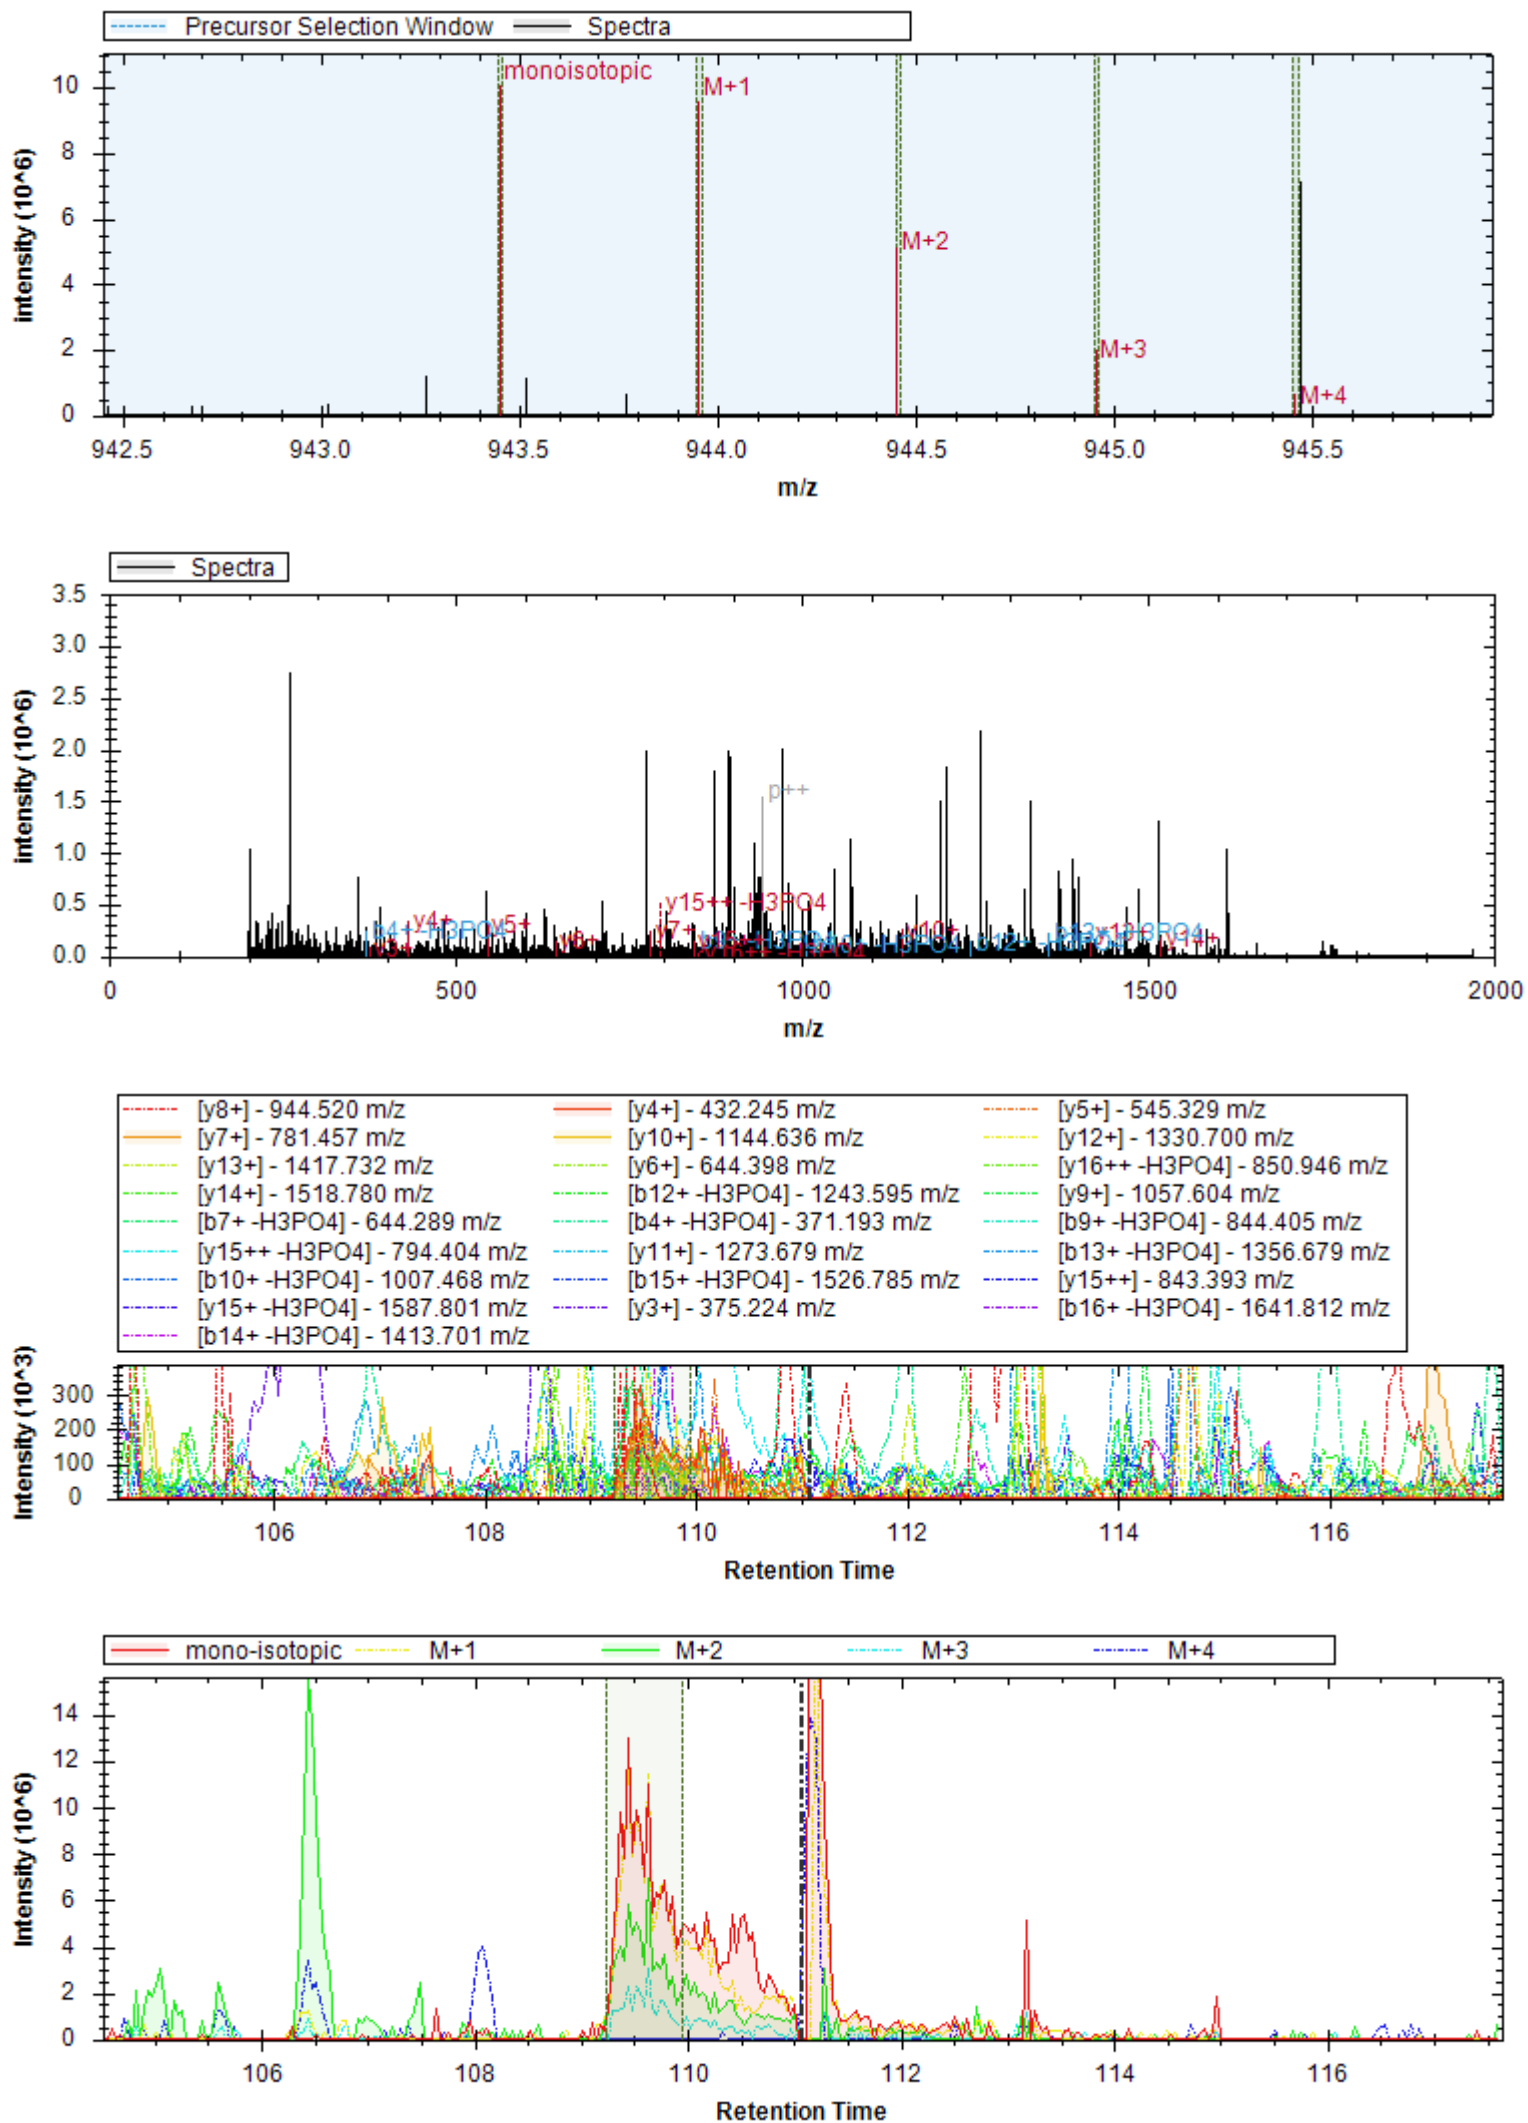

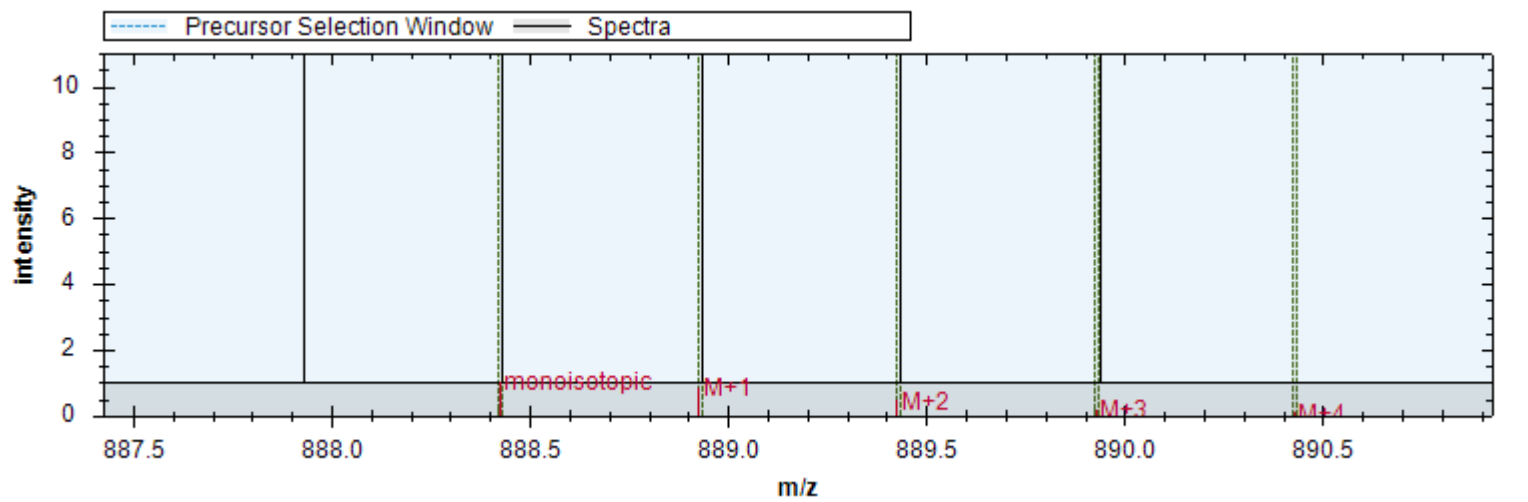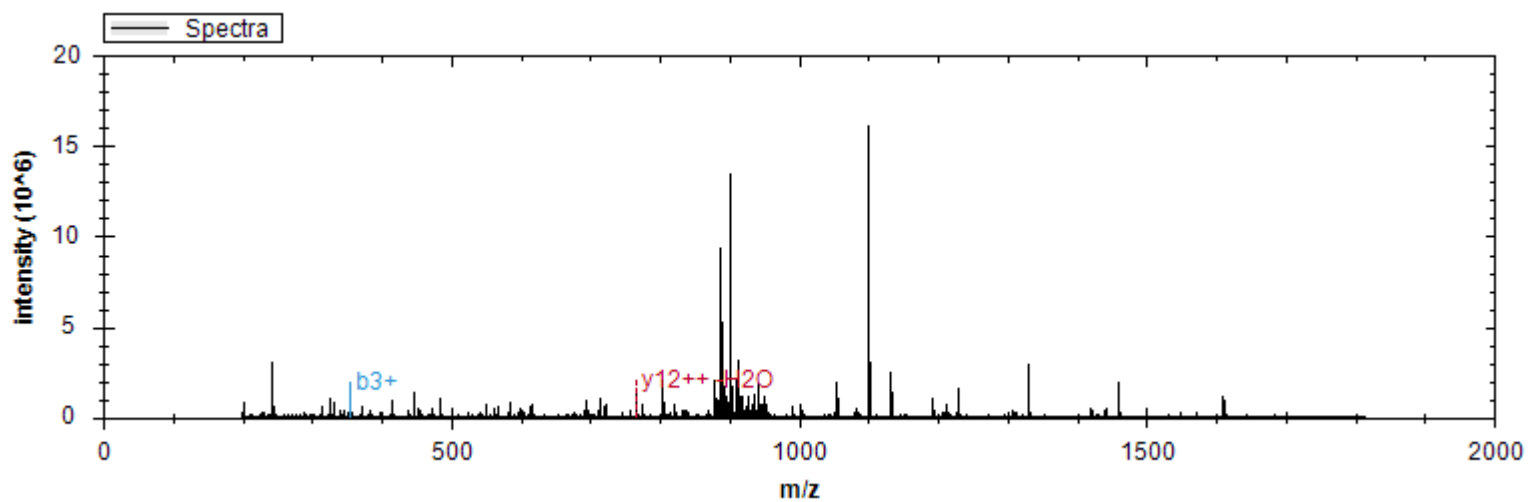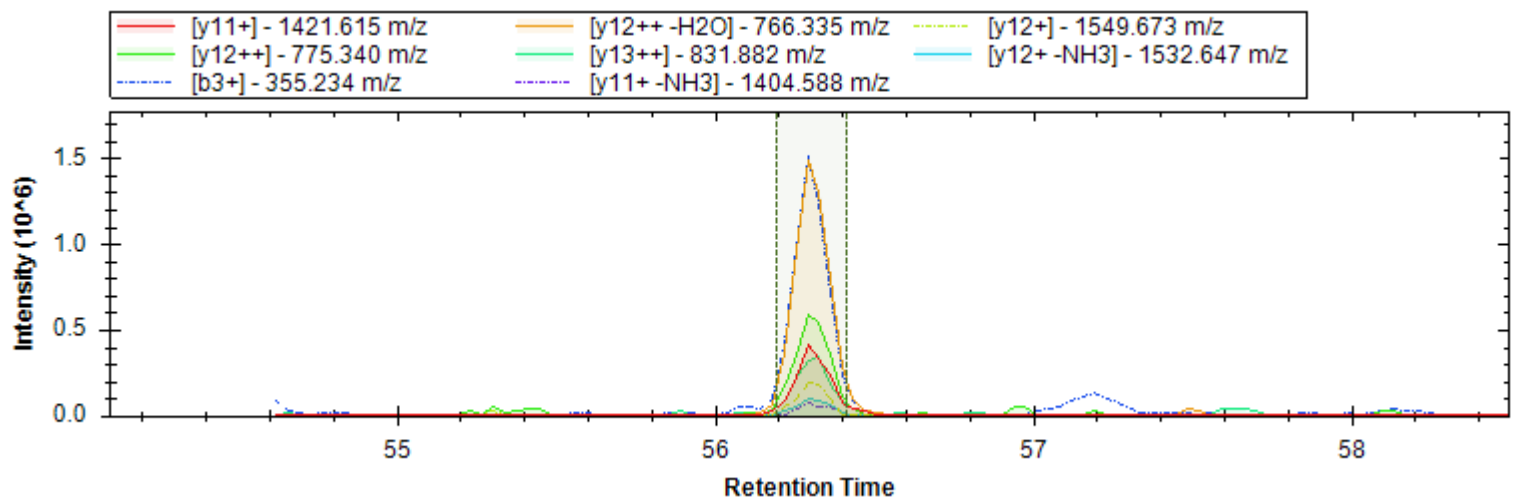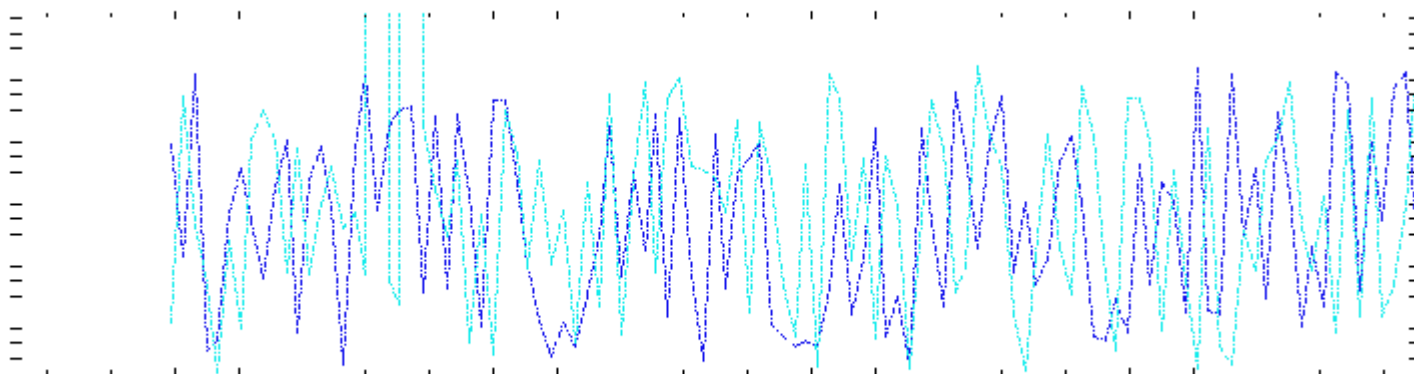



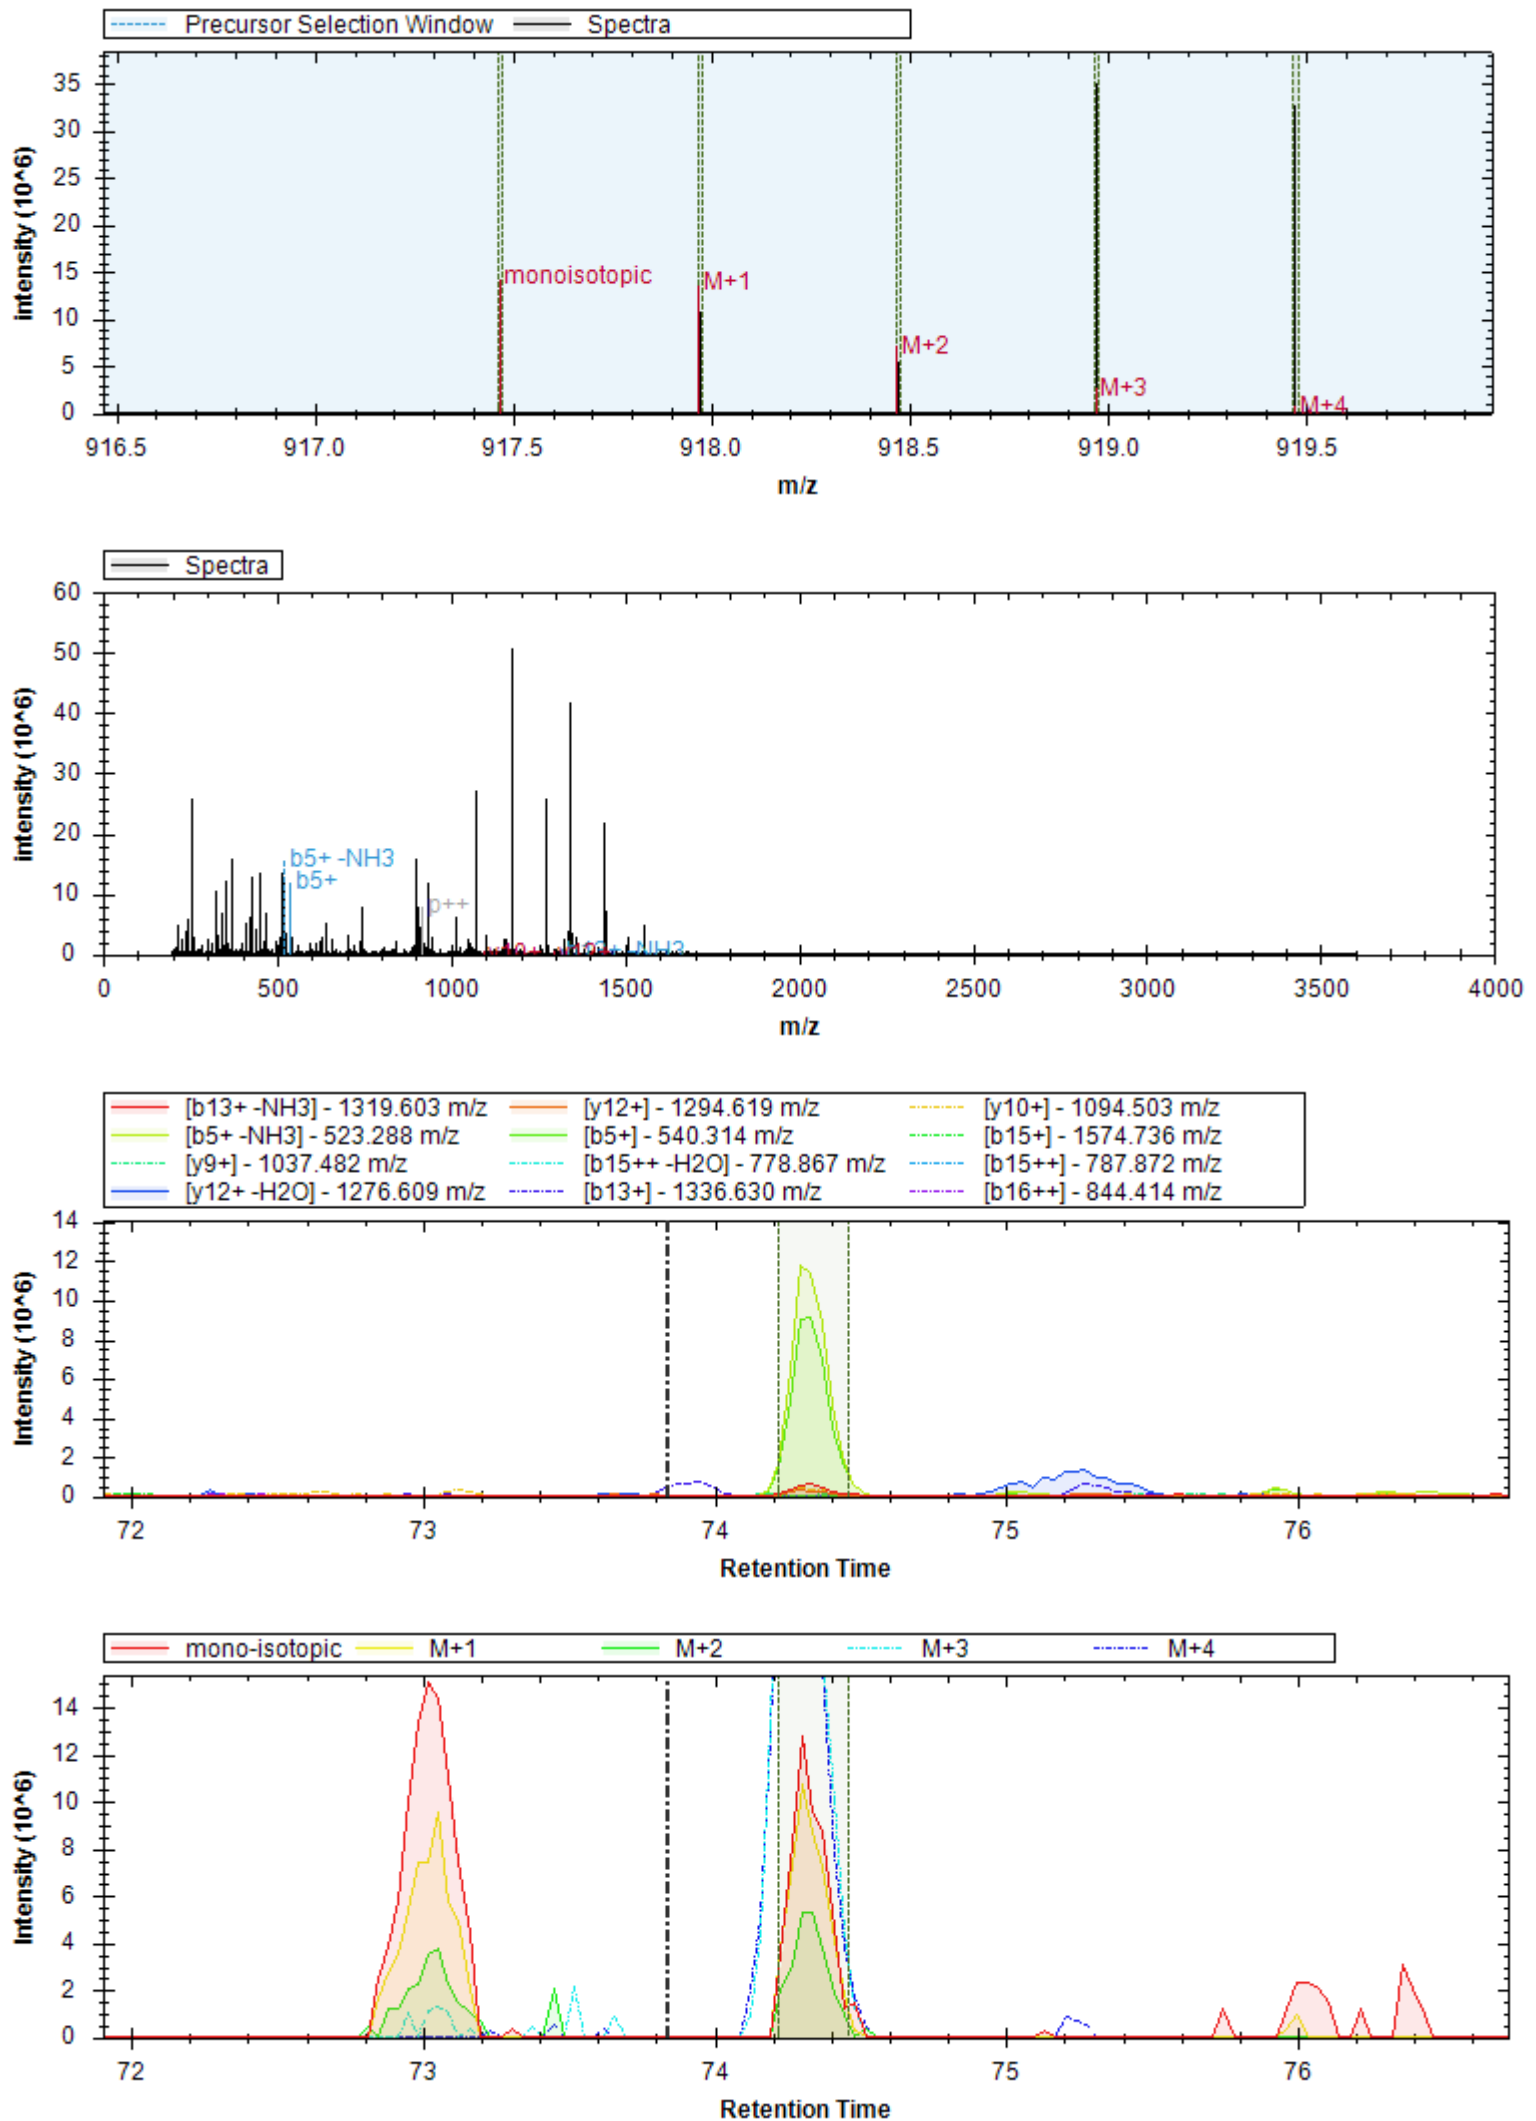

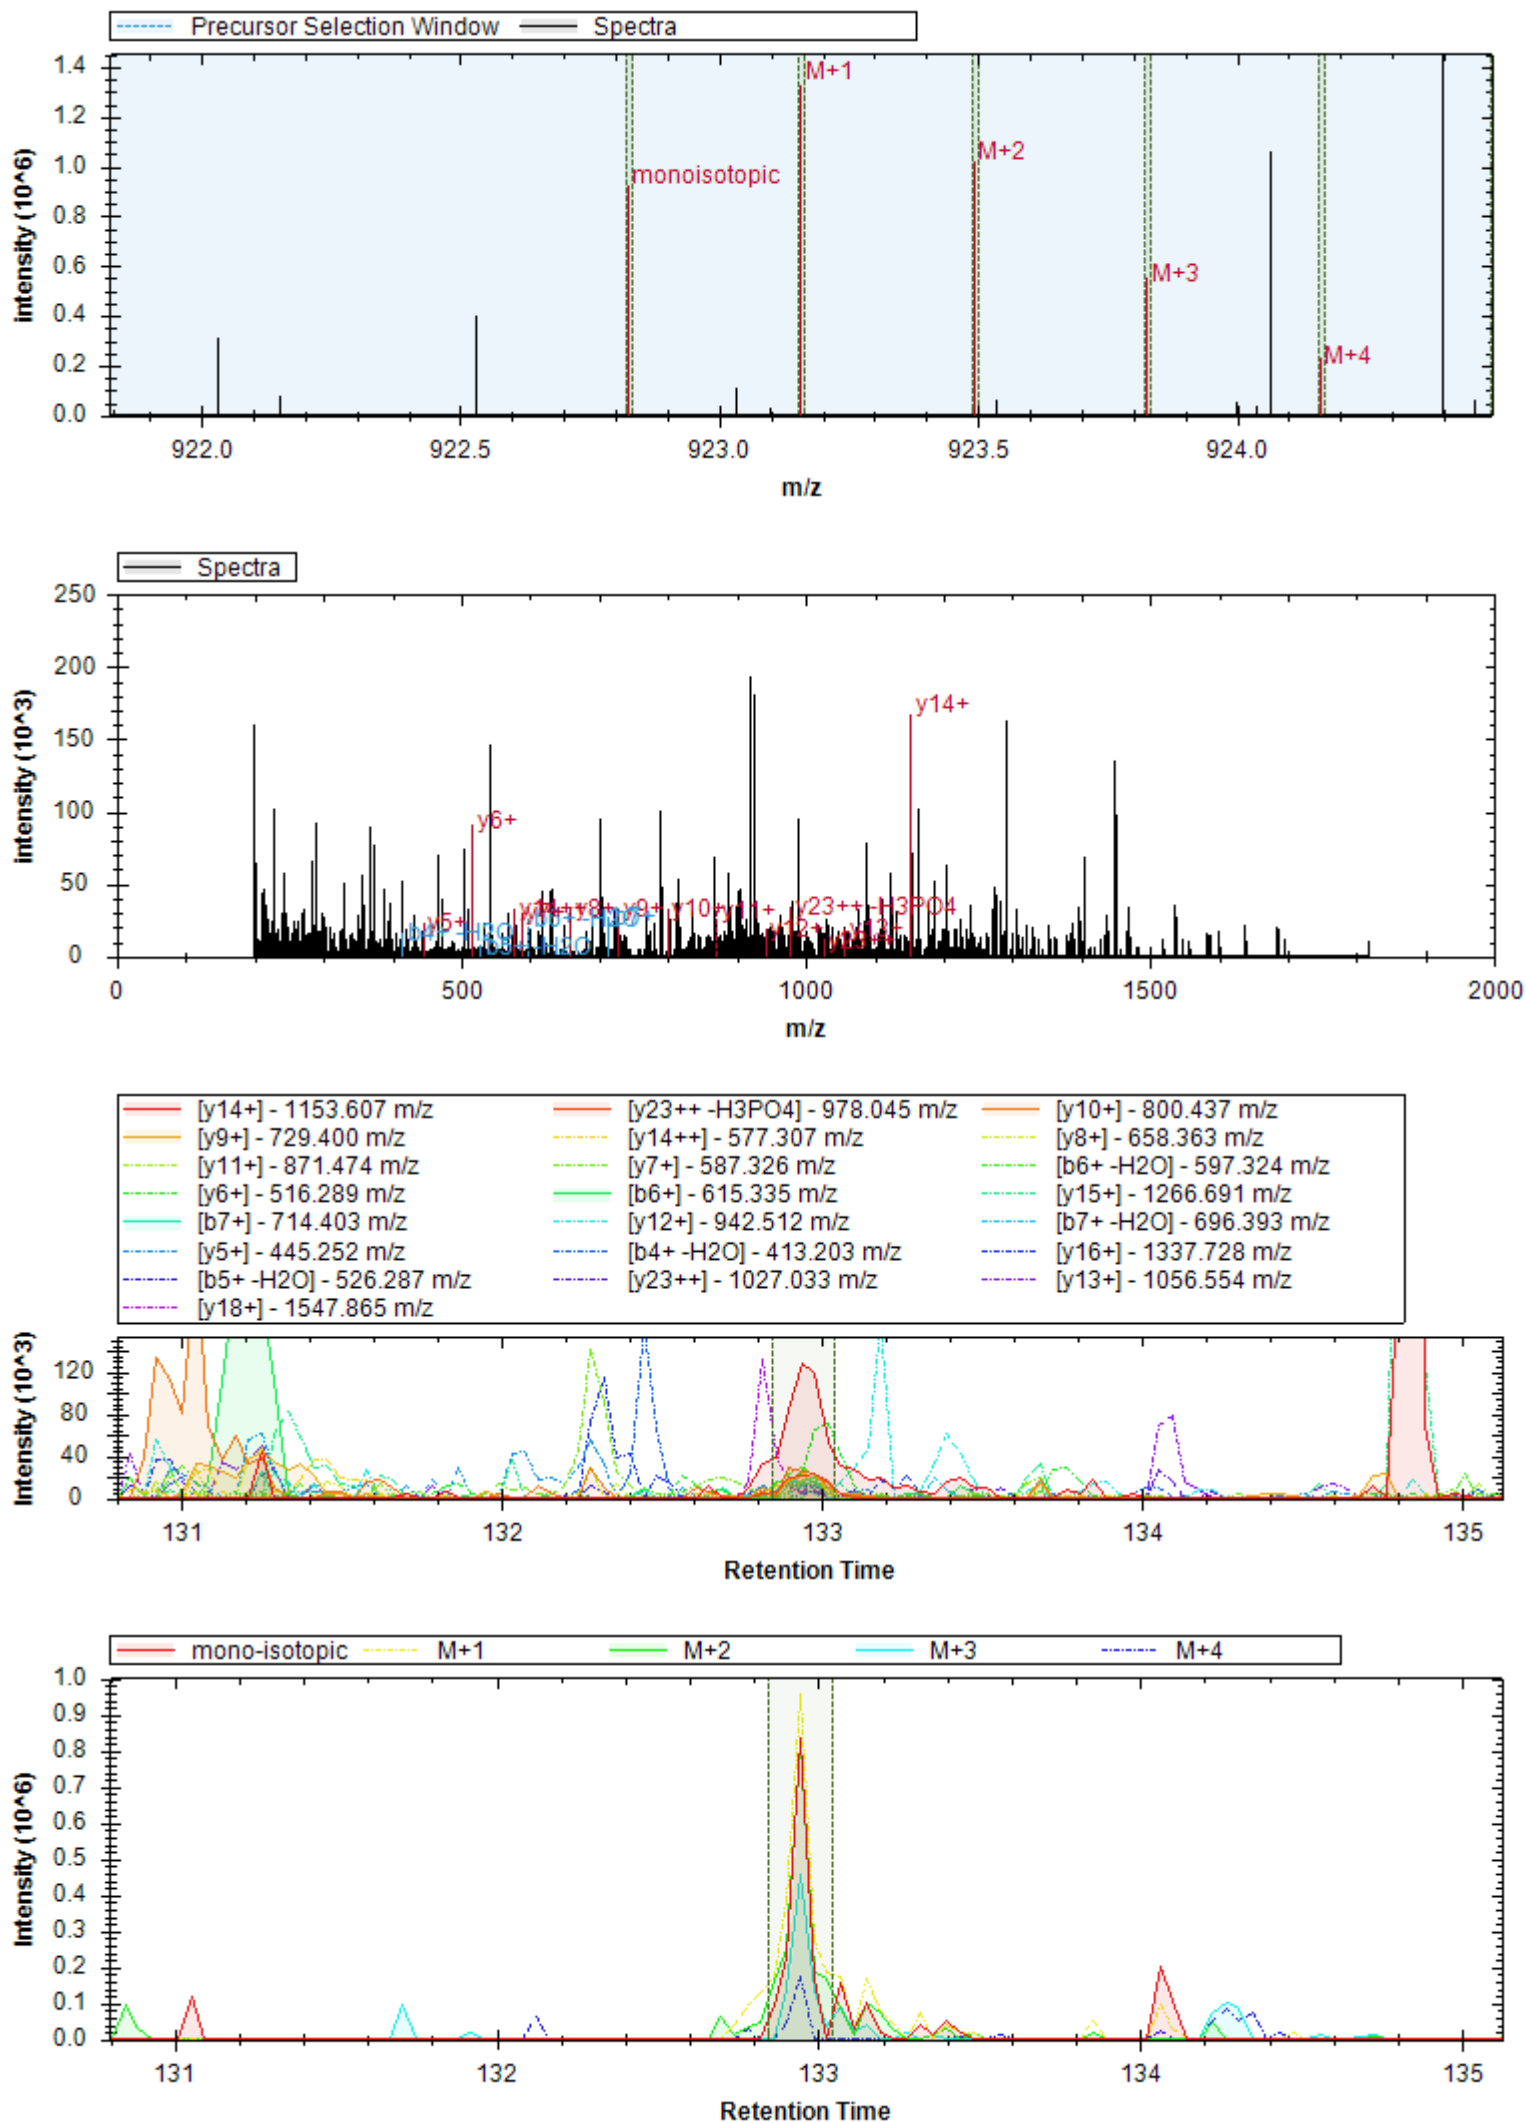

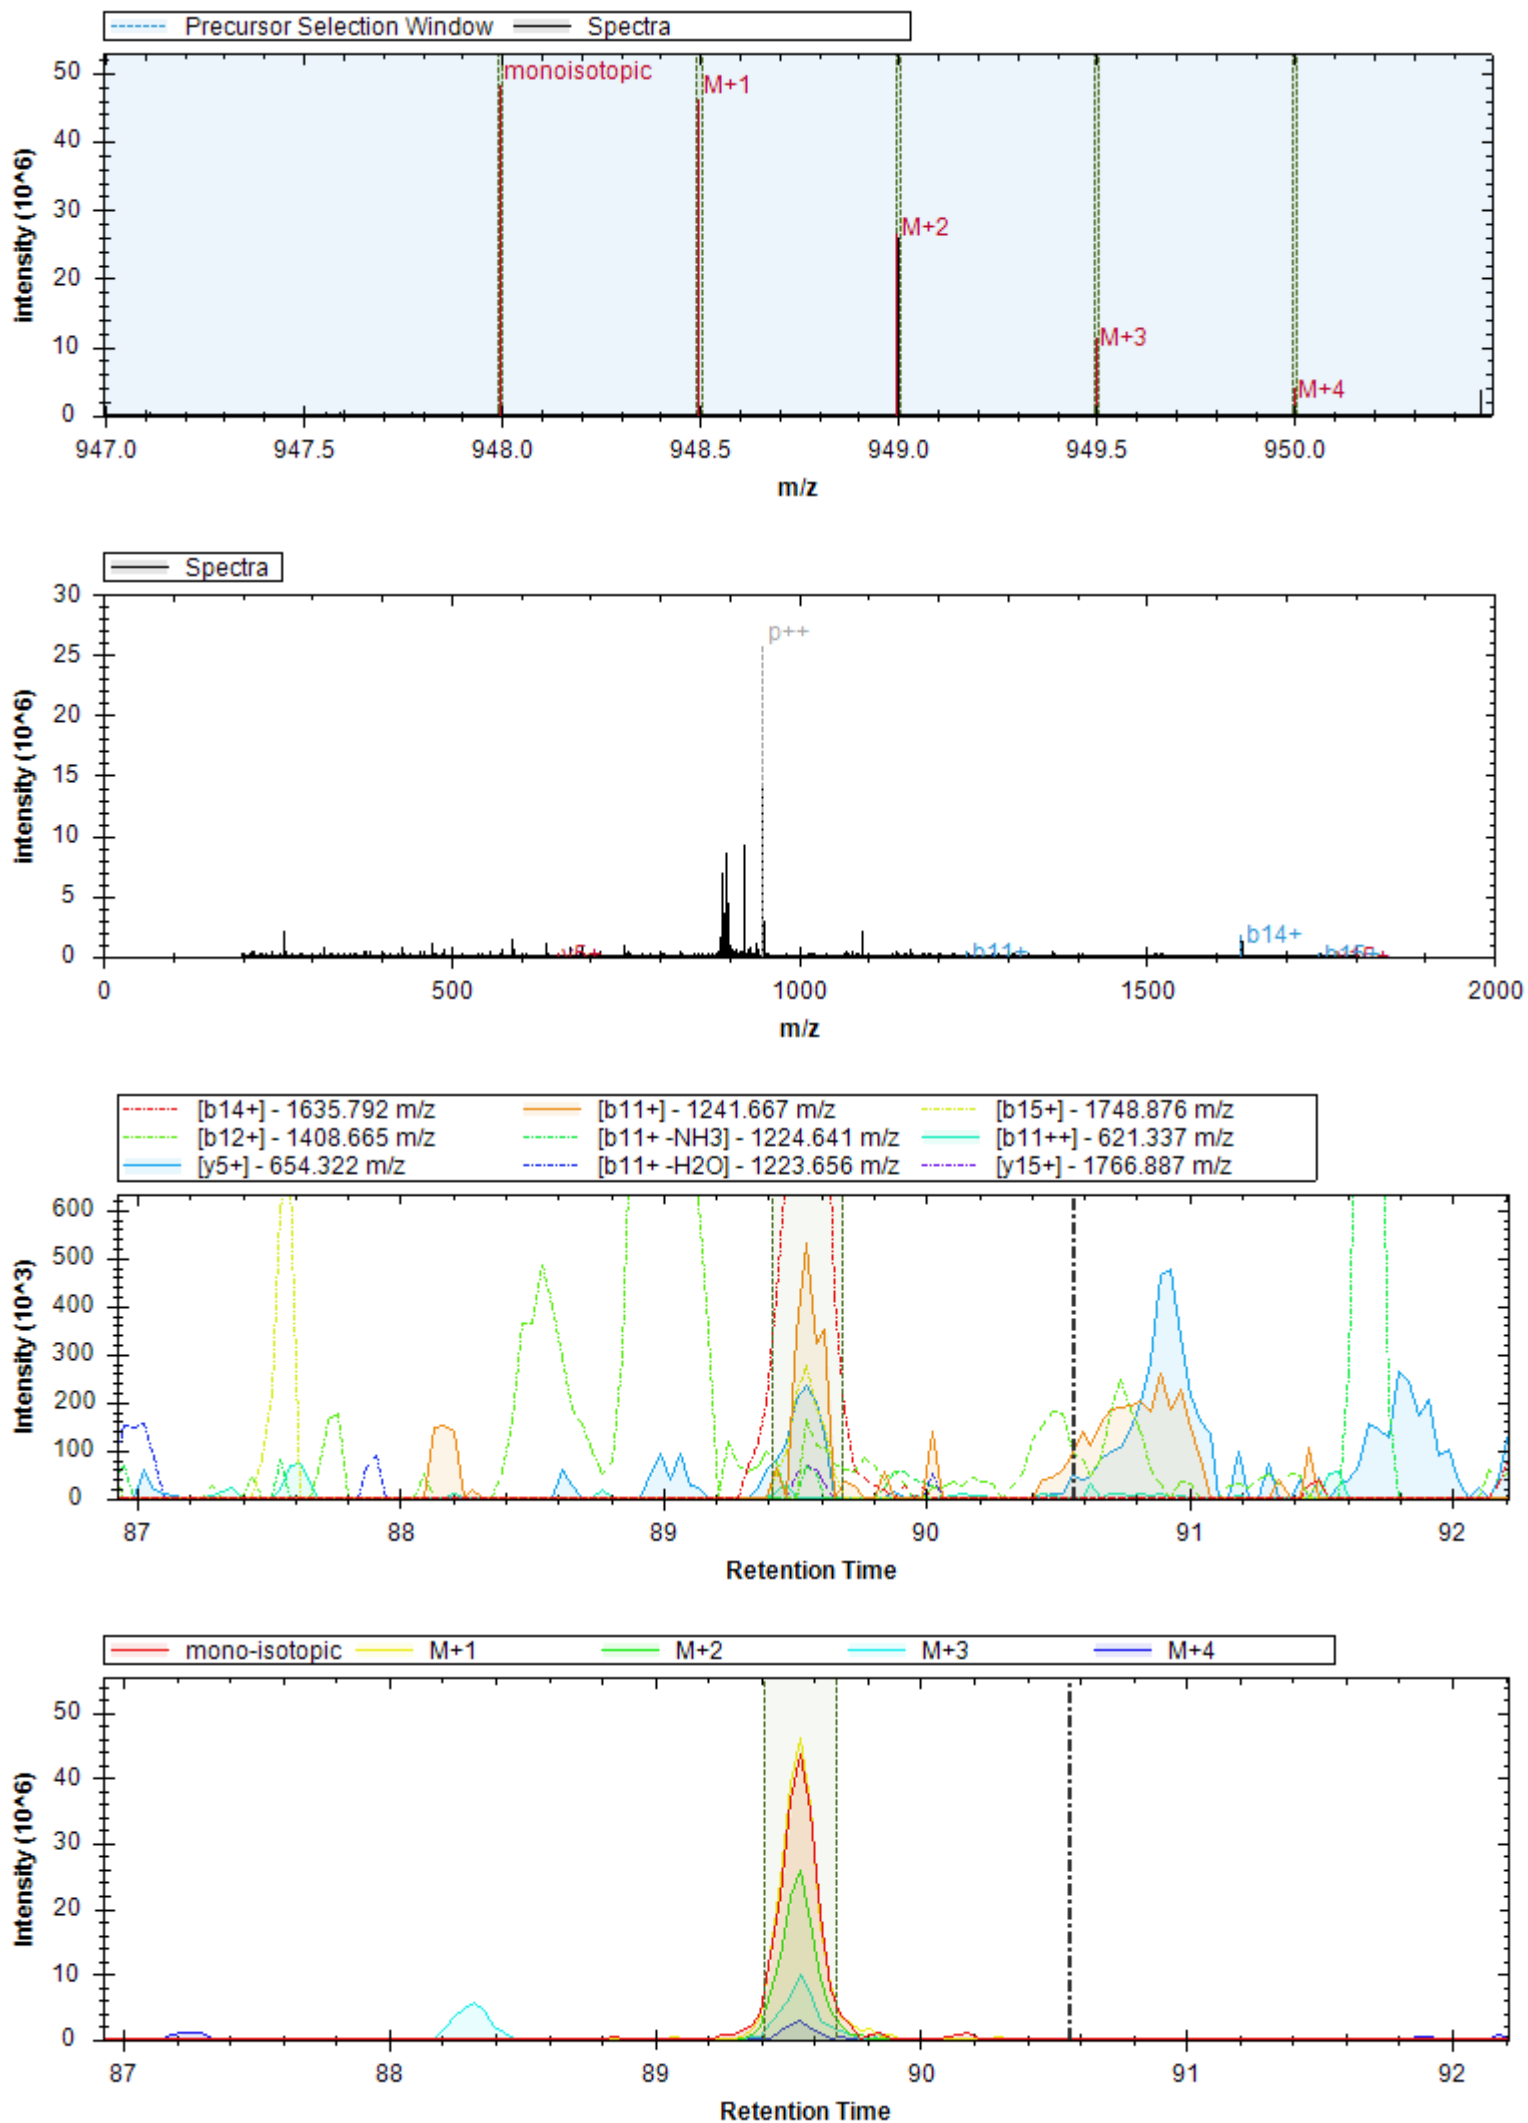

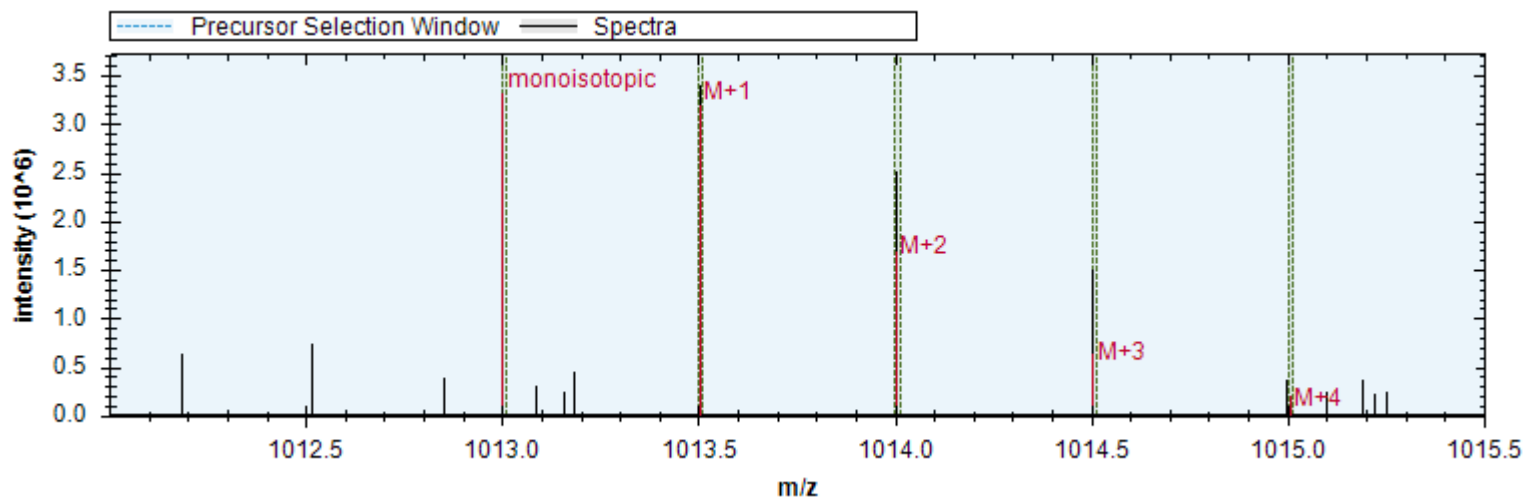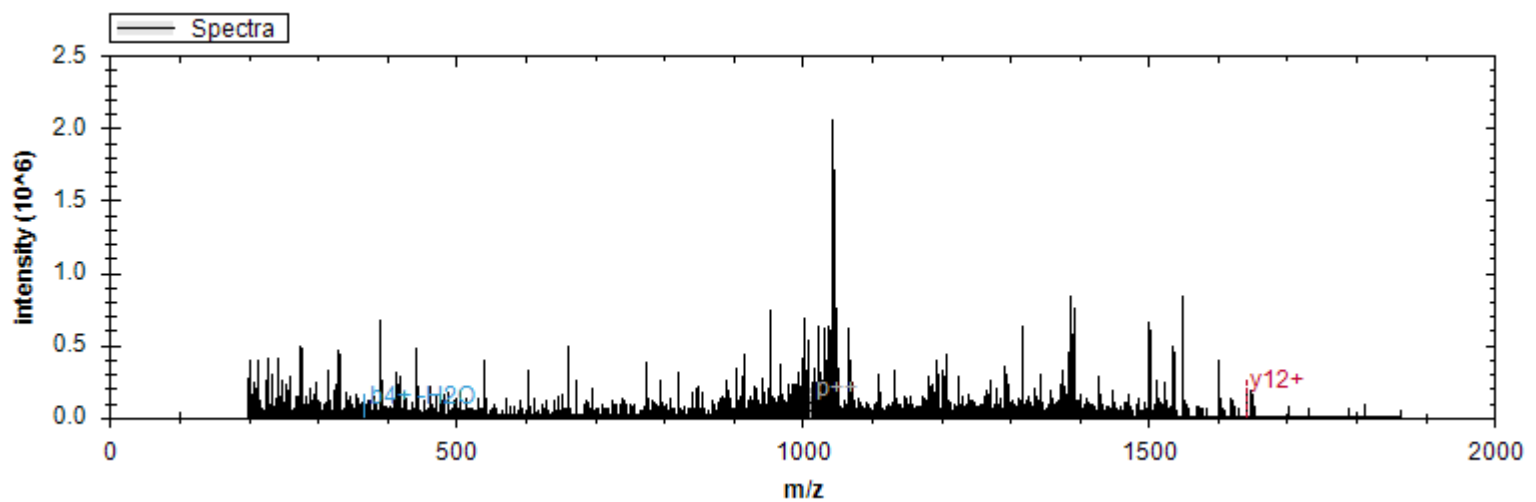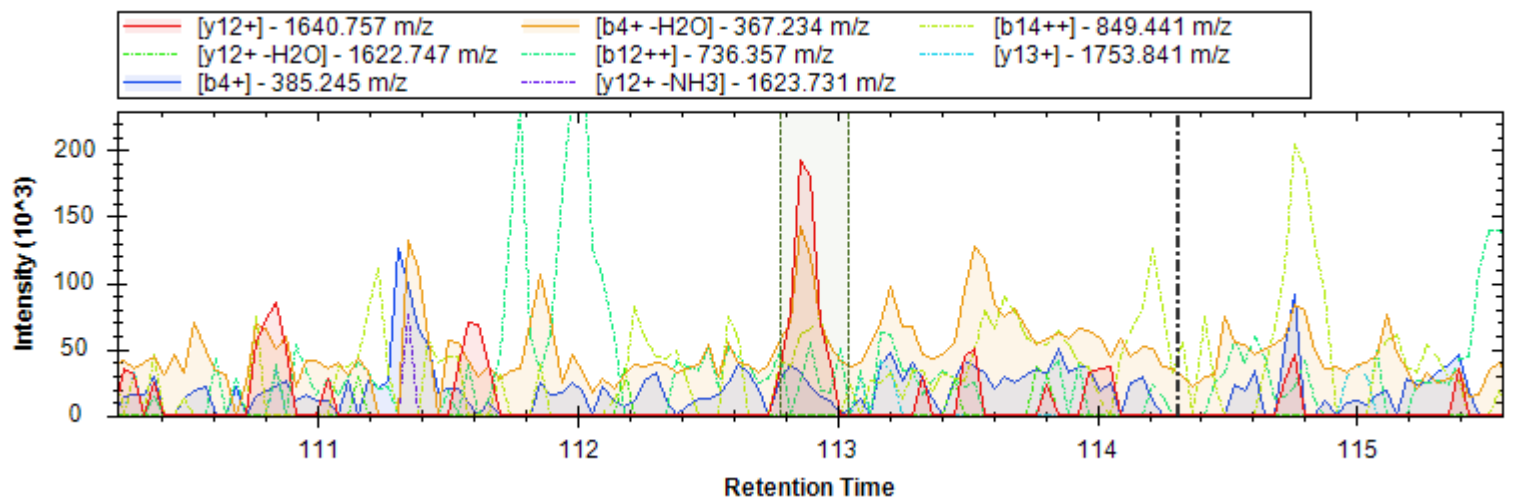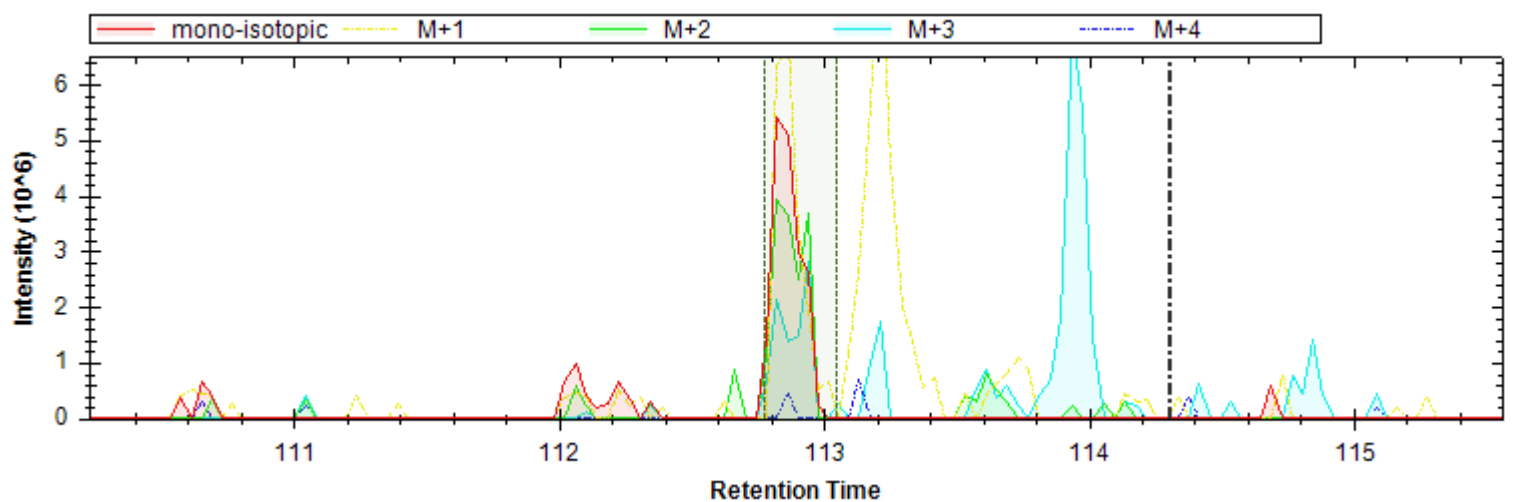

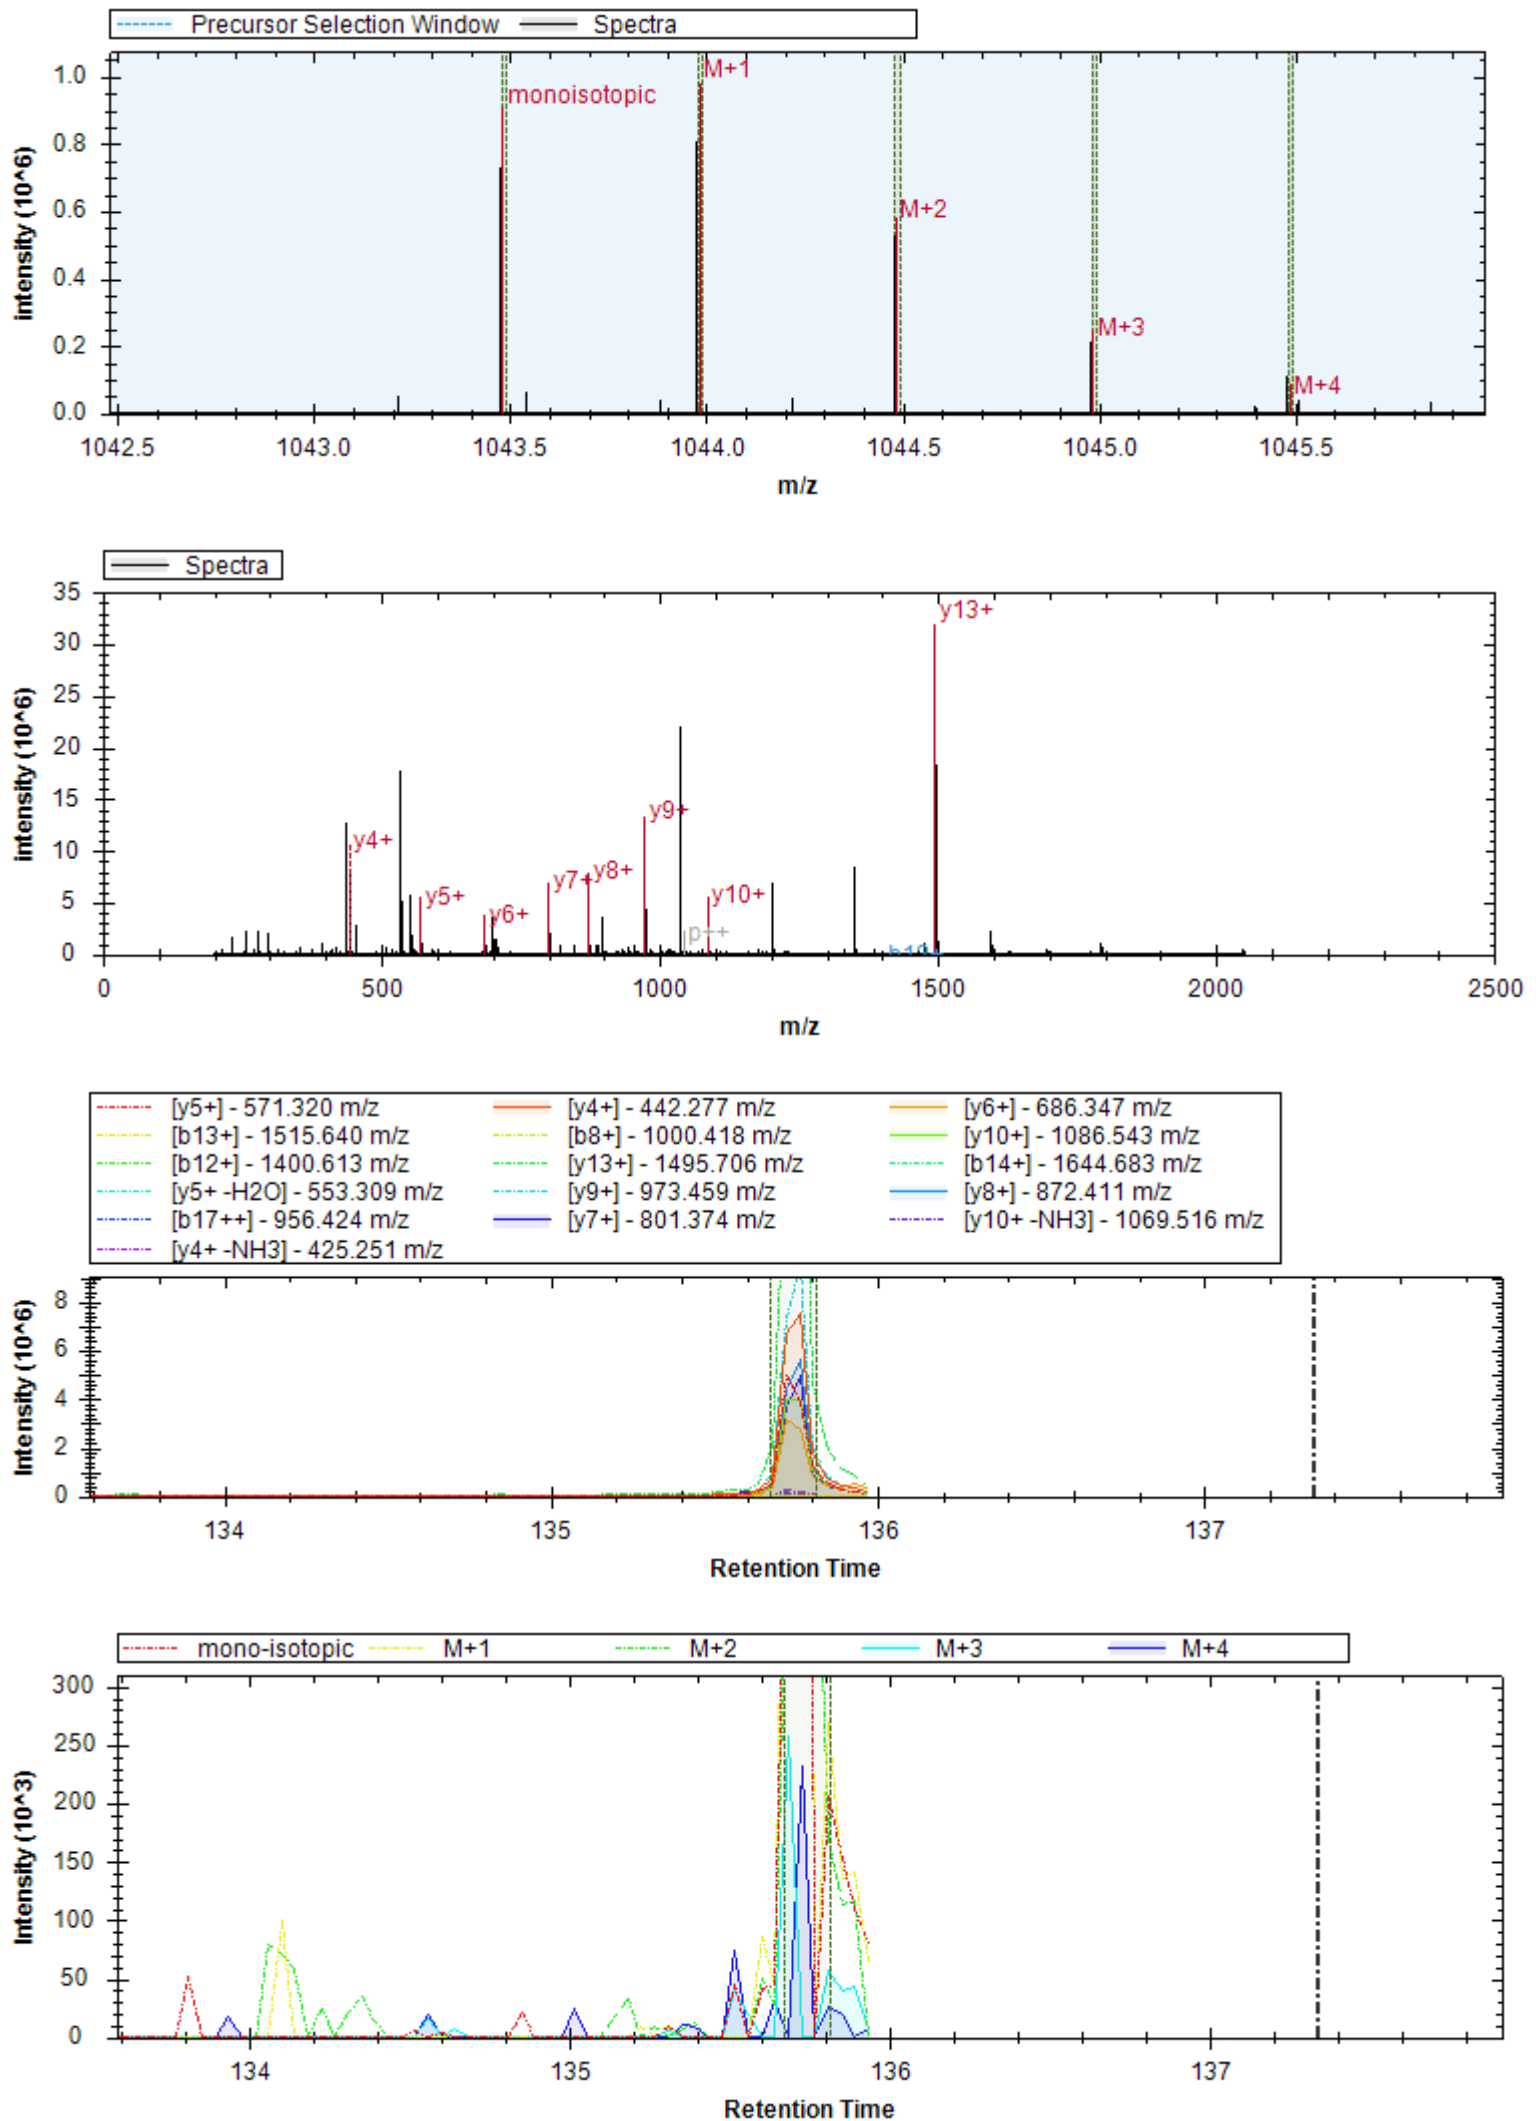

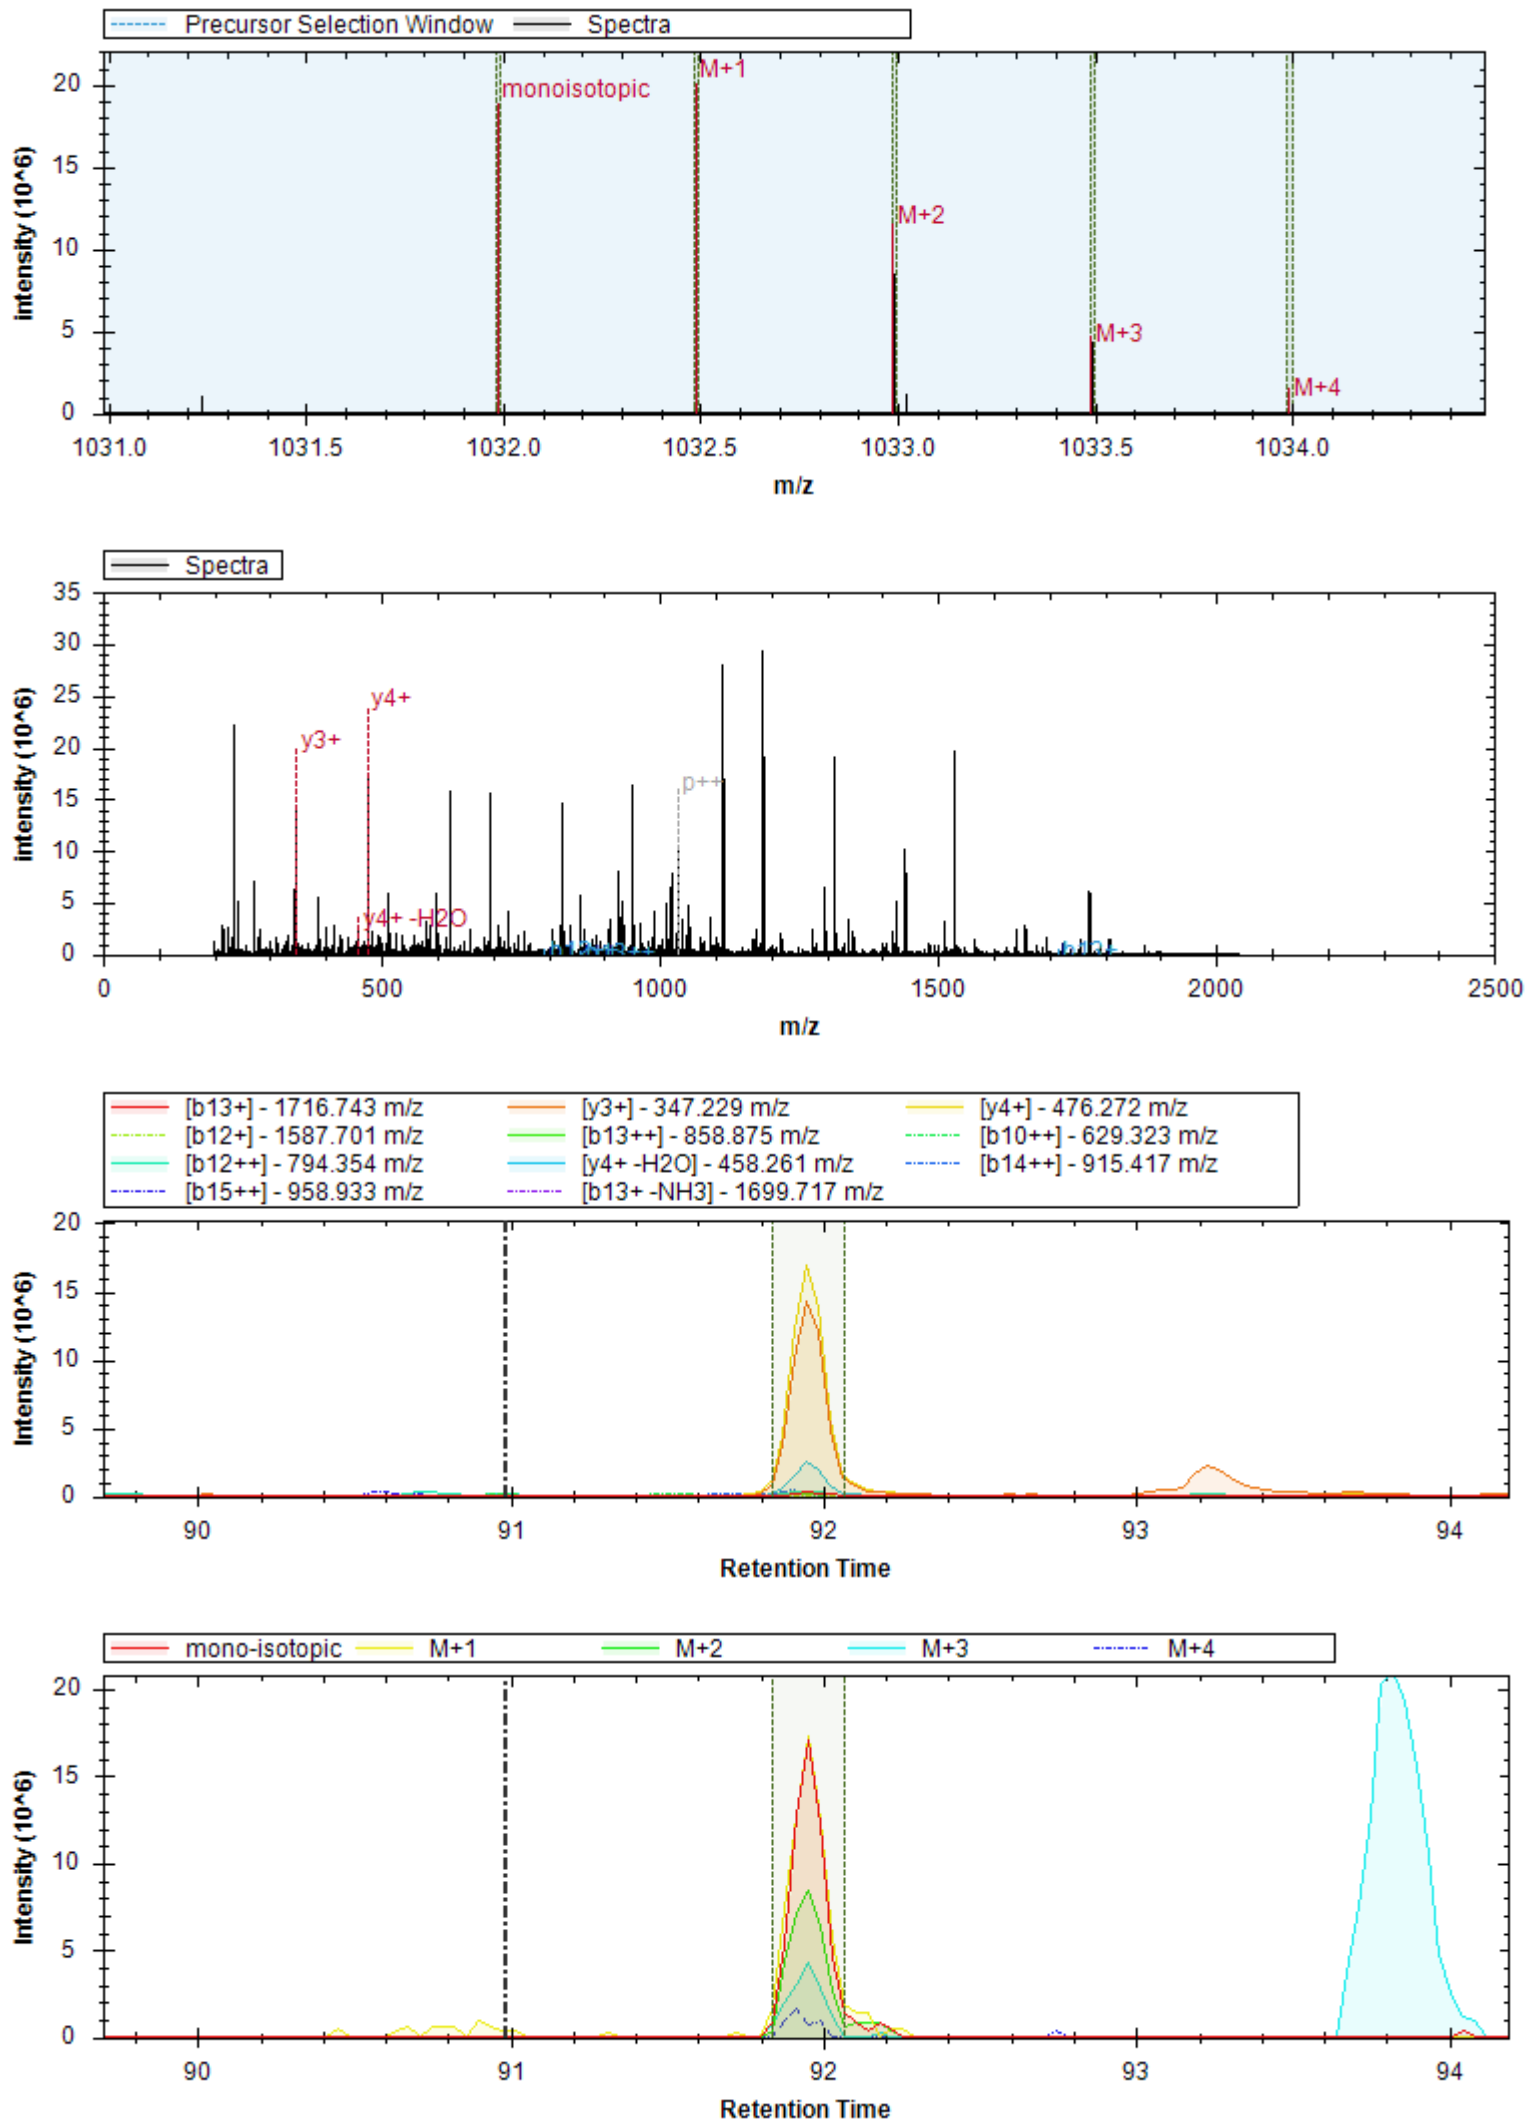

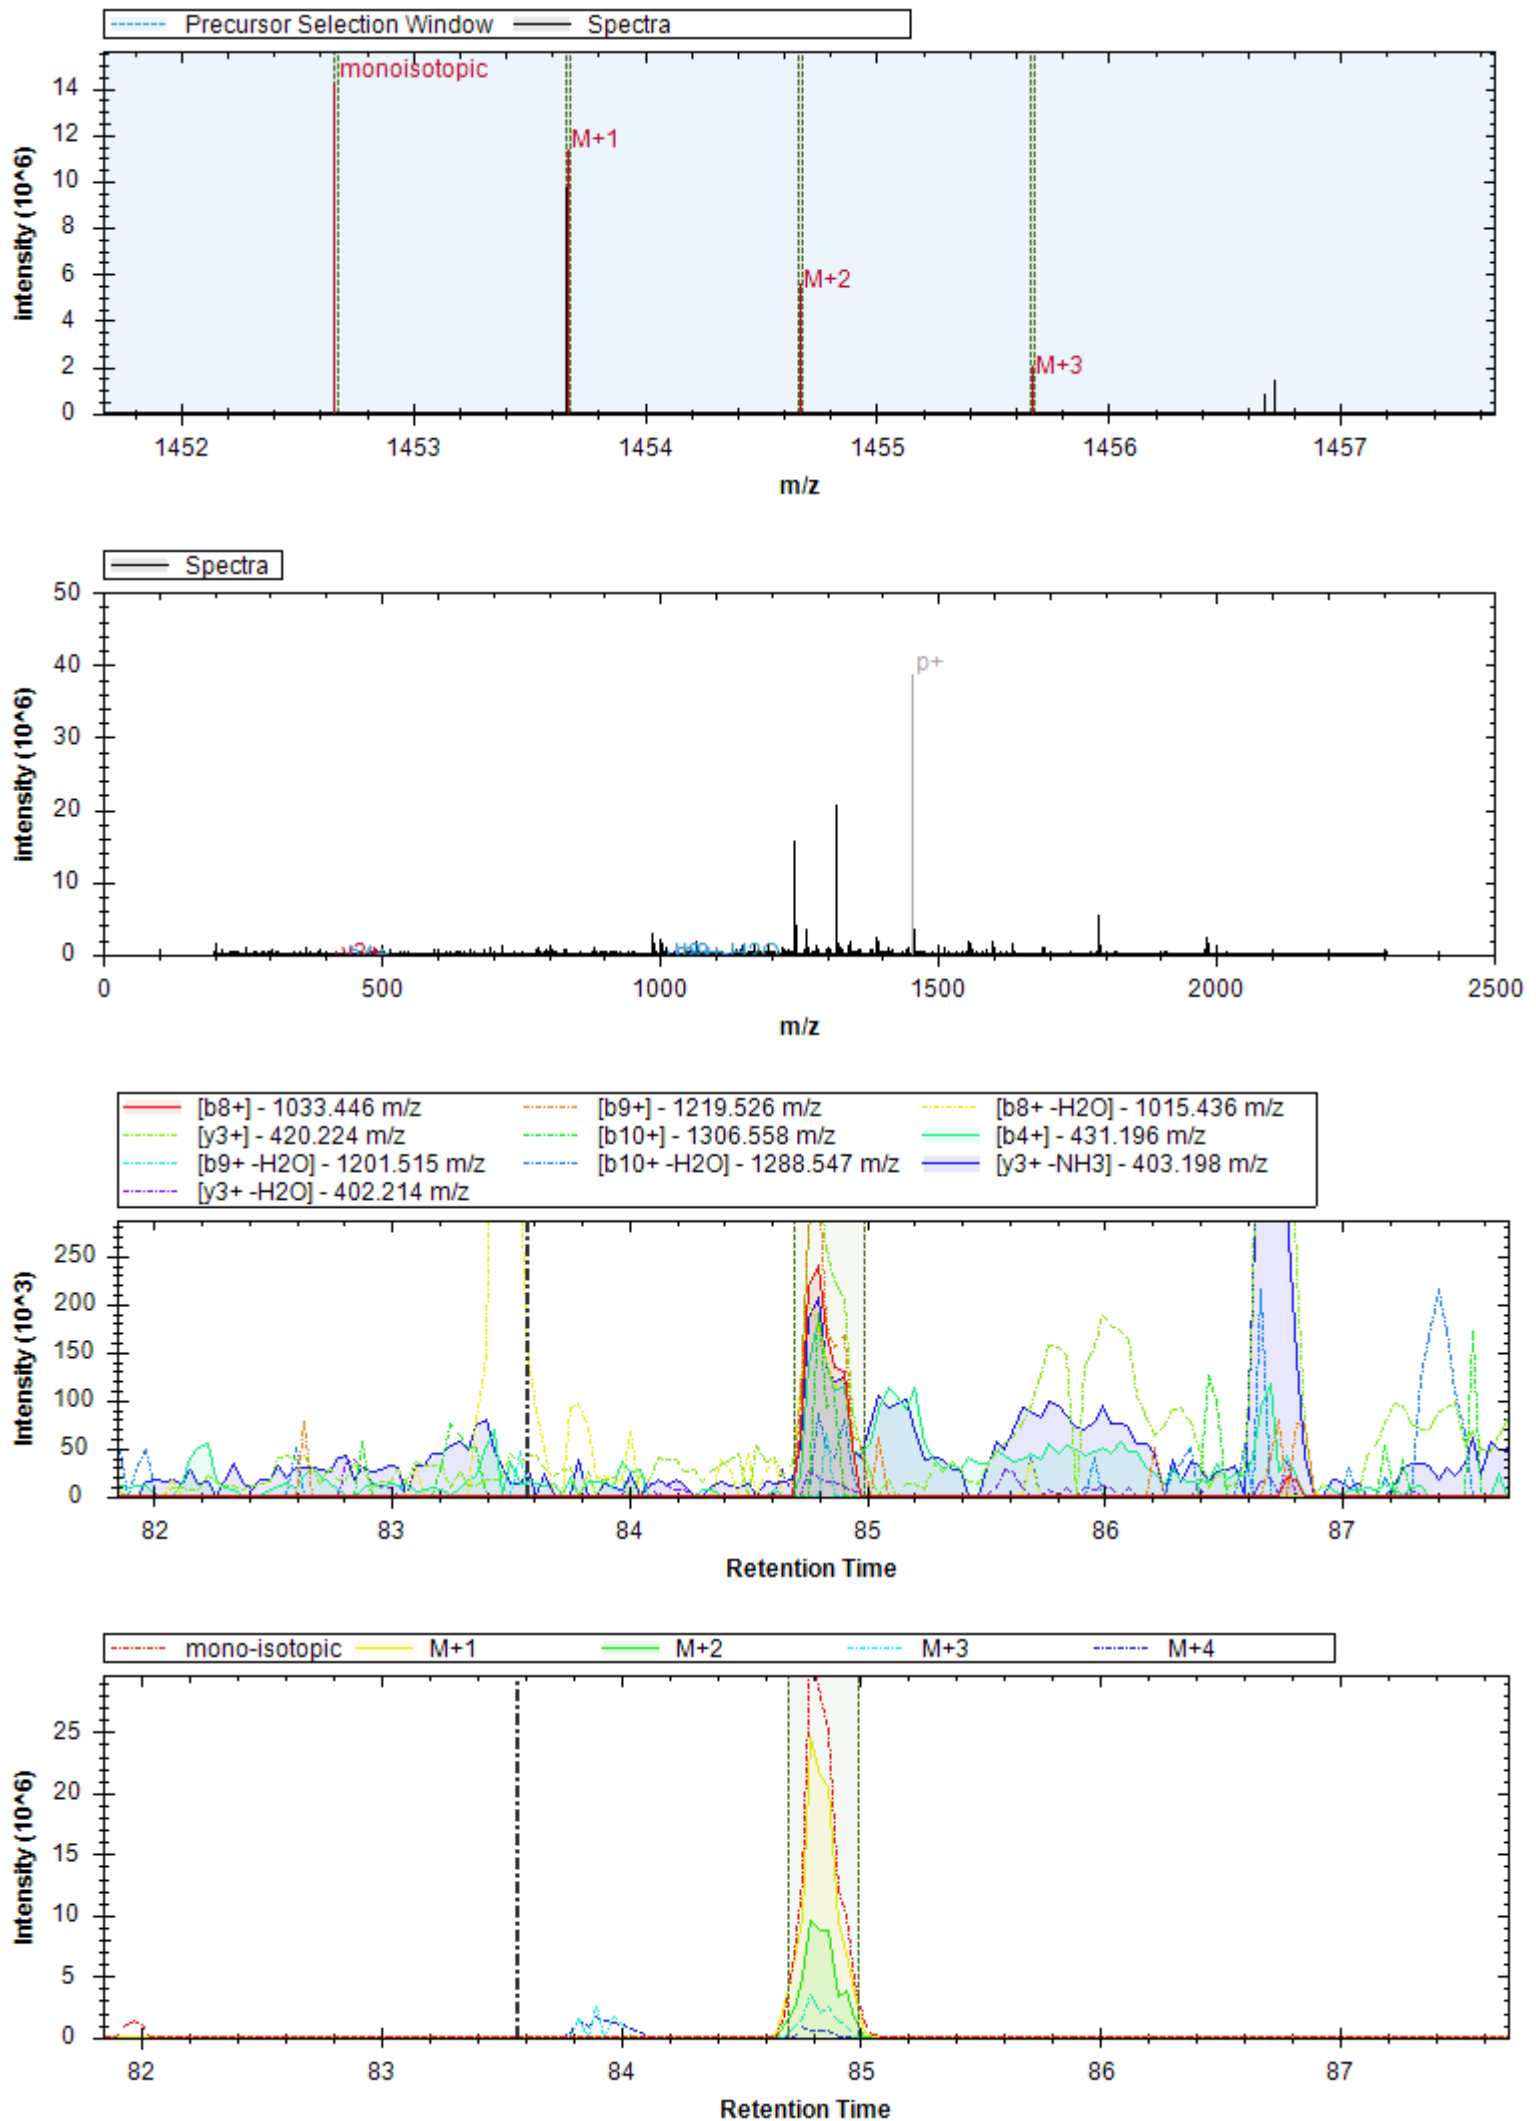

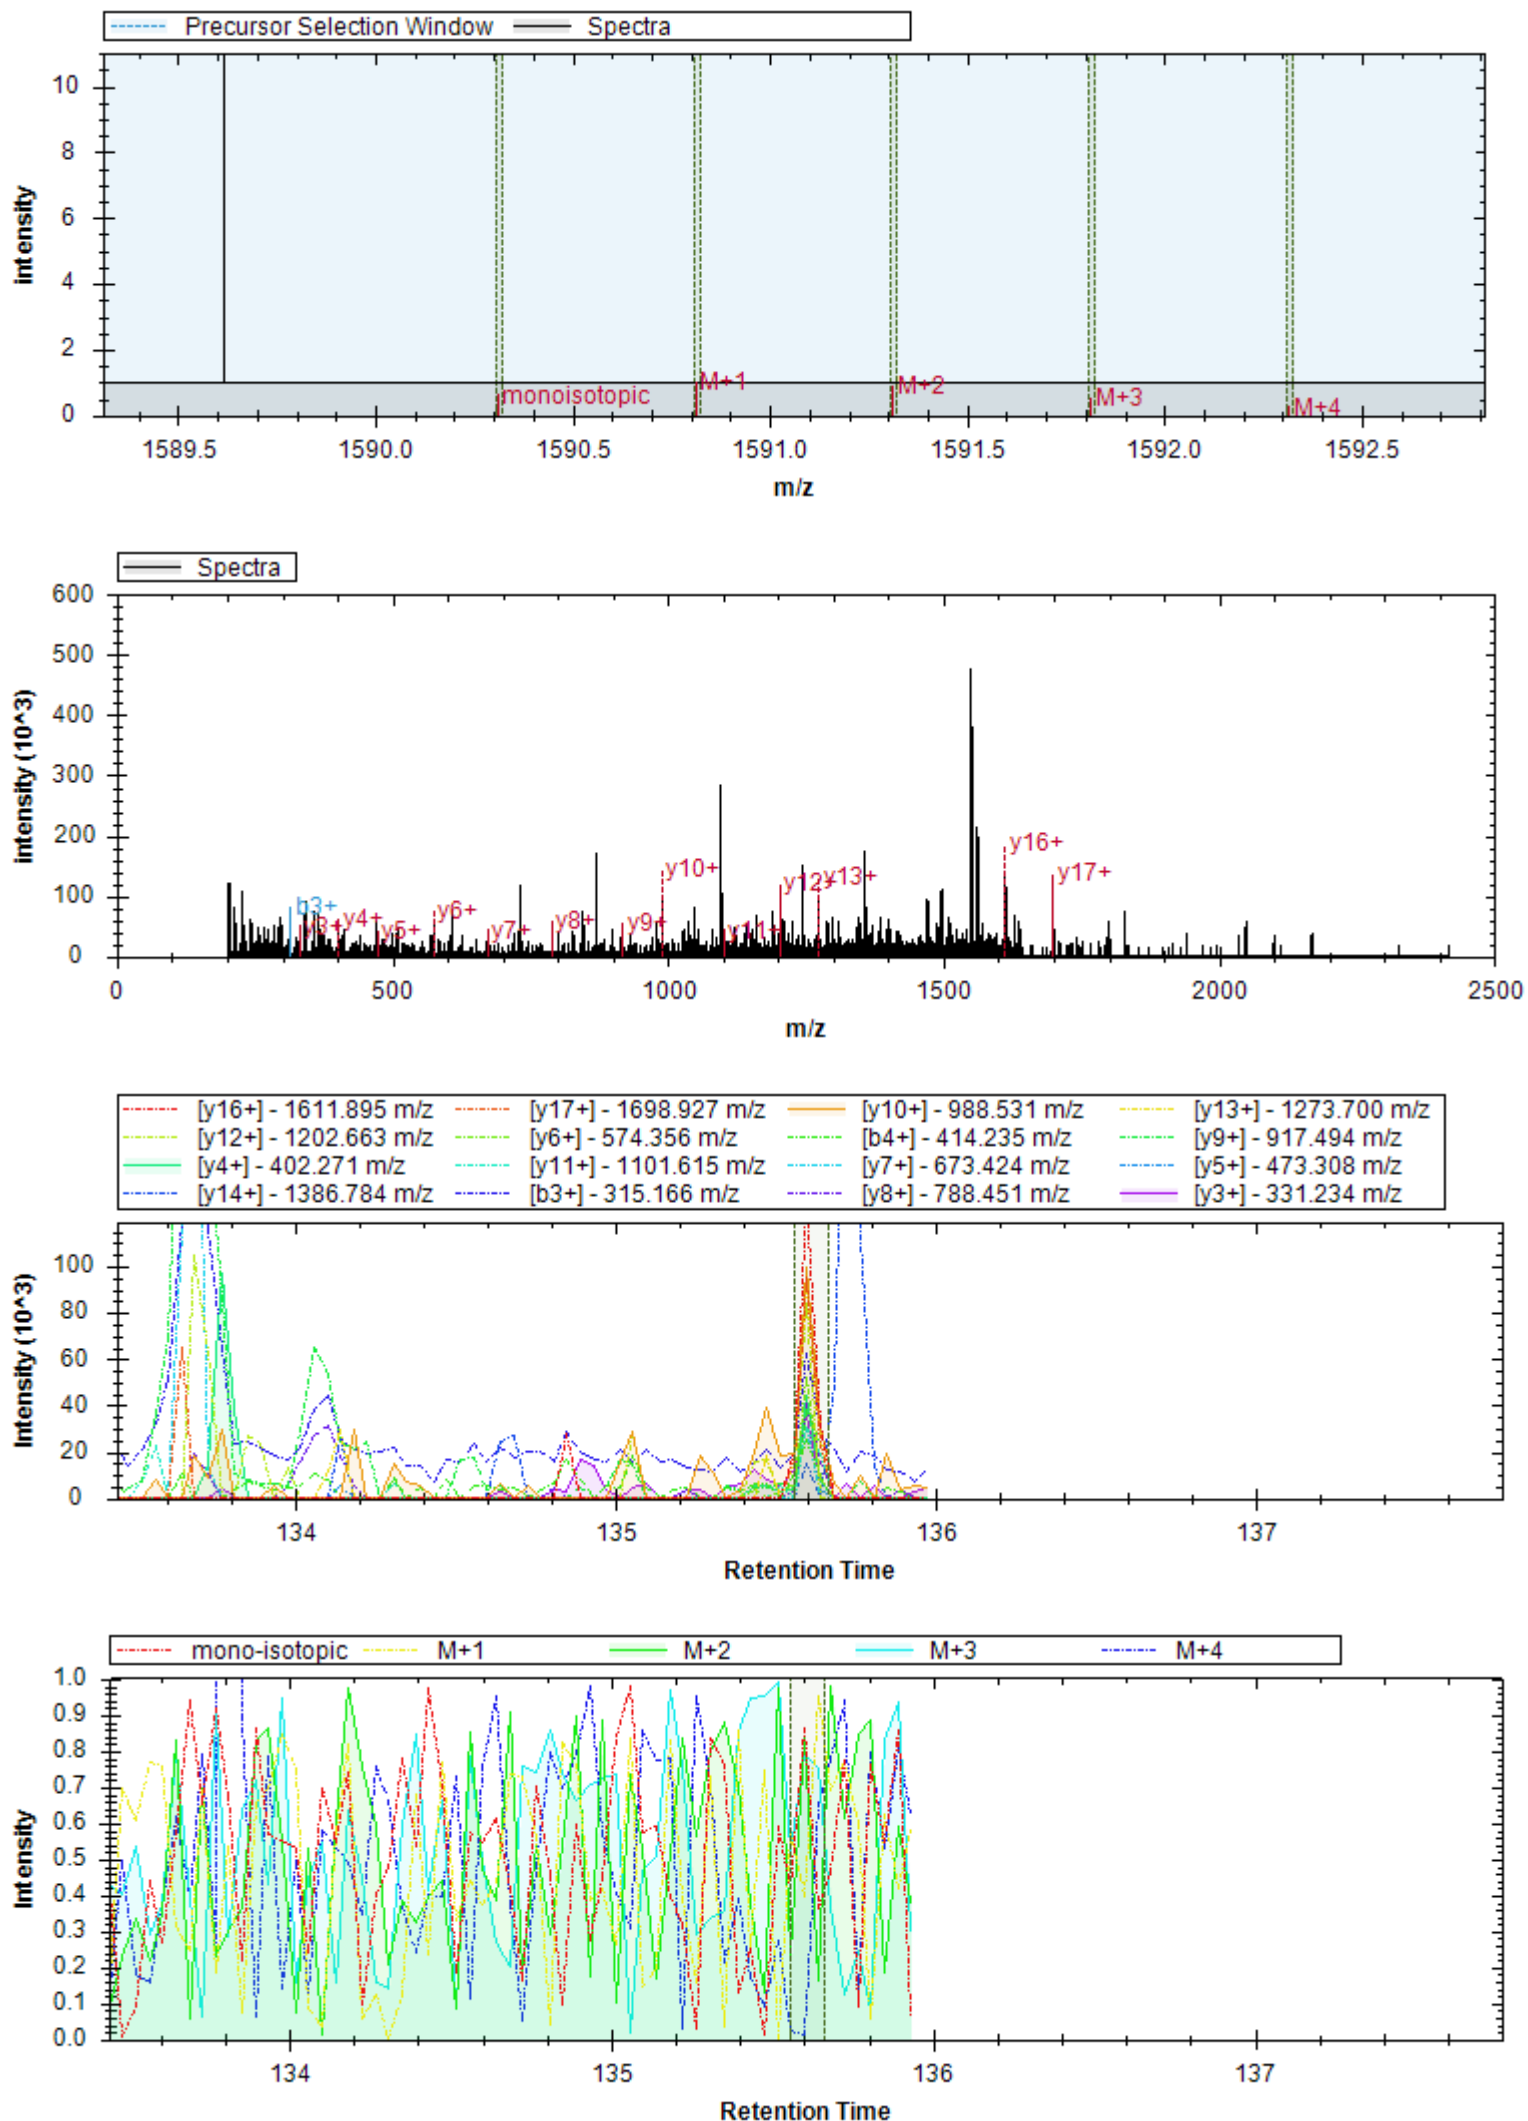



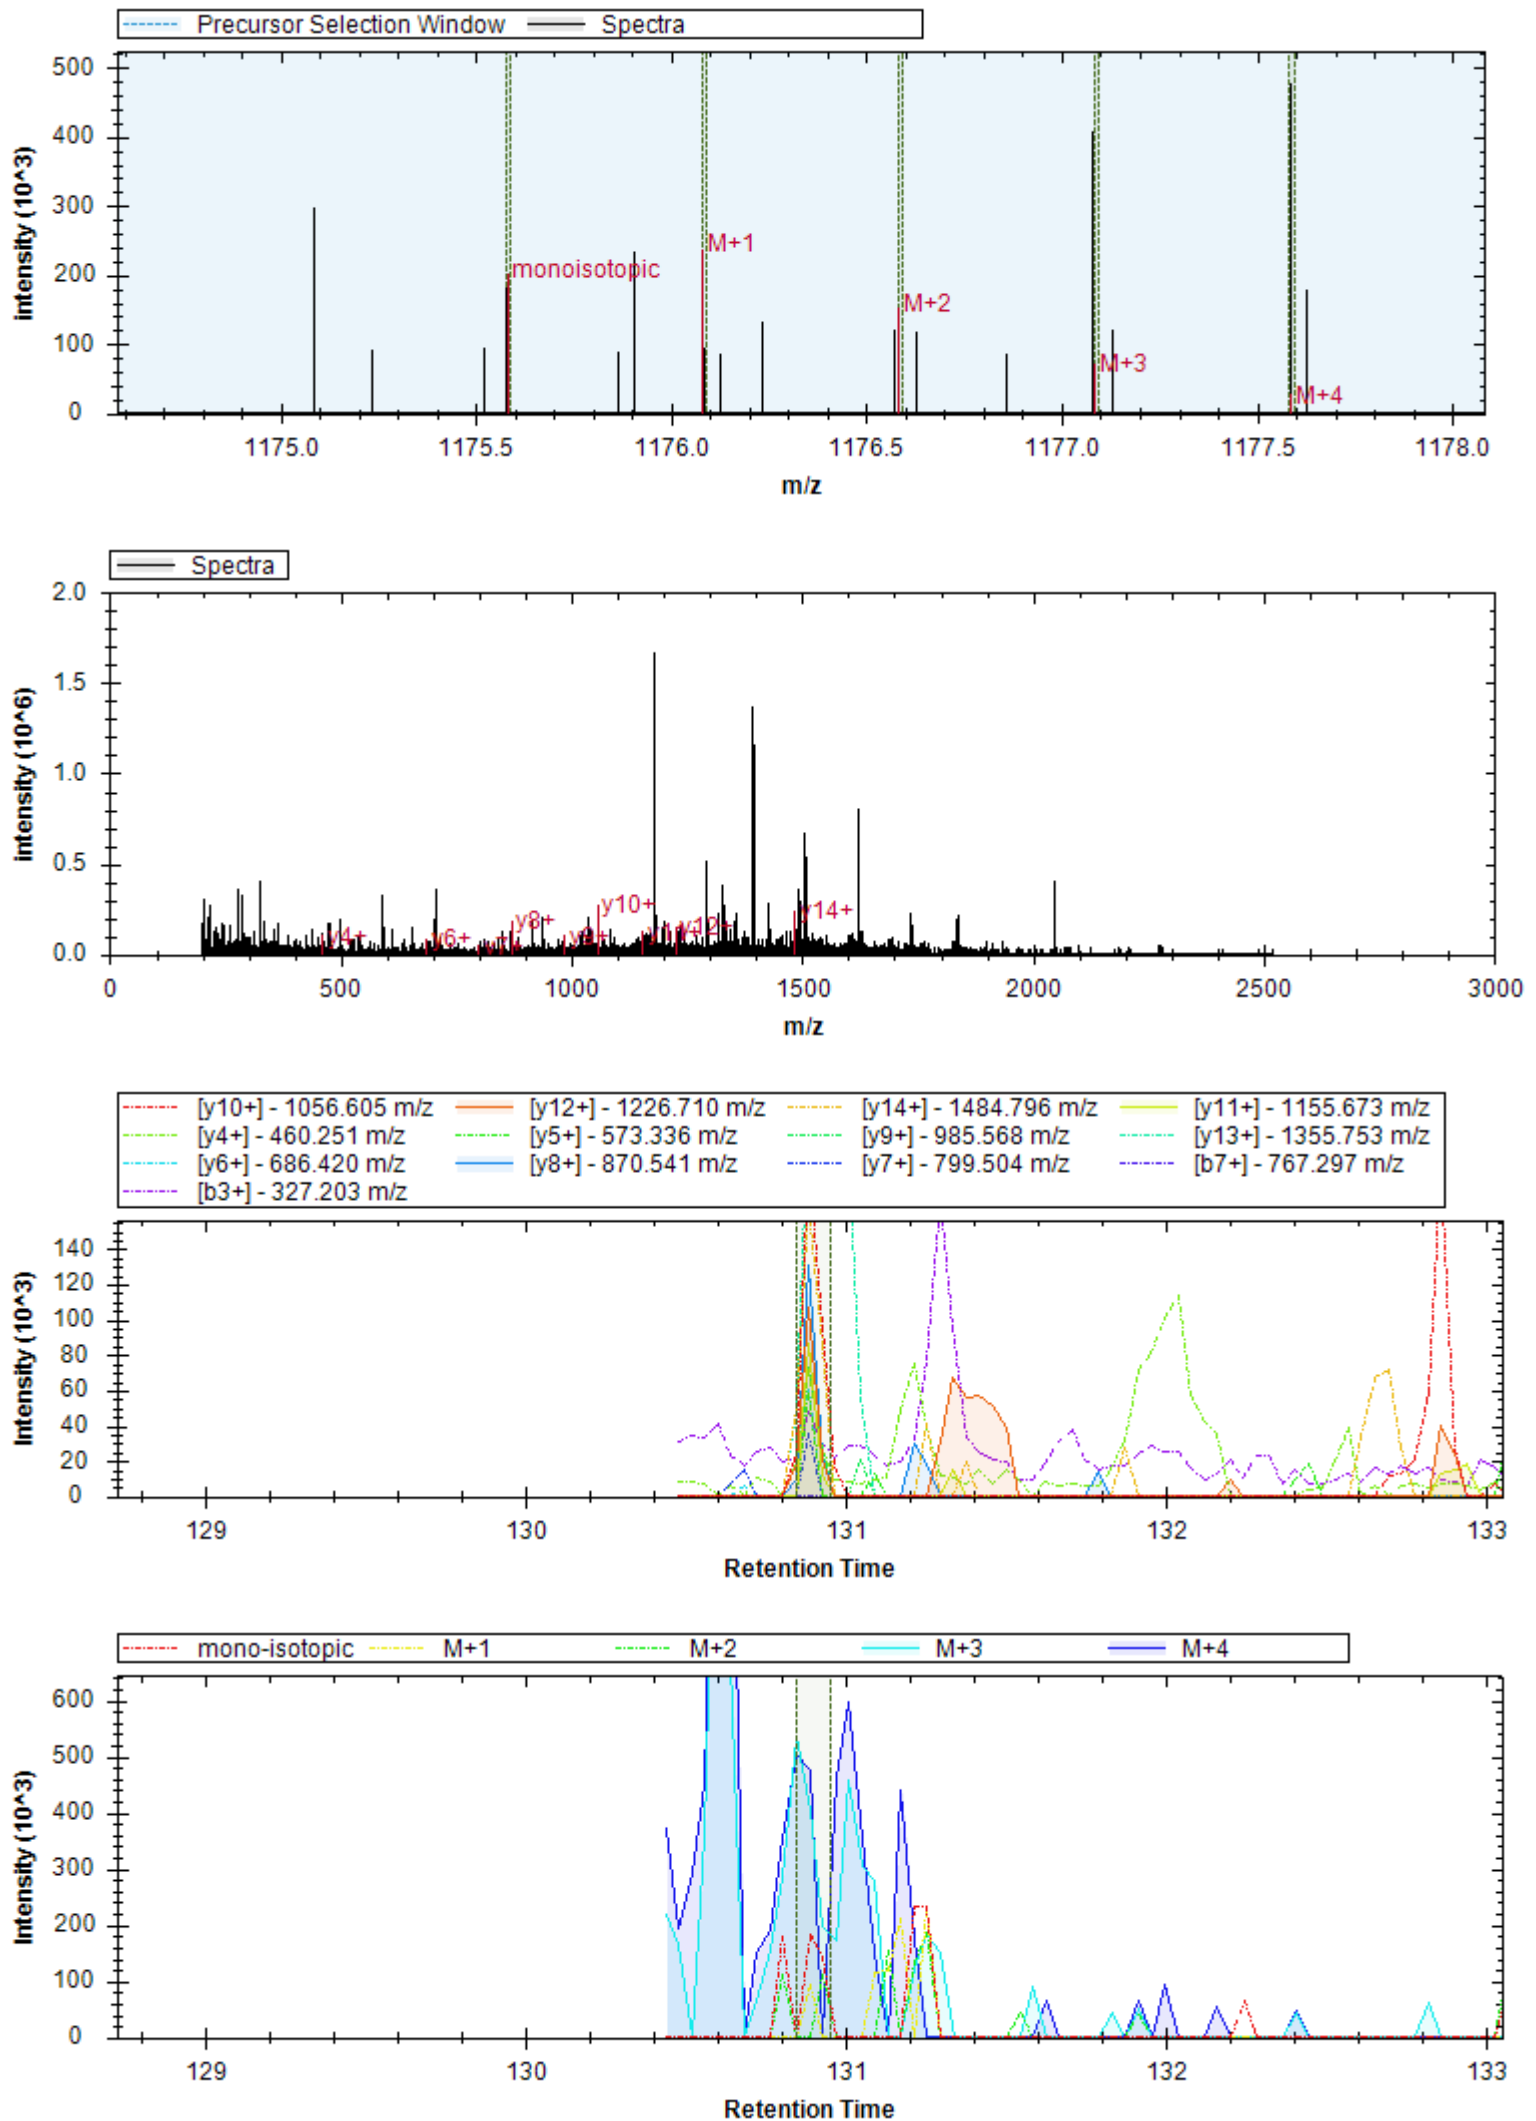

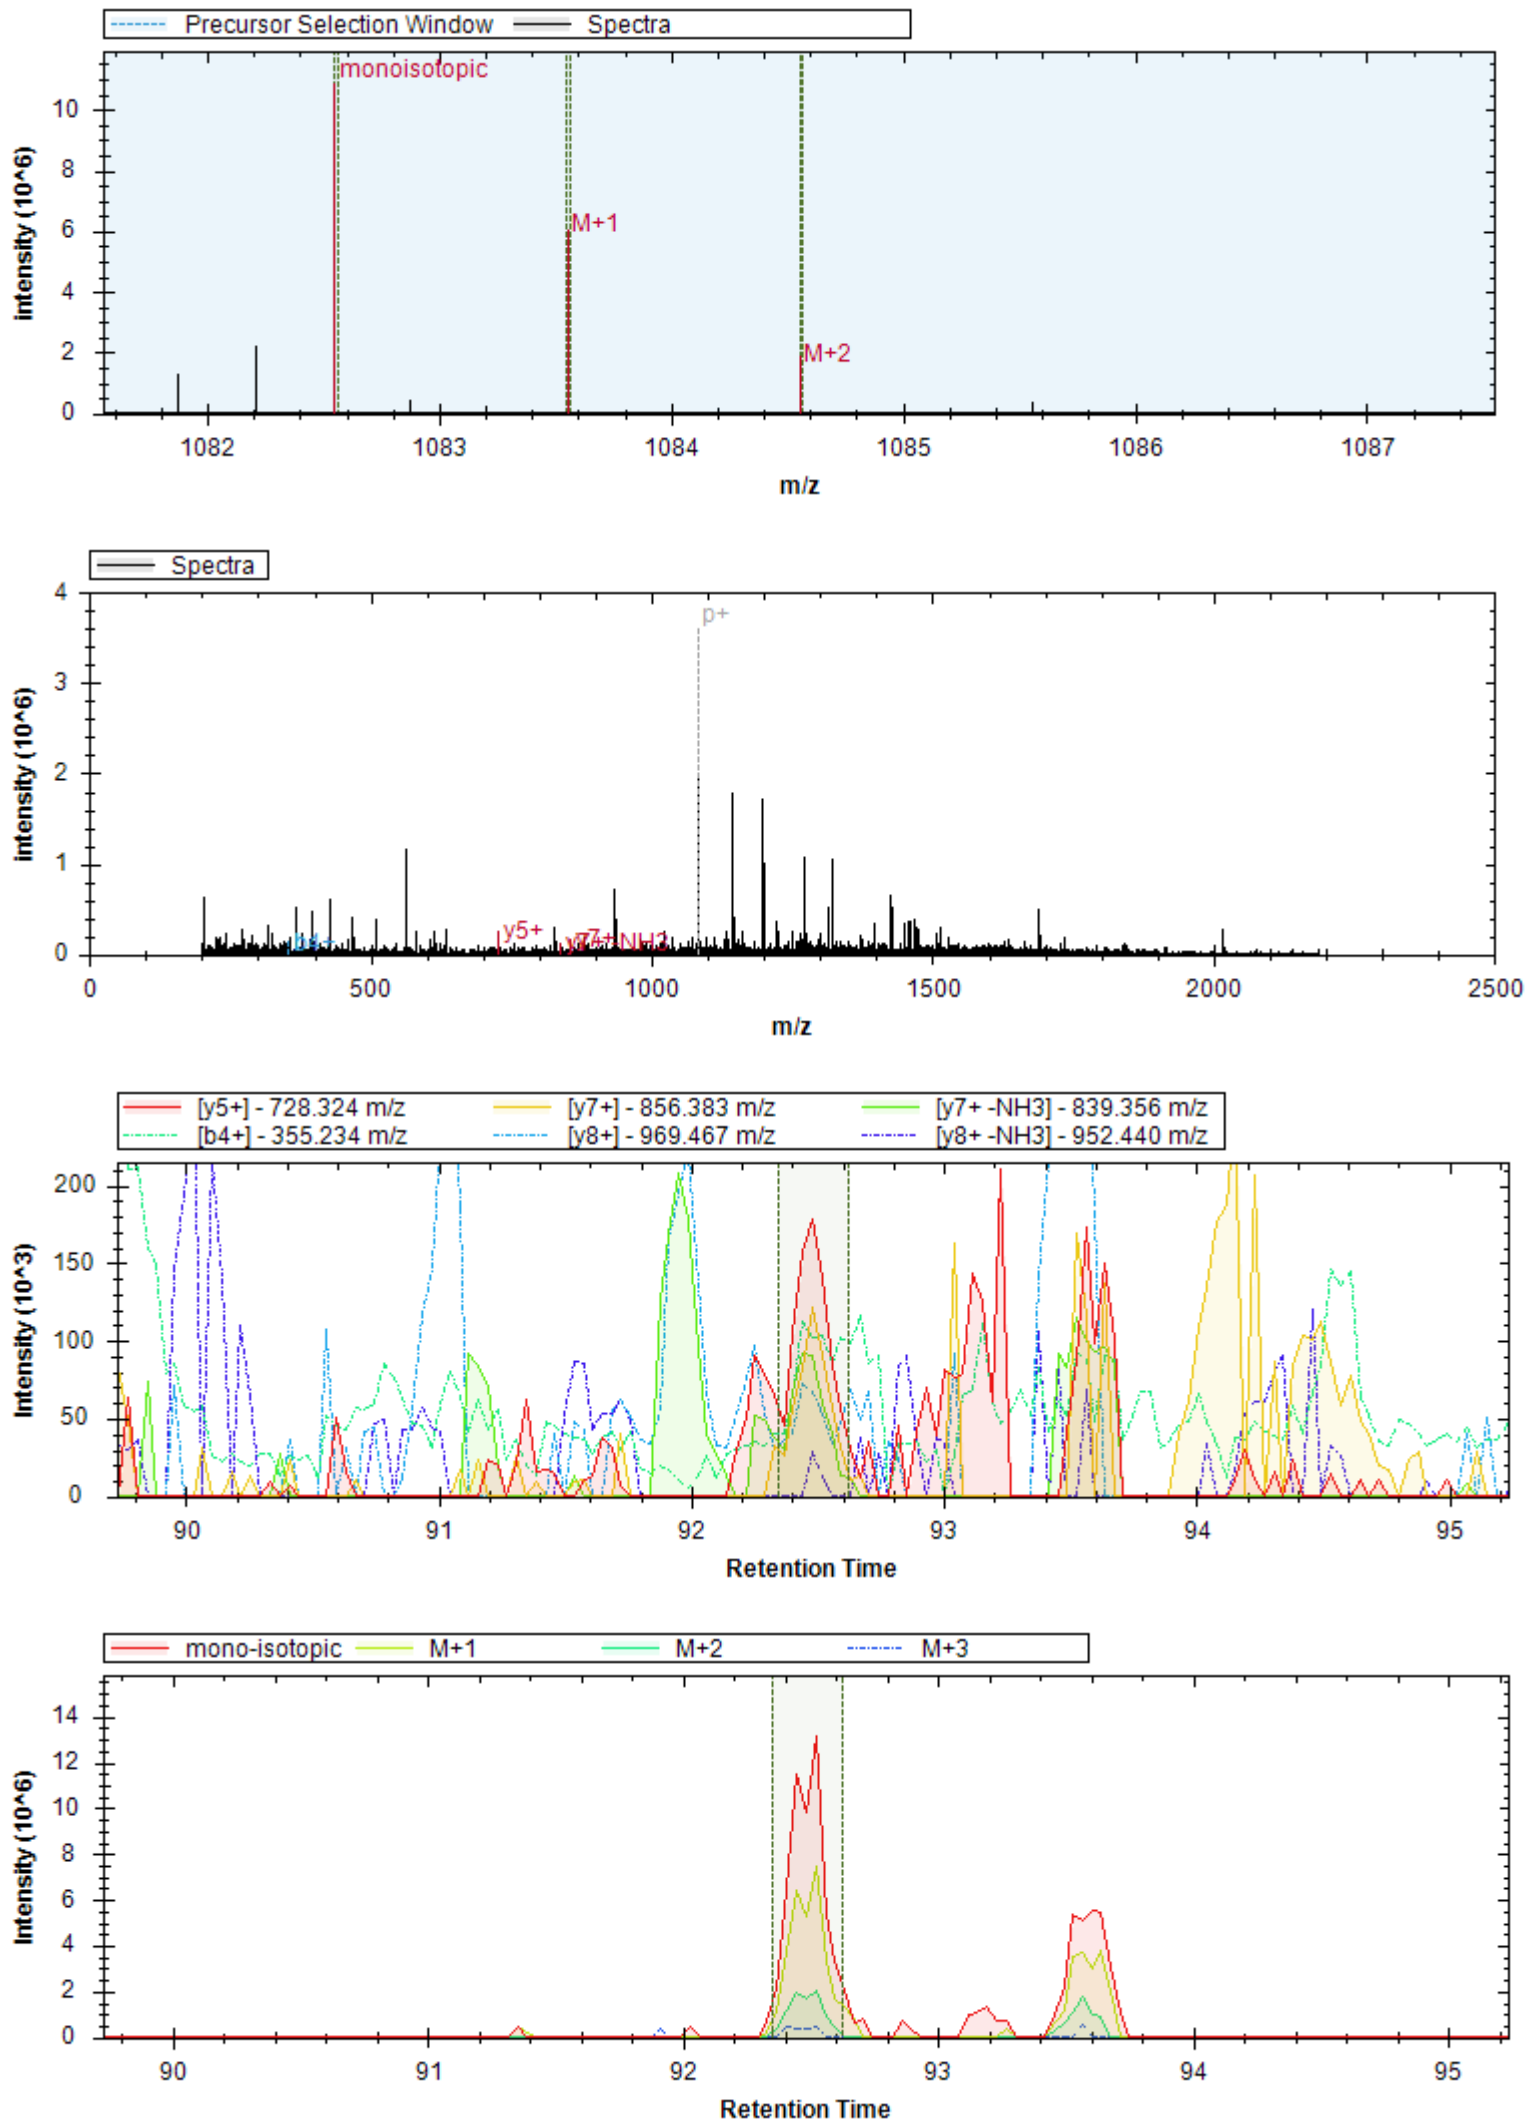

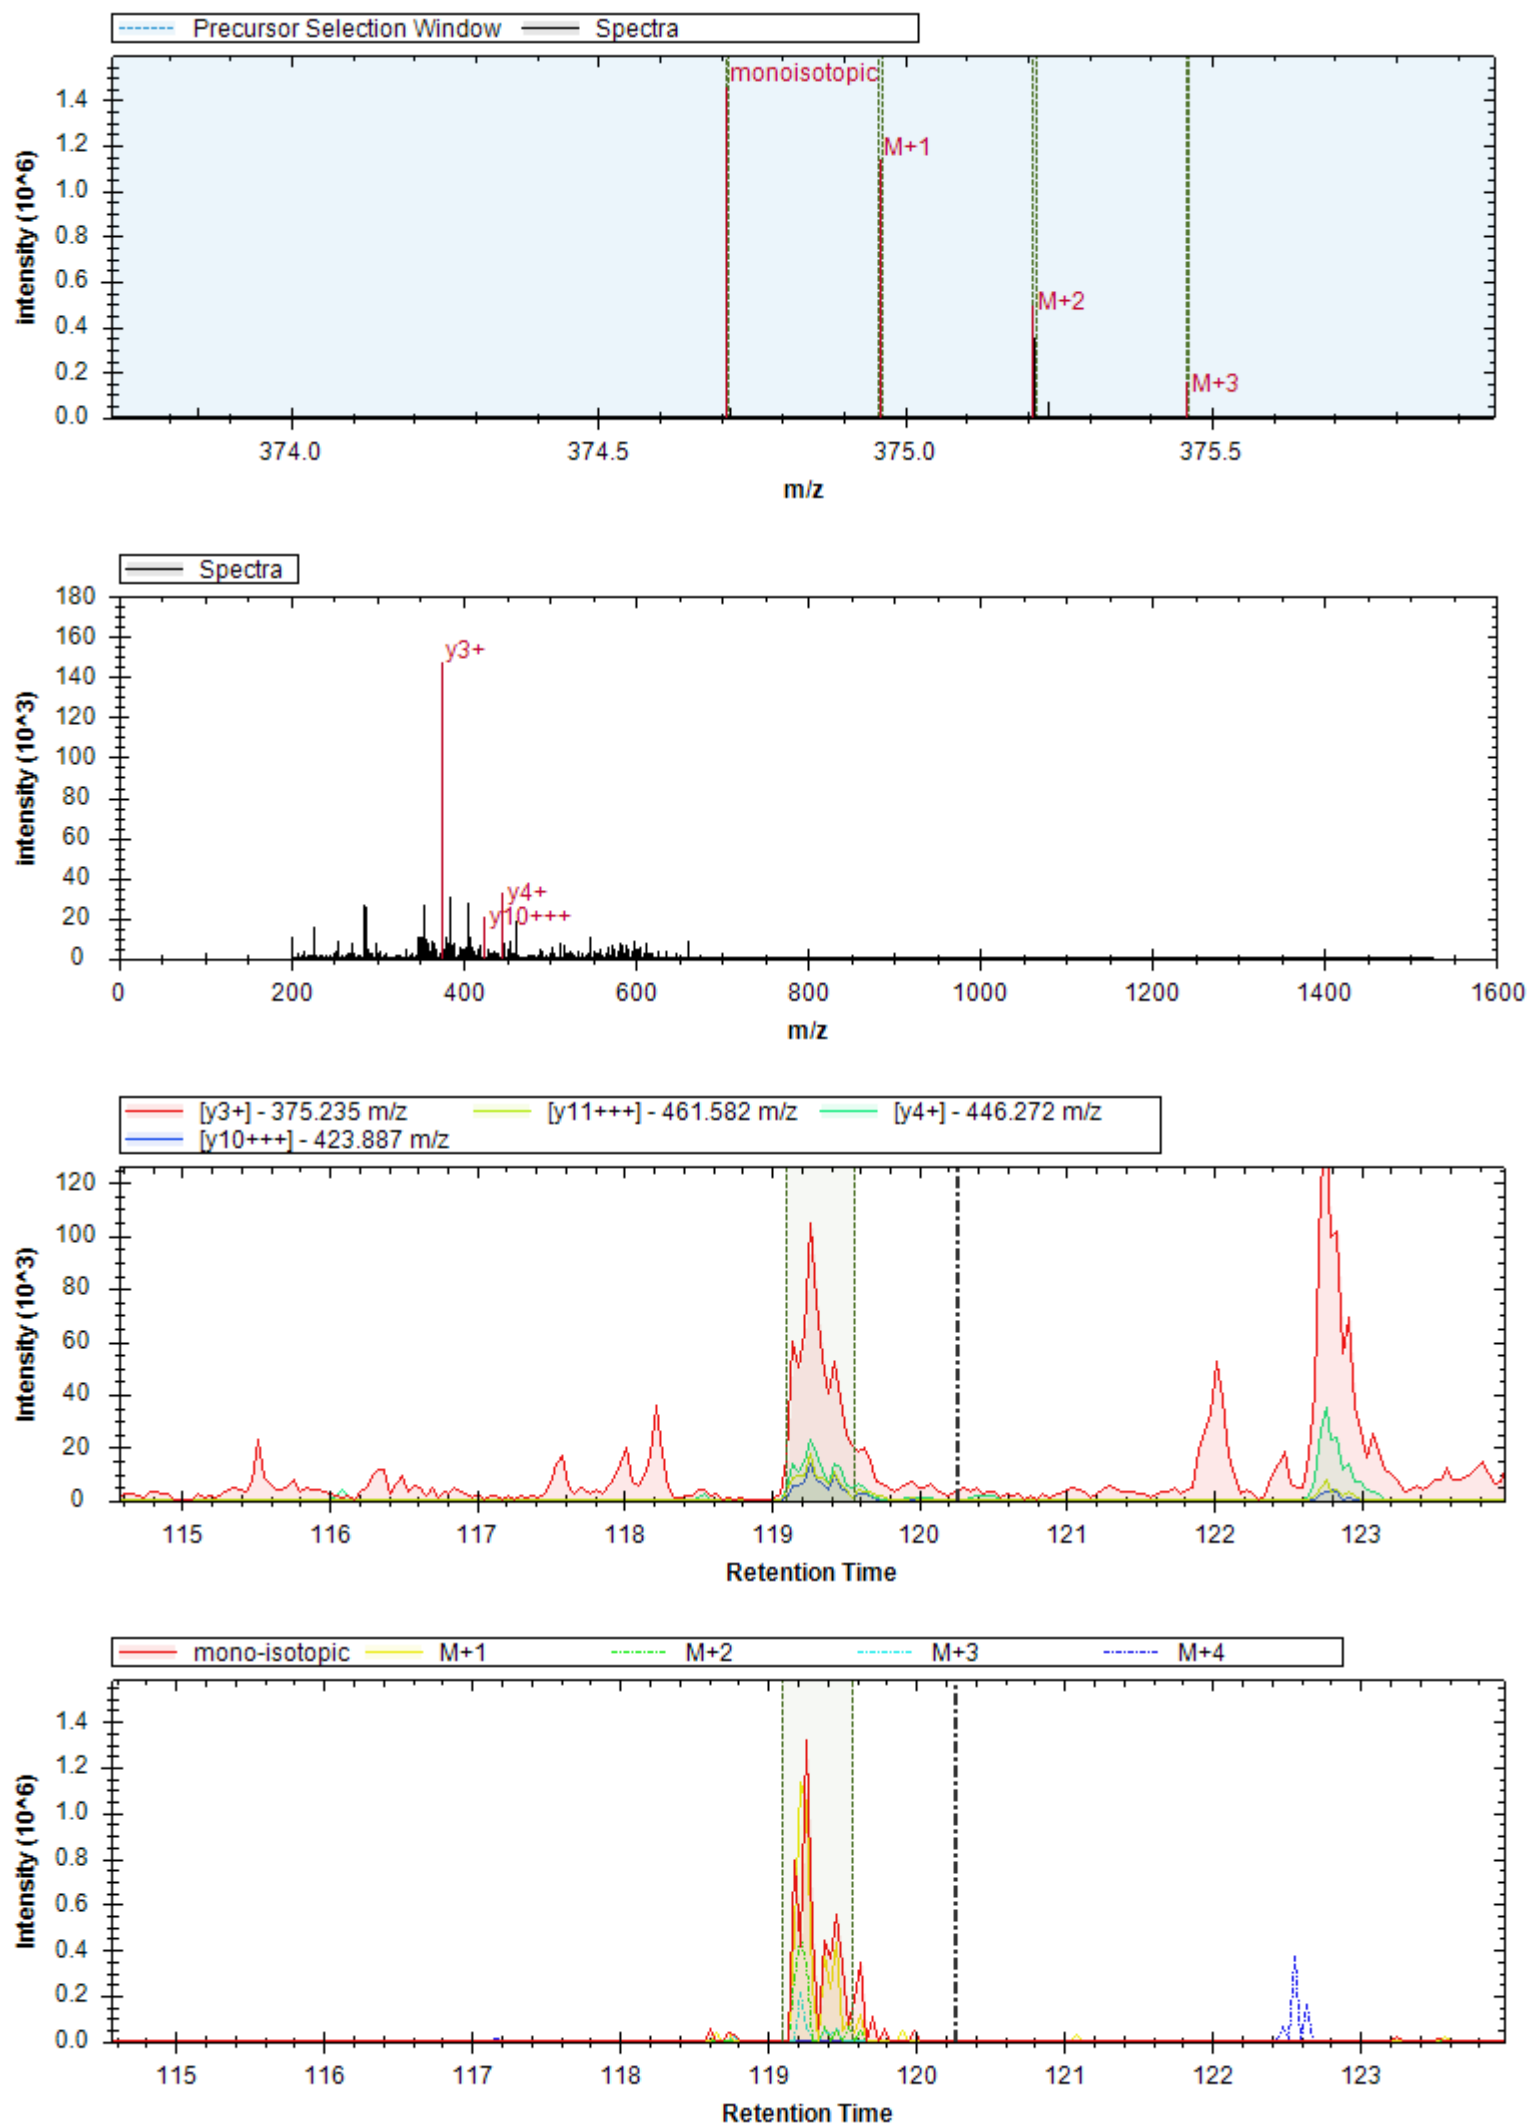

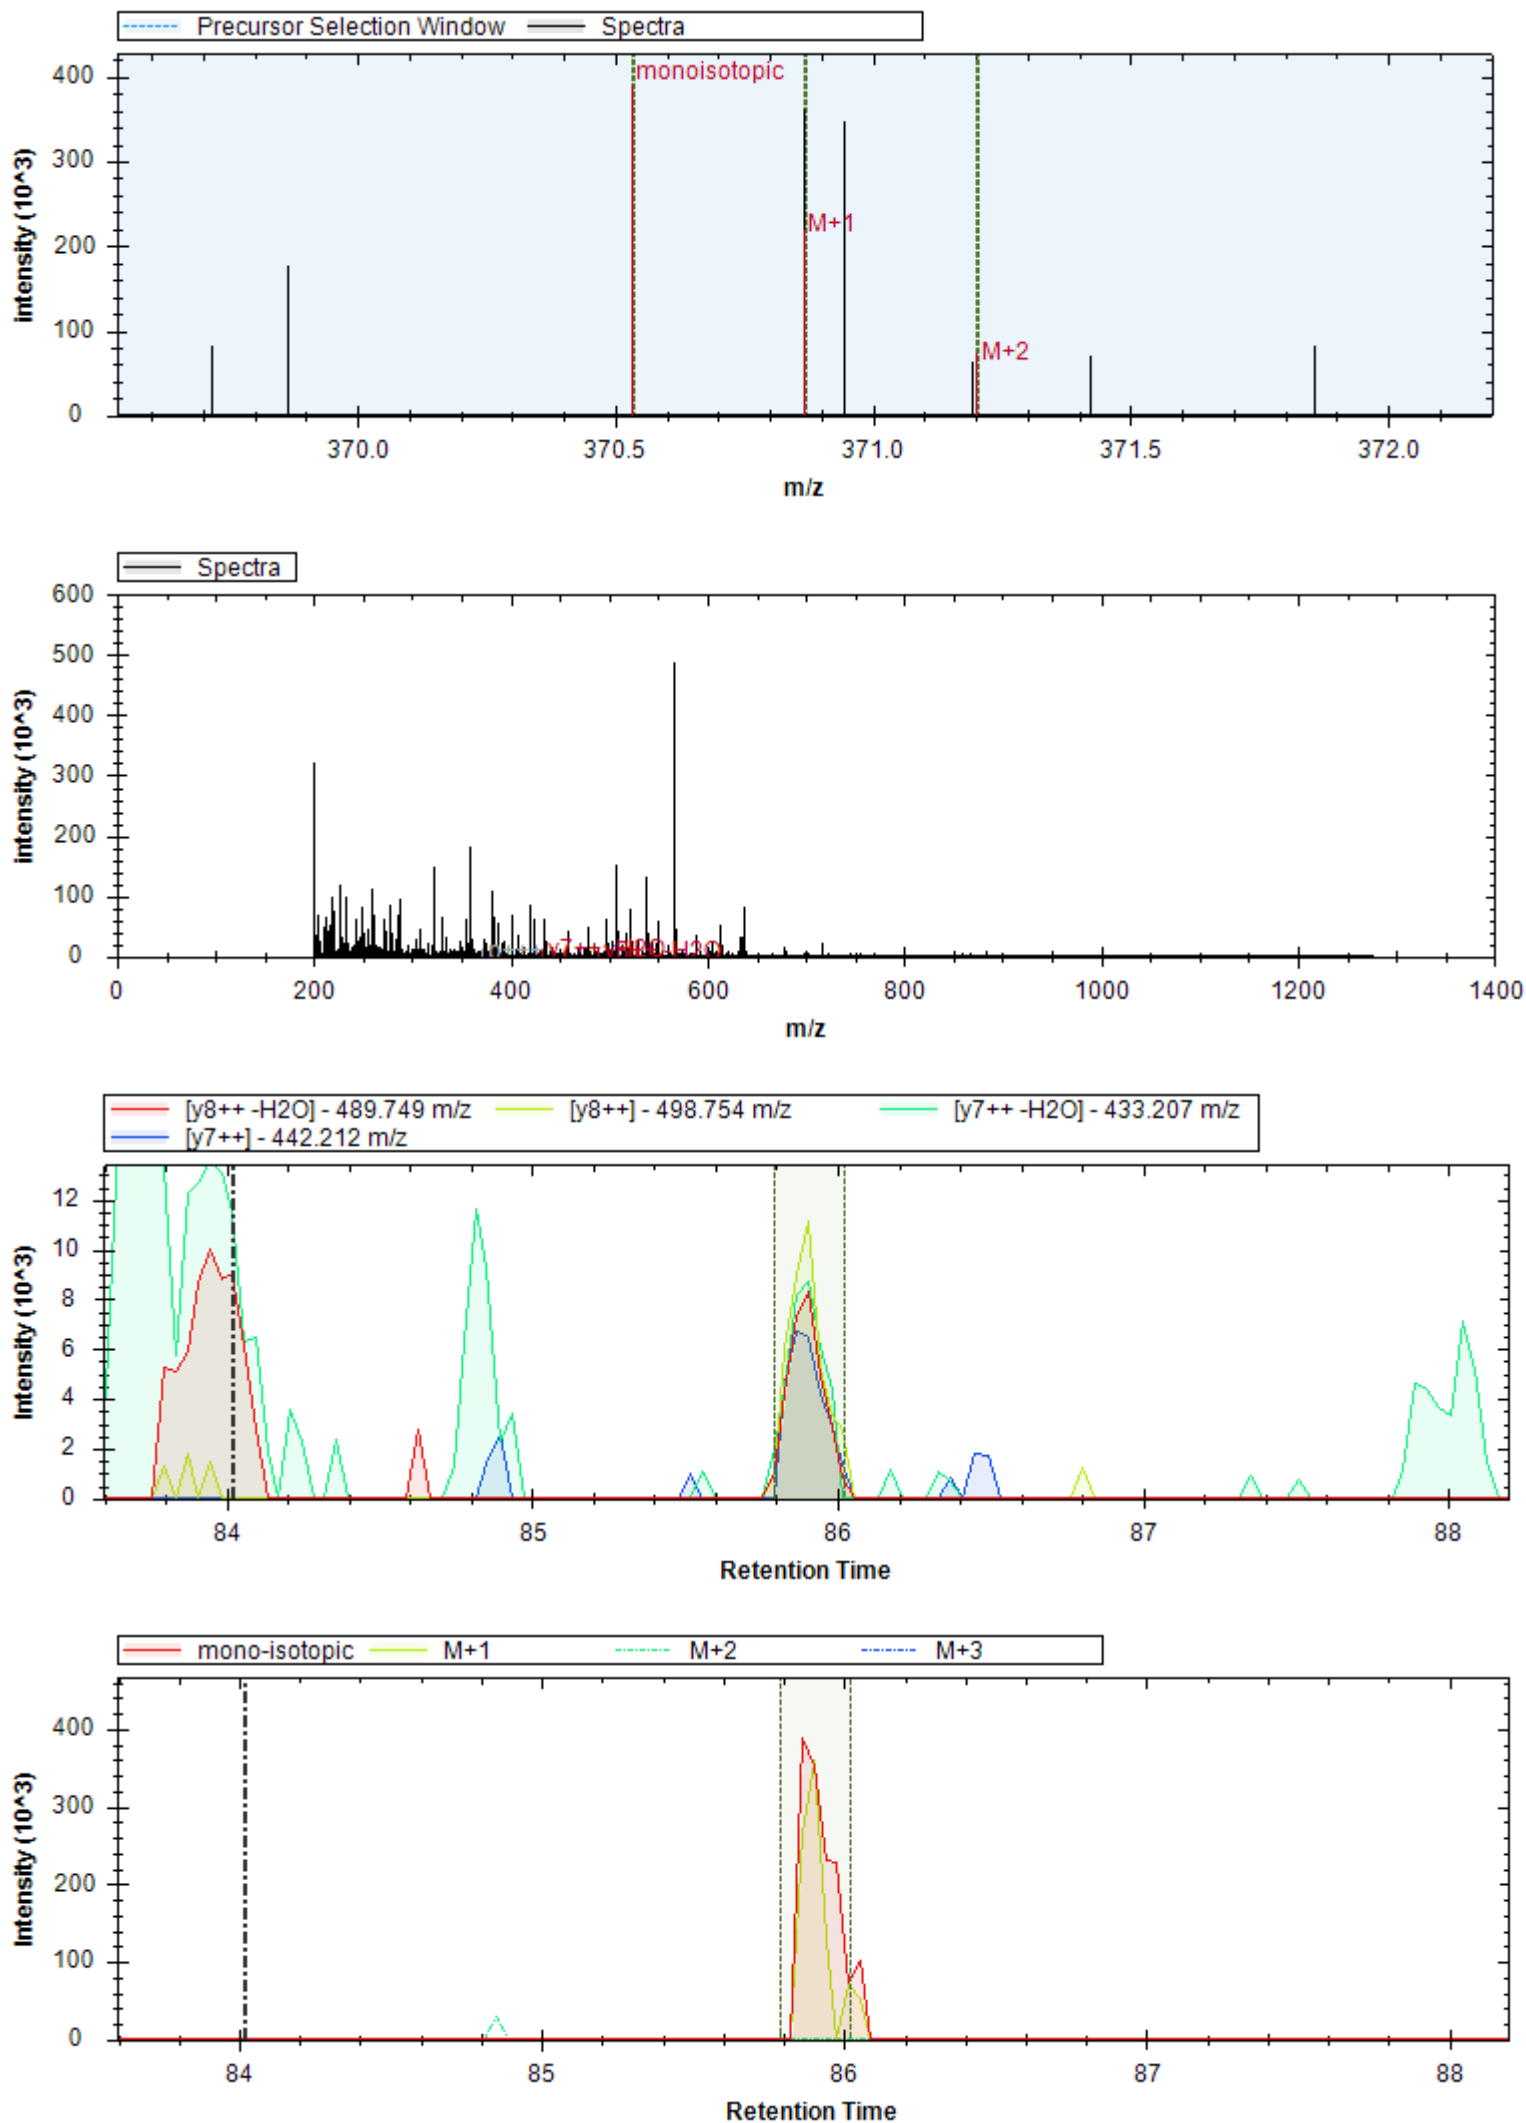

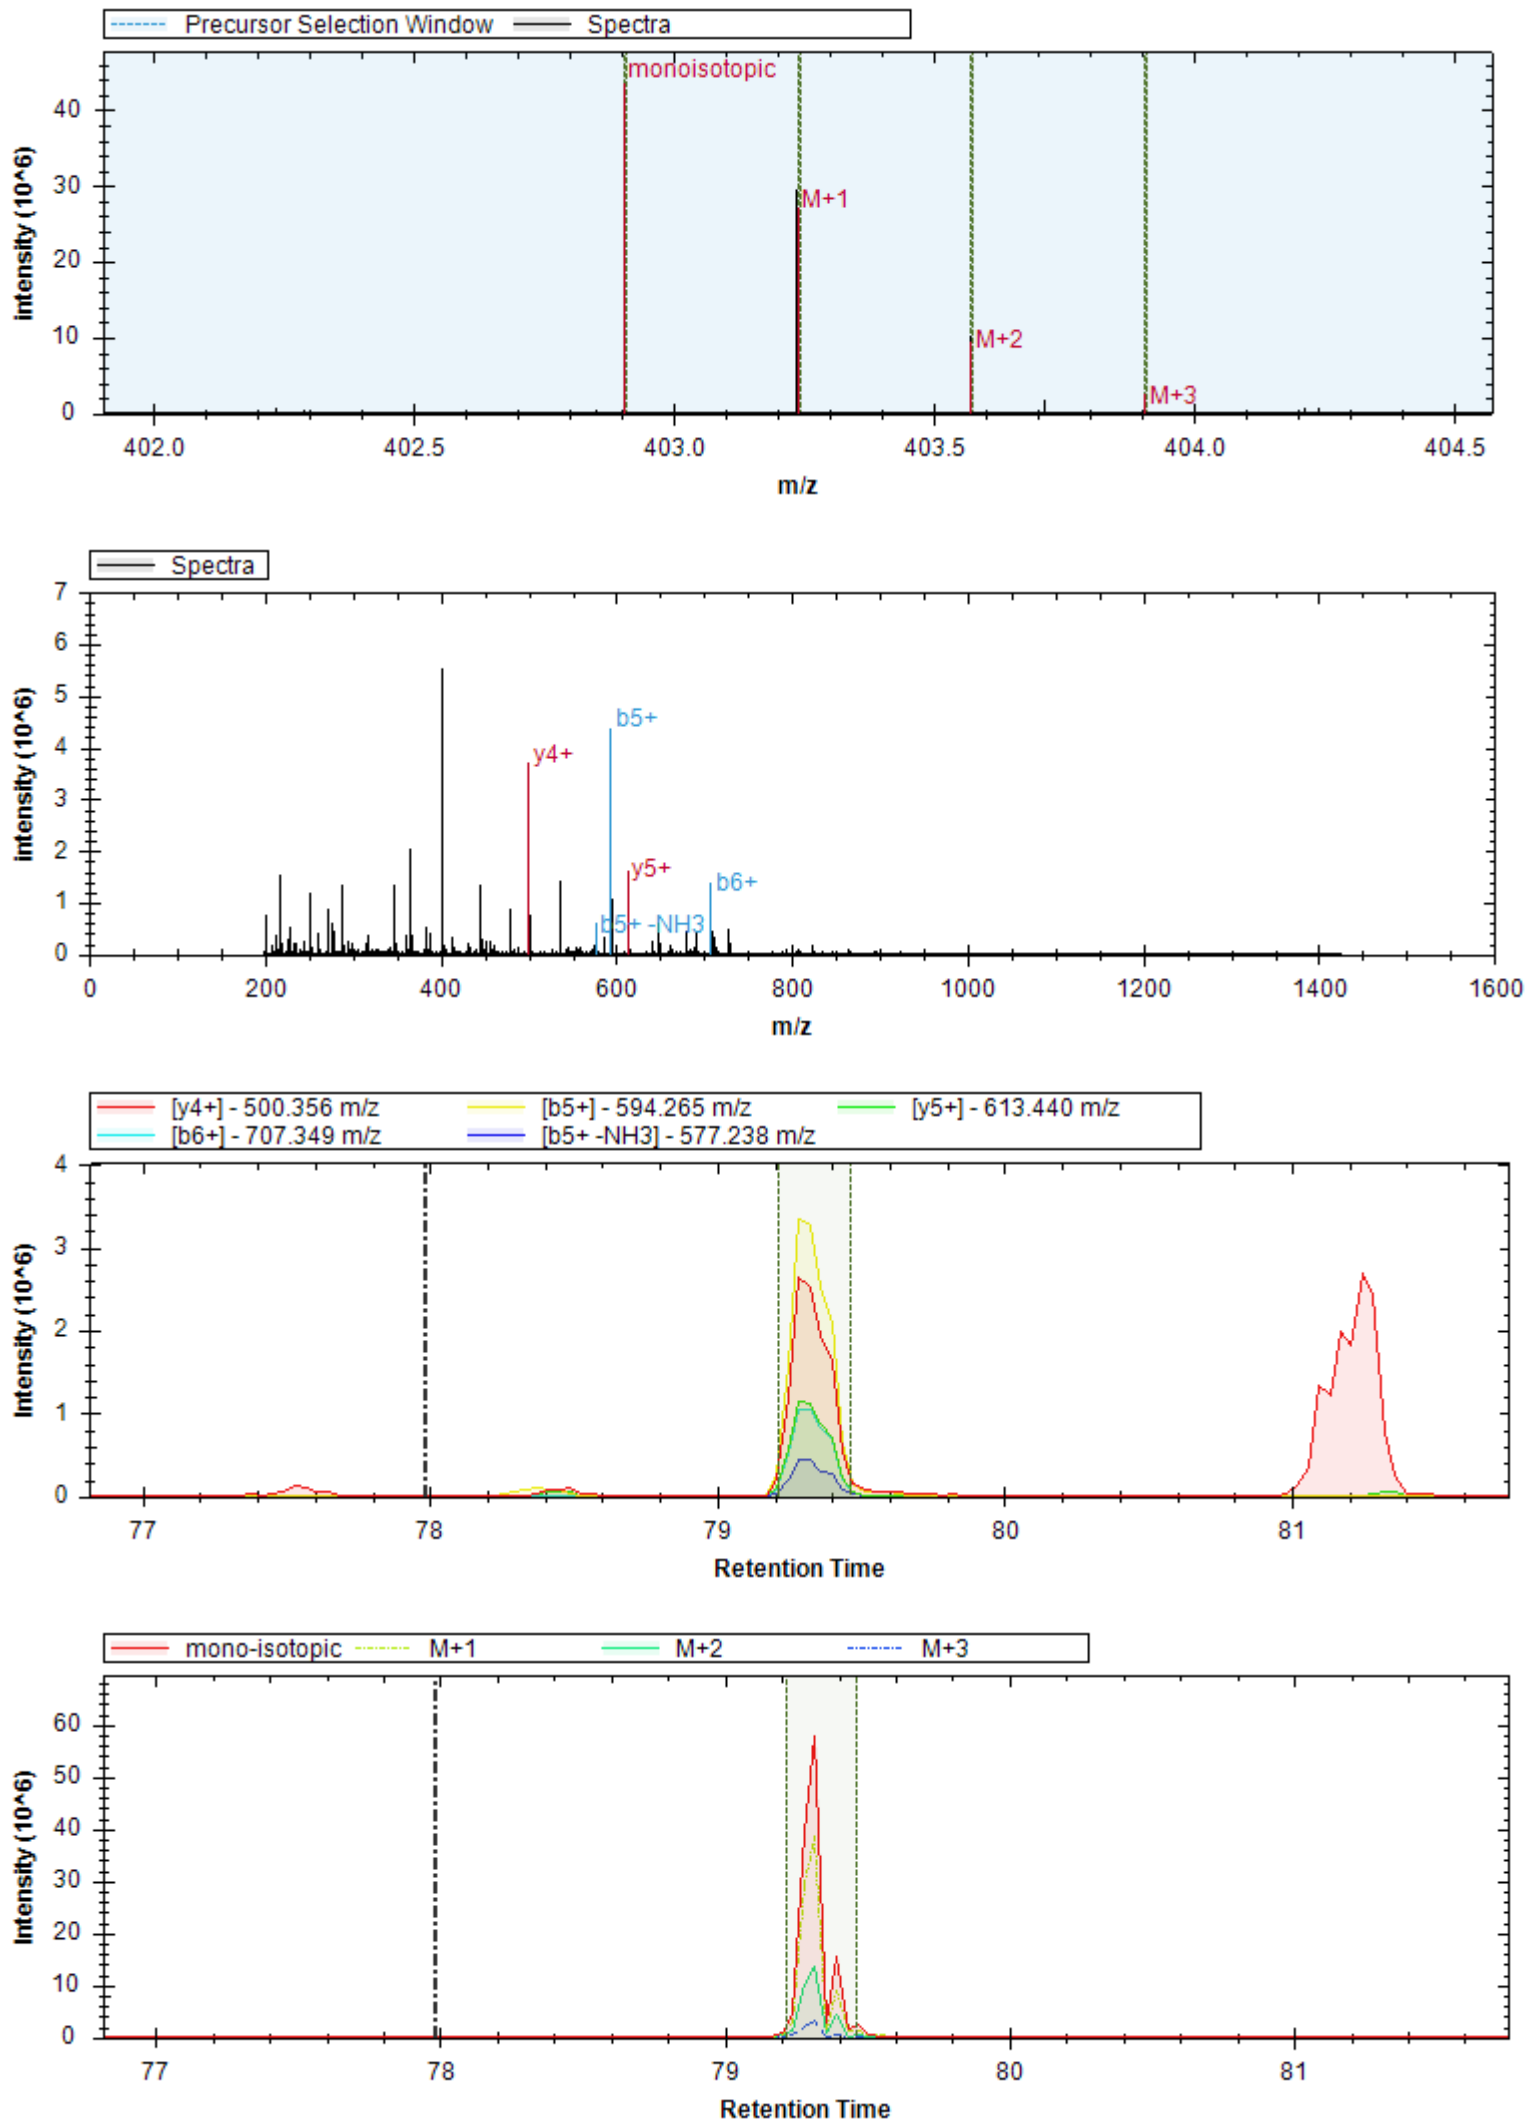

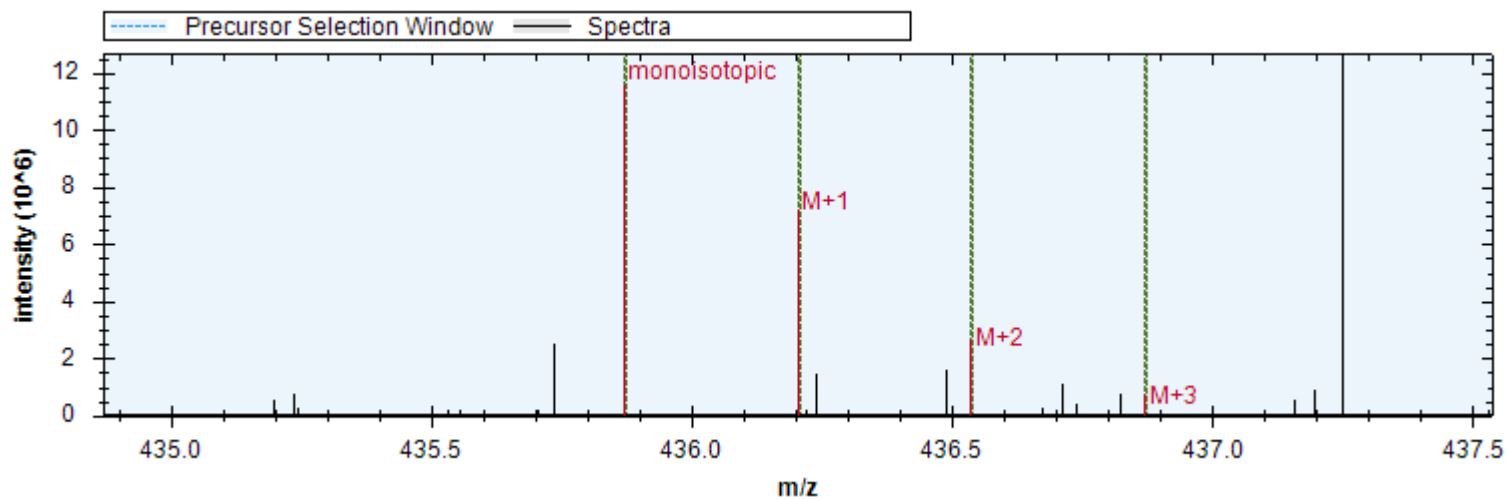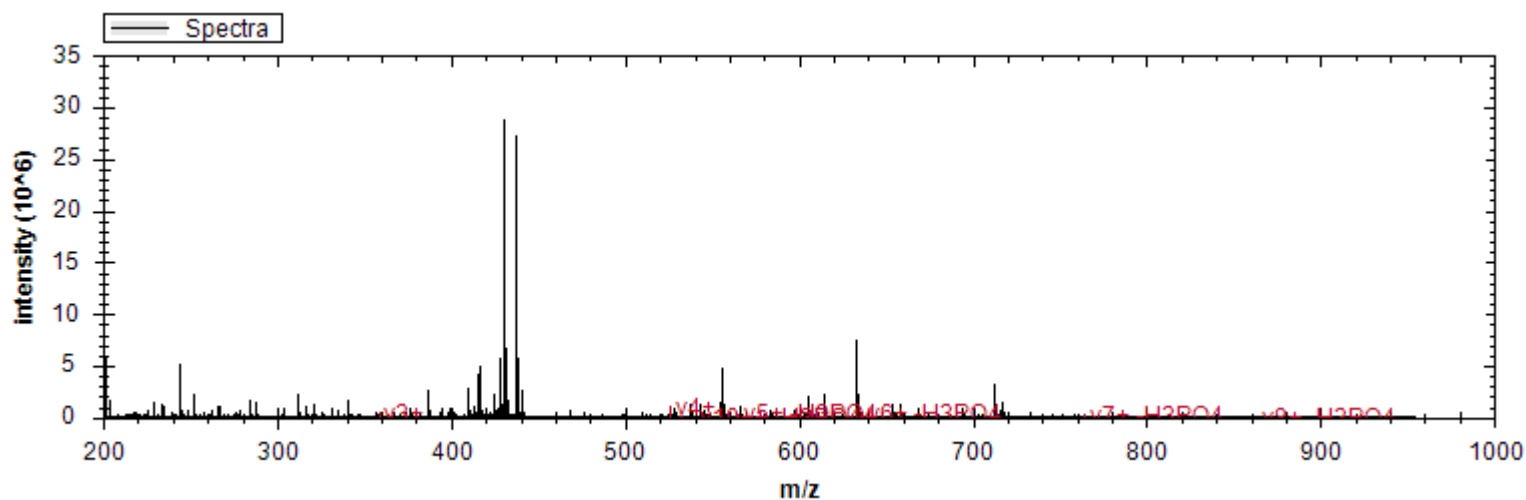

- |                            |                              |                            |
|----------------------------|------------------------------|----------------------------|
| [y3+] - 359.204 m/z        | [y5+ -H3PO4] - 565.284 m/z   | [y6+ -H3PO4] - 636.321 m/z |
| [y4+ -H3PO4] - 428.225 m/z | [y10++ -H3PO4] - 540.265 m/z | [y7+ -H3PO4] - 764.380 m/z |
| [y10++] - 589.254 m/z      | [y7+ -NH3] - 943.130 m/z     | [y6+] - 734.298 m/z        |
| [y5+] - 663.261 m/z        | [y8++] - 481.216 m/z         | [y4+] - 526.202 m/z        |
| [y8+ -H3PO4] - 863.448 m/z | [y6++] - 367.653 m/z         | [y7+ -H2O] - 942.146 m/z   |

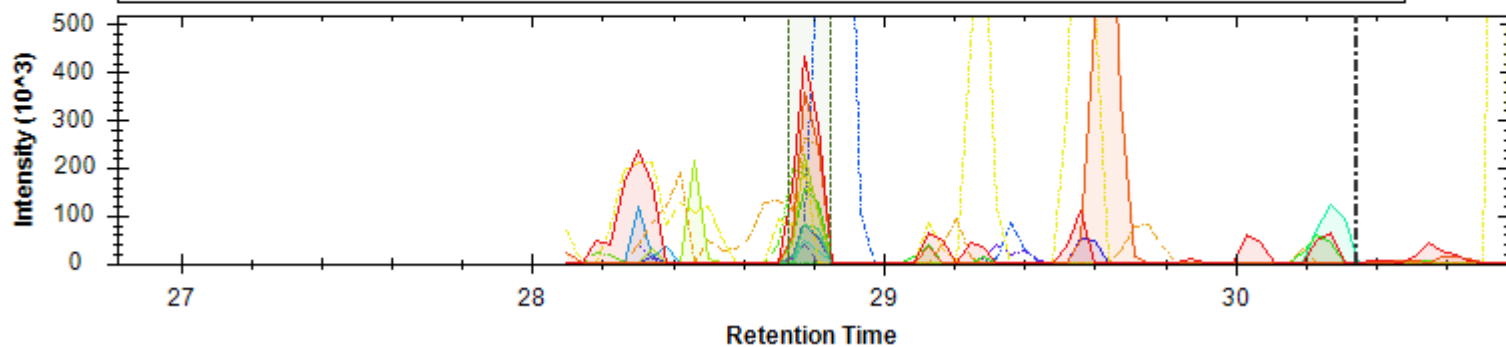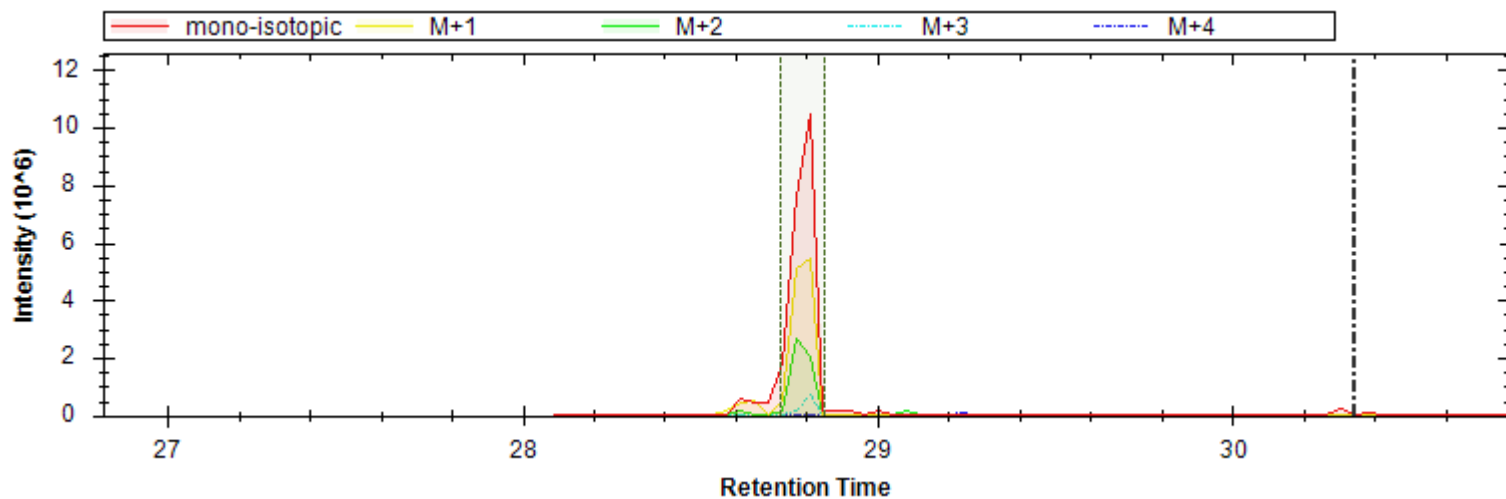

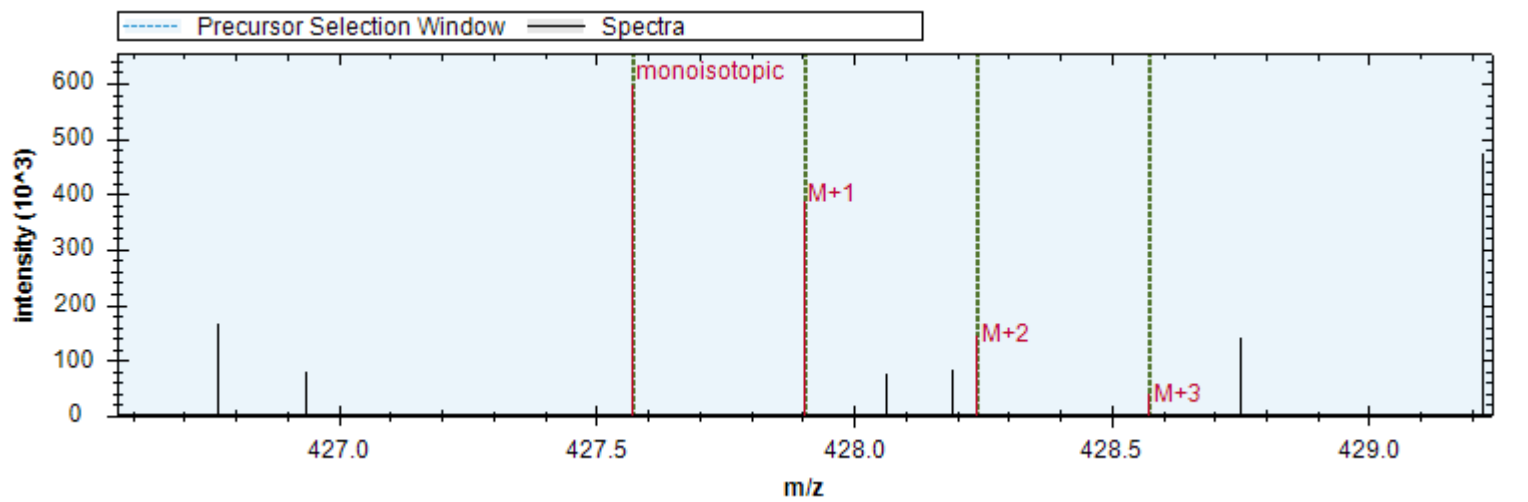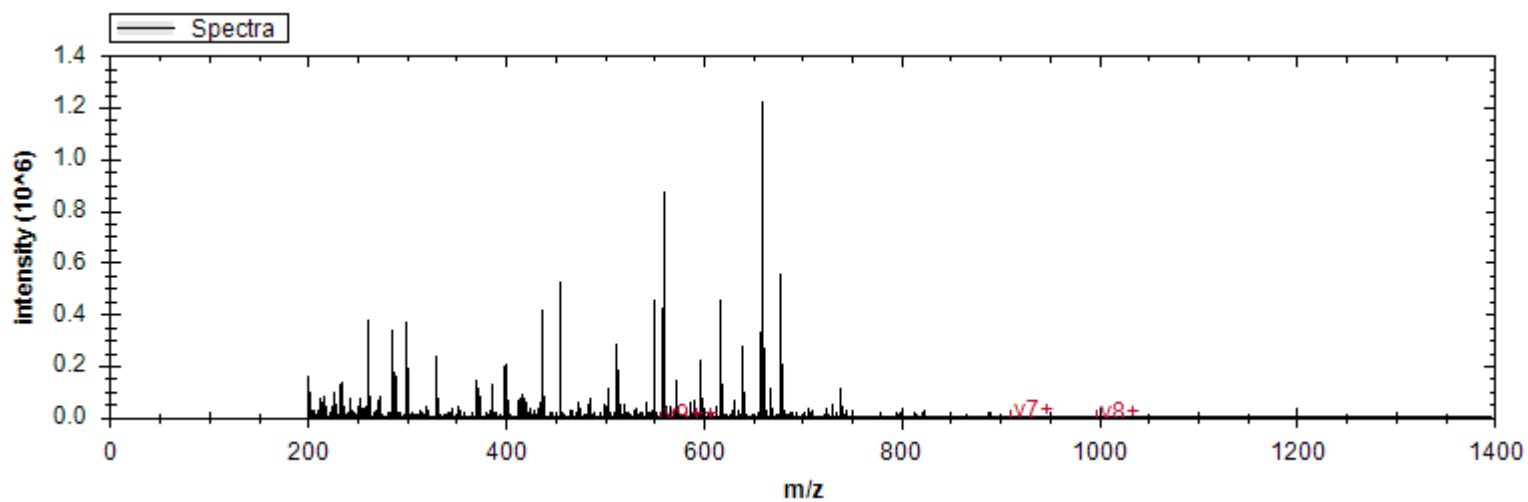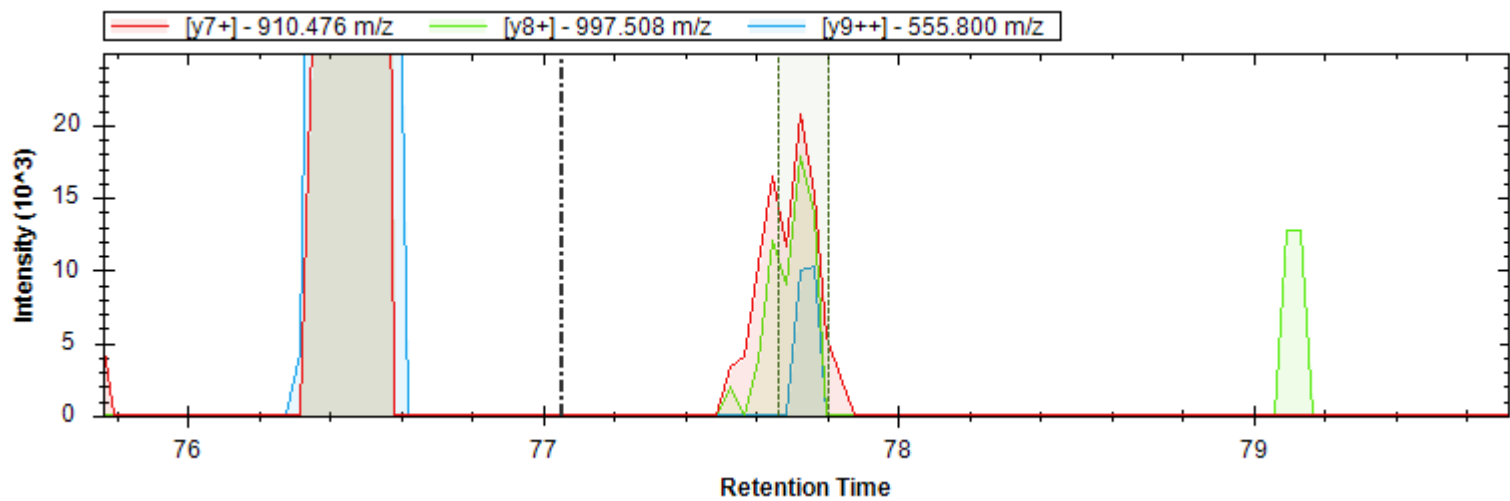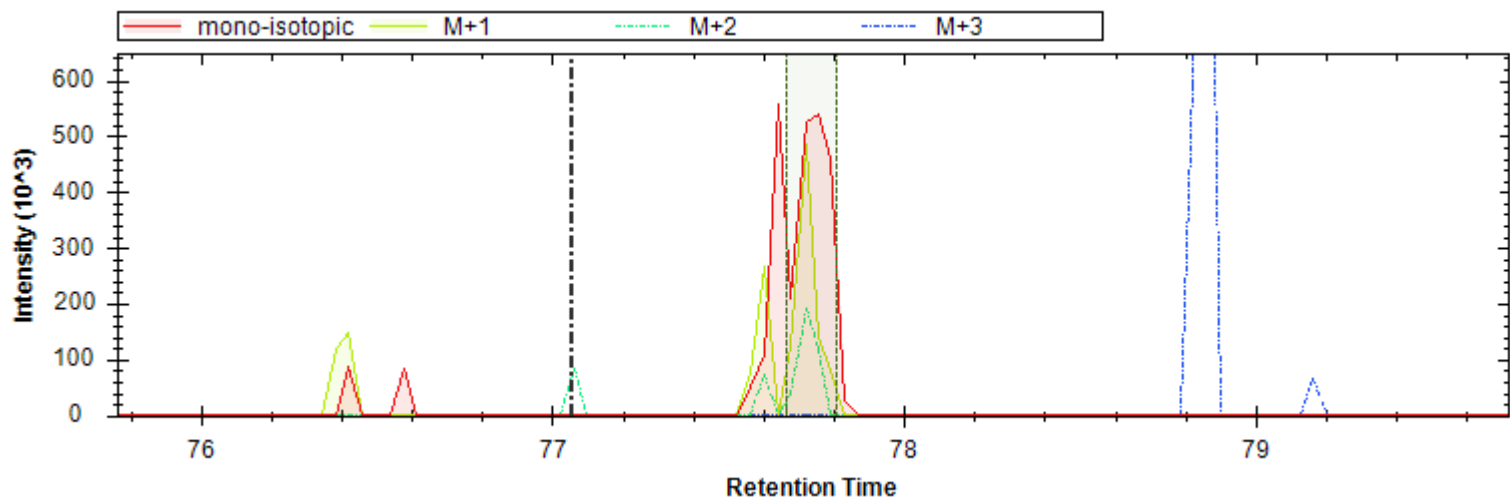

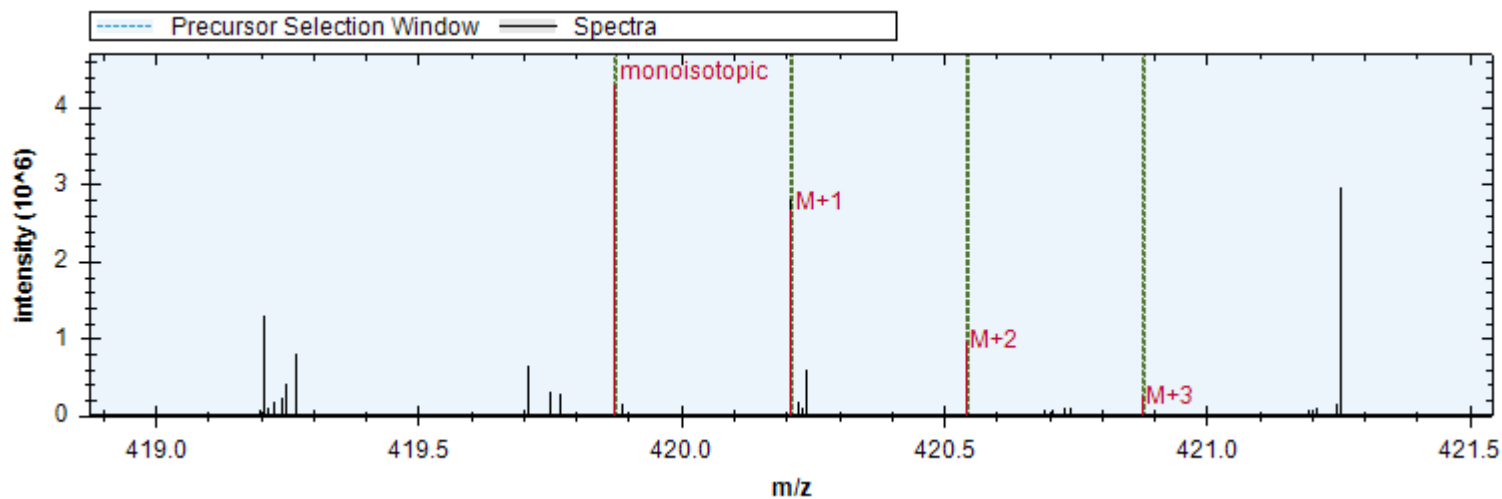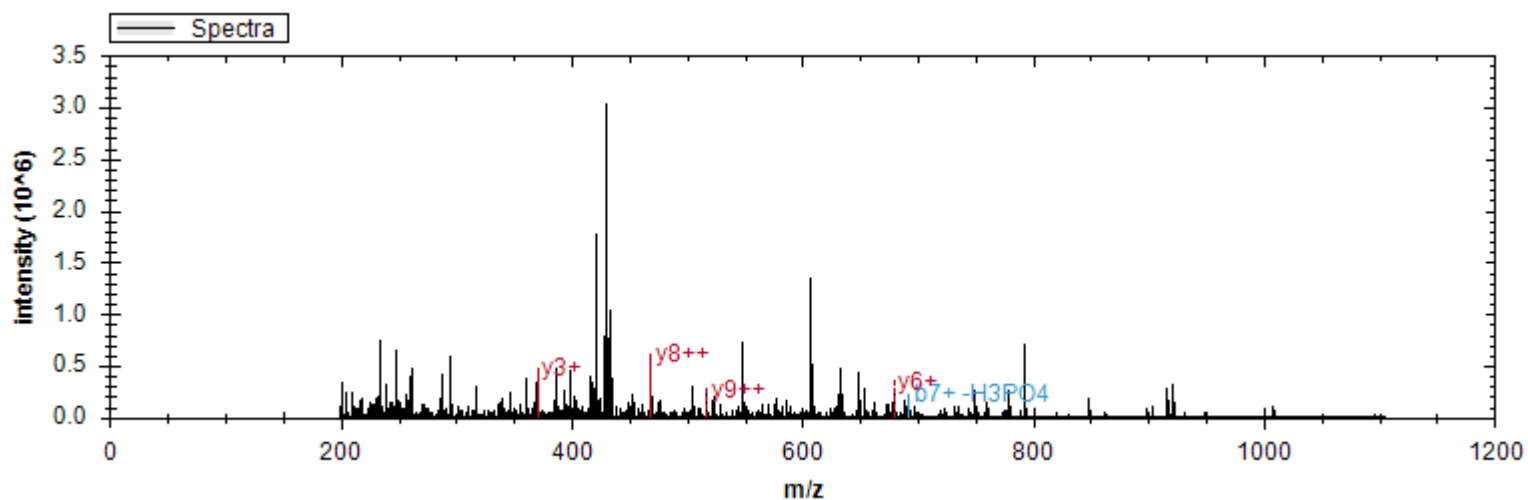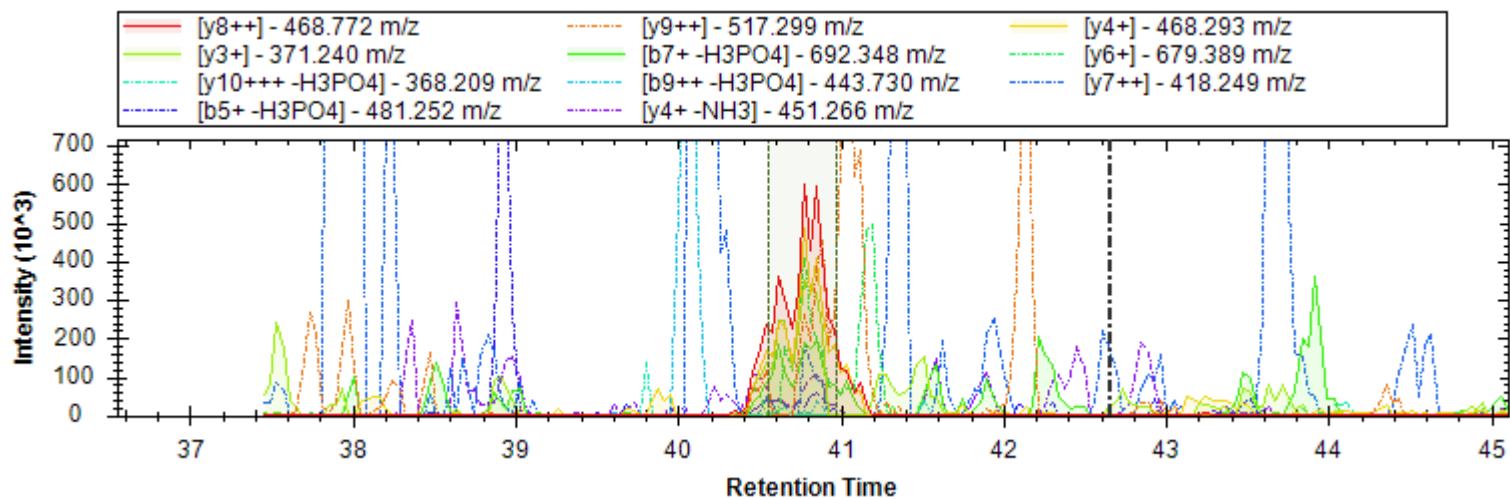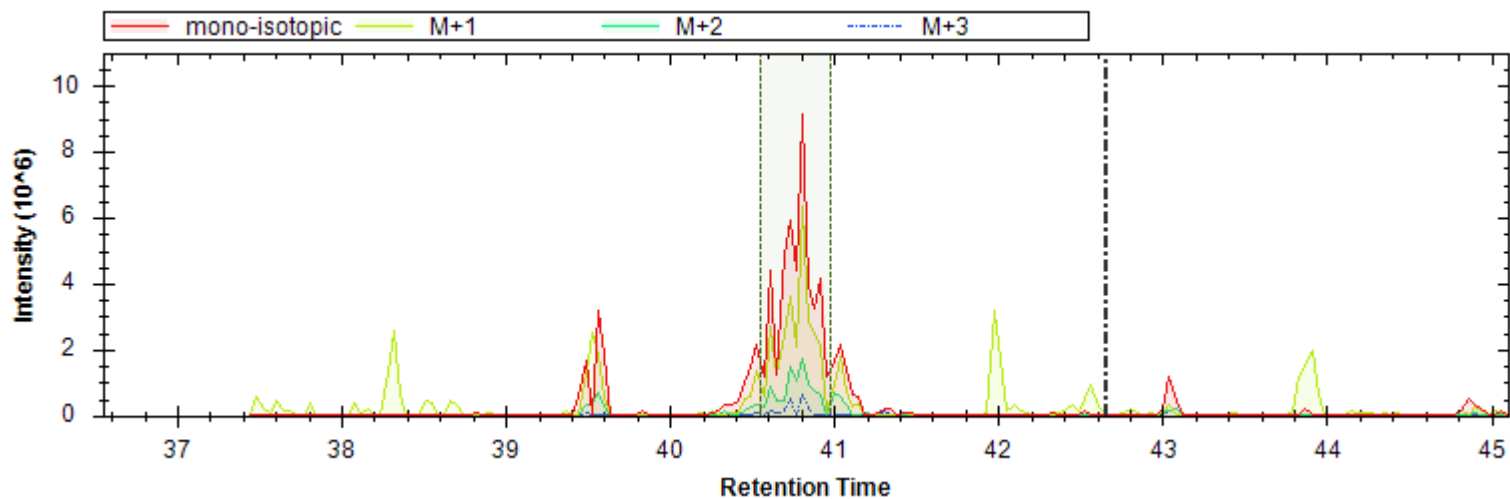



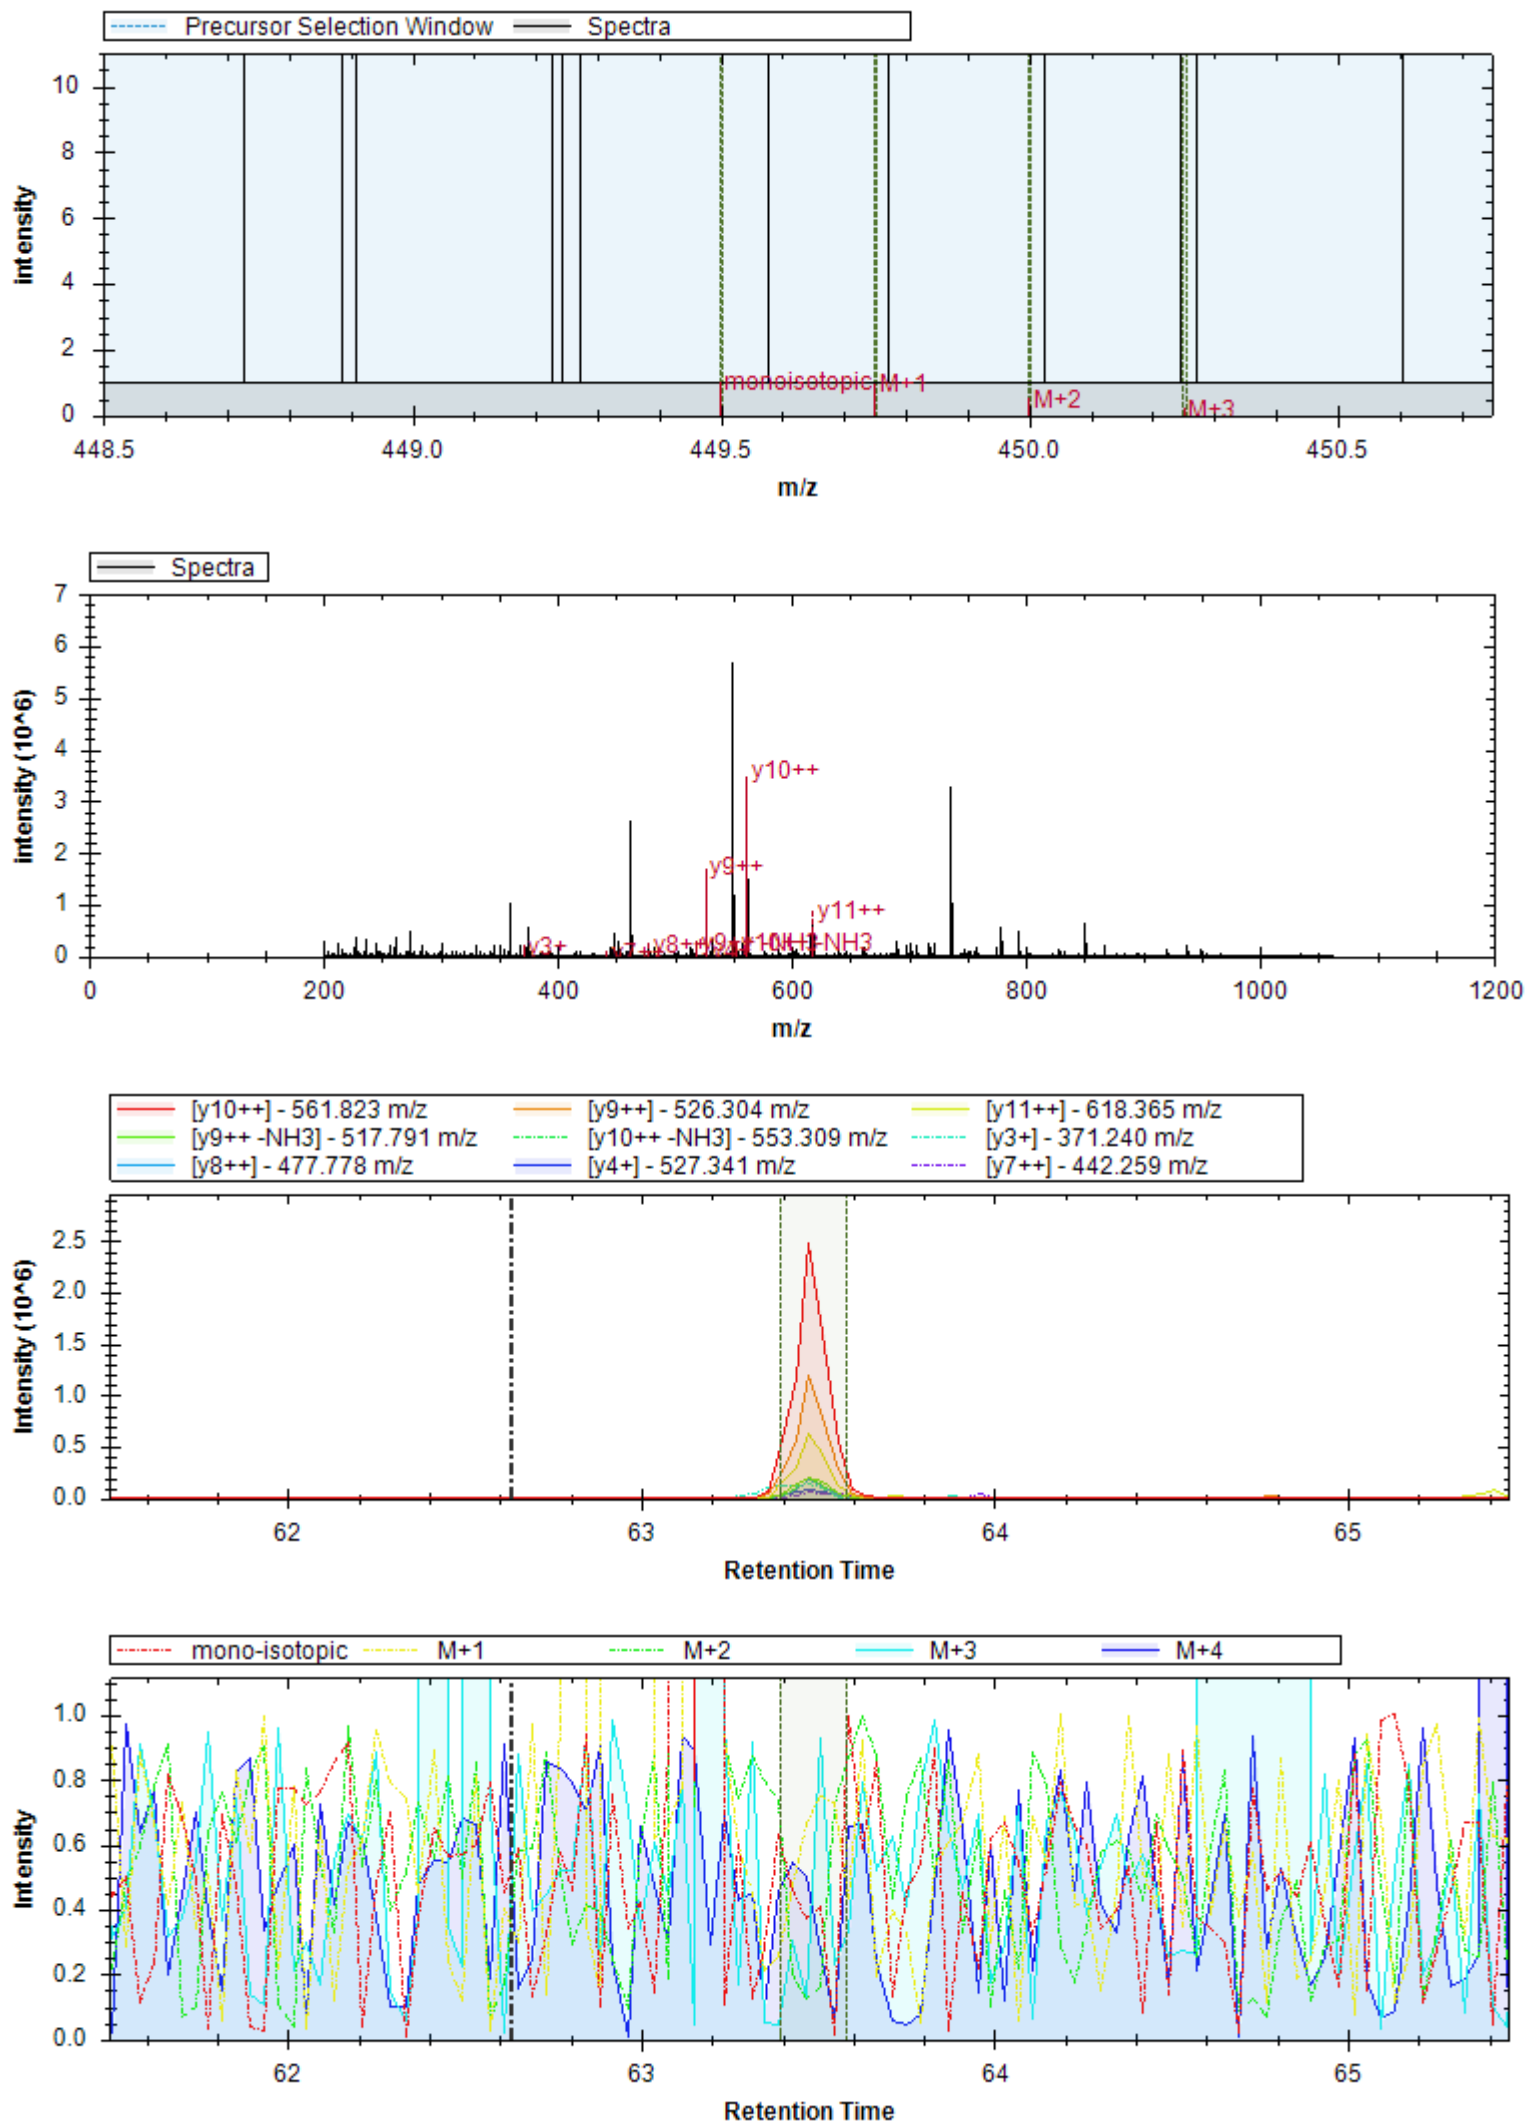

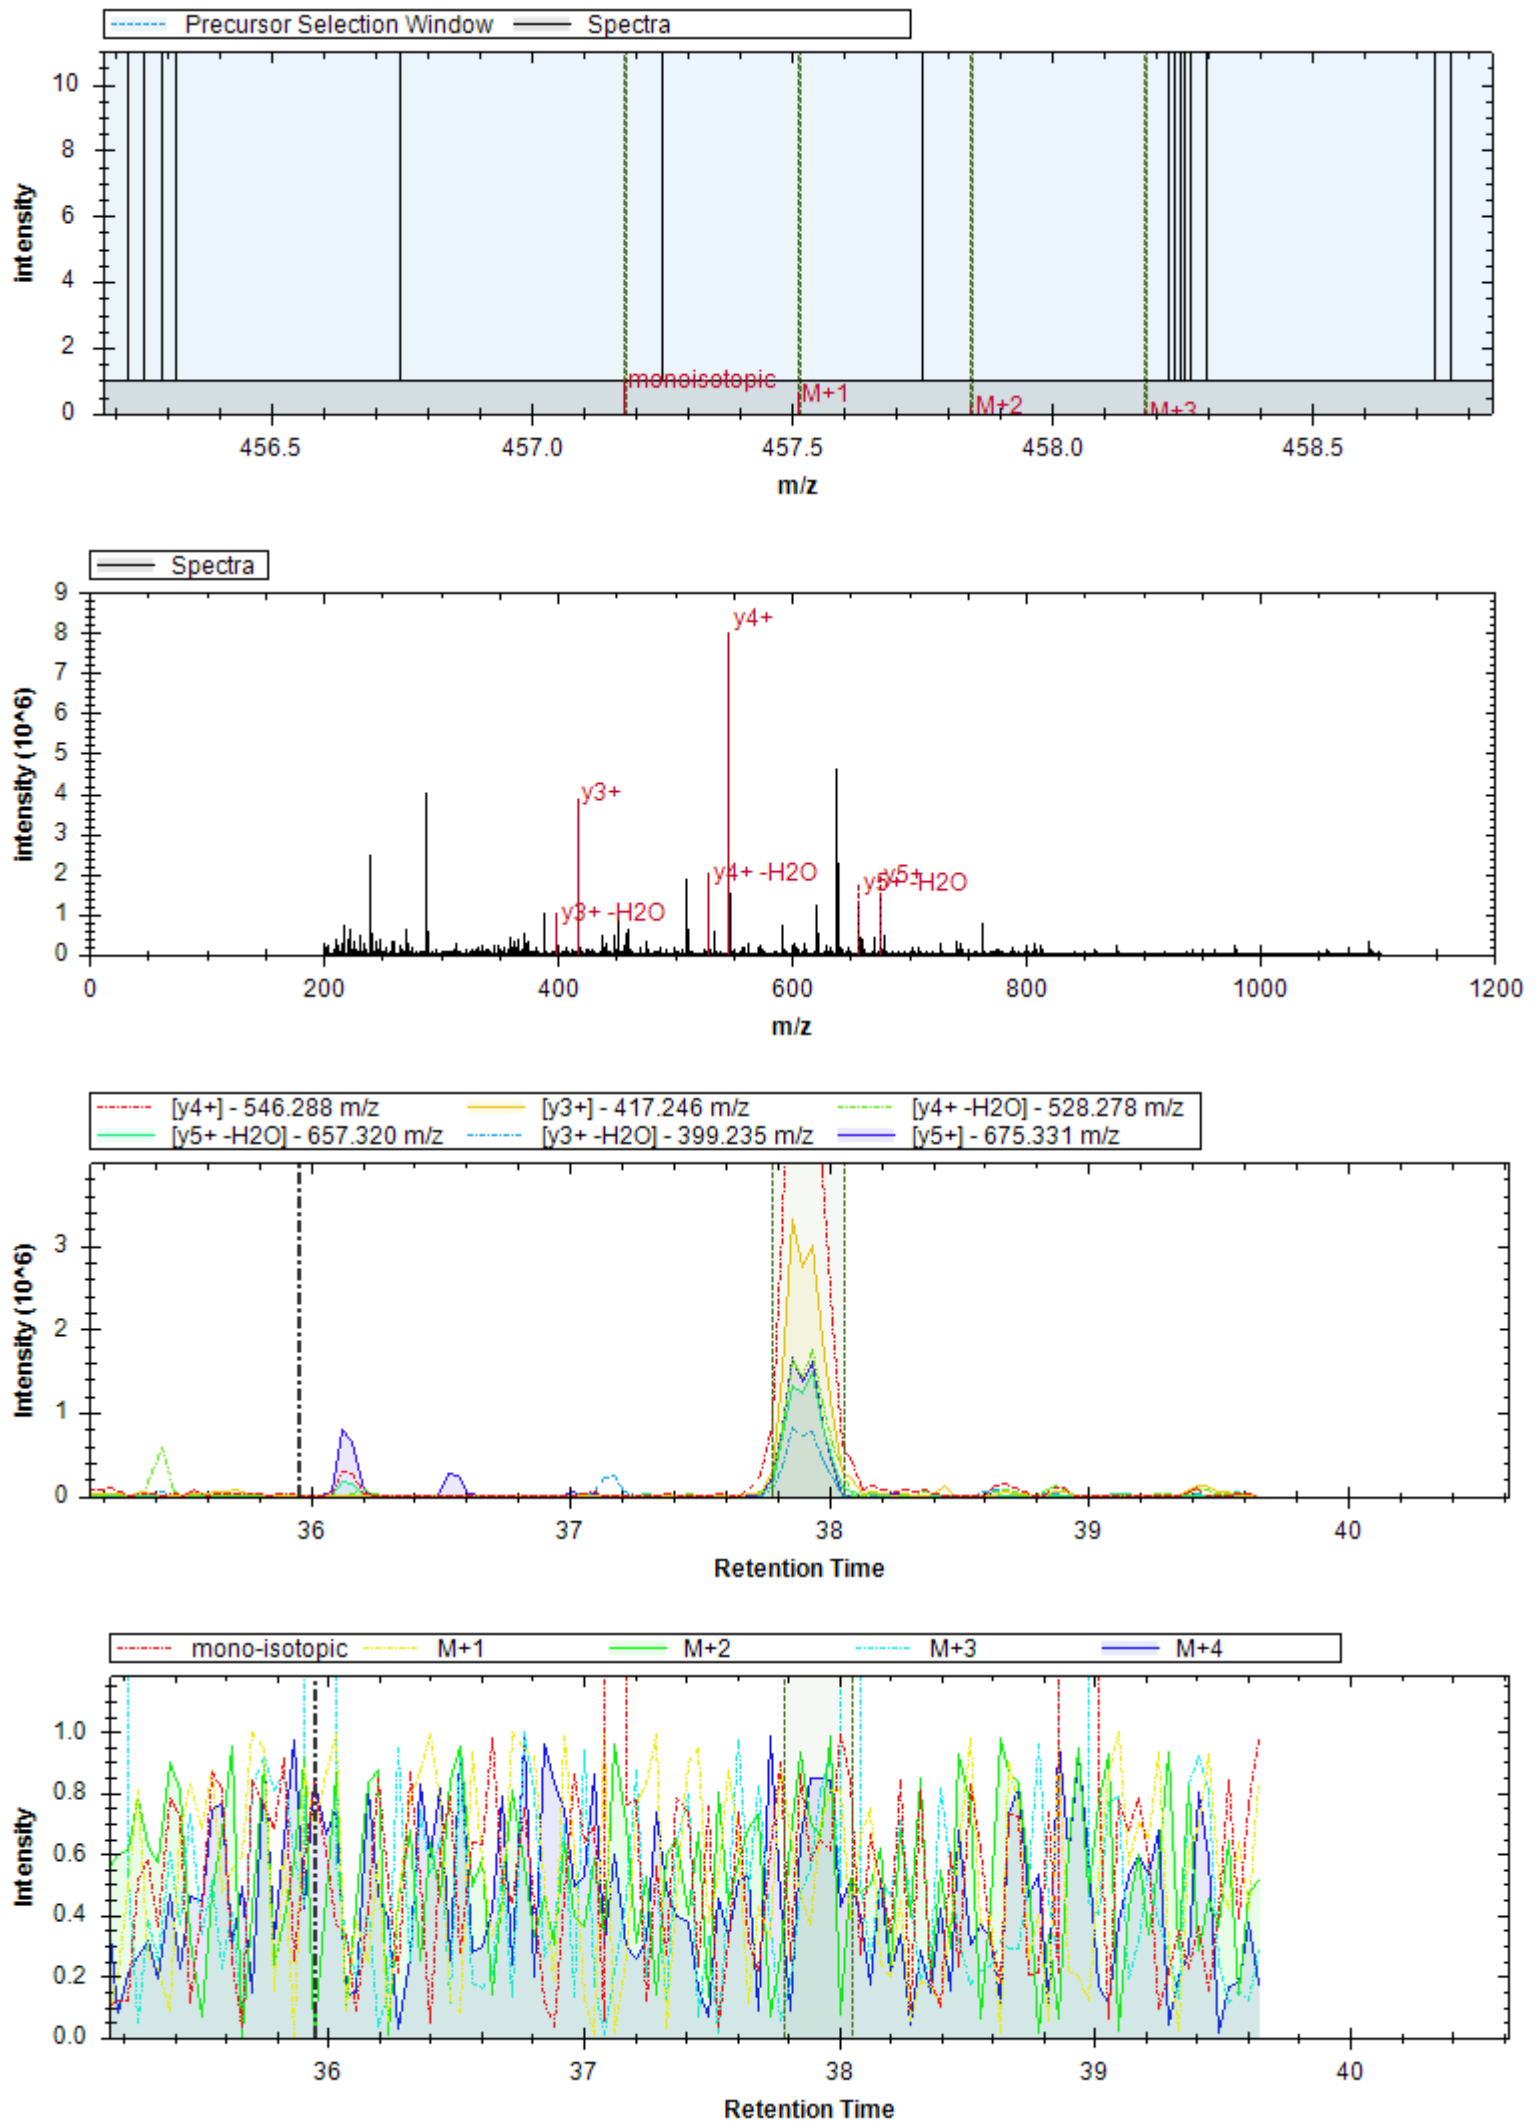

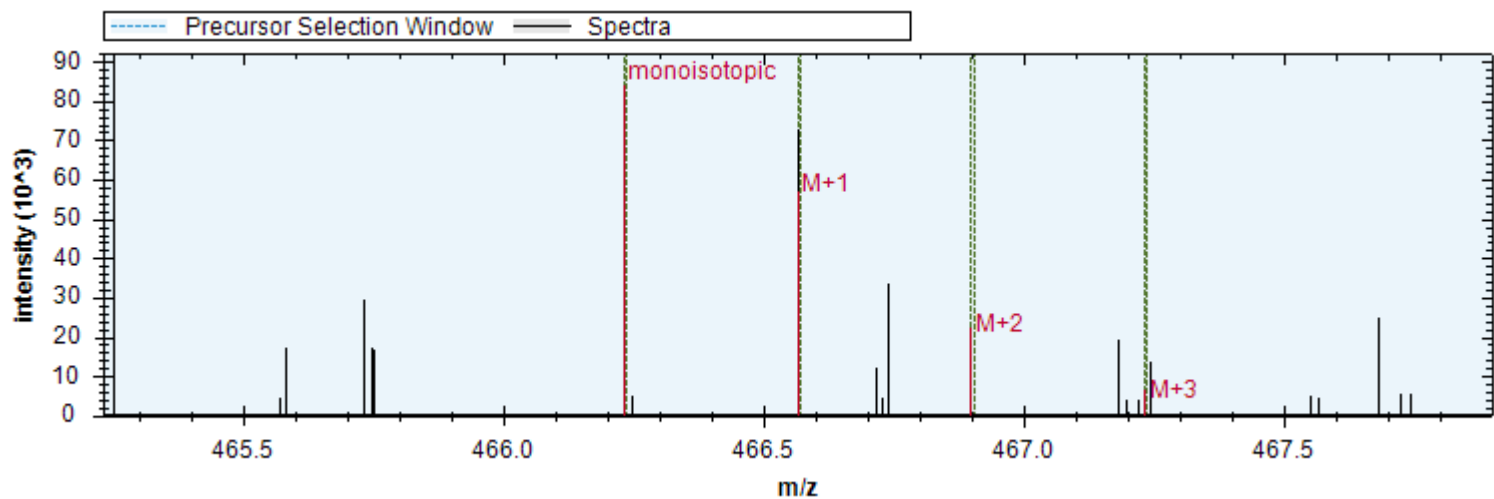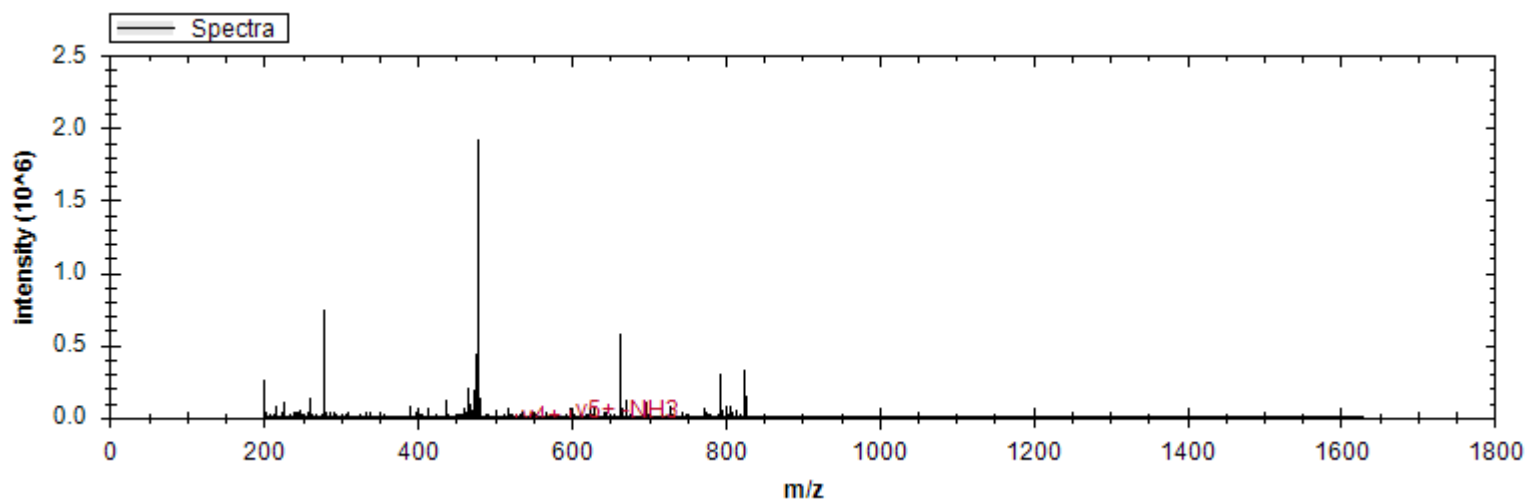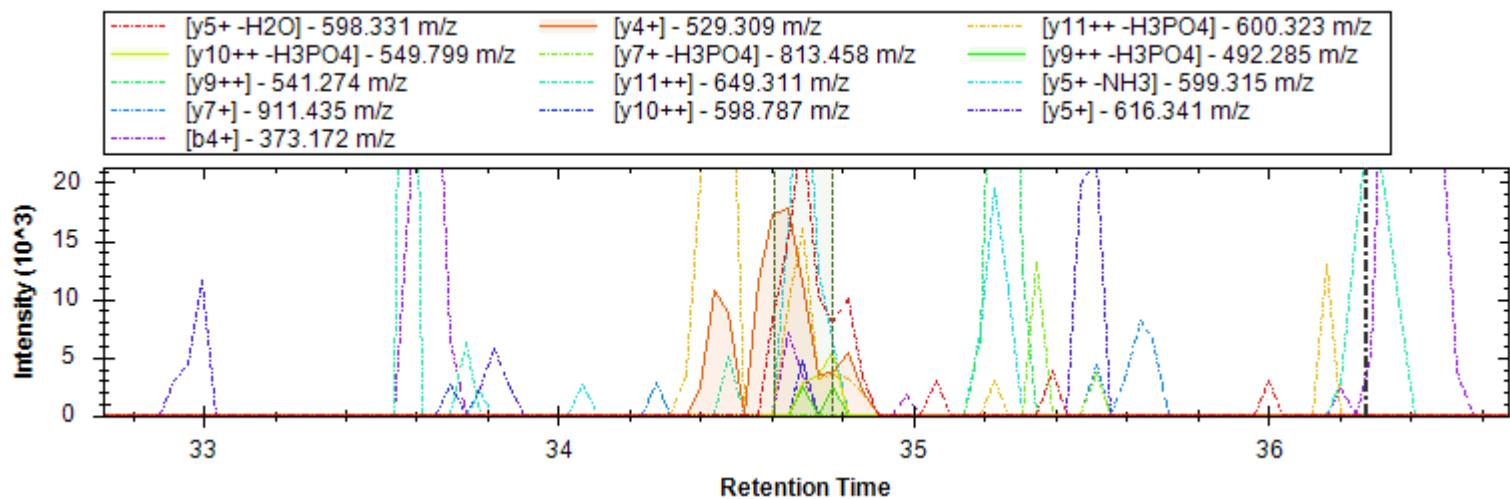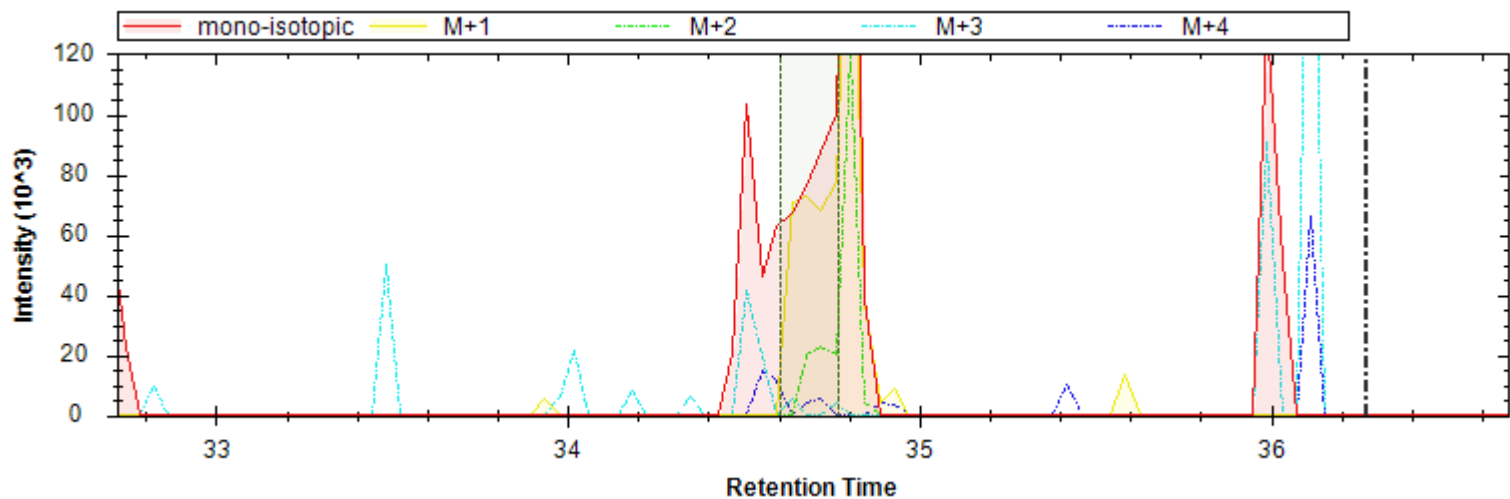

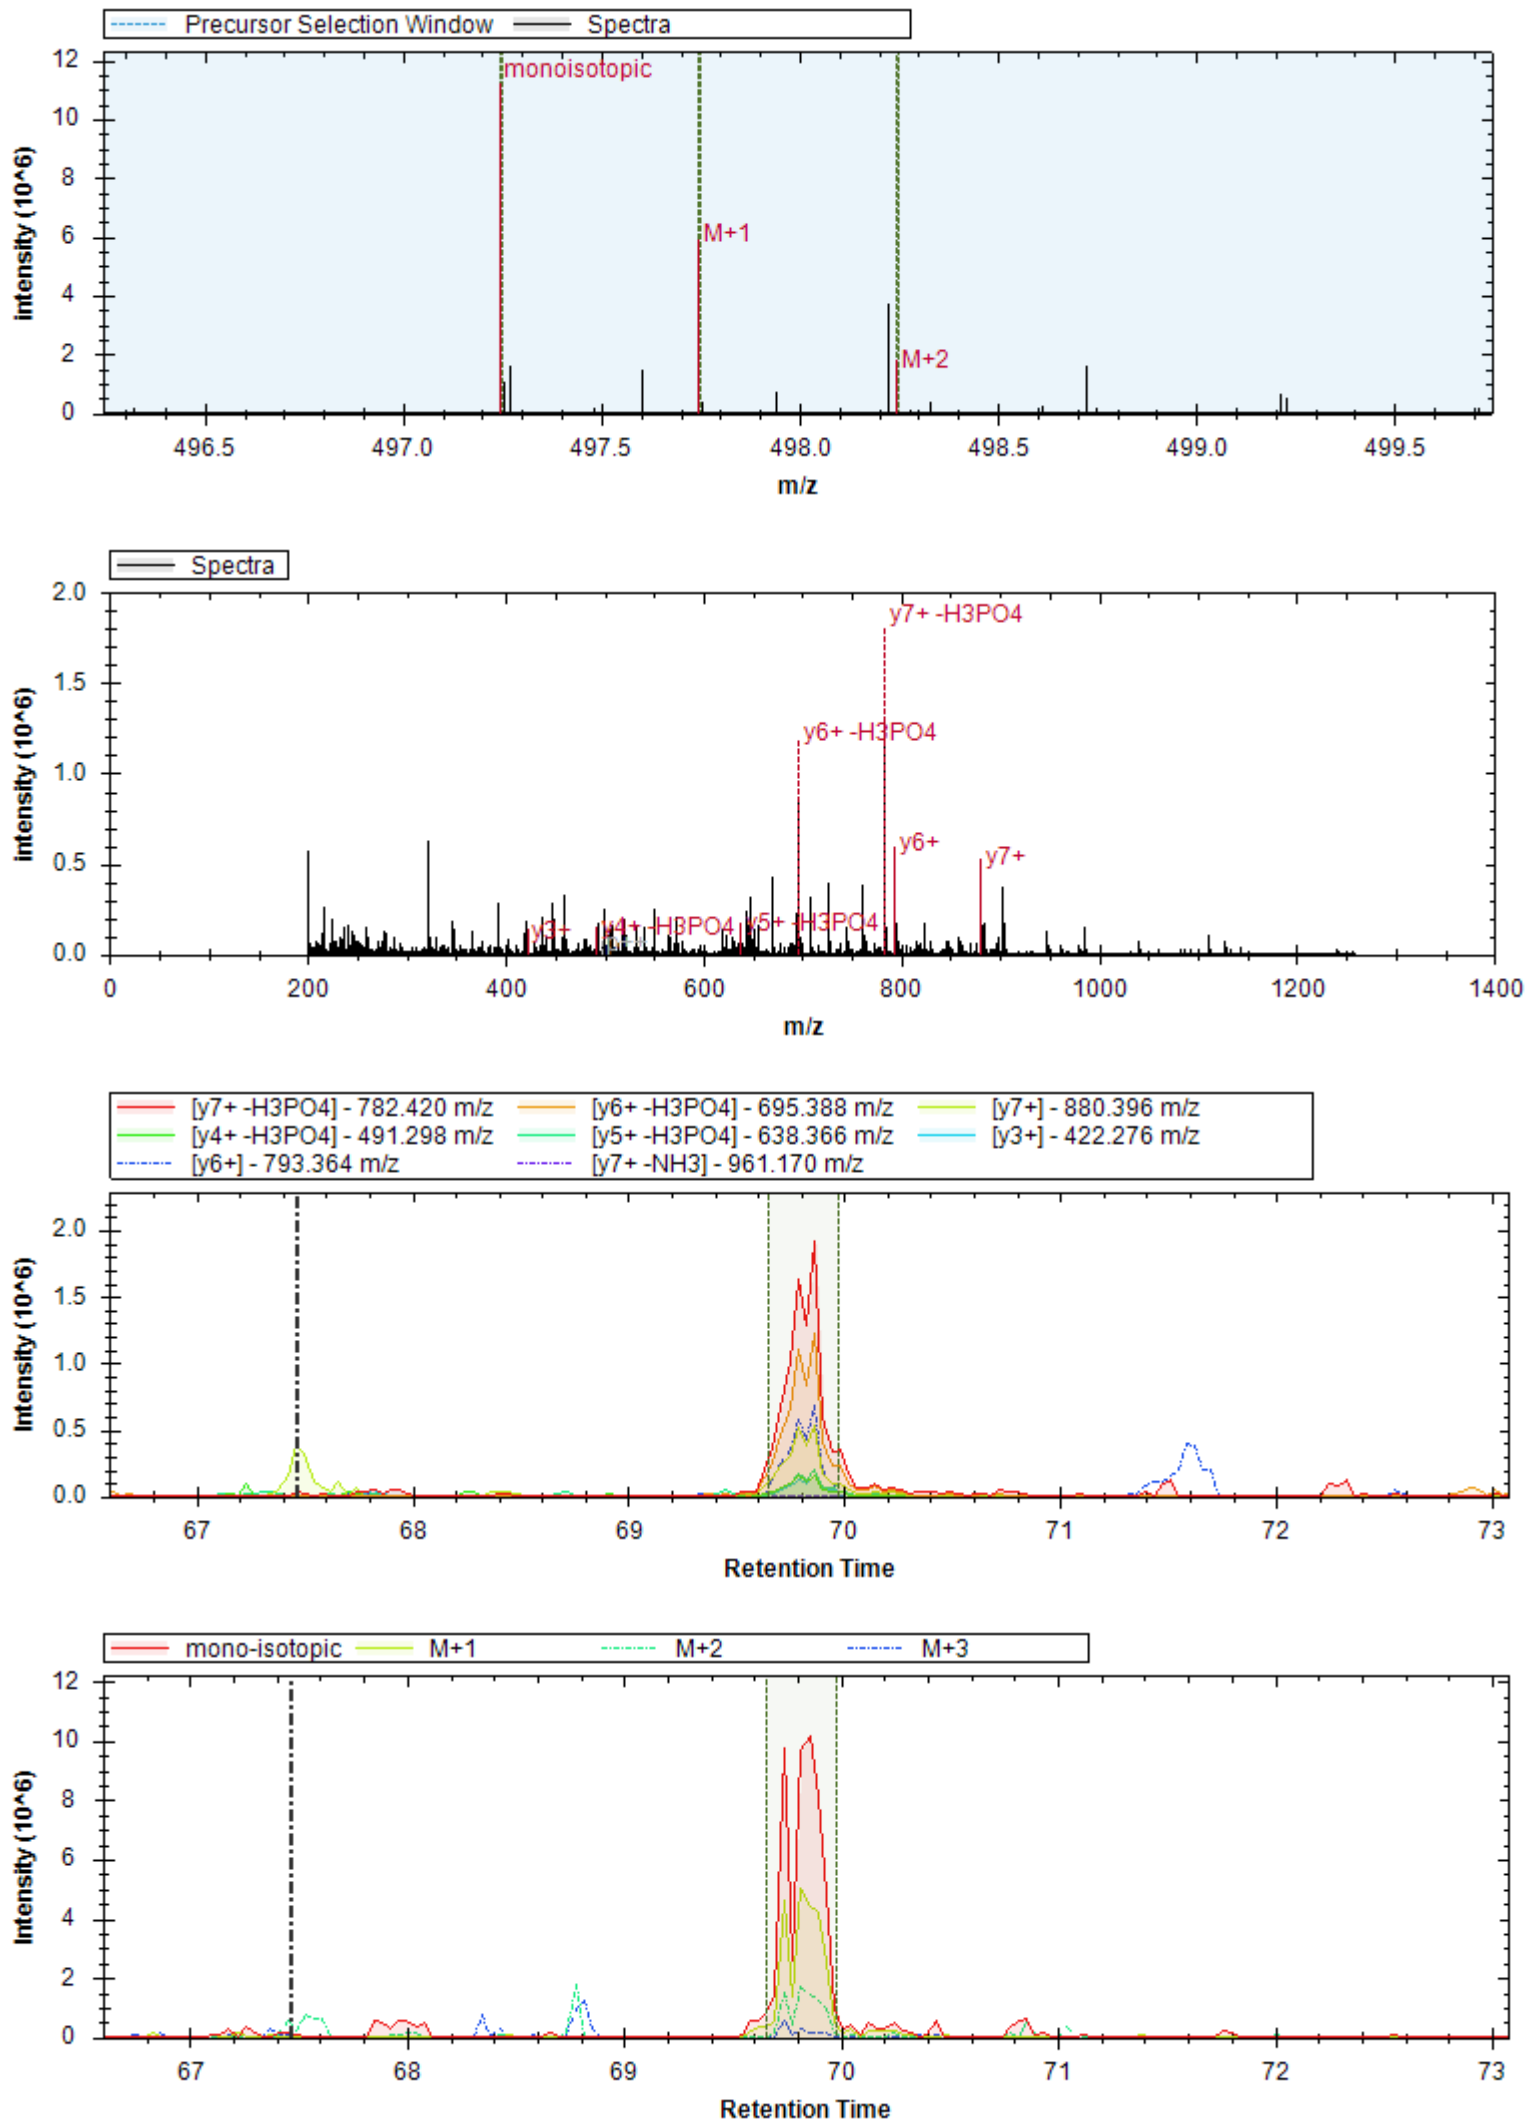

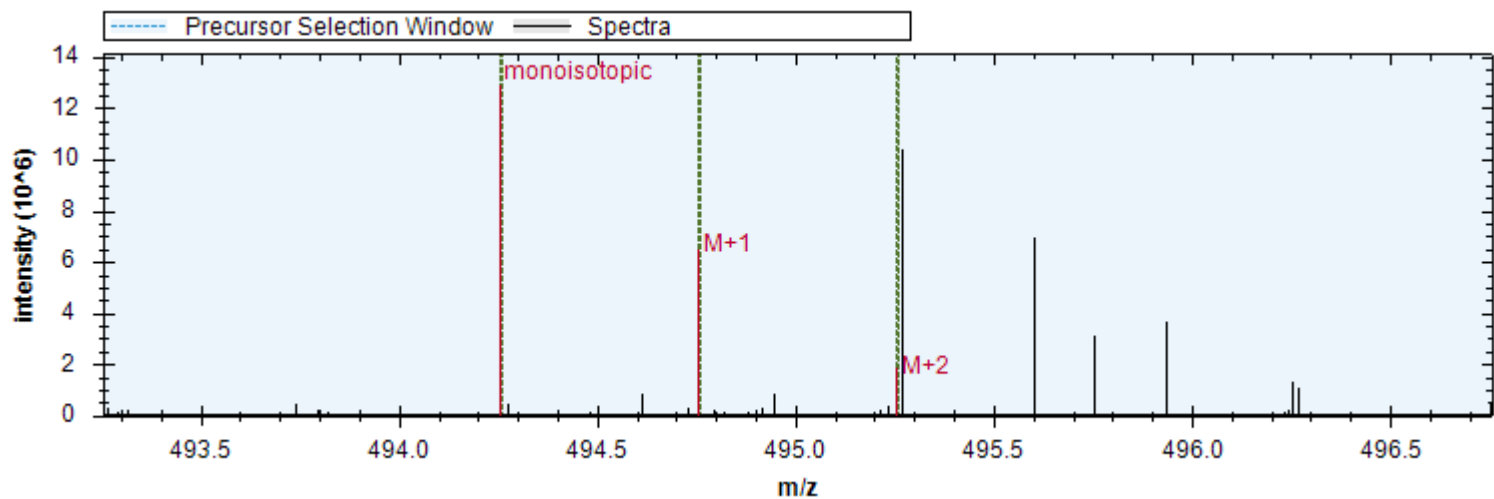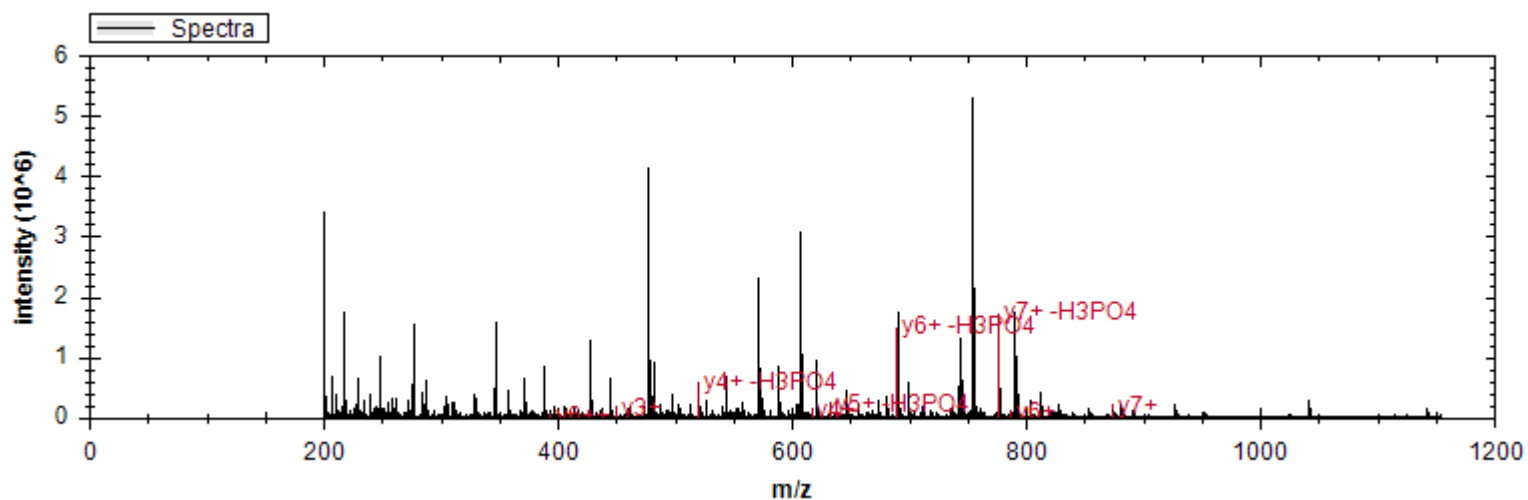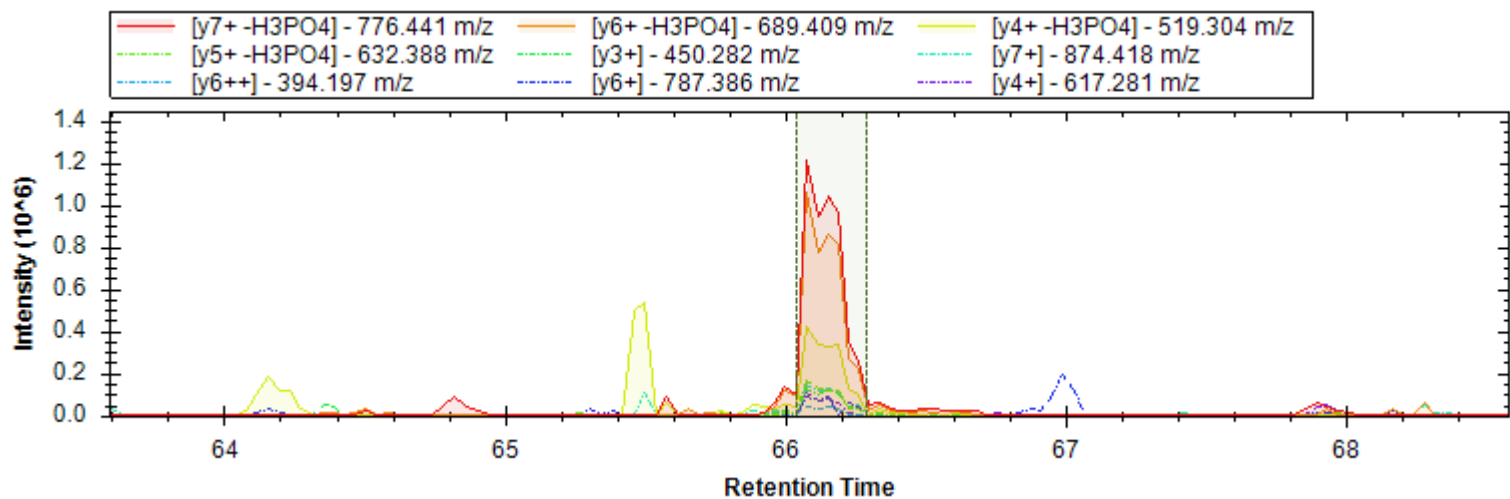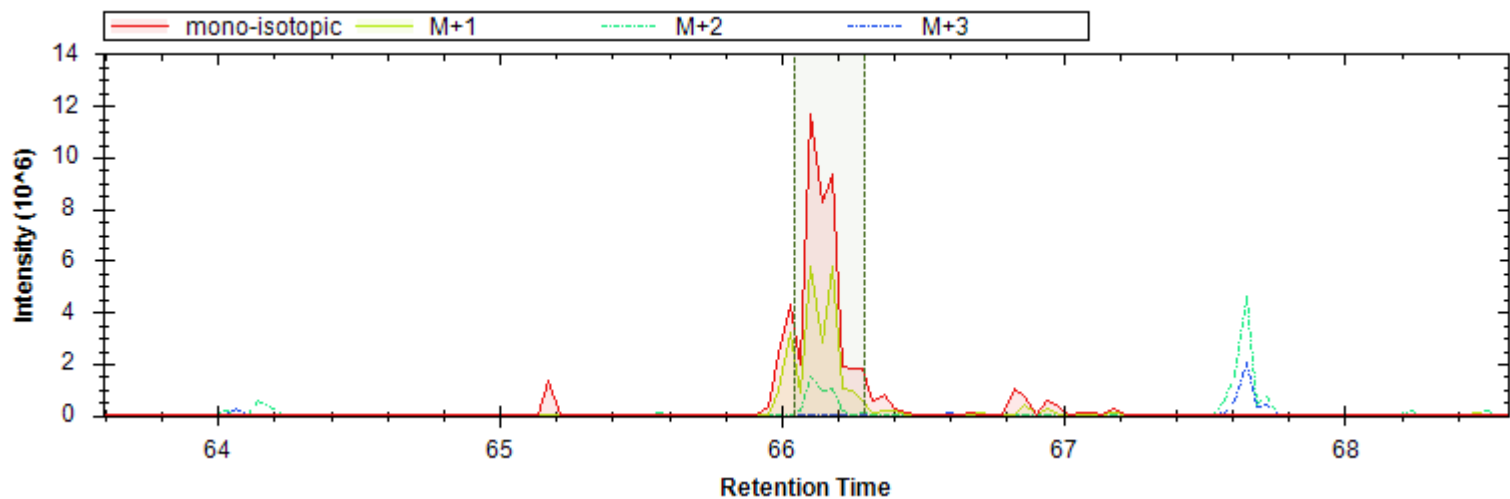

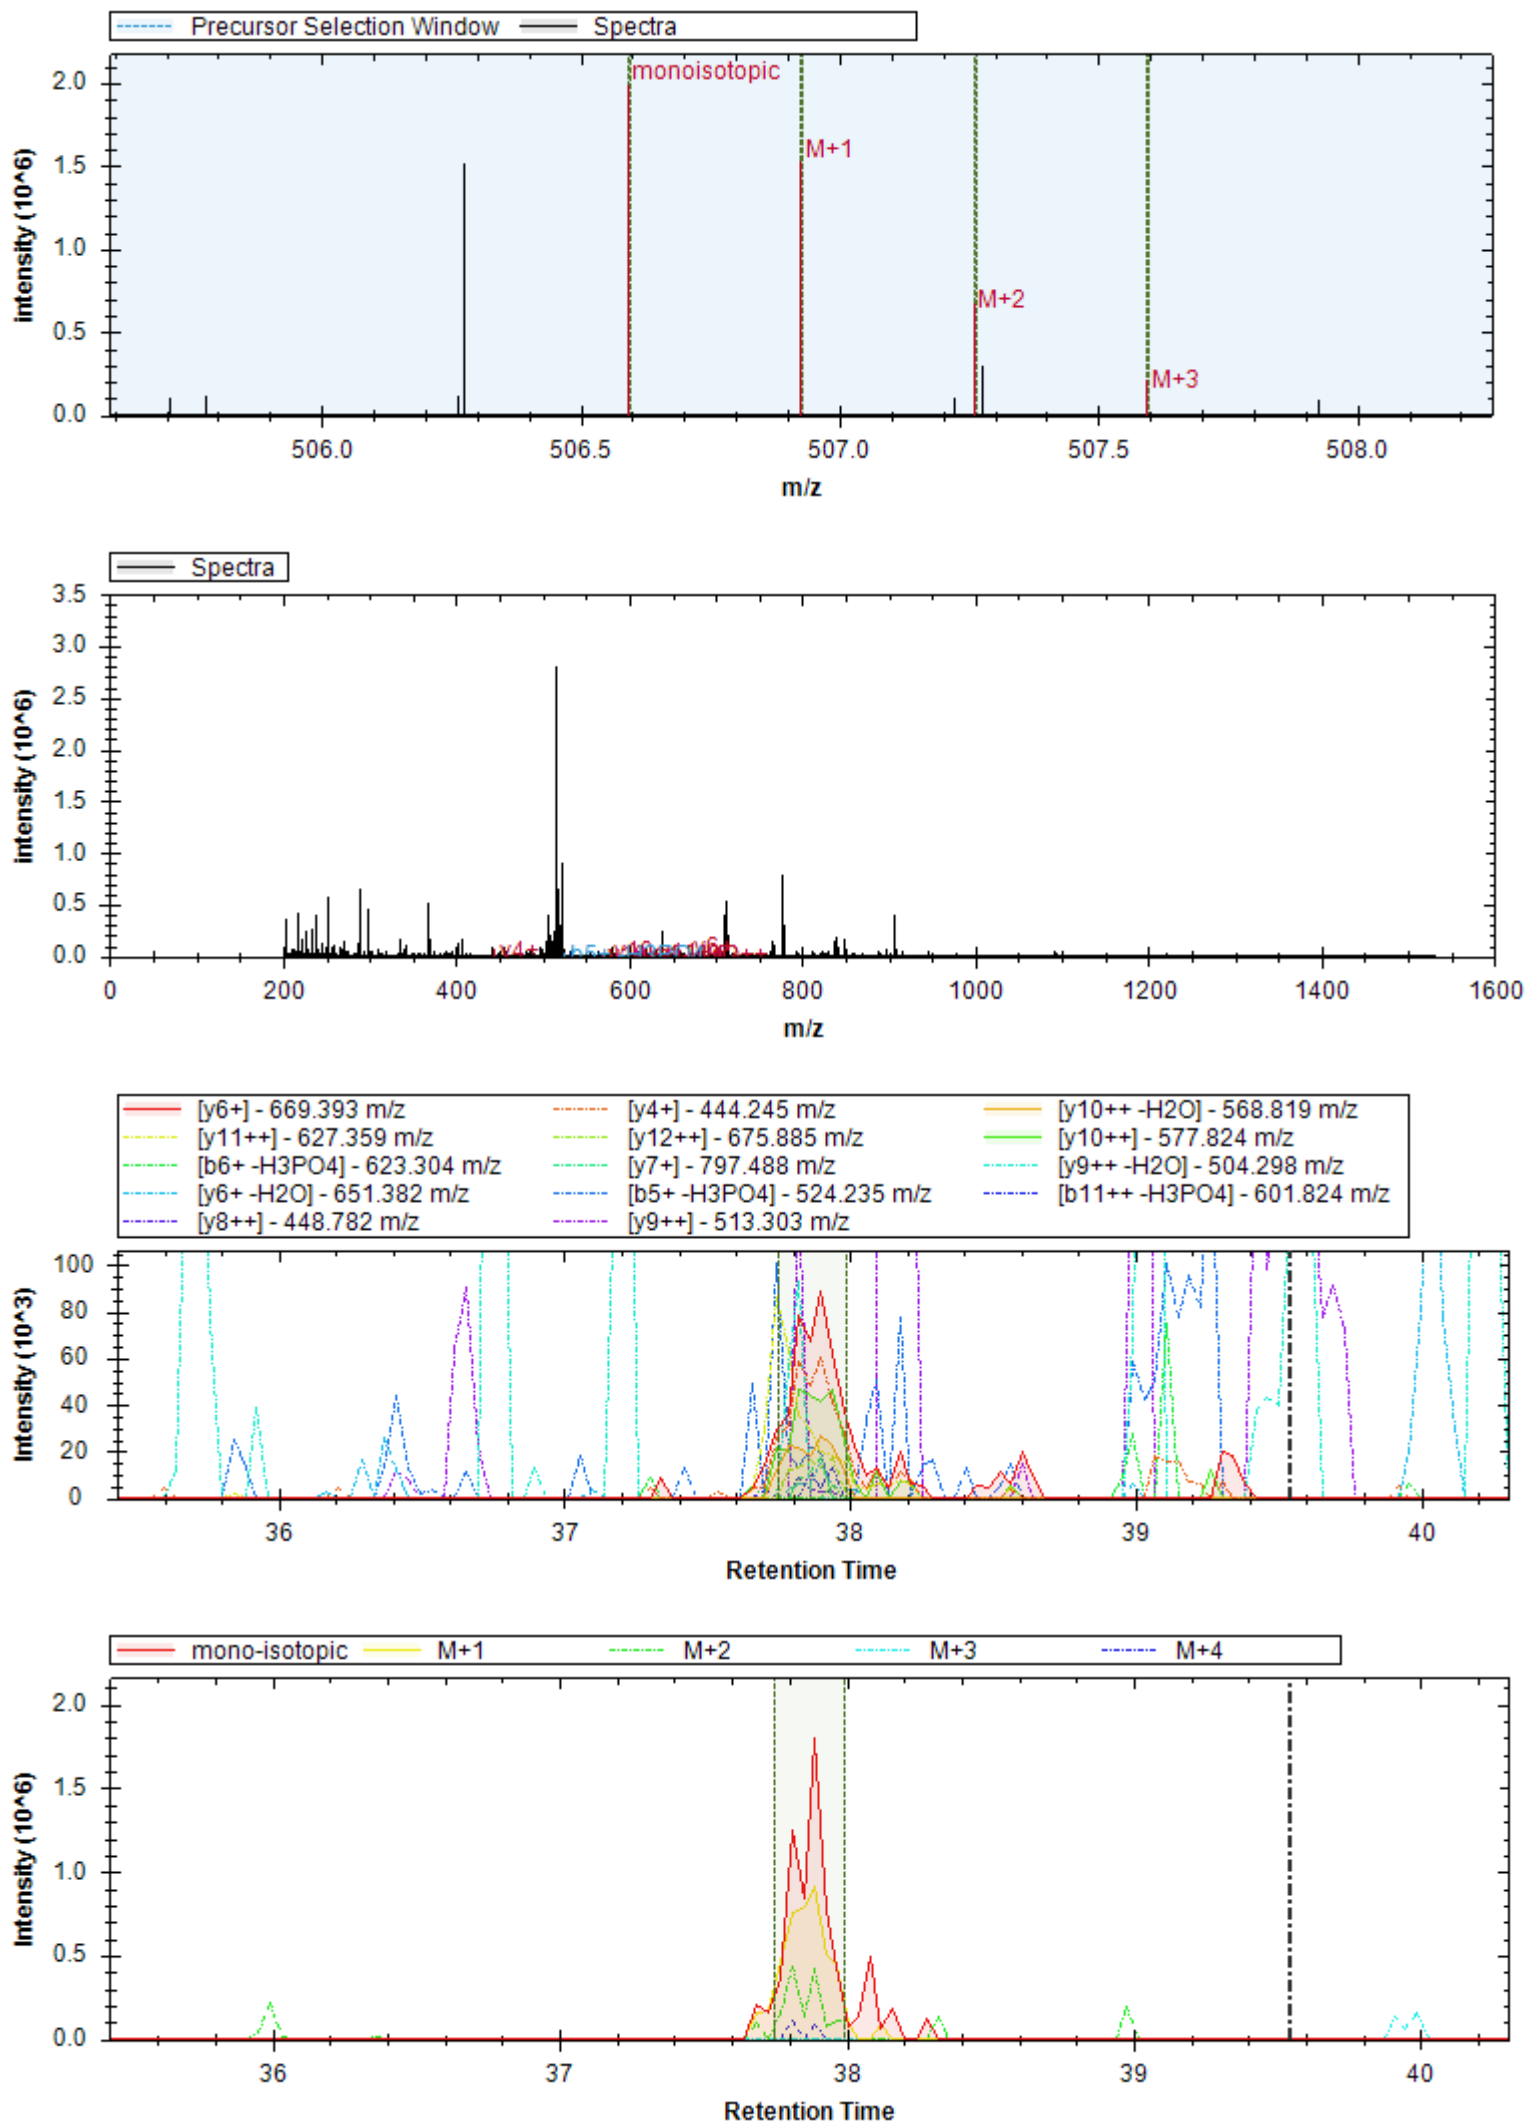

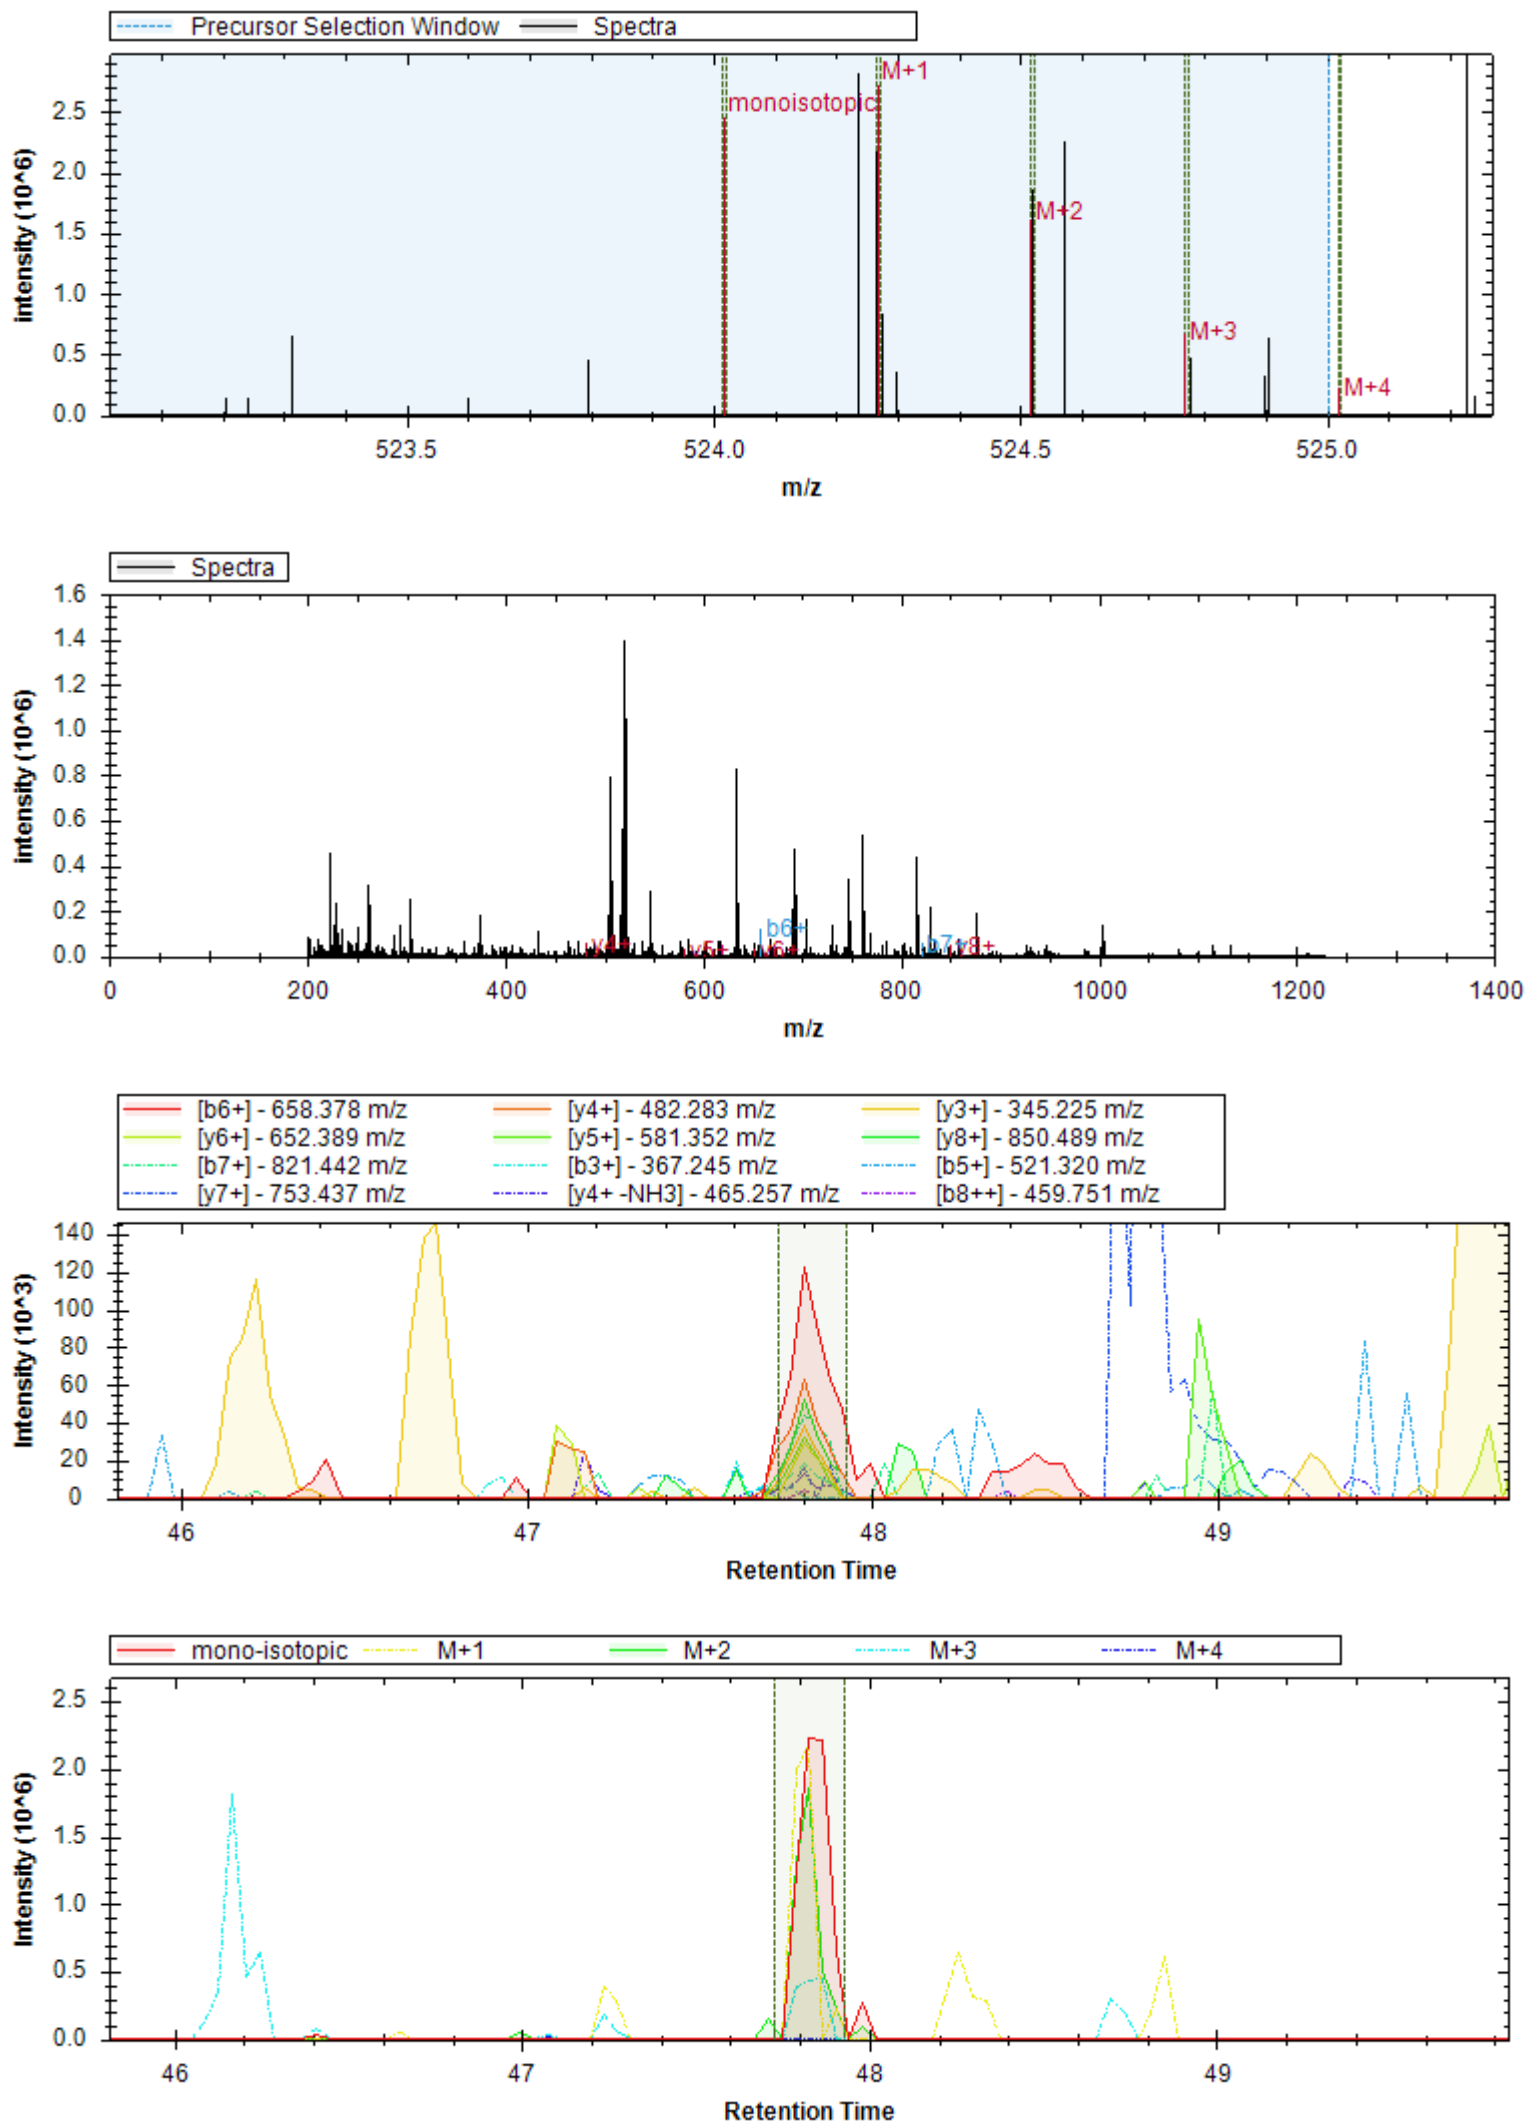

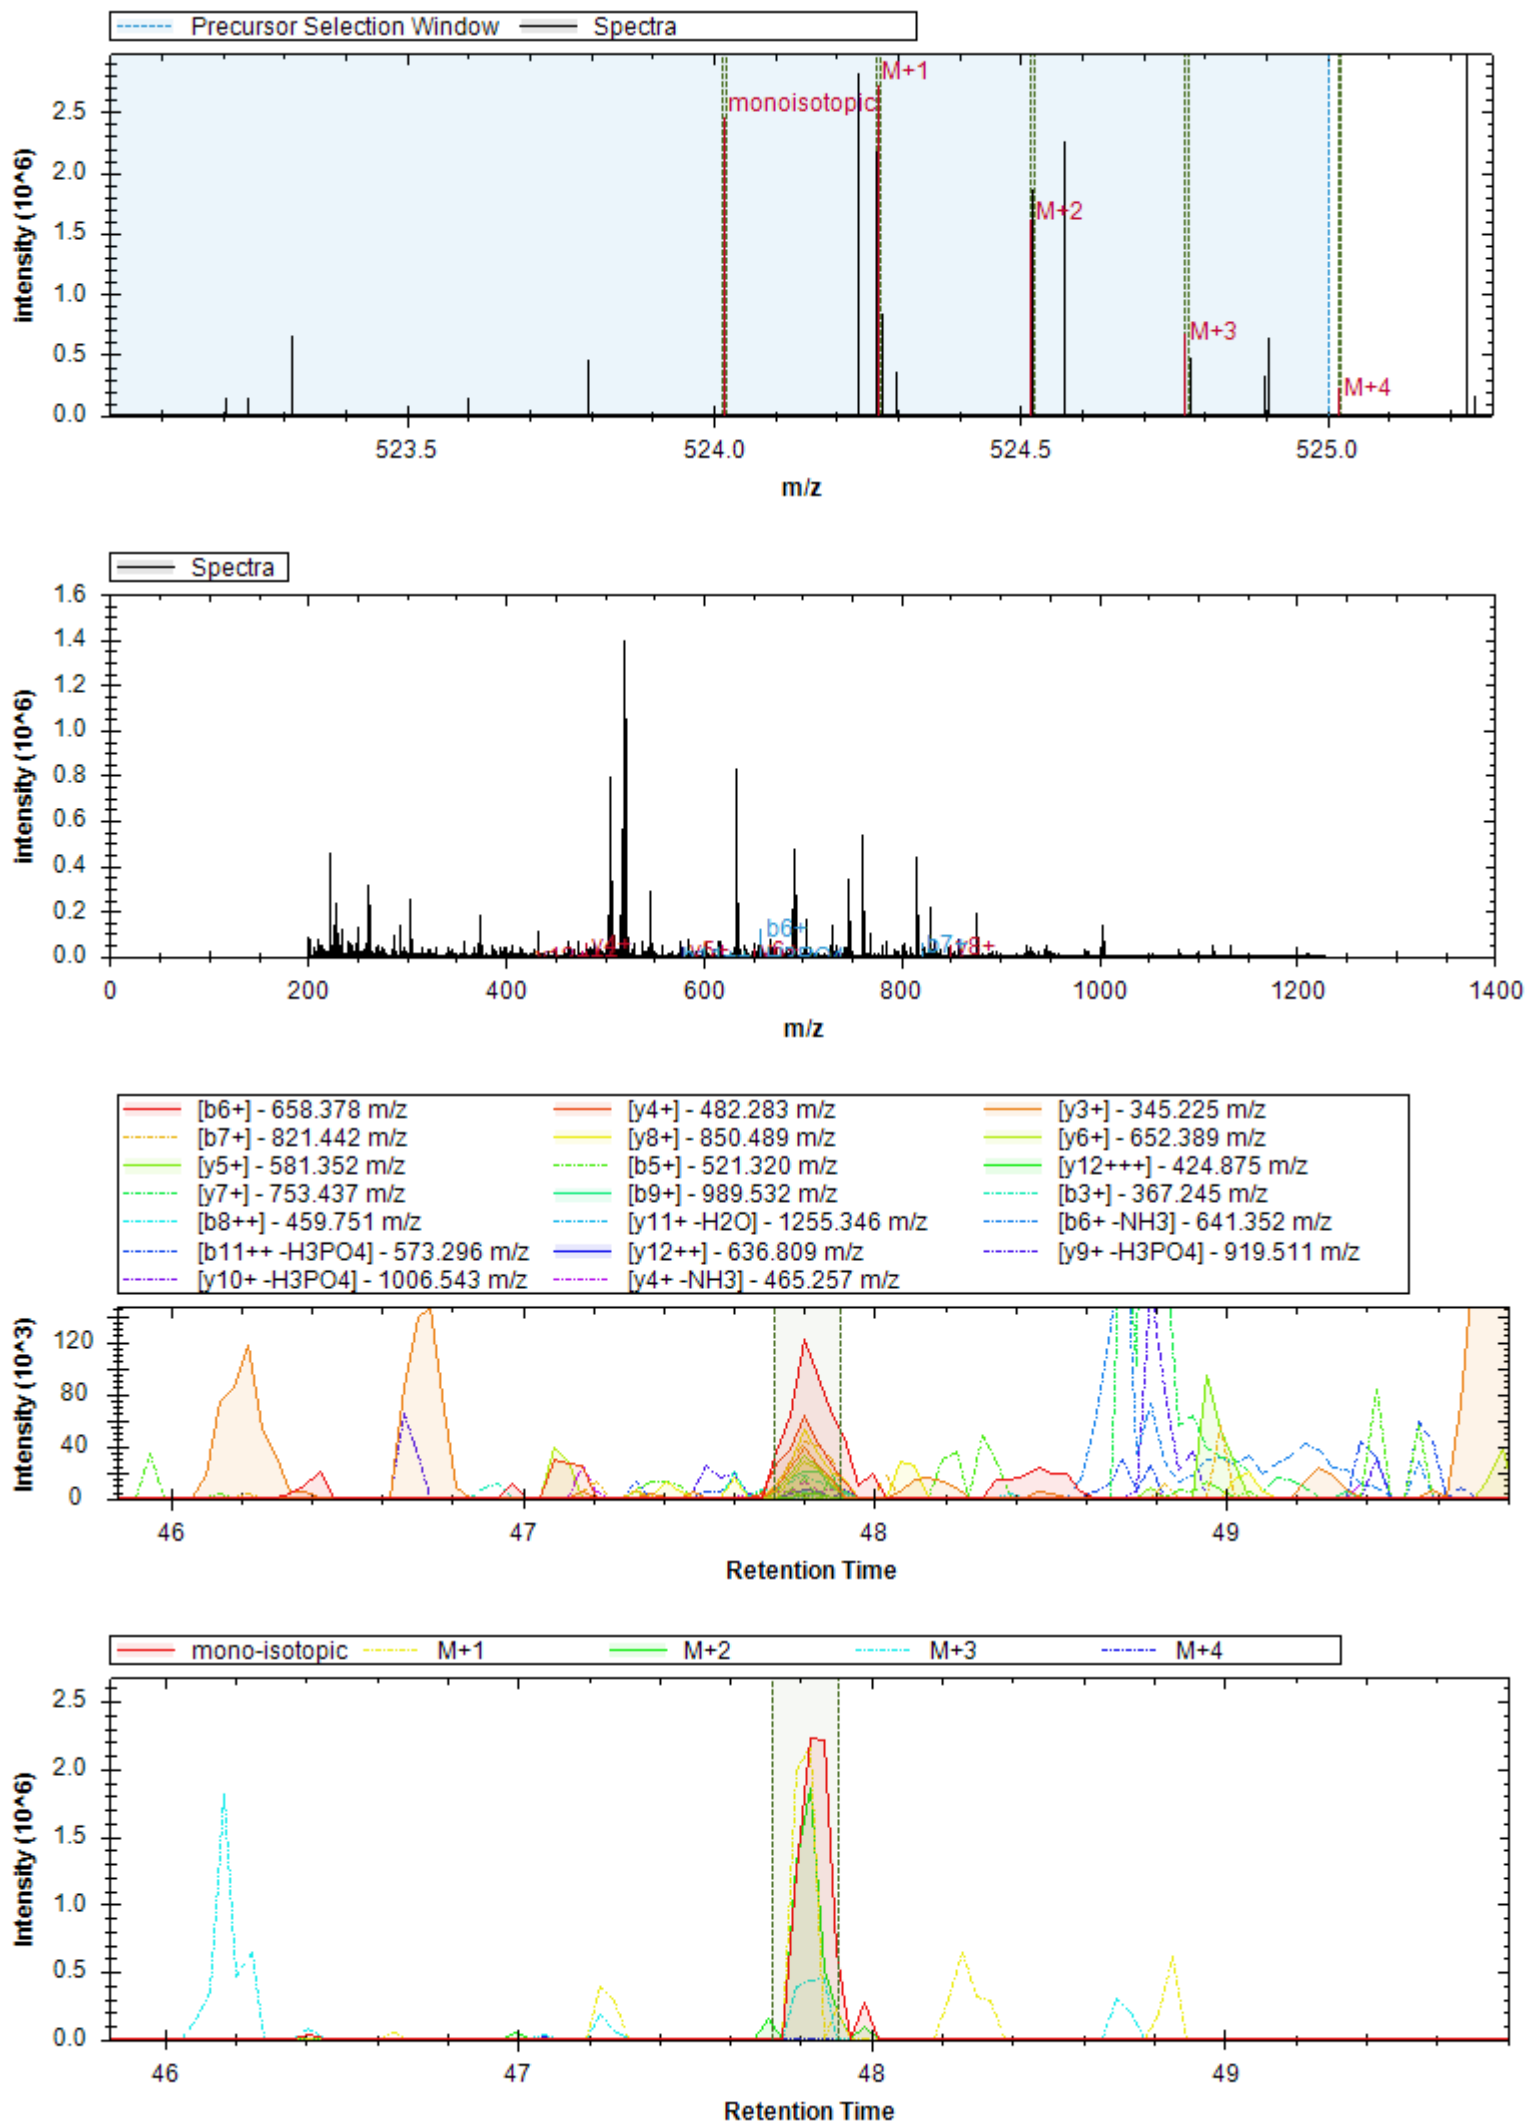



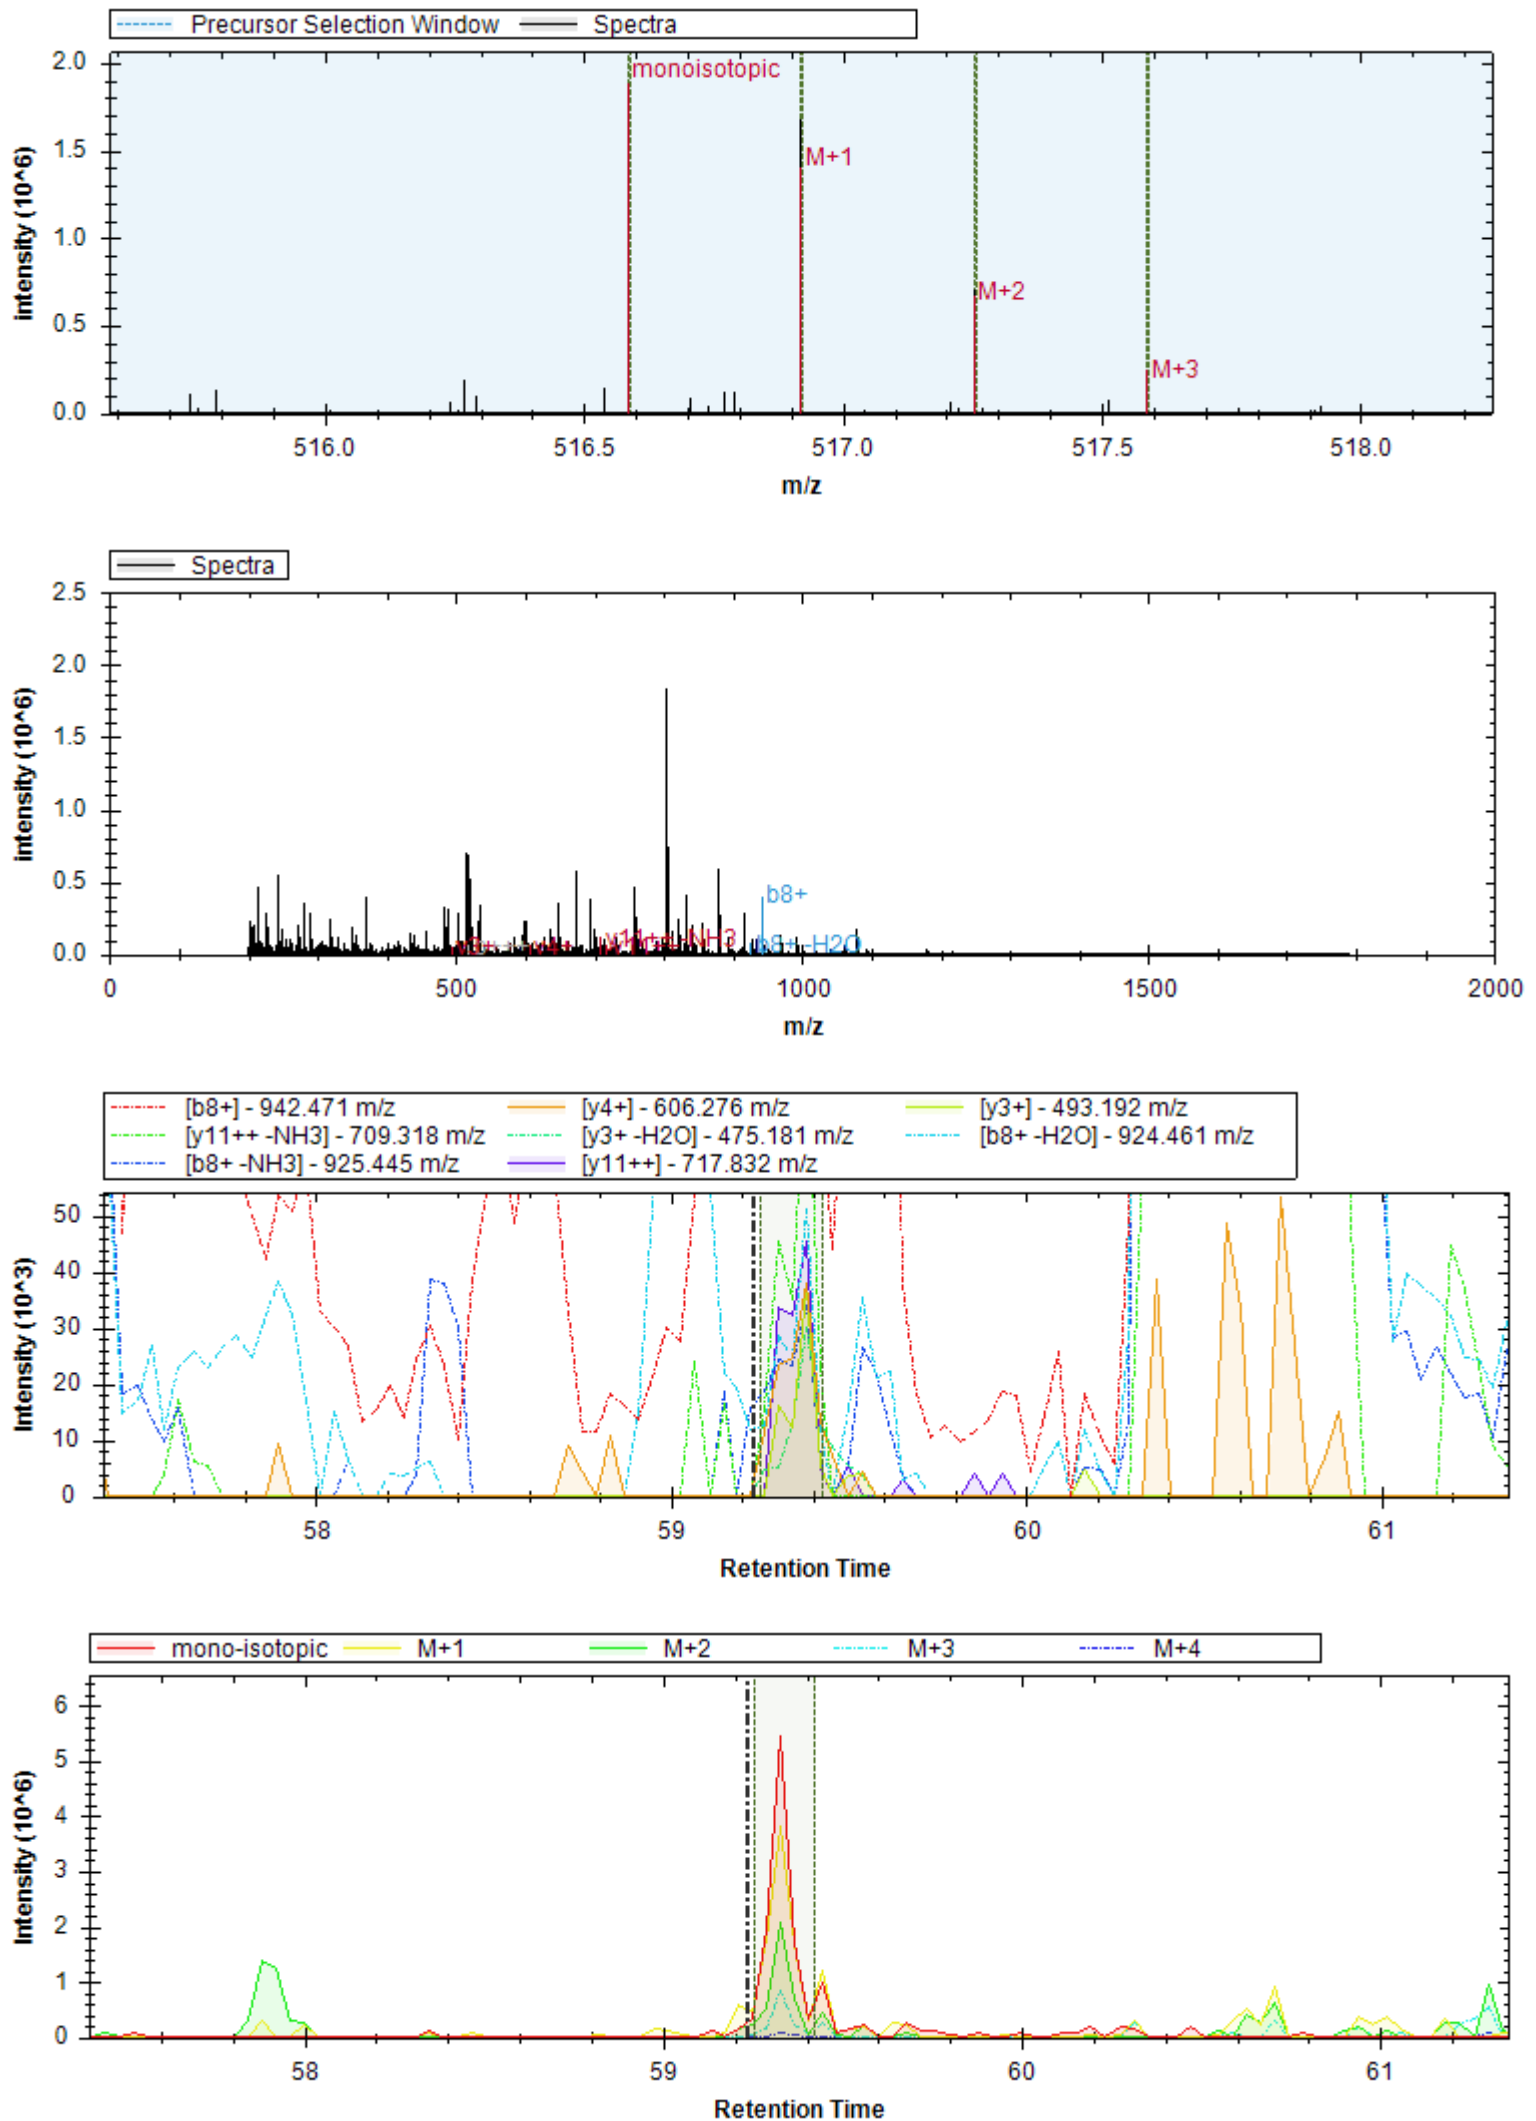

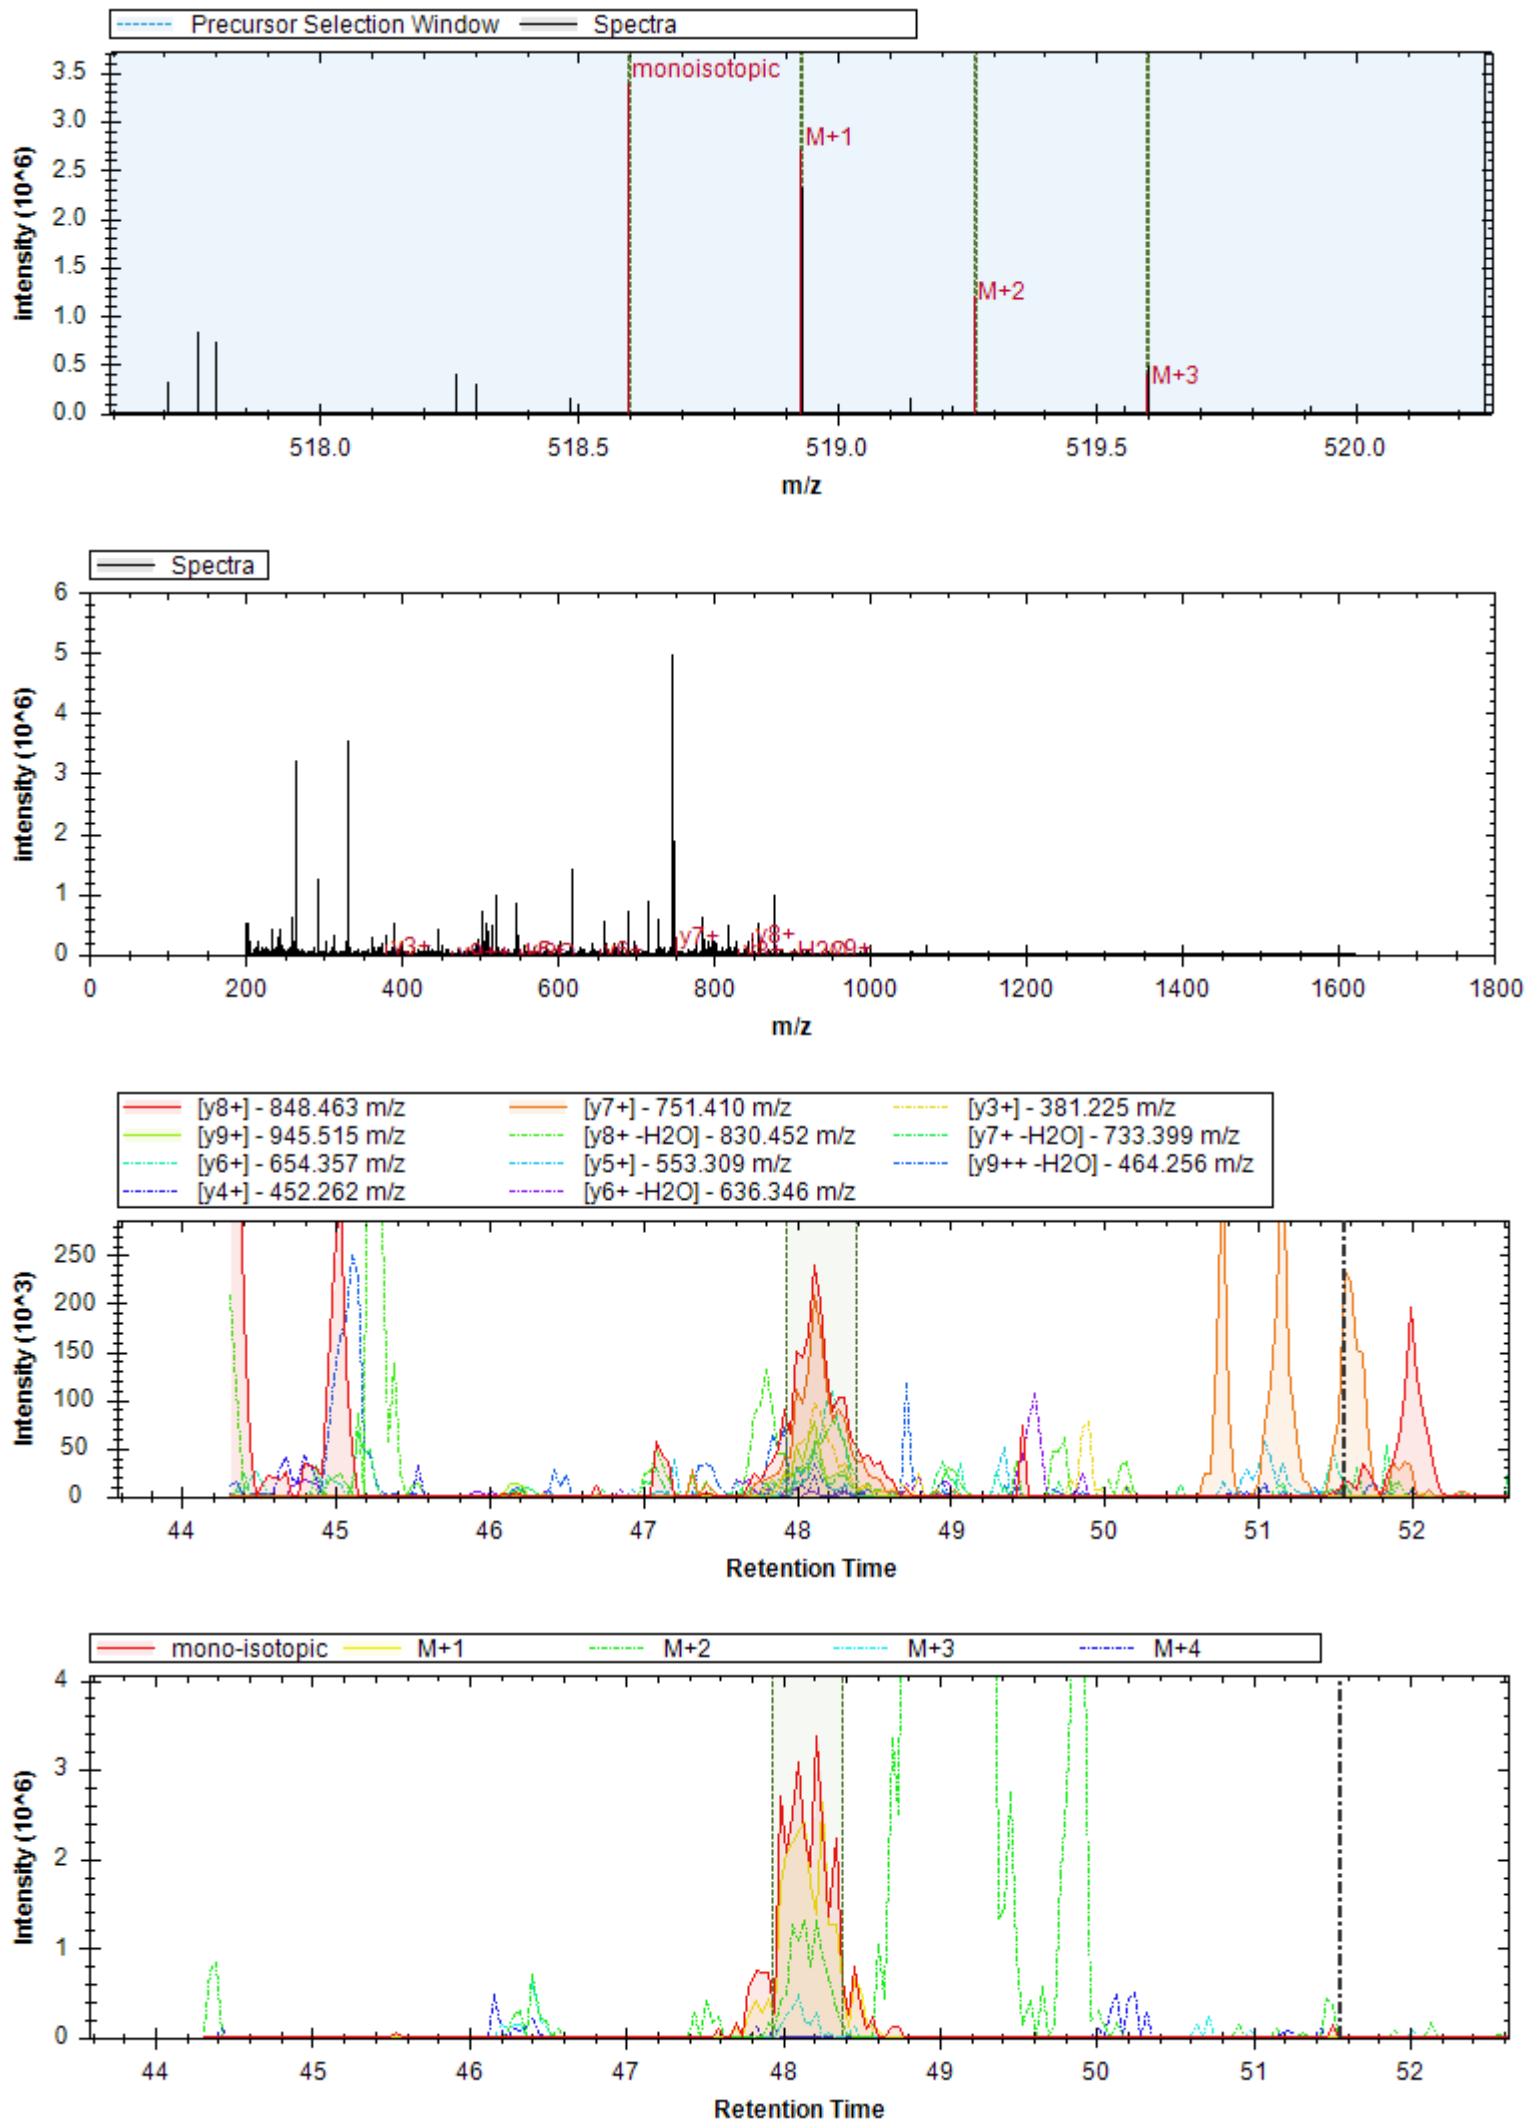

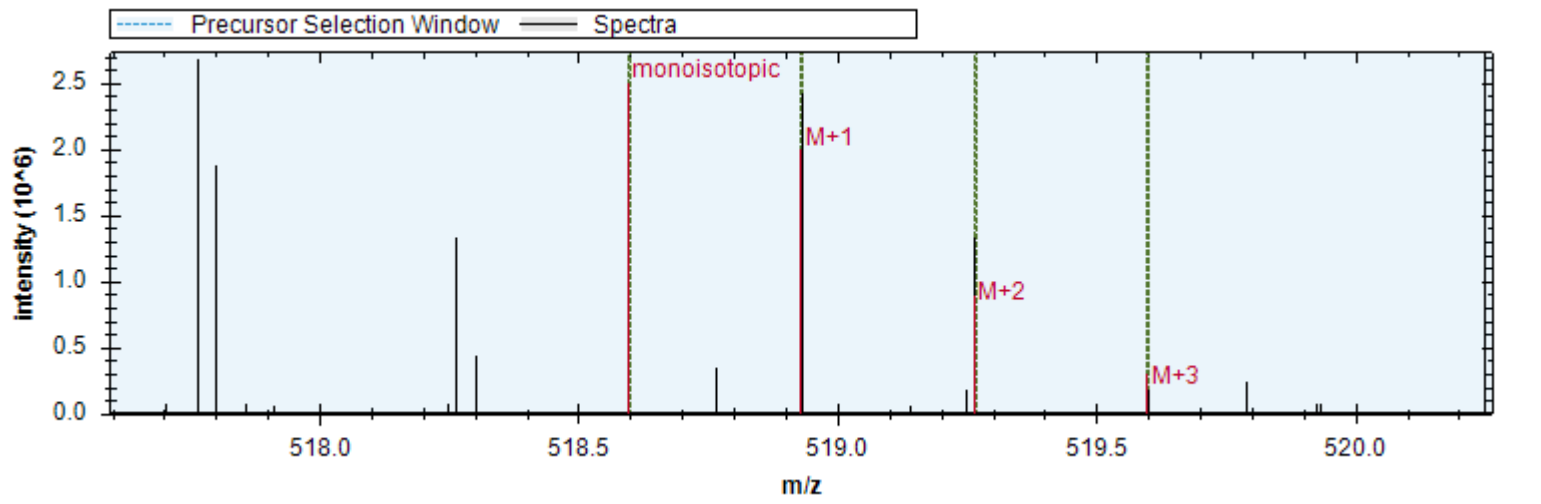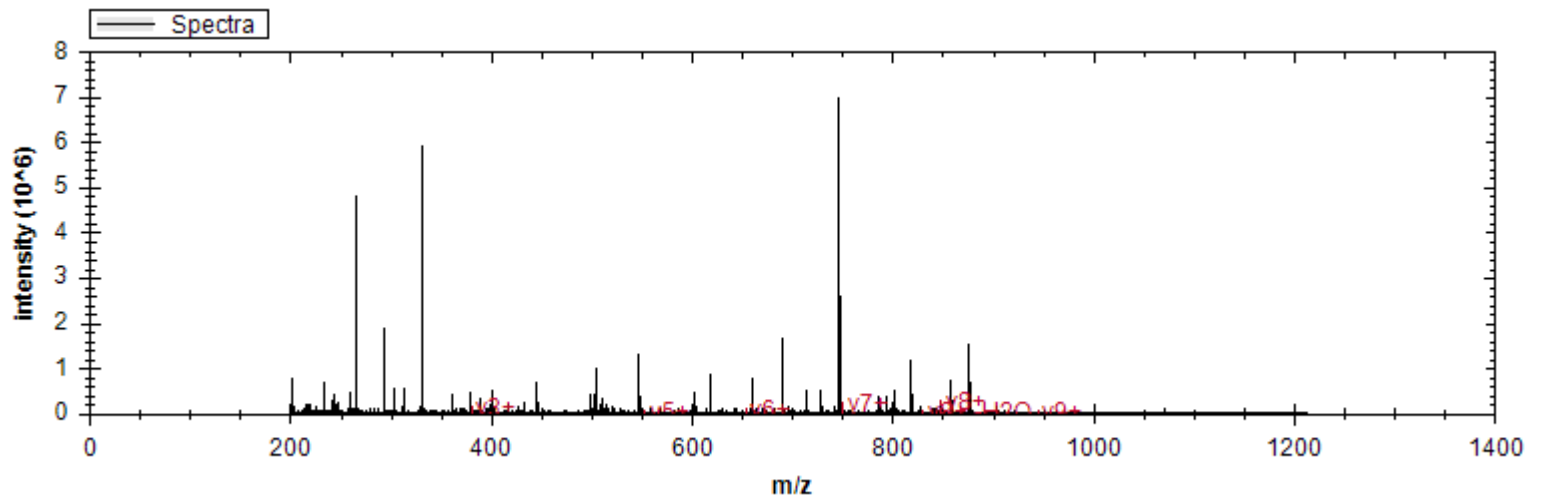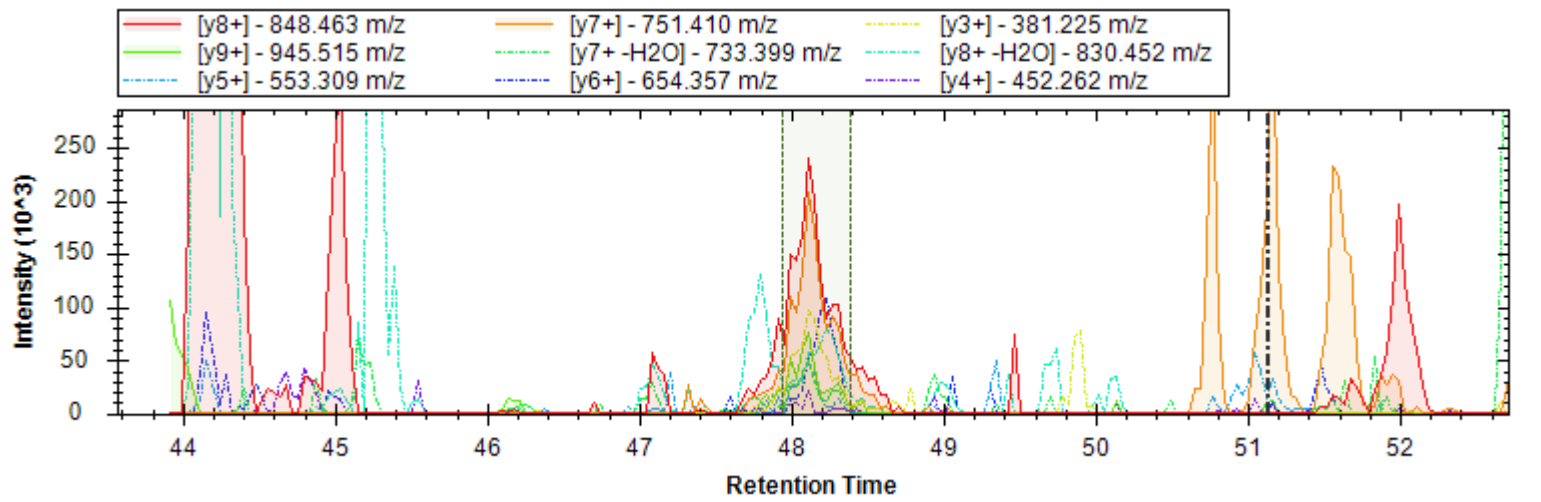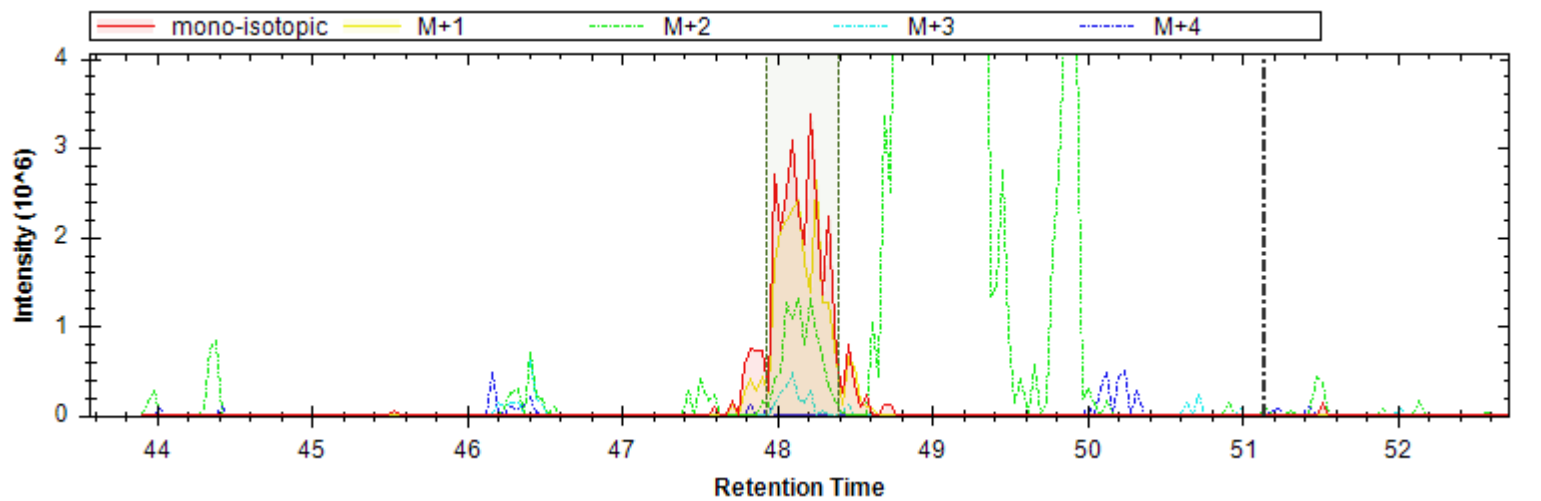

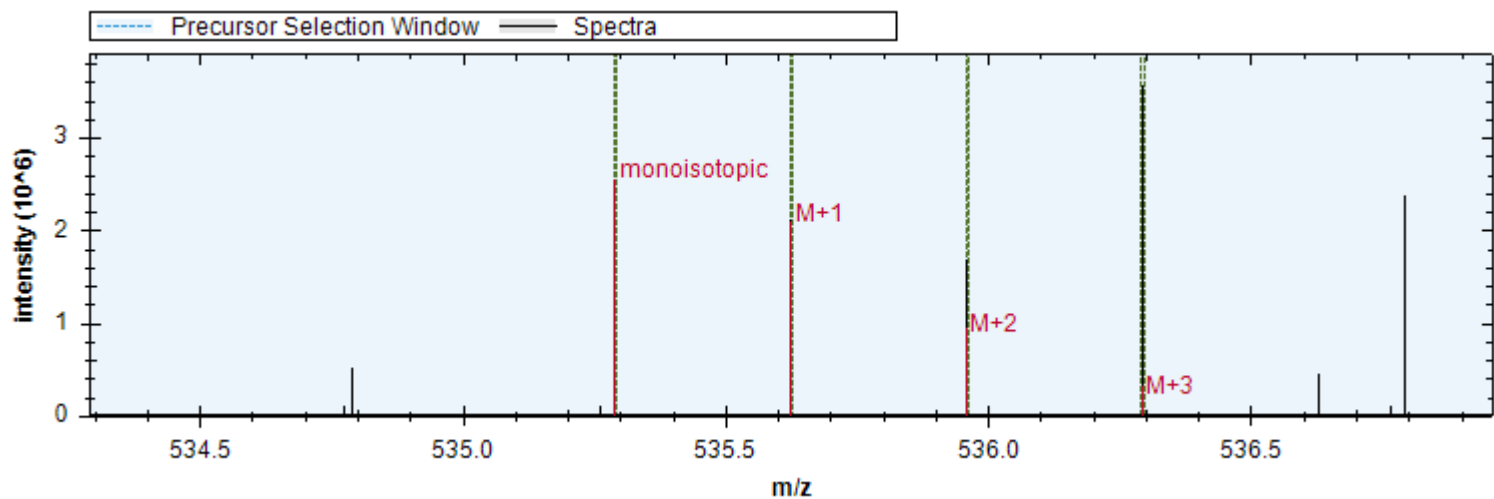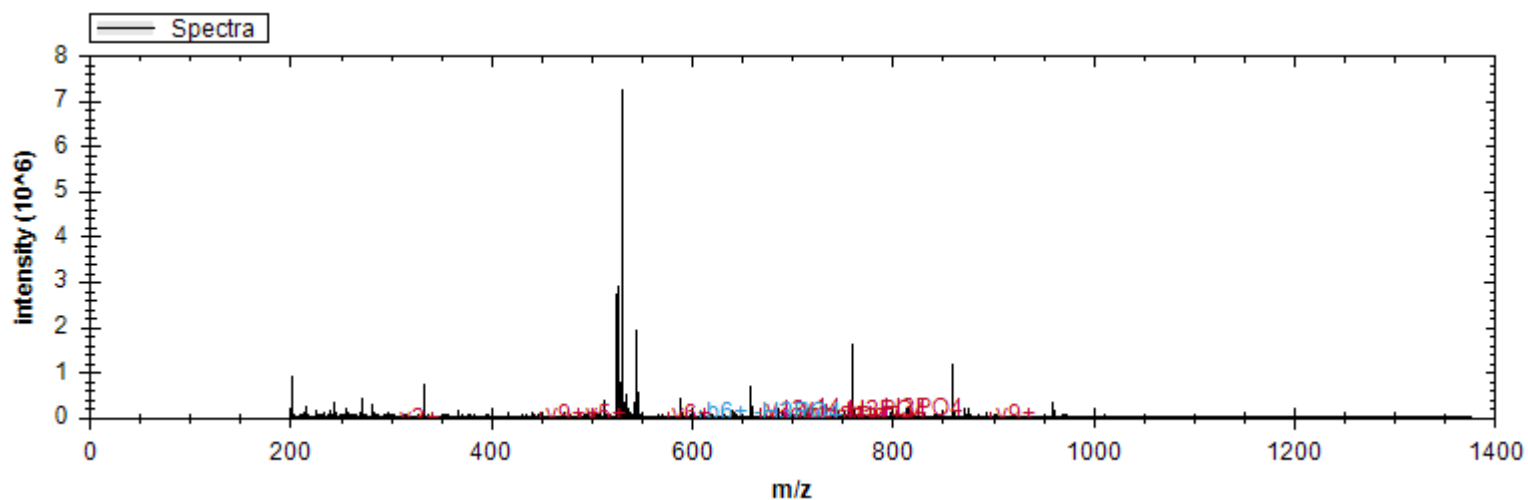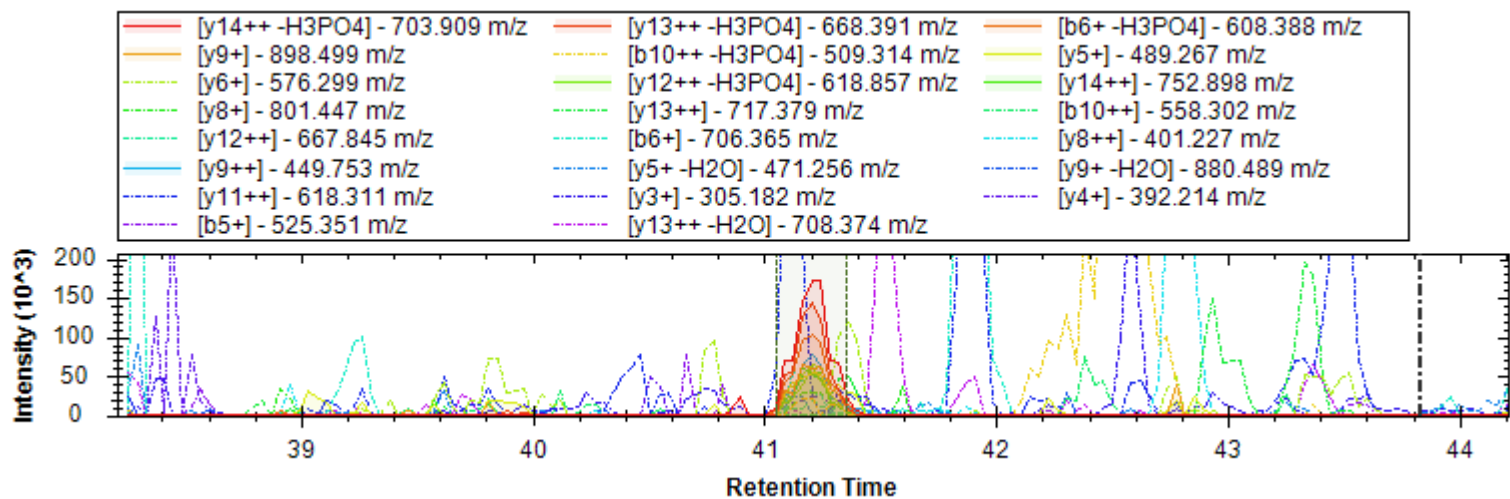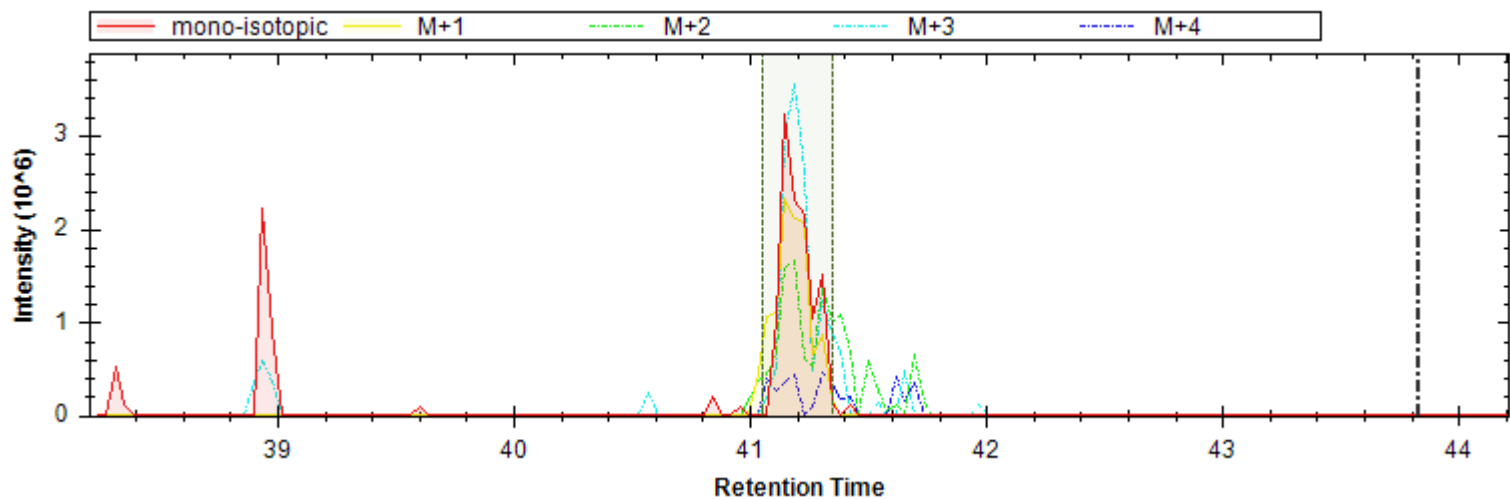

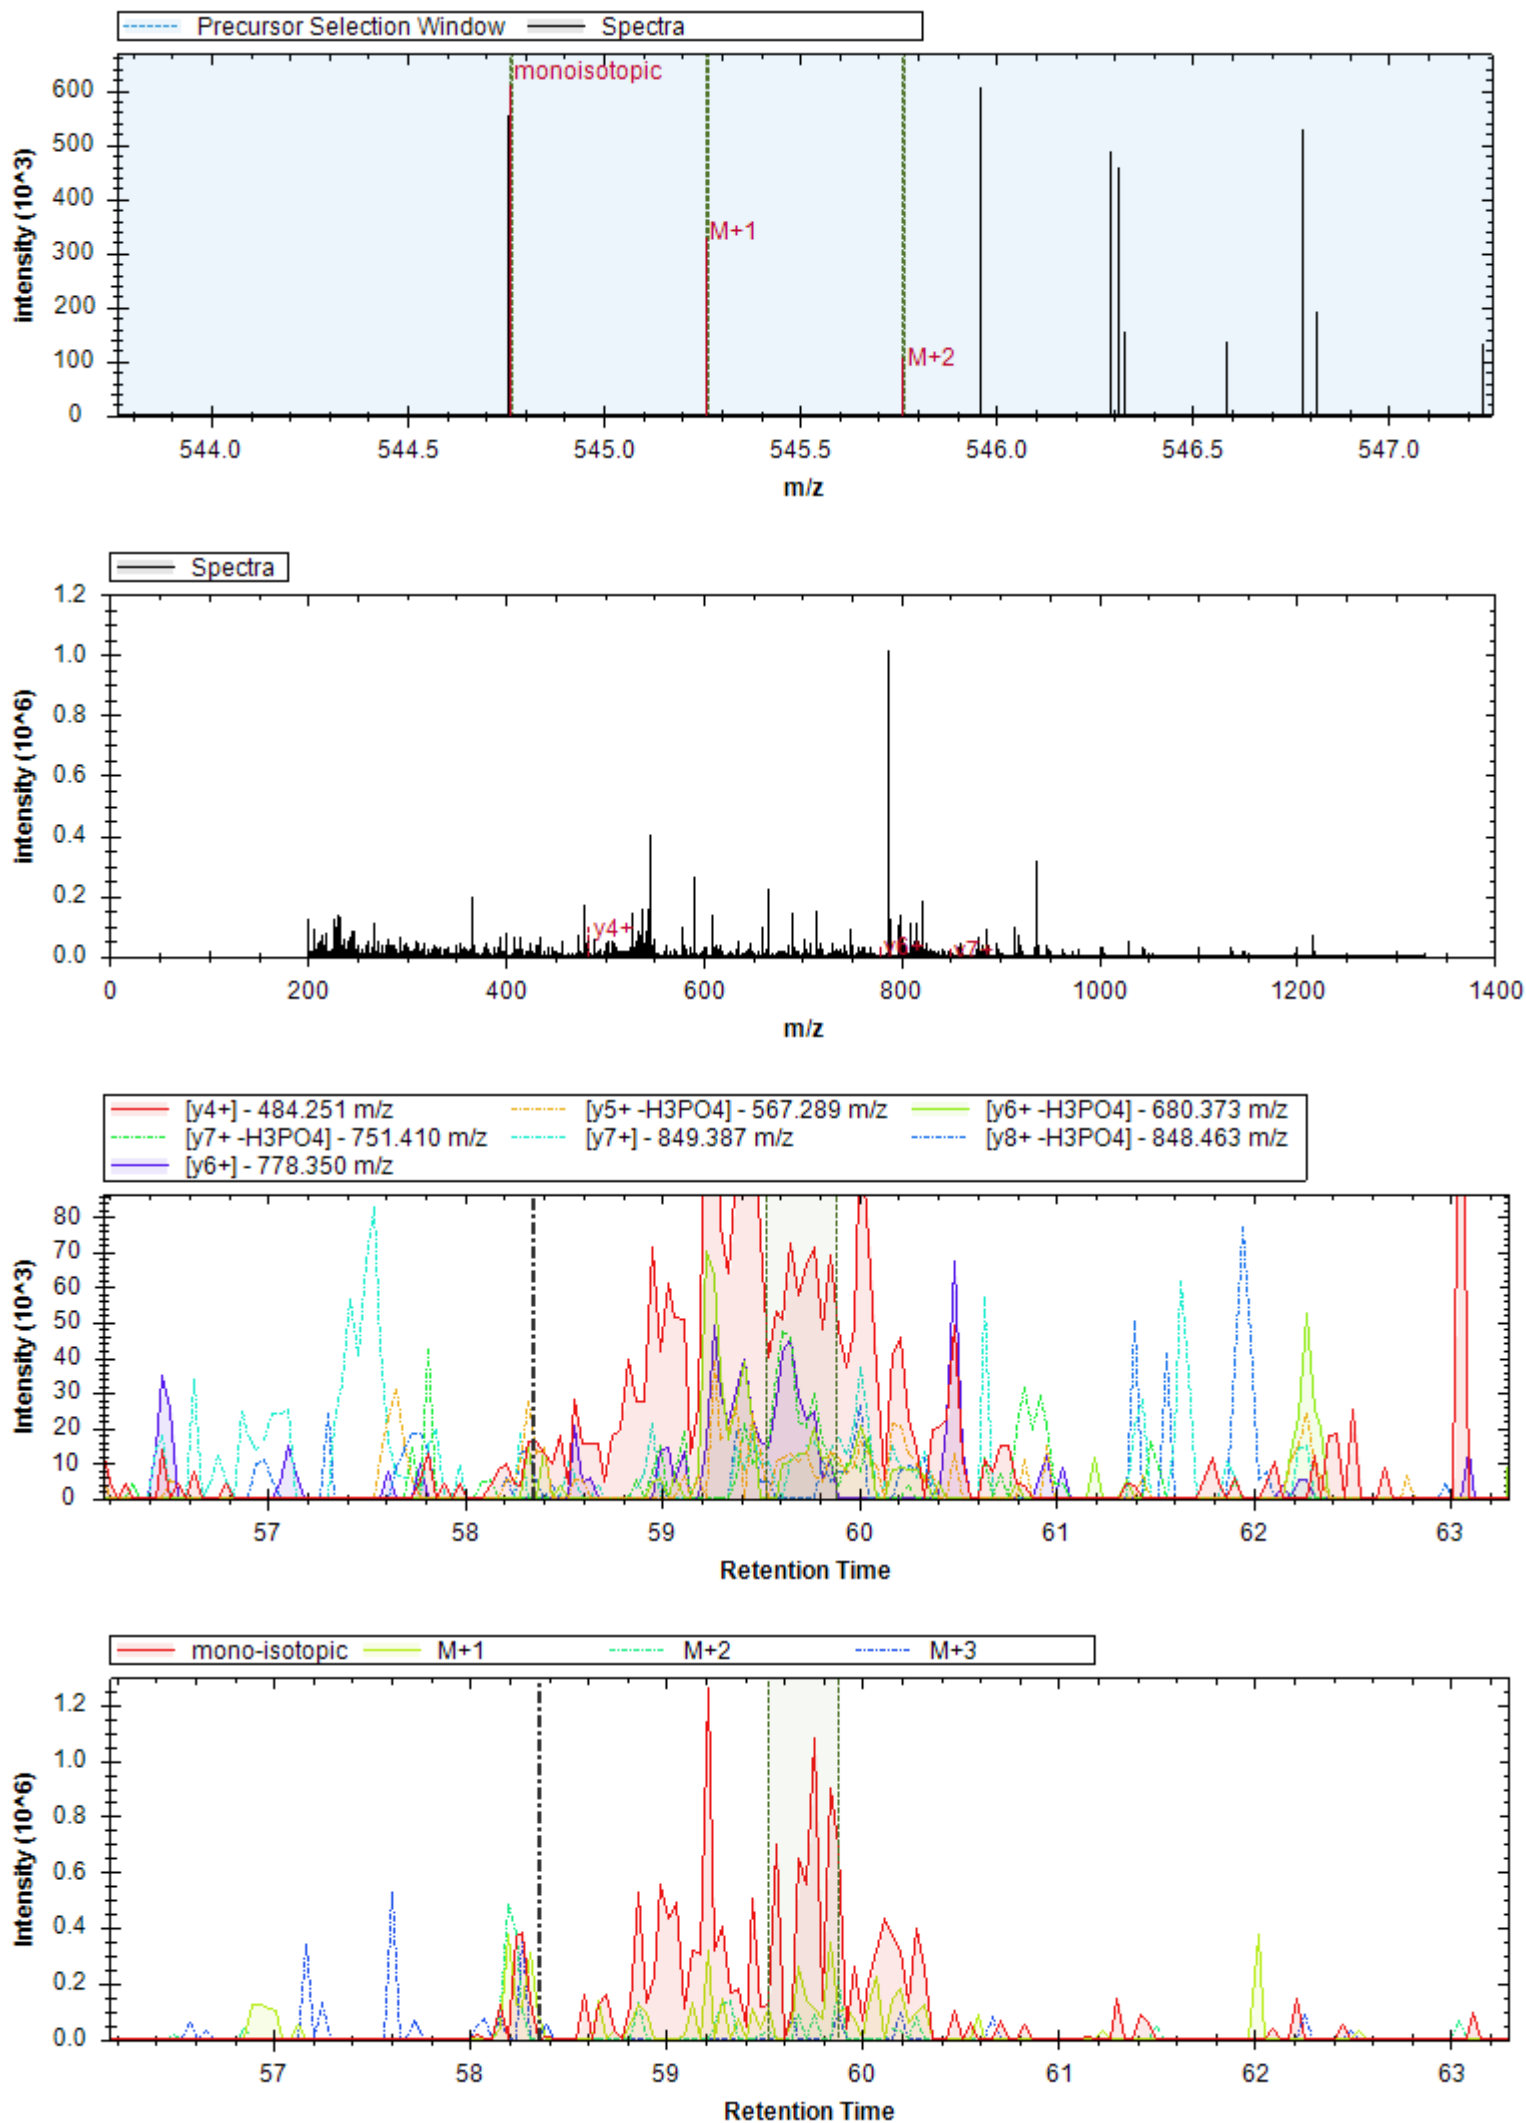

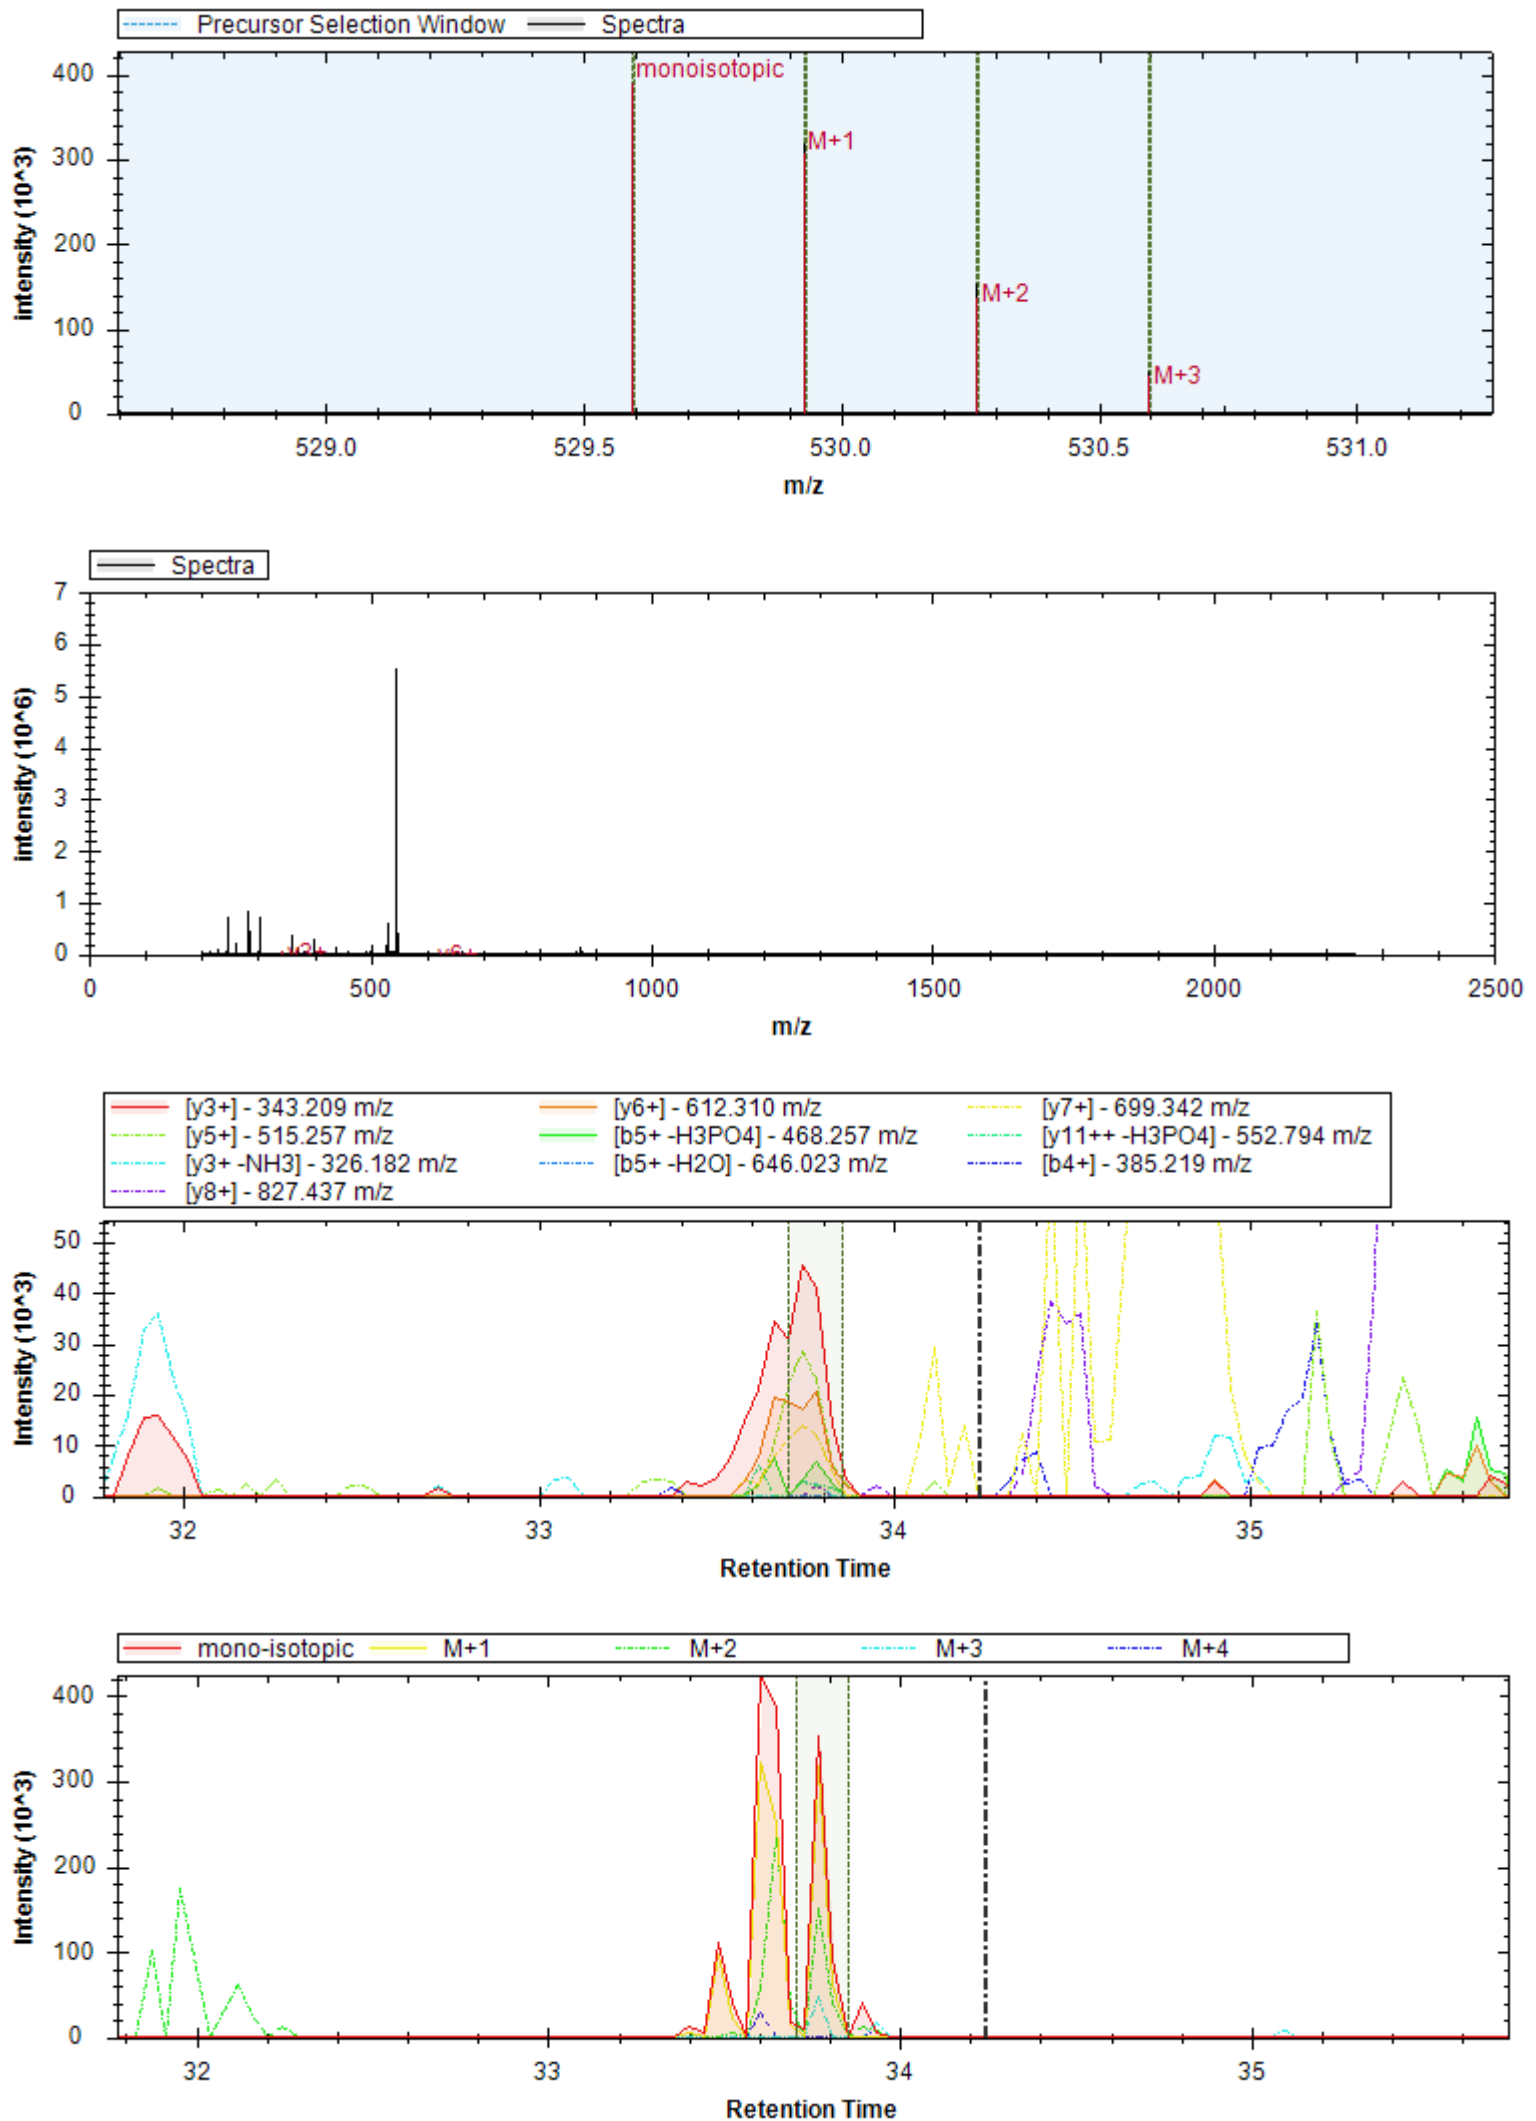

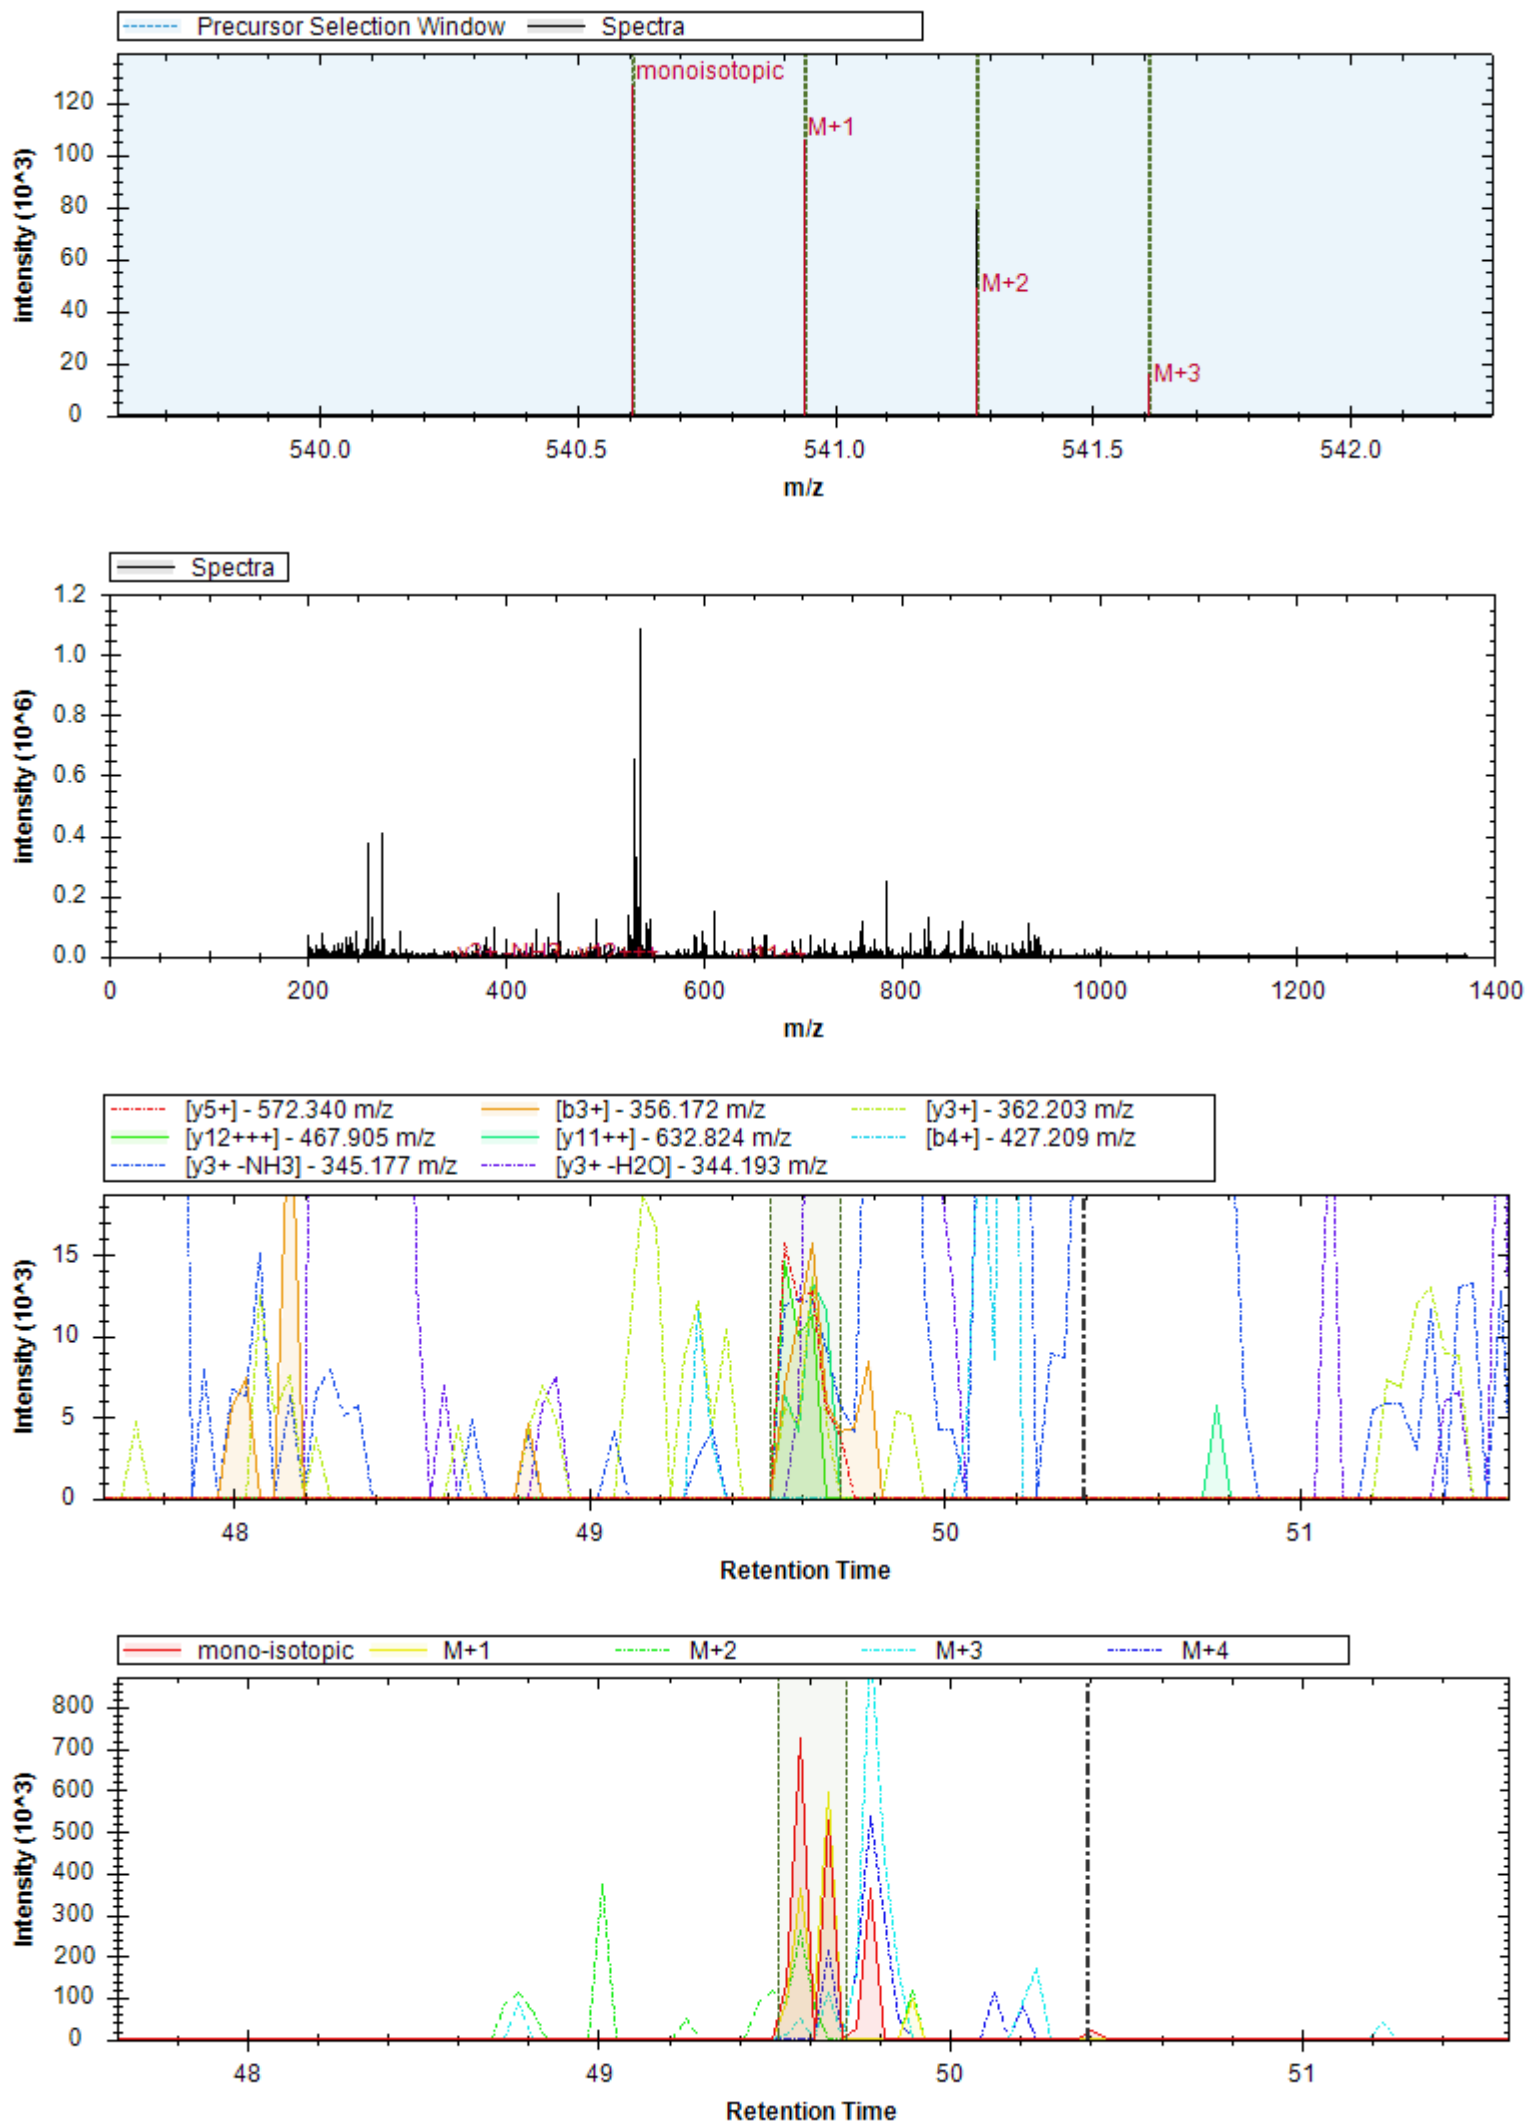

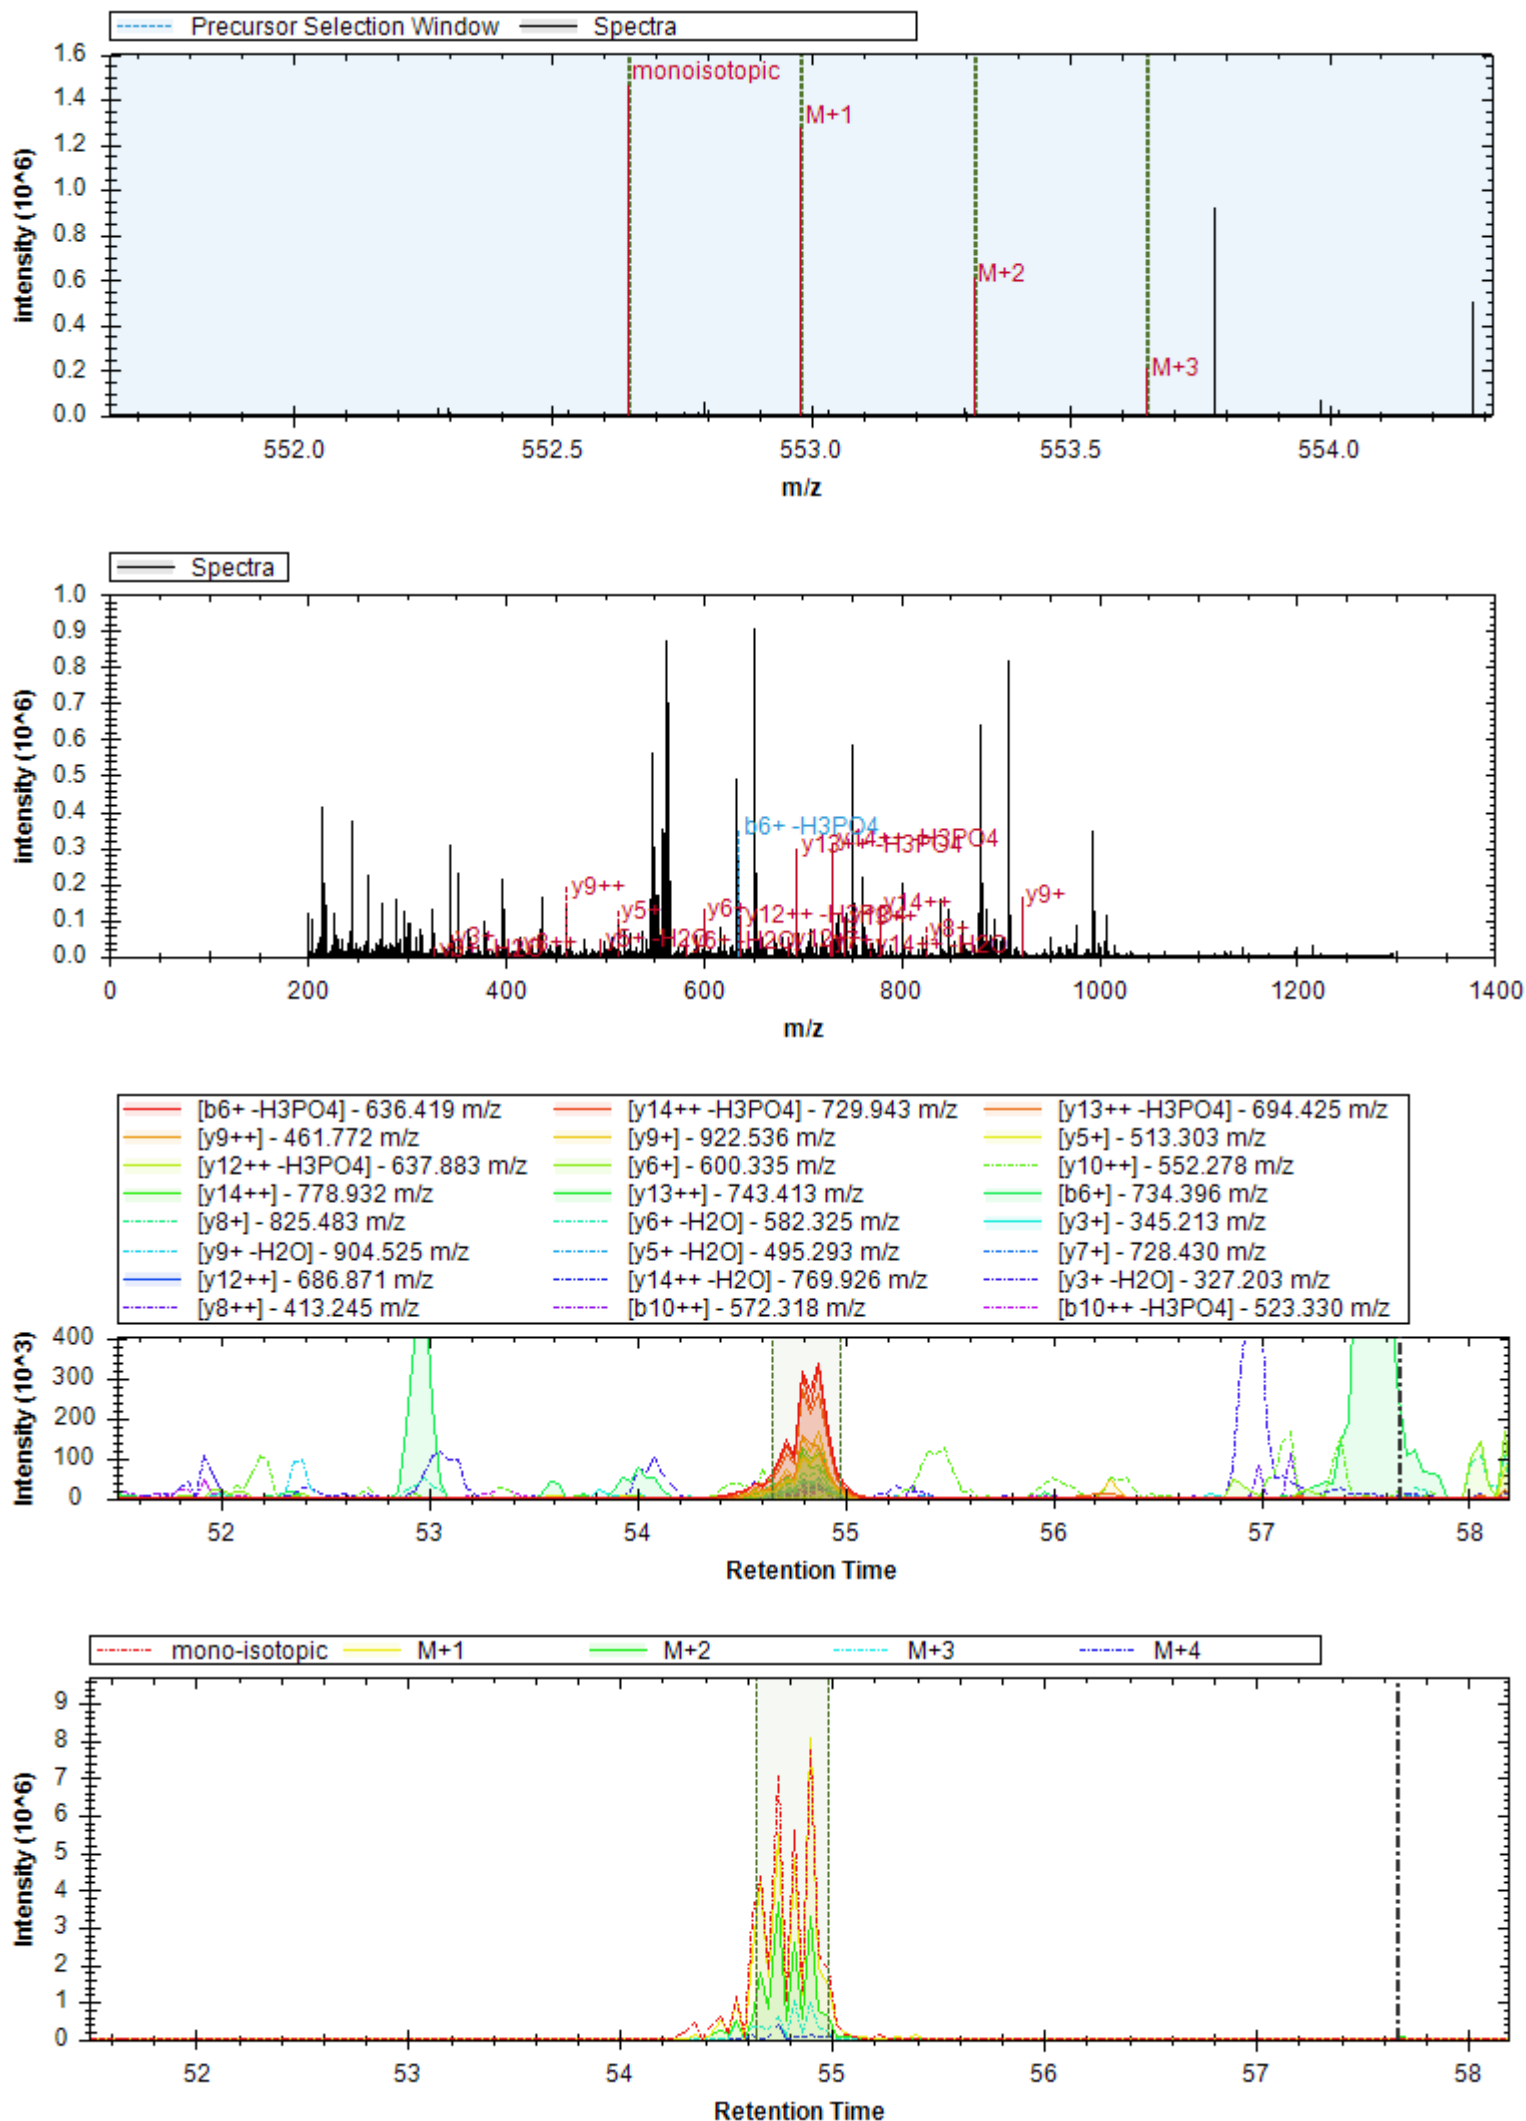



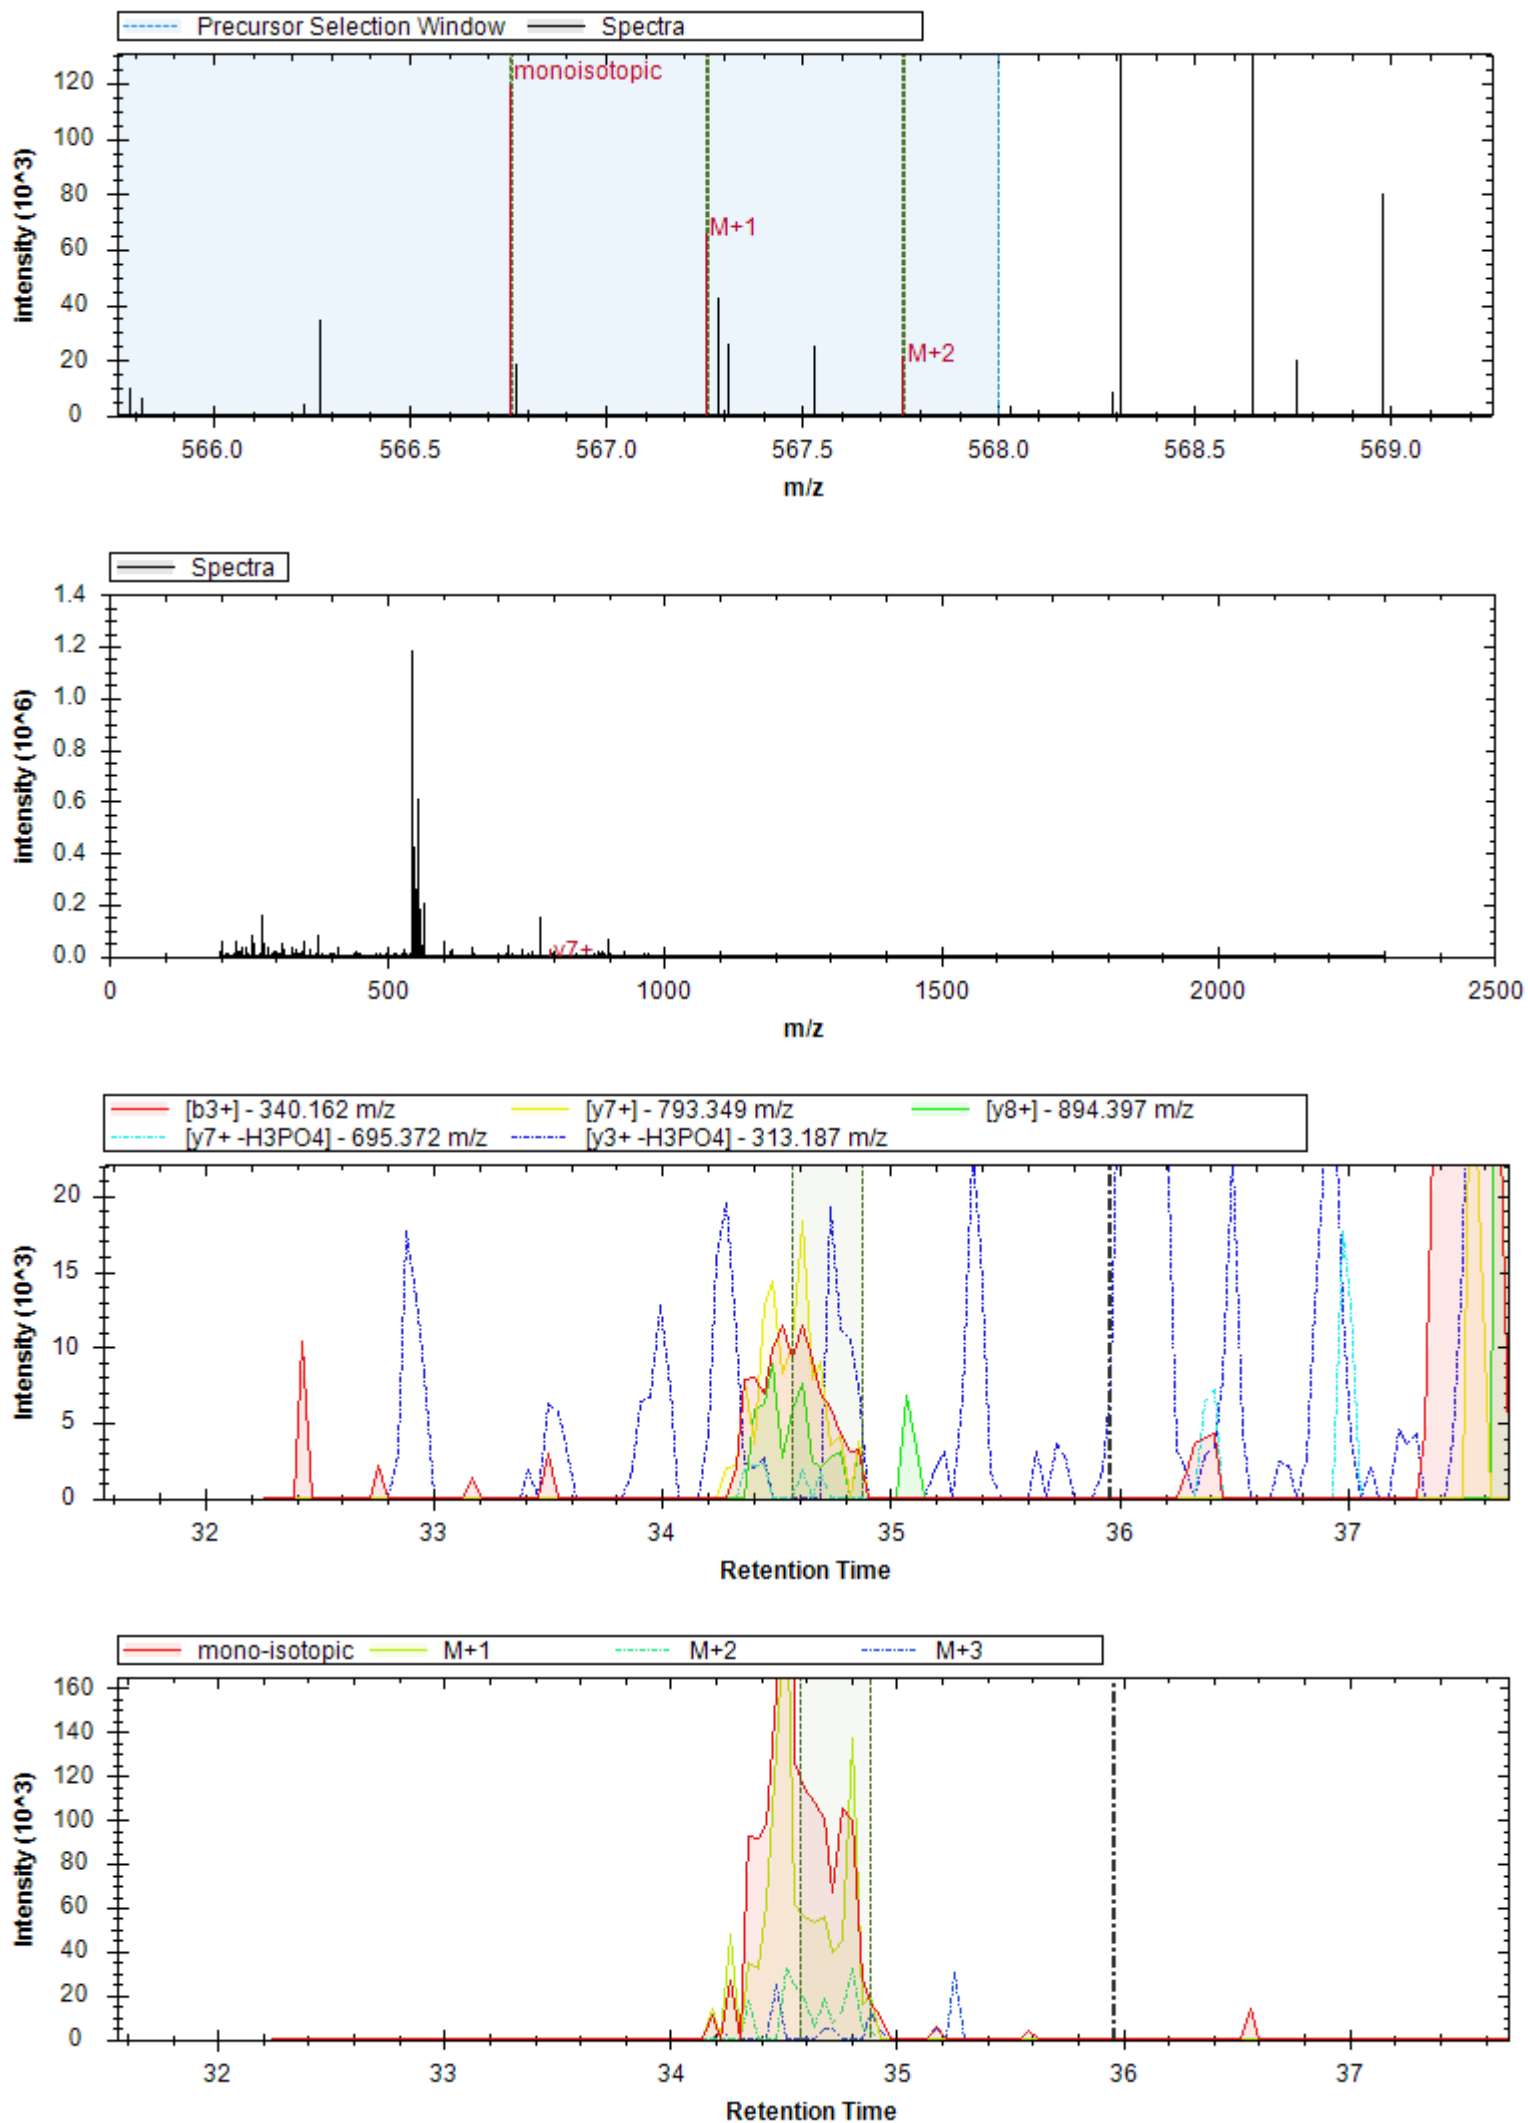

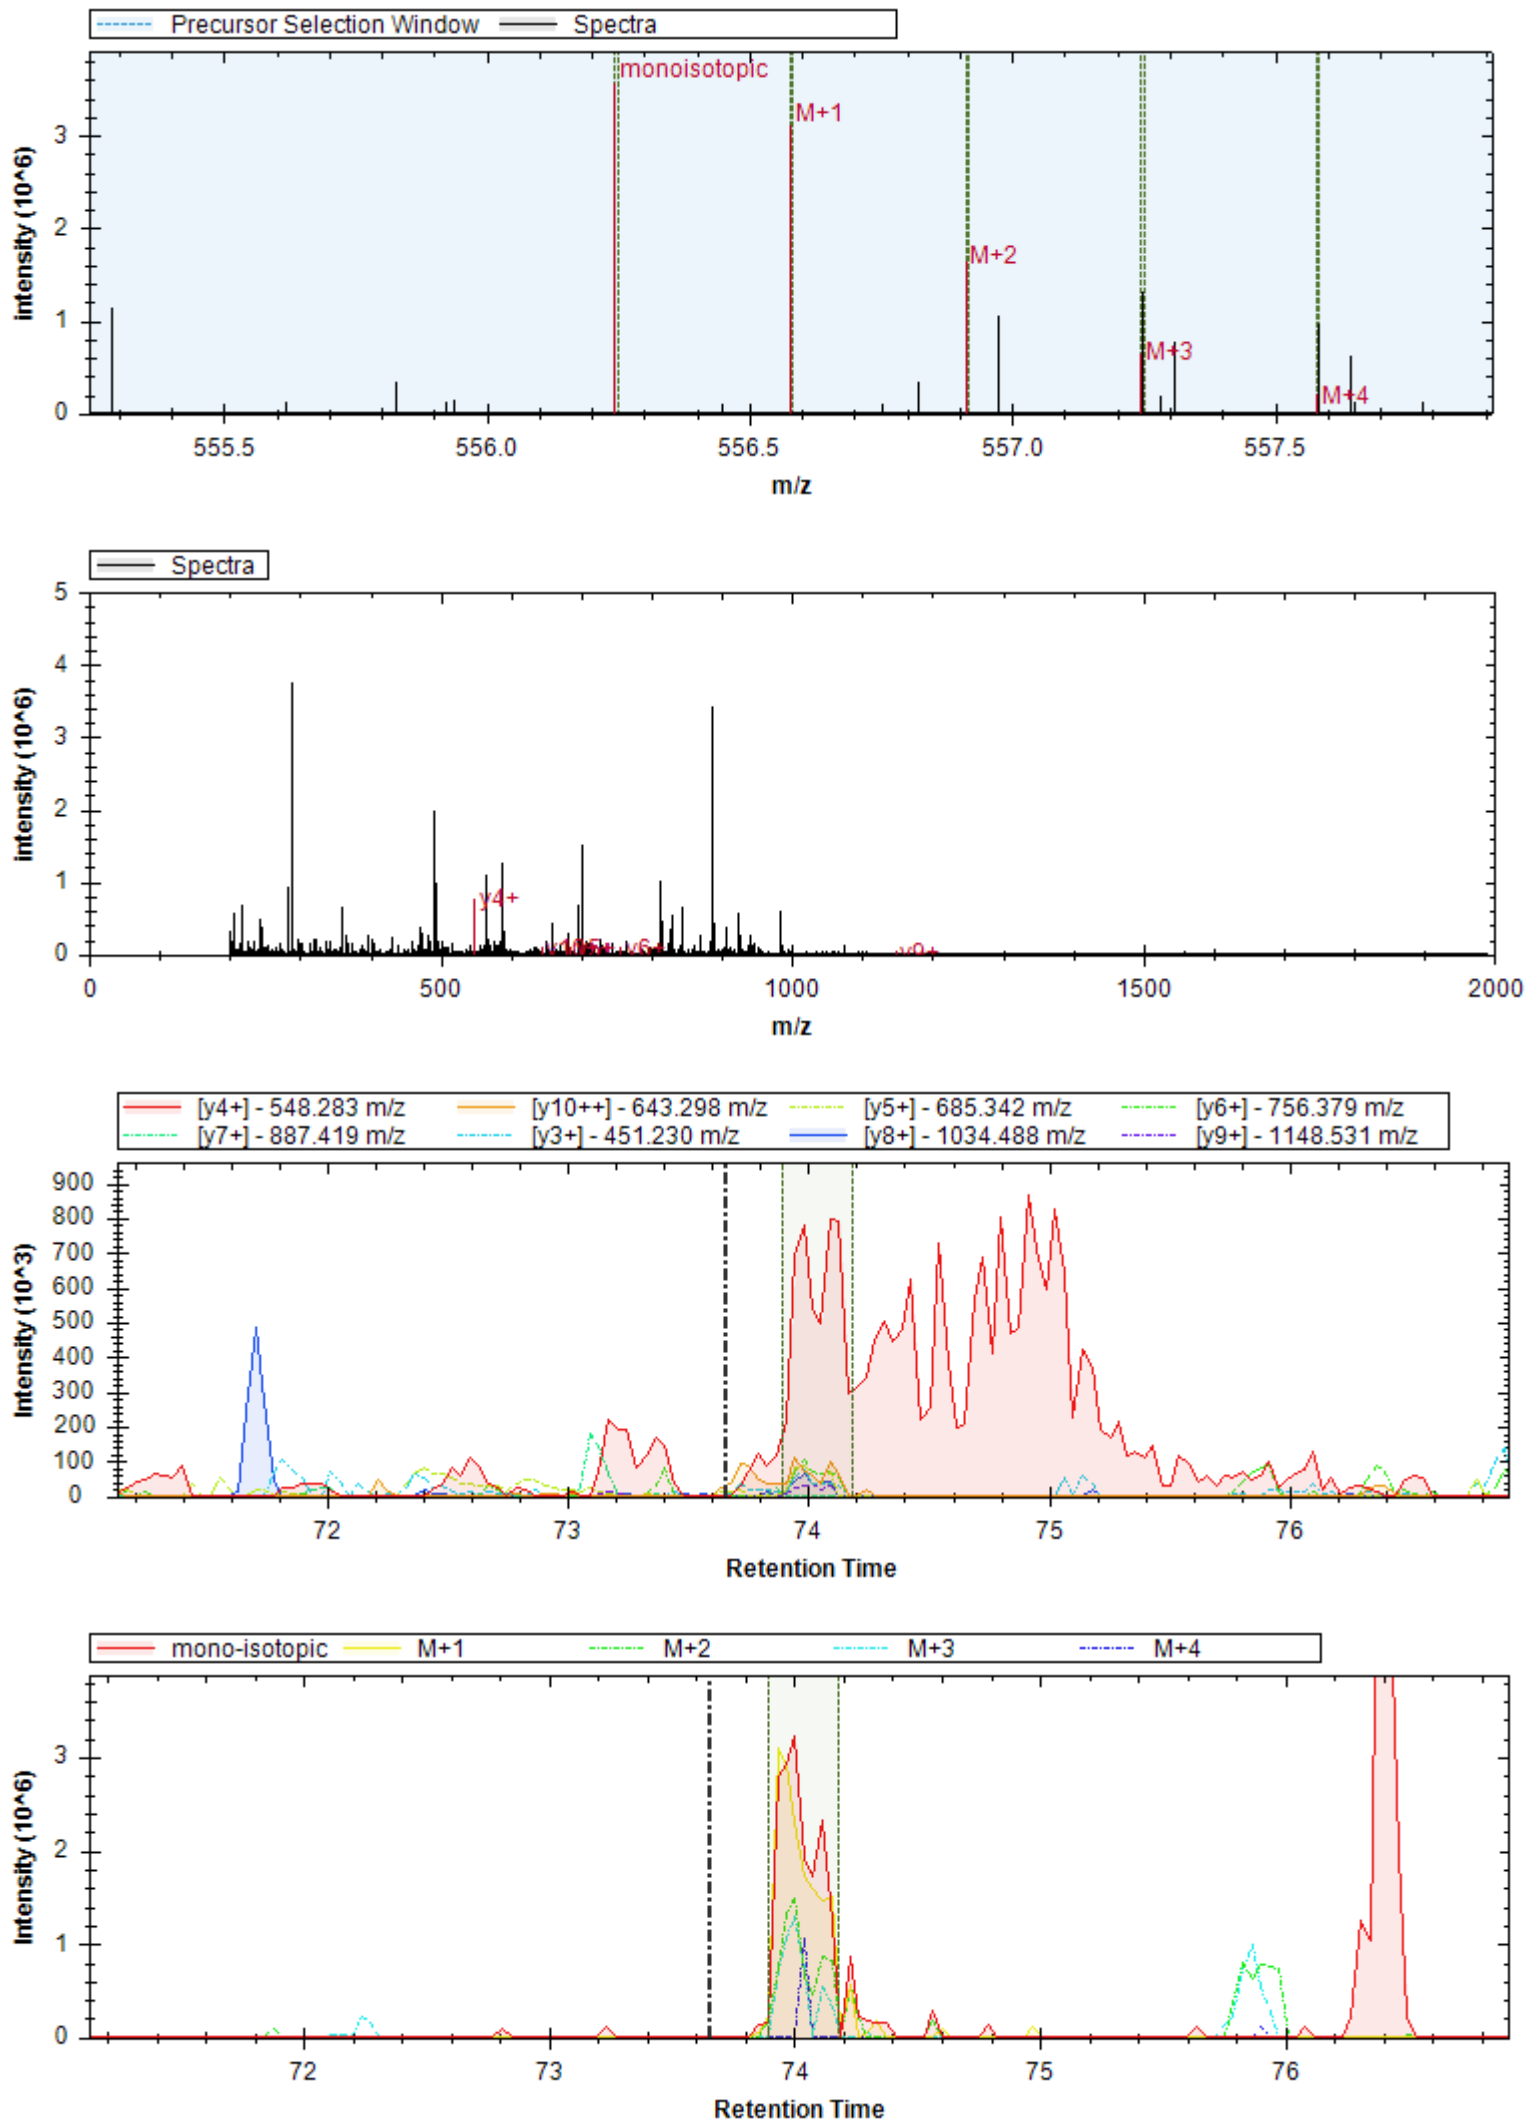

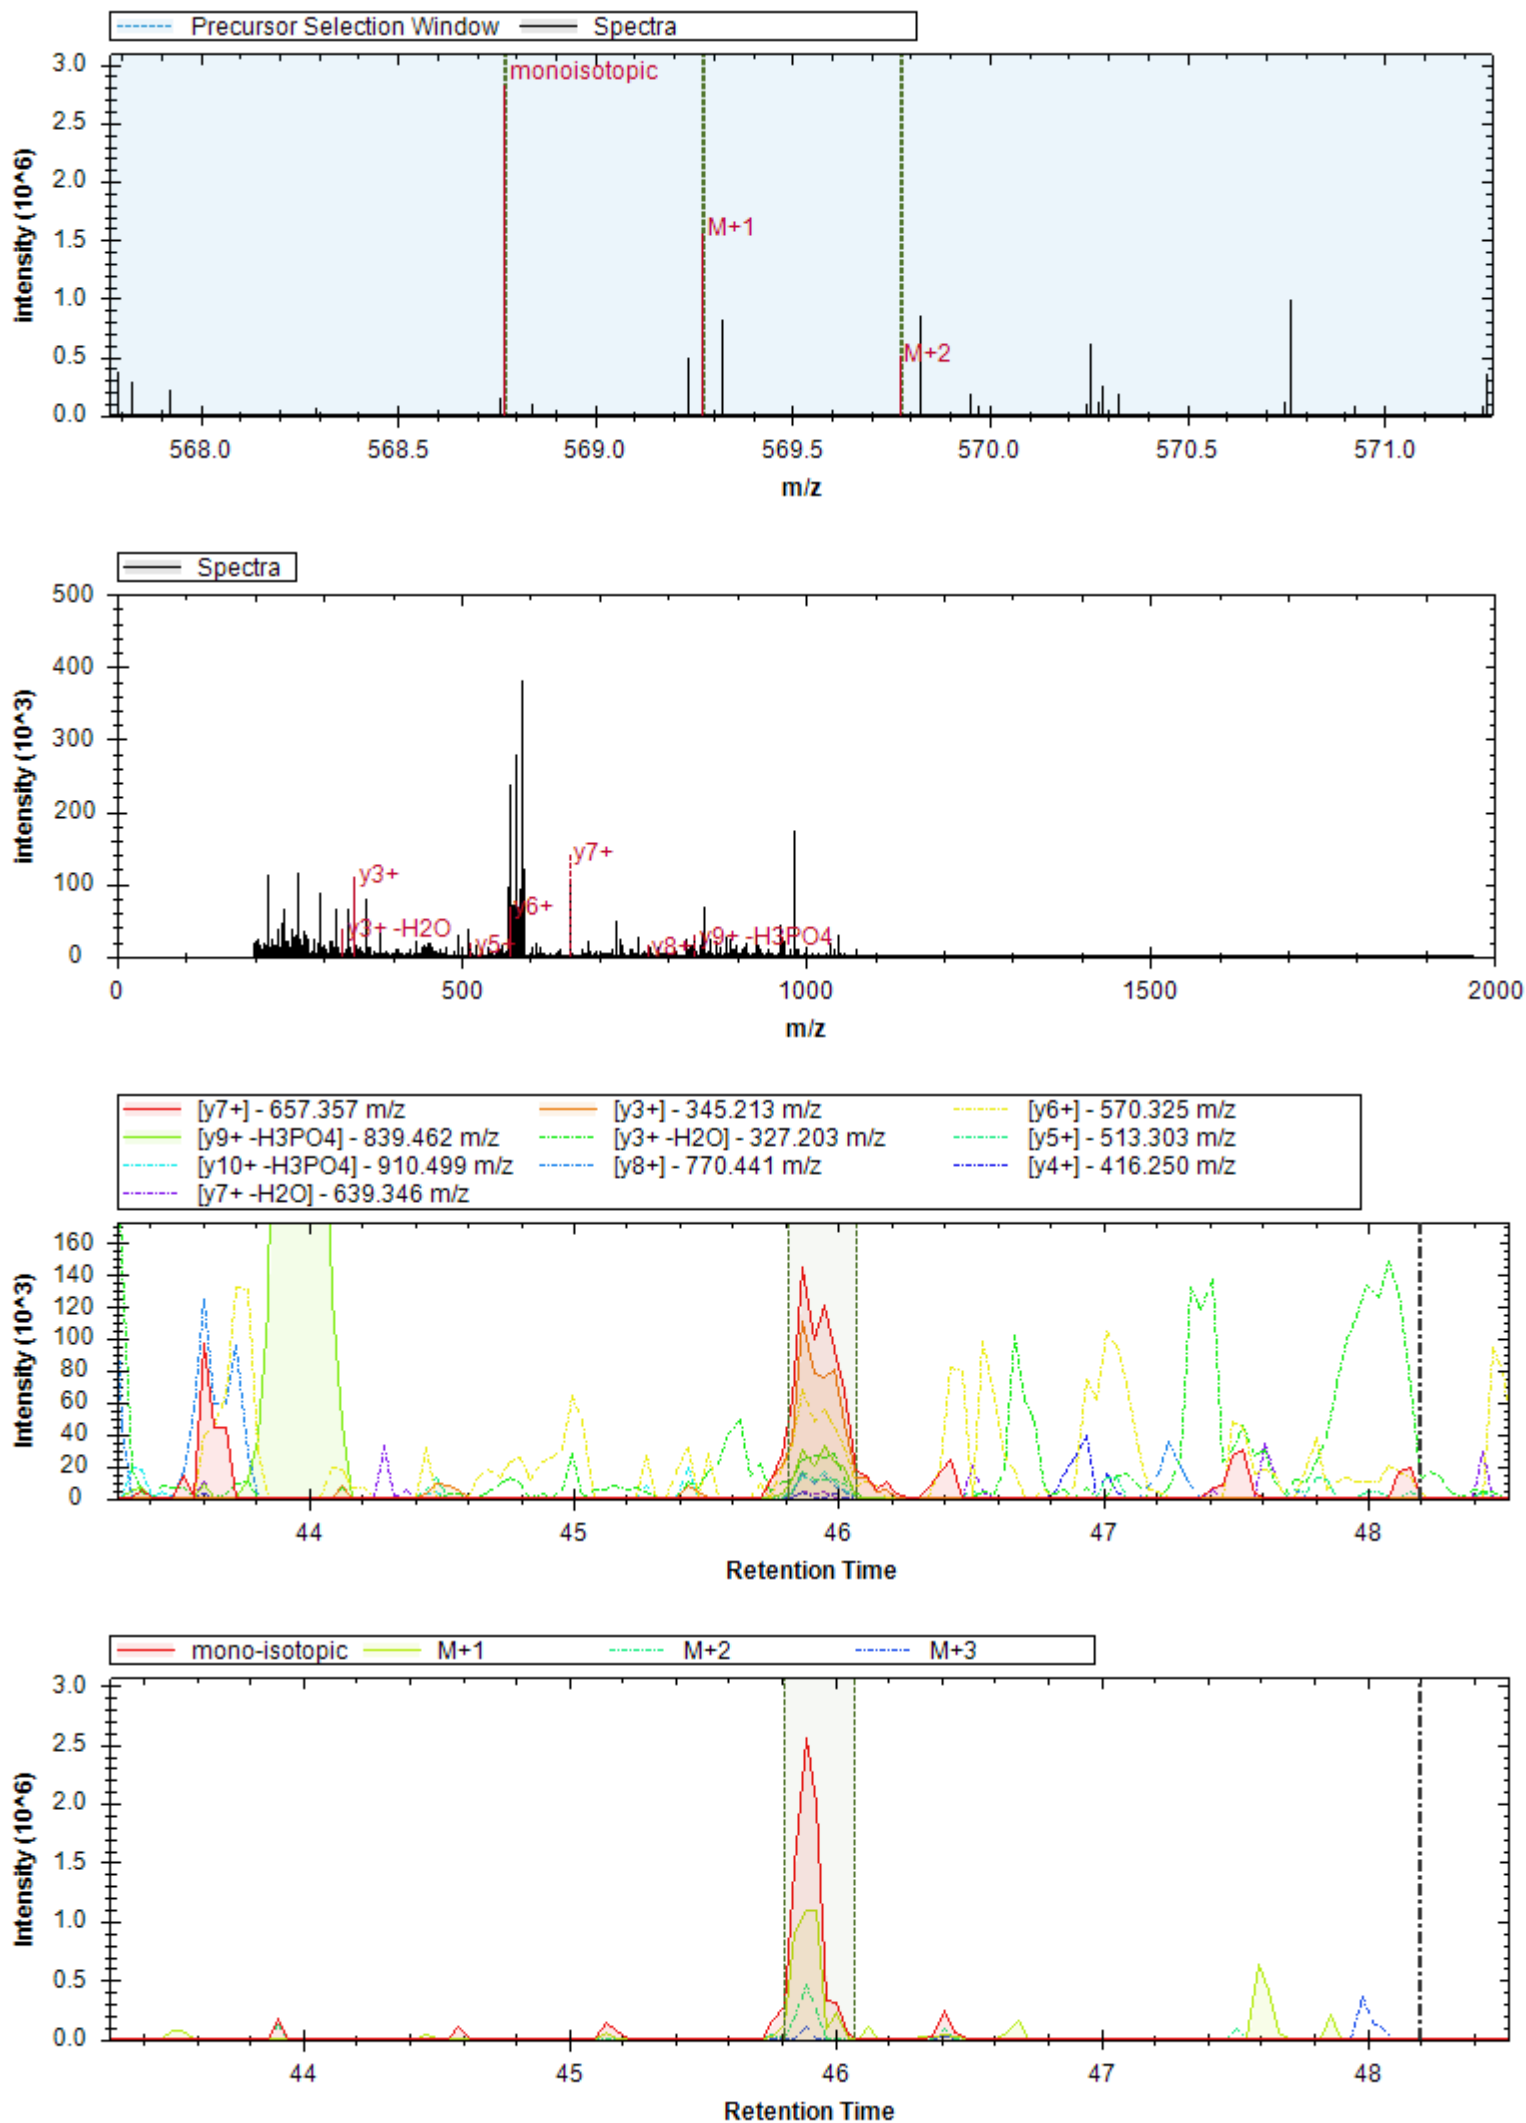

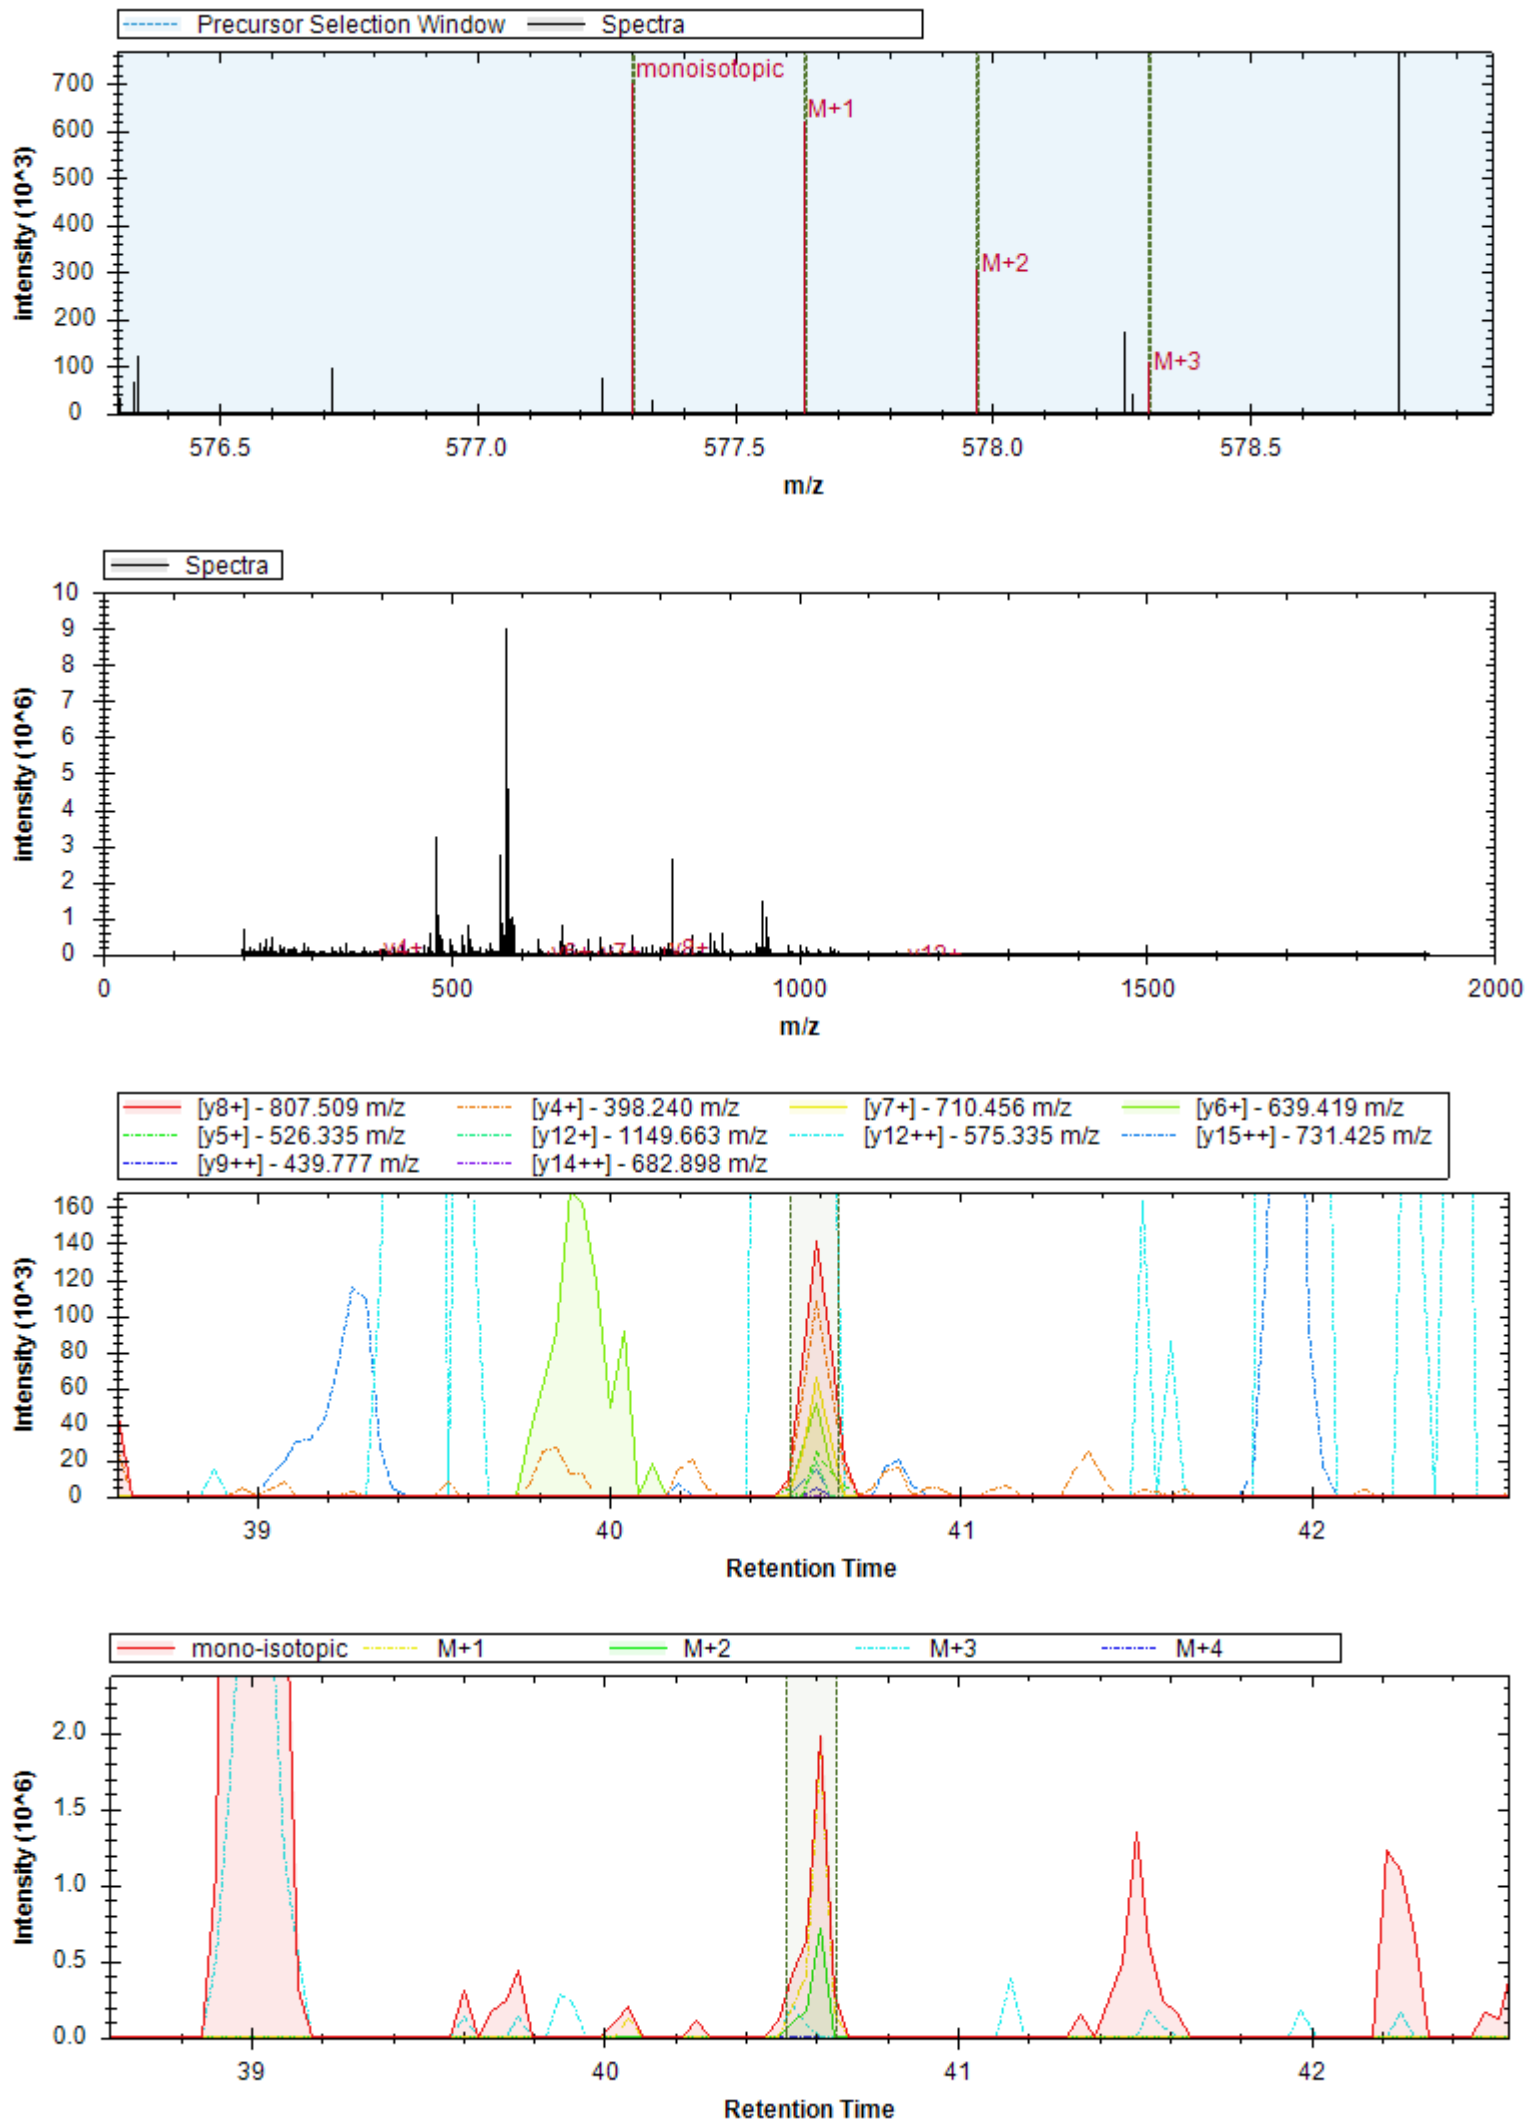

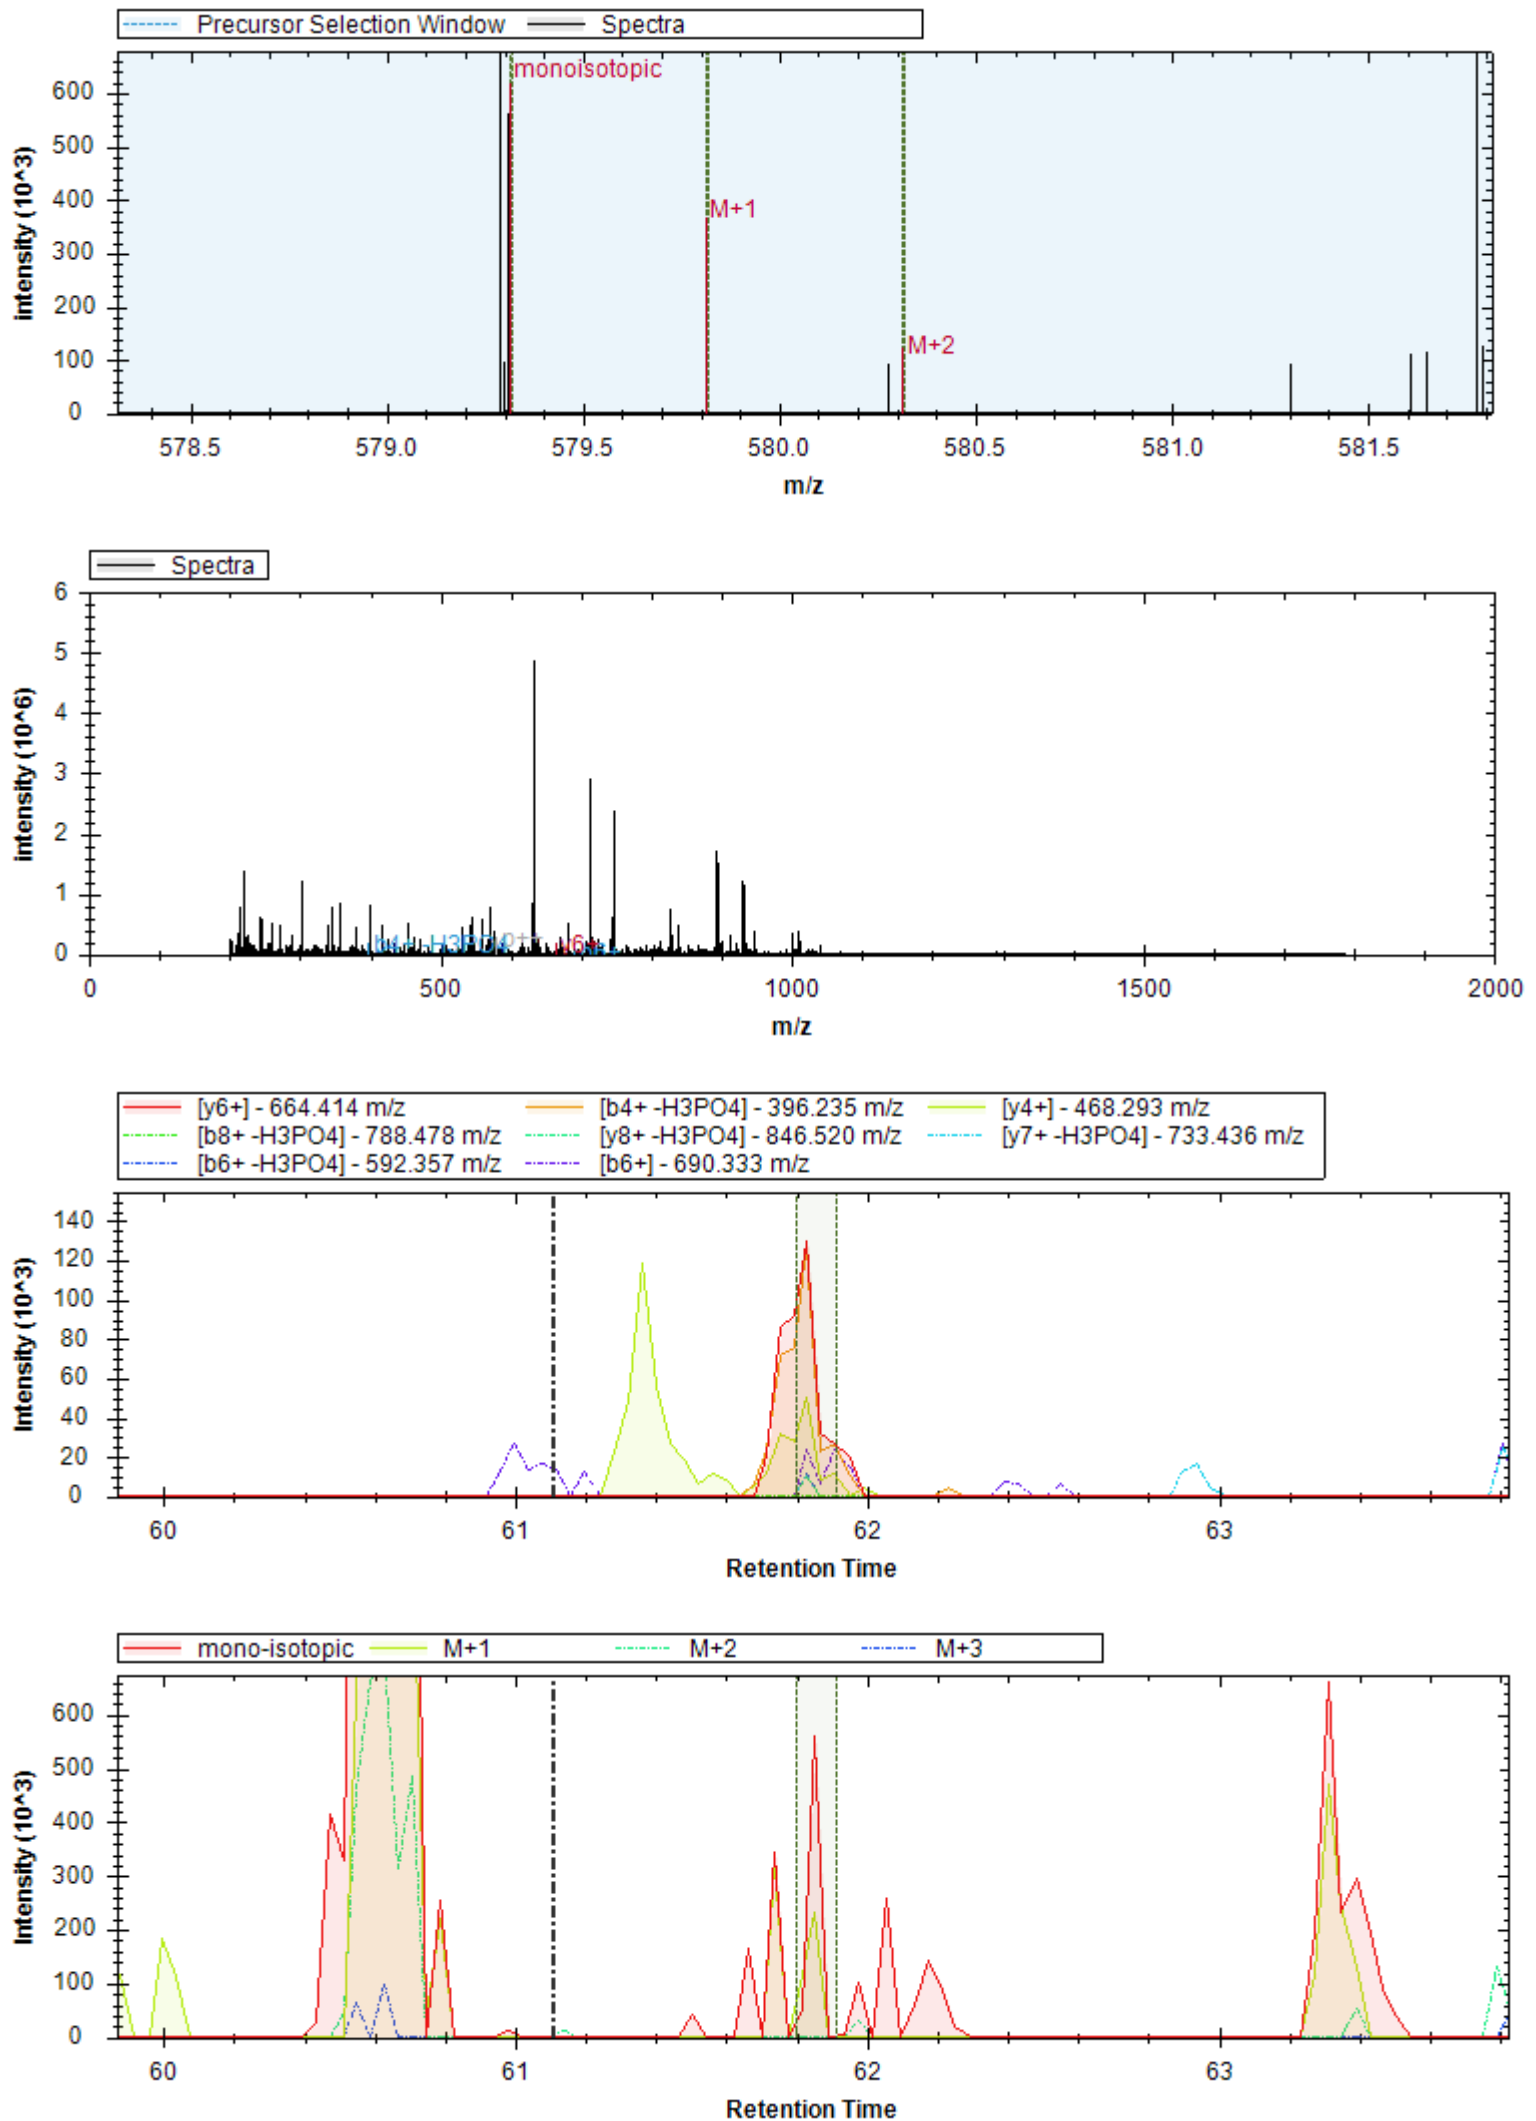

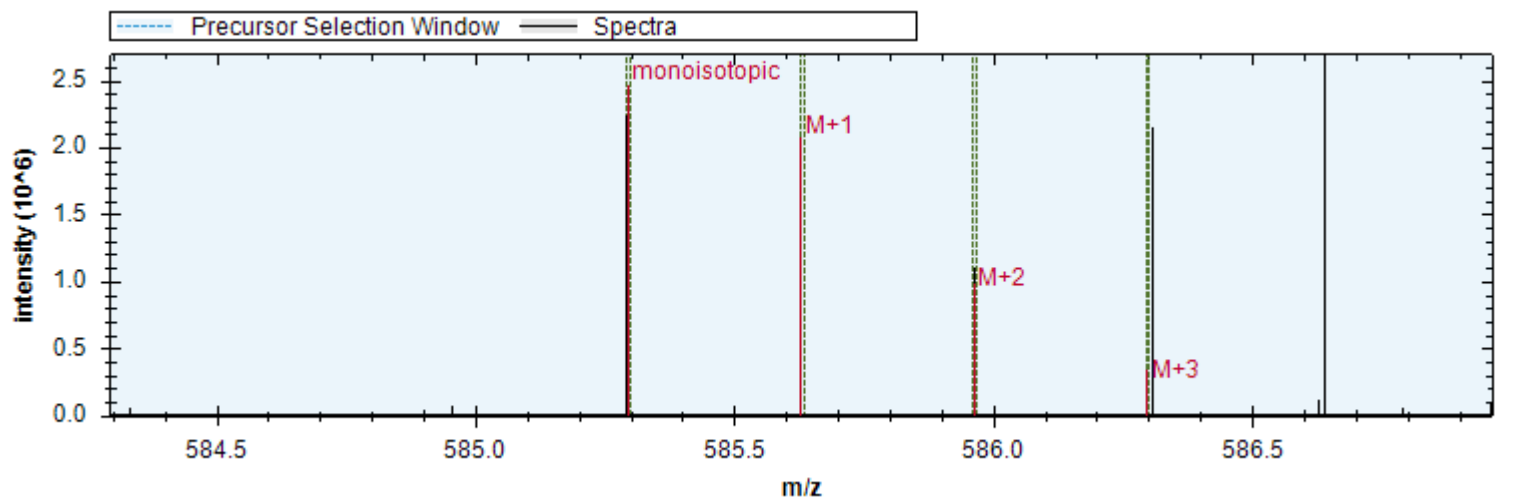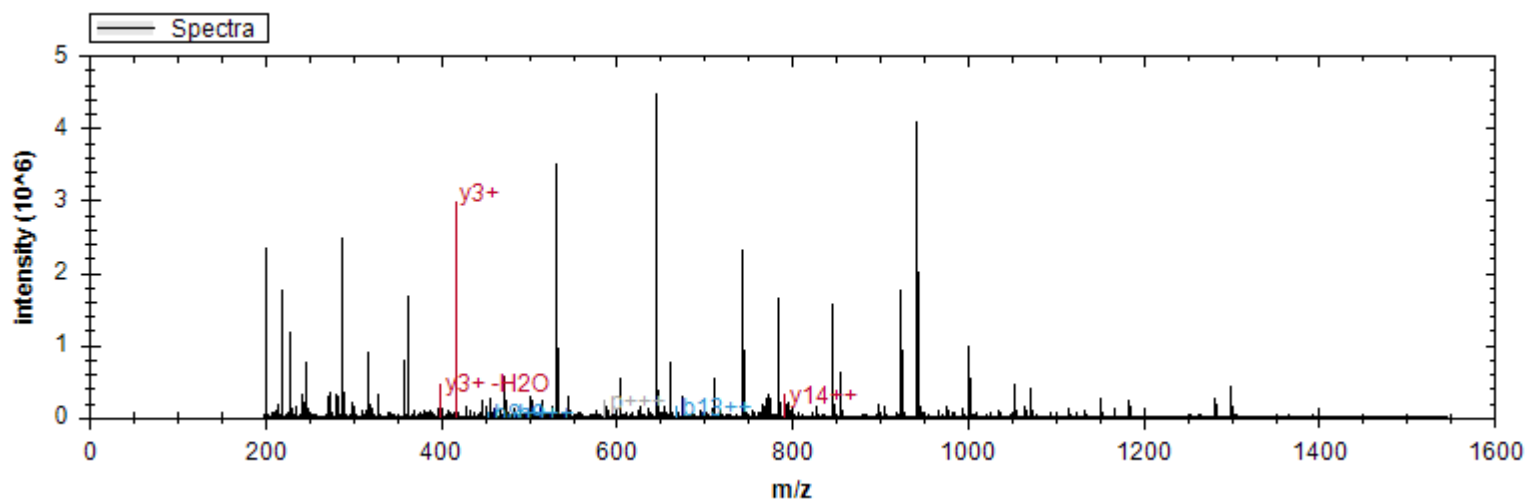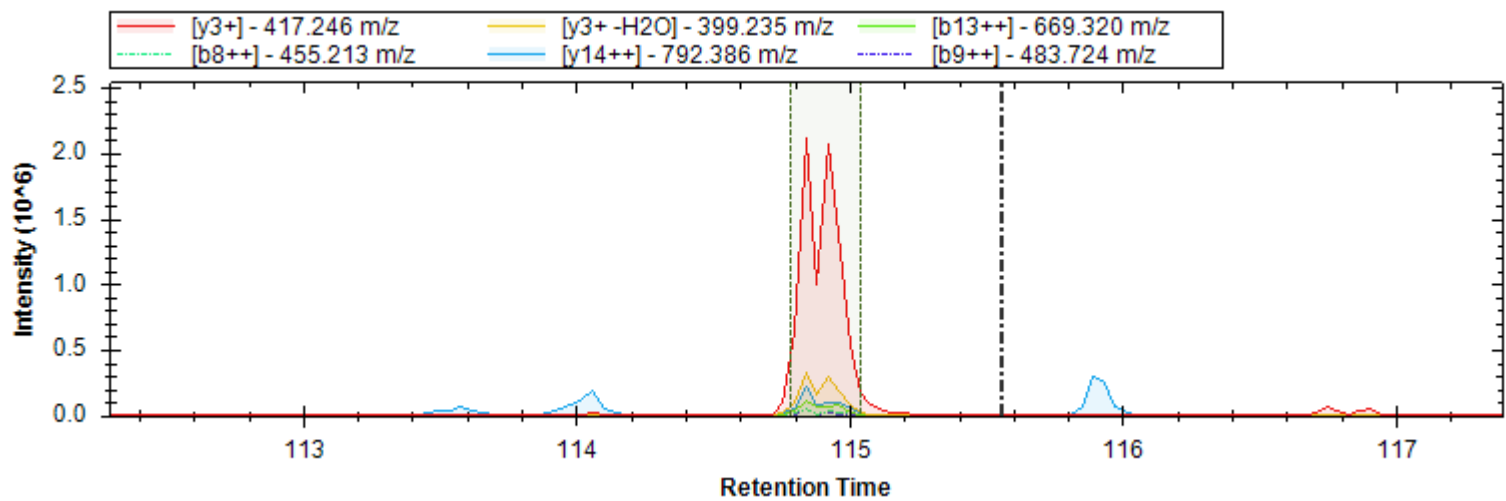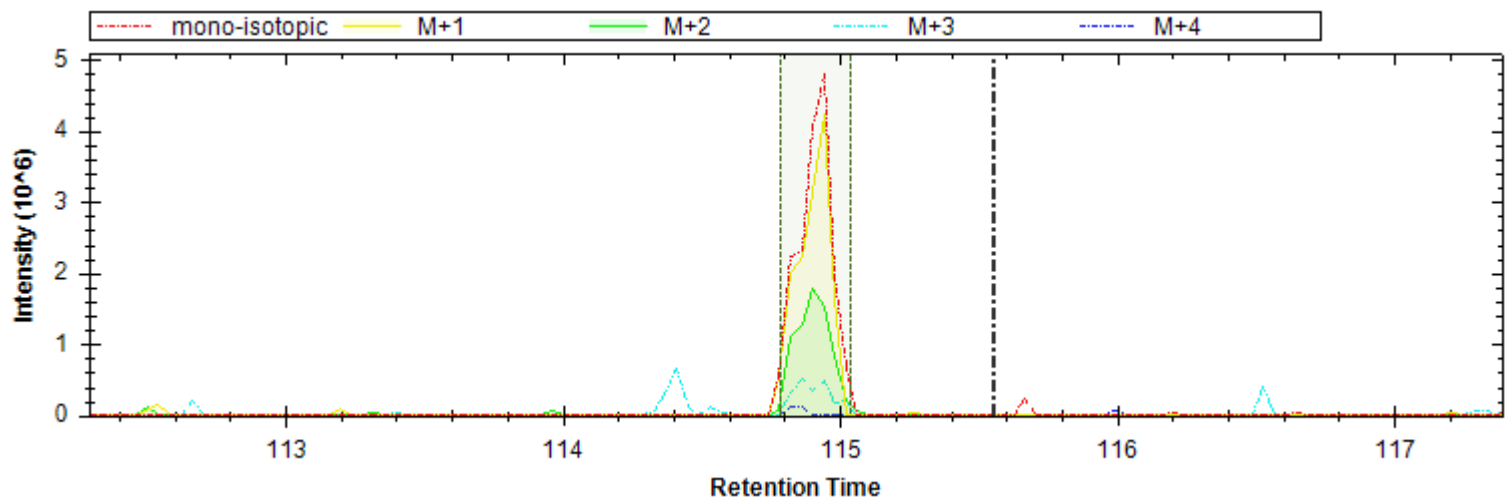

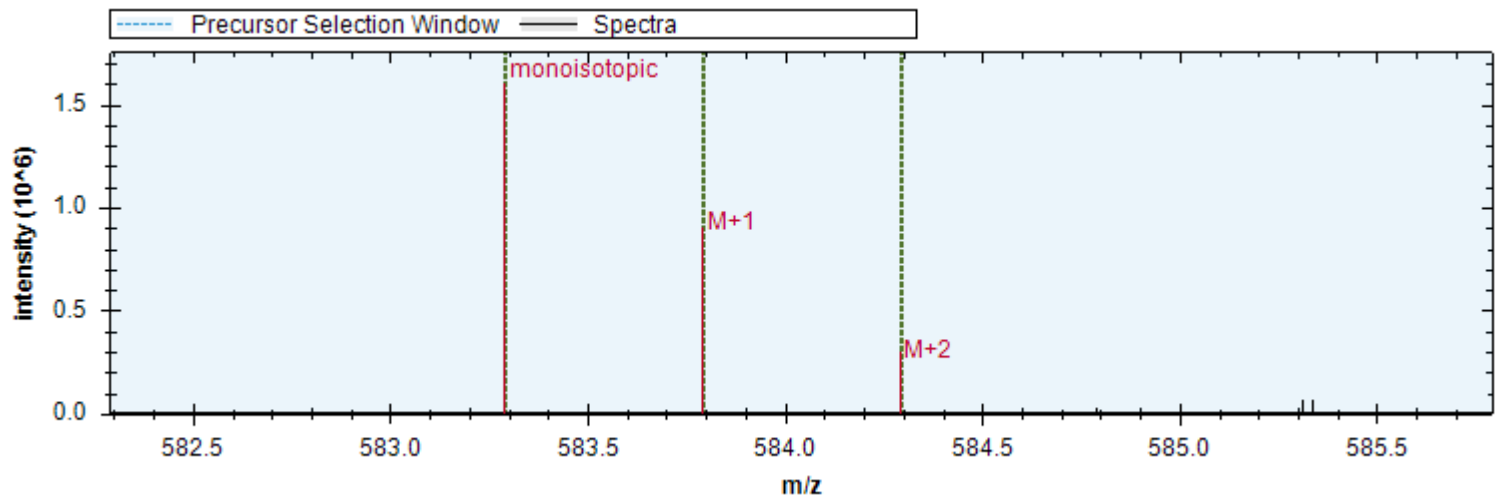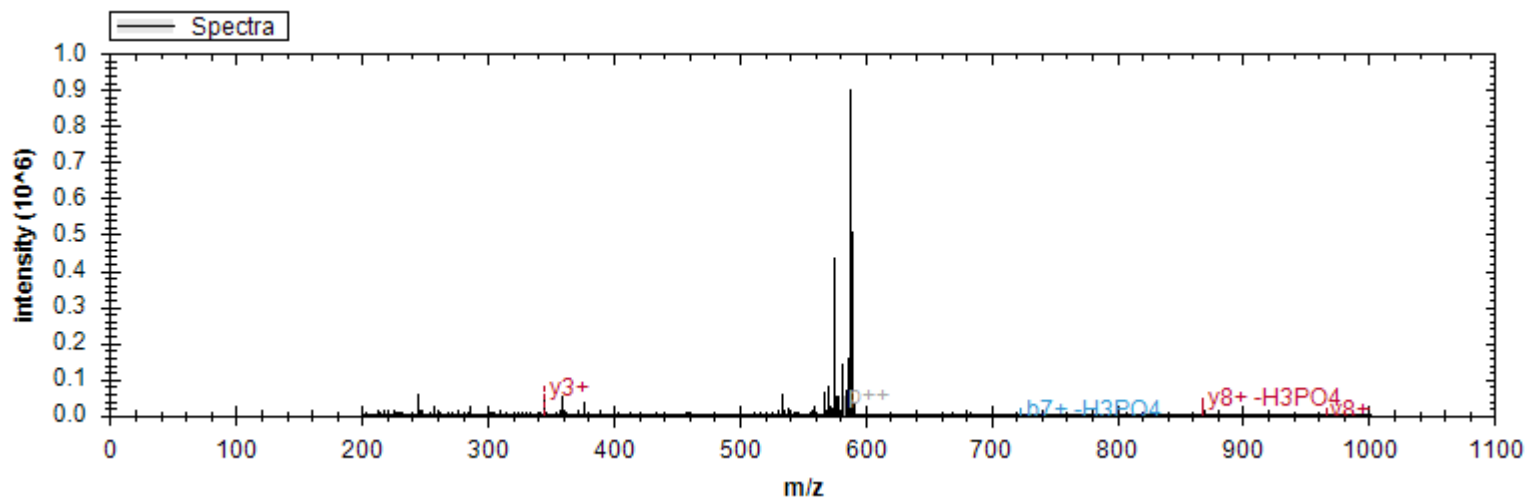

- |                             |                            |                            |
|-----------------------------|----------------------------|----------------------------|
| [y8+ -H3PO4] - 868.500 m/z  | [b7+ -H3PO4] - 723.390 m/z | [y3+] - 345.213 m/z        |
| [y8+] - 966.477 m/z         | [y6+ -H3PO4] - 683.420 m/z | [y5+ -H3PO4] - 570.336 m/z |
| [y9++ -H3PO4] - 498.783 m/z | [b4+] - 385.183 m/z        | [b6+] - 654.368 m/z        |
| [y5+] - 668.313 m/z         | [b9+ -H3PO4] - 921.490 m/z | [y8+ -H2O] - 948.466 m/z   |
| [y7+ -H3PO4] - 811.479 m/z  | [b9+ -NH3] - 1100.240 m/z  | [y4+ -H3PO4] - 414.235 m/z |

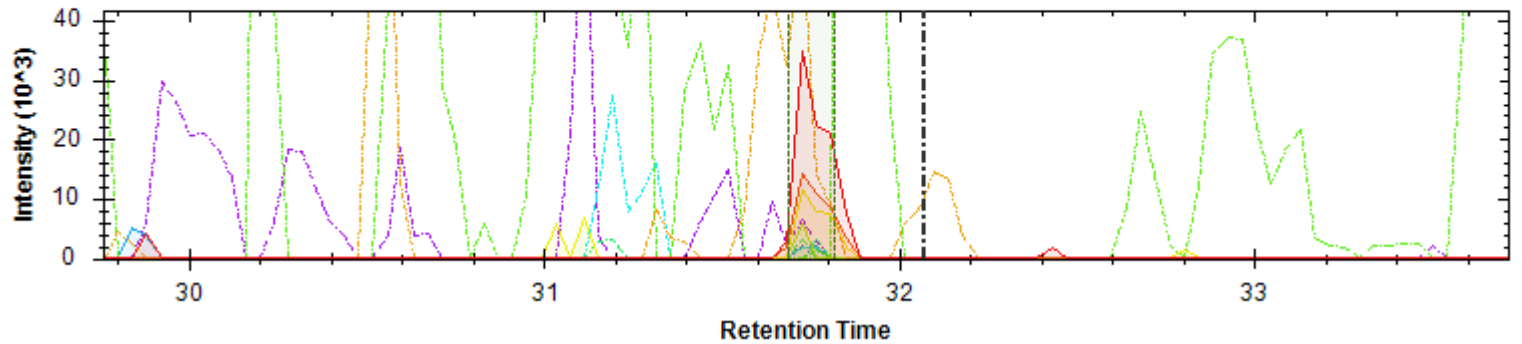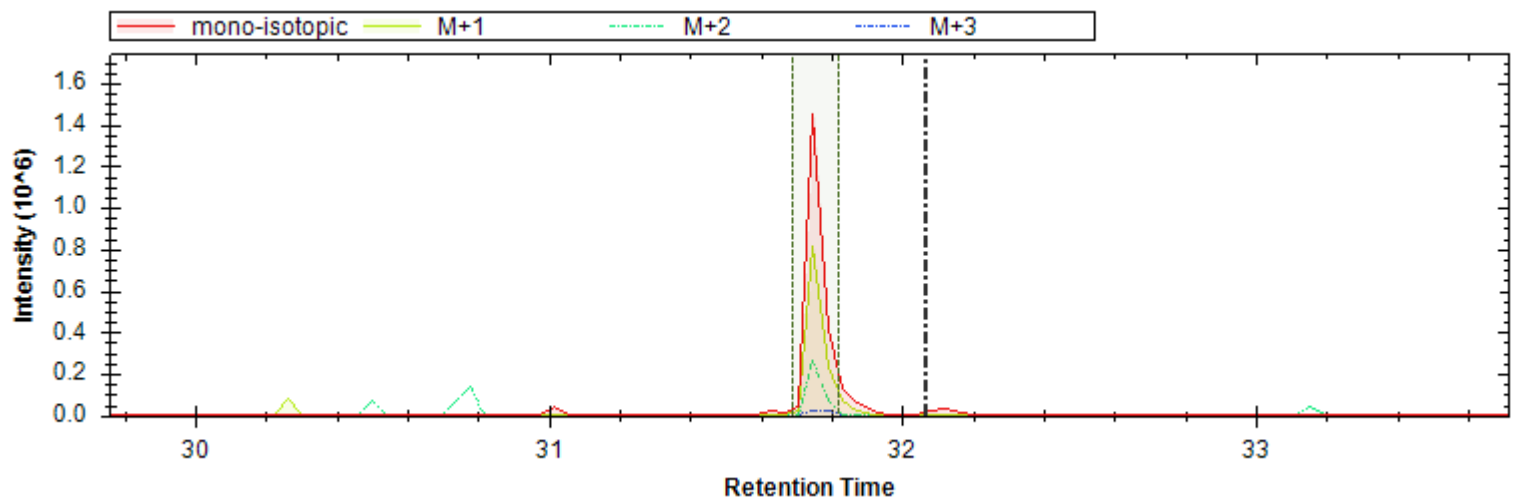

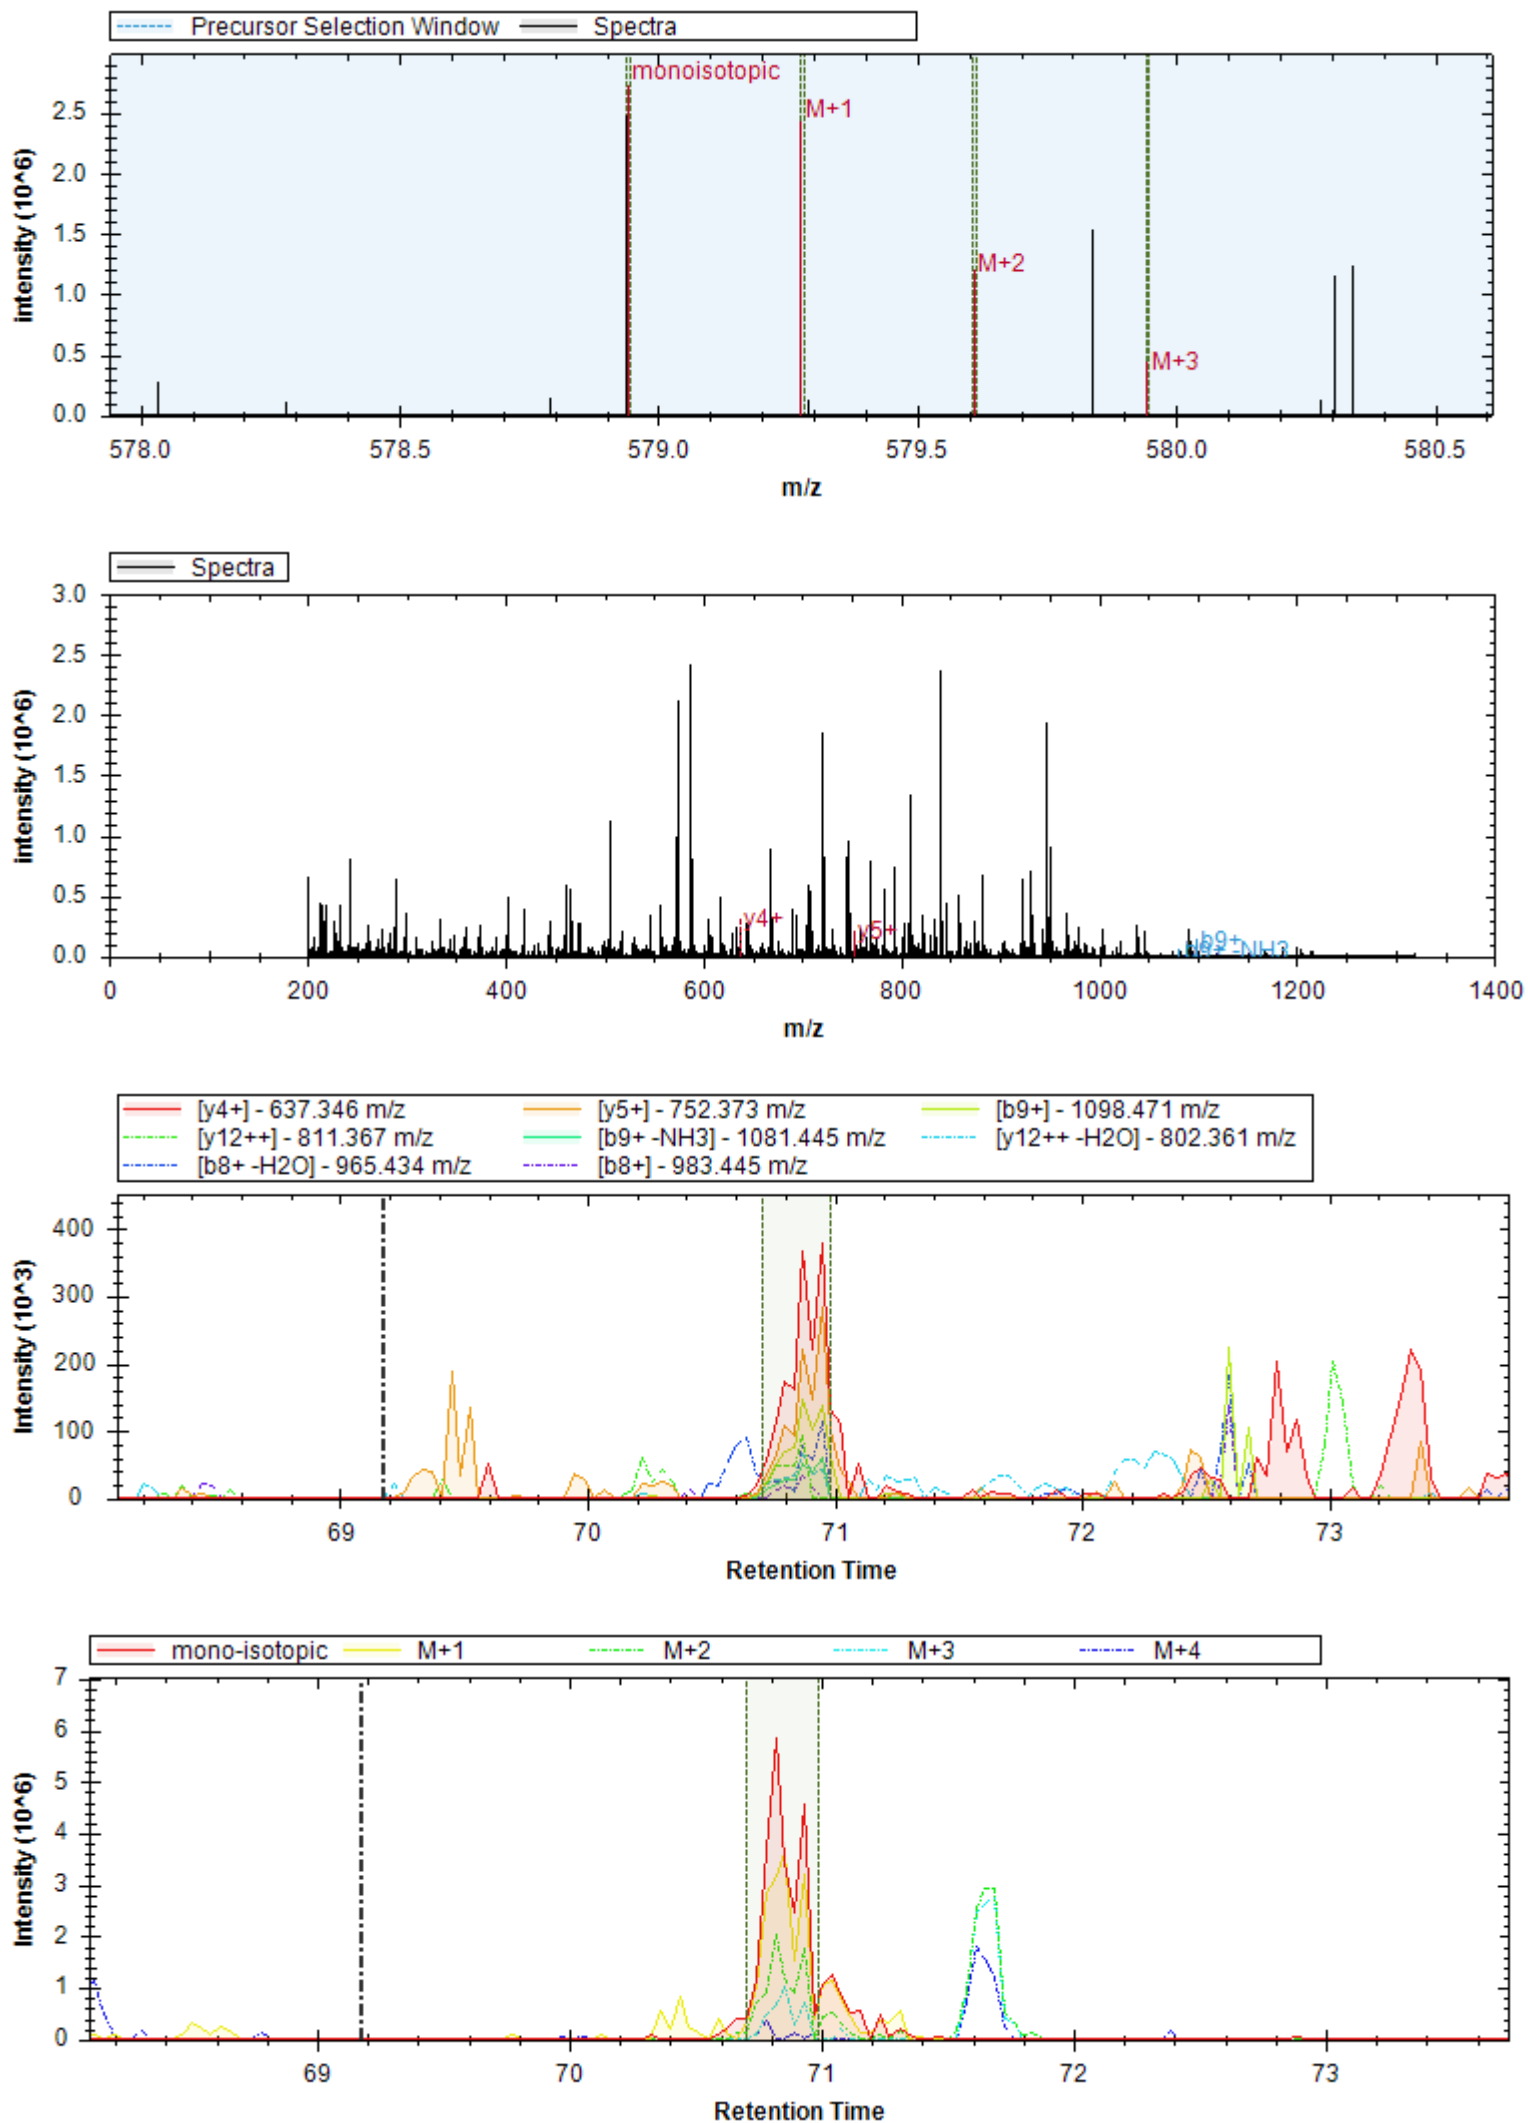



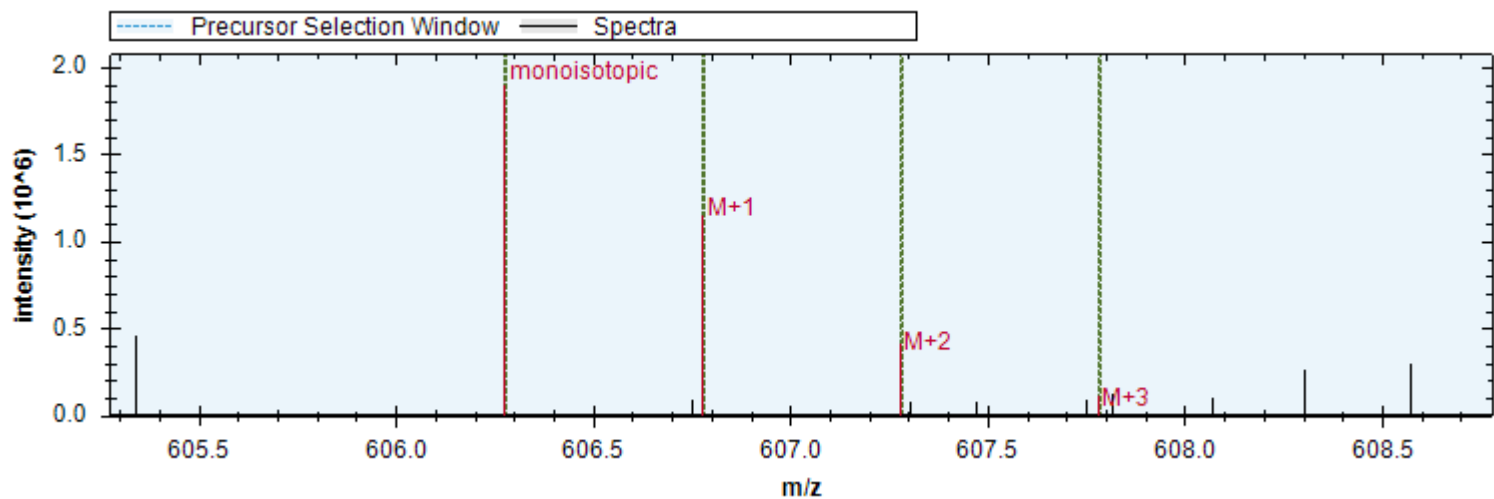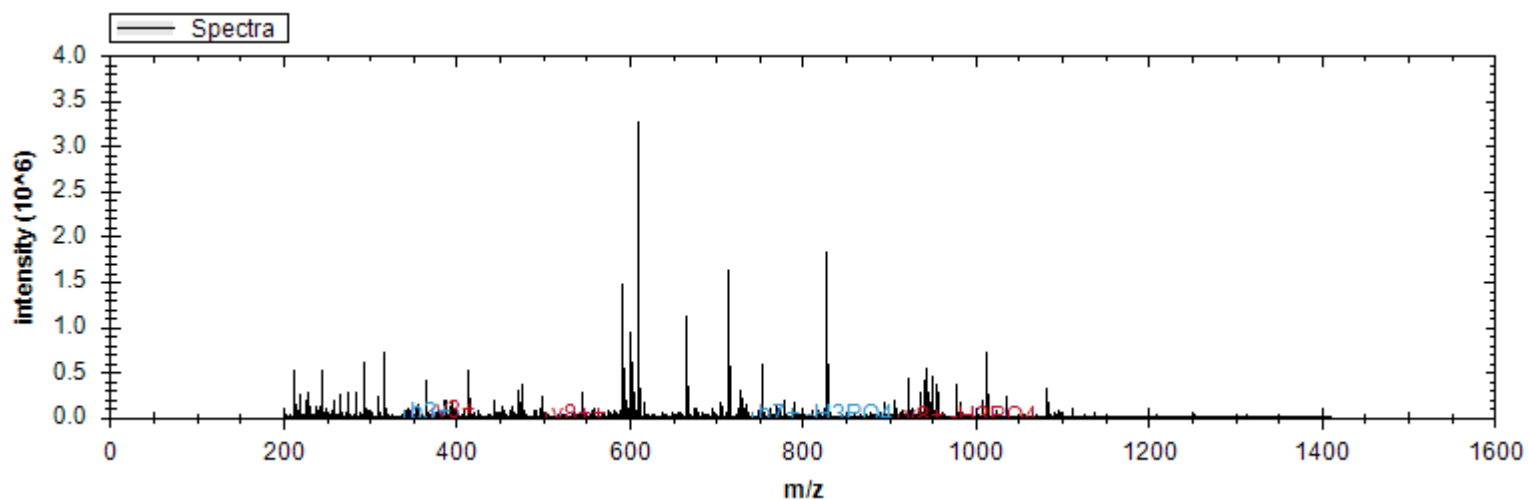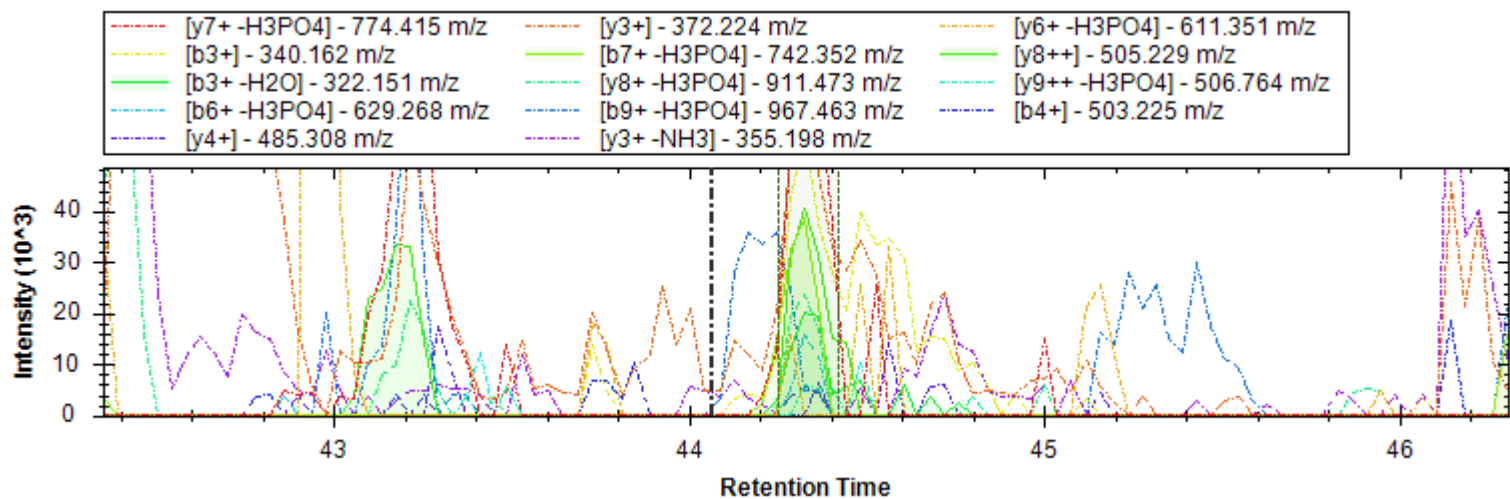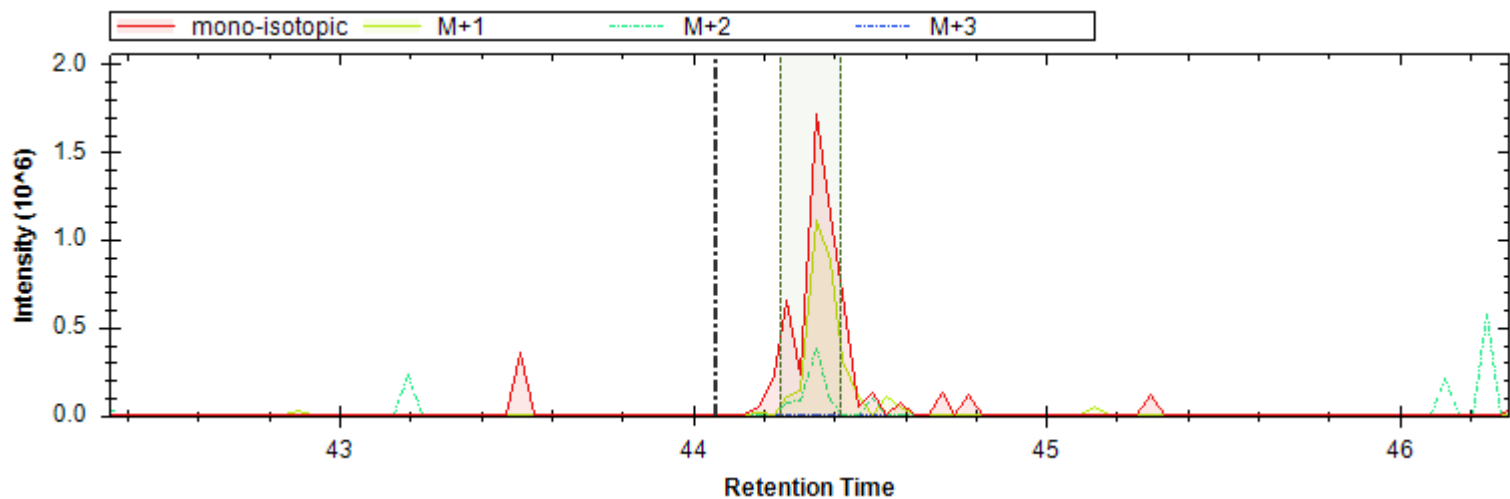

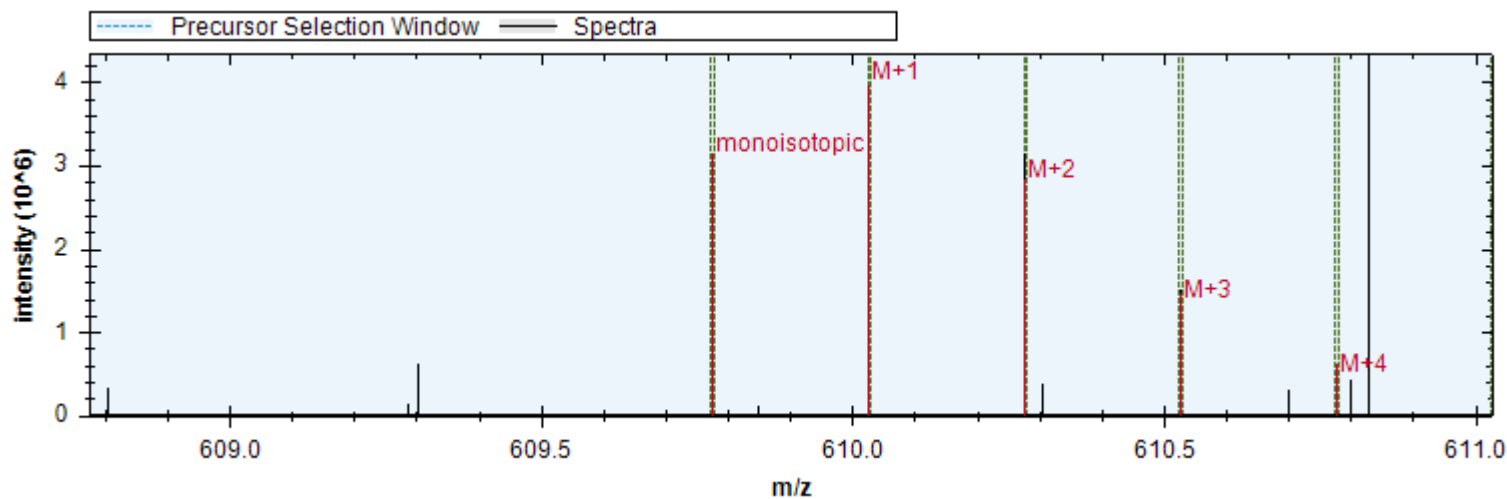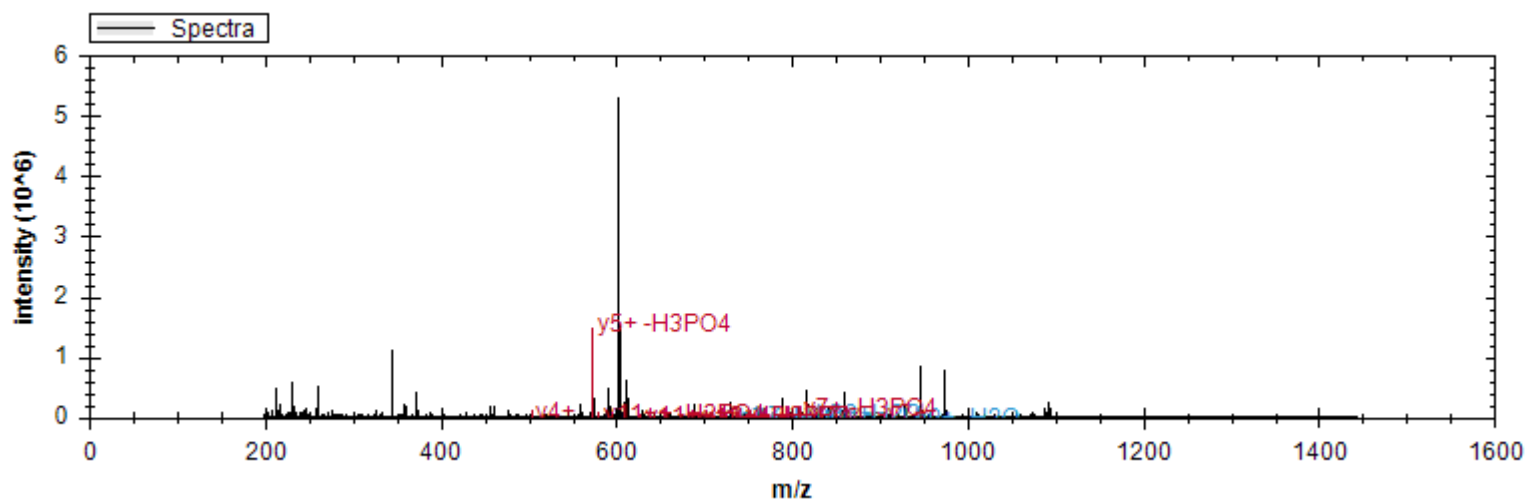

- |                              |                              |                              |
|------------------------------|------------------------------|------------------------------|
| [y7+ -H3PO4] - 807.382 m/z   | [y13++ -H3PO4] - 694.325 m/z | [b8+ -H2O] - 820.374 m/z     |
| [y4+] - 504.249 m/z          | [b8+] - 838.384 m/z          | [y7+] - 905.359 m/z          |
| [y11++ -H3PO4] - 579.280 m/z | [y5+ -H3PO4] - 573.270 m/z   | [y12++ -H3PO4] - 643.801 m/z |
| [y11+] - 628.268 m/z         | [y13++] - 743.313 m/z        | [b7+] - 751.352 m/z          |
| [b9++] - 476.238 m/z         | [y6+ -H3PO4] - 710.329 m/z   | [b6+ -H2O] - 662.305 m/z     |
| [y12++] - 692.789 m/z        | [b9+ -H2O] - 933.458 m/z     | [b7+ -H2O] - 733.342 m/z     |
| [b6+] - 680.315 m/z          | [y5+ -NH3] - 752.020 m/z     | [y4+ -H2O] - 486.238 m/z     |
| [b5+] - 593.283 m/z          | [y7++] - 453.183 m/z         | [b3+] - 306.156 m/z          |
| [y10++] - 592.750 m/z        |                              |                              |

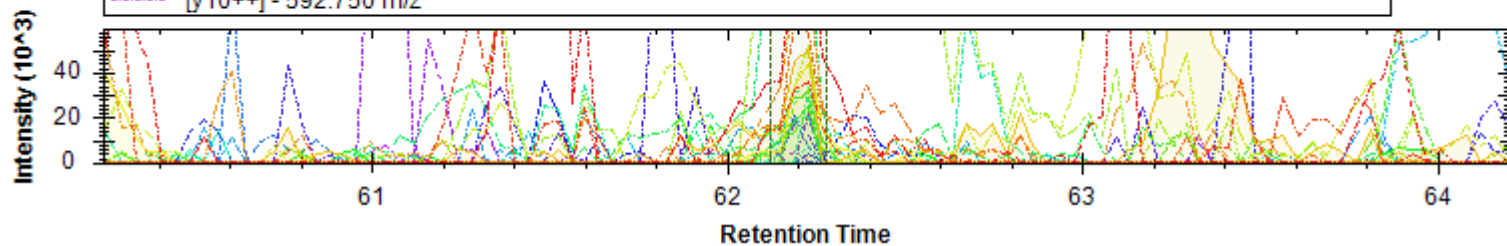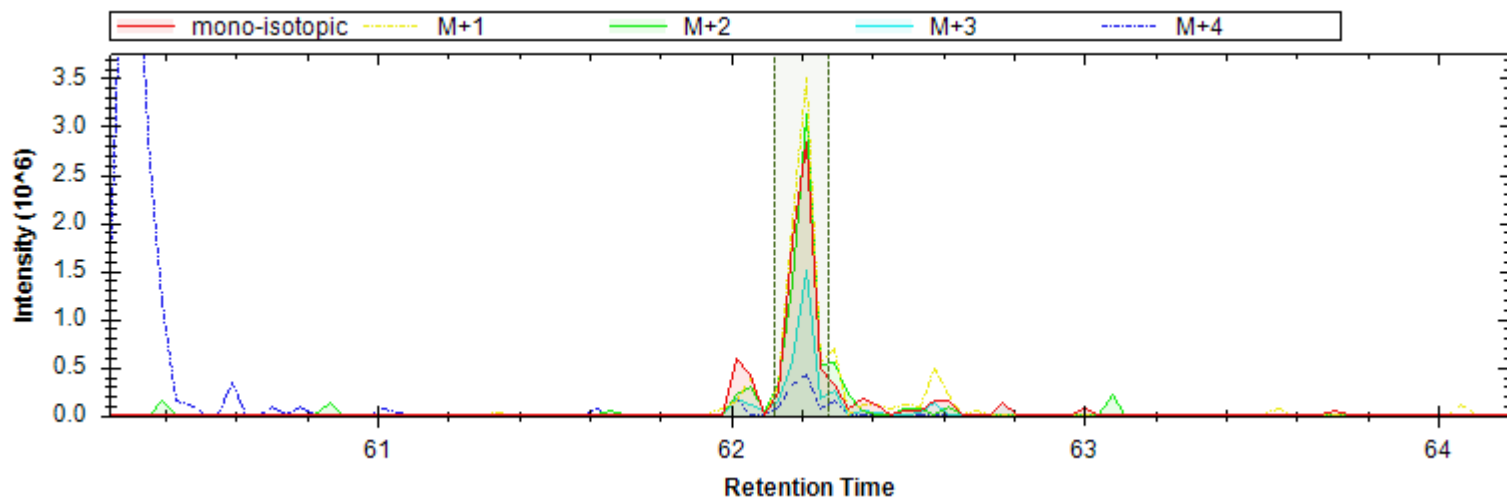

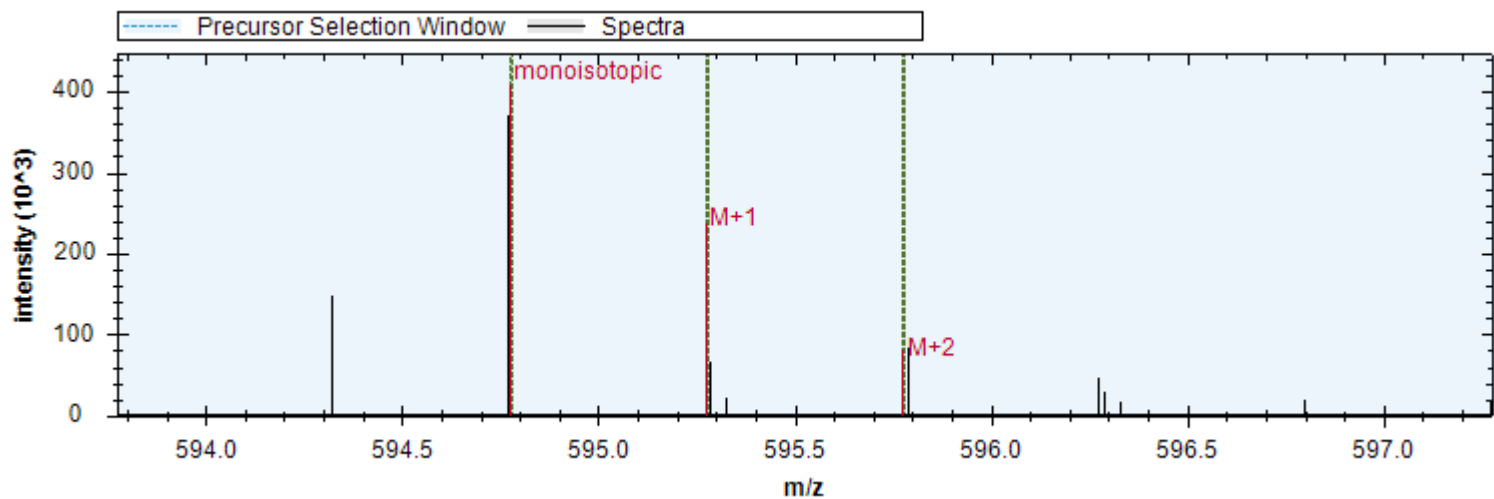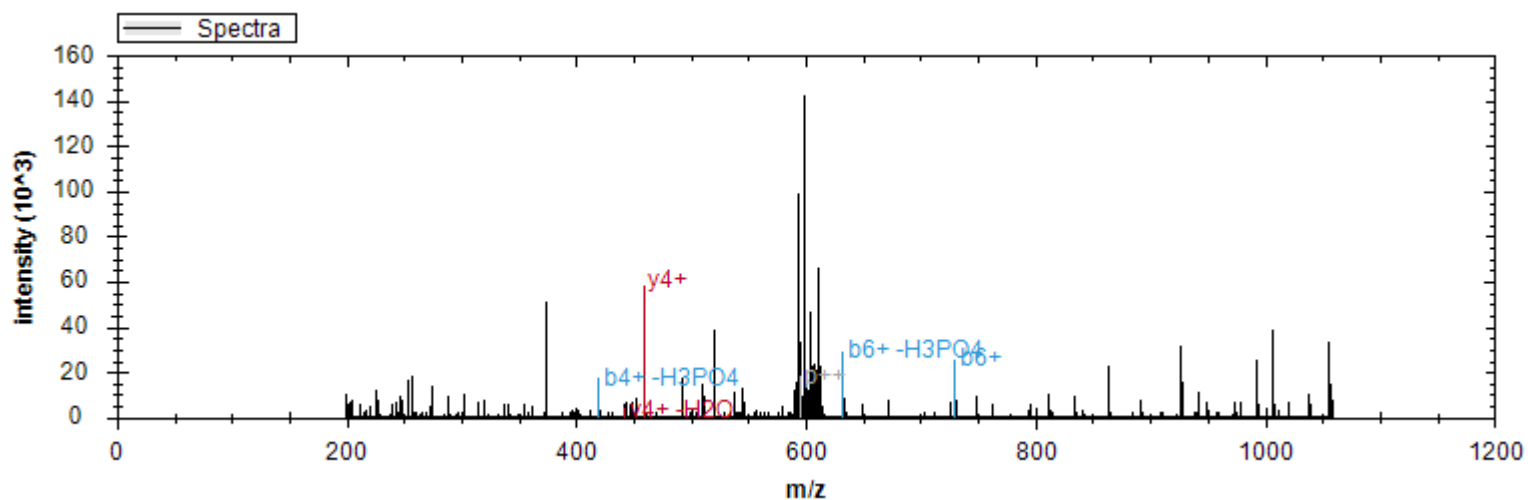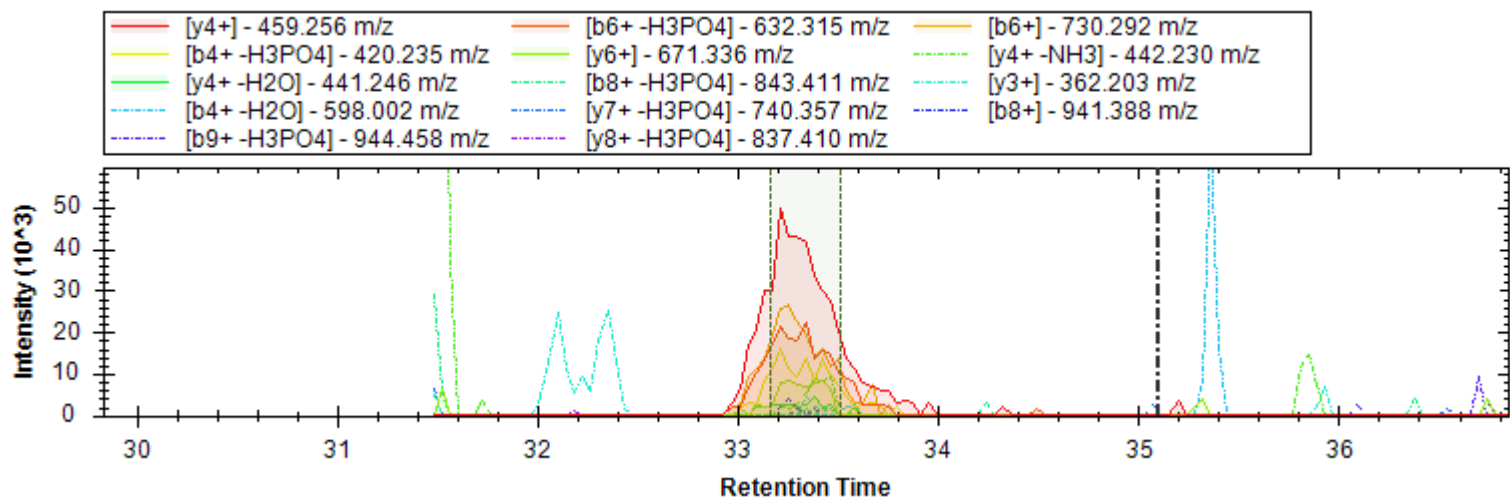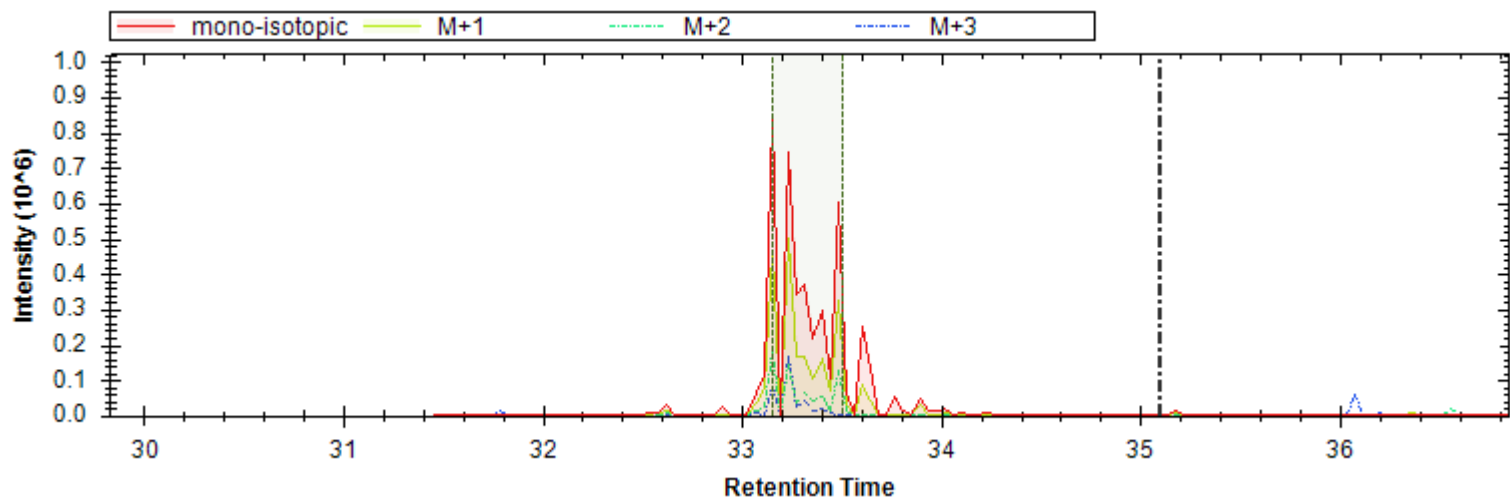

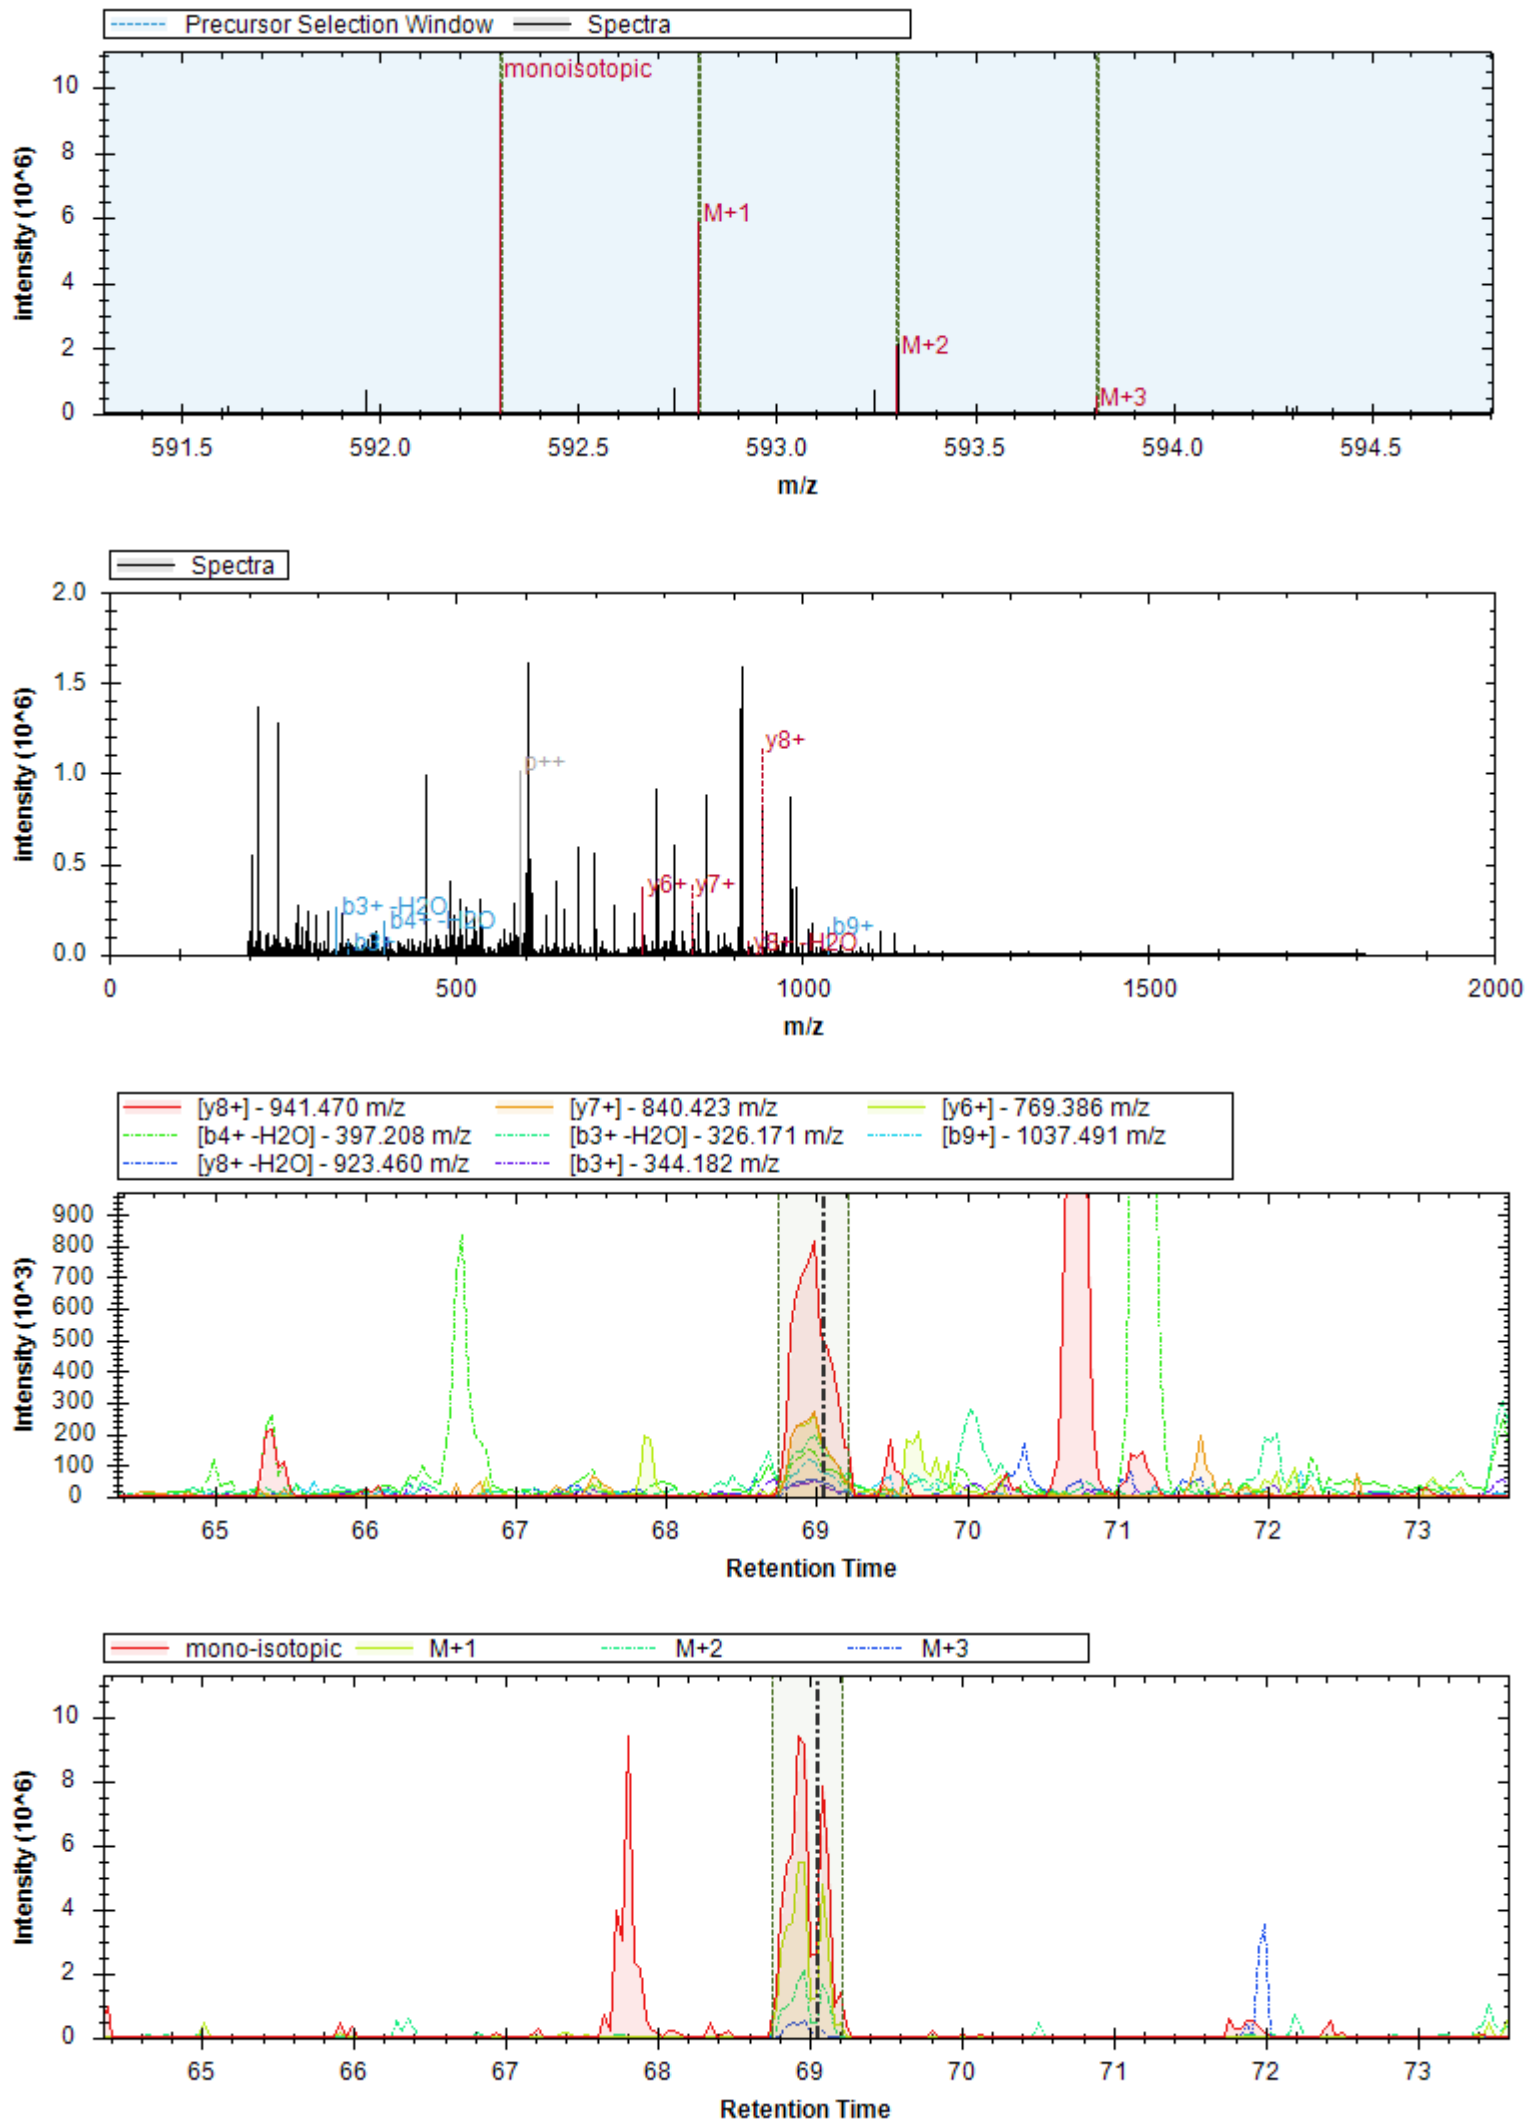

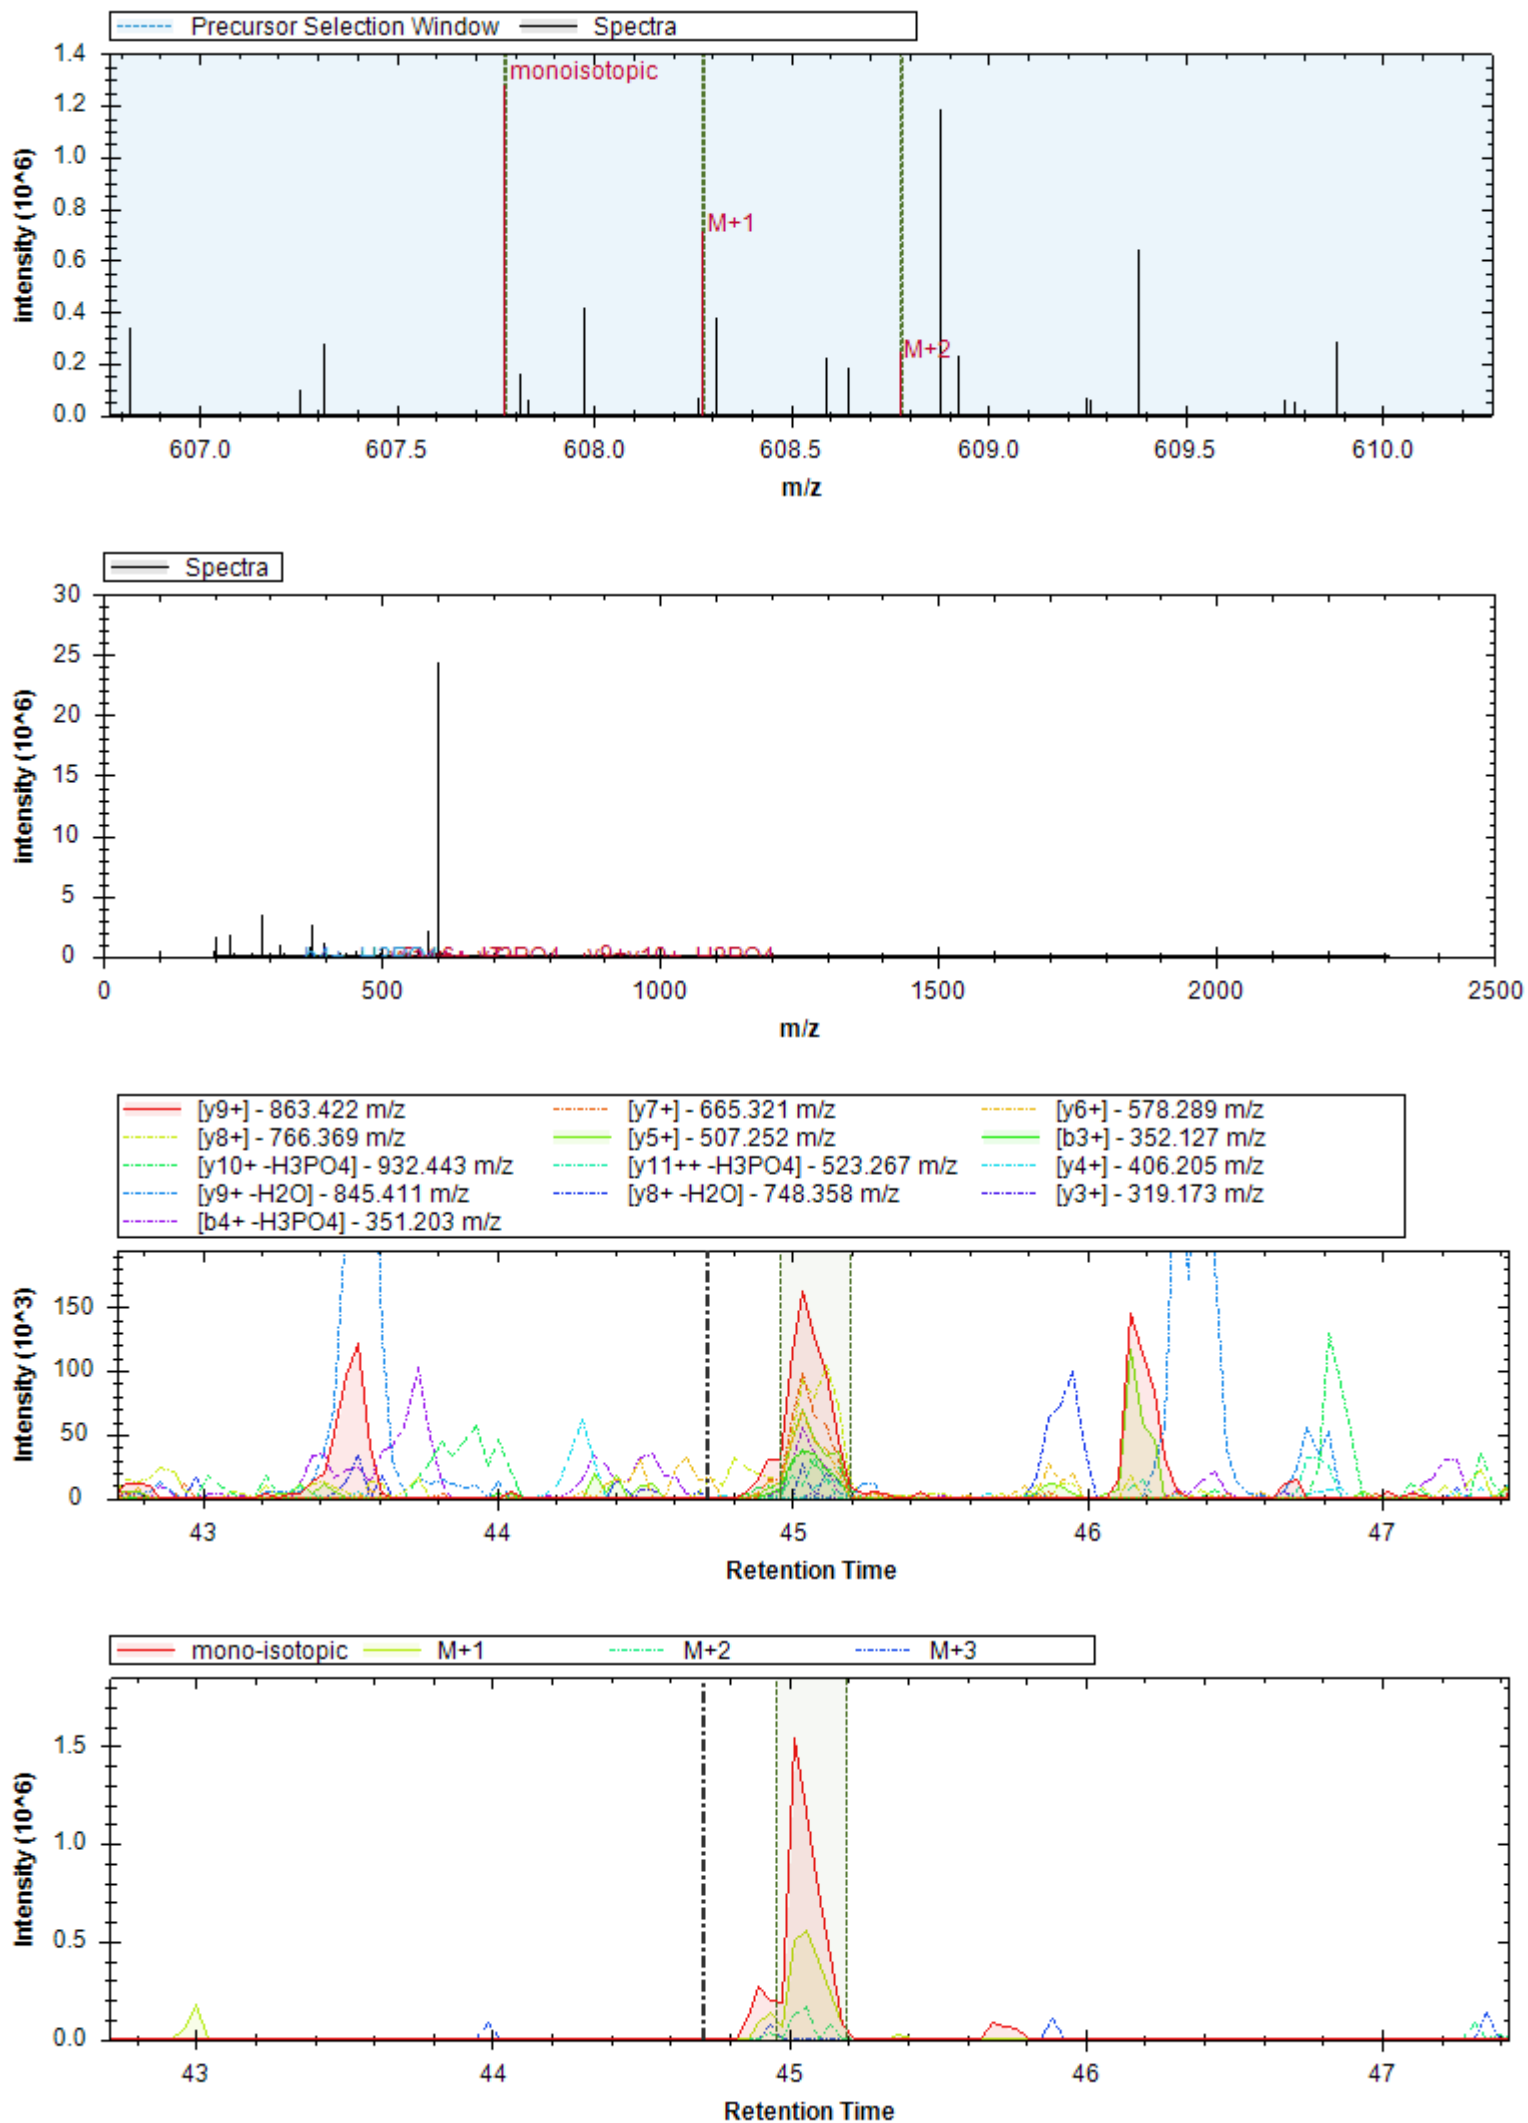

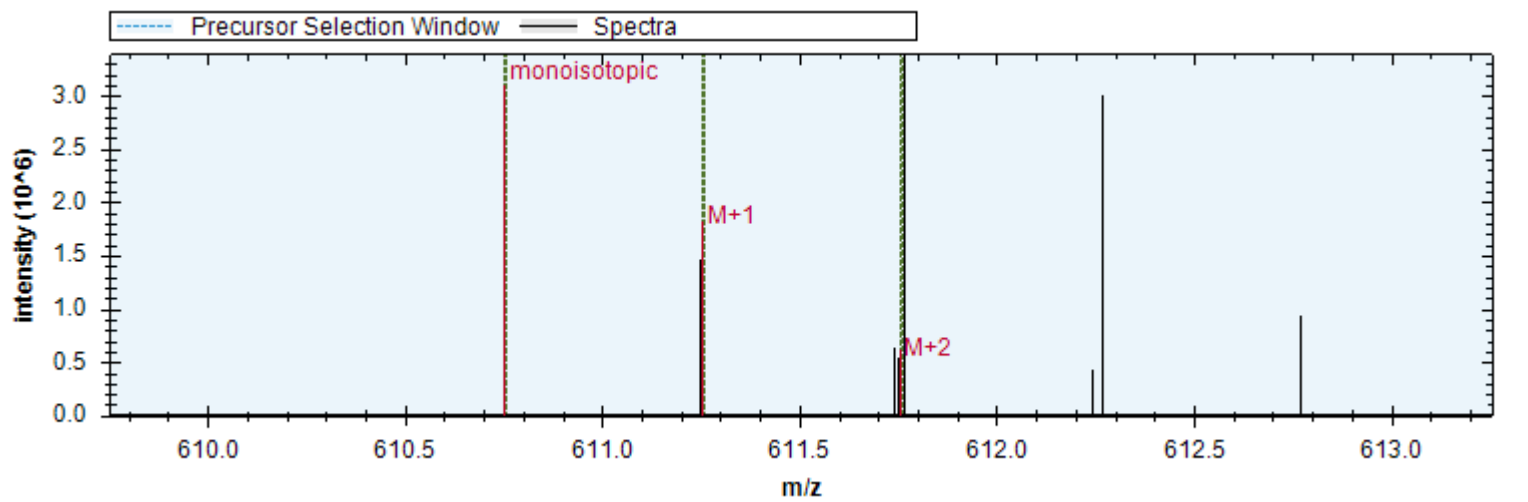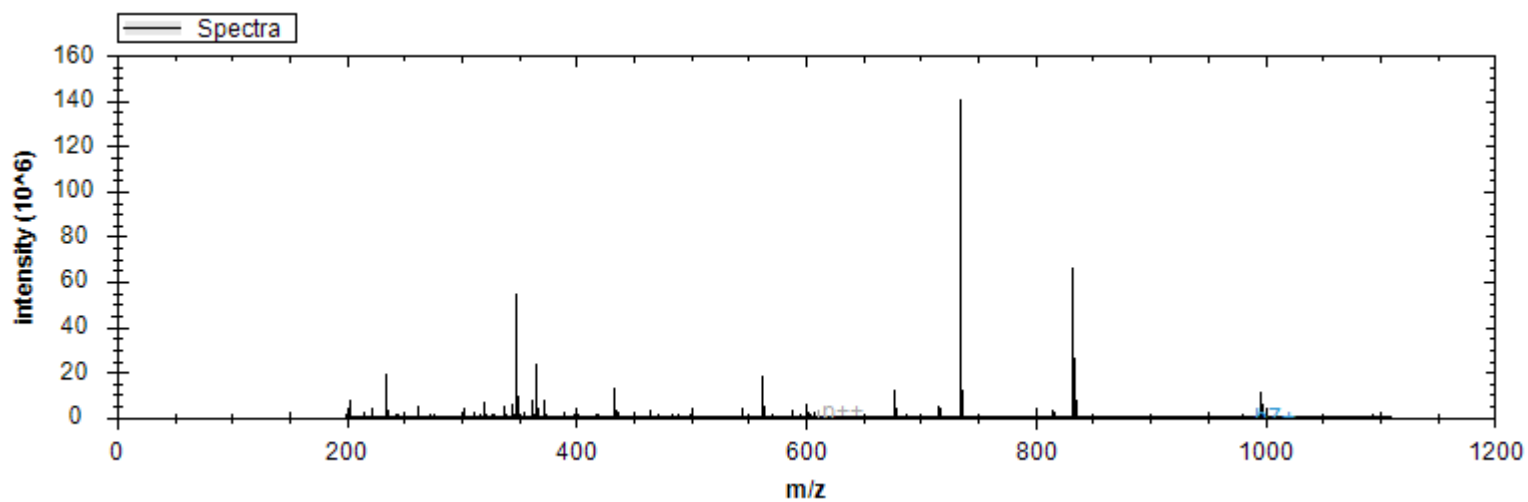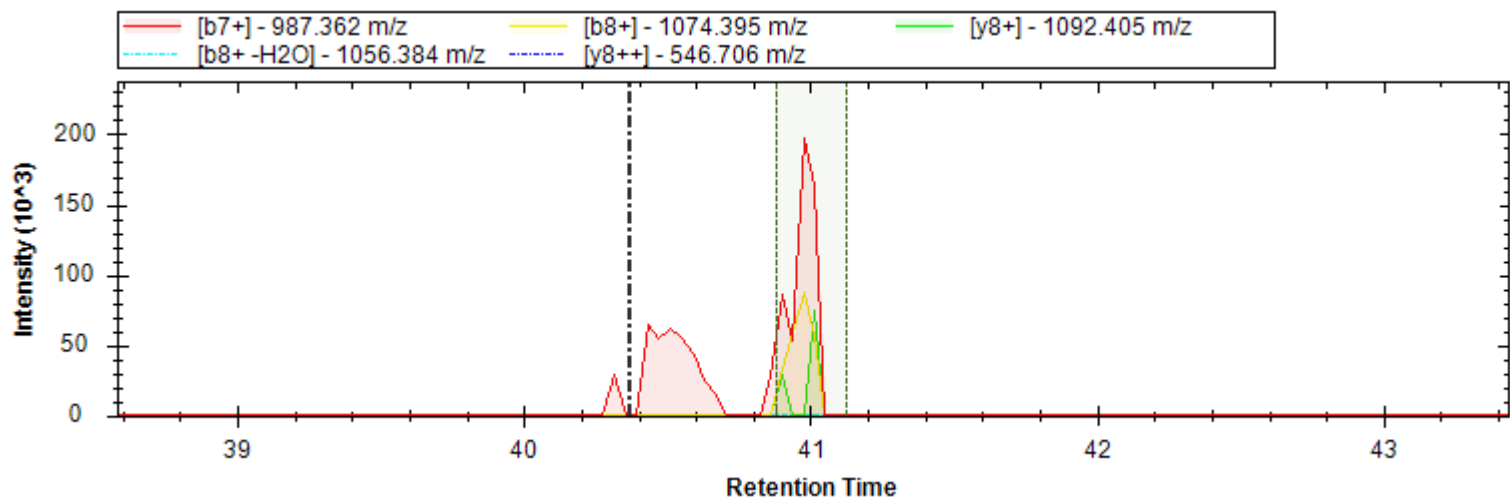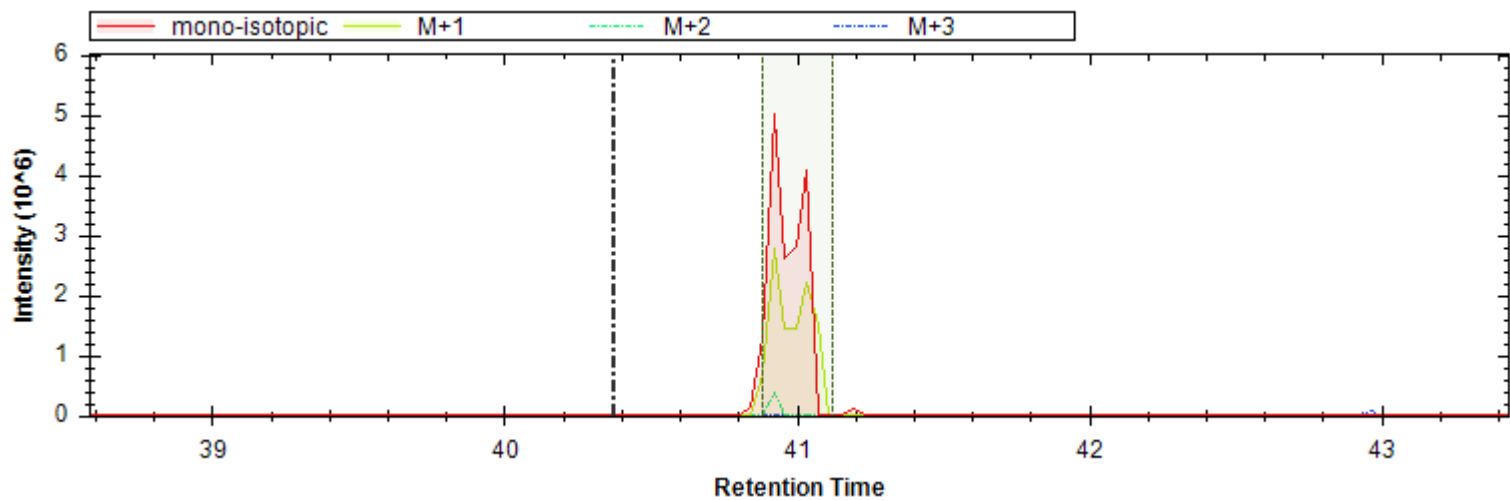

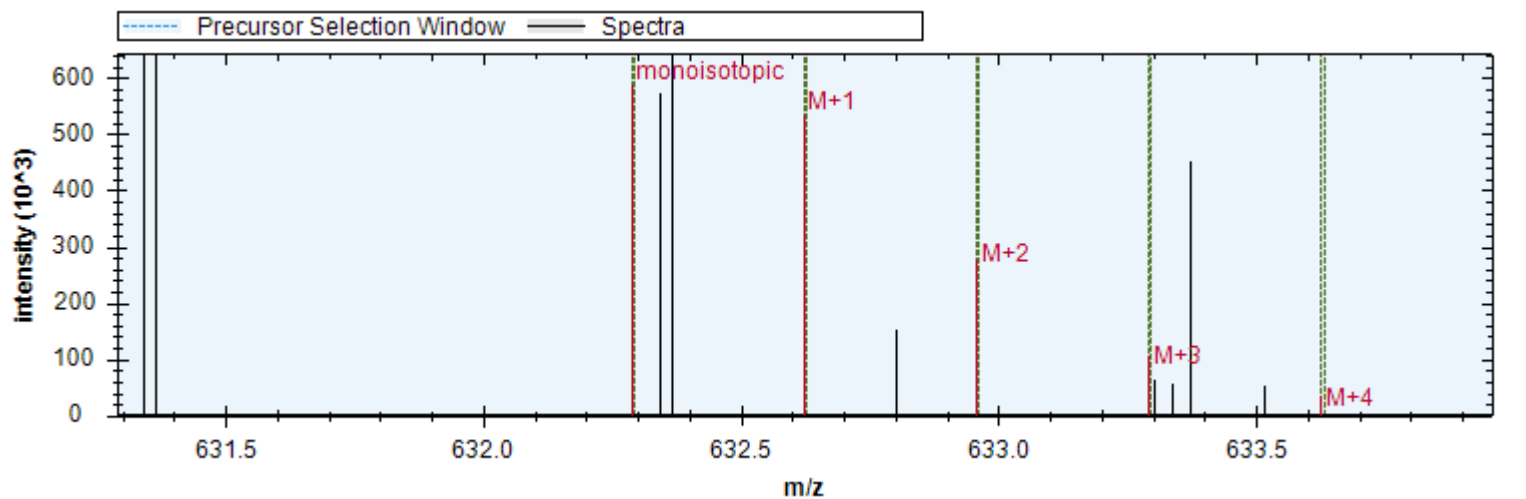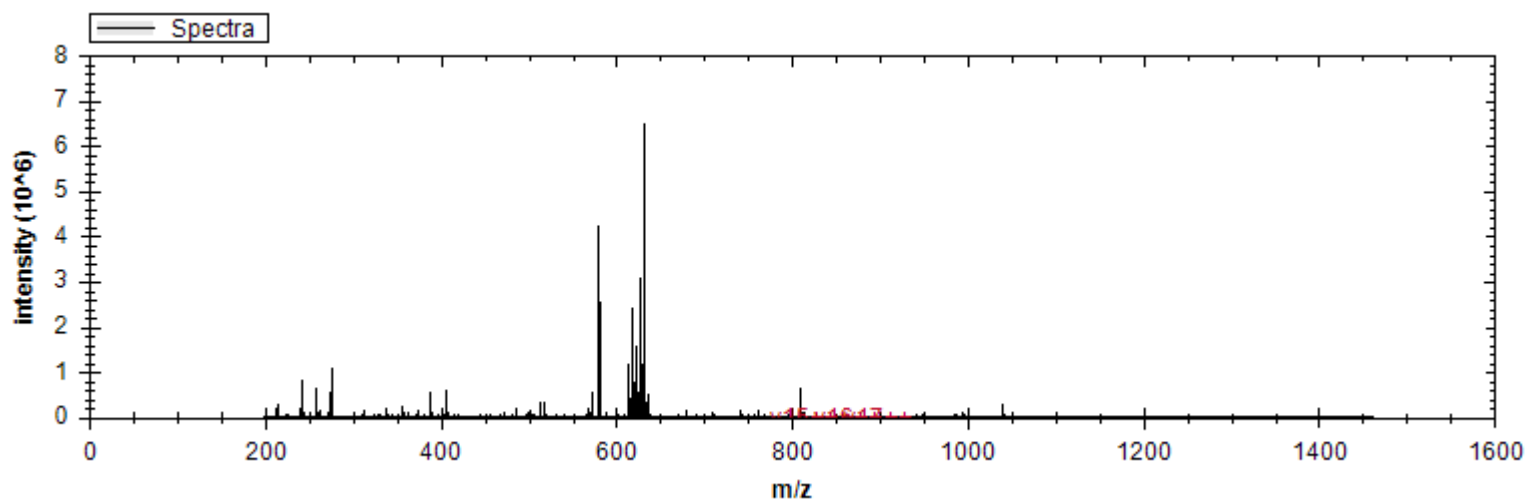

- |                              |                              |                            |
|------------------------------|------------------------------|----------------------------|
| [y3+] - 331.198 m/z          | [y6+] - 656.265 m/z          | [y17++] - 854.899 m/z      |
| [y15++] - 768.856 m/z        | [y16++] - 819.380 m/z        | [y7+] - 755.334 m/z        |
| [y17++ -H3PO4] - 805.910 m/z | [y5+ -H2O] - 665.017 m/z     | [b12+] - 1140.528 m/z      |
| [y16++ -H3PO4] - 770.392 m/z | [b8+] - 812.390 m/z          | [y6+ -H3PO4] - 558.288 m/z |
| [b4+ -H2O] - 341.146 m/z     | [y5+] - 585.228 m/z          | [y5+ -H3PO4] - 487.251 m/z |
| [y4+ -H3PO4] - 400.219 m/z   | [y15++ -H3PO4] - 719.868 m/z | [y6+ -H2O] - 736.055 m/z   |
| [y8+] - 826.371 m/z          | [b4+] - 359.156 m/z          | [y3+ -H2O] - 313.187 m/z   |
| [b10+] - 998.454 m/z         |                              |                            |

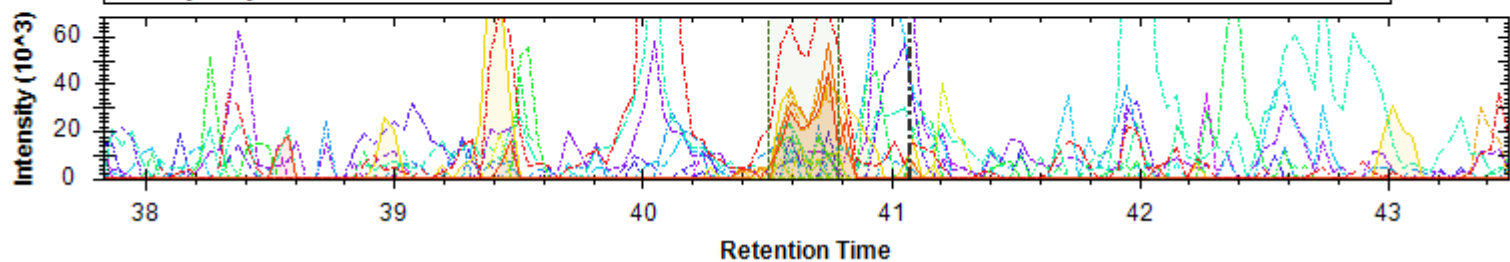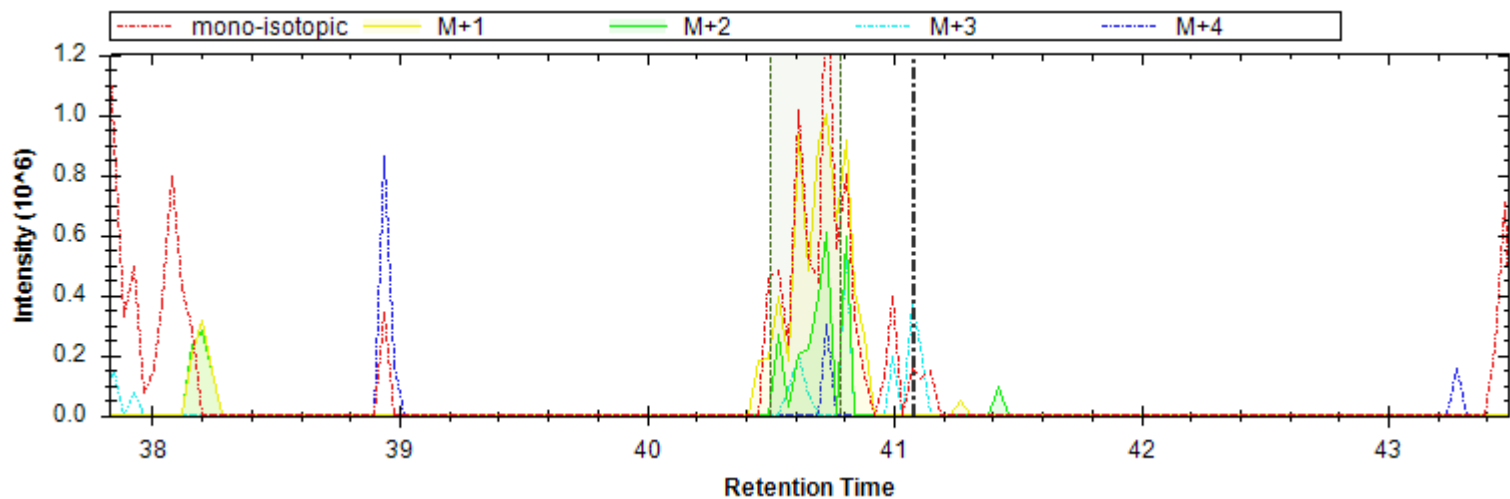

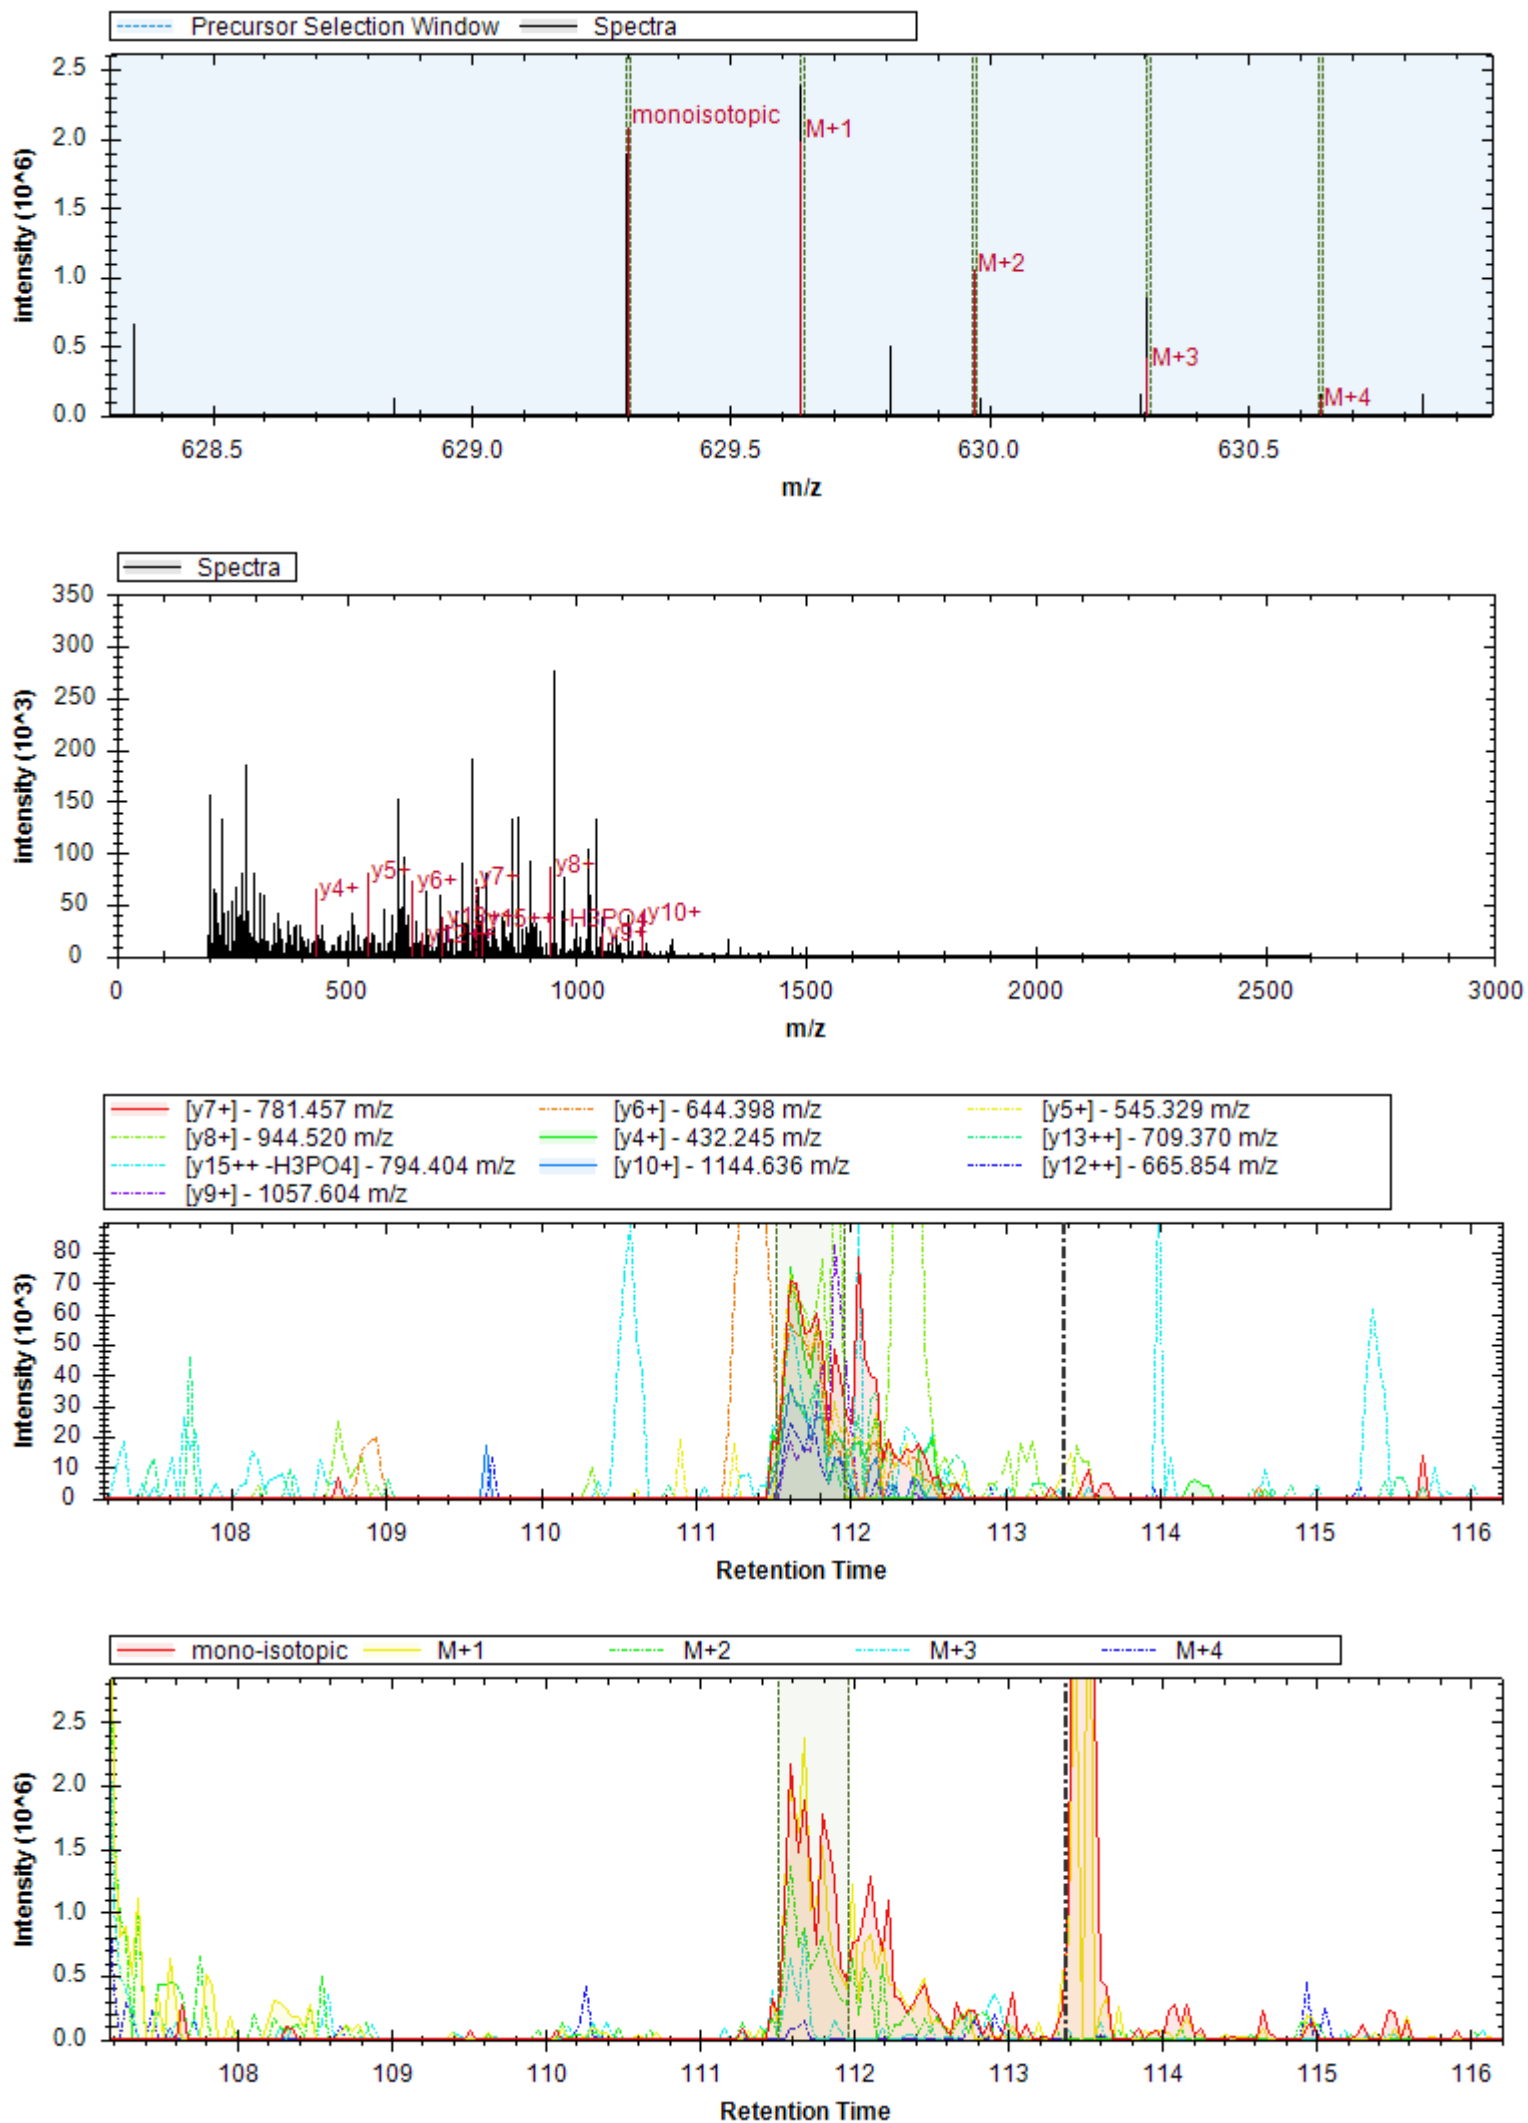



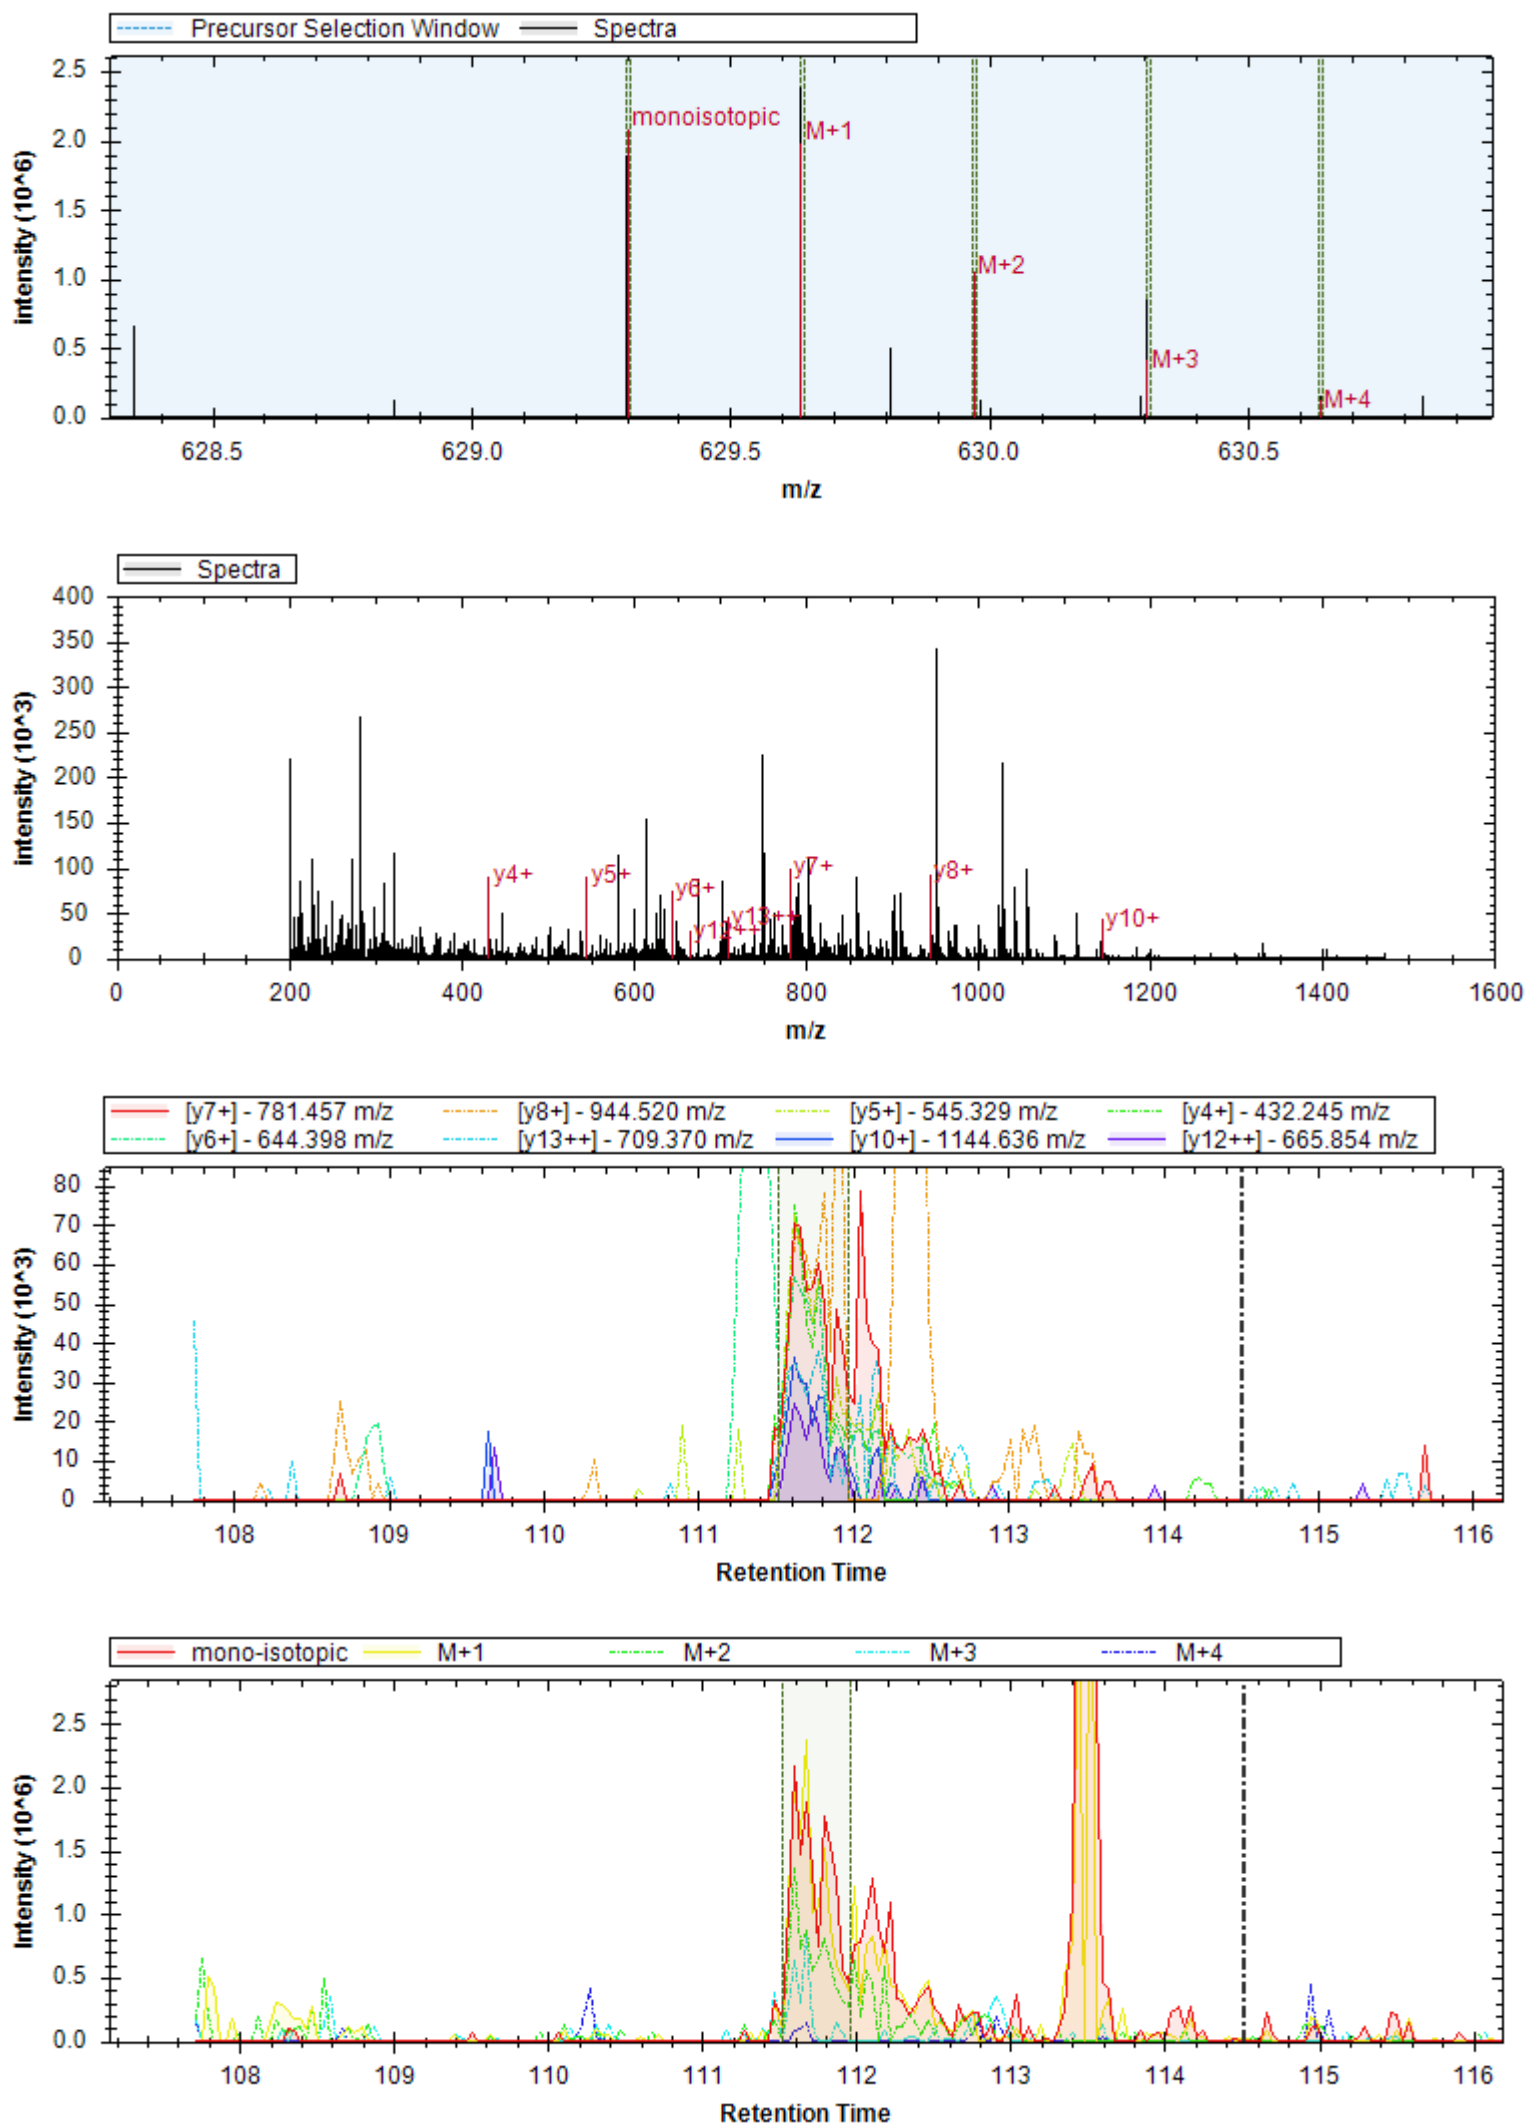

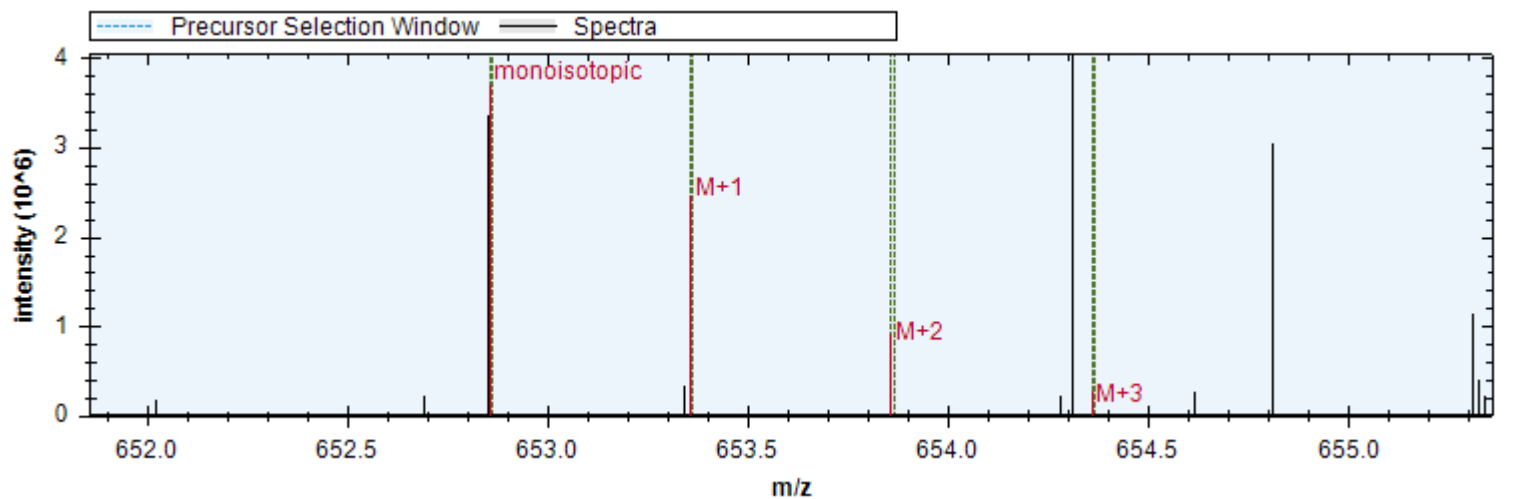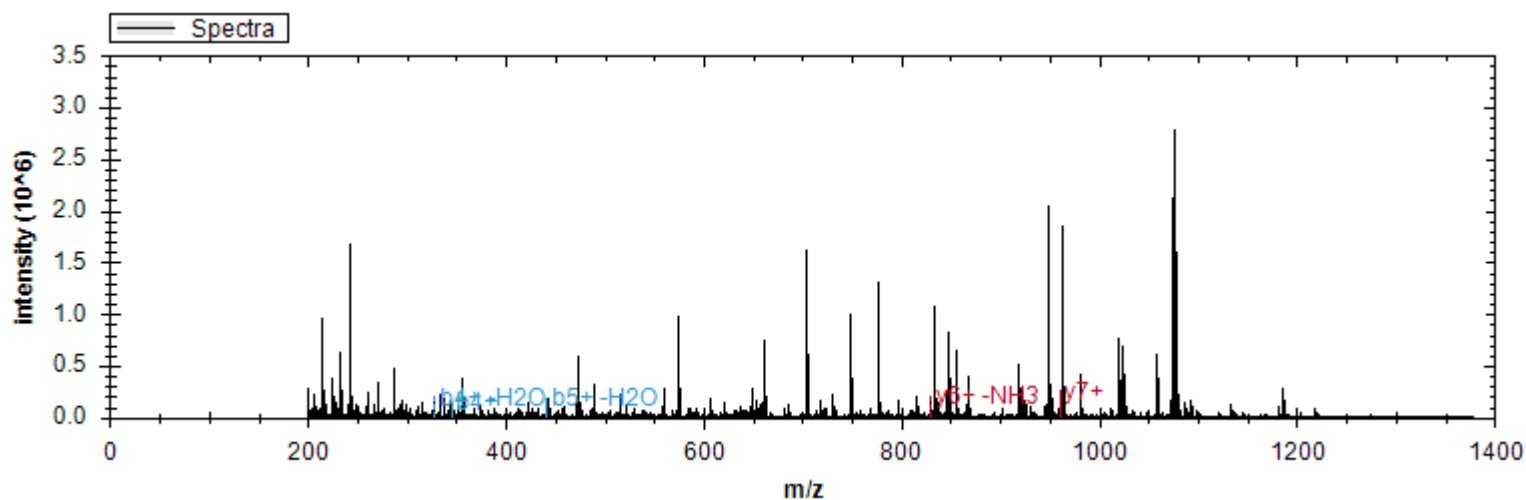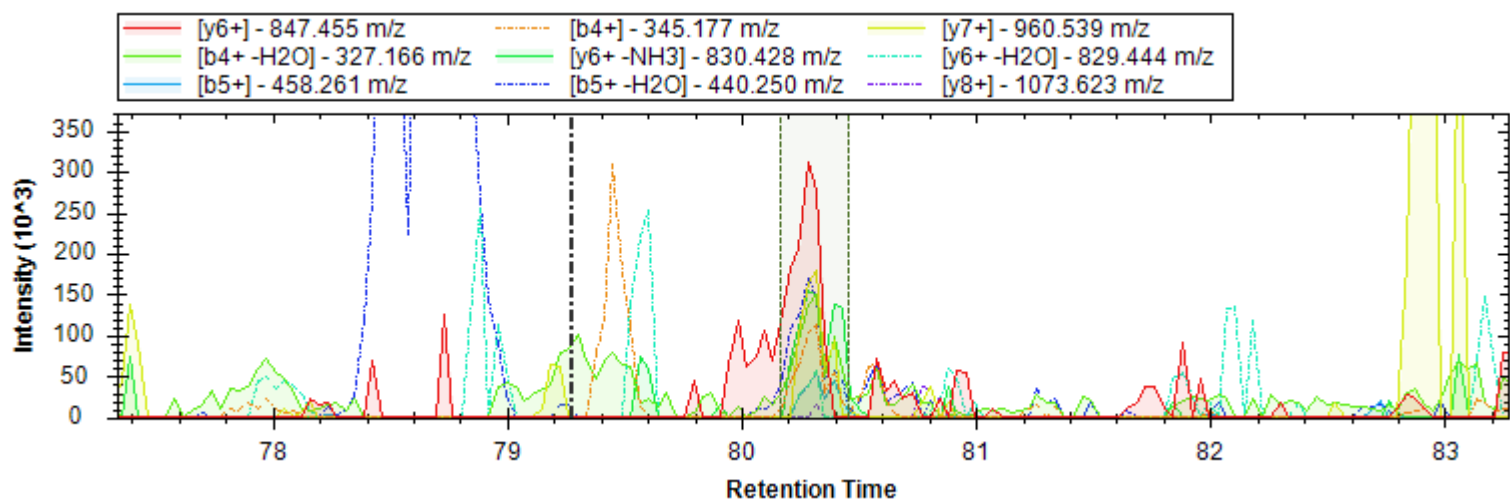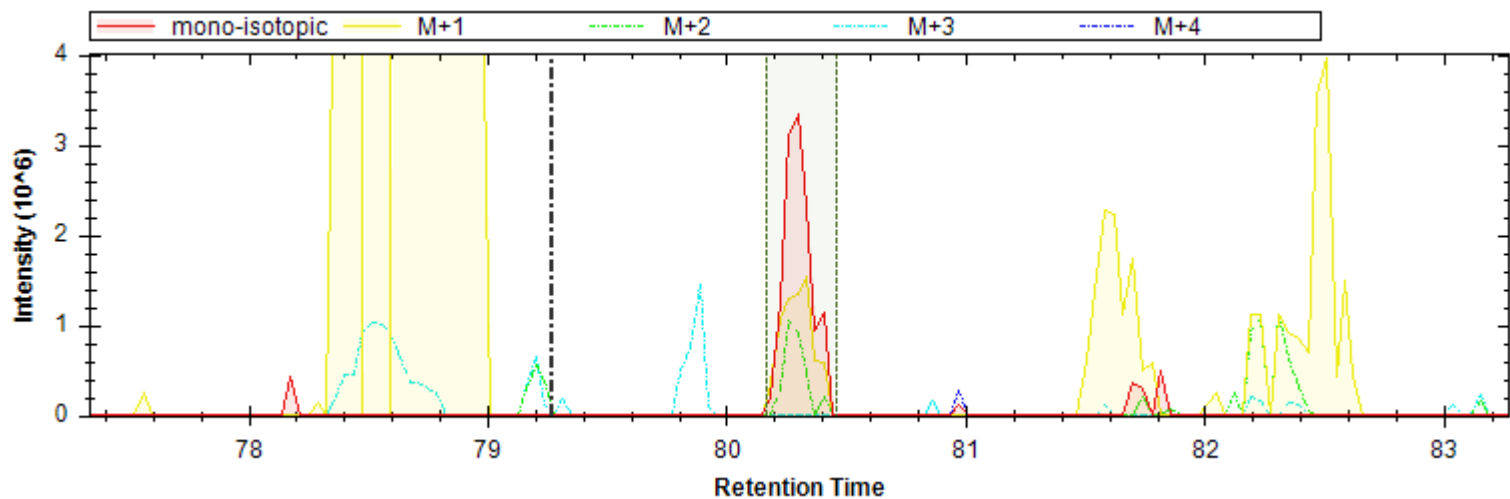

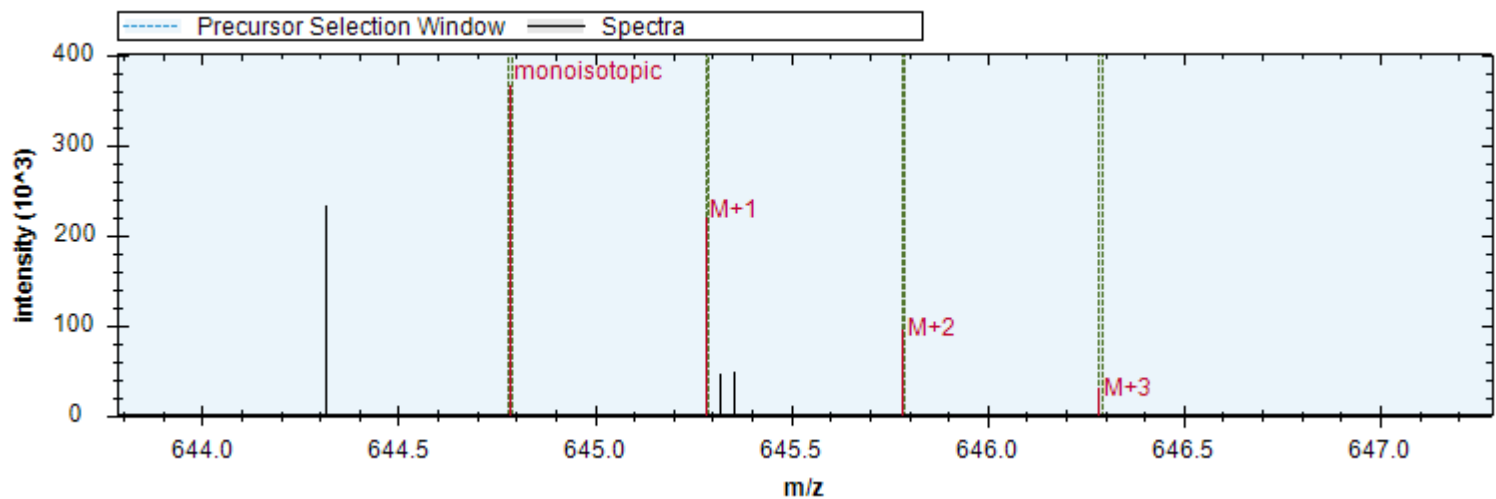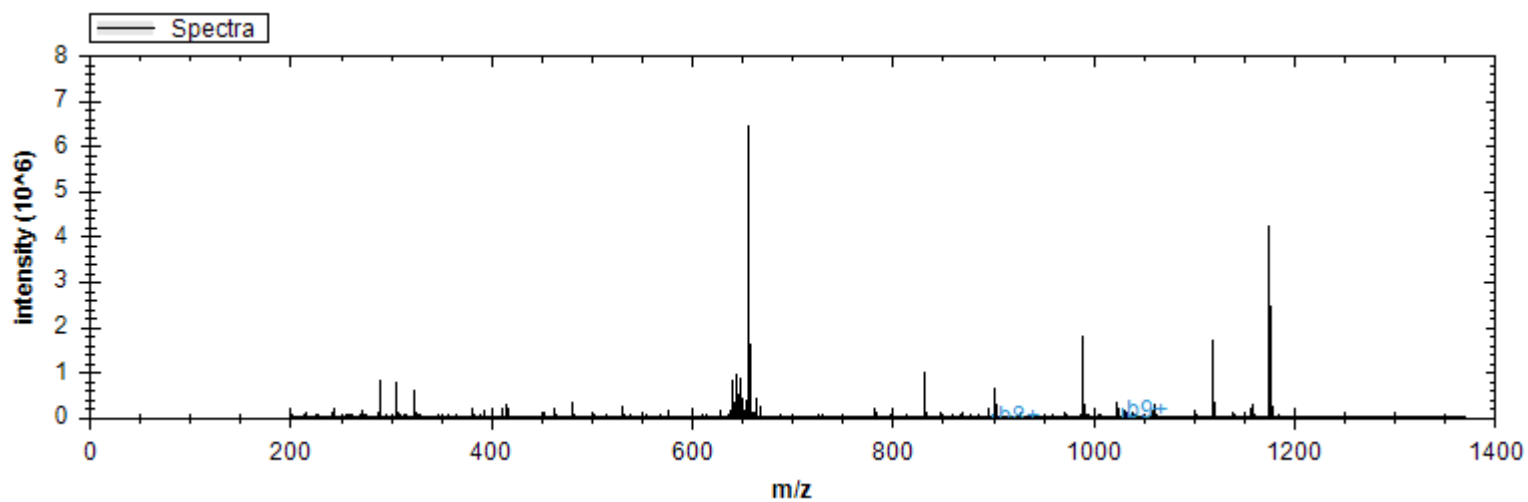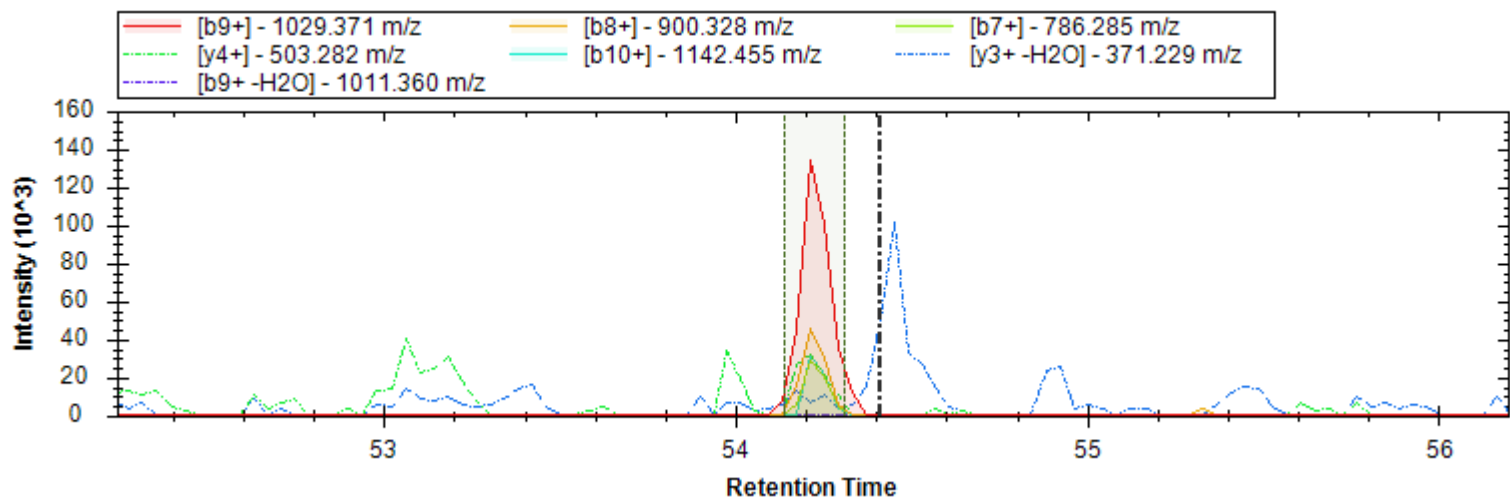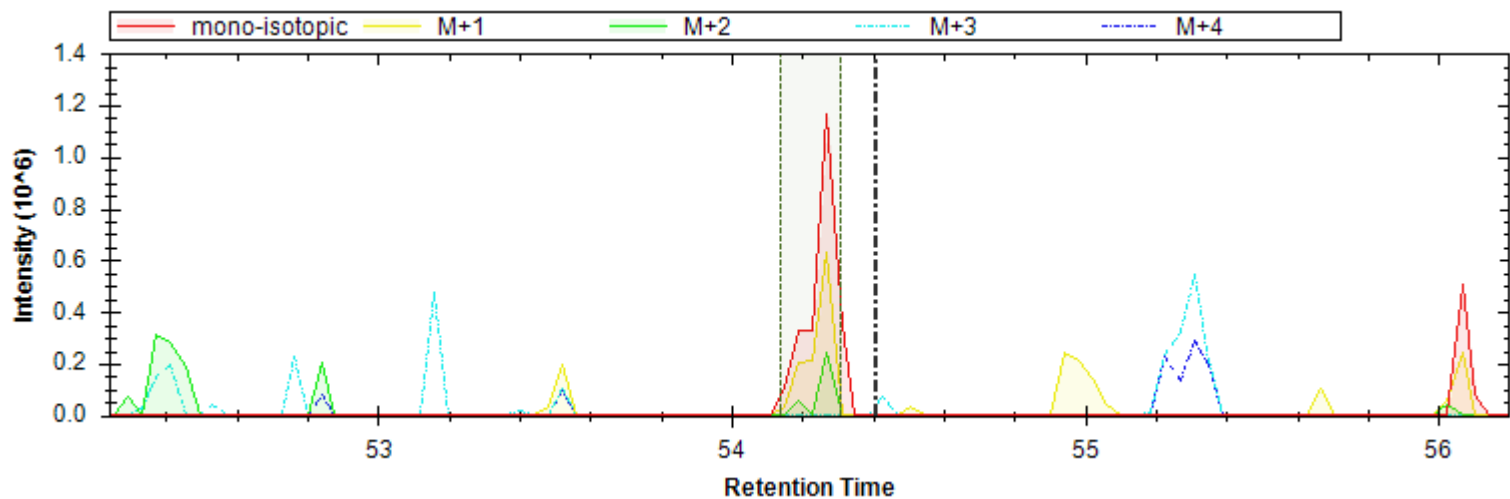

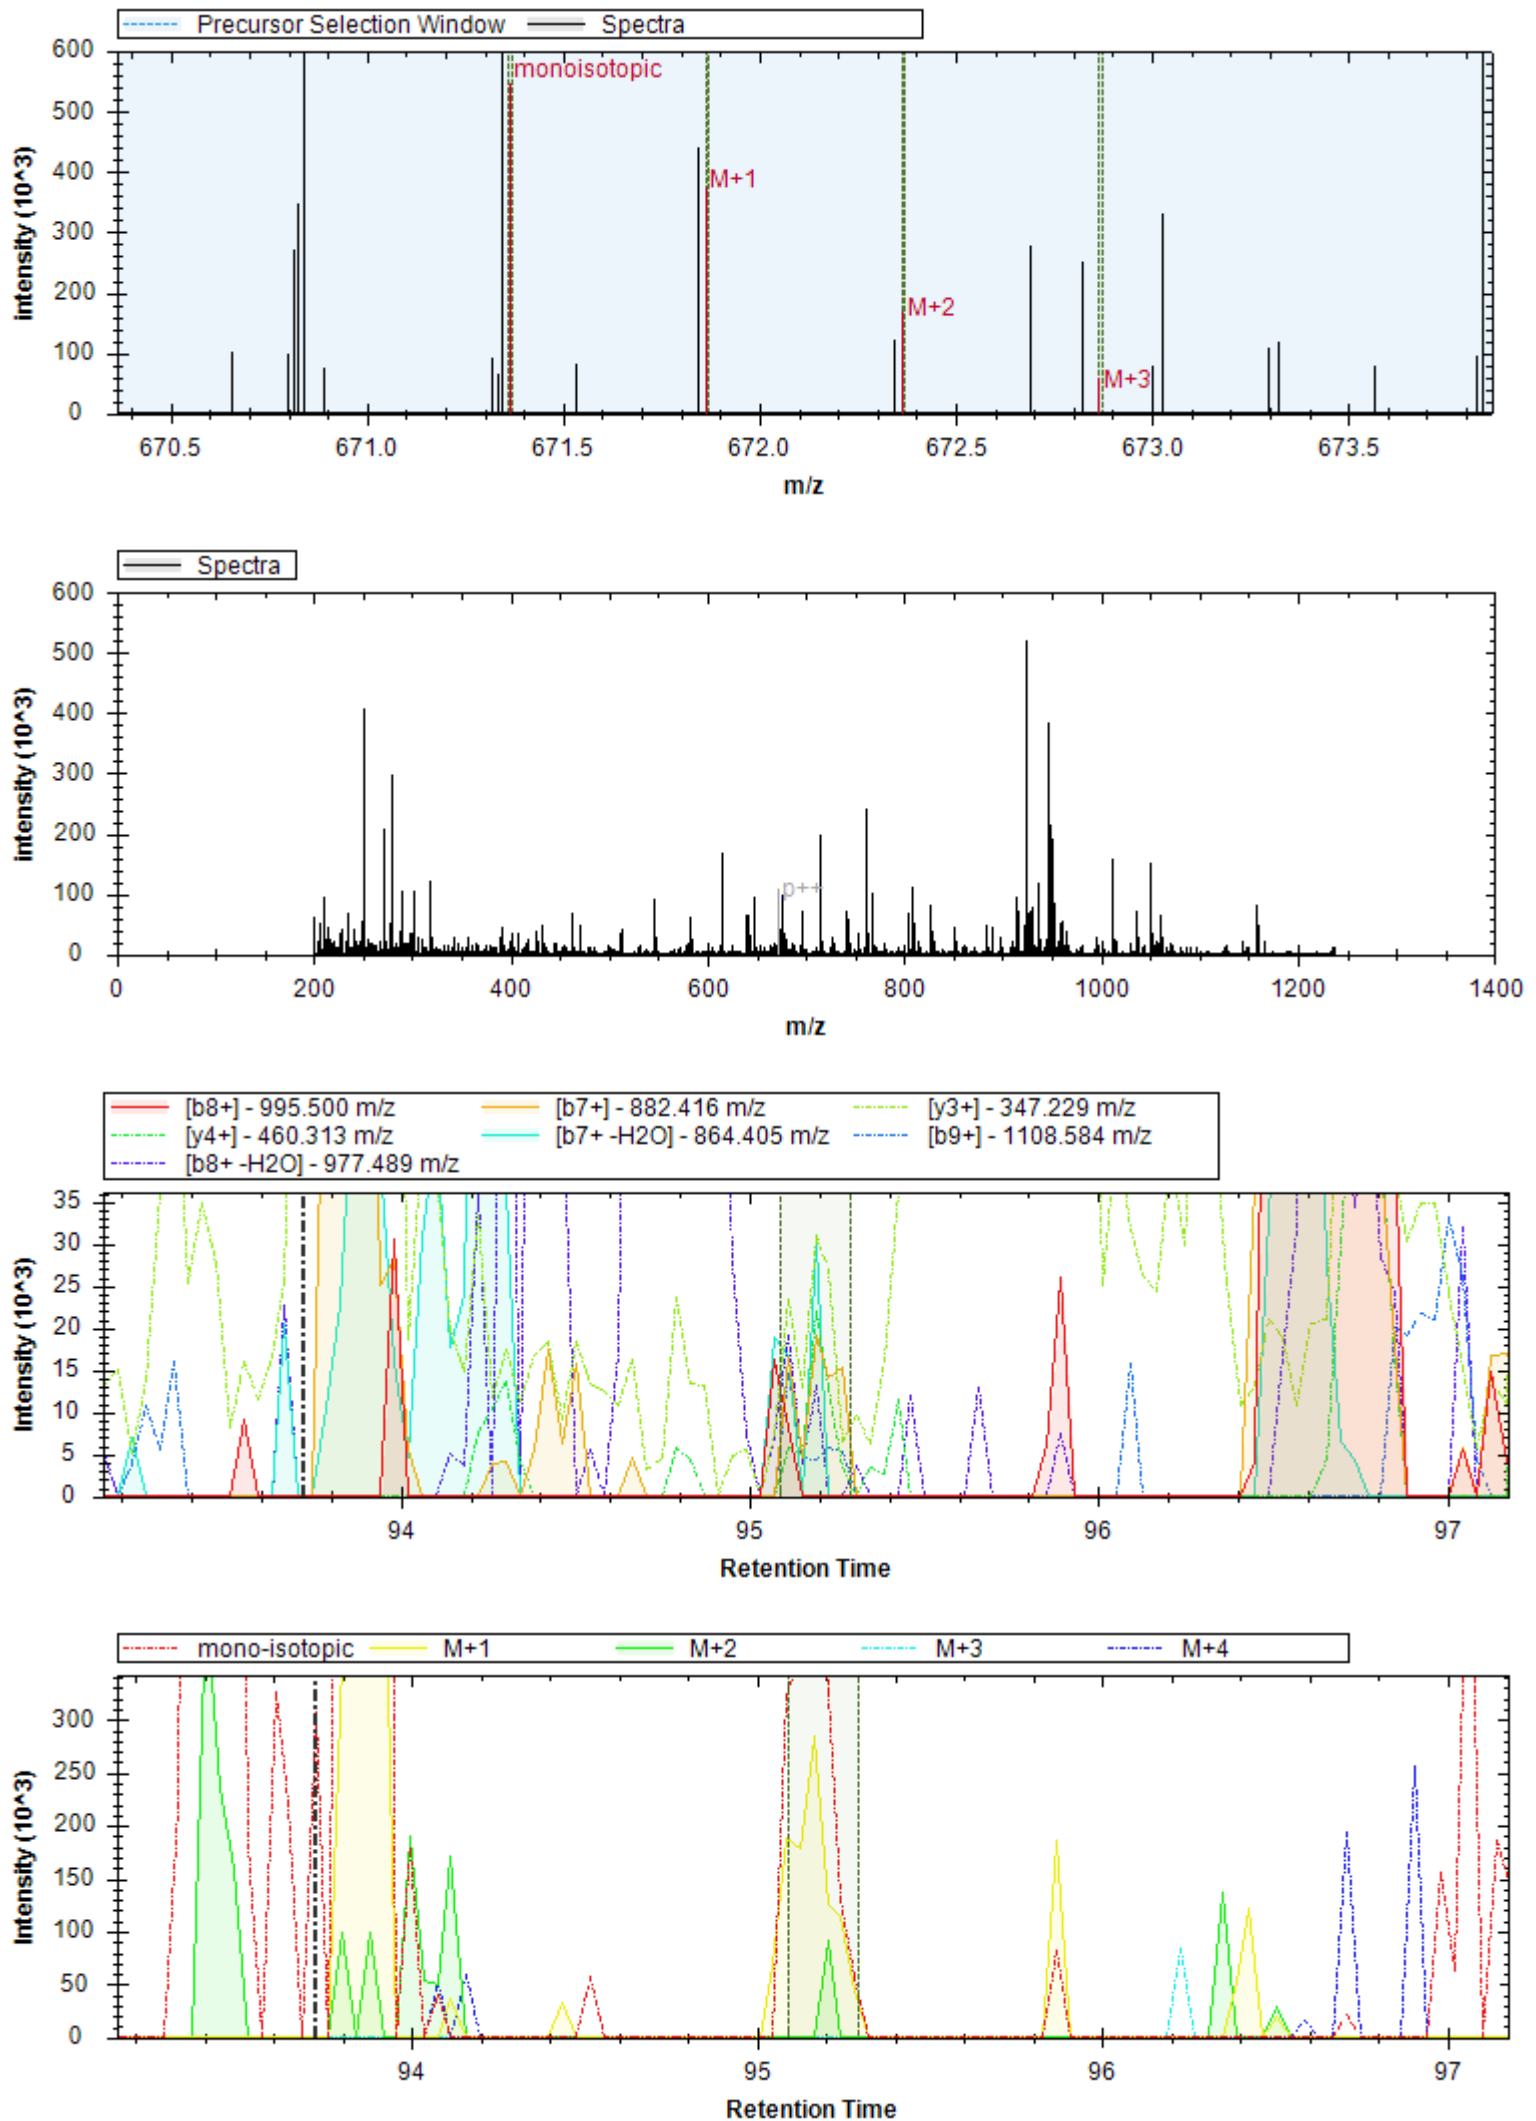

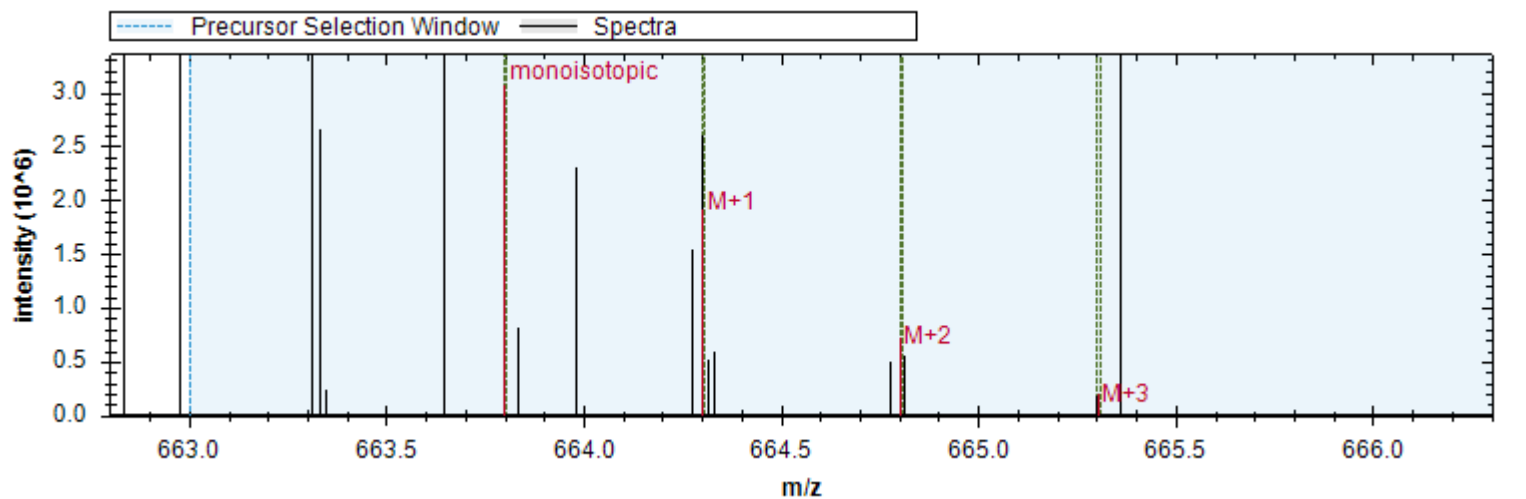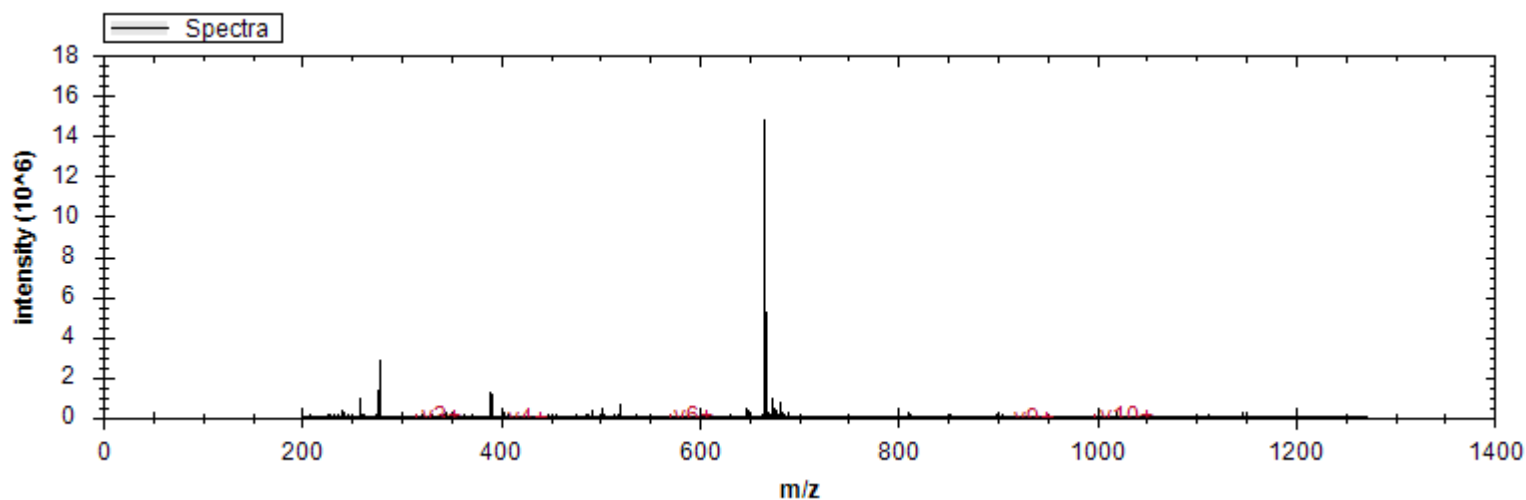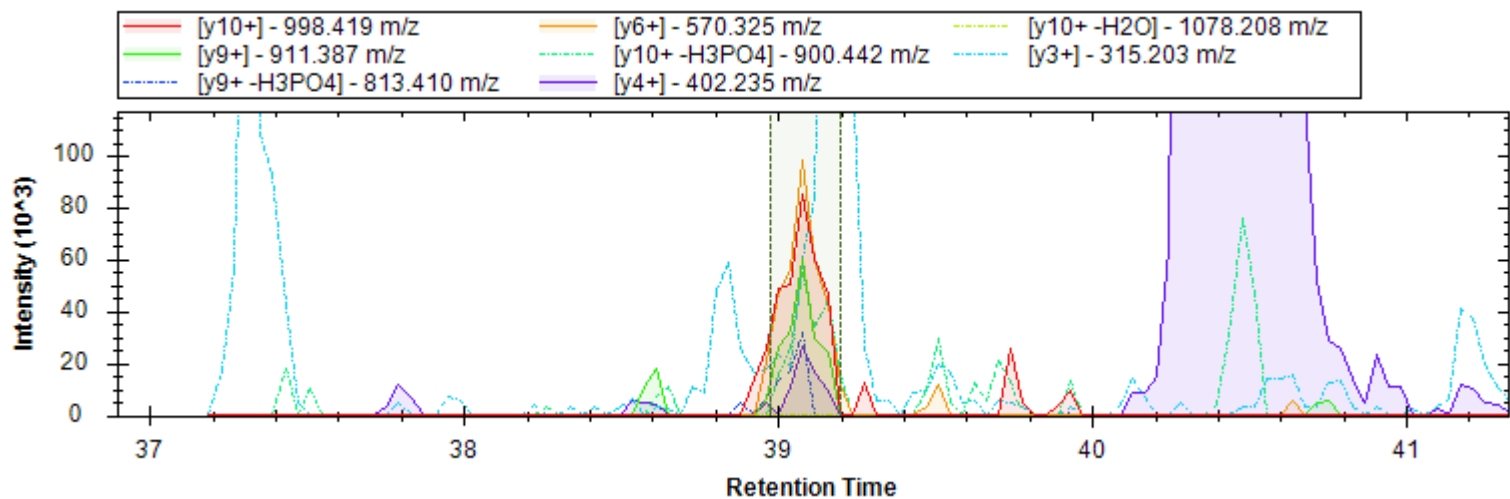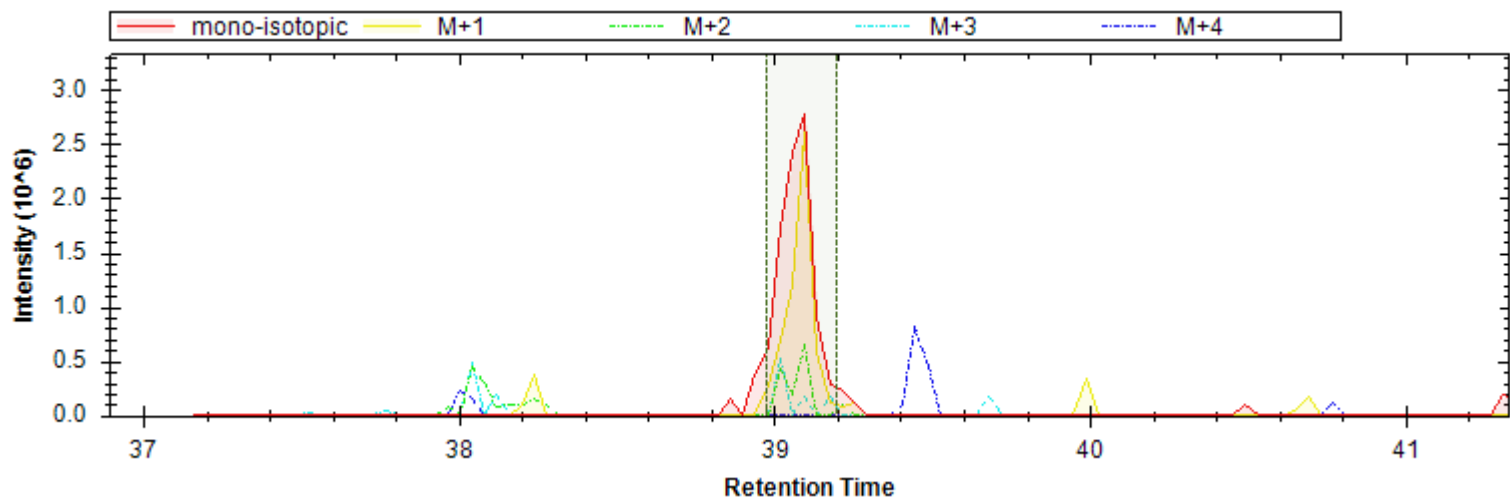

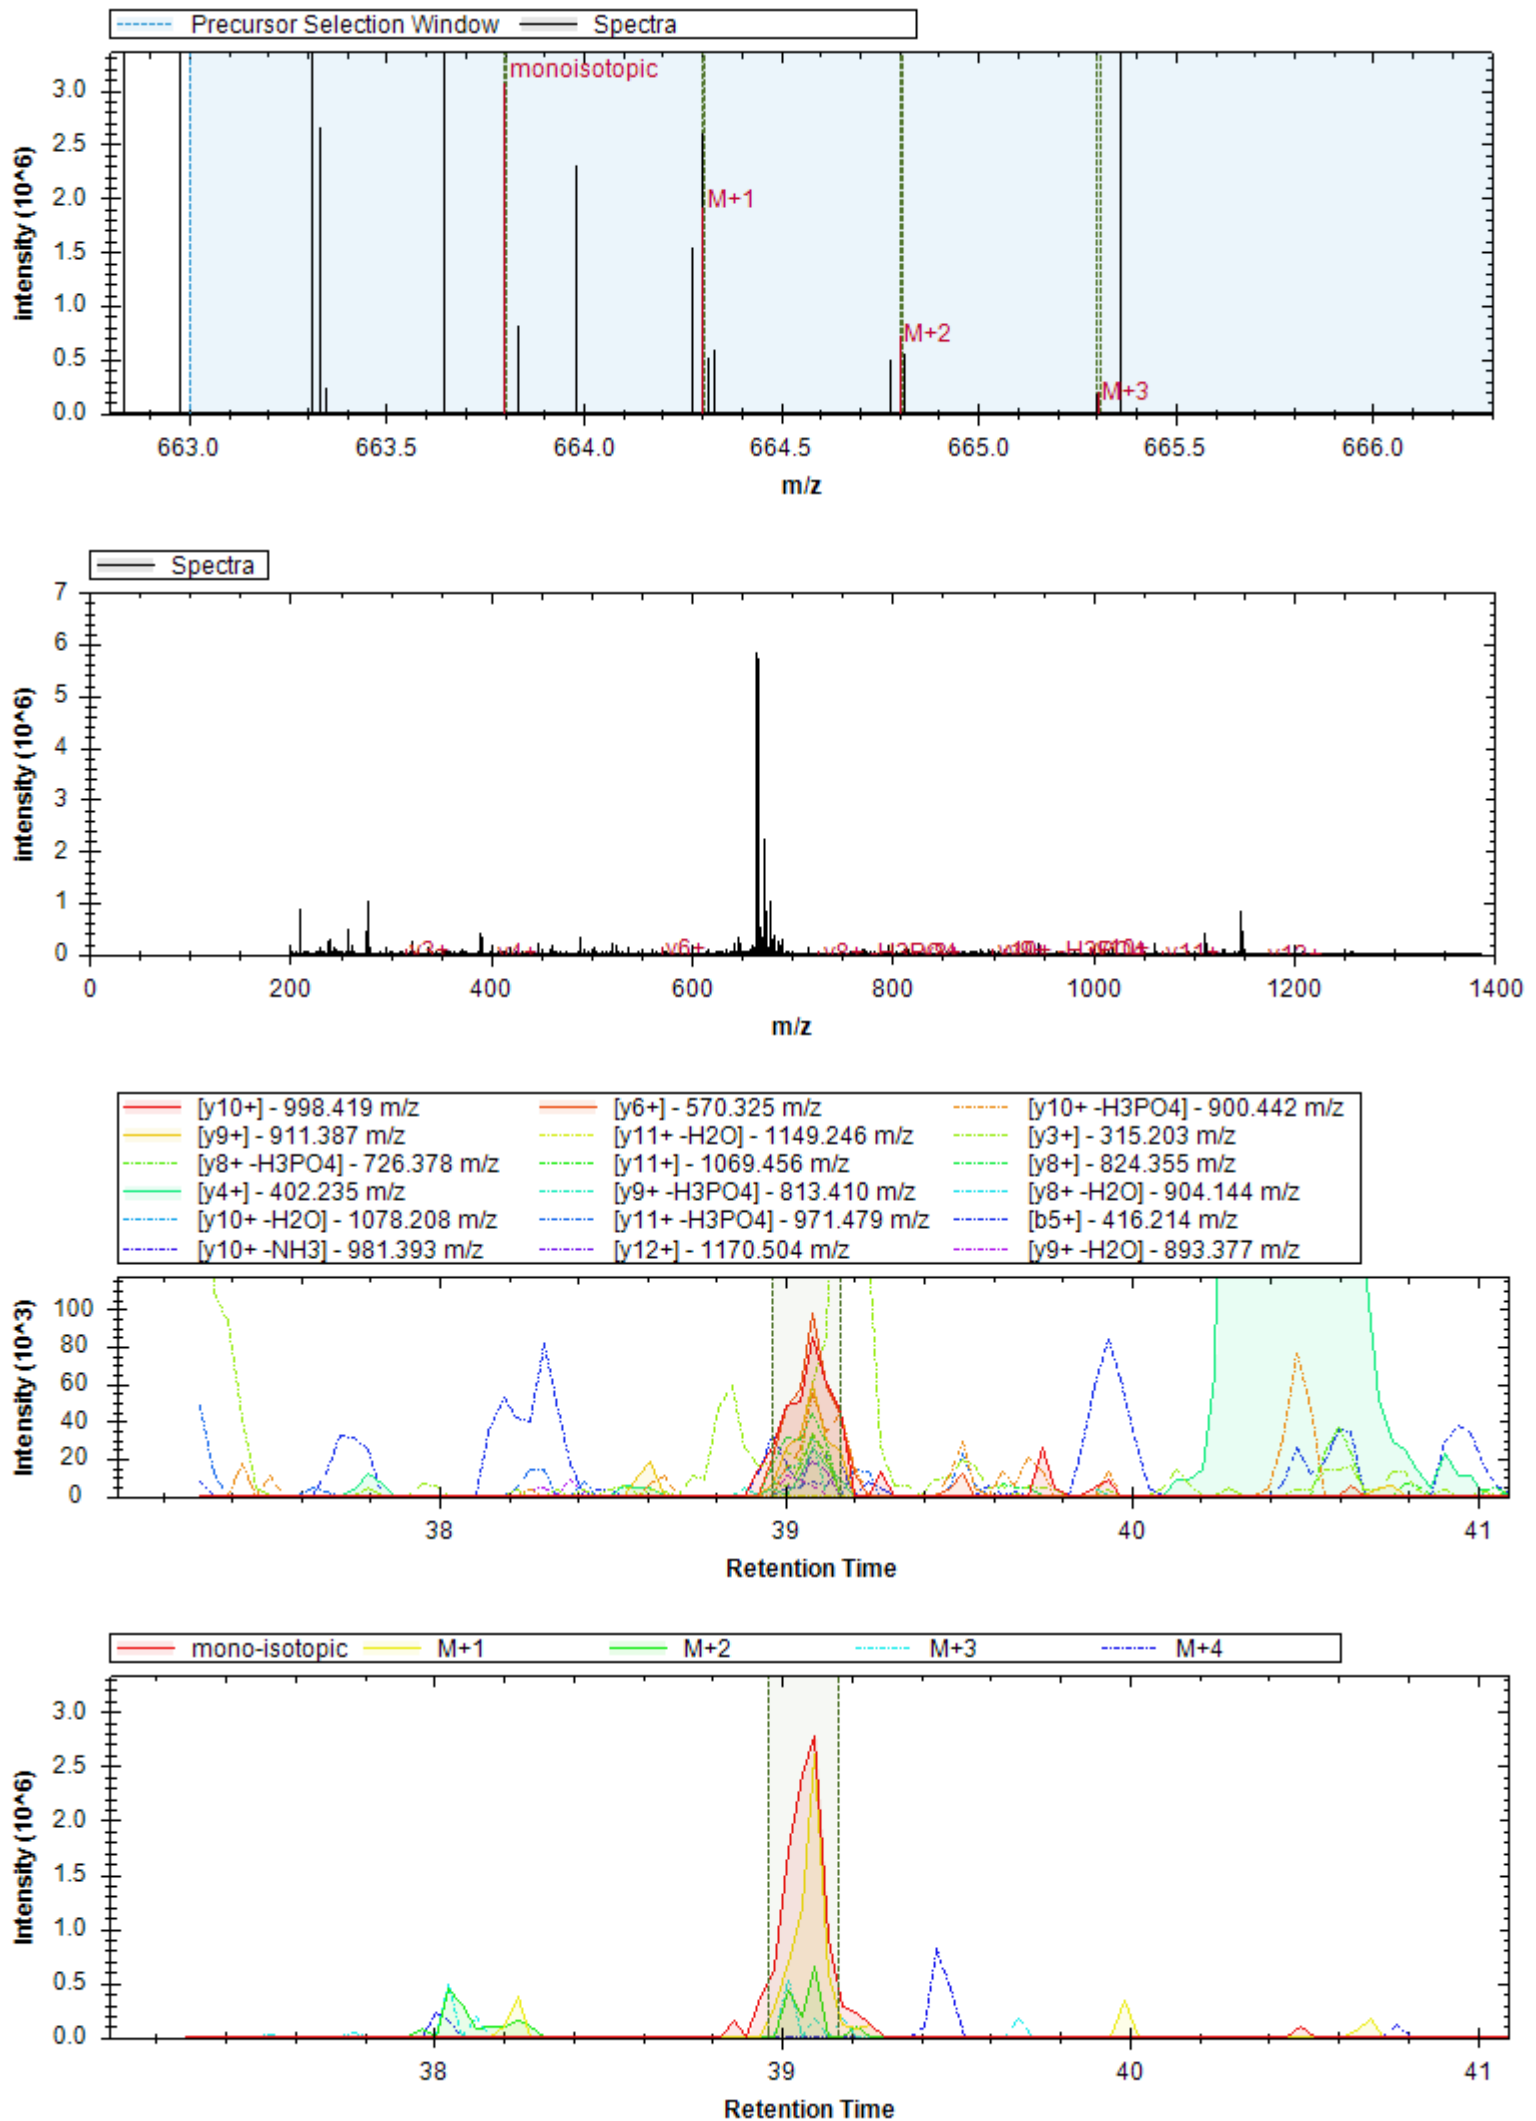

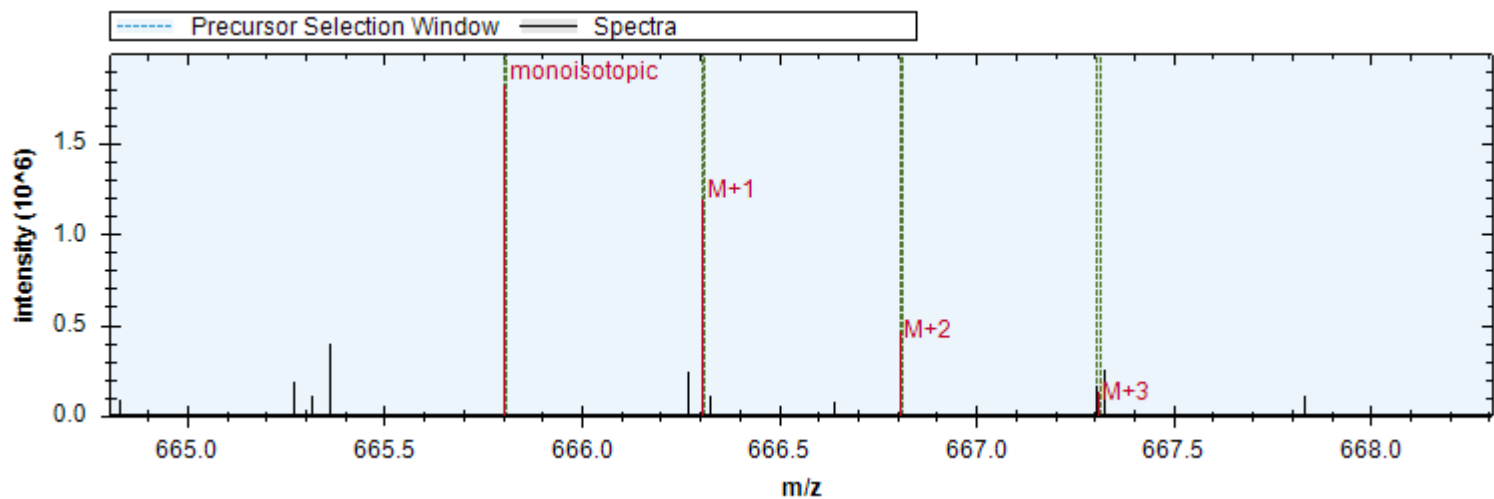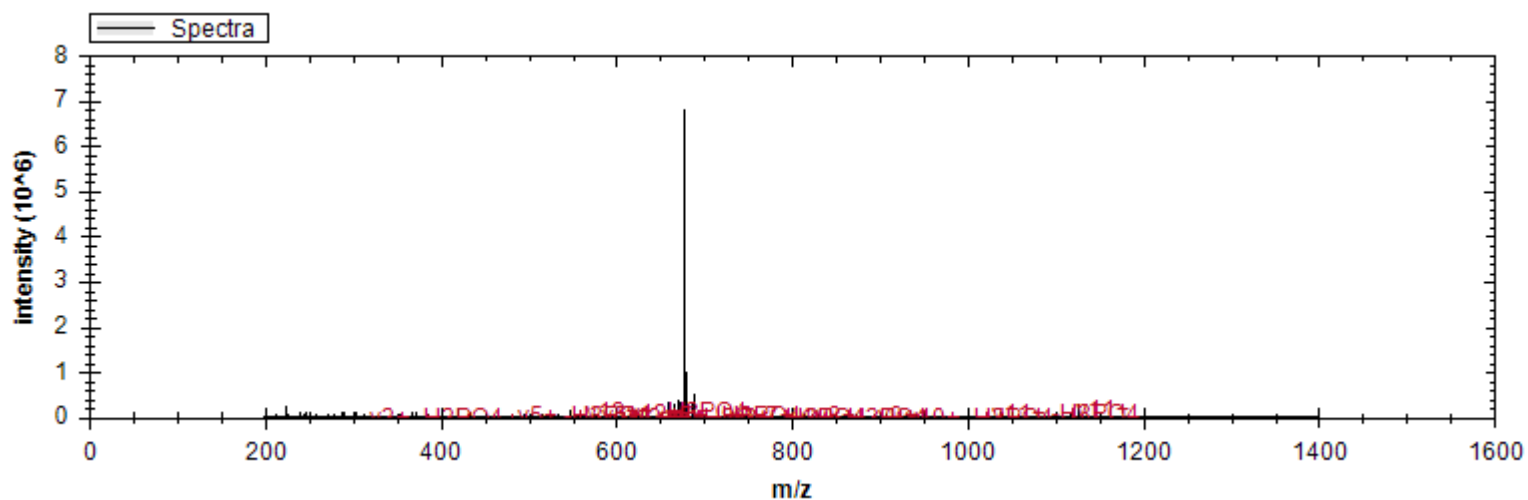

- |                              |                              |                             |
|------------------------------|------------------------------|-----------------------------|
| [y12++ -H3PO4] - 559.796 m/z | [y11+ -H3PO4] - 1021.531 m/z | [y11+] - 1119.508 m/z       |
| [y12++] - 608.784 m/z        | [y5+] - 579.254 m/z          | [y5+ -H3PO4] - 481.277 m/z  |
| [y9+] - 893.413 m/z          | [y9+ -H3PO4] - 795.436 m/z   | [y12++ -H2O] - 599.779 m/z  |
| [y7+] - 751.339 m/z          | [y8+] - 822.376 m/z          | [y6+] - 650.291 m/z         |
| [y8+ -H3PO4] - 724.399 m/z   | [y7+ -H3PO4] - 653.362 m/z   | [y10+ -H3PO4] - 924.479 m/z |
| [b5+ -NH3] - 492.209 m/z     | [y6+ -H3PO4] - 552.314 m/z   | [b3+] - 309.156 m/z         |
| [y9+ -H2O] - 875.402 m/z     | [y11+ -H2O] - 1199.298 m/z   | [b5+] - 509.235 m/z         |
| [y3+ -H3PO4] - 313.187 m/z   | [b4+ -NH3] - 421.172 m/z     |                             |

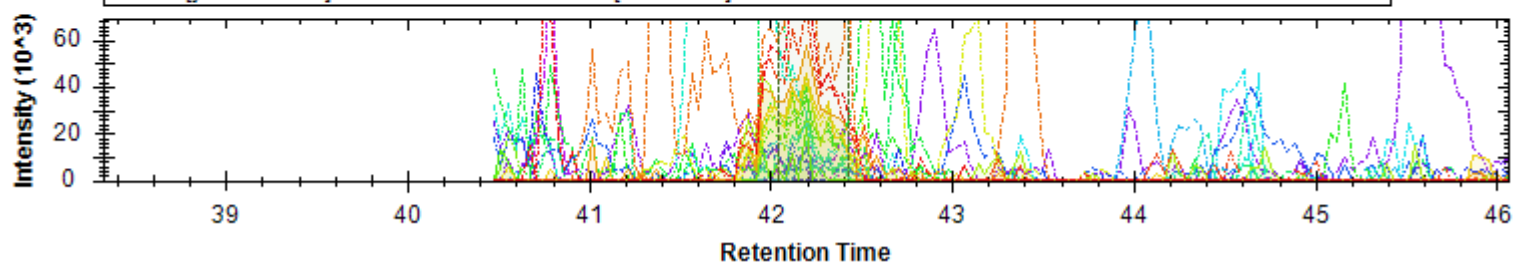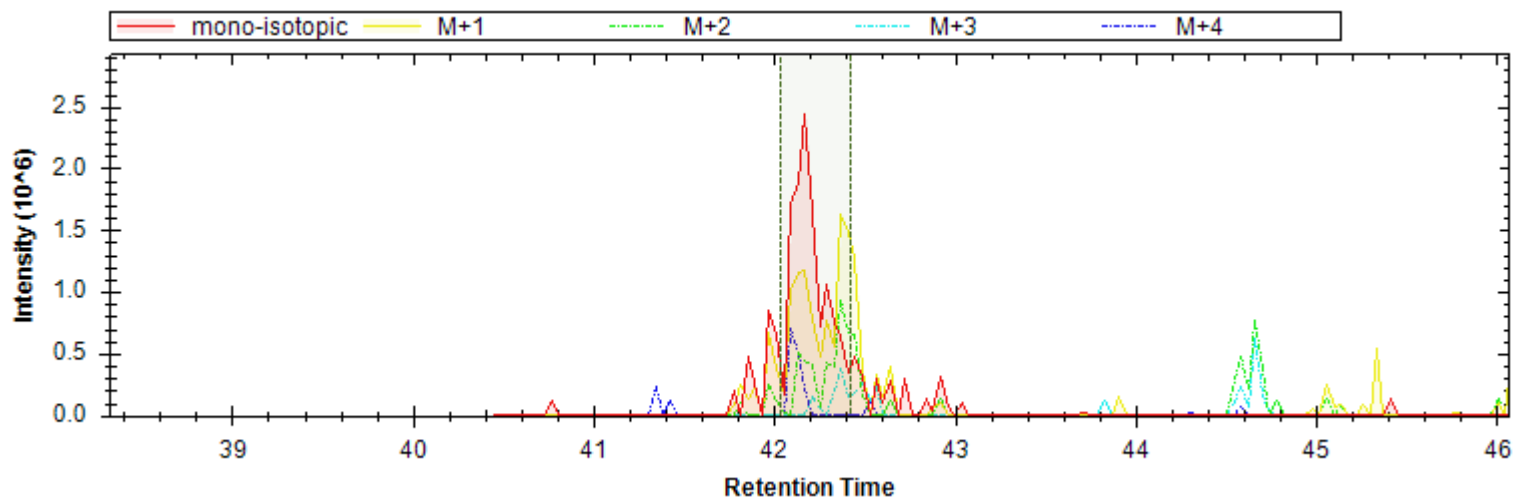

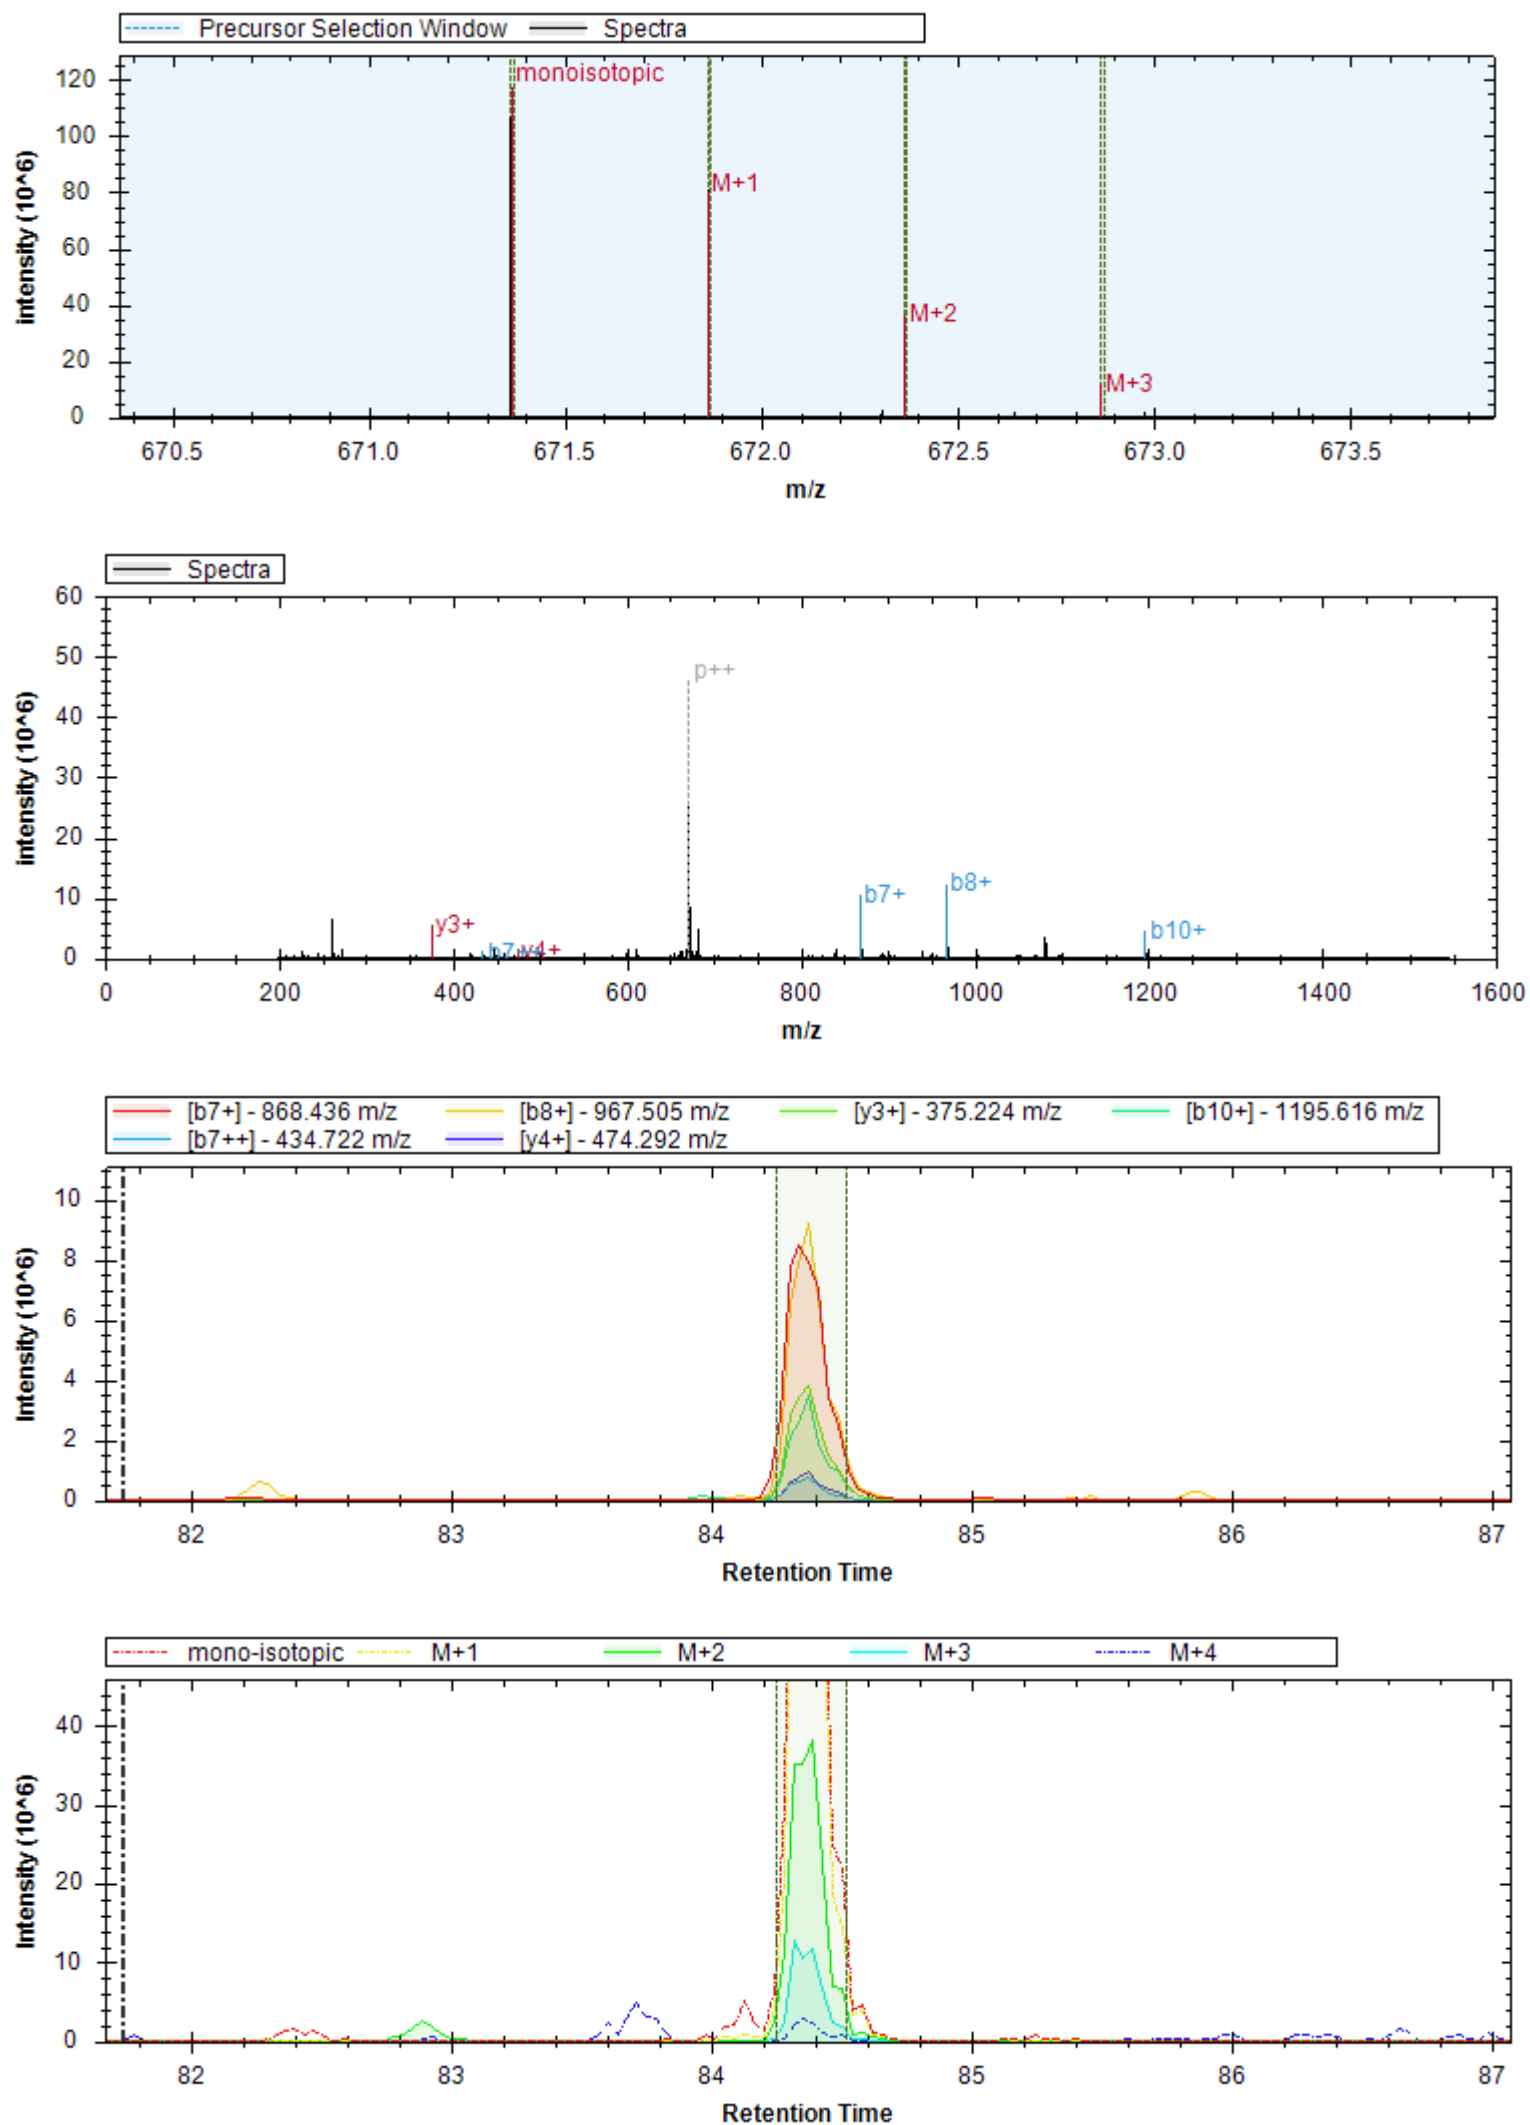



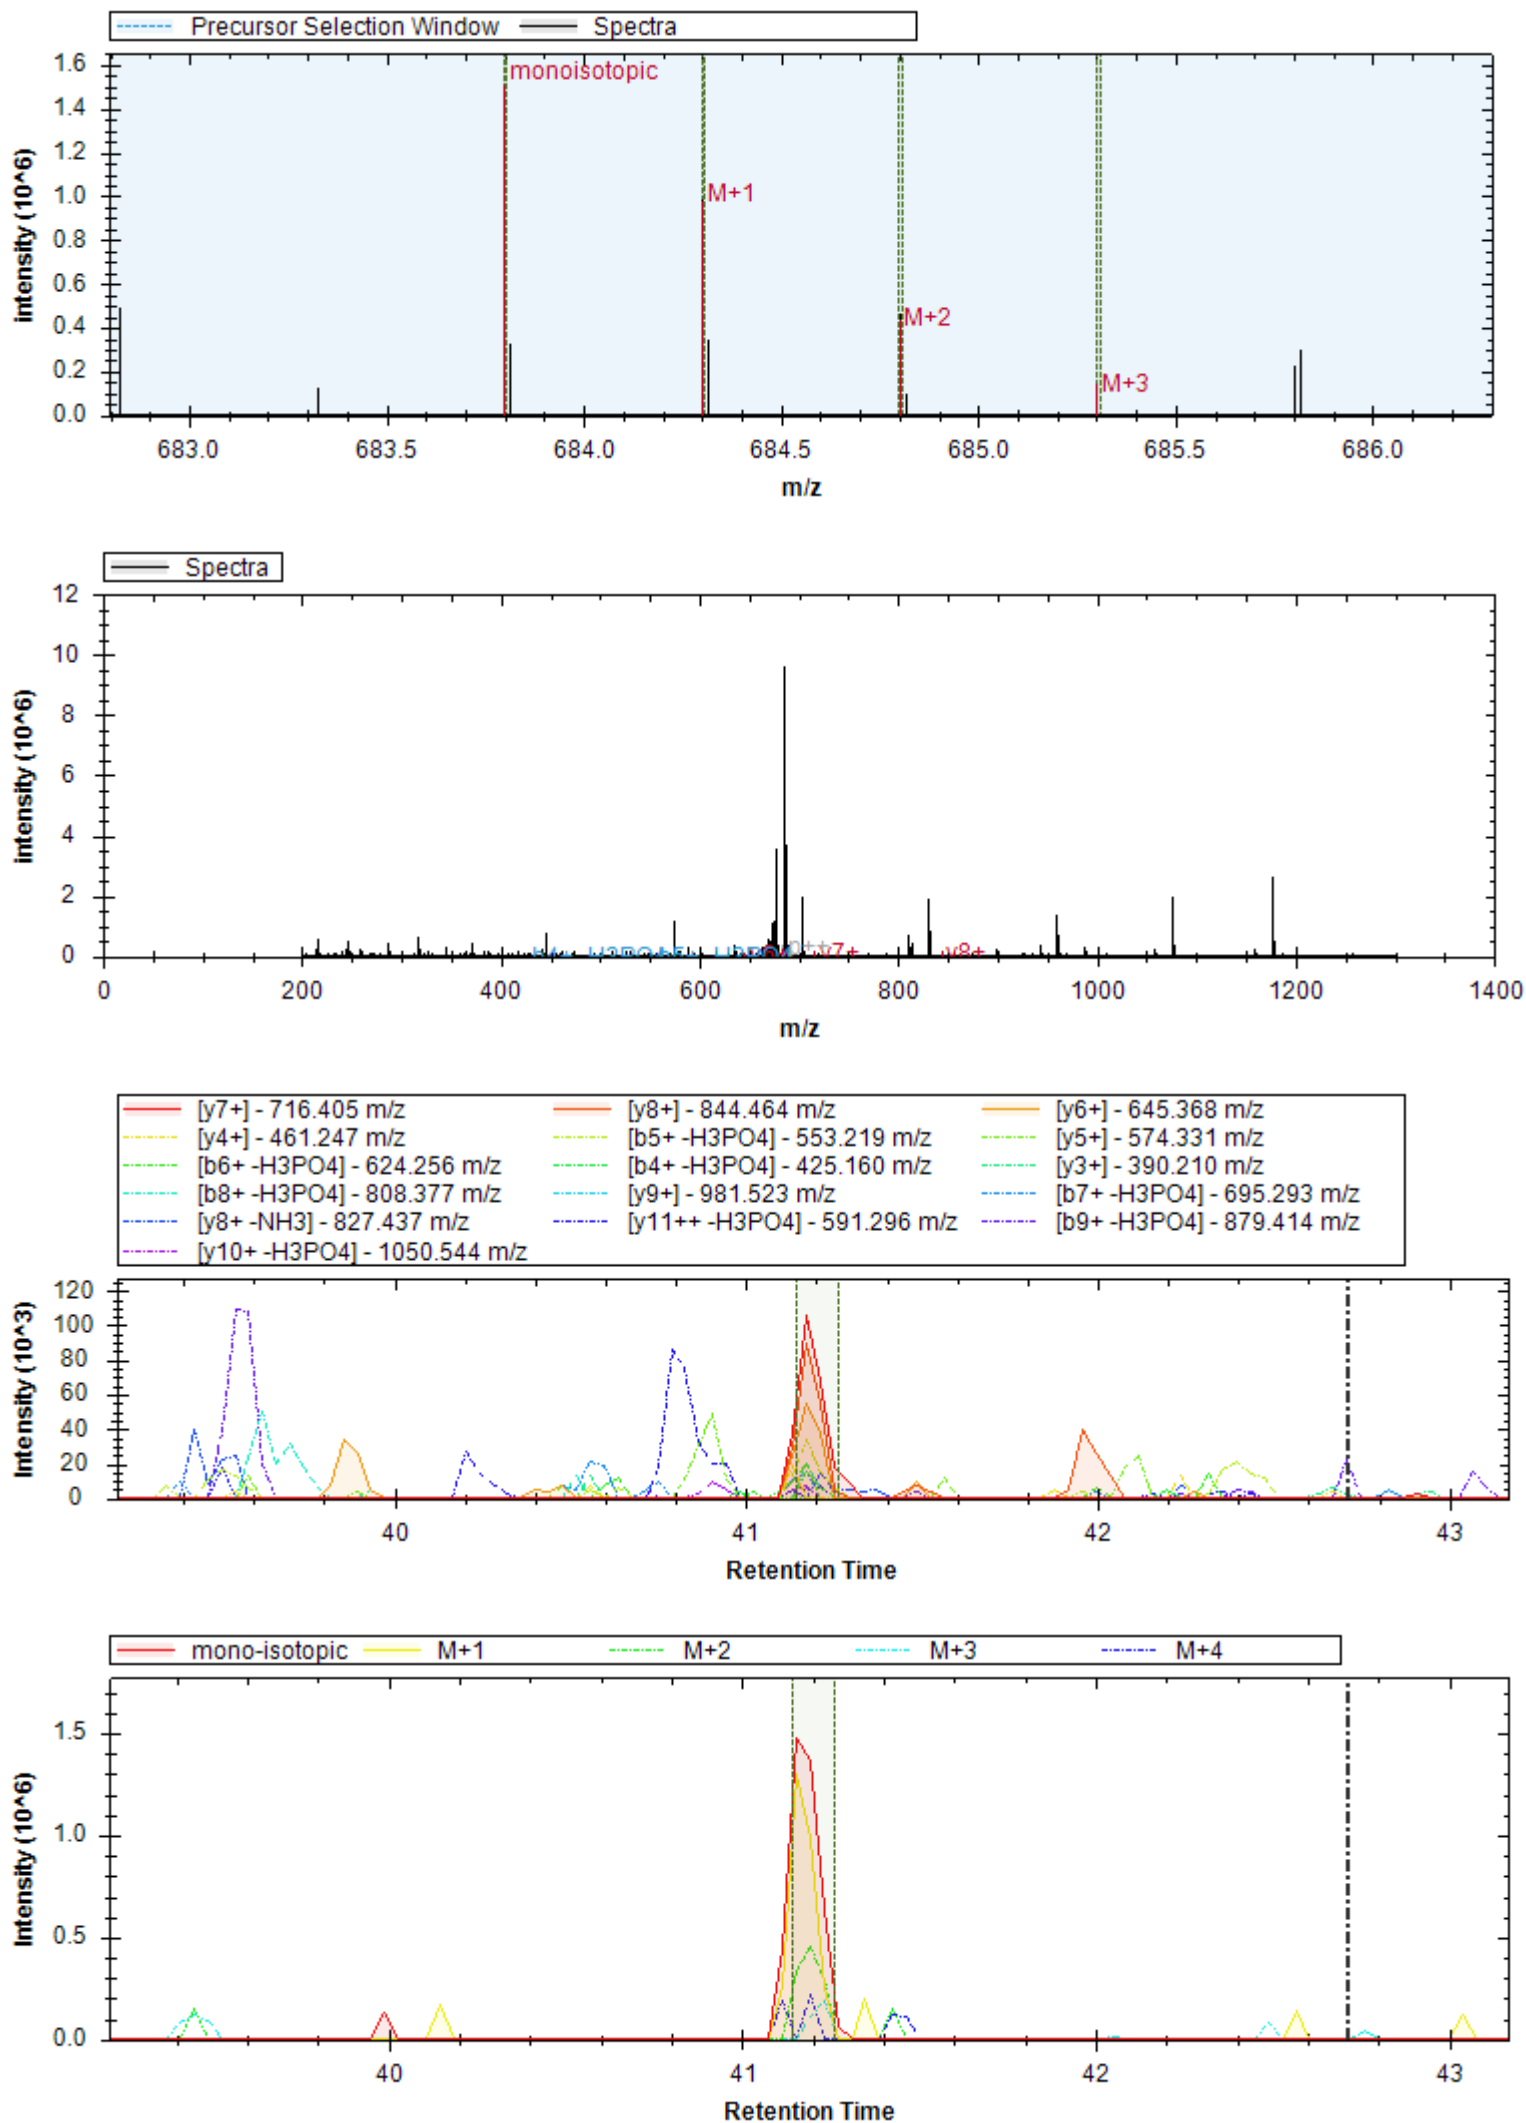

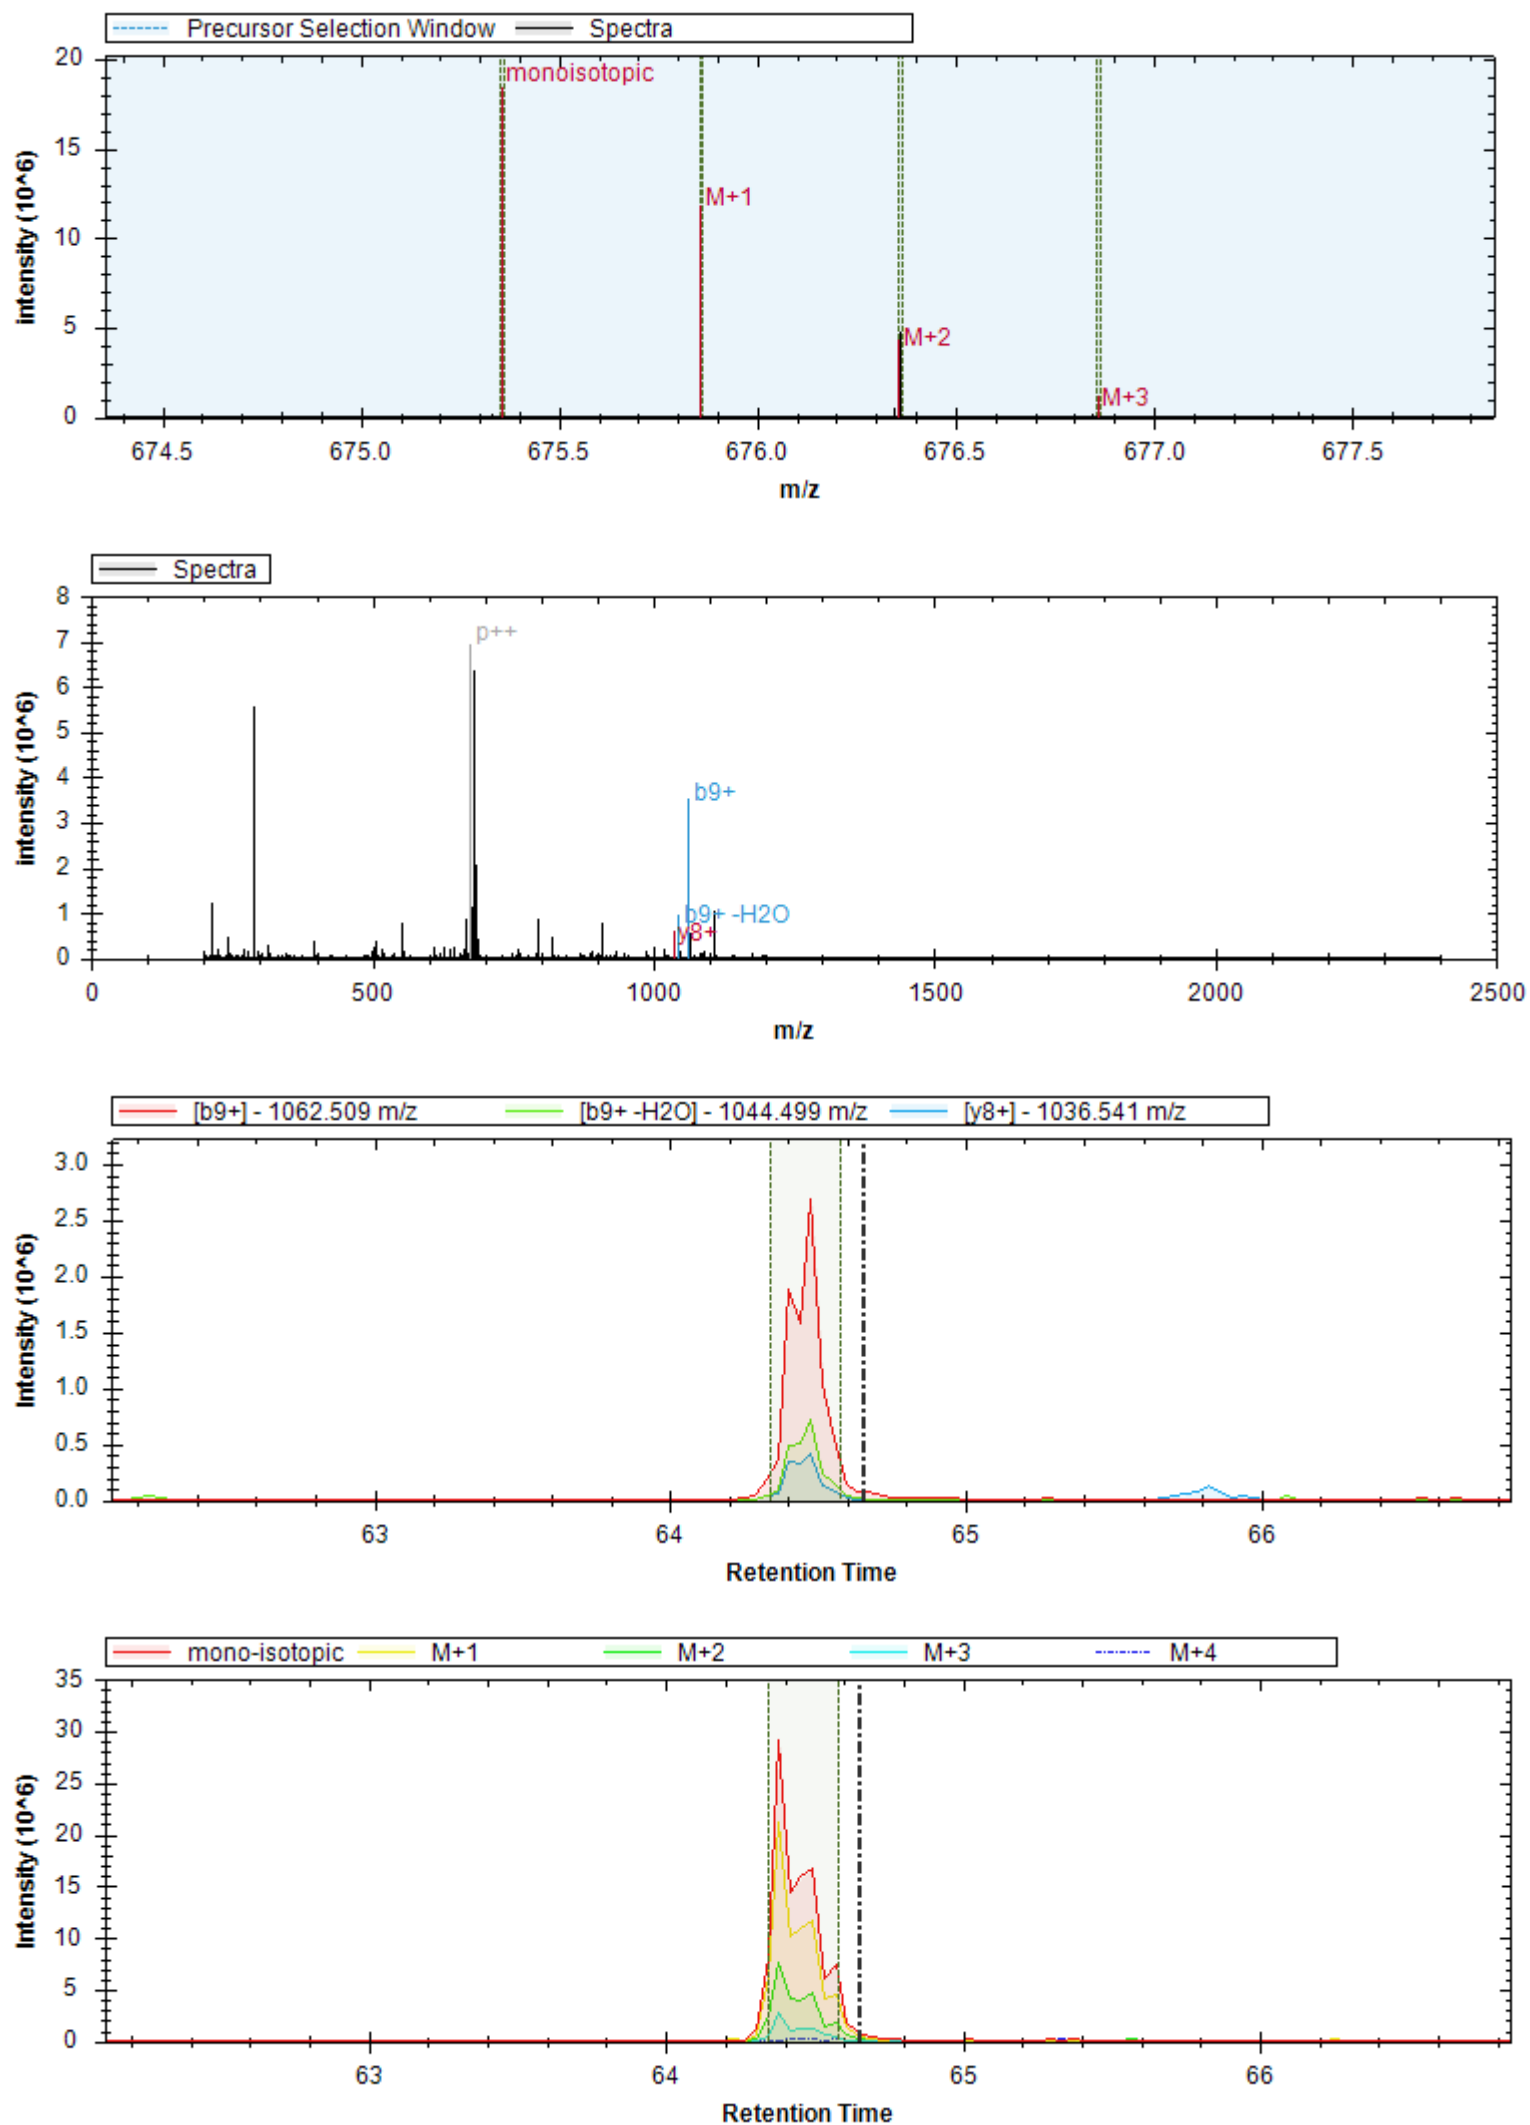

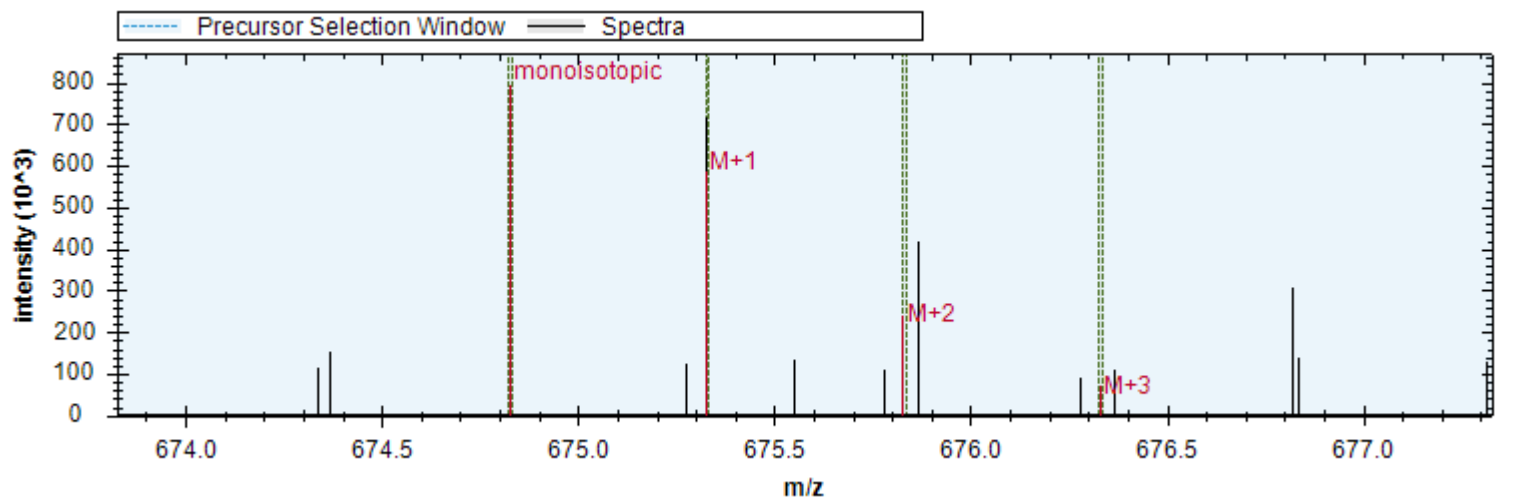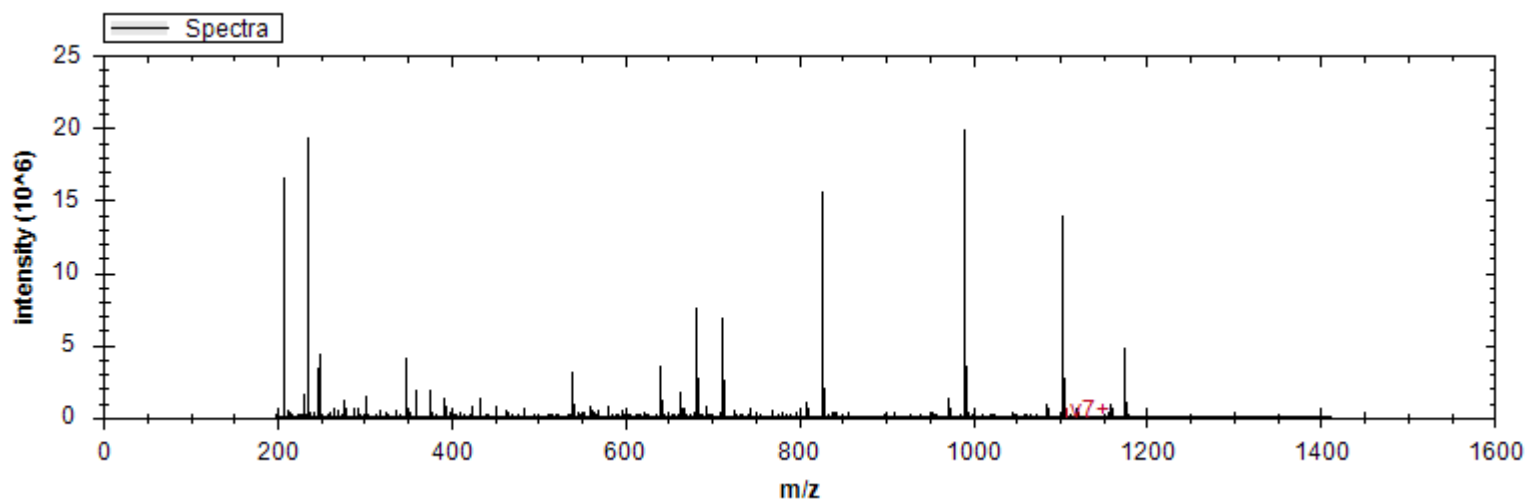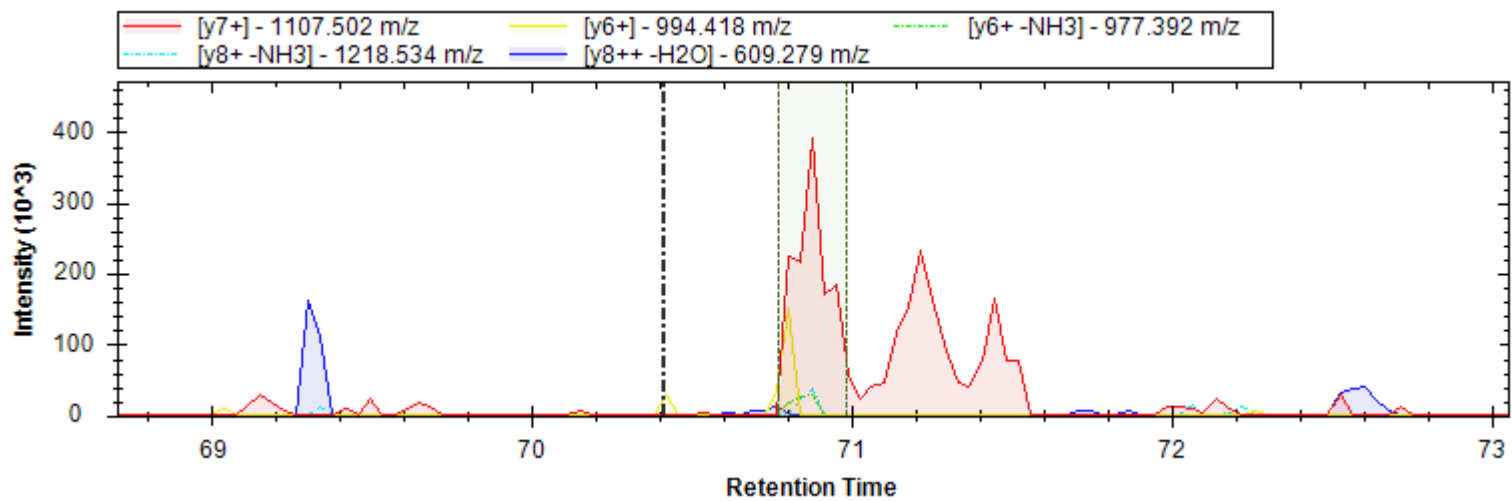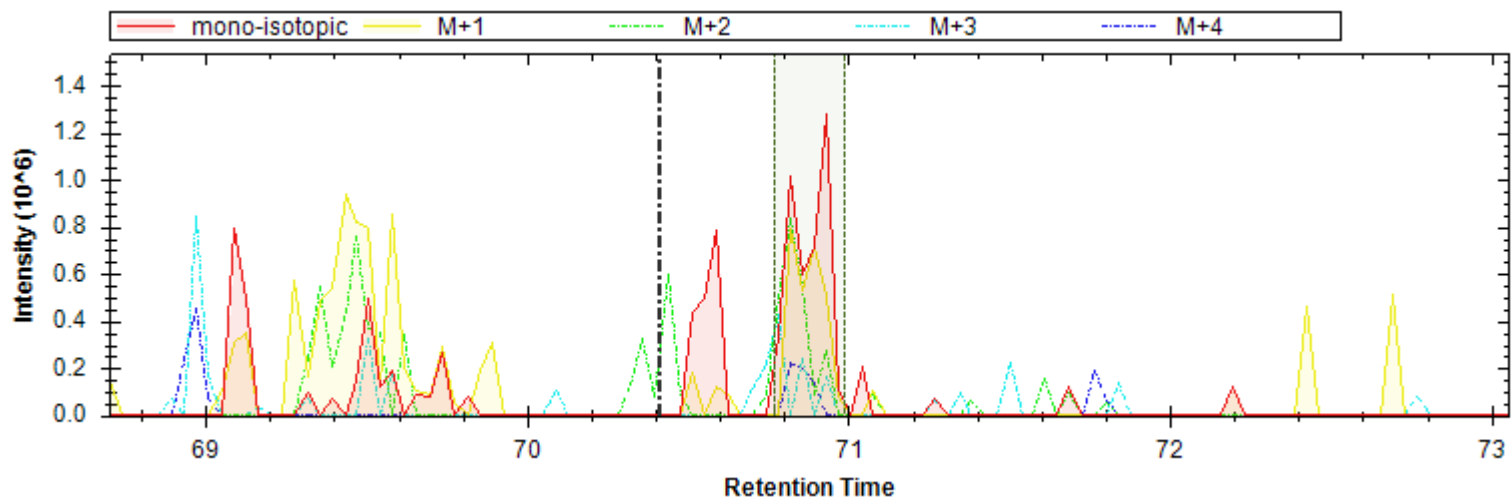

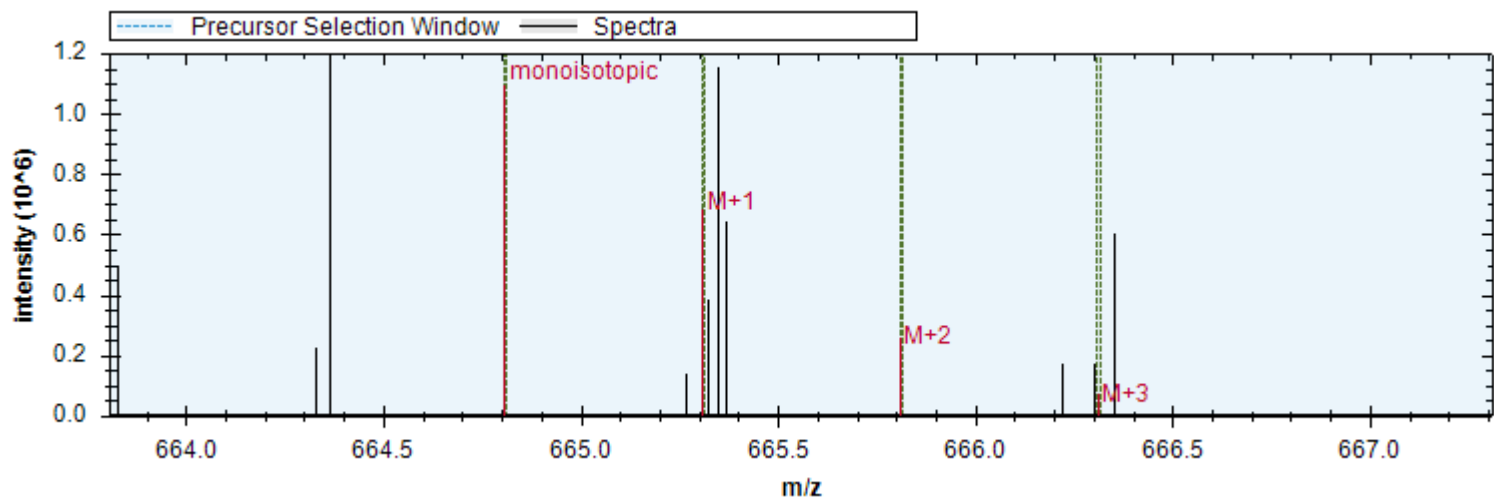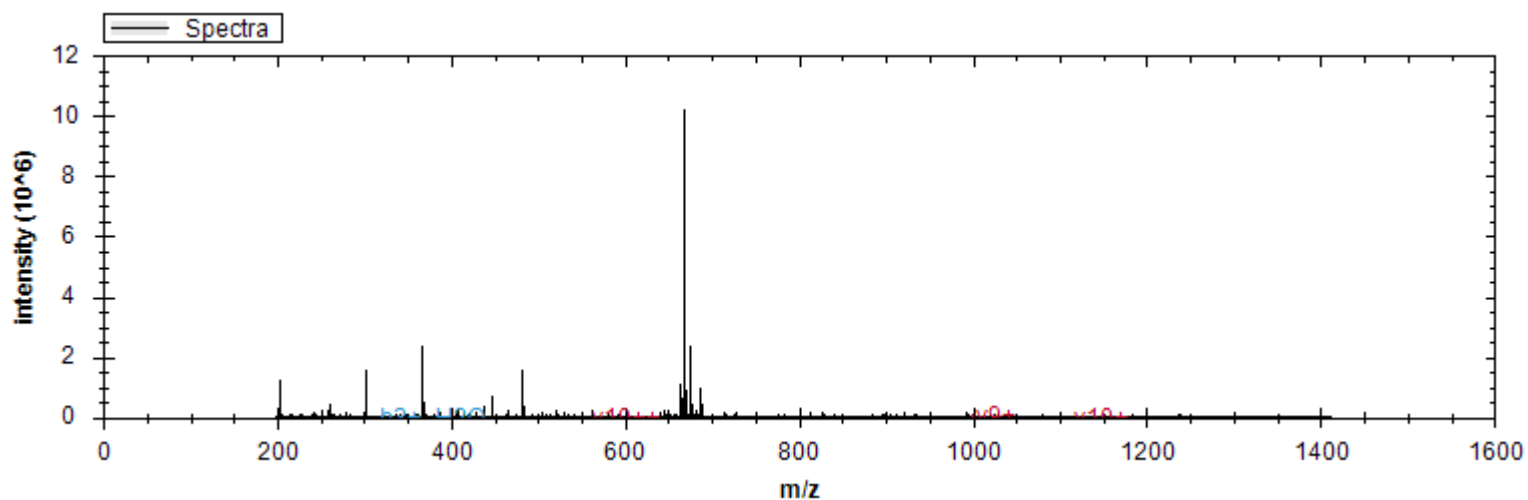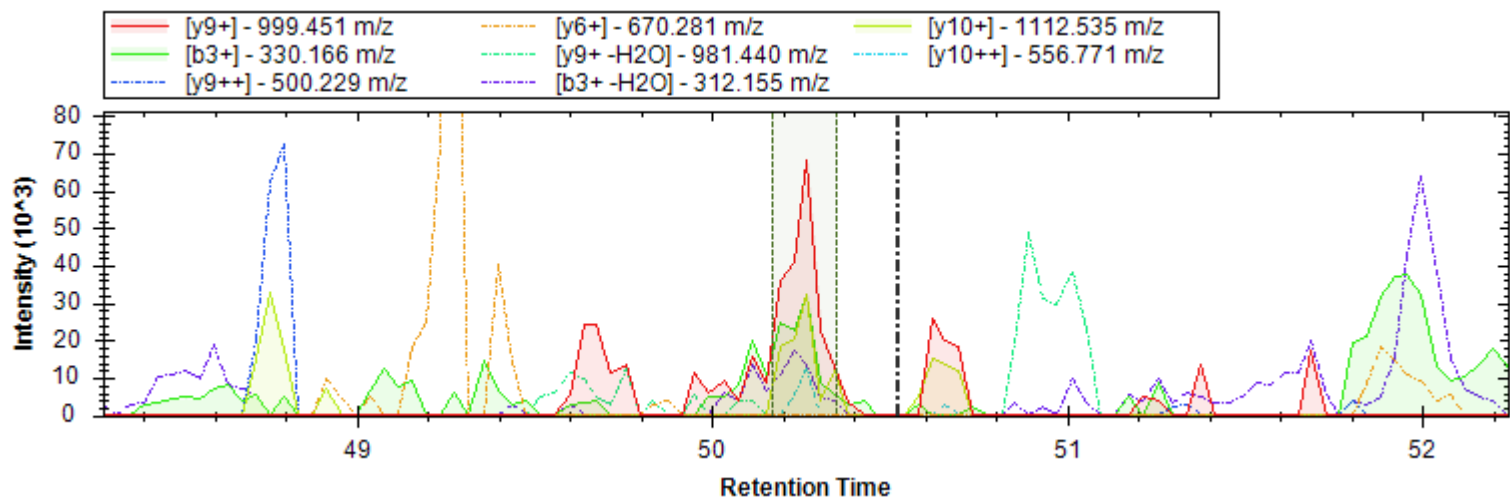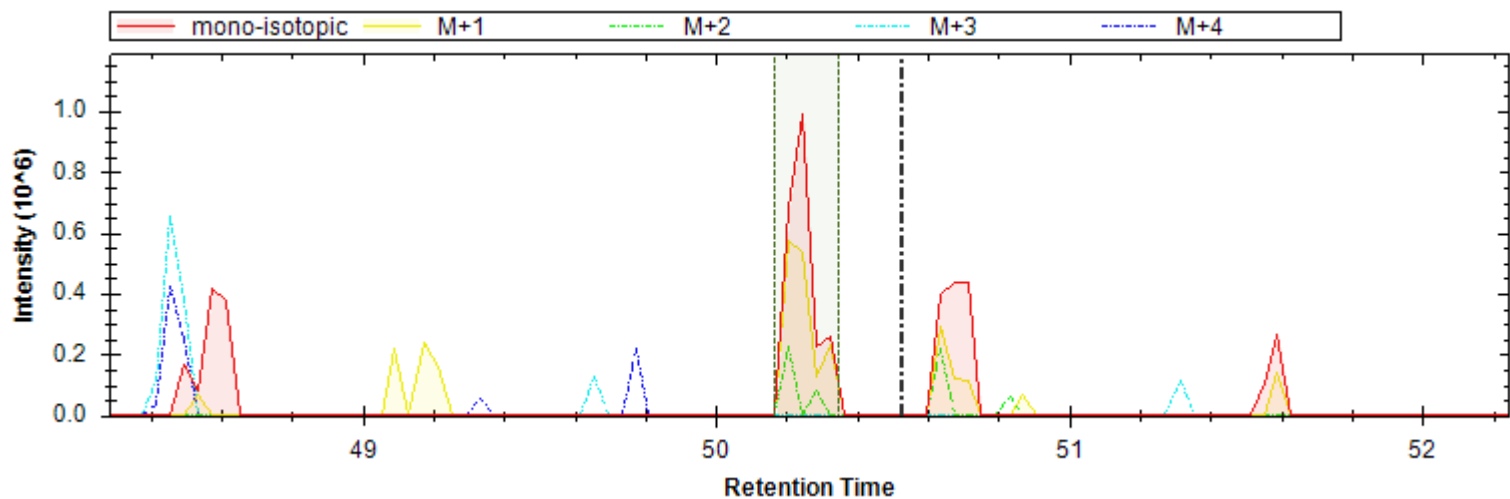

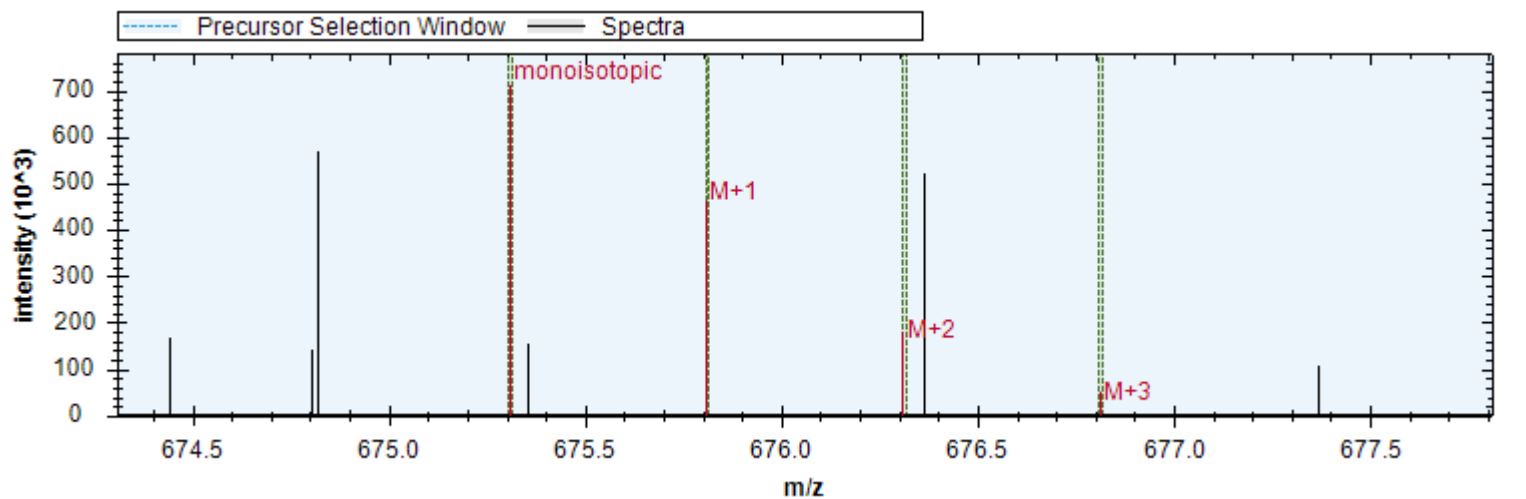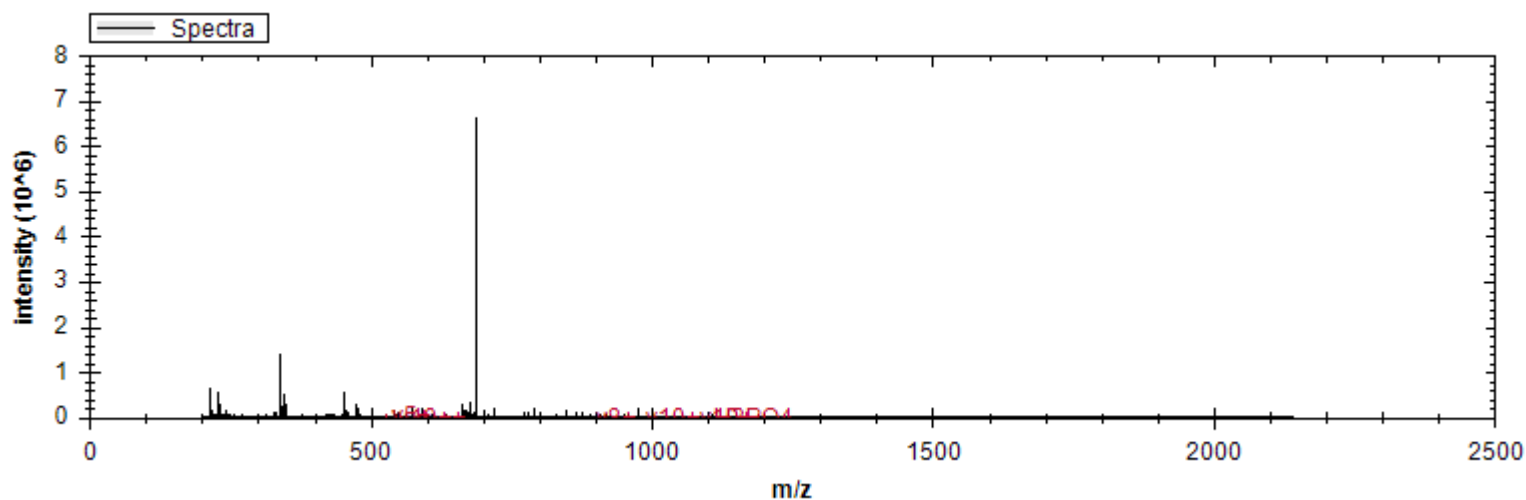

- |                              |                            |                             |
|------------------------------|----------------------------|-----------------------------|
| [y5+] - 529.309 m/z          | [y8+] - 894.408 m/z        | [y10+ -H3PO4] - 980.516 m/z |
| [y8+ -H3PO4] - 796.431 m/z   | [y9+] - 981.440 m/z        | [y10+] - 1078.493 m/z       |
| [y11+ -H3PO4] - 1067.548 m/z | [y9+ -H3PO4] - 883.463 m/z | [b4+ -H2O] - 351.166 m/z    |
| [y10++] - 539.750 m/z        | [b4+] - 369.177 m/z        | [b5+] - 456.209 m/z         |
| [y11+] - 1165.525 m/z        | [y10+ -NH3] - 1257.066 m/z | [y6+ -H3PO4] - 598.331 m/z  |
| [y12++] - 631.793 m/z        | [y6+] - 696.308 m/z        | [b8+ -H3PO4] - 723.331 m/z  |
| [y10+ -H2O] - 1158.282 m/z   | [y7+ -H3PO4] - 699.378 m/z | [y7+ -H2O] - 877.145 m/z    |
| [y11+ -H2O] - 1147.514 m/z   |                            |                             |

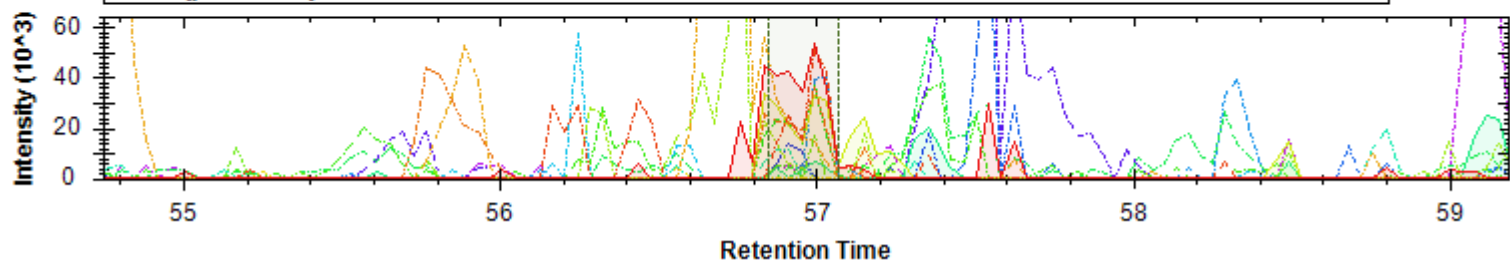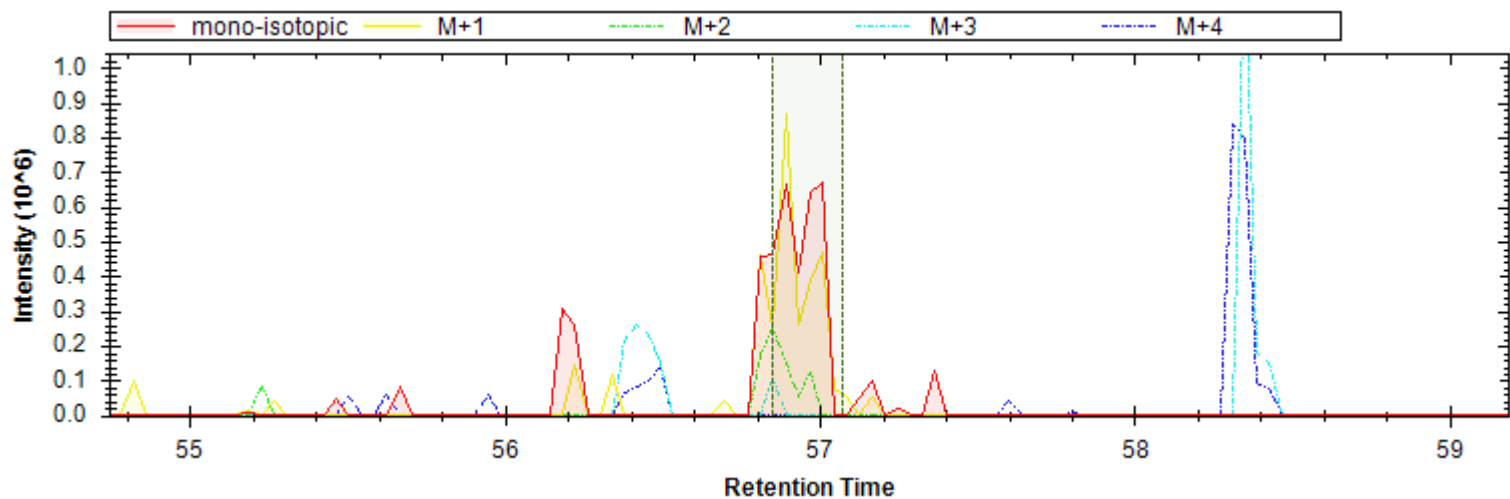

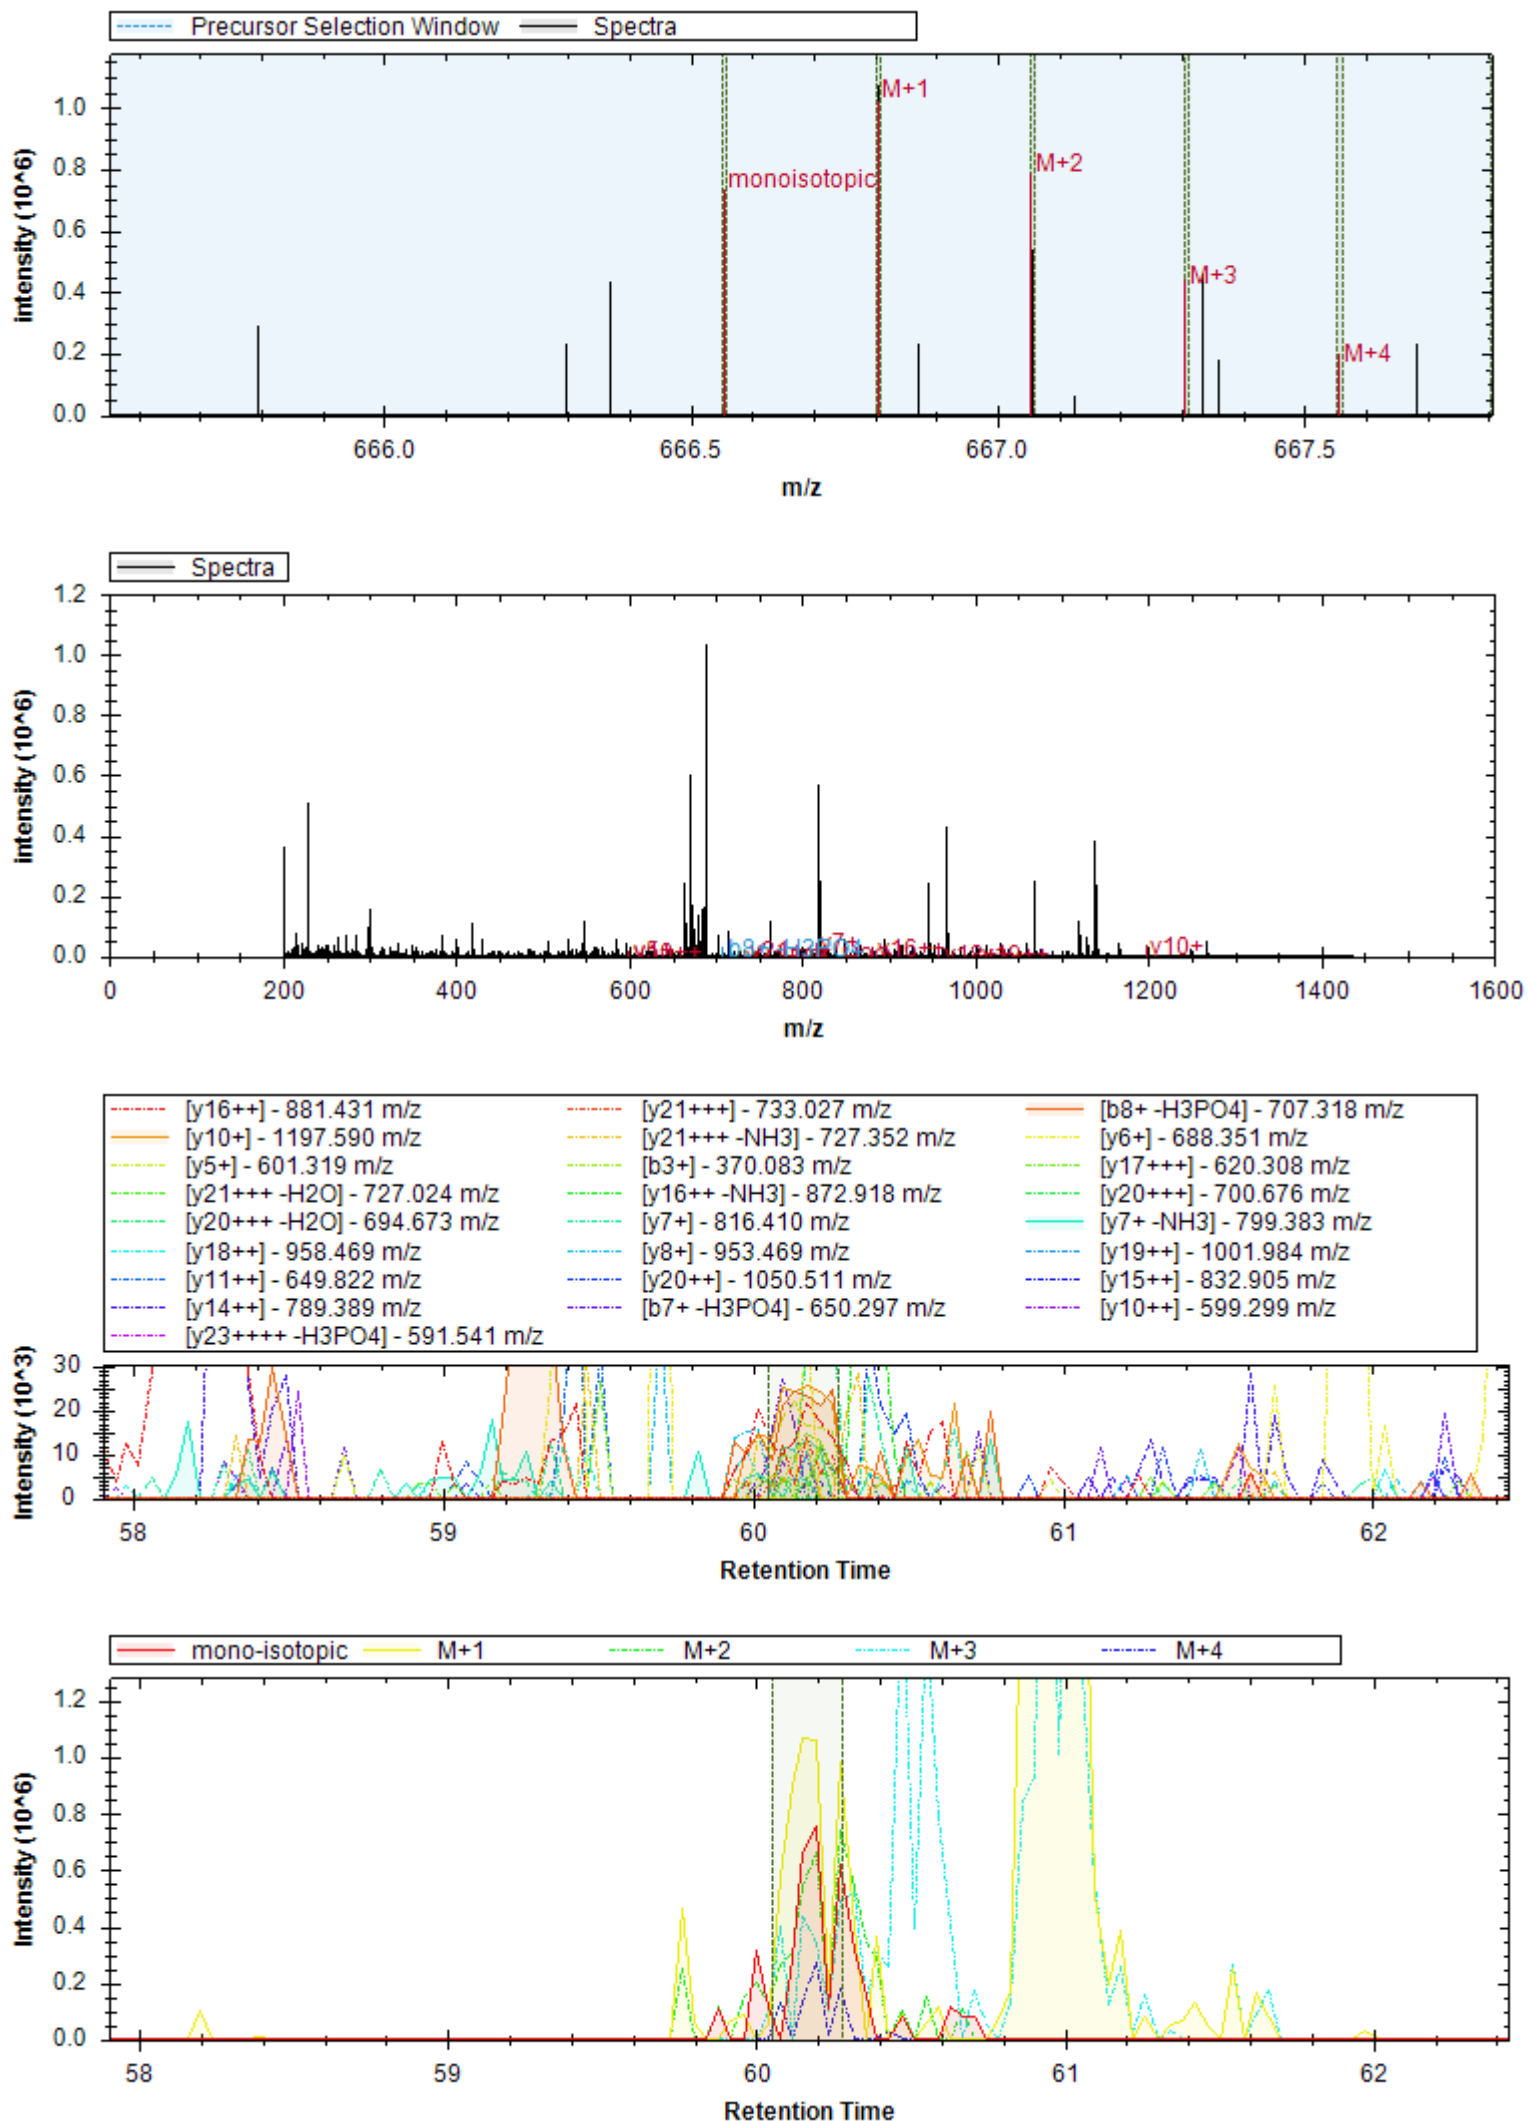

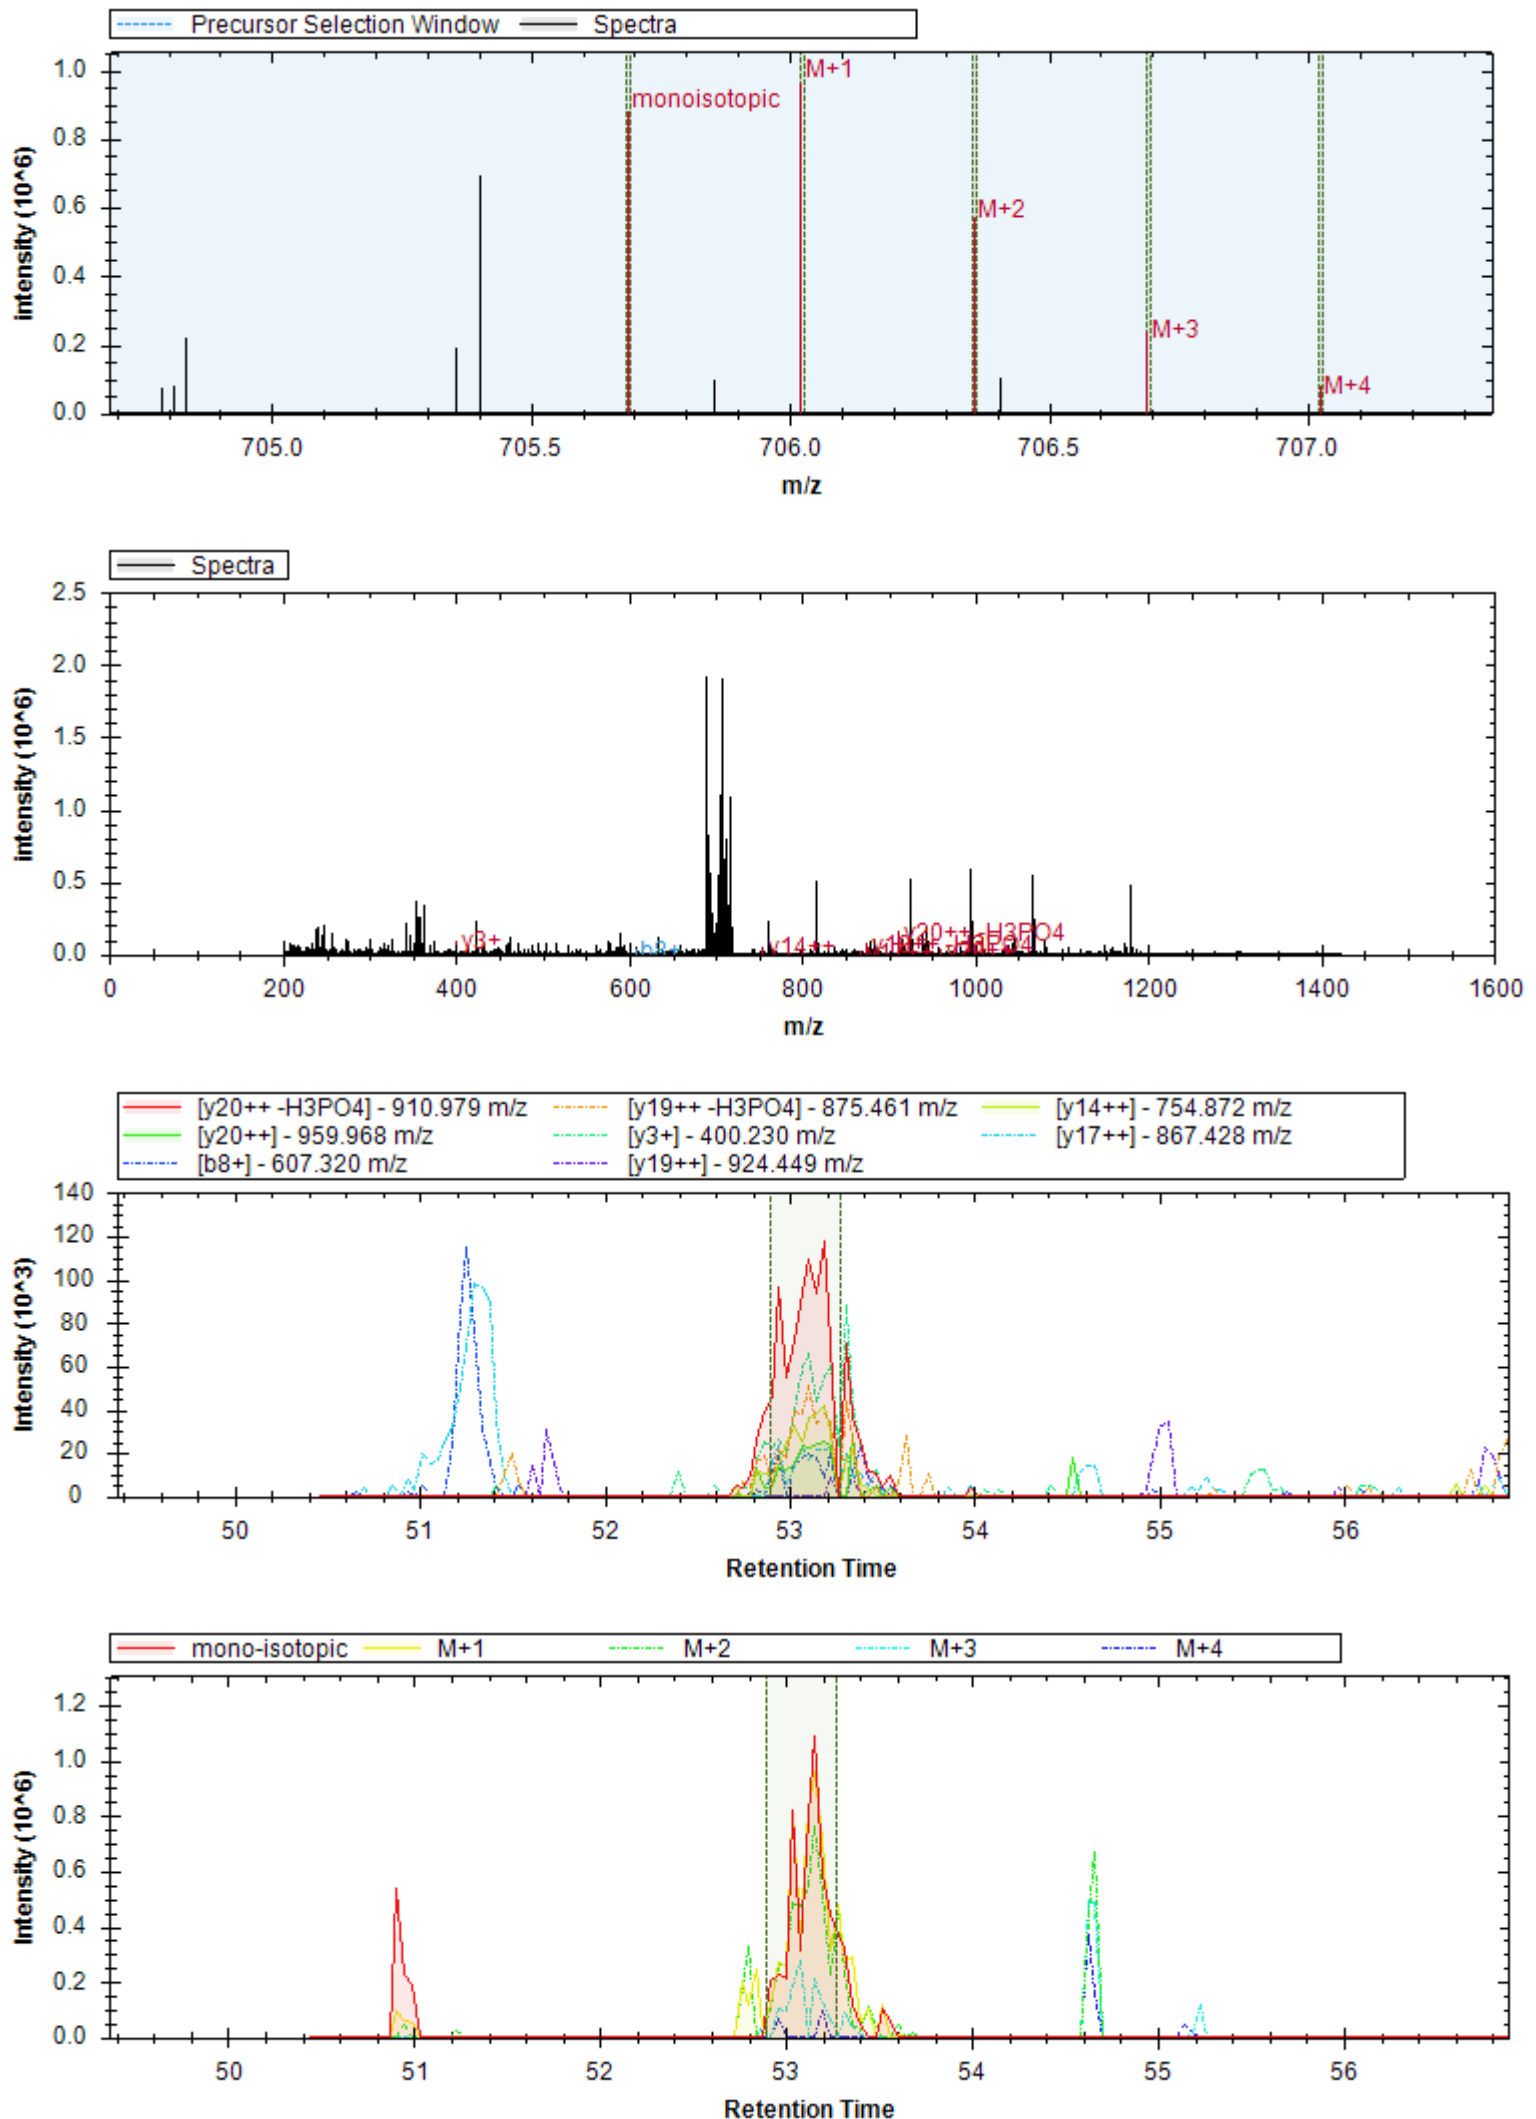

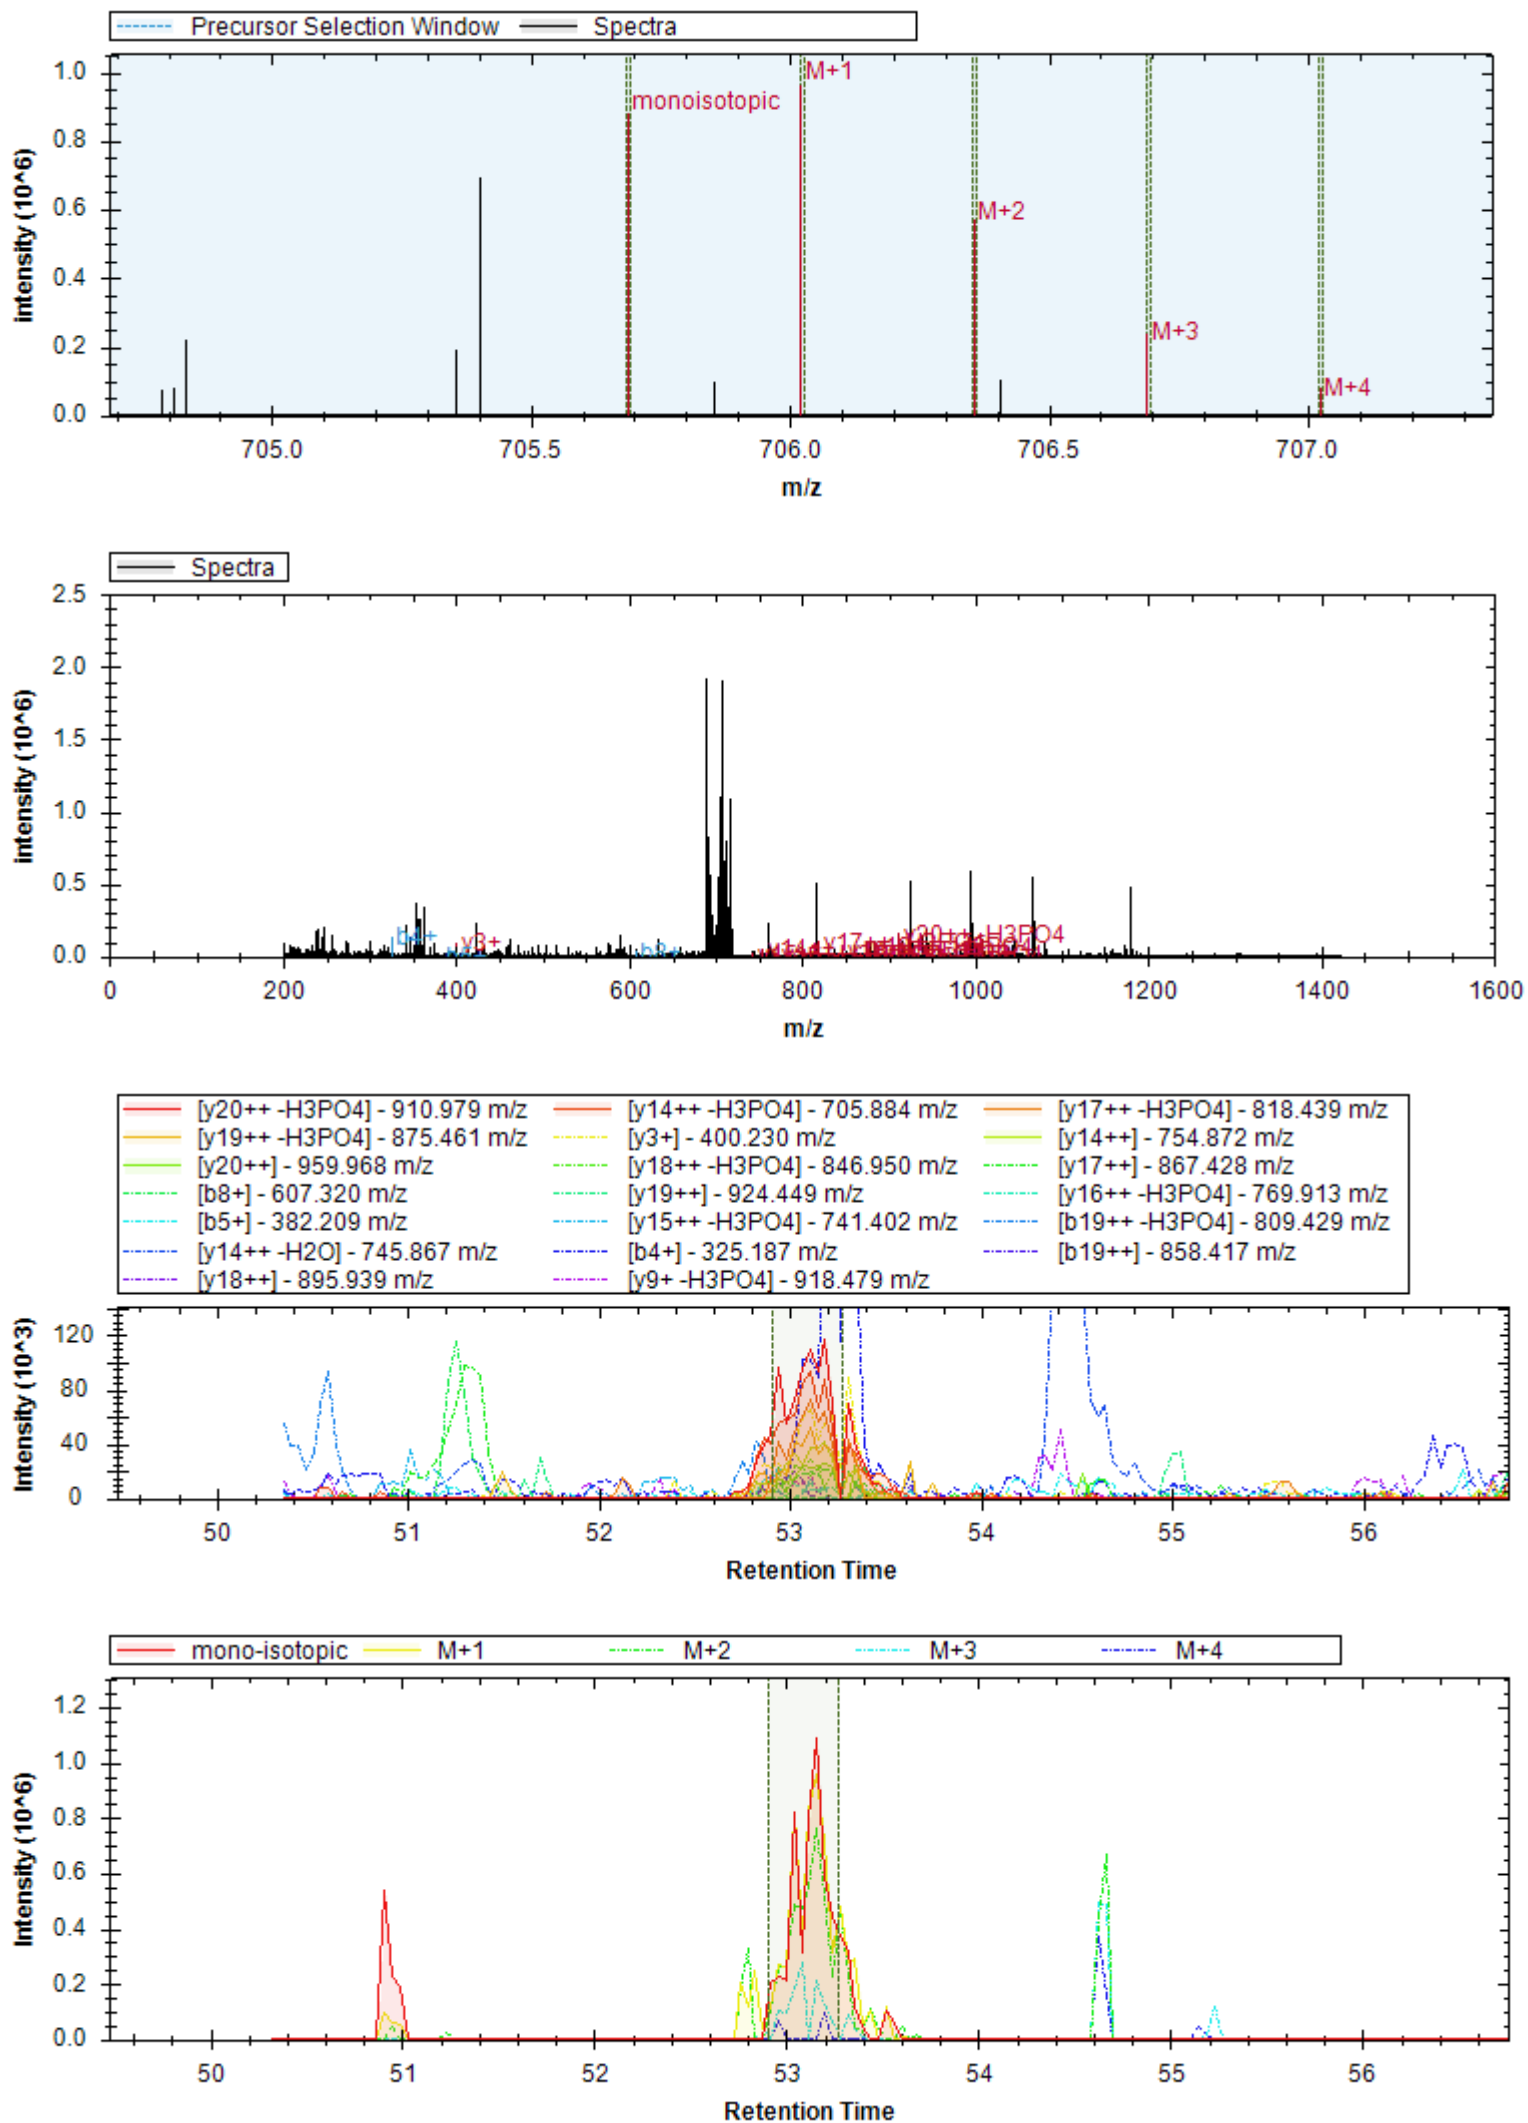



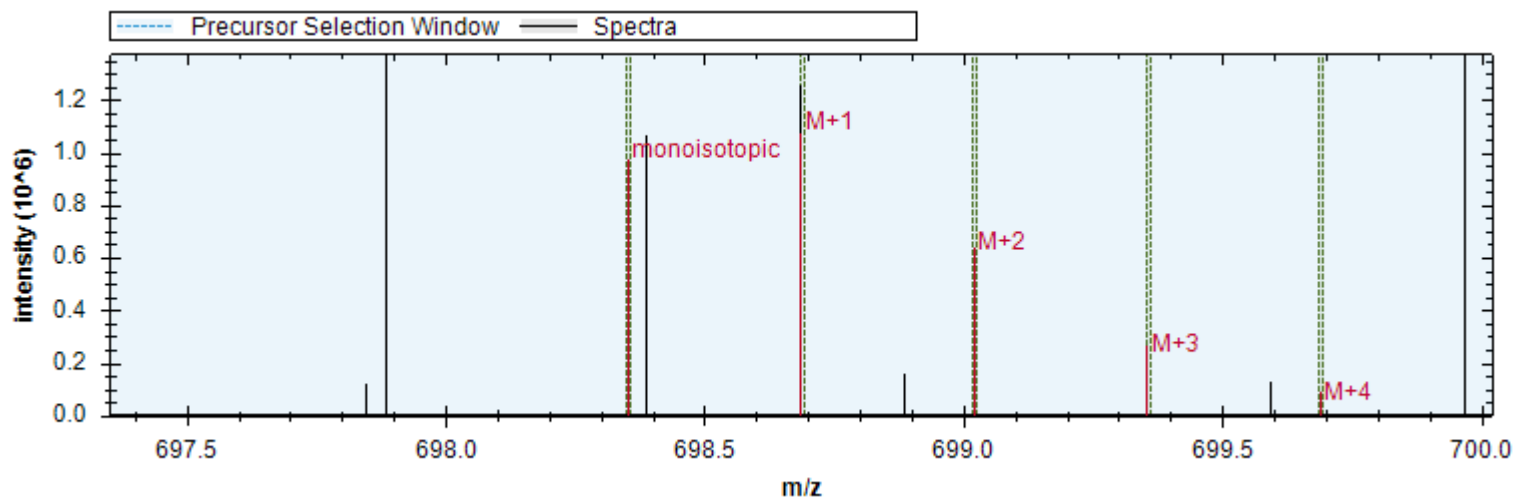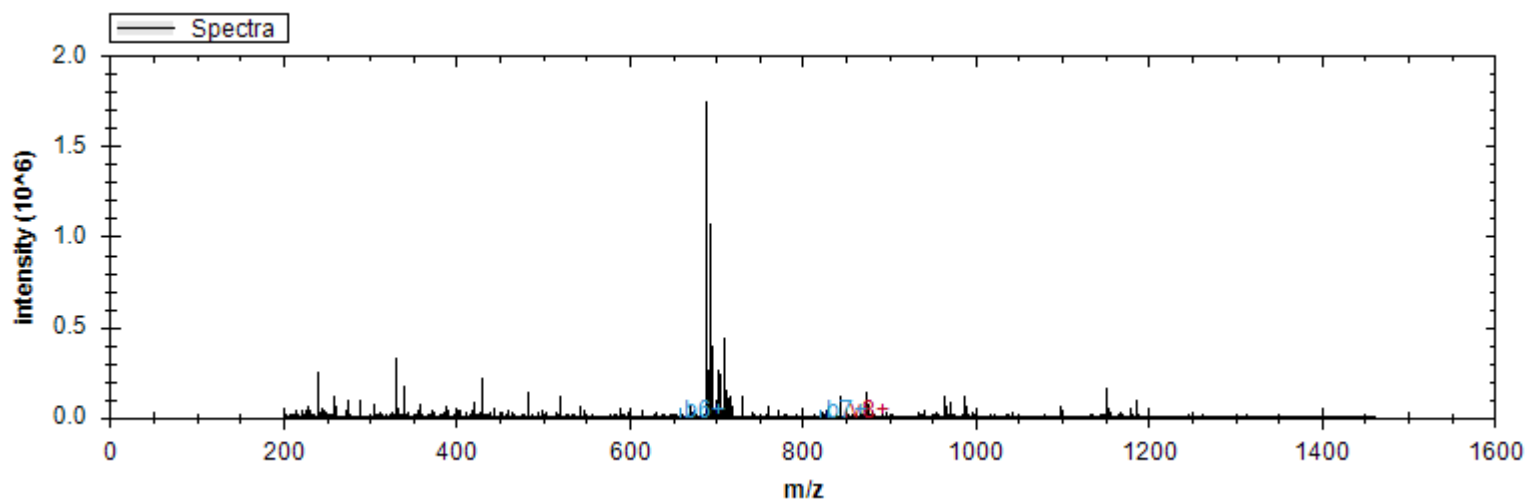

|                              |                              |                      |
|------------------------------|------------------------------|----------------------|
| [b7+] - 821.442 m/z          | [y10+ -H2O] - 1184.309 m/z   | [b6+] - 658.378 m/z  |
| [y8+] - 850.489 m/z          | [b9+] - 989.532 m/z          | [b8++] - 459.751 m/z |
| [y4+] - 482.283 m/z          | [y12+ -H2O] - 1352.399 m/z   | [b3+] - 367.245 m/z  |
| [y6+] - 652.389 m/z          | [y12+ -H3PO4] - 1174.633 m/z | [y7+] - 753.437 m/z  |
| [y12++] - 636.809 m/z        | [b17++] - 910.436 m/z        | [y8++] - 425.748 m/z |
| [b11+ -H3PO4] - 1145.585 m/z | [y10+ -H3PO4] - 1006.543 m/z | [y3+] - 345.225 m/z  |
| [y5+] - 581.352 m/z          | [y13++] - 718.340 m/z        |                      |

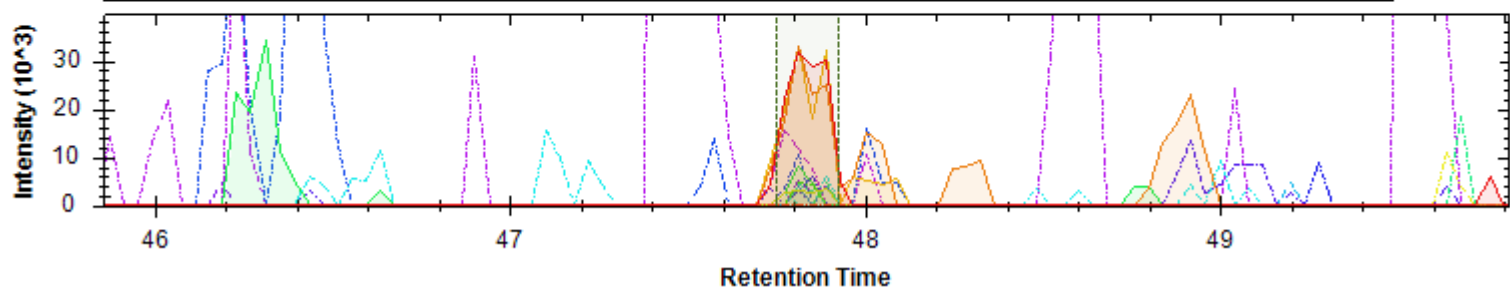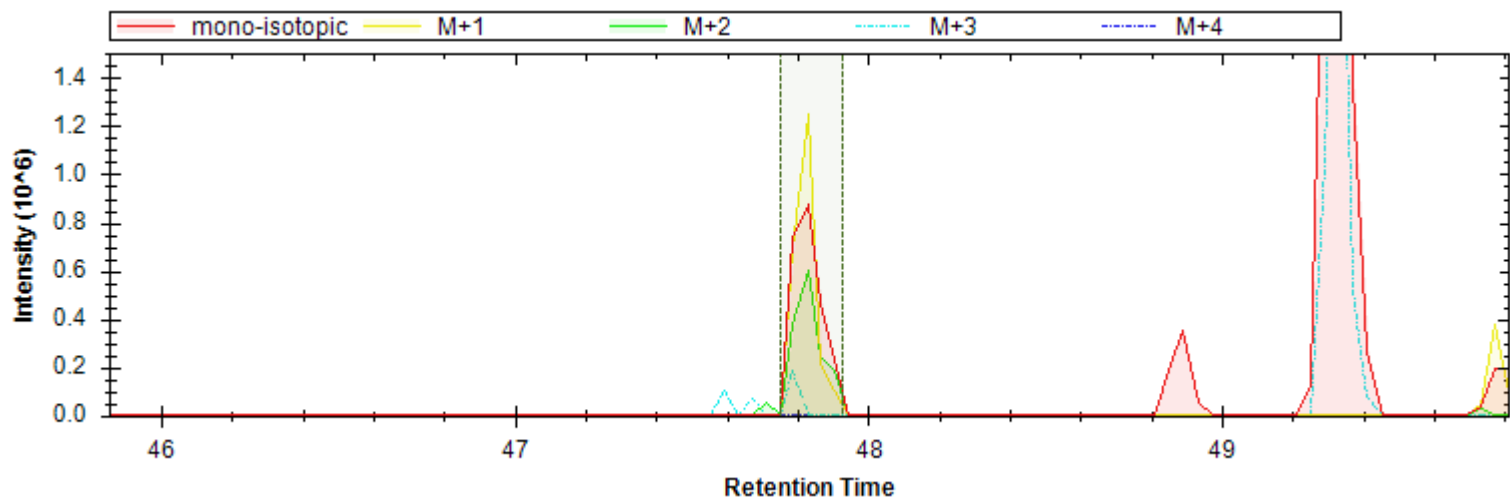

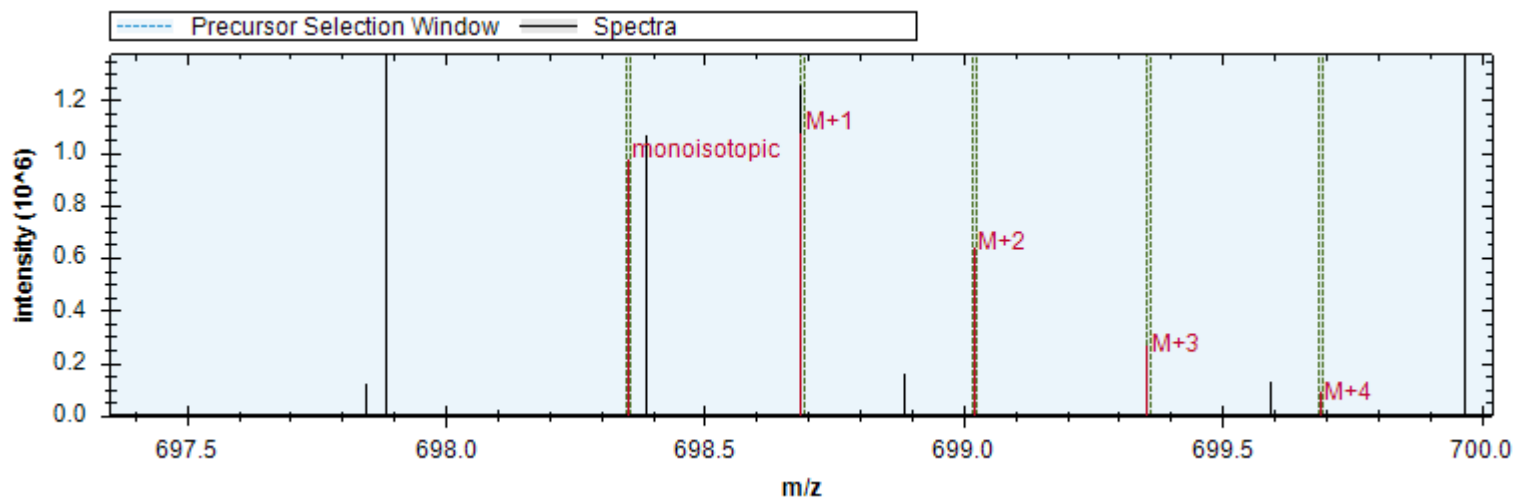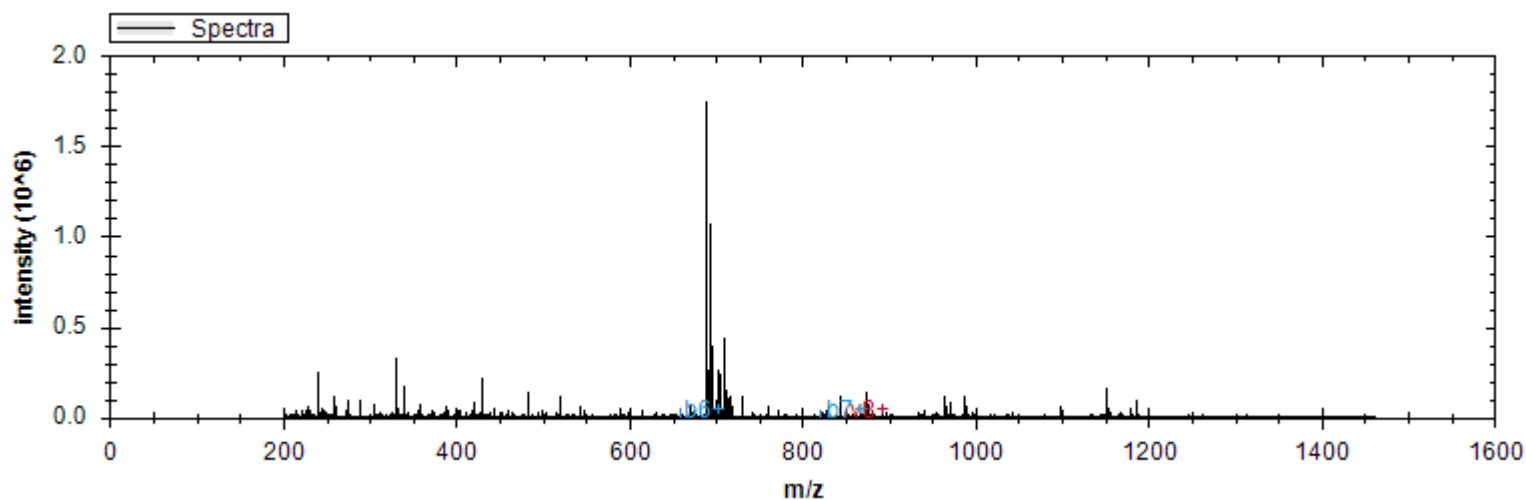

- |                              |                              |                              |
|------------------------------|------------------------------|------------------------------|
| [b7+] - 821.442 m/z          | [y8+] - 850.489 m/z          | [b6+] - 658.378 m/z          |
| [b9+] - 989.532 m/z          | [y4+] - 482.283 m/z          | [b8++] - 459.751 m/z         |
| [y11+ -H2O] - 1255.346 m/z   | [y6+] - 652.389 m/z          | [b3+] - 367.245 m/z          |
| [y5+] - 581.352 m/z          | [y9+ -H3PO4] - 919.511 m/z   | [y7+] - 753.437 m/z          |
| [y10+ -H3PO4] - 1006.543 m/z | [b11+ -H3PO4] - 1145.585 m/z | [y12+ -H3PO4] - 1174.633 m/z |
| [y3+] - 345.225 m/z          | [y12++] - 636.809 m/z        | [y8++] - 425.748 m/z         |
| [y11+ -H3PO4] - 1077.580 m/z |                              |                              |

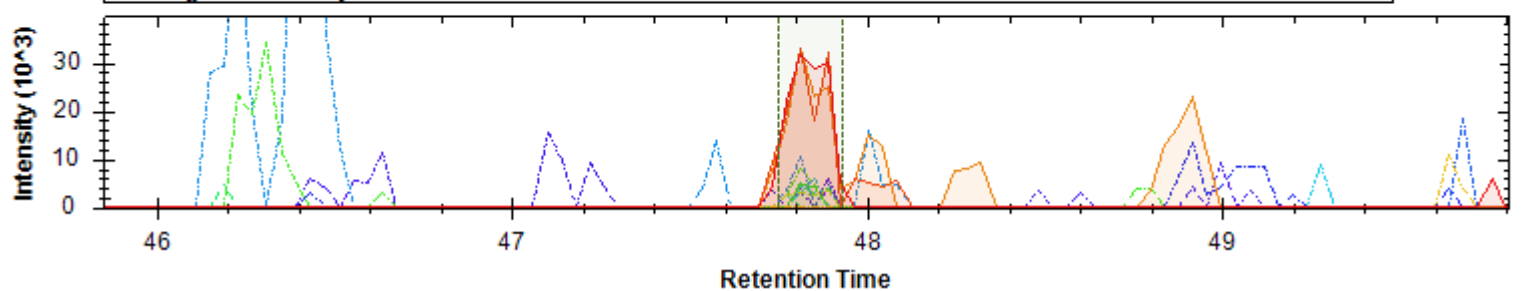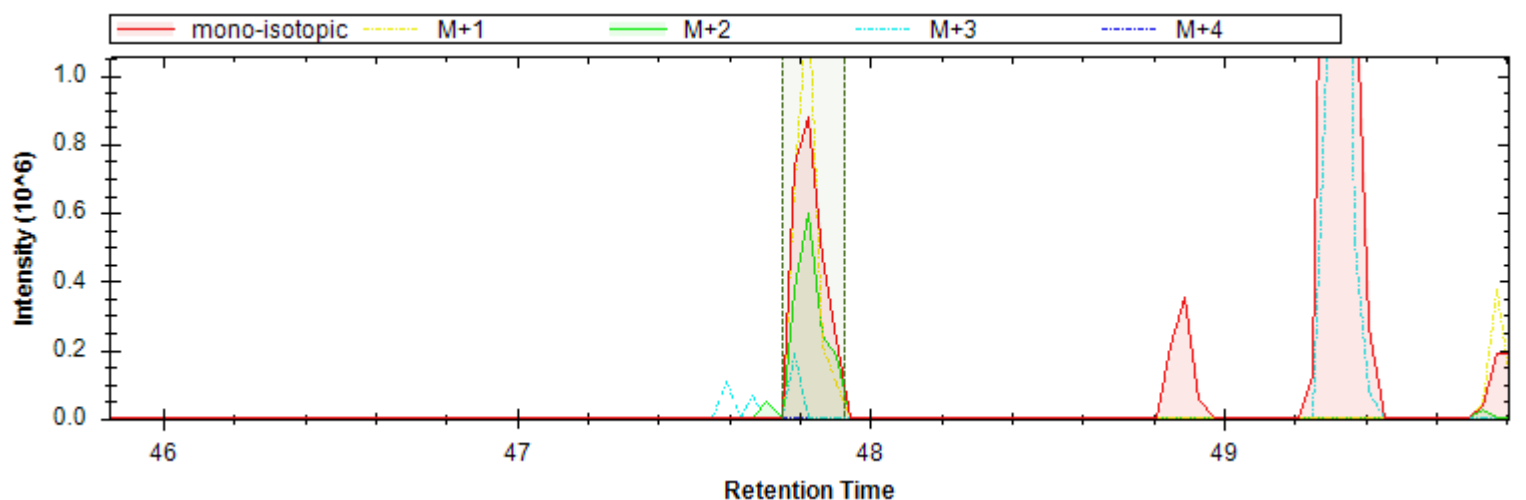

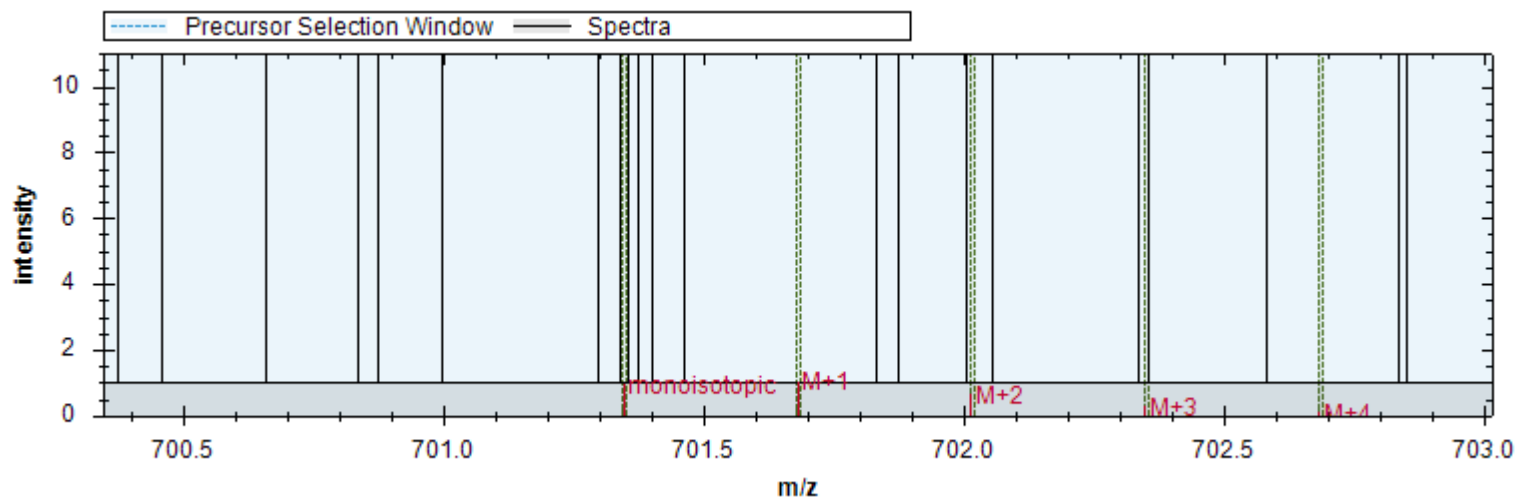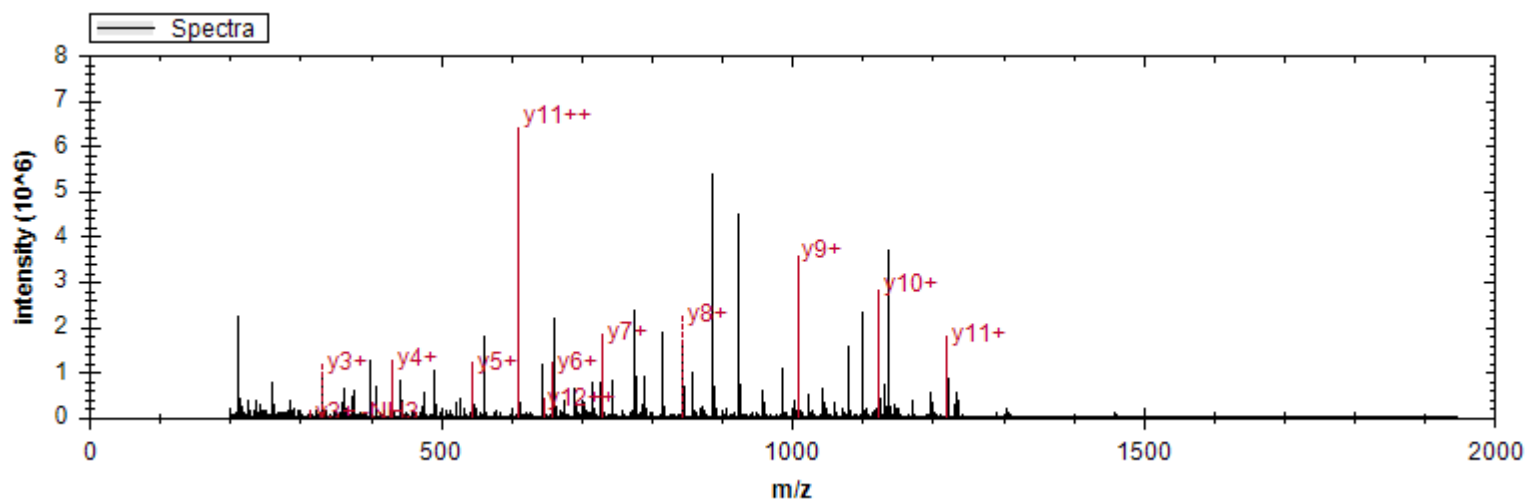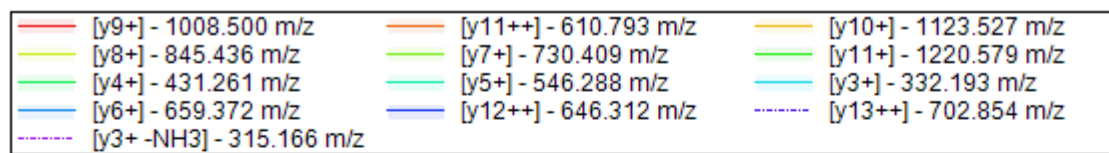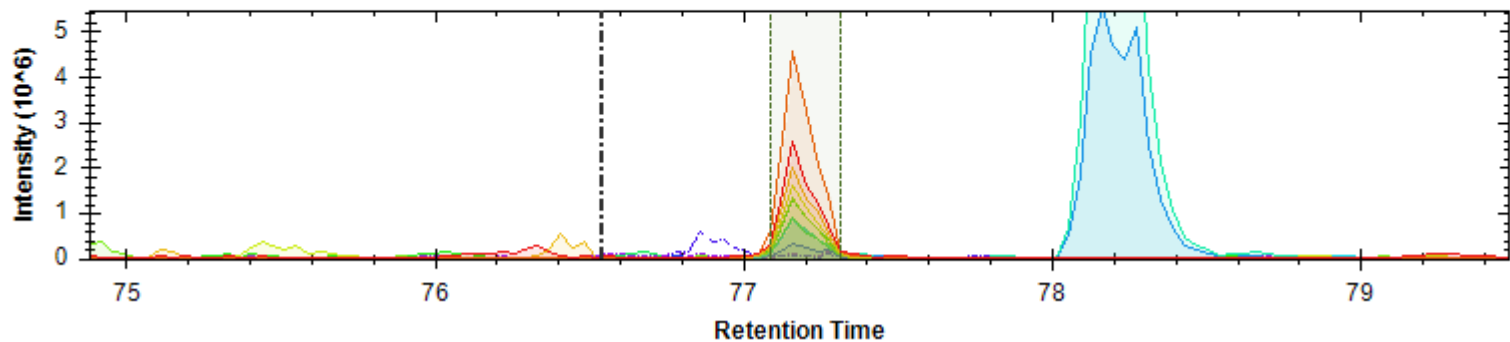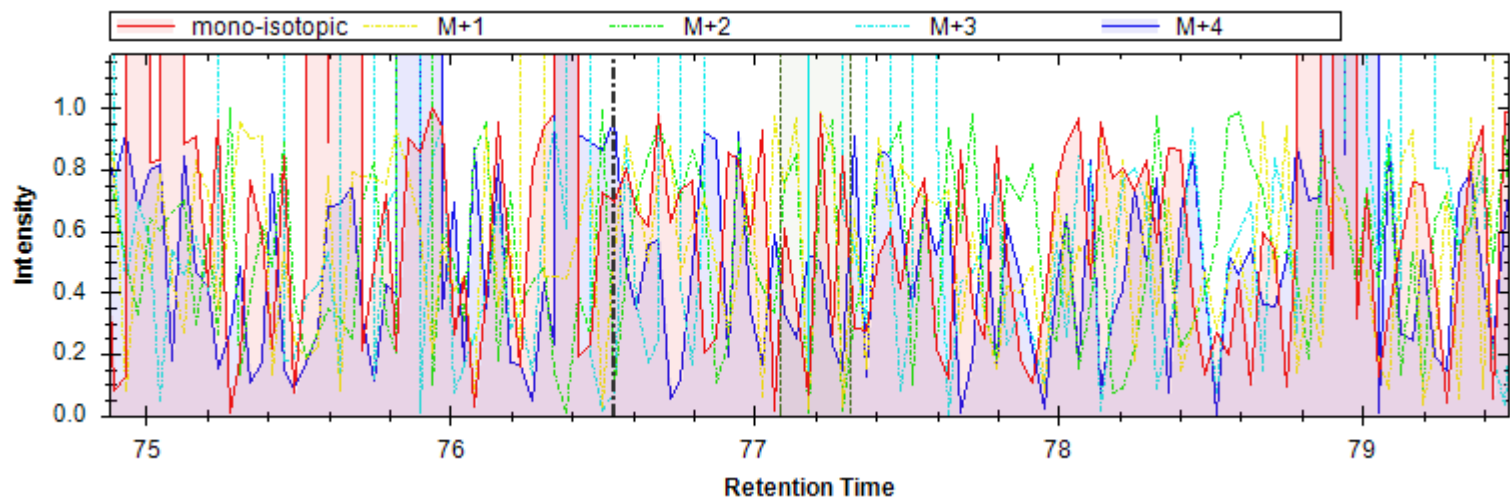

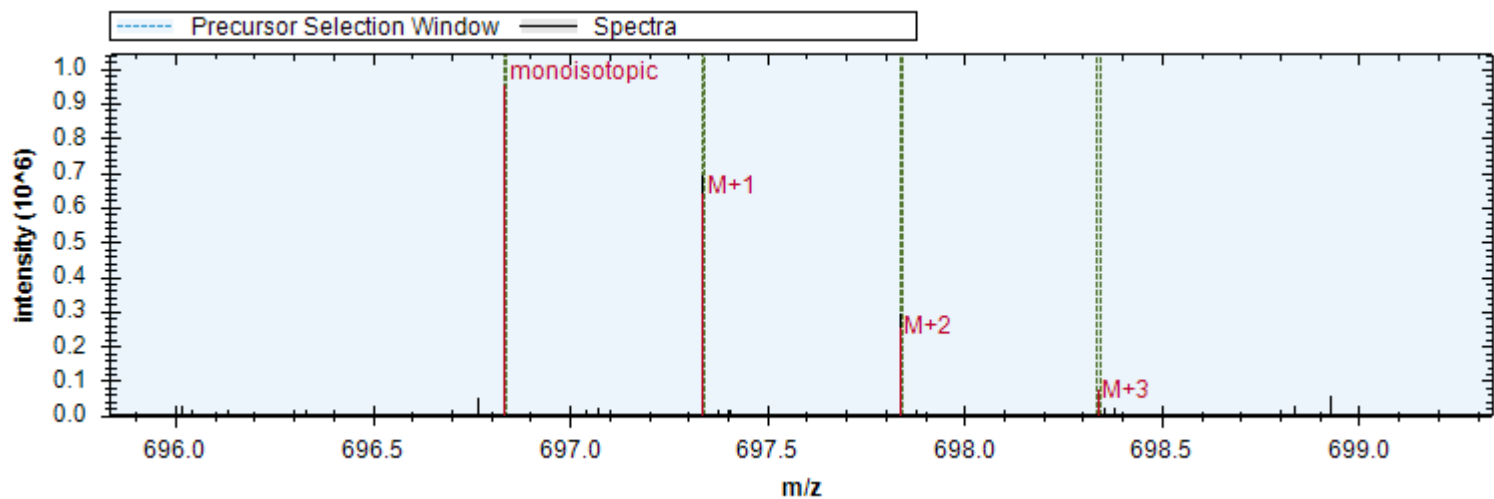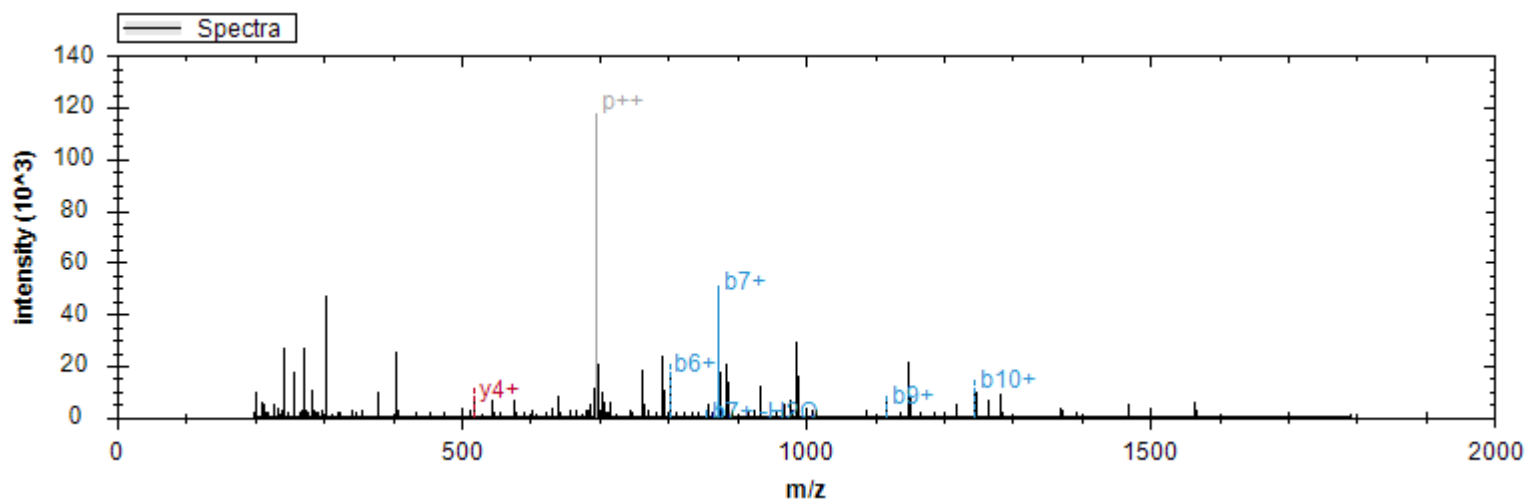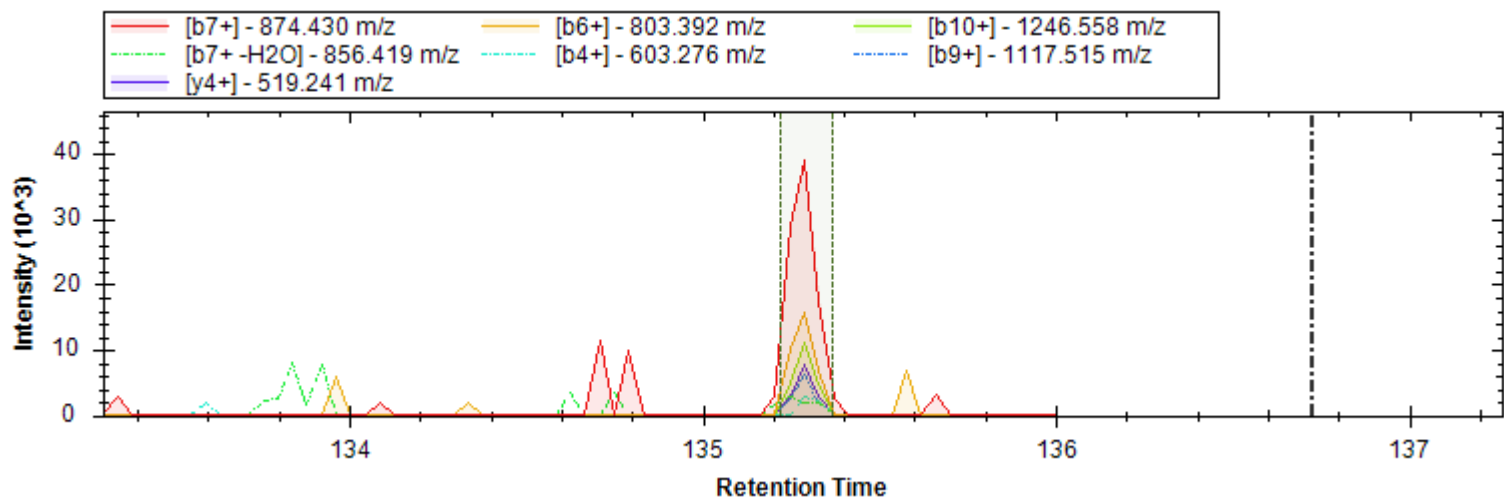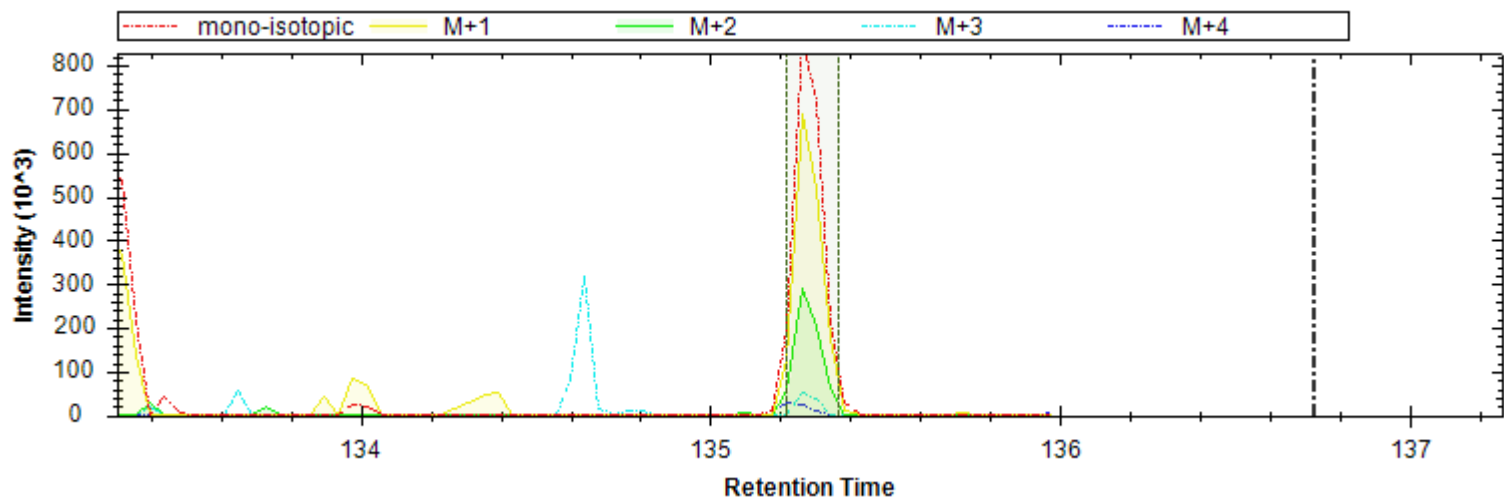

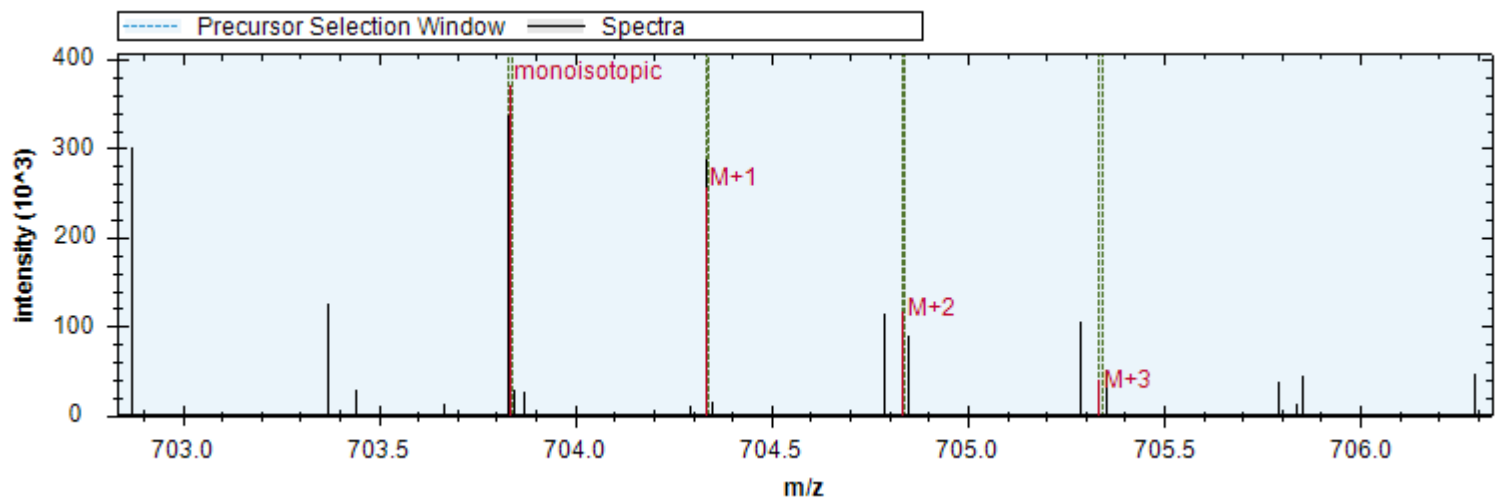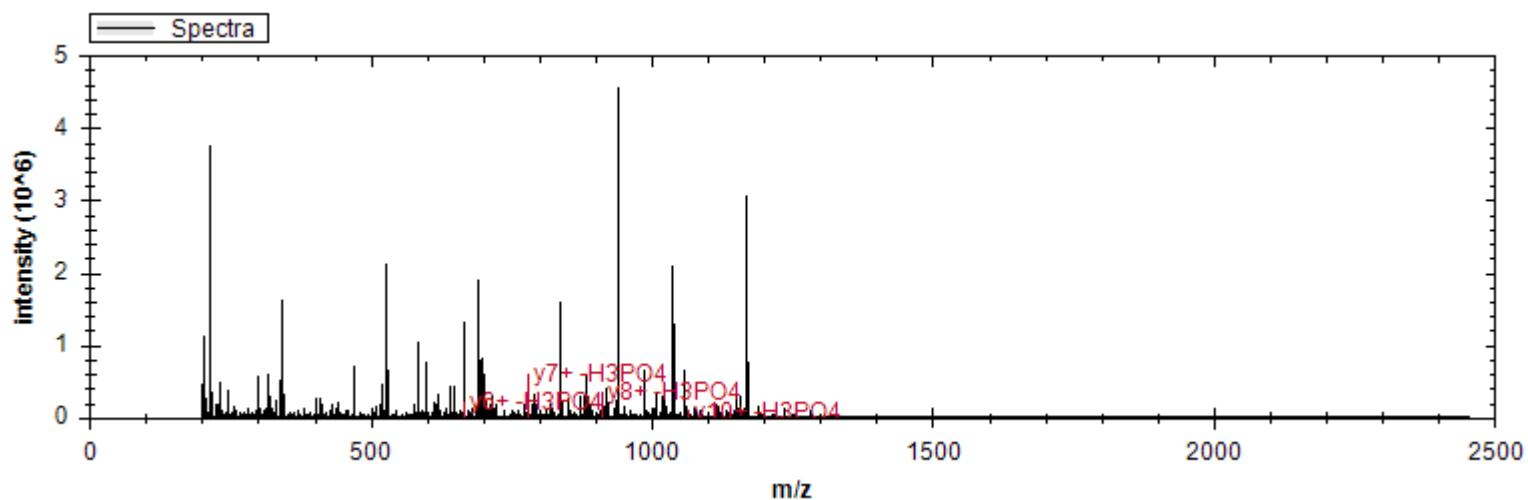

- |                            |                              |                              |
|----------------------------|------------------------------|------------------------------|
| [y8+ -H3PO4] - 911.452 m/z | [y6+ -H3PO4] - 667.327 m/z   | [y8+] - 1009.428 m/z         |
| [y7+ -H3PO4] - 780.411 m/z | [y11++] - 618.781 m/z        | [y6+] - 765.304 m/z          |
| [y7+] - 878.388 m/z        | [b5+] - 398.240 m/z          | [y11+ -H3PO4] - 1138.579 m/z |
| [b6+] - 529.280 m/z        | [y10+ -H3PO4] - 1067.542 m/z | [y11+] - 1236.556 m/z        |
| [y10+] - 1165.518 m/z      | [y10++] - 583.263 m/z        | [y8++] - 505.218 m/z         |
| [y3+] - 426.221 m/z        | [b7+] - 642.364 m/z          | [y7++] - 439.698 m/z         |
| [y9++] - 554.752 m/z       |                              |                              |

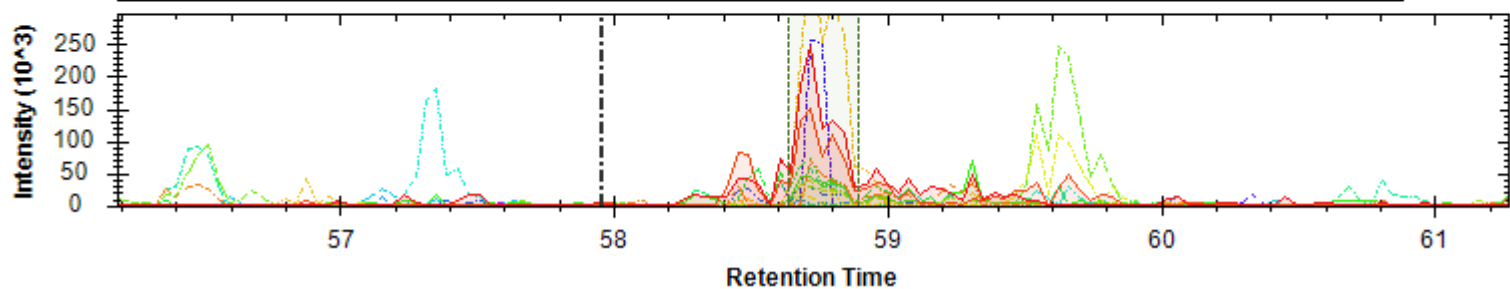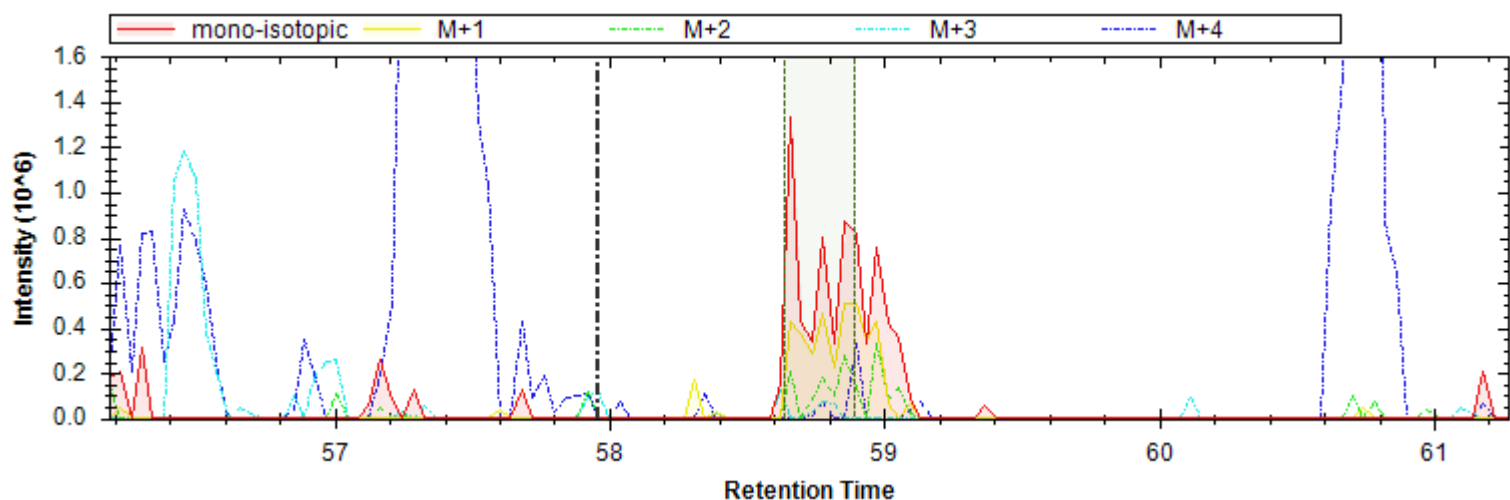

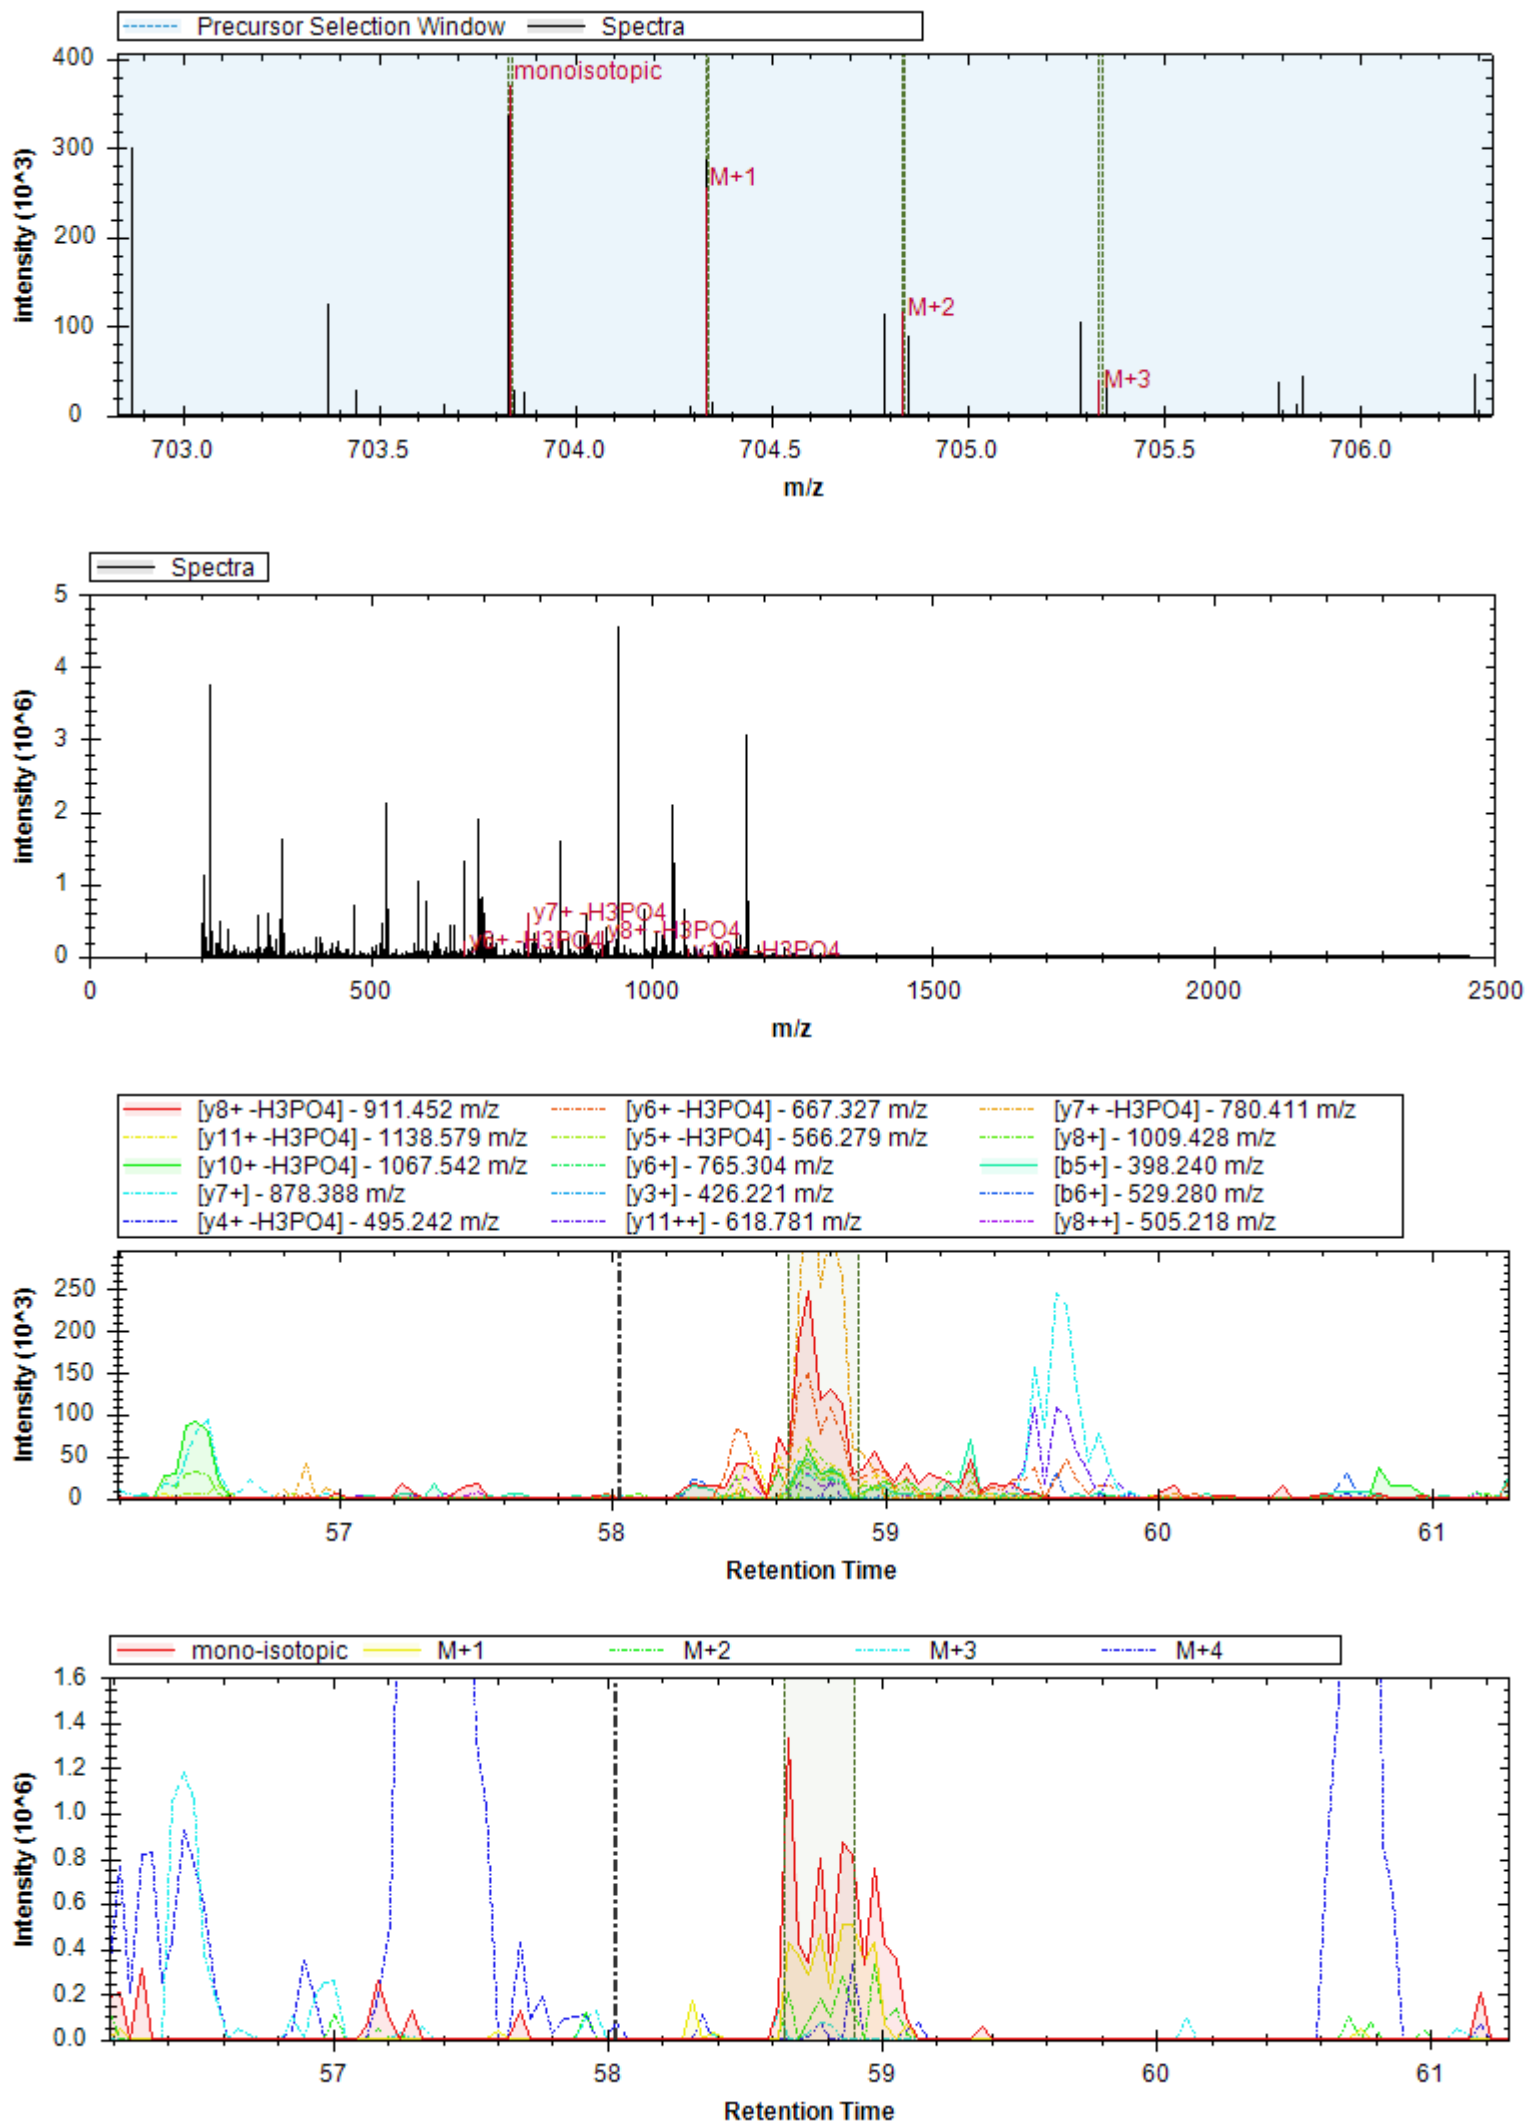

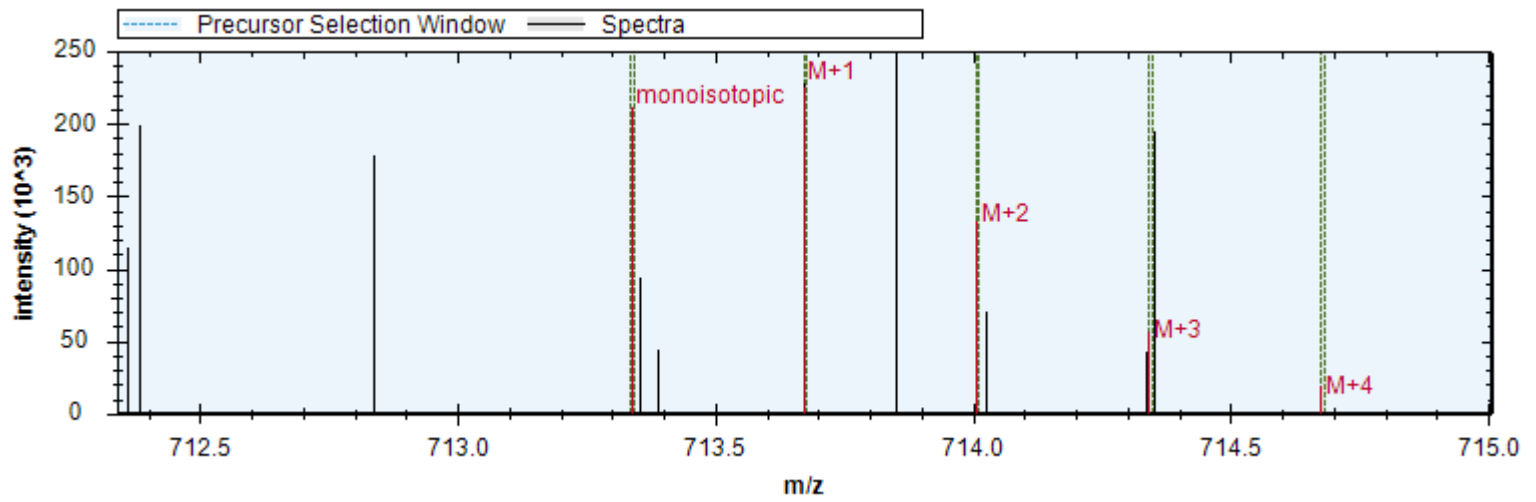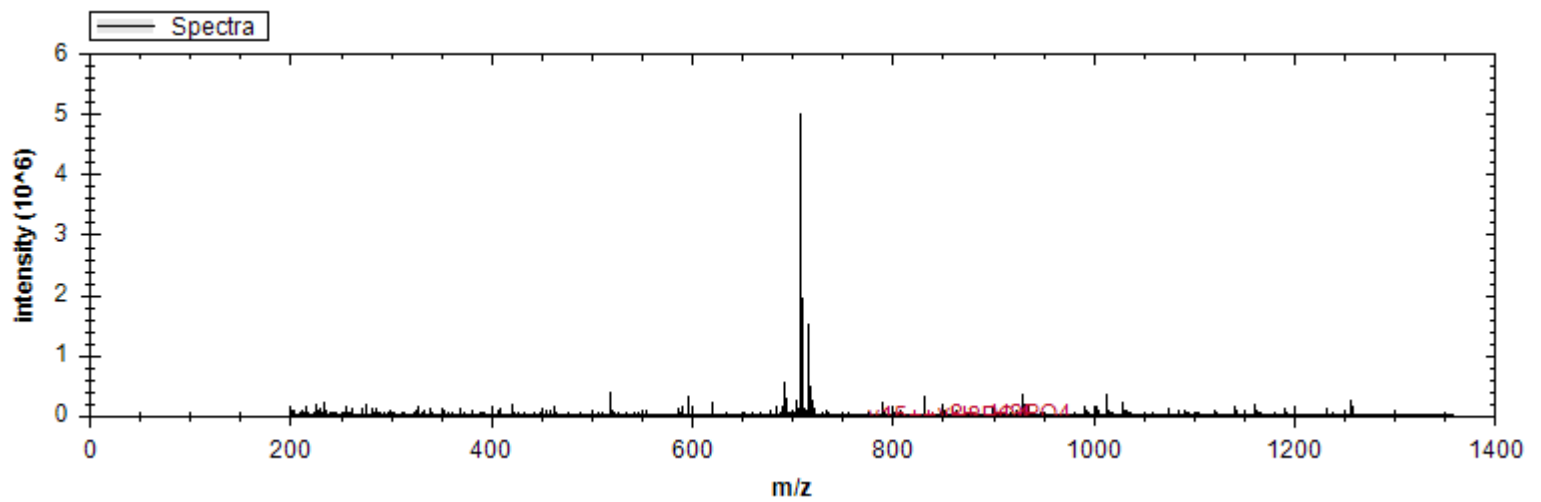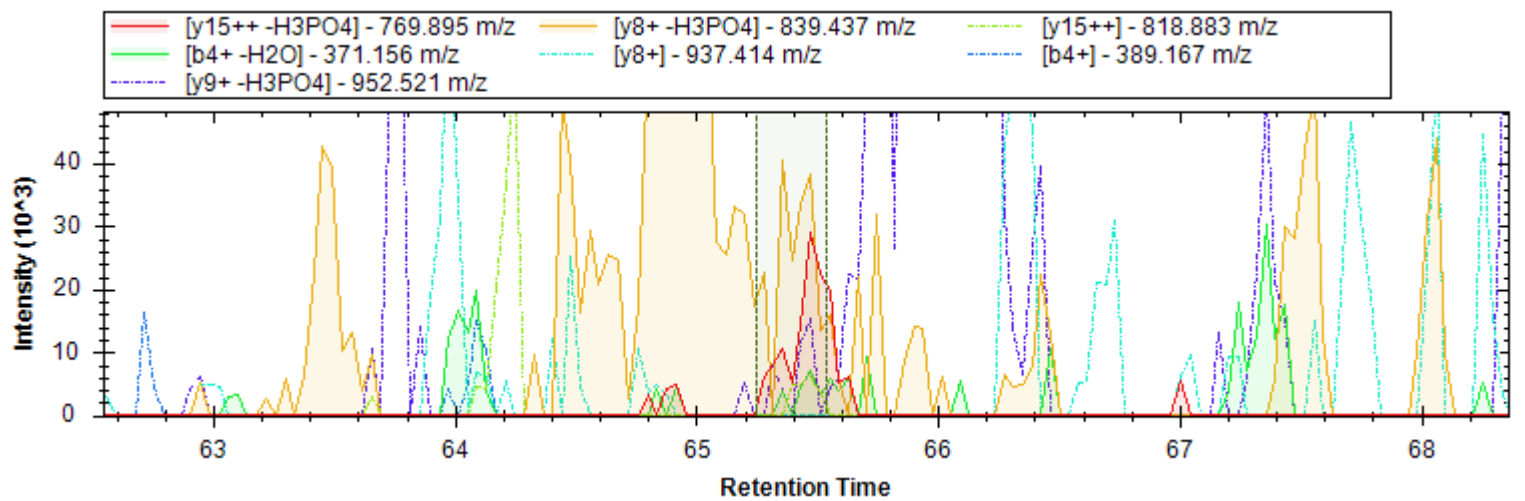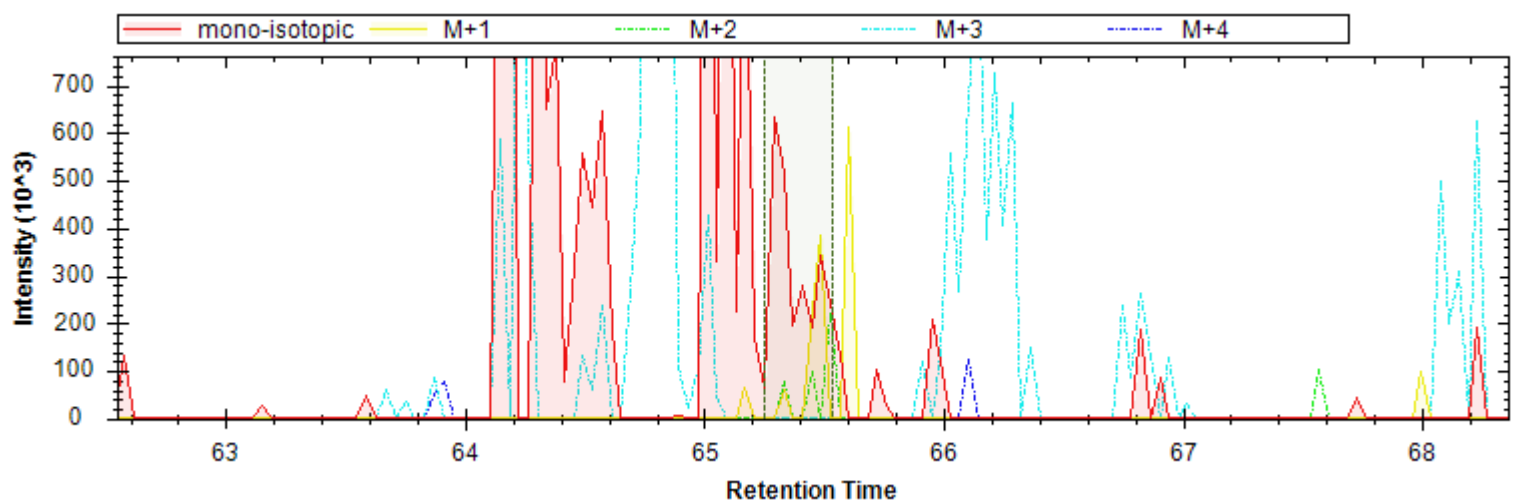

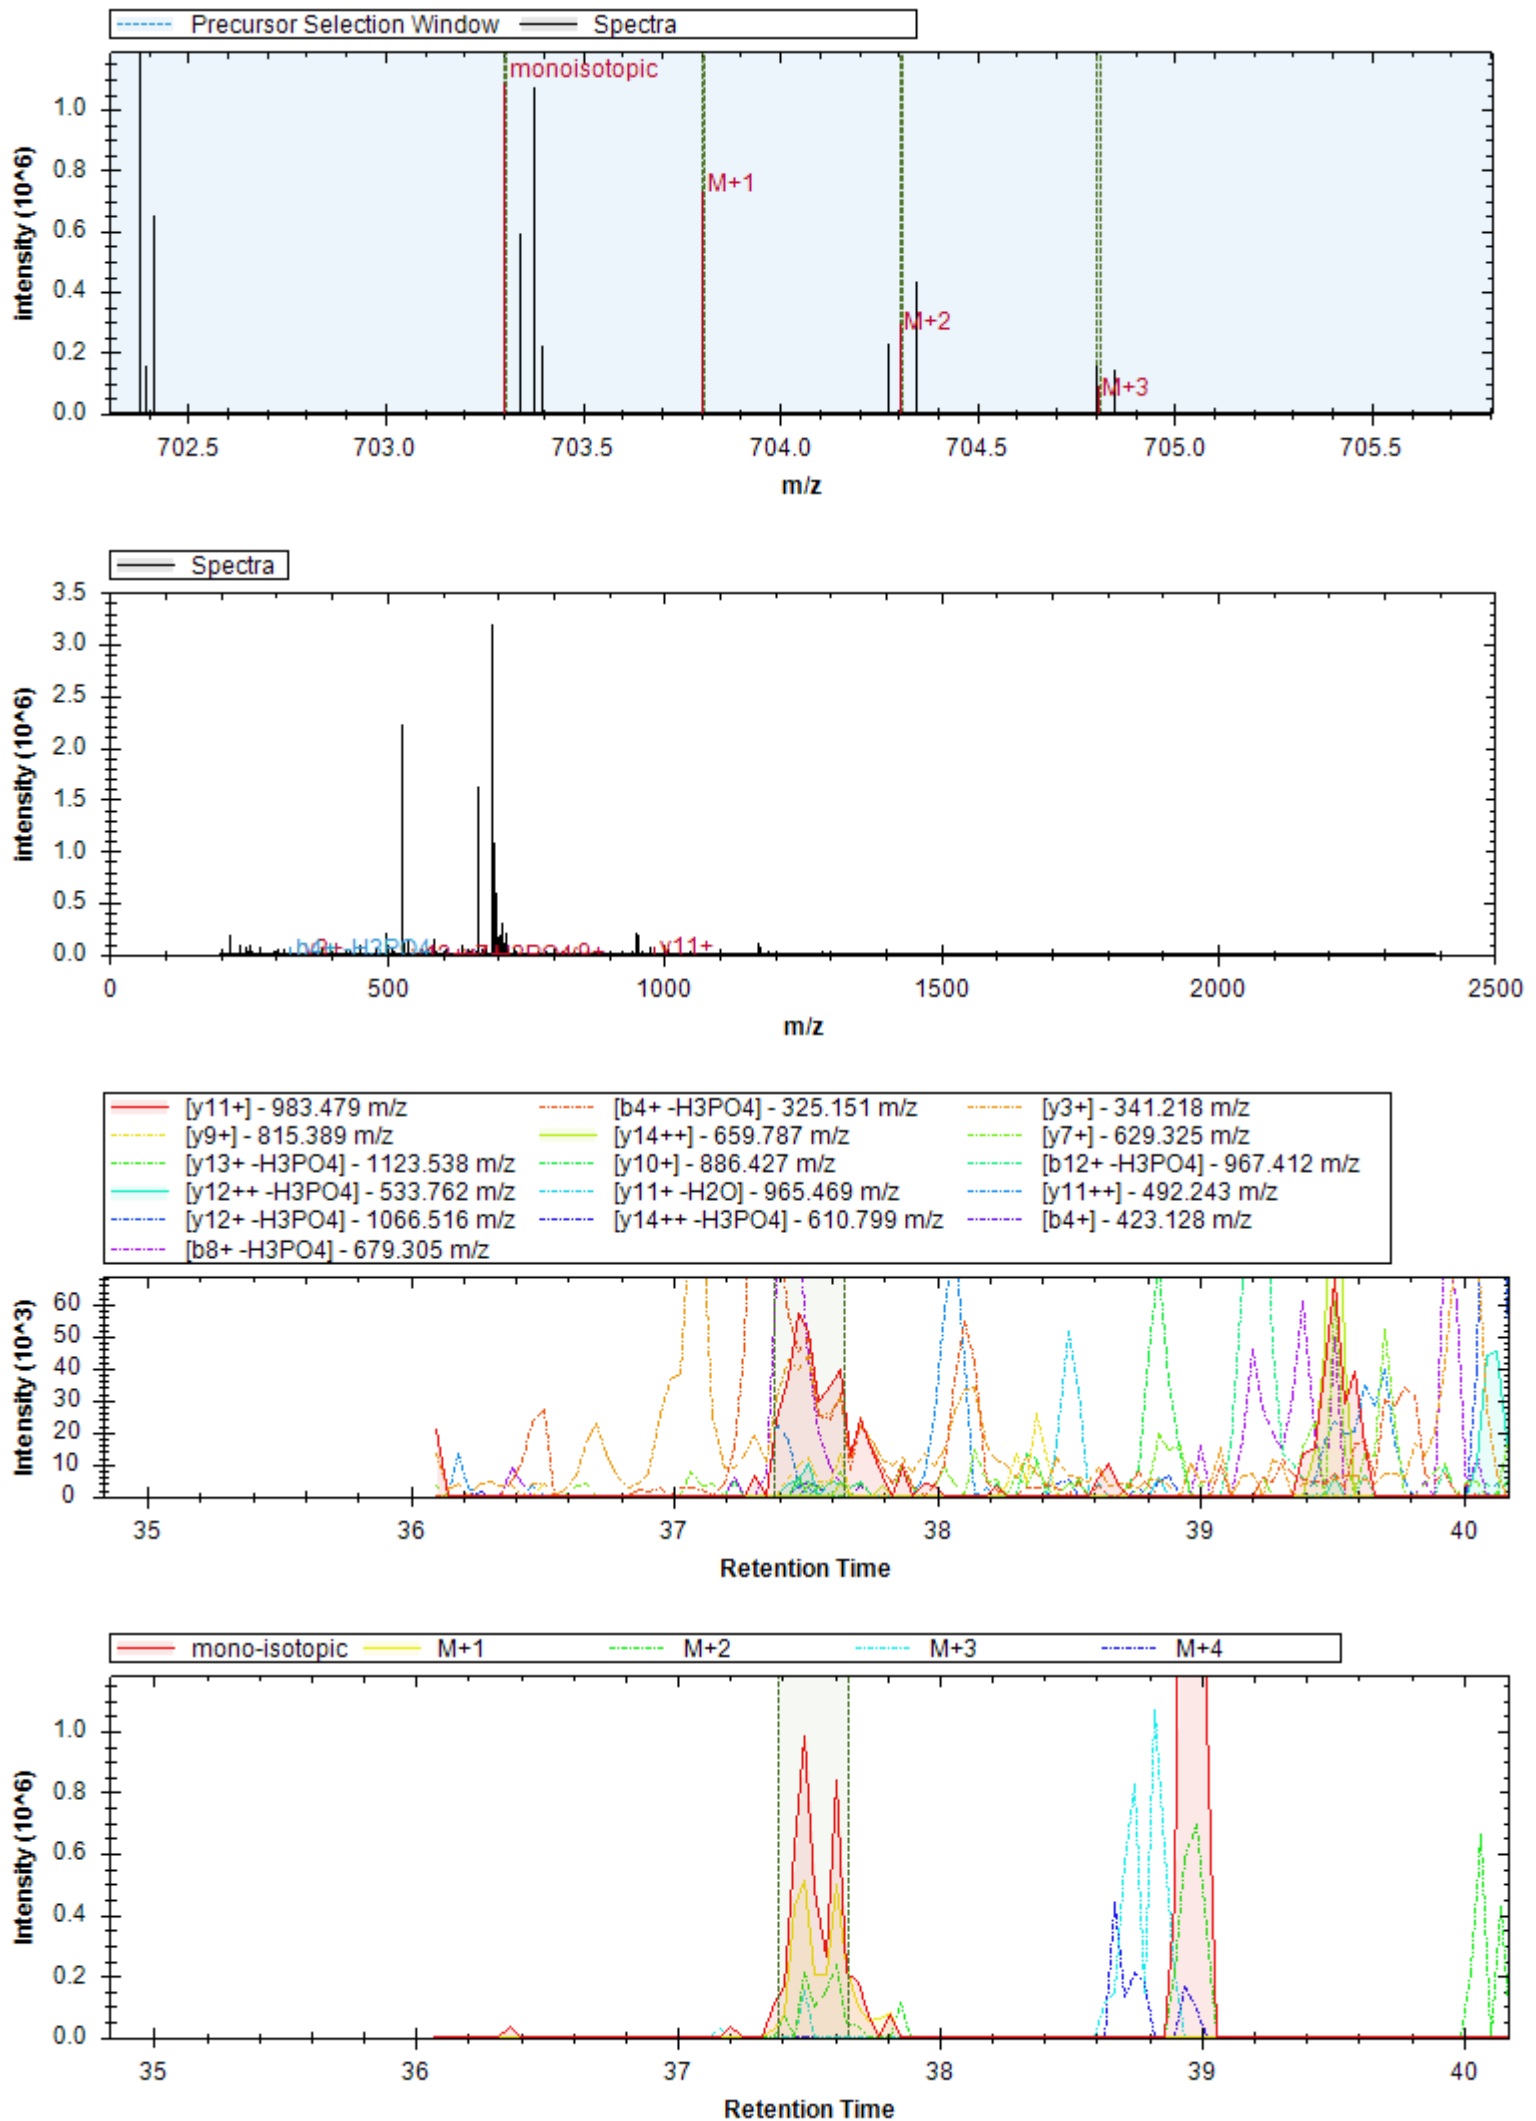



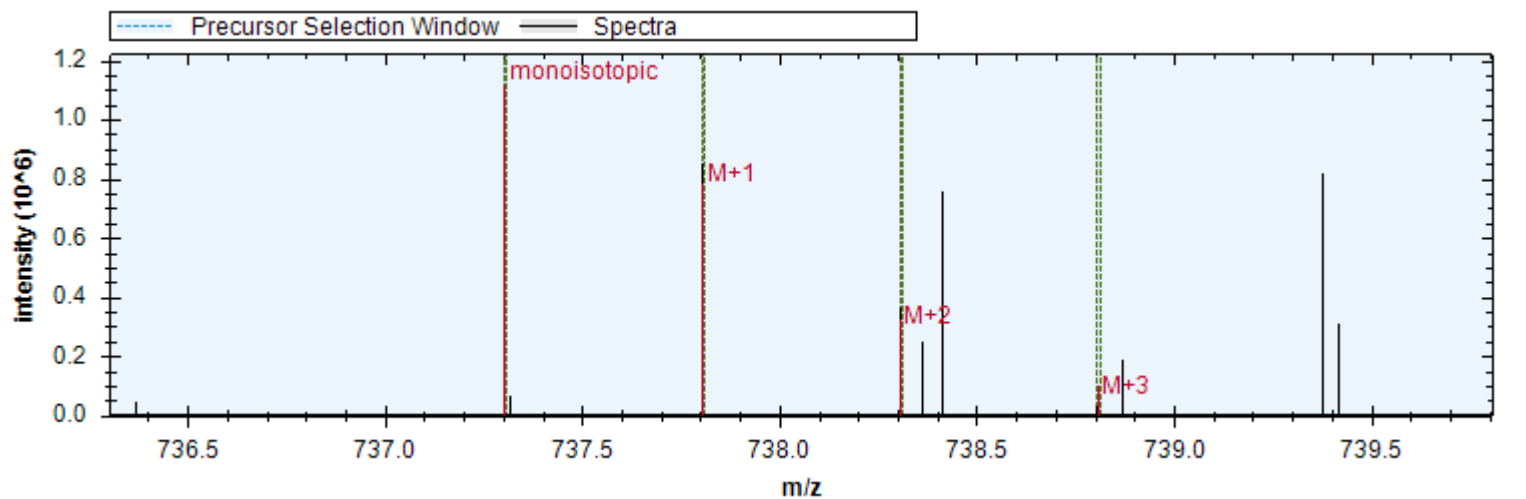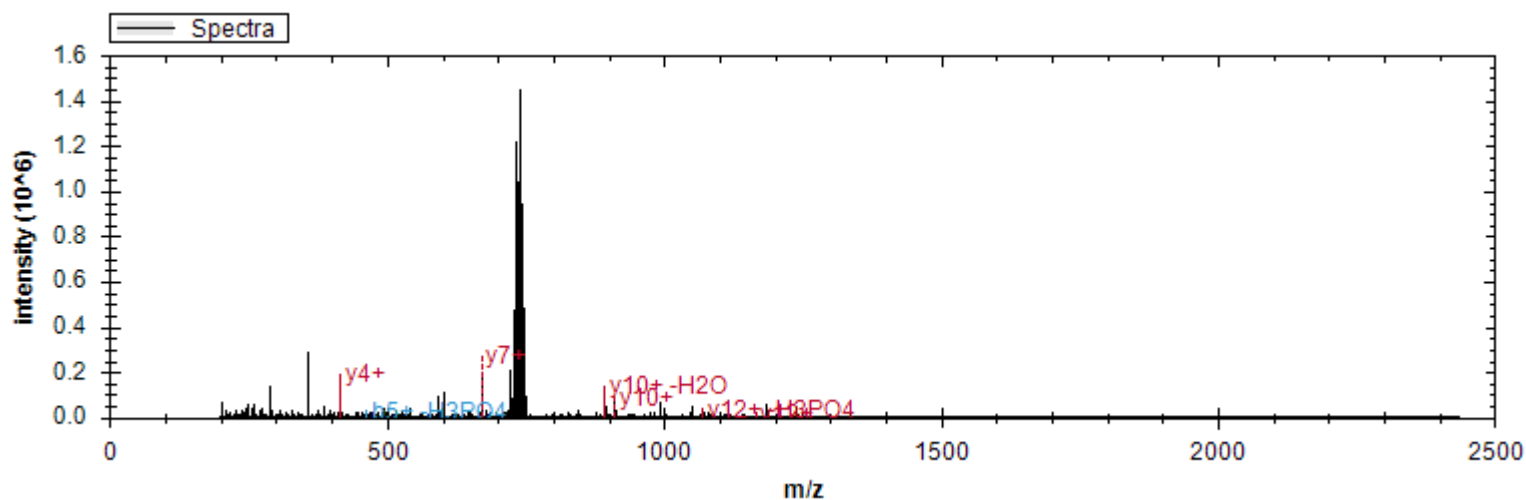

- |                                                         |                                        |                                                        |
|---------------------------------------------------------|----------------------------------------|--------------------------------------------------------|
| [y7+] - 671.347 m/z                                     | [y4+] - 416.225 m/z                    | [y10+ - H <sub>2</sub> O] - 894.443 m/z                |
| [y10+] - 912.453 m/z                                    | [b3+] - 308.124 m/z                    | [y11+ - H <sub>3</sub> PO <sub>4</sub> ] - 981.475 m/z |
| [y12+ - H <sub>3</sub> PO <sub>4</sub> ] - 1068.507 m/z | [y9+ - H <sub>2</sub> O] - 797.390 m/z | [b5+ - H <sub>3</sub> PO <sub>4</sub> ] - 464.178 m/z  |
| [b5+ - H <sub>2</sub> O] - 641.944 m/z                  | [b4+ - H <sub>2</sub> O] - 377.146 m/z | [y5+] - 517.273 m/z                                    |
| [y7+ - H <sub>2</sub> O] - 653.337 m/z                  | [b8+ - H <sub>2</sub> O] - 883.050 m/z | [y6+] - 574.294 m/z                                    |
| [y8+ - H <sub>2</sub> O] - 740.369 m/z                  | [y4+ - NH <sub>3</sub> ] - 399.199 m/z | [y12+] - 1166.484 m/z                                  |
| [b4+] - 395.156 m/z                                     |                                        |                                                        |

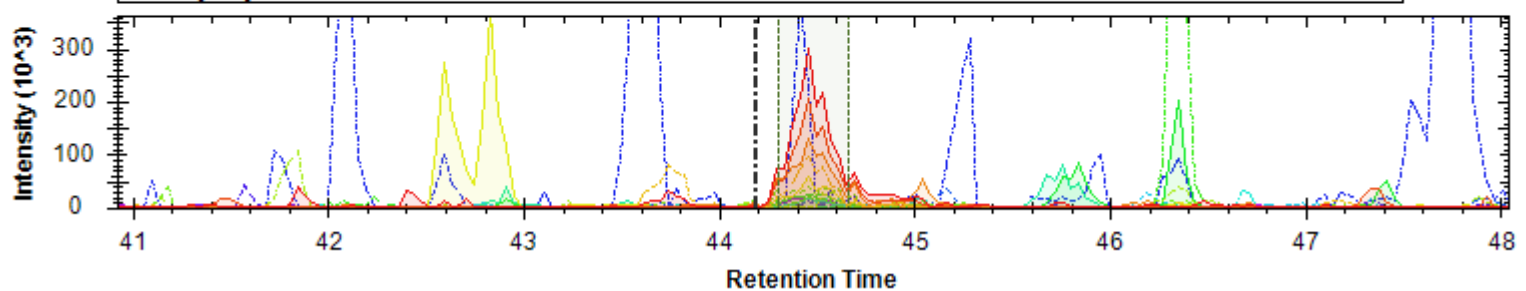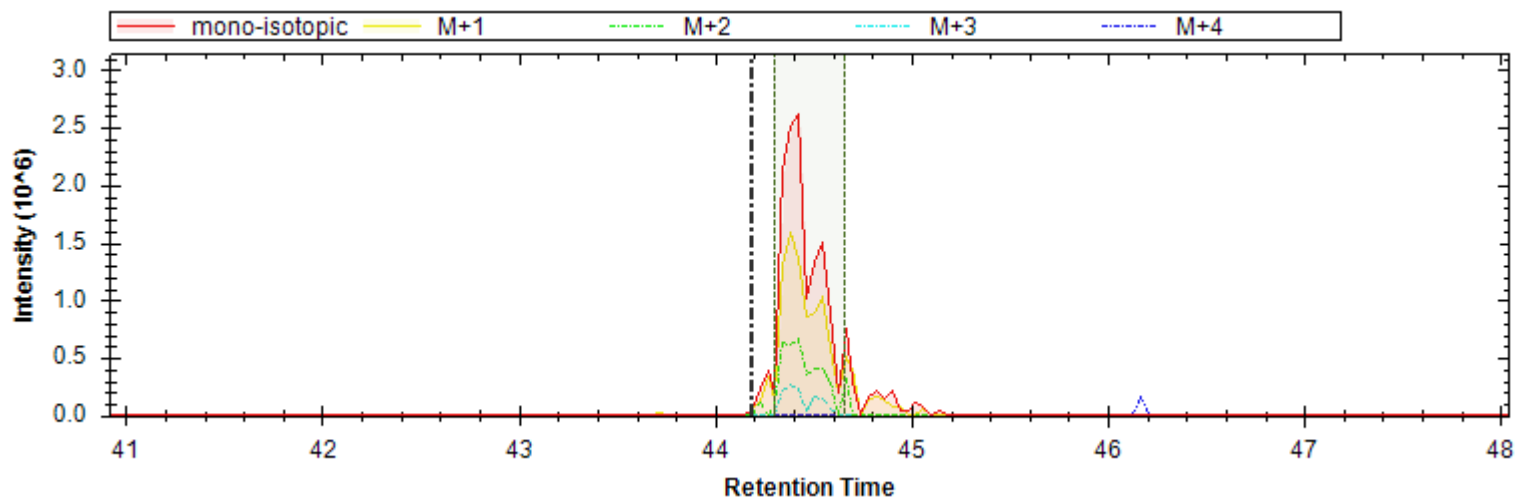

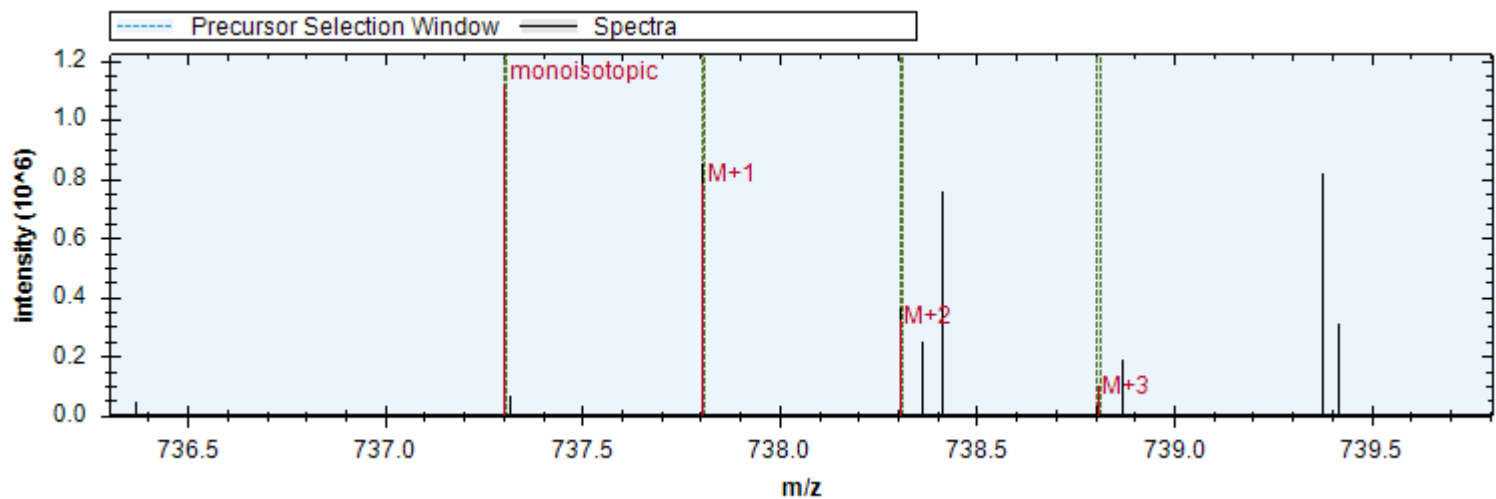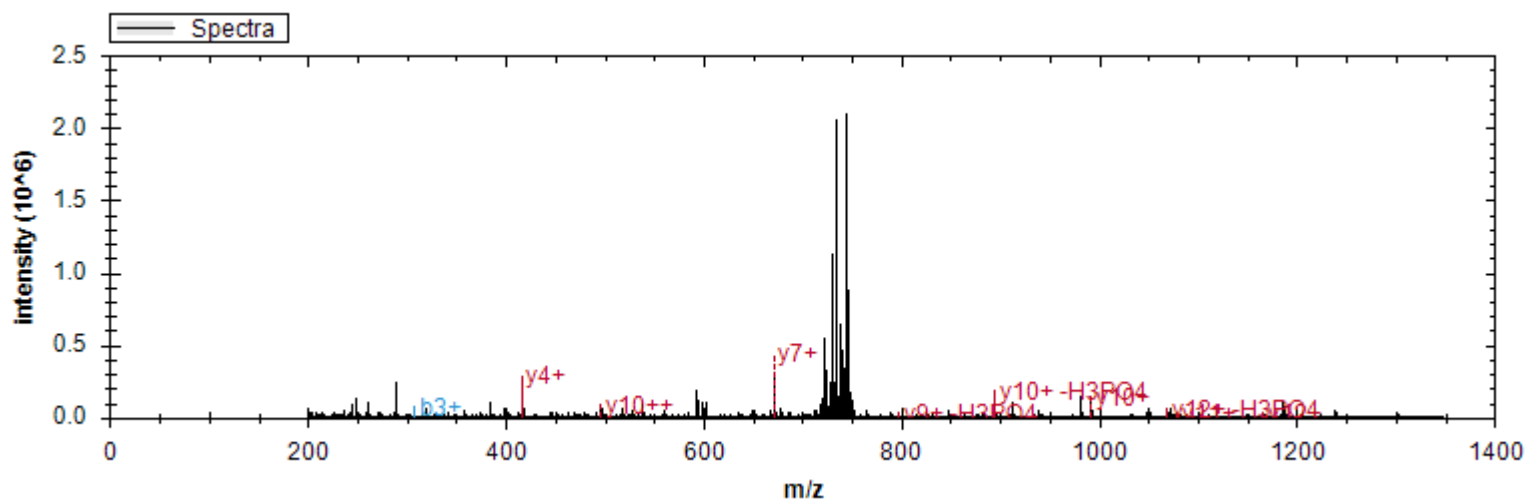

- |                             |                              |                            |
|-----------------------------|------------------------------|----------------------------|
| [y7+] - 671.347 m/z         | [y10+ -H3PO4] - 894.443 m/z  | [y4+] - 416.225 m/z        |
| [y10+] - 992.420 m/z        | [y10++] - 496.714 m/z        | [b3+] - 308.124 m/z        |
| [y11+ -H3PO4] - 981.475 m/z | [y12+ -H3PO4] - 1068.507 m/z | [y9+ -H3PO4] - 797.390 m/z |
| [y11++] - 540.230 m/z       | [y11+] - 1079.452 m/z        | [y7+ -H2O] - 653.337 m/z   |
| [y8+ -H3PO4] - 740.369 m/z  | [y12+] - 1166.484 m/z        | [y10+ -H2O] - 1072.209 m/z |
| [b4+ -H2O] - 377.146 m/z    | [y5+] - 517.273 m/z          | [y10+ -NH3] - 975.393 m/z  |
| [b4+] - 395.156 m/z         |                              |                            |

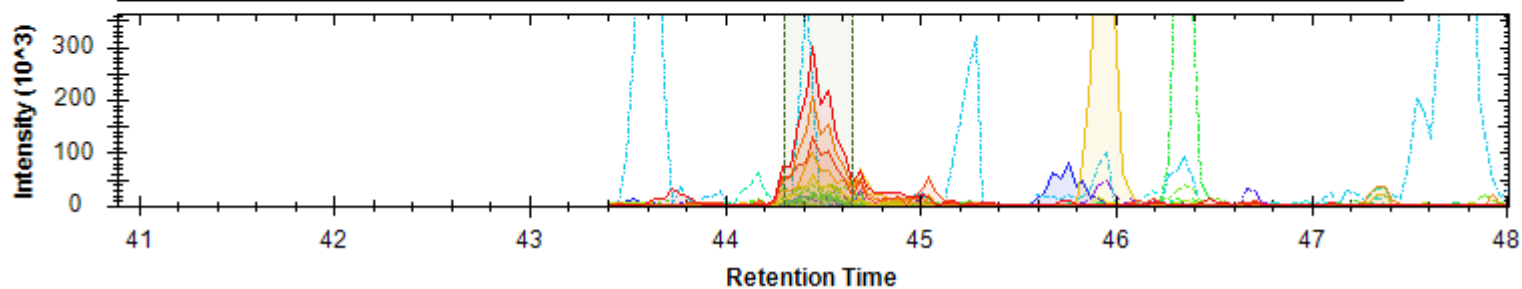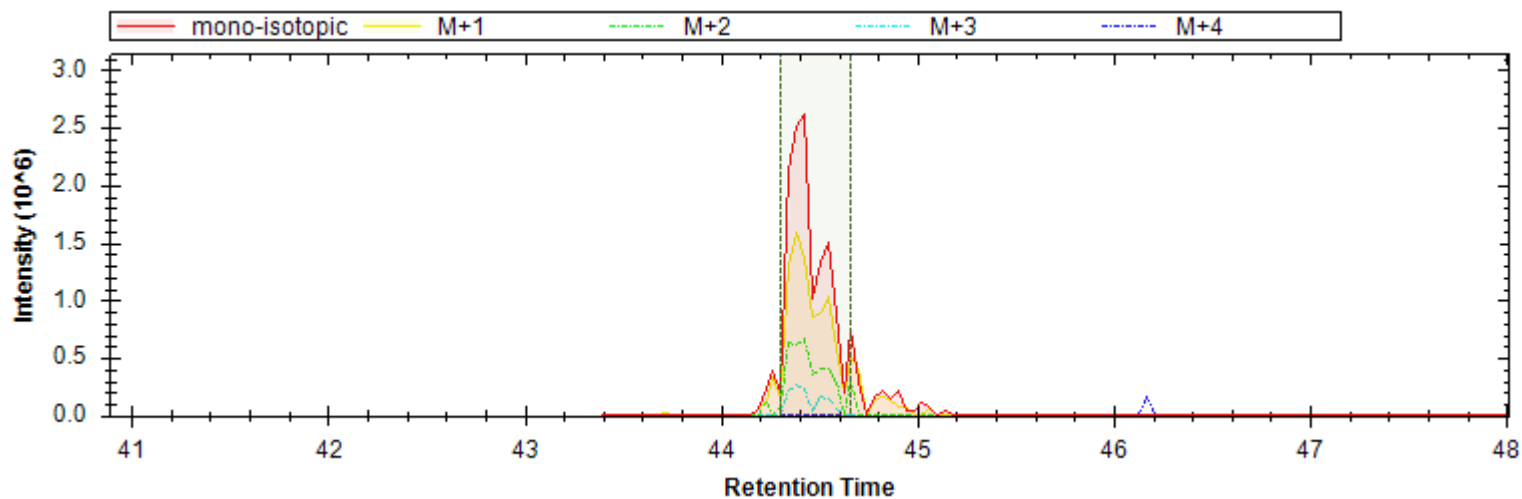

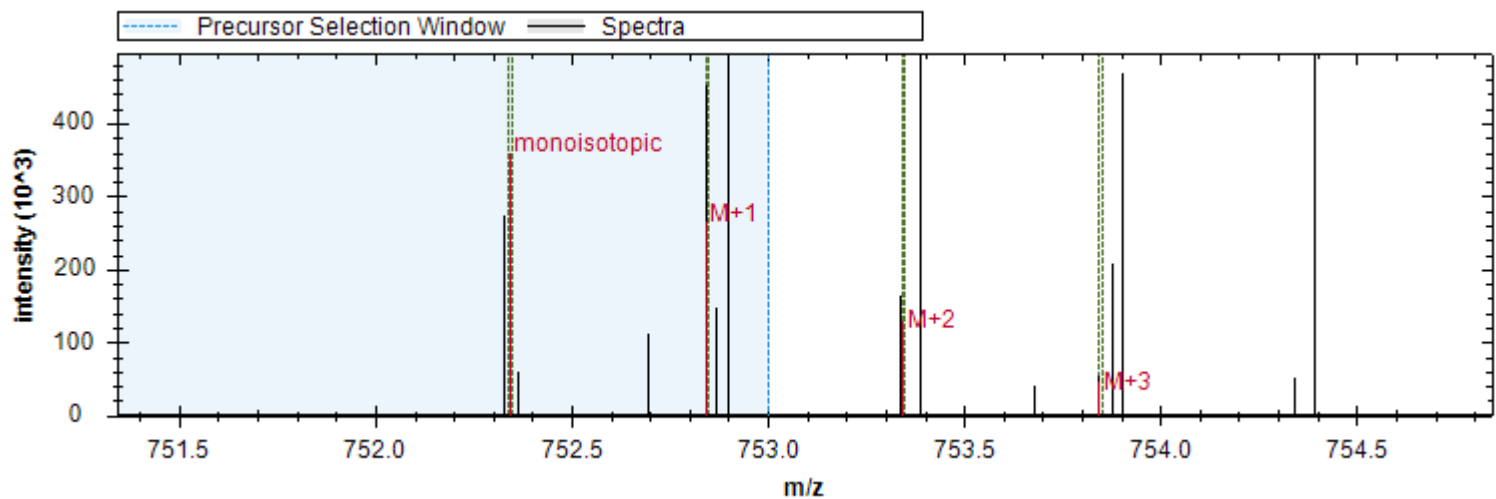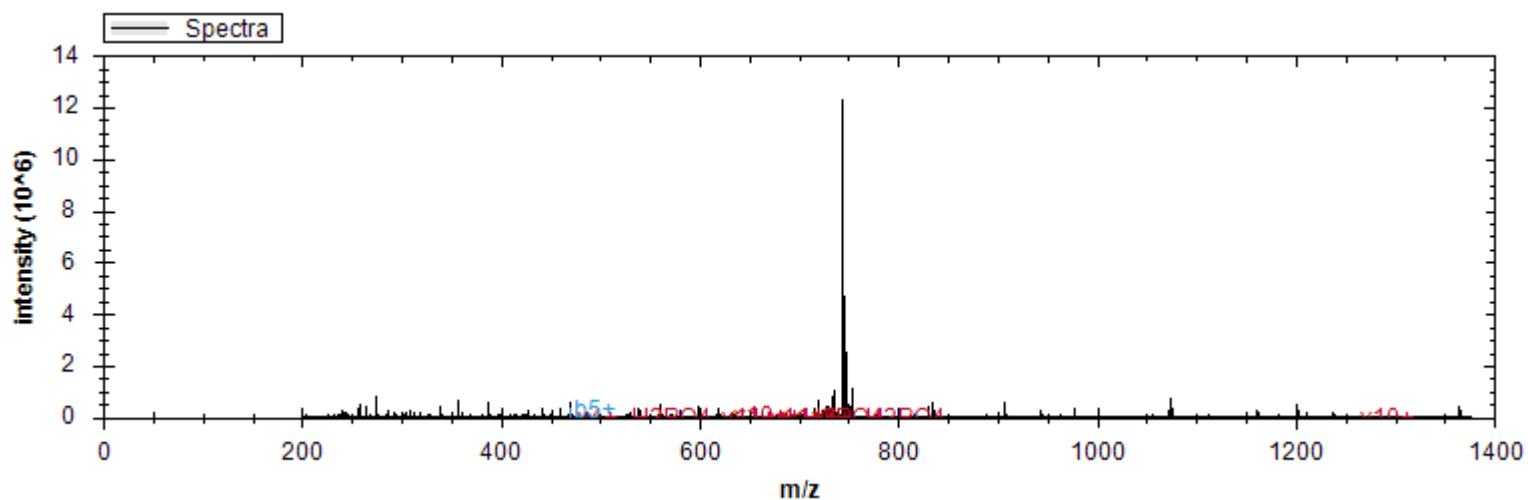

- |                               |                                |                                |
|-------------------------------|--------------------------------|--------------------------------|
| [y3+] - 403.212 $m/z$         | [y10+ -H3PO4] - 1162.579 $m/z$ | [y11++ -H3PO4] - 617.312 $m/z$ |
| [y10++] - 630.781 $m/z$       | [y6+ -H3PO4] - 708.361 $m/z$   | [y8+ -H3PO4] - 937.467 $m/z$   |
| [y5+ -H3PO4] - 571.302 $m/z$  | [b10+ -H3PO4] - 1003.496 $m/z$ | [y10+] - 1260.556 $m/z$        |
| [y7+ -H3PO4] - 836.420 $m/z$  | [y11++] - 666.300 $m/z$        | [y8+] - 1035.444 $m/z$         |
| [y4+ -H3PO4] - 472.234 $m/z$  | [y6+] - 806.338 $m/z$          | [y4+] - 570.211 $m/z$          |
| [b8+] - 835.406 $m/z$         | [y11+ -H3PO4] - 1233.616 $m/z$ | [b5+] - 469.241 $m/z$          |
| [y9+ -H3PO4] - 1065.526 $m/z$ | [y4+ -H2O] - 552.200 $m/z$     |                                |

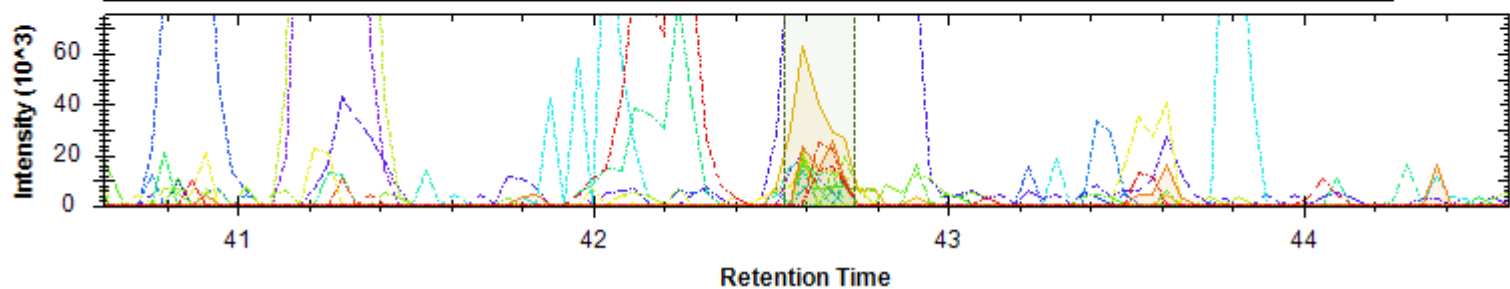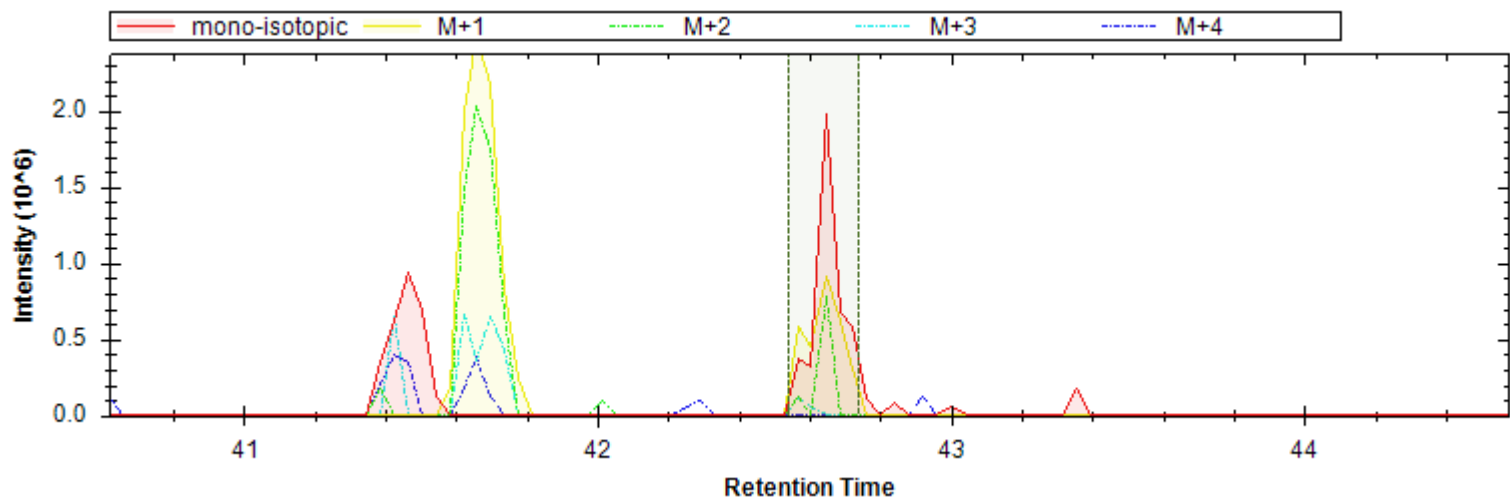

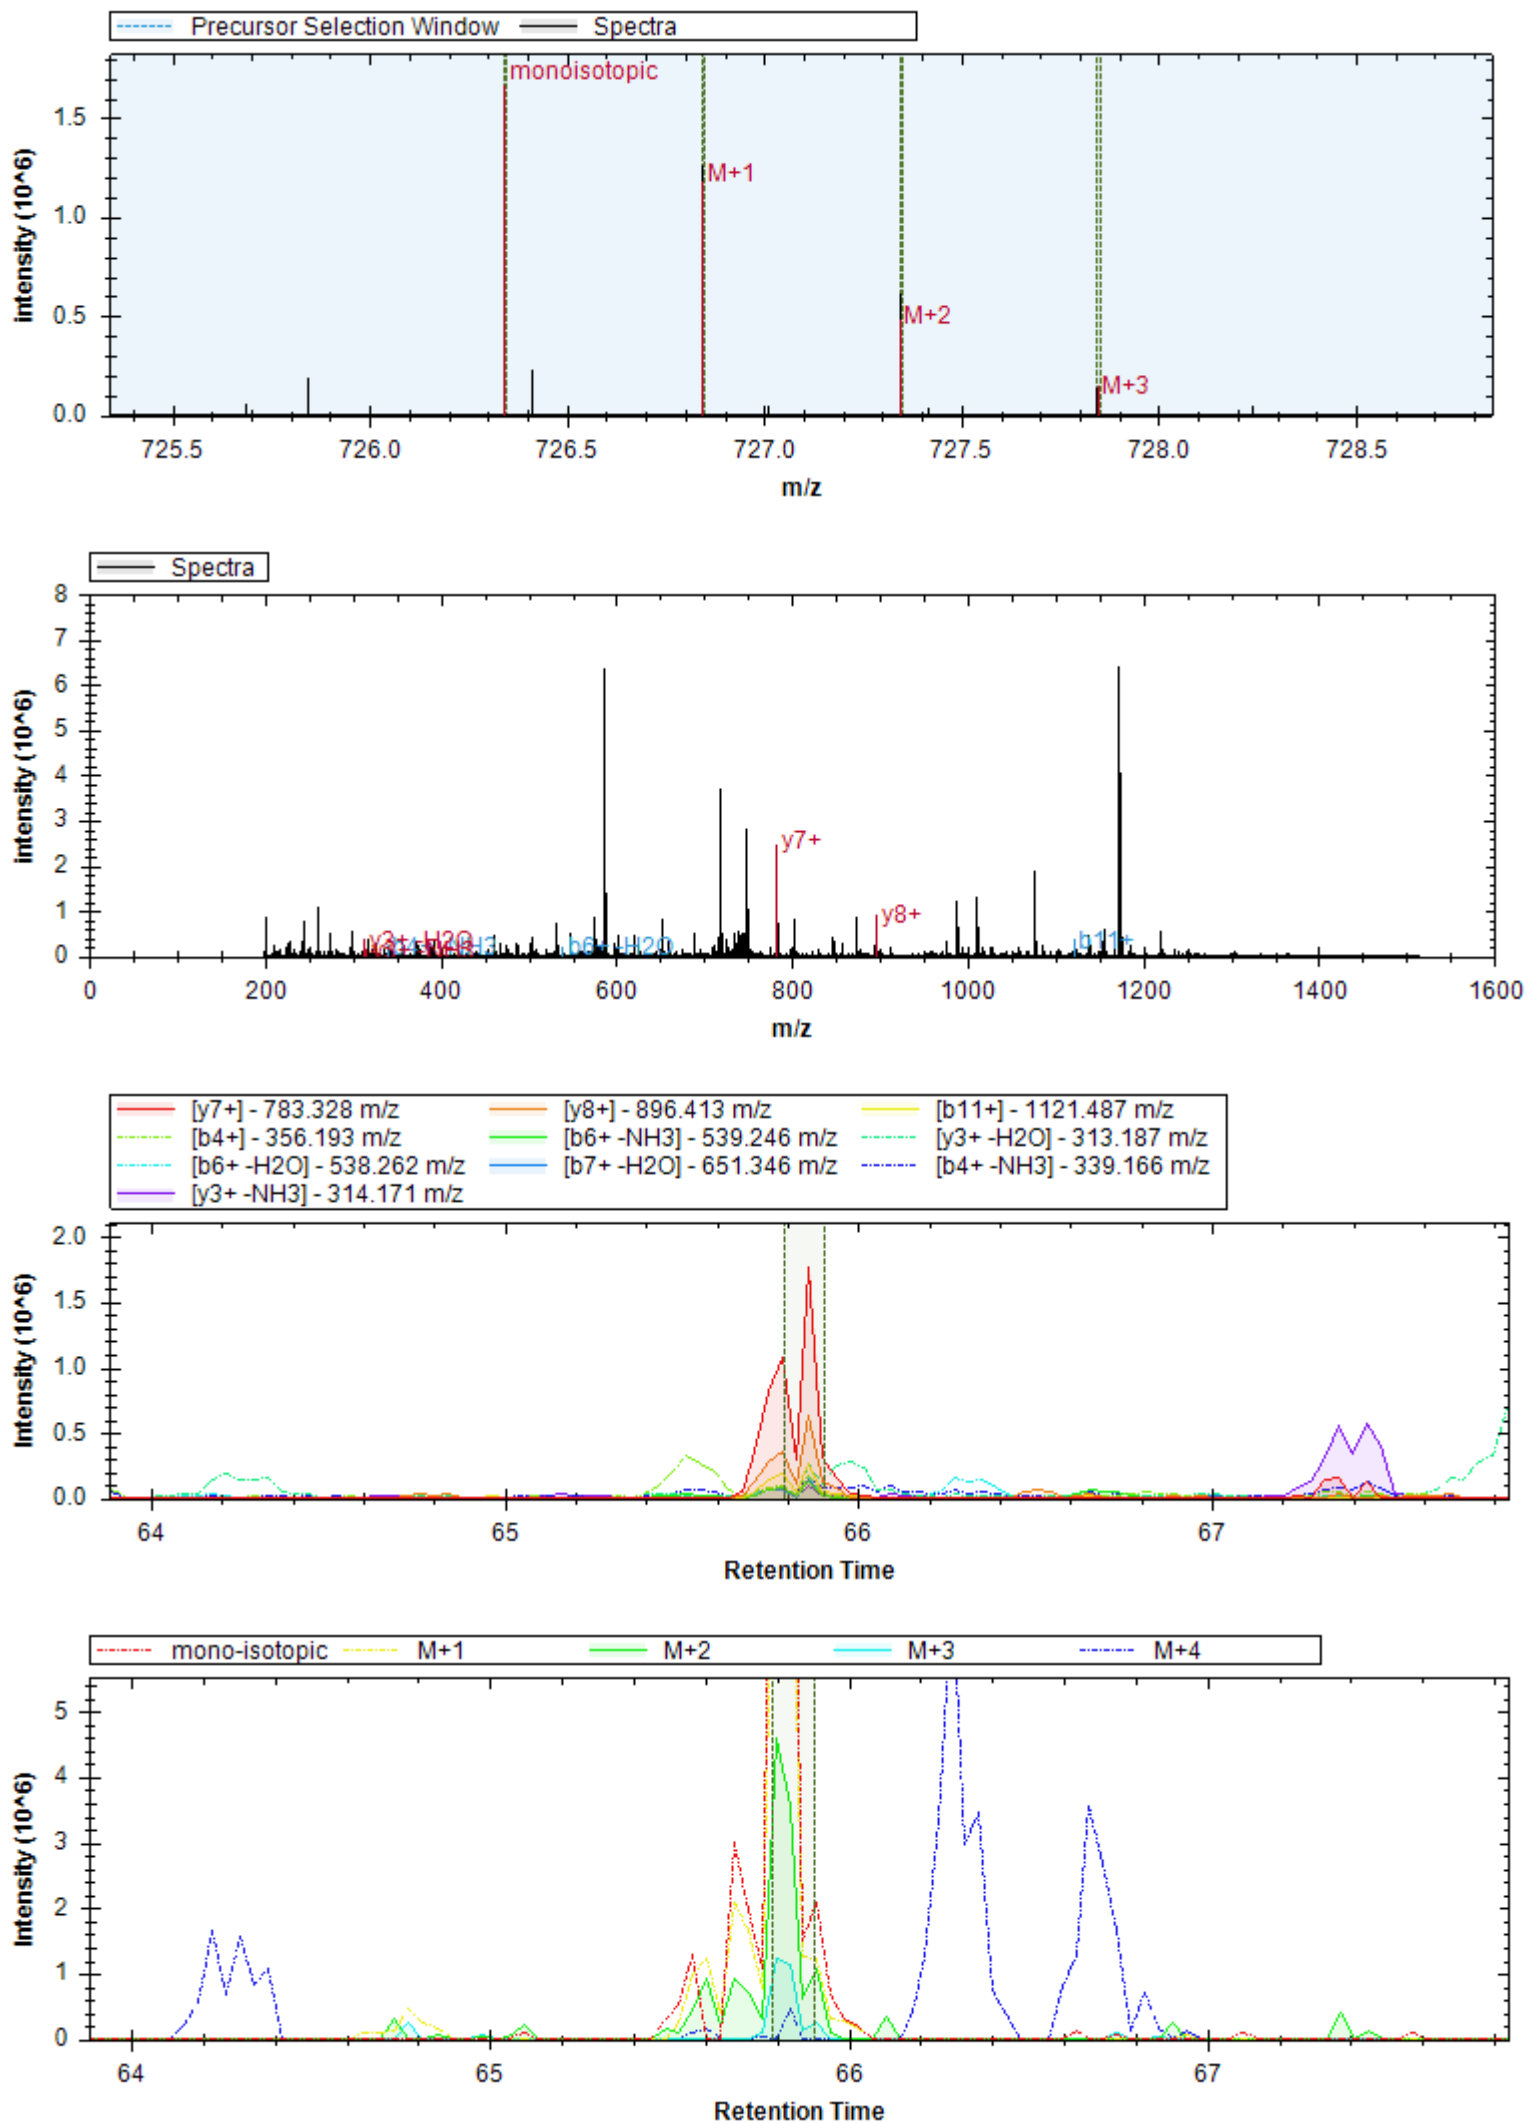

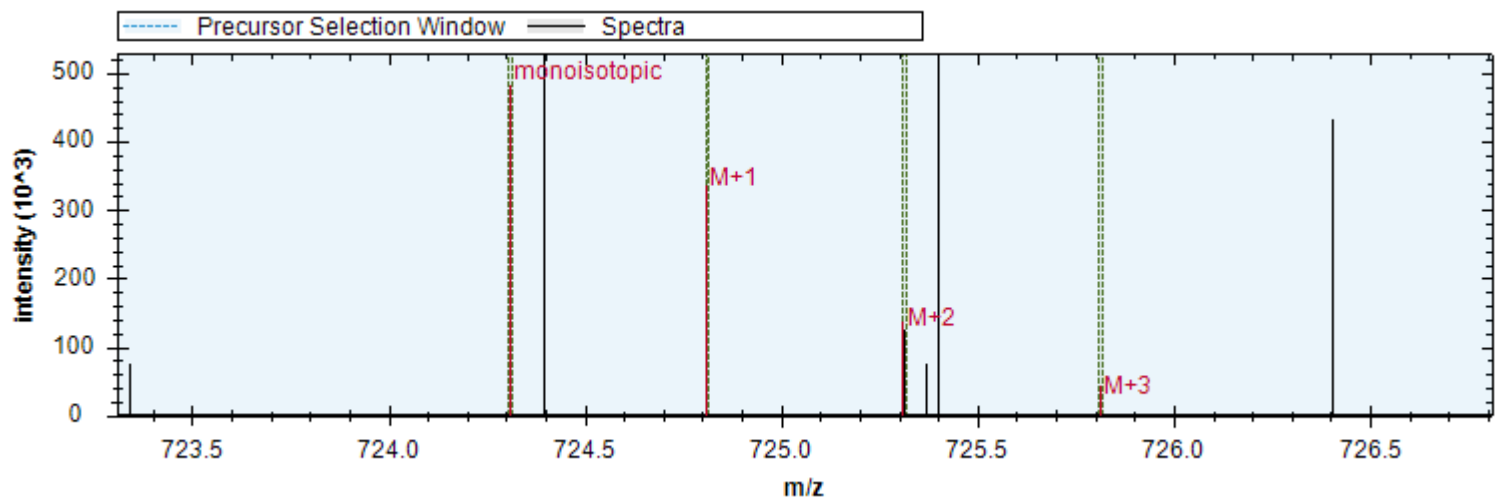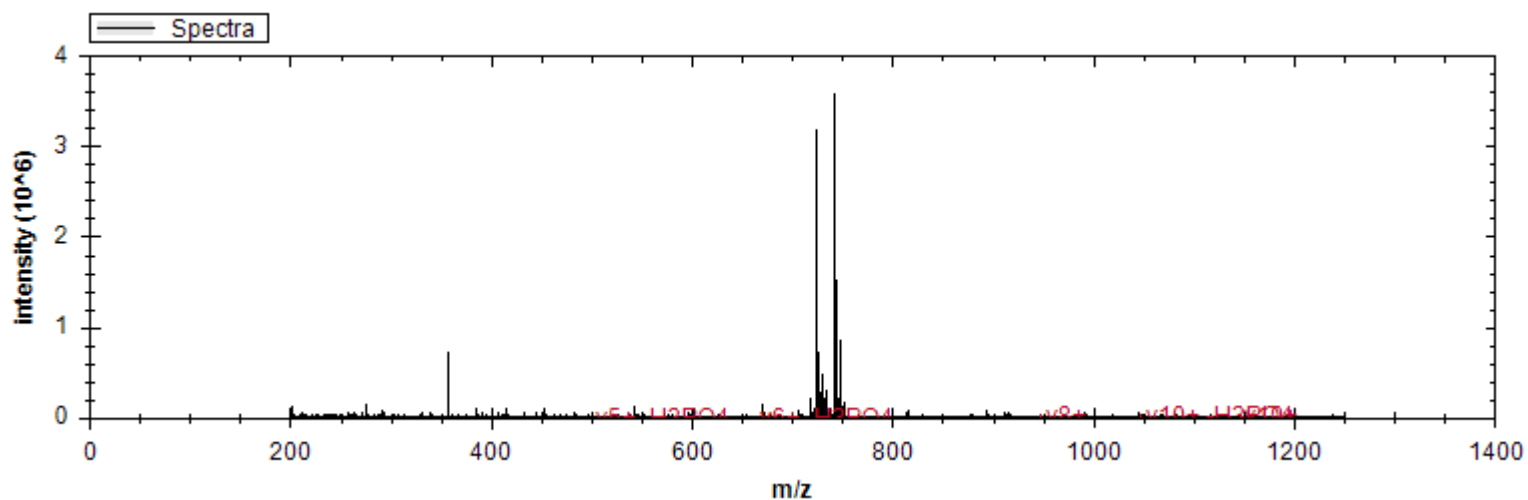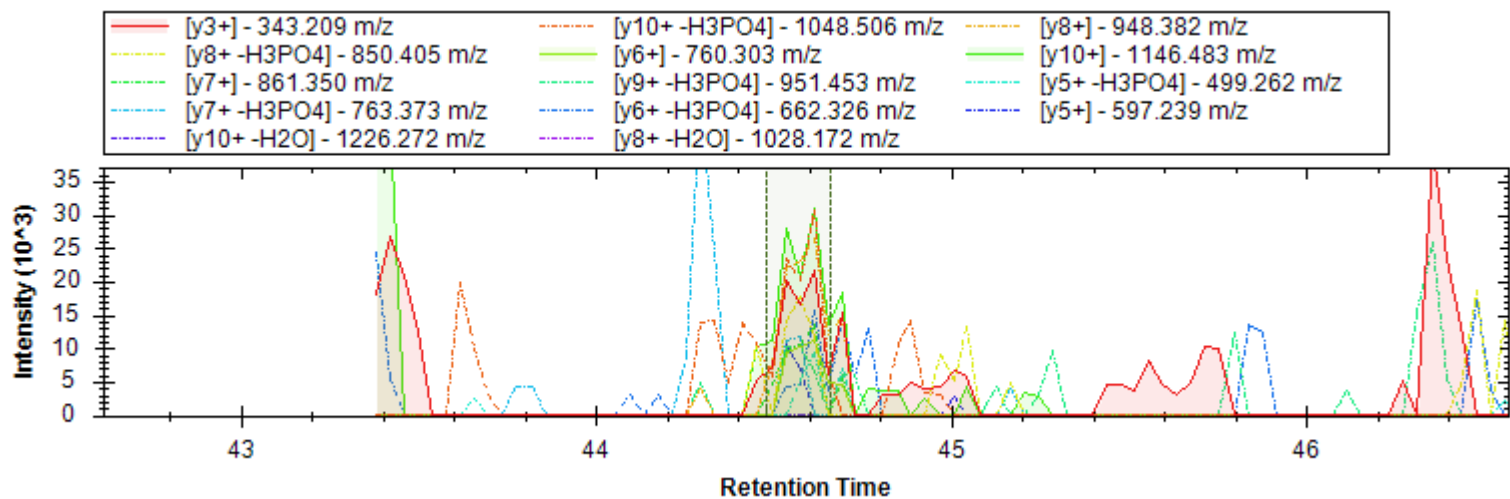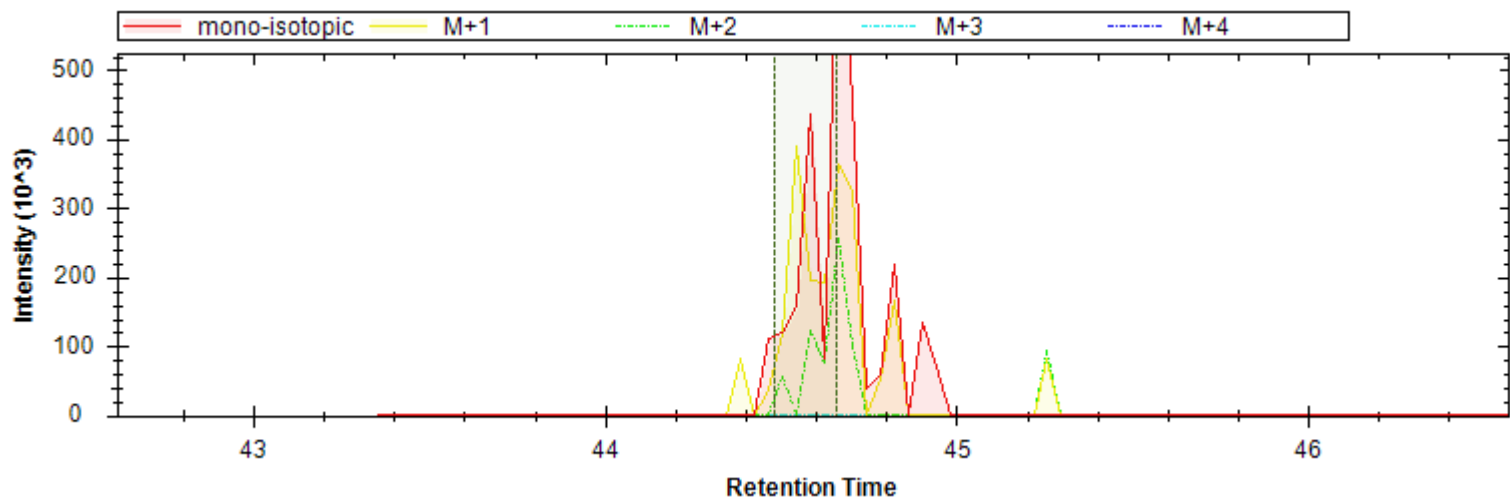

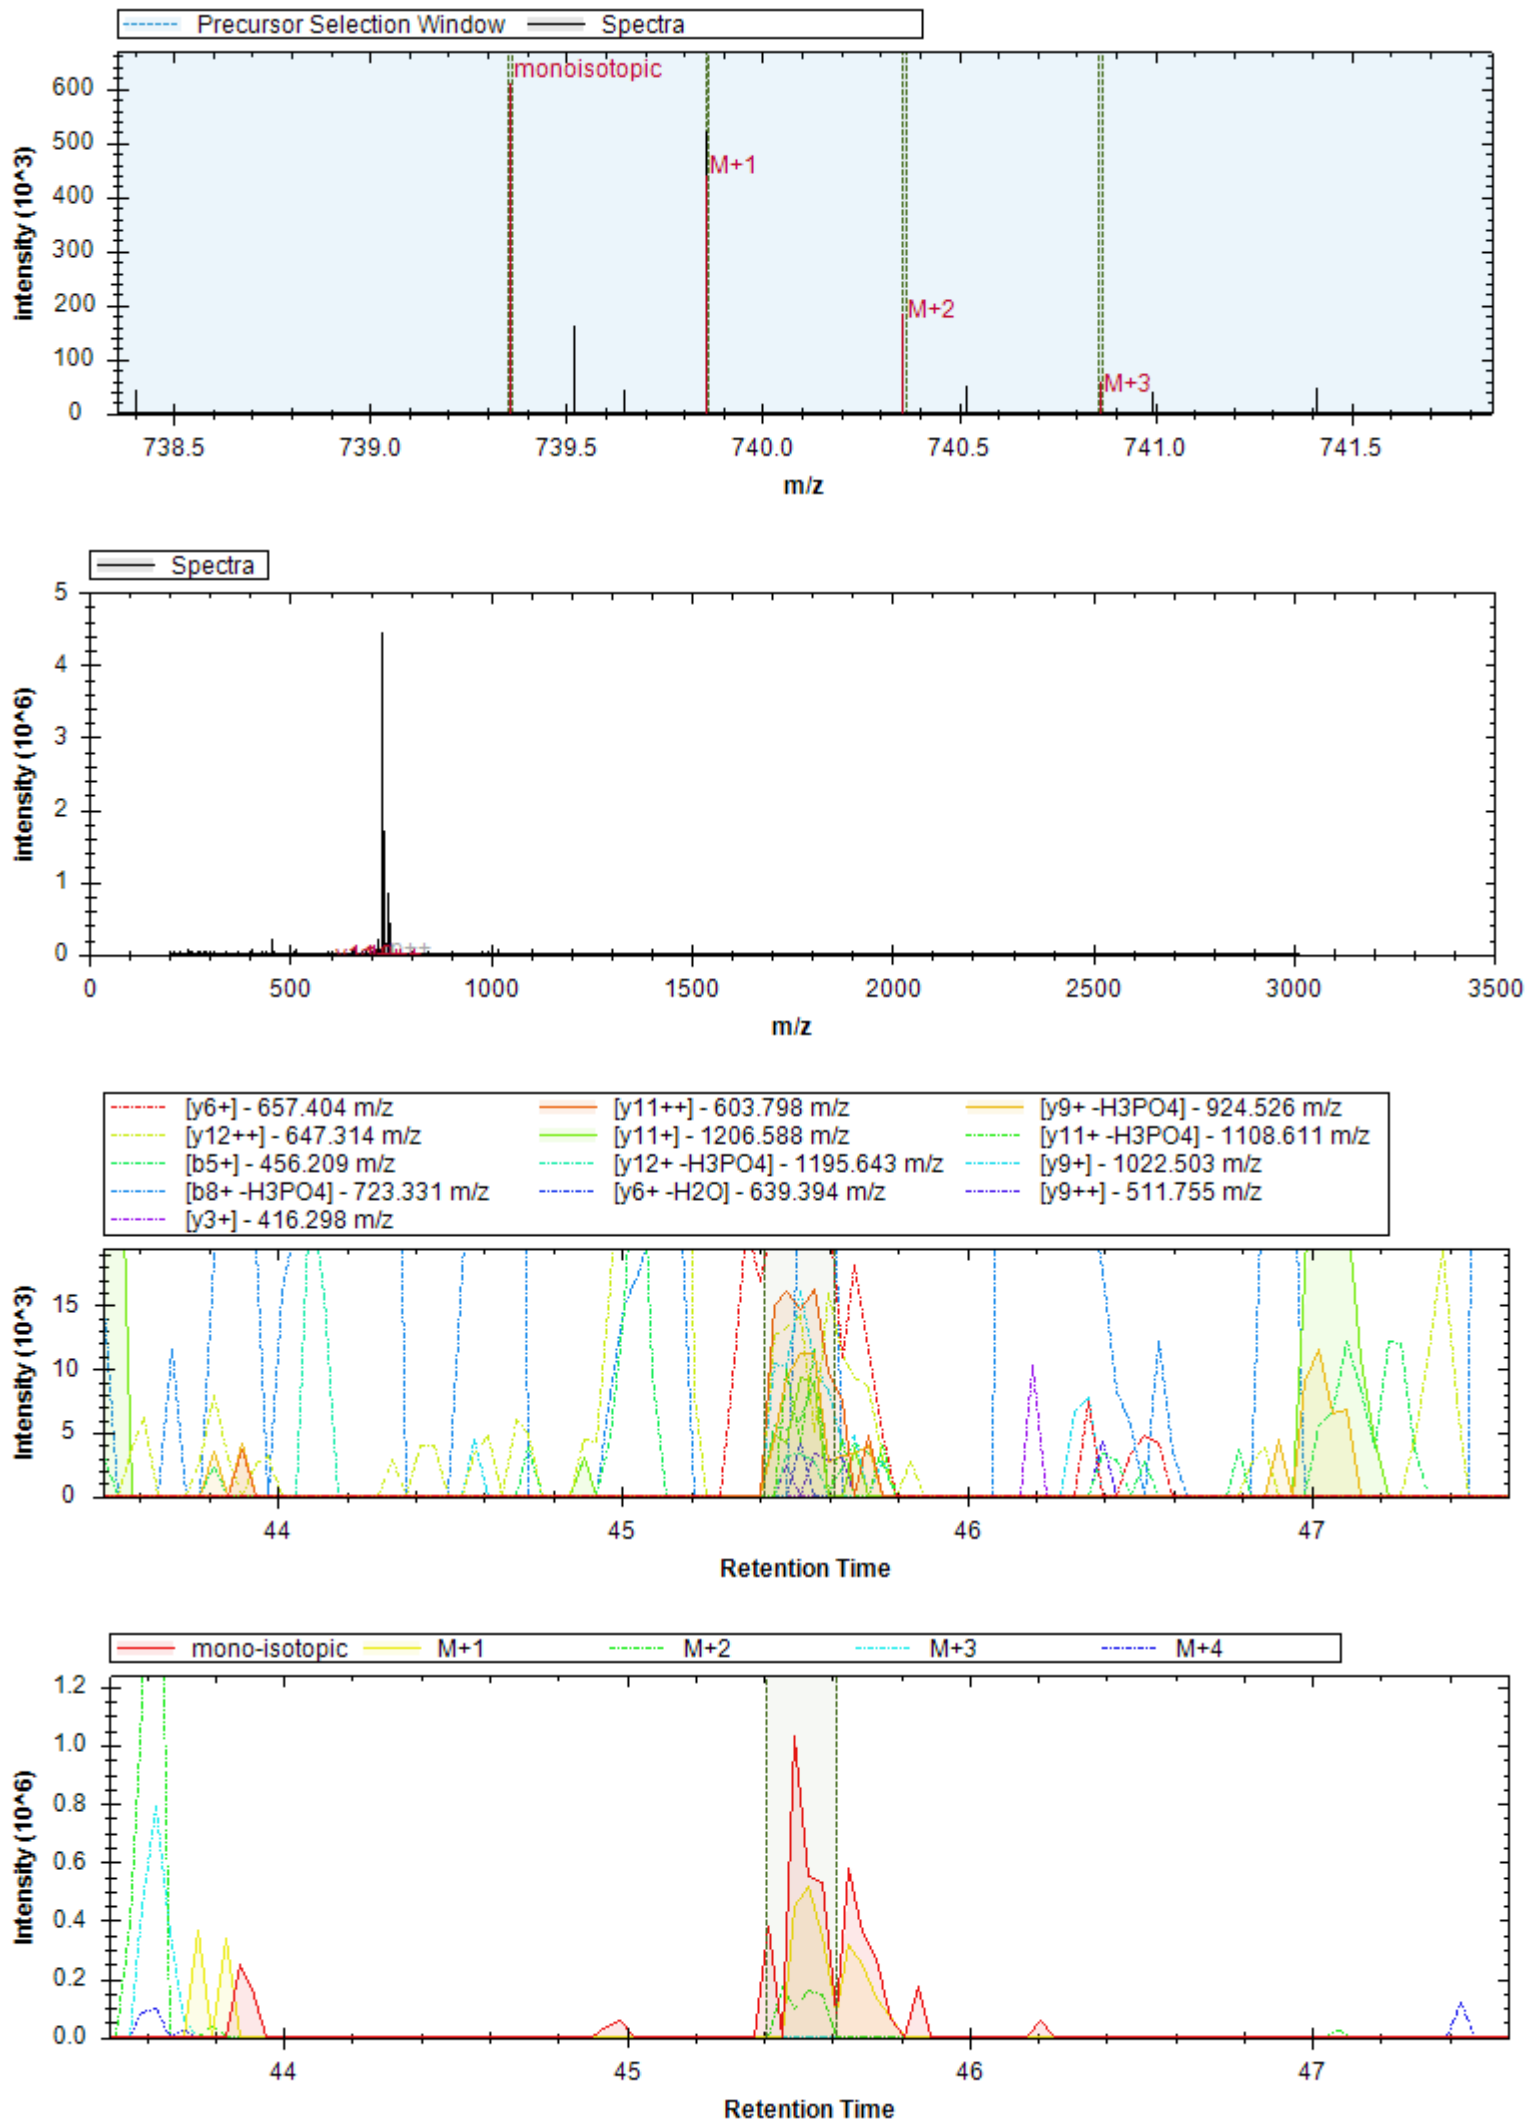

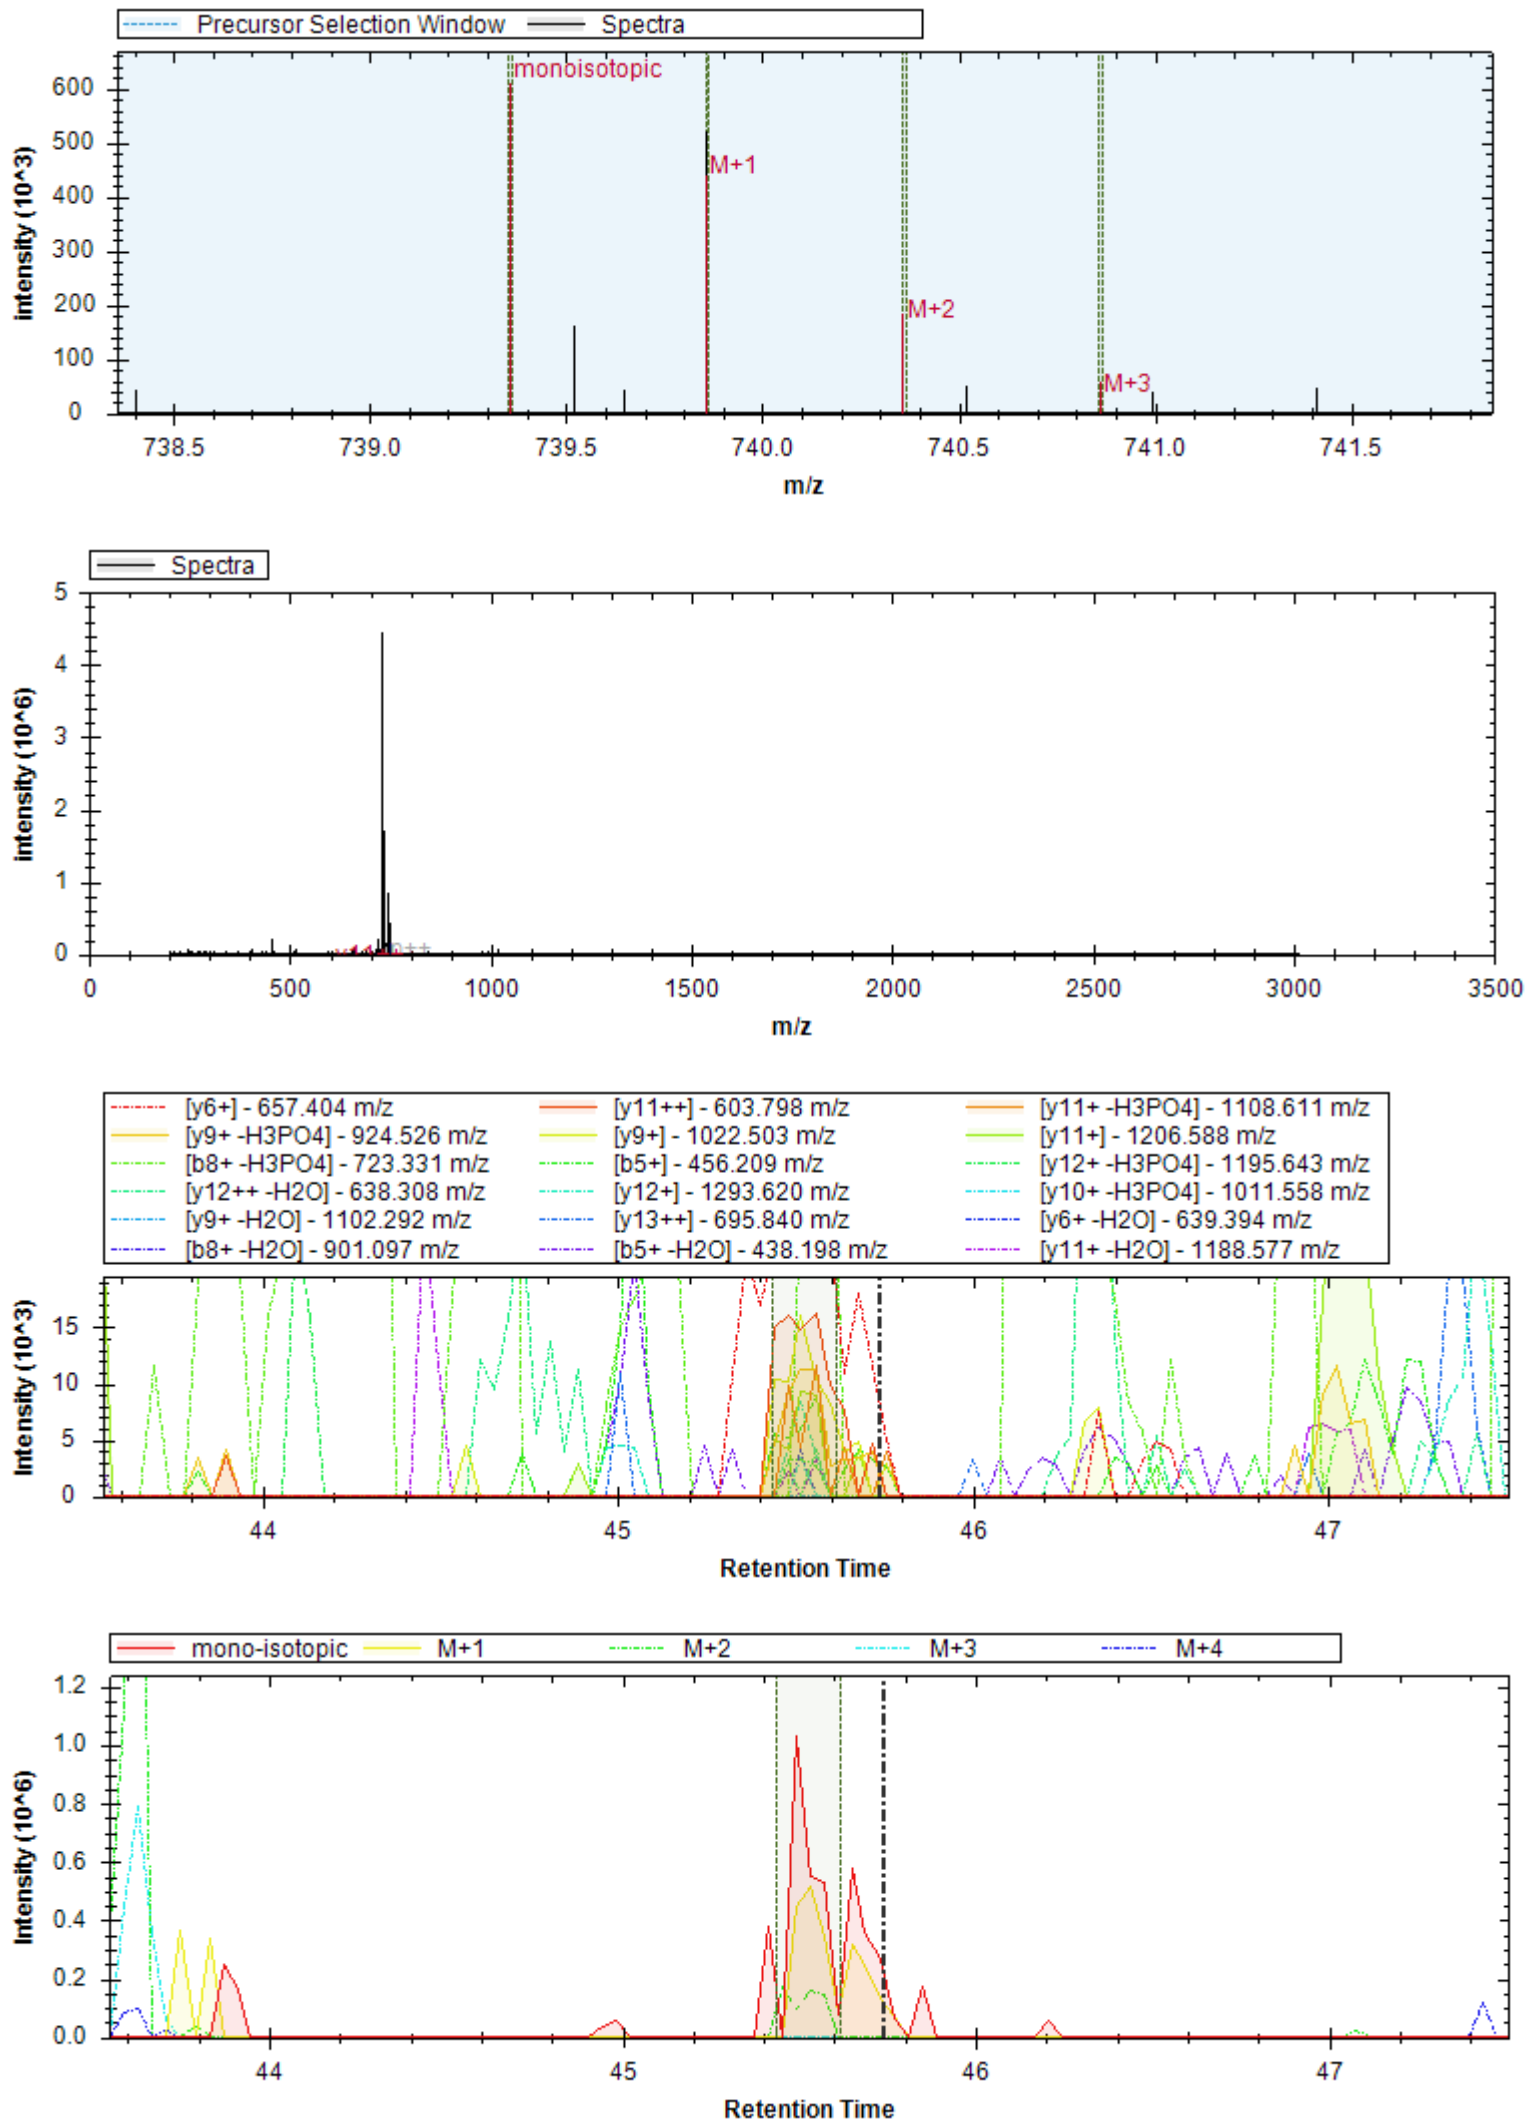

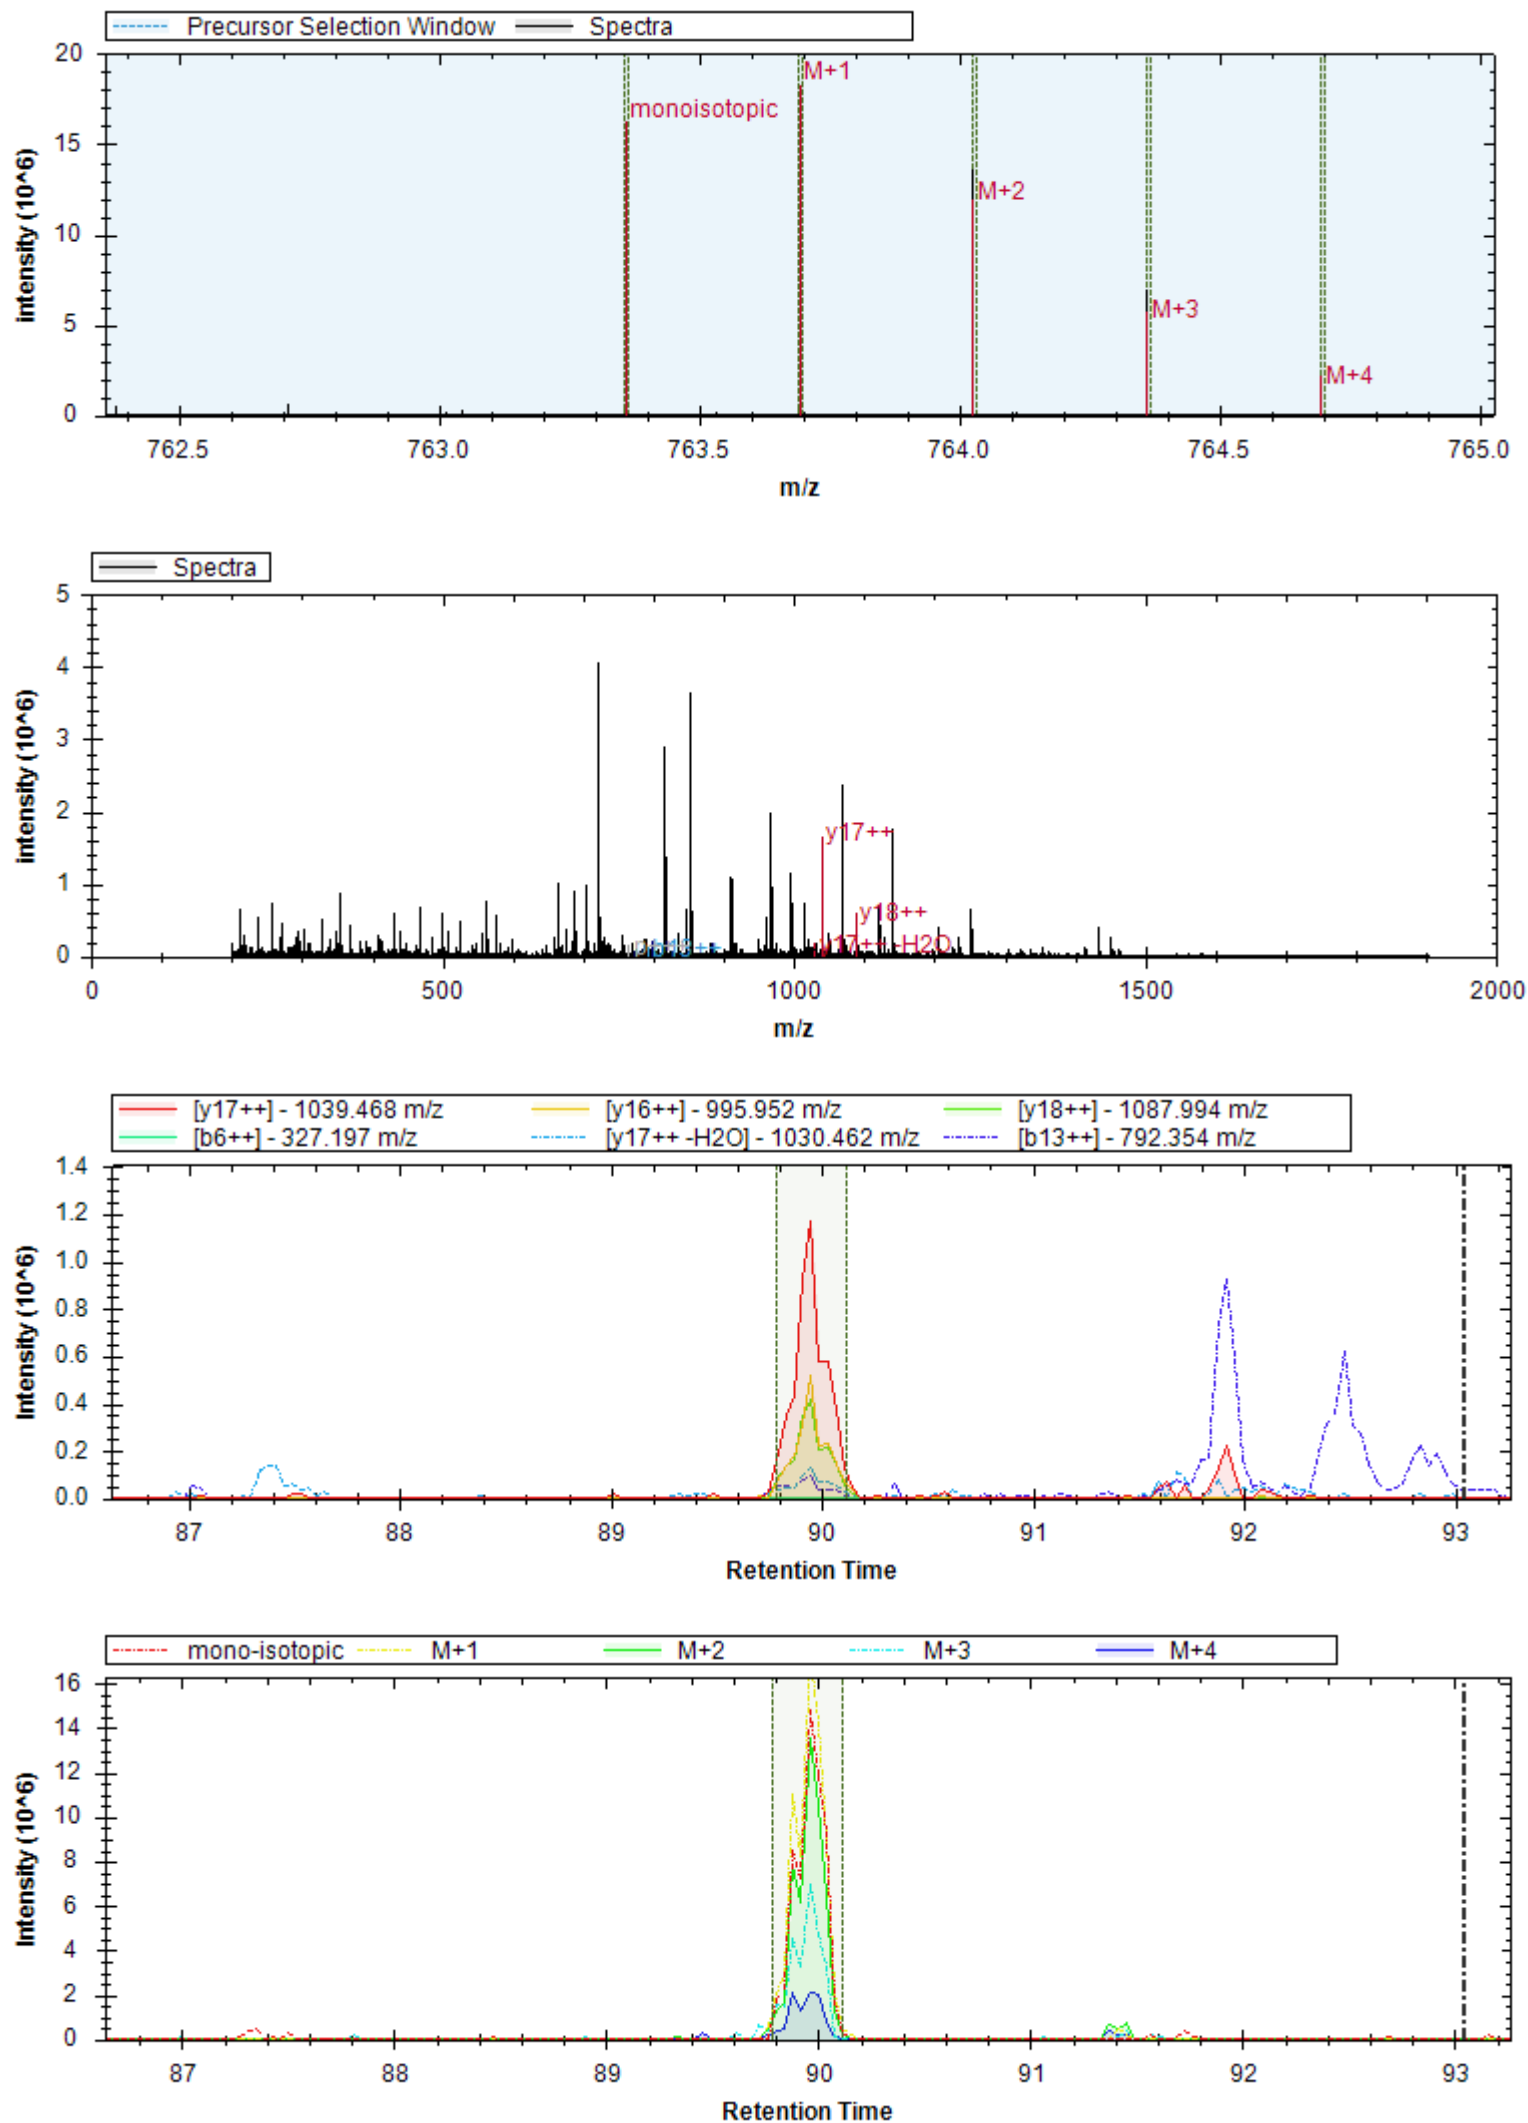



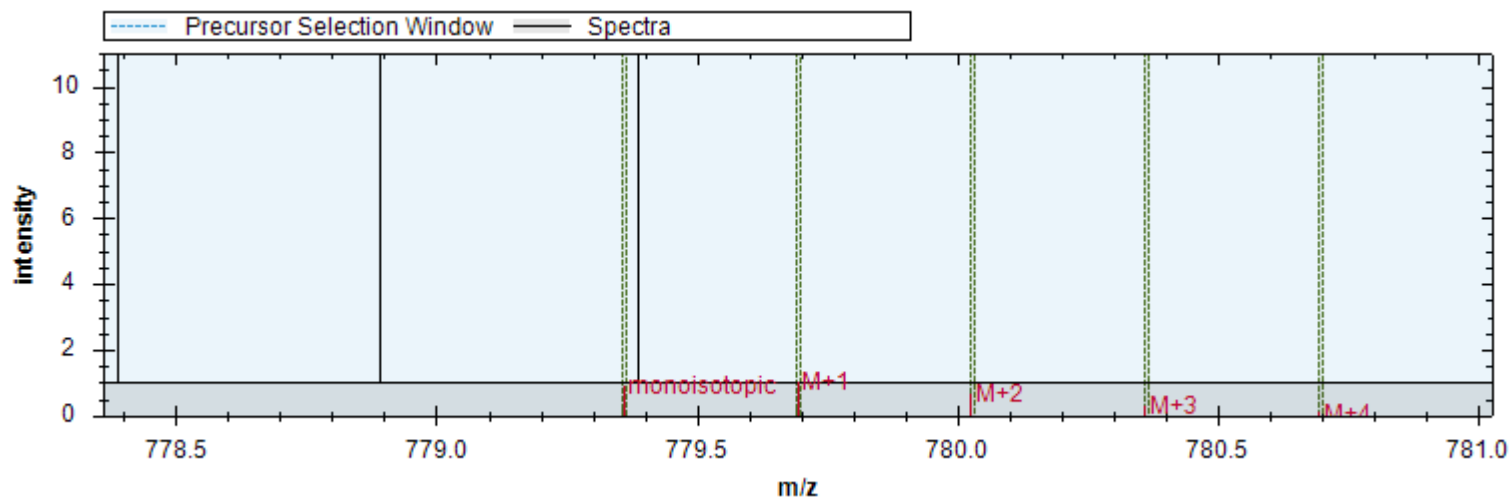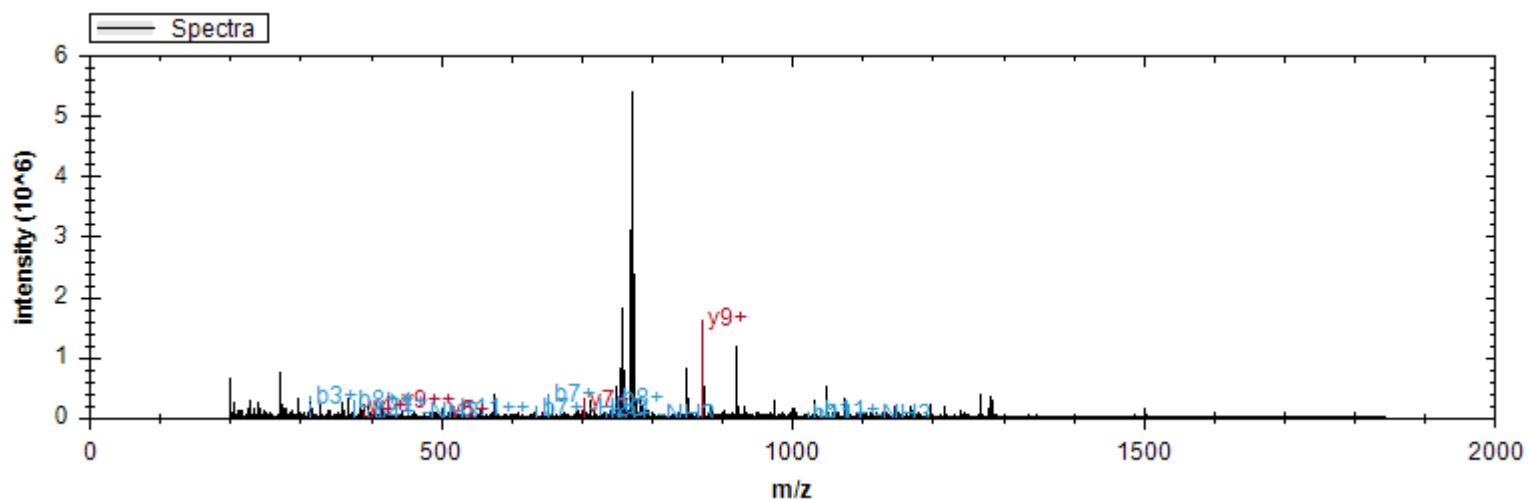

|                          |                          |                            |
|--------------------------|--------------------------|----------------------------|
| [y9+] - 873.431 m/z      | [b7+] - 653.325 m/z      | [b11+] - 1039.505 m/z      |
| [b3+] - 315.130 m/z      | [b8++] - 376.701 m/z     | [y7+] - 705.341 m/z        |
| [b4+] - 414.198 m/z      | [b11++] - 520.256 m/z    | [b7+ -H2O] - 635.315 m/z   |
| [b8+] - 752.394 m/z      | [b4+ -H2O] - 396.188 m/z | [y8+] - 776.379 m/z        |
| [y4+] - 390.235 m/z      | [y11+] - 1155.493 m/z    | [y9++] - 437.219 m/z       |
| [b12+] - 1110.543 m/z    | [y6+] - 634.304 m/z      | [b7+ -NH3] - 636.299 m/z   |
| [y12+] - 1226.530 m/z    | [b5+] - 511.251 m/z      | [b11+ -NH3] - 1022.479 m/z |
| [b4+ -NH3] - 397.172 m/z | [b13+] - 1181.580 m/z    | [b8+ -NH3] - 735.367 m/z   |
| [y5+] - 505.262 m/z      |                          |                            |

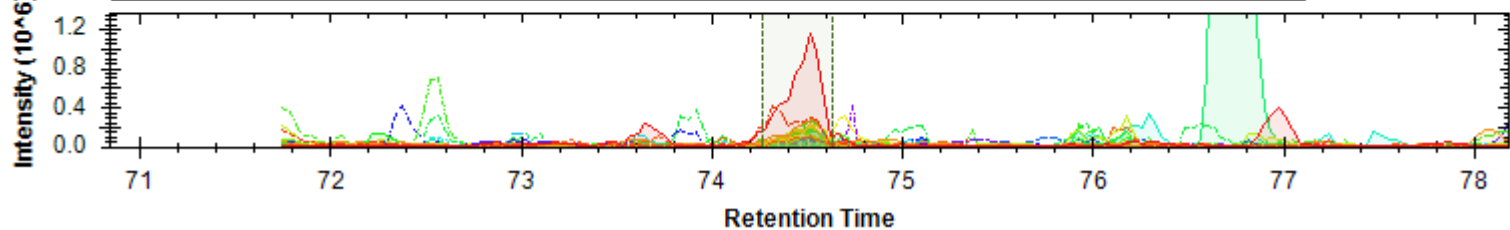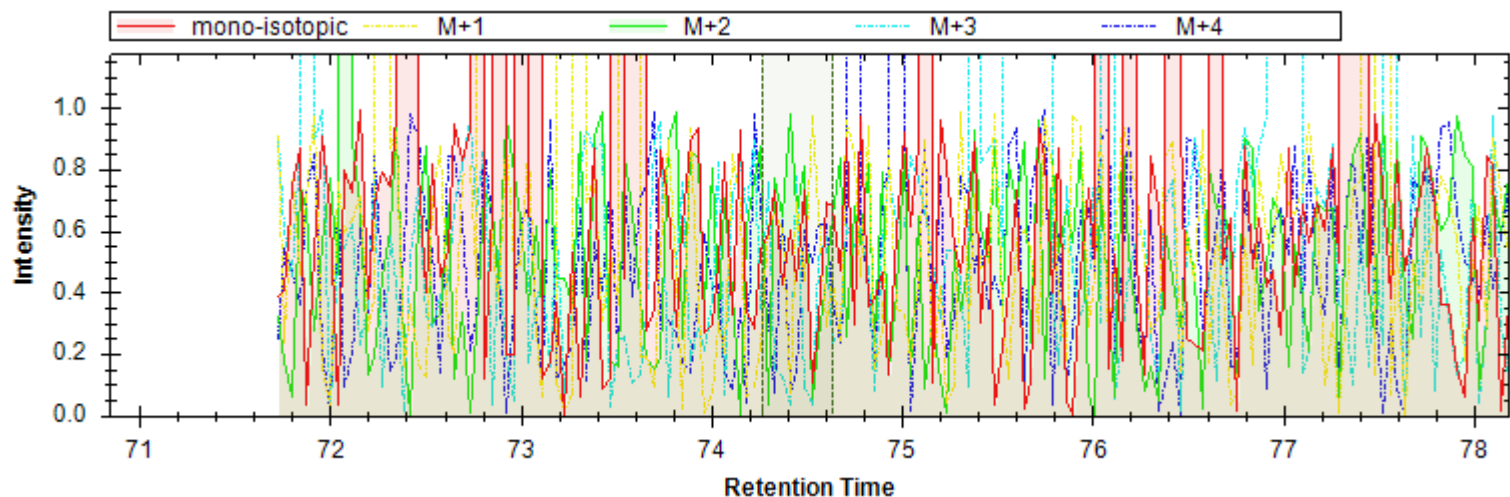

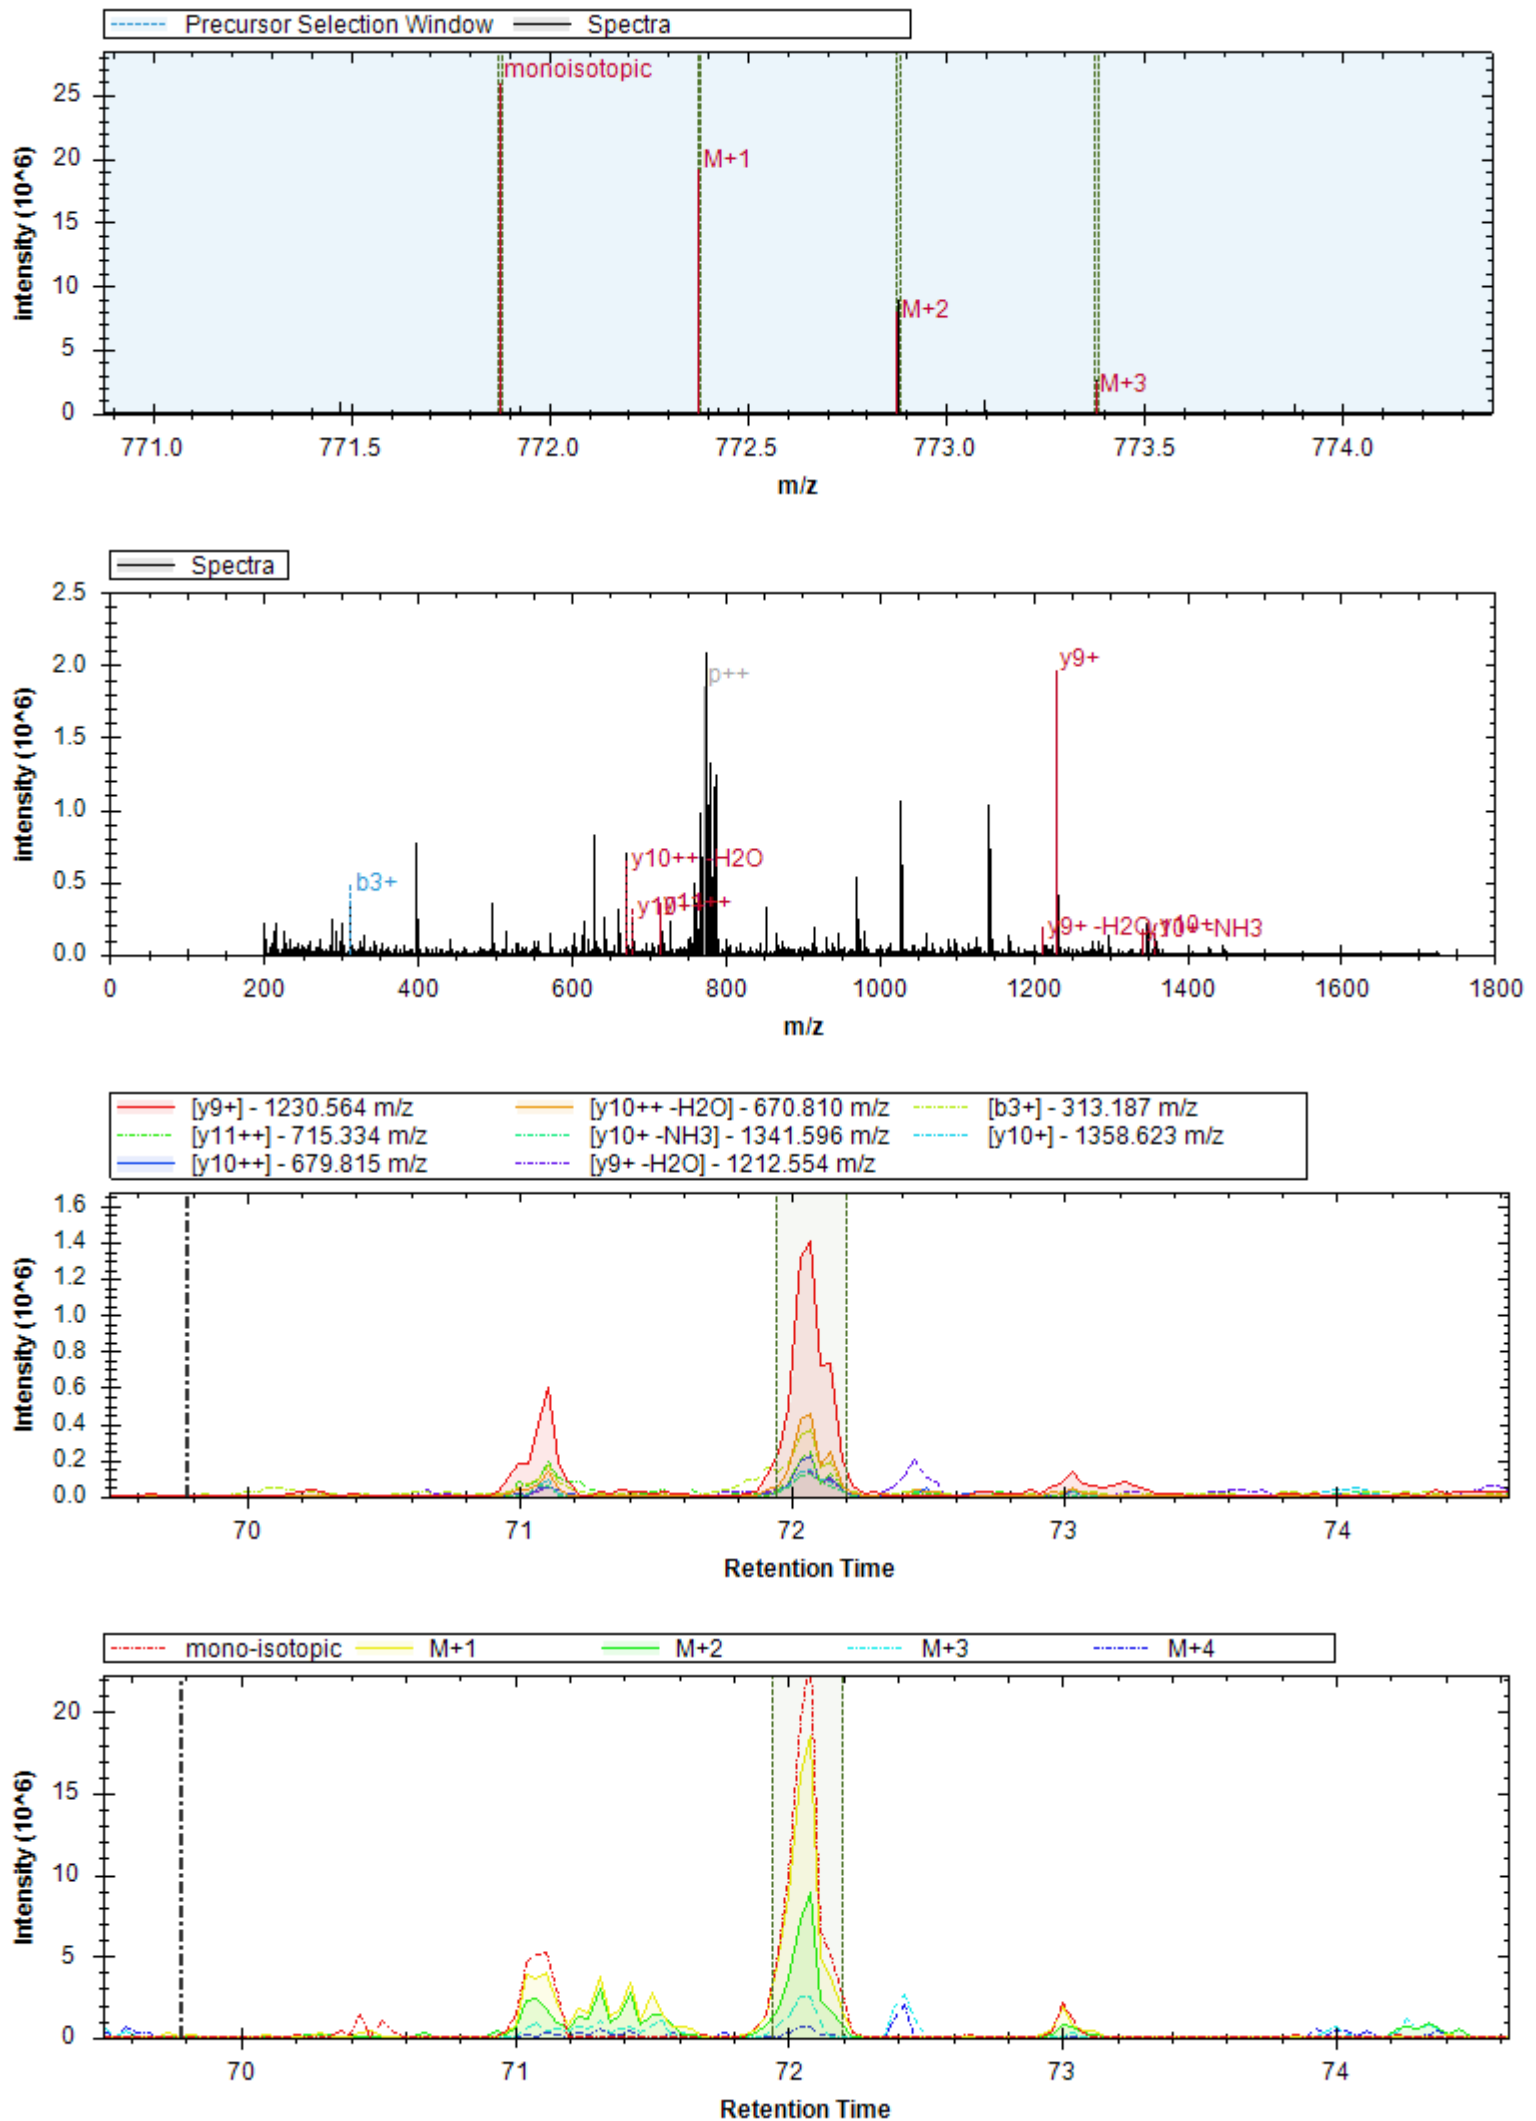

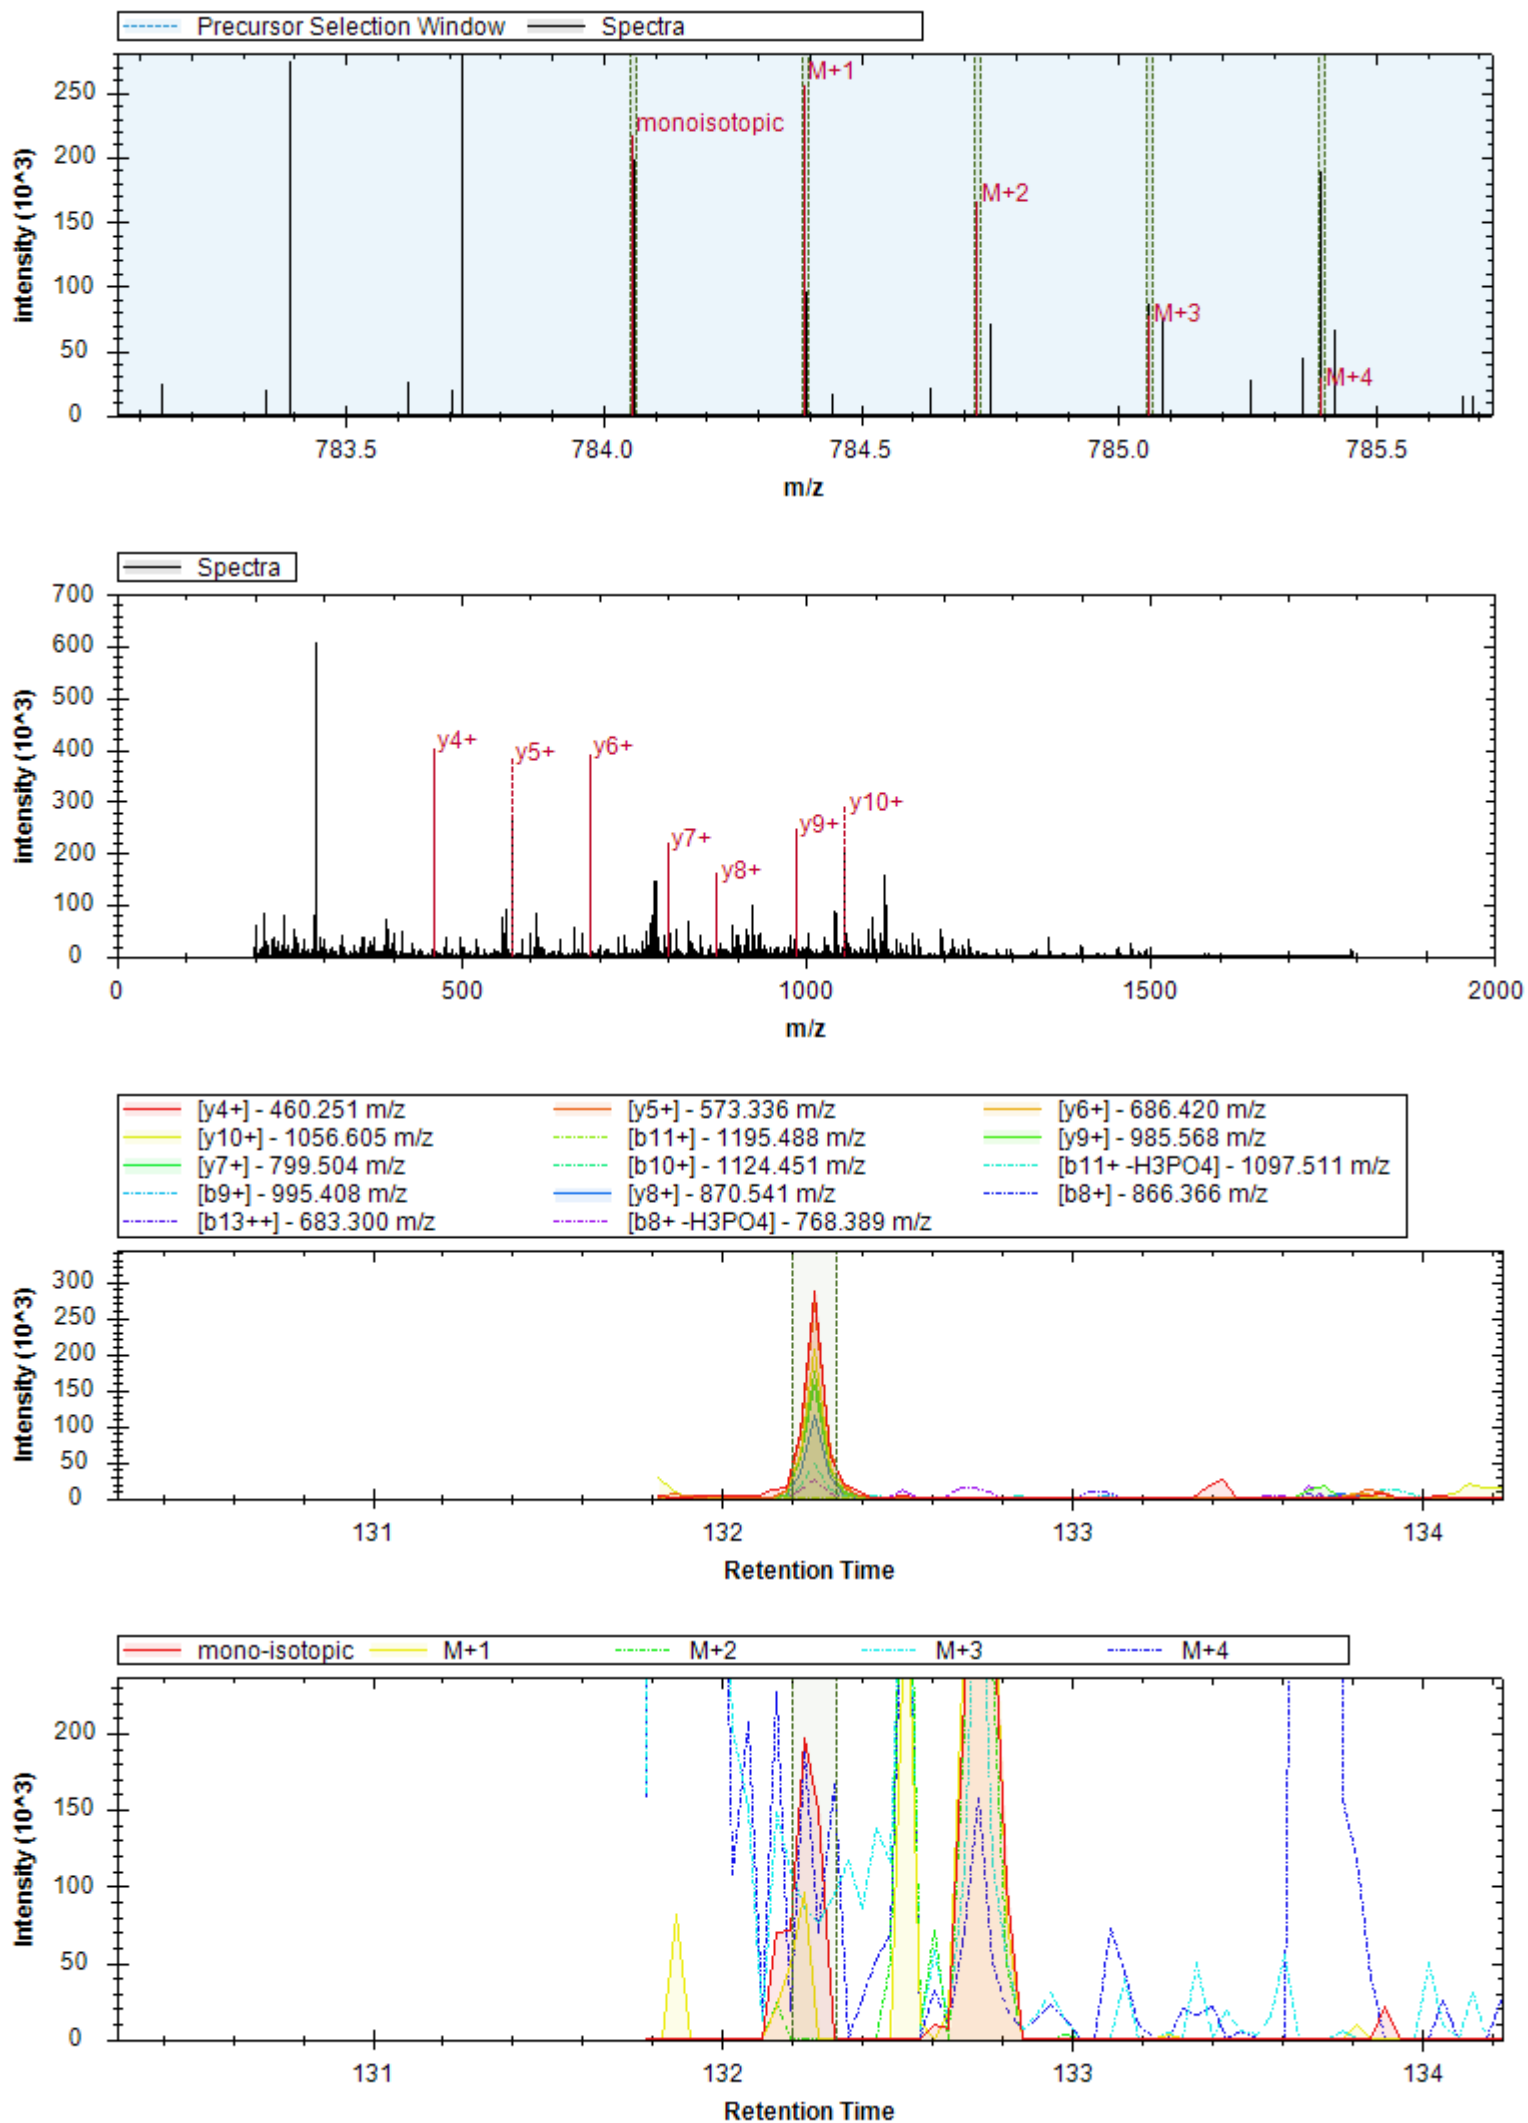

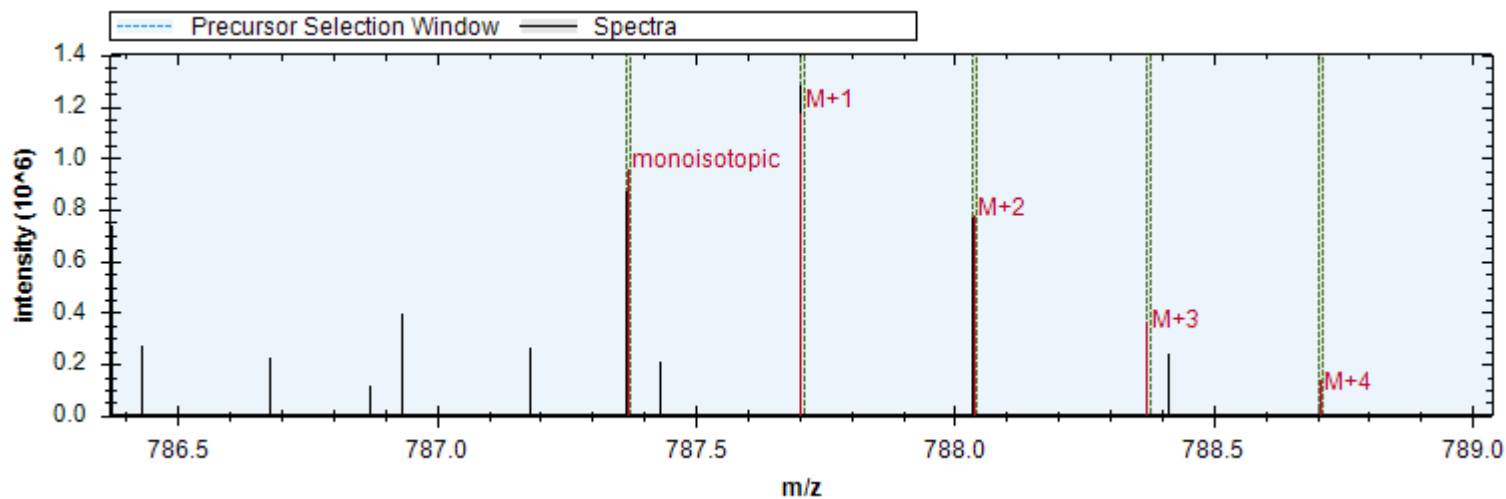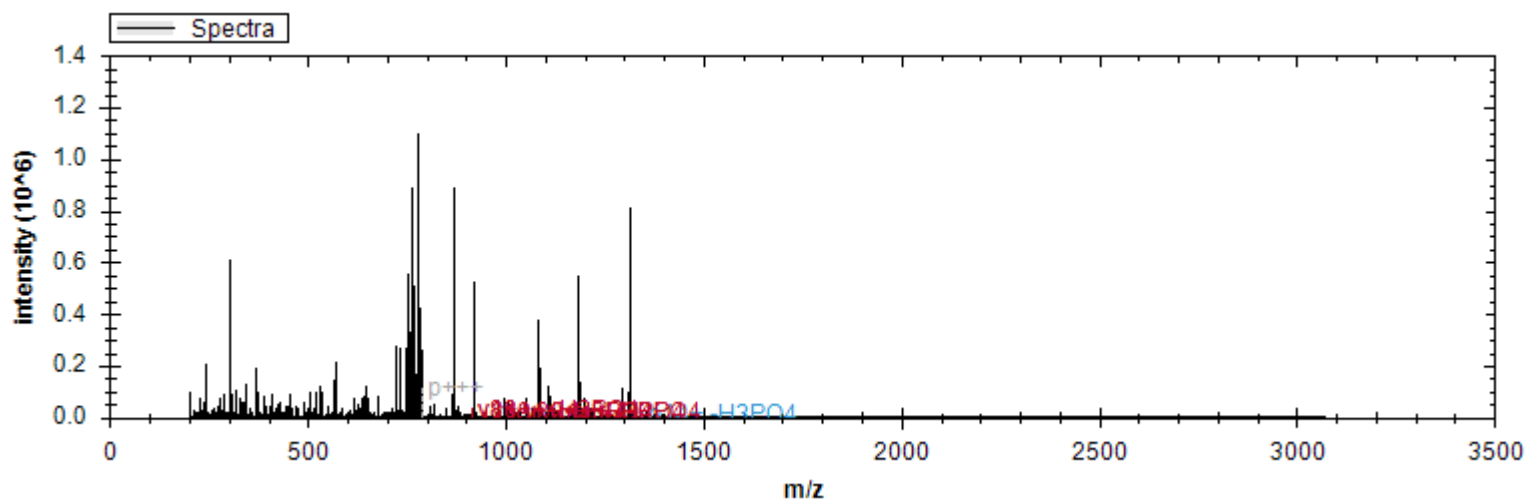

|                              |                               |                               |
|------------------------------|-------------------------------|-------------------------------|
| [y18++ -H3PO4] - 914.454 m/z | [y19++ -H3PO4] - 949.972 m/z  | [y20++ -H3PO4] - 1031.504 m/z |
| [y5+] - 583.295 m/z          | [y21++ -H3PO4] - 1075.020 m/z | [b3+ -H2O] - 346.176 m/z      |
| [b14+ -H3PO4] - 1346.649 m/z | [y6+] - 720.354 m/z           | [y4+] - 446.236 m/z           |
| [b3+] - 364.187 m/z          | [y8+] - 916.475 m/z           | [y6++] - 360.681 m/z          |
| [b7+] - 705.368 m/z          | [y3+] - 375.199 m/z           | [y20++] - 1080.492 m/z        |
| [y17++ -H3PO4] - 885.943 m/z | [y10+ -H3PO4] - 1042.518 m/z  | [b11+] - 1149.569 m/z         |
| [y18++] - 963.442 m/z        | [b12+] - 1220.606 m/z         | [y19++] - 998.961 m/z         |
| [y7+] - 819.422 m/z          | [y21++] - 1124.008 m/z        | [y20+++] - 720.664 m/z        |
| [b13+] - 1277.627 m/z        |                               |                               |

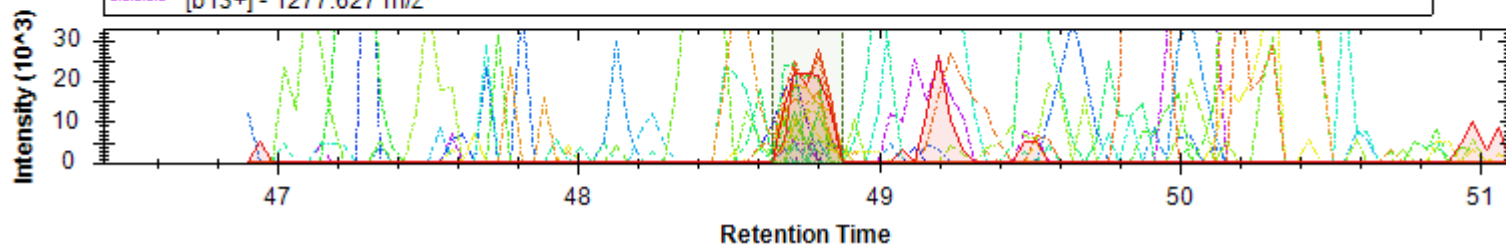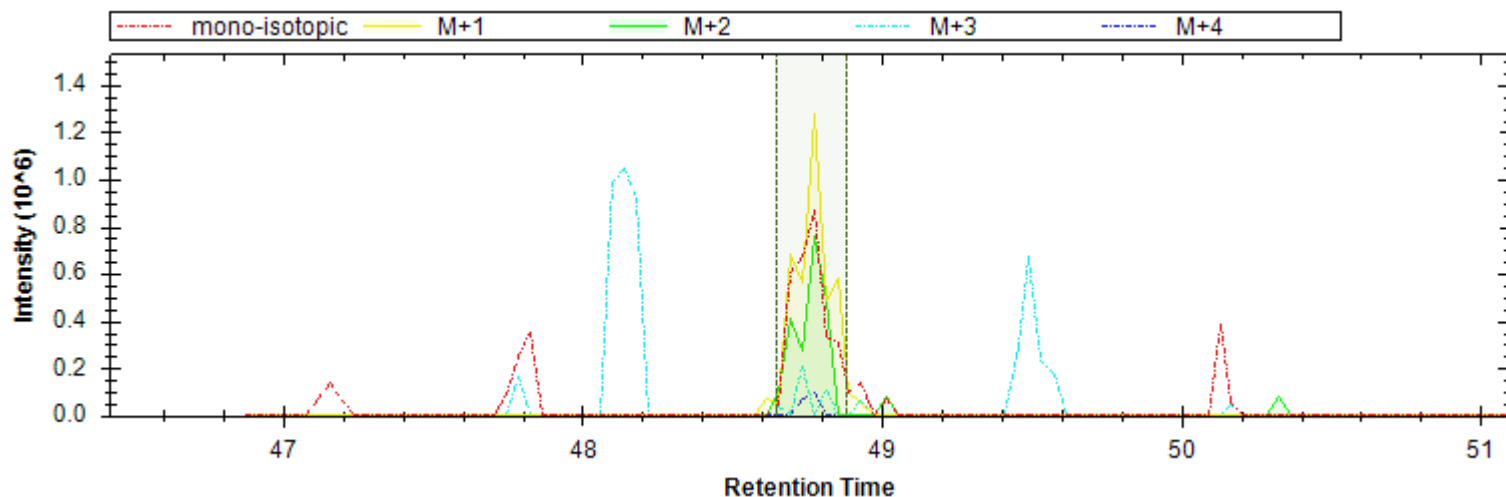

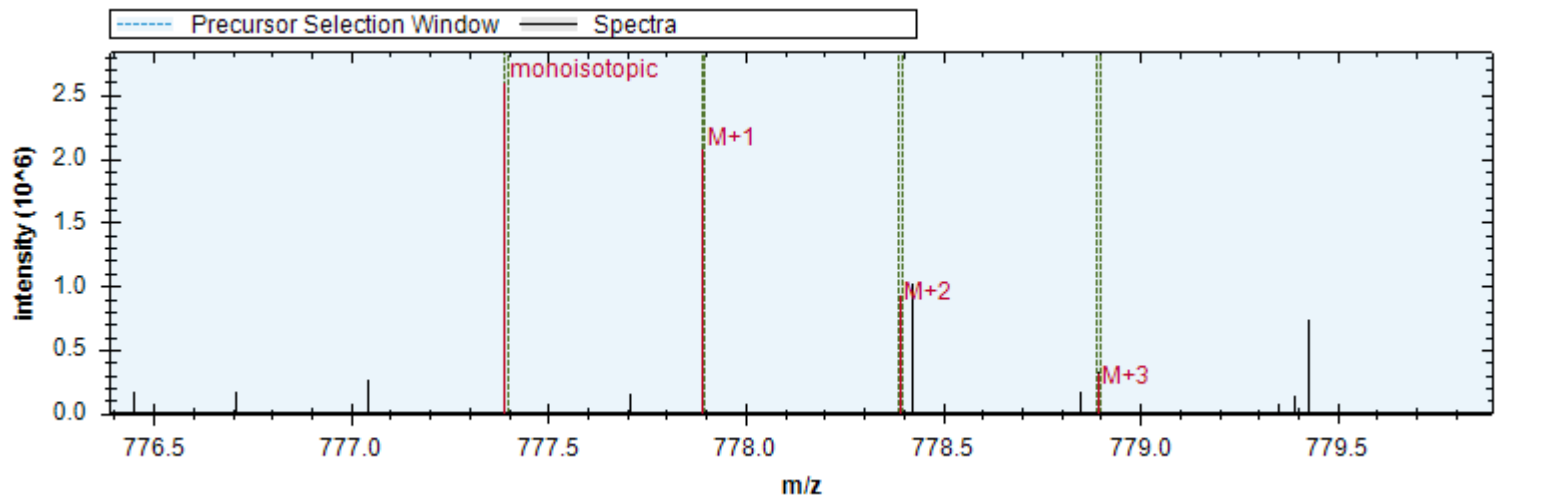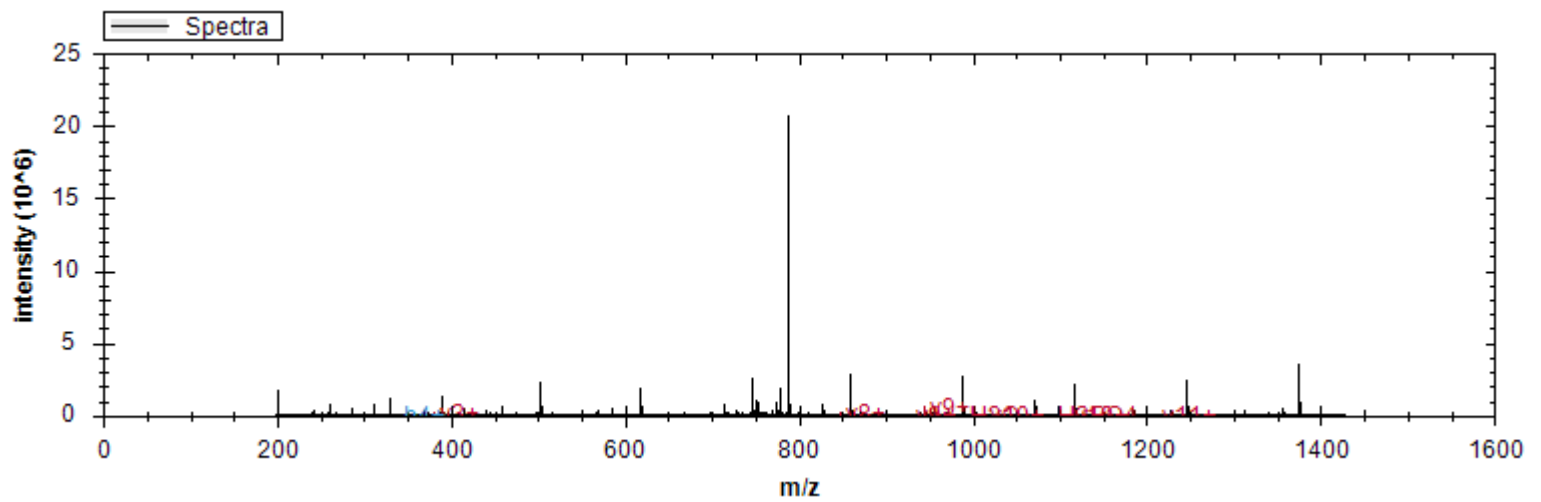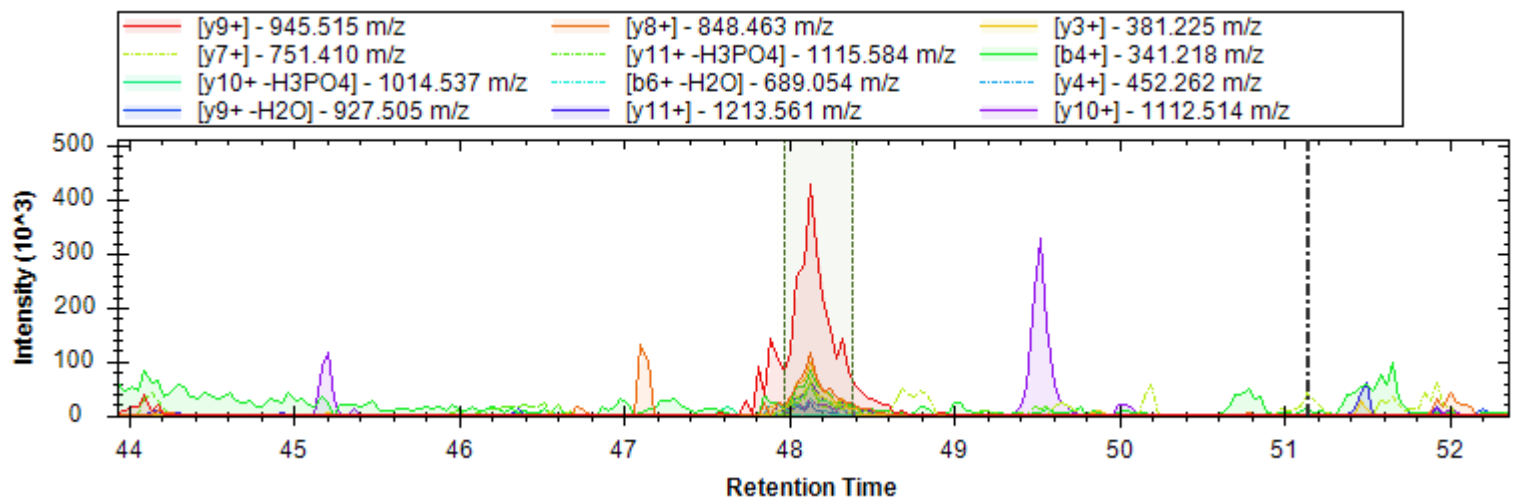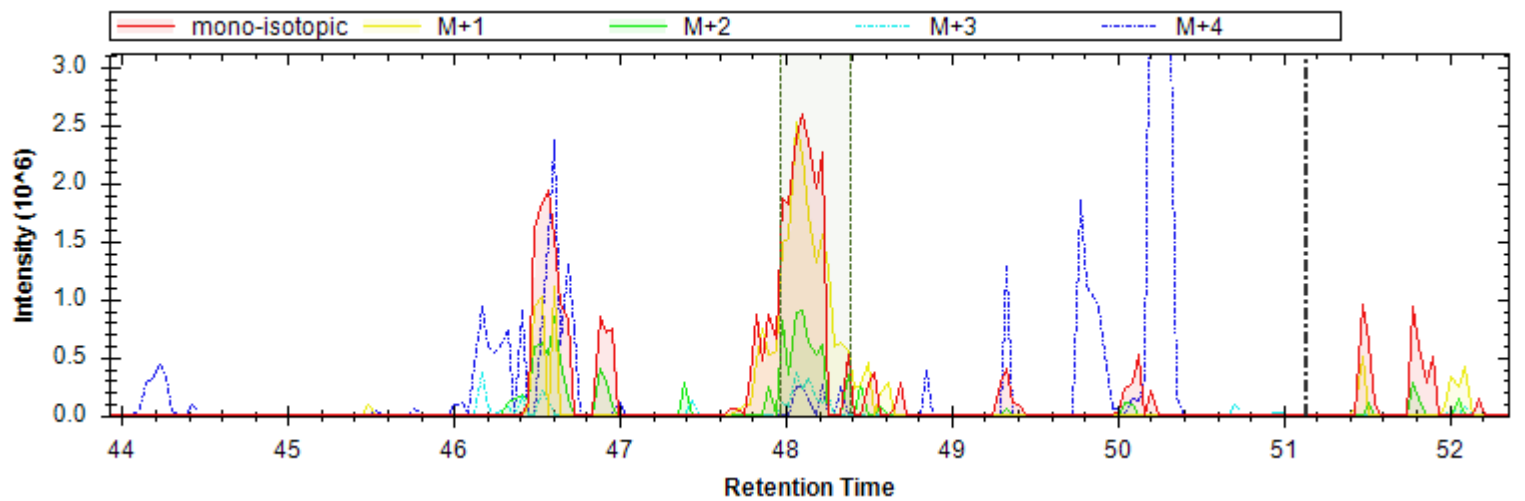

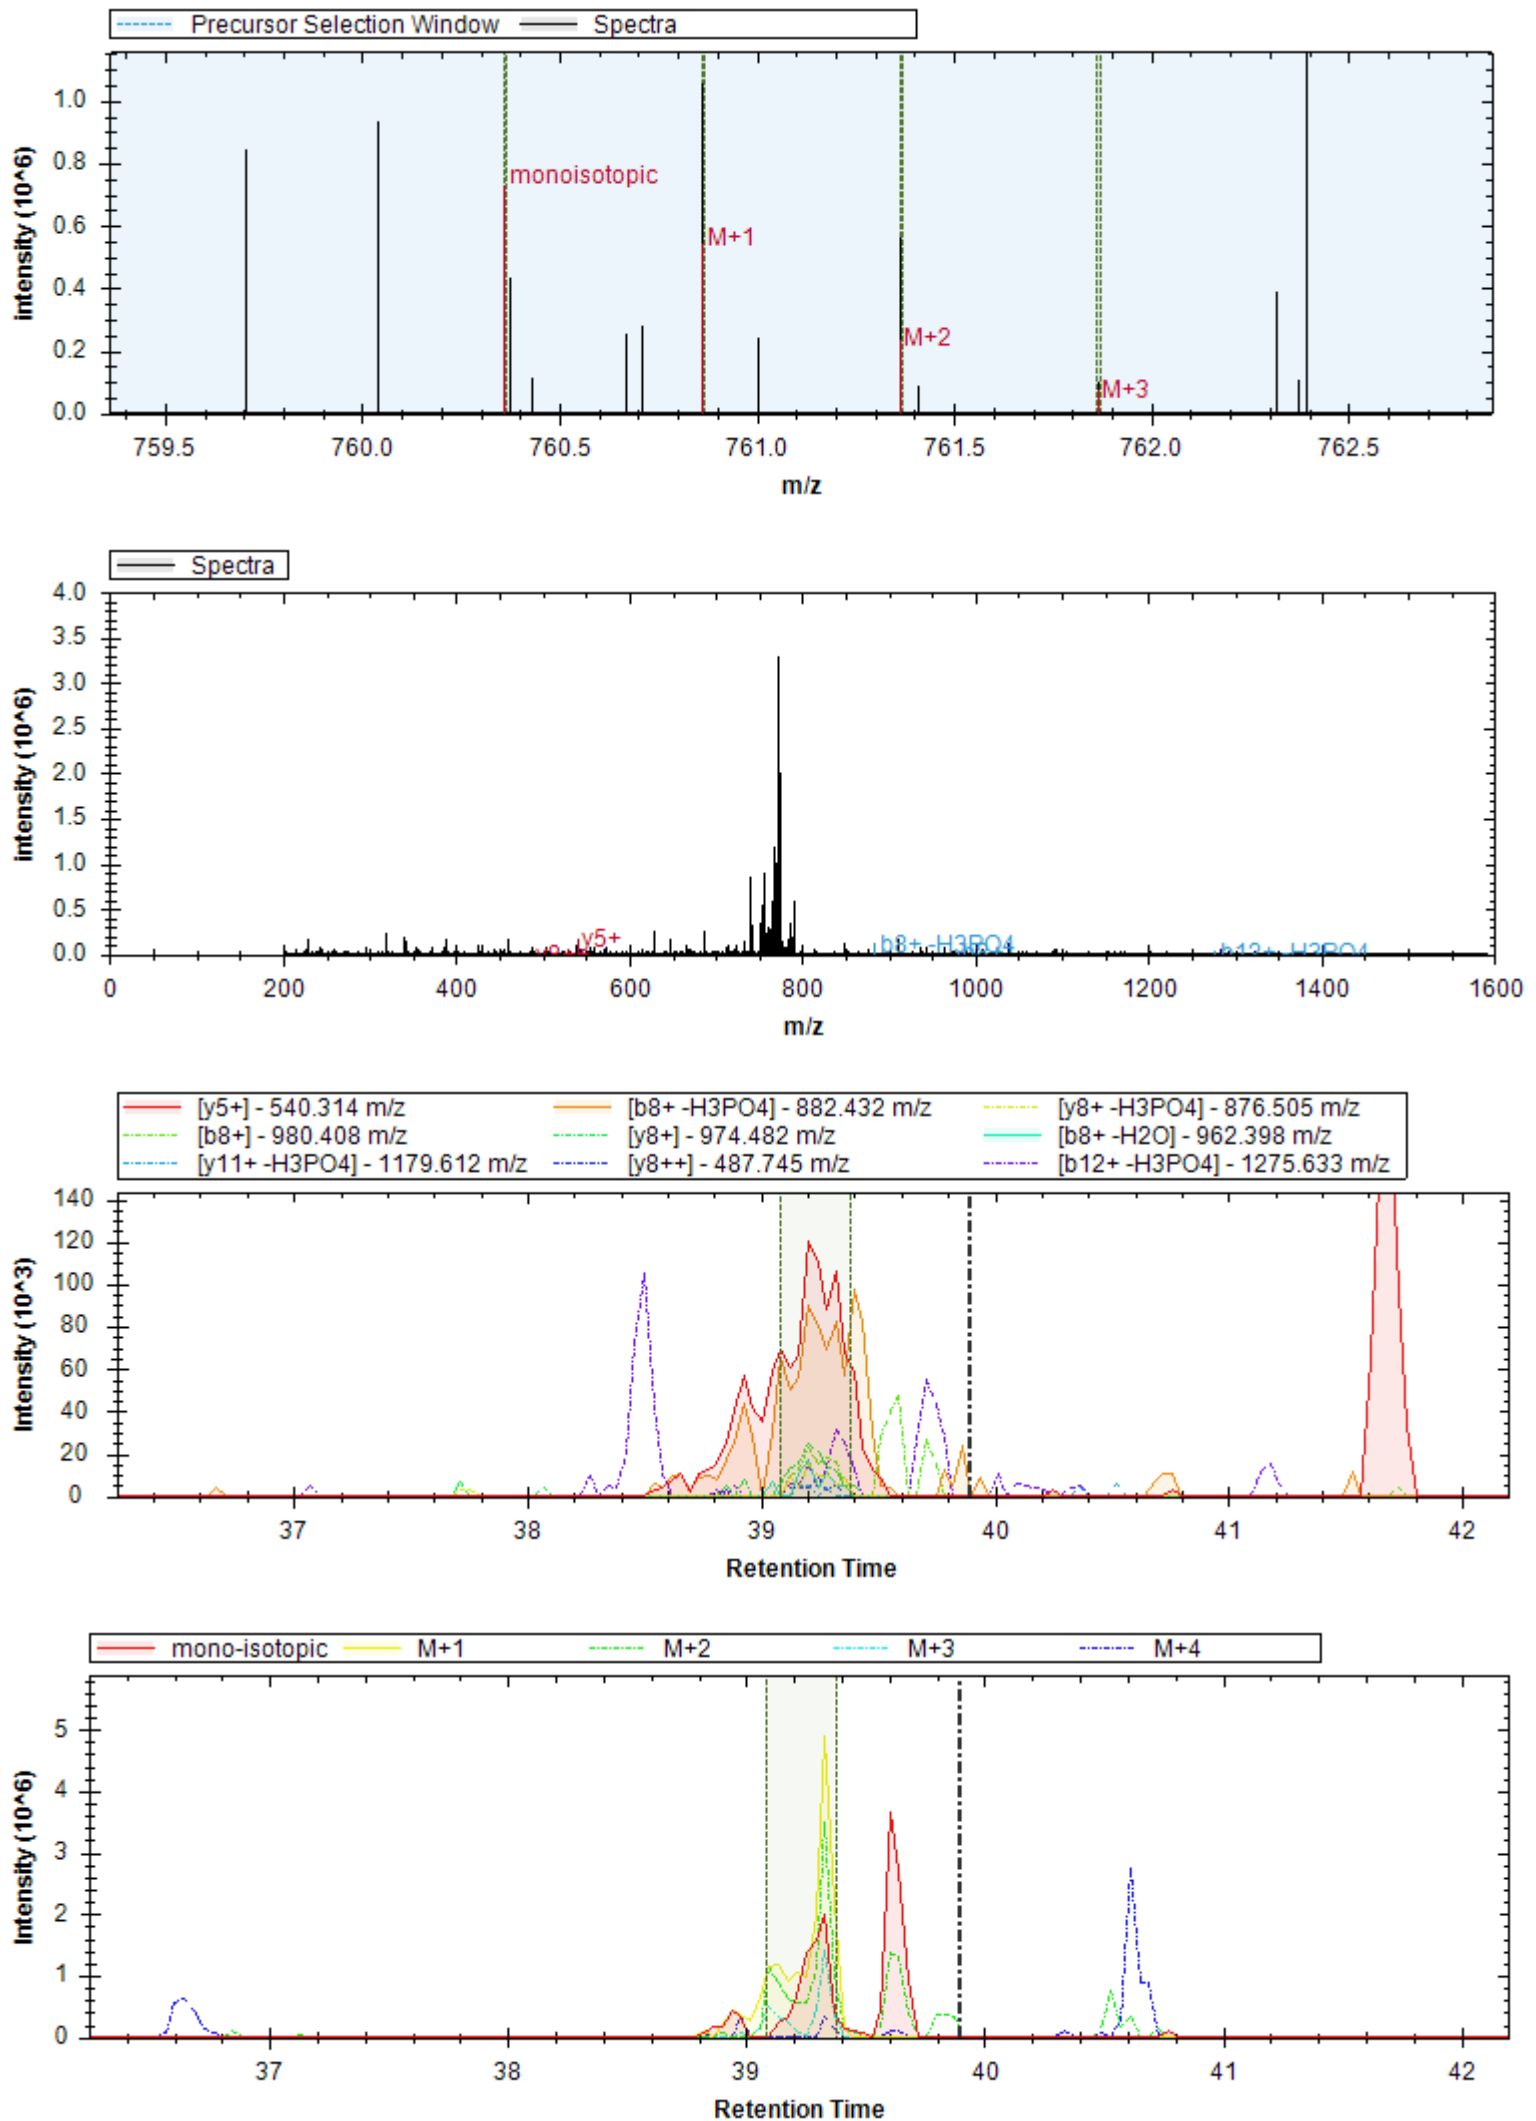

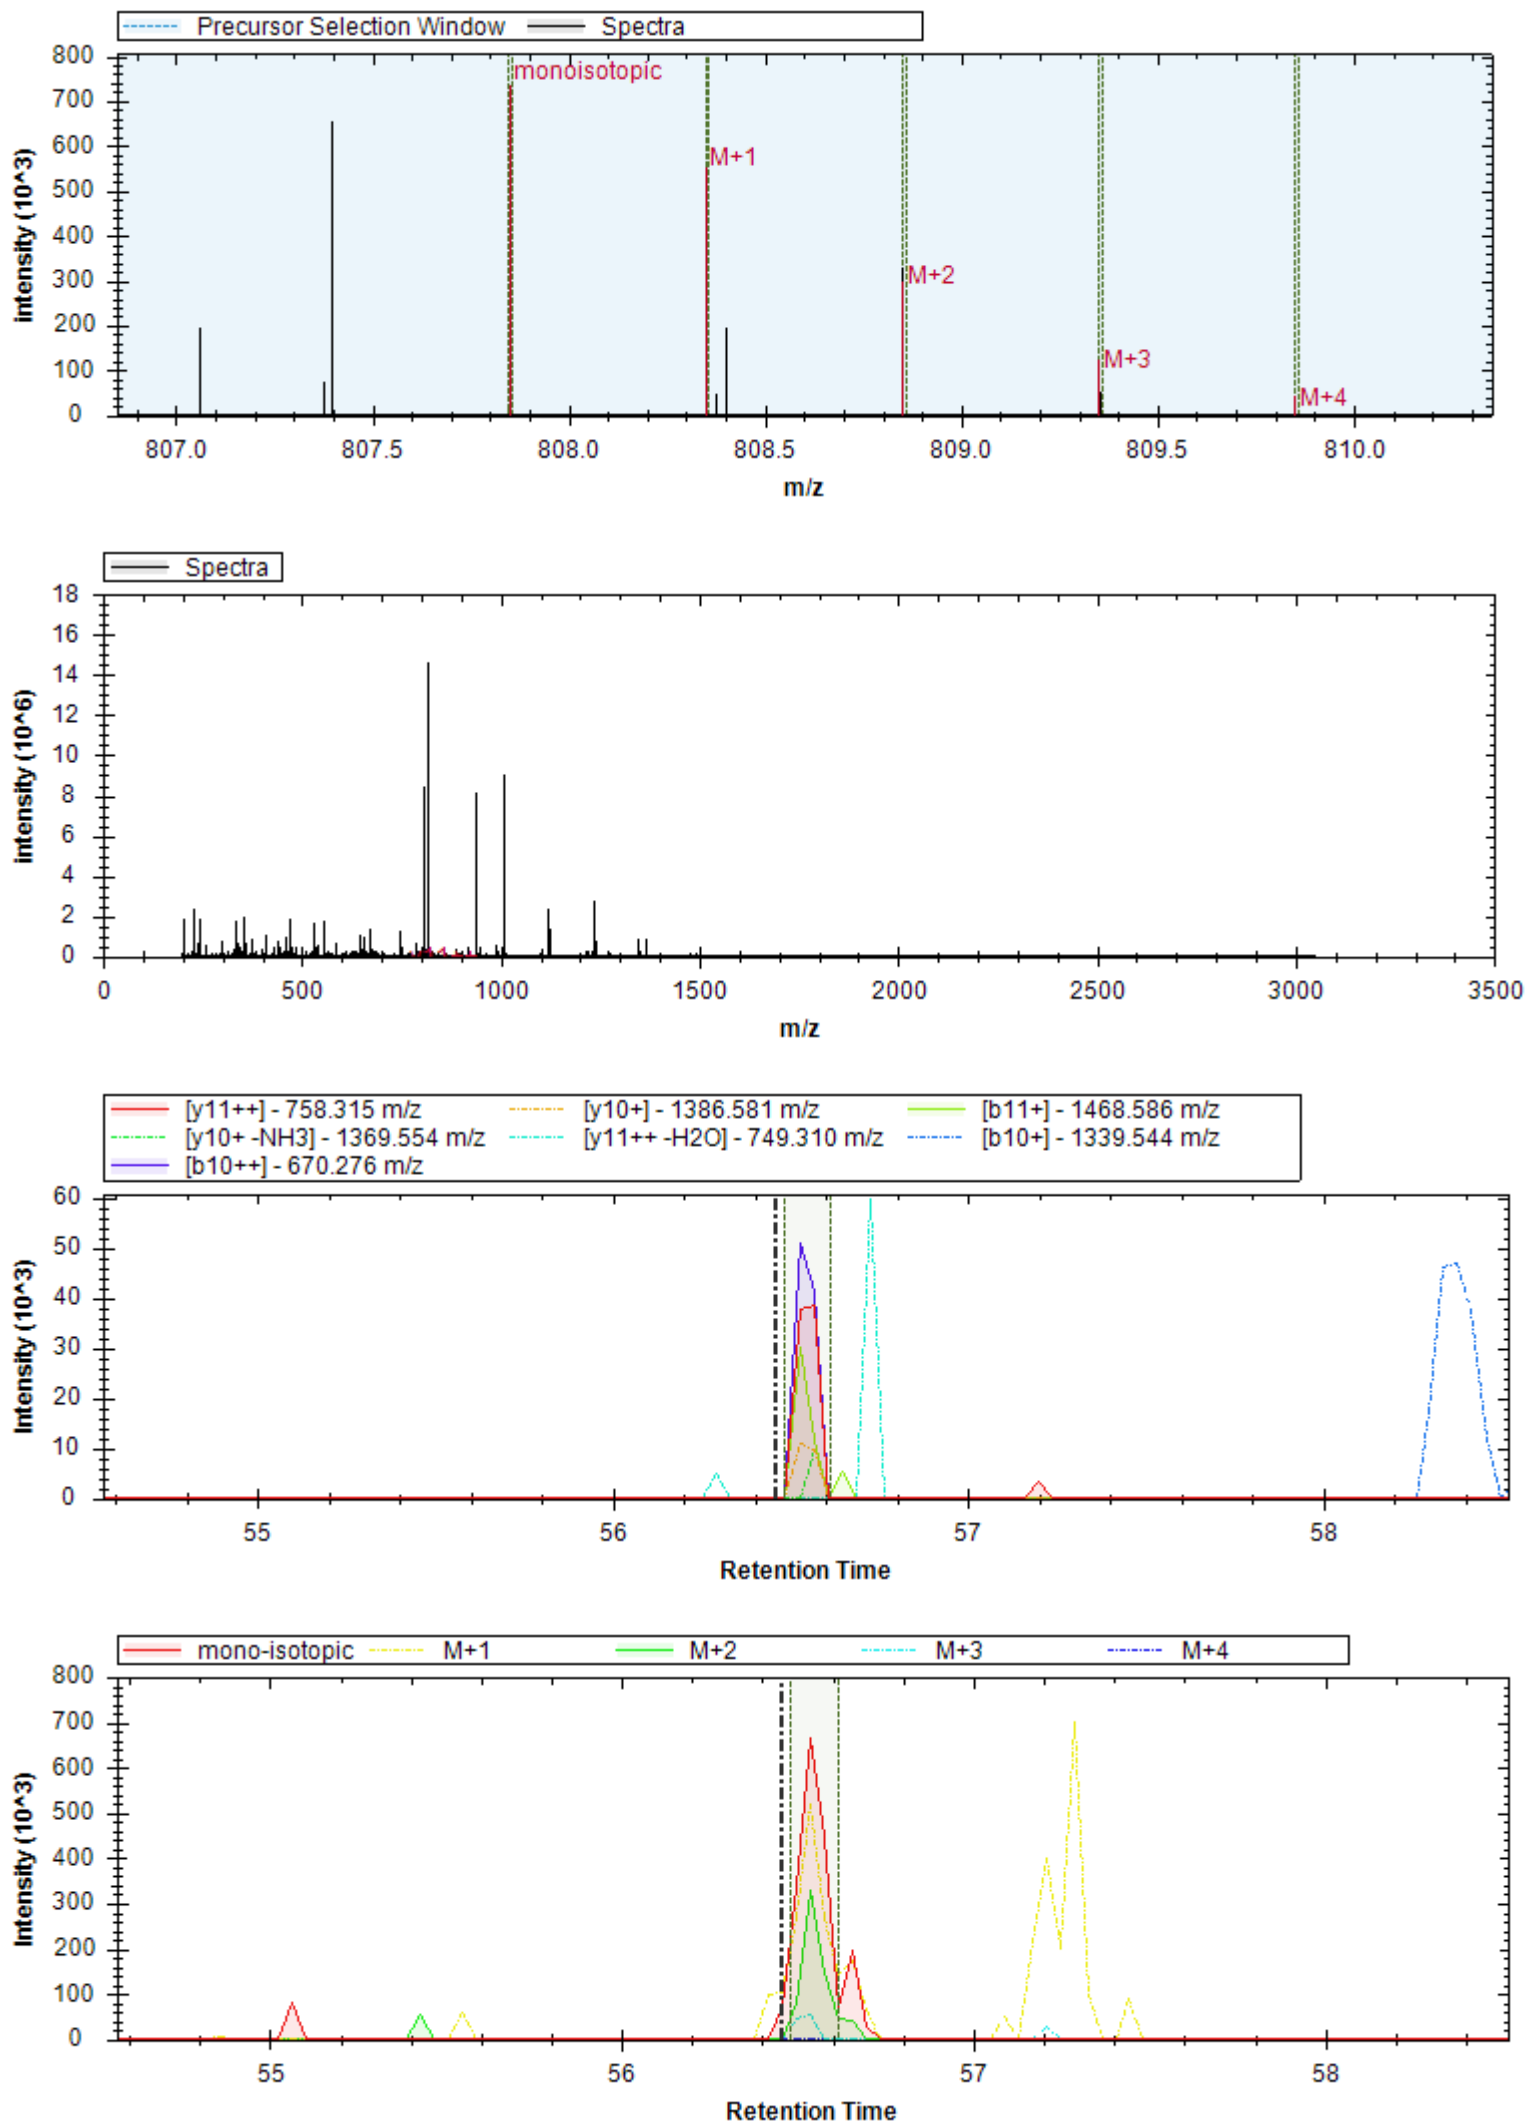

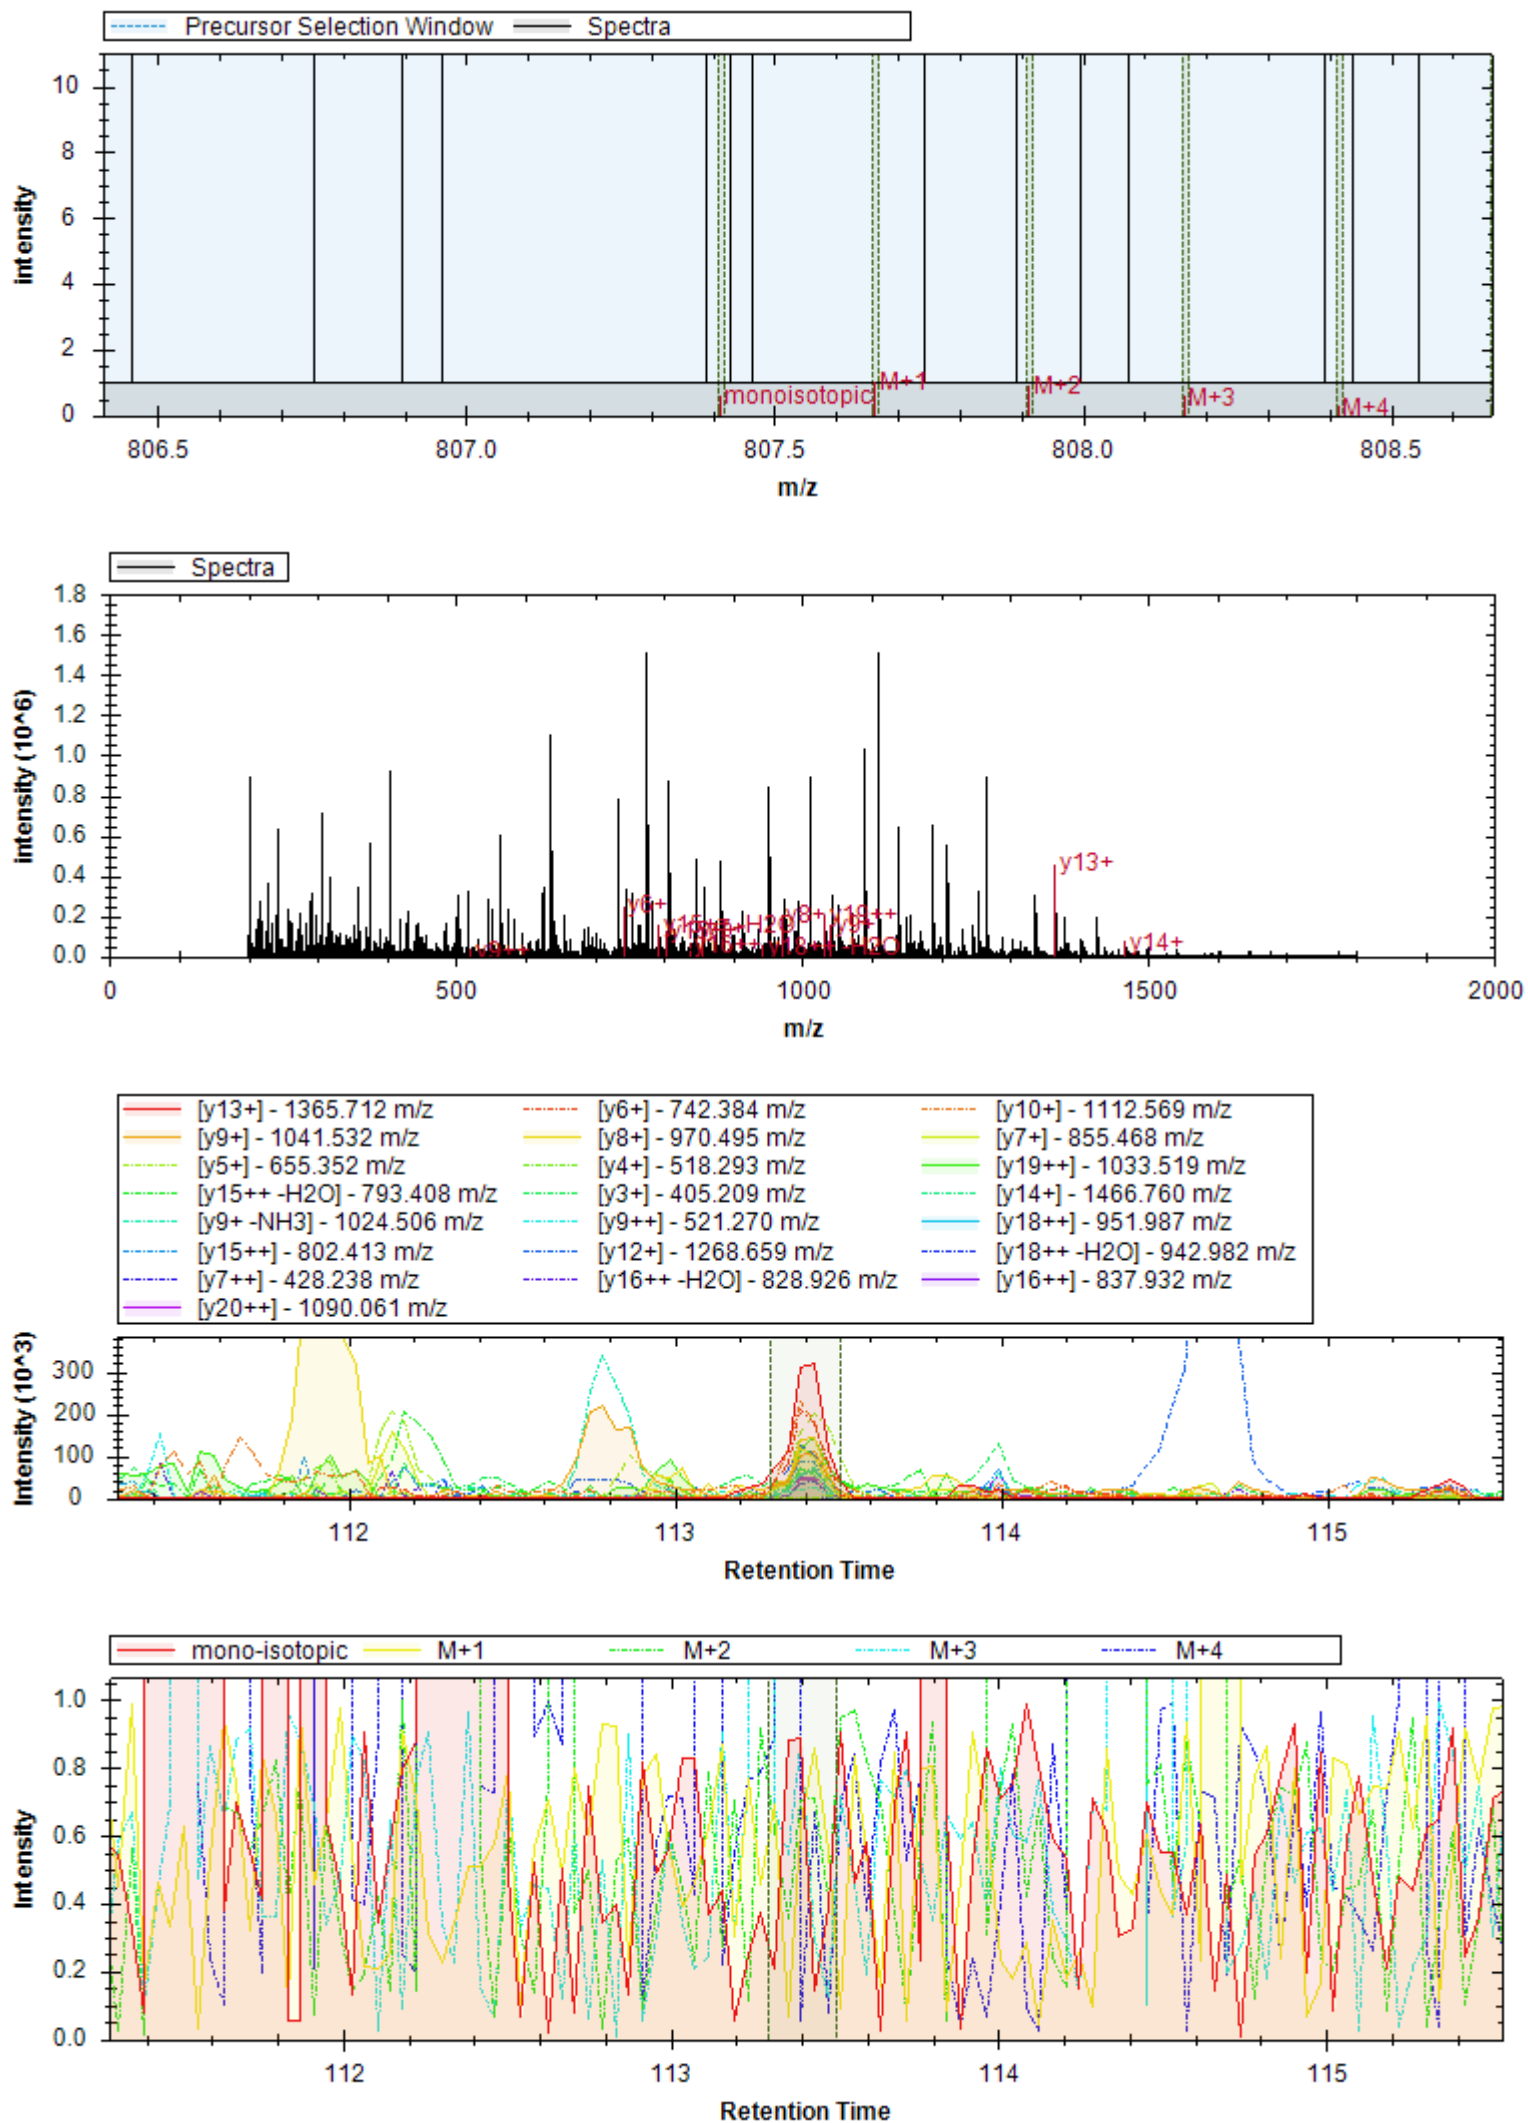



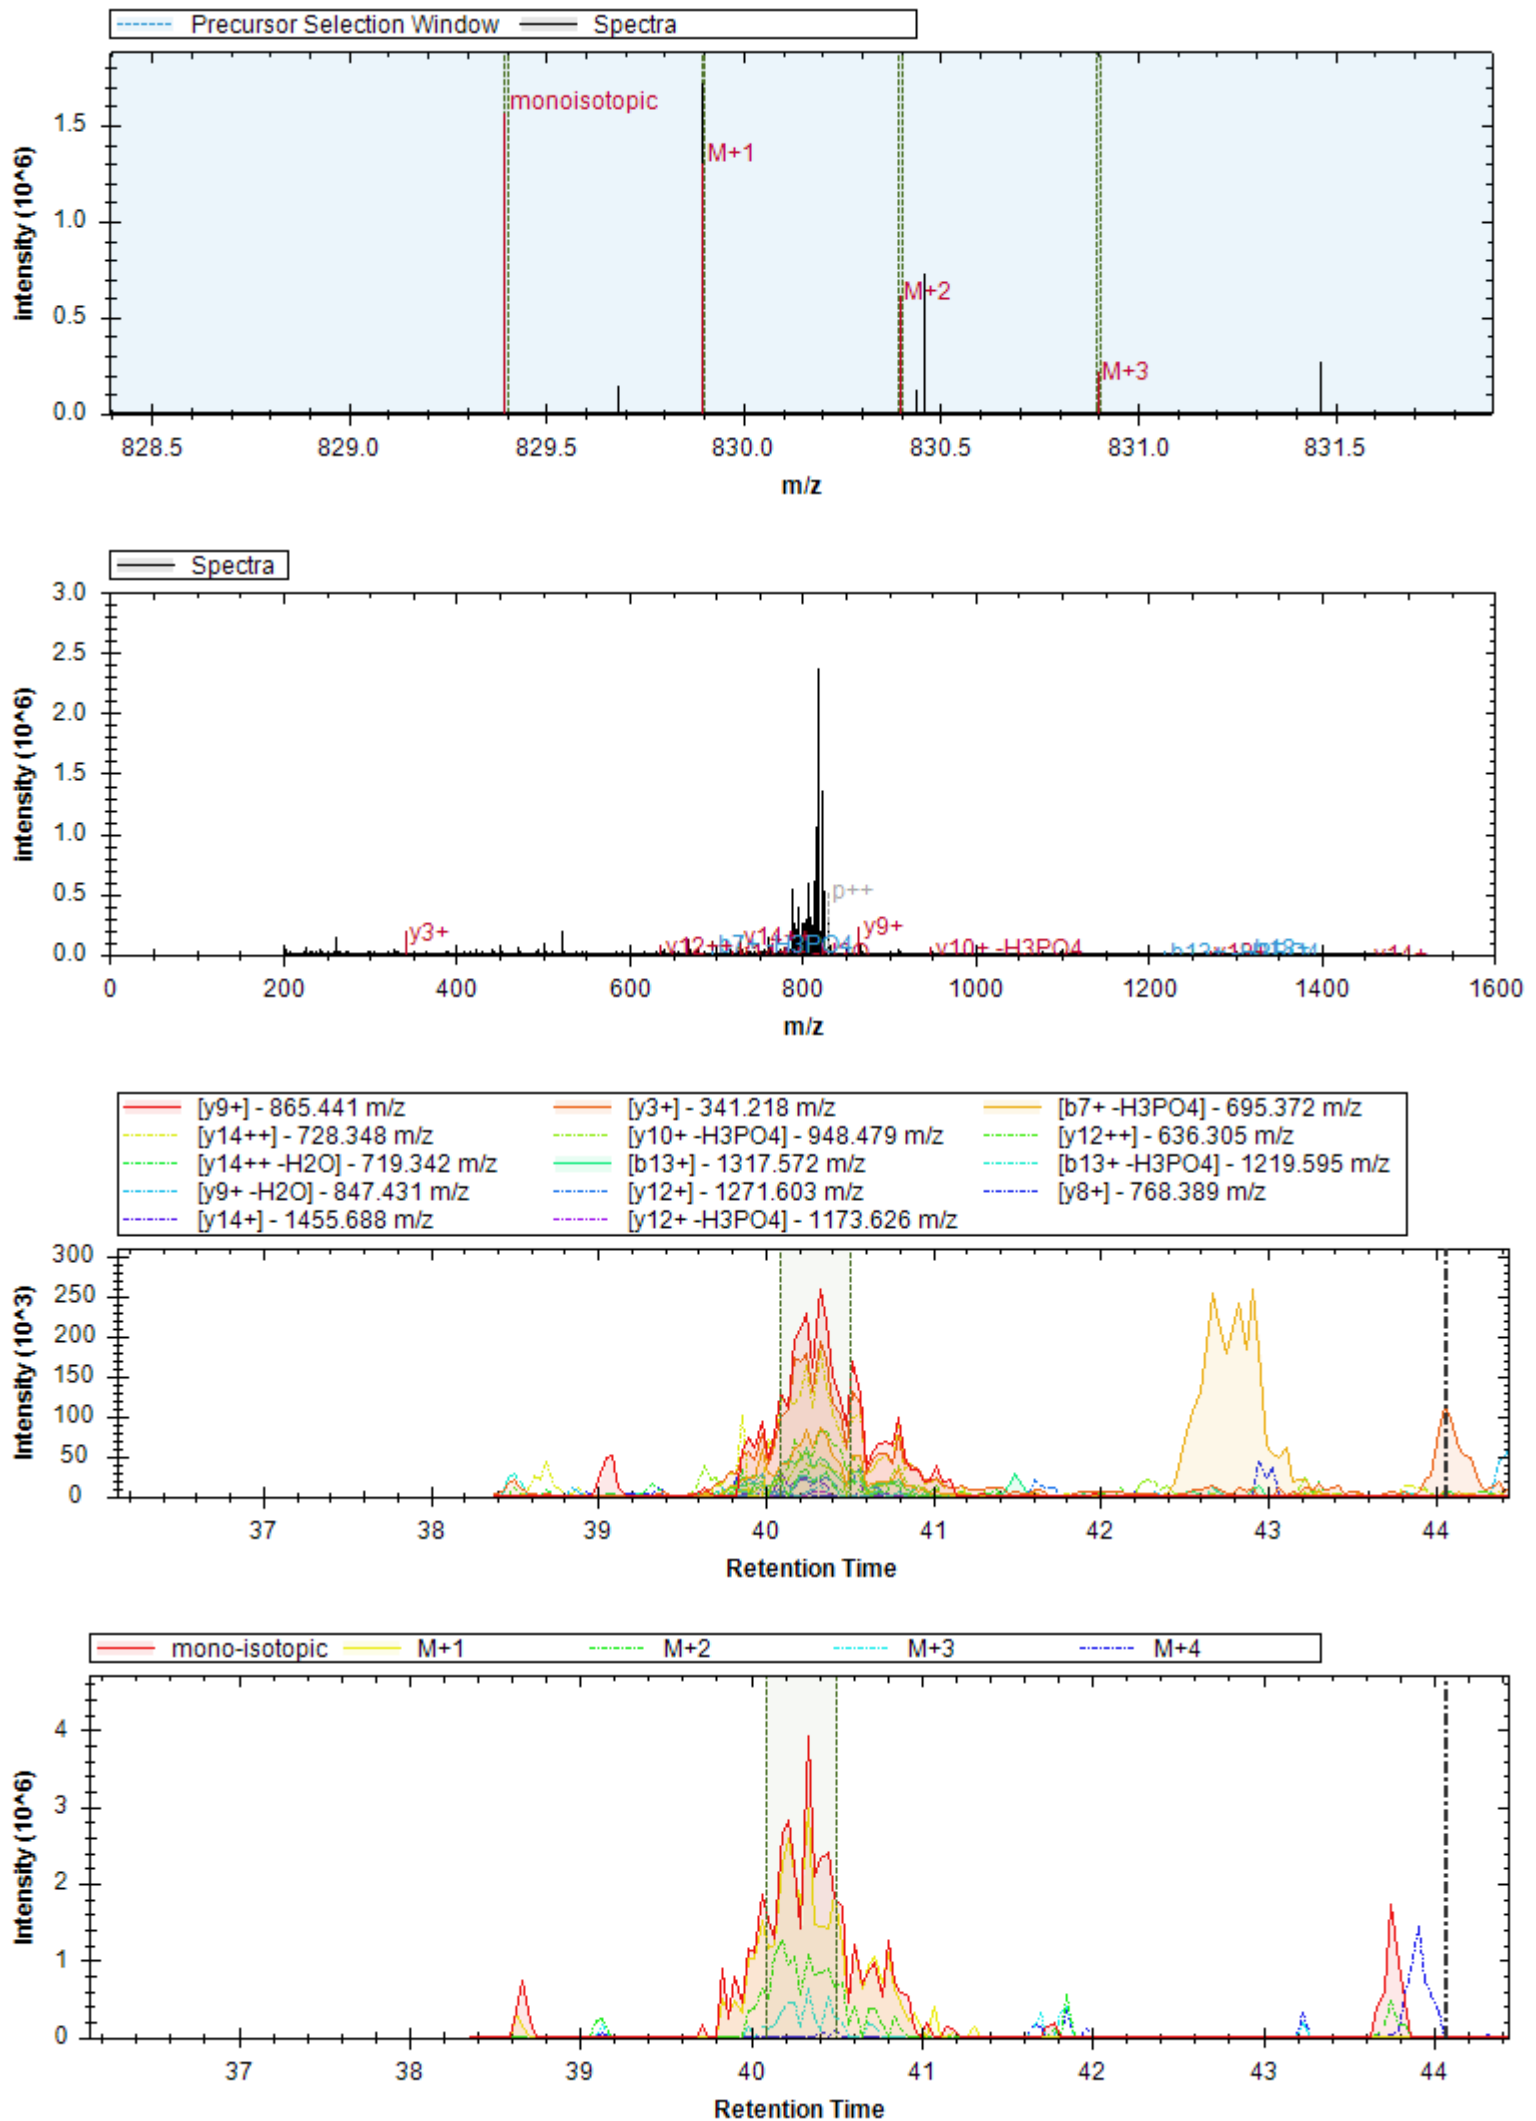

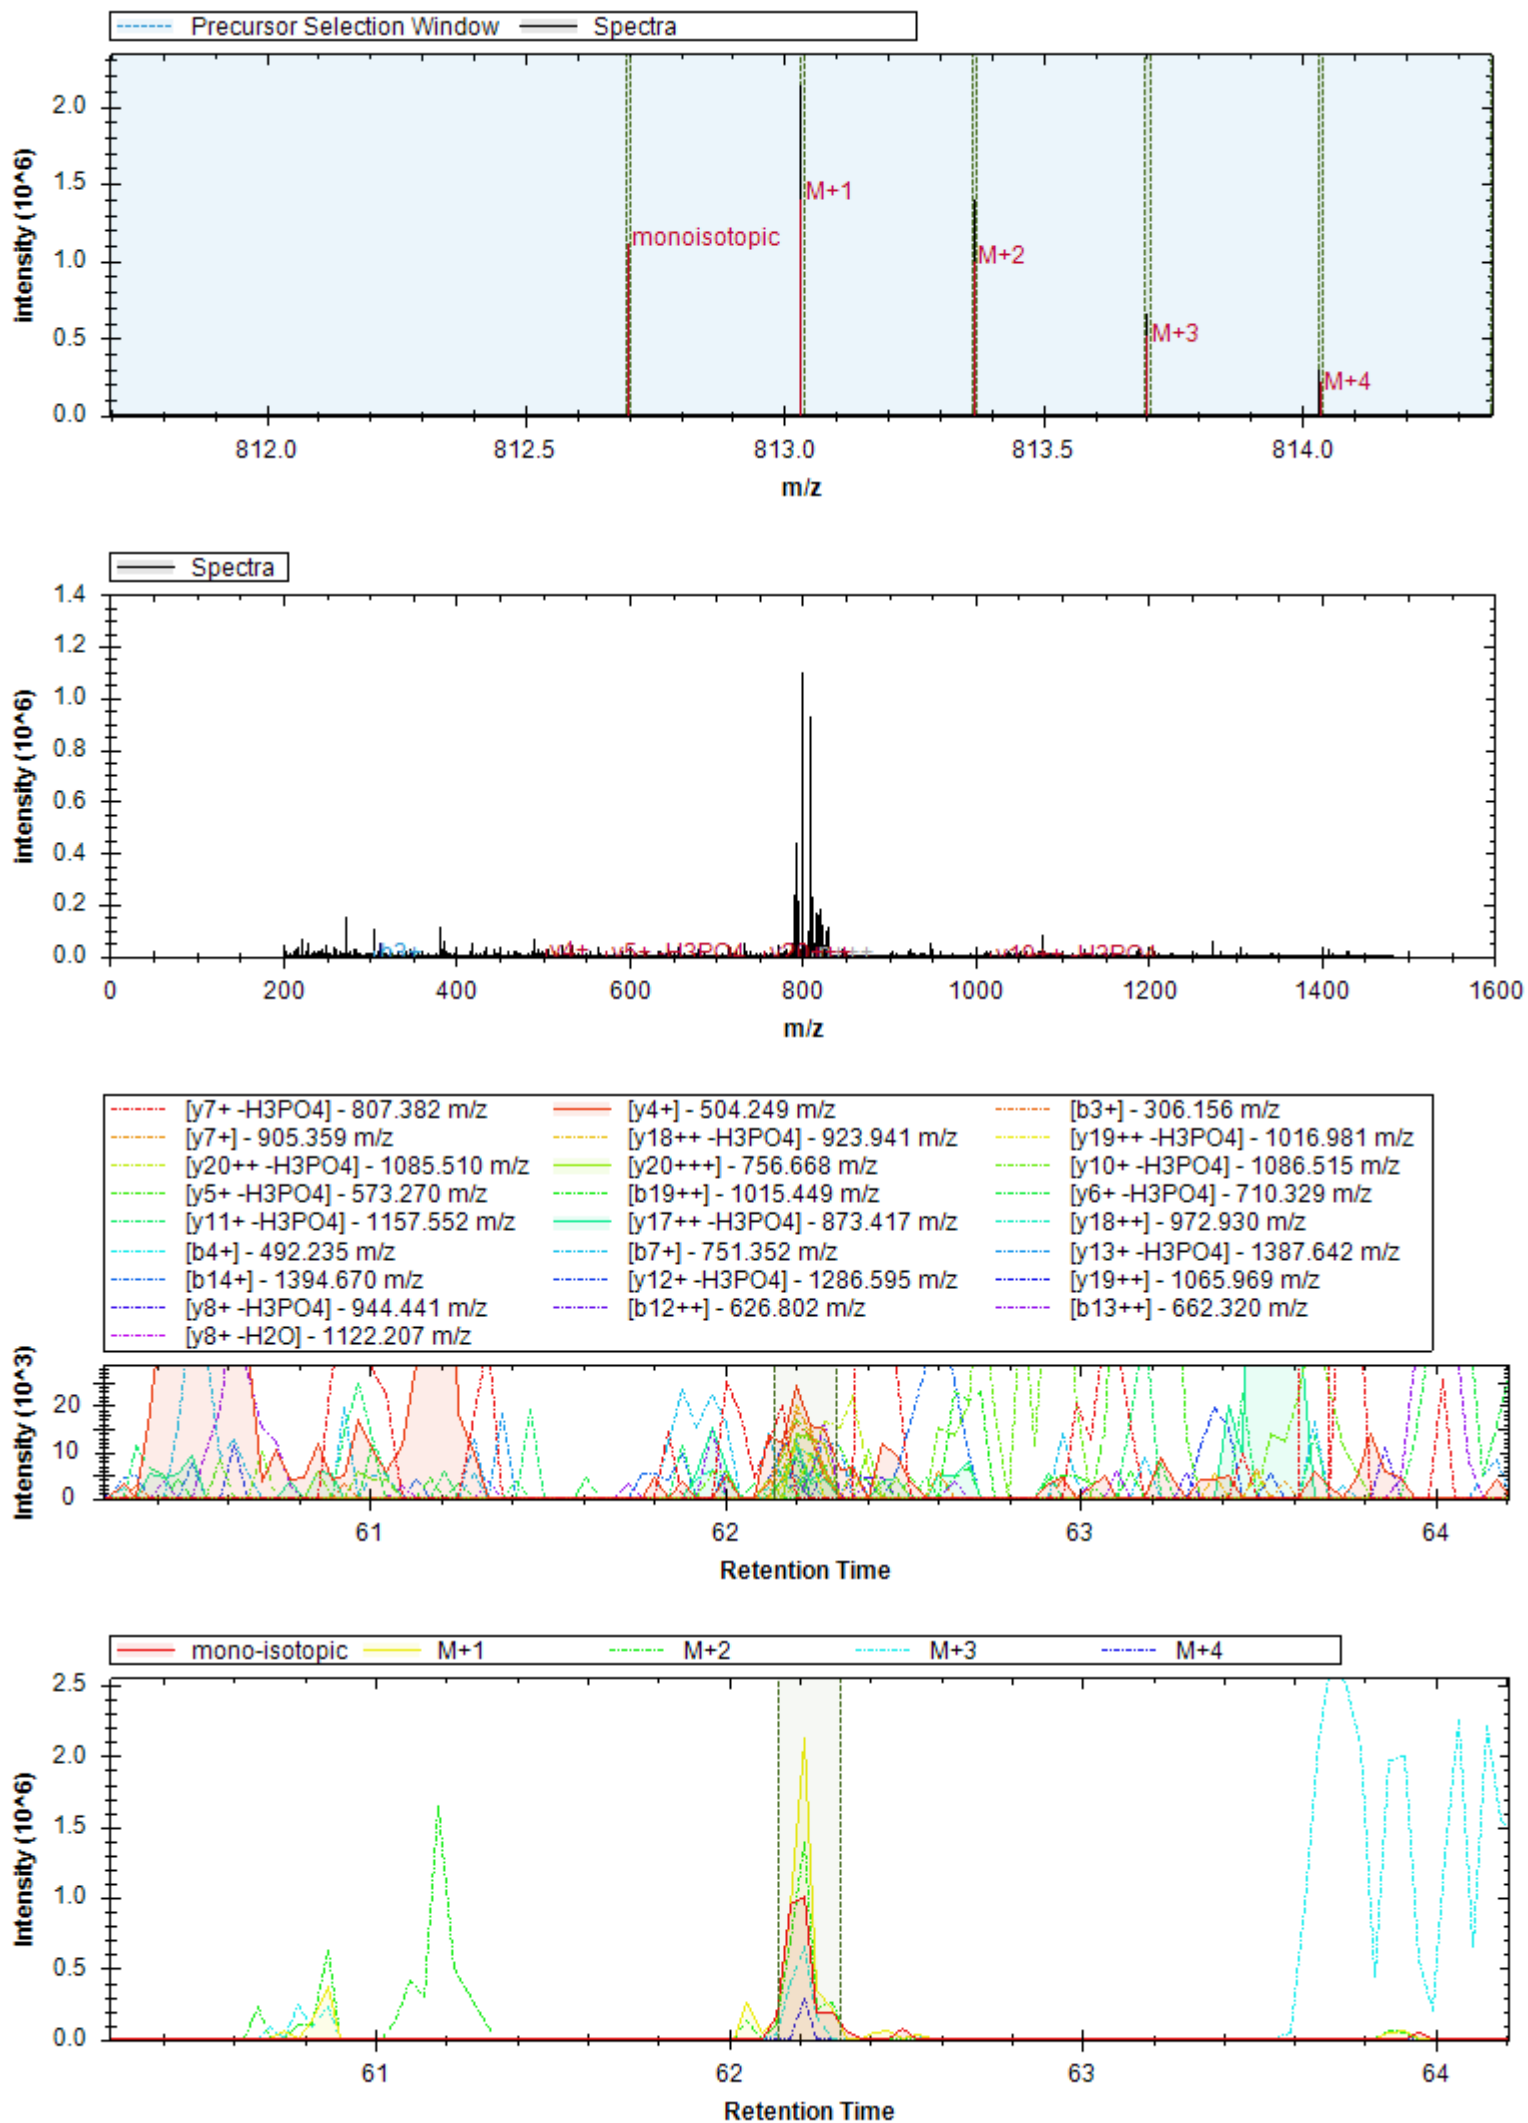

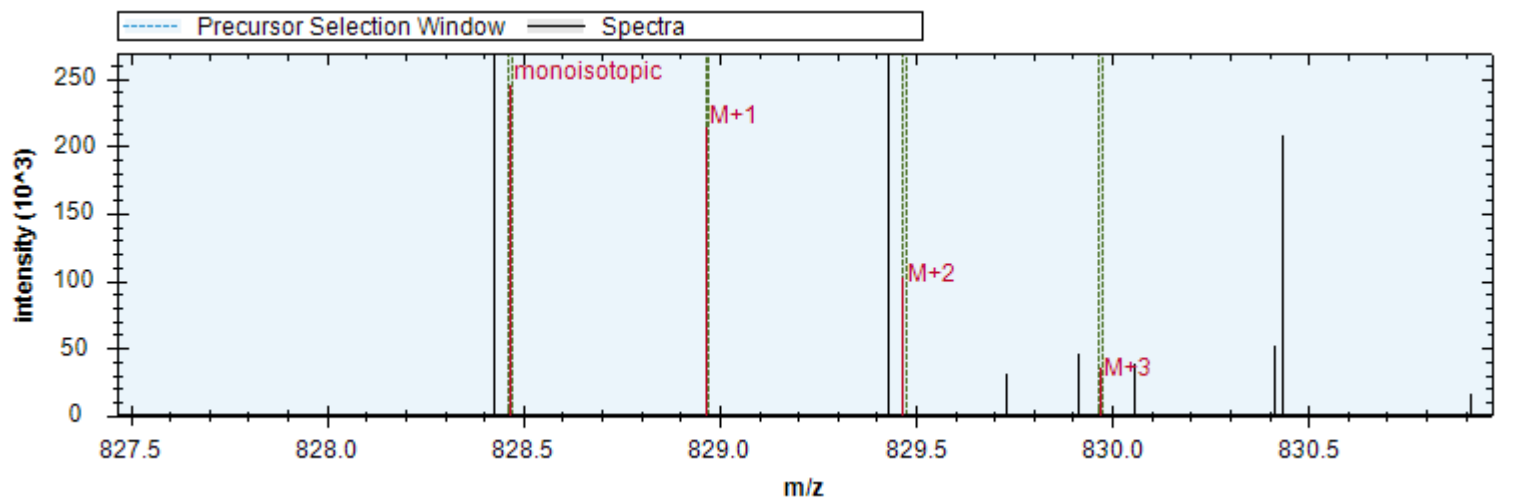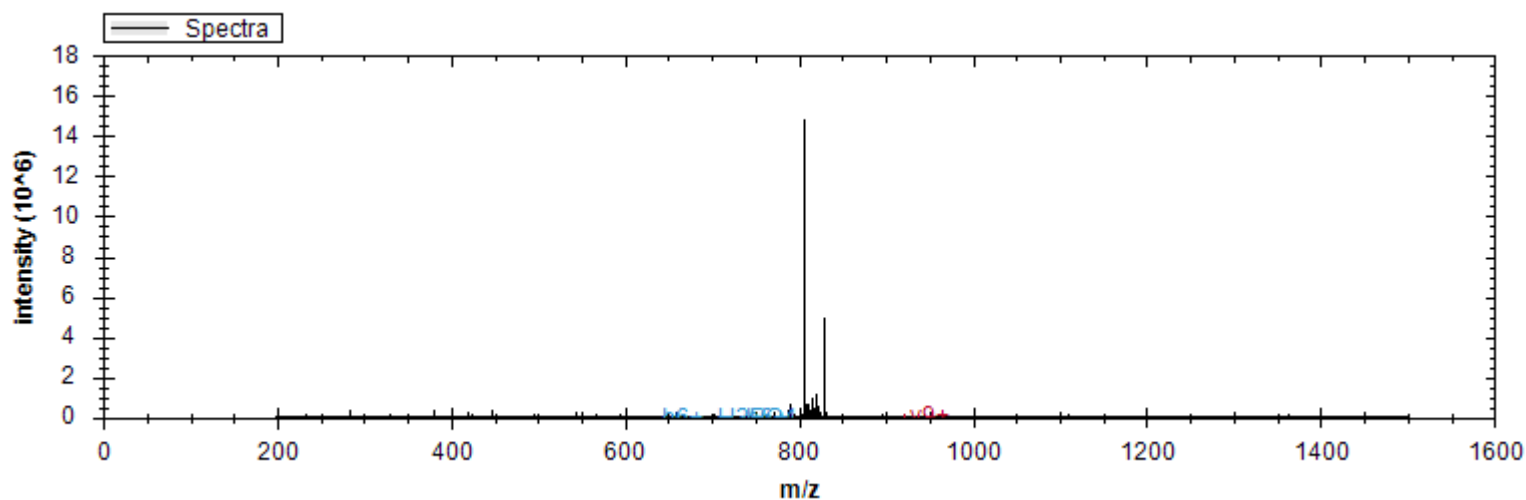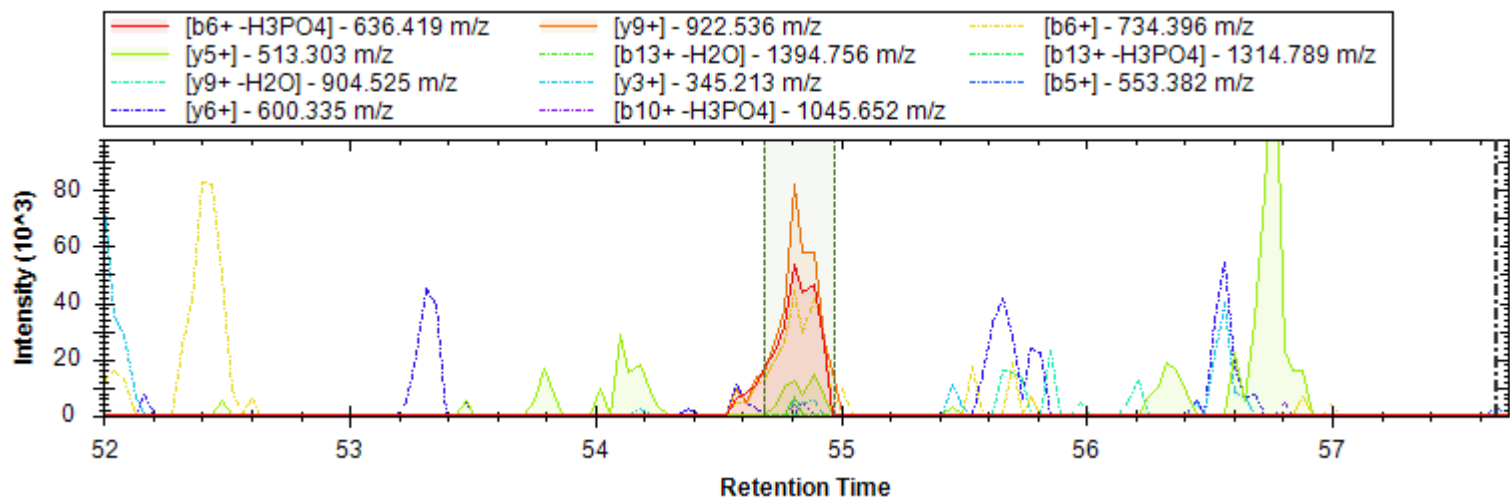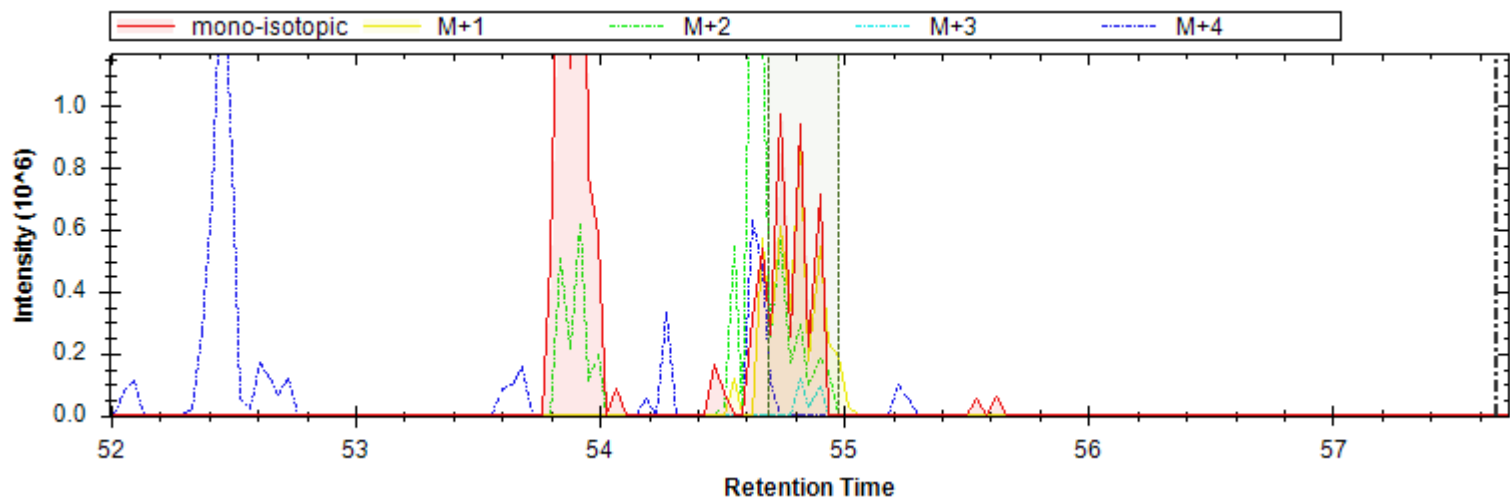

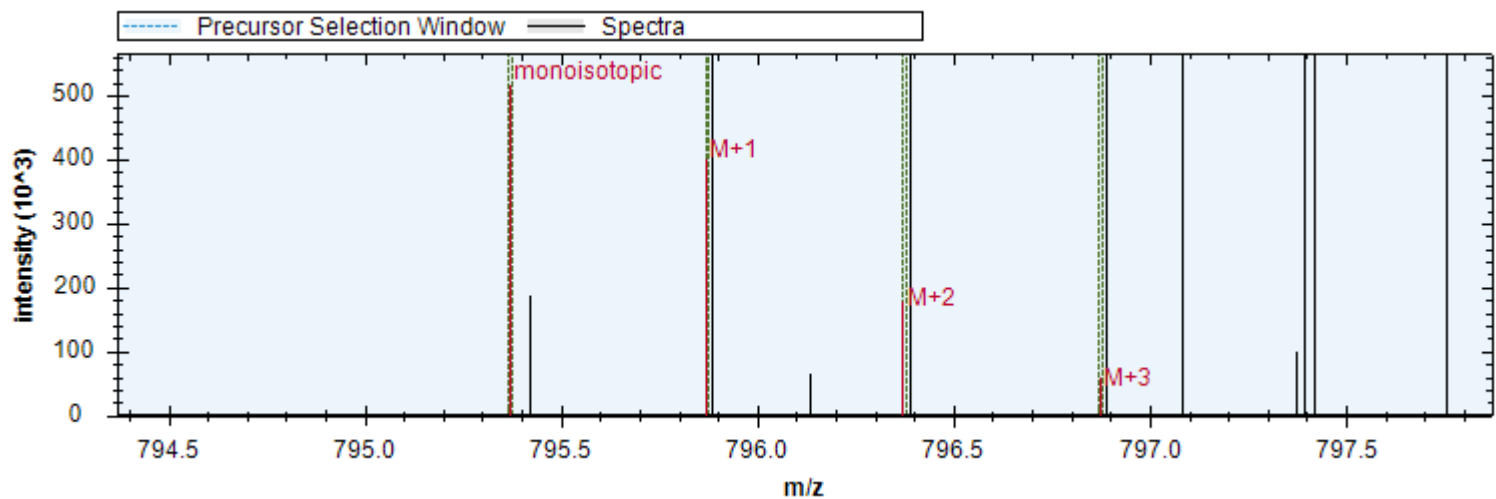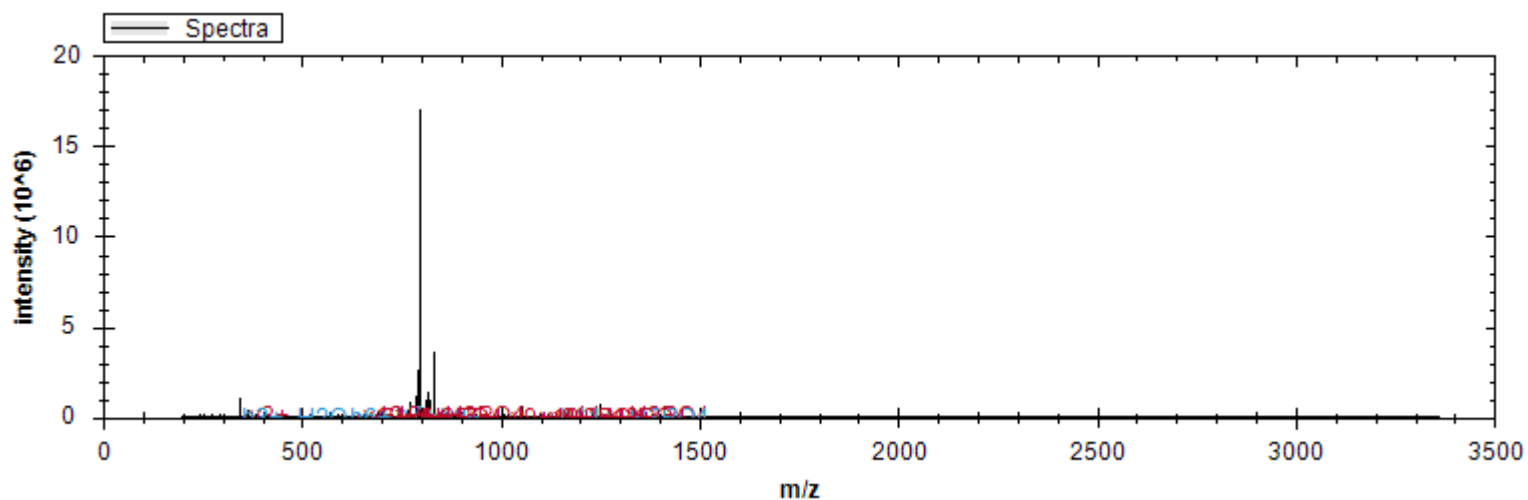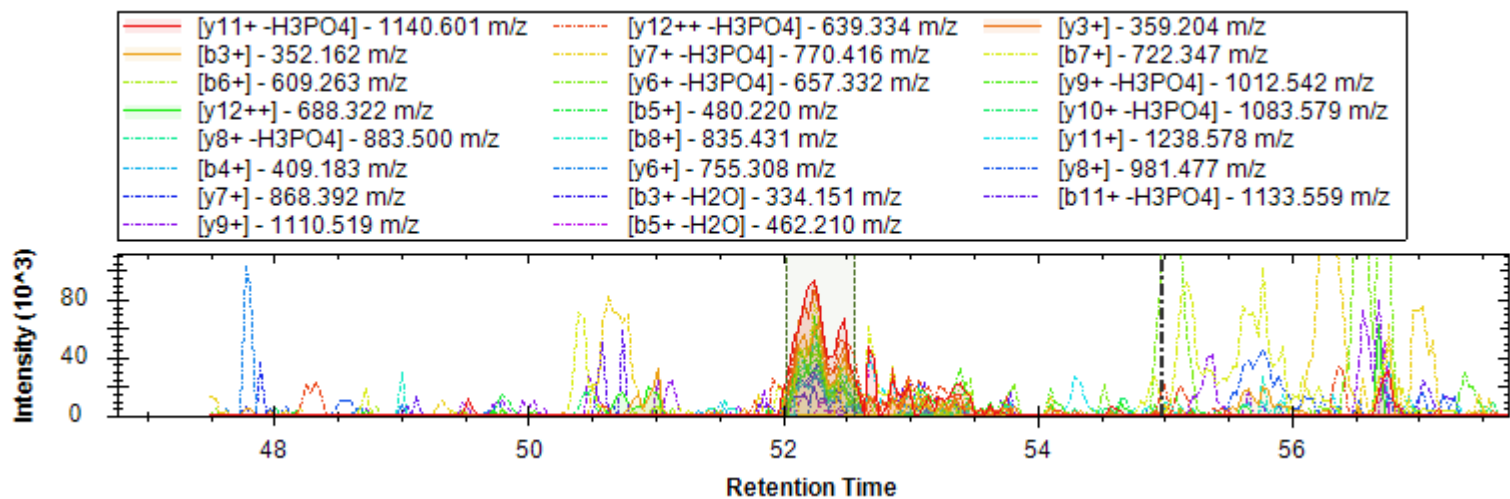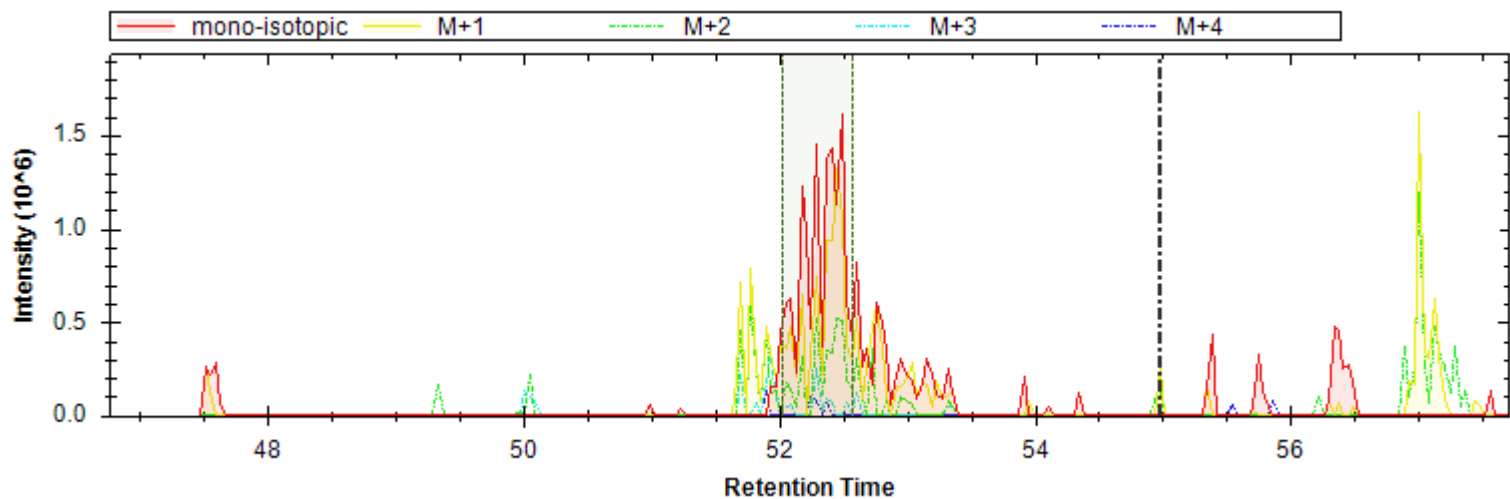

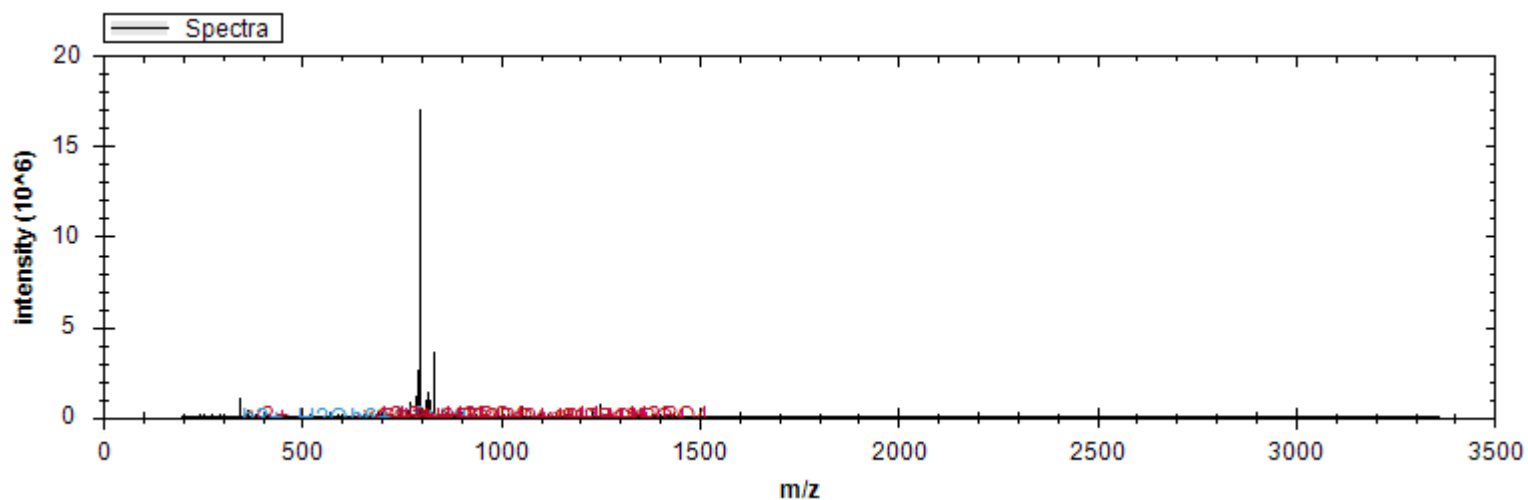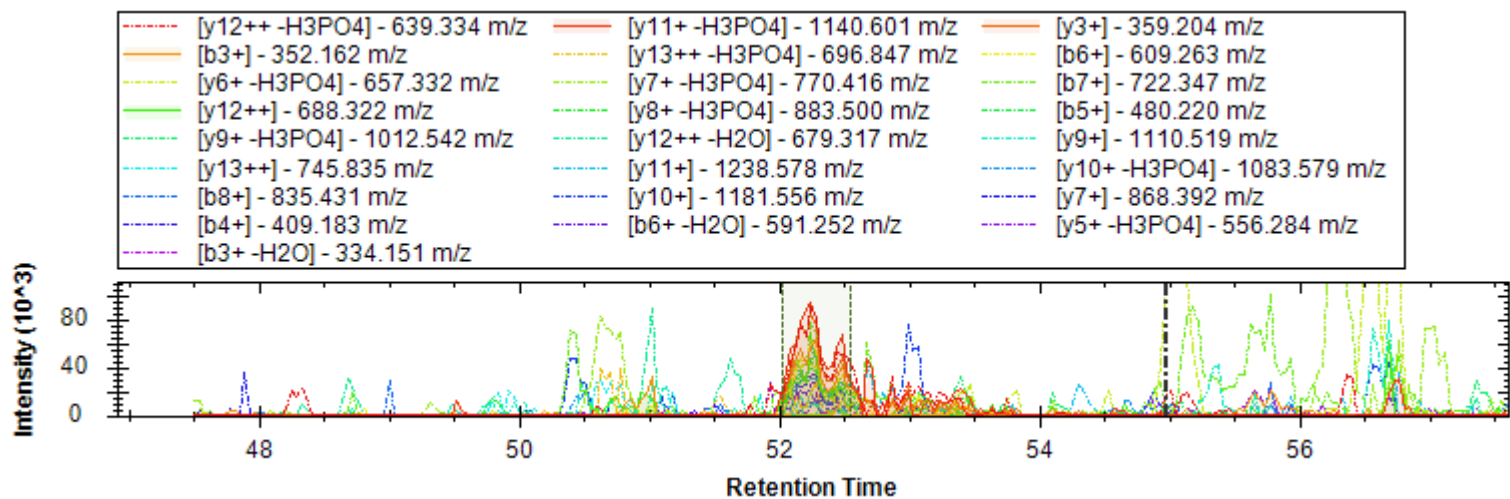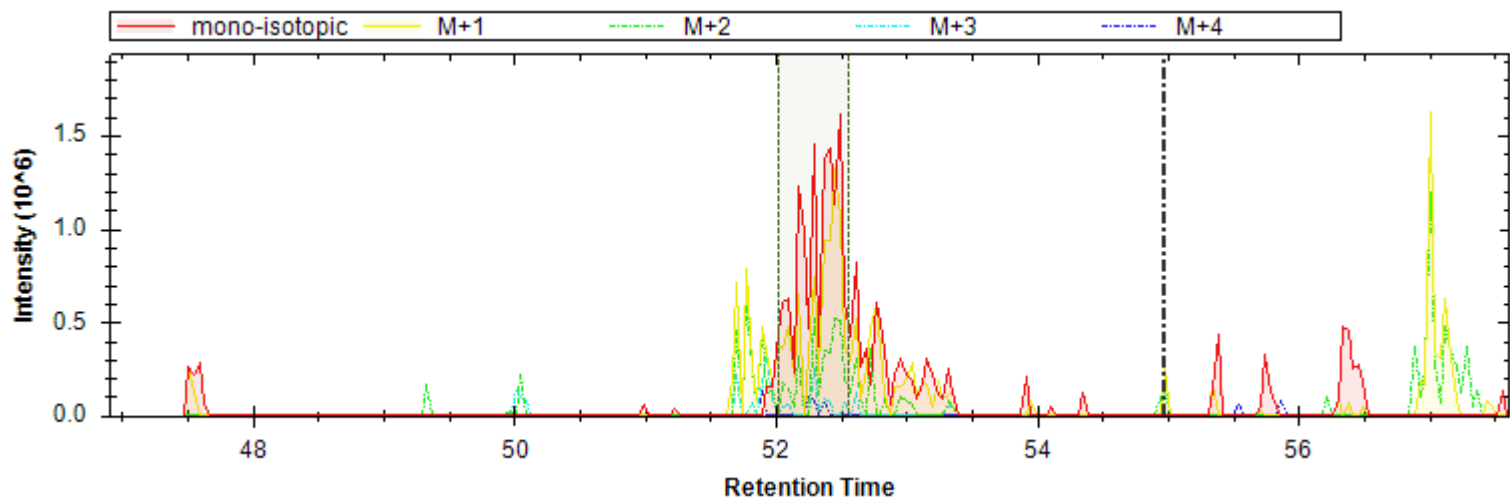

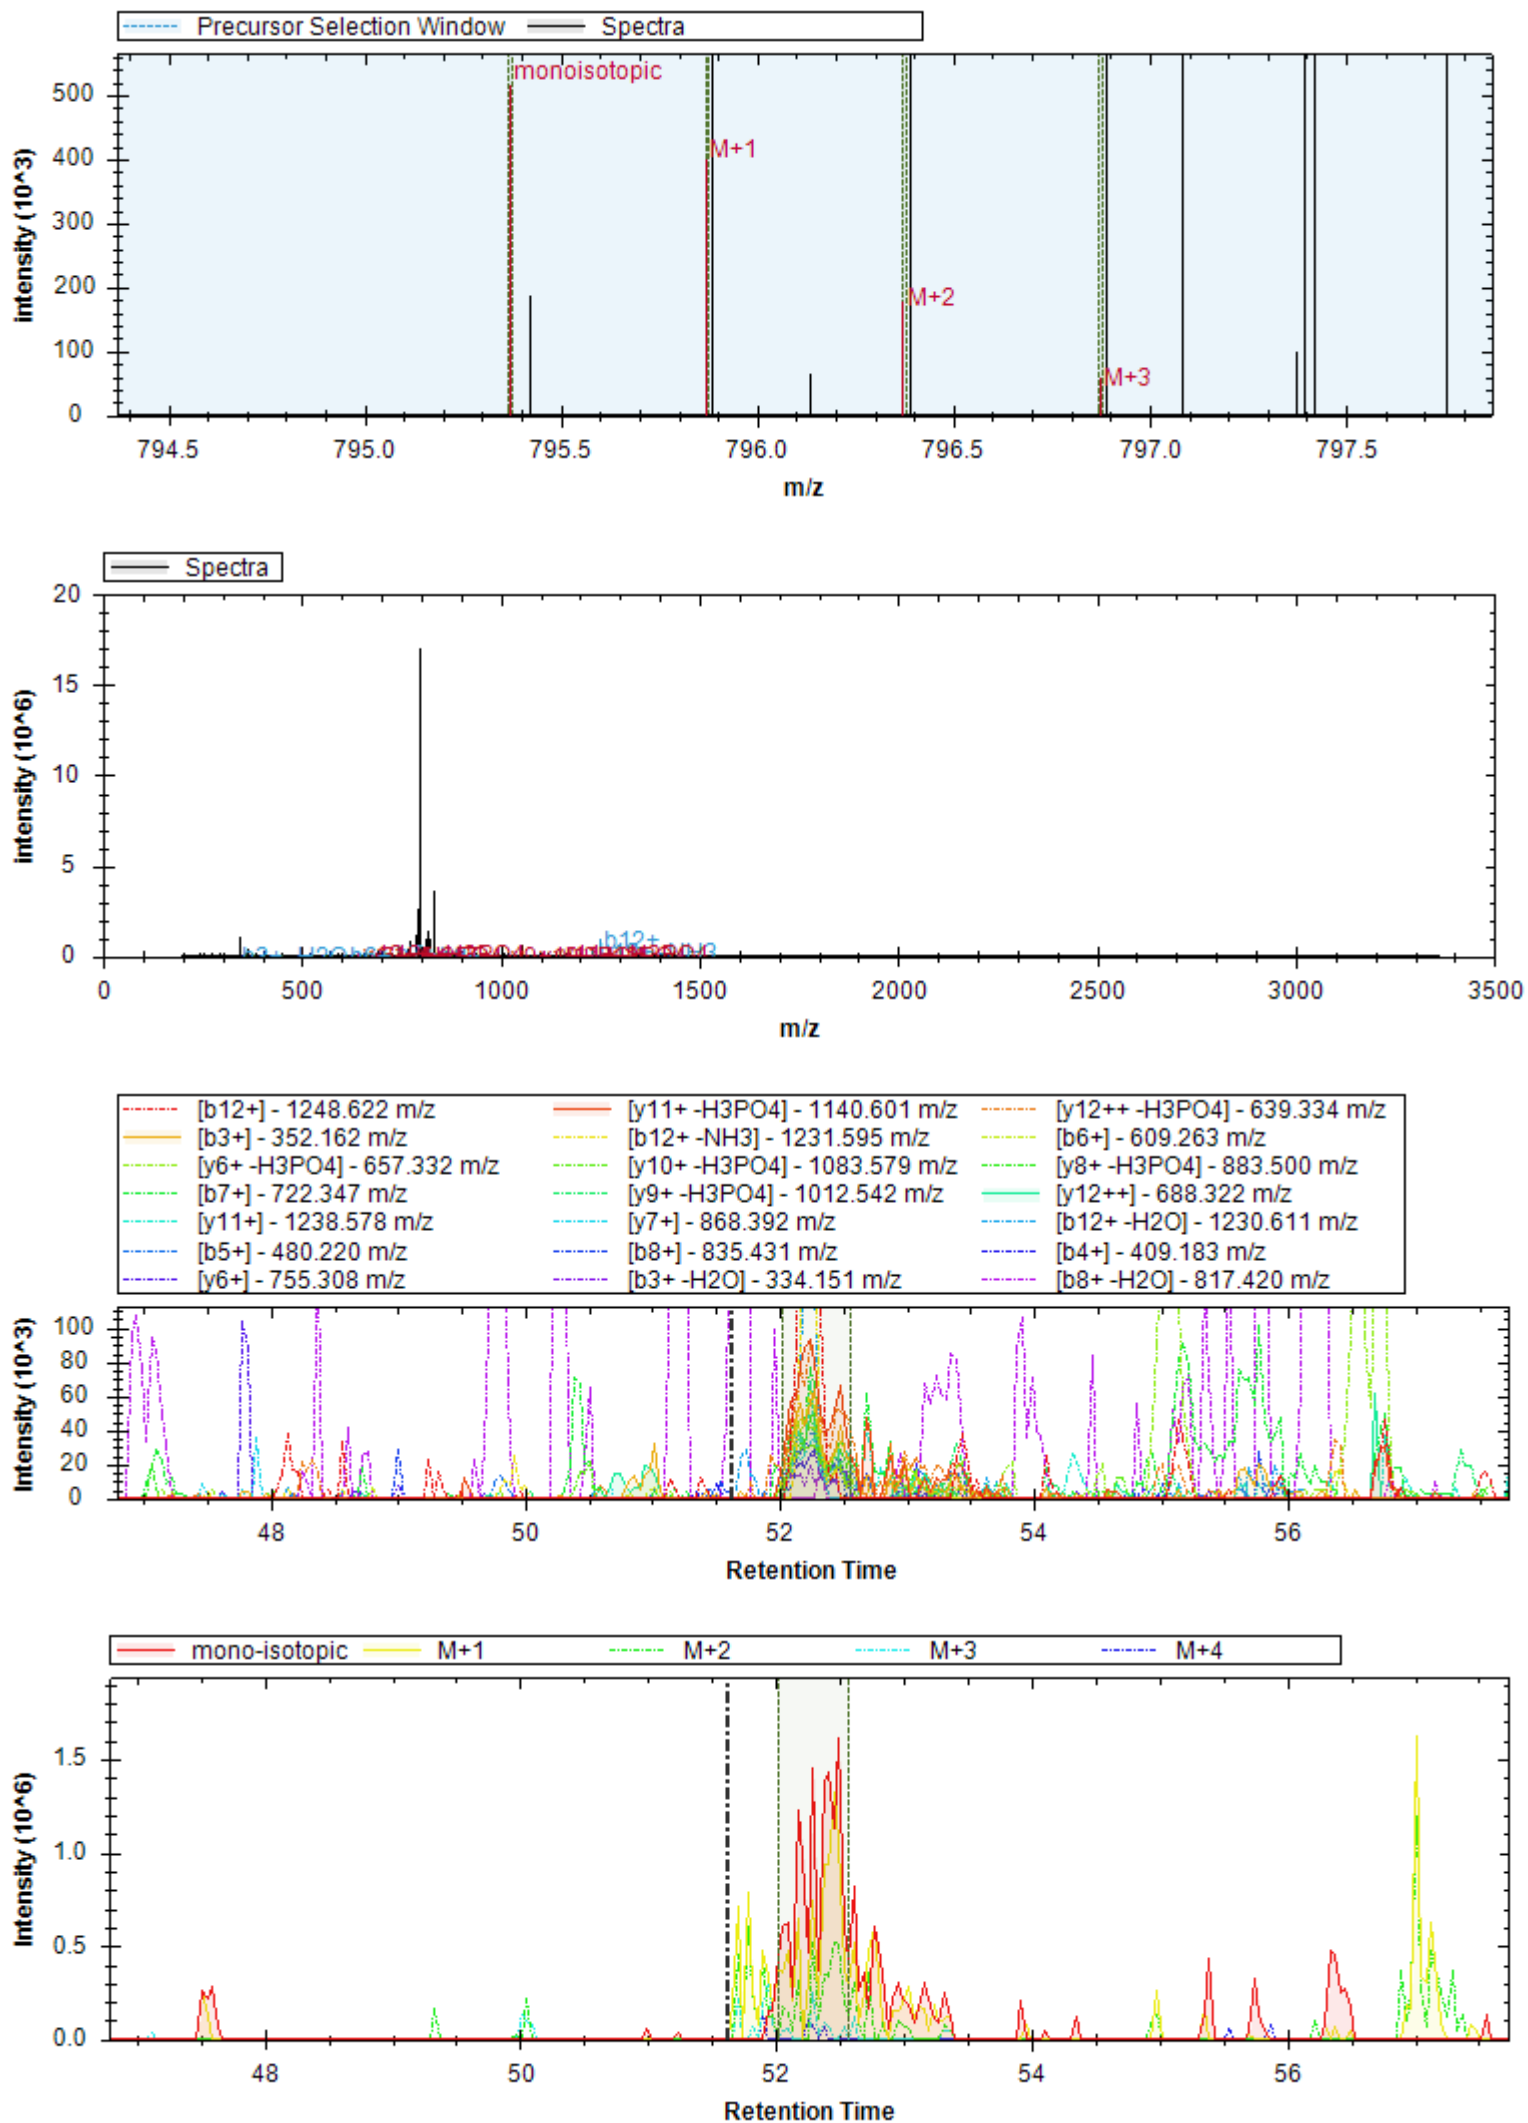

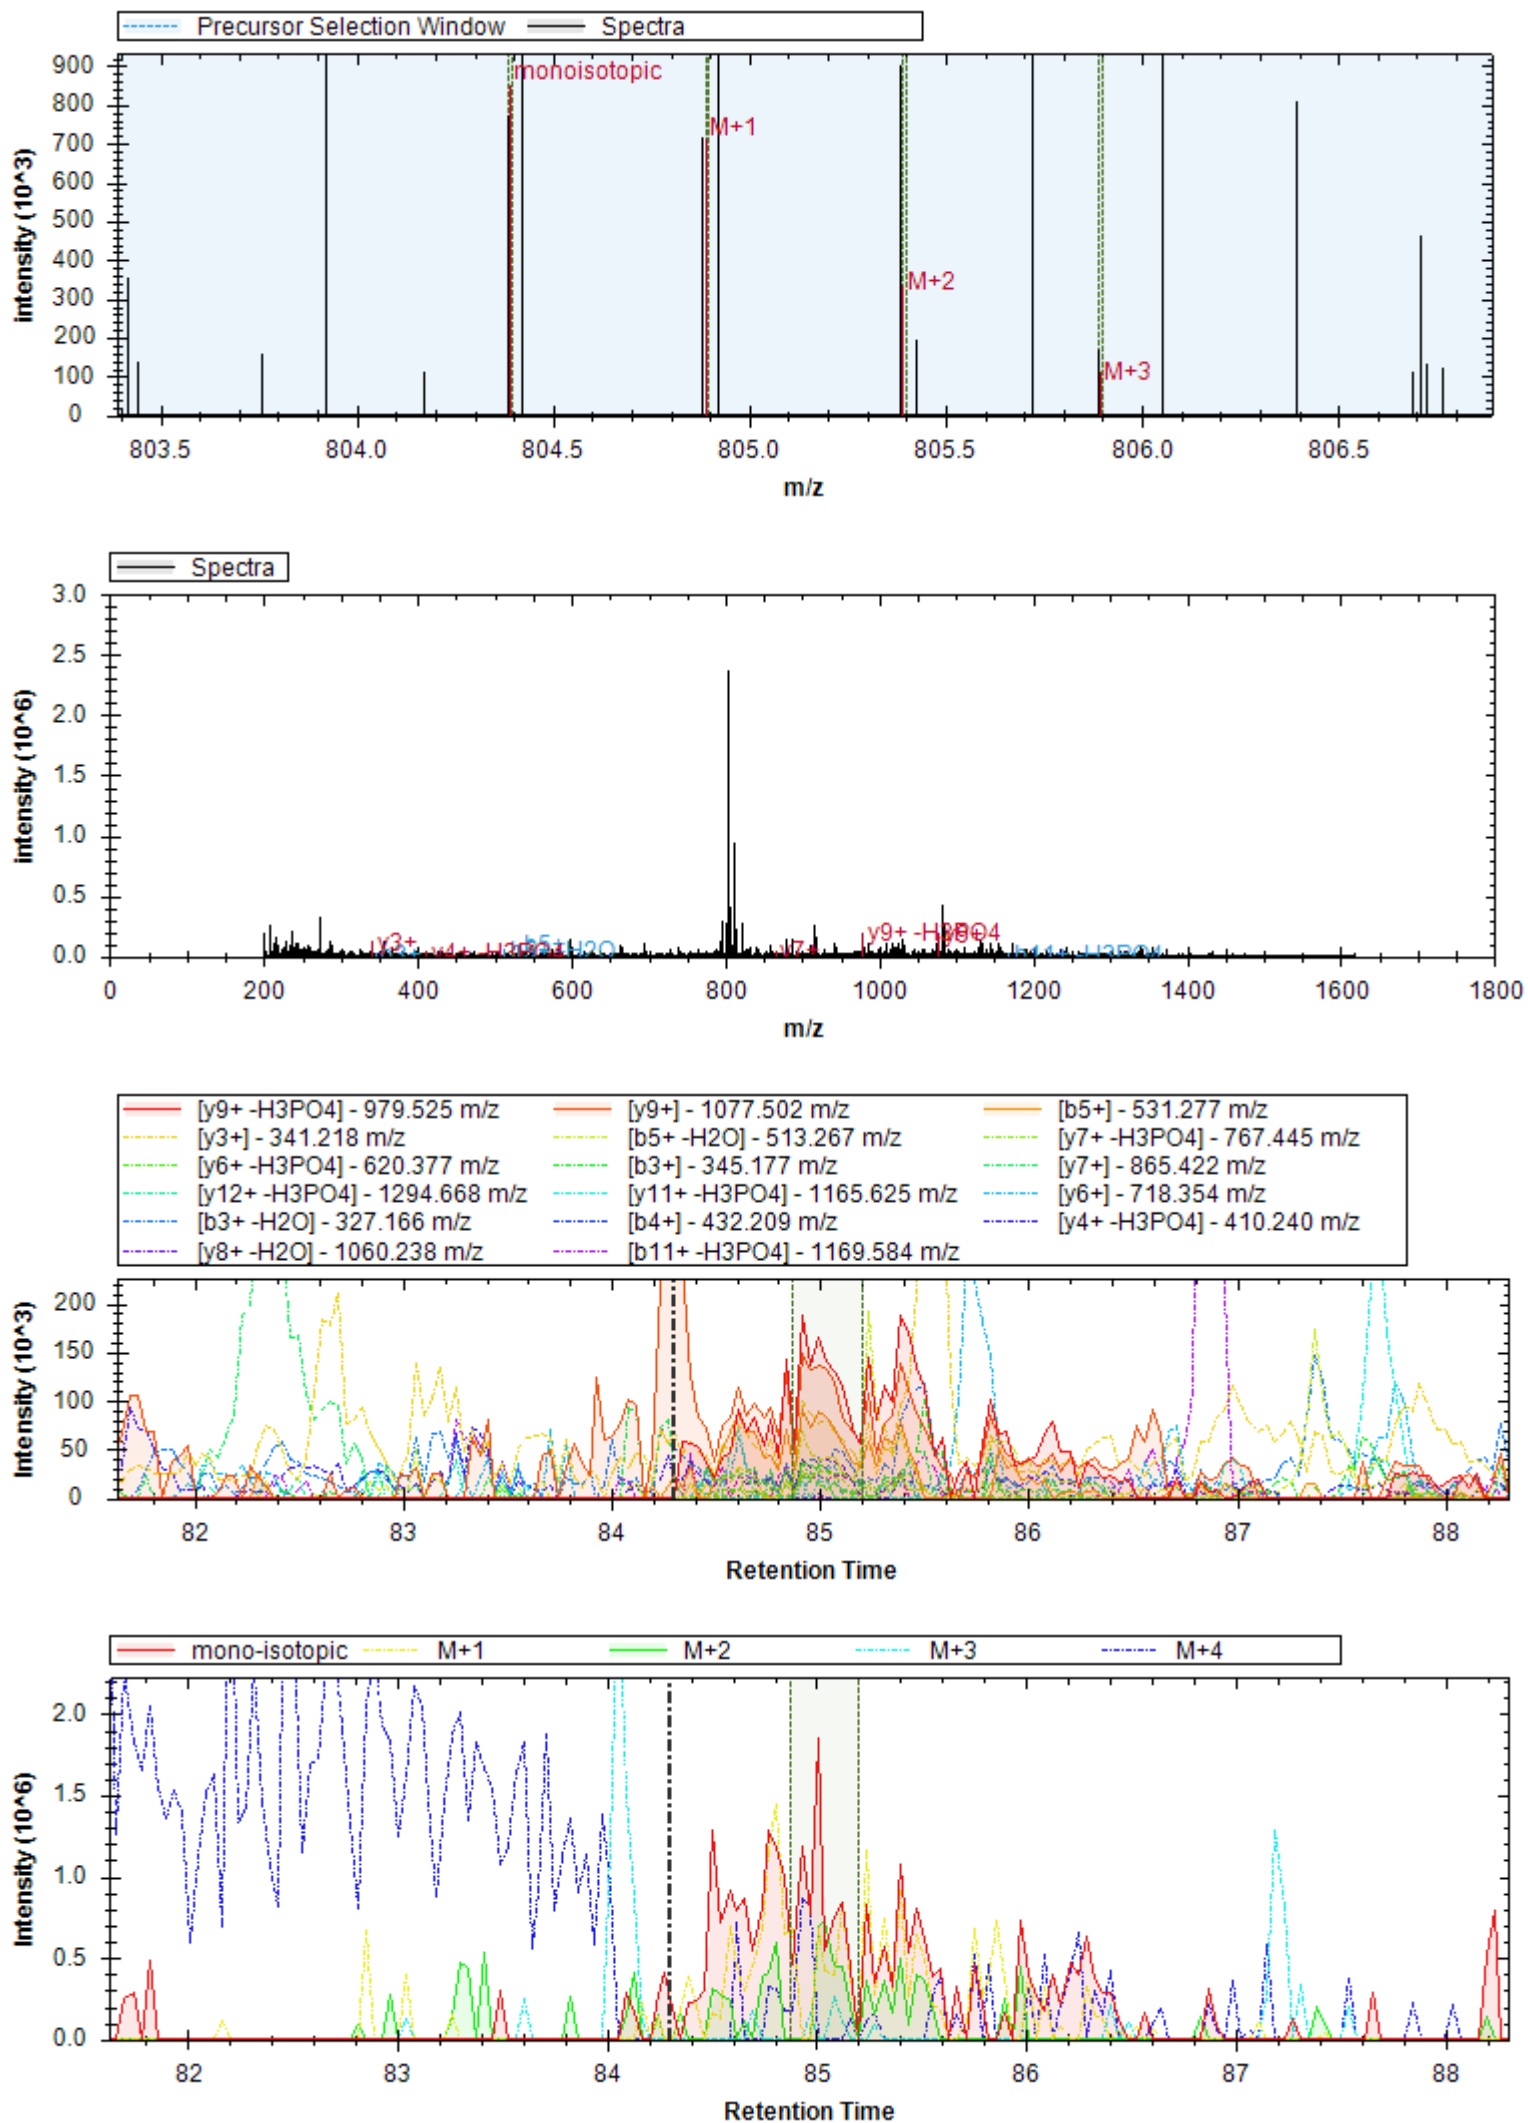

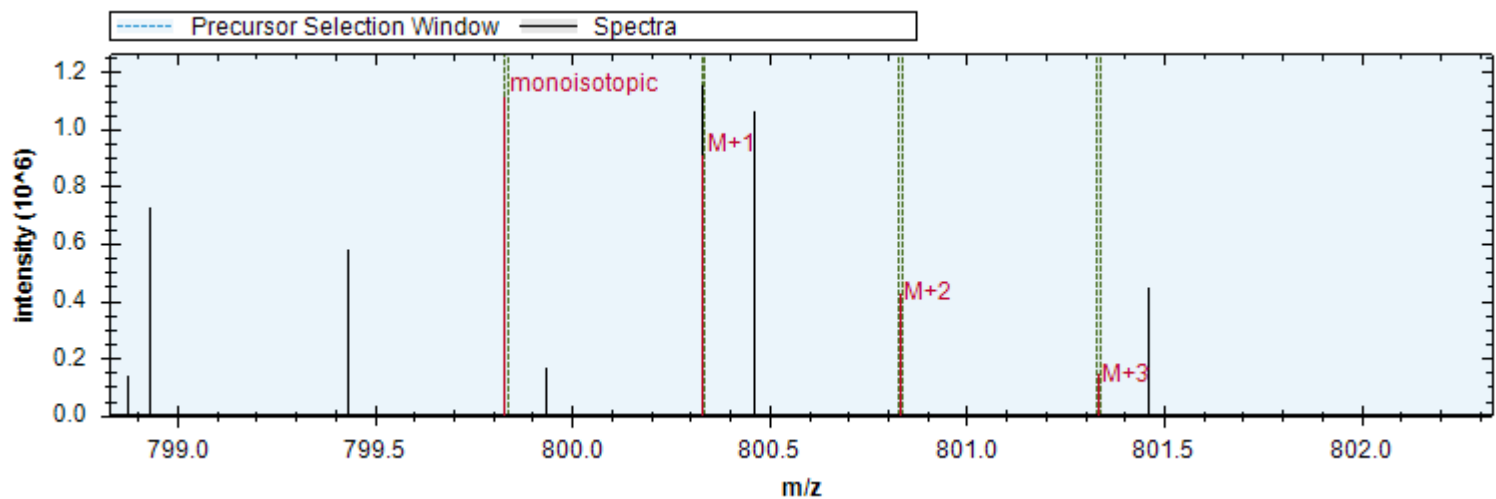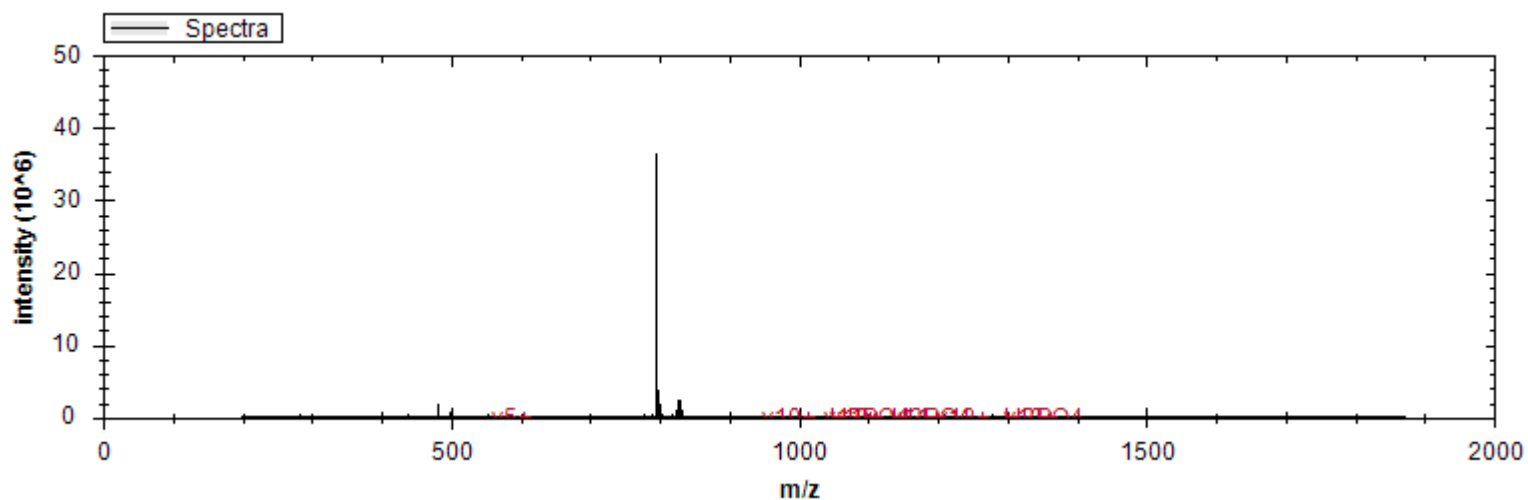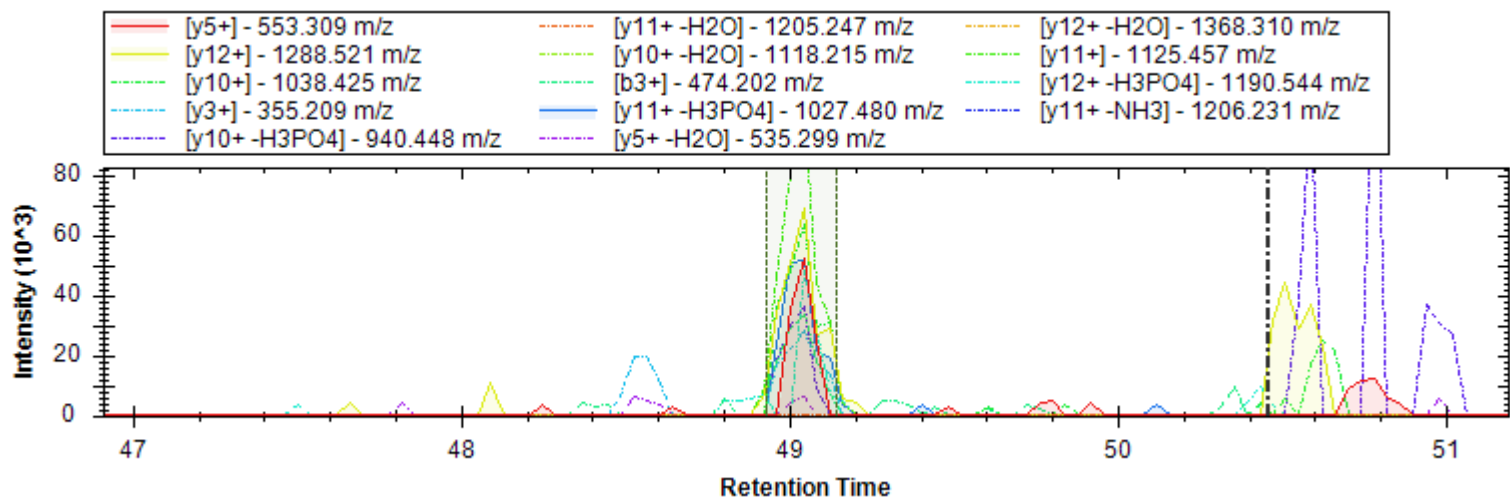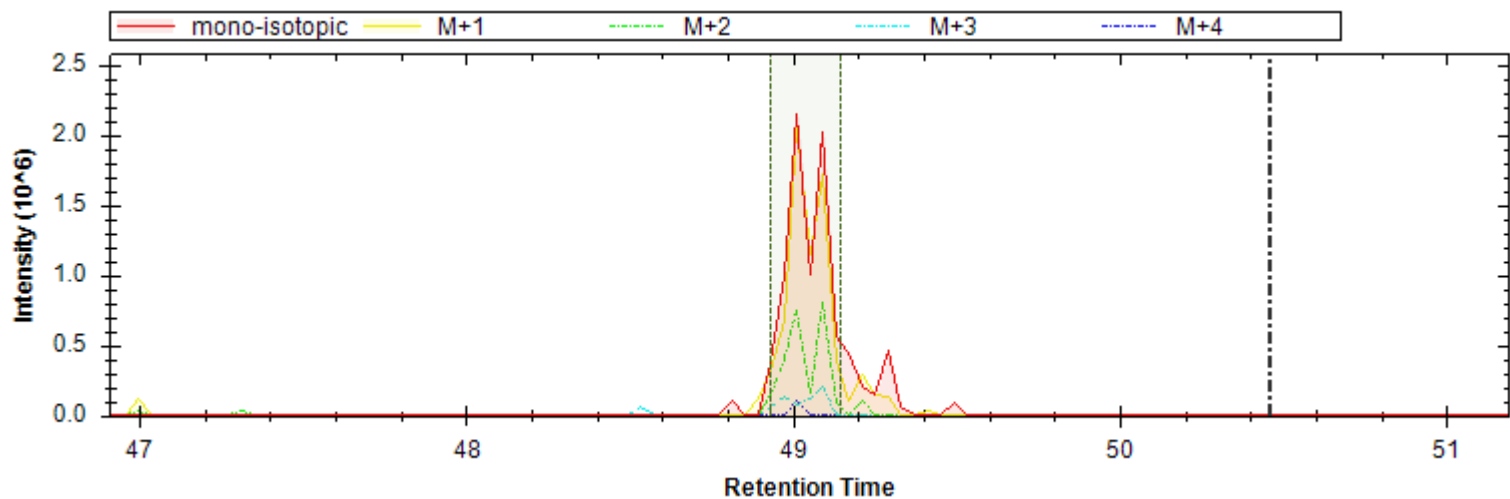



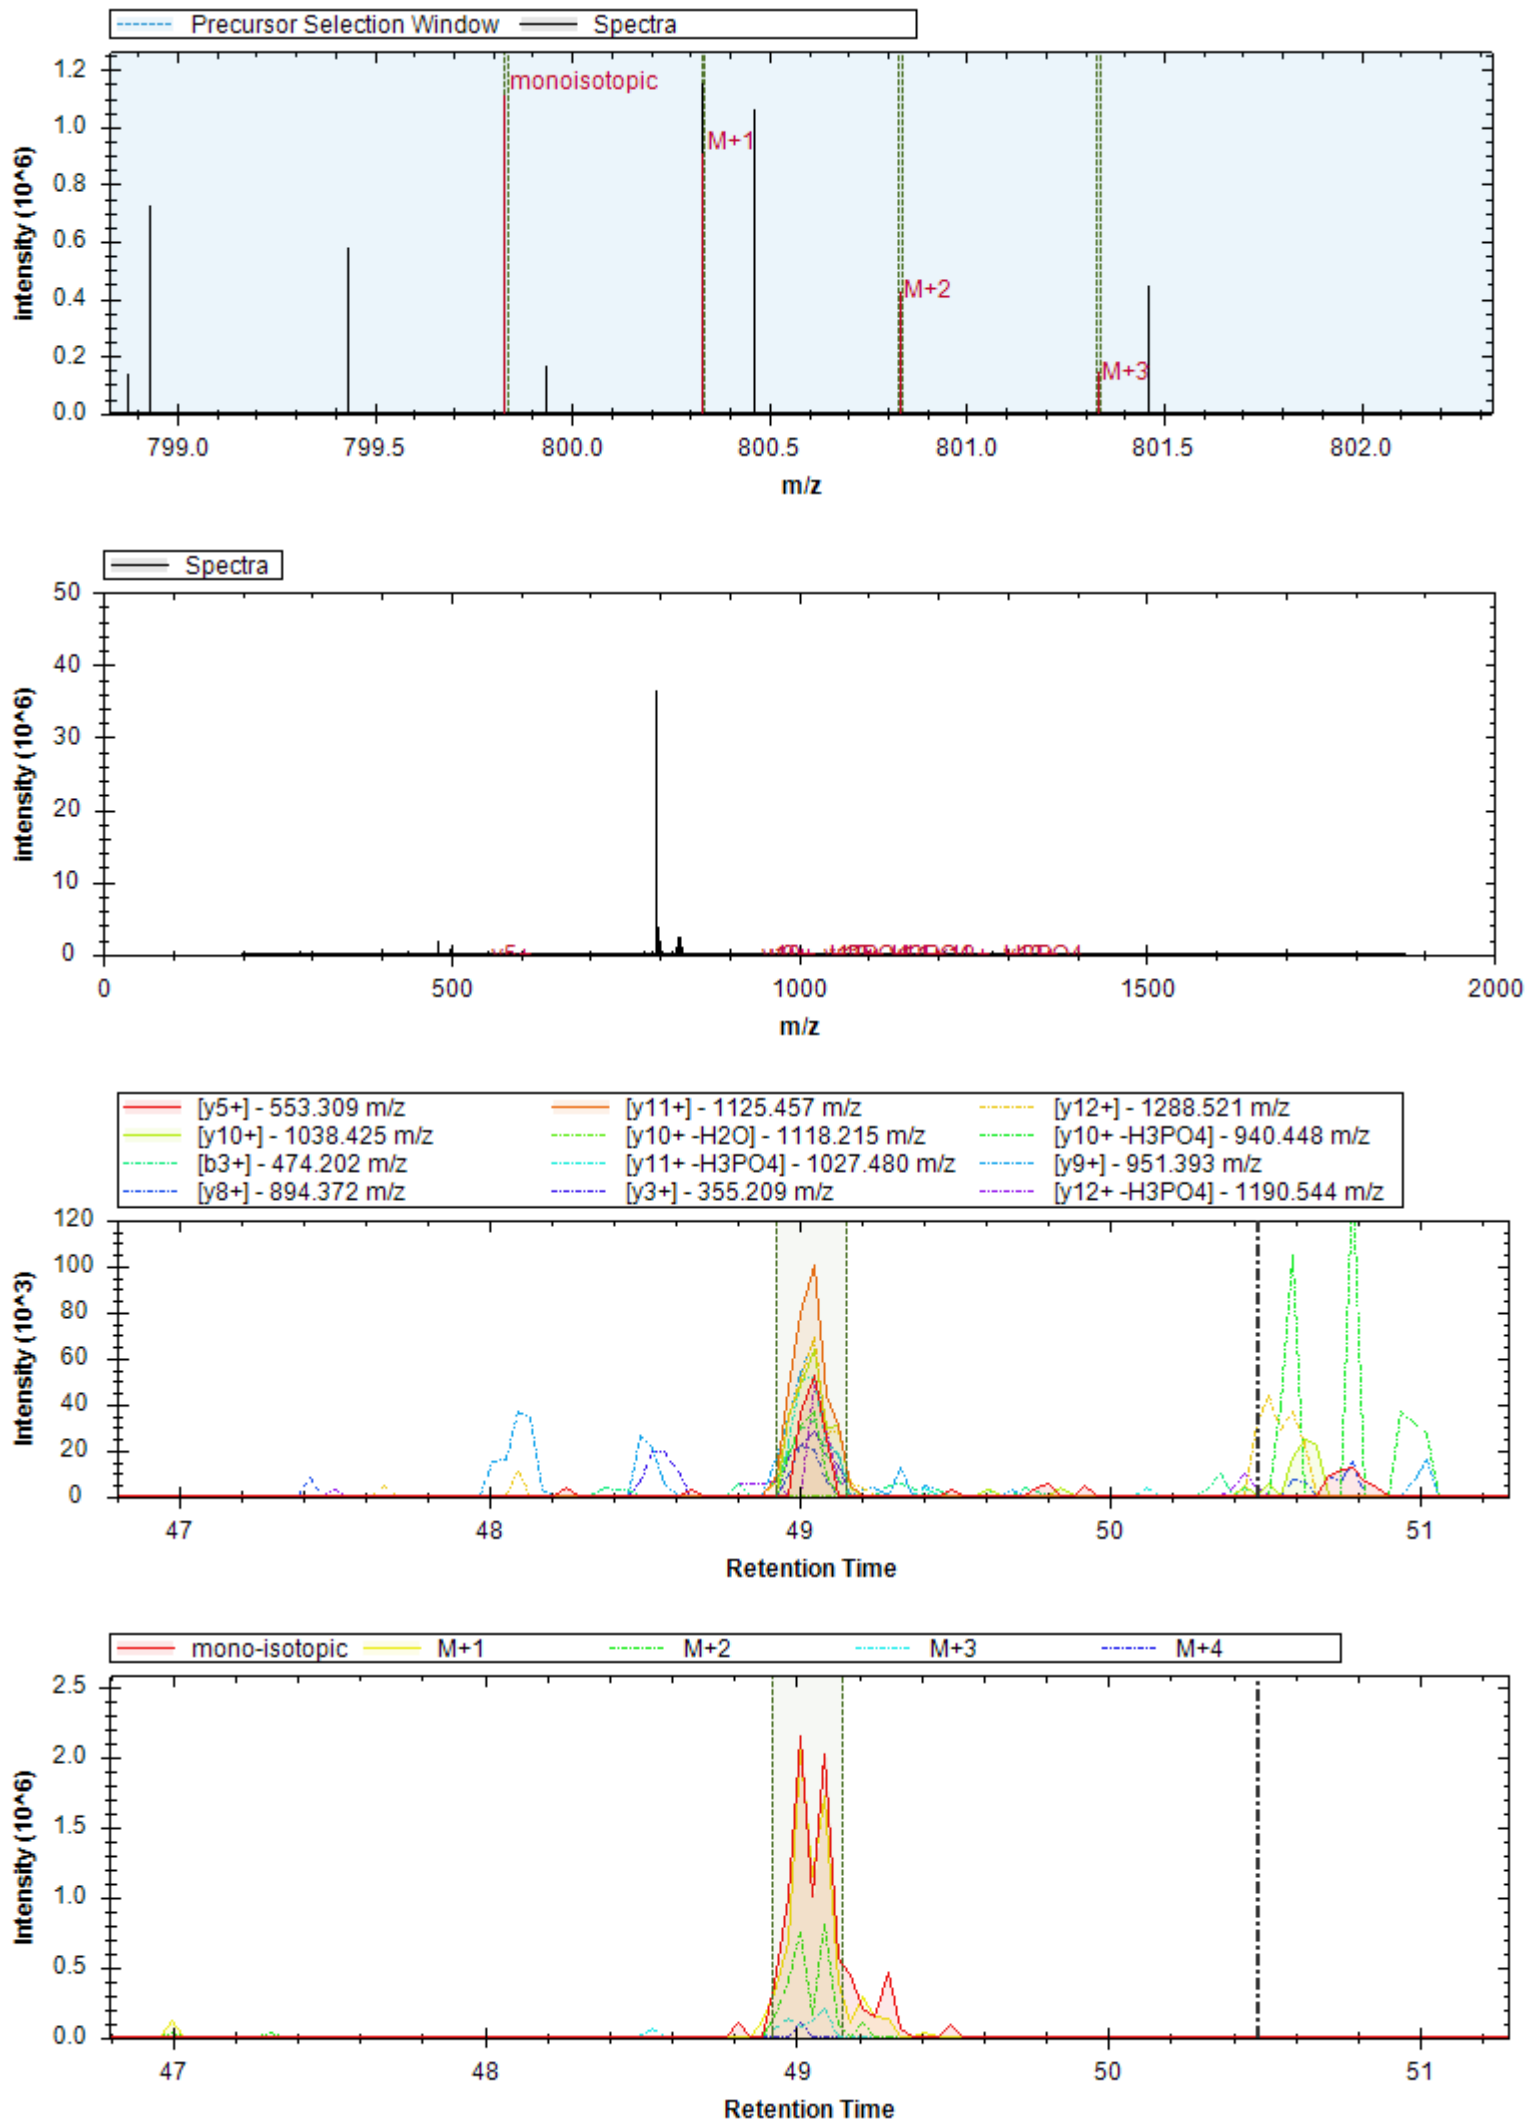

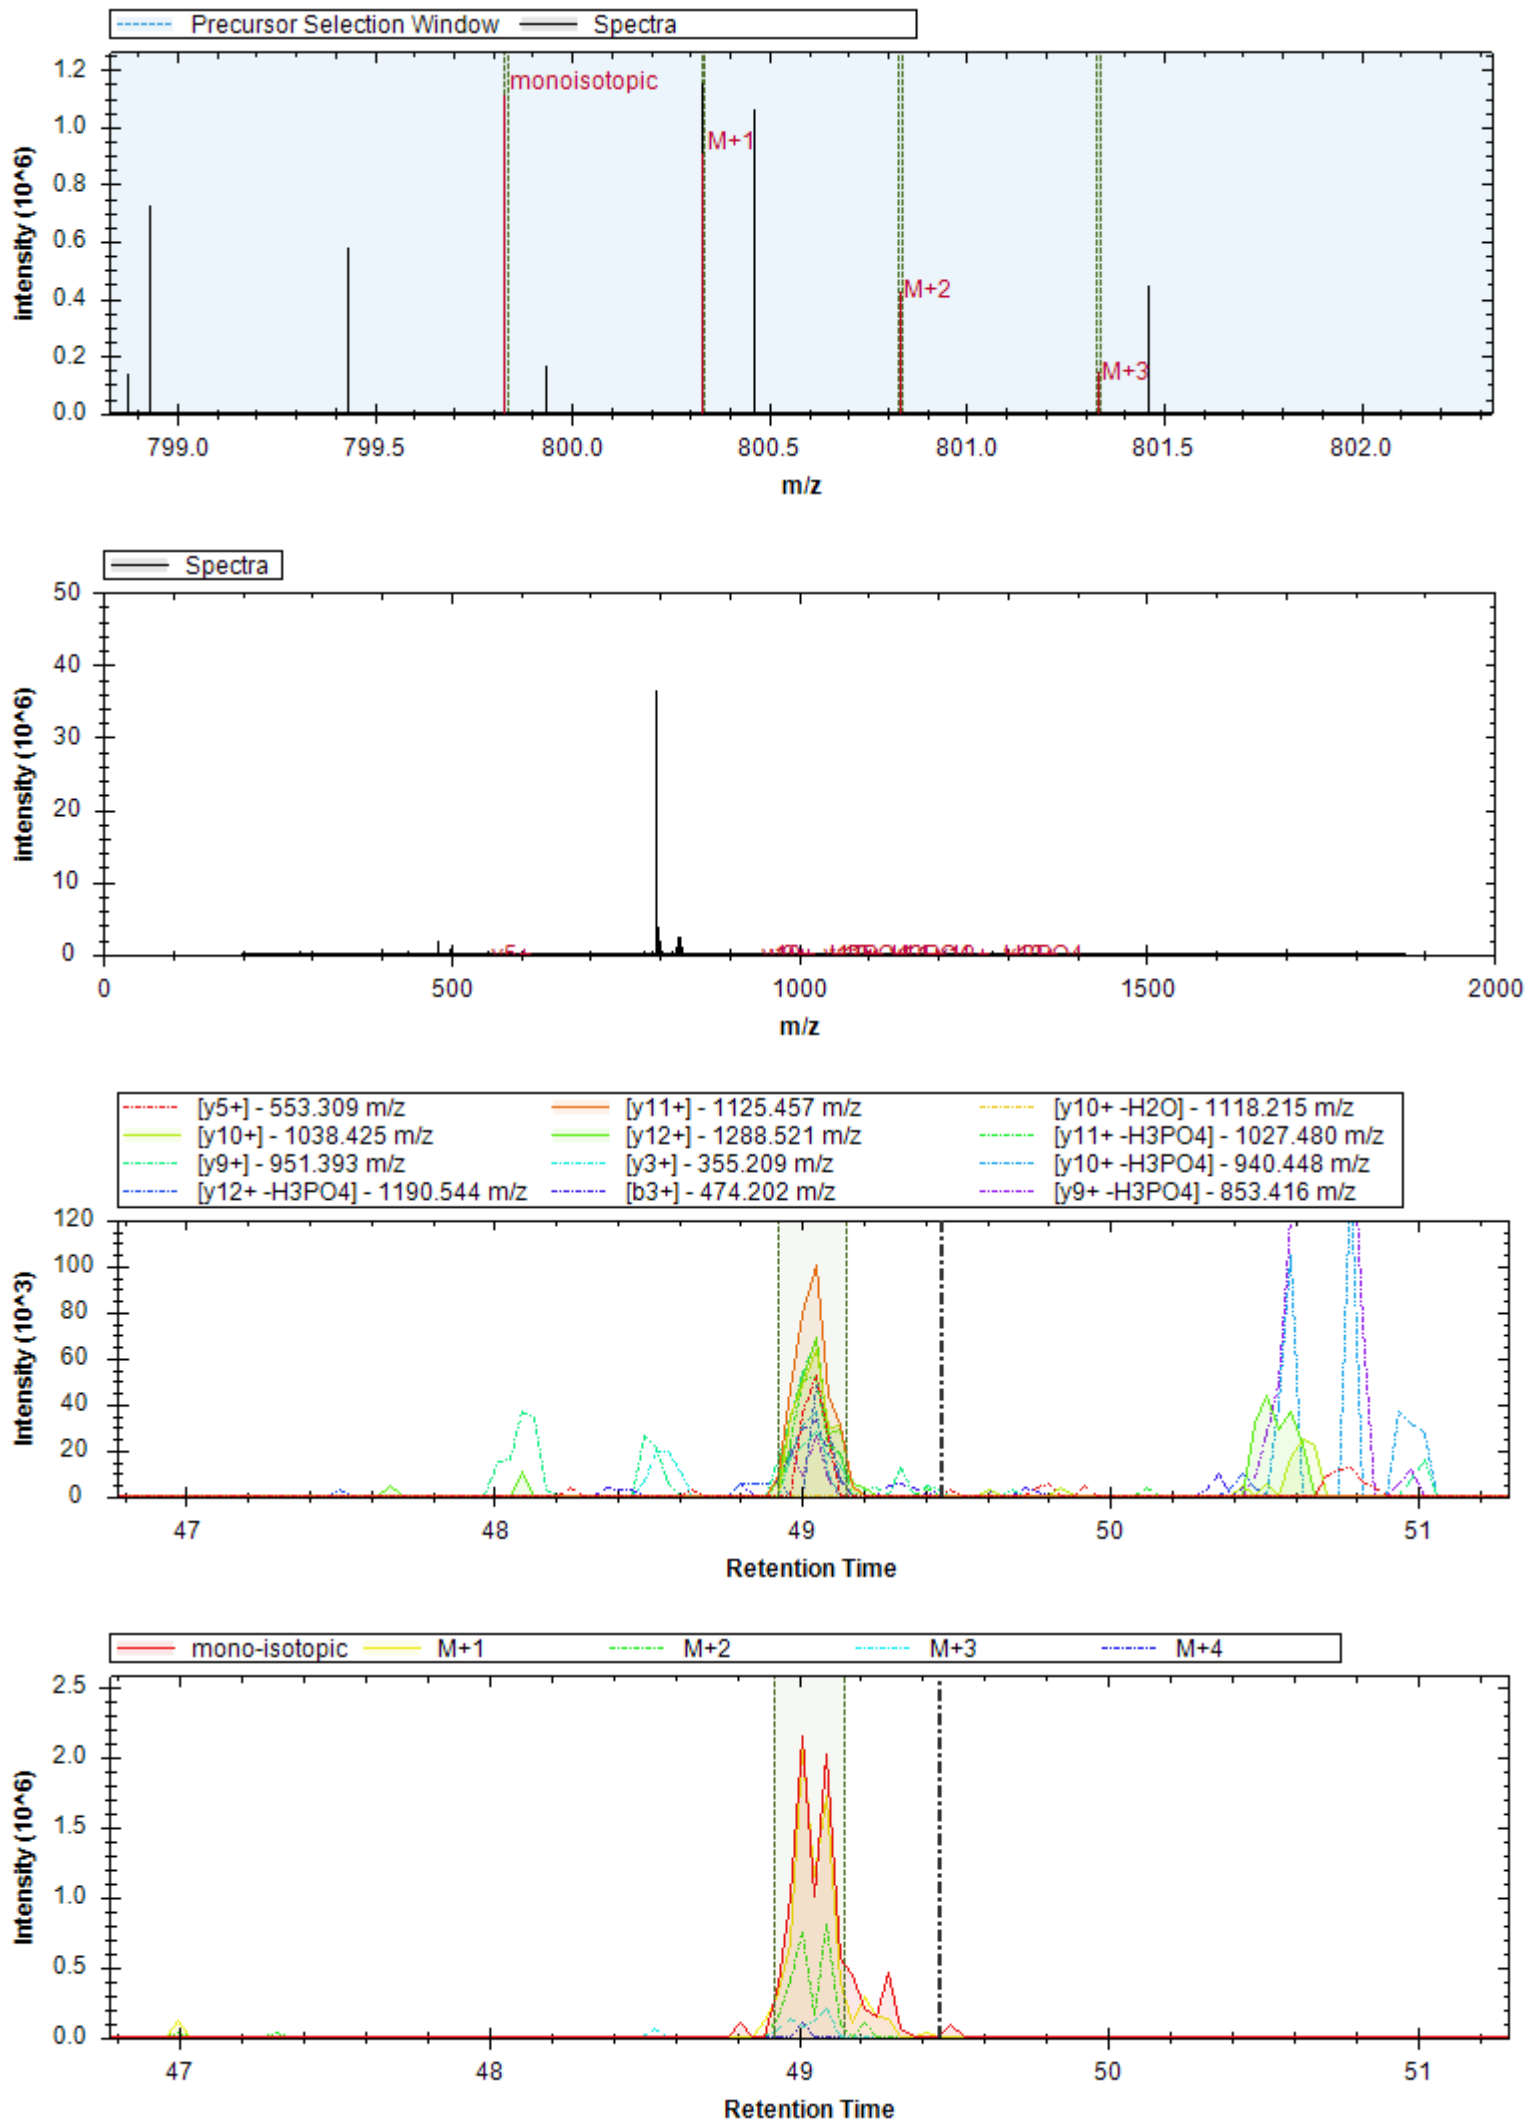

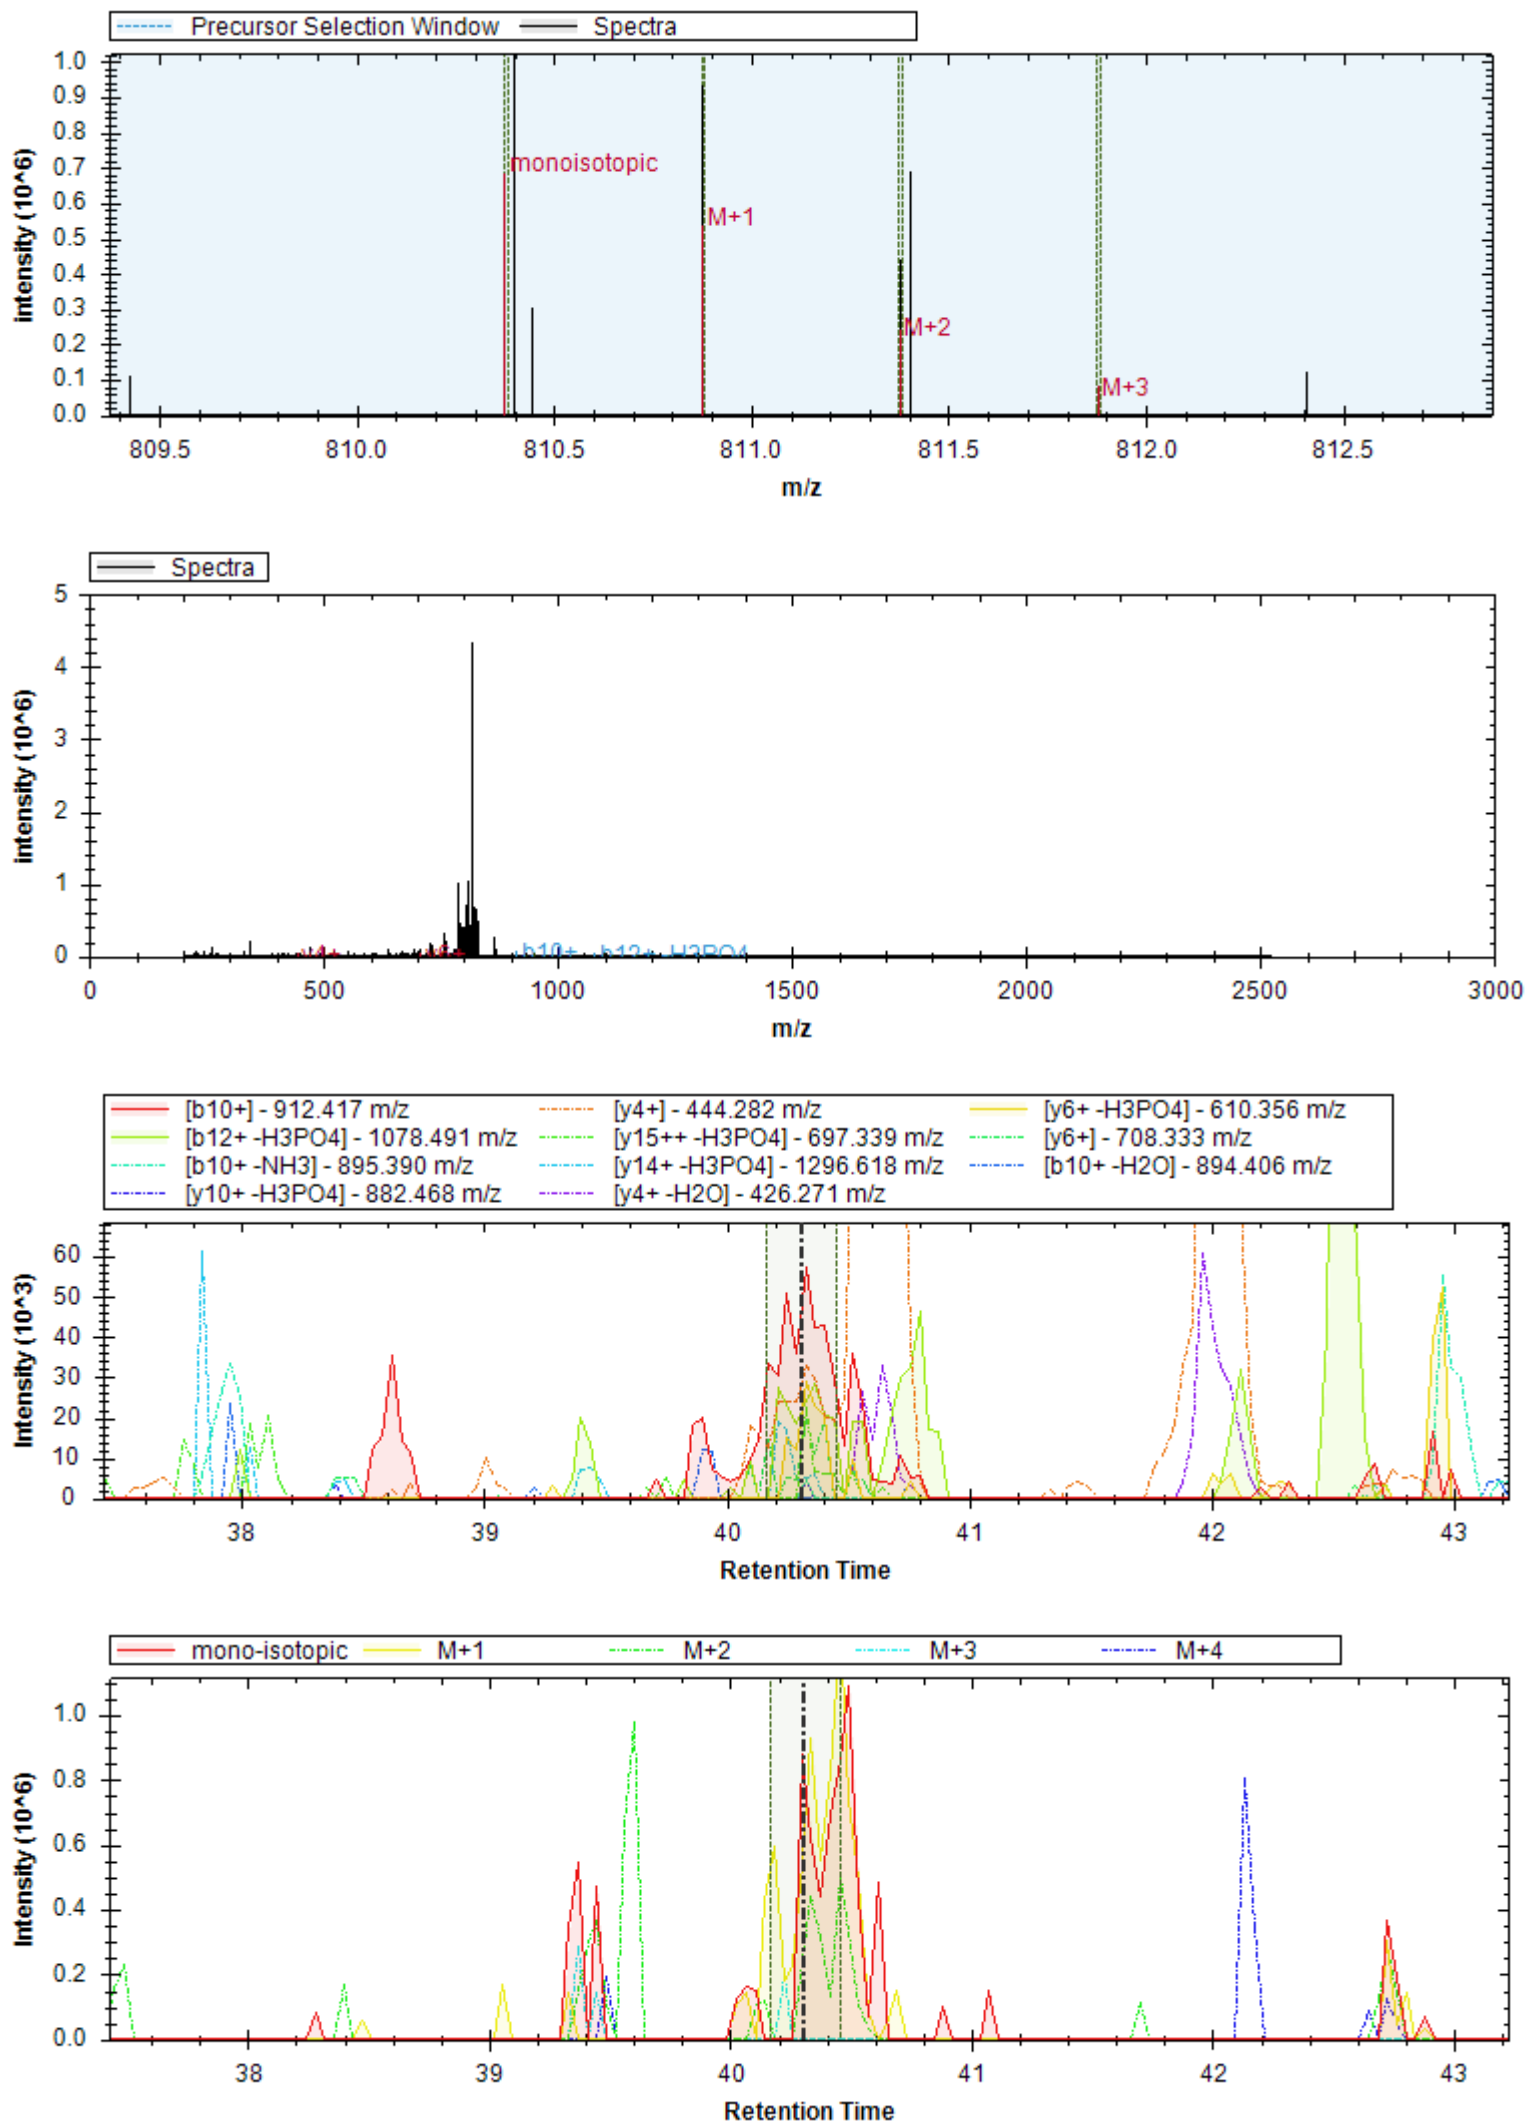

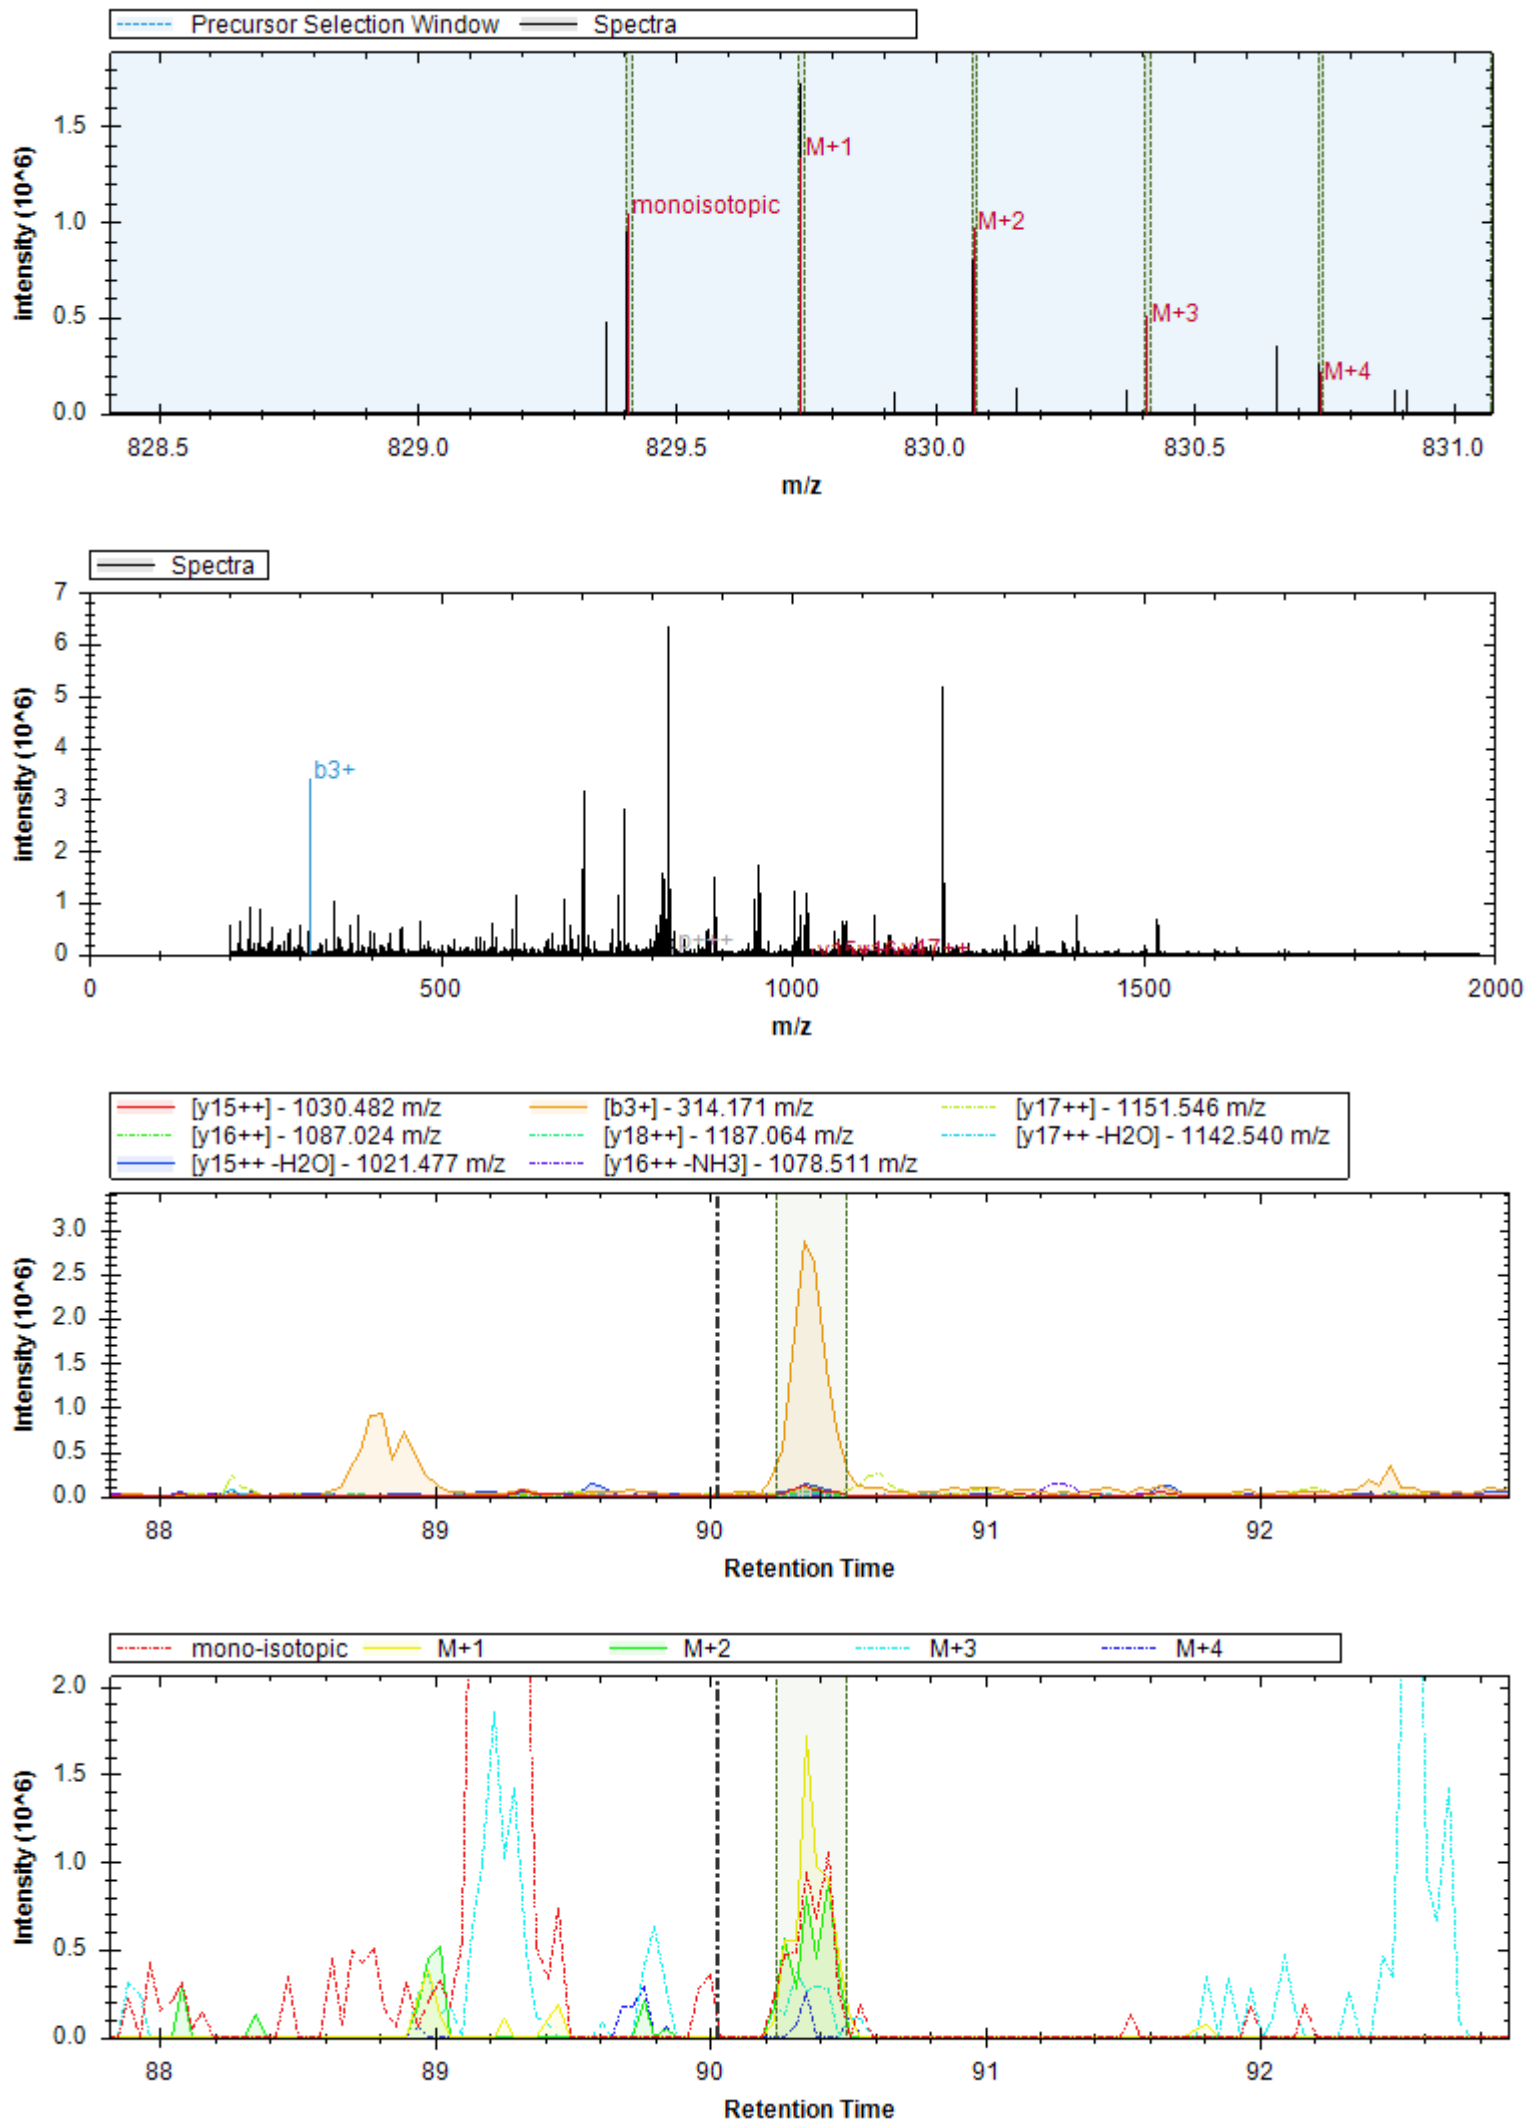

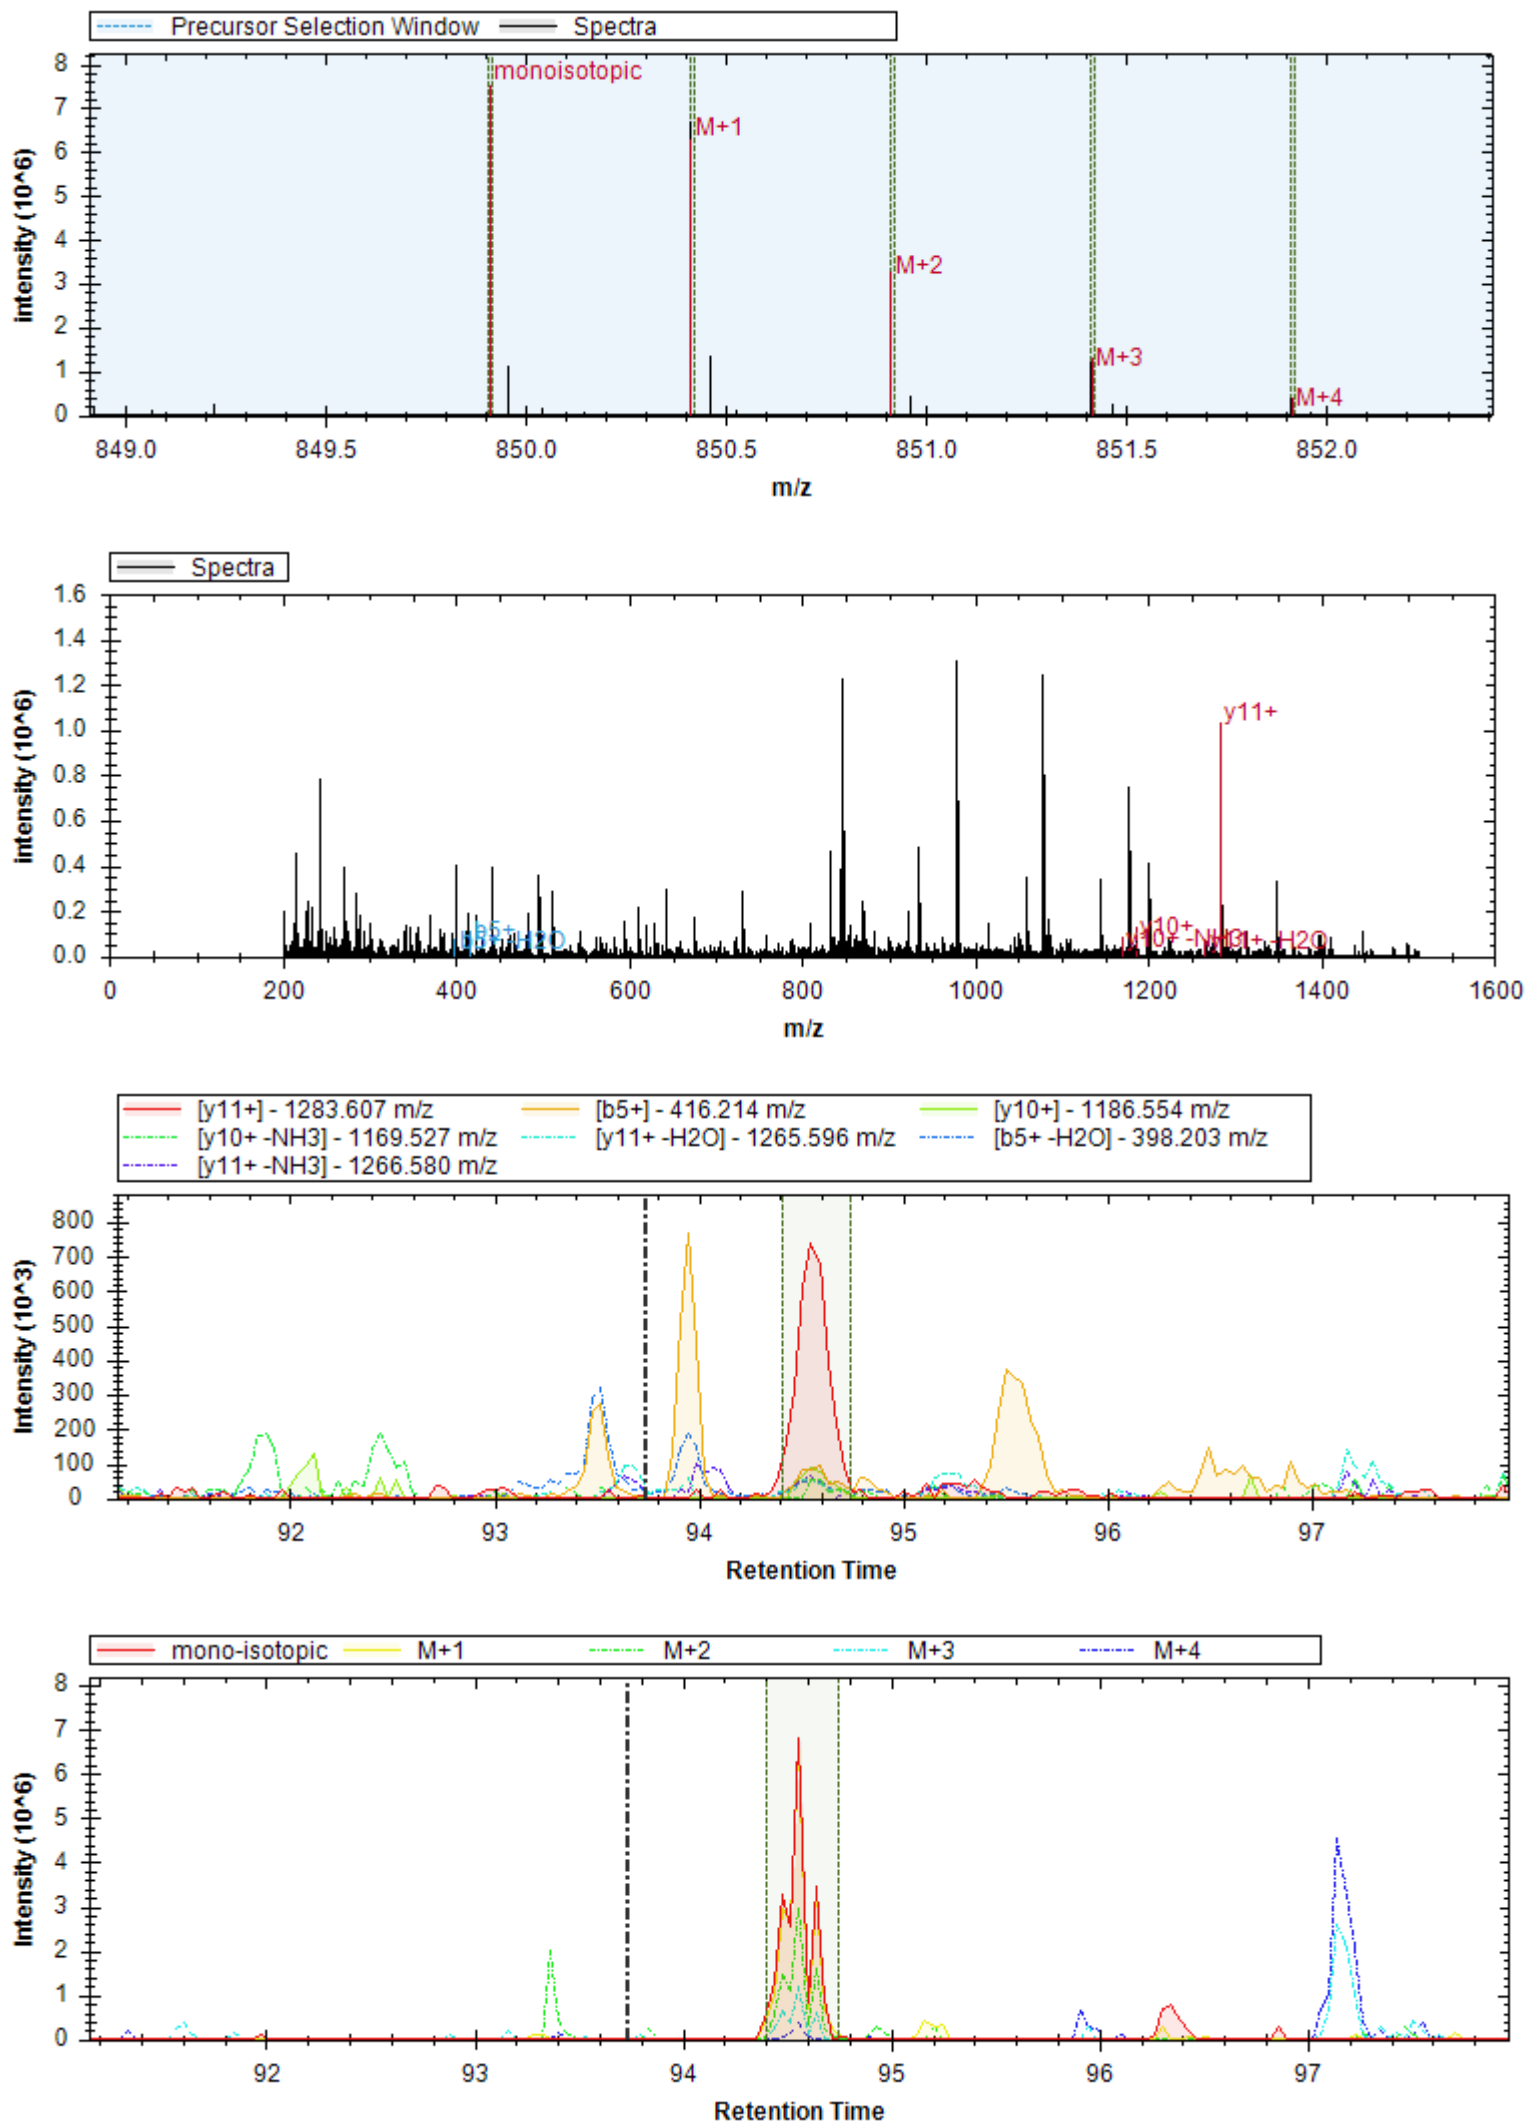

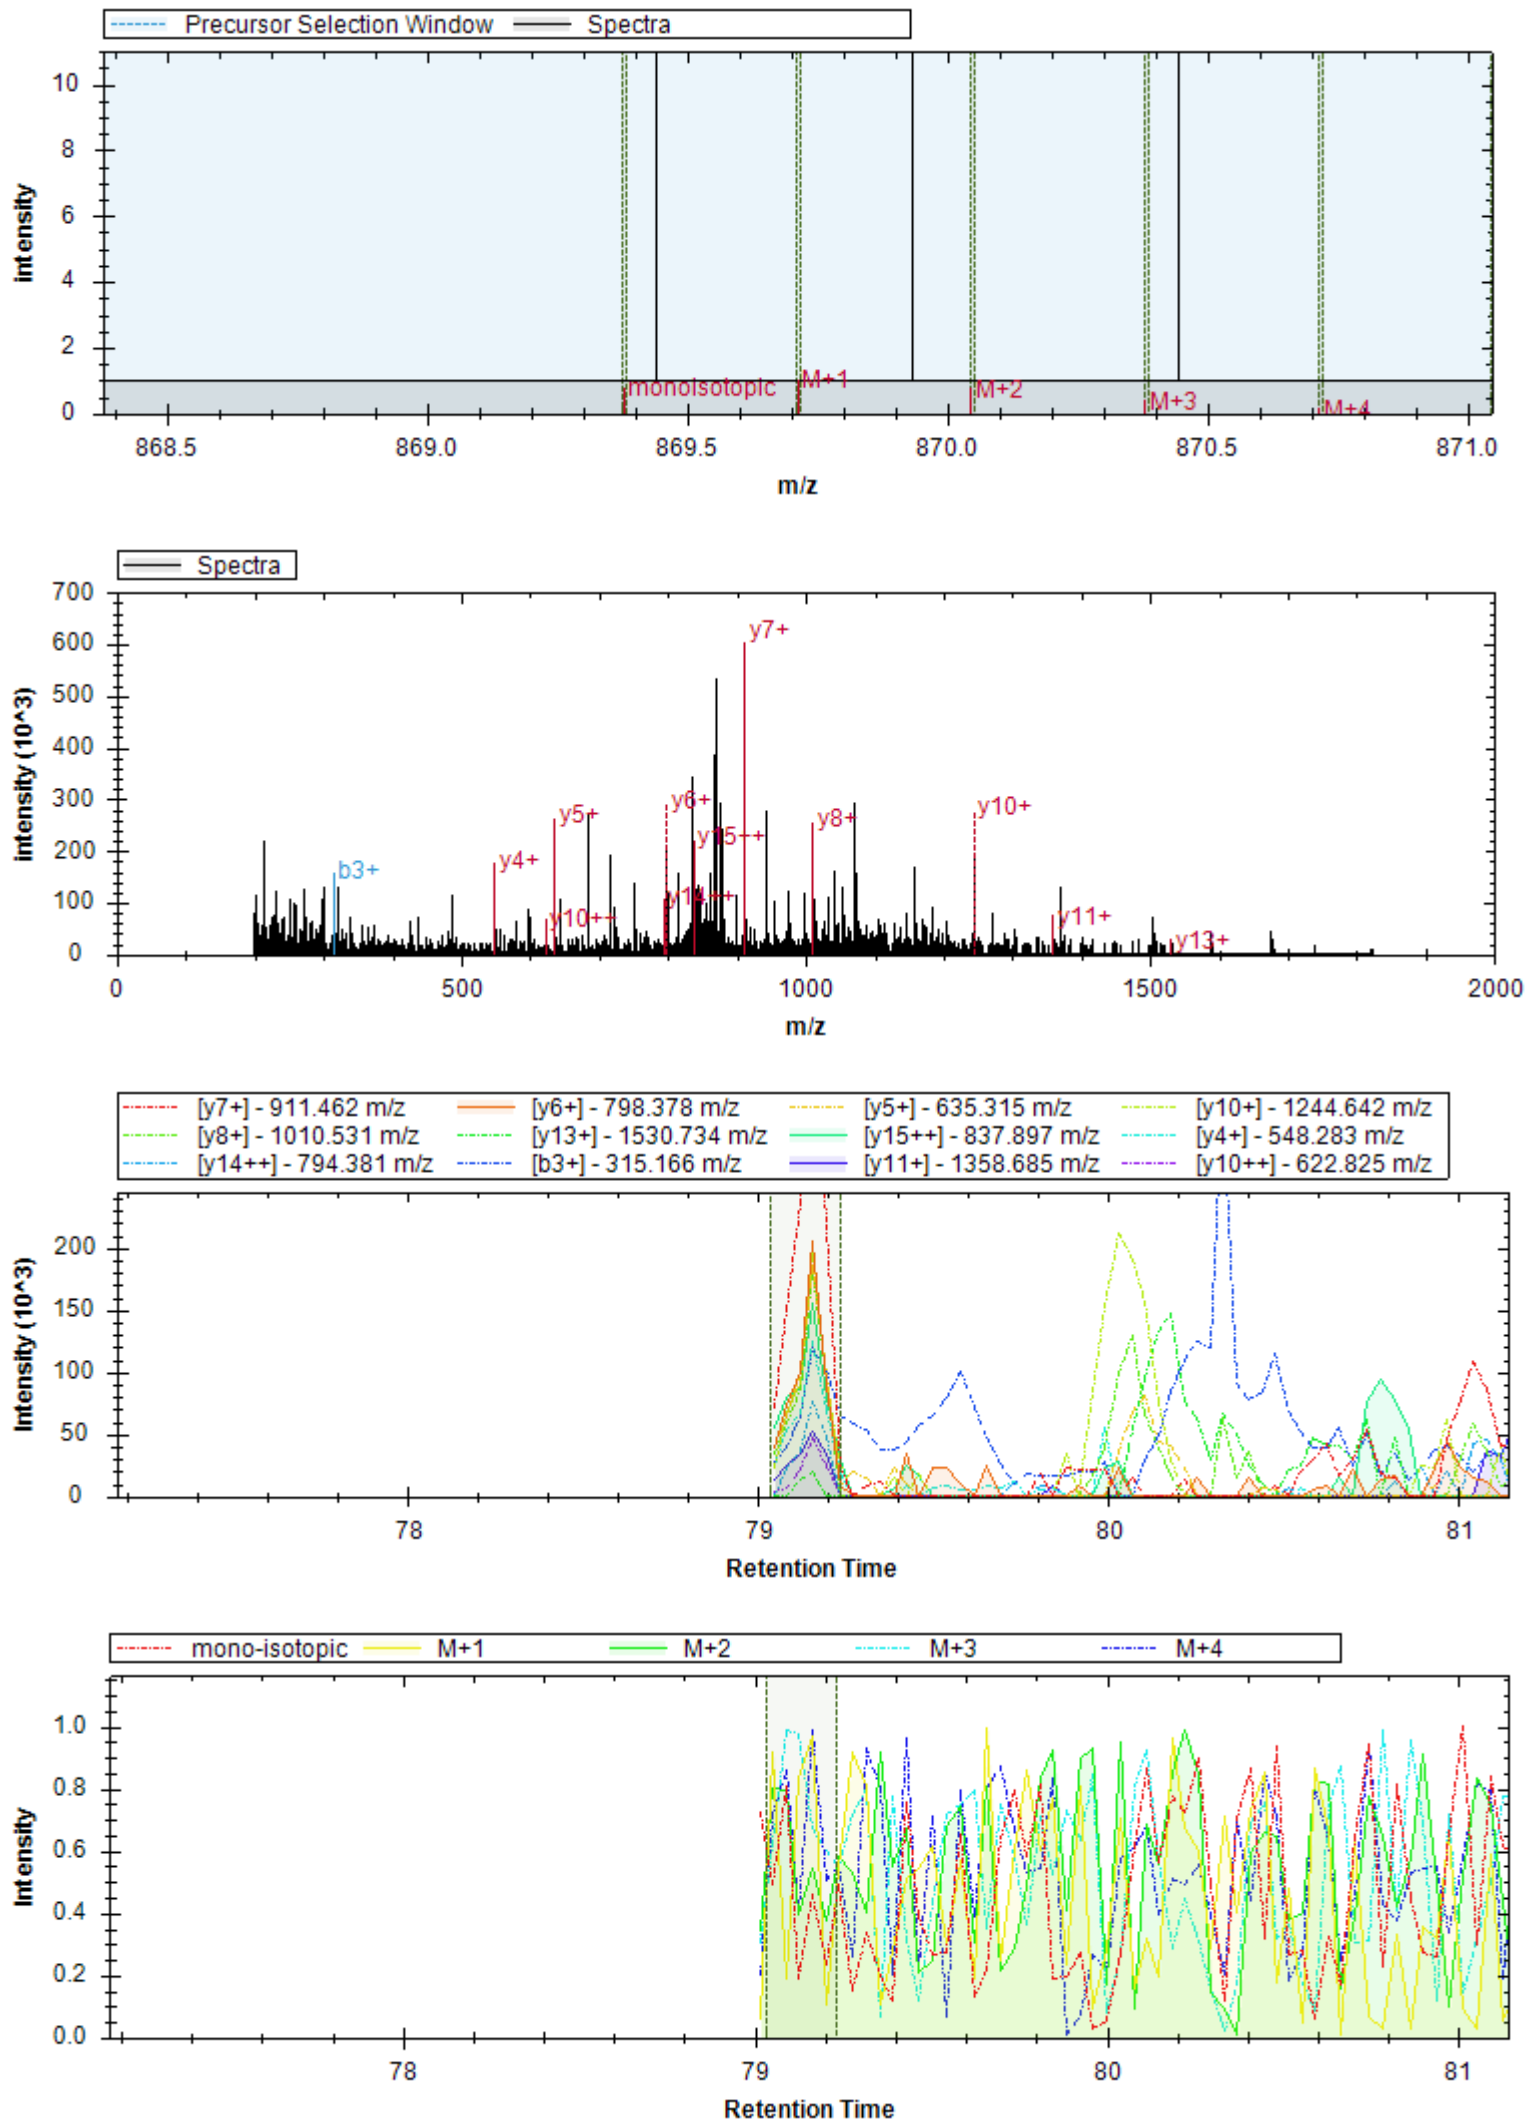

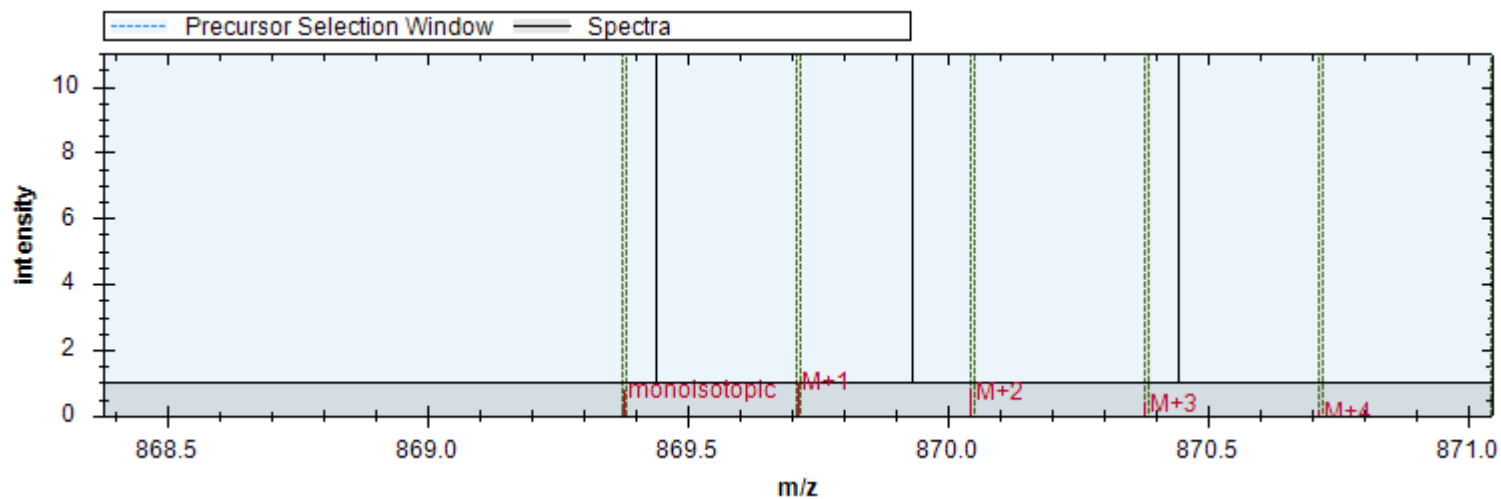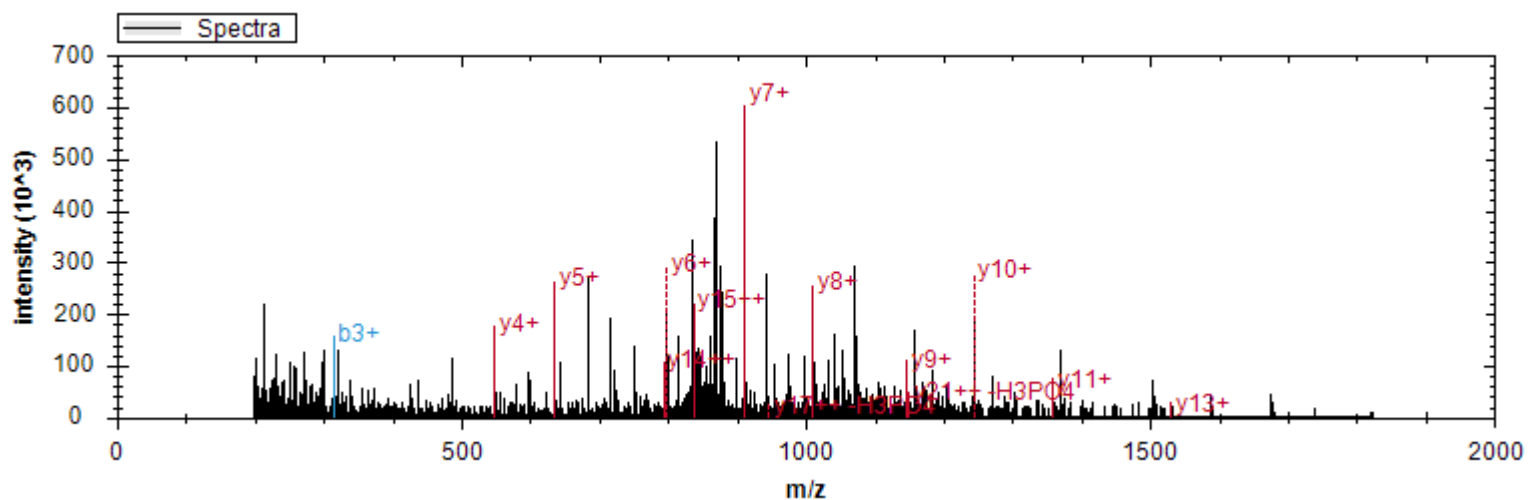

|                               |                               |                          |
|-------------------------------|-------------------------------|--------------------------|
| [y7+] - 911.462 m/z           | [y5+] - 635.315 m/z           | [y6+] - 798.378 m/z      |
| [y10+] - 1244.642 m/z         | [y8+] - 1010.531 m/z          | [y15++] - 837.897 m/z    |
| [y13+] - 1530.734 m/z         | [y4+] - 548.283 m/z           | [y14++] - 794.381 m/z    |
| [y17++ -H3PO4] - 945.942 m/z  | [b3+] - 315.166 m/z           | [y9+] - 1147.589 m/z     |
| [y19++ -H3PO4] - 1032.974 m/z | [y11+] - 1358.685 m/z         | [b4+ -H2O] - 426.198 m/z |
| [y21++] - 1197.008 m/z        | [y21++ -H3PO4] - 1148.019 m/z |                          |

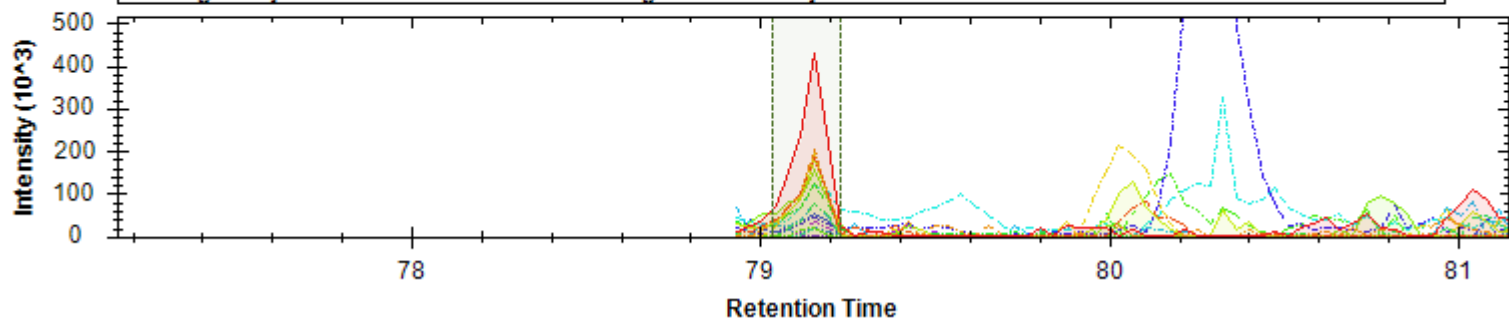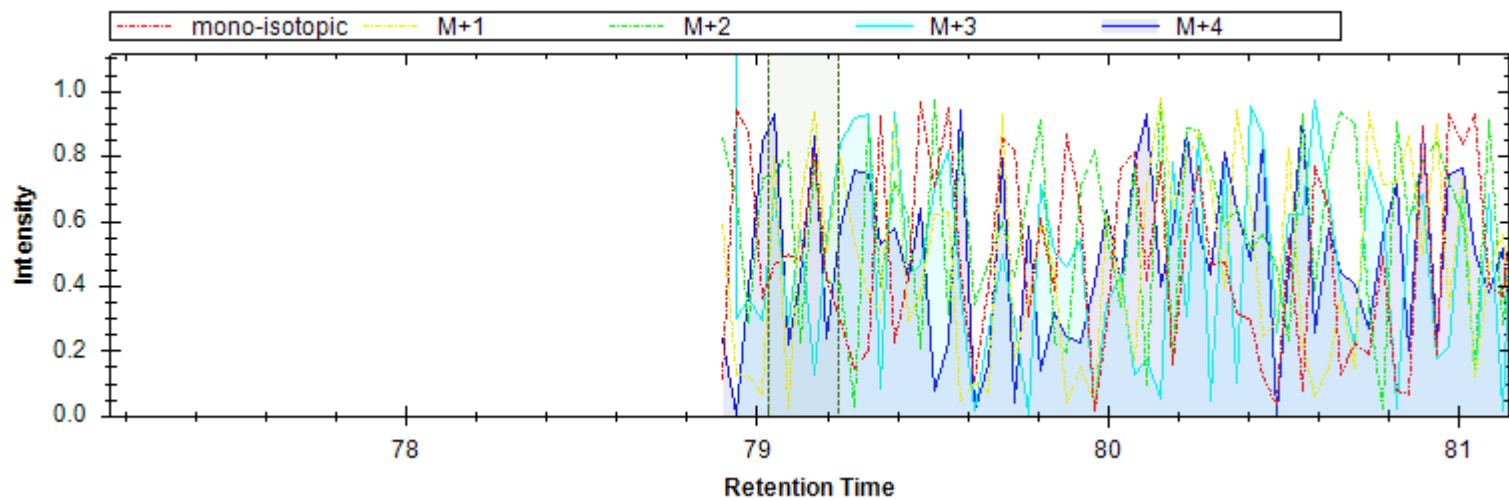

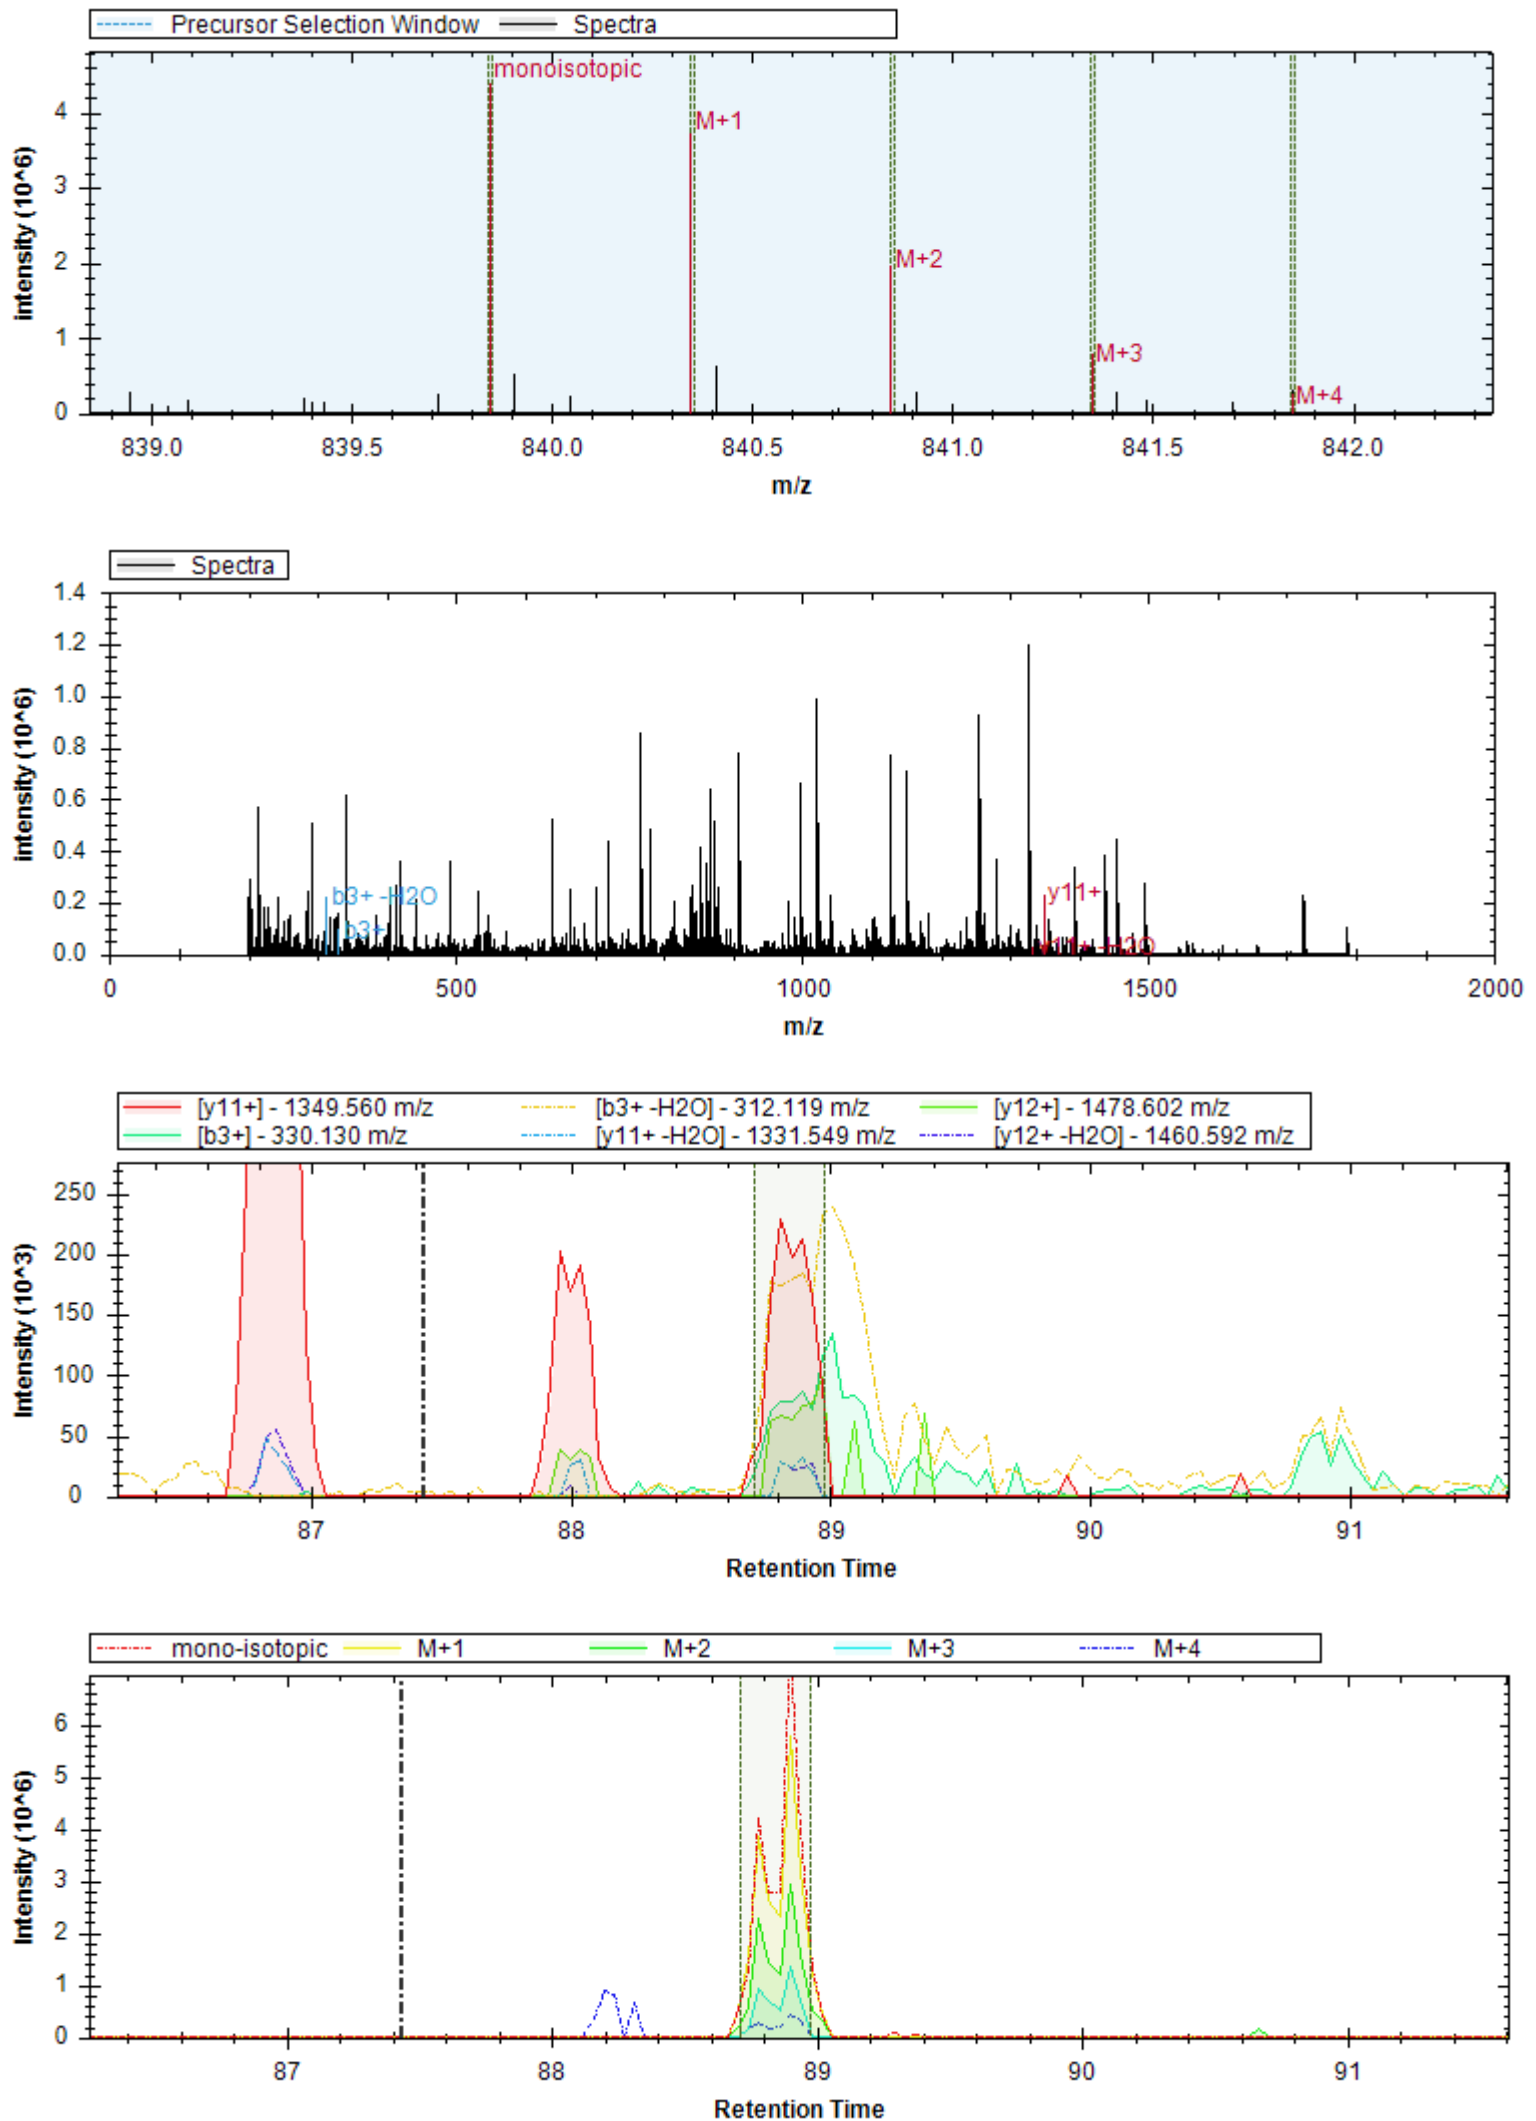



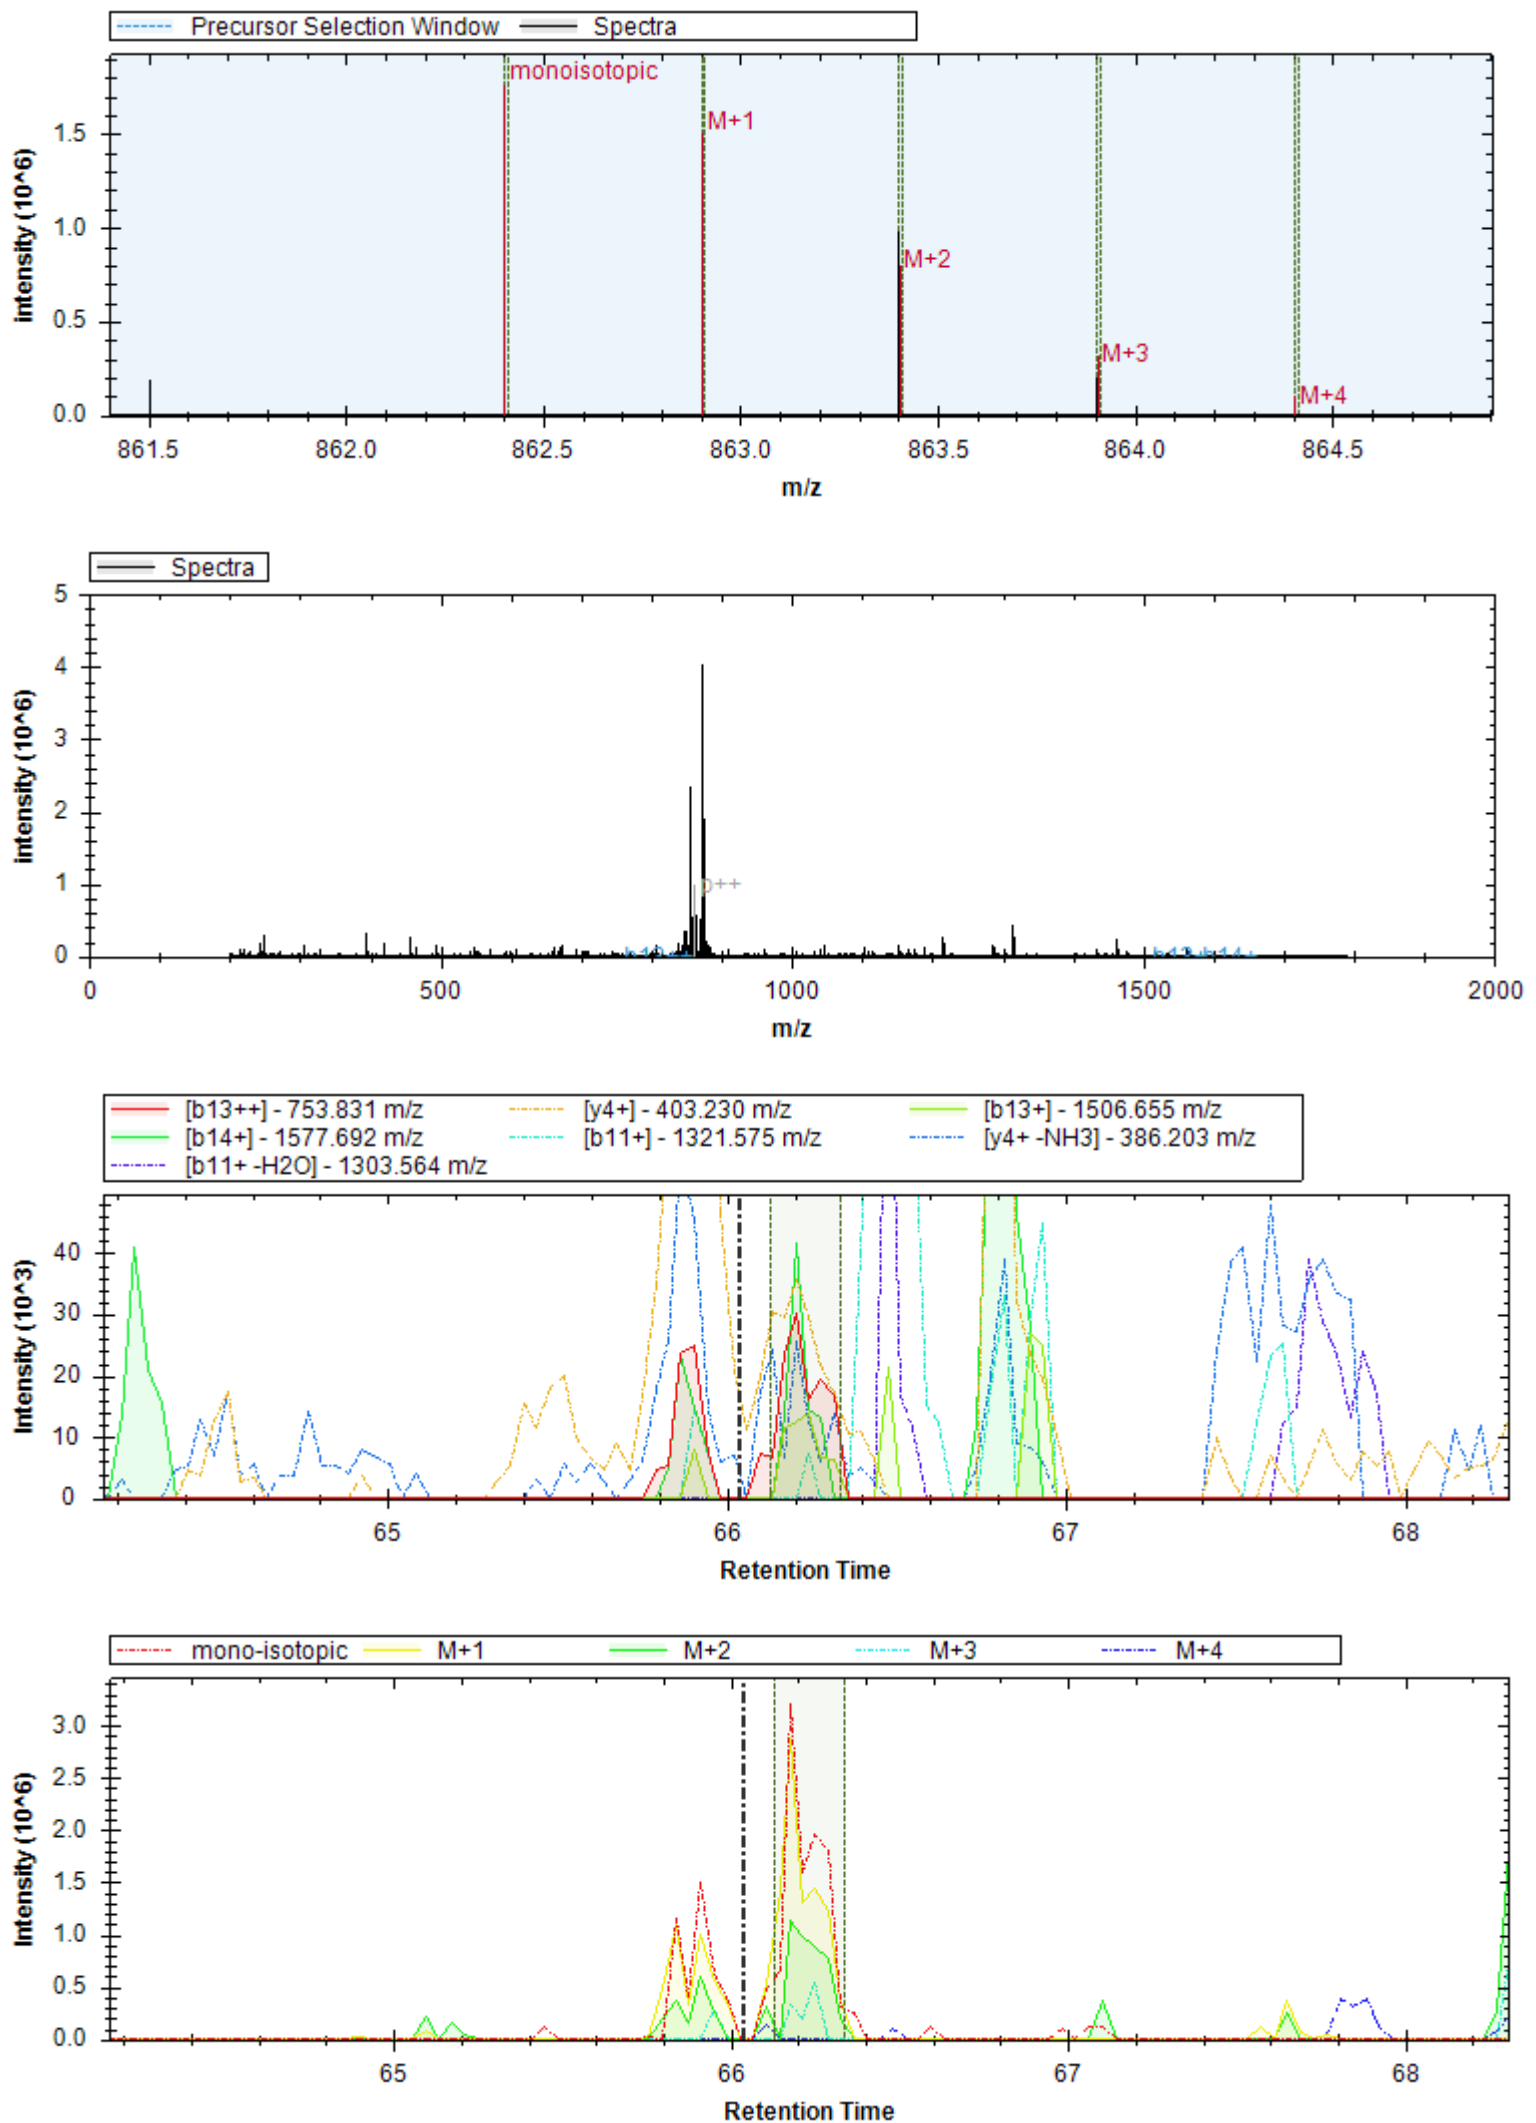

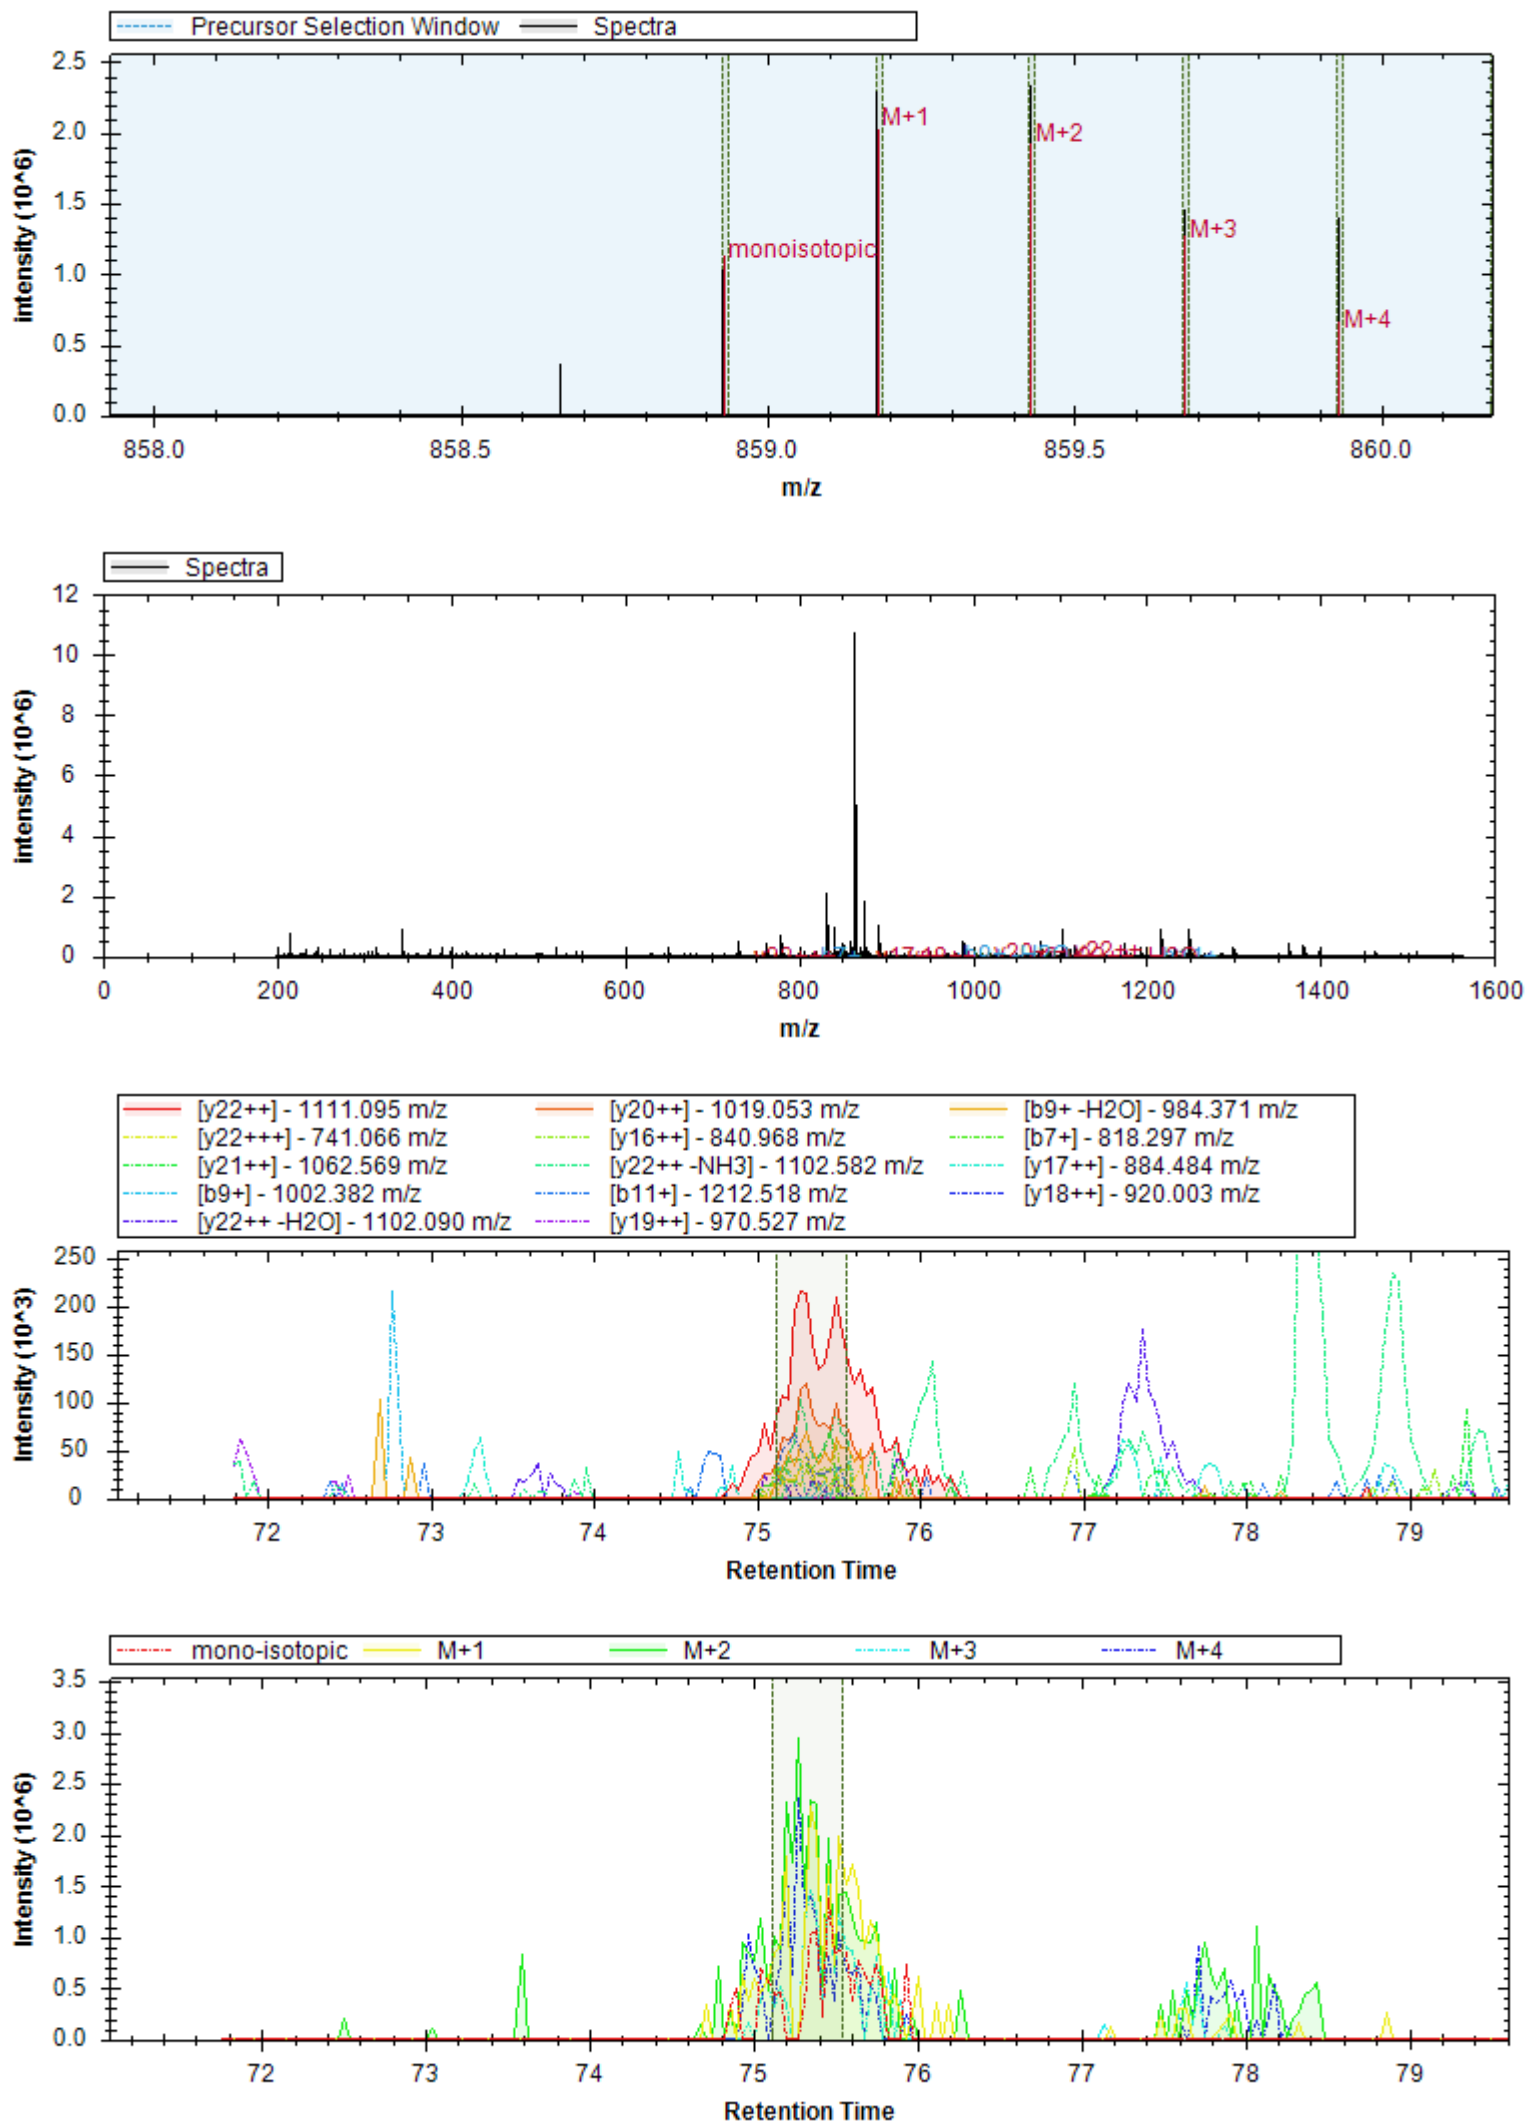

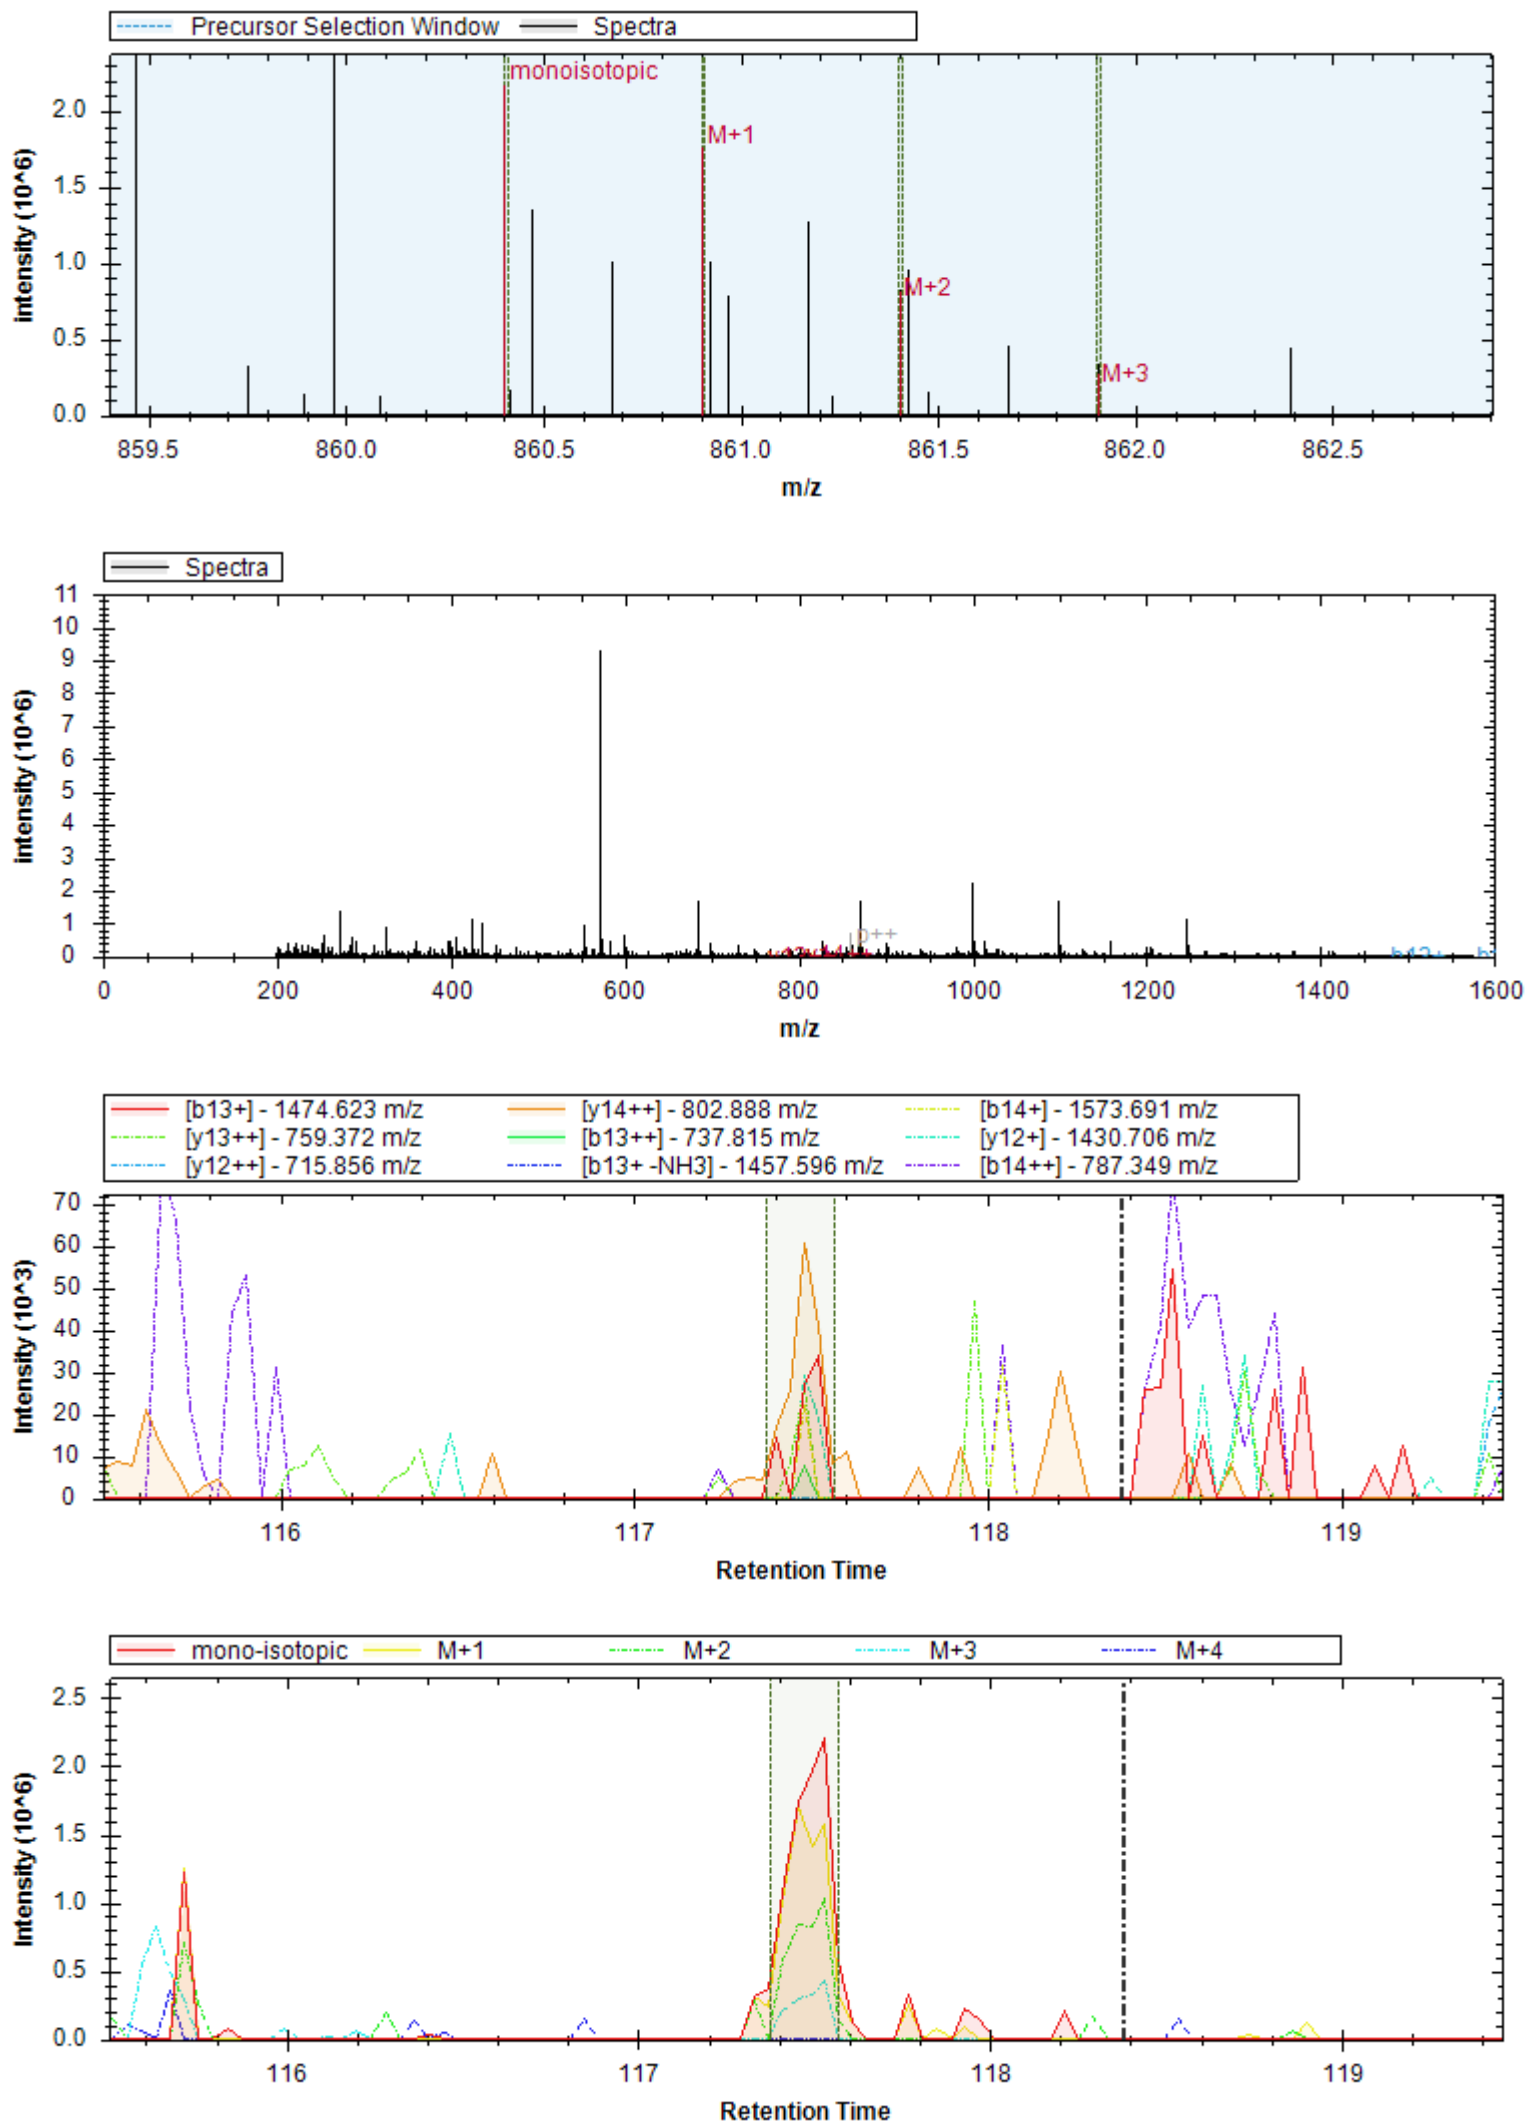

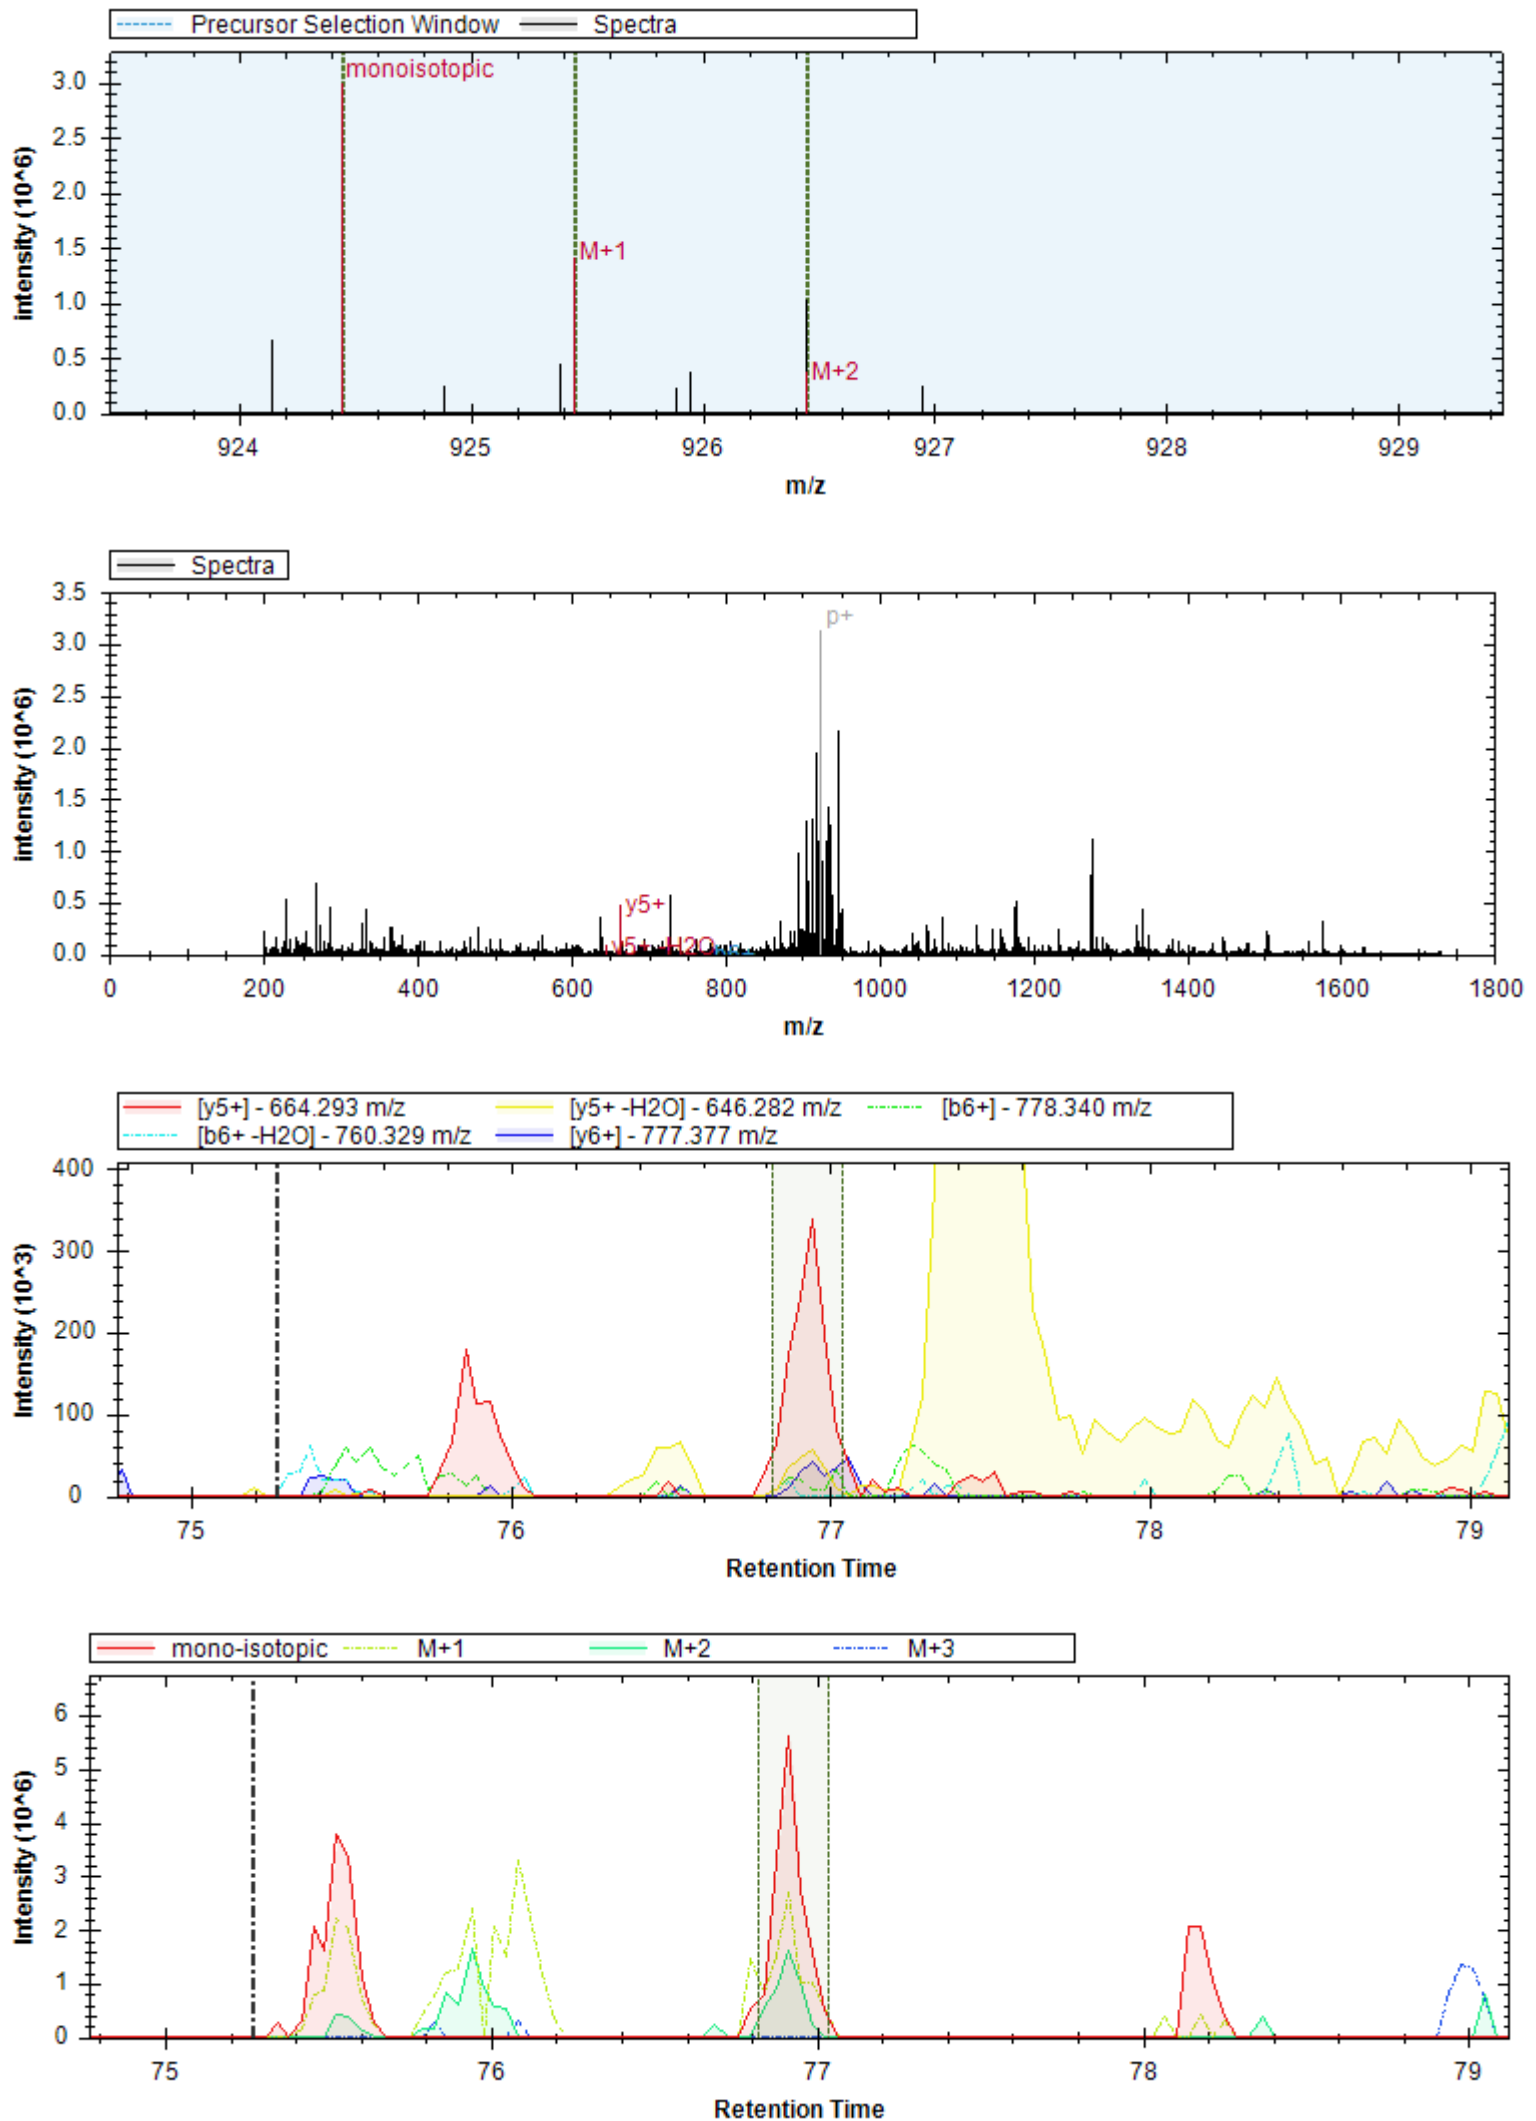

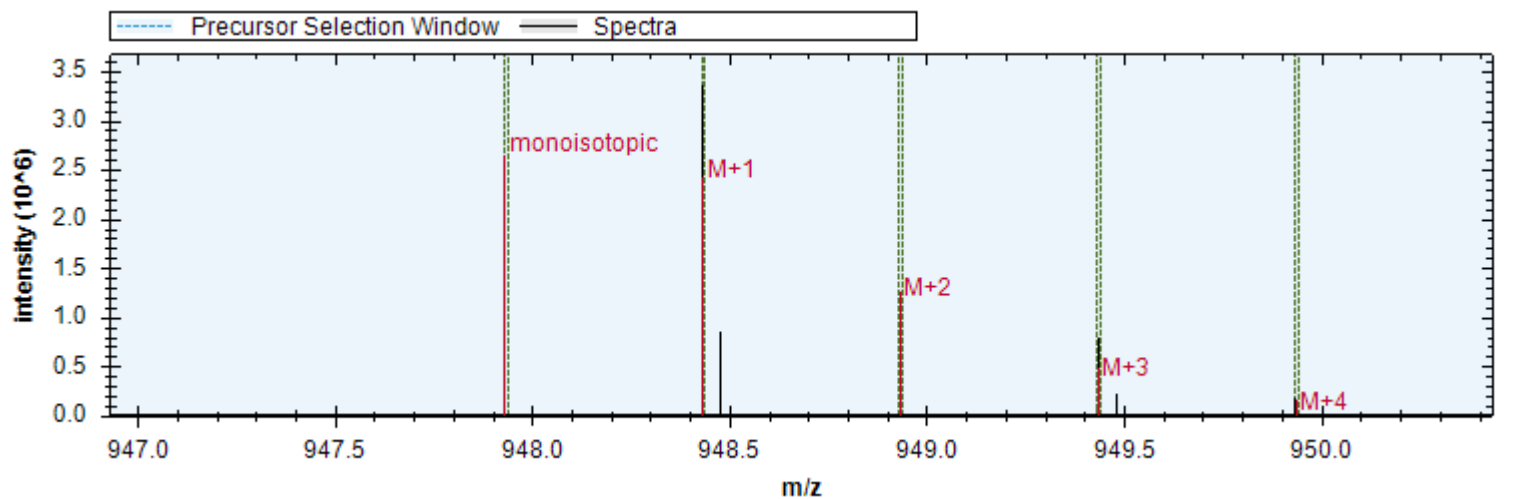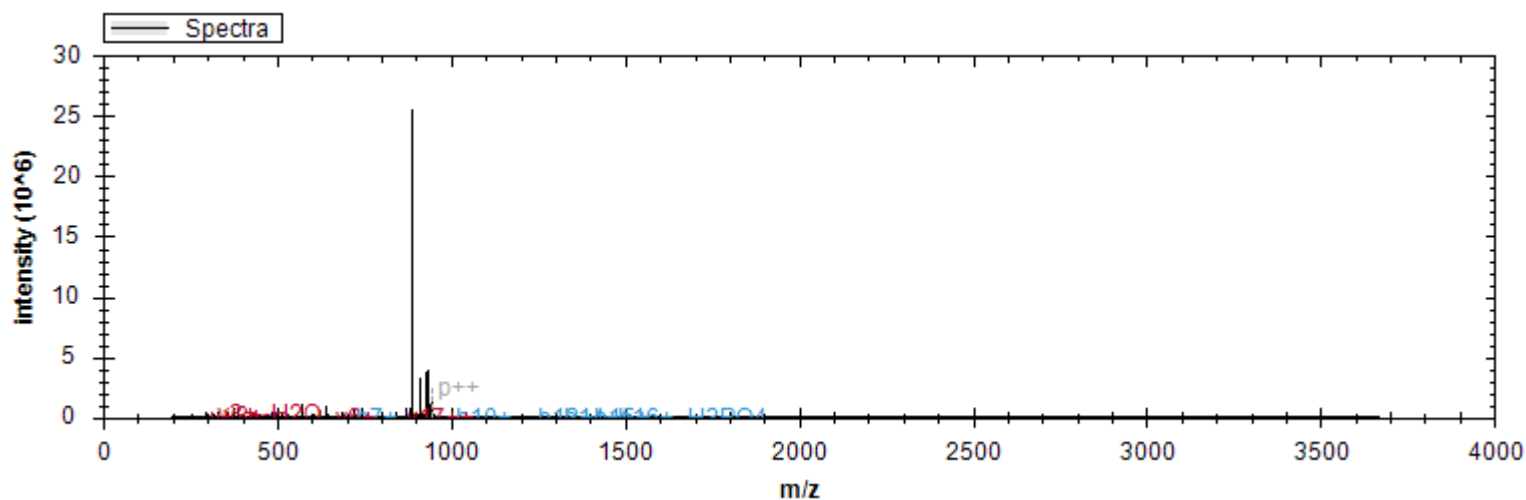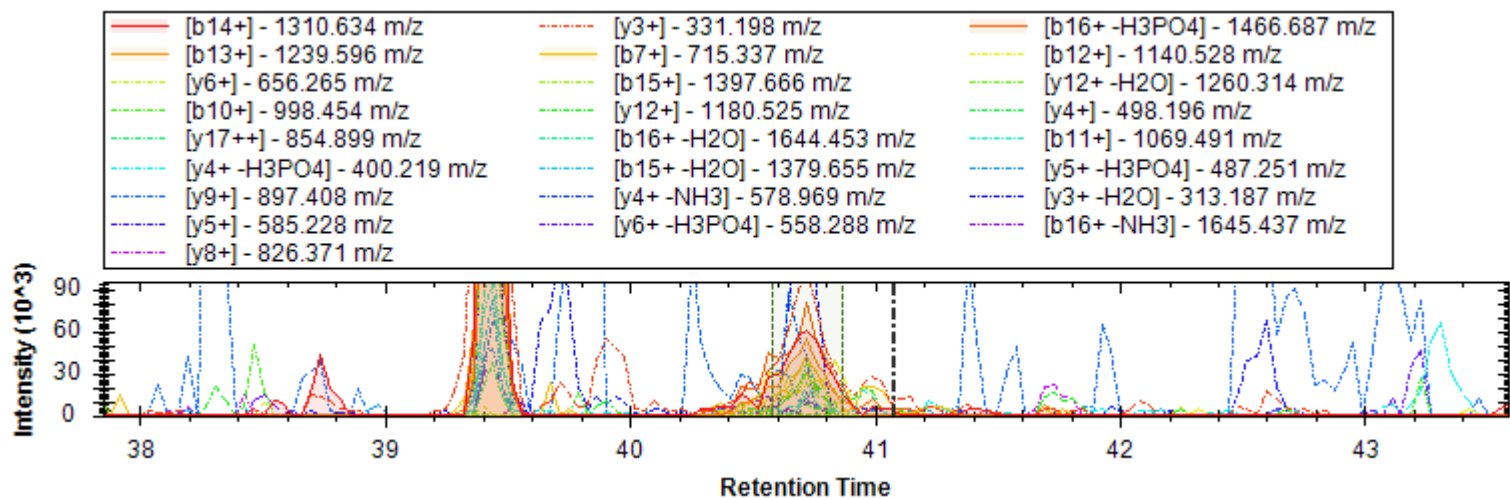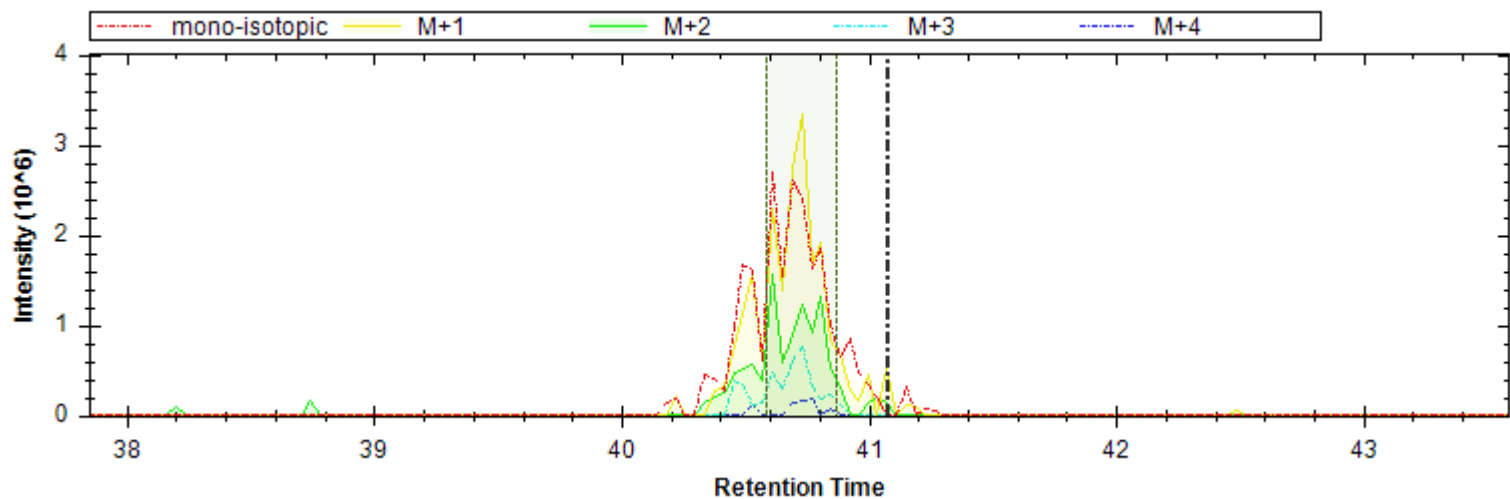

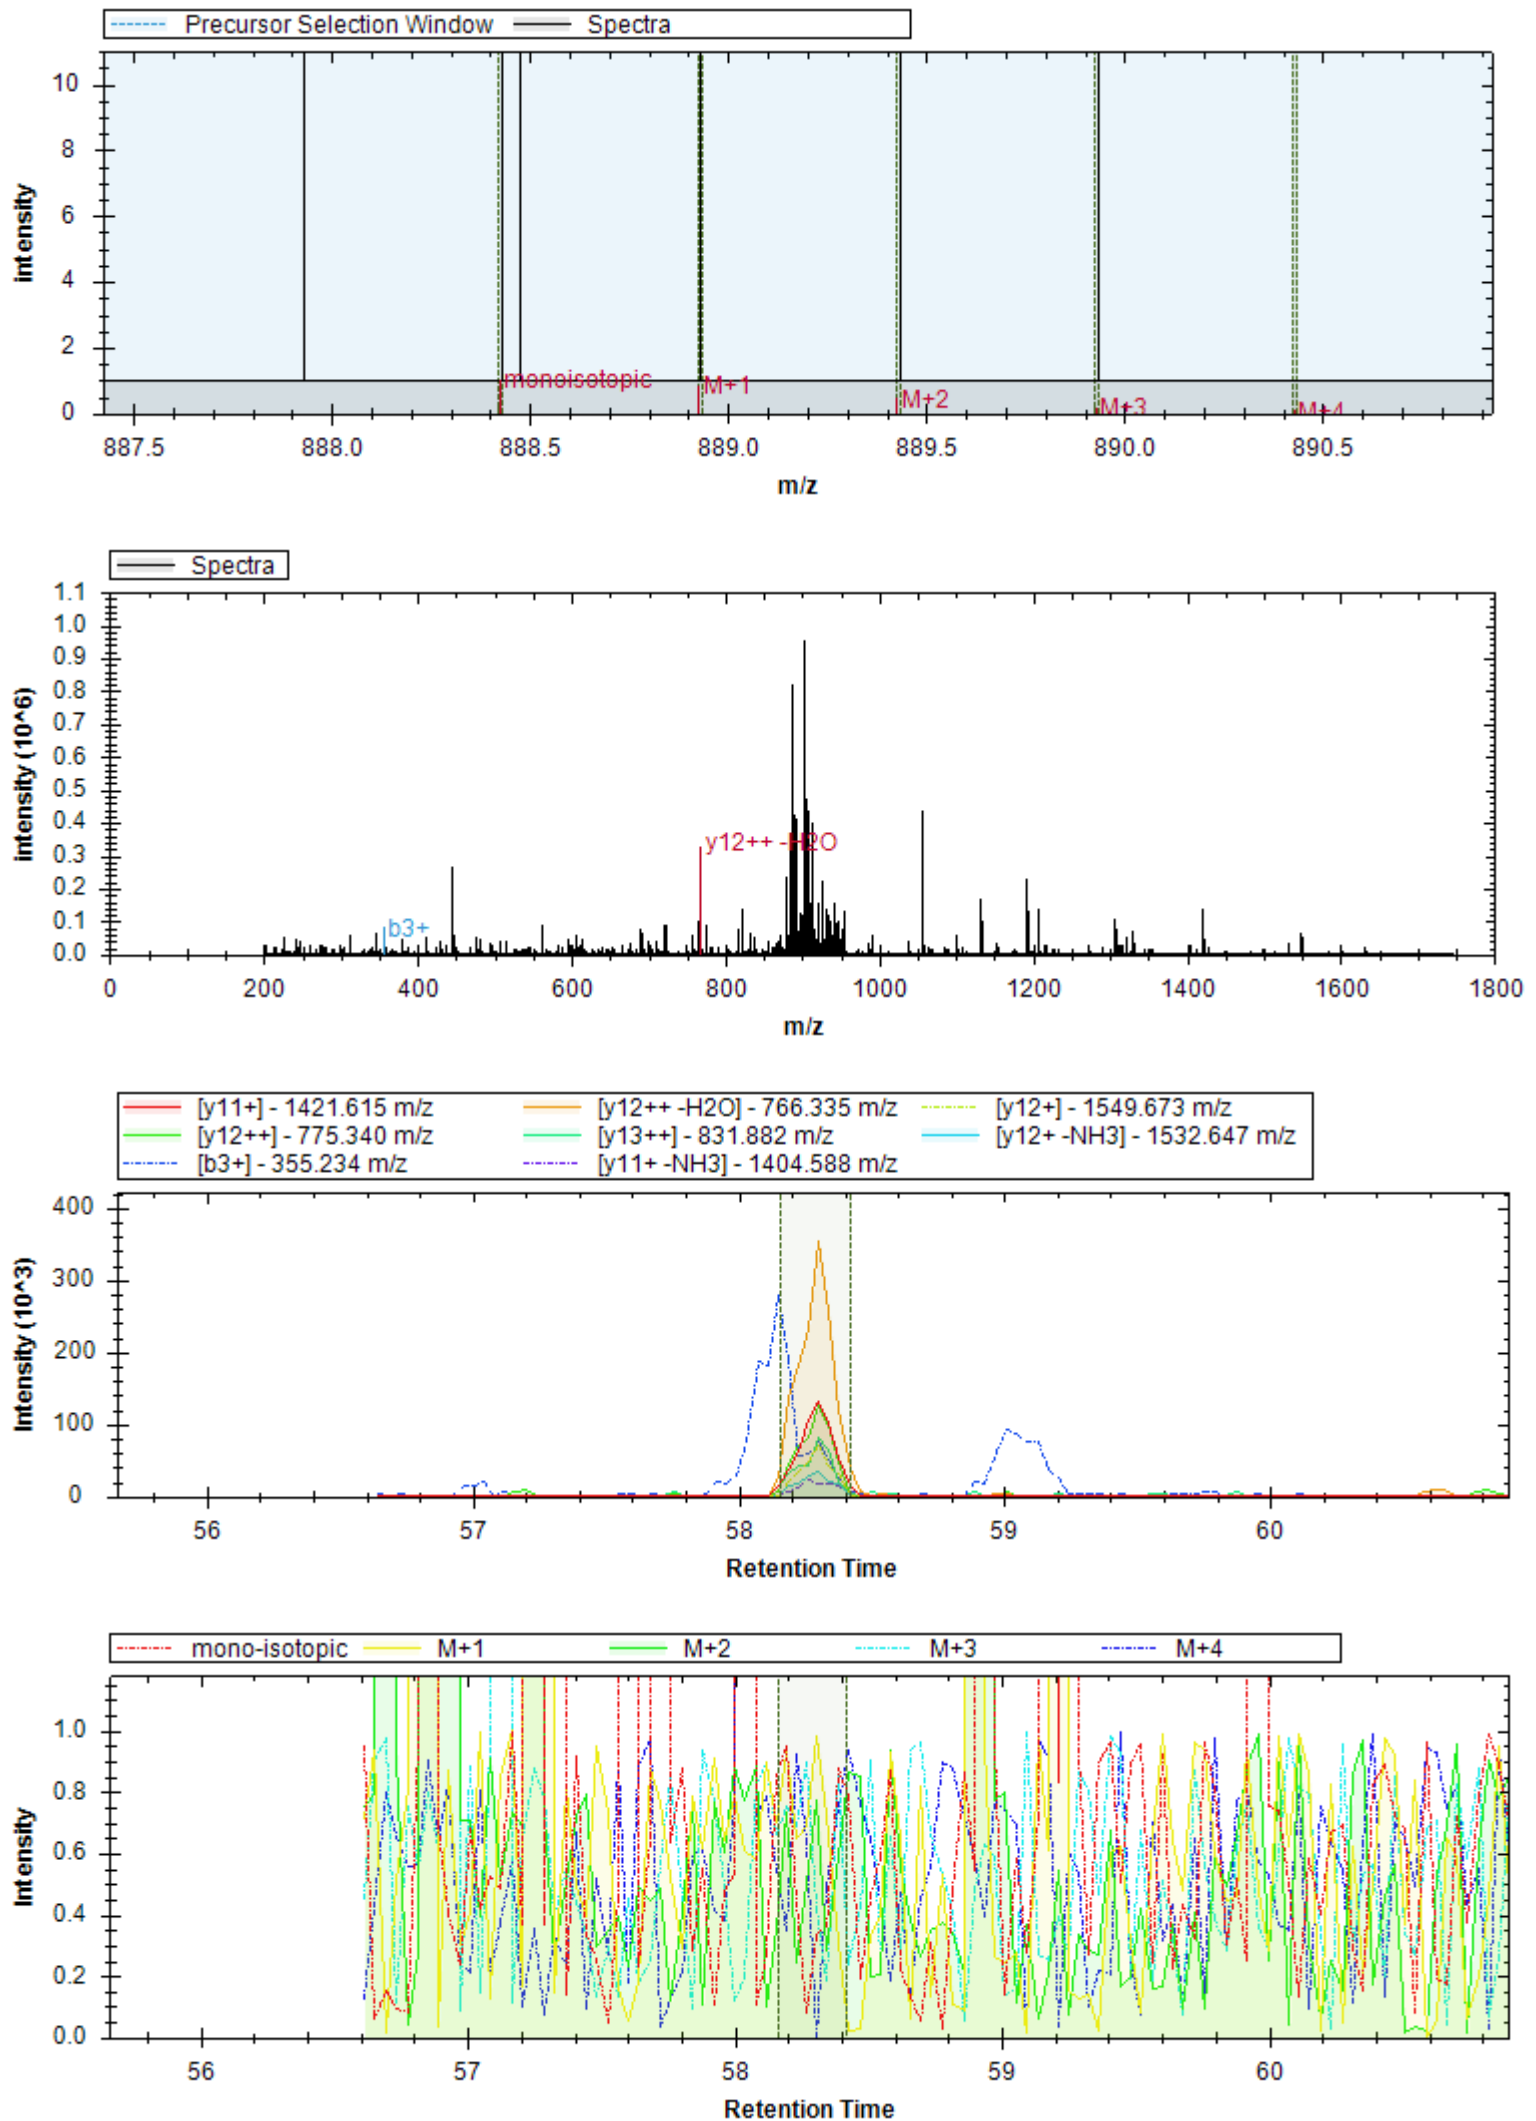

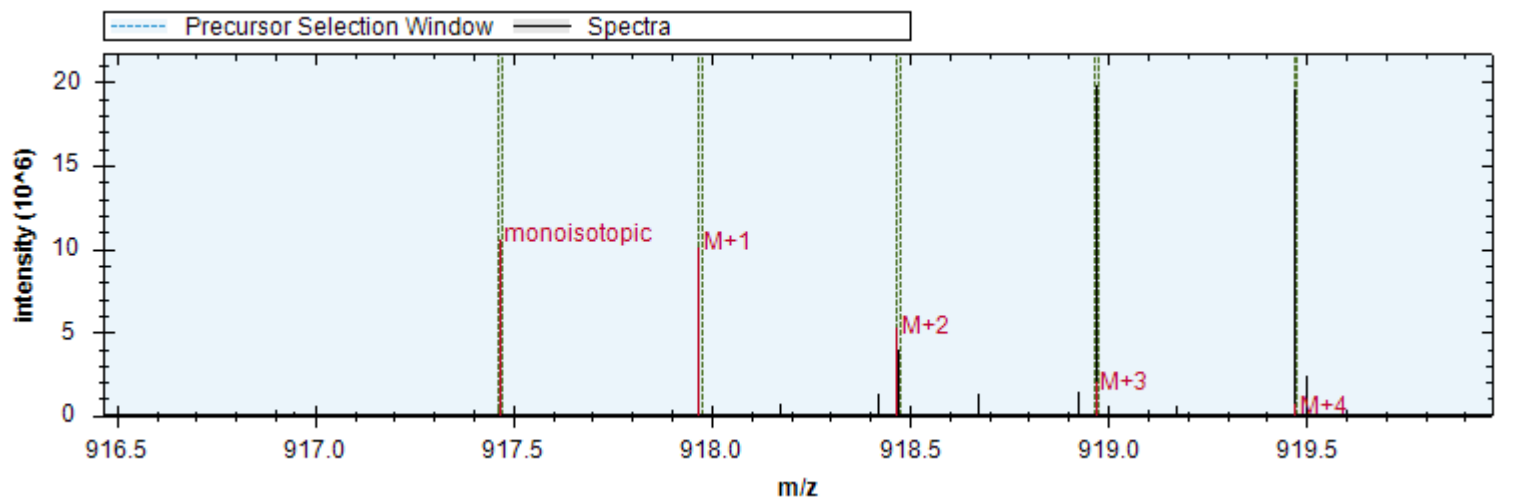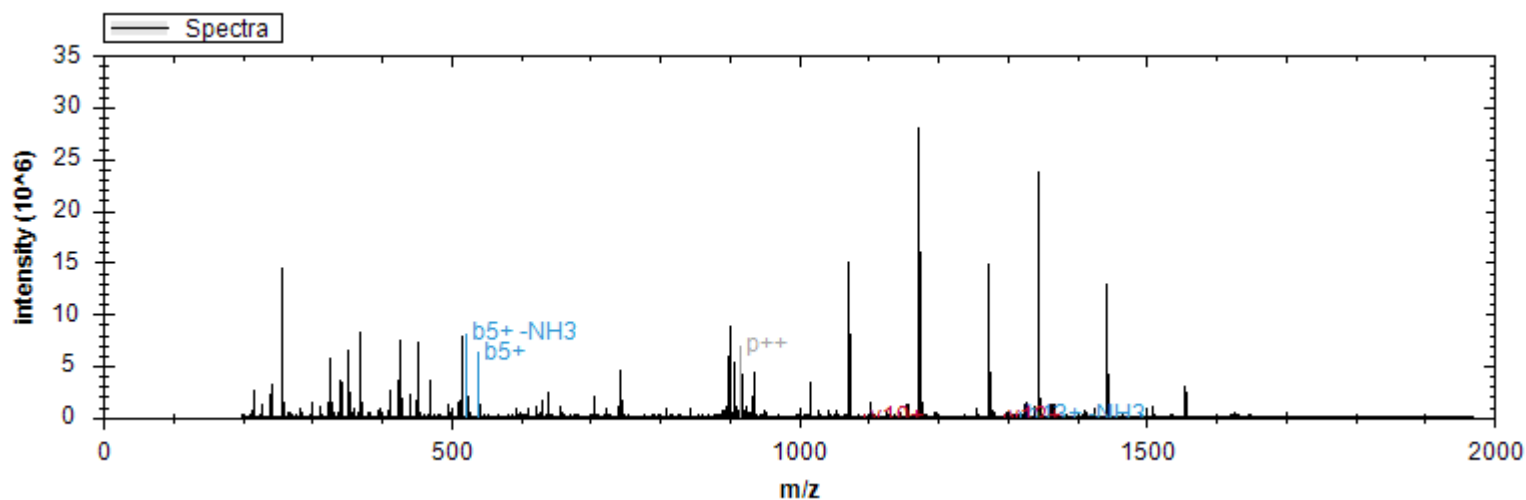

|                            |                            |                       |
|----------------------------|----------------------------|-----------------------|
| [b13+ -NH3] - 1319.603 m/z | [y12+] - 1294.619 m/z      | [y10+] - 1094.503 m/z |
| [b5+ -NH3] - 523.288 m/z   | [b5+] - 540.314 m/z        | [b15+] - 1574.736 m/z |
| [y9+] - 1037.482 m/z       | [b15++ -H2O] - 778.867 m/z | [b15++] - 787.872 m/z |
| [y12+ -H2O] - 1276.609 m/z | [b13+] - 1336.630 m/z      | [b16++] - 844.414 m/z |

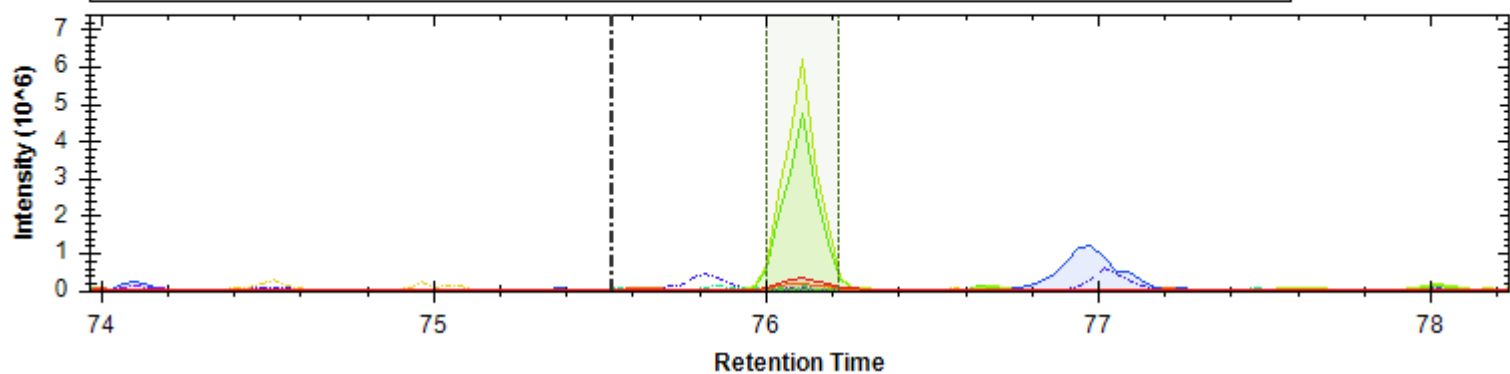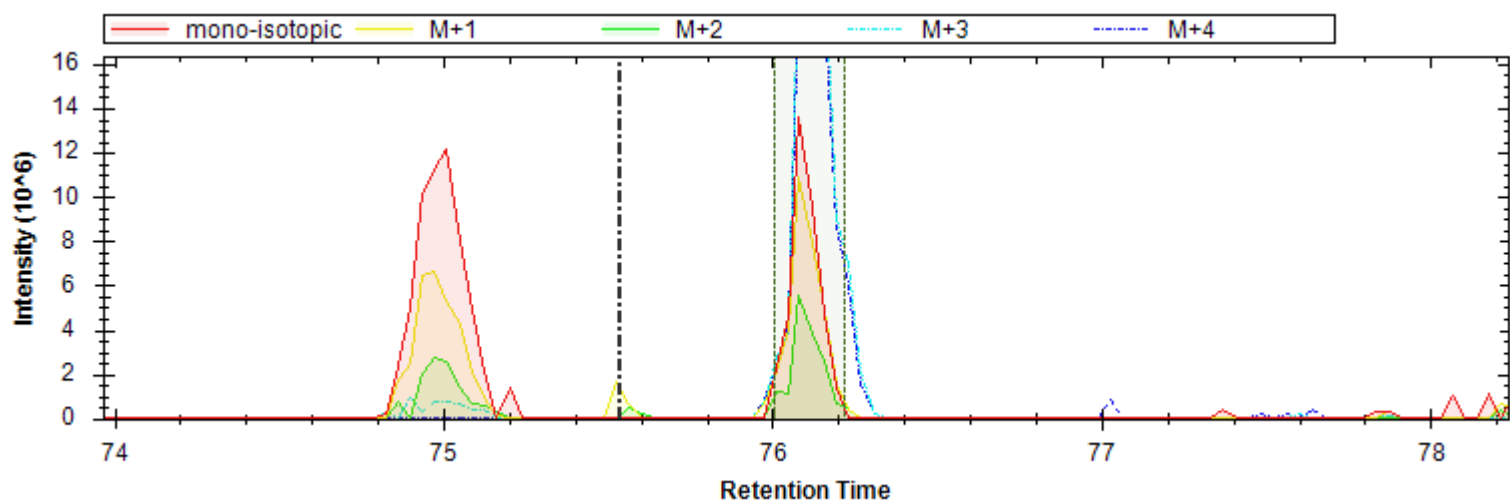

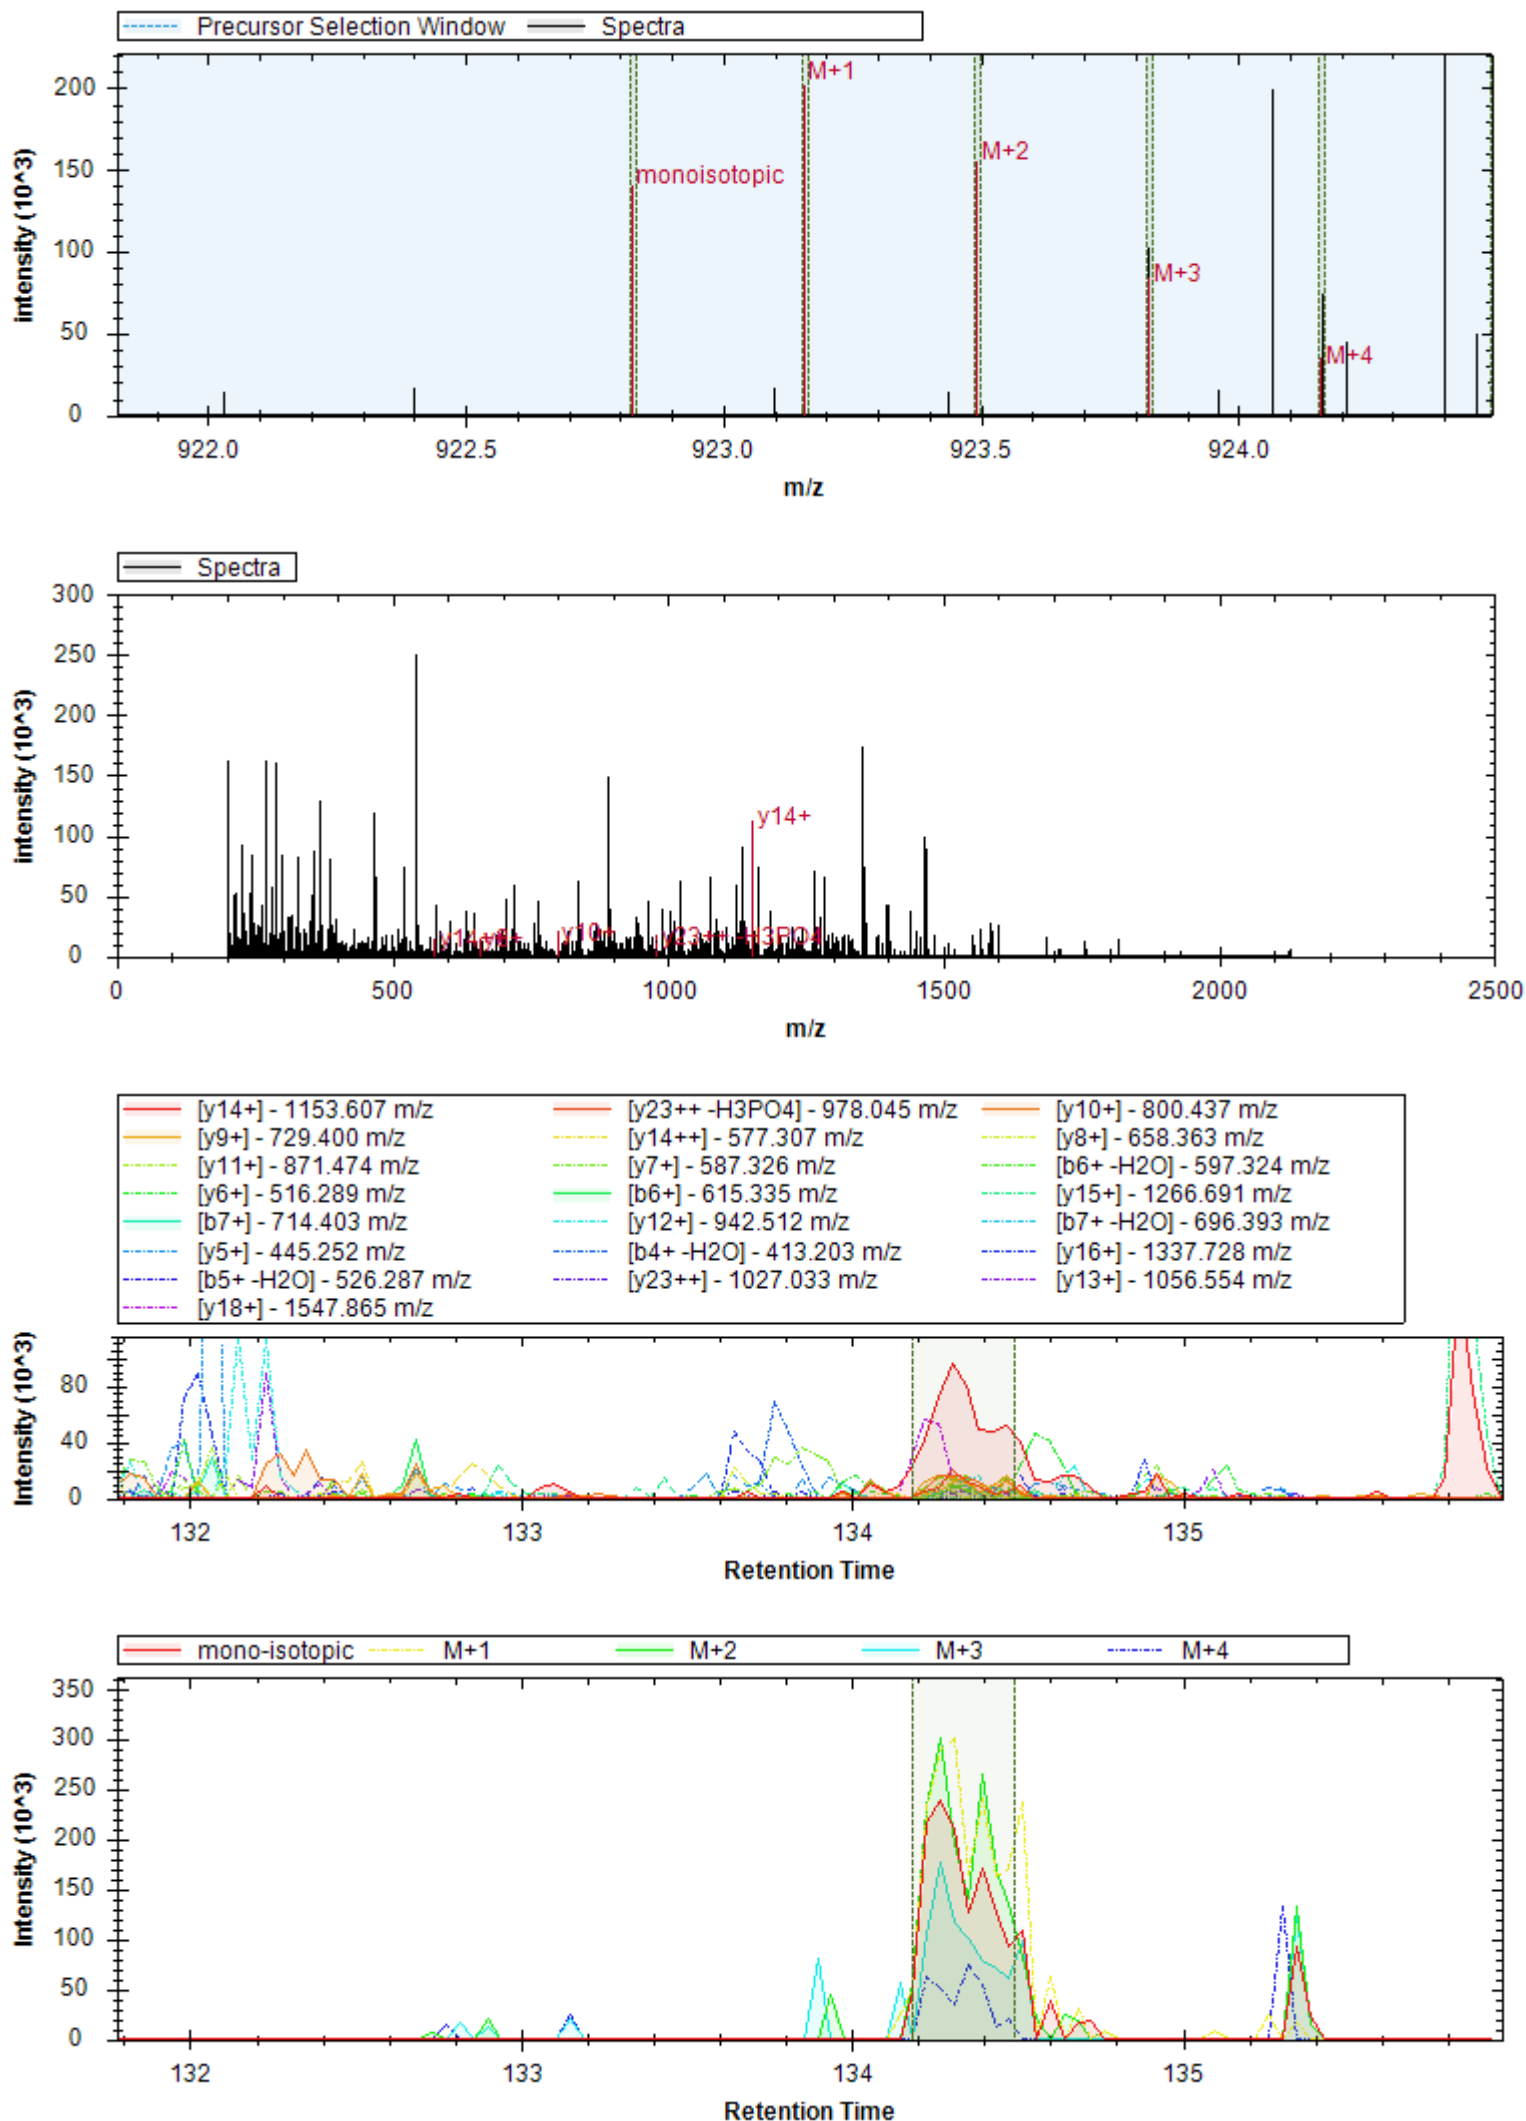



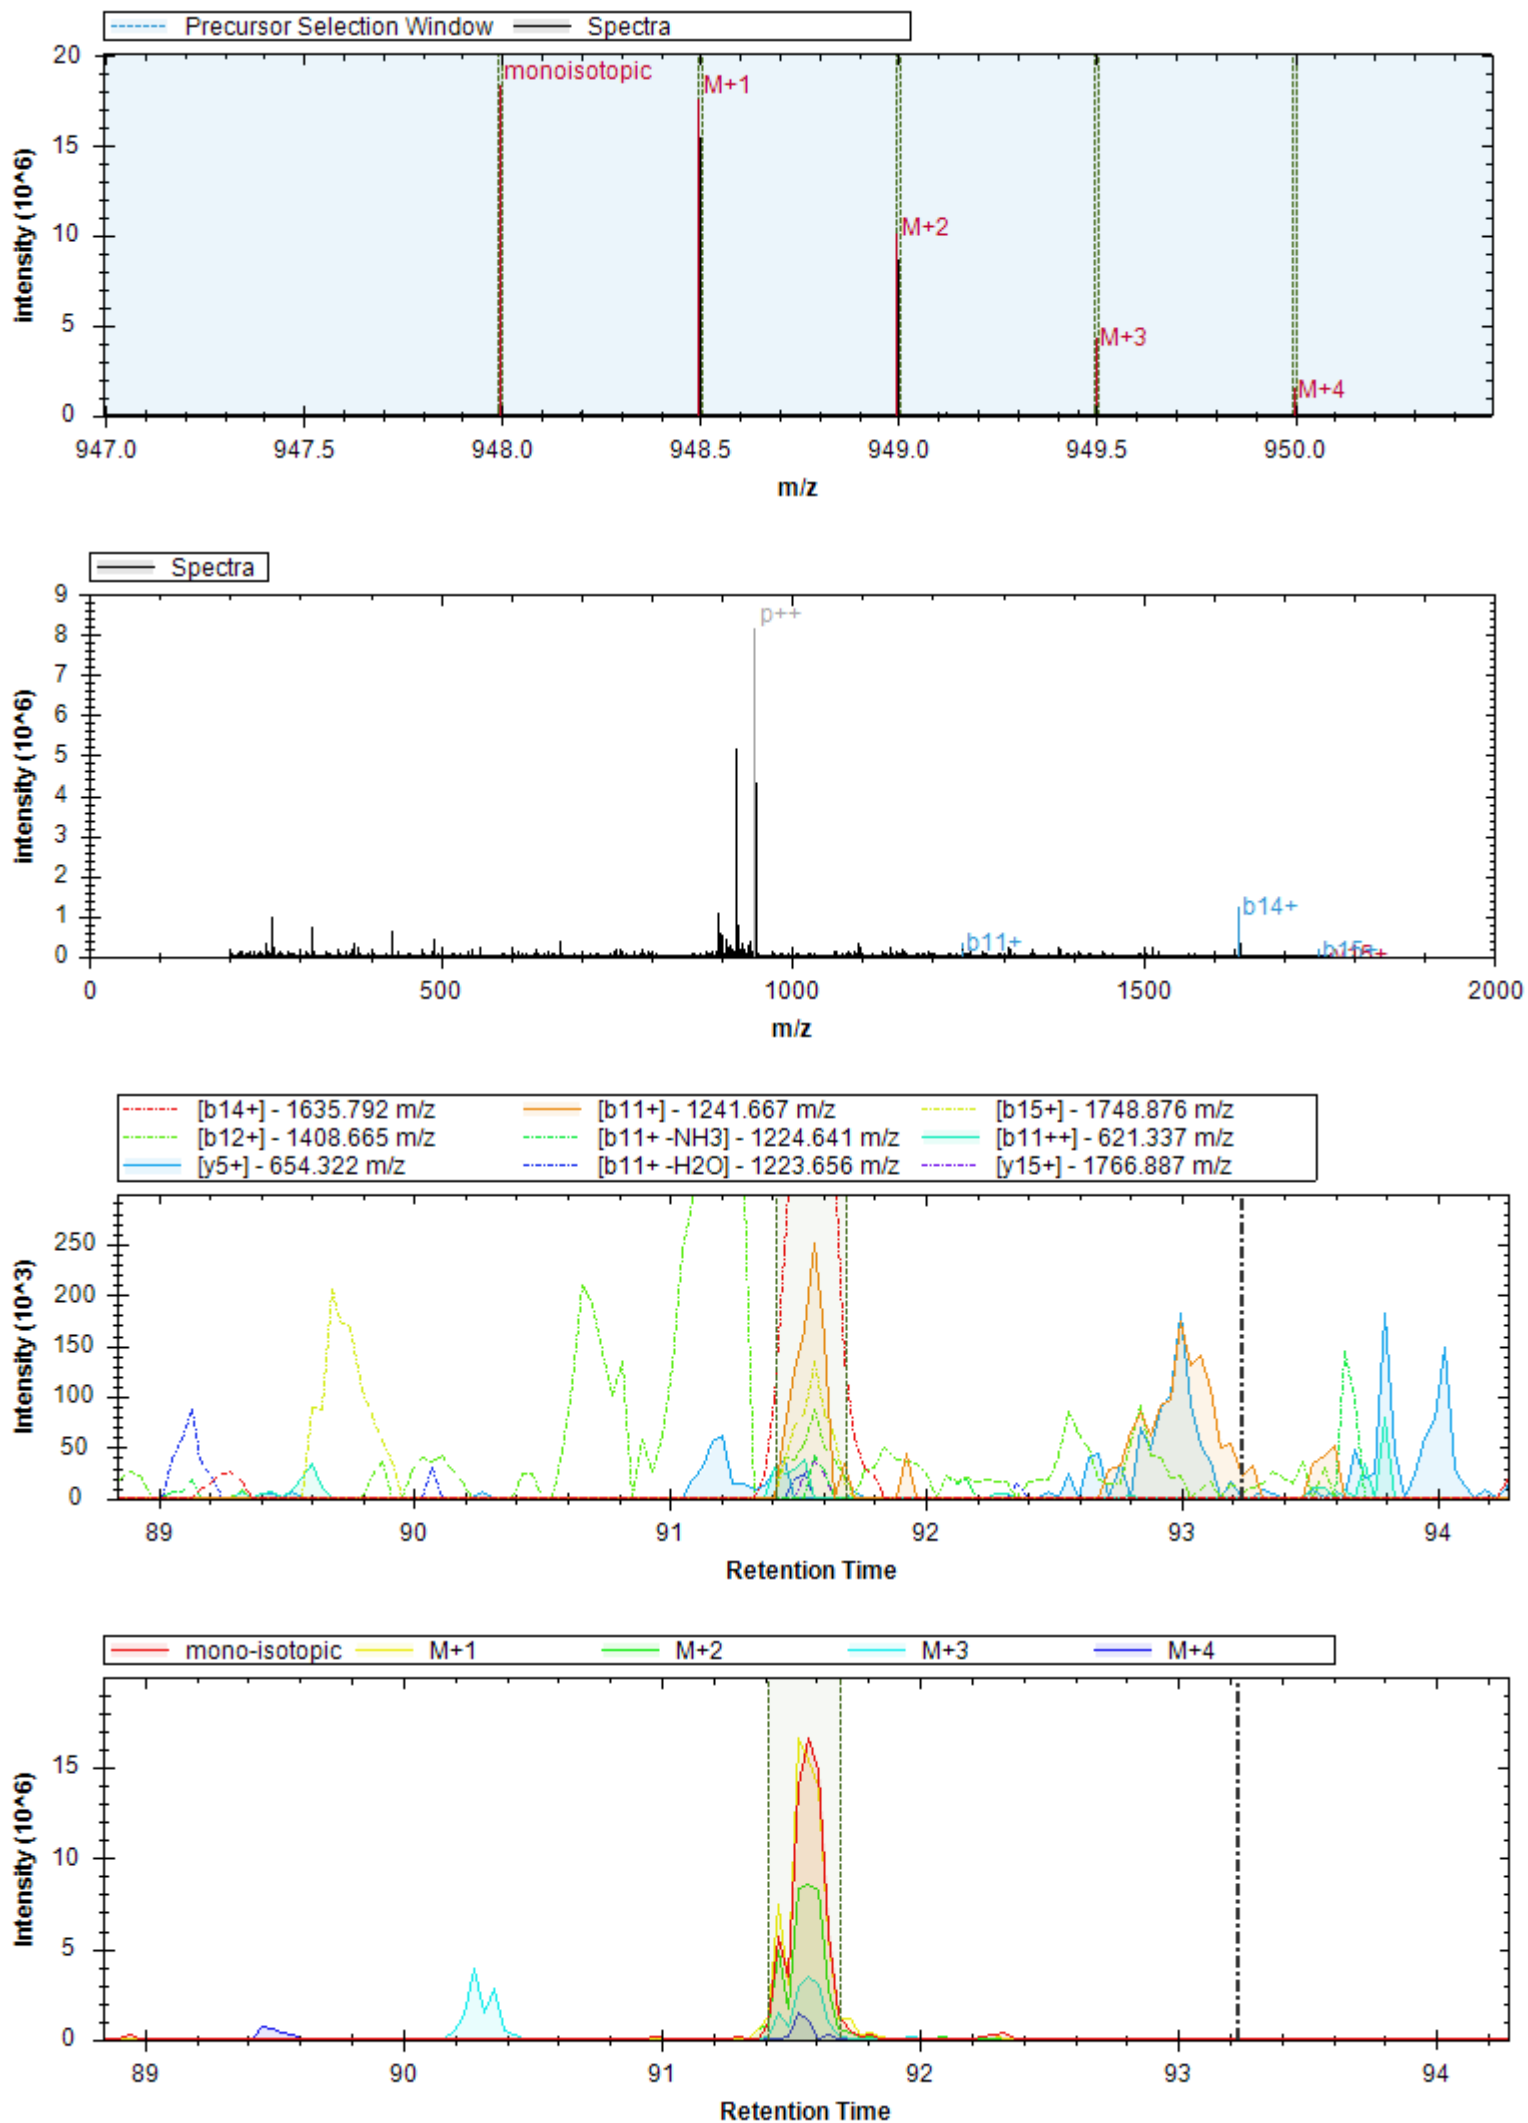

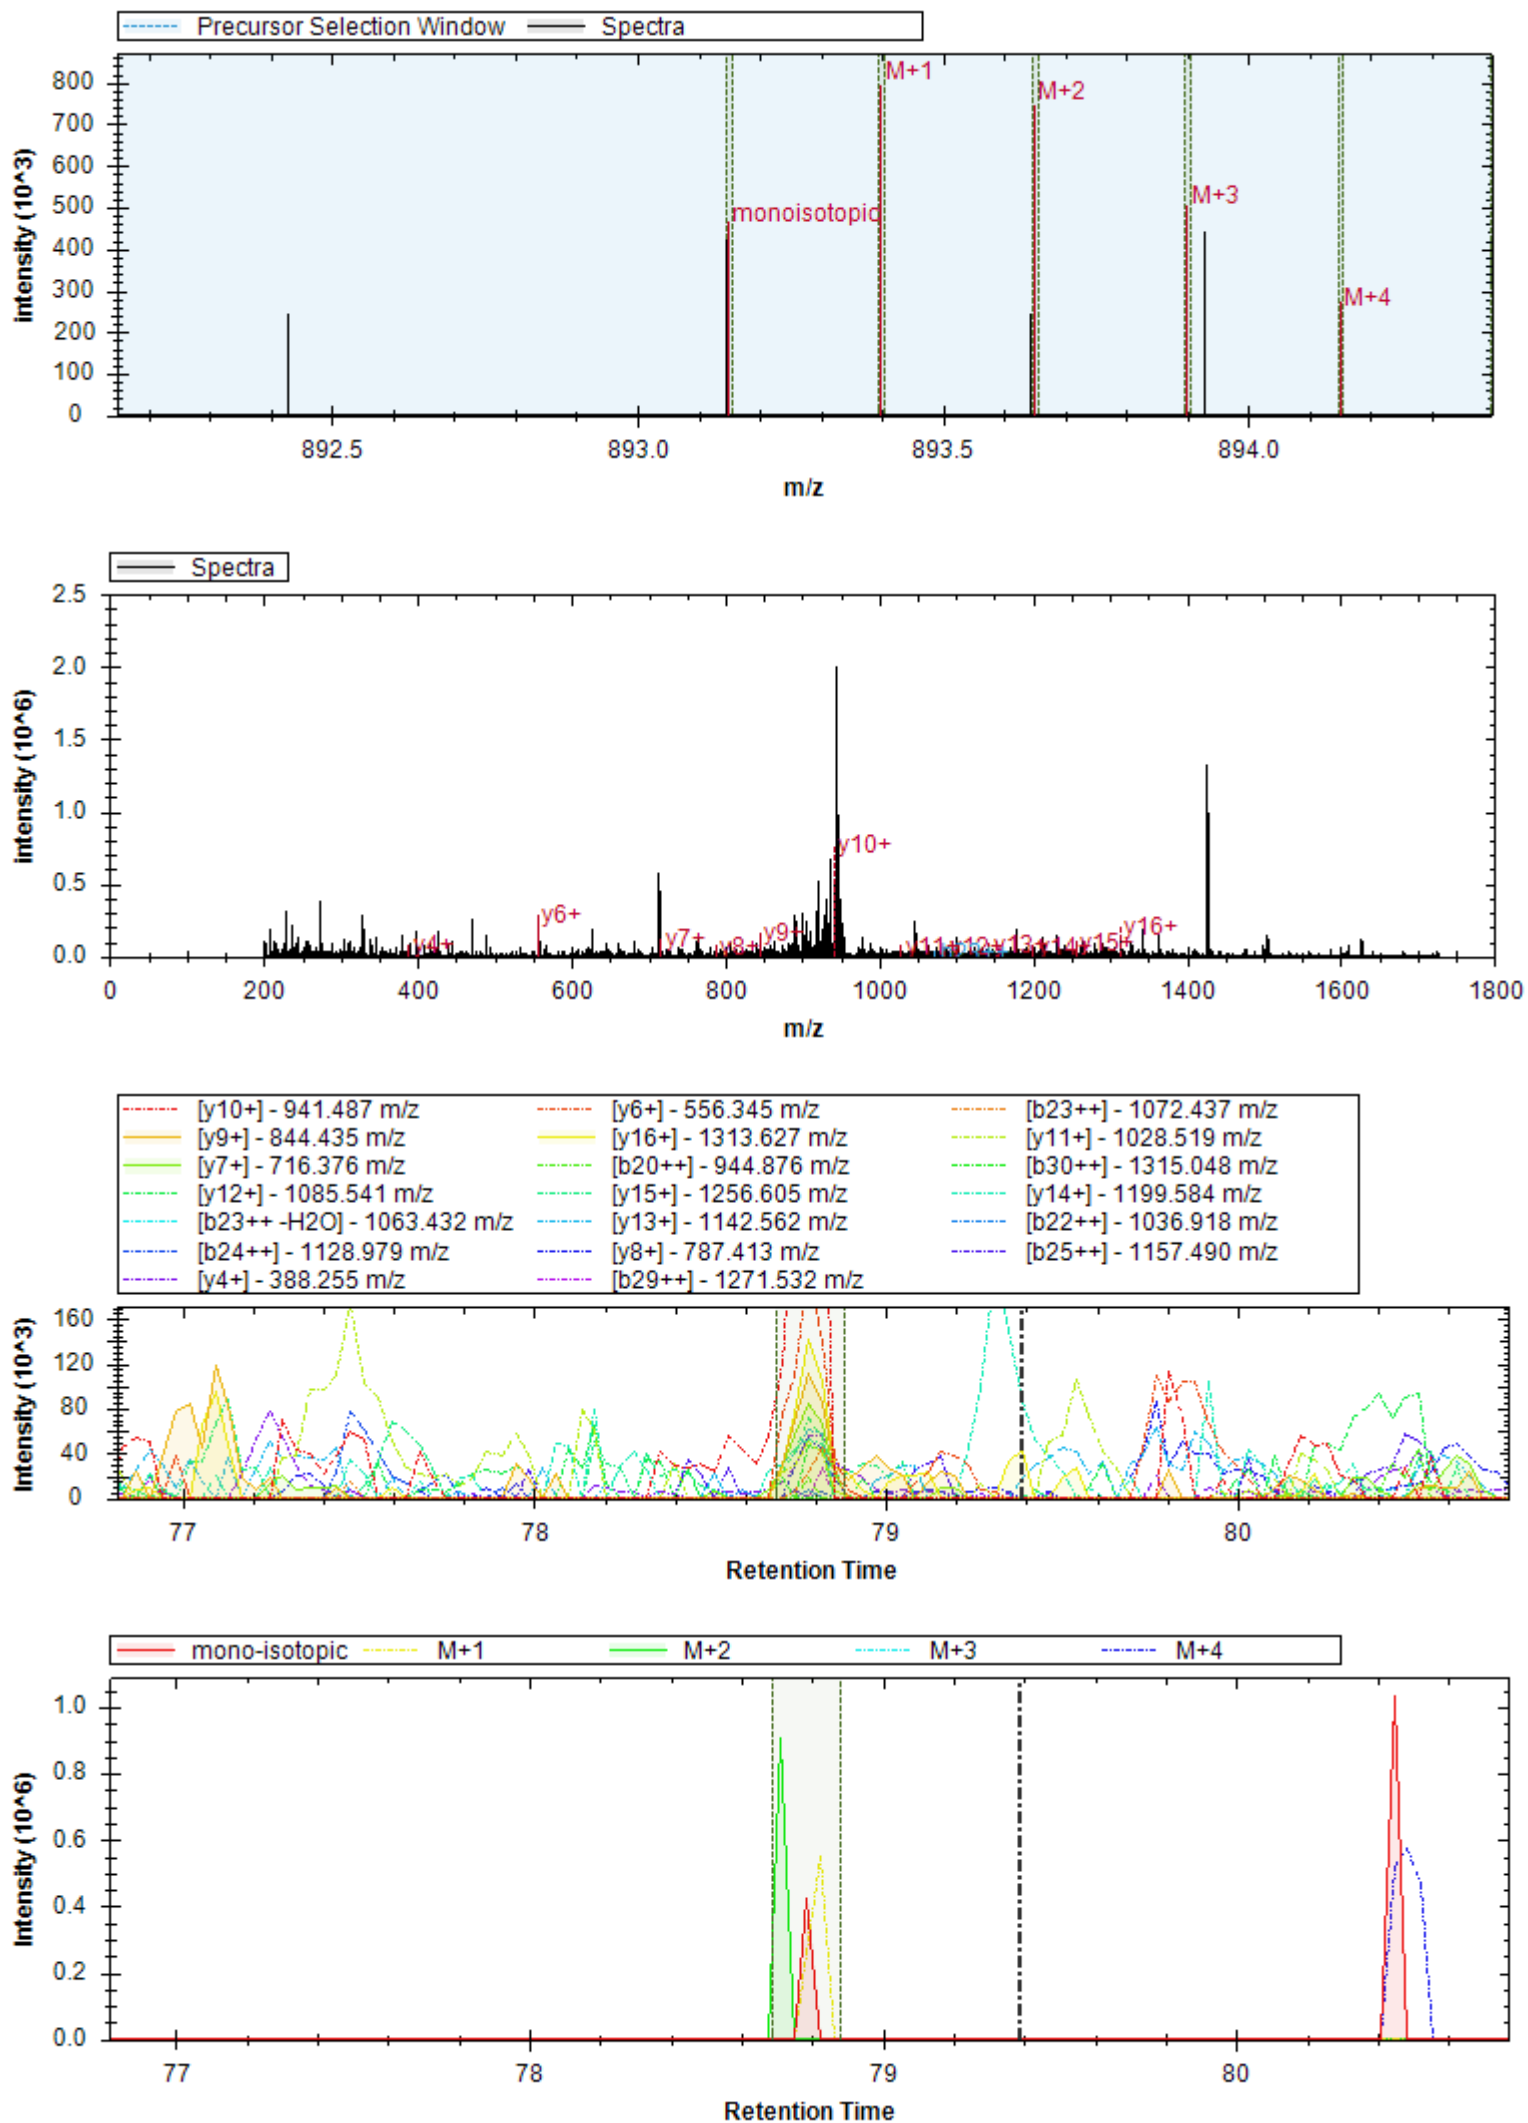

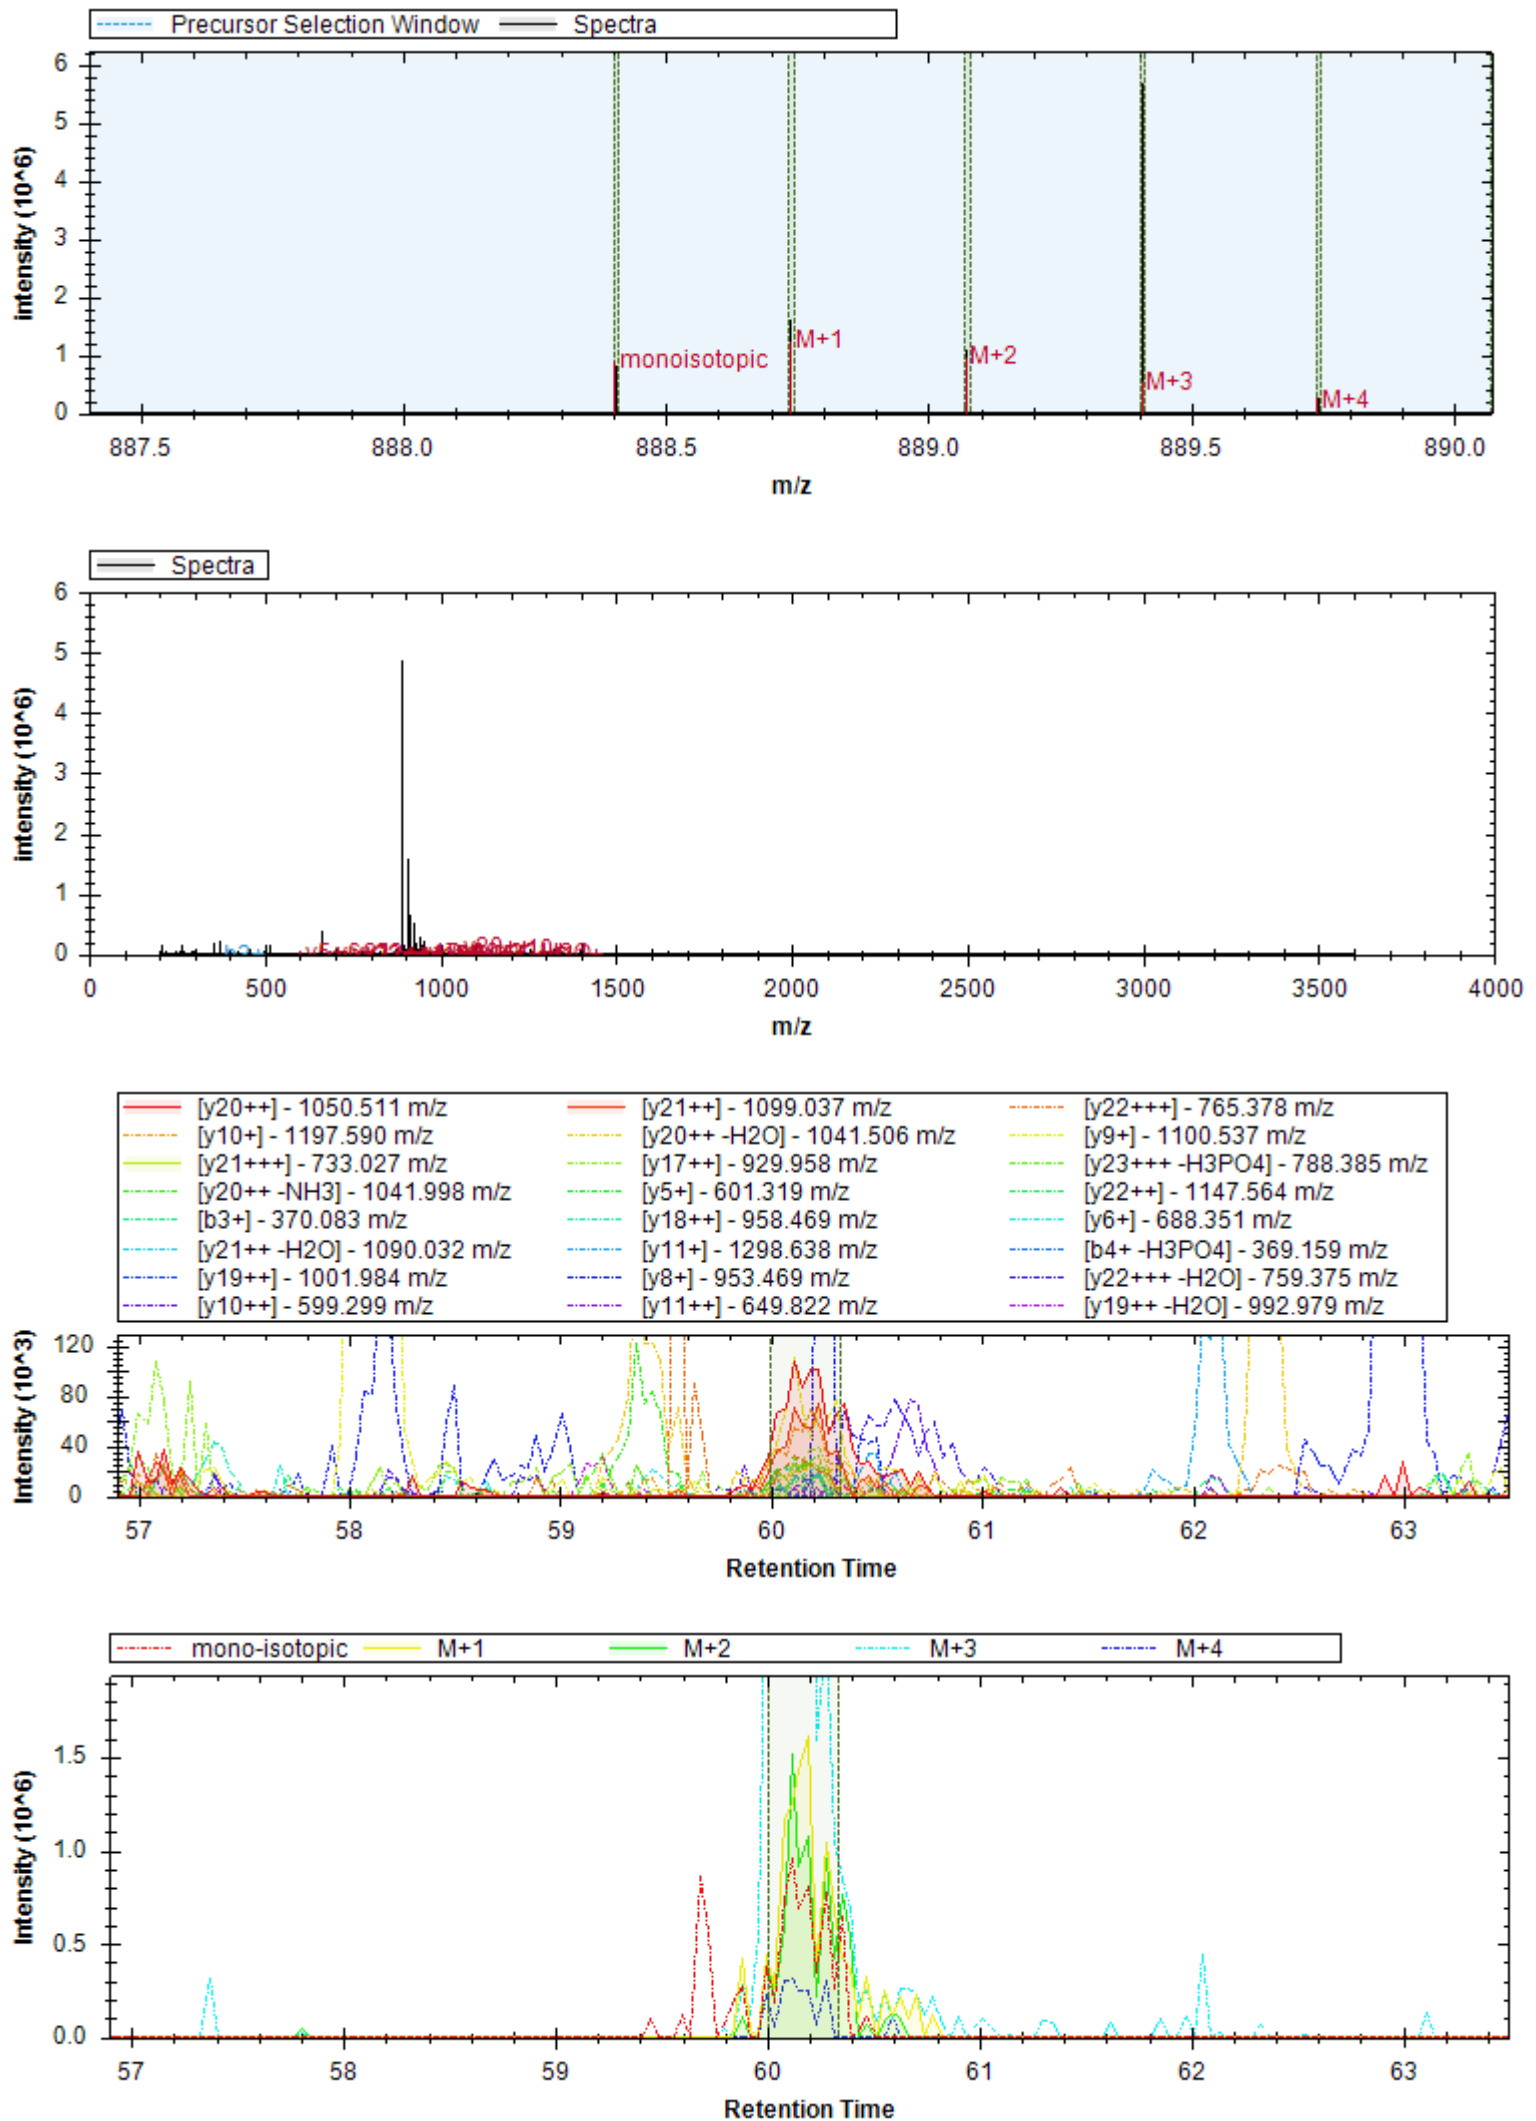

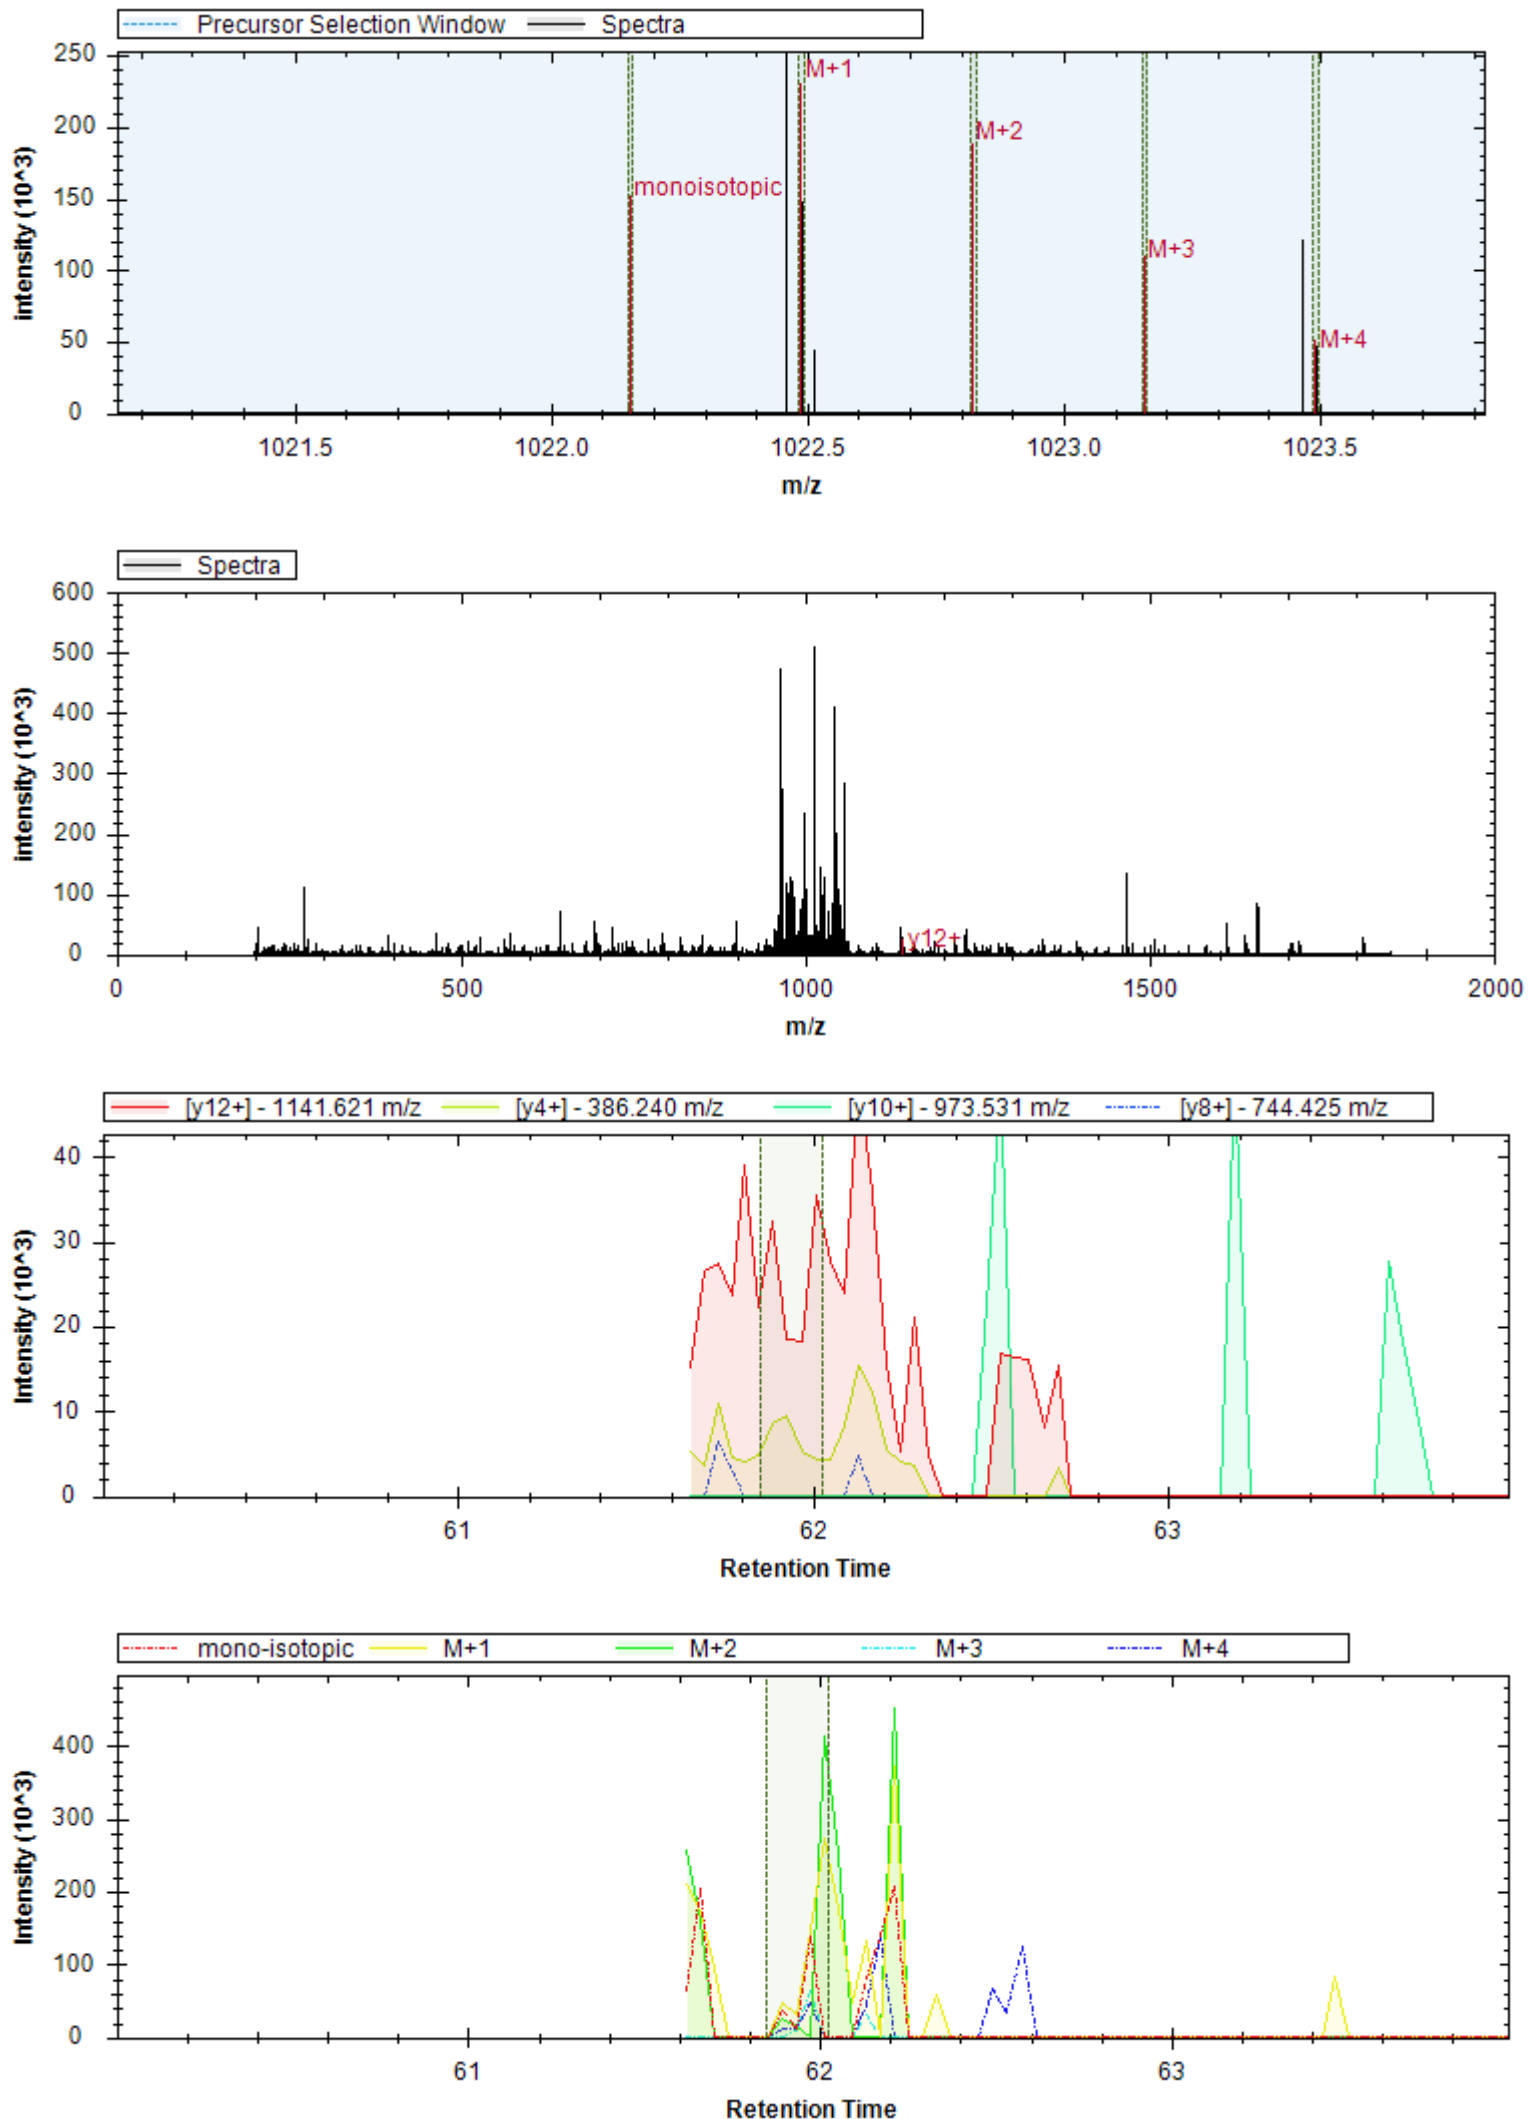

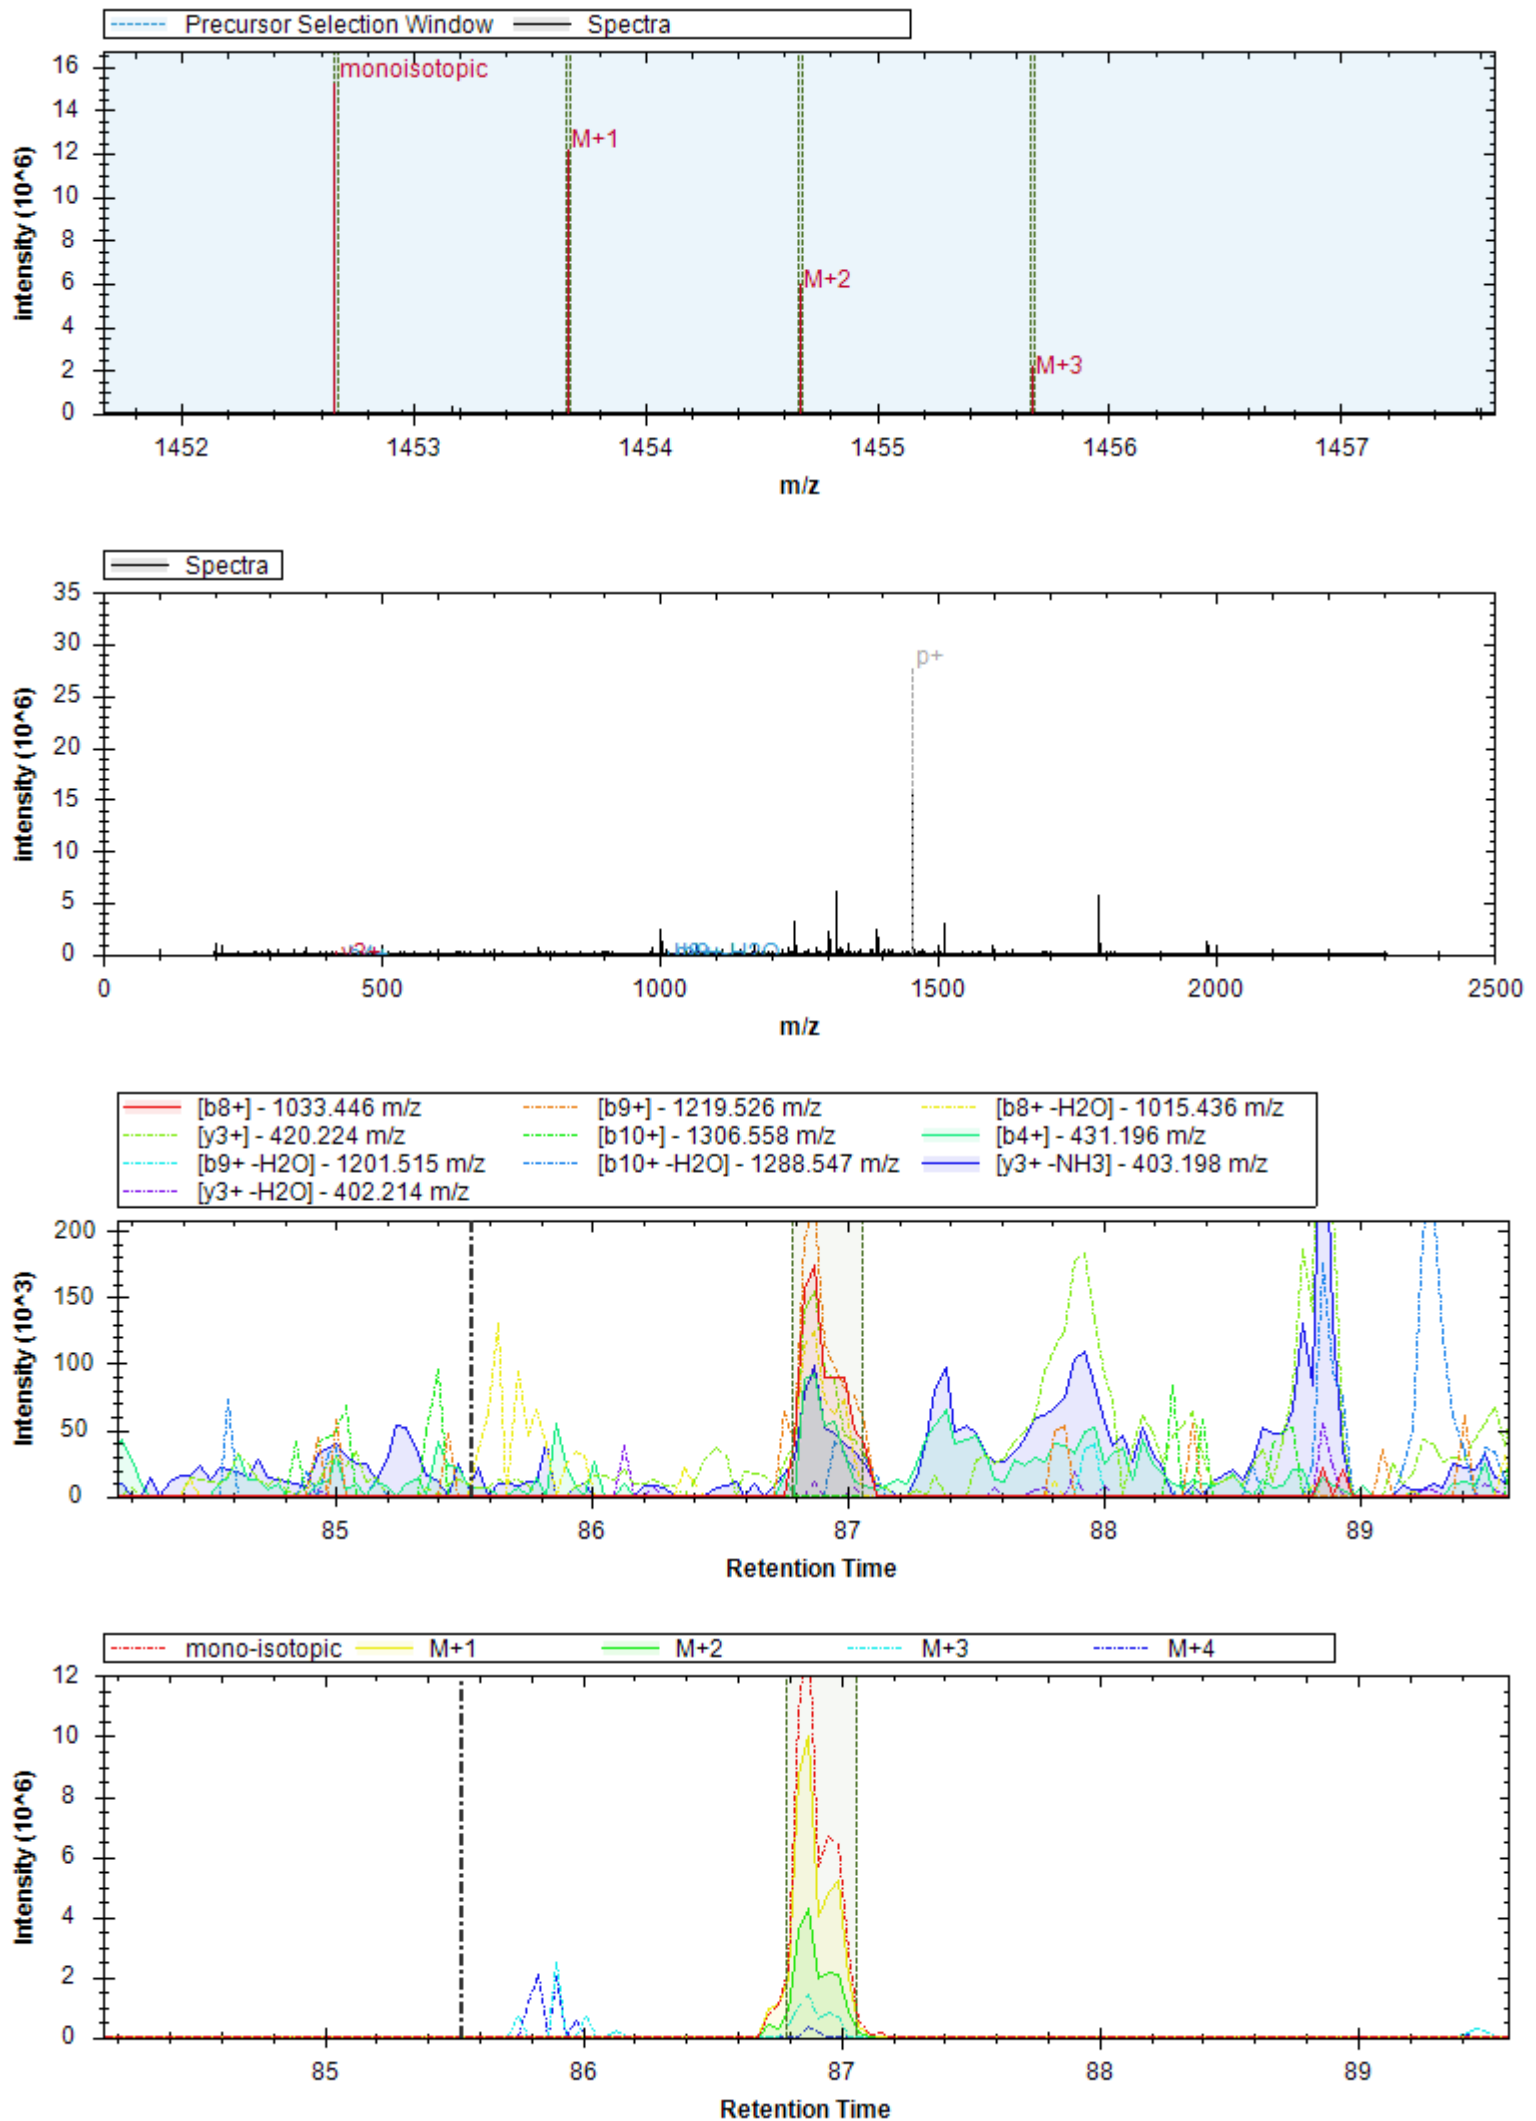

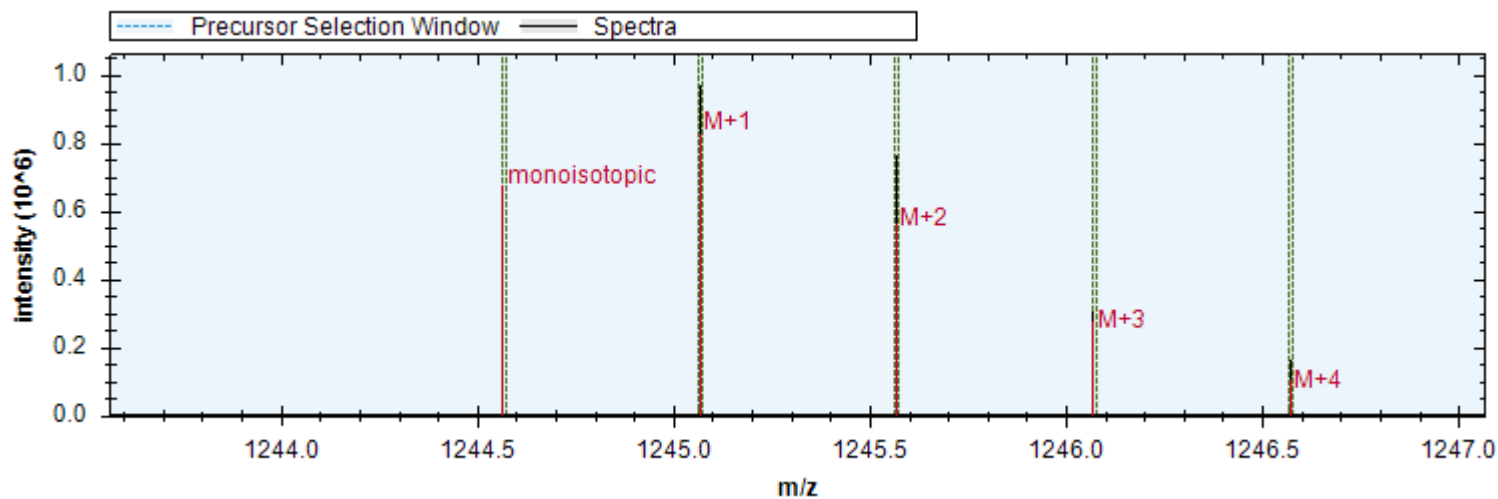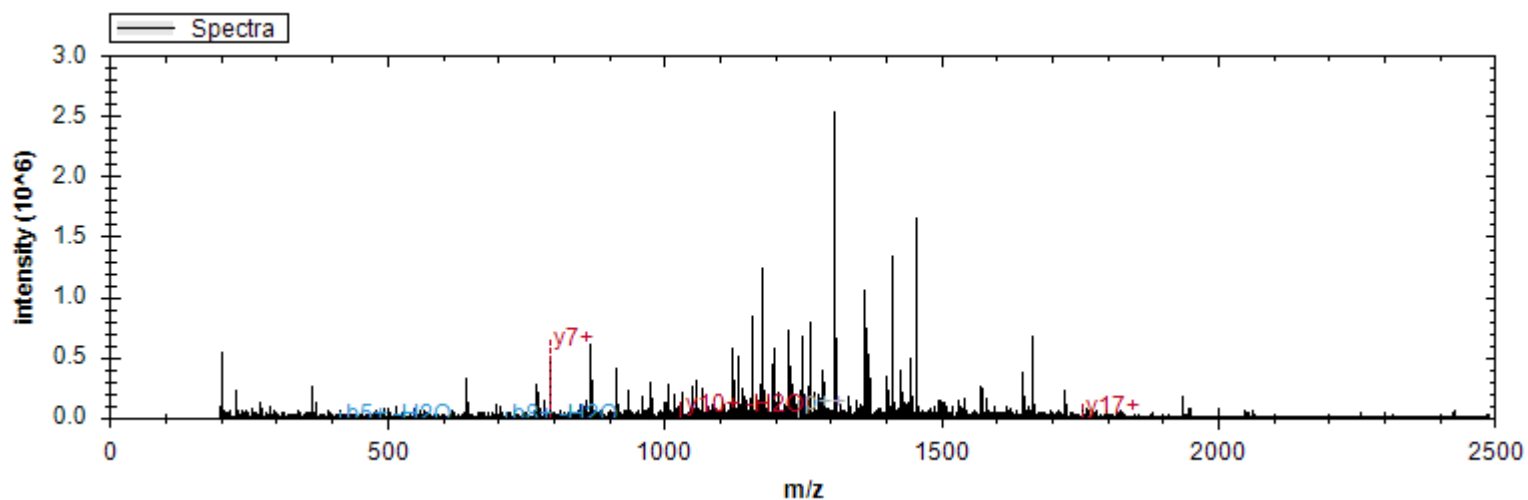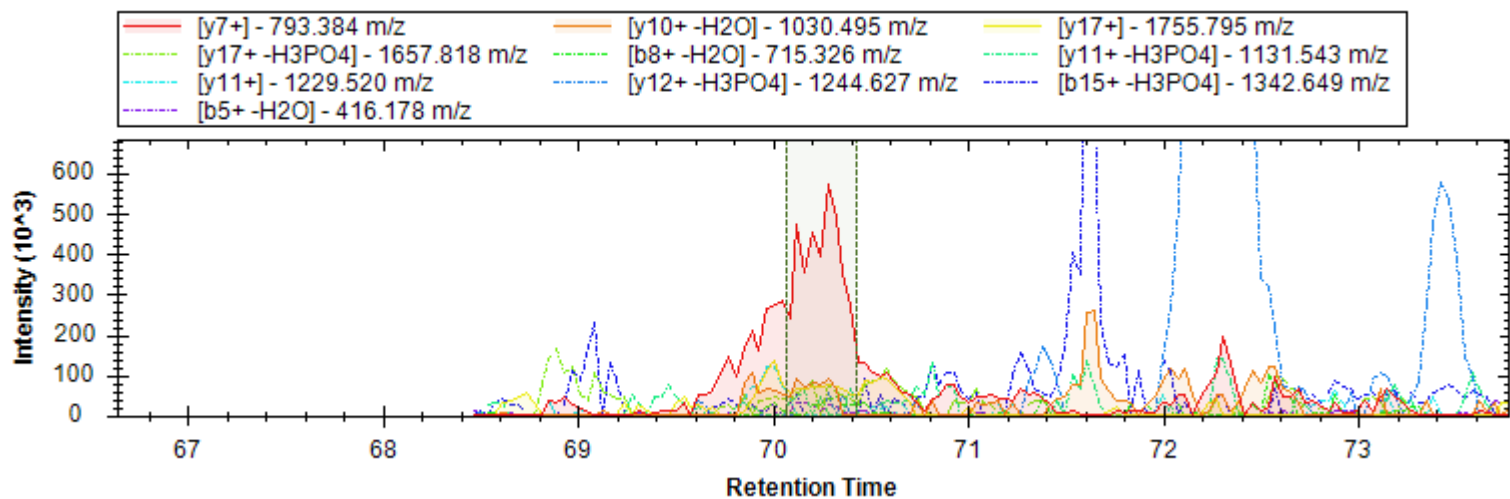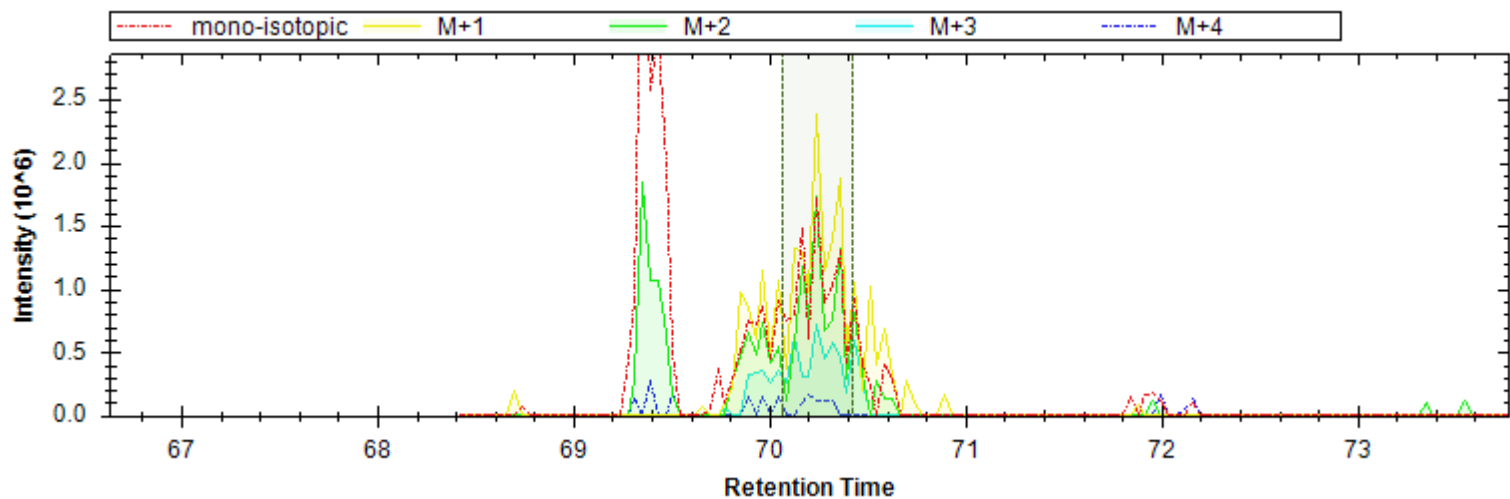

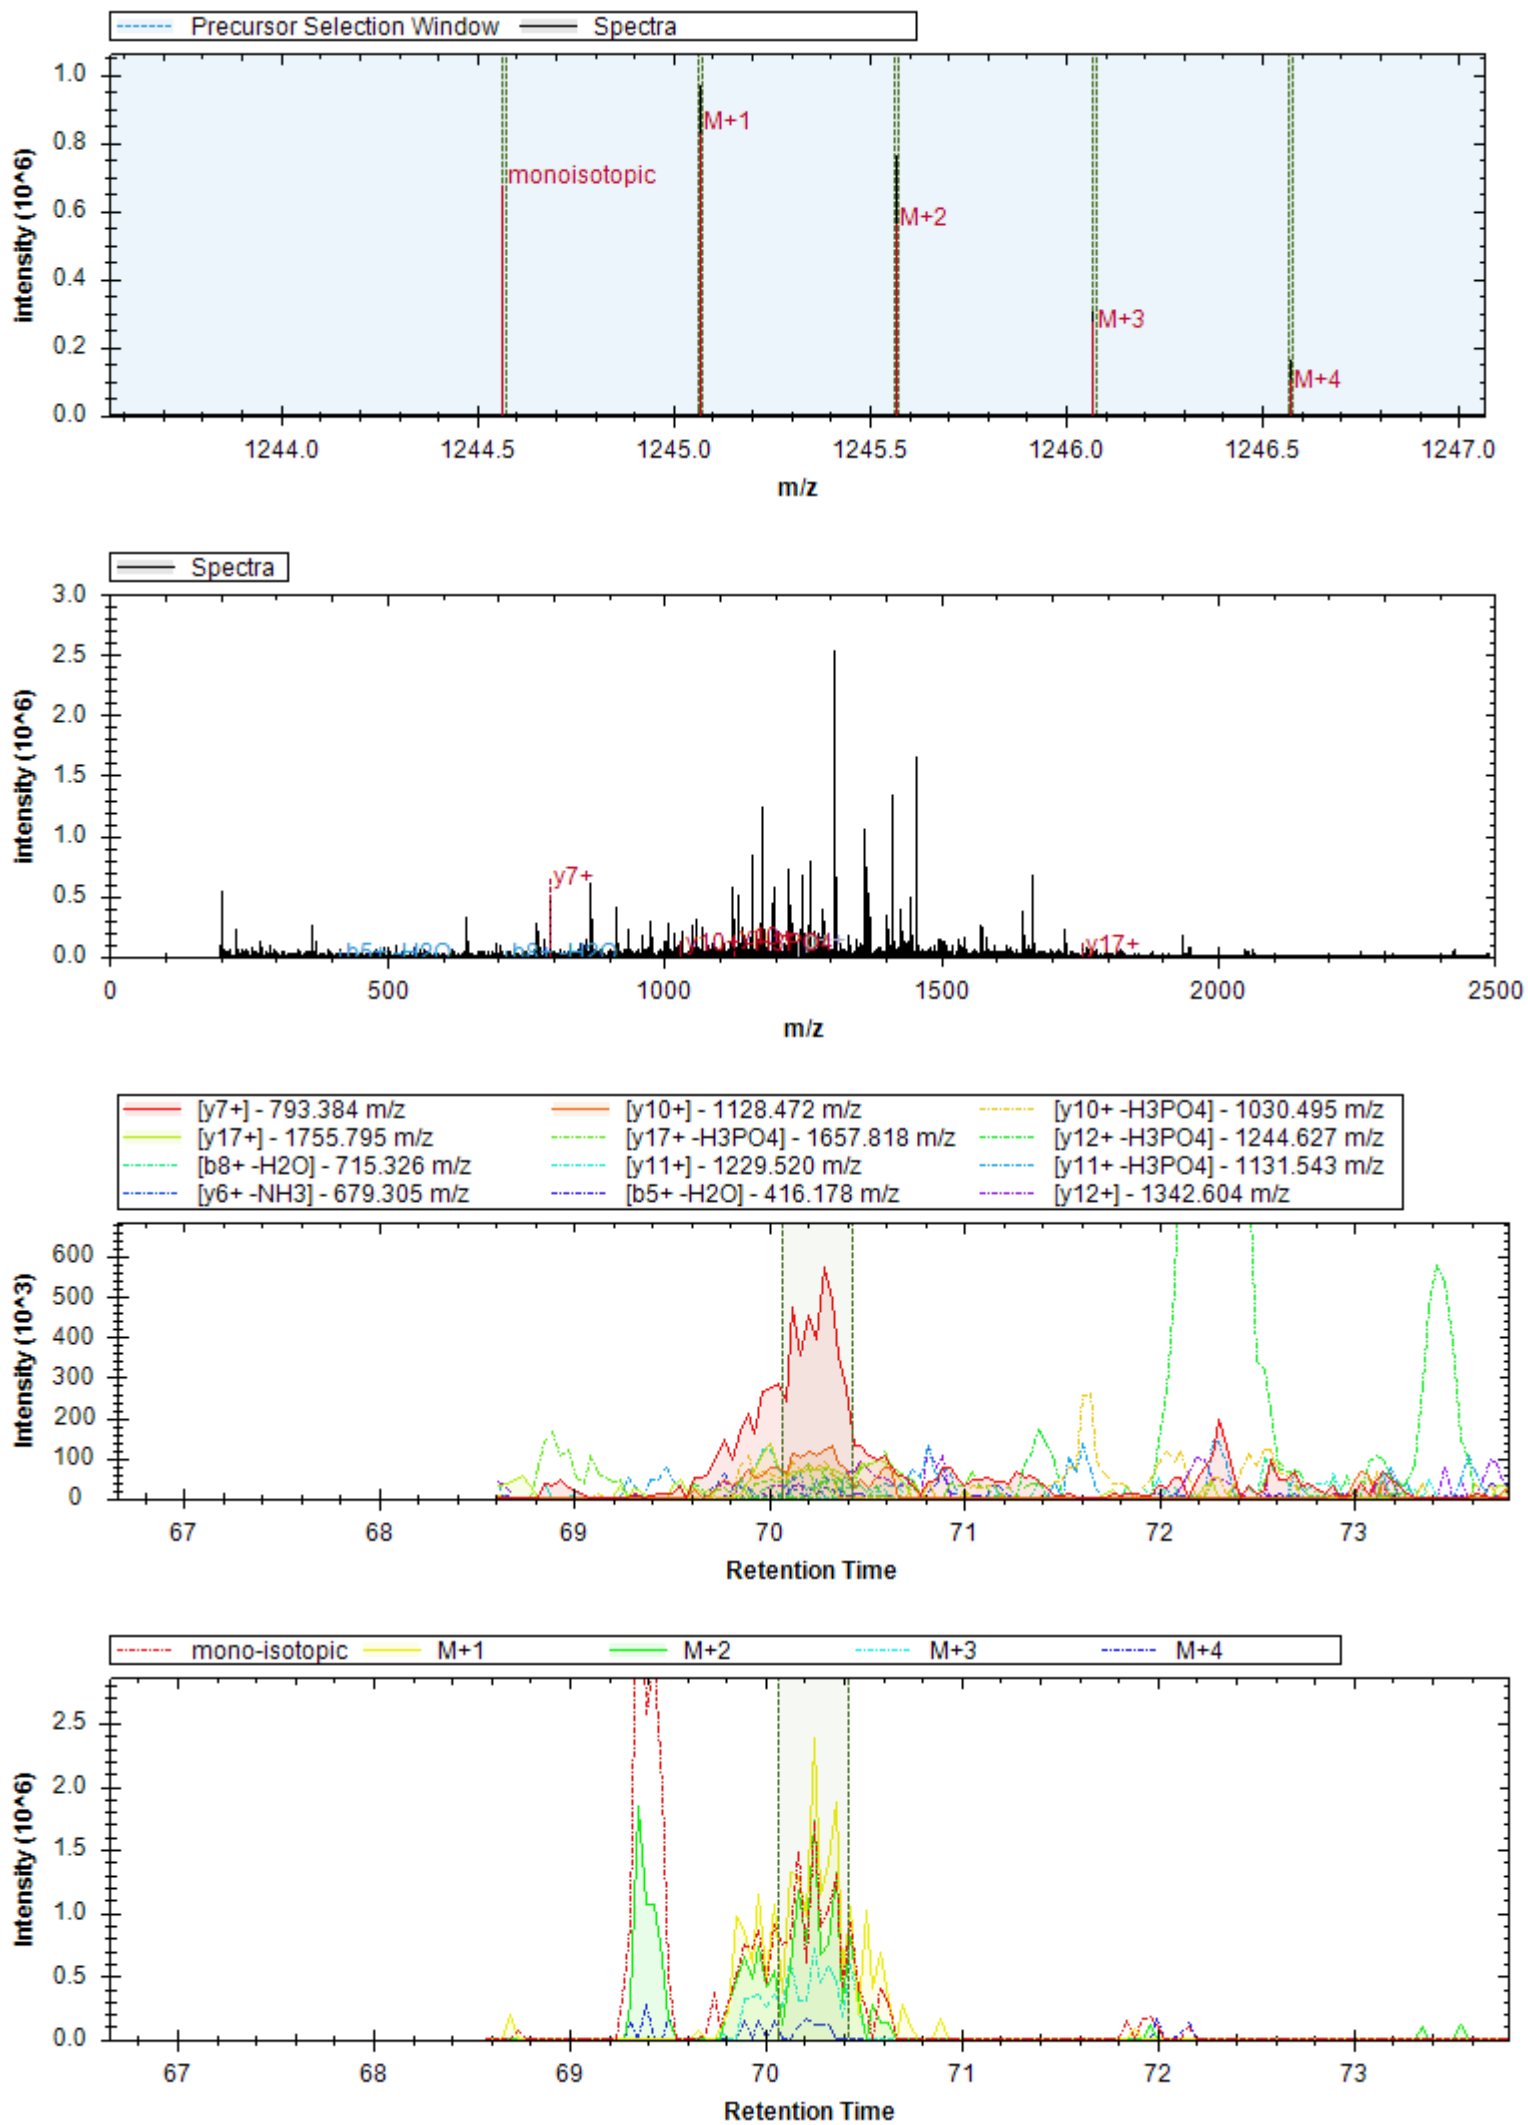

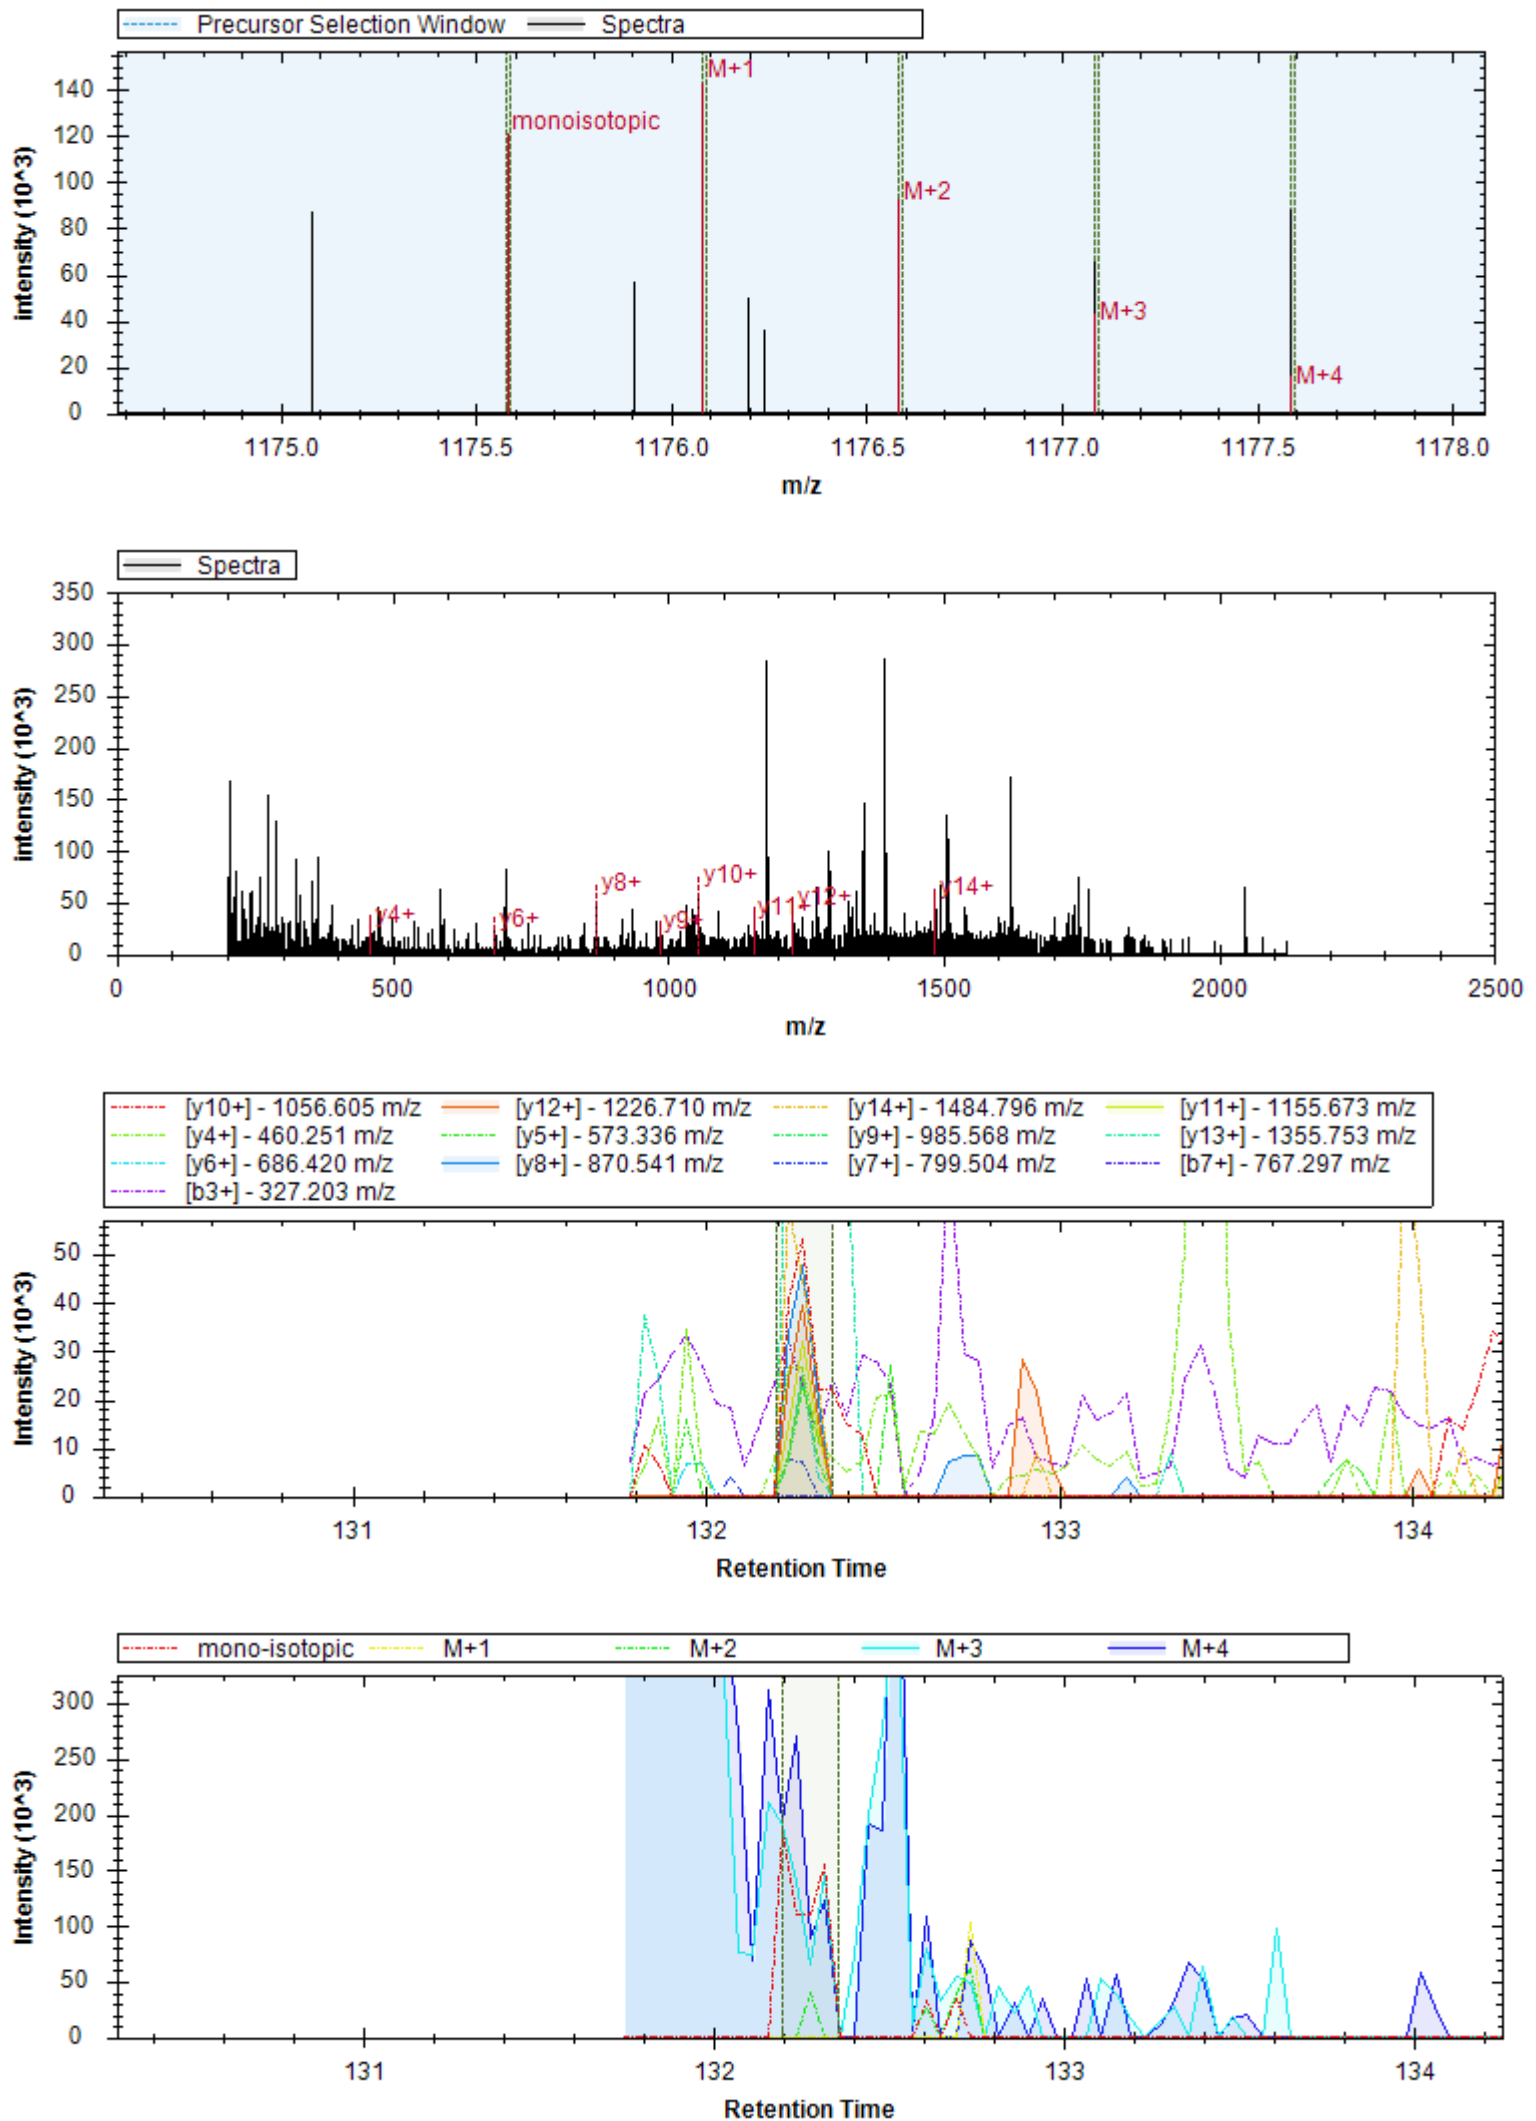



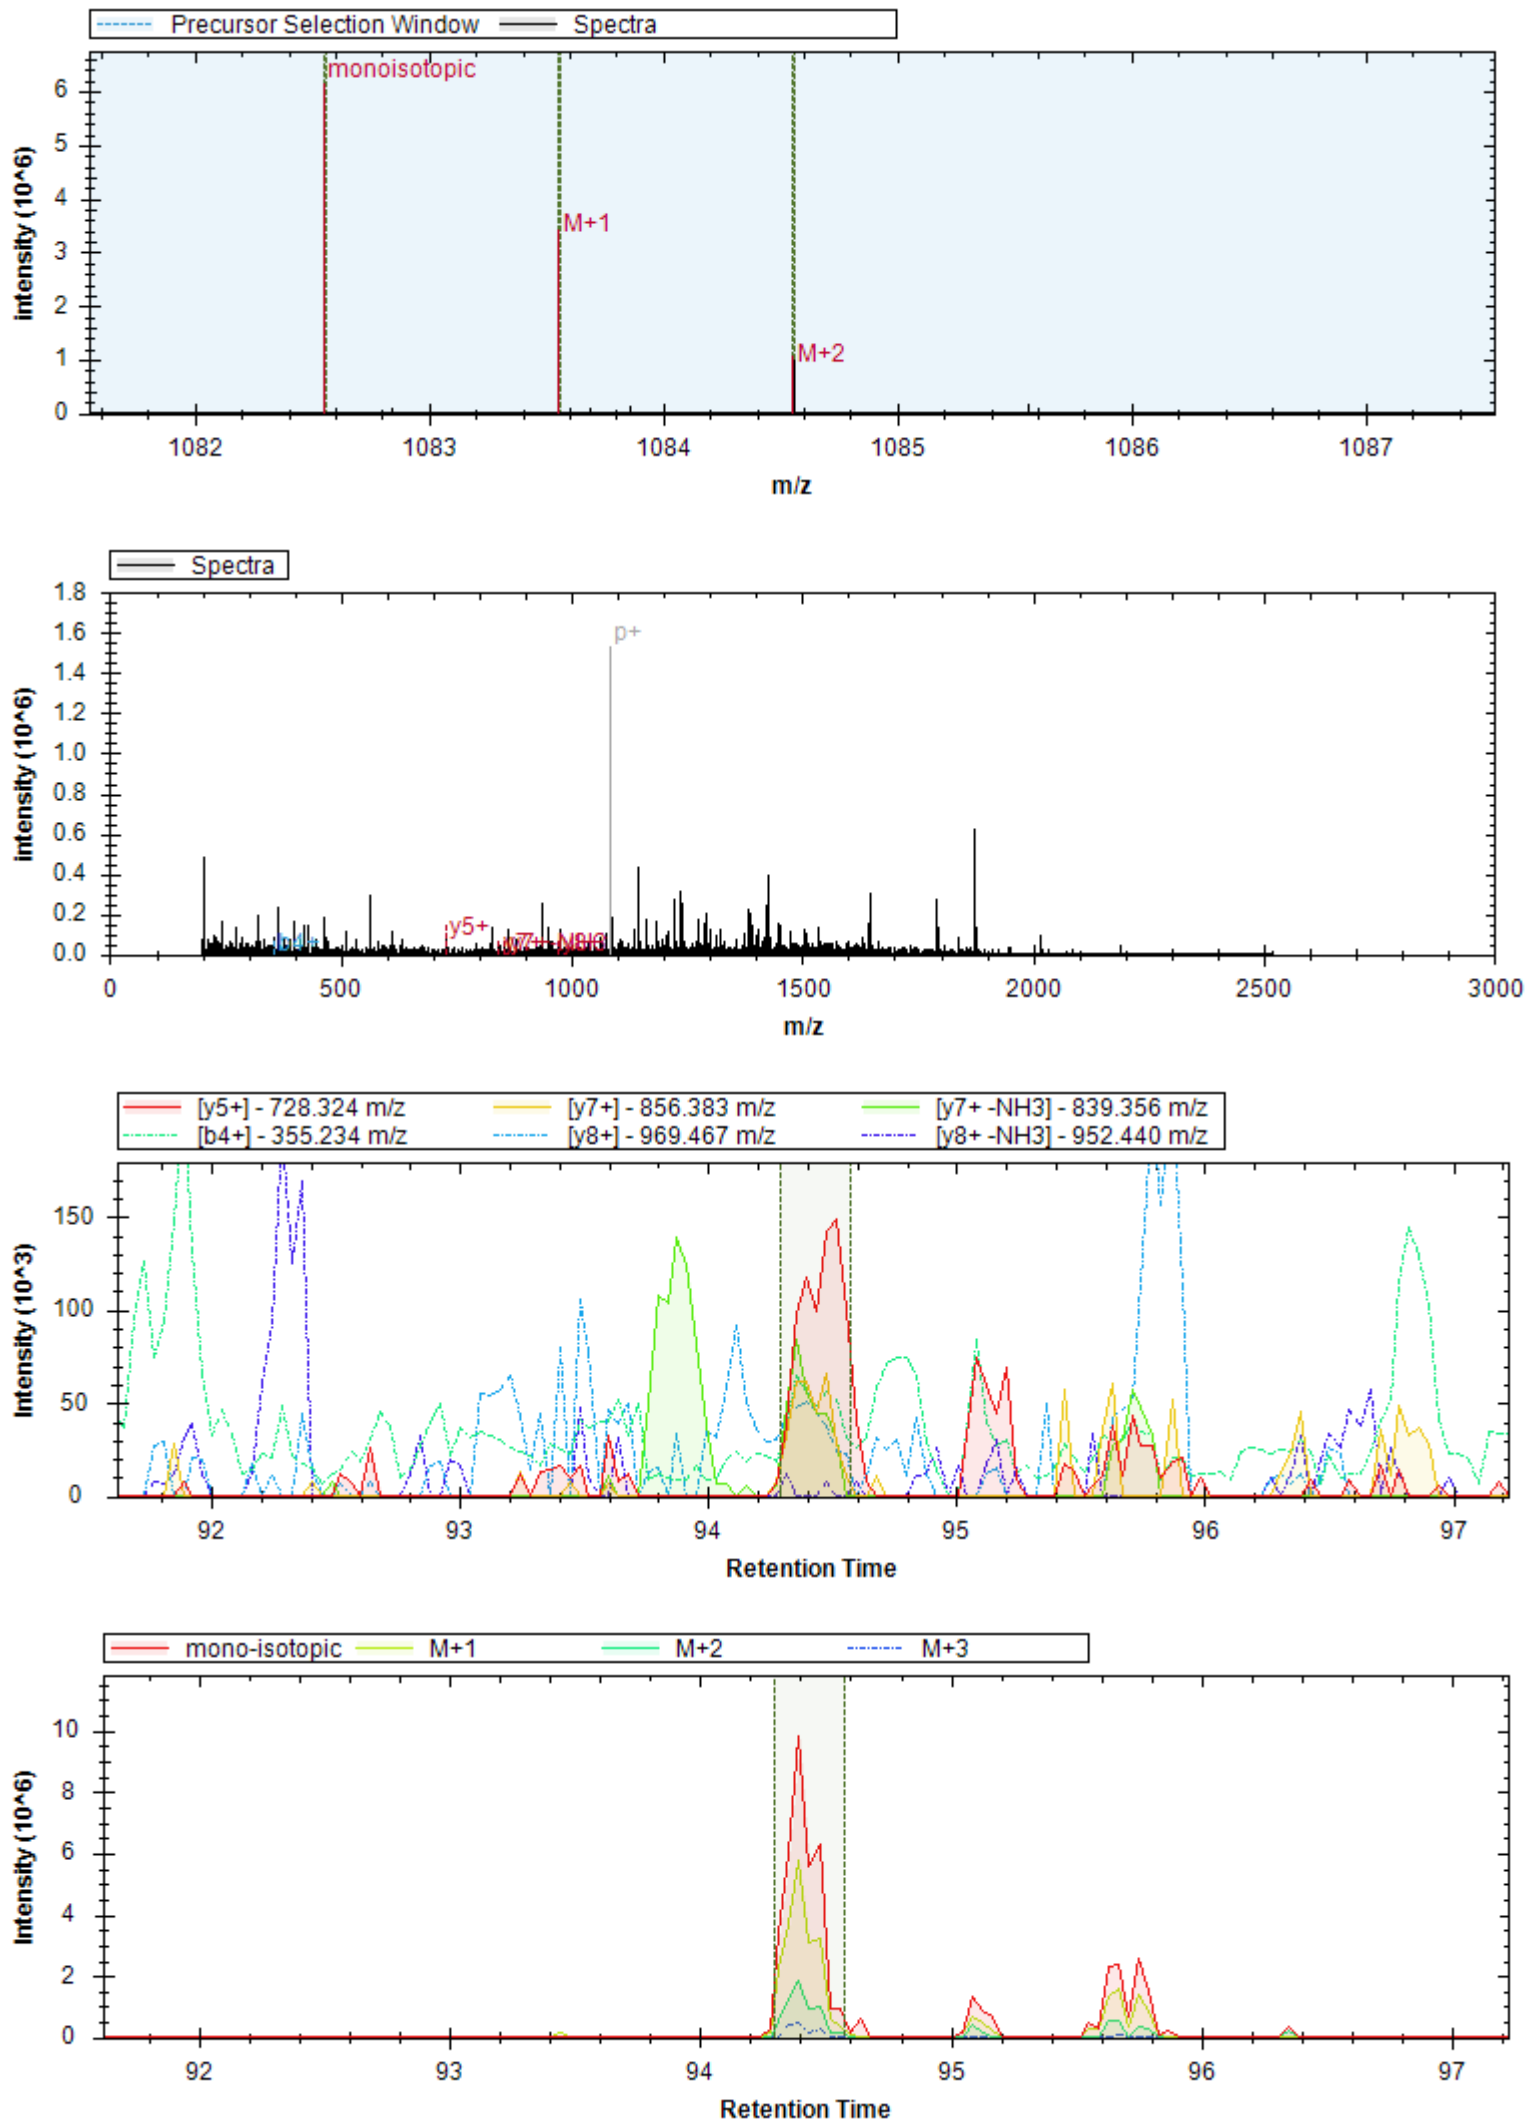

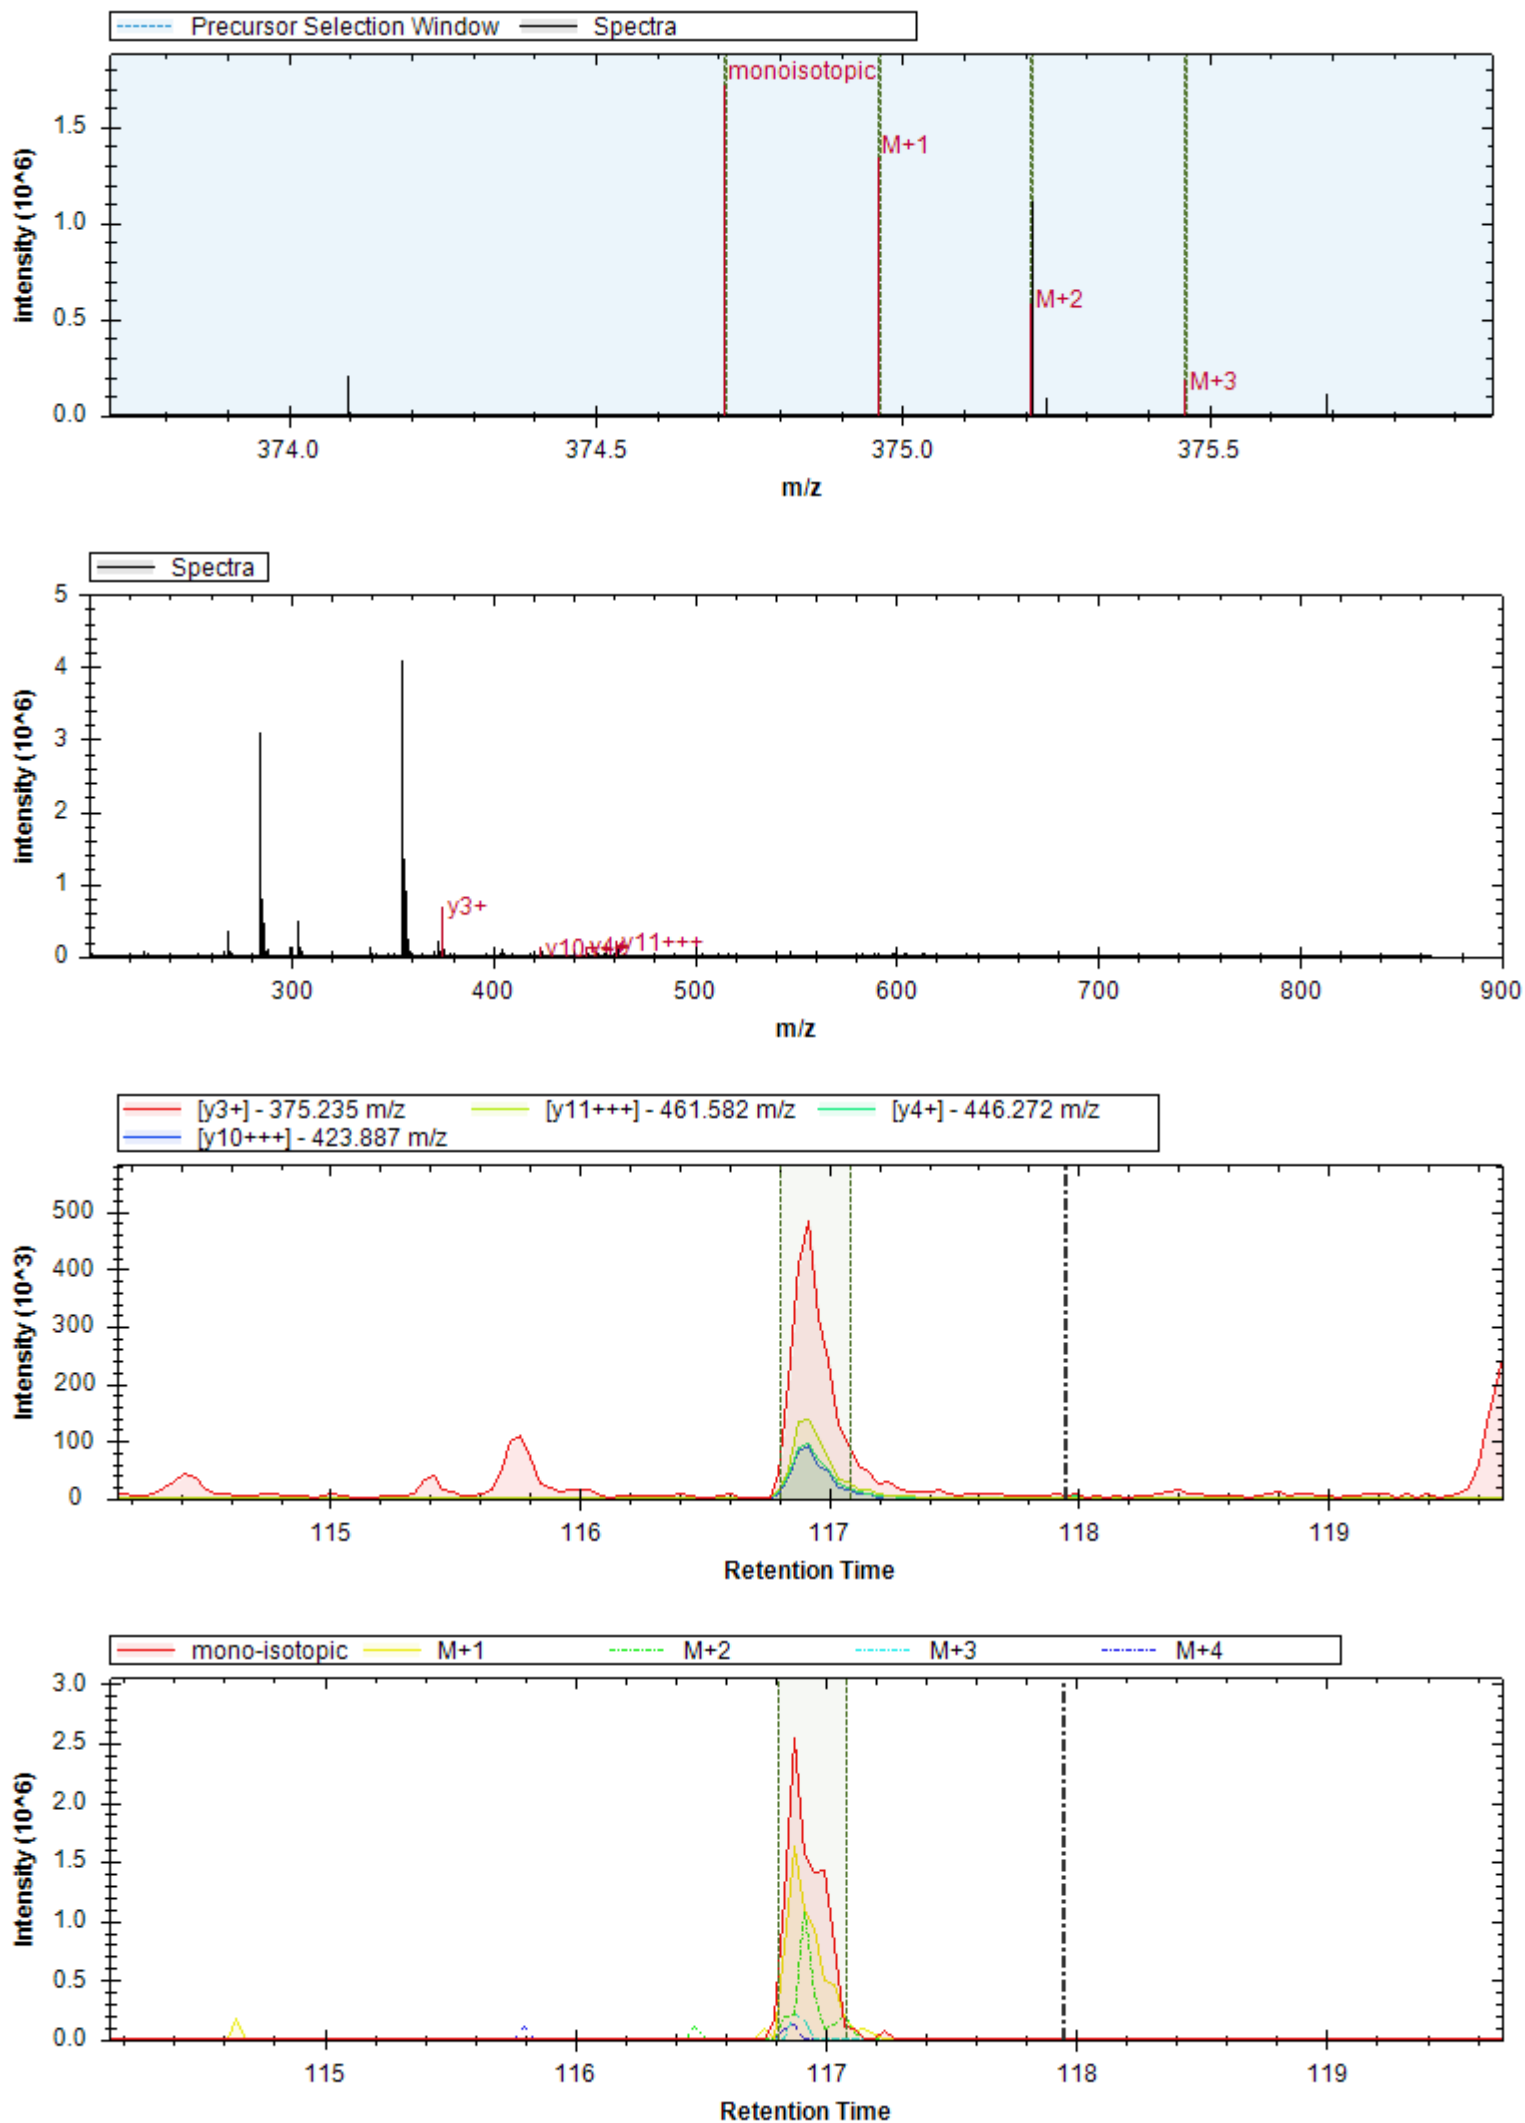

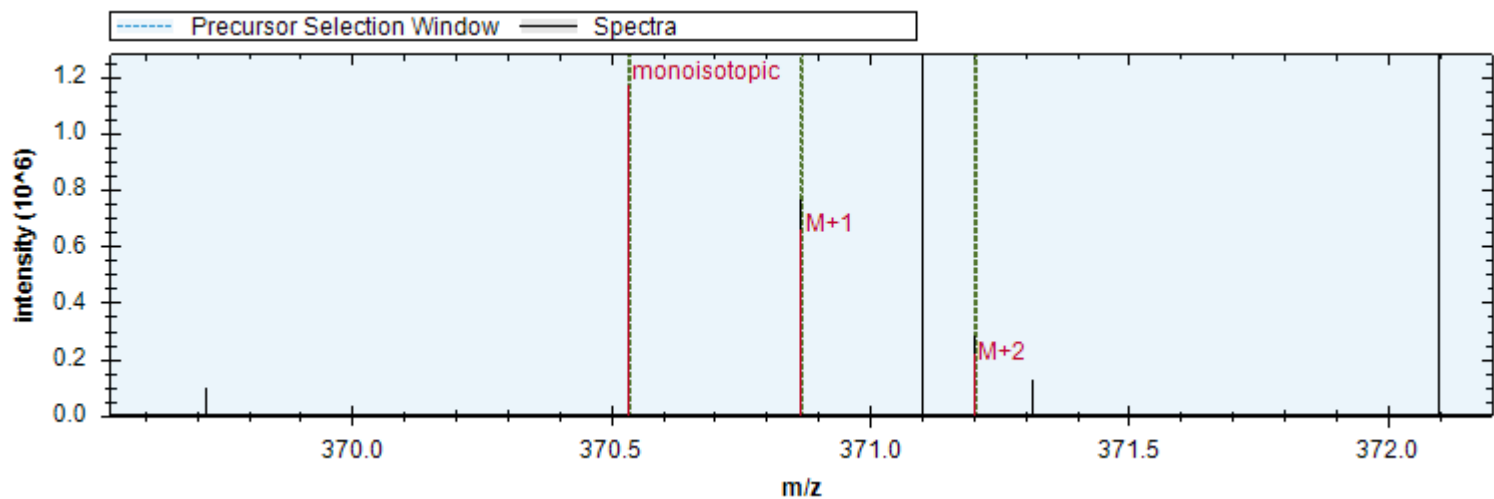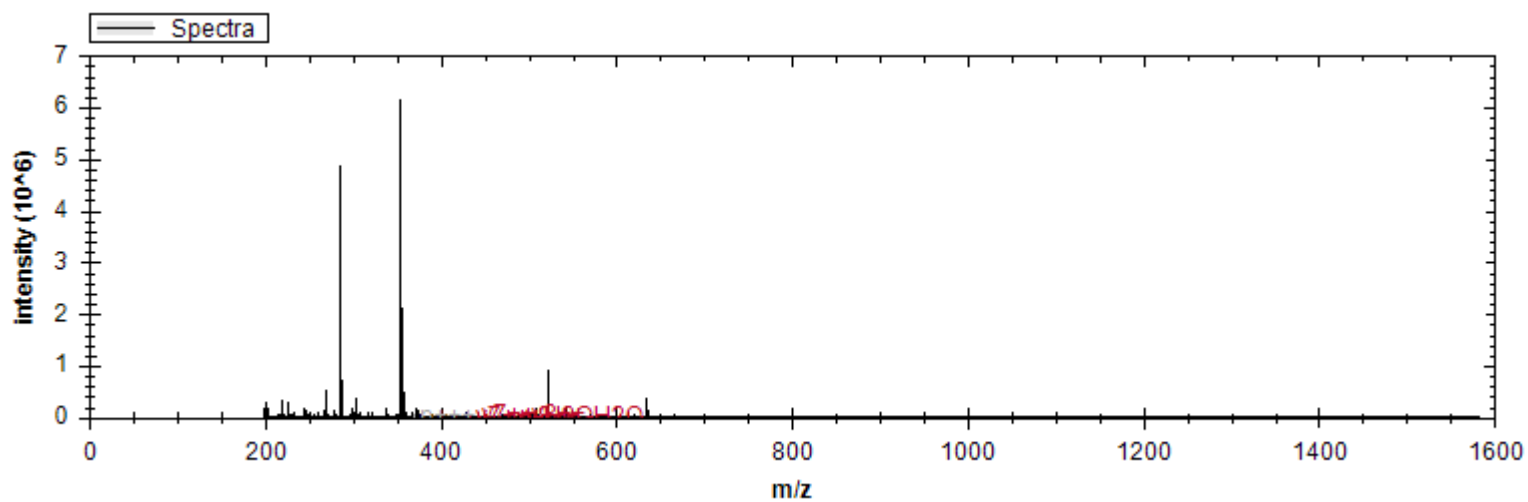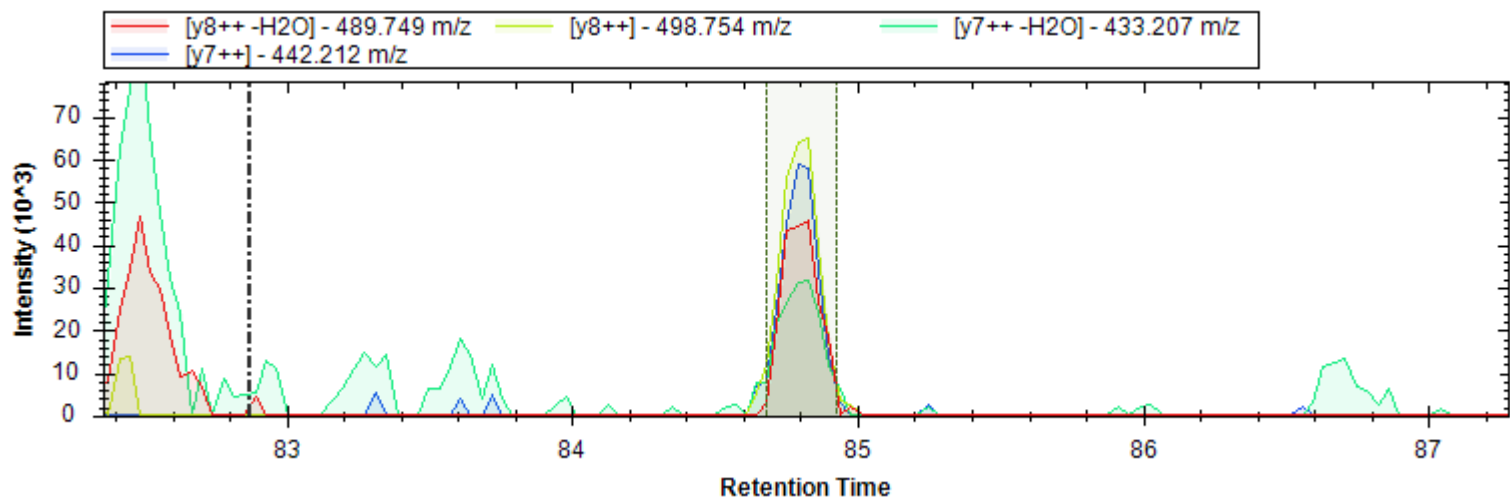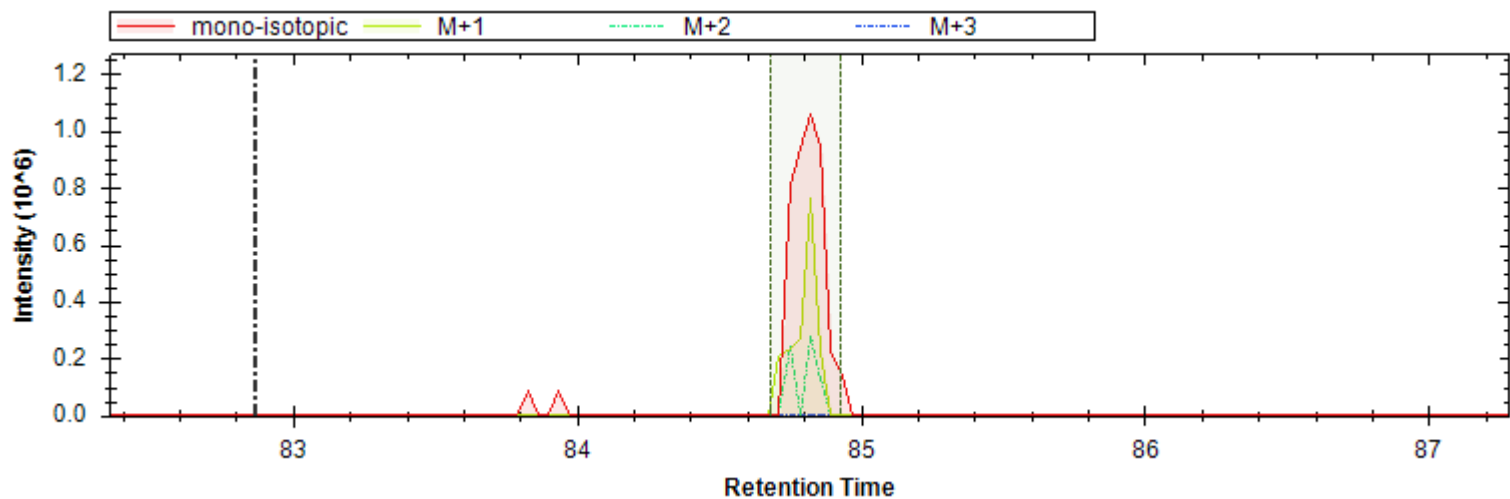

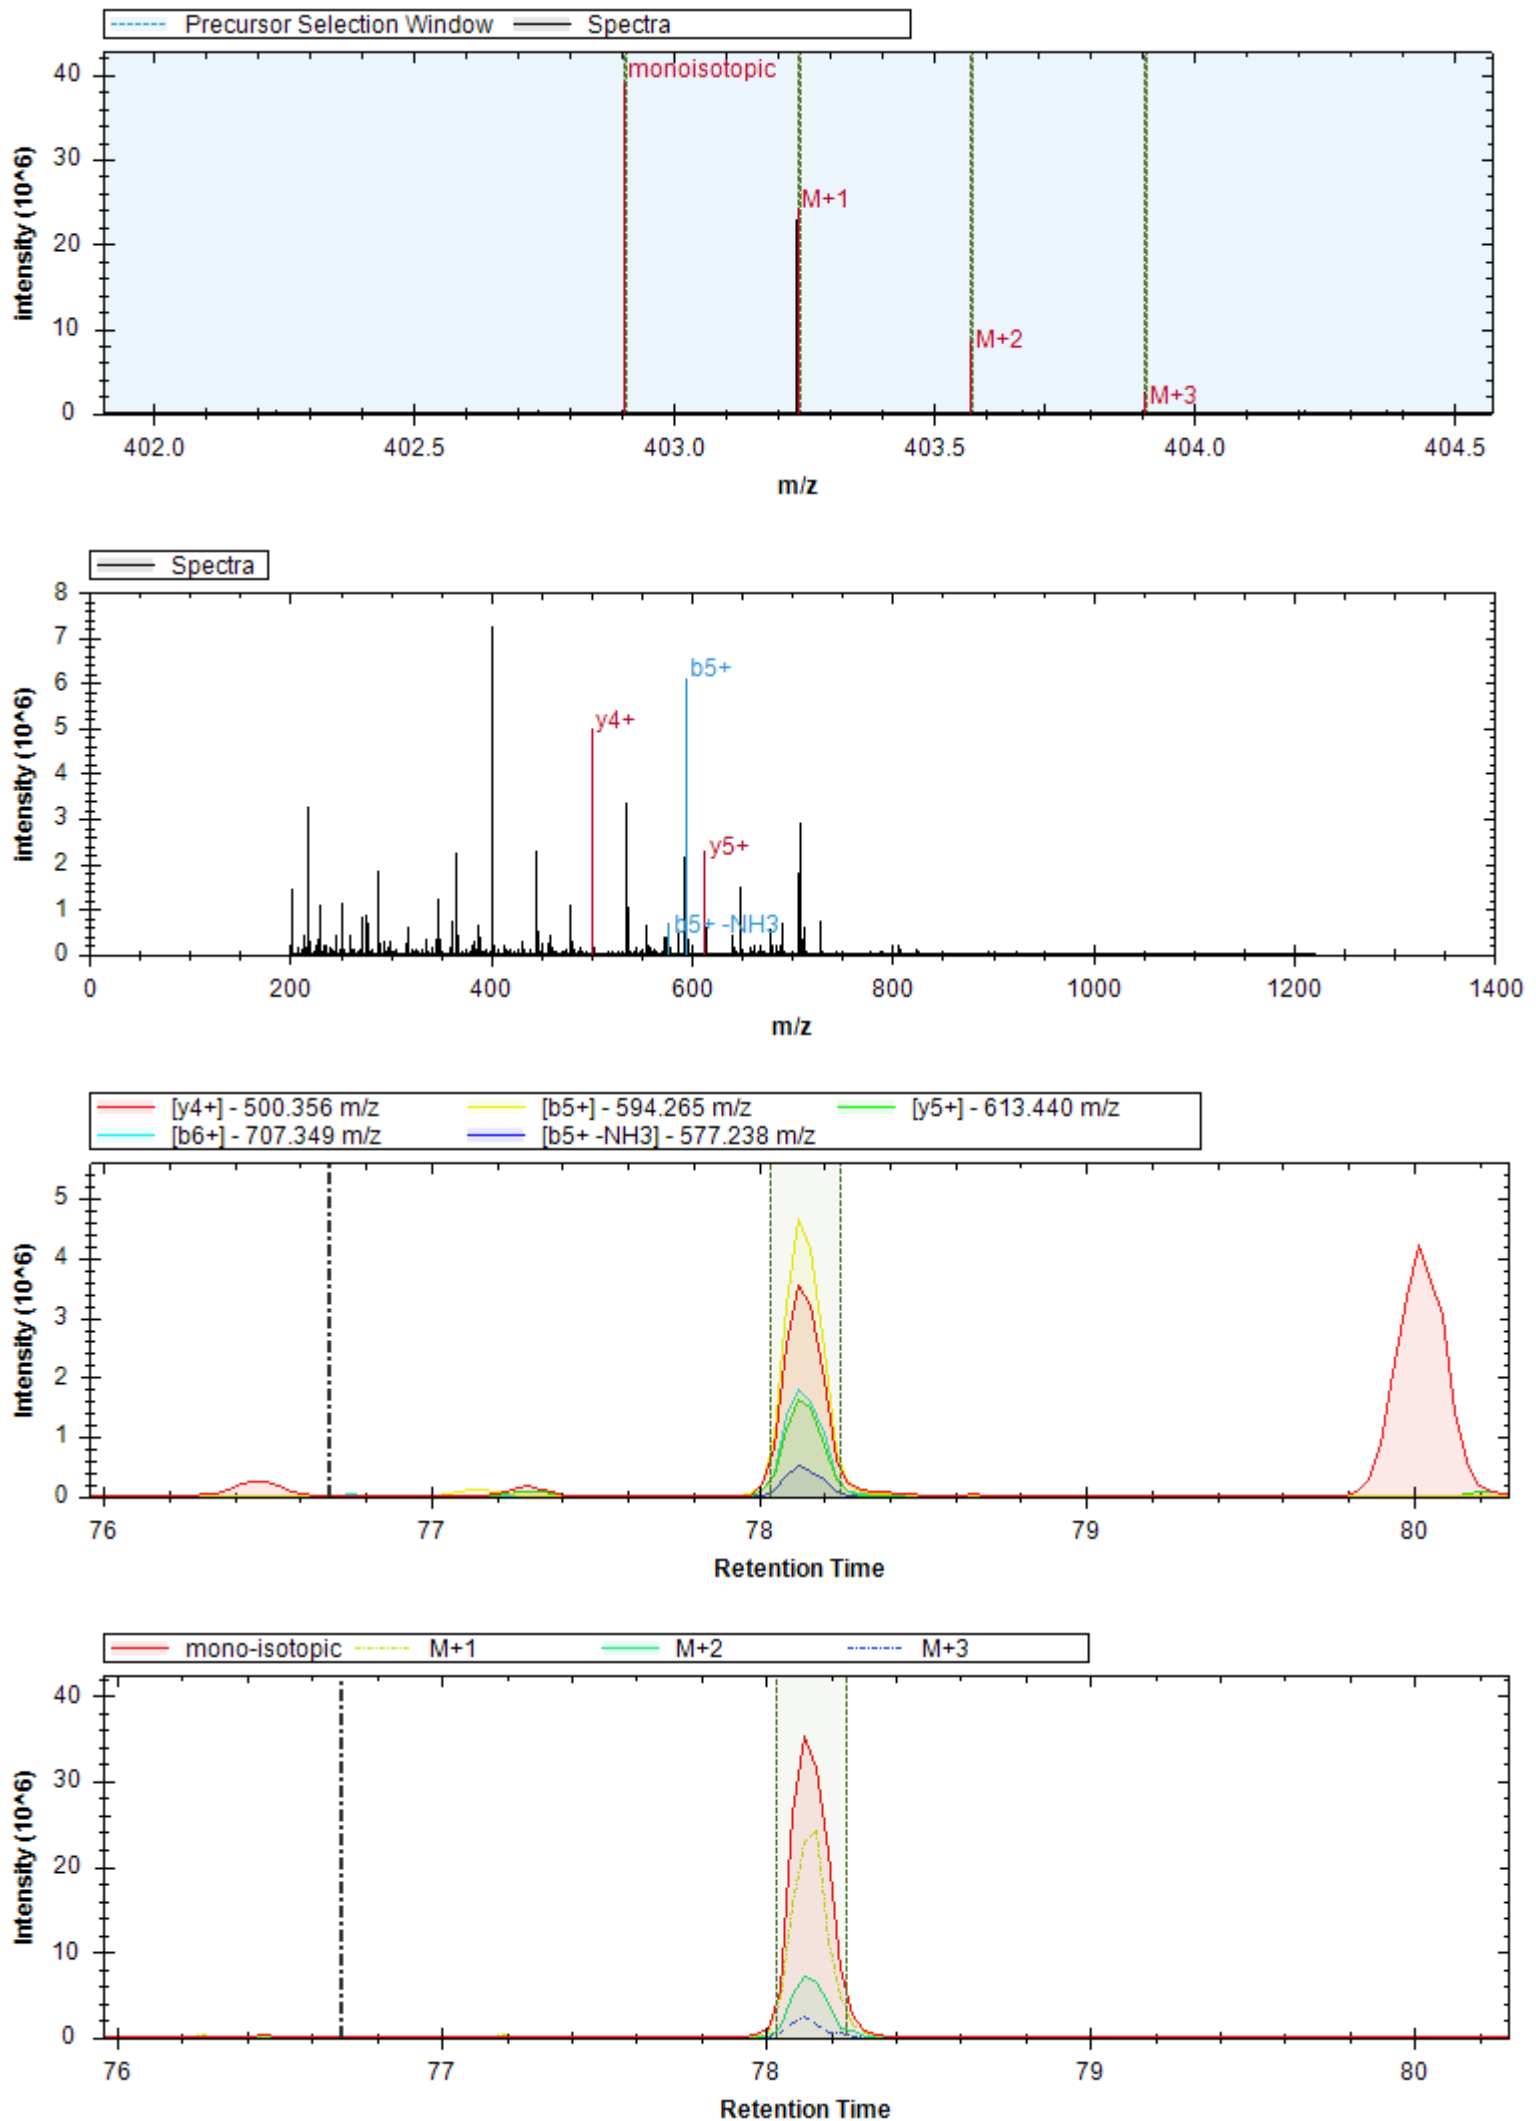

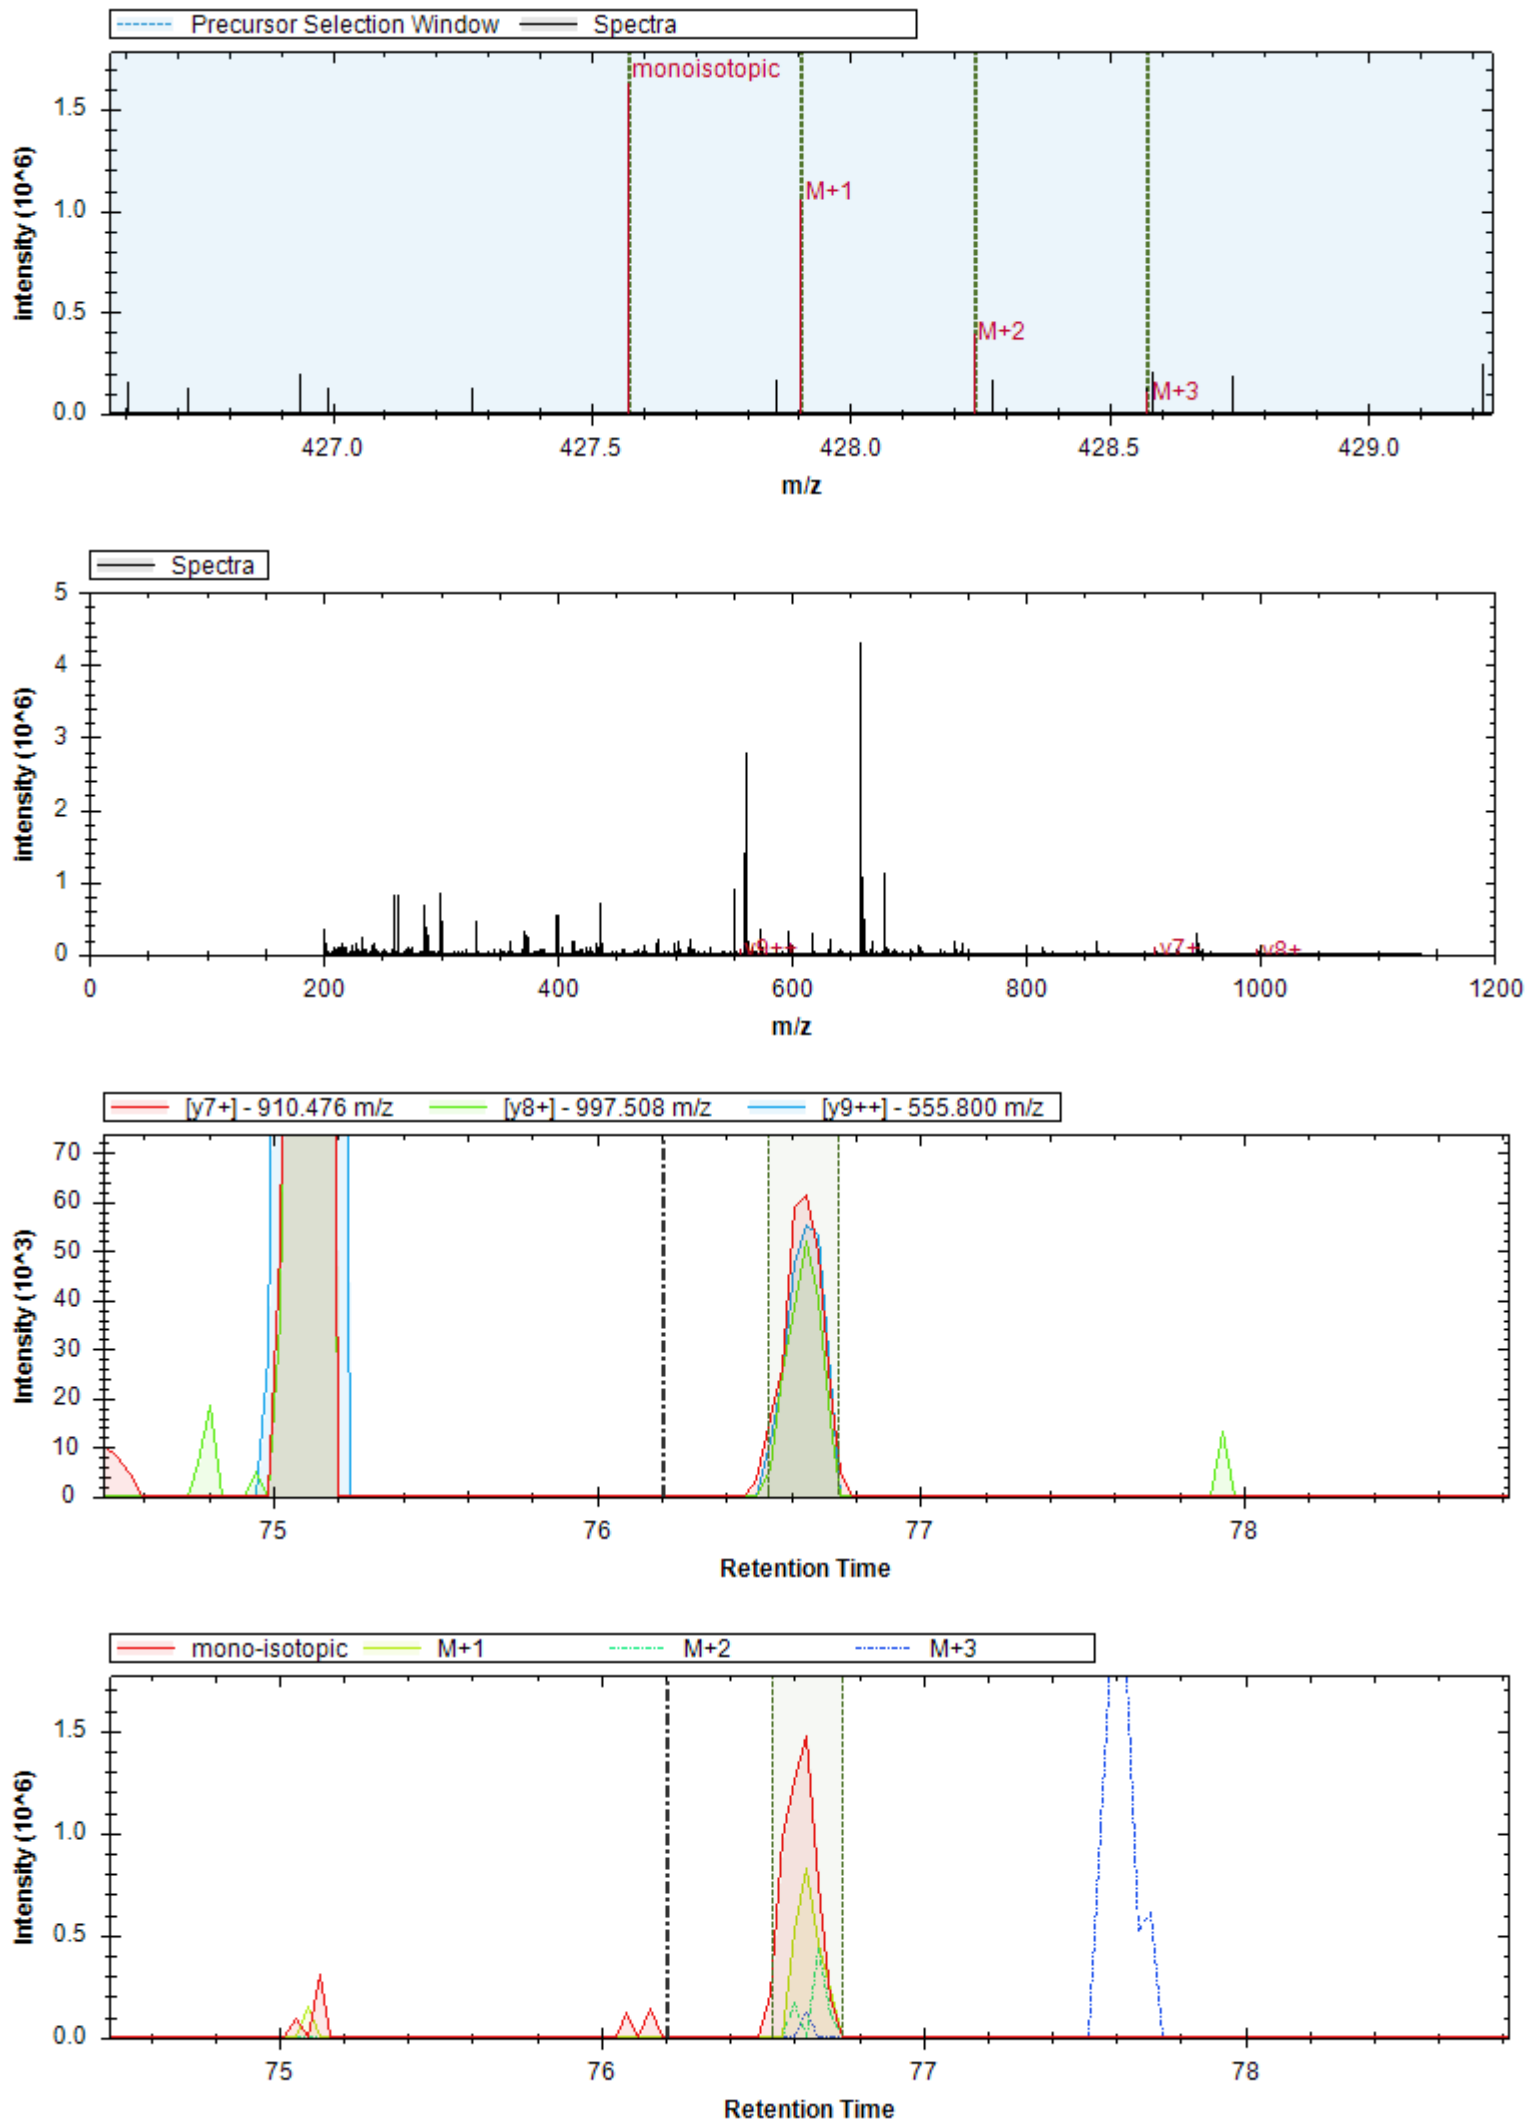

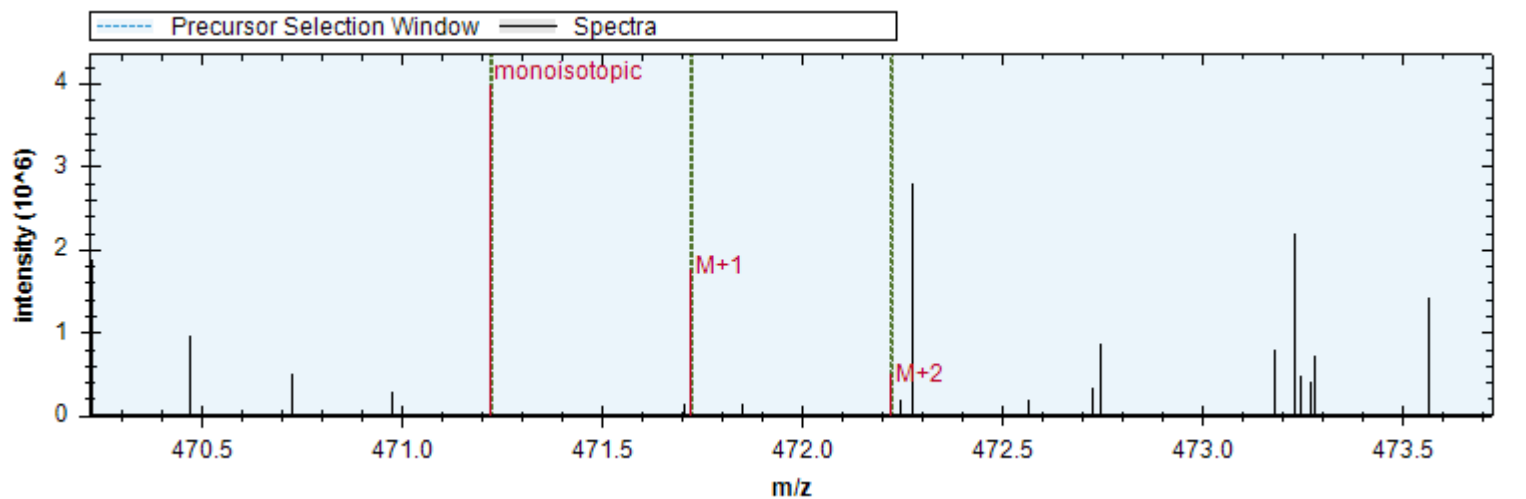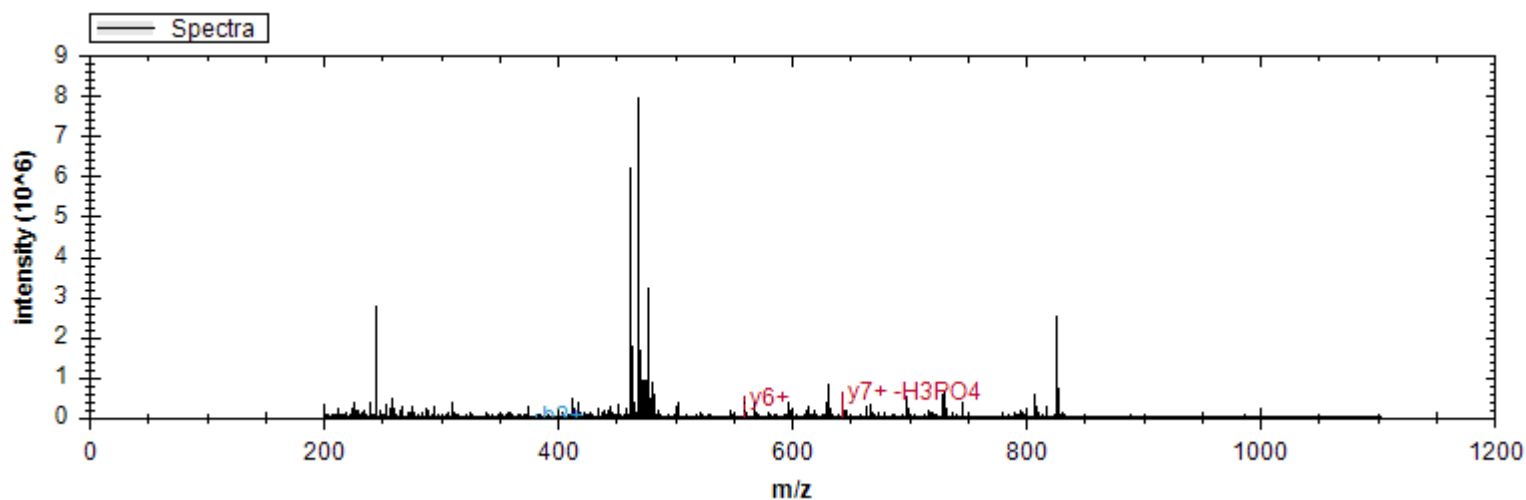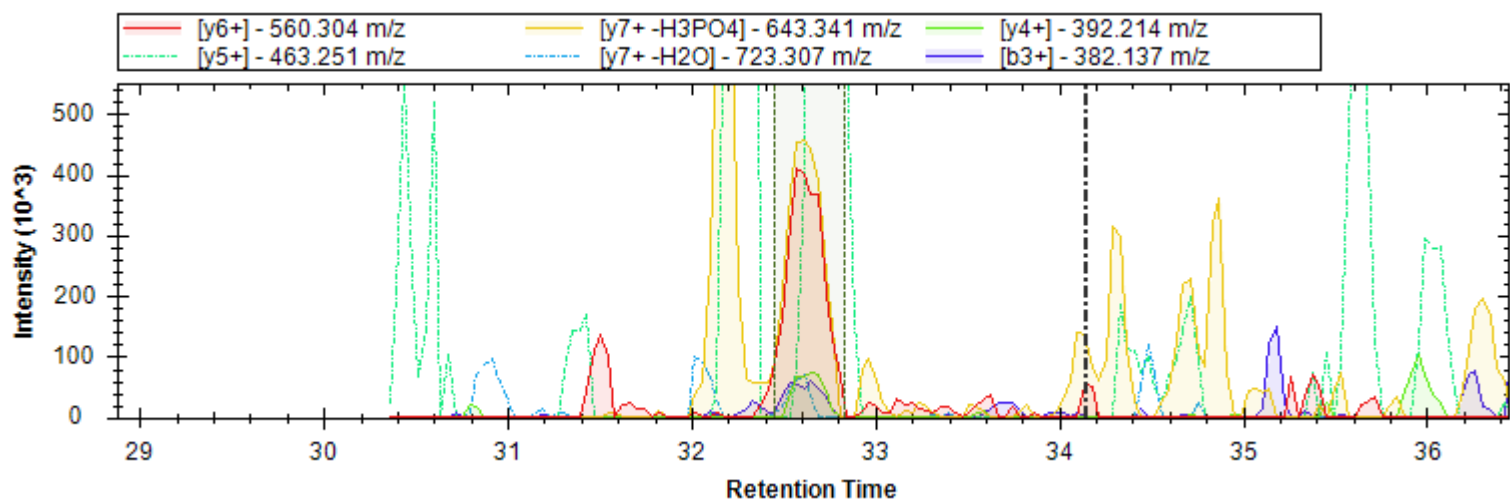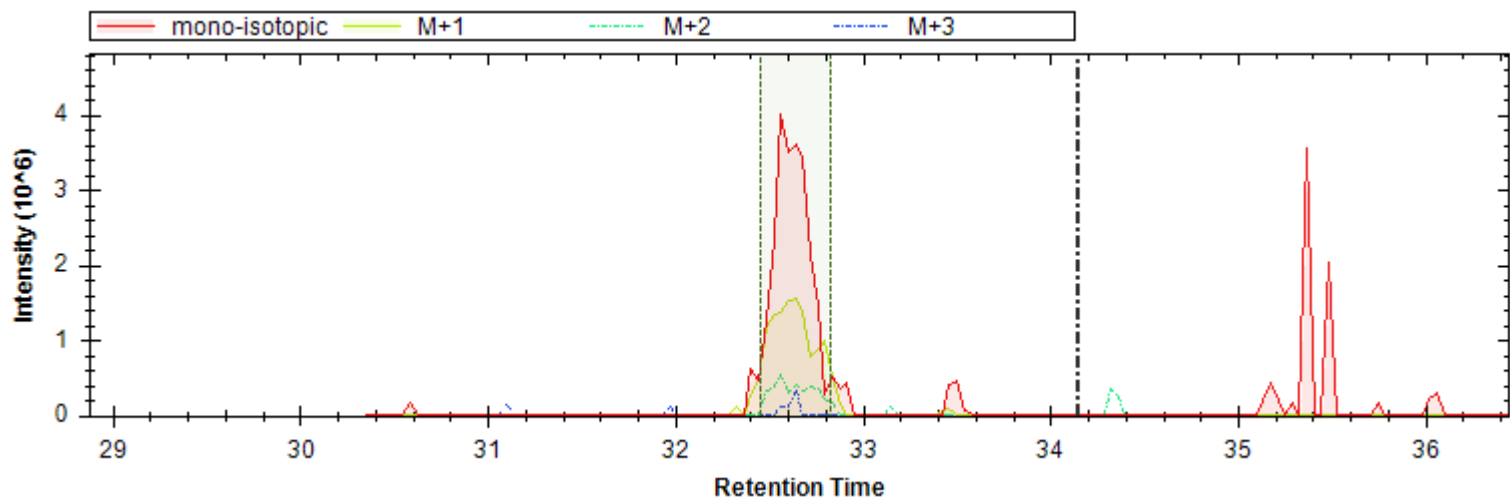

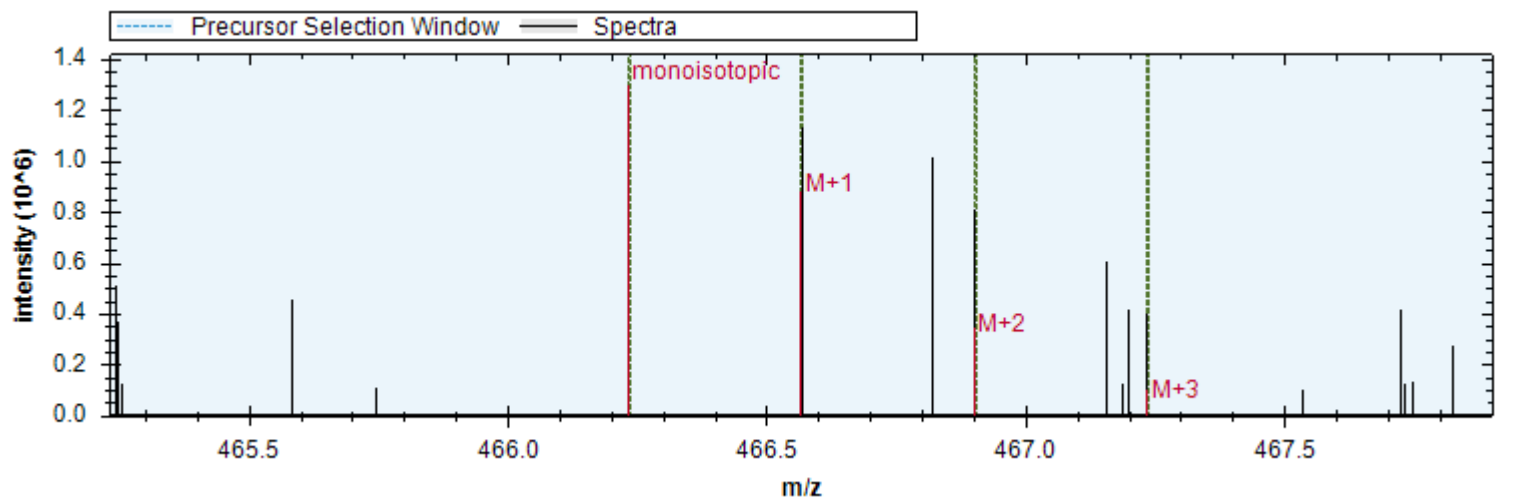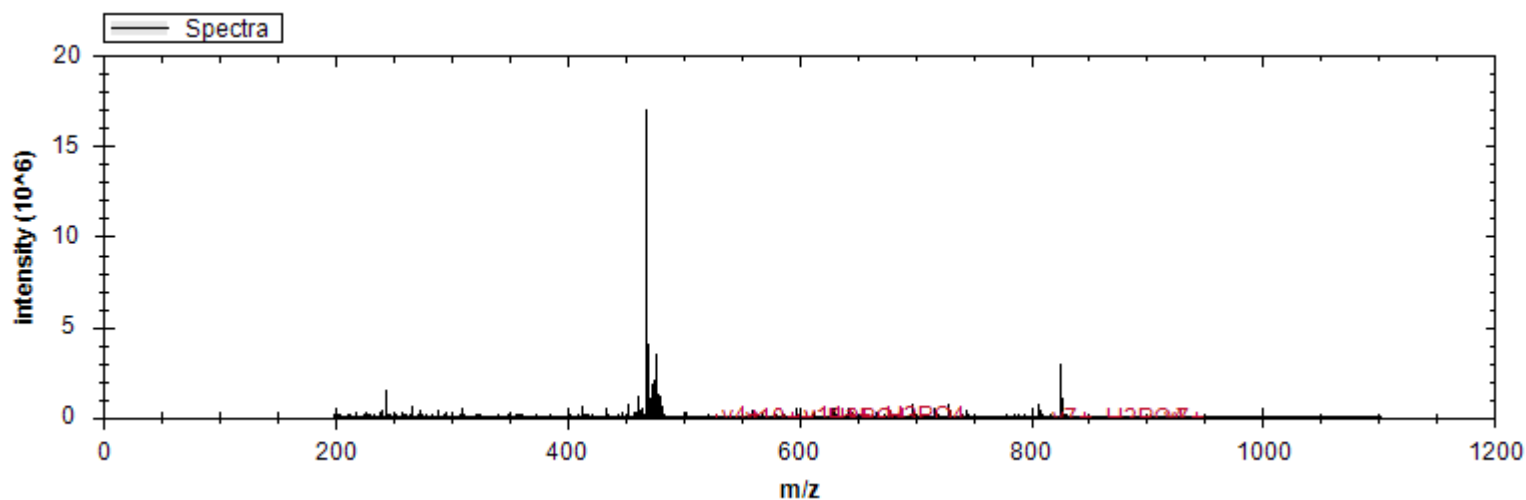

- |                              |                            |                              |
|------------------------------|----------------------------|------------------------------|
| [y5+ -H2O] - 598.331 m/z     | [y4+] - 529.309 m/z        | [y11++ -H3PO4] - 600.323 m/z |
| [y10++ -H3PO4] - 549.799 m/z | [y7+ -H3PO4] - 813.458 m/z | [y9++ -H3PO4] - 492.285 m/z  |
| [y9++] - 541.274 m/z         | [y11++] - 649.311 m/z      | [y5+ -NH3] - 599.315 m/z     |
| [y7+] - 911.435 m/z          | [y10++] - 598.787 m/z      | [y5+] - 616.341 m/z          |
| [b4+] - 373.172 m/z          |                            |                              |

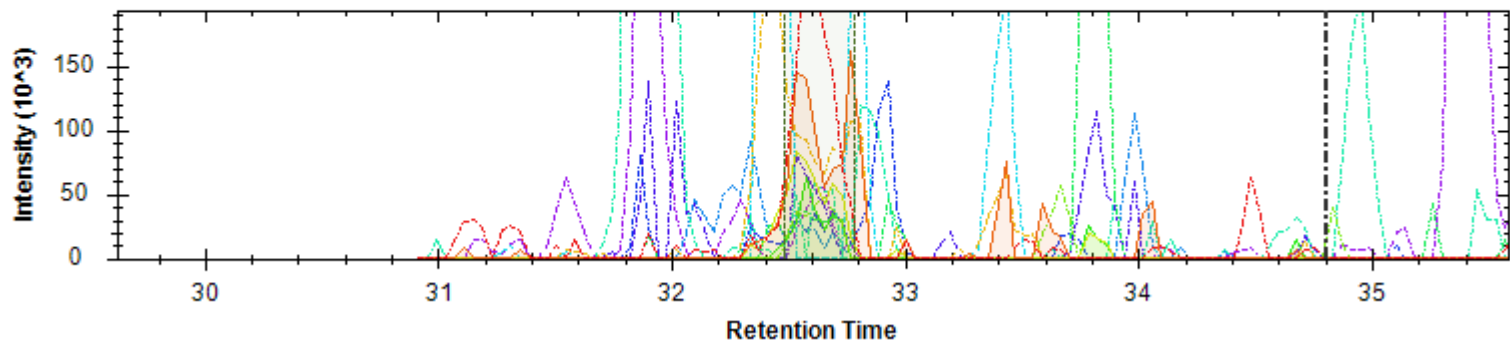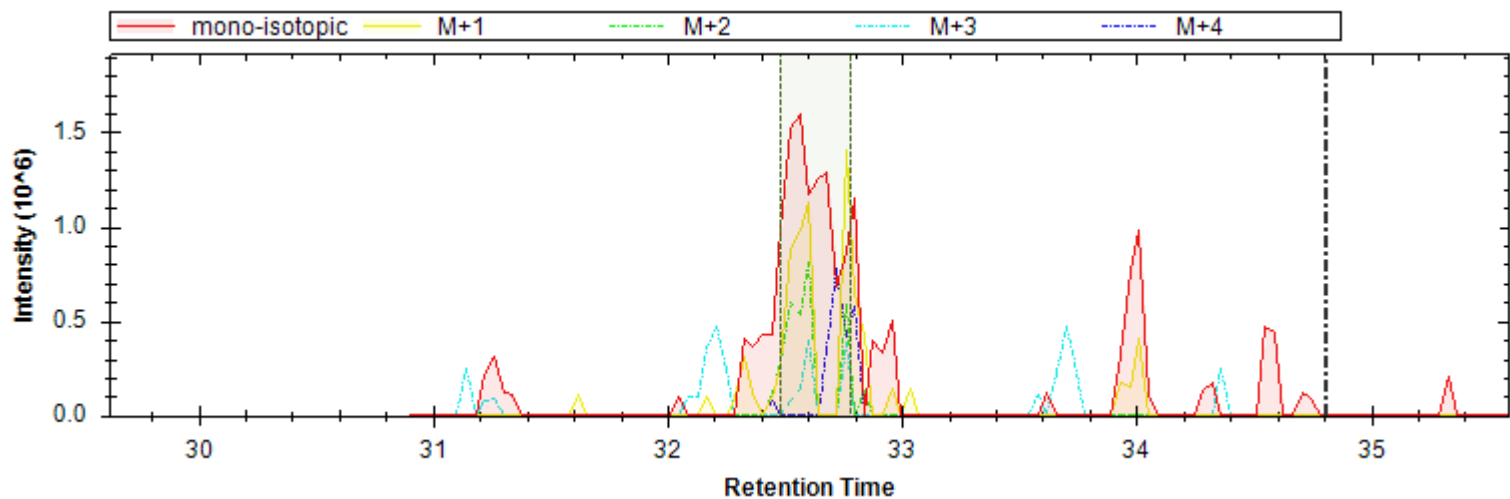

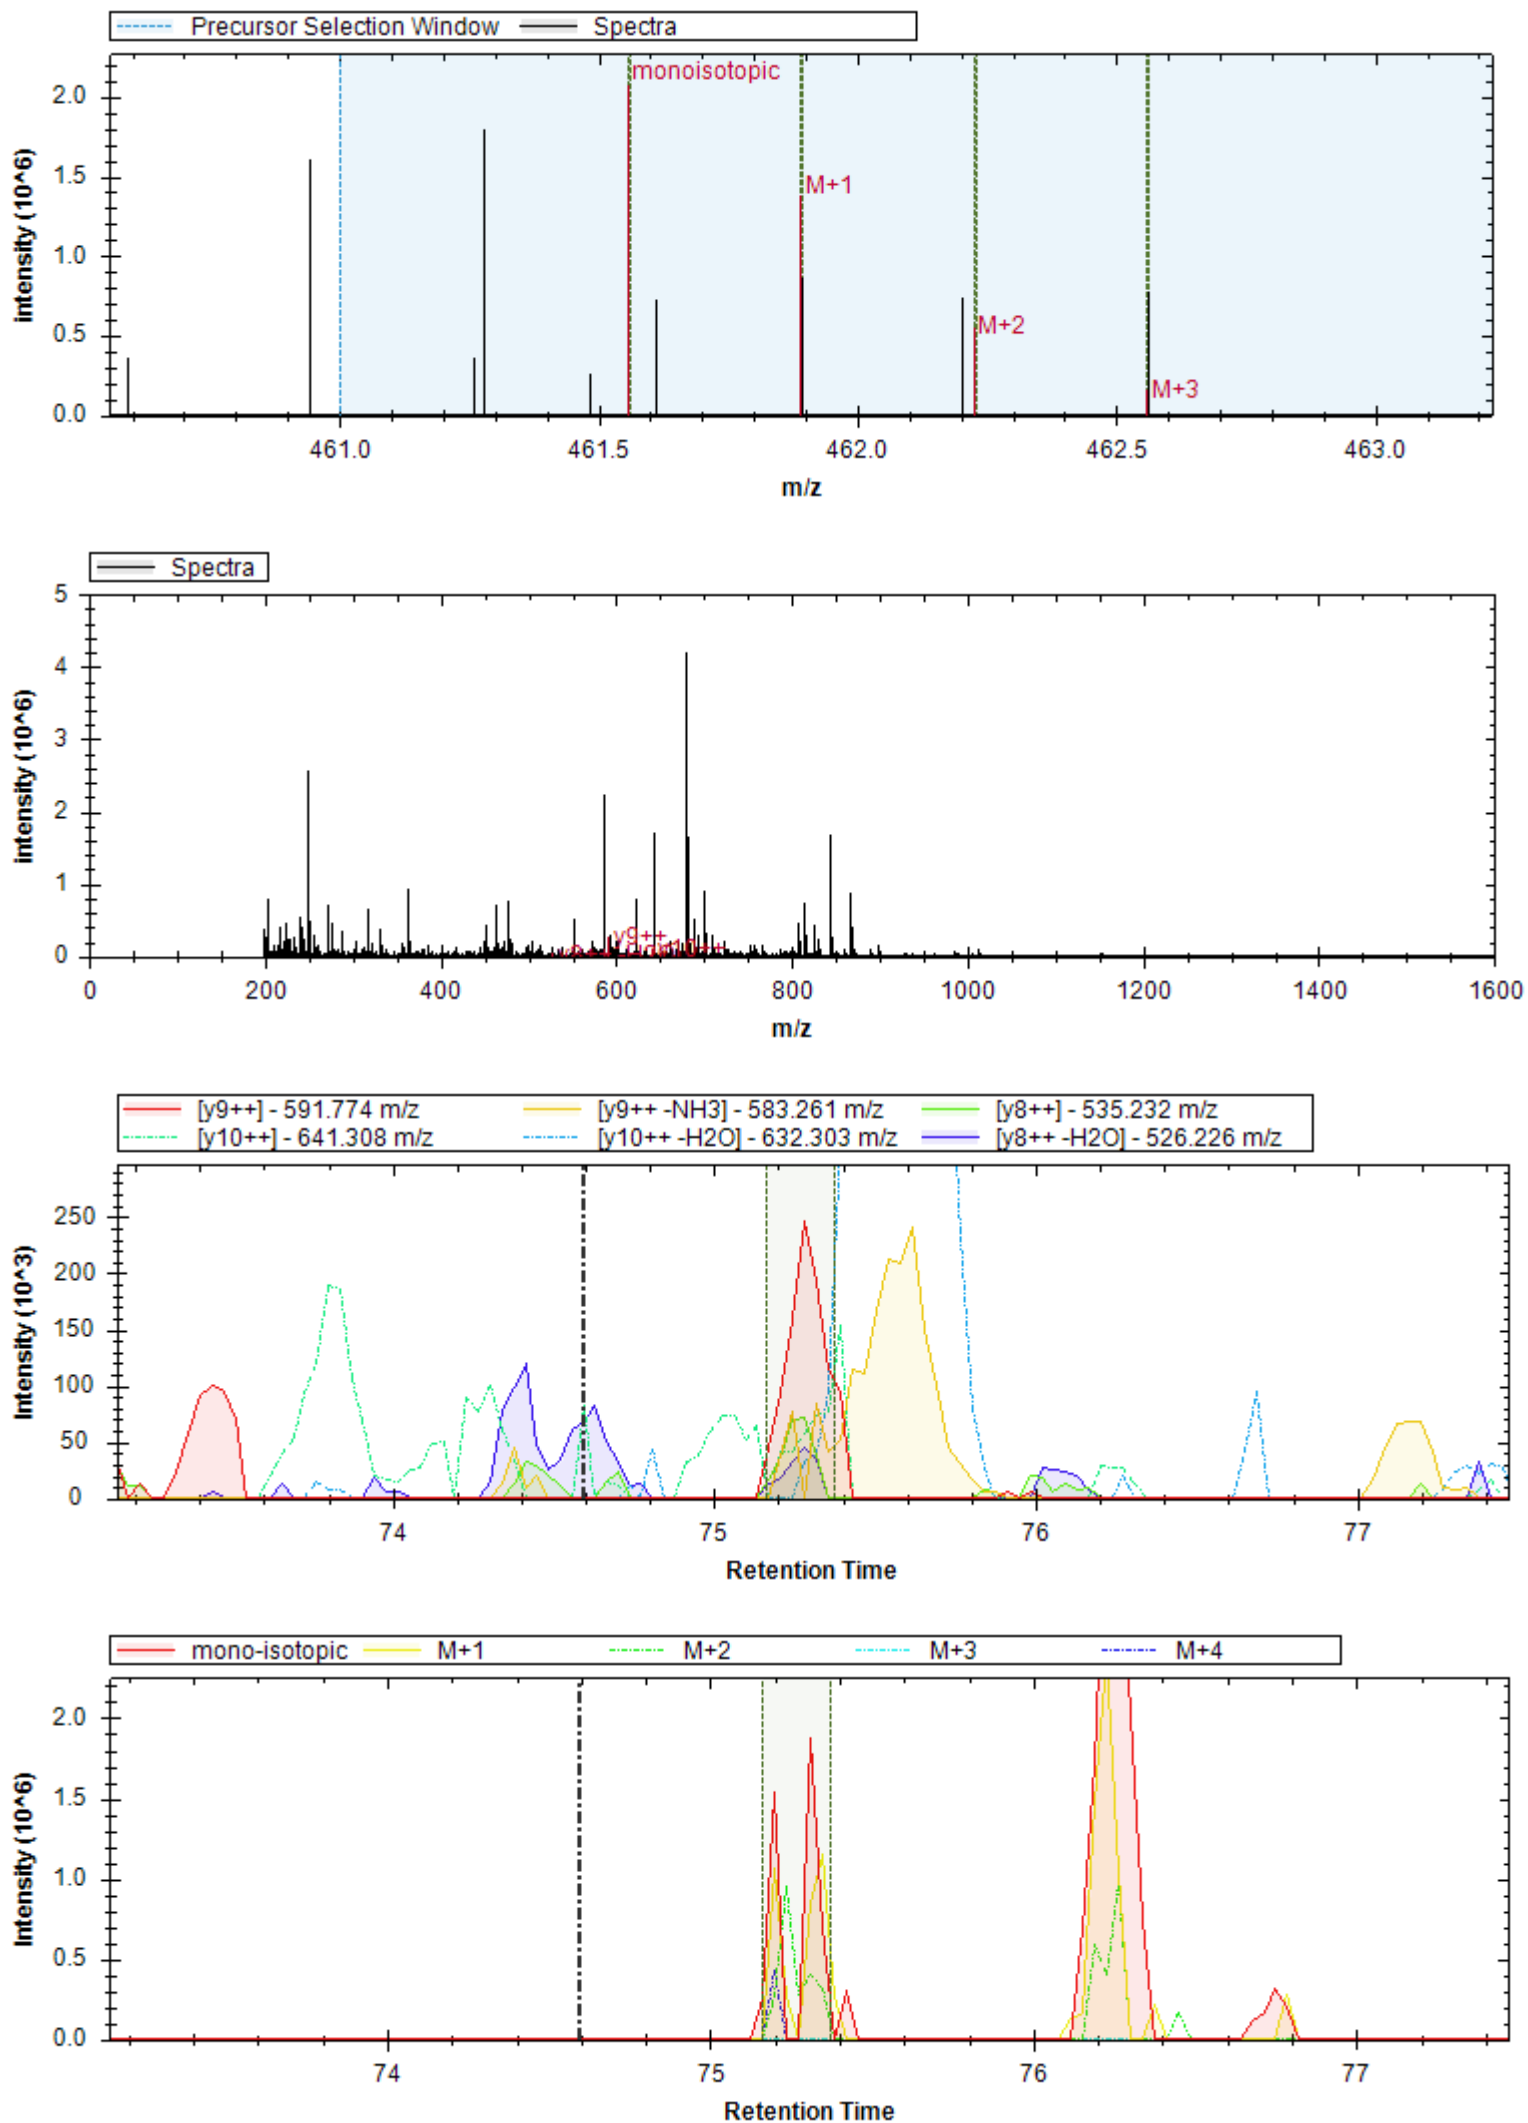



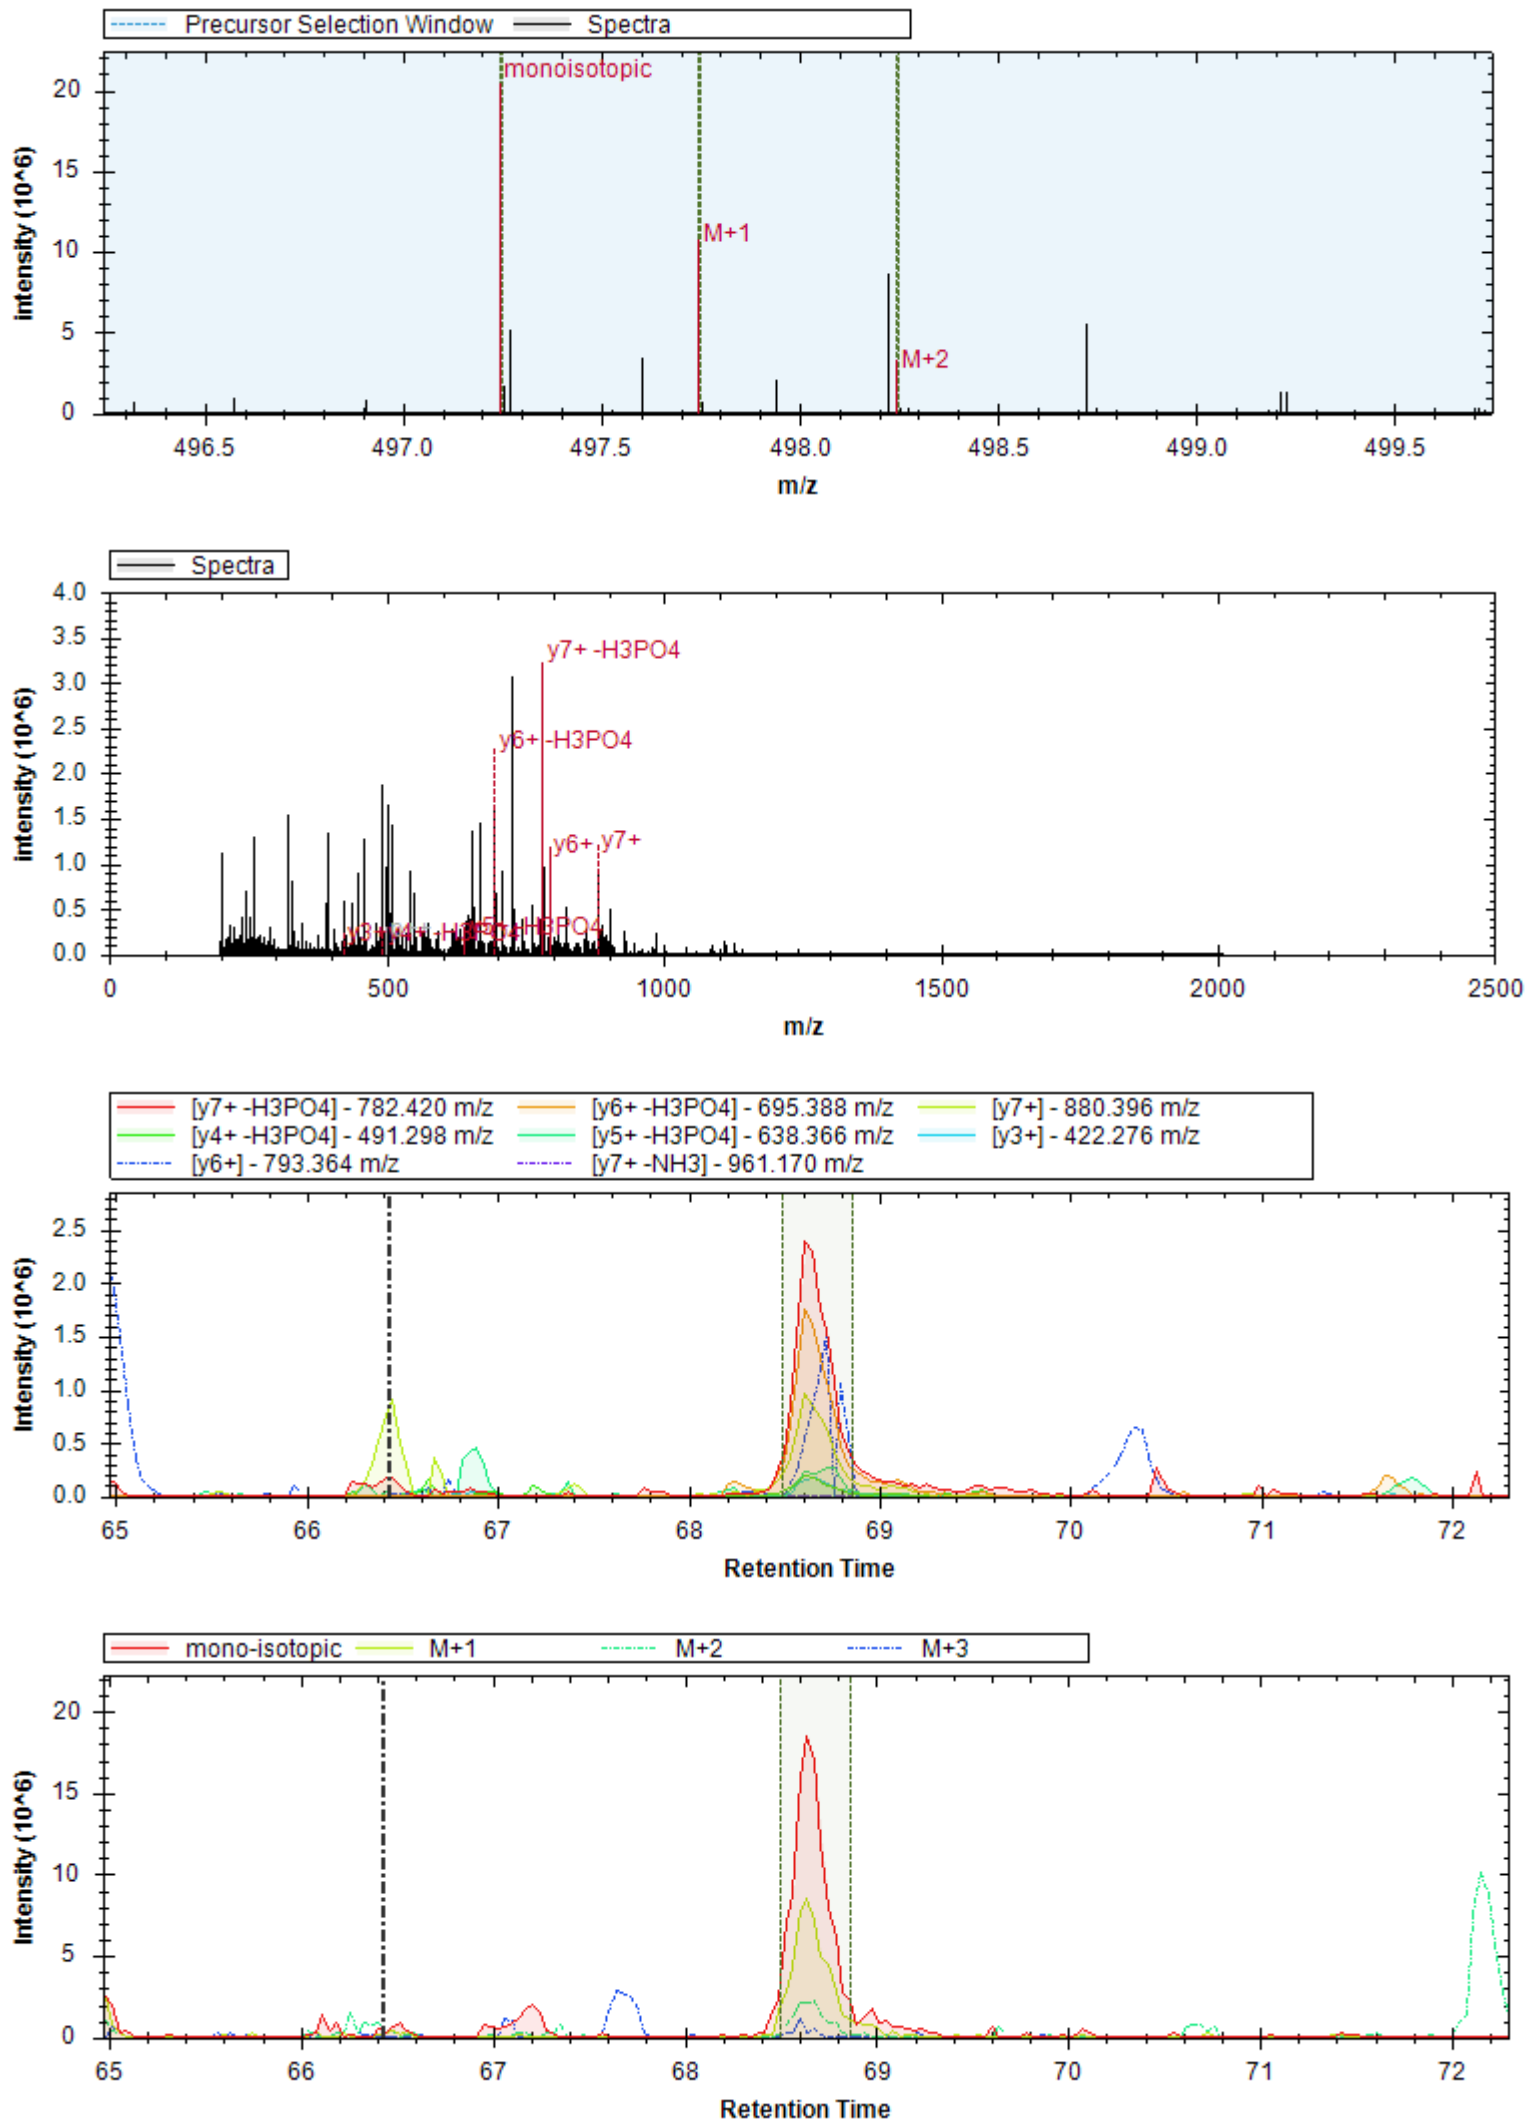

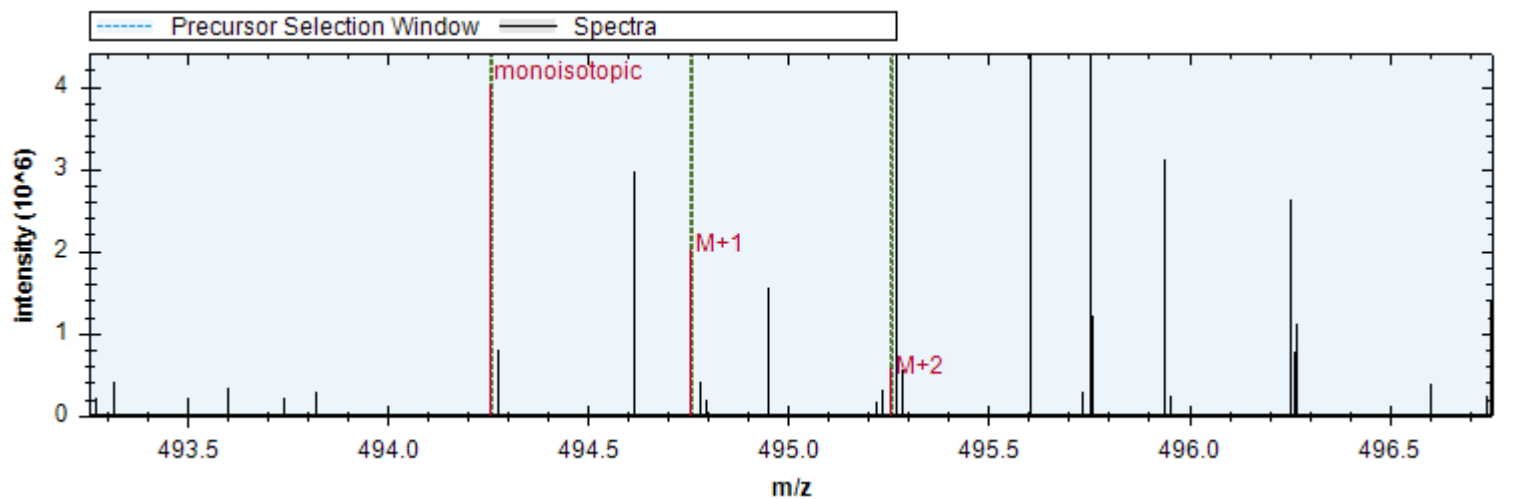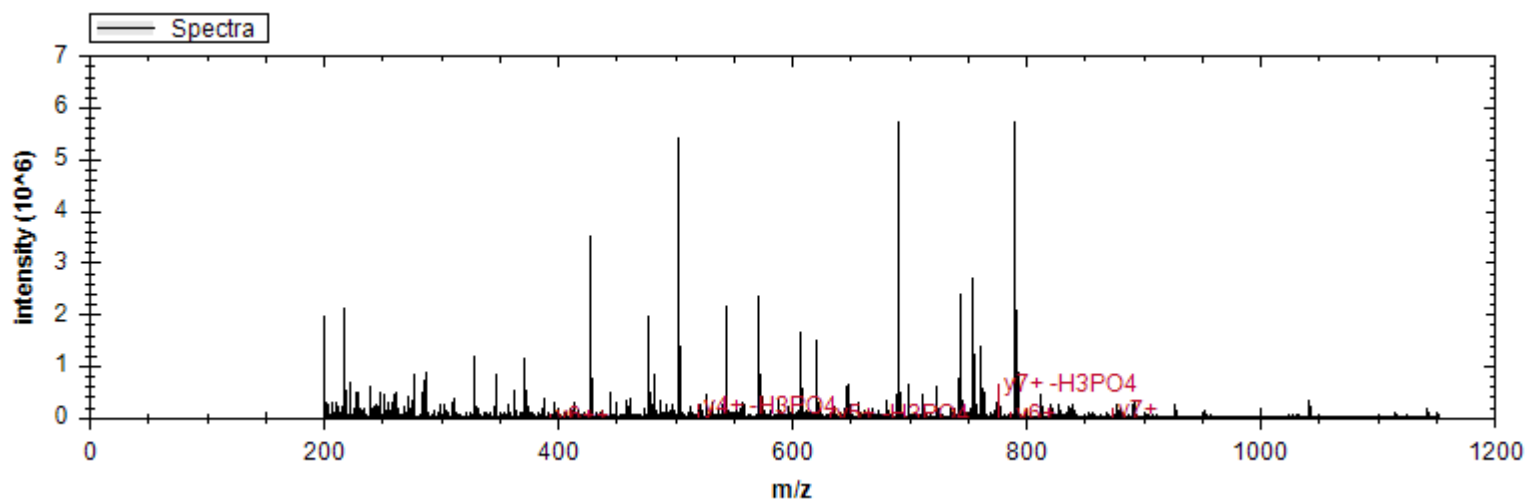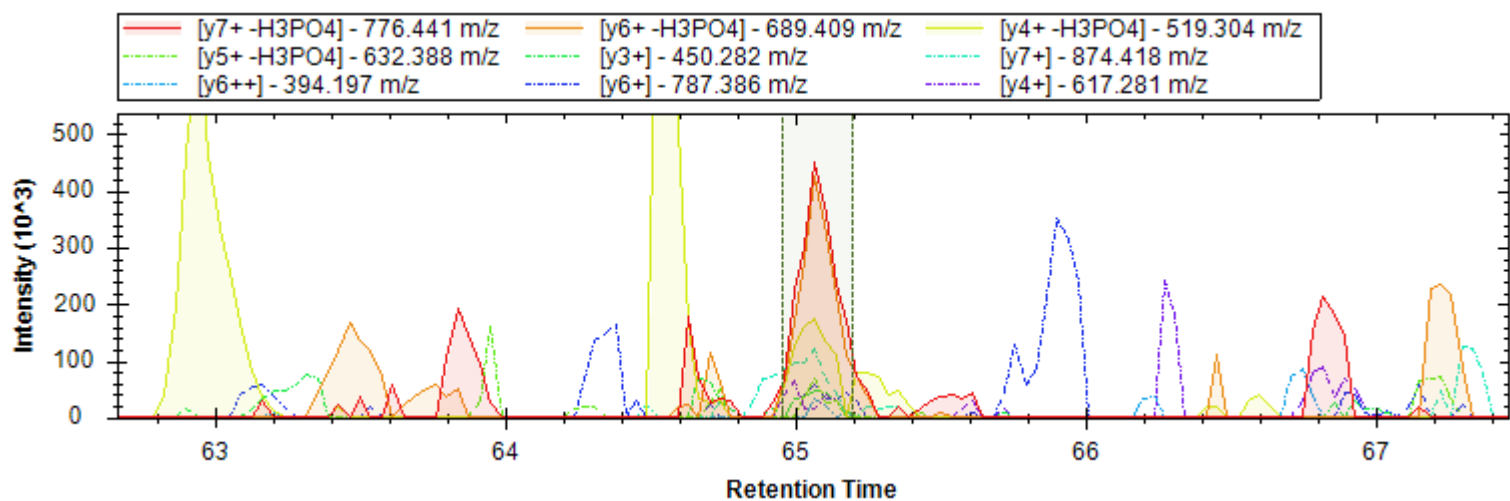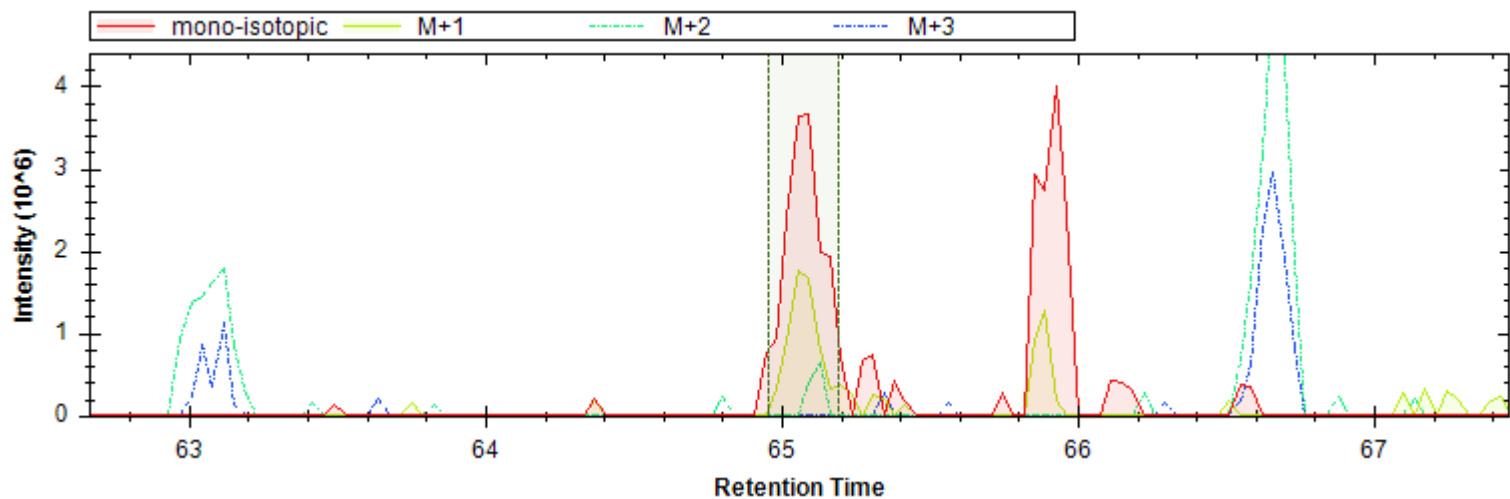

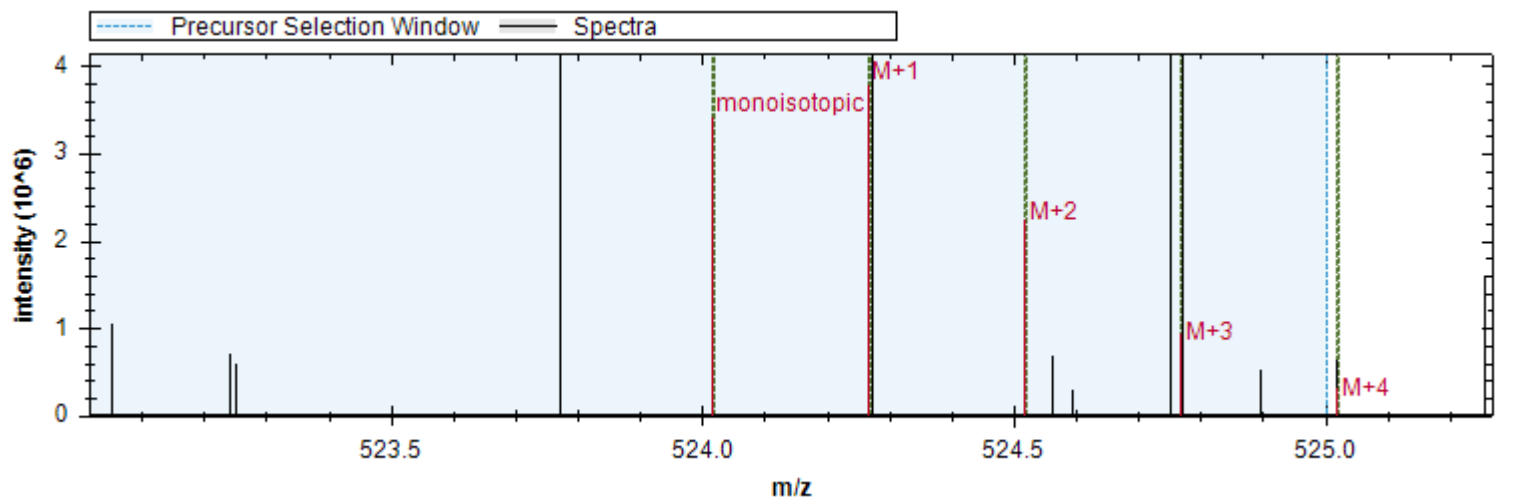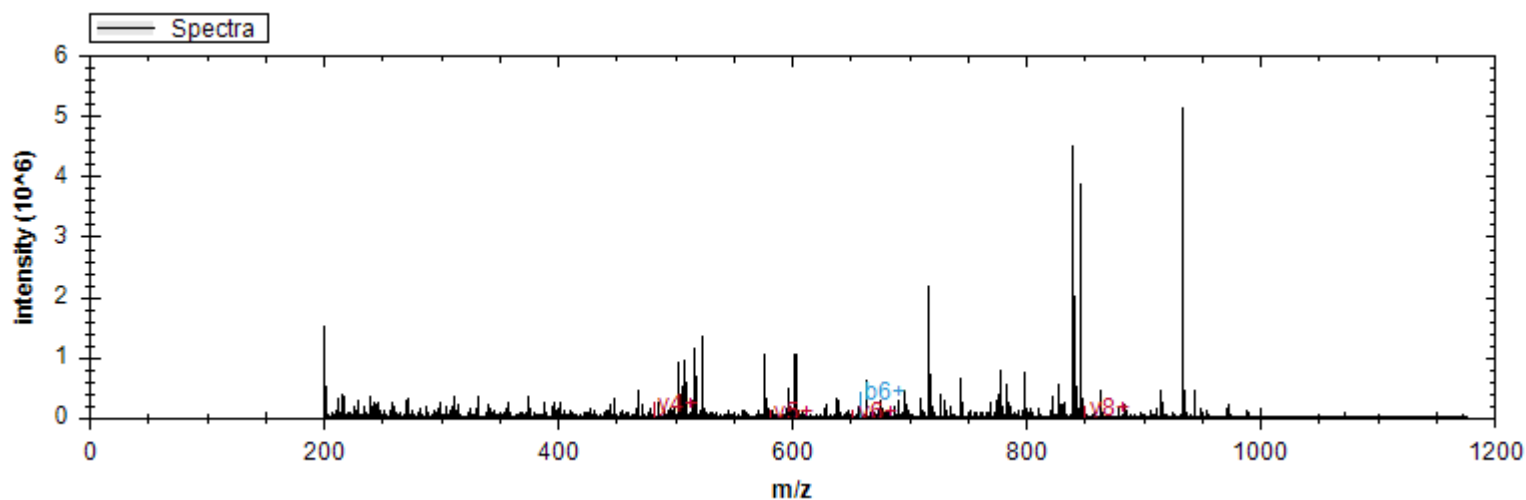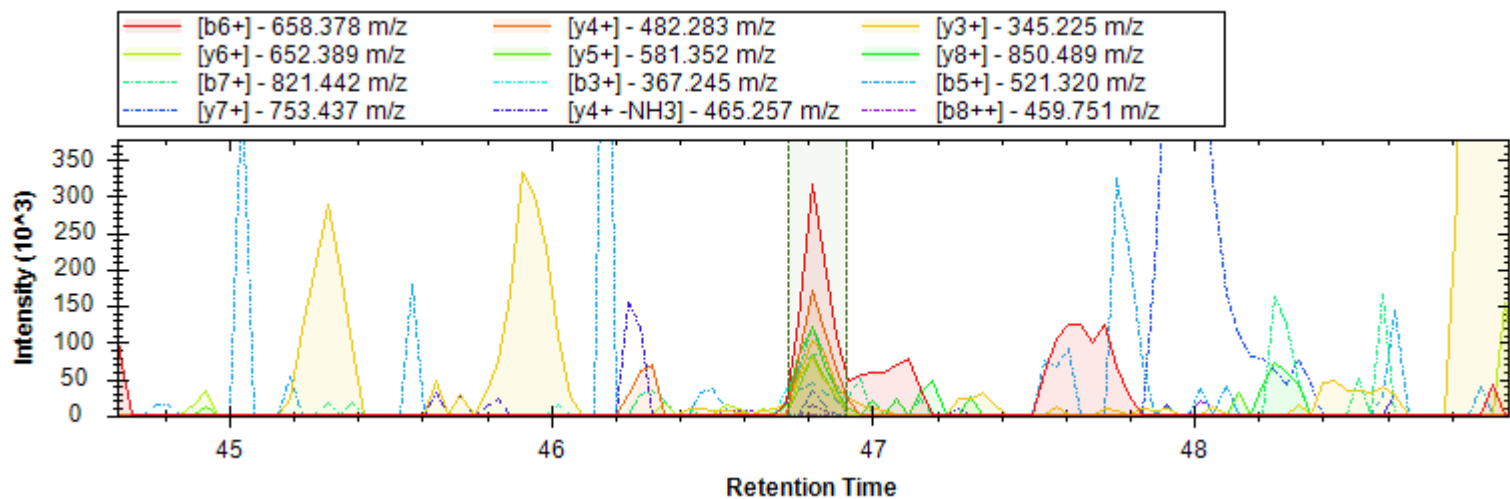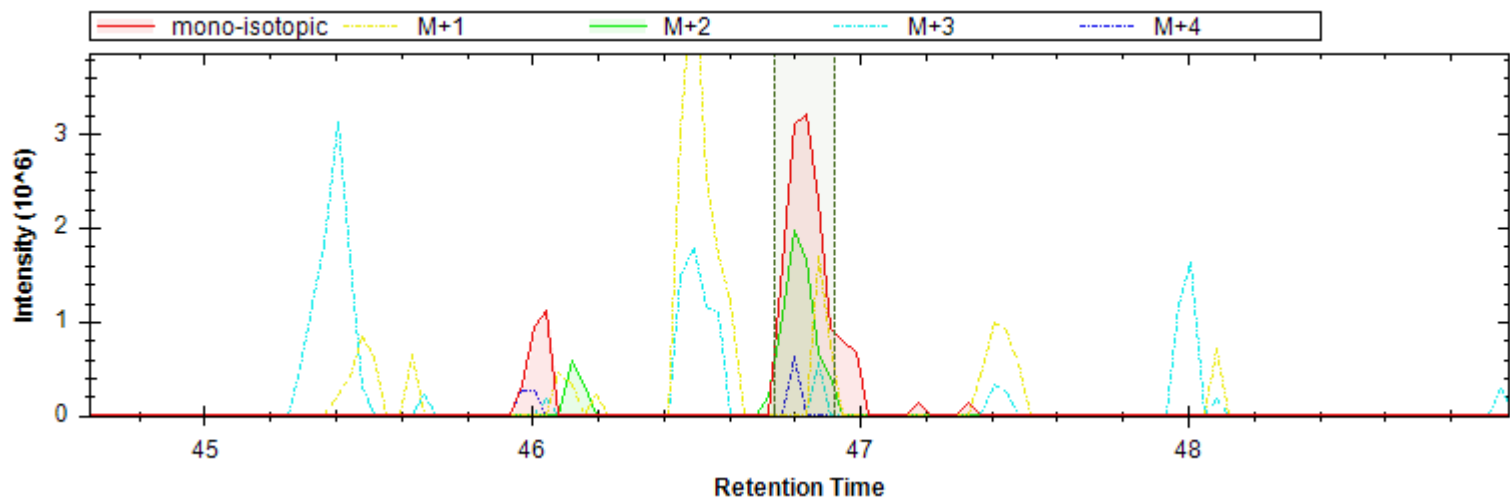

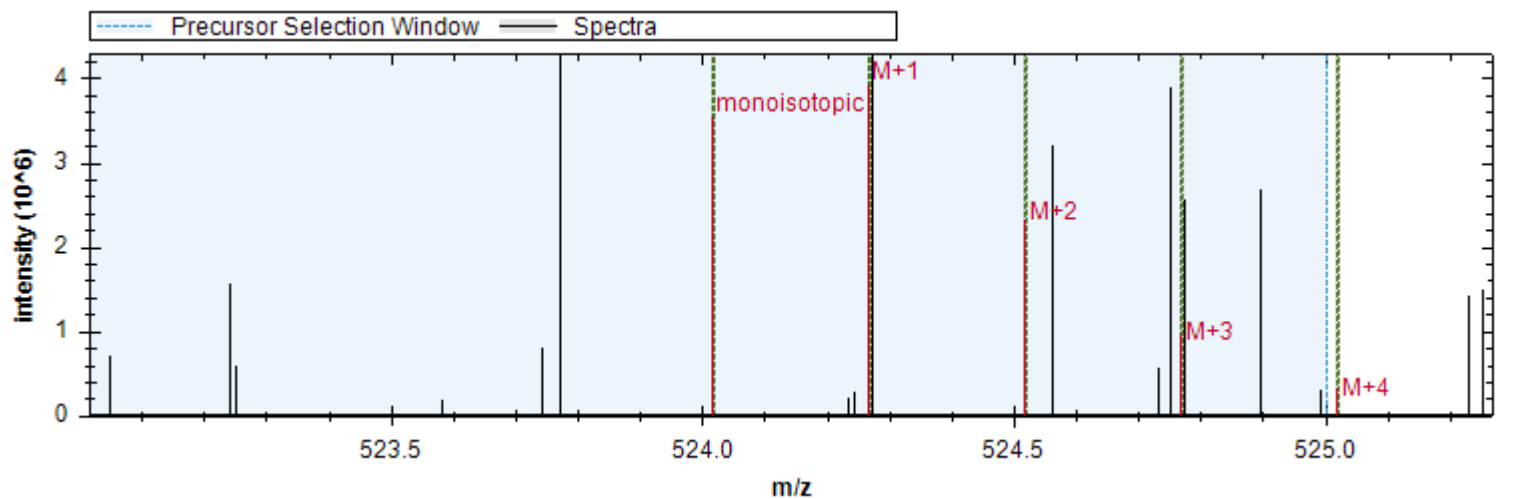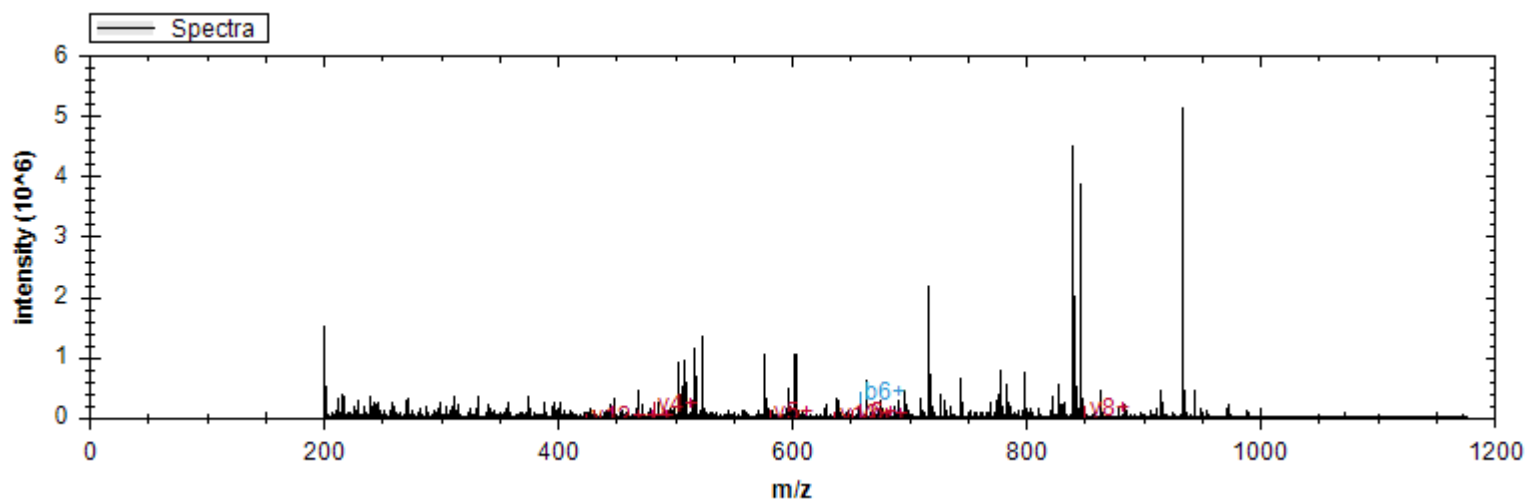

- |                              |                            |                            |
|------------------------------|----------------------------|----------------------------|
| [b6+] - 658.378 m/z          | [y4+] - 482.283 m/z        | [y3+] - 345.225 m/z        |
| [b7+] - 821.442 m/z          | [y8+] - 850.489 m/z        | [y6+] - 652.389 m/z        |
| [y5+] - 581.352 m/z          | [b5+] - 521.320 m/z        | [y12+++] - 424.875 m/z     |
| [y7+] - 753.437 m/z          | [b9+] - 989.532 m/z        | [b3+] - 367.245 m/z        |
| [b8++] - 459.751 m/z         | [y11+ -H2O] - 1255.346 m/z | [b6+ -NH3] - 641.352 m/z   |
| [b11++ -H3PO4] - 573.296 m/z | [y12++] - 636.809 m/z      | [y9+ -H3PO4] - 919.511 m/z |
| [y10+ -H3PO4] - 1006.543 m/z | [y4+ -NH3] - 465.257 m/z   |                            |

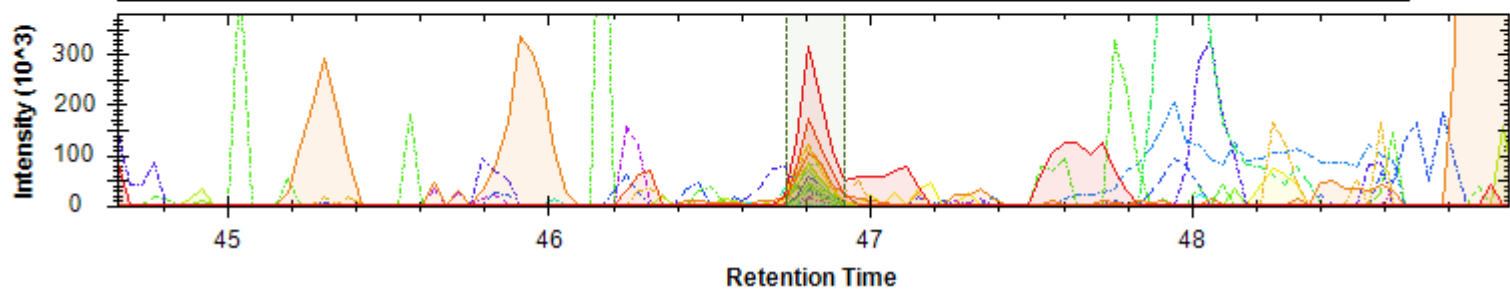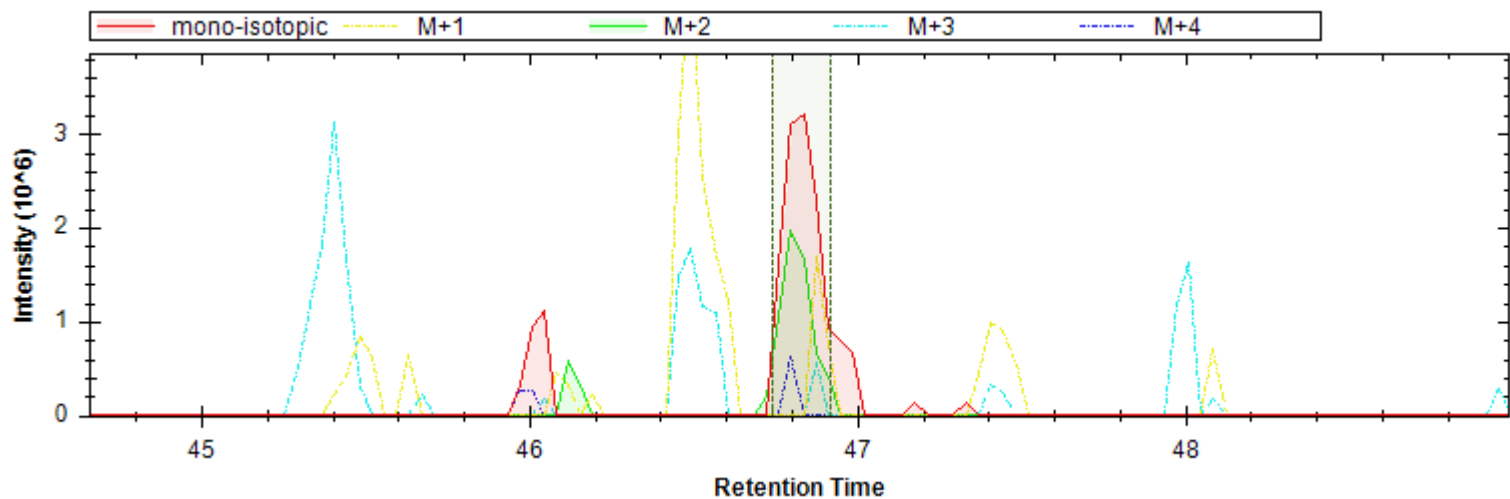

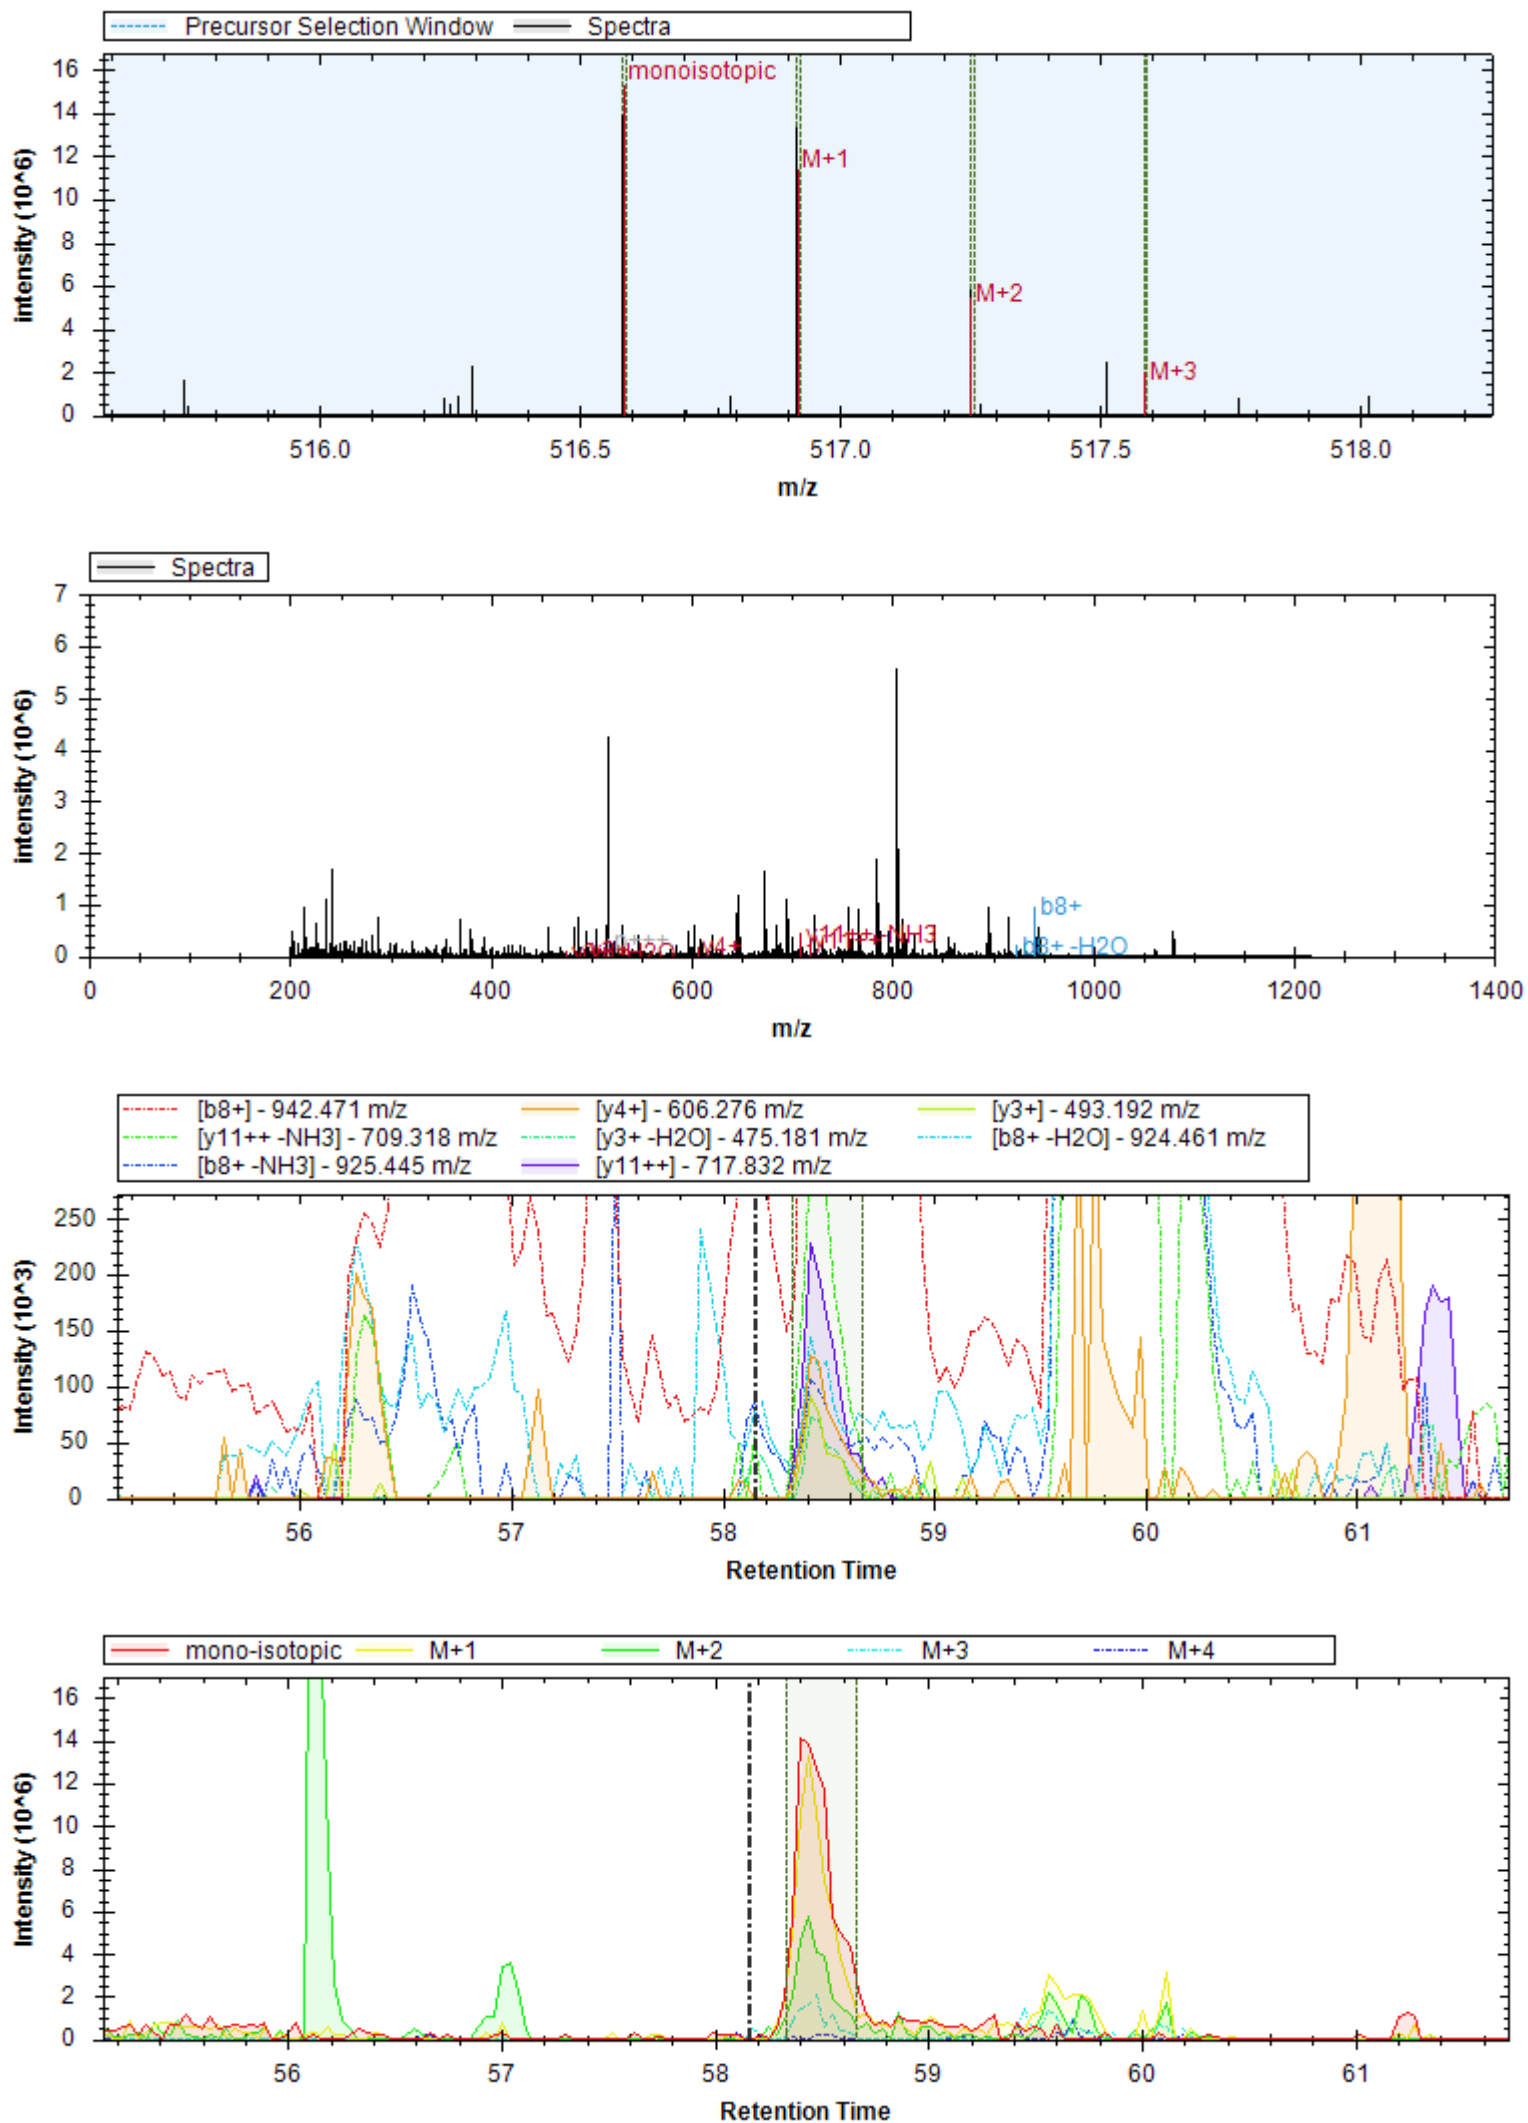

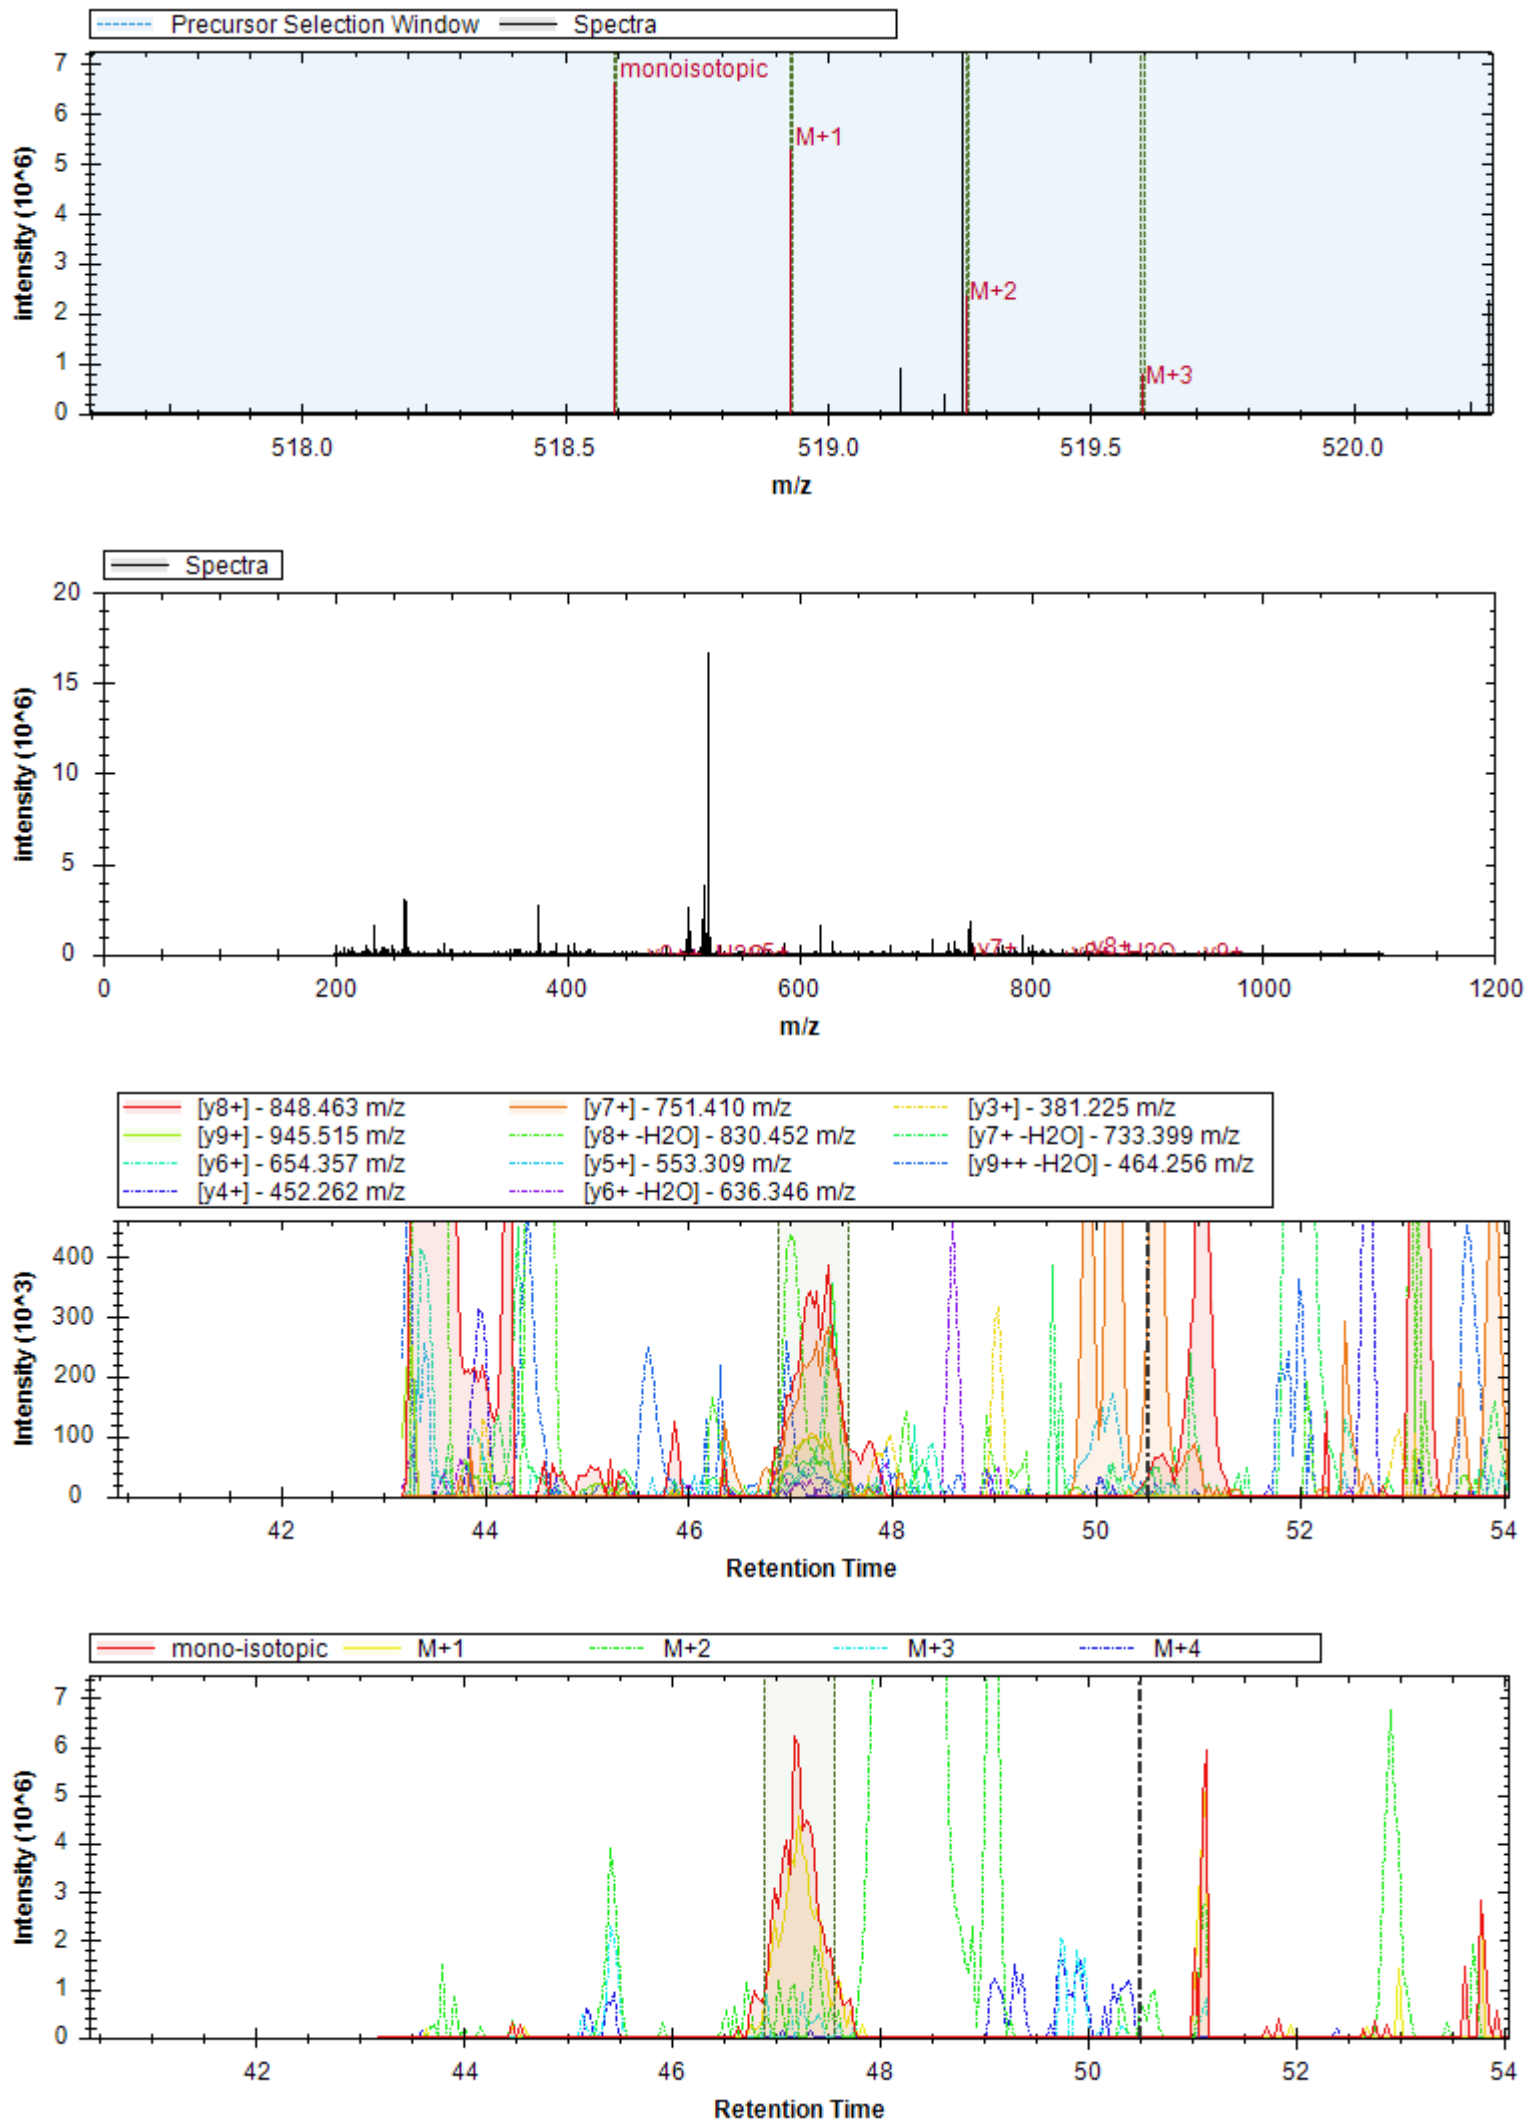

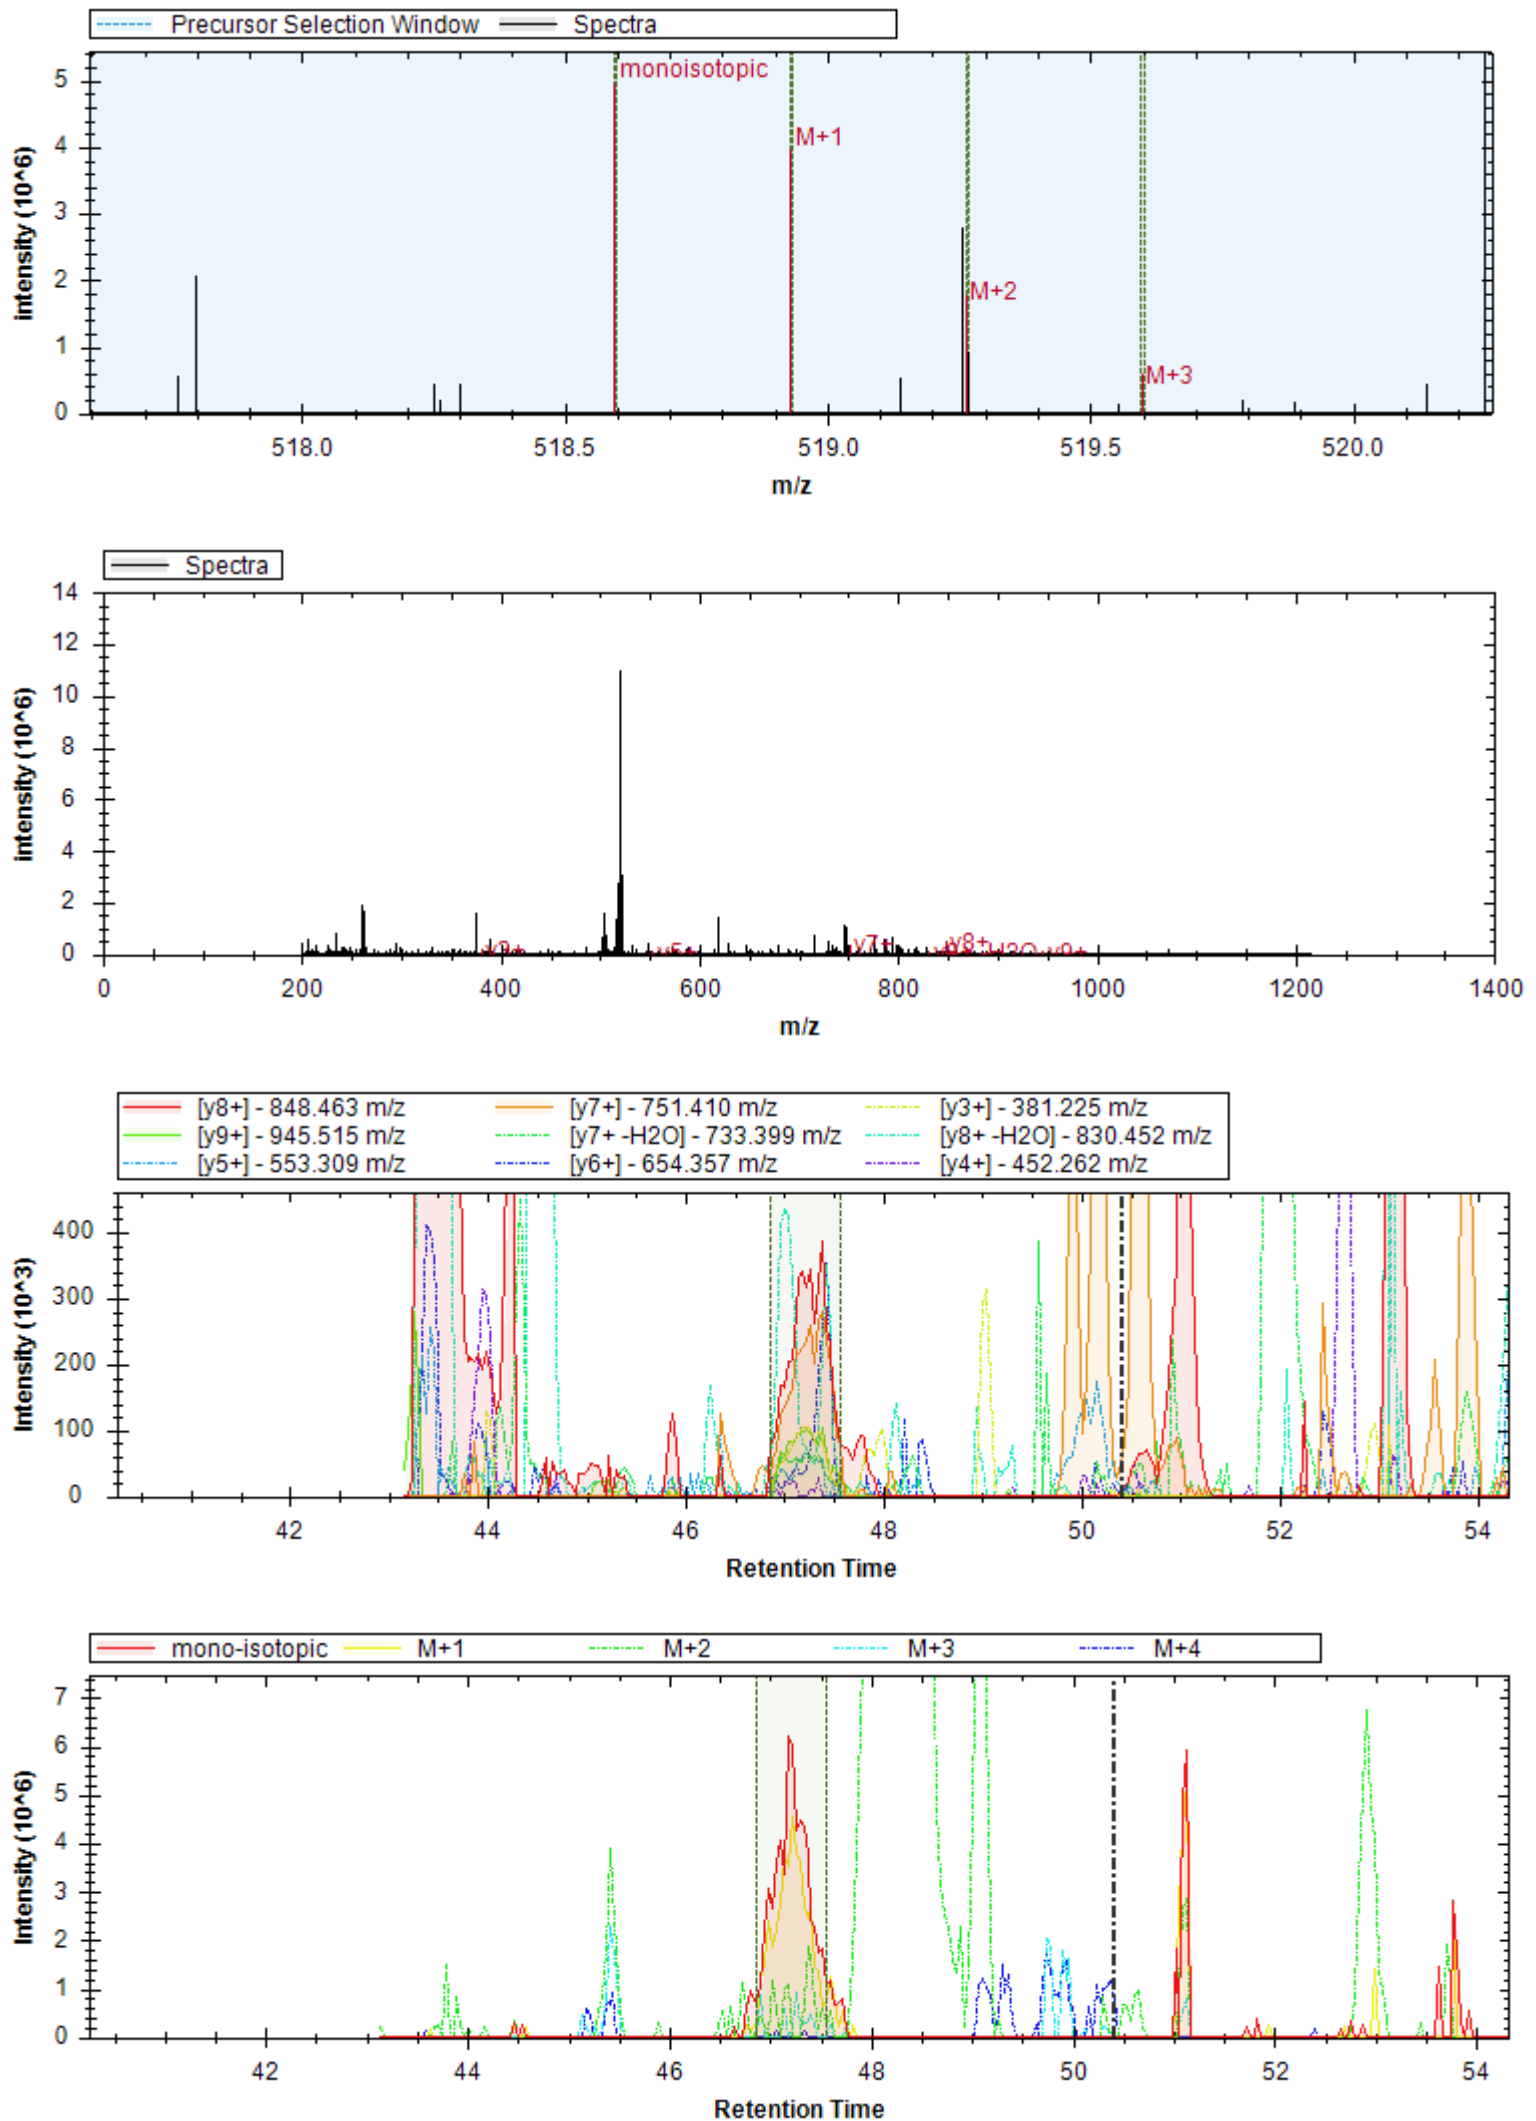

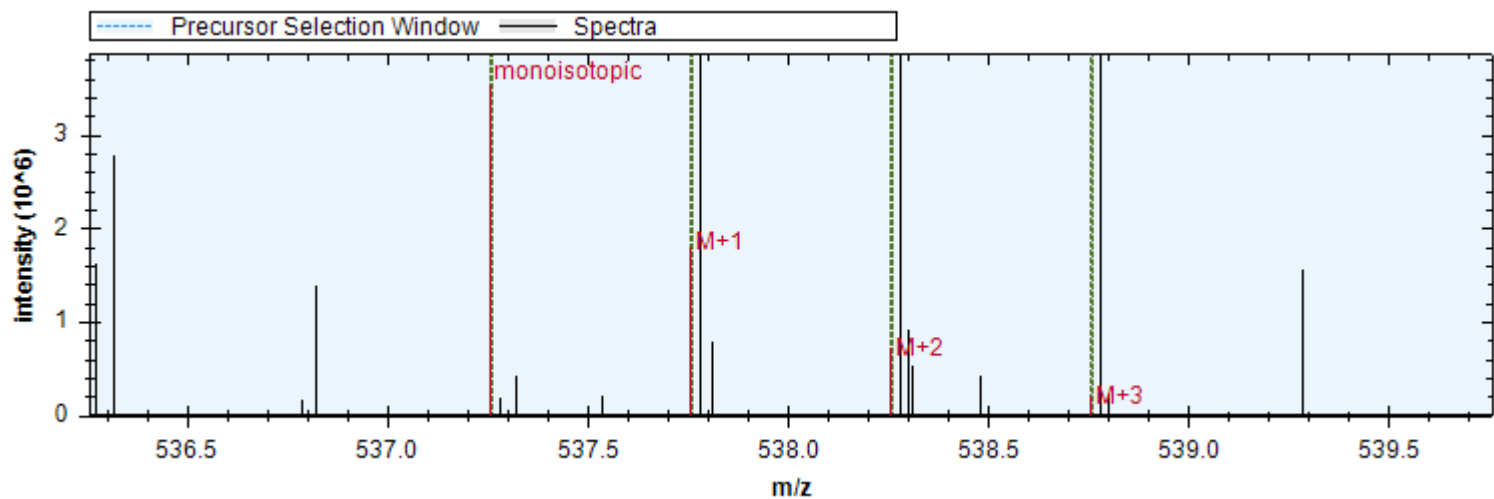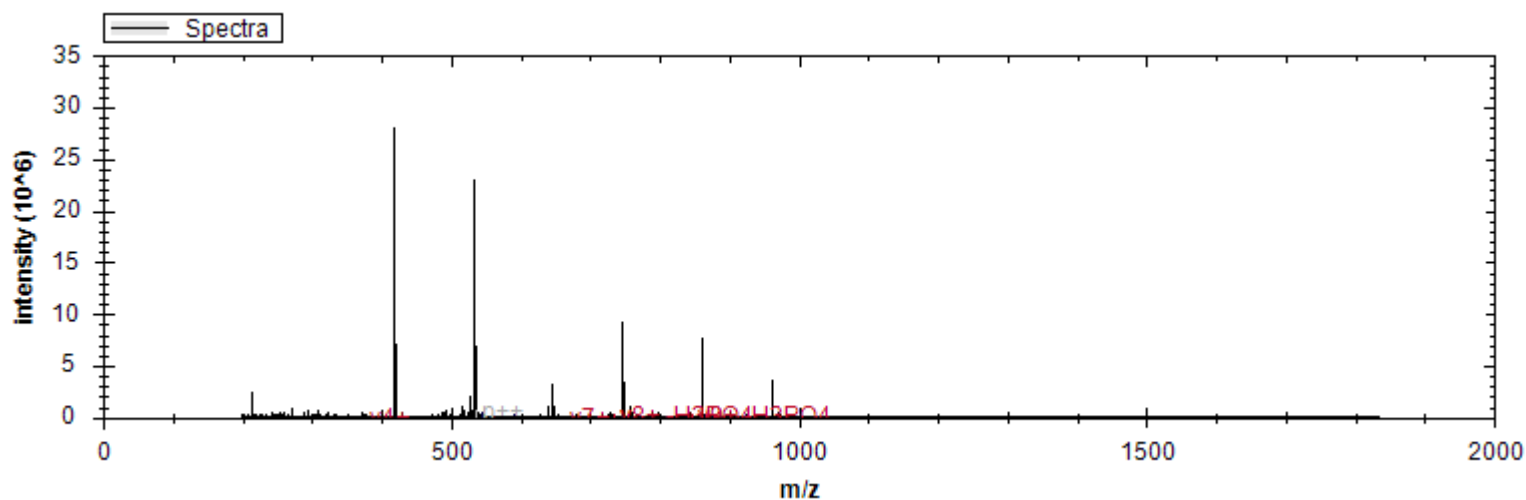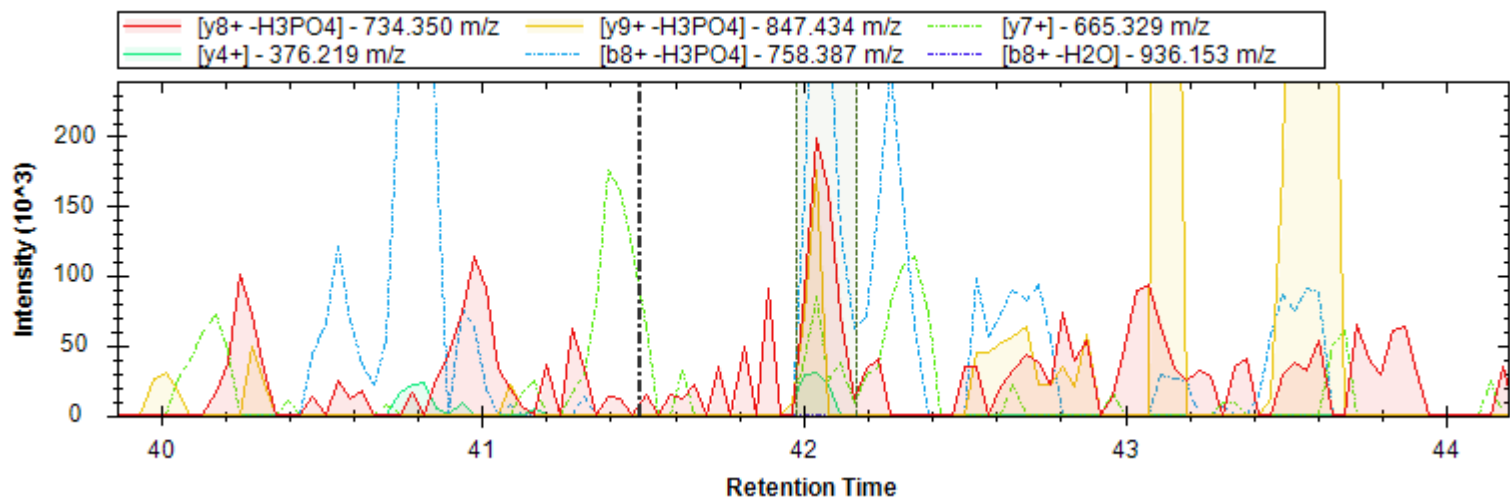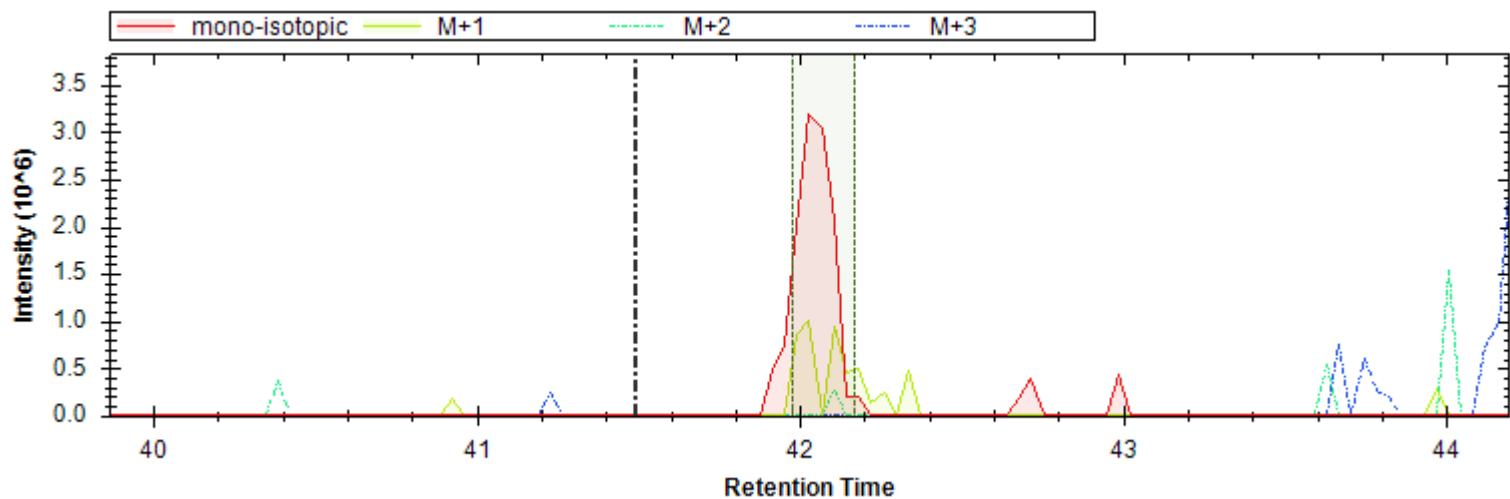



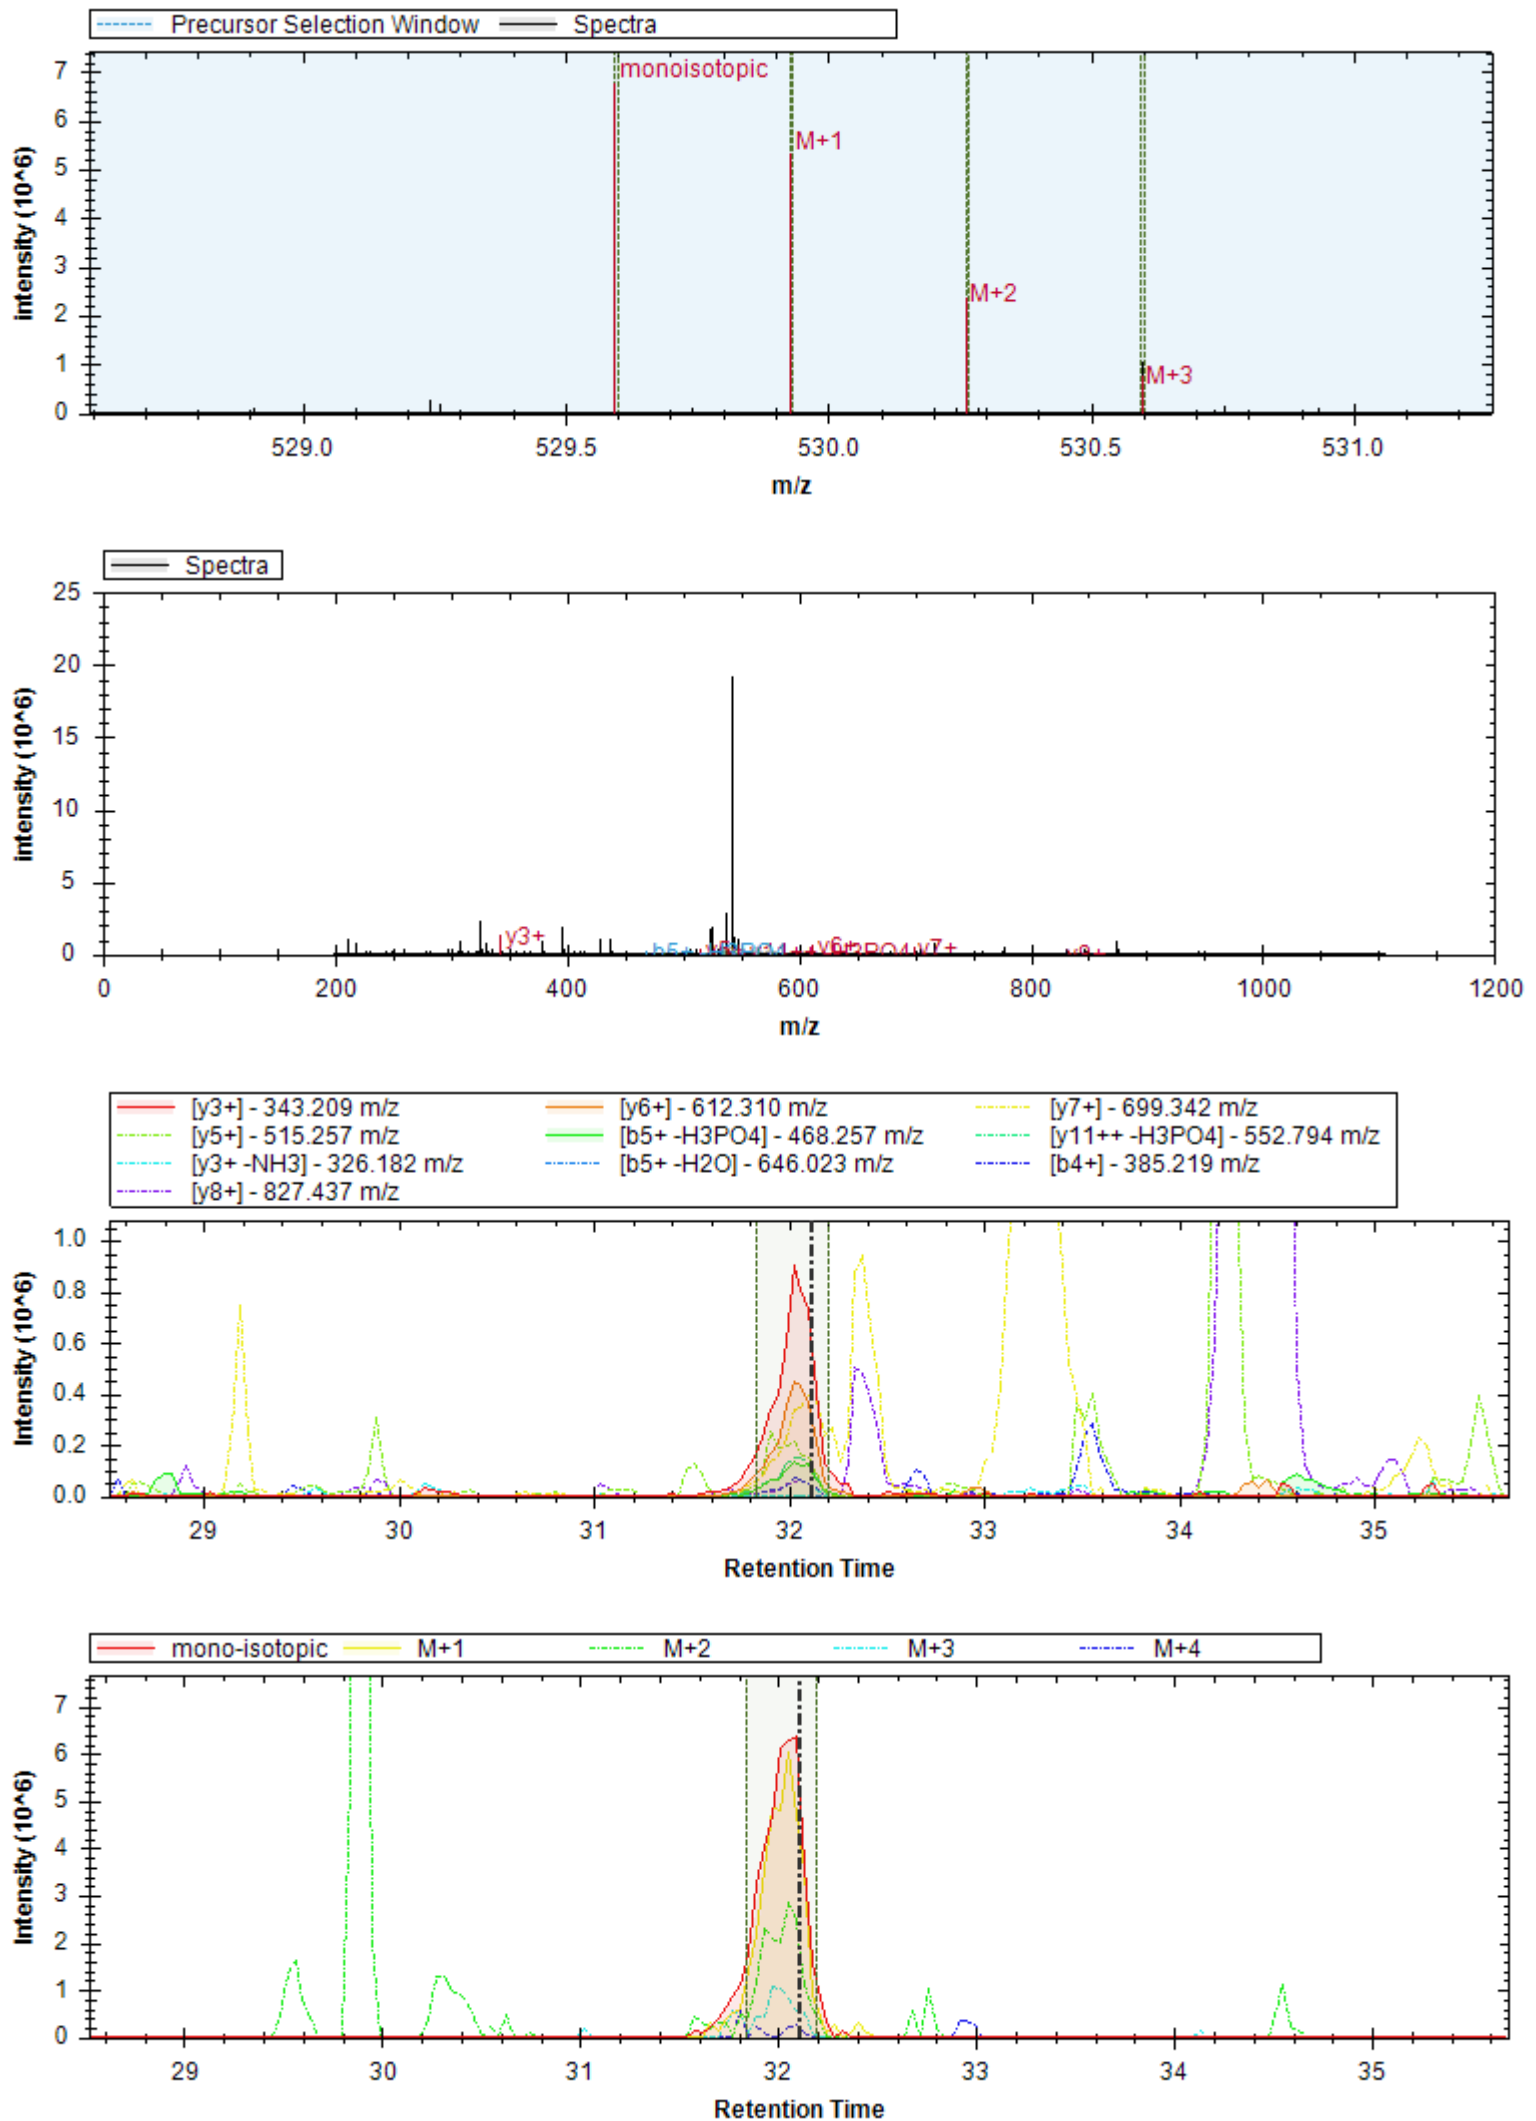

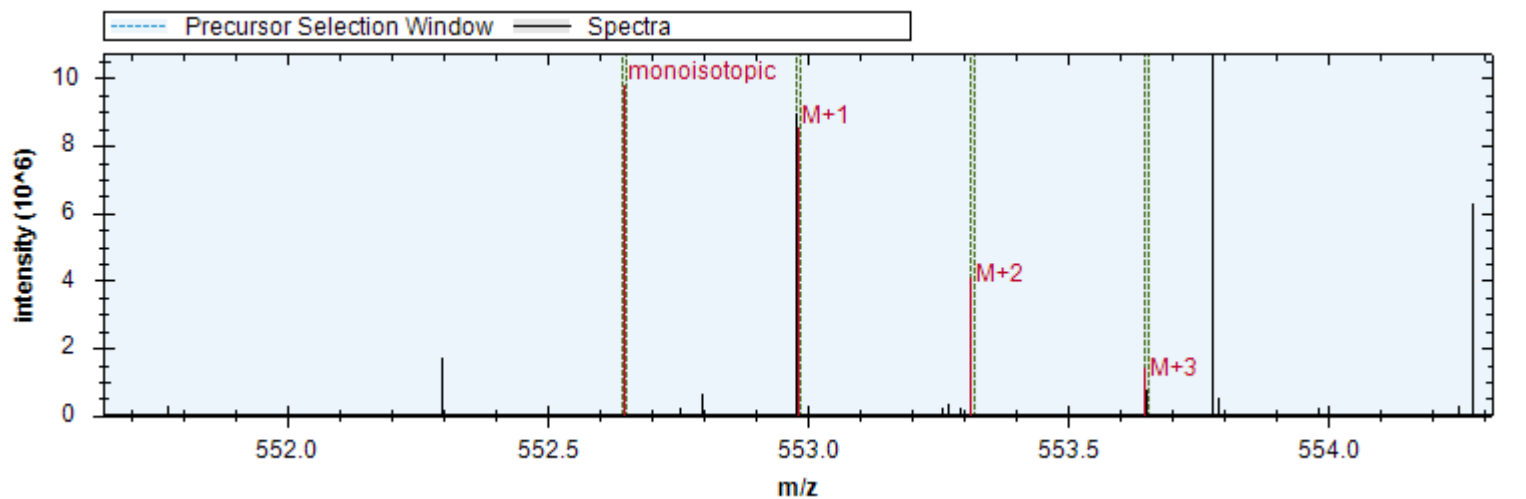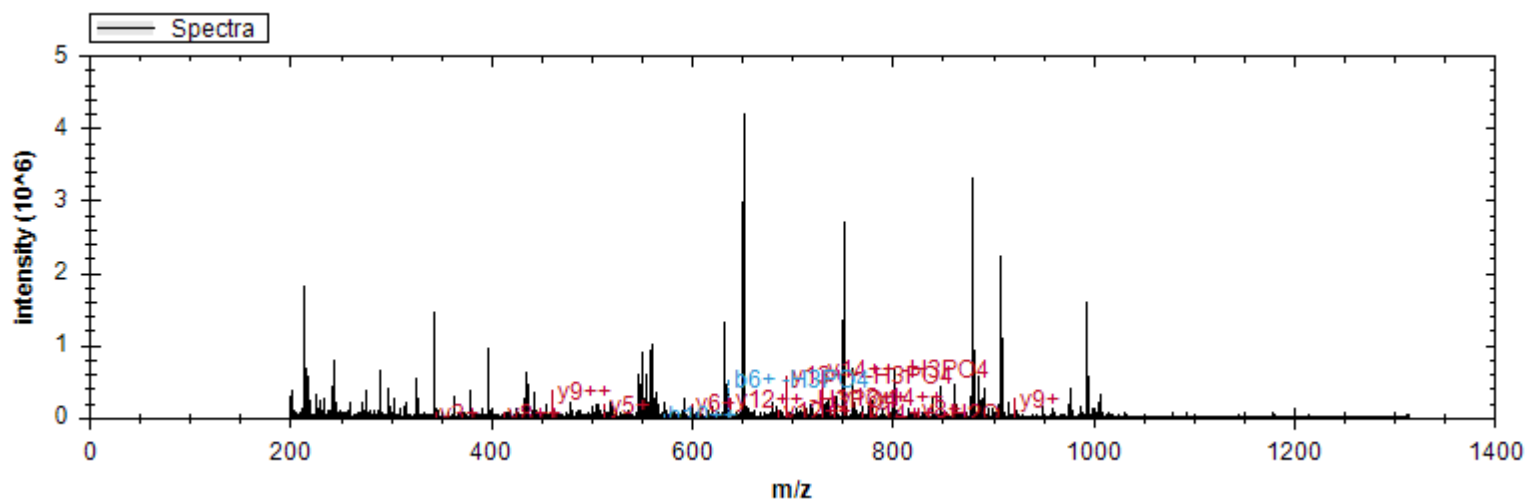

|                              |                              |                              |
|------------------------------|------------------------------|------------------------------|
| [b6+ -H3PO4] - 636.419 m/z   | [y14++ -H3PO4] - 729.943 m/z | [y13++ -H3PO4] - 694.425 m/z |
| [y9++] - 461.772 m/z         | [y9+] - 922.536 m/z          | [y5+] - 513.303 m/z          |
| [y12++ -H3PO4] - 637.883 m/z | [y6+] - 600.335 m/z          | [y10++] - 552.278 m/z        |
| [y14++] - 778.932 m/z        | [y13++] - 743.413 m/z        | [b6+] - 734.396 m/z          |
| [y8+] - 825.483 m/z          | [y6+ -H2O] - 582.325 m/z     | [y3+] - 345.213 m/z          |
| [y9+ -H2O] - 904.525 m/z     | [y5+ -H2O] - 495.293 m/z     | [y7+] - 728.430 m/z          |
| [y12++] - 686.871 m/z        | [y14++ -H2O] - 769.926 m/z   | [y3+ -H2O] - 327.203 m/z     |
| [y8++] - 413.245 m/z         | [b10++] - 572.318 m/z        | [b10++ -H3PO4] - 523.330 m/z |

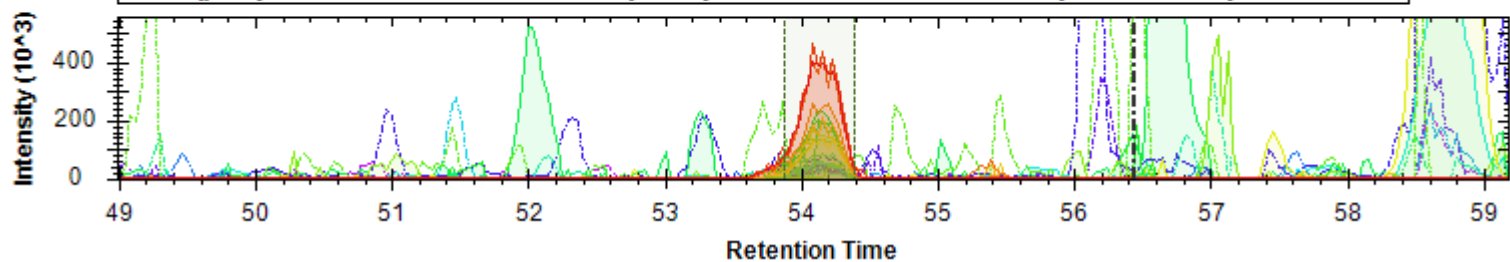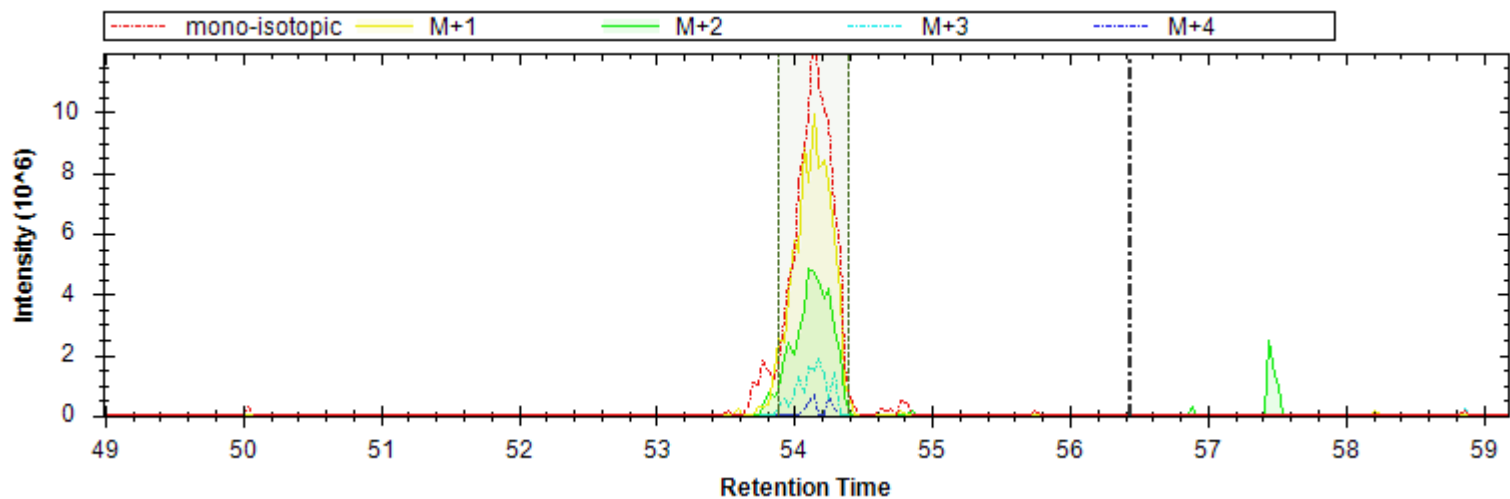

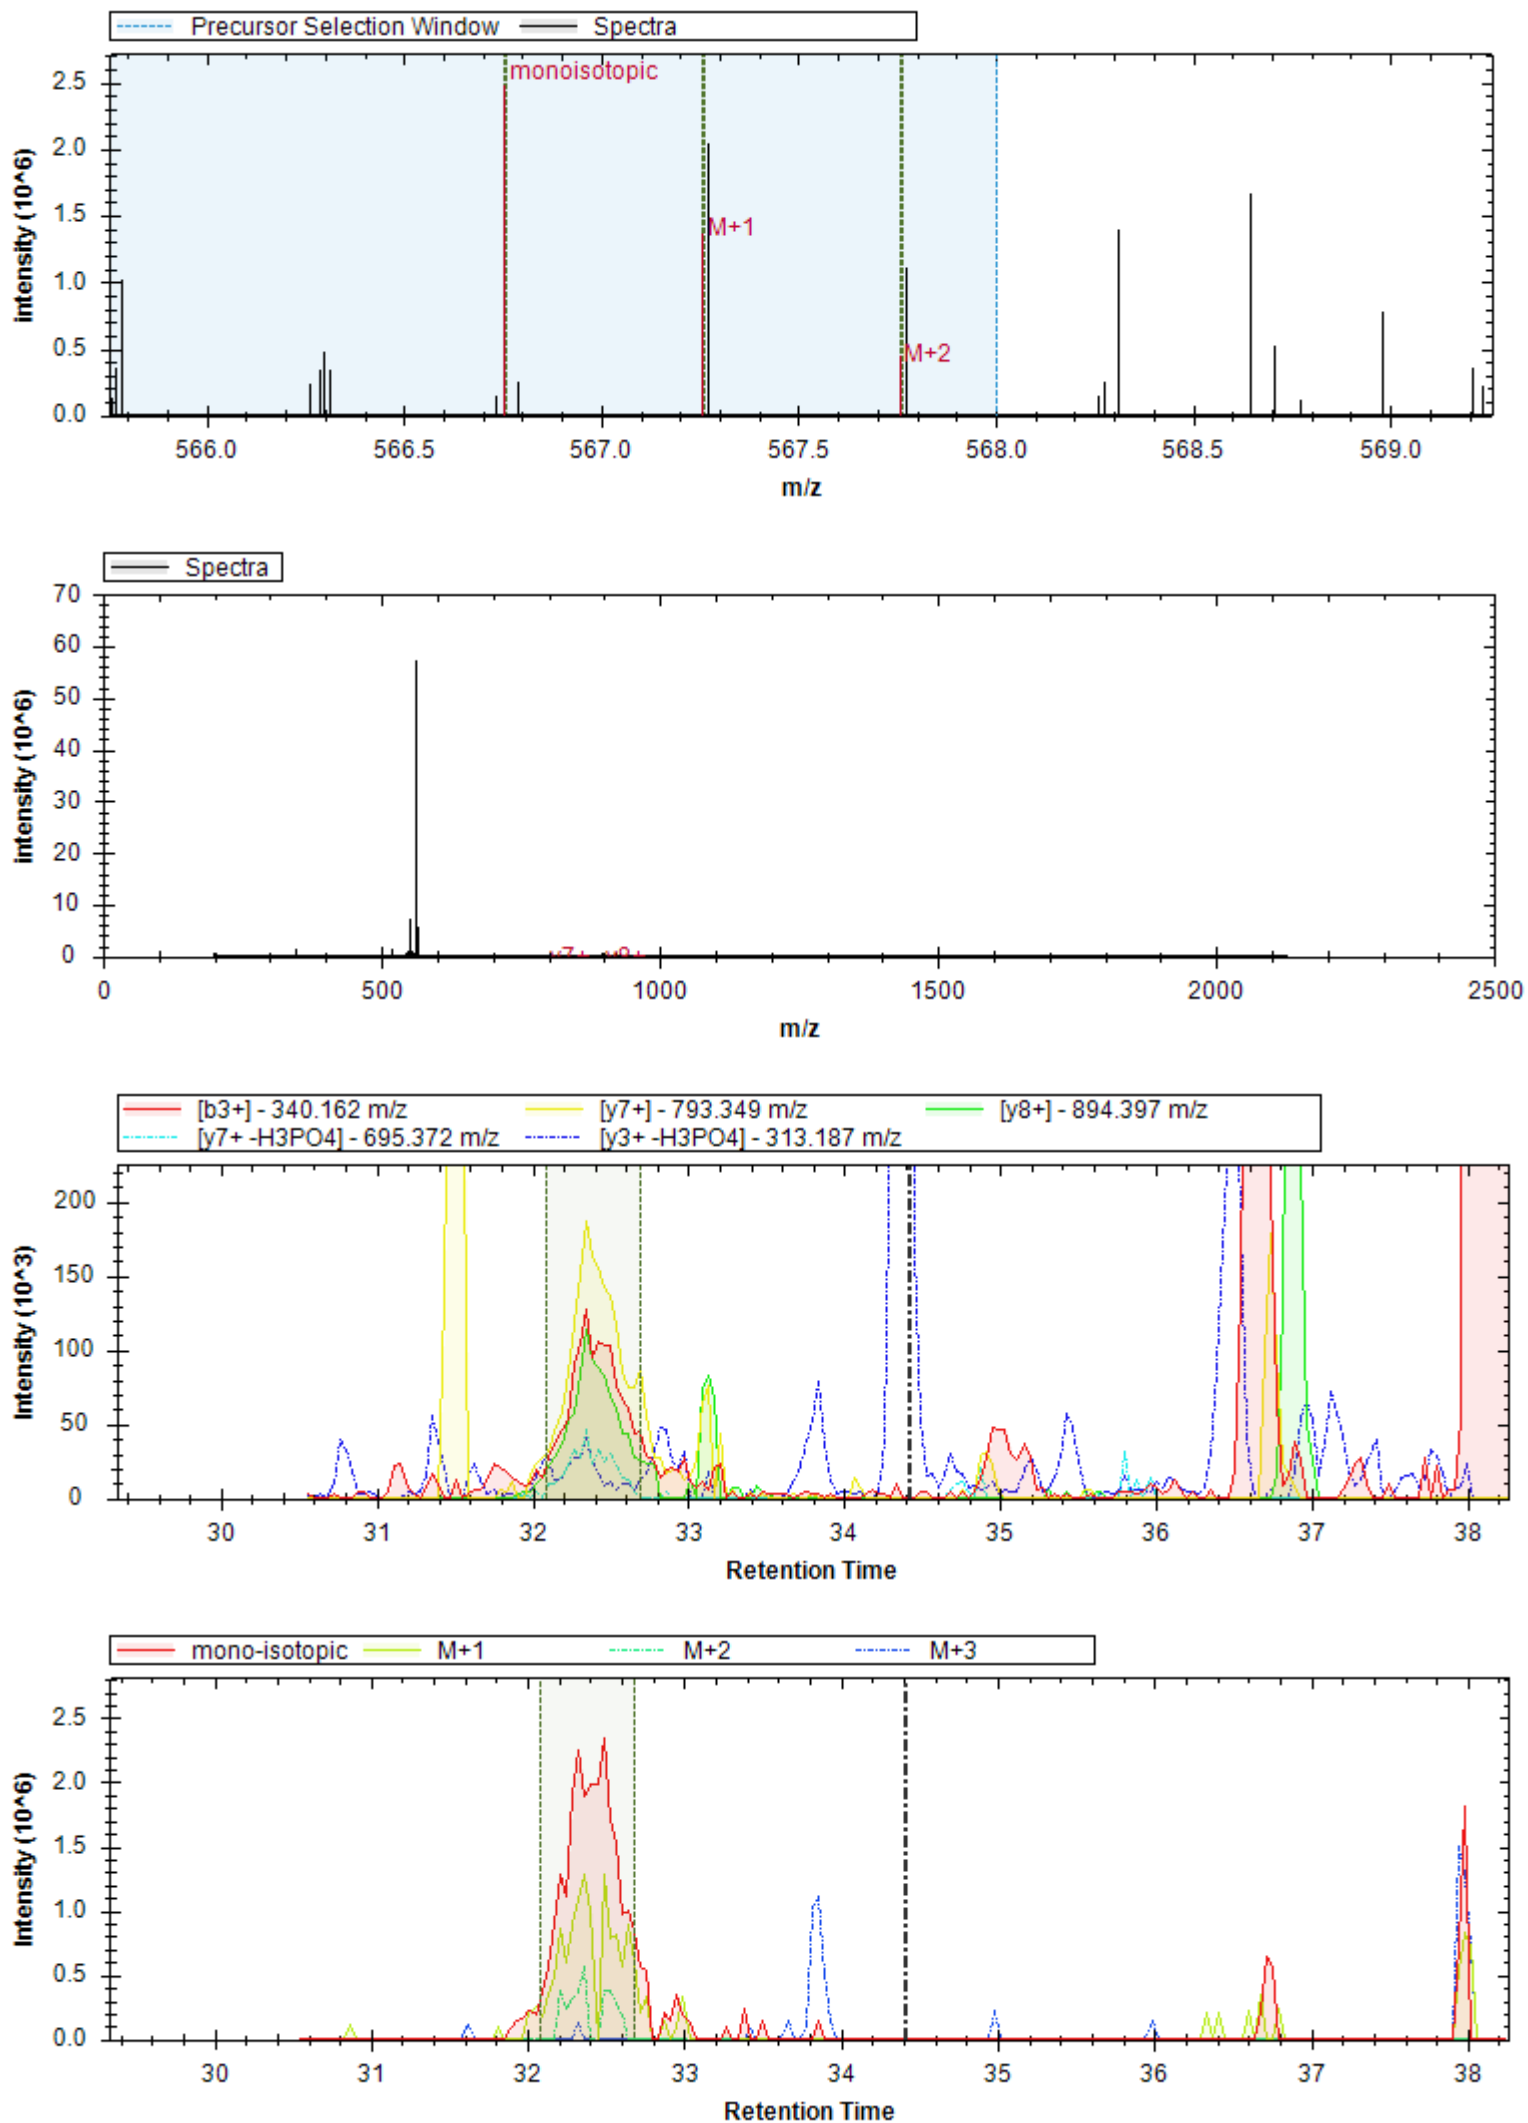

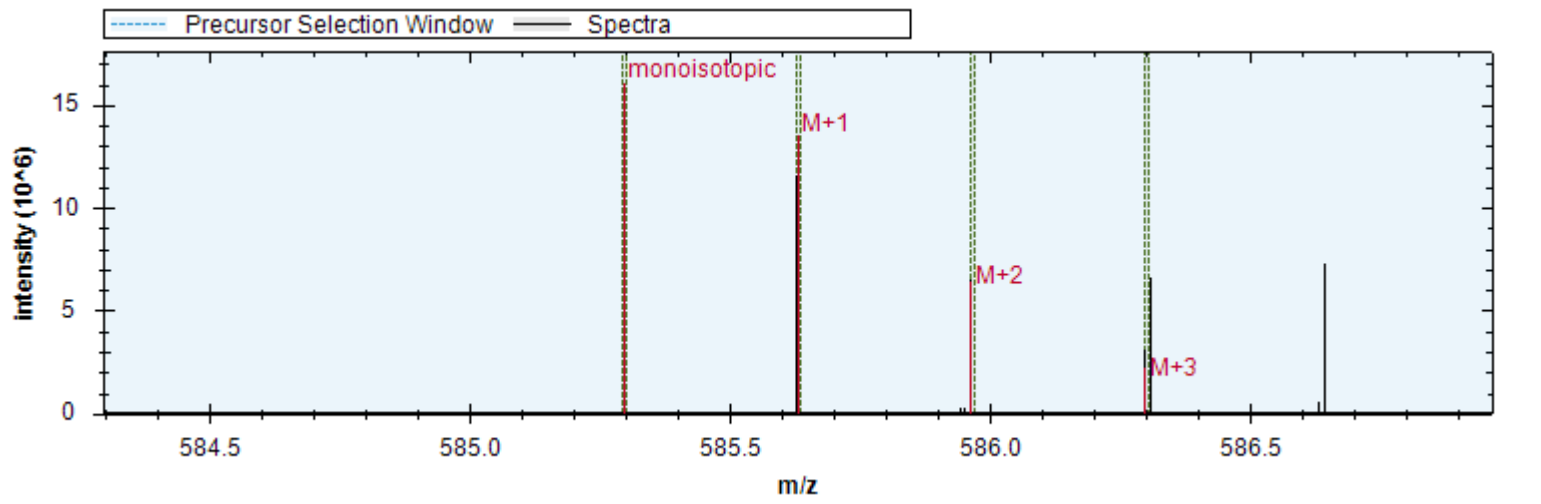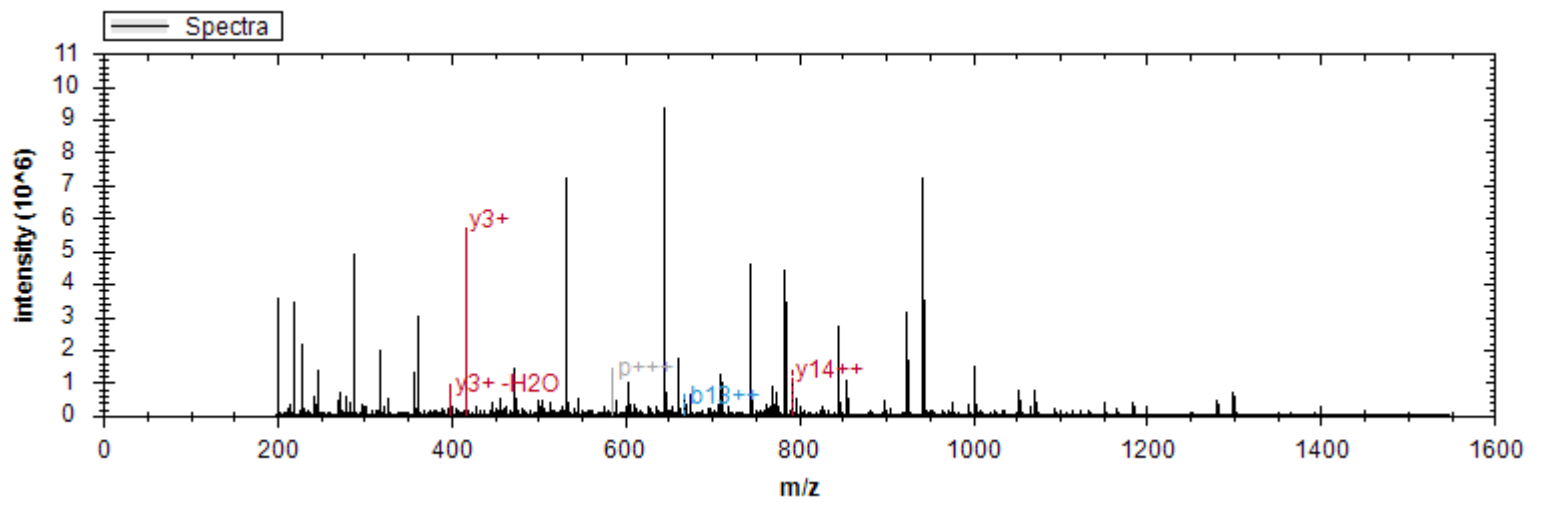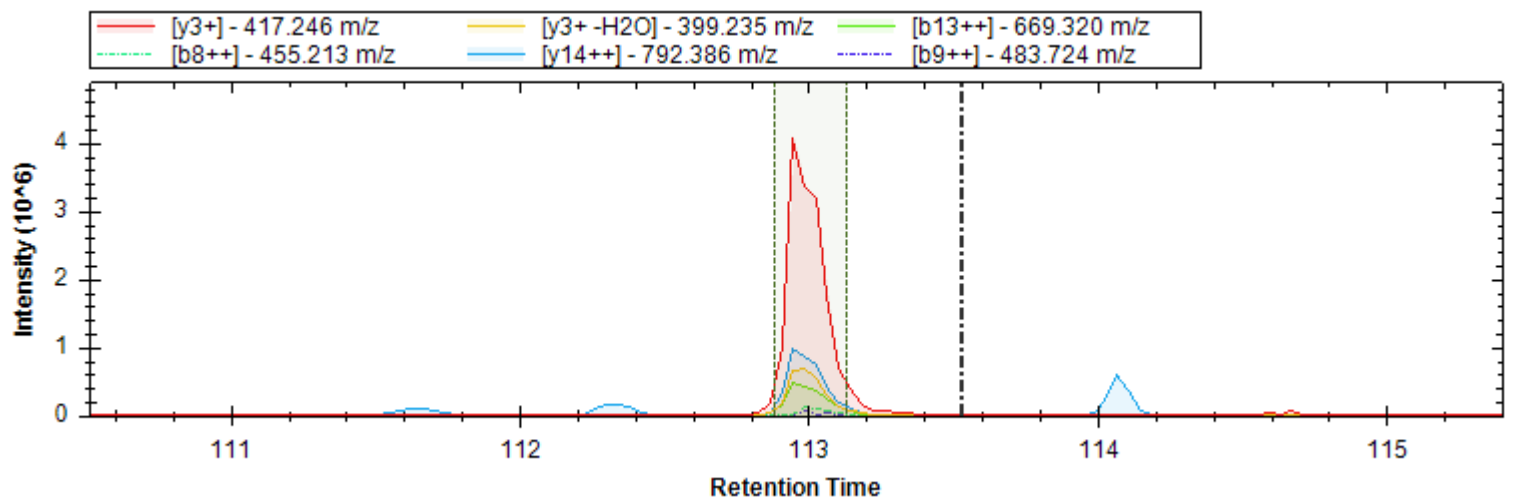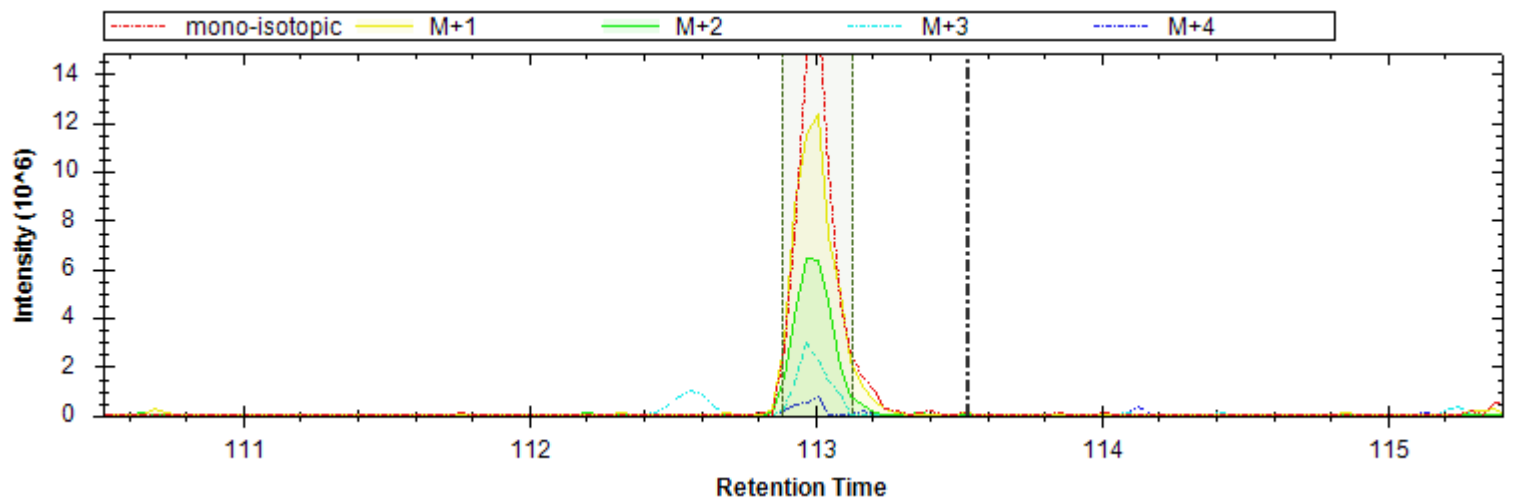

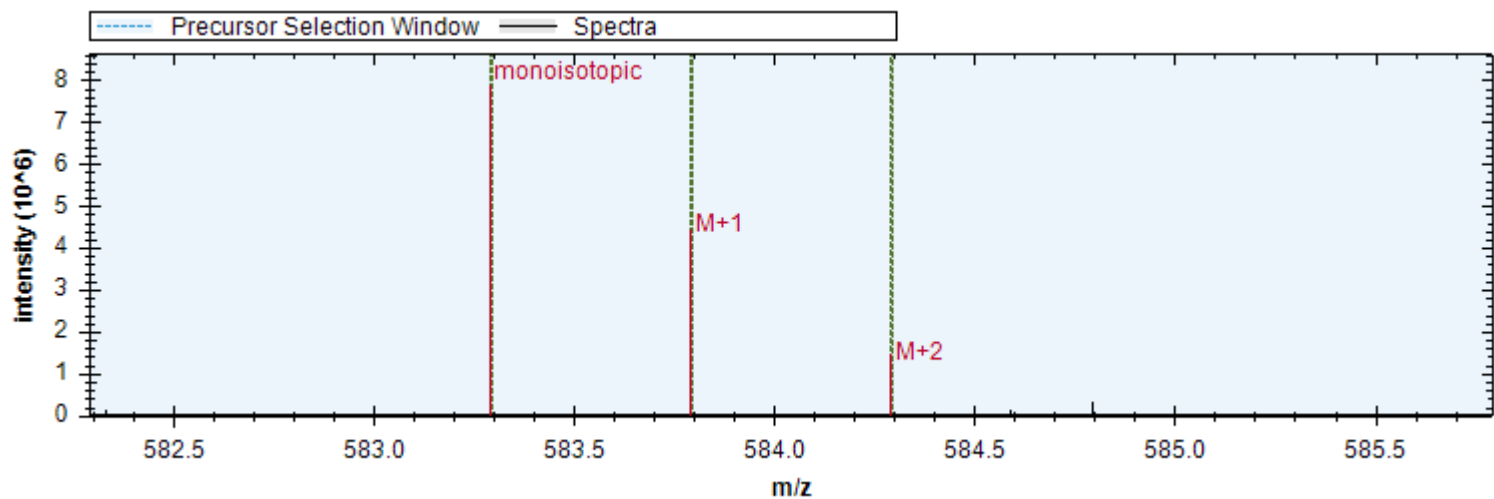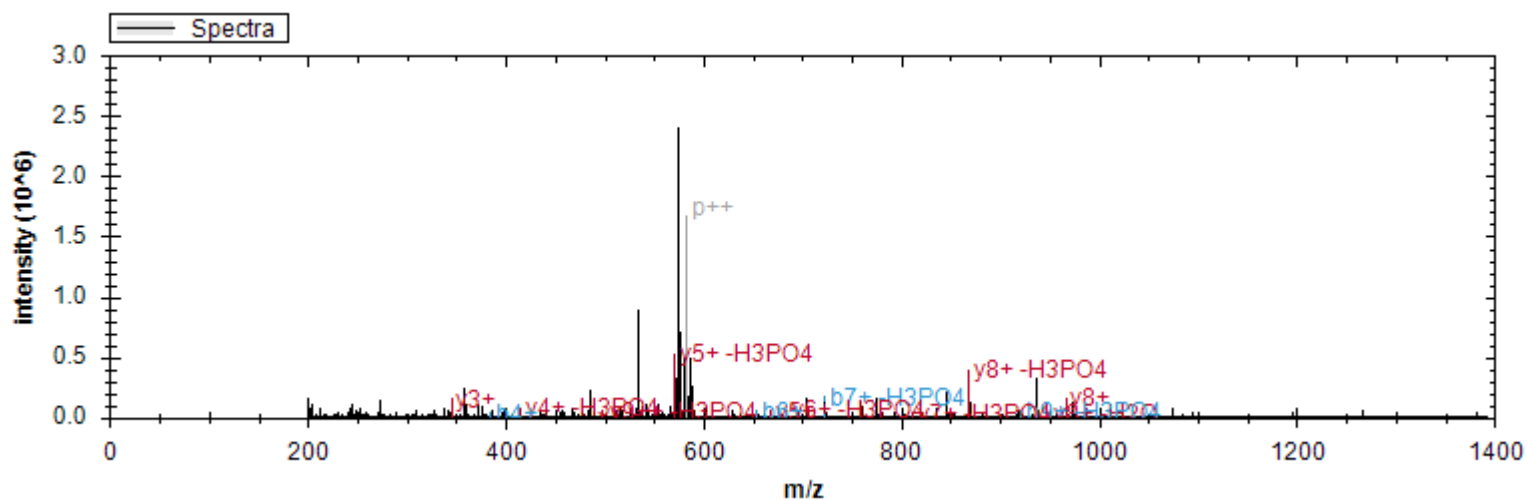

|                             |                            |                            |
|-----------------------------|----------------------------|----------------------------|
| [y8+ -H3PO4] - 868.500 m/z  | [b7+ -H3PO4] - 723.390 m/z | [y3+] - 345.213 m/z        |
| [y8+] - 966.477 m/z         | [y6+ -H3PO4] - 683.420 m/z | [y5+ -H3PO4] - 570.336 m/z |
| [y9++ -H3PO4] - 498.783 m/z | [b4+] - 385.183 m/z        | [b6+] - 654.368 m/z        |
| [y5+] - 668.313 m/z         | [b9+ -H3PO4] - 921.490 m/z | [y8+ -H2O] - 948.466 m/z   |
| [y7+ -H3PO4] - 811.479 m/z  | [b9+ -NH3] - 1100.240 m/z  | [y4+ -H3PO4] - 414.235 m/z |

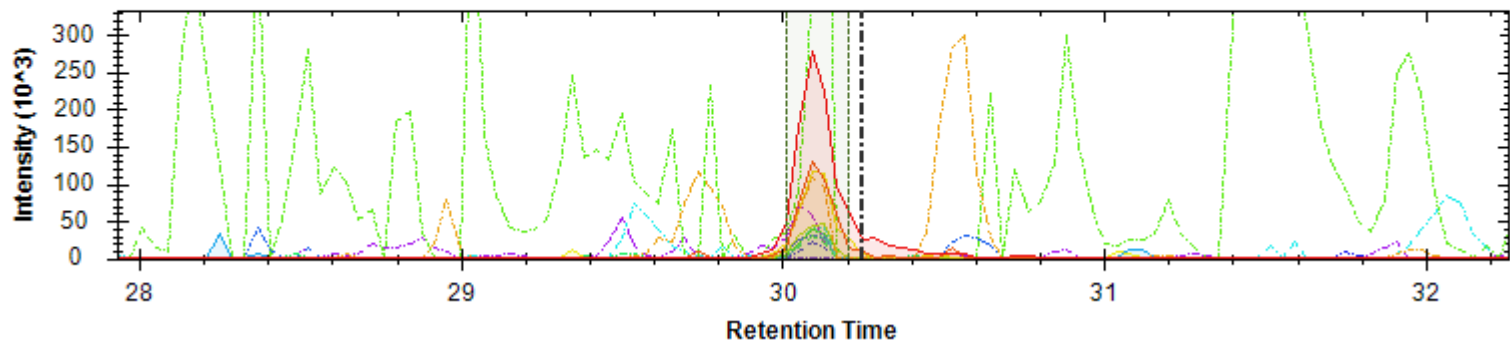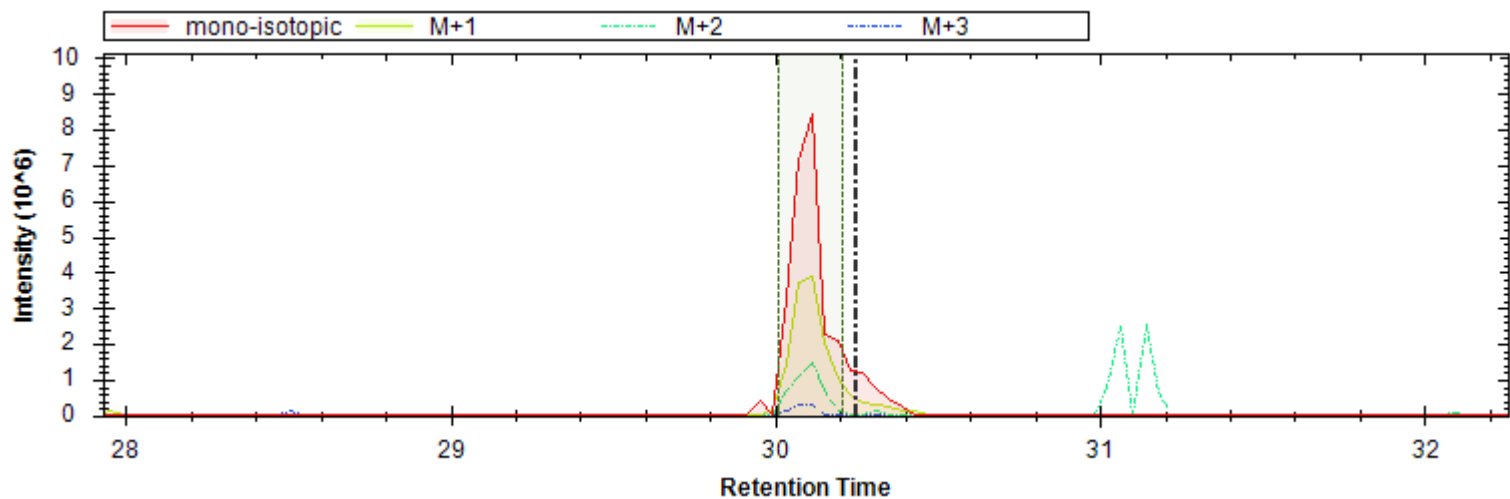

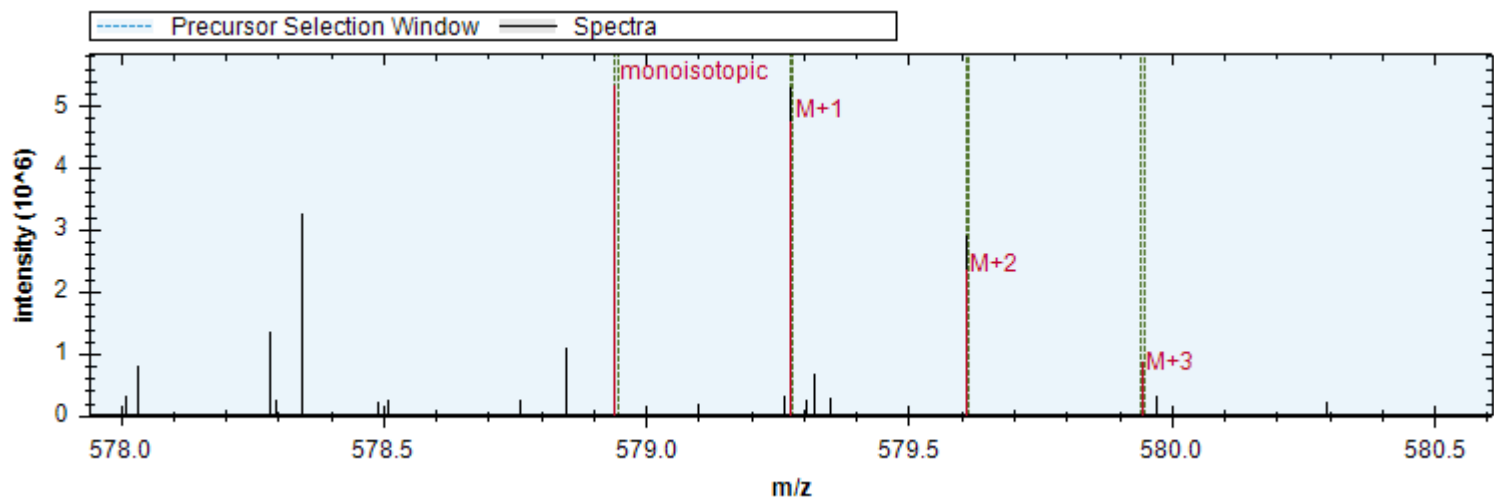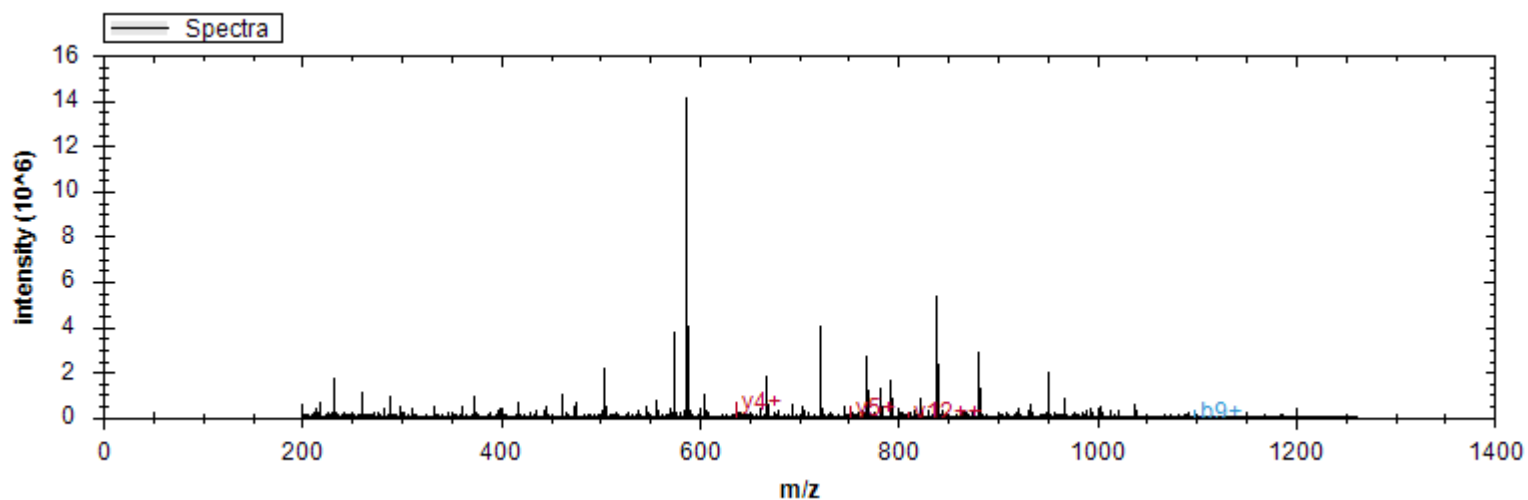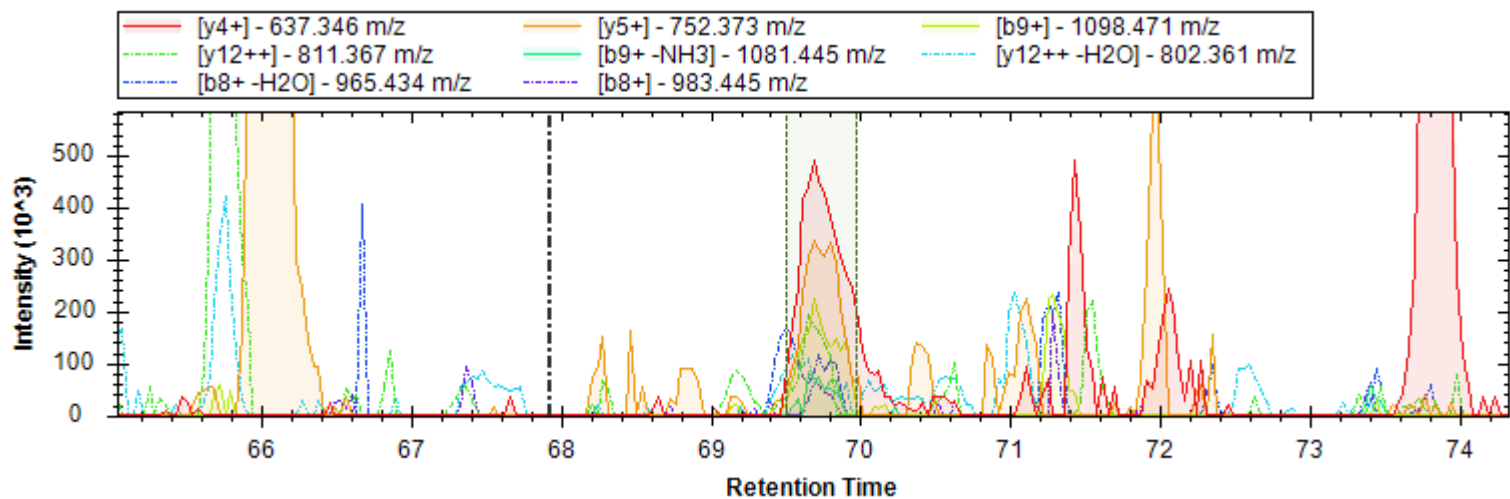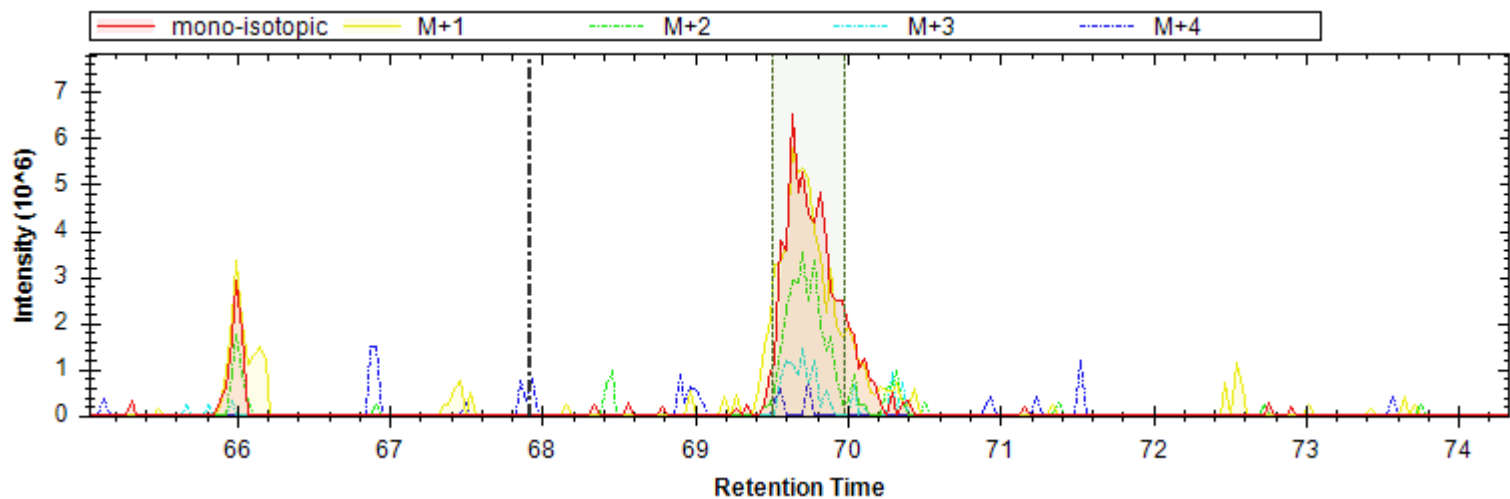

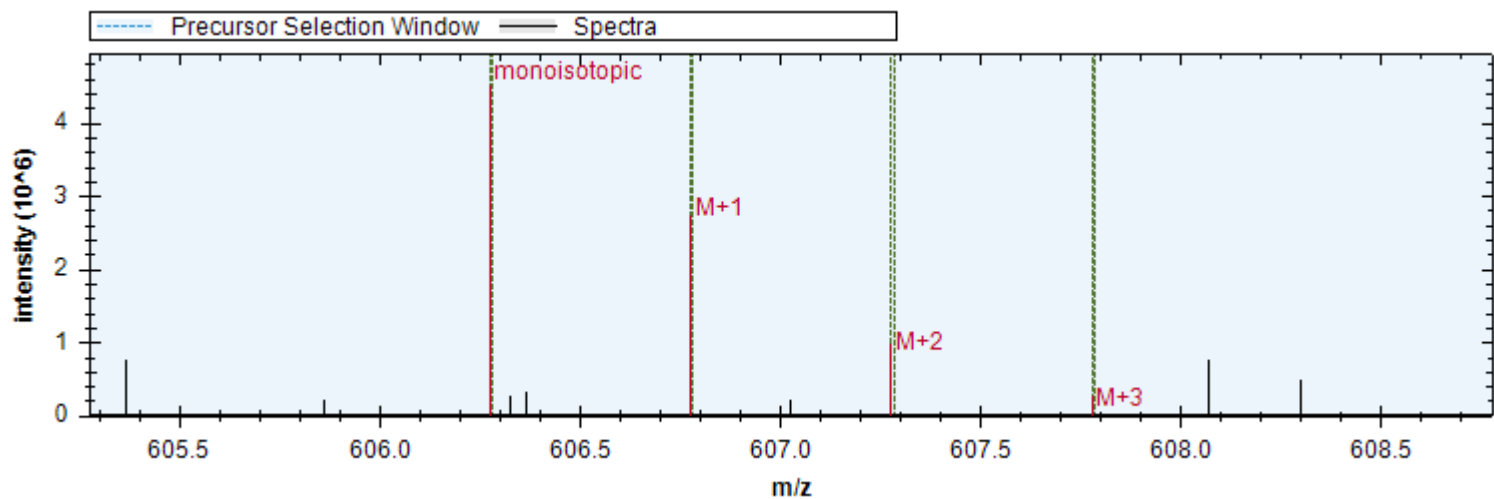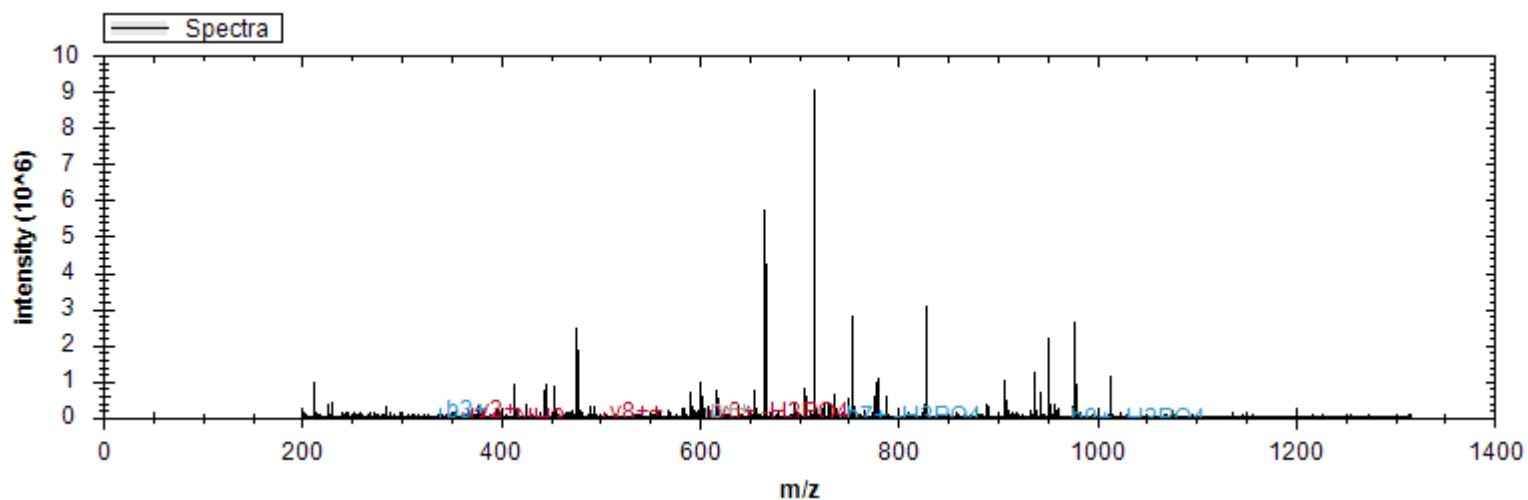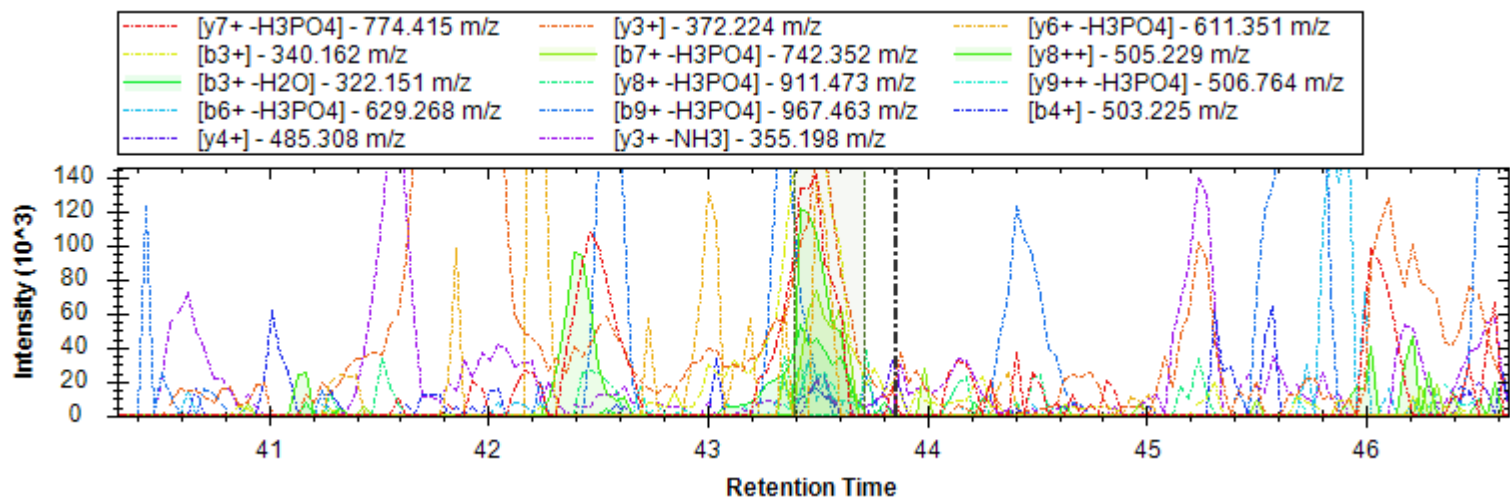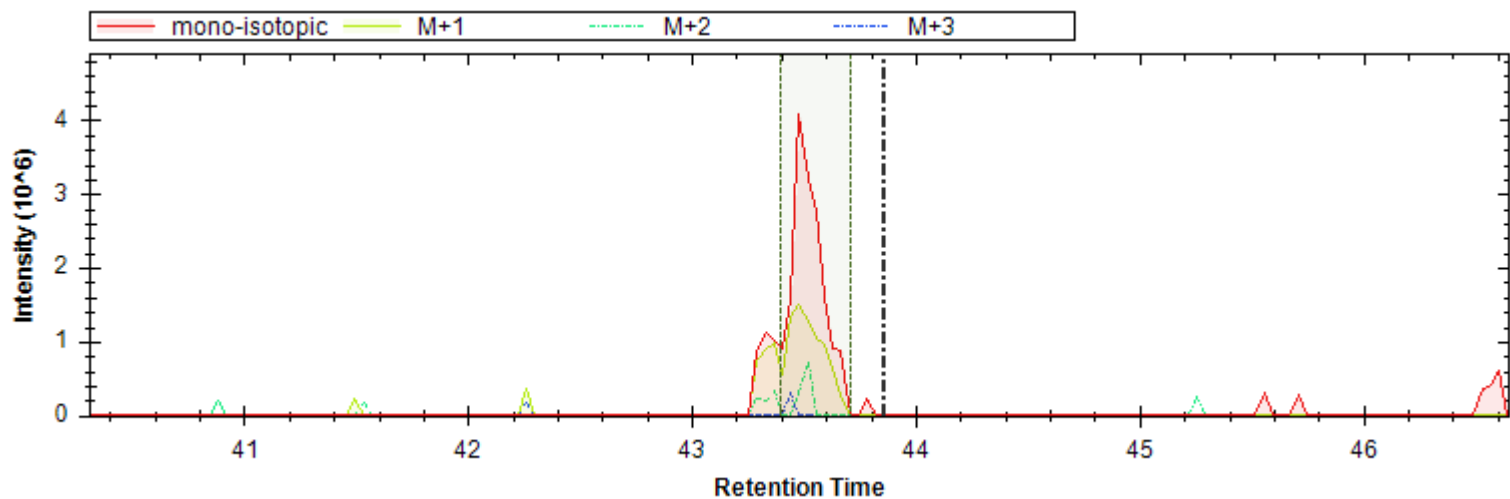

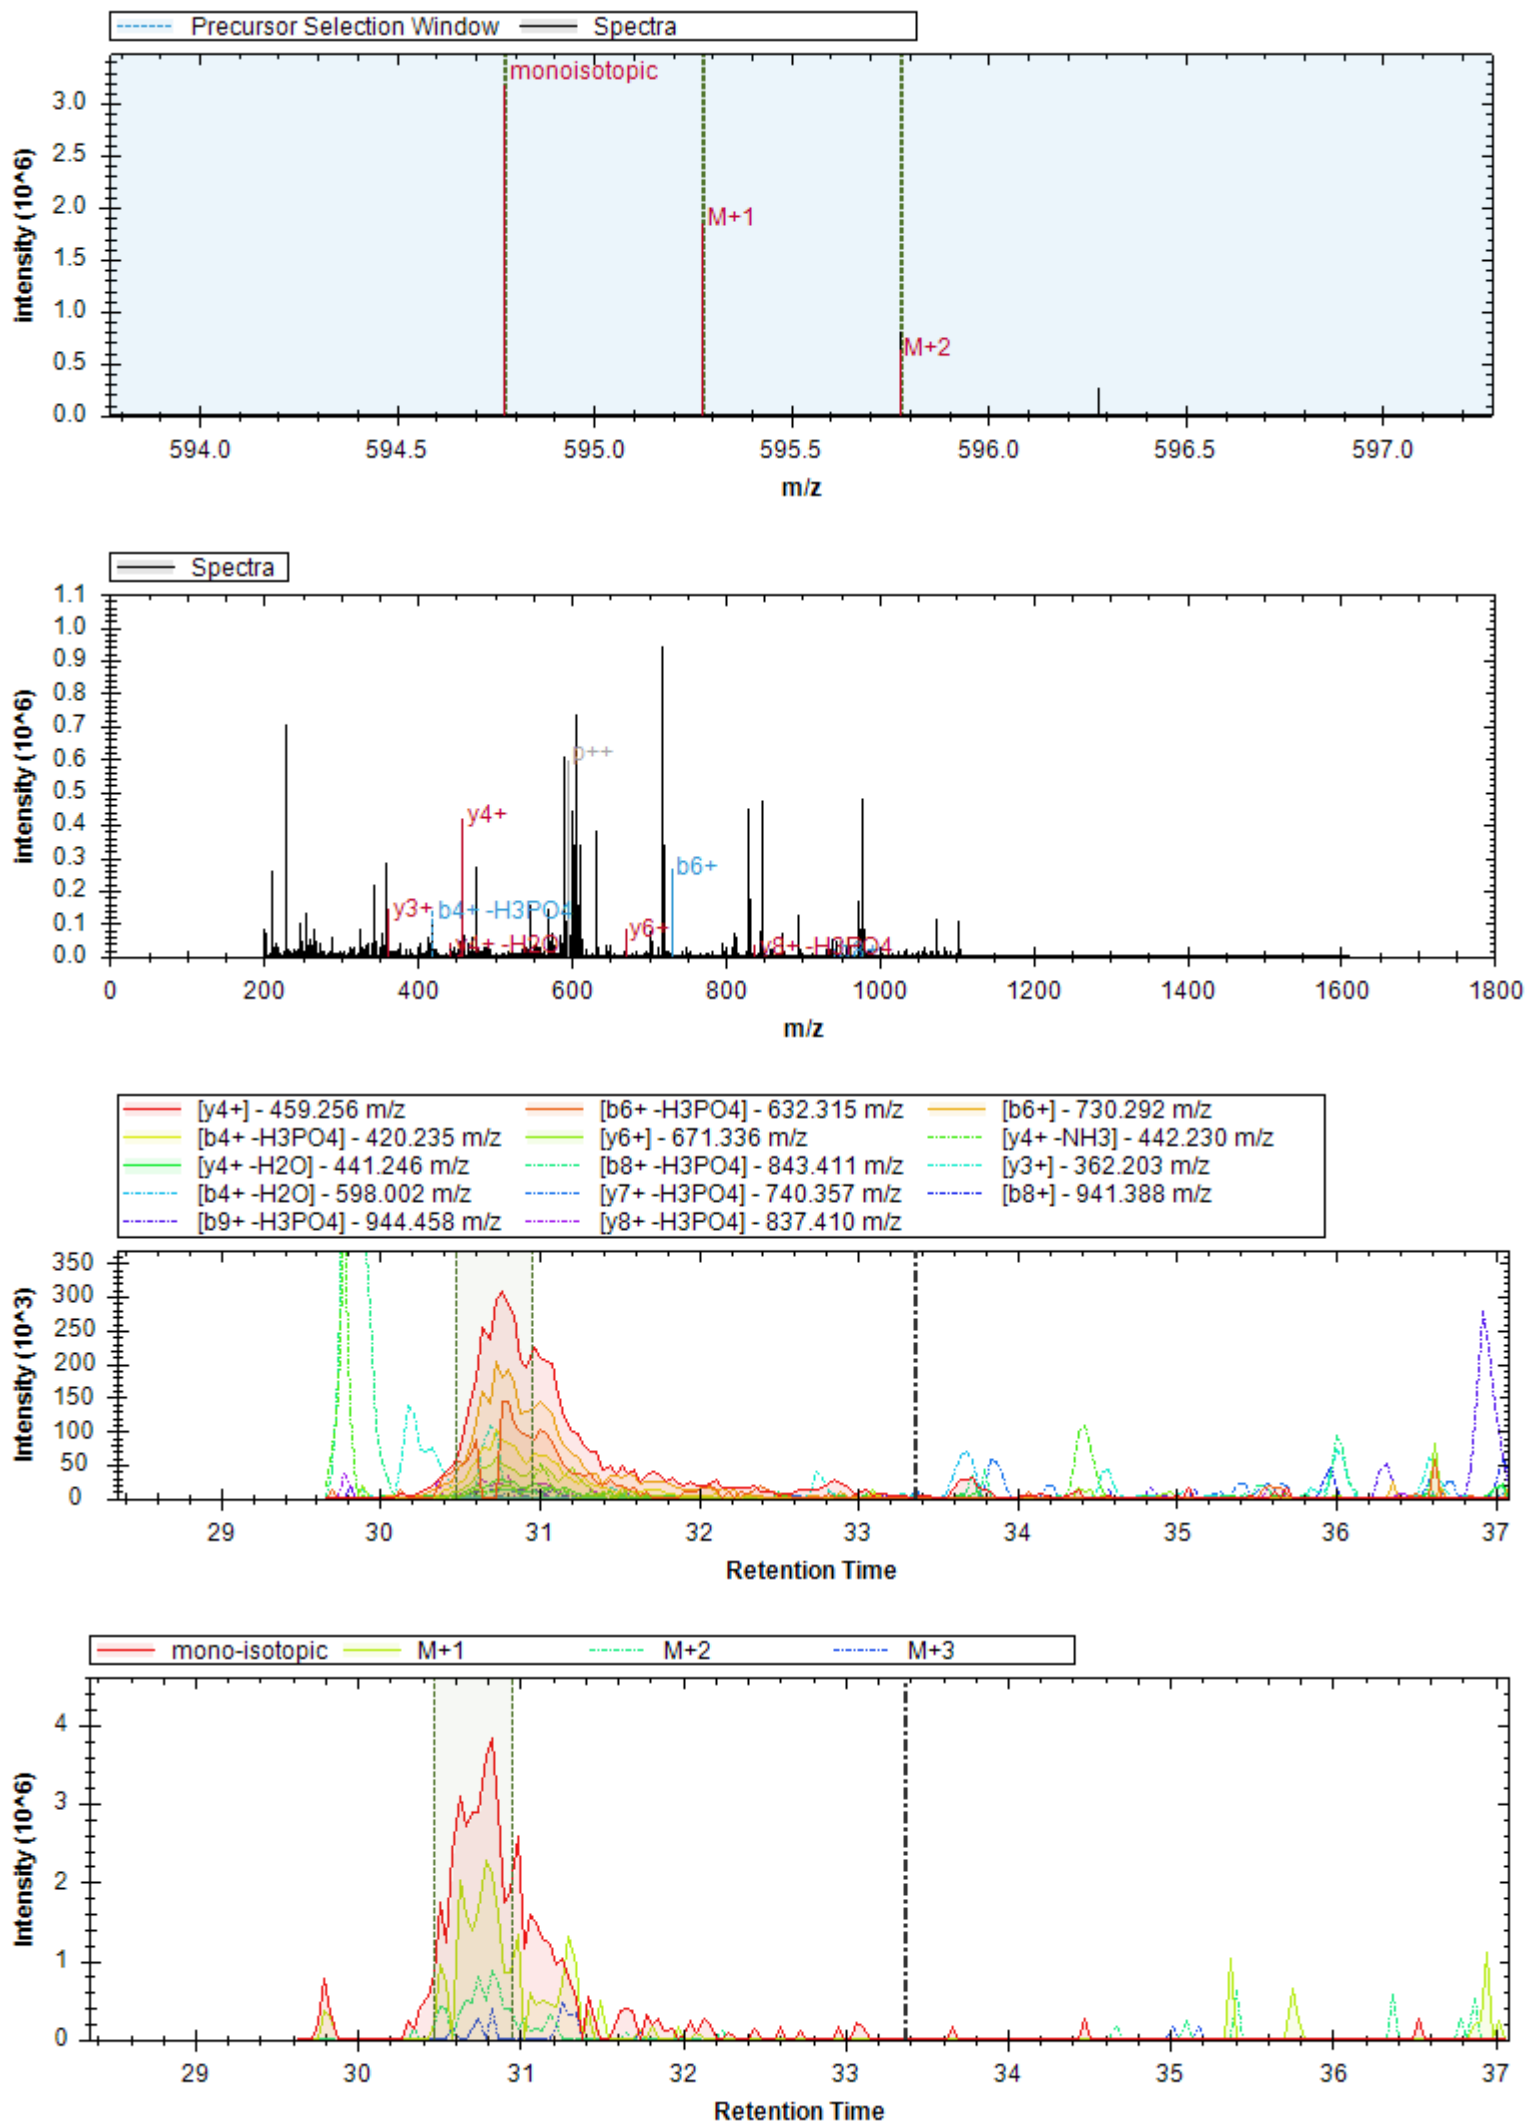



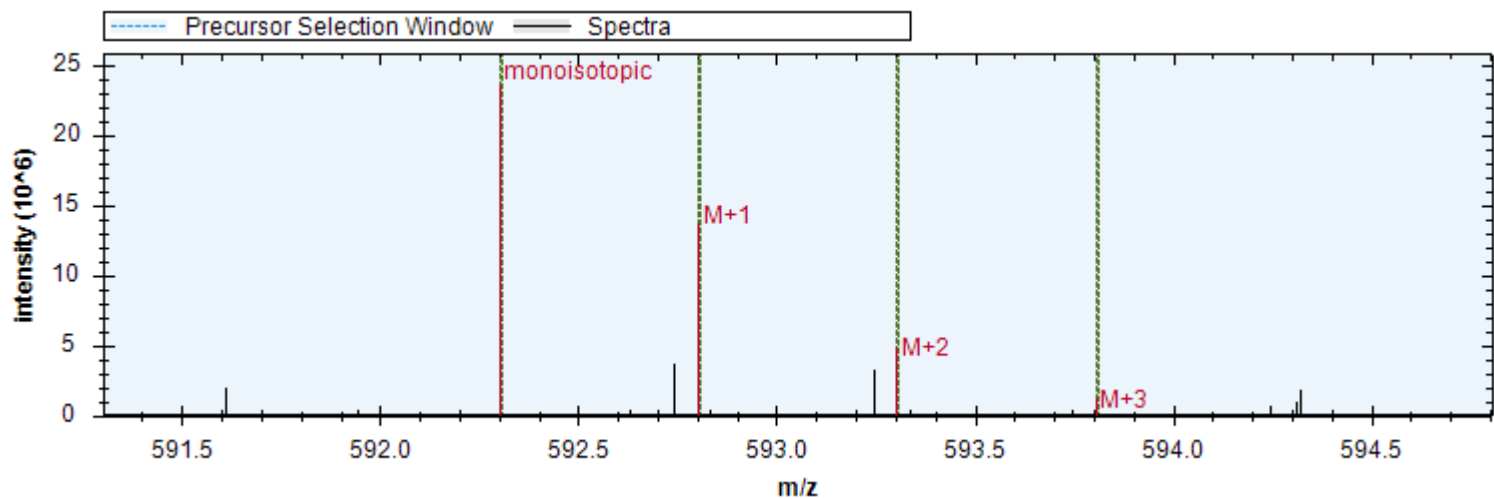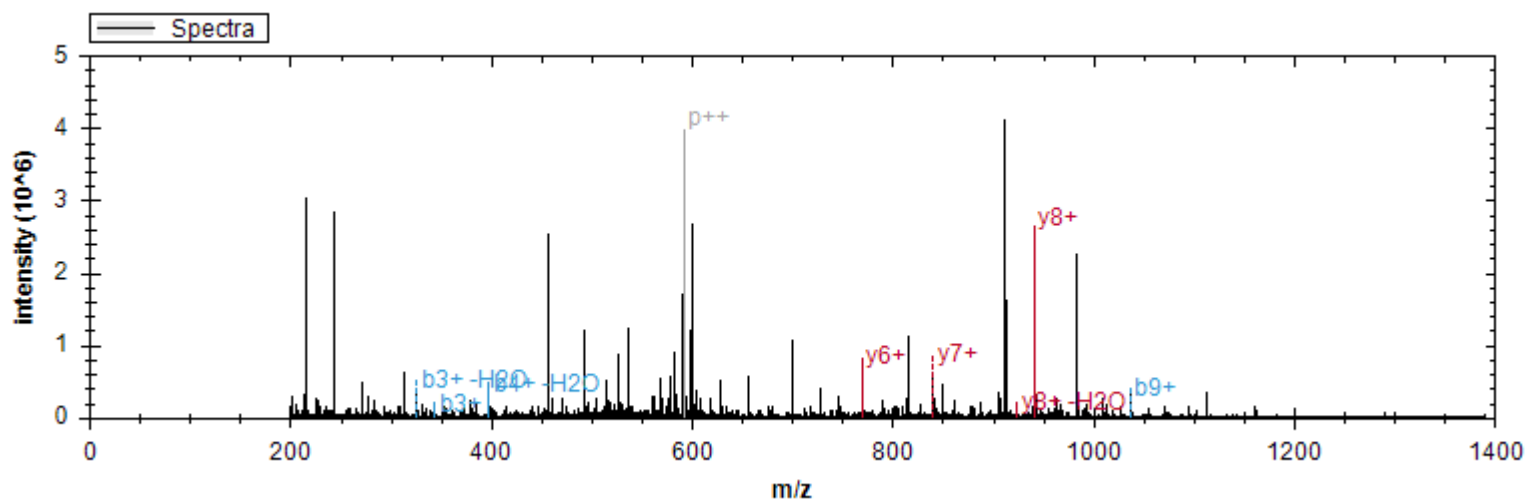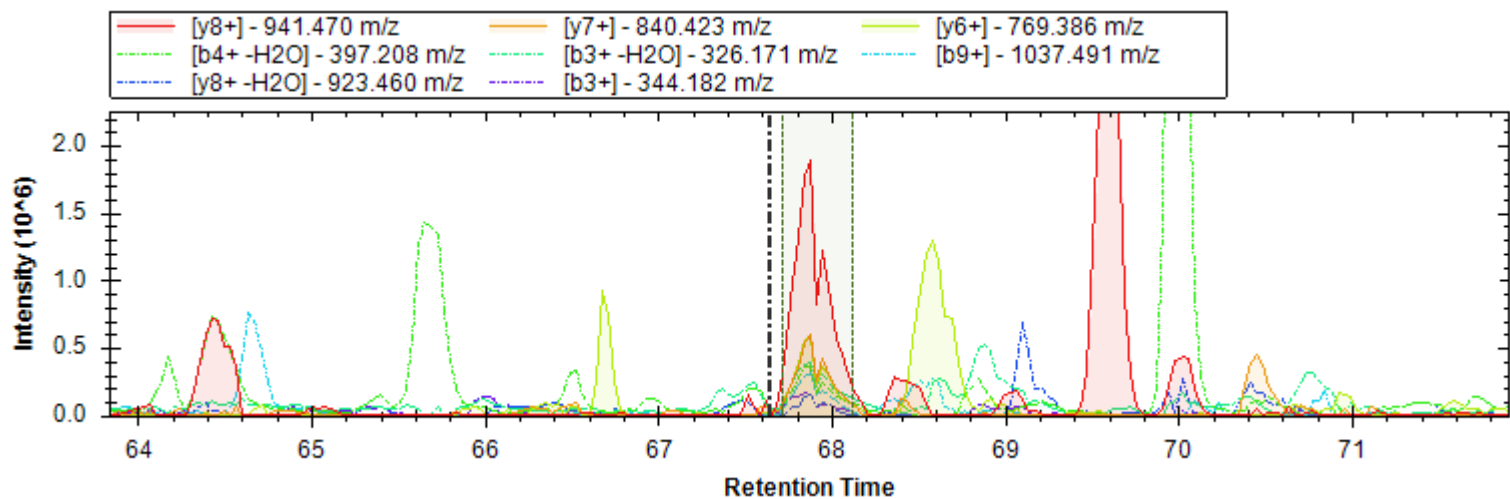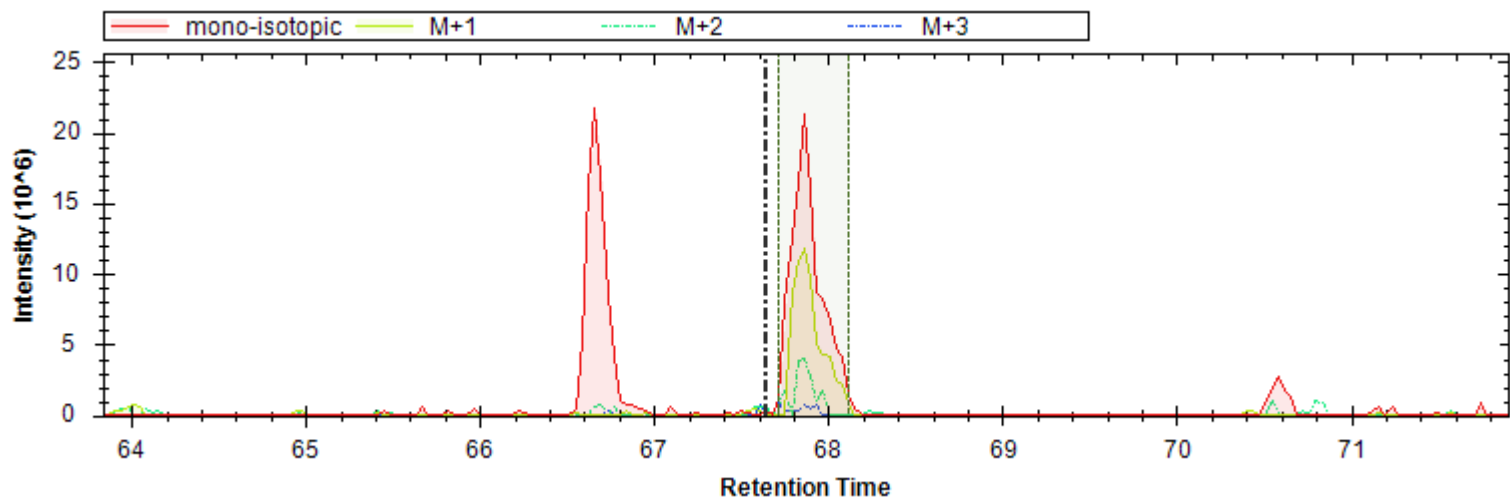

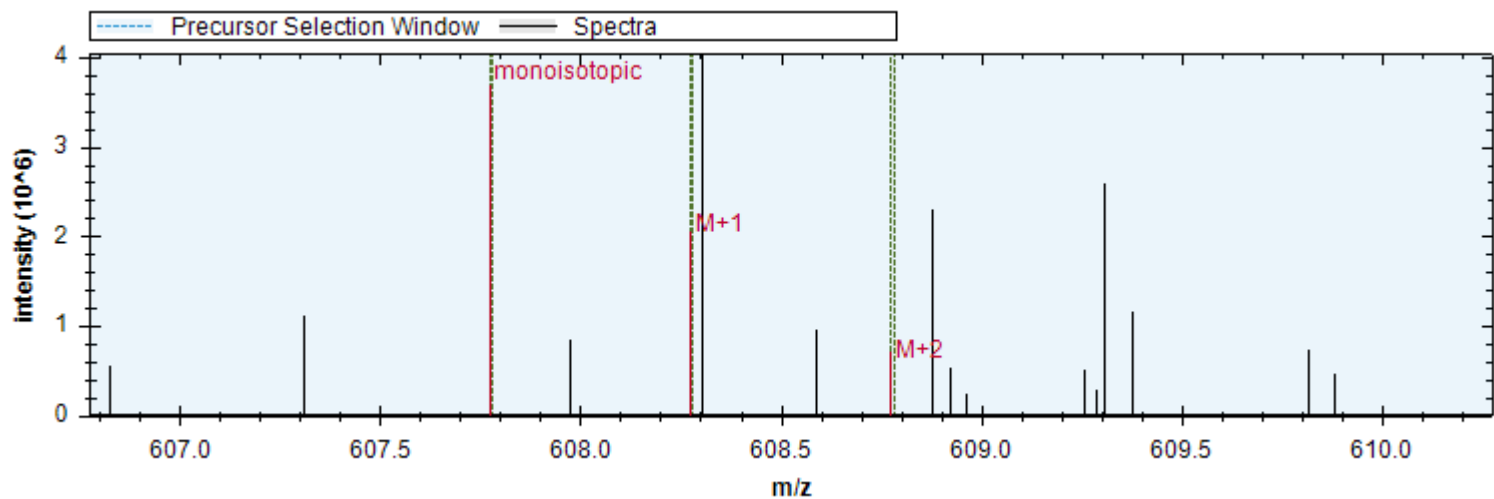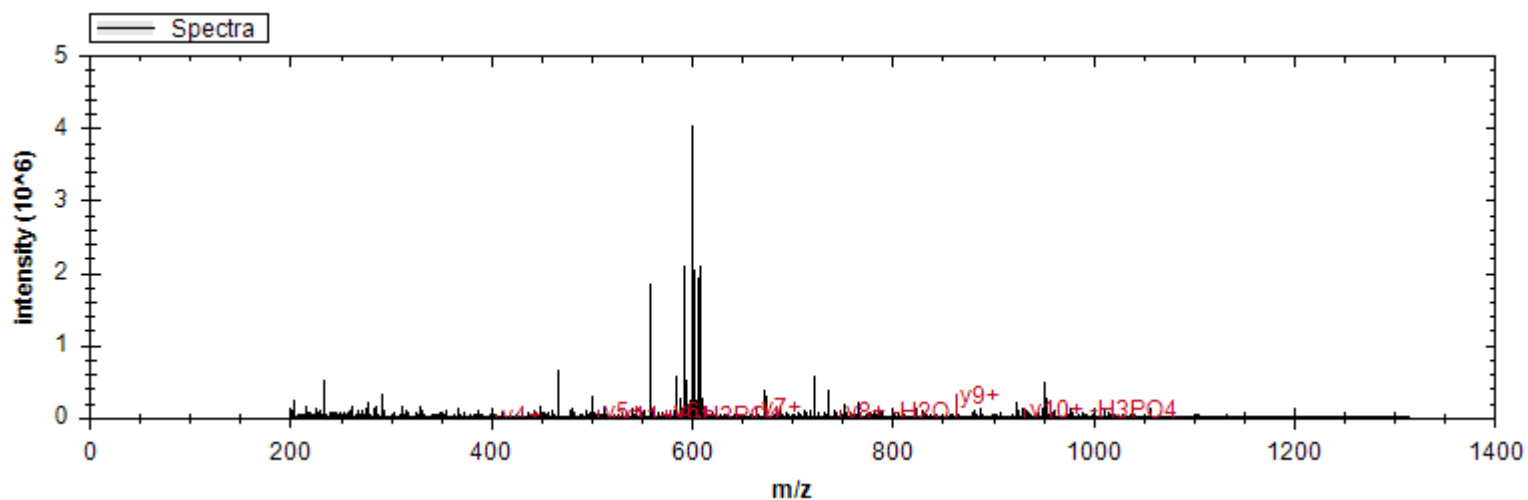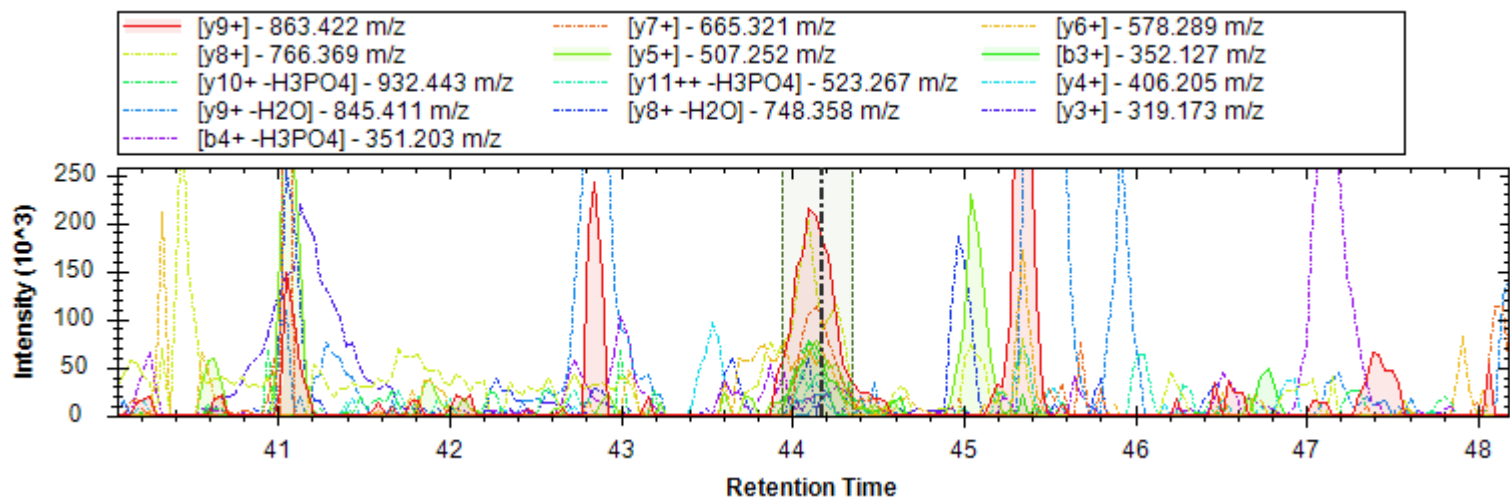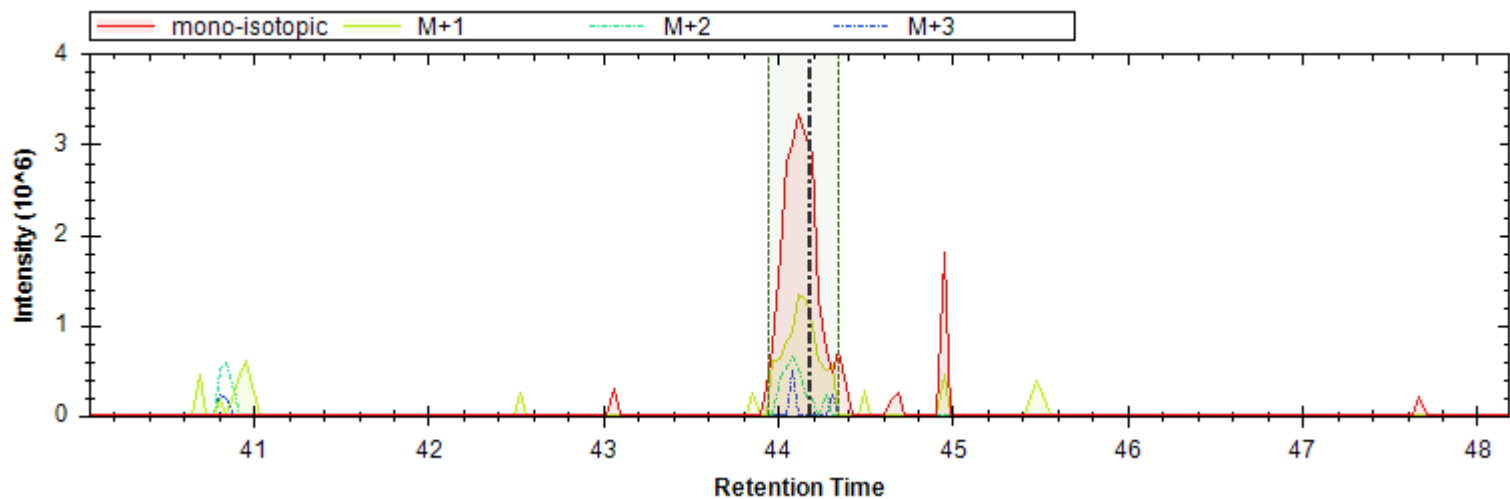

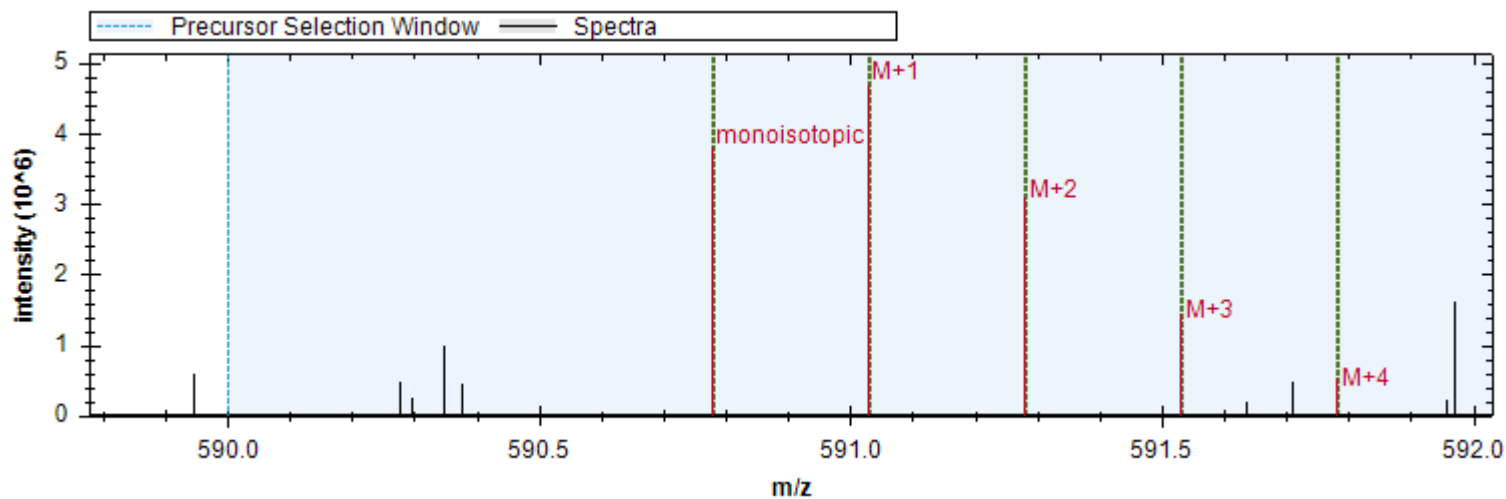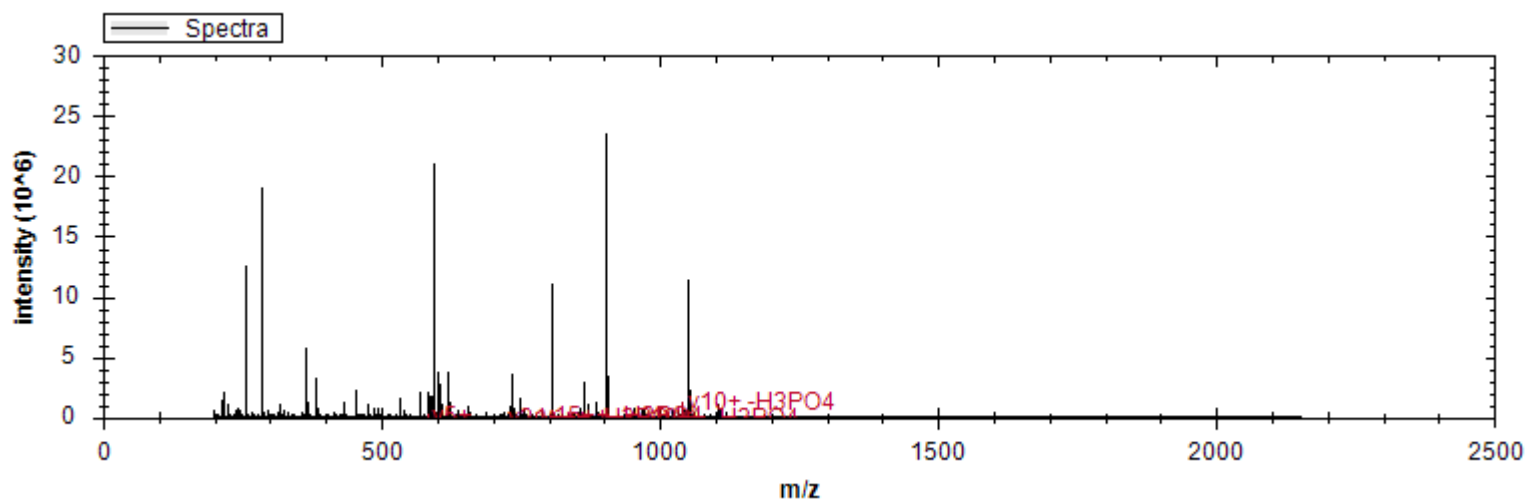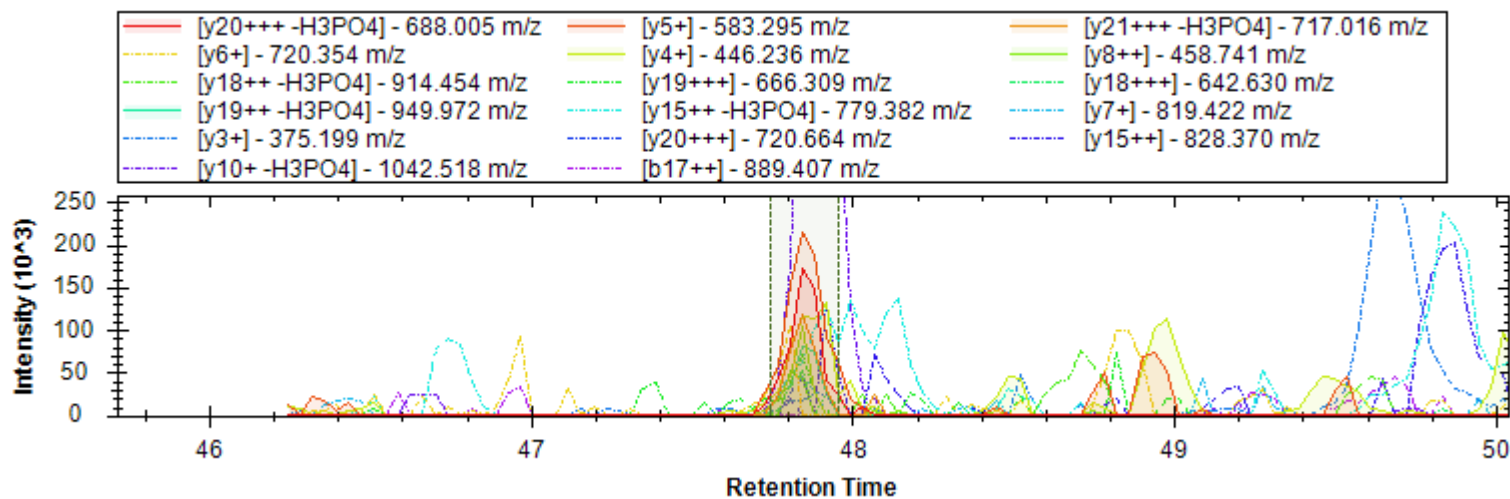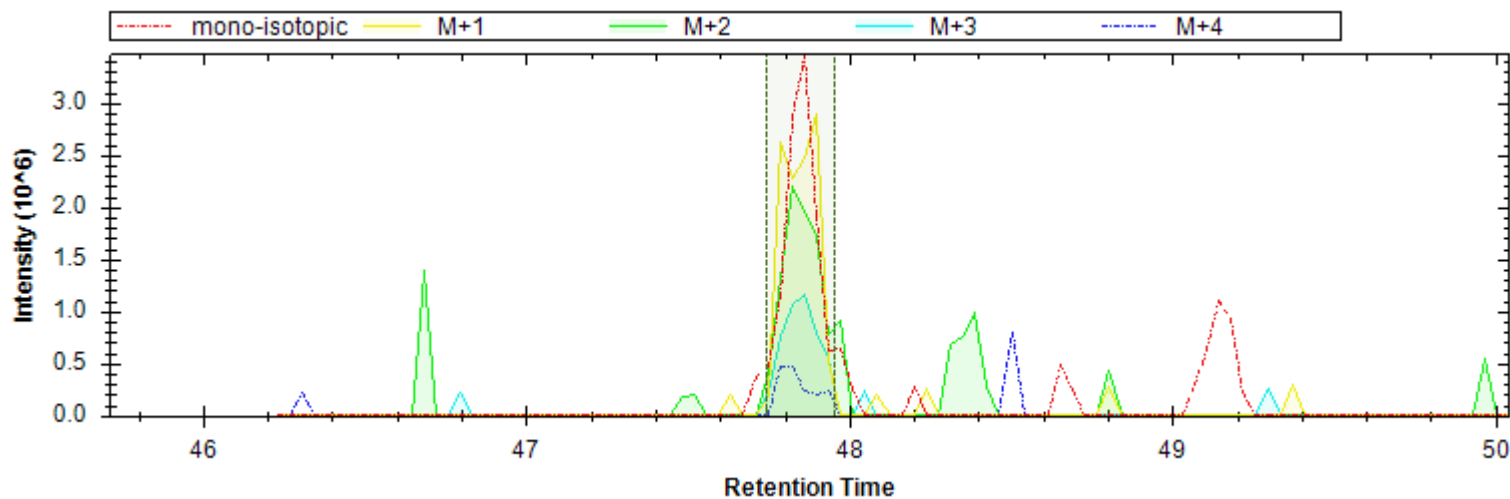

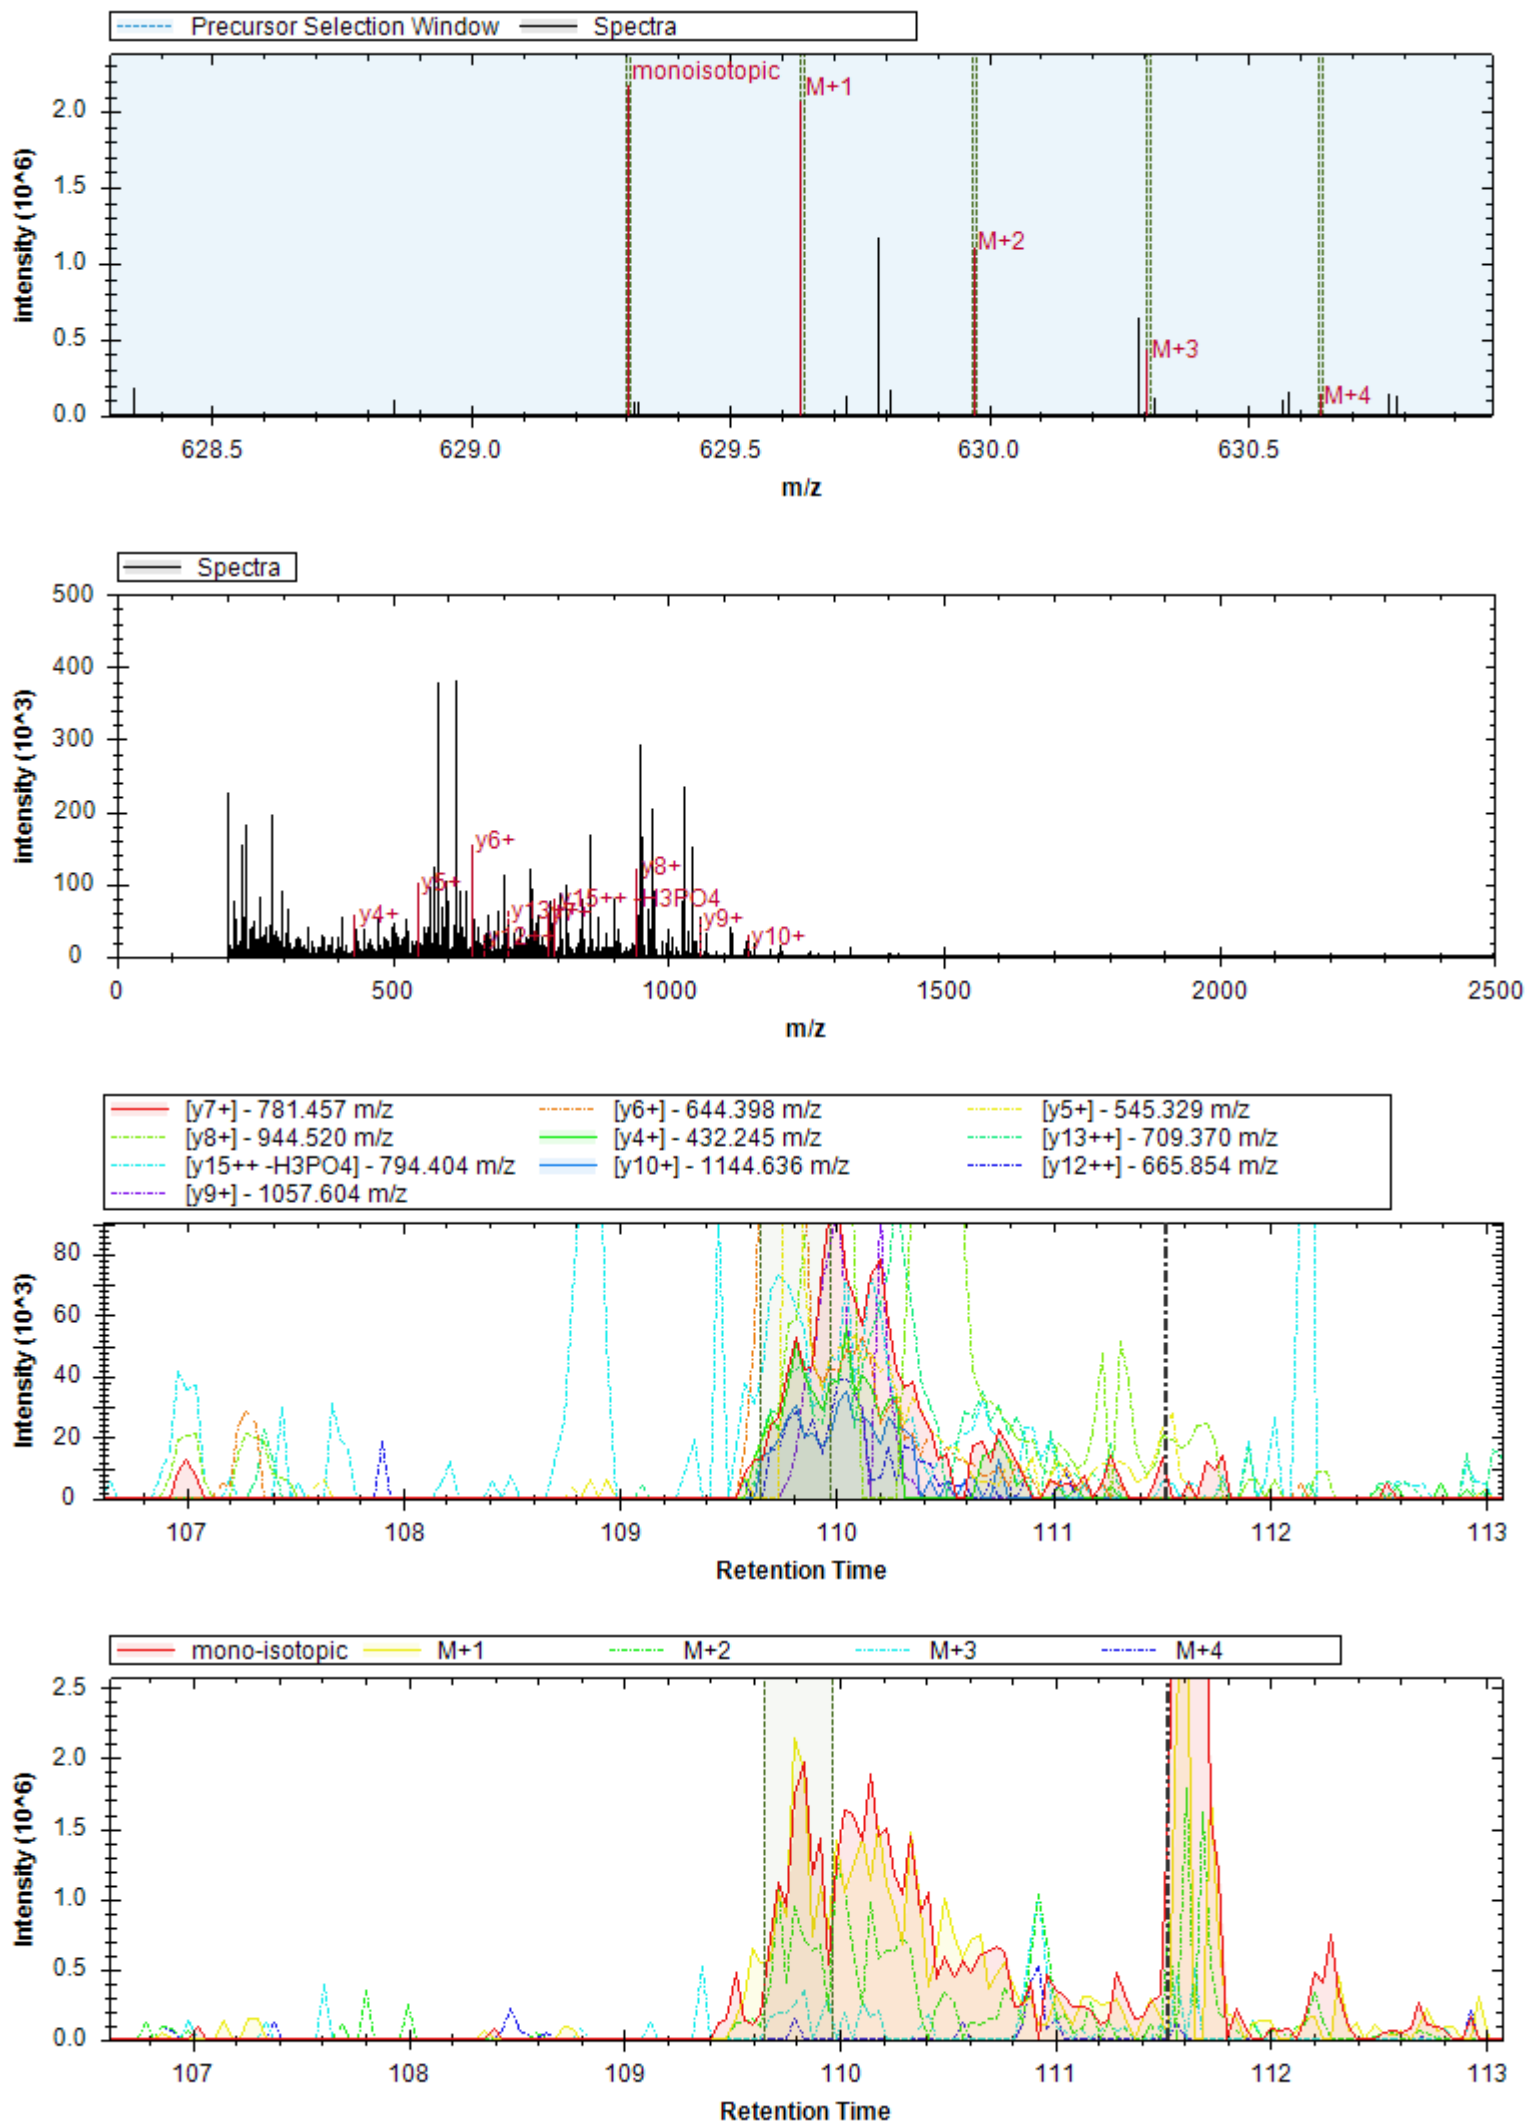

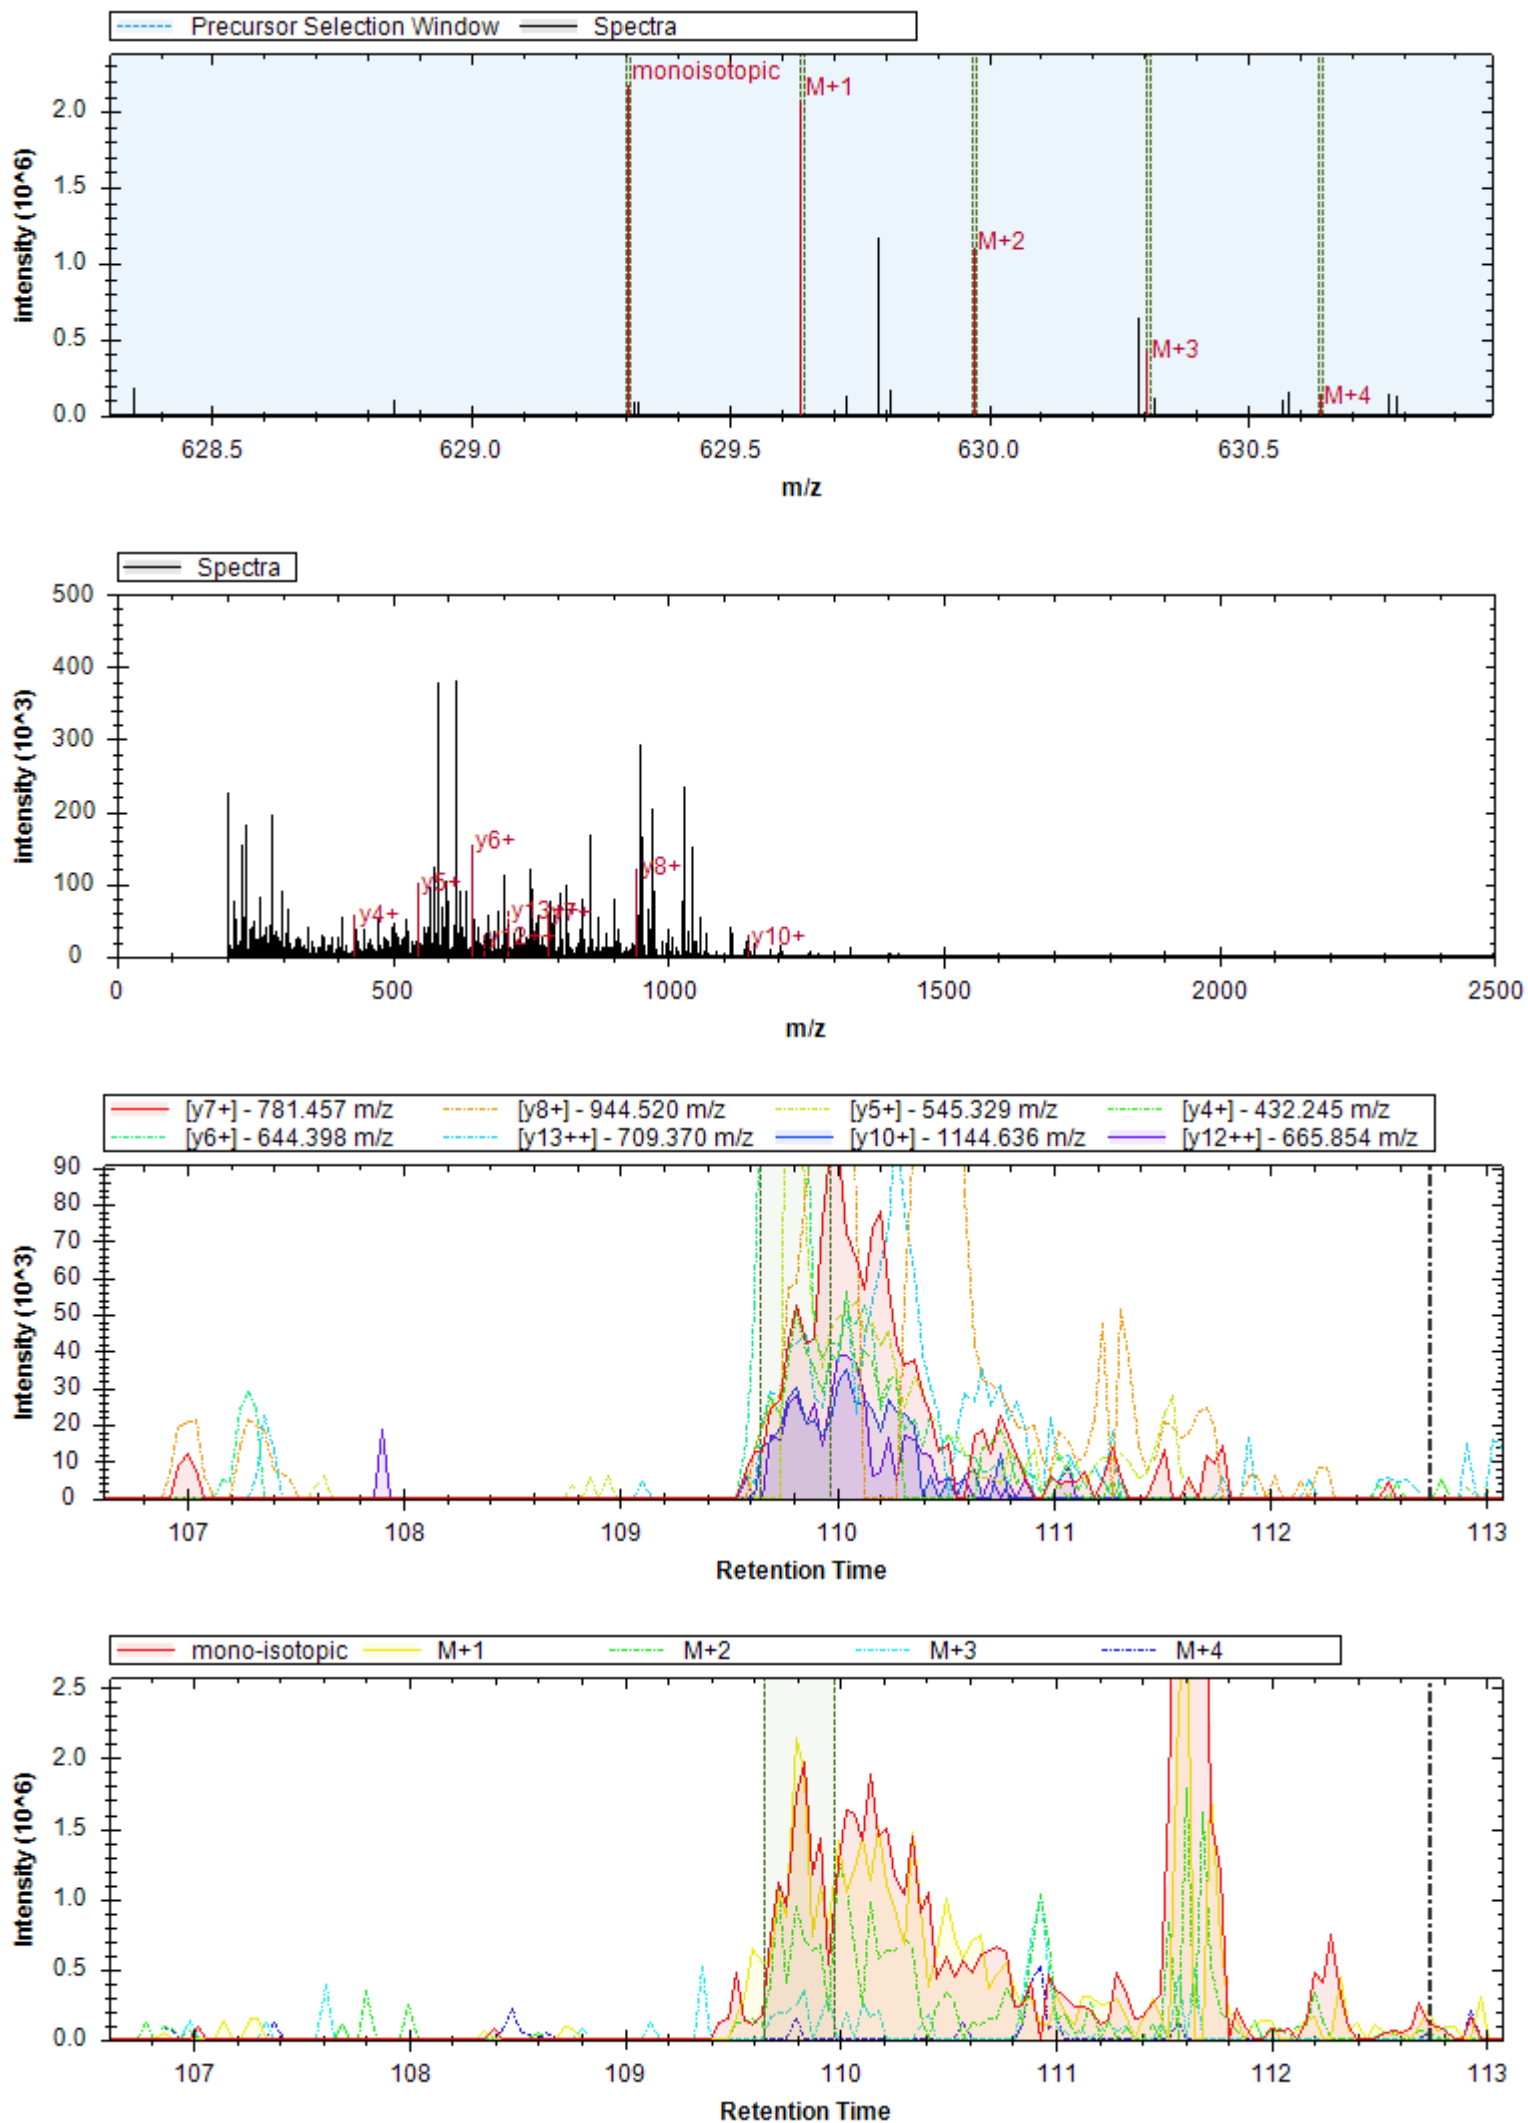

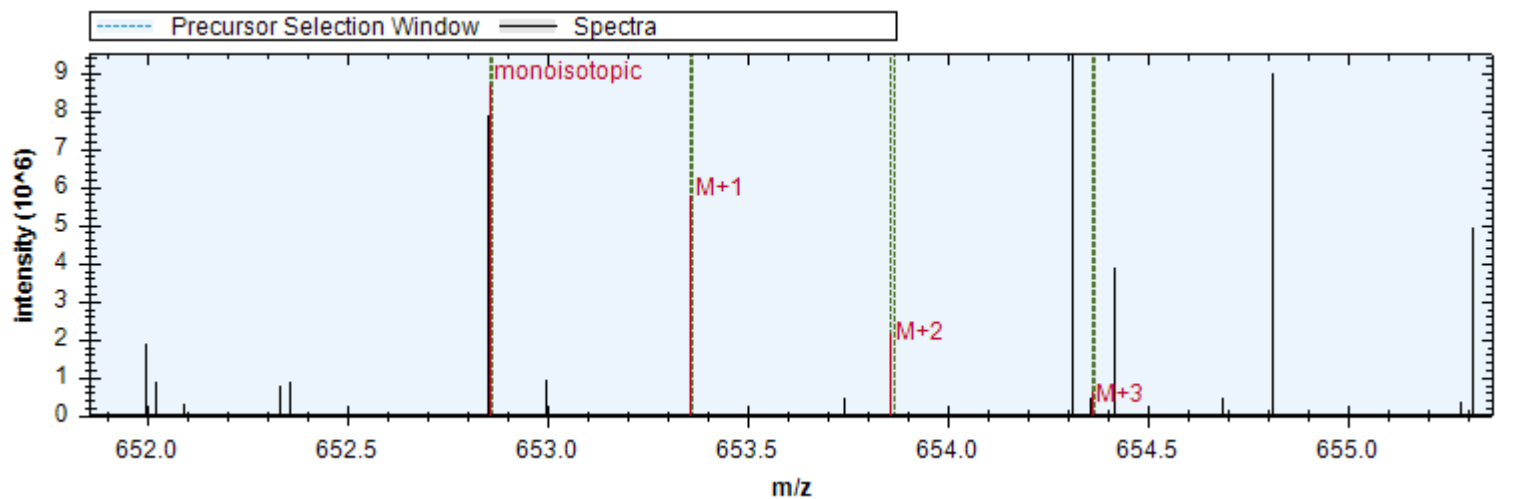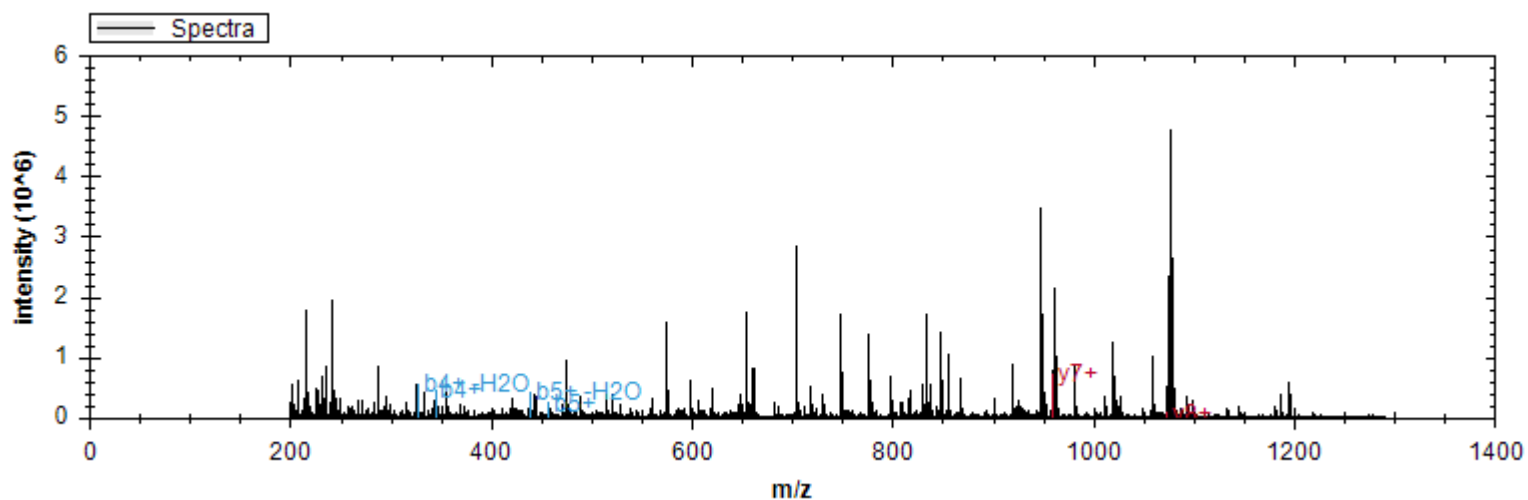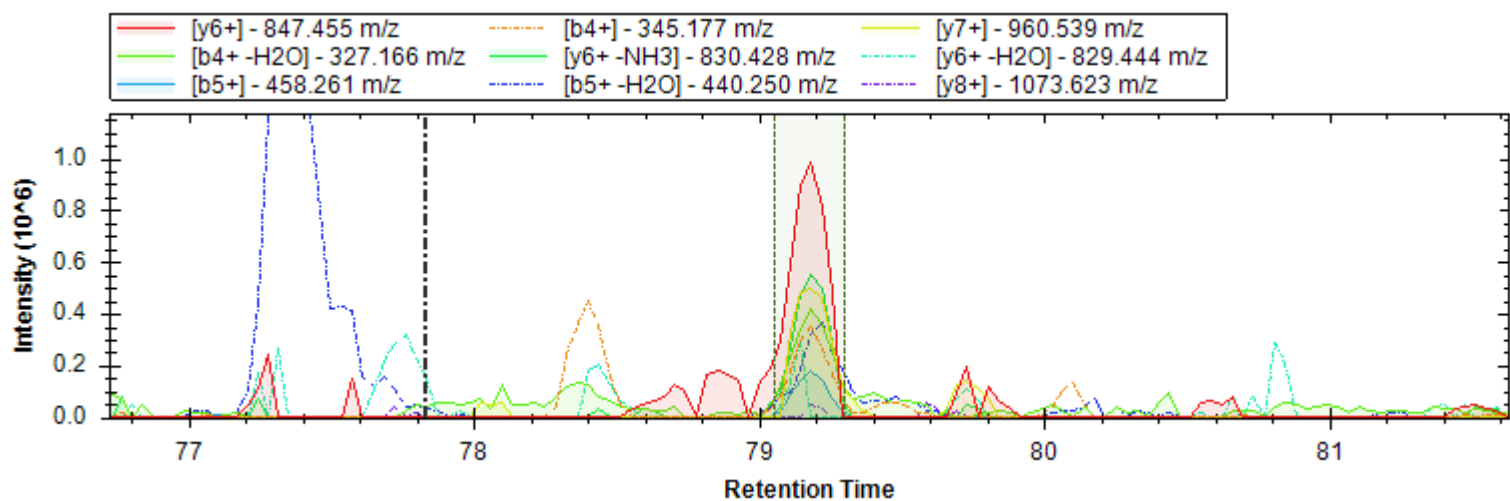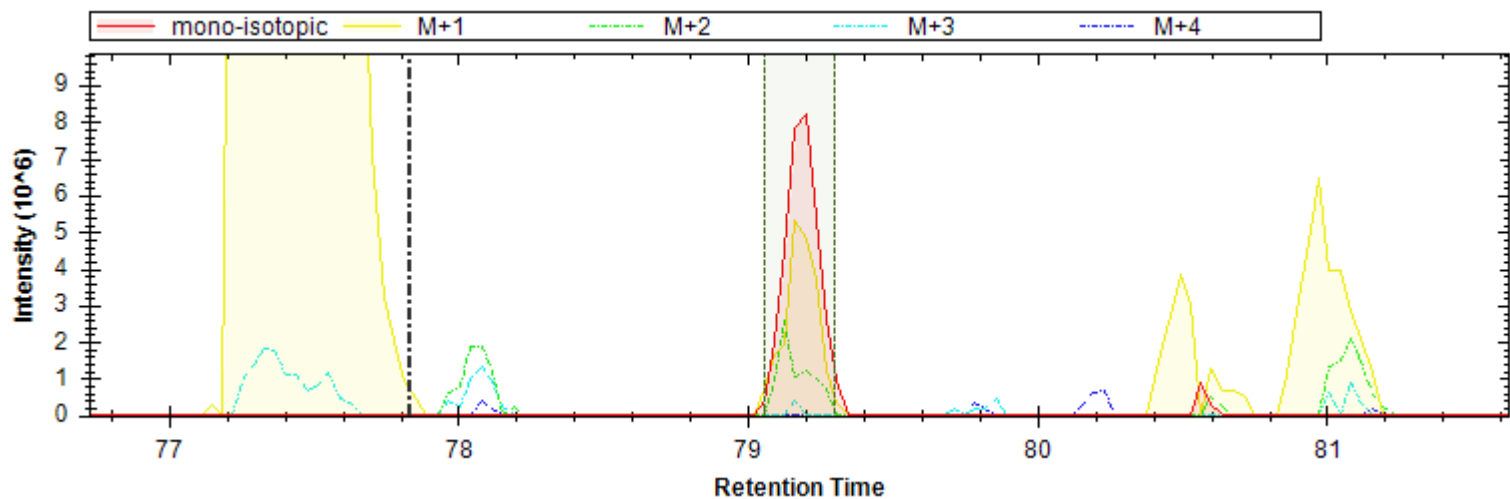

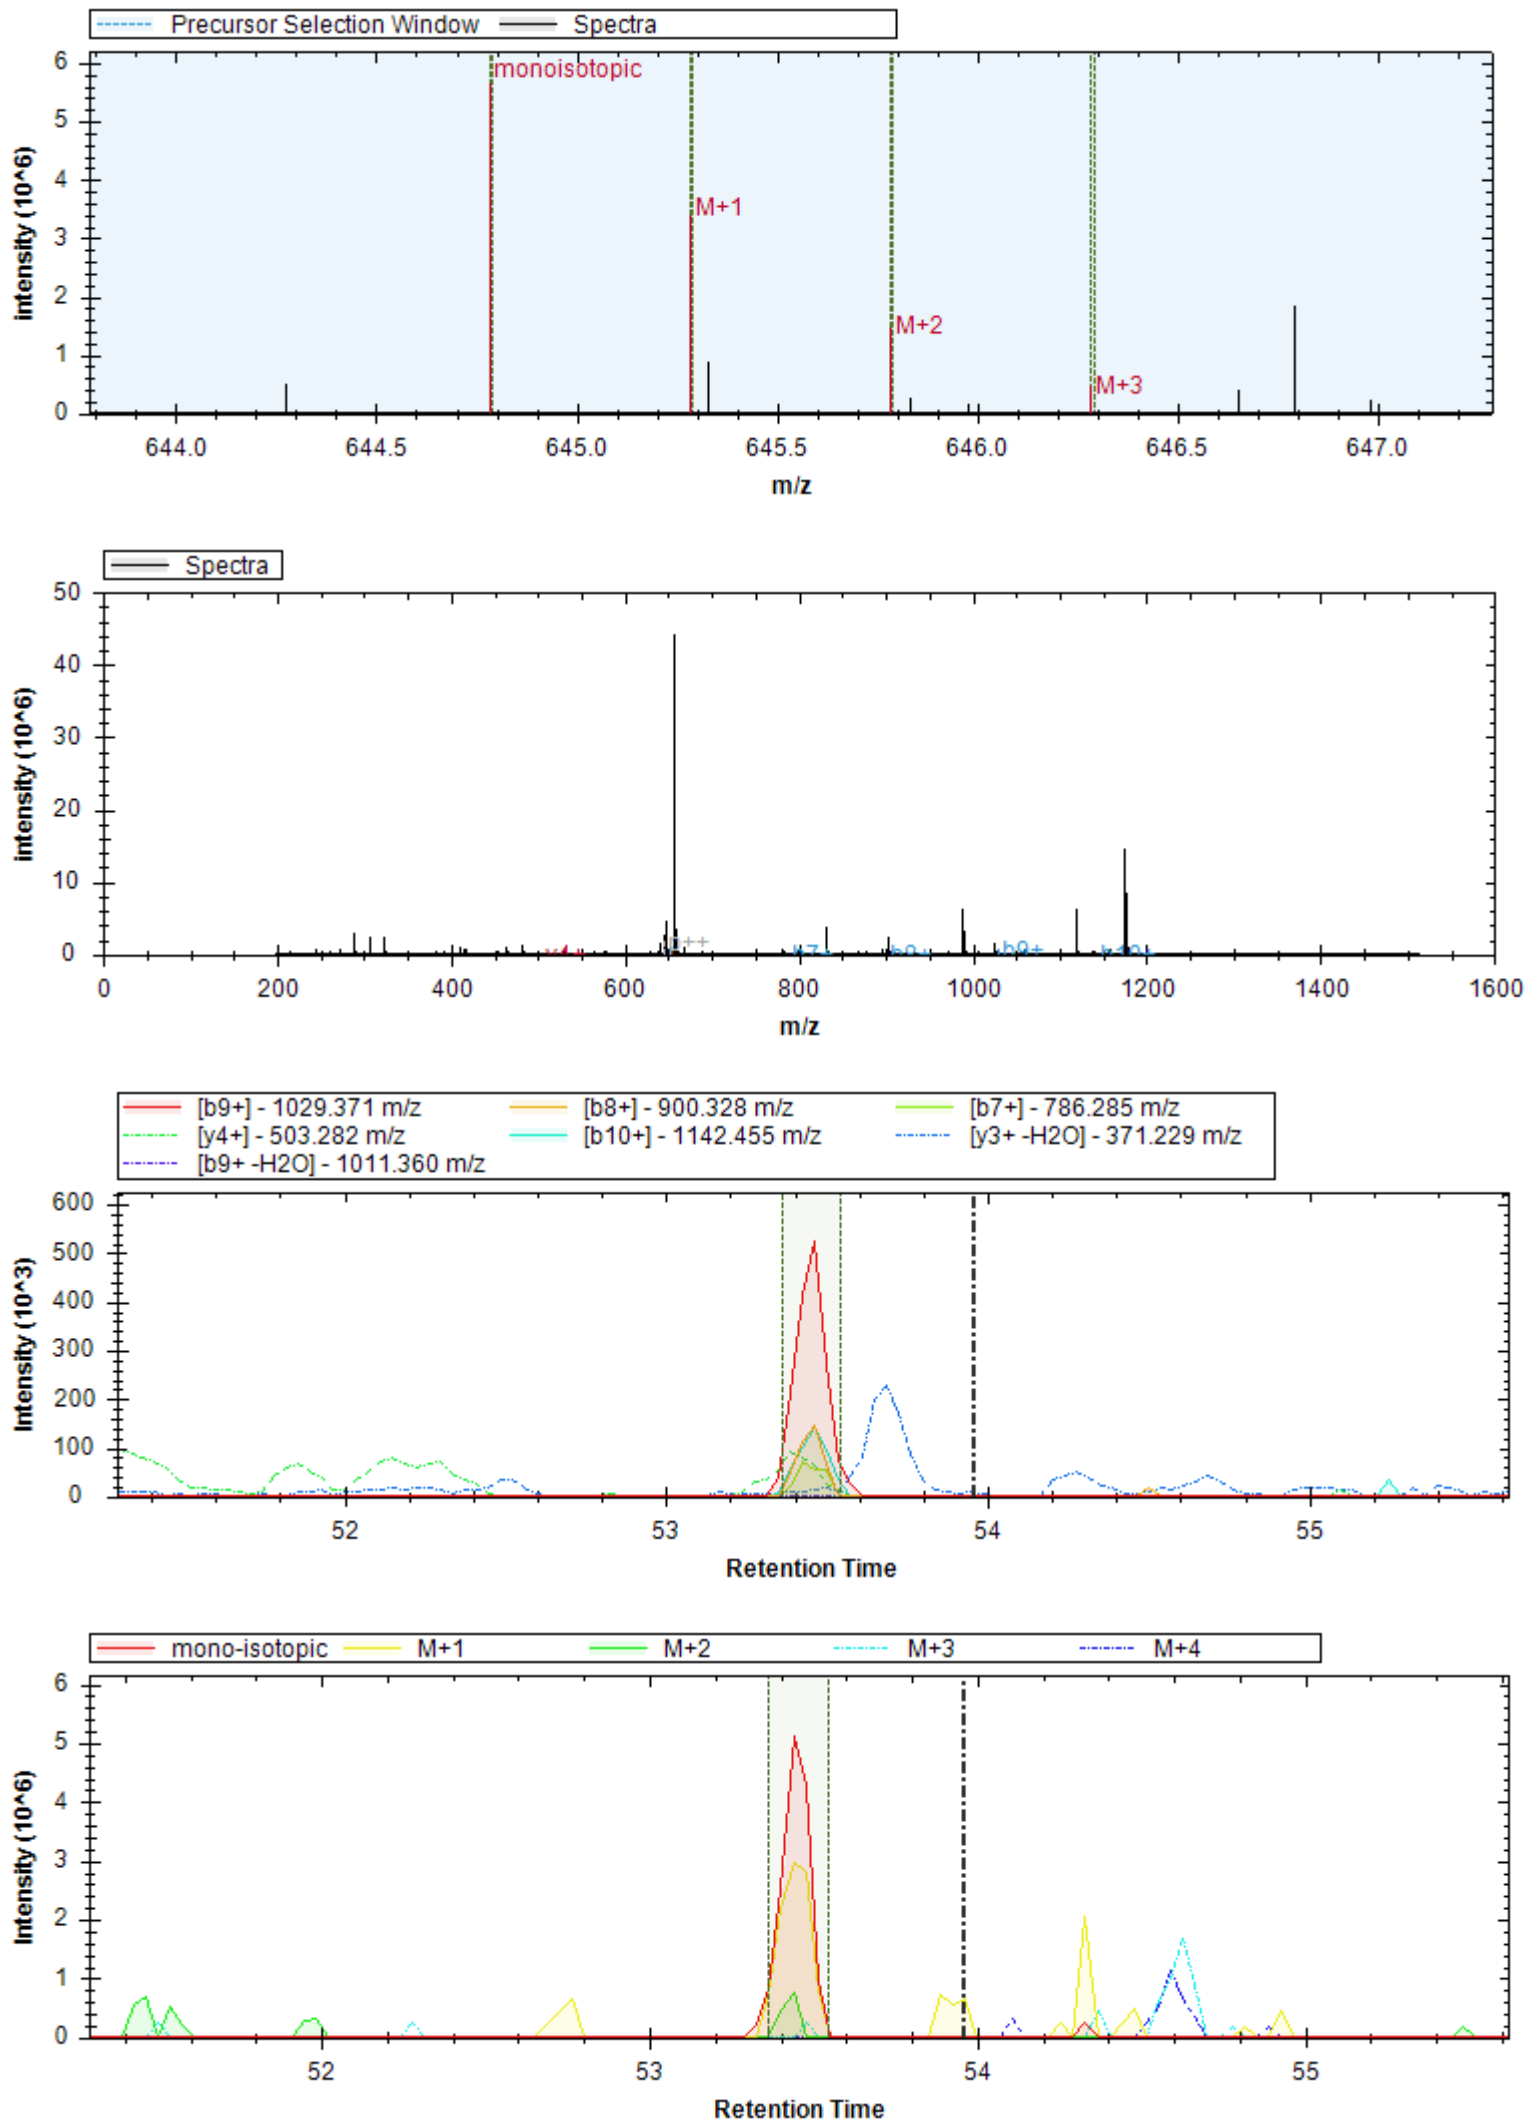

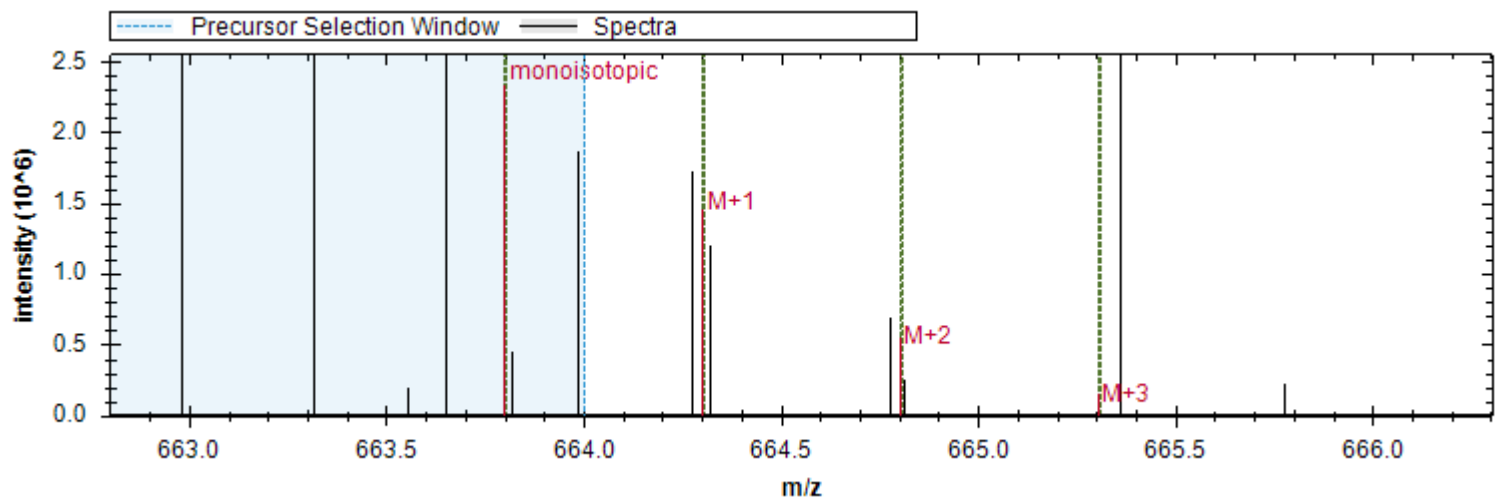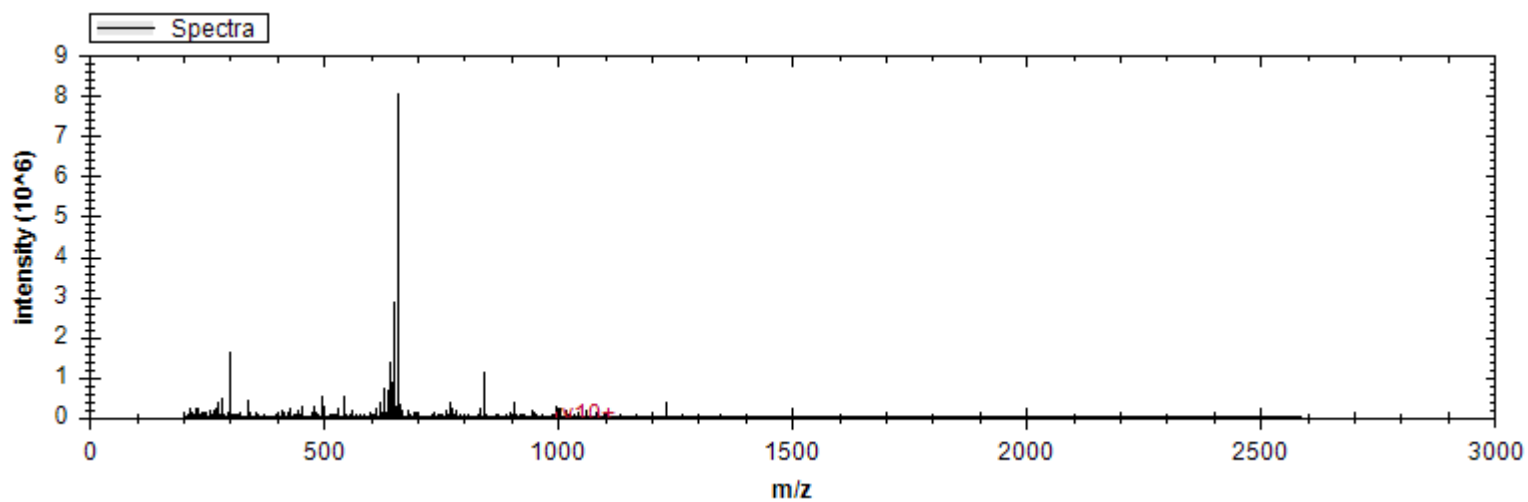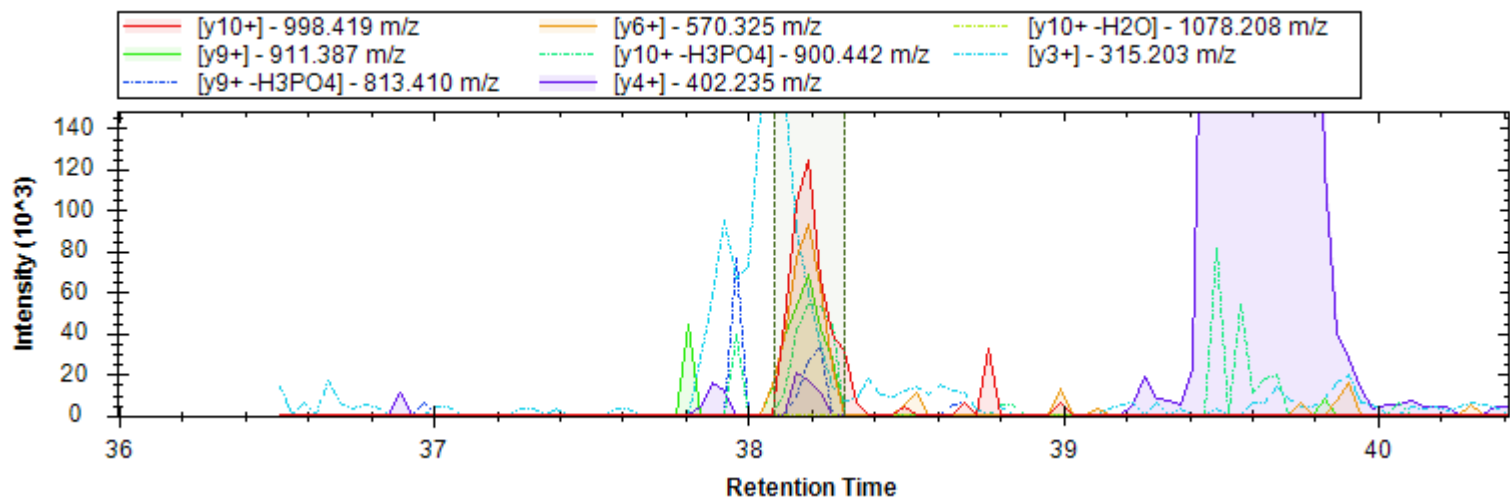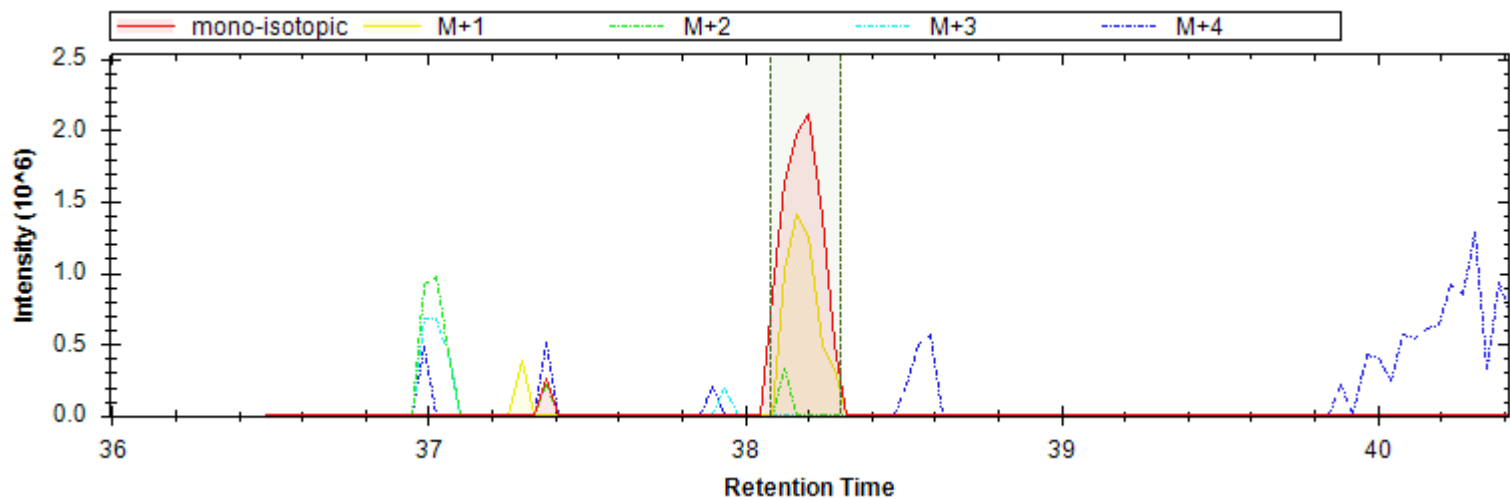



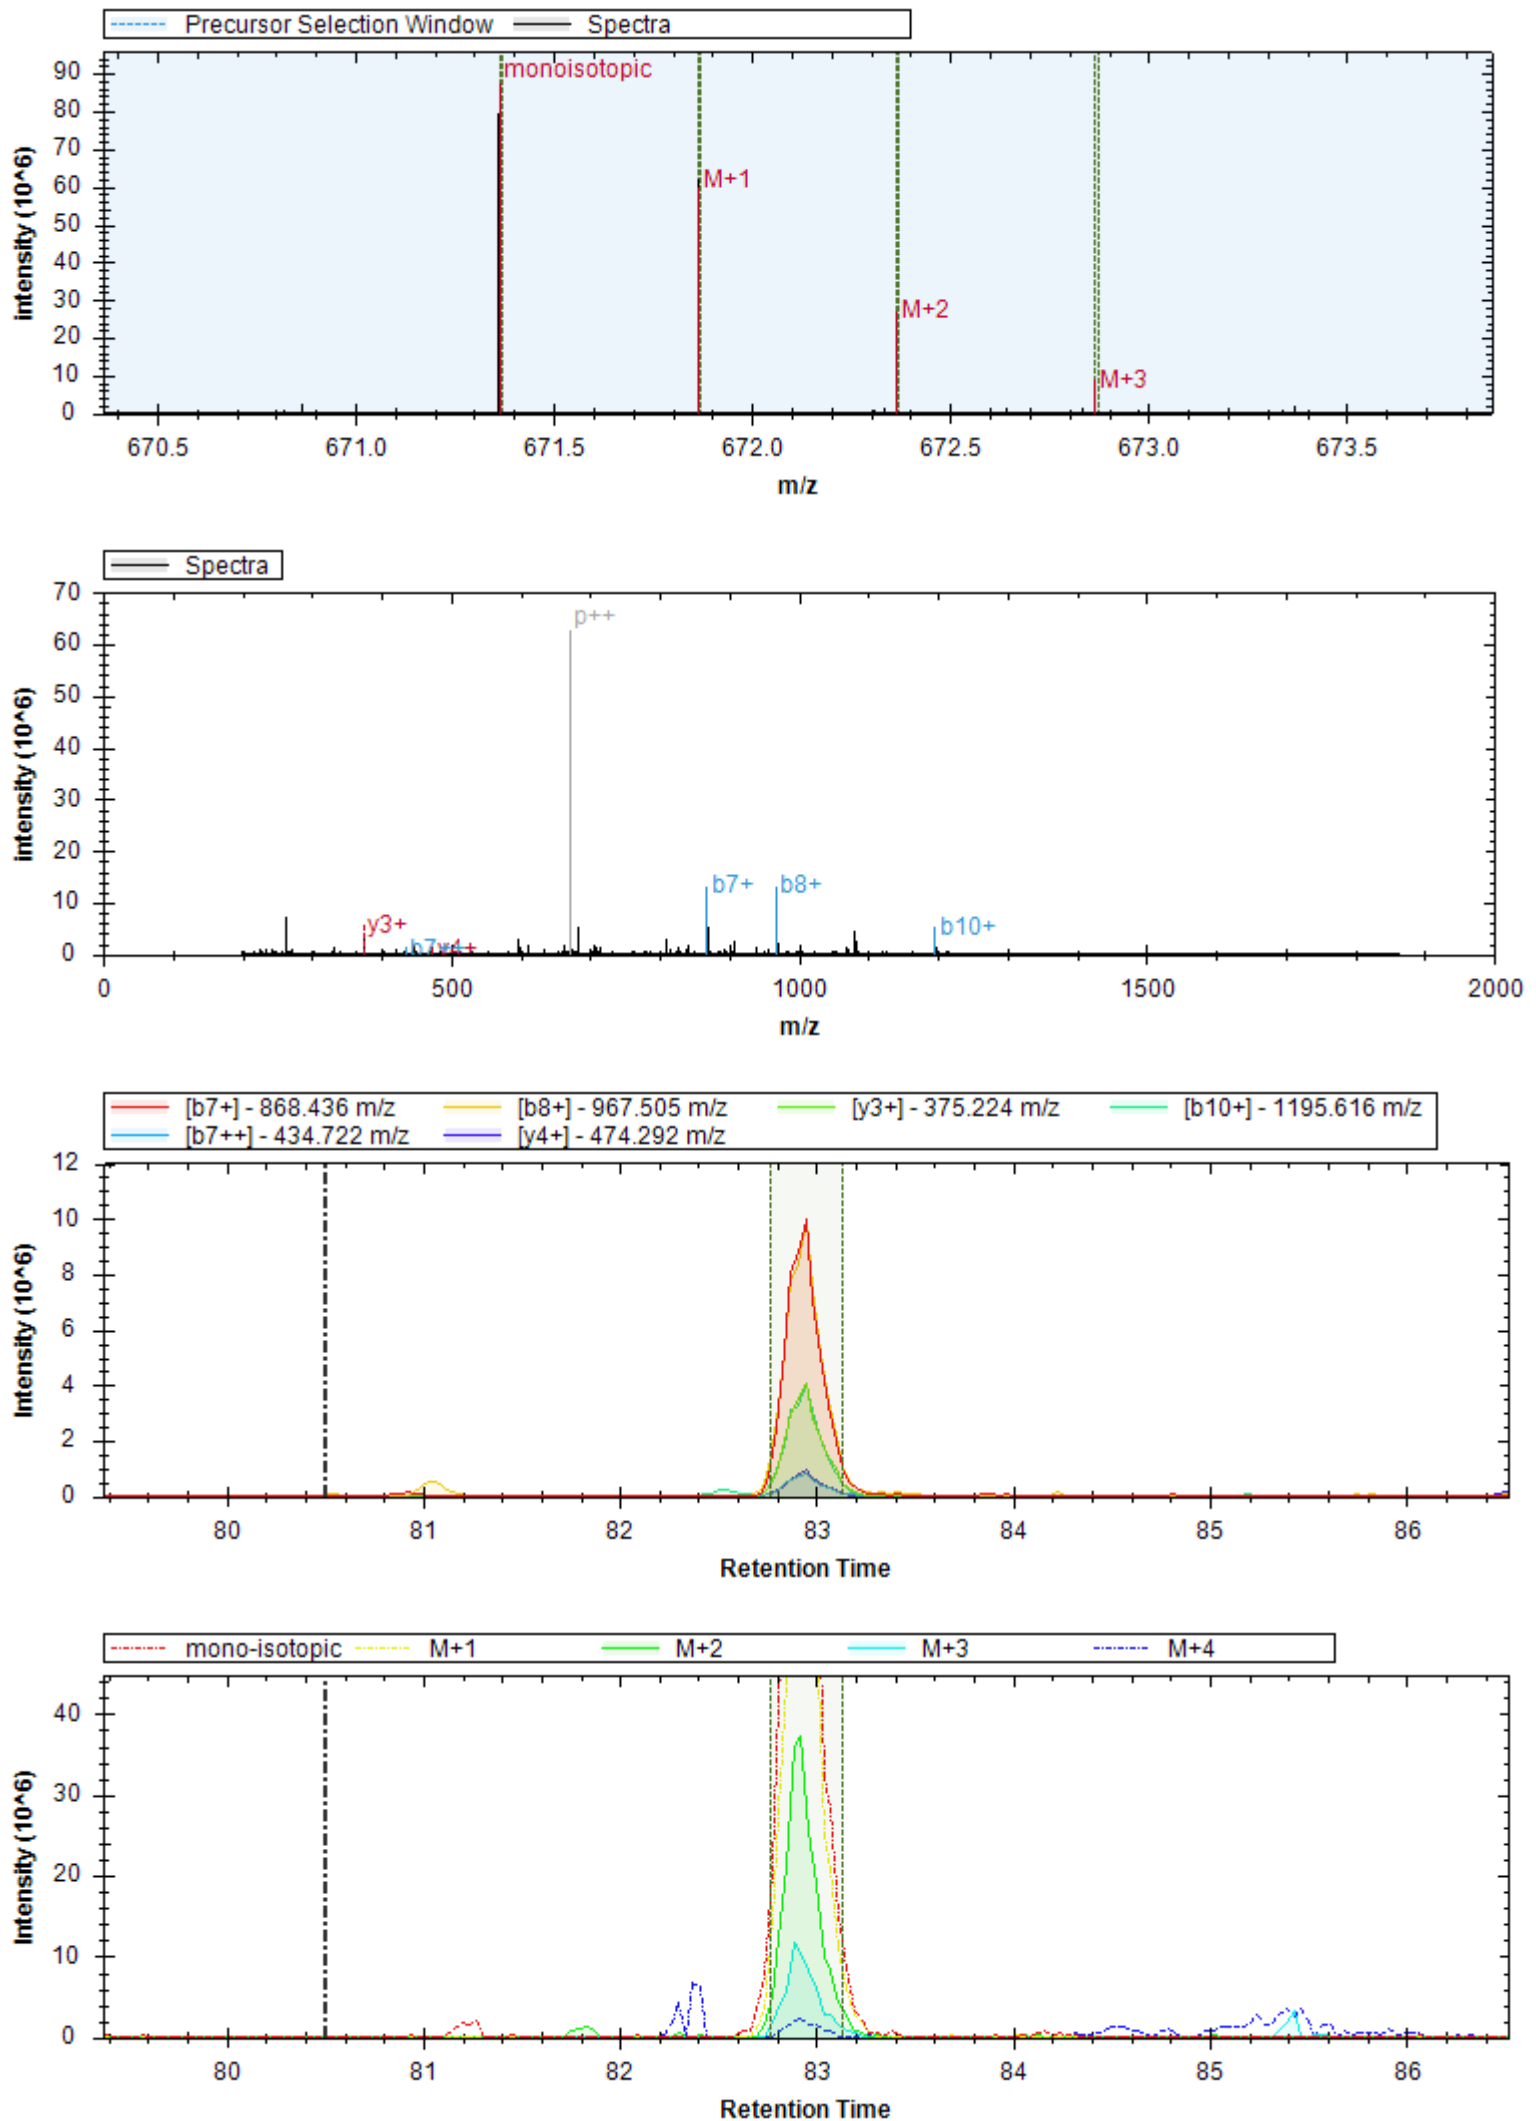

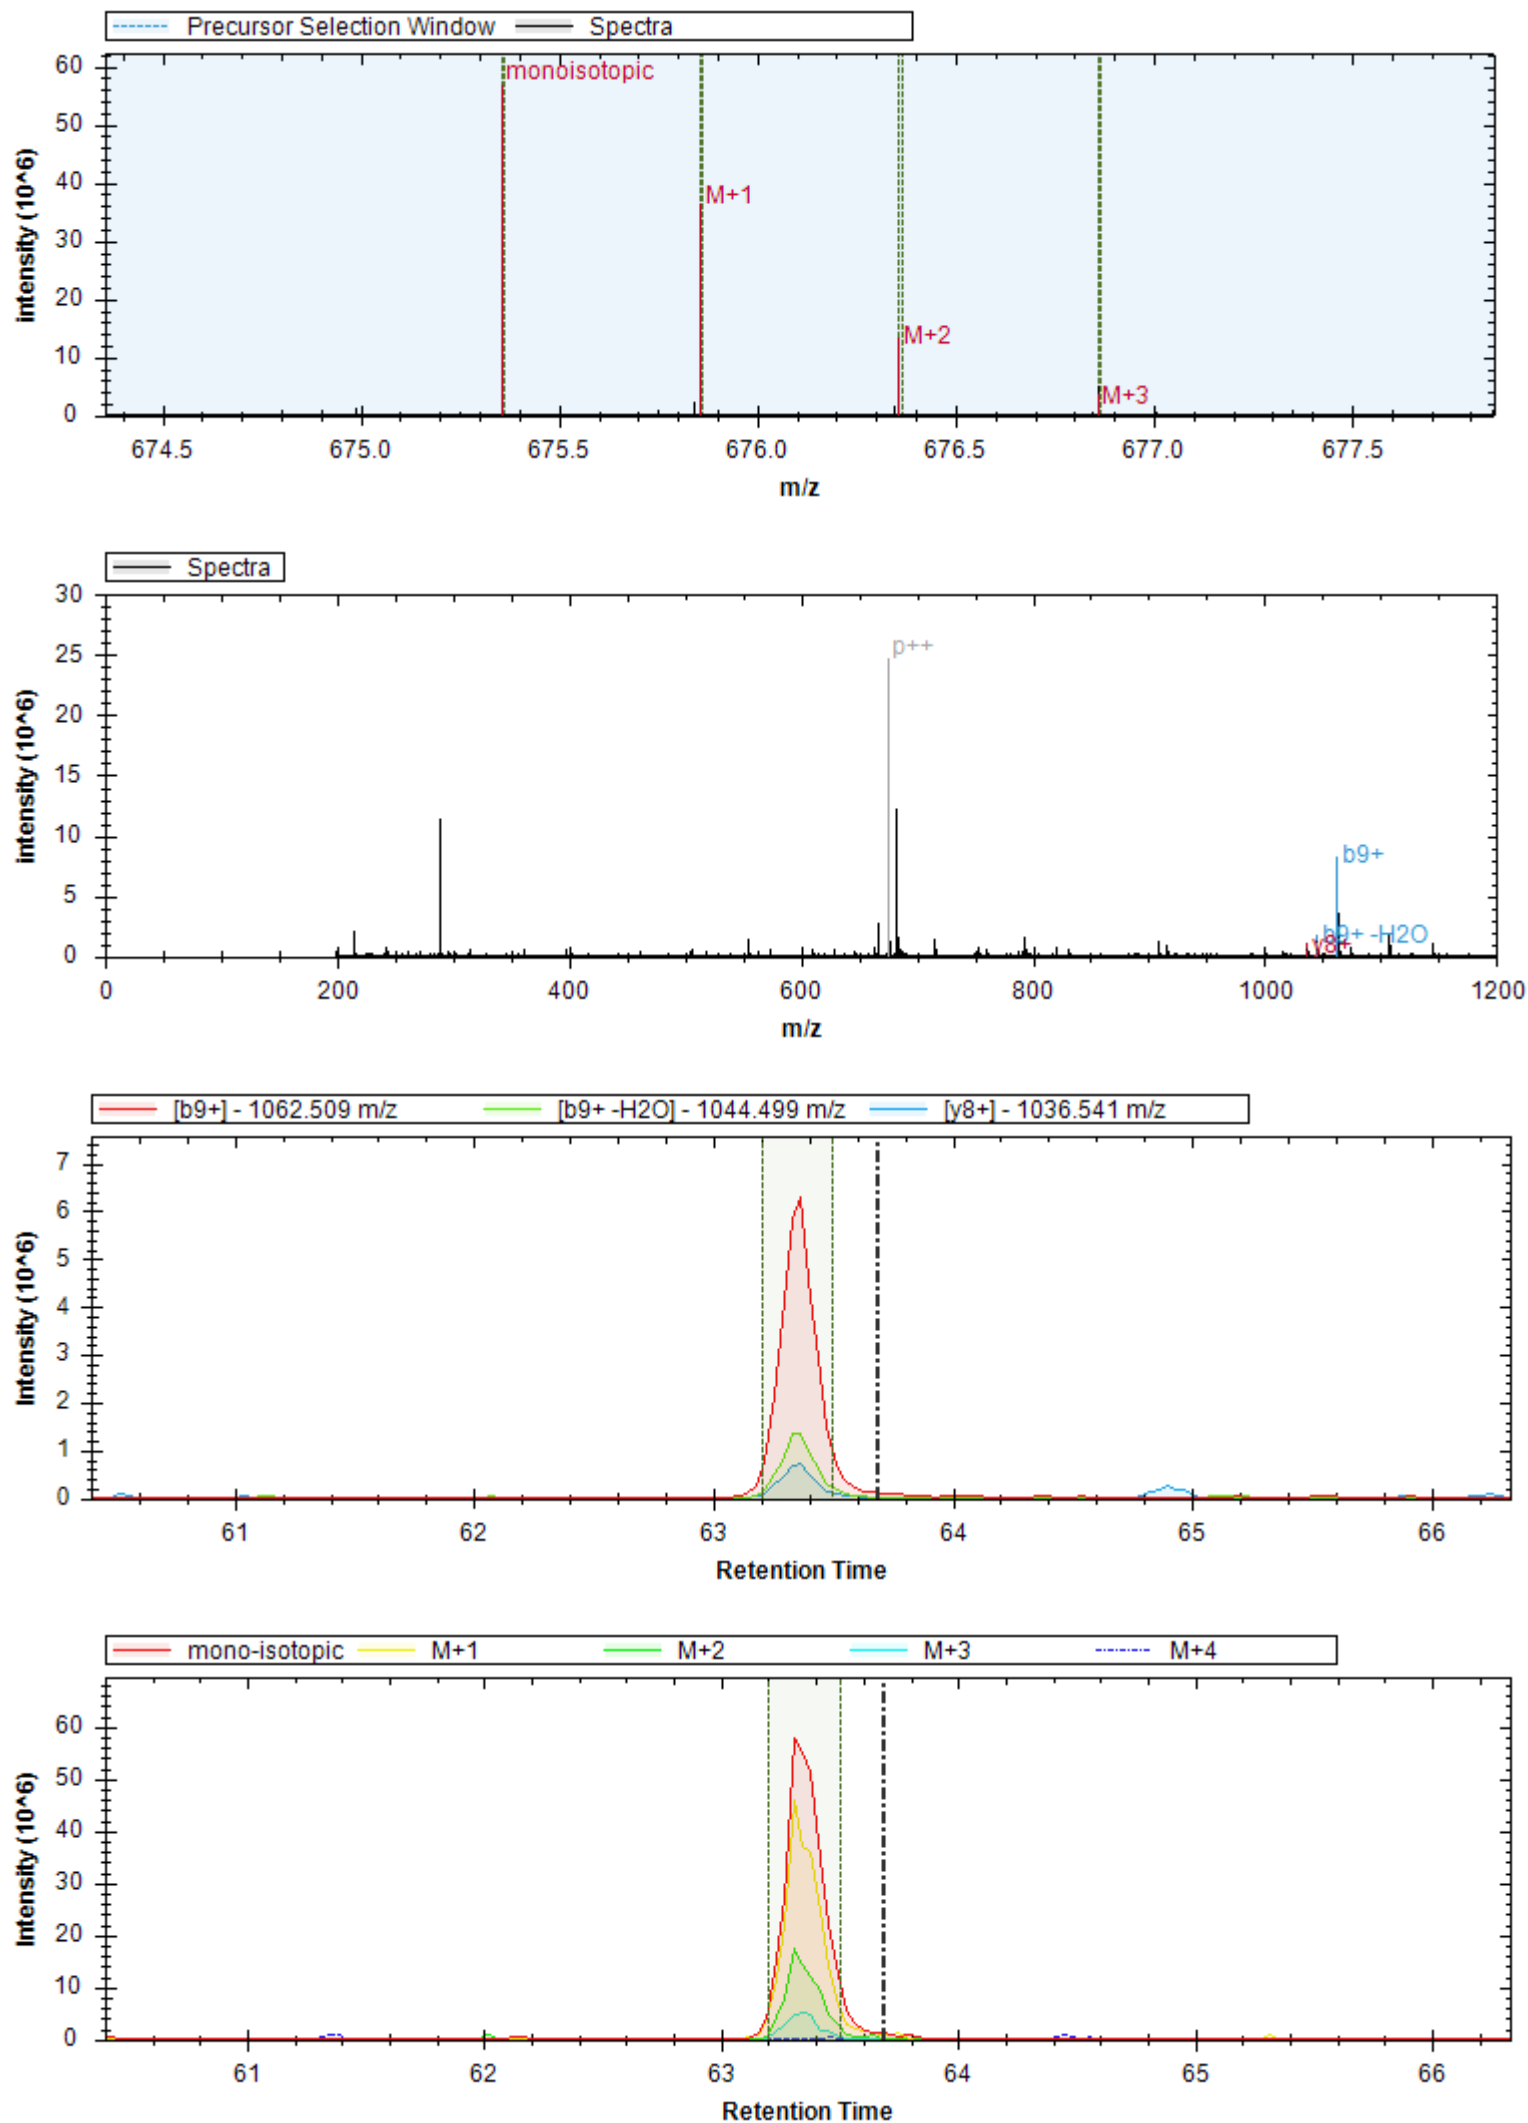

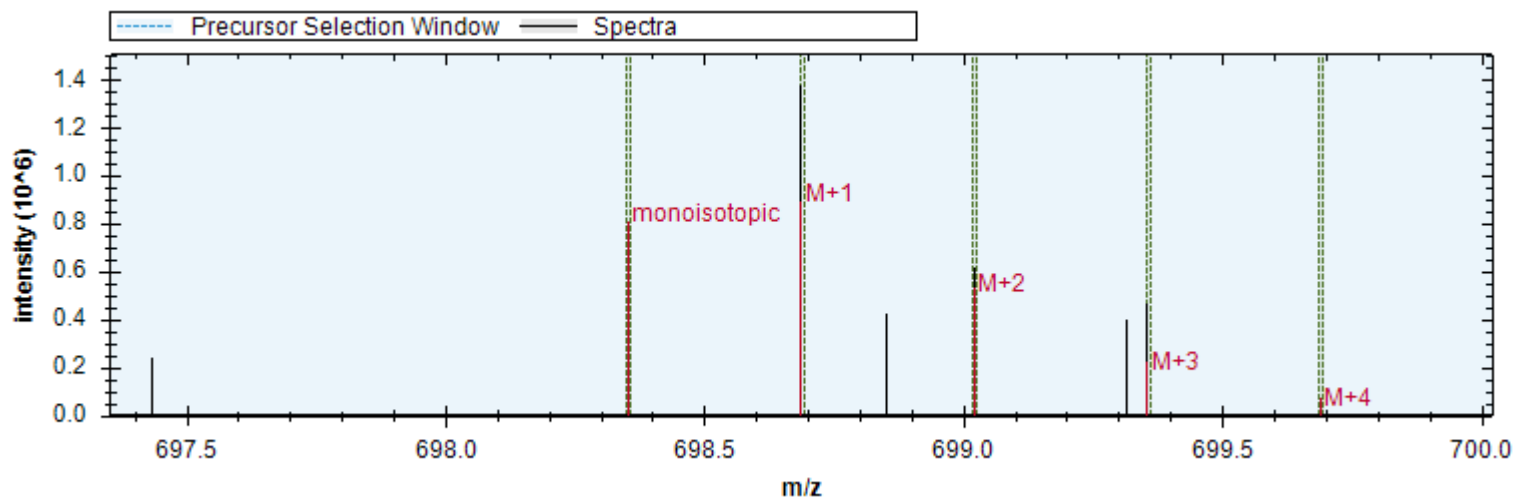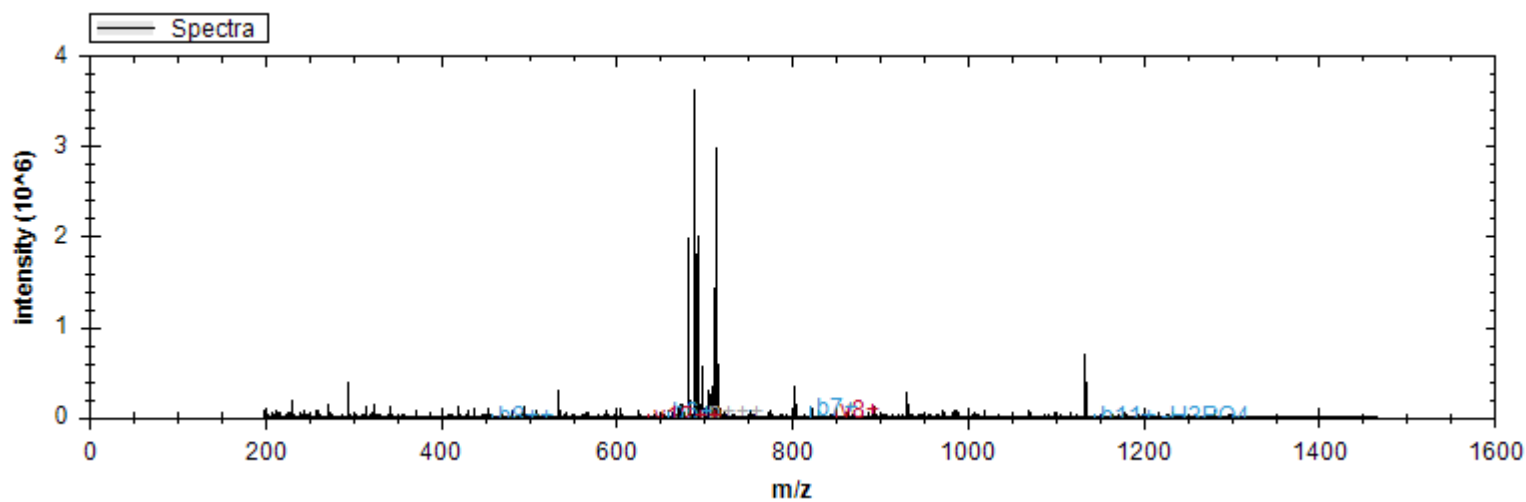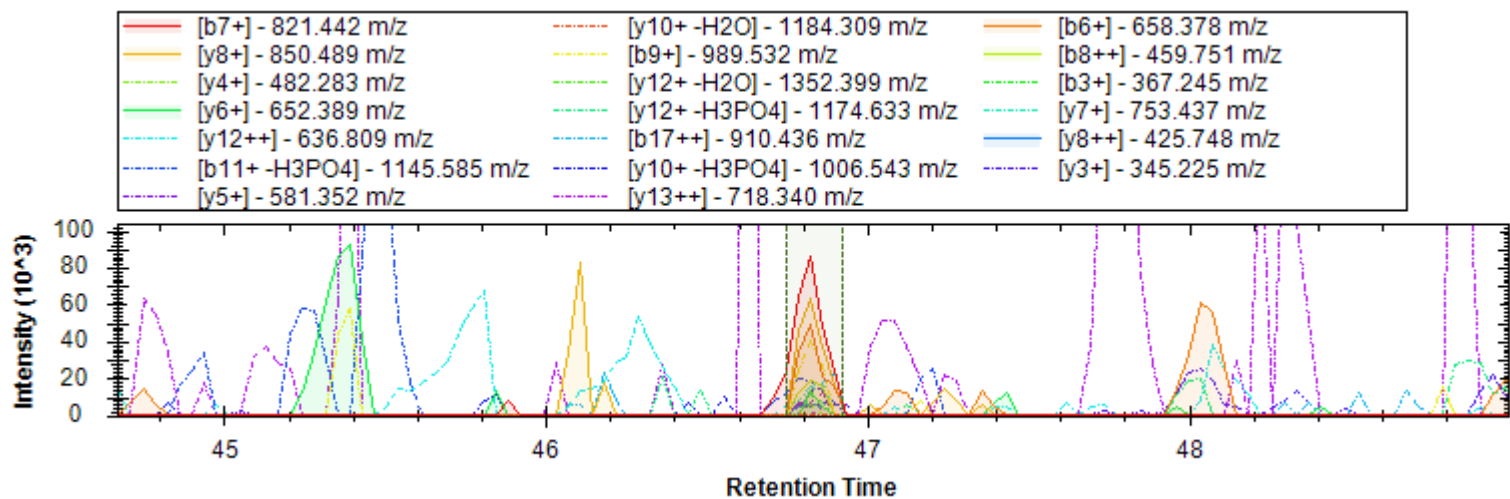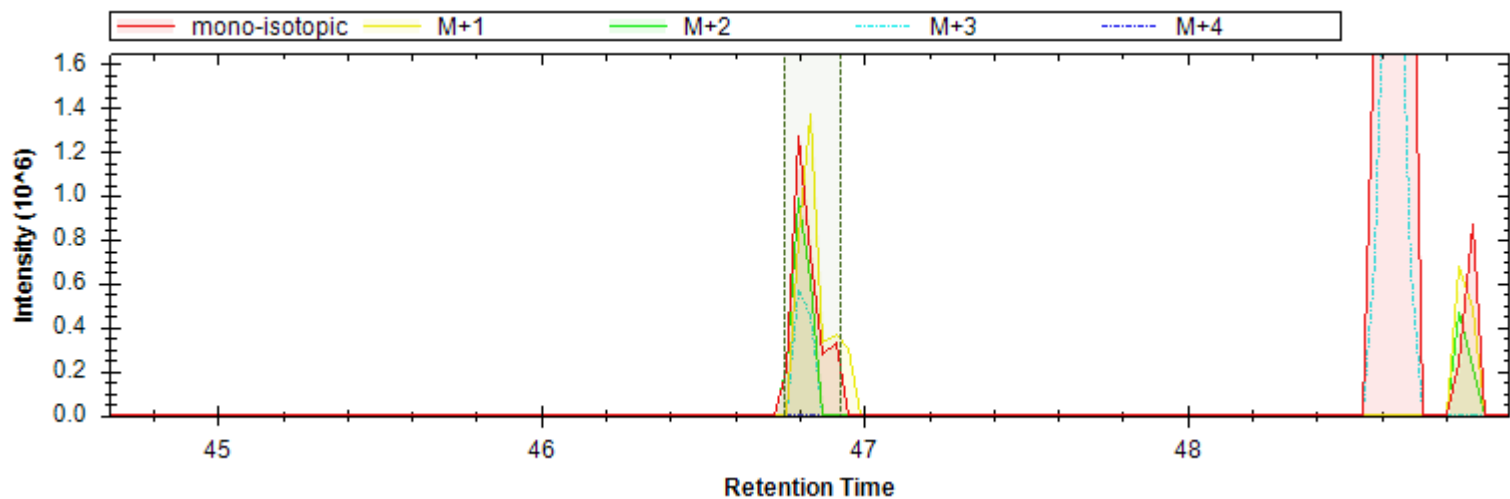

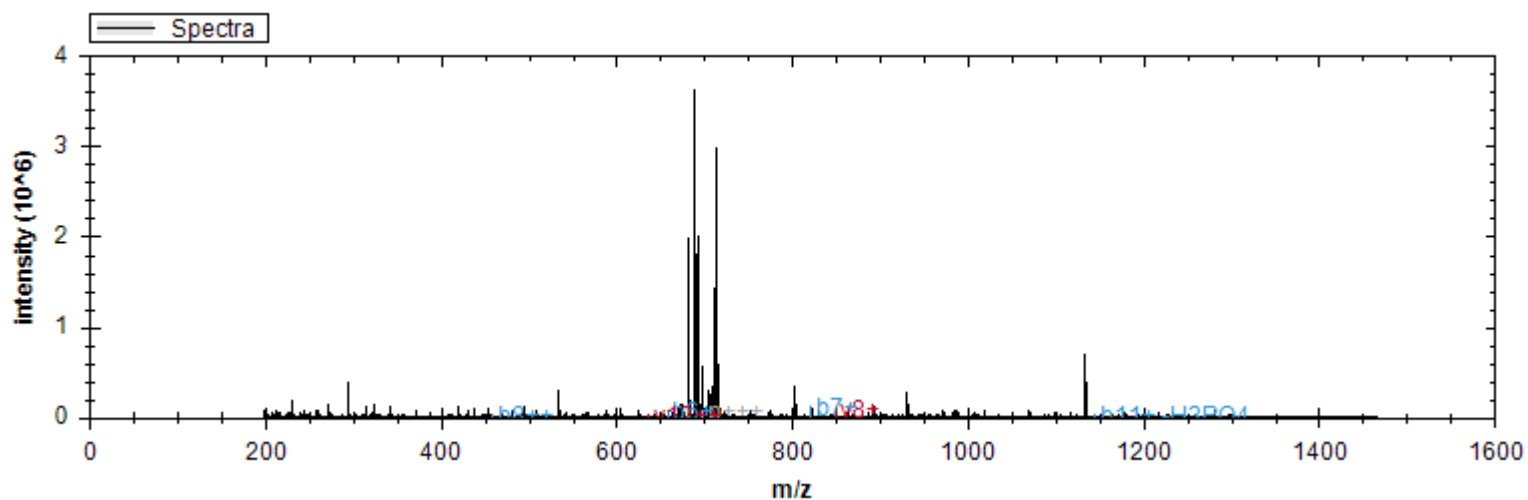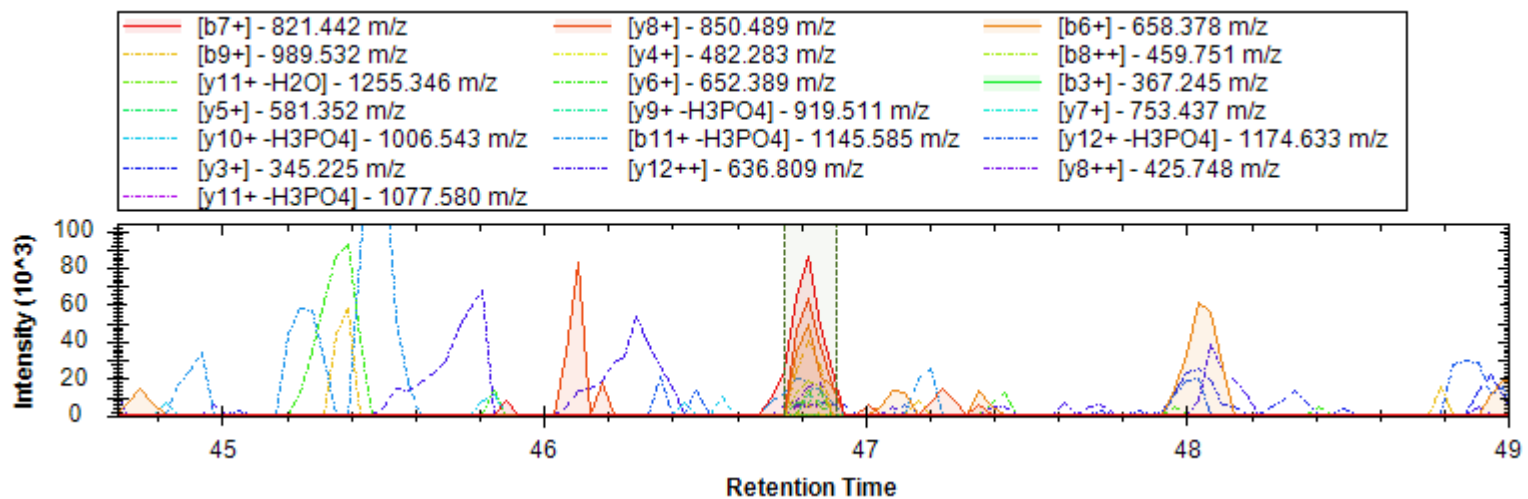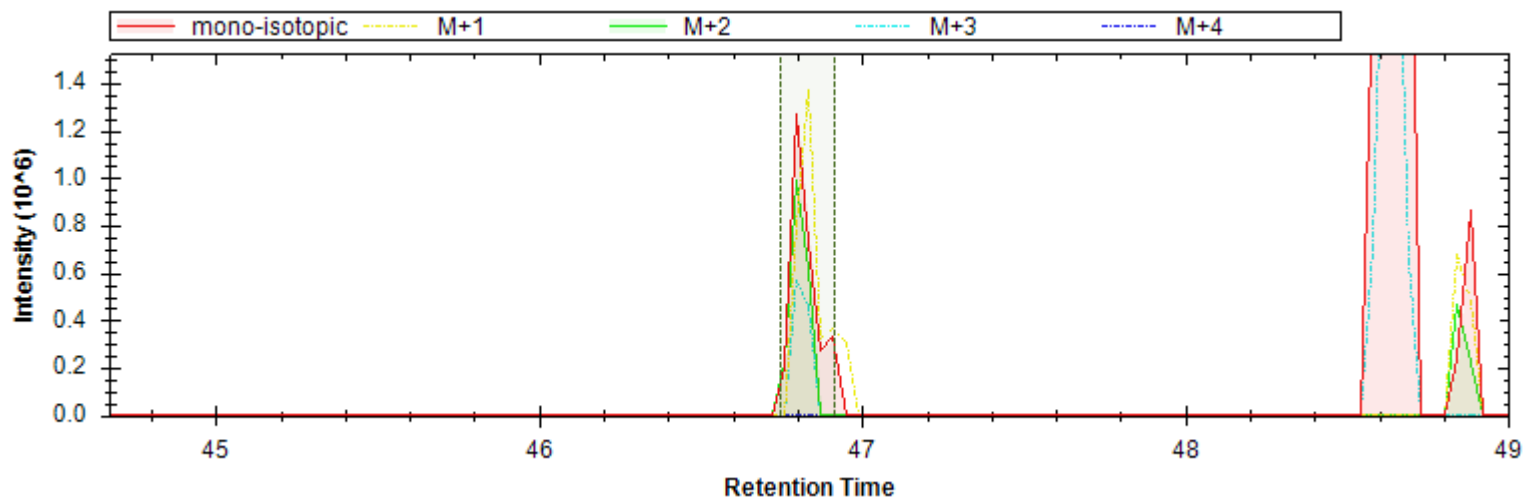

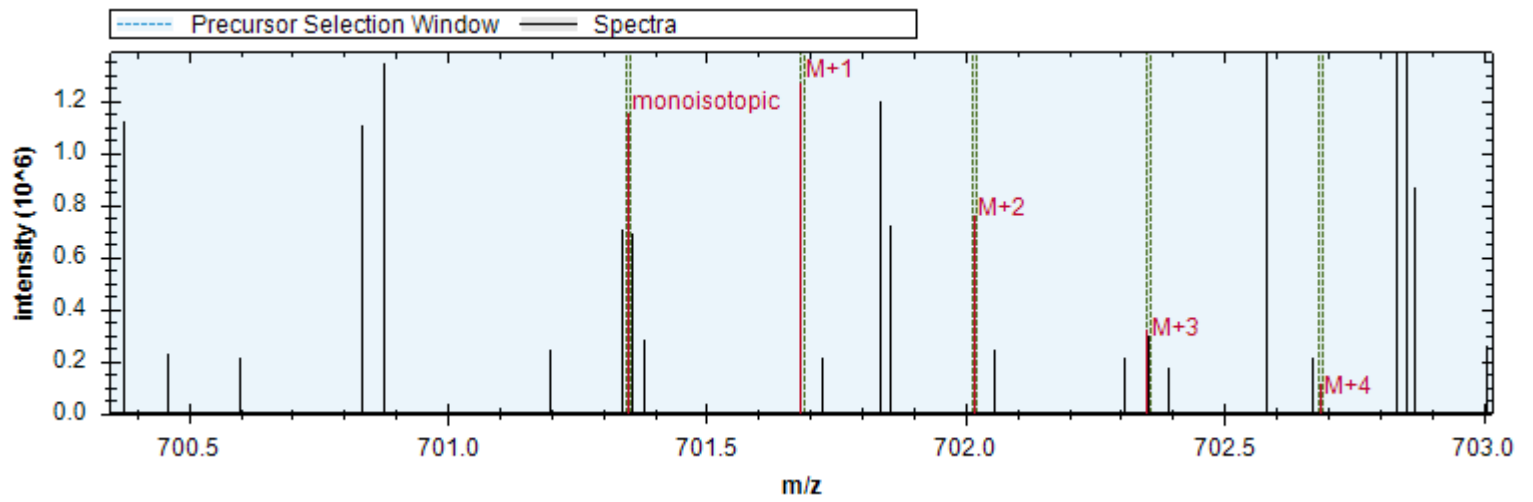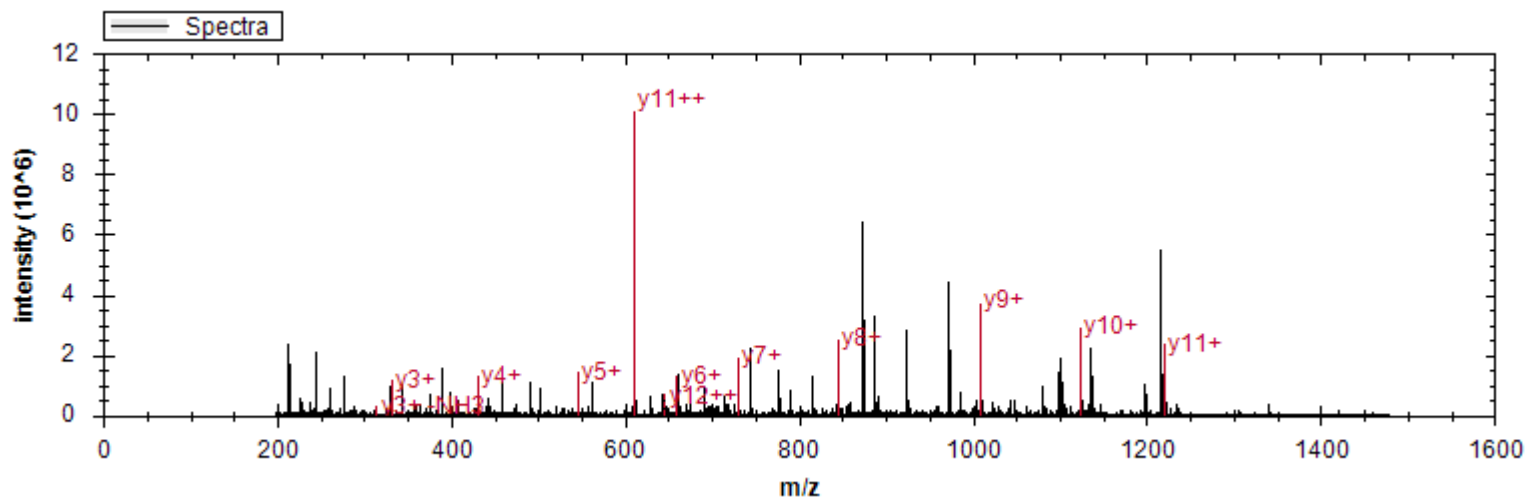

|                          |                       |                       |
|--------------------------|-----------------------|-----------------------|
| [y9+] - 1008.500 m/z     | [y11++] - 610.793 m/z | [y10+] - 1123.527 m/z |
| [y8+] - 845.436 m/z      | [y7+] - 730.409 m/z   | [y11+] - 1220.579 m/z |
| [y4+] - 431.261 m/z      | [y5+] - 546.288 m/z   | [y3+] - 332.193 m/z   |
| [y6+] - 659.372 m/z      | [y12++] - 646.312 m/z | [y13++] - 702.854 m/z |
| [y3+ -NH3] - 315.166 m/z |                       |                       |

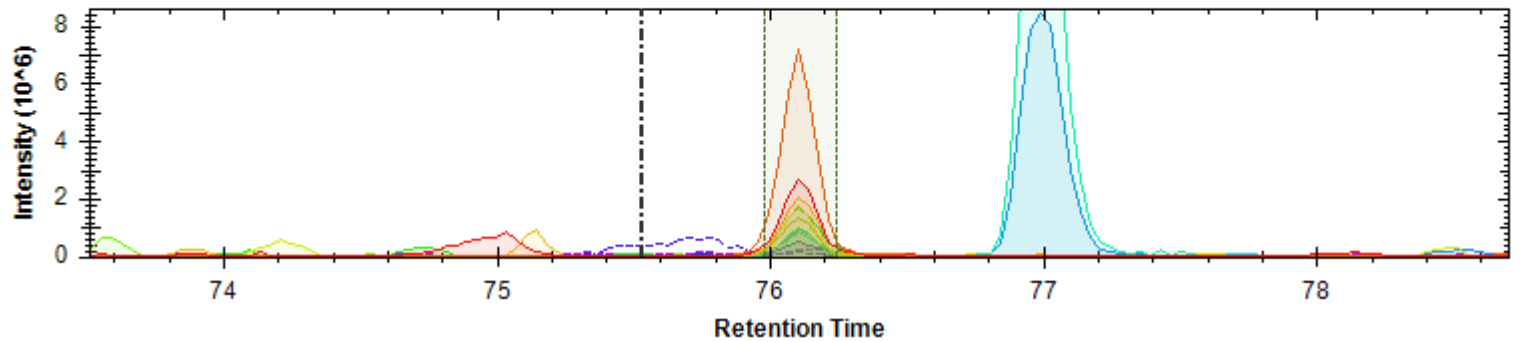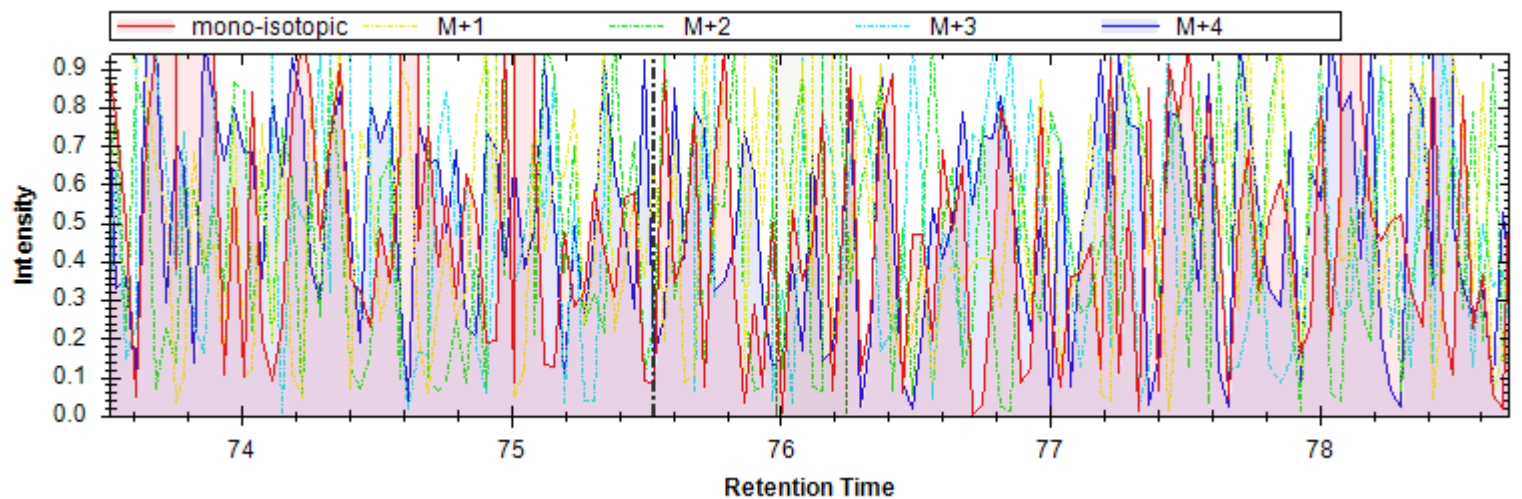

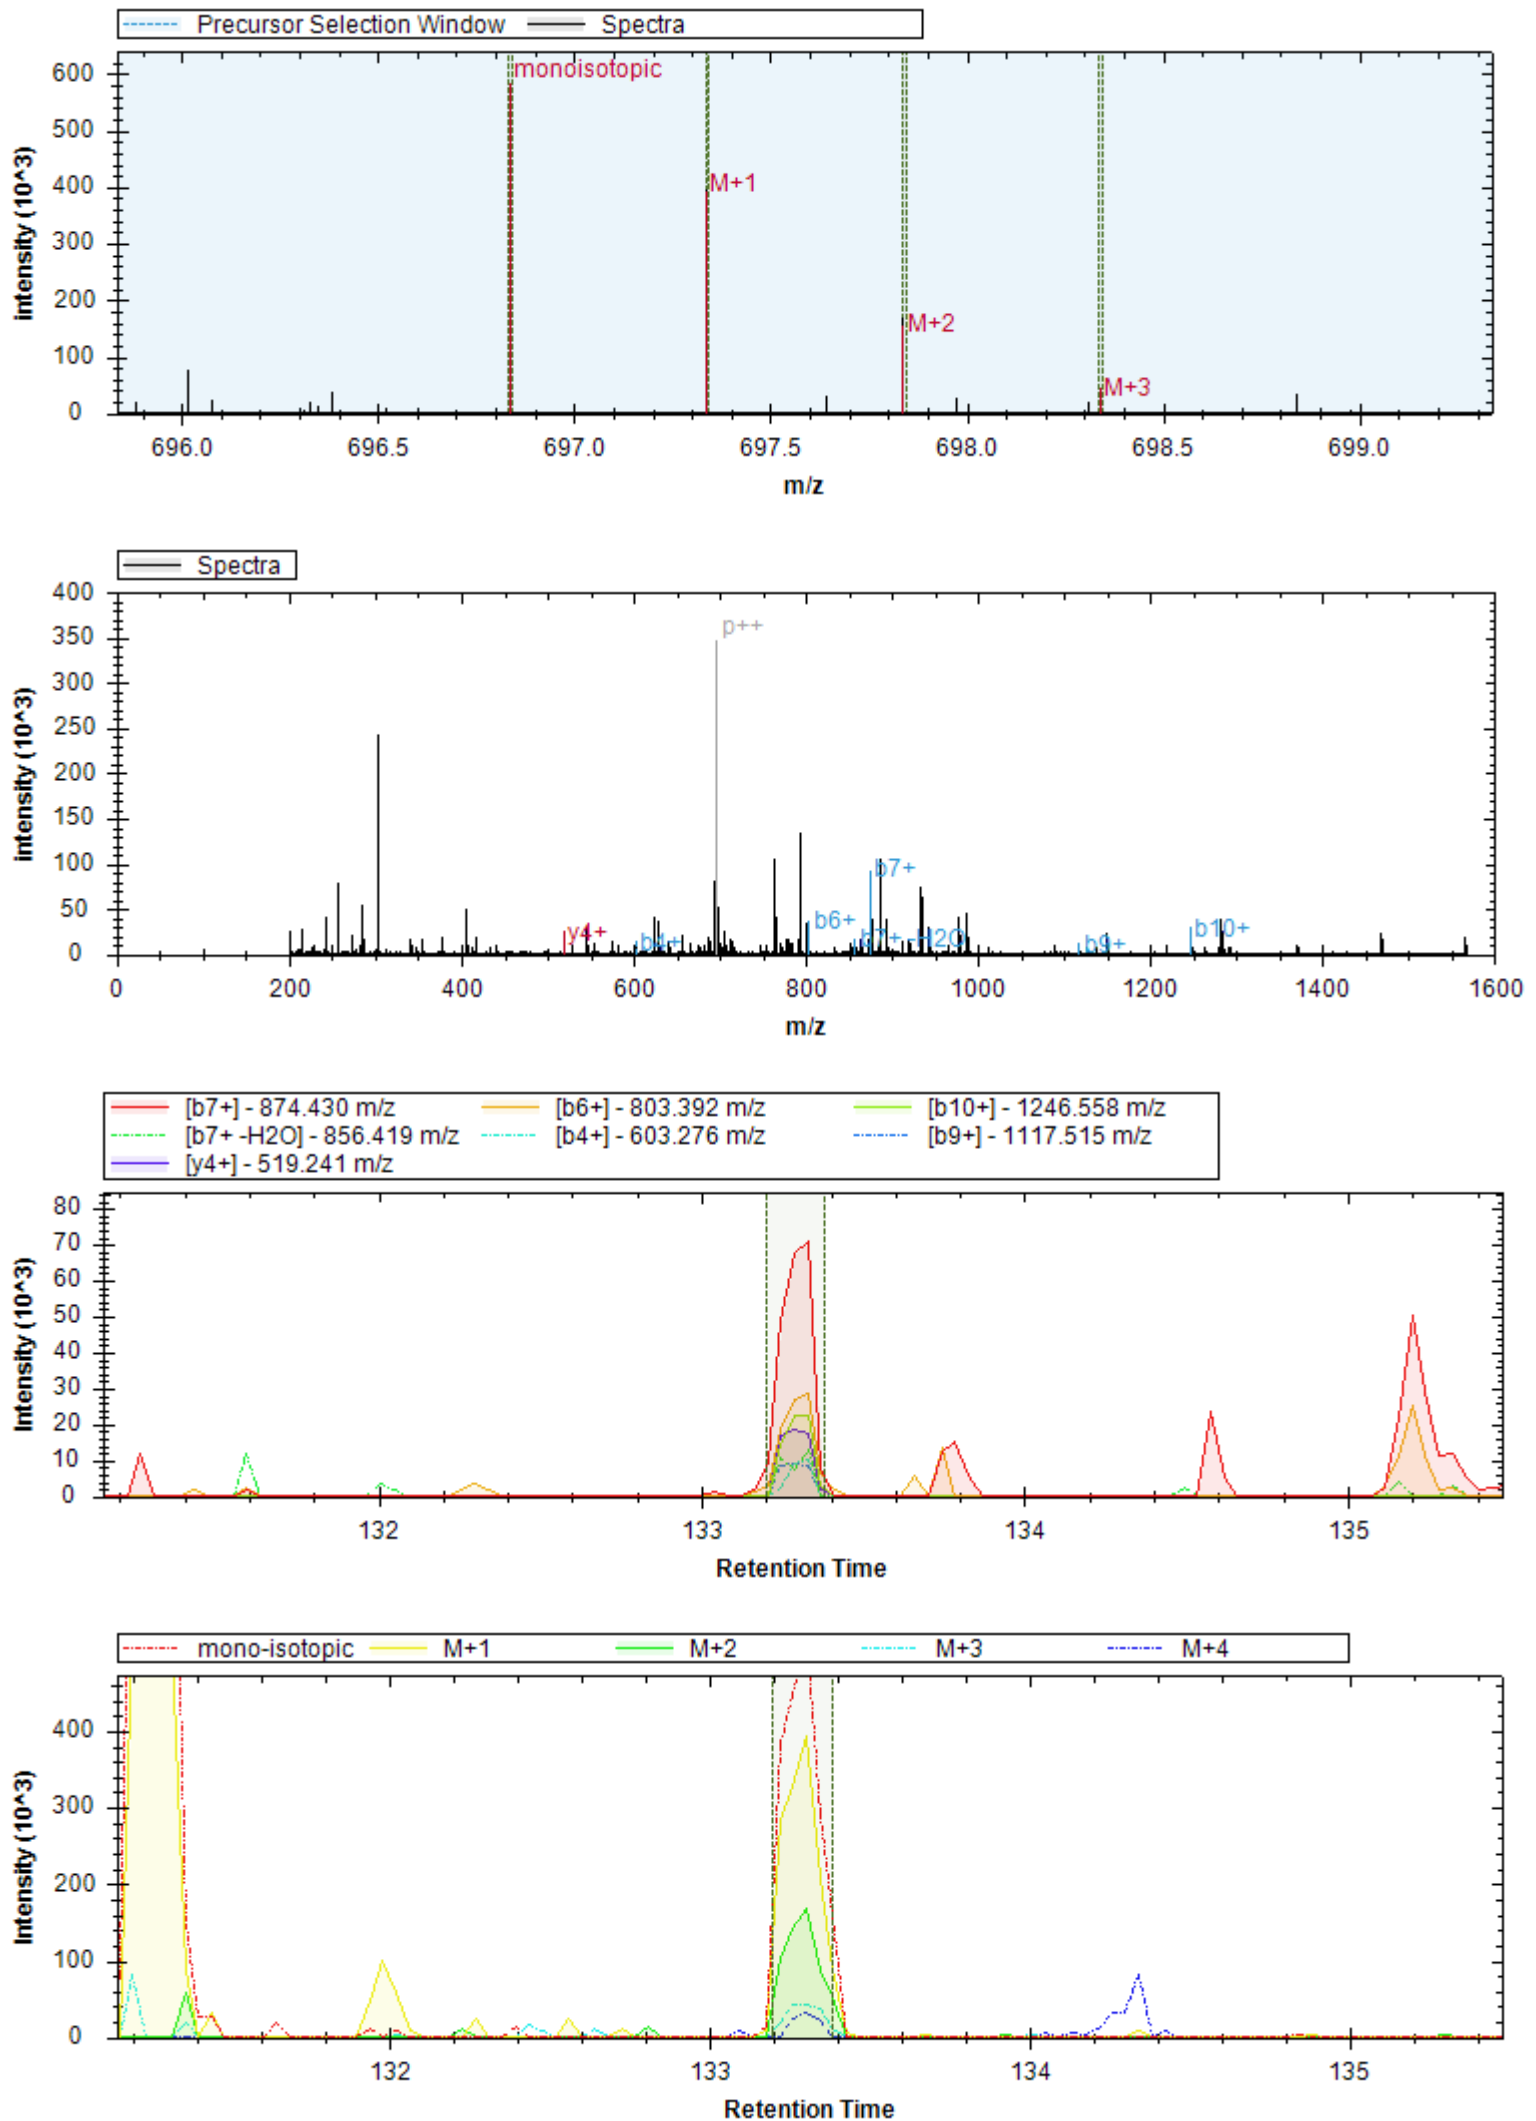

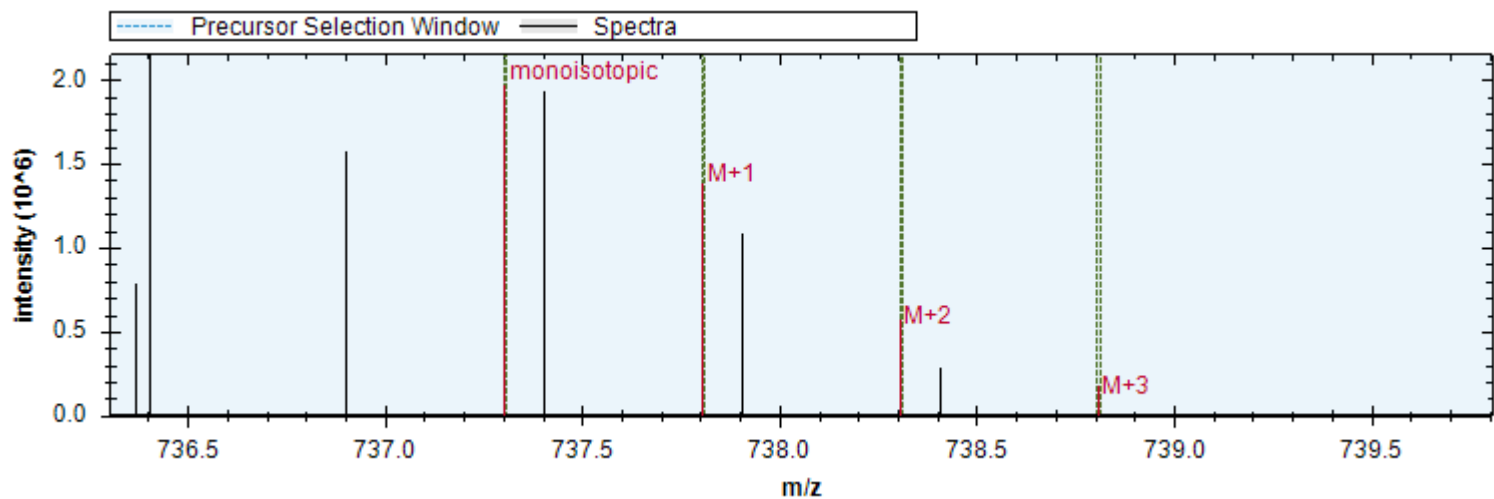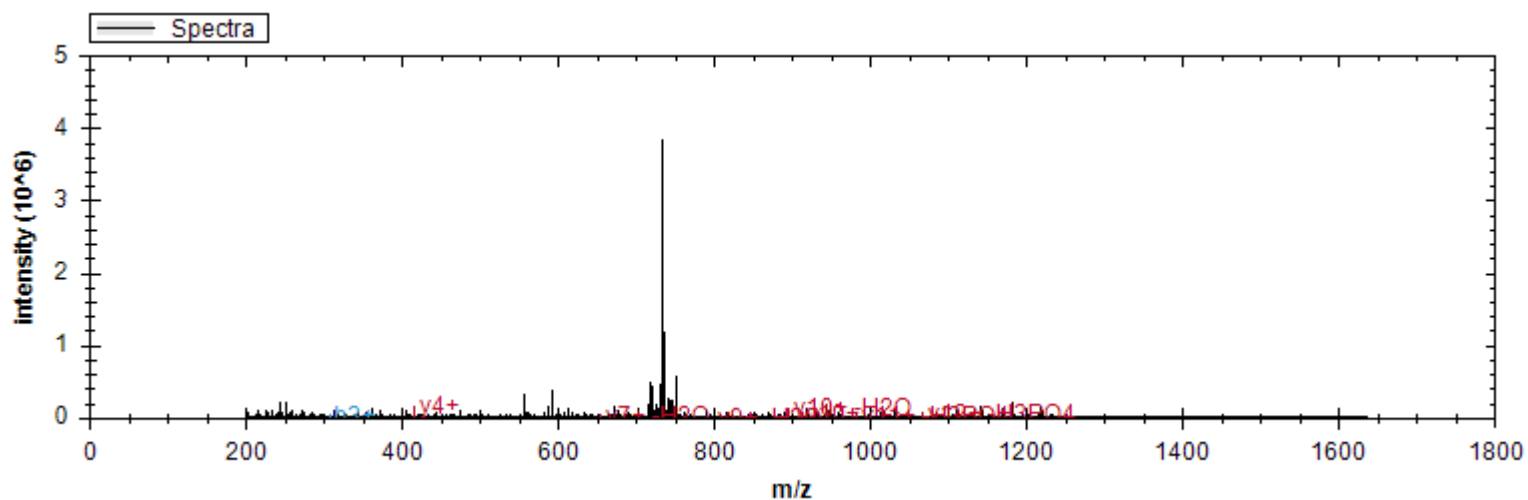

- |                              |                          |                             |
|------------------------------|--------------------------|-----------------------------|
| [y7+] - 671.347 m/z          | [y4+] - 416.225 m/z      | [y10+ -H2O] - 894.443 m/z   |
| [y10+] - 912.453 m/z         | [b3+] - 308.124 m/z      | [y11+ -H3PO4] - 981.475 m/z |
| [y12+ -H3PO4] - 1068.507 m/z | [y9+ -H2O] - 797.390 m/z | [b5+ -H3PO4] - 464.178 m/z  |
| [b5+ -H2O] - 641.944 m/z     | [b4+ -H2O] - 377.146 m/z | [y5+] - 517.273 m/z         |
| [y7+ -H2O] - 653.337 m/z     | [b8+ -H2O] - 883.050 m/z | [y6+] - 574.294 m/z         |
| [y8+ -H2O] - 740.369 m/z     | [y4+ -NH3] - 399.199 m/z | [y12+] - 1166.484 m/z       |
| [b4+] - 395.156 m/z          |                          |                             |

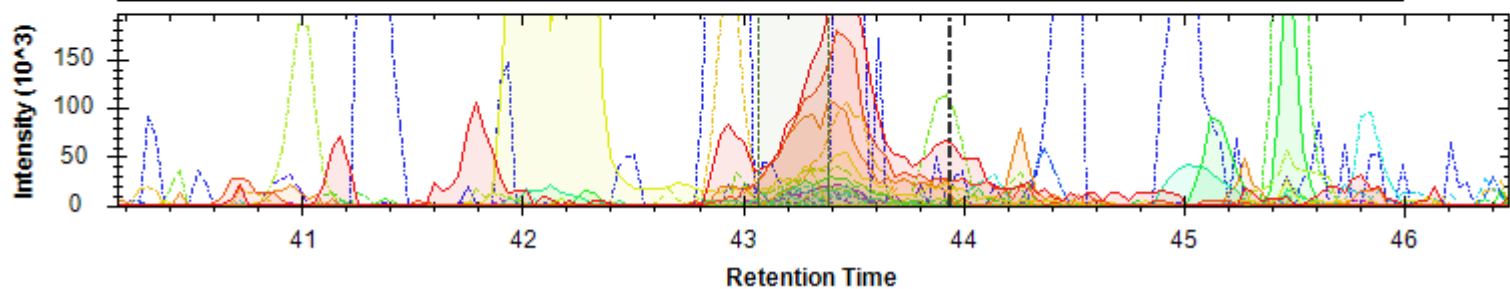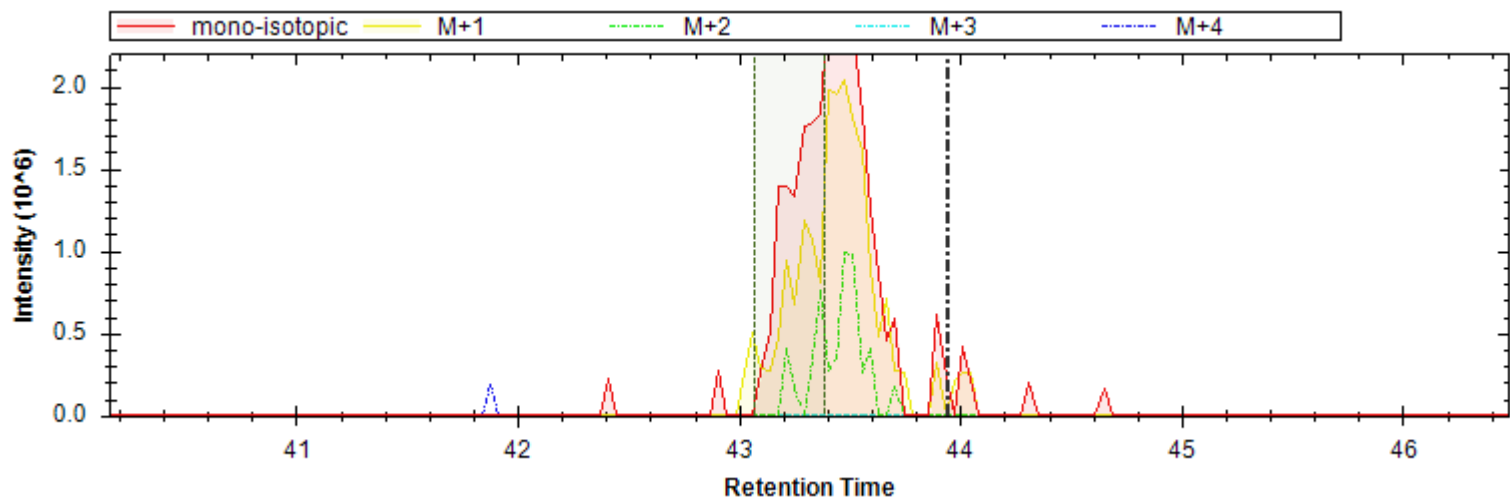

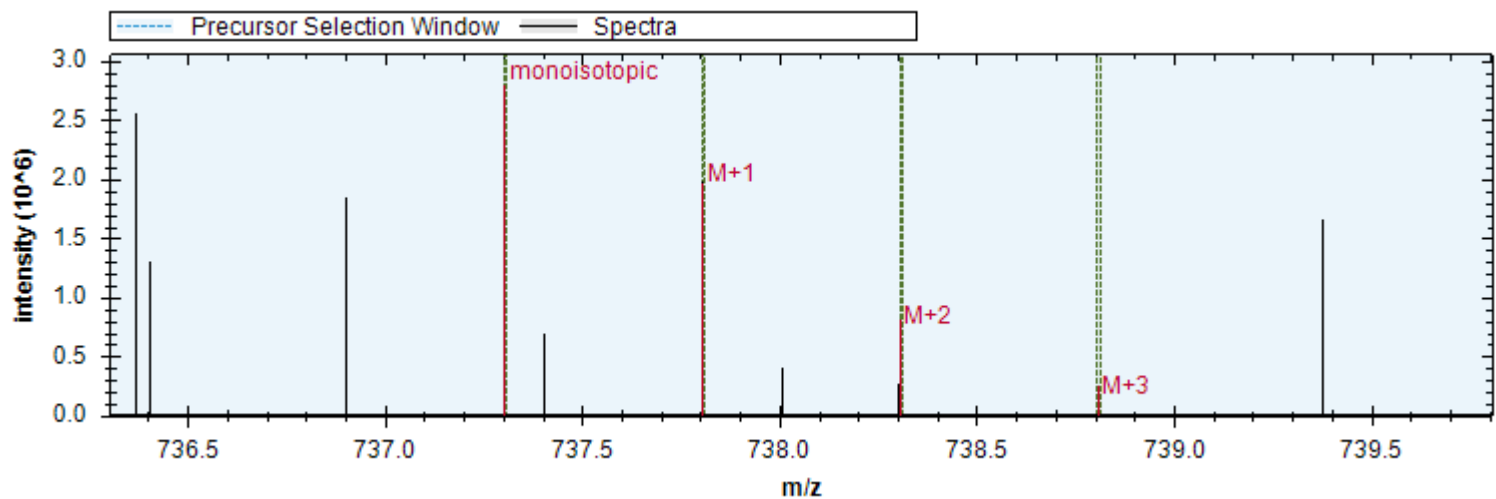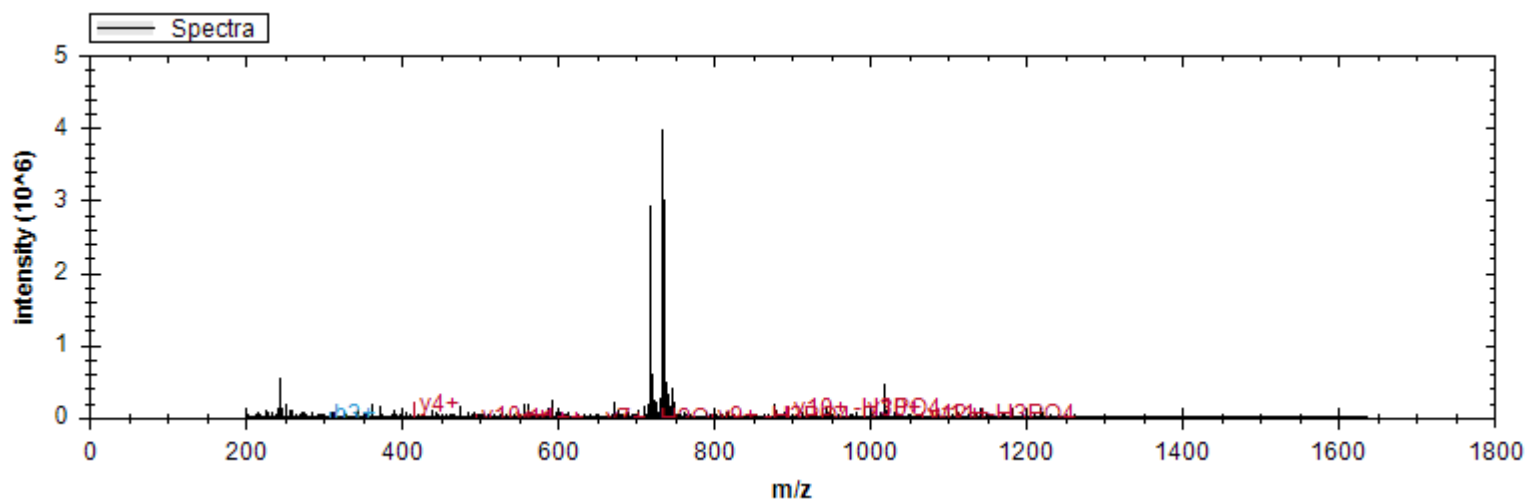

- |                             |                              |                            |
|-----------------------------|------------------------------|----------------------------|
| [y7+] - 671.347 m/z         | [y10+ -H3PO4] - 894.443 m/z  | [y4+] - 416.225 m/z        |
| [y10+] - 992.420 m/z        | [y10++] - 496.714 m/z        | [b3+] - 308.124 m/z        |
| [y11+ -H3PO4] - 981.475 m/z | [y12+ -H3PO4] - 1068.507 m/z | [y9+ -H3PO4] - 797.390 m/z |
| [y11++] - 540.230 m/z       | [y11+] - 1079.452 m/z        | [y7+ -H2O] - 653.337 m/z   |
| [y8+ -H3PO4] - 740.369 m/z  | [y12+] - 1166.484 m/z        | [y10+ -H2O] - 1072.209 m/z |
| [b4+ -H2O] - 377.146 m/z    | [y5+] - 517.273 m/z          | [y10+ -NH3] - 975.393 m/z  |
| [b4+] - 395.156 m/z         |                              |                            |

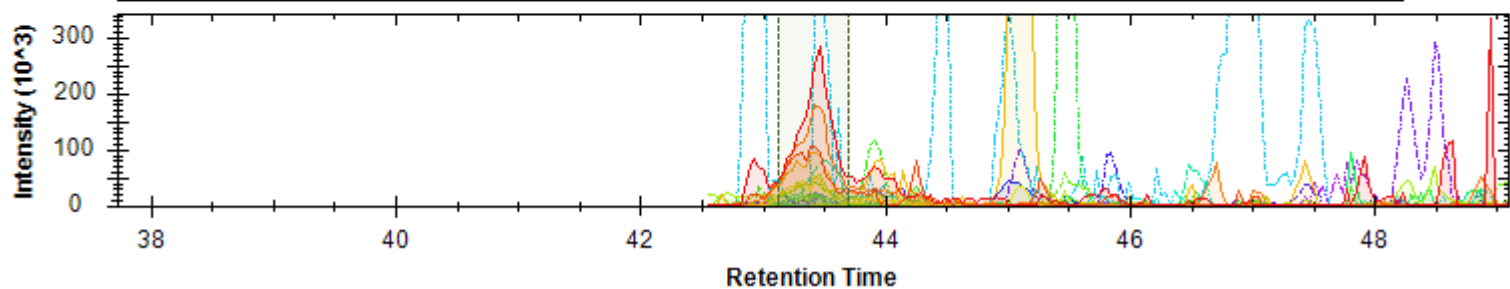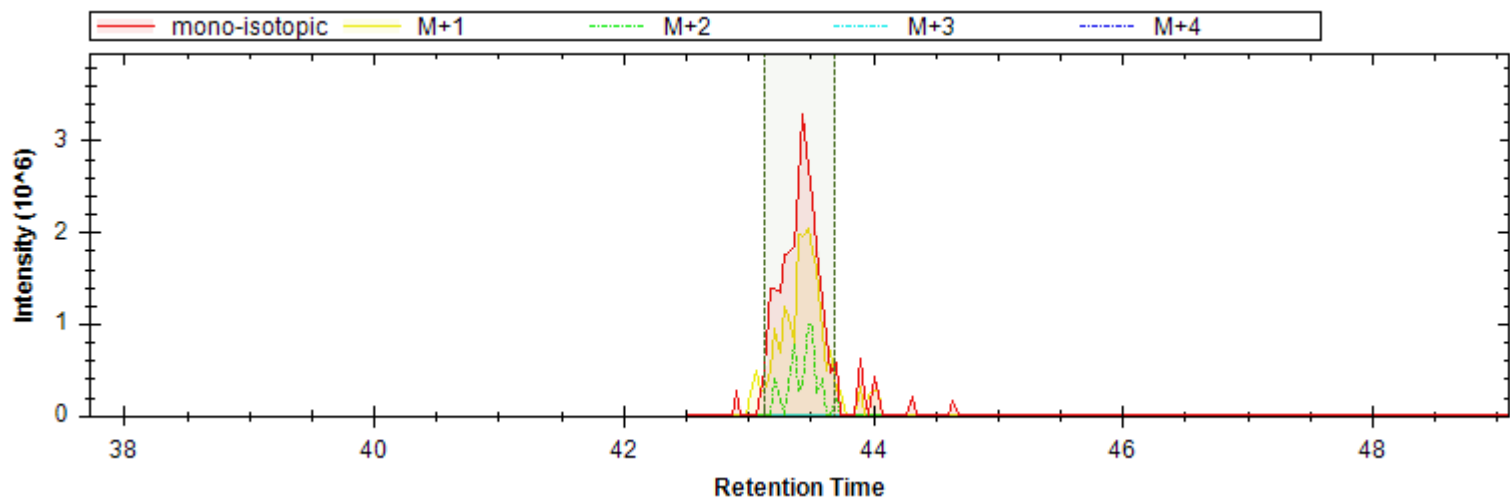



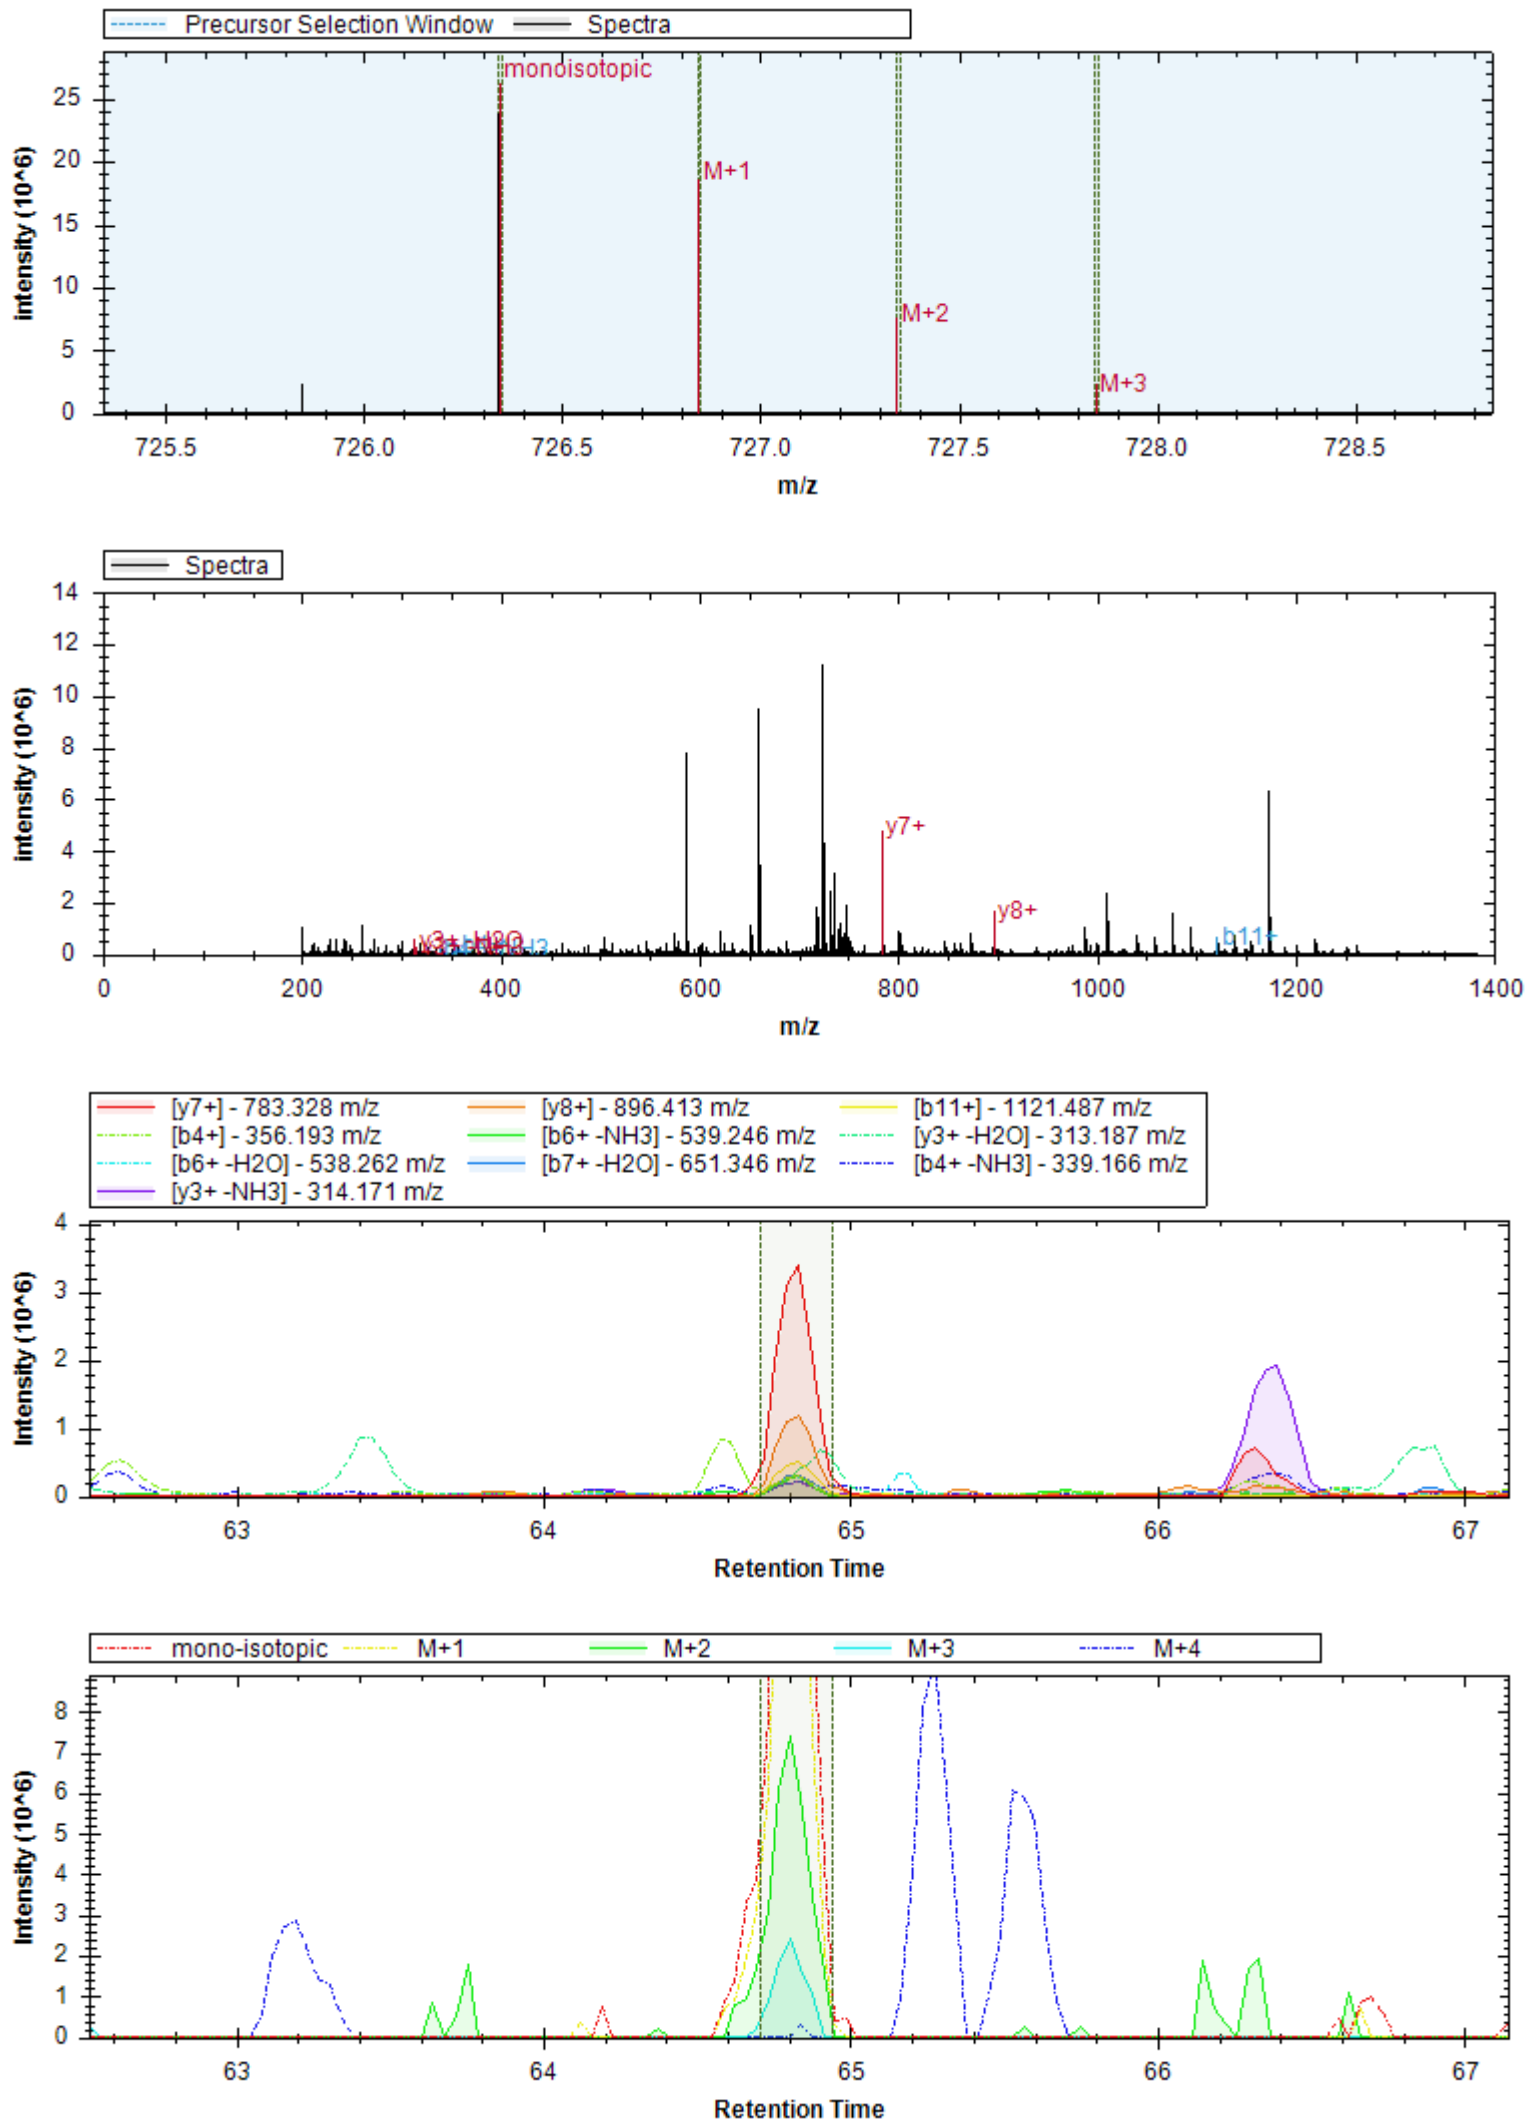

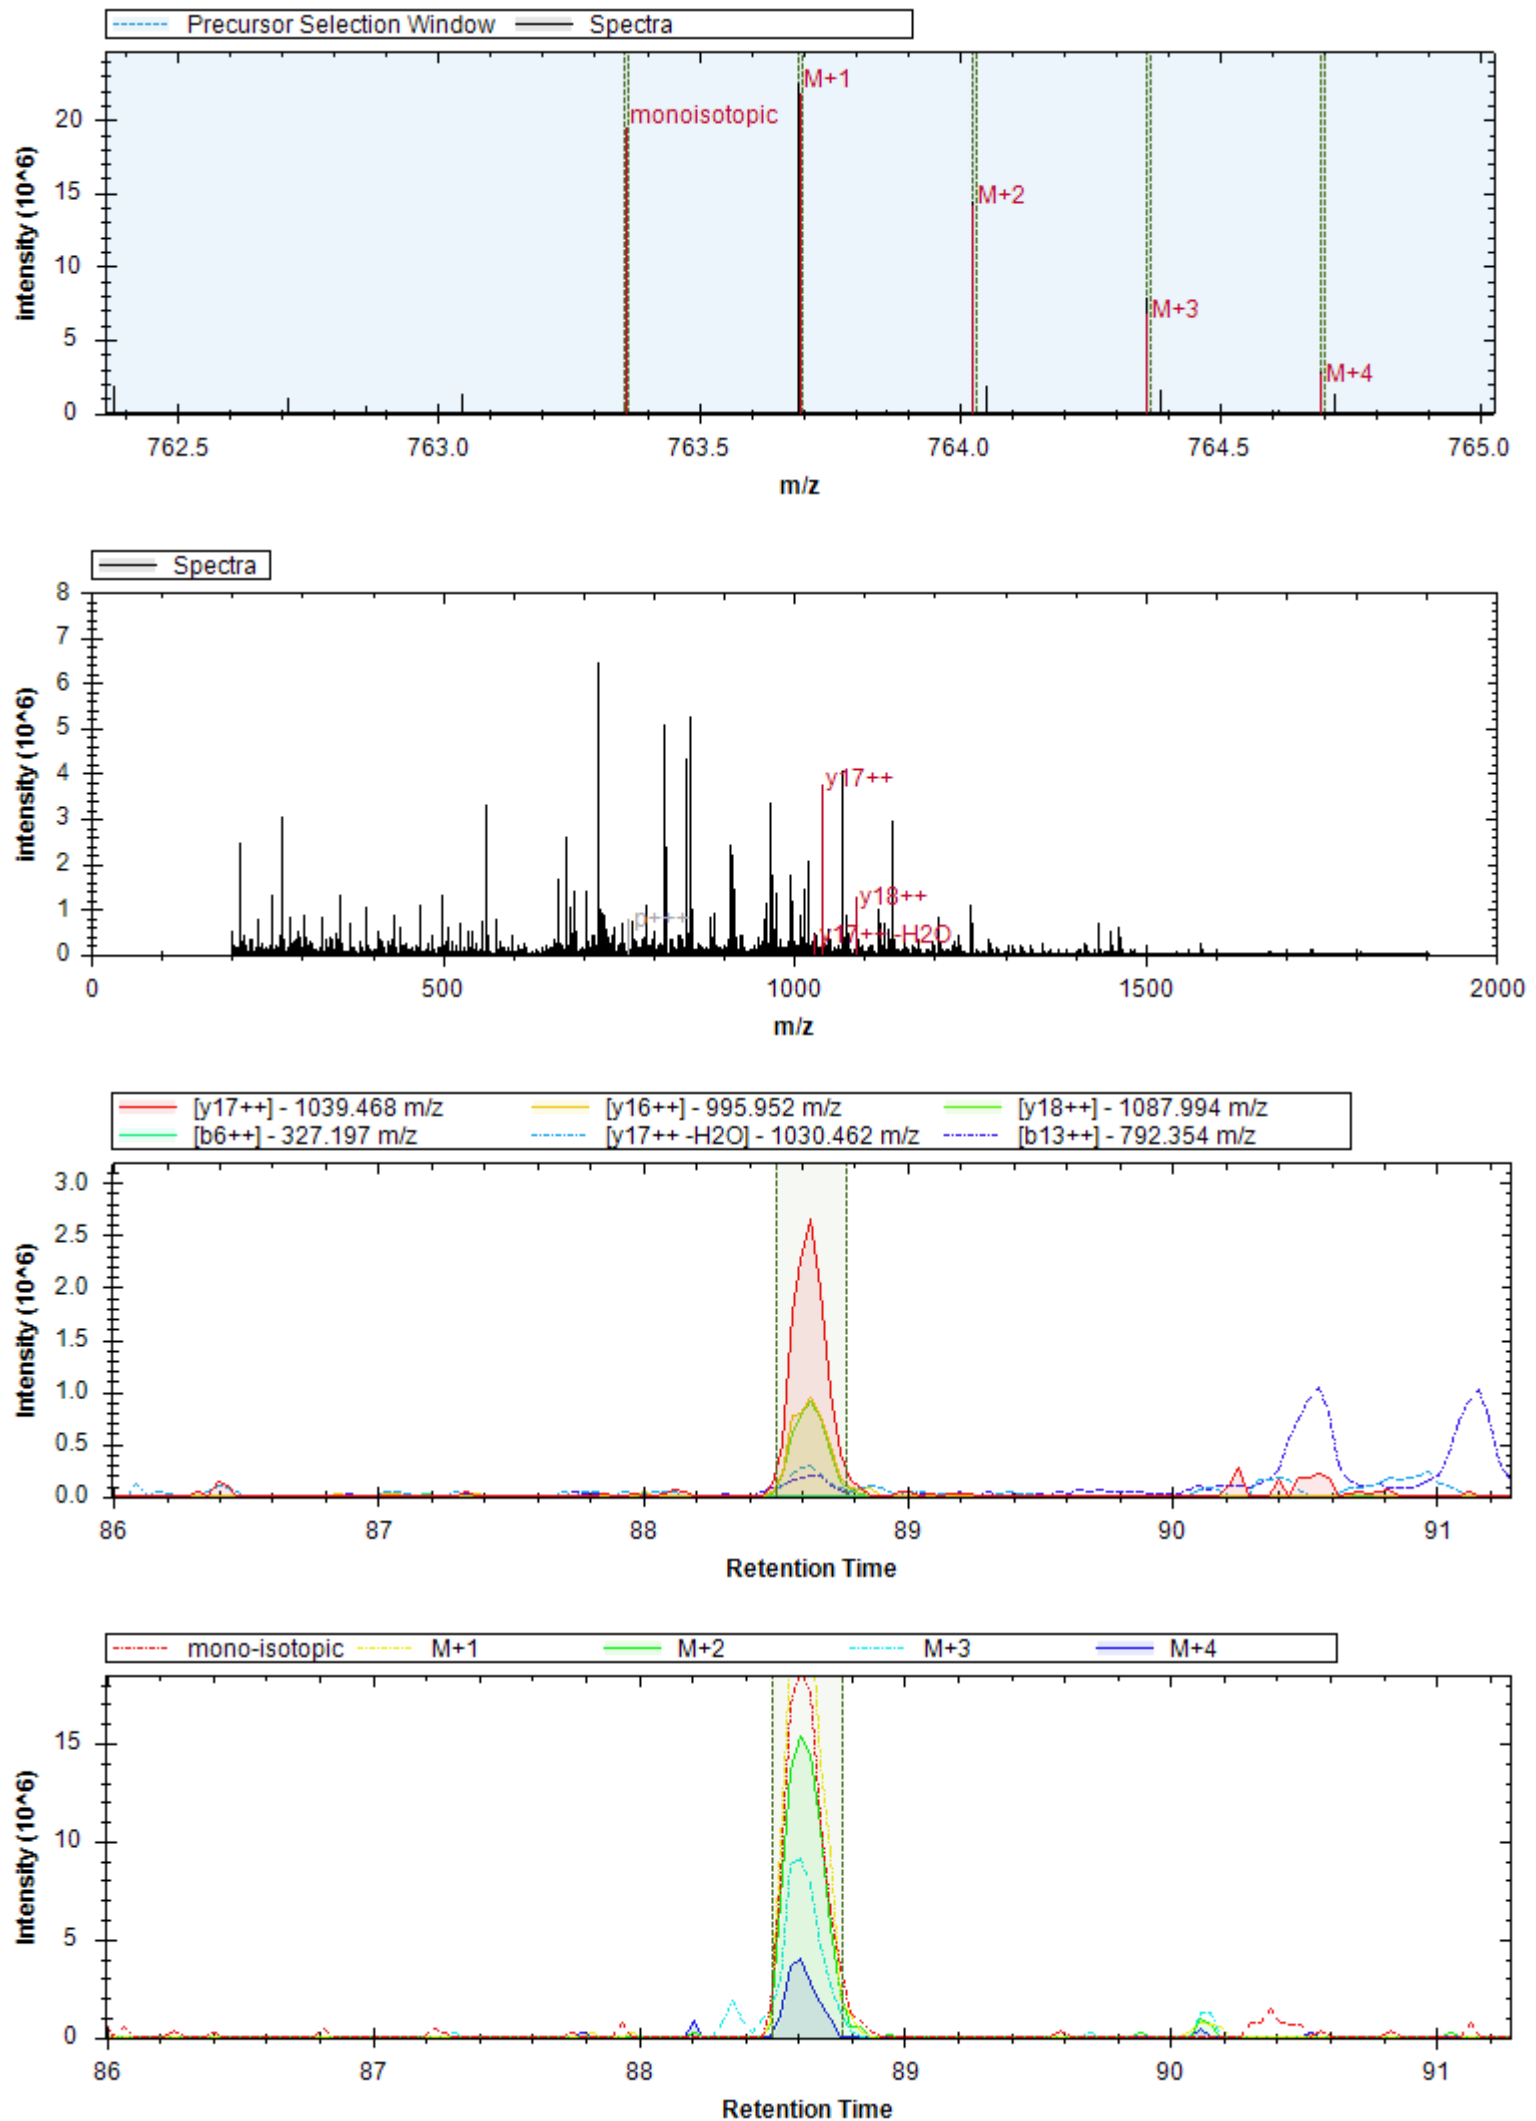

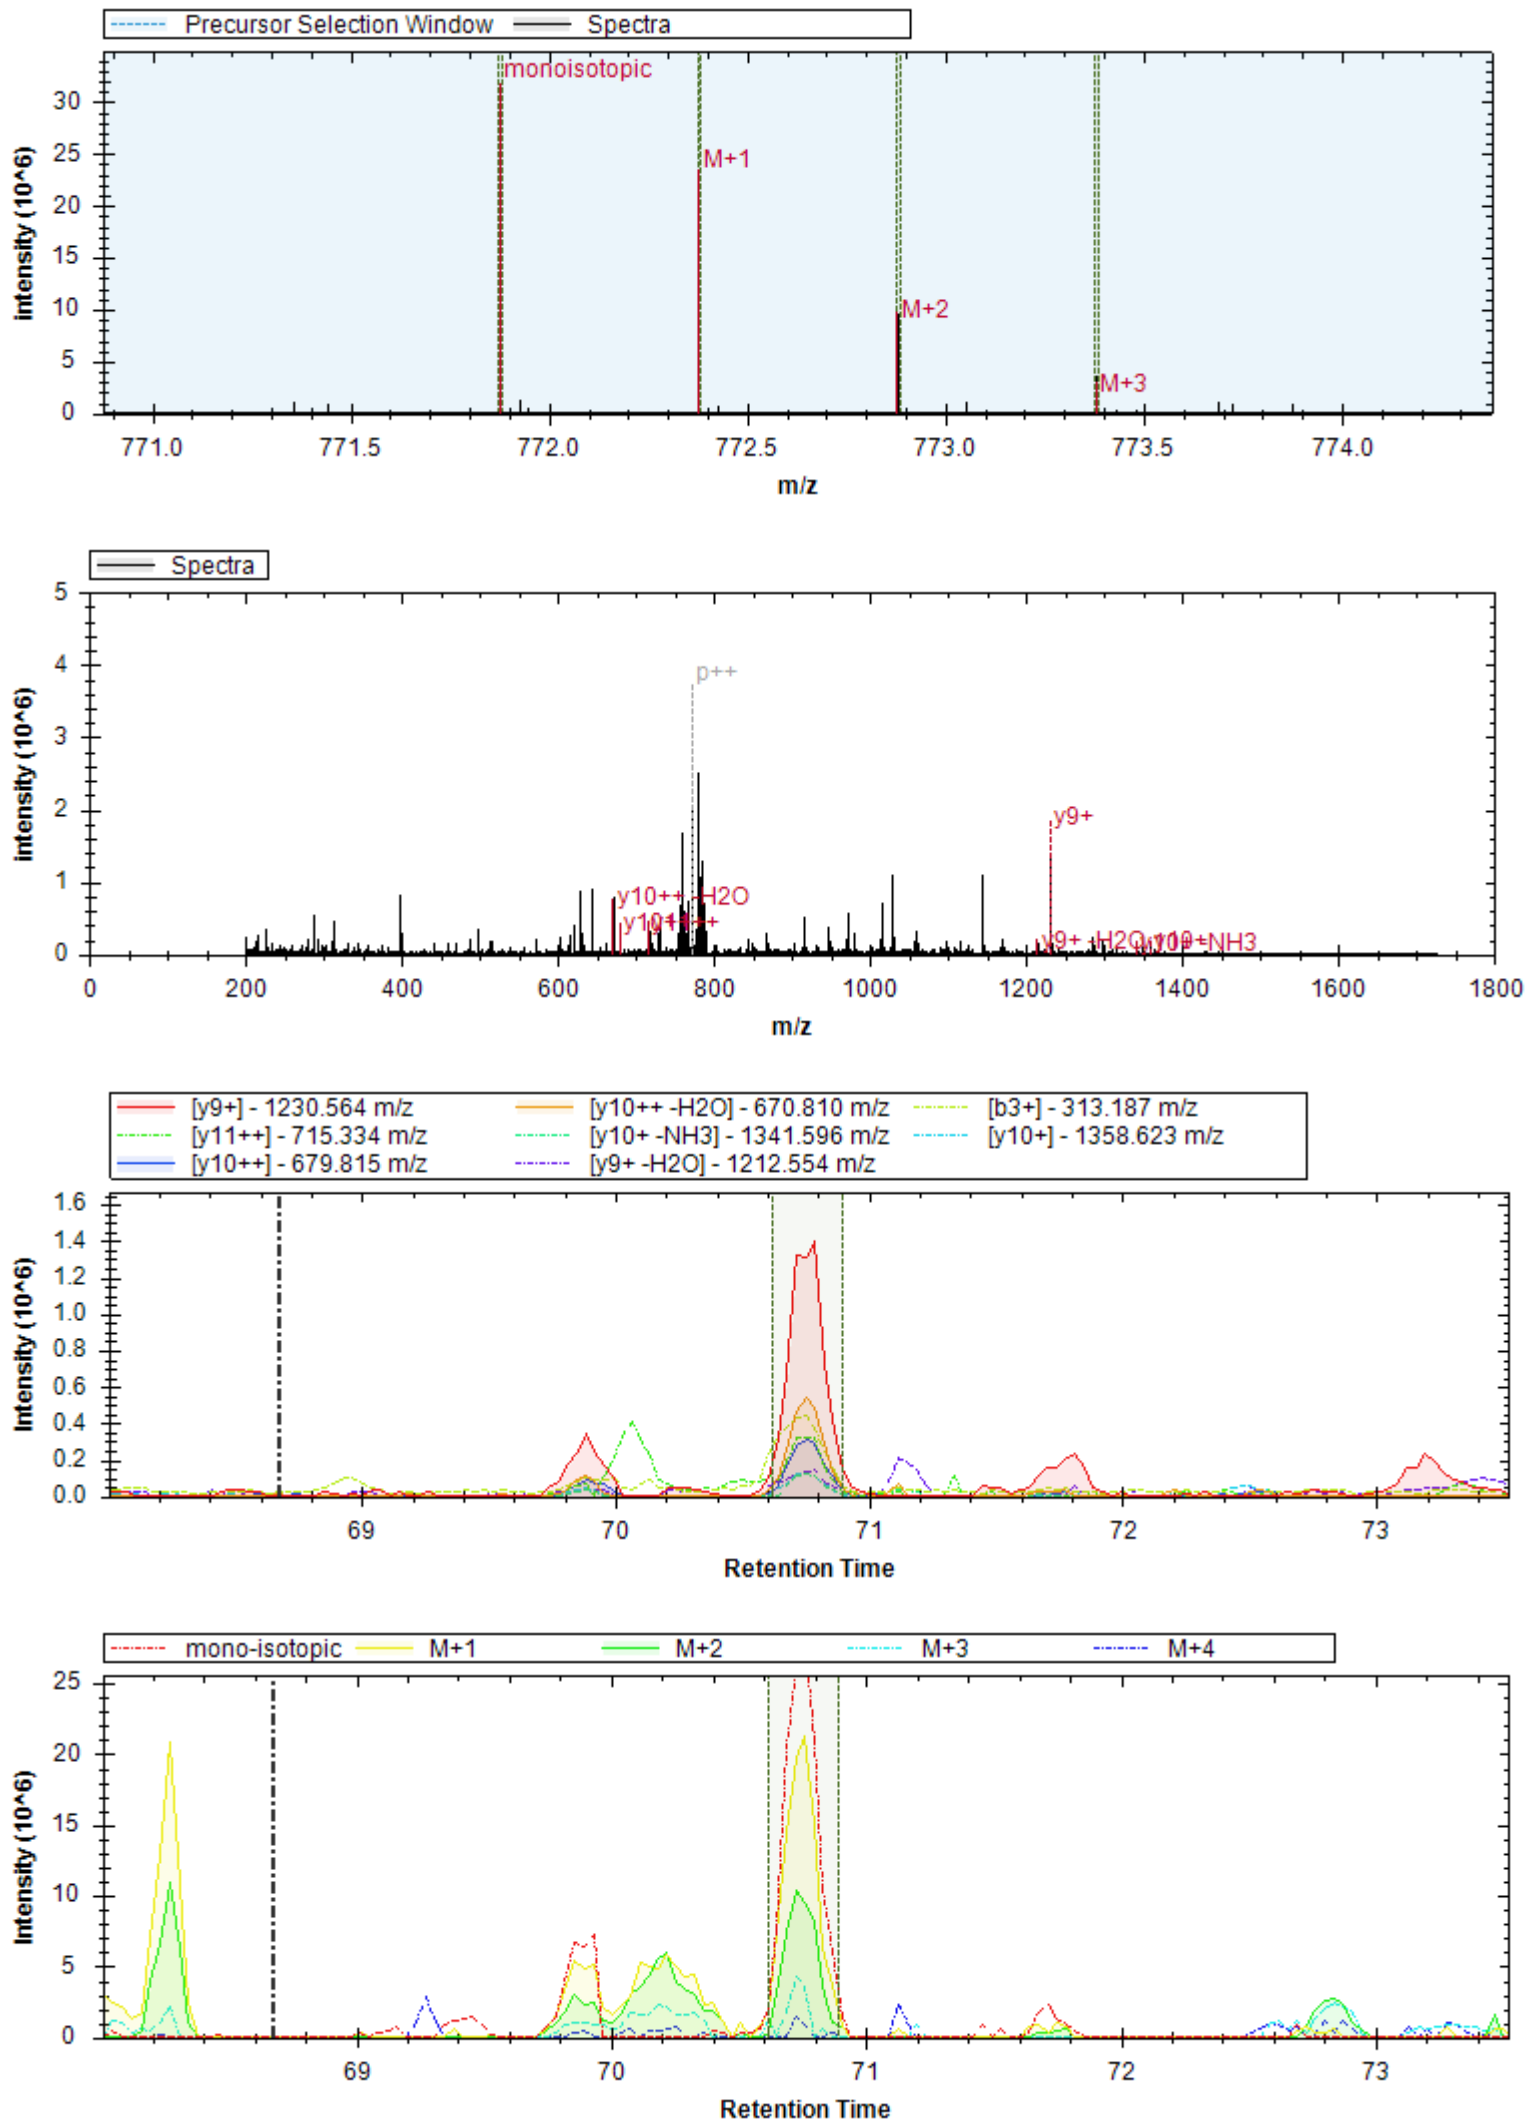

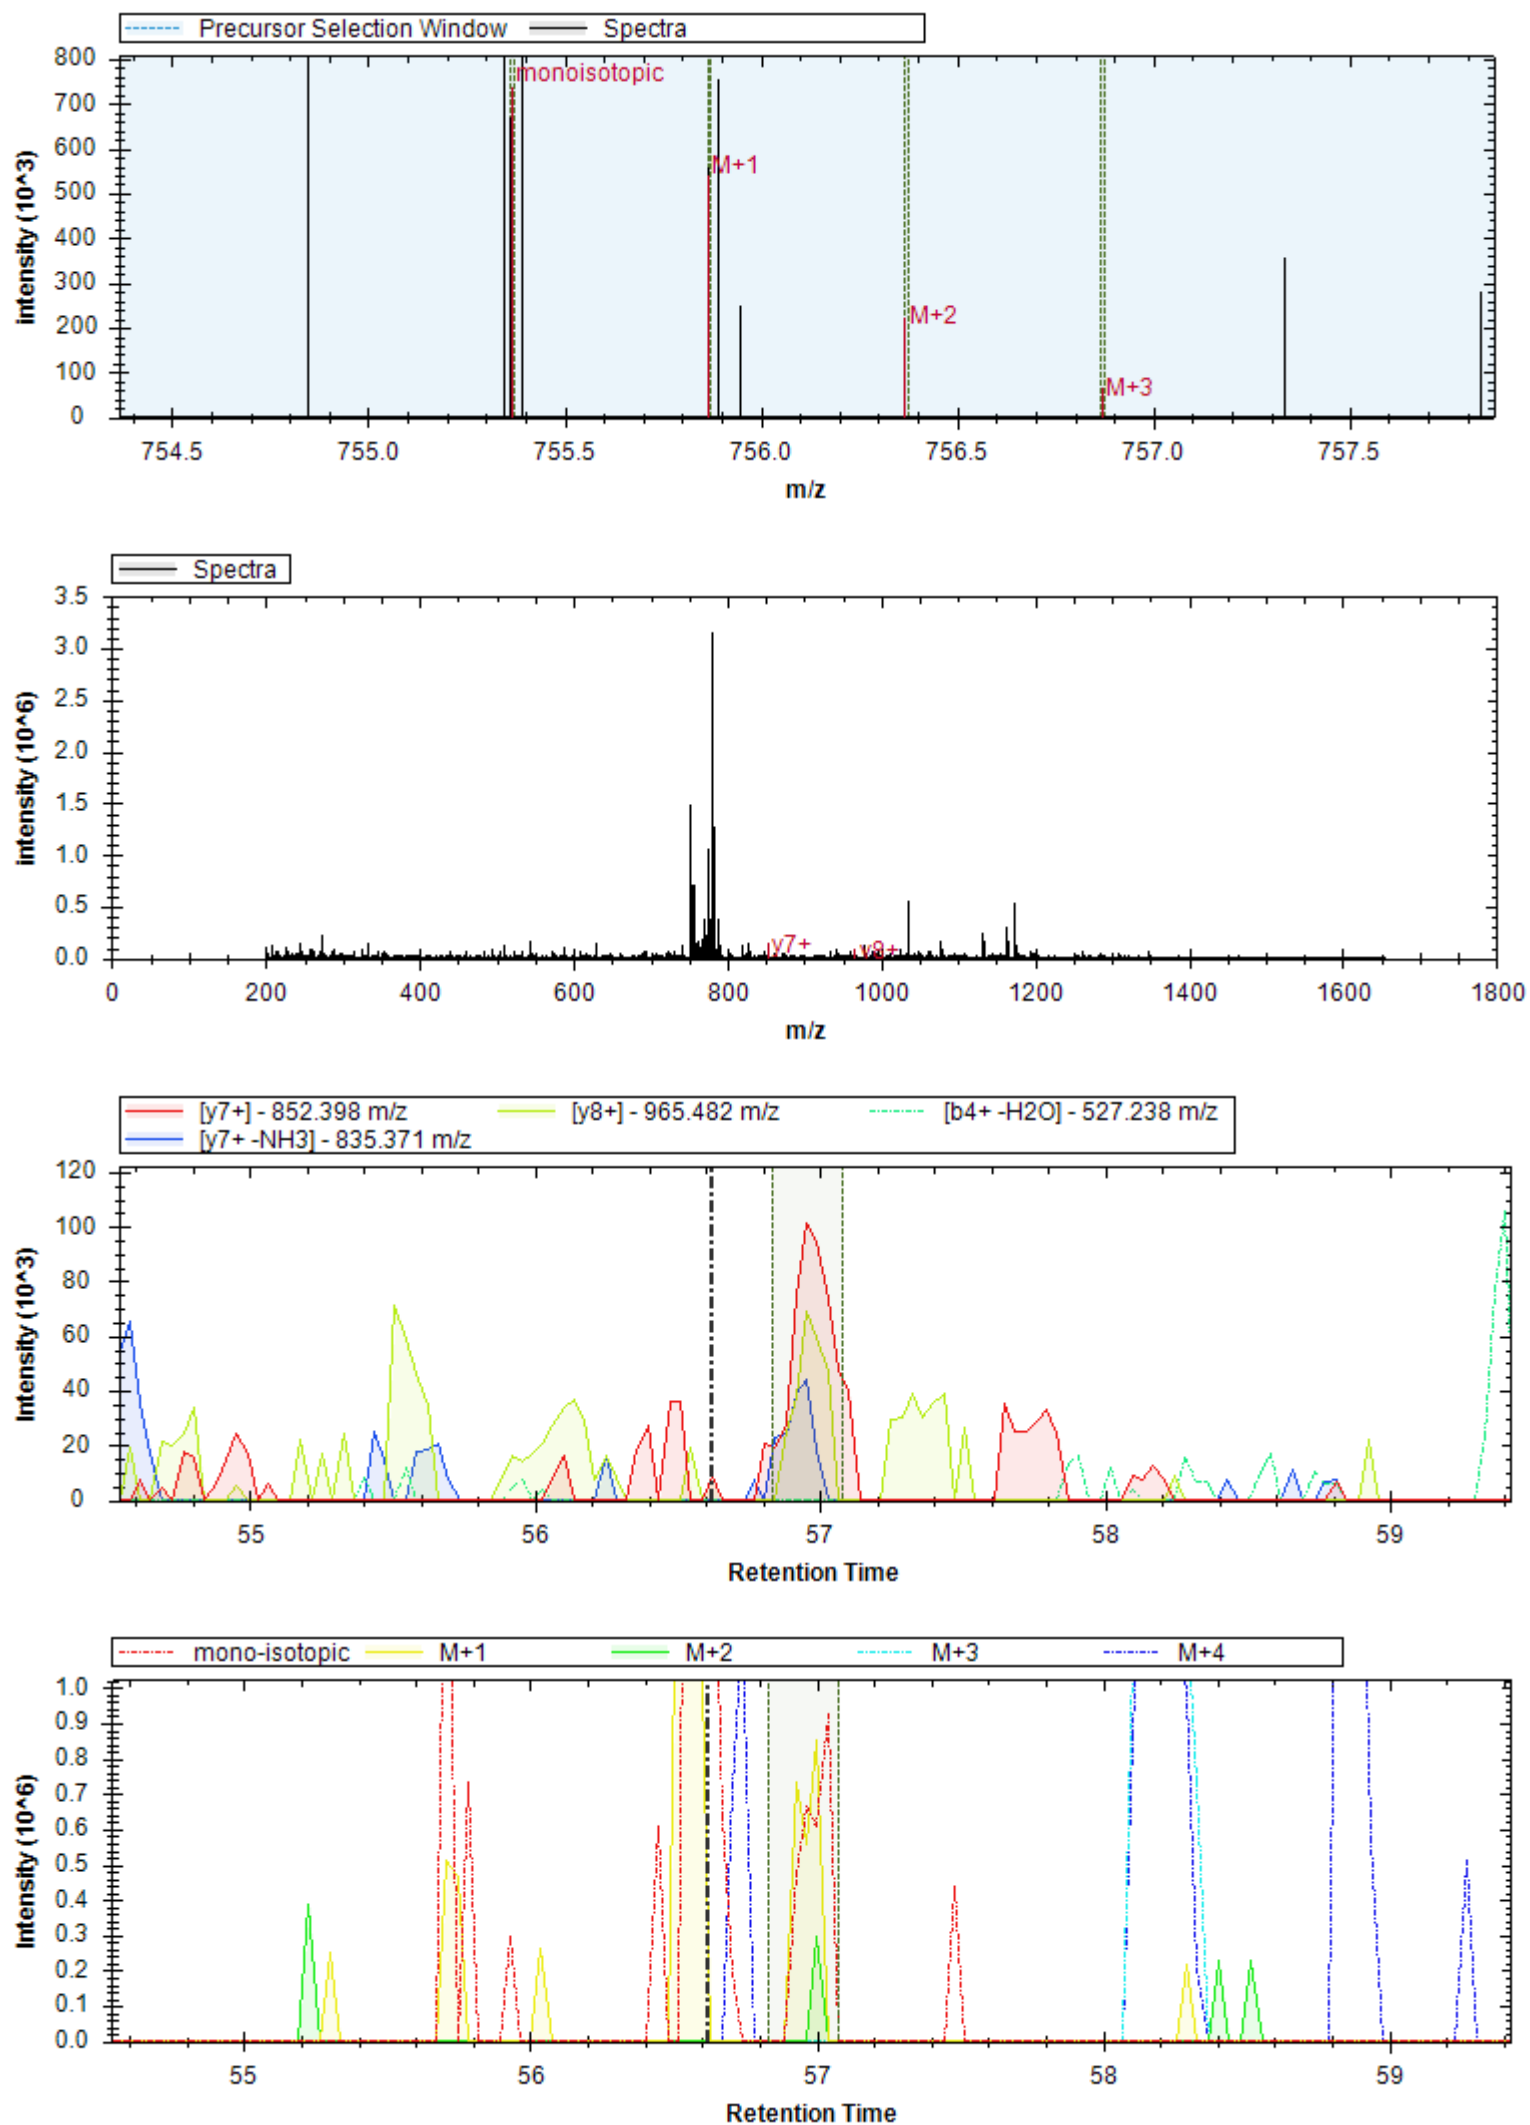

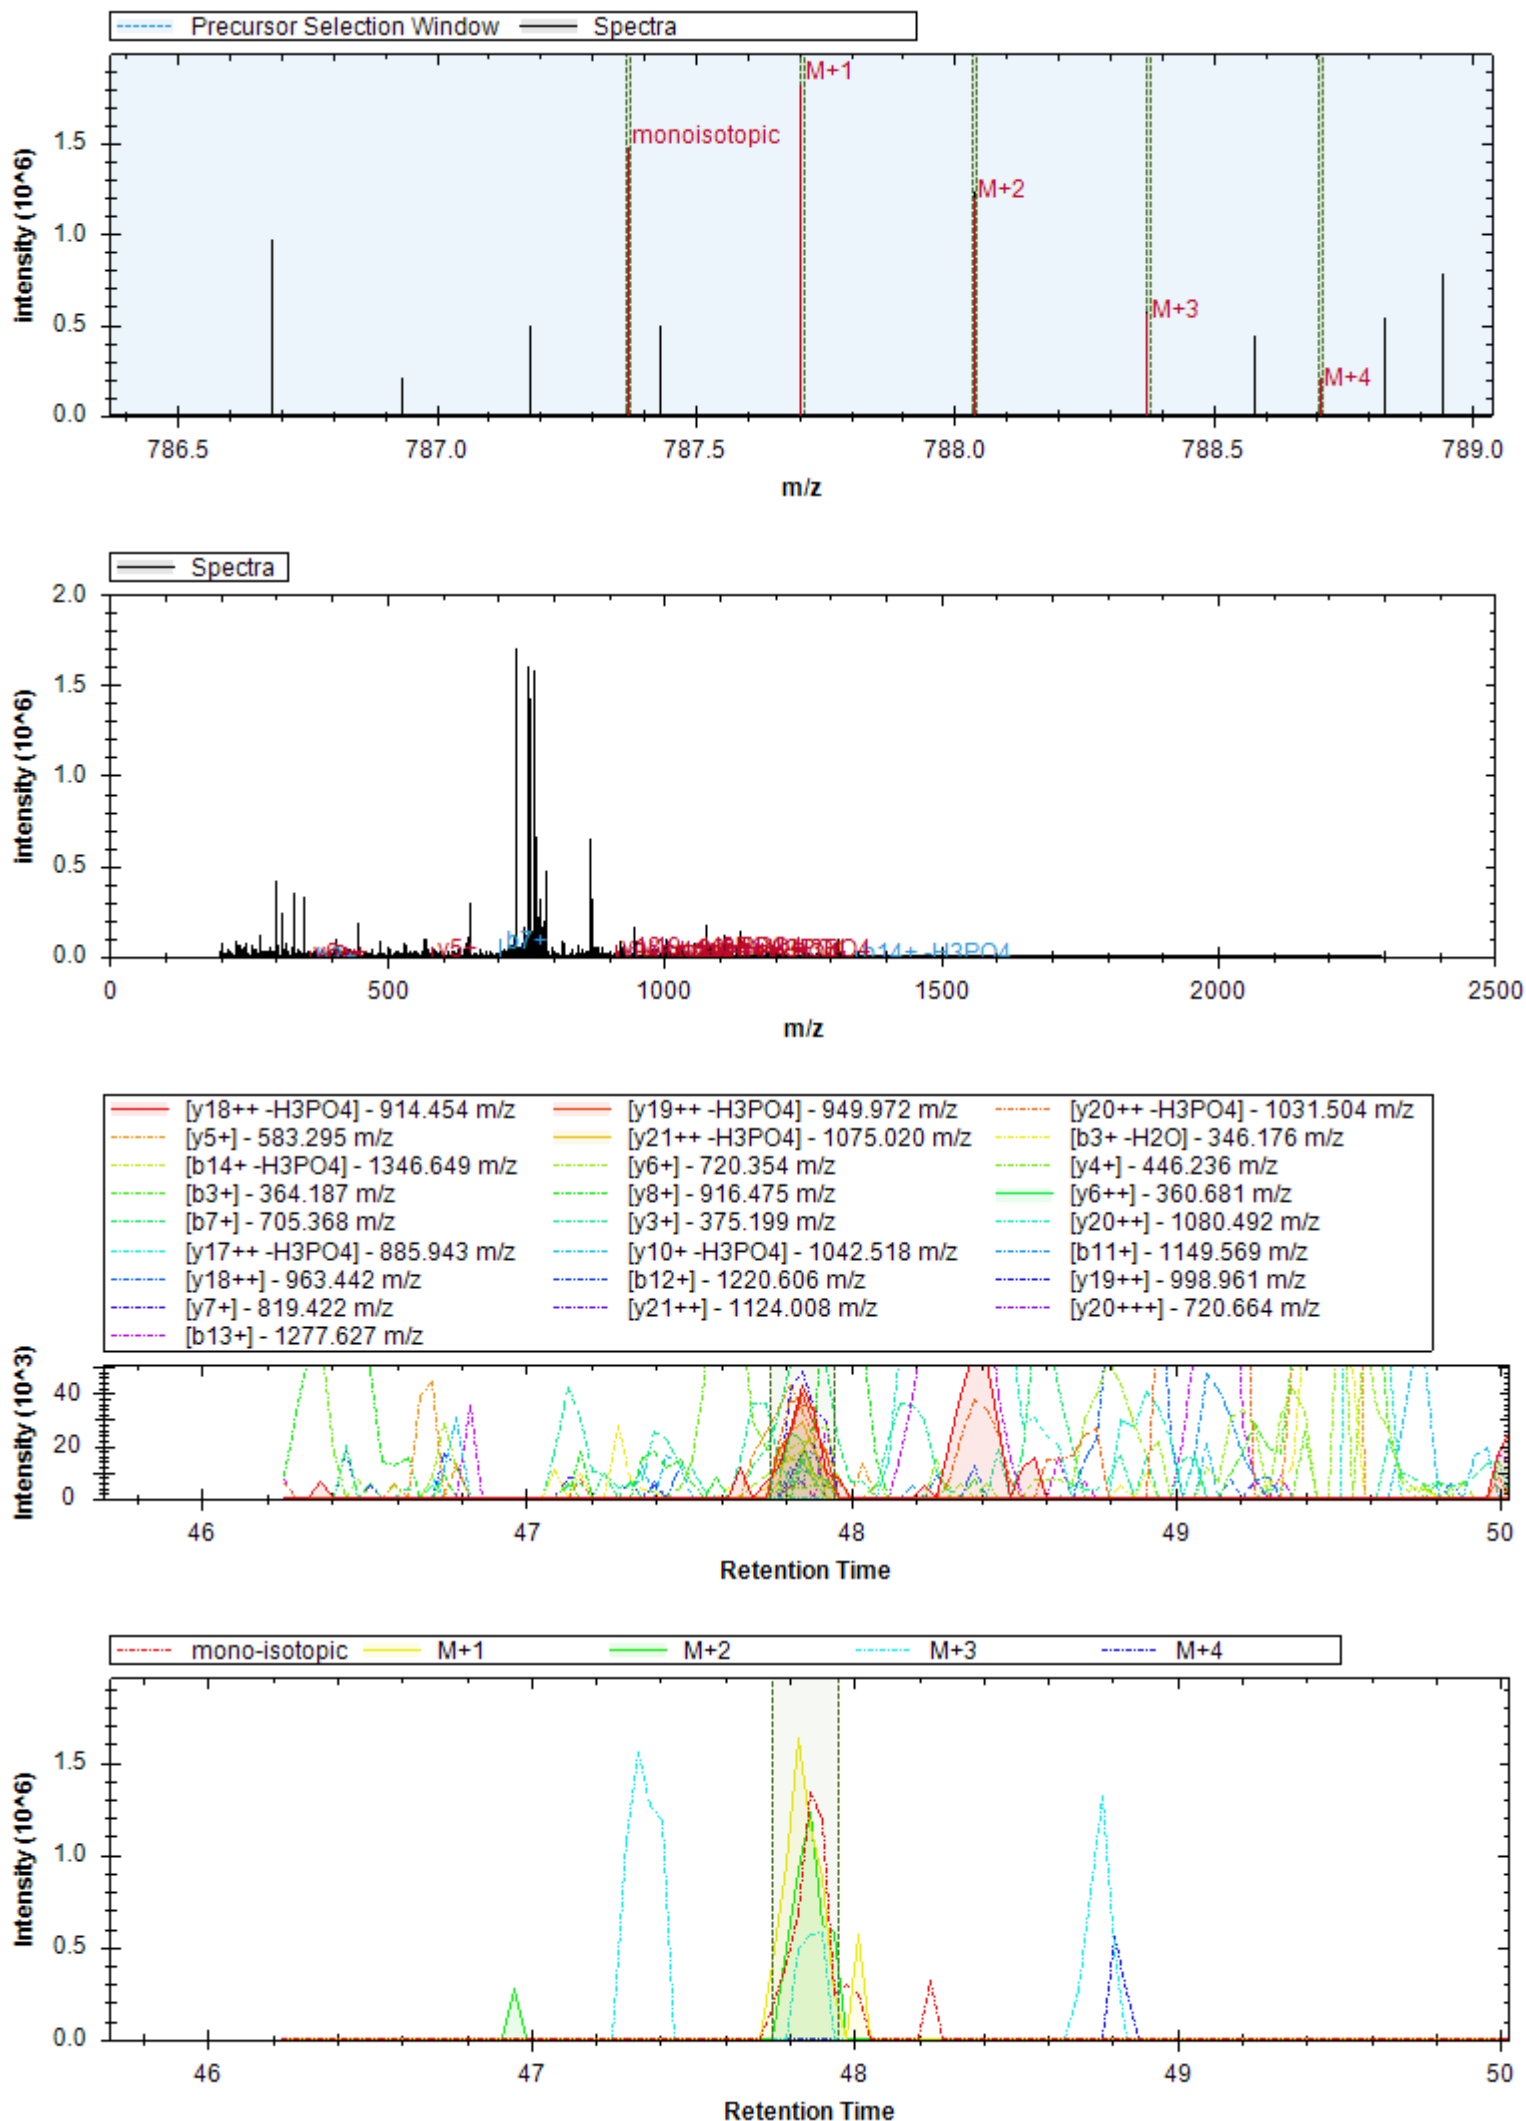

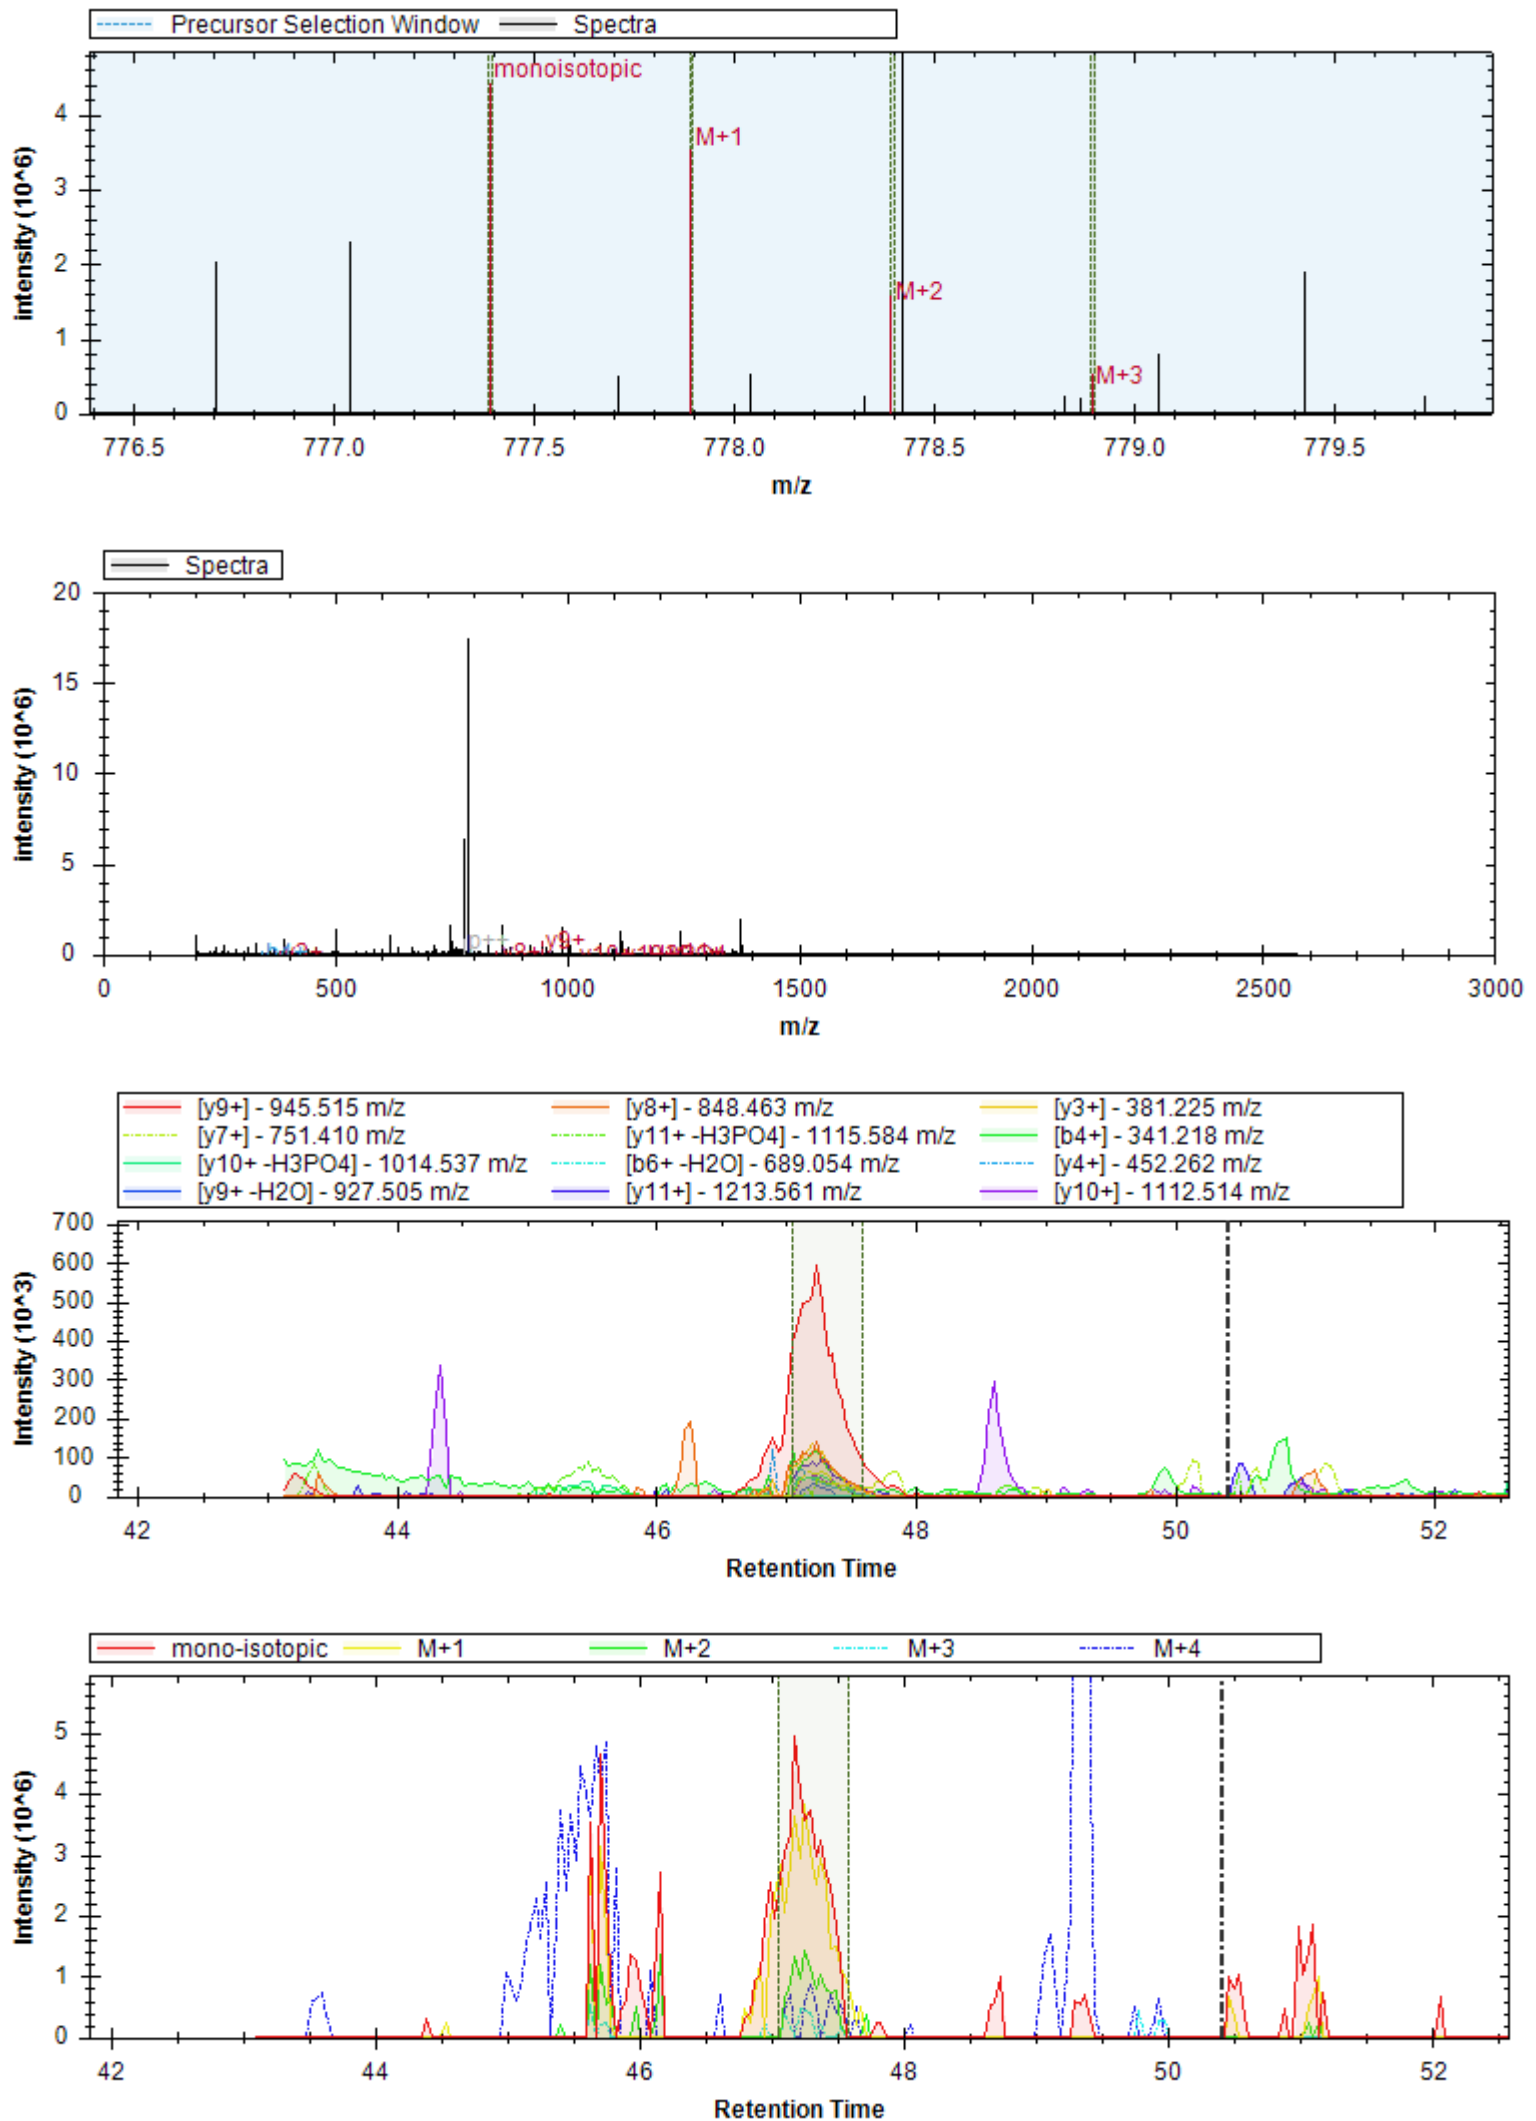

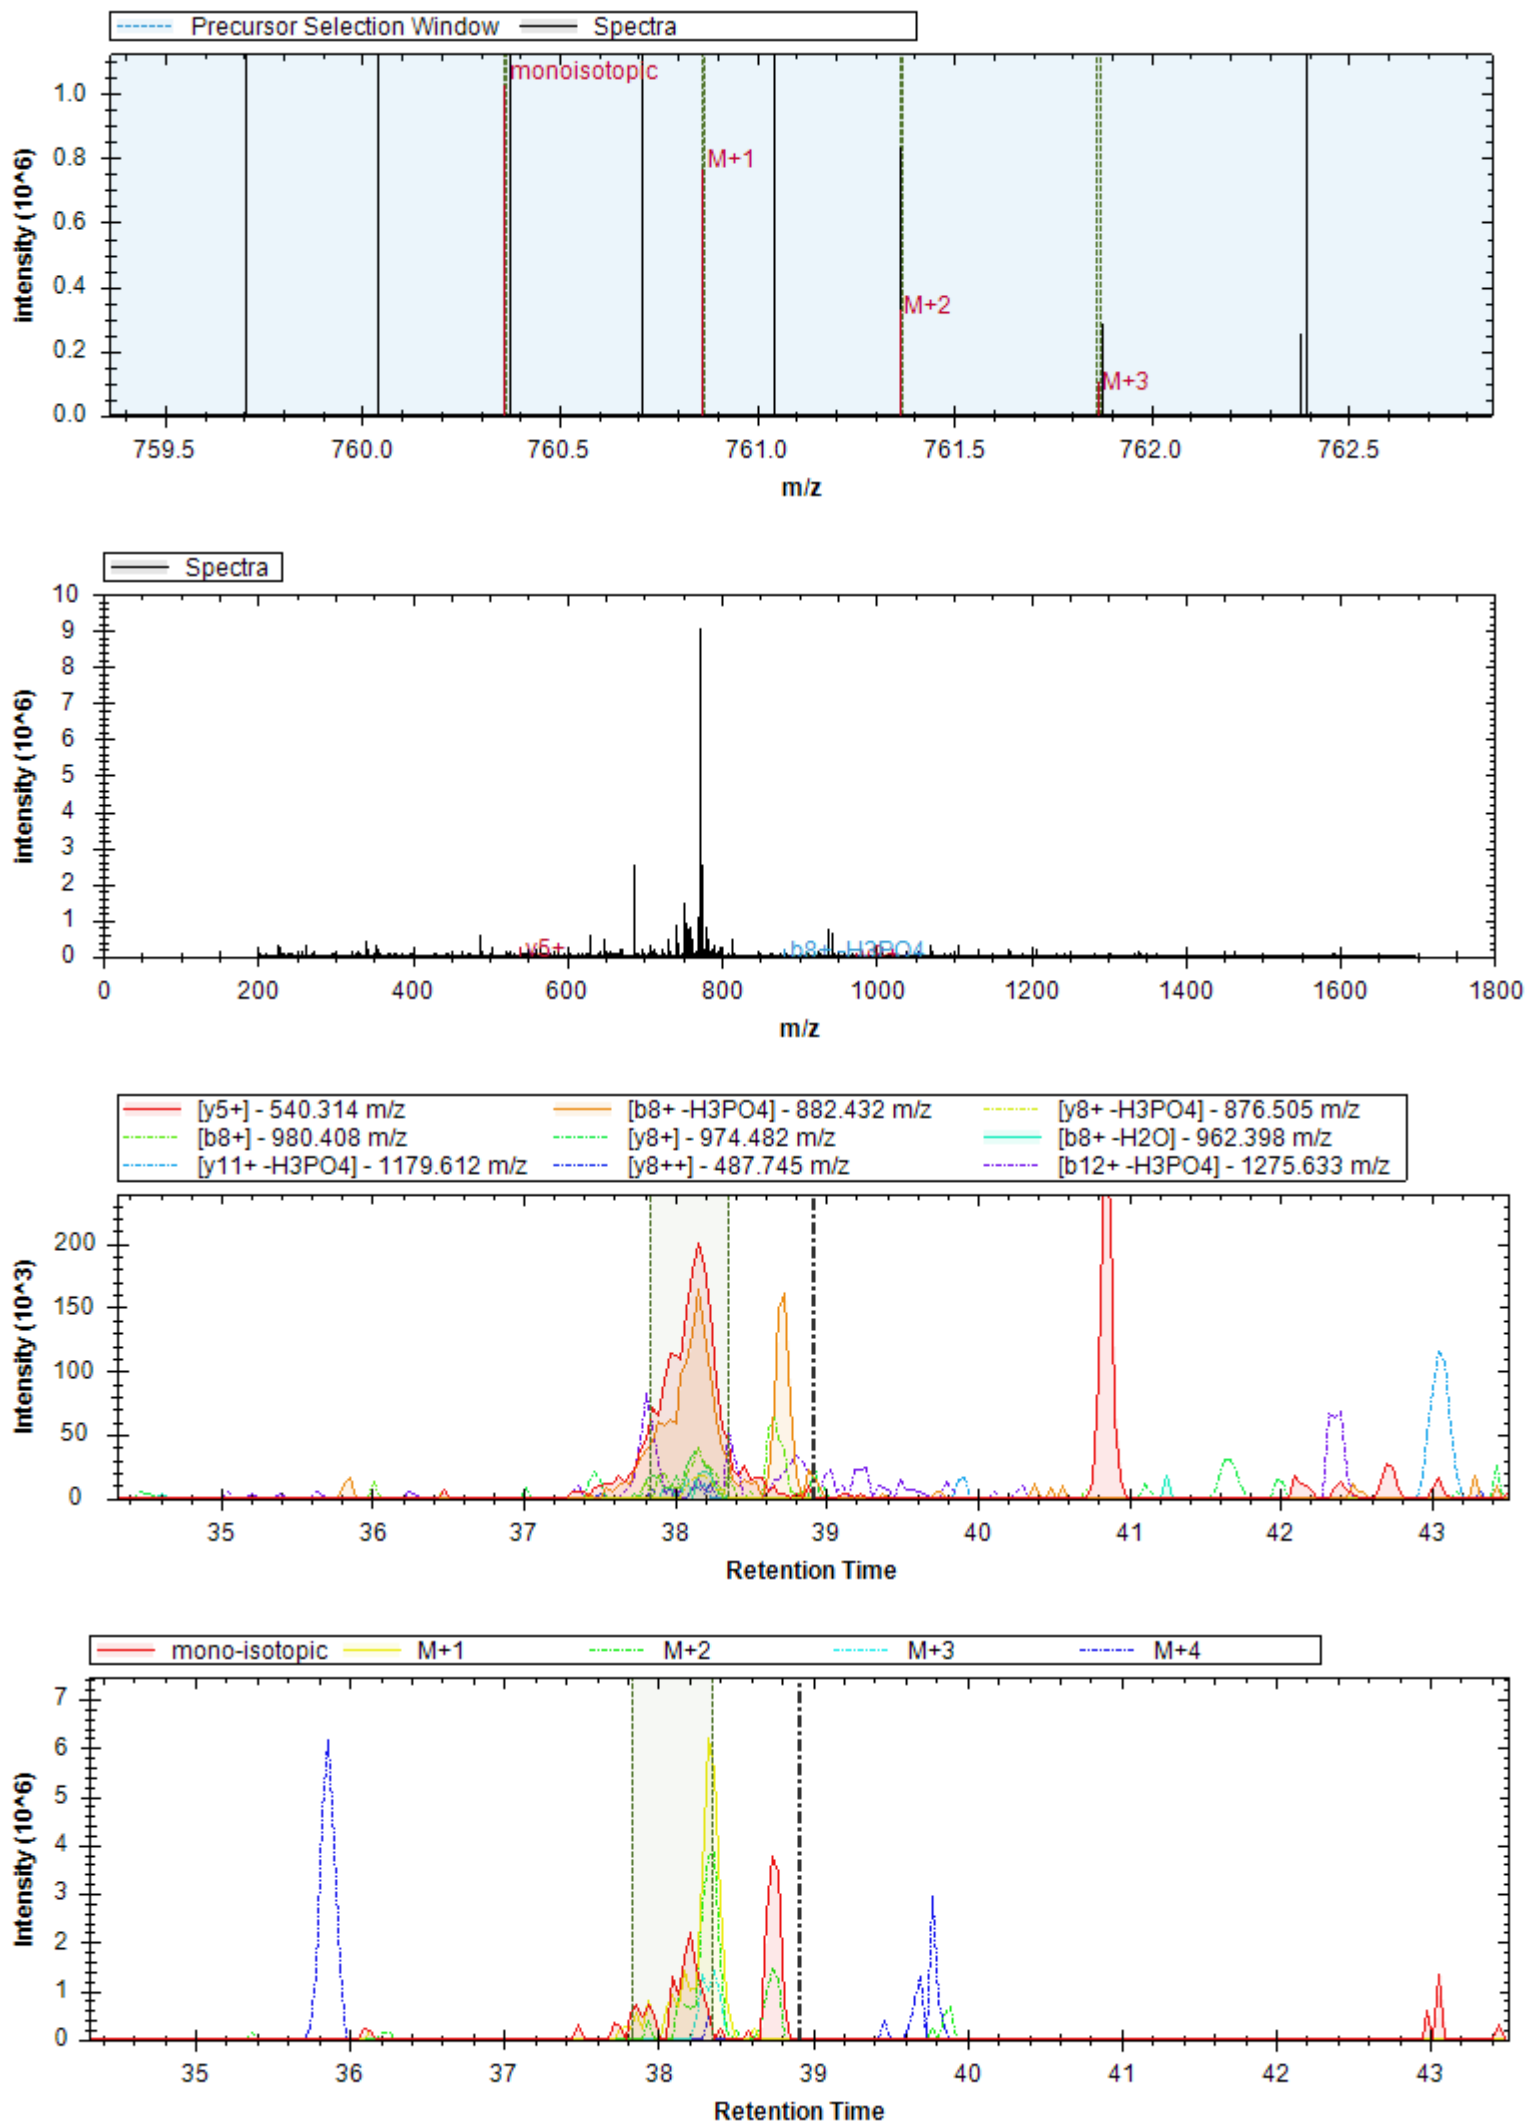

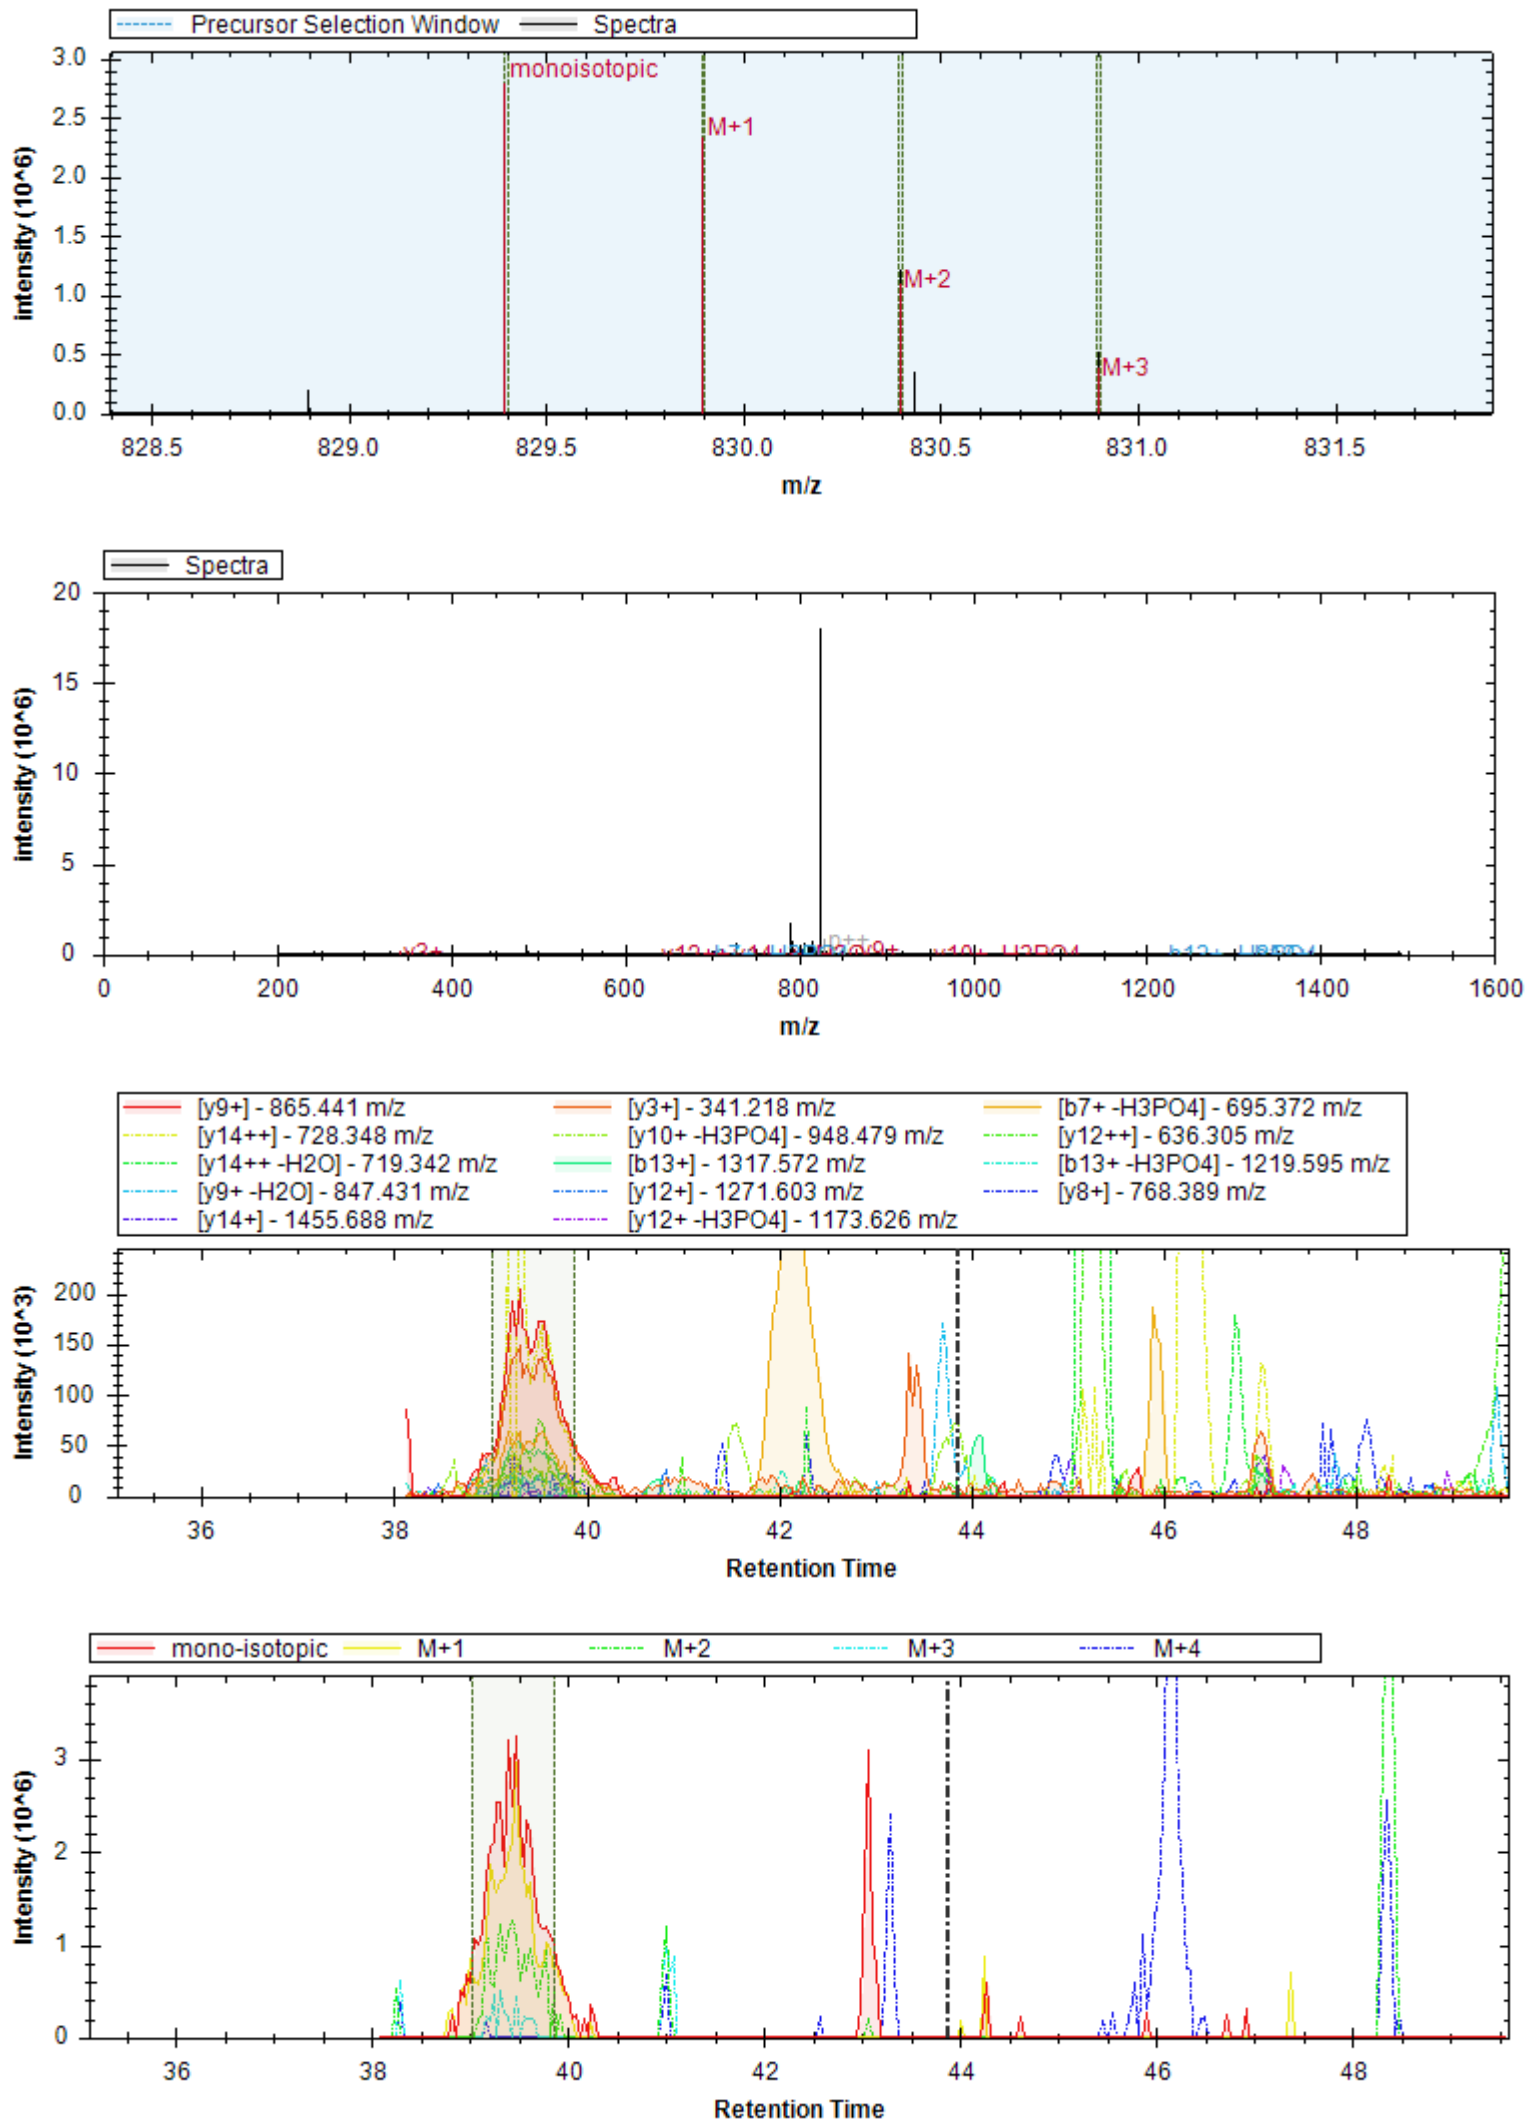



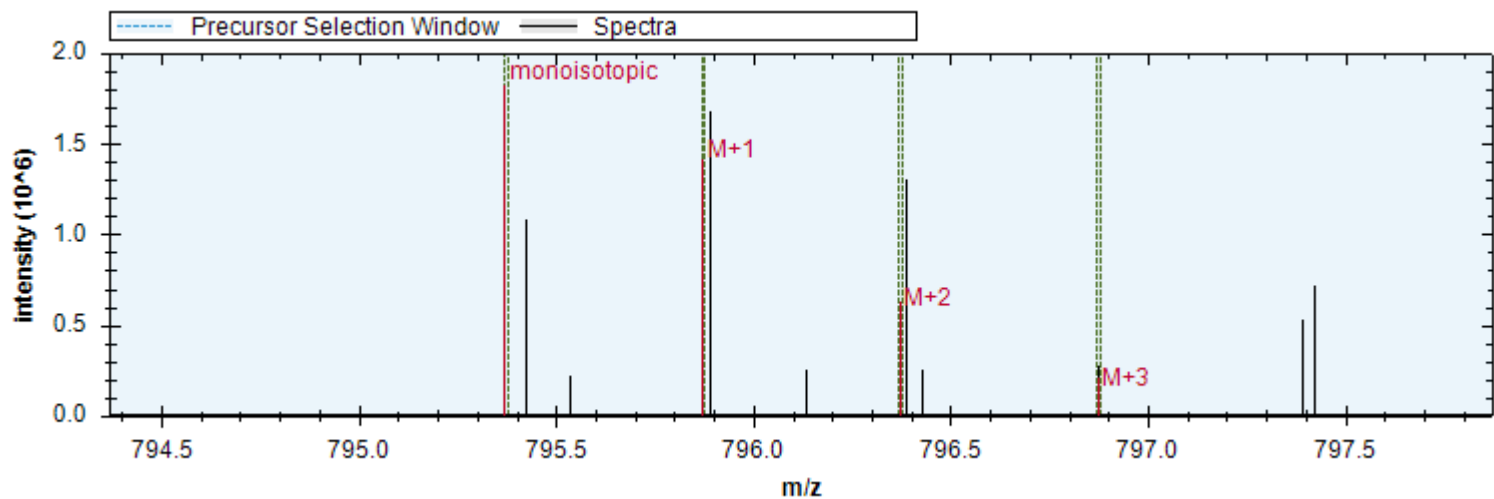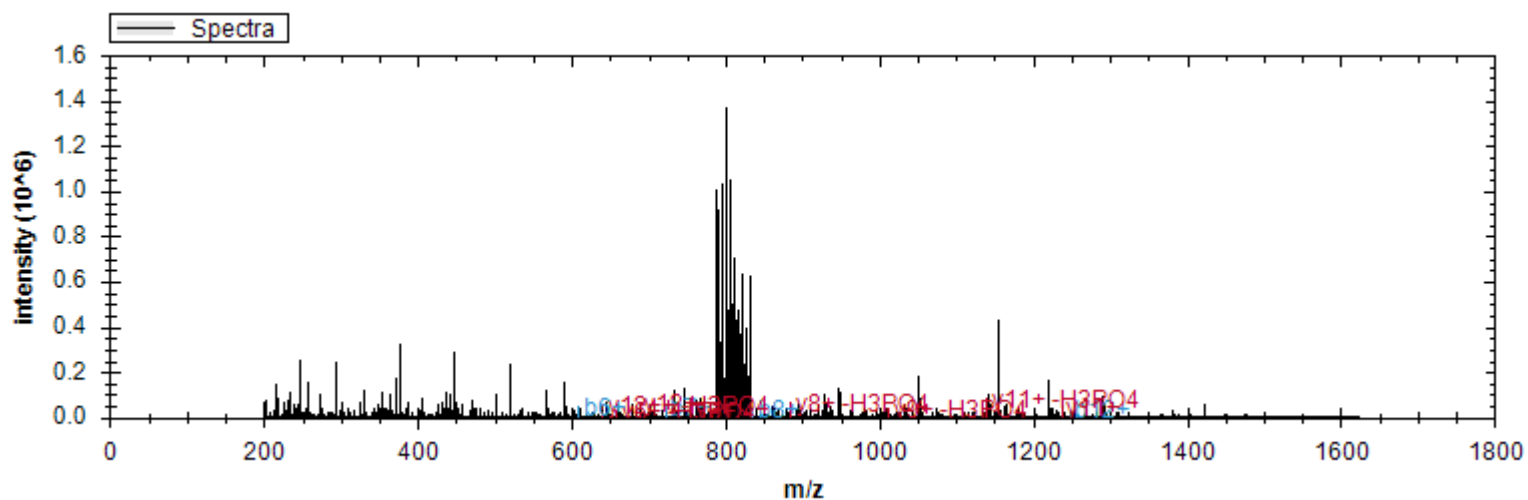

|                            |                              |                              |
|----------------------------|------------------------------|------------------------------|
| [b12+] - 1248.622 m/z      | [y11+ -H3PO4] - 1140.601 m/z | [y12++ -H3PO4] - 639.334 m/z |
| [b3+] - 352.162 m/z        | [b12+ -NH3] - 1231.595 m/z   | [b6+] - 609.263 m/z          |
| [y6+ -H3PO4] - 657.332 m/z | [y10+ -H3PO4] - 1083.579 m/z | [y8+ -H3PO4] - 883.500 m/z   |
| [b7+] - 722.347 m/z        | [y9+ -H3PO4] - 1012.542 m/z  | [y12++] - 688.322 m/z        |
| [y11+] - 1238.578 m/z      | [y7+] - 868.392 m/z          | [b12+ -H2O] - 1230.611 m/z   |
| [b5+] - 480.220 m/z        | [b8+] - 835.431 m/z          | [b4+] - 409.183 m/z          |
| [y6+] - 755.308 m/z        | [b3+ -H2O] - 334.151 m/z     | [b8+ -H2O] - 817.420 m/z     |

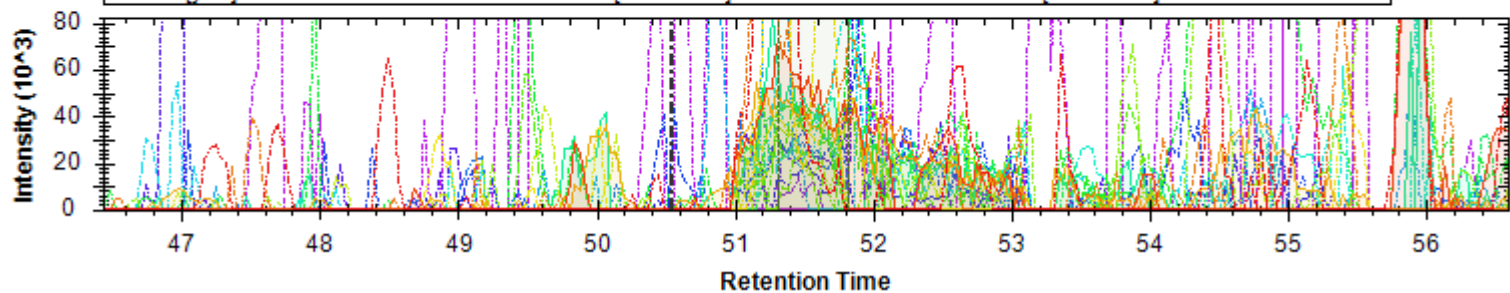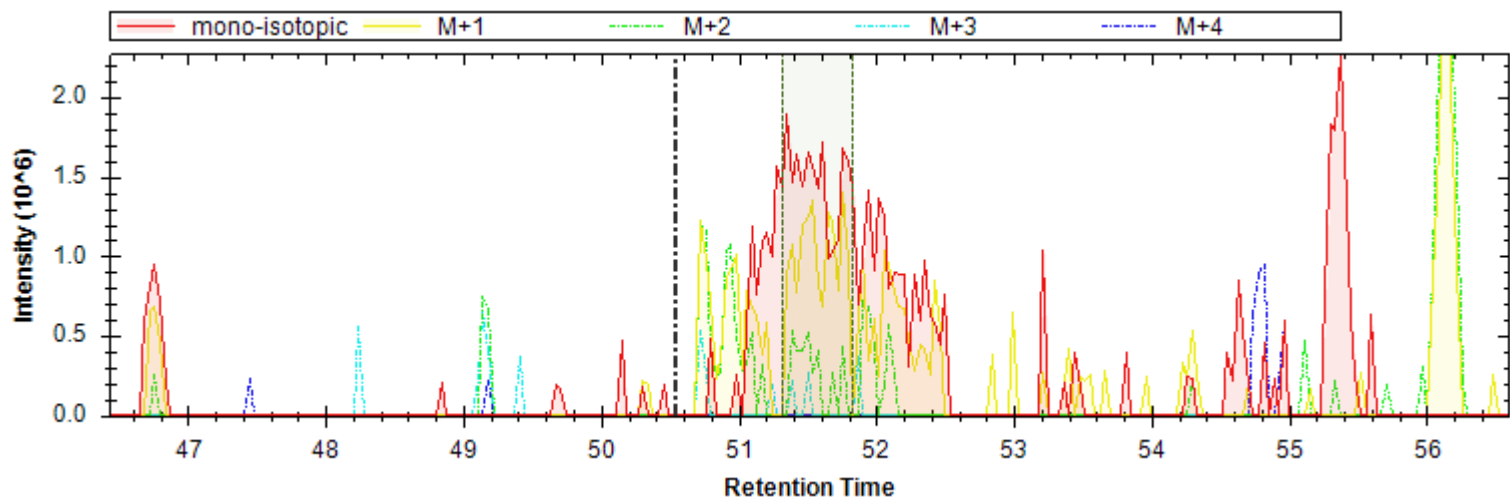

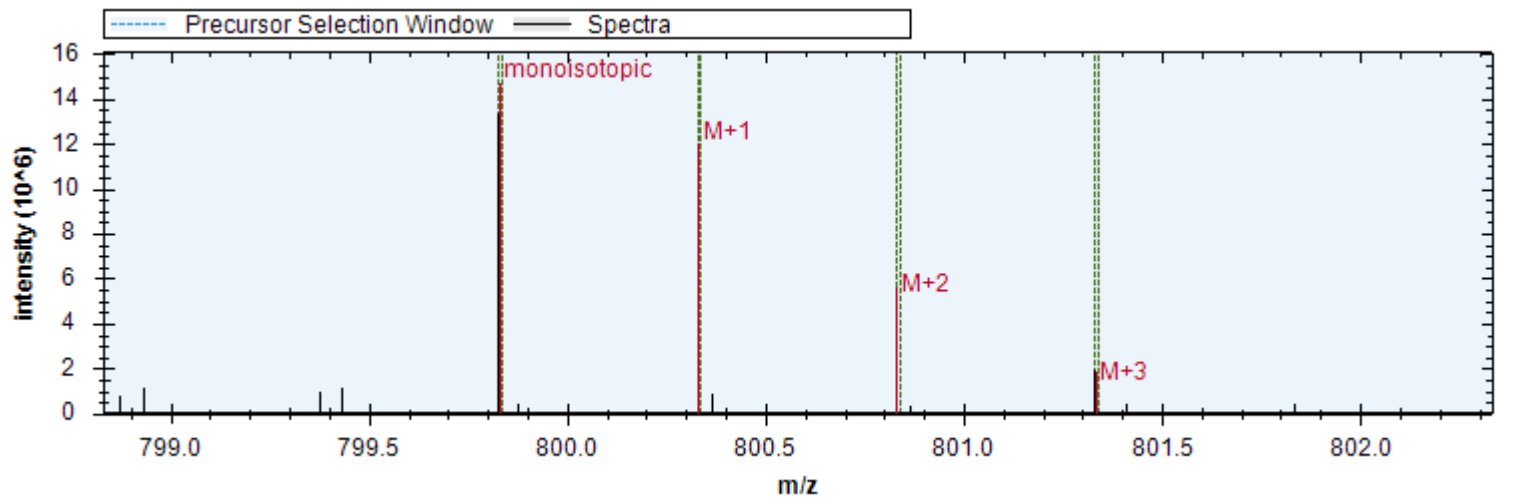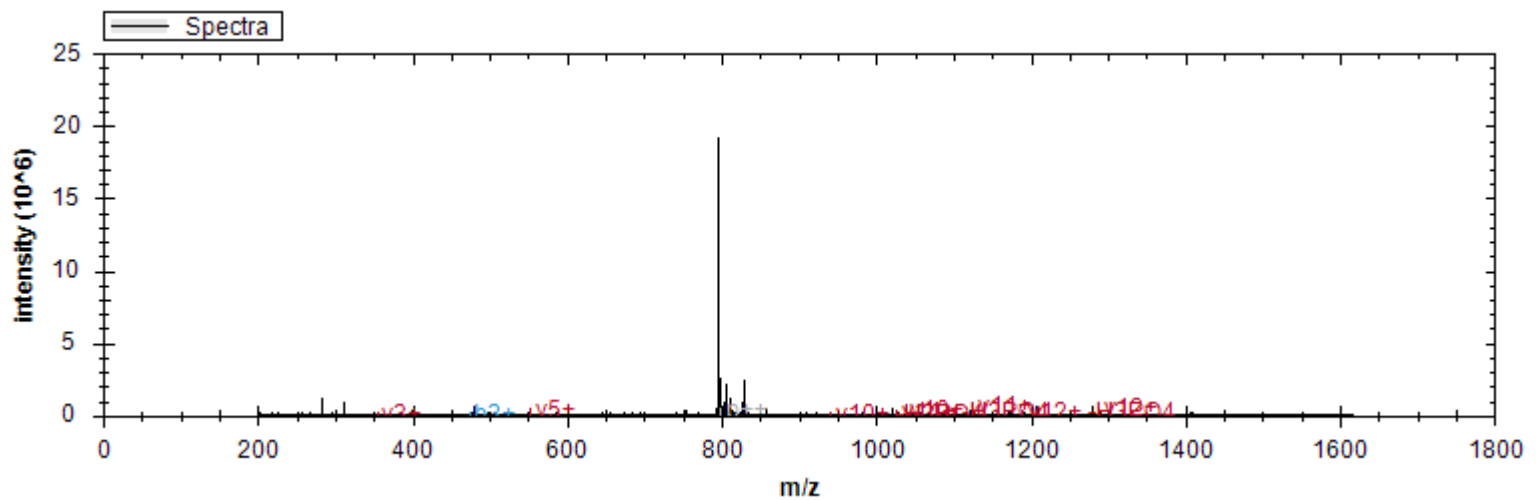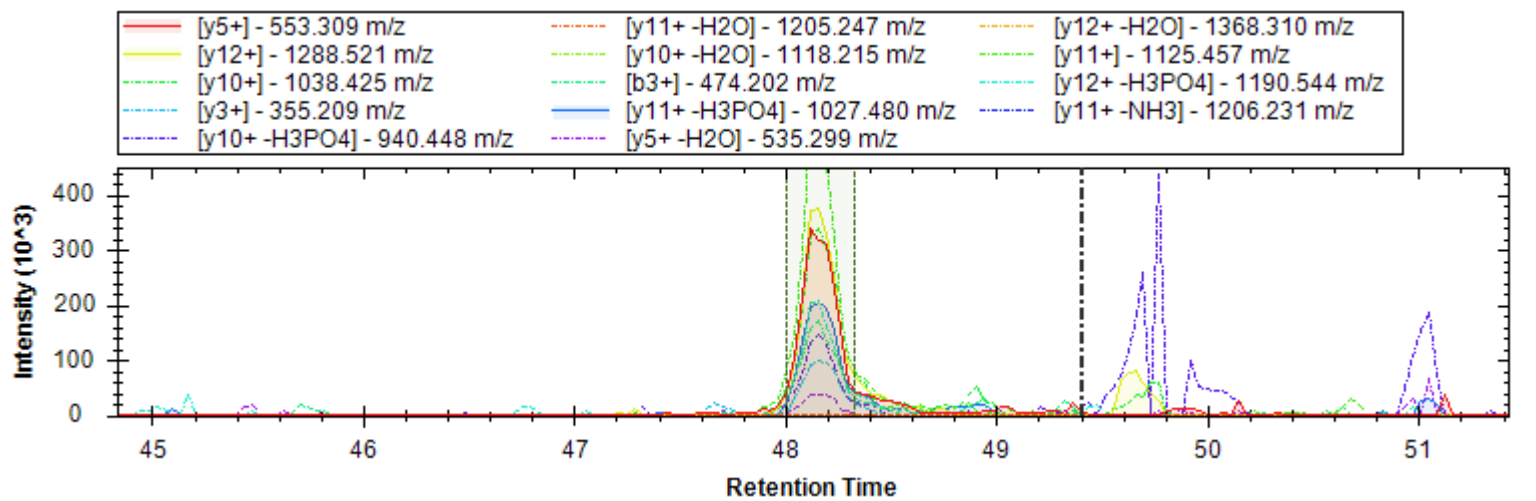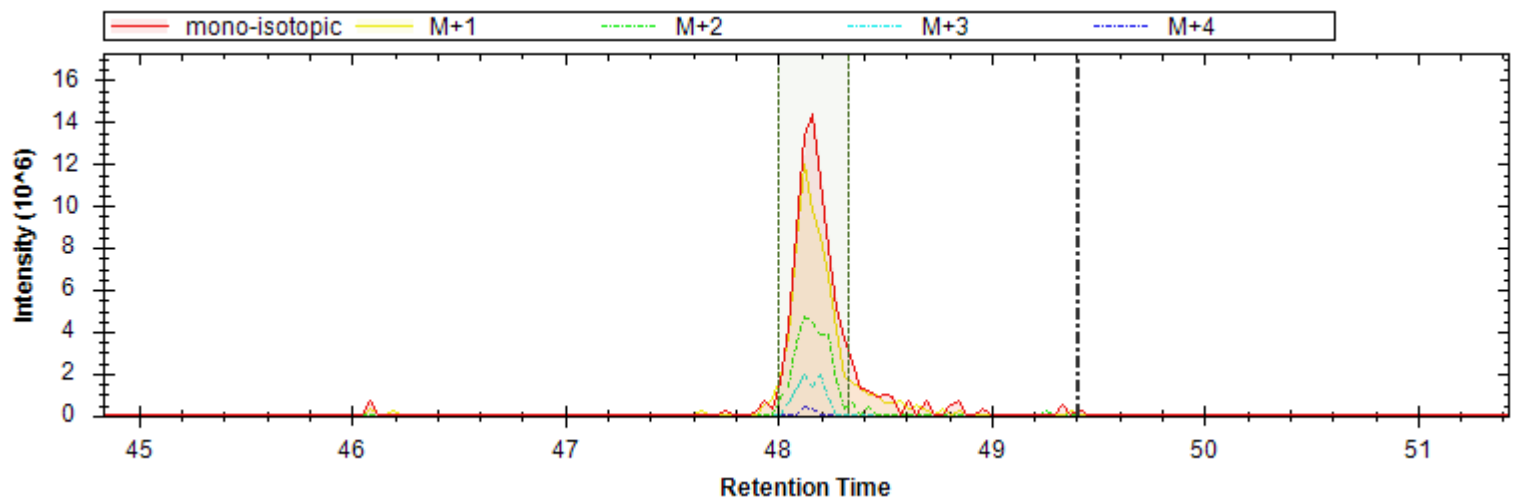

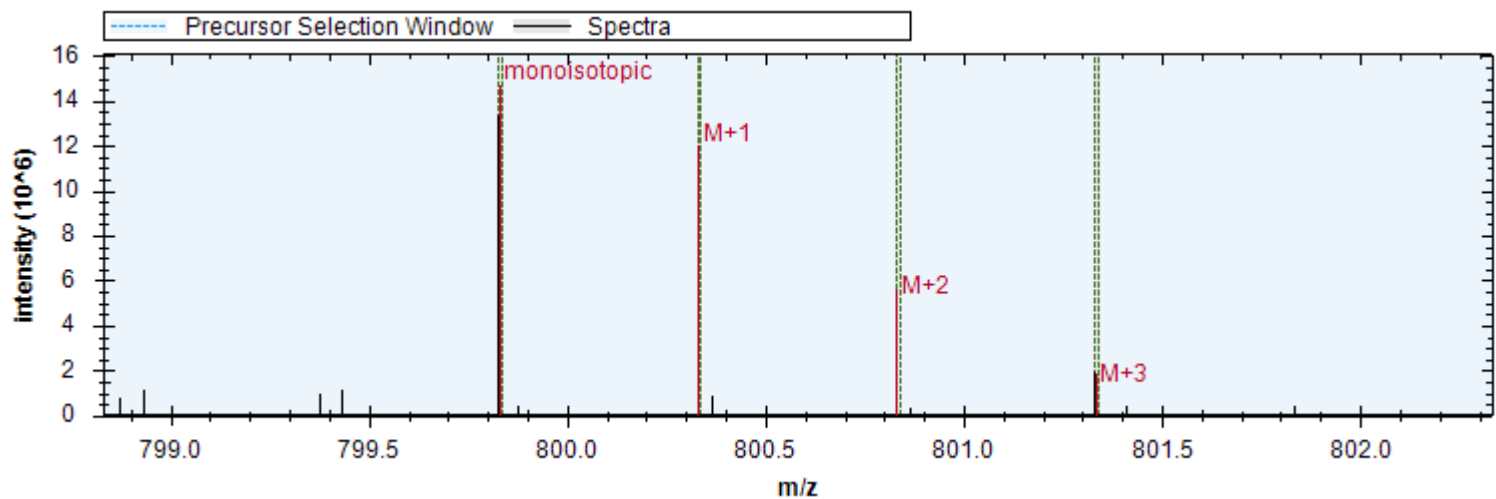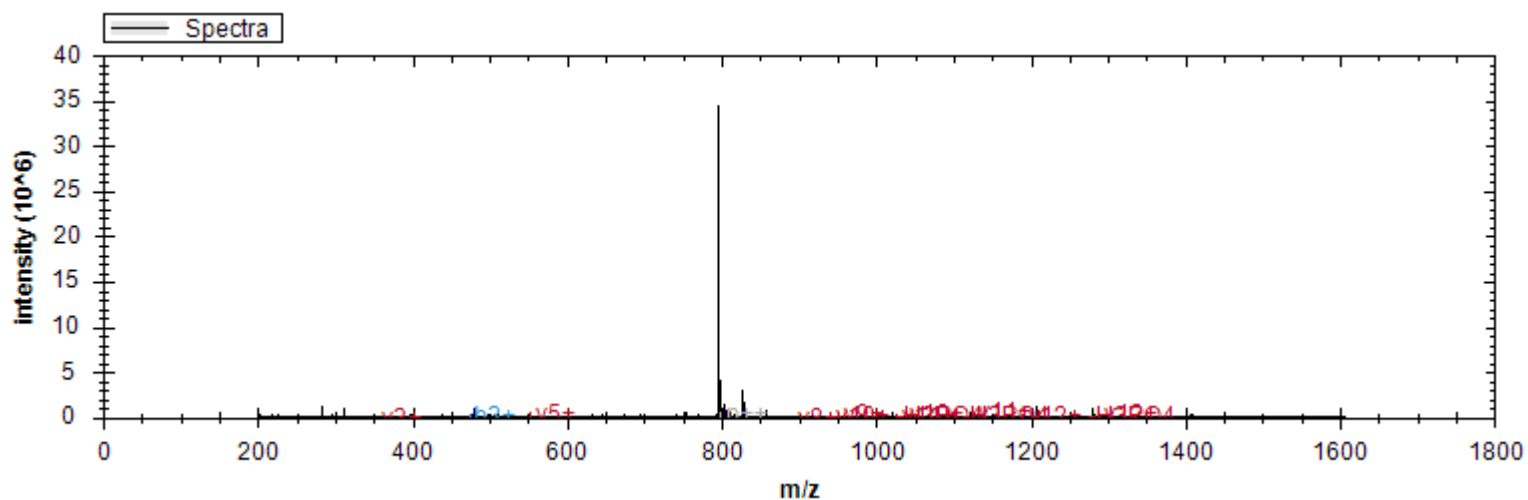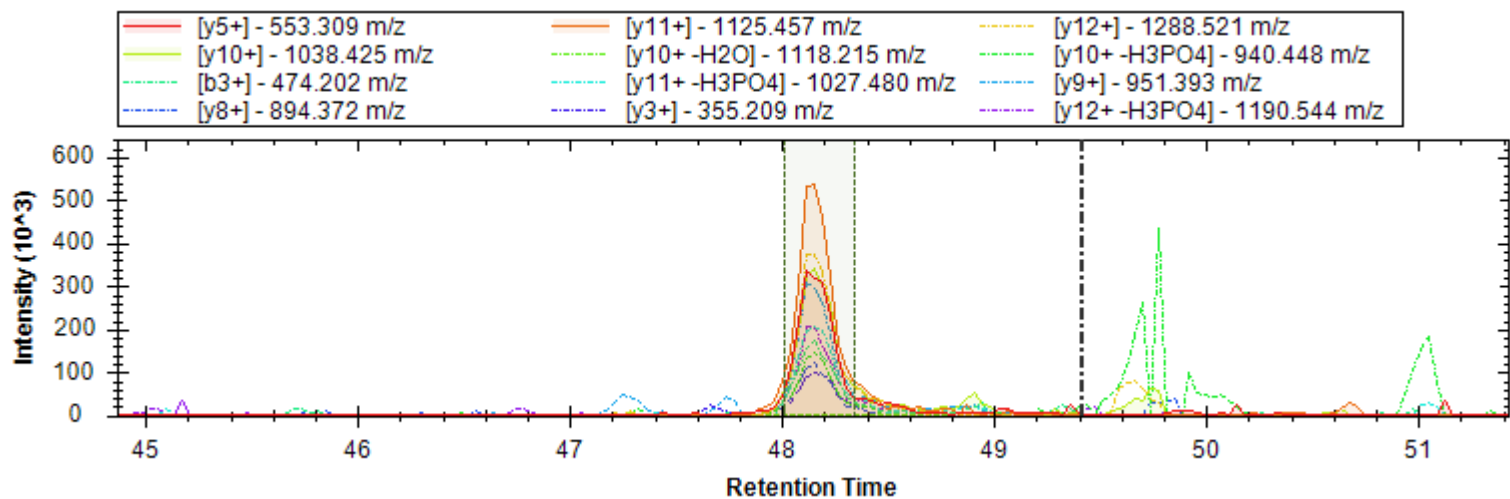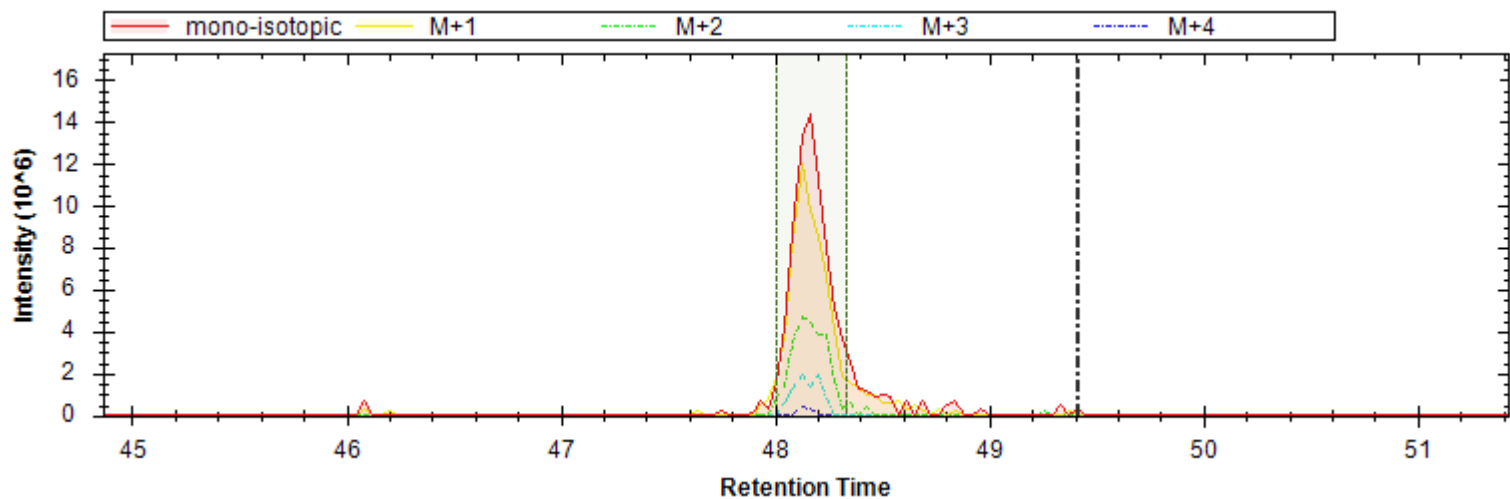

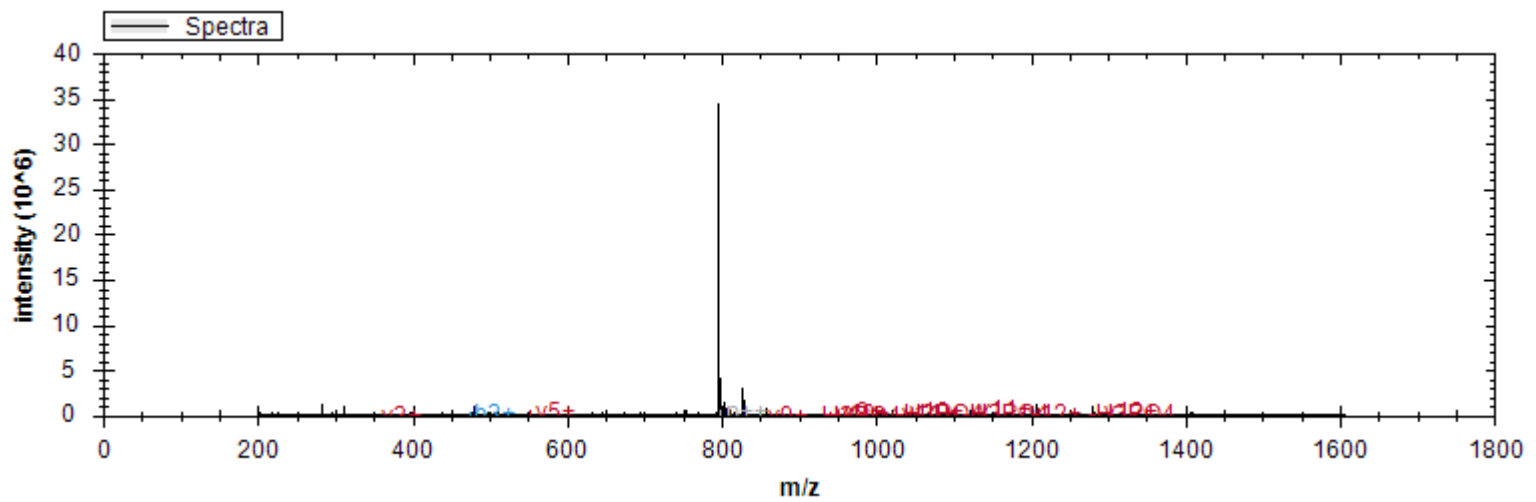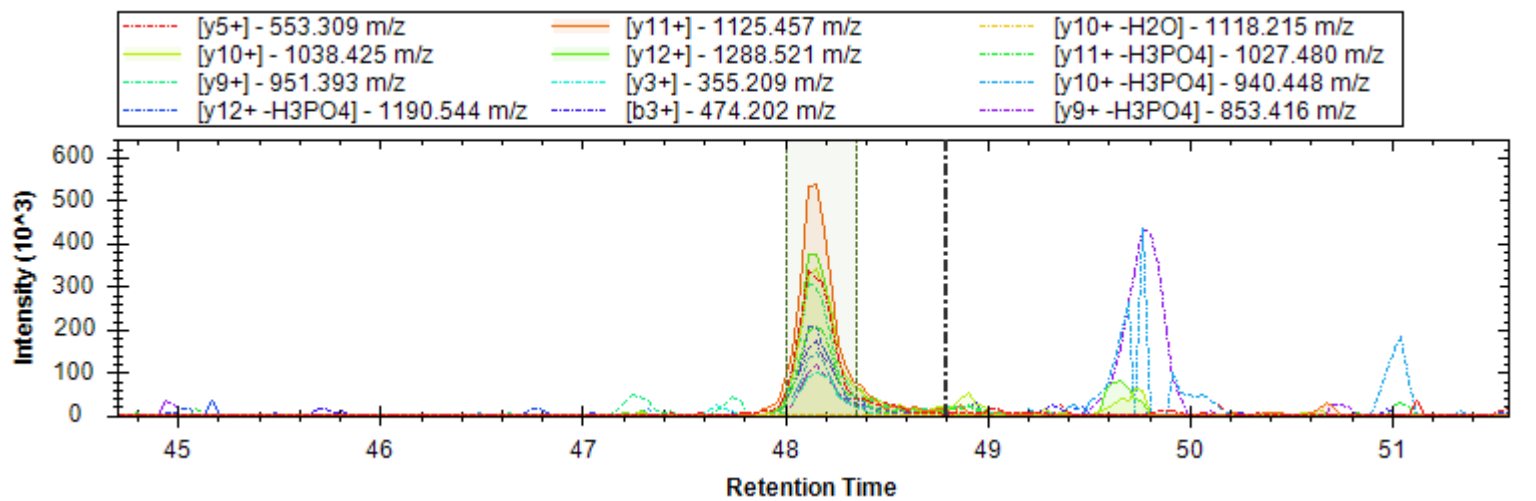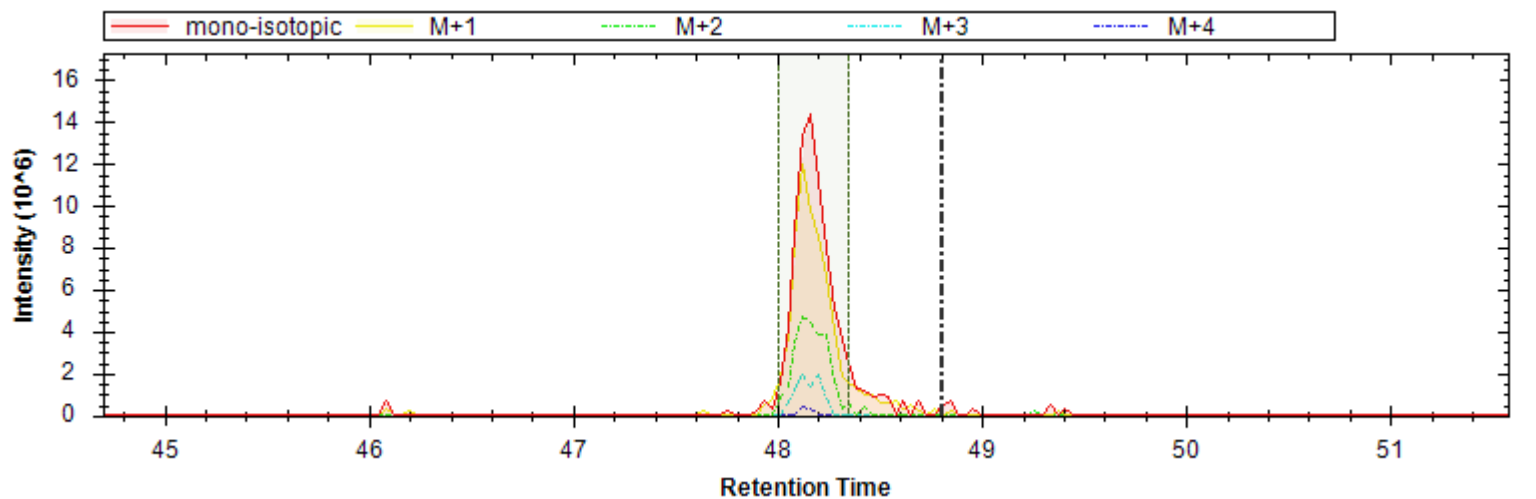

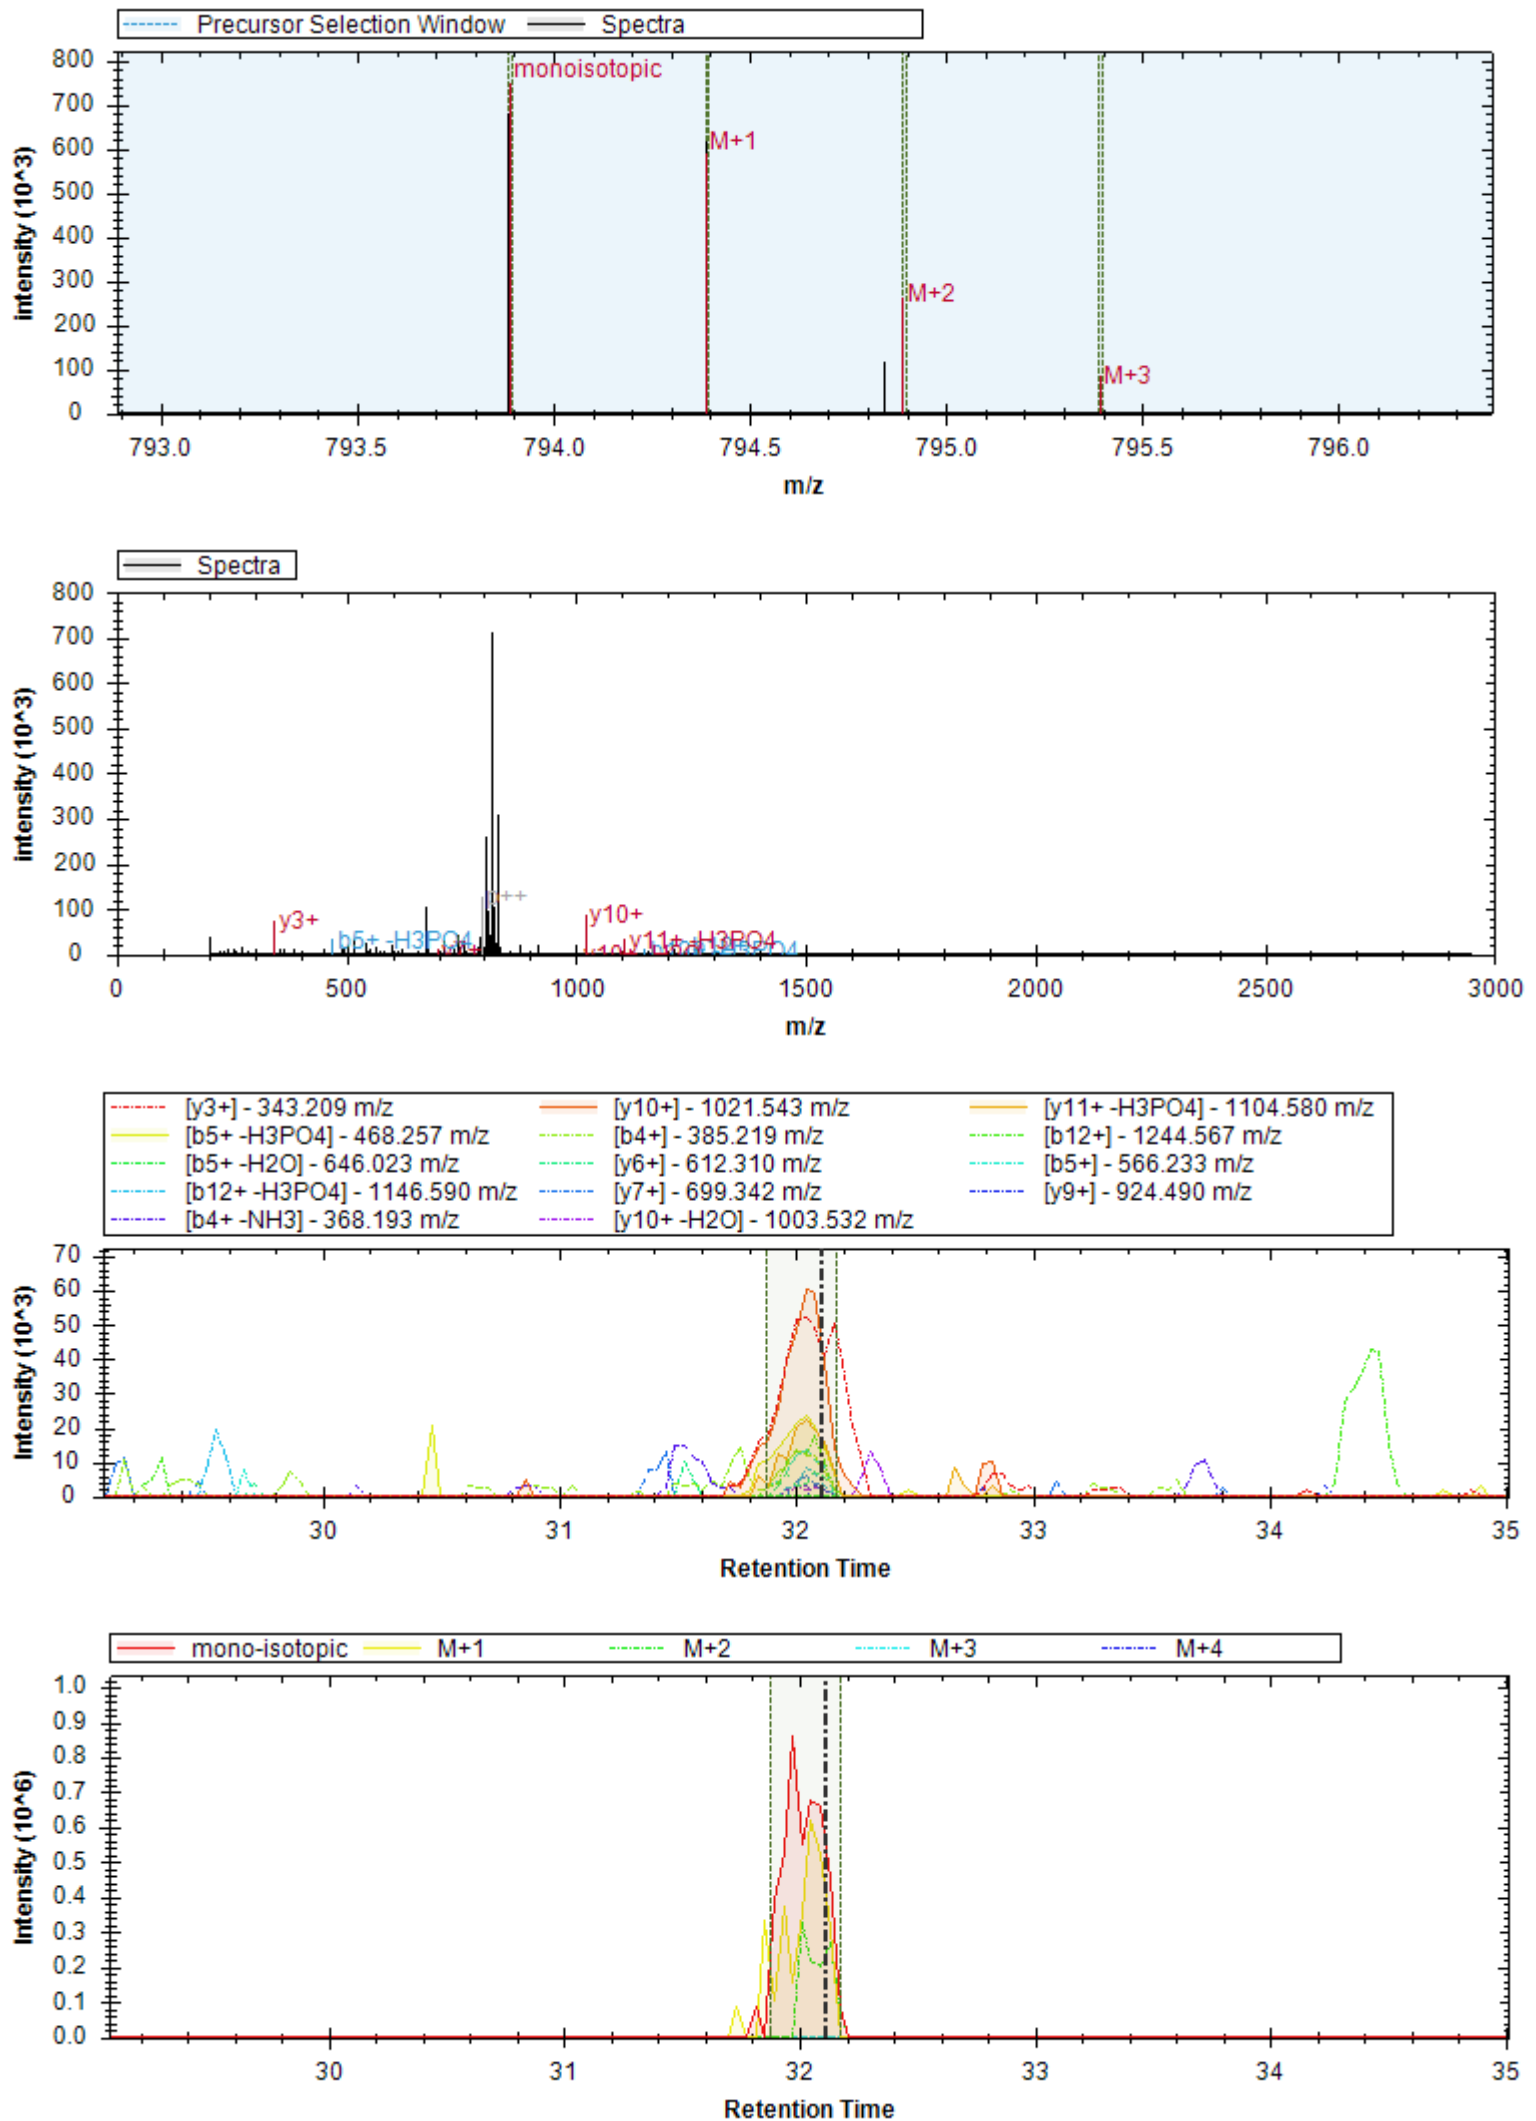

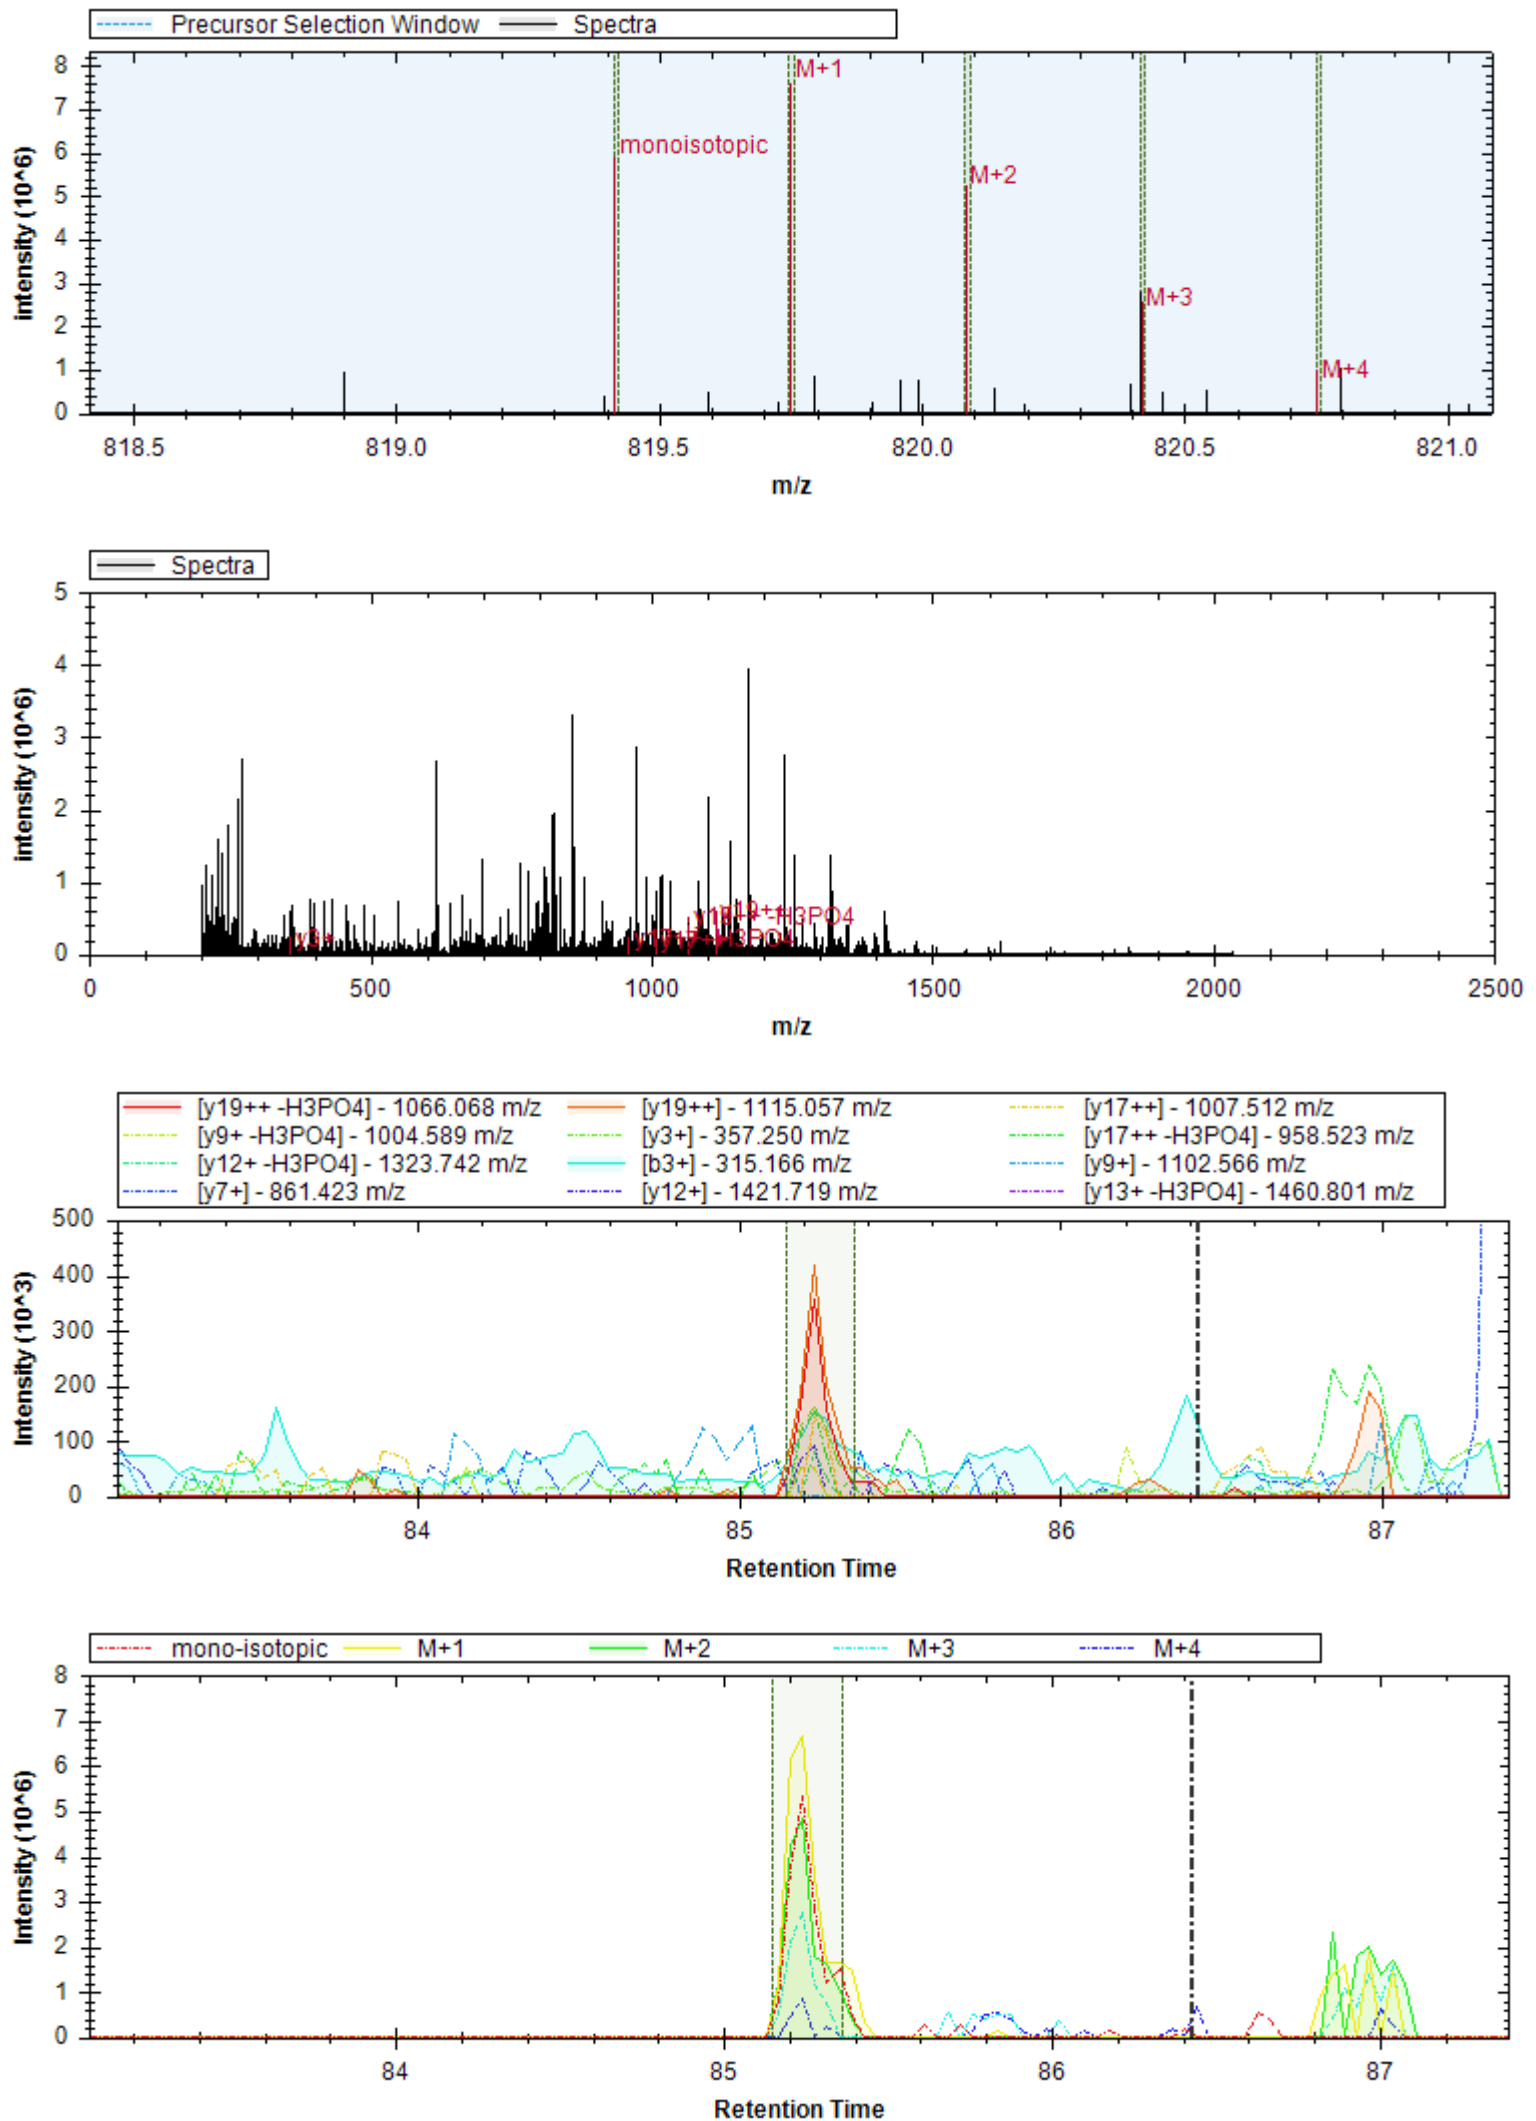

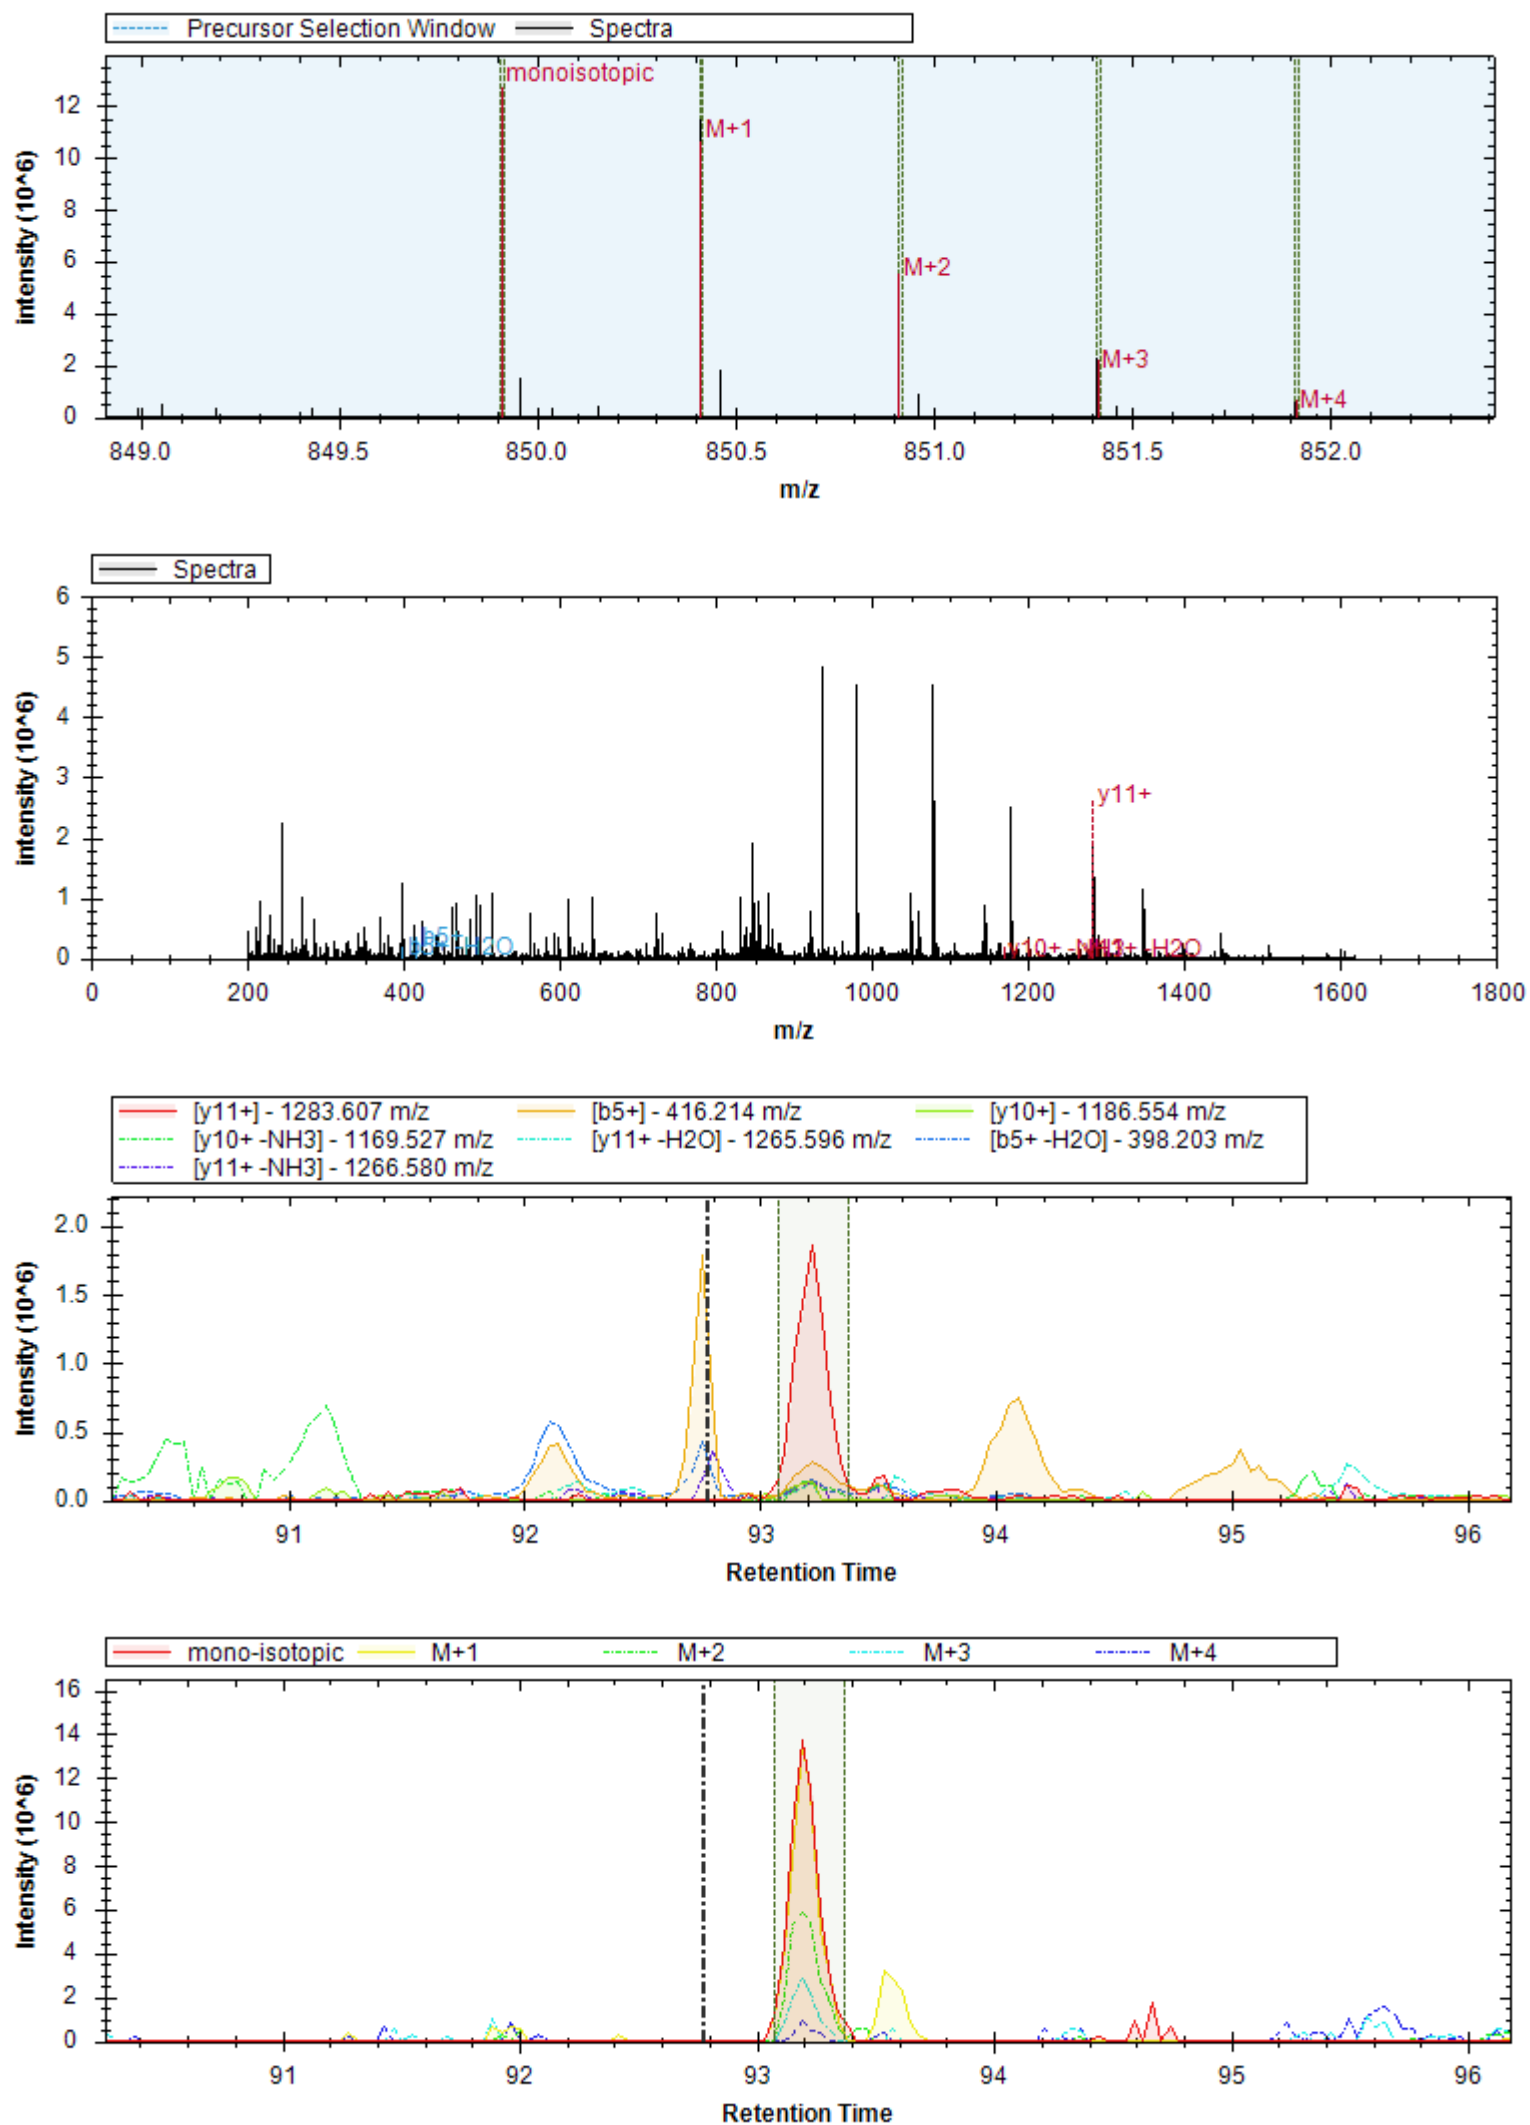

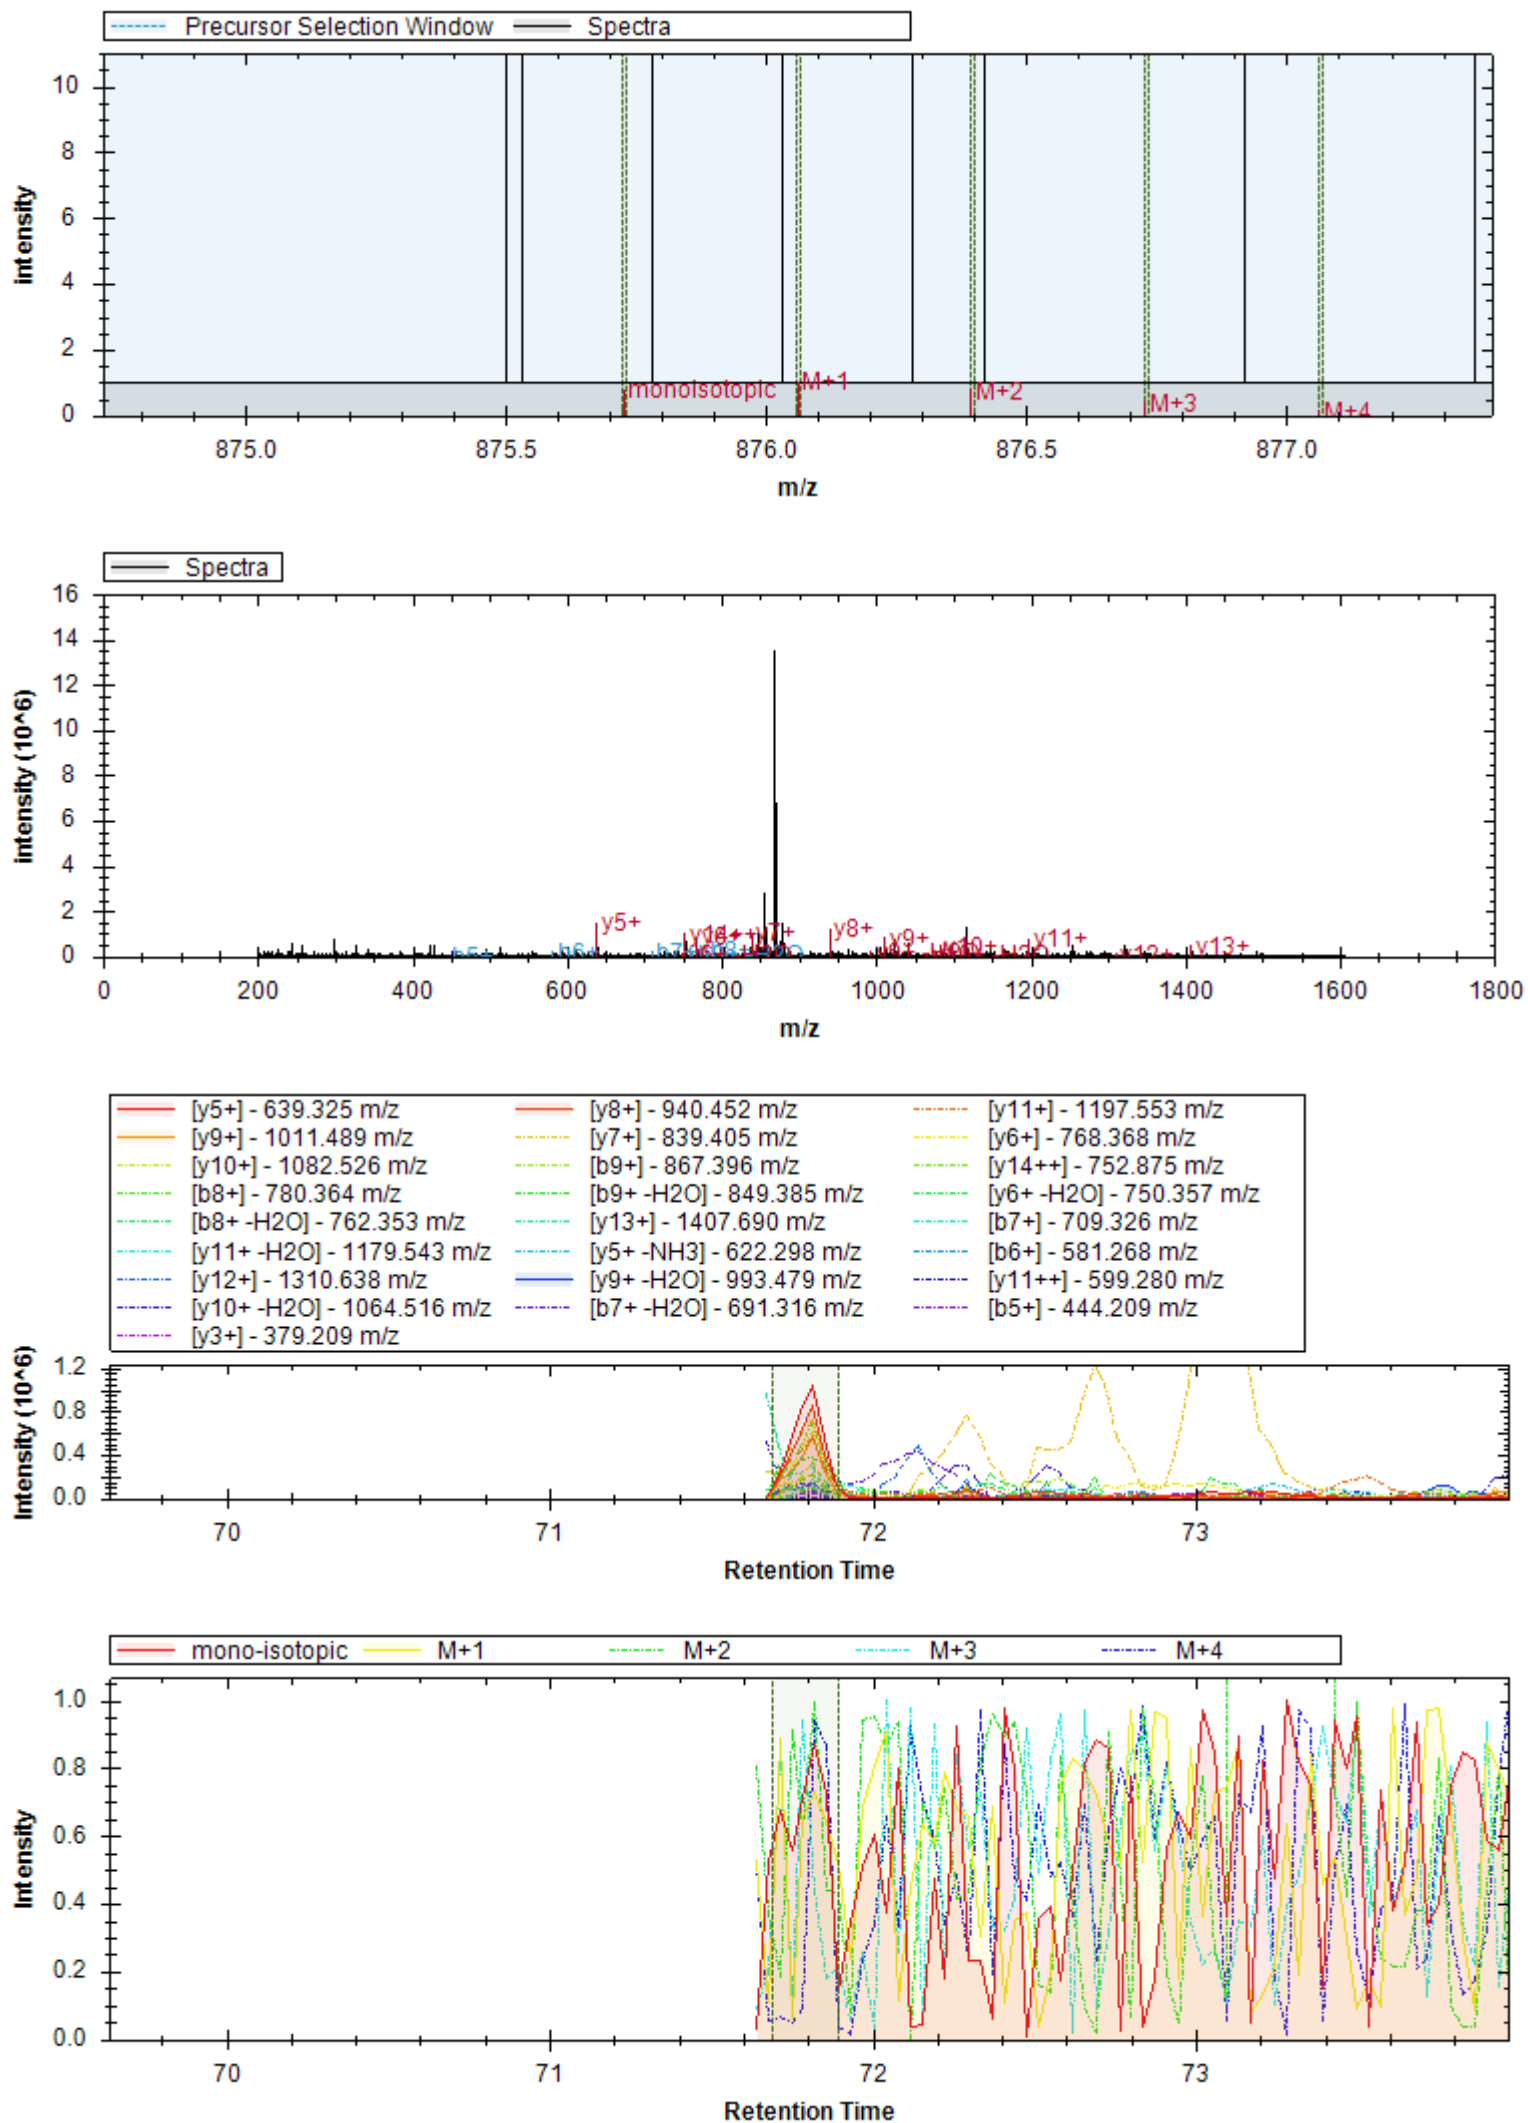



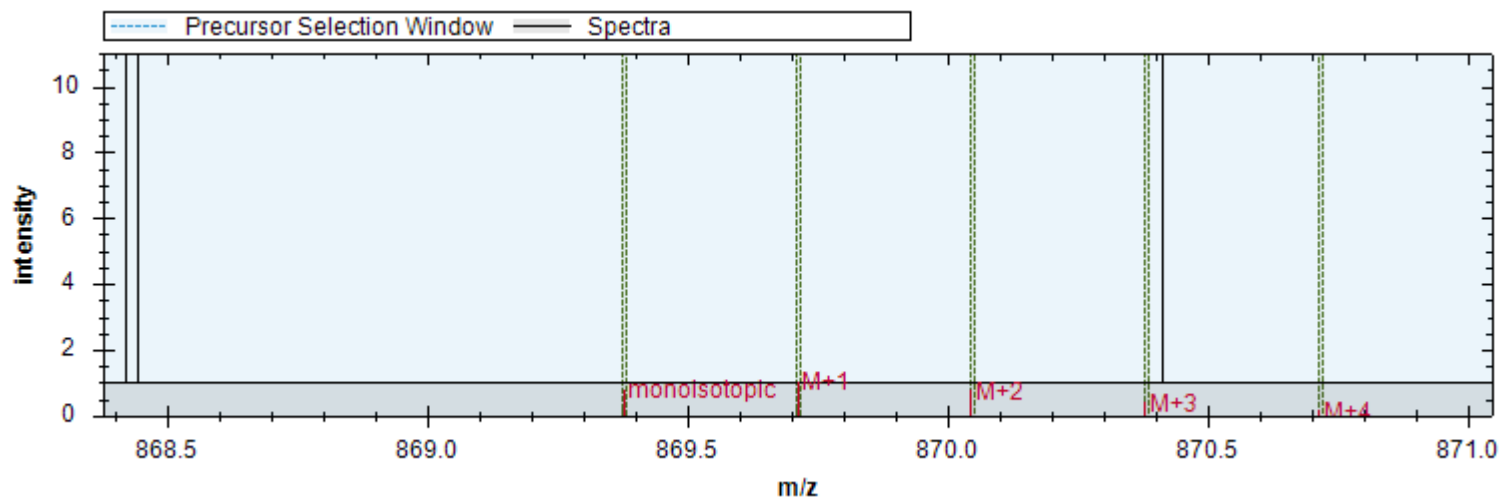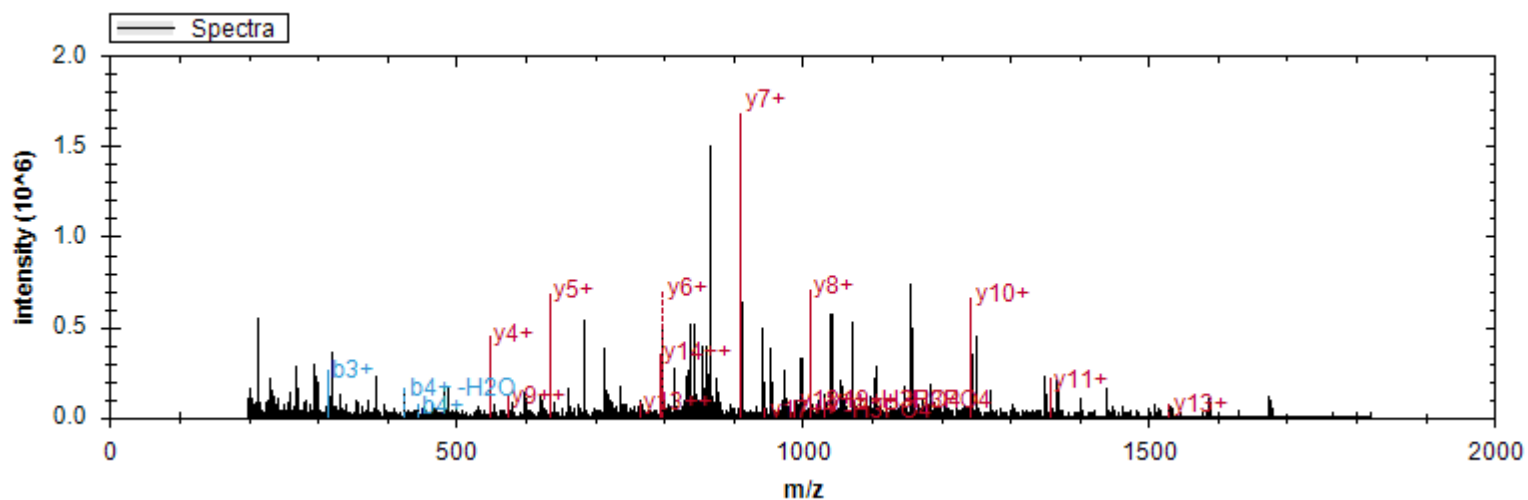

|                              |                       |                               |
|------------------------------|-----------------------|-------------------------------|
| [y7+] - 911.462 m/z          | [b8+] - 852.373 m/z   | [y5+] - 635.315 m/z           |
| [y6+] - 798.378 m/z          | [y10+] - 1244.642 m/z | [y8+] - 1010.531 m/z          |
| [y17++ -H3PO4] - 945.942 m/z | [y14++] - 794.381 m/z | [y4+] - 548.283 m/z           |
| [y18++ -H3PO4] - 989.458 m/z | [y13+] - 1530.734 m/z | [y11+] - 1358.685 m/z         |
| [b4+ -H2O] - 426.198 m/z     | [y13++] - 765.870 m/z | [y19++ -H3PO4] - 1032.974 m/z |
| [y9+] - 1147.589 m/z         | [b3+] - 315.166 m/z   | [y9++] - 574.298 m/z          |
| [y17++] - 994.931 m/z        | [b4+] - 444.209 m/z   |                               |

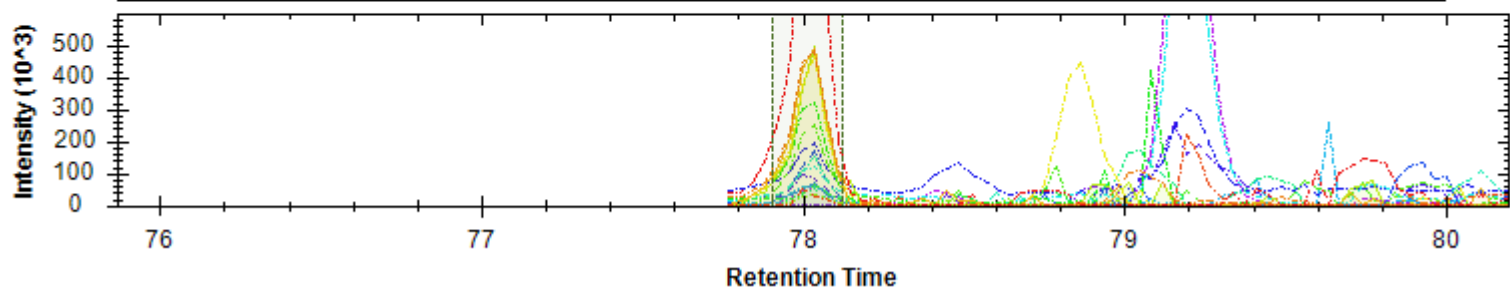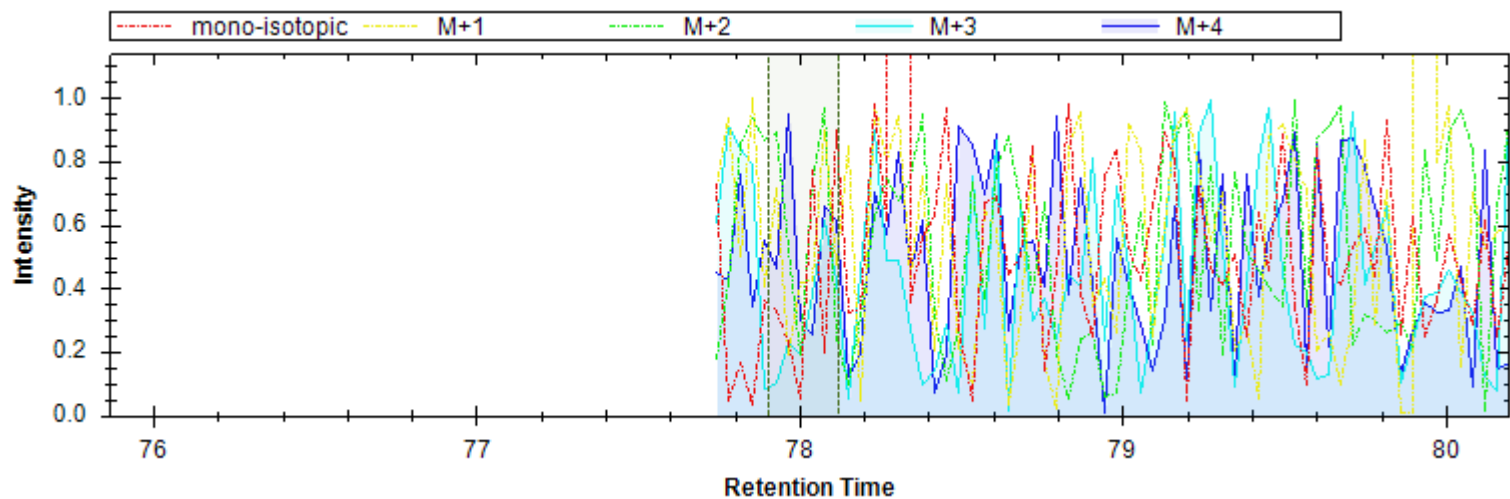

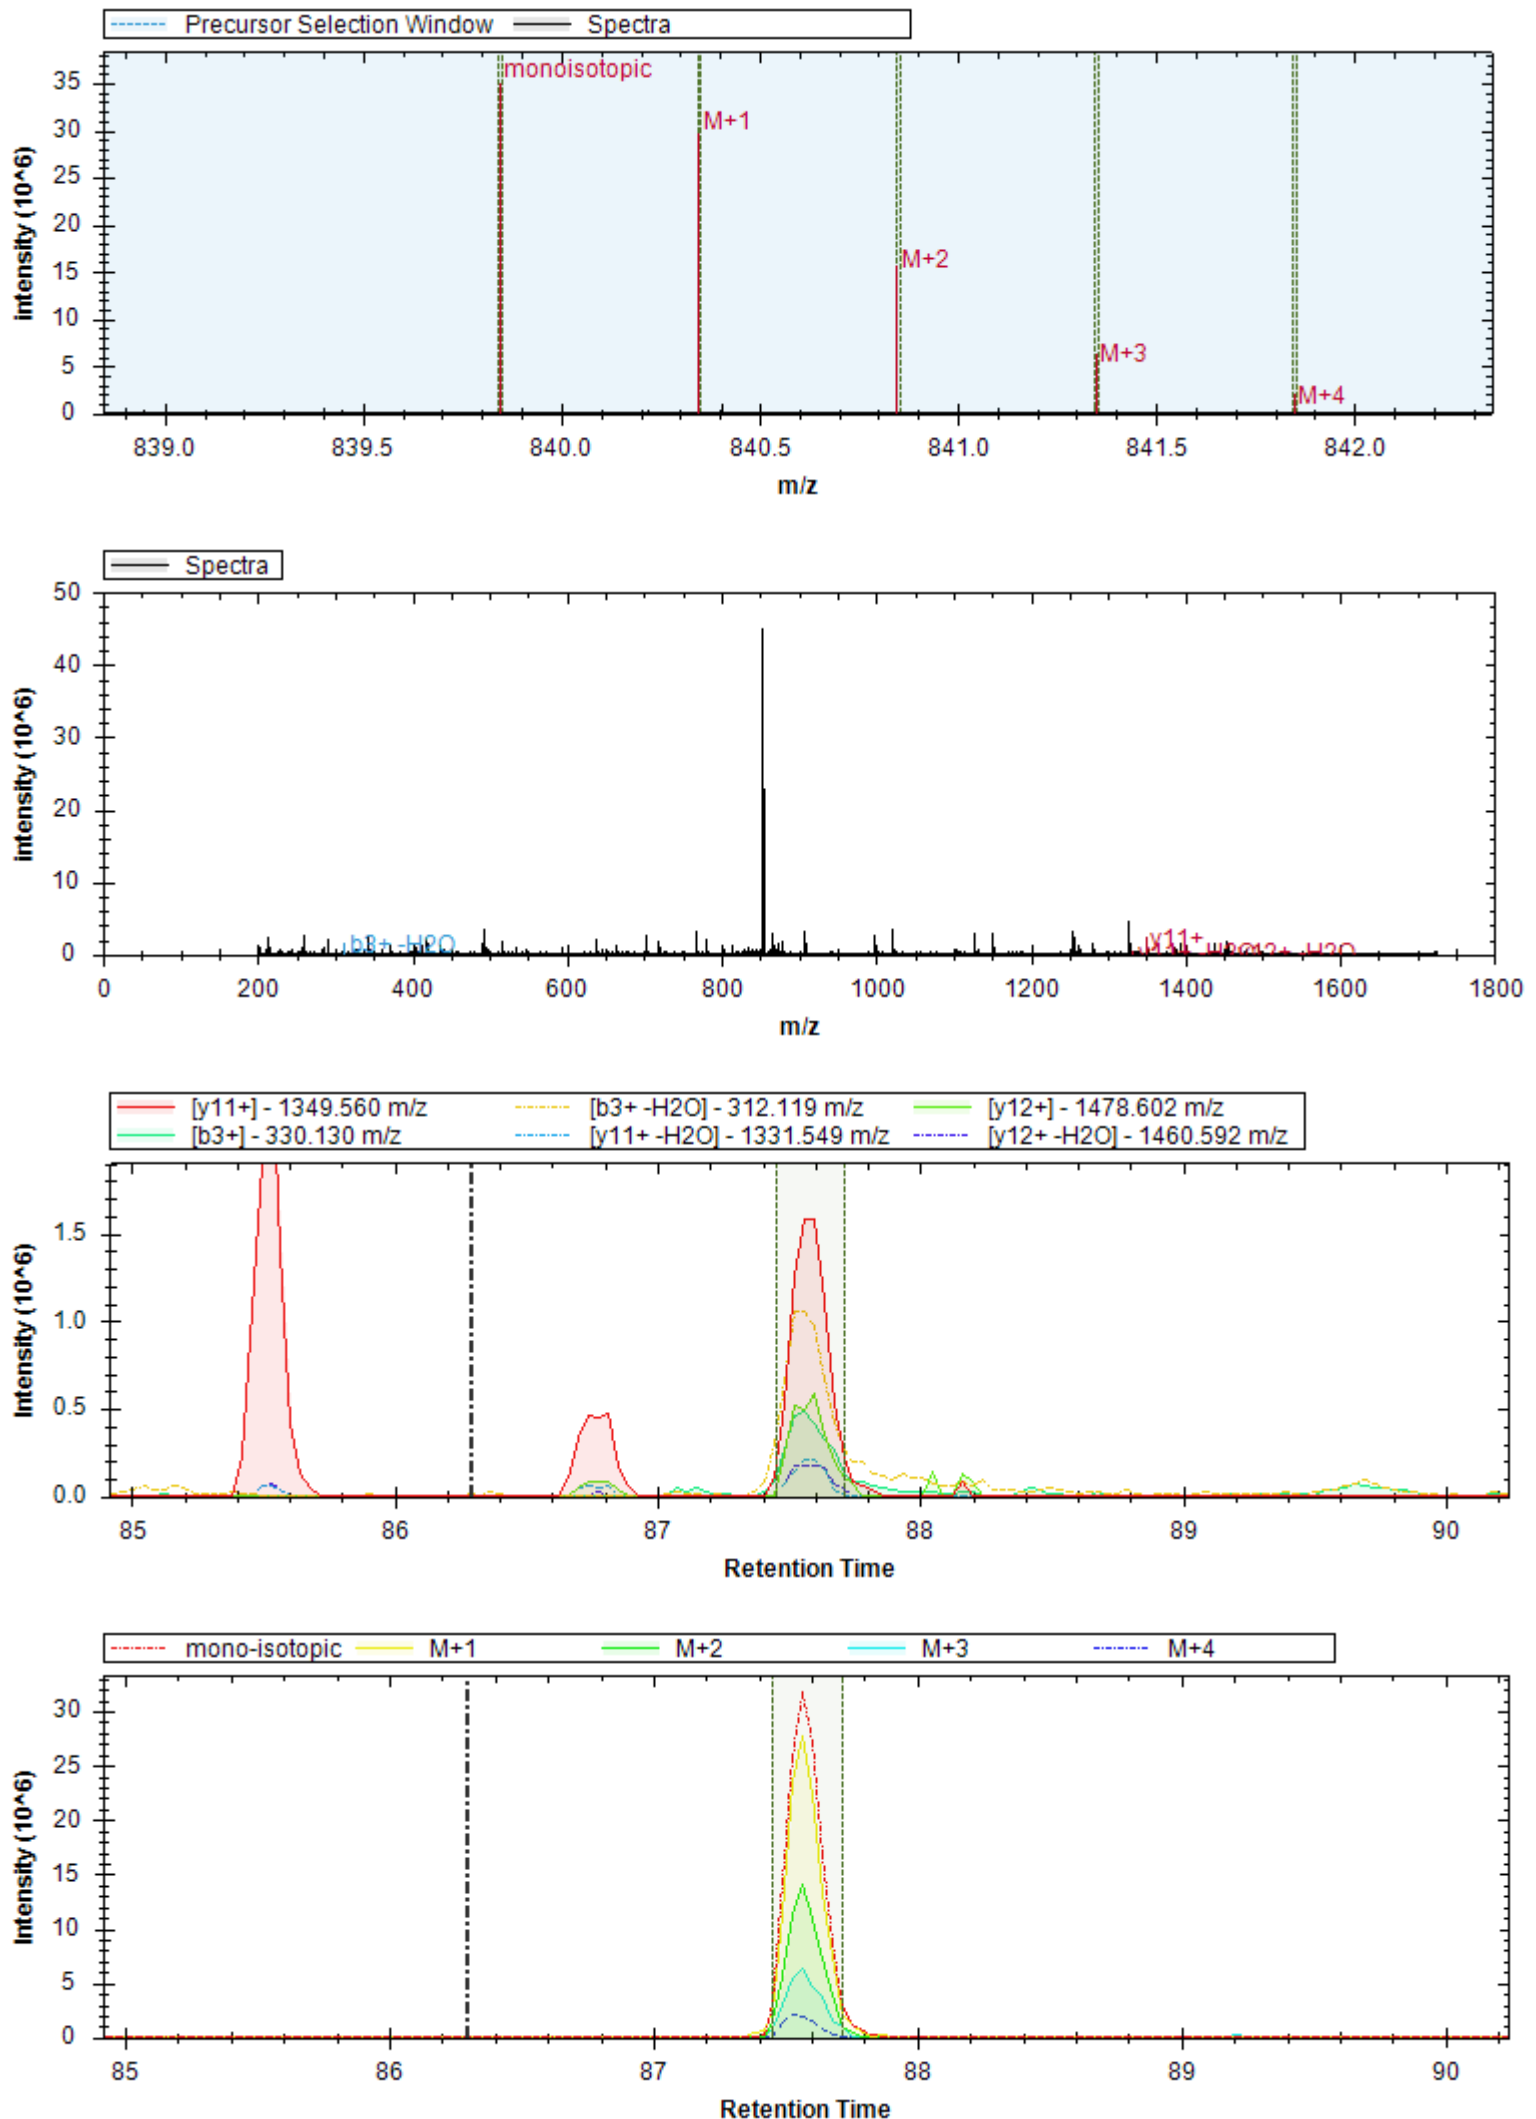

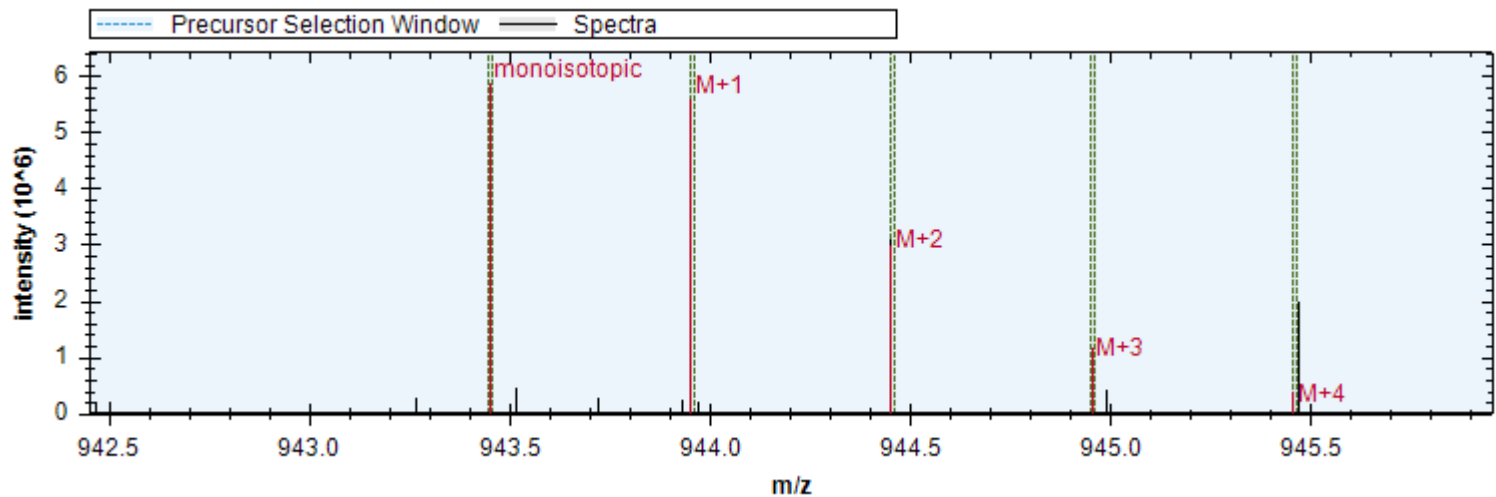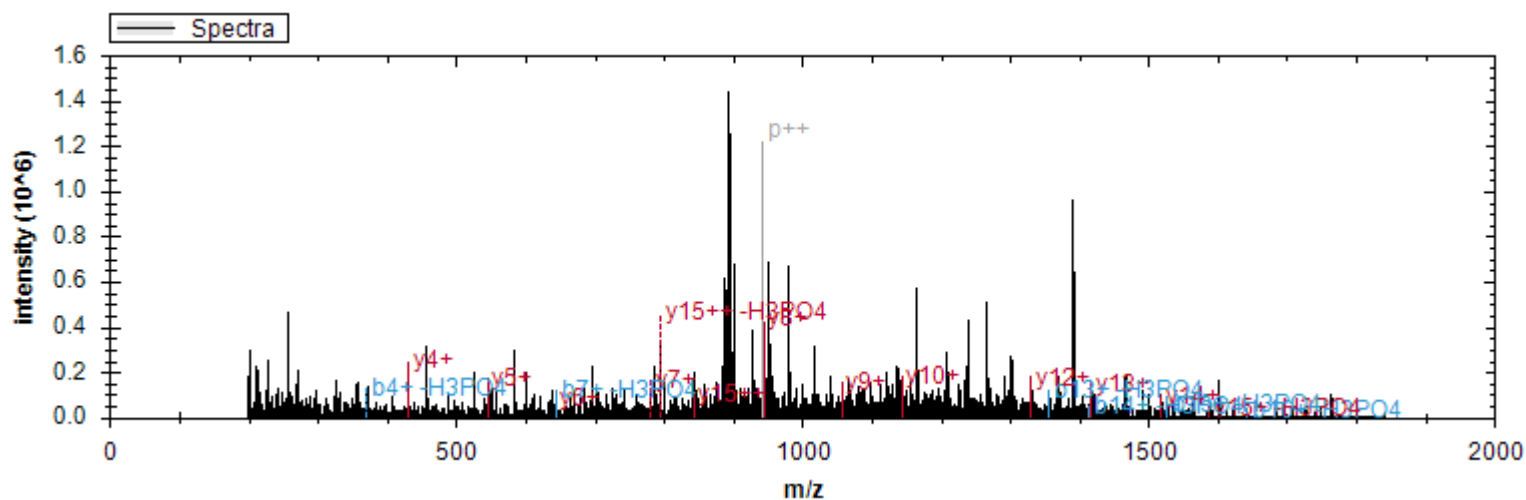

- |                              |                              |                              |
|------------------------------|------------------------------|------------------------------|
| [y8+] - 944.520 m/z          | [y4+] - 432.245 m/z          | [y5+] - 545.329 m/z          |
| [y7+] - 781.457 m/z          | [y10+] - 1144.636 m/z        | [y12+] - 1330.700 m/z        |
| [y13+] - 1417.732 m/z        | [y6+] - 644.398 m/z          | [y16++ -H3PO4] - 850.946 m/z |
| [y14+] - 1518.780 m/z        | [b12+ -H3PO4] - 1243.595 m/z | [y9+] - 1057.604 m/z         |
| [b7+ -H3PO4] - 644.289 m/z   | [b4+ -H3PO4] - 371.193 m/z   | [b9+ -H3PO4] - 844.405 m/z   |
| [y15++ -H3PO4] - 794.404 m/z | [y11+] - 1273.679 m/z        | [b13+ -H3PO4] - 1356.679 m/z |
| [b10+ -H3PO4] - 1007.468 m/z | [b15+ -H3PO4] - 1526.785 m/z | [y15++] - 843.393 m/z        |
| [y15+ -H3PO4] - 1587.801 m/z | [y3+] - 375.224 m/z          | [b16+ -H3PO4] - 1641.812 m/z |
| [b14+ -H3PO4] - 1413.701 m/z |                              |                              |

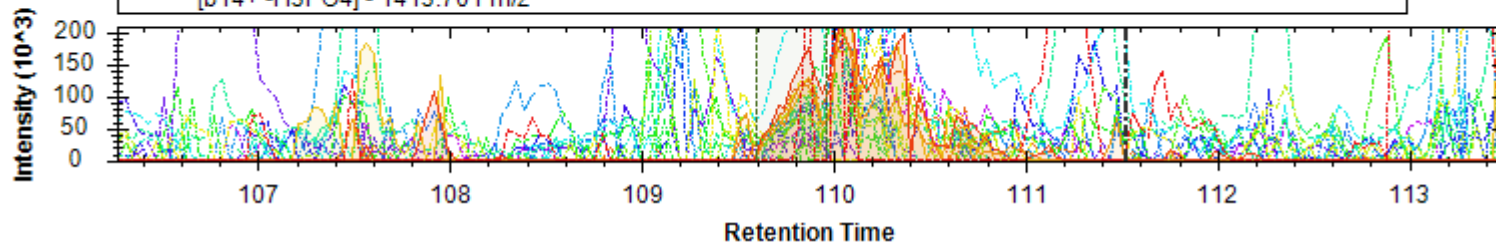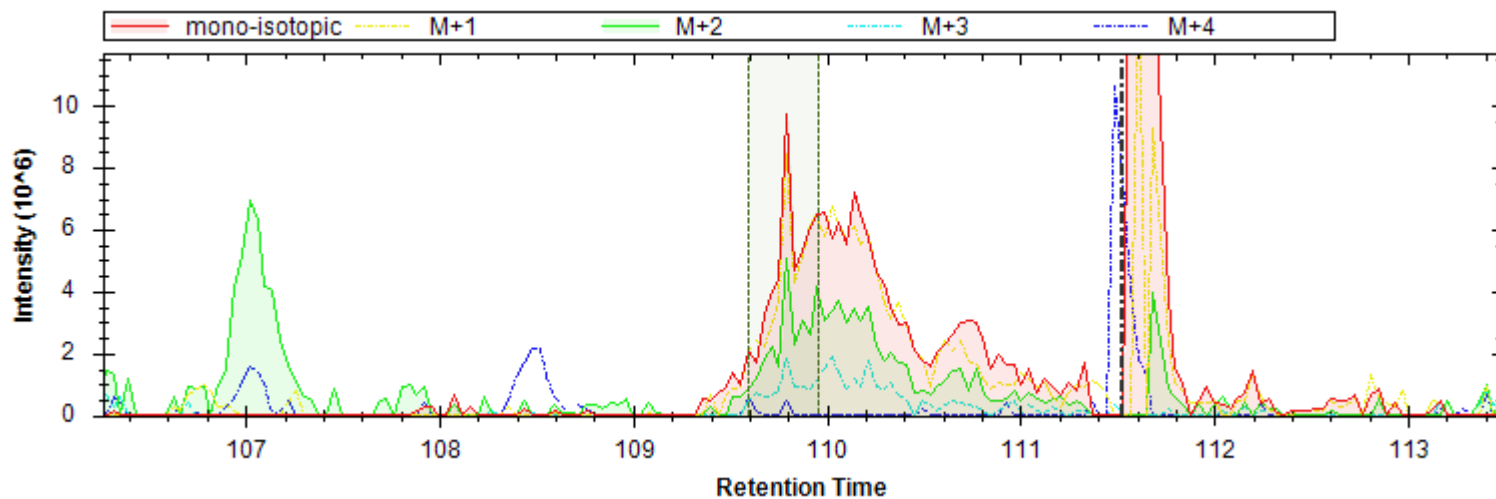

Fig4\_MP-DIA-barrel-cortex-p54-1\_MHRM.htrms

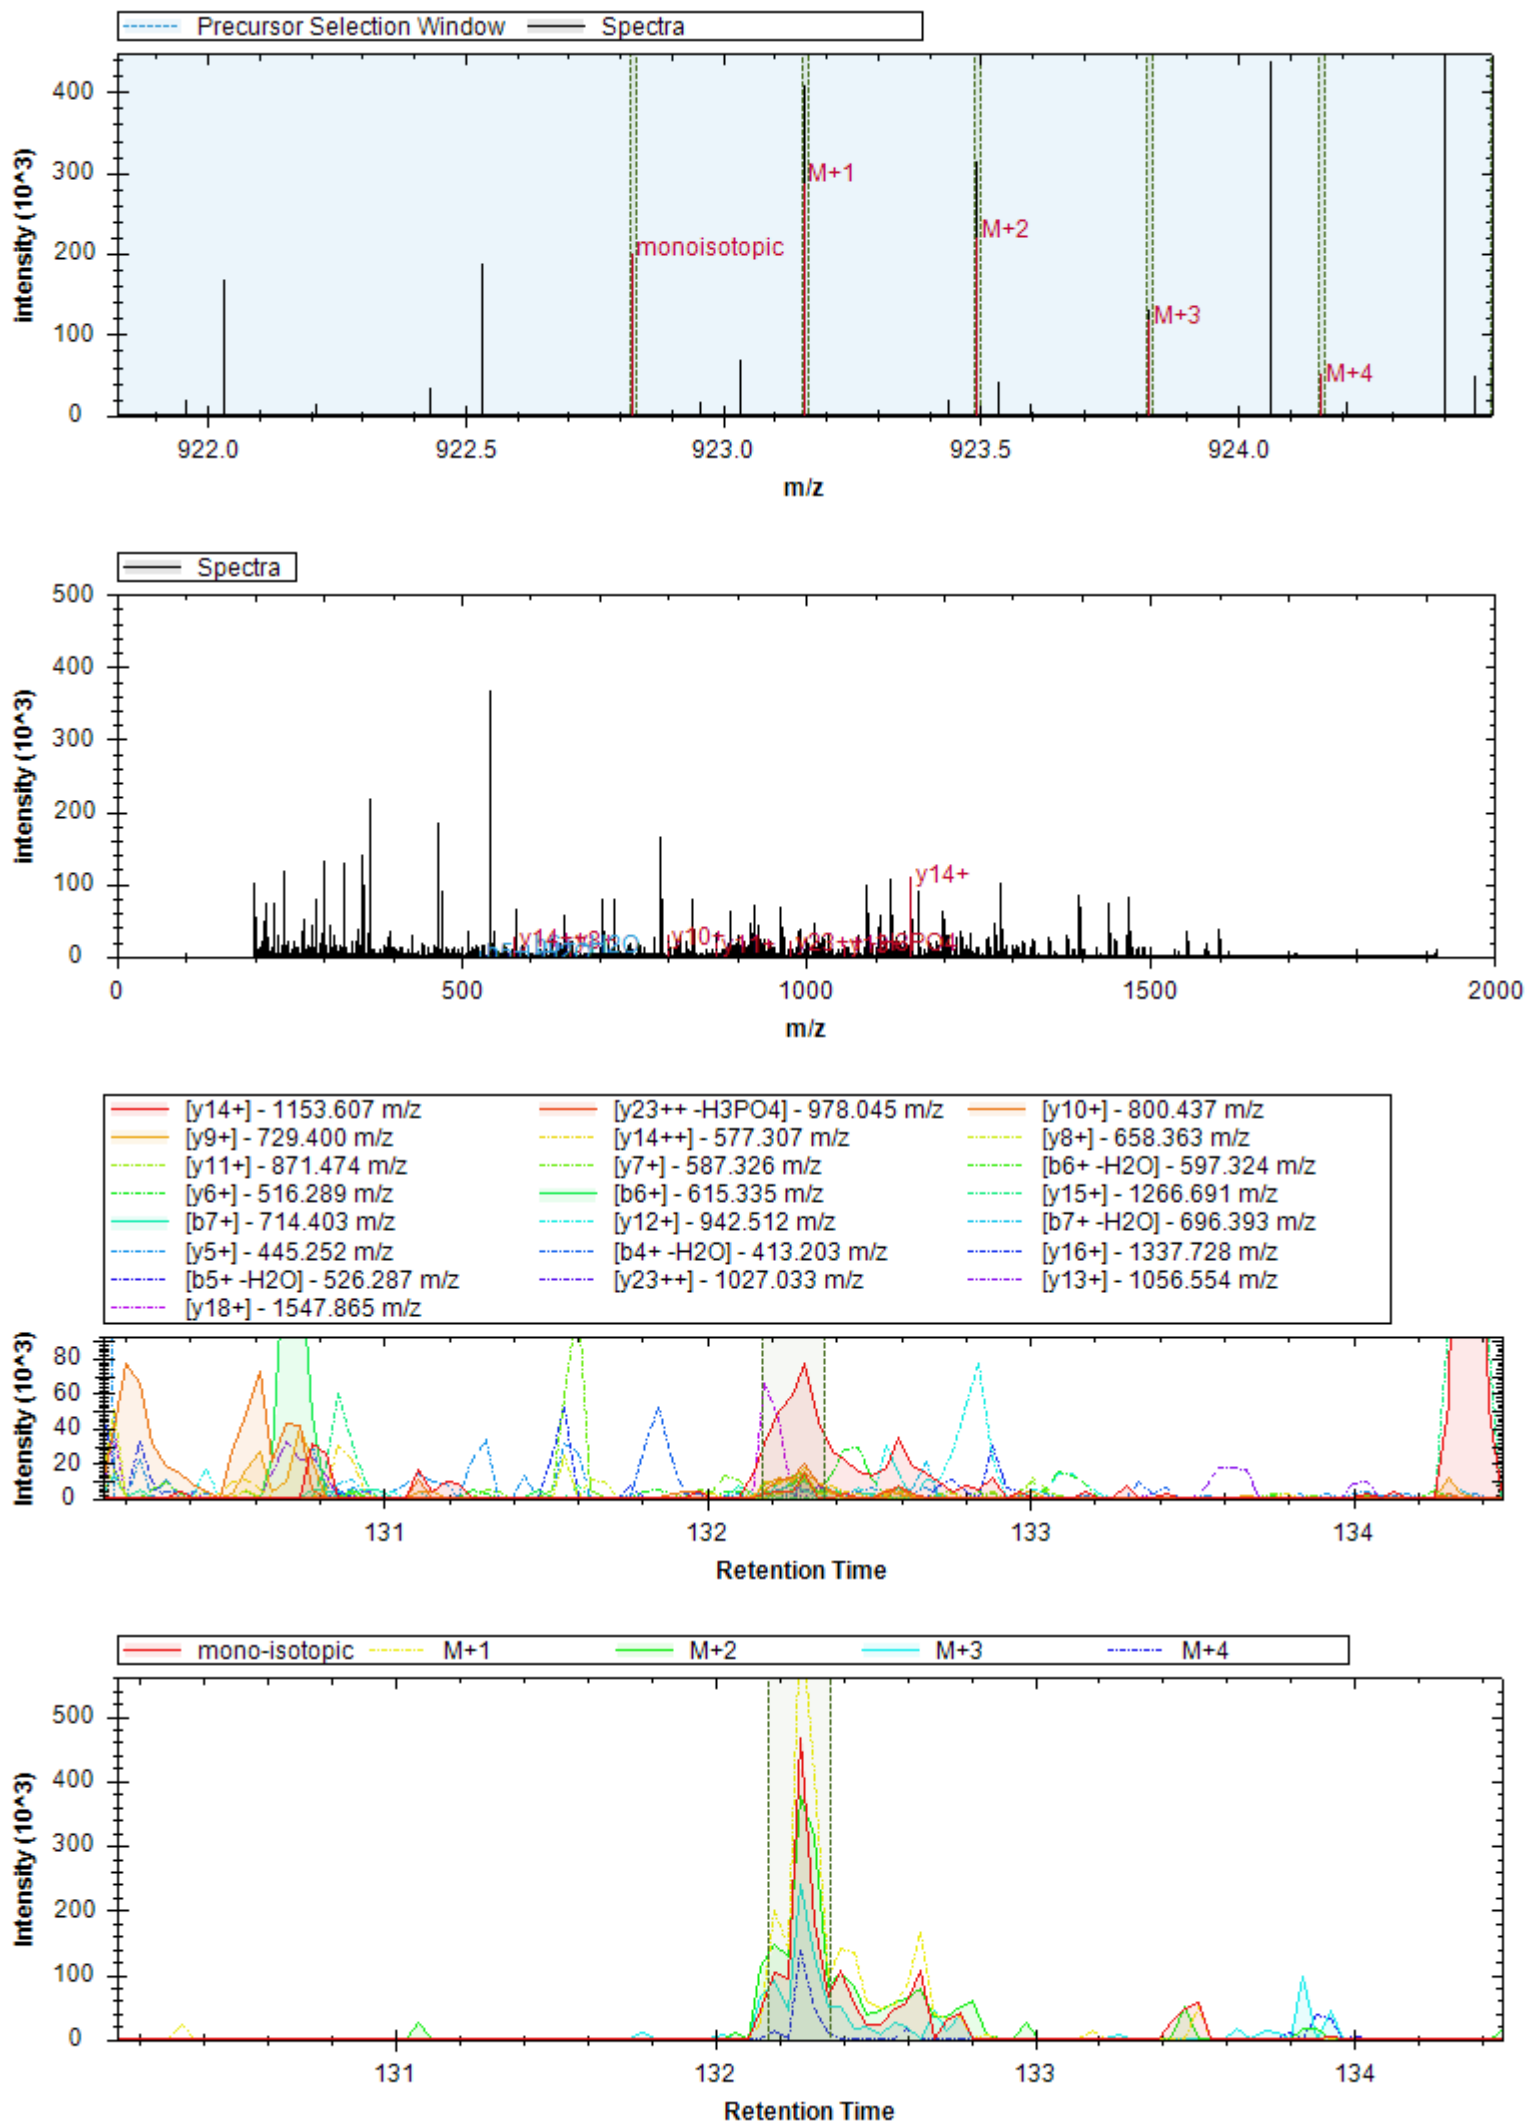

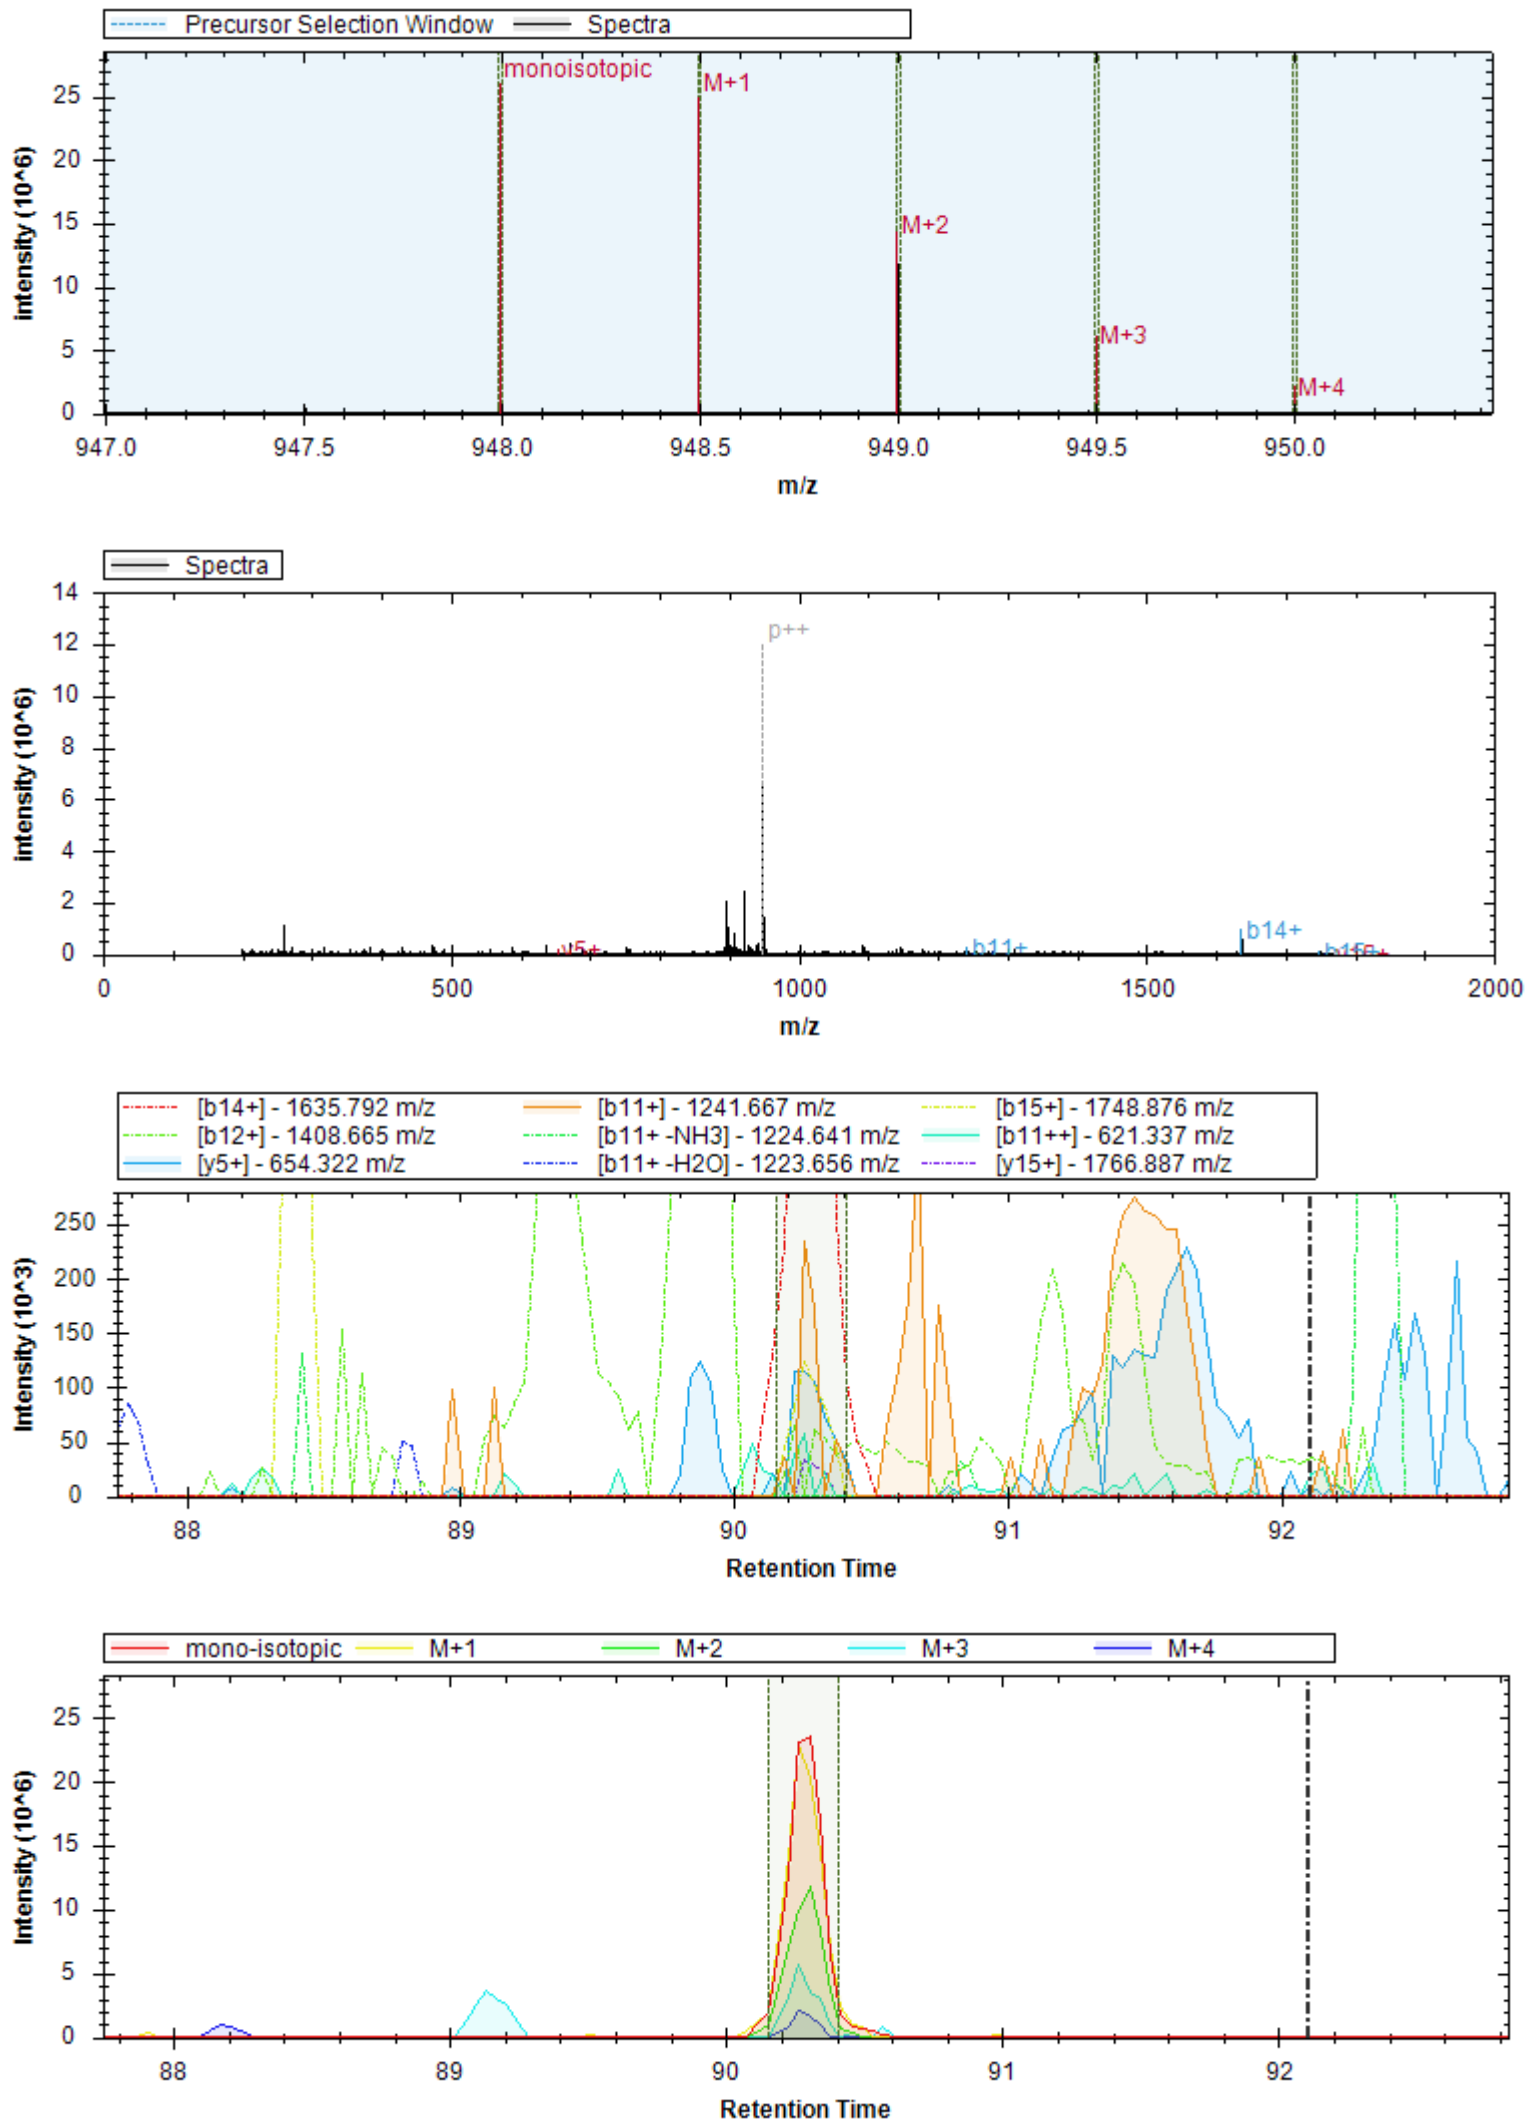

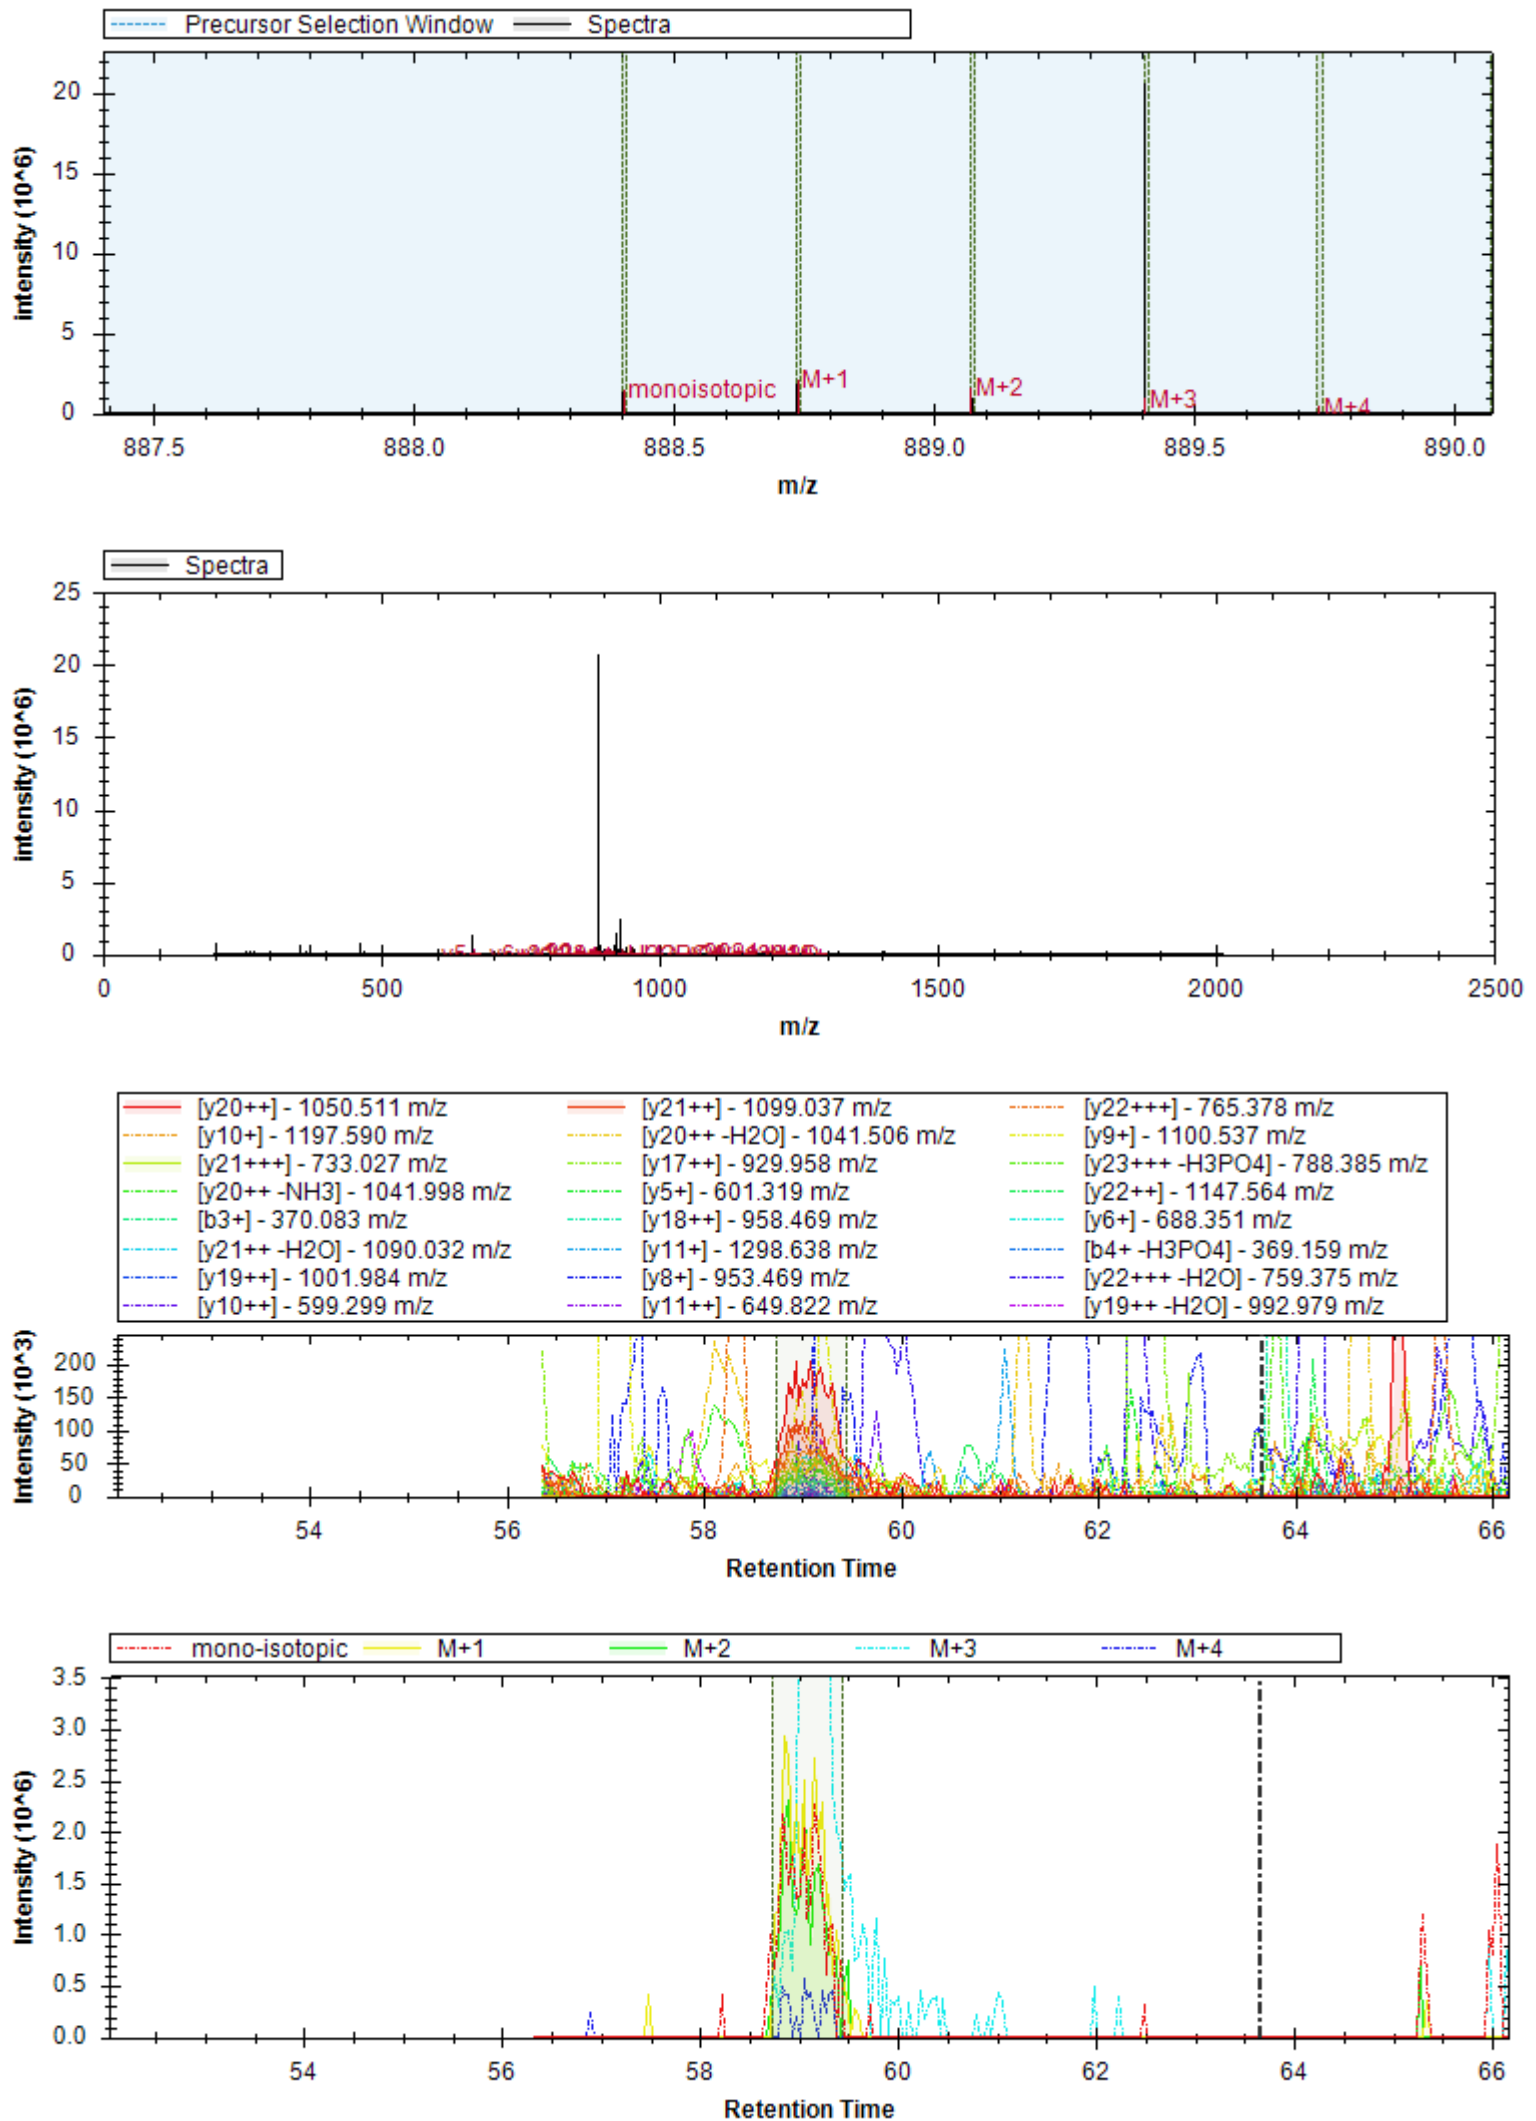

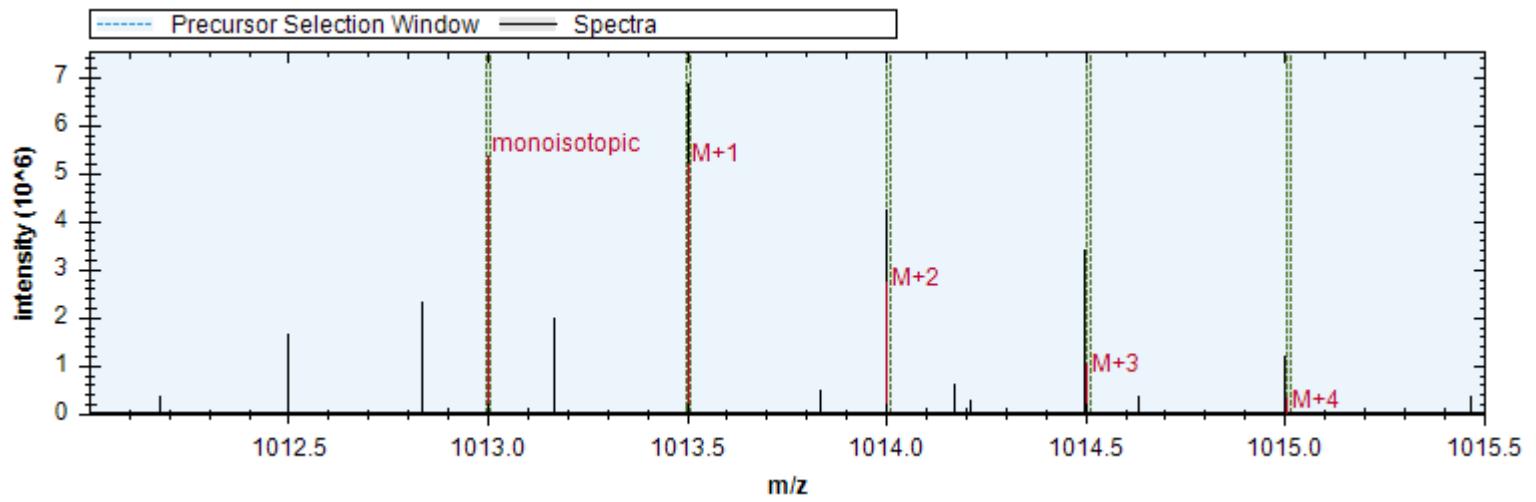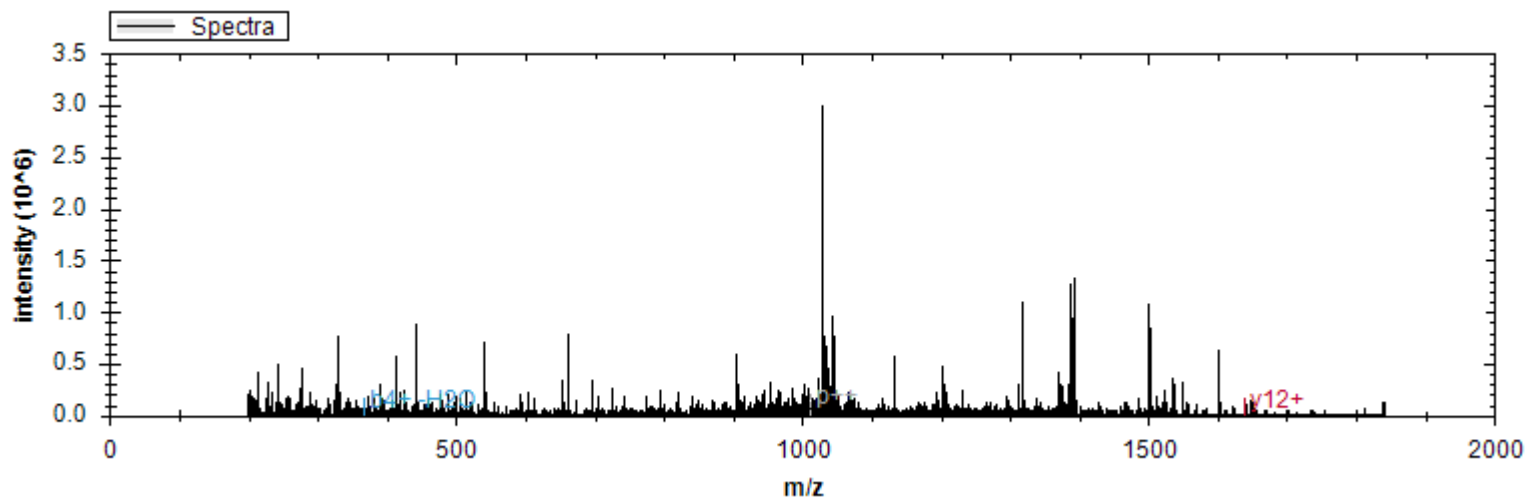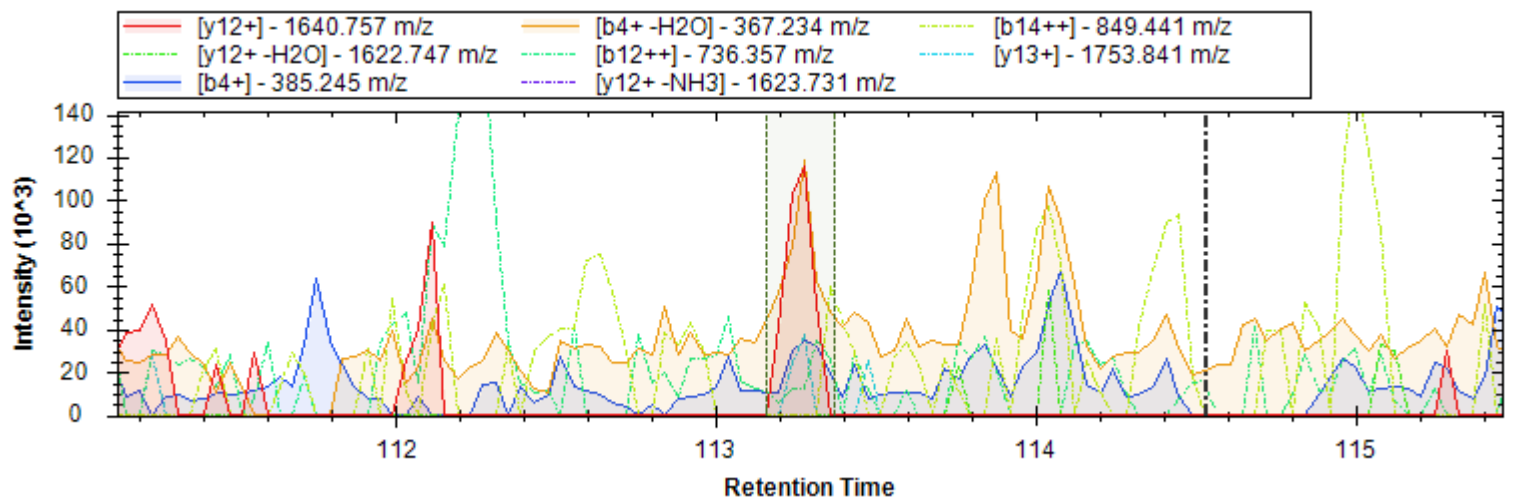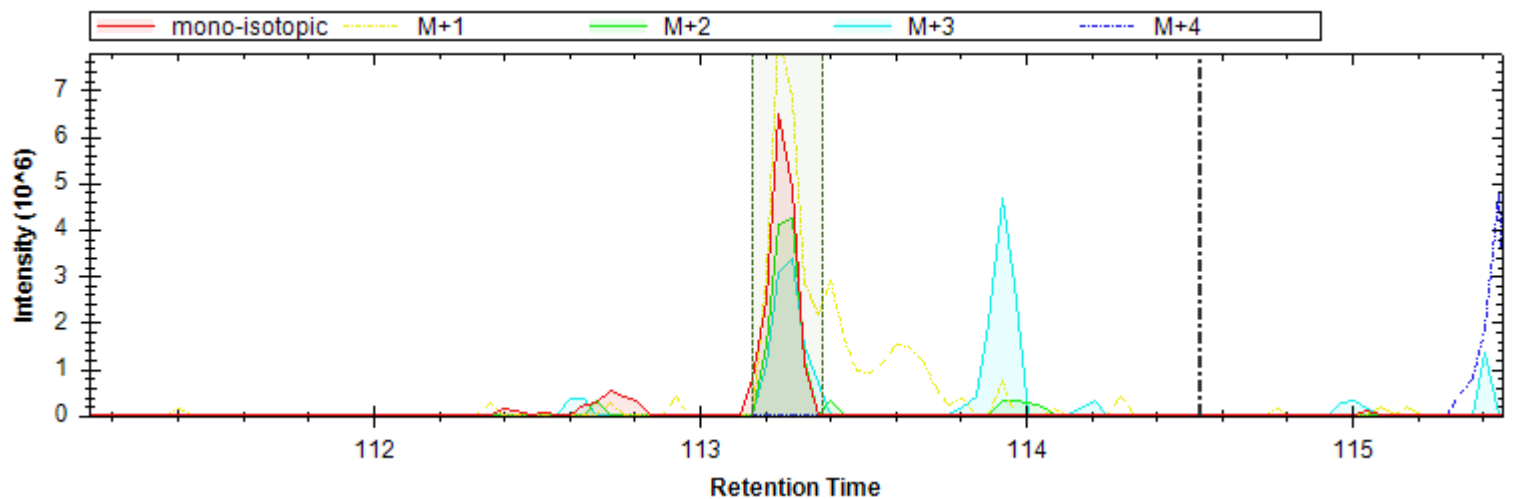

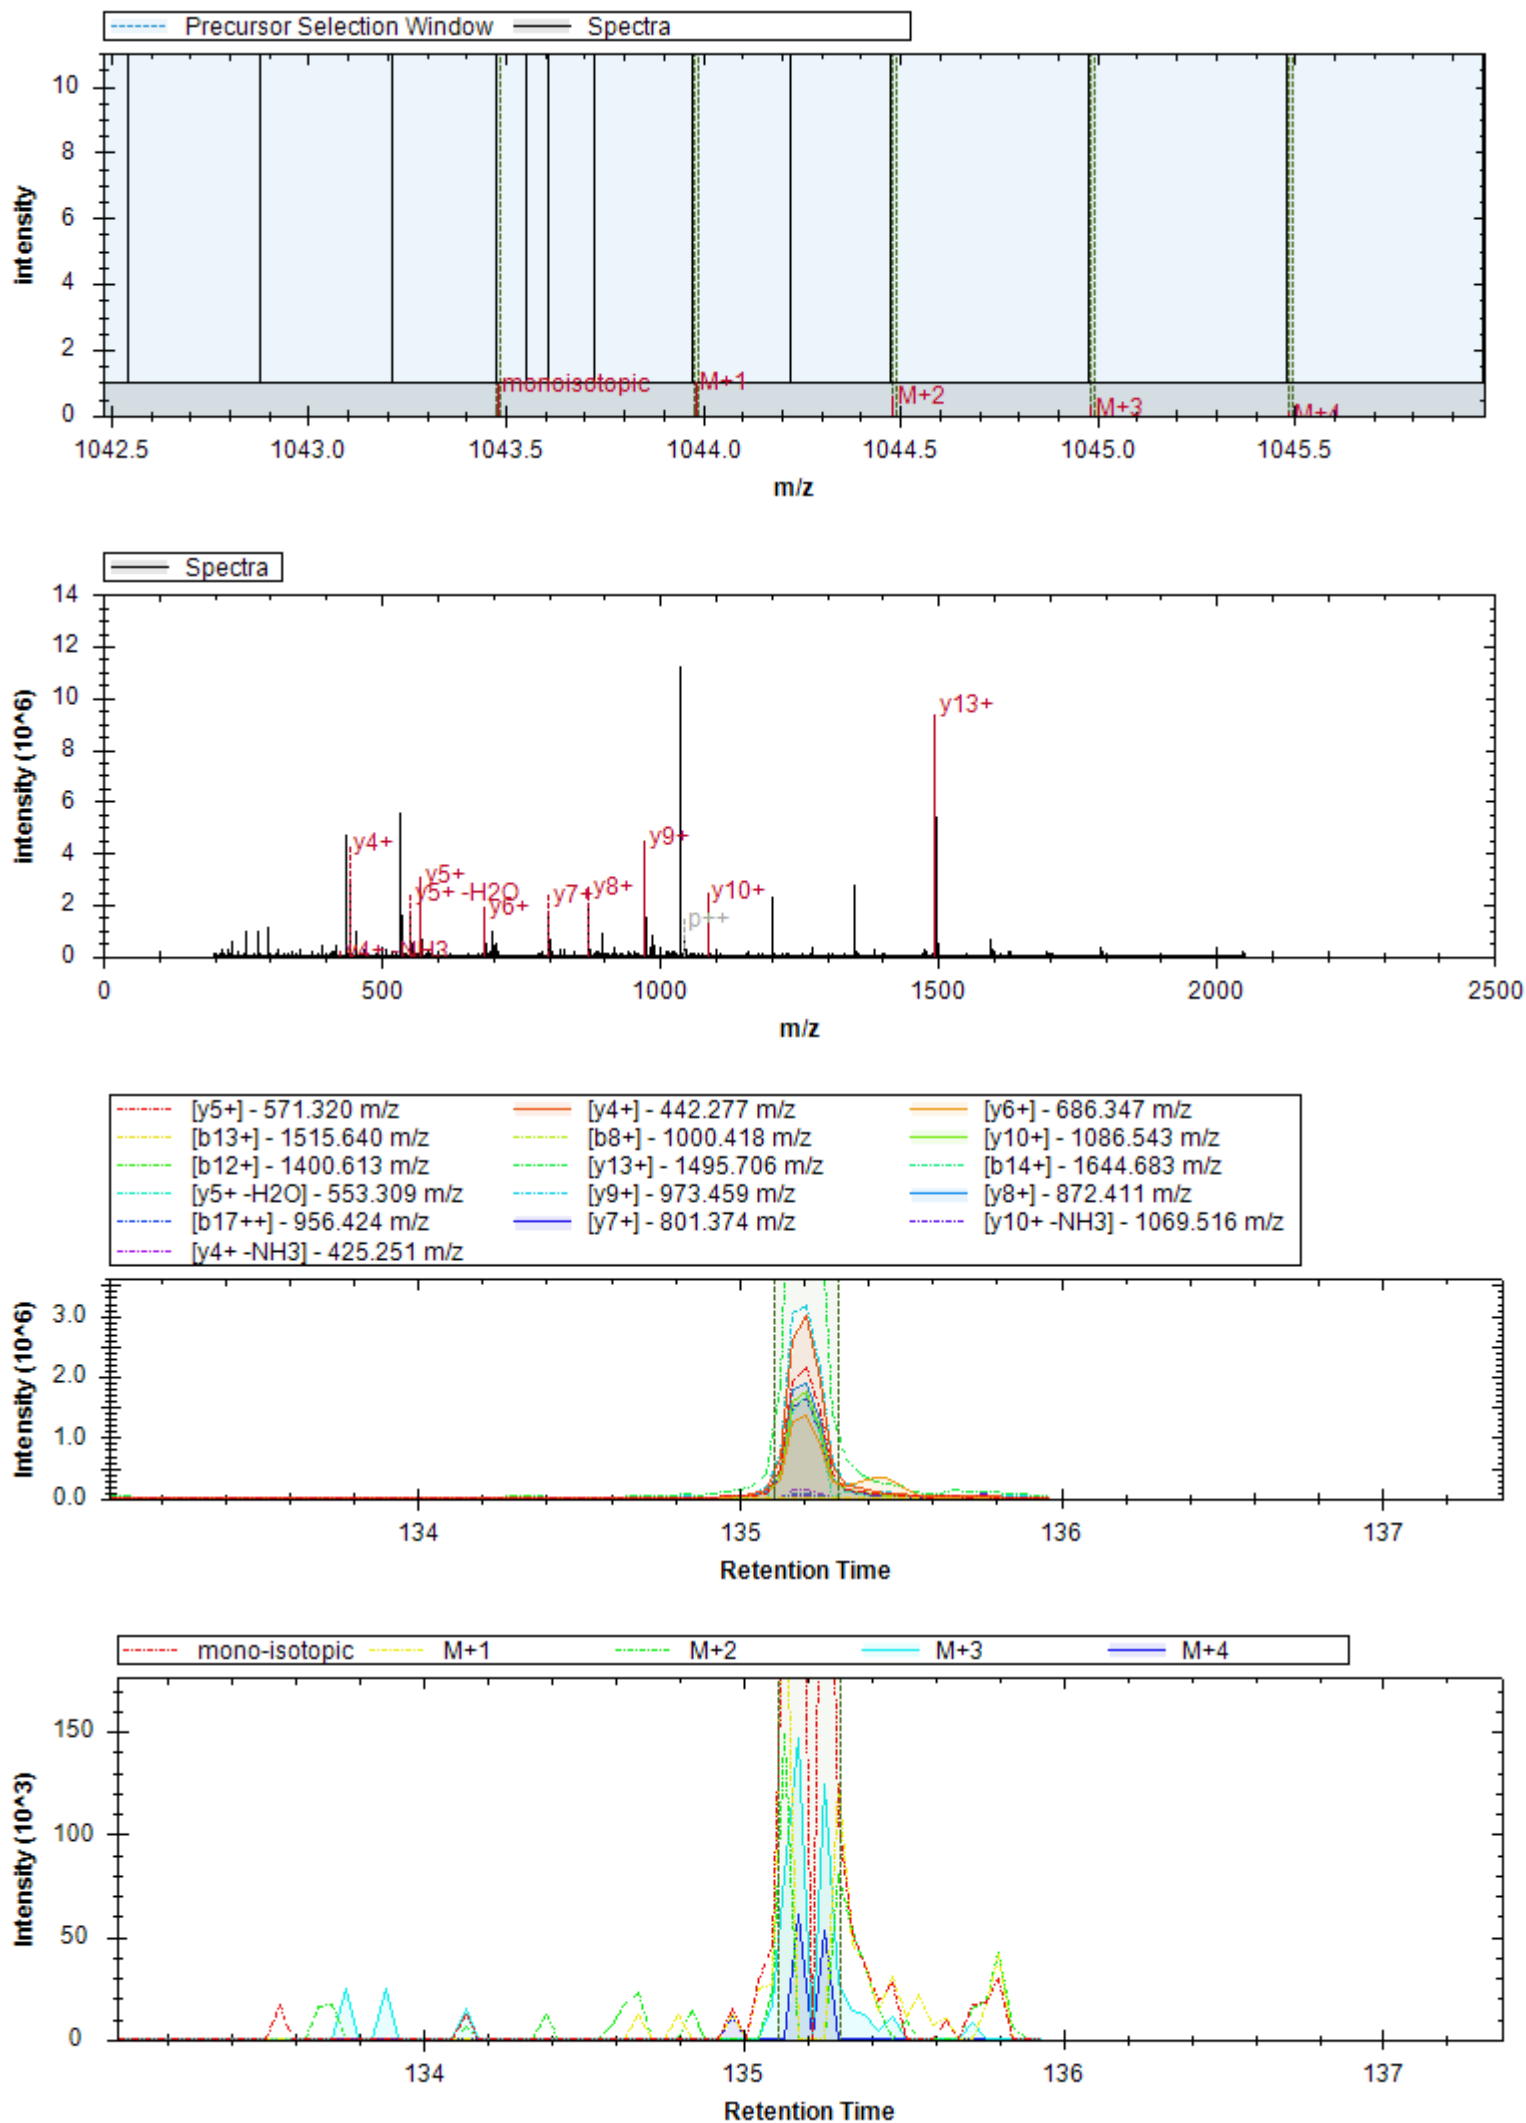



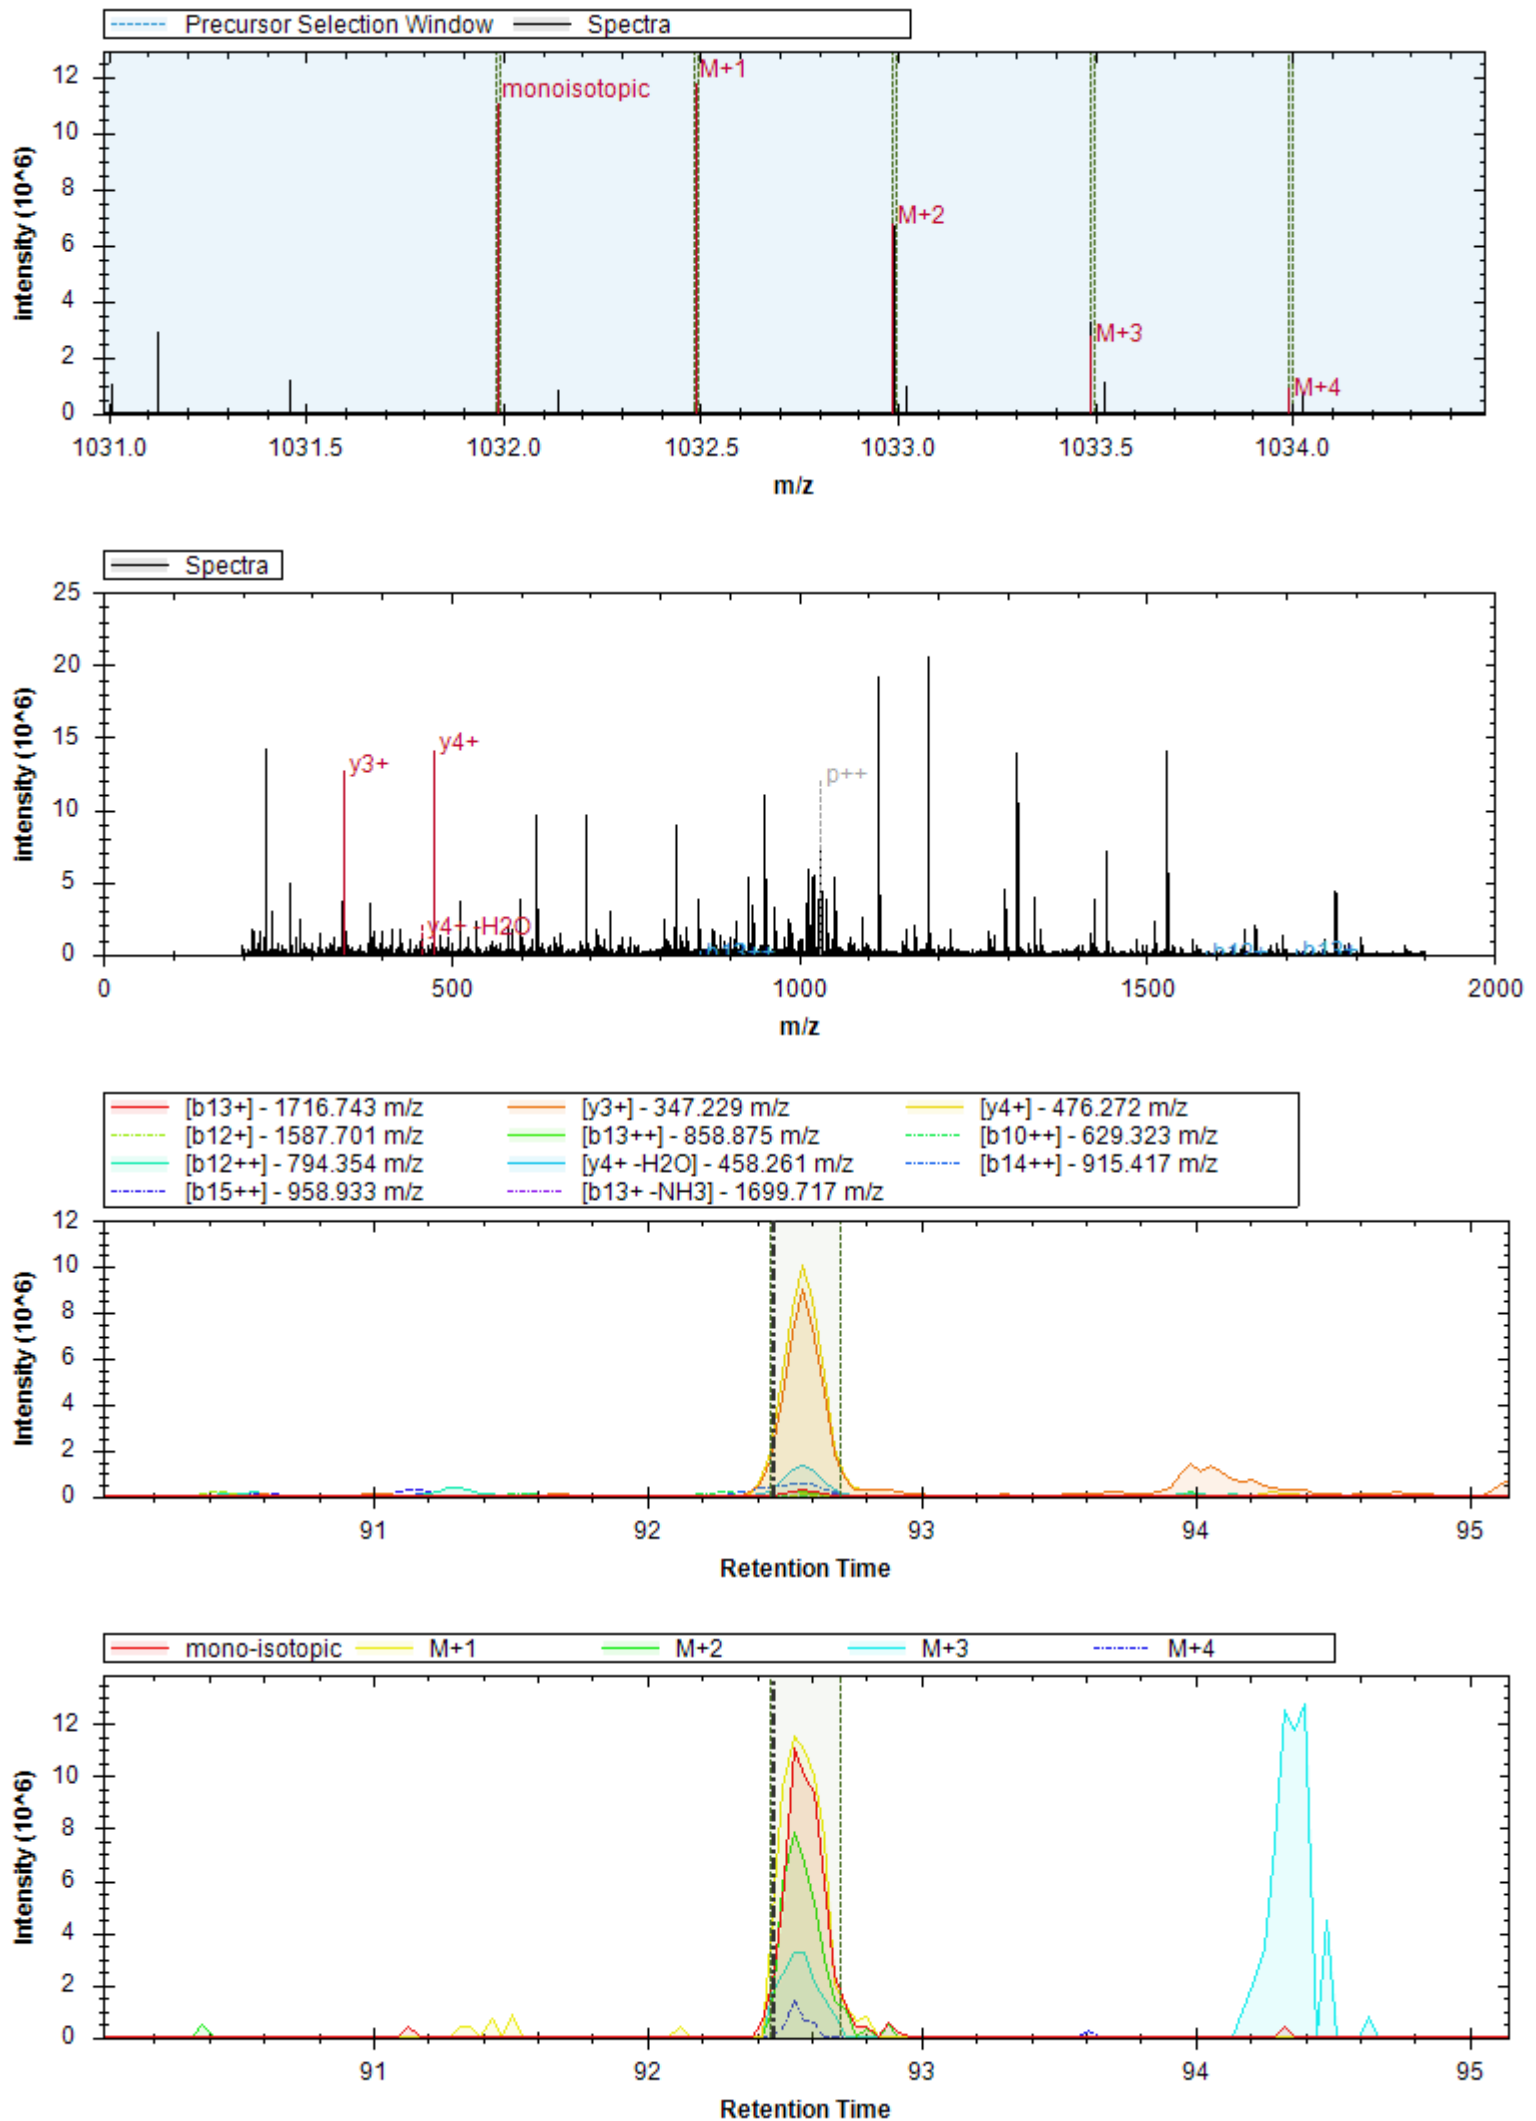

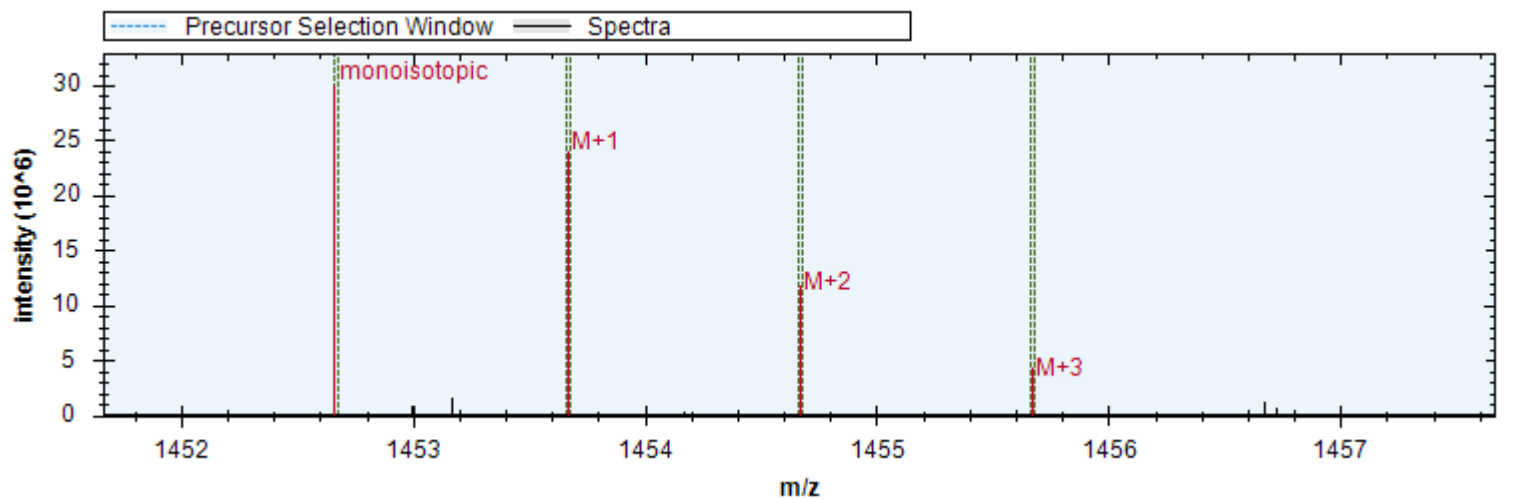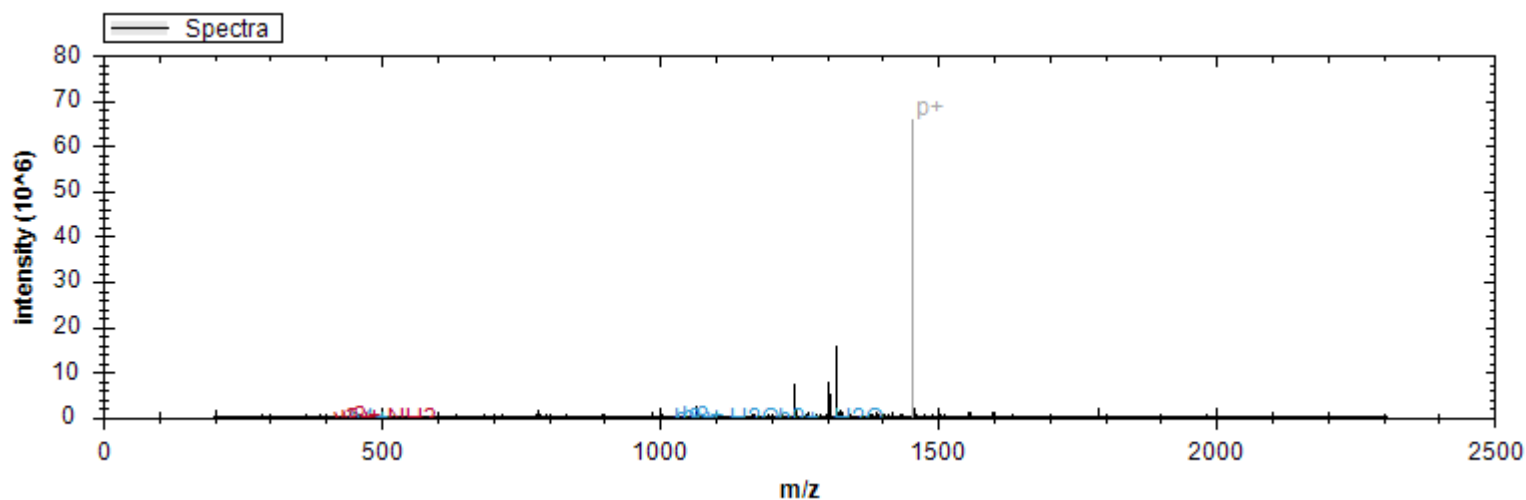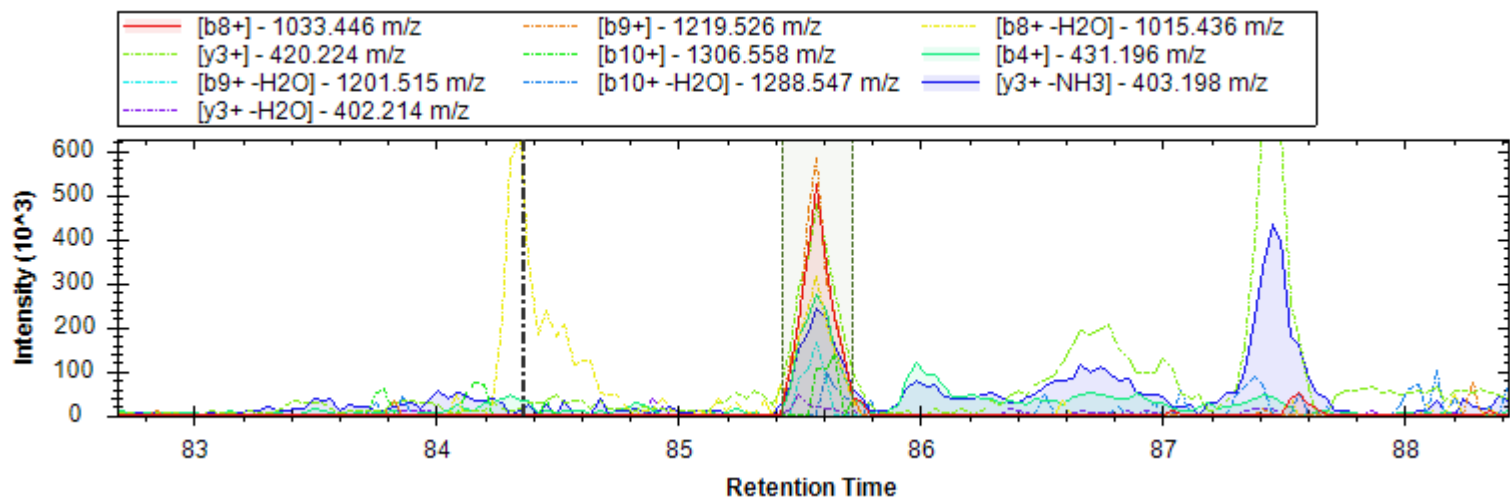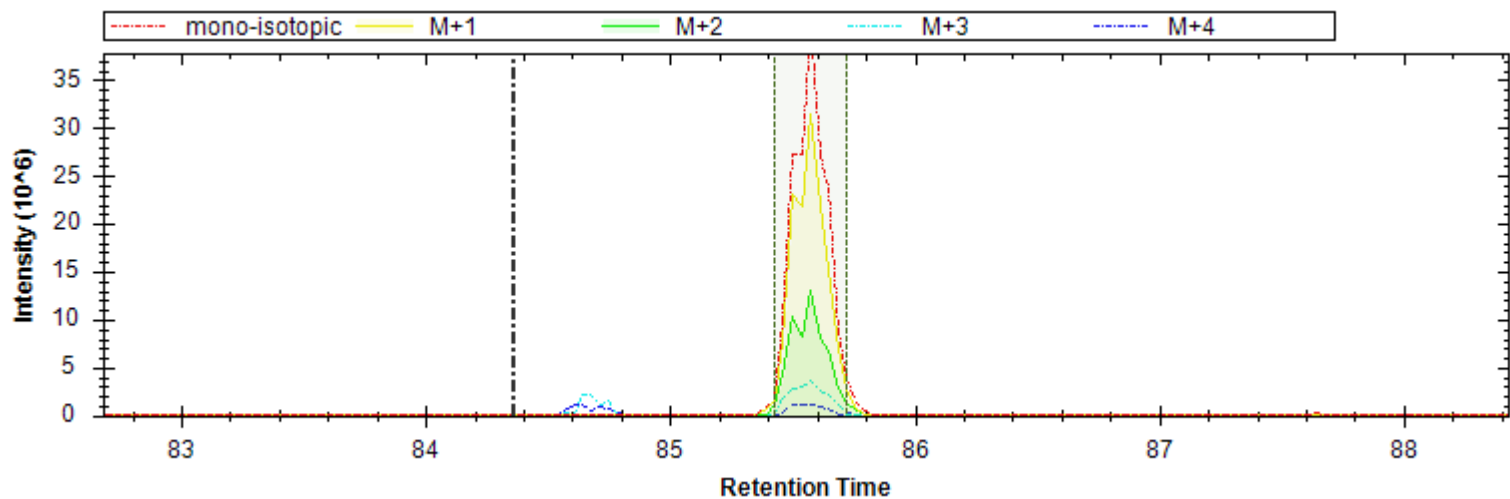

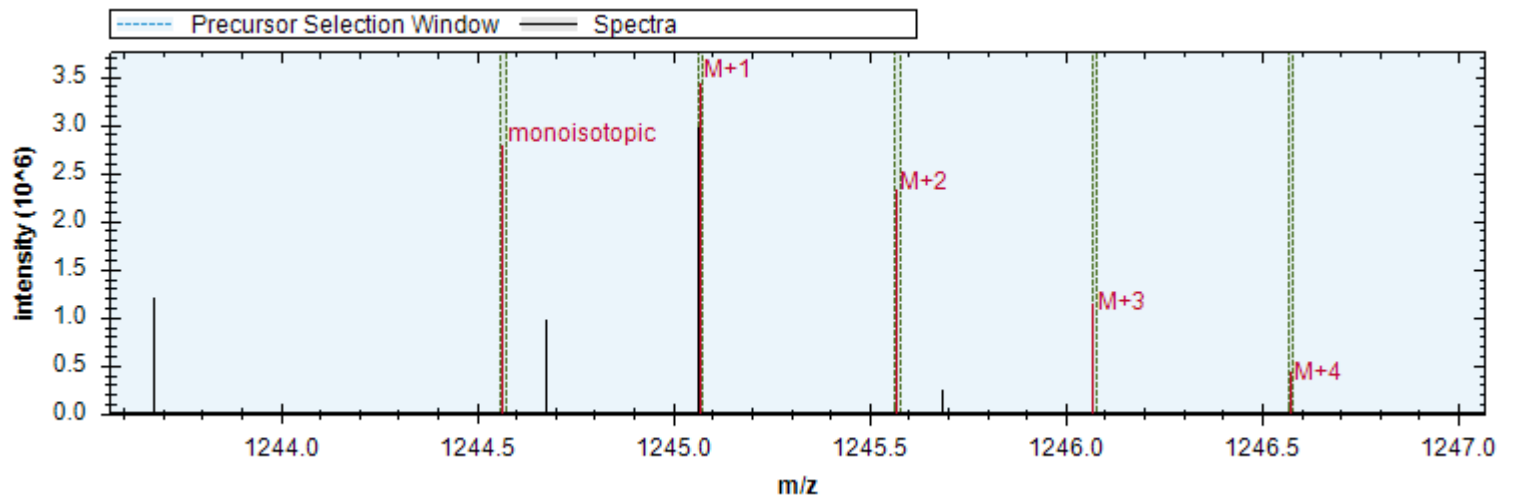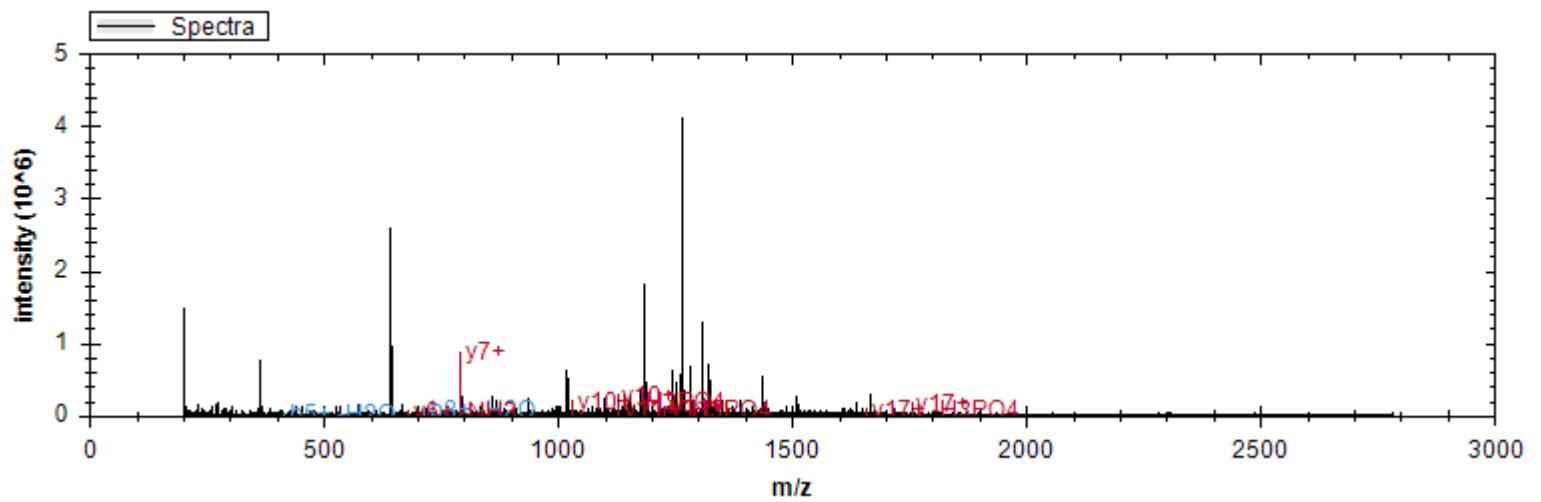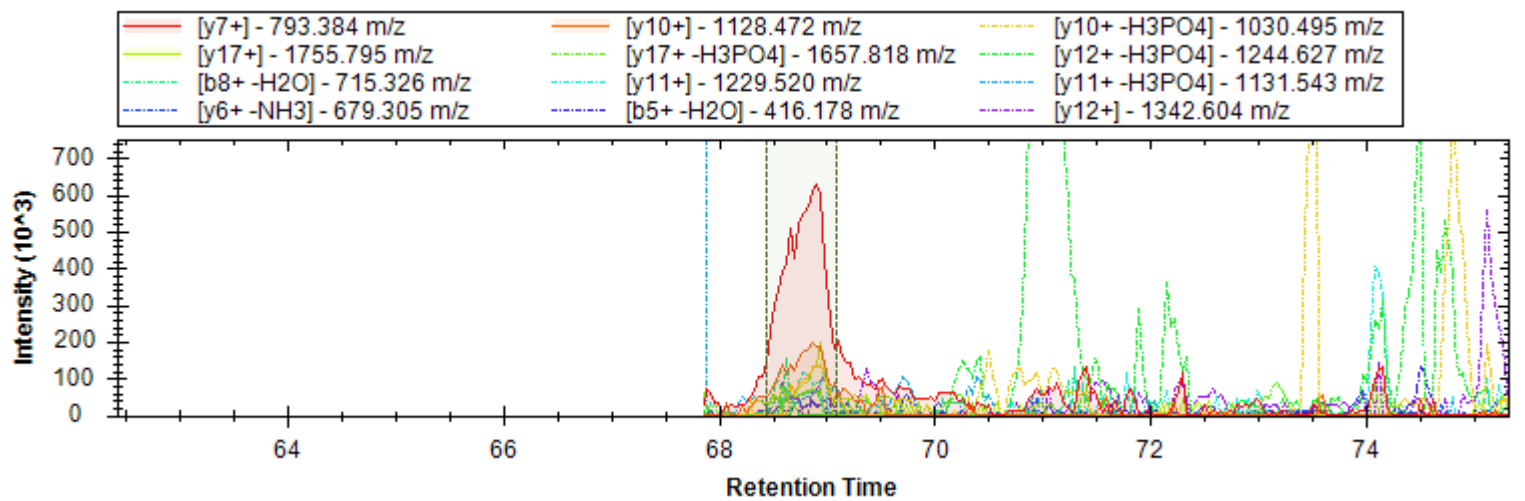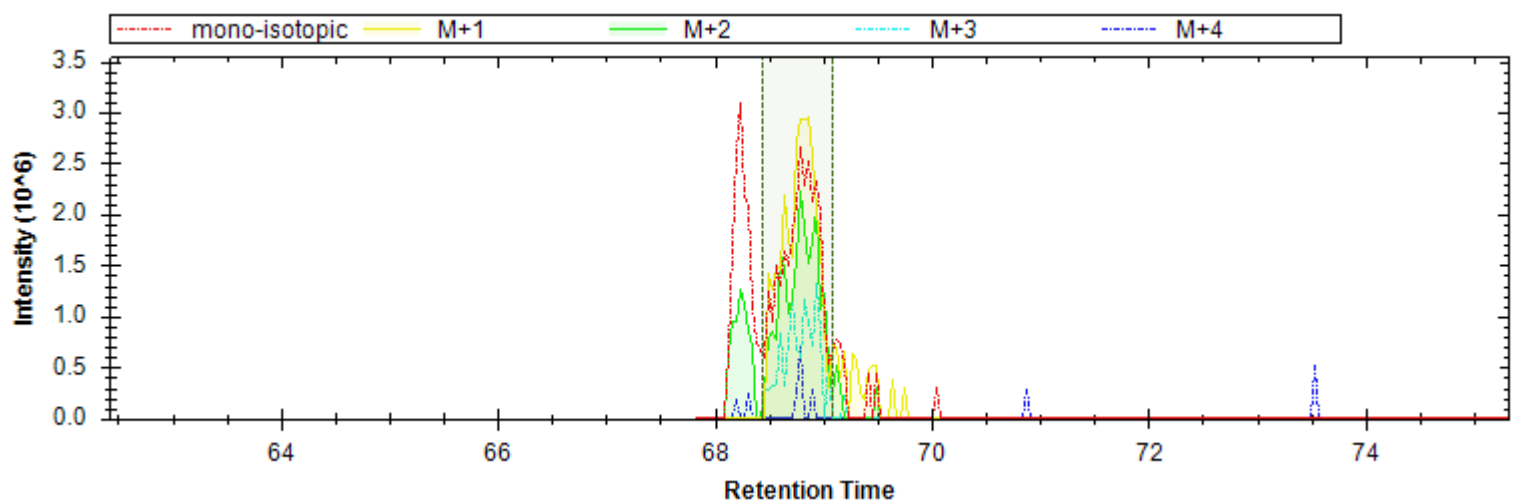

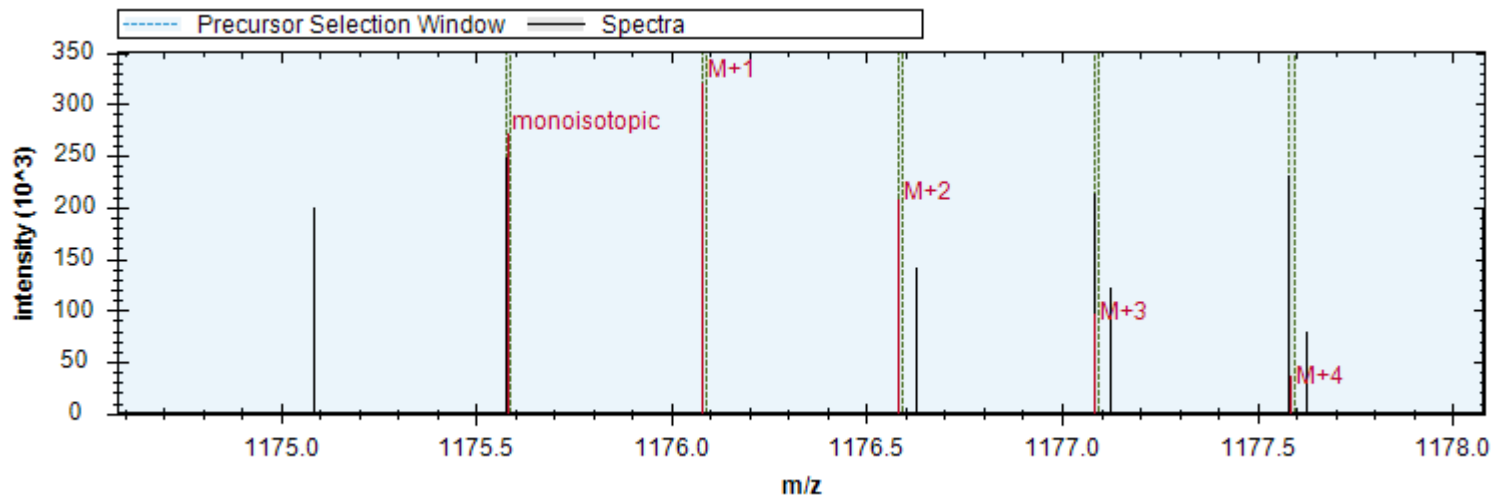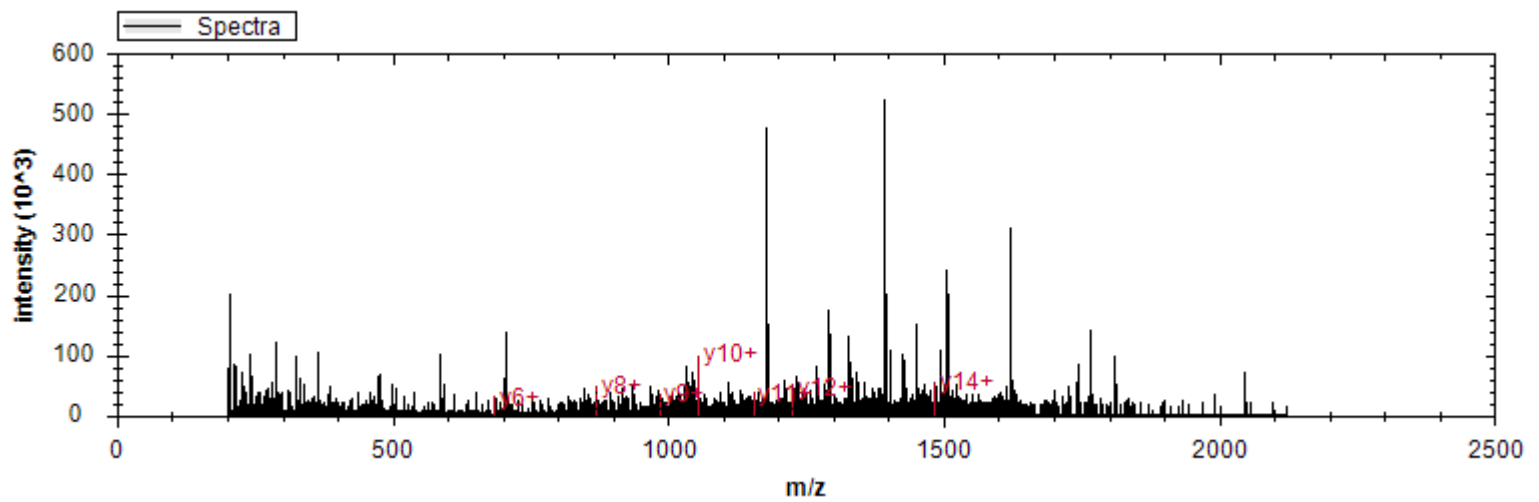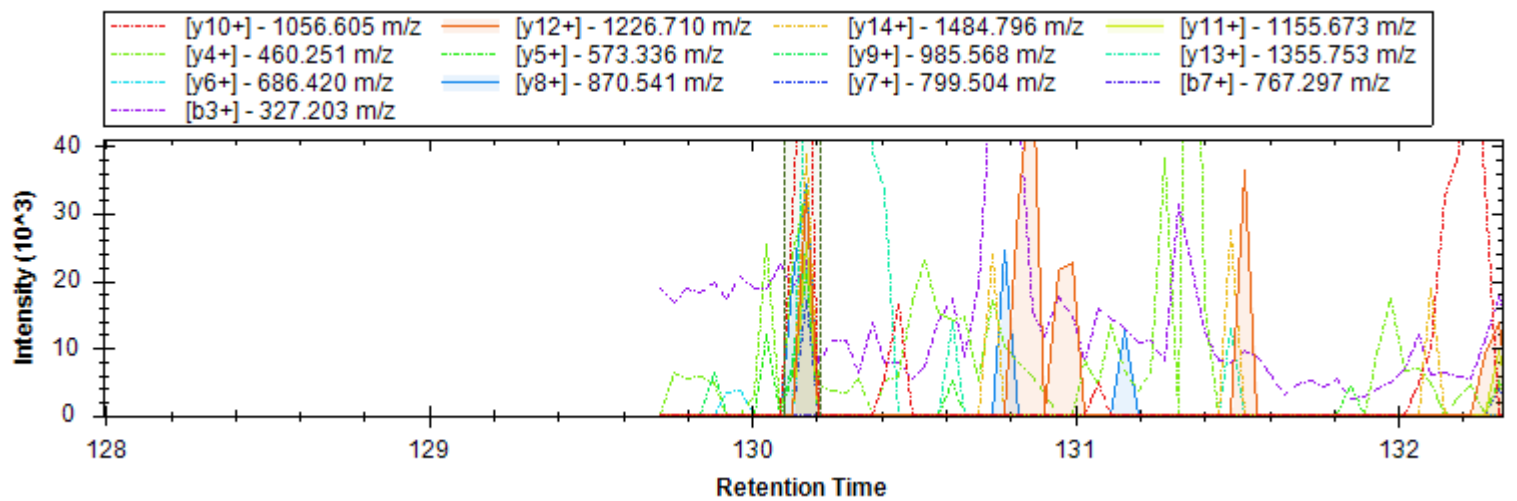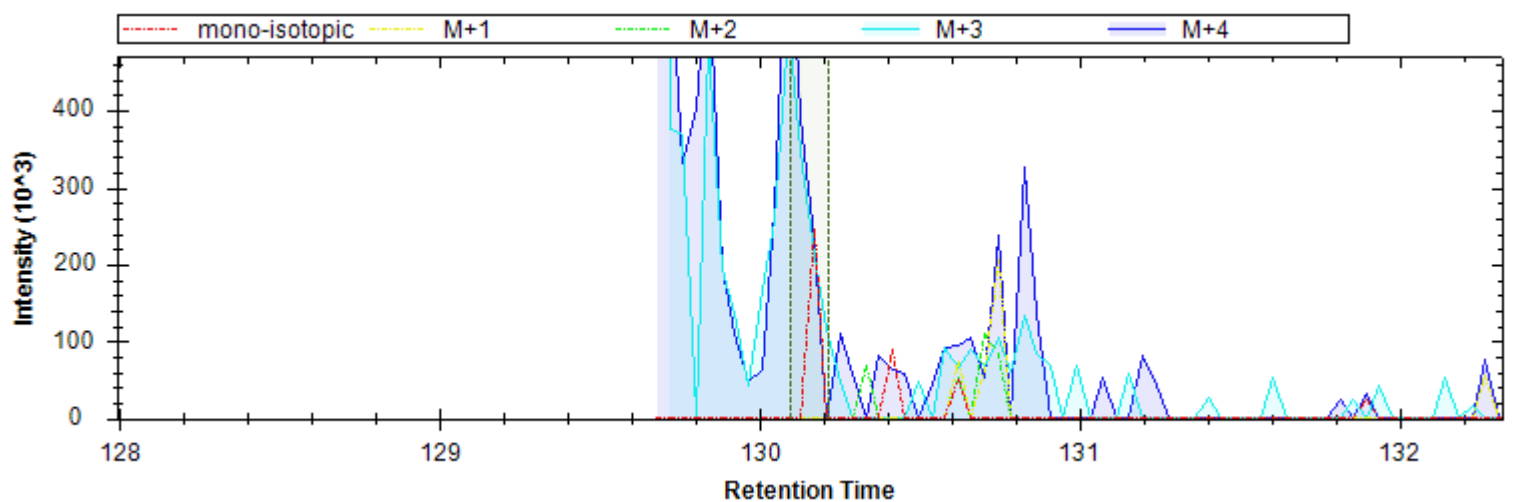

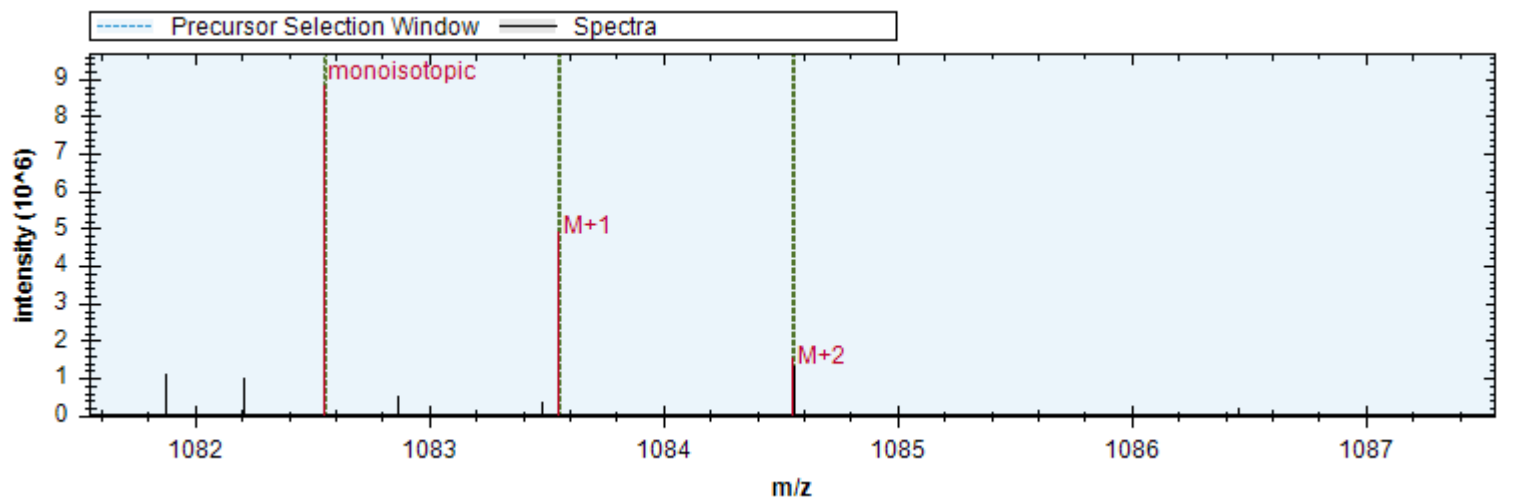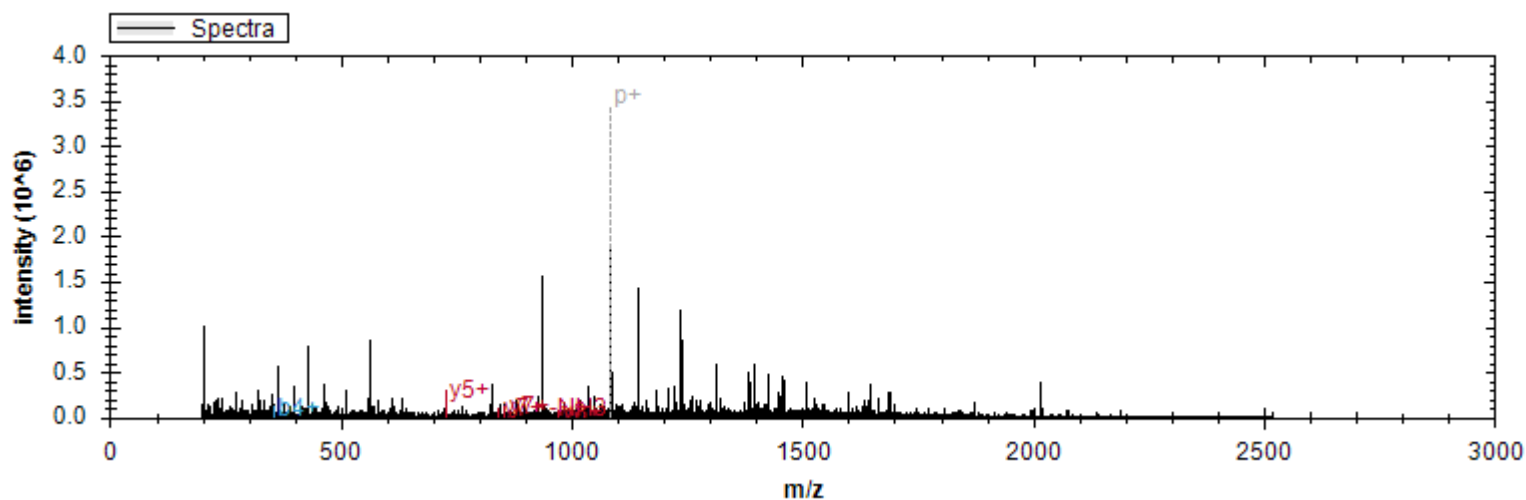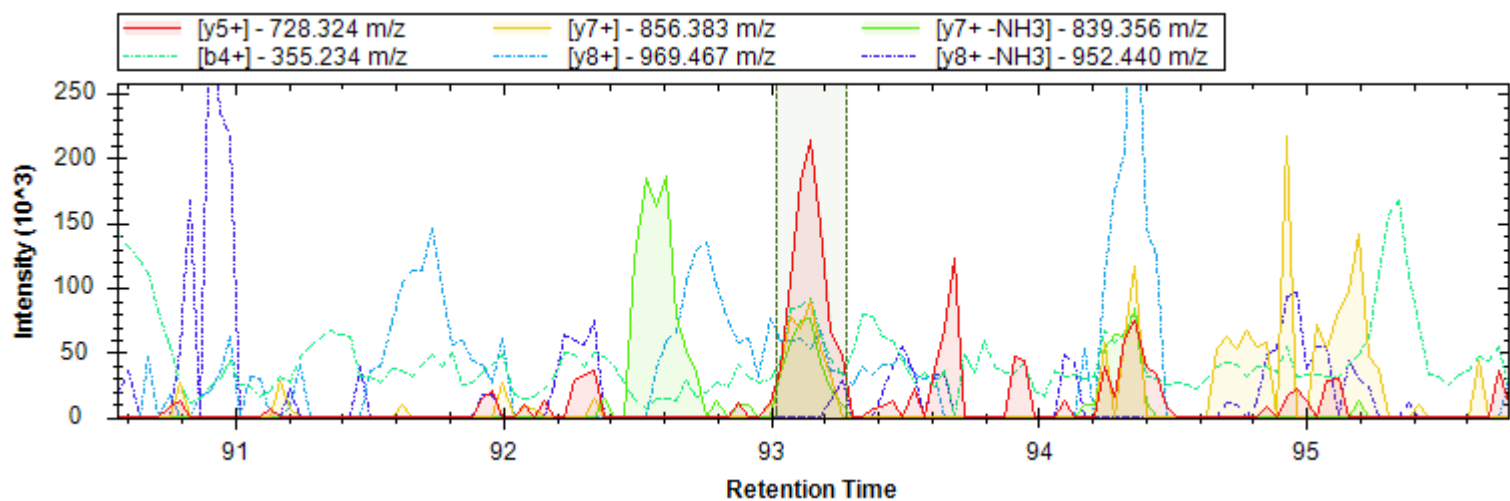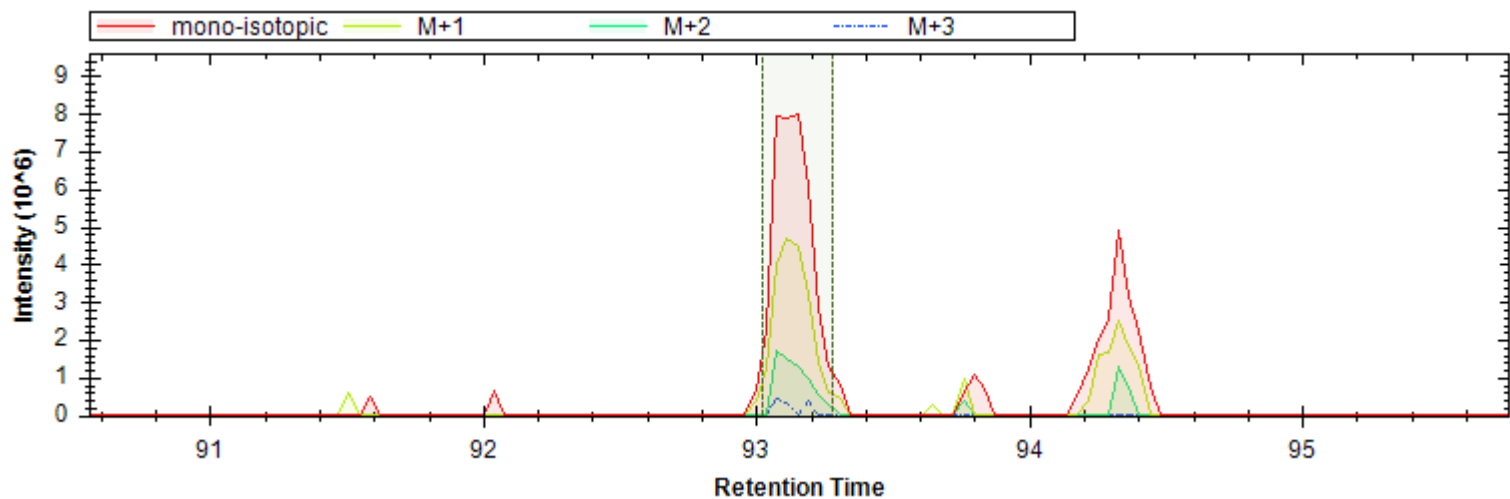

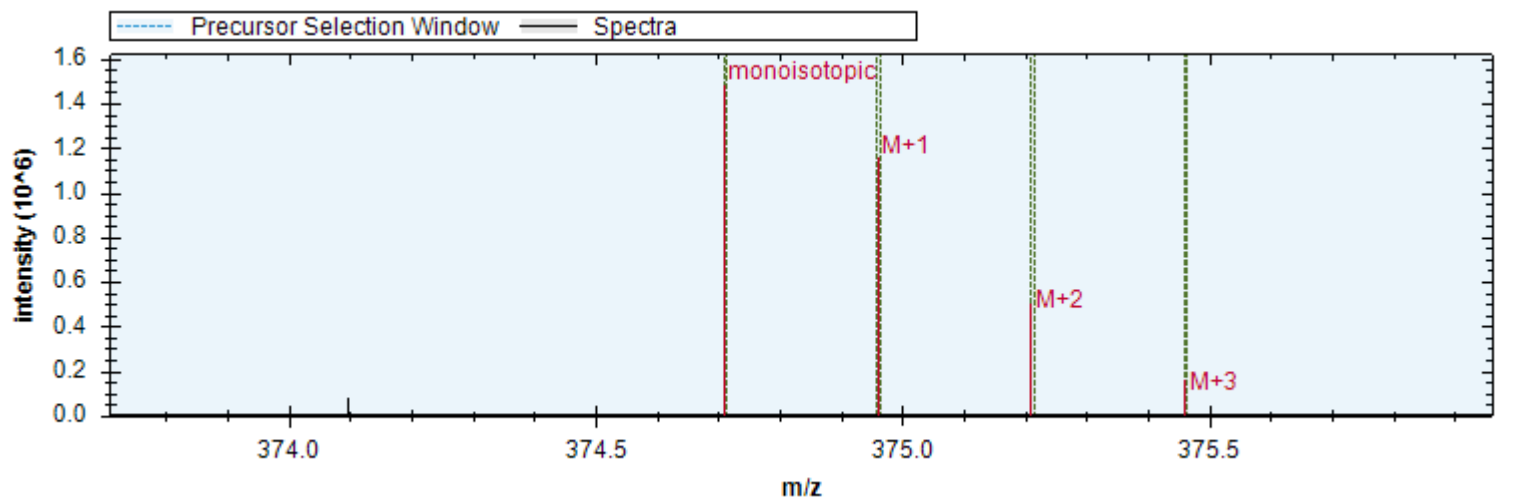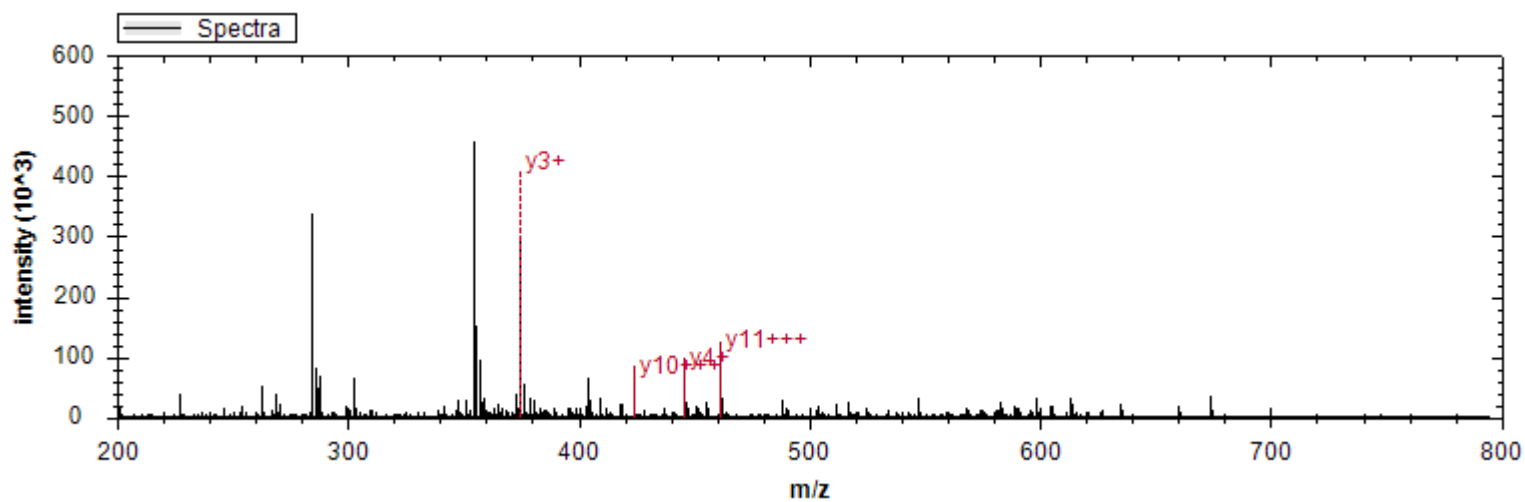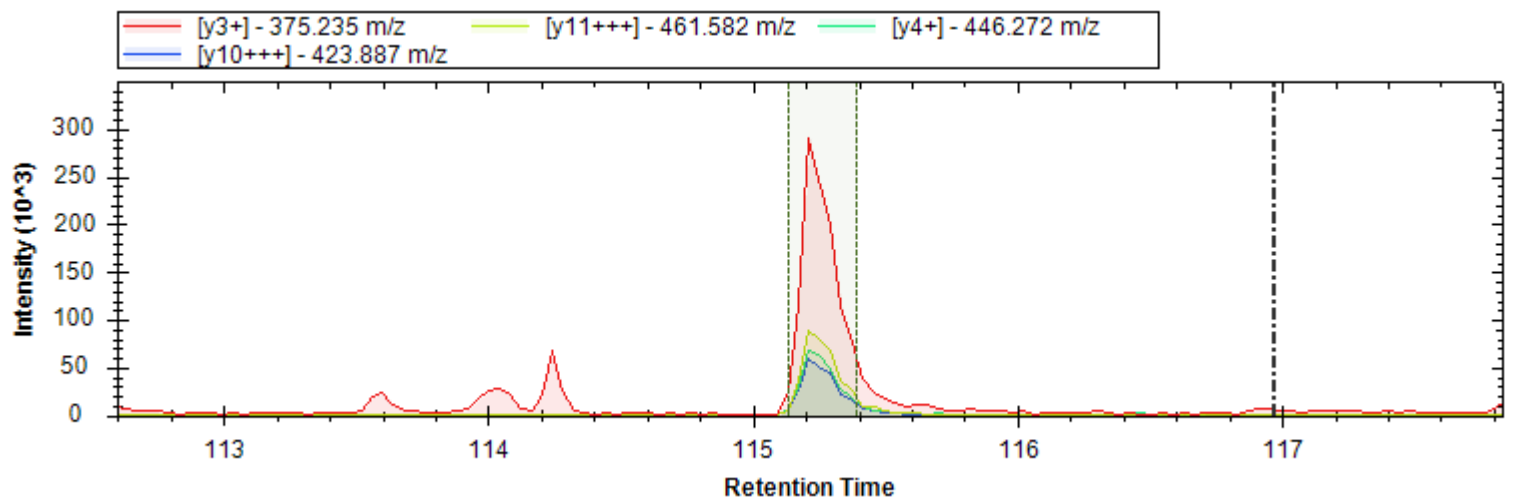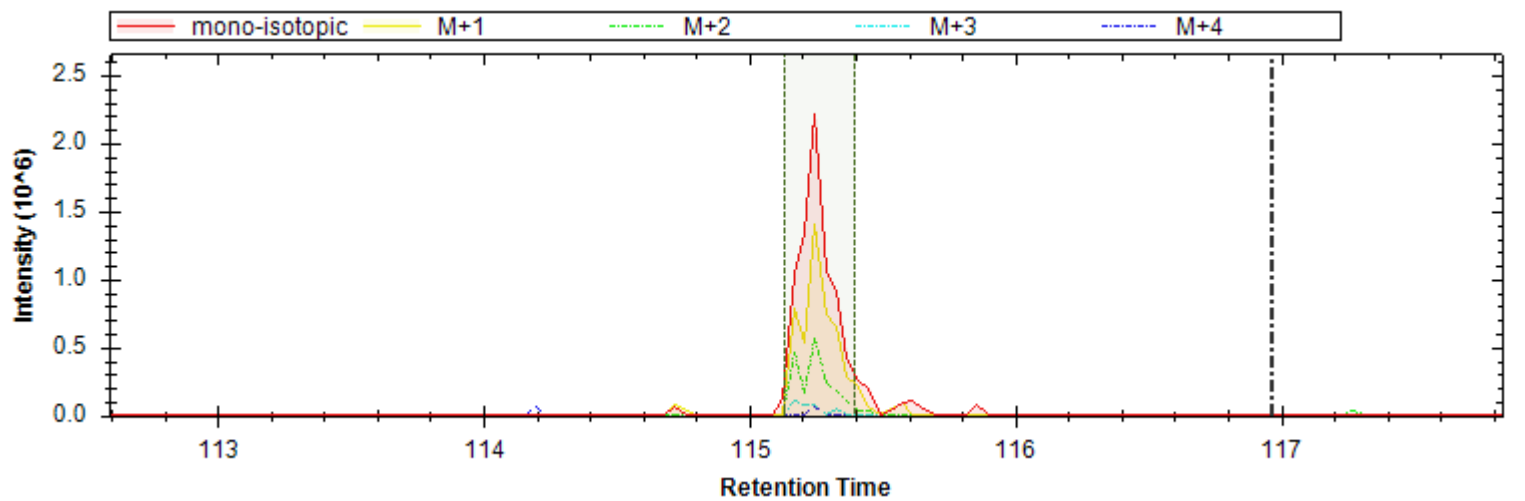

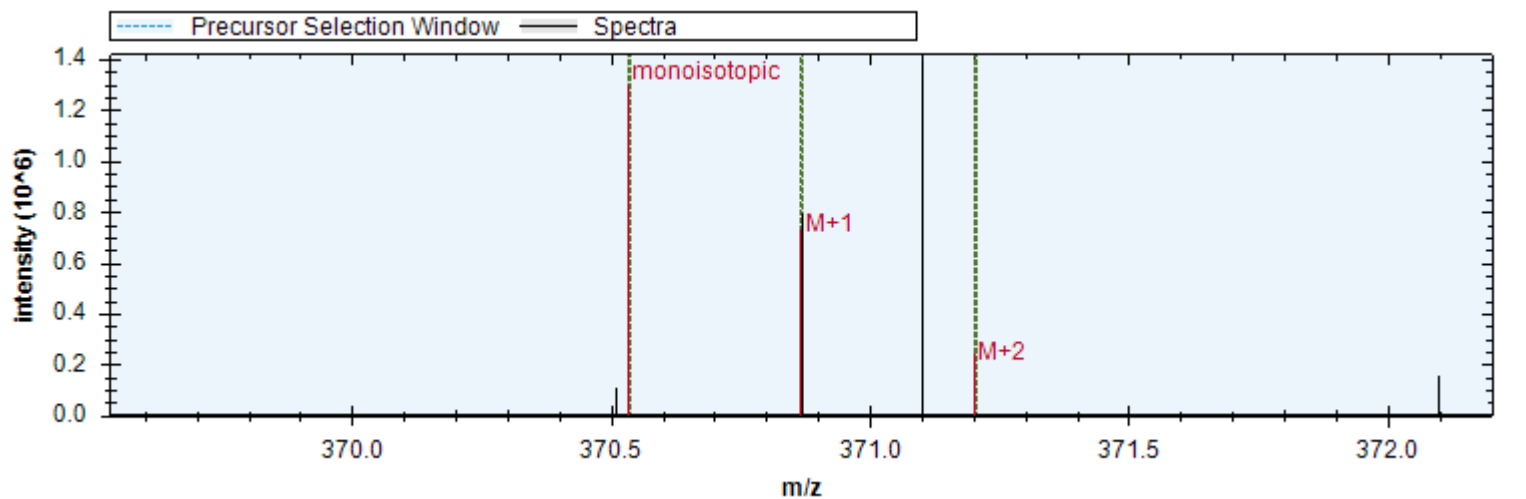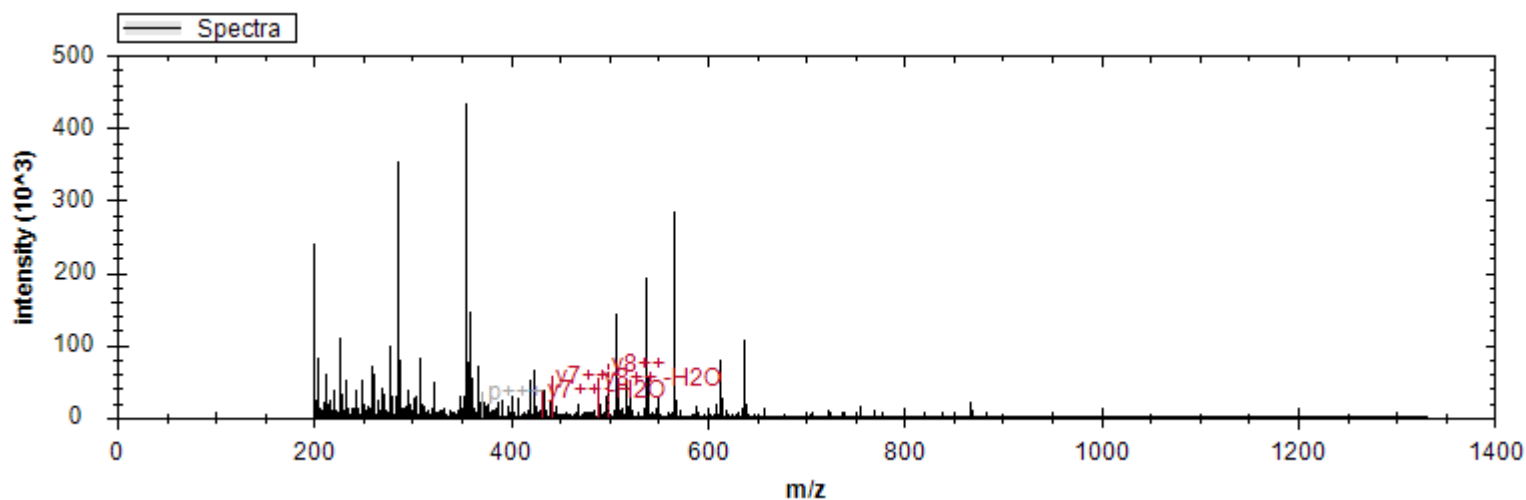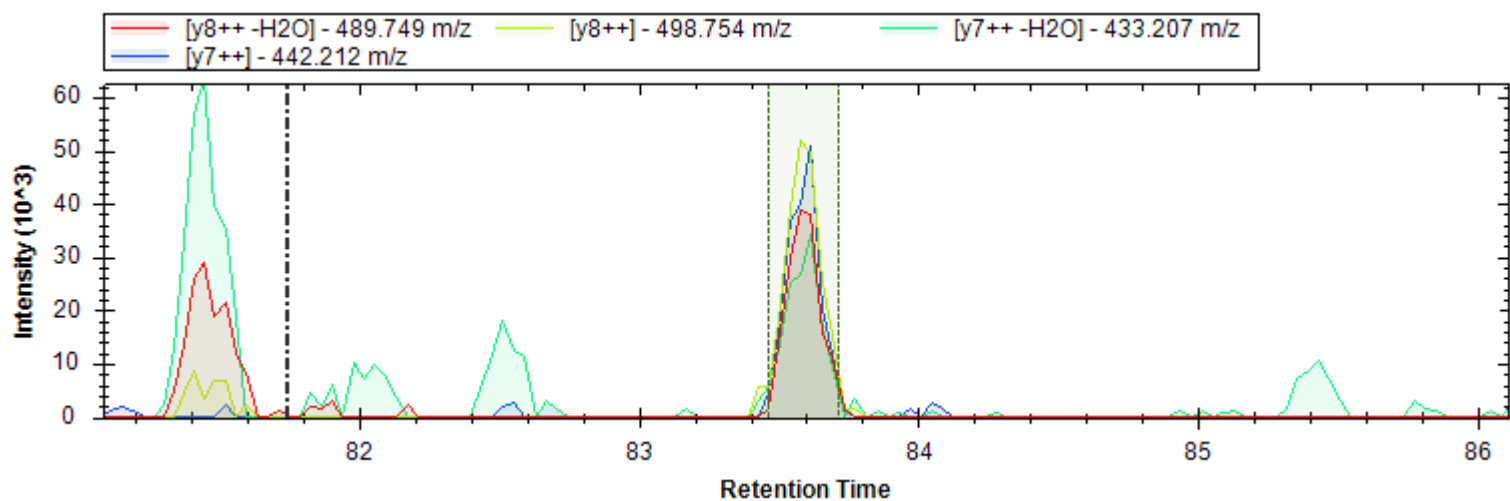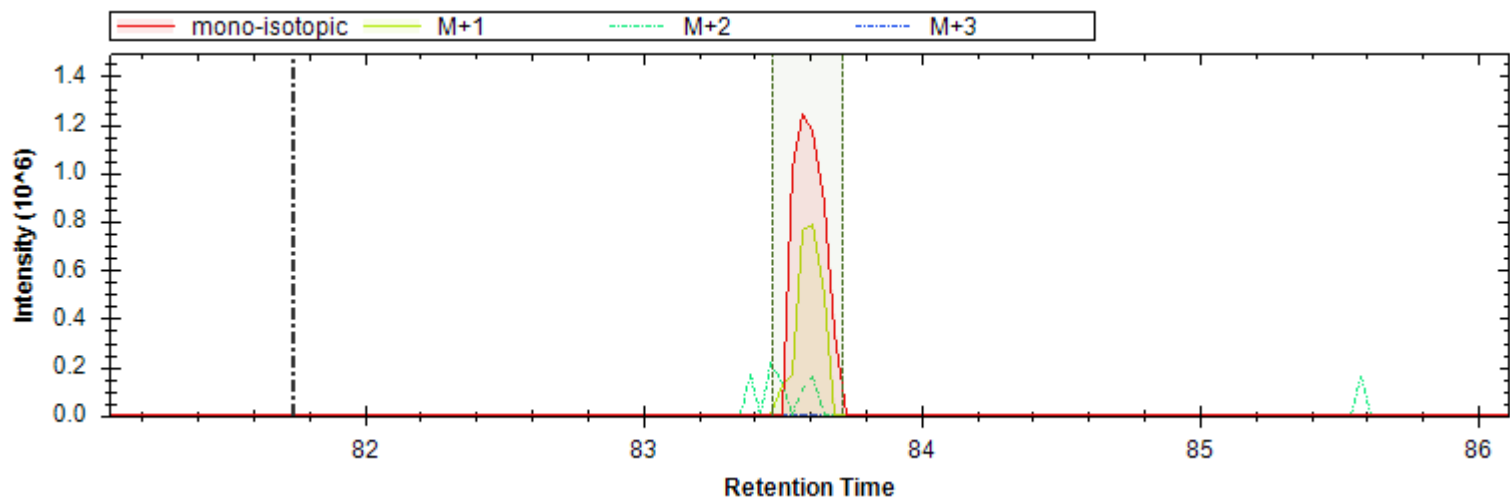

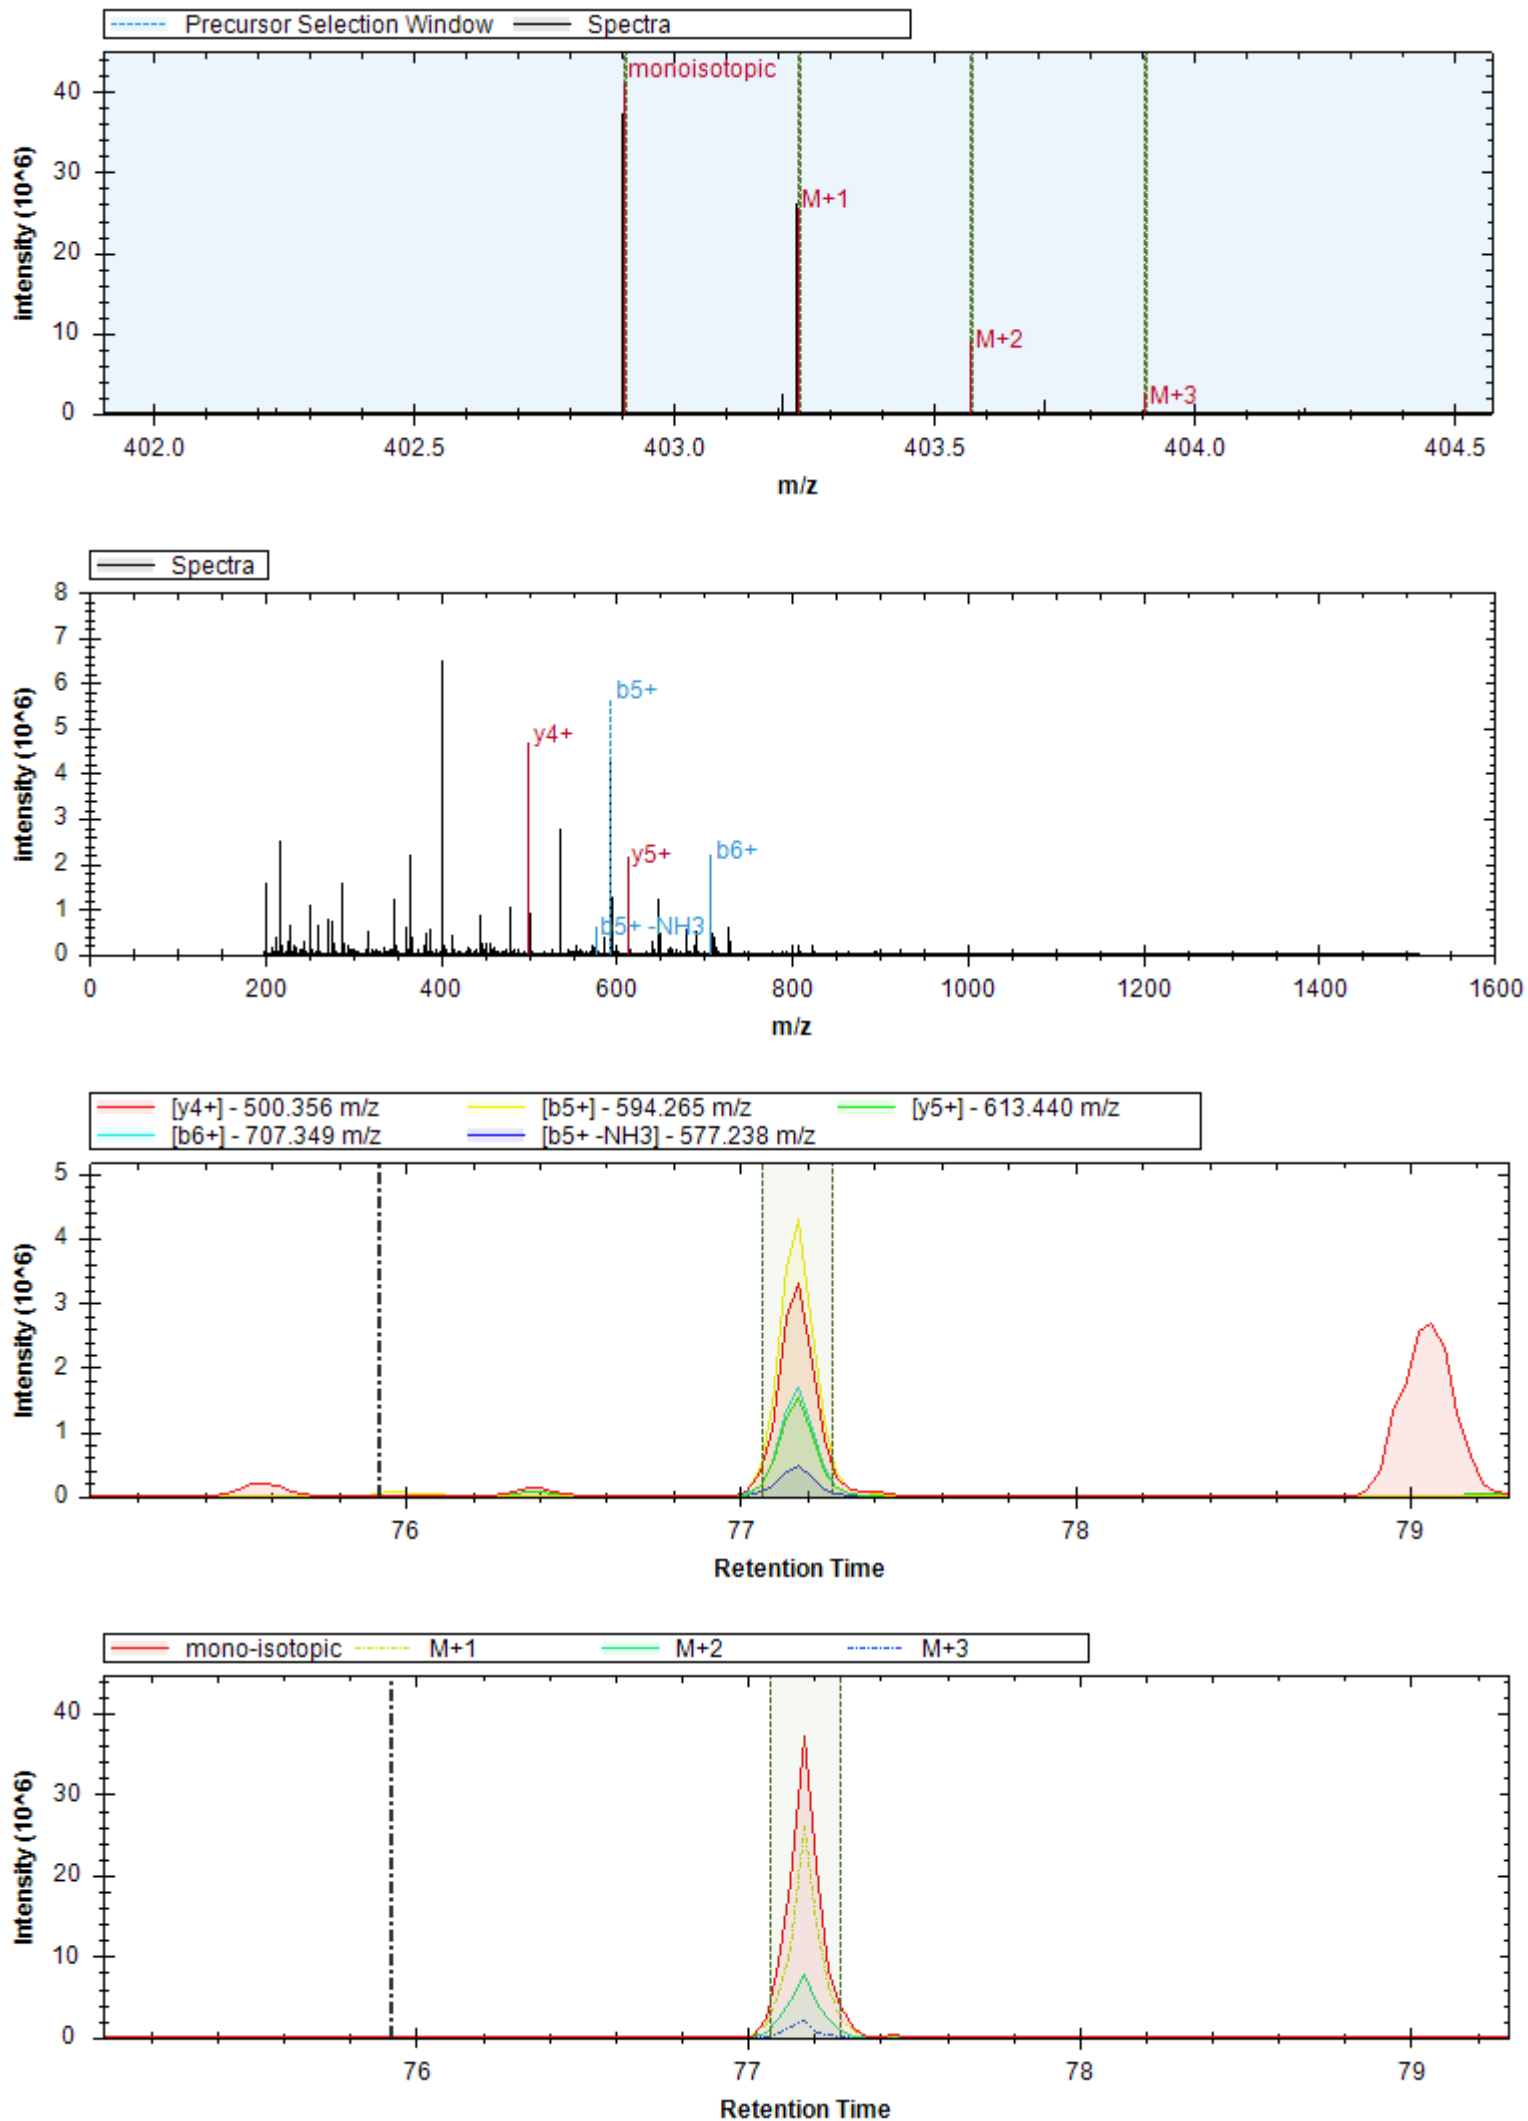



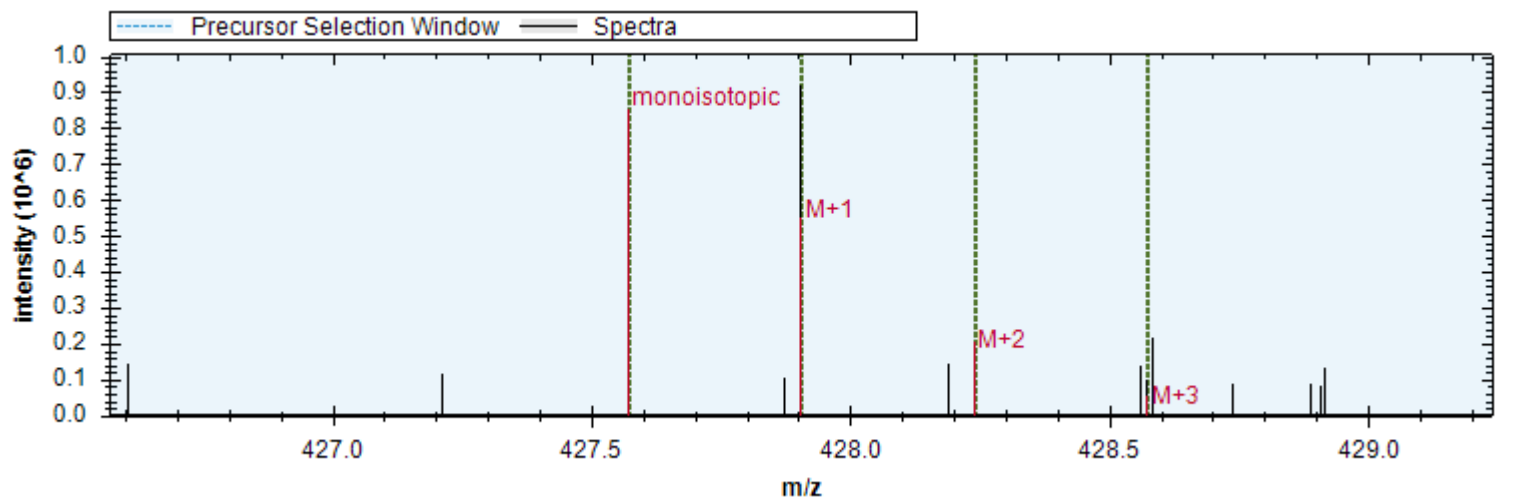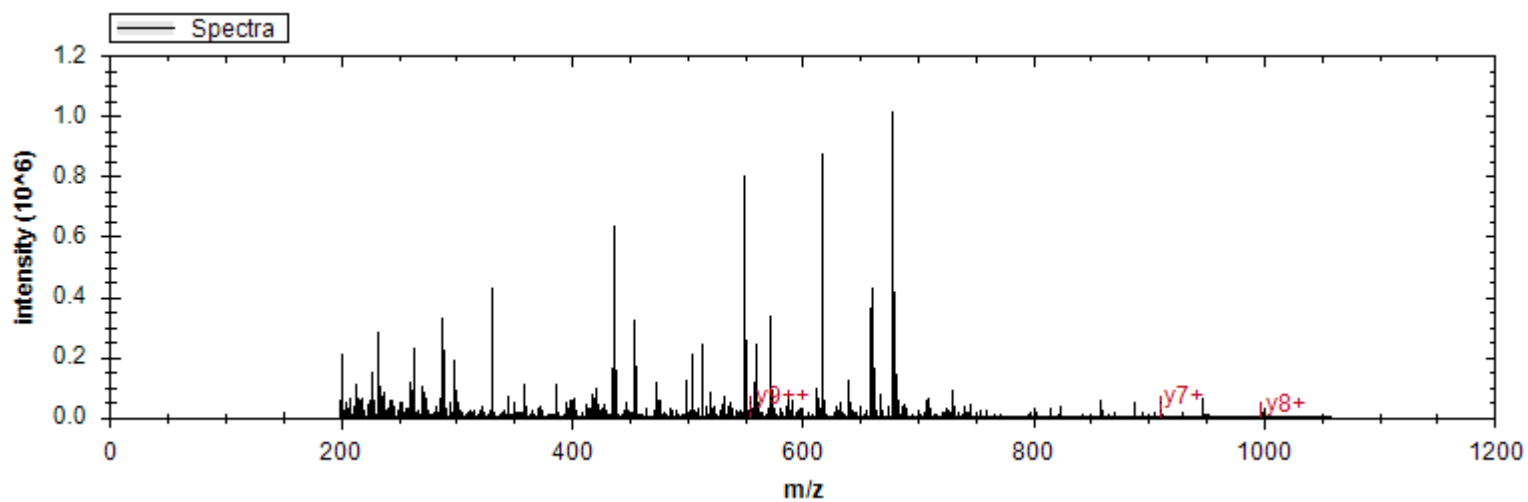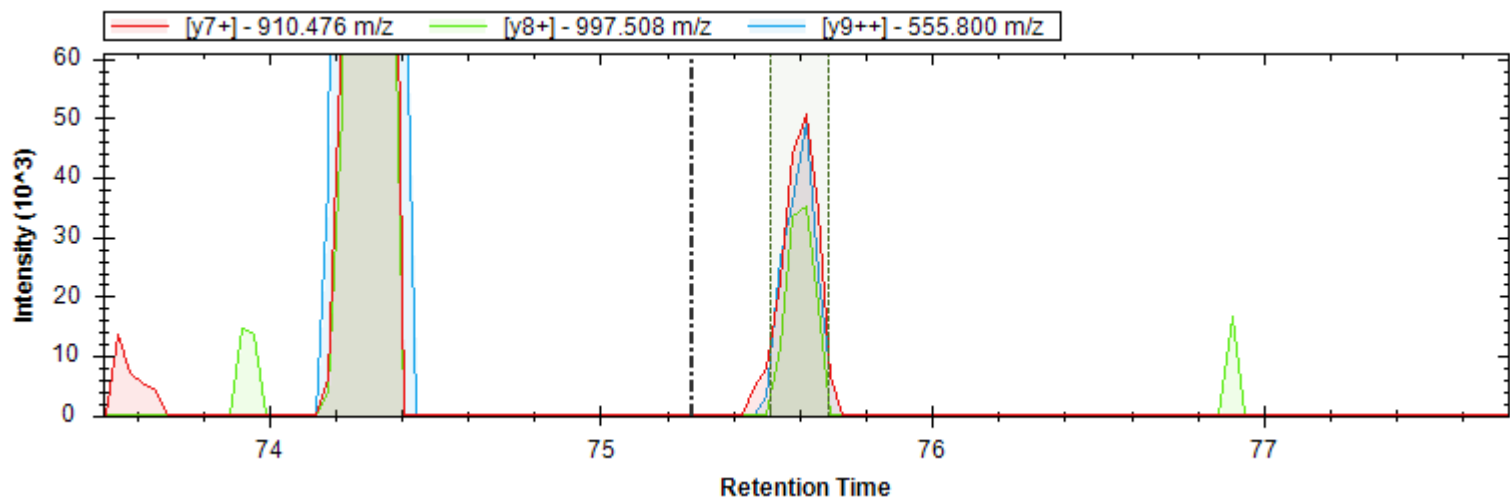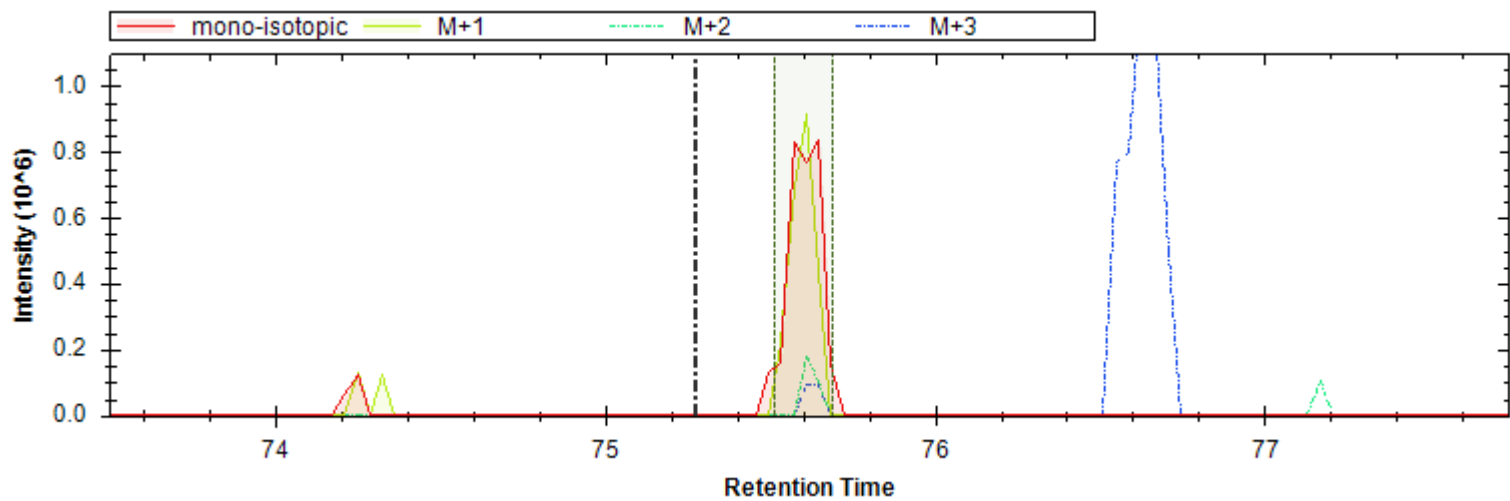

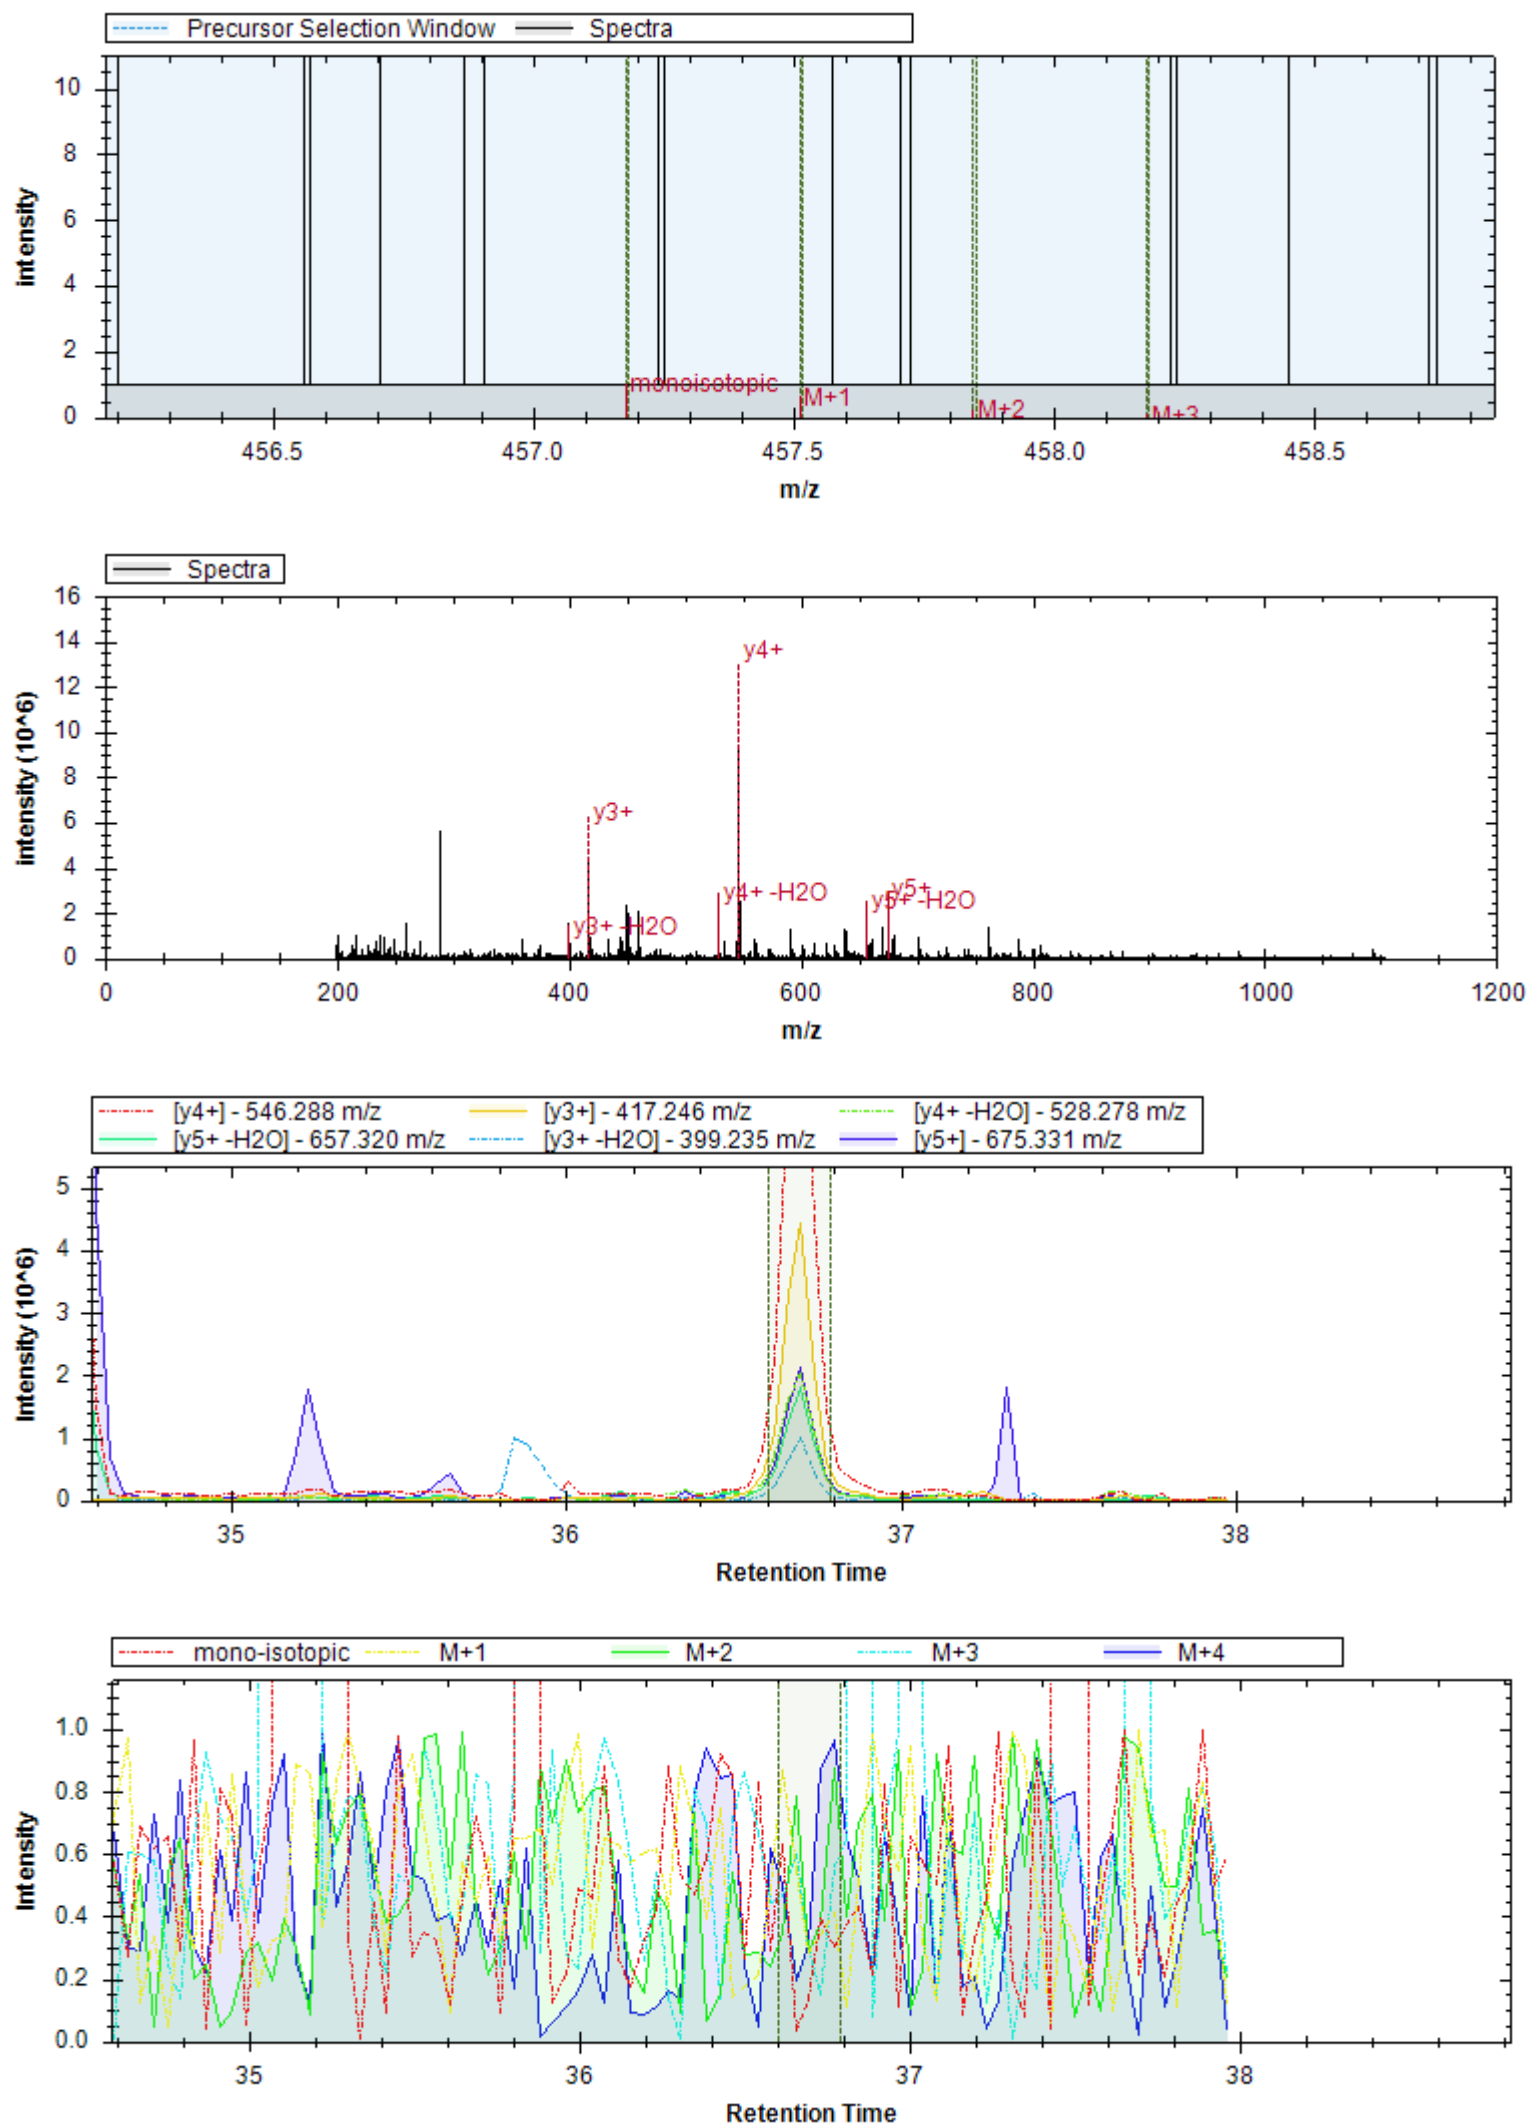

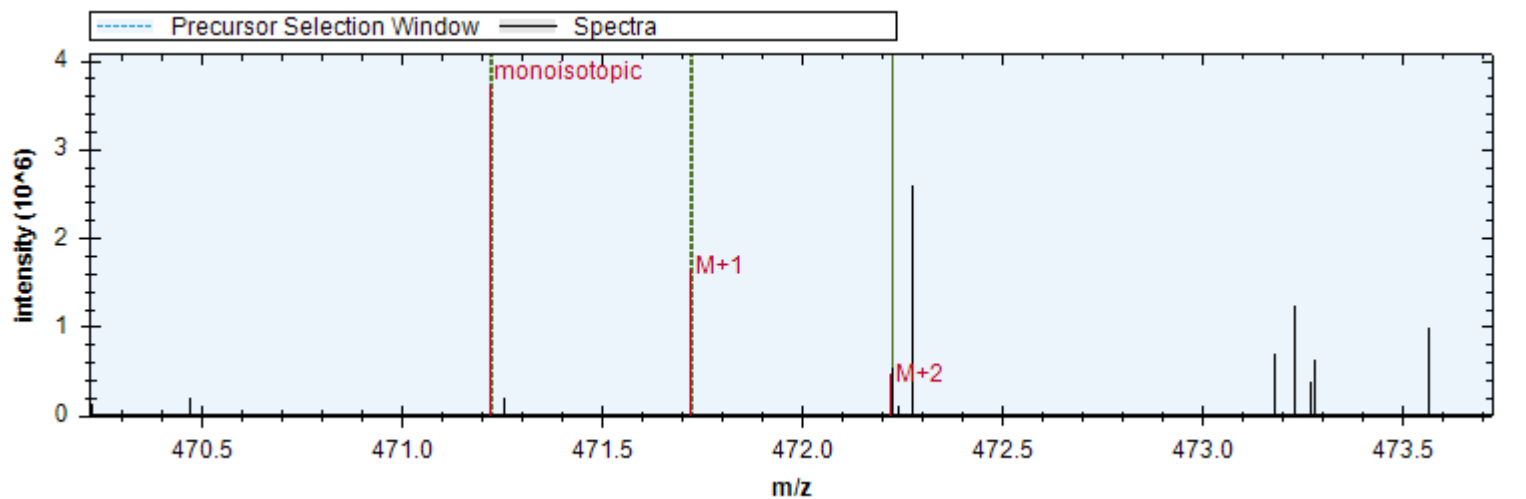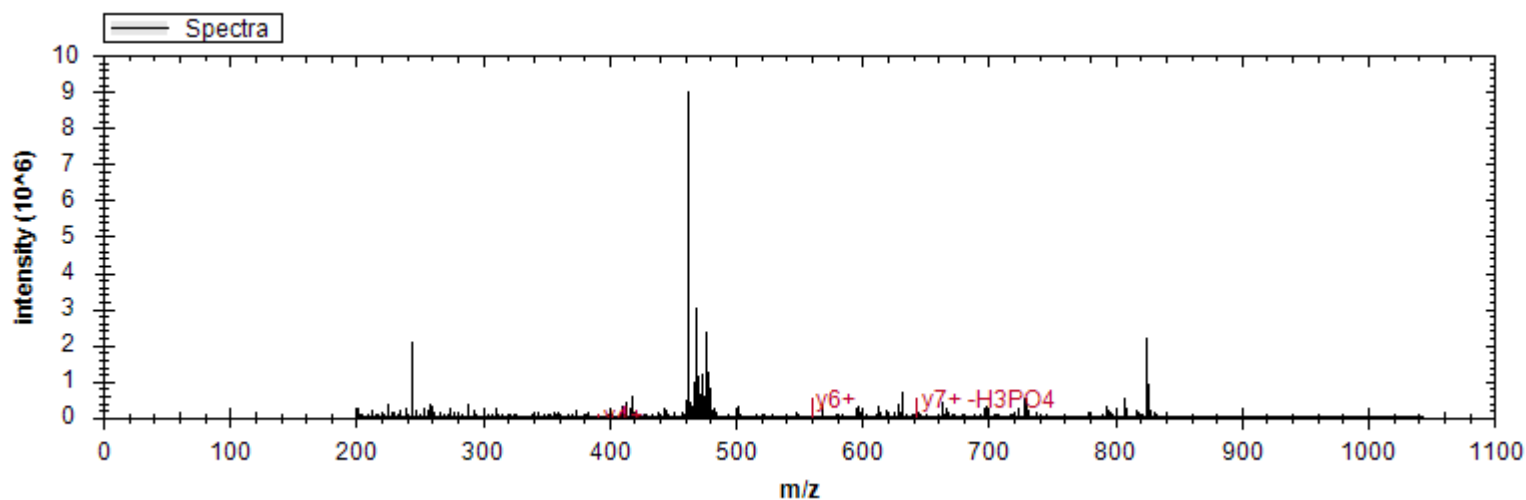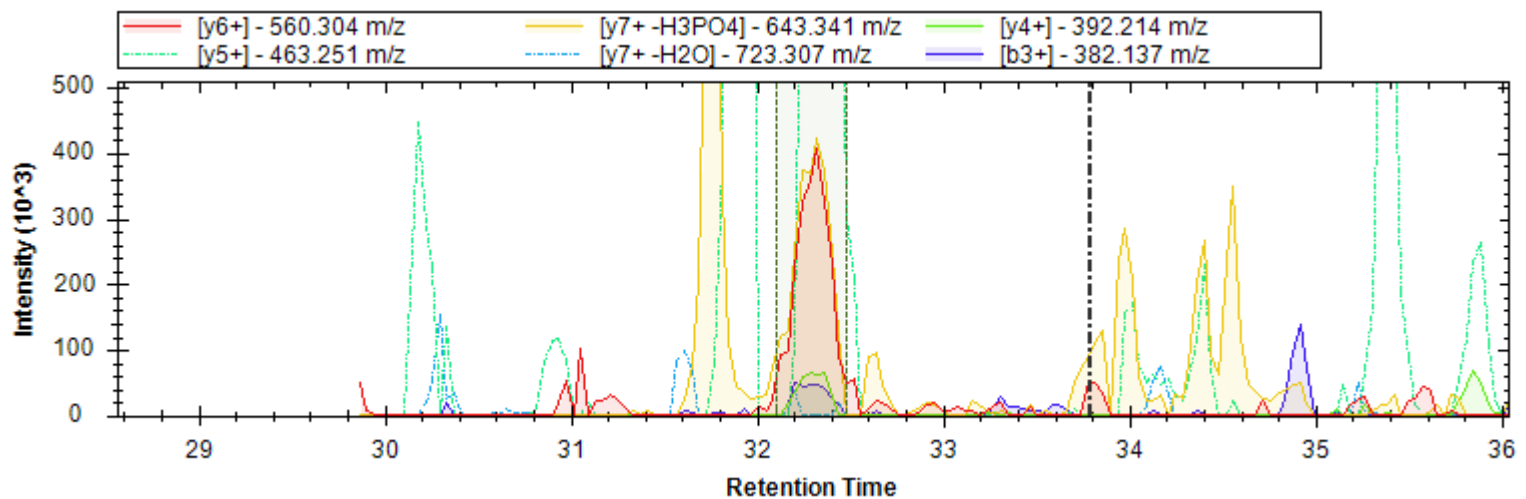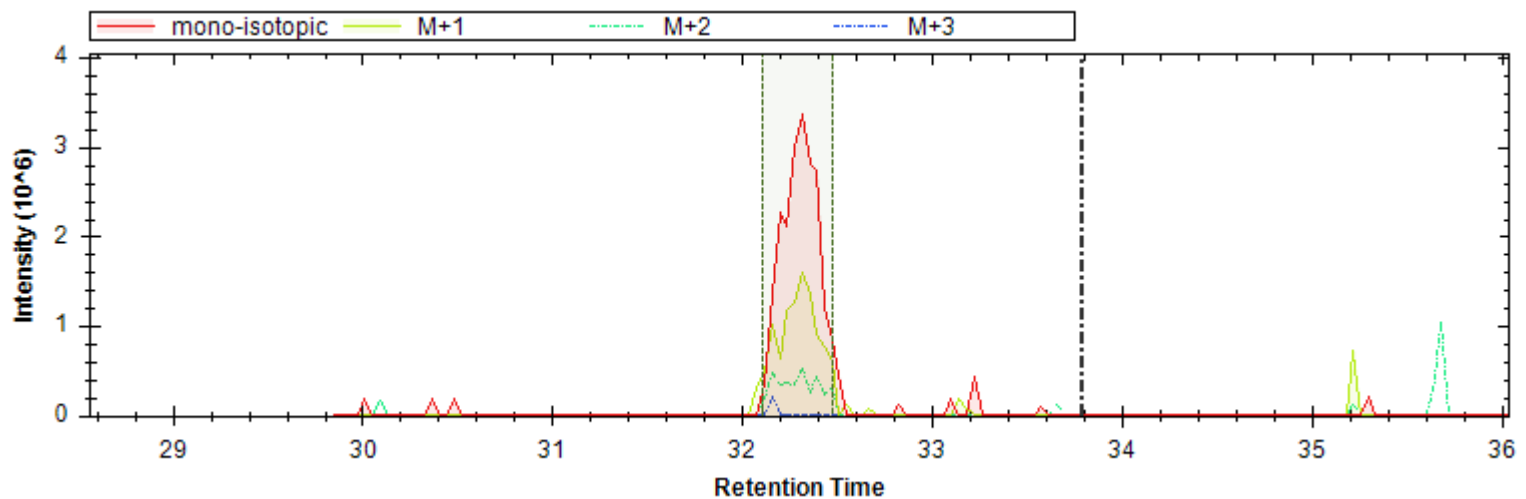

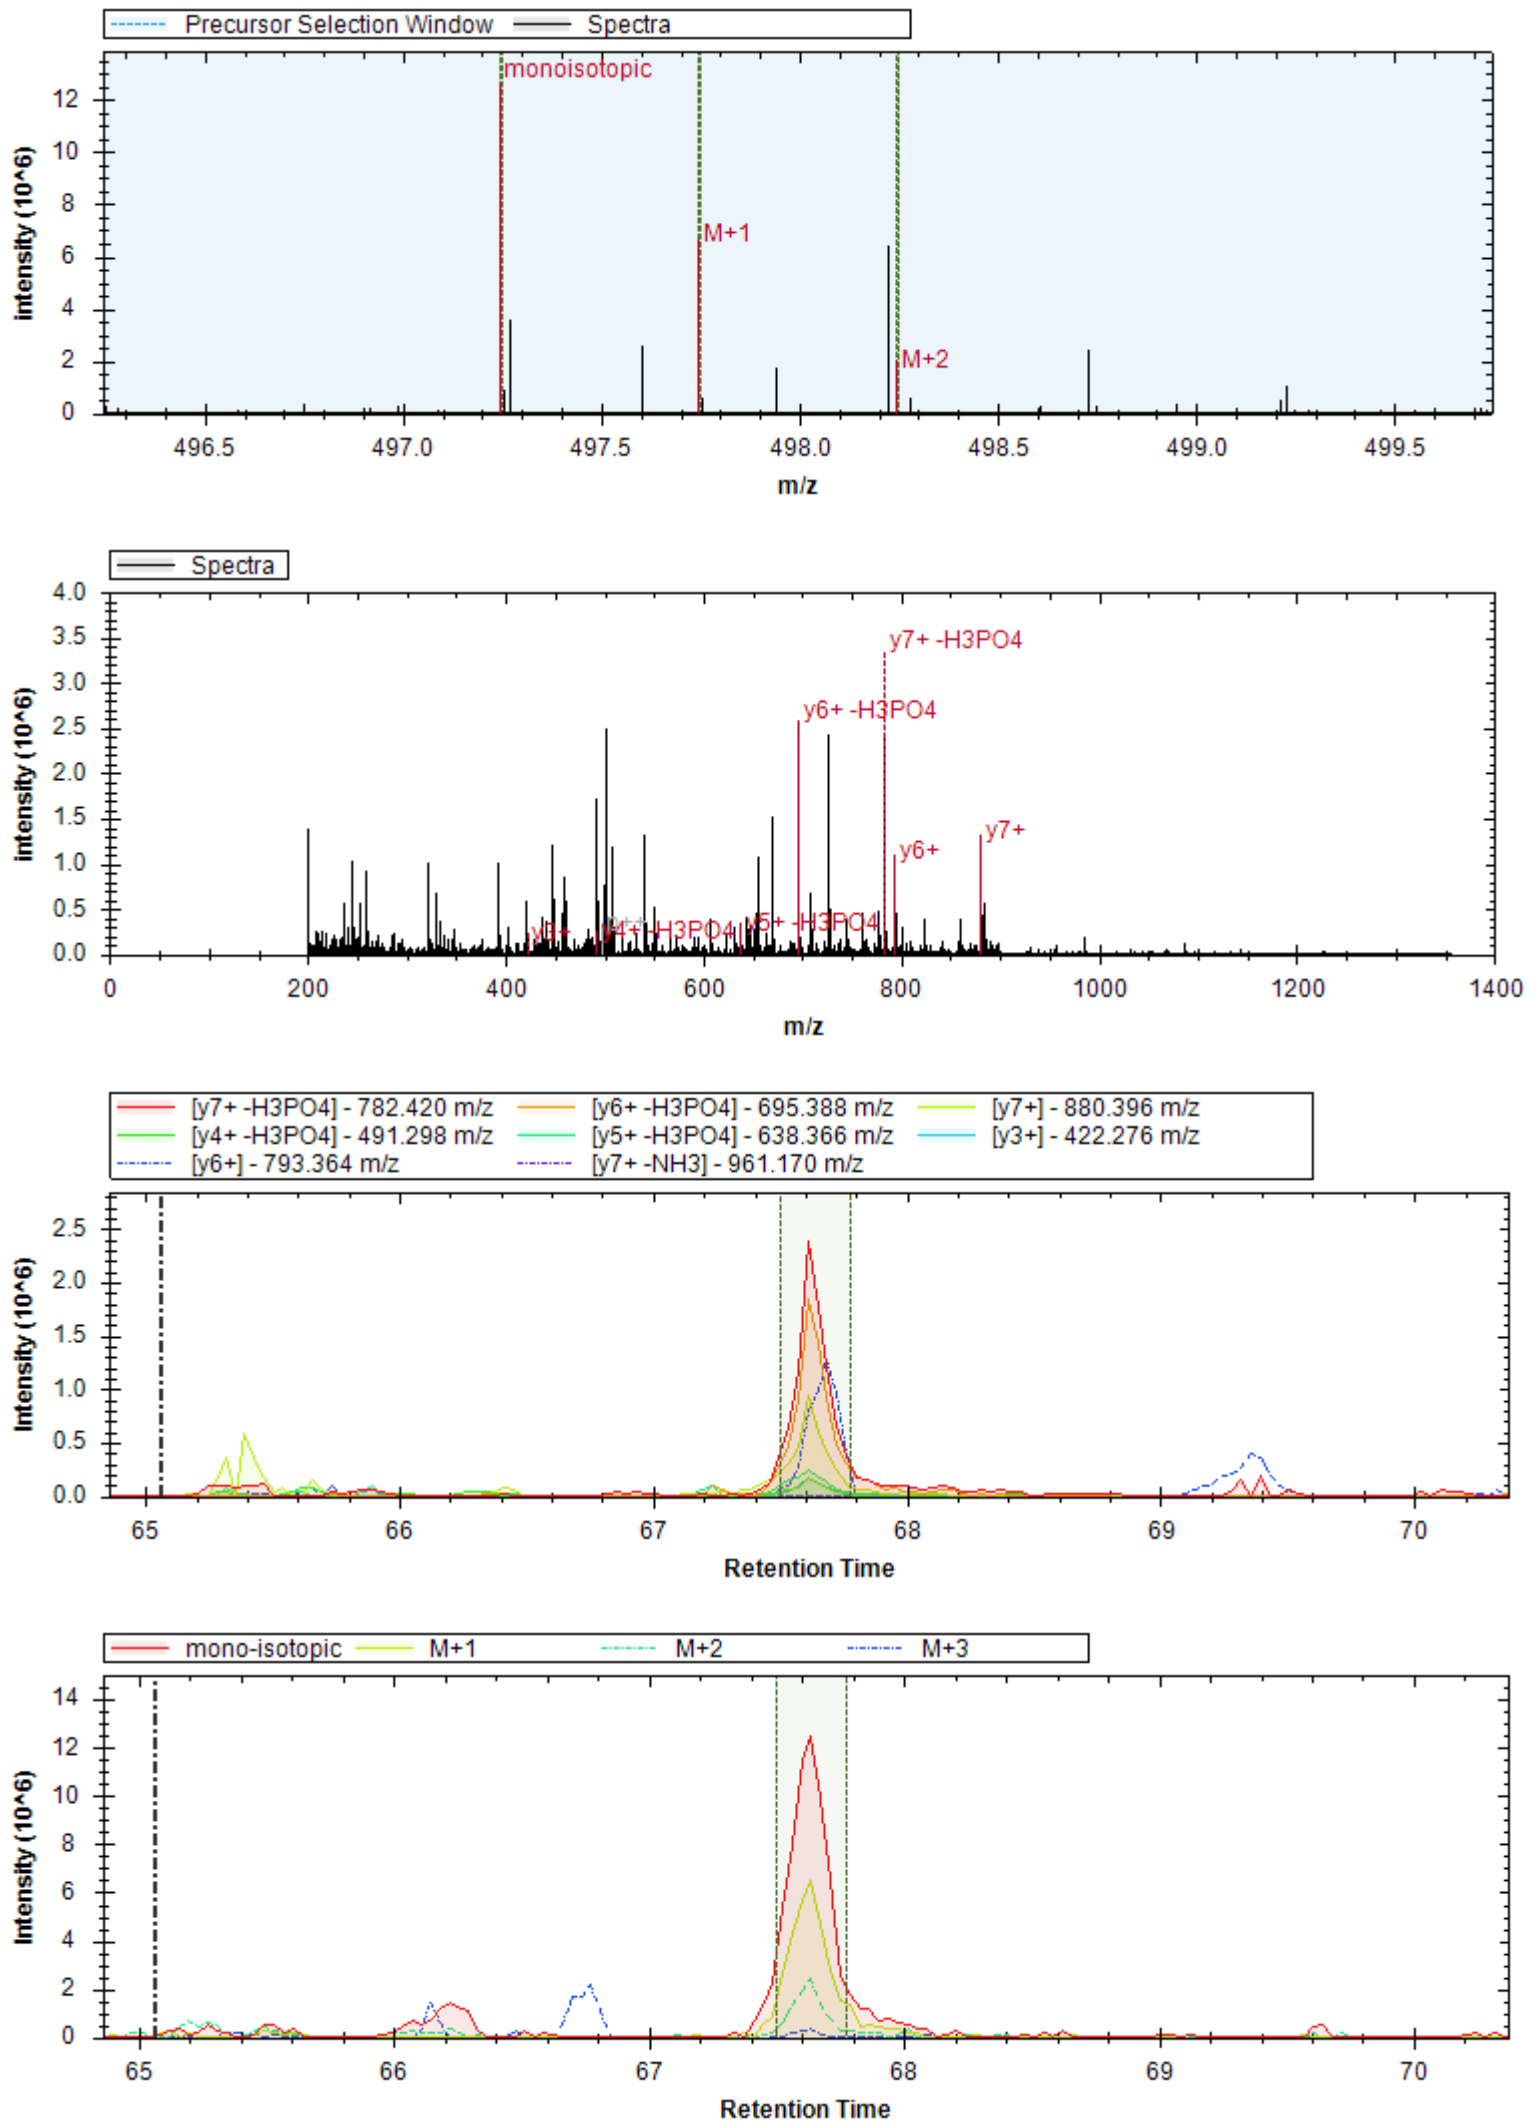

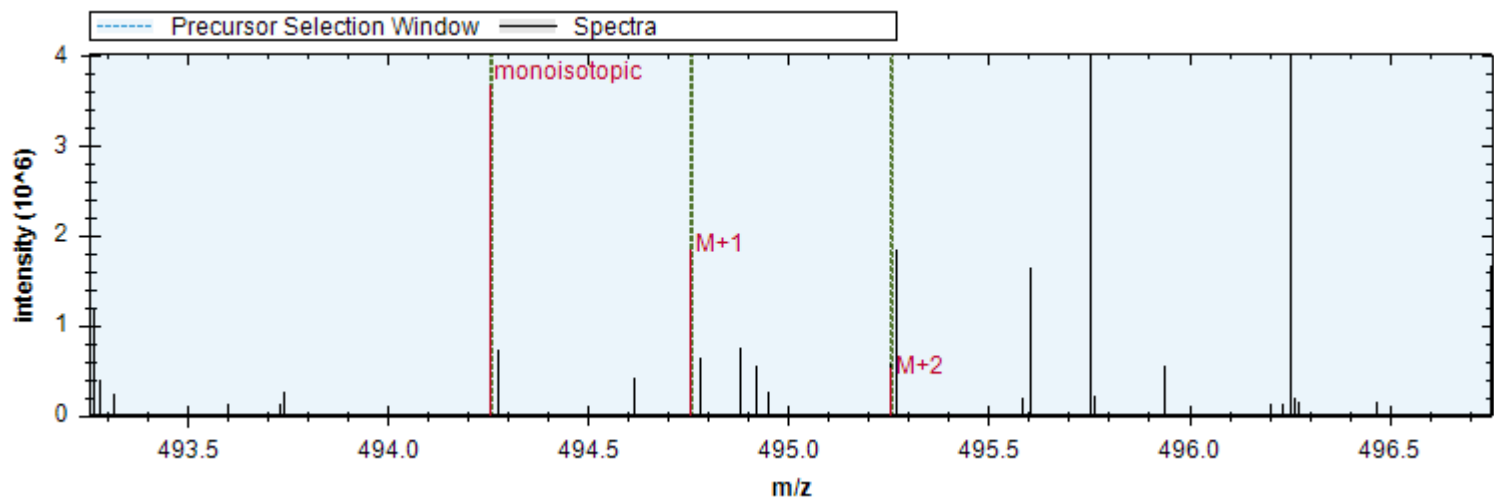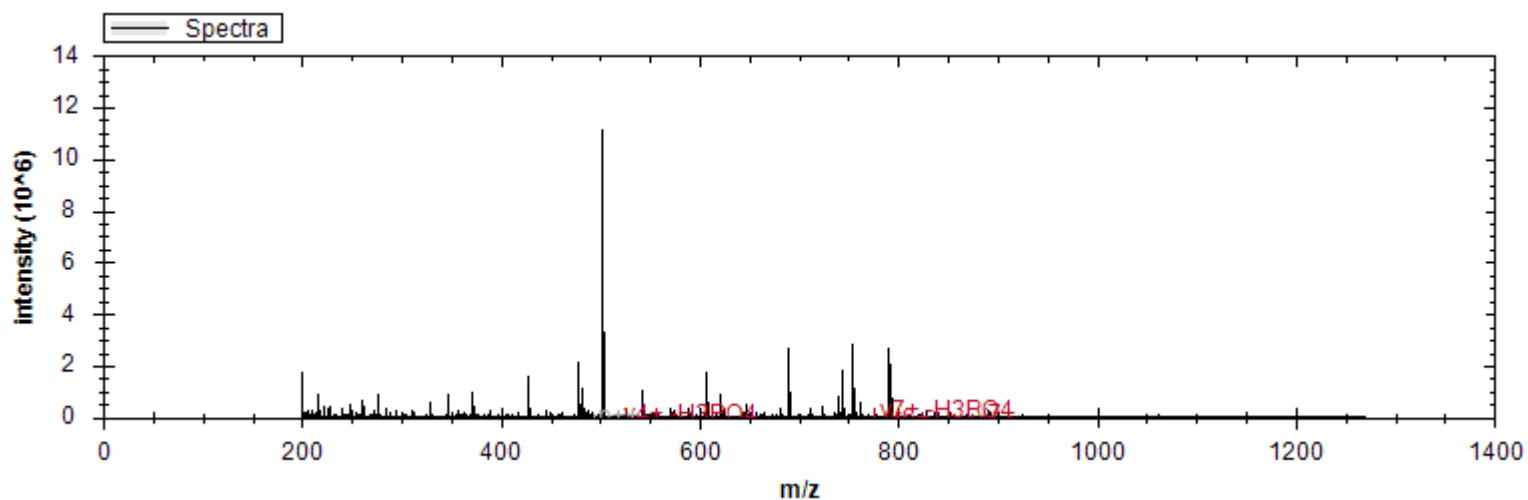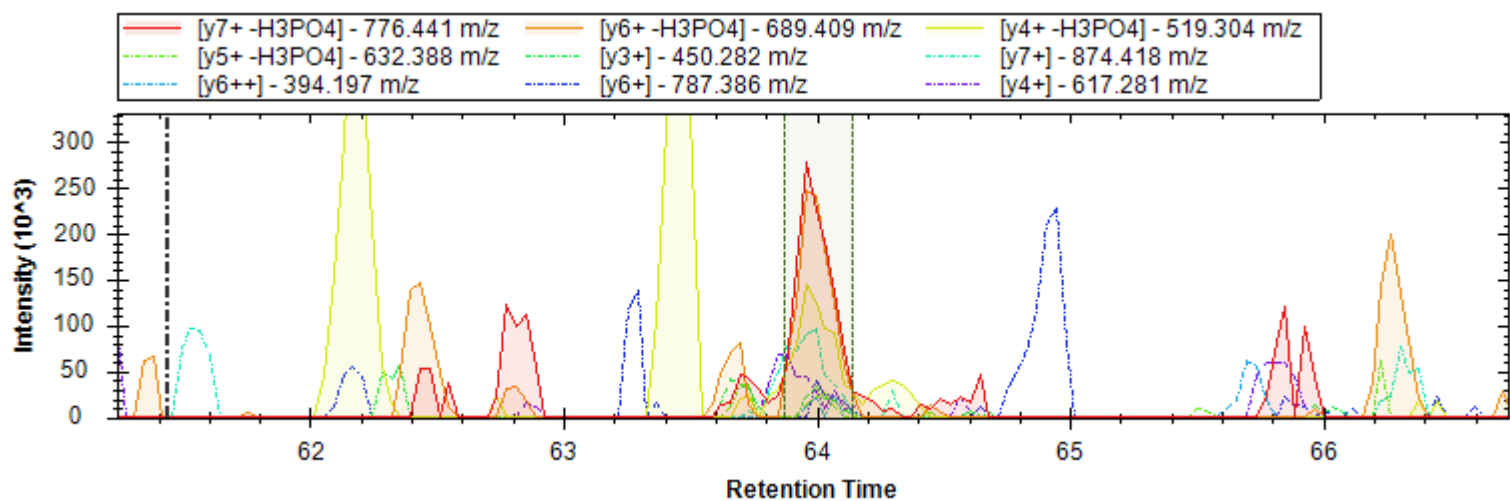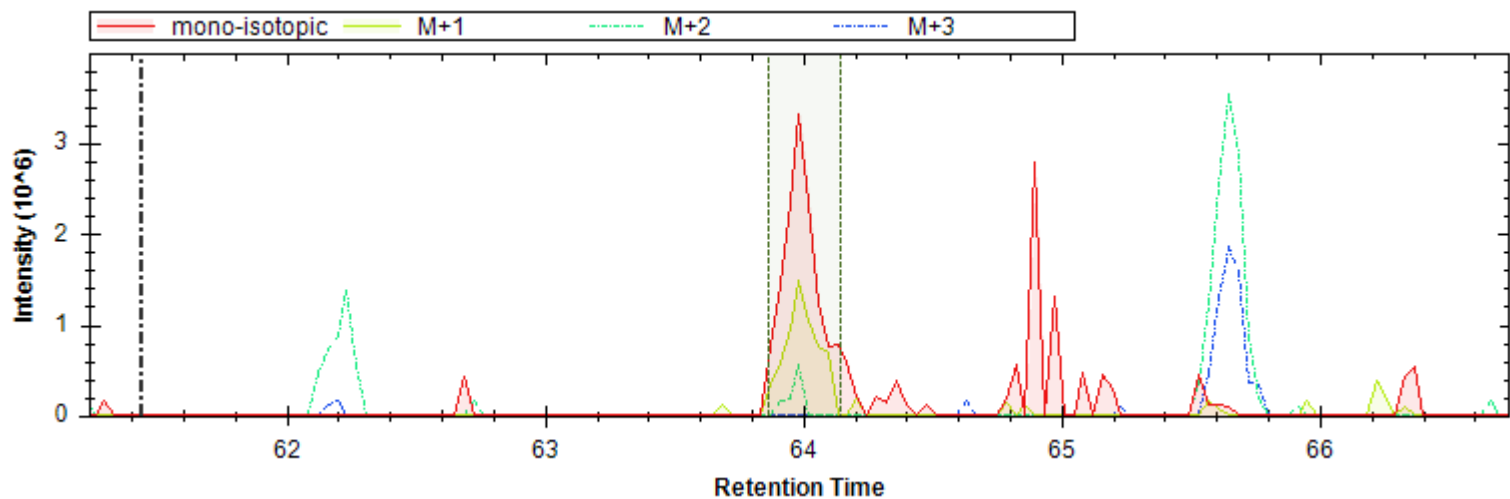

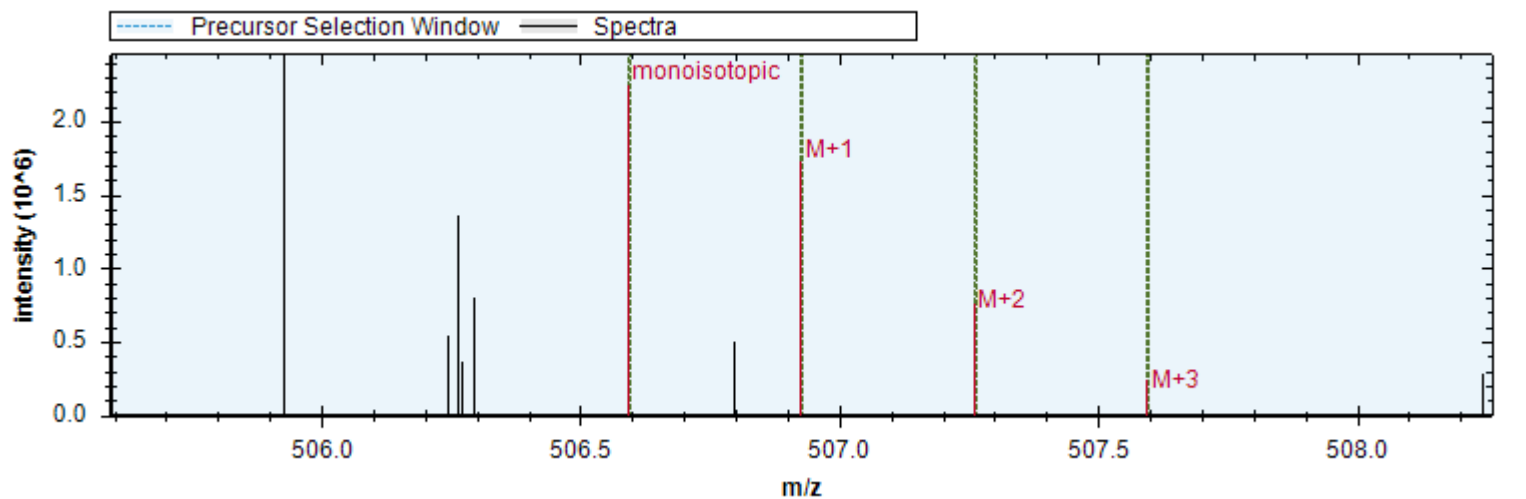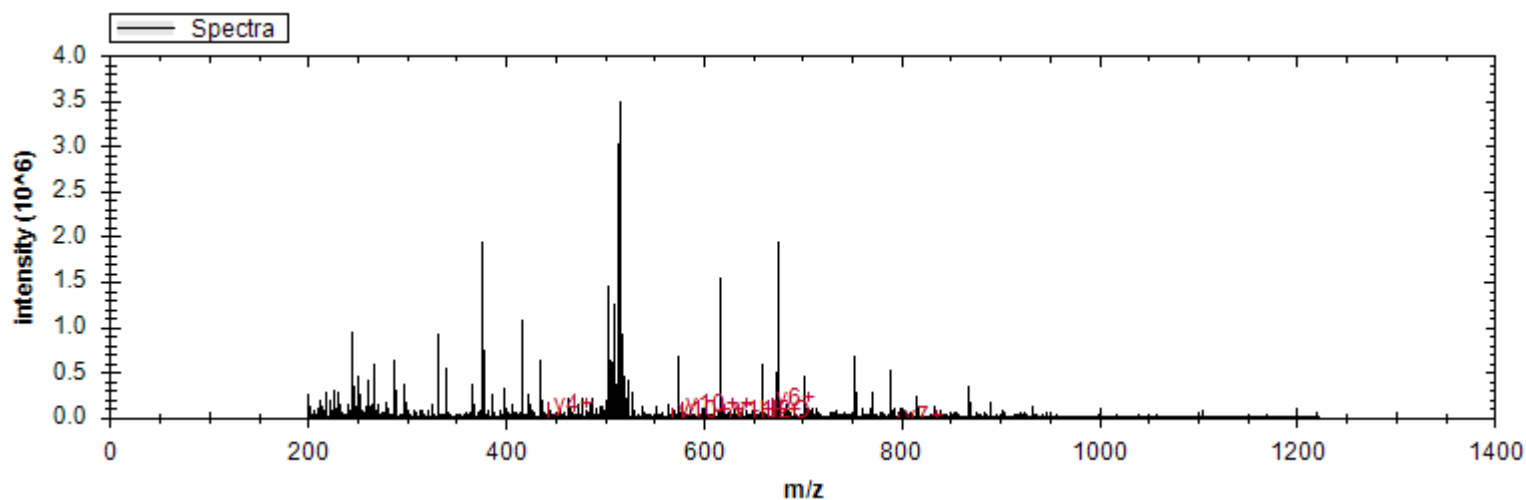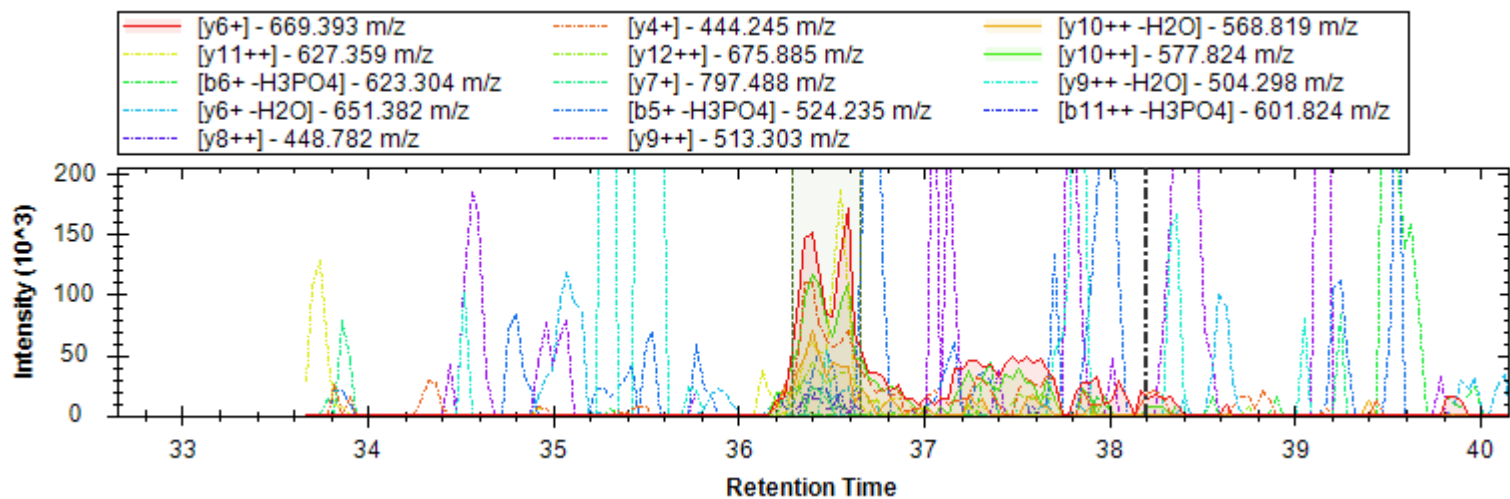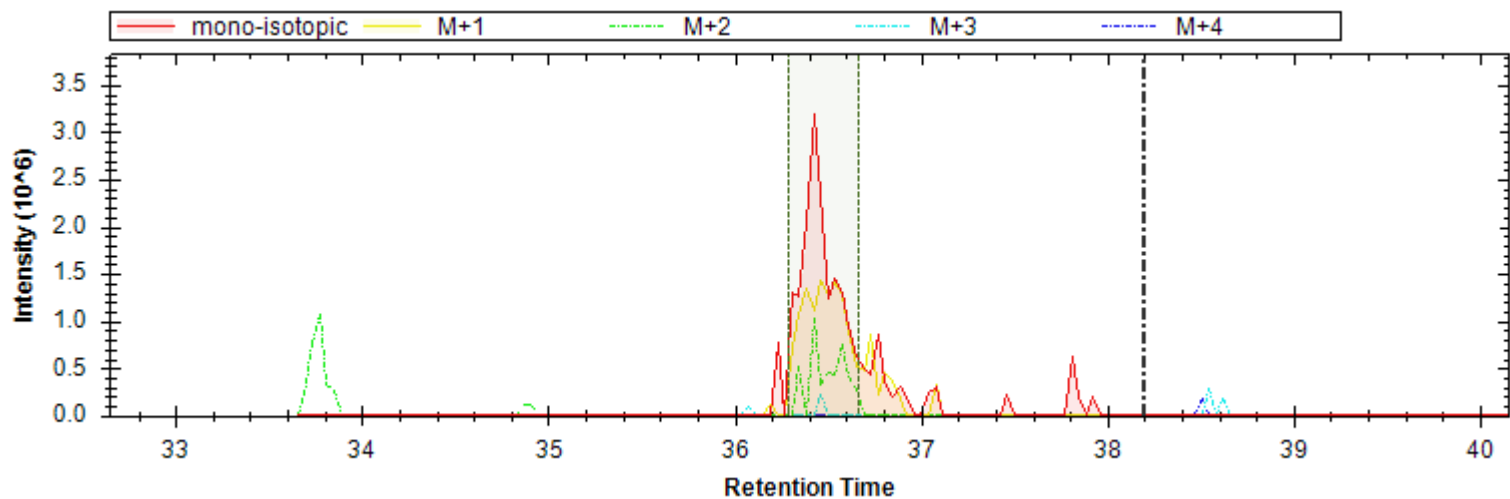

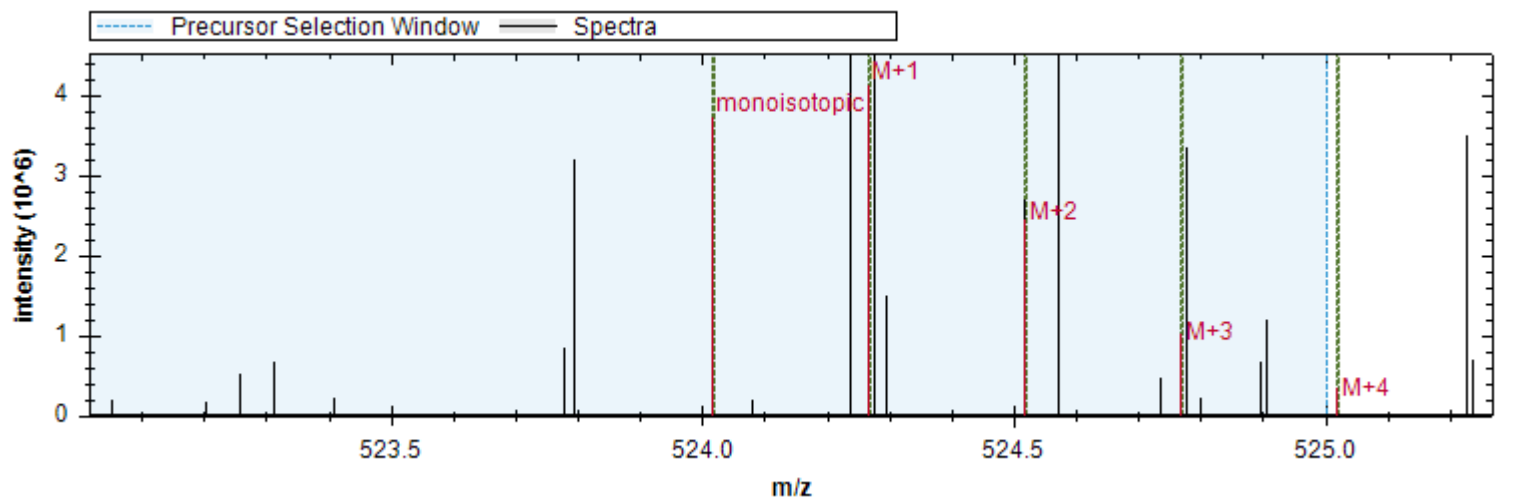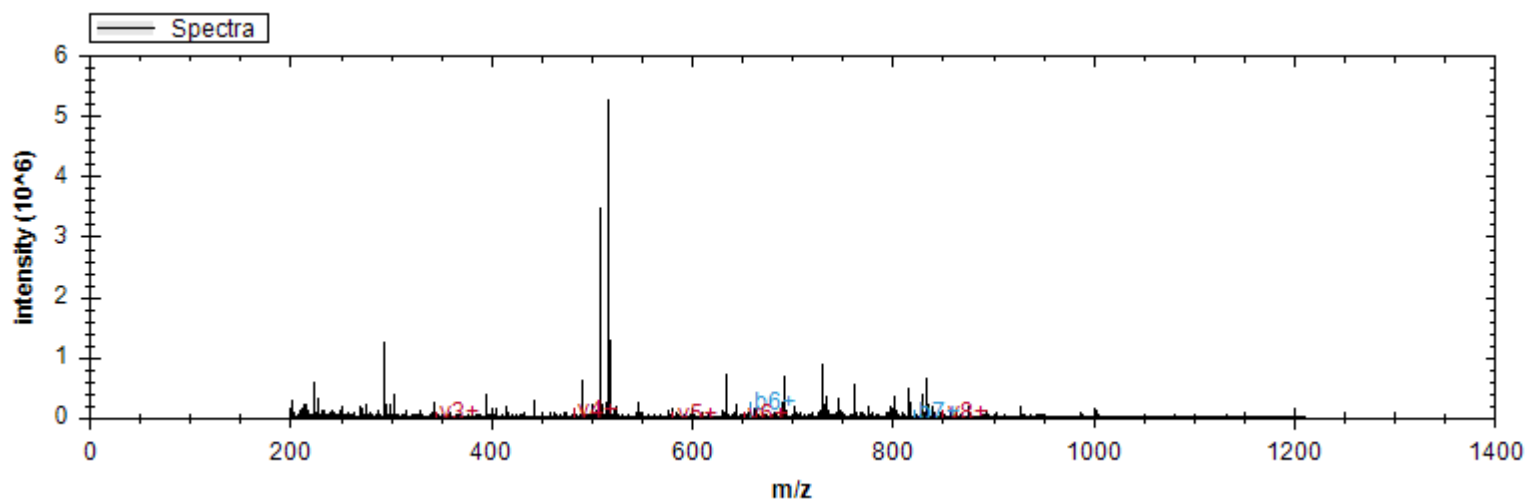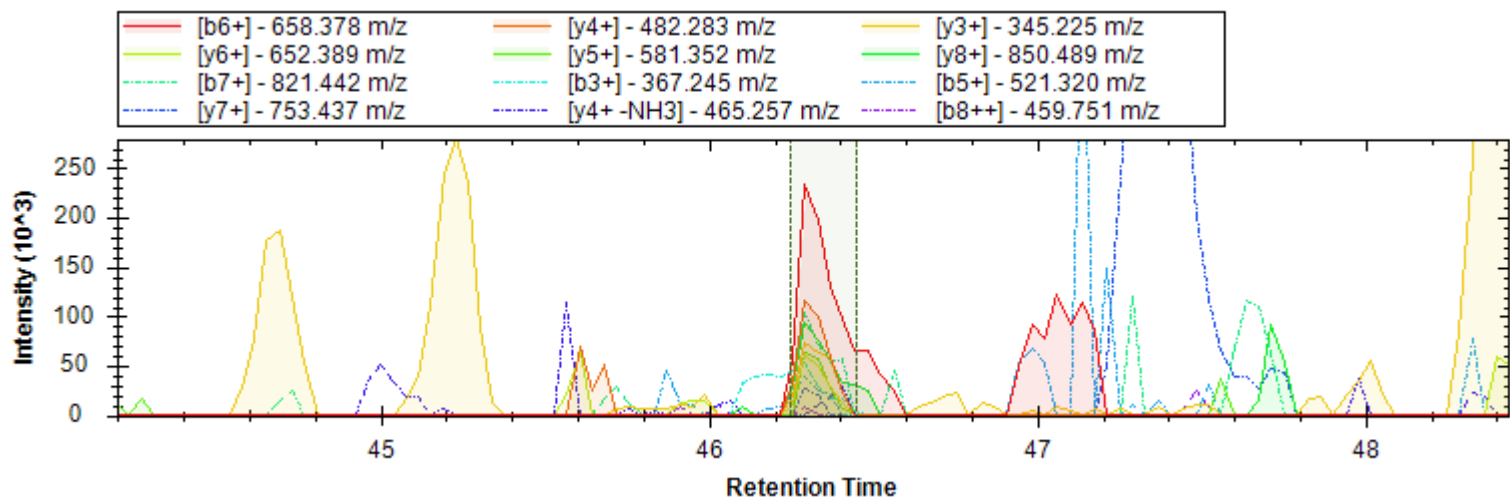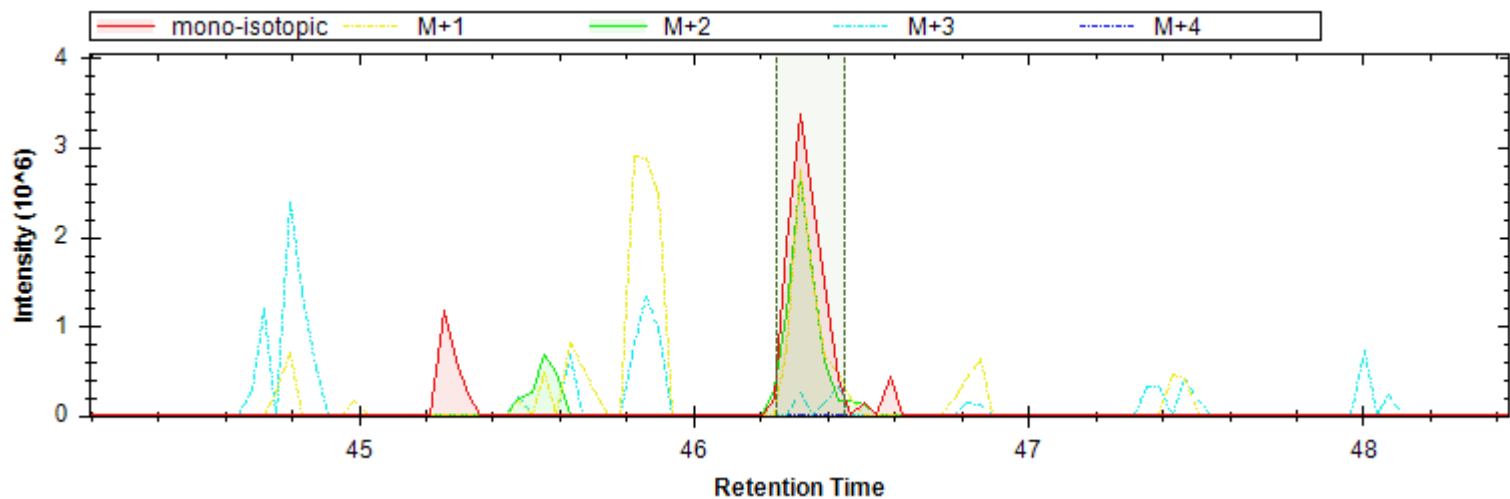

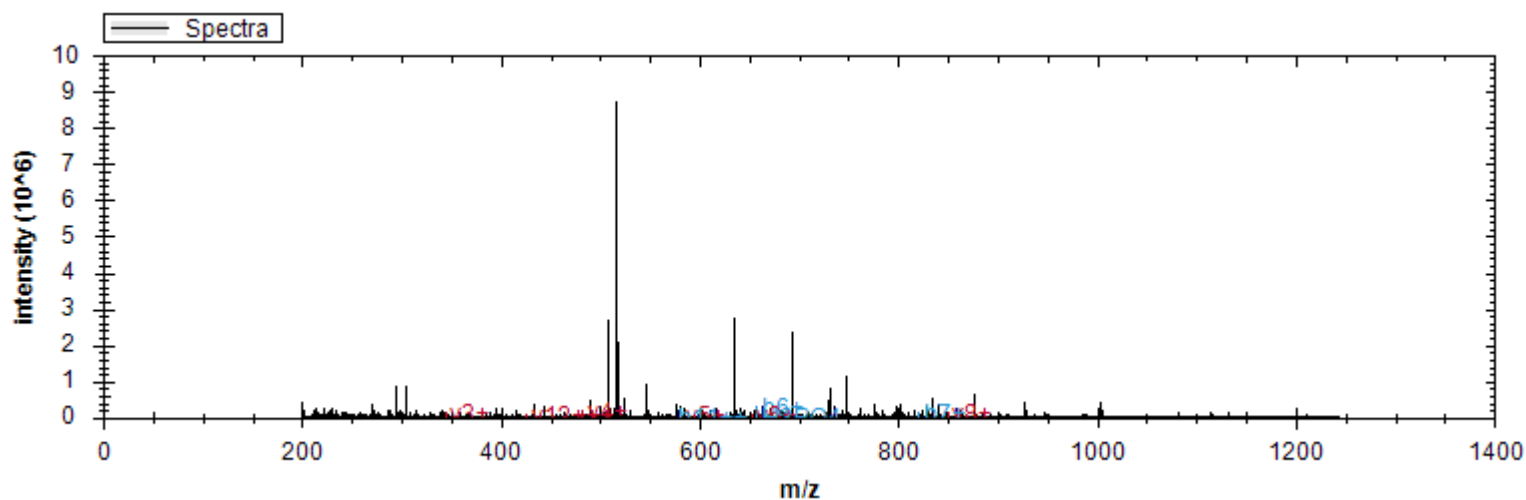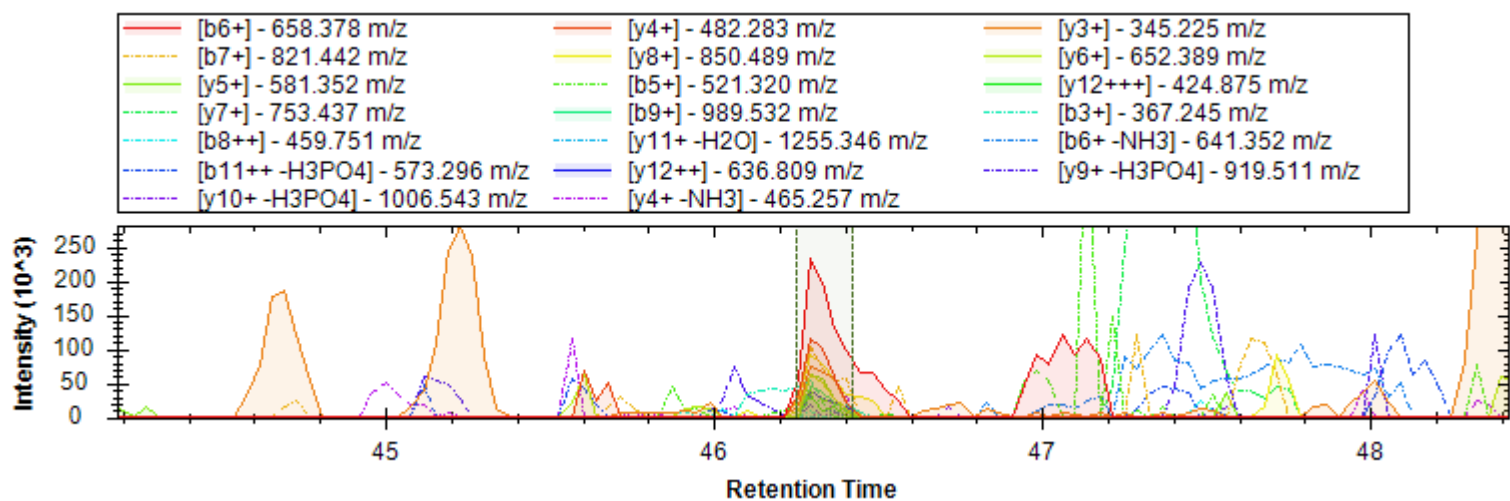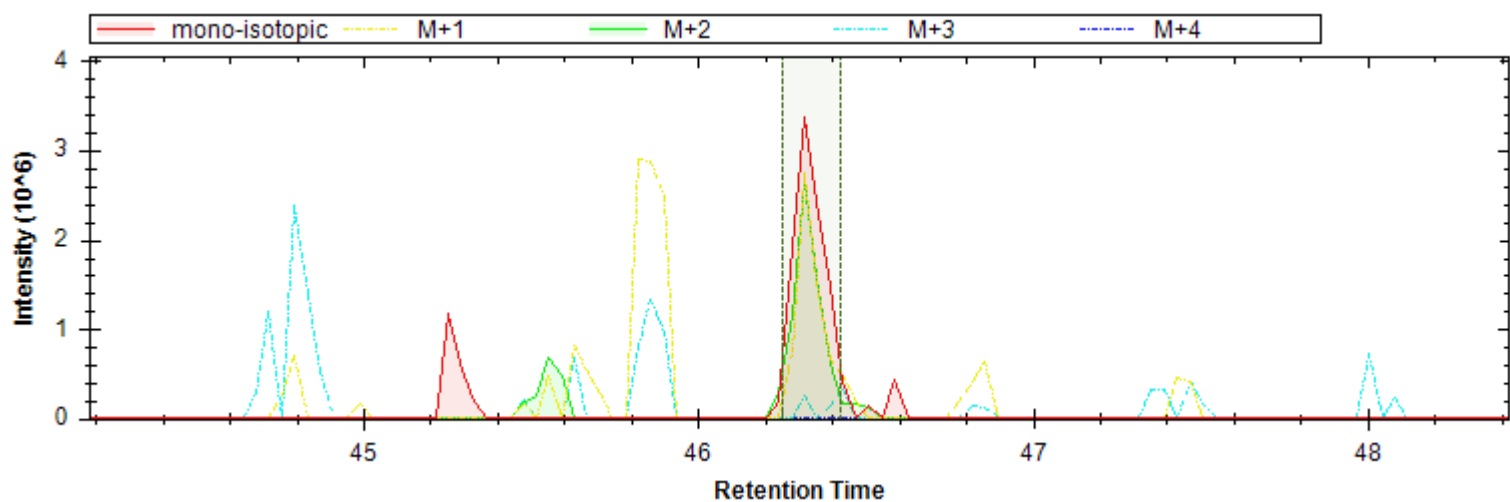





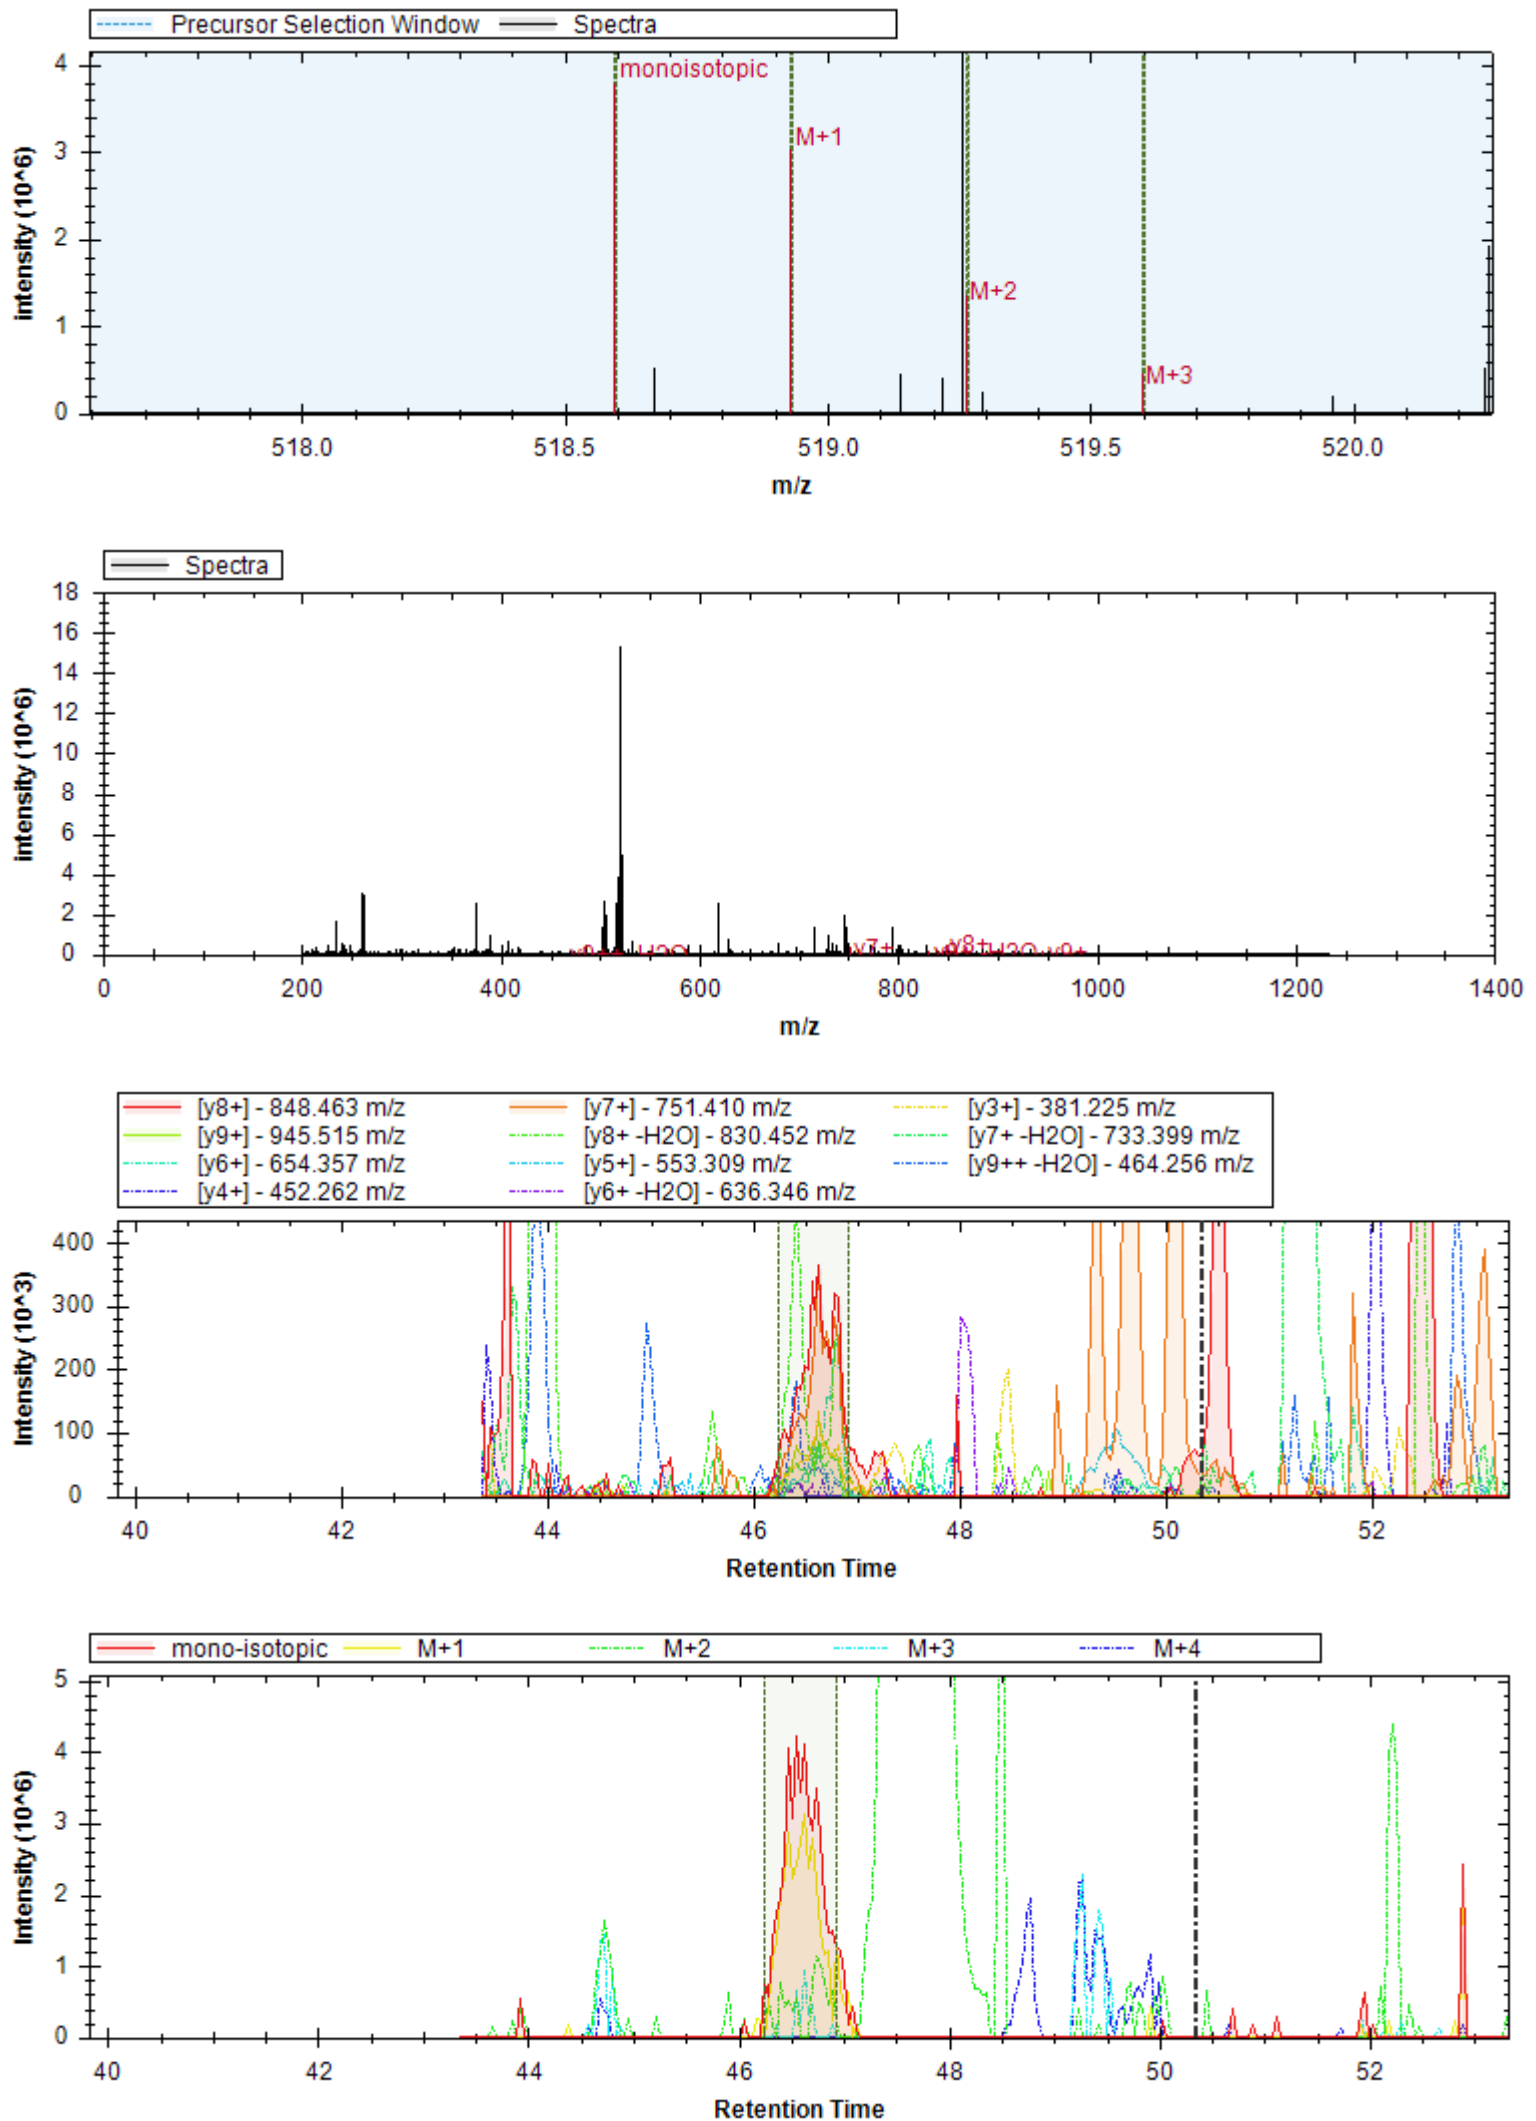

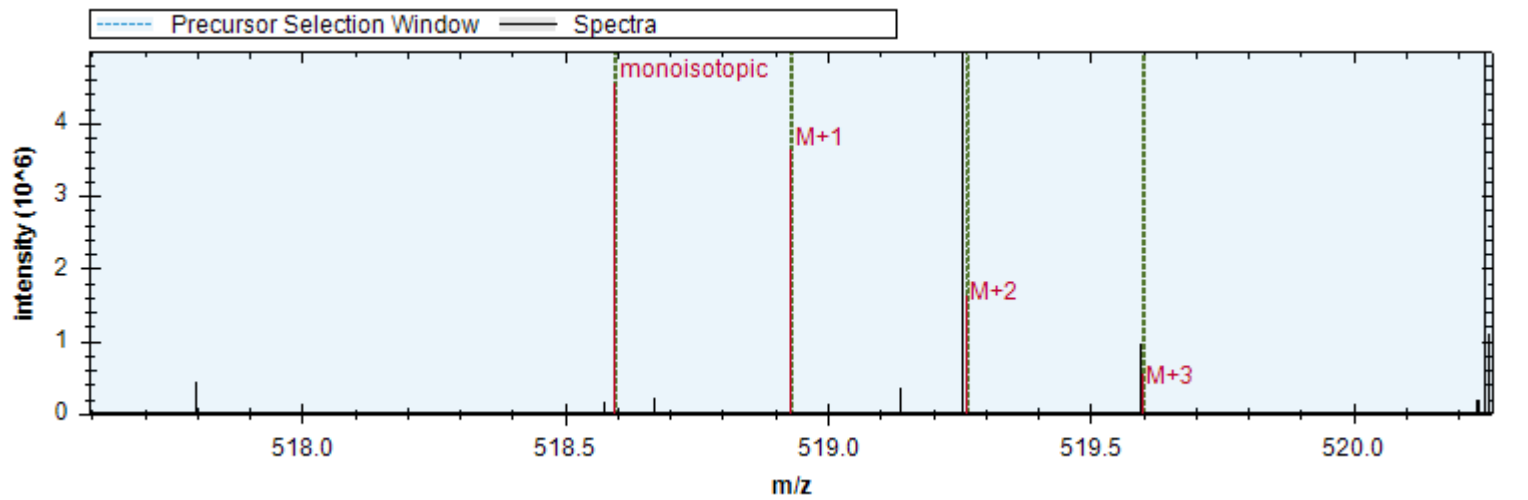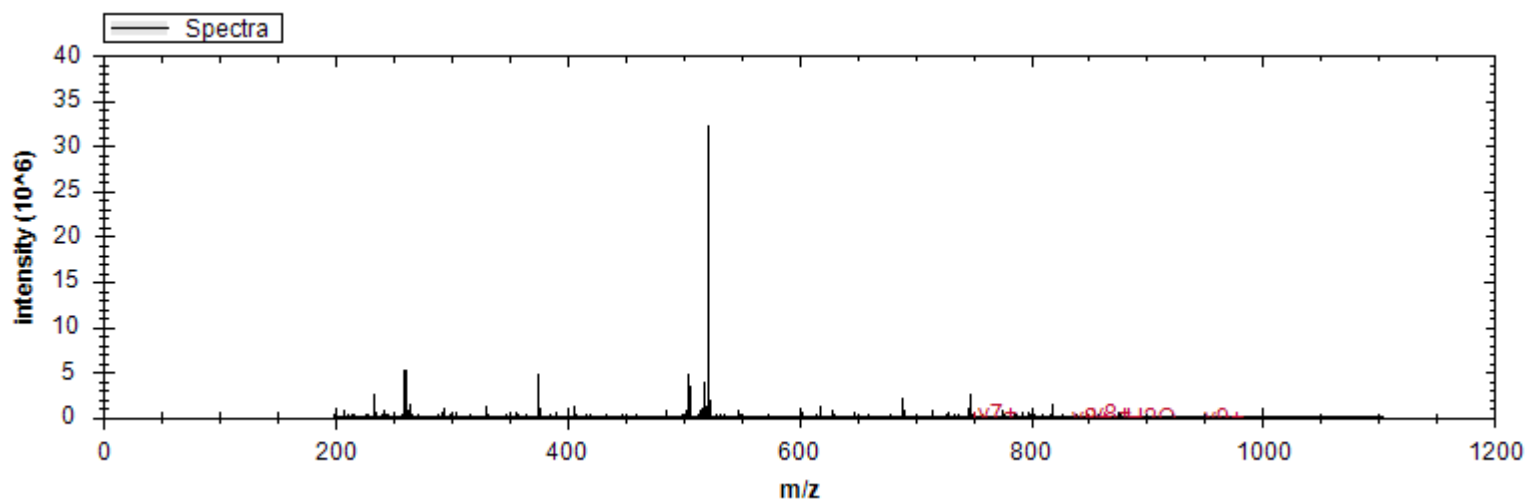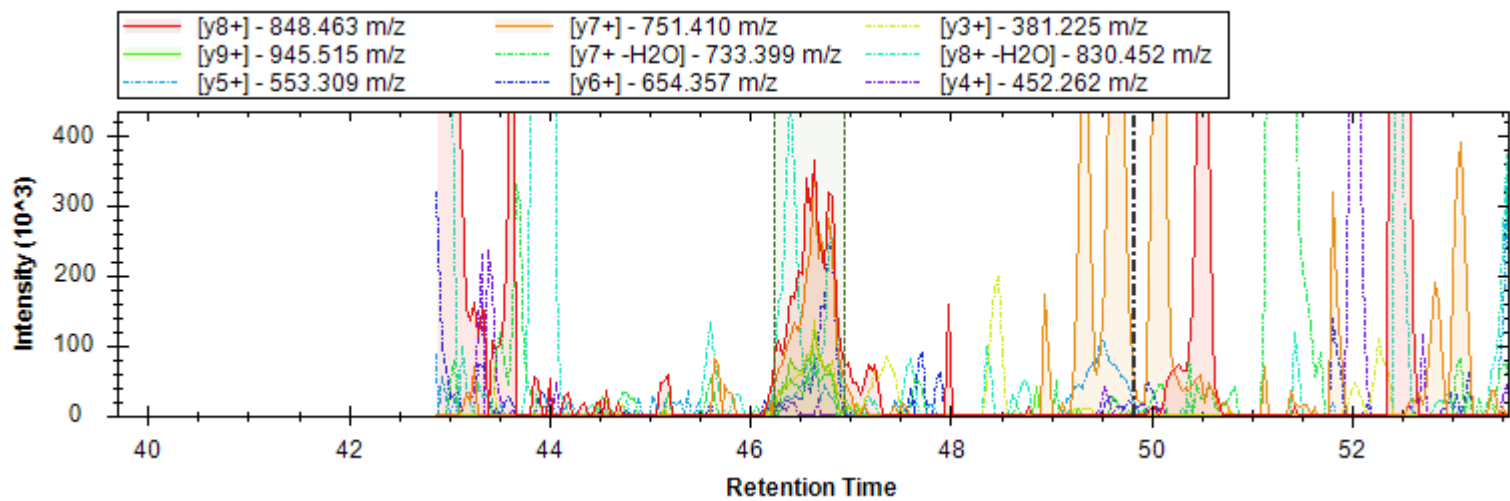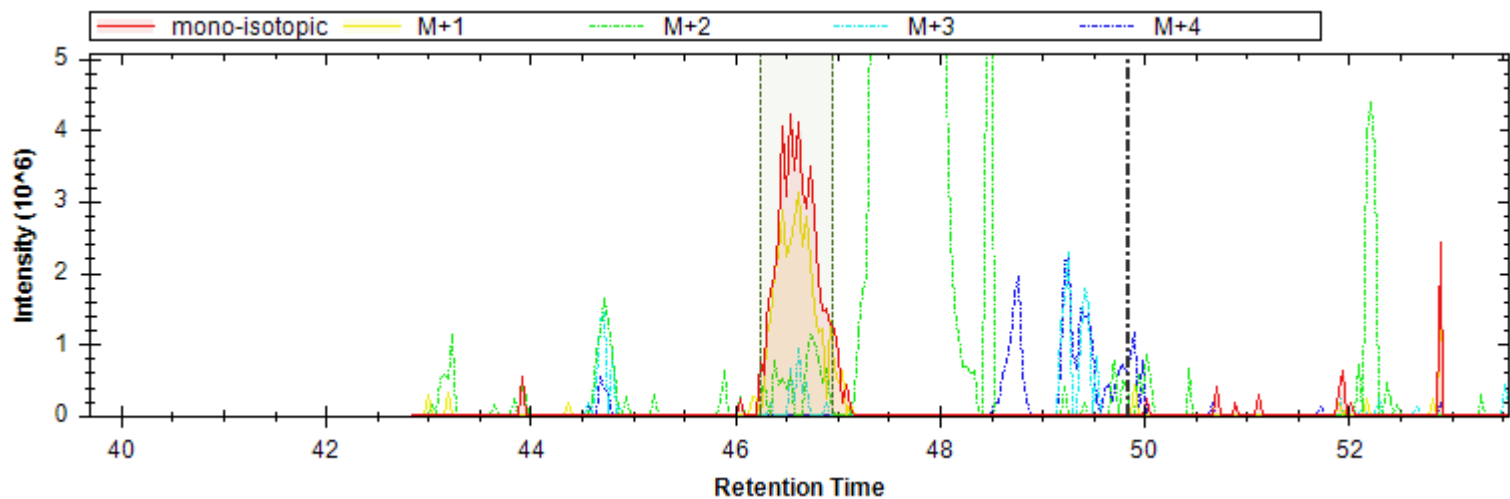

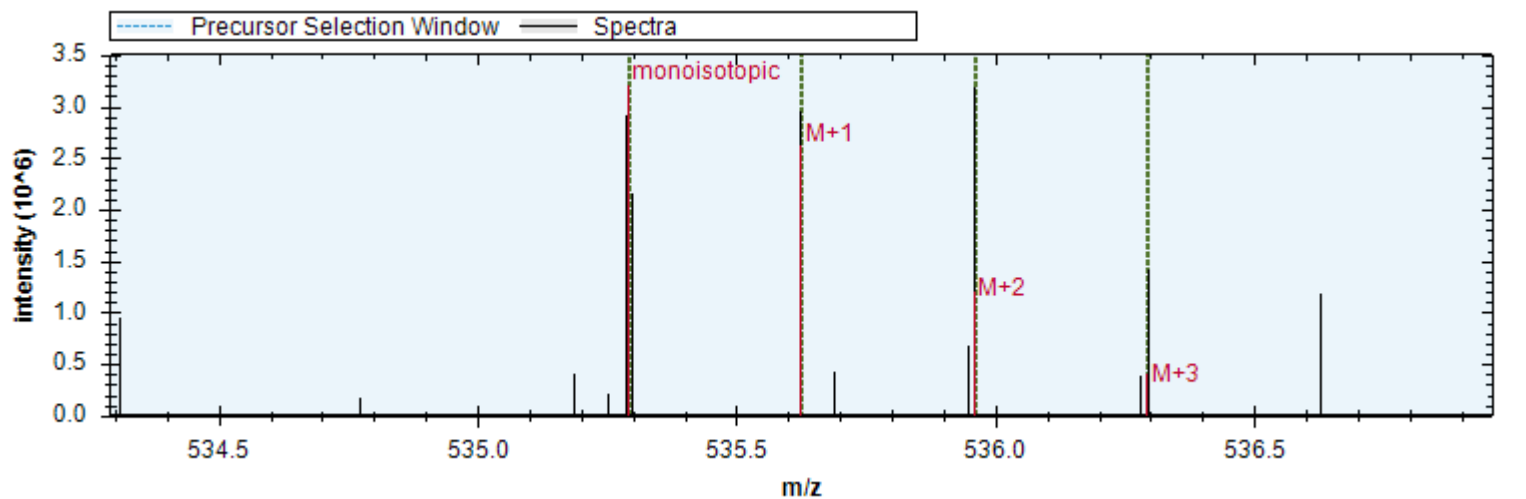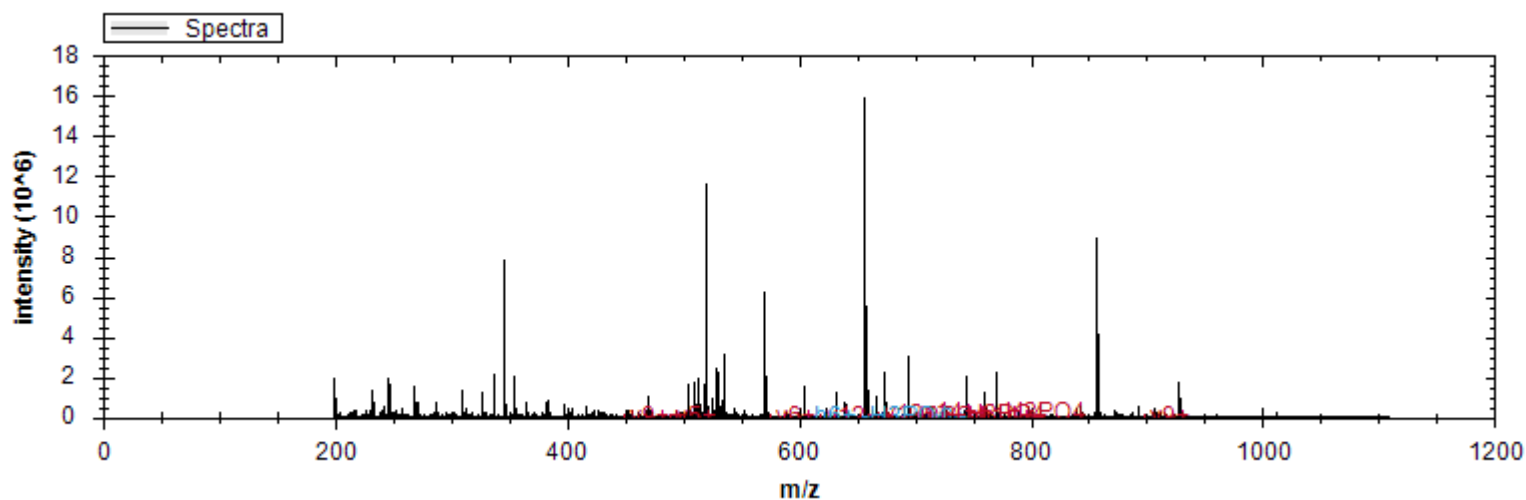

- |                              |                              |                            |
|------------------------------|------------------------------|----------------------------|
| [y14++ -H3PO4] - 703.909 m/z | [y13++ -H3PO4] - 668.391 m/z | [b6+ -H3PO4] - 608.388 m/z |
| [y9+] - 898.499 m/z          | [b10++ -H3PO4] - 509.314 m/z | [y5+] - 489.267 m/z        |
| [y6+] - 576.299 m/z          | [y12++ -H3PO4] - 618.857 m/z | [y14++] - 752.898 m/z      |
| [y8+] - 801.447 m/z          | [y13++] - 717.379 m/z        | [b10++] - 558.302 m/z      |
| [y12++] - 667.845 m/z        | [b6+] - 706.365 m/z          | [y8++] - 401.227 m/z       |
| [y9++] - 449.753 m/z         | [y5+ -H2O] - 471.256 m/z     | [y9+ -H2O] - 880.489 m/z   |
| [y11++] - 618.311 m/z        | [y3+] - 305.182 m/z          | [y4+] - 392.214 m/z        |
| [b5+] - 525.351 m/z          | [y13++ -H2O] - 708.374 m/z   |                            |

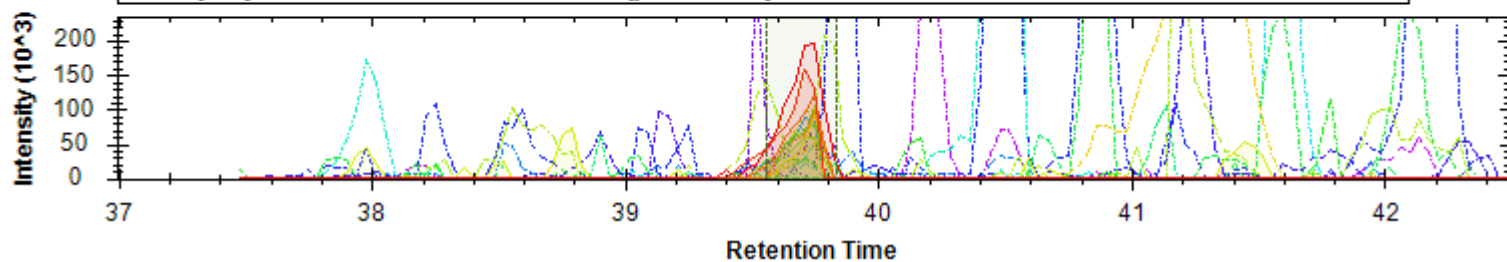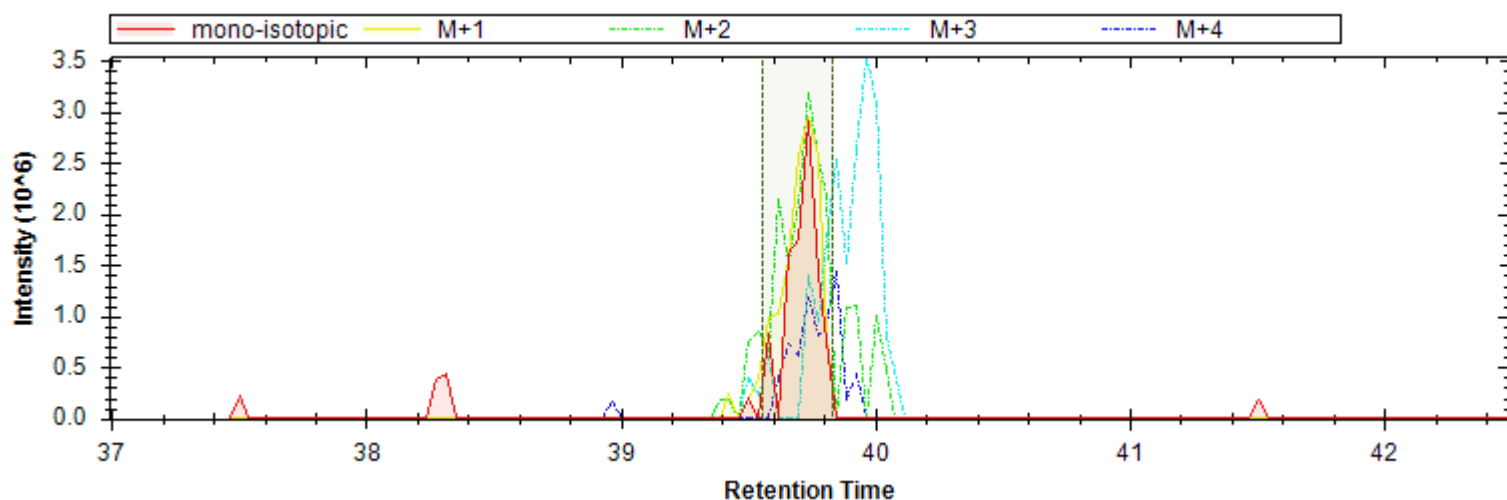

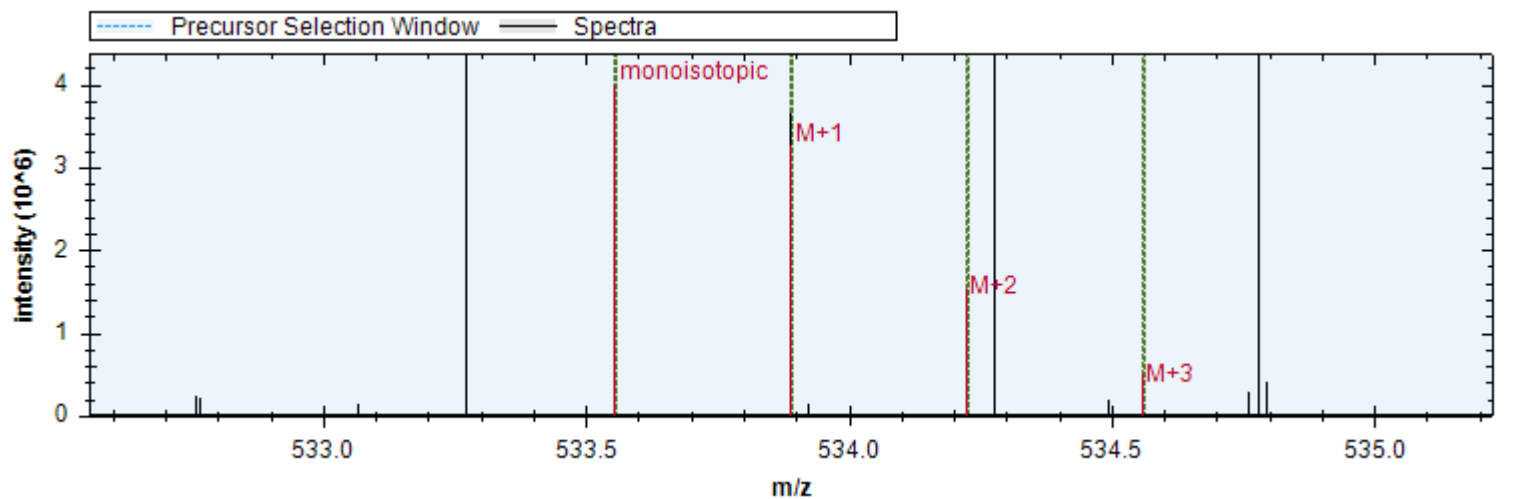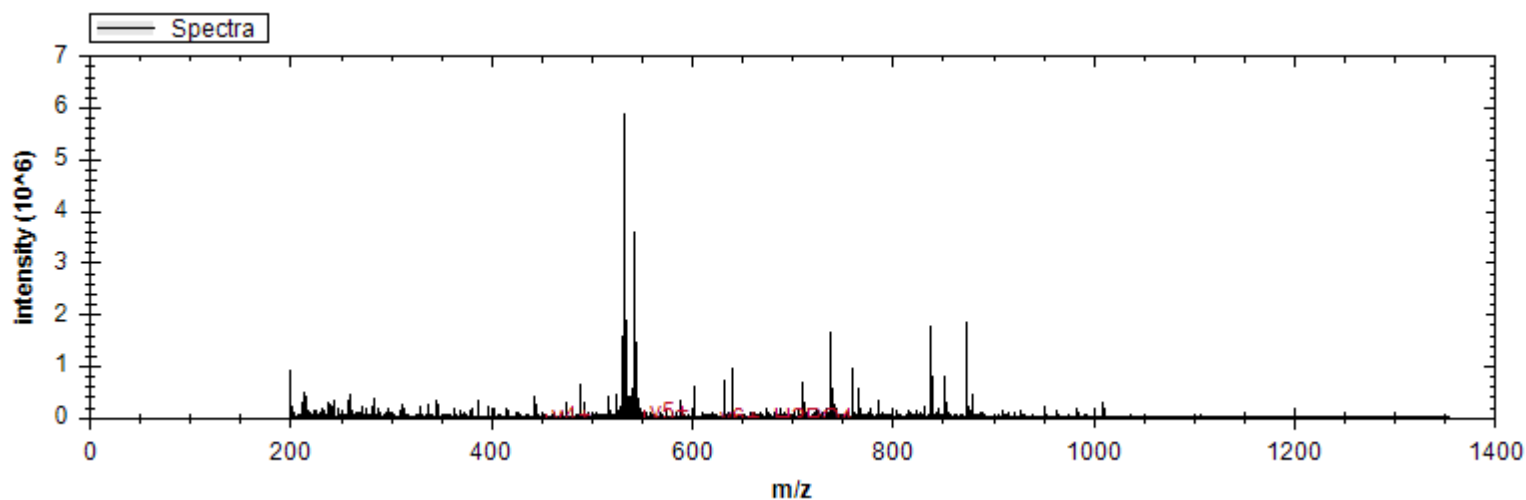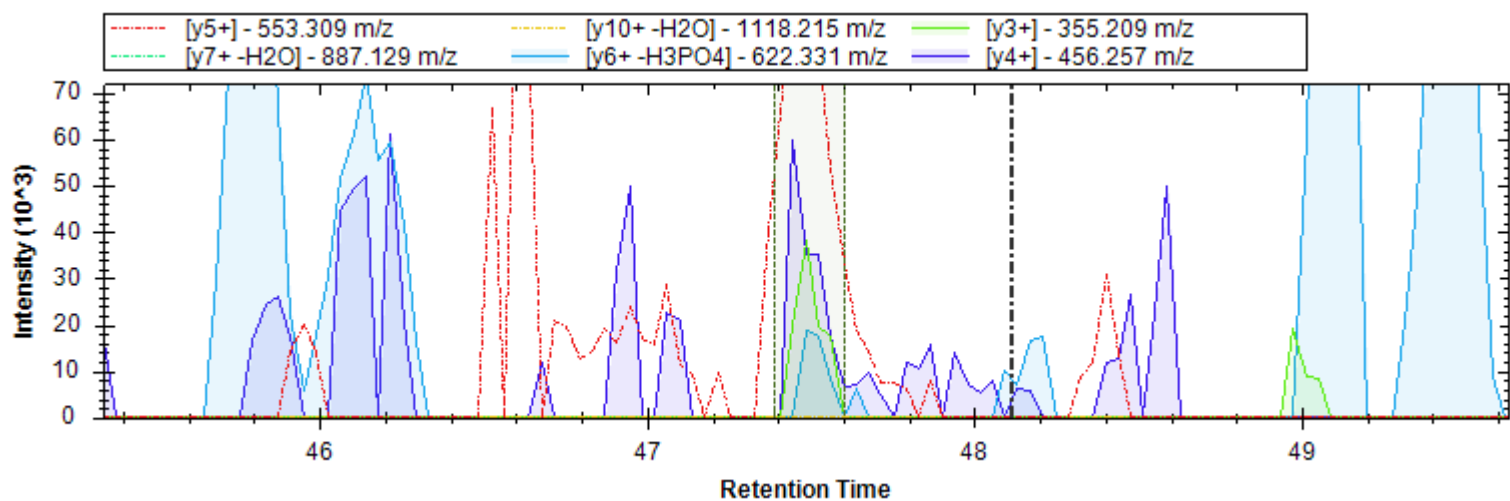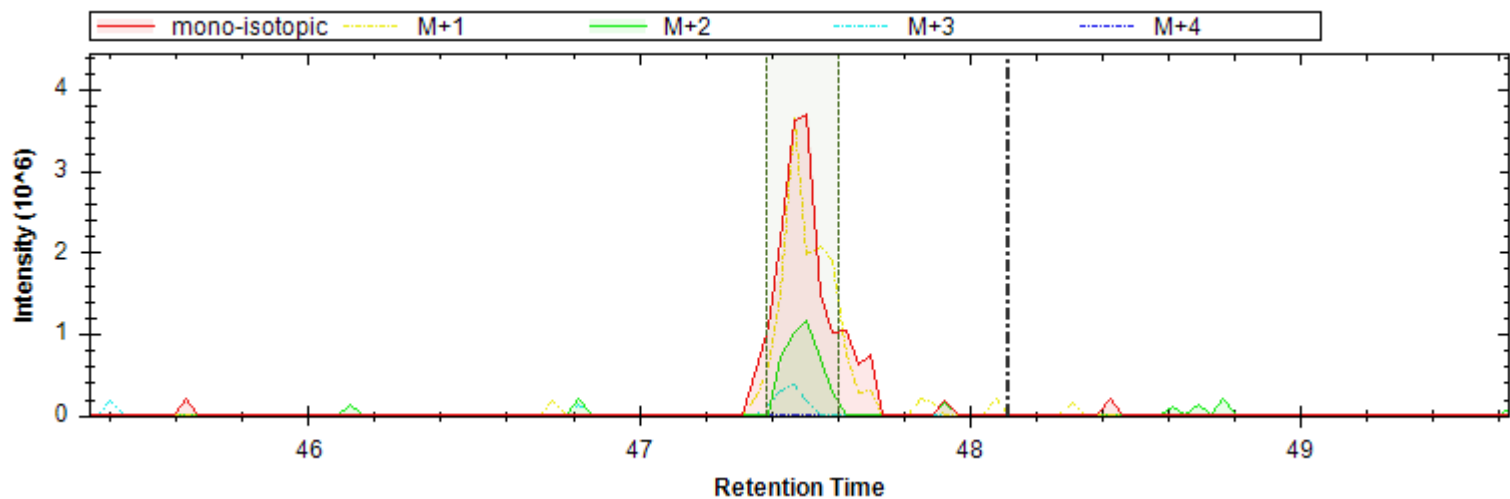

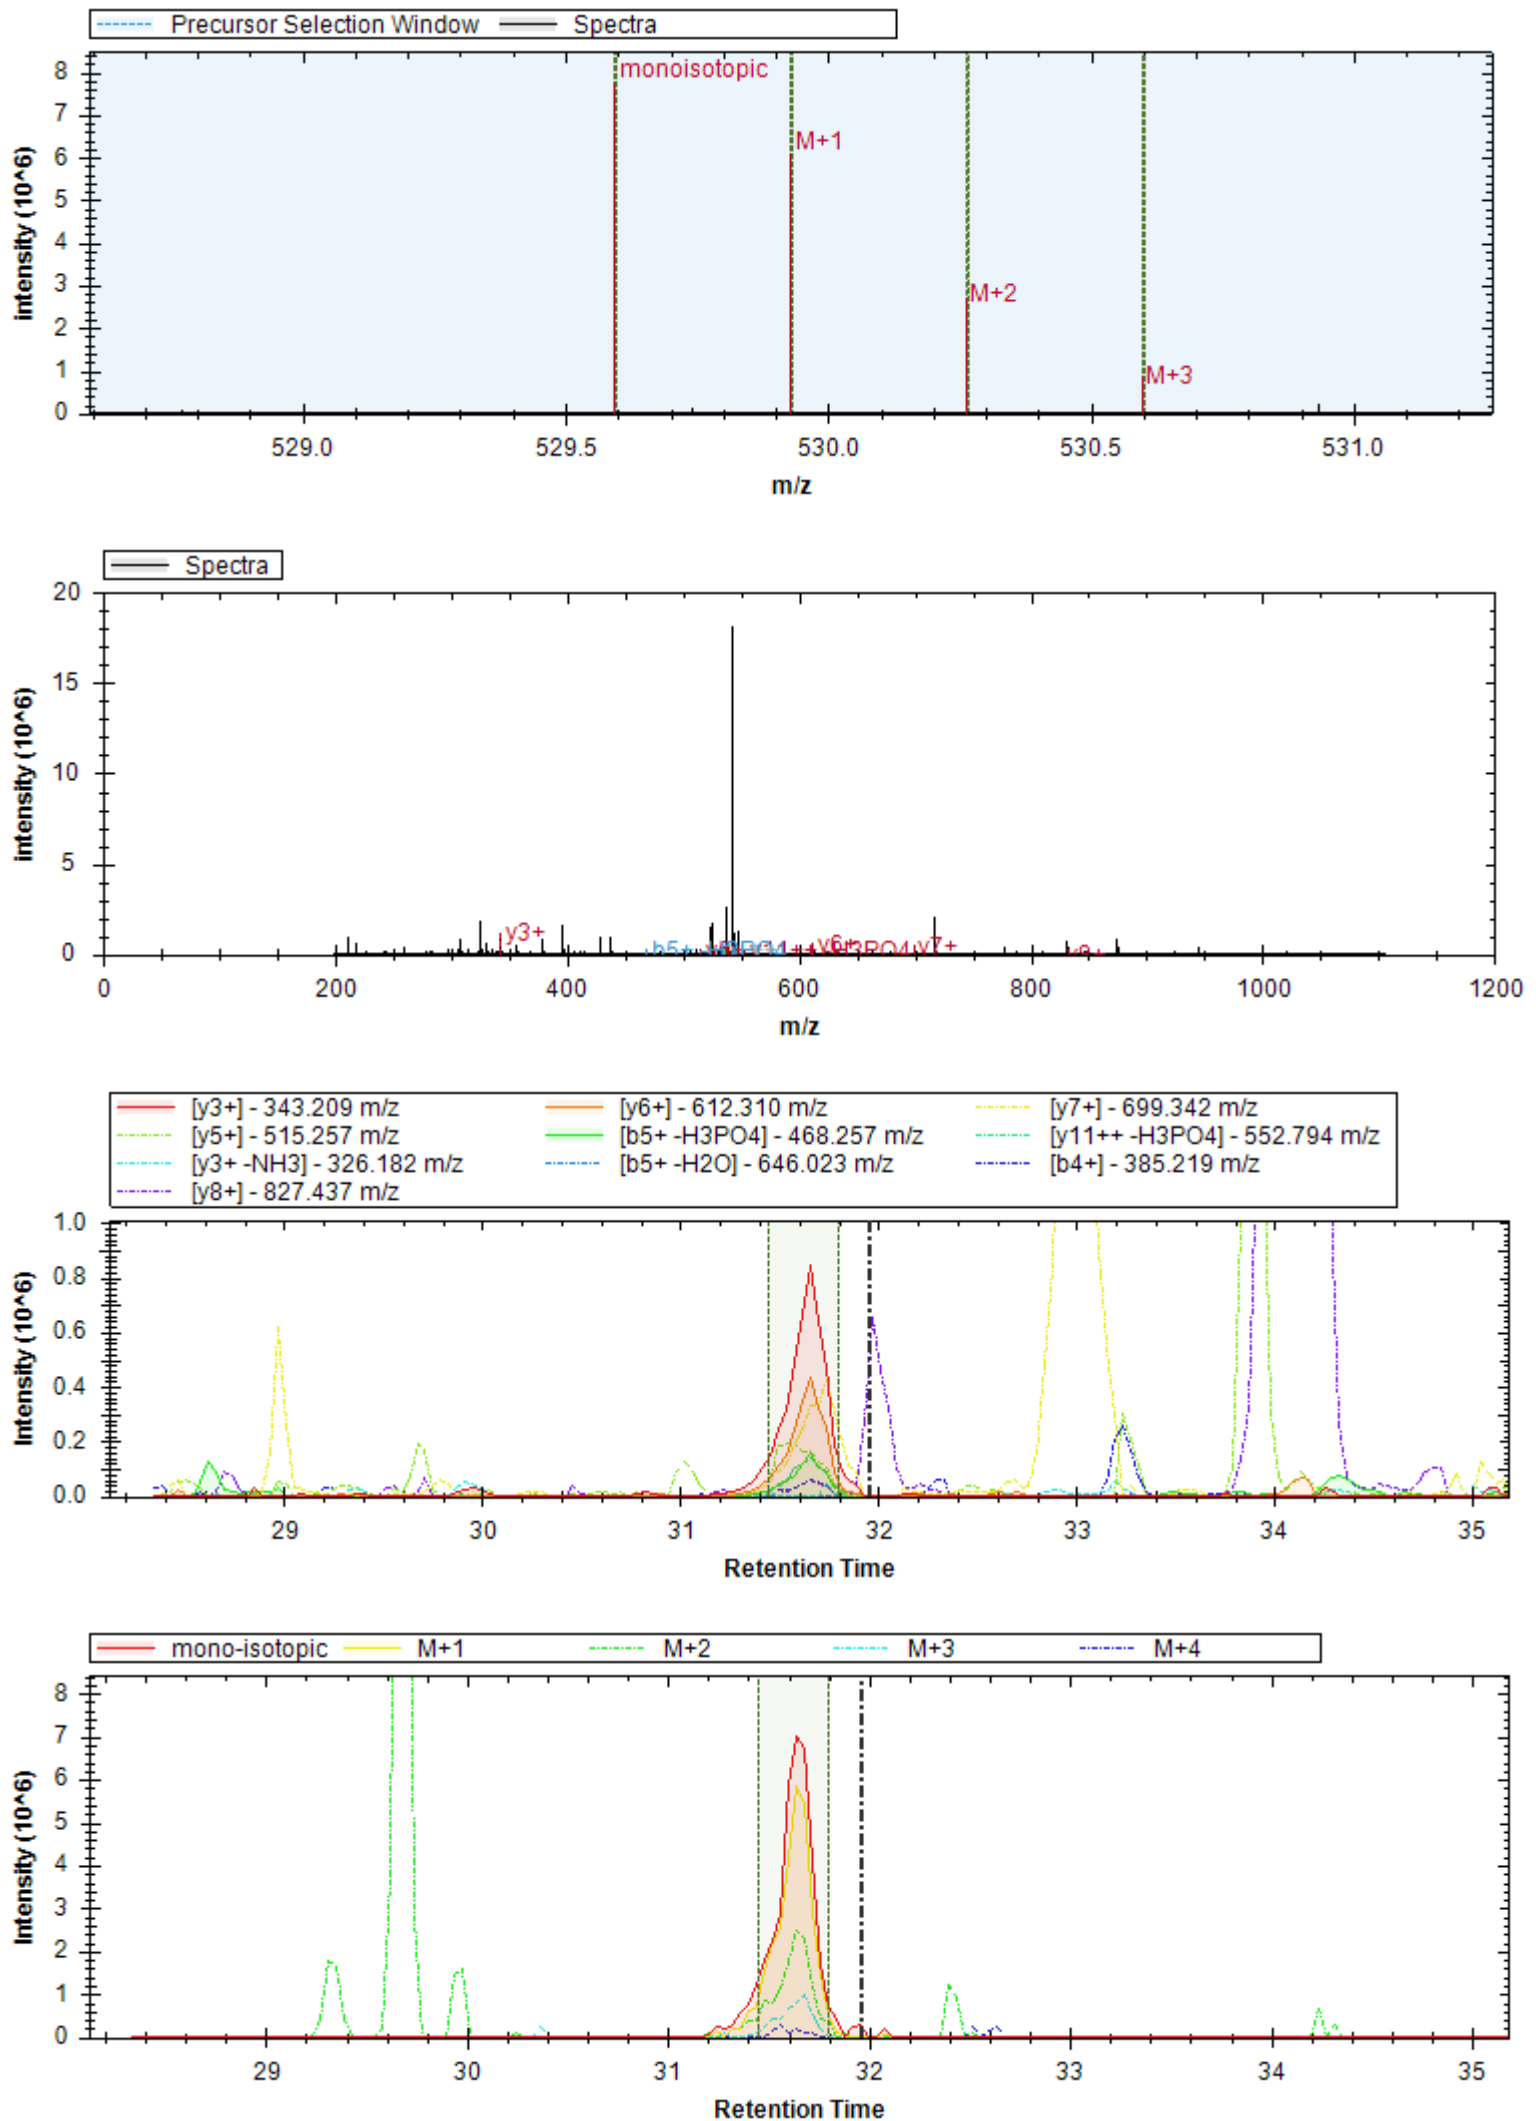

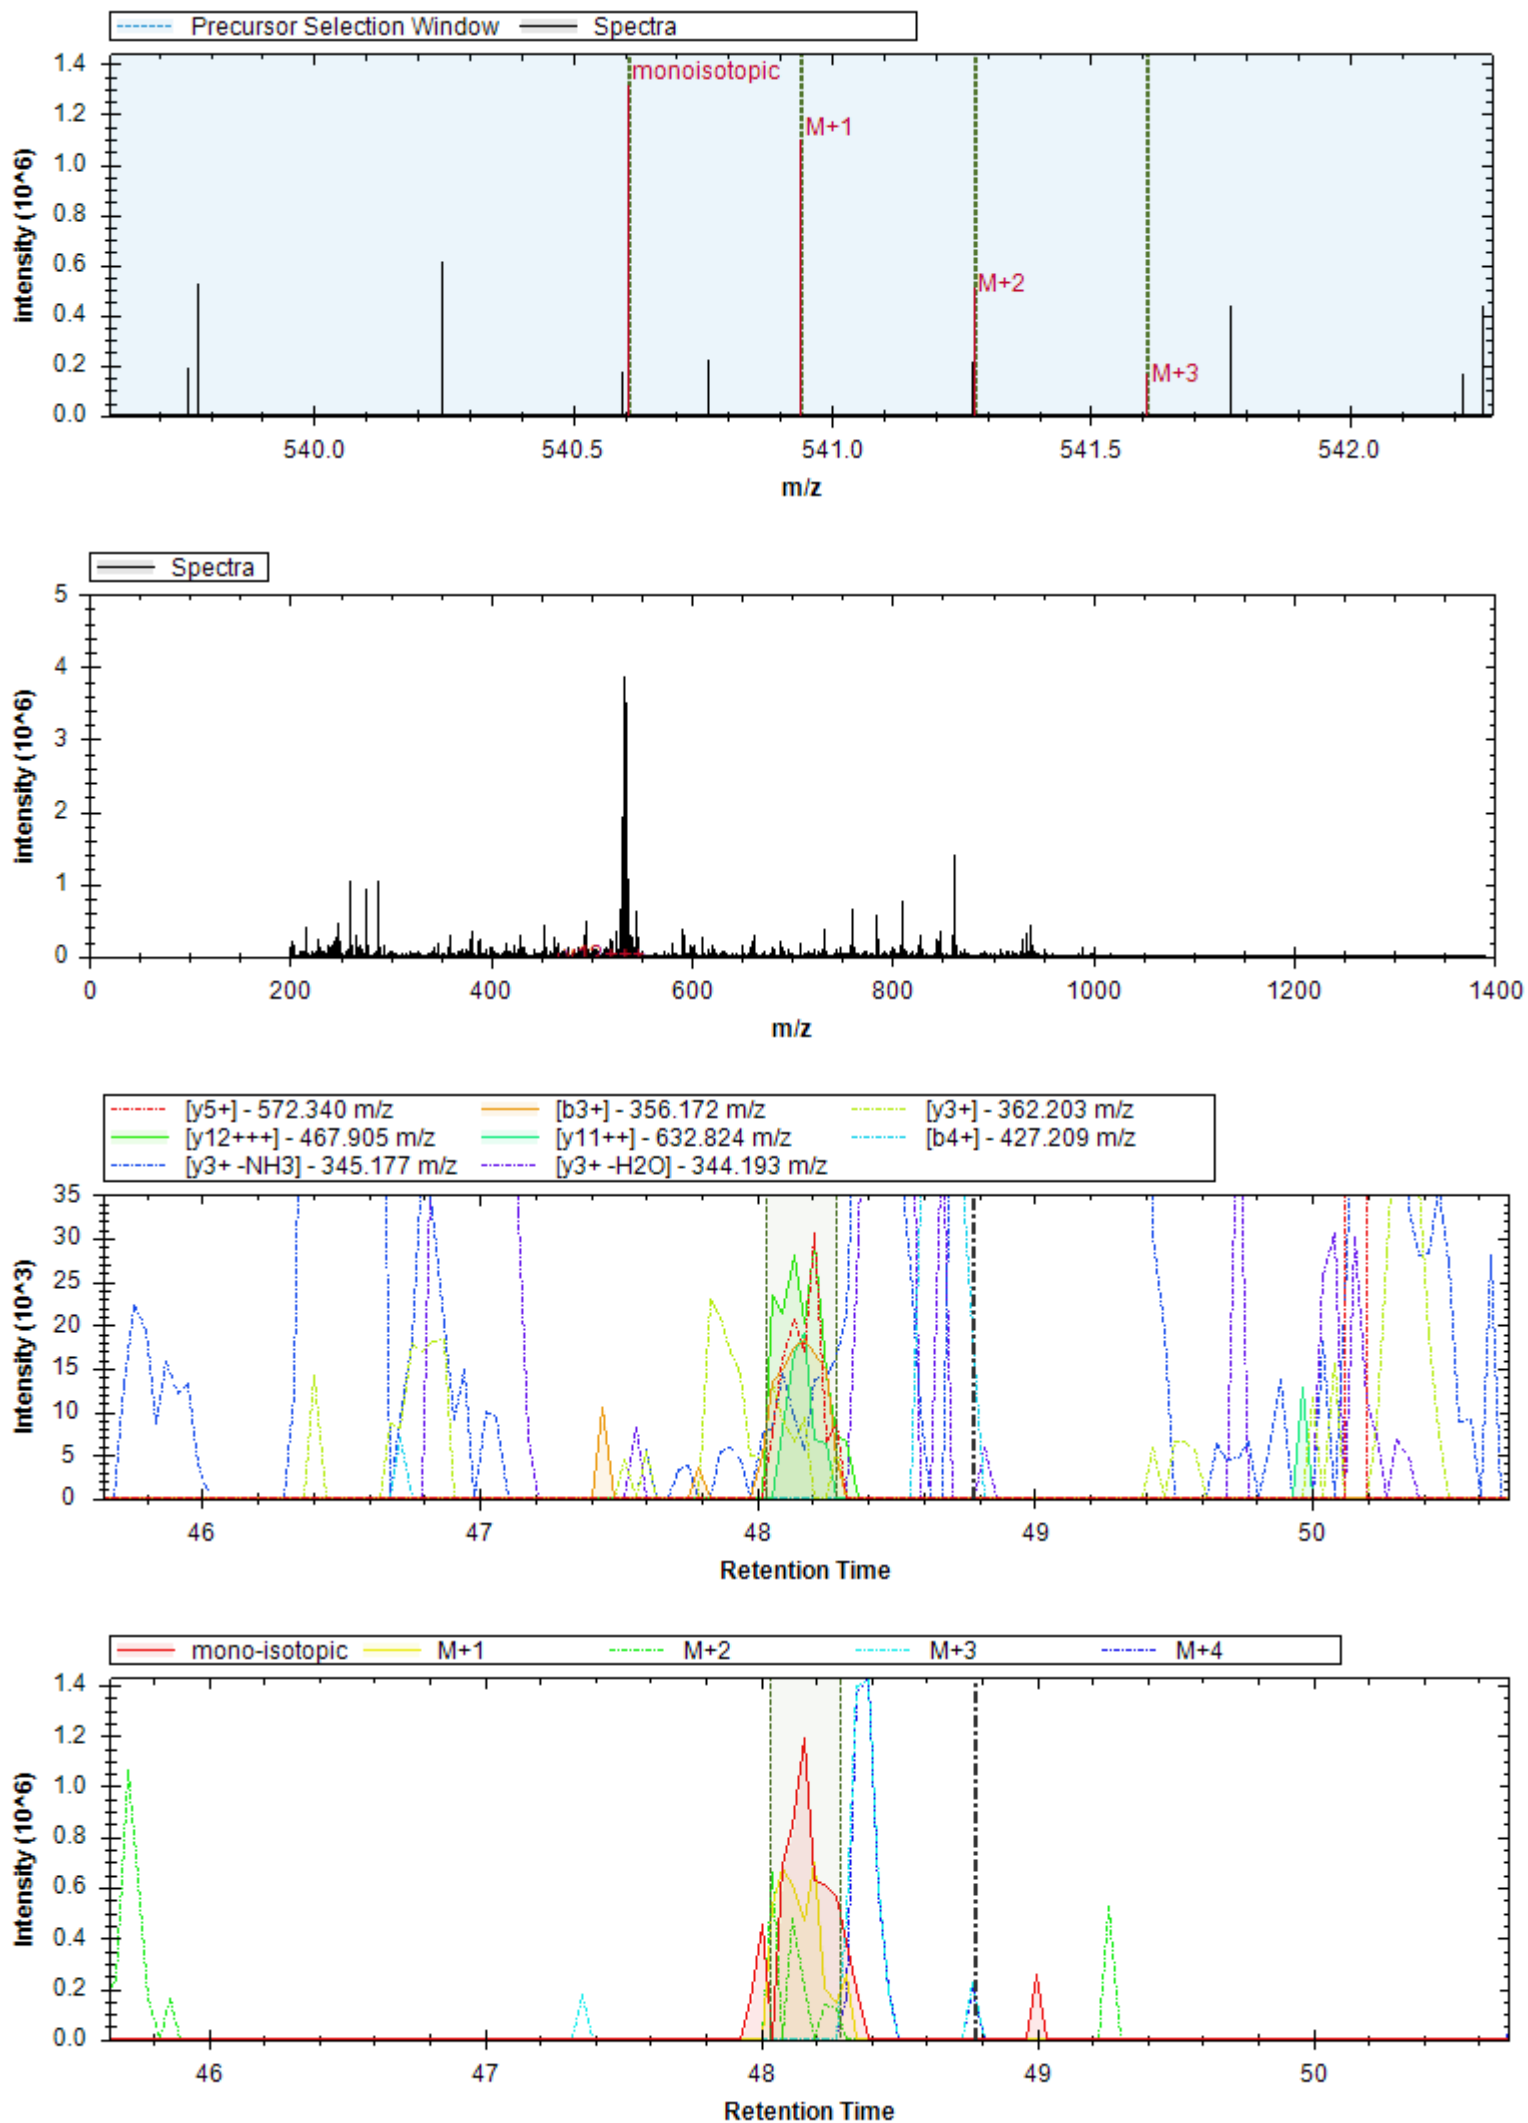

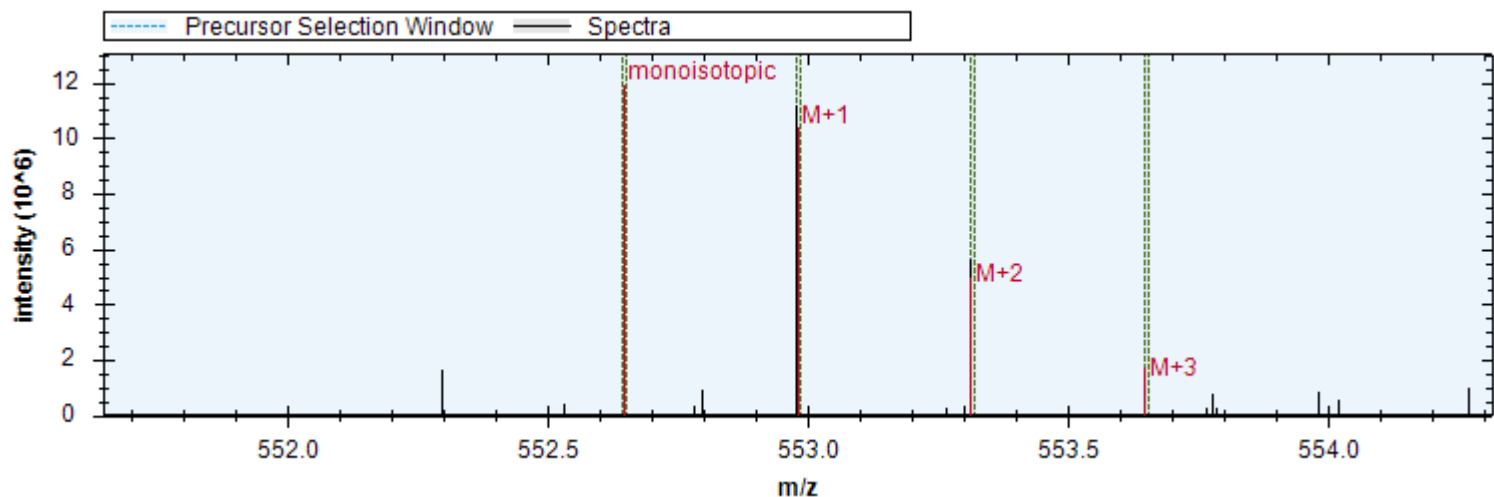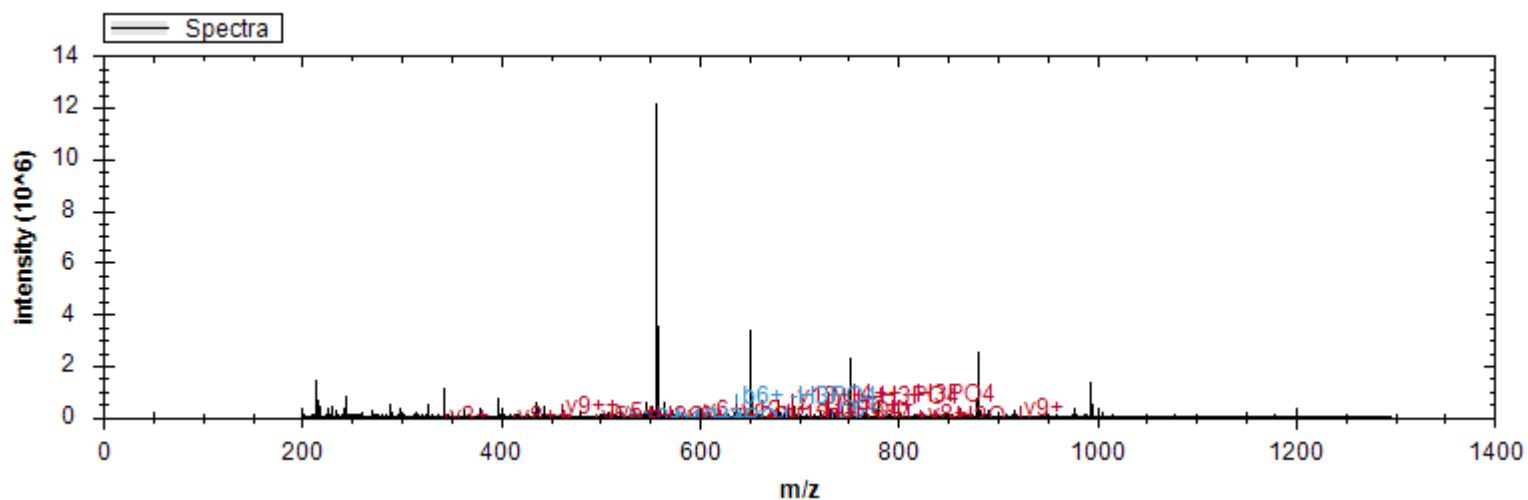

- |                              |                              |                              |
|------------------------------|------------------------------|------------------------------|
| [b6+ -H3PO4] - 636.419 m/z   | [y14++ -H3PO4] - 729.943 m/z | [y13++ -H3PO4] - 694.425 m/z |
| [y9++ - 461.772 m/z          | [y9+ - 922.536 m/z           | [y5+ - 513.303 m/z           |
| [y12++ -H3PO4] - 637.883 m/z | [y6+ - 600.335 m/z           | [y10++ - 552.278 m/z         |
| [y14++ - 778.932 m/z         | [y13++ - 743.413 m/z         | [b6+ - 734.396 m/z           |
| [y8+ - 825.483 m/z           | [y6+ -H2O] - 582.325 m/z     | [y3+ - 345.213 m/z           |
| [y9+ -H2O] - 904.525 m/z     | [y5+ -H2O] - 495.293 m/z     | [y7+ - 728.430 m/z           |
| [y12++ - 686.871 m/z         | [y14++ -H2O] - 769.926 m/z   | [y3+ -H2O] - 327.203 m/z     |
| [y8++ - 413.245 m/z          | [b10++ - 572.318 m/z         | [b10++ -H3PO4] - 523.330 m/z |

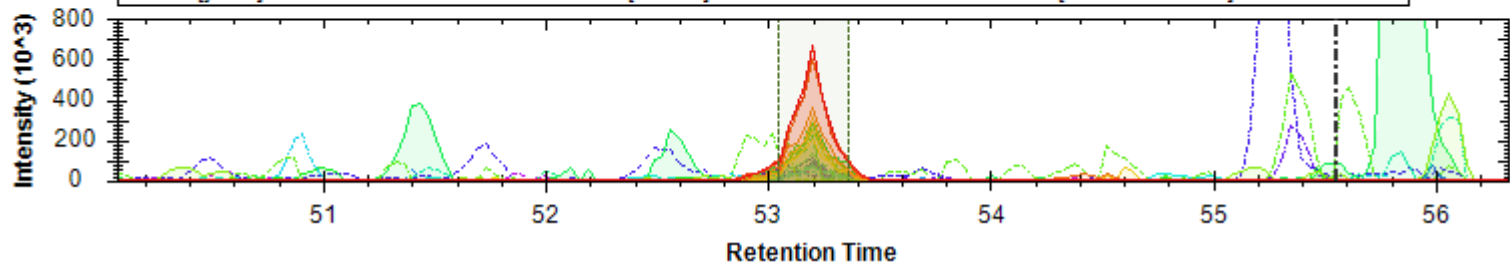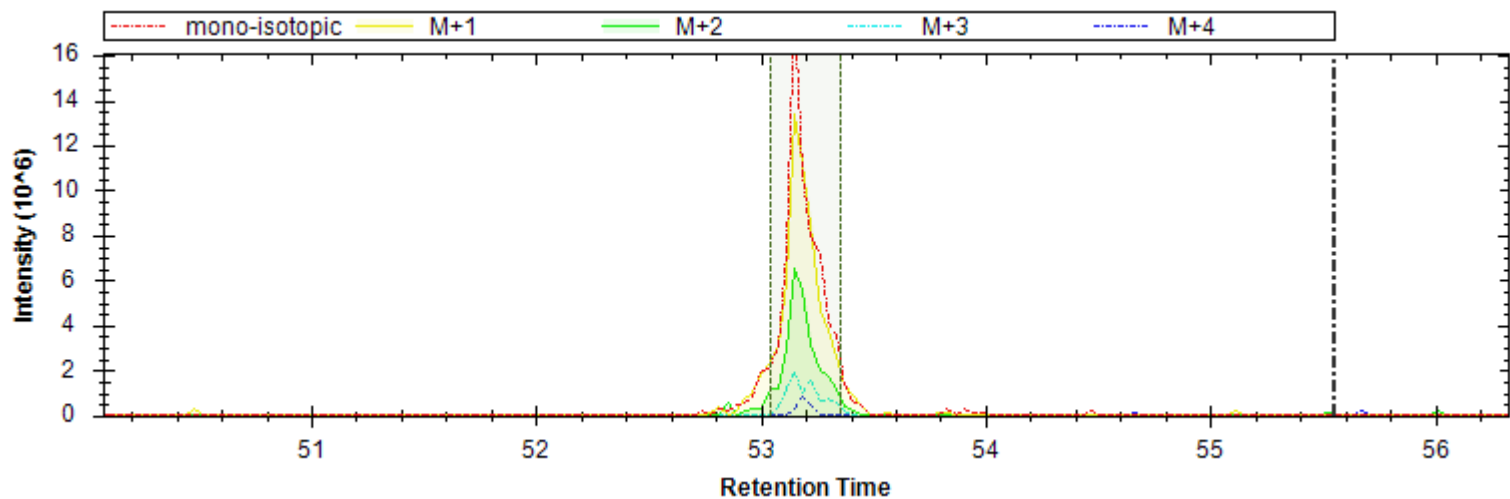



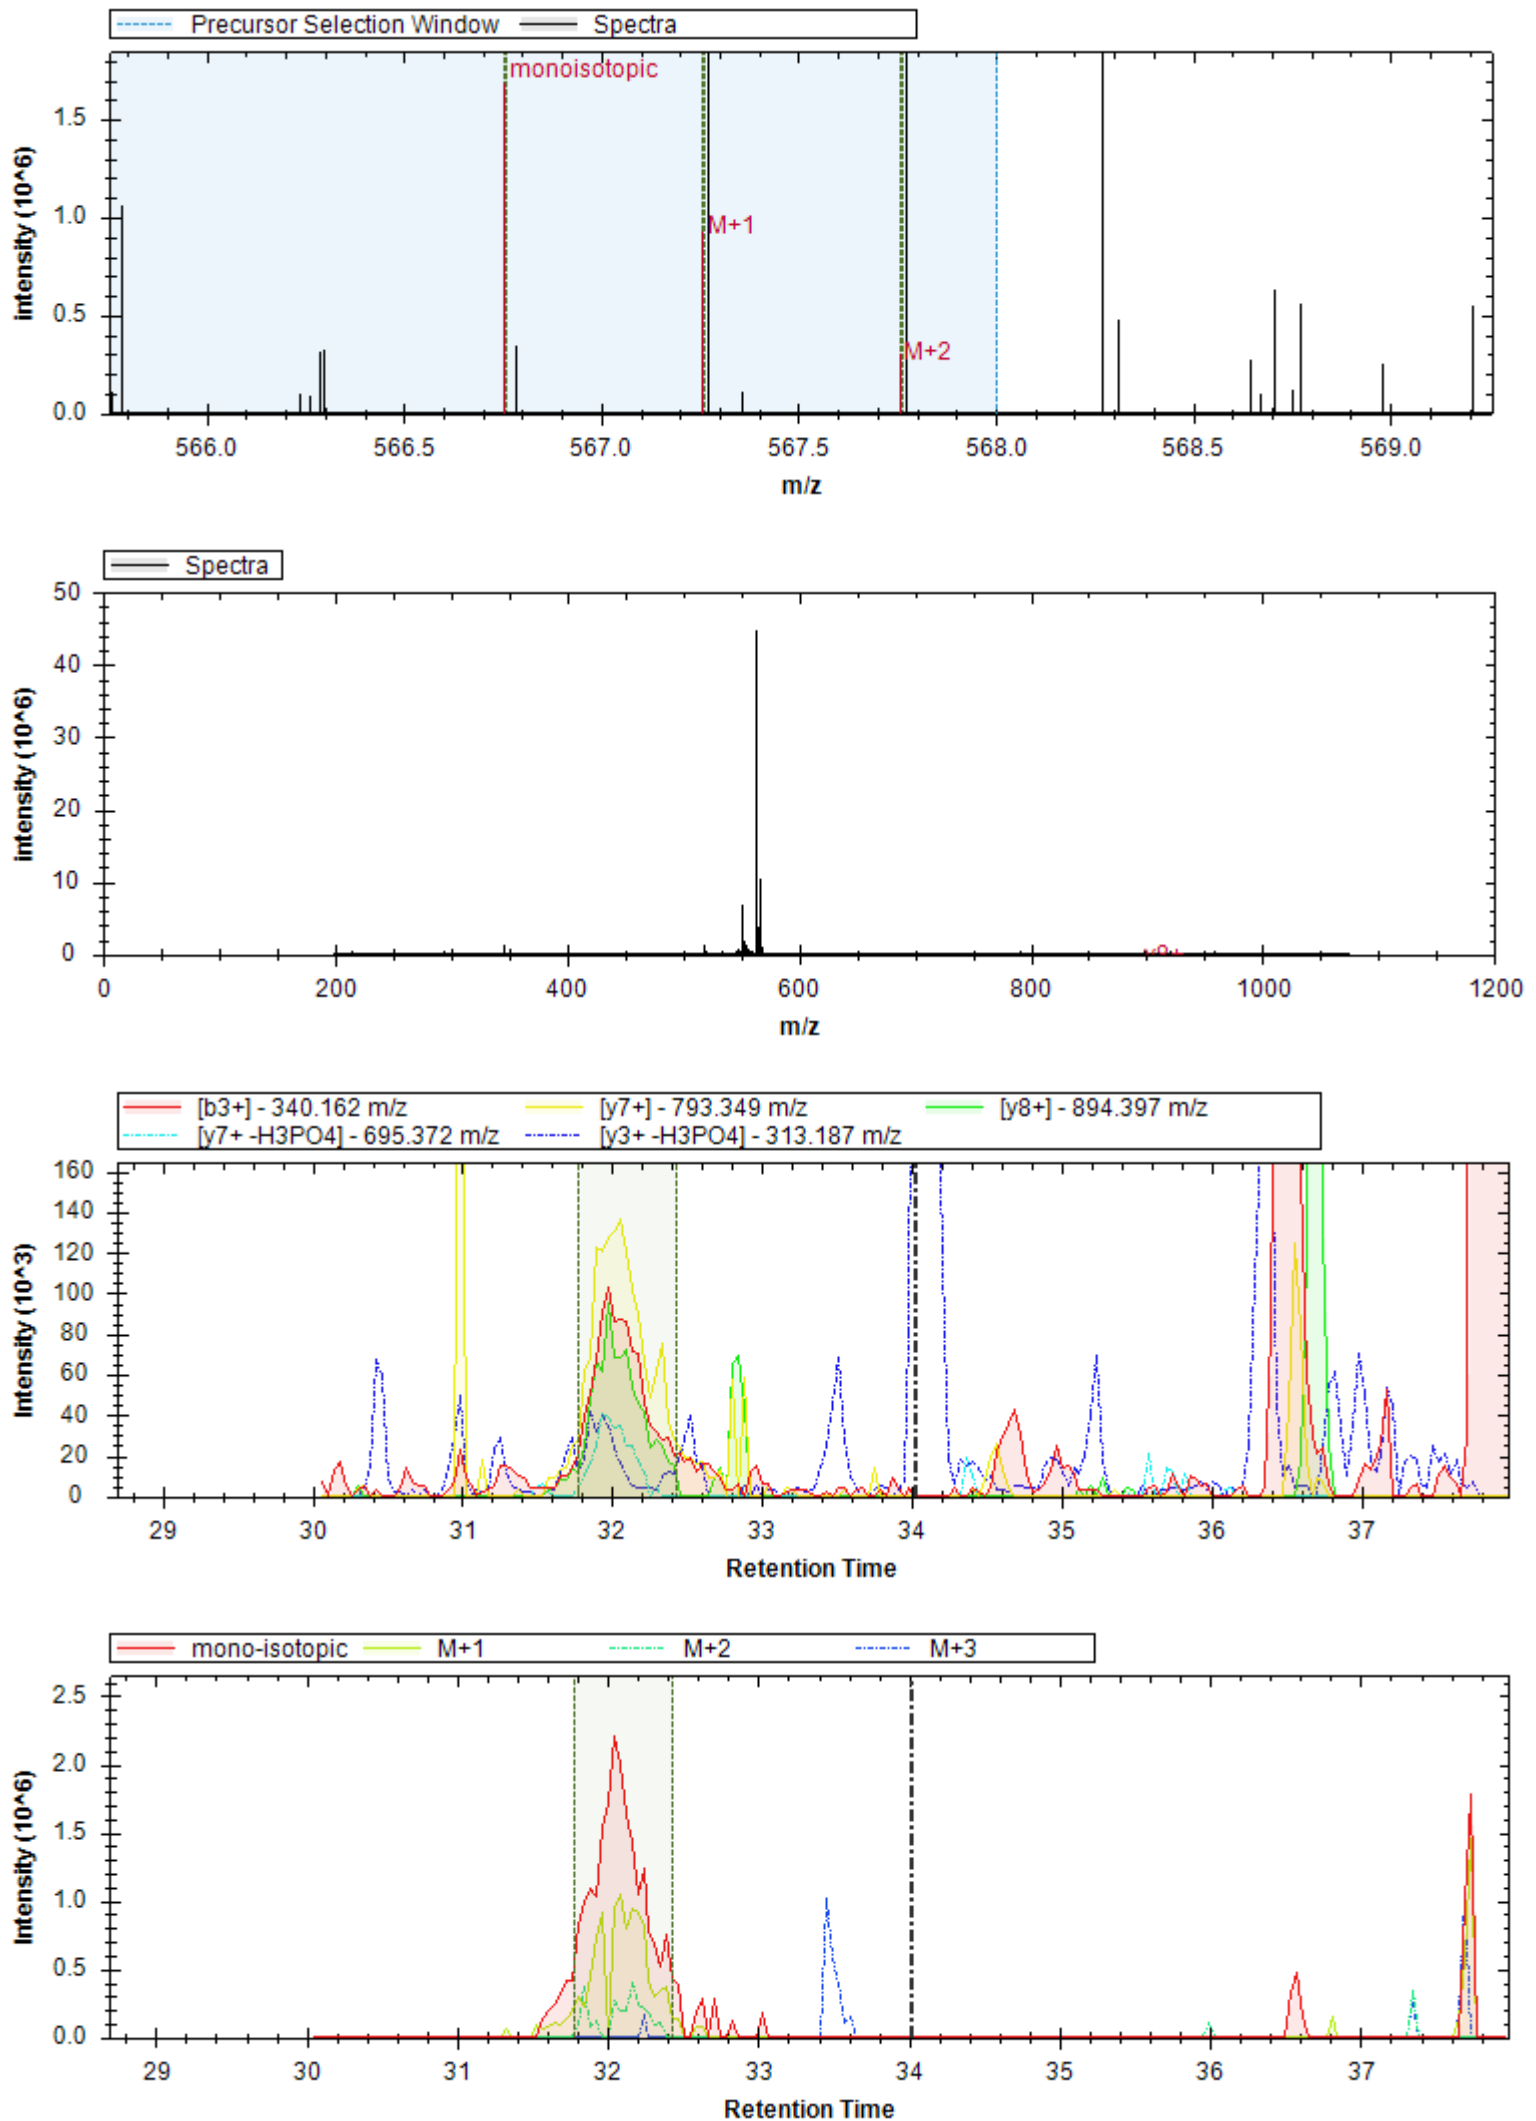

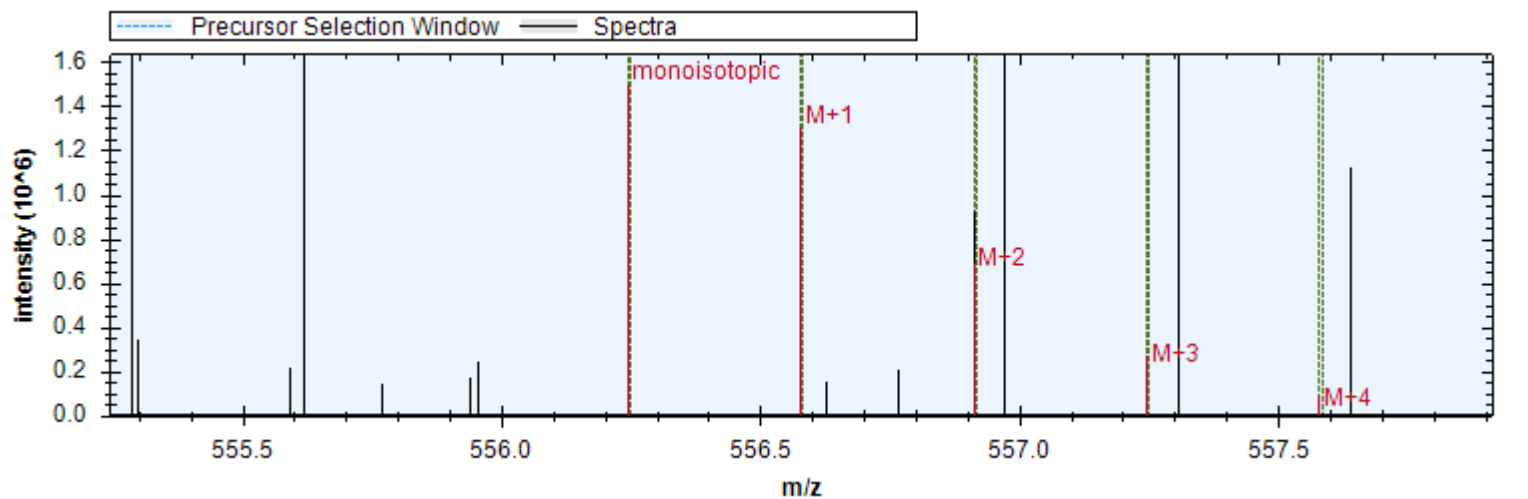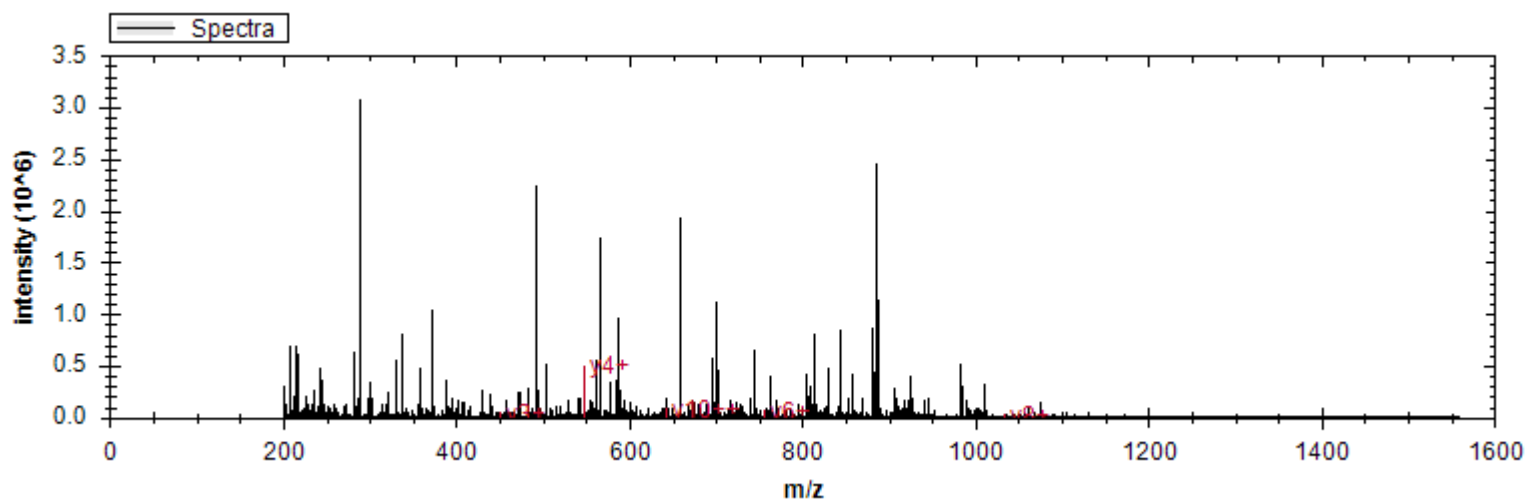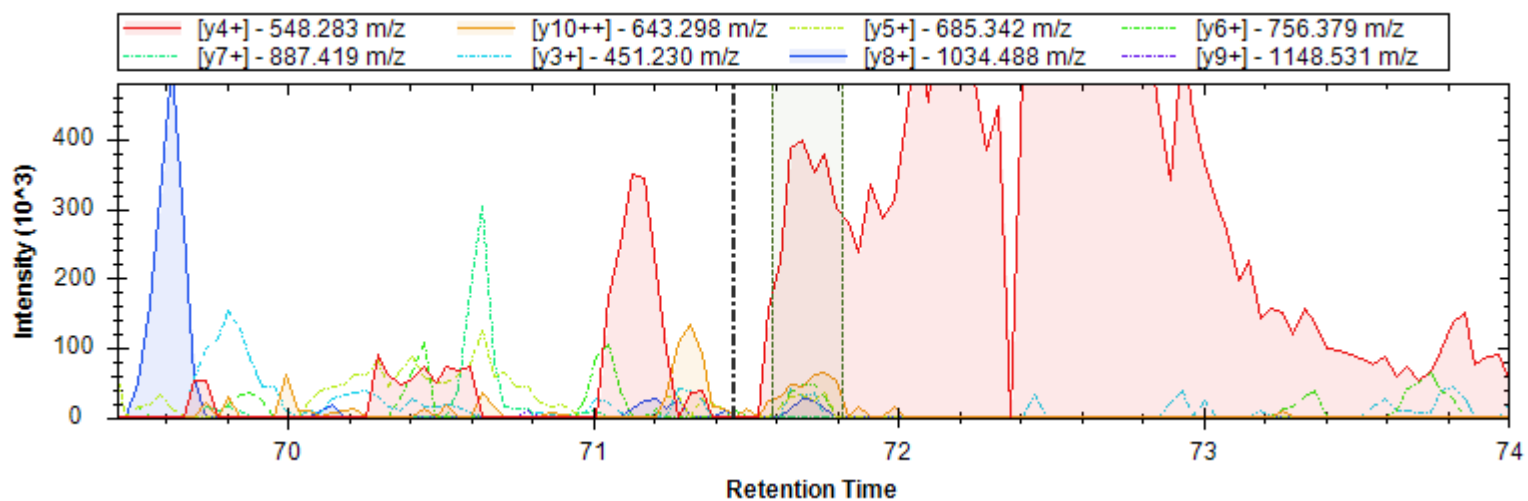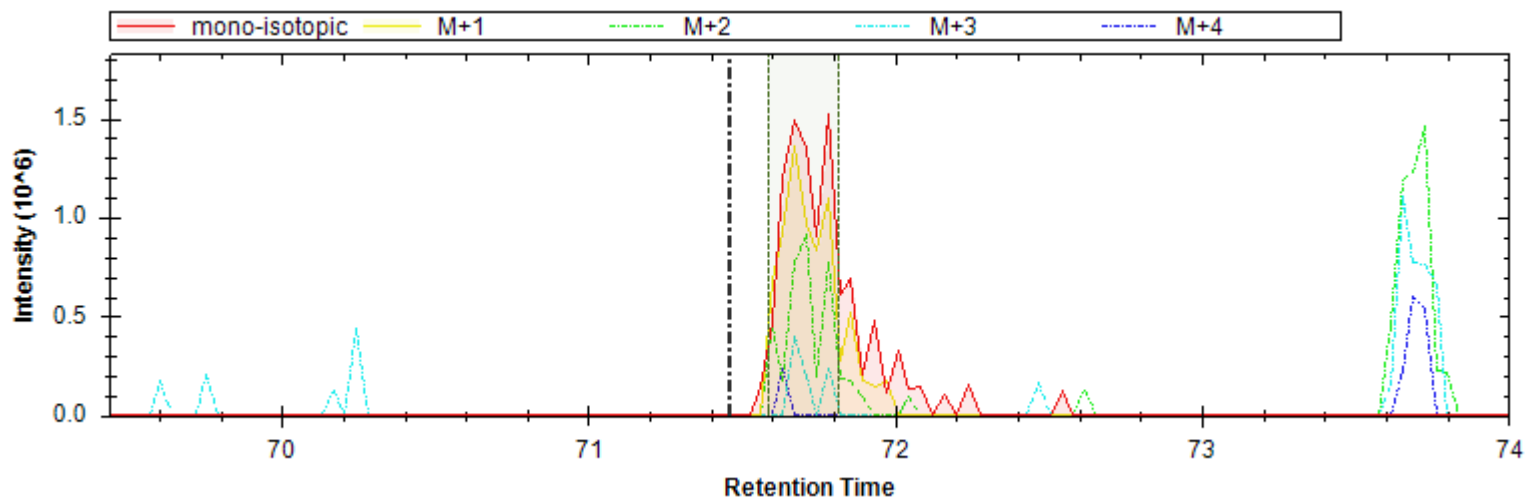

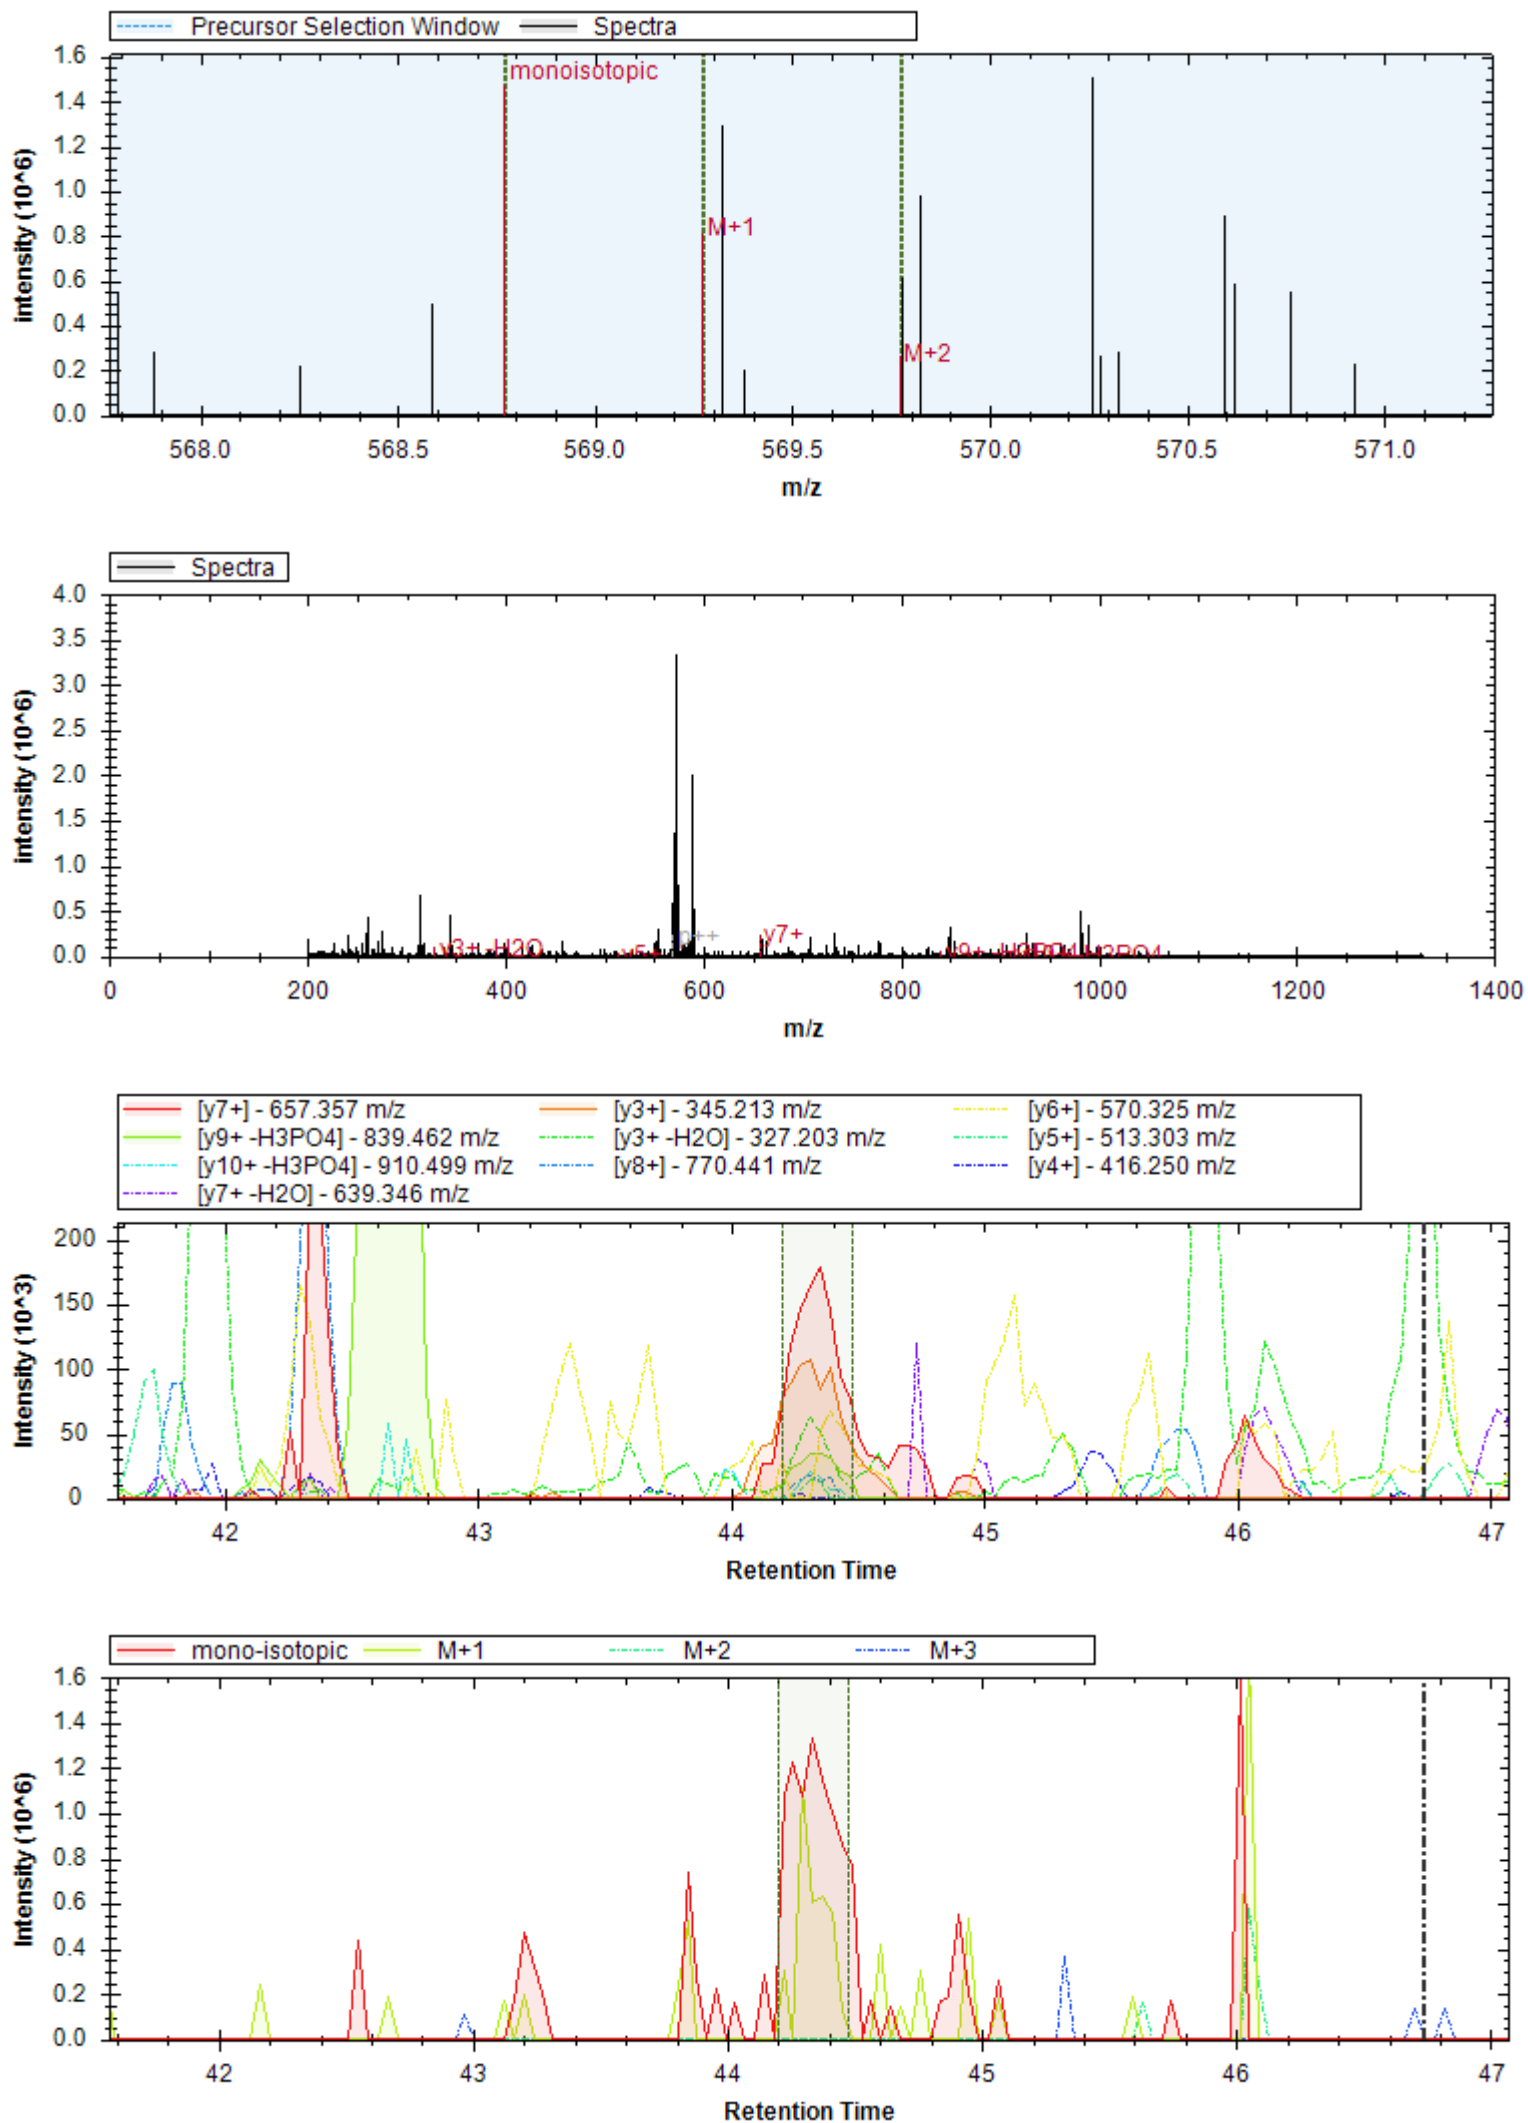

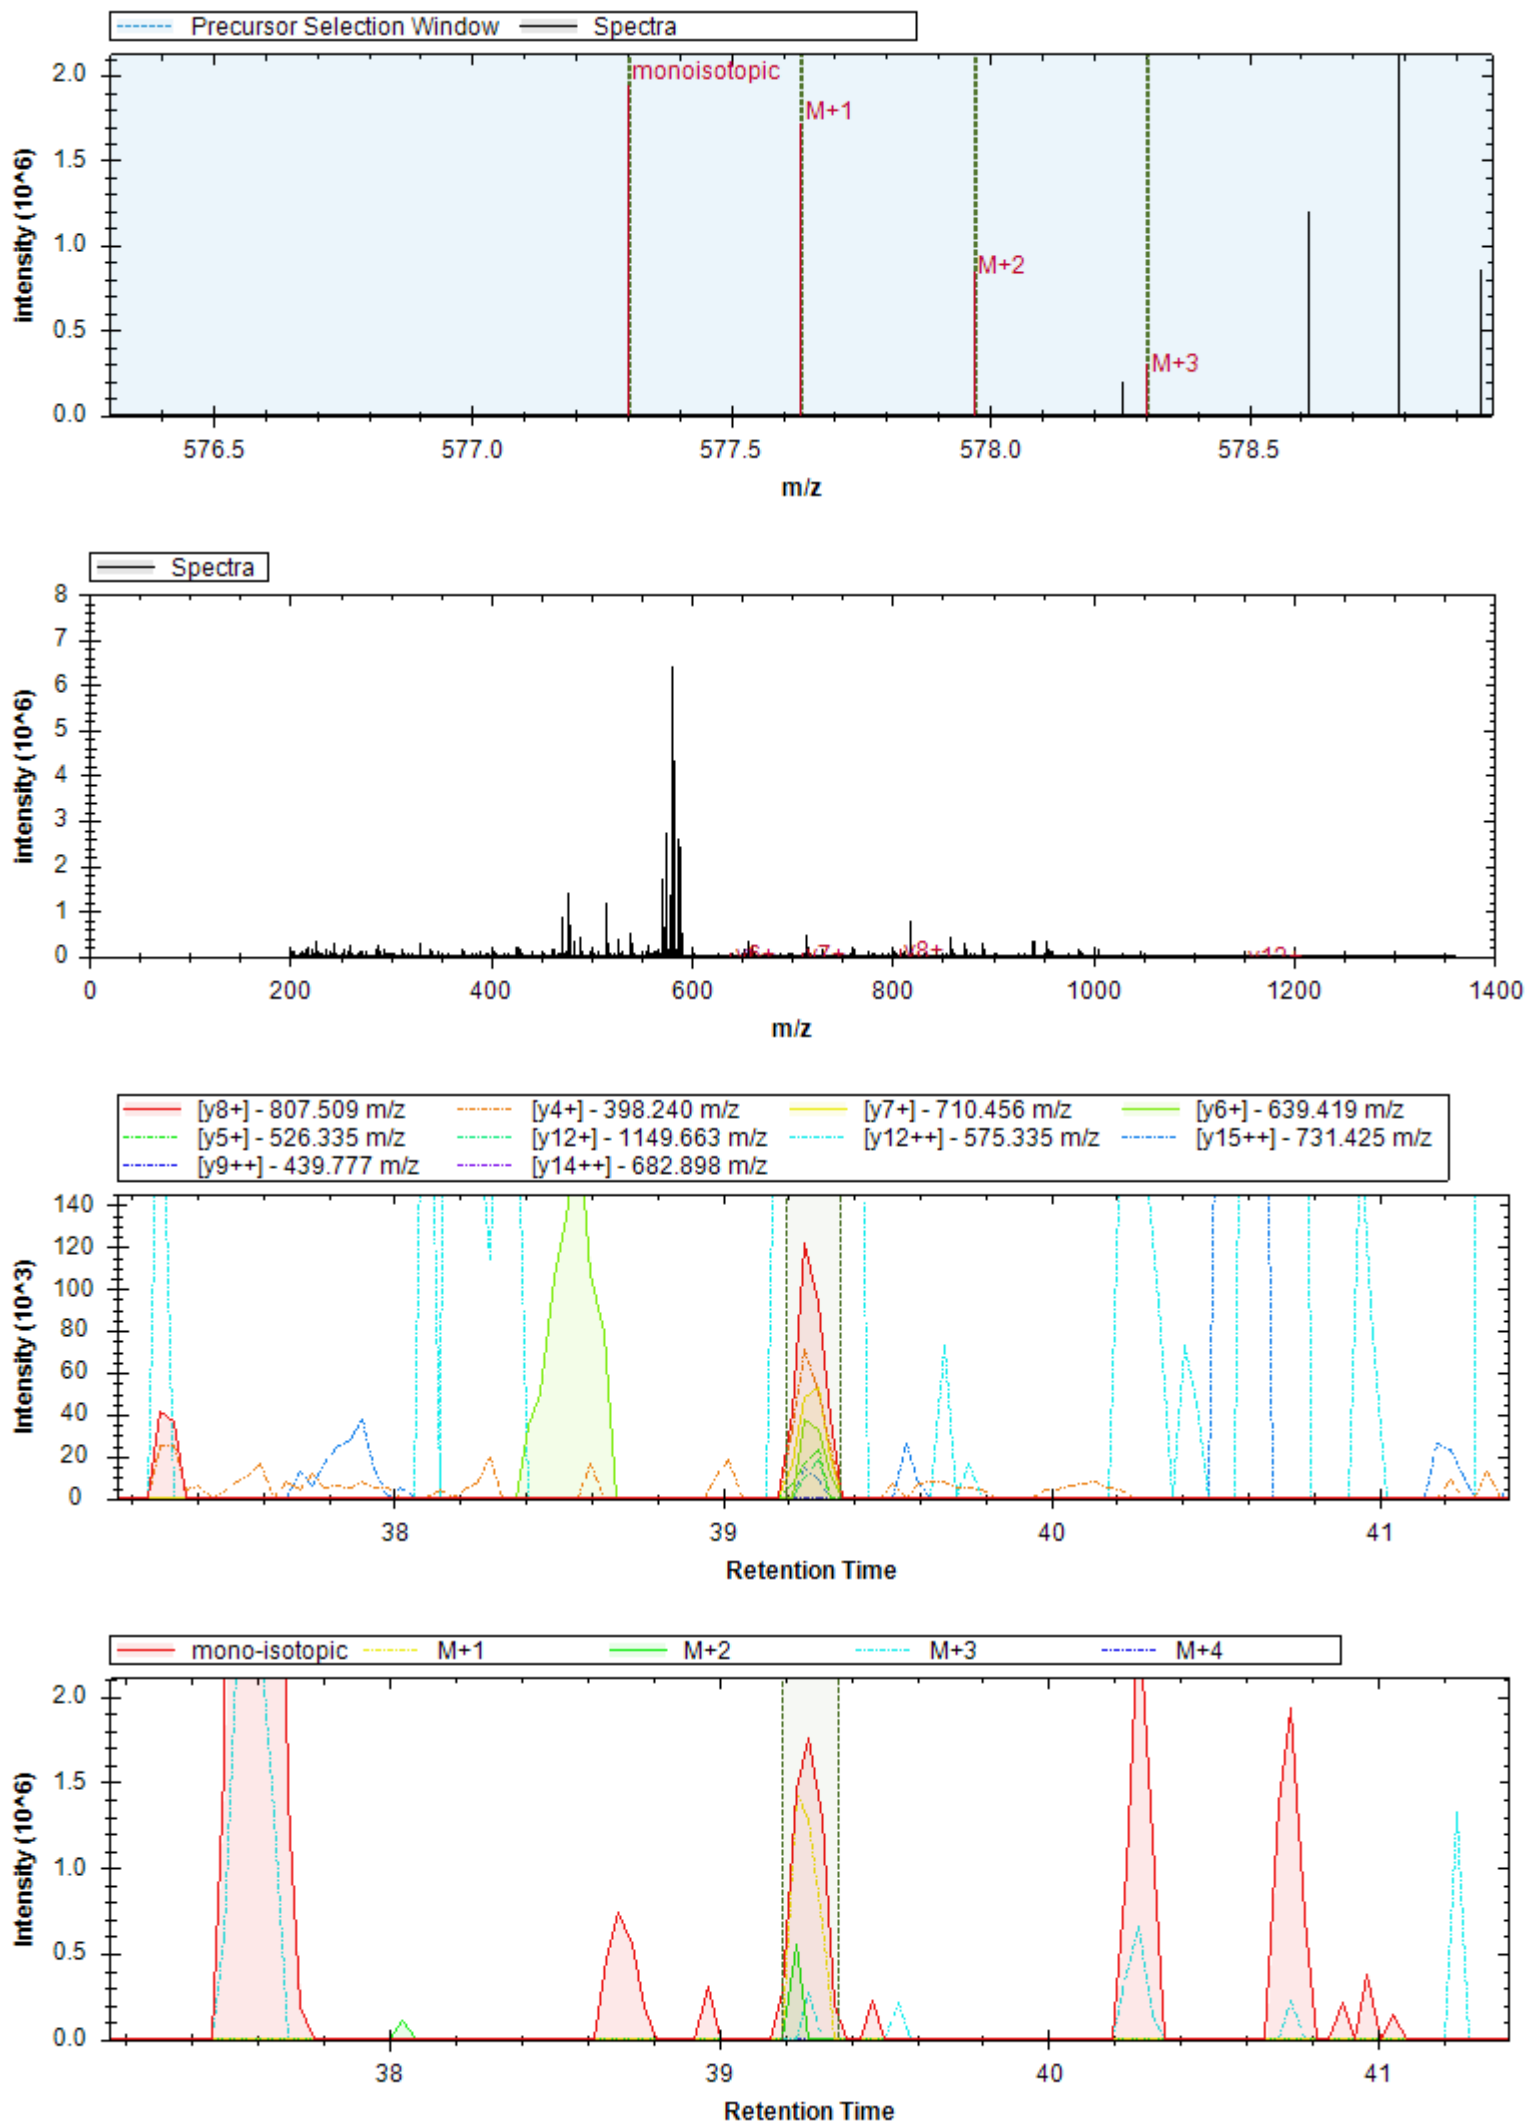

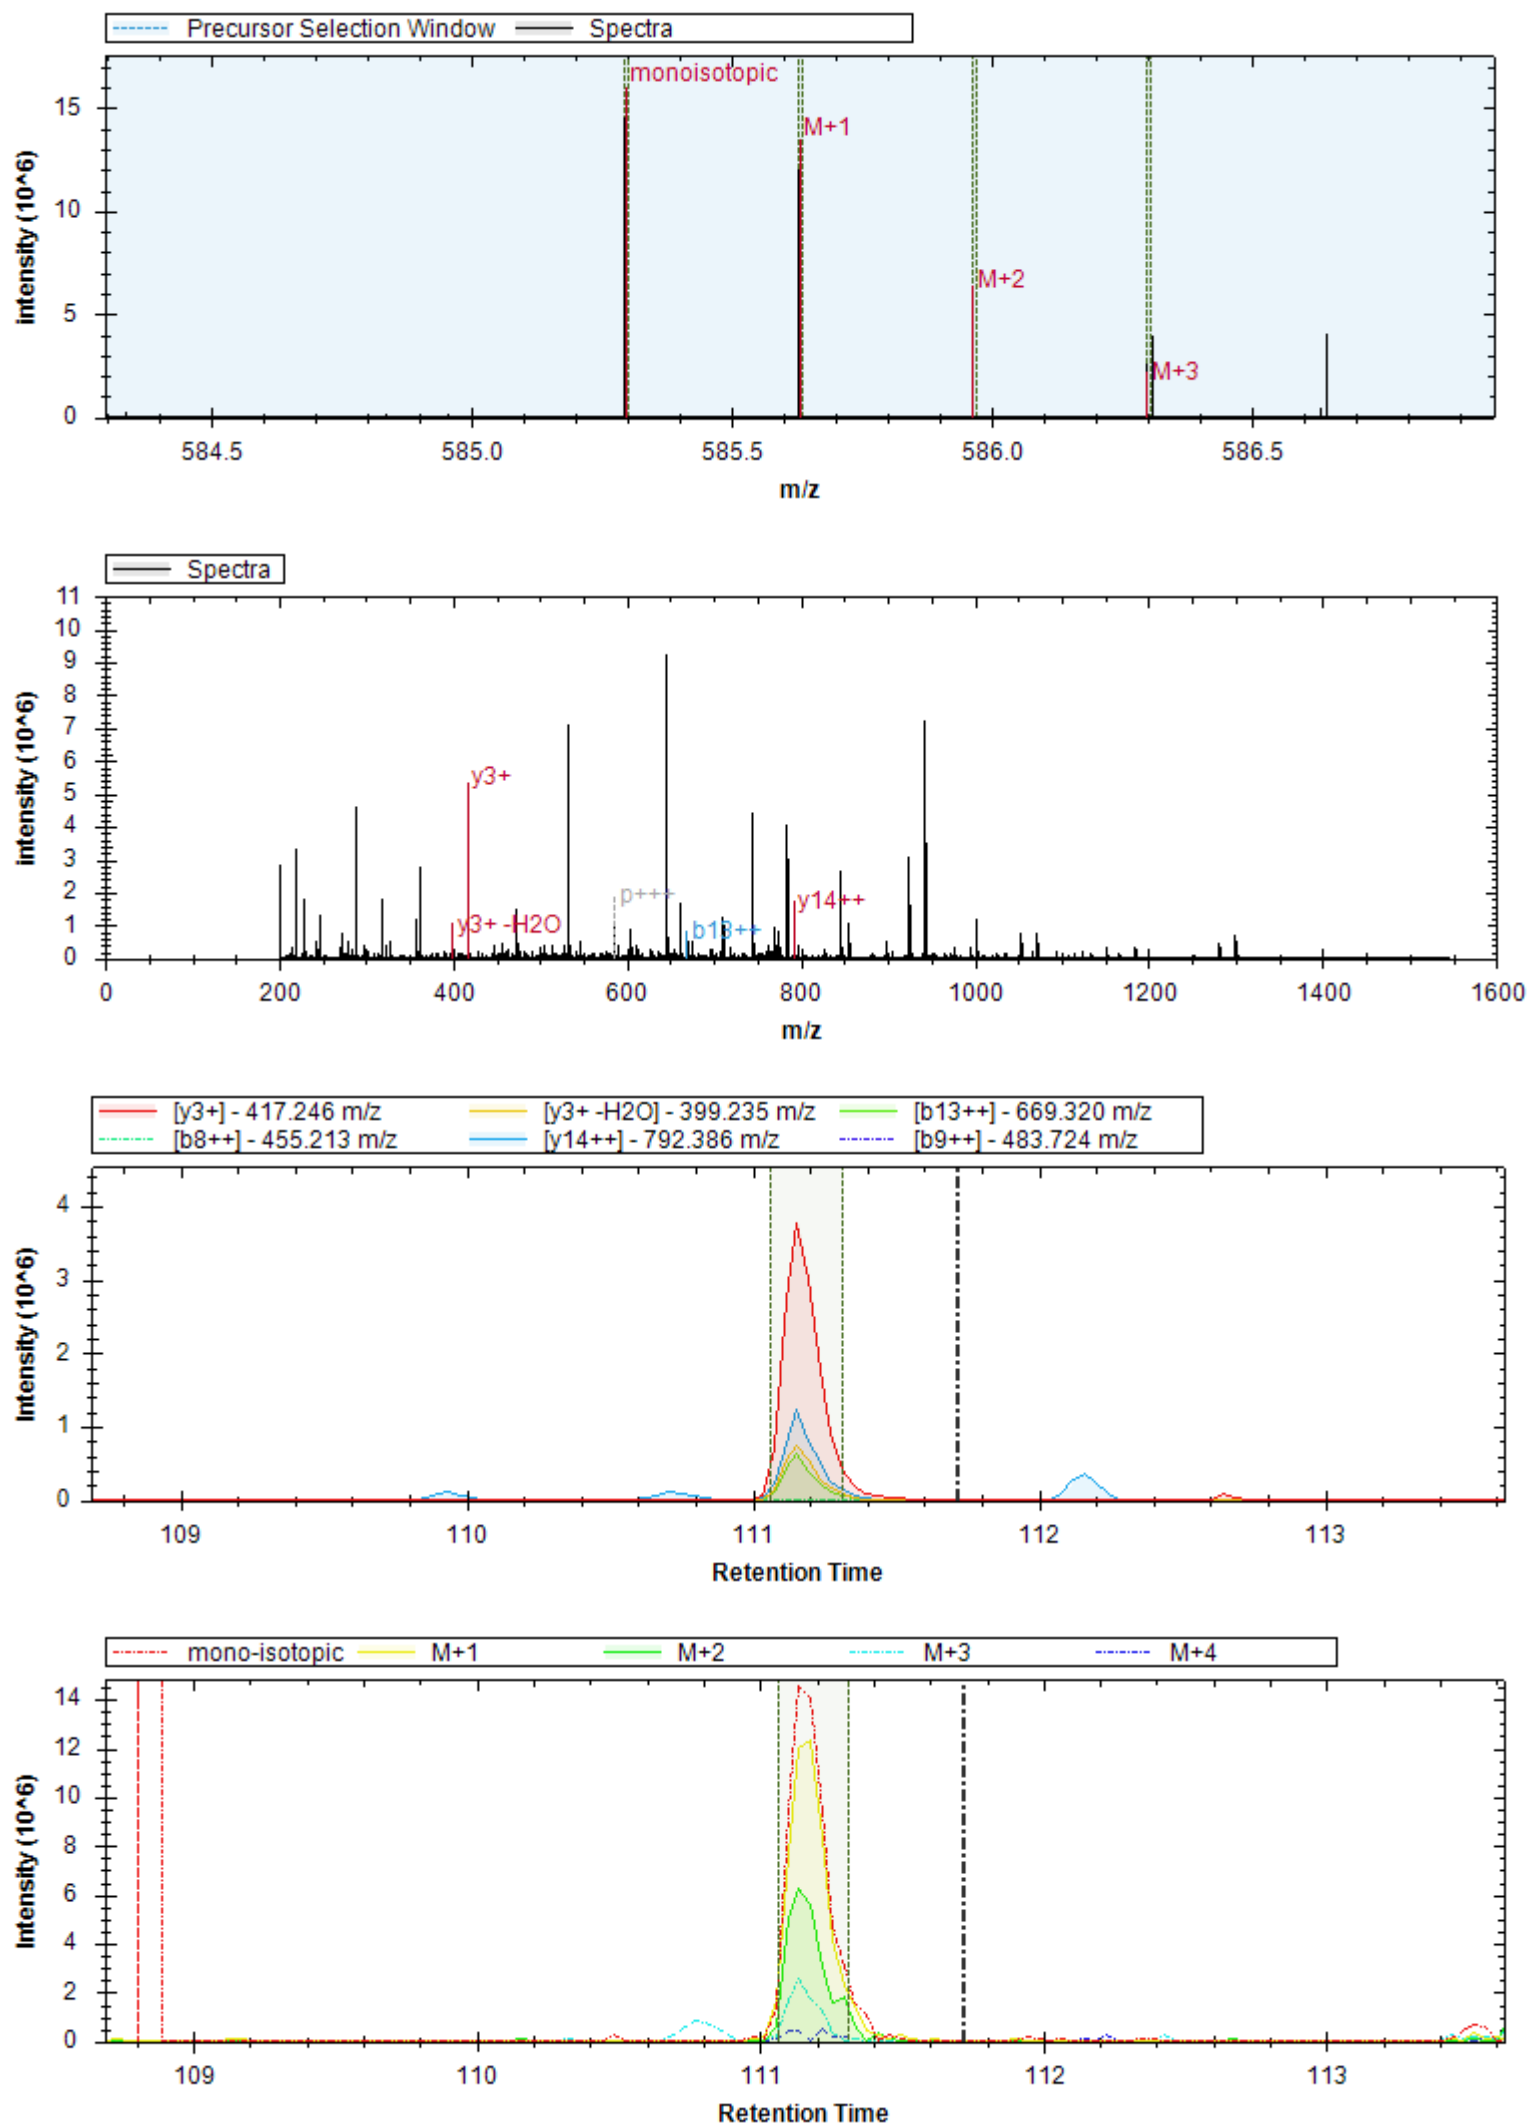

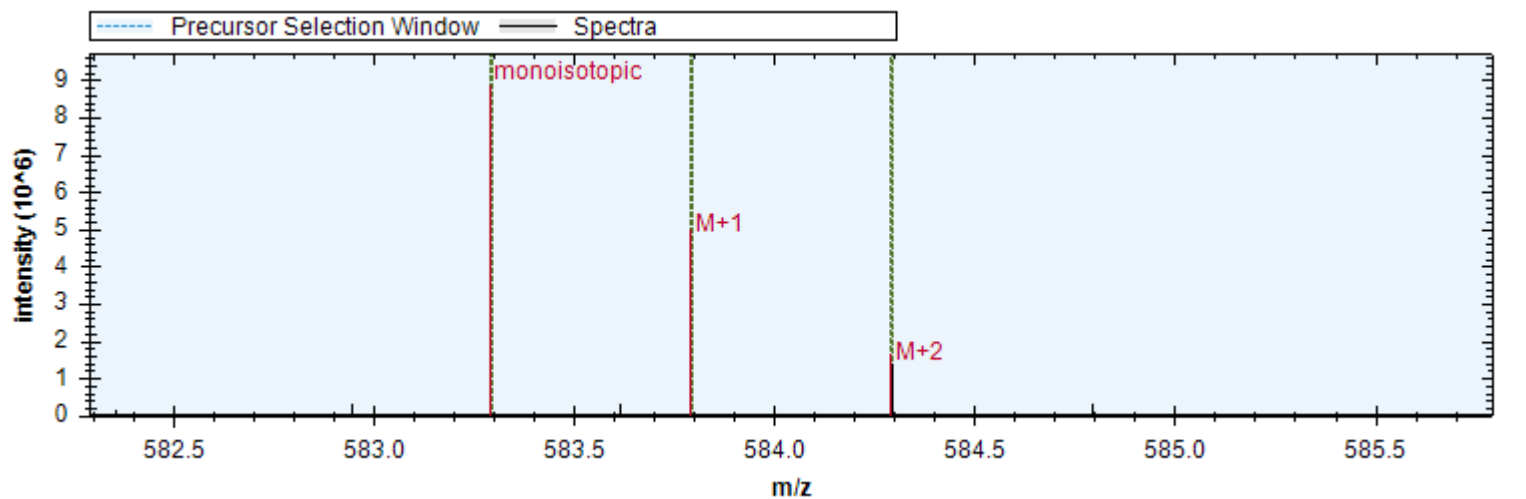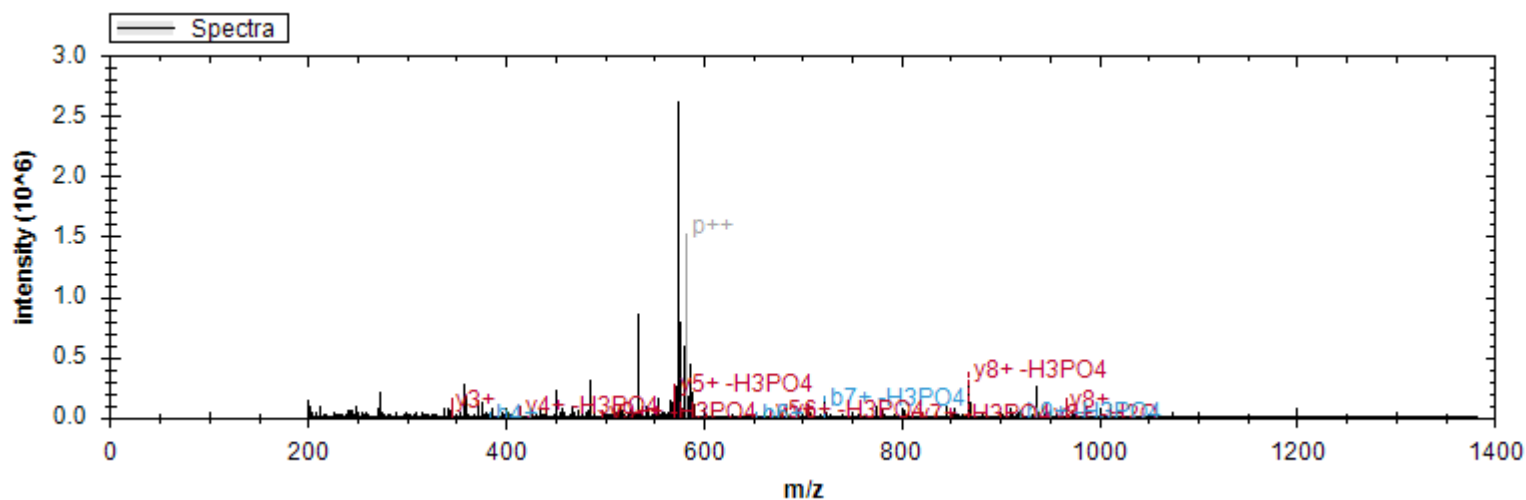

|                             |                            |                            |
|-----------------------------|----------------------------|----------------------------|
| [y8+ -H3PO4] - 868.500 m/z  | [b7+ -H3PO4] - 723.390 m/z | [y3+] - 345.213 m/z        |
| [y8+] - 966.477 m/z         | [y6+ -H3PO4] - 683.420 m/z | [y5+ -H3PO4] - 570.336 m/z |
| [y9++ -H3PO4] - 498.783 m/z | [b4+] - 385.183 m/z        | [b6+] - 654.368 m/z        |
| [y5+] - 668.313 m/z         | [b9+ -H3PO4] - 921.490 m/z | [y8+ -H2O] - 948.466 m/z   |
| [y7+ -H3PO4] - 811.479 m/z  | [b9+ -NH3] - 1100.240 m/z  | [y4+ -H3PO4] - 414.235 m/z |

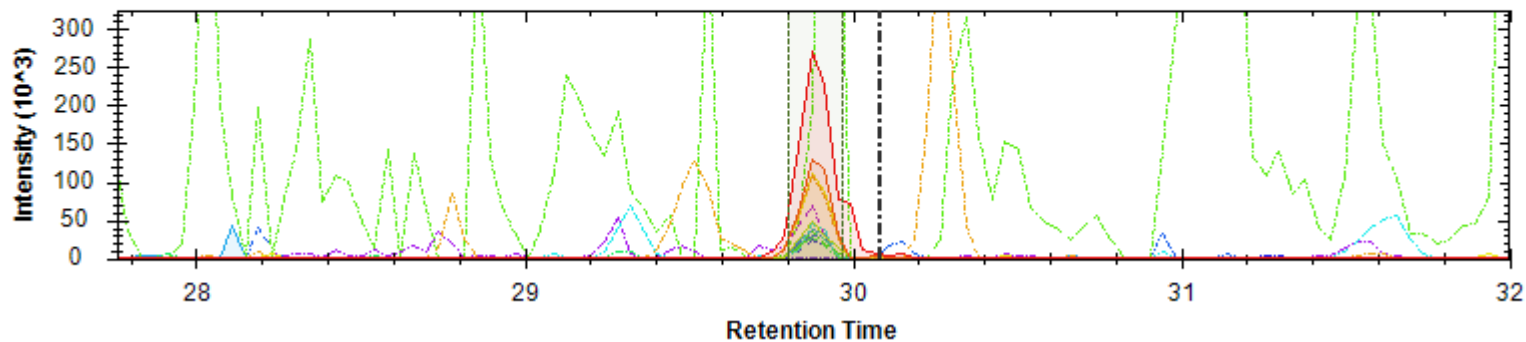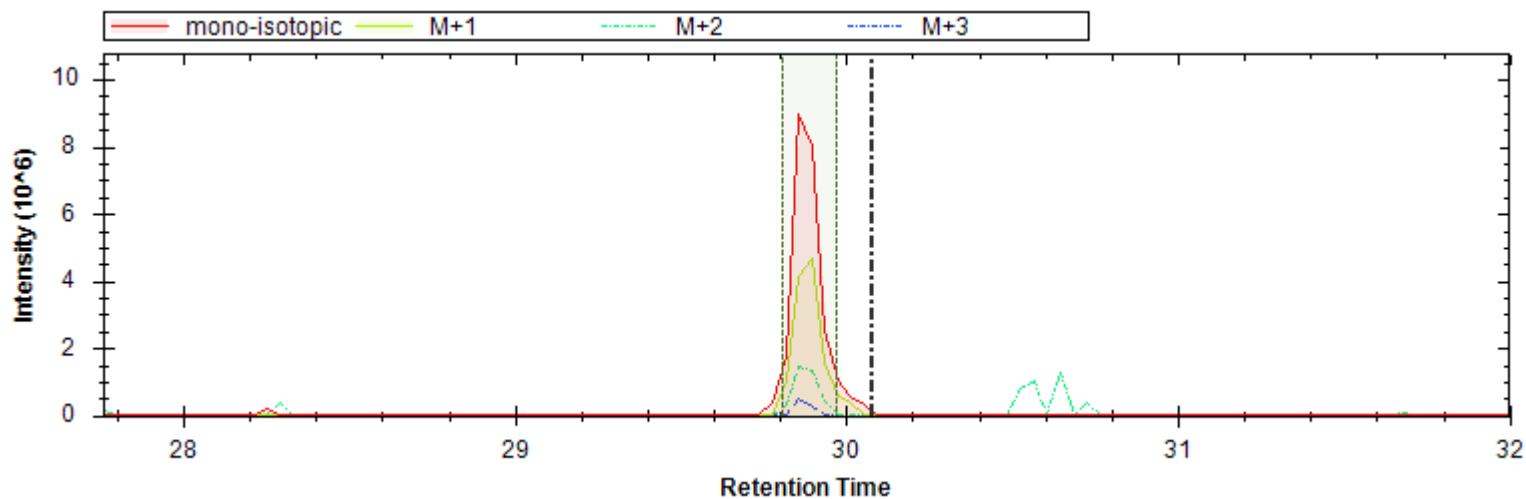

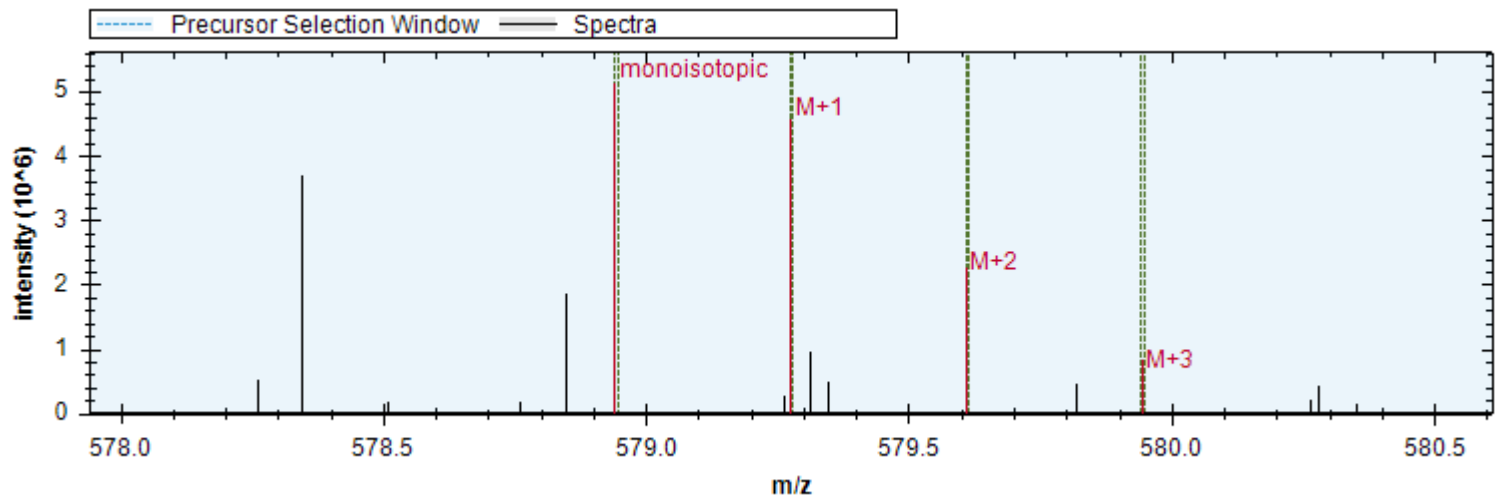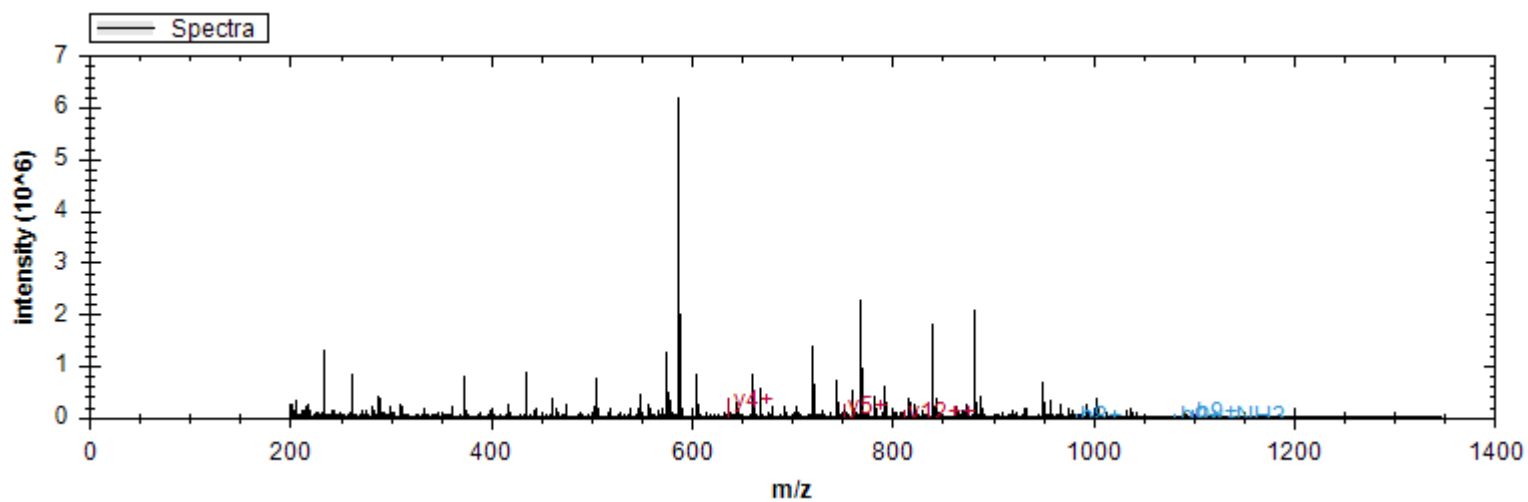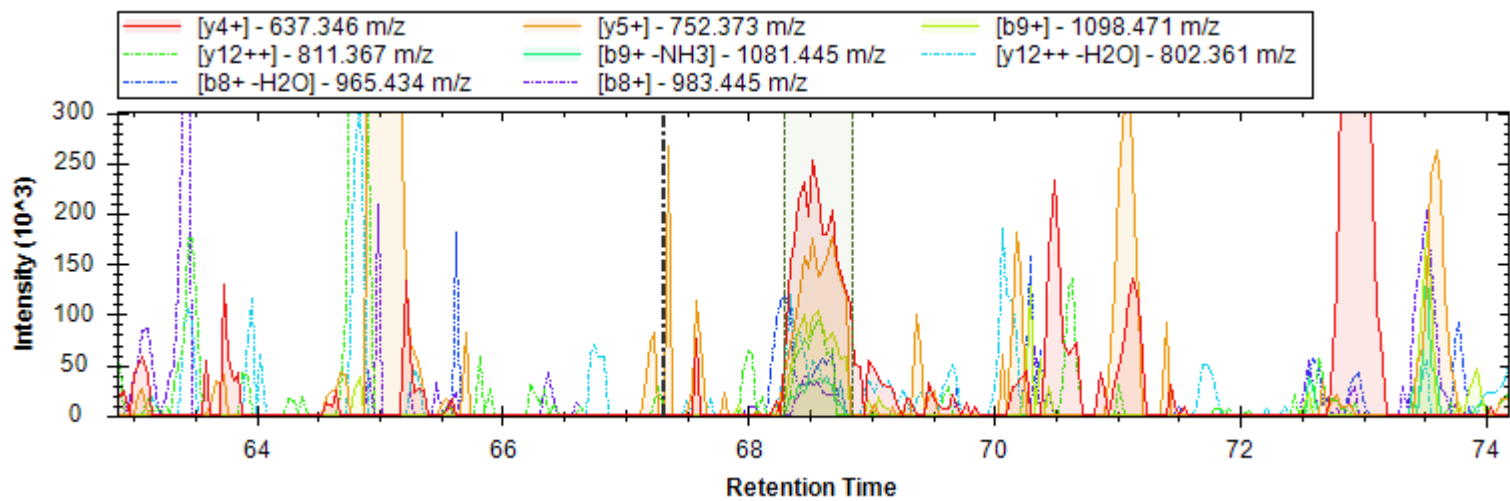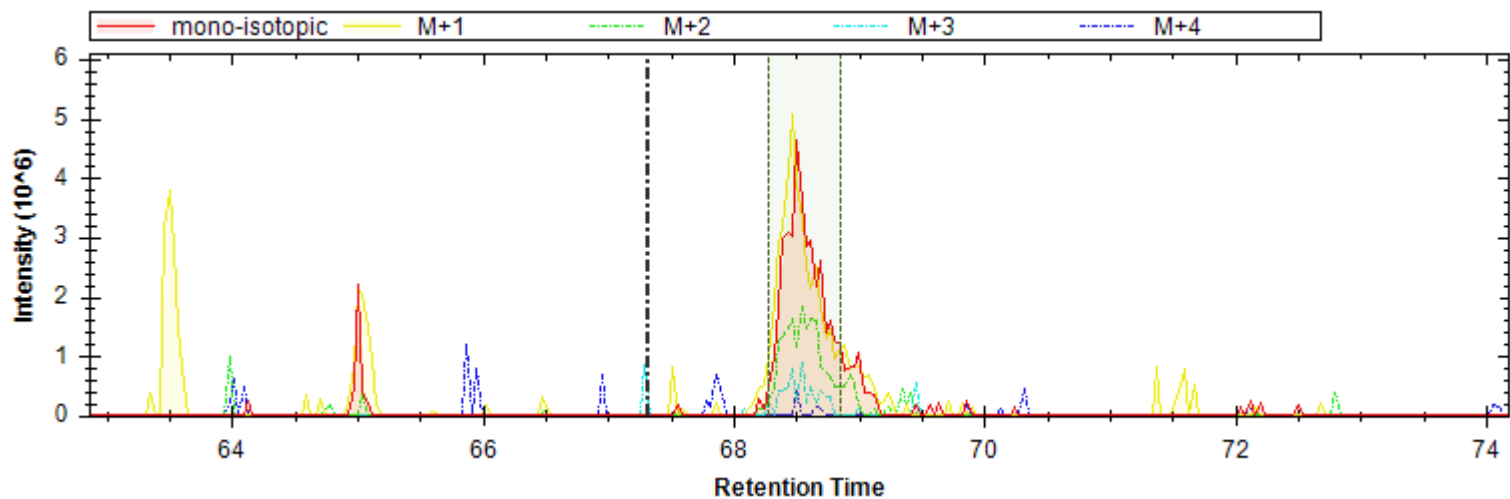

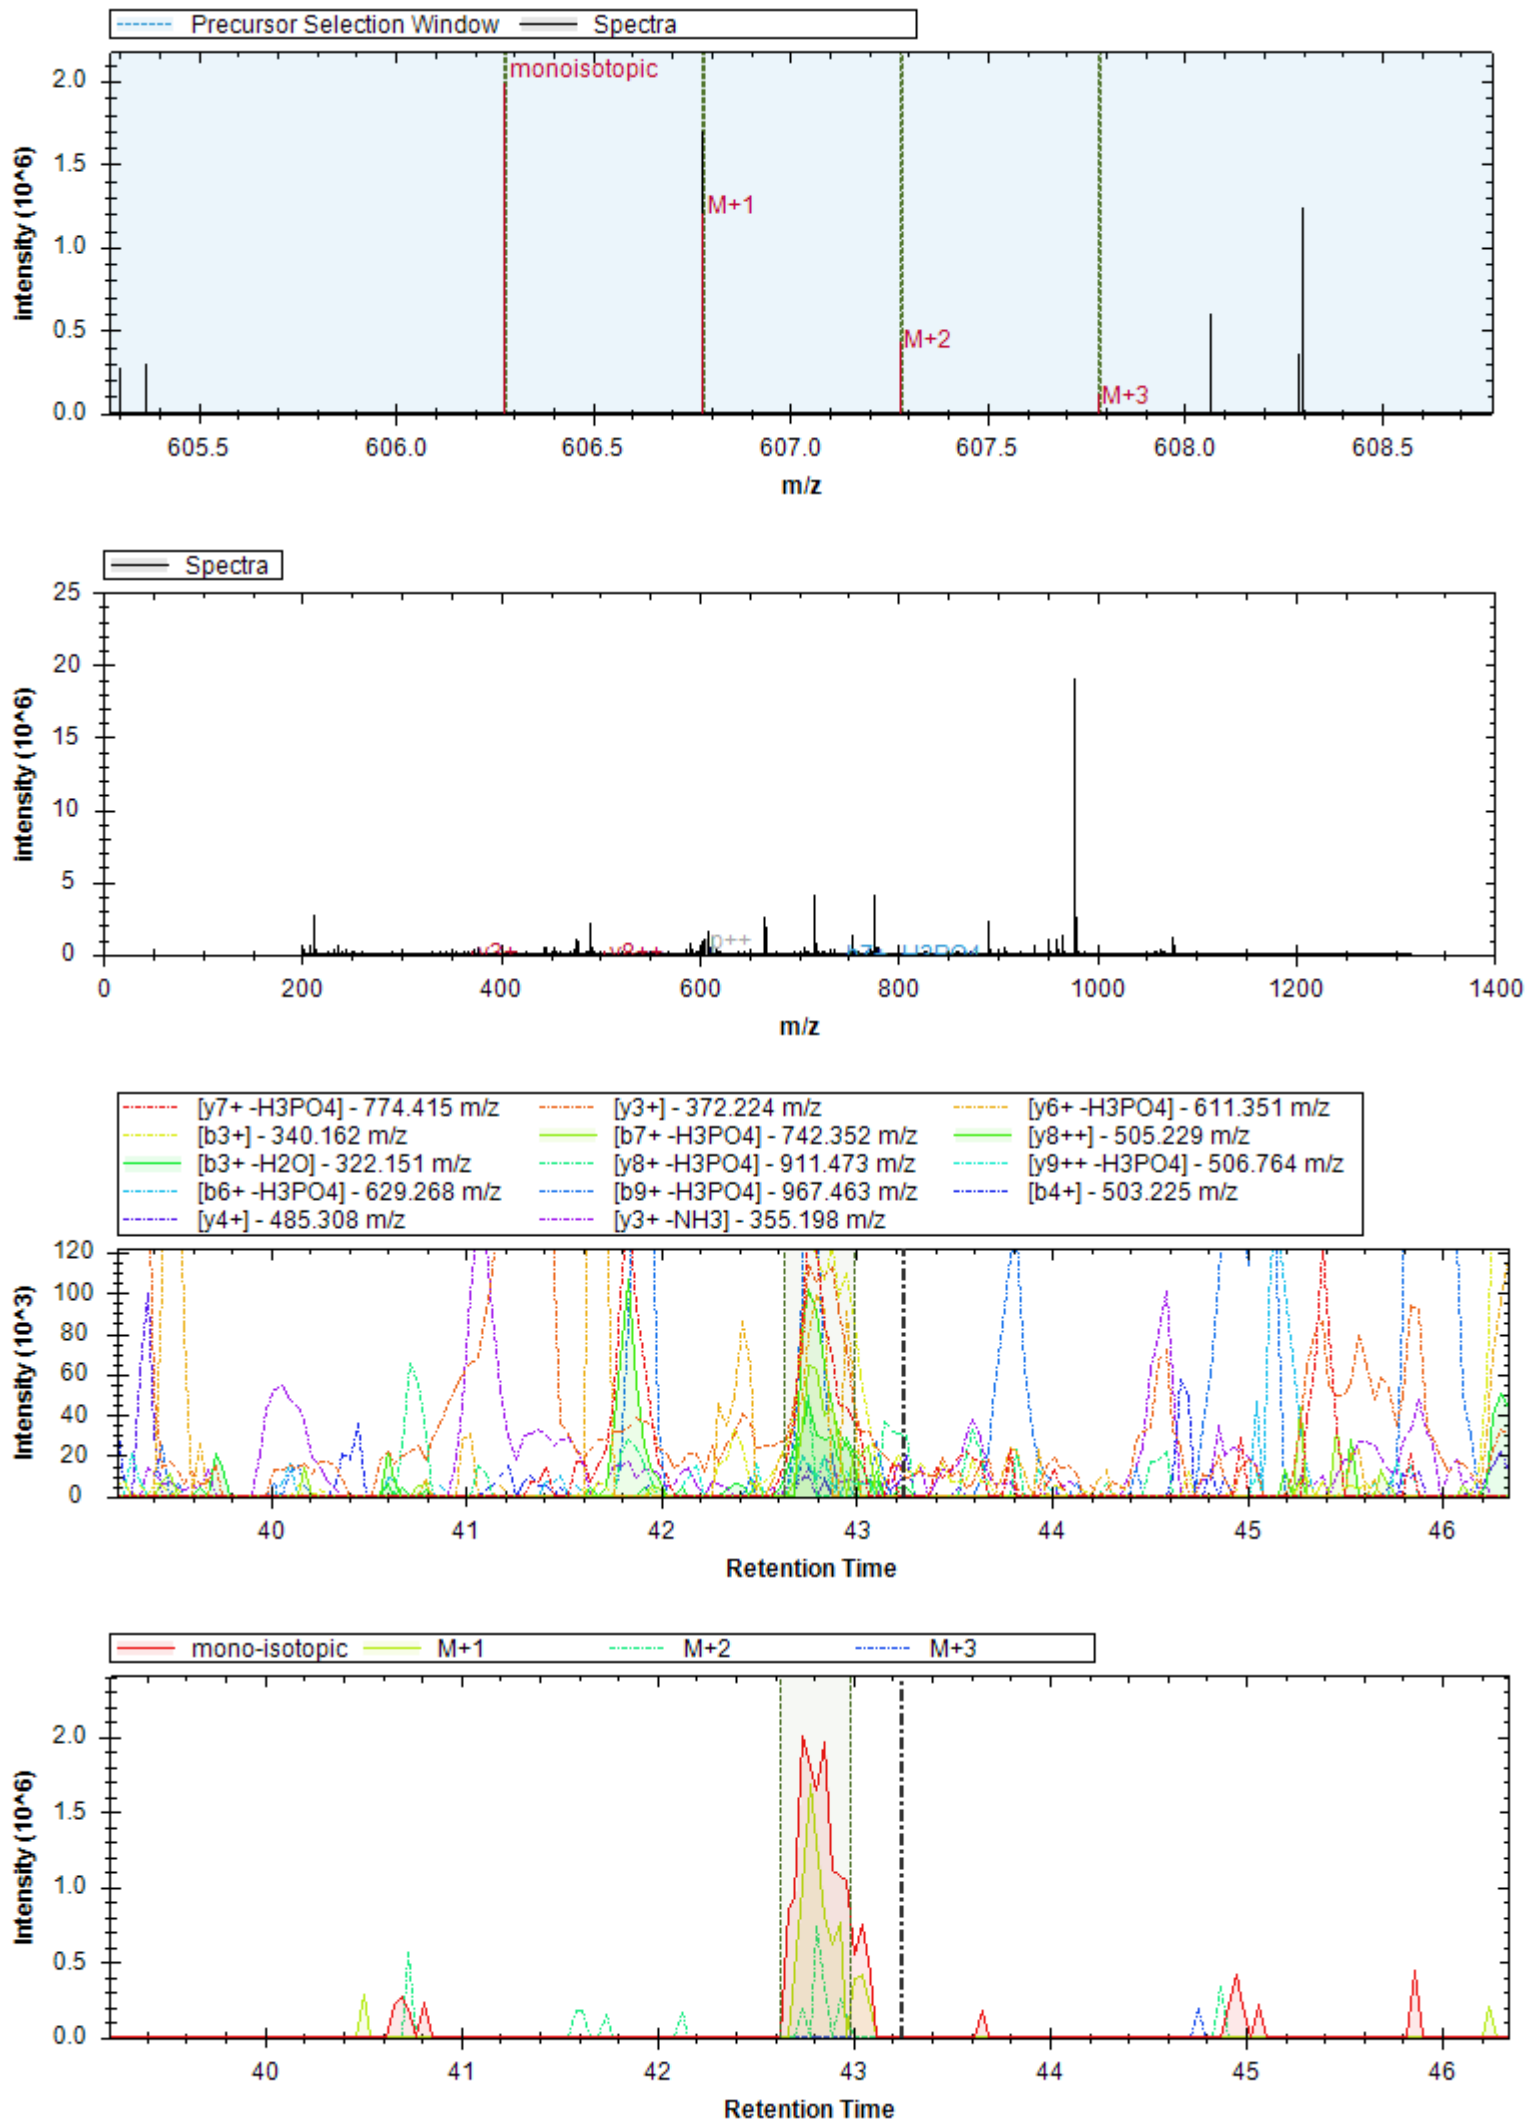



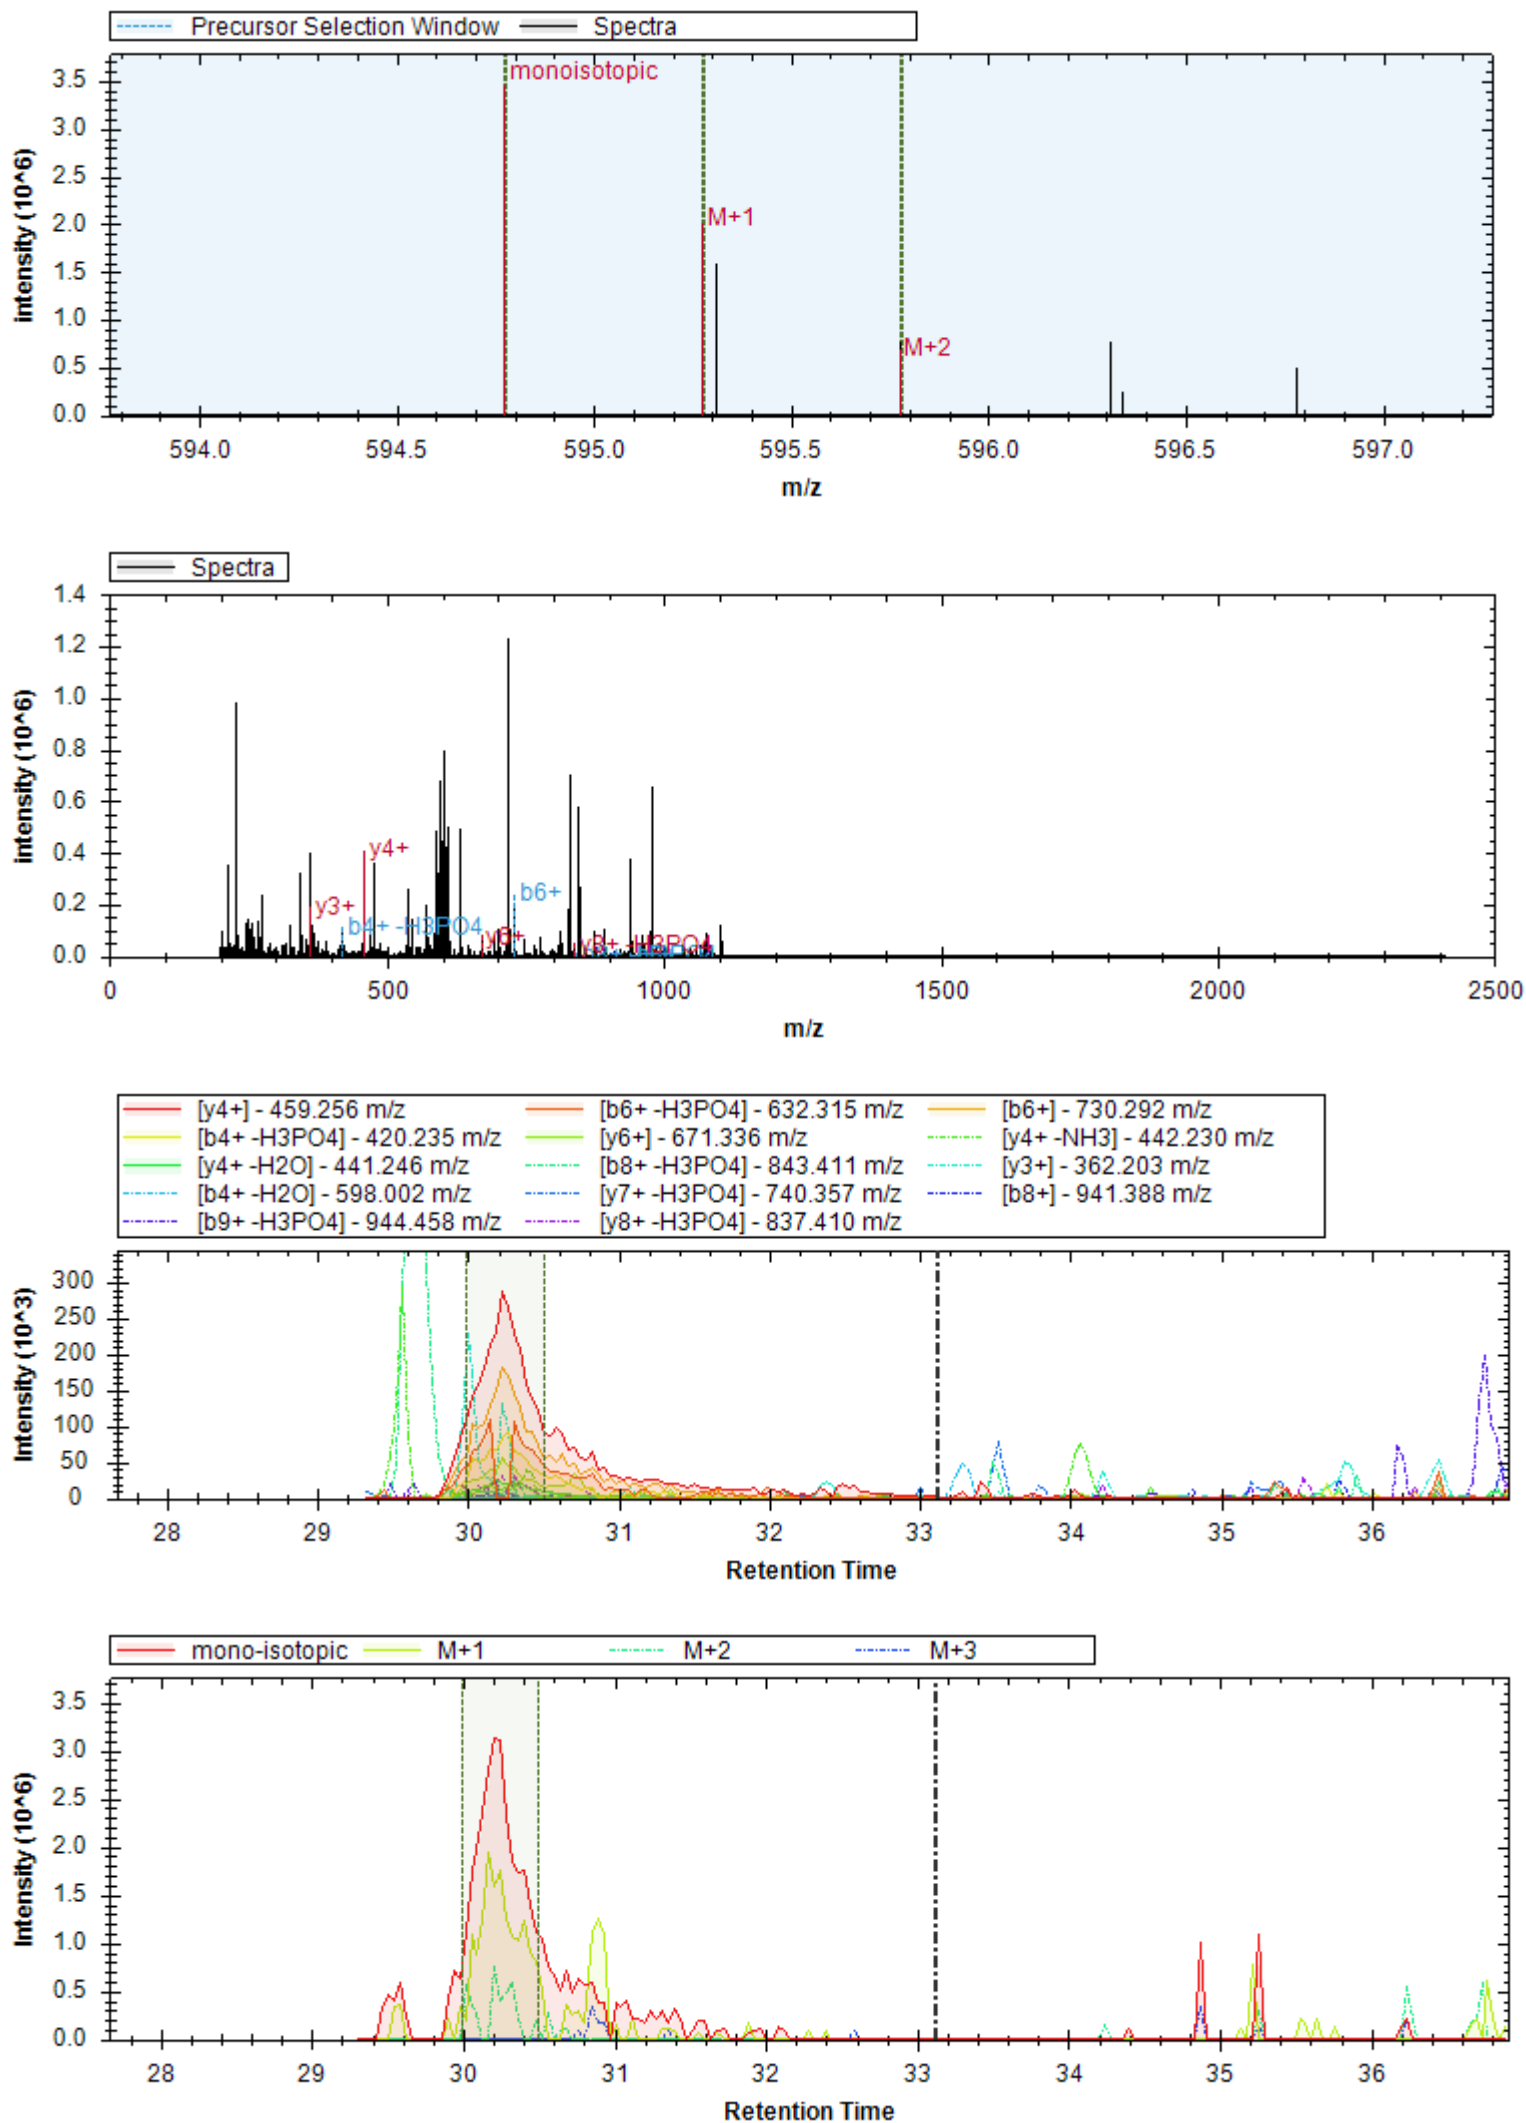

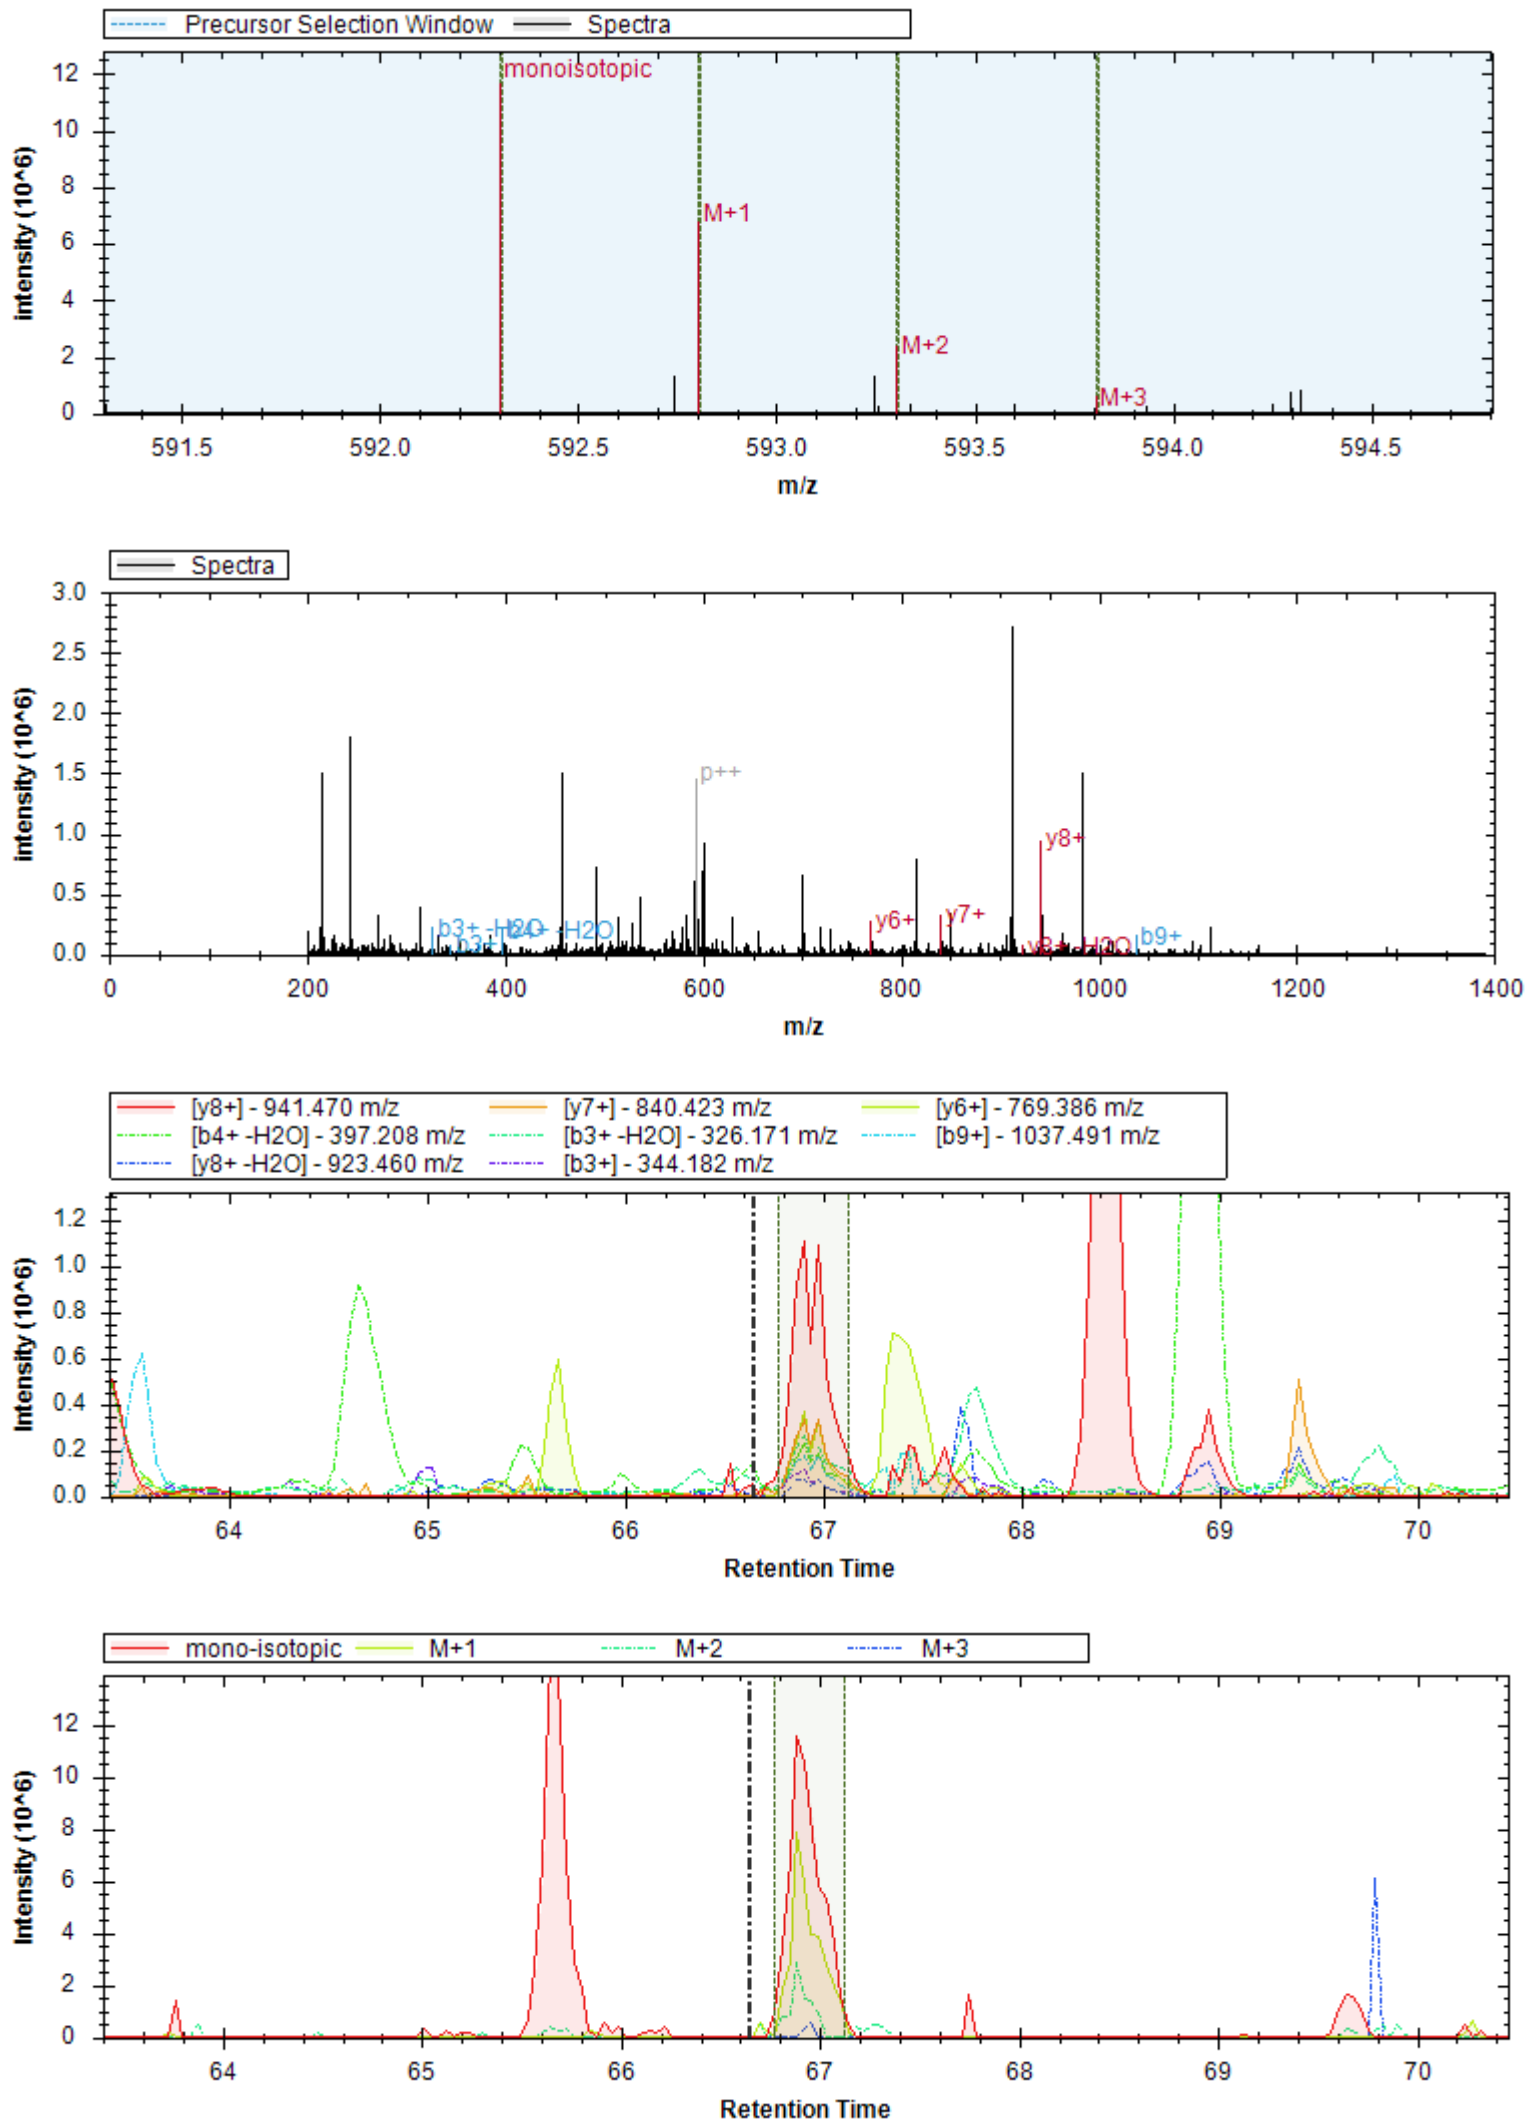

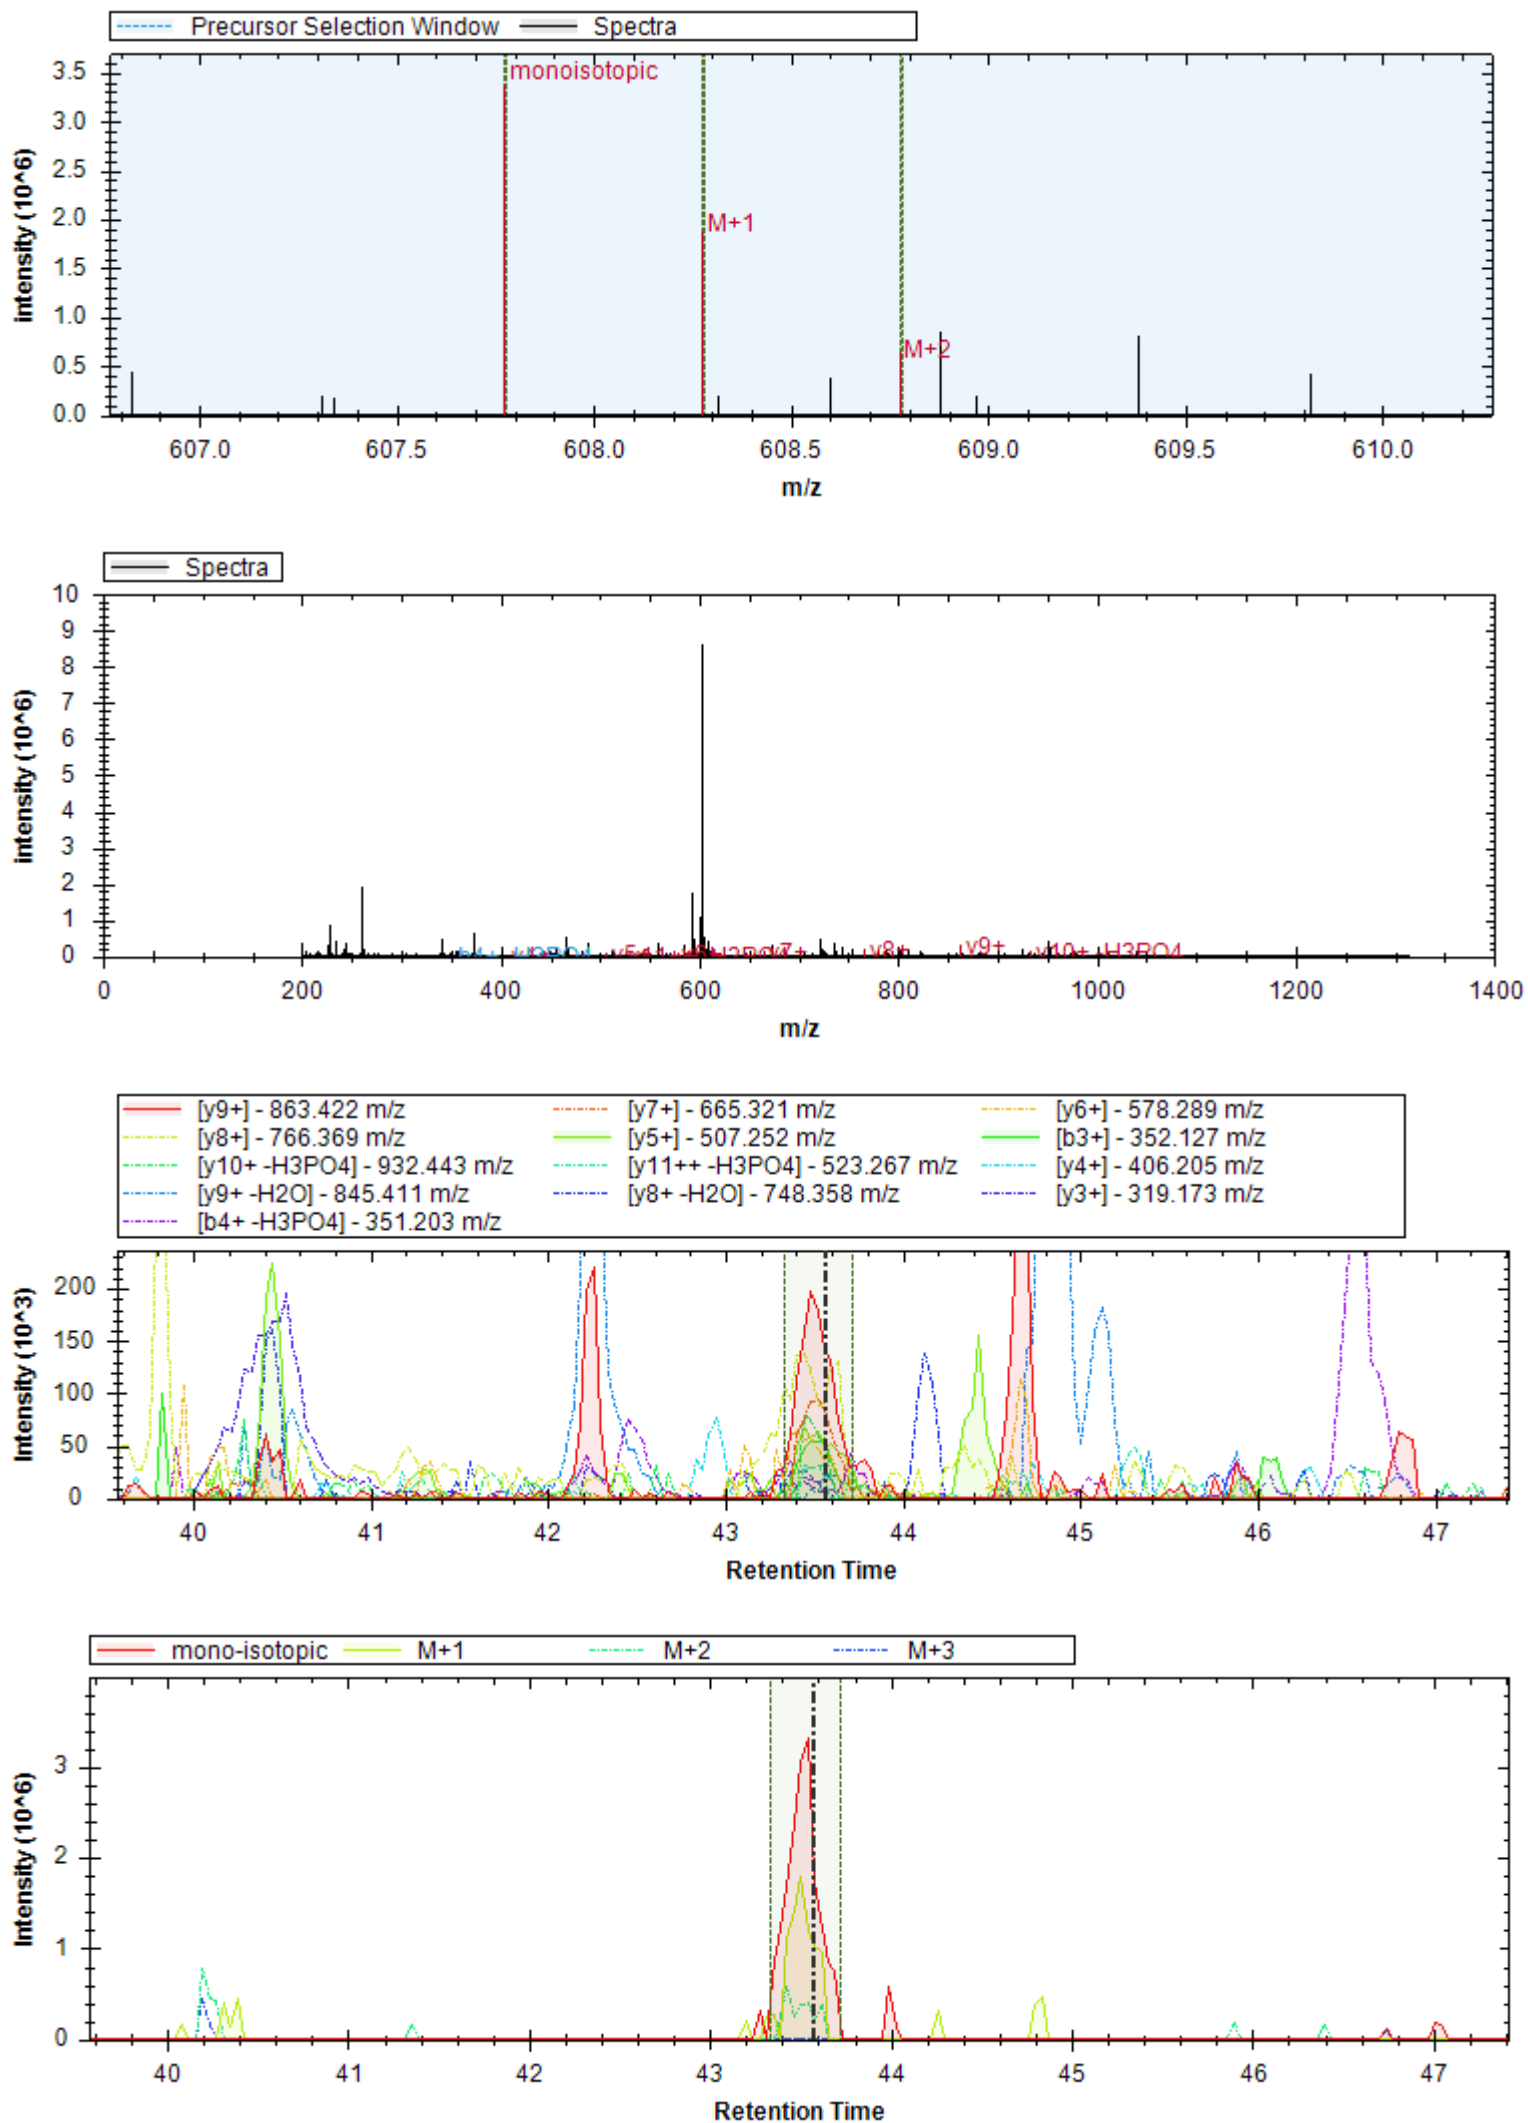

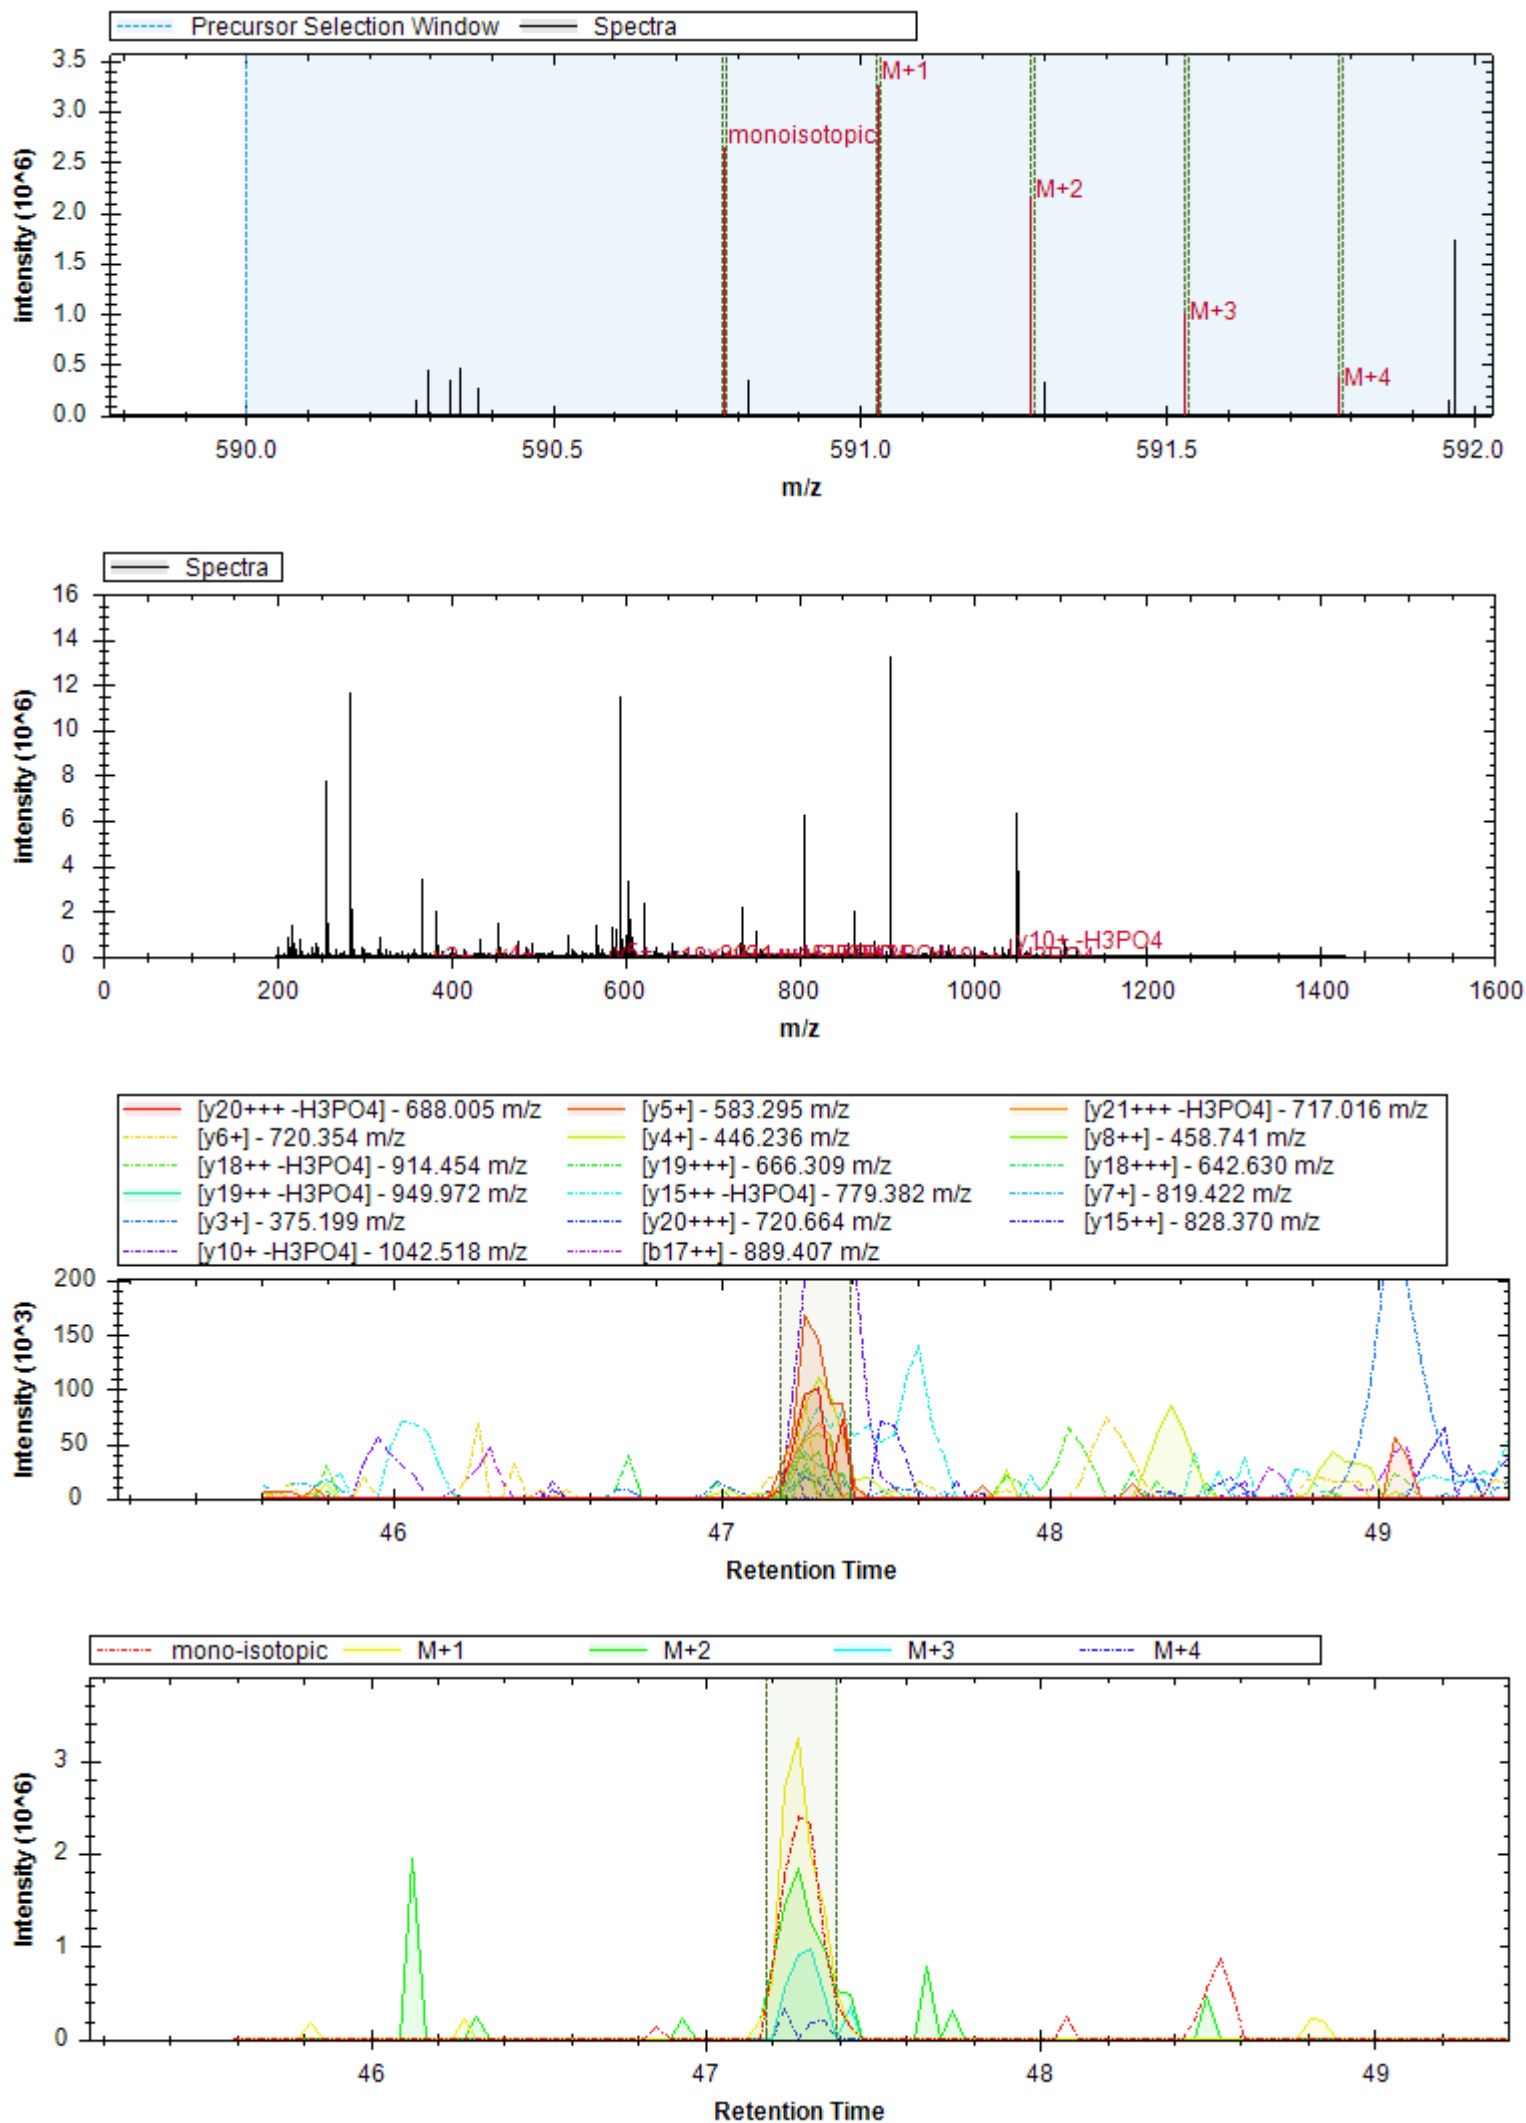

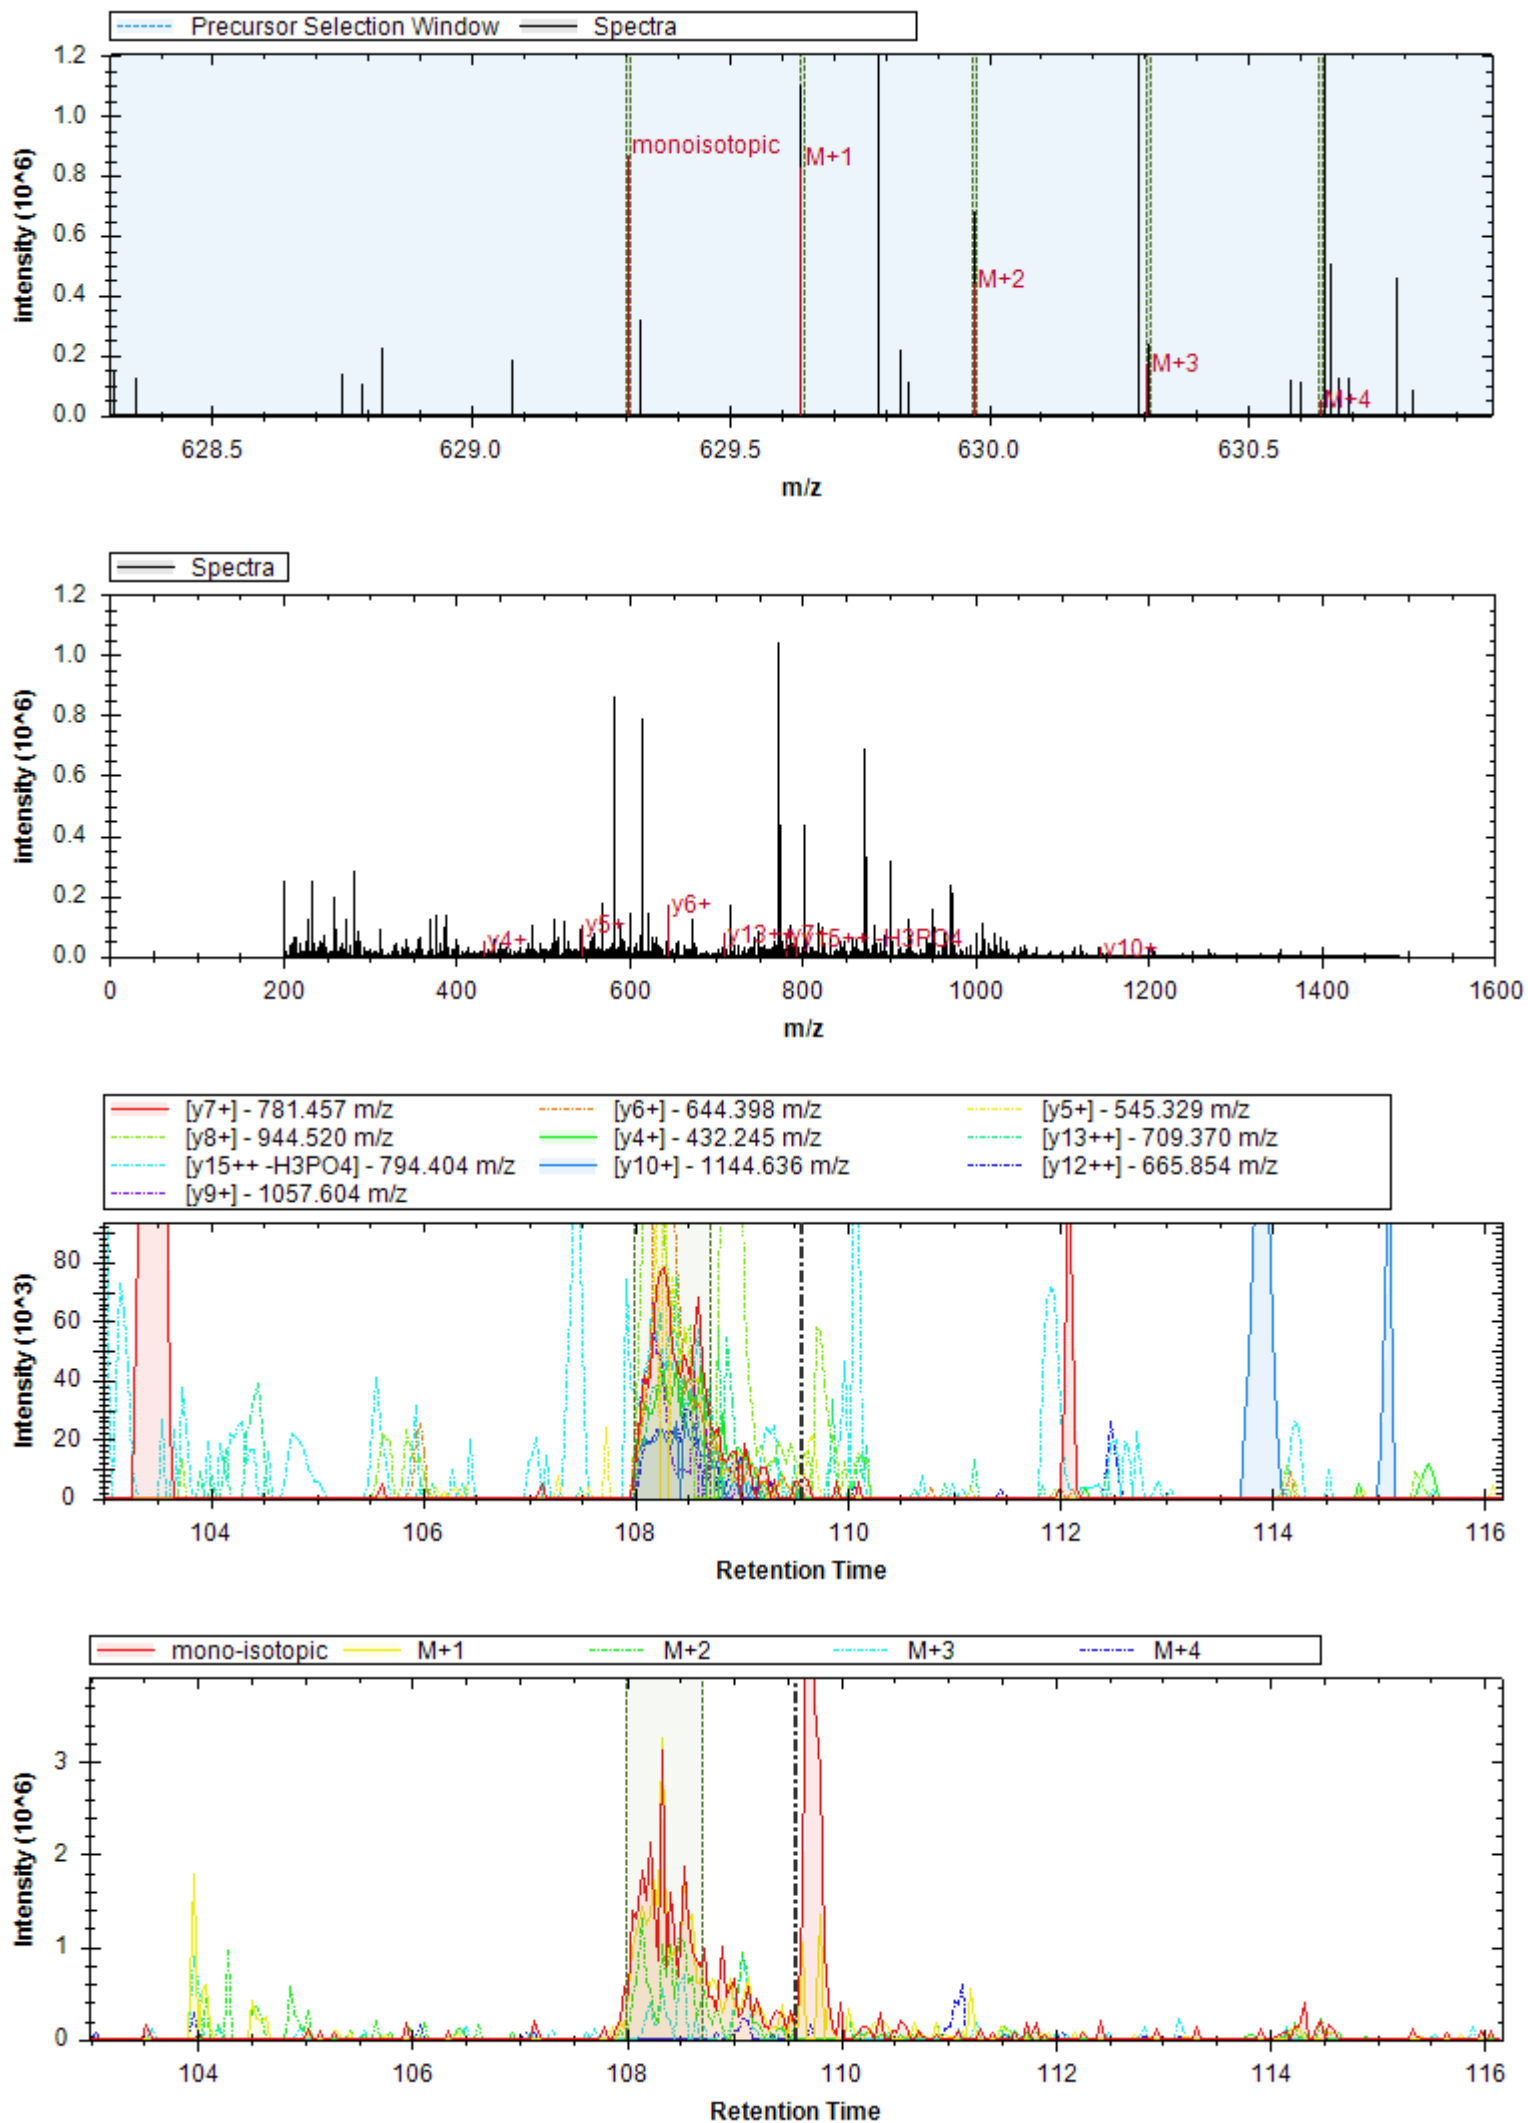

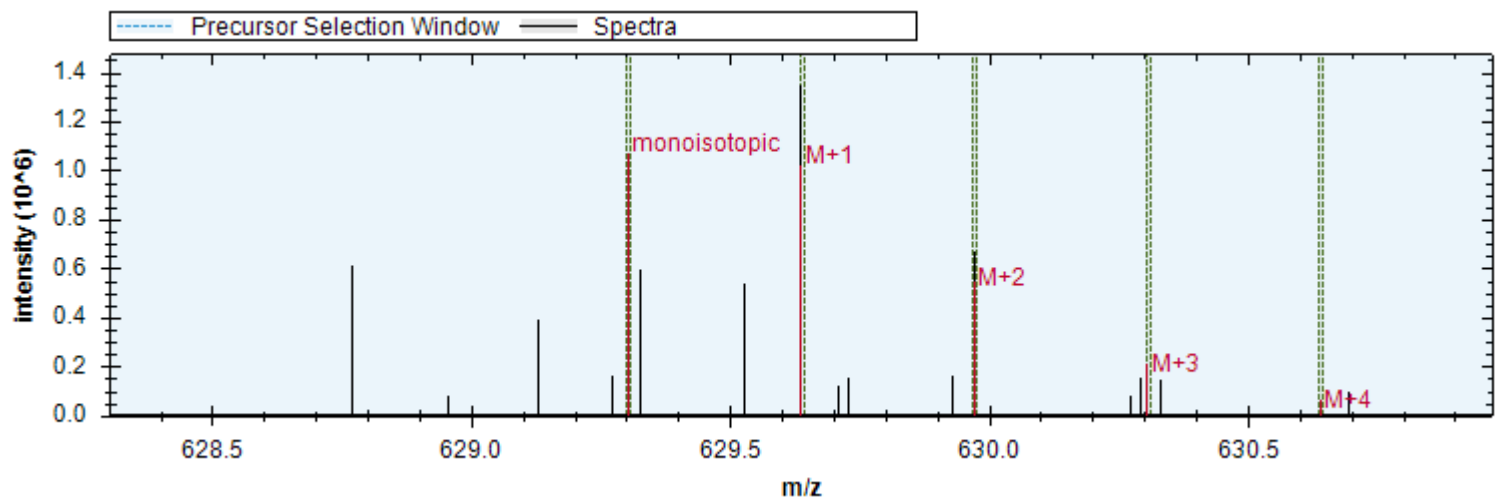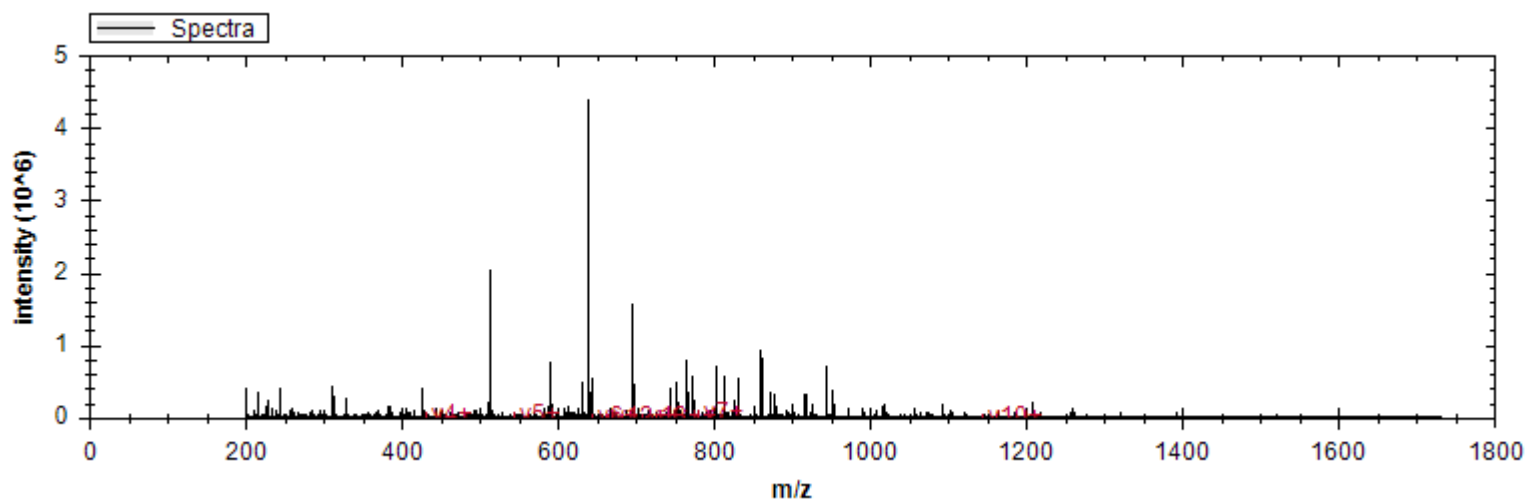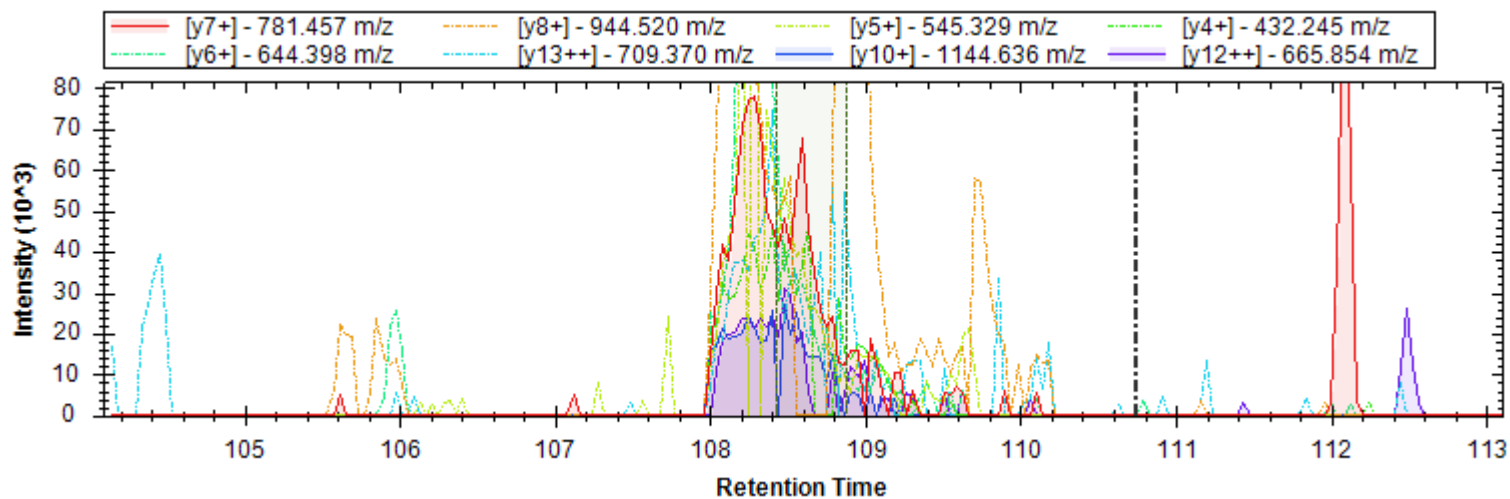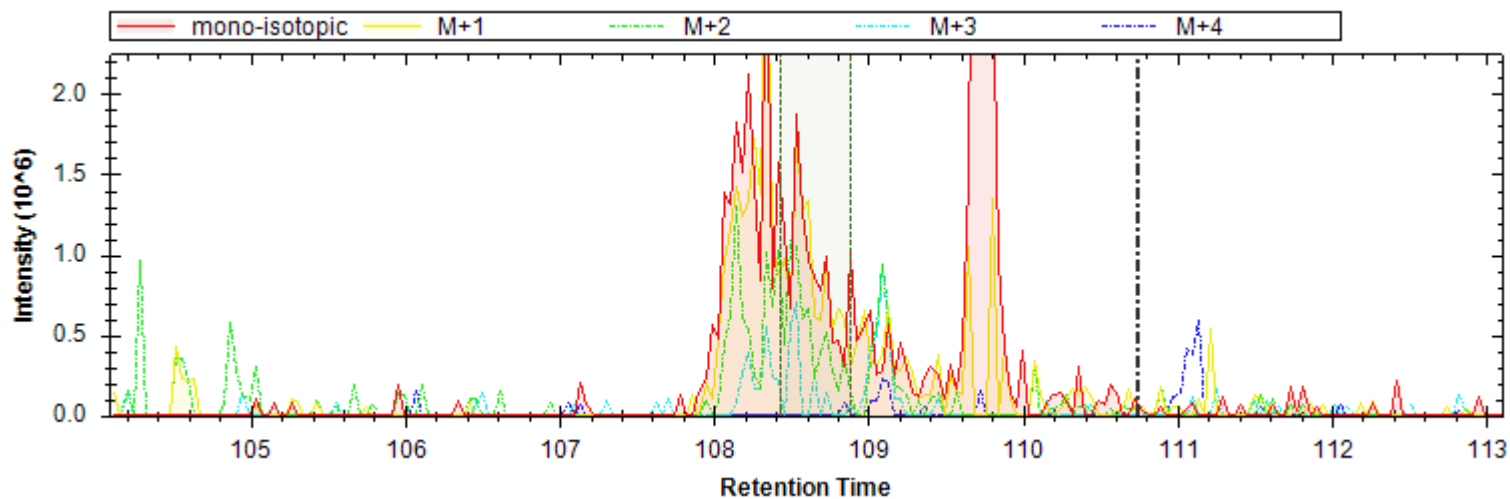

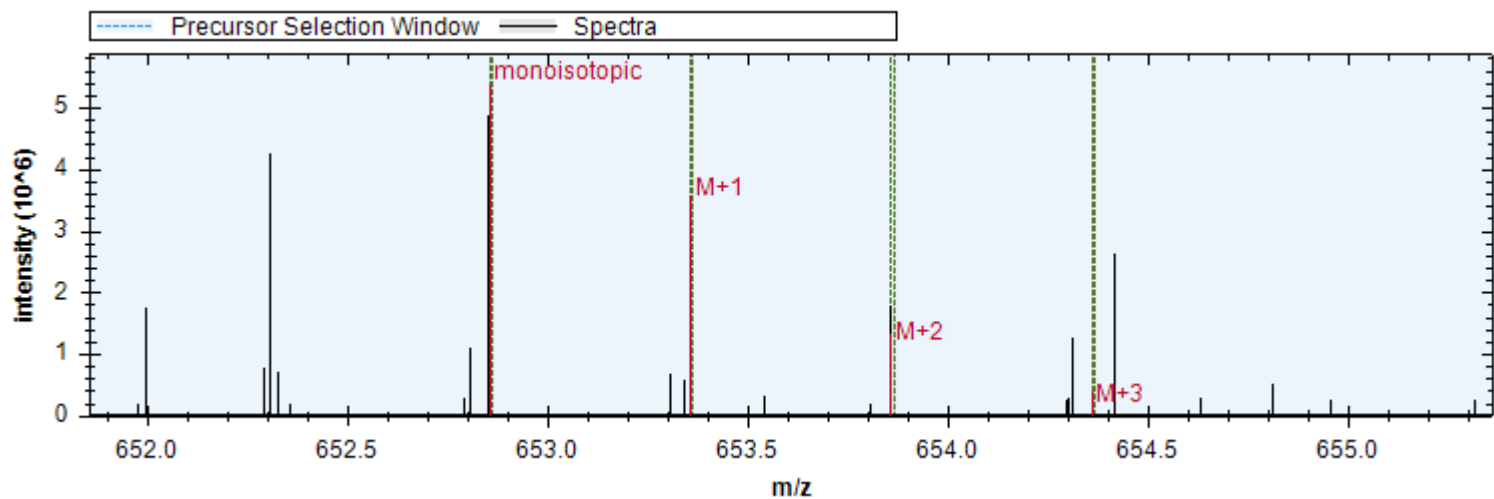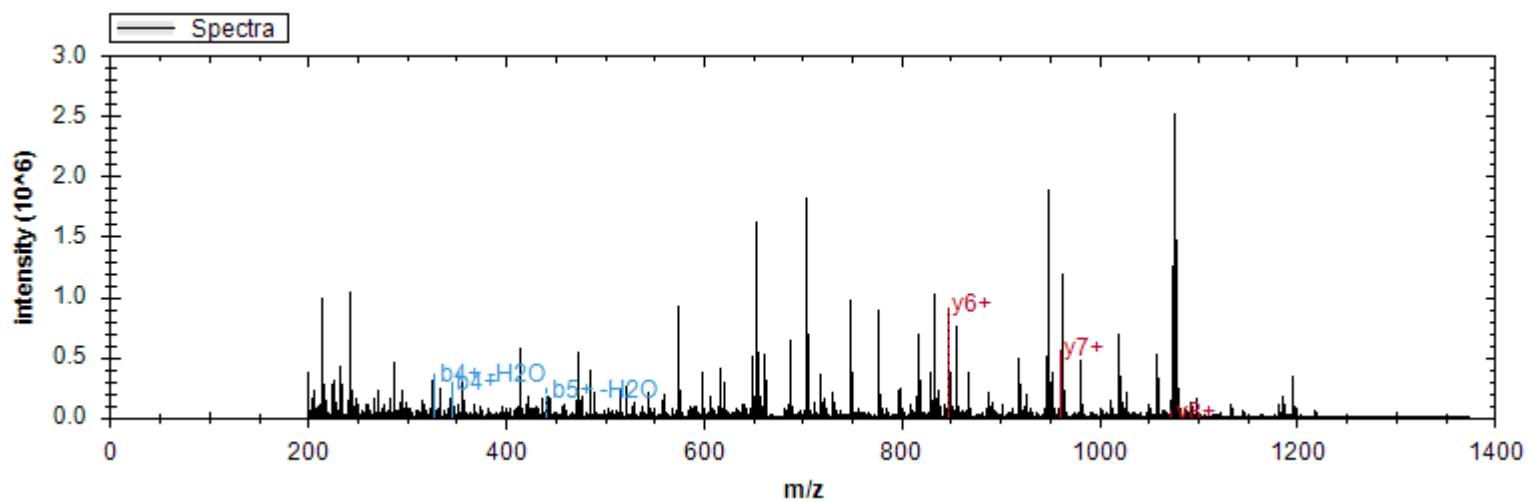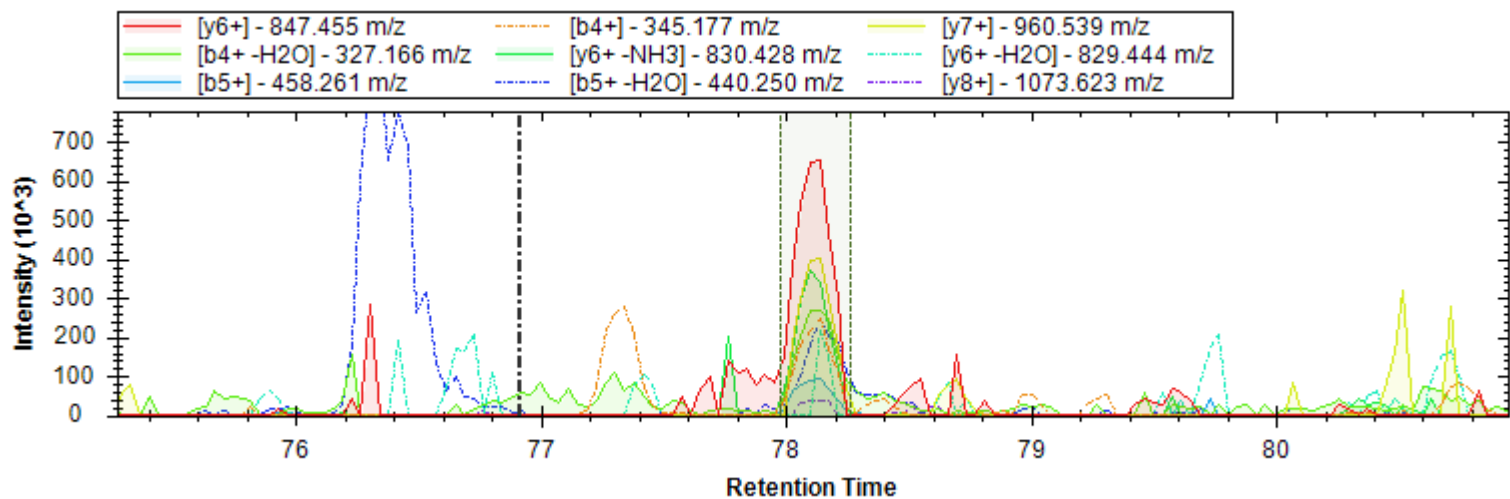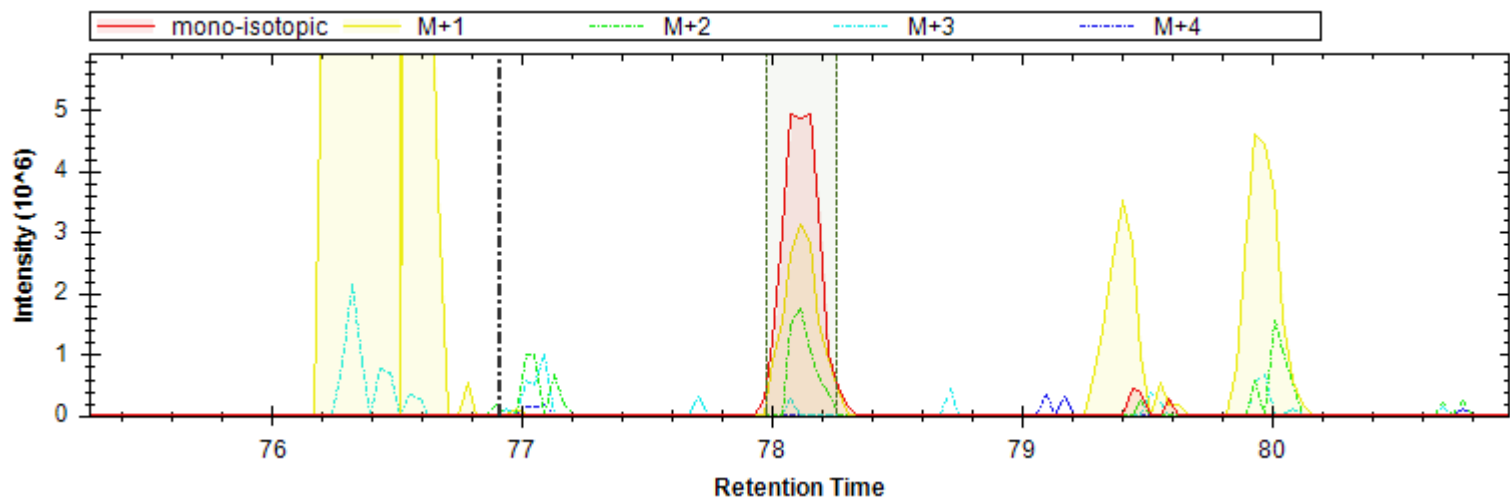

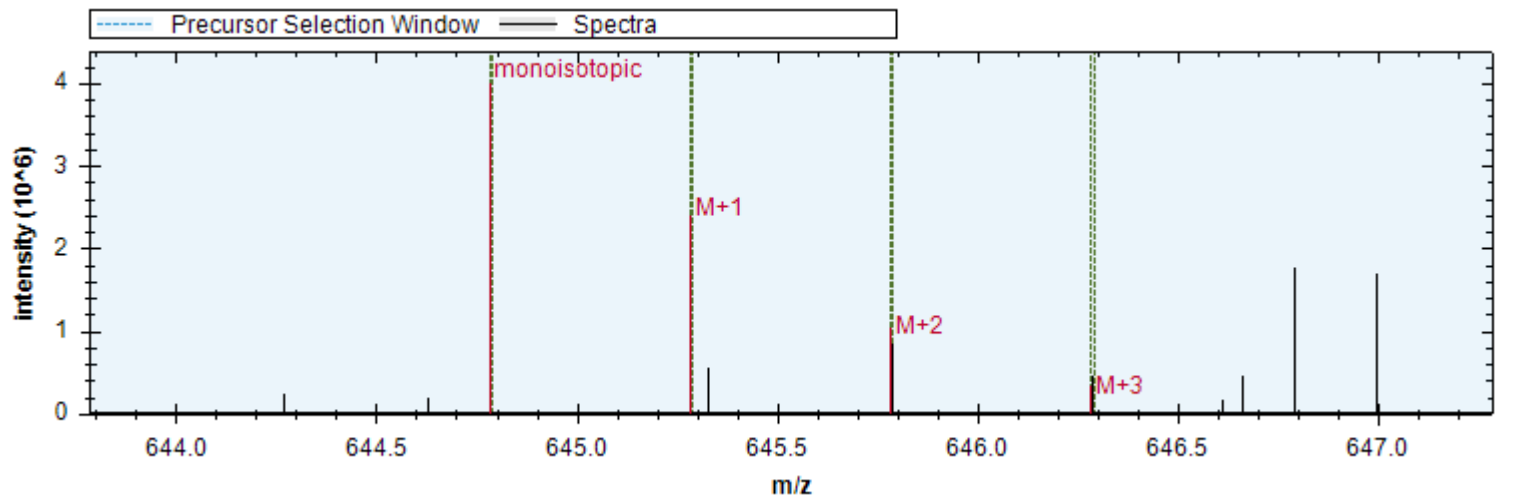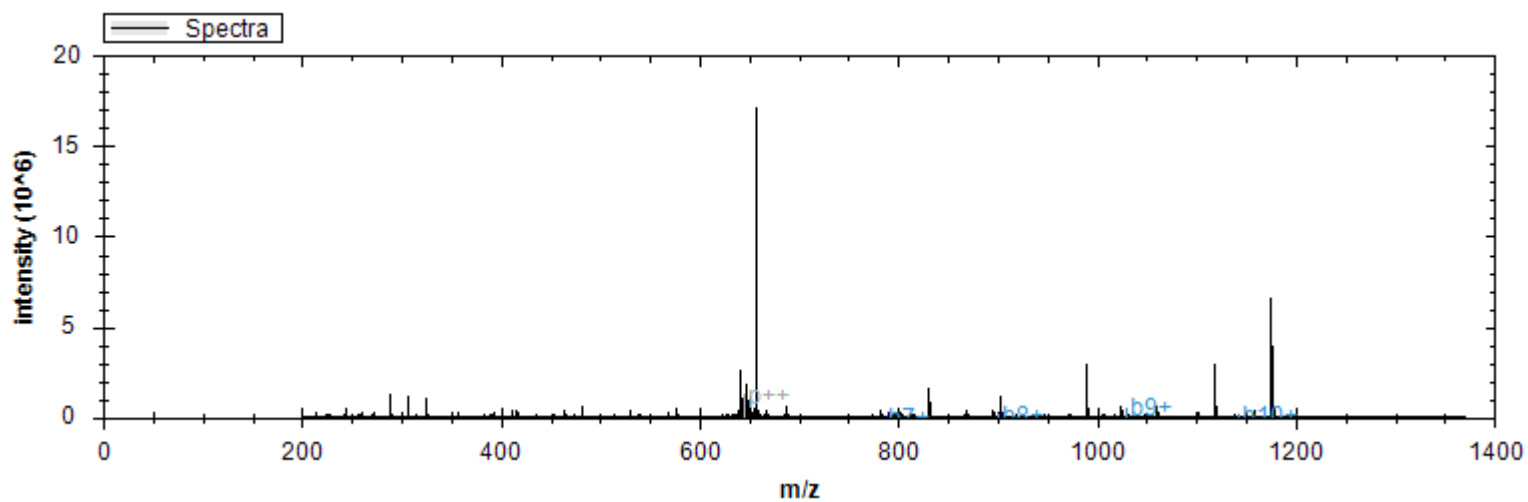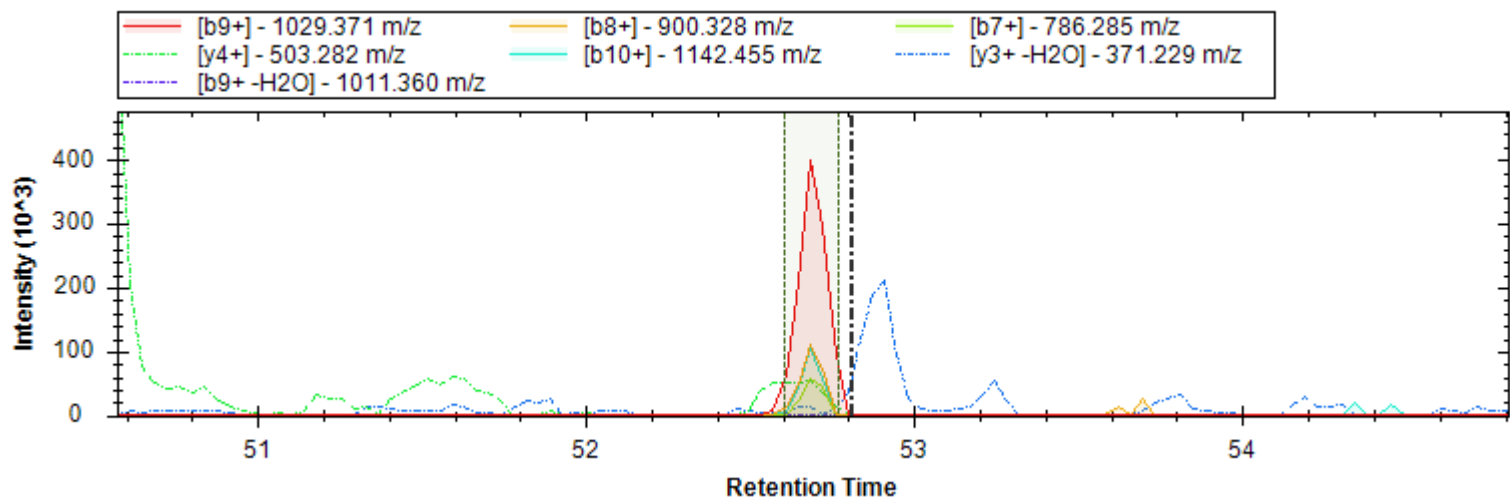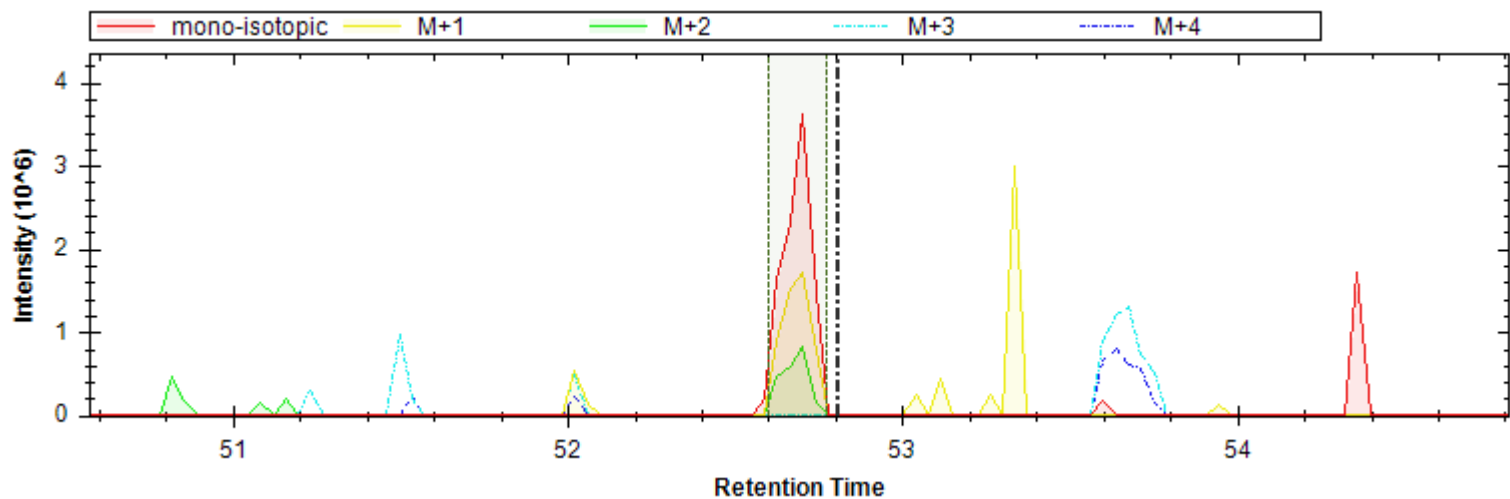



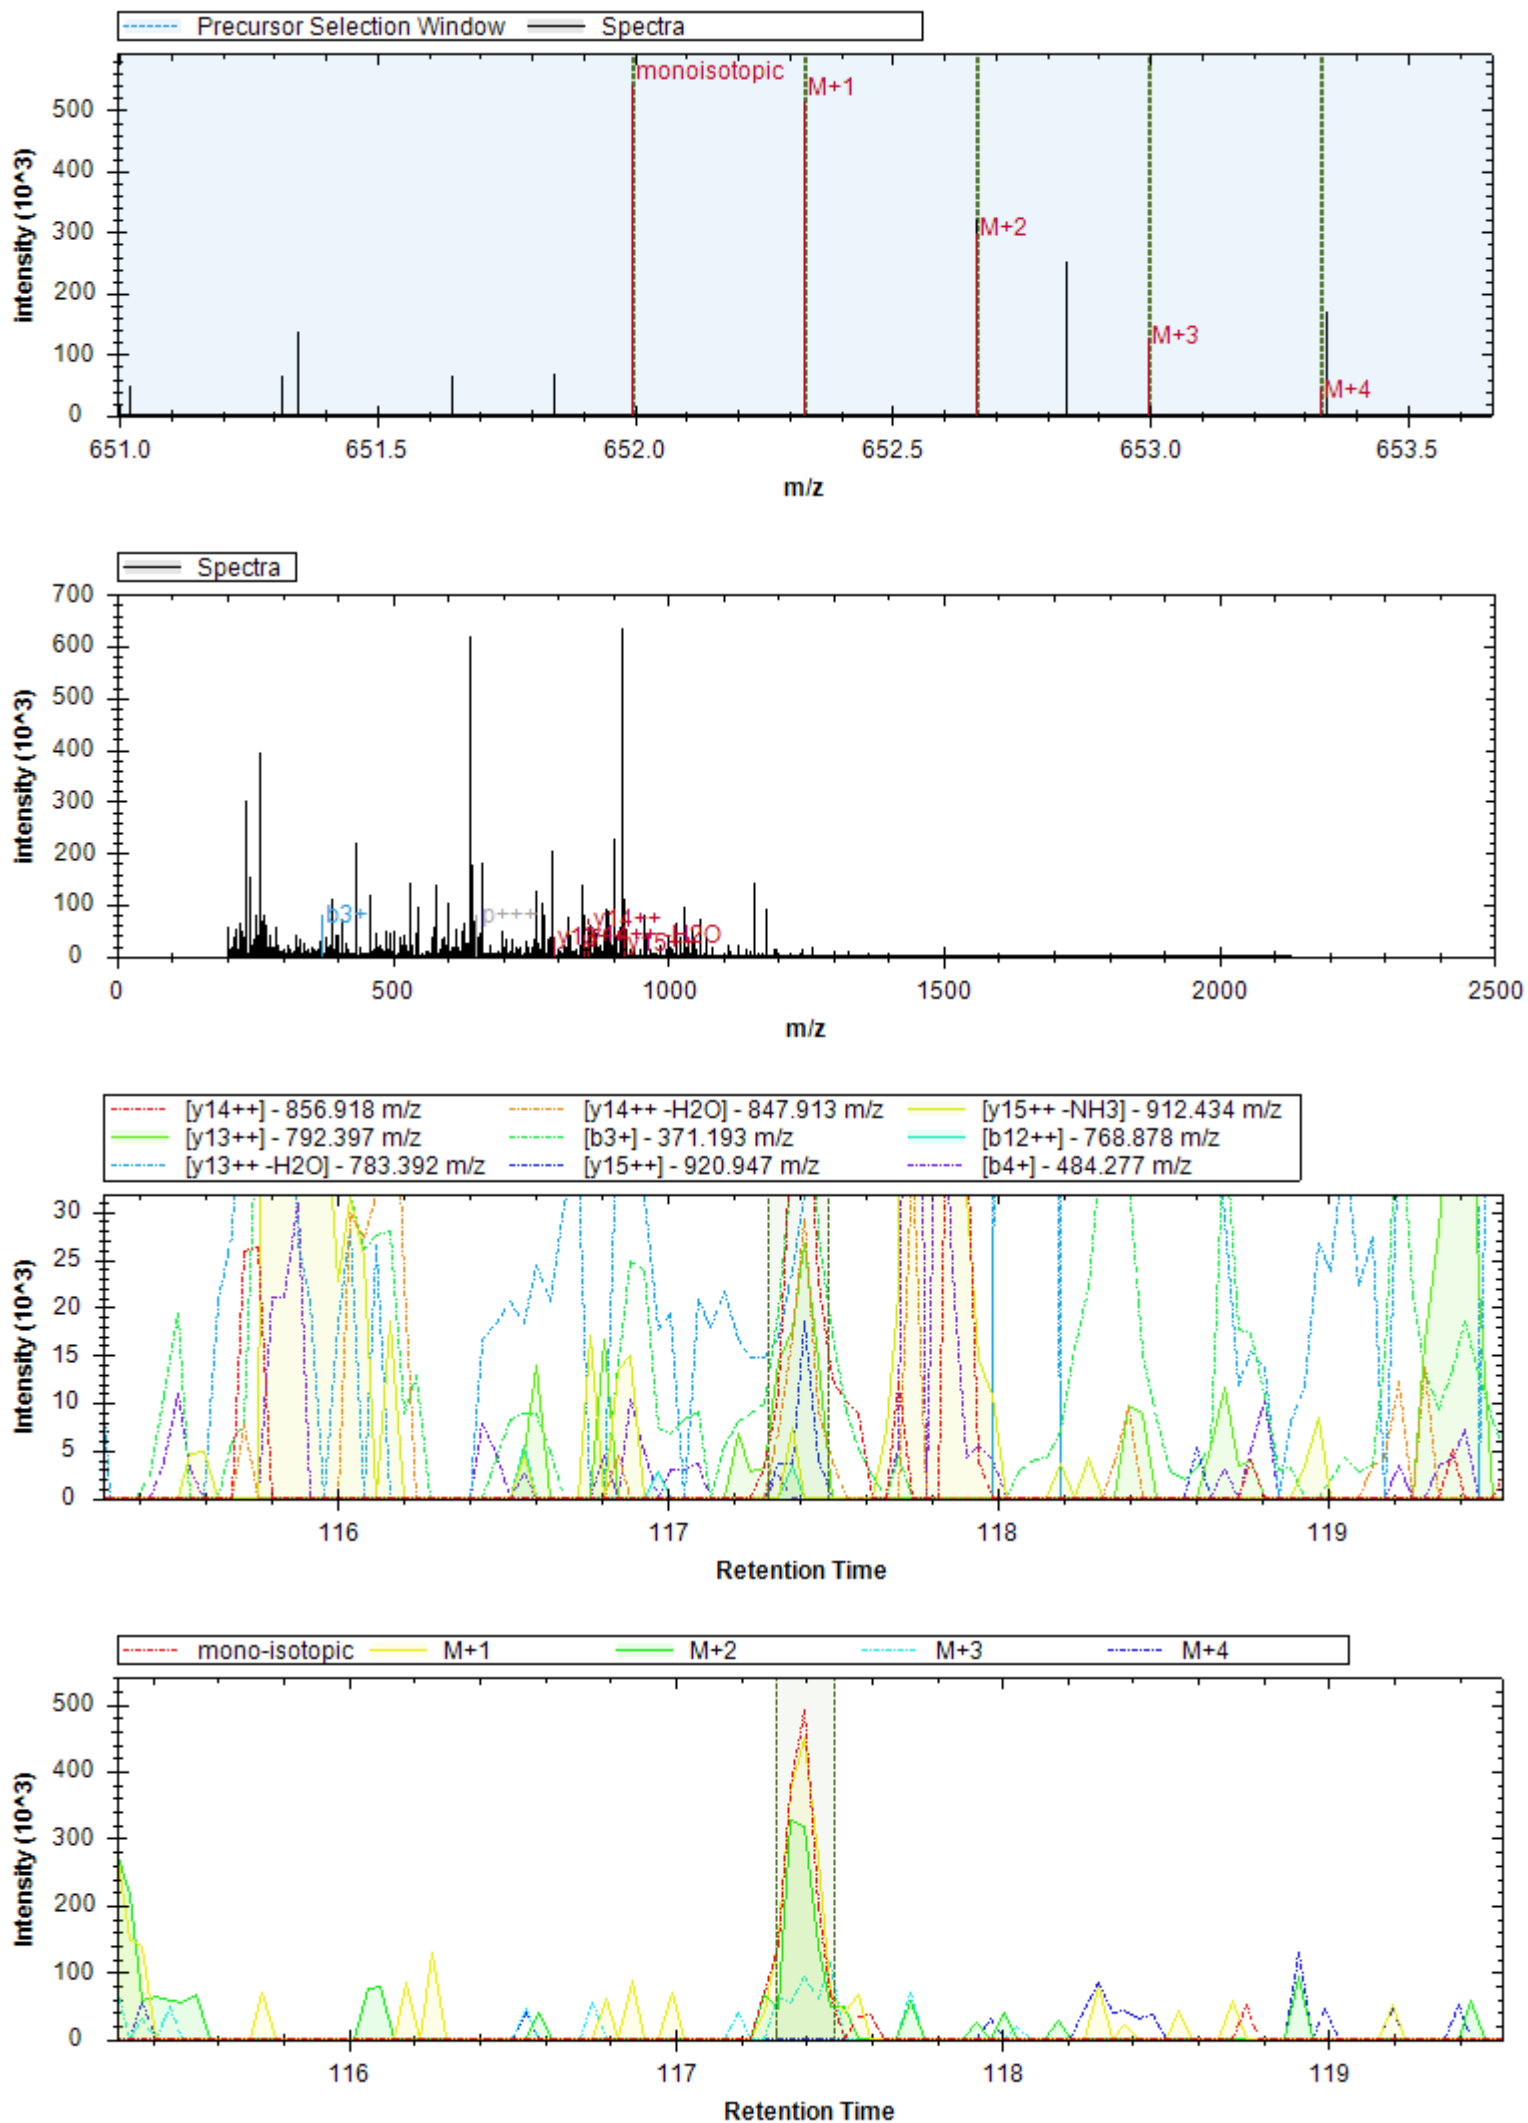

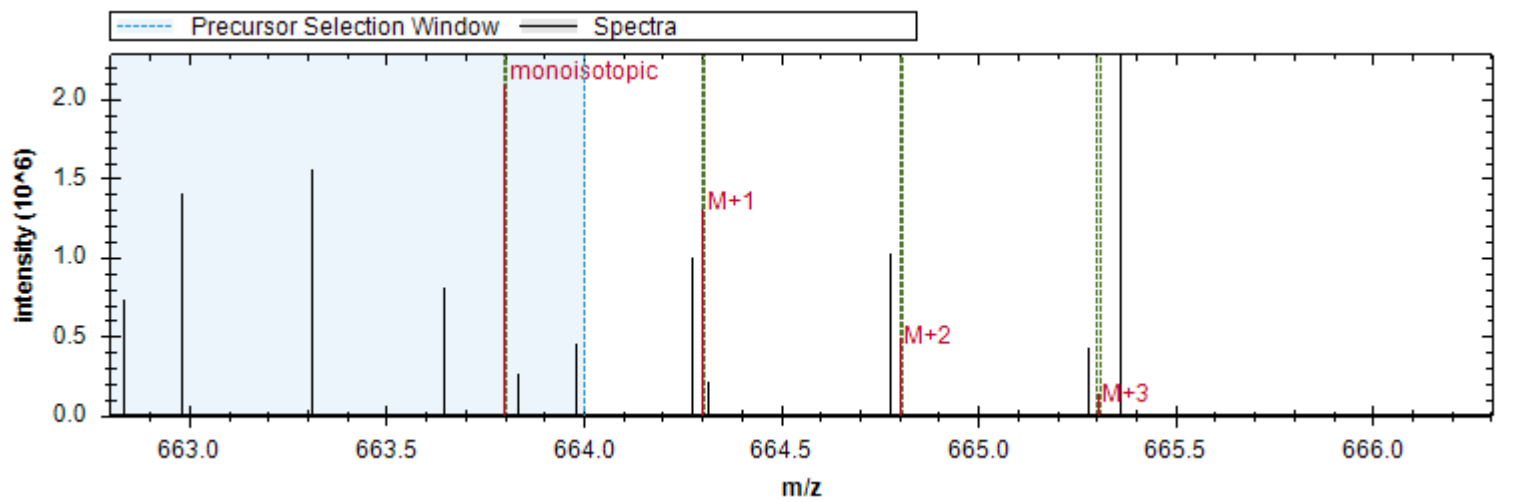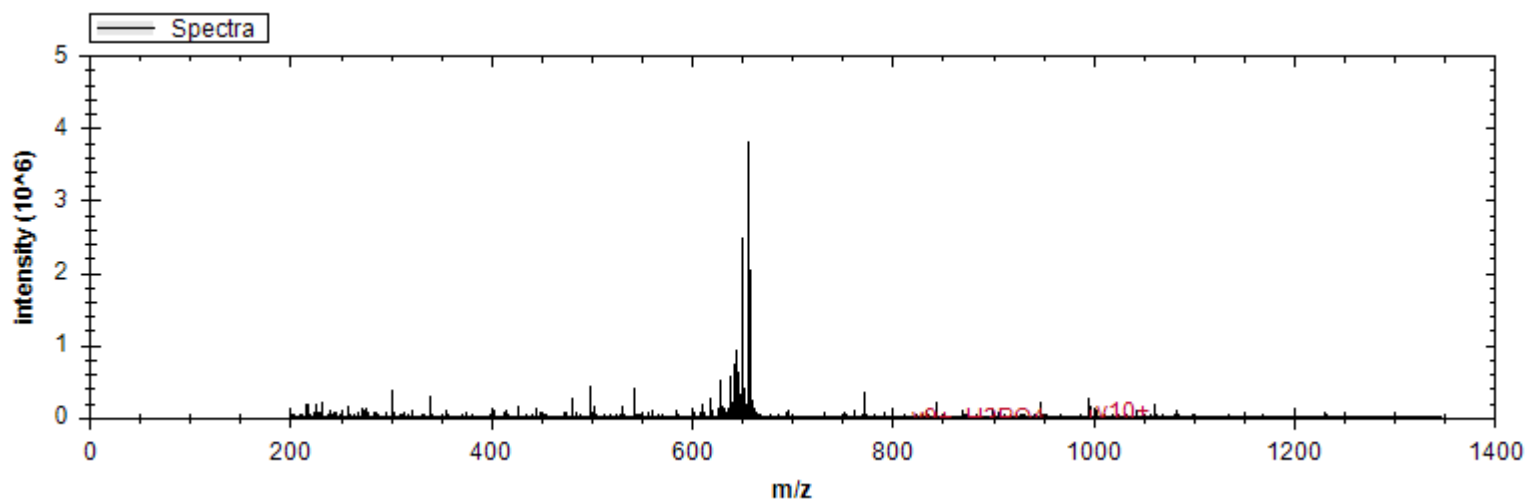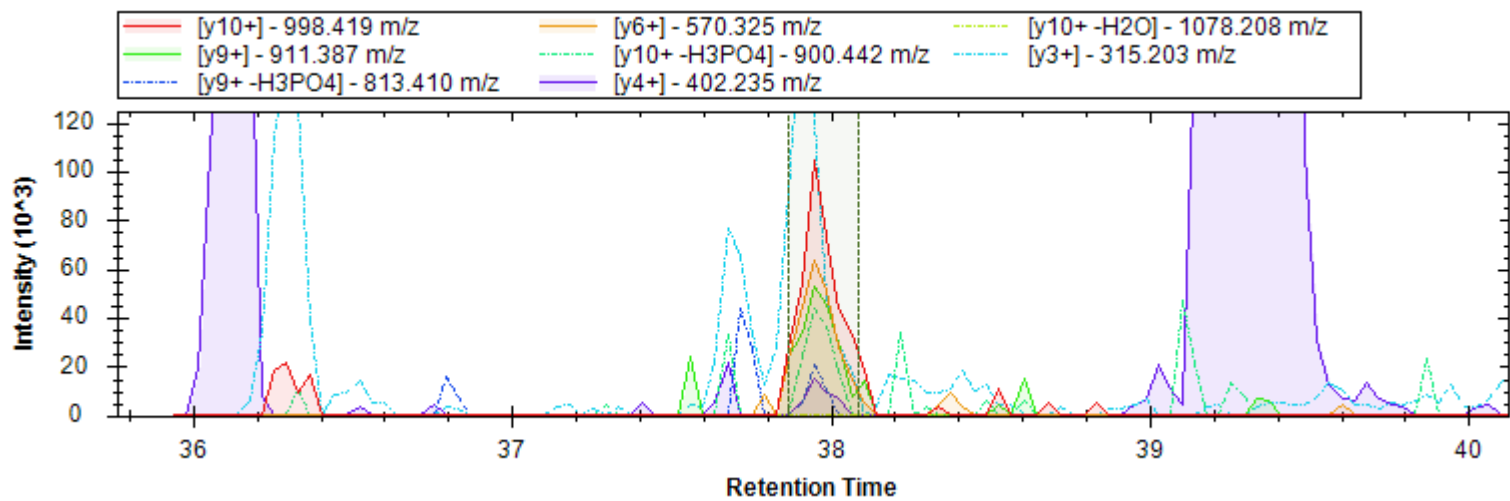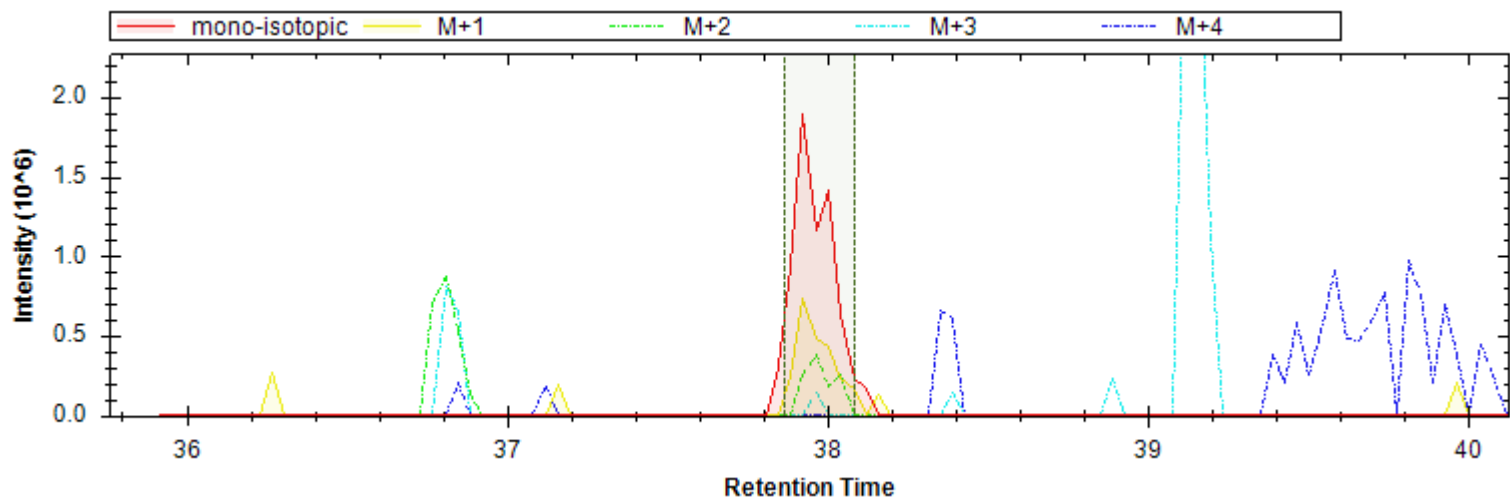

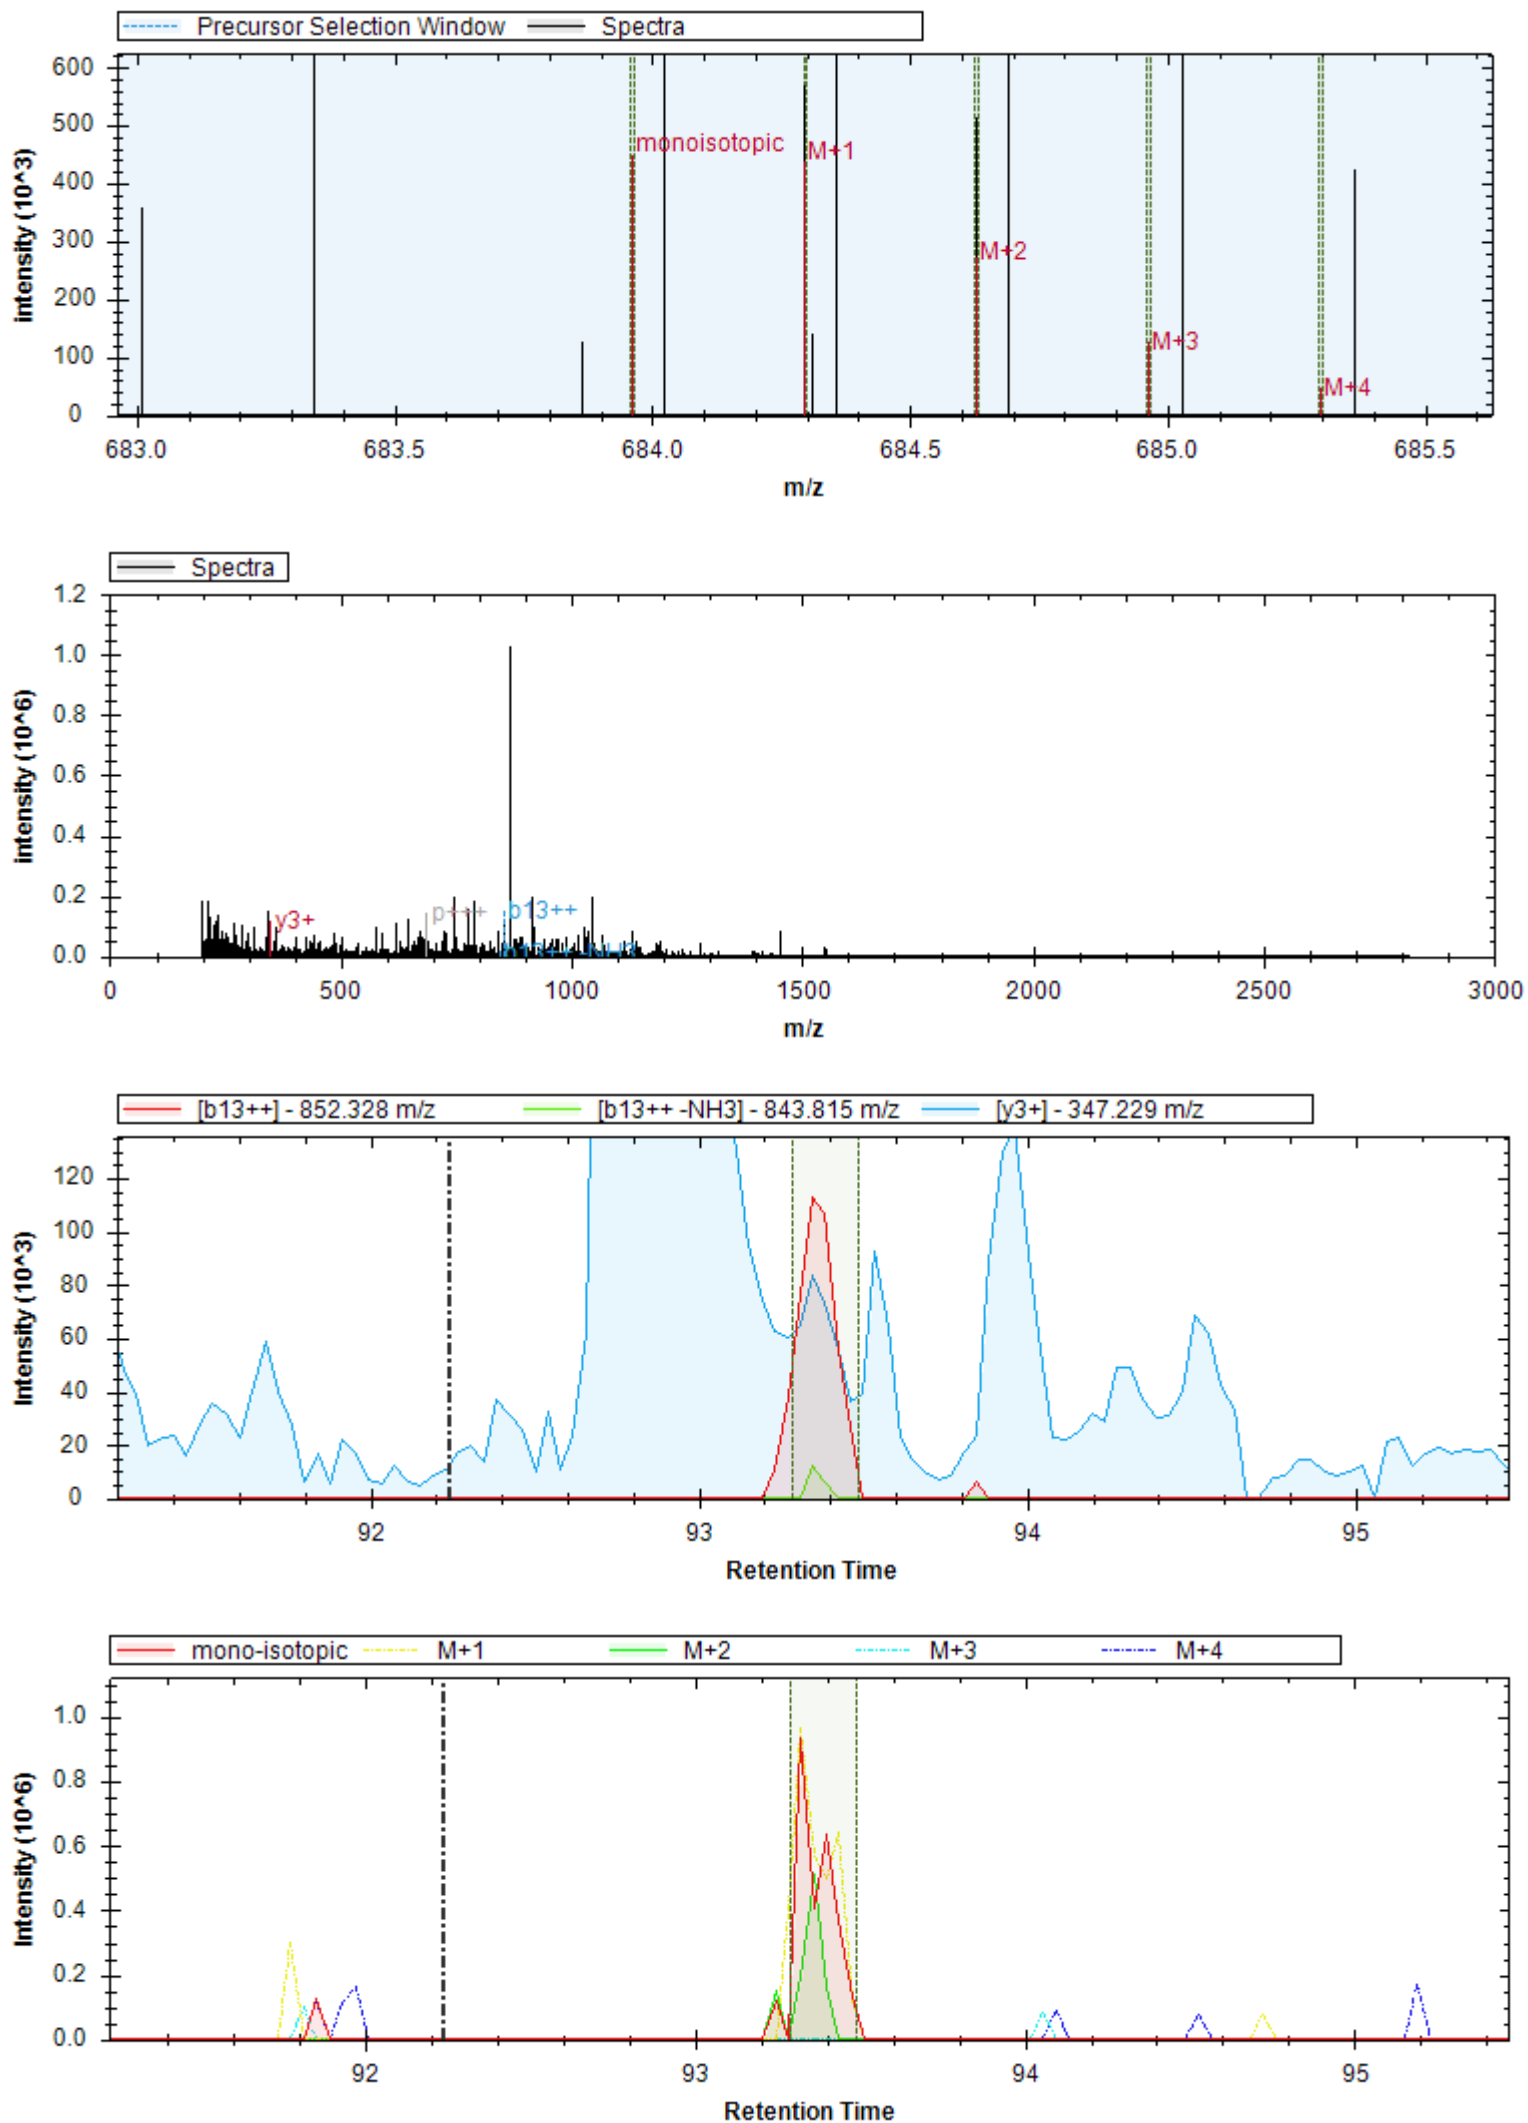

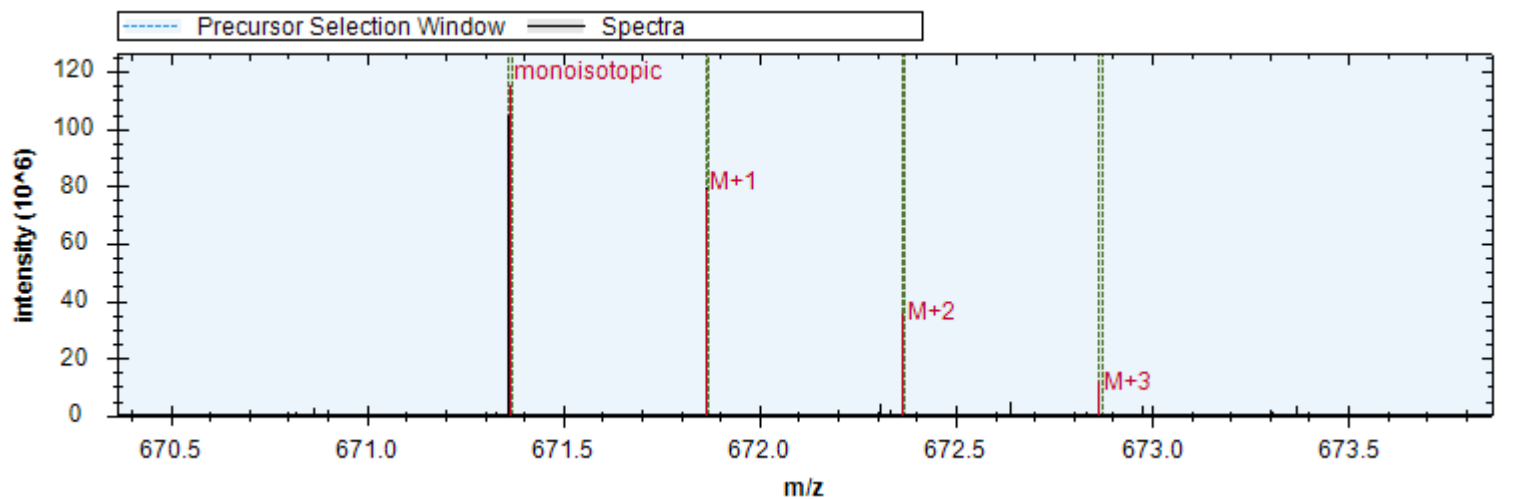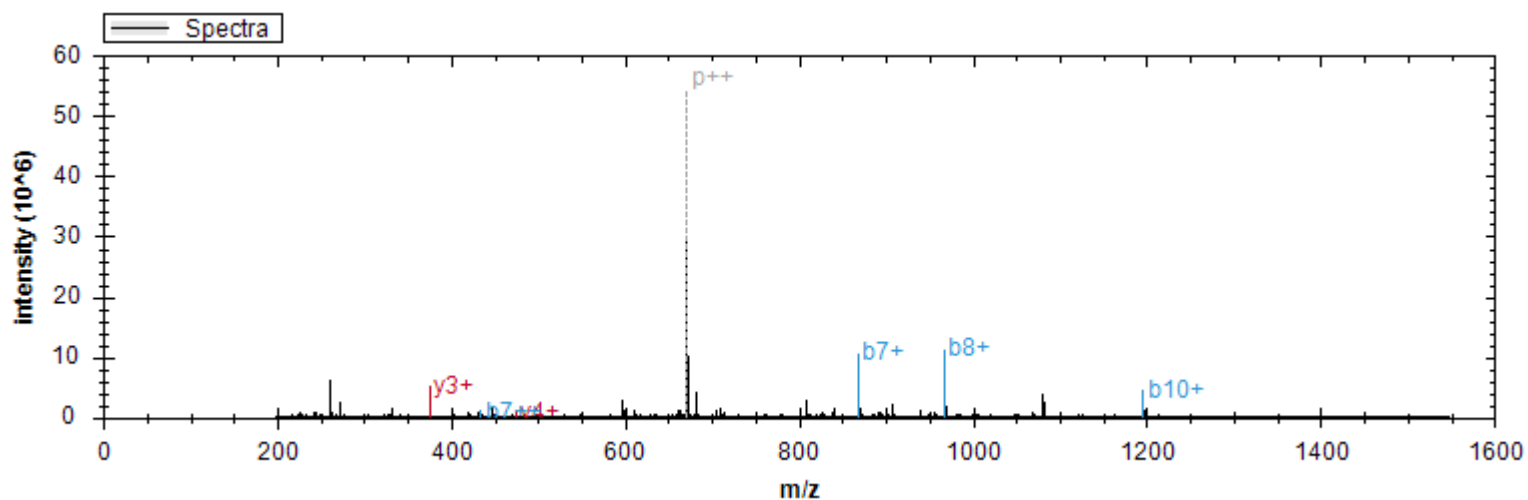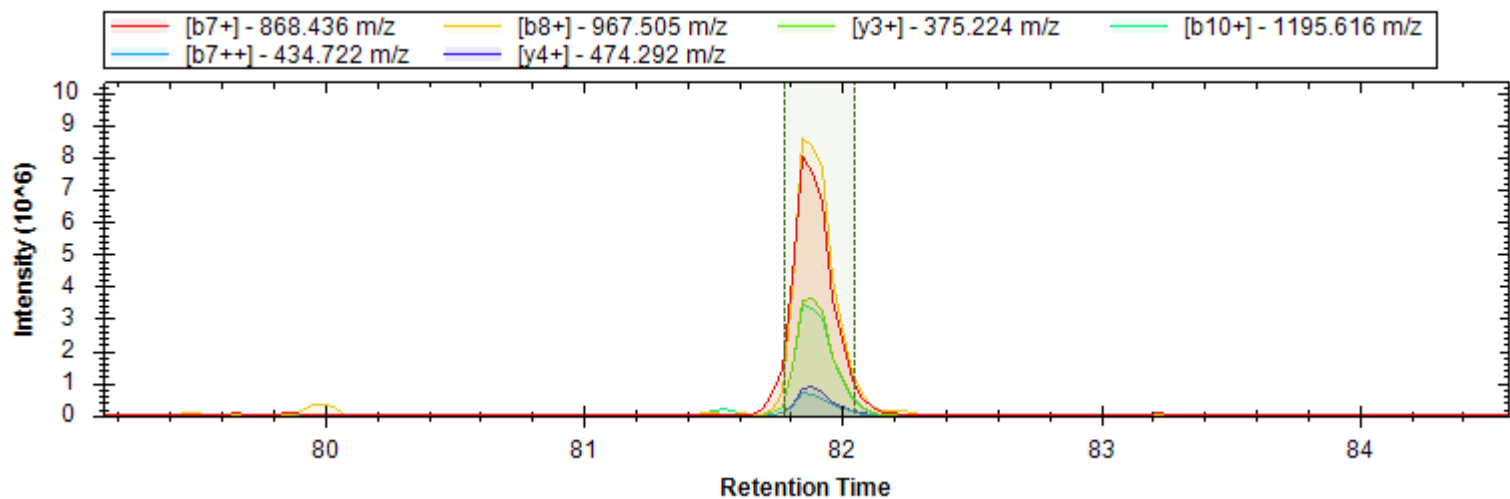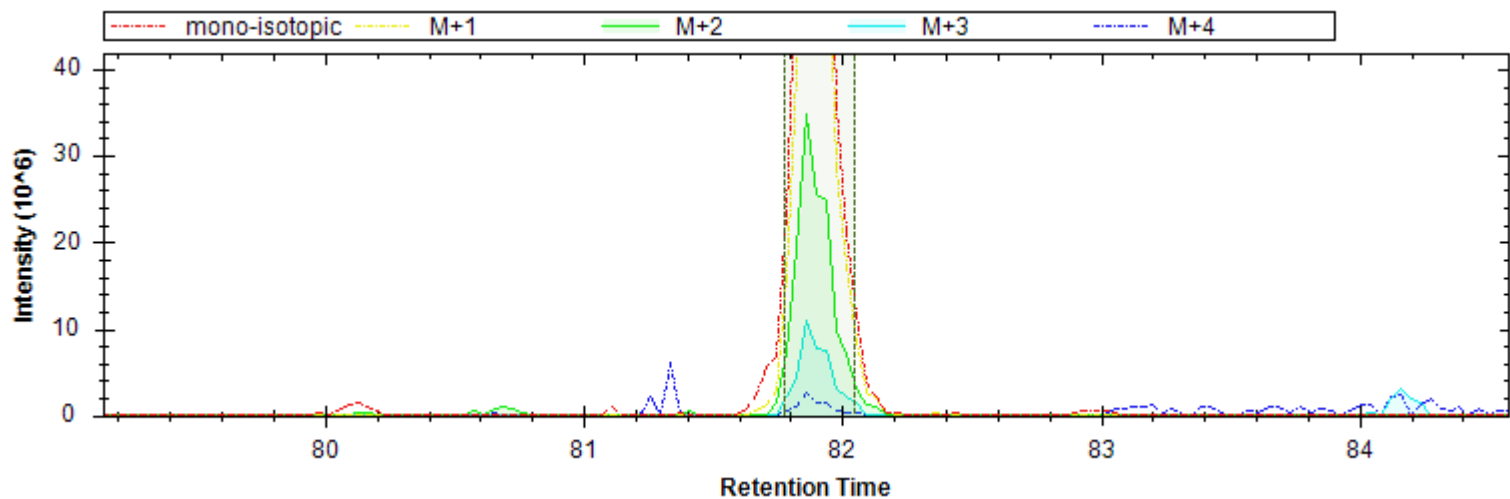

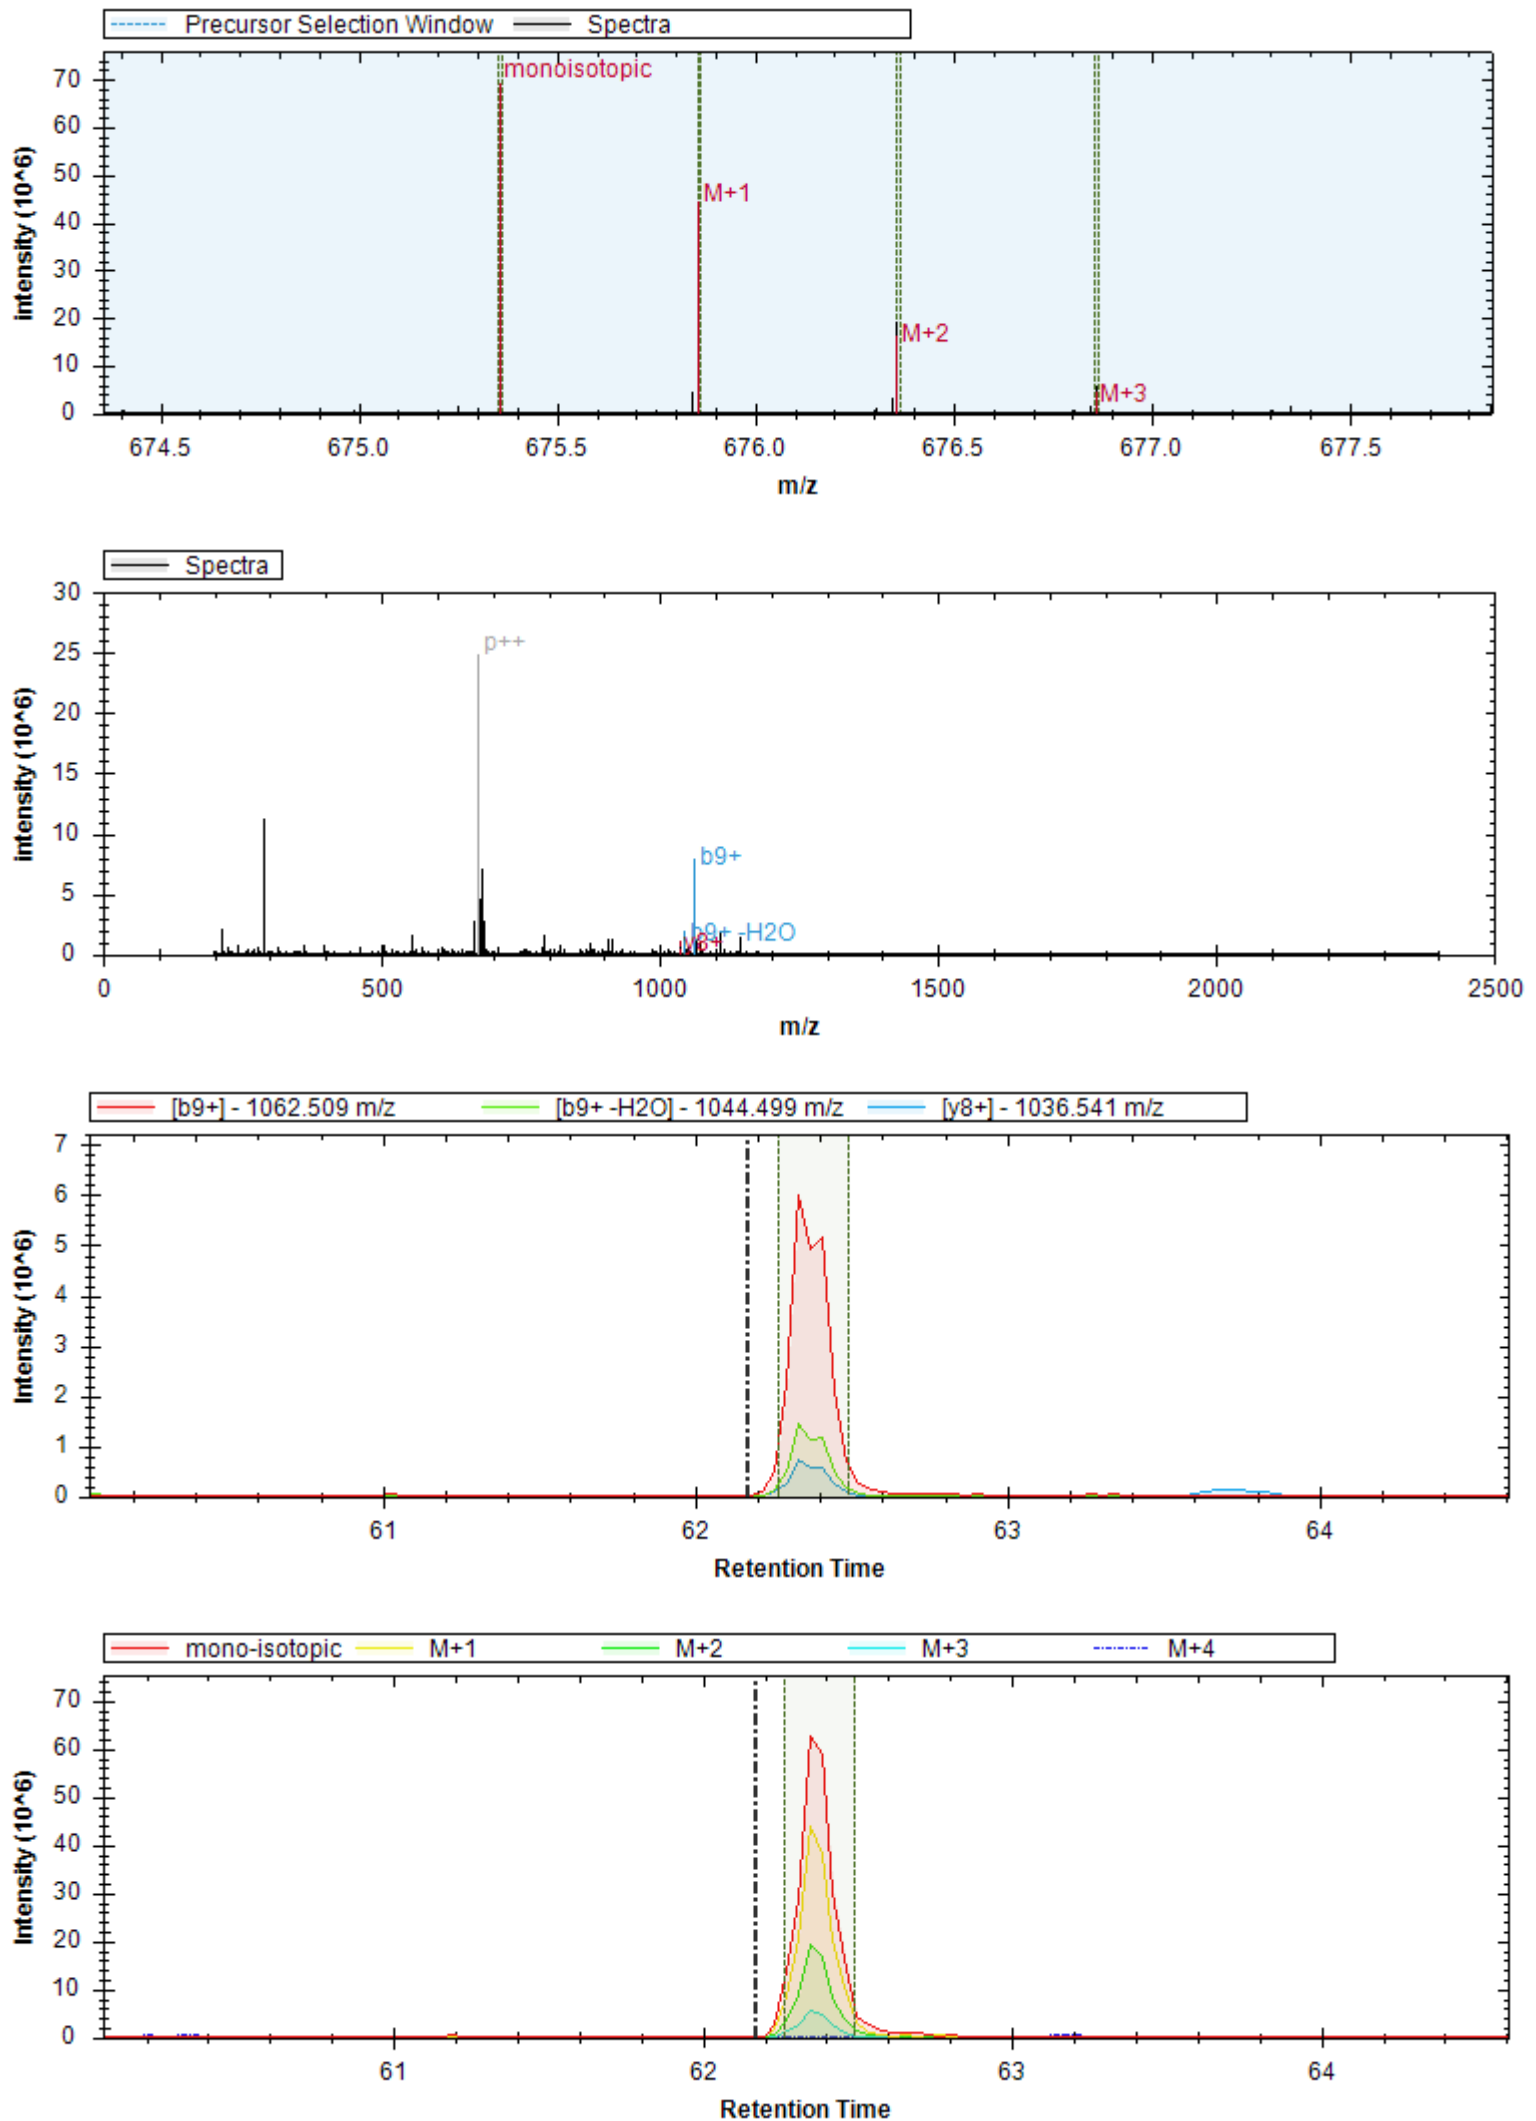

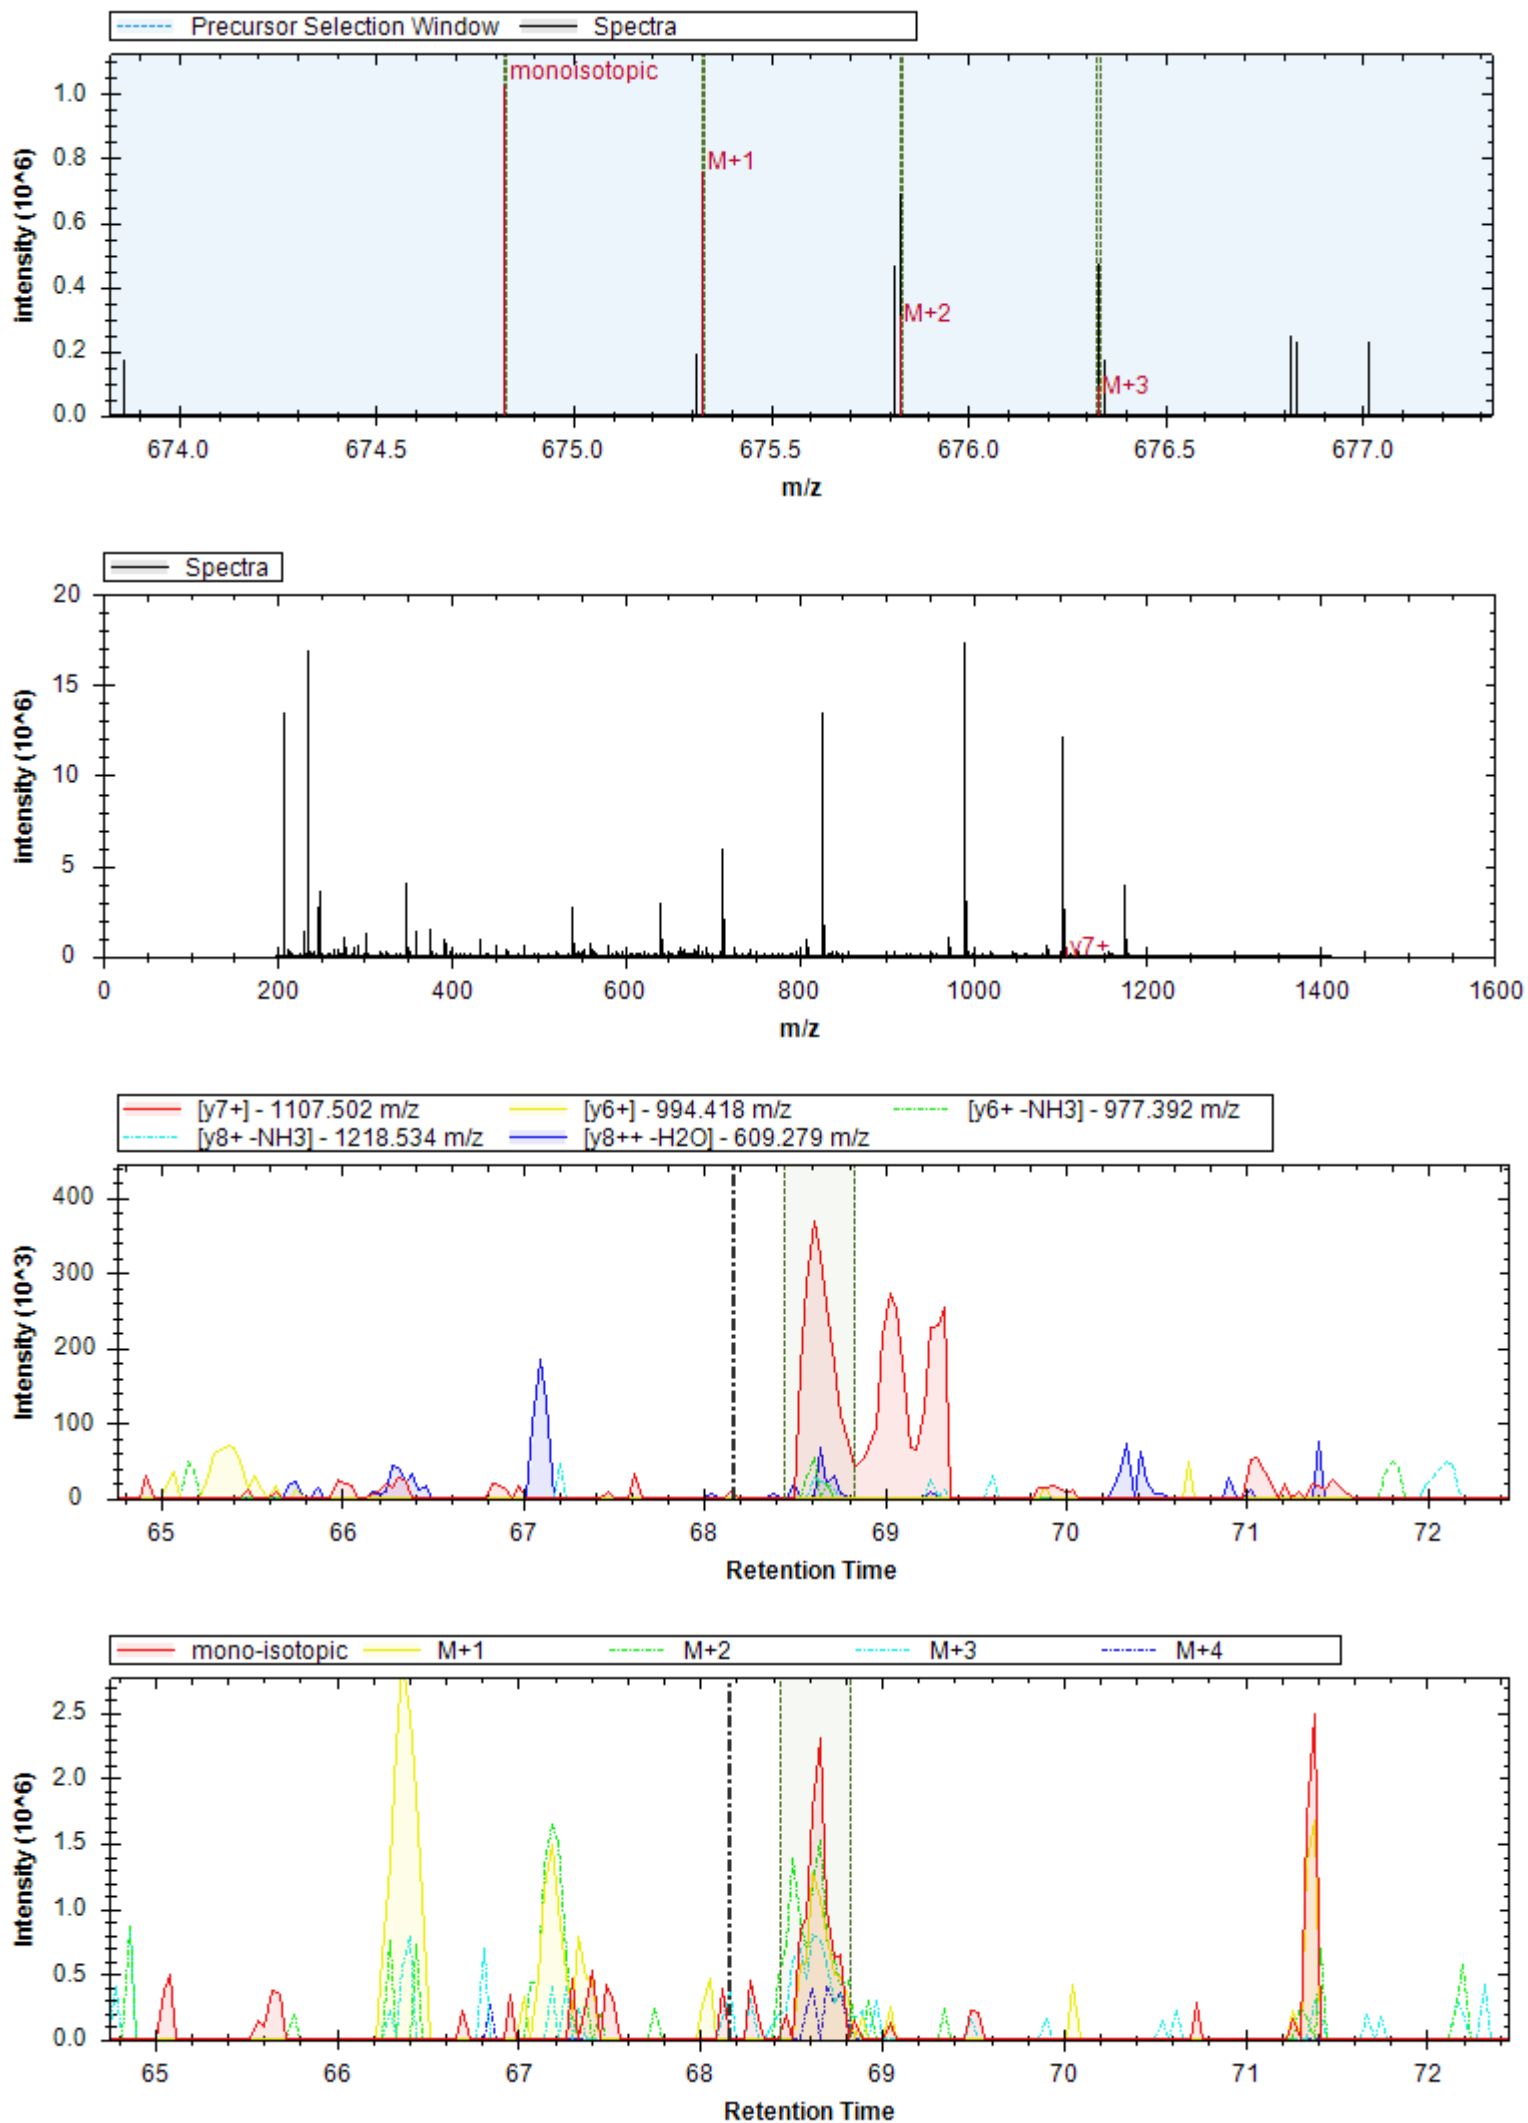

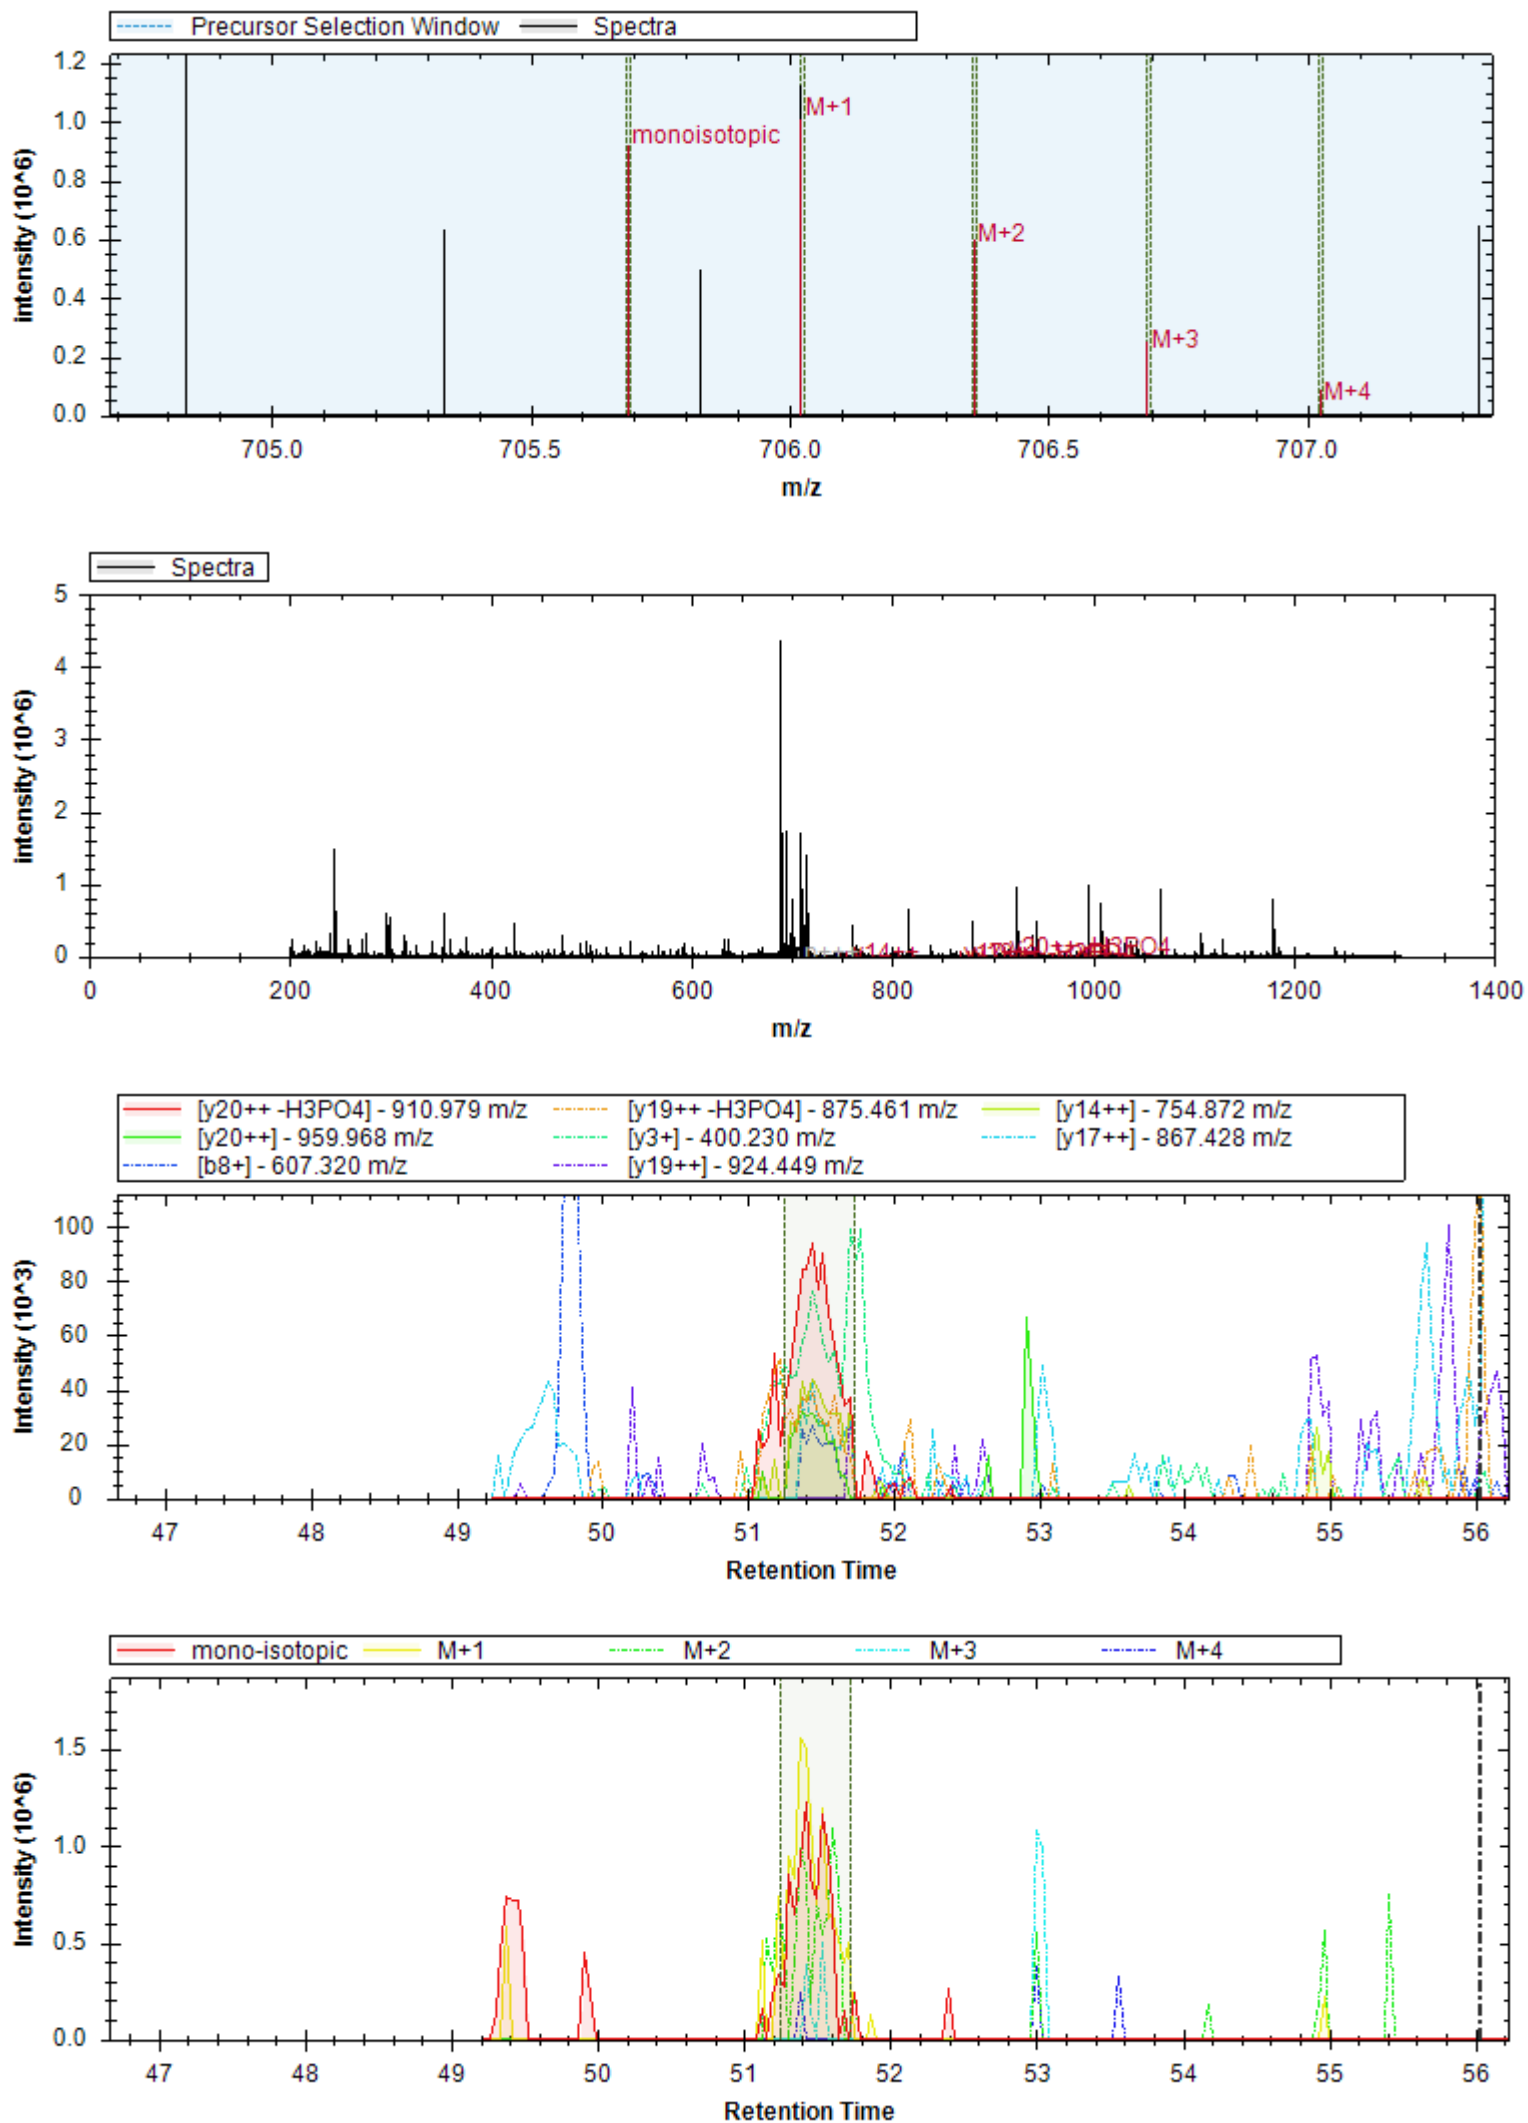

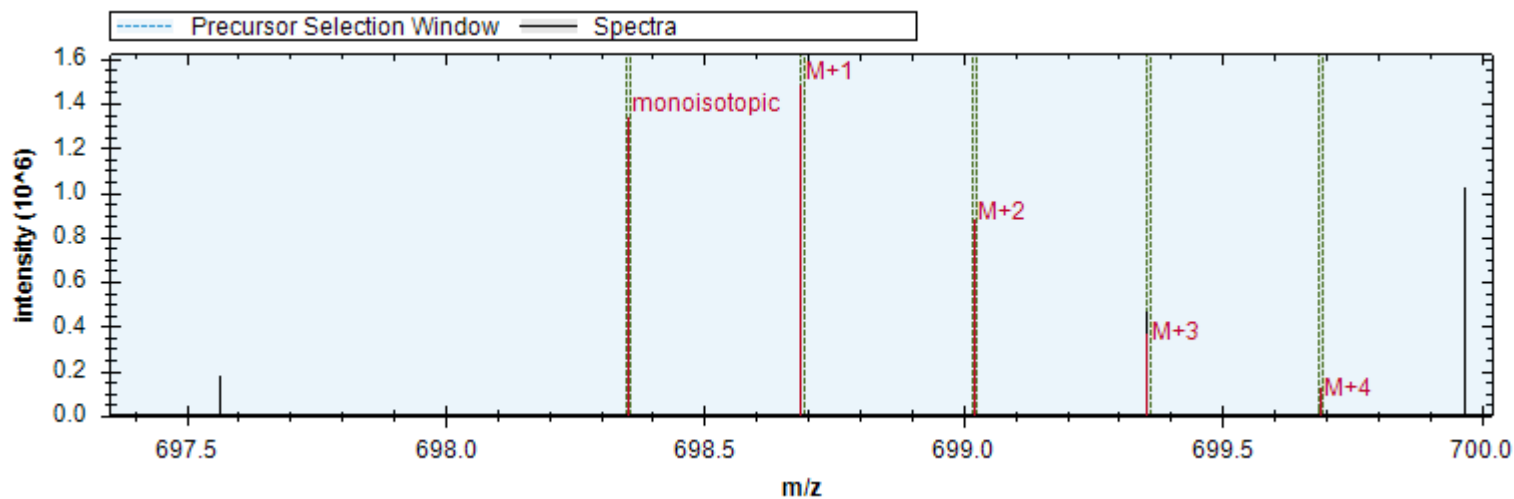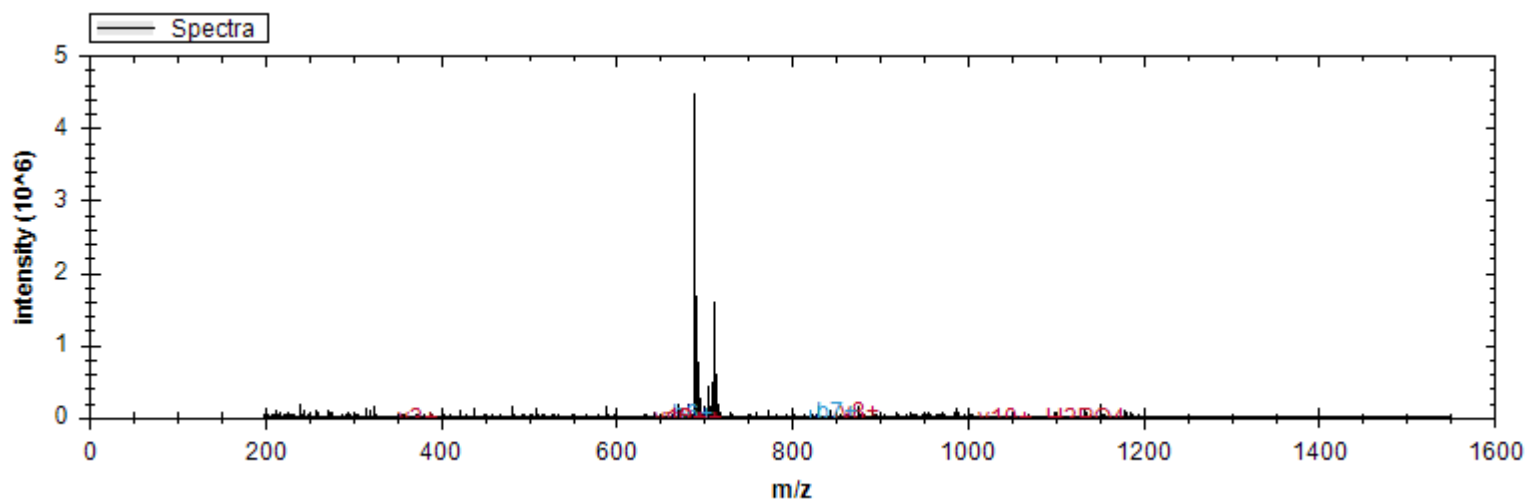

|                              |                              |                      |
|------------------------------|------------------------------|----------------------|
| [b7+] - 821.442 m/z          | [y10+ -H2O] - 1184.309 m/z   | [b6+] - 658.378 m/z  |
| [y8+] - 850.489 m/z          | [b9+] - 989.532 m/z          | [b8++] - 459.751 m/z |
| [y4+] - 482.283 m/z          | [y12+ -H2O] - 1352.399 m/z   | [b3+] - 367.245 m/z  |
| [y6+] - 652.389 m/z          | [y12+ -H3PO4] - 1174.633 m/z | [y7+] - 753.437 m/z  |
| [y12++] - 636.809 m/z        | [b17++] - 910.436 m/z        | [y8++] - 425.748 m/z |
| [b11+ -H3PO4] - 1145.585 m/z | [y10+ -H3PO4] - 1006.543 m/z | [y3+] - 345.225 m/z  |
| [y5+] - 581.352 m/z          | [y13++] - 718.340 m/z        |                      |

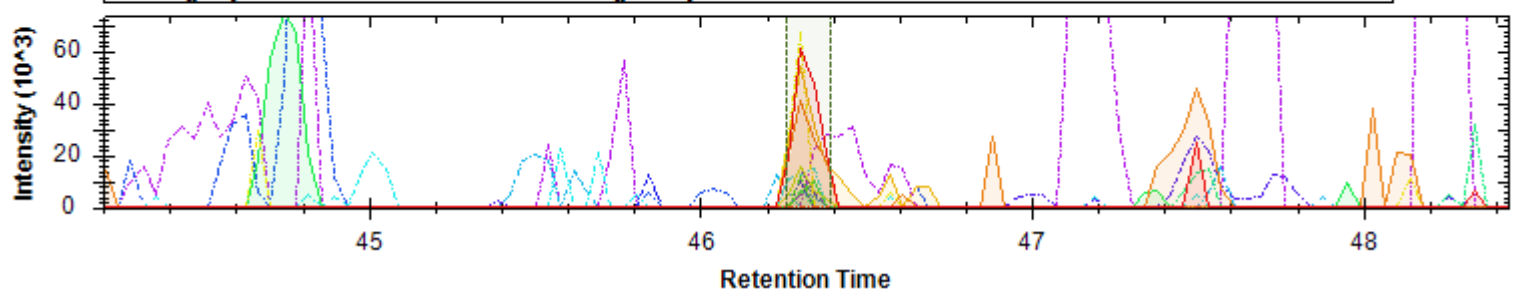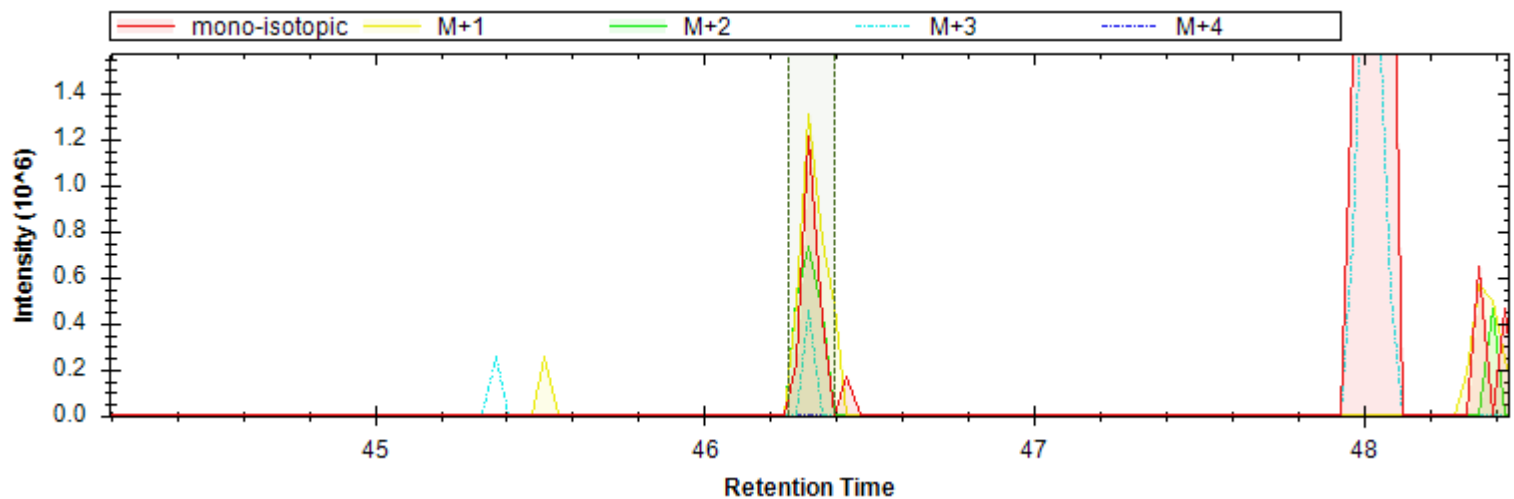



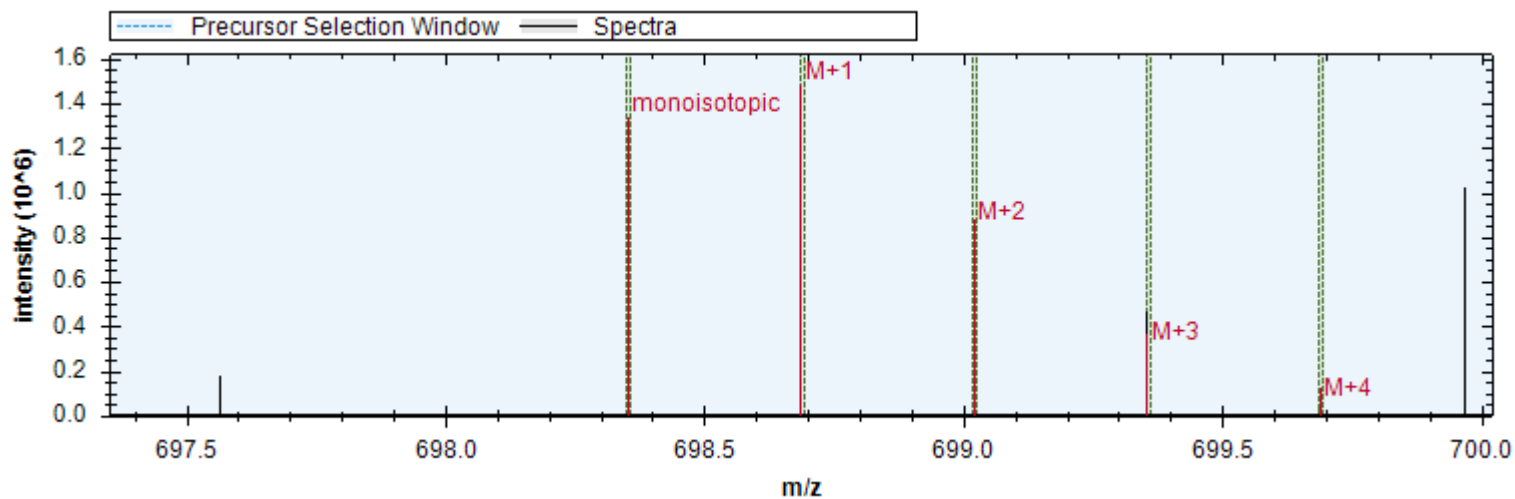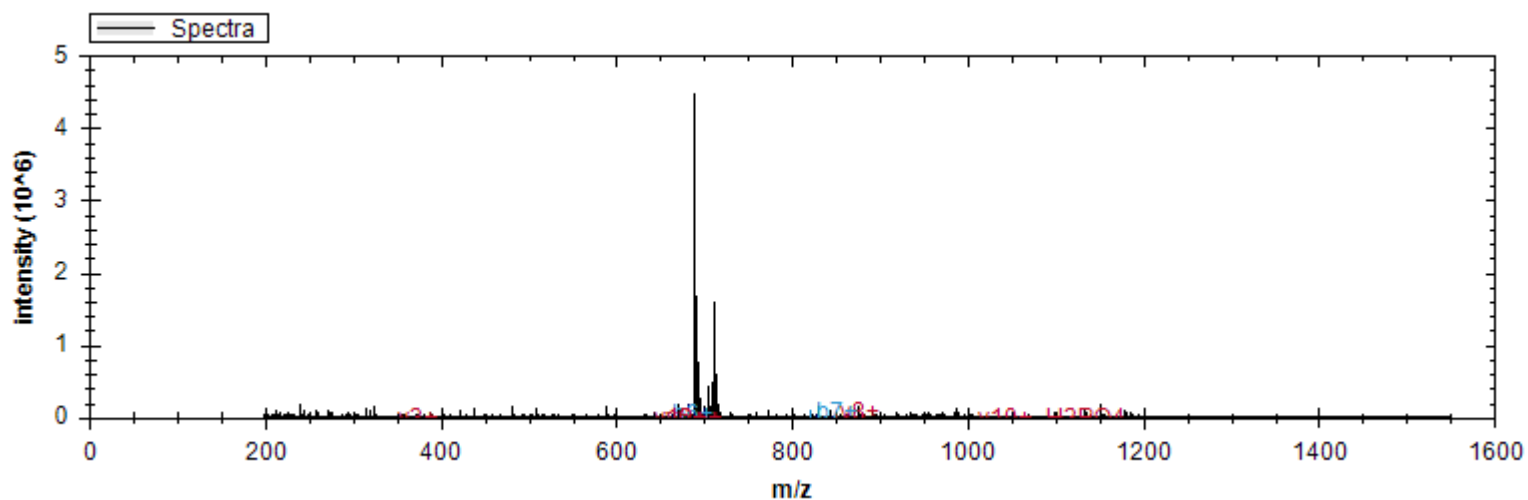

- |                              |                              |                              |
|------------------------------|------------------------------|------------------------------|
| [b7+] - 821.442 m/z          | [y8+] - 850.489 m/z          | [b6+] - 658.378 m/z          |
| [b9+] - 989.532 m/z          | [y4+] - 482.283 m/z          | [b8++] - 459.751 m/z         |
| [y11+ -H2O] - 1255.346 m/z   | [y6+] - 652.389 m/z          | [b3+] - 367.245 m/z          |
| [y5+] - 581.352 m/z          | [y9+ -H3PO4] - 919.511 m/z   | [y7+] - 753.437 m/z          |
| [y10+ -H3PO4] - 1006.543 m/z | [b11+ -H3PO4] - 1145.585 m/z | [y12+ -H3PO4] - 1174.633 m/z |
| [y3+] - 345.225 m/z          | [y12++] - 636.809 m/z        | [y8++] - 425.748 m/z         |
| [y11+ -H3PO4] - 1077.580 m/z |                              |                              |

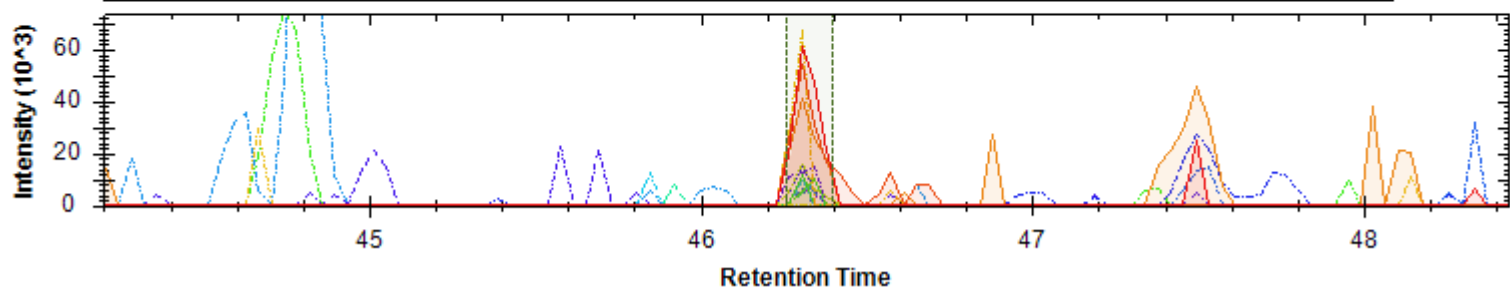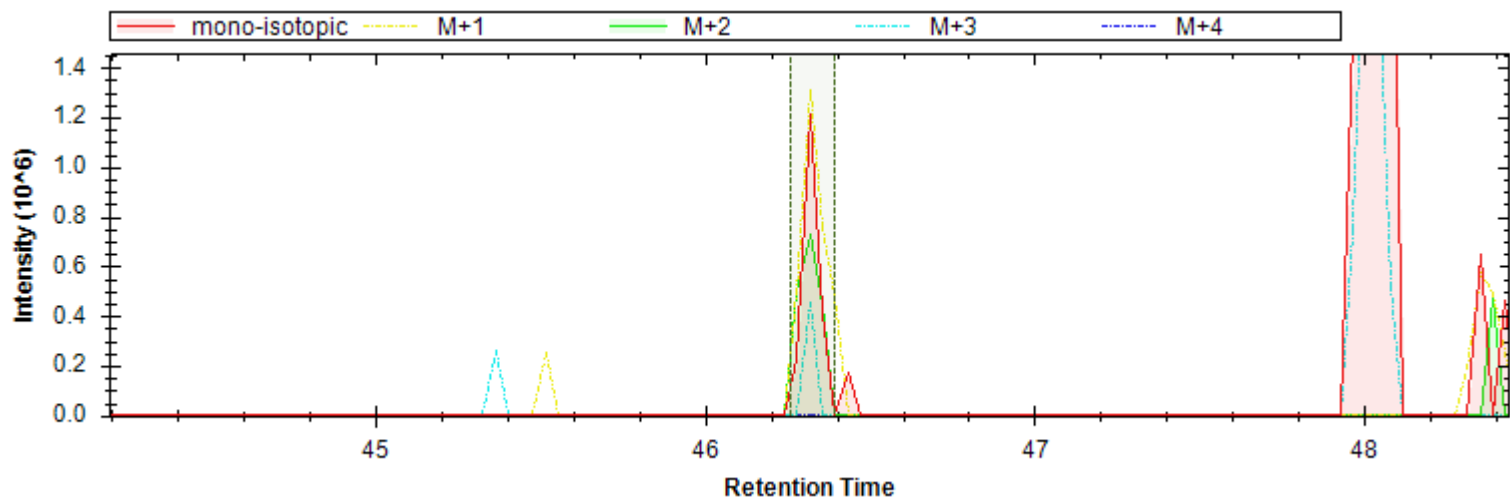

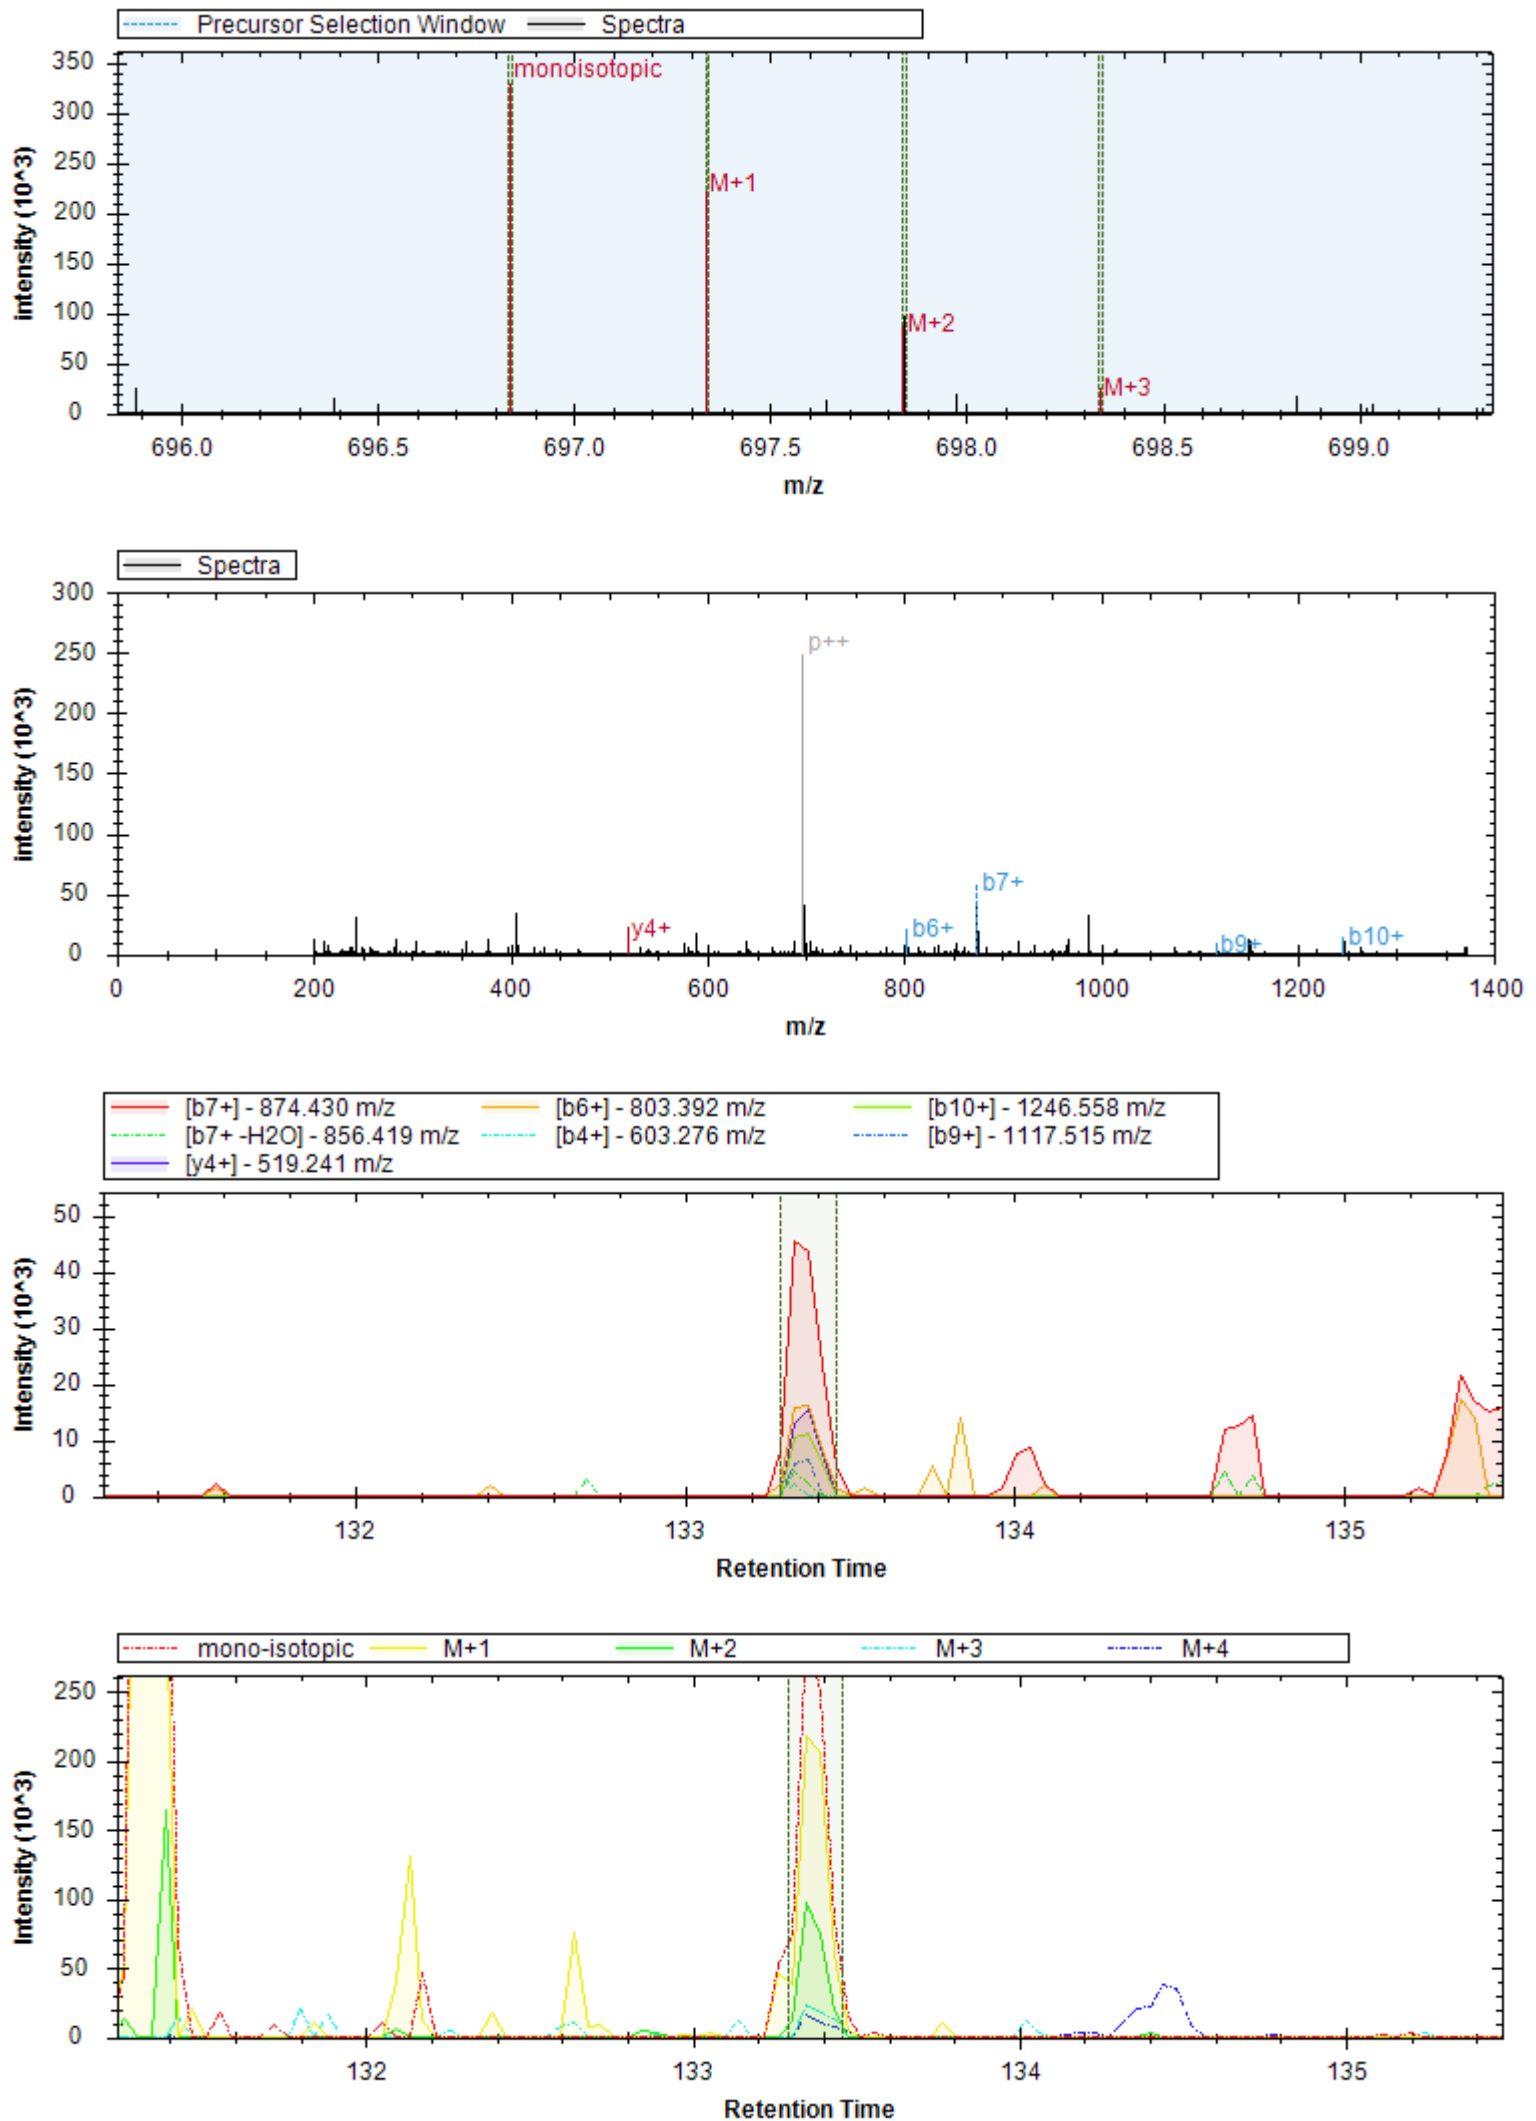



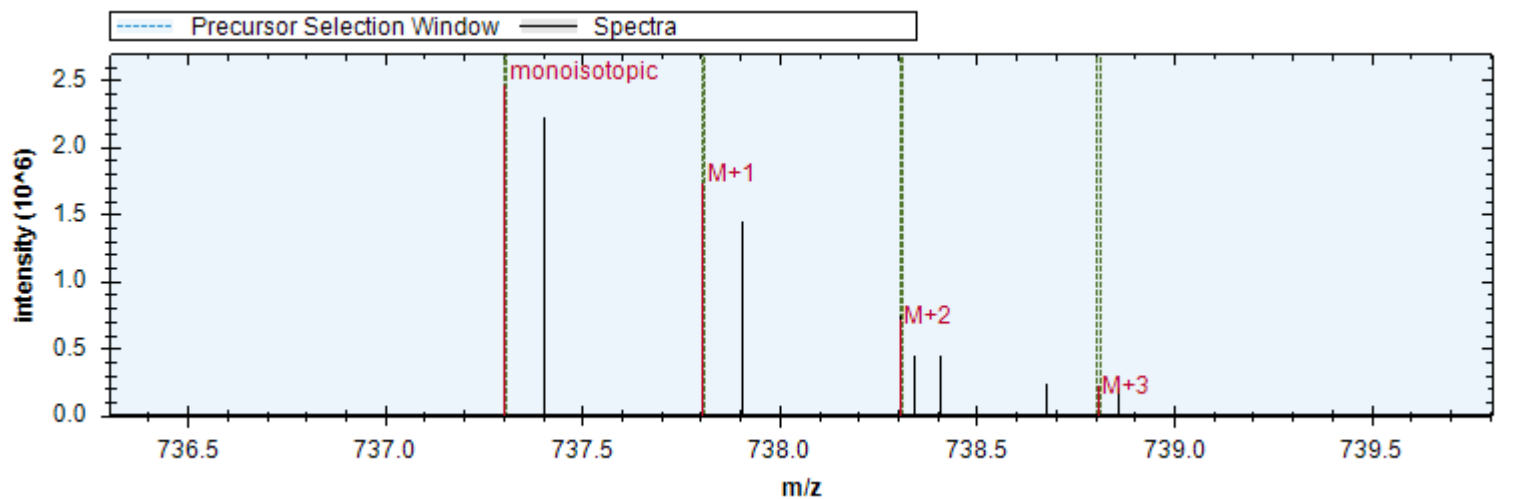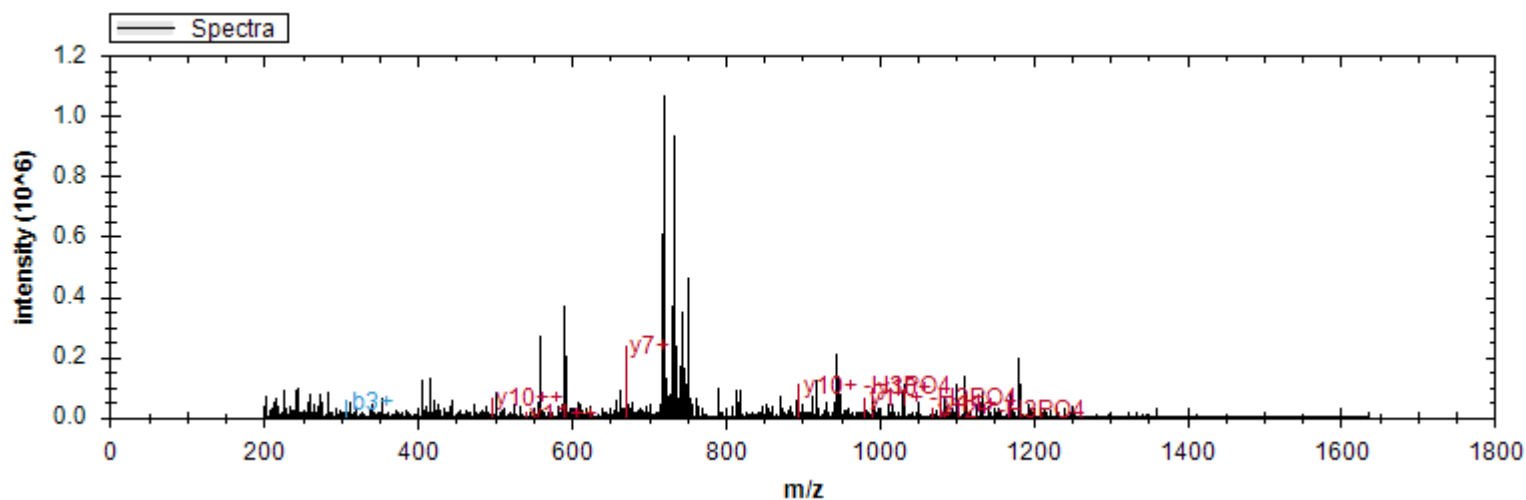

- |                             |                              |                            |
|-----------------------------|------------------------------|----------------------------|
| [y7+] - 671.347 m/z         | [y10+ -H3PO4] - 894.443 m/z  | [y4+] - 416.225 m/z        |
| [y10+] - 992.420 m/z        | [y10++] - 496.714 m/z        | [b3+] - 308.124 m/z        |
| [y11+ -H3PO4] - 981.475 m/z | [y12+ -H3PO4] - 1068.507 m/z | [y9+ -H3PO4] - 797.390 m/z |
| [y11++] - 540.230 m/z       | [y11+] - 1079.452 m/z        | [y7+ -H2O] - 653.337 m/z   |
| [y8+ -H3PO4] - 740.369 m/z  | [y12+] - 1166.484 m/z        | [y10+ -H2O] - 1072.209 m/z |
| [b4+ -H2O] - 377.146 m/z    | [y5+] - 517.273 m/z          | [y10+ -NH3] - 975.393 m/z  |
| [b4+] - 395.156 m/z         |                              |                            |

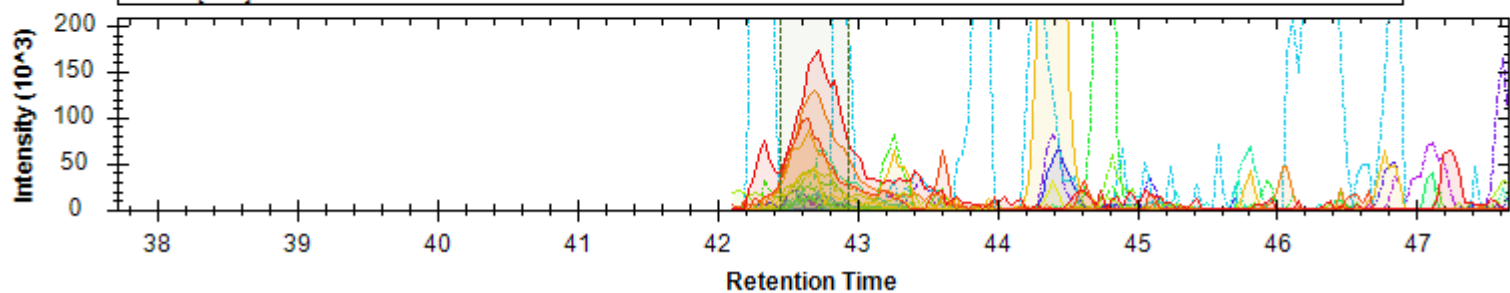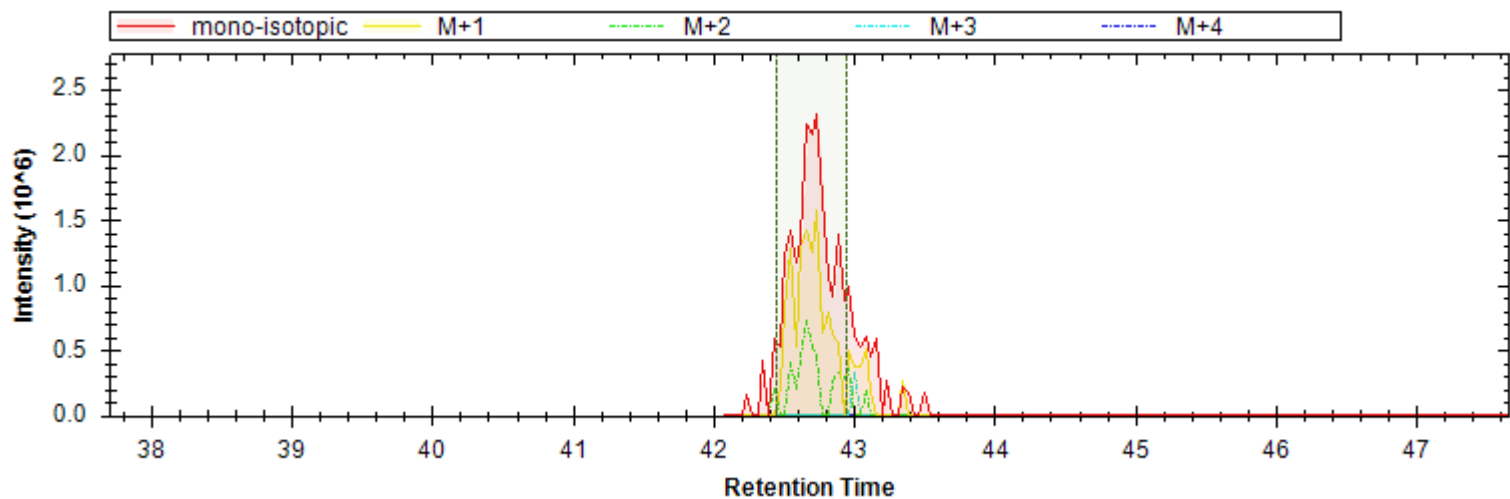

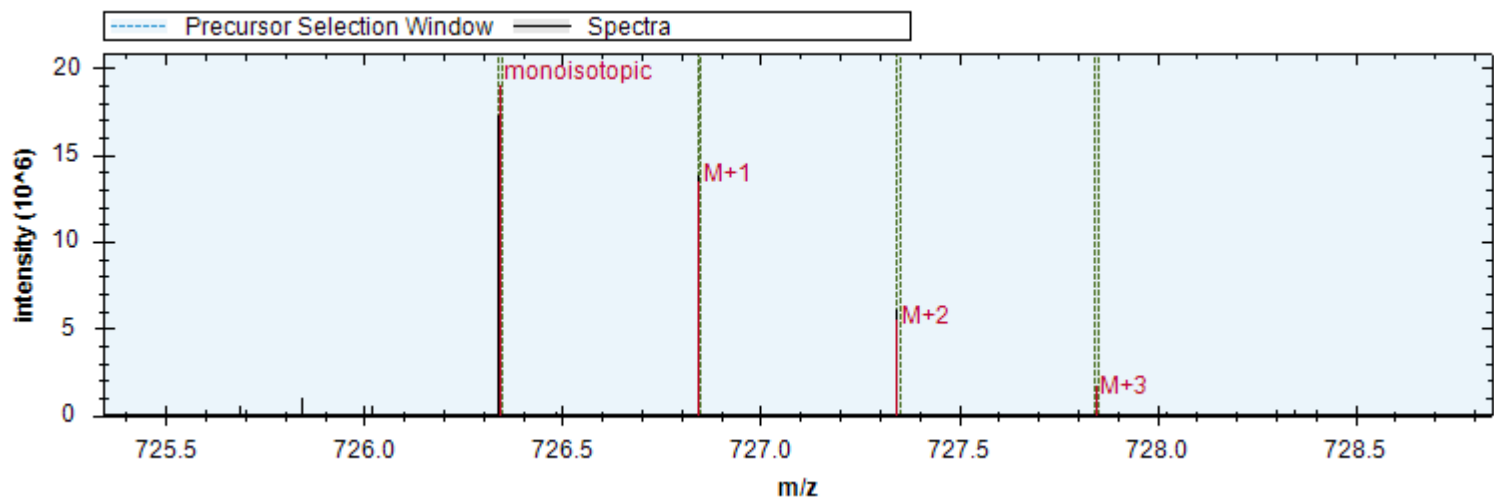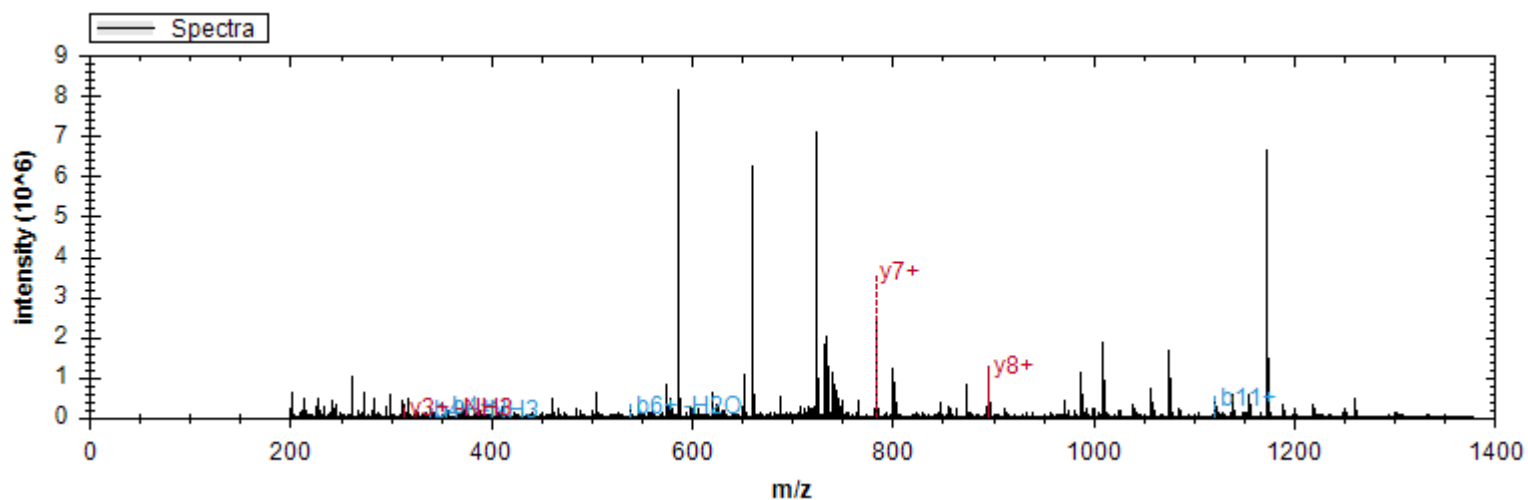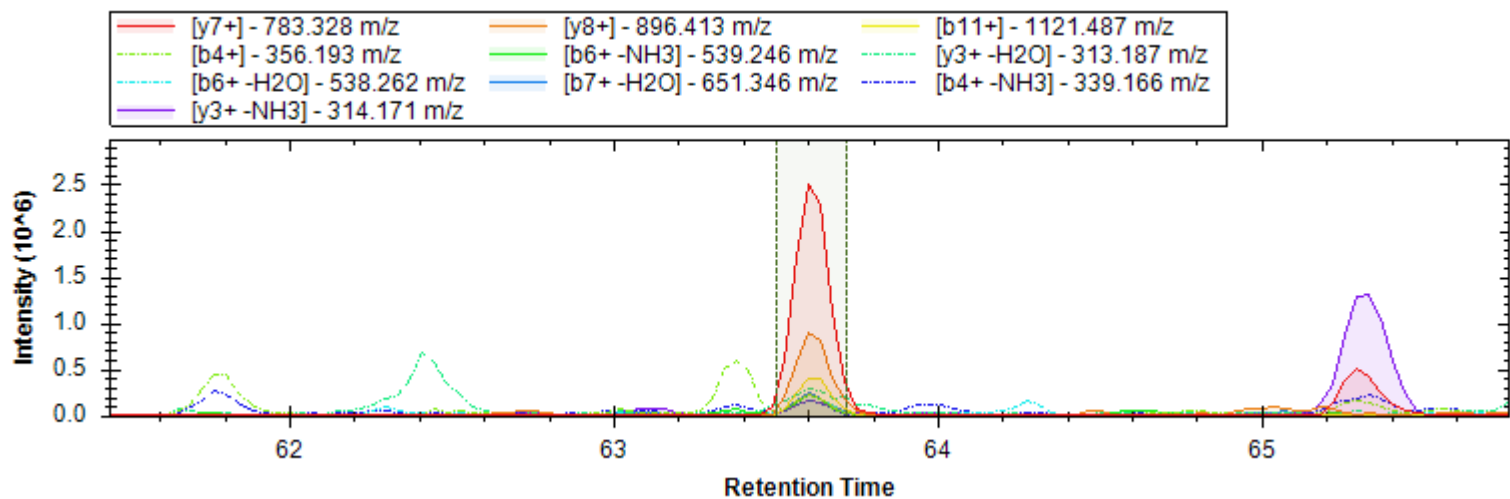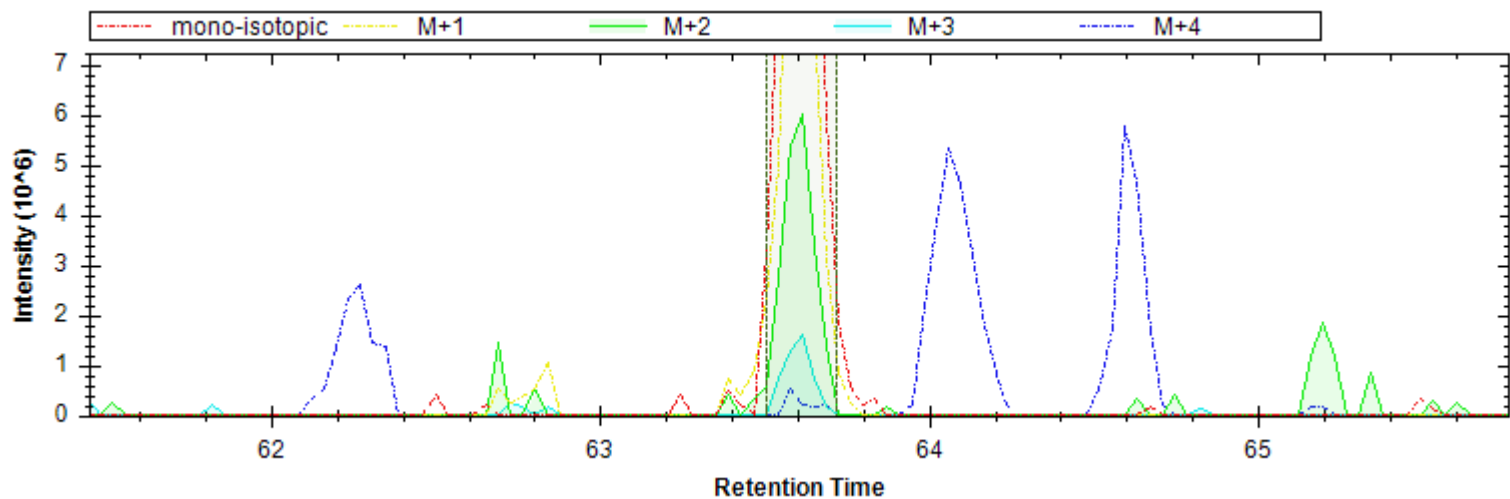

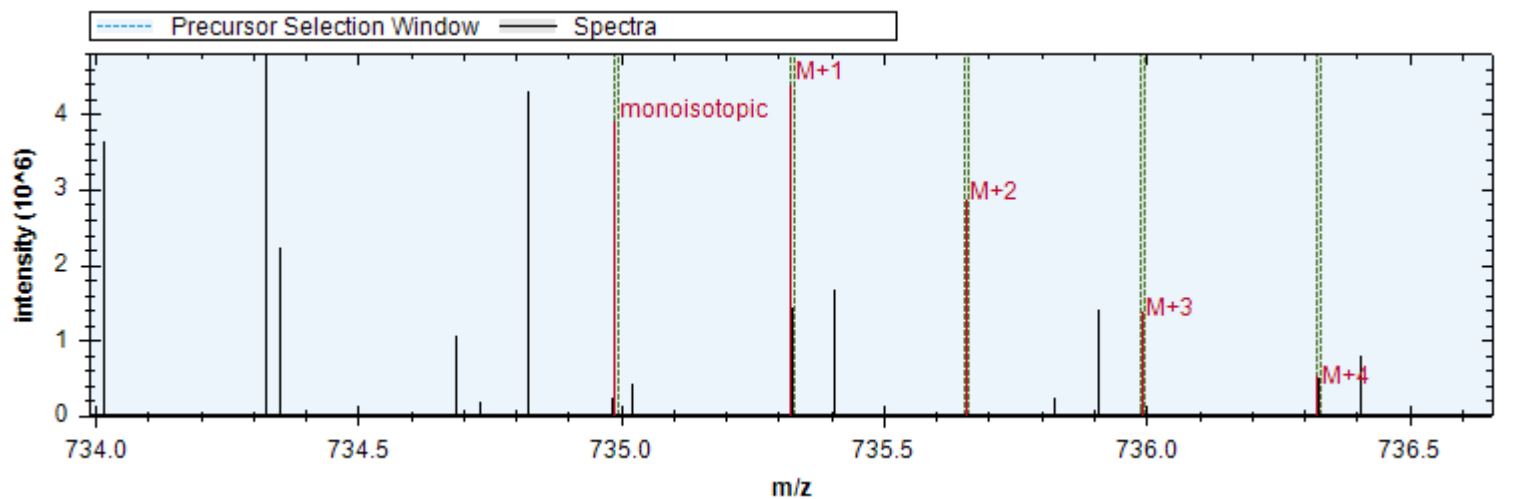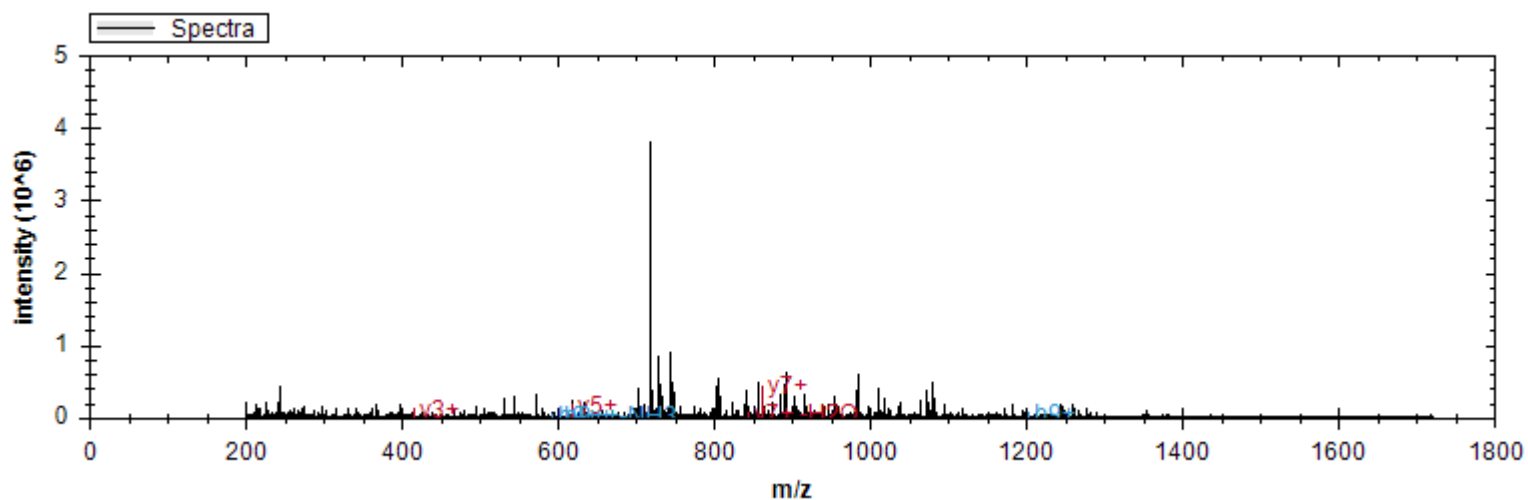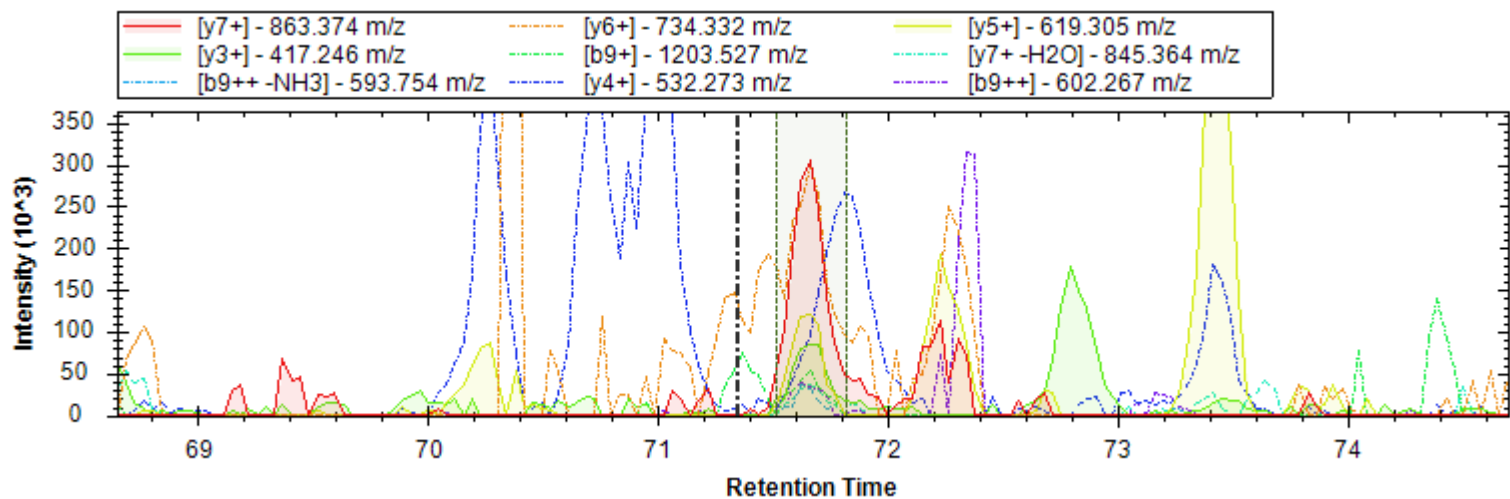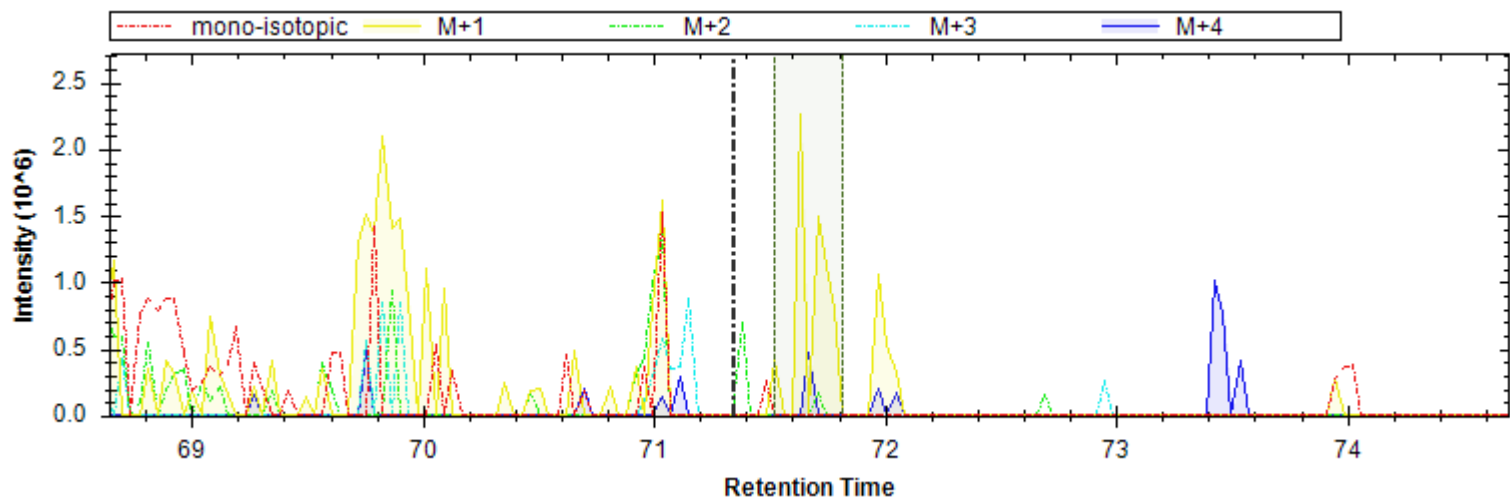

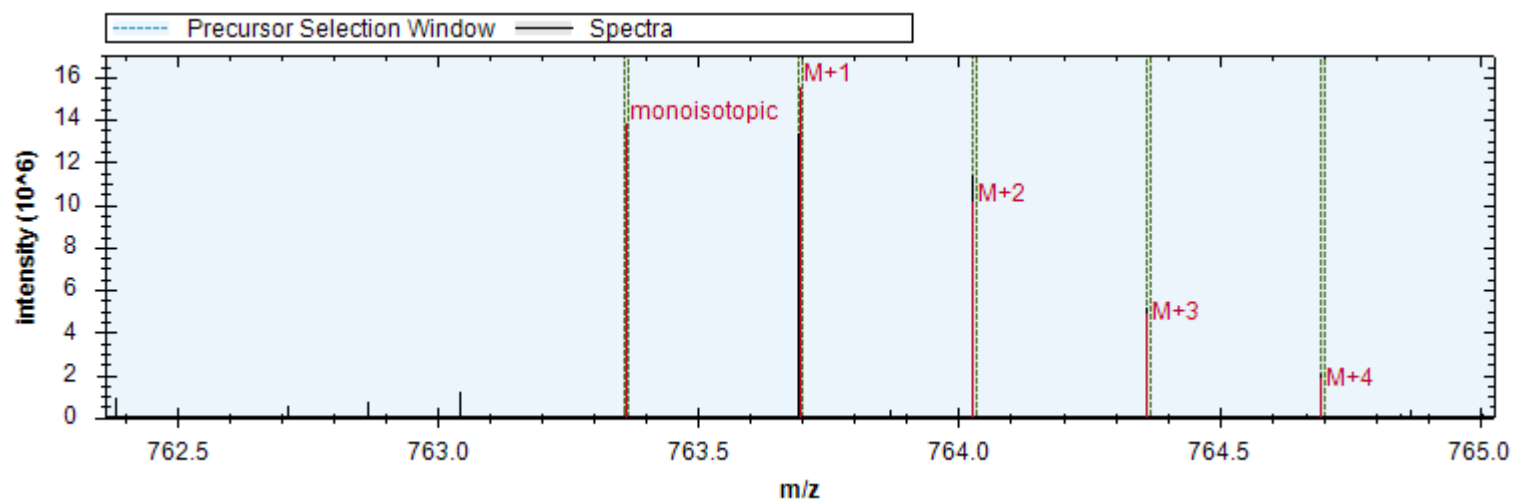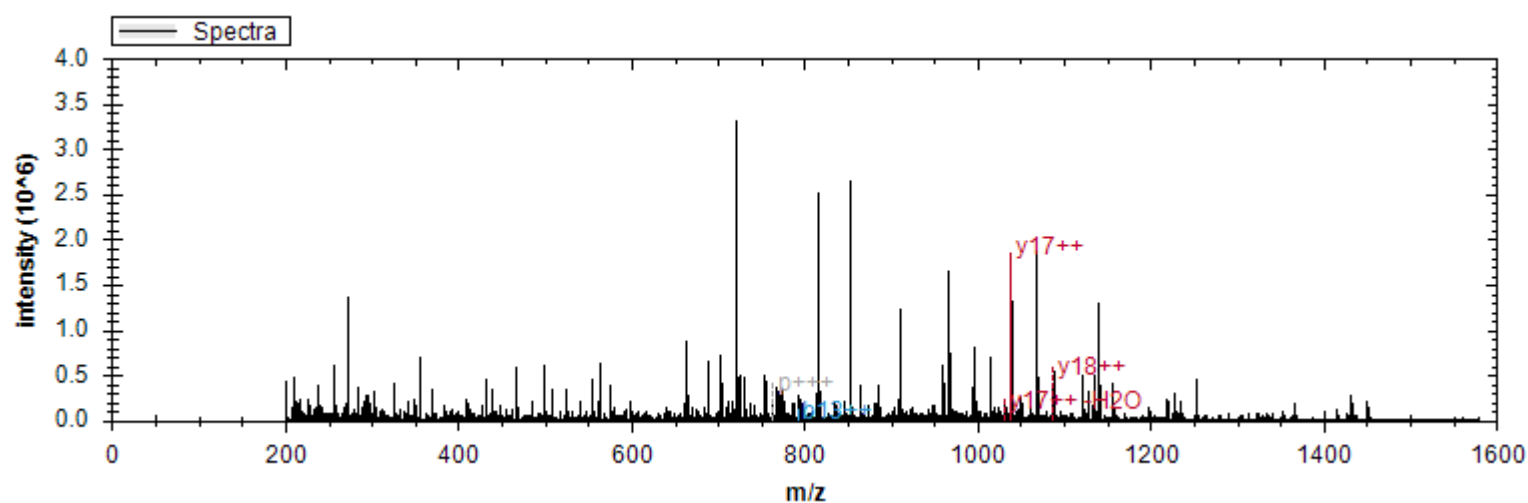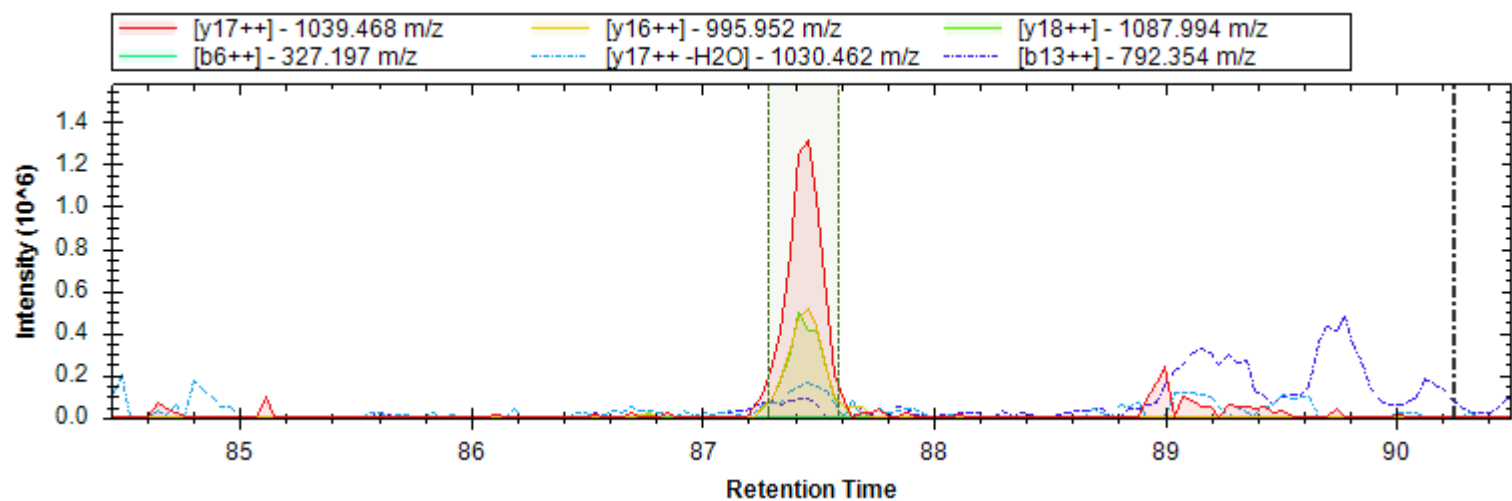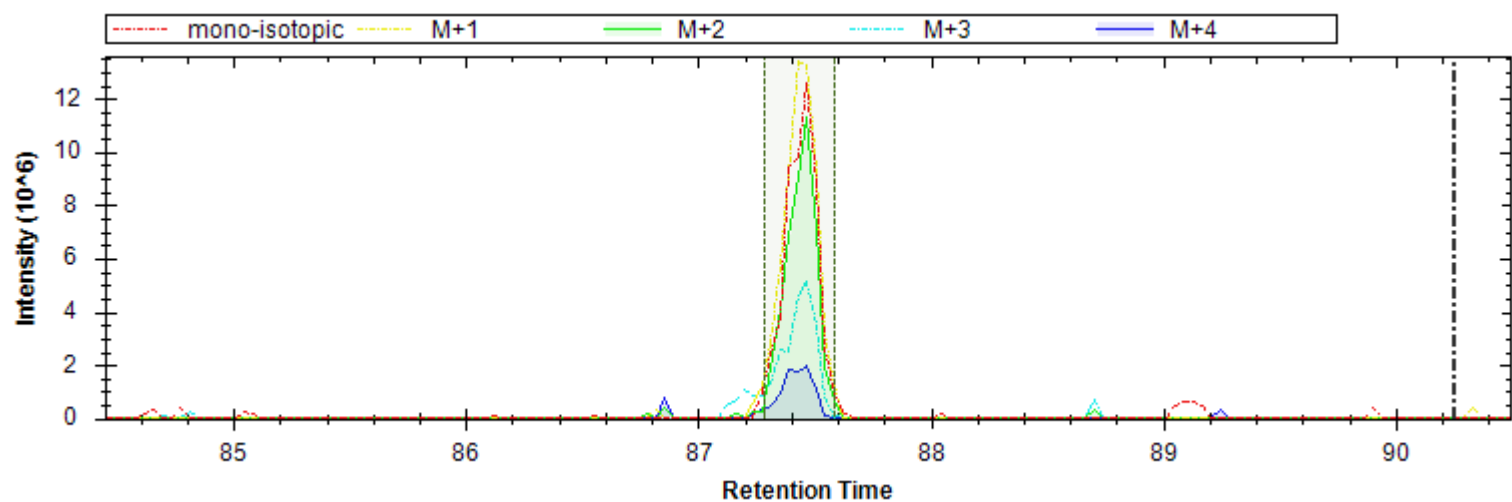

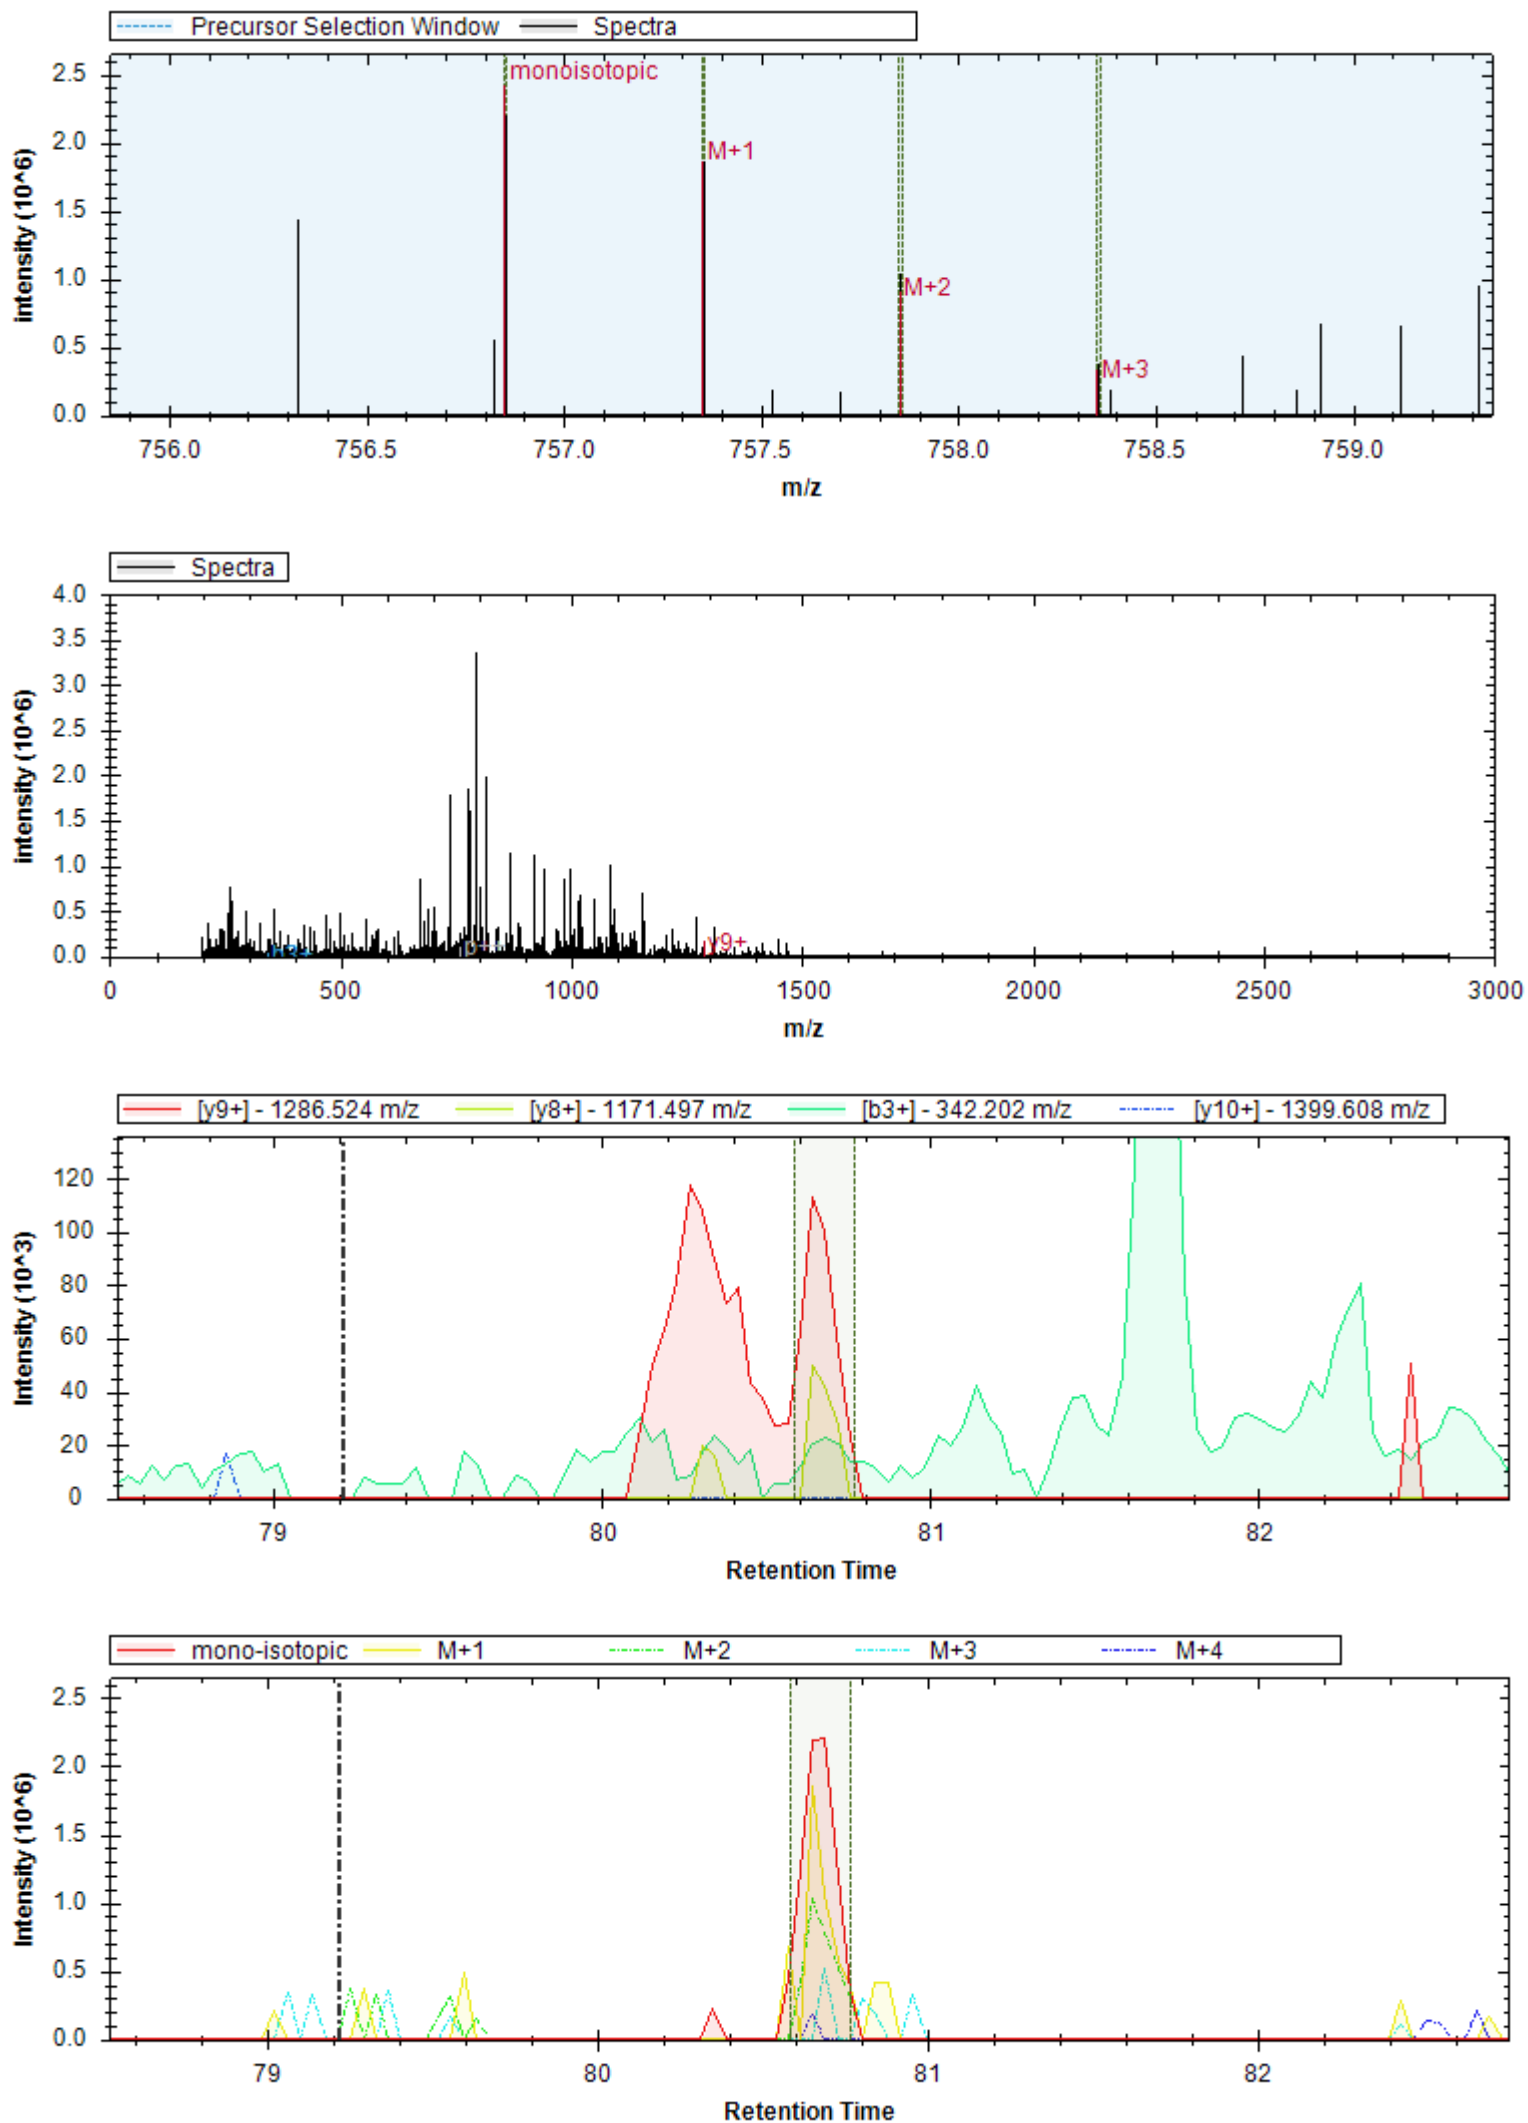



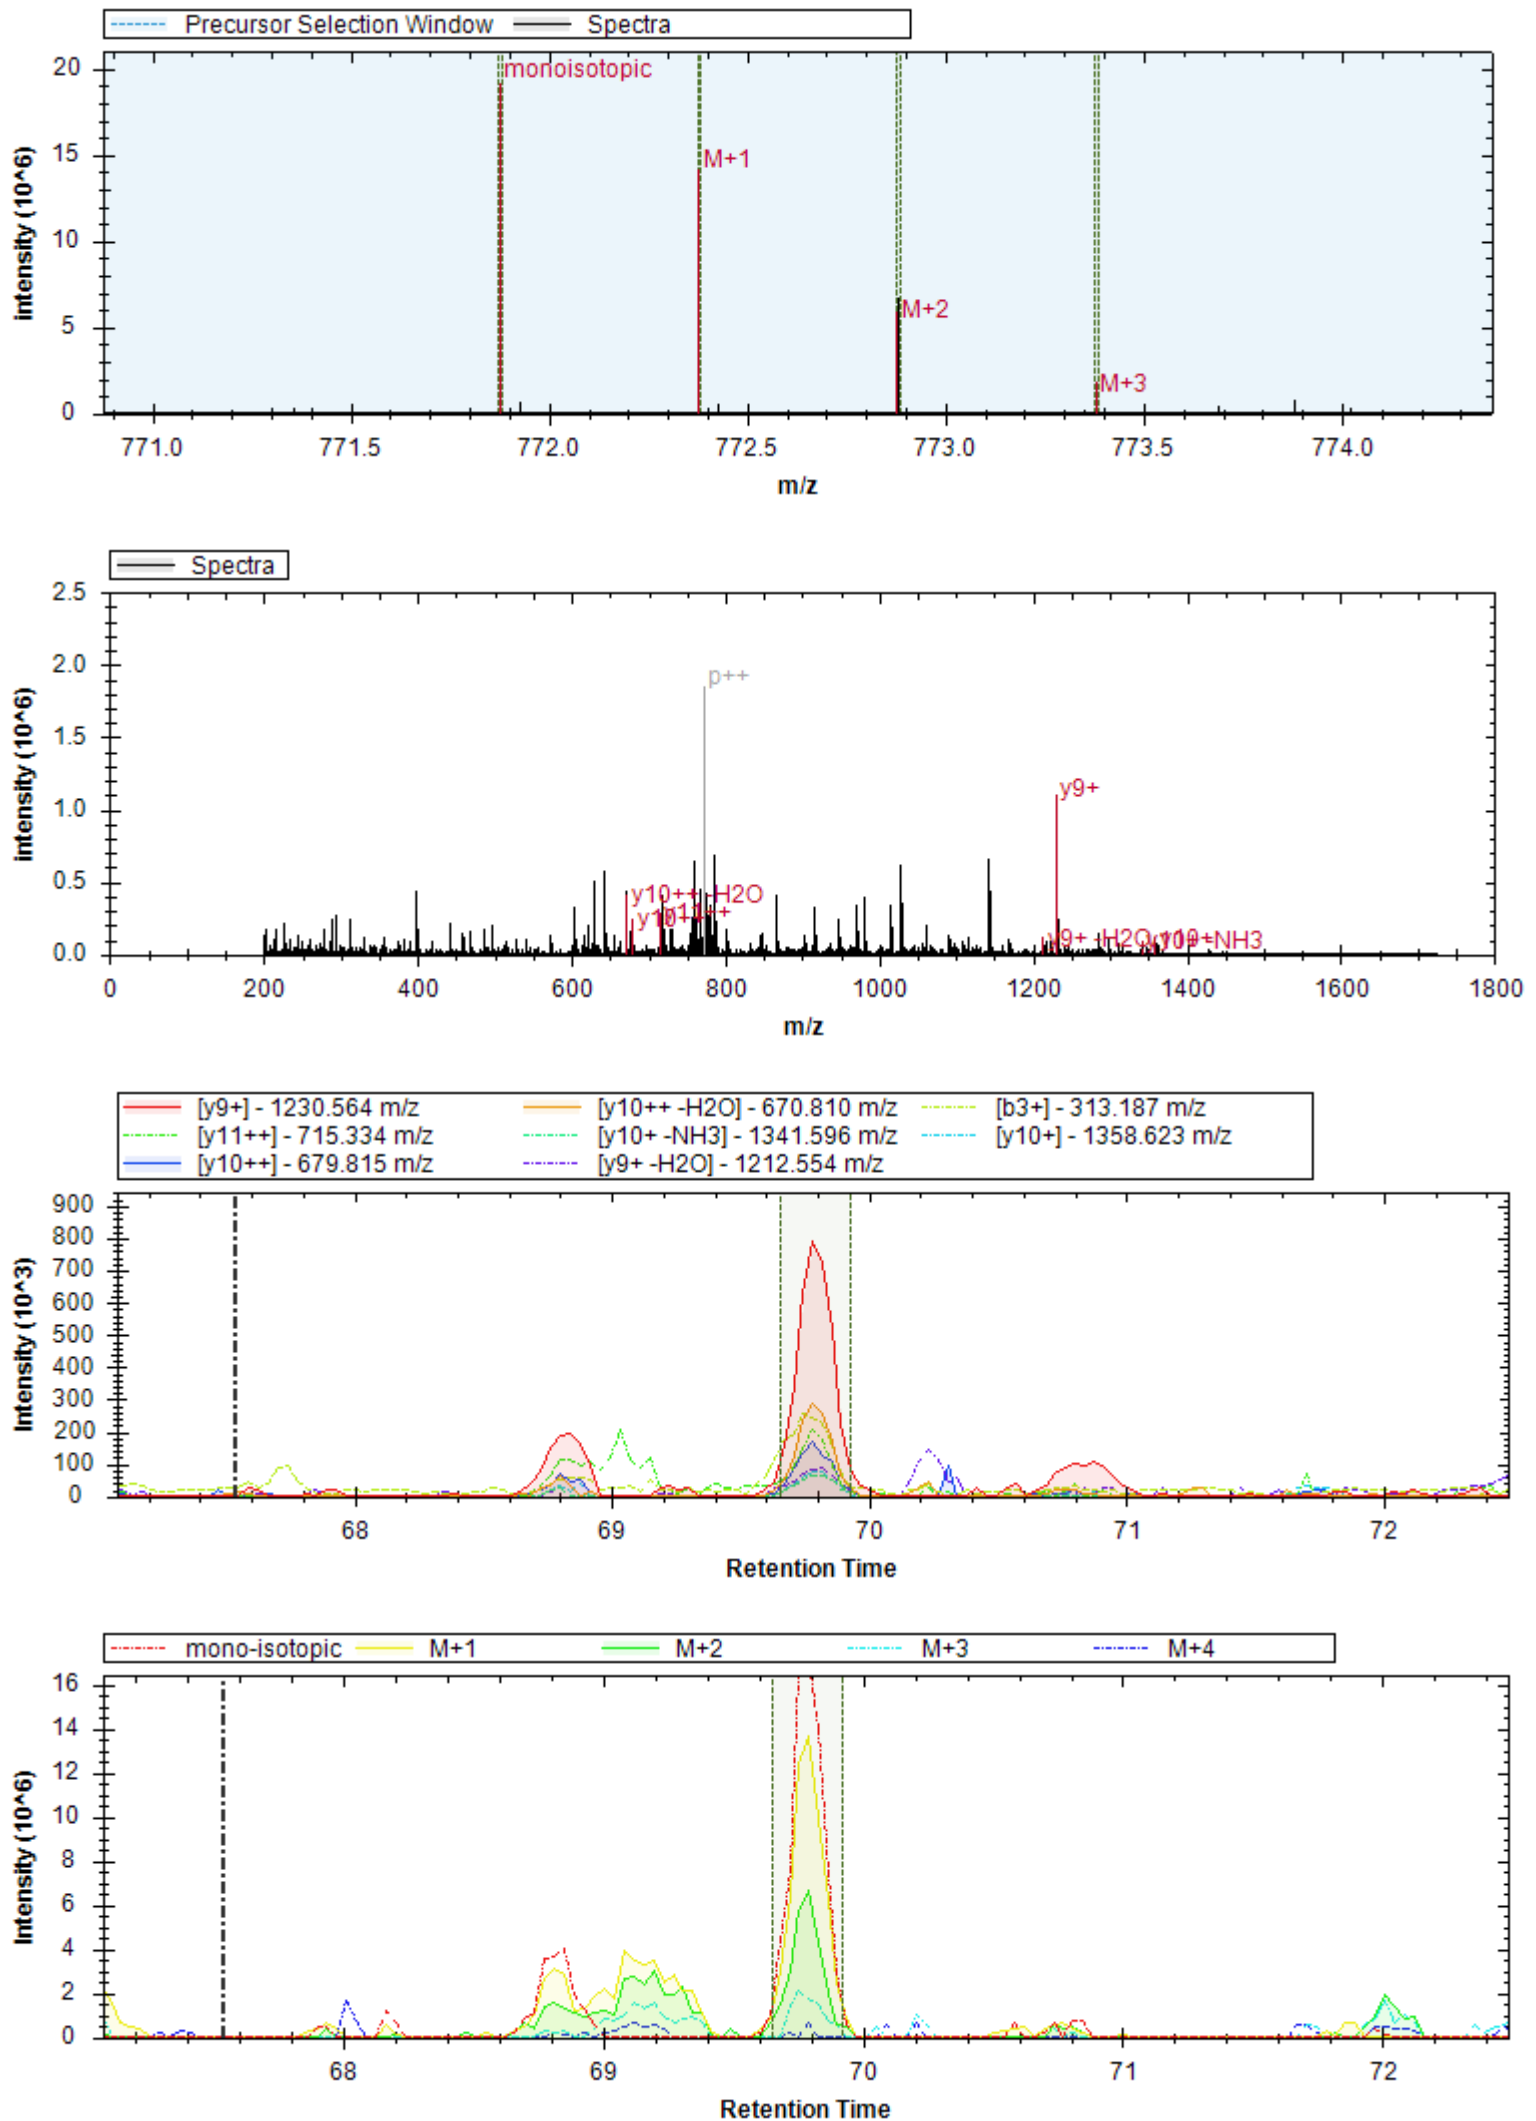

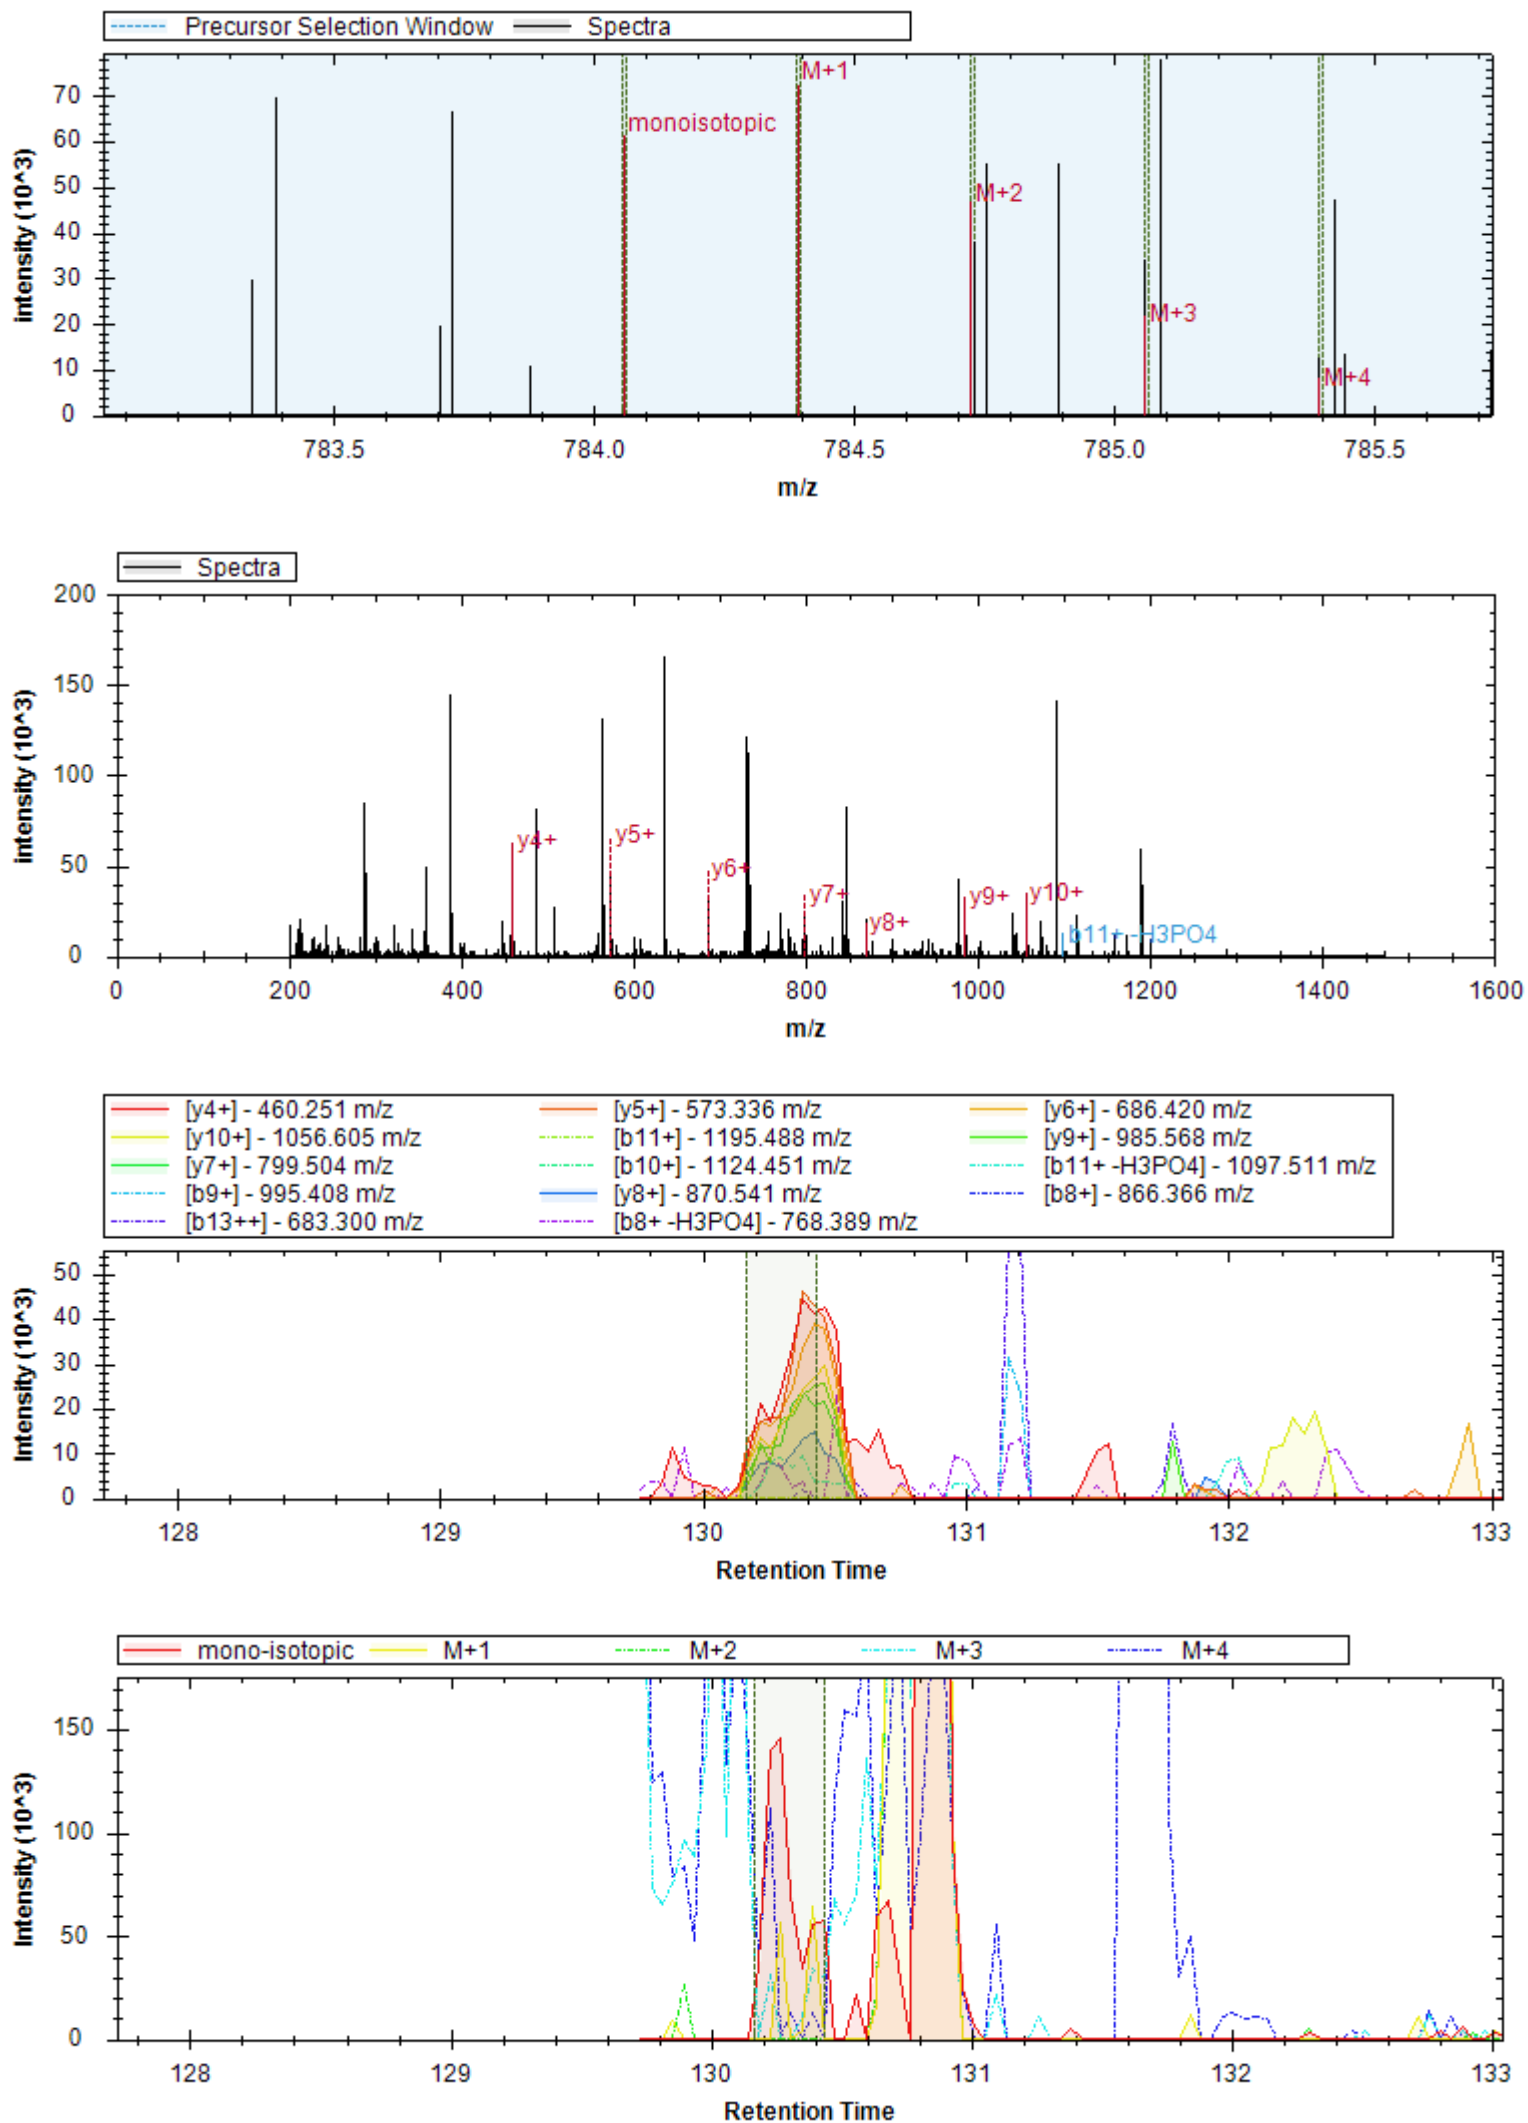

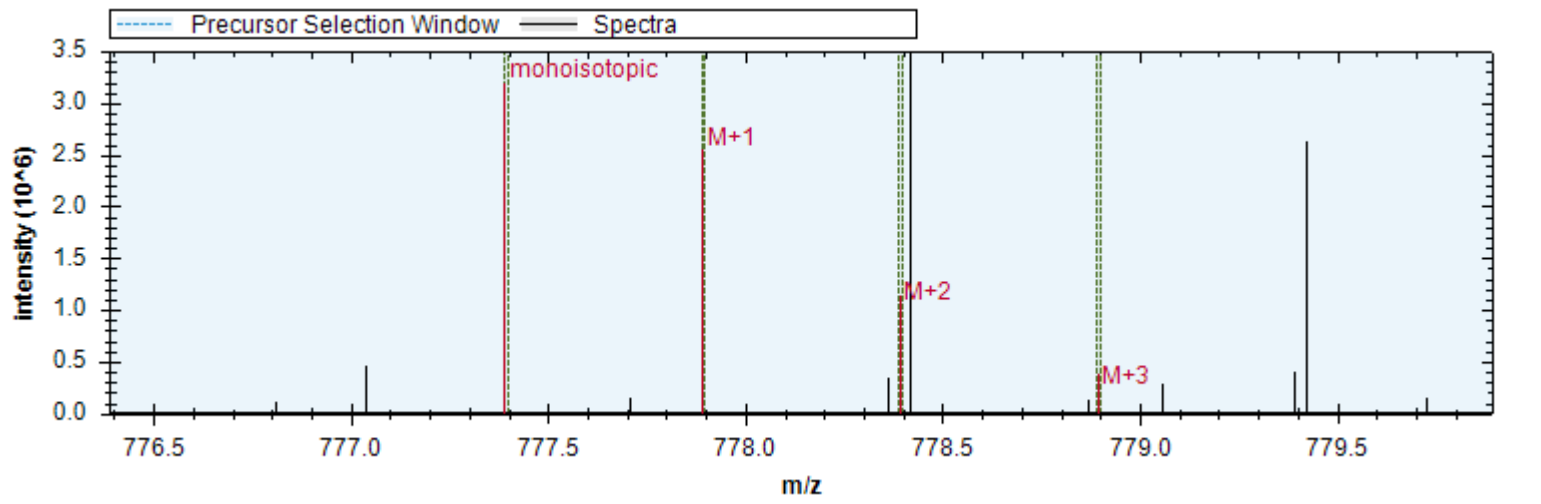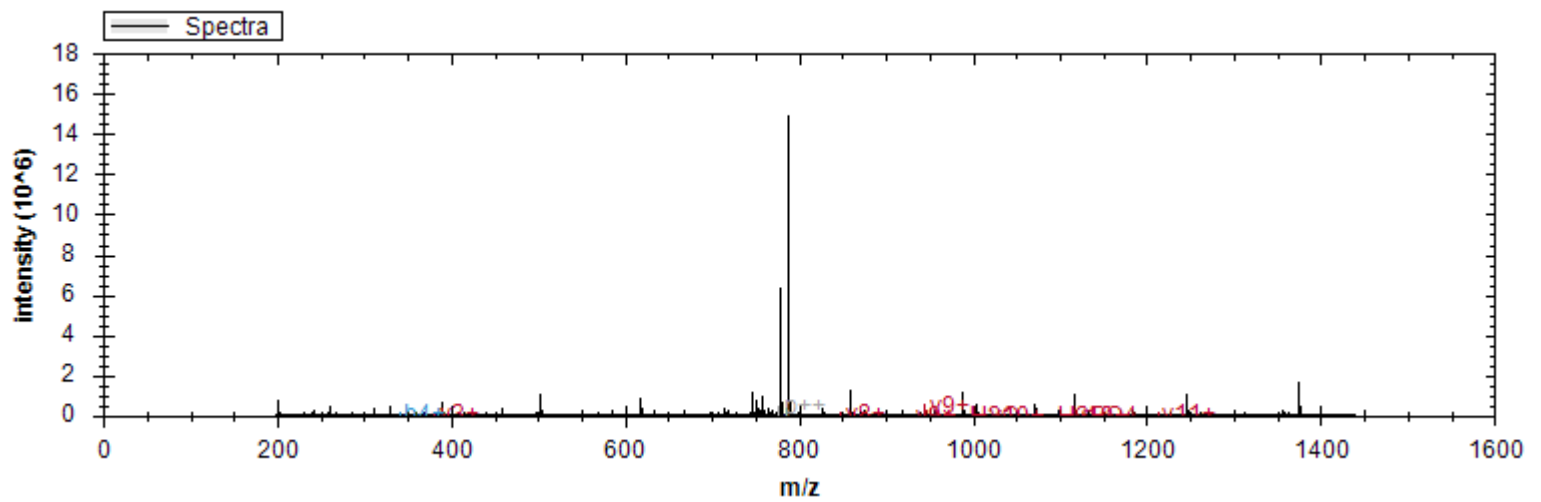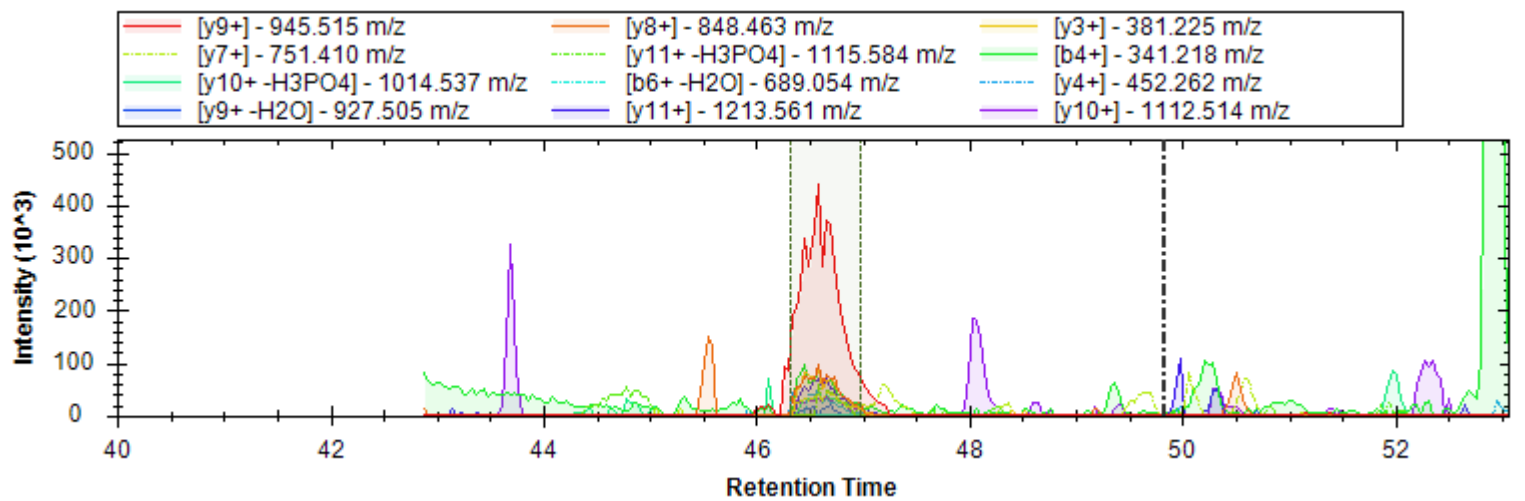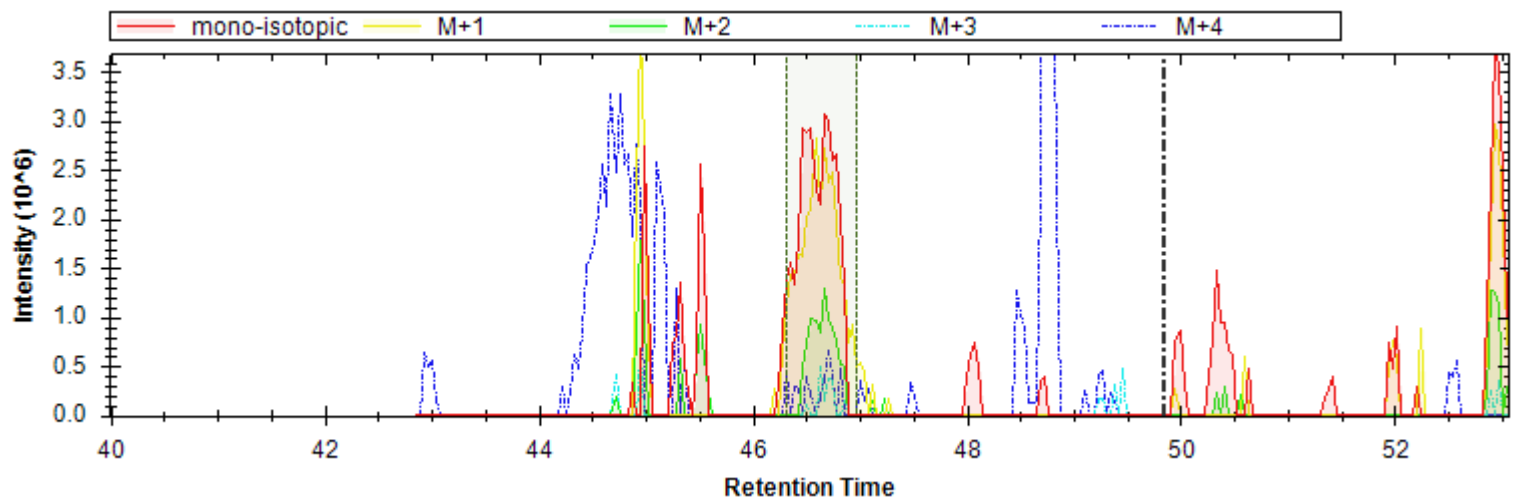

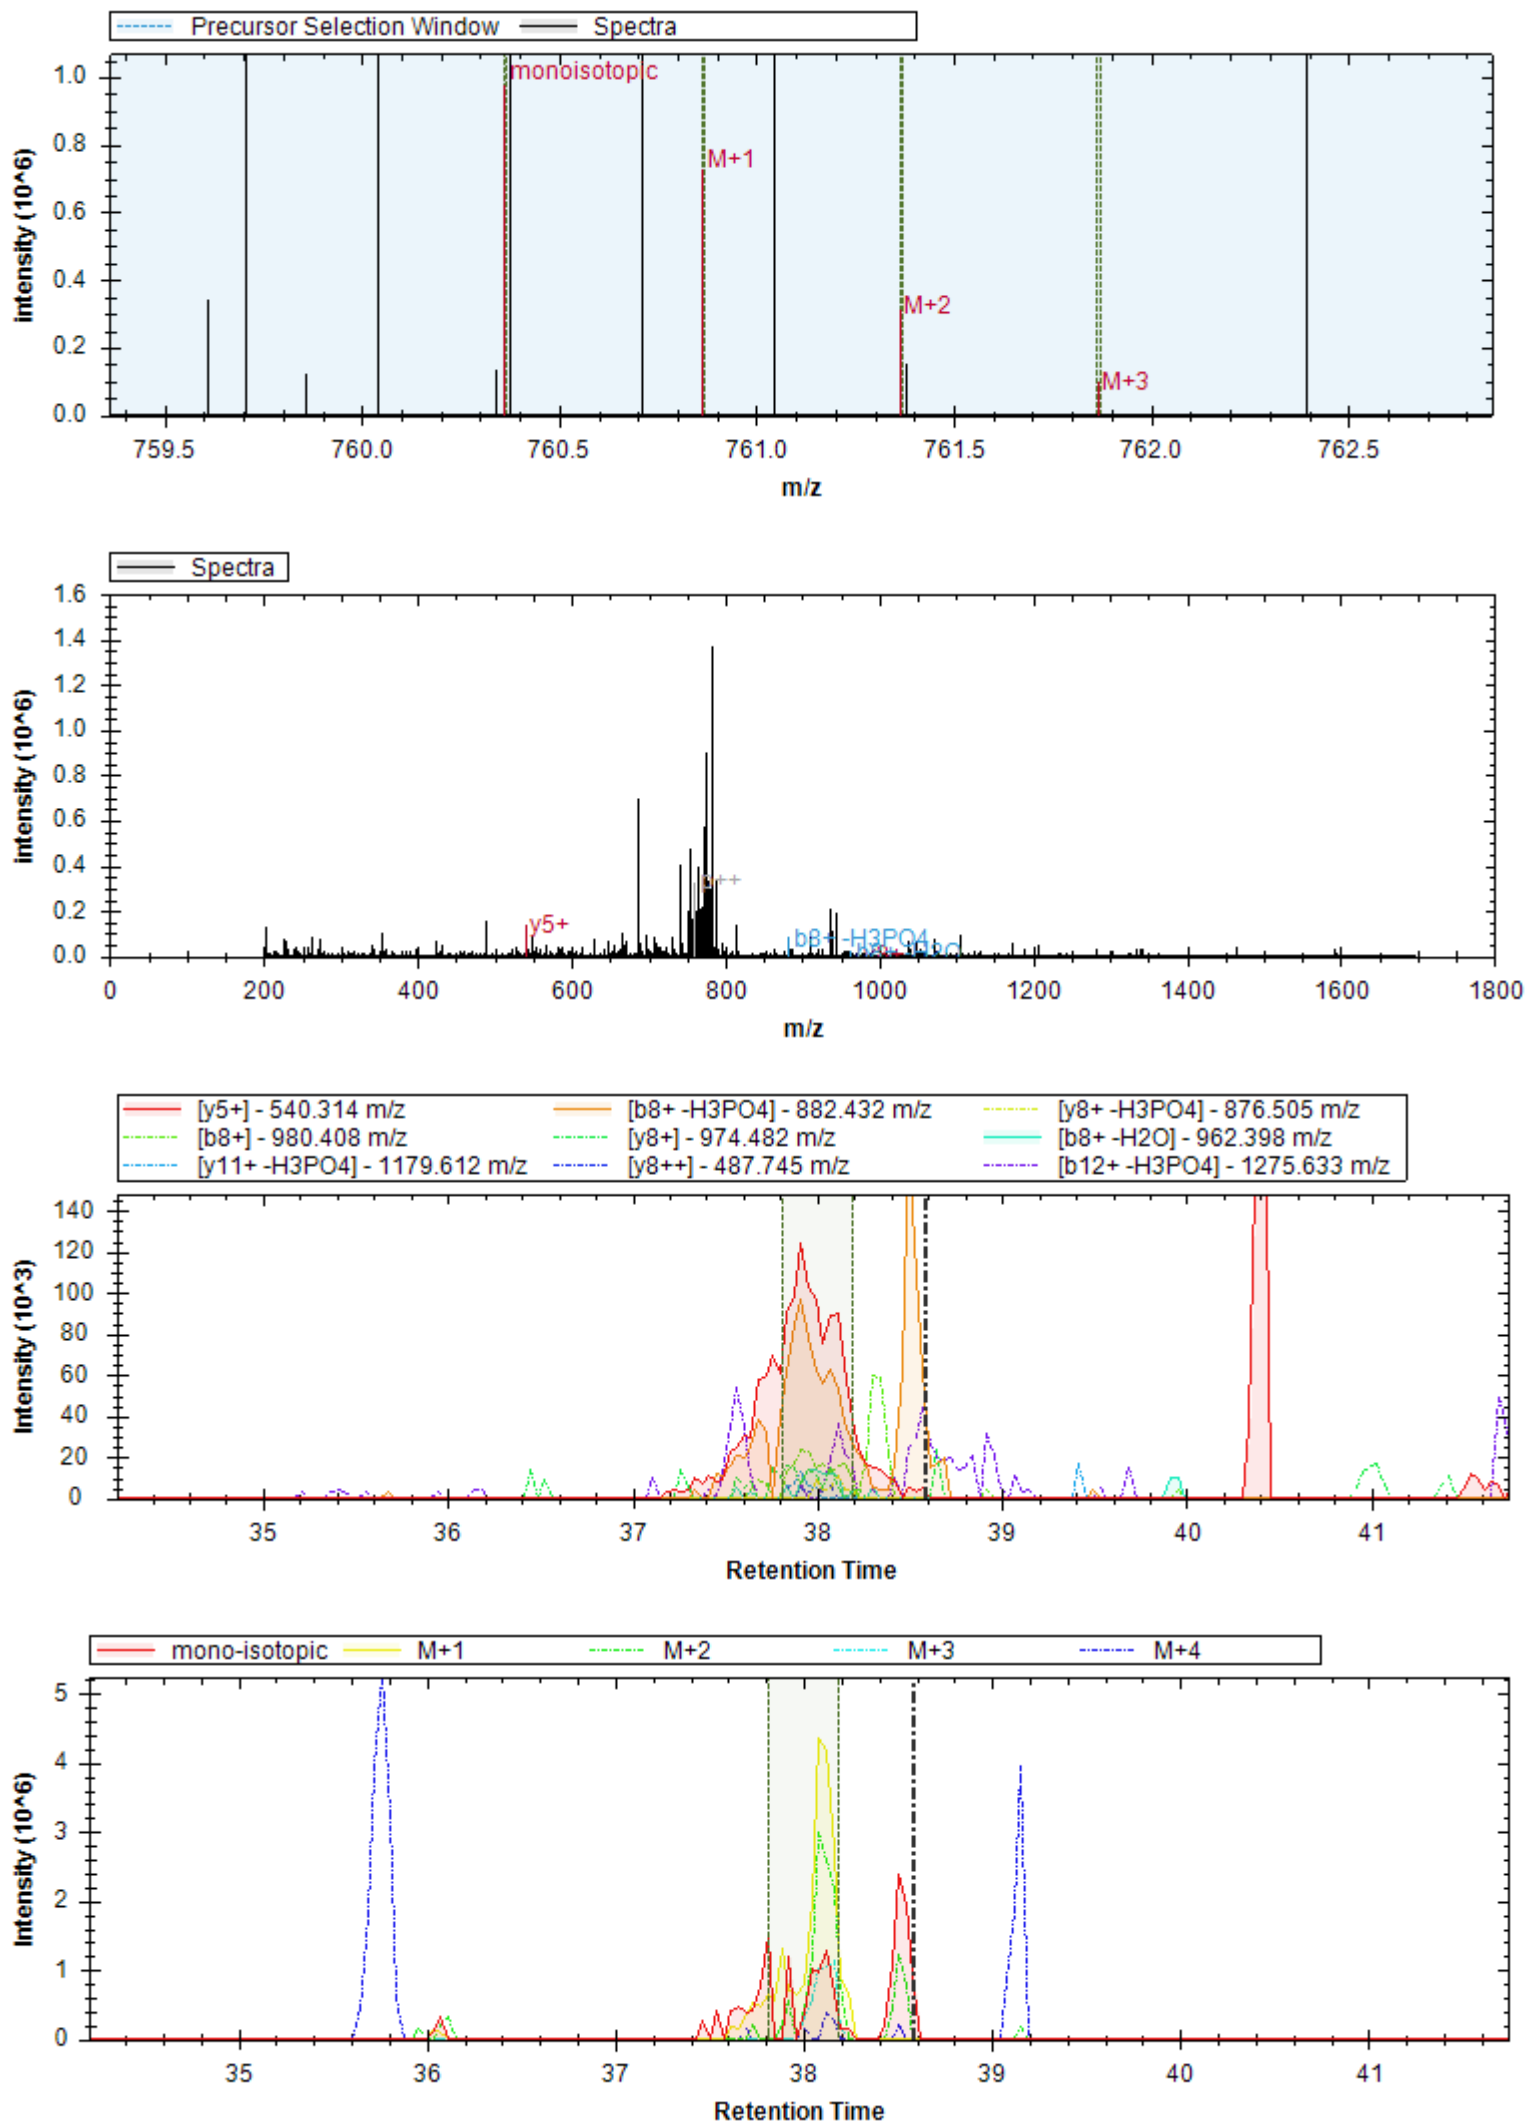

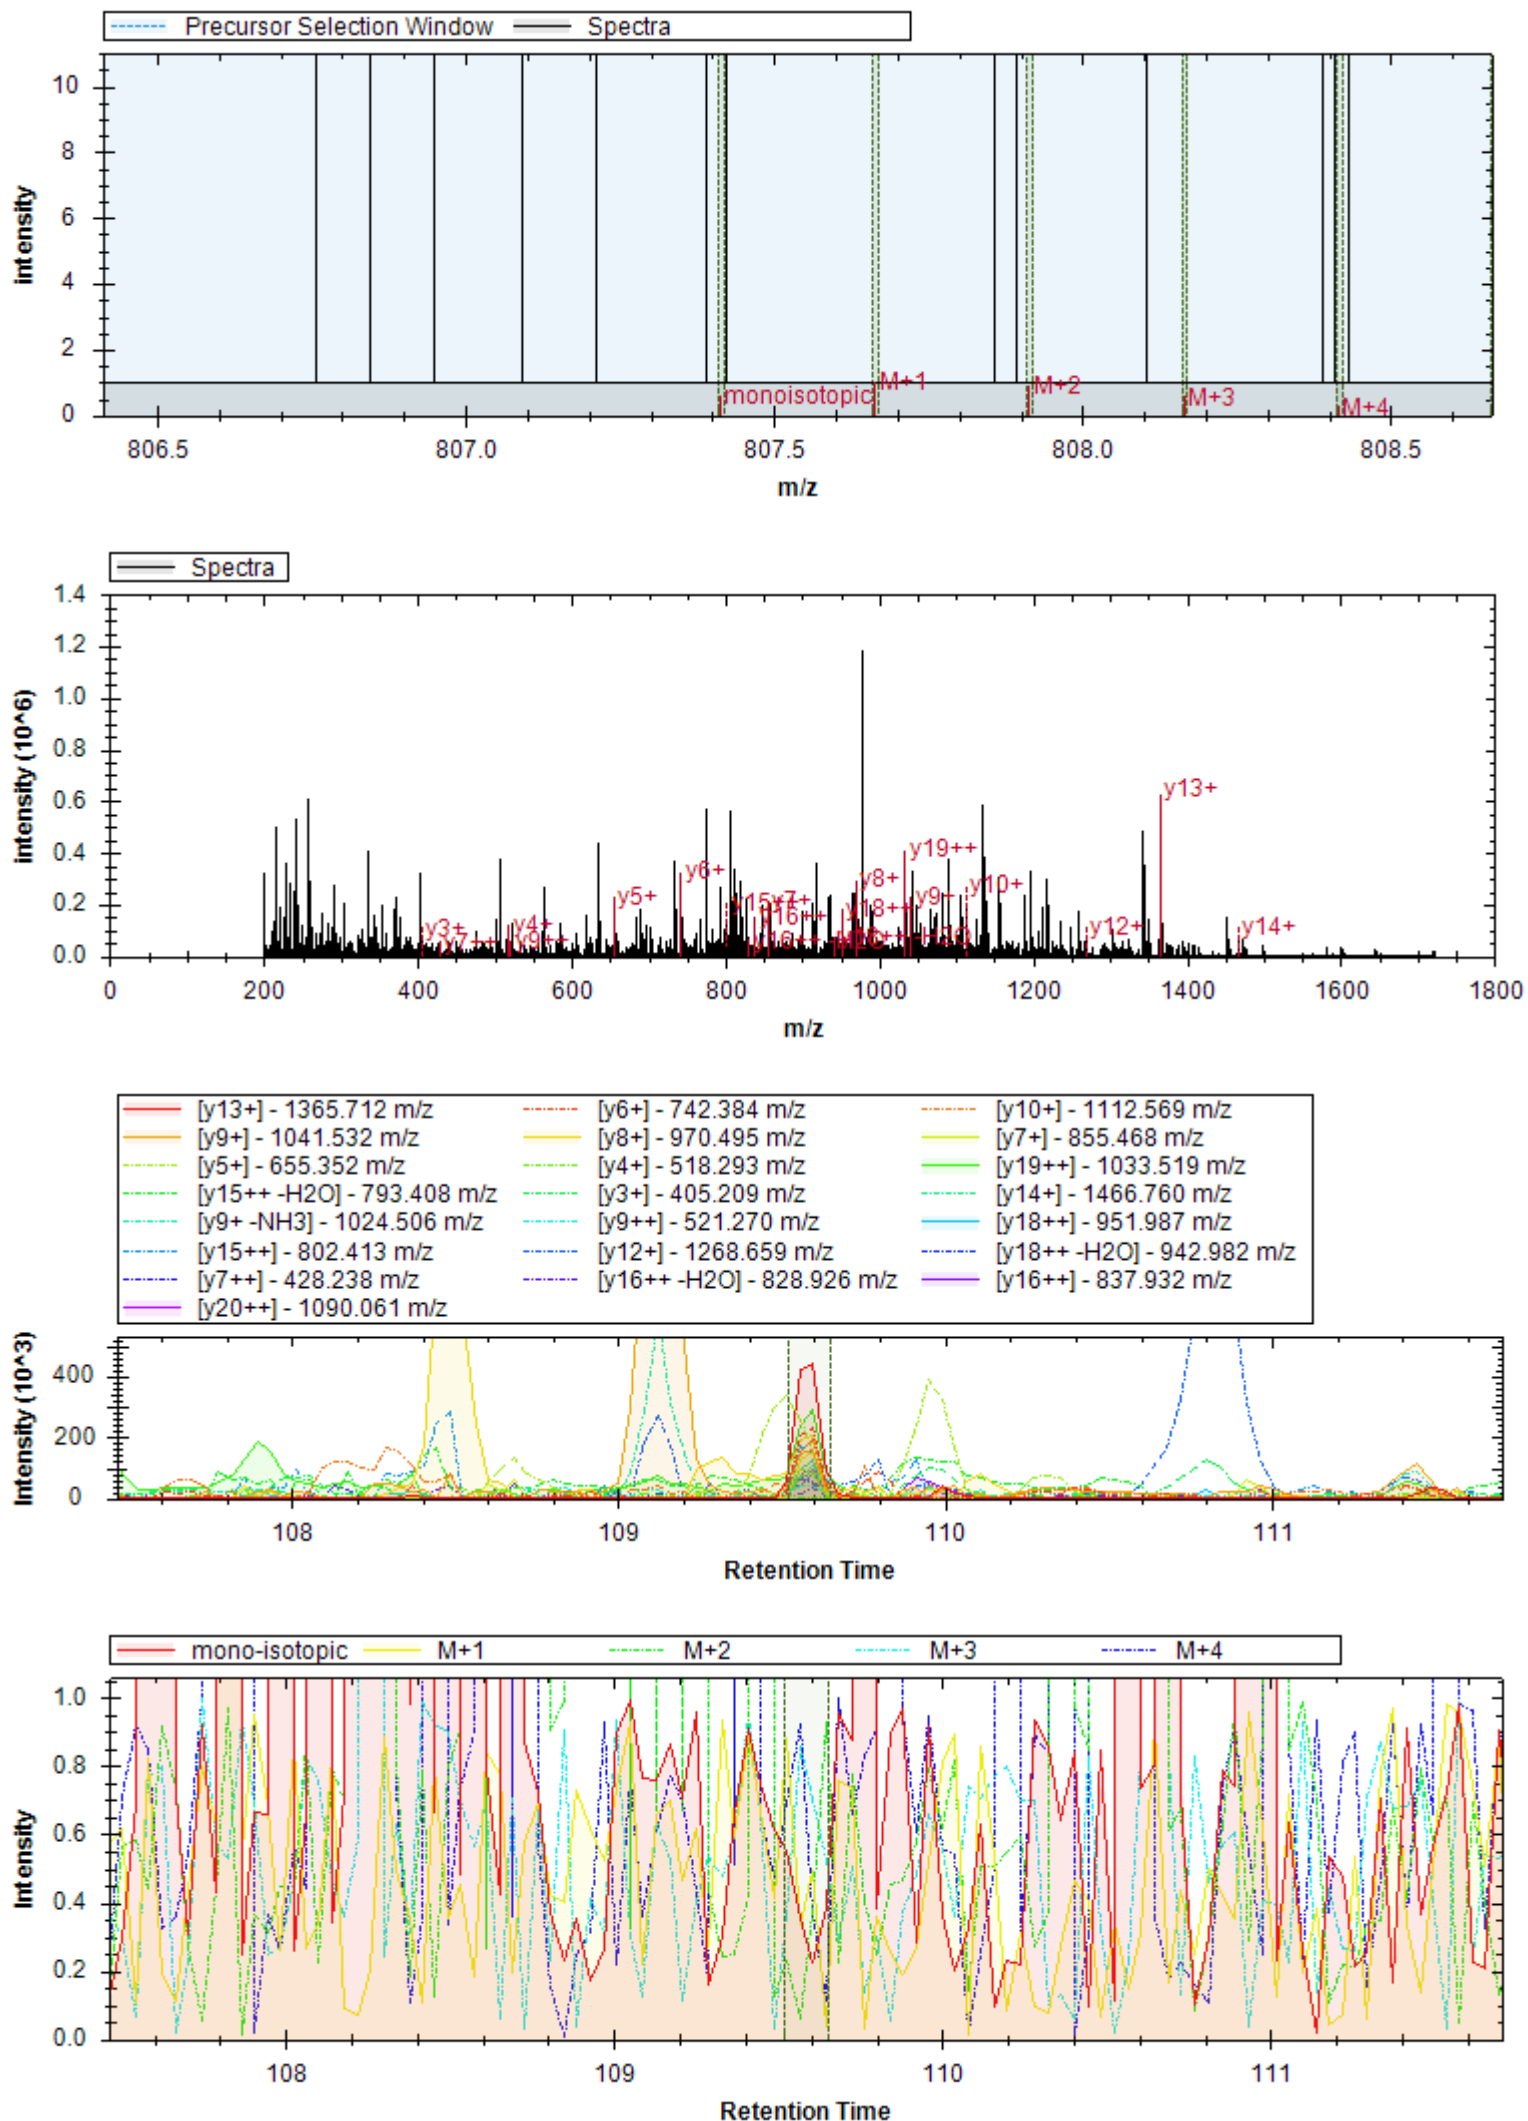

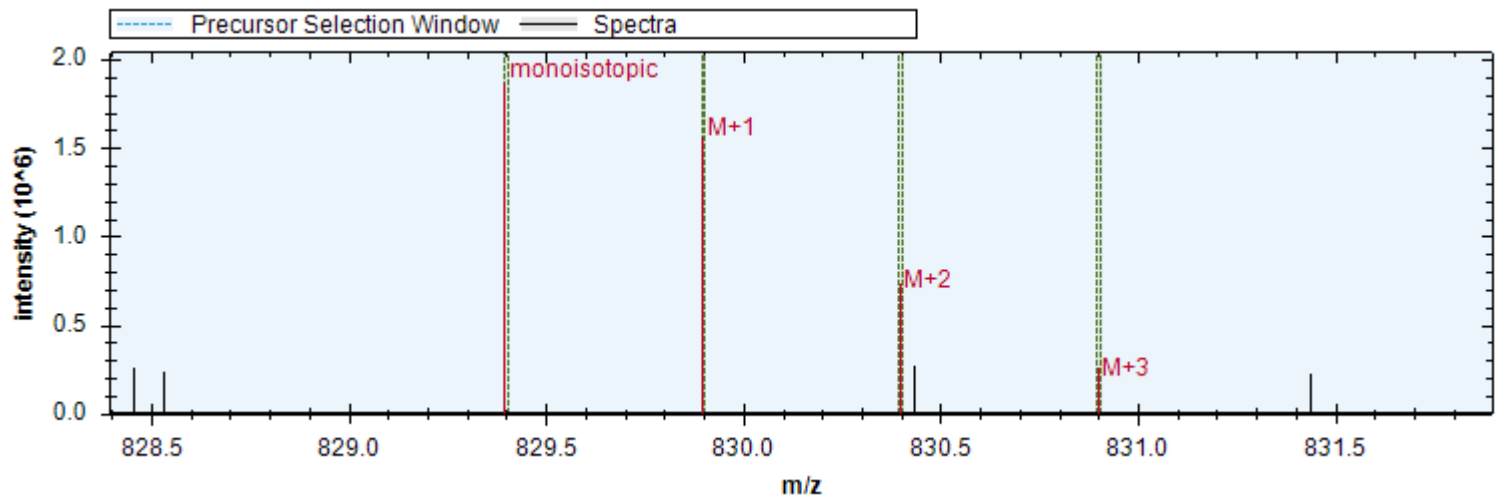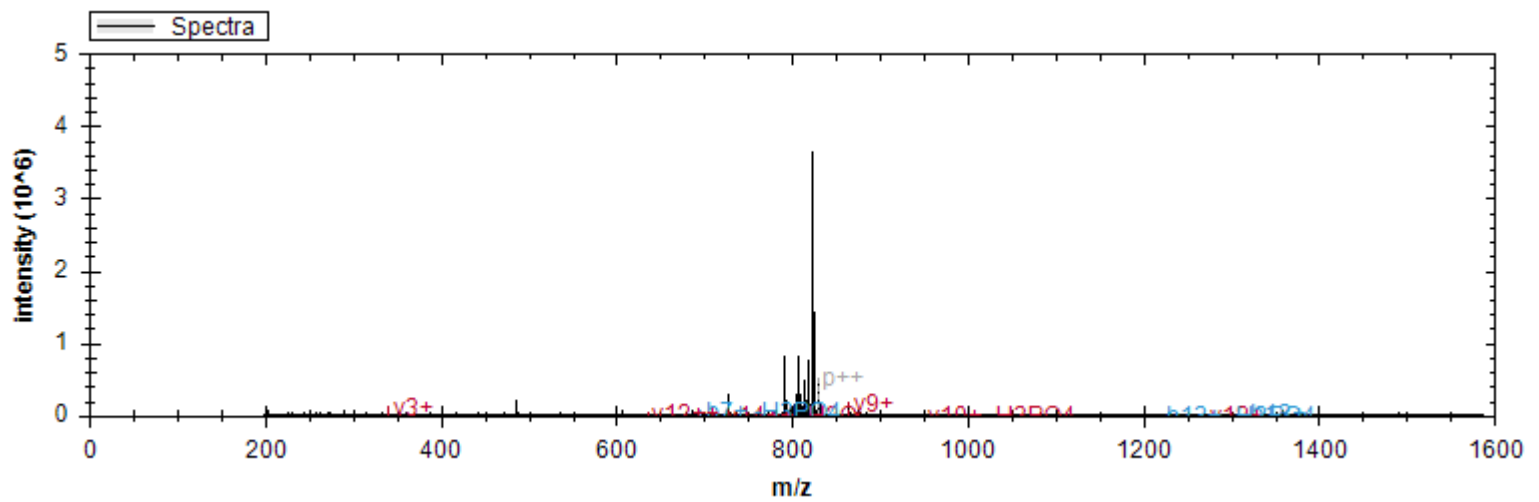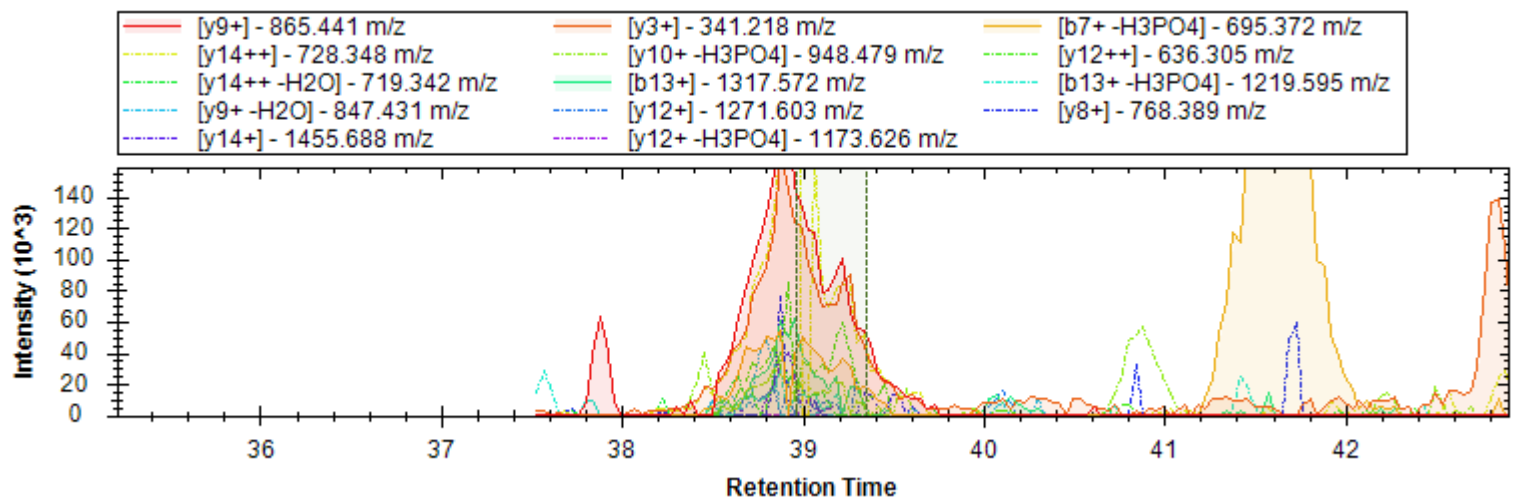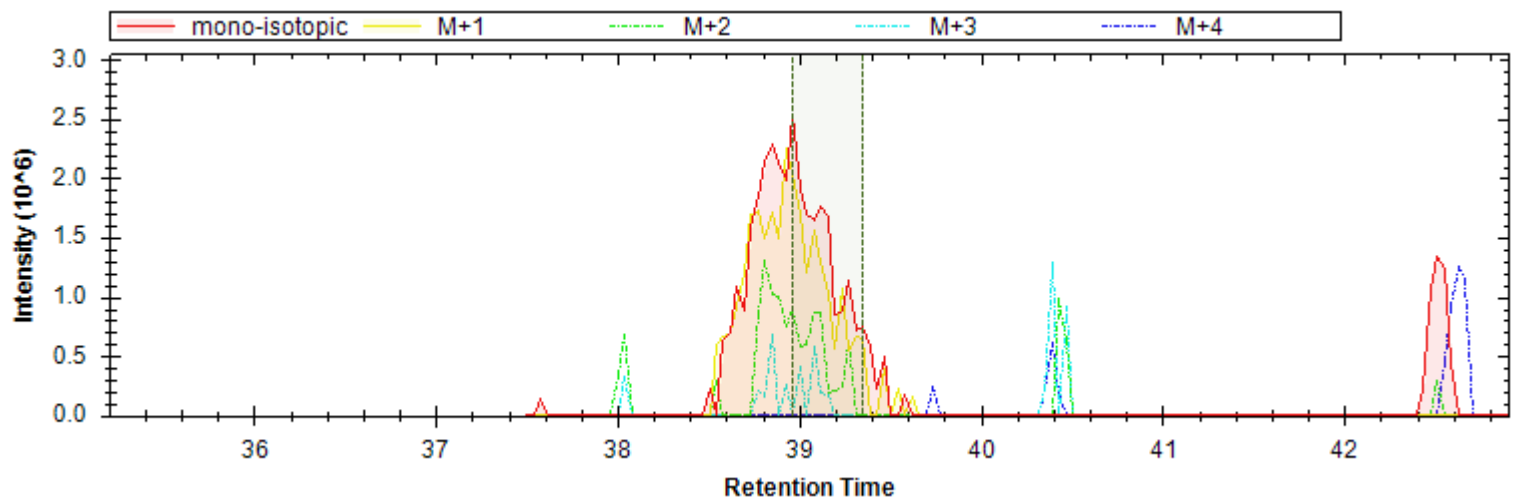

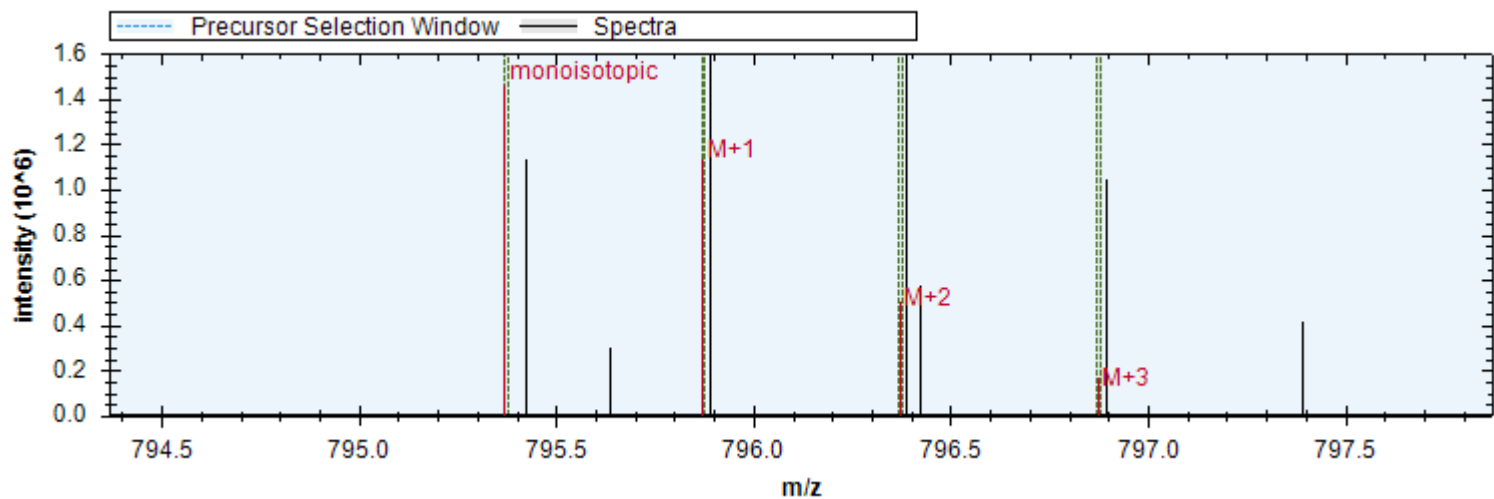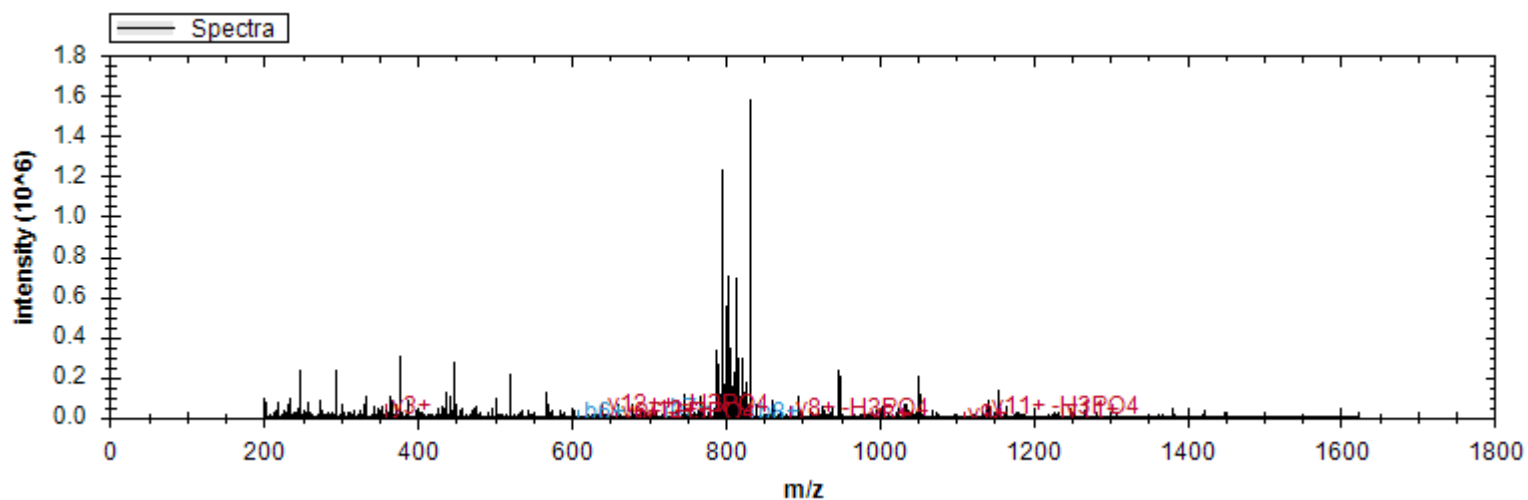

- |                              |                              |                              |
|------------------------------|------------------------------|------------------------------|
| [y11+ -H3PO4] - 1140.601 m/z | [y12++ -H3PO4] - 639.334 m/z | [y3+] - 359.204 m/z          |
| [b3+] - 352.162 m/z          | [y7+ -H3PO4] - 770.416 m/z   | [b7+] - 722.347 m/z          |
| [b6+] - 609.263 m/z          | [y6+ -H3PO4] - 657.332 m/z   | [y9+ -H3PO4] - 1012.542 m/z  |
| [y12++]- 688.322 m/z         | [b5+] - 480.220 m/z          | [y10+ -H3PO4] - 1083.579 m/z |
| [y8+ -H3PO4] - 883.500 m/z   | [b8+] - 835.431 m/z          | [y11+] - 1238.578 m/z        |
| [b4+] - 409.183 m/z          | [y6+] - 755.308 m/z          | [y8+] - 981.477 m/z          |
| [y7+] - 868.392 m/z          | [b3+ -H2O] - 334.151 m/z     | [b11+ -H3PO4] - 1133.559 m/z |
| [y9+] - 1110.519 m/z         | [b5+ -H2O] - 462.210 m/z     |                              |

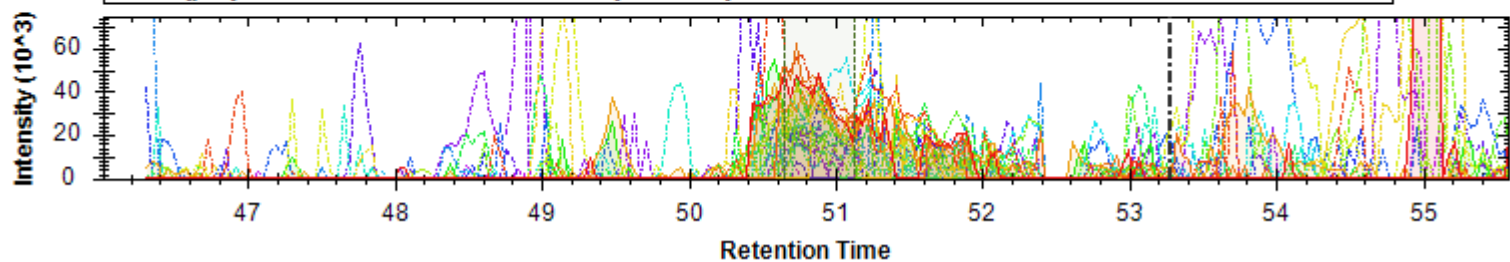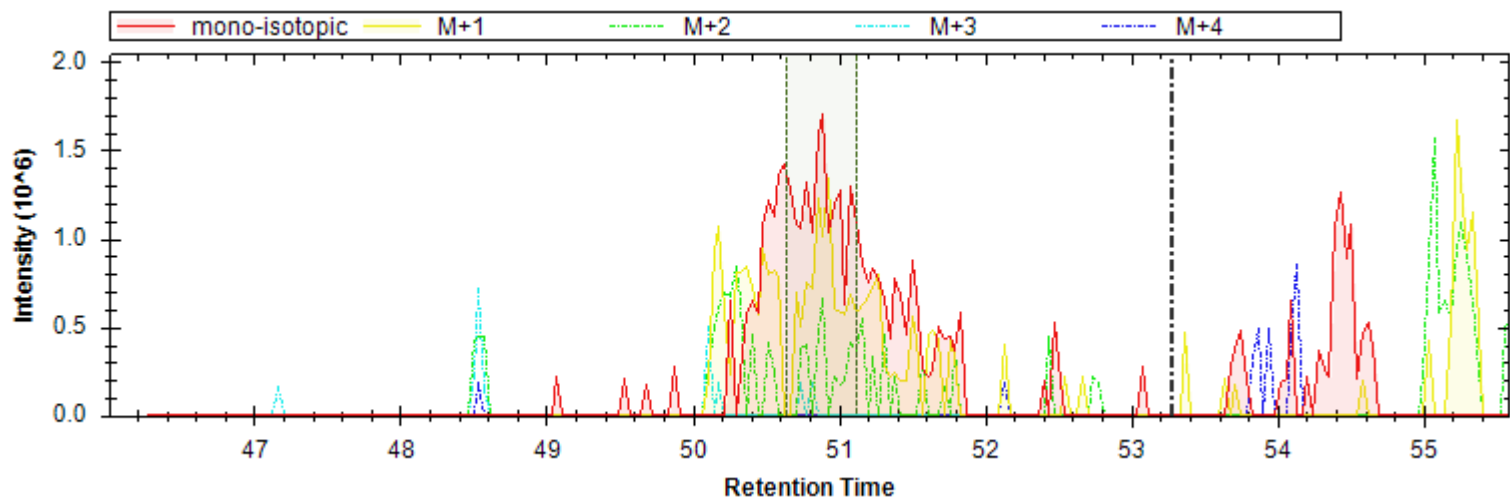

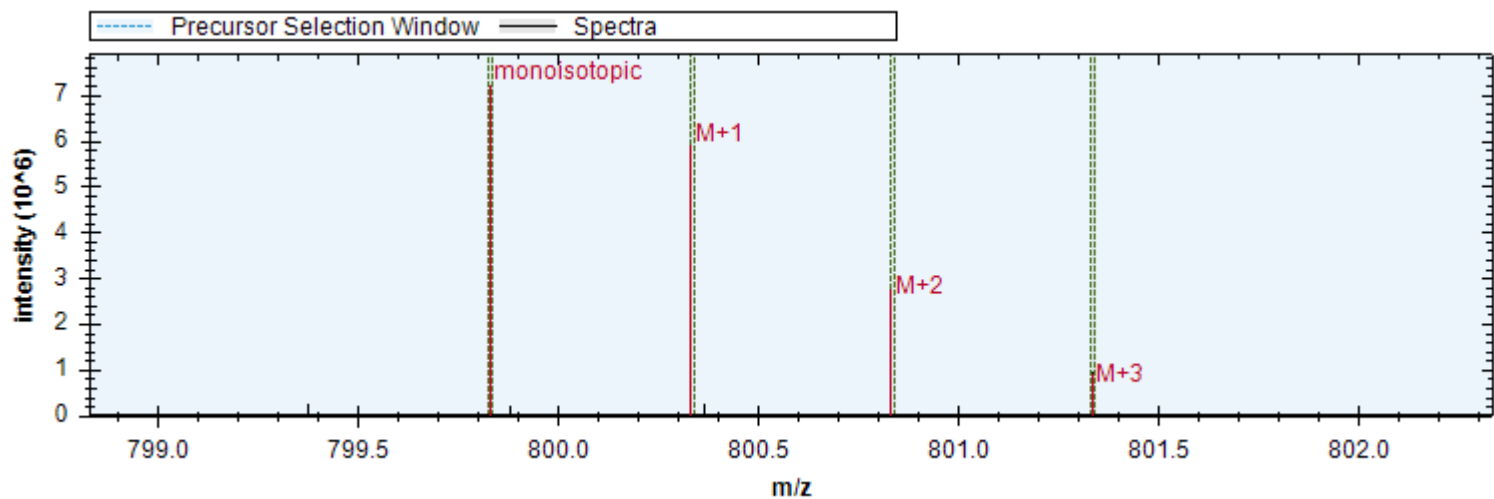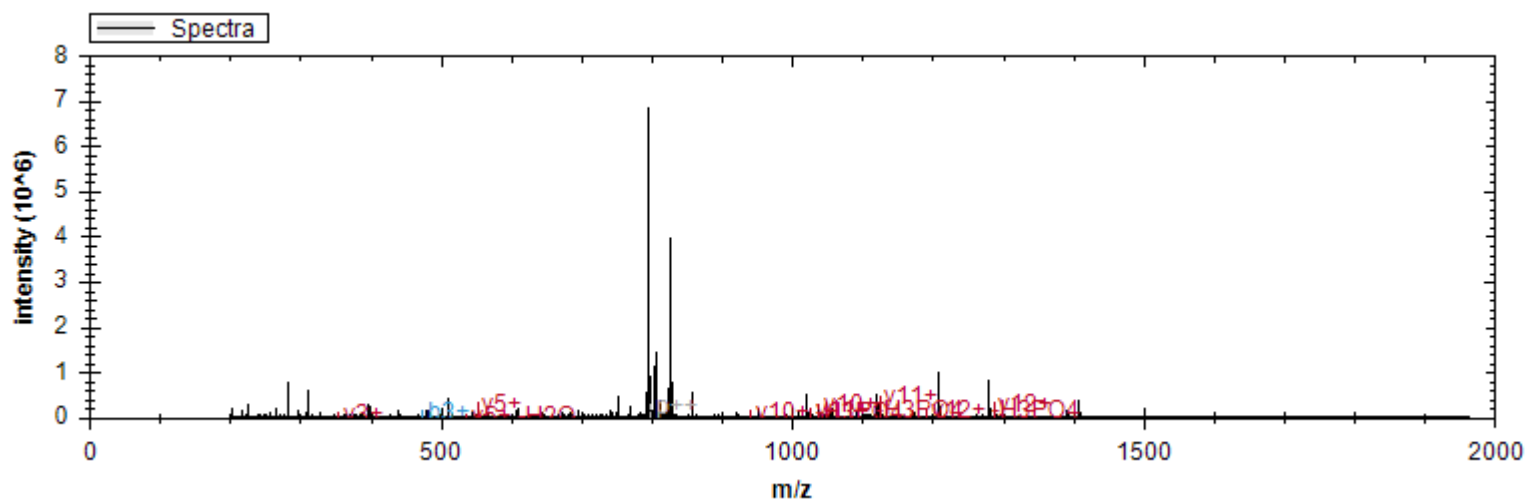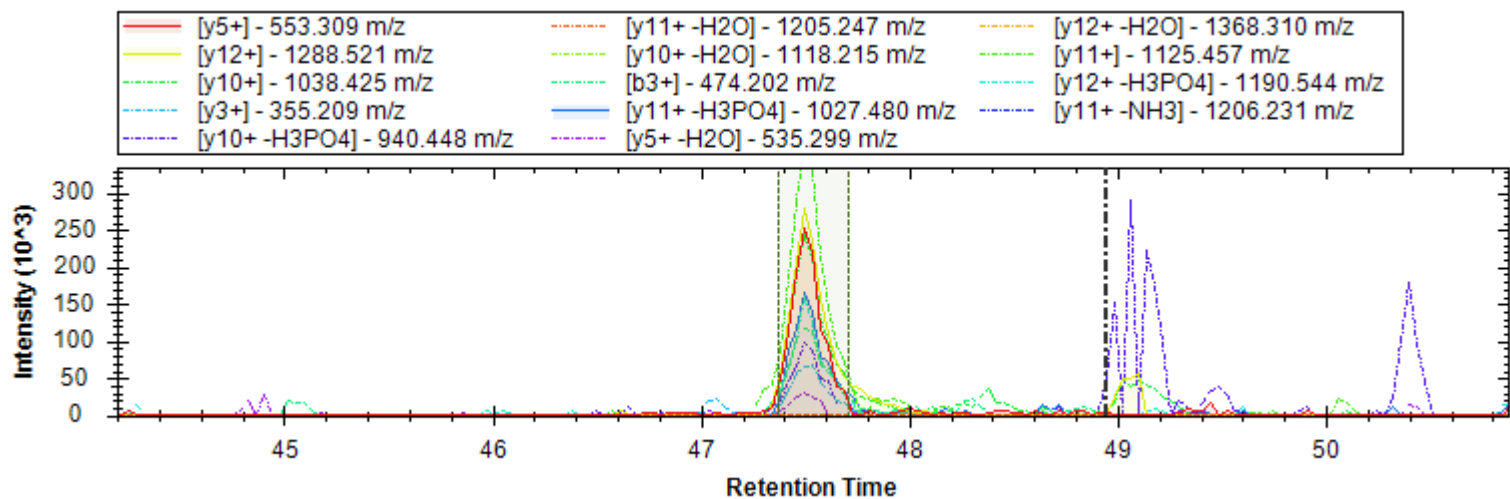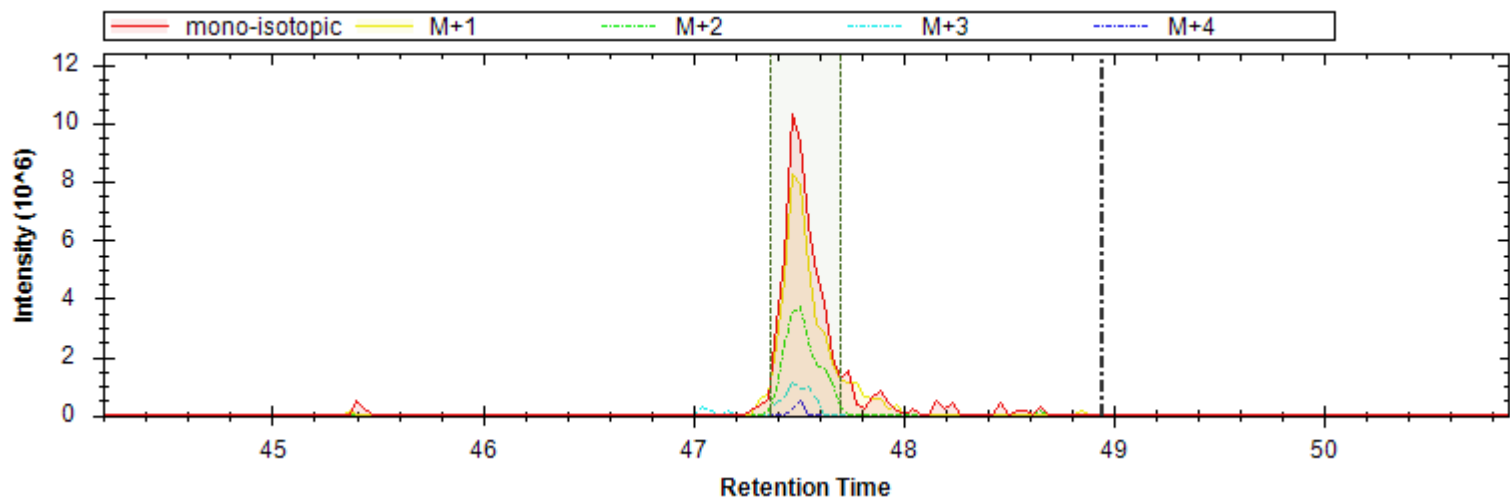



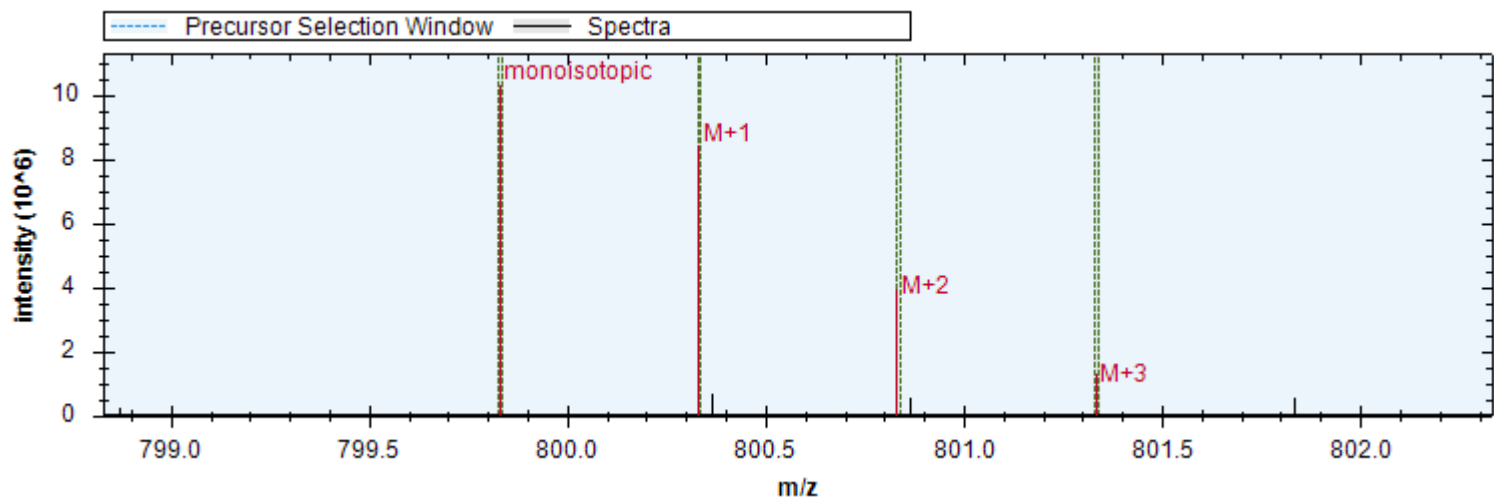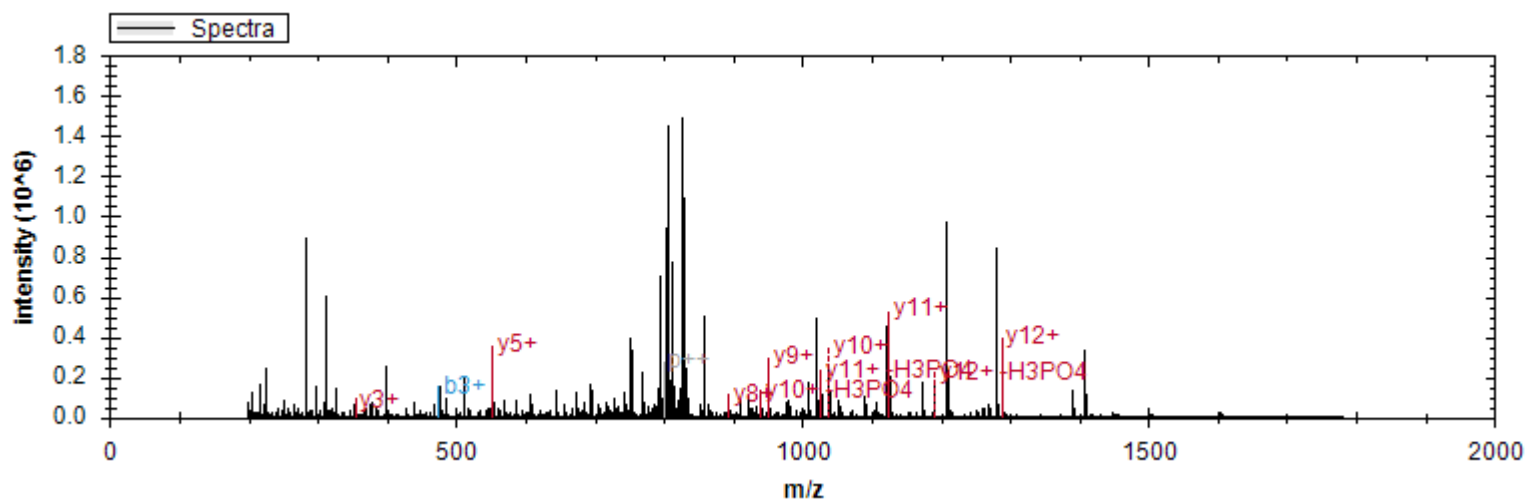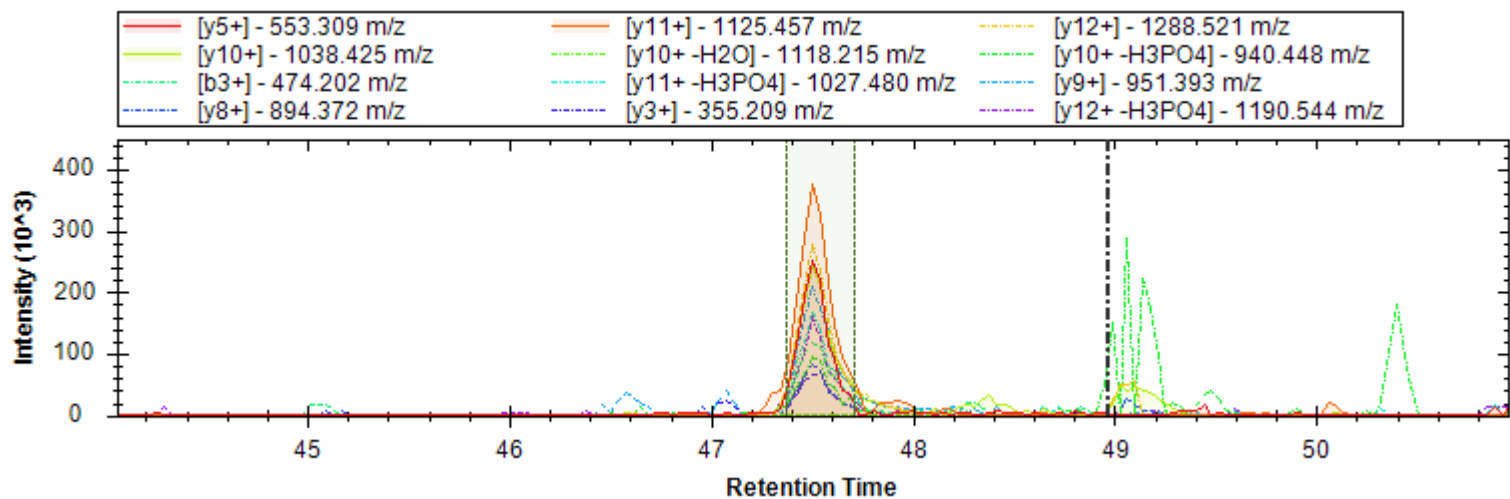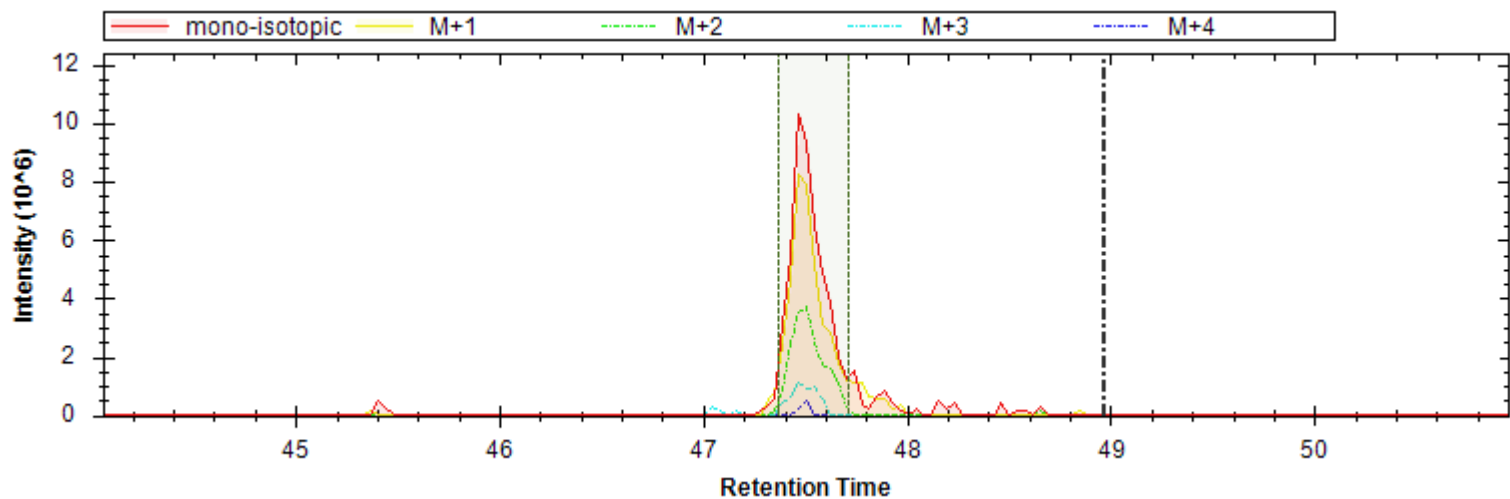

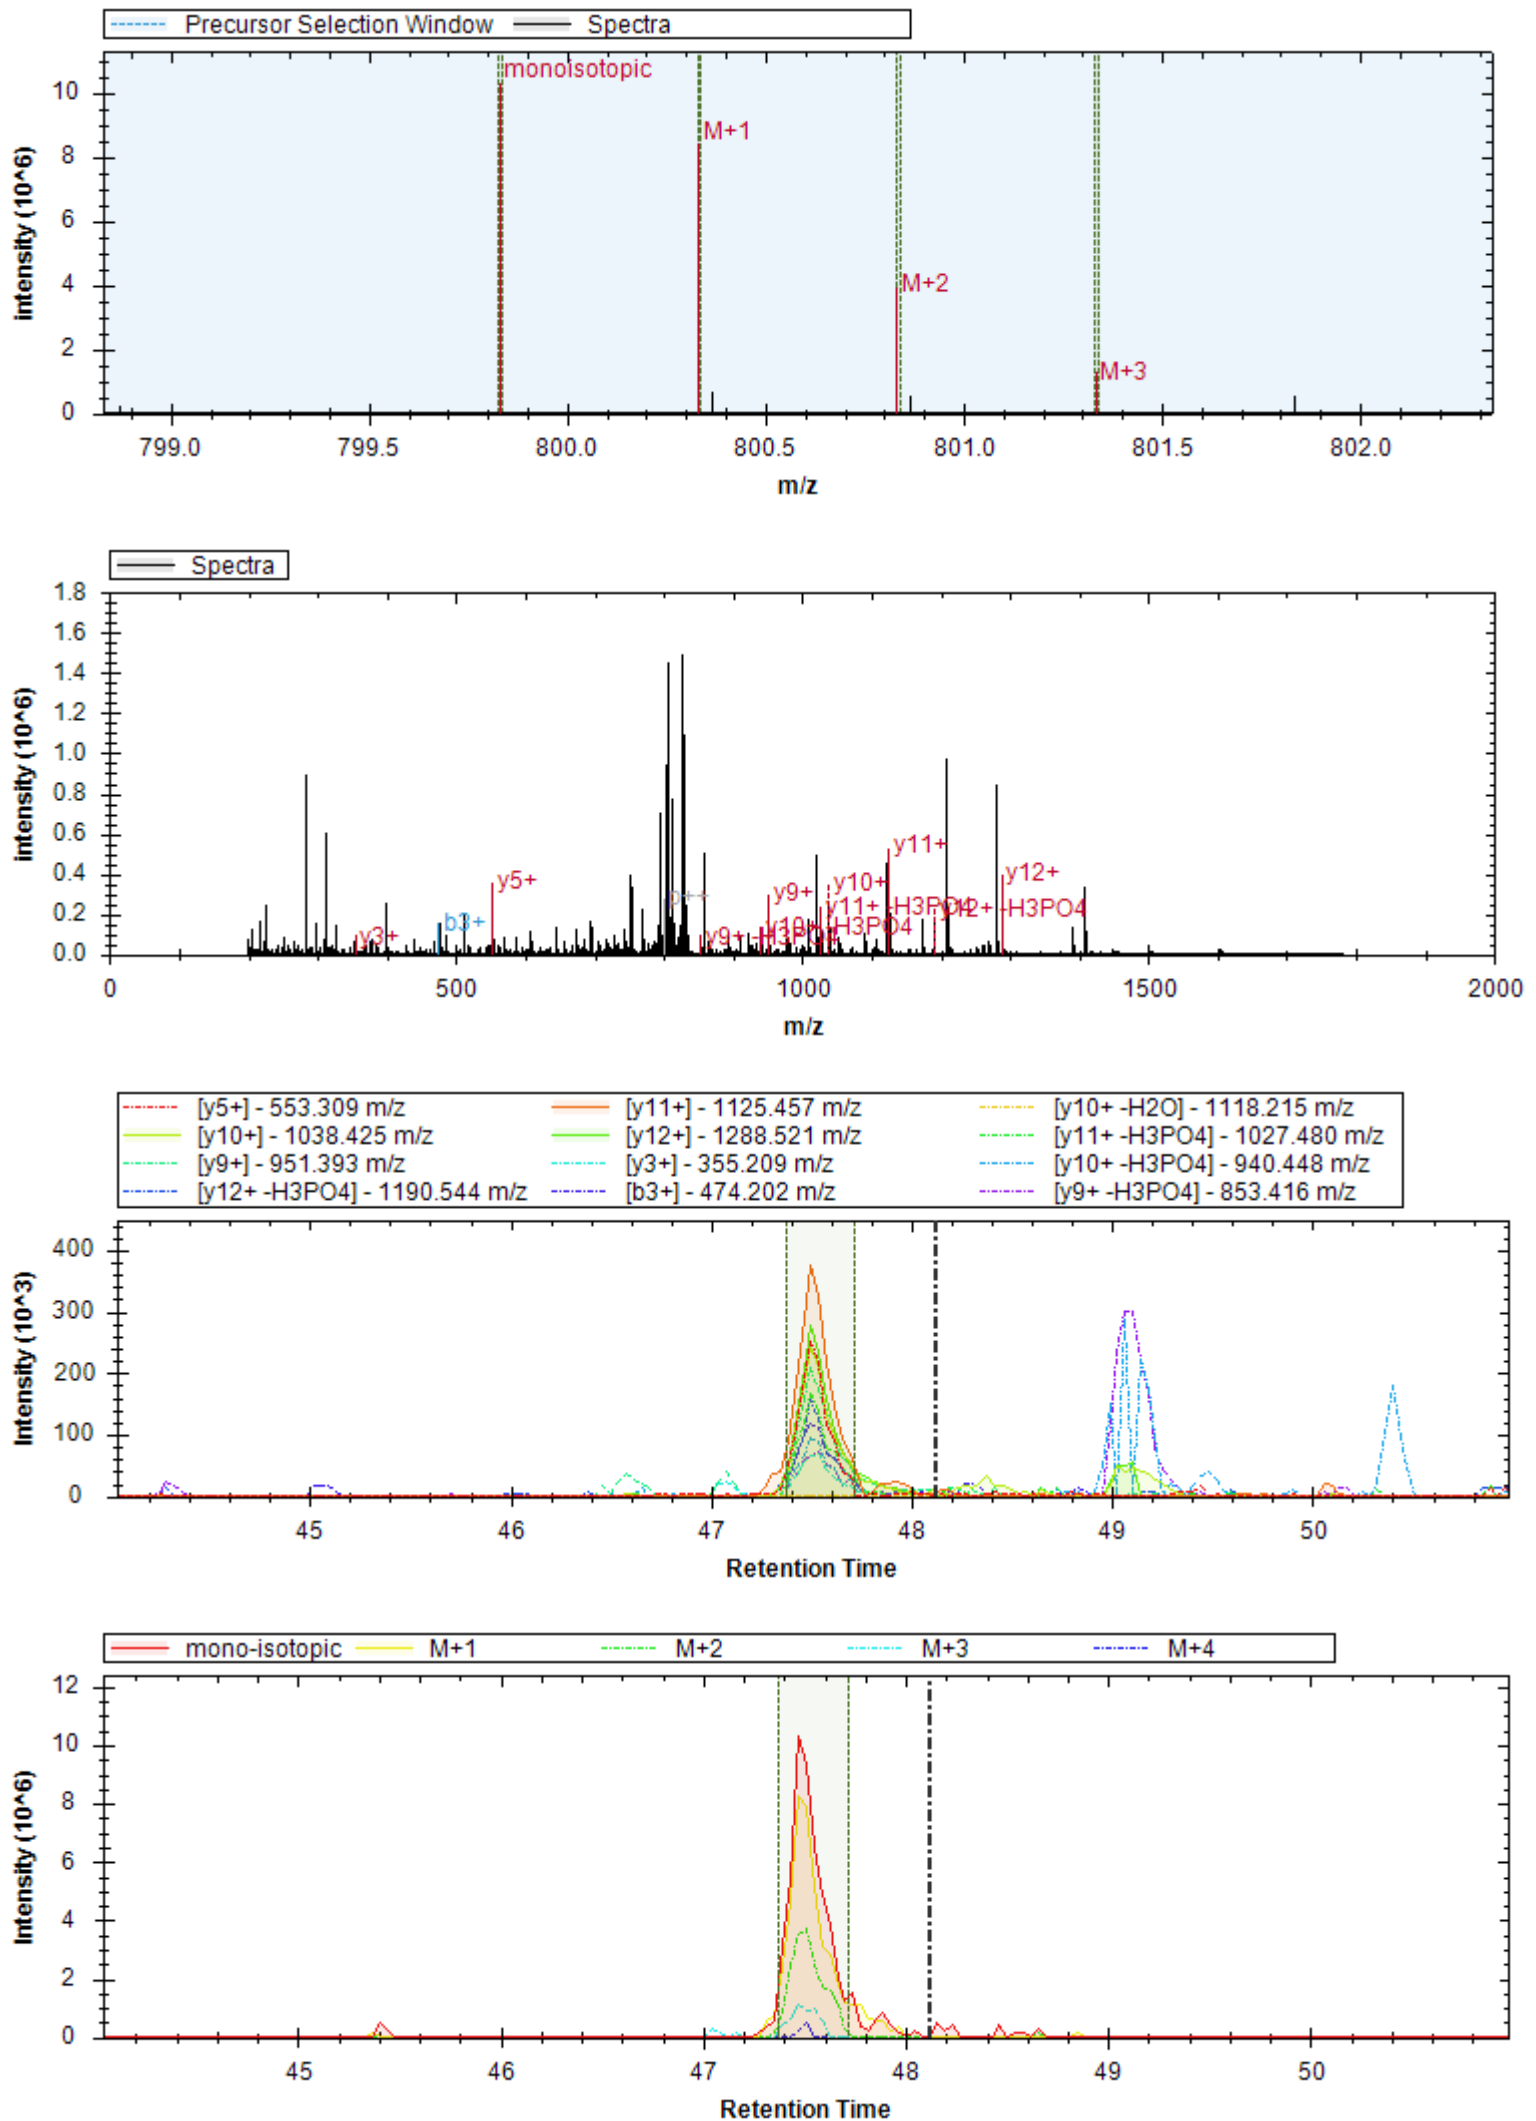

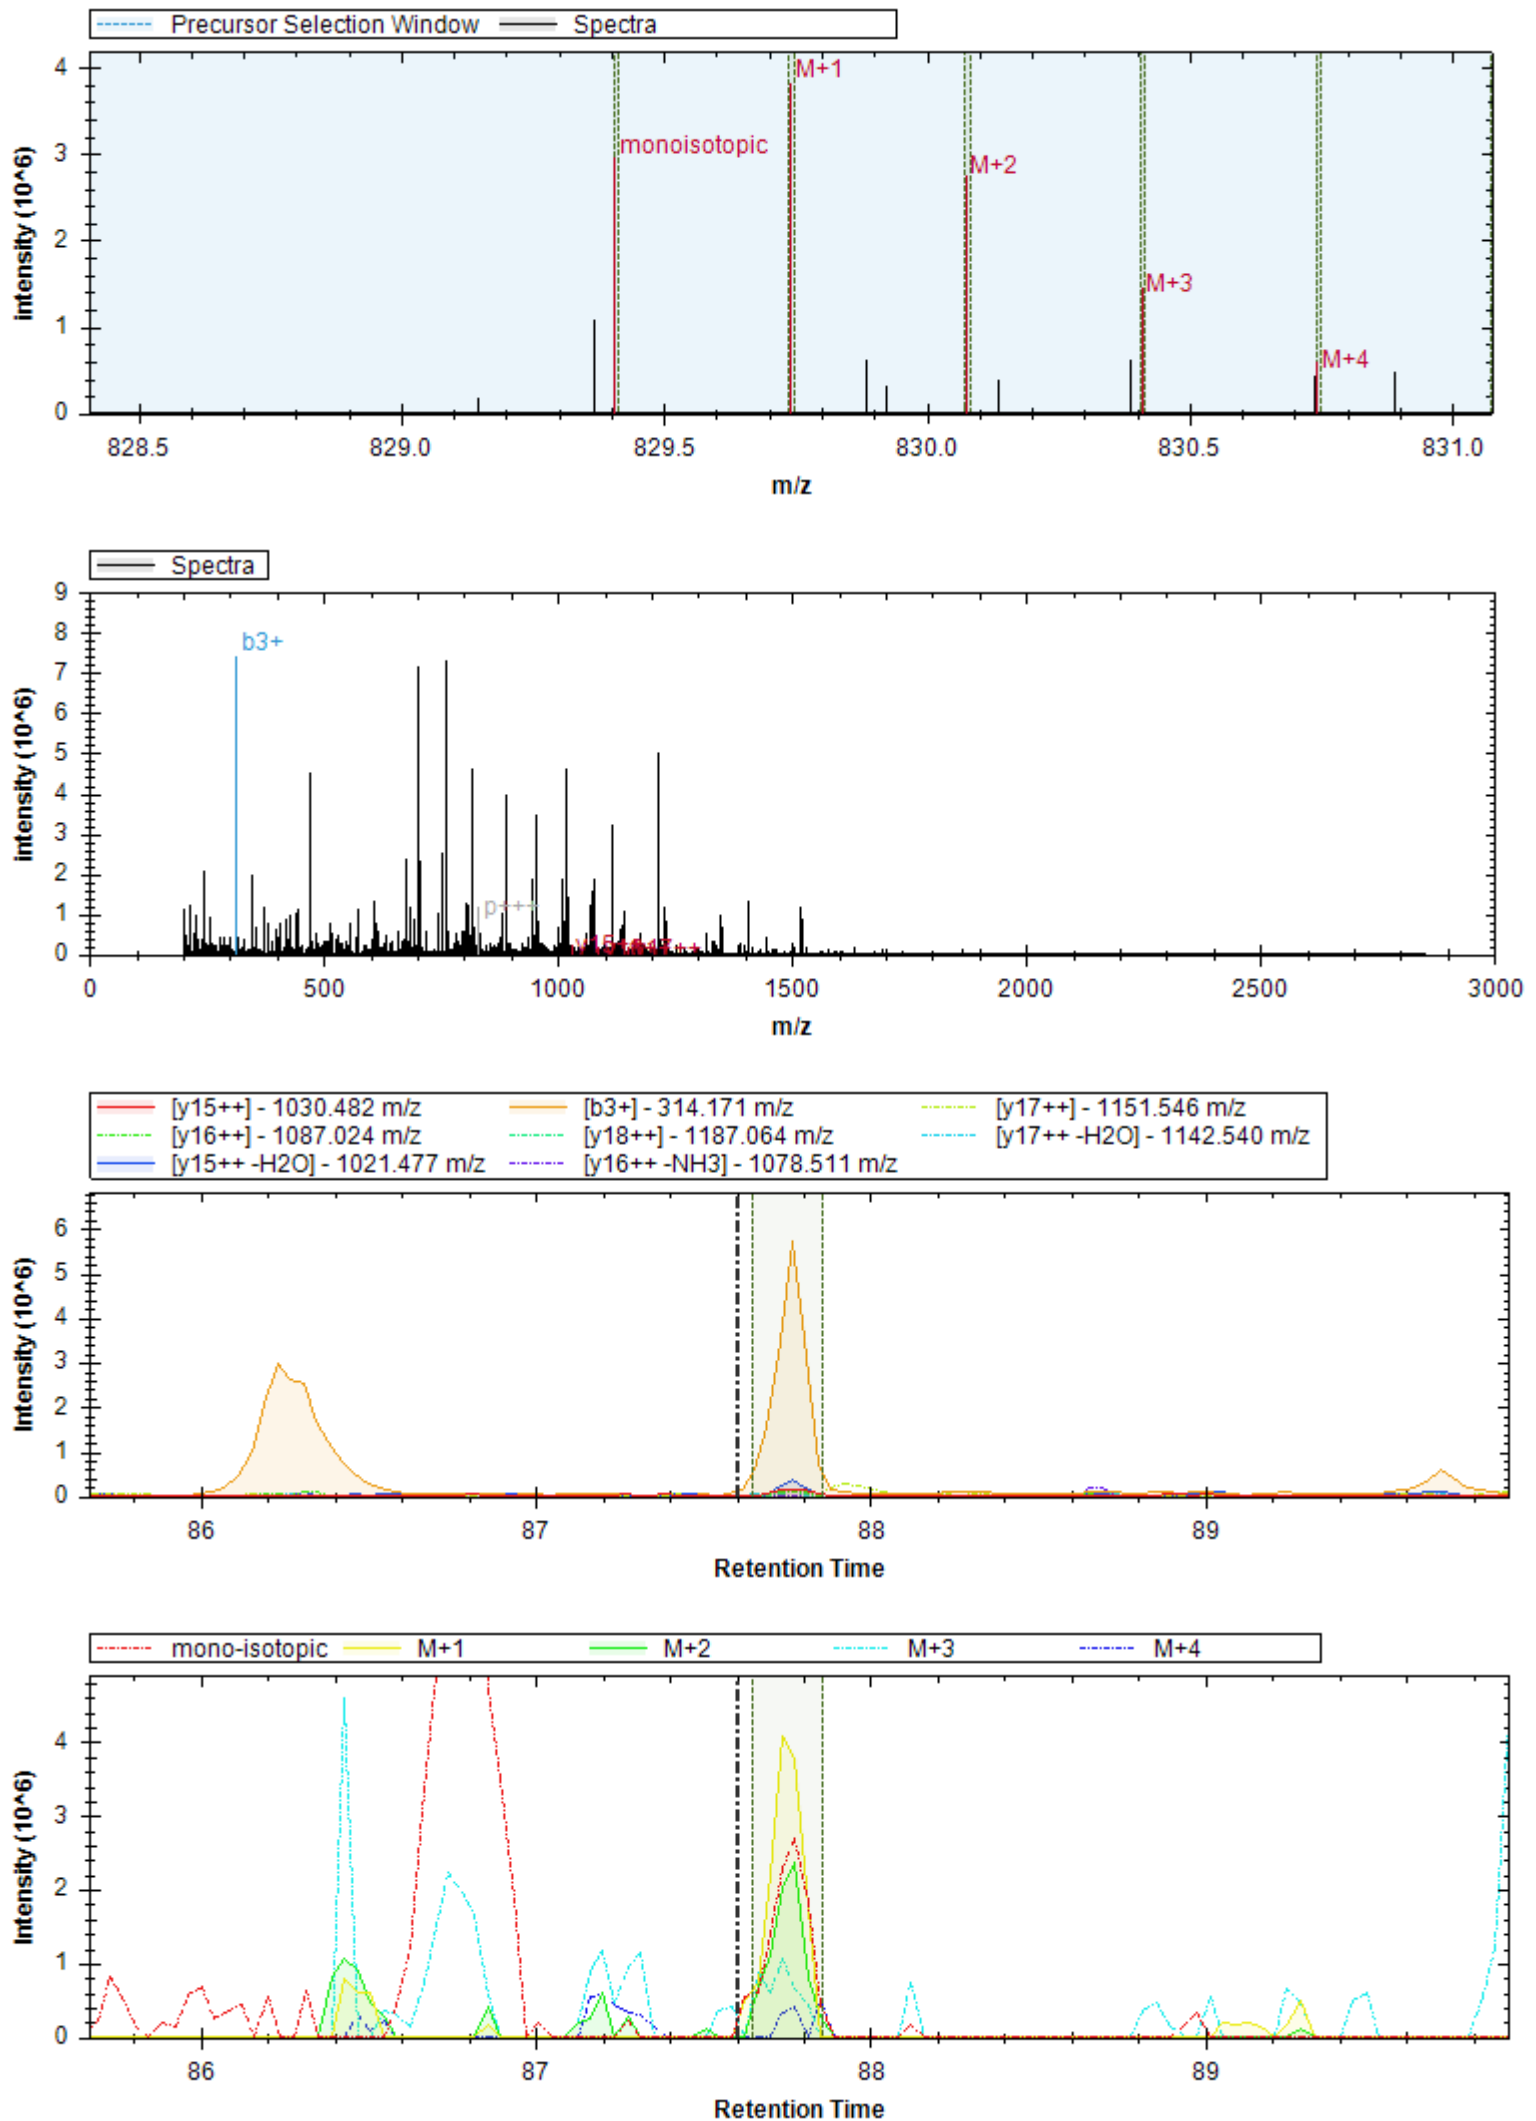

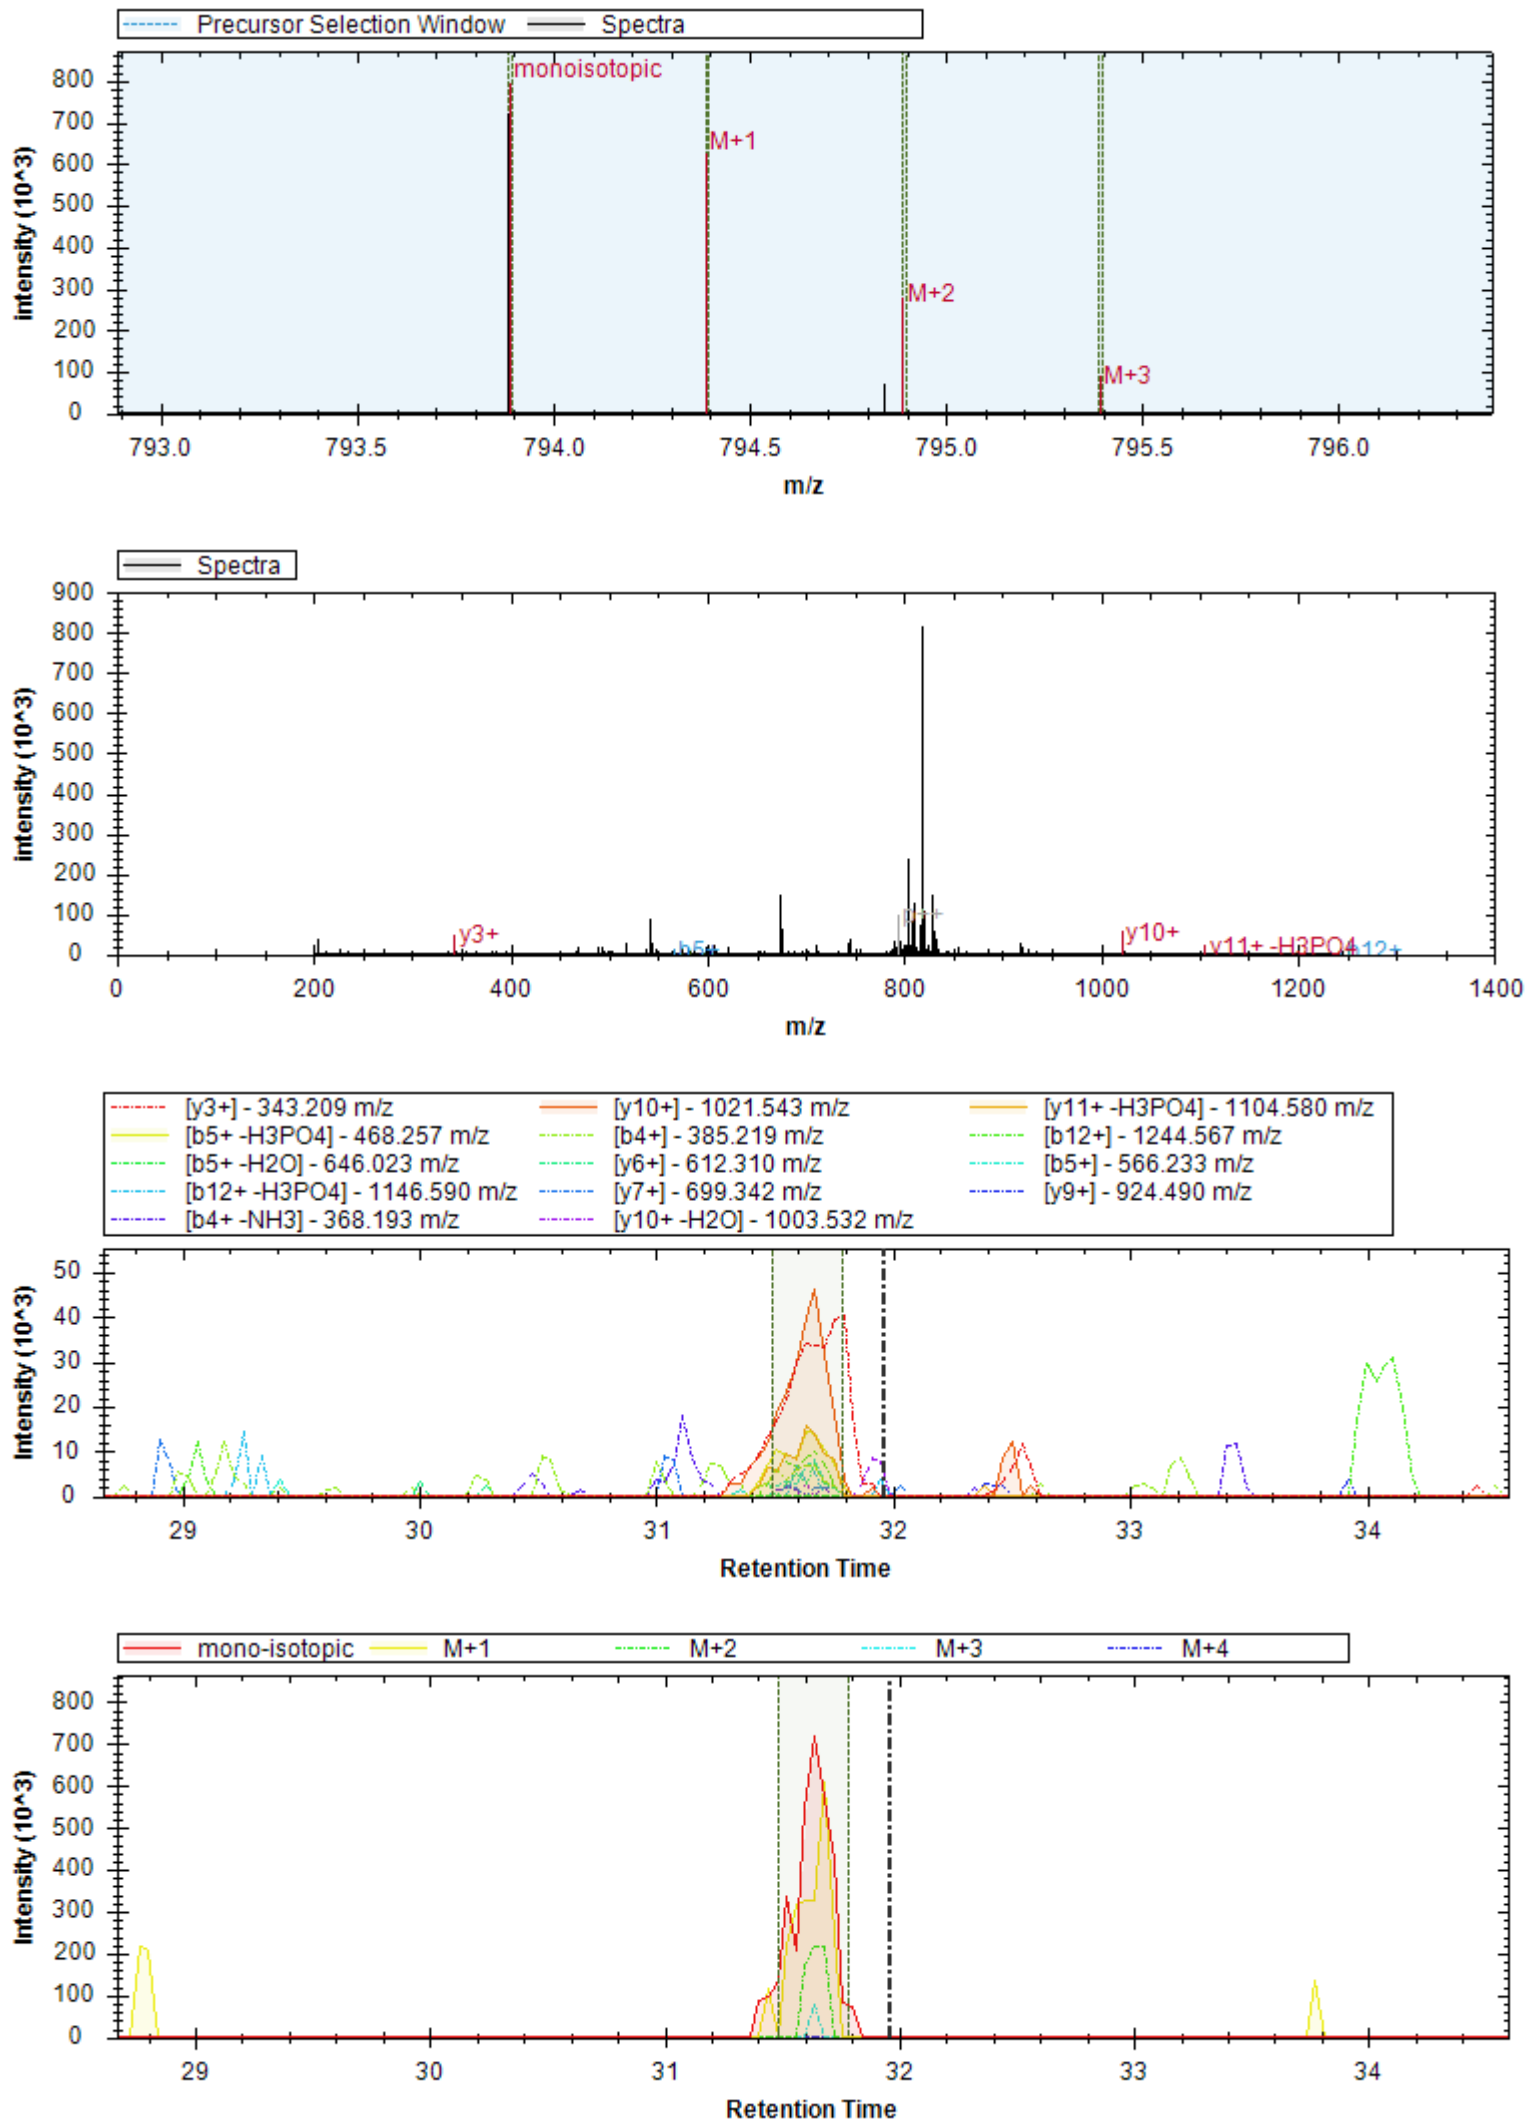

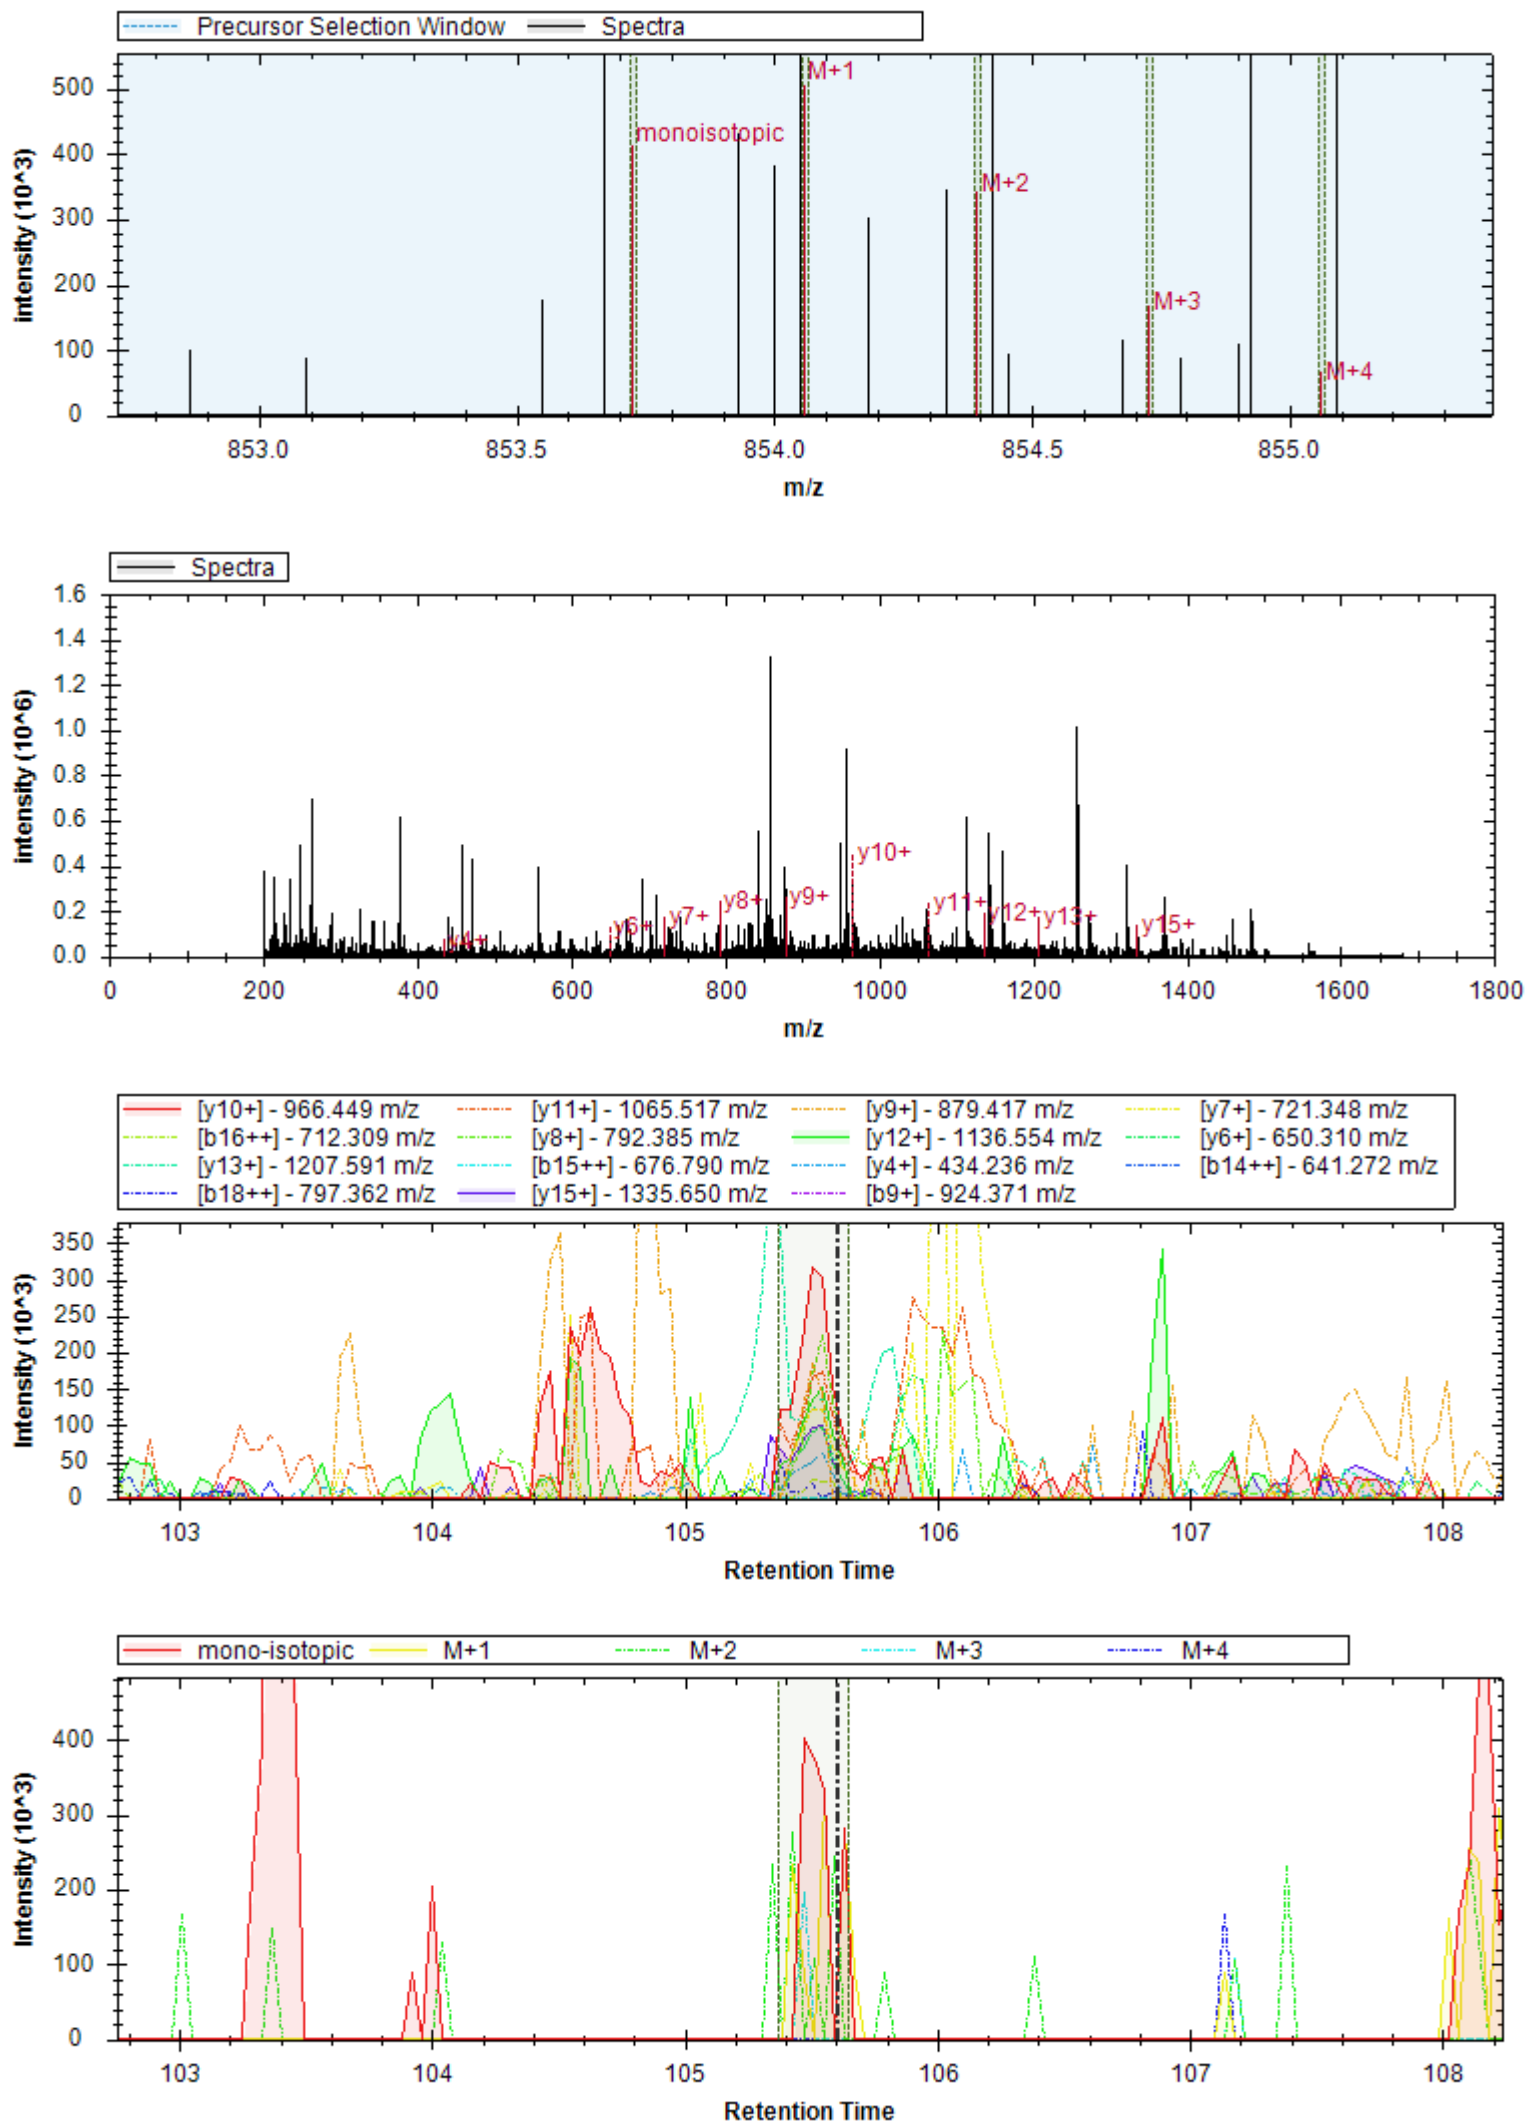

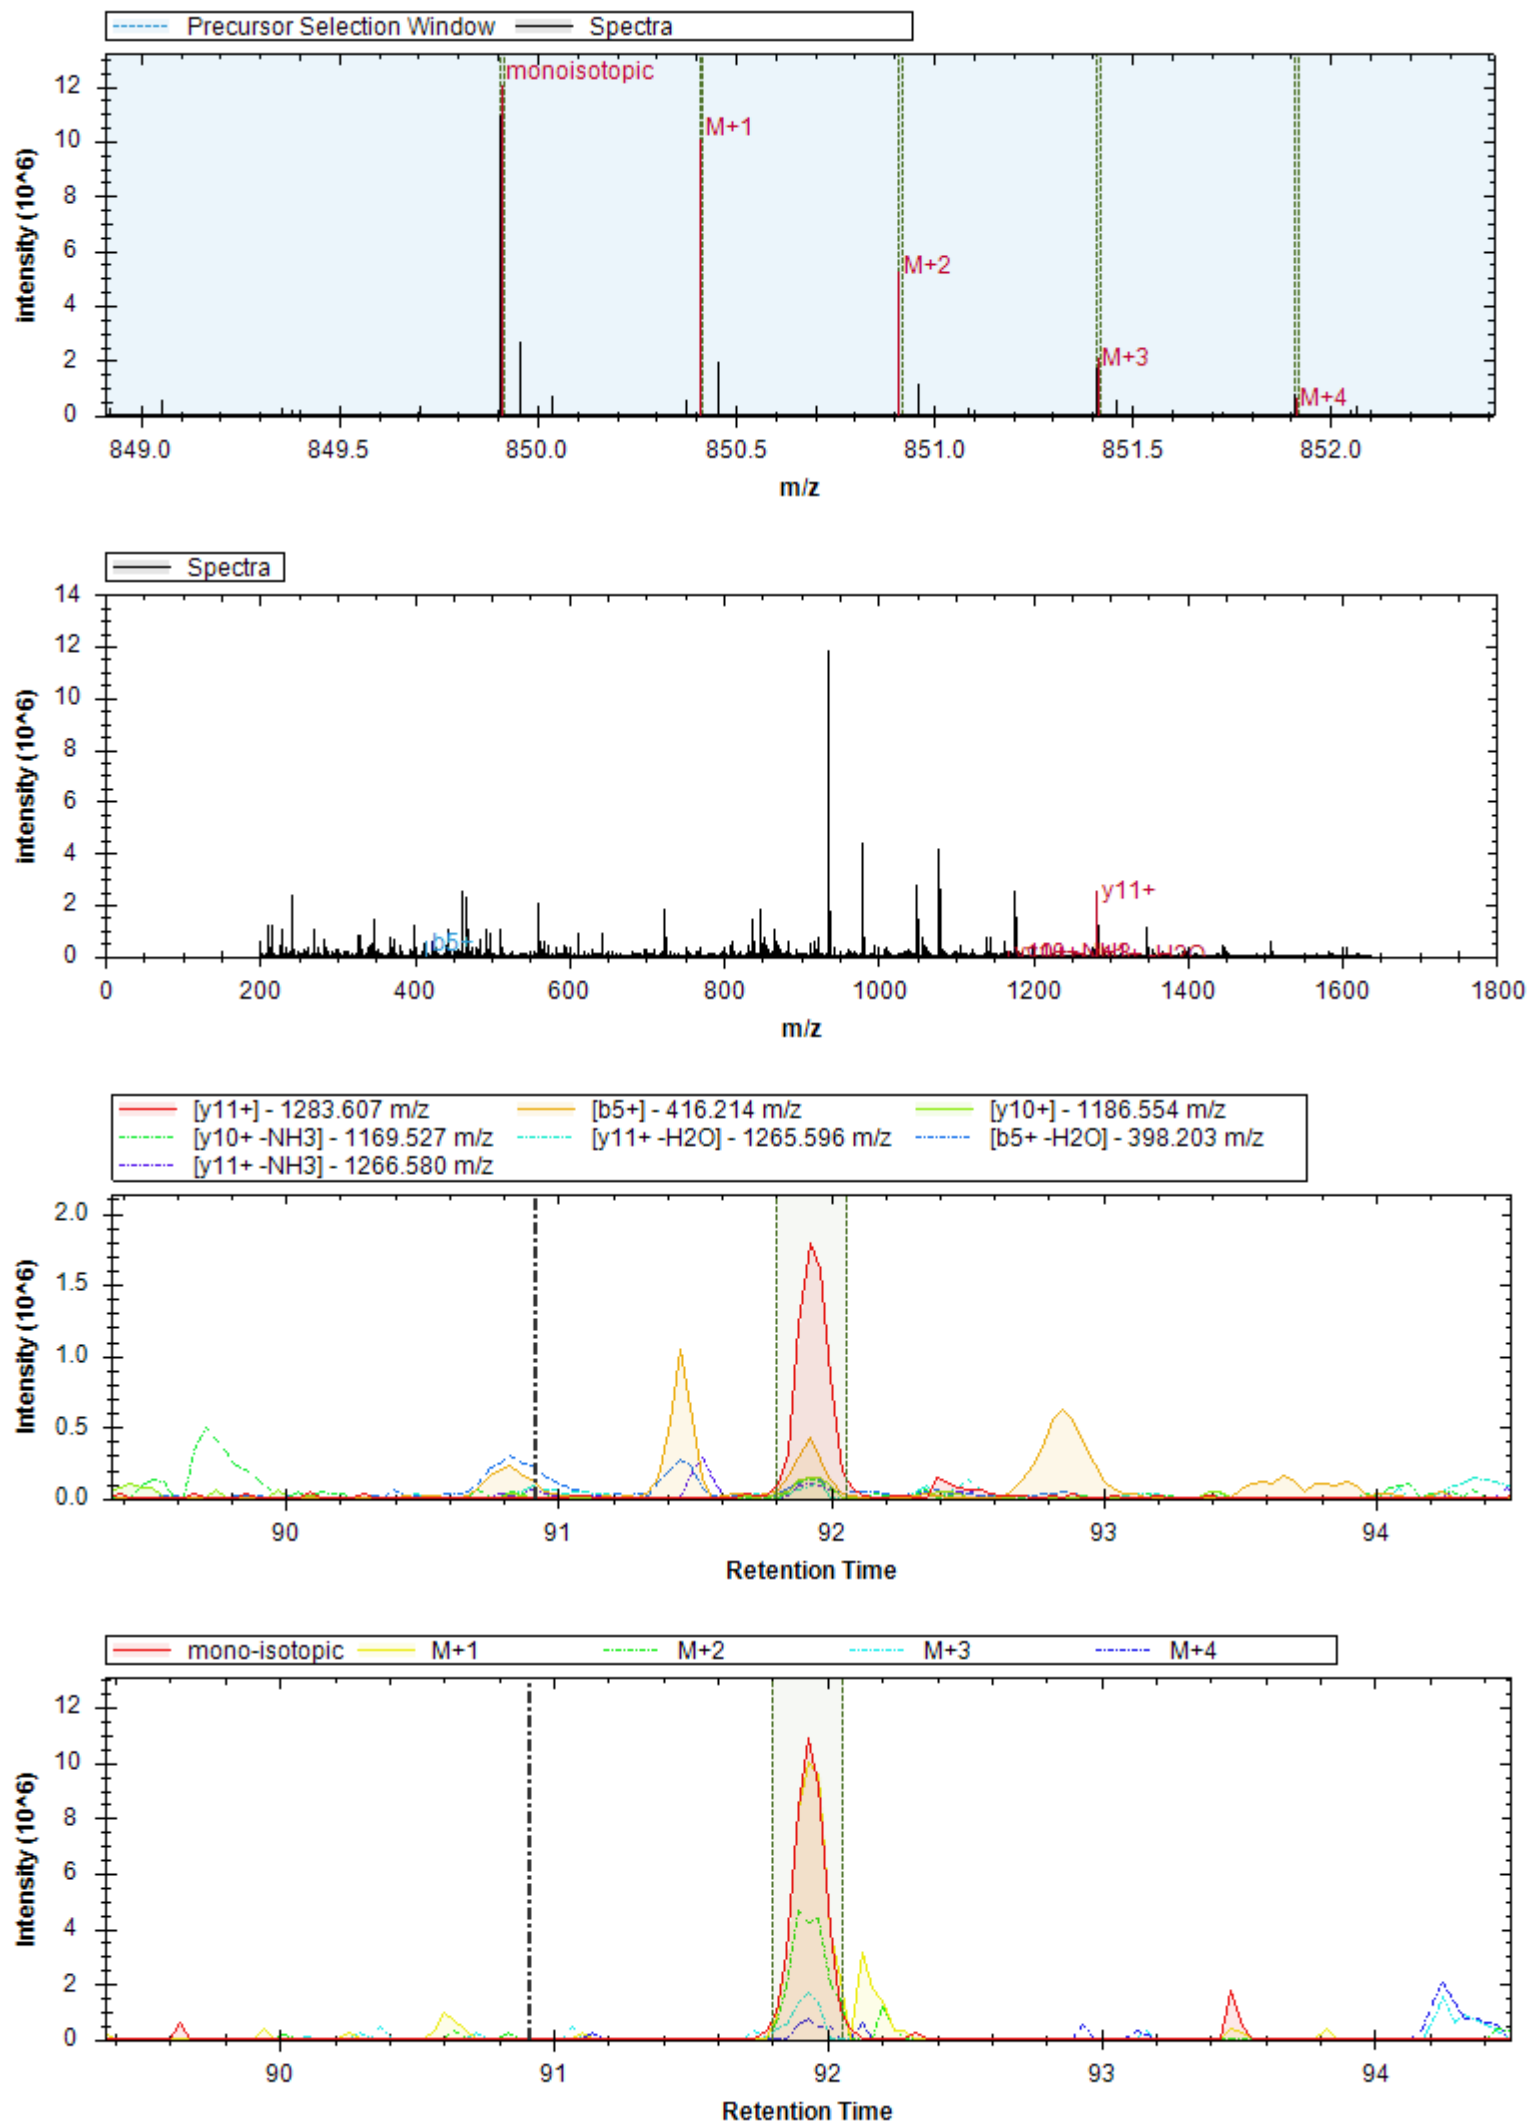

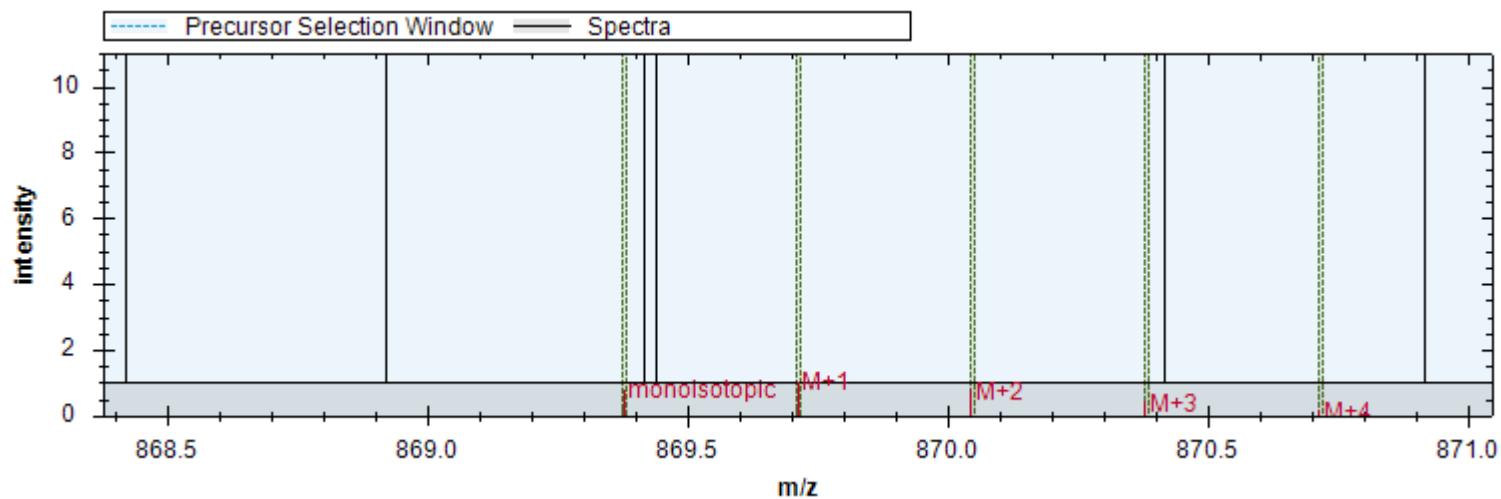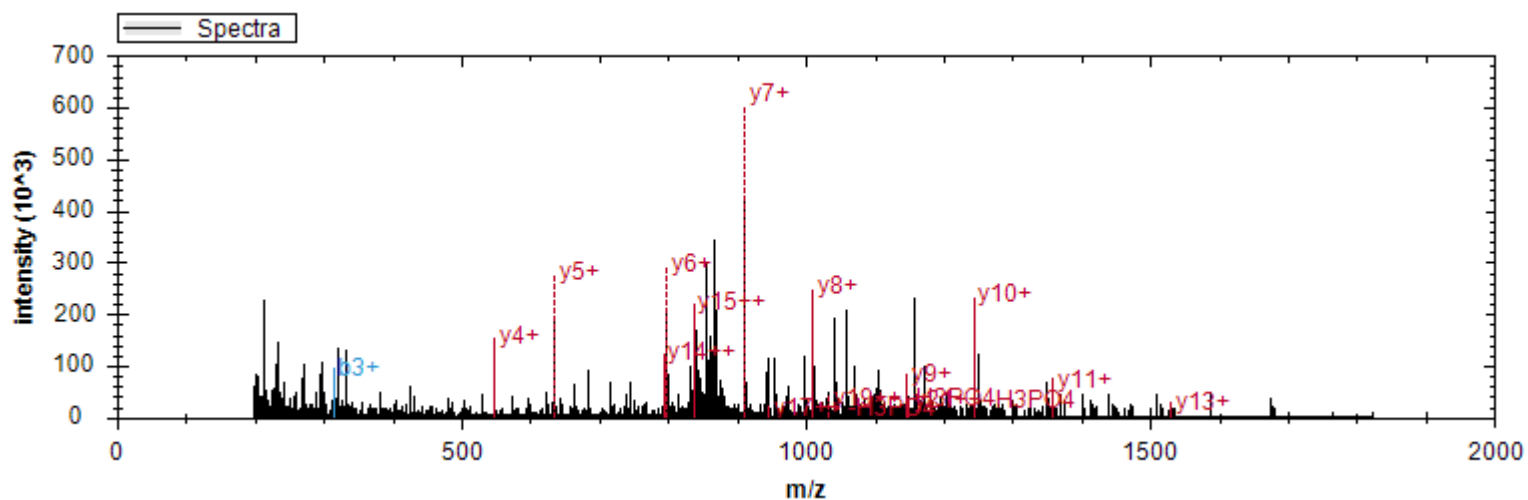

|                               |                               |                          |
|-------------------------------|-------------------------------|--------------------------|
| [y7+] - 911.462 m/z           | [y5+] - 635.315 m/z           | [y6+] - 798.378 m/z      |
| [y10+] - 1244.642 m/z         | [y8+] - 1010.531 m/z          | [y15+] - 837.897 m/z     |
| [y13+] - 1530.734 m/z         | [y4+] - 548.283 m/z           | [y14+] - 794.381 m/z     |
| [y17++ -H3PO4] - 945.942 m/z  | [b3+] - 315.166 m/z           | [y9+] - 1147.589 m/z     |
| [y19++ -H3PO4] - 1032.974 m/z | [y11+] - 1358.685 m/z         | [b4+ -H2O] - 426.198 m/z |
| [y21++] - 1197.008 m/z        | [y21++ -H3PO4] - 1148.019 m/z |                          |

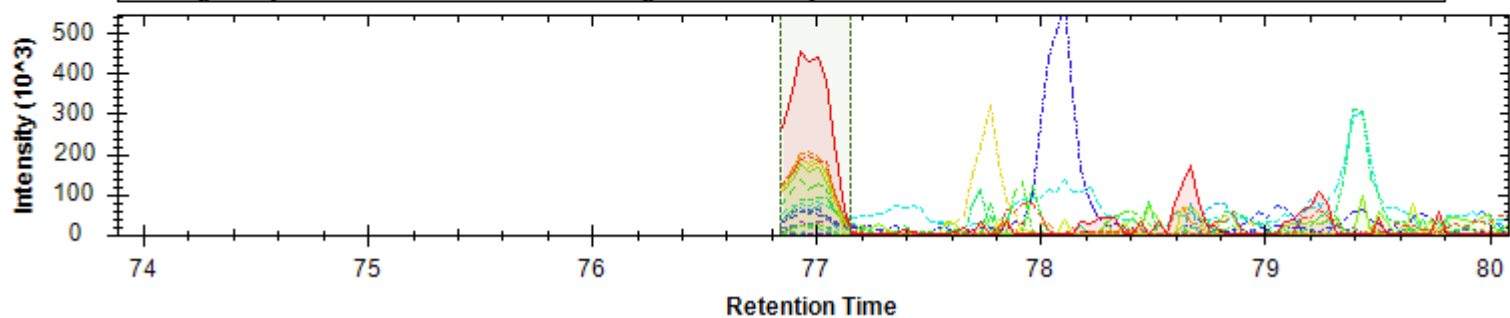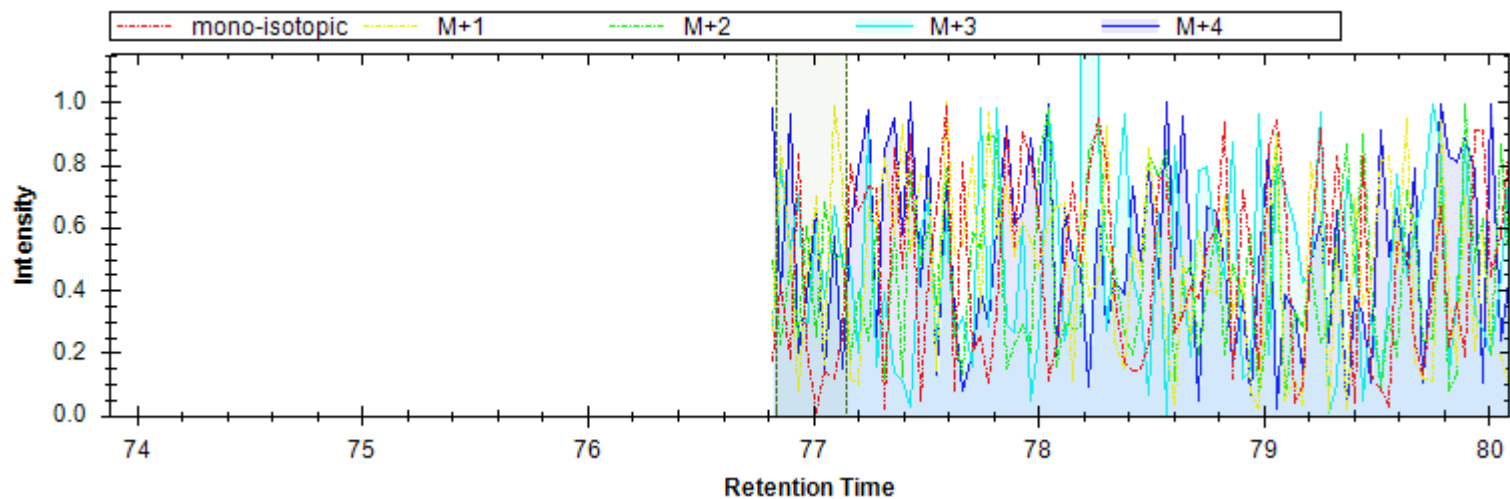

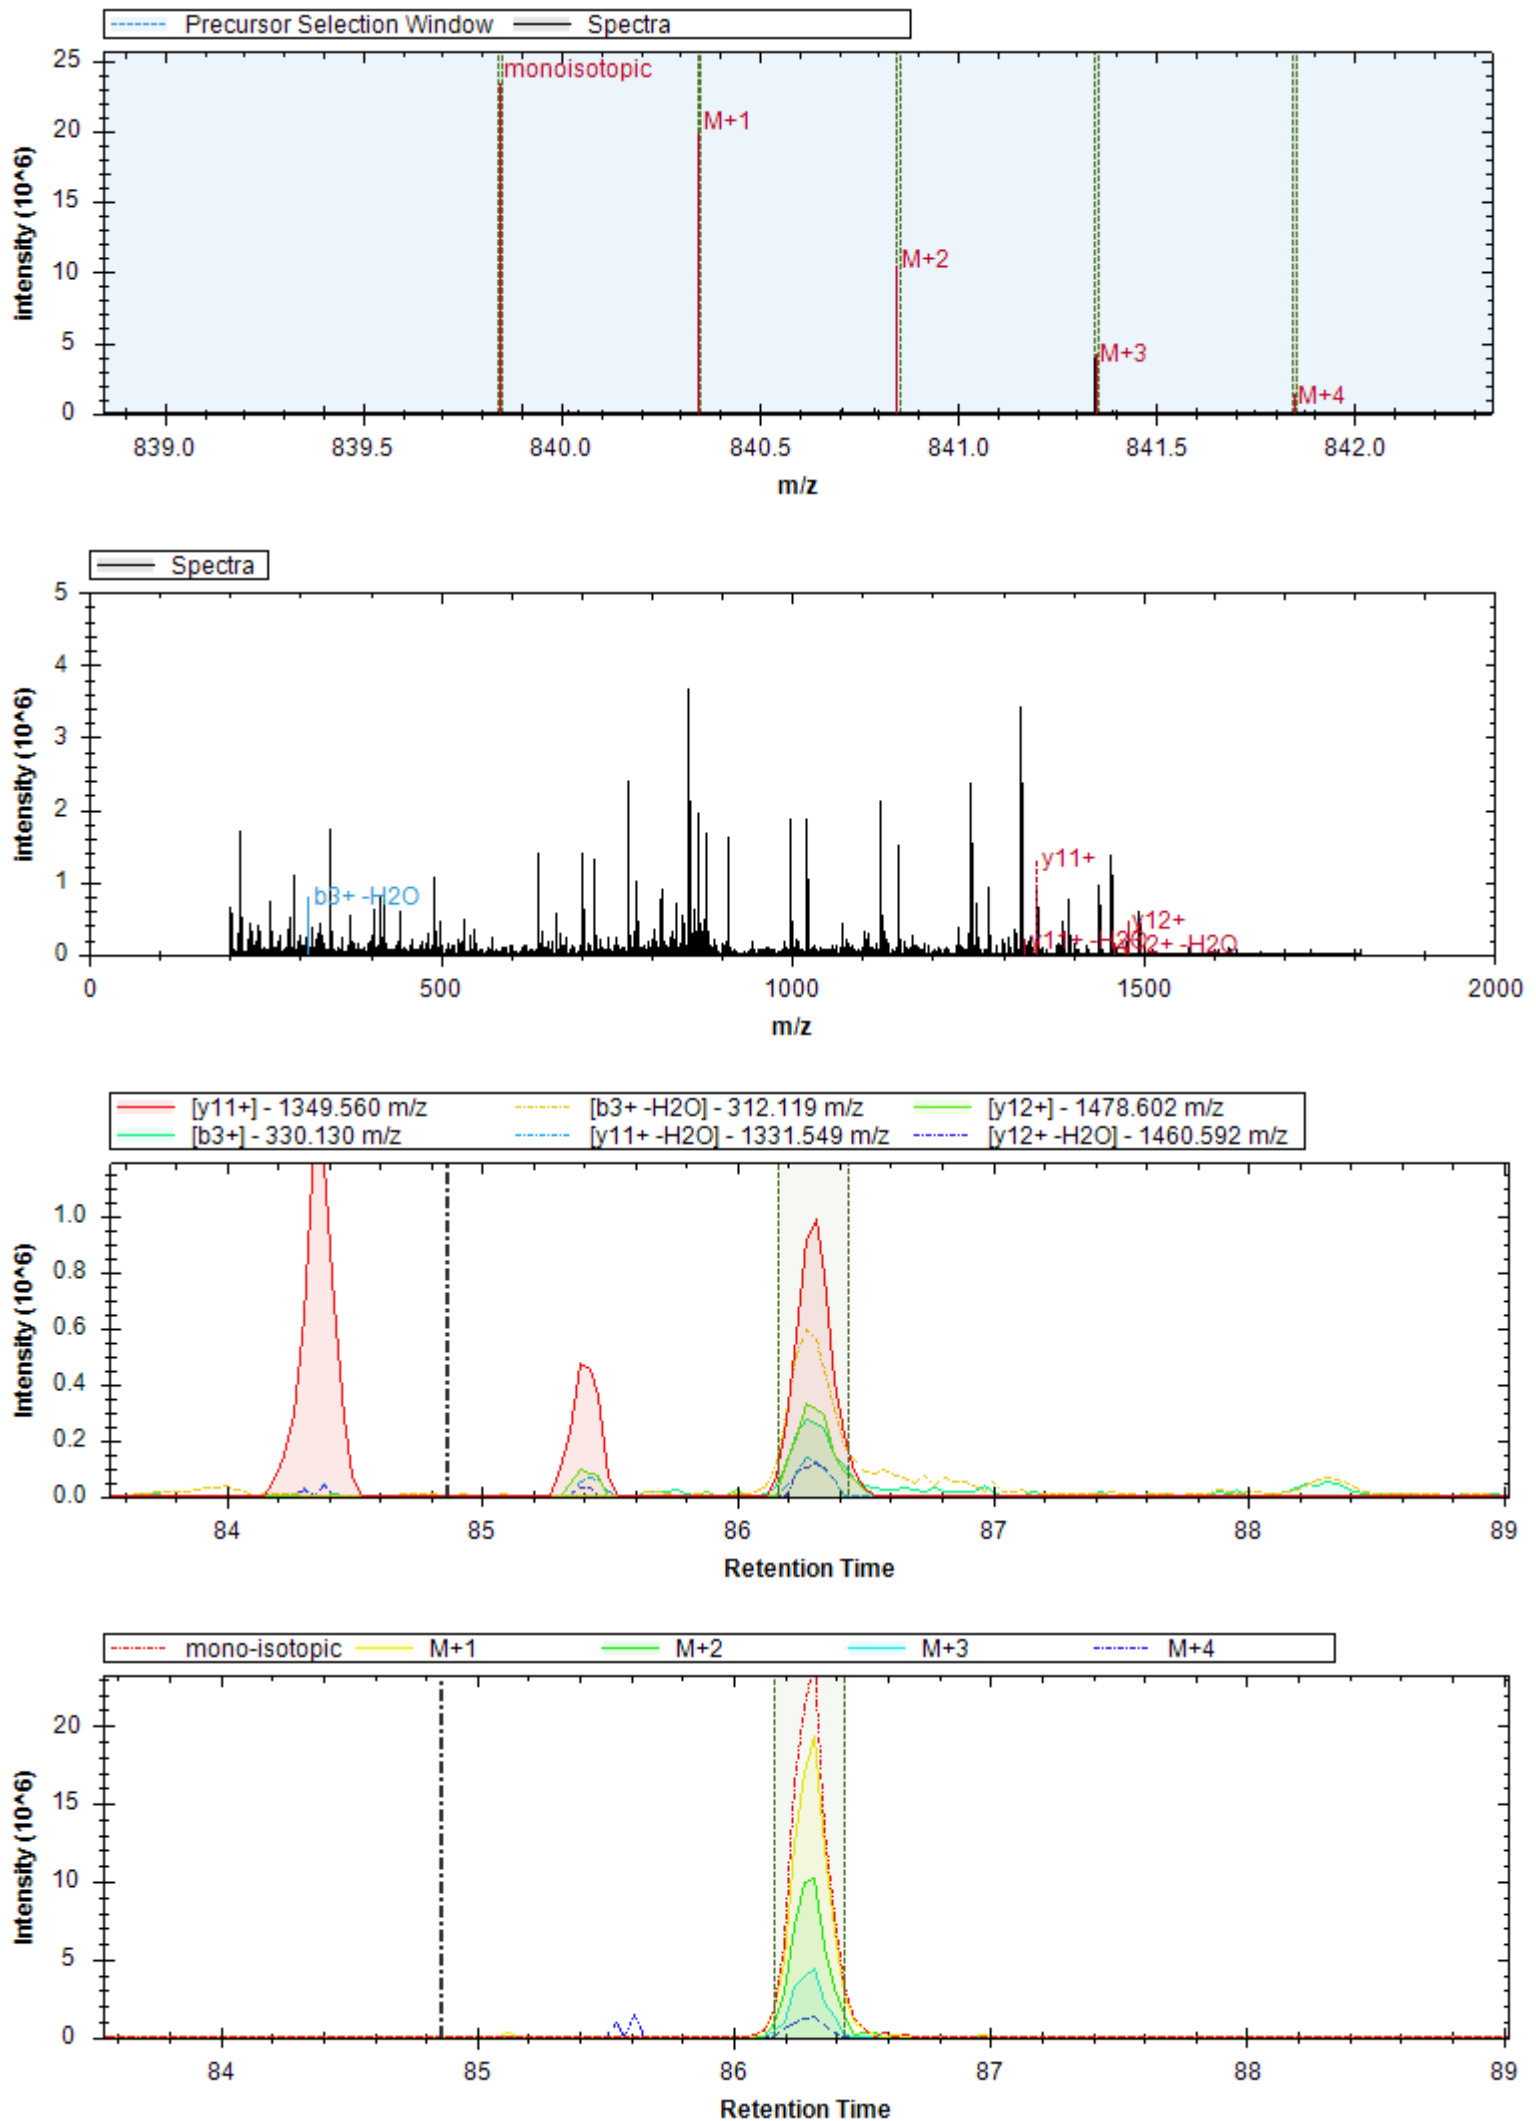



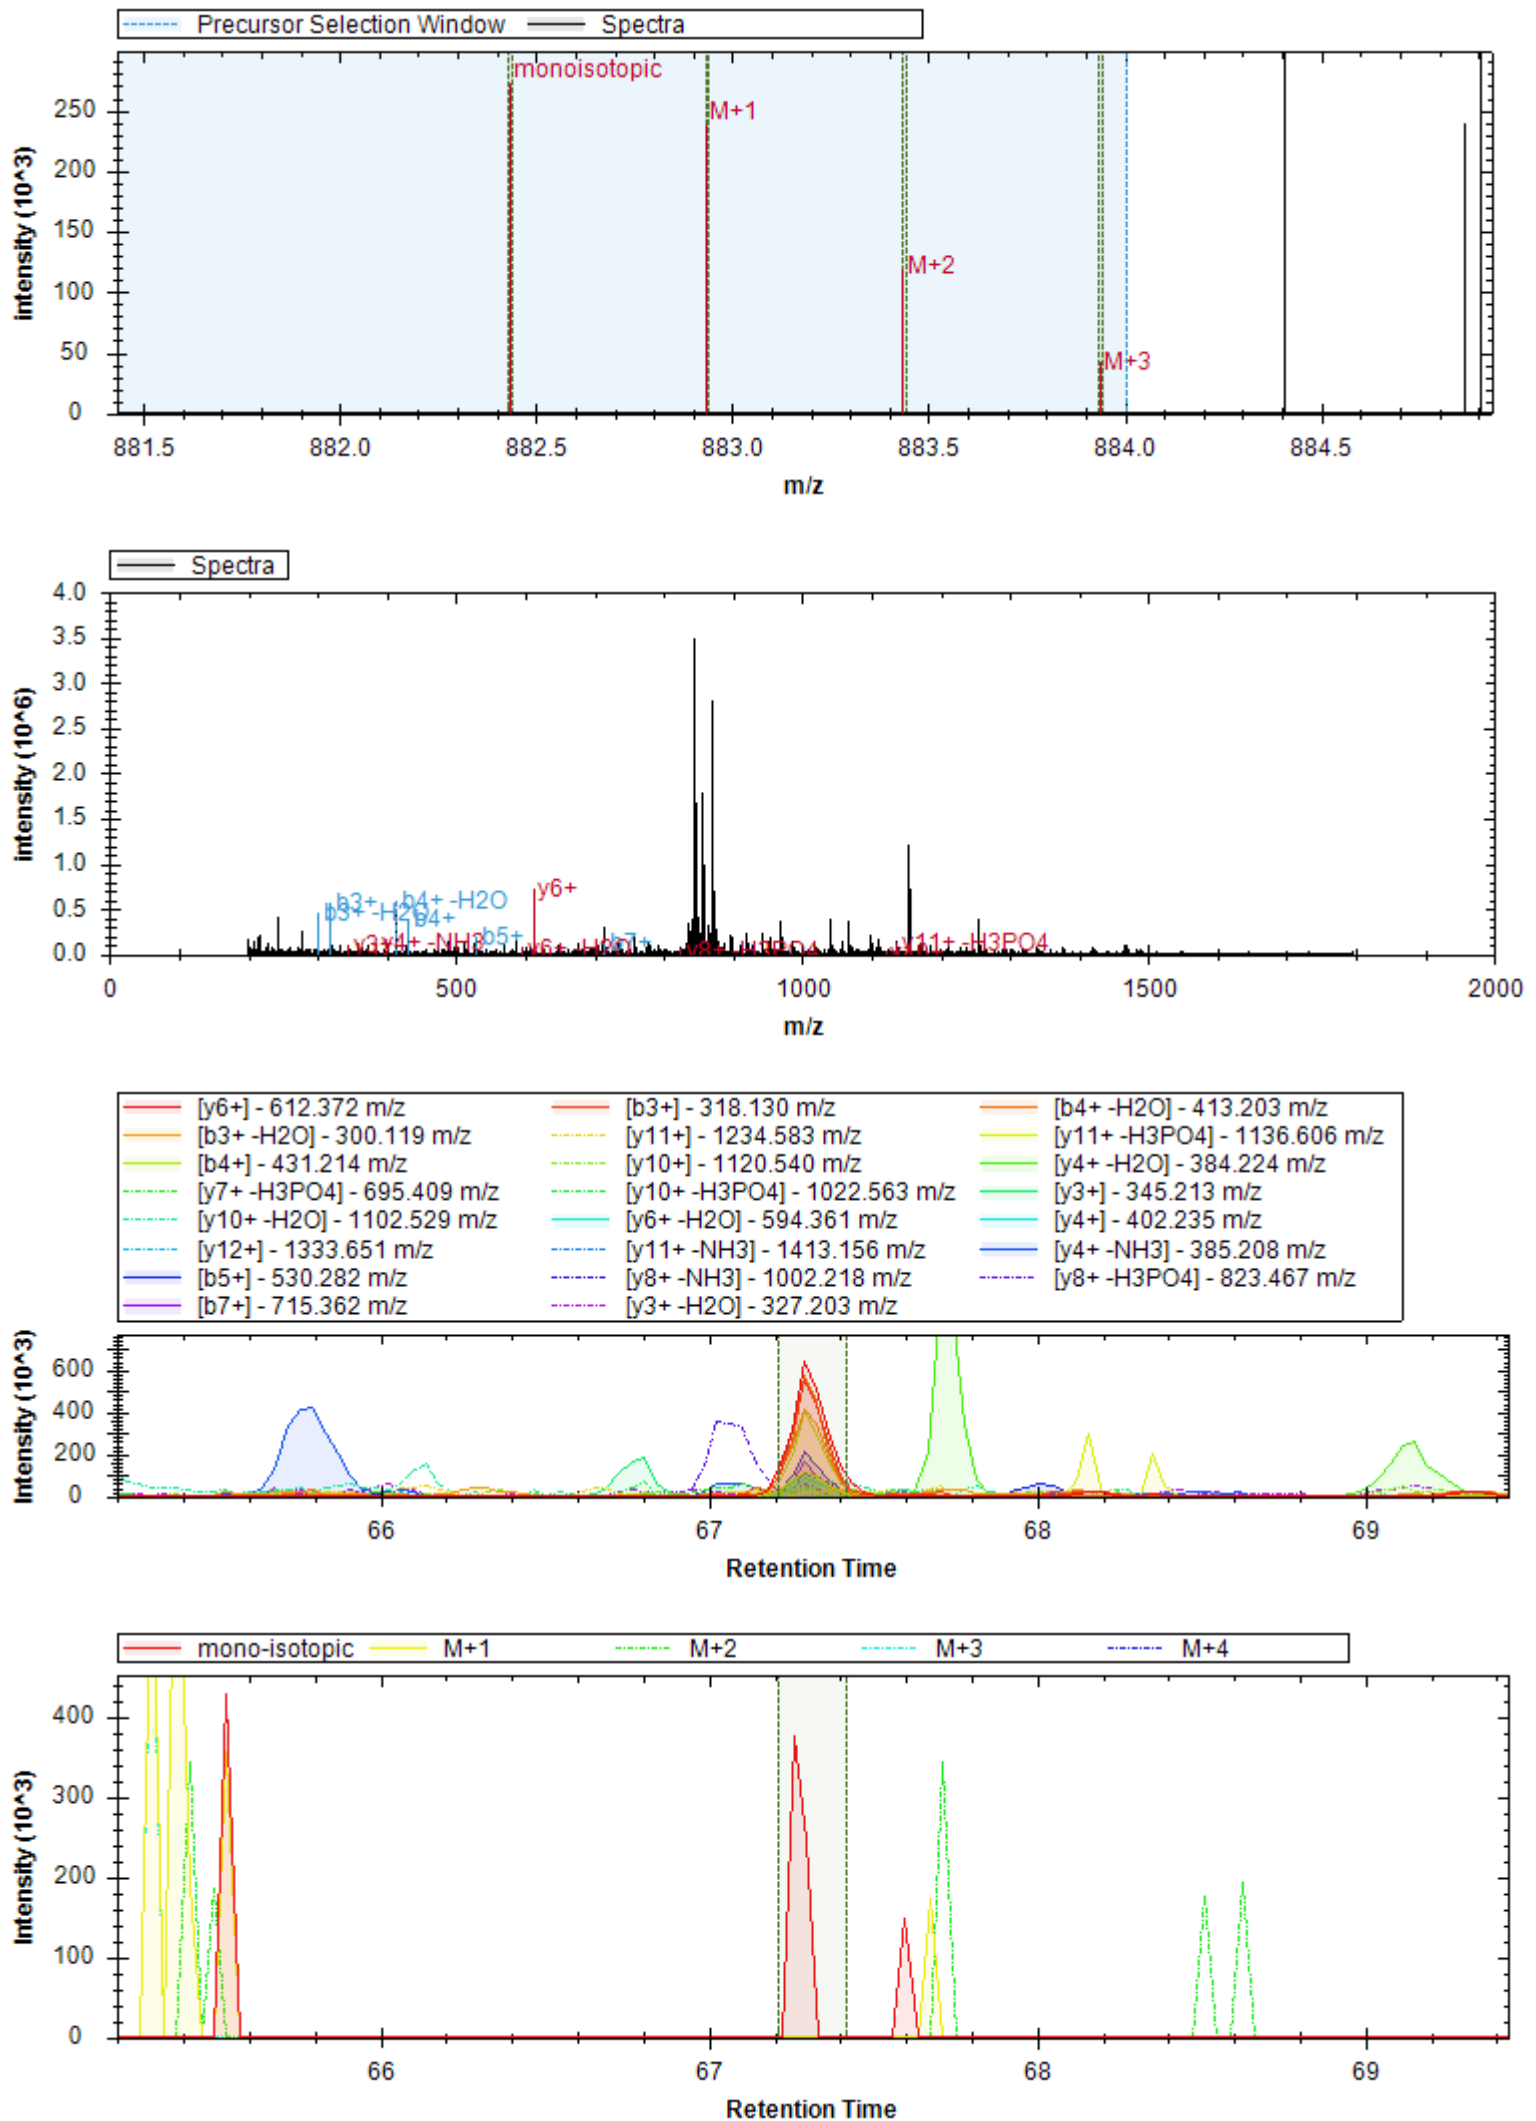

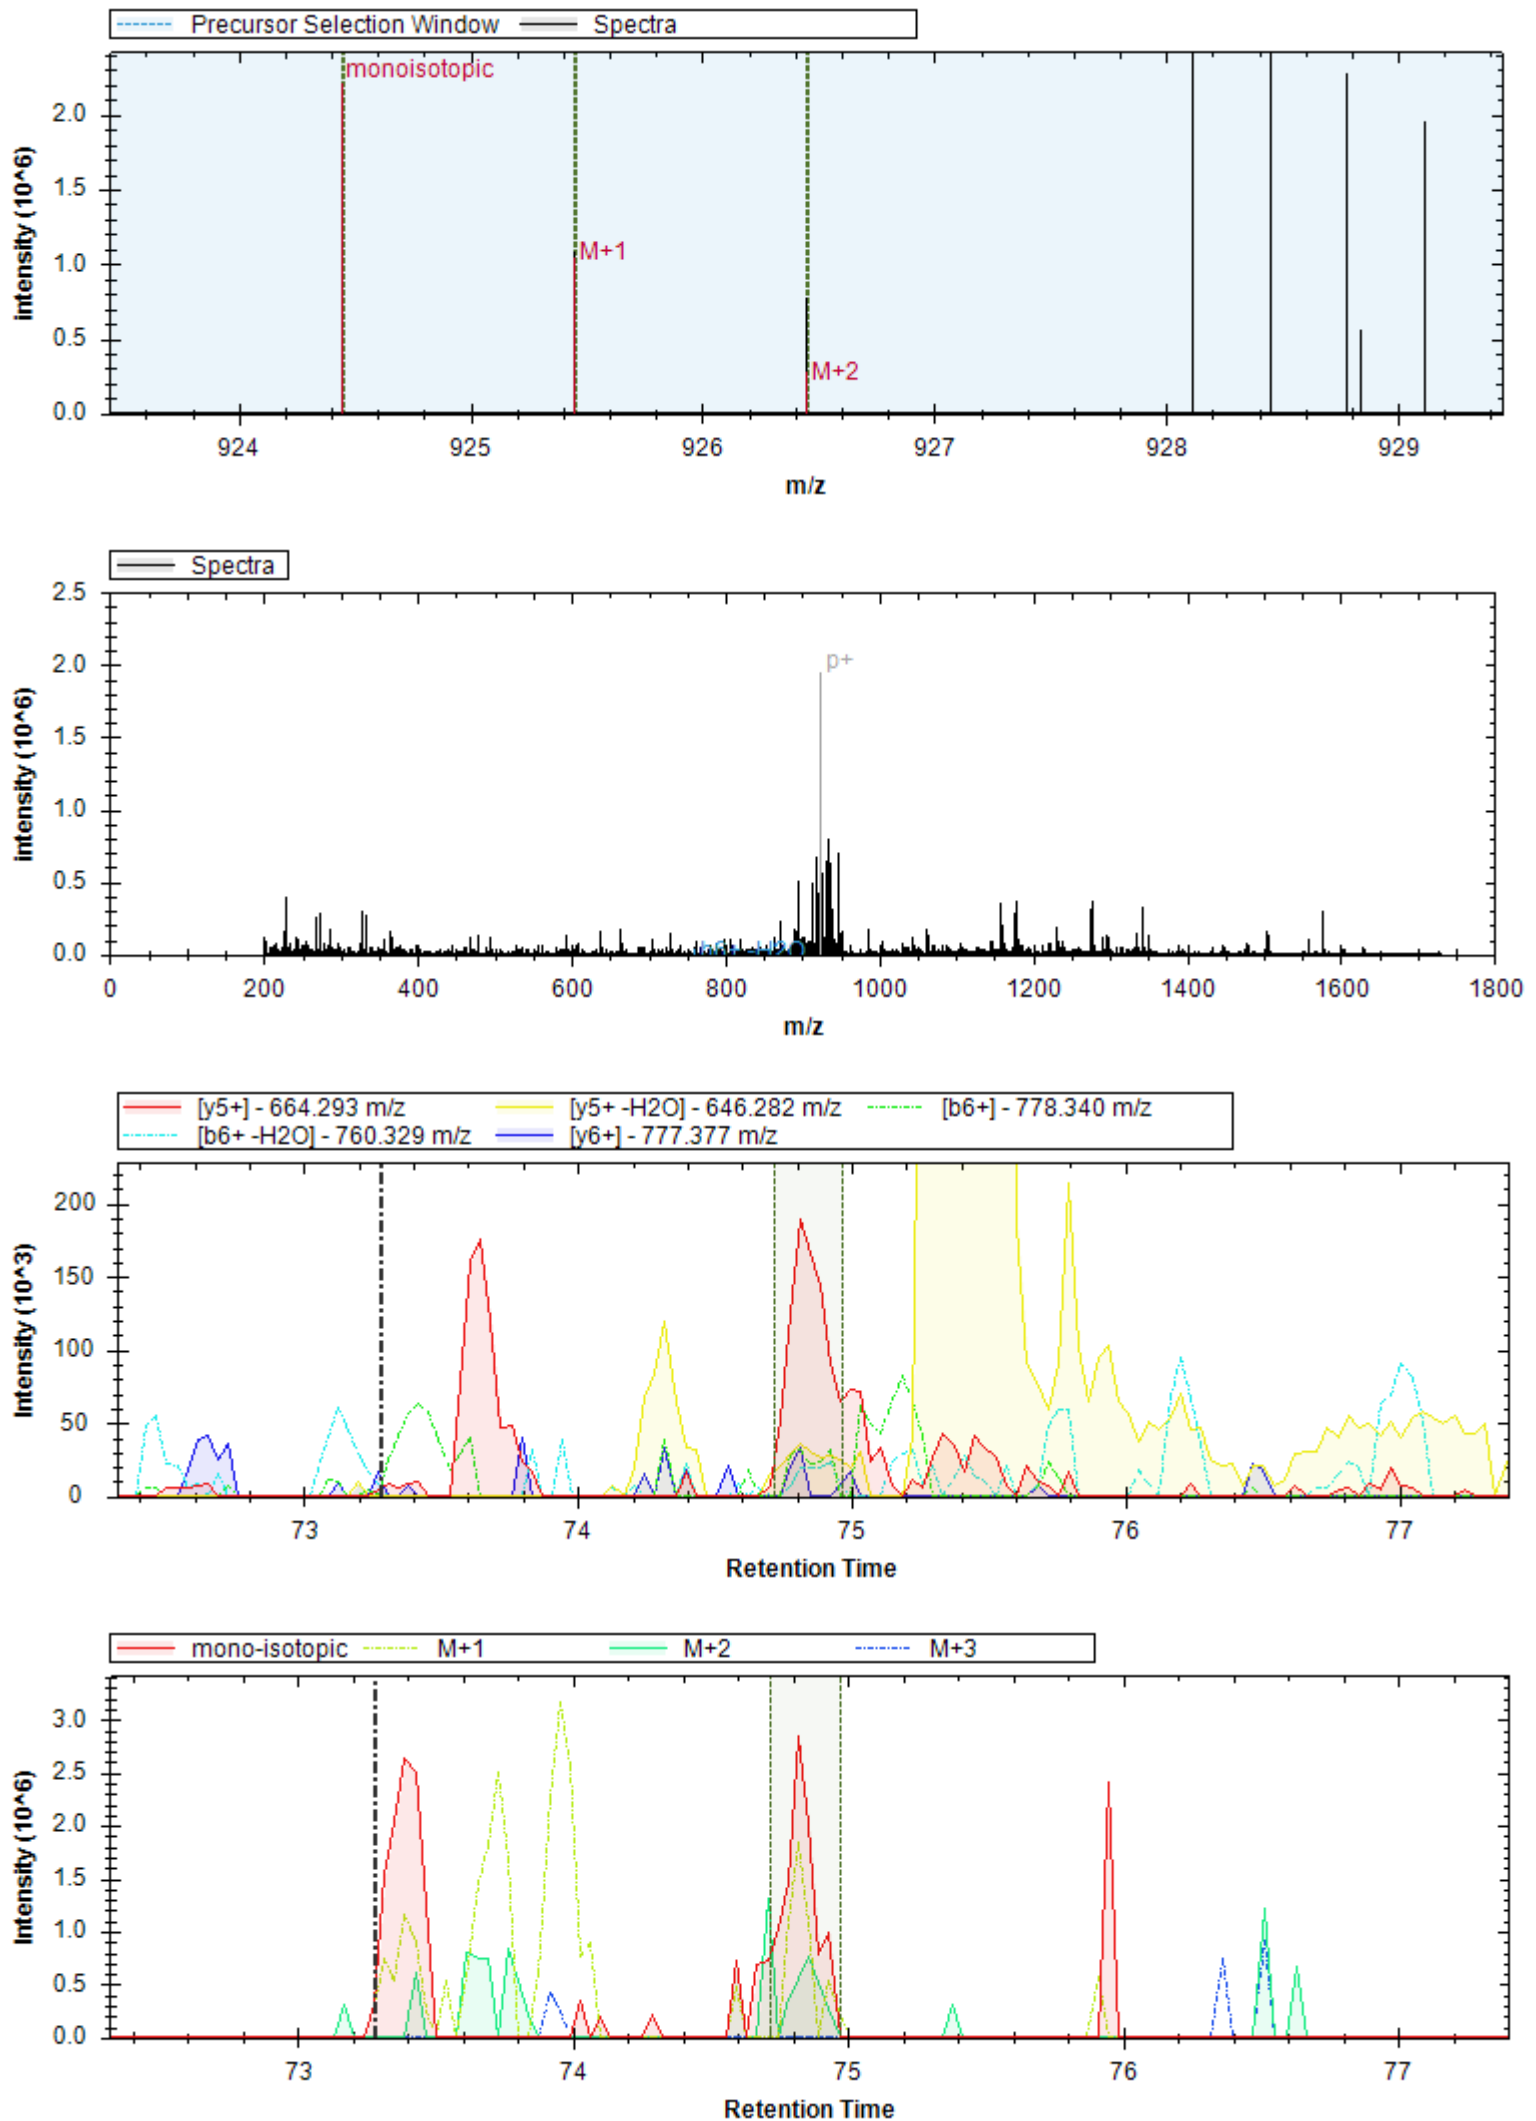

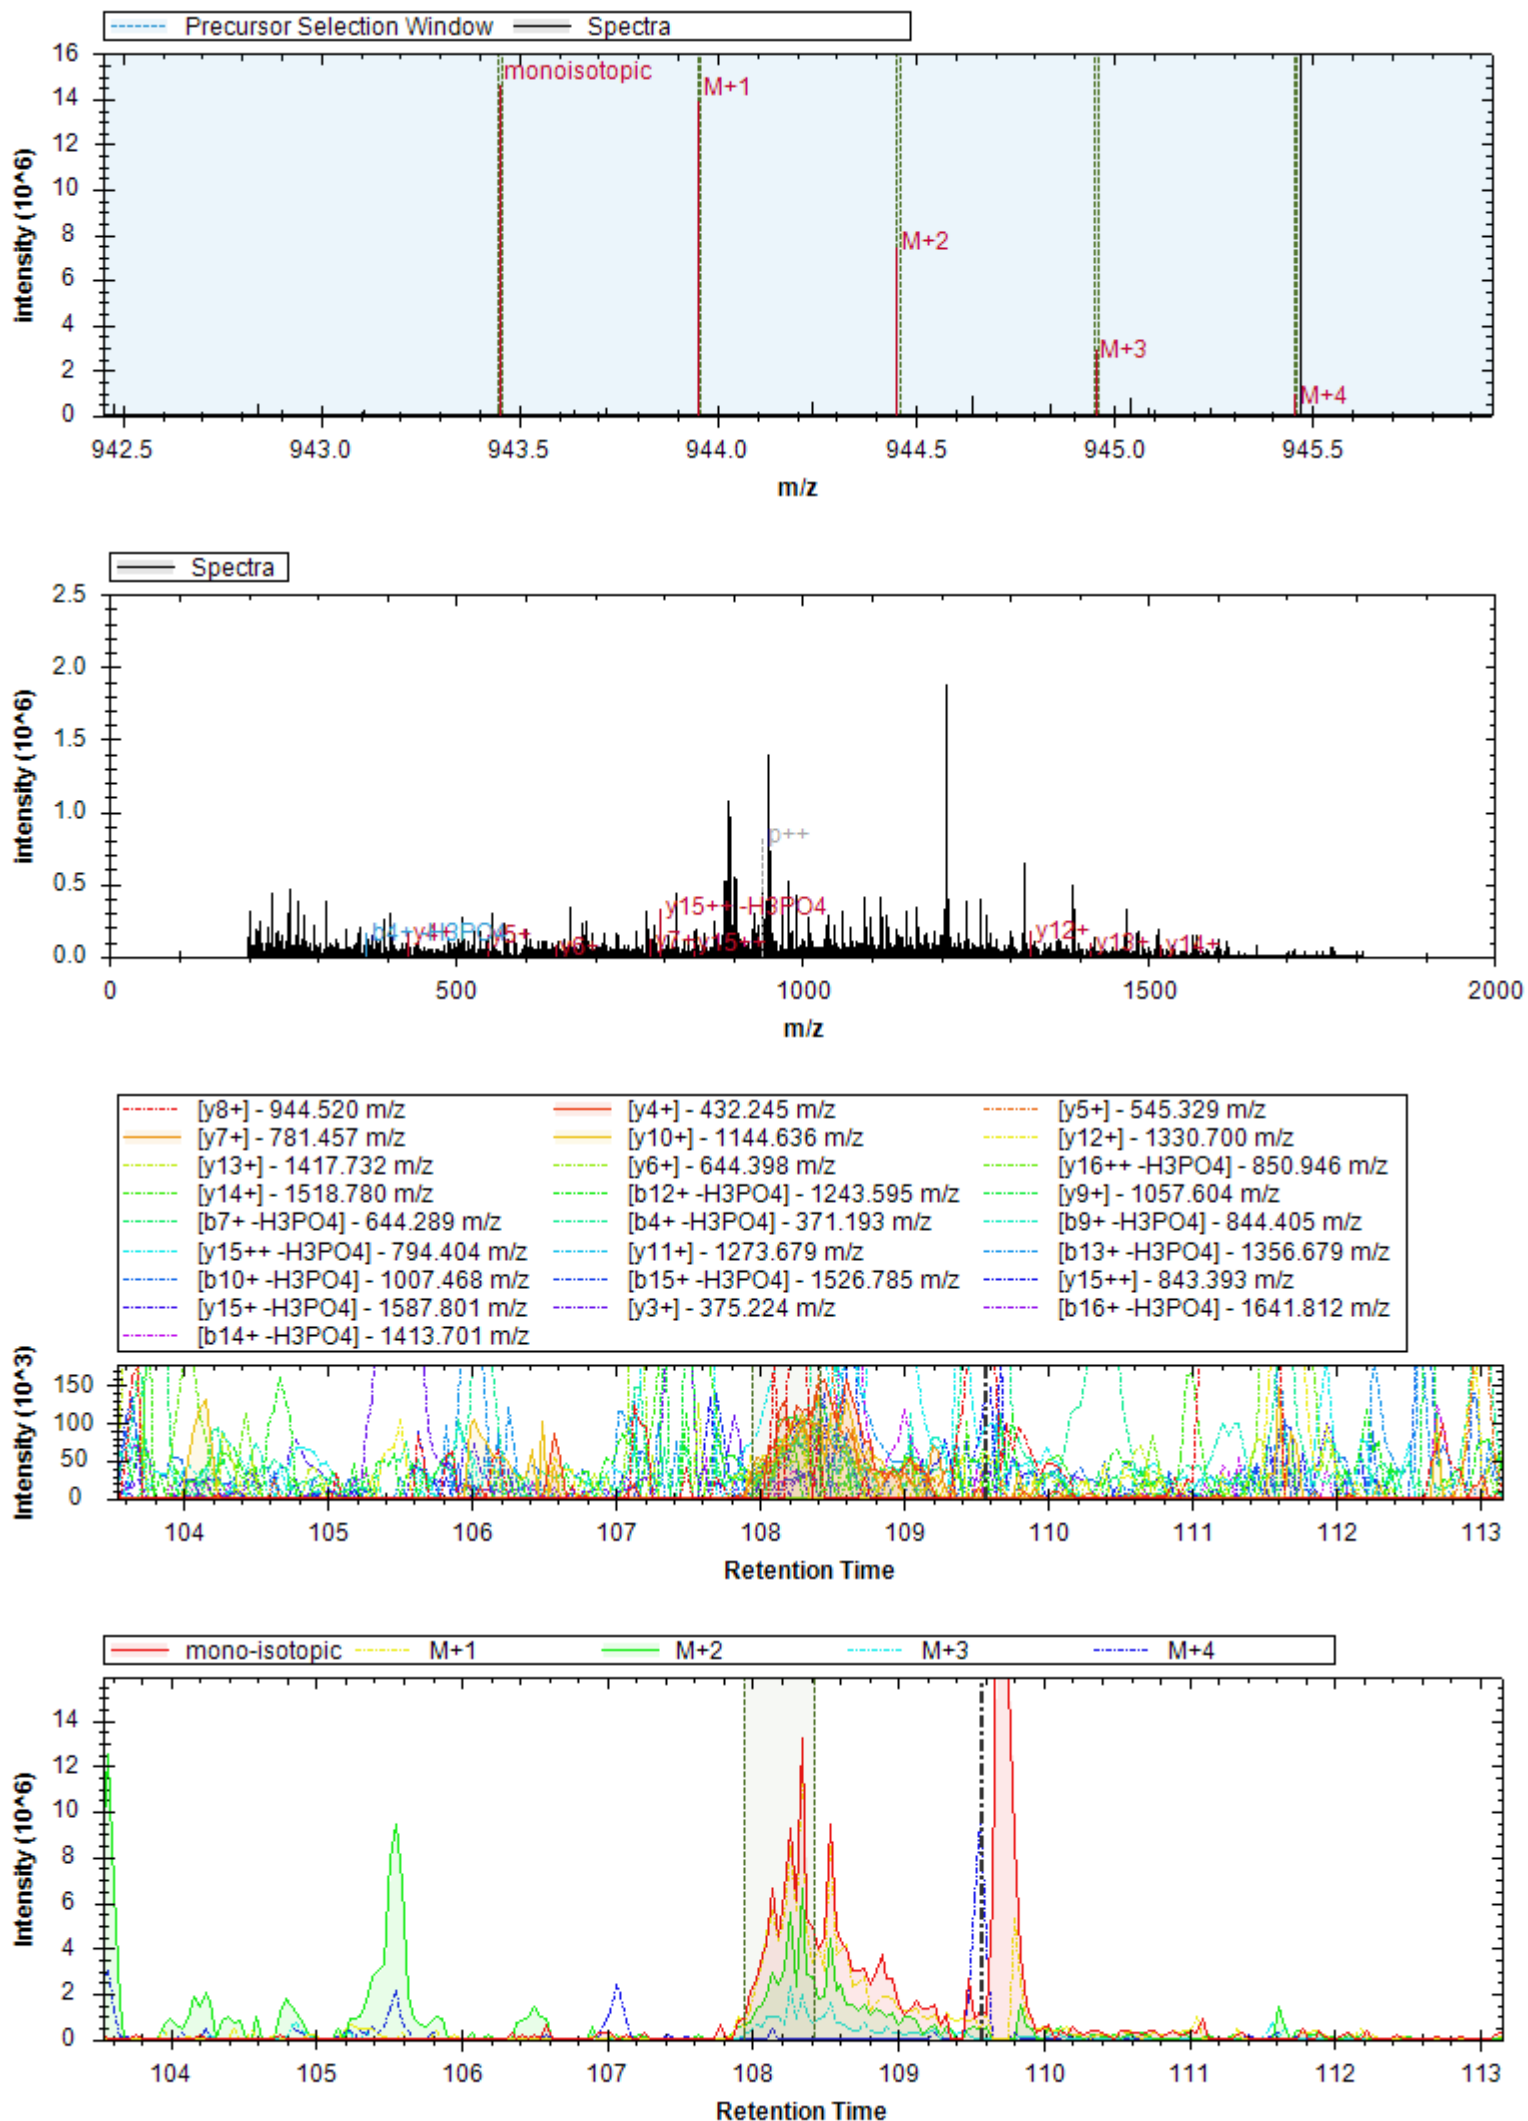

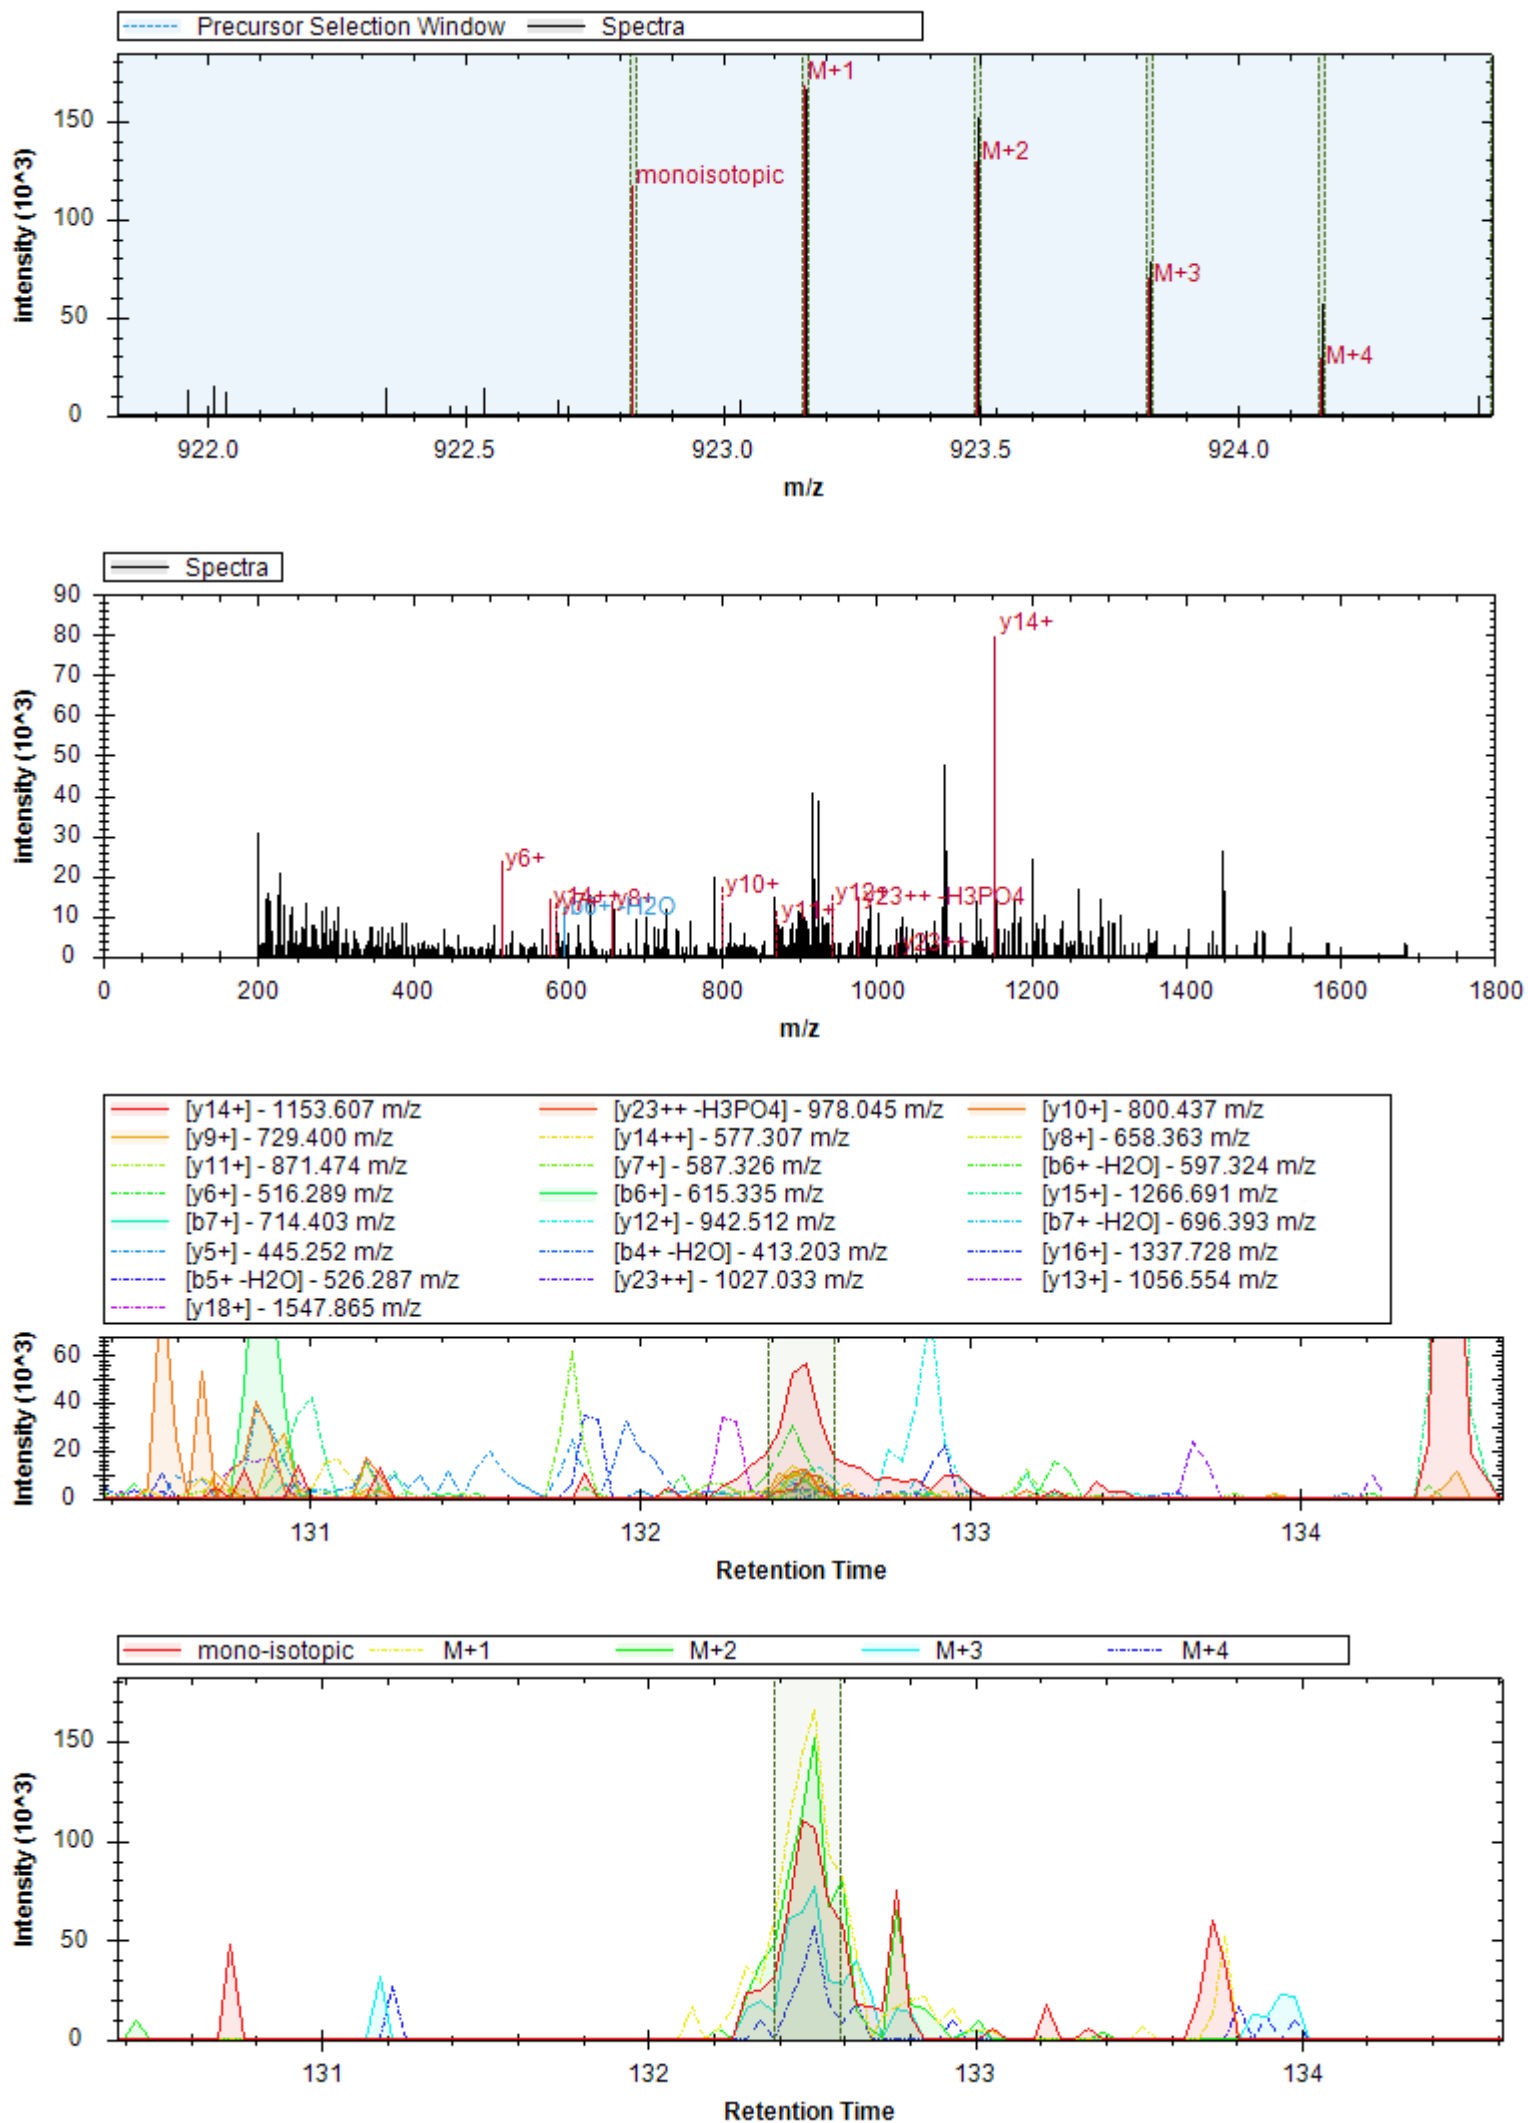

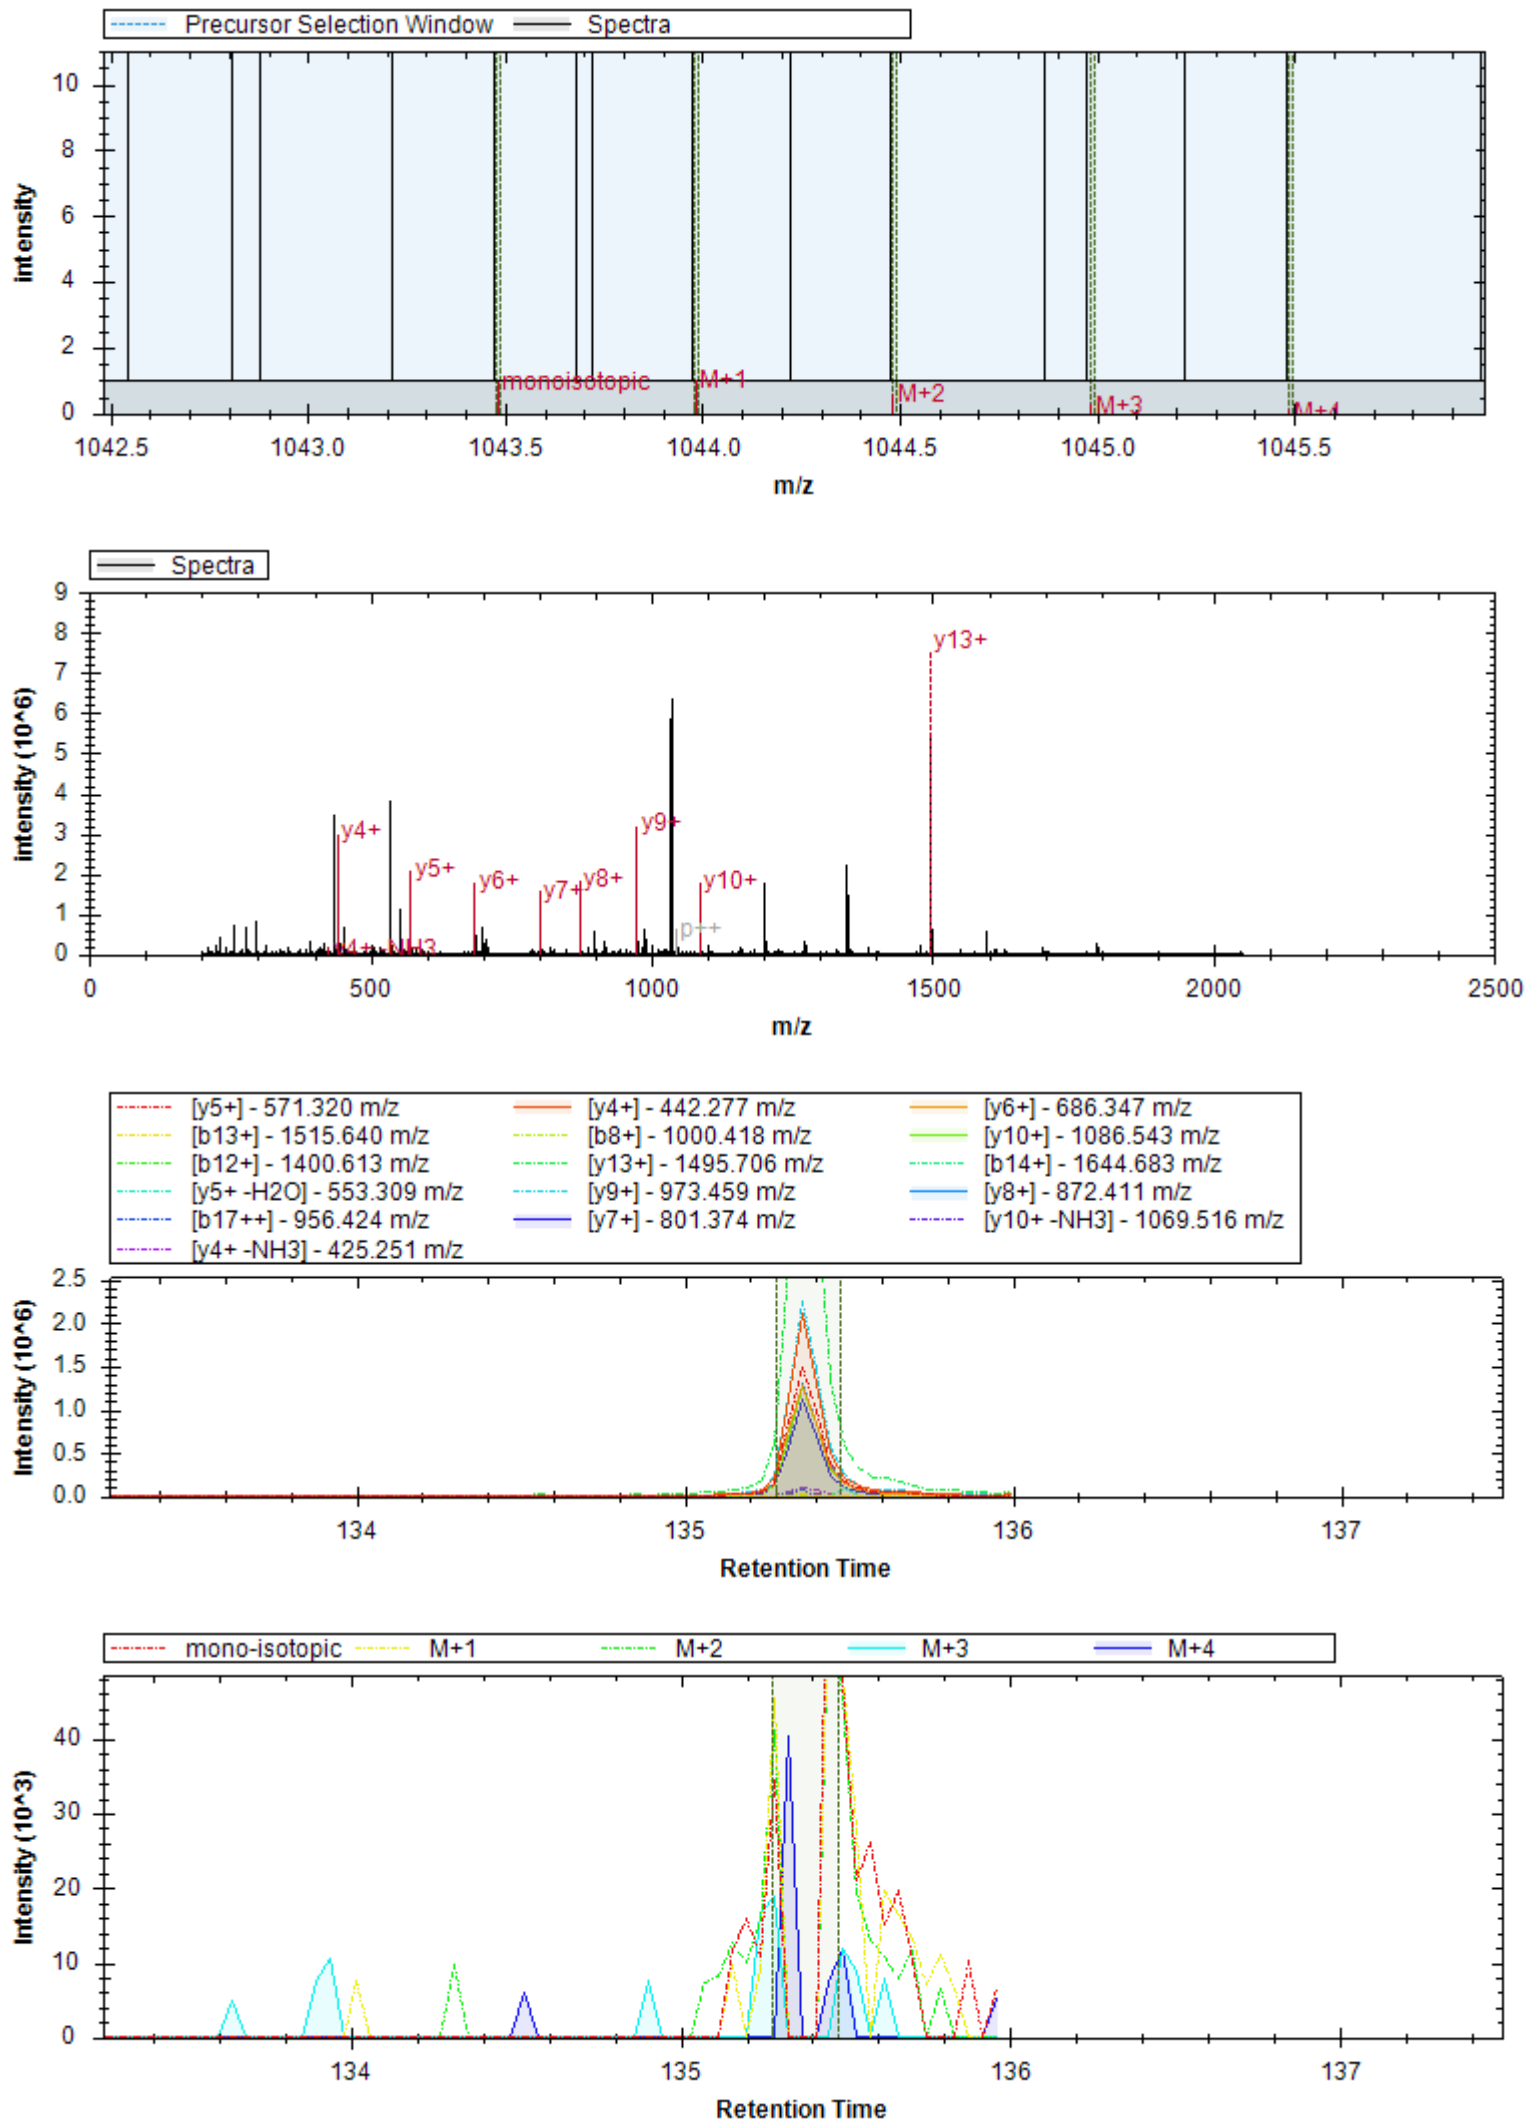

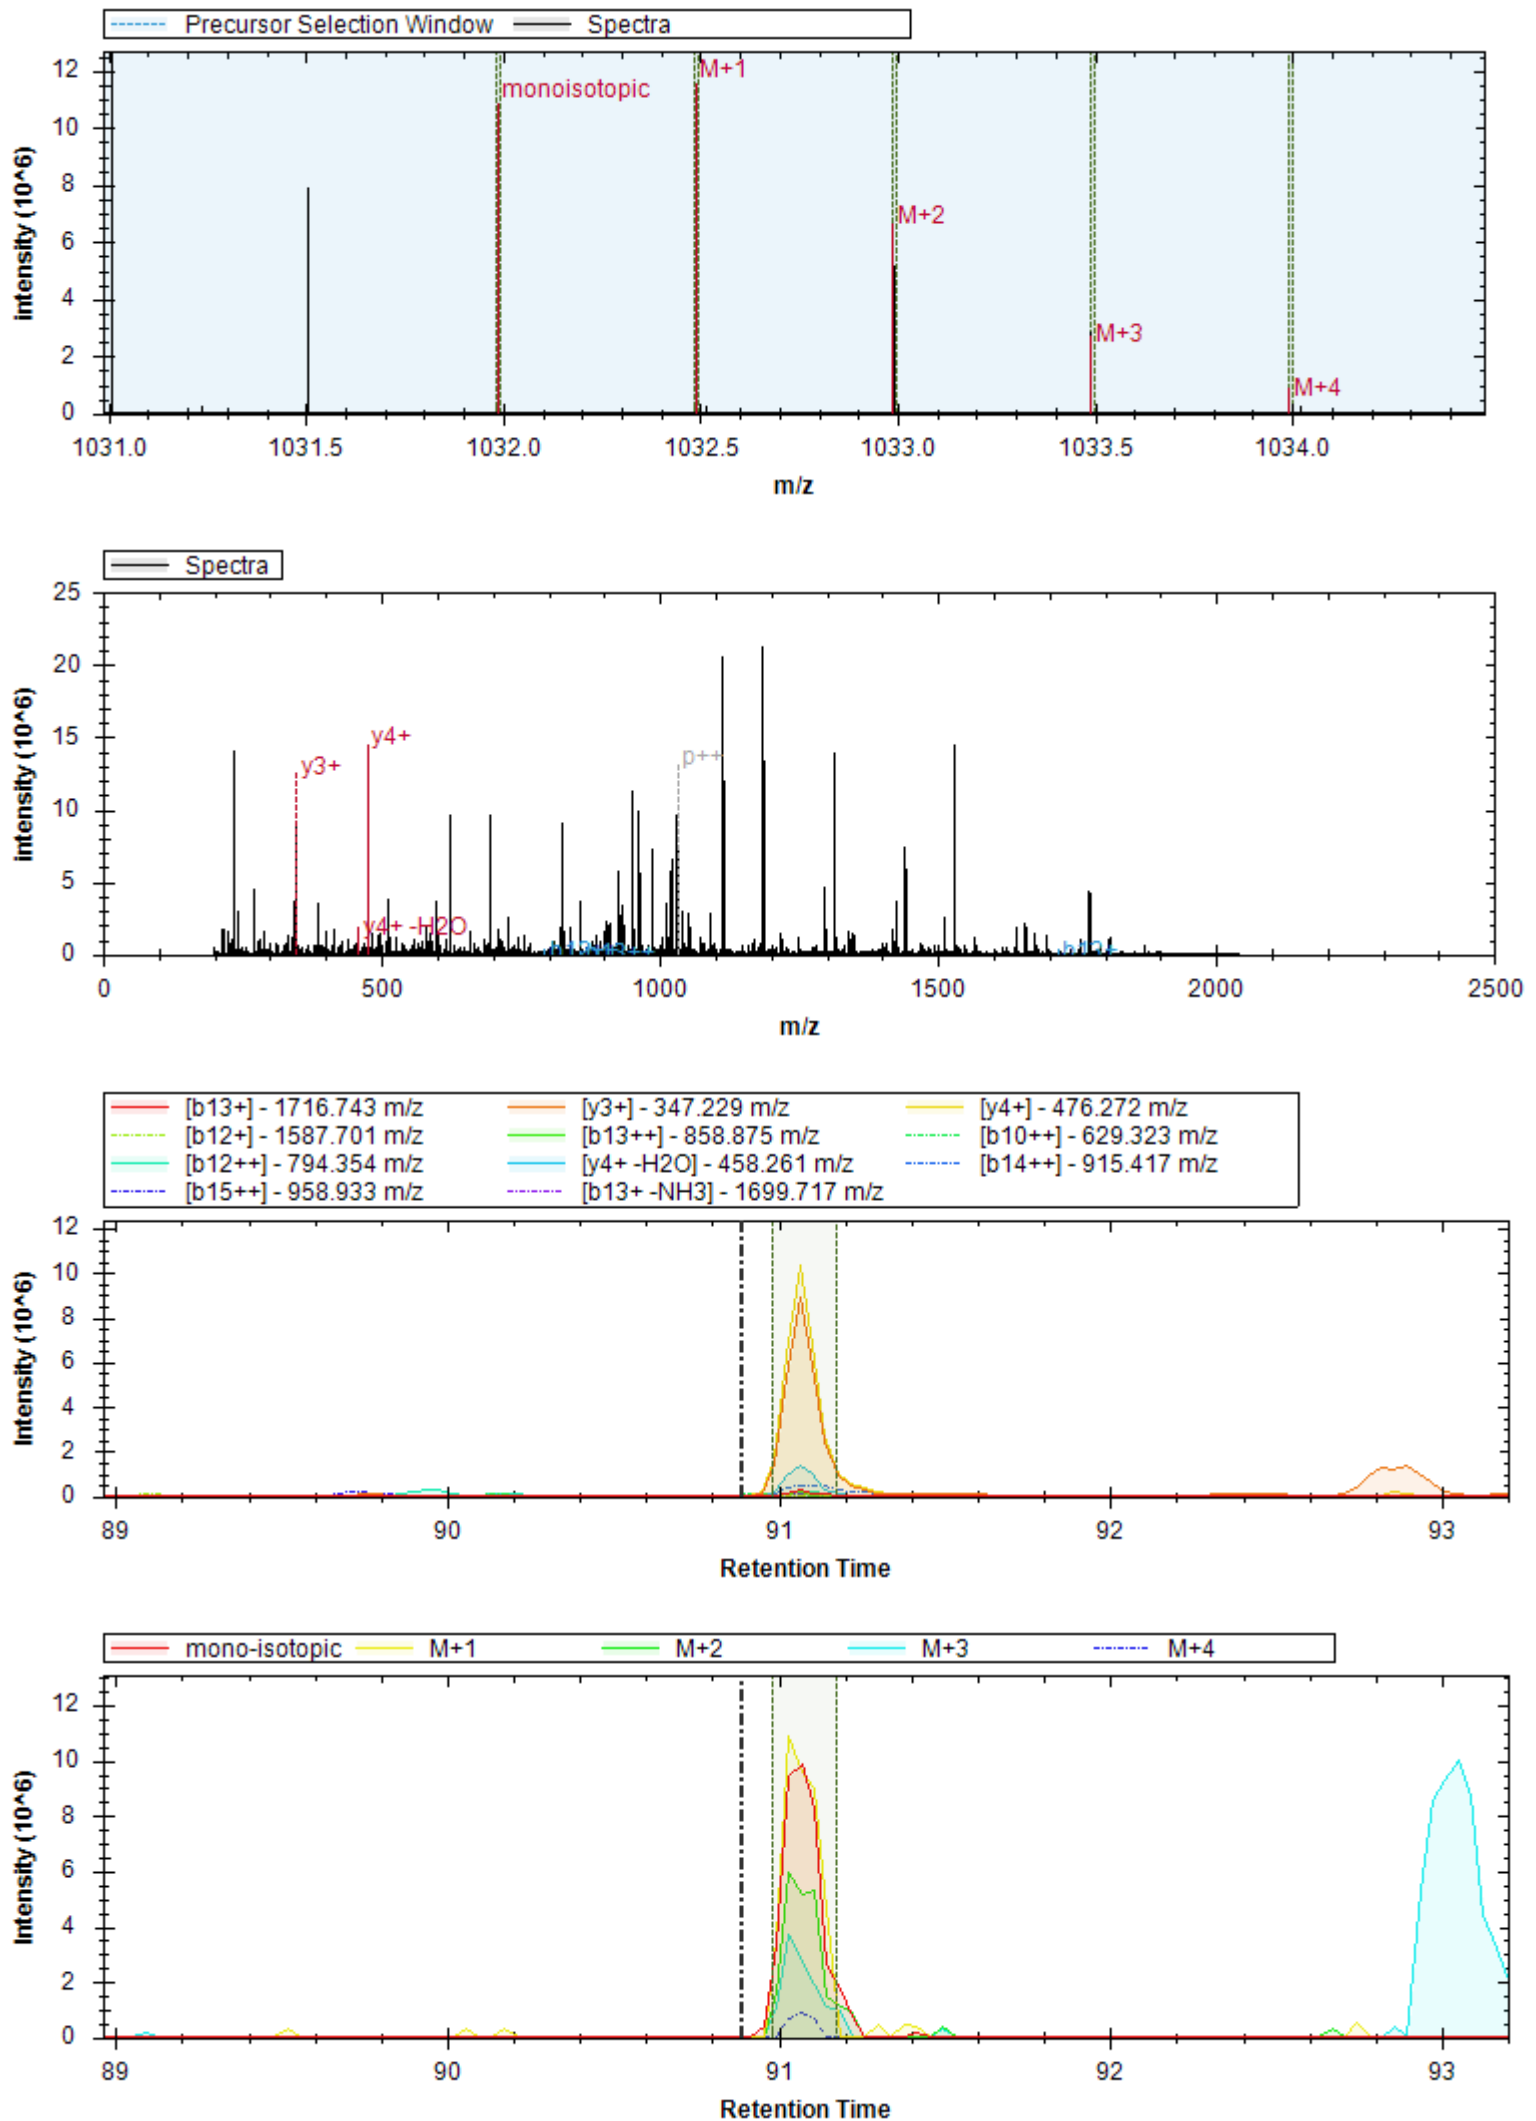

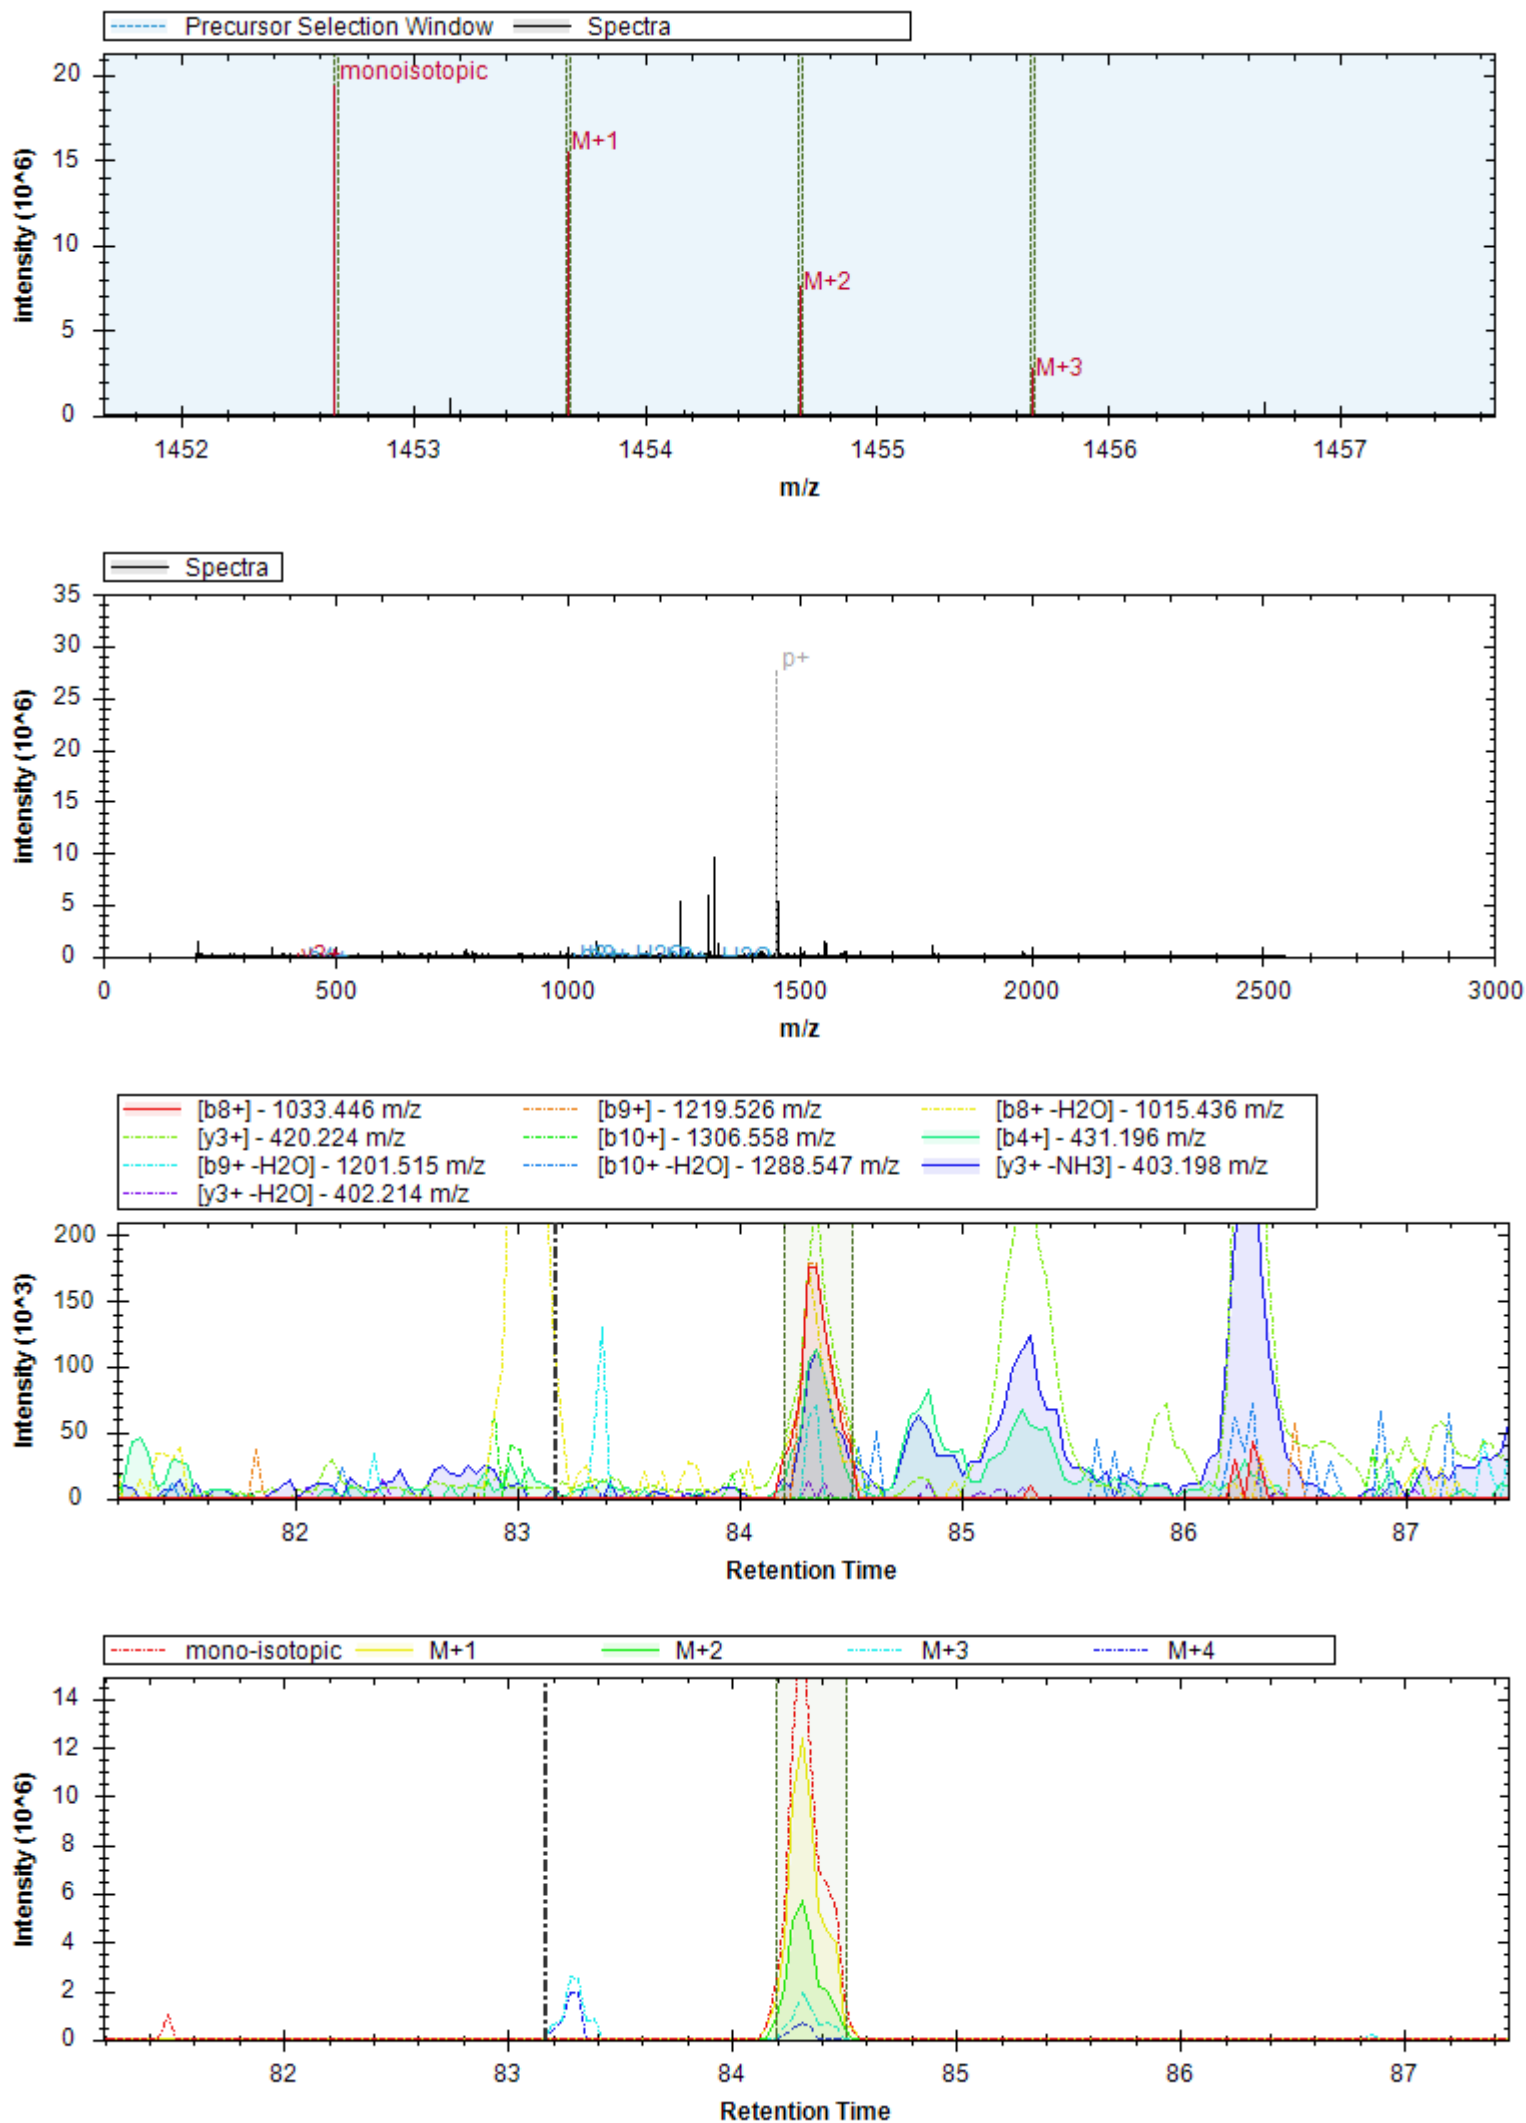

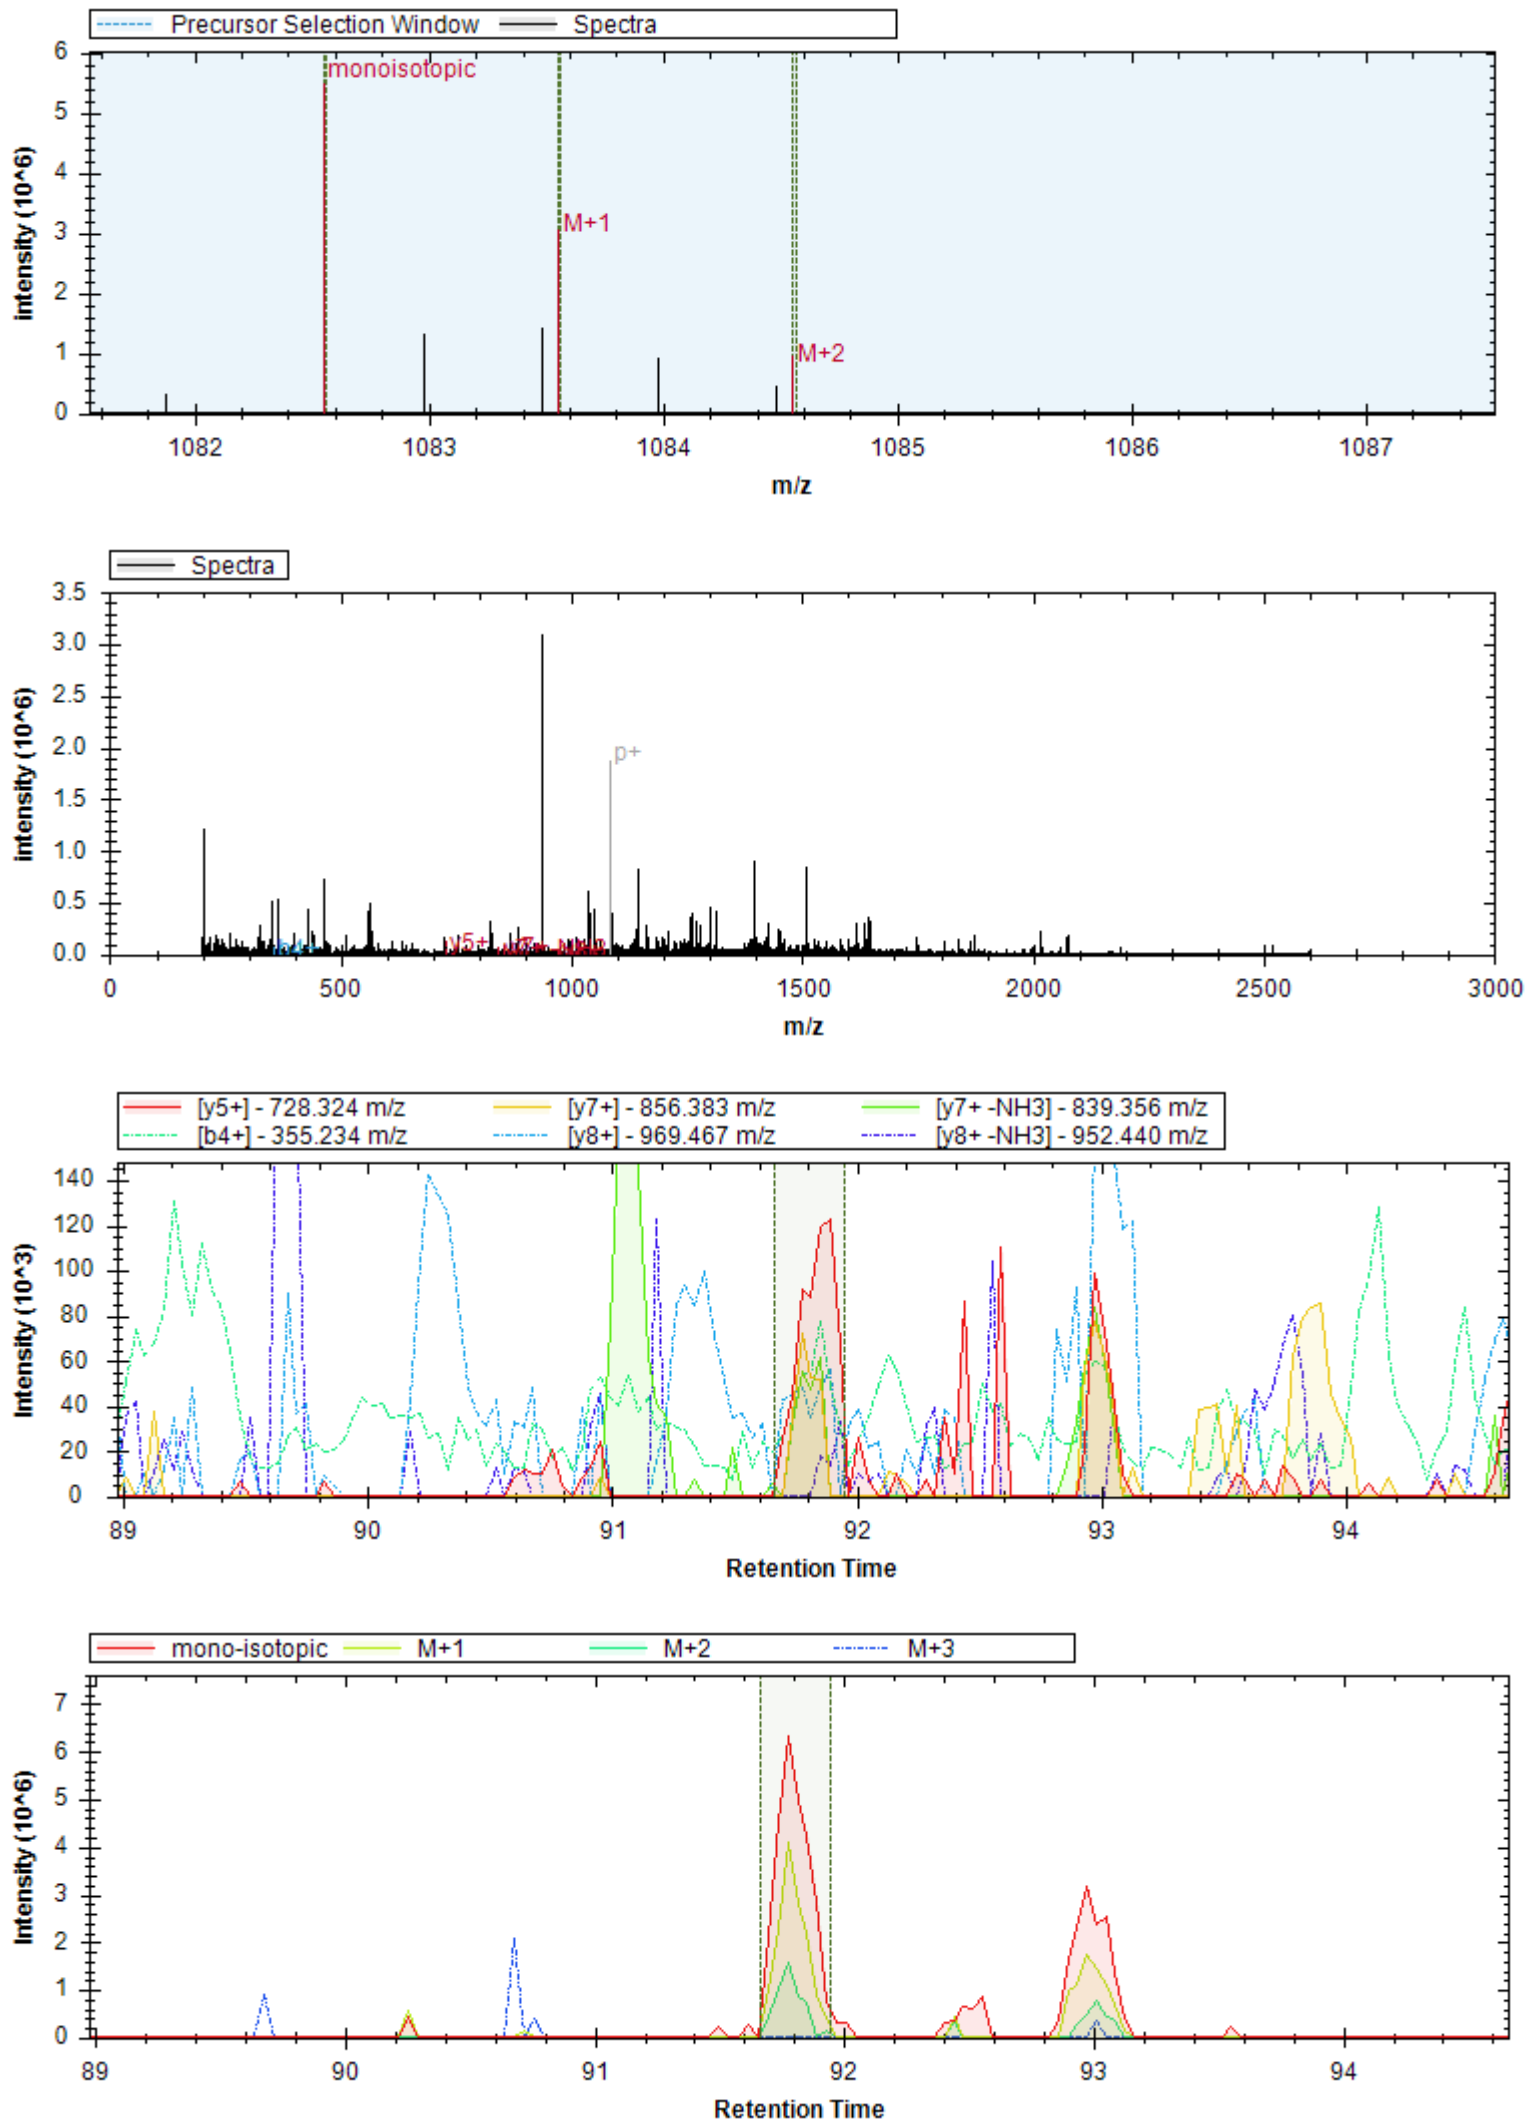



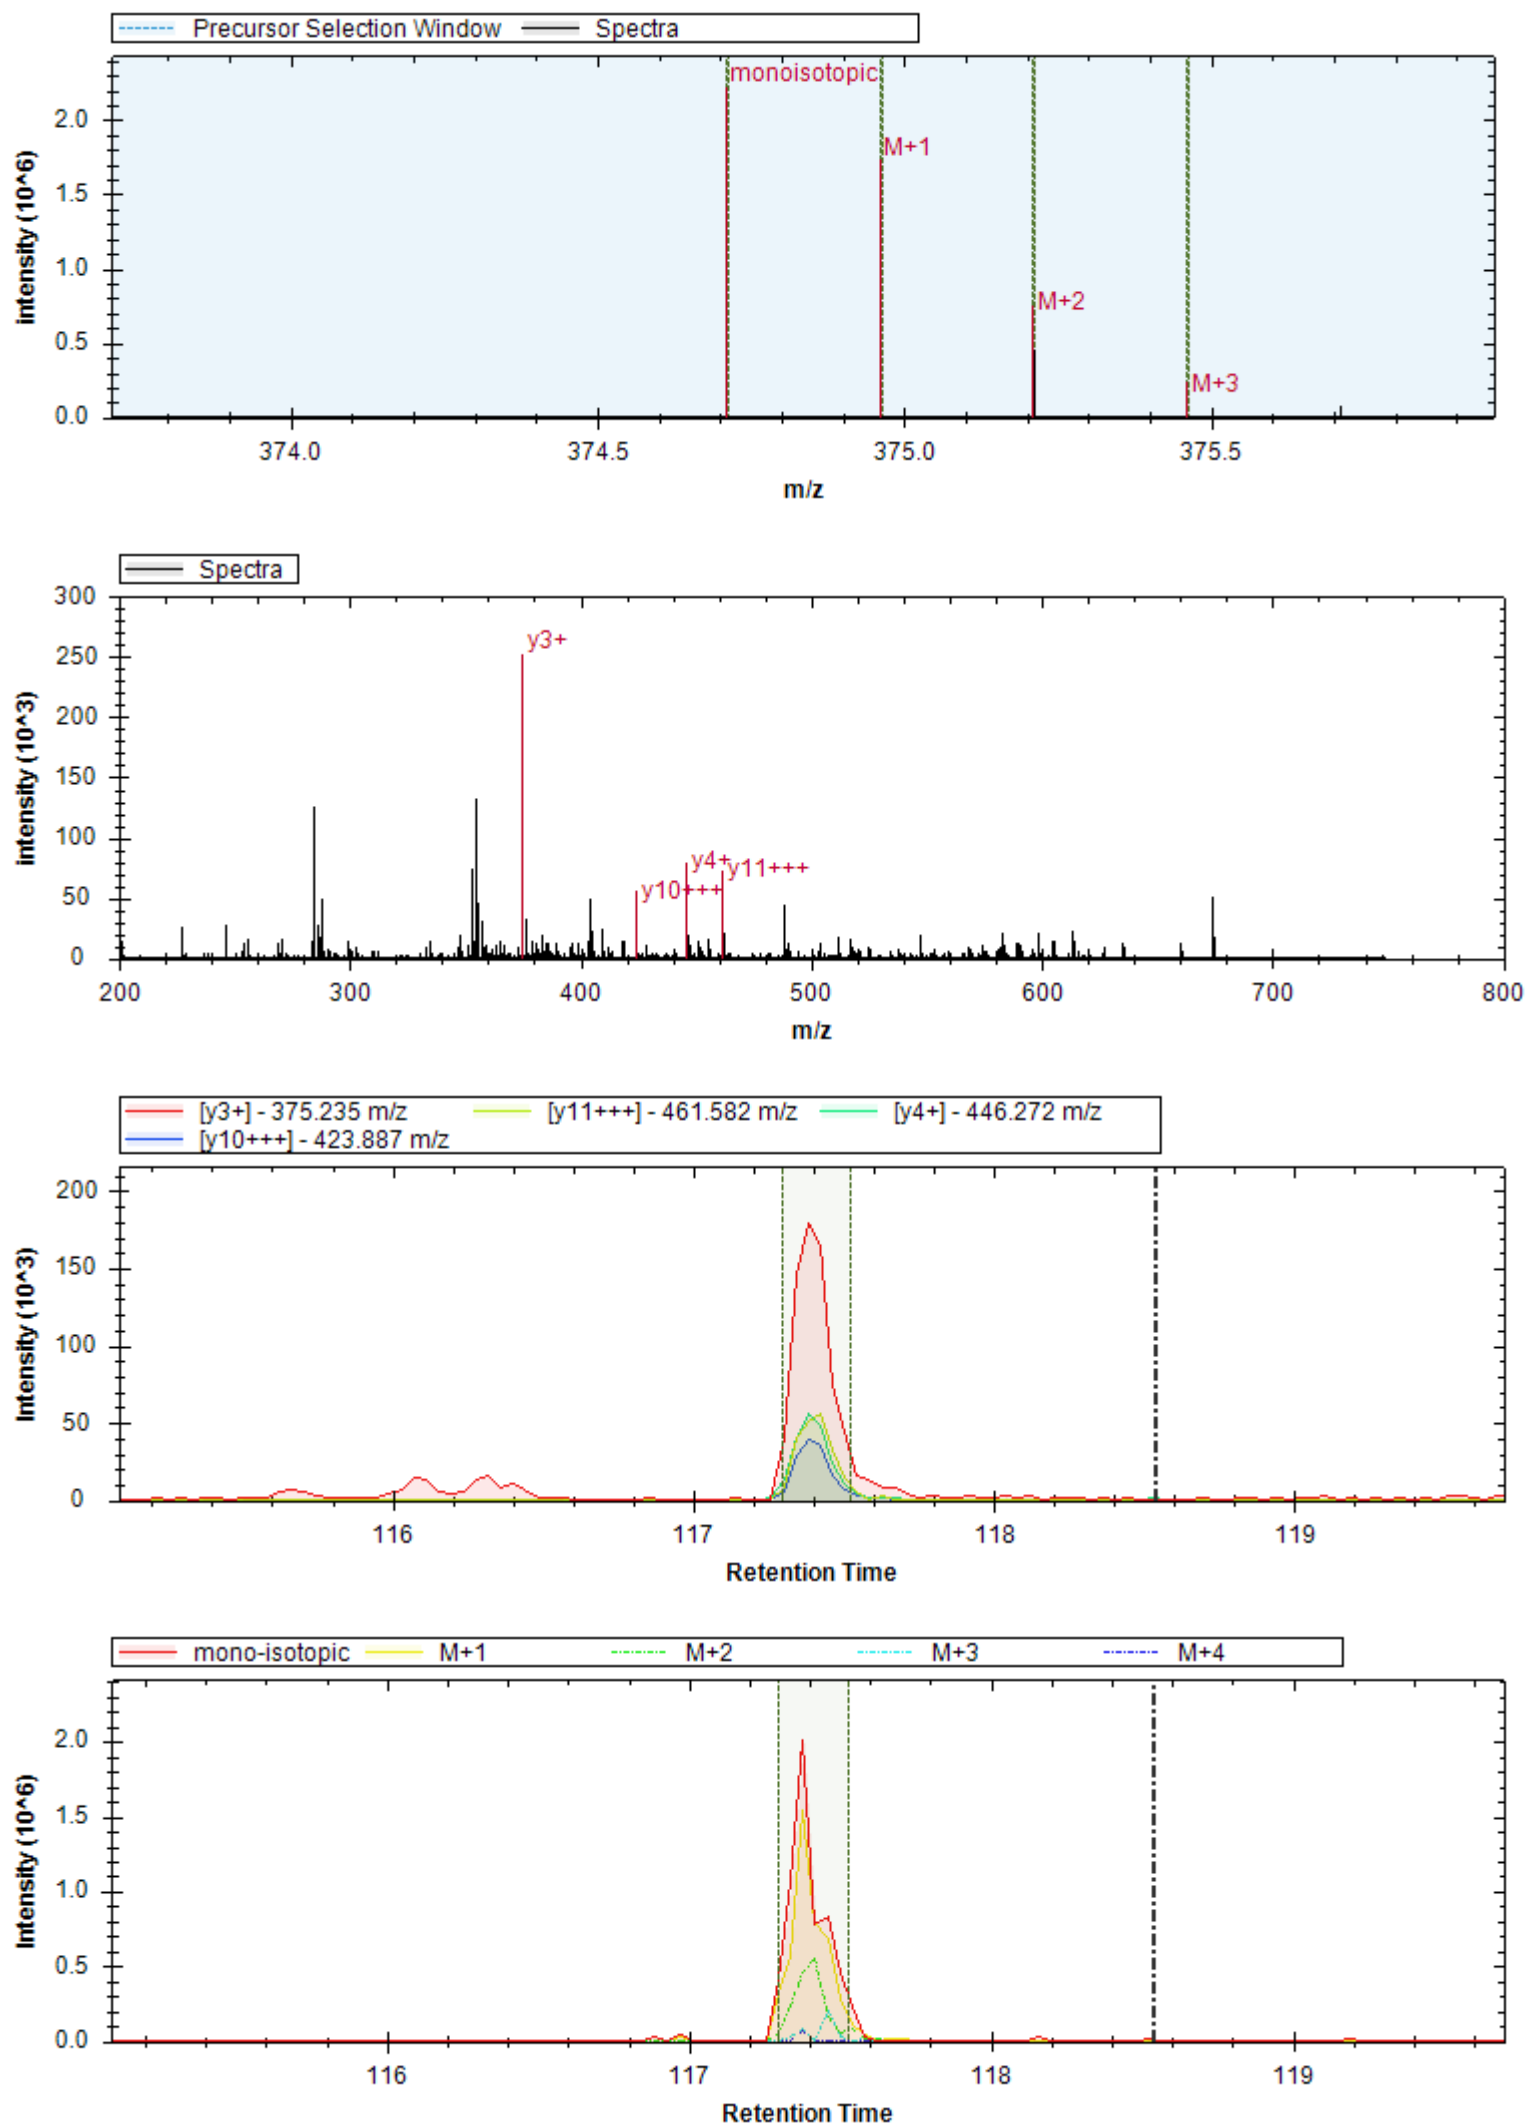

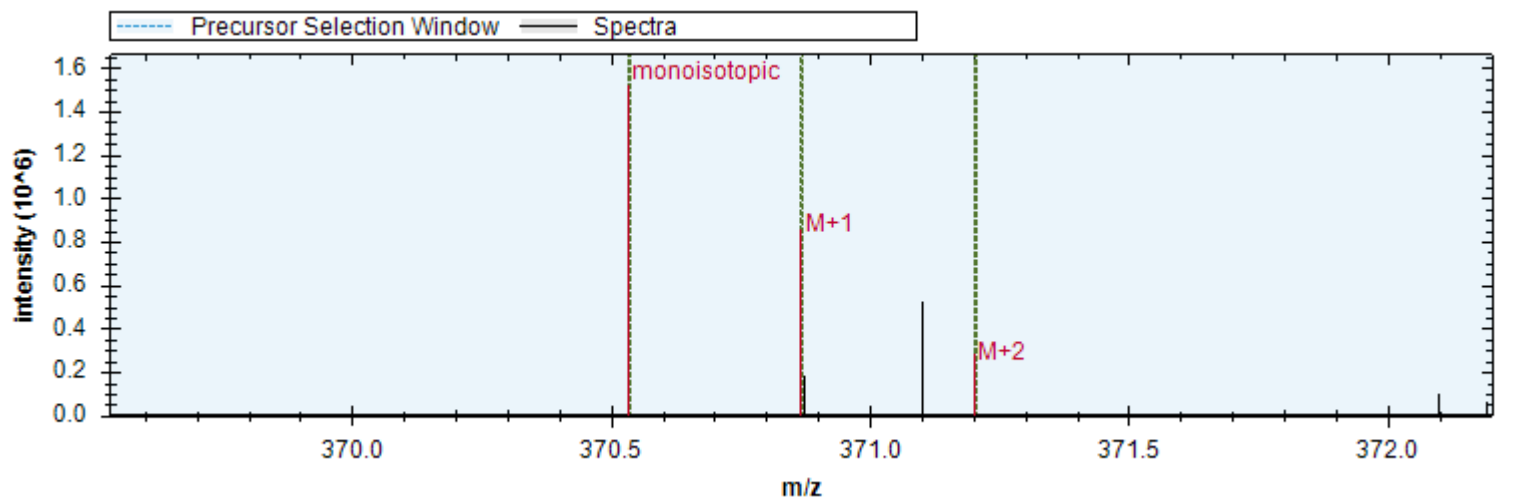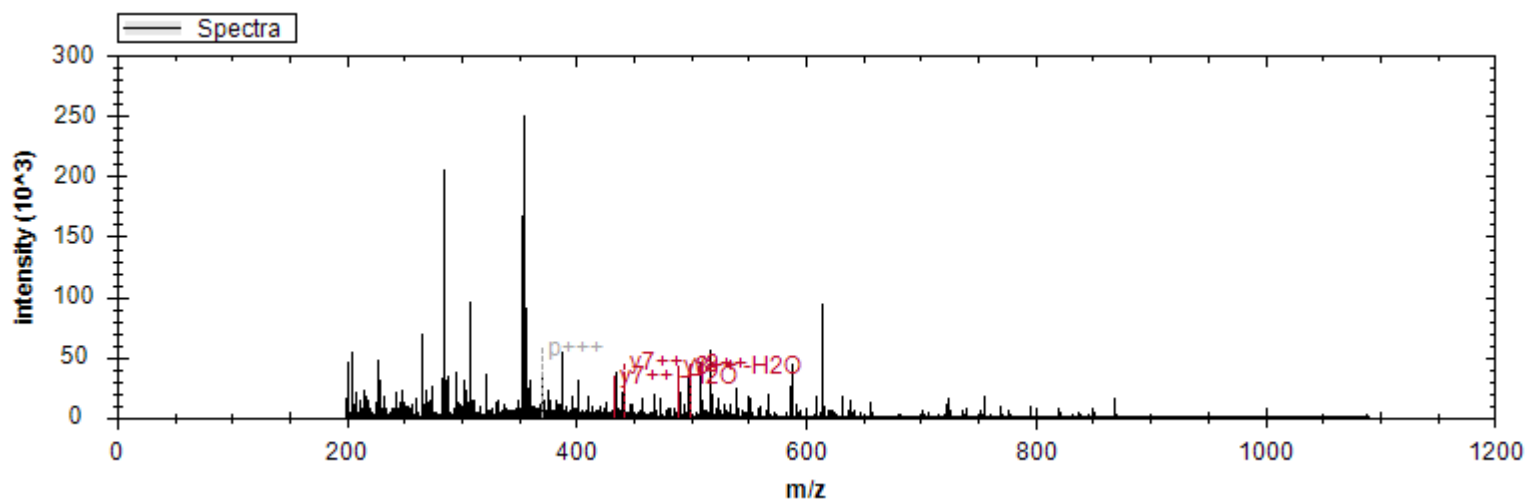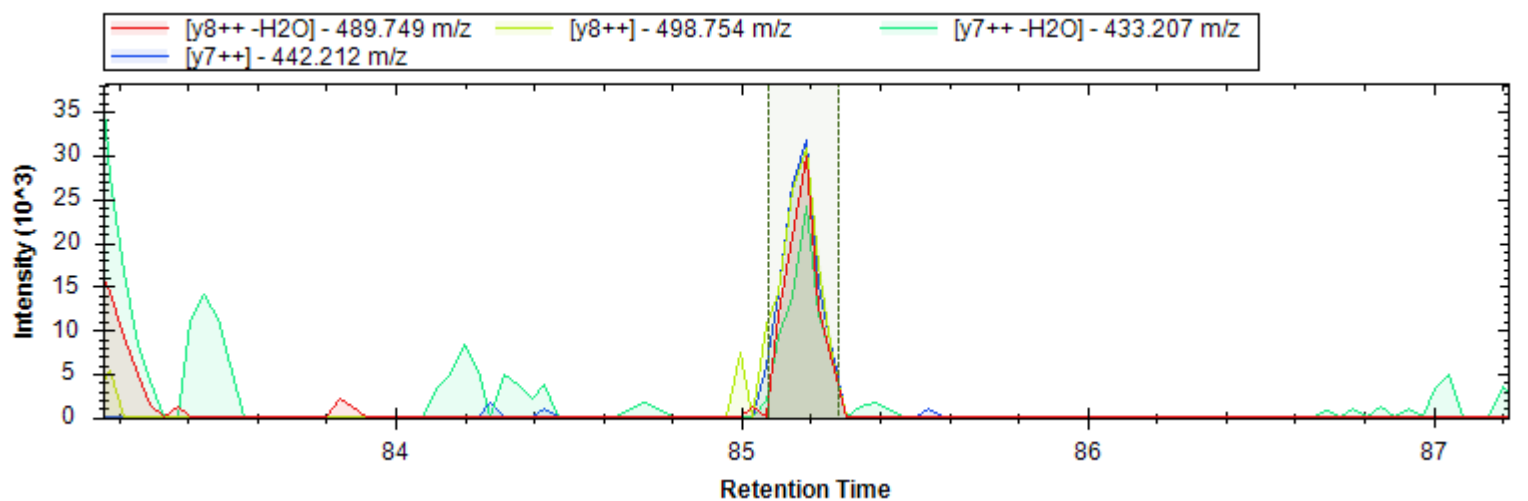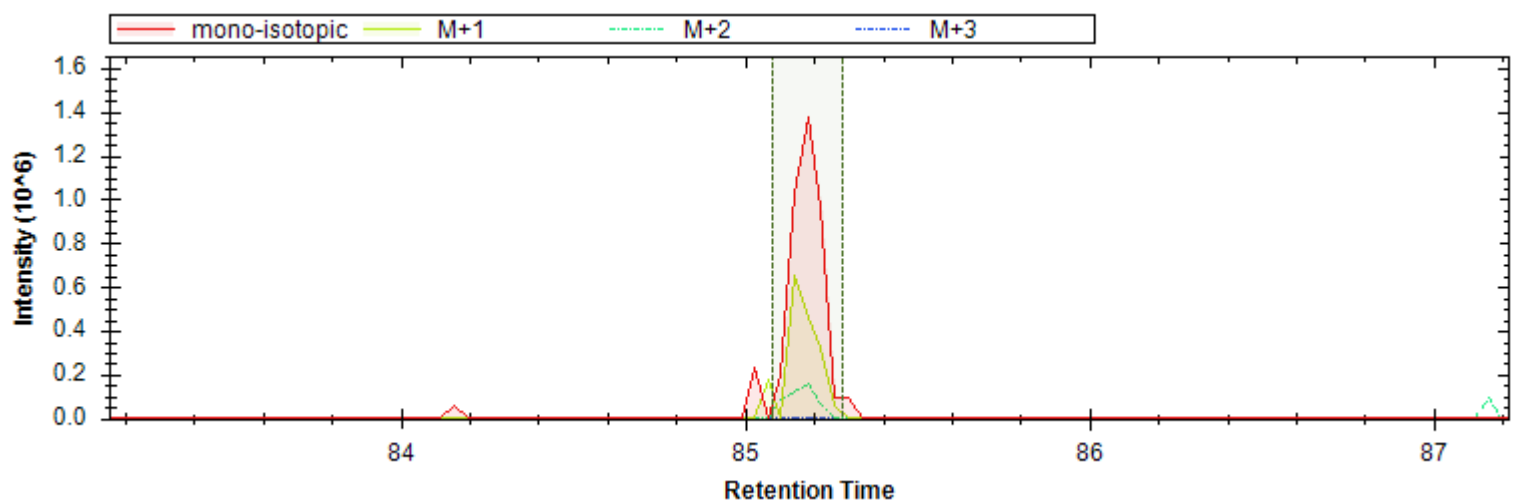

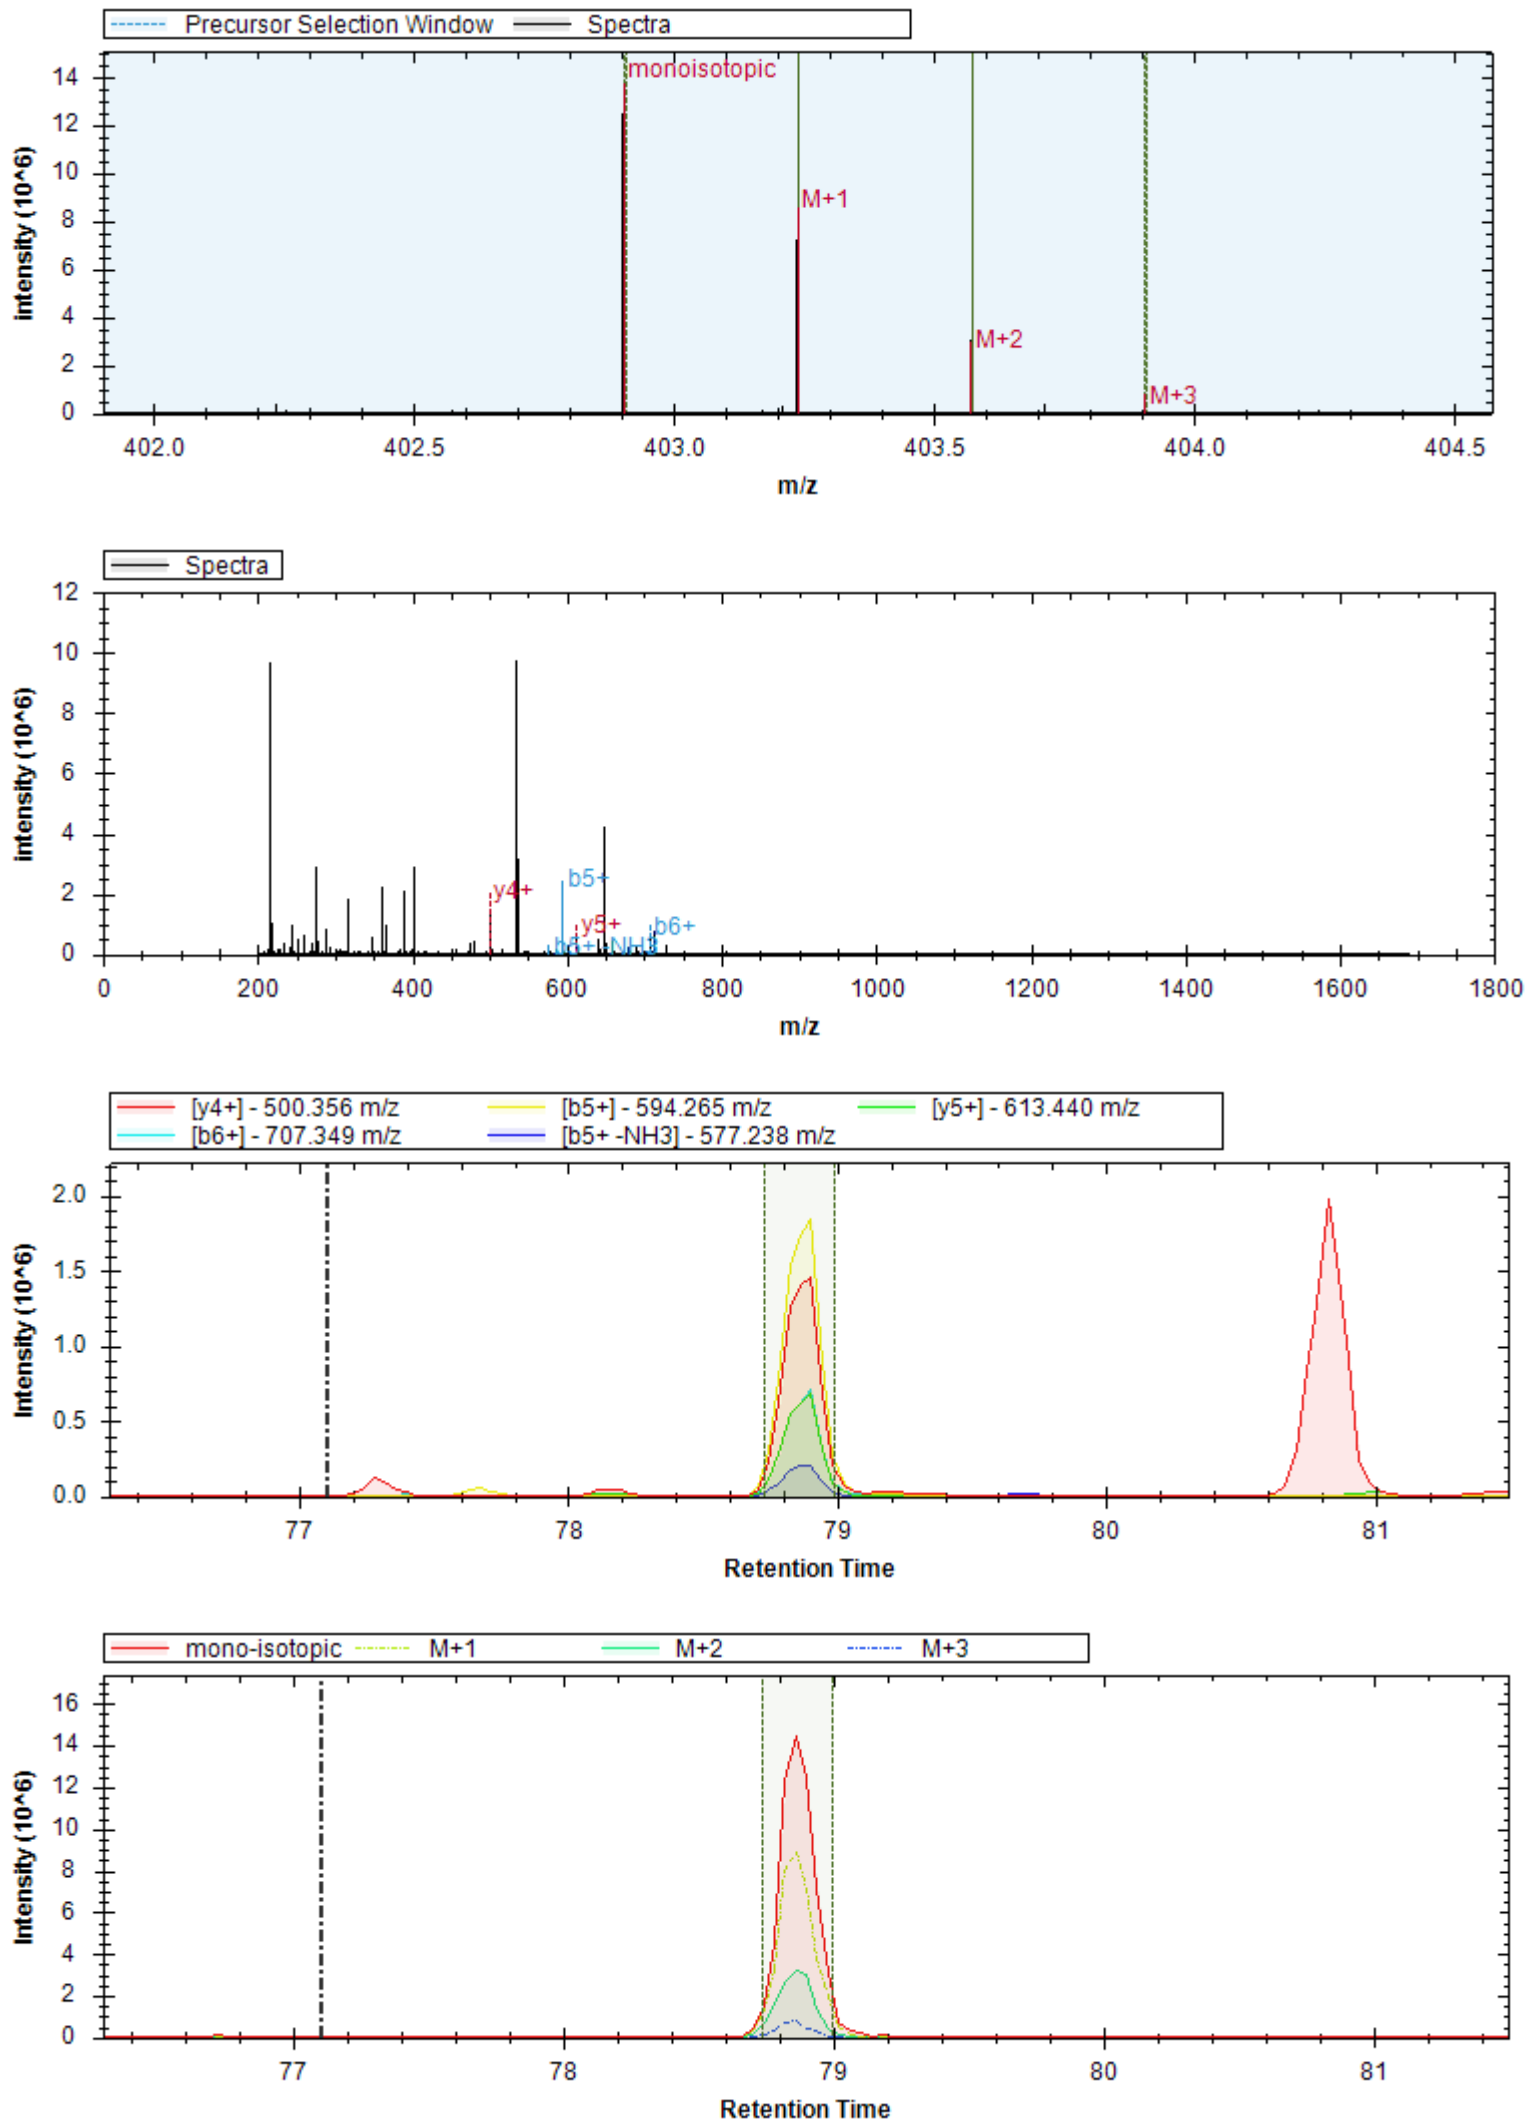

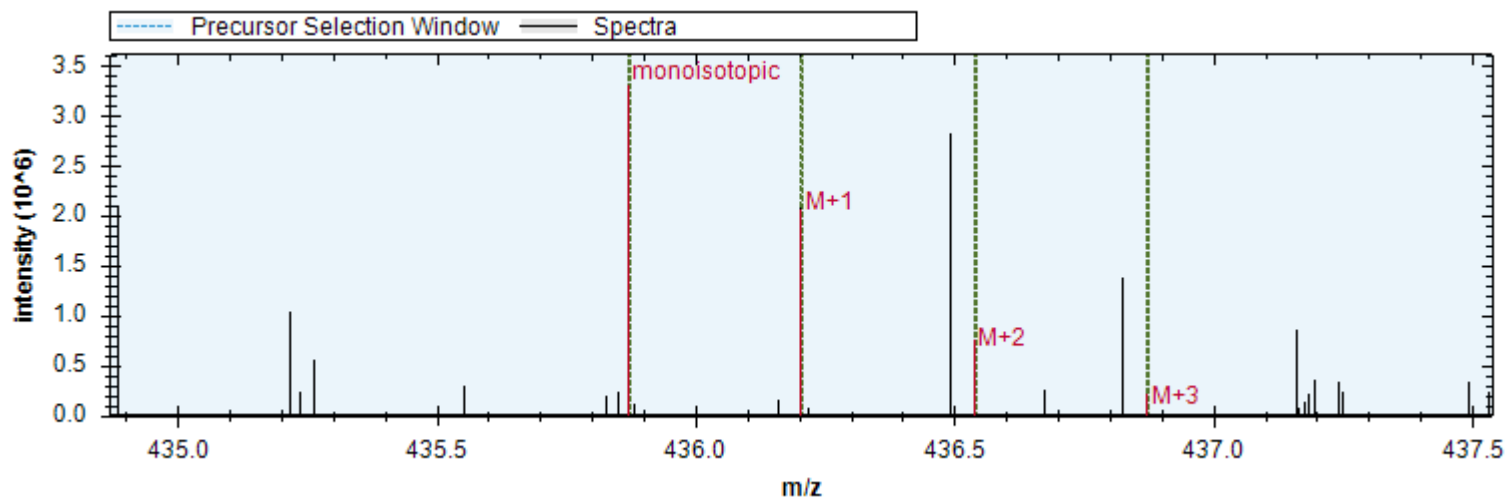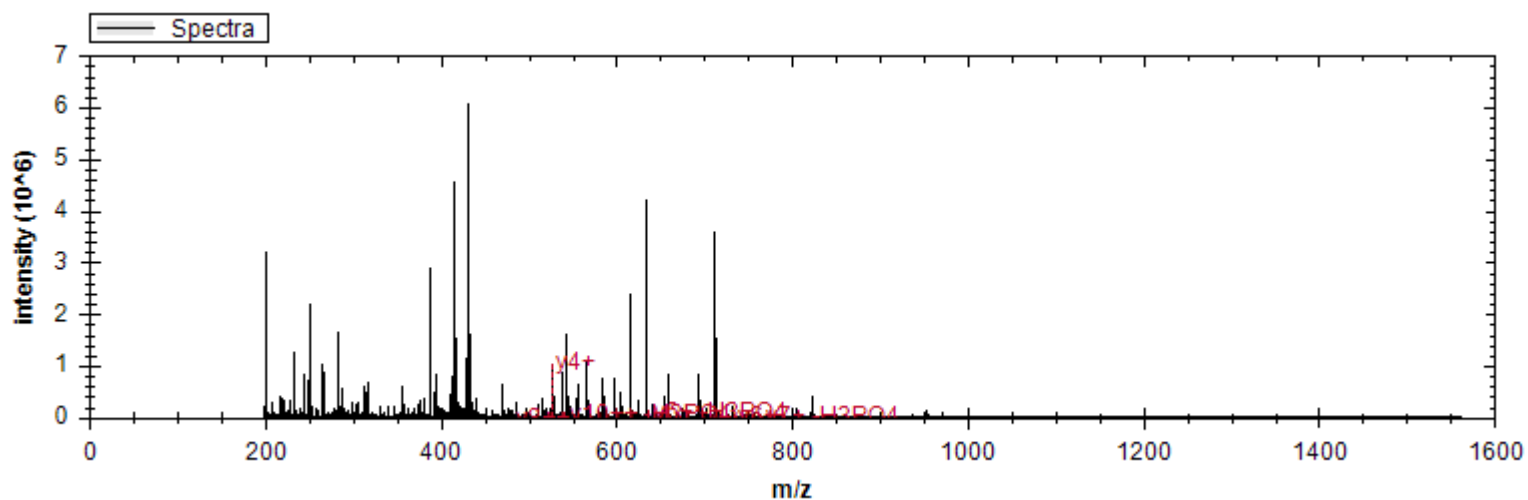

- |                            |                              |                            |
|----------------------------|------------------------------|----------------------------|
| [y3+] - 359.204 m/z        | [y5+ -H3PO4] - 565.284 m/z   | [y6+ -H3PO4] - 636.321 m/z |
| [y4+ -H3PO4] - 428.225 m/z | [y10++ -H3PO4] - 540.265 m/z | [y7+ -H3PO4] - 764.380 m/z |
| [y10++] - 589.254 m/z      | [y7+ -NH3] - 943.130 m/z     | [y6+] - 734.298 m/z        |
| [y5+] - 663.261 m/z        | [y8++] - 481.216 m/z         | [y4+] - 526.202 m/z        |
| [y8+ -H3PO4] - 863.448 m/z | [y6++] - 367.653 m/z         | [y7+ -H2O] - 942.146 m/z   |

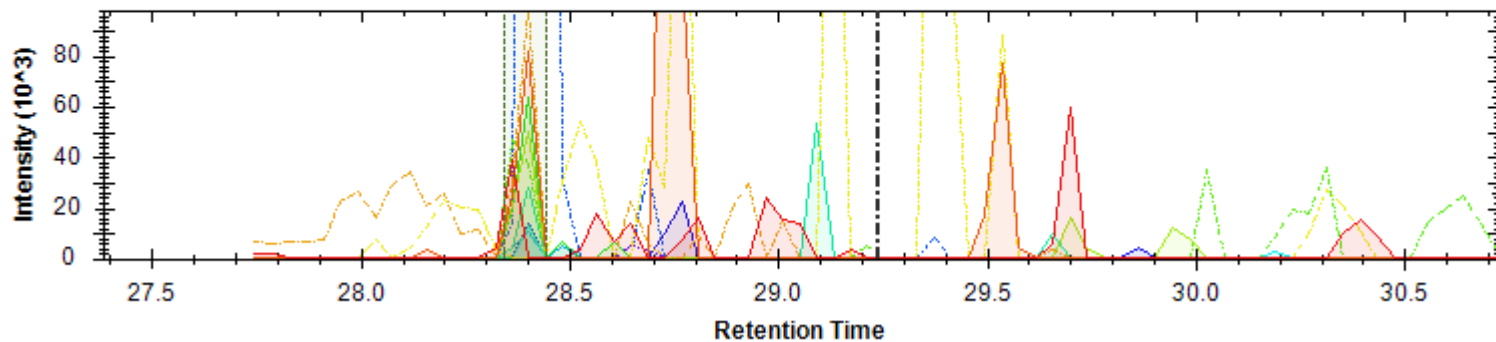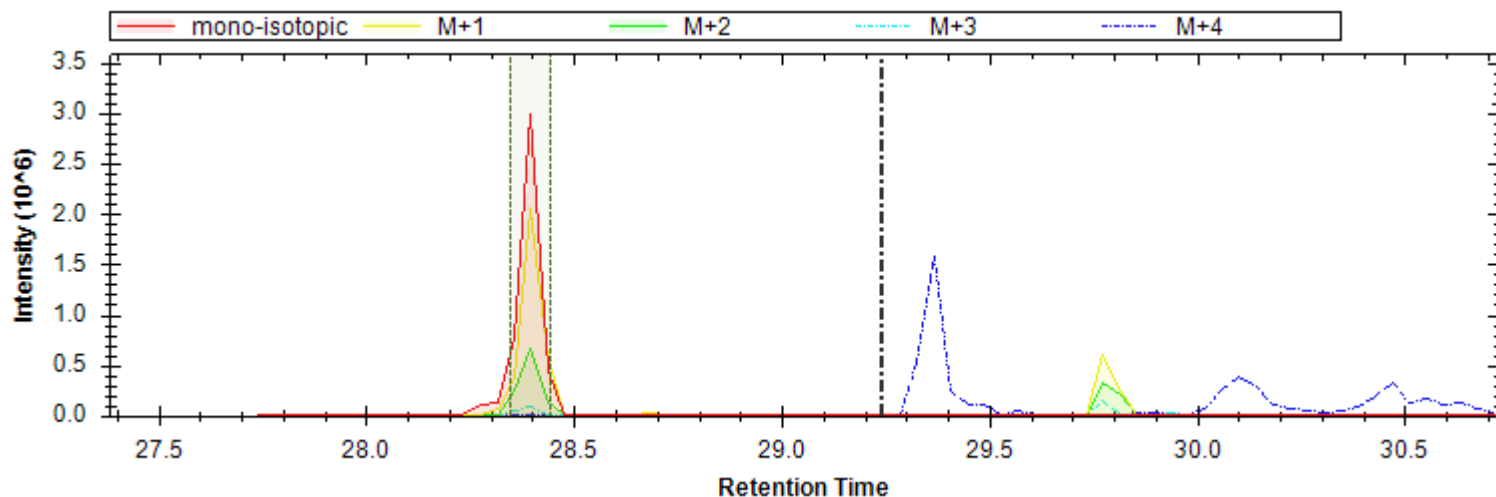

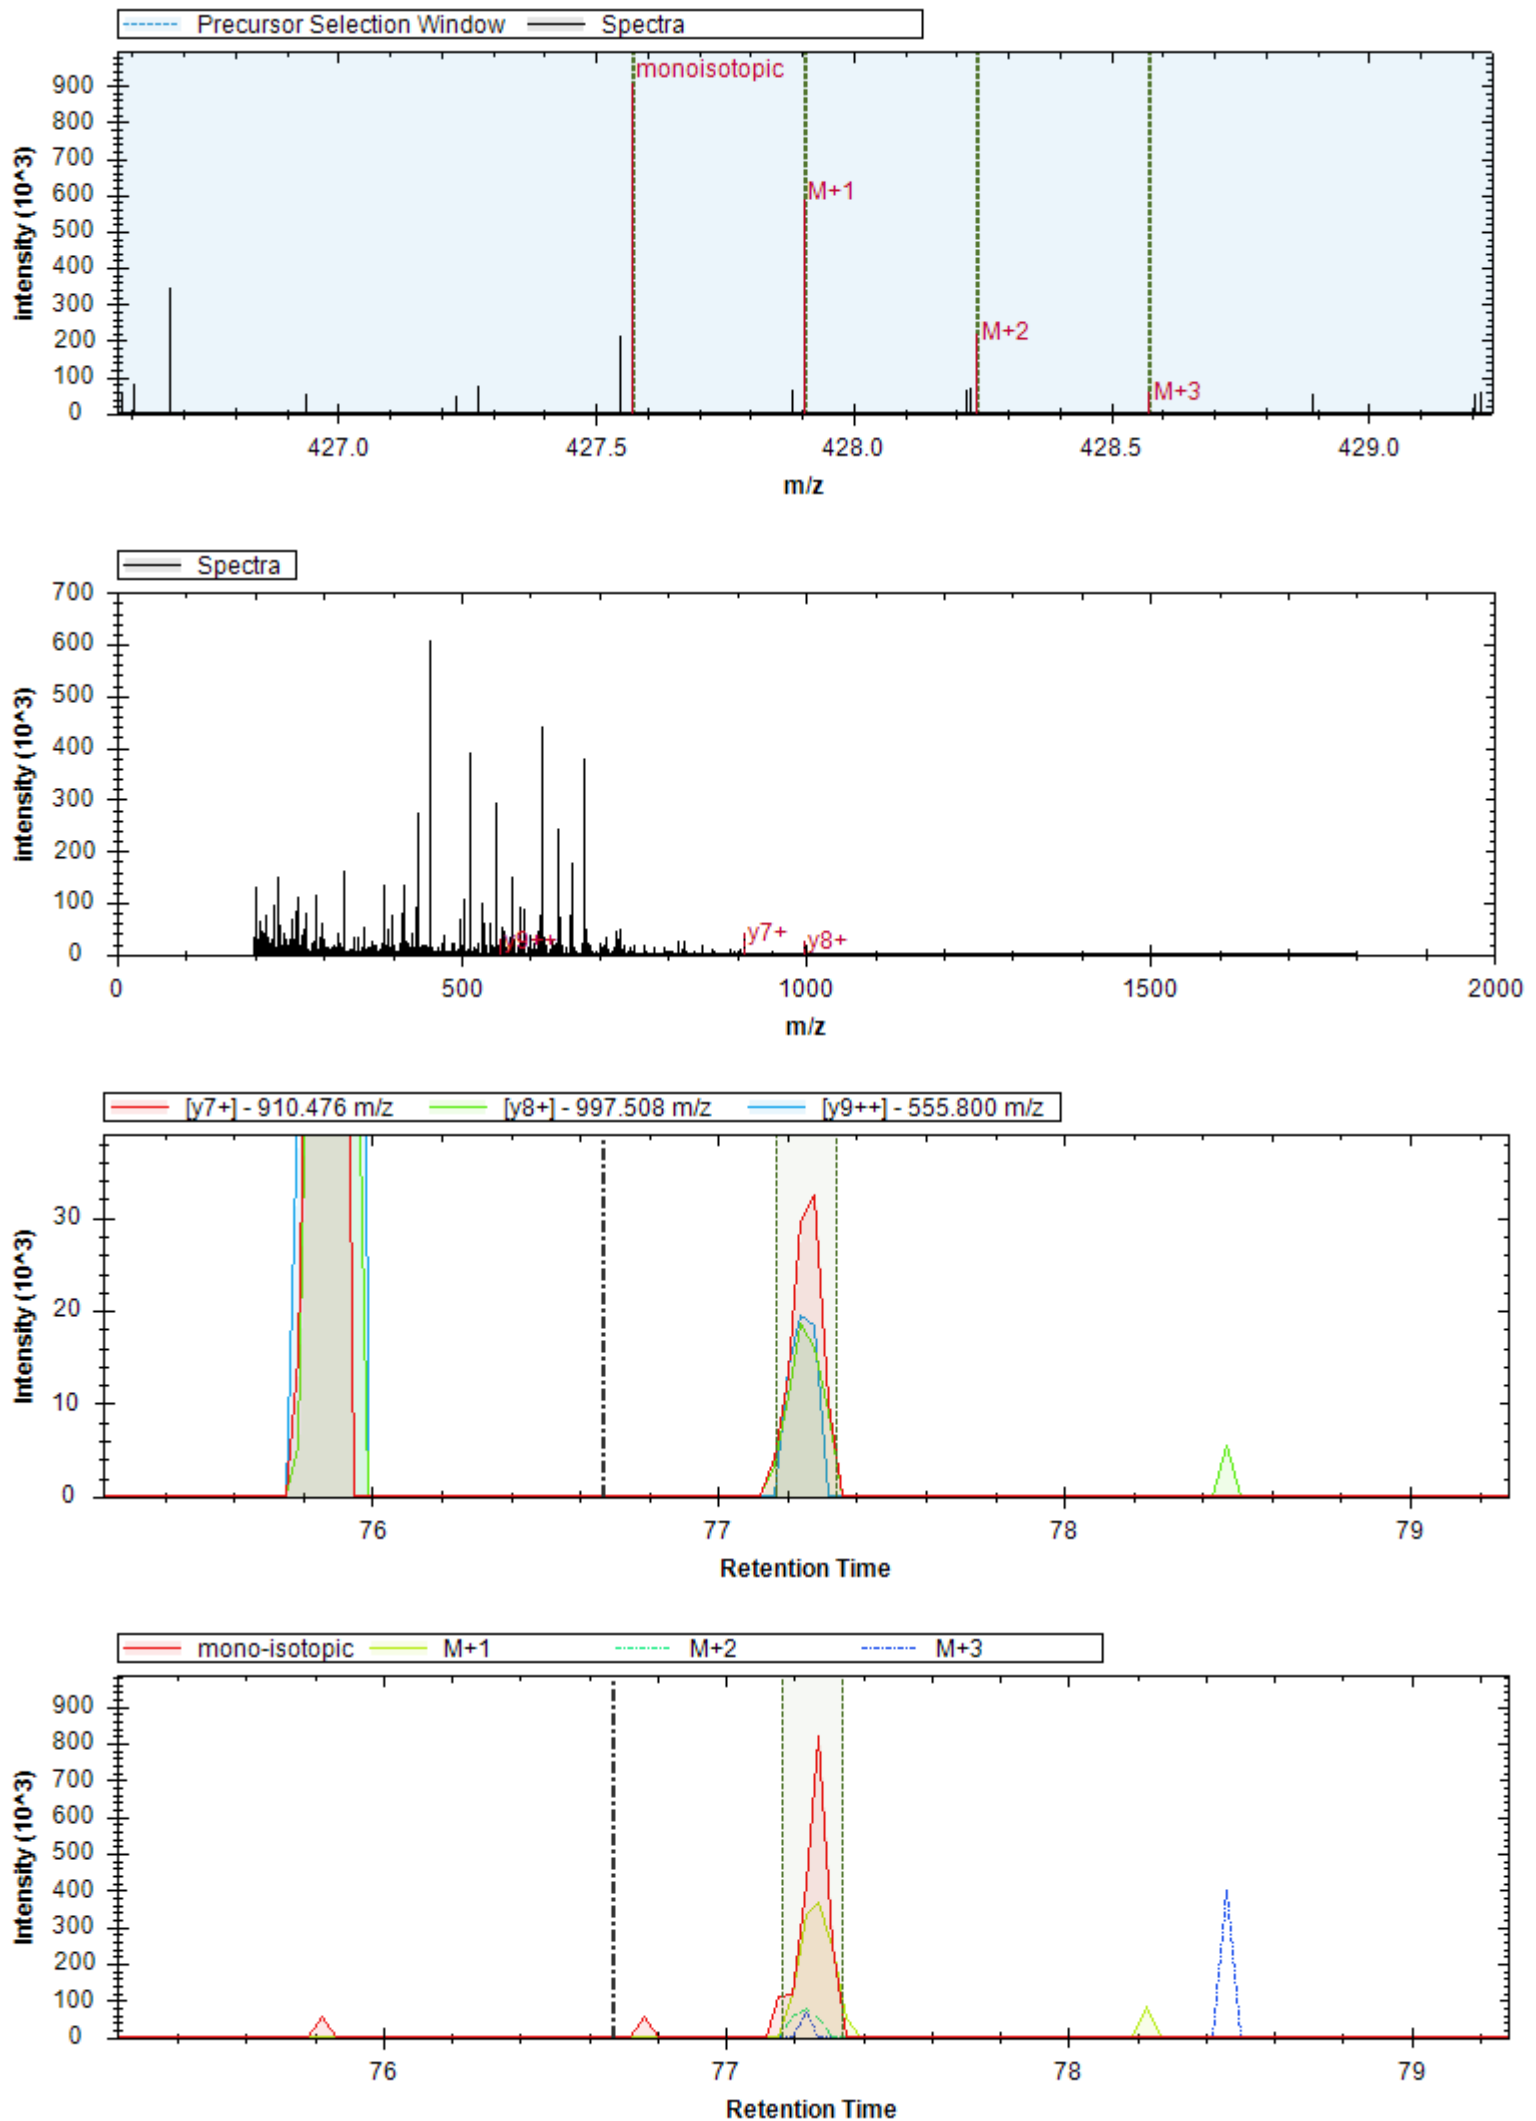

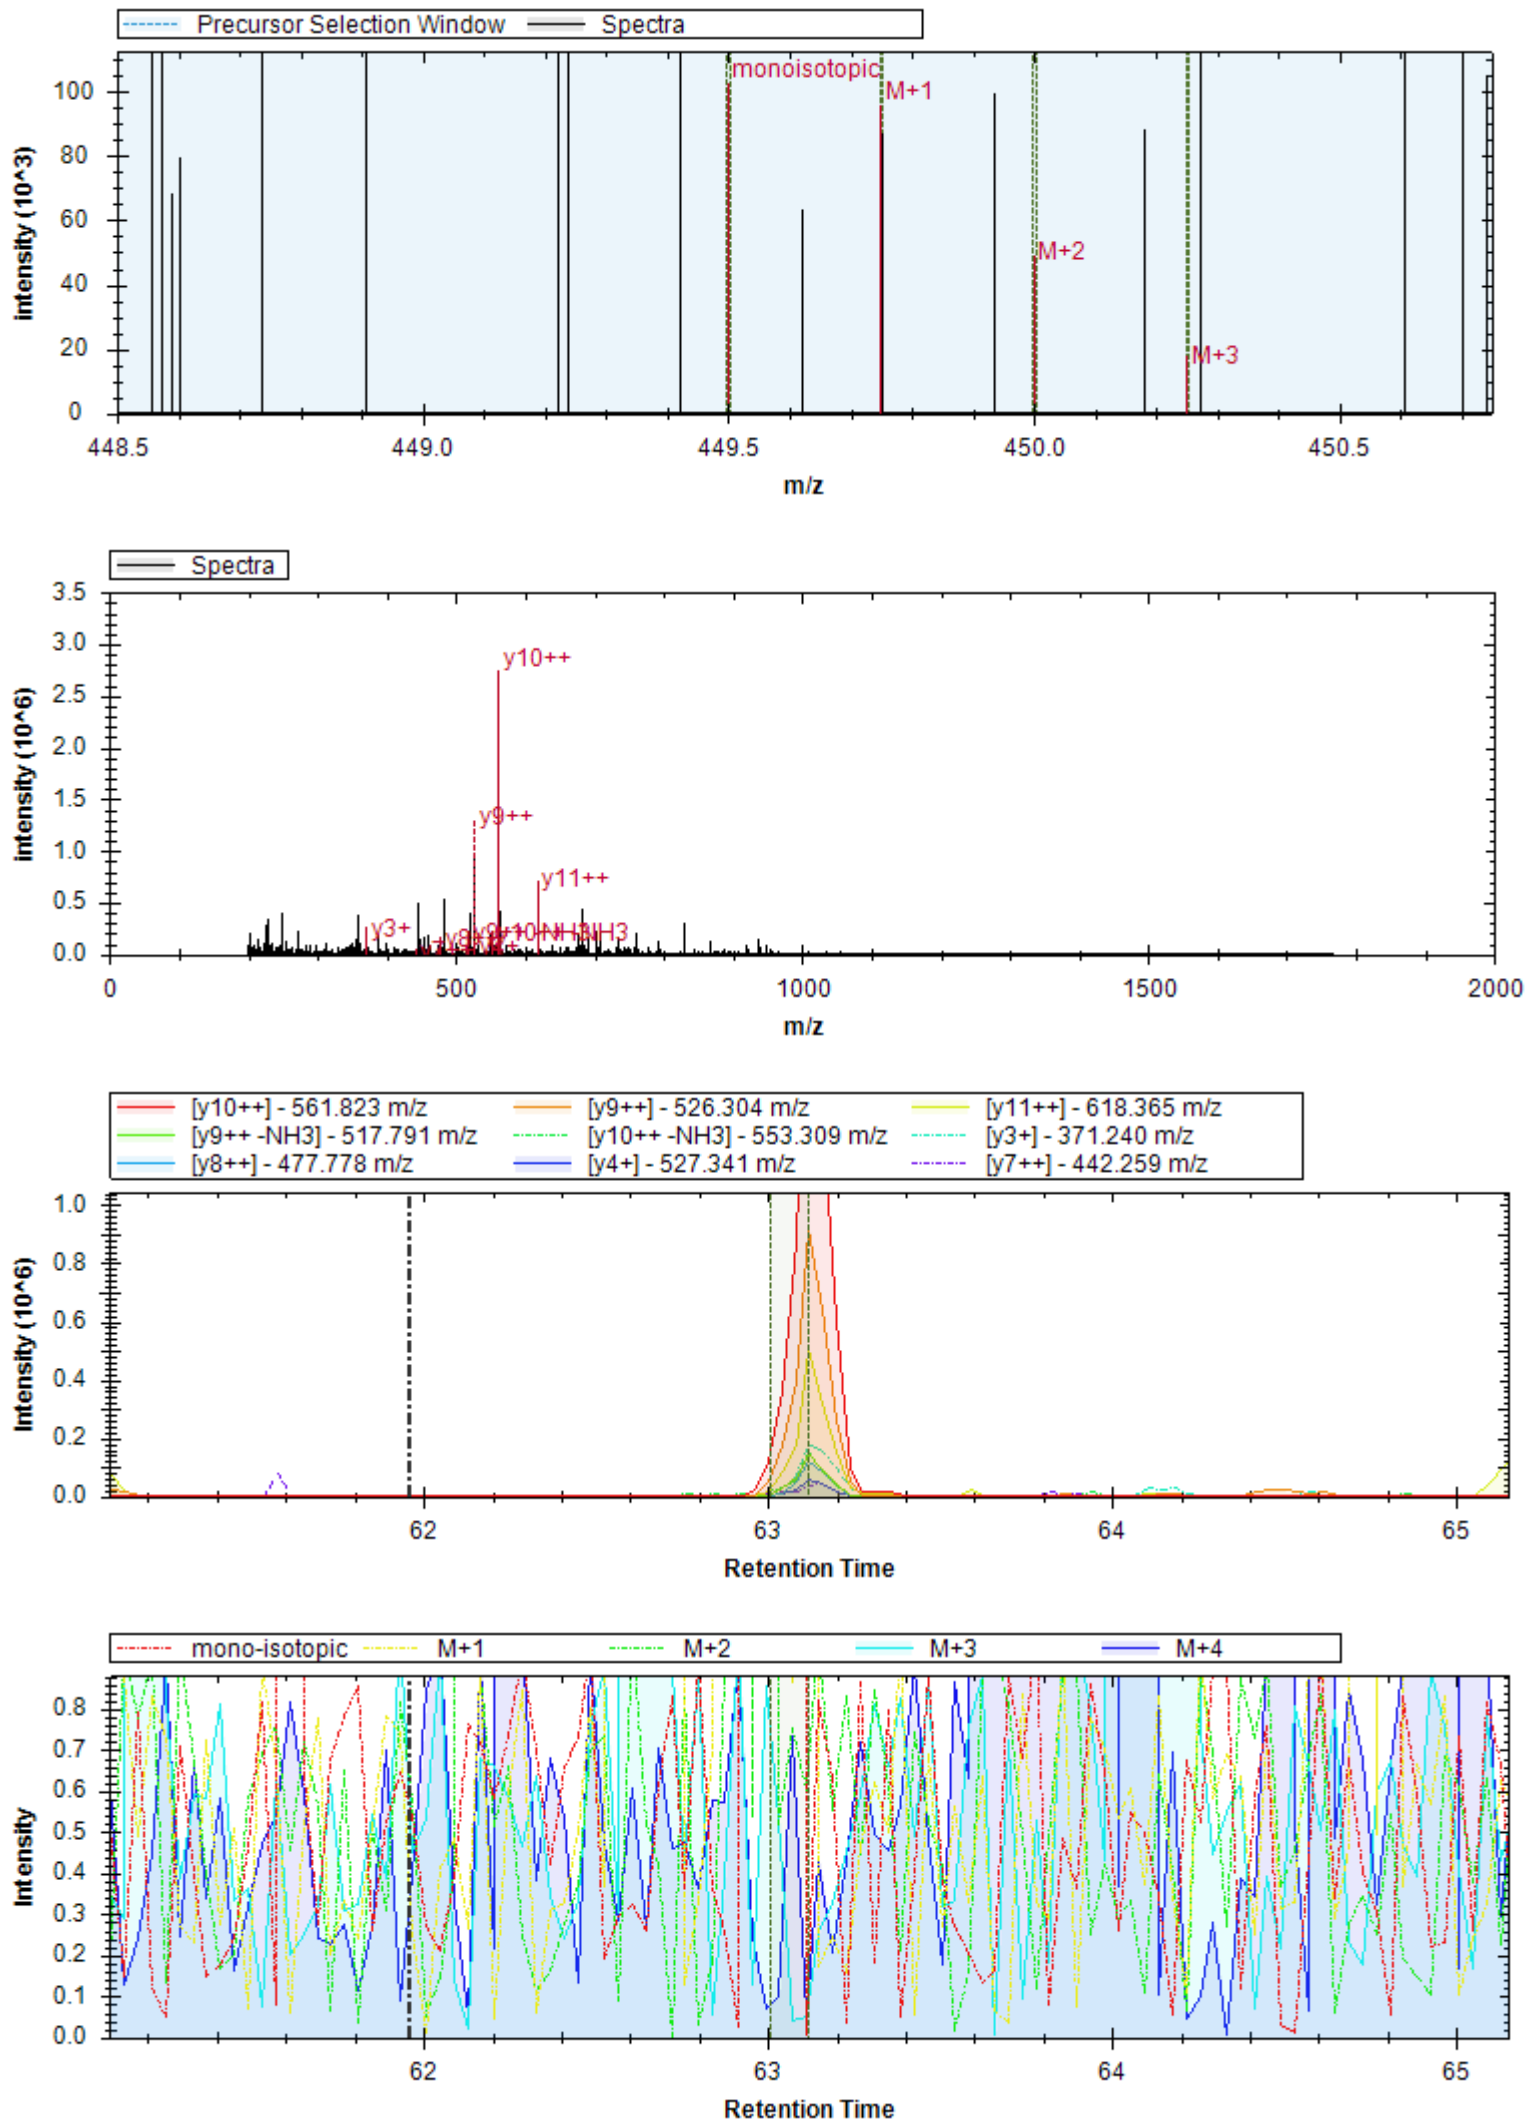

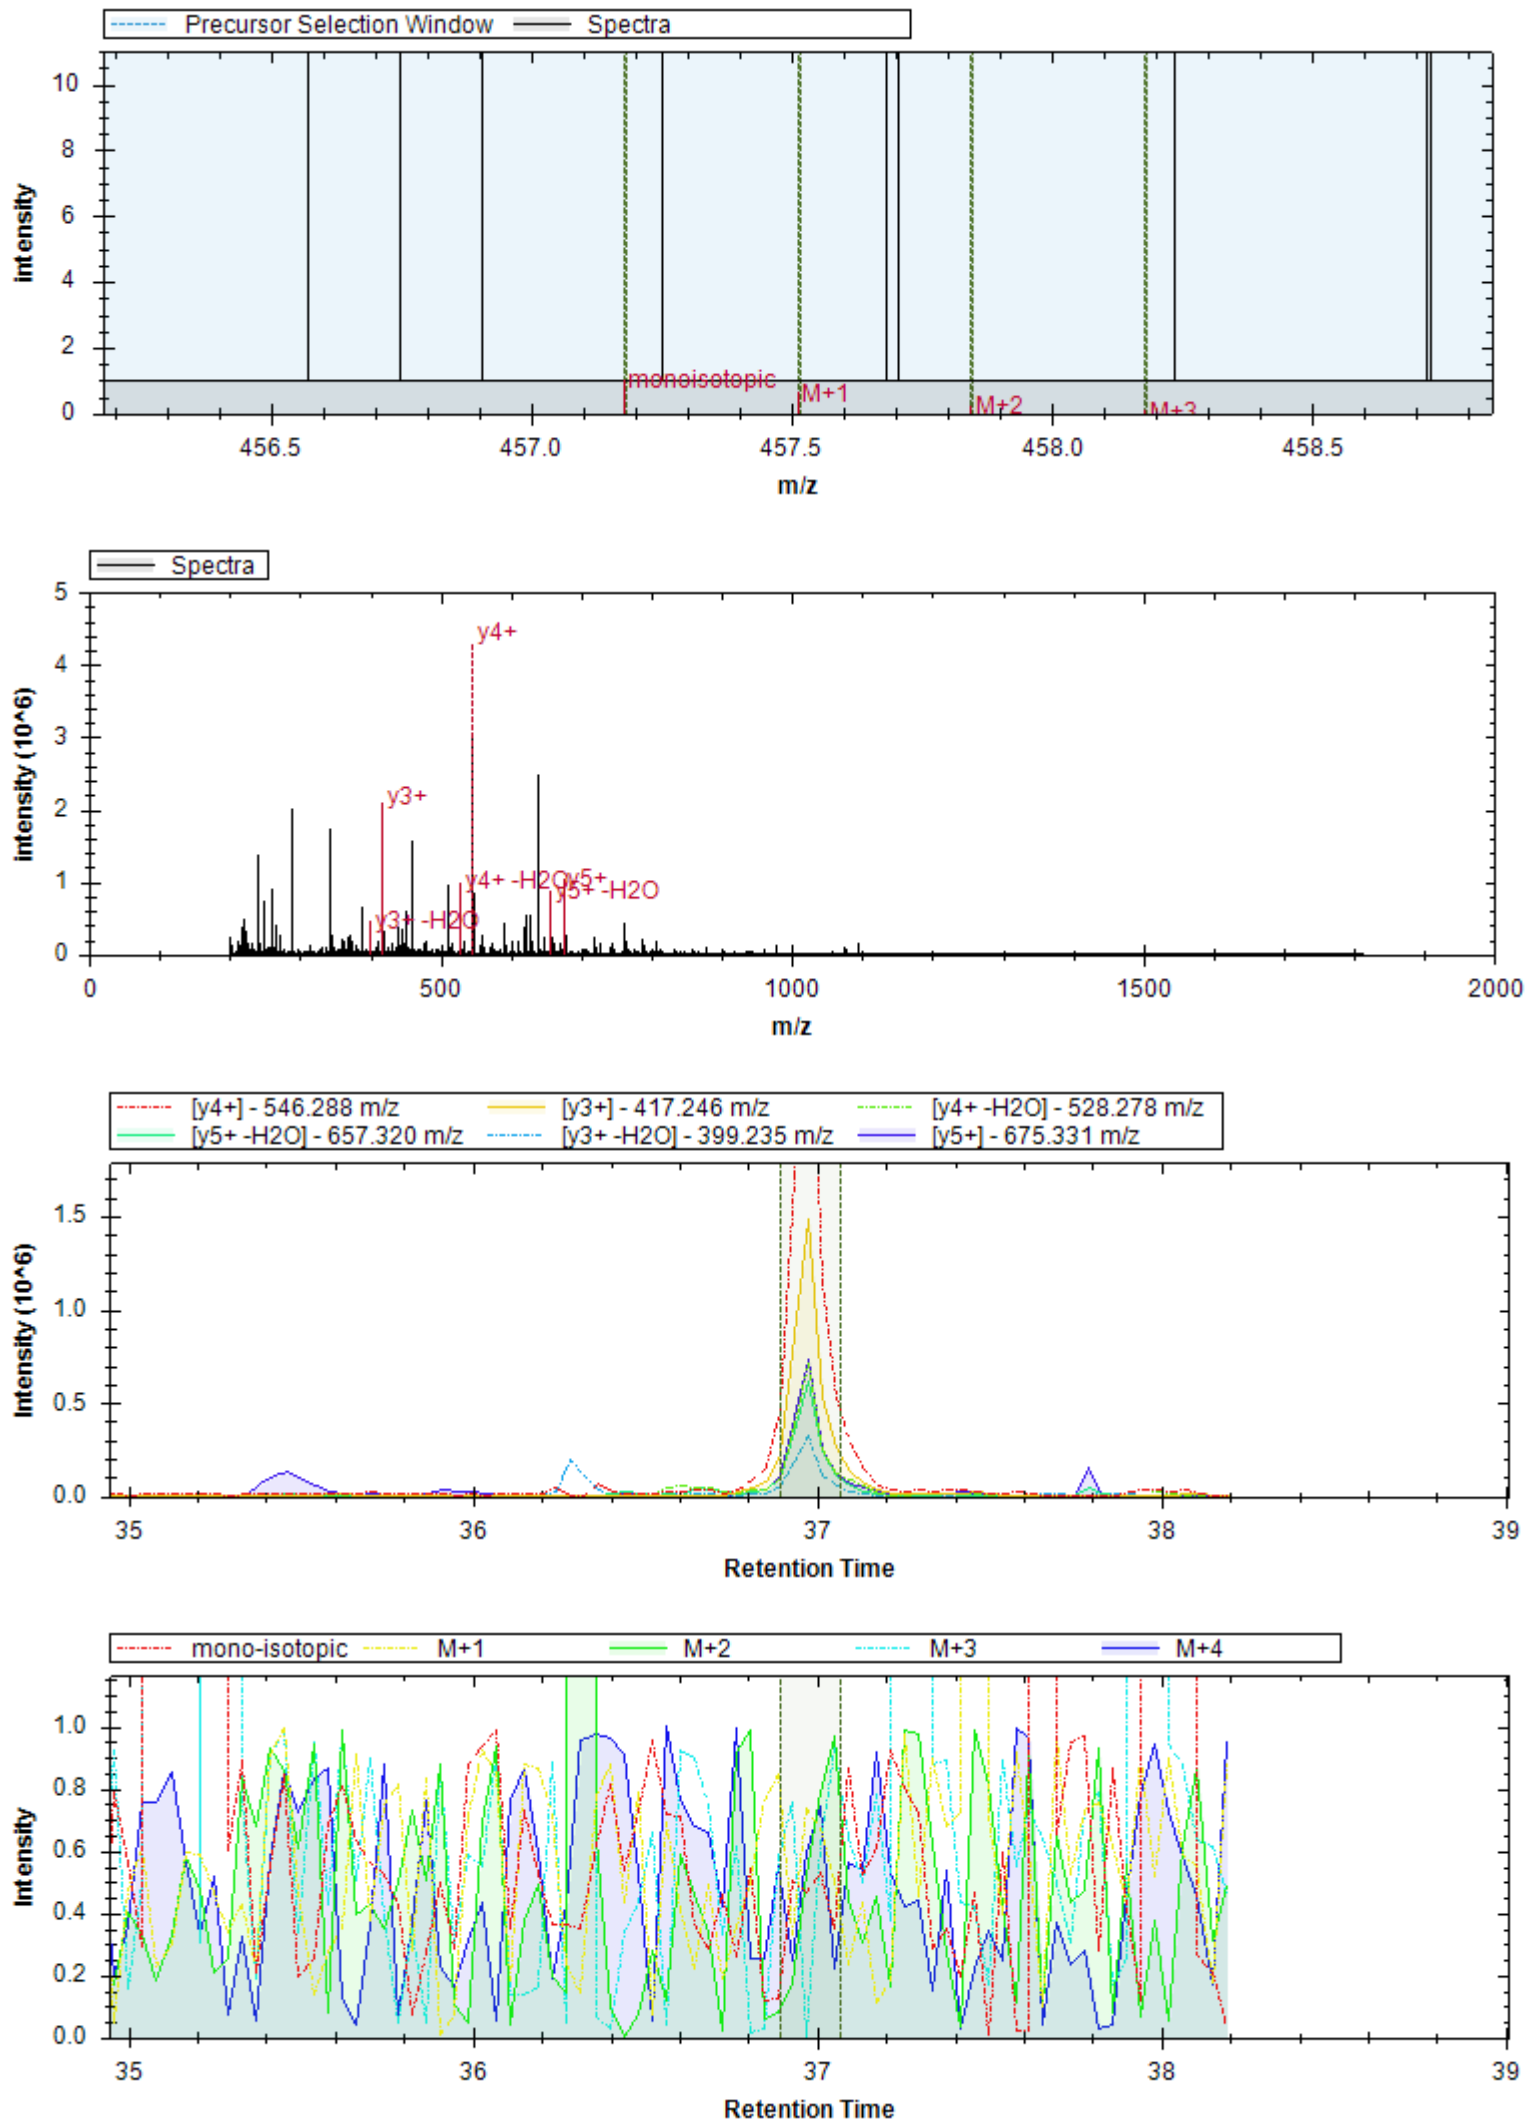

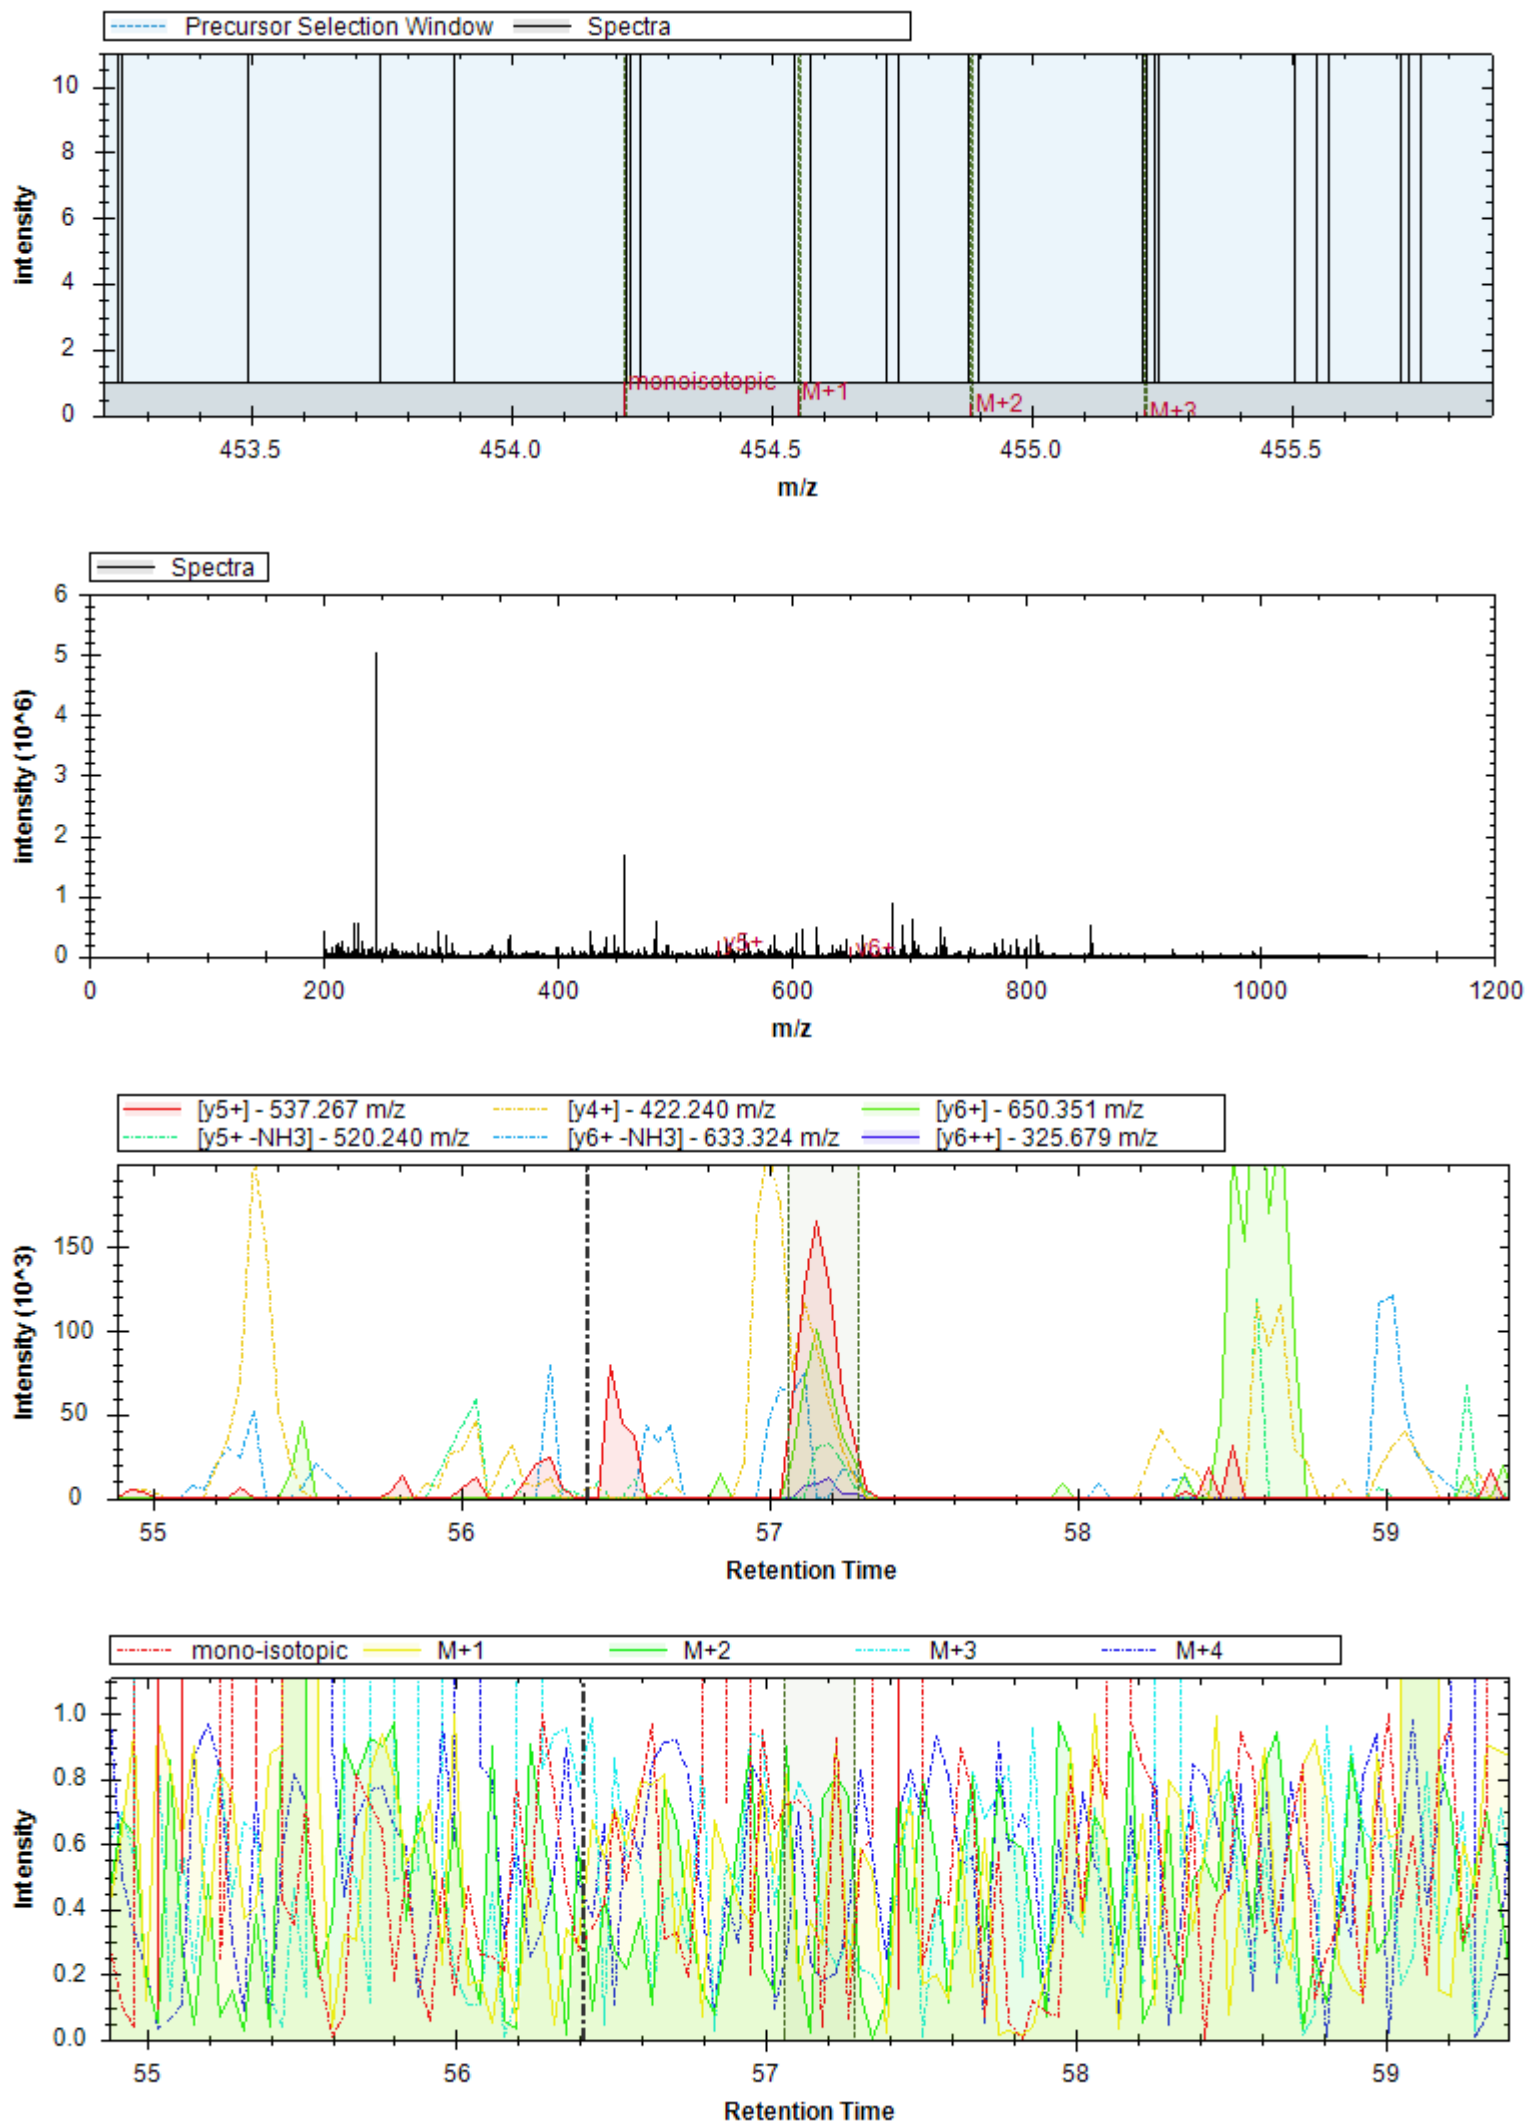



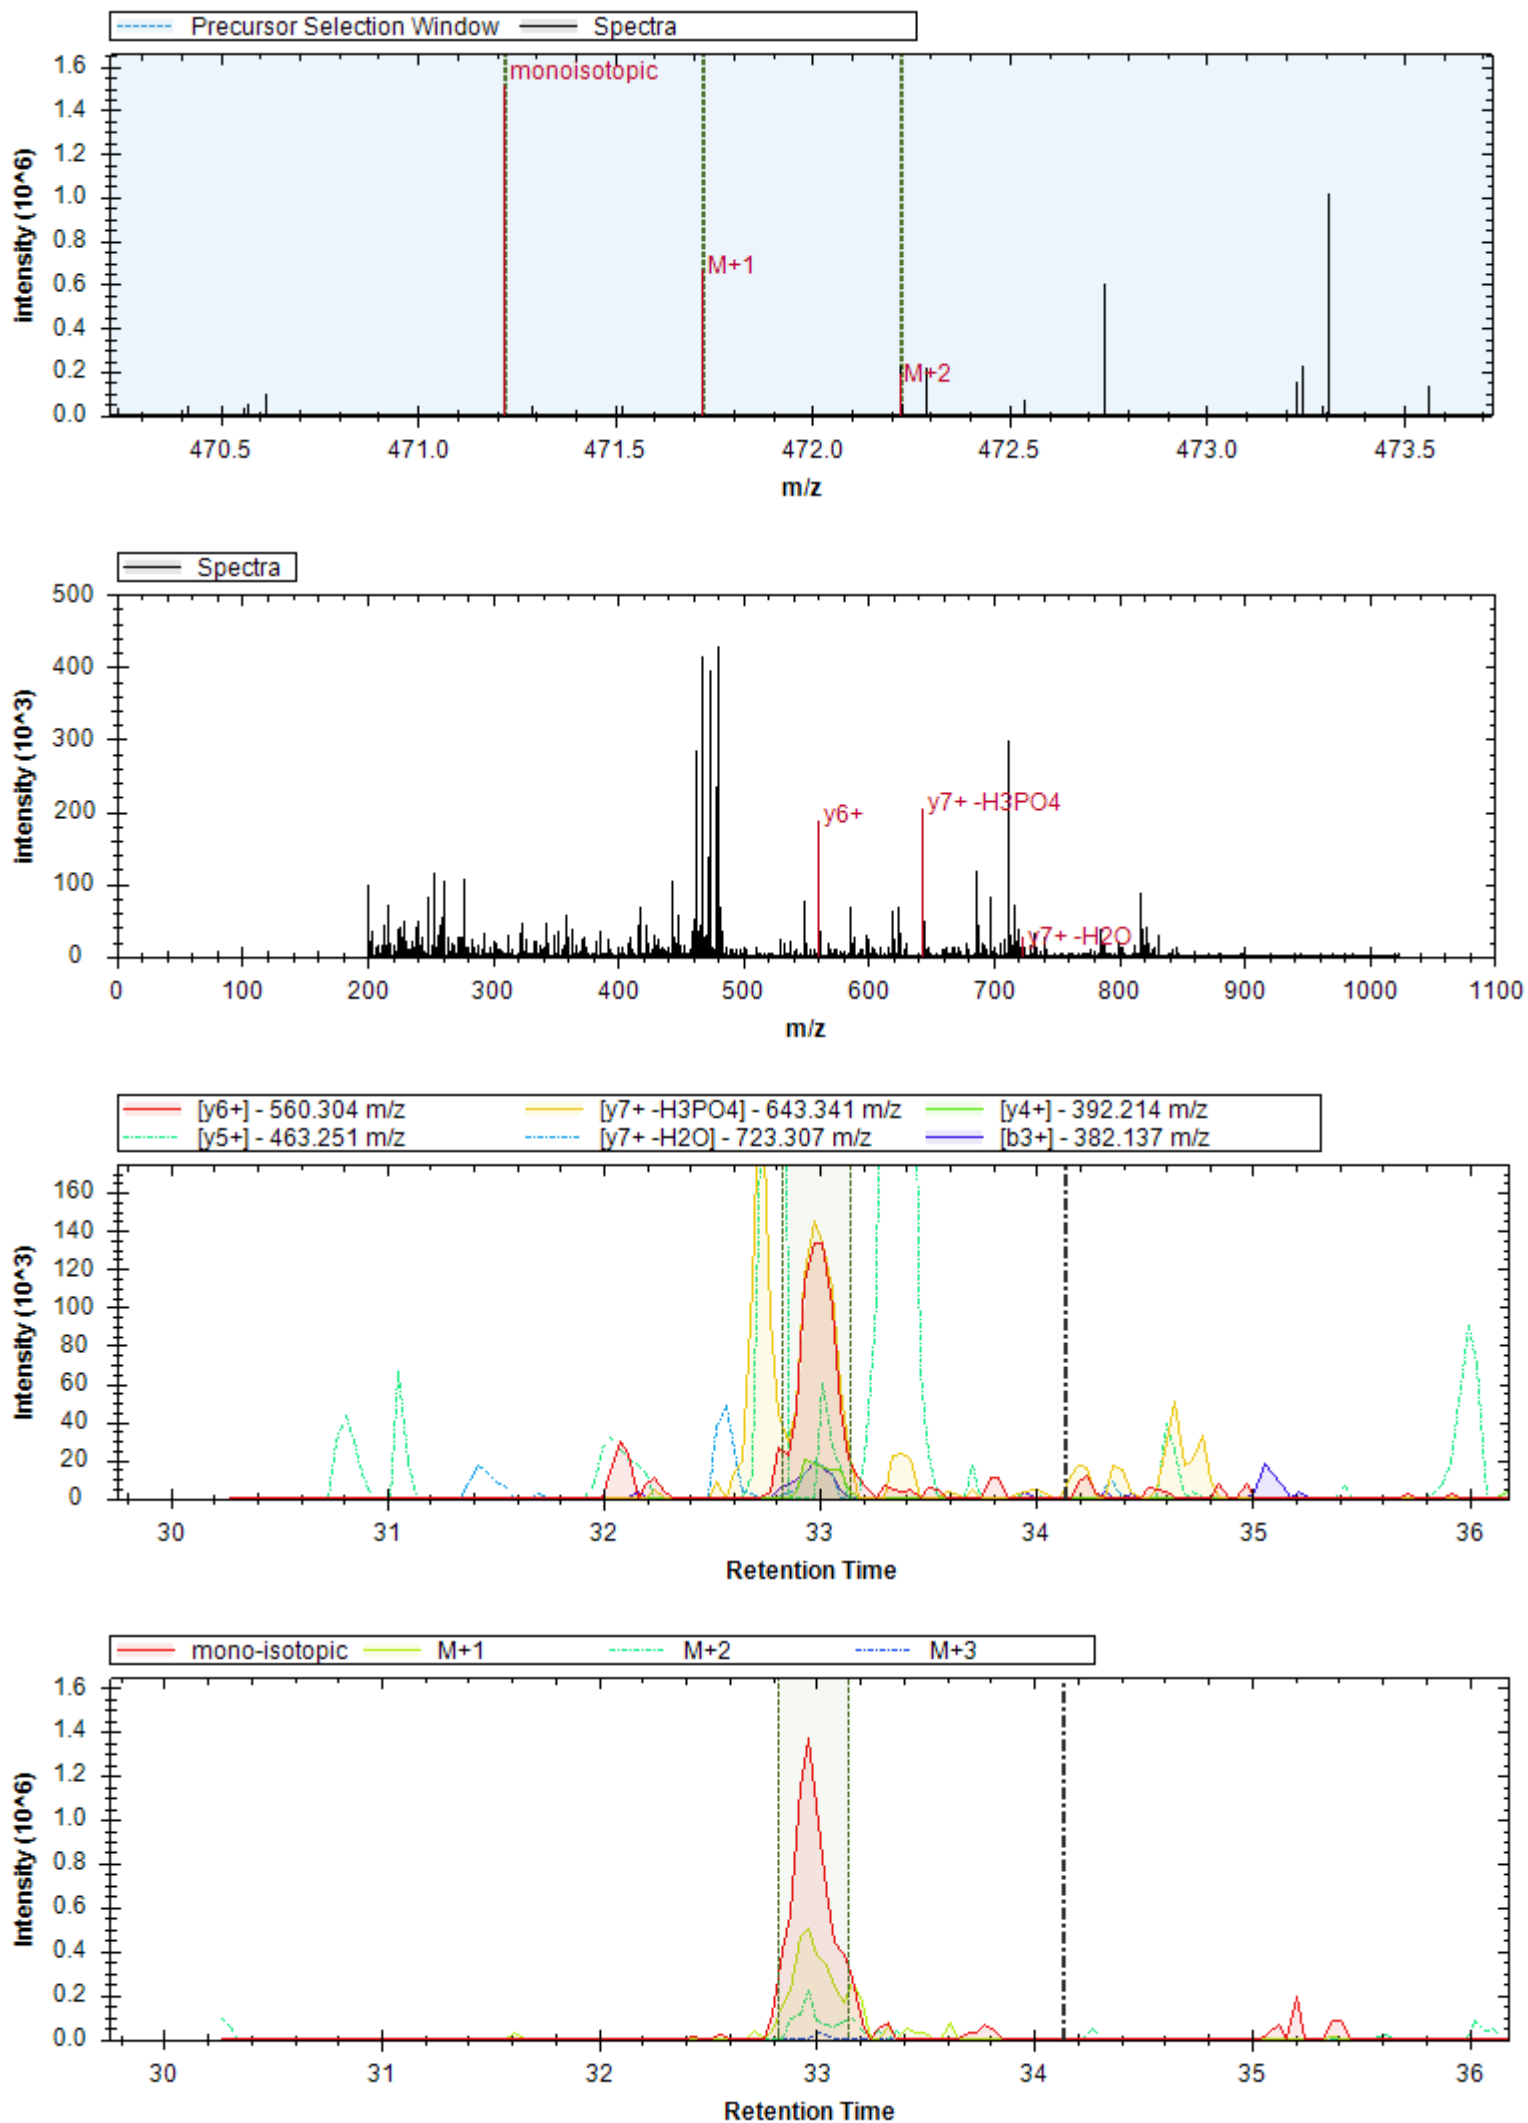

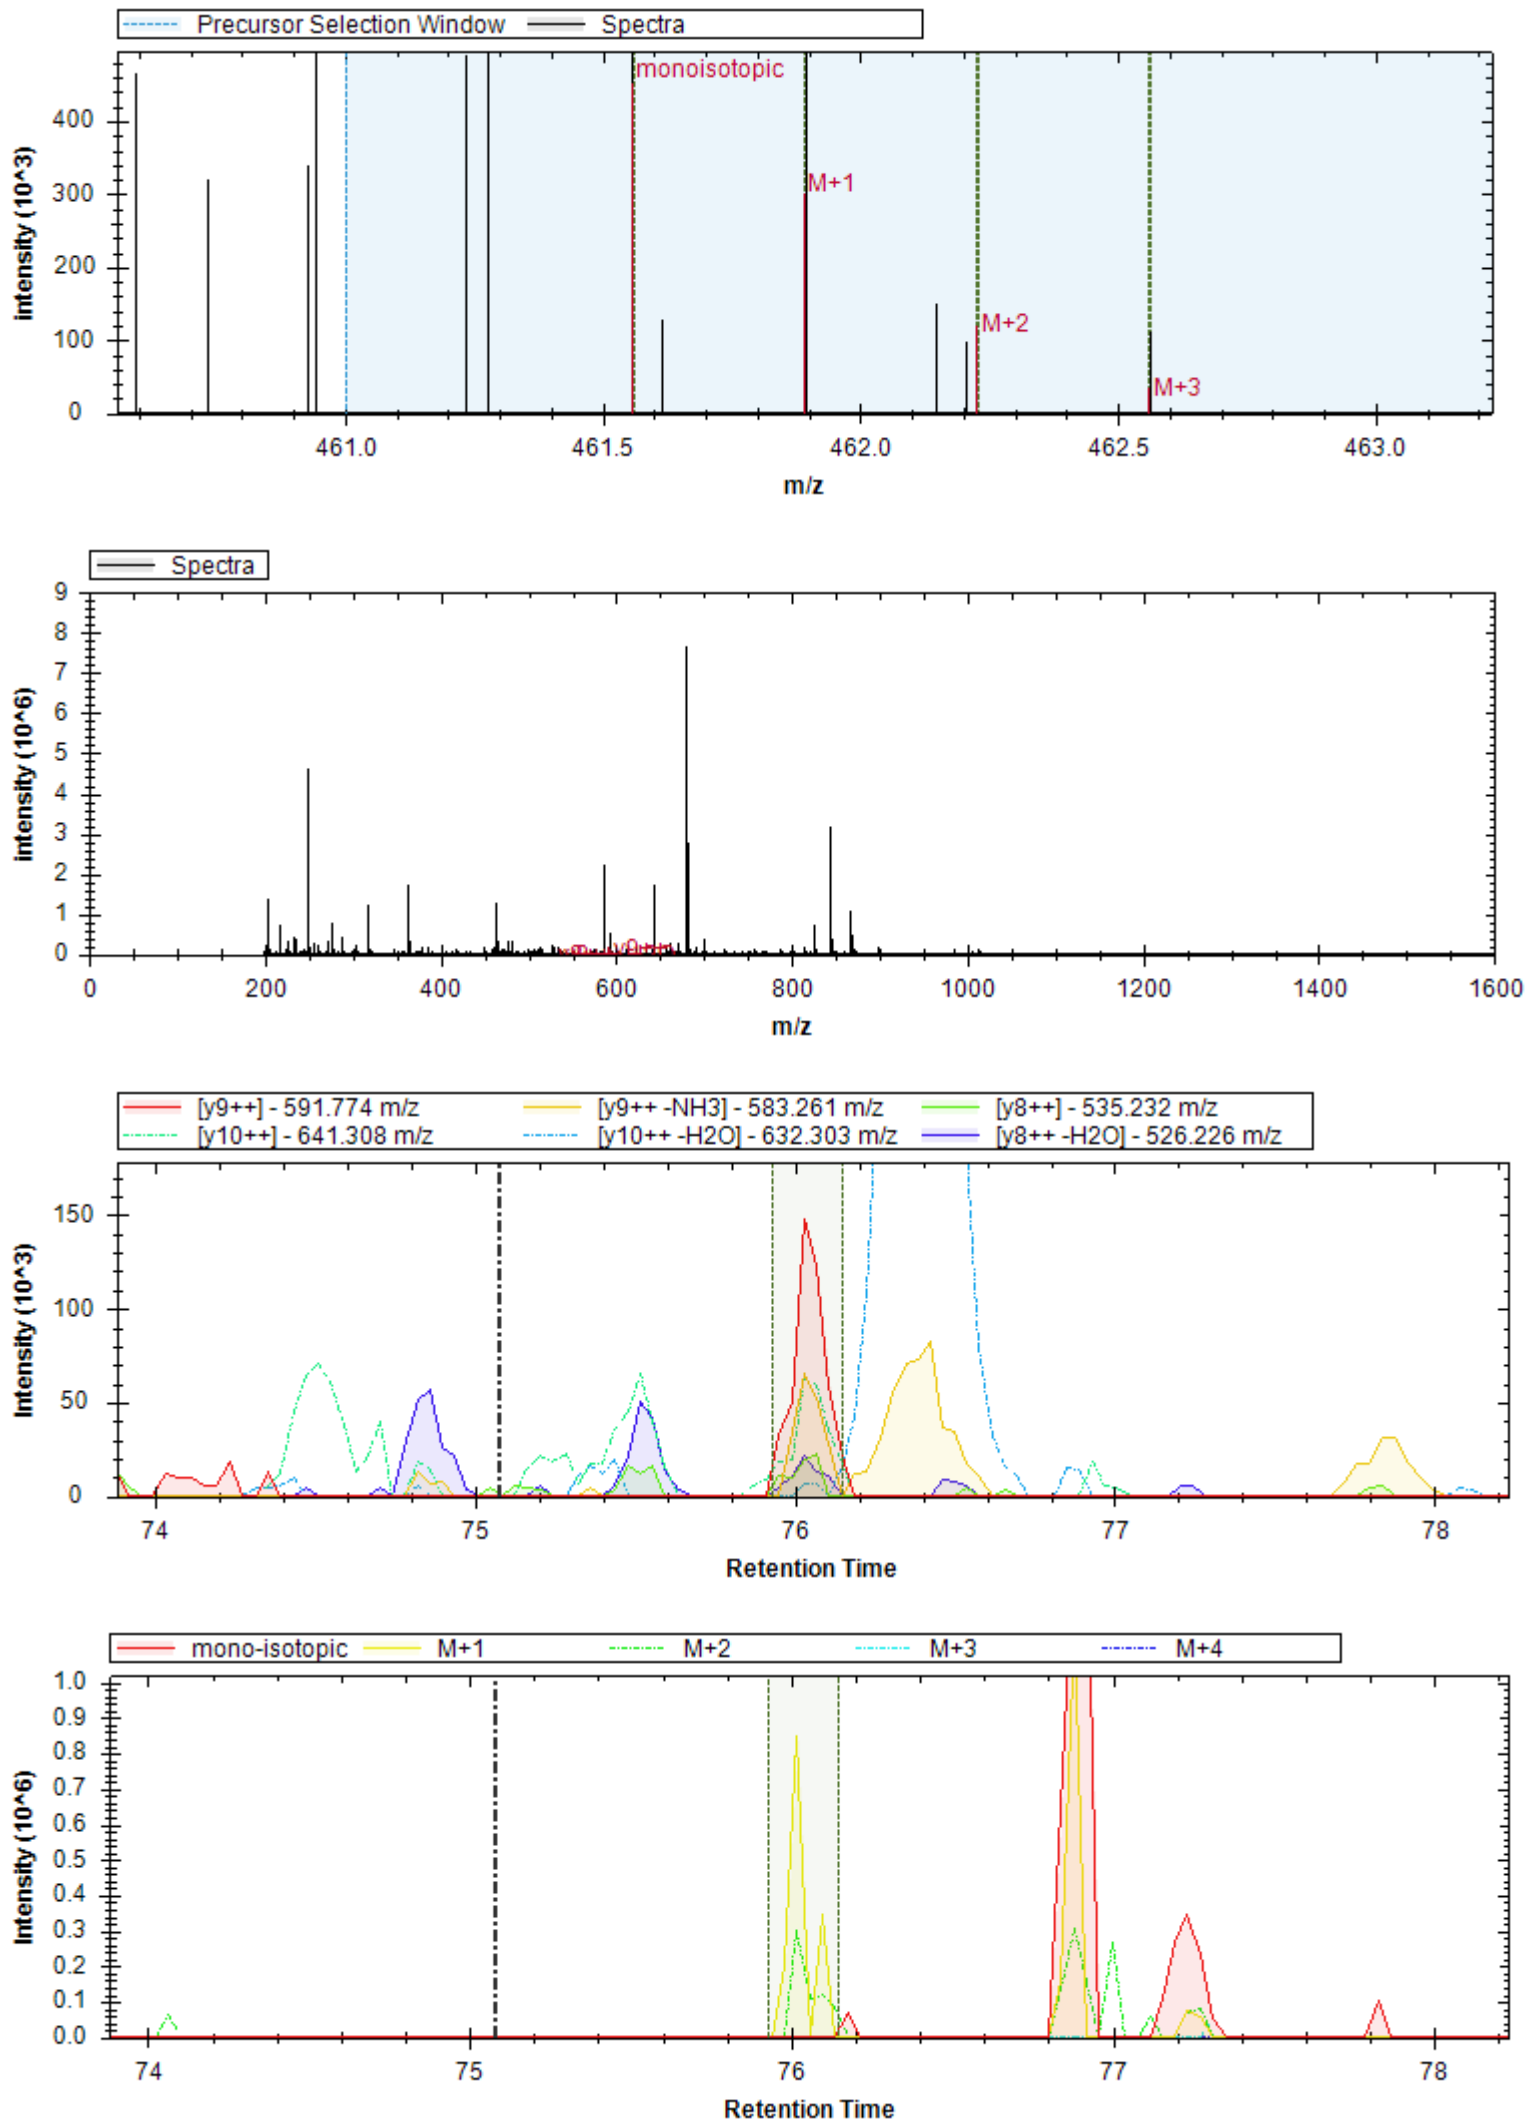

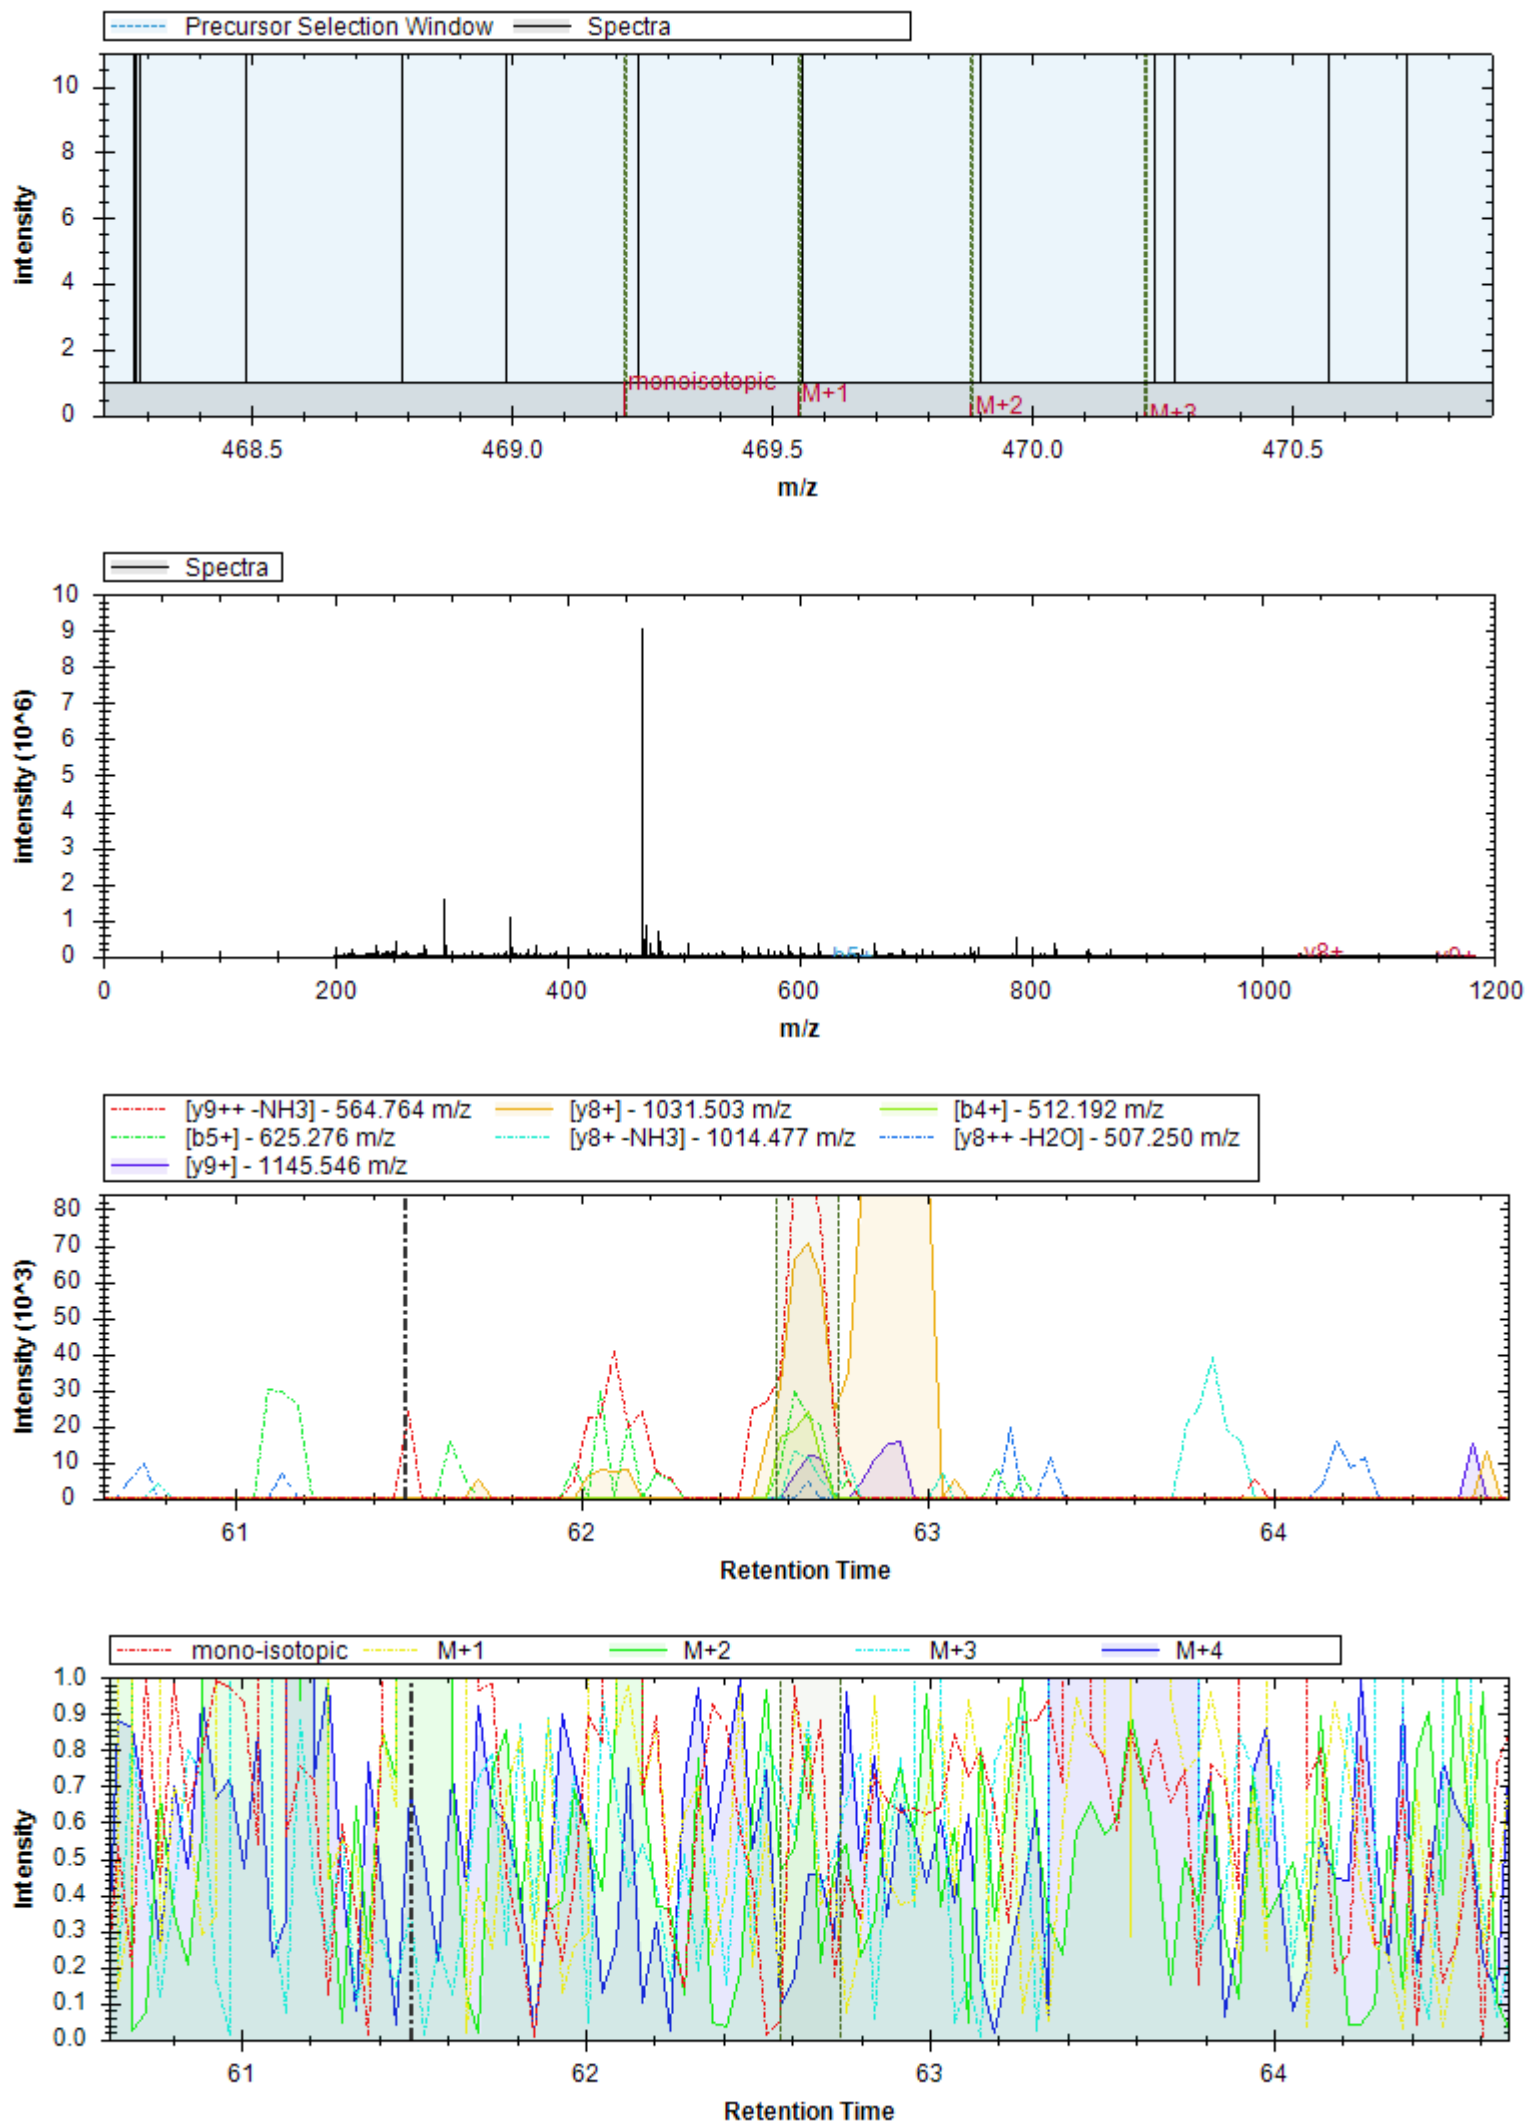

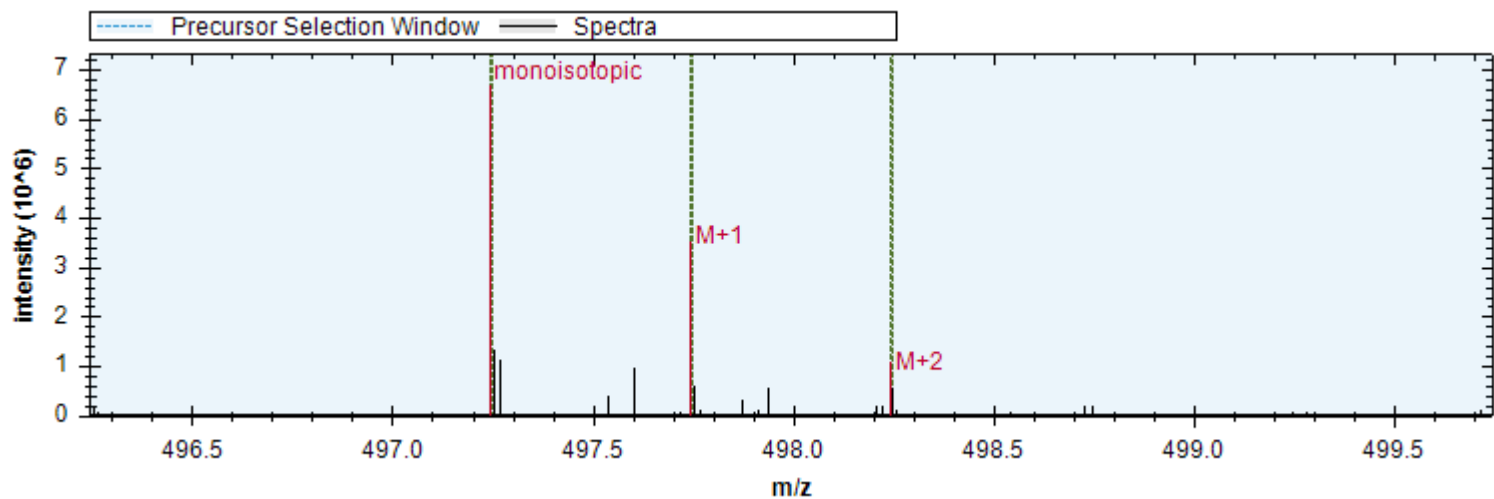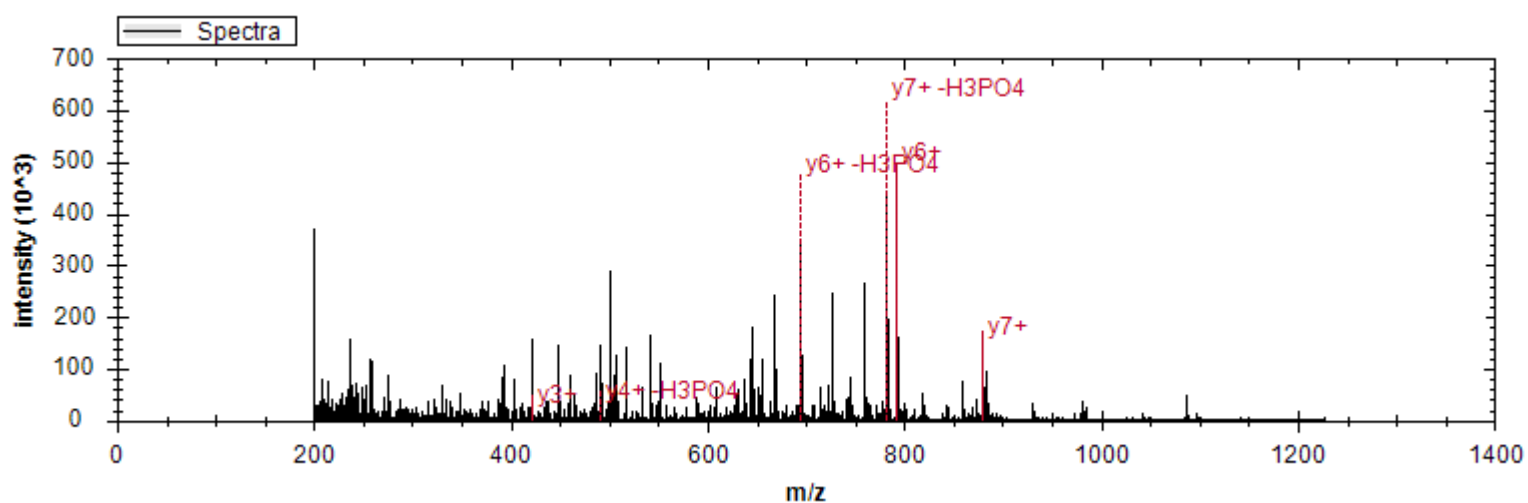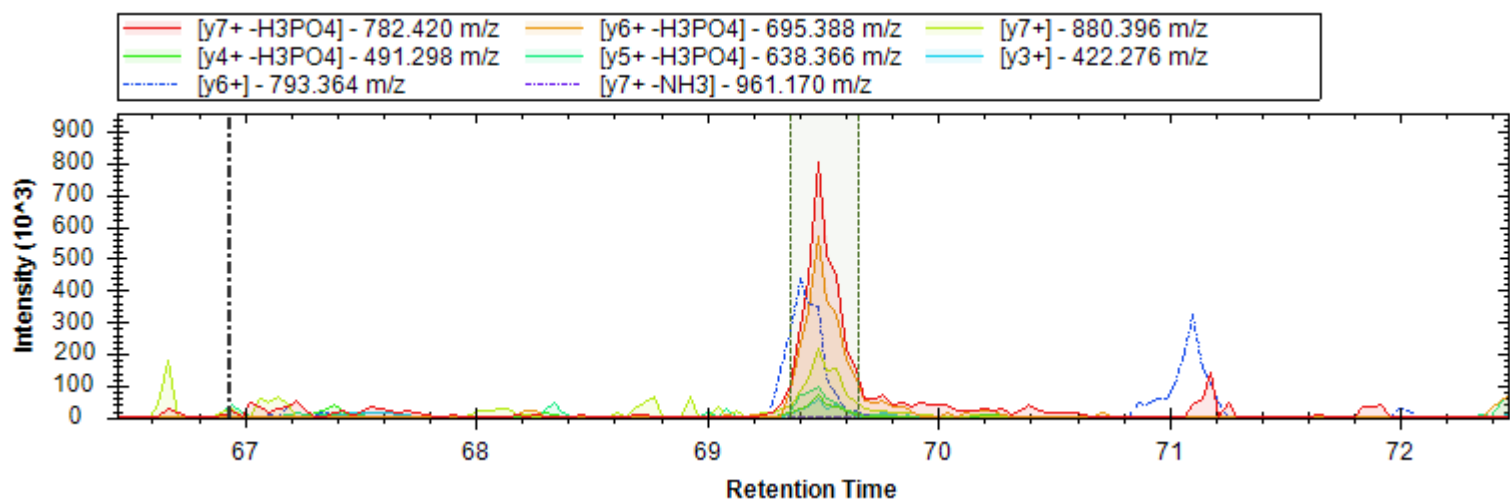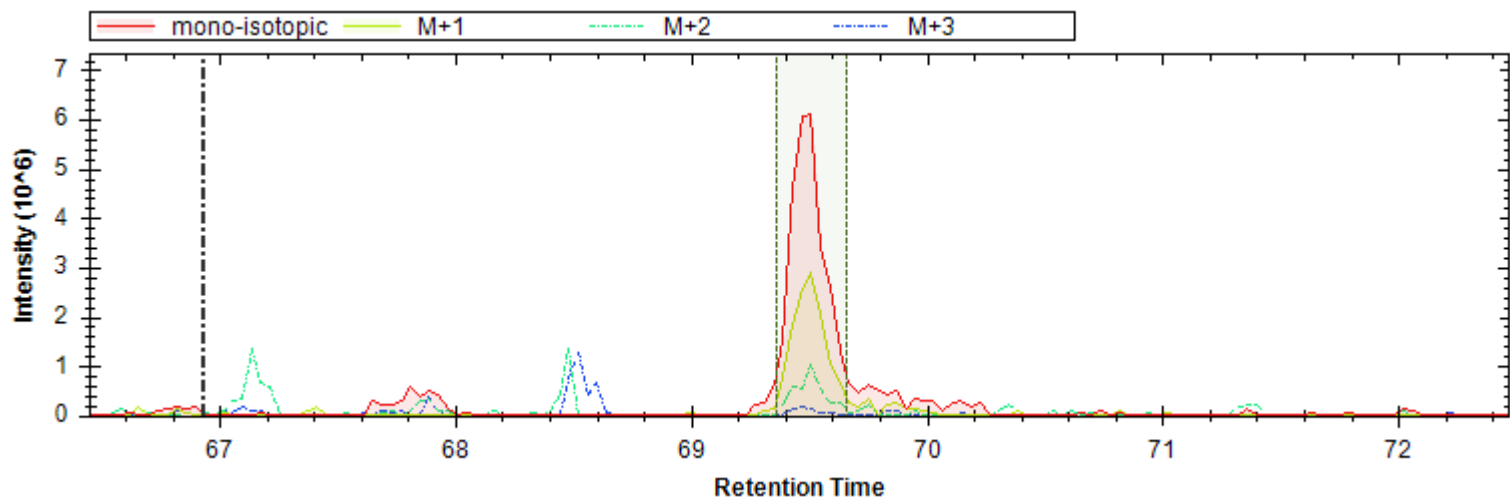

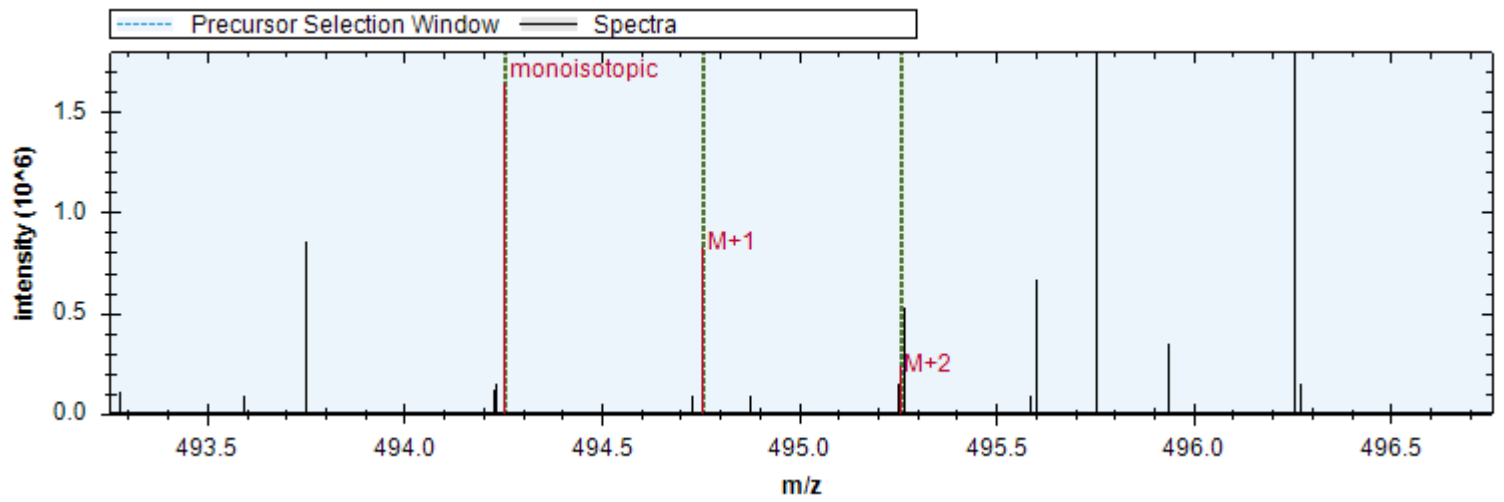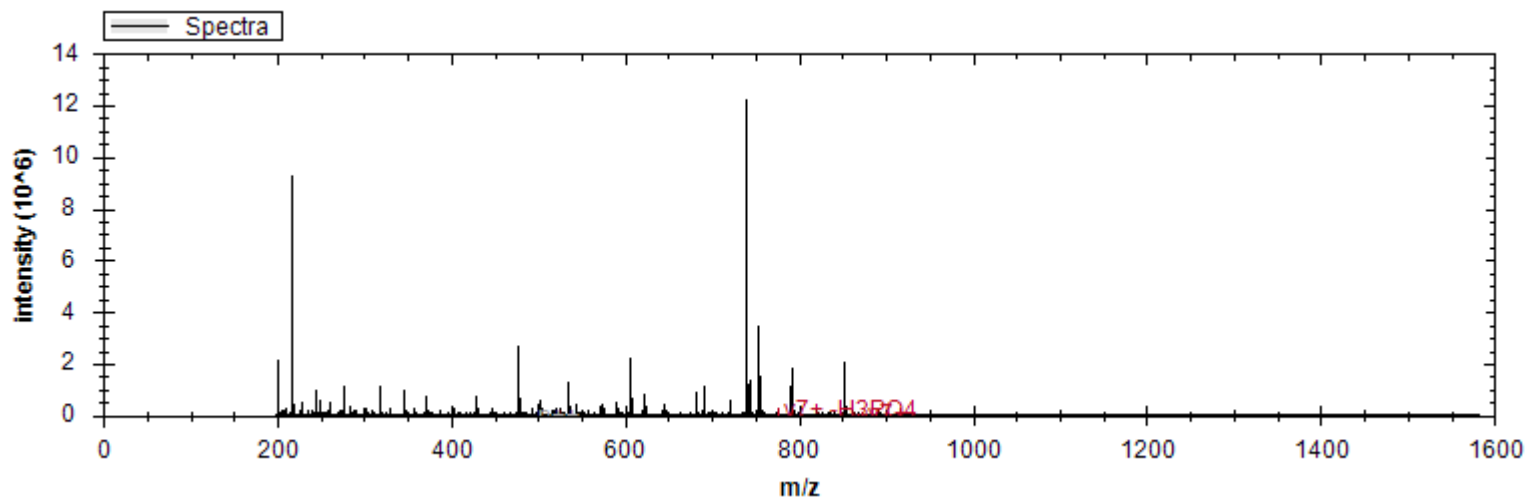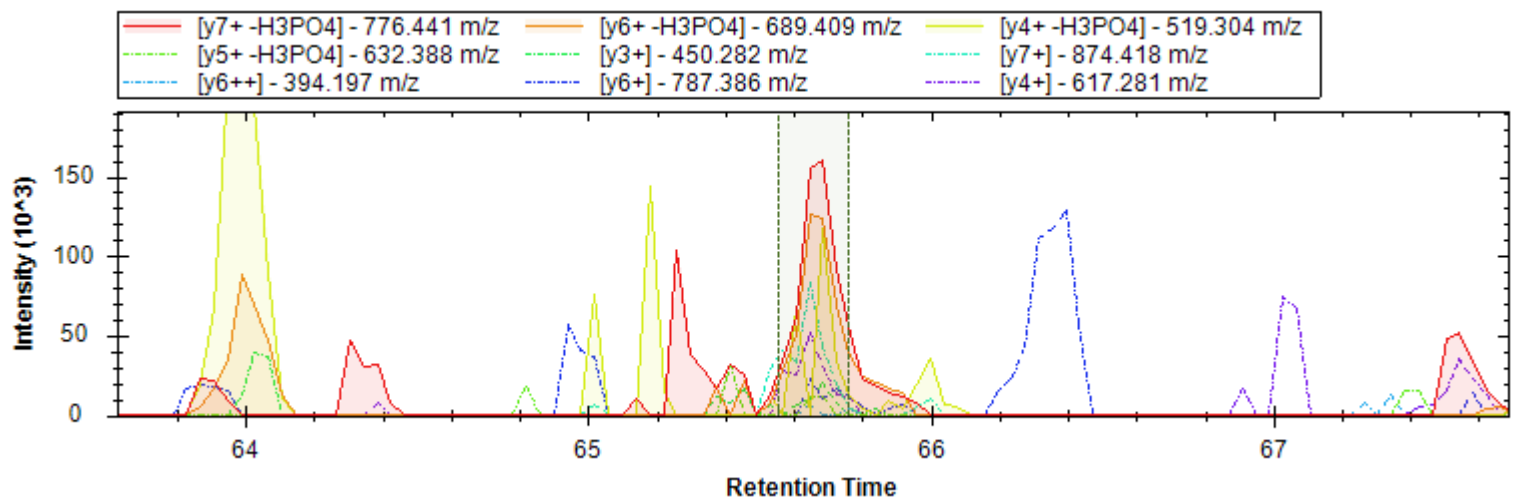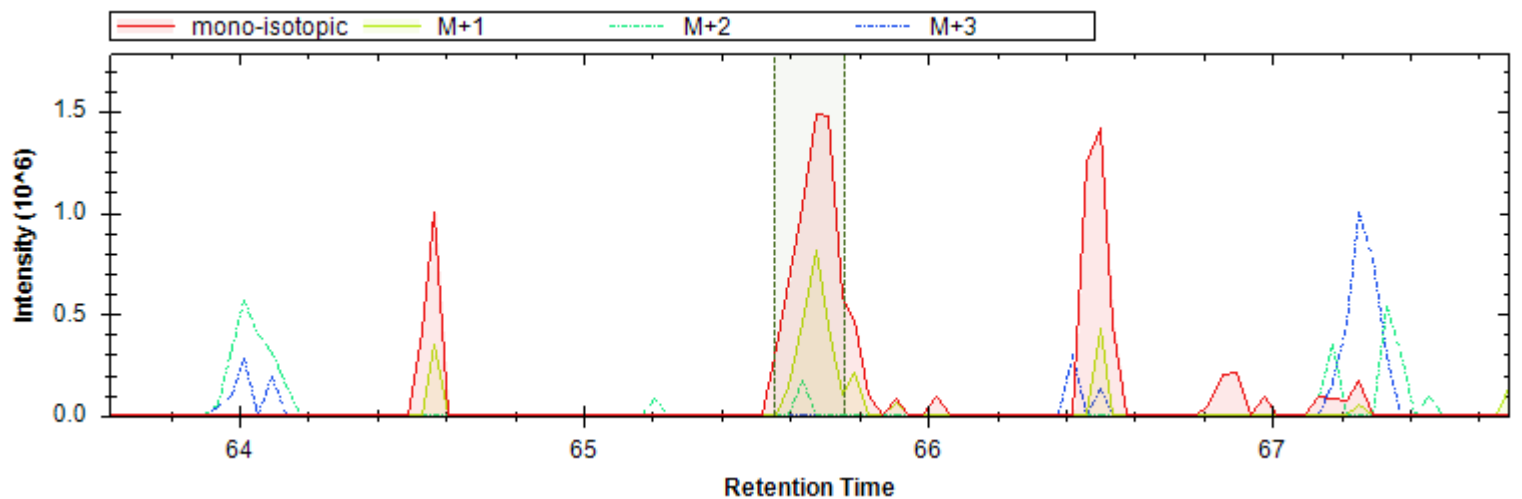

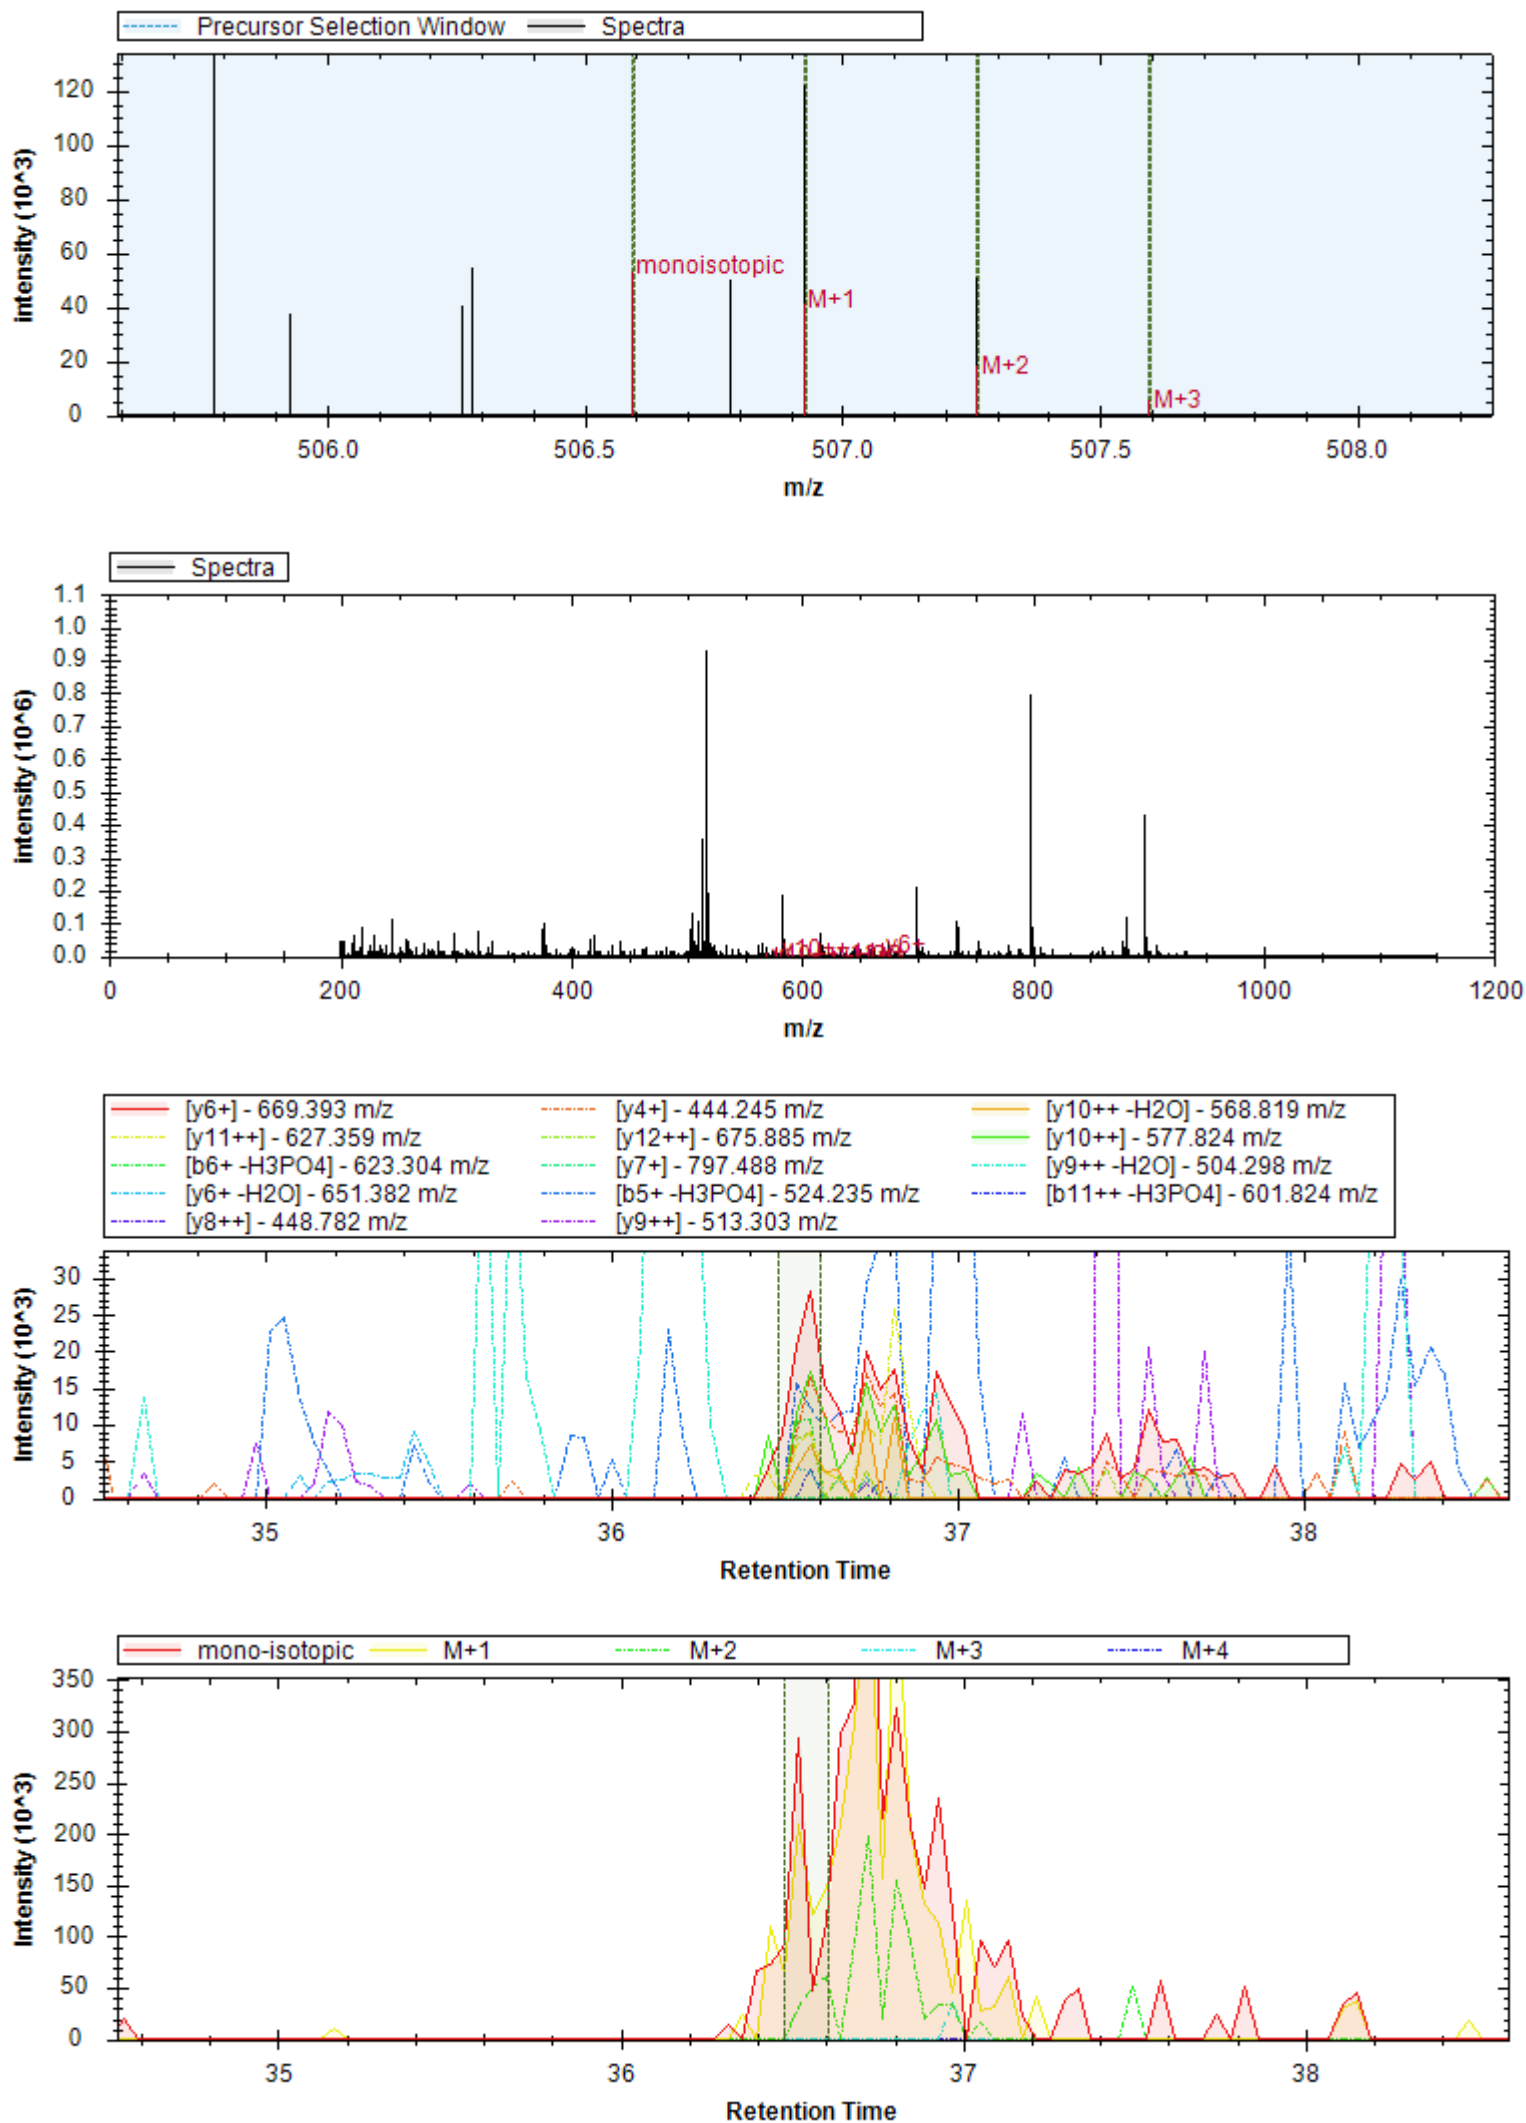

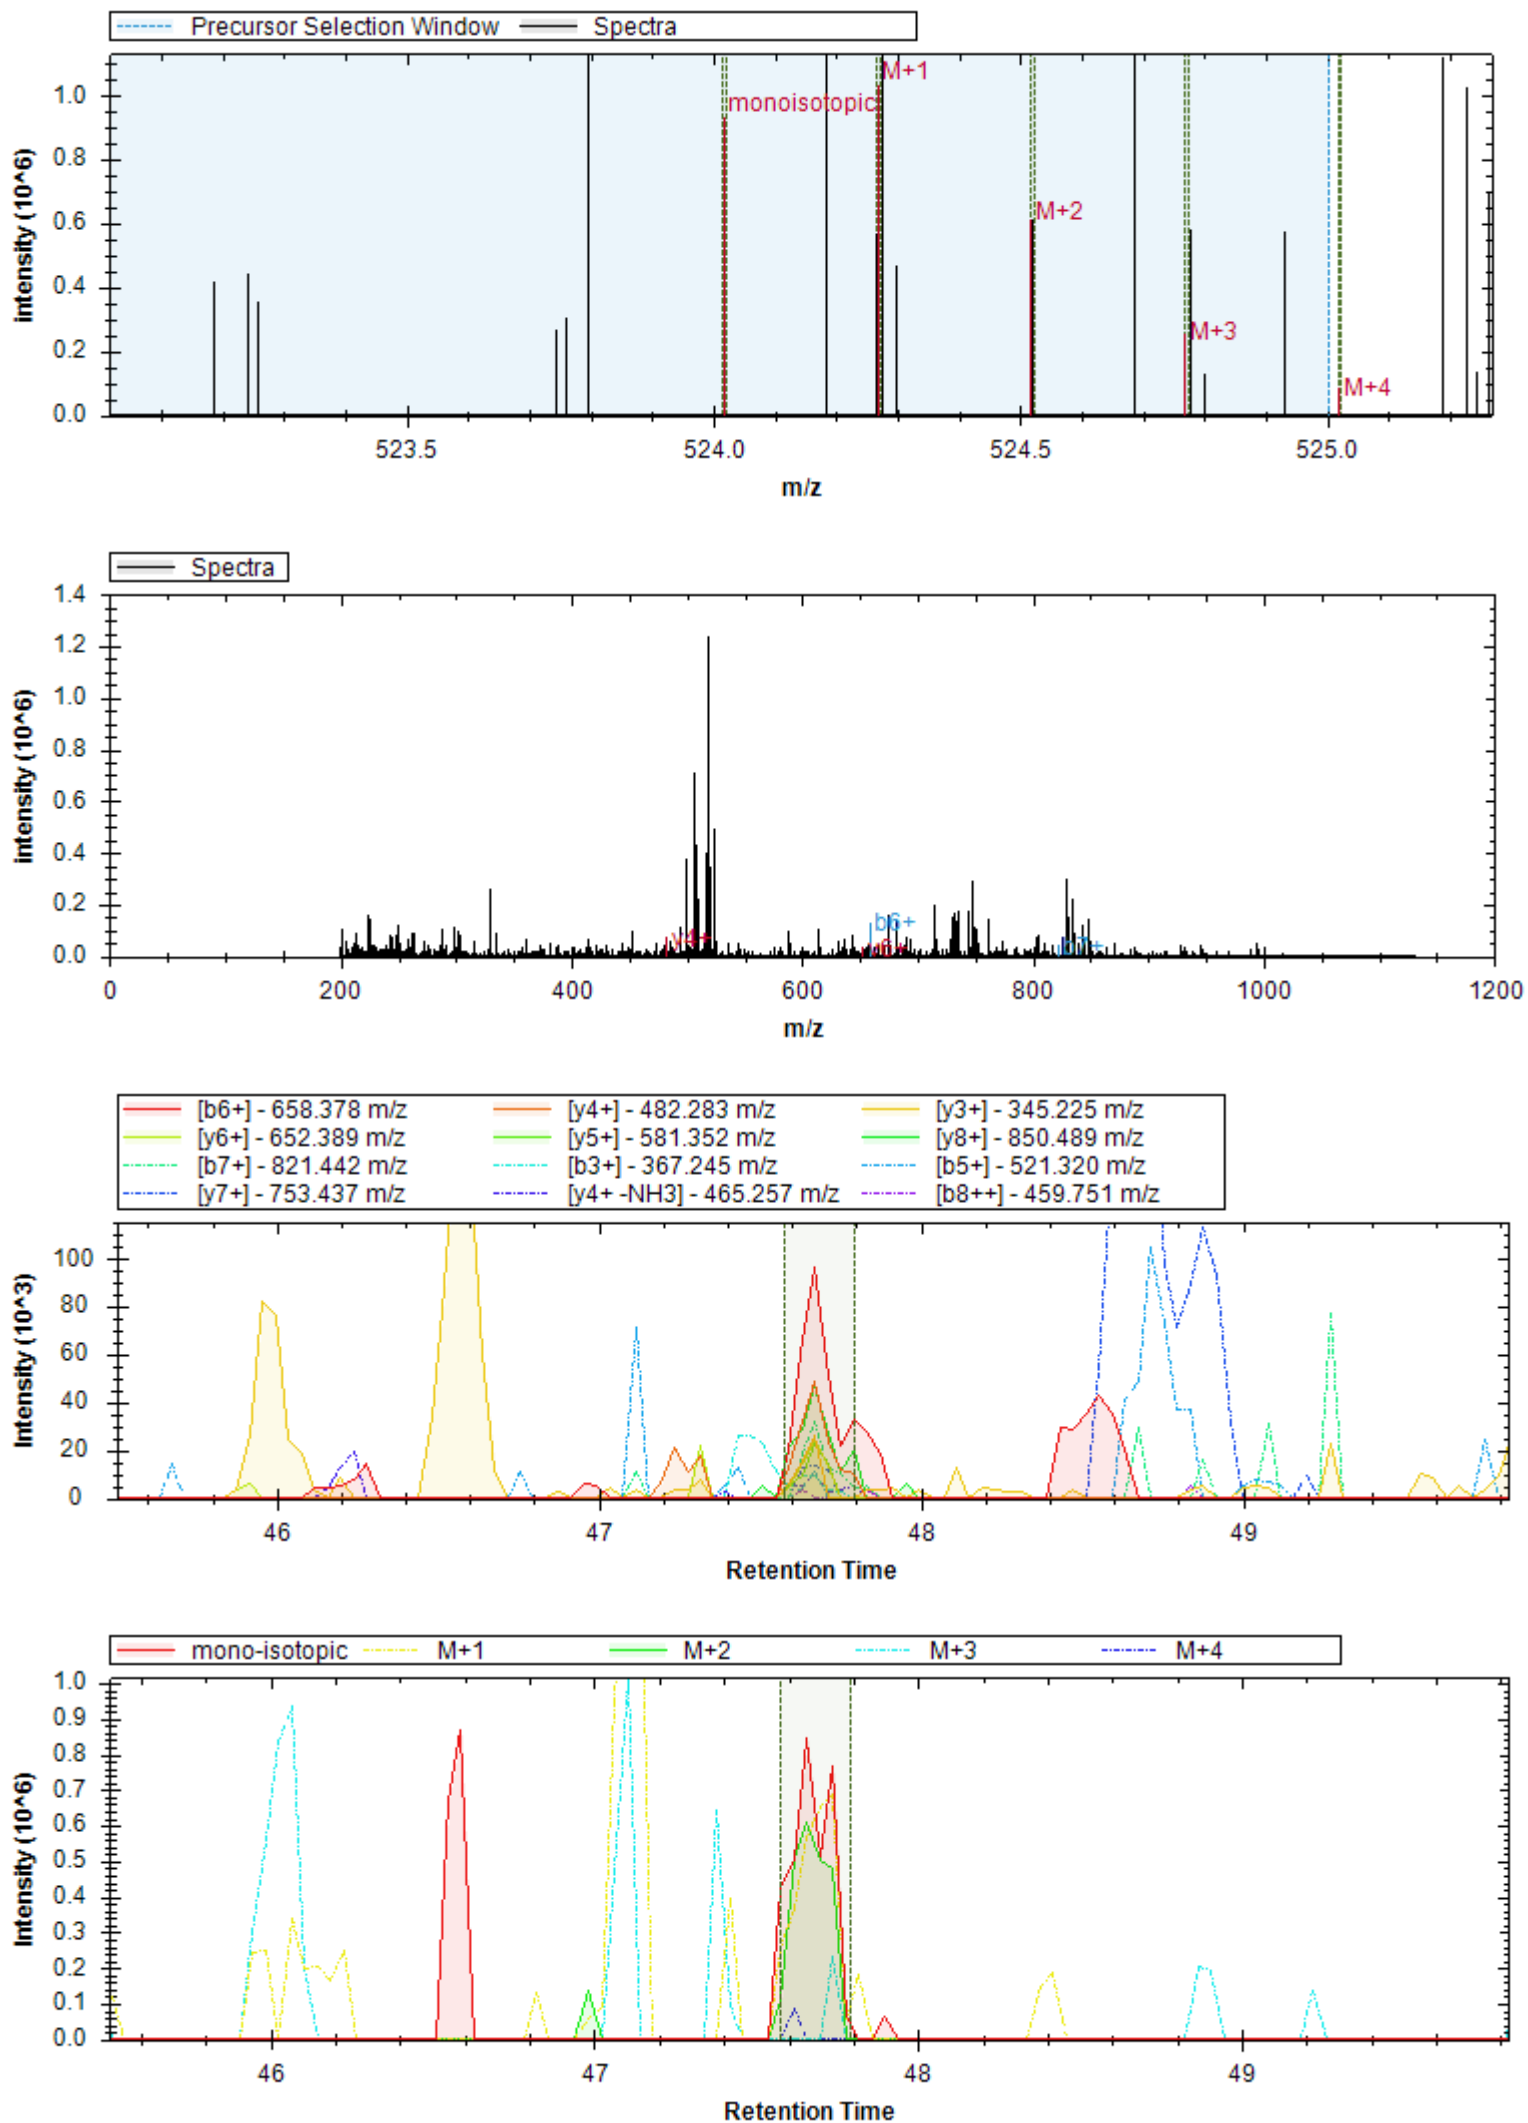

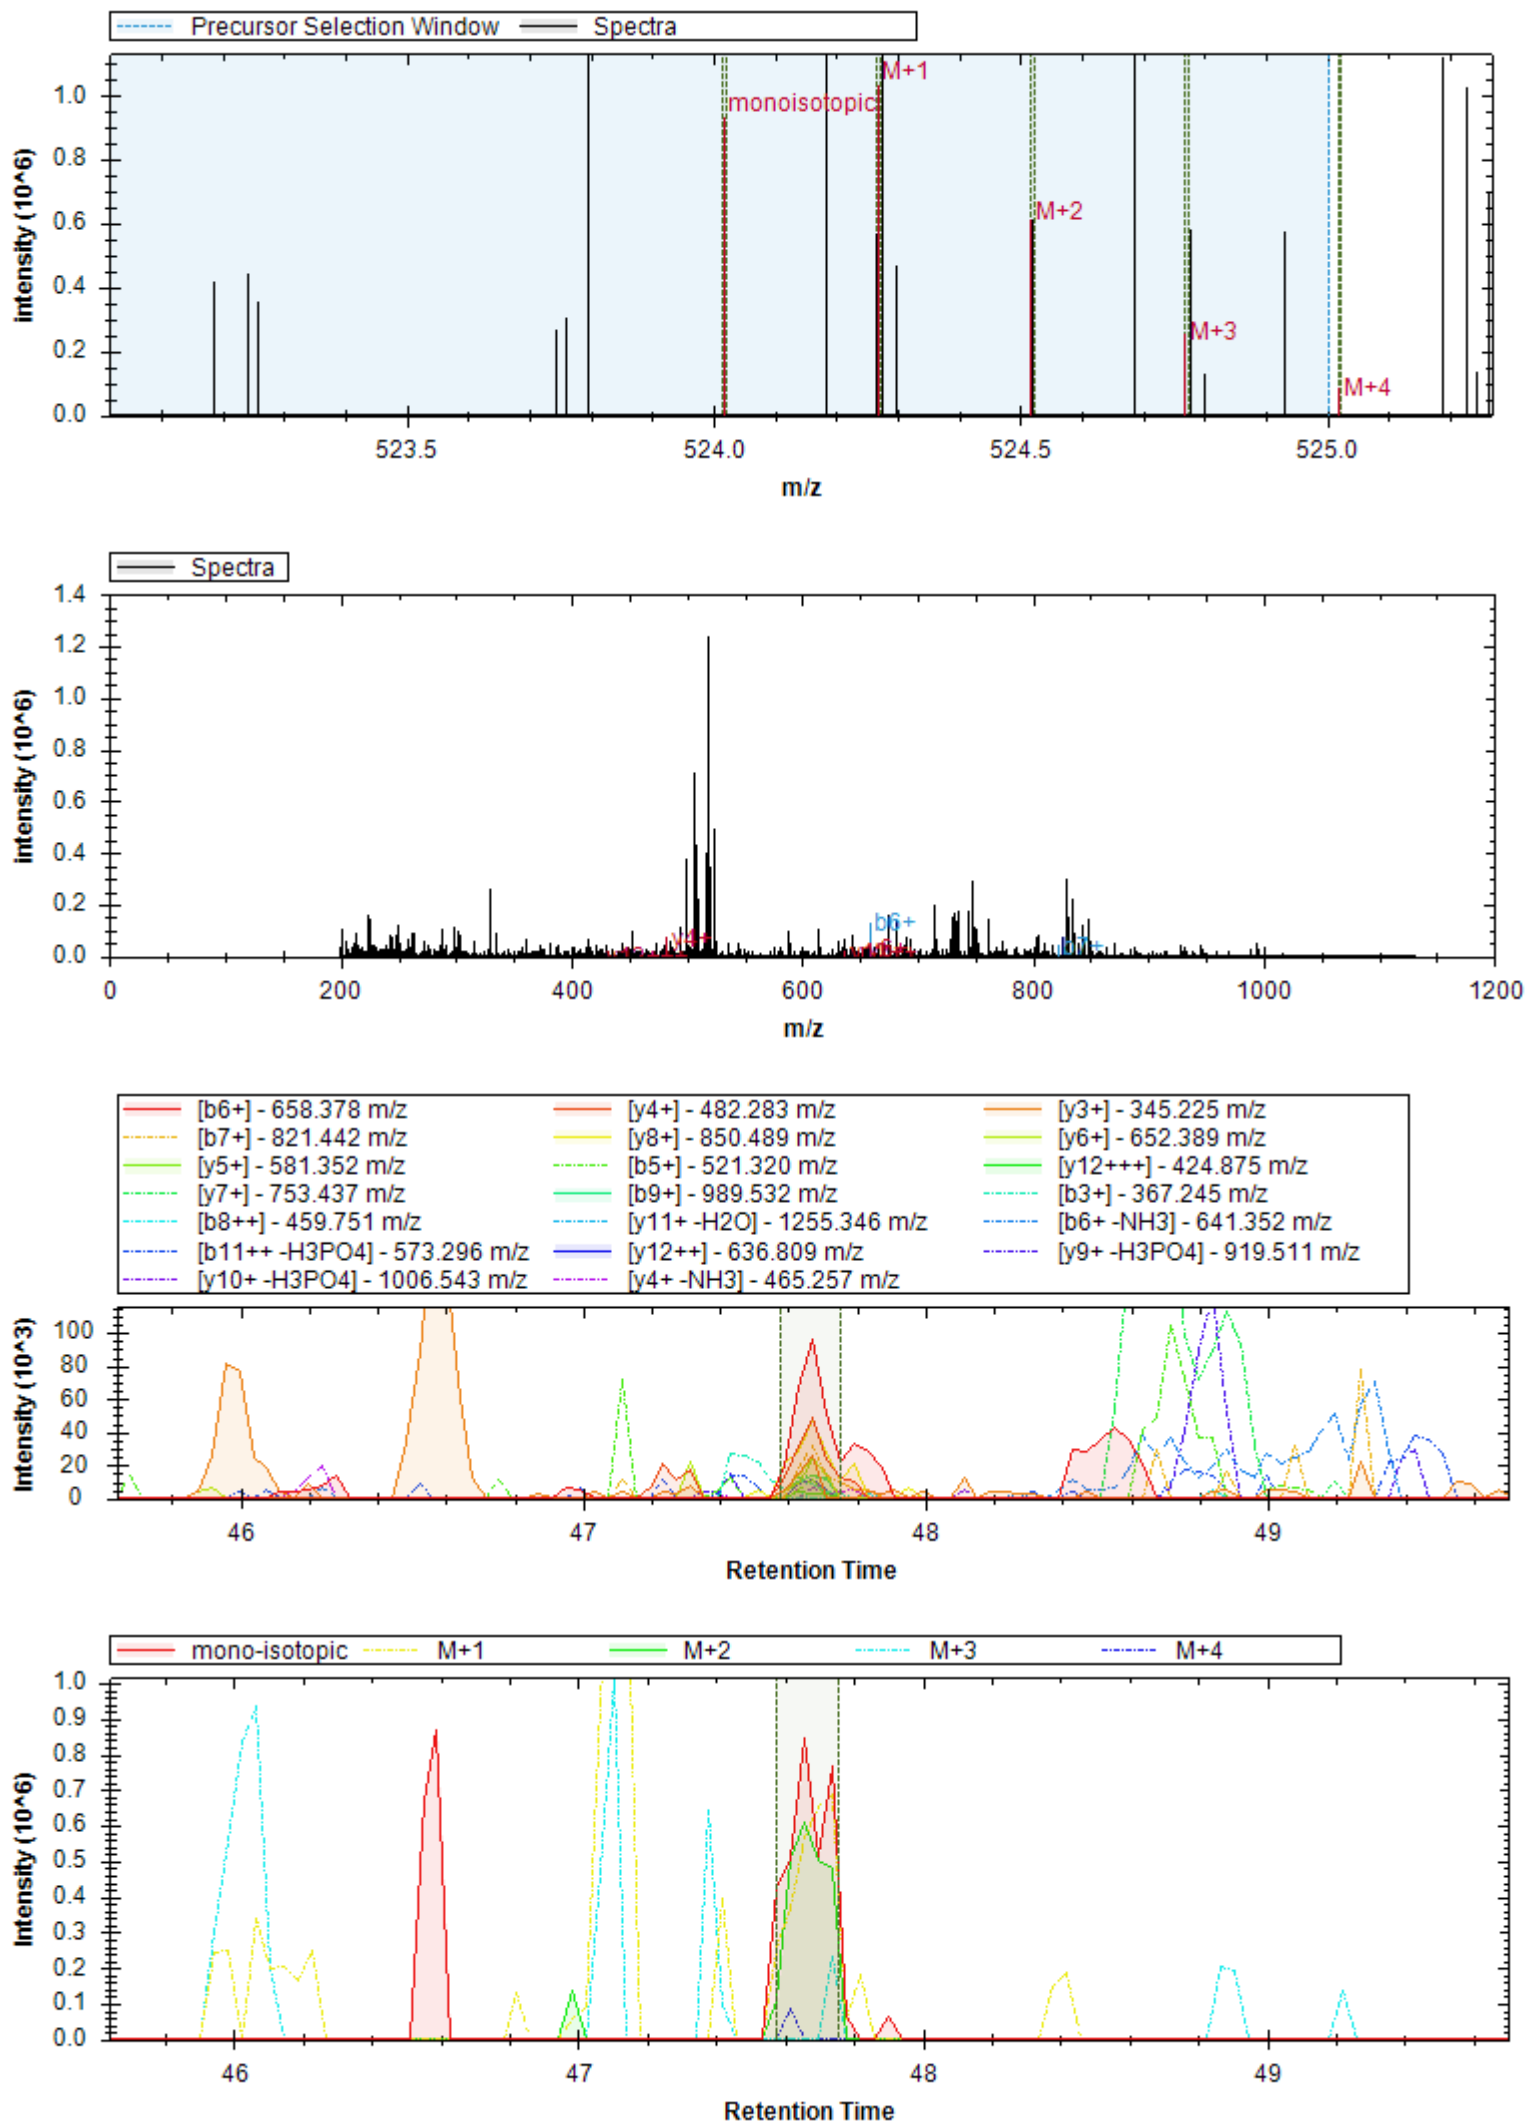



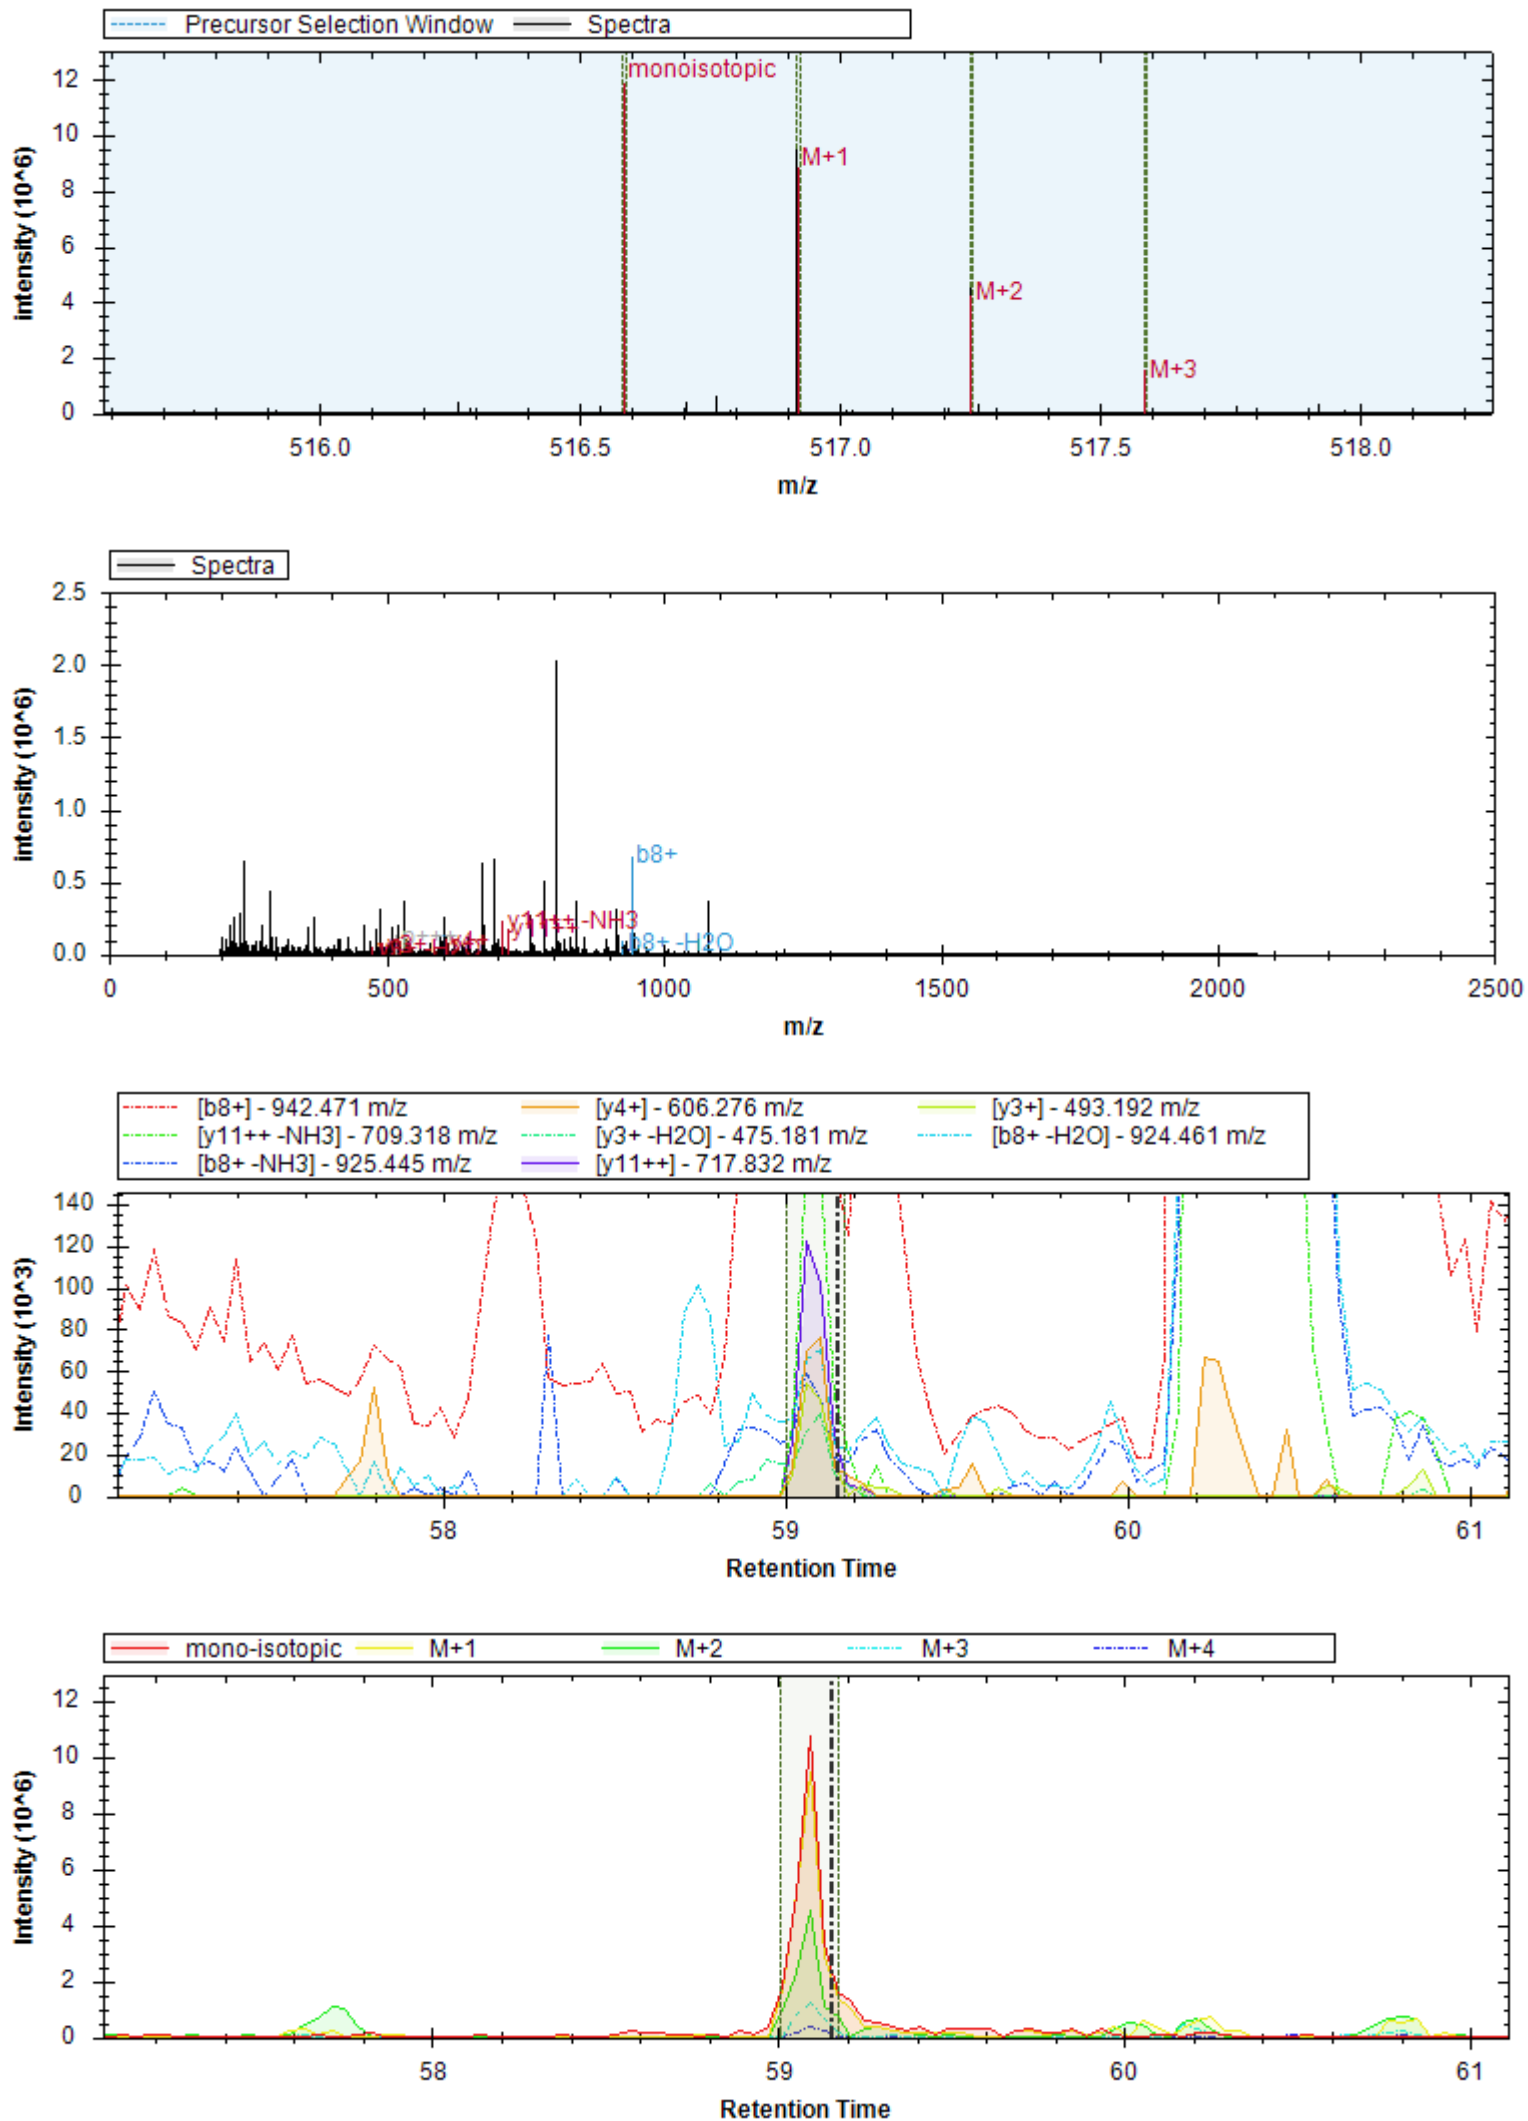

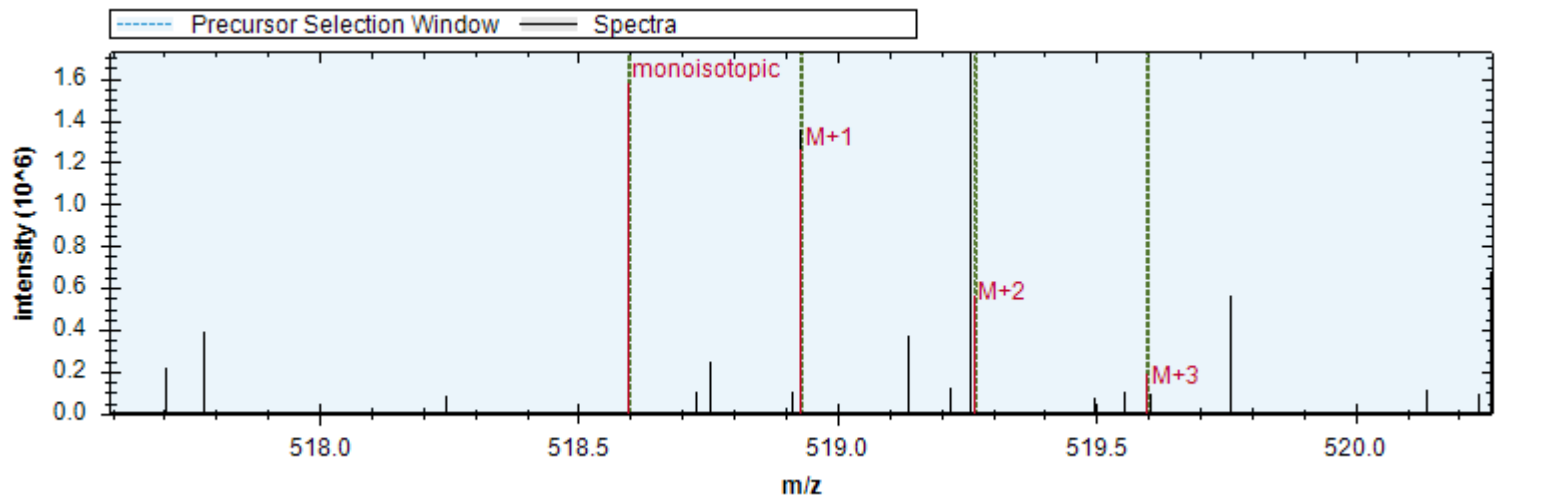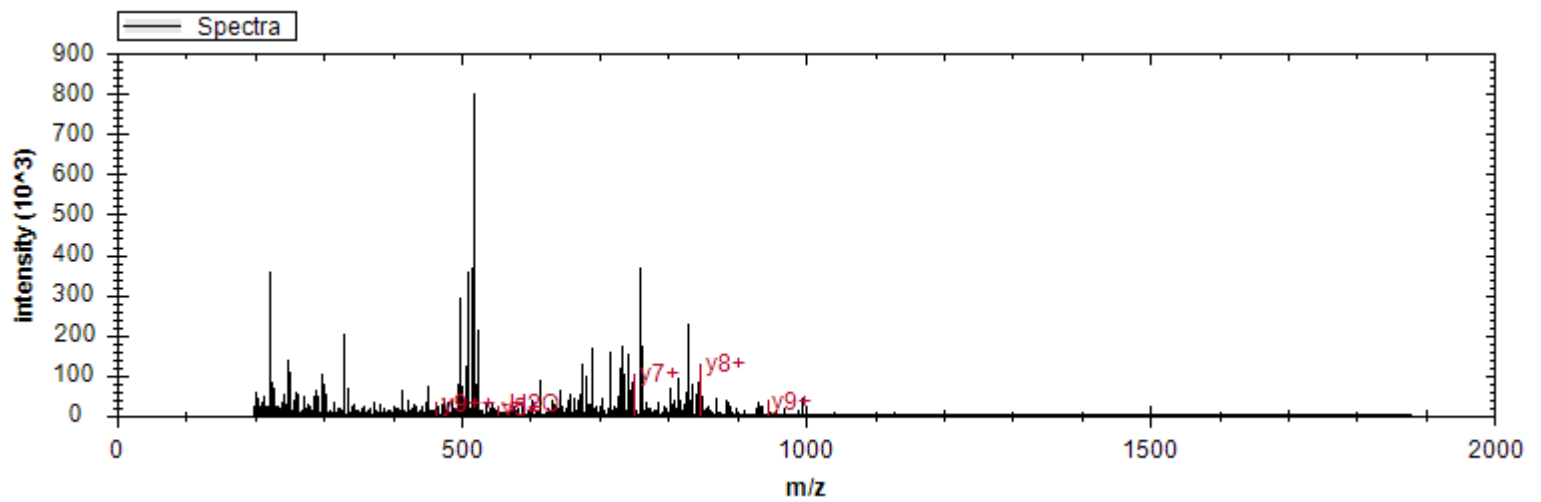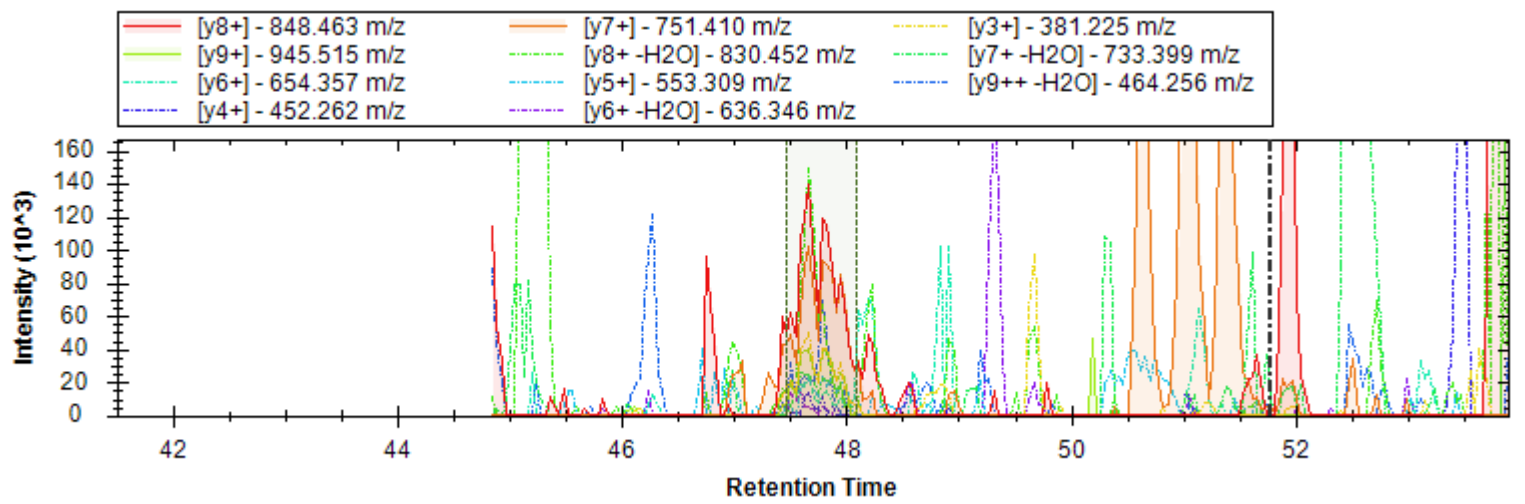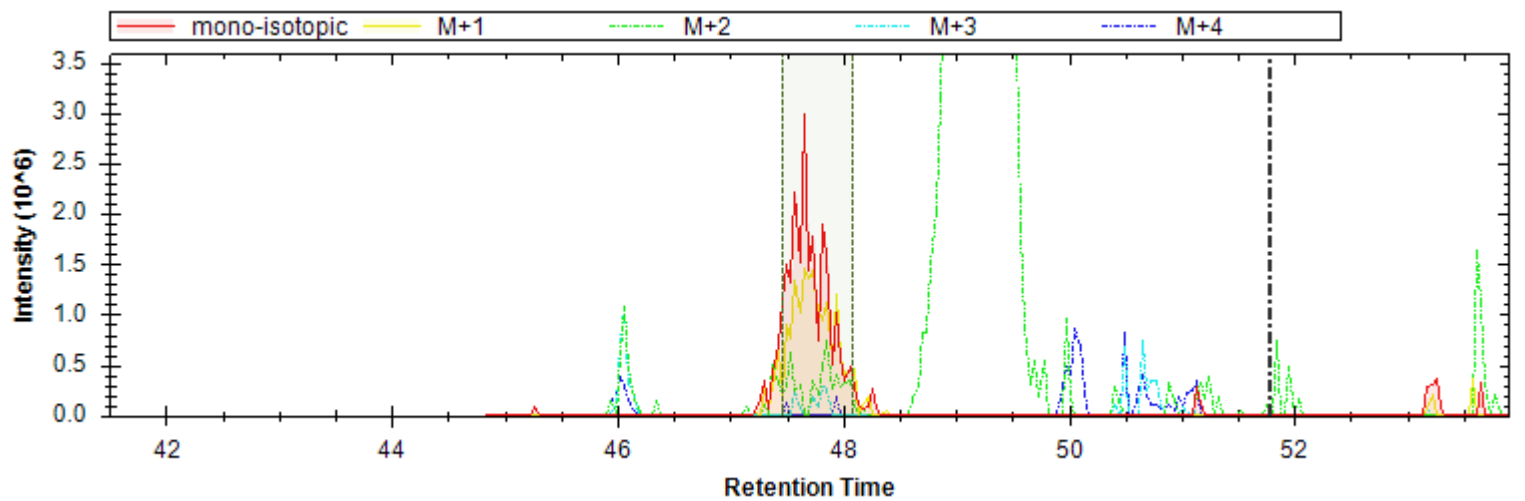

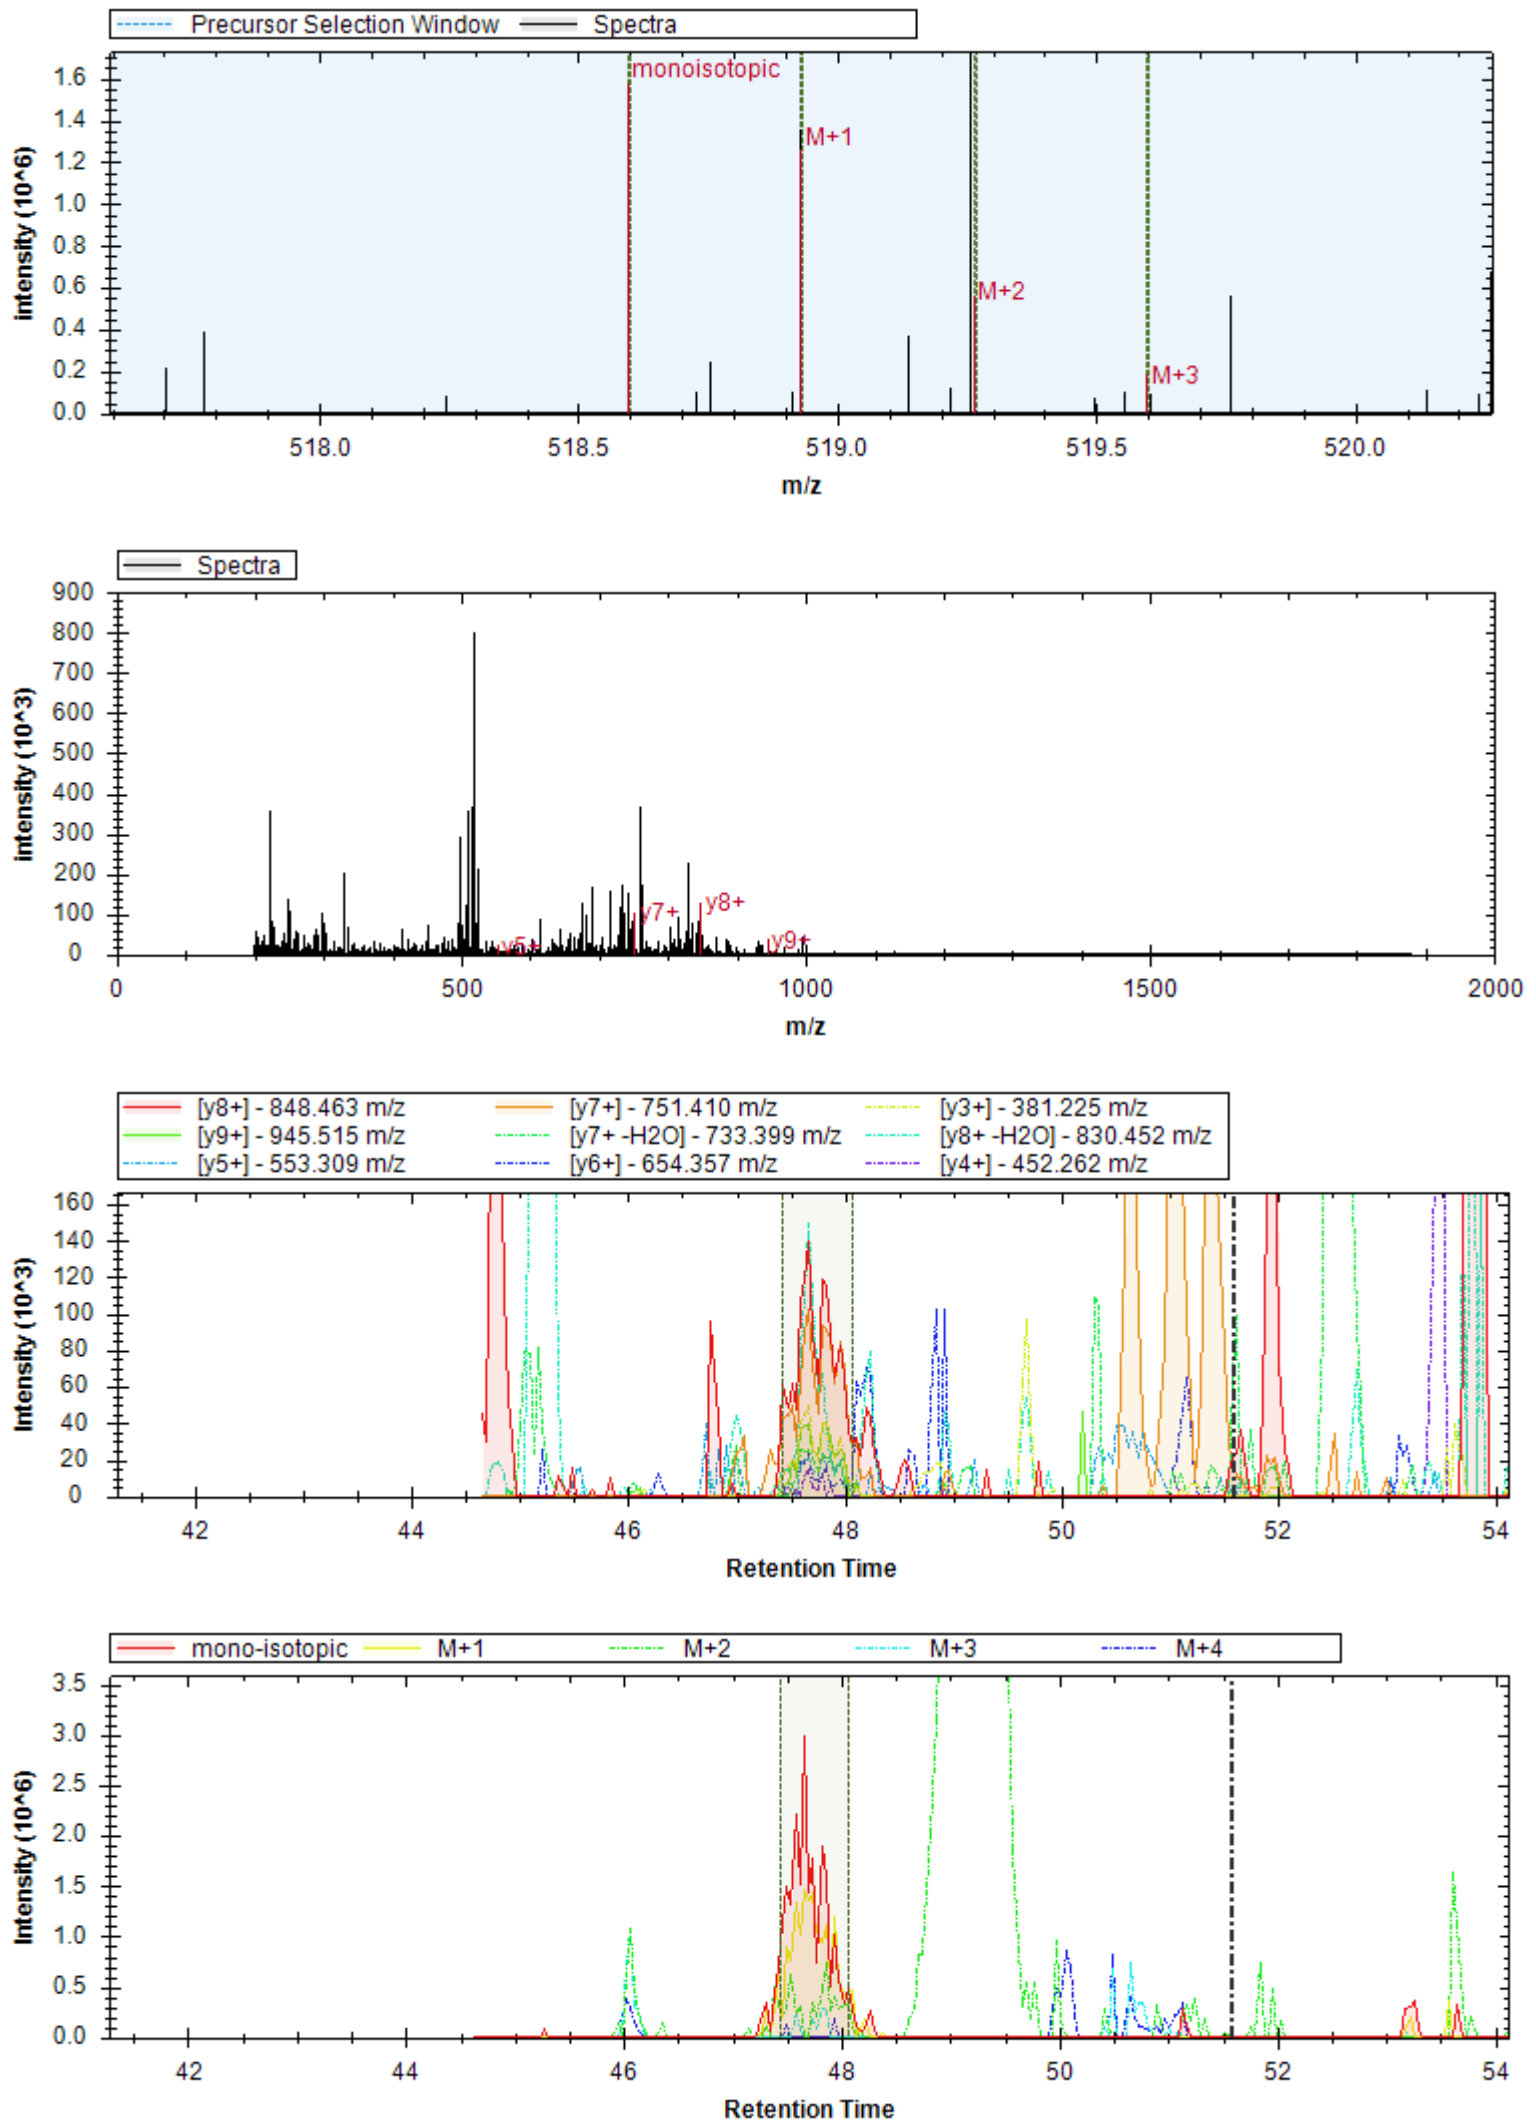

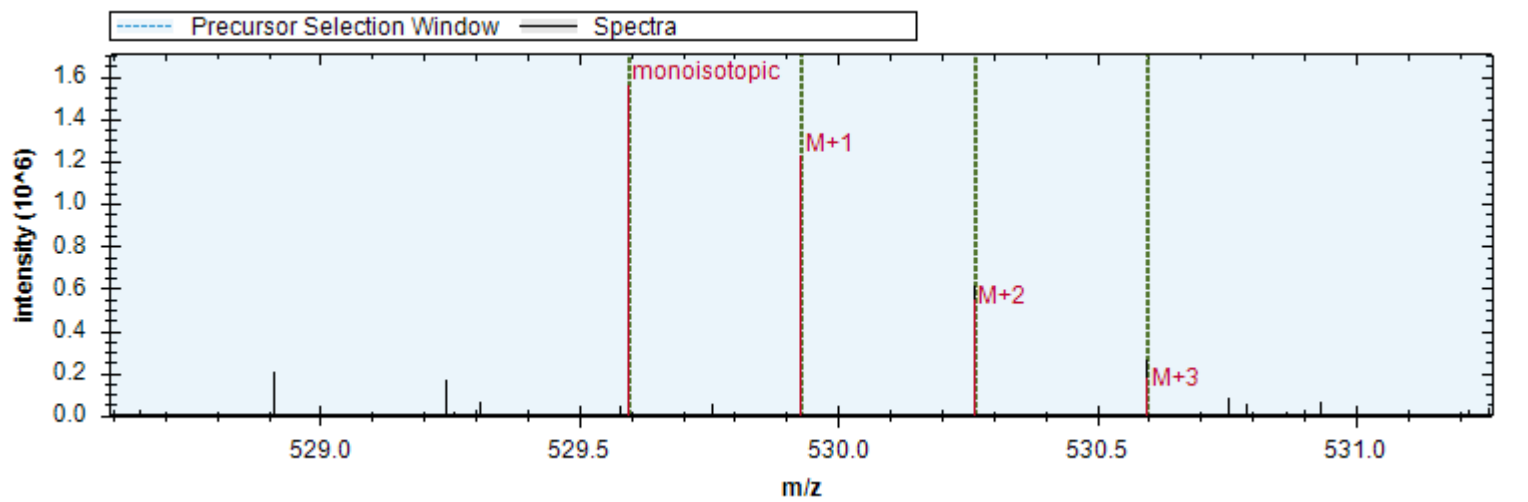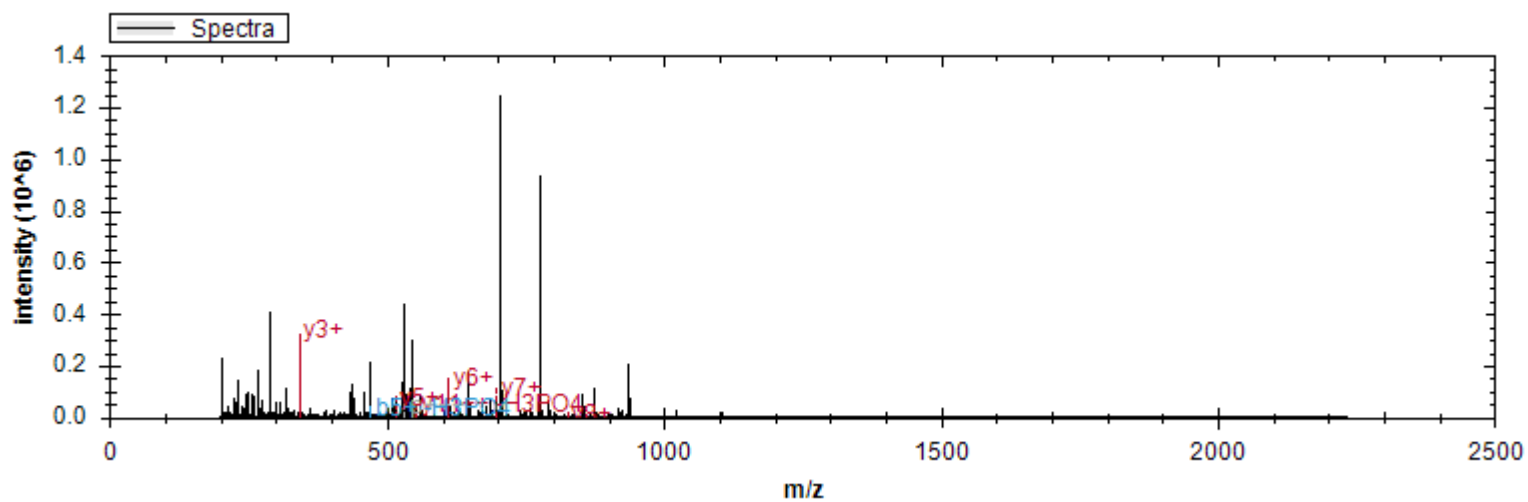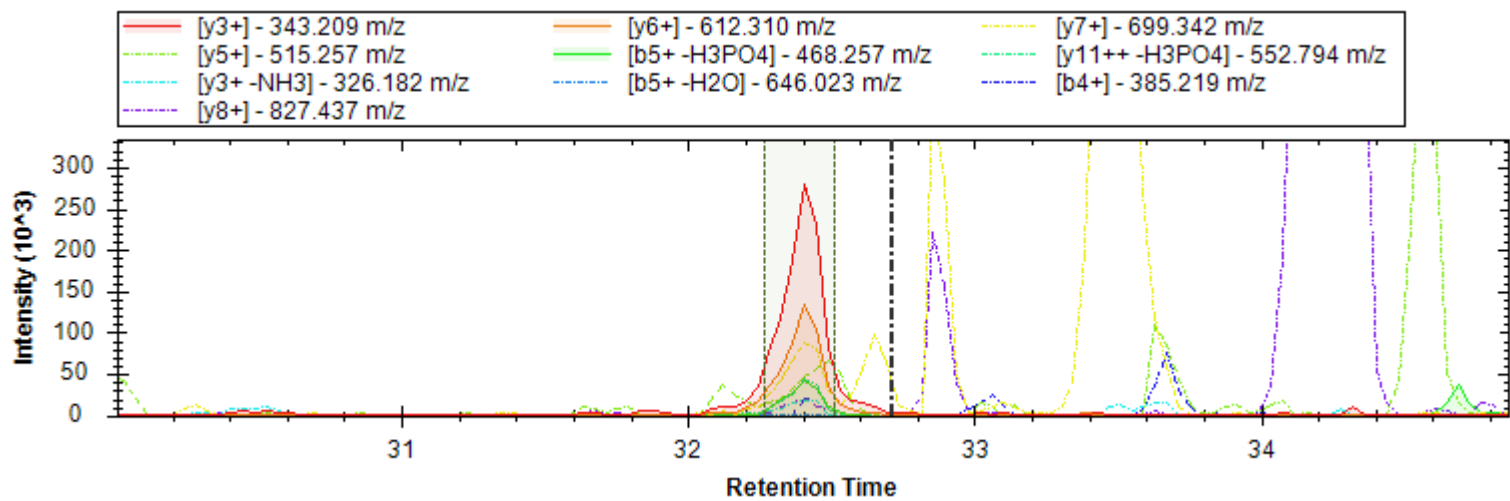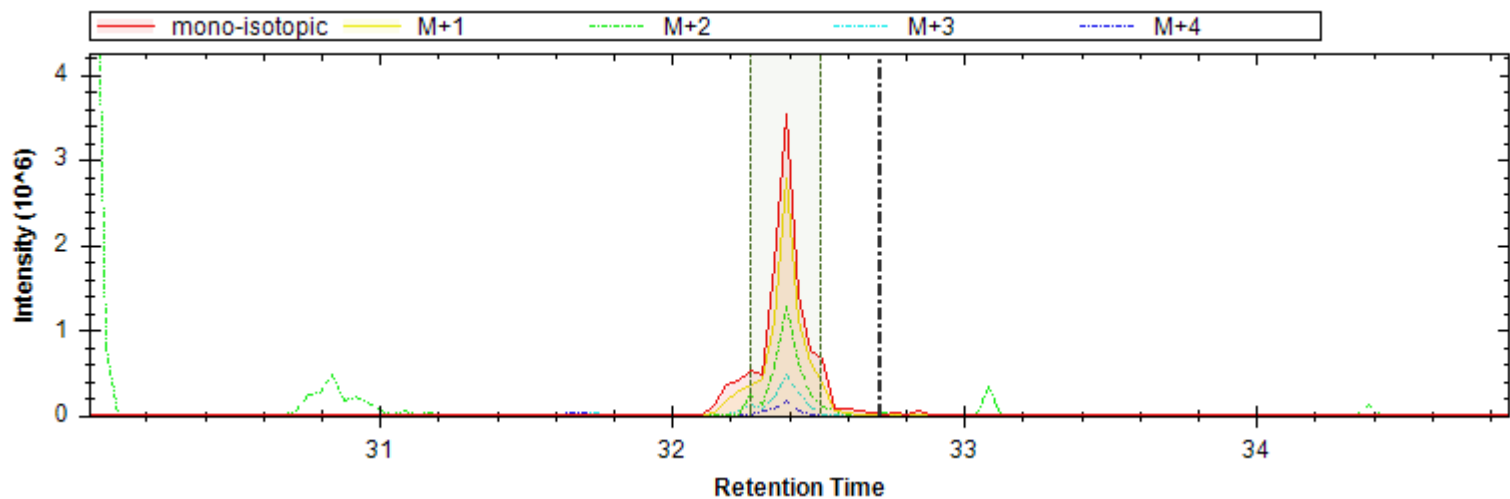

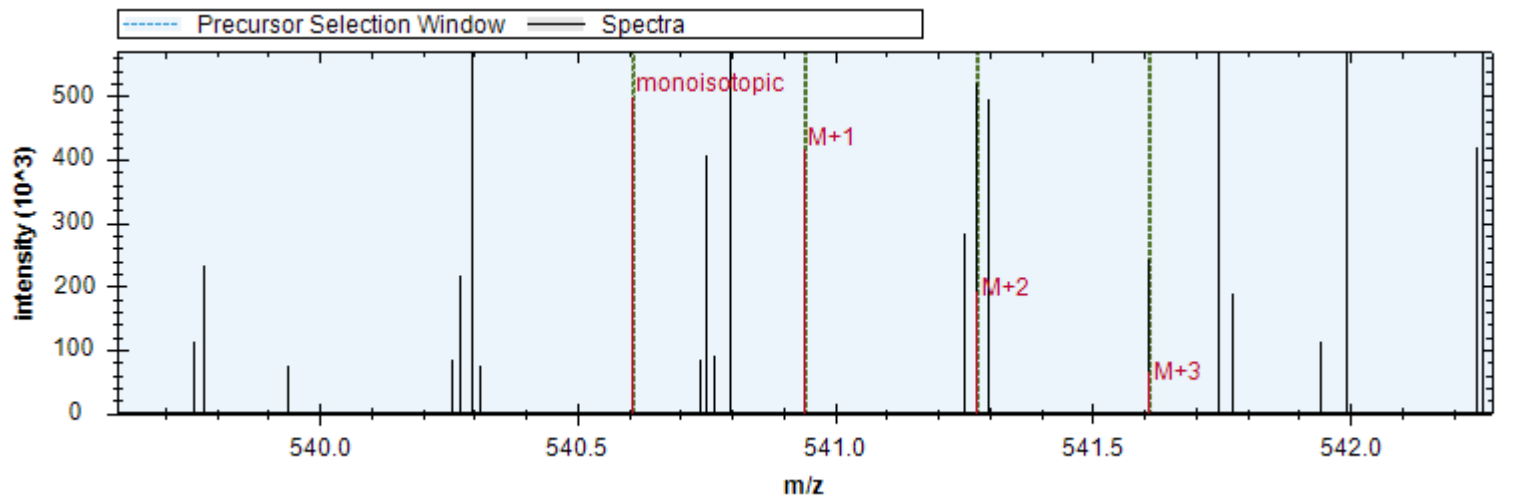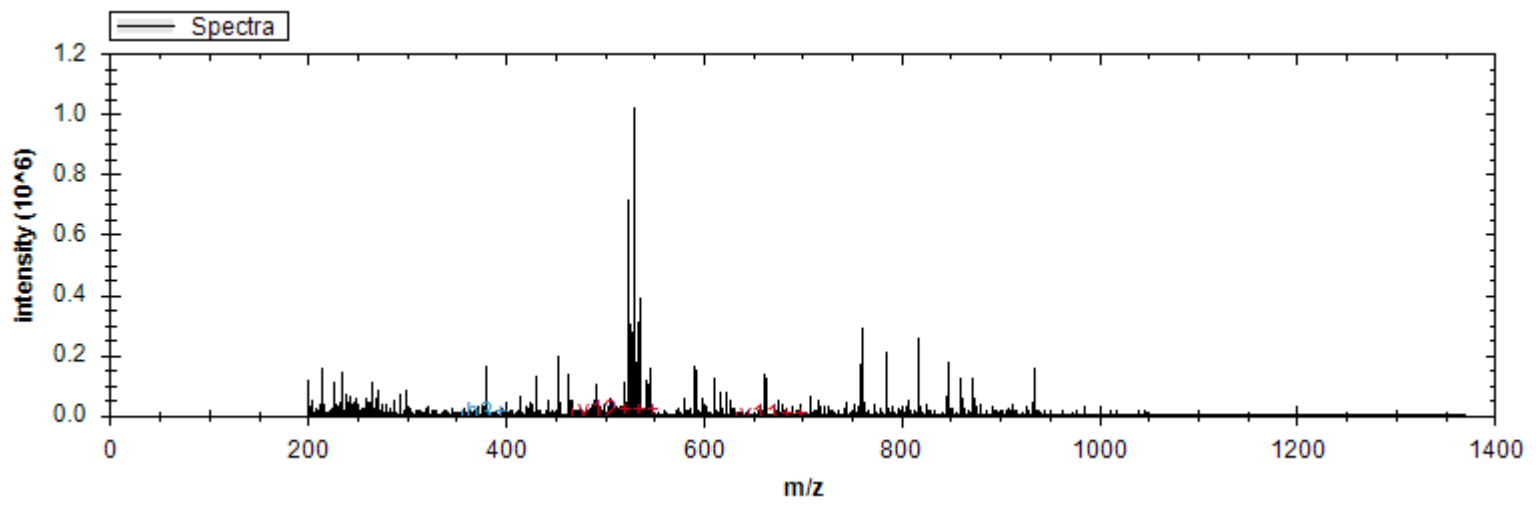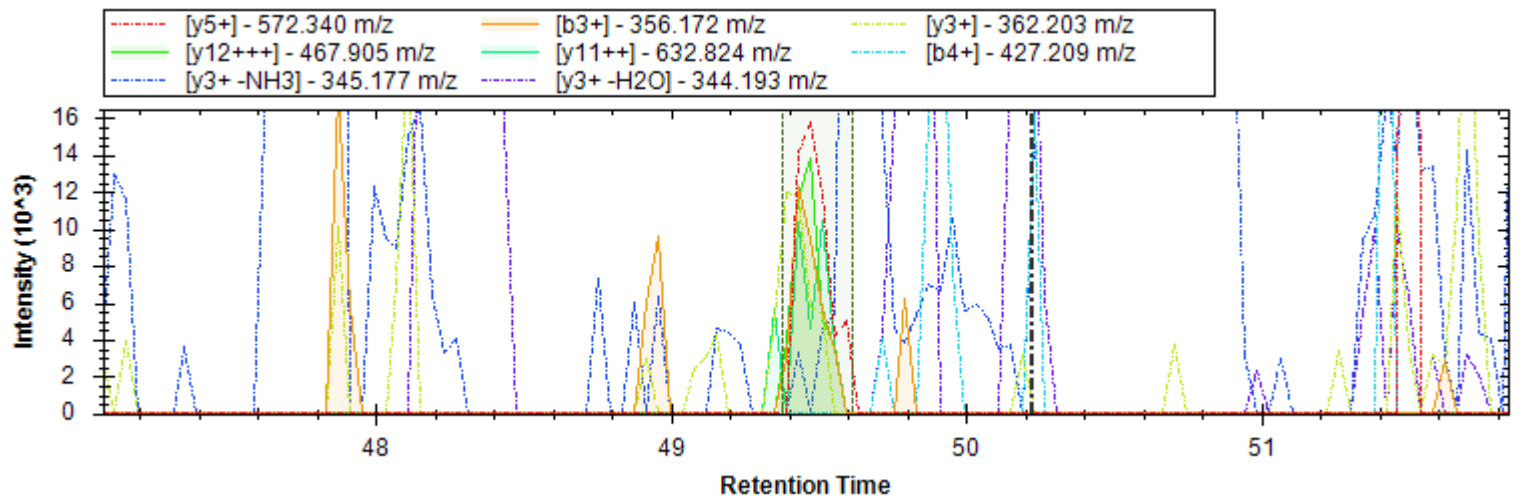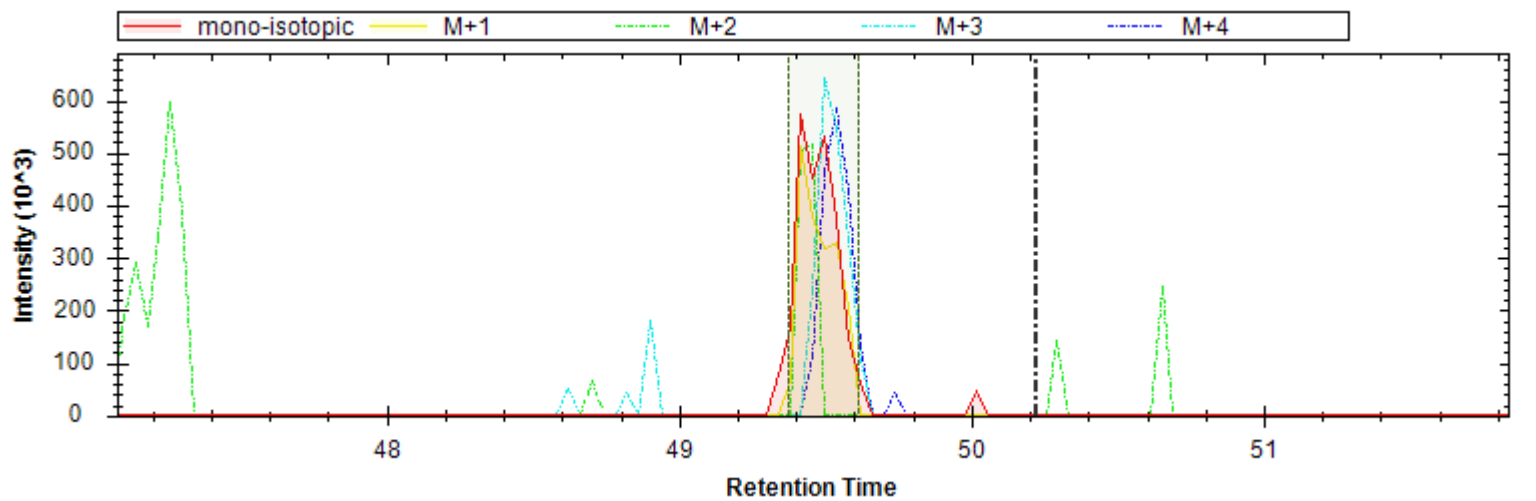

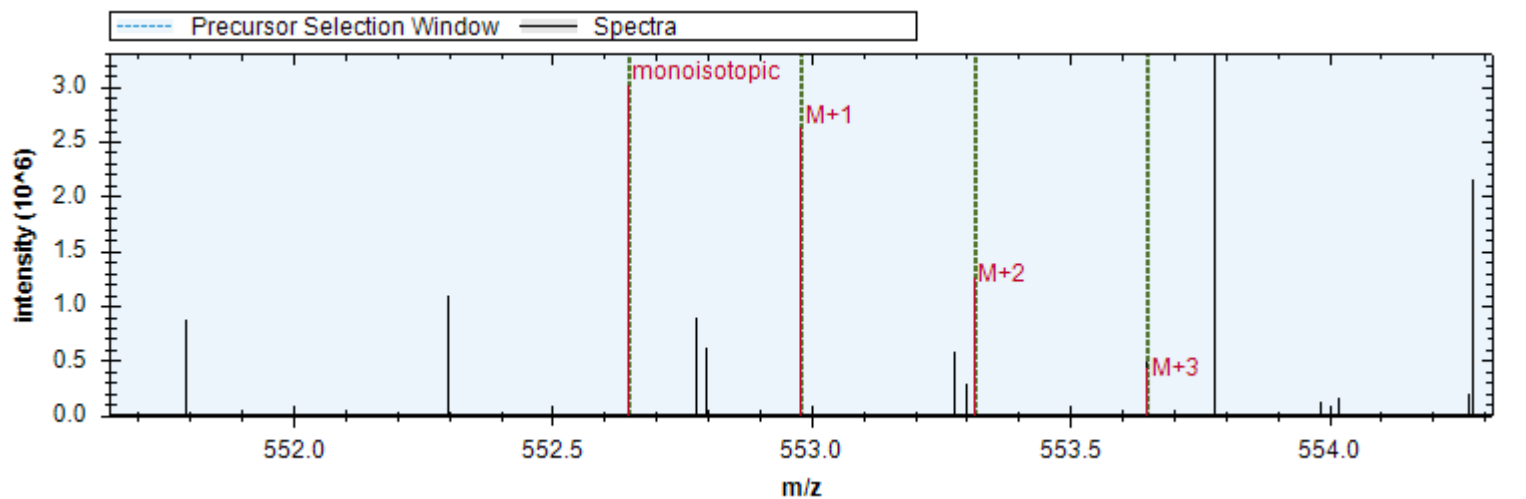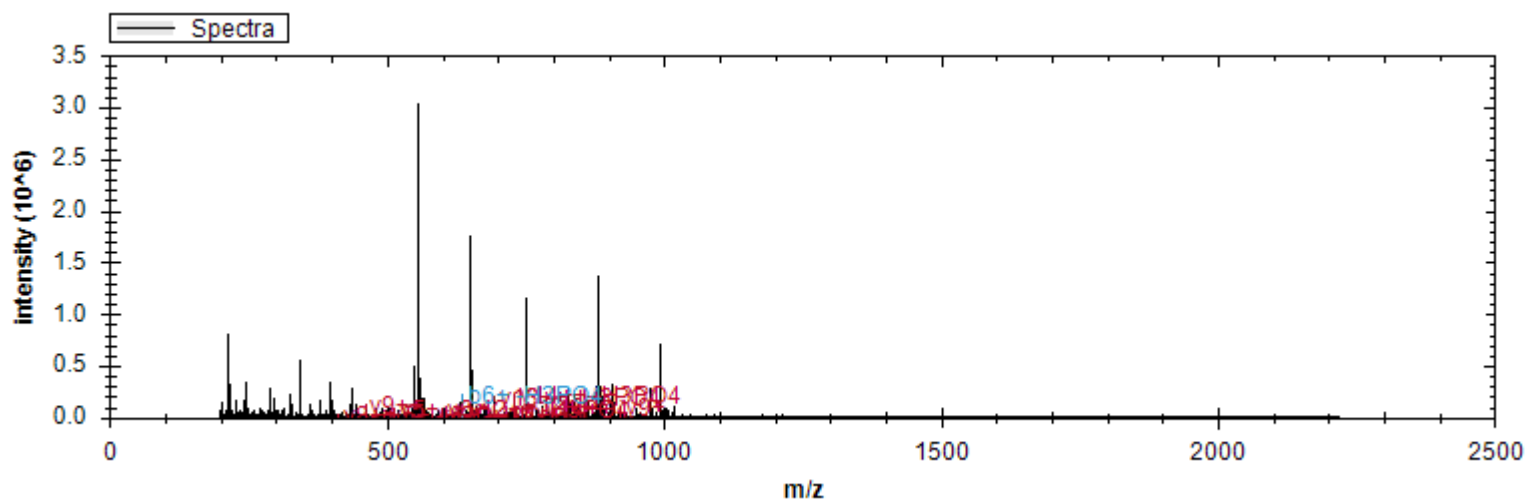

- |                              |                              |                              |
|------------------------------|------------------------------|------------------------------|
| [b6+ -H3PO4] - 636.419 m/z   | [y14++ -H3PO4] - 729.943 m/z | [y13++ -H3PO4] - 694.425 m/z |
| [y9++] - 461.772 m/z         | [y9+] - 922.536 m/z          | [y5+] - 513.303 m/z          |
| [y12++ -H3PO4] - 637.883 m/z | [y6+] - 600.335 m/z          | [y10++] - 552.278 m/z        |
| [y14++] - 778.932 m/z        | [y13++] - 743.413 m/z        | [b6+] - 734.396 m/z          |
| [y8+] - 825.483 m/z          | [y6+ -H2O] - 582.325 m/z     | [y3+] - 345.213 m/z          |
| [y9+ -H2O] - 904.525 m/z     | [y5+ -H2O] - 495.293 m/z     | [y7+] - 728.430 m/z          |
| [y12++] - 686.871 m/z        | [y14++ -H2O] - 769.926 m/z   | [y3+ -H2O] - 327.203 m/z     |
| [y8++] - 413.245 m/z         | [b10++] - 572.318 m/z        | [b10++ -H3PO4] - 523.330 m/z |

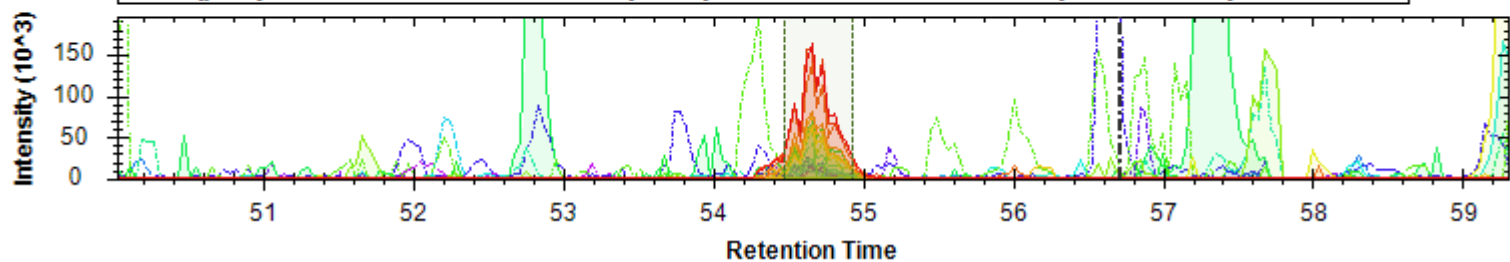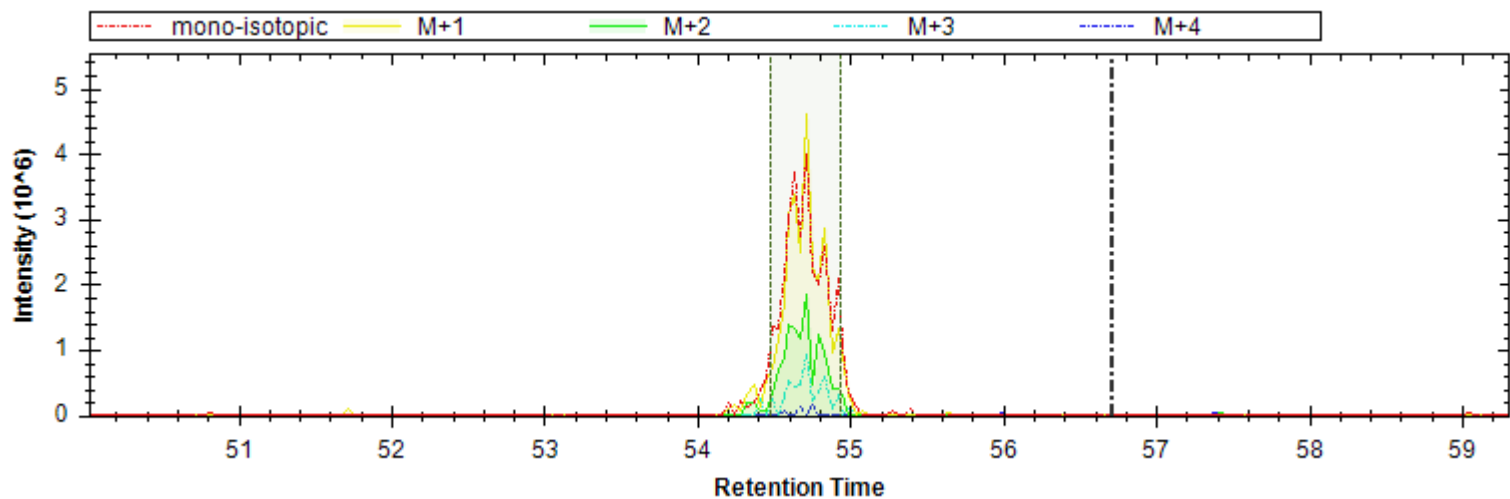

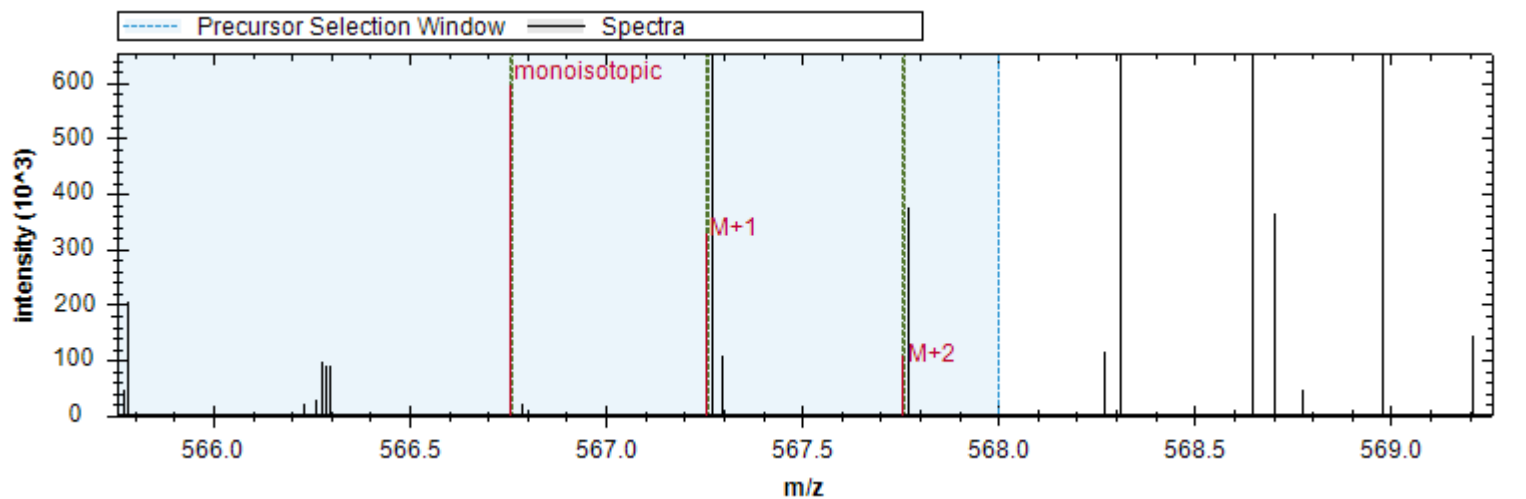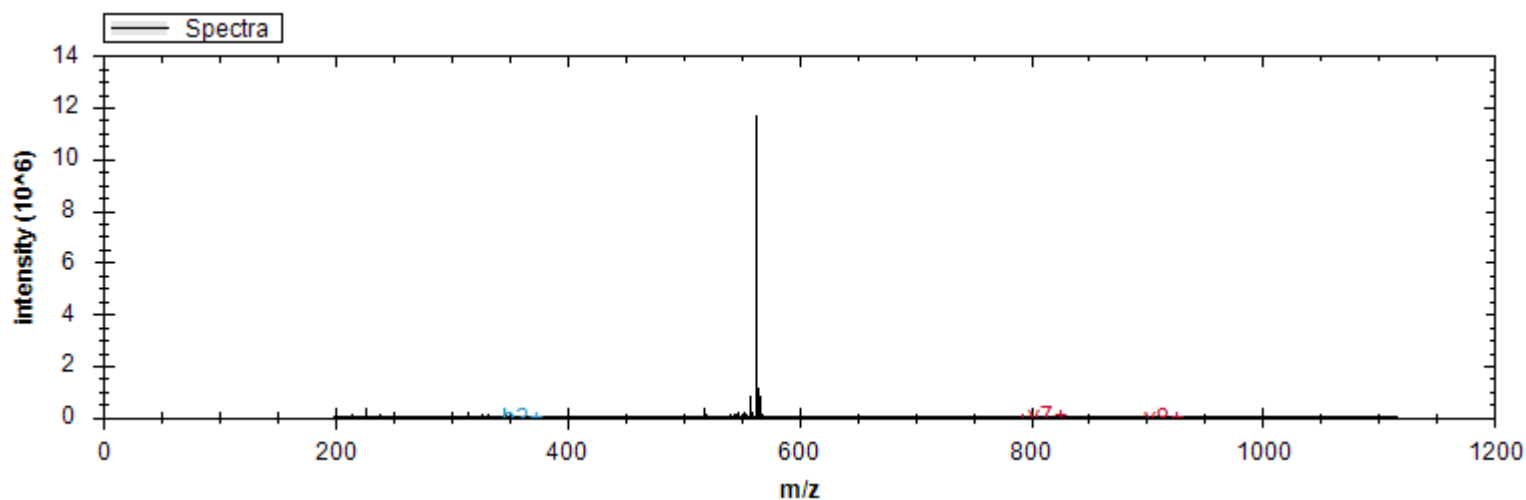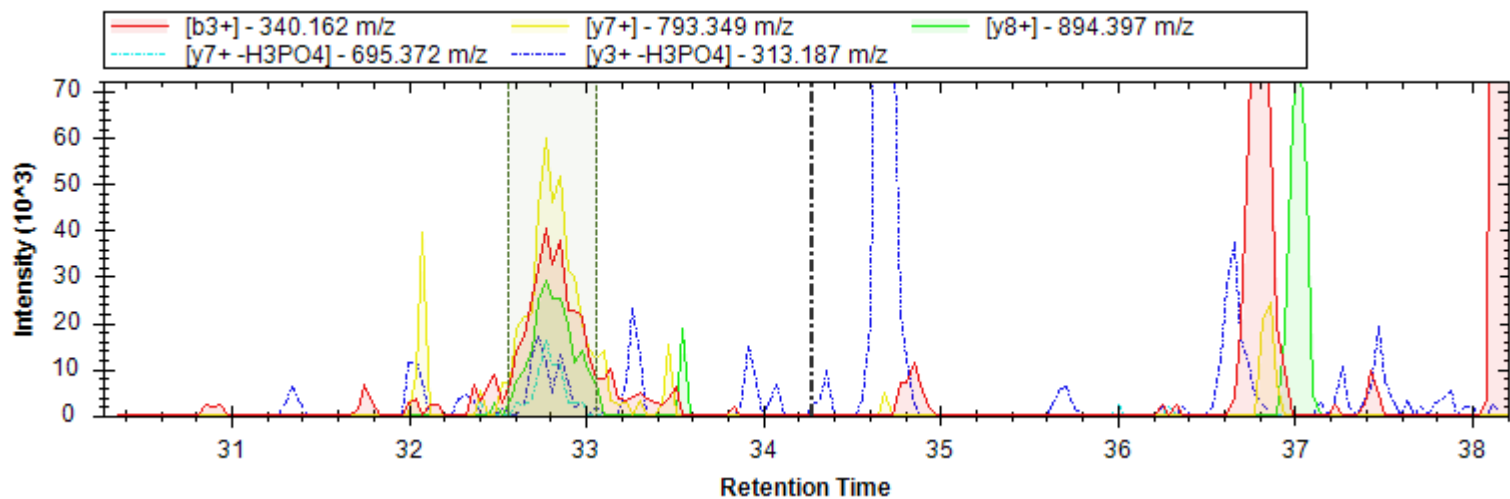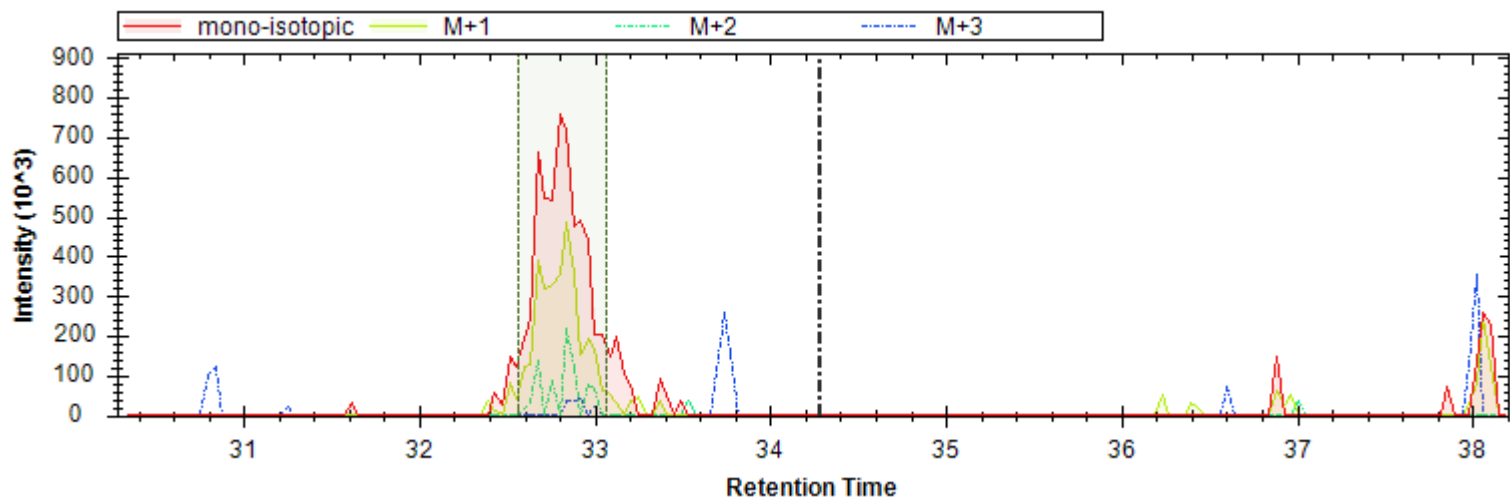

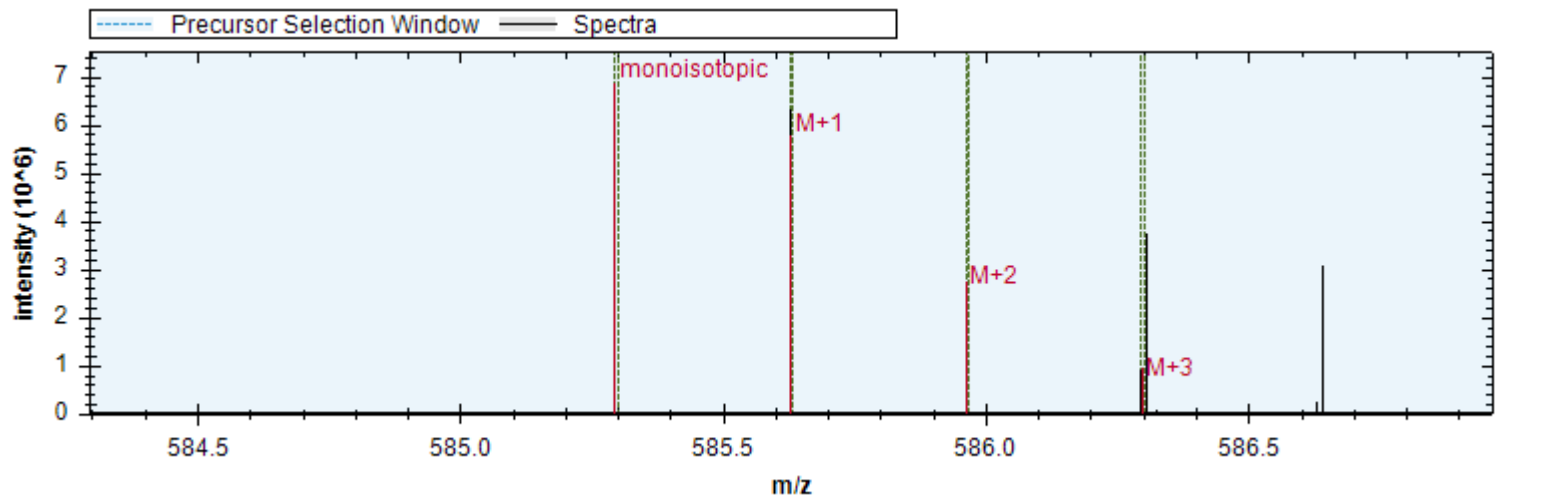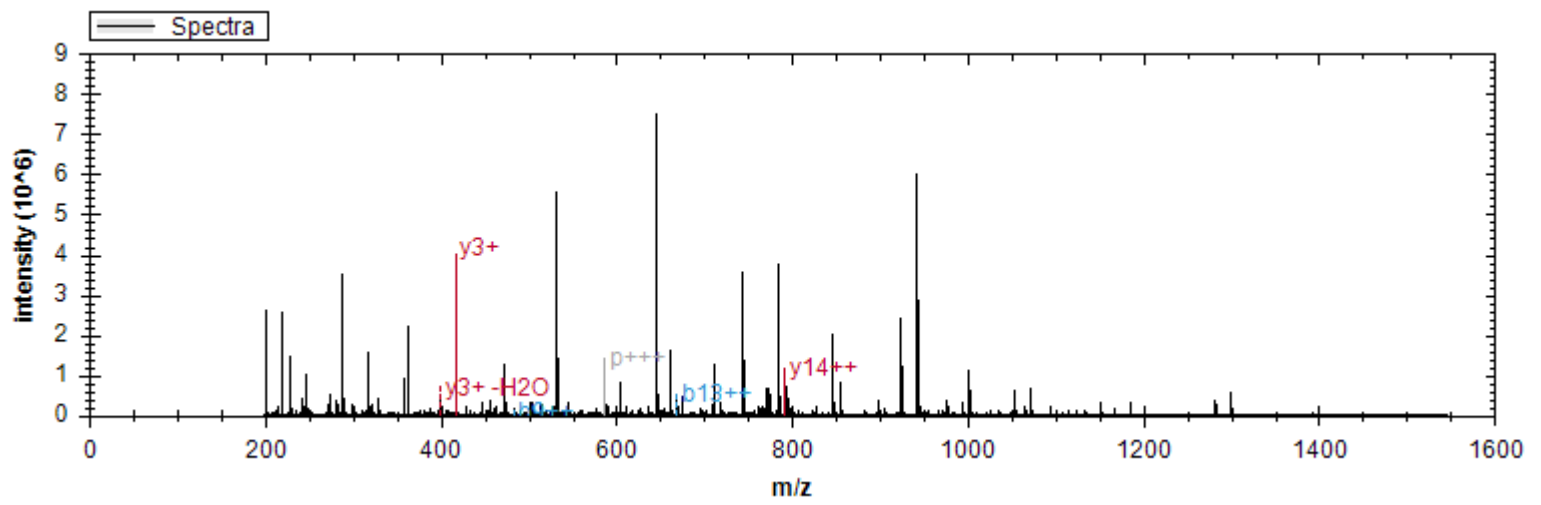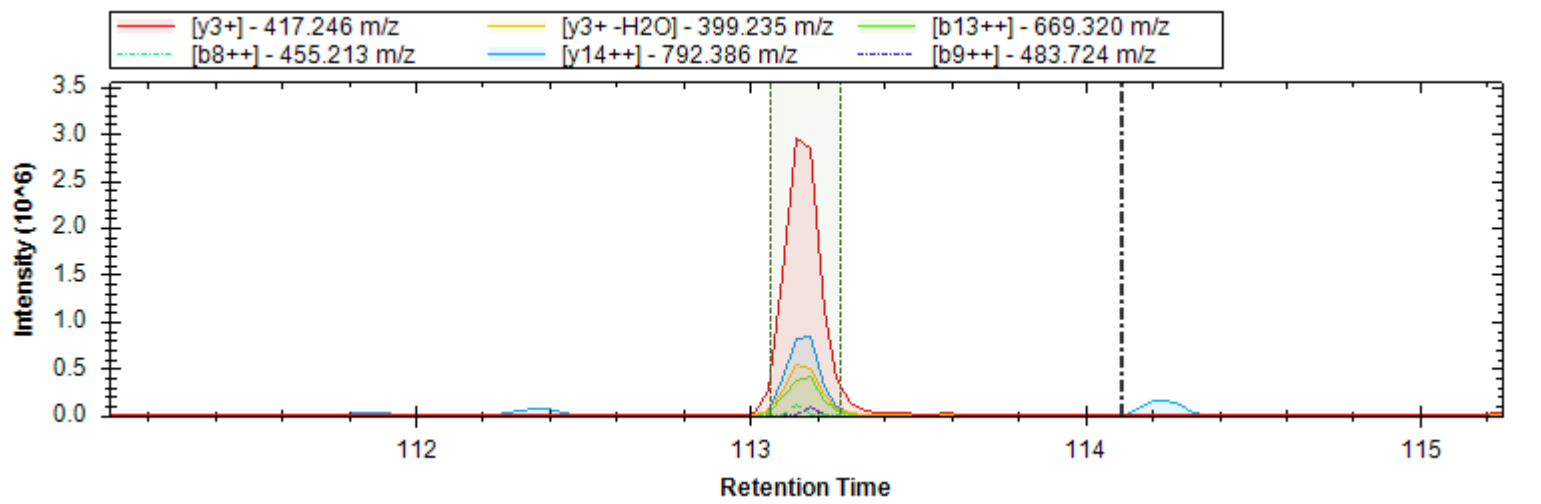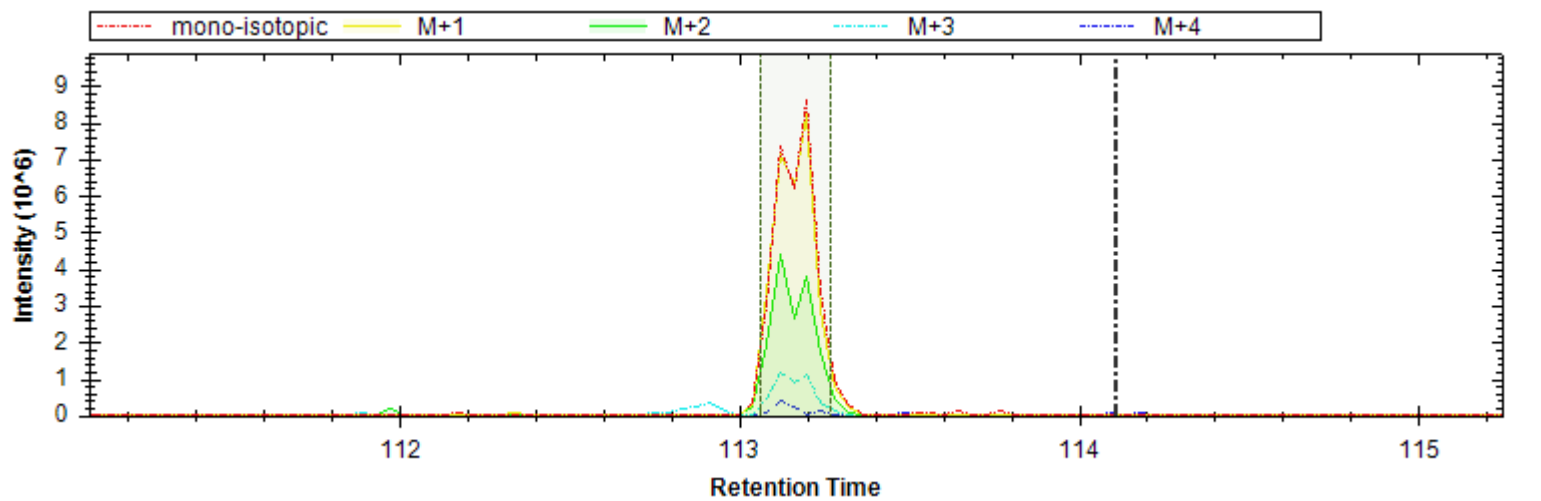



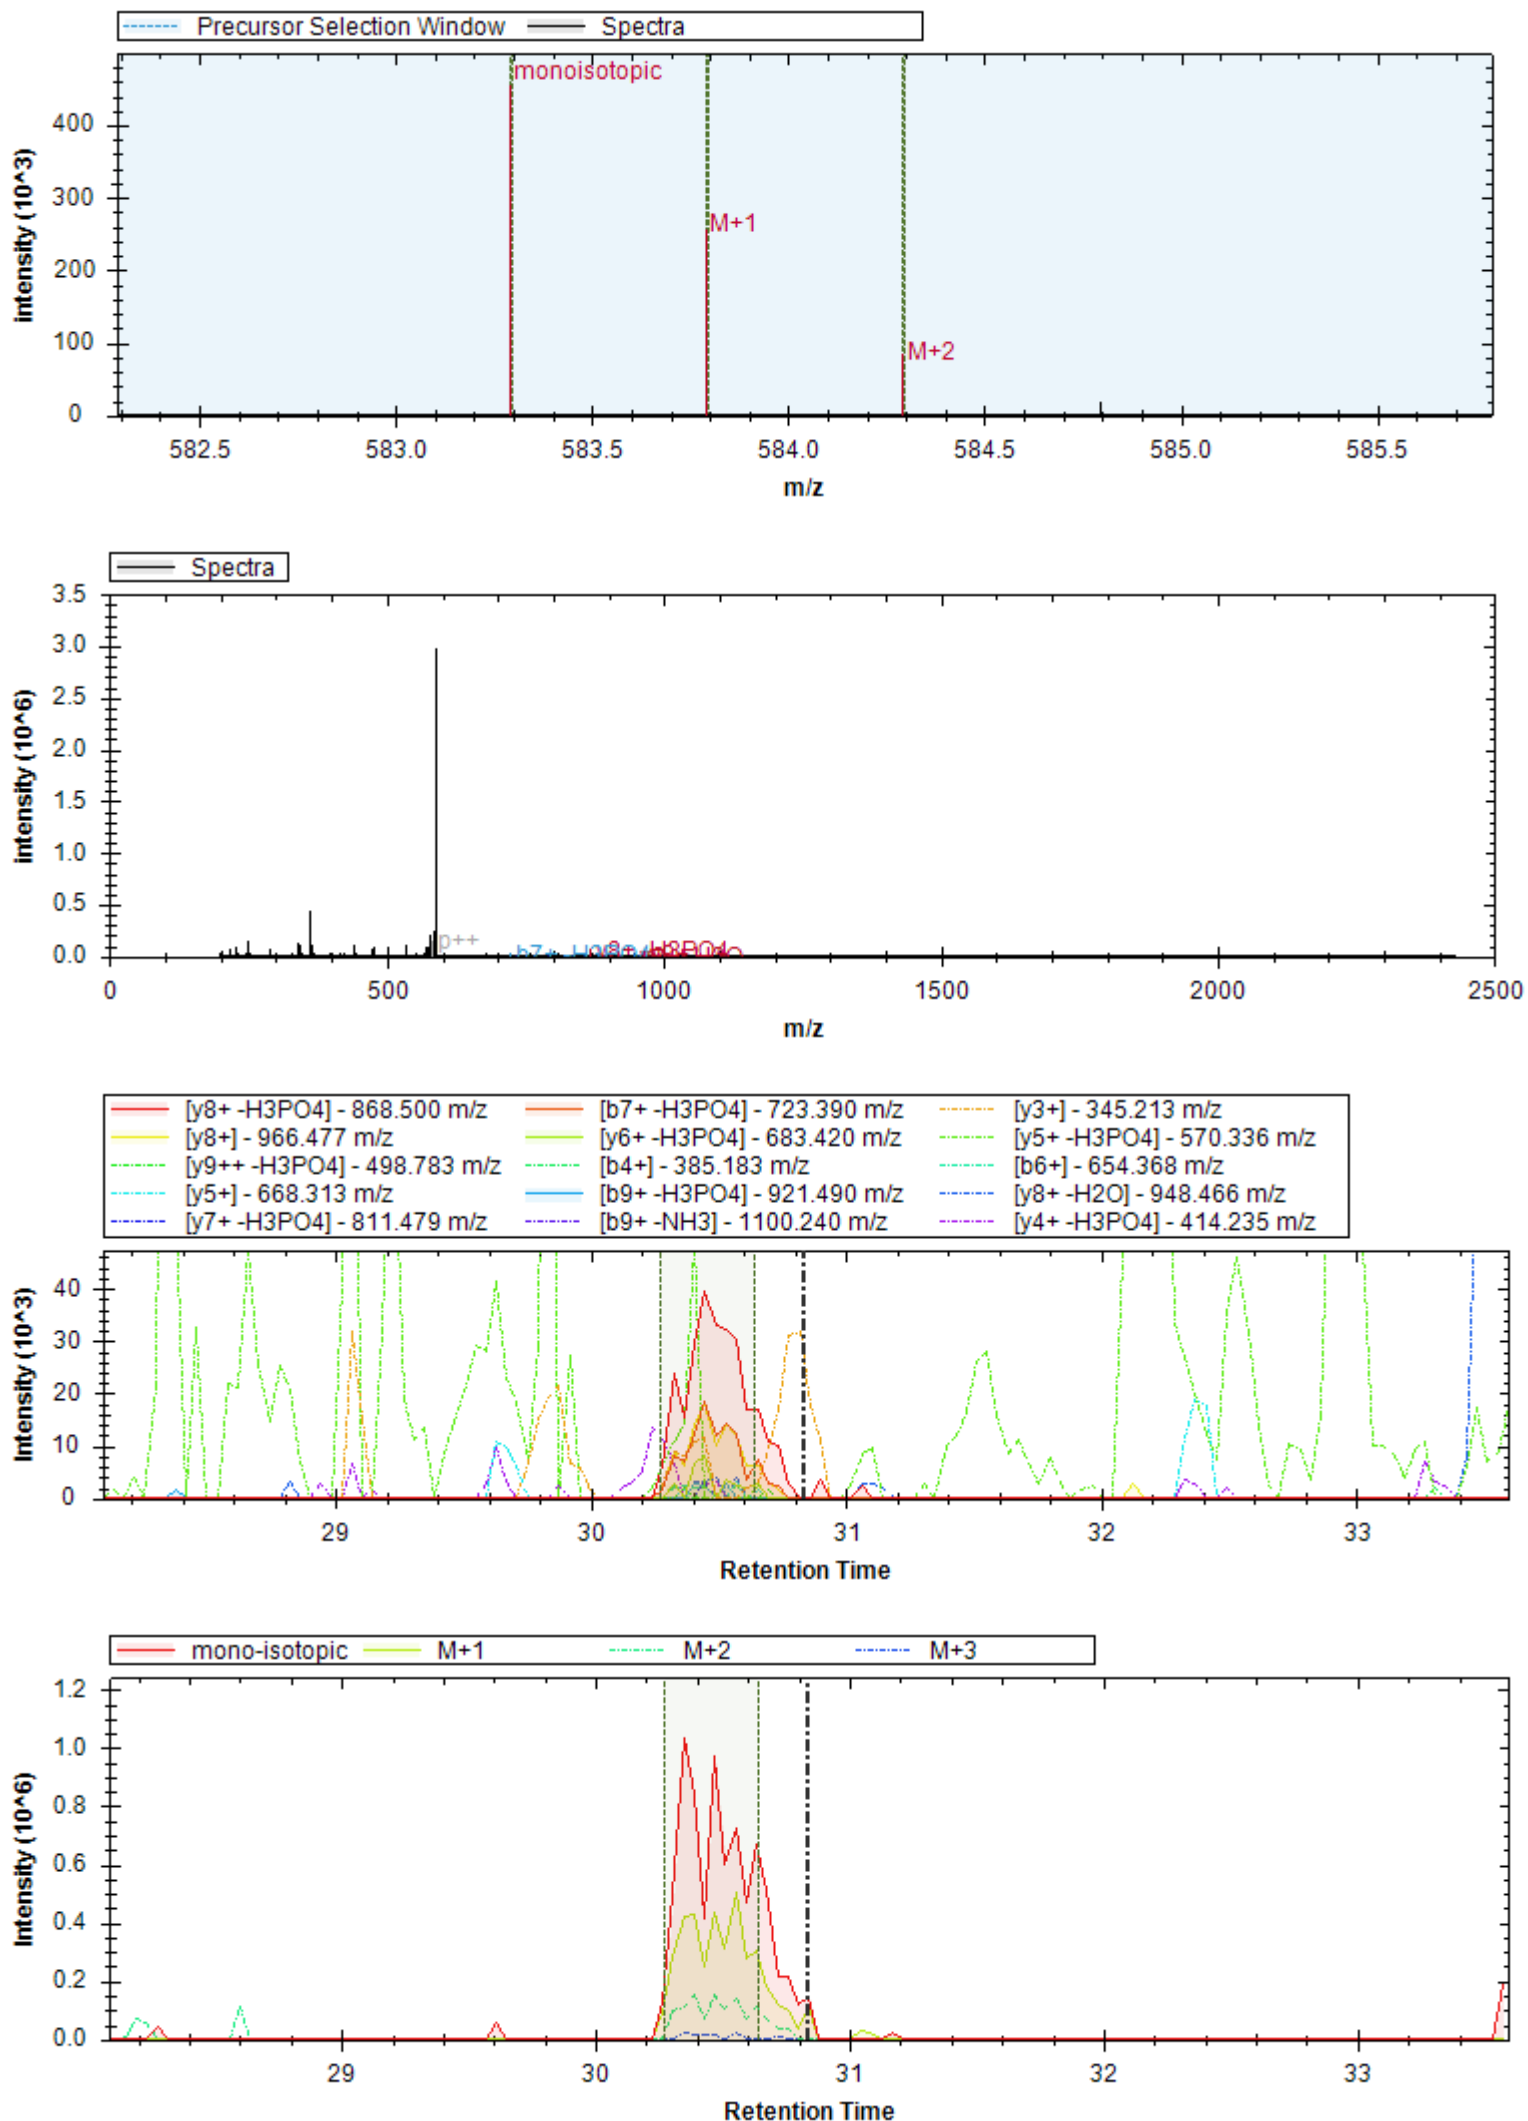

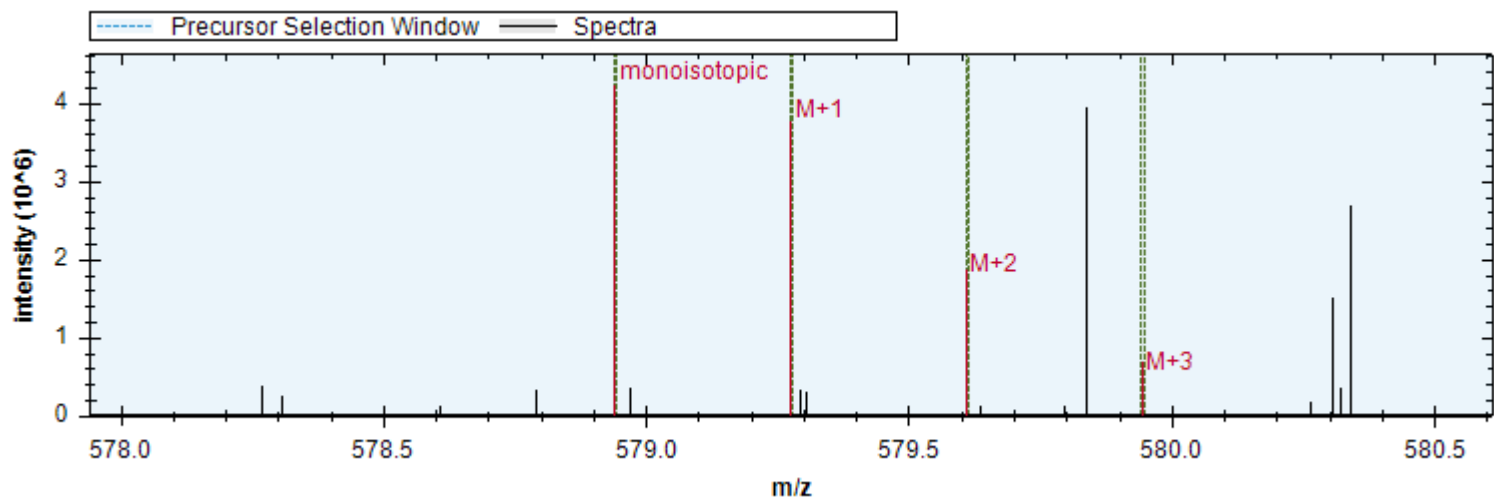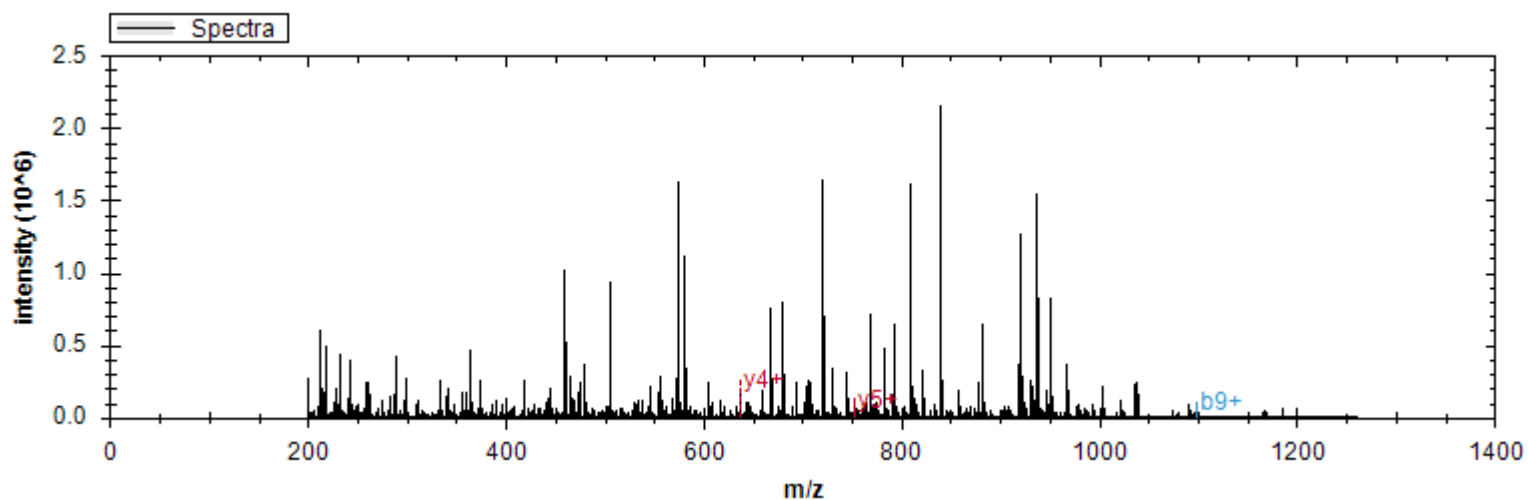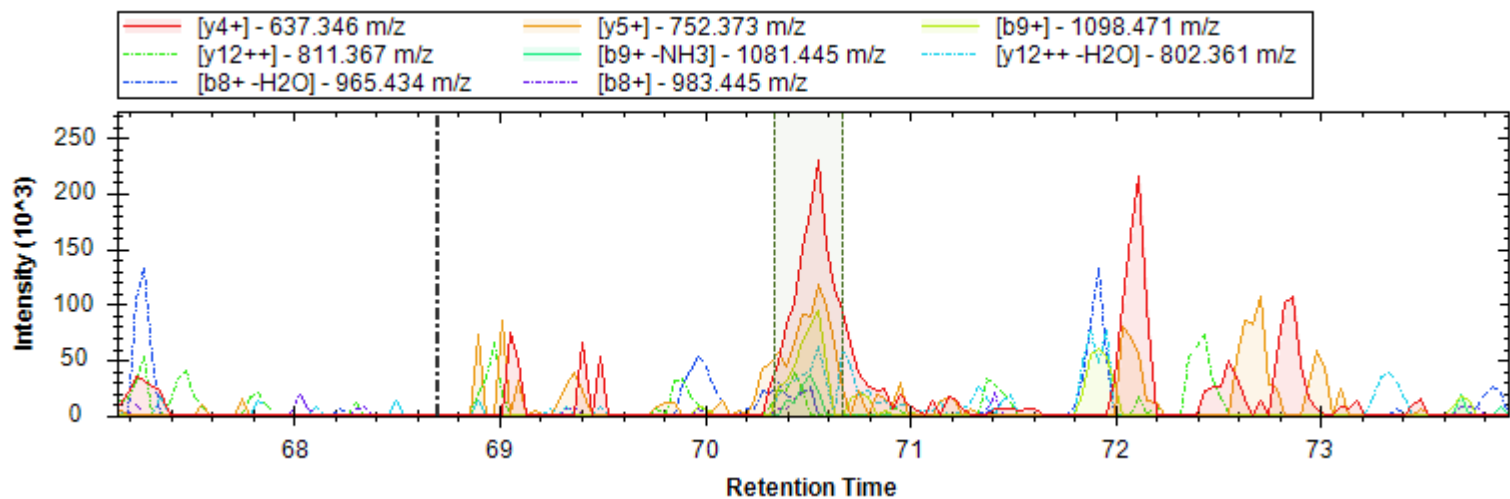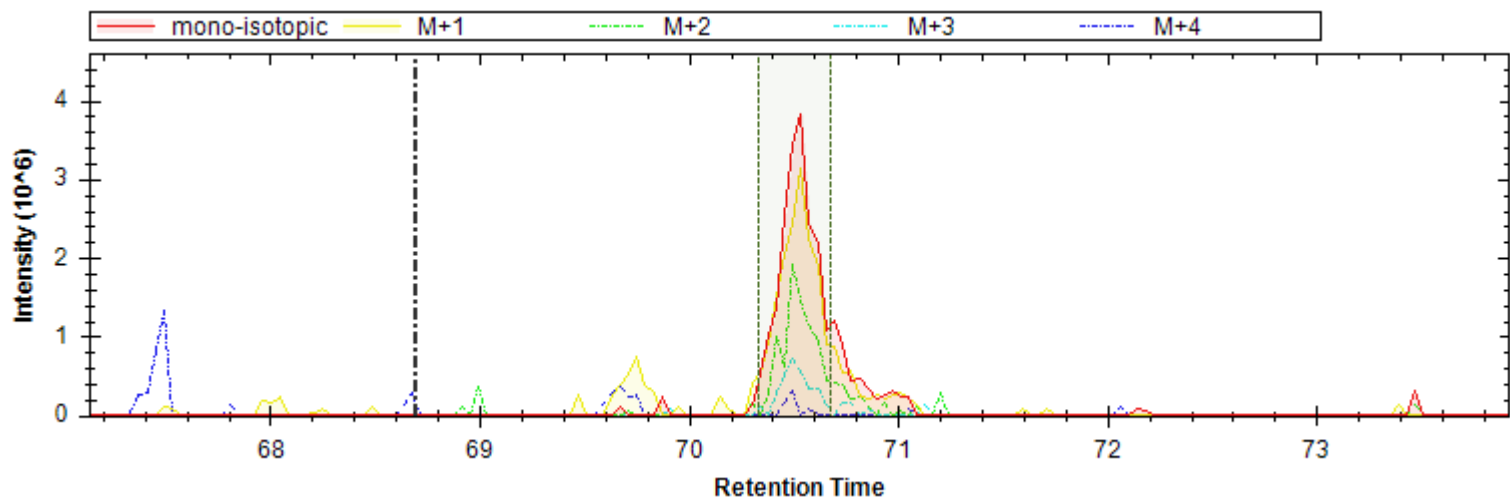

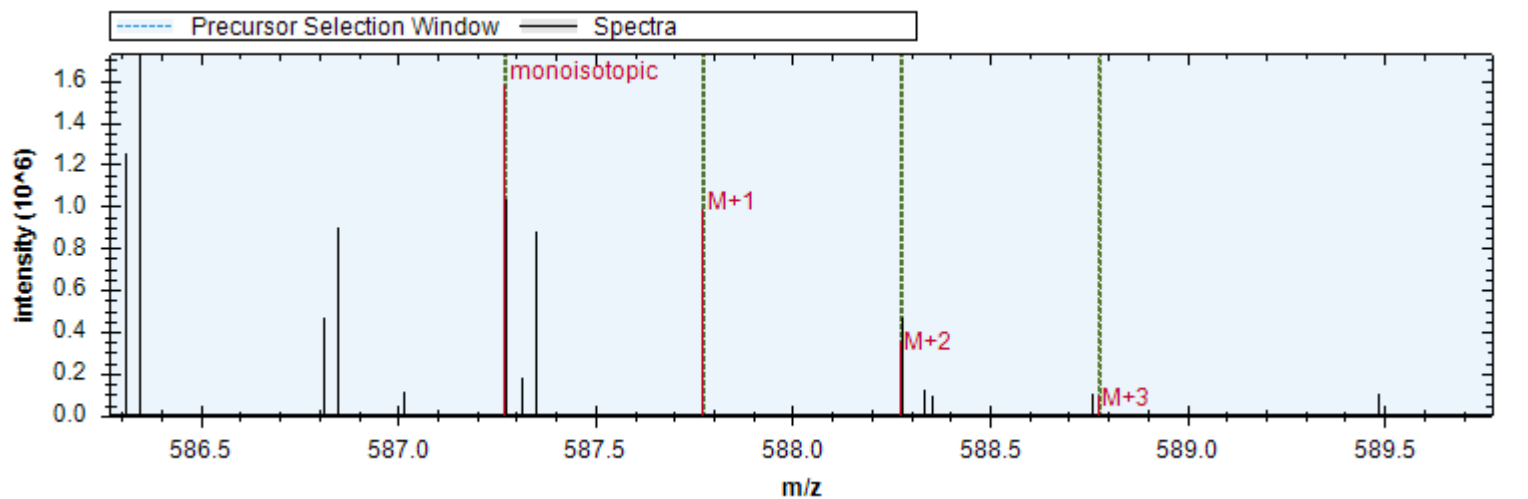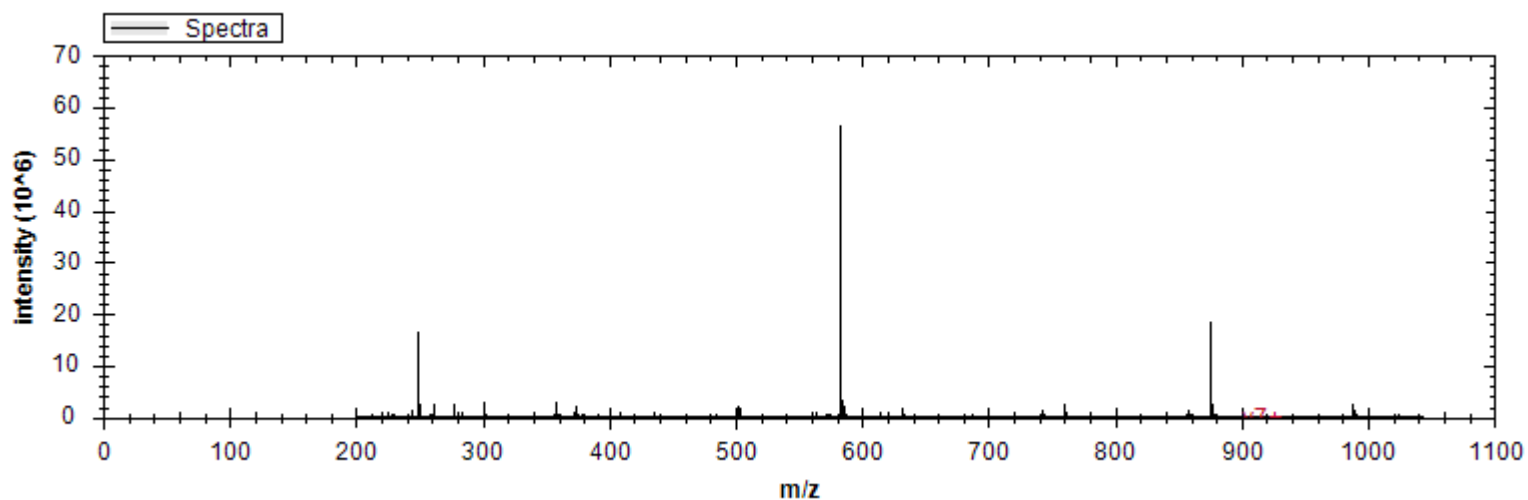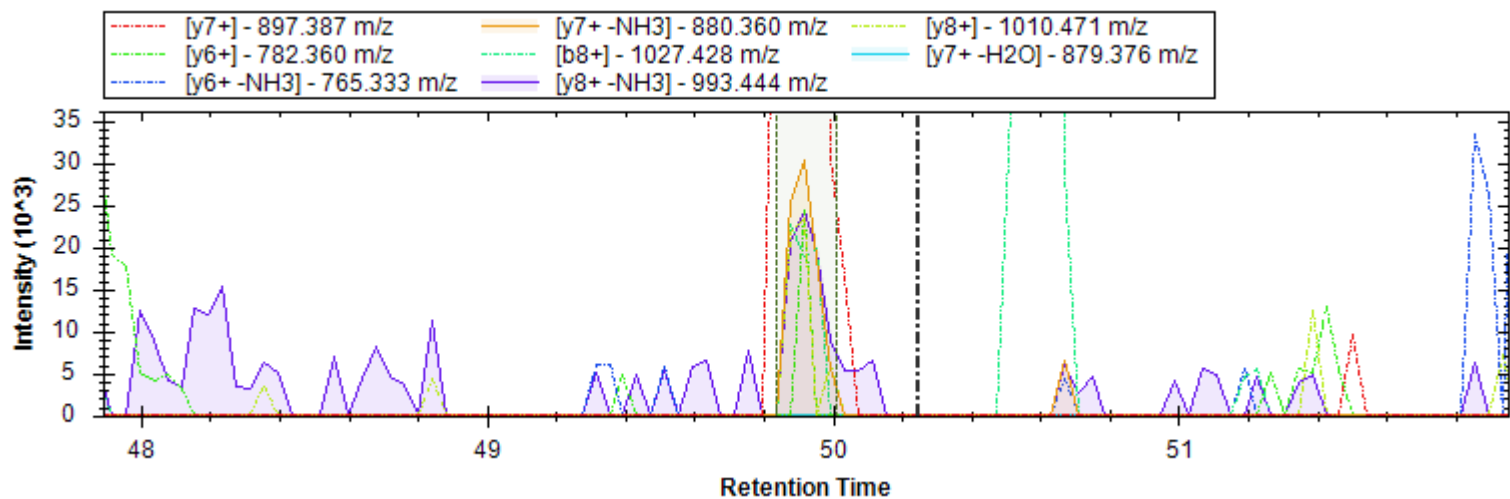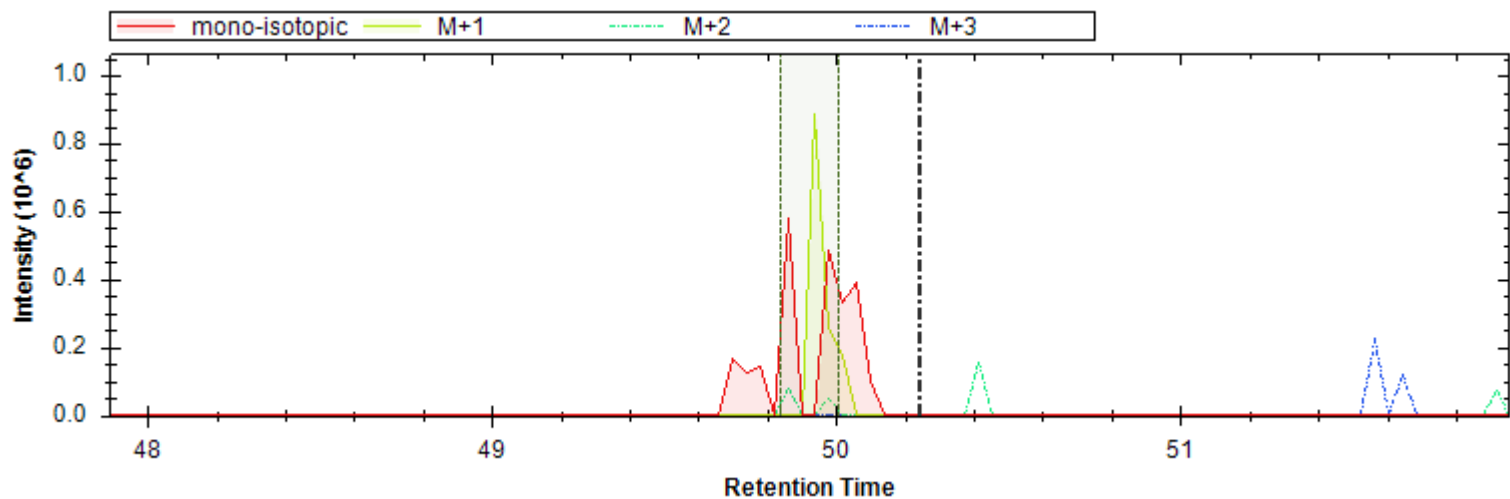

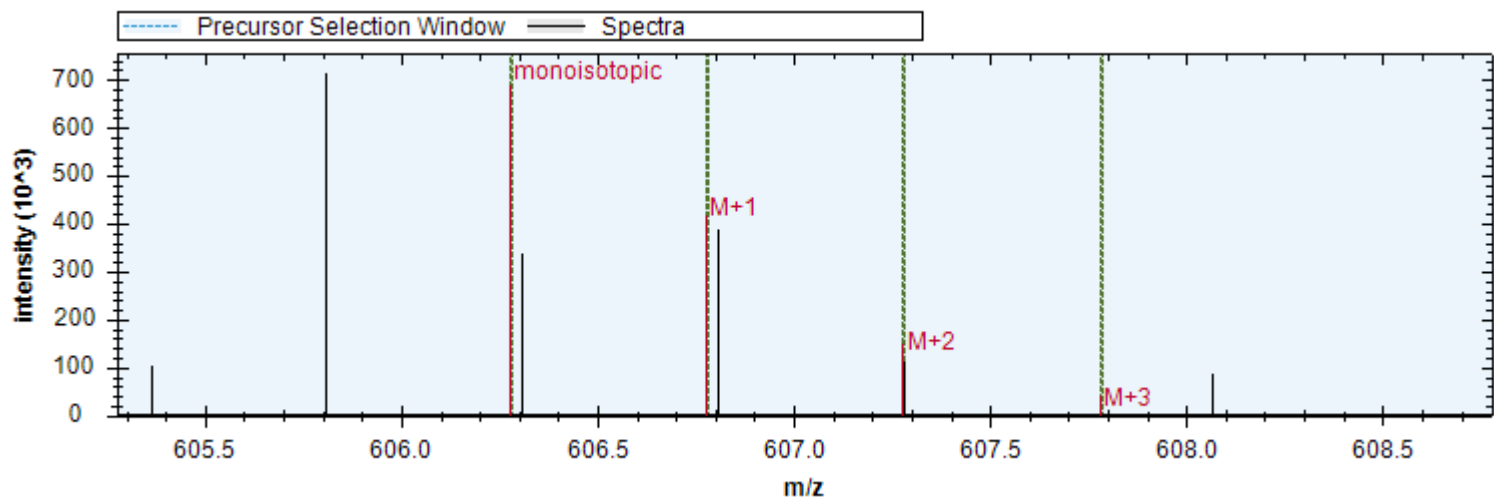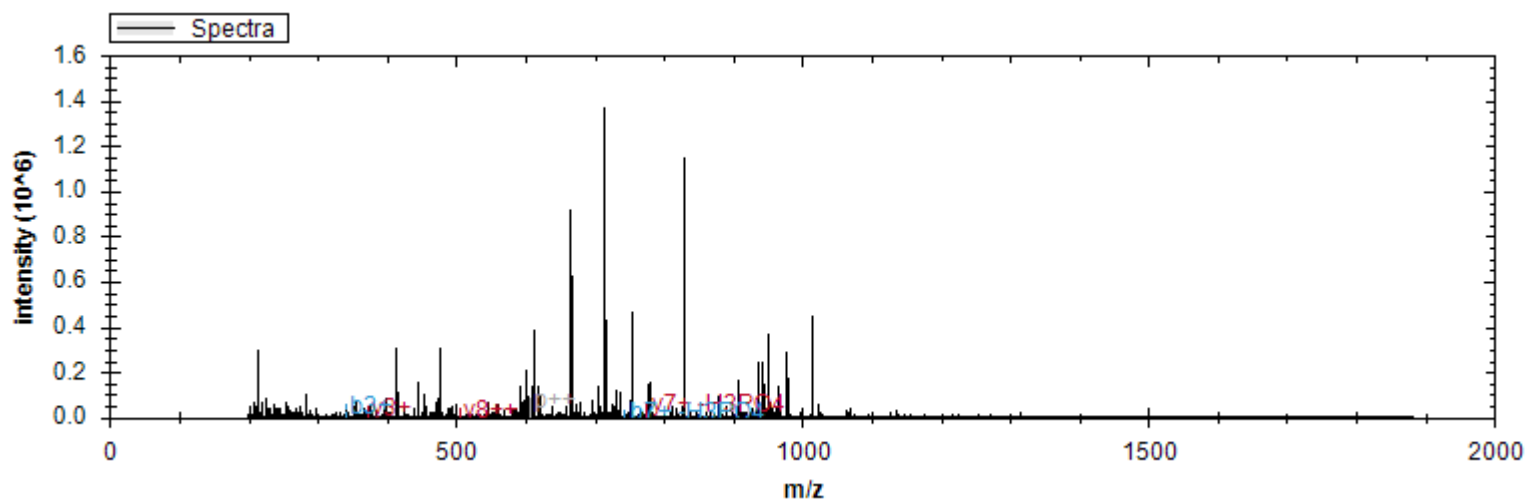

- |                            |                            |                             |
|----------------------------|----------------------------|-----------------------------|
| [y7+ -H3PO4] - 774.415 m/z | [y3+] - 372.224 m/z        | [y6+ -H3PO4] - 611.351 m/z  |
| [b3+] - 340.162 m/z        | [b7+ -H3PO4] - 742.352 m/z | [y8++] - 505.229 m/z        |
| [b3+ -H2O] - 322.151 m/z   | [y8+ -H3PO4] - 911.473 m/z | [y9++ -H3PO4] - 506.764 m/z |
| [b6+ -H3PO4] - 629.268 m/z | [b9+ -H3PO4] - 967.463 m/z | [b4+] - 503.225 m/z         |
| [y4+] - 485.308 m/z        | [y3+ -NH3] - 355.198 m/z   |                             |

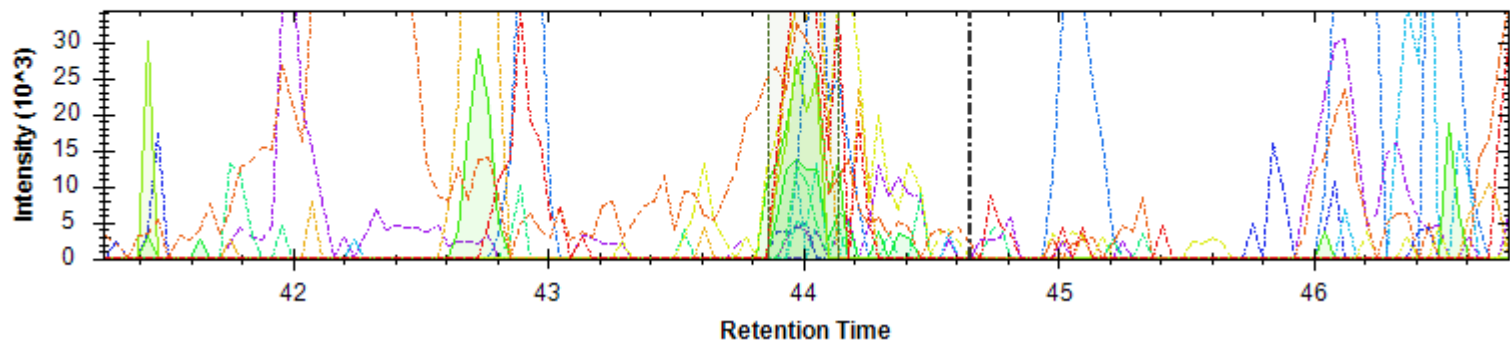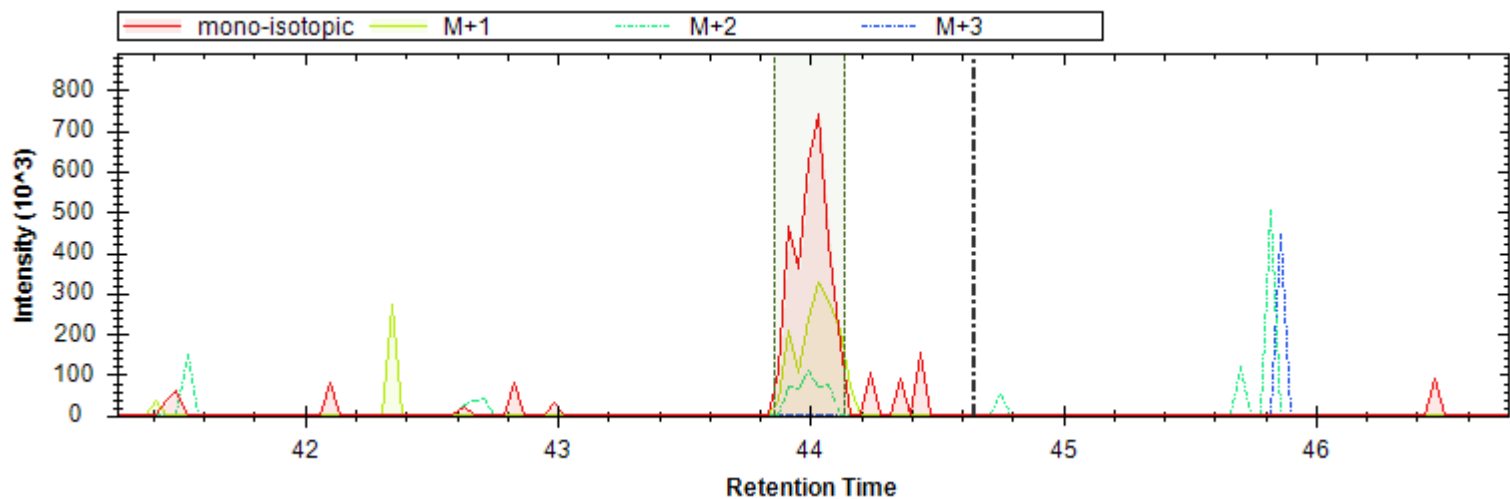

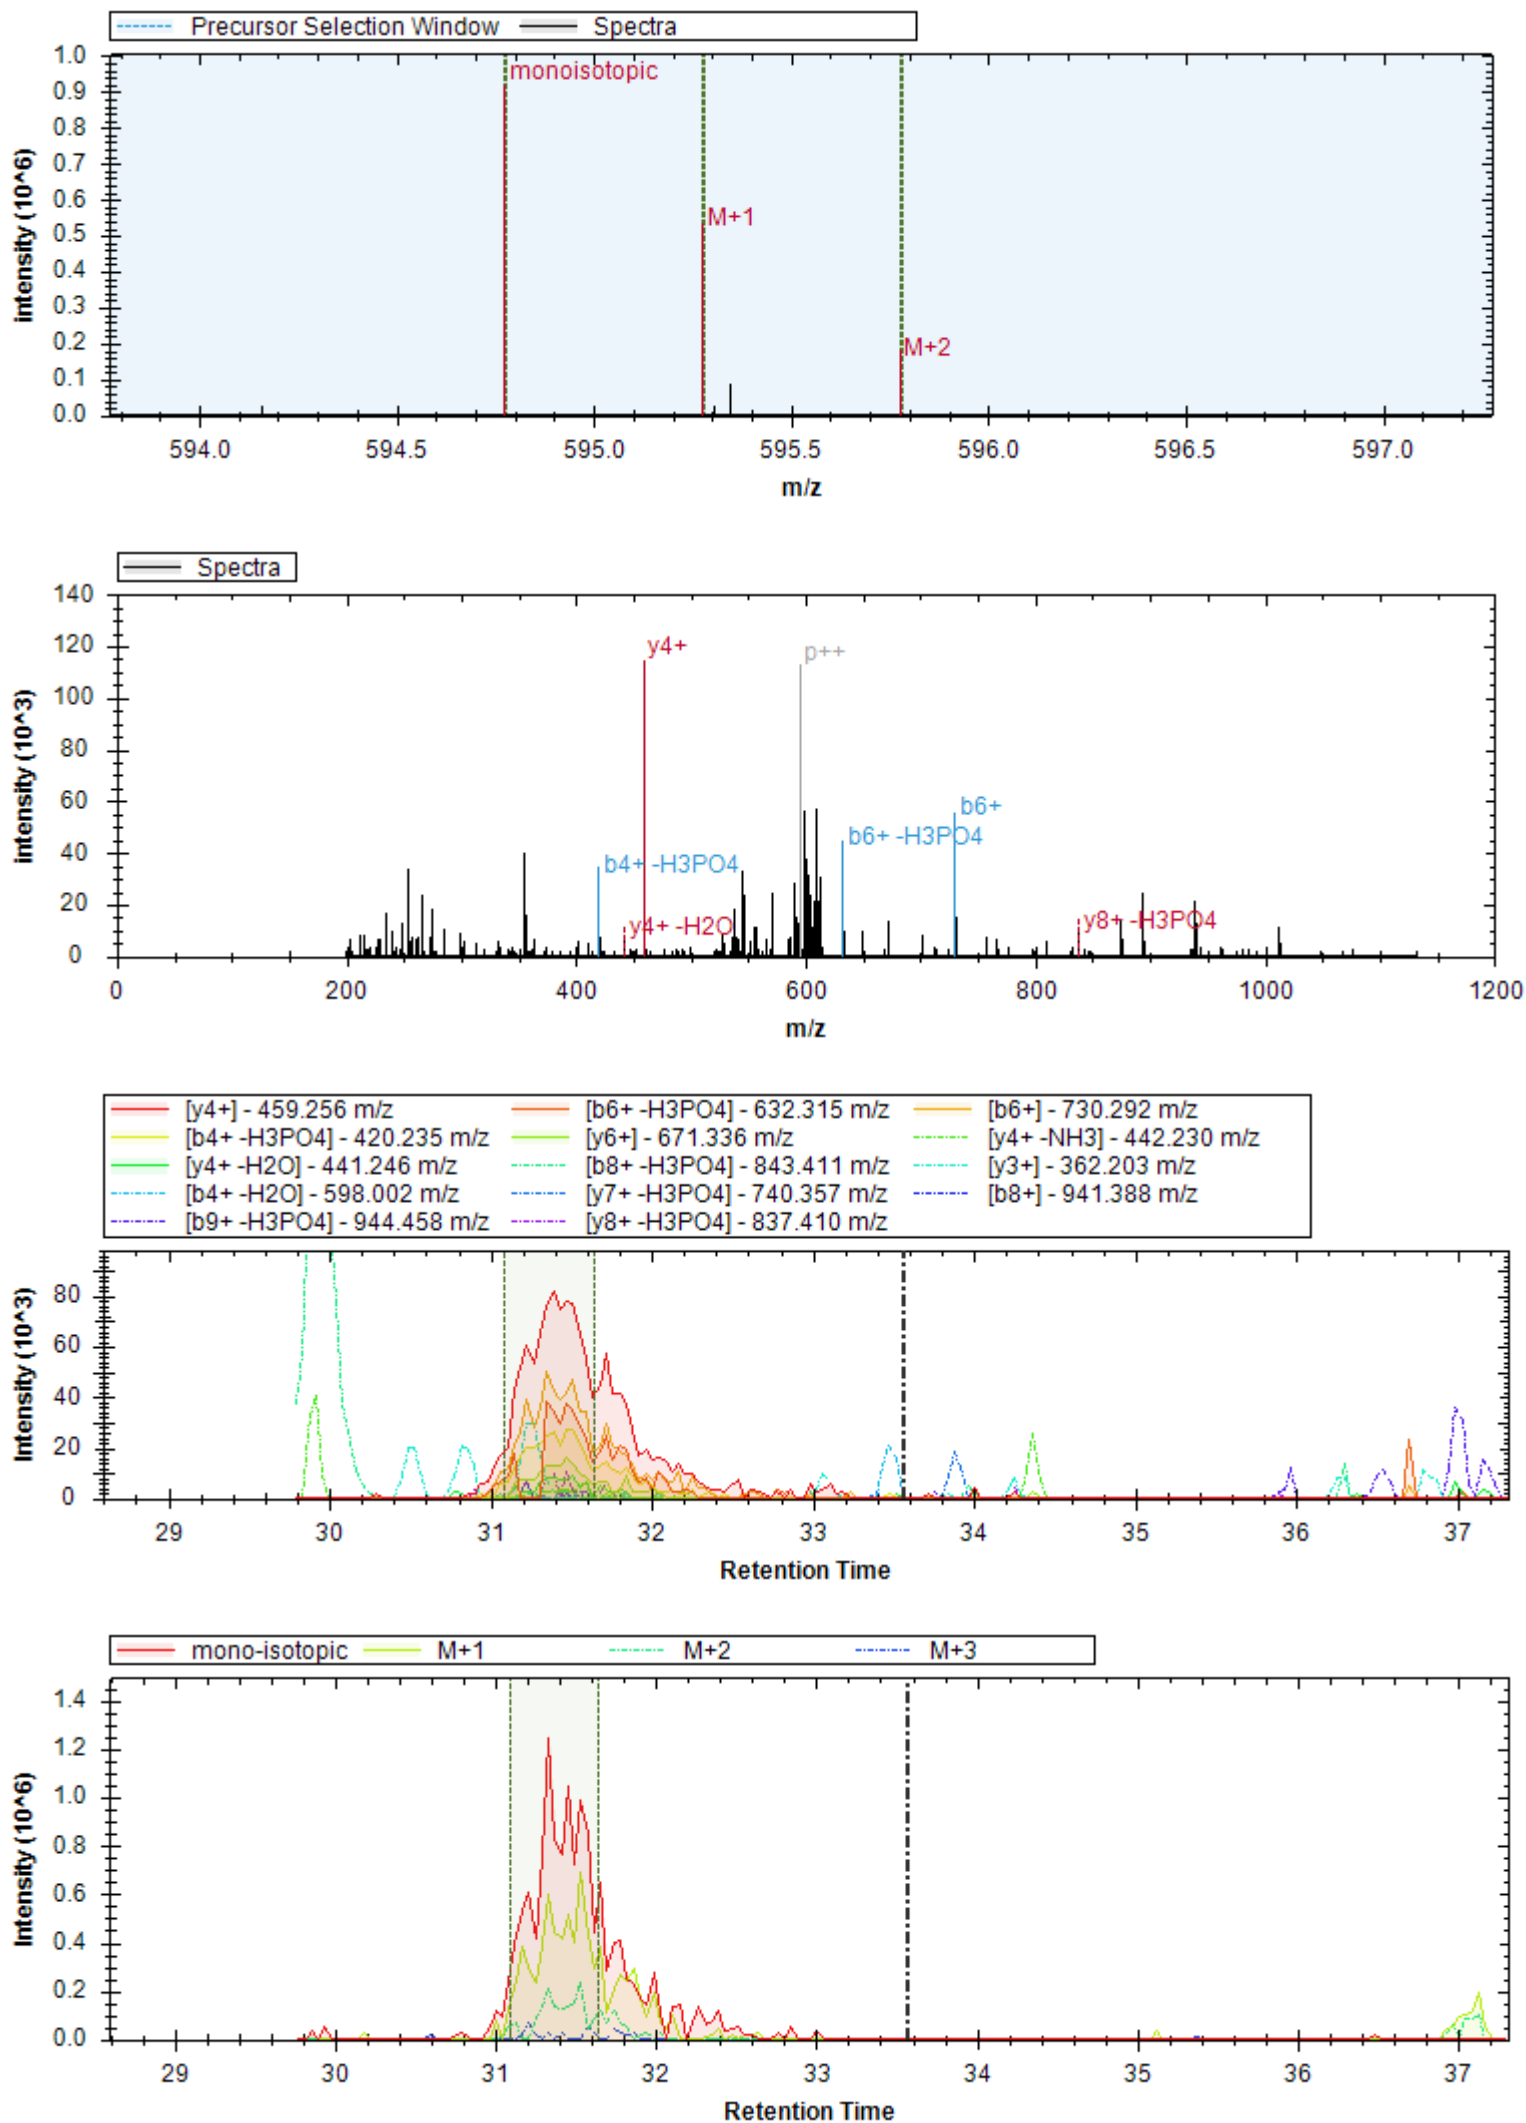

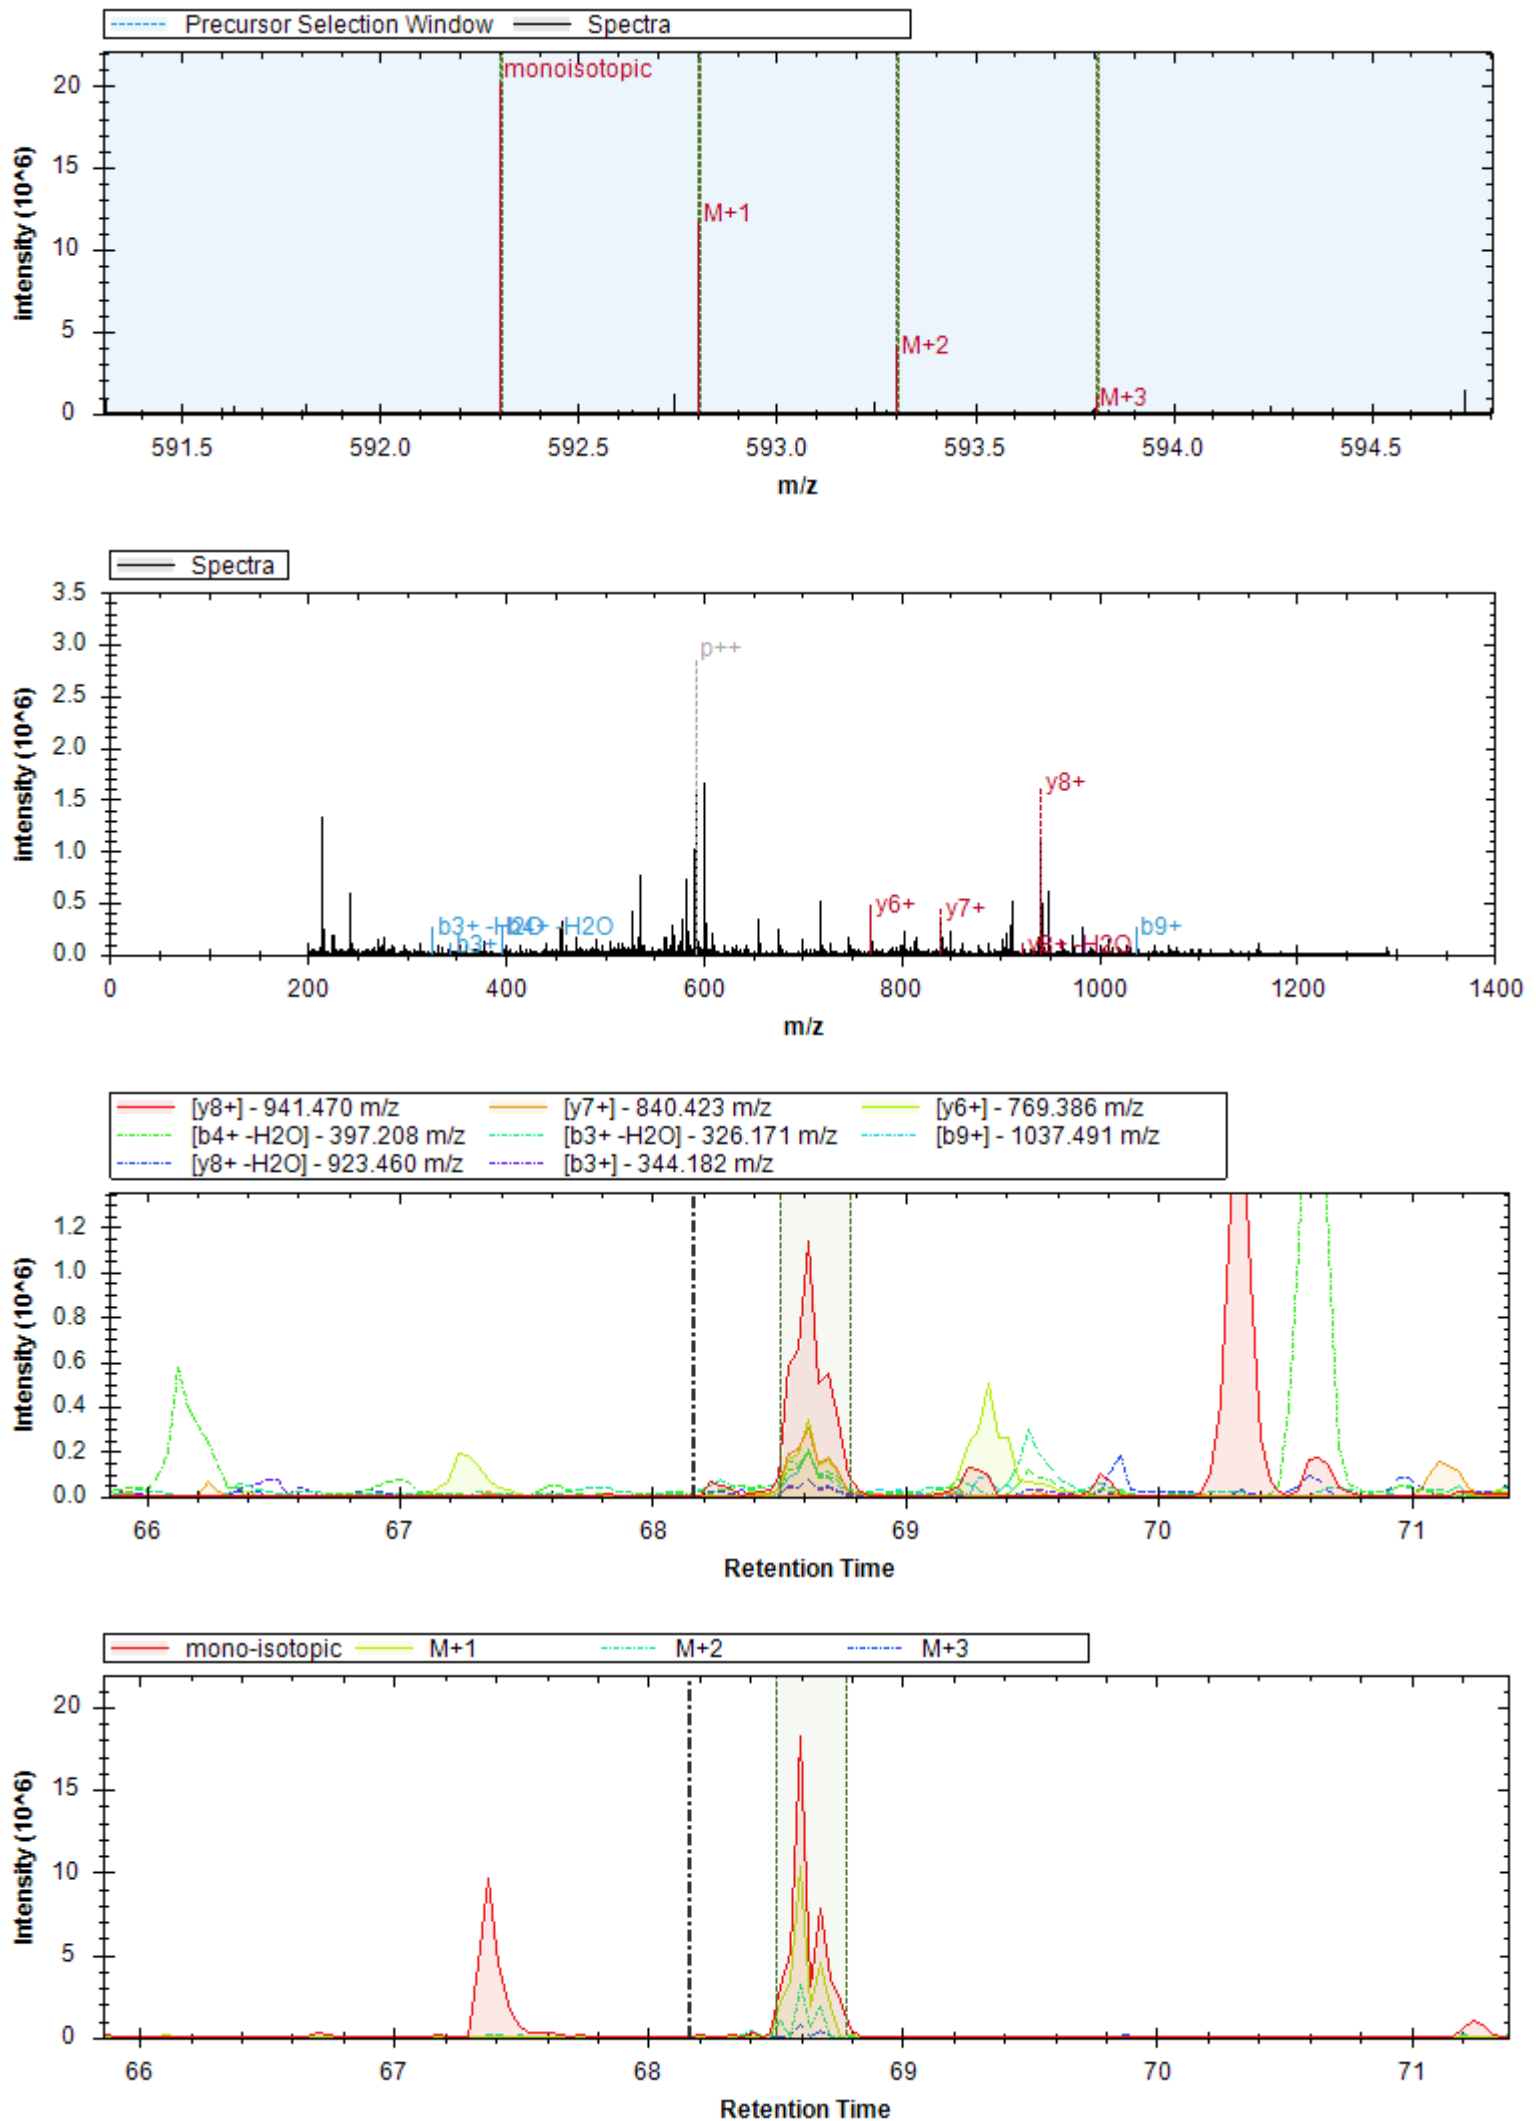

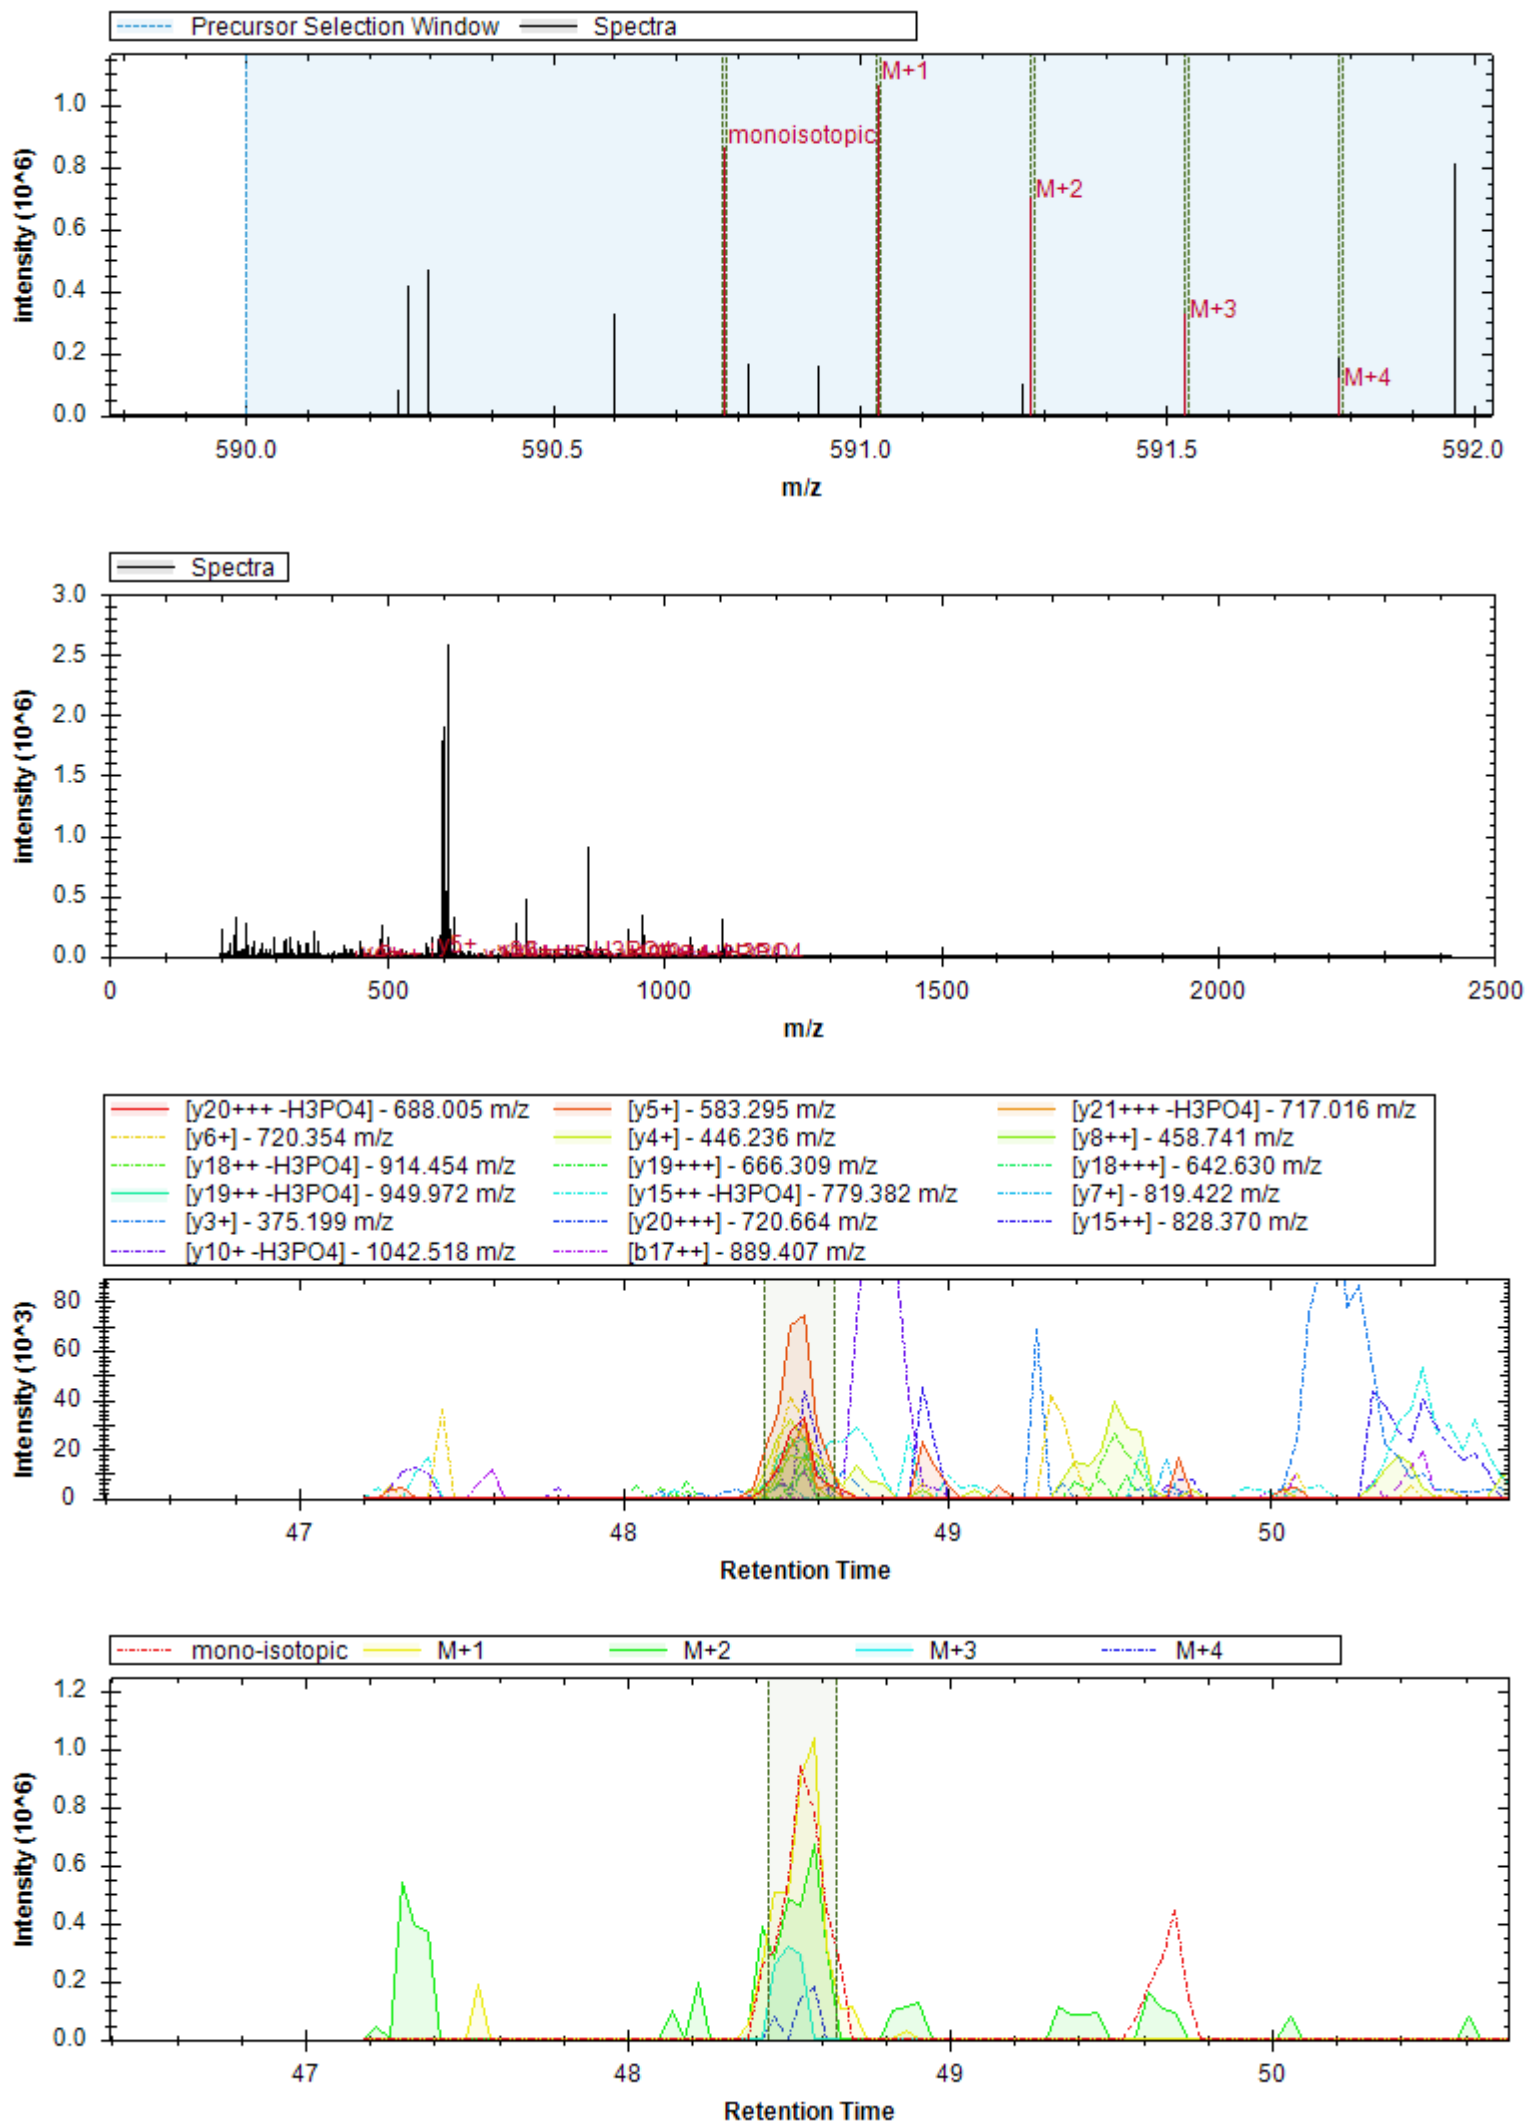

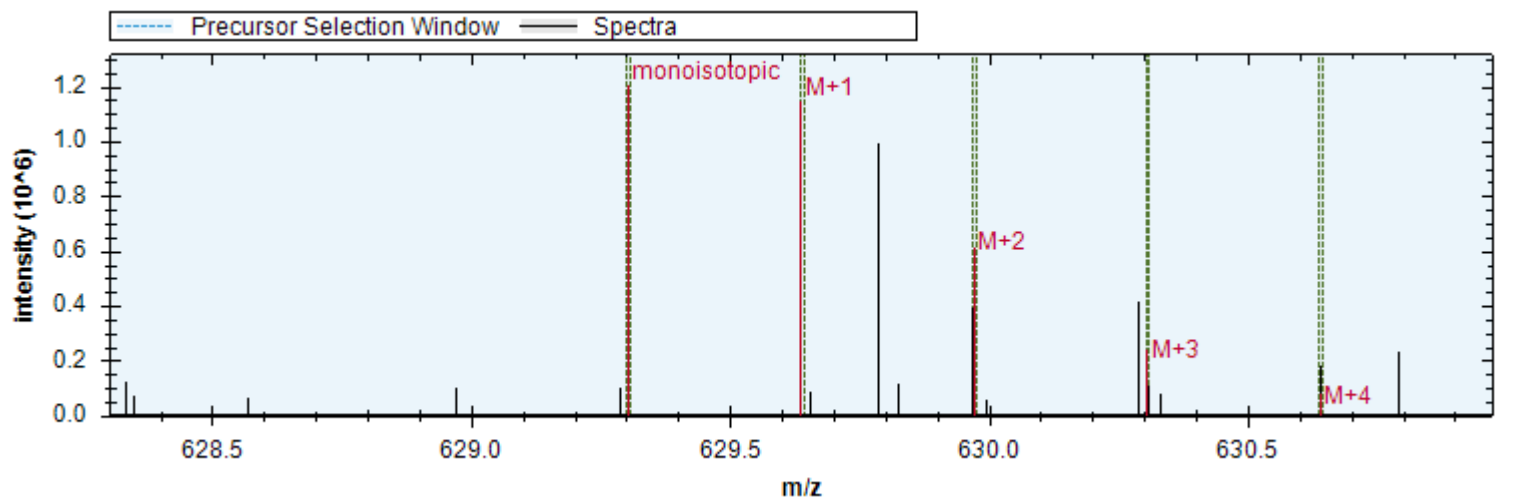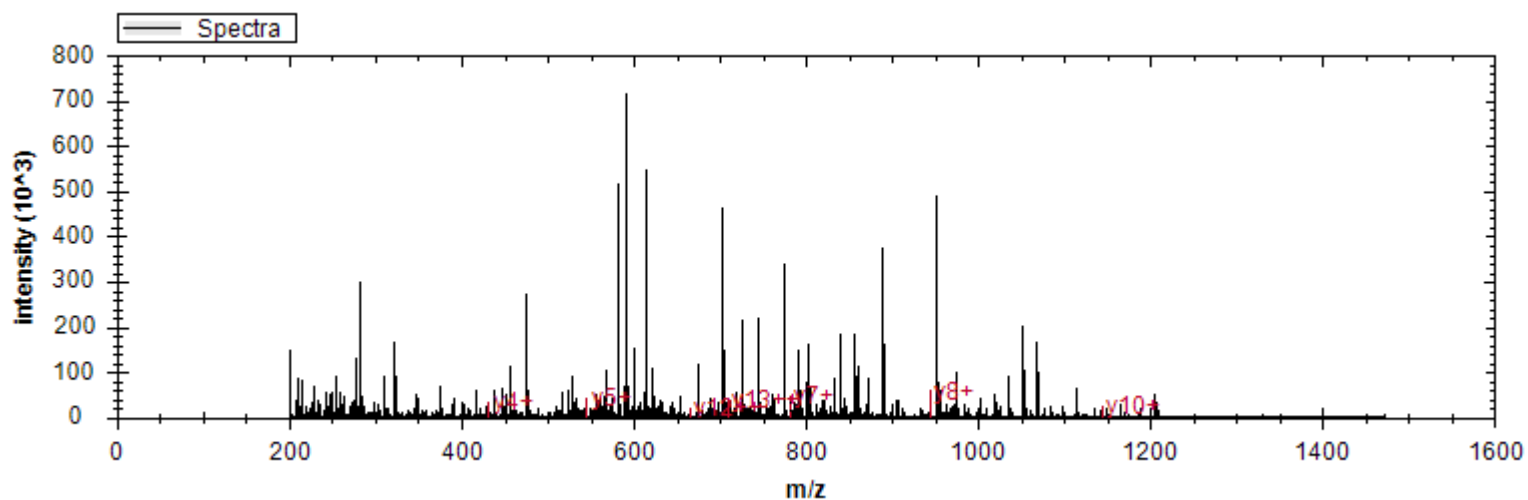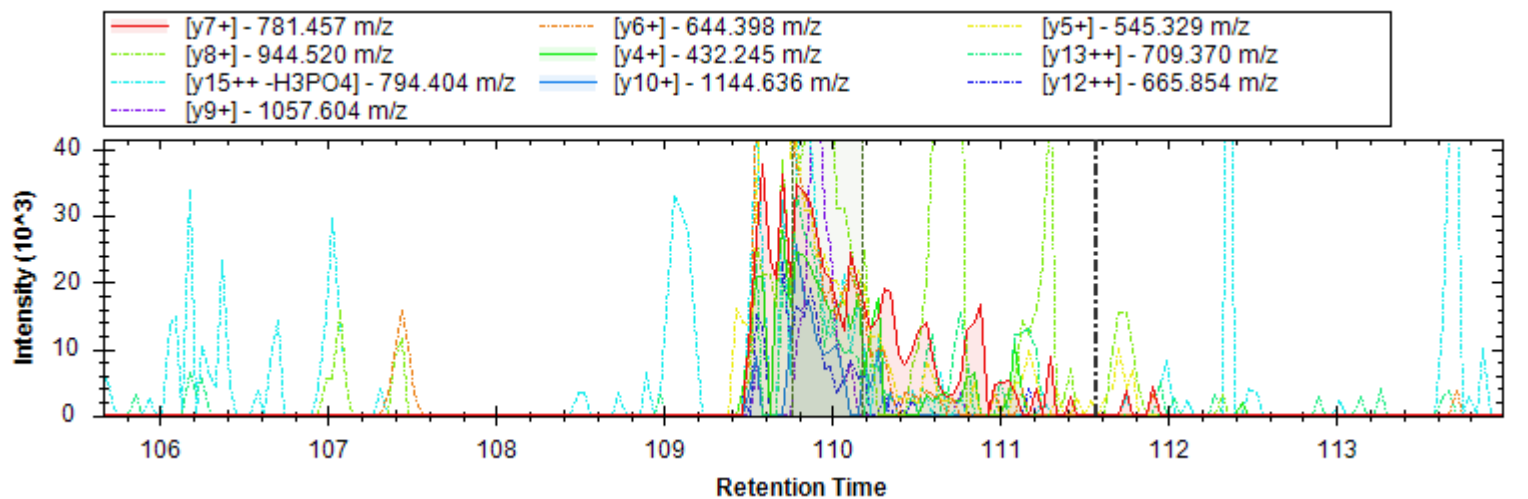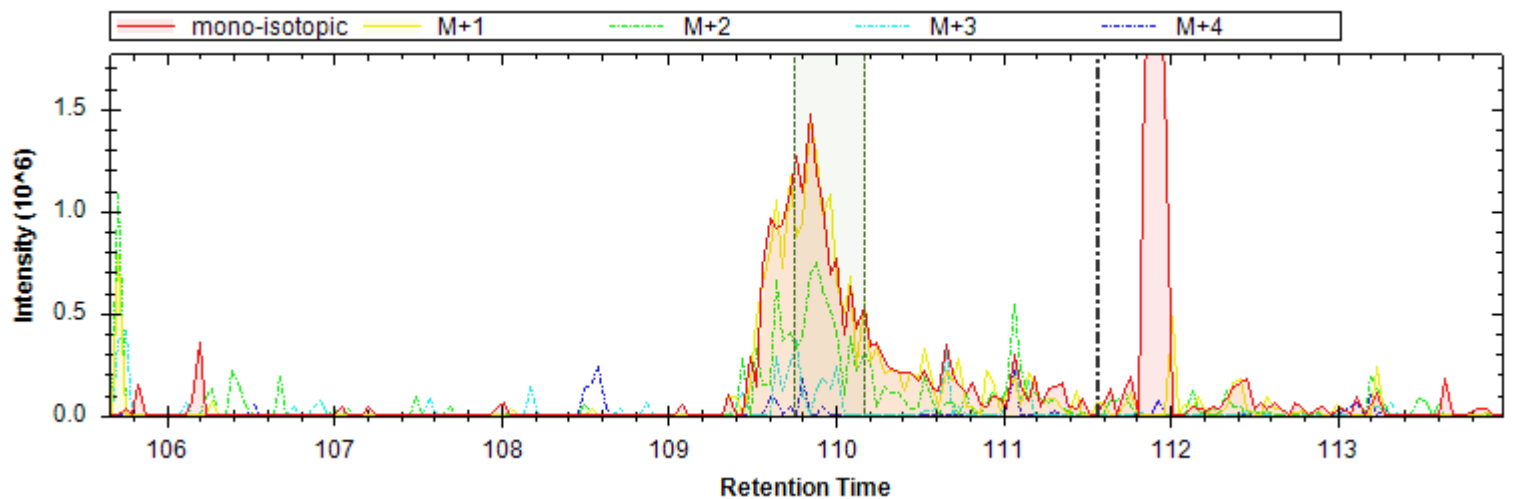



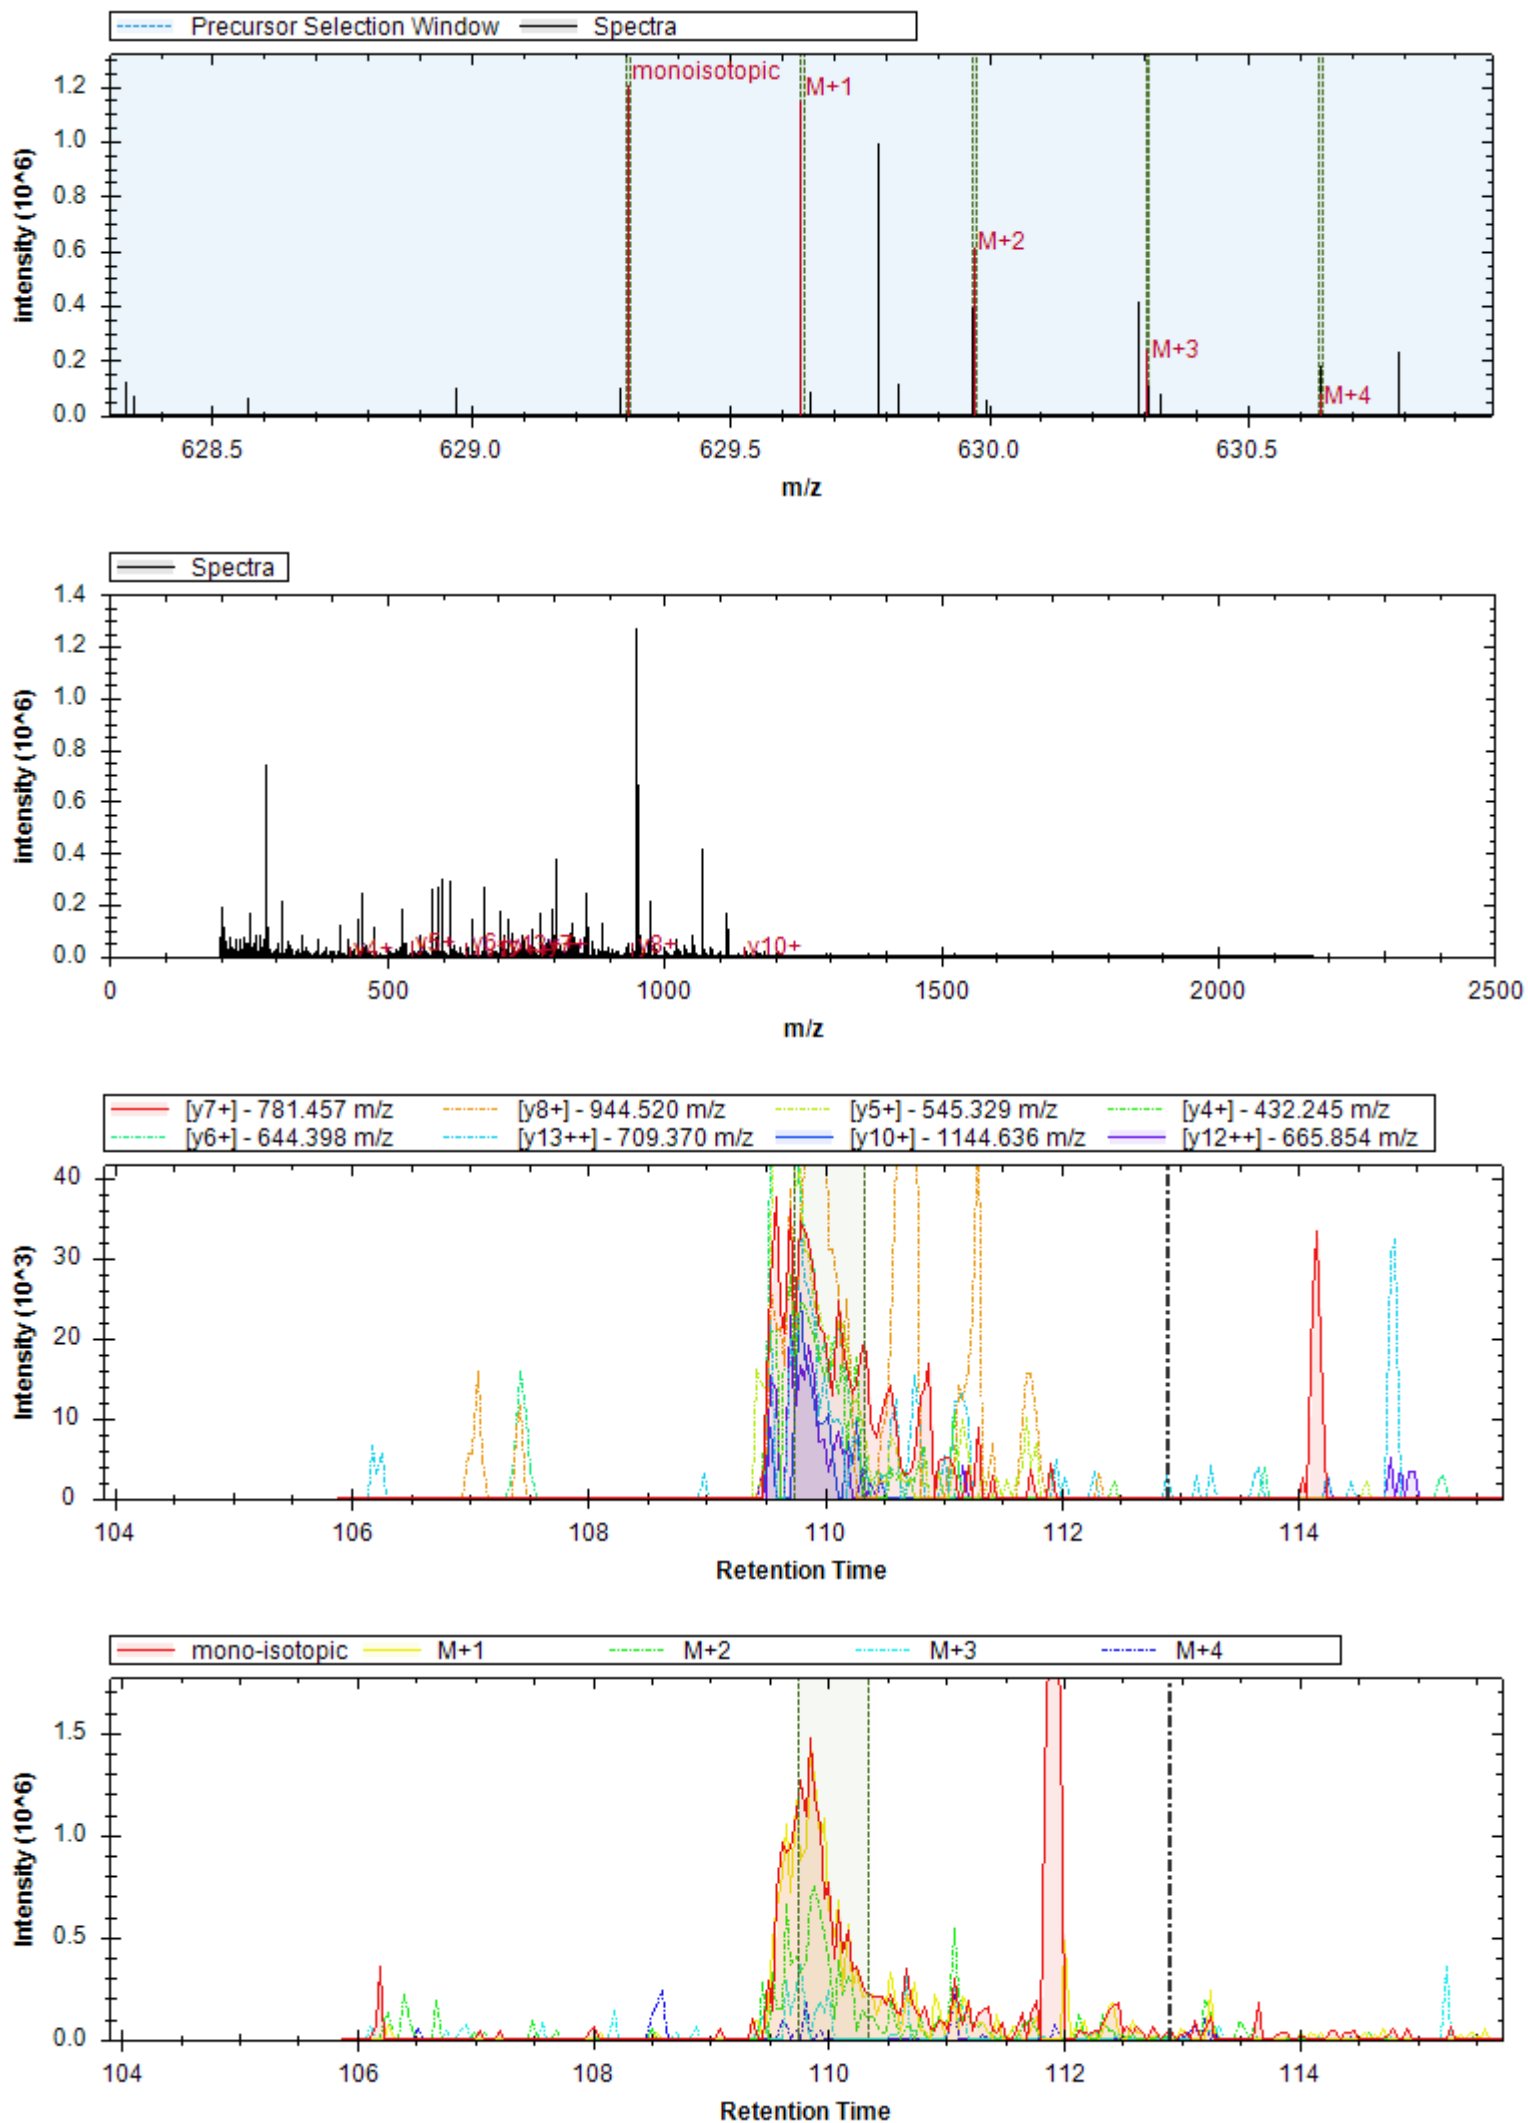

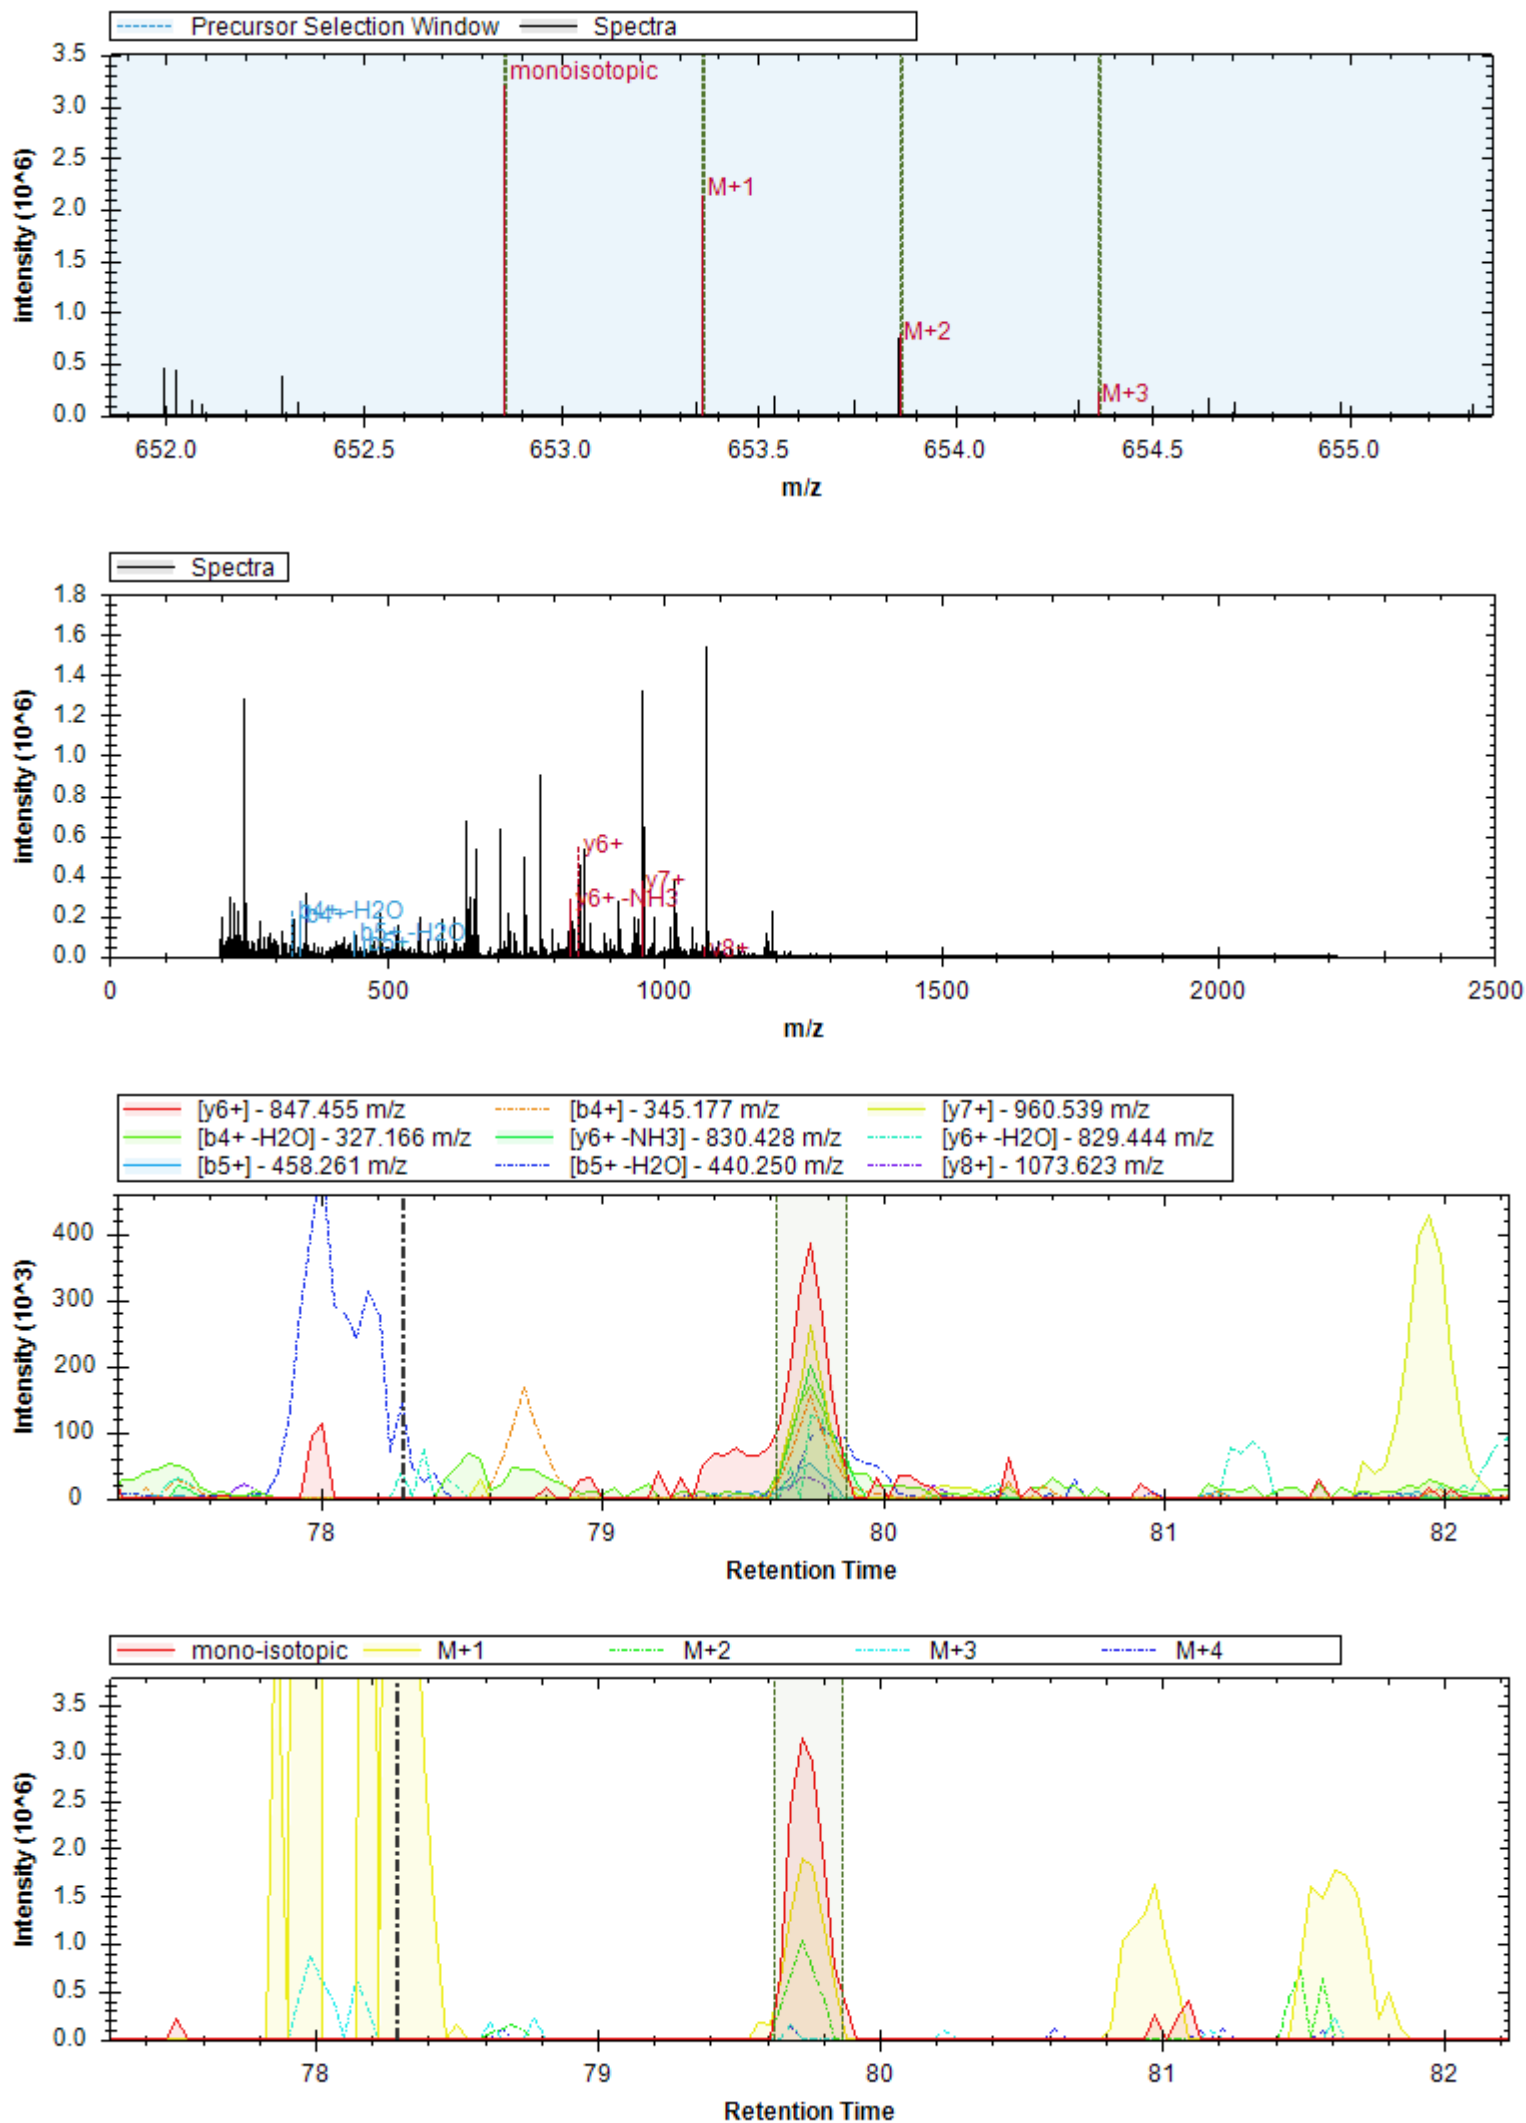

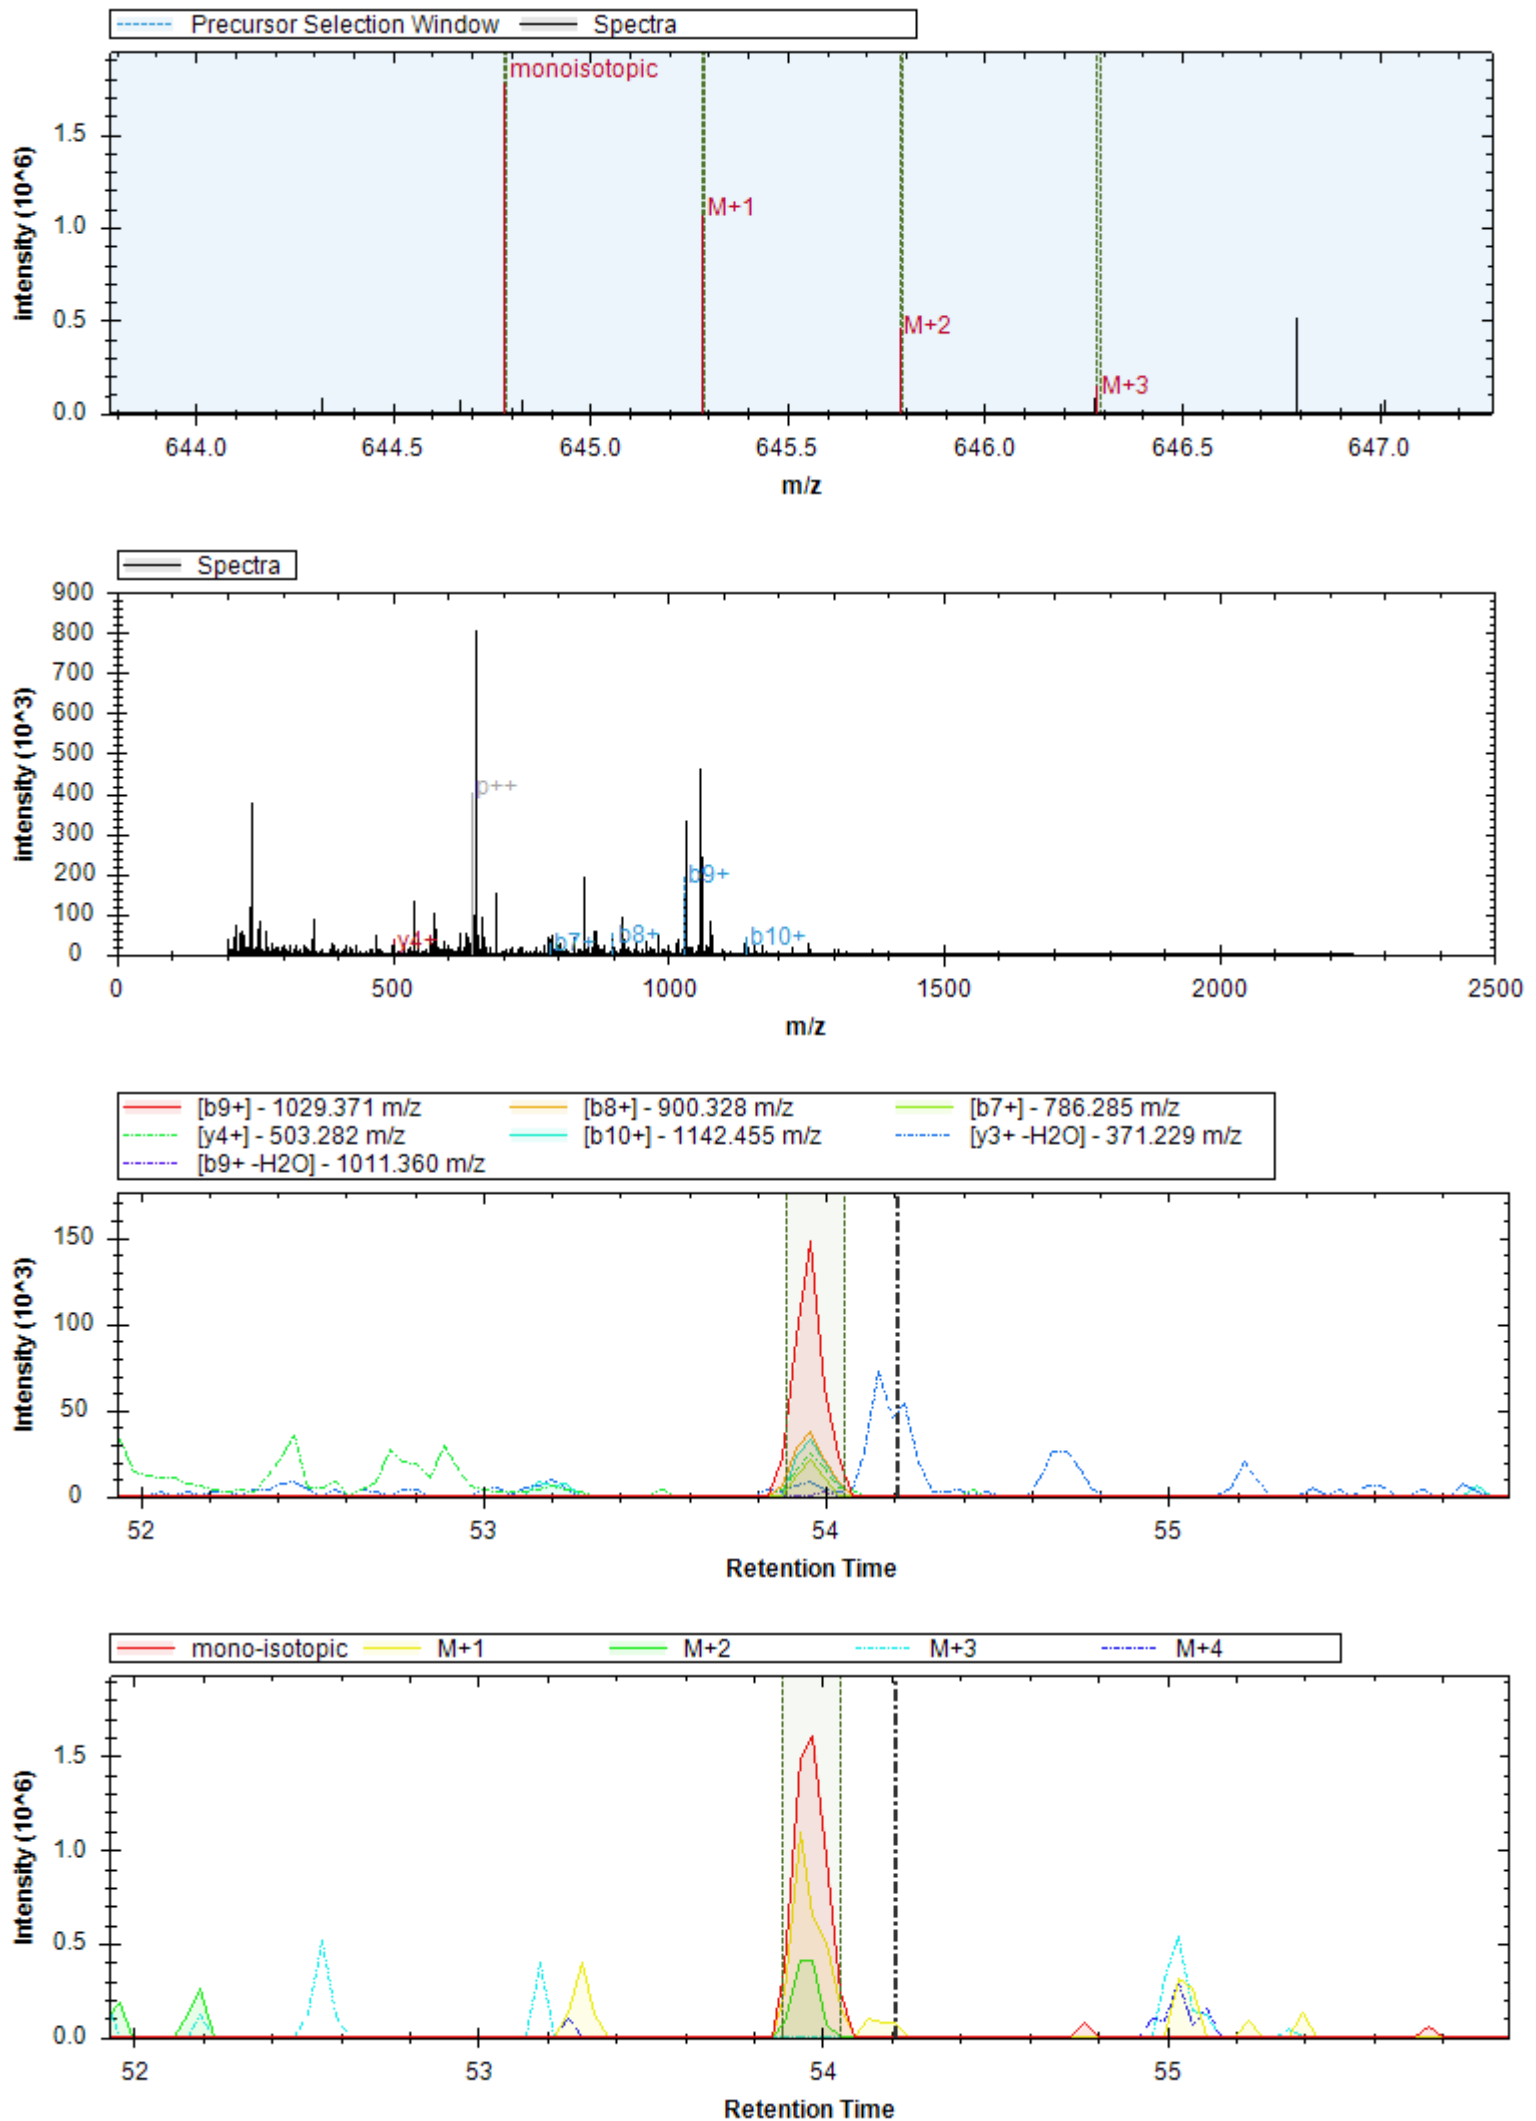

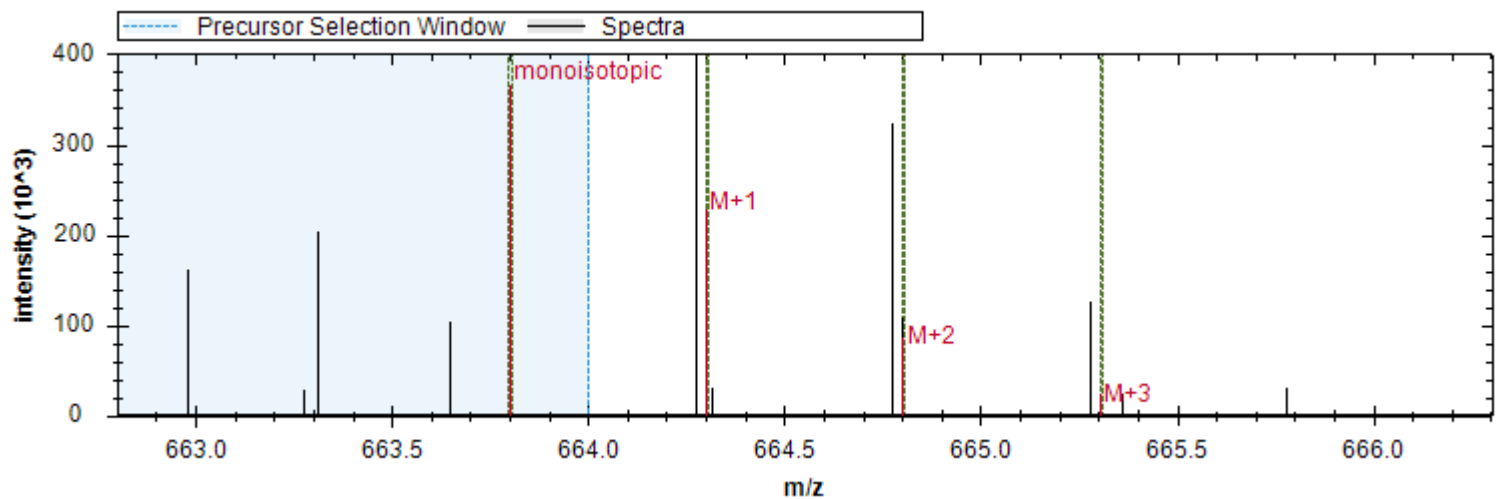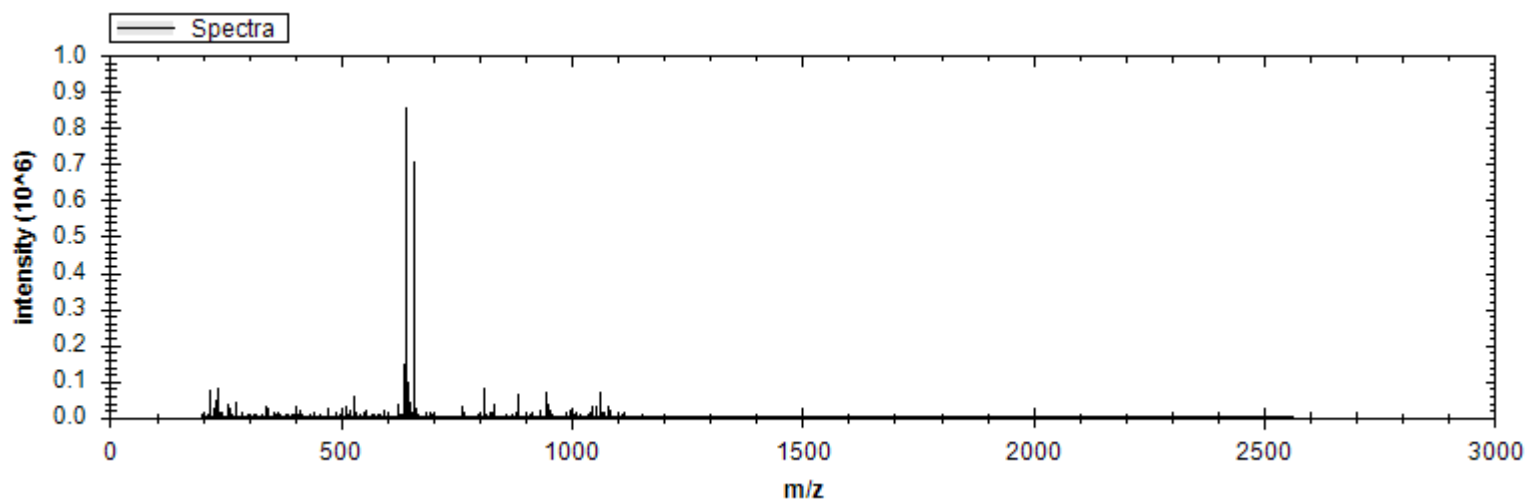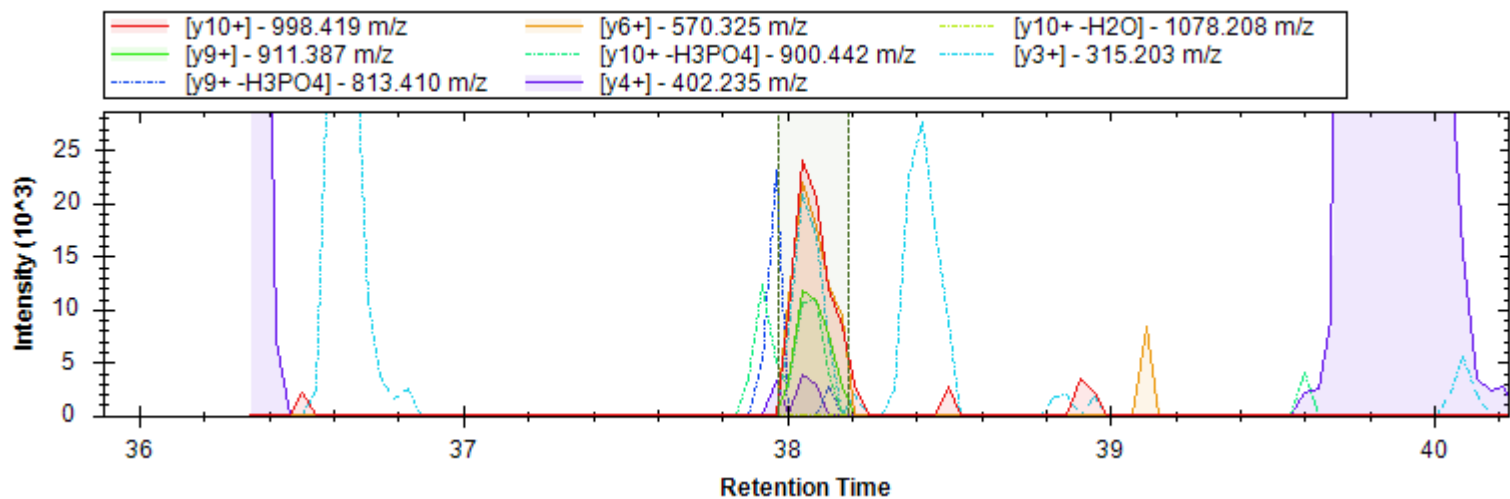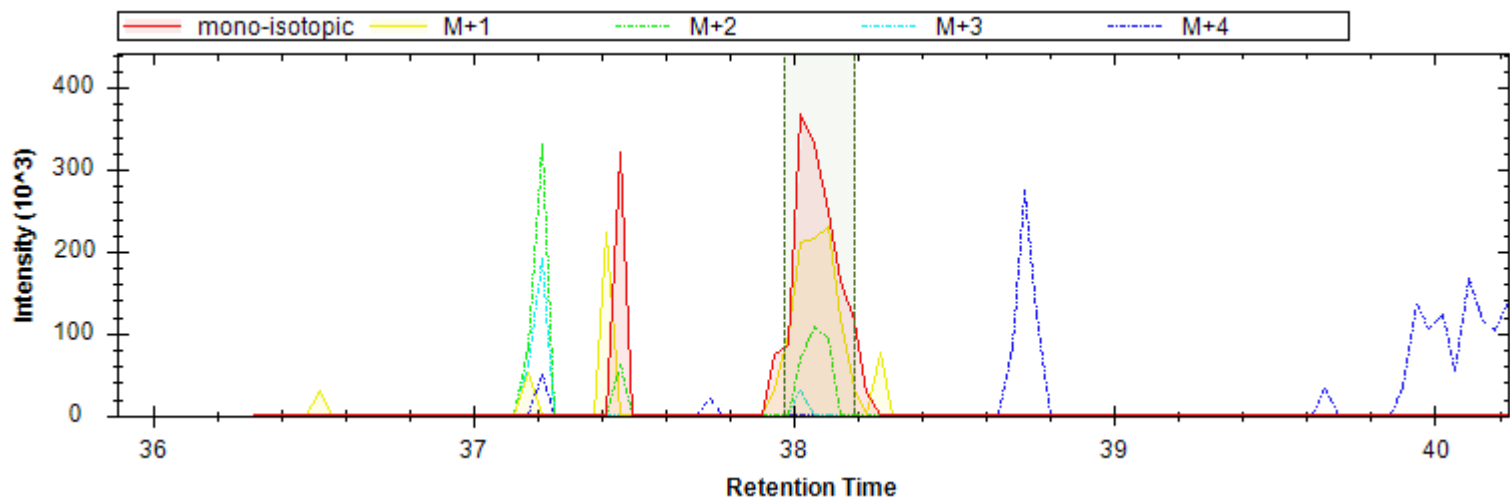

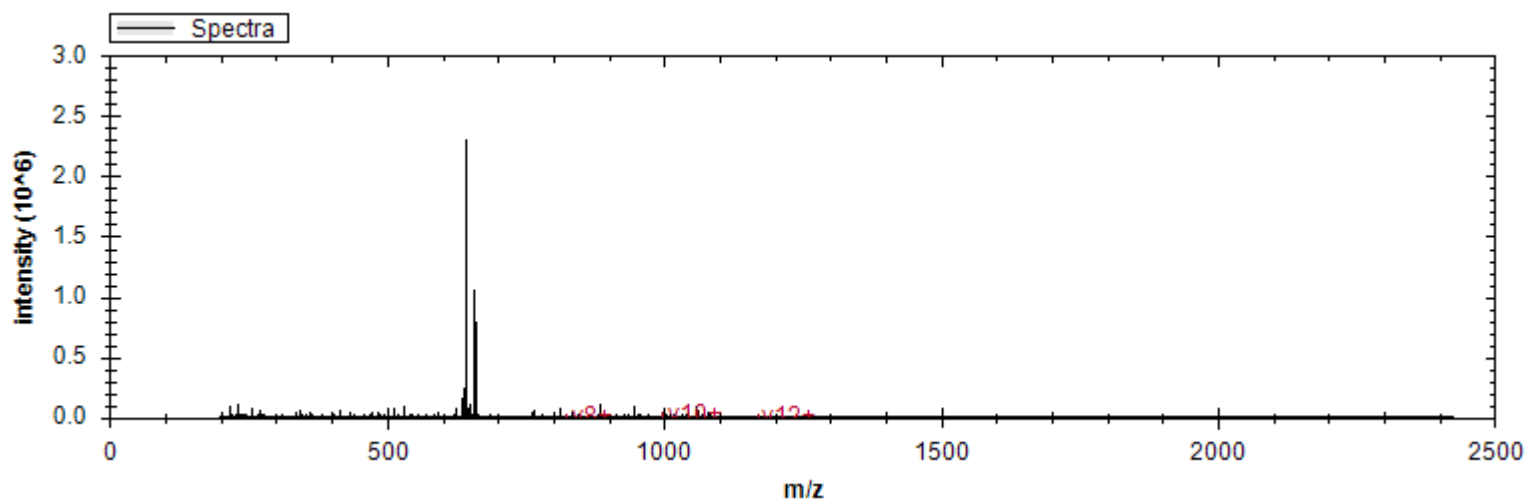

- |                            |                             |                             |
|----------------------------|-----------------------------|-----------------------------|
| [y10+] - 998.419 m/z       | [y6+] - 570.325 m/z         | [y10+ -H3PO4] - 900.442 m/z |
| [y9+] - 911.387 m/z        | [y11+ -H2O] - 1149.246 m/z  | [y3+] - 315.203 m/z         |
| [y8+ -H3PO4] - 726.378 m/z | [y11+] - 1069.456 m/z       | [y8+] - 824.355 m/z         |
| [y4+] - 402.235 m/z        | [y9+ -H3PO4] - 813.410 m/z  | [y8+ -H2O] - 904.144 m/z    |
| [y10+ -H2O] - 1078.208 m/z | [y11+ -H3PO4] - 971.479 m/z | [b5+] - 416.214 m/z         |
| [y10+ -NH3] - 981.393 m/z  | [y12+] - 1170.504 m/z       | [y9+ -H2O] - 893.377 m/z    |

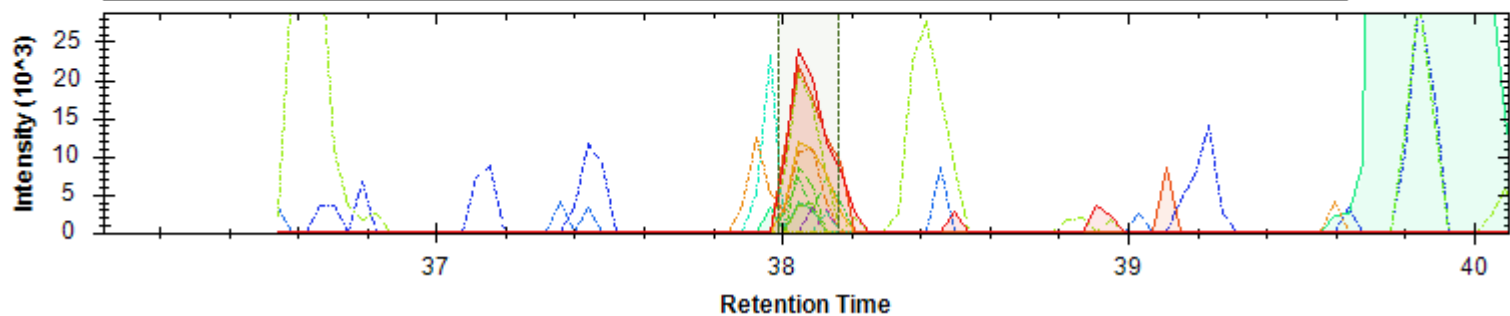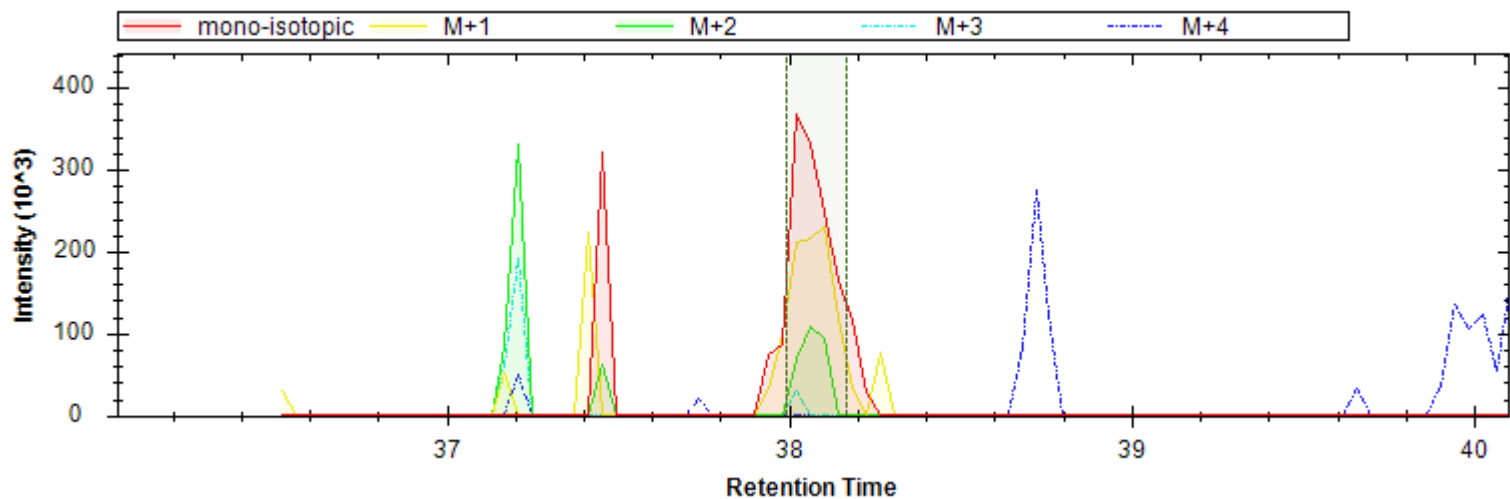

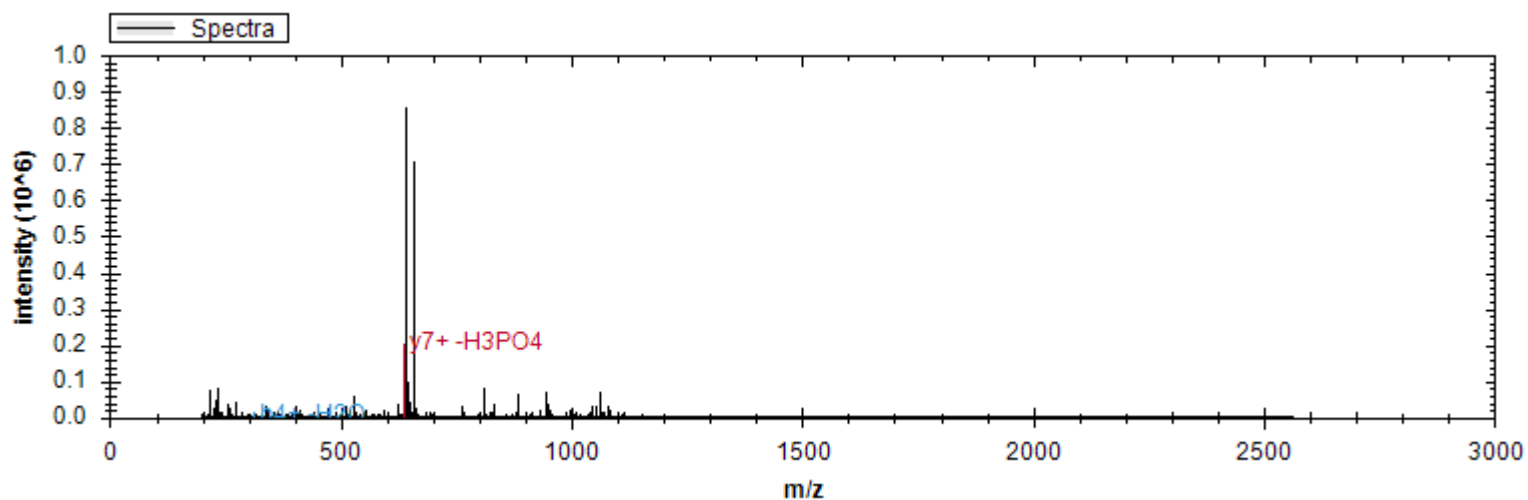

- |                             |                             |                            |
|-----------------------------|-----------------------------|----------------------------|
| [y6+] - 570.325 m/z         | [y10+] - 998.419 m/z        | [b4+ -H2O] - 311.171 m/z   |
| [y4+ -H2O] - 384.224 m/z    | [y10+ -H3PO4] - 900.442 m/z | [y9+] - 911.387 m/z        |
| [y3+] - 315.203 m/z         | [y8+ -H3PO4] - 726.378 m/z  | [y4+] - 402.235 m/z        |
| [y8+] - 824.355 m/z         | [b4+] - 329.182 m/z         | [b5+] - 416.214 m/z        |
| [y11+ -H3PO4] - 971.479 m/z | [b5+ -H2O] - 398.203 m/z    | [y11+] - 1069.456 m/z      |
| [y8+ -H2O] - 904.144 m/z    | [y9+ -H3PO4] - 813.410 m/z  | [y7+ -H3PO4] - 639.346 m/z |
| [y11+ -H2O] - 1247.046 m/z  | [y9+ -H2O] - 991.177 m/z    |                            |

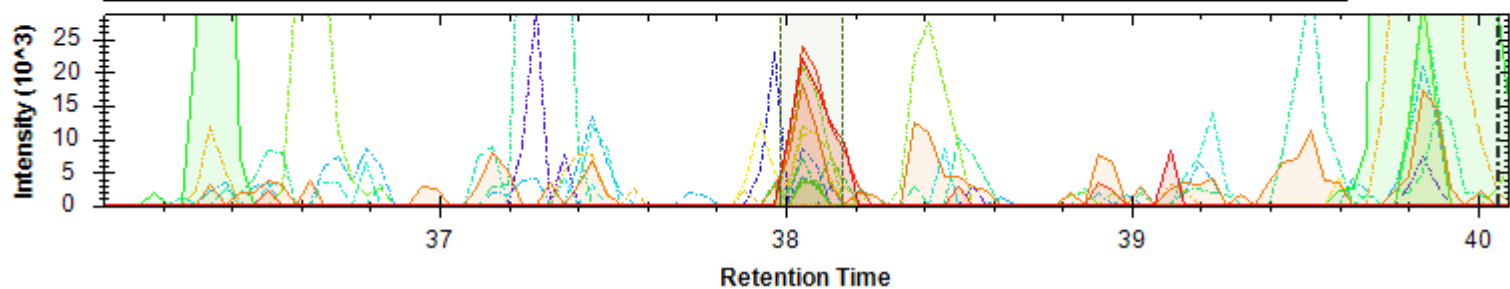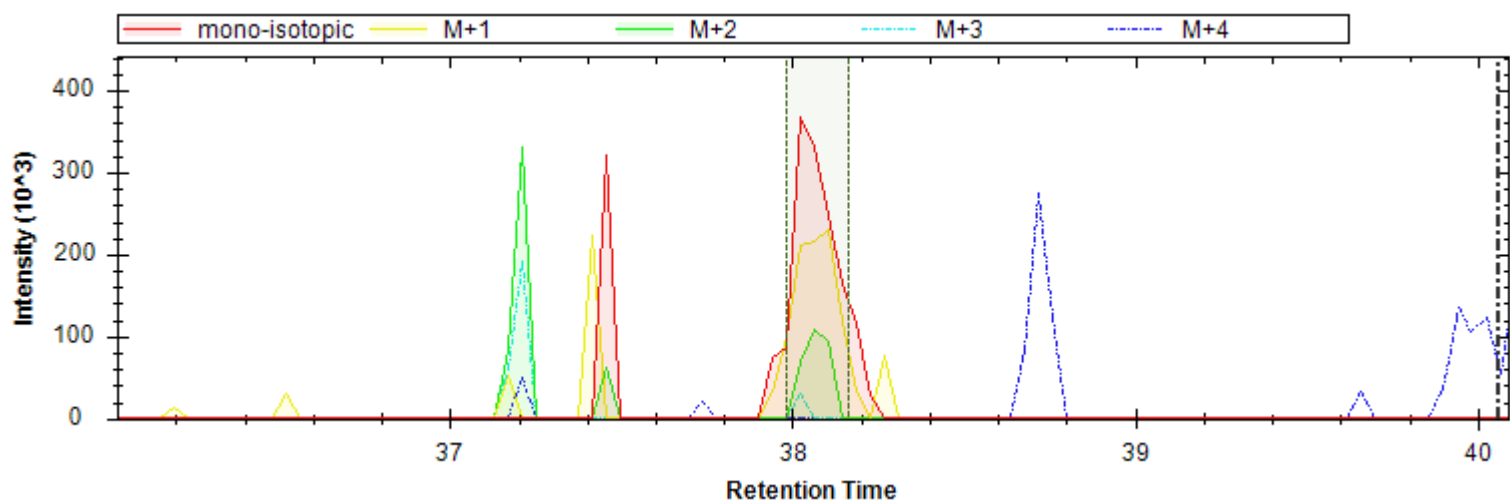

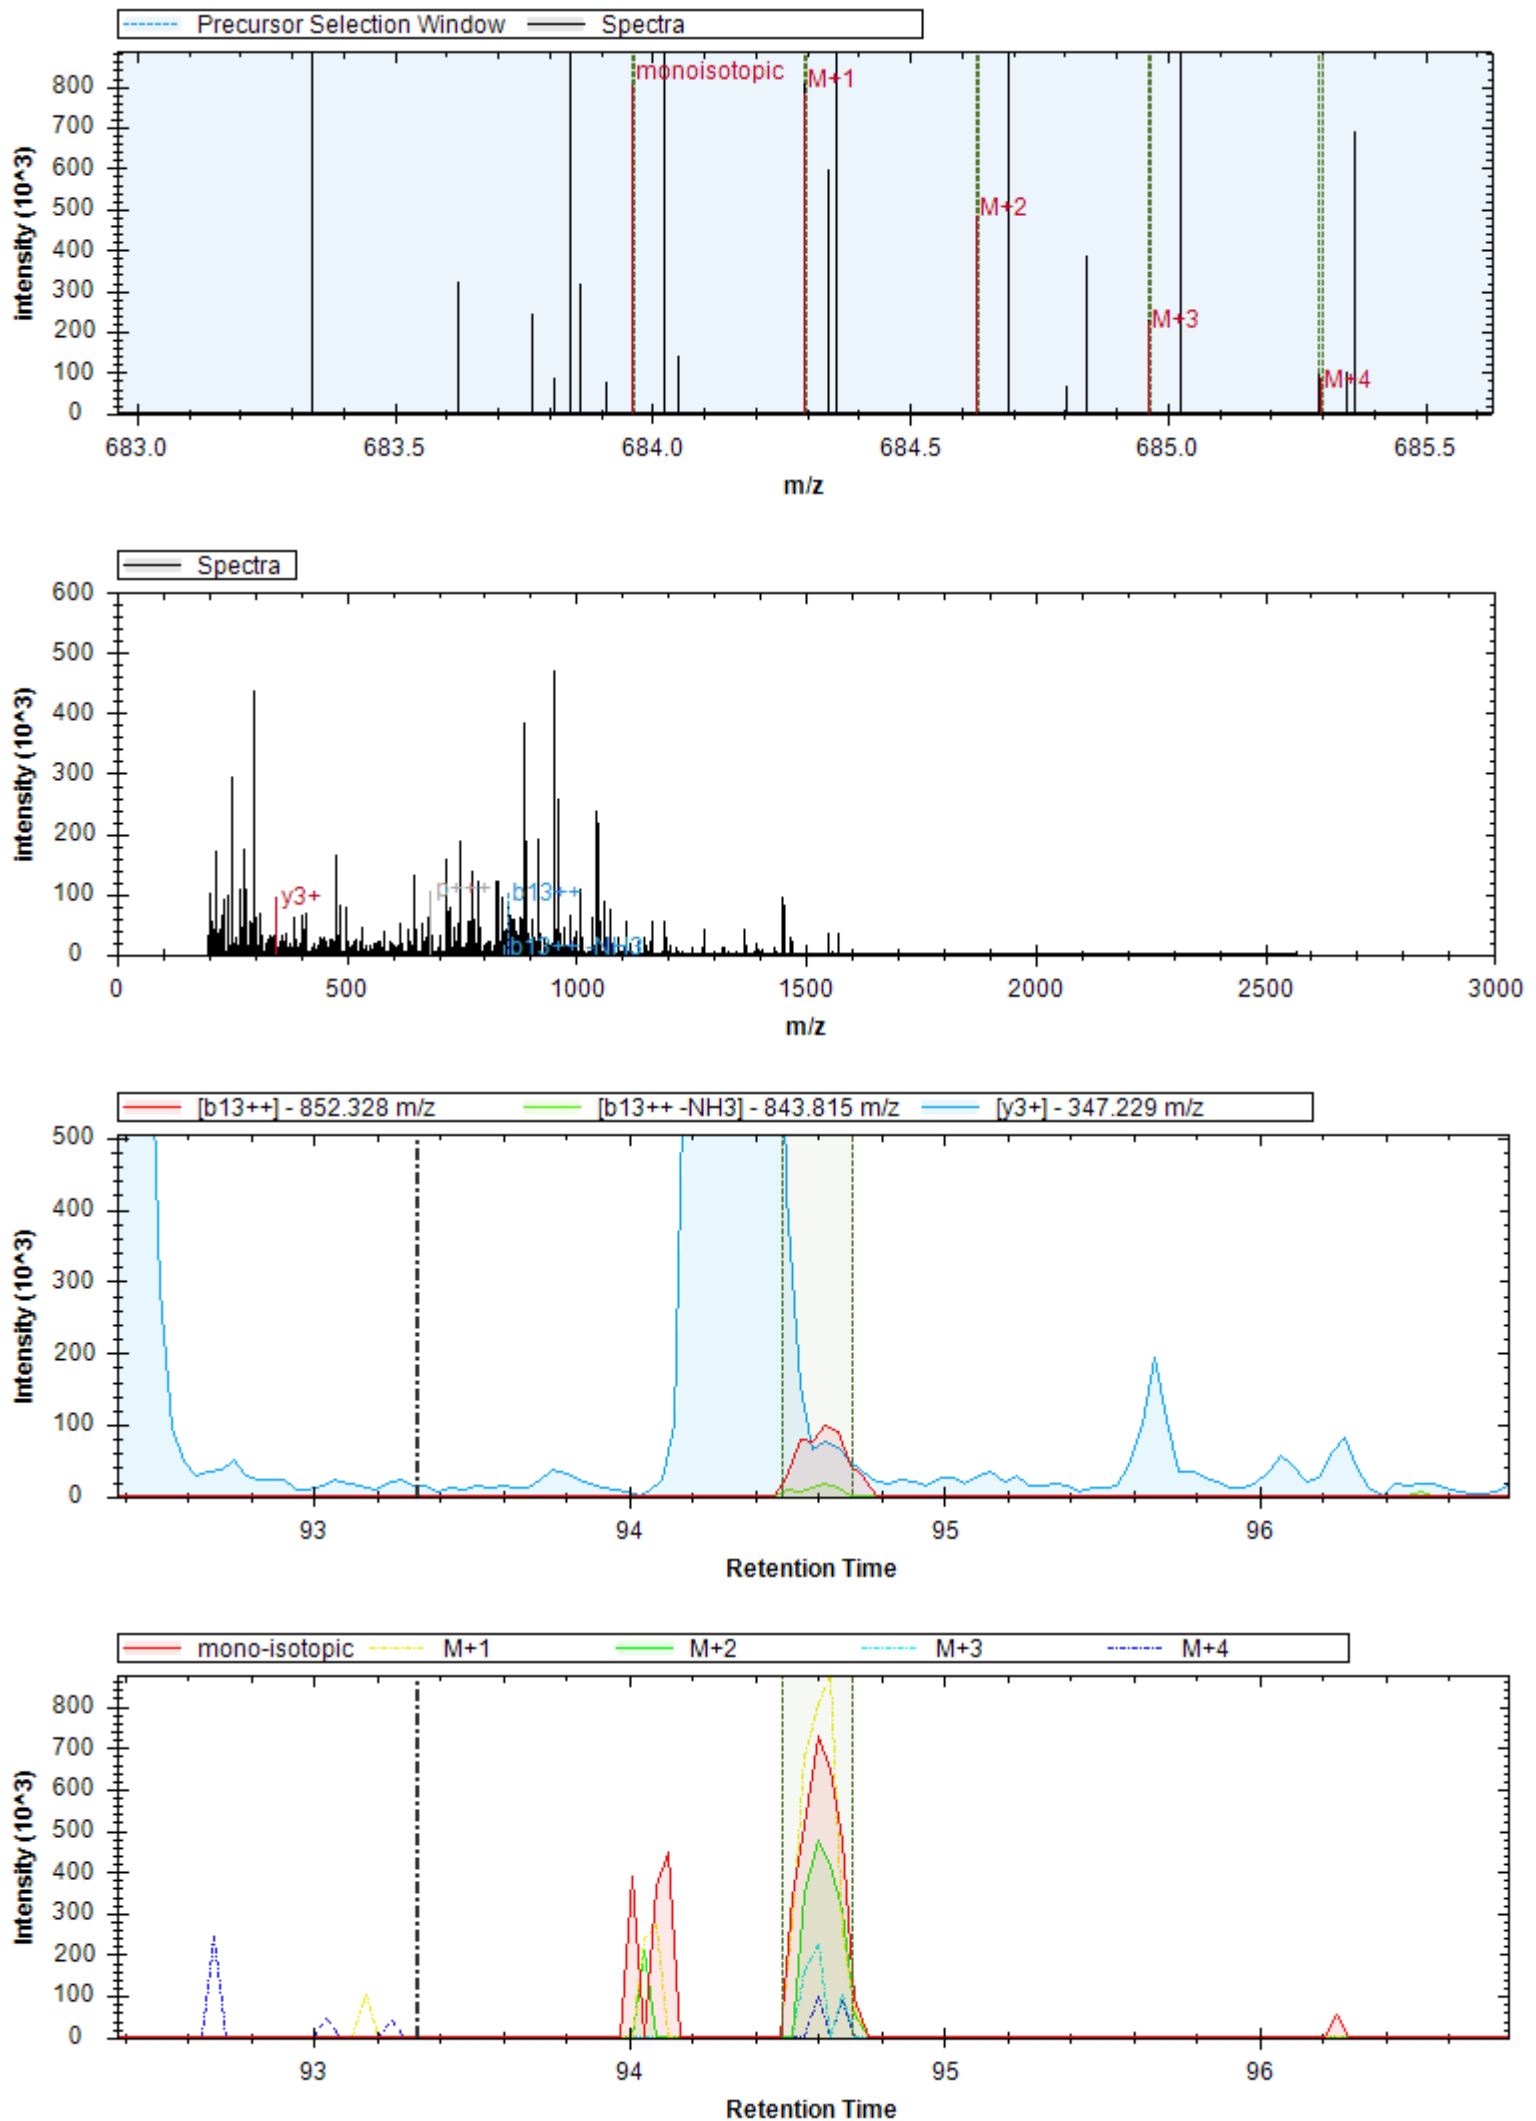

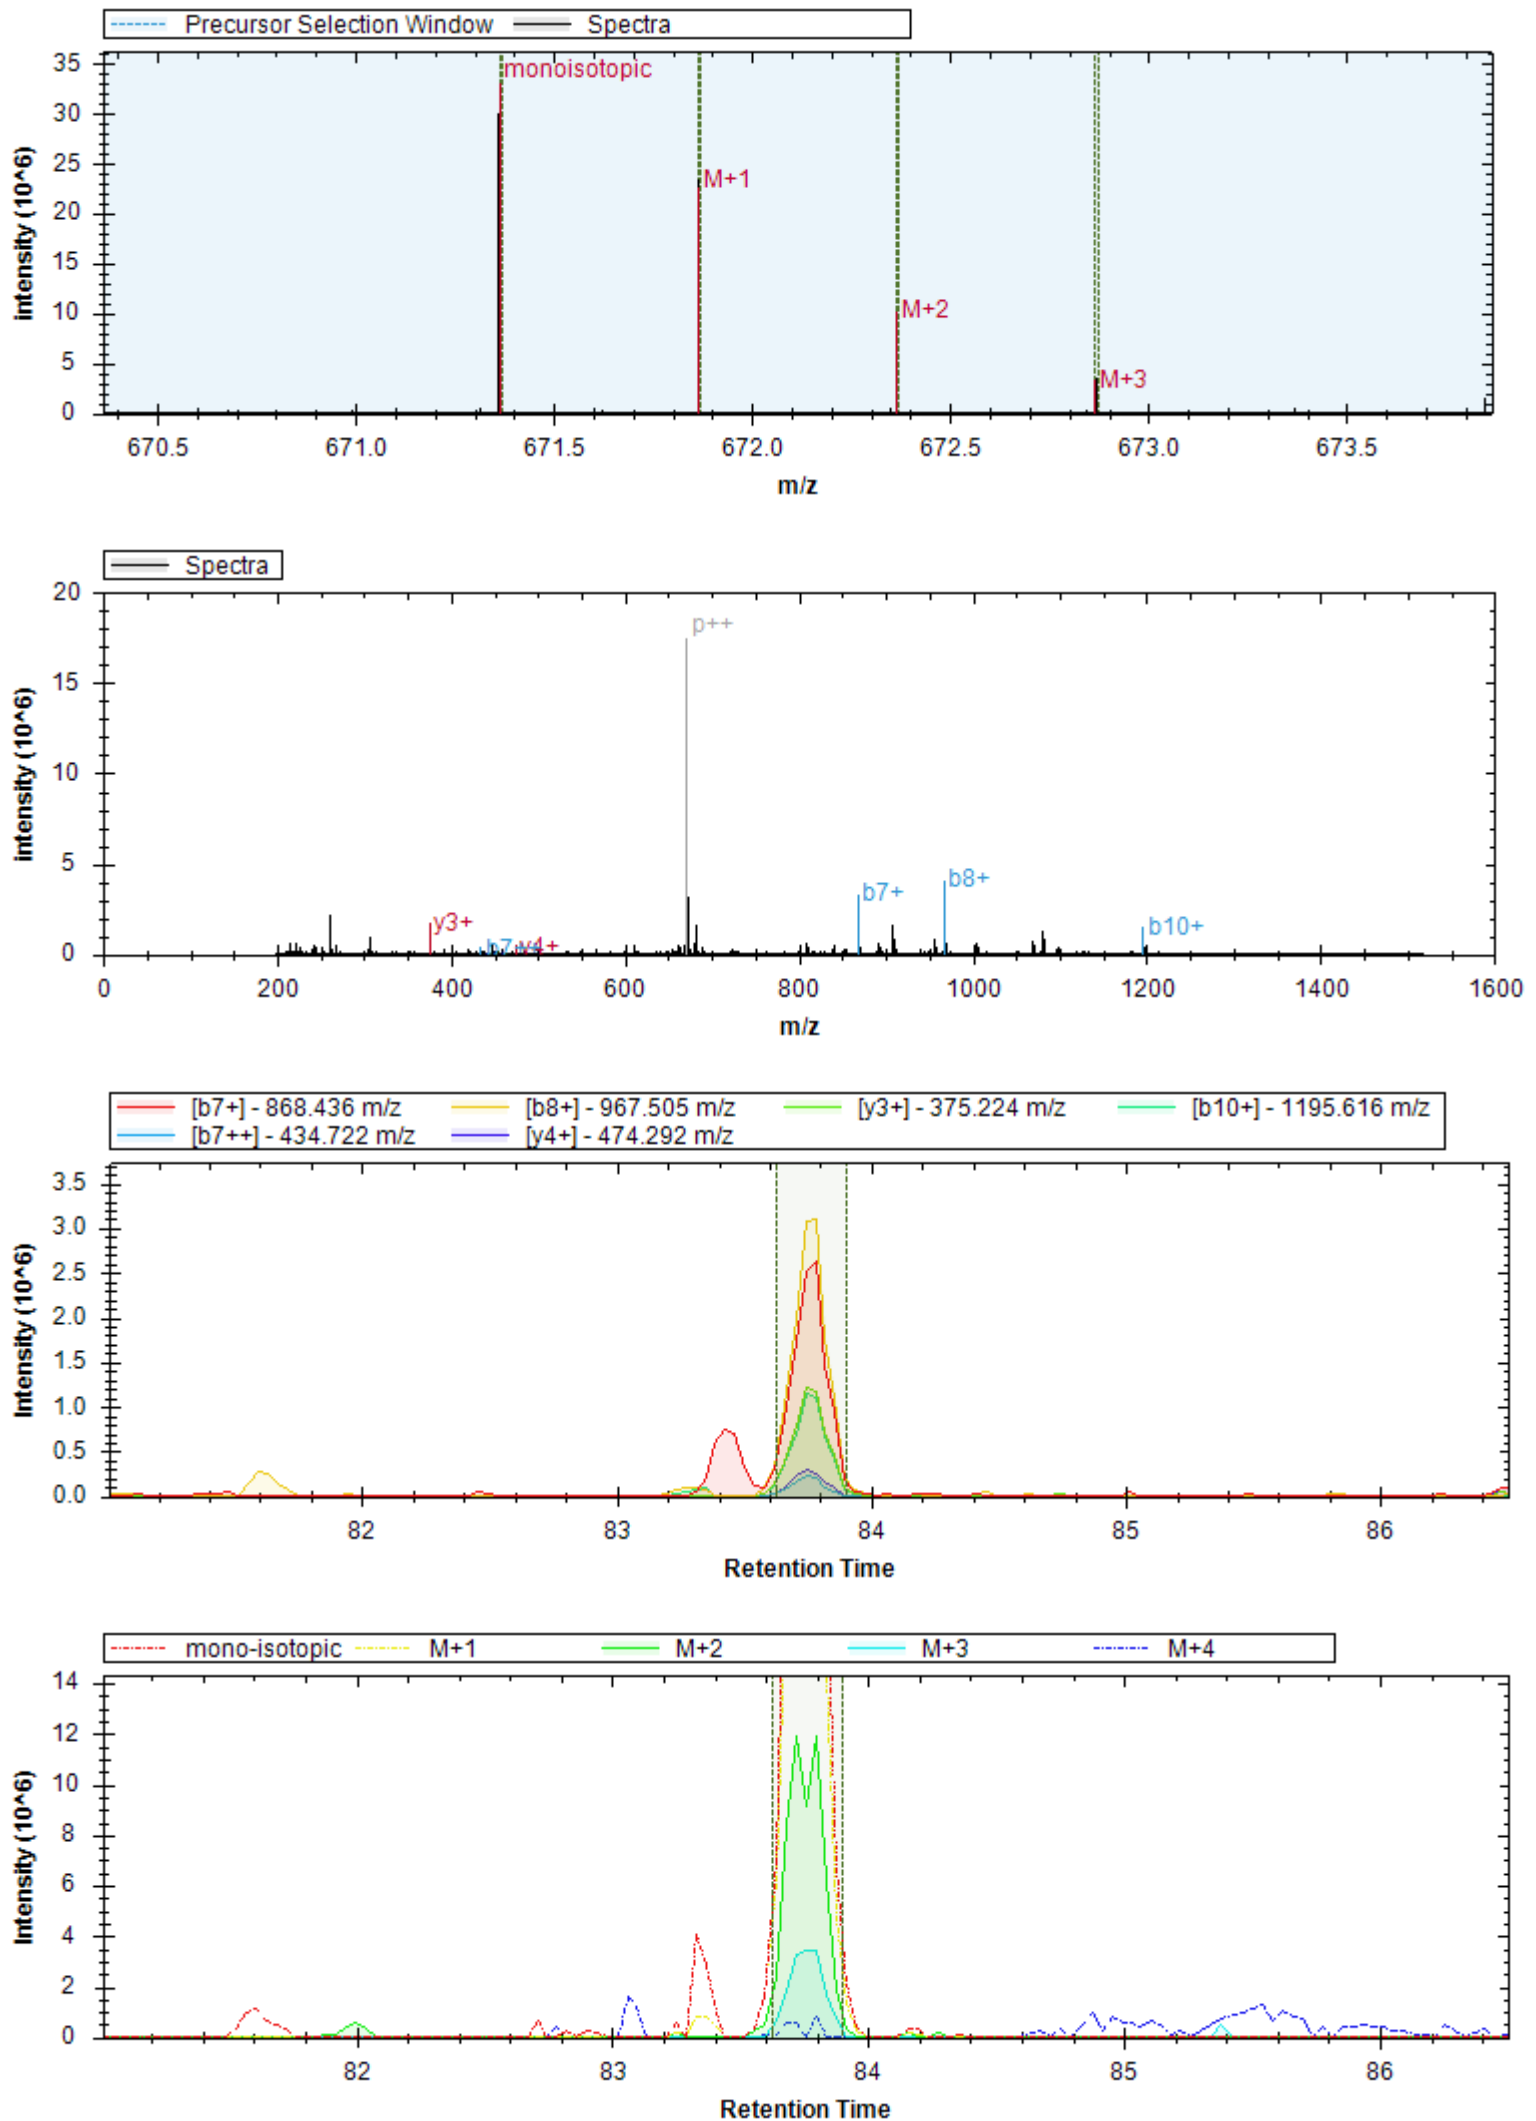



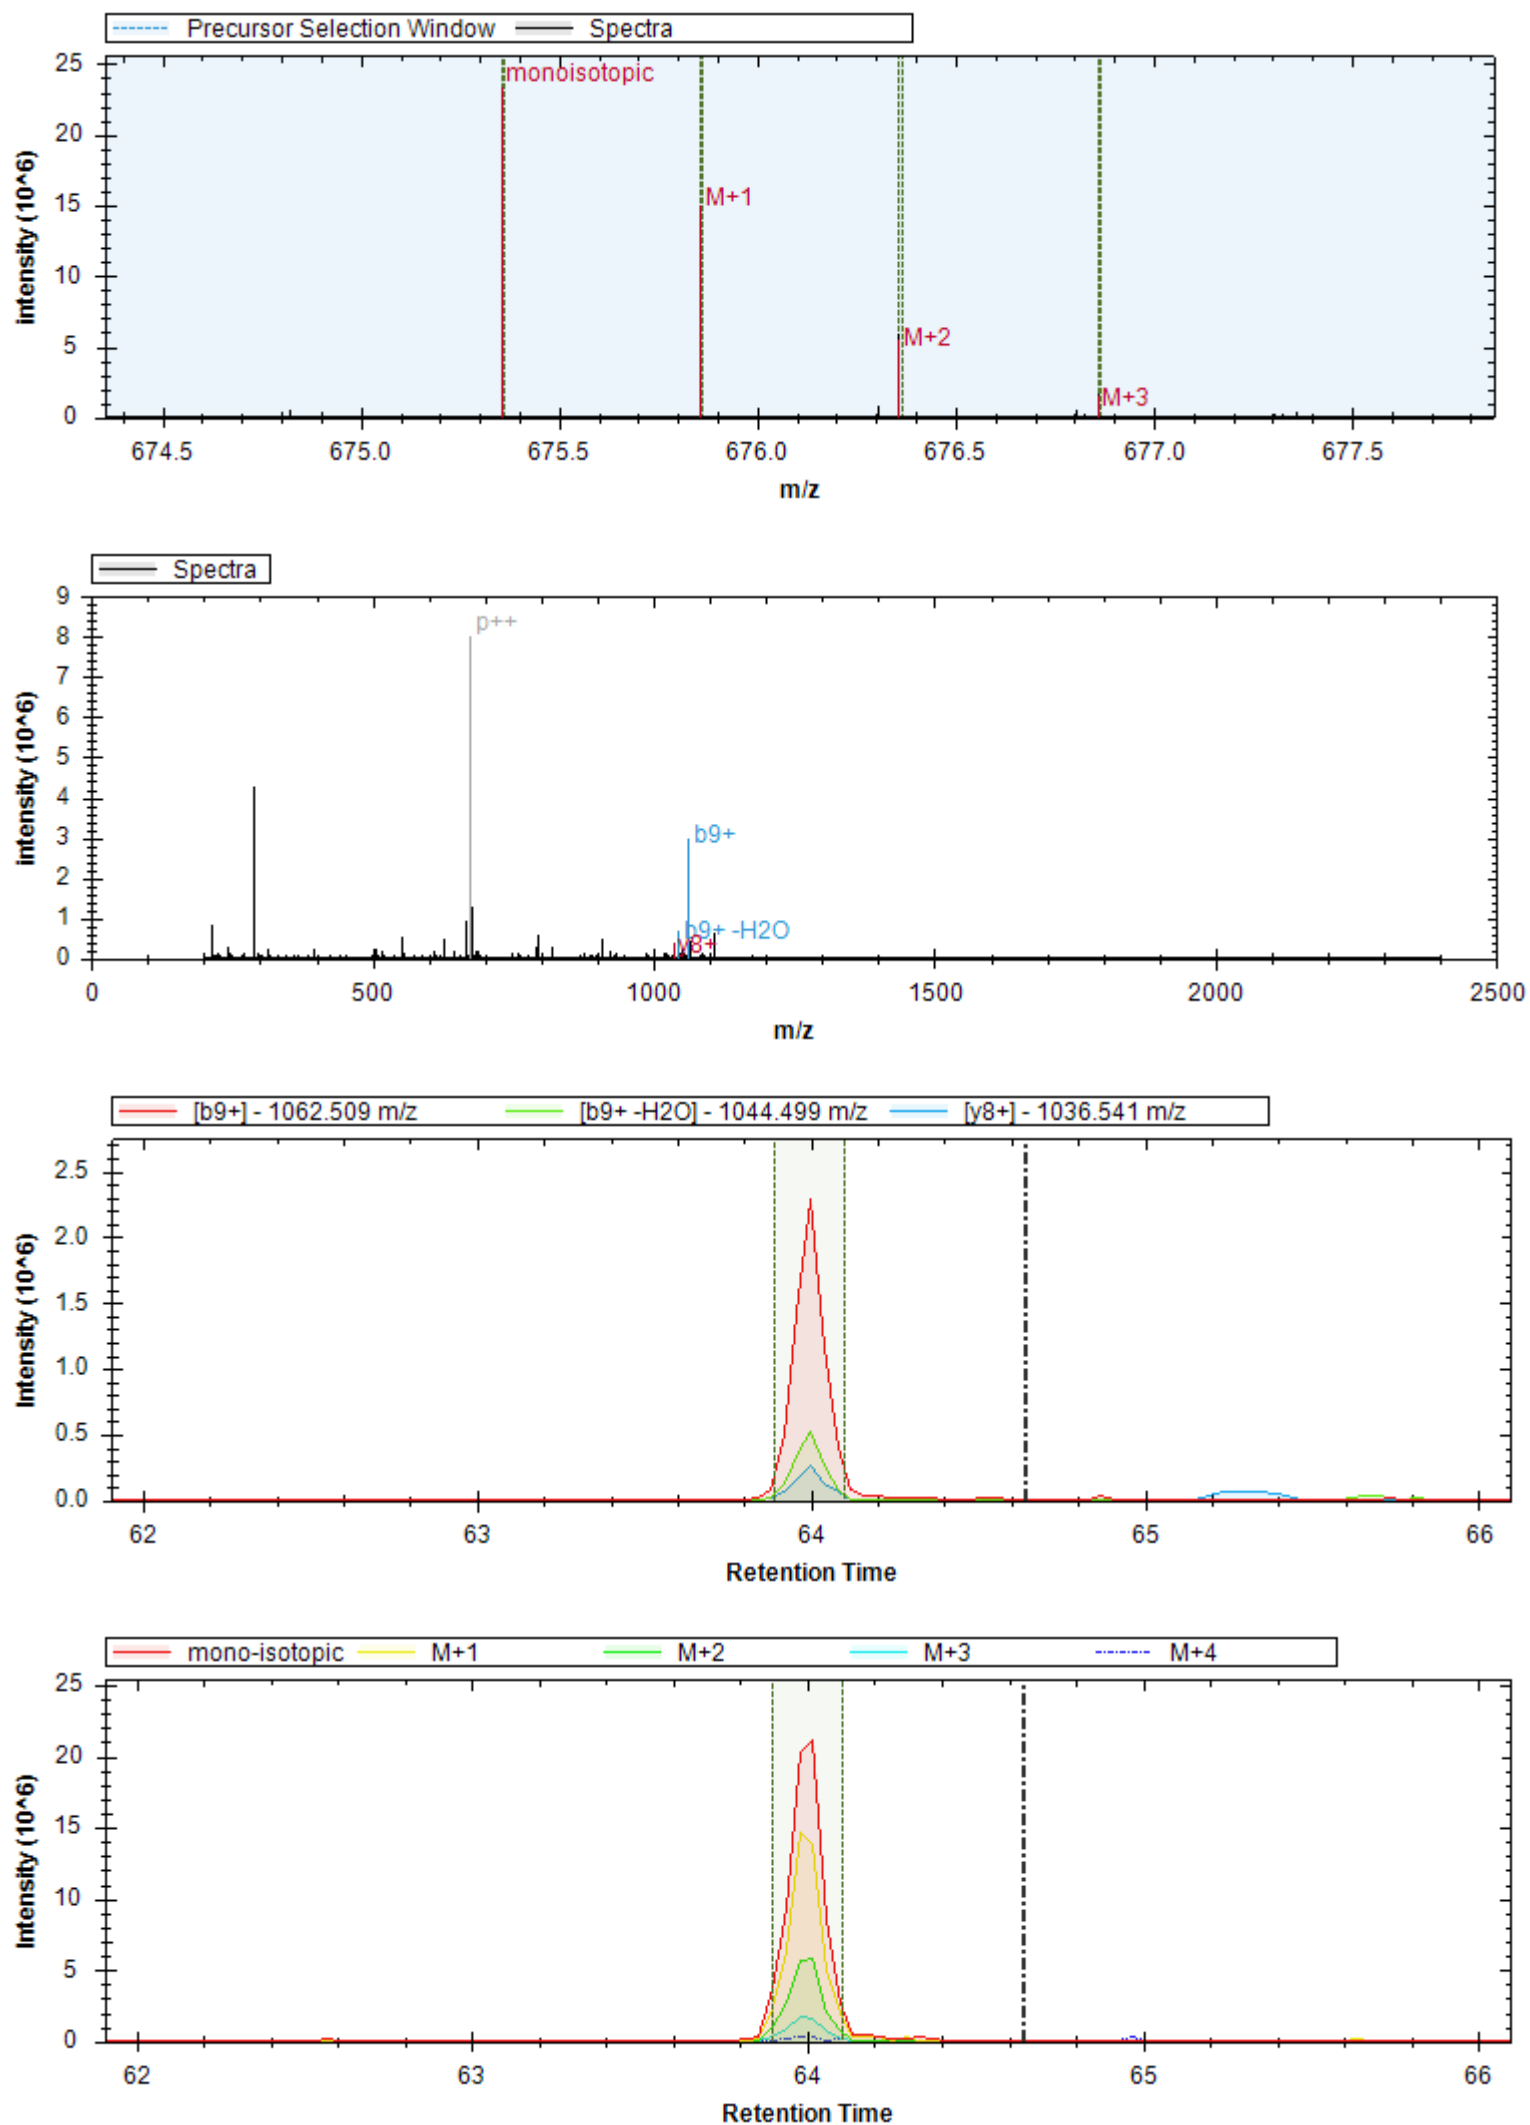

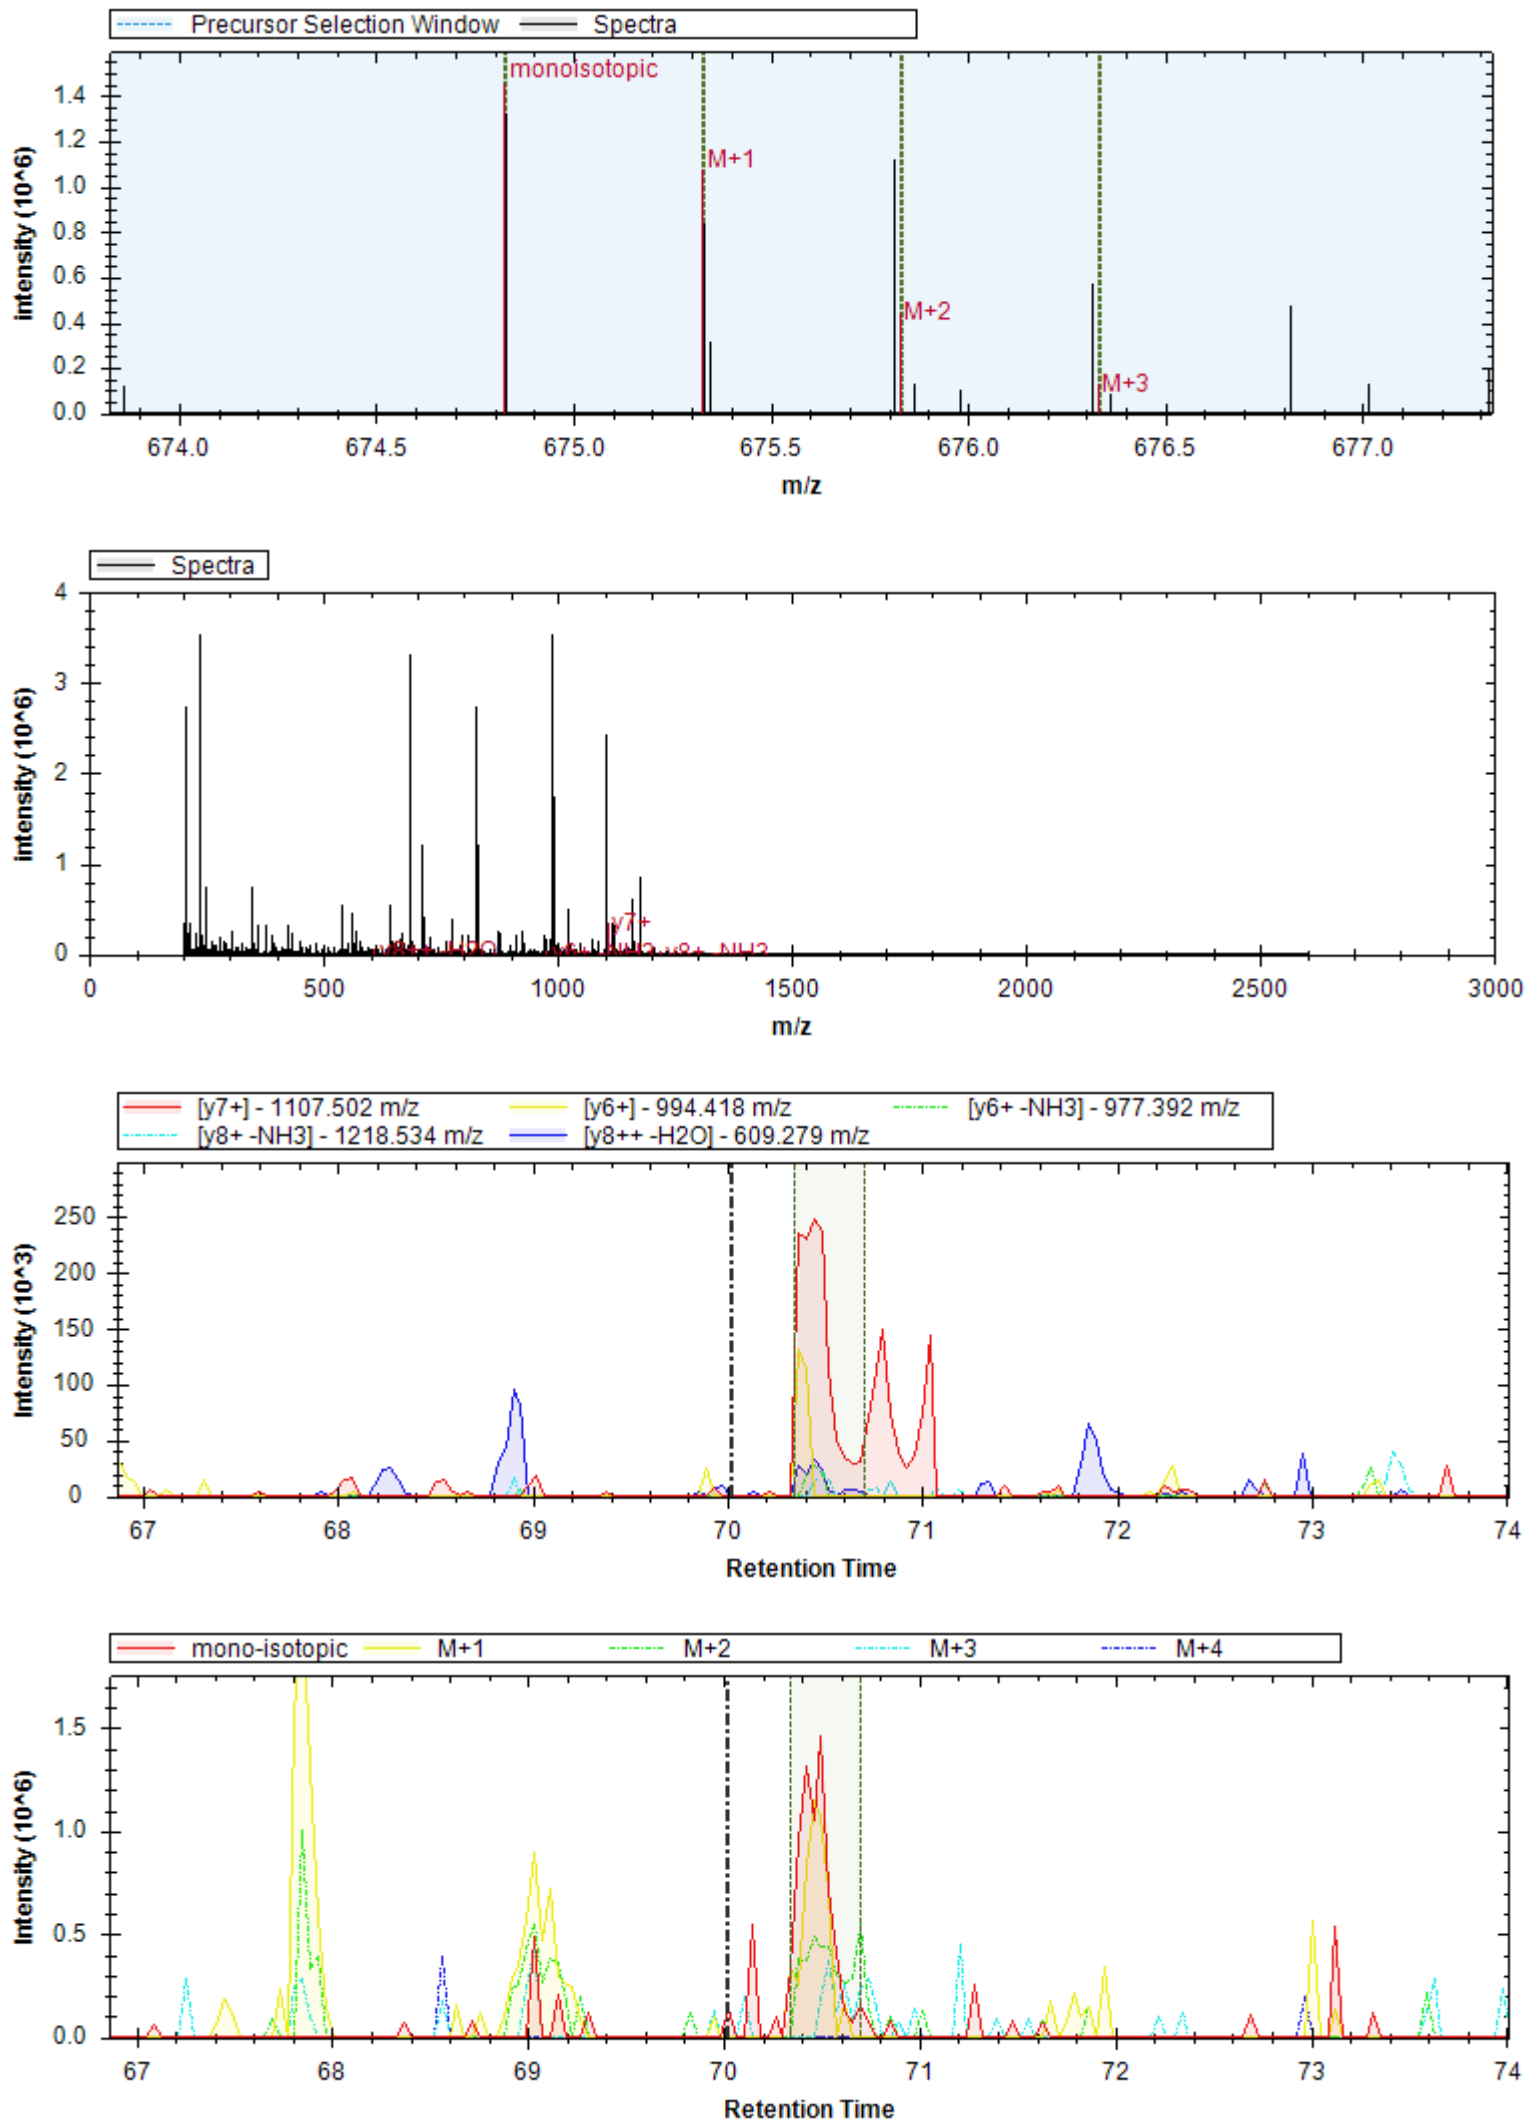

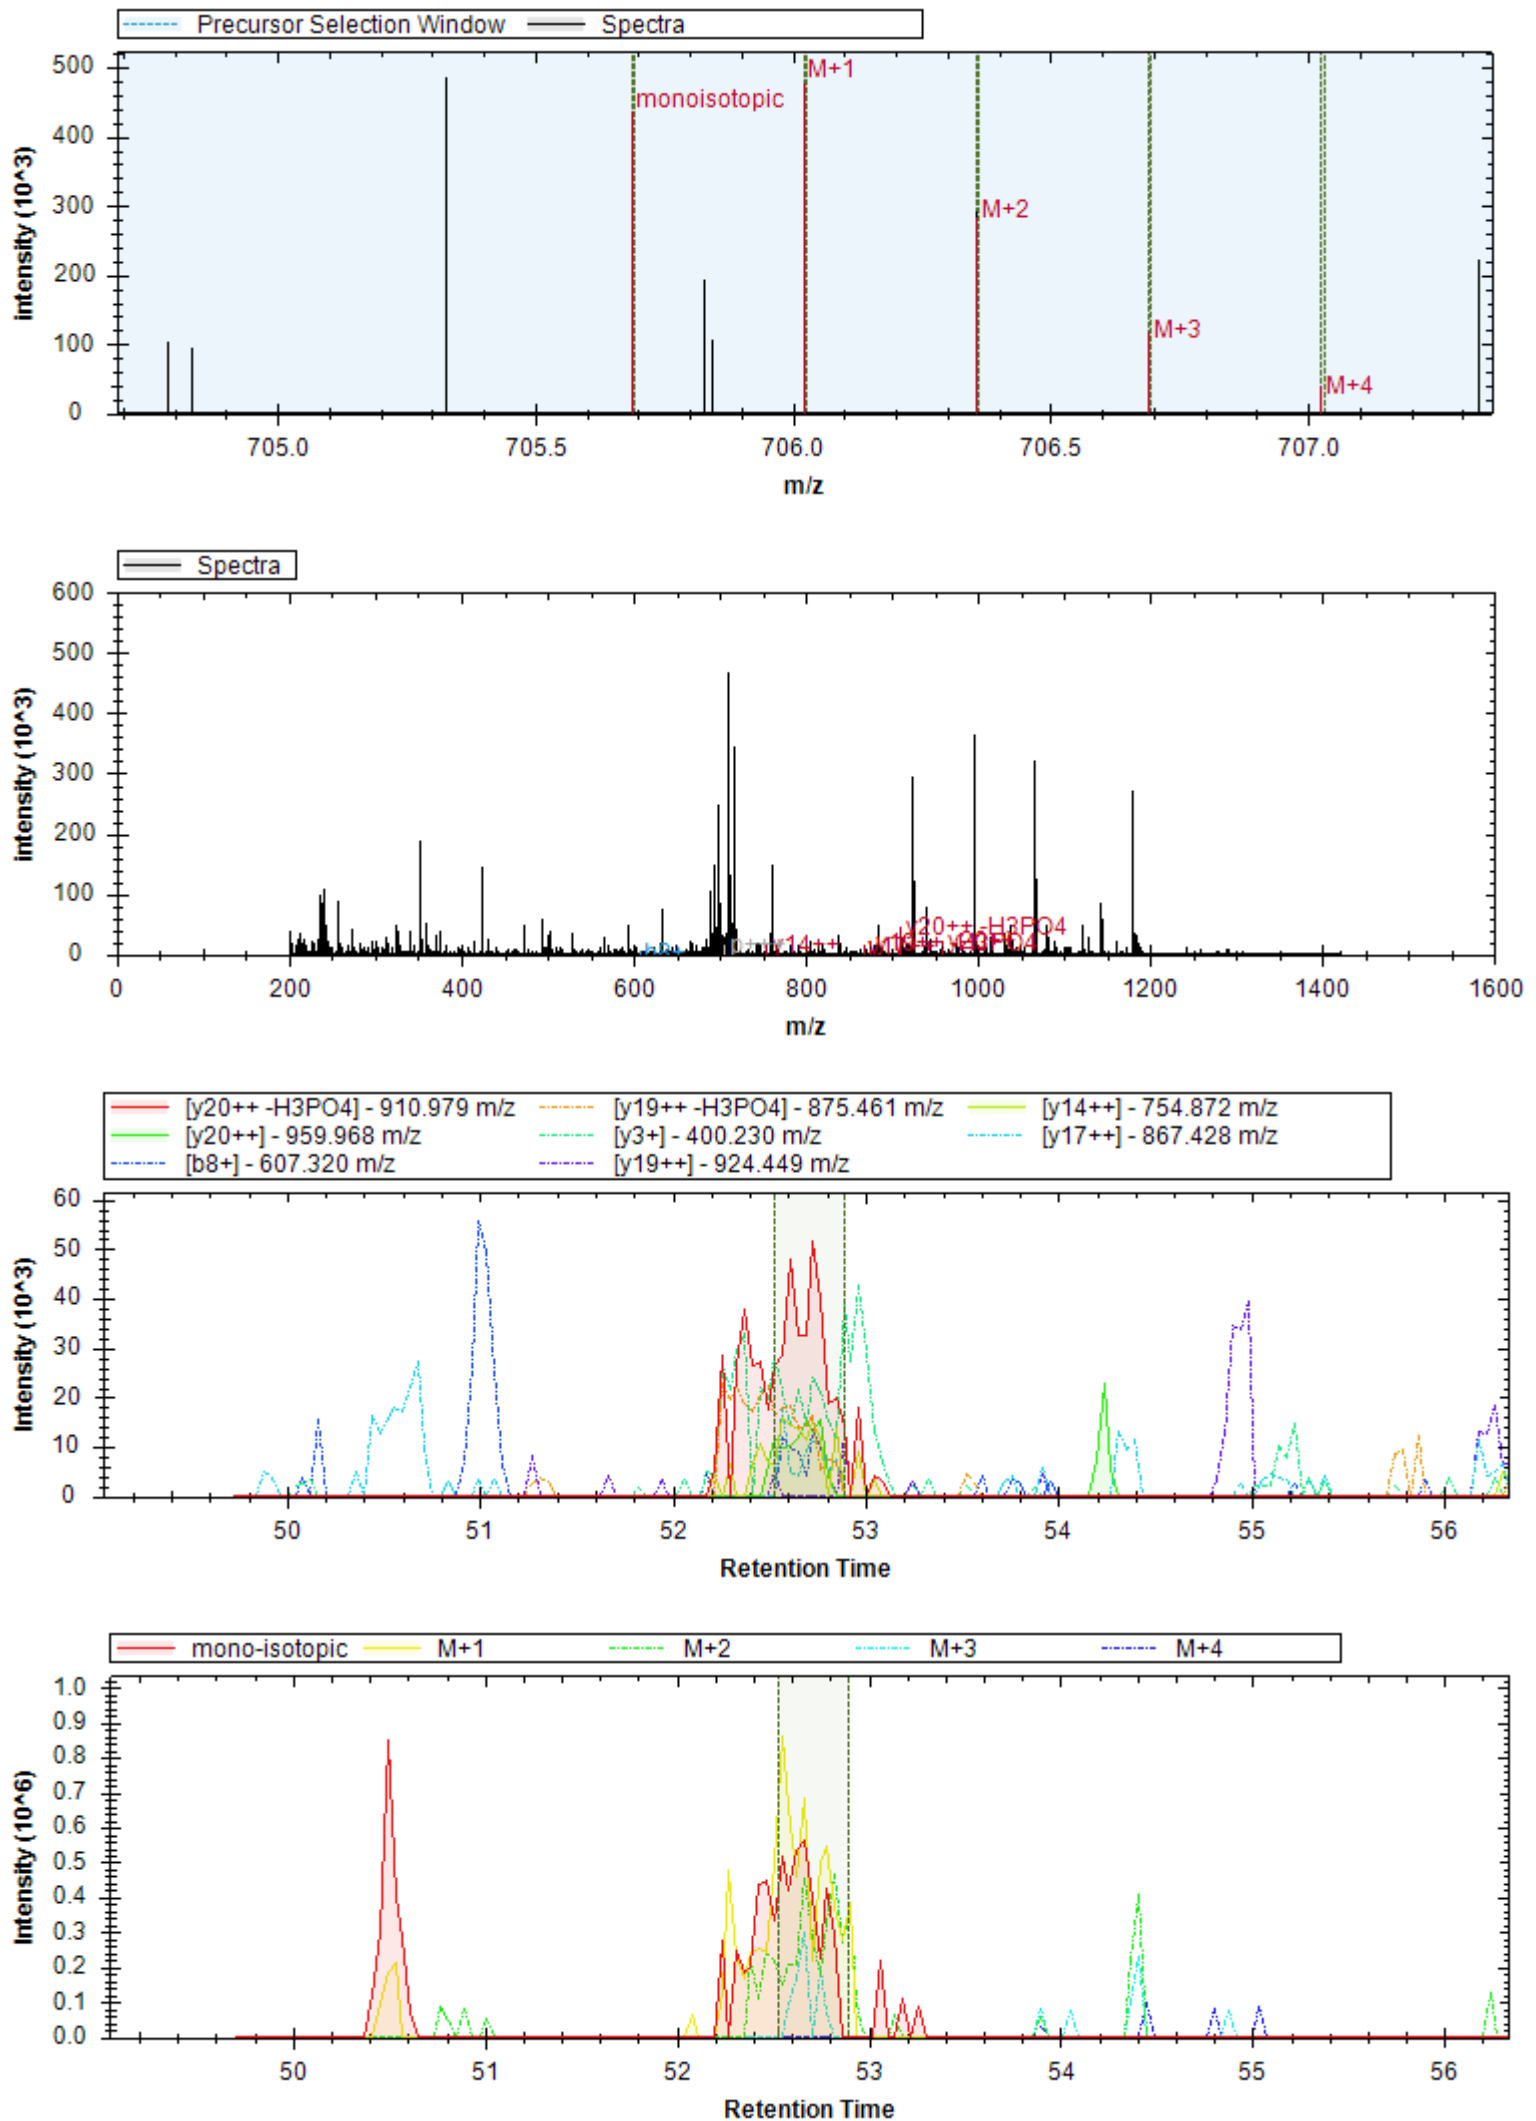

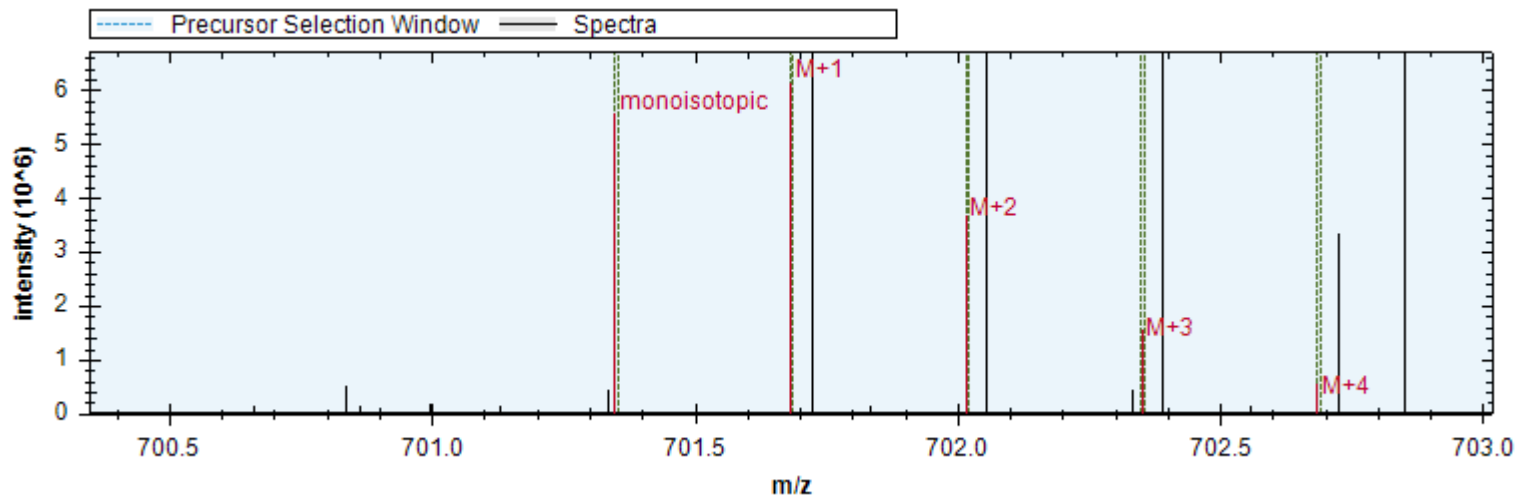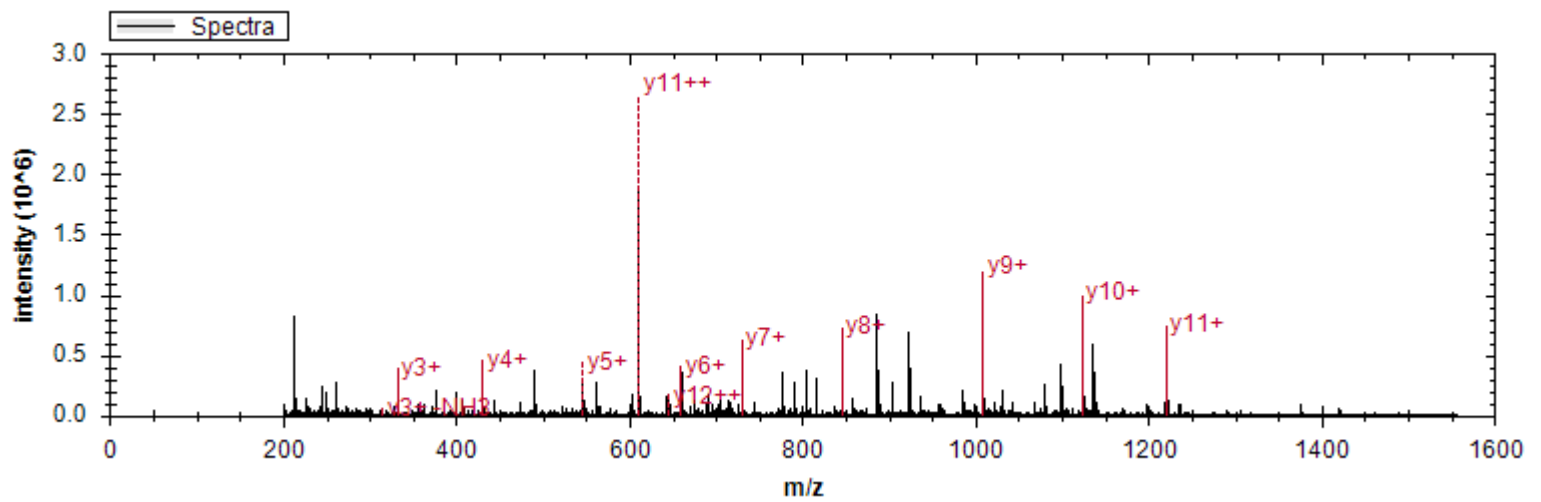

|                         |                       |                       |
|-------------------------|-----------------------|-----------------------|
| [y9+] - 1008.500 m/z    | [y11++] - 610.793 m/z | [y10+] - 1123.527 m/z |
| [y8+] - 845.436 m/z     | [y7+] - 730.409 m/z   | [y11+] - 1220.579 m/z |
| [y4+] - 431.261 m/z     | [y5+] - 546.288 m/z   | [y3+] - 332.193 m/z   |
| [y6+] - 659.372 m/z     | [y12++] - 646.312 m/z | [y13++] - 702.854 m/z |
| [y3+-NH3] - 315.166 m/z |                       |                       |

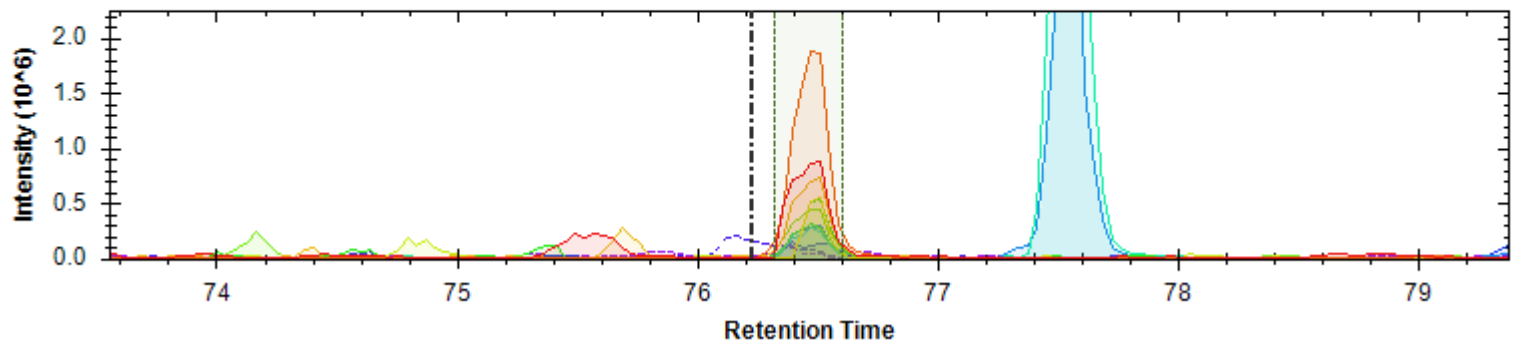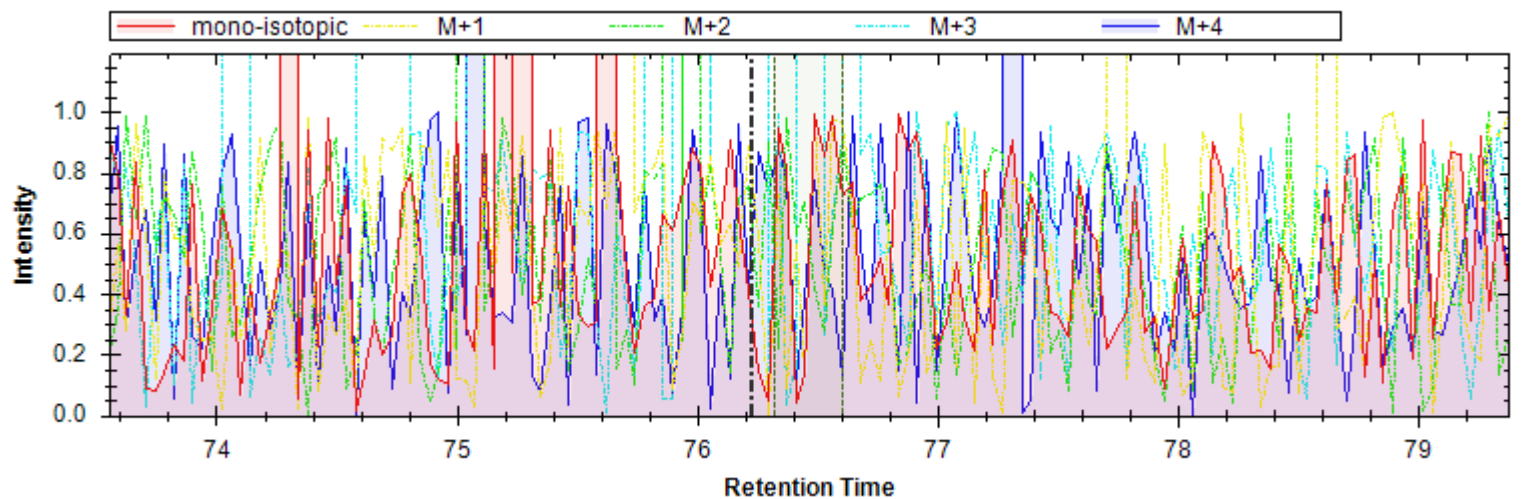

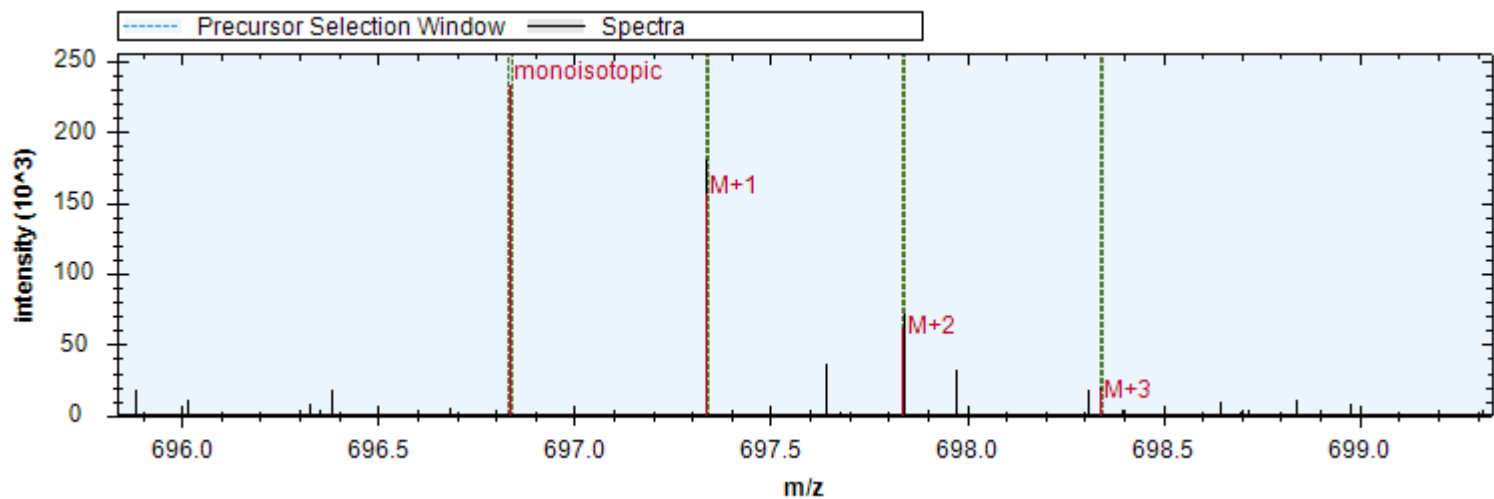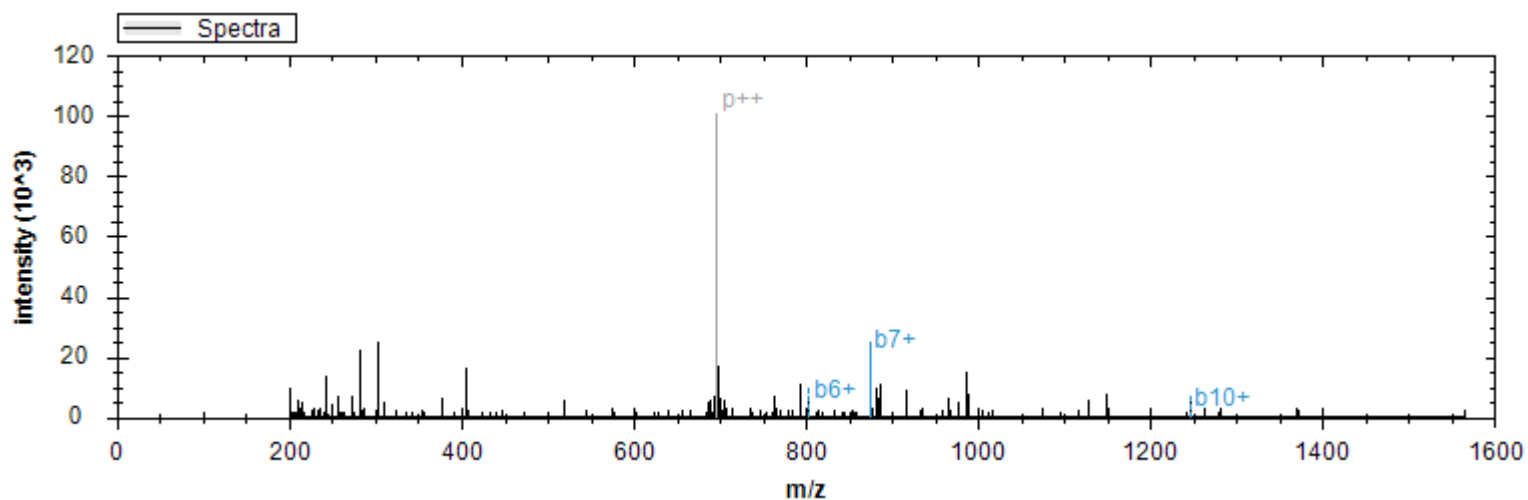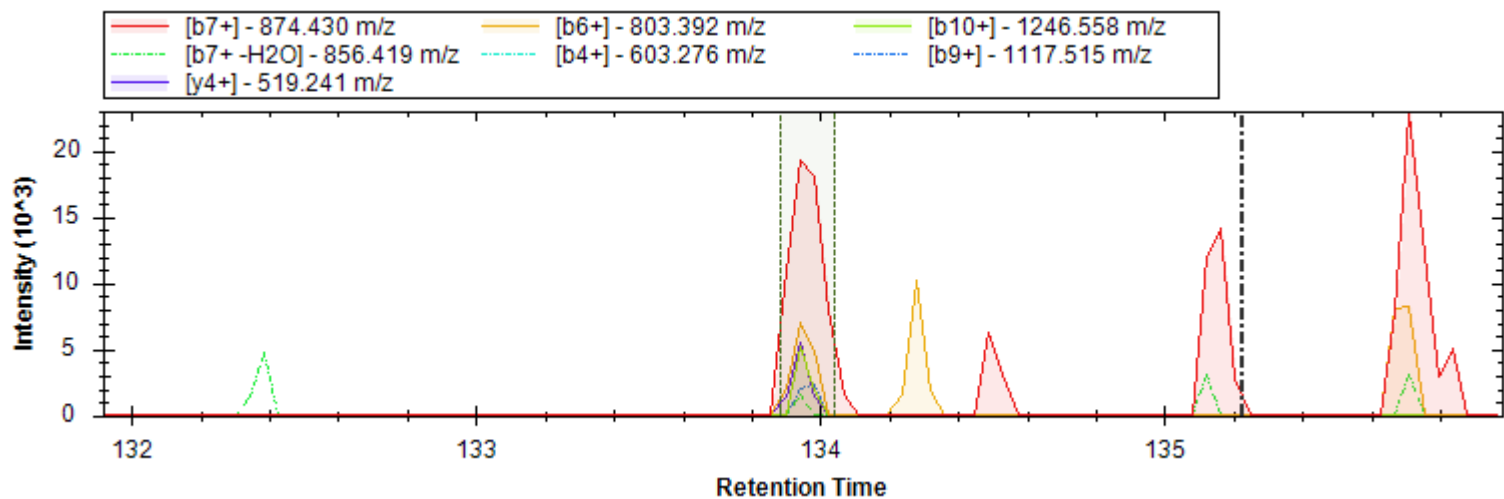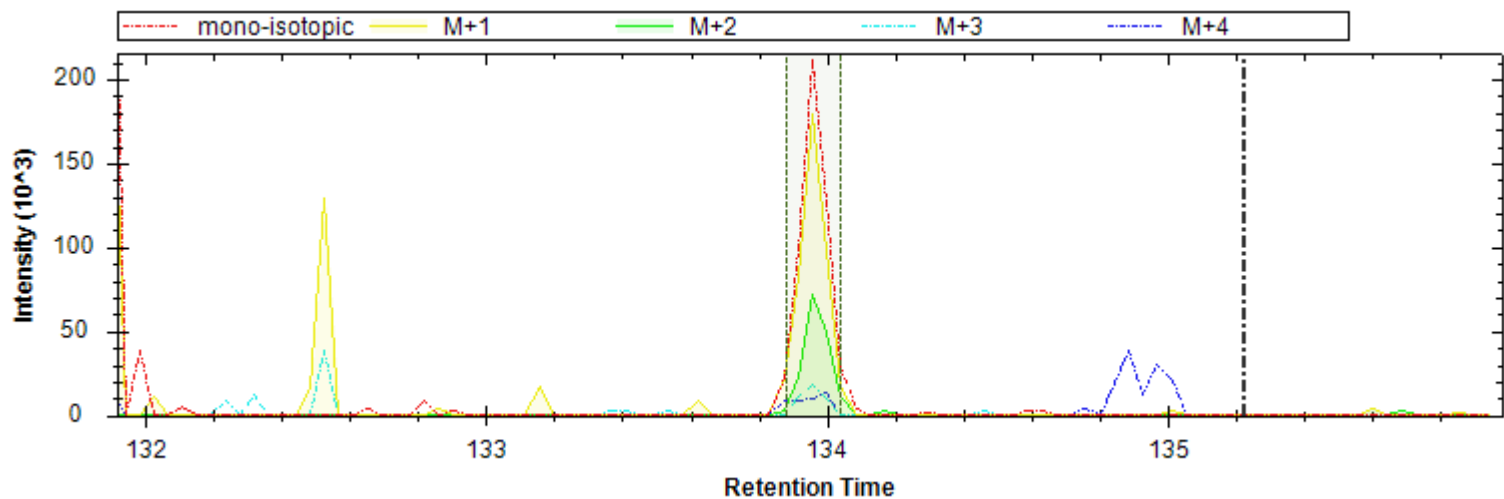

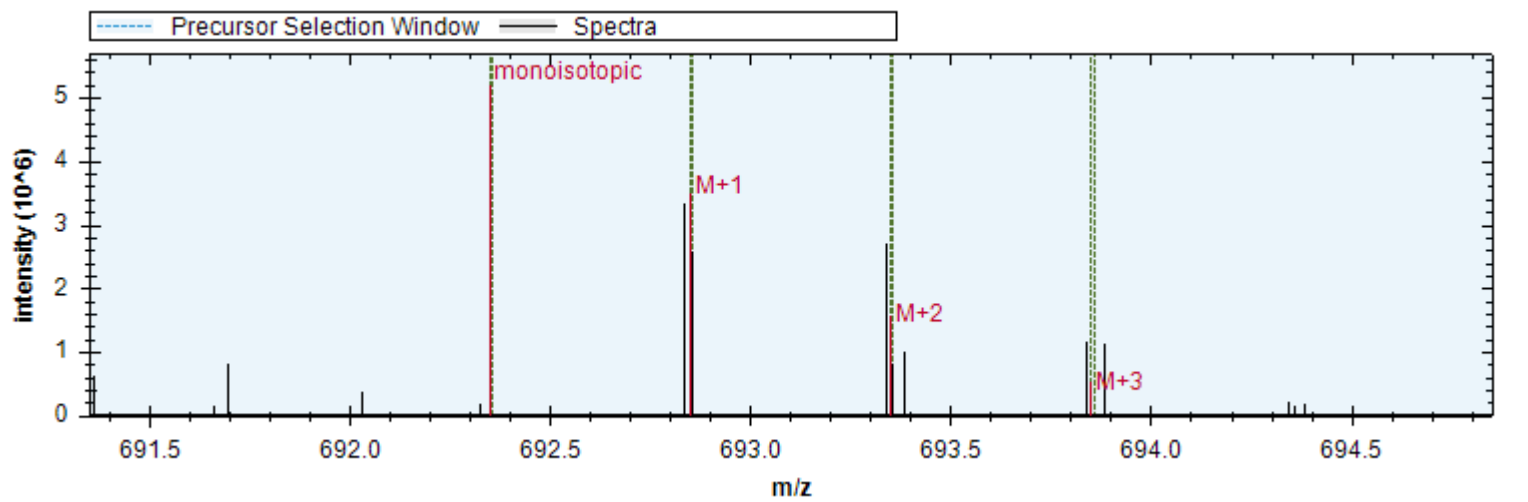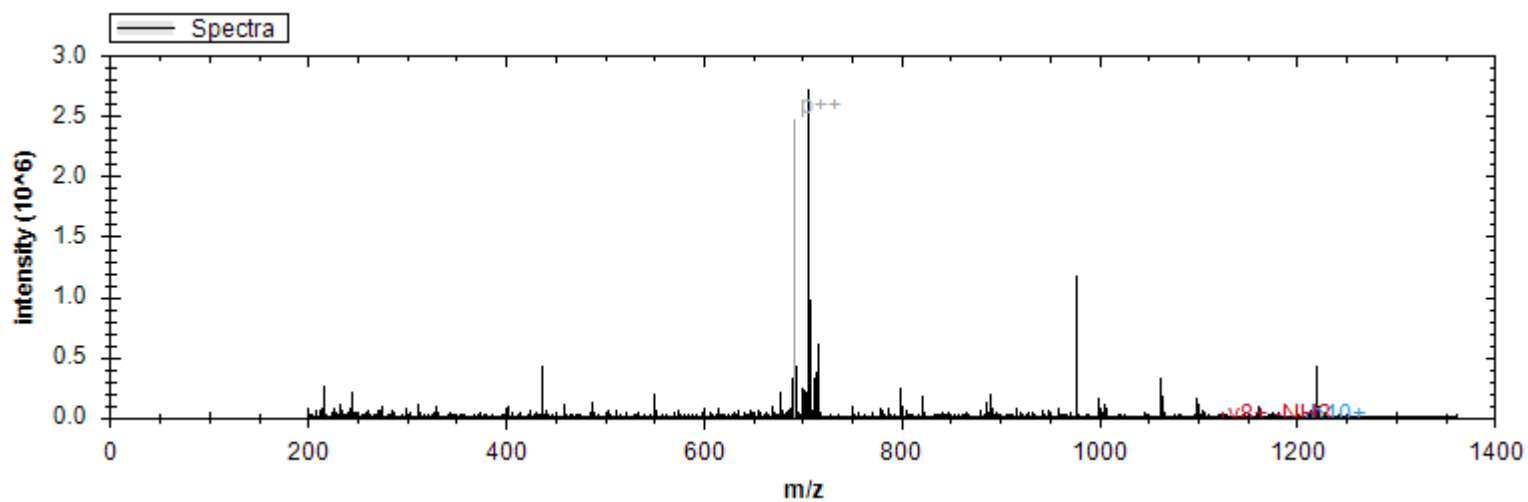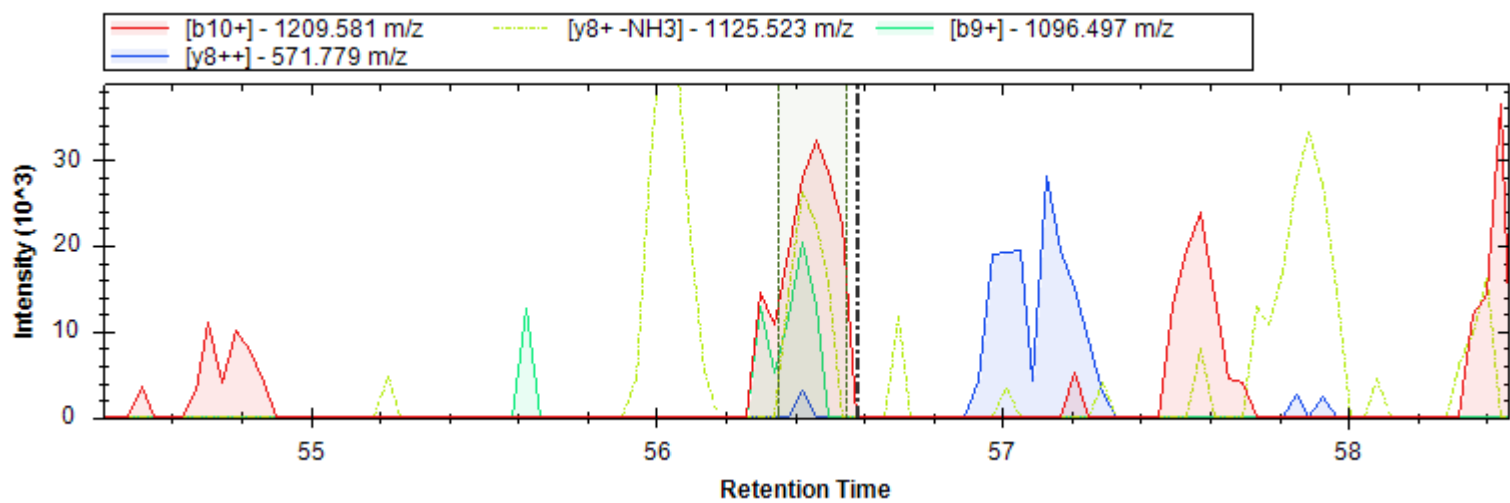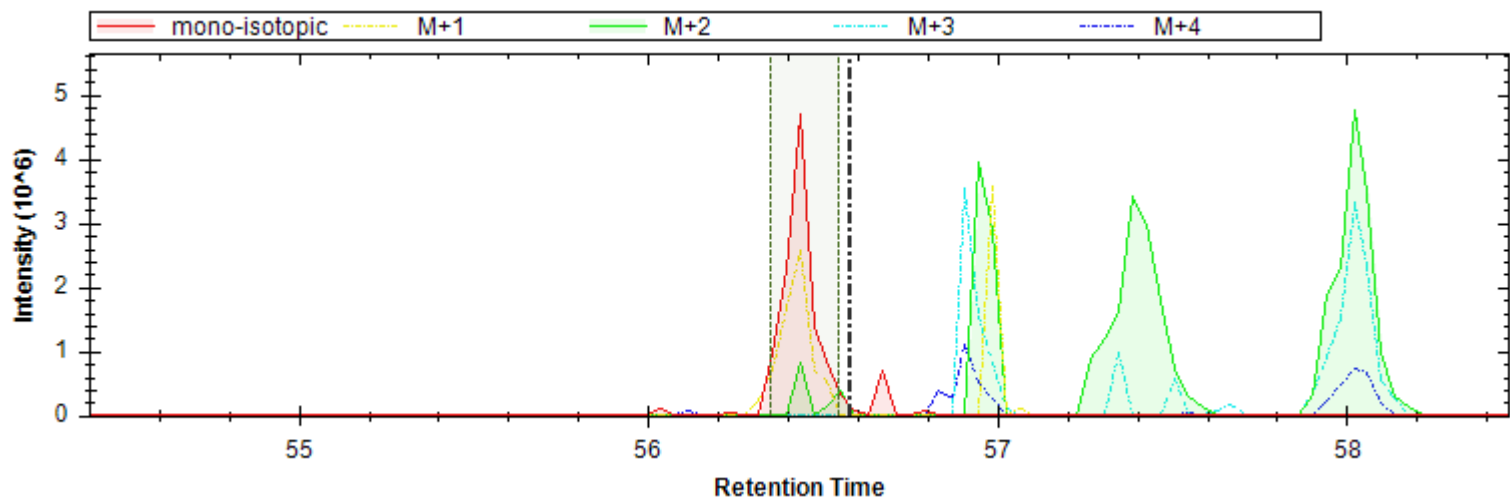

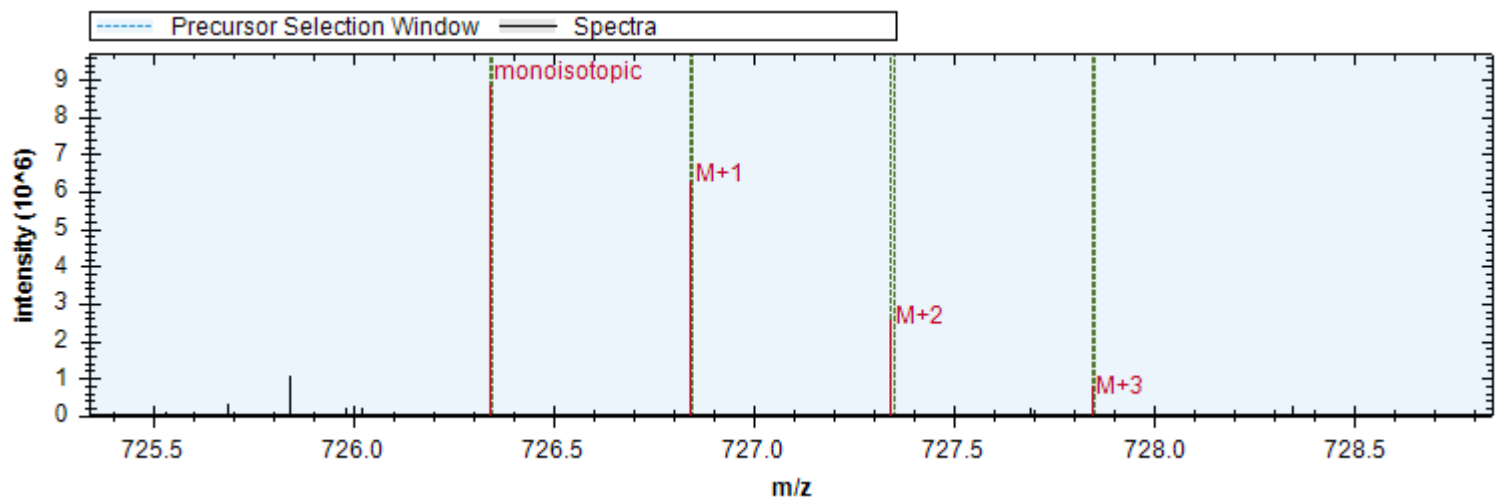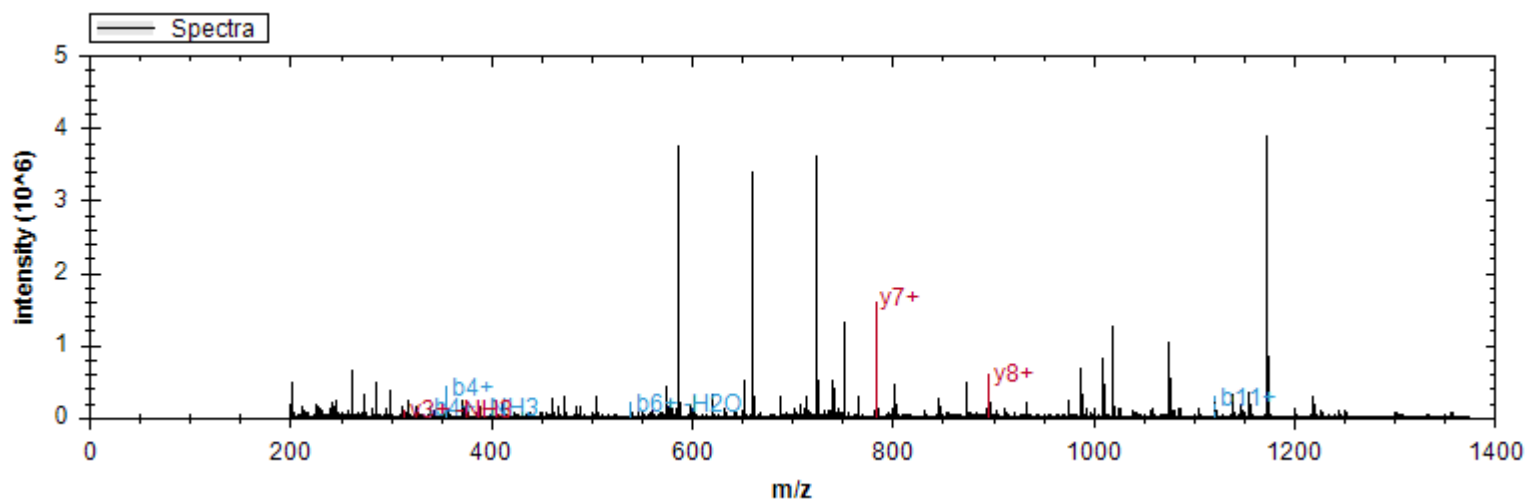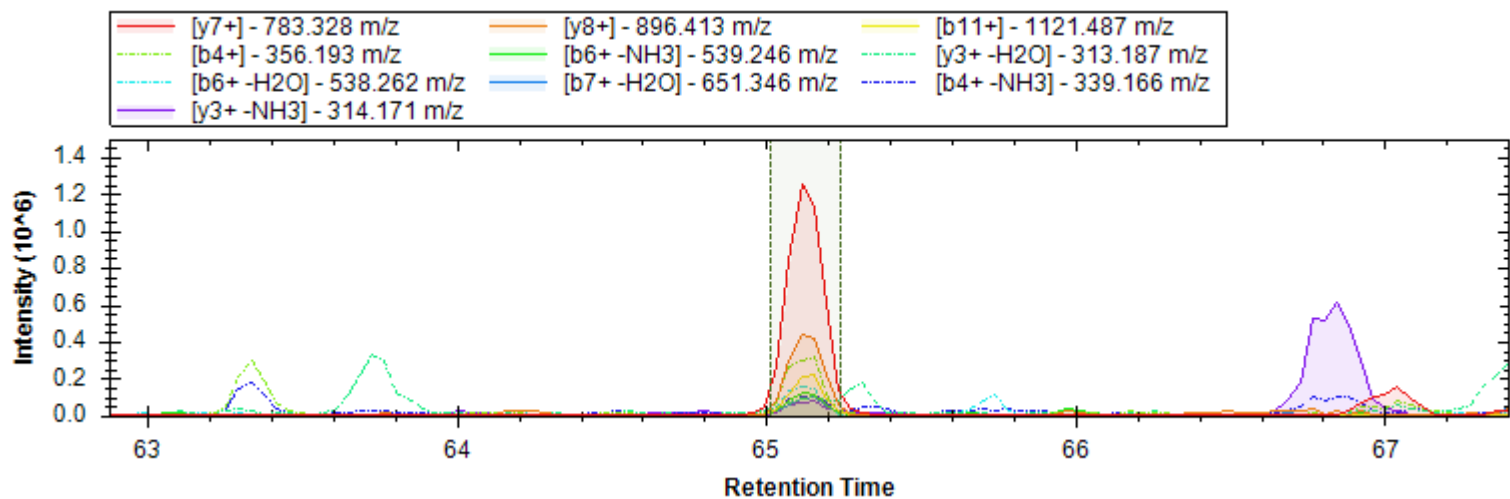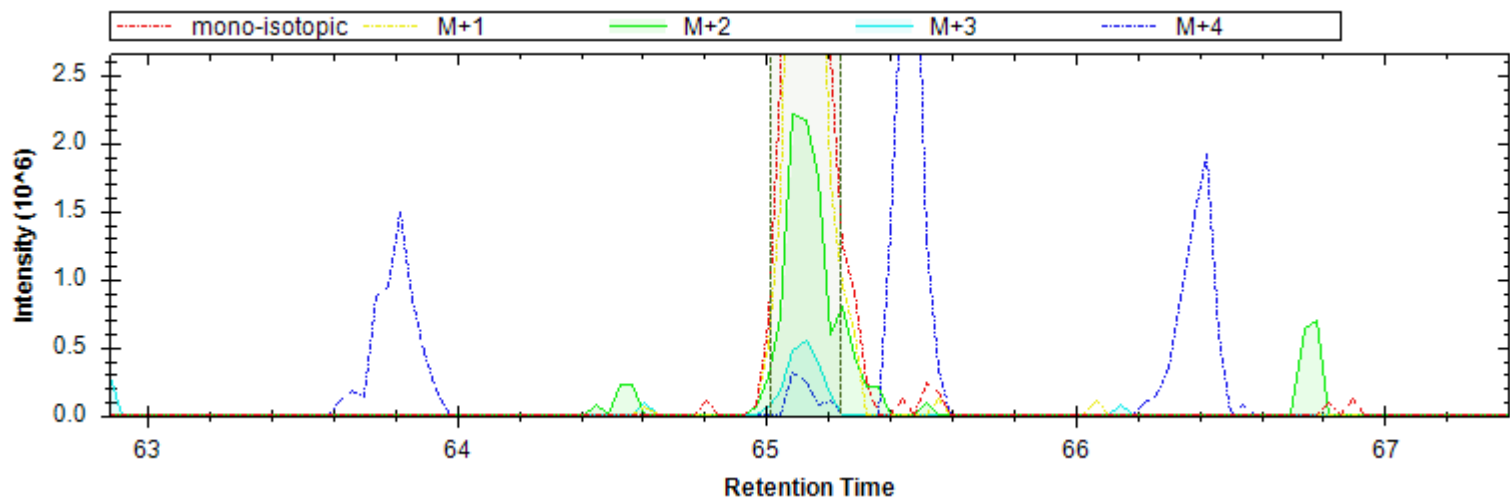





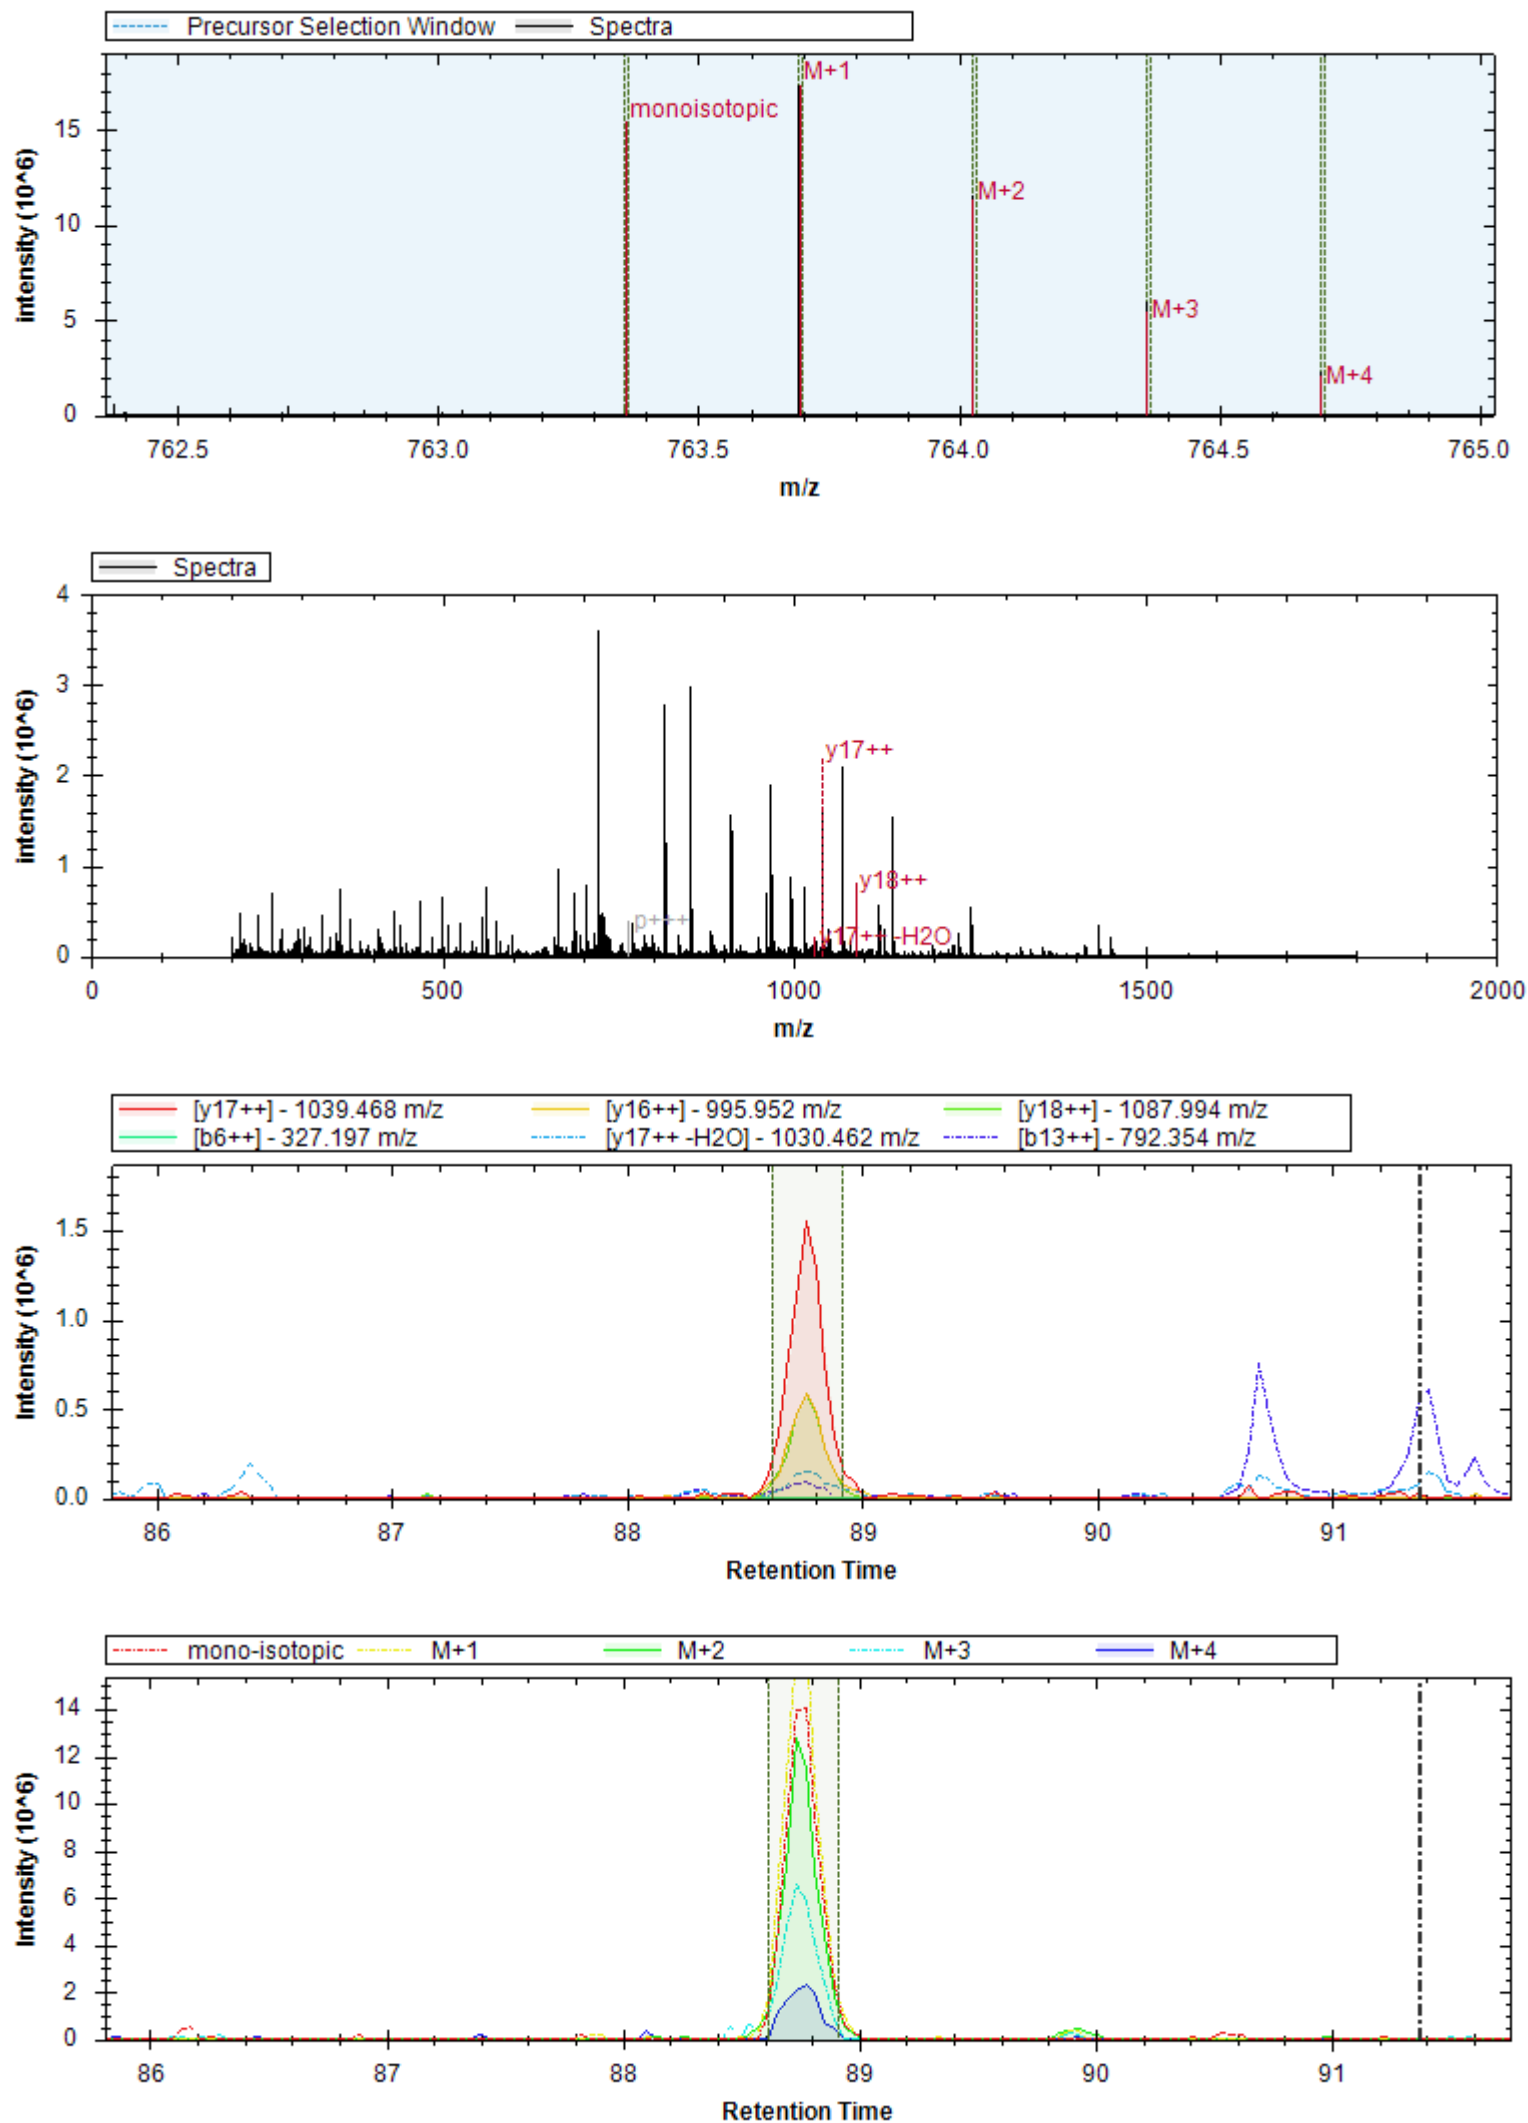

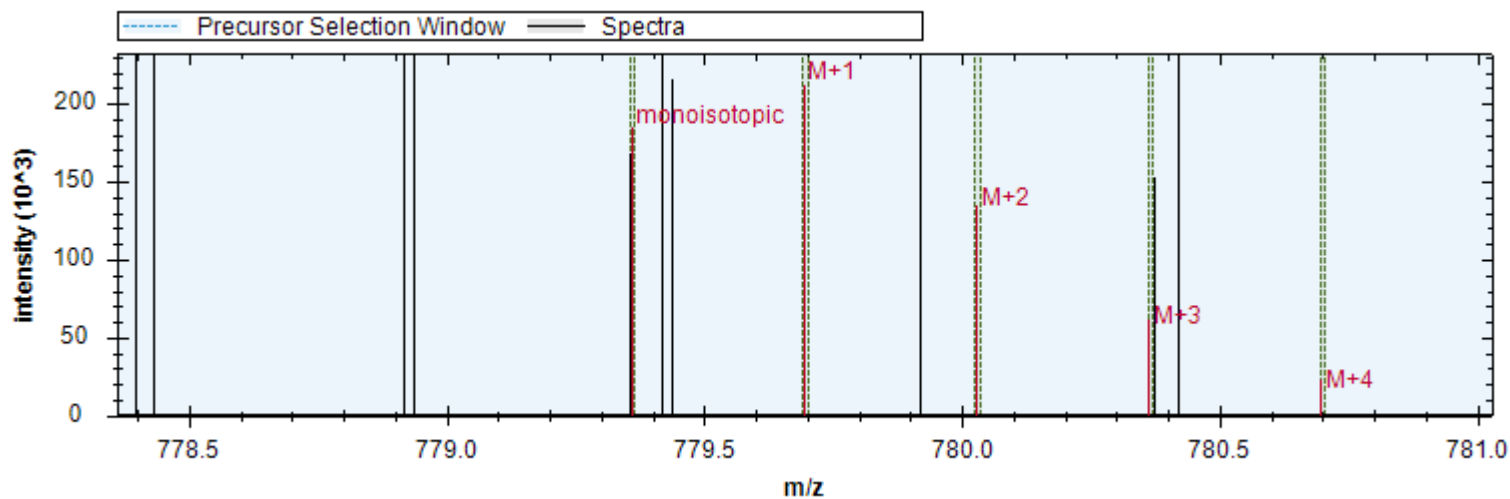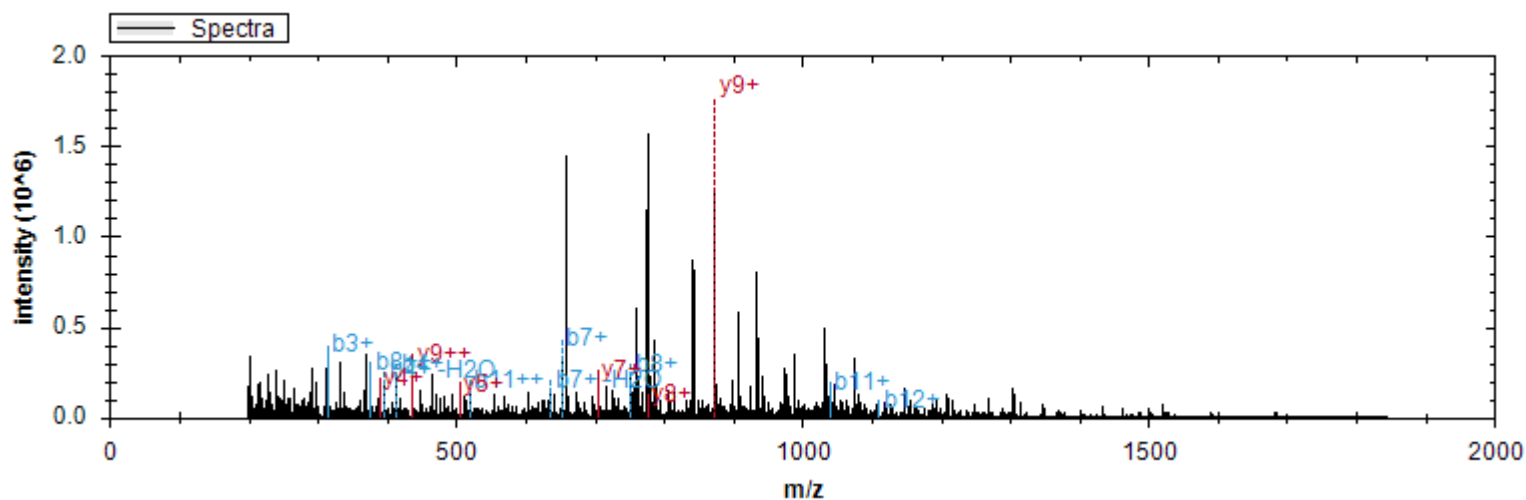

|                          |                          |                            |
|--------------------------|--------------------------|----------------------------|
| [y9+] - 873.431 m/z      | [b7+] - 653.325 m/z      | [b11+] - 1039.505 m/z      |
| [b3+] - 315.130 m/z      | [b8++] - 376.701 m/z     | [y7+] - 705.341 m/z        |
| [b4+] - 414.198 m/z      | [b11++] - 520.256 m/z    | [b7+ -H2O] - 635.315 m/z   |
| [b8+] - 752.394 m/z      | [b4+ -H2O] - 396.188 m/z | [y8+] - 776.379 m/z        |
| [y4+] - 390.235 m/z      | [y11+] - 1155.493 m/z    | [y9++] - 437.219 m/z       |
| [b12+] - 1110.543 m/z    | [y6+] - 634.304 m/z      | [b7+ -NH3] - 636.299 m/z   |
| [y12+] - 1226.530 m/z    | [b5+] - 511.251 m/z      | [b11+ -NH3] - 1022.479 m/z |
| [b4+ -NH3] - 397.172 m/z | [b13+] - 1181.580 m/z    | [b8+ -NH3] - 735.367 m/z   |
| [y5+] - 505.262 m/z      |                          |                            |

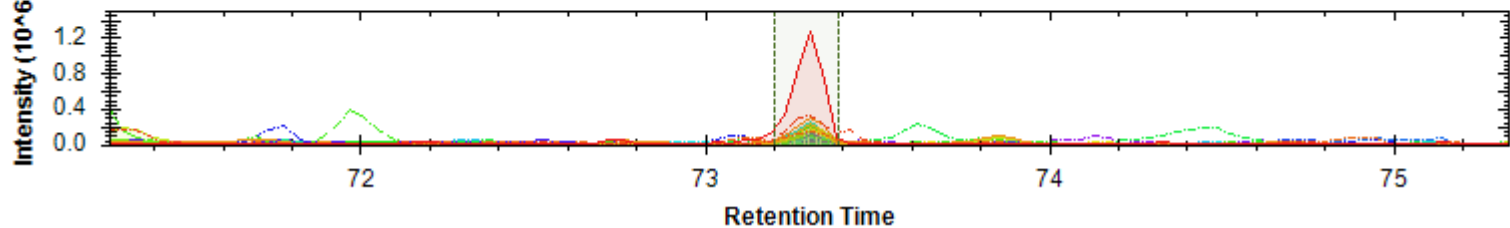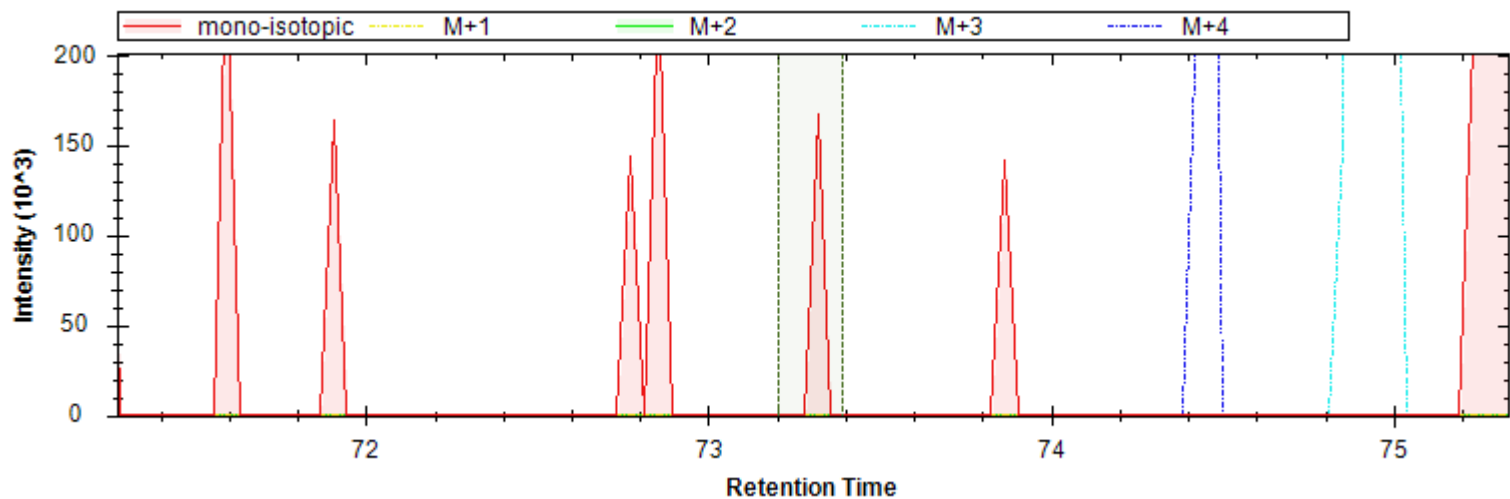

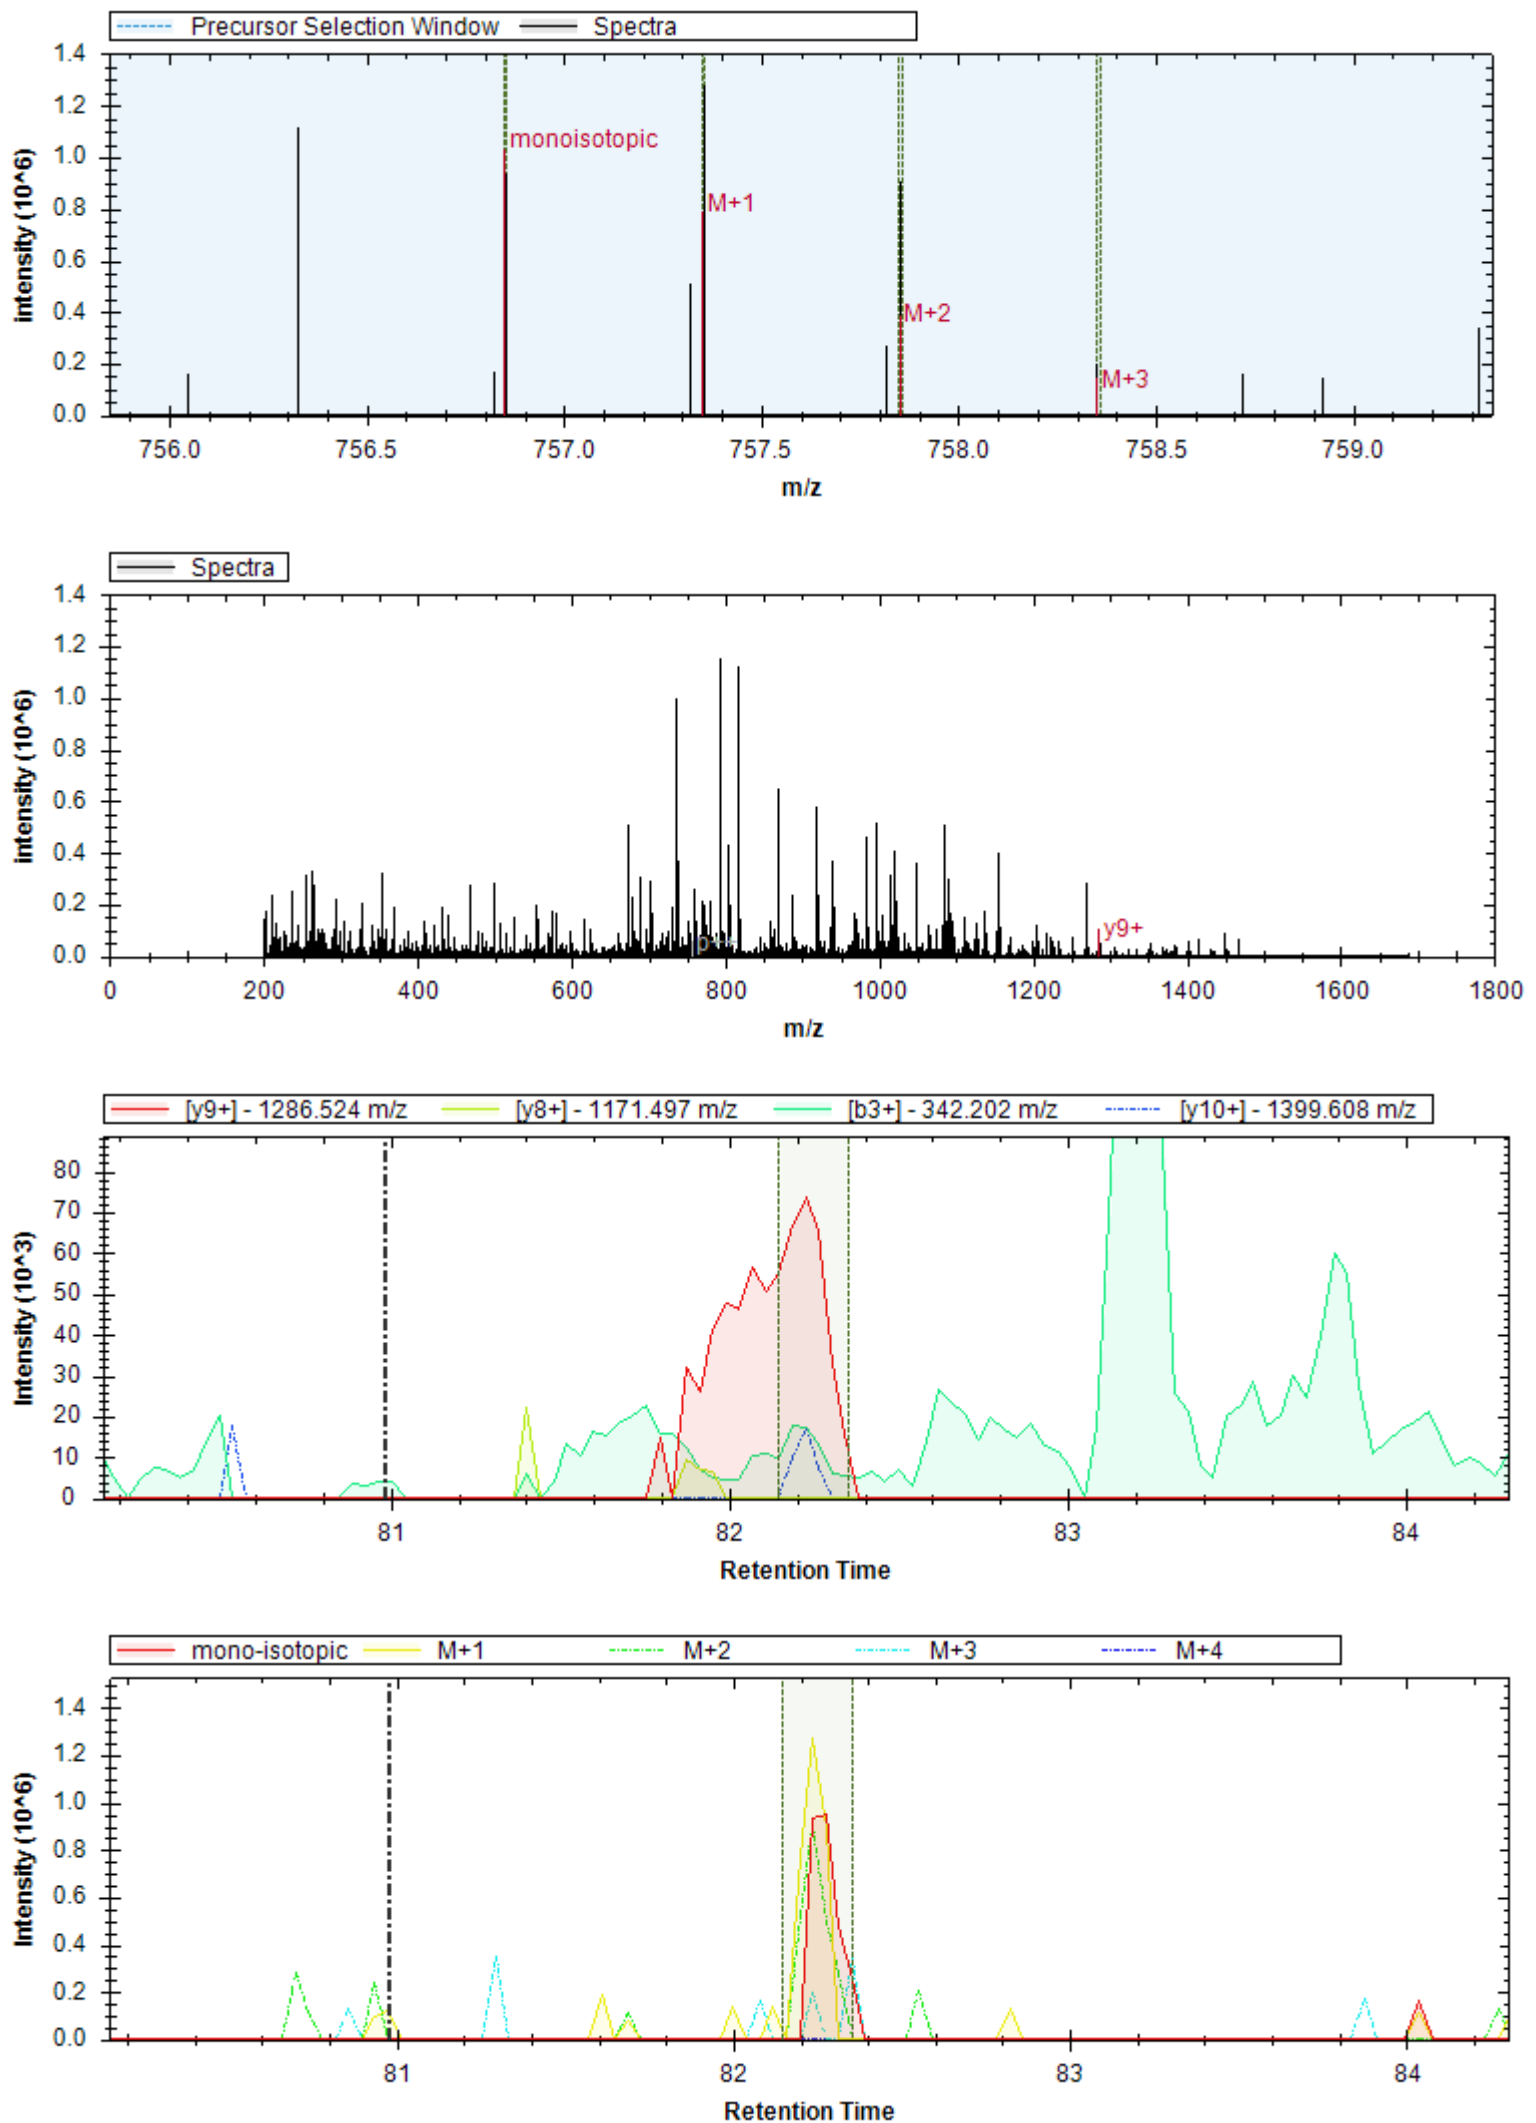

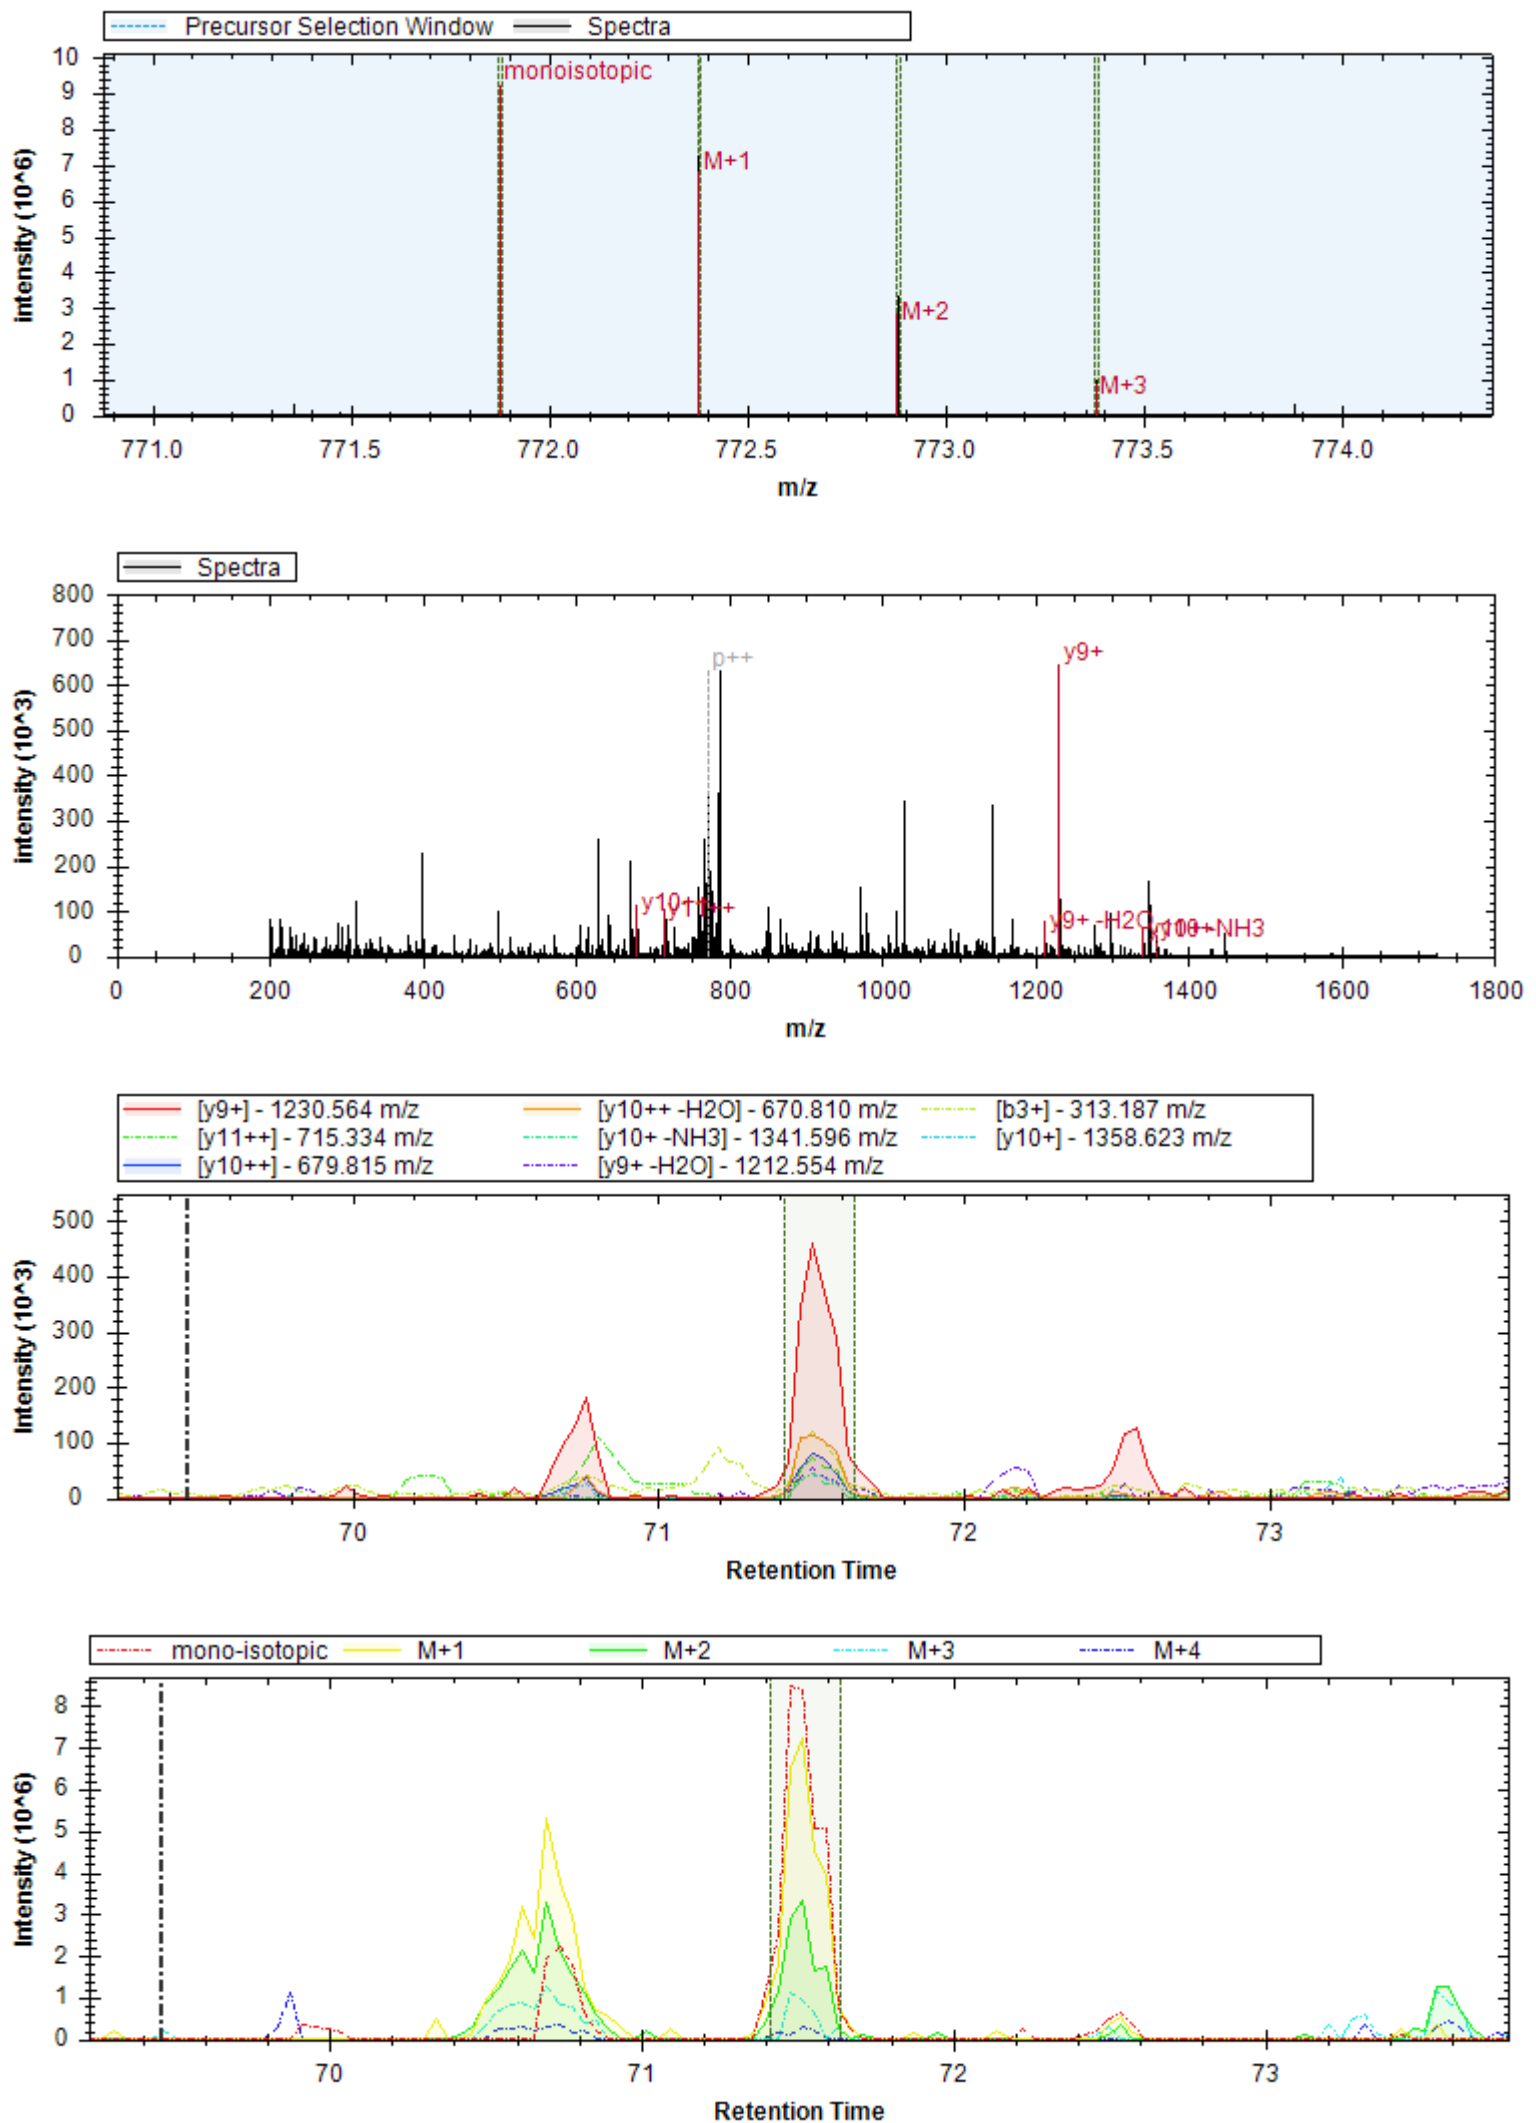

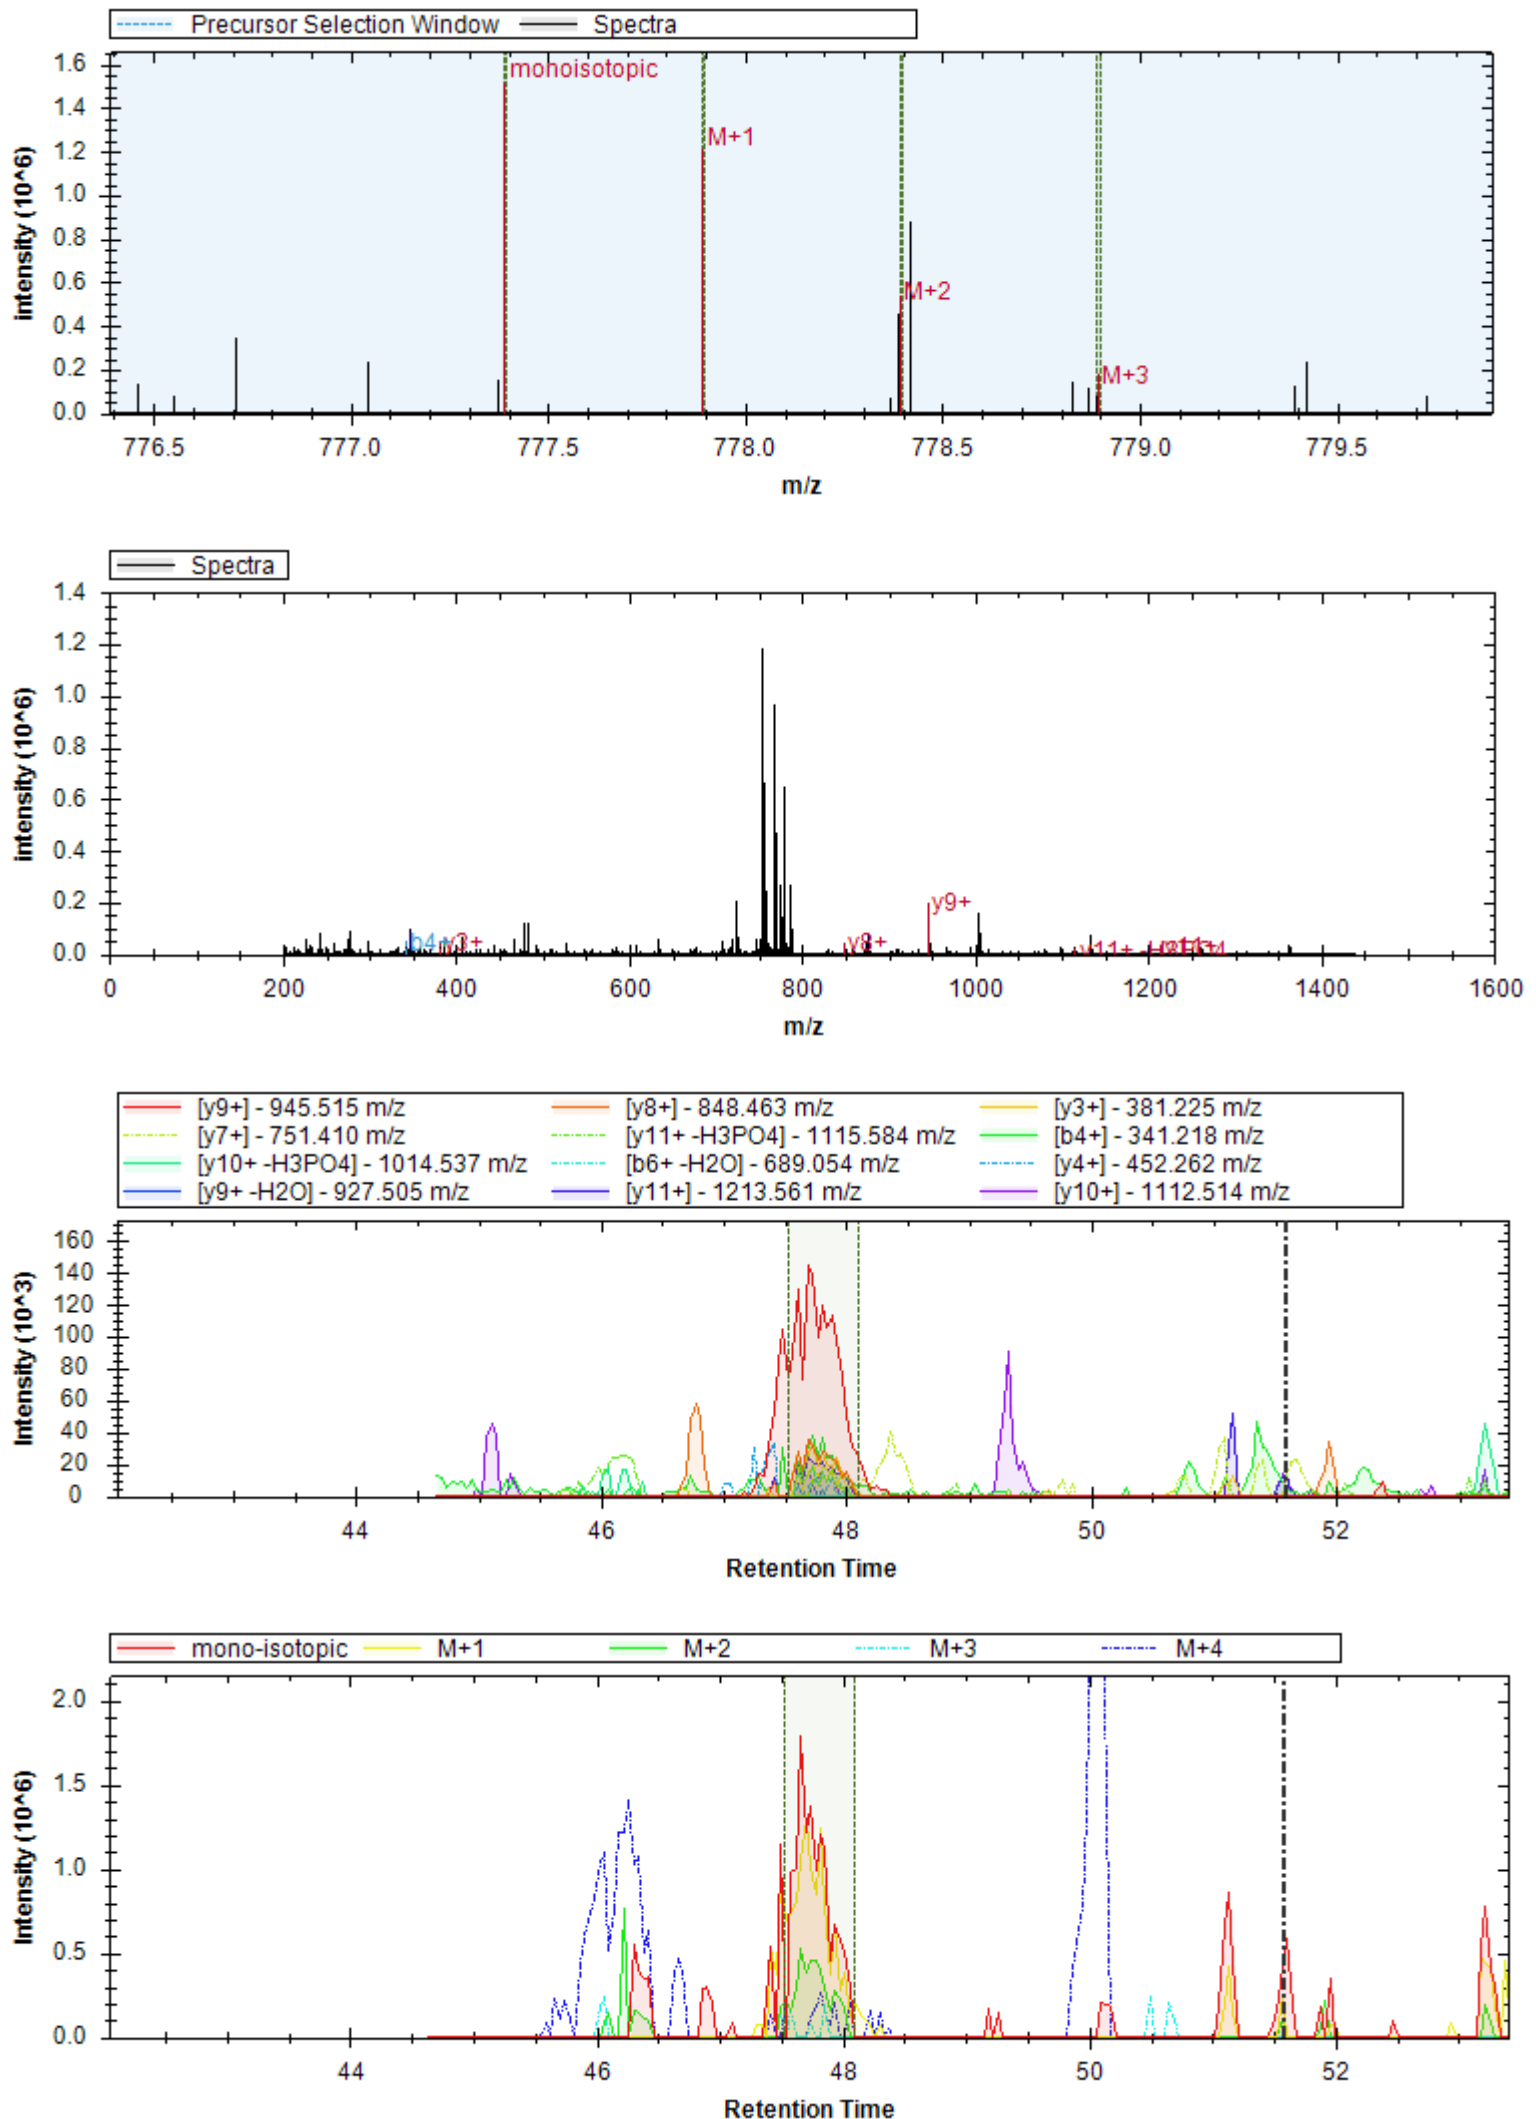

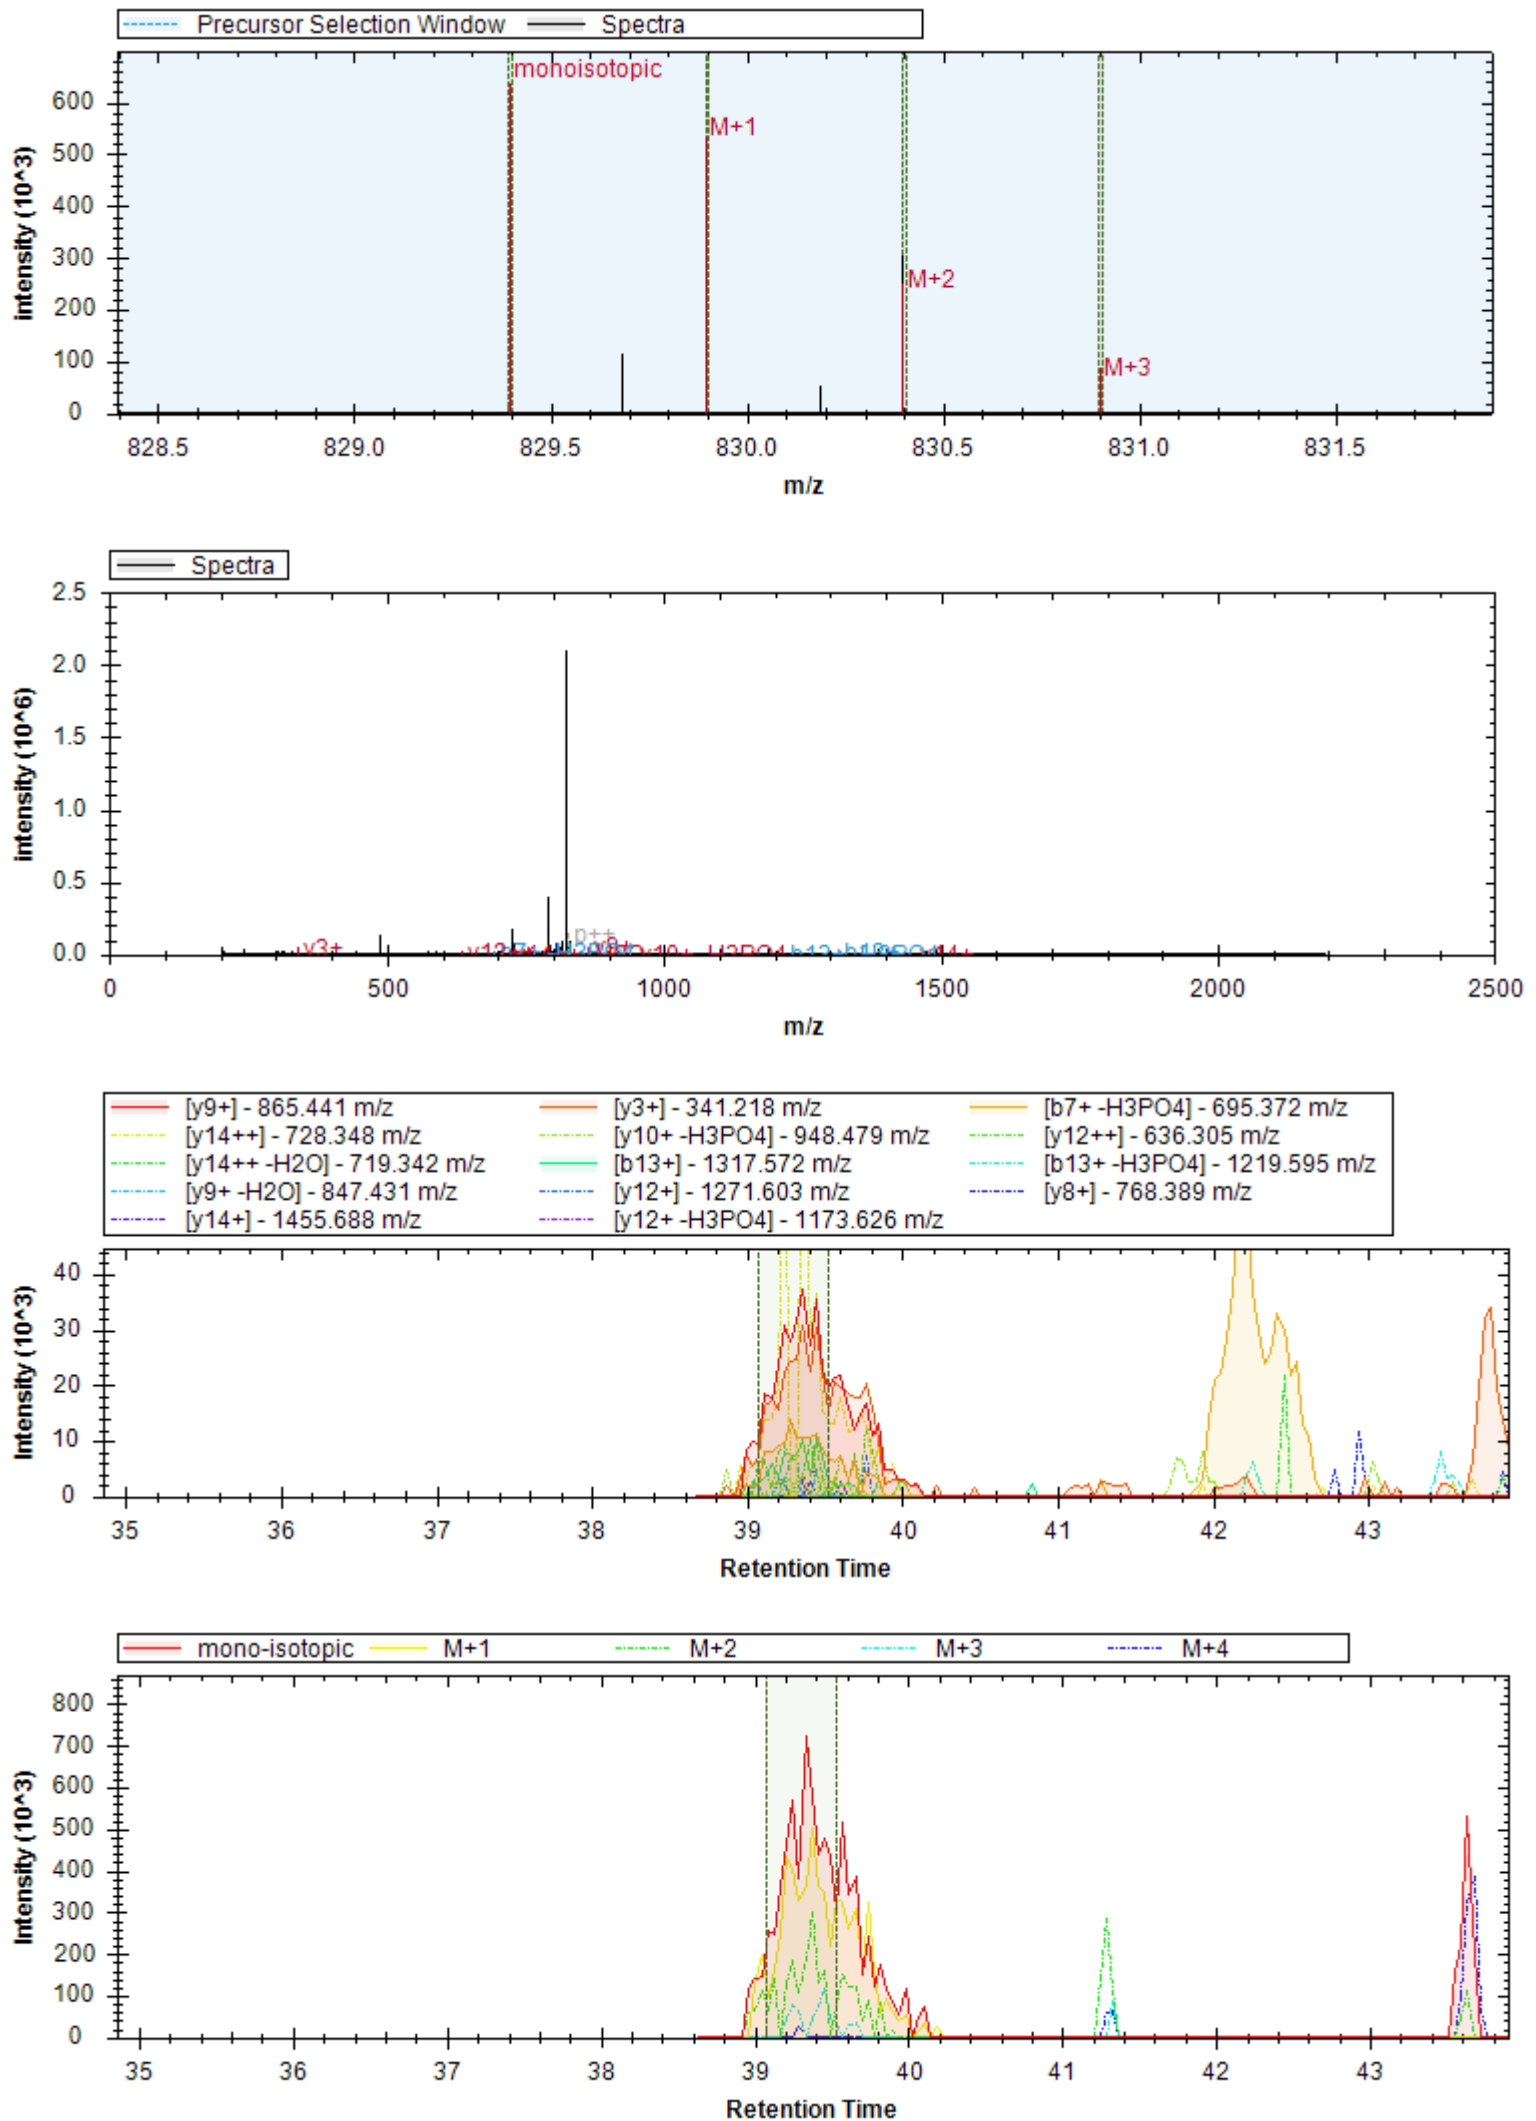

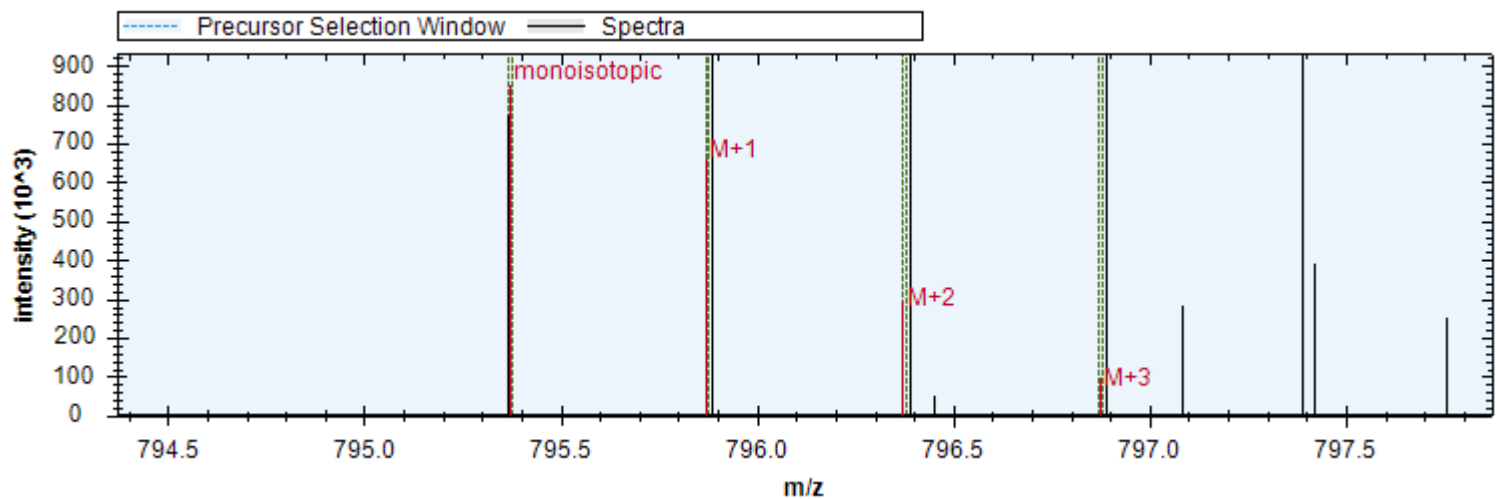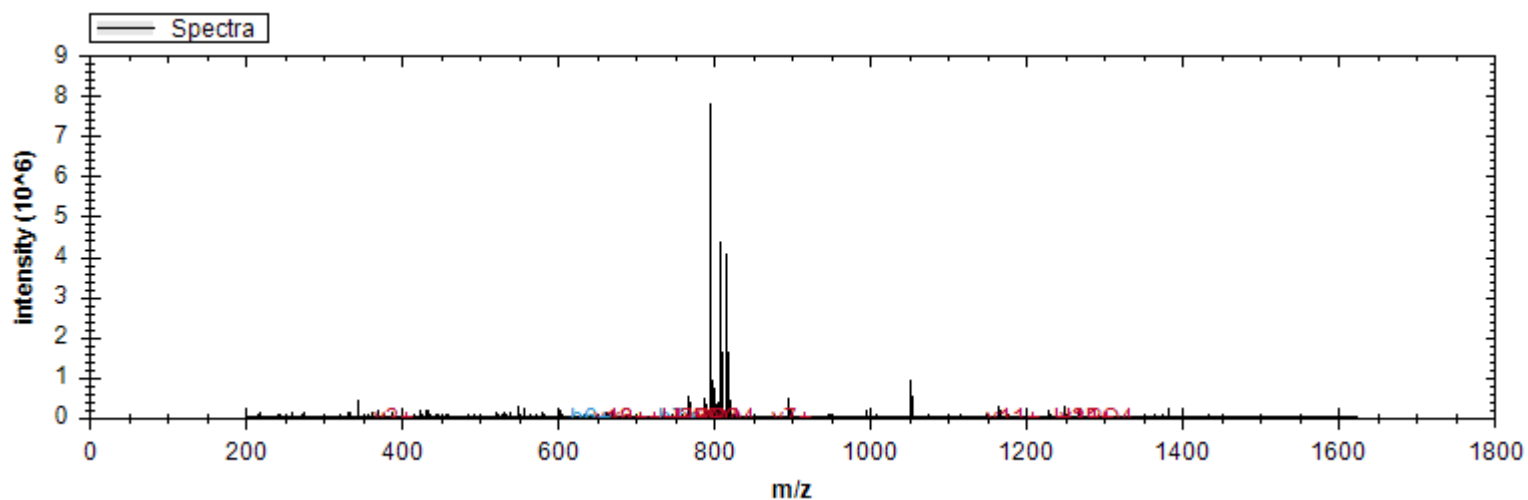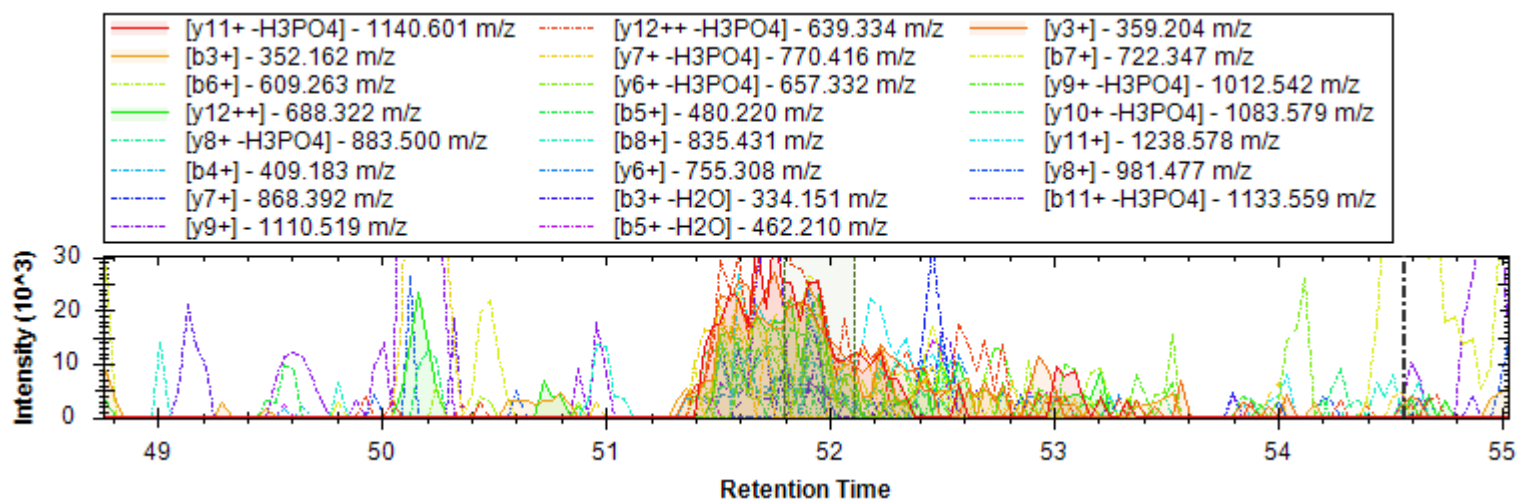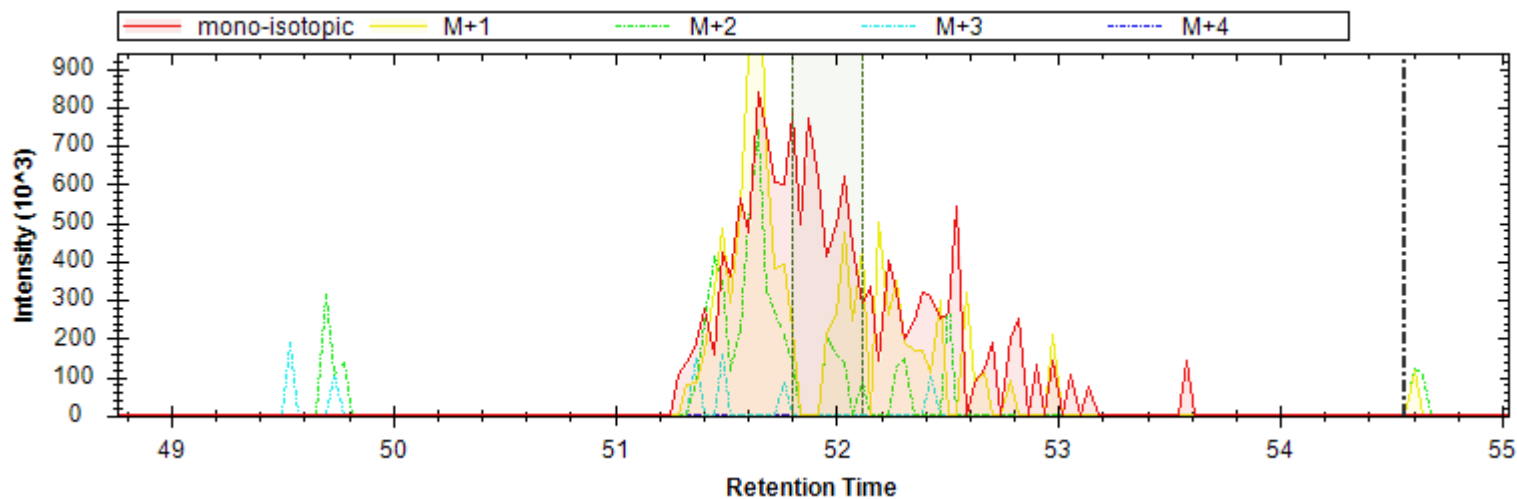

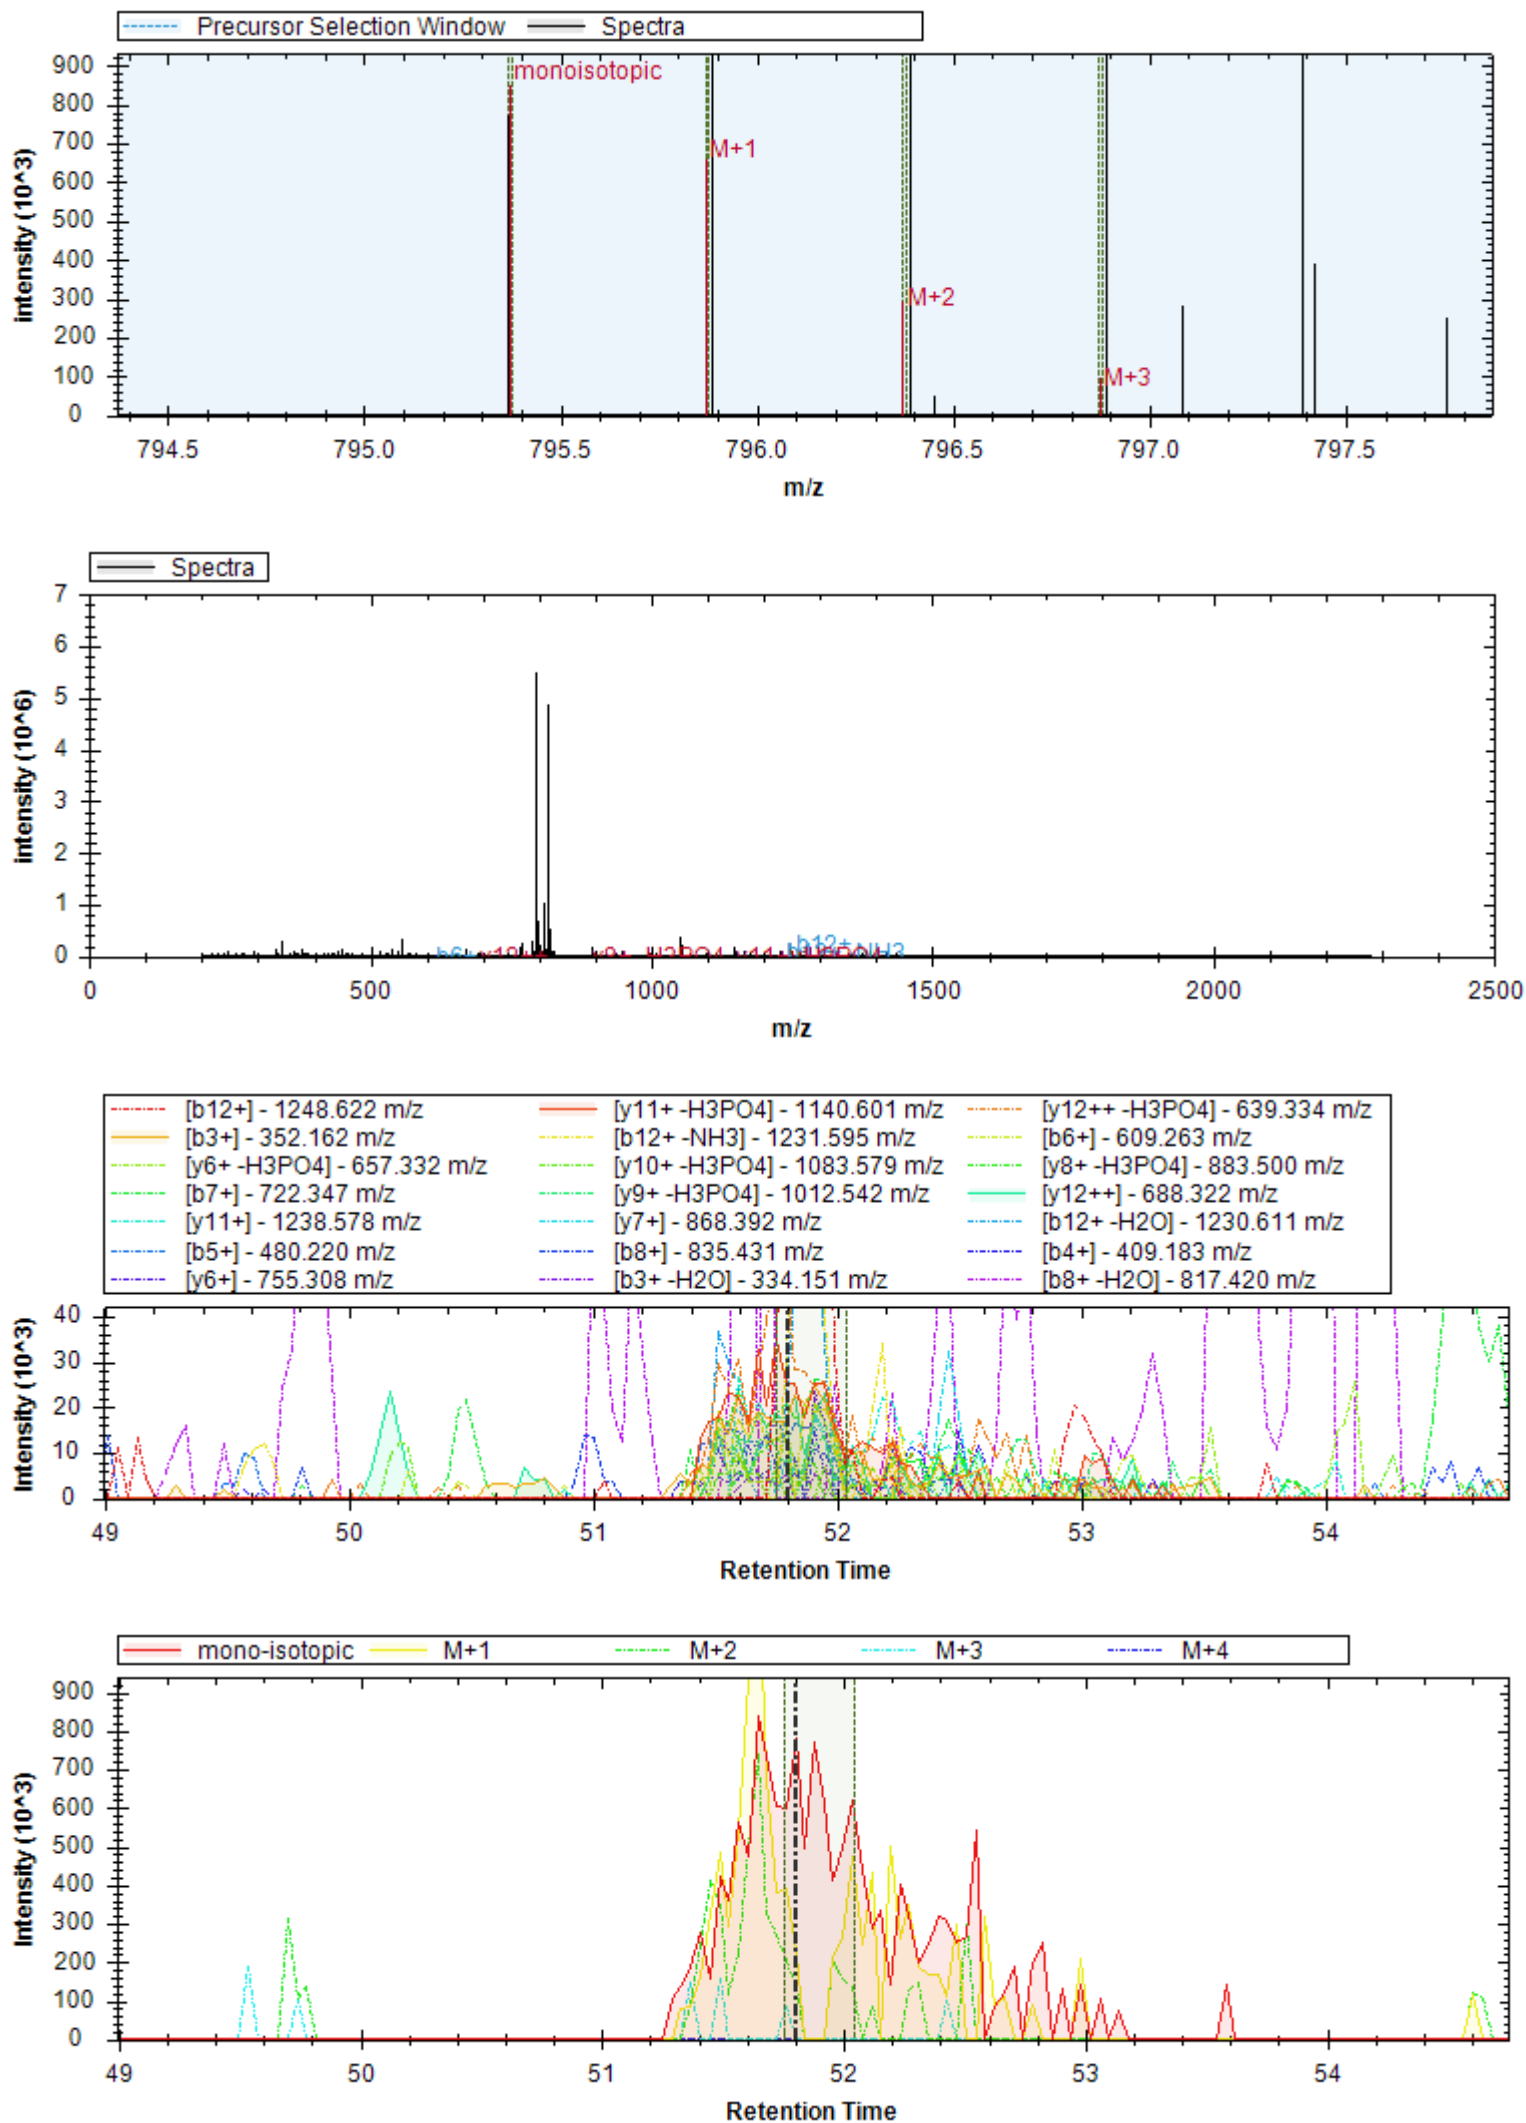



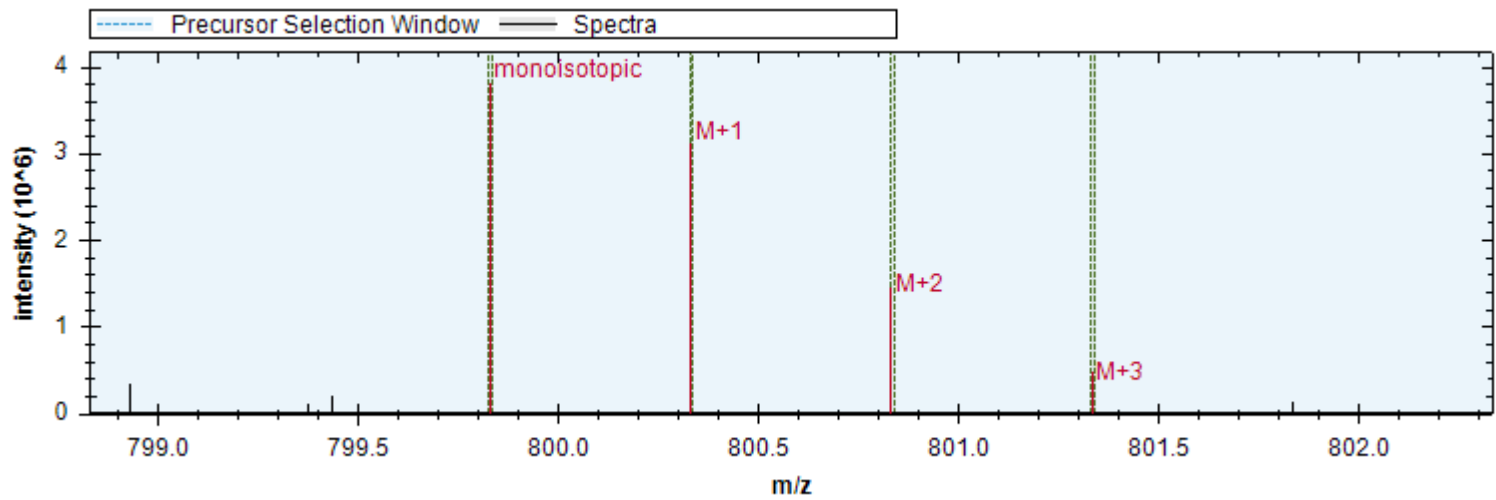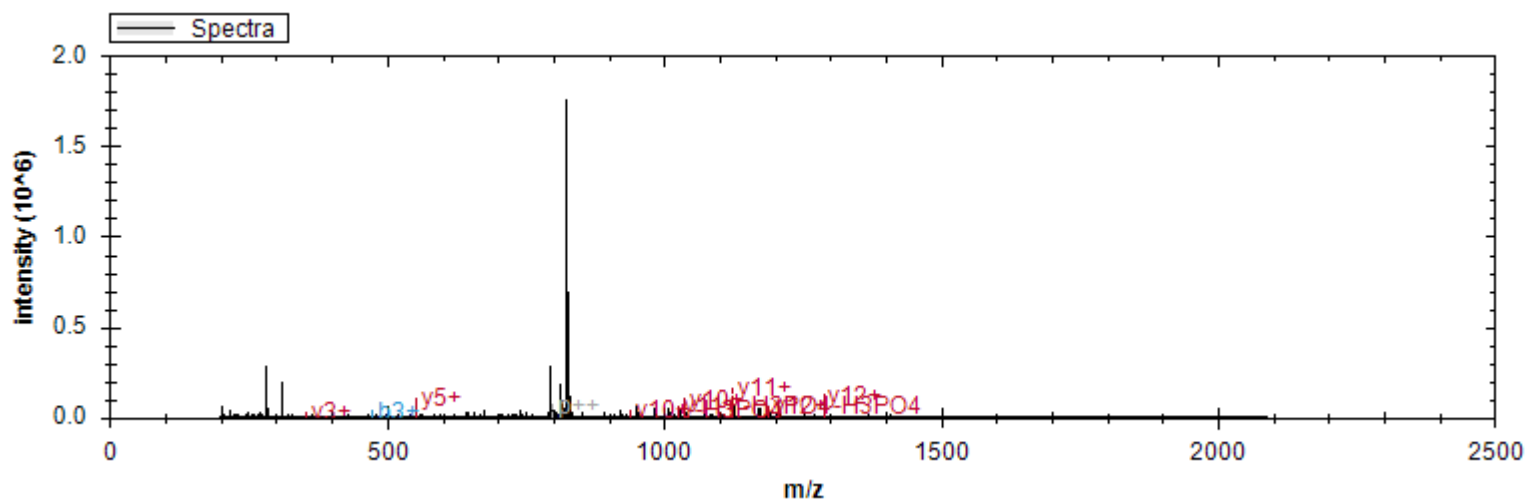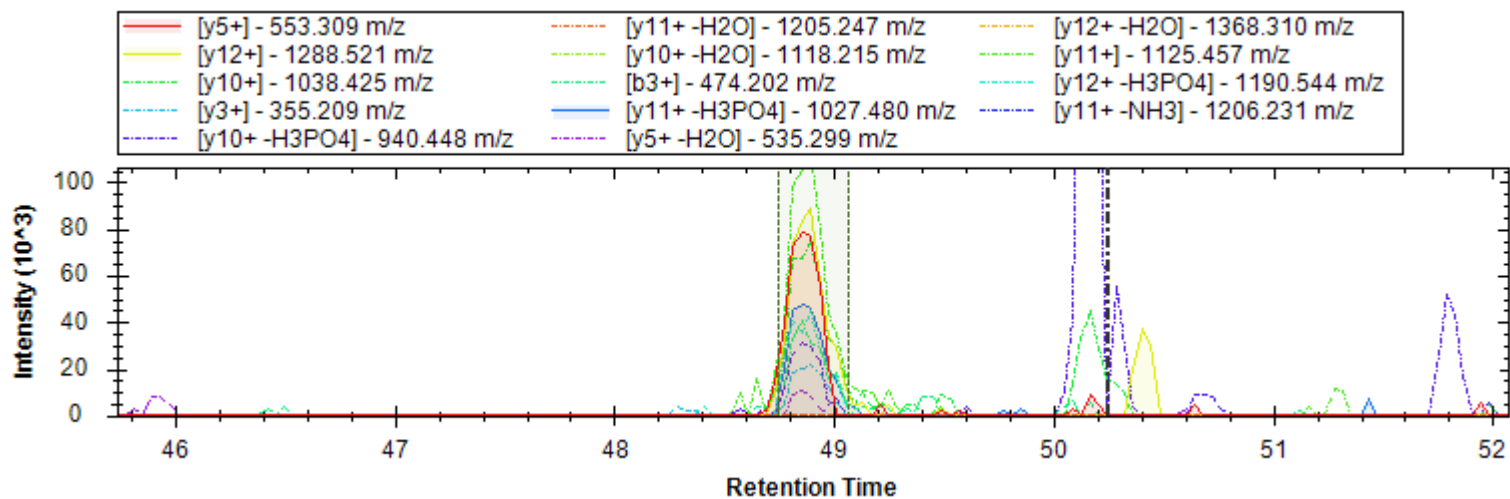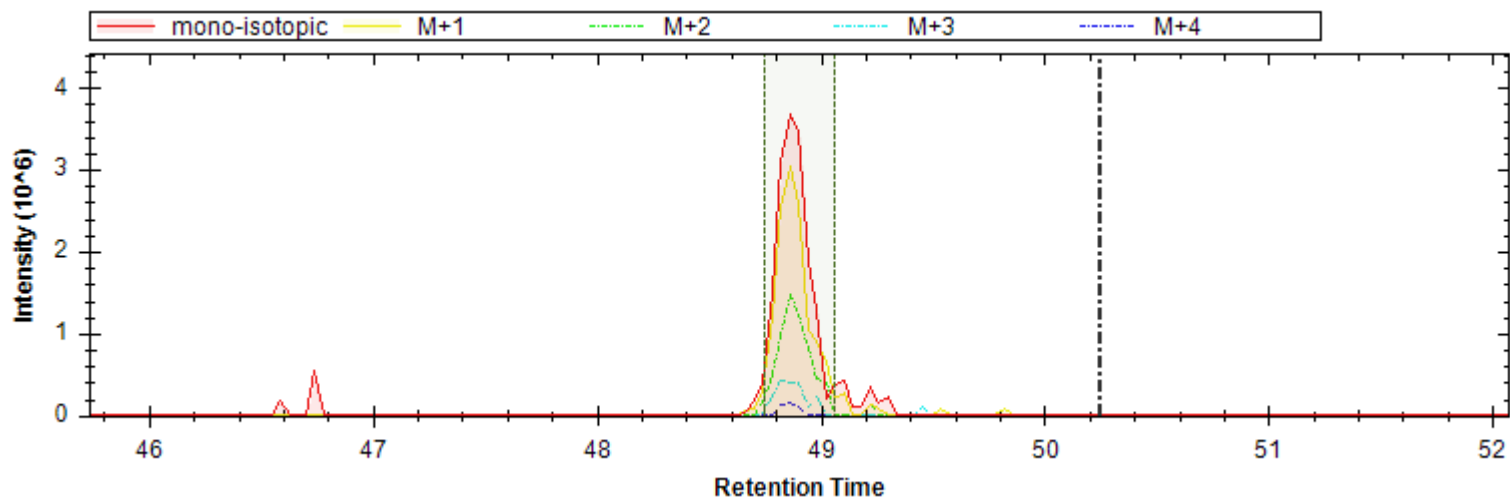

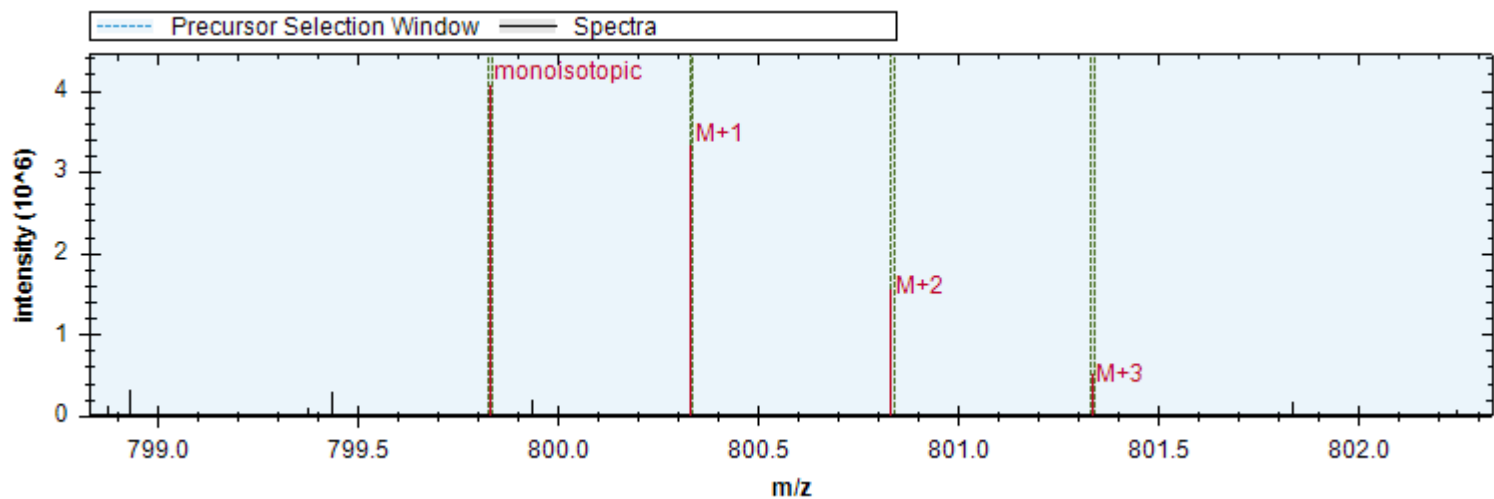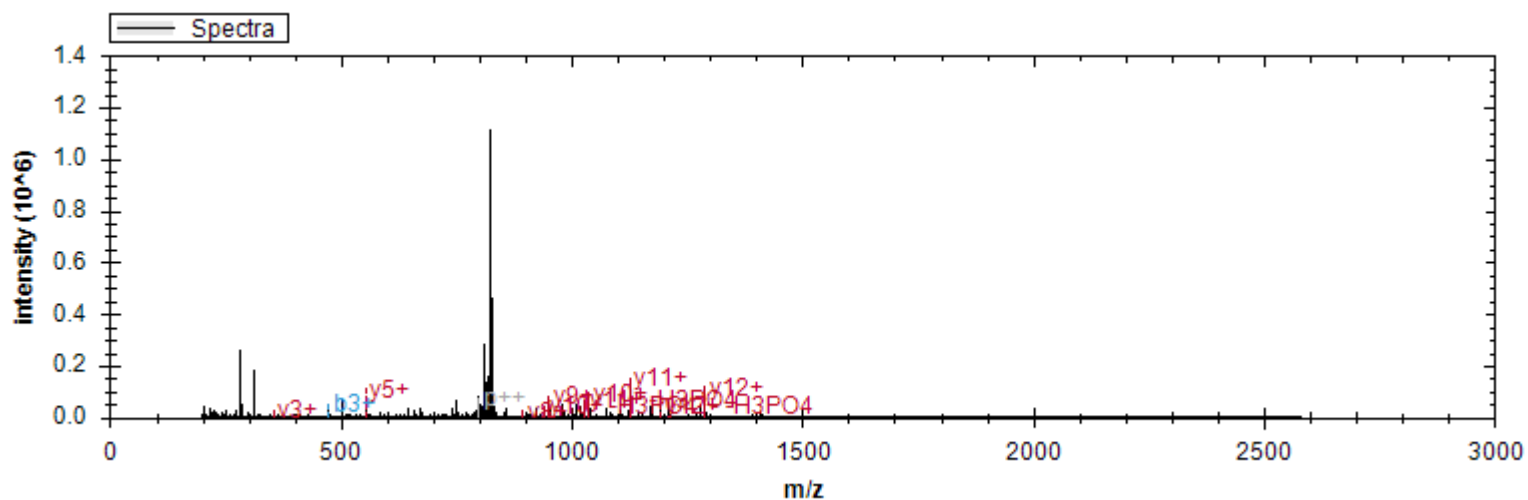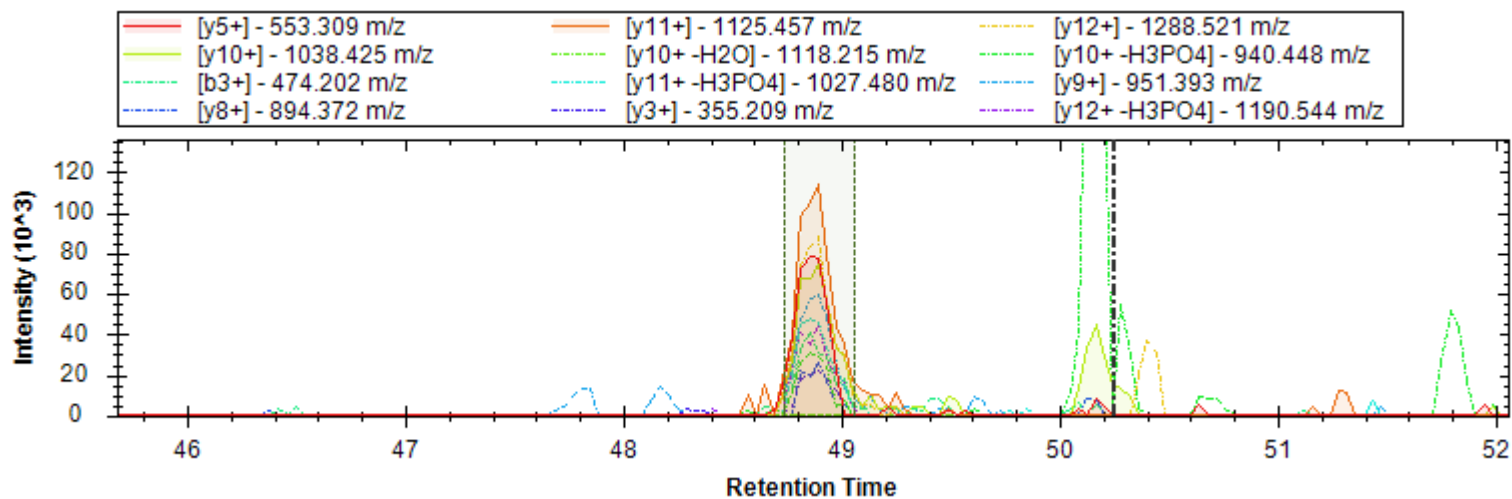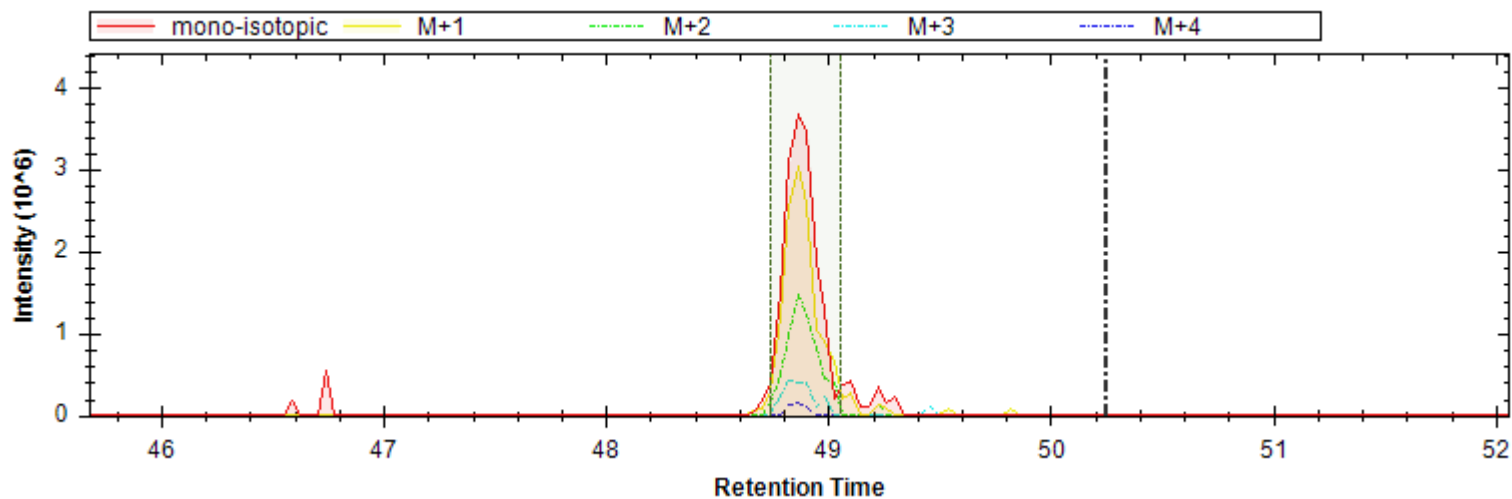

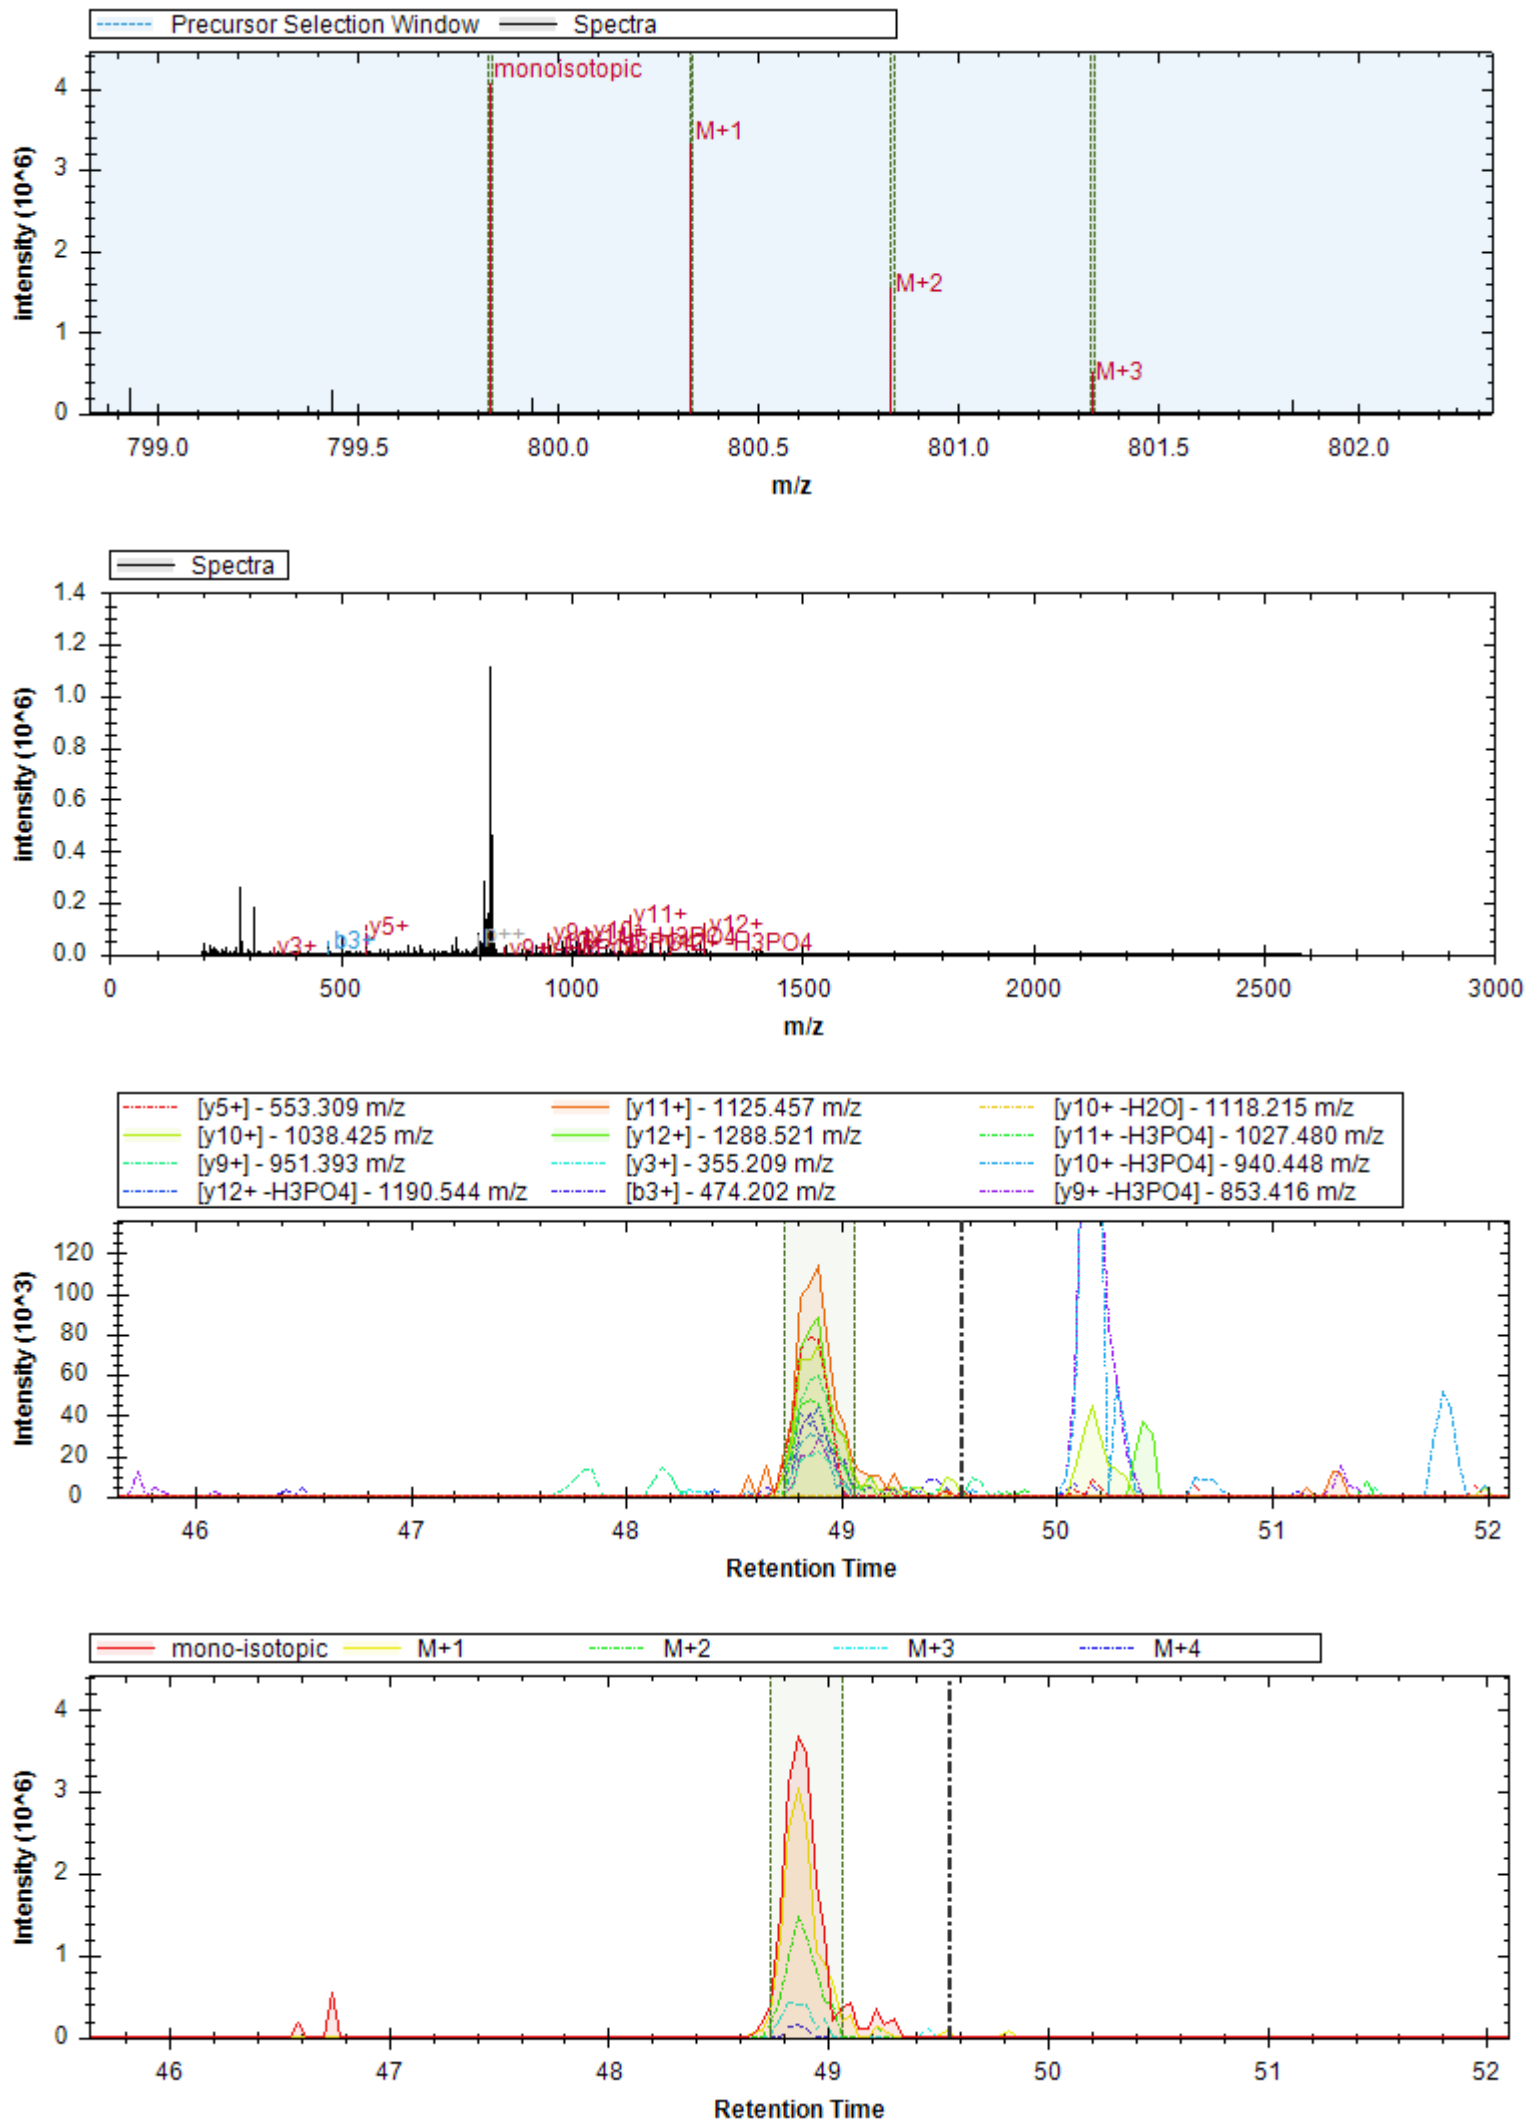

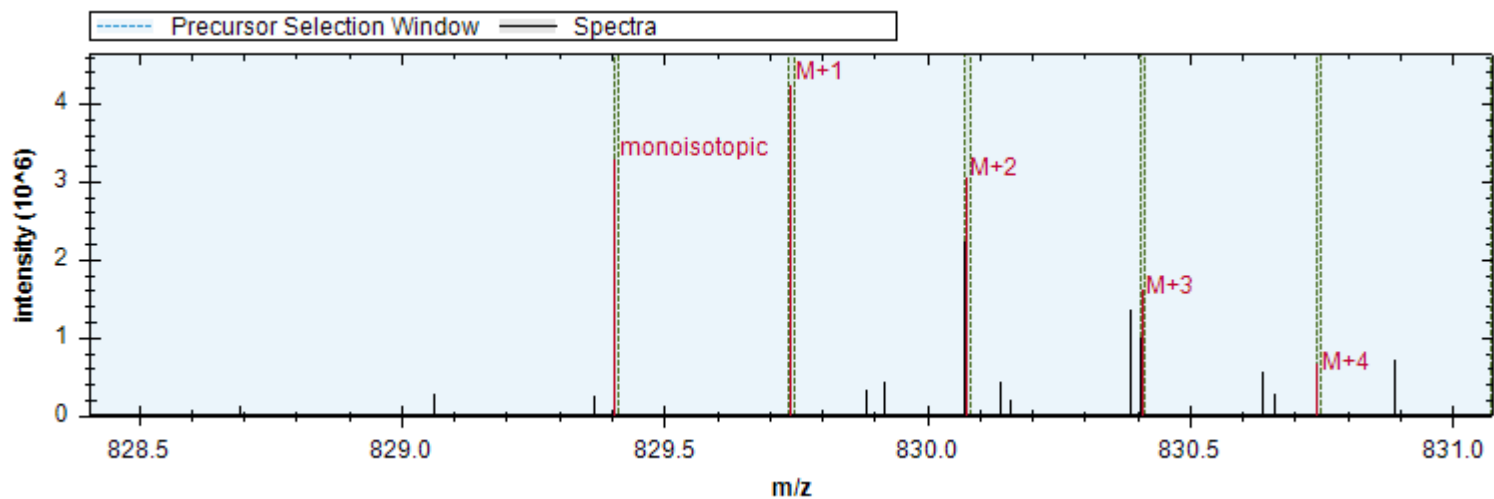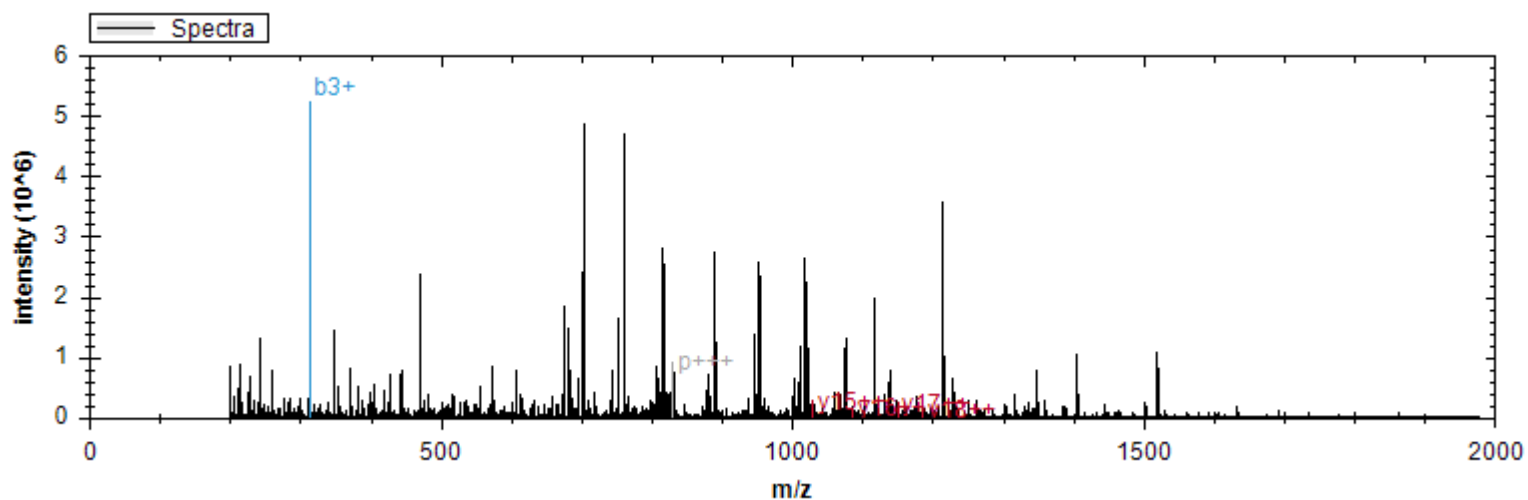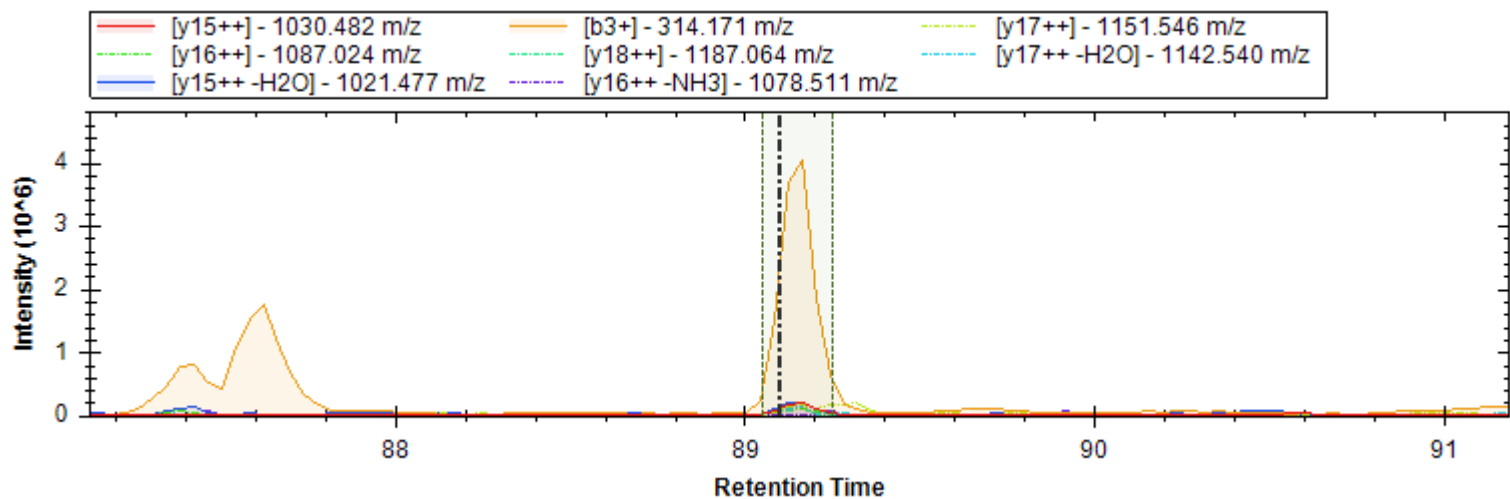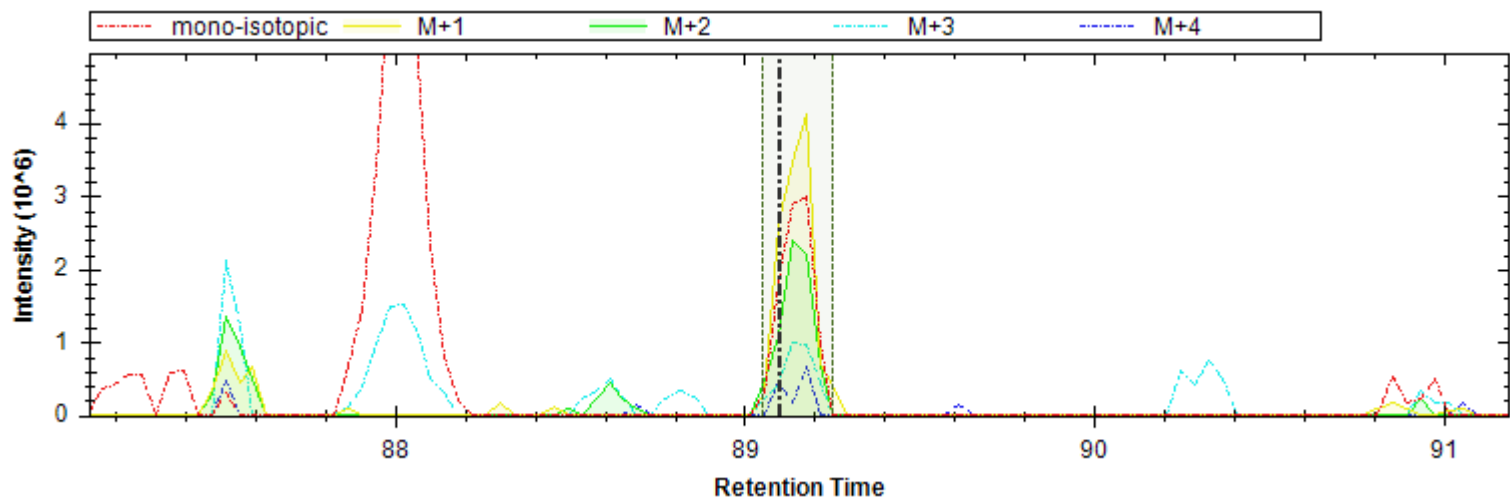

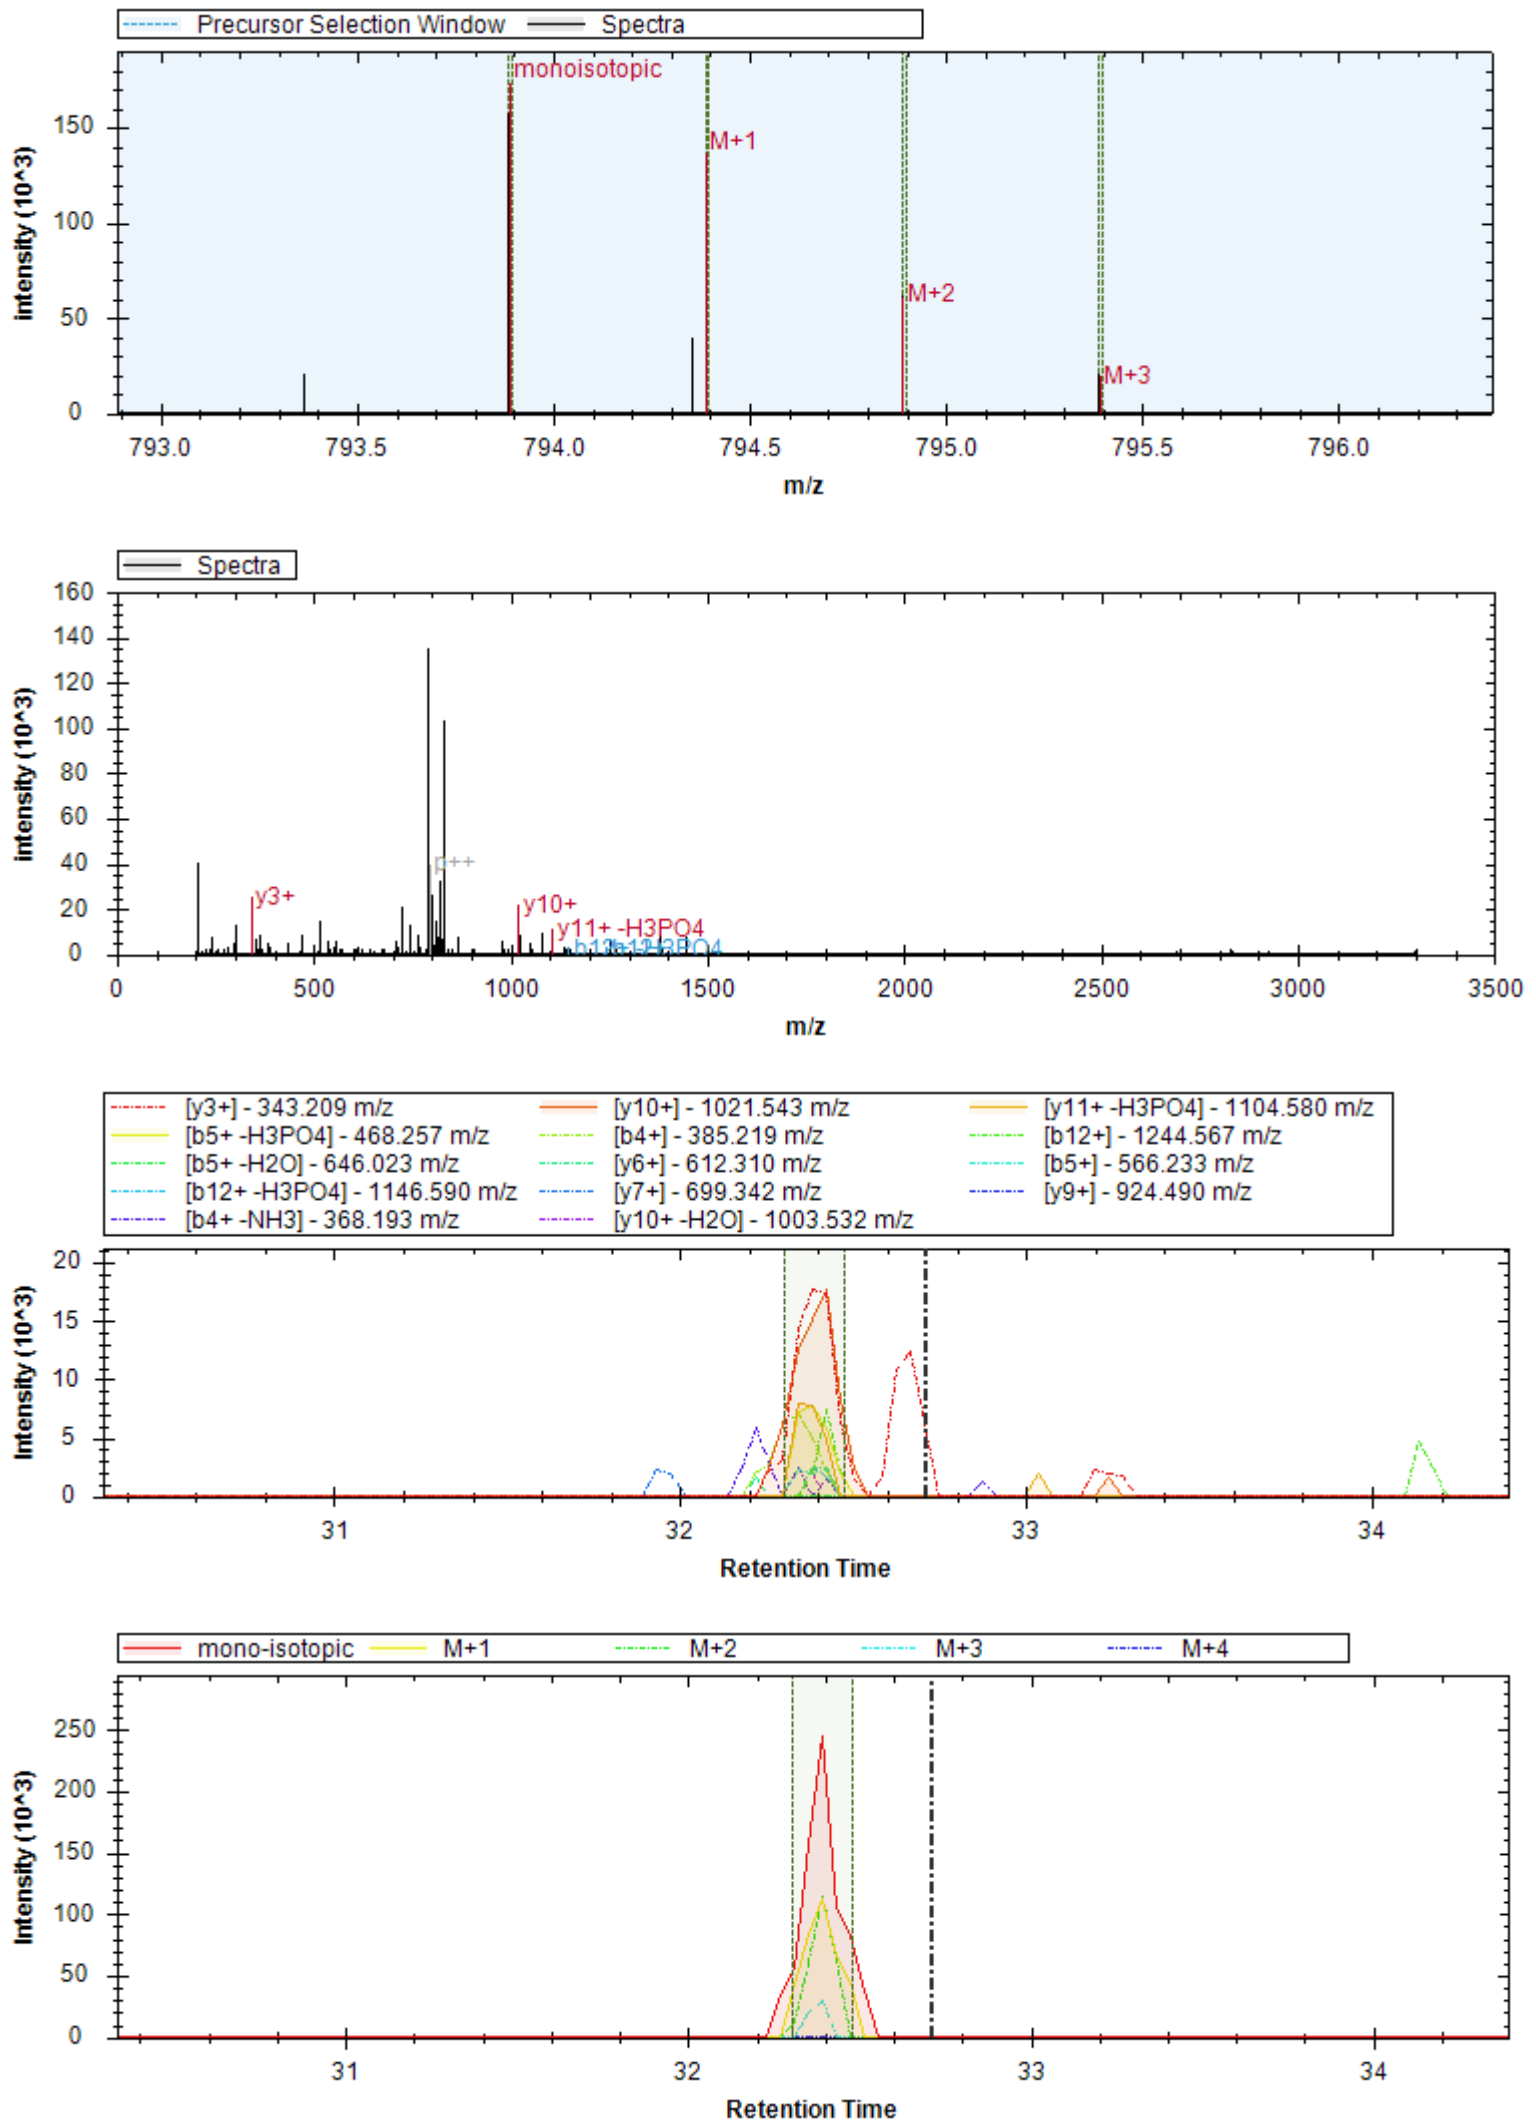

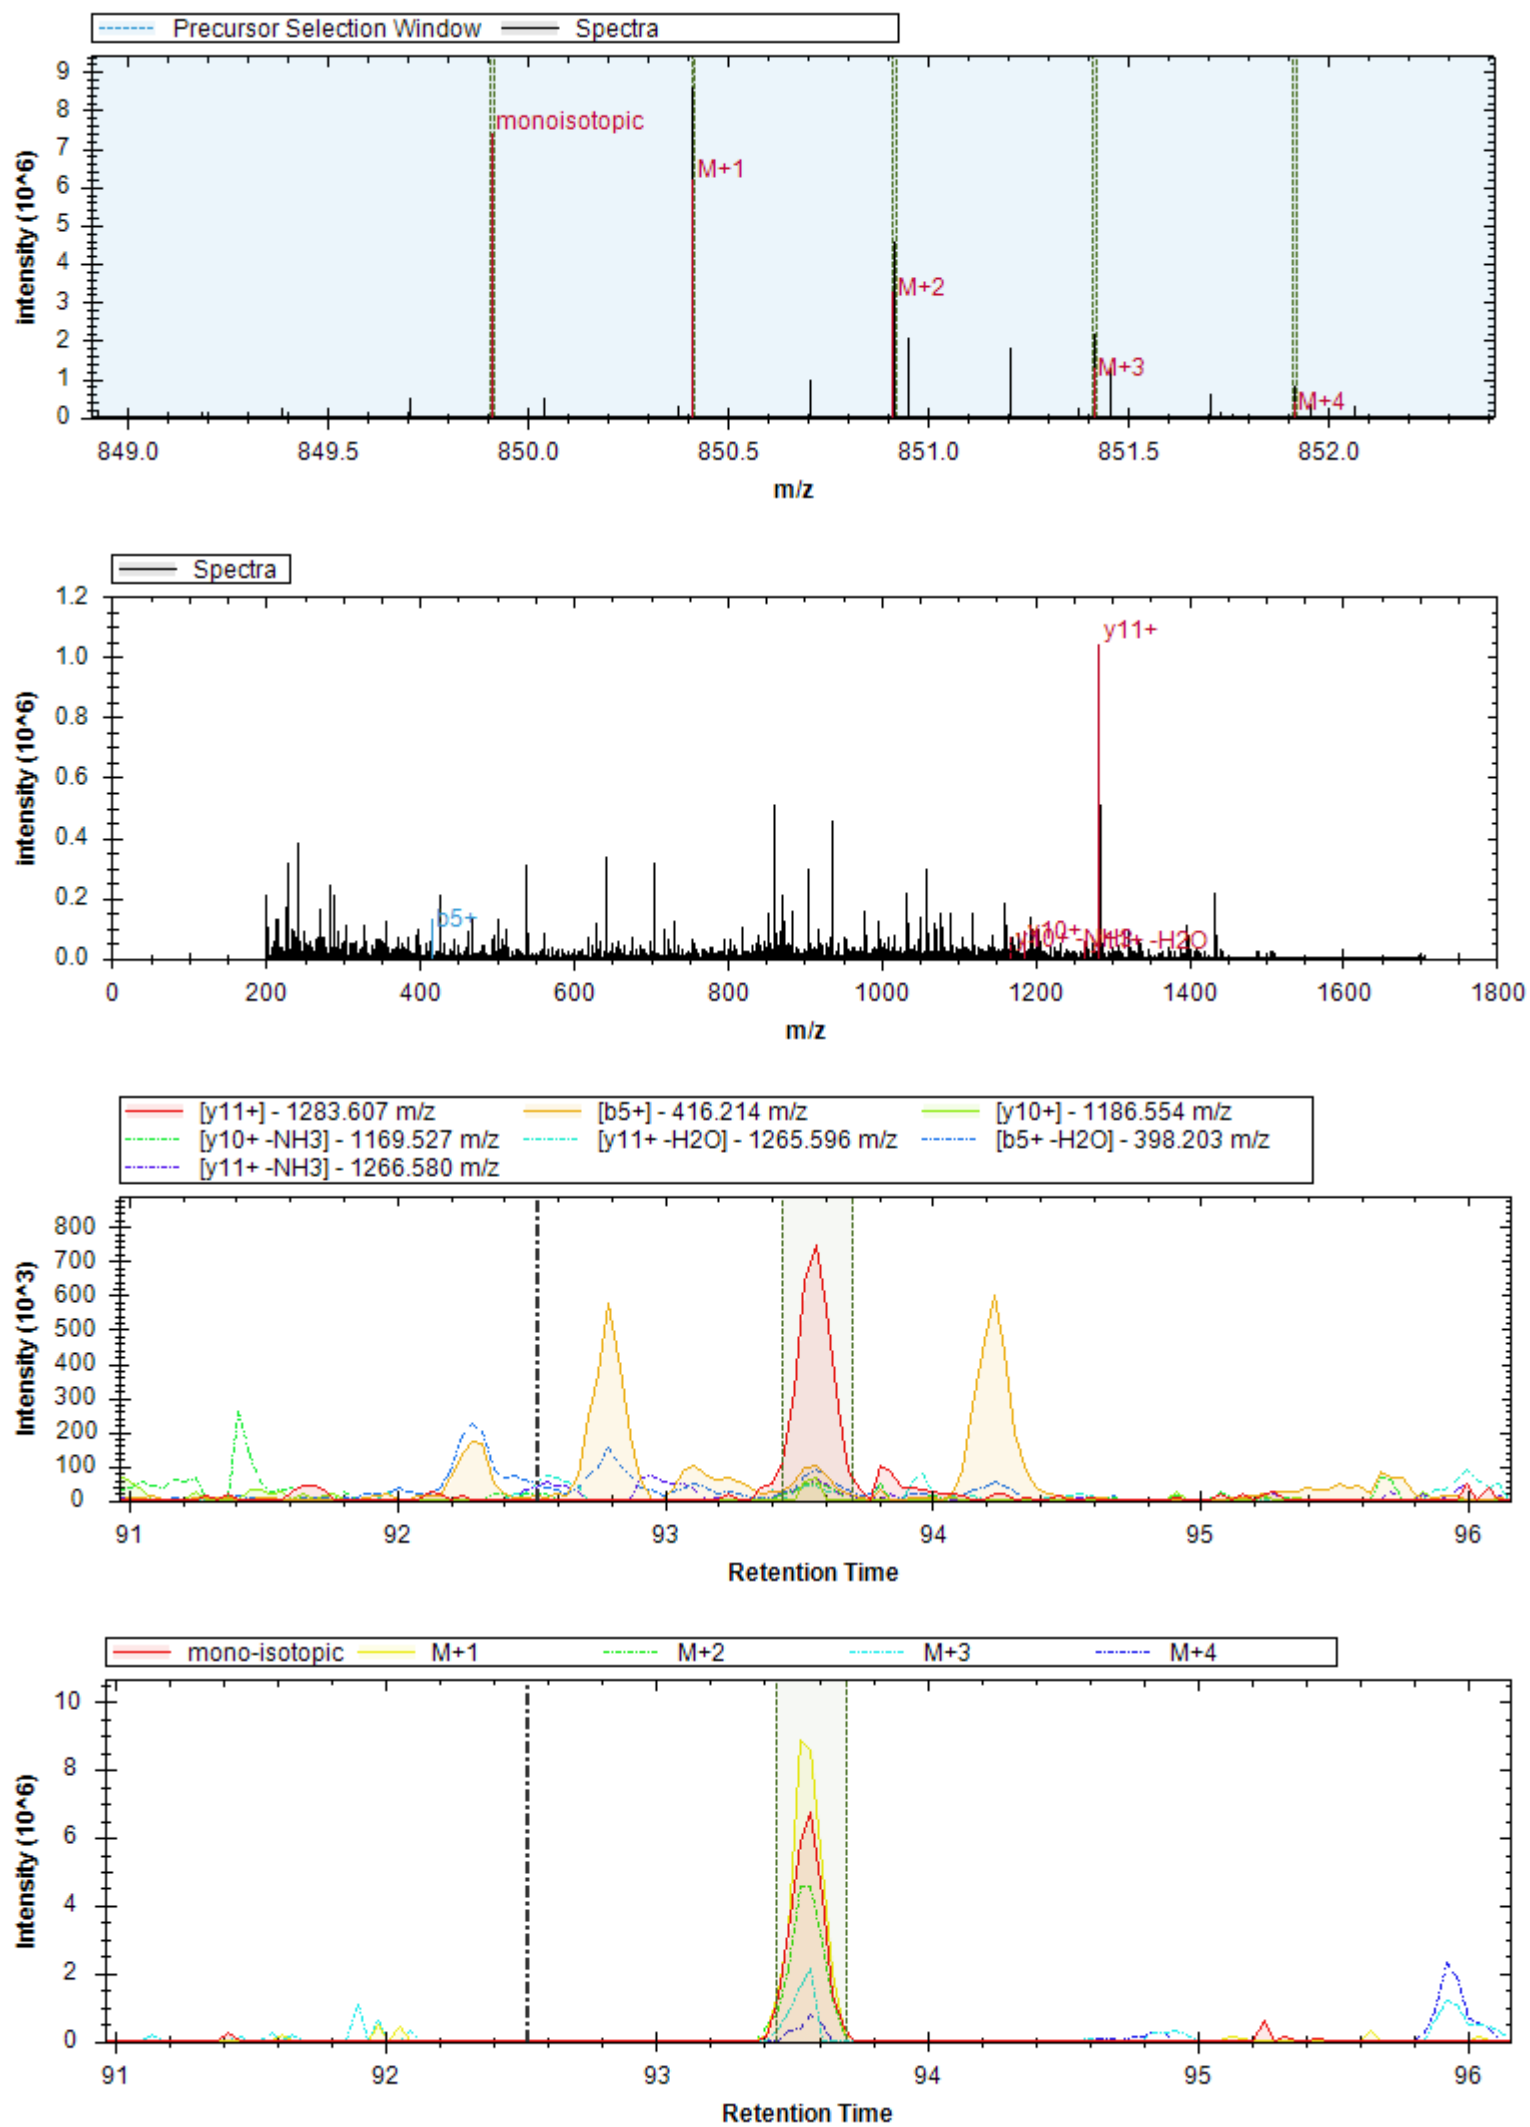

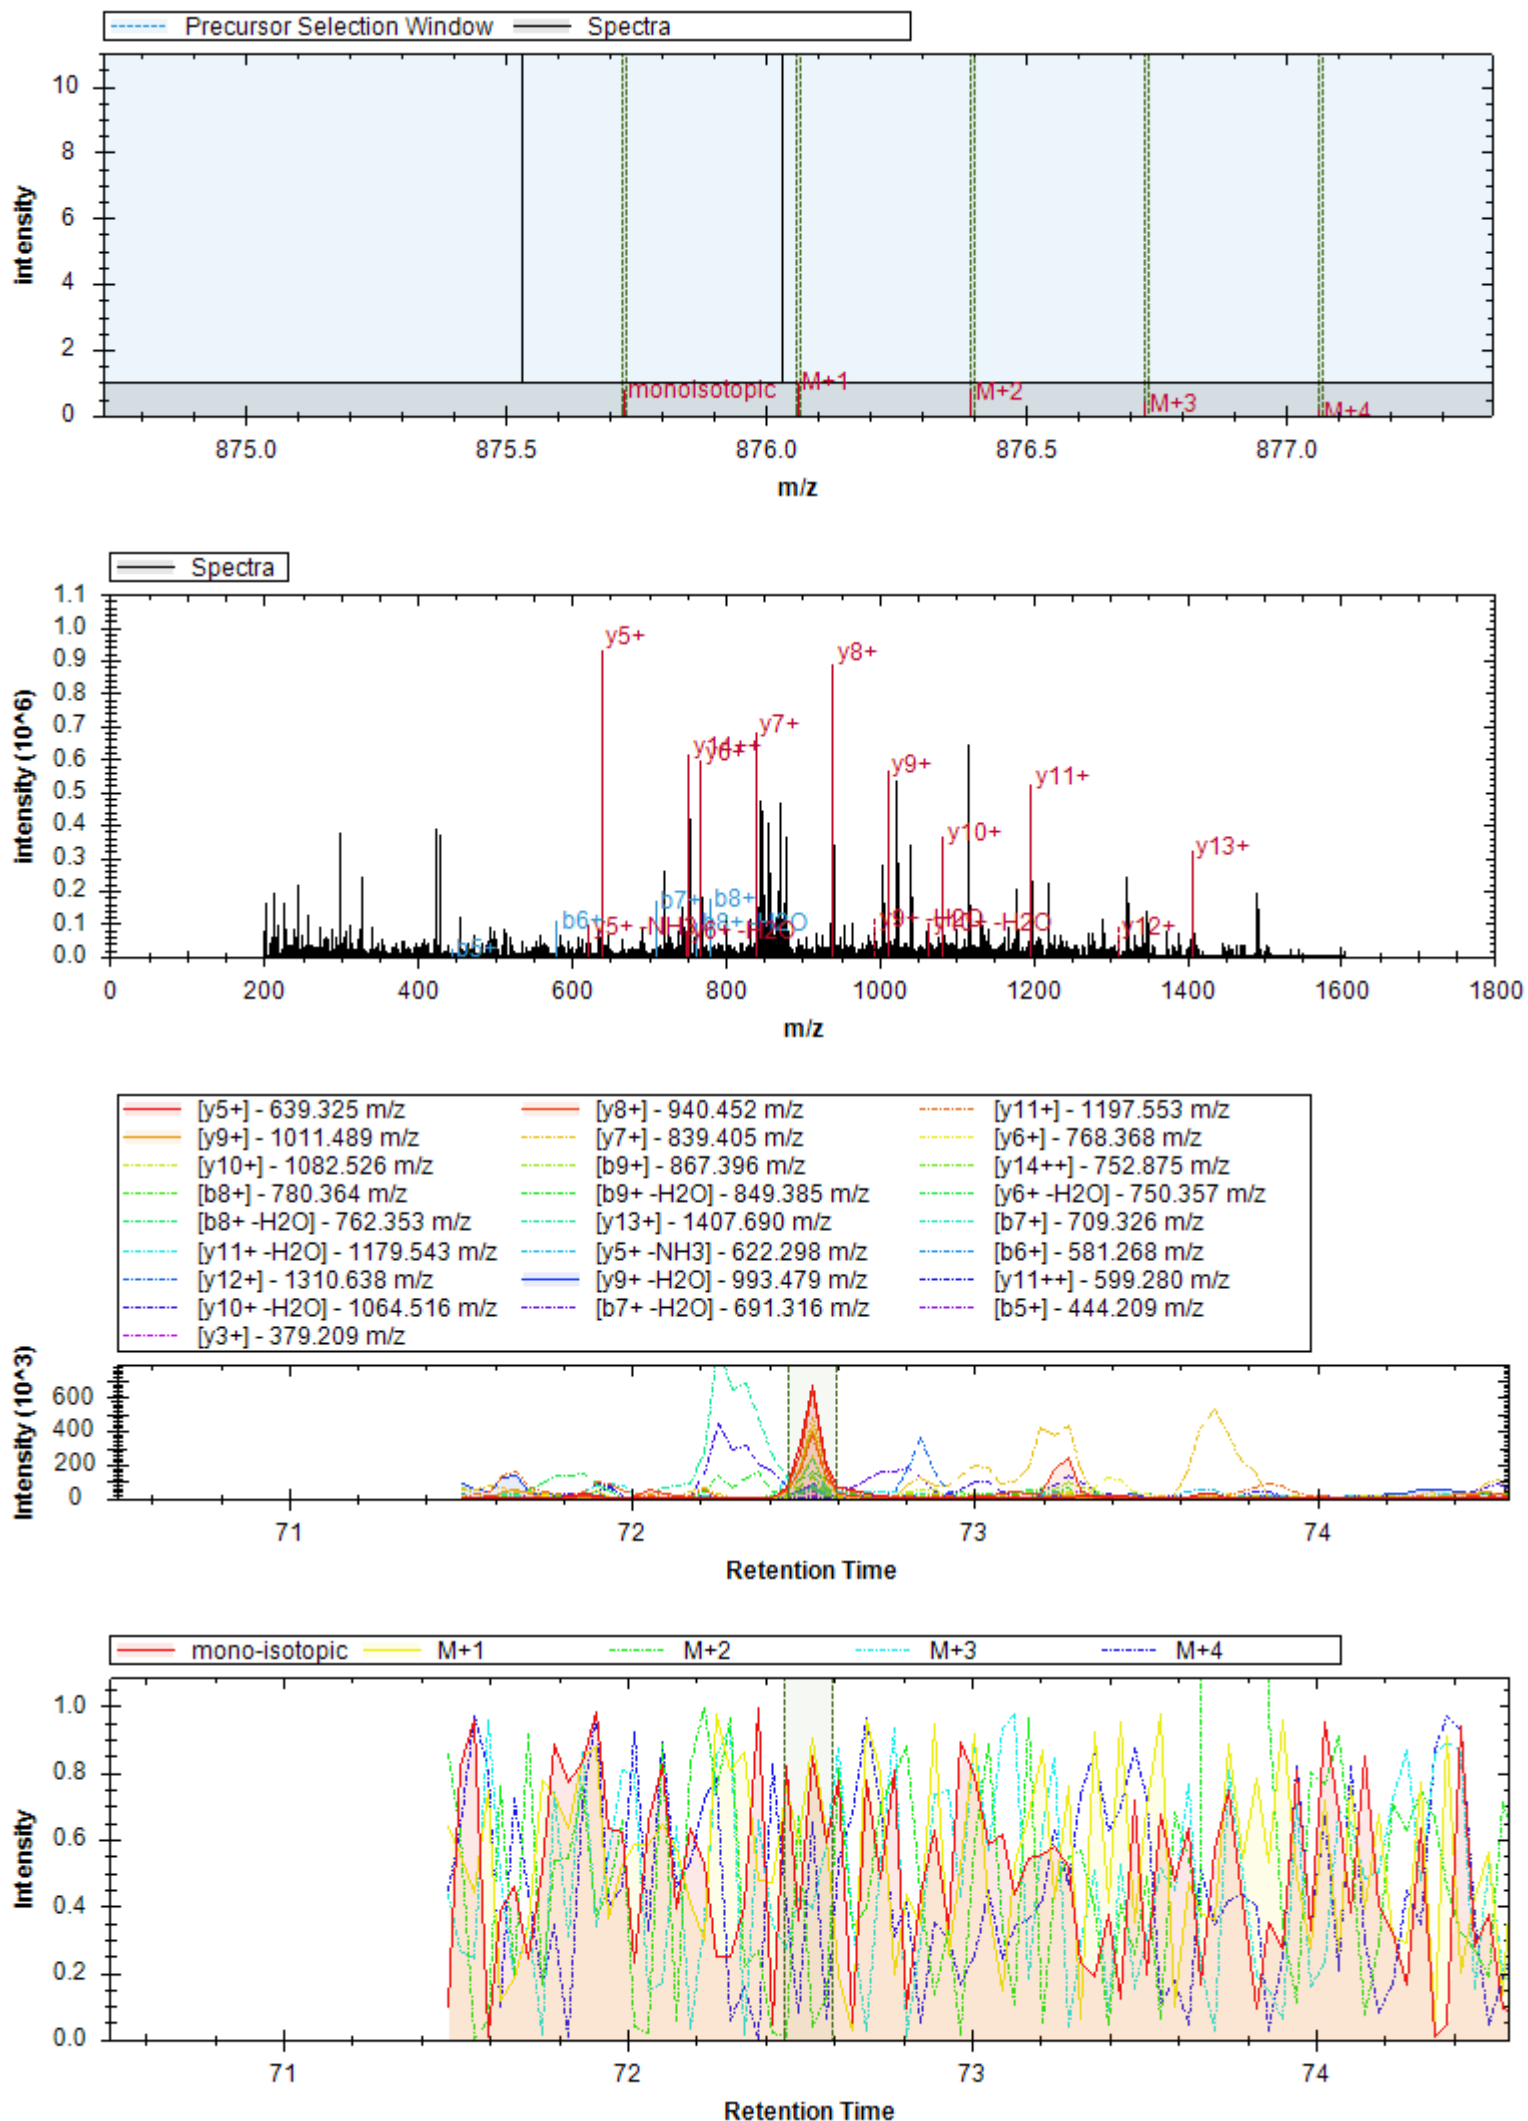

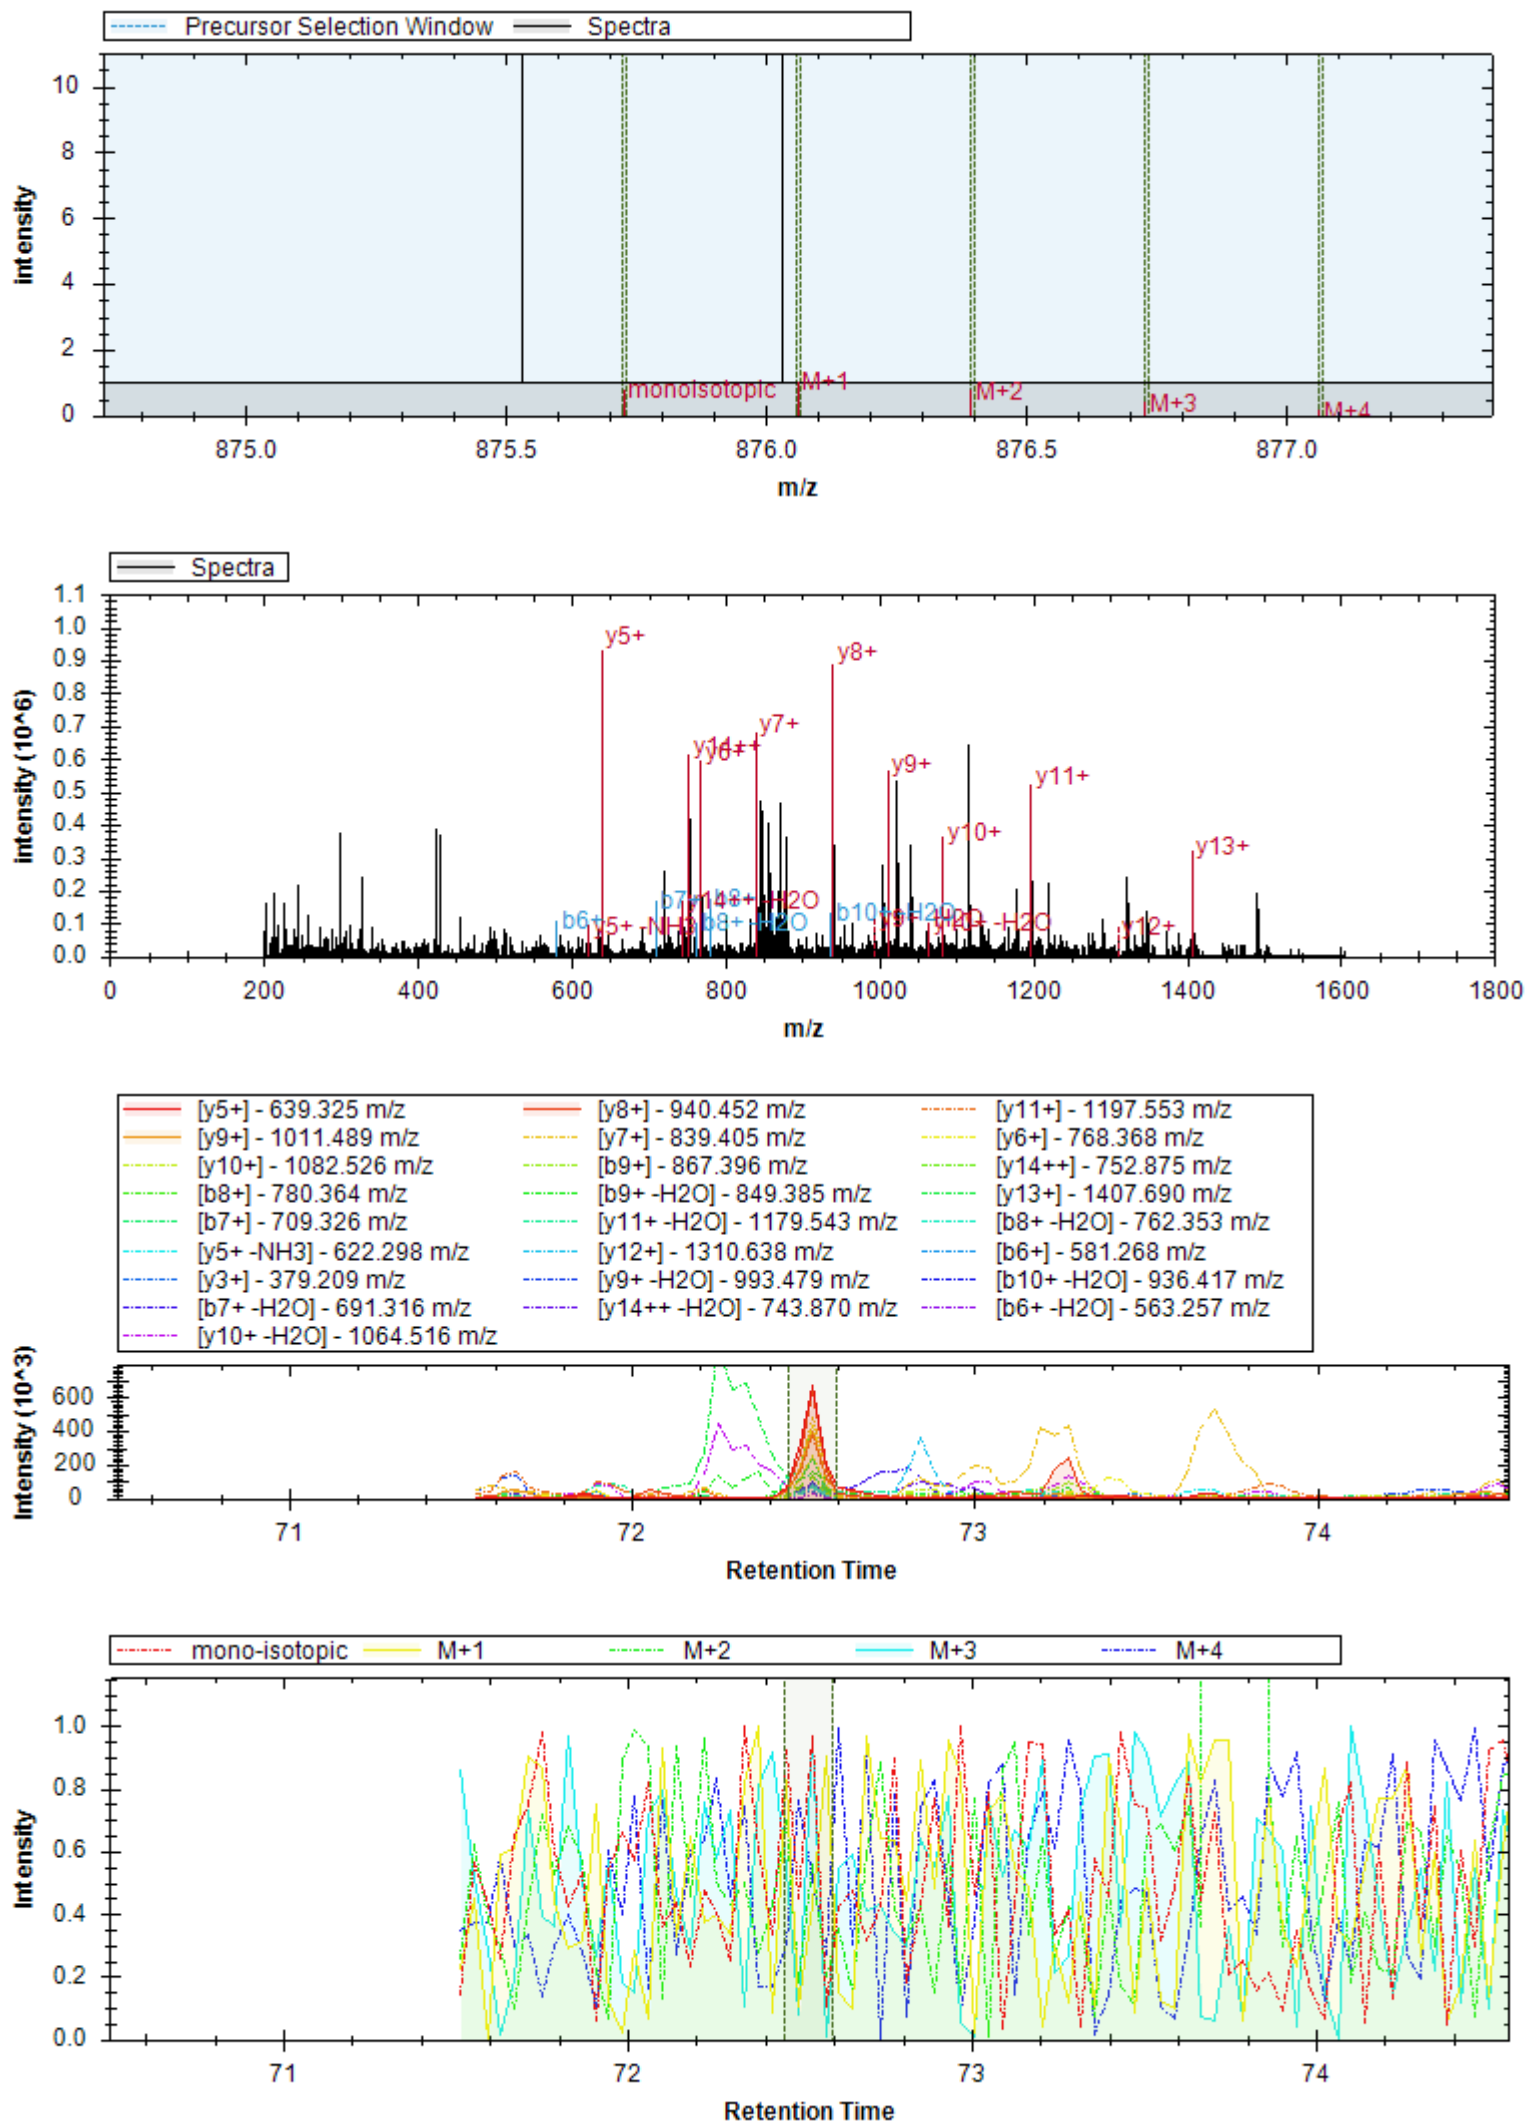



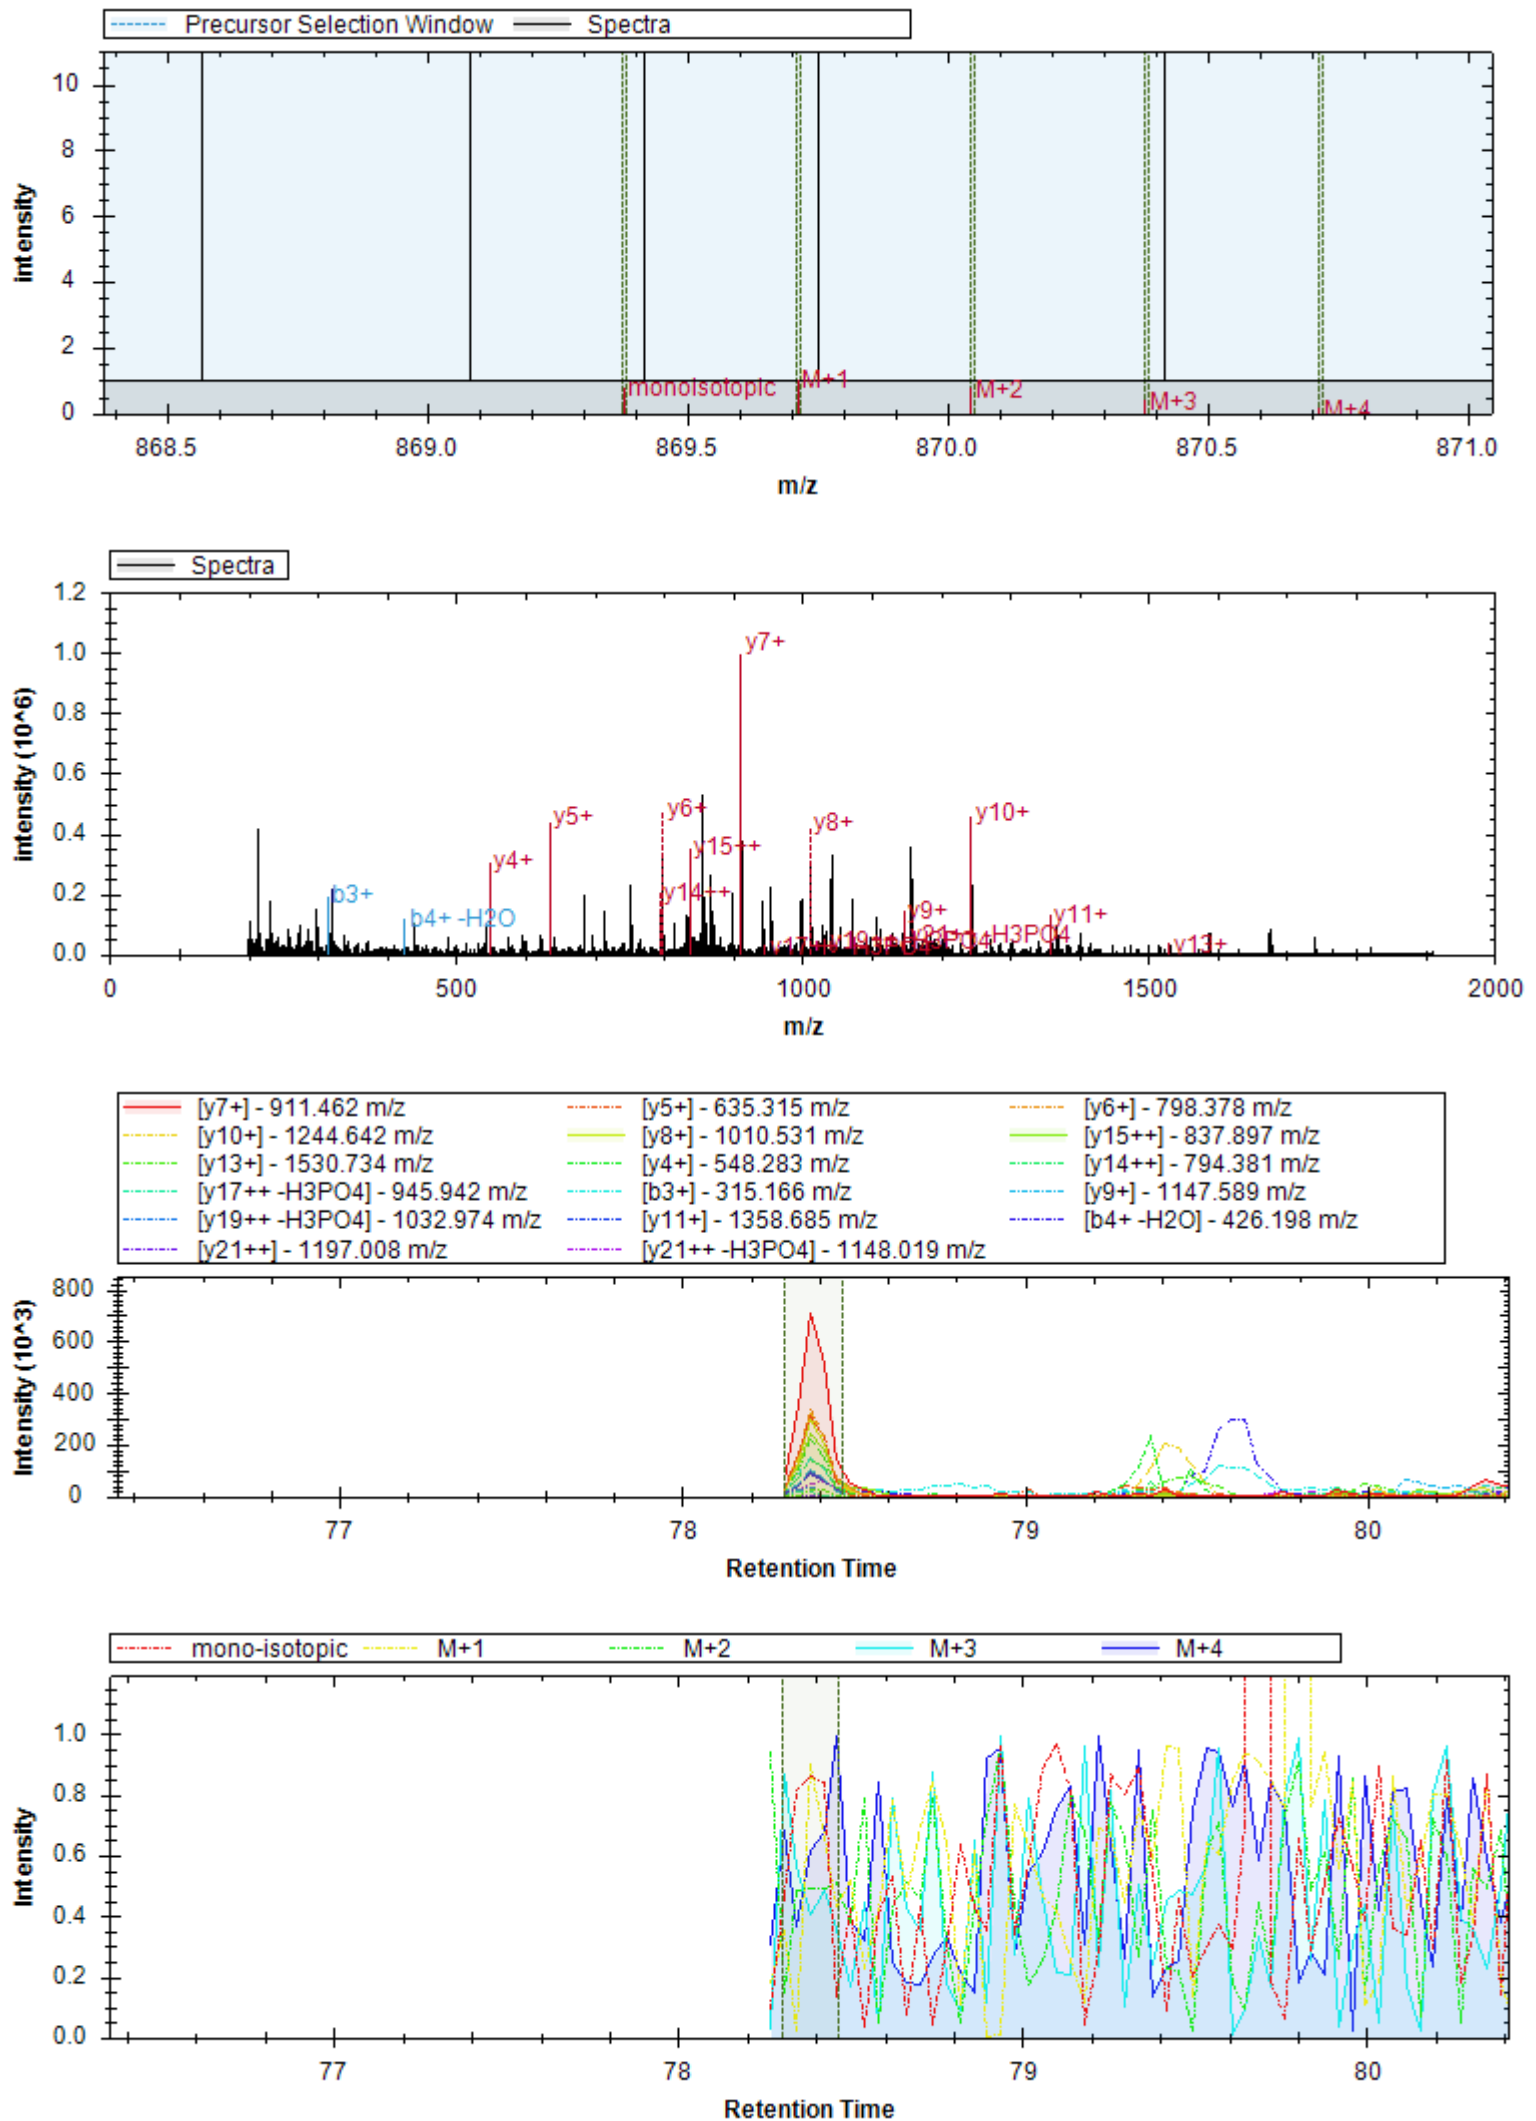

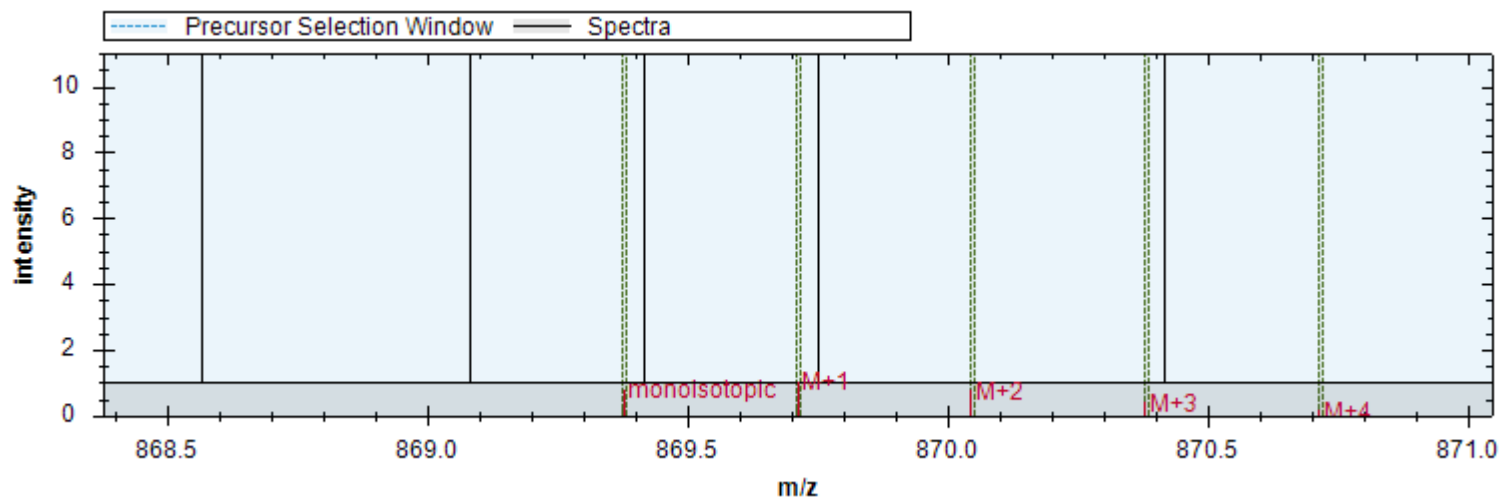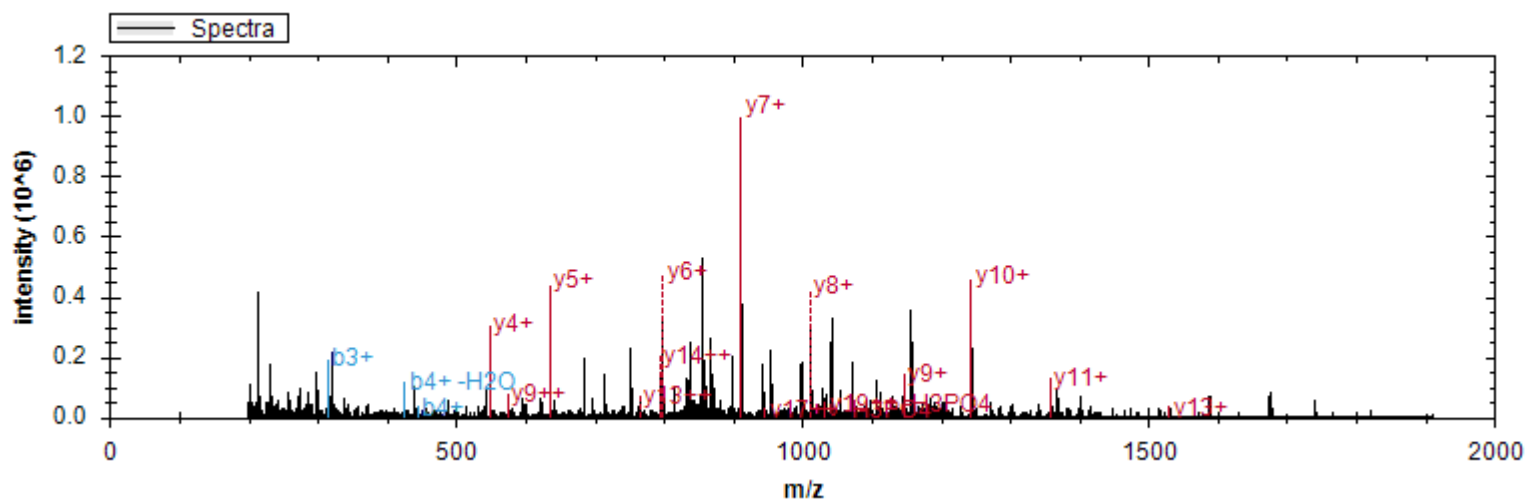

|                              |                       |                               |
|------------------------------|-----------------------|-------------------------------|
| [y7+] - 911.462 m/z          | [b8+] - 852.373 m/z   | [y5+] - 635.315 m/z           |
| [y6+] - 798.378 m/z          | [y10+] - 1244.642 m/z | [y8+] - 1010.531 m/z          |
| [y17++ -H3PO4] - 945.942 m/z | [y14++] - 794.381 m/z | [y4+] - 548.283 m/z           |
| [y18++ -H3PO4] - 989.458 m/z | [y13+] - 1530.734 m/z | [y11+] - 1358.685 m/z         |
| [b4+ -H2O] - 426.198 m/z     | [y13++] - 765.870 m/z | [y19++ -H3PO4] - 1032.974 m/z |
| [y9+] - 1147.589 m/z         | [b3+] - 315.166 m/z   | [y9++] - 574.298 m/z          |
| [y17++] - 994.931 m/z        | [b4+] - 444.209 m/z   |                               |

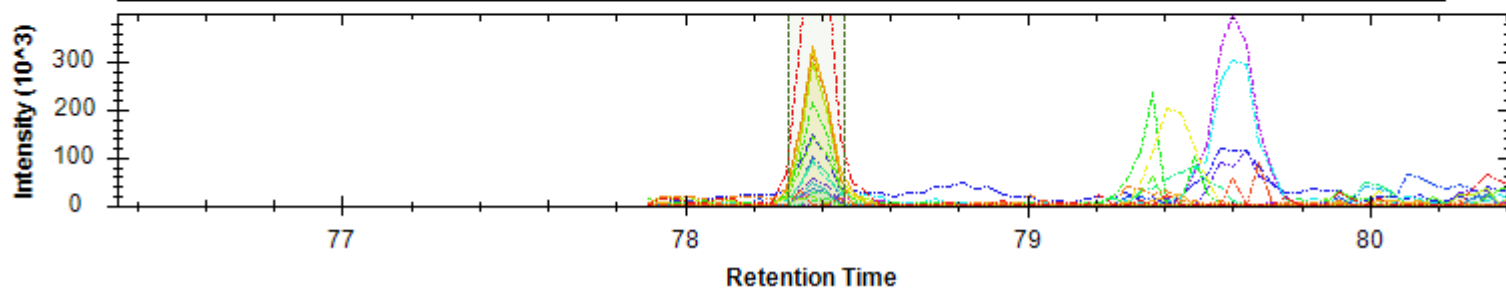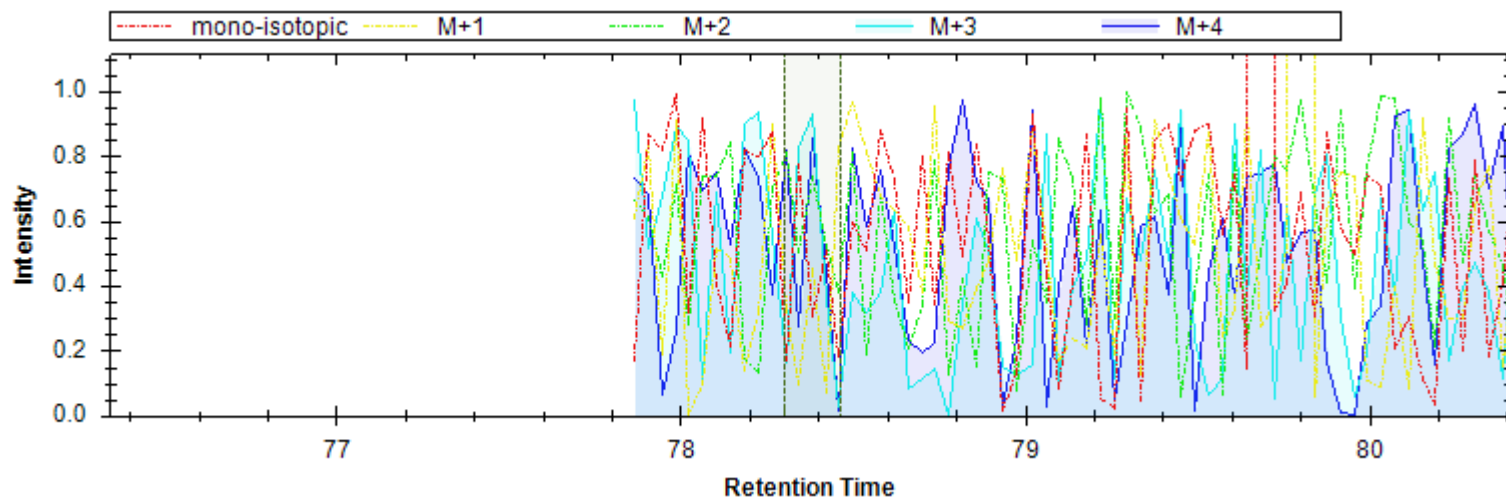

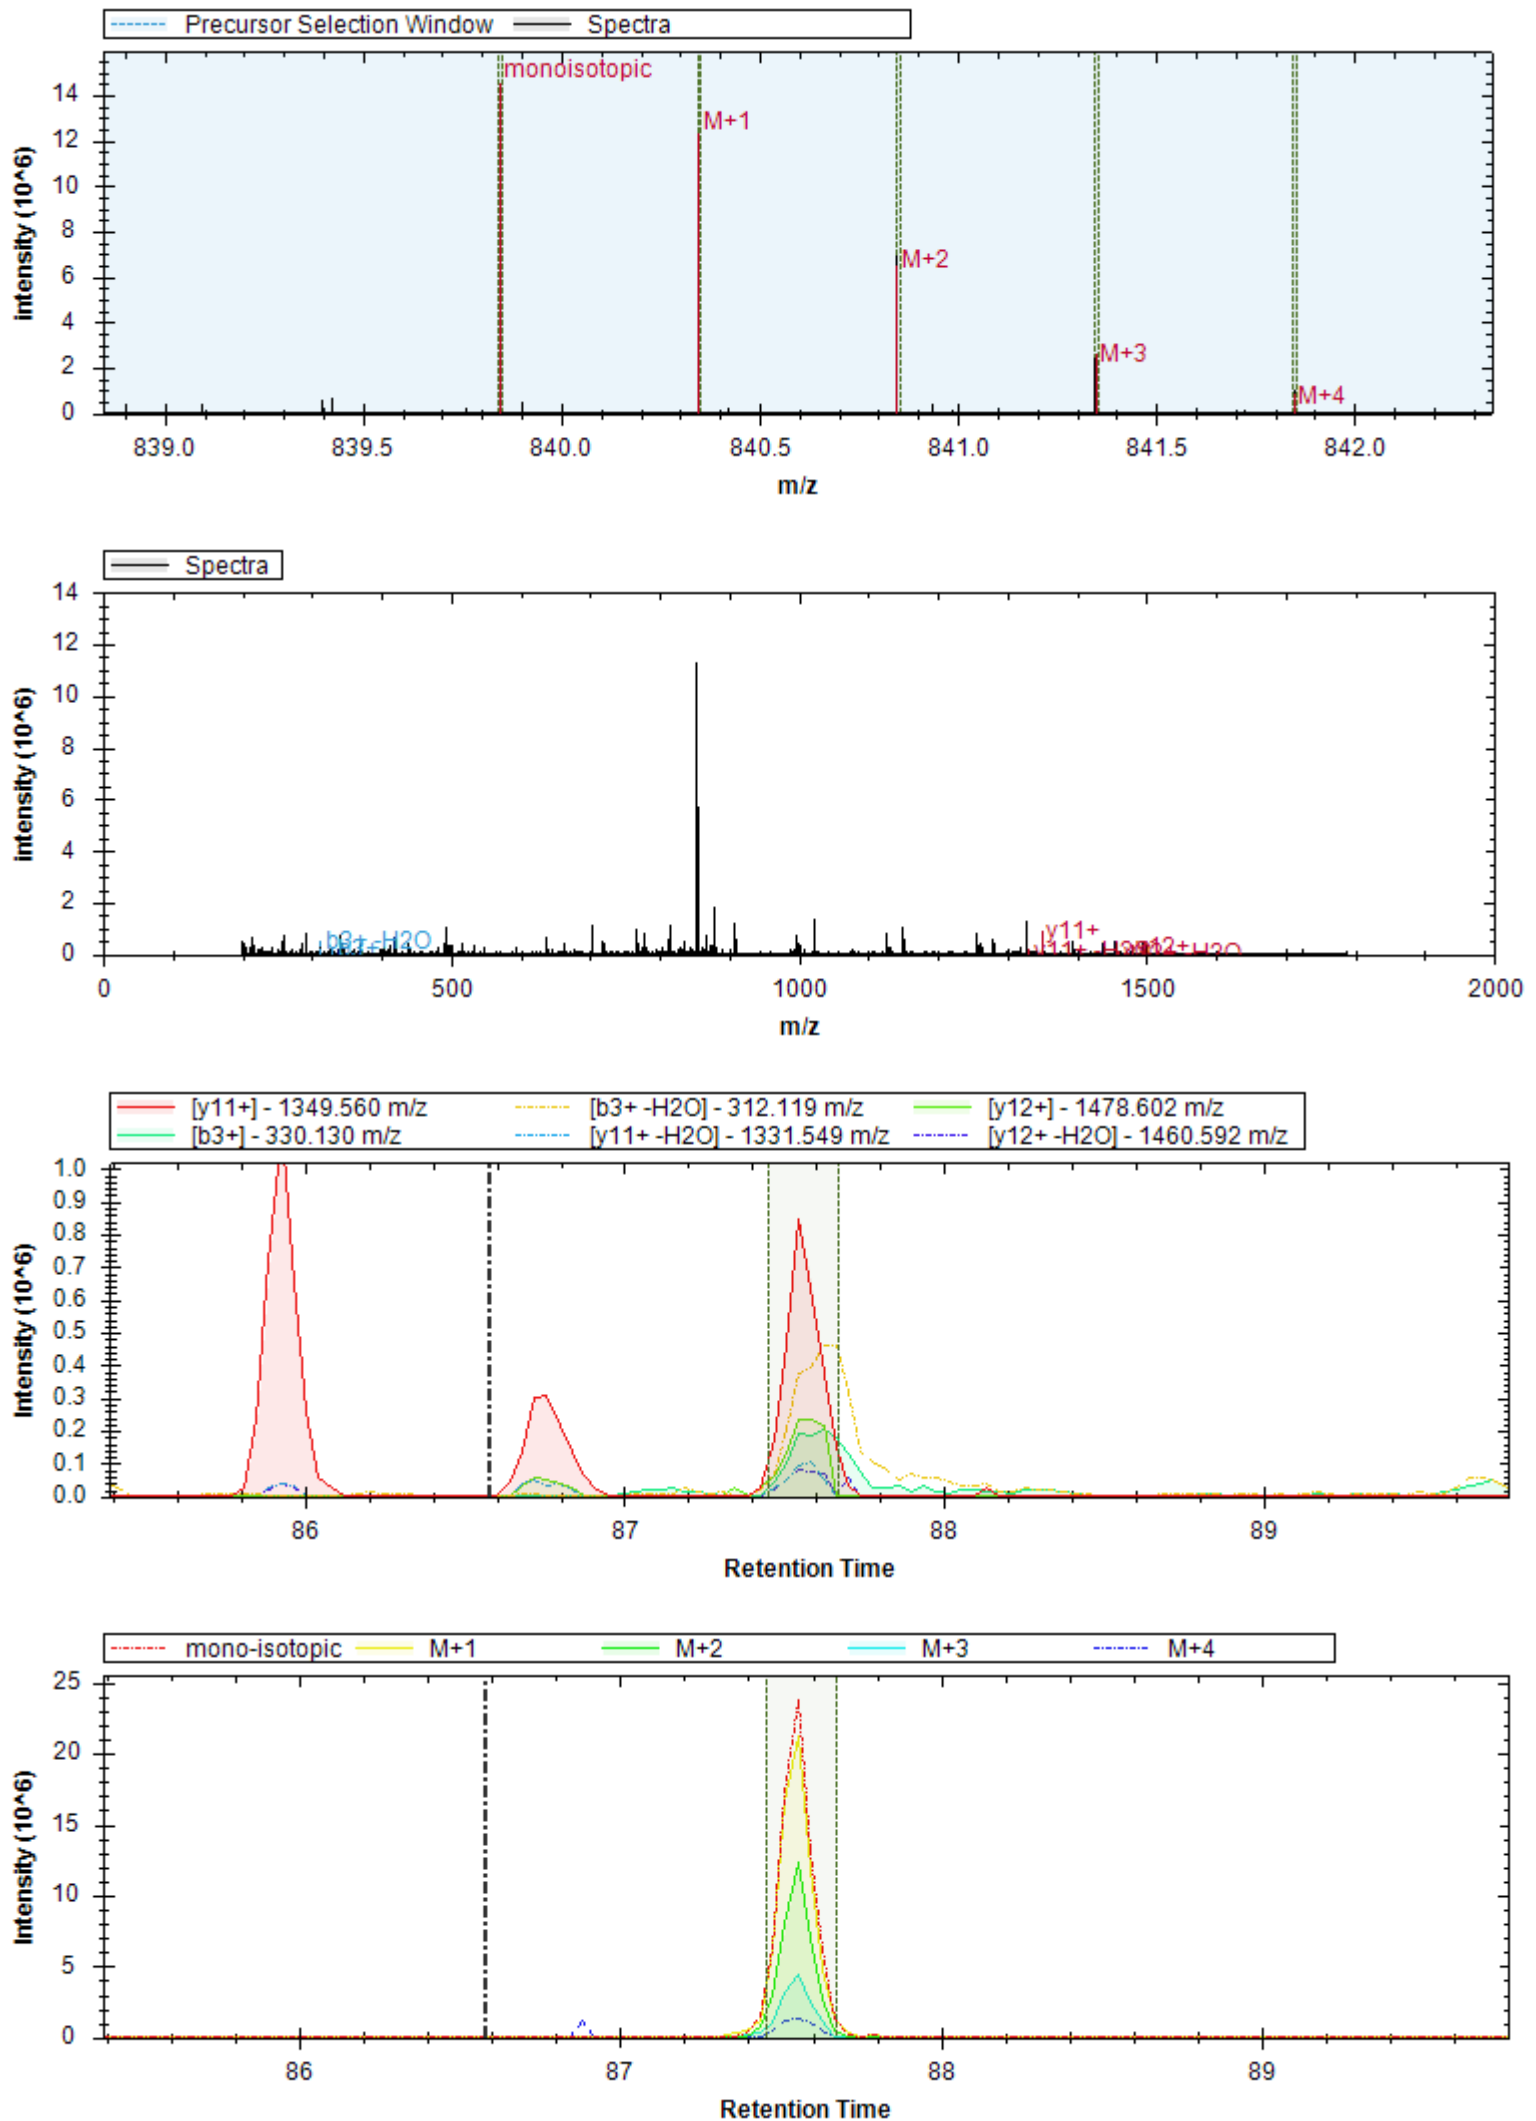

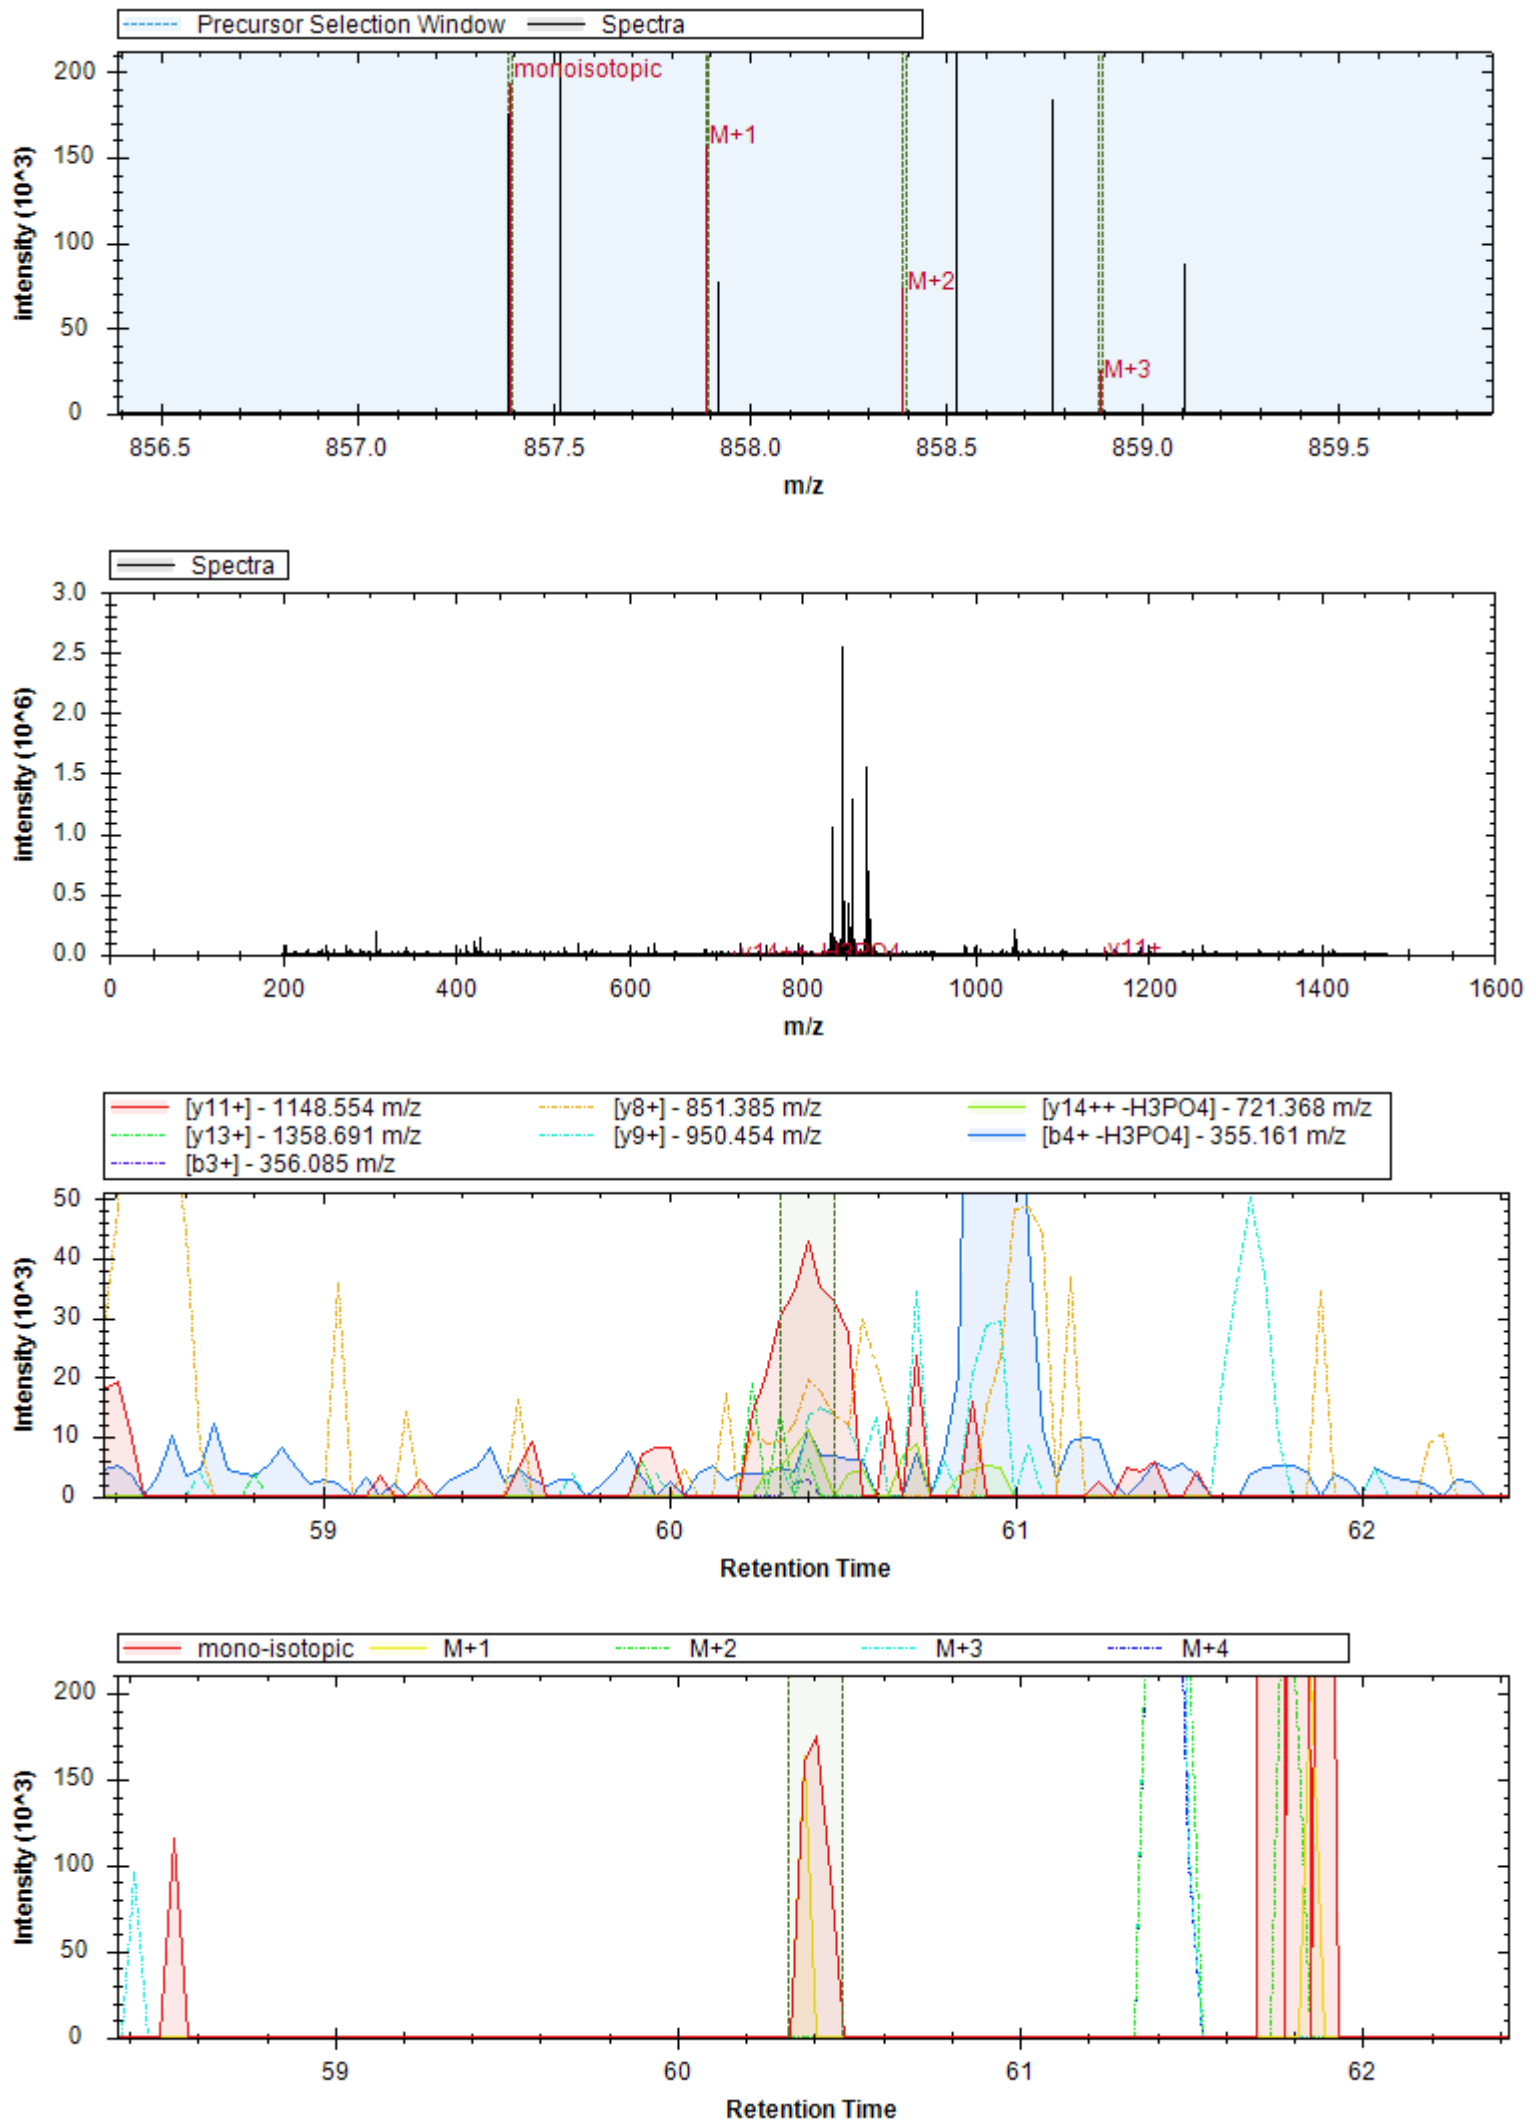

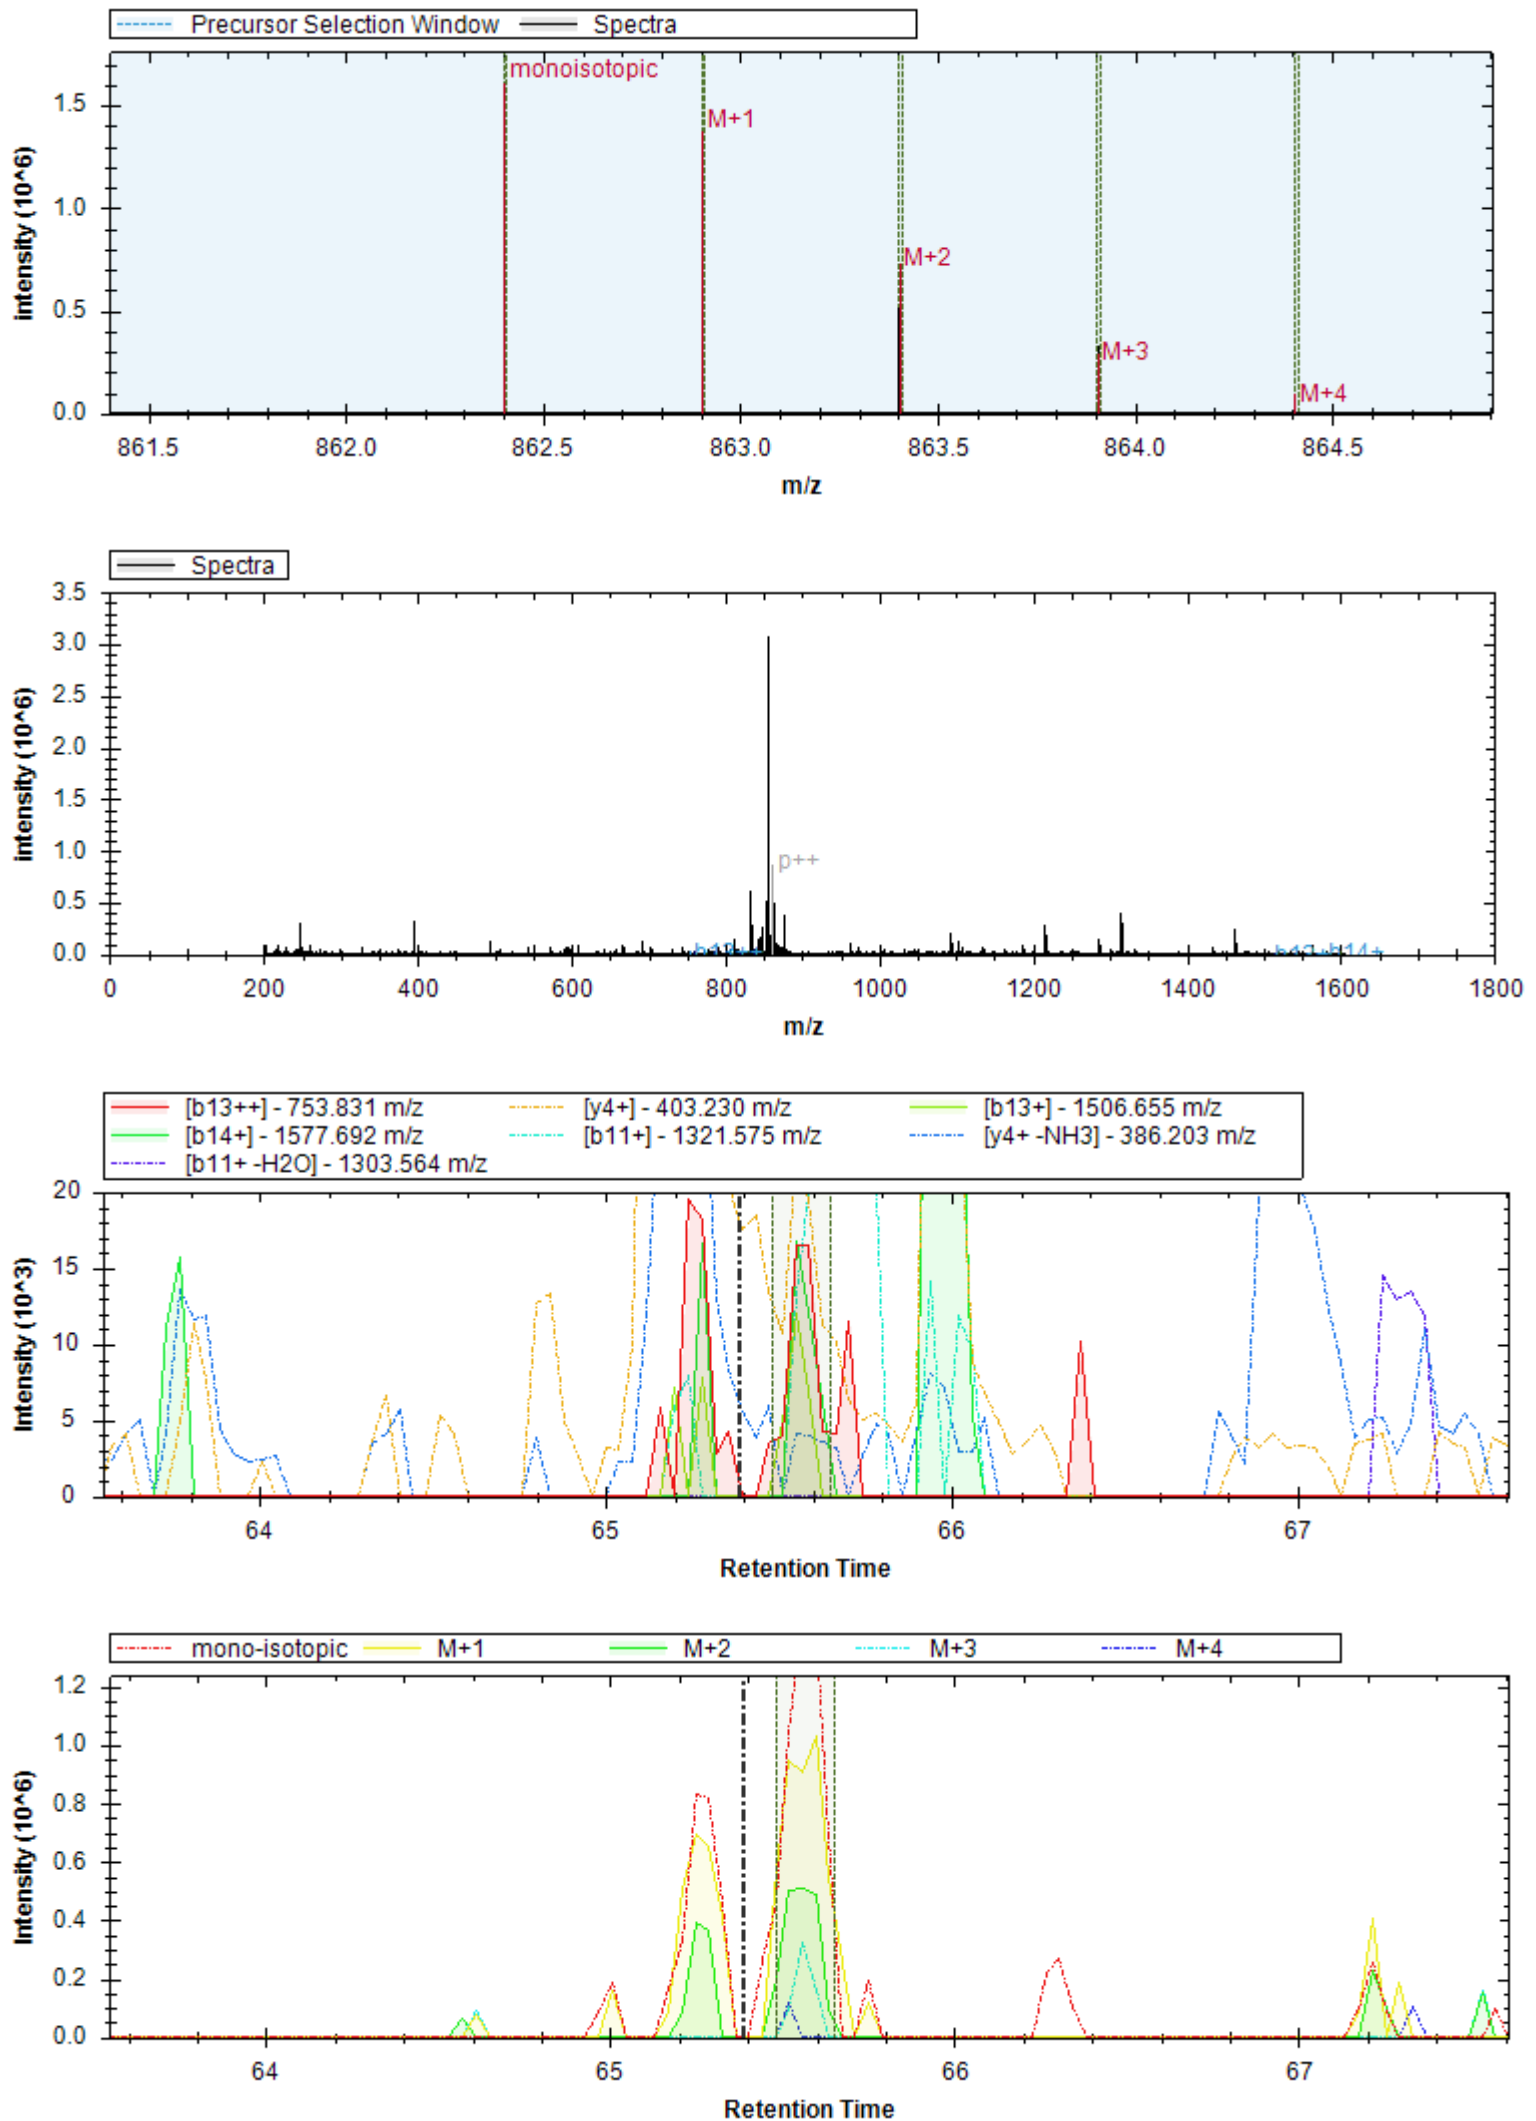

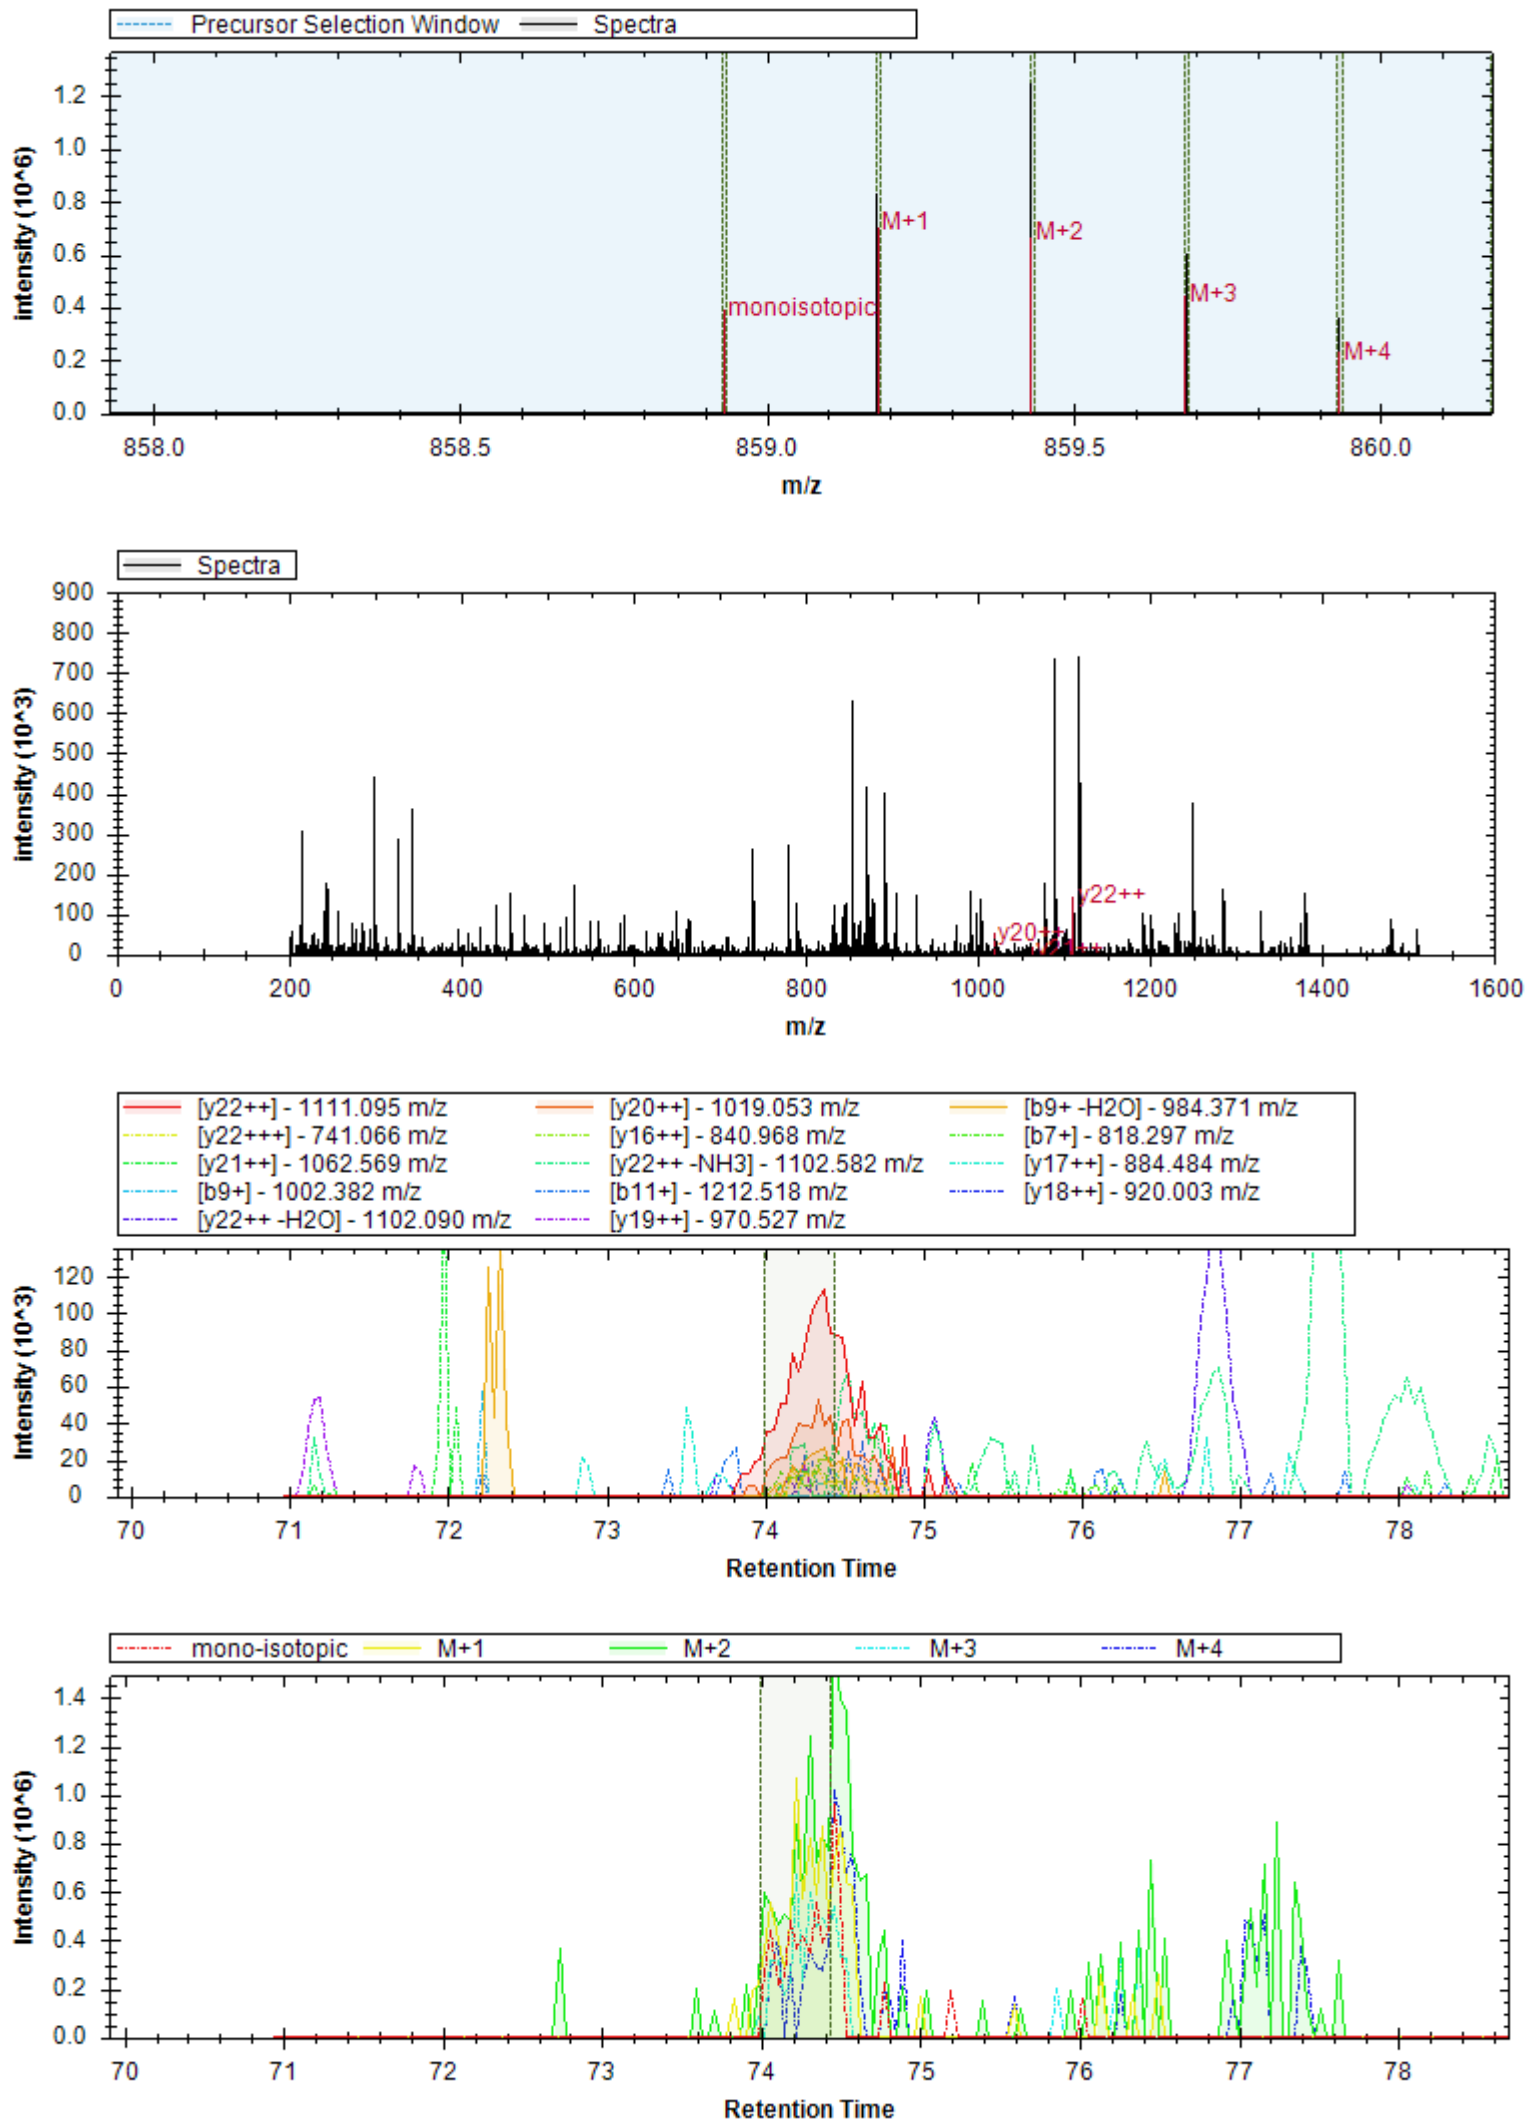

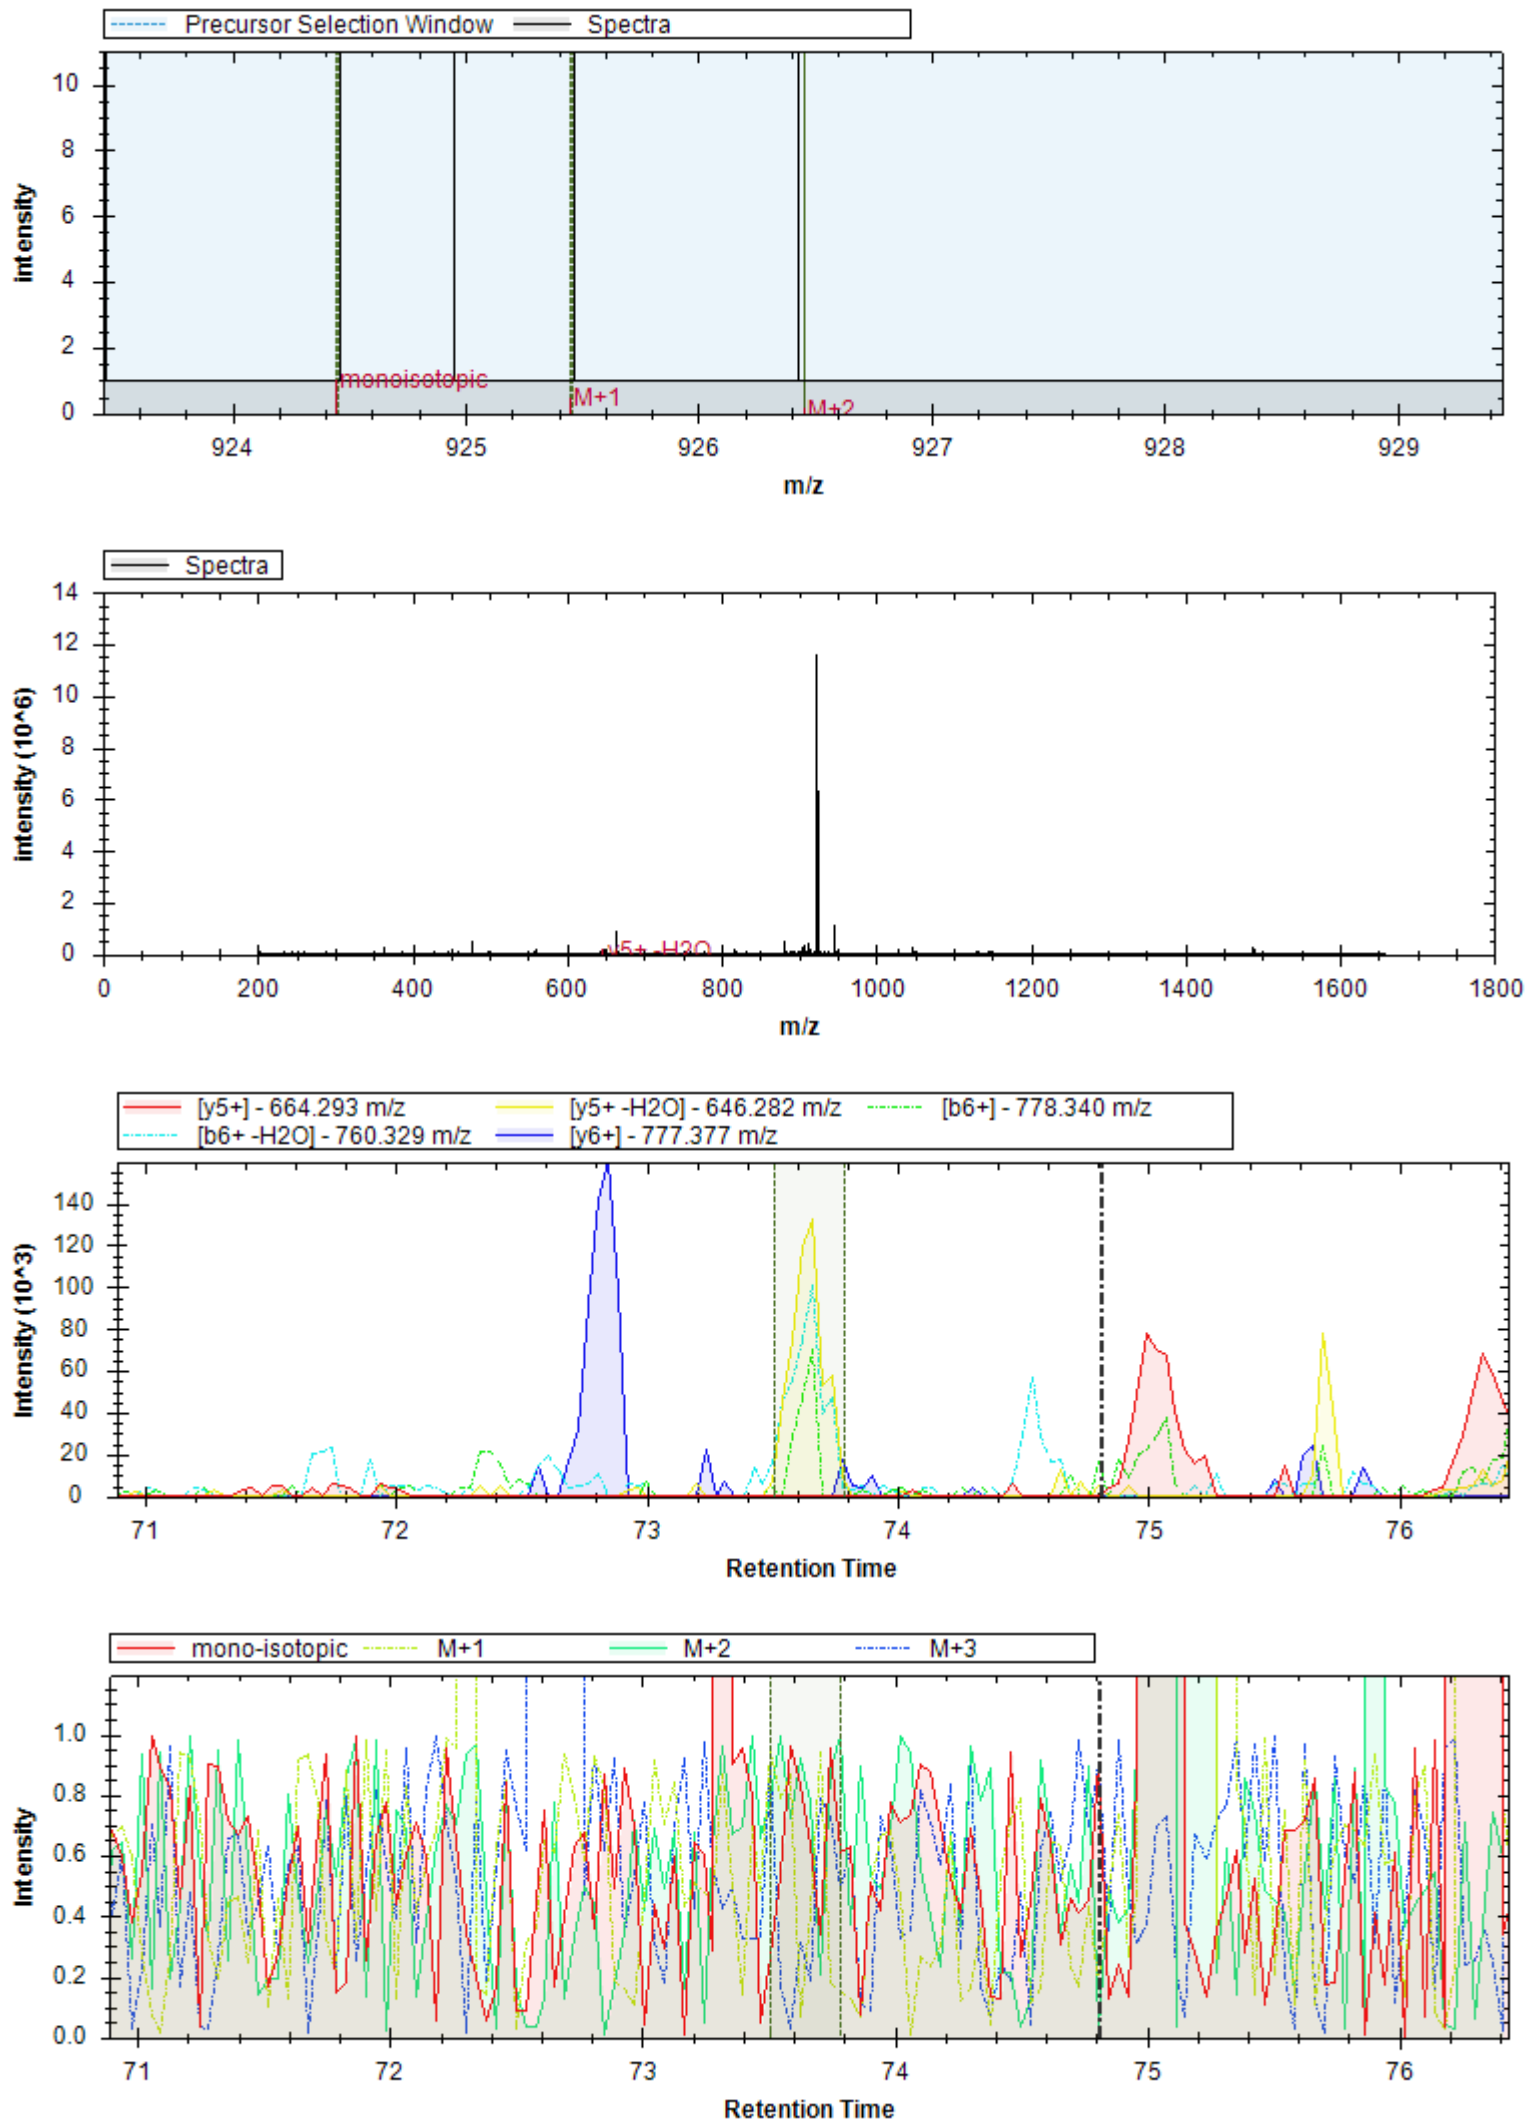

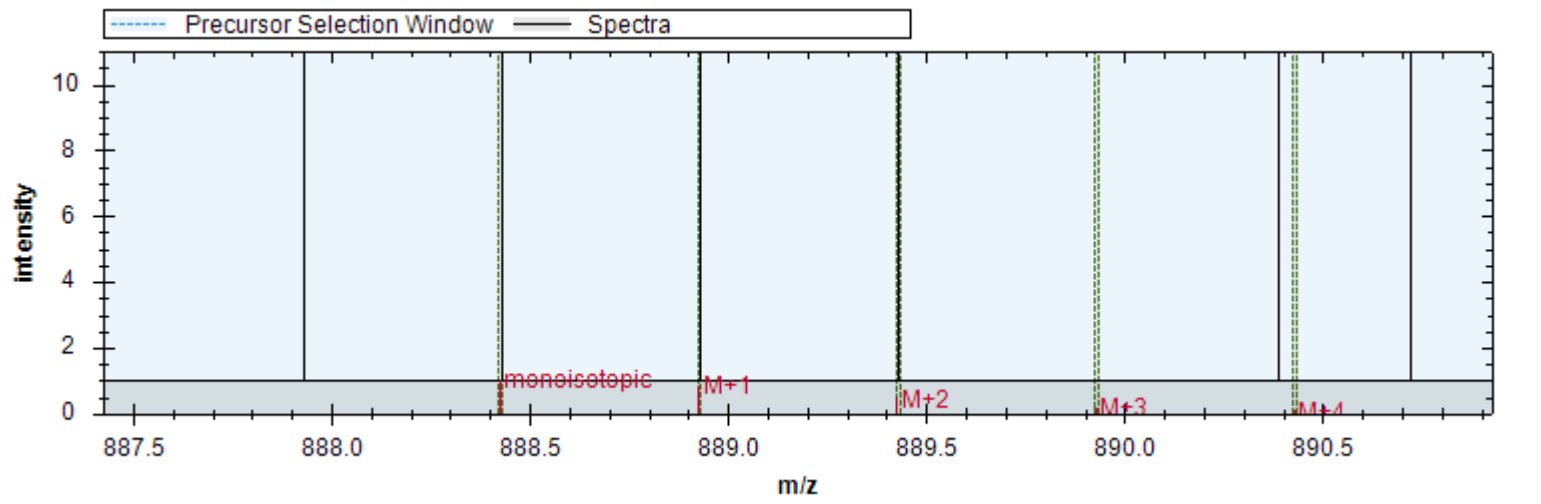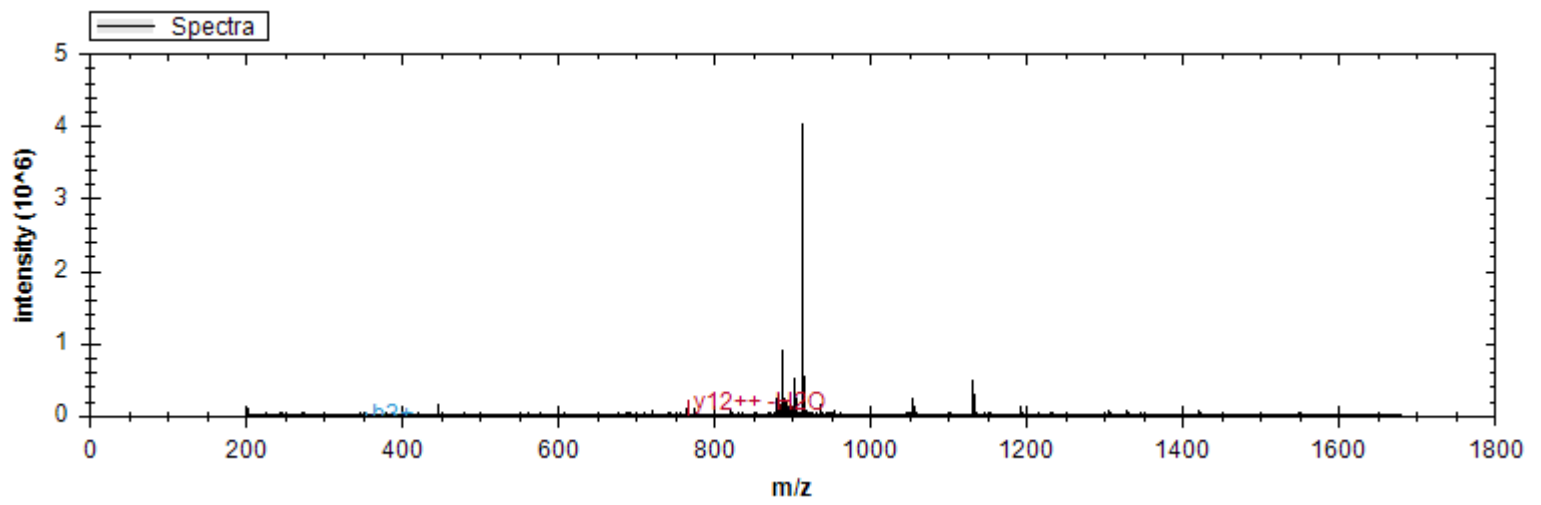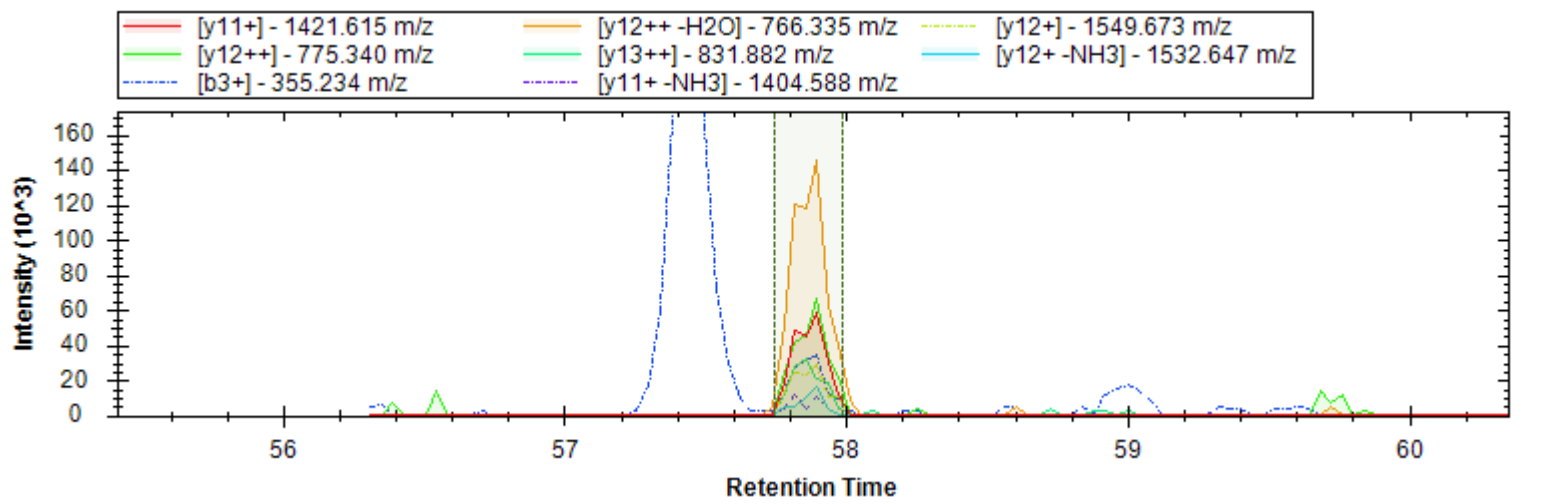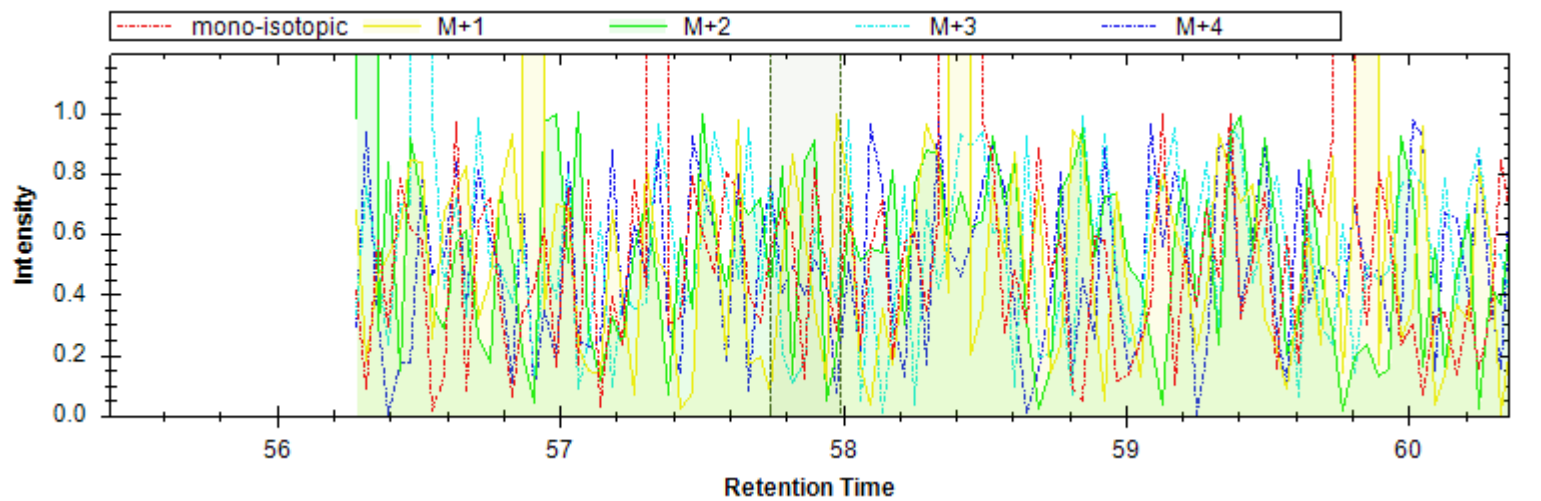



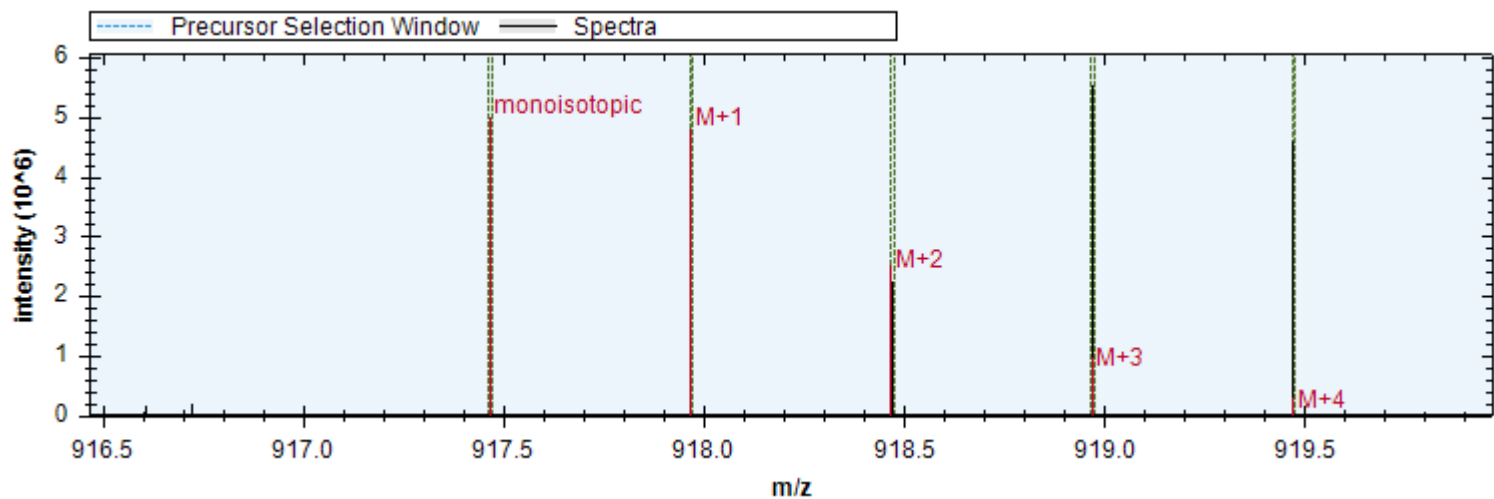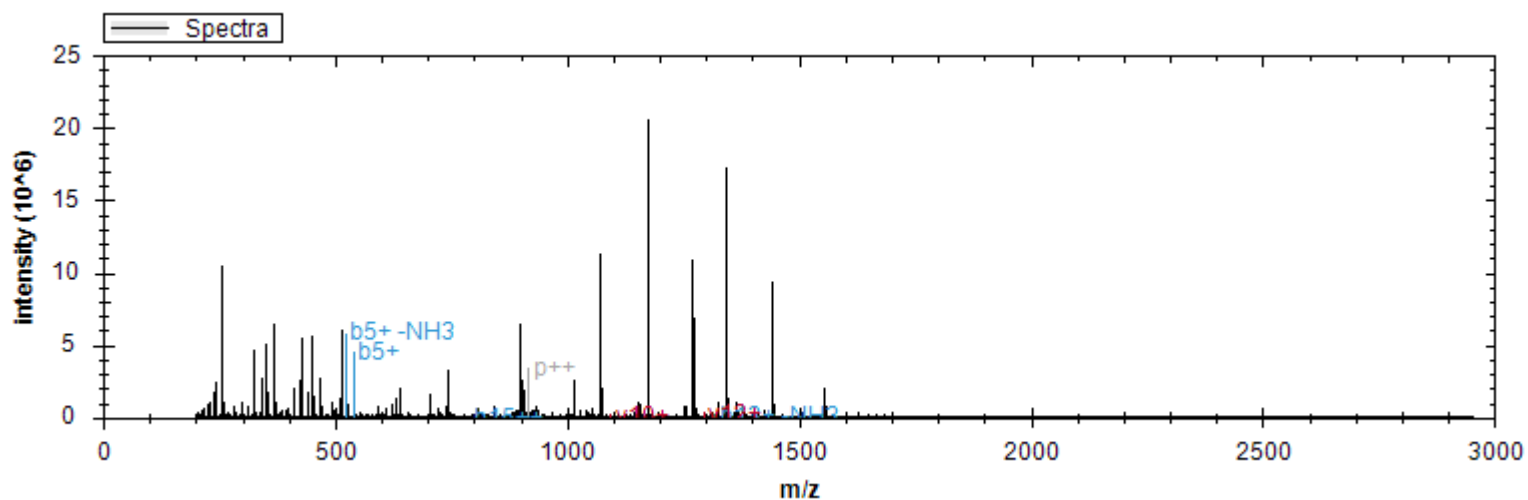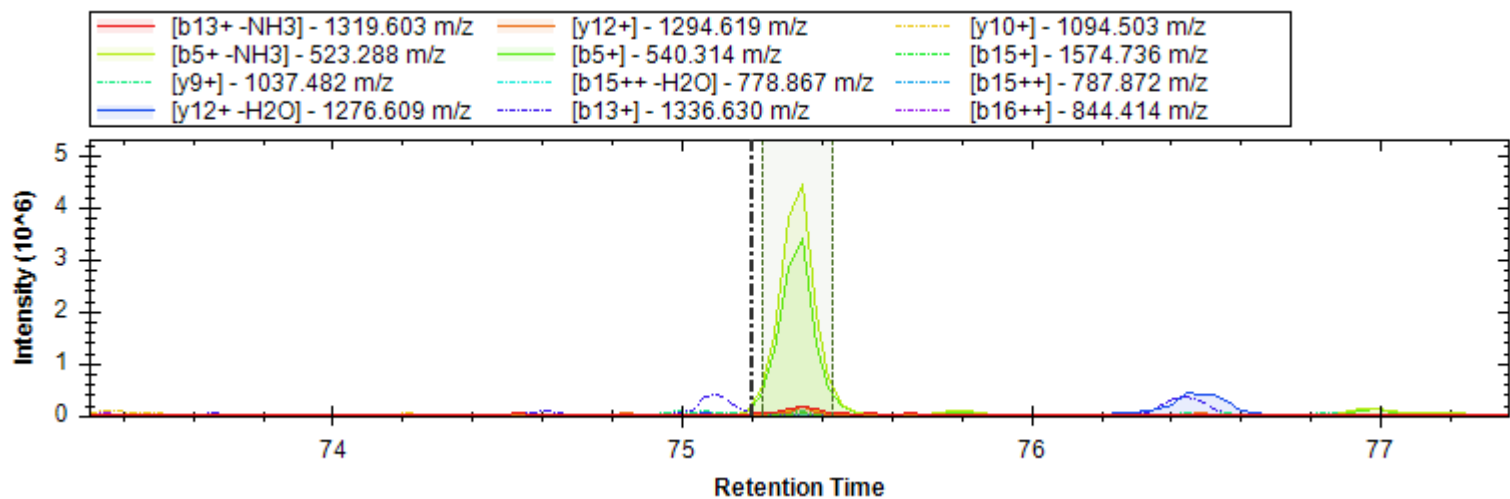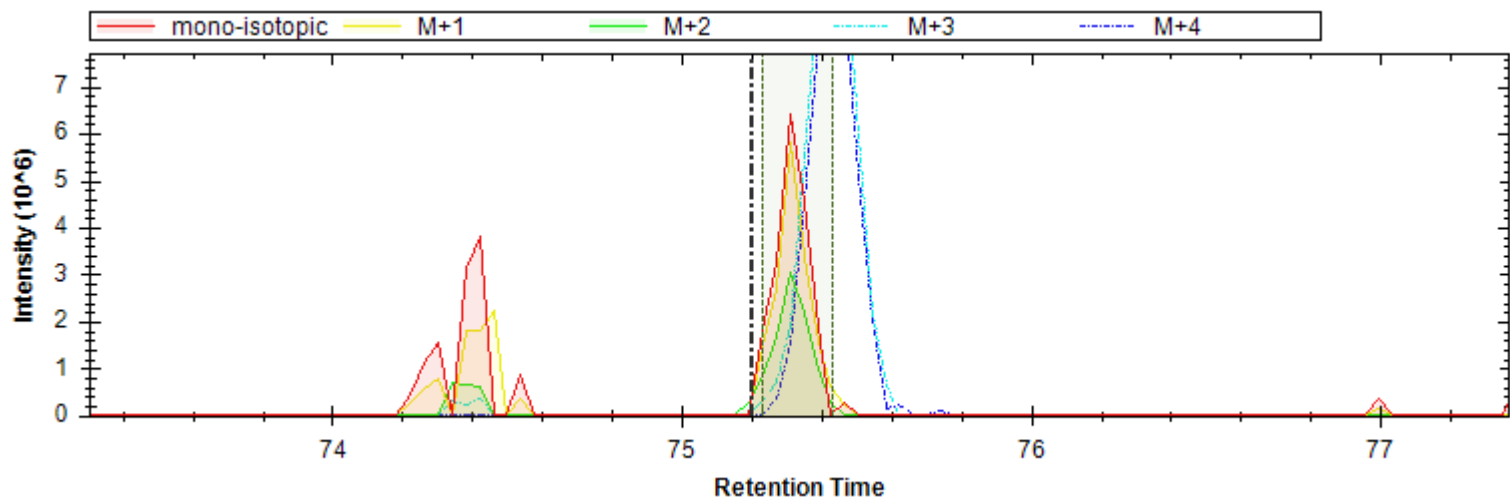

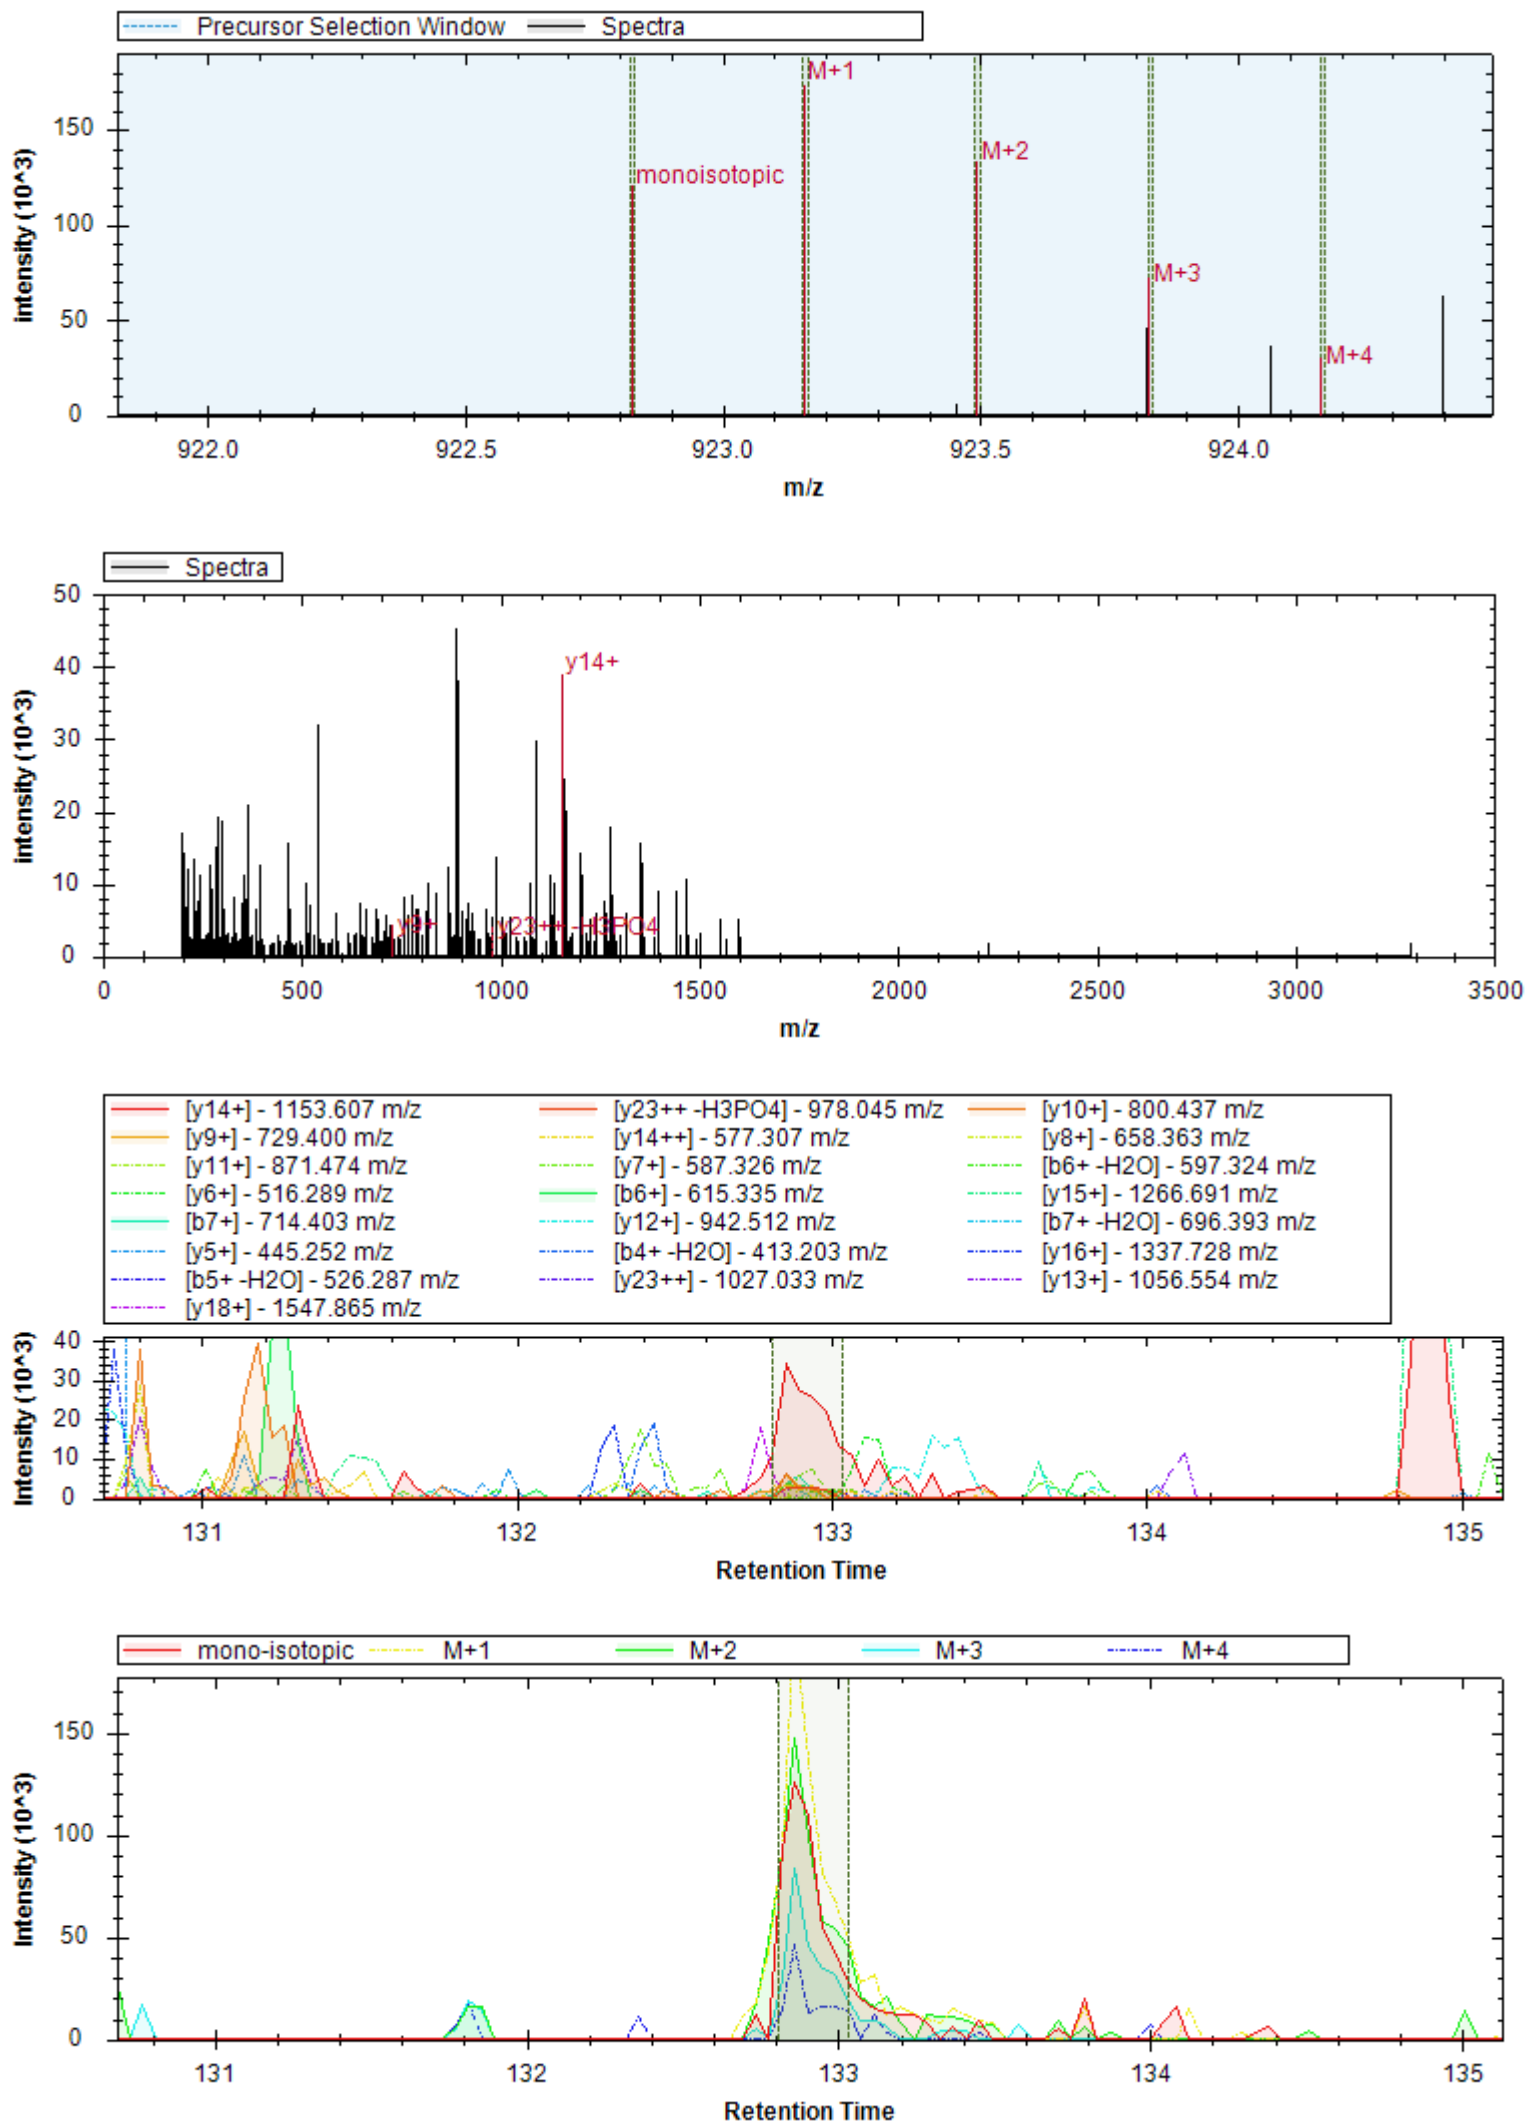

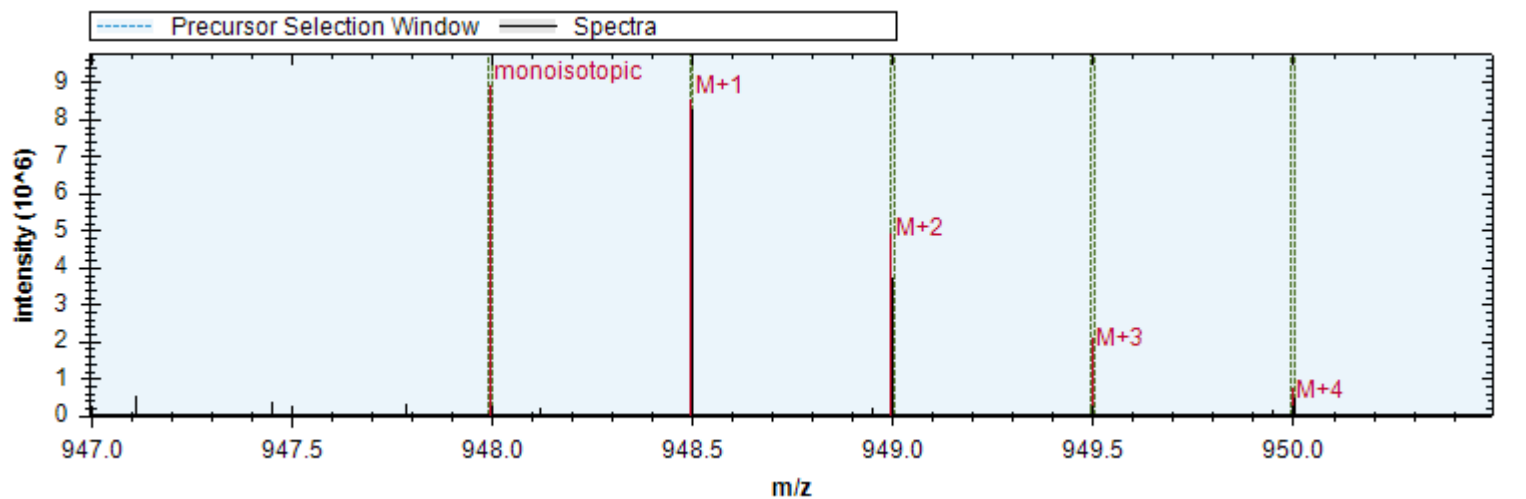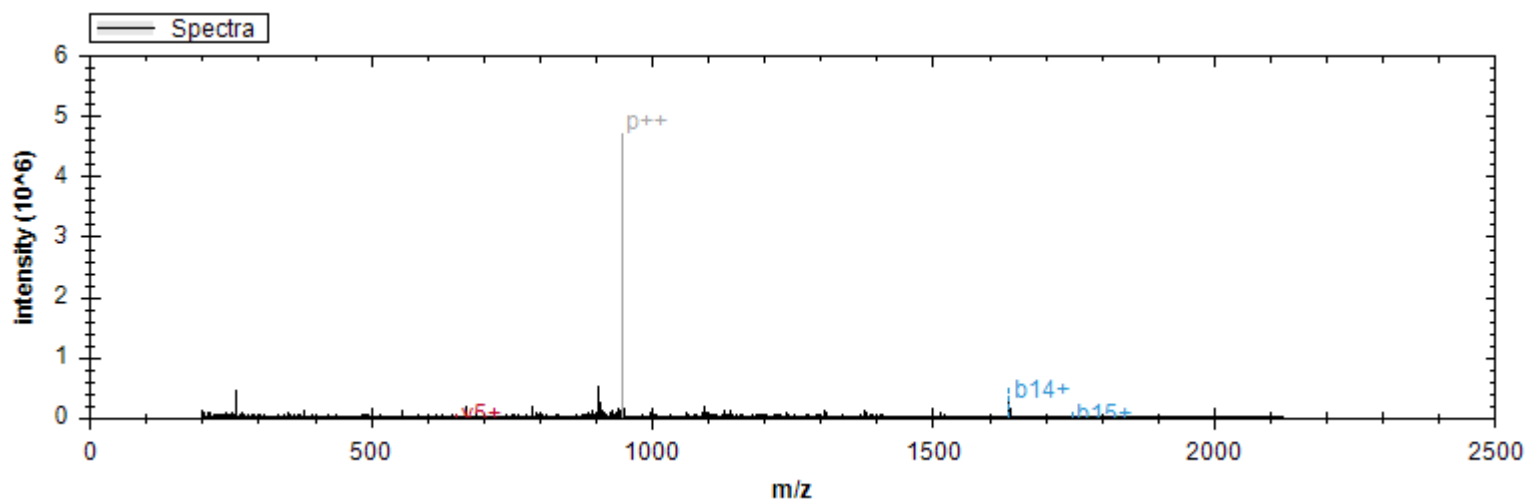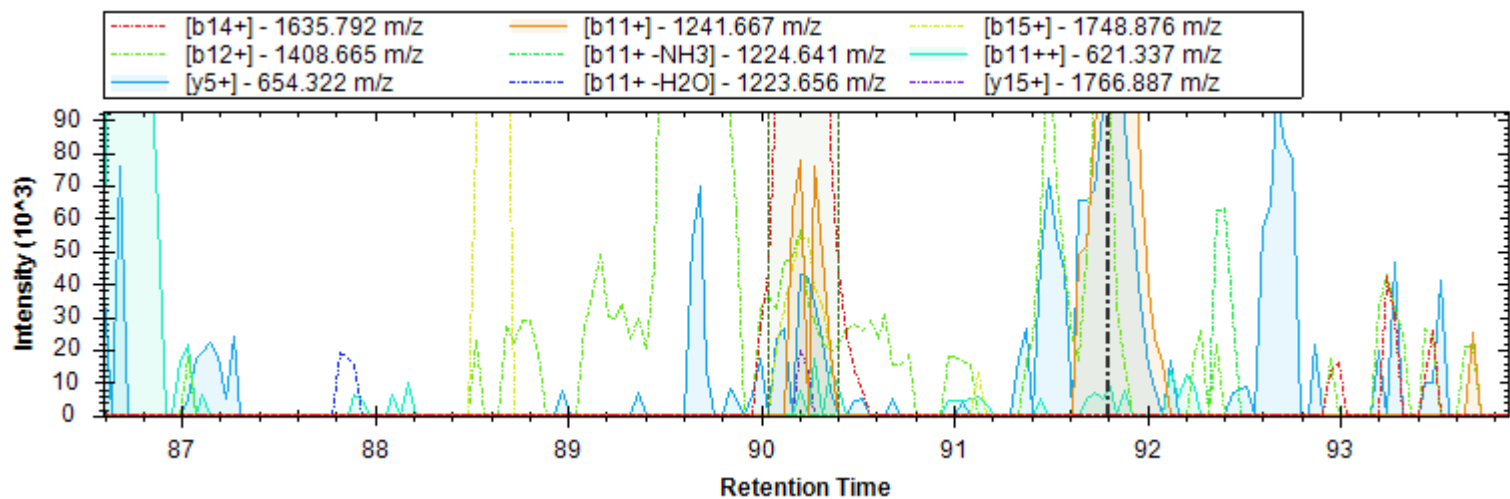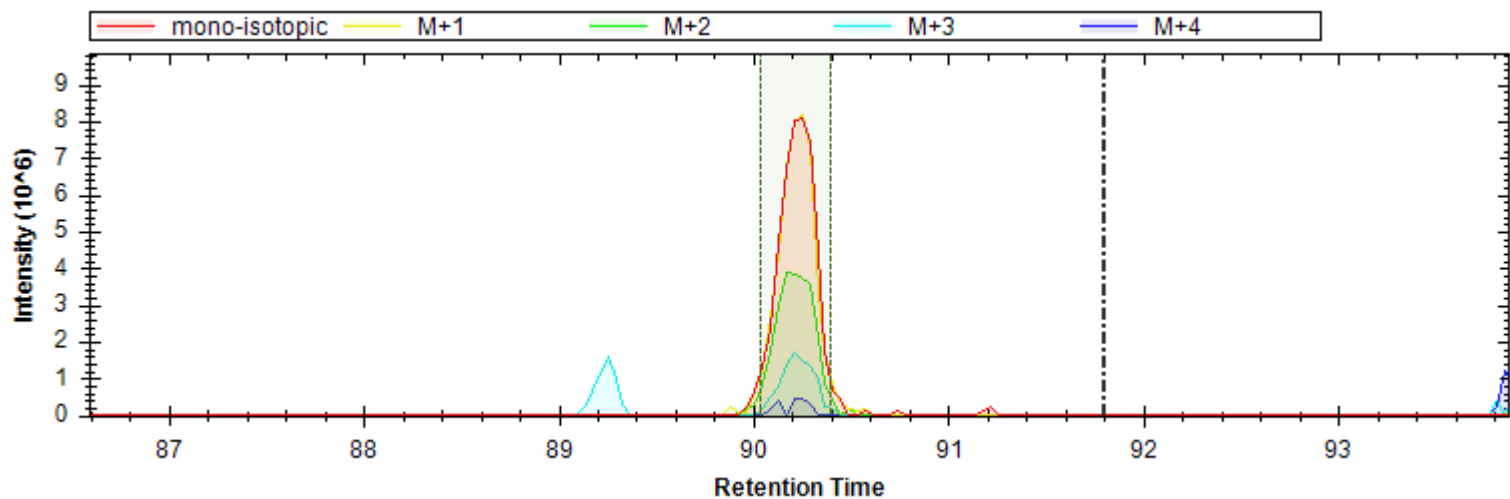

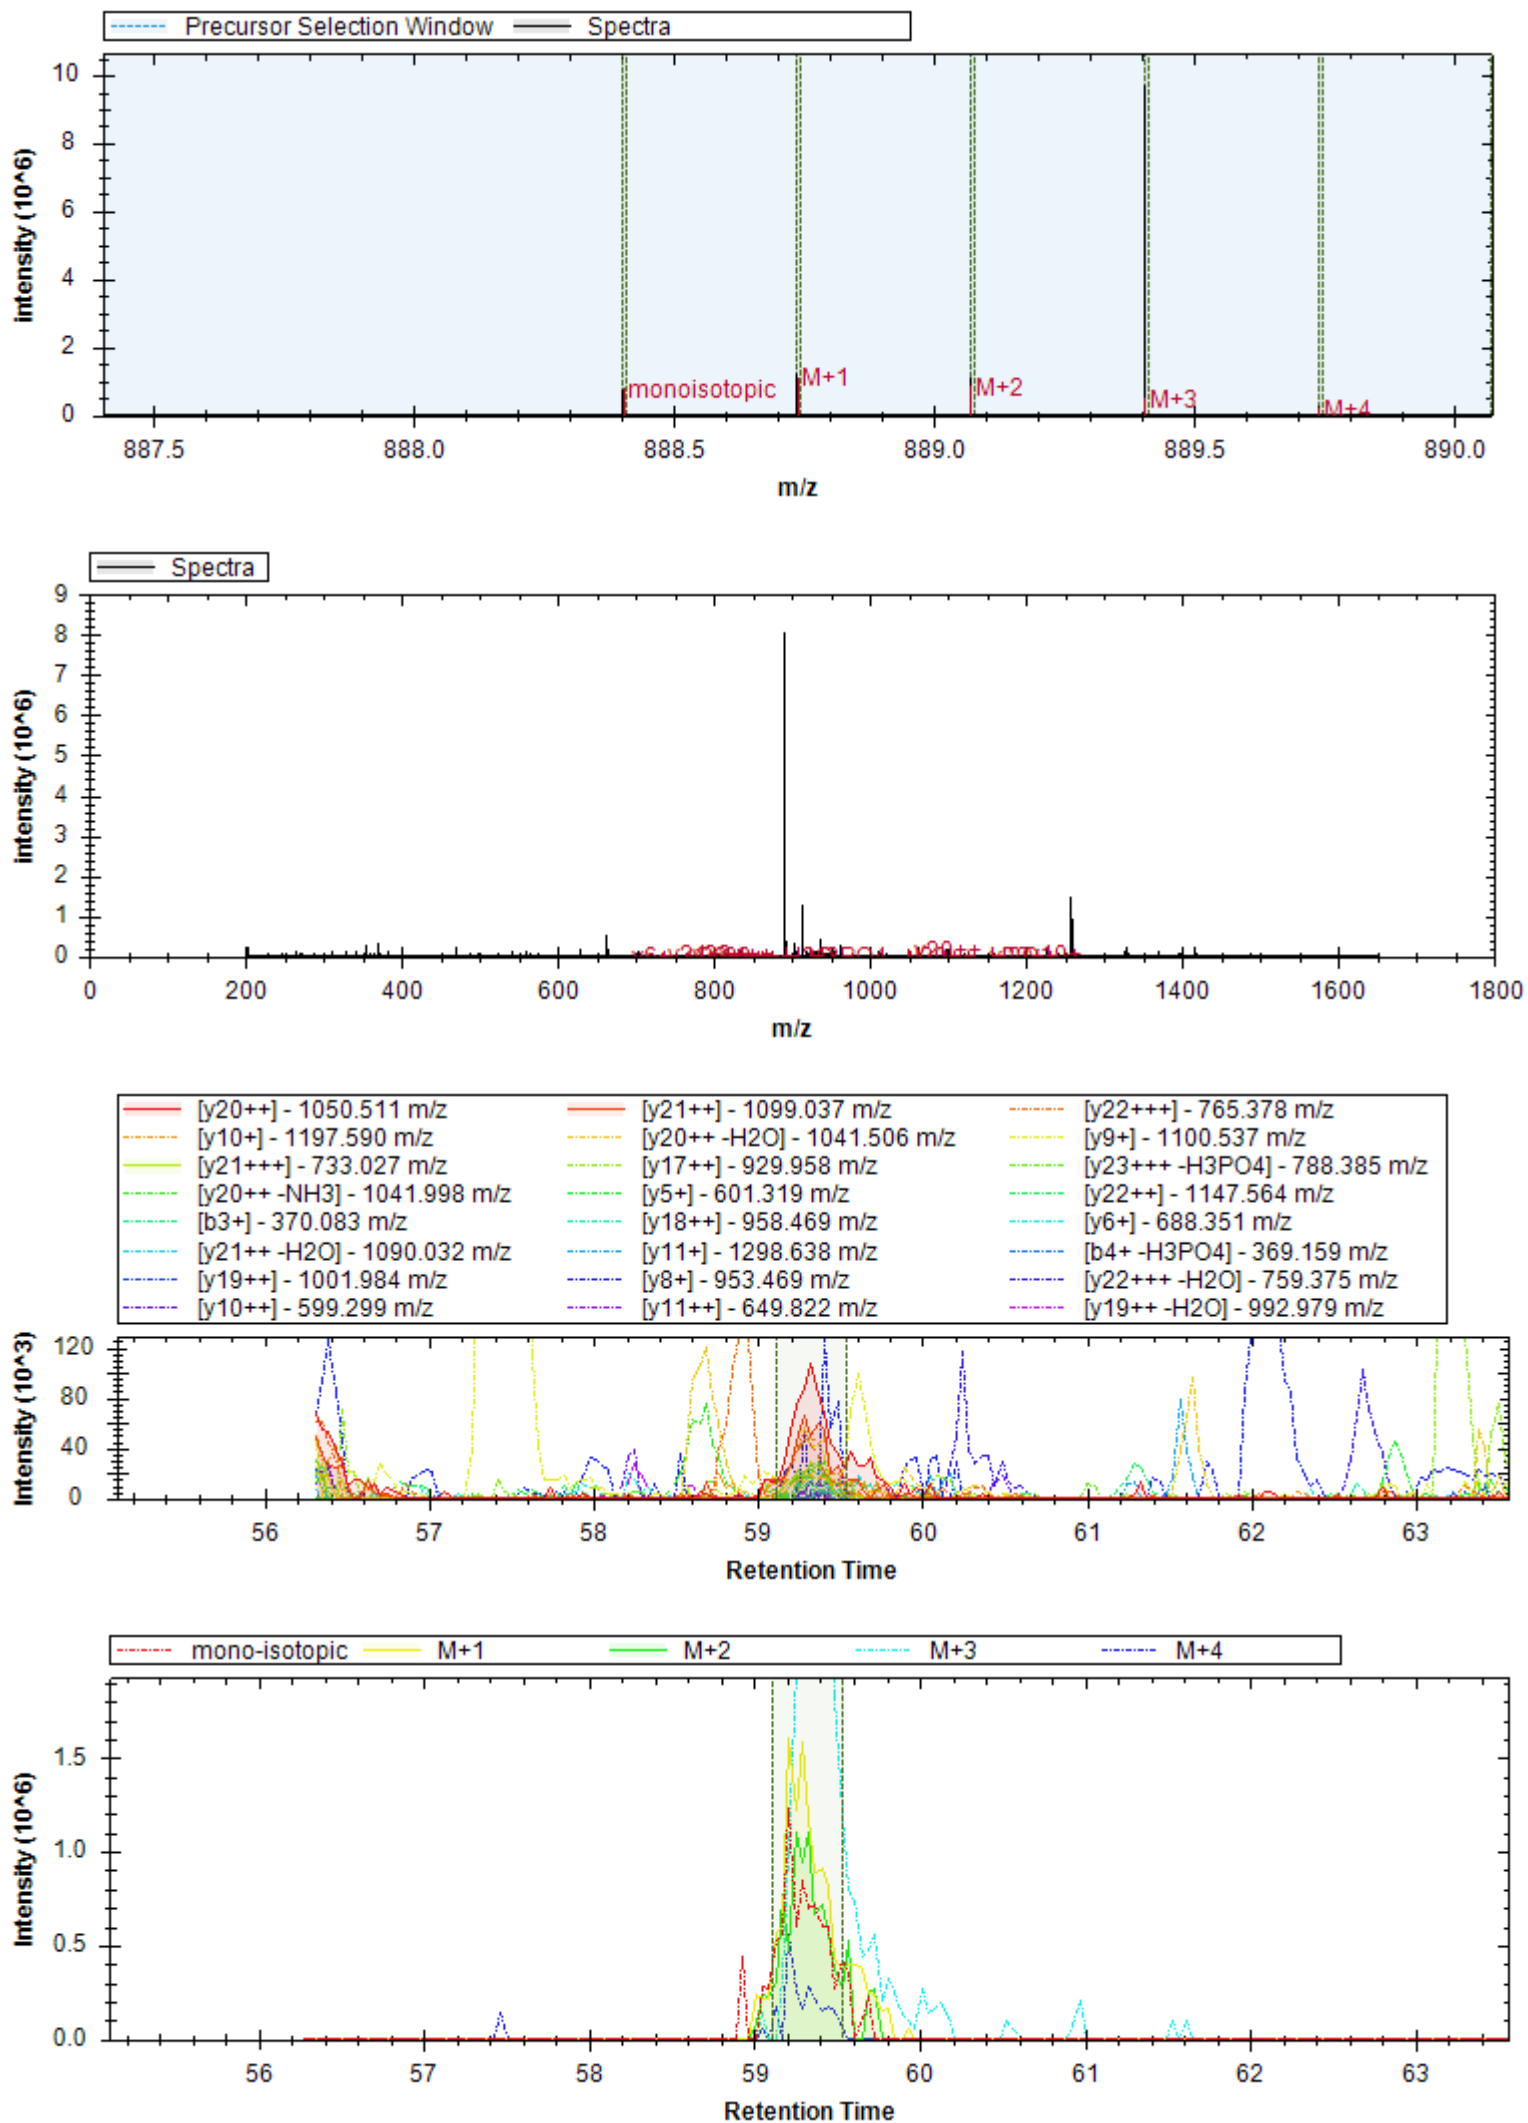

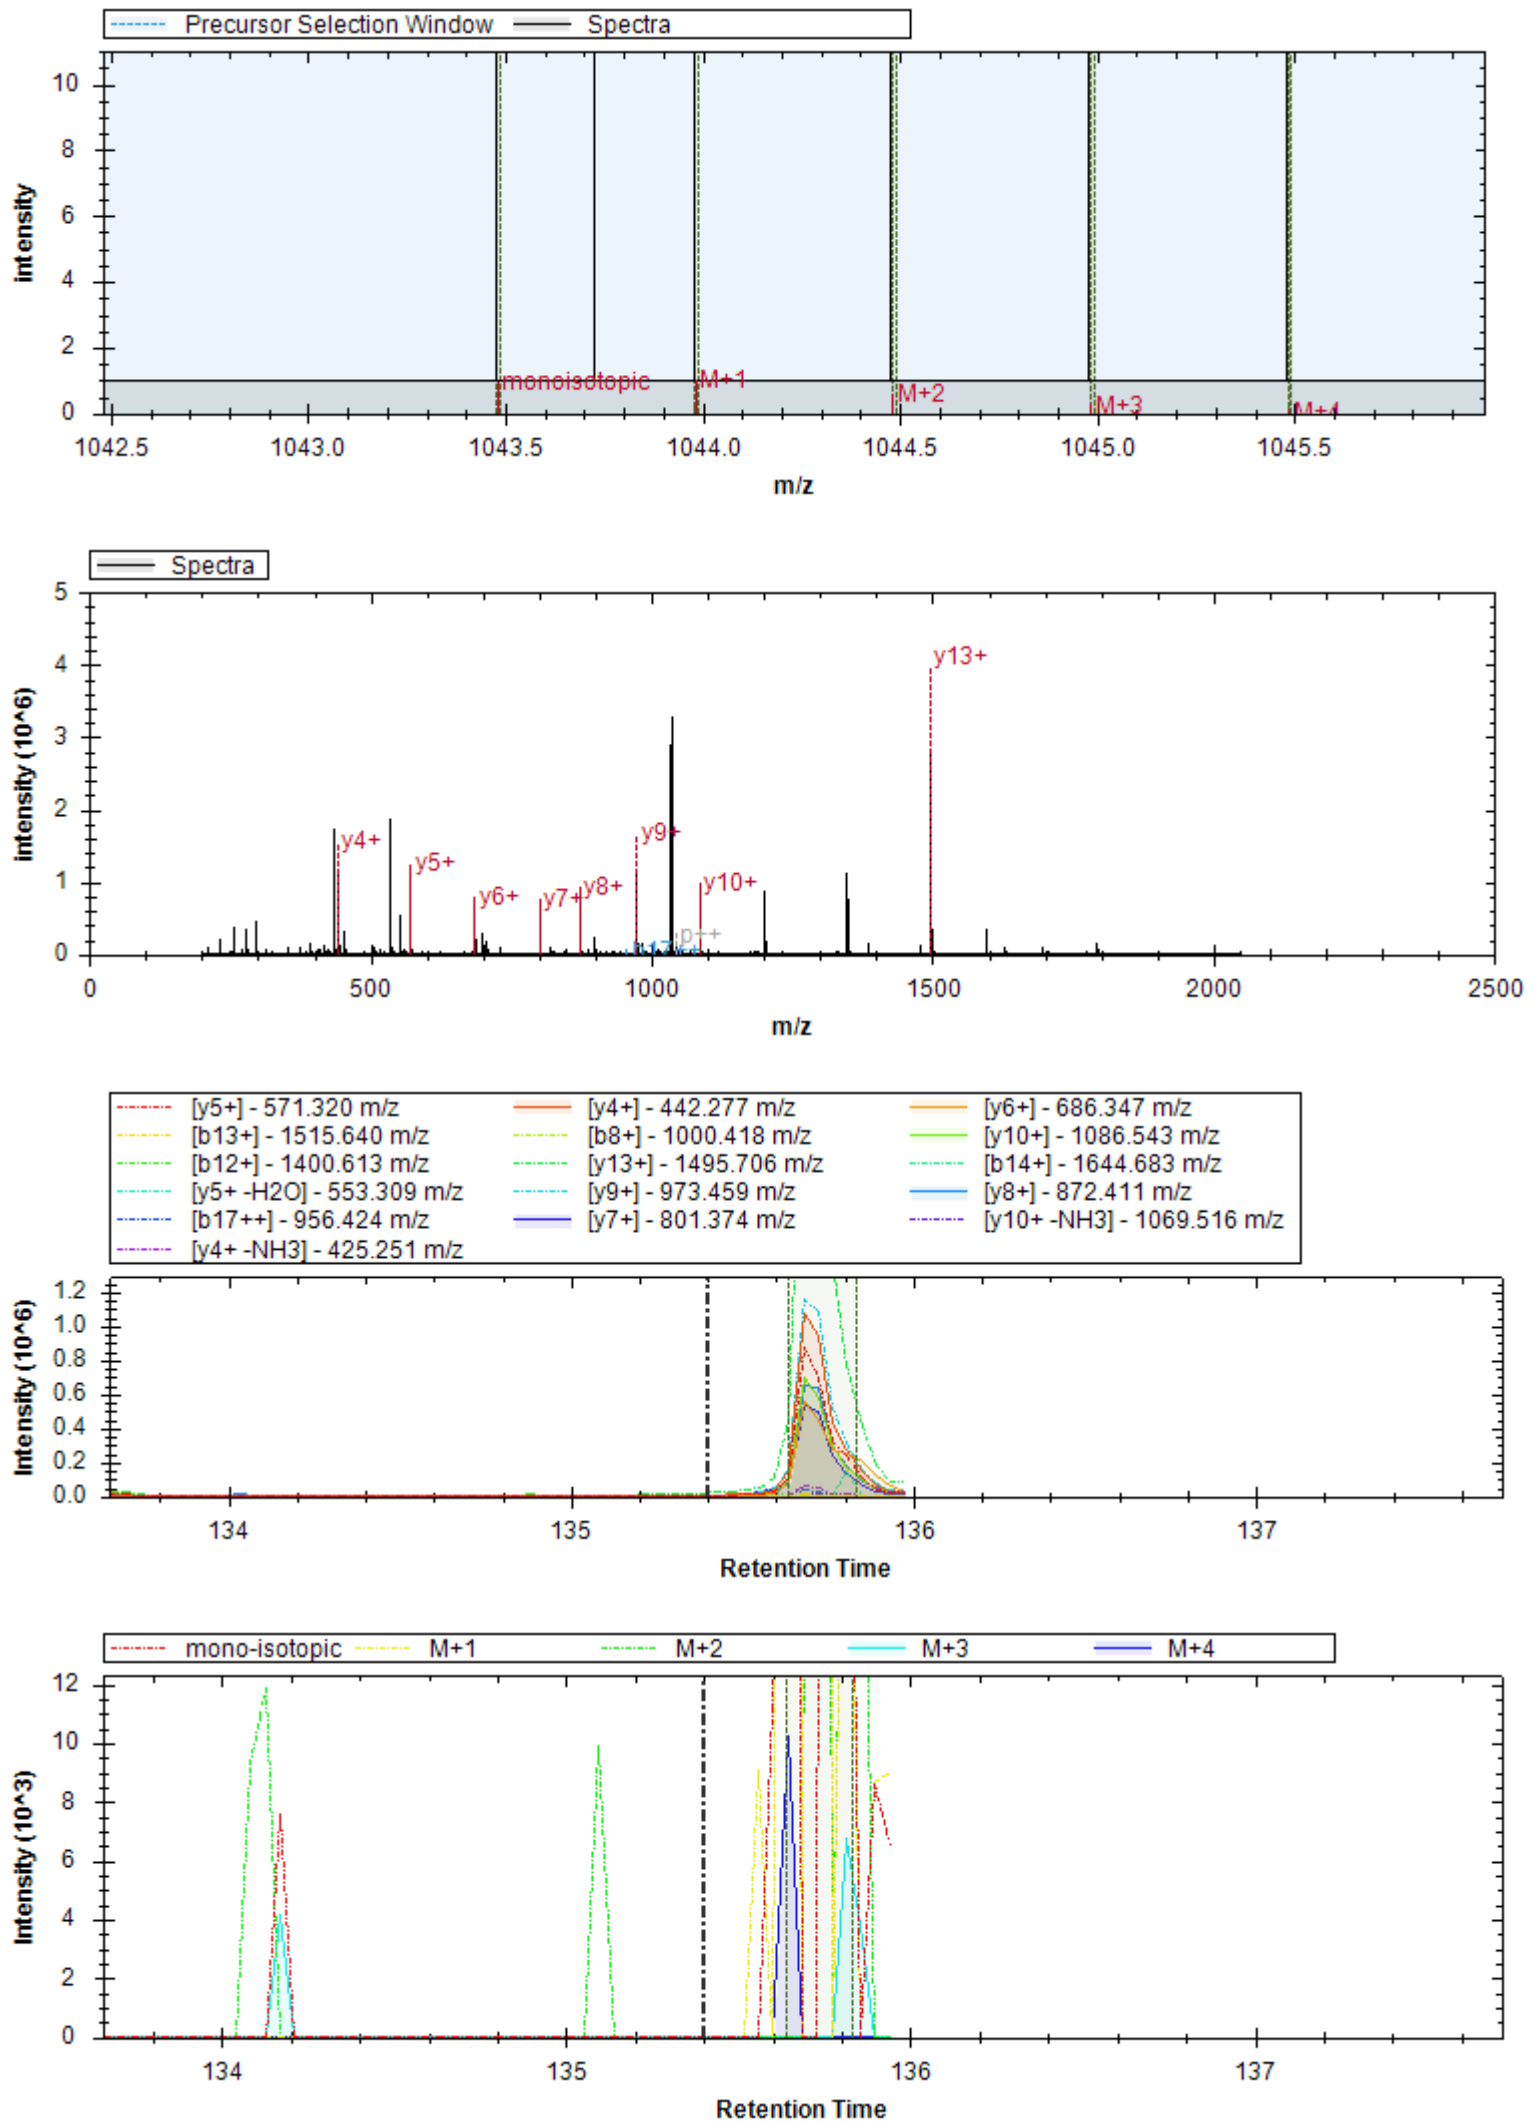

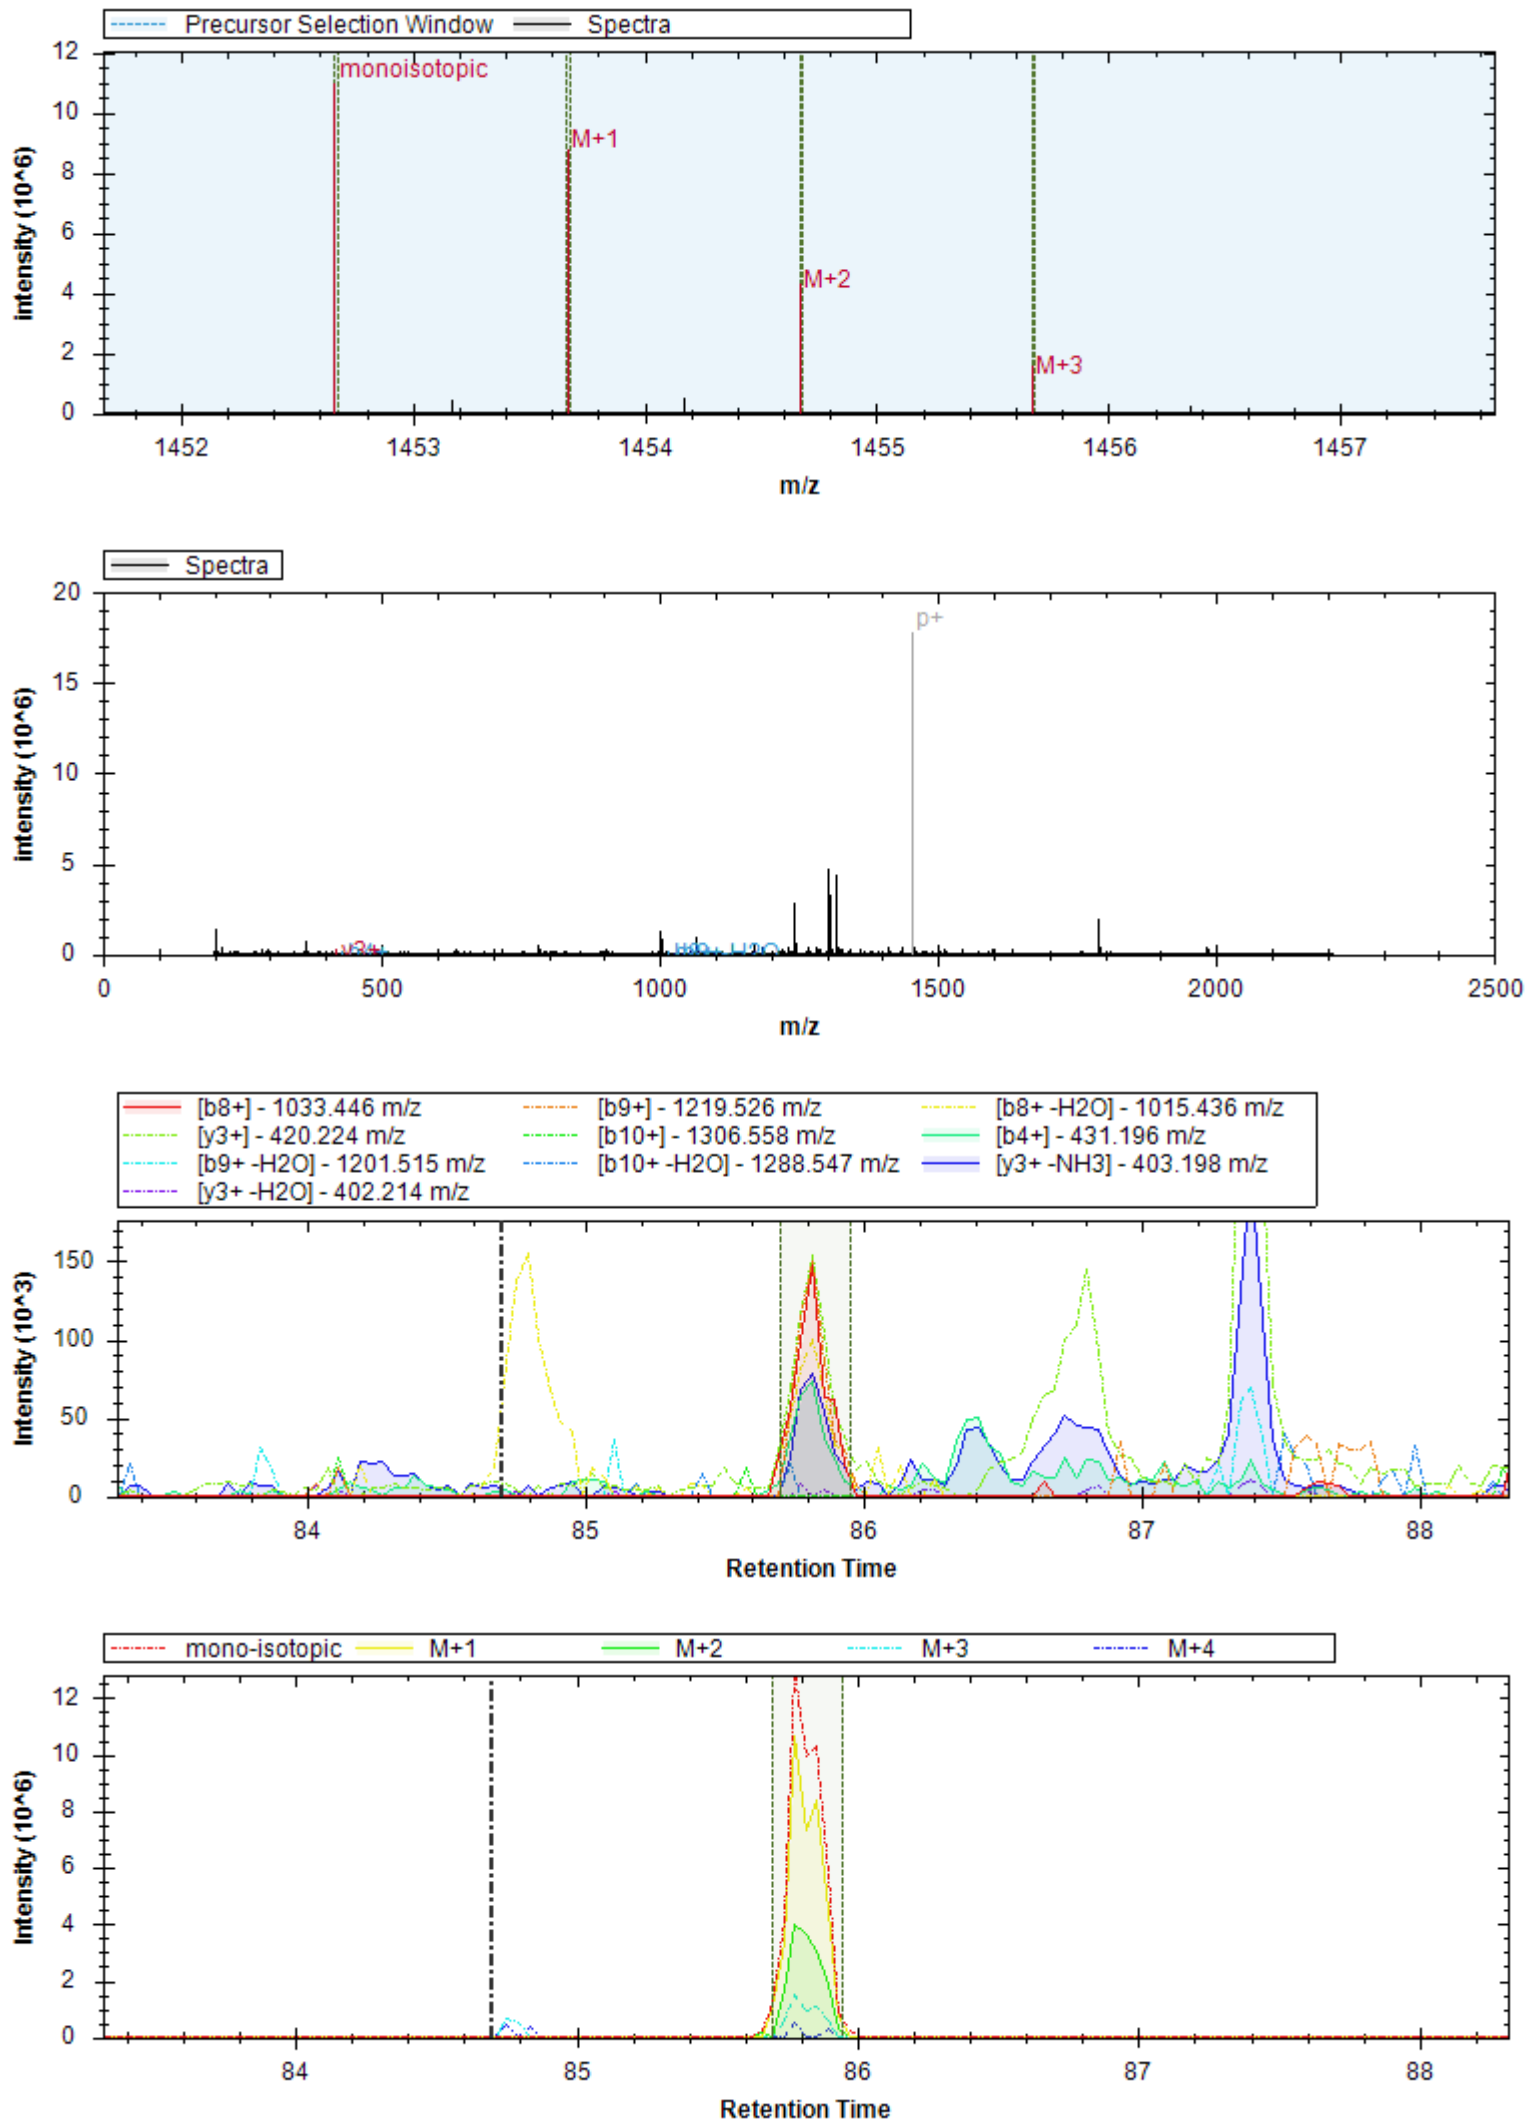

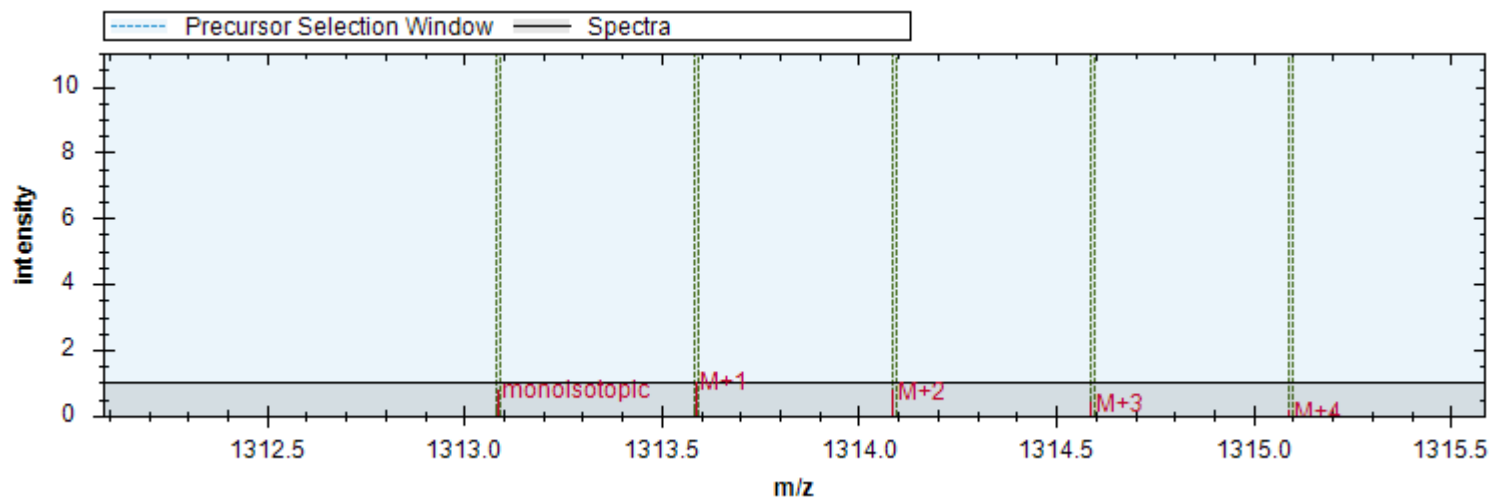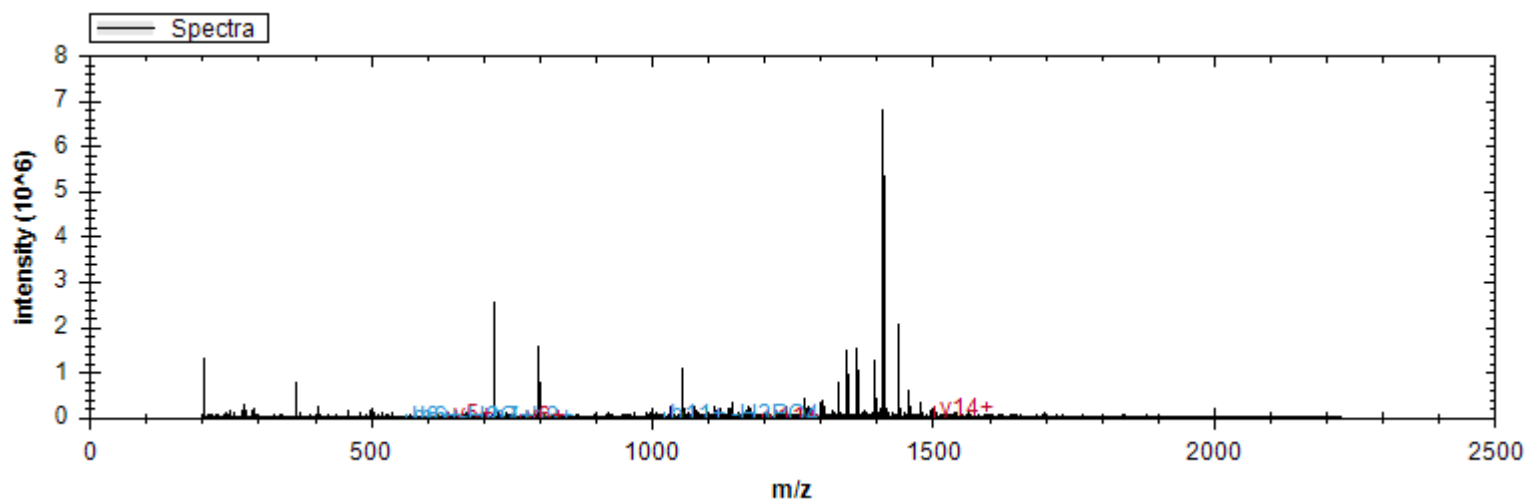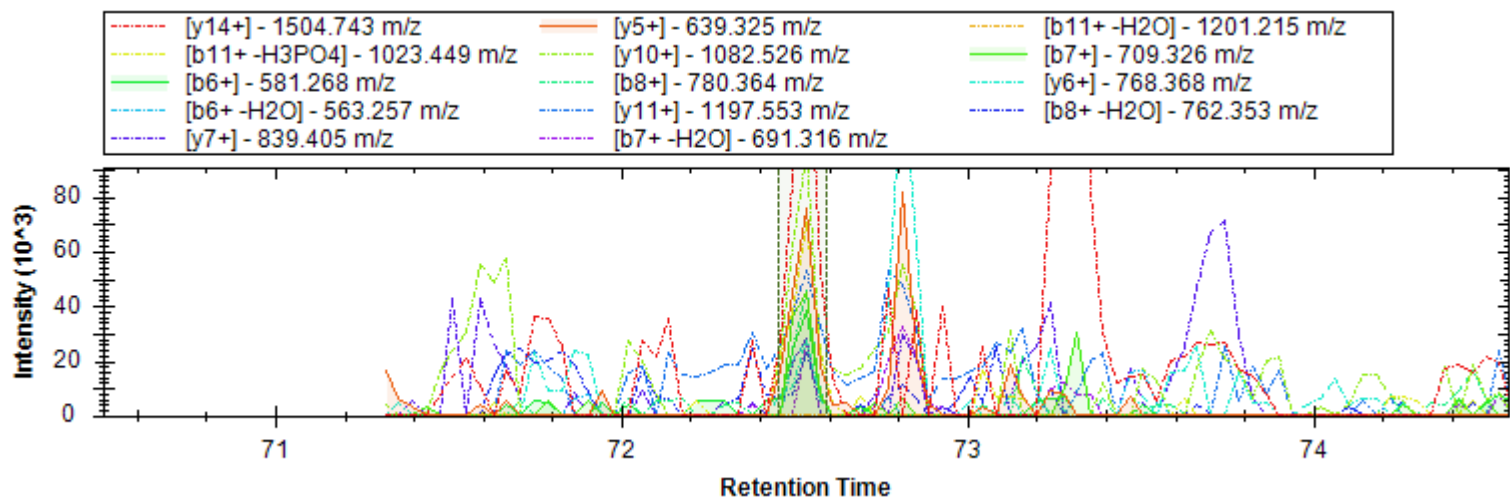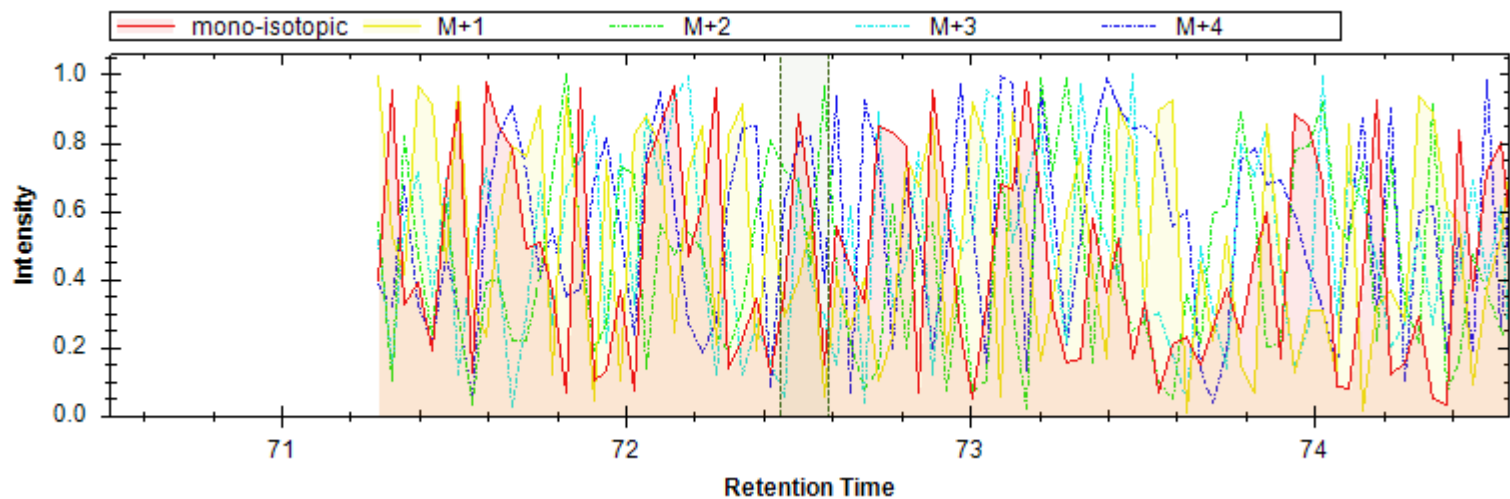

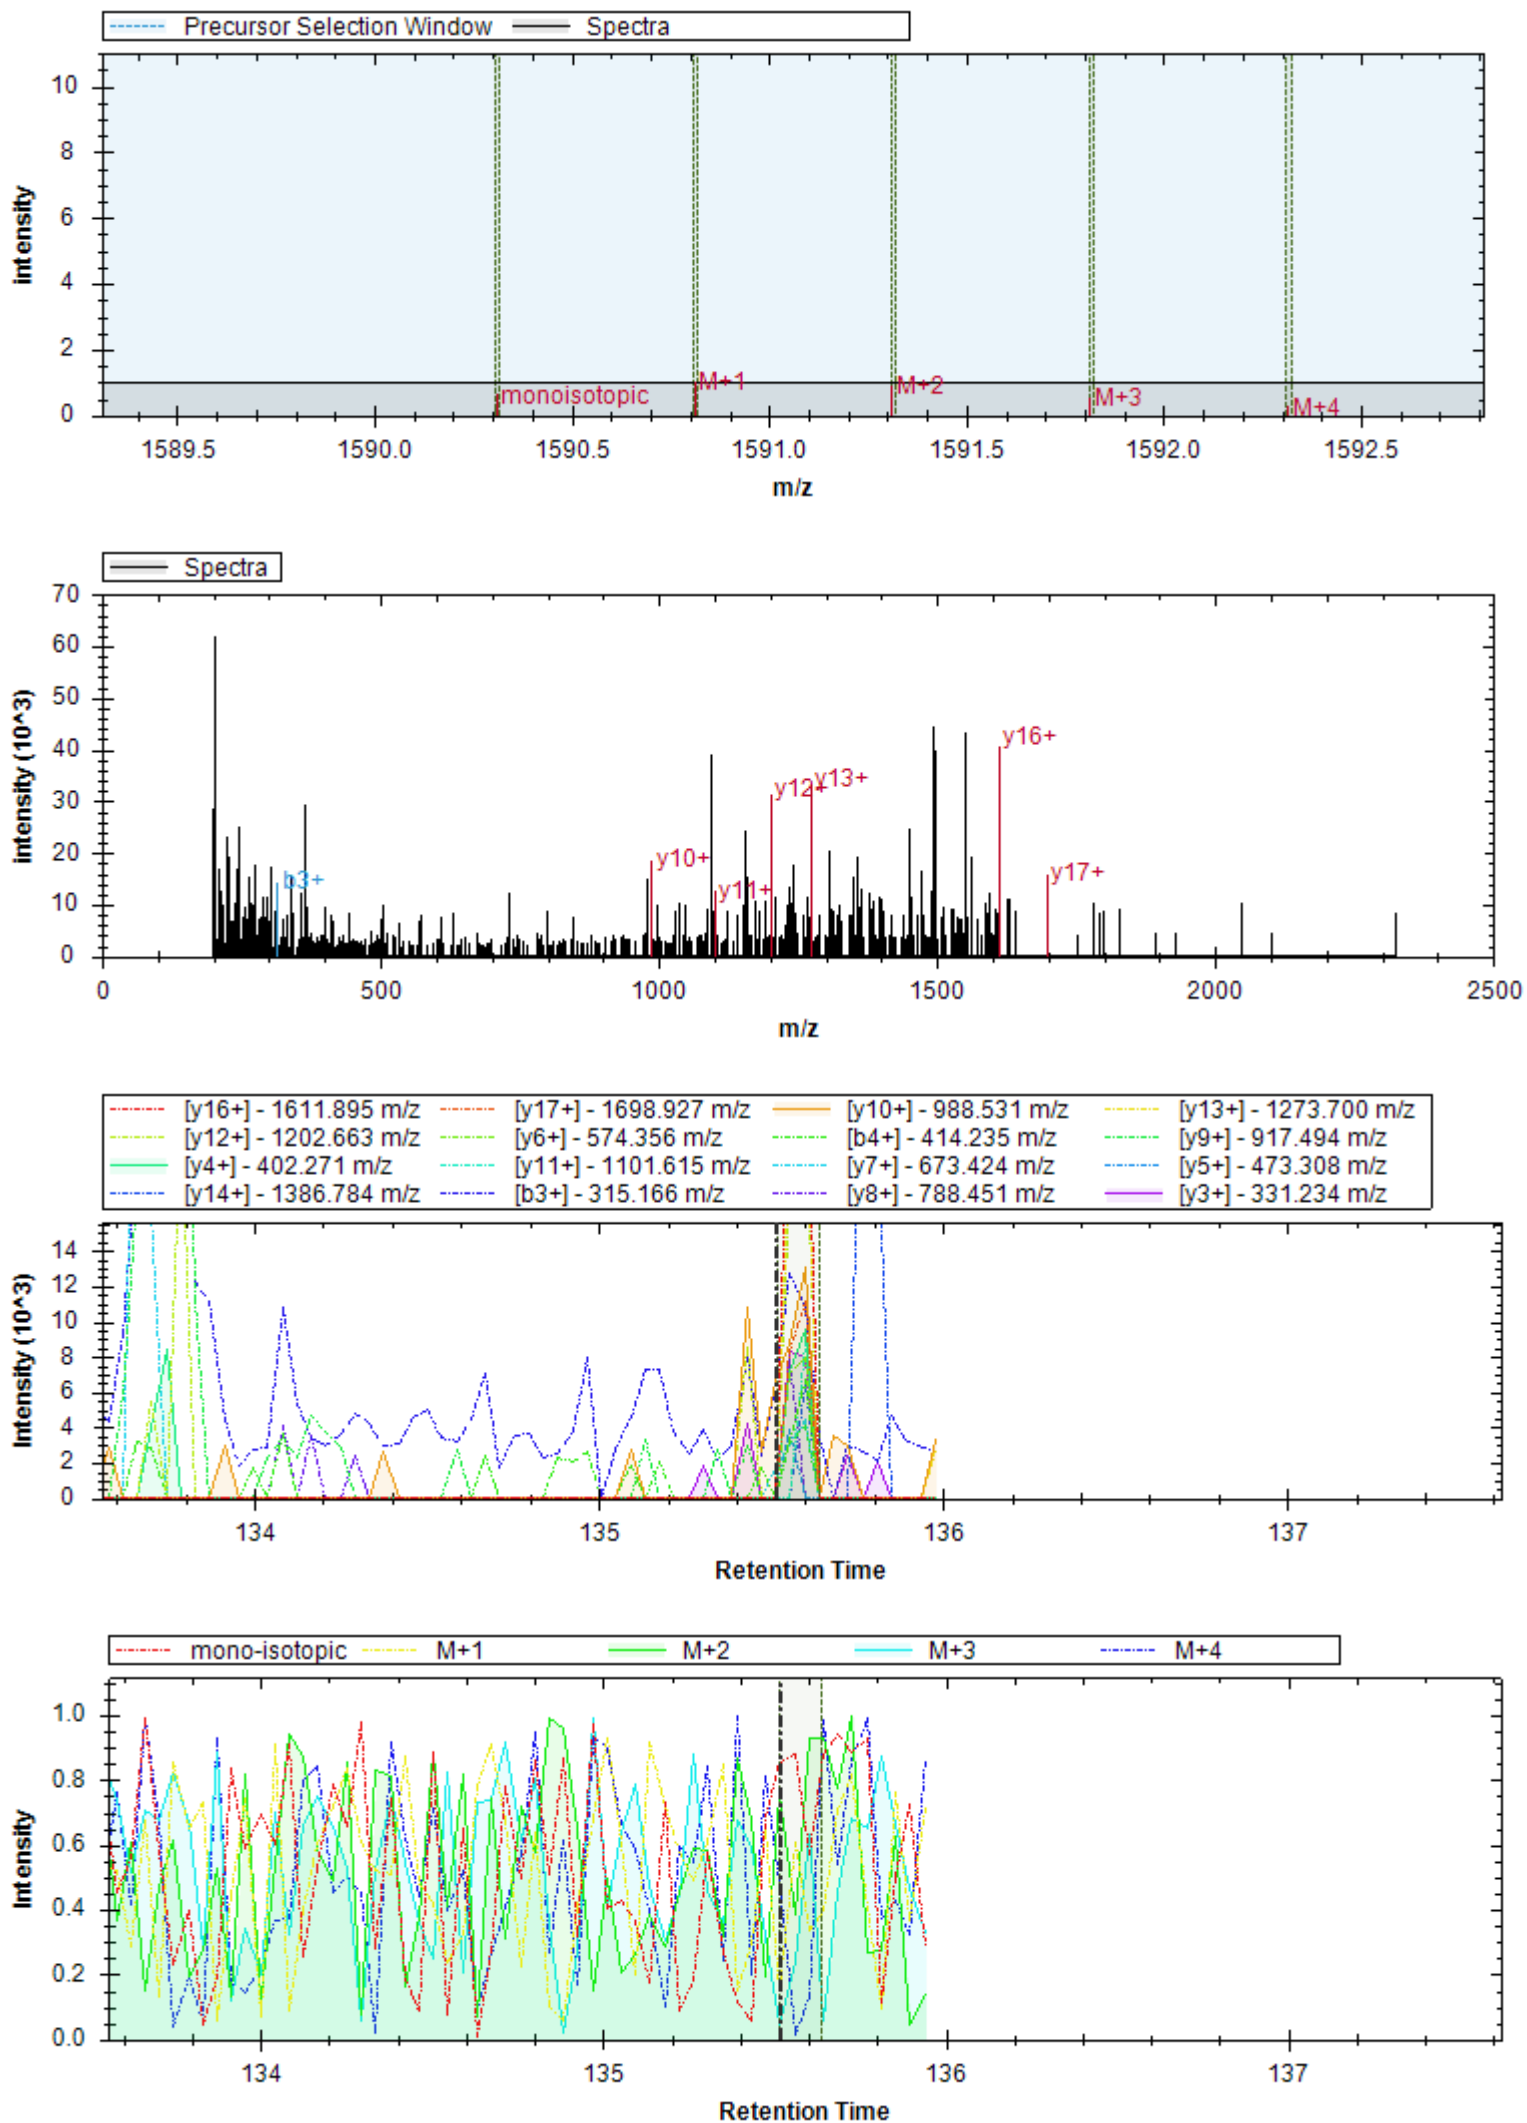



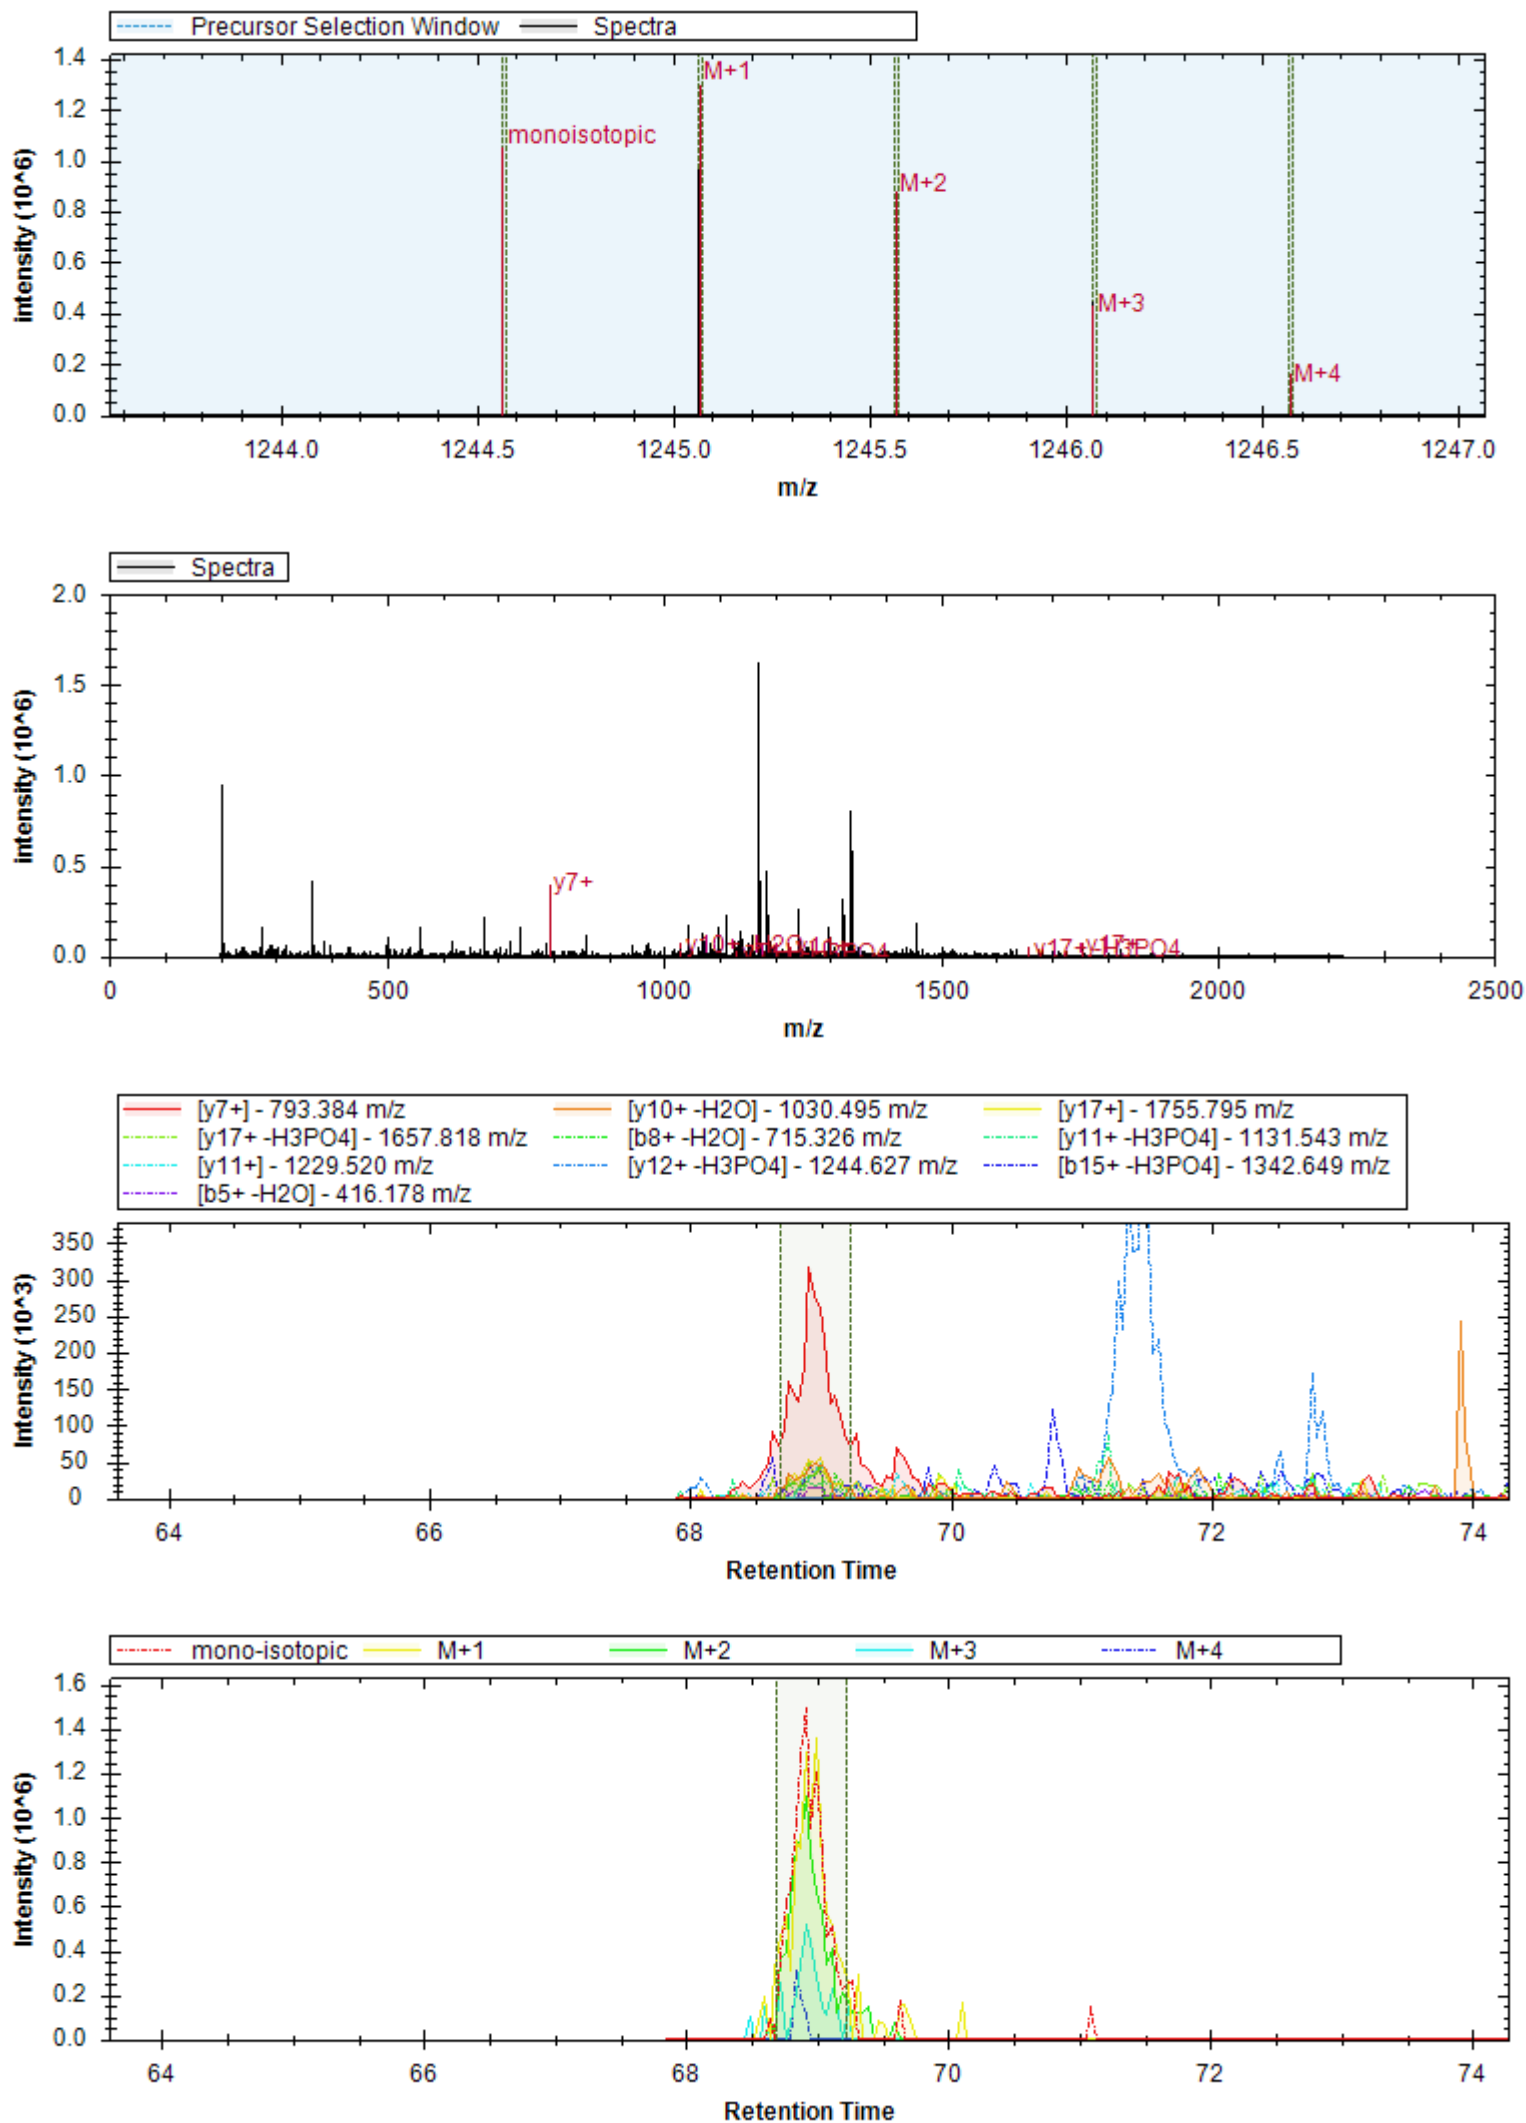

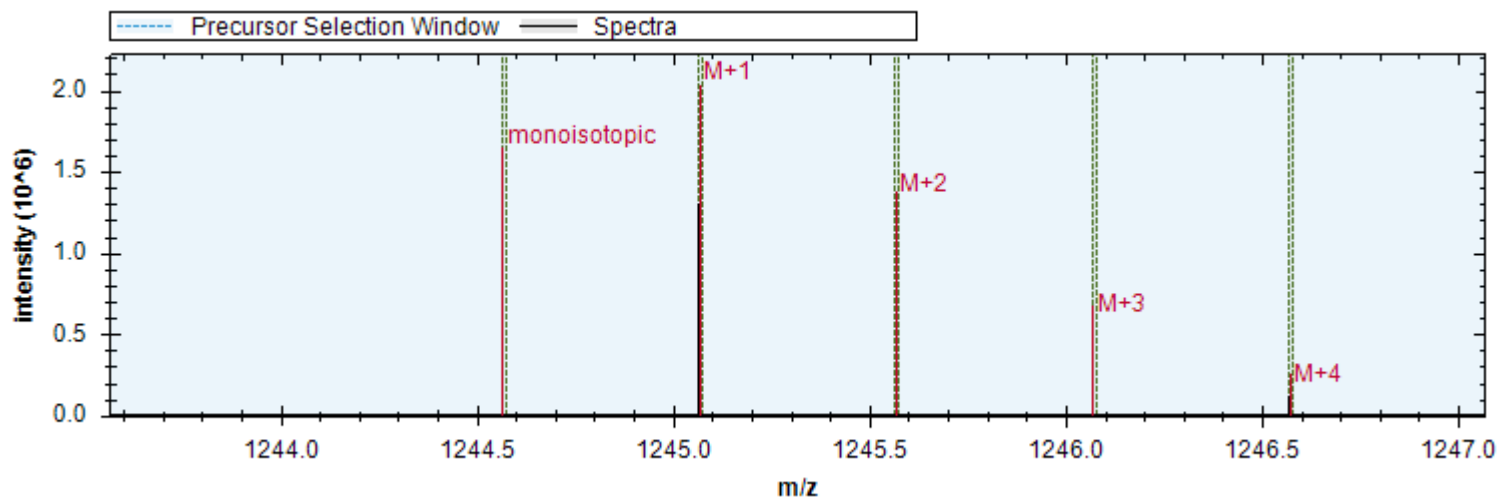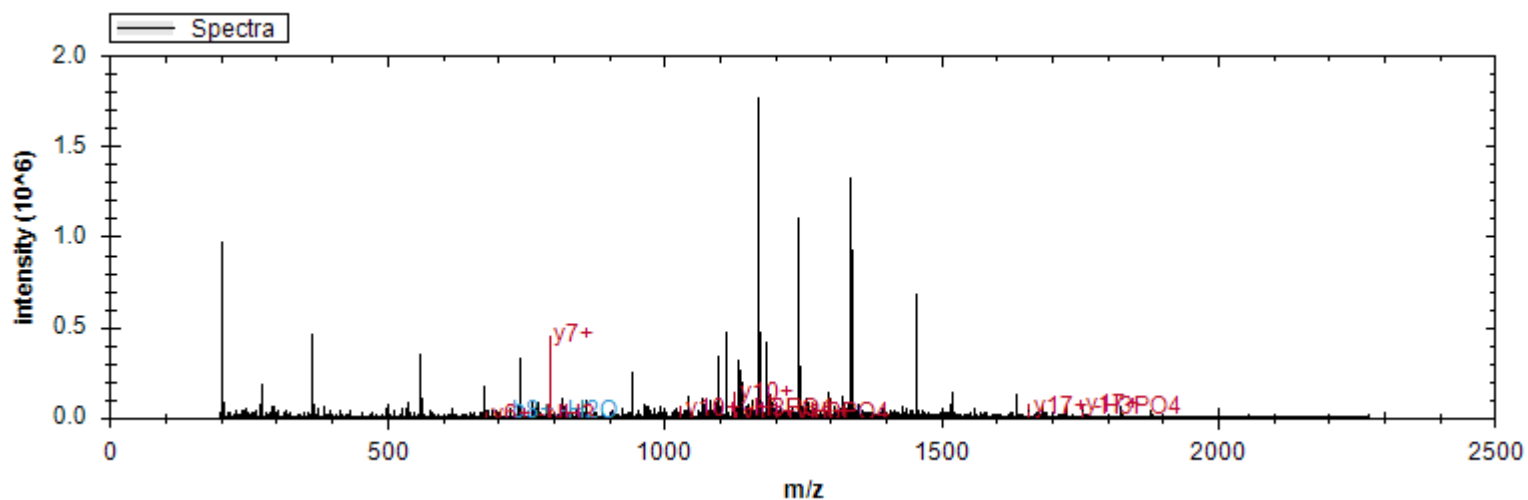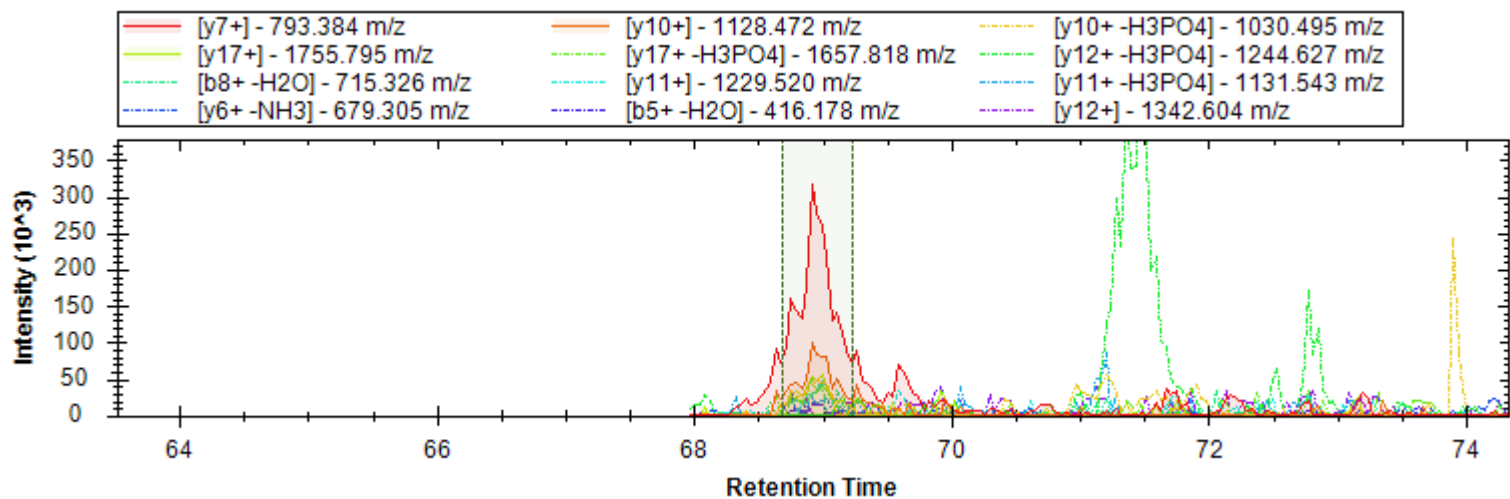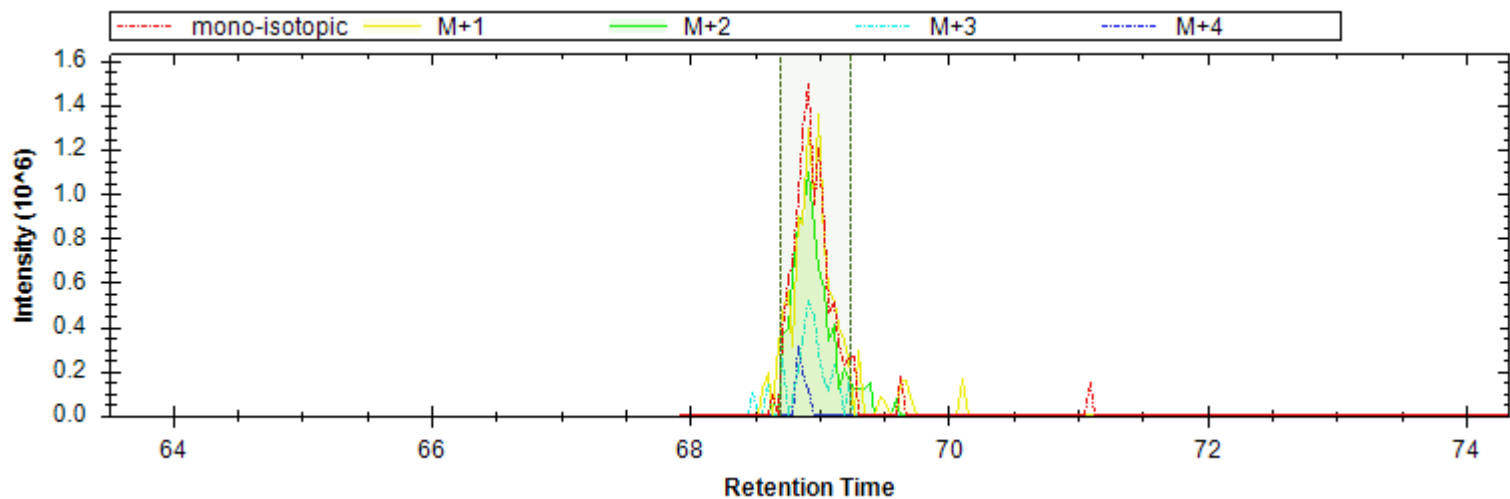

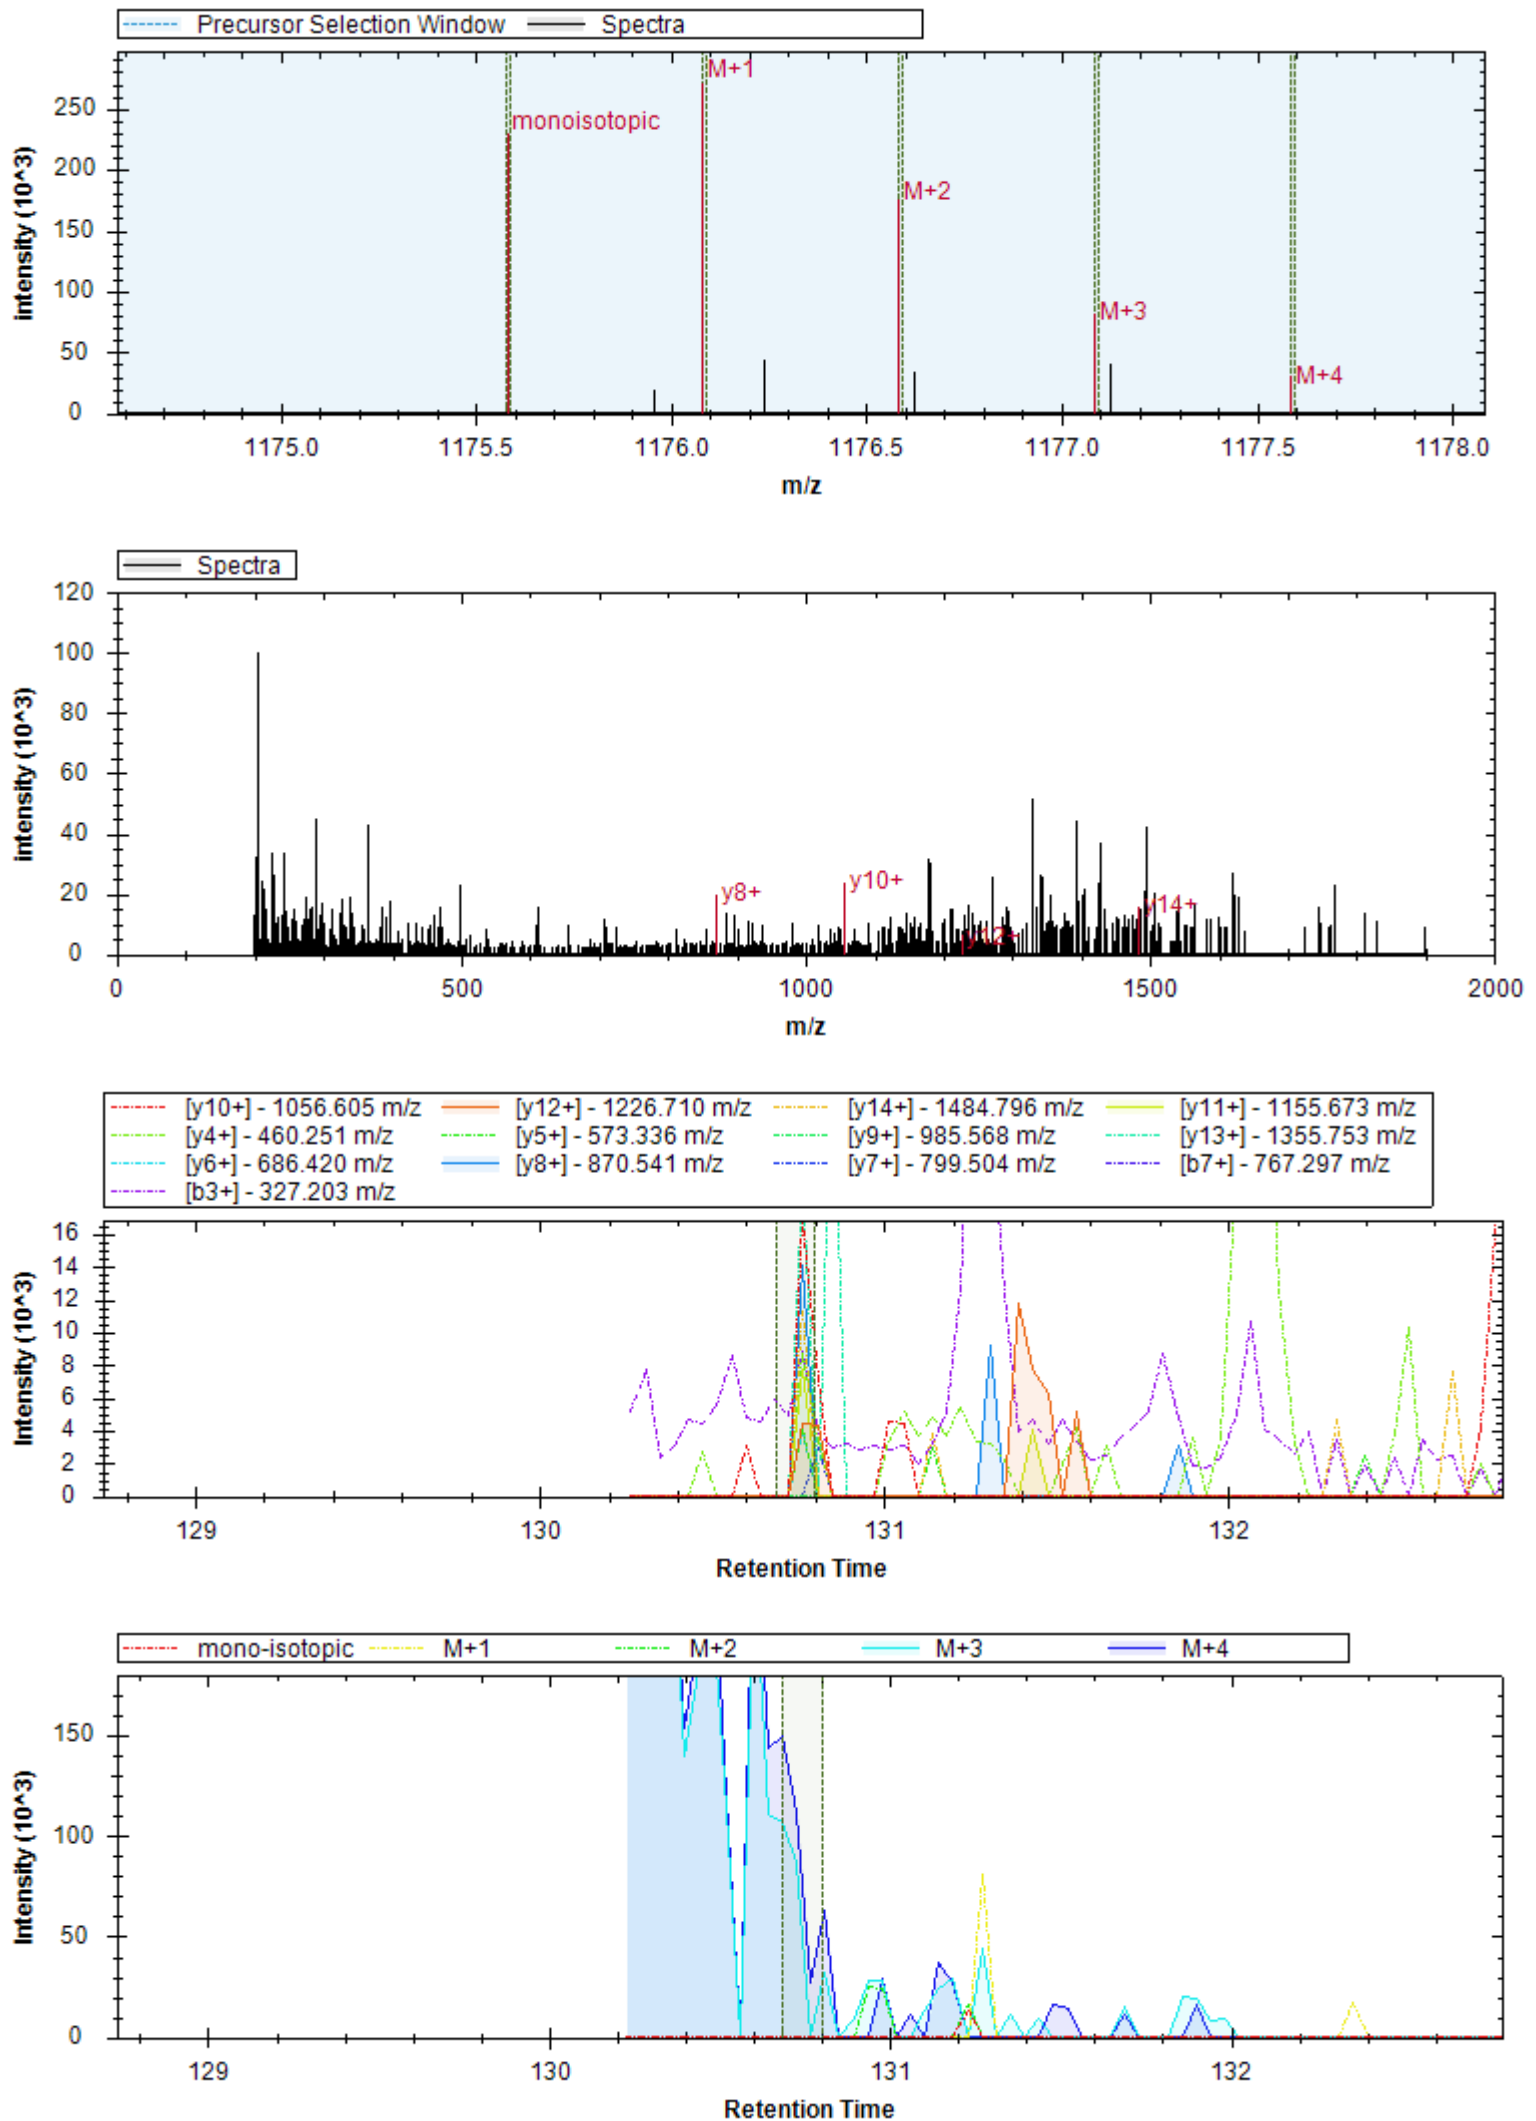

Supplement: supp_RA117.000314_4947_1_supp_14569_ty28nv.pdf [file supp_RA117.000314_4947_1_supp_14569_ty28nv.pdf]
